# Supplementary material for: A rapid and massive gene expression shift marking adolescent transition in C. elegans
Source: PubMed Central journal article supplement — Sci Rep. 2014 Jan 28;4:3912. doi: 10.1038/srep03912 (PMC3904150; doi:10.1038/srep03912), 2014-01-28

## **Supplementary figure and table legends**

### **Supplementary methods**

A detailed description of all the methods used in this manuscript.

### **Supplementary discussion**

Here we discuss the “transcriptomic ruler” and the validation experiments in more detail. Furthermore the findings in the SPELL database are more elaborately discussed.

### **Supplementary fig. S1. Expression of all genes.**

The expression of all genes during the 44-58 h time-course sorted alphabetically. The lines represent the log<sub>2</sub> ratios with the mean over all time-points. If the expression activity of a gene was measured with multiple probes on the microarrays, multiple lines are shown.

### **Supplementary fig. S2. Pearson correlation between time-points.**

Heat-plot of the Pearson correlations of the expression (log<sub>2</sub> ratios with the mean) between the time points. Remarkably, there is a clear distinction between early- and late-L4. The same analysis carried out per chromosome revealed the same correlations.

### **Supplementary fig. S3. The k-means clusters.**

Twelve individual k-means clusters are shown; in the small boxes the number of the cluster (large numbers) and the number of individual genes in each cluster (small numbers) are shown. The thin white lines represent individual genes; the blue lines indicate the average pattern of all genes in the cluster. The twelve clusters can be divided over six groups: up-regulation (clusters 1, 2, 3 and 4), down-regulation (clusters 5, 6 and 10), down-regulation in early L4 (cluster 7), down regulation in late L4 (cluster 8), no change (cluster 11 and 12) and up-regulation mid-L4 (cluster 9).

### **Supplementary fig. S4. Overlap and enrichment between the expression pattern clusters found in this paper and in (Kim *et al.* 2013; fig. 2a).**

In our paper gene expression during the complete L4 stage was measured, in the Kim *et al.* 2013 paper gene expression from L1 to L4 stage was measured. Cluster numbers 1 to 12 shown at the thick marks. Left or under the cluster number the number of genes in the cluster and a letter indicating the general pattern type; U: up-regulated, D: down regulated, O: oscillating, S: stable (not changing), Capital letters were used when the pattern was stronger compare to the rest of the patterns. The clusters showing up-regulation in this paper (1, 2 and 3) are showing significant overlap with the specifically during L4 up-regulated clusters 8 and 9 from Kim *et al.* 2013. The oscillating clusters (1, 2, 3, 4, 5 and 6) from Kim *et al.* 2013 show significant overlap with clusters showing down-regulation during L4 (5, 6, 7 and 8).

**Supplementary fig. S5. Relative expression of *lin-4* (red) and *lin-14*(black) during L4 (44 to 58 hours at 20oC).** *Lin-4* shows a steady decrease, which in Kim *et al.* 2013 marks the time just after moulting. *Lin-14* shows some variation in expression possibly a slight increase at the later time points.

**Supplementary fig. S6. Physical distance between genes within the same expression cluster.**

The distance between the nearest neighbouring gene within the same expression cluster is shown. The grey lines indicate the outcomes of 1,000 permutations, whereas the black line is the actual set of genes. Significant overrepresentation of a distance is shown by a red line at the bottom of the graphs (FDR<0.01).

**Supplementary fig. S7. Enrichment analysis on physical location.**

Pattern-enrichment analysis on physical location per 100 kb bins and per chromosomal region. (A) Per 100 kb bin we find that all of the clusters are characterized by local enrichment. For example, genes belonging to cluster 1 are overrepresented on chromosome IV at 13.7 Mb, chromosome V at 14.1 Mb and at chromosome X at 3.5 and 11.9 Mb. (B) Enrichment analysis based on the region of the chromosomes (left-tip, left-arm, center, right-arm and right-tip) (Rockman & Kruglyak, 2009). This shows that the two unresponsive clusters both are enriched on the arms of the autosomal chromosomes 7 out of 10 times (FDR<0.05).

**Supplementary fig. S8. Dynamic gene expression patterns of all the GO-annotation terms.**

Dynamic patterns per gene in log<sub>2</sub> ratio of the mean per GO-annotation term.

**Supplementary fig. S9. Dynamic gene expression patterns of all Gene Classes.**

Dynamic patterns per gene in log<sub>2</sub> ratio of the mean per Gene class.

**Supplementary fig. S10. Dynamic gene expression patterns of all Anatomy terms.**

Dynamic patterns per gene in log<sub>2</sub> ratio of the mean per Anatomy term.

**Supplementary fig. S11. Dynamic gene expression patterns of all KEGG pathways.**

Dynamic patterns per gene in log<sub>2</sub> ratio of the mean per KEGG pathway.

**Supplementary fig. S12. Dynamic gene expression patterns of all Protein Domains.**

Dynamic patterns per gene in log<sub>2</sub> ratio of the mean per protein domain.

**Supplementary fig. S13. Dynamic gene expression patterns of all Wormbook Chapters.**

Dynamic patterns per gene in log<sub>2</sub> ratio of the mean per Wormbook chapter ([www.wormbook.org](http://www.wormbook.org)).

**Supplementary fig. S14. The transcriptomic ruler.**

Validation and application of the transcriptomic ruler. (A) The real age of a data point versus the transcriptome age-estimate. The blue dots represent biological replicates on which the ruler was designed and red dots represent an application on a validation experiment. (B) The estimated age of different genotypes on two food sources, *E. coli* and *E. rhapsodica*. The vertical lines represent SE. There is a significant increase in estimated age when *C. elegans* is fed on *E. rhapsodica* (P<0.001). (C) The age after synchronization when the first eggs were laid for different genotypes feeding on different food sources (*E. coli* in yellow and *E.*



*rhapontici* in green). *C. elegans* lays its eggs significantly later when fed on *E. coli* ( $P \ll 0.001$ ). **(D)** The relative age of recombinant inbred lines in a genetical genomics experiment (Viñuela *et al.* 2010). All lines were profiled at the same absolute age. See also comments for **Supplementary fig. S14E** **(E)** The relative age of recombinant inbred lines in a genetical genomics experiment (Rockman *et al.* 2010). All lines were profiled at the same absolute age. Developmental differences between recombinant inbred lines of a N2 x CB4856 cross were described in (Gutteling *et al.* 2007). This difference in development is reflected in the transcript profiles of these lines. It shows that the transcriptomic ruler can be used to determine the developmental age of each individual line. This can subsequently be used for a better understanding of the results, for example eQTL analysis in contrast with developmental age.

**Supplementary fig. S15. Development as a source of variation in SPELL transcript profiles.**

All the sample comparisons of the micro-array experiments in the SPELL data base (Hibbs *et al.* 2007) were tested for enrichment of developmental marker genes (cluster 1) in the top 10% up or down regulated genes.

**Supplementary table S1. The genes per cluster as found by k-means clustering.**  
The names of the genes in the 12 k-means clusters.

**Supplementary table S2. Enrichment analyses on the k-means clusters.**

Outcome of enrichment analyses on the genes in the k-means clusters. Enrichment was tested for gene ontology (GO) terms, gene classes, anatomy terms, KEGG pathway, protein domains and WormBook chapters. Only significantly enriched groups with more than 3 genes overlap are shown.

**Supplementary table S3. Number of mutations in gene structures from the million mutation project.**

The number of mutations that were used in the analysis on the expression clusters, as extracted from the million mutation project database (Thompson *et al.* 2013).

**Supplementary table S4. Number of photographed *C. elegans* individuals per time point.**

Time points in hours after synchronisation.

**Supplementary table S5. Information about the photographs of individual worms.**

Per photograph is given: time point at which it was taken, name of photograph, and category of development that the worm is in.

**Supplementary table S6. Method of RNA isolation per sample.**

The RNA isolation methods used.

## **Supplementary Materials and Methods**

### *Nematode strains and population maintenance*

Wild type *C. elegans* Bristol N2 was used and maintained at 12°C on Nematode Growth Medium (NGM) with *E. coli* OP50 as a food source (Lewis, J. A. & Fleming 1995). In two experiments (timing of egg laying and transcriptomics of strains grown on different food sources), other strains were used next to N2, namely: CB4856, JU1581, JU1921, JU1930, JU1932, JU1944, and JU1949 (Volkers *et al.* 2013).

### *Analysis of morphological changes*

After synchronisation by bleaching, pictures of individual worms were taken between 48 and 67 hours of growth at 20°C with an AxioCam MRc5 (Carl Zeiss Microscopy GmbH, Jena, Germany) mounted on a light microscope (100x magnification), with Axiovision software, version 4.8 (Carl Zeiss Microscopy). The pictures were taken in black and white, 1292x968 pixels; post-imaging sharpening with a strength of 0.5 was used. Ten nematodes per patch were placed onto 3% agarose patches on microscope glass slides. The glass slides were put on ice for 5 minutes to slow down movement of the nematodes. Per time point, 15 – 59 larvae were photographed see Supplementary table S4. The pictures are available upon request.

The pictures were scored for morphological changes in *C. elegans* between 48 and 67 hours after synchronisation. Development was divided into five stages: no vulva, developing vulva (vulval groove absent), fully developed vulva (vulval groove present), eggs in uterus, and eggs in uterus with developing oocytes visible. Each individual worm was categorized into one of these developmental categories (see Supplementary table S5 for information about the category that each individual worm was placed into. Because the distinction between the categories 'eggs in uterus' and 'developing oocytes visible' could not always be made reliably, these categories were joined in later analyses.)

### *Timing of egg laying*

After synchronisation by bleaching, the eggs were left to hatch in 1 ml M9 at 20°C overnight. Larvae were then deposited on NGM with either *E. coli* OP50 or *Erwinia rhapontici* (Volkers *et al.* 2013) and cultured at 20°C. Starting from 46 hours after they were placed on NGM they were checked every hour for the first eggs to appear on the plates. After the first eggs were observed the plates were followed several hours to ensure egg laying fully started. Per bacterial food source 17 biological replicate populations were used (2 to 3 per genotype).

### *Worm culturing for transcriptome analysis*

For the mRNA microarrays of N2, populations of hermaphrodites grown on *E. coli* OP50 were used. Up to three independent replicates per time point were used to generate the transcription patterns during development. The populations were stage synchronized by bleaching and the eggs were placed on NGM-plates and incubated at 20°C for 41.5, 42, 43, 44, 45, 46, 47, 48, 49, 50, 51, 52, 53, 54, 55, 56, 58, 60.5, 62 or 64 hours. After harvesting the larvae, they were flash frozen in liquid nitrogen and stored at -80°C. For the mRNA microarrays of different genotypes on either *E. coli* OP50 or *E. rhapontici*, synchronized hermaphrodites were grown for 48 hours (L4 stage) before harvesting and flash freezing in liquid nitrogen.

### *RNA isolation*

For mRNA isolation of the samples, two different methods were used, see Supplementary table S6 for all method-, sample- and replicate information. The first method used an RNEasy Micro Kit from Qiagen (Hilden, Germany), following the 'Purification of Total RNA from Animal and Human Tissues' -protocol provided with the kit, with modified lysing procedure. The frozen pellets were lysed in 150  $\mu$ l RLT buffer, 295  $\mu$ l RNase-free water, 800  $\mu$ g/ml proteinase K and 1%  $\beta$ -mercaptoethanol. This suspension was incubated in a Thermomixer (Eppendorf, Hamburg, Germany) at 55°C and 1200 rpm for one hour or until the sample was clear. To the lysate 0.5 volume of 96% ethanol was added. The second method used a Maxwell® 16 AS2000 instrument with a Maxwell® 16 LEV simplyRNA Tissue Kit (both Promega Corporation, Madison, WI, USA). The mRNA isolation was preceded by a modified lysis step. In short, 200  $\mu$ l homogenization buffer, 200  $\mu$ l lysis buffer and 10  $\mu$ l of a 20 mg/ml stock solution of proteinase K were added to each sample. The samples were then incubated for 10 minutes at 65°C, 1000 rpm in a Thermomixer (Eppendorf, Hamburg, Germany). After cooling on ice for 1 minute, the samples were pipetted into the cartridges and the standard protocol for this Maxwell® kit was followed.

### *Microarray sample preparation, scanning and normalization*

After mRNA isolation, the 'Two-Color Microarray-Based Gene Expression Analysis; Low Input Quick Amp Labeling' -protocol, version 6.0 from Agilent (Agilent Technologies, Santa Clara, CA, USA) was followed, starting from step 5. The microarrays used were *C. elegans* (V2) Gene Expression Microarray 4X44K slides, manufactured by Agilent. The microarrays were scanned using an Agilent High Resolution C Scanner, using the settings as recommended in the above mentioned manual. Data was extracted with the Agilent Feature Extraction Software version 10.5, following manufacturers' guidelines.

For normalization the Limma package for the "R" environment (version 2.13.1 x64) was used. No background correction of the RNA-array data was performed as recommended by (Zahurak *et al.* 2007). For within-array normalization of the RNA-array data the Loess method was used and for between-array normalization the Quantile method was used. The obtained log<sub>2</sub> normalized intensities (single channel data) were used for further analysis.

### *Statistical analysis of developmental effects*

All statistical analyses were carried out in "R" (version 2.13.1 x64). The intensities were batch corrected by calculating the batch effect per gene and subtracting the effect from the above mentioned log<sub>2</sub> normalized intensities. The batch effect was calculated by a linear model taking the factor 'time' into account

$$I_{x,y} \sim B_y + T_x$$

where I is the intensity of gene x in batch y, B is the batch and T is time.

Further analysis were done on the log<sub>2</sub> ratios of the batch corrected intensities of individual time points with the mean intensity of all time points per spot. These were calculated by

$$R_x = \log_2(I_x/\bar{I})$$

where  $R$  is the log<sub>2</sub> ratio of time point  $x$  and  $I$  is the normalized intensity measured on the microarray. From now on called “the log<sub>2</sub> ratios with the mean”.

To find major sources of variation a principal component analysis (PCA) was performed on the log<sub>2</sub> ratios with the mean.

The overall activity of genomic regions was studied by dividing the chromosomes into 100 kb bins and take the average the log<sub>2</sub> ratios with the mean for the genes per bin per time point.

Gene expression clusters were determined by the K-means clustering method, 20 iterations on 10 different starting situations were performed, at a setting of 12 different clusters. As input the log<sub>2</sub> ratios with the mean was used.

### *Enrichments*

Enrichment studies were done using a hyper-geometric test. Release WS220 of the GO-, Anatomy-, Protein Domains- and Gene Class- annotations, release 65.0 of the KEGG database, and the Wormbook ([www.wormbook.org](http://www.wormbook.org)) version of 2012 were used. For determining the false discovery rate of the enrichment studies on the bins (genetic loci) of the K-means clusters a 1000 permutations were done per cluster. Using equally sized randomly picked sets of genes. P-values were scaled according to the false discovery rate found by the permutations. Only loci containing >2 genes of the same Kmeans clusters were considered.

### *Physical distance of K-means cluster genes*

The physical distance from one gene to the closest neighbour-gene within the same K-means cluster was measured as the distance from start-site to start-site. The obtained distances were counted in bins of 1kb and the results presented as the percentage of genes per cluster per bin. To assess the significance of findings, a permutation analysis was done; testing 1000 equally sized random sets of genes in the same way.

### *Mutation frequency of k-means cluster genes*

The mutation frequency of the genes per k-means cluster was tested on the datasets of the million mutation project (Thompson *et al.* 2013), for the induced and the wild-type mutations (<http://genome.sfu.ca/mmp/>). The frequency of mutations per gene was counted per 1 kb, the intron and coding sequence sizes were obtained from WS220 ([www.wormbase.org](http://www.wormbase.org)). To determine the relative abundance of mutations, a permutation analysis was done testing the number of mutations found in a random set of equal size. To determine the significance of the mutation frequency found per k-means cluster 1000 permutations were executed.

### *Heat-maps and clustering*

Heat-maps of the log<sub>2</sub> ratios with the mean of all GO-terms, anatomy-terms, gene classes, KEGG, protein domains and Wormbook chapters were made and clustering was performed by the default settings of the “heatmap” function in the “R” environment.

### *Age estimation by transcription profiles*

Linear regression in which the ratio with the mean was regressed over time was used to determine which genes had a significant in- or decrease during L4 development. The samples from time point 44 unto 58 hours (Supplementary table S6) were used to determine the slope of the linear in- or decrease per spot by linear regression. The

effects of the spots/genes above the significance threshold ( $-\log_{10}(p) > 6$  for conservative settings (782 spots or 596 genes) or 4 (4268 spots or 2836 genes) to have more spots/genes as input for the age estimation) could then be used to determine the age of samples which' transcript profile was measured. We used spots when the same microarray design was used or genes in case of a different design. This was done for each spot/gene above the threshold and the average was taken as the estimated age. [Age  $\sim$  effect\* gene expression level]. This was used on the samples used to determine the effect originally, on the samples used to test the age estimation, and used on the samples grown on the two different bacterial food-sources.

#### *Determining the effect of development in the SPELL dataset experiments*

The effect of development in the SPELL (<http://spell.caltech.edu:3000>; Hibbs *et al.* 2007) experiments was determined by transforming each experiment into a set of ratios. When not in ratios downloaded from the SPELL website, the log<sub>2</sub> ratio per spot was calculated with the mean. With these ratios it was determined whether the top 10% of genes with the lowest or highest ratios were enriched for the 115 genes in cluster 1 (Supplementary table S1). To calculate enrichment a hypergeometric test was used.

Development was considered to play a role in the variation in gene expression between the samples from an experiment stored in SPELL when  $> 25\%$  of the samples showed a significant enrichment above the threshold ( $-\log_{10}(p) > 6$ ). The data from Coolon *et al.* (2009) was averaged per bacterial food comparison per spot and tested for developmental differences with the method described above.

## Supplementary Discussion | The transcriptome as genetic ruler

### *Age estimation by transcription profiles*

The transcription profiles allow for age estimation of worms (**Supplementary fig. S14a**). The genetic ruler consisting of 782 spots (596 genes) with a significant ( $\log_{10}(p) > 6$ ) linear up or down regulation during the time period from 44 to 58 hours were used. The blue dots in **Supplementary fig. S14a** represent these samples and they lie on an almost perfect straight line ( $R^2 = 0.97$ ), as expected. Using genes with a less significant linear effect ( $-\log_{10}(p) > 4$ , 4268 spots, 2836 genes) works equally well (not shown). A second batch of samples, not included in constructing the ruler, was used to identify the accuracy of the age estimators (red dots in **Supplementary fig. S14a**). These samples lie on the same line, meaning that their age can be estimated accurately, especially when the samples fall within the time range that was used to calculate the straight line. Outside the original time range the estimation was less accurate, however the early samples (around 43h) were still estimated much younger than the older samples (around 62 hours). This shows that within a certain time frame transcription profiles can be used to precisely estimate the age of a worm sample. More important, this experiment shows that age estimation by transcription profile is a necessity as expression levels of hundreds (if not thousands) of genes change significantly within two hours or less (**Fig. 2 & Supplementary fig. S3**).

### *Age estimation in different genotypes and environments*

To validate the transcriptomic ruler further, we show the performance on multiple genotypes raised on different food-sources (environments). We find that environmental parameters can have an effect on development that is visible in microarray results. We used the canonical strain N2, the frequently used lab strain CB4856 and freshly isolated strains from Orsay (JU1581, JU1944 and JU1949) and Santeuil (JU1921, JU1930 and JU1932) (Volkers et al. 2013). As food source we used the standard lab food *E.coli* OP50 and the Gram-negative plant pathogen *Erwinia rhapontici* (Volkers et al. 2013).

First, we investigated if a difference in development could be detected by eye, by measuring the time between synchronization and the start of egg laying. Worms fed with *E. coli* and grown at 20°C on average started laying eggs 51.3 hours after synchronization, while worms grown on *E. rhapontici* were faster (49.3 hours) (**Supplementary fig. S14c**). This difference was highly significant ( $p < 0.001$ ). Next, the transcription profiles of the same strains grown on the same two bacteria were determined at exactly 48 hours after synchronization. The age of the worms was estimated as described before and most strains grown on *E. coli* were estimated to be 48 hours of age (47-49.5 hours; **Supplementary fig. S12b**). After feeding on *E. rhapontici* all lines had a transcriptional profile that estimated them a few hours older than the 48 hours of development on *E. coli* (49 -52 hours, 51 hours on average **Supplementary fig. S12b**). This difference also was significant ( $p < 0.001$ ). The differences in developmental timing of worms grown on *E. coli* compared to *E. rhapontici* are remarkably similar in both experiments. This is not only the case on average: for example, the strain with the youngest estimated age (transcript profile), JU1930, was the strains with the longest time between synchronization and start of egg laying (**Supplementary fig. S12b & c**). A linear relationship between the estimated age by transcript profile and the start of egg laying was found. The start of egg laying can be significantly explained by the estimated age (**Fig. 4b**;  $R^2=0.63$ ,  $p < 0.001$ ) which shows that under these conditions *C. elegans* develops faster on *E.*

*rhapontici* than on *E. coli* OP50. More important, it is now shown that developmental differences as small as only 2 hours can be visible in transcriptomics results, while remaining invisible by most optical assessments.

*Application of the data to genetical genomics experiments*

The effect of the genetic background on development and subsequent gene expression differences could be found in experiments using recombinant inbred lines or different genotypes (Li et al., 2006; Li et al., 2010; Rockman et al., 2010; Viñuela et al., 2010; Viñuela et al., 2012). To illustrate this, the age estimations of an experiment with age as a variable is shown (**Supplementary fig. S12d & e**). This provides interesting opportunities for re-mapping the expression quantitative trait loci (eQTLs) found in these studies, taking in account the dynamics of expression. Or, alternatively, correct samples for their transcriptomic age-bias and find more specific eQTLs influenced by the actual experimental variation.

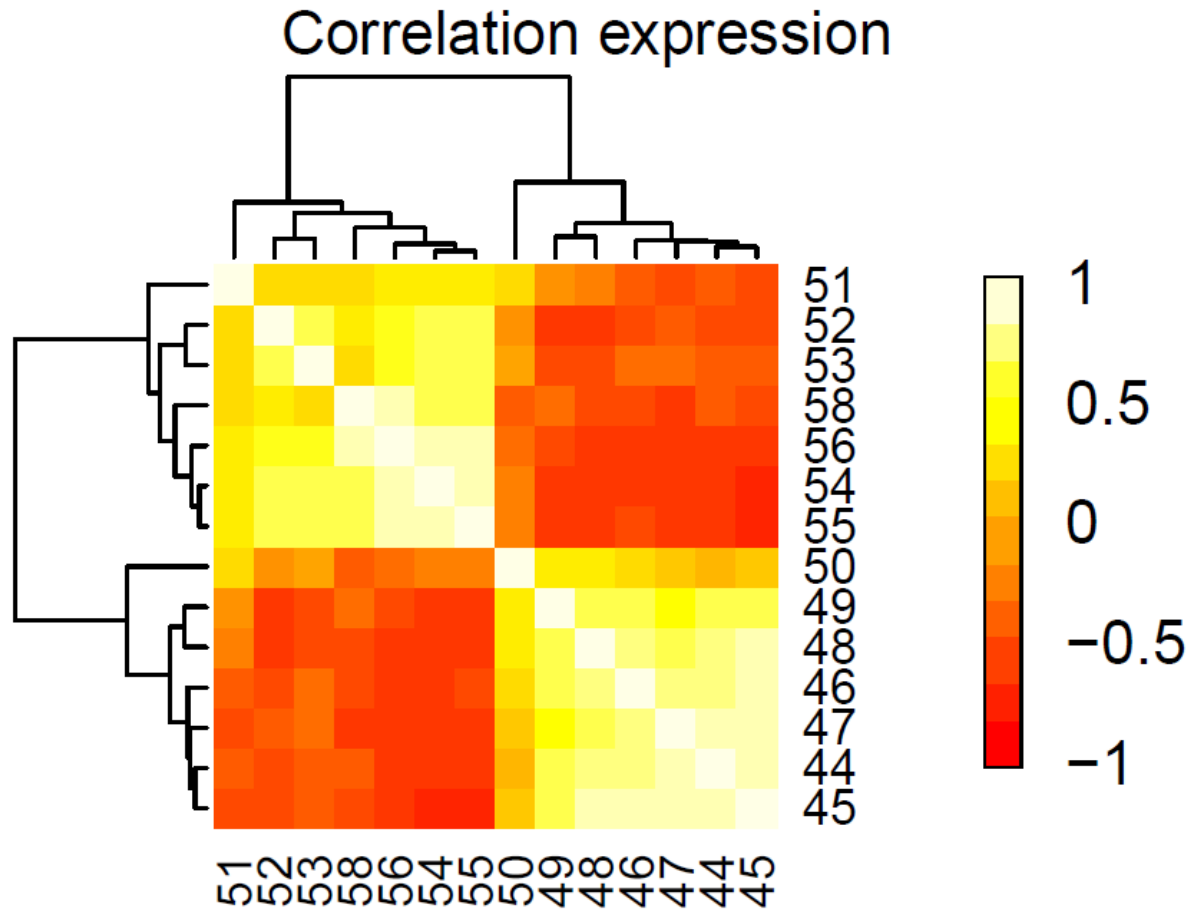

**Supplementary fig. S2. Pearson correlation between time-points.** Heat-plot of the Pearson correlation of the expression (log<sub>2</sub> ratios with the mean) between the time points. Remarkably, there is a clear distinction between early- and late-L4. The same analysis carried out per chromosome revealed the same correlations.



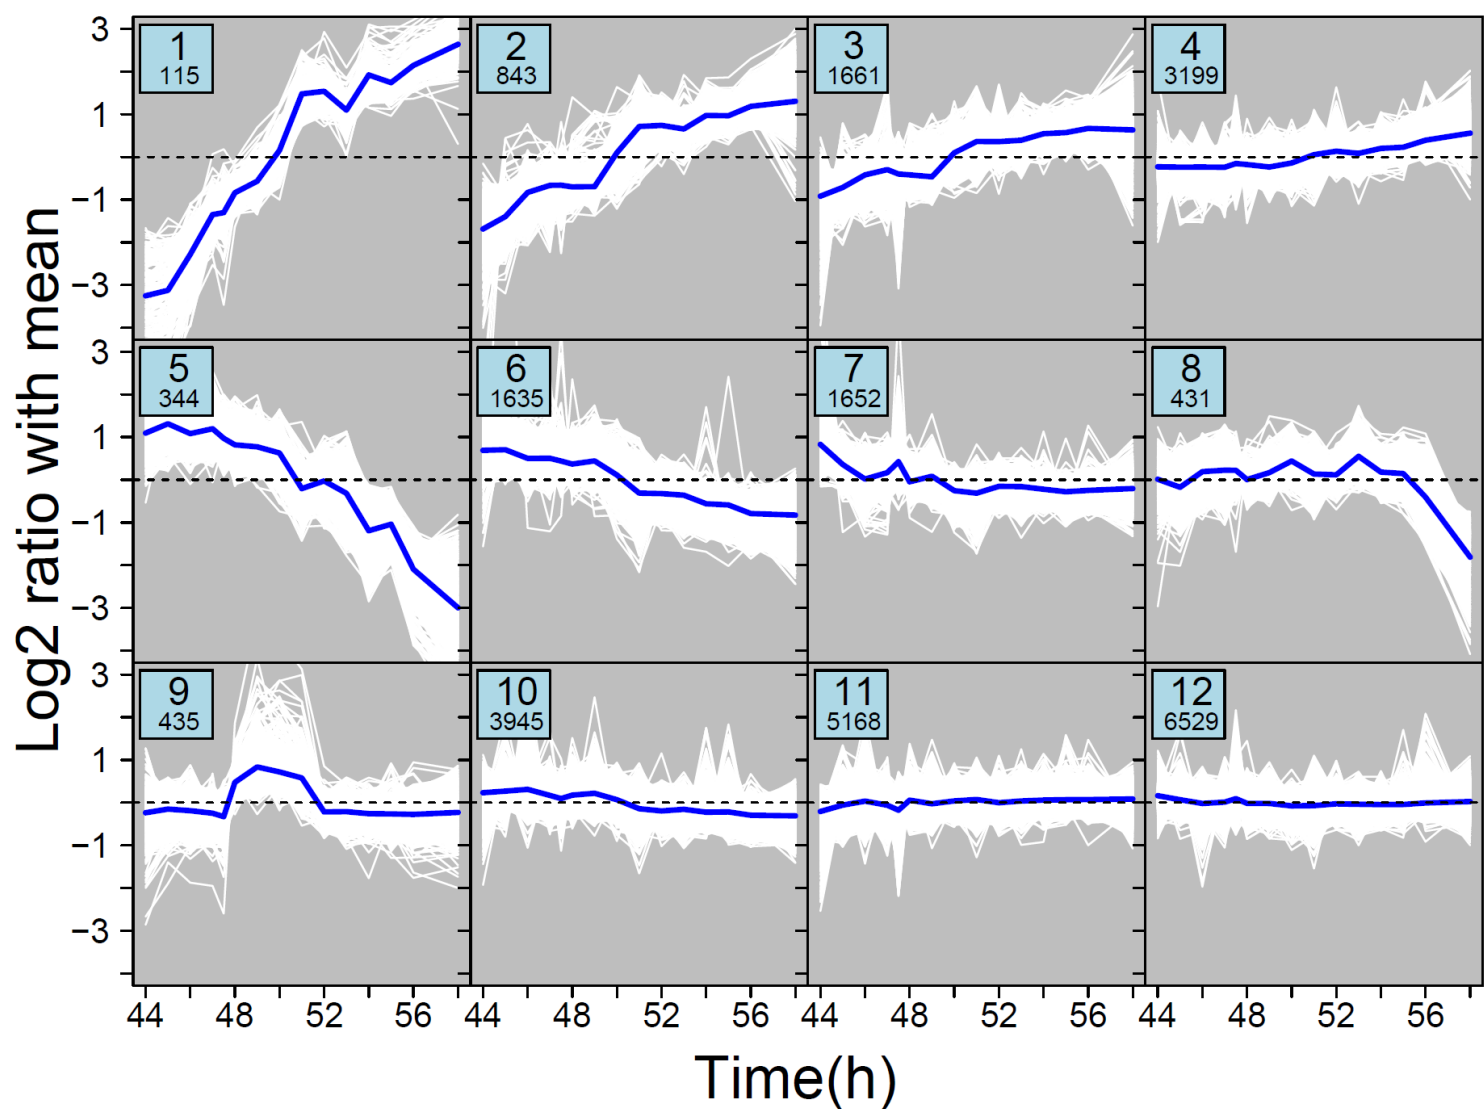

**Supplementary fig. S3. The k-means clusters.** Twelve individual k-means clusters are shown, in the small boxes the number of the cluster (large numbers) and the number of individual genes in each cluster (small numbers) are shown. The thin white lines represent individual genes, the blue lines indicate the average pattern of all genes in the cluster. The twelve clusters can be divided over six groups: up-regulation (clusters 1, 2, 3 and 4), down-regulation (clusters 5, 6 and 10), down-regulation in early L4 (cluster 7), down regulation in late L4 (cluster 8), no change (cluster 11 and 12) and up-regulation mid-L4 (cluster 9).

Kim, Grun, Oudenaarden Clusters

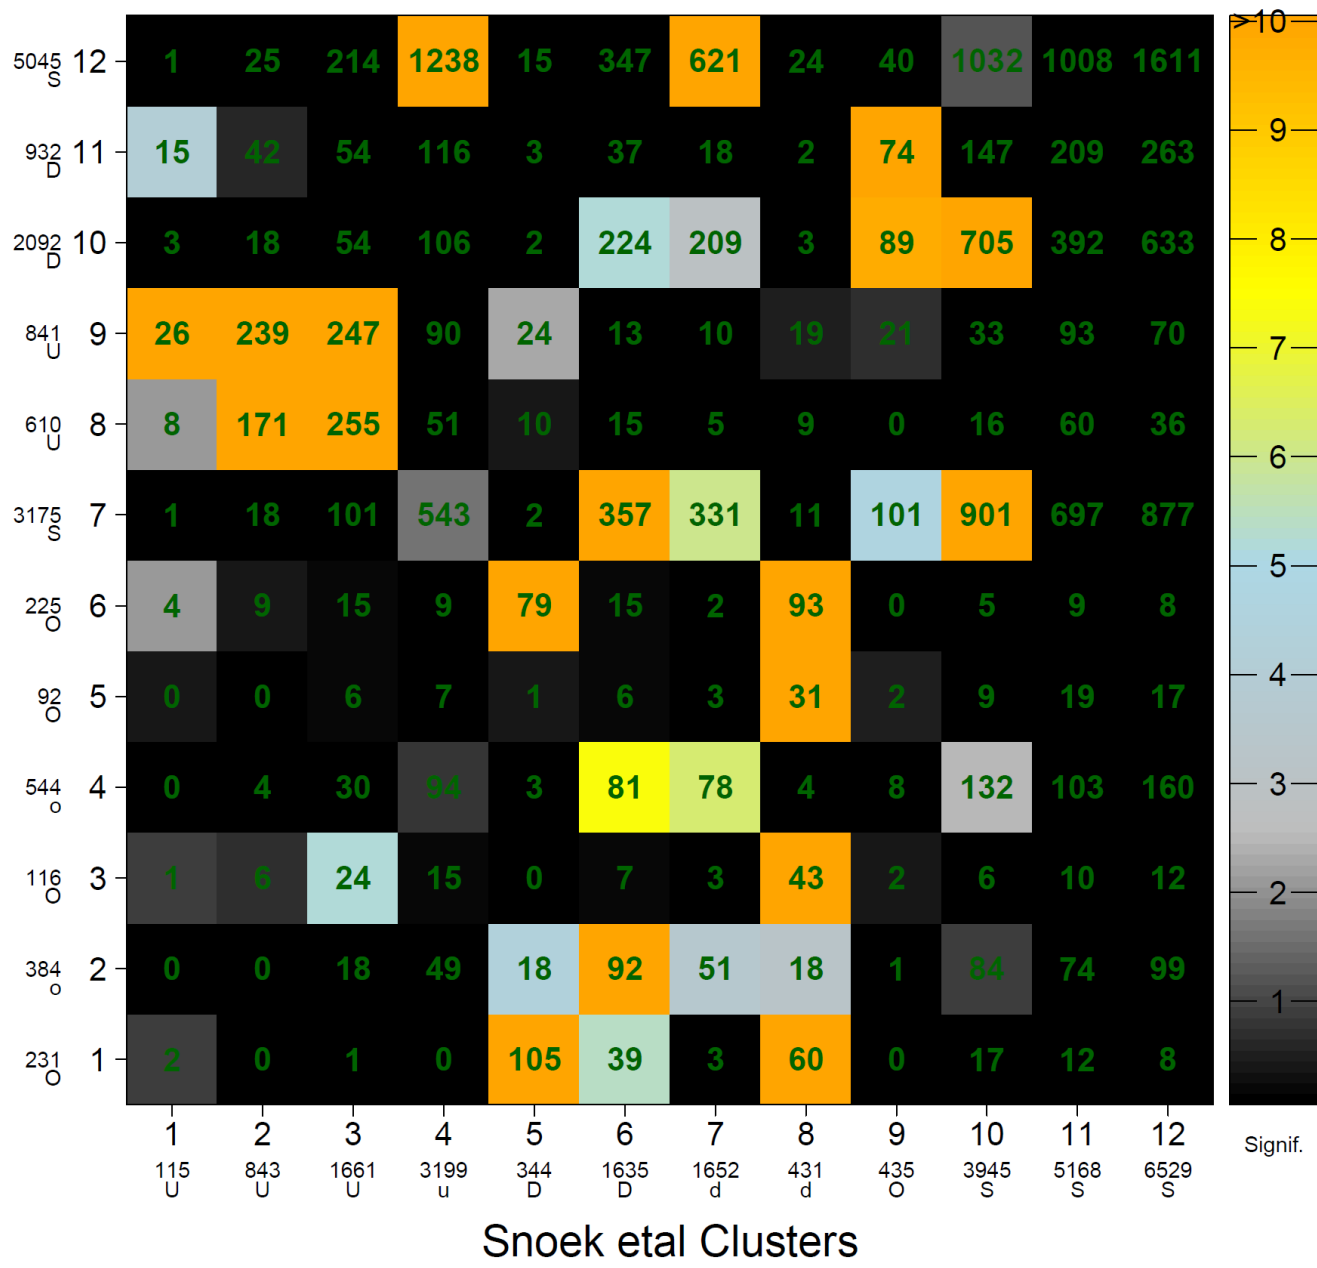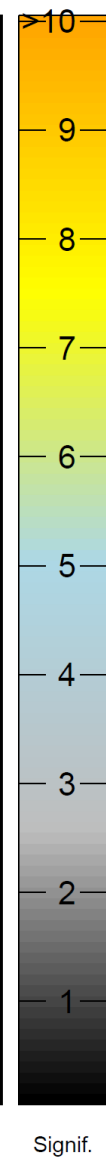

**Supplementary fig. S4. Overlap and enrichment between the expression pattern clusters found in this paper and in (Kim *et al.* 2013; fig 2a). In this paper gene expression during the complete L4 stage was measured, in the Kim *et al.* 2013 paper gene expression from L1 to L4 stage was measured. Cluster numbers 1 to 12 shown at the thick marks. Left or under the cluster number the number of genes in the cluster and a letter indicating the general pattern type; U: up-regulated, D: down regulated, O: oscillating, S: stable (not changing), Capital letters were used when the pattern was stronger compare to the rest of the patterns. The clusters showing up-regulation in this paper (1, 2 and 3) are showing significant overlap with the specifically during L4 up-regulated clusters 8 and 9 from Kim *et al.* 2013. The Oscillating clusters (1, 2, 3, 4, 5 and 6) from Kim *et al.* 2013 show significant overlap with clusters showing down-regulation during L4 (5, 6, 7 and 8).**

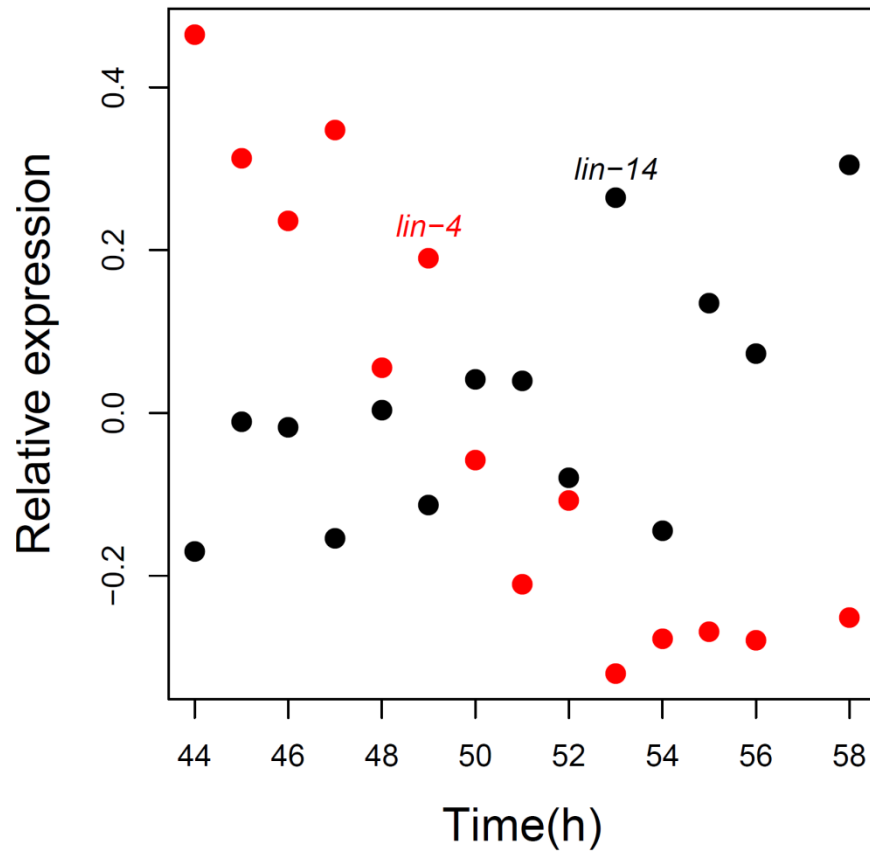

**Supplementary fig. S5. Relative expression of *lin-4* (red) and *lin-14*(black) during L4 (44 to 58 hours at 20oC). *Lin-4* shows a steady decrease, which in Kim *et al.* 2013 marks the time just after moulting. *Lin-14* only shows some variation in expression possibly a slight increase at the later time points.**

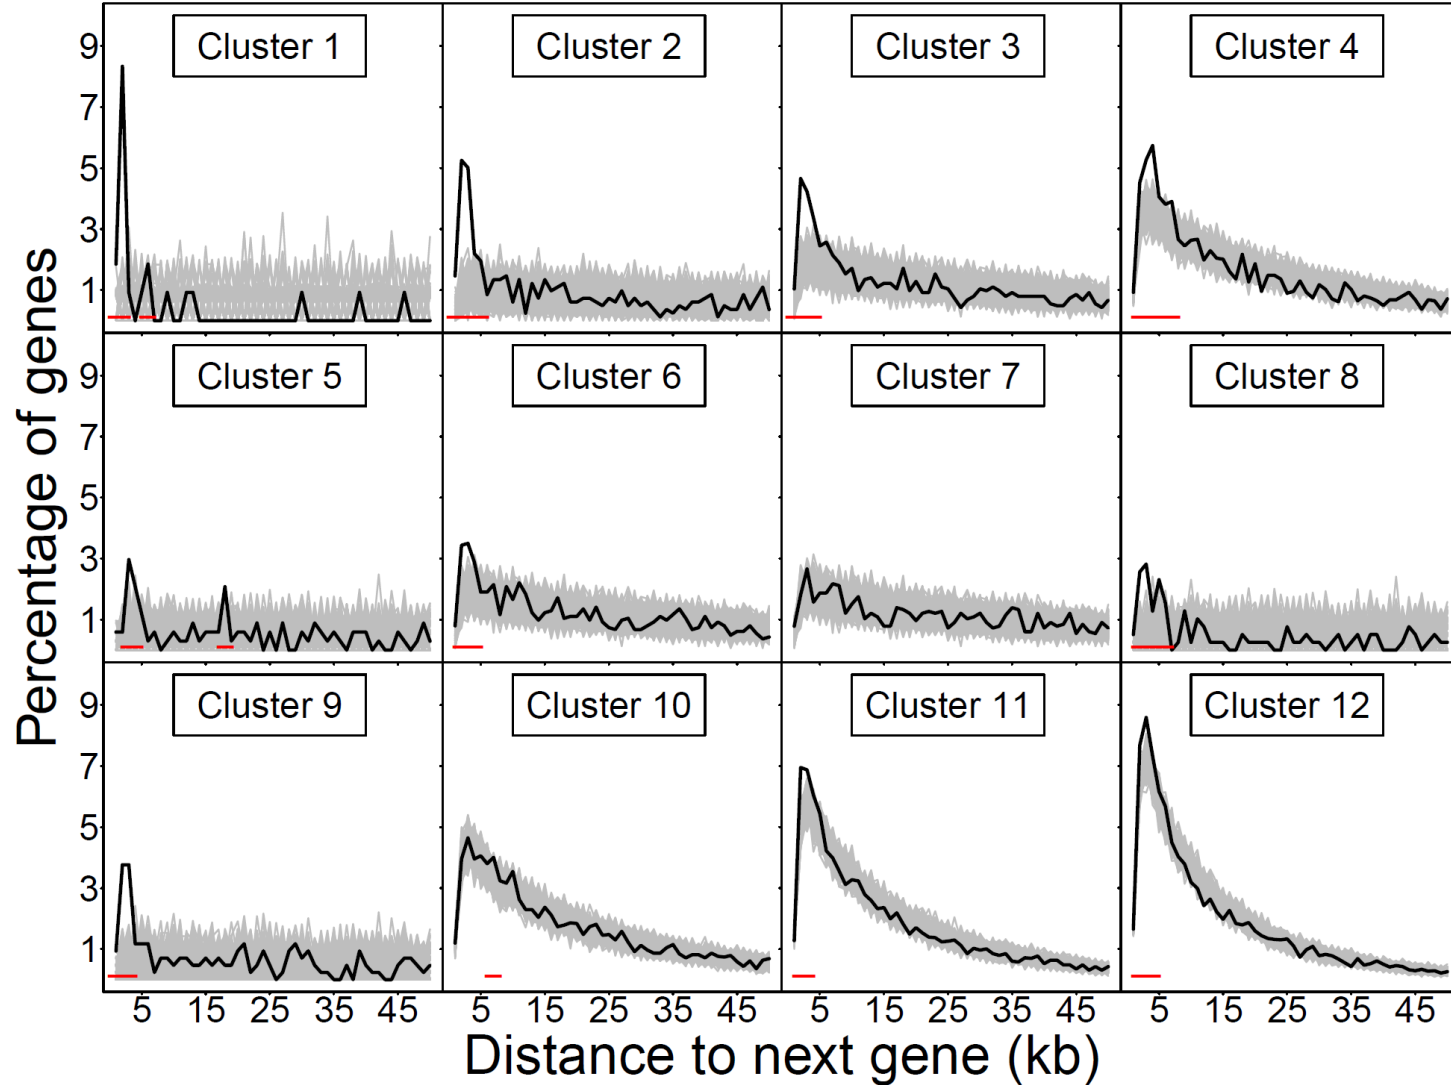

**Supplementary fig. S6. Physical distance between genes within the same expression cluster.** The distance between the nearest neighboring gene within the same expression cluster is shown. The grey lines indicate the outcomes of 1,000 permutations, whereas the black line is the actual set of genes. Significant overrepresentation of a distance is shown by a red line at the bottom of the graphs (FDR<0.01).

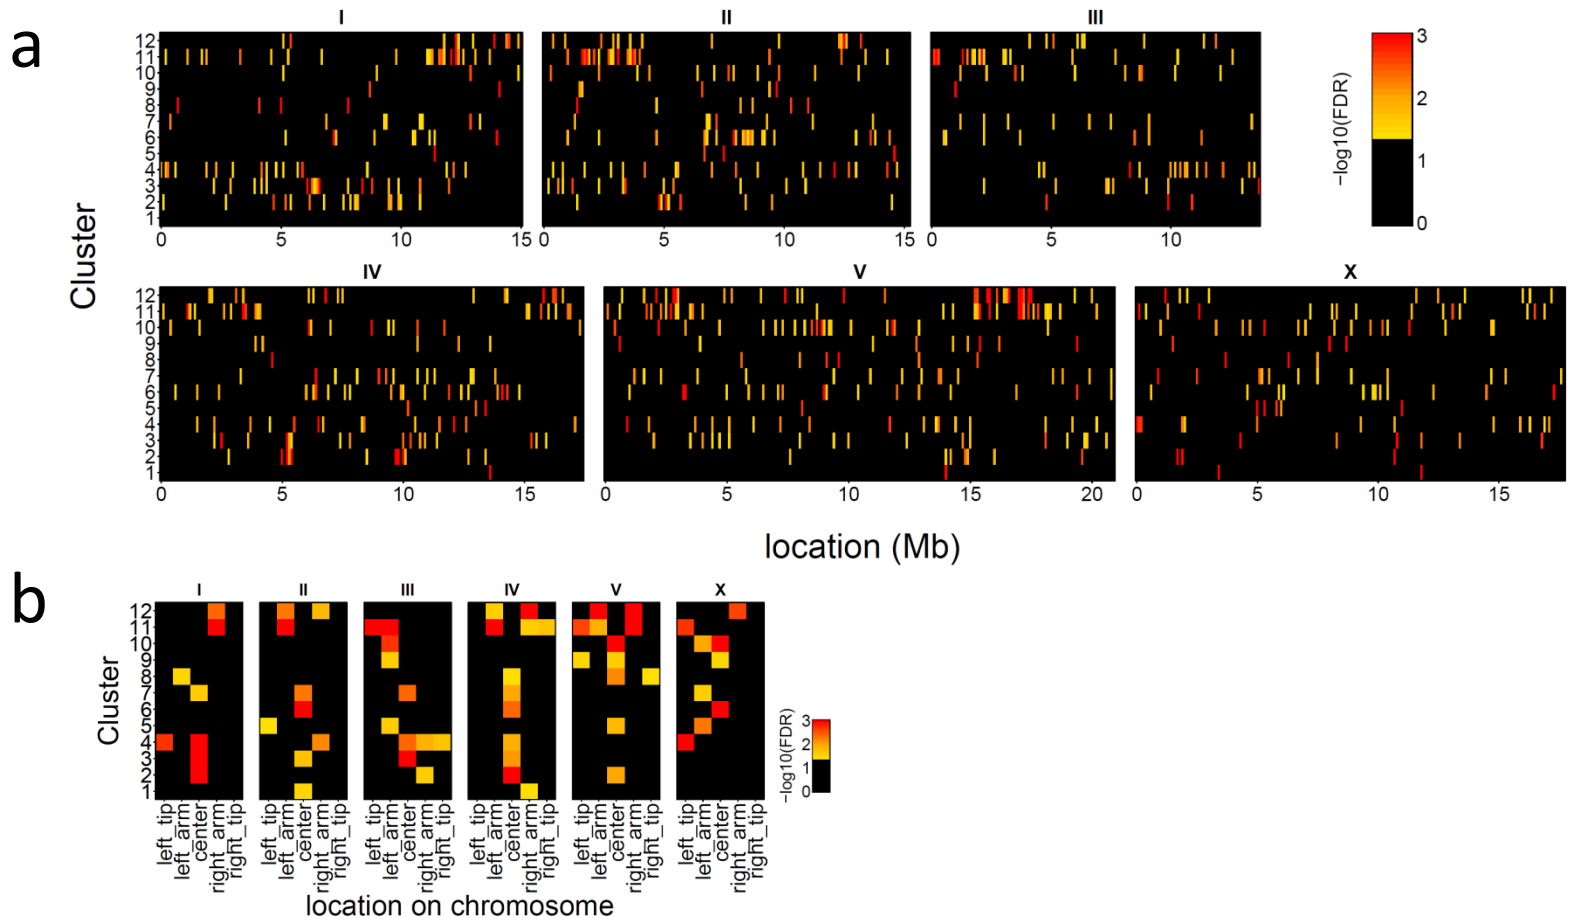

**Supplementary fig. S7. Enrichment analysis on physical location.** Pattern-enrichment analysis on physical location per 100 kb bins and per chromosomal region. **(A)** Per 100 kb bin we find that all of the clusters are characterized by local enrichment. For example, genes belonging to cluster 1 are overrepresented on chromosome *IV* at 13.7 Mb, chromosome *V* at 14.1 Mb and at chromosome *X* at 3.5 and 11.9 Mb. **(B)** Enrichment analysis based on the region of the chromosomes (left-tip, left-arm, center, right-arm and right-tip) (Rockman & Kruglyak, 2009). This shows that the two unresponsive clusters both are enriched on the arms of the autosomal chromosomes 7 out of 10 times ( $\text{FDR} < 0.05$ ).

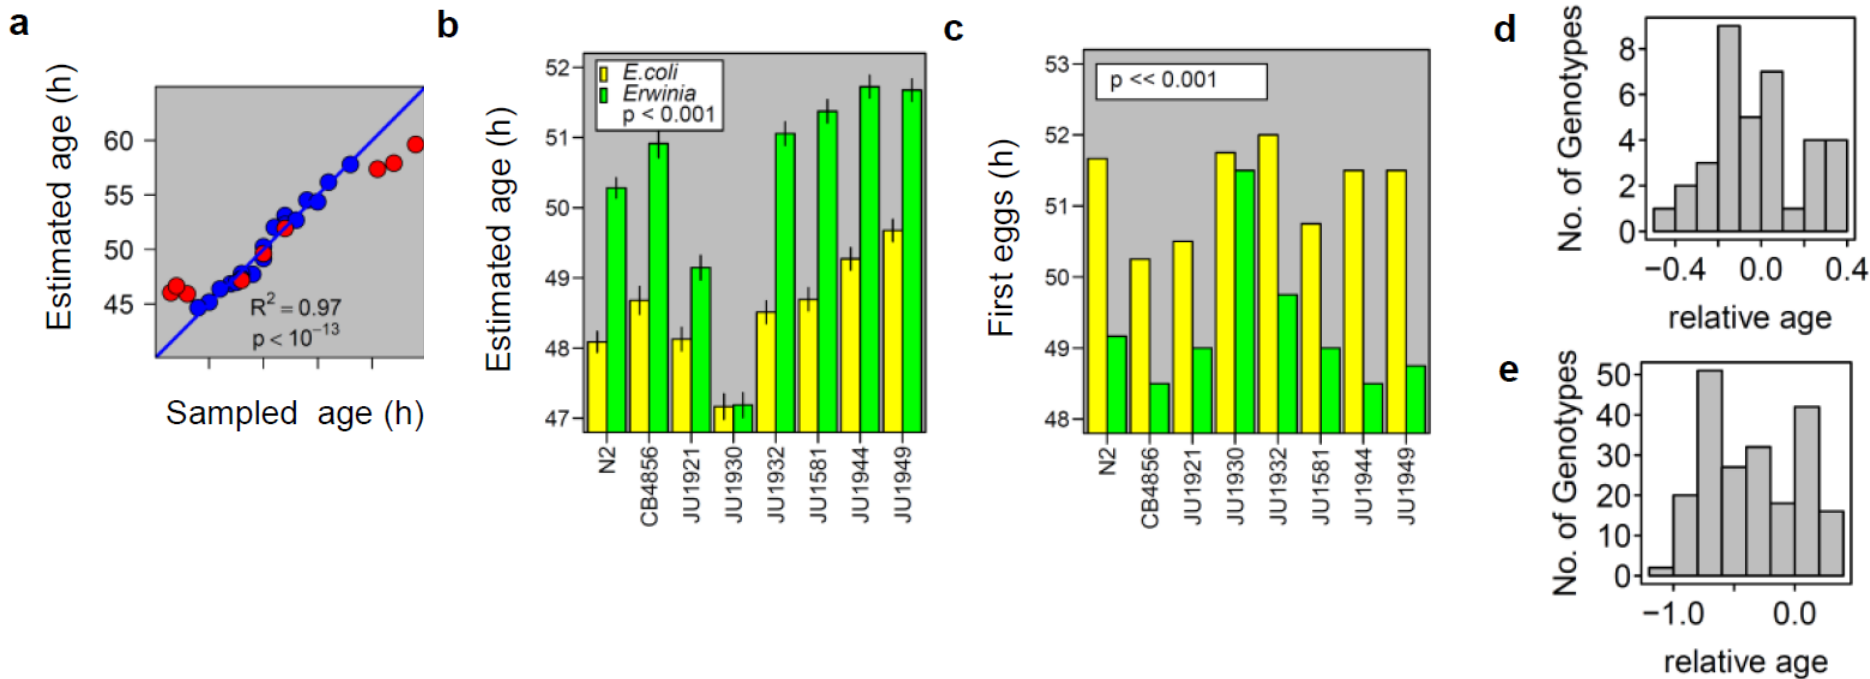

### Supplementary fig. S14. The transcriptomic ruler. Validation and application of the transcriptomic ruler. (A)

The real age of a data point versus the transcriptome age-estimate. The blue dots represent biological replicates on which the ruler was designed and red dots represent an application on a validation experiment. (B) The estimated age of different genotypes on two food sources, *E. coli* and *E. rhapontici*. The vertical lines represent SE. There is a significant increase in estimated age when *C. elegans* is fed on *E. rhapontici* ( $P < 0.001$ ). (C) The age after synchronization when the first eggs were laid for different genotypes feeding on different food sources (*E. coli* in yellow and *E. rhapontici* in green). *C. elegans* lays its eggs significantly later when fed on *E. coli* ( $P < 0.001$ ). (D) The relative age of recombinant inbred lines in a genetical genomics experiment (Viñuela *et al.* 2010). All lines were profiled at the same absolute age. See also comments for **fig. S14E** (E) The relative age of recombinant inbred lines in a genetical genomics experiment (Rockman *et al.* 2010). All lines were profiled at the same absolute age. Developmental differences between recombinant inbred lines of a N2 x CB4856 cross were described in (Gutteling *et al.* 2007), this difference in development is reflected in the transcript profiles of these lines. It shows that the transcriptomic ruler can be used to determine the developmental age of each individual line. This can subsequently be used for a better understanding of the results, for example eQTL analysis in contrast with developmental age.

**Supplementary table S3 | Number of mutations in gene structures from the million mutation project.**

| <b>Gene structure</b> | <b>Mutants</b> | <b>Wild isolates</b> |
|-----------------------|----------------|----------------------|
| intron                | 242,341        | 298,191              |
| exon                  | 250,599        | 144,721              |
| missense              | 172,112        | 64,763               |
| synonymous            | 68,237         | 68,024               |
| 5'UTR                 | 7,172          | 5,519                |
| 3'UTR                 | 17,874         | 16,559               |
| Total SNPs            | 758,335        | 597,777              |

**Supplementary table S3. Number of mutations in gene structures from the million mutation project.** The number of mutations that were used in the analysis on the expression clusters, as extracted from the million mutation project database (Thompson *et al.* 2013).

**Supplementary table S4** Number of photographed *C. elegans* individuals per time point. Time points in hours after synchronisation.

| <b>Time point</b> | <b>No. of worms</b> | <b>Time point</b> | <b>No. of worms</b> |
|-------------------|---------------------|-------------------|---------------------|
| 48                | 19                  | 58                | 36                  |
| 49                | 41                  | 59                | NA                  |
| 50                | 54                  | 60                | 16                  |
| 51                | 58                  | 61                | 15                  |
| 52                | 59                  | 62                | 18                  |
| 53                | 38                  | 63                | 19                  |
| 54                | 39                  | 64                | 15                  |
| 55                | 40                  | 65                | 20                  |
| 56                | 40                  | 66                | 20                  |
| 57                | 41                  | 67                | 20                  |

**Supplementary table S4. Number of photographed *C. elegans* individuals per time point.** Time points in hours after synchronisation.



**Supplementary table S6** Method of RNA isolation per sample. Q = RNEasy Micro Kit from Qiagen, M = Maxwell® 16 LEV simplyRNA Tissue Kit from Promega.

| Samples used to calculate the slope of linear in- or decrease <sup>a</sup> |        |        |        | Test samples <sup>b</sup> |        |
|----------------------------------------------------------------------------|--------|--------|--------|---------------------------|--------|
| Sample <sup>c</sup>                                                        | Method | Sample | Method | Sample                    | Method |
| 44                                                                         | Q      | 51     | Q      | 41.5                      | M      |
| 45                                                                         | Q      | 52A    | Q      | 42                        | M      |
| 46                                                                         | Q      | 52B    | M      | 43                        | M      |
| 47                                                                         | Q      | 53     | M      | 48C                       | M      |
| 48A                                                                        | Q      | 54     | M      | 50C                       | M      |
| 48B                                                                        | M      | 55     | M      | 52C                       | M      |
| 49                                                                         | Q      | 56     | M      | 60.5                      | M      |
| 50A                                                                        | Q      | 58     | M      | 62                        | M      |
| 50B                                                                        | M      |        |        | 64                        | M      |

a) Samples used to calculate the slope of linear in- or decrease per spot, in order to be able to estimate the age of other samples

b) Samples used to test whether it is possible to estimate age by transcript profile

c) Samples are named according to time point

### **Supplementary table S6. Method of RNA isolation per sample.**

The RNA isolation methods used.

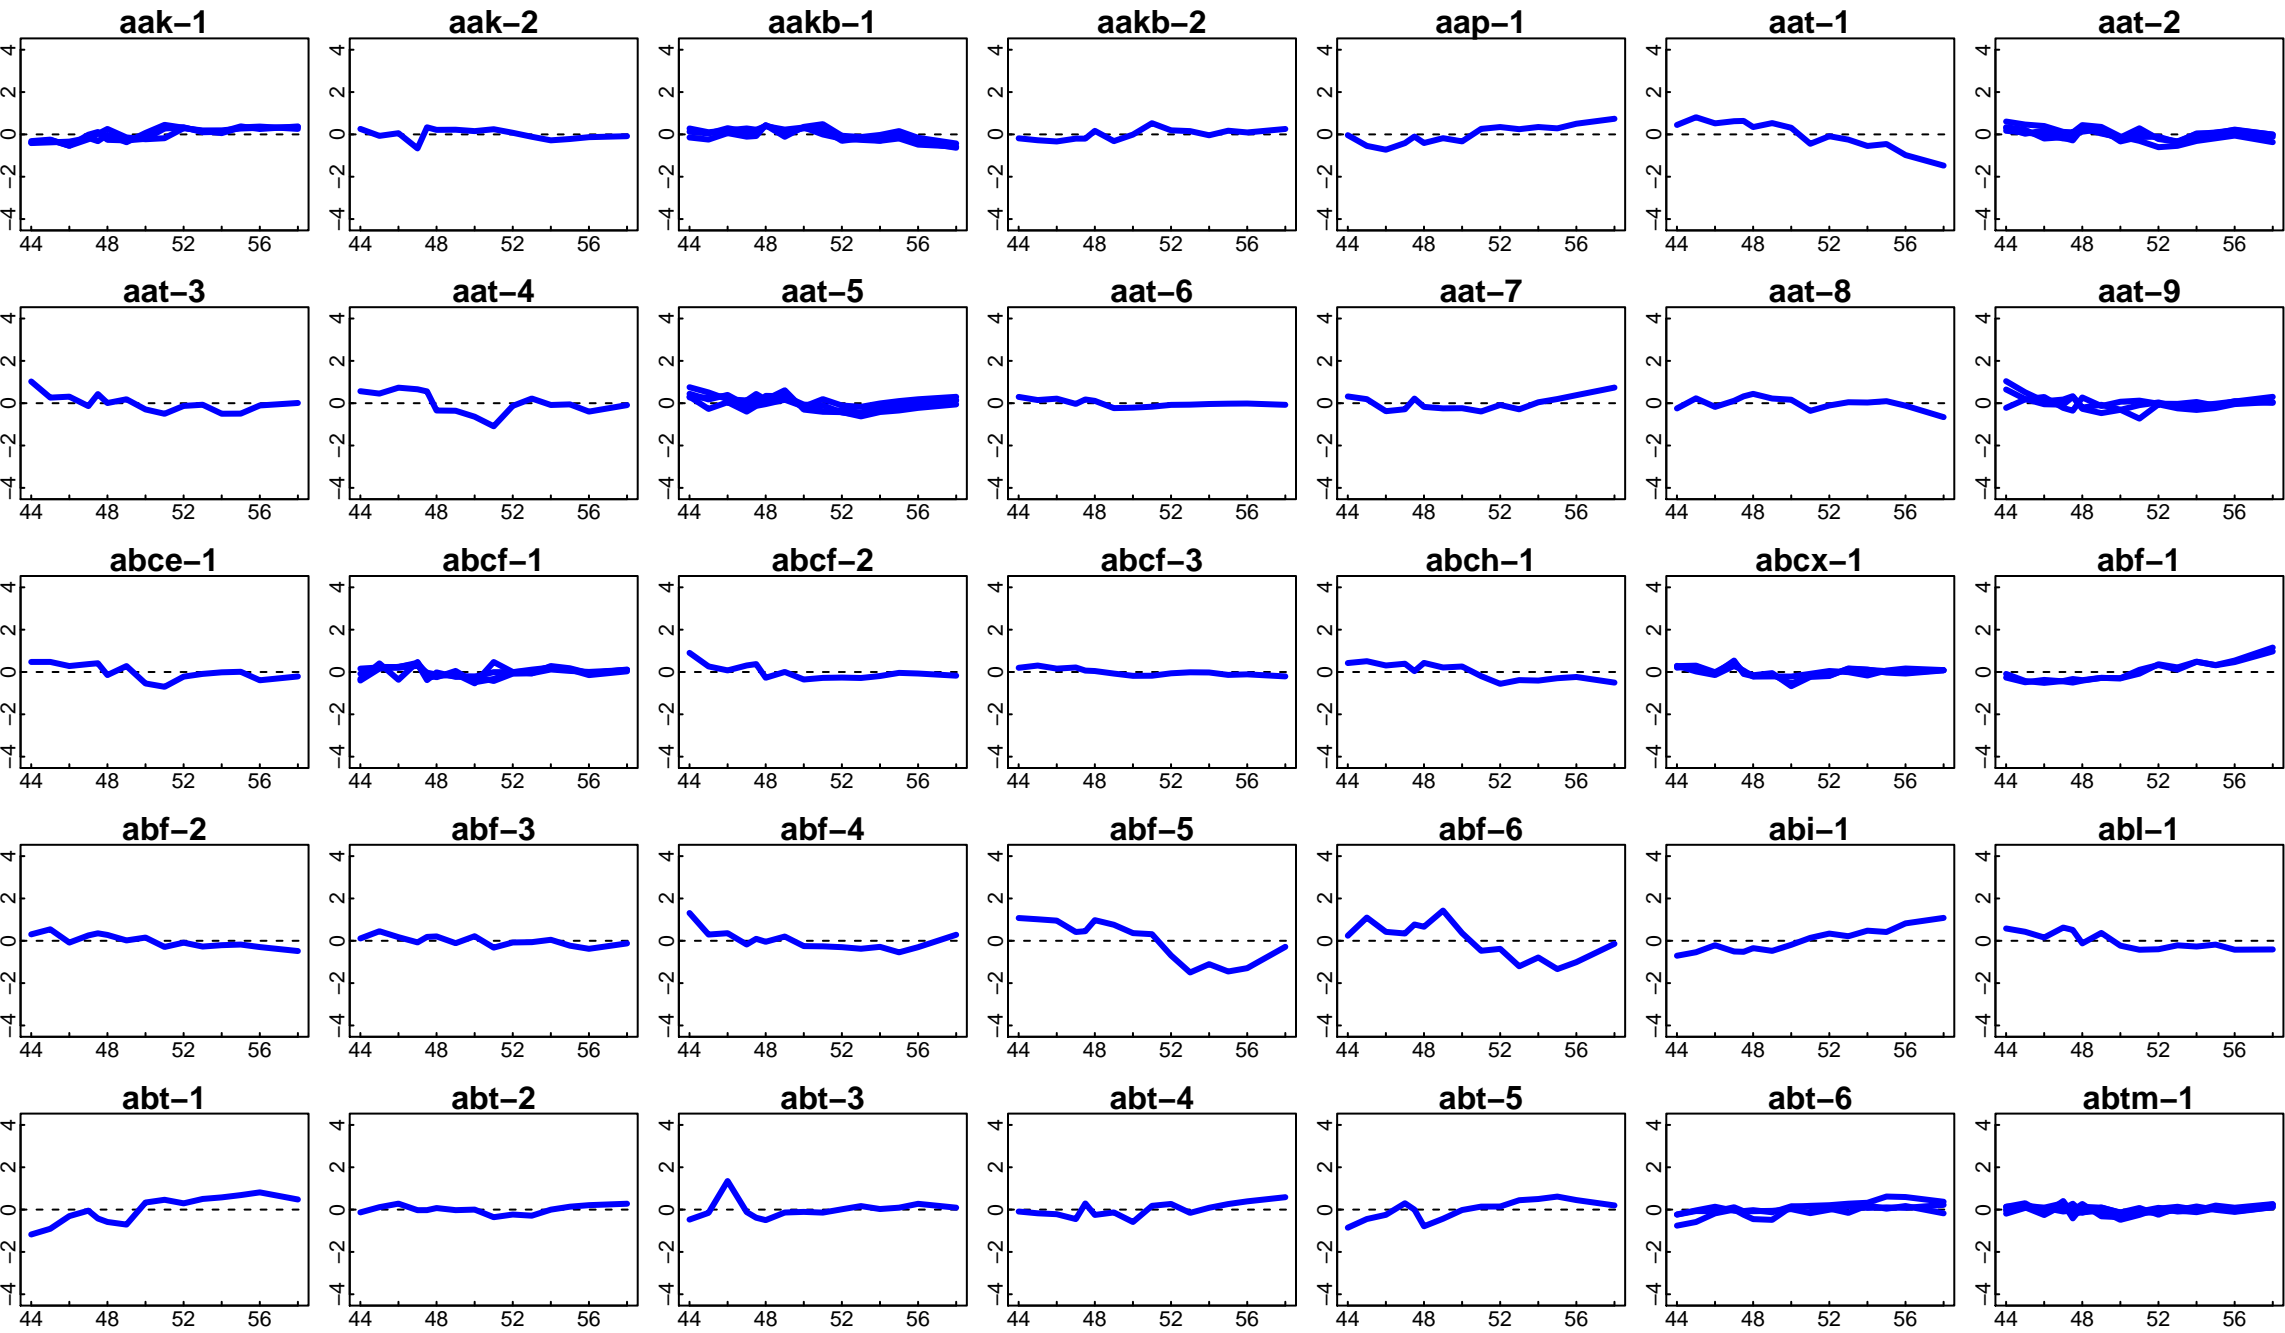

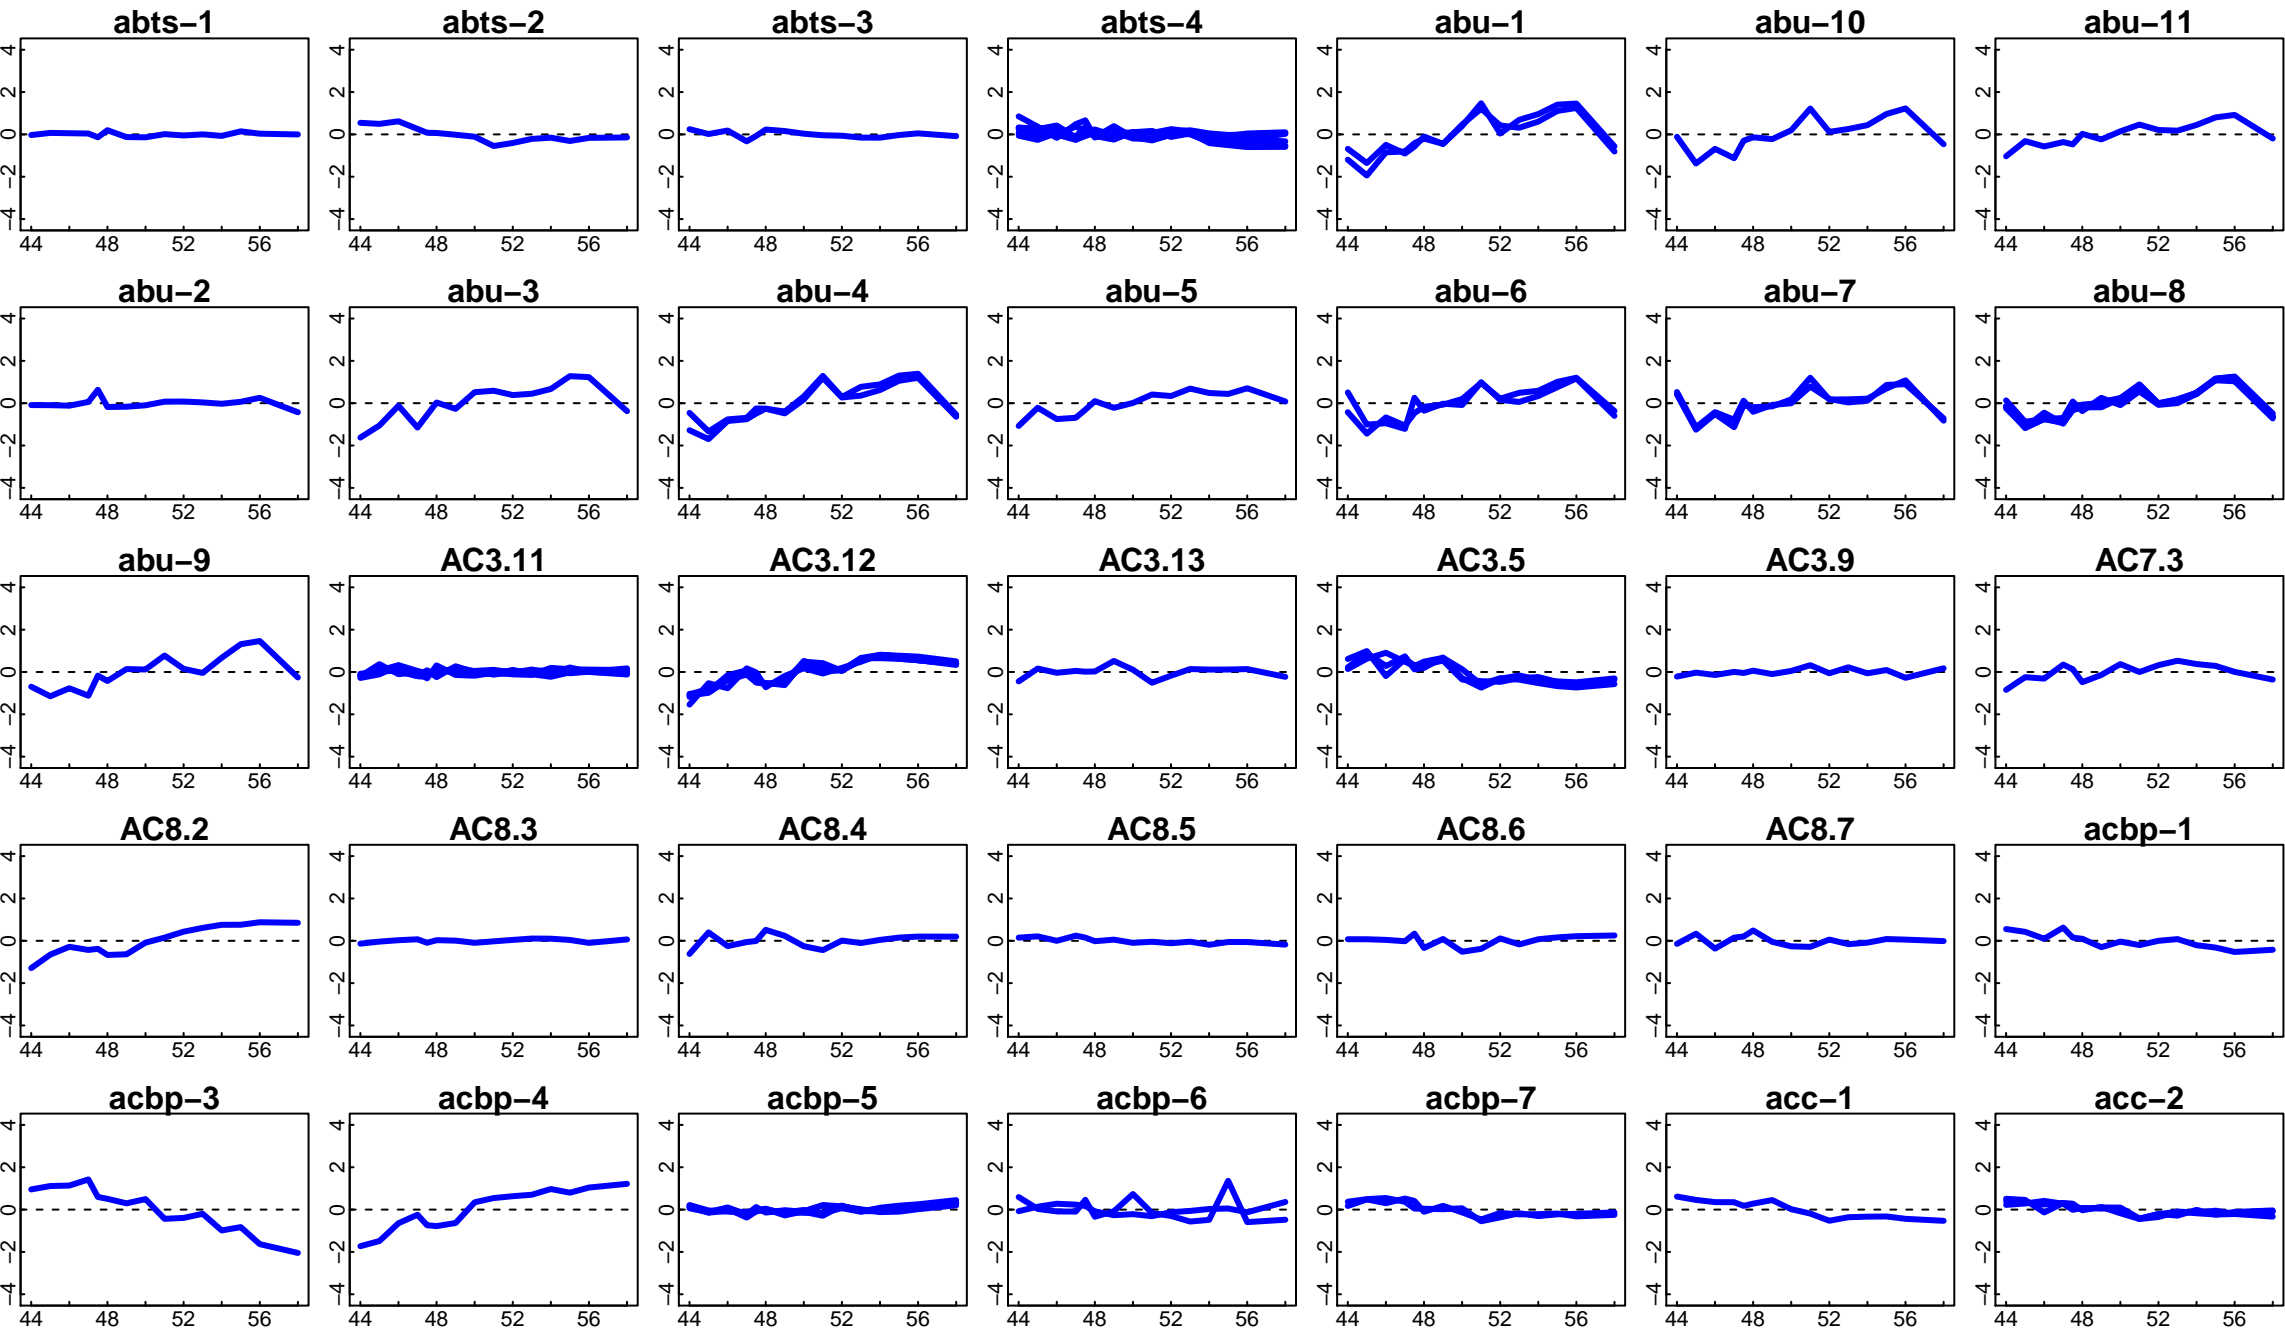

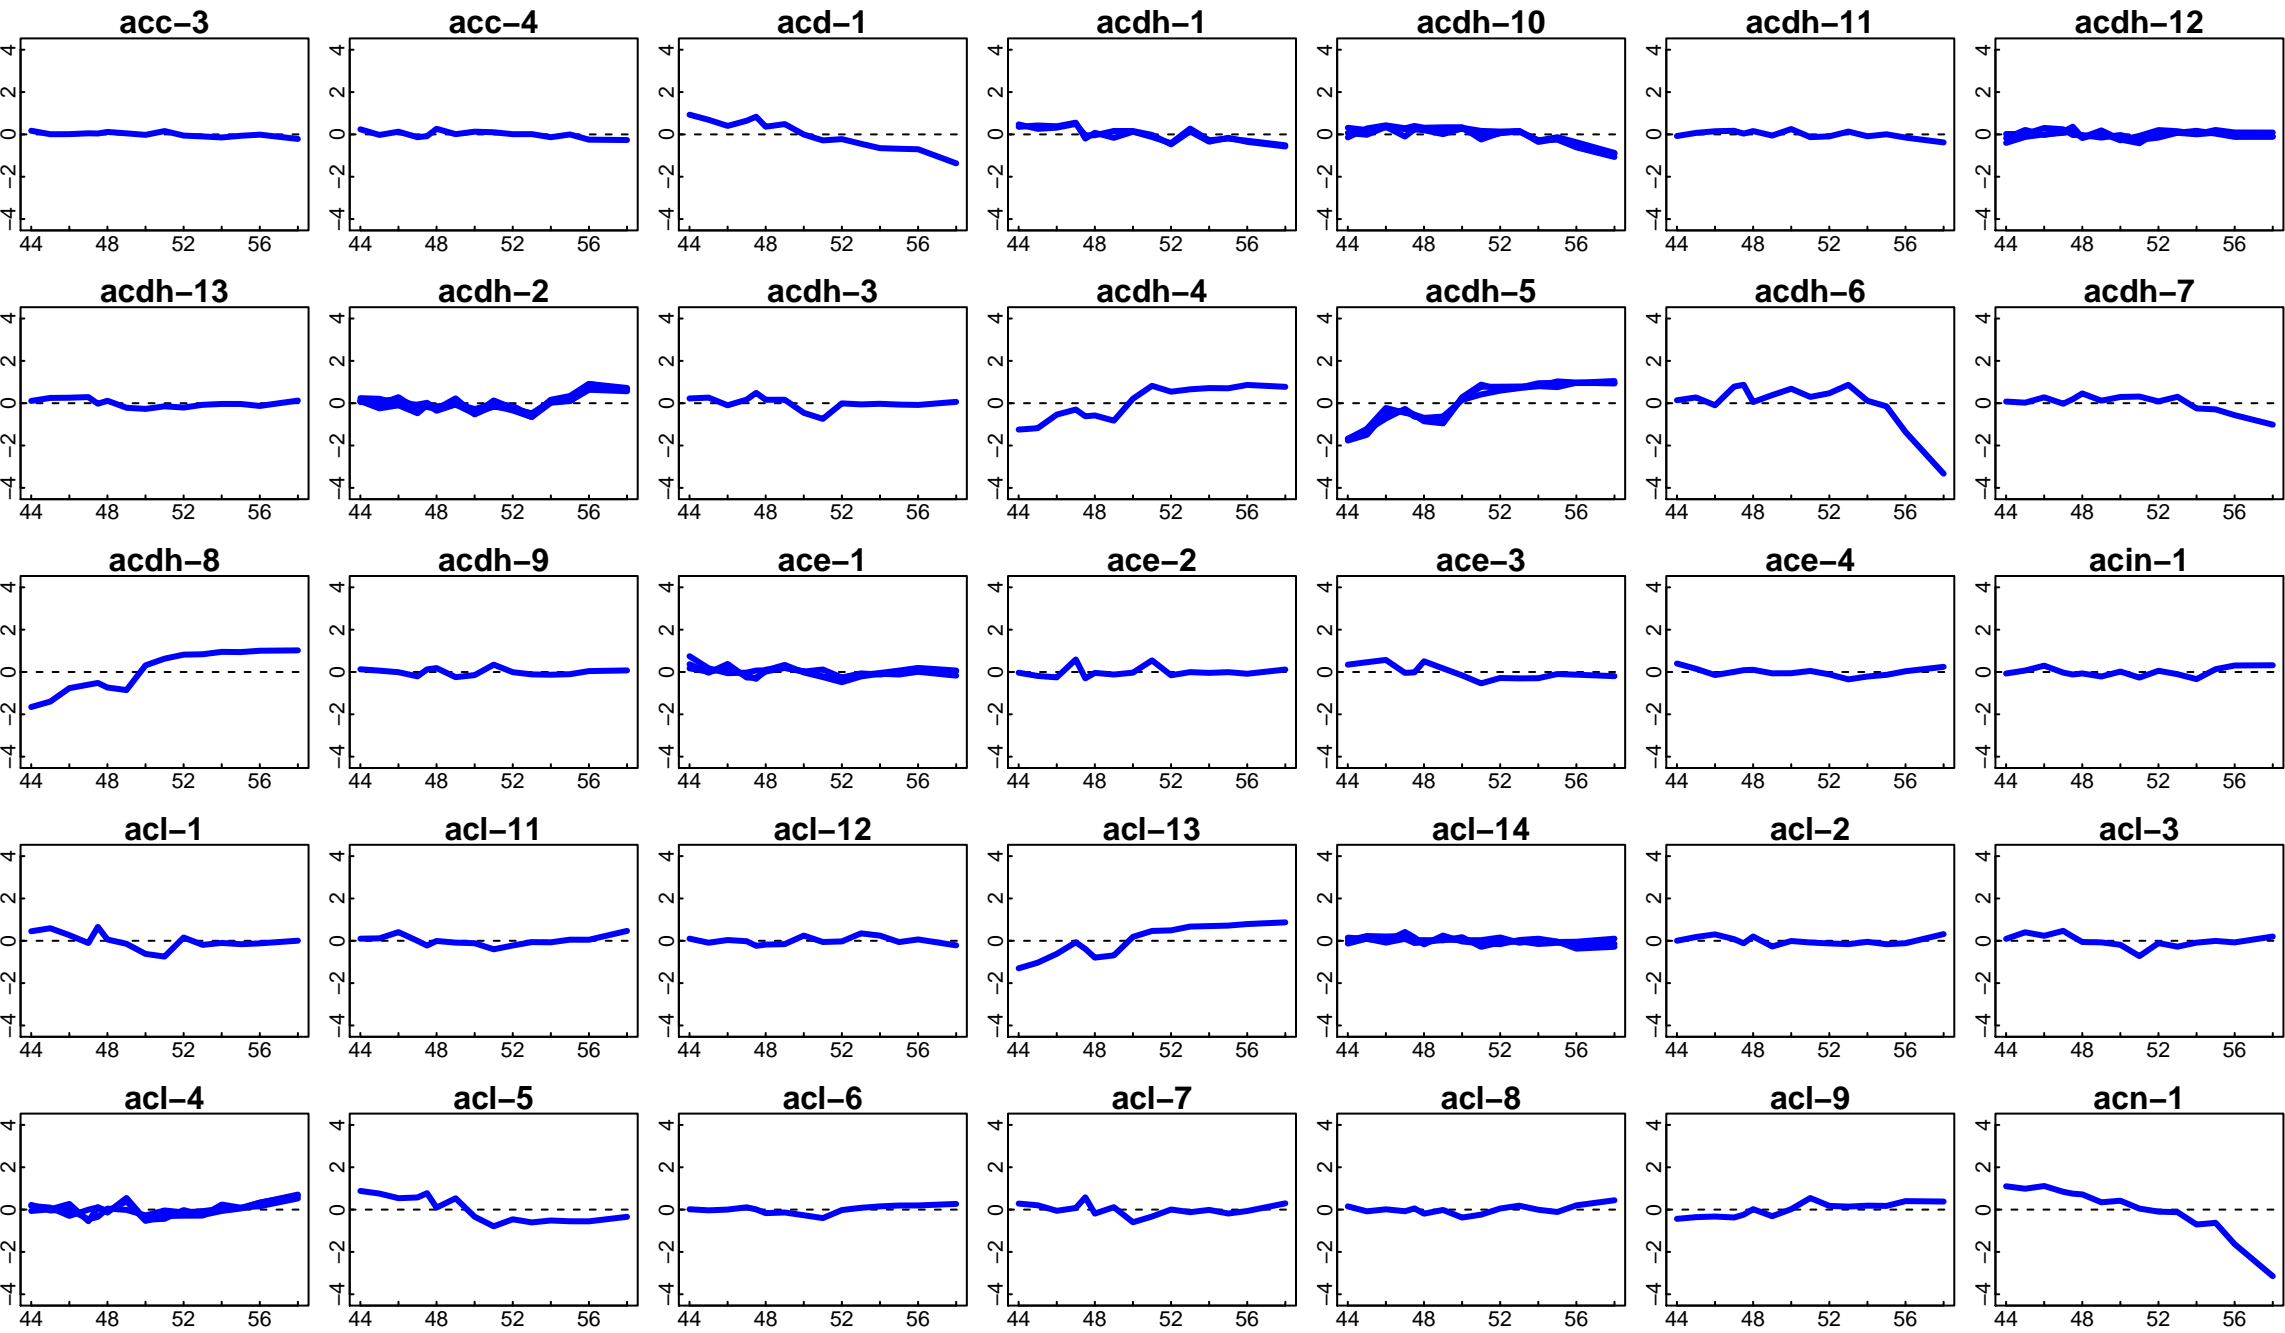

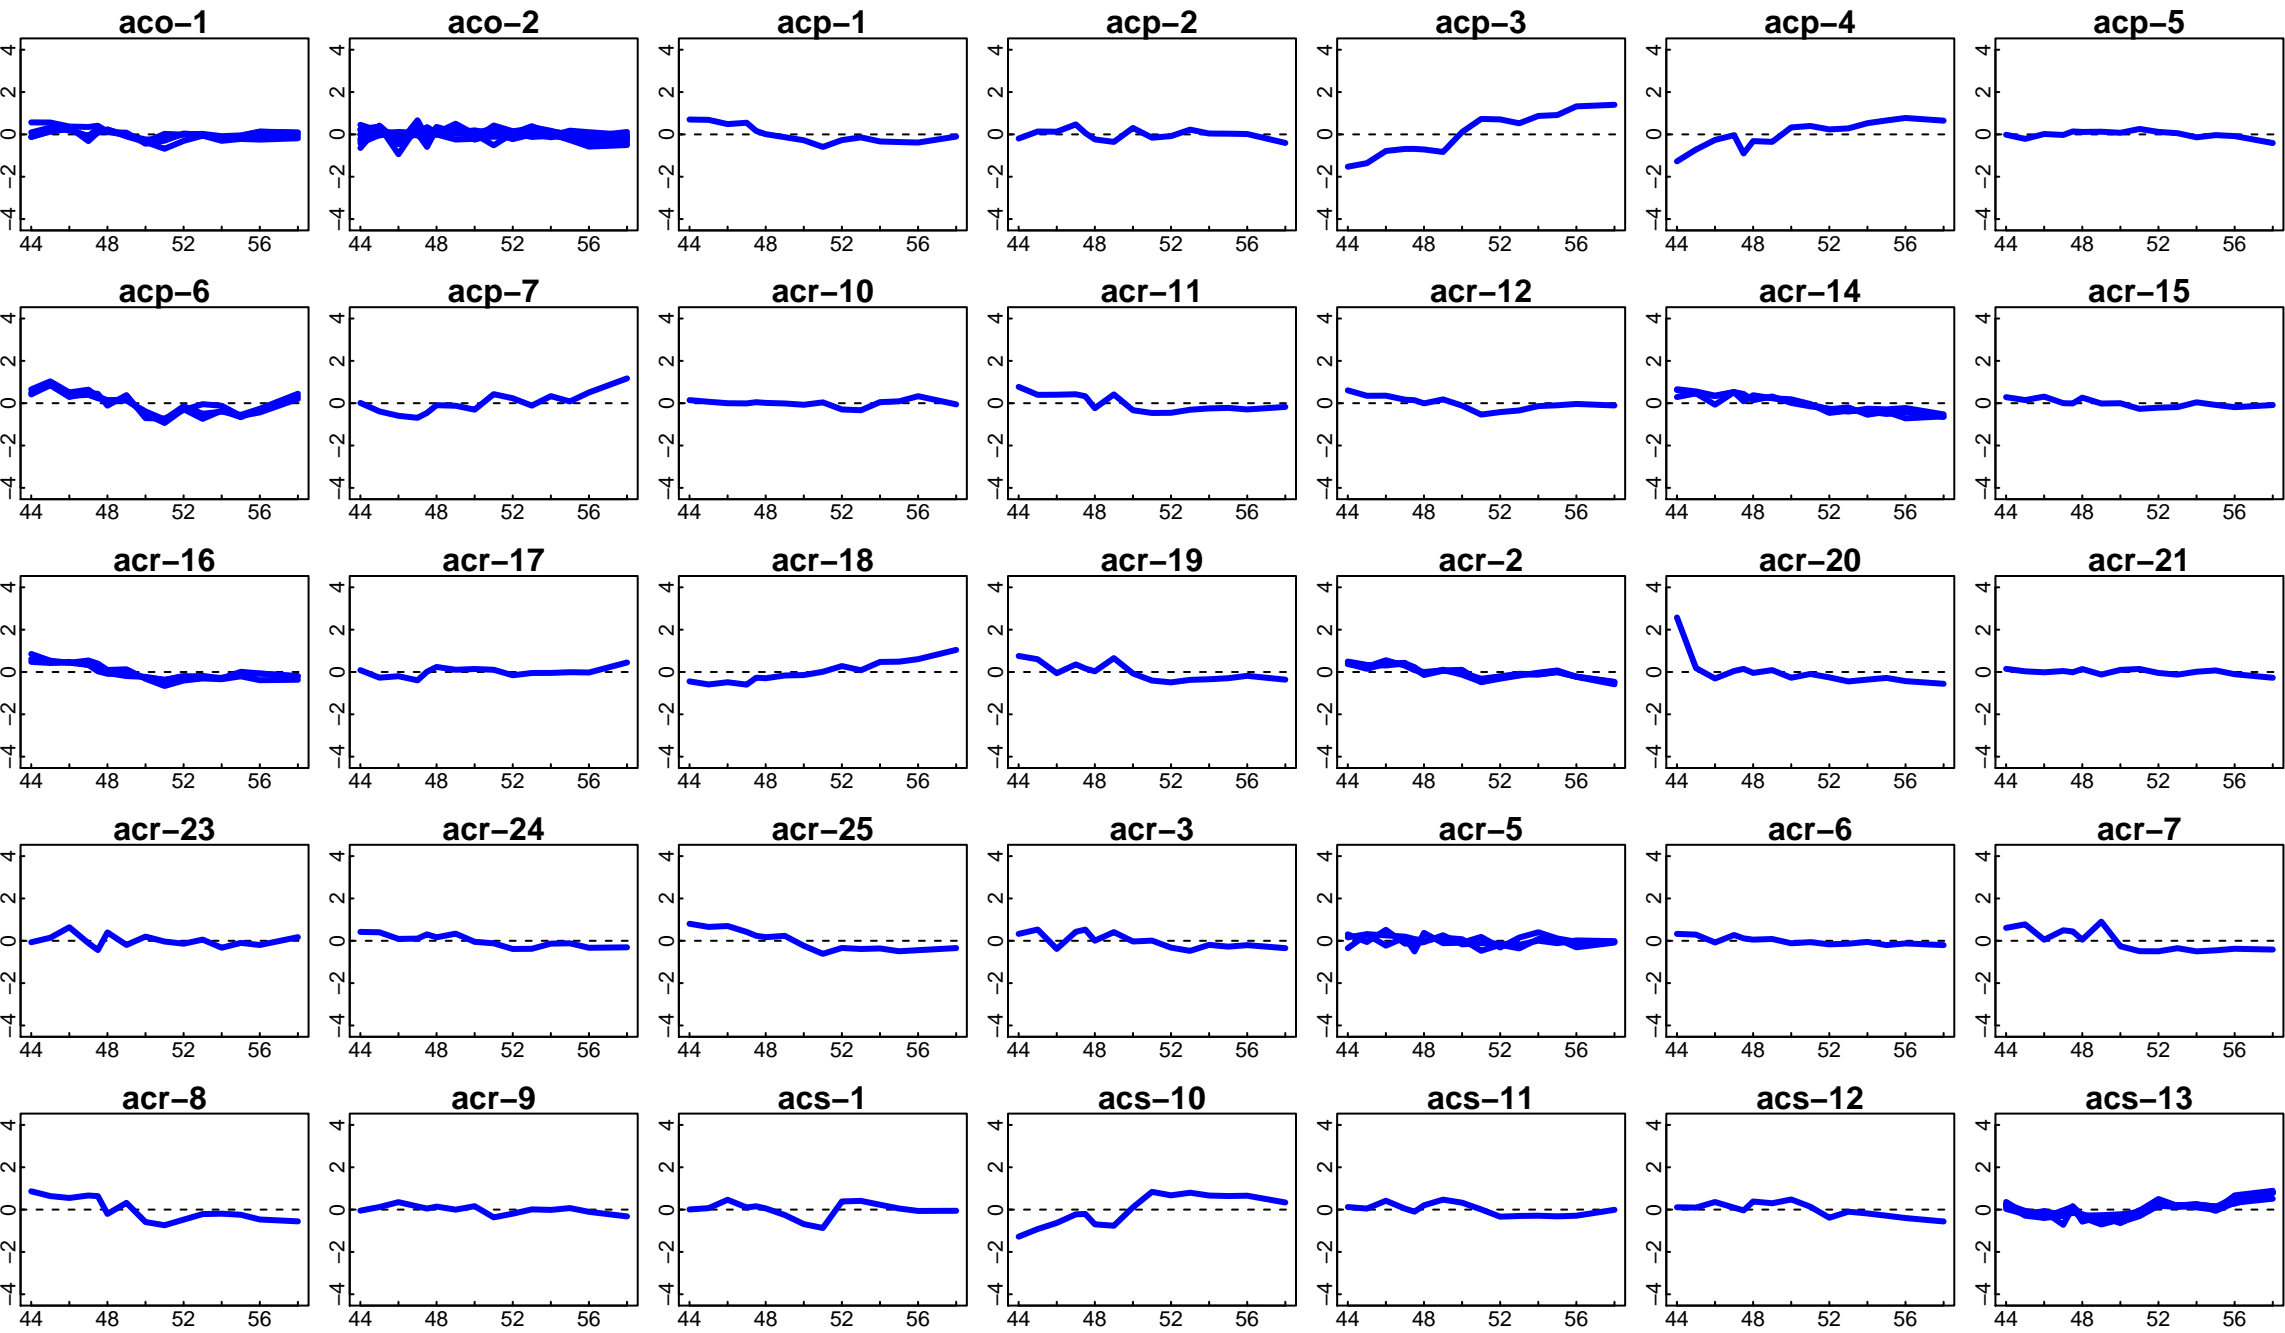

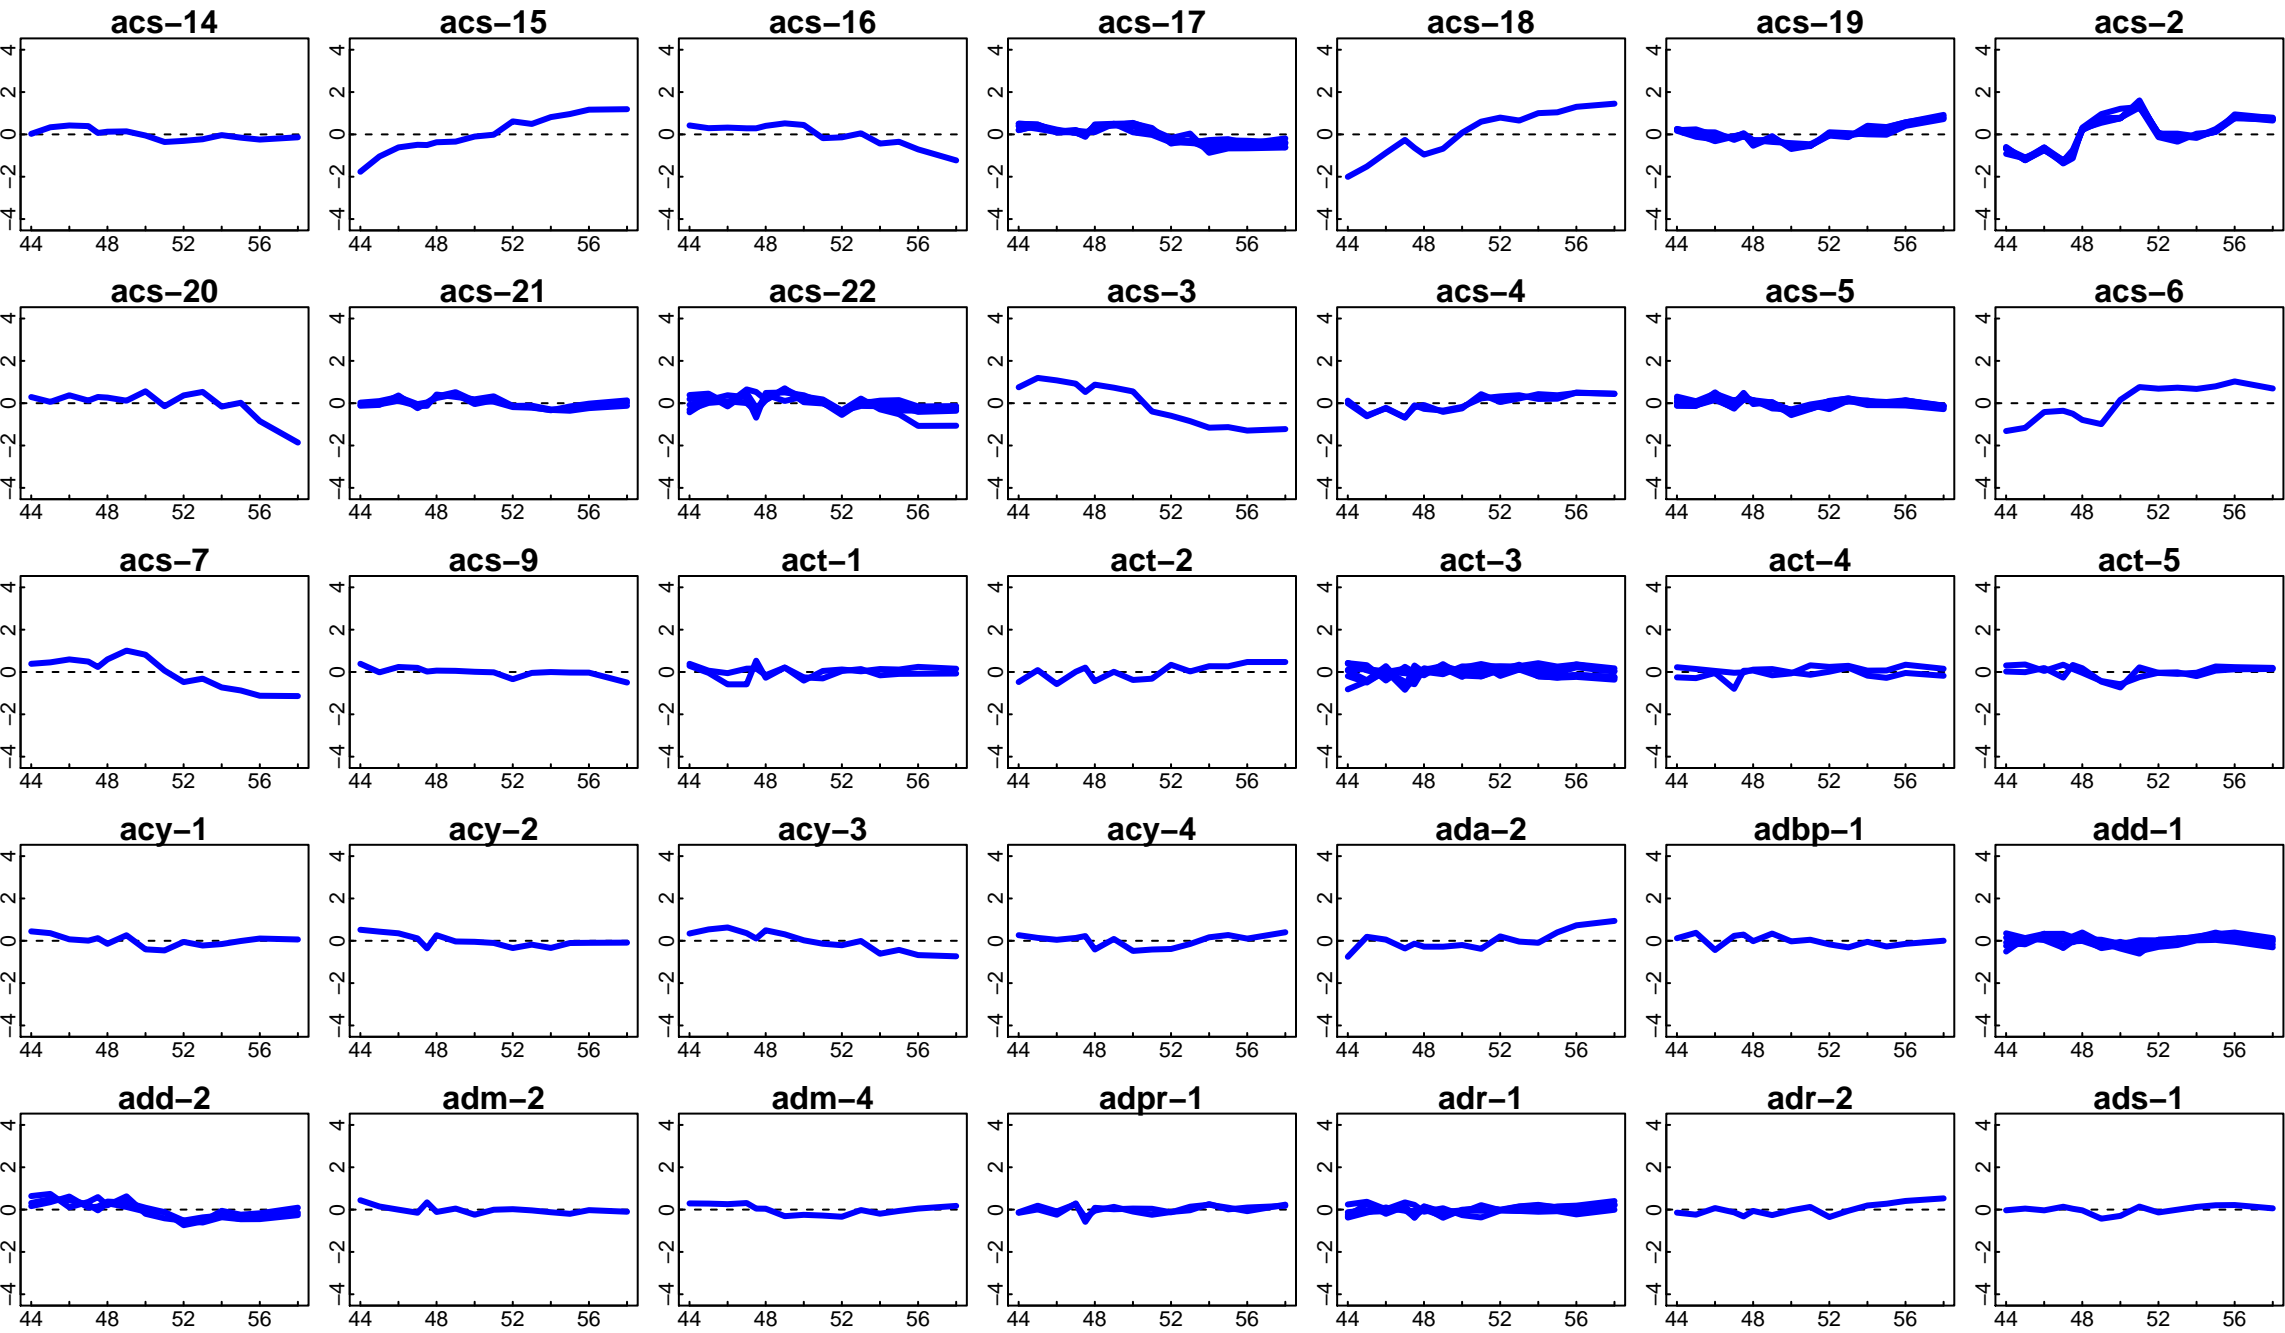

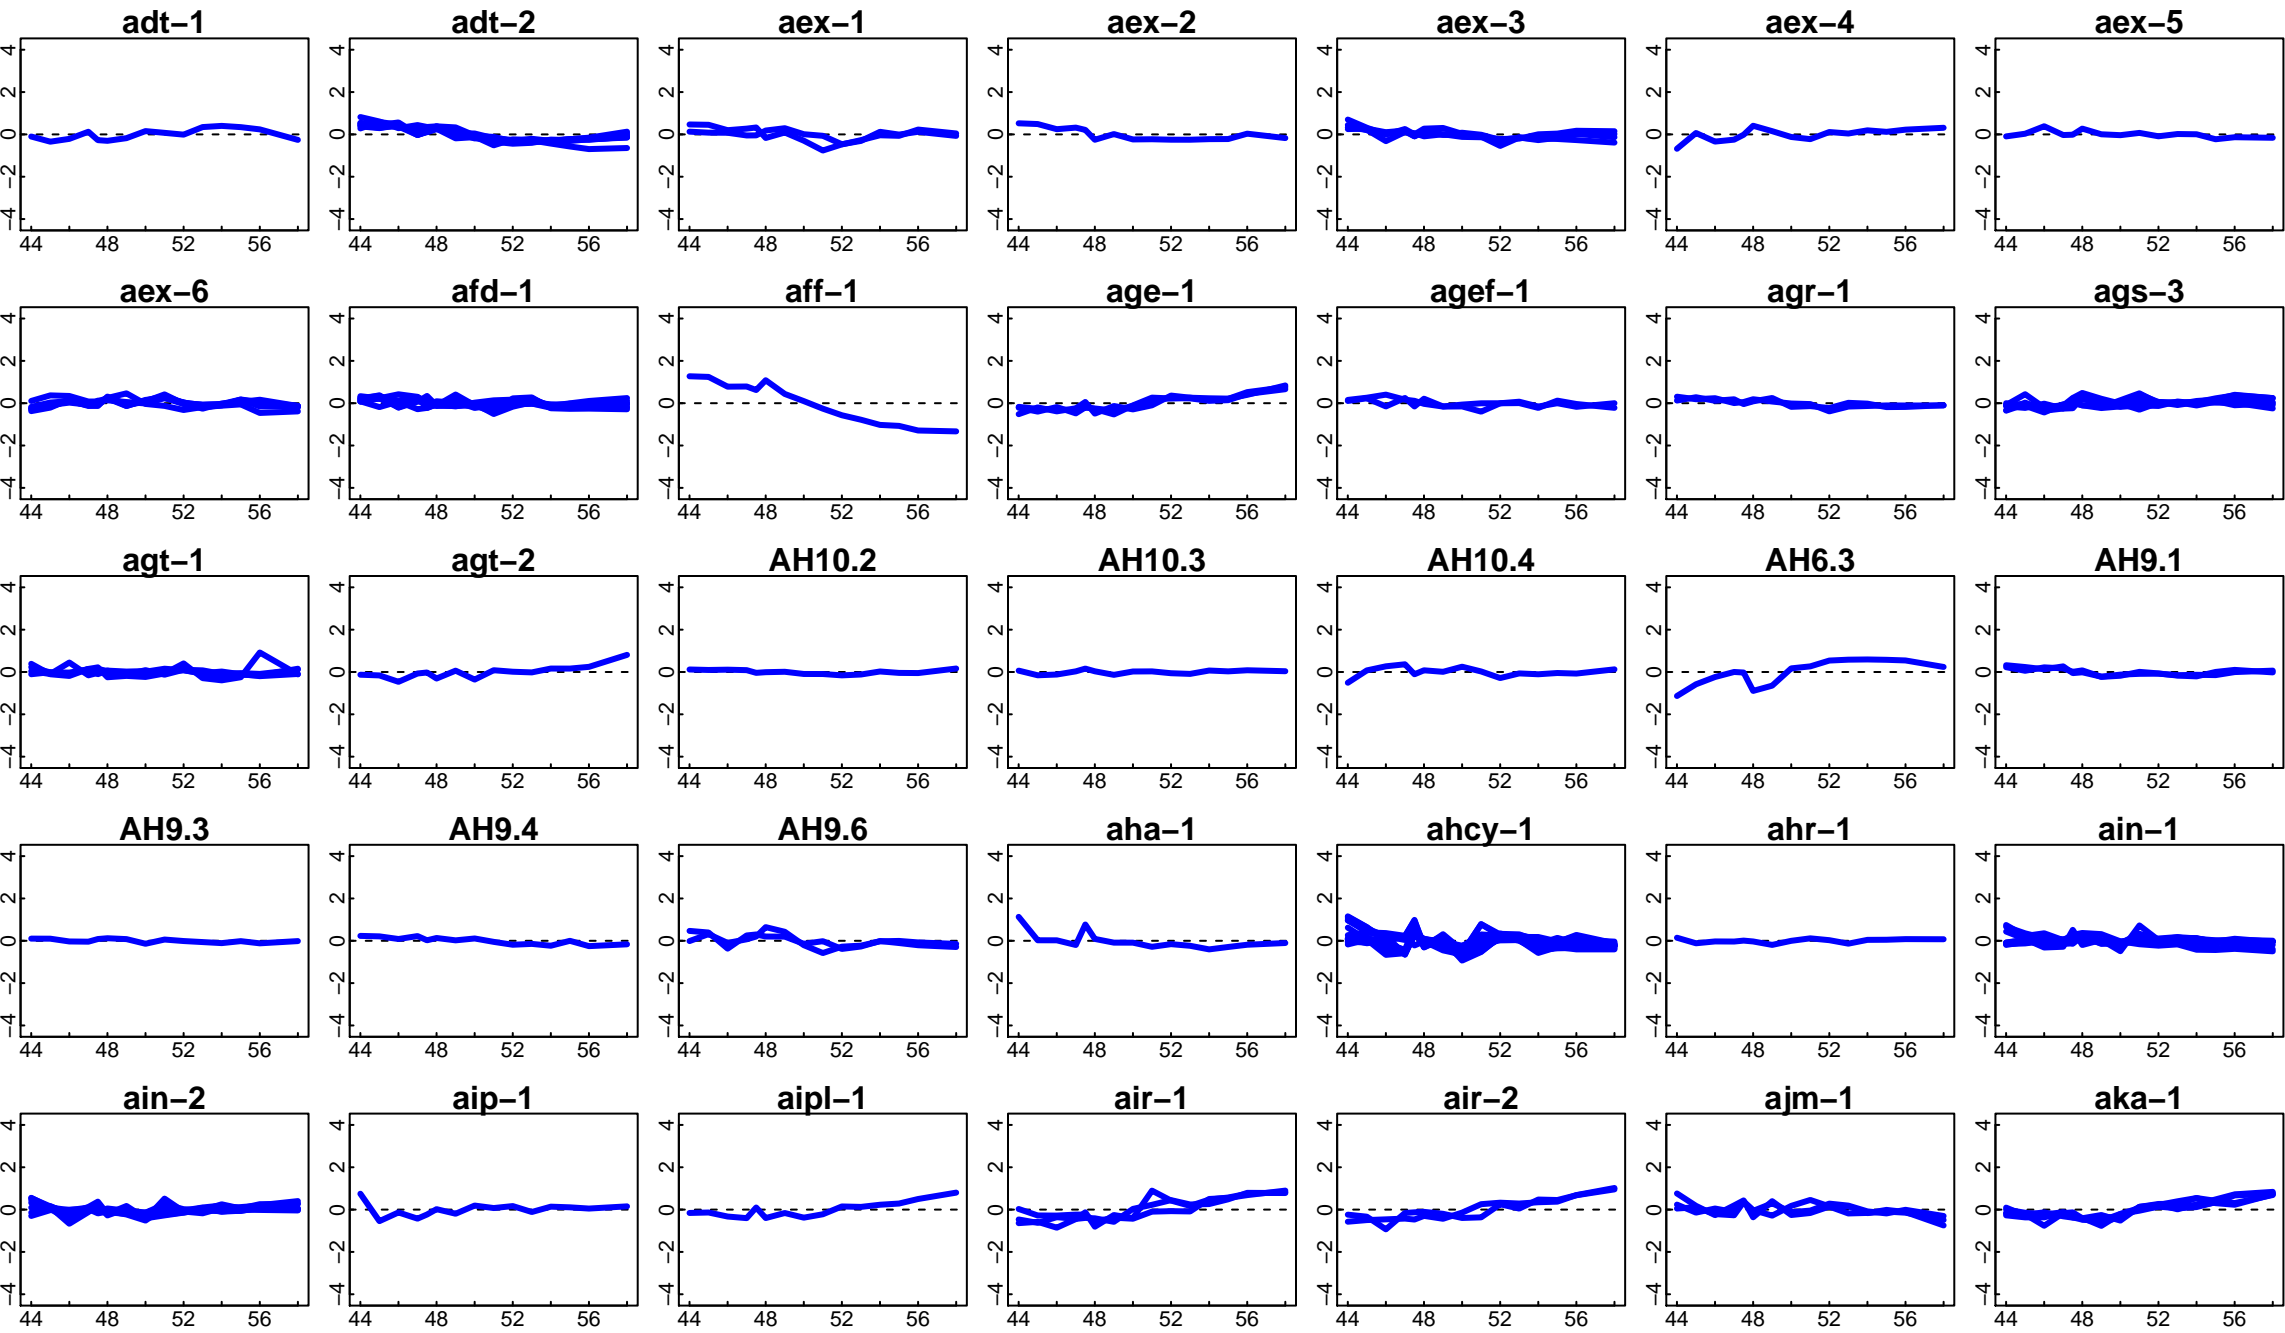

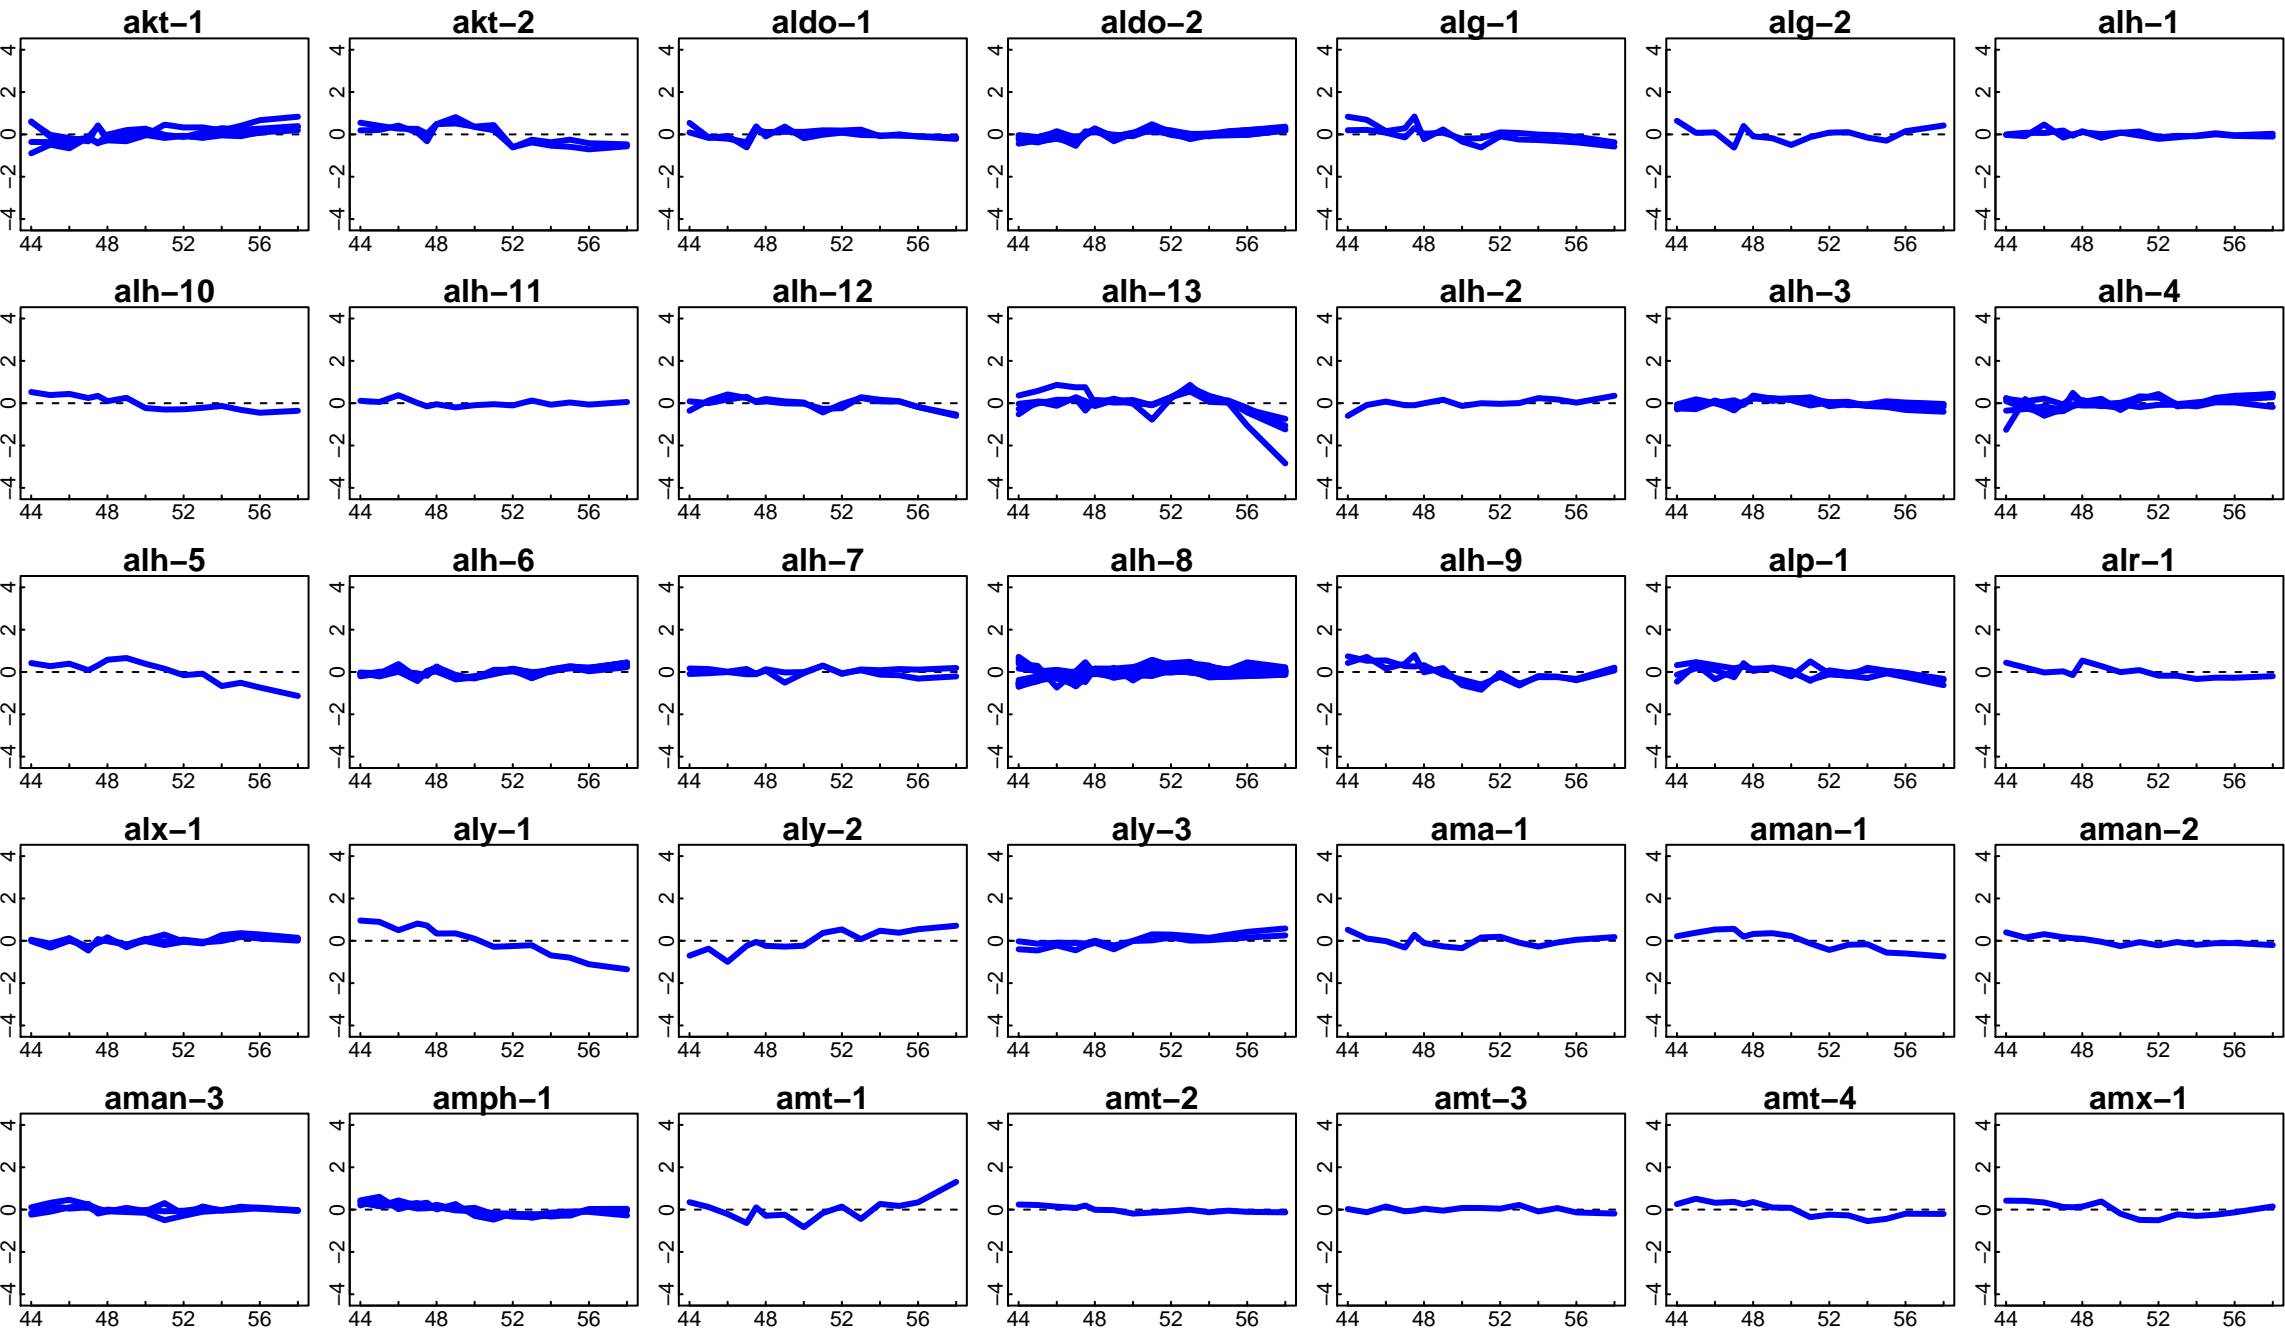



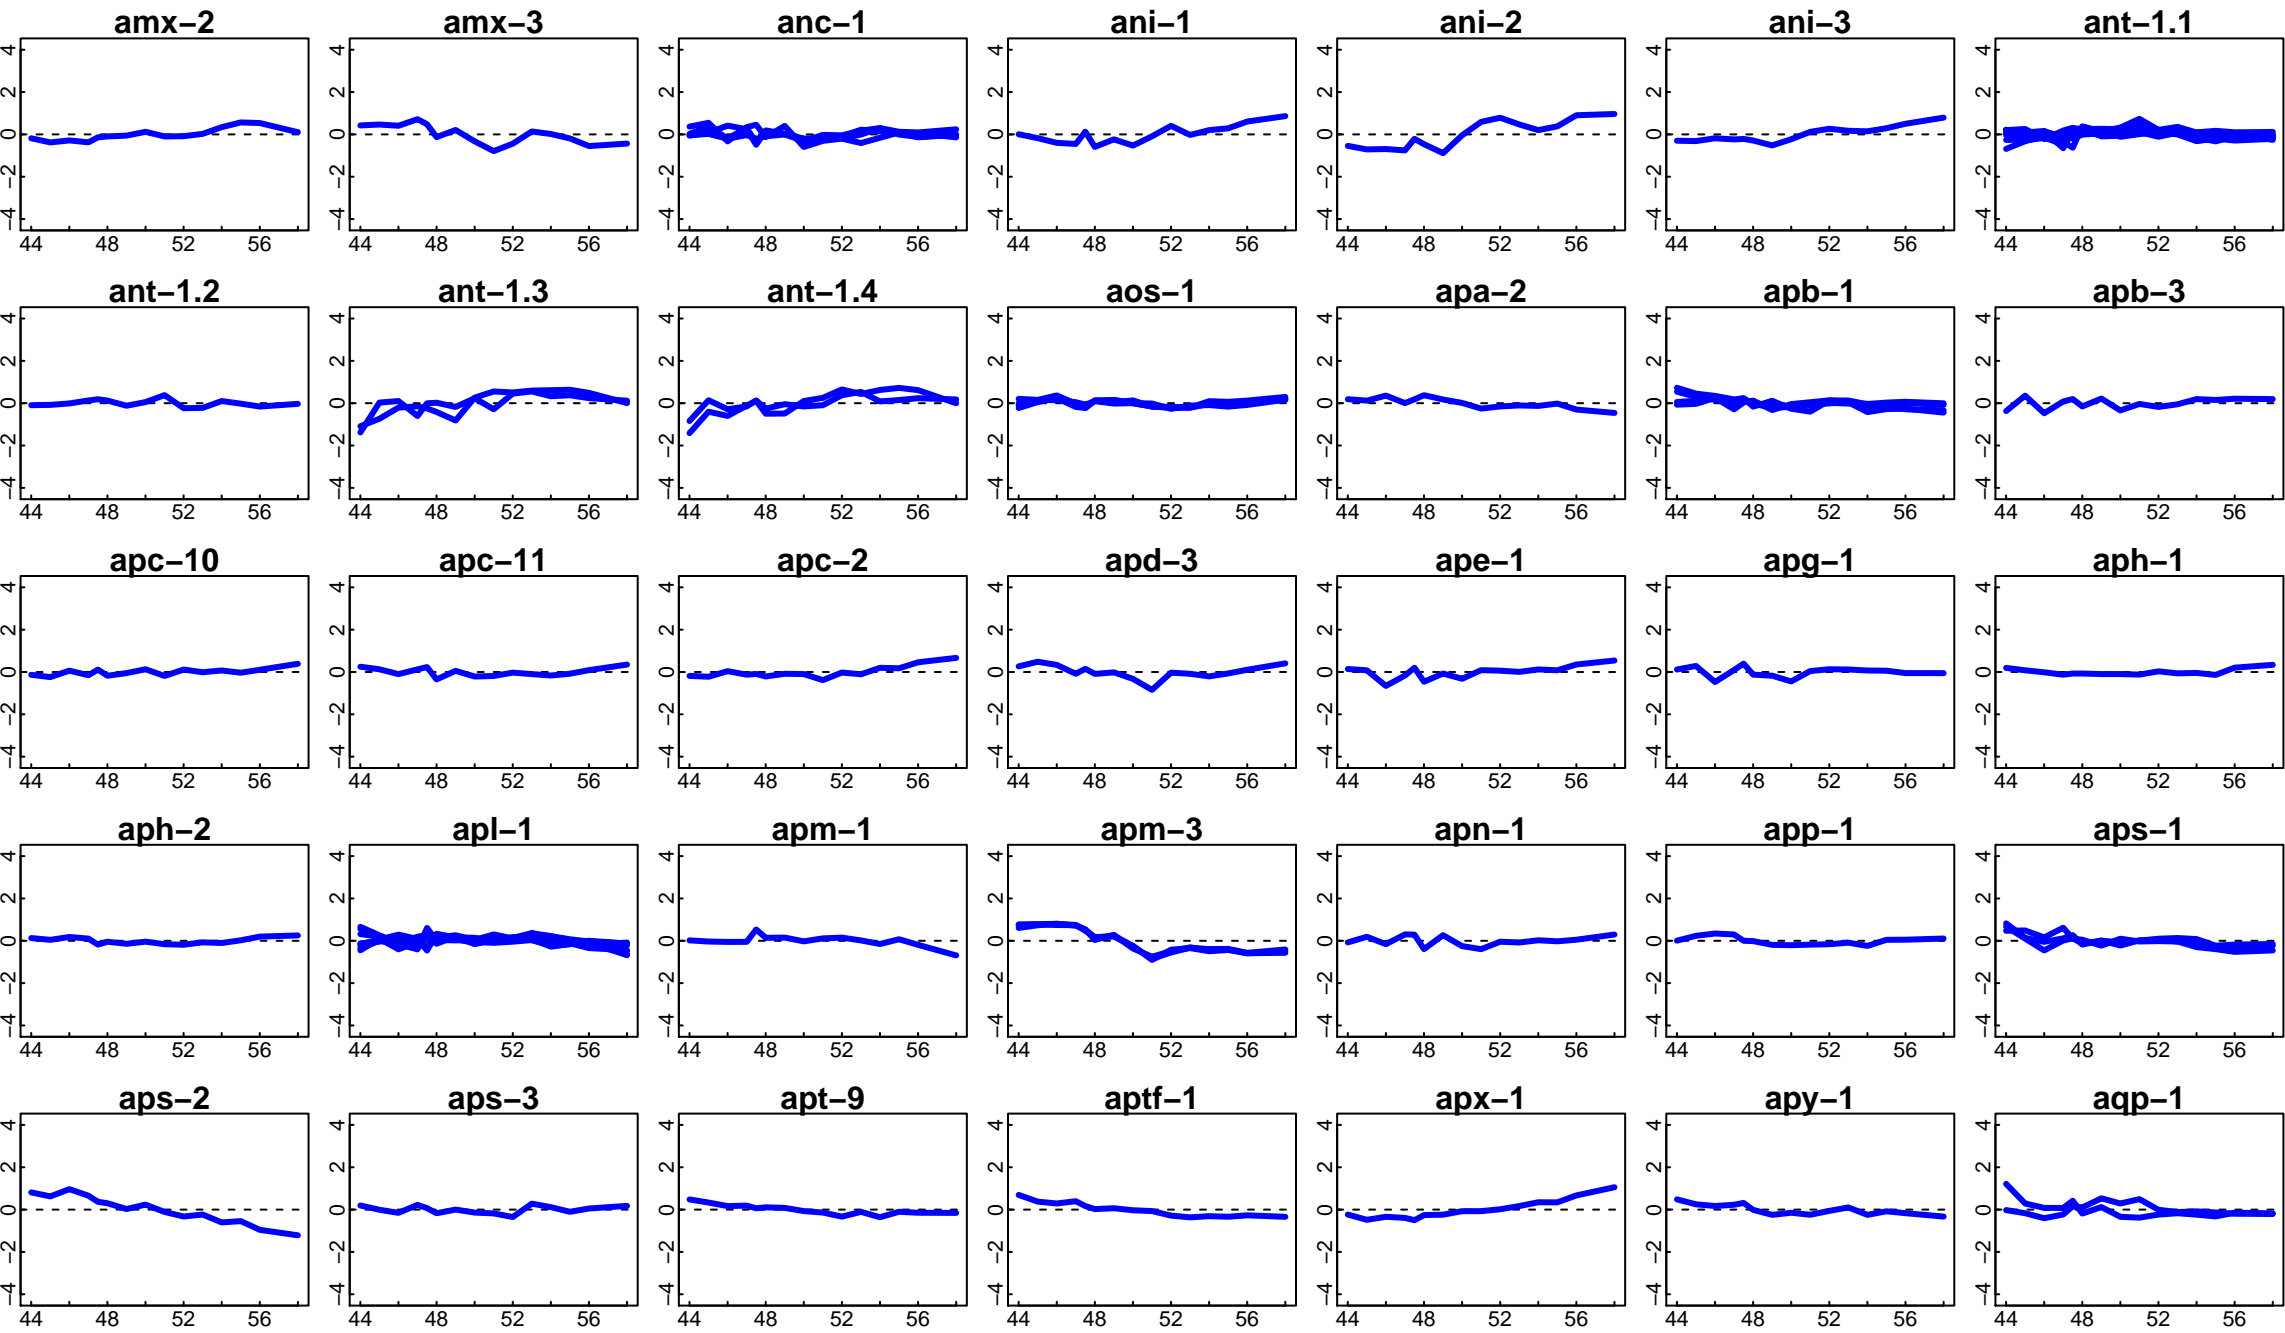

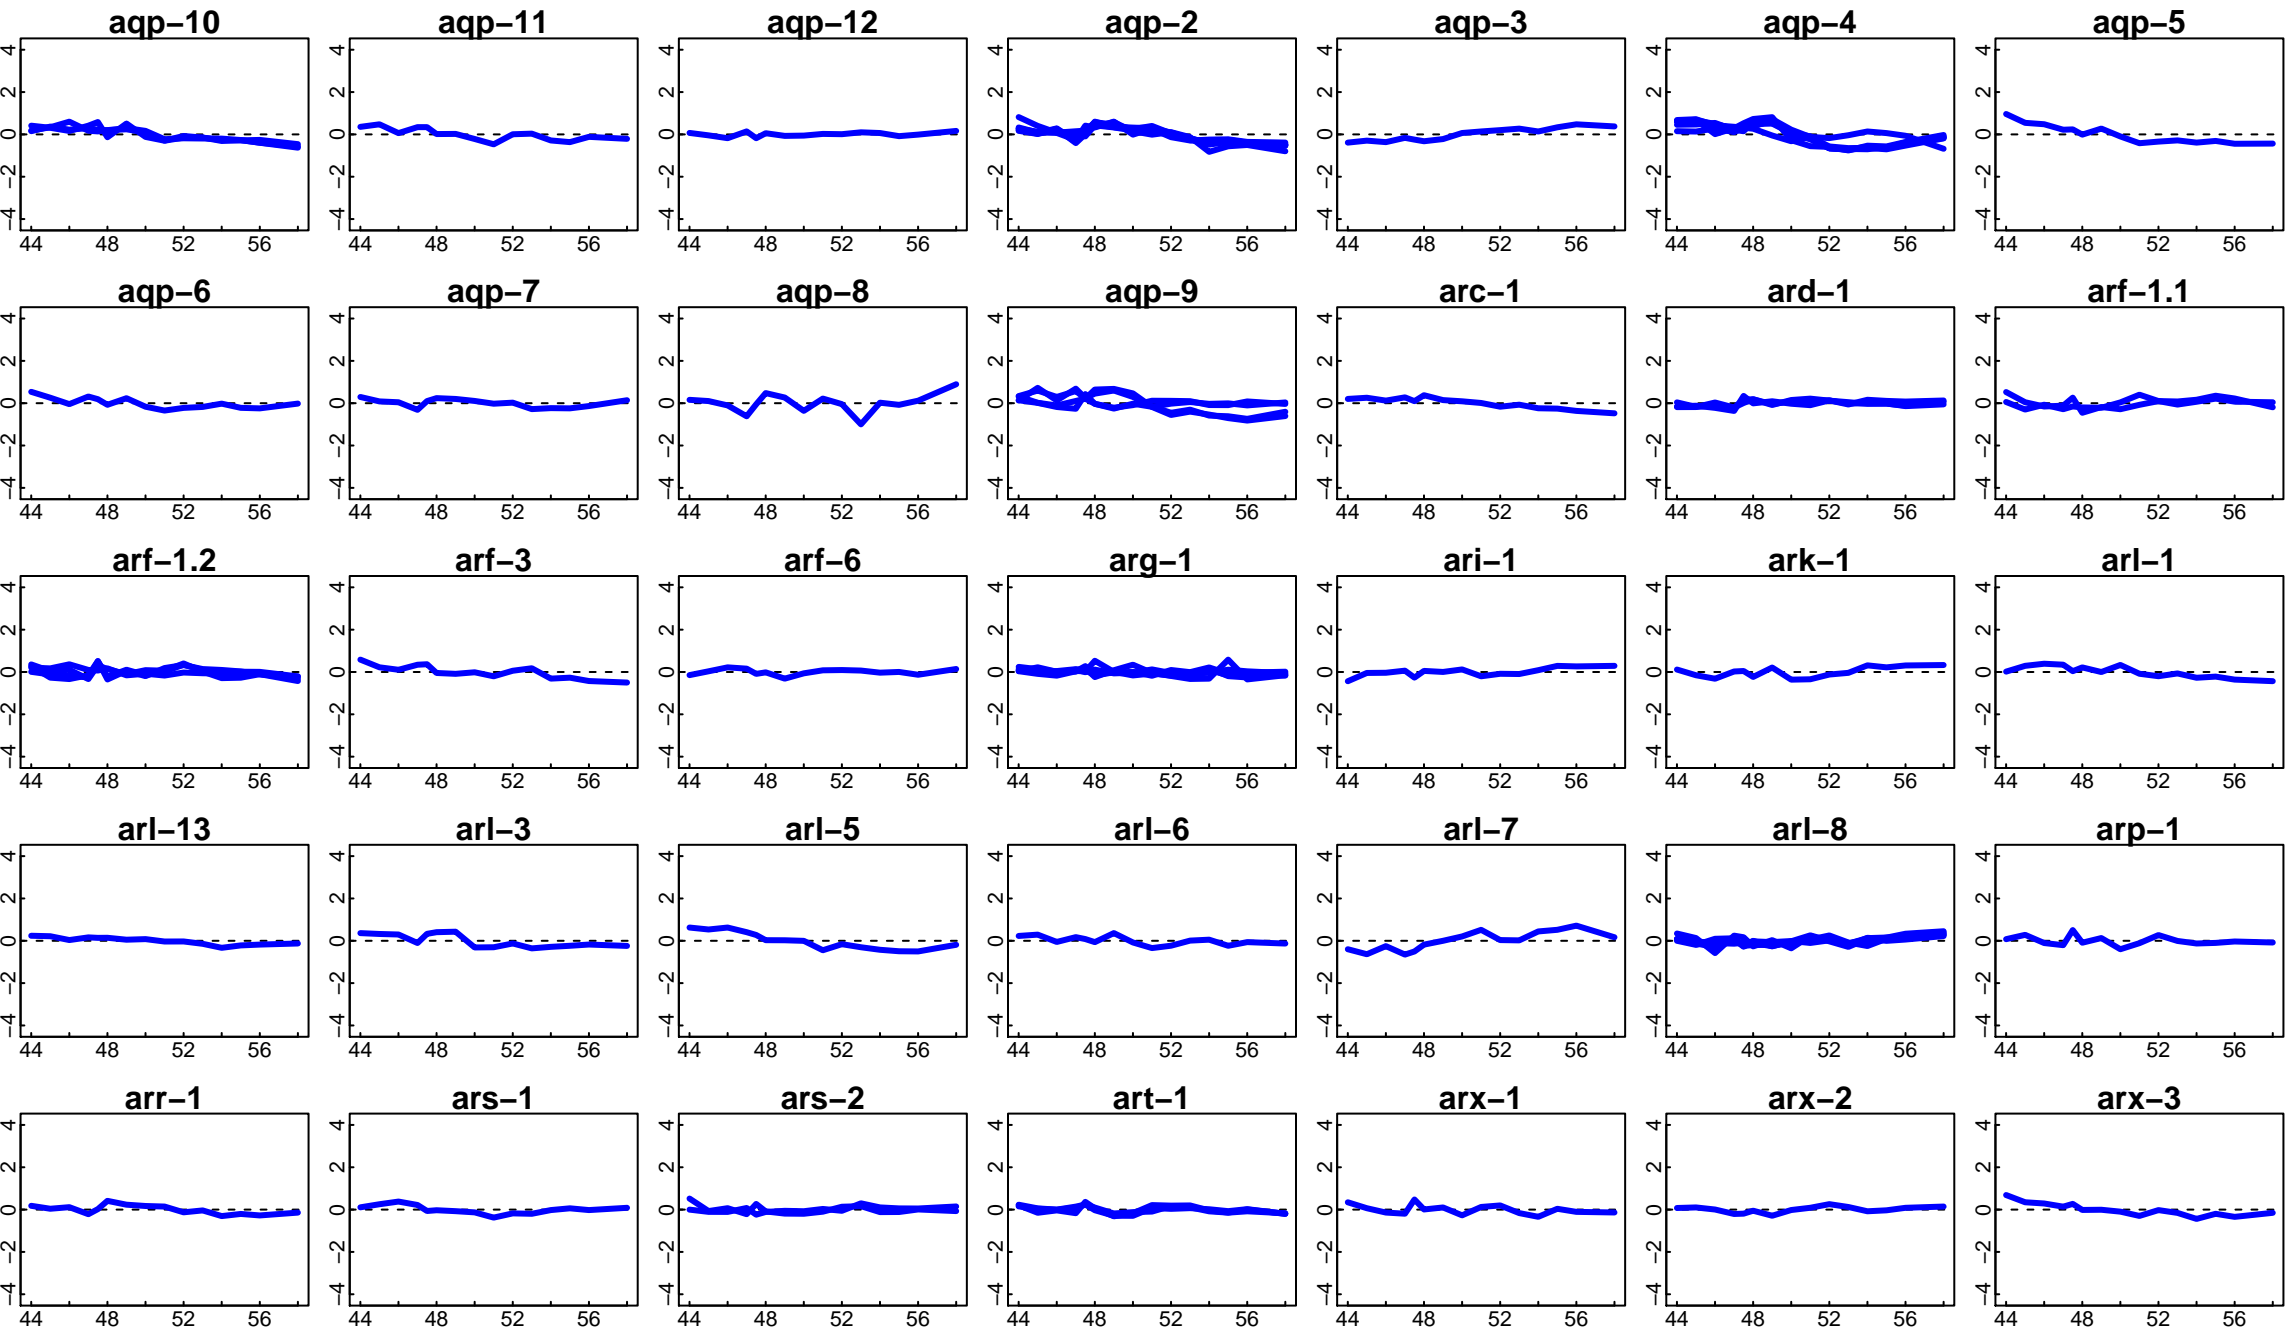

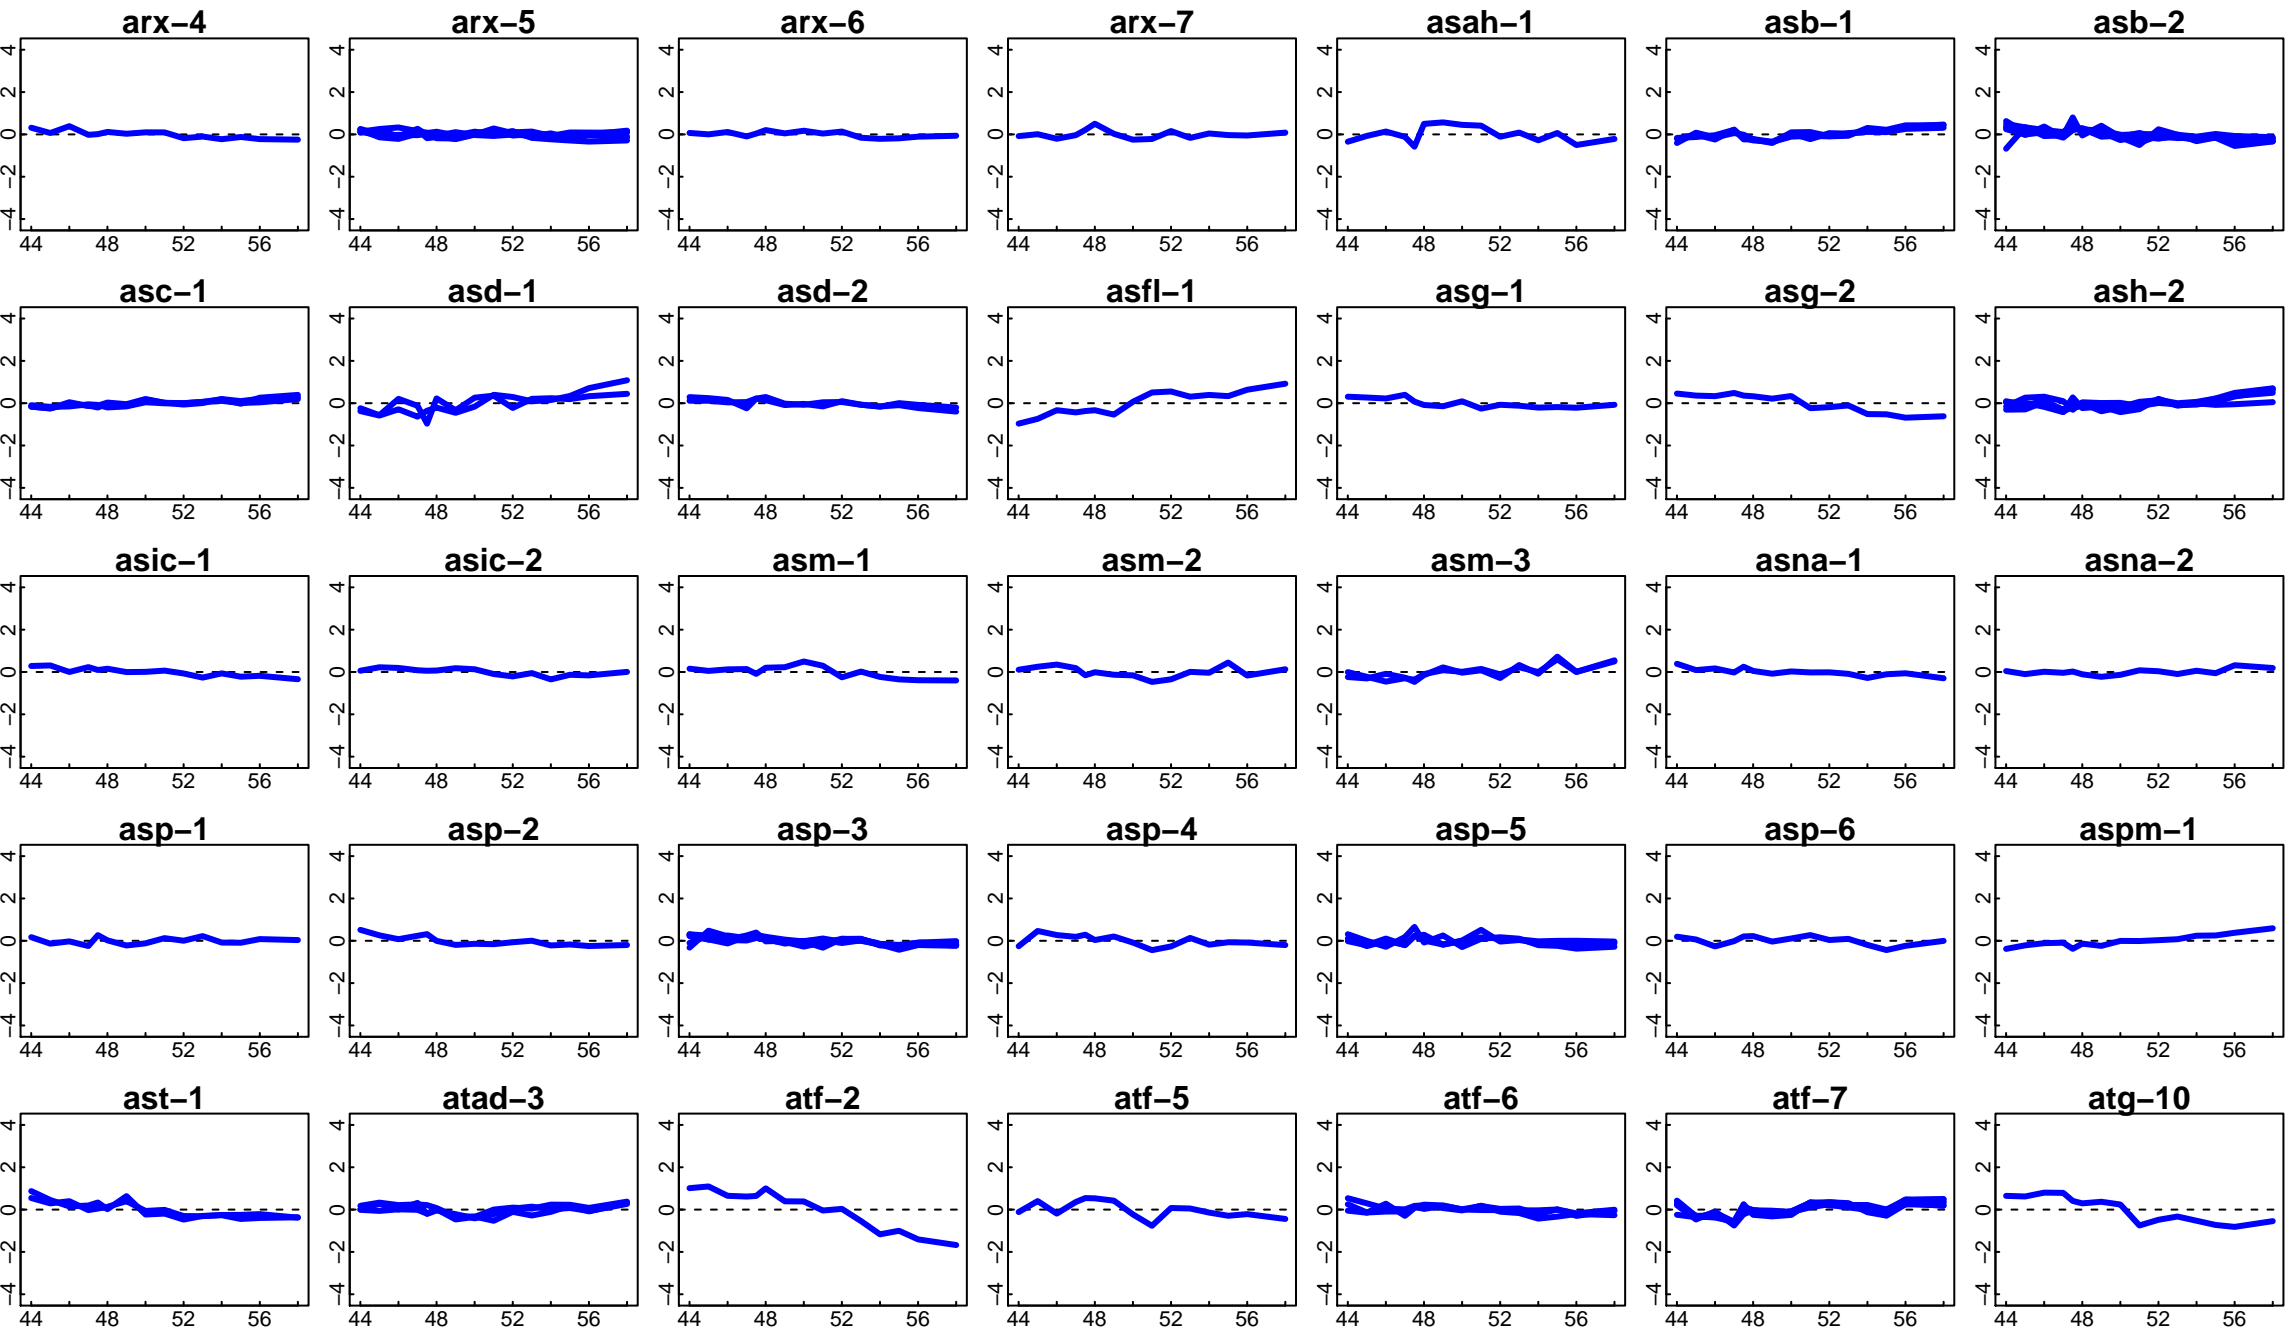

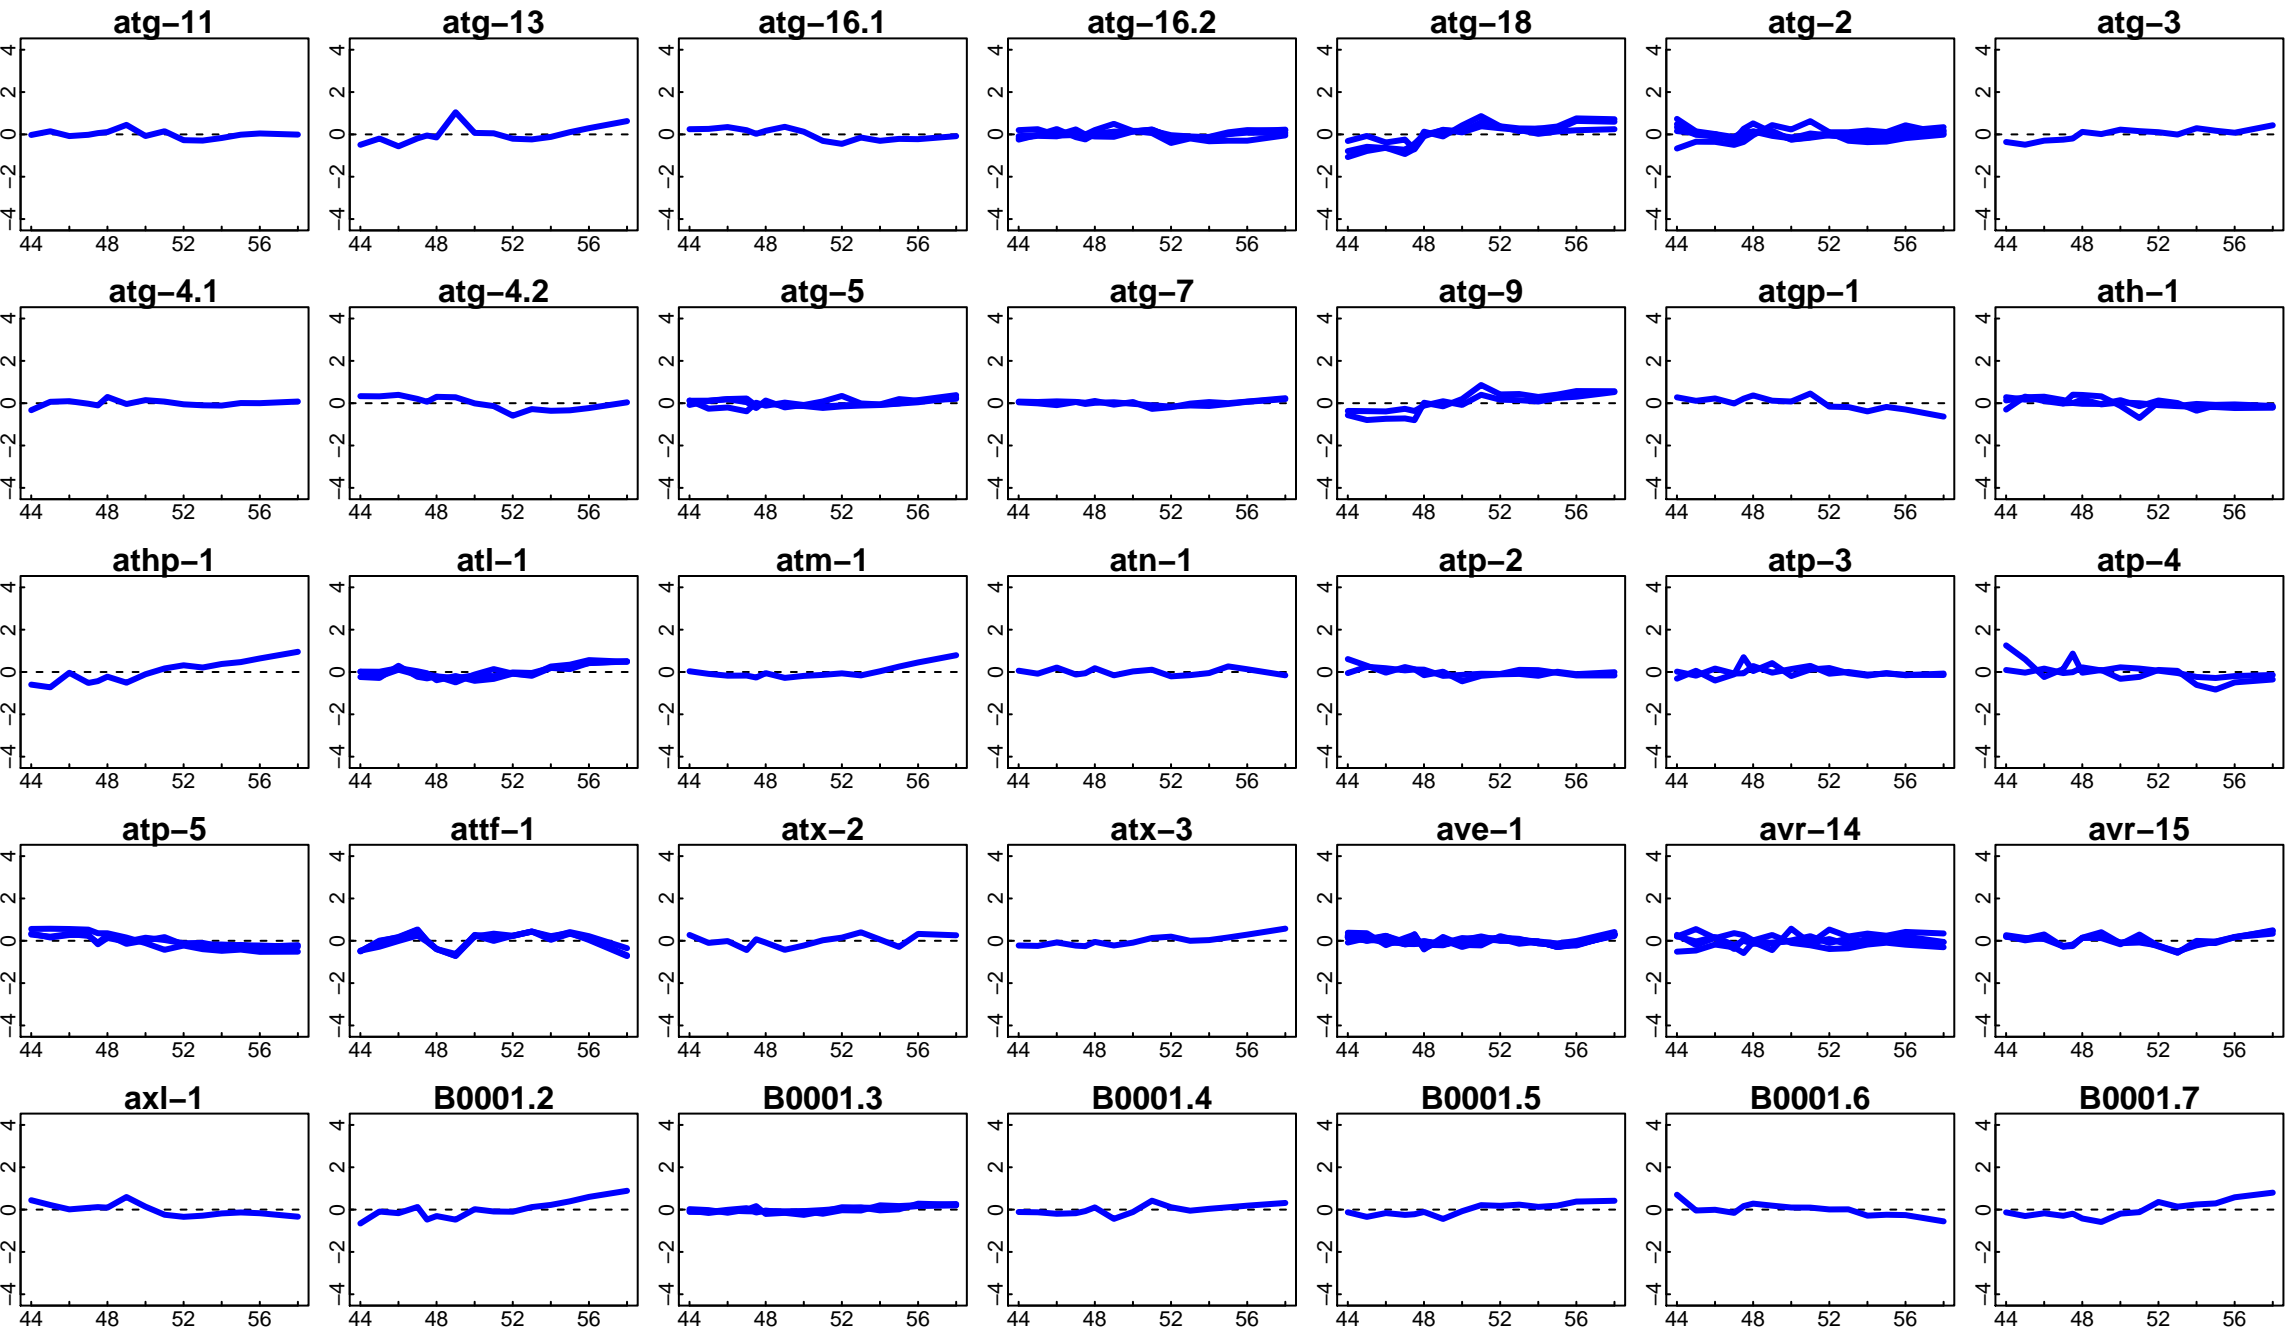

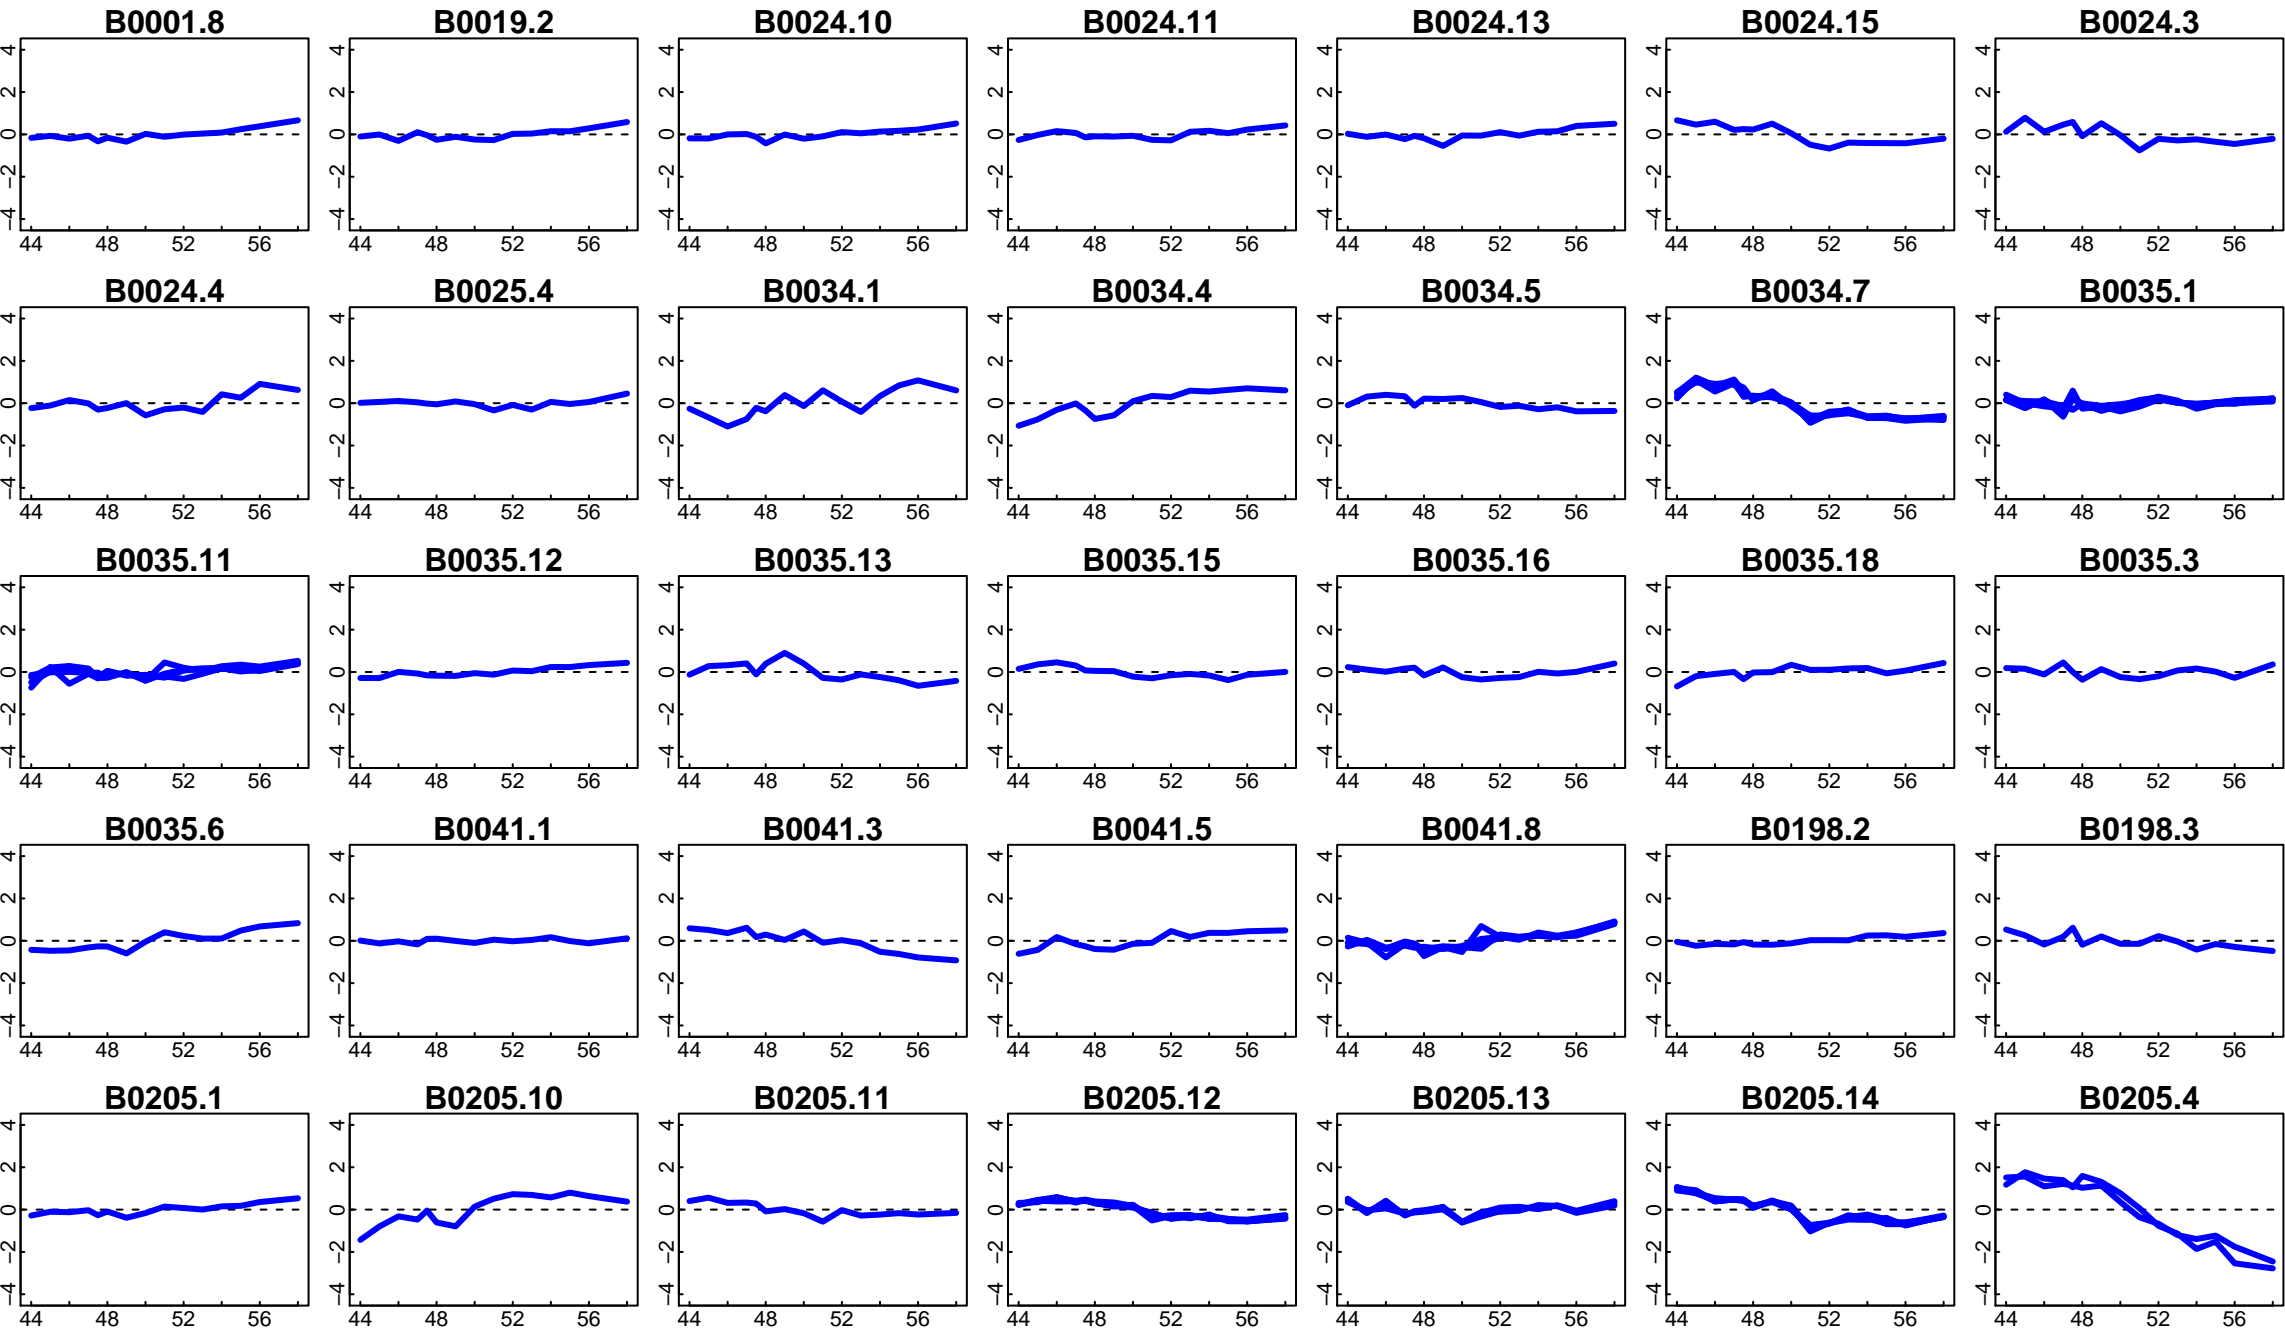

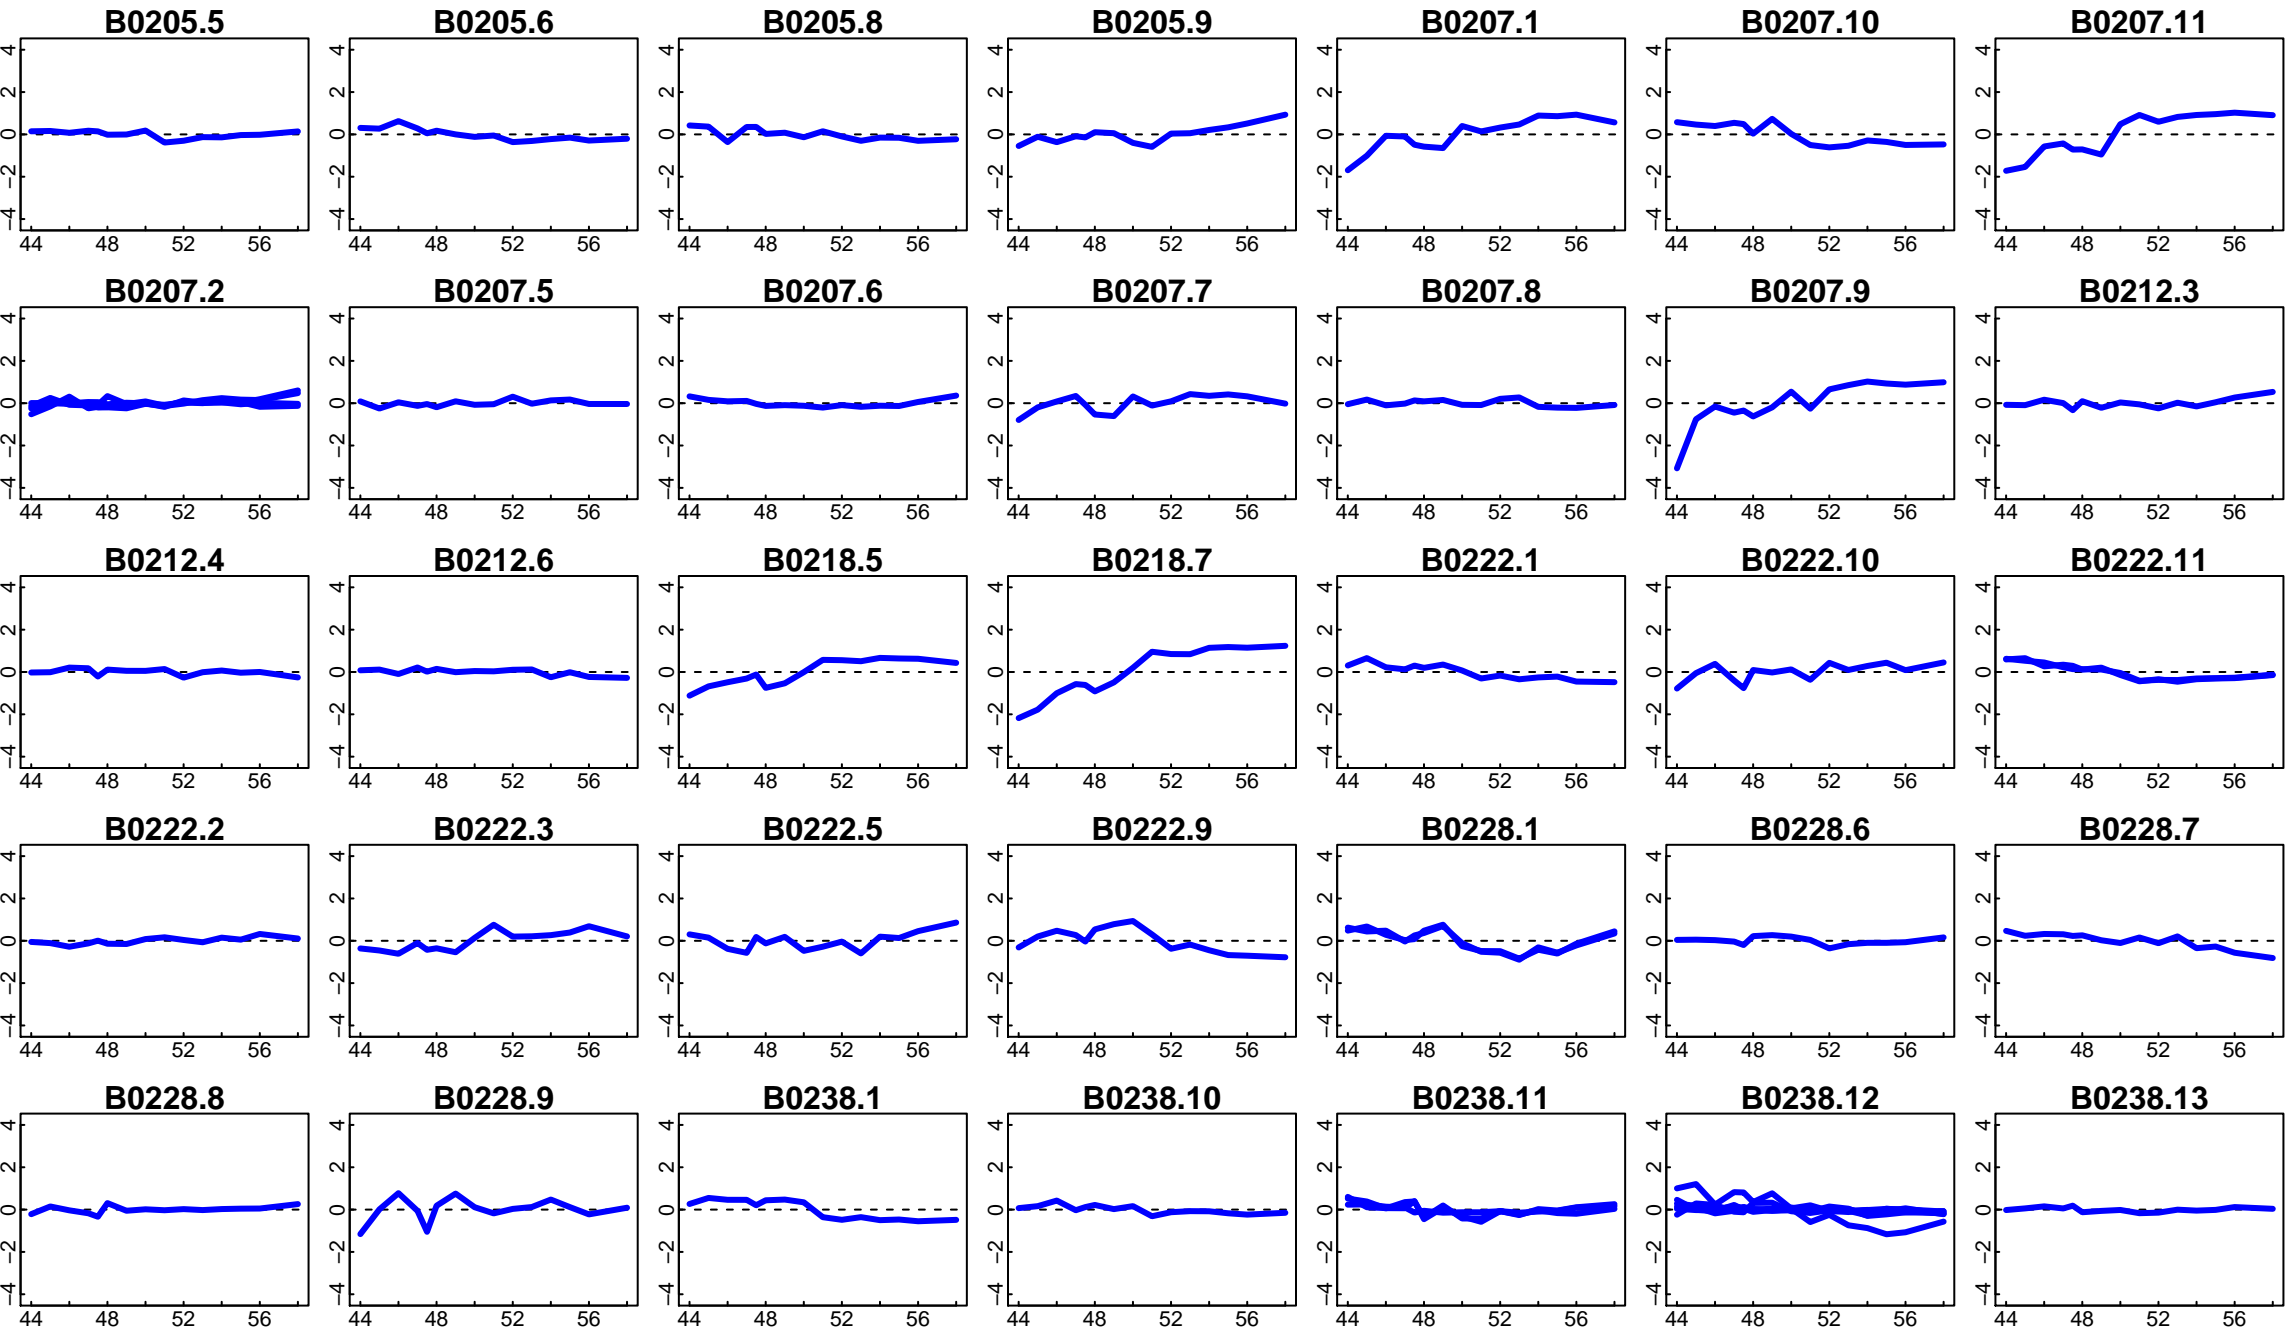

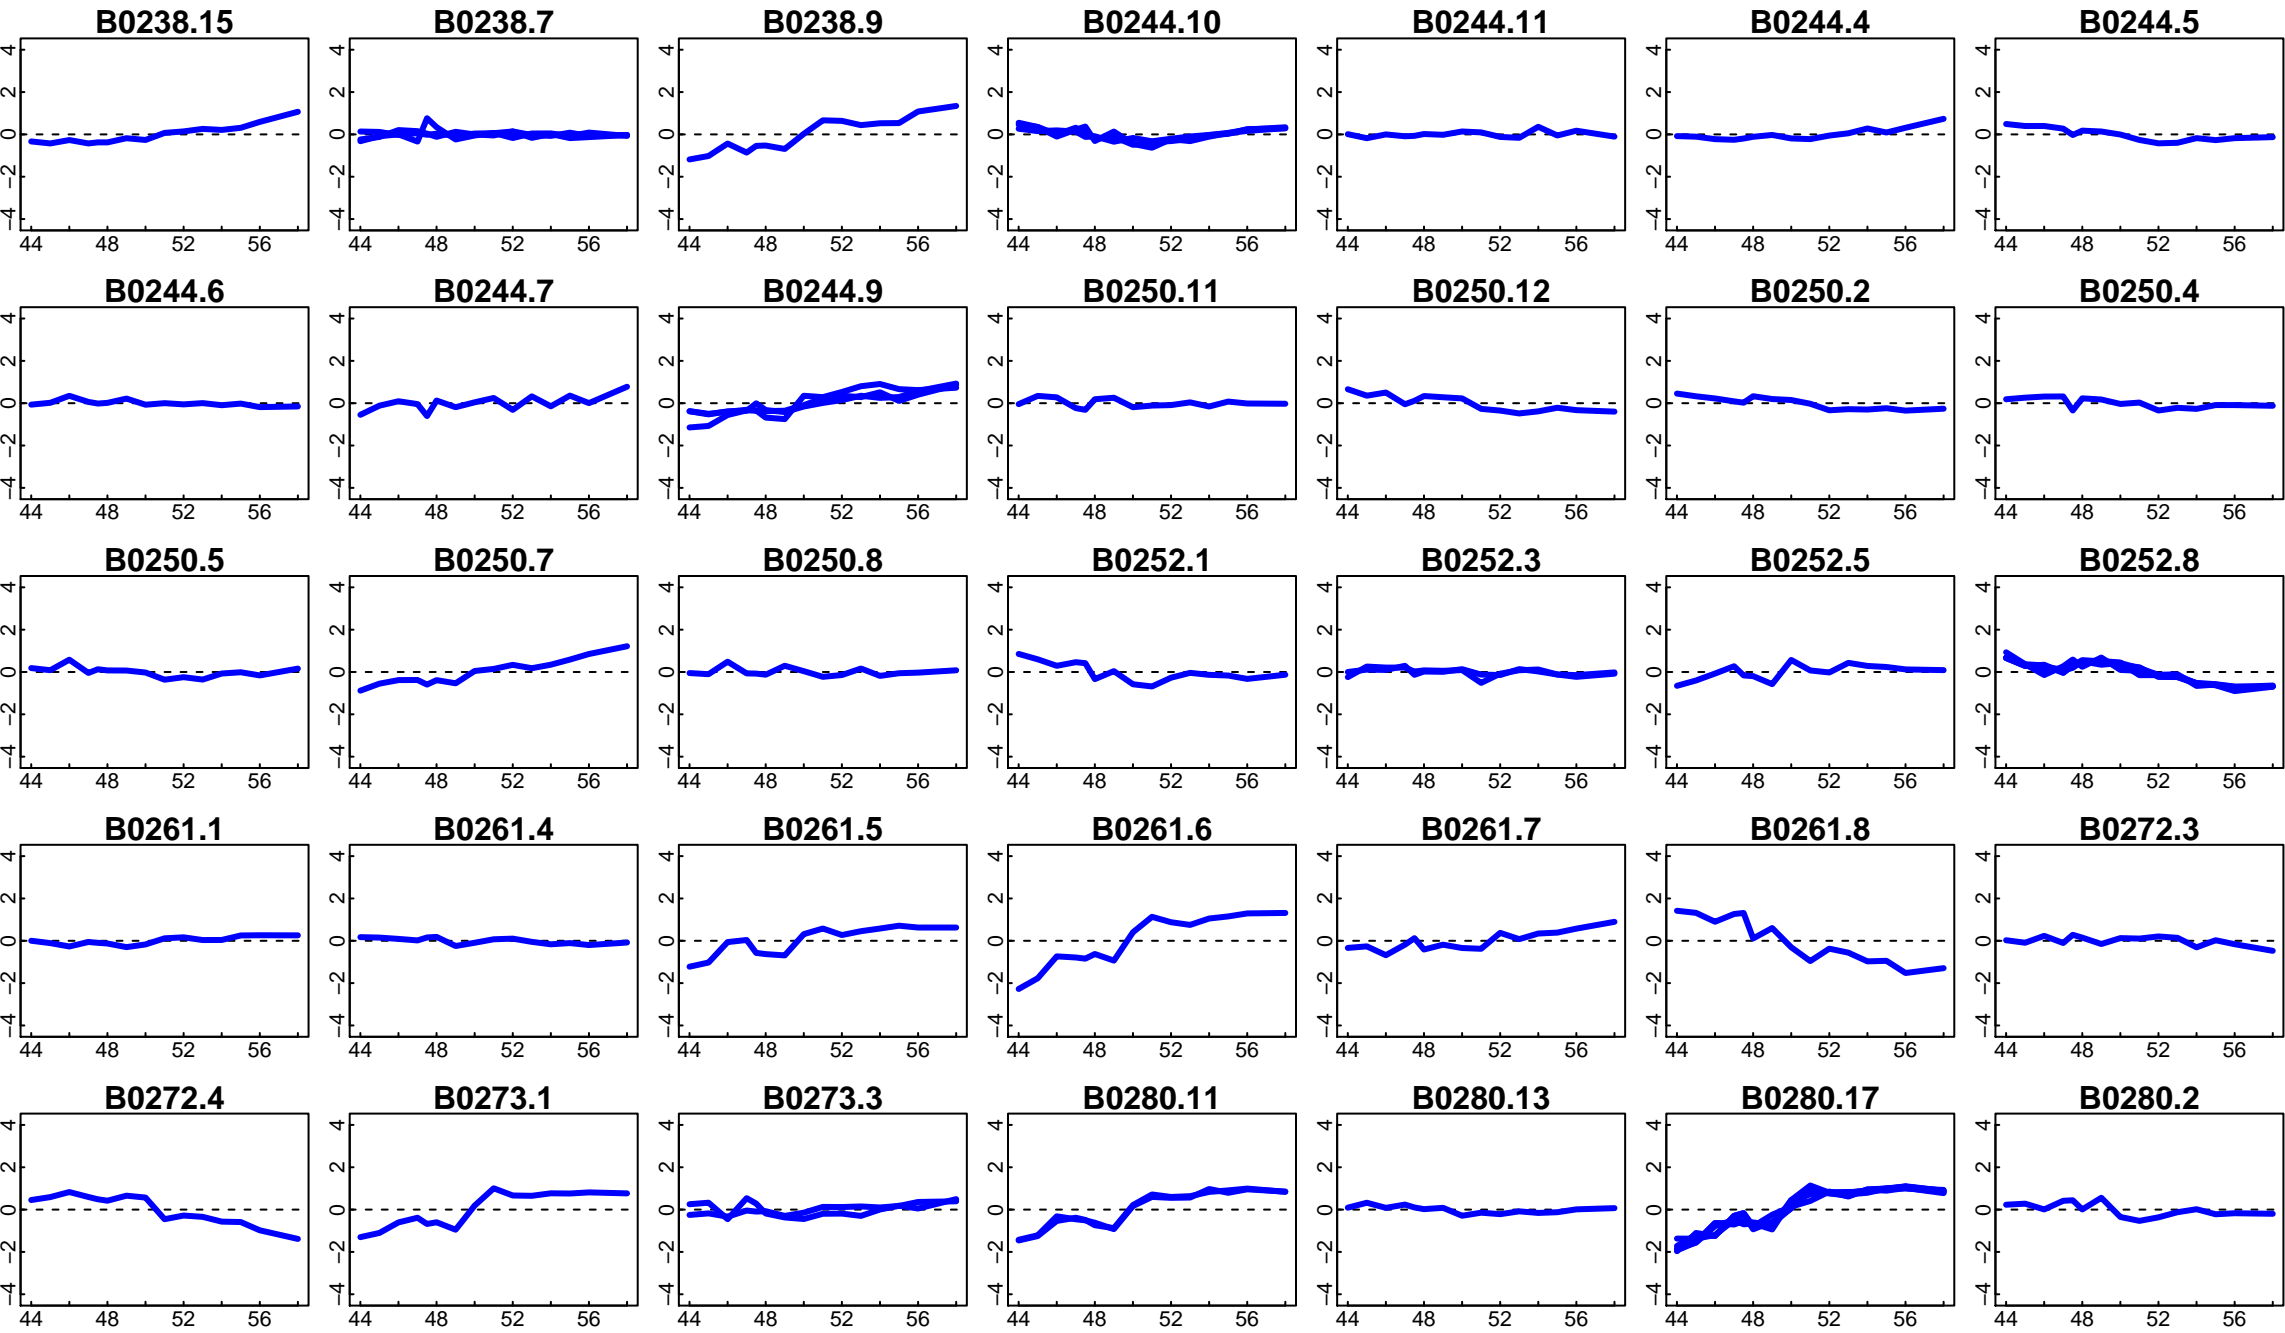

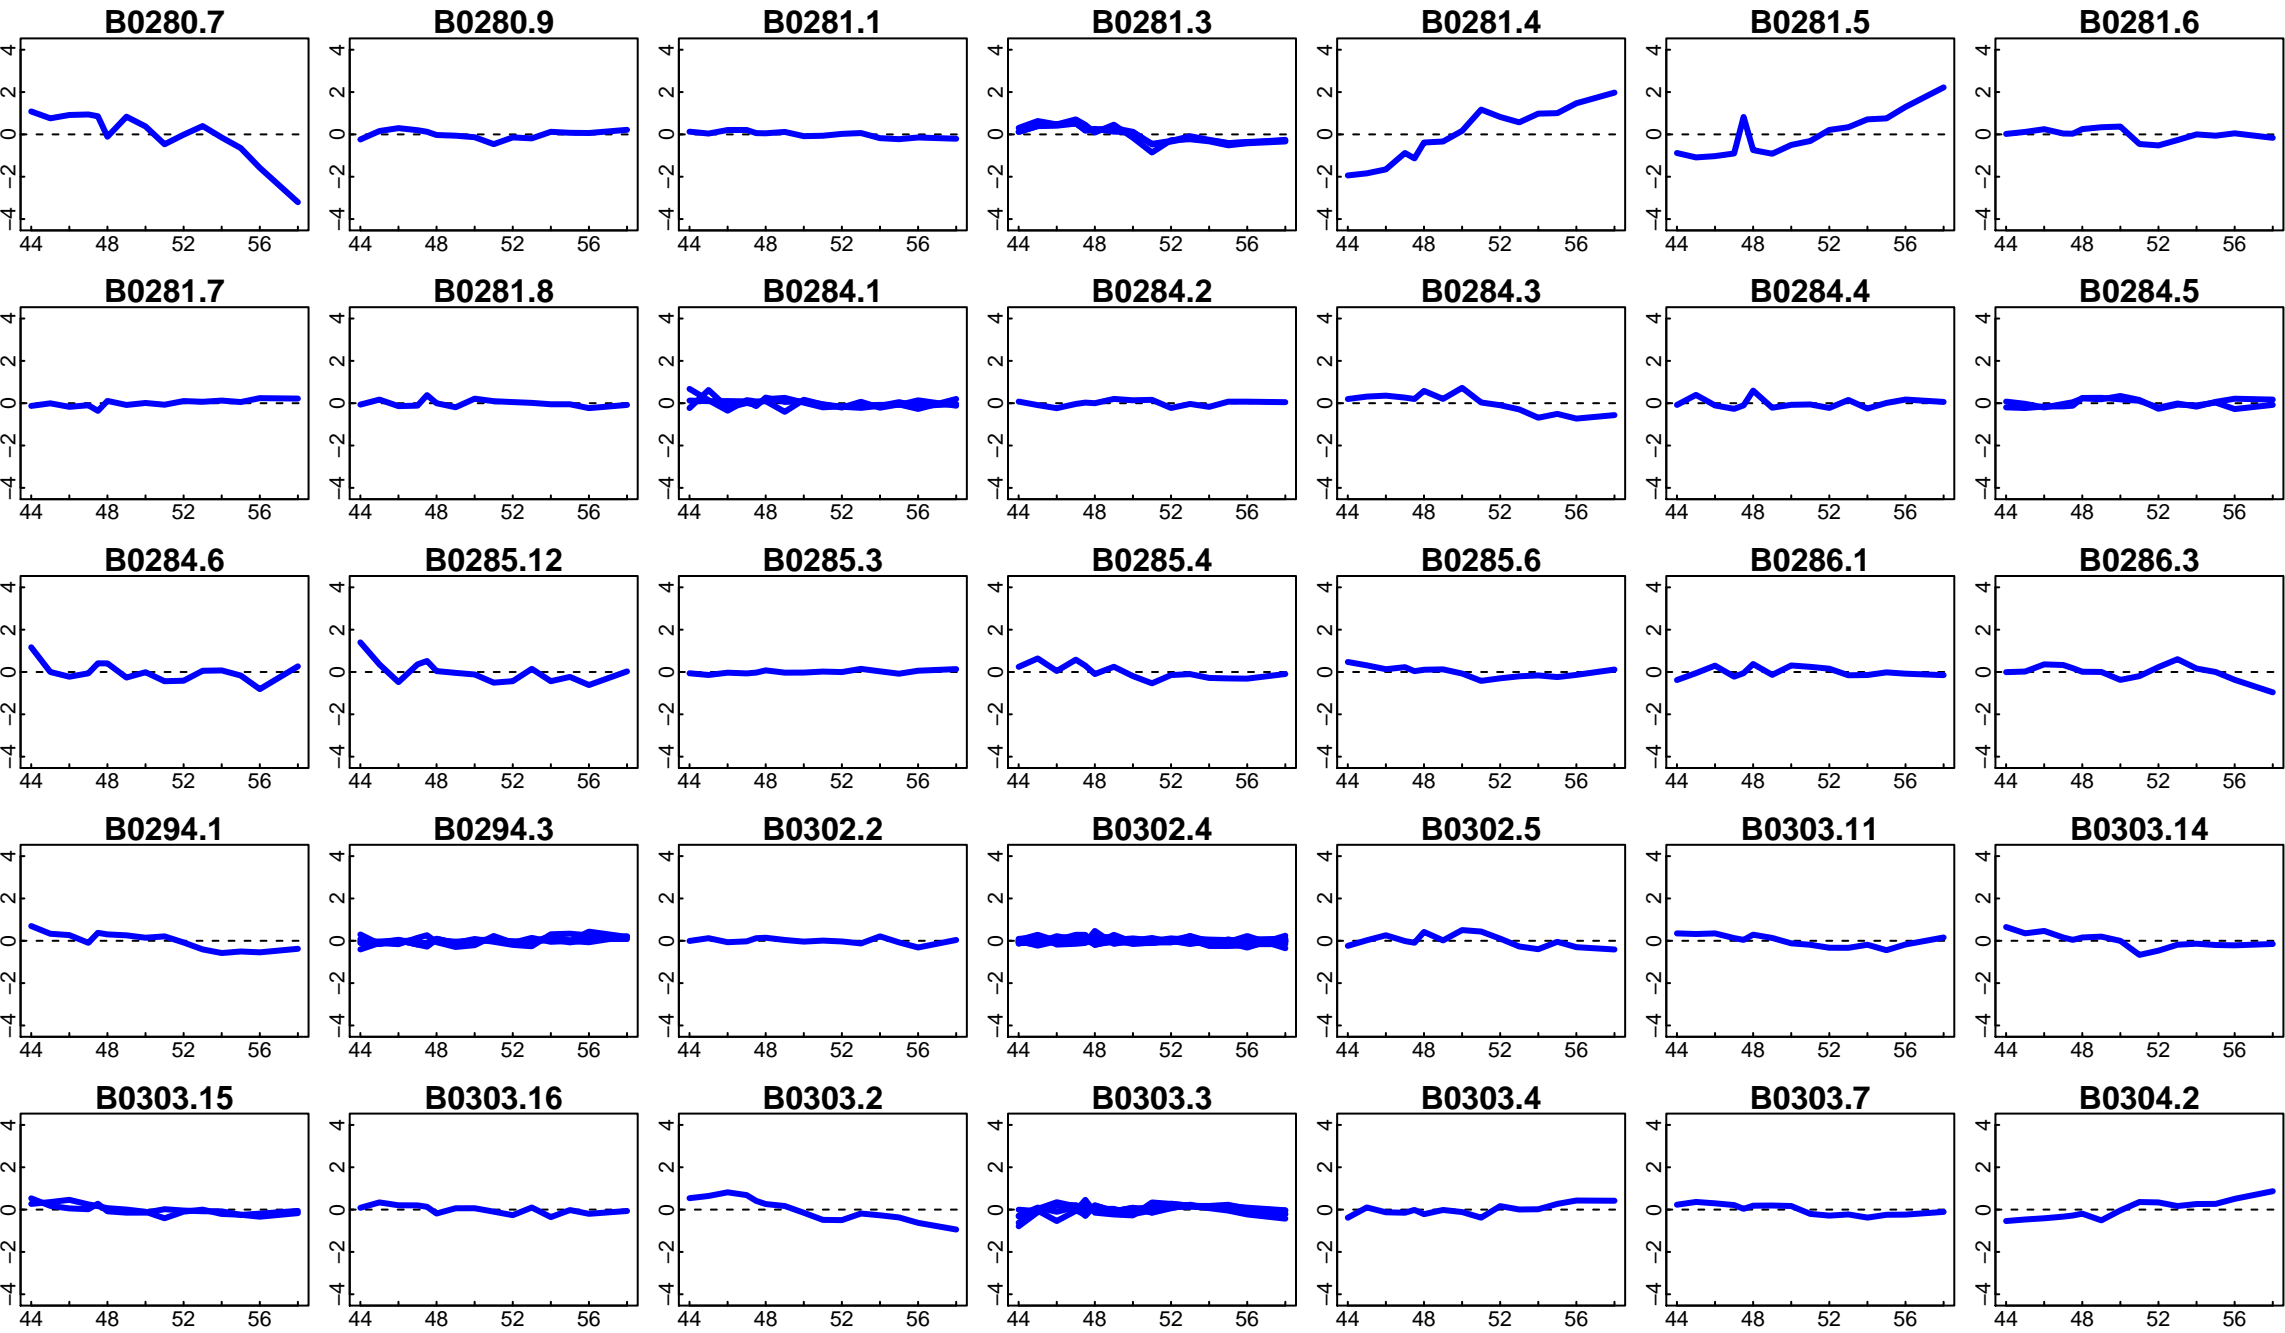



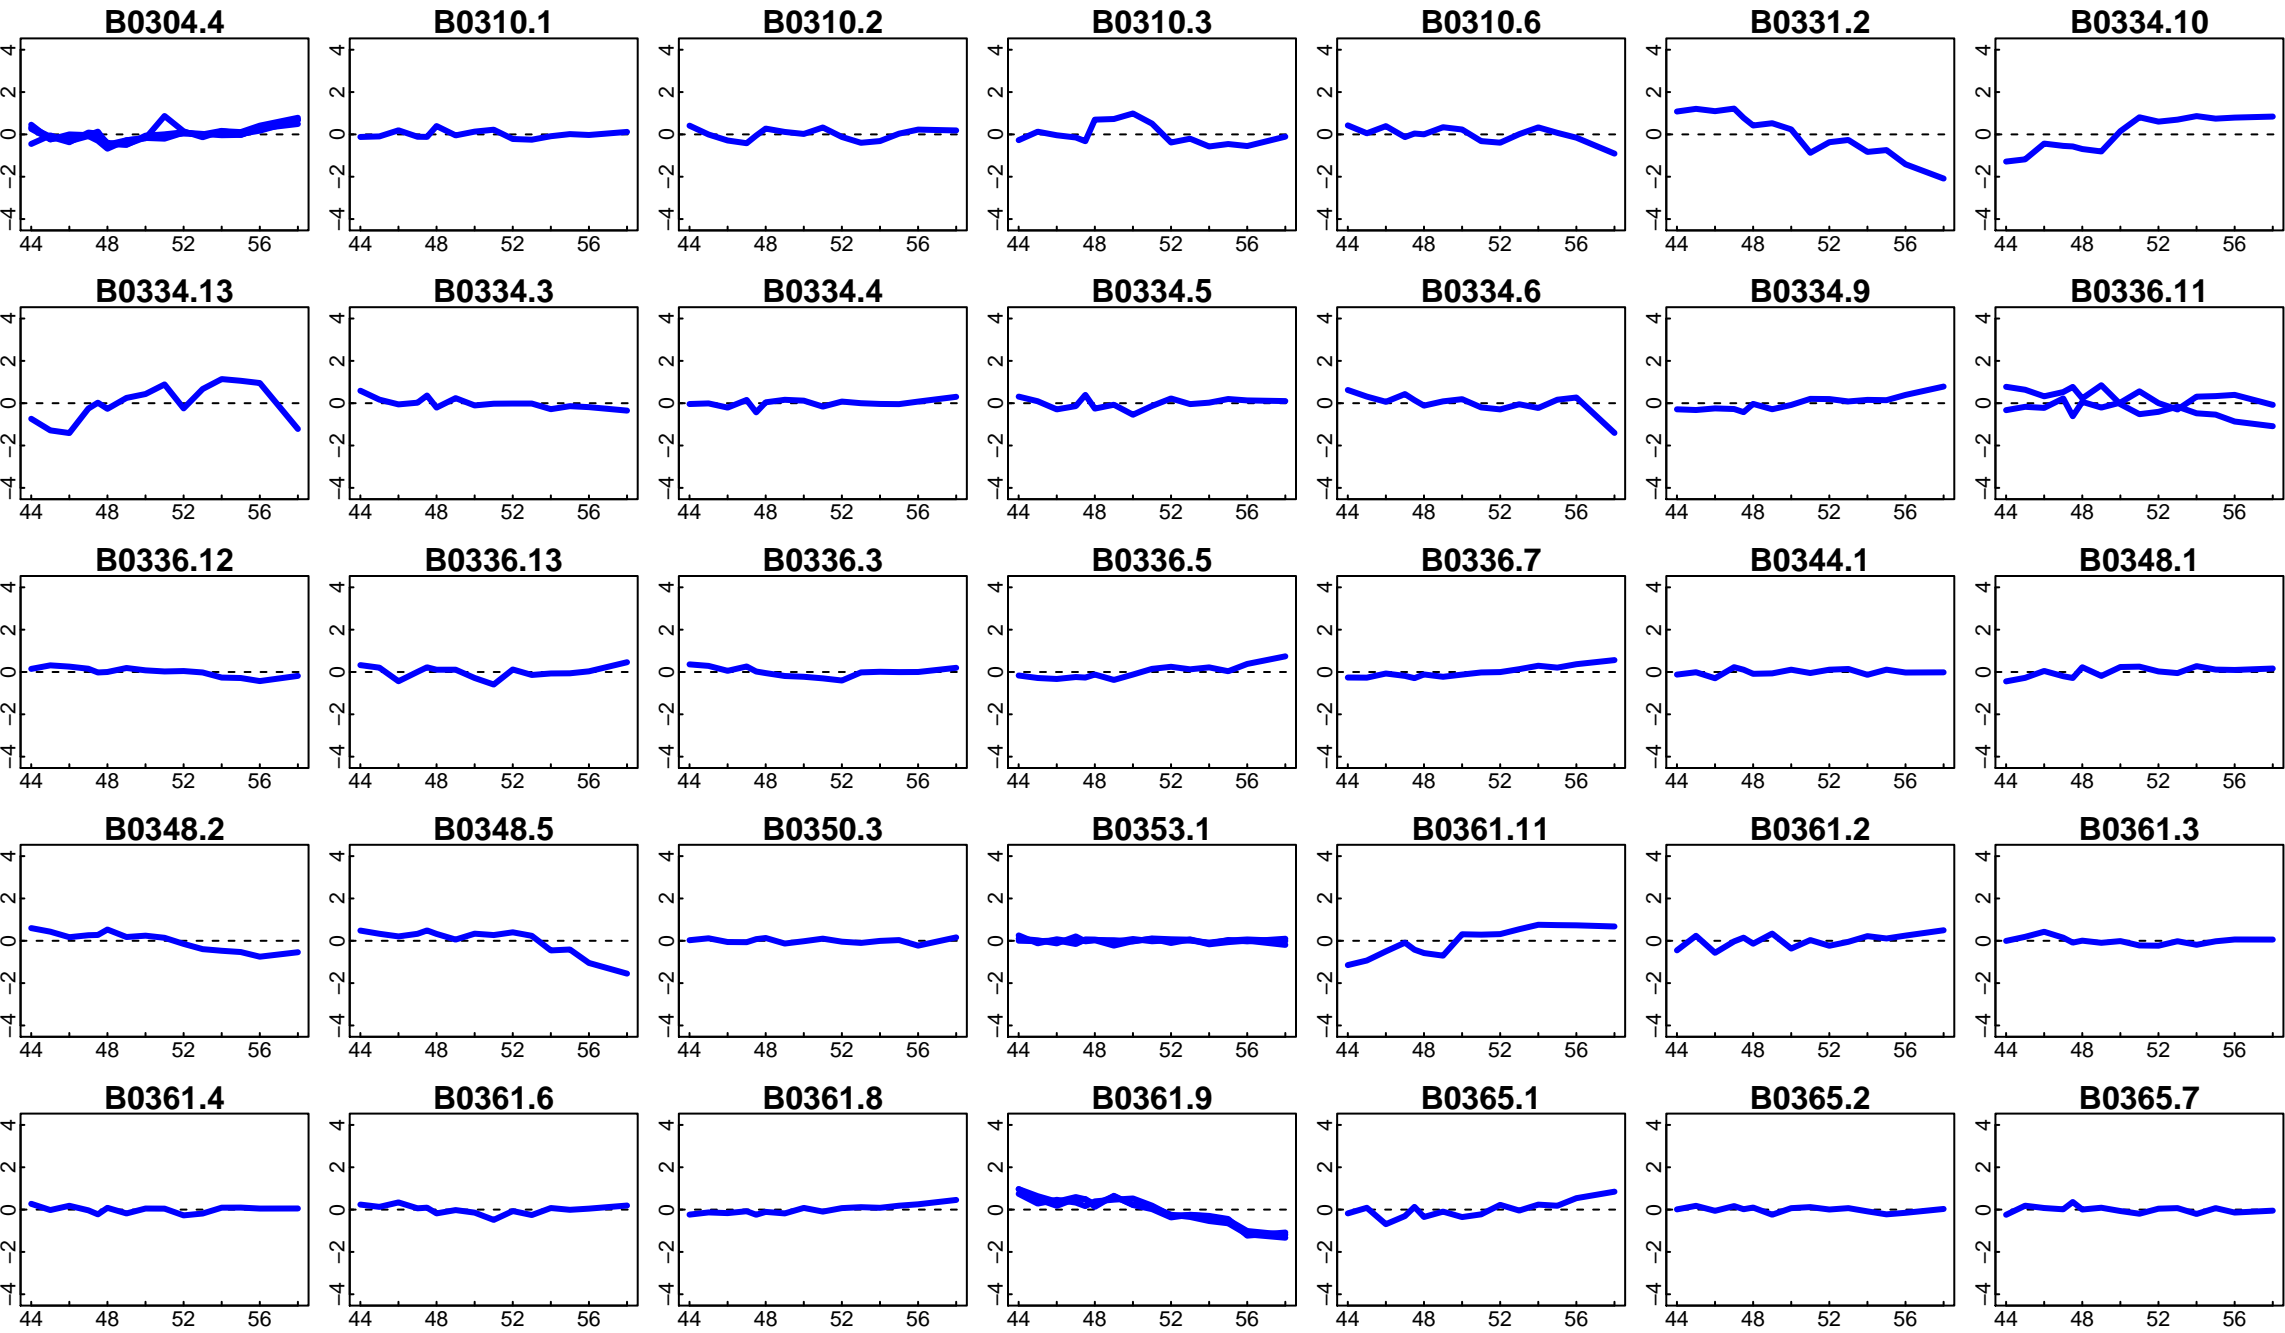

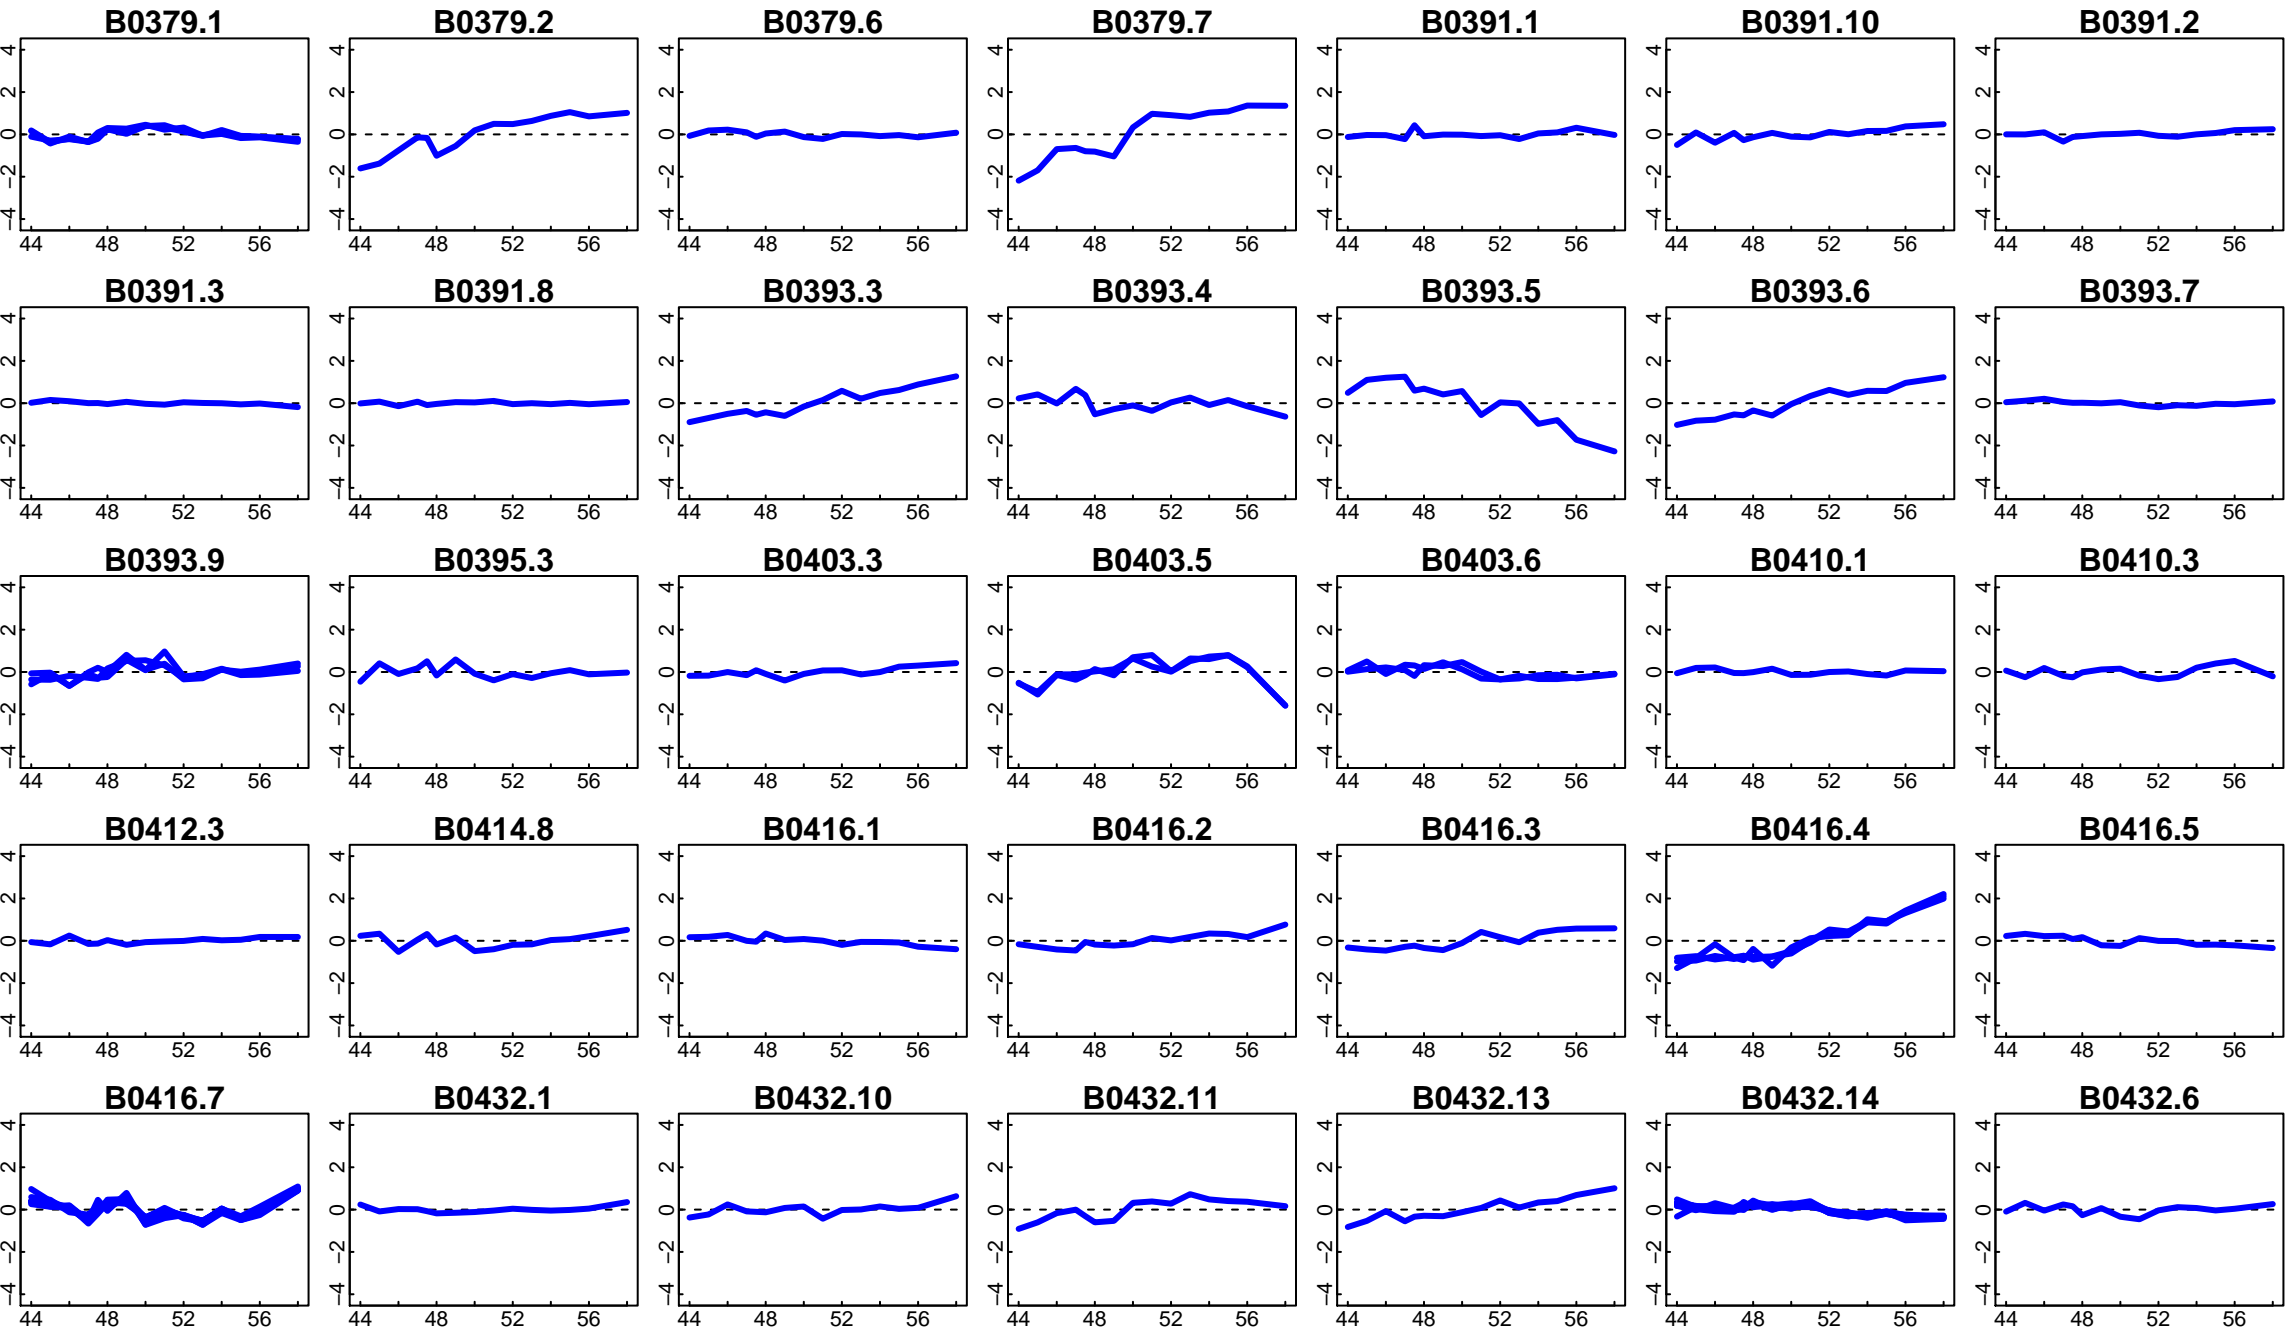

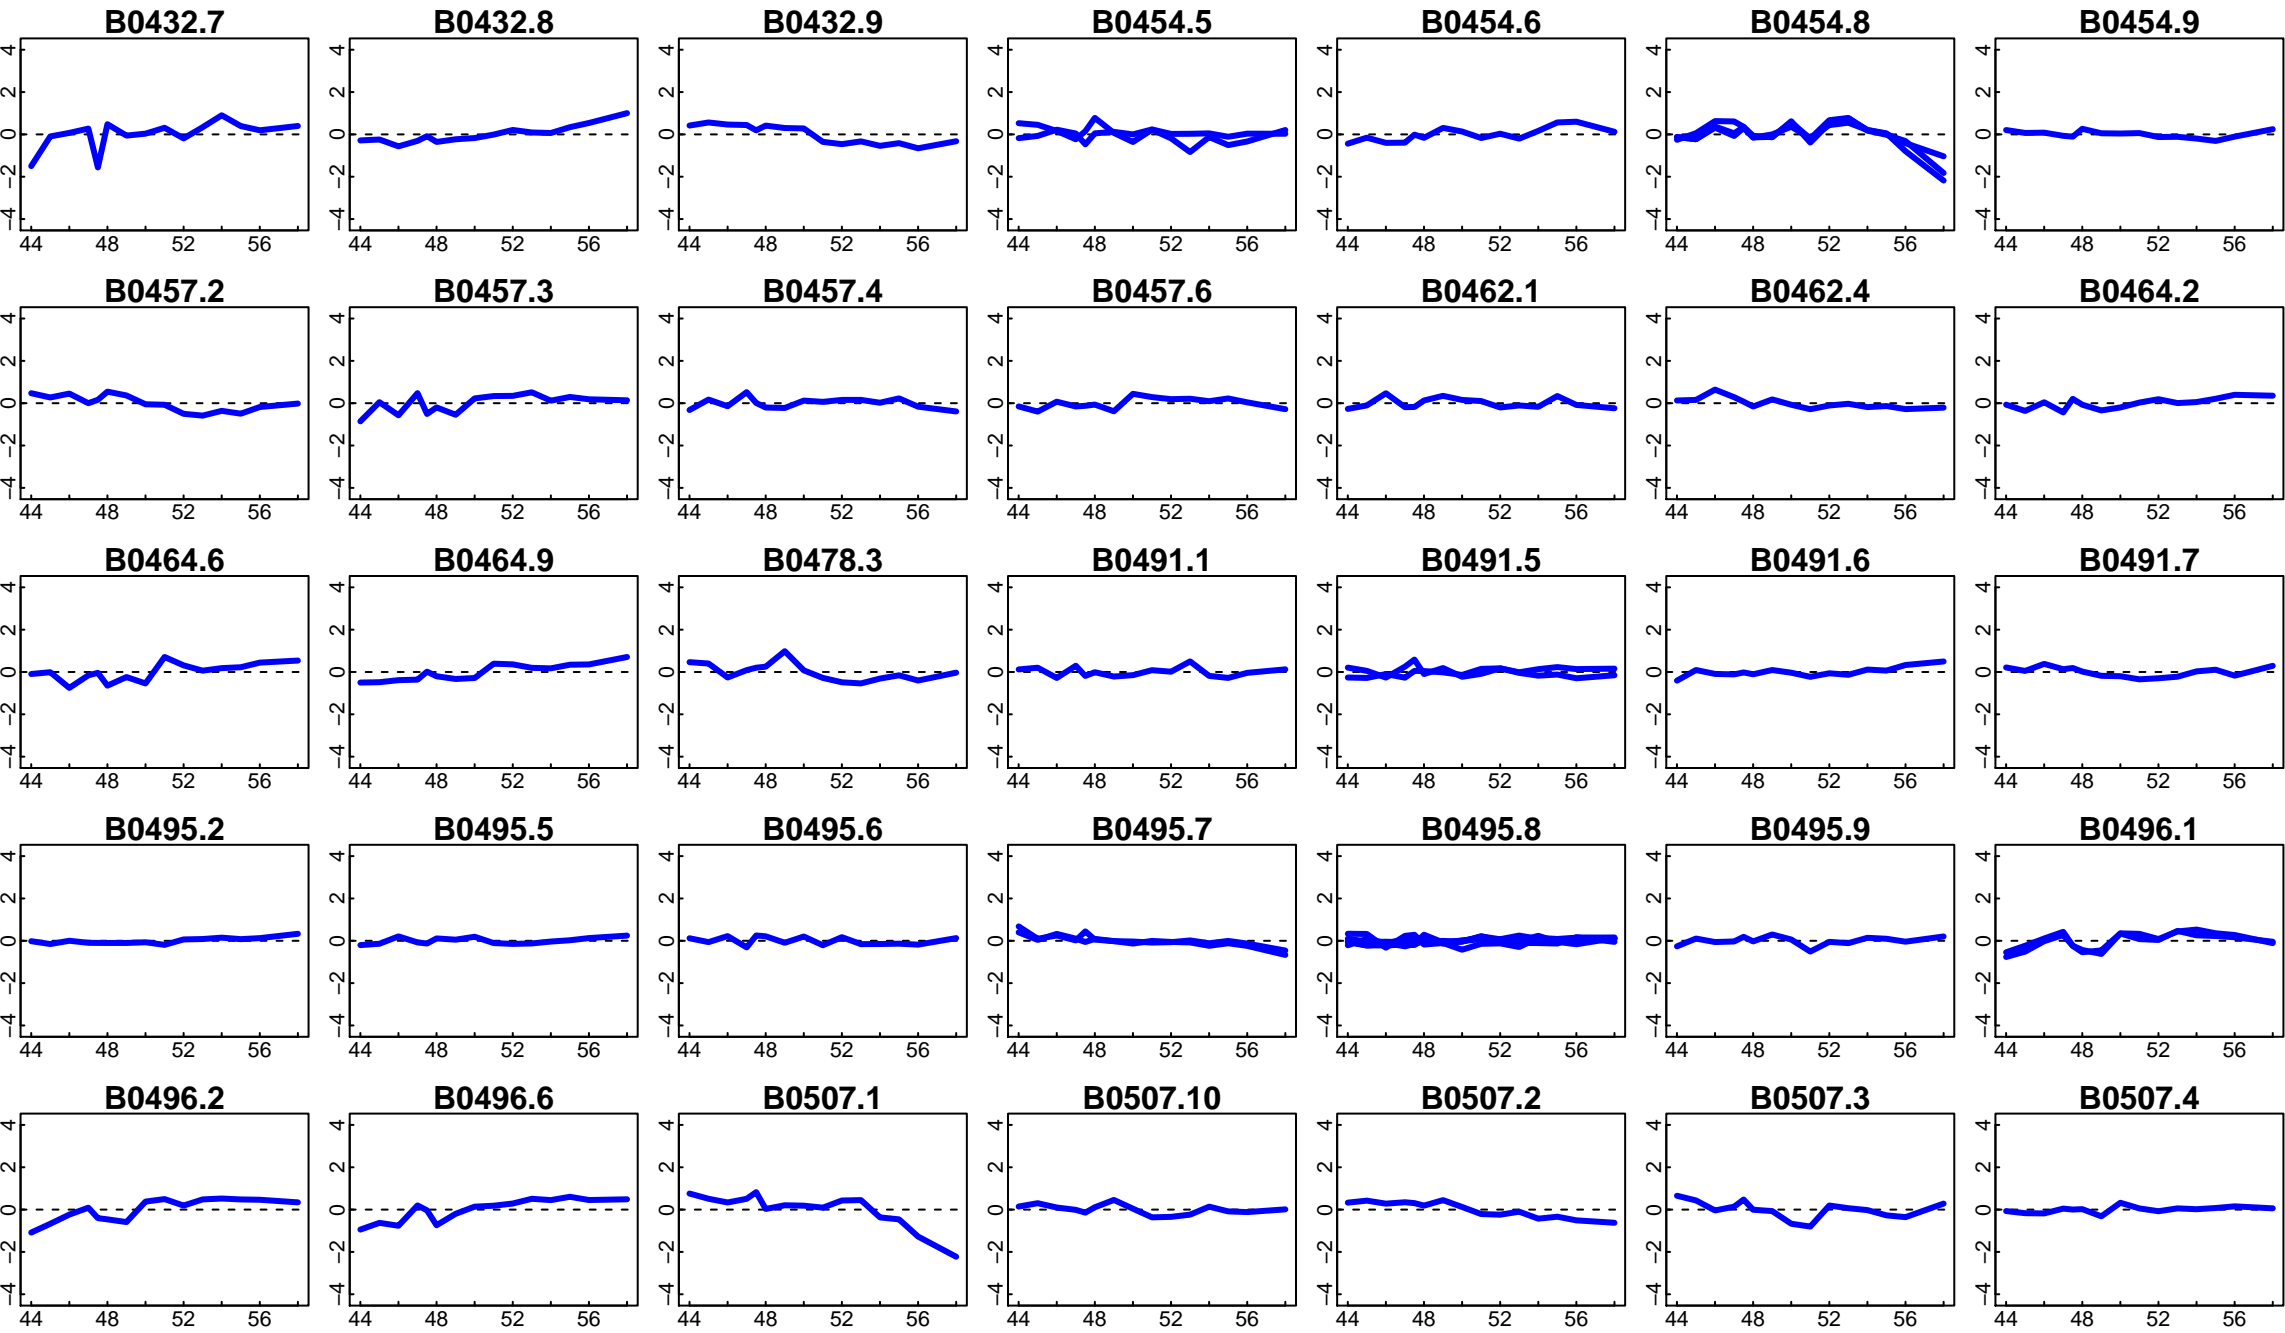

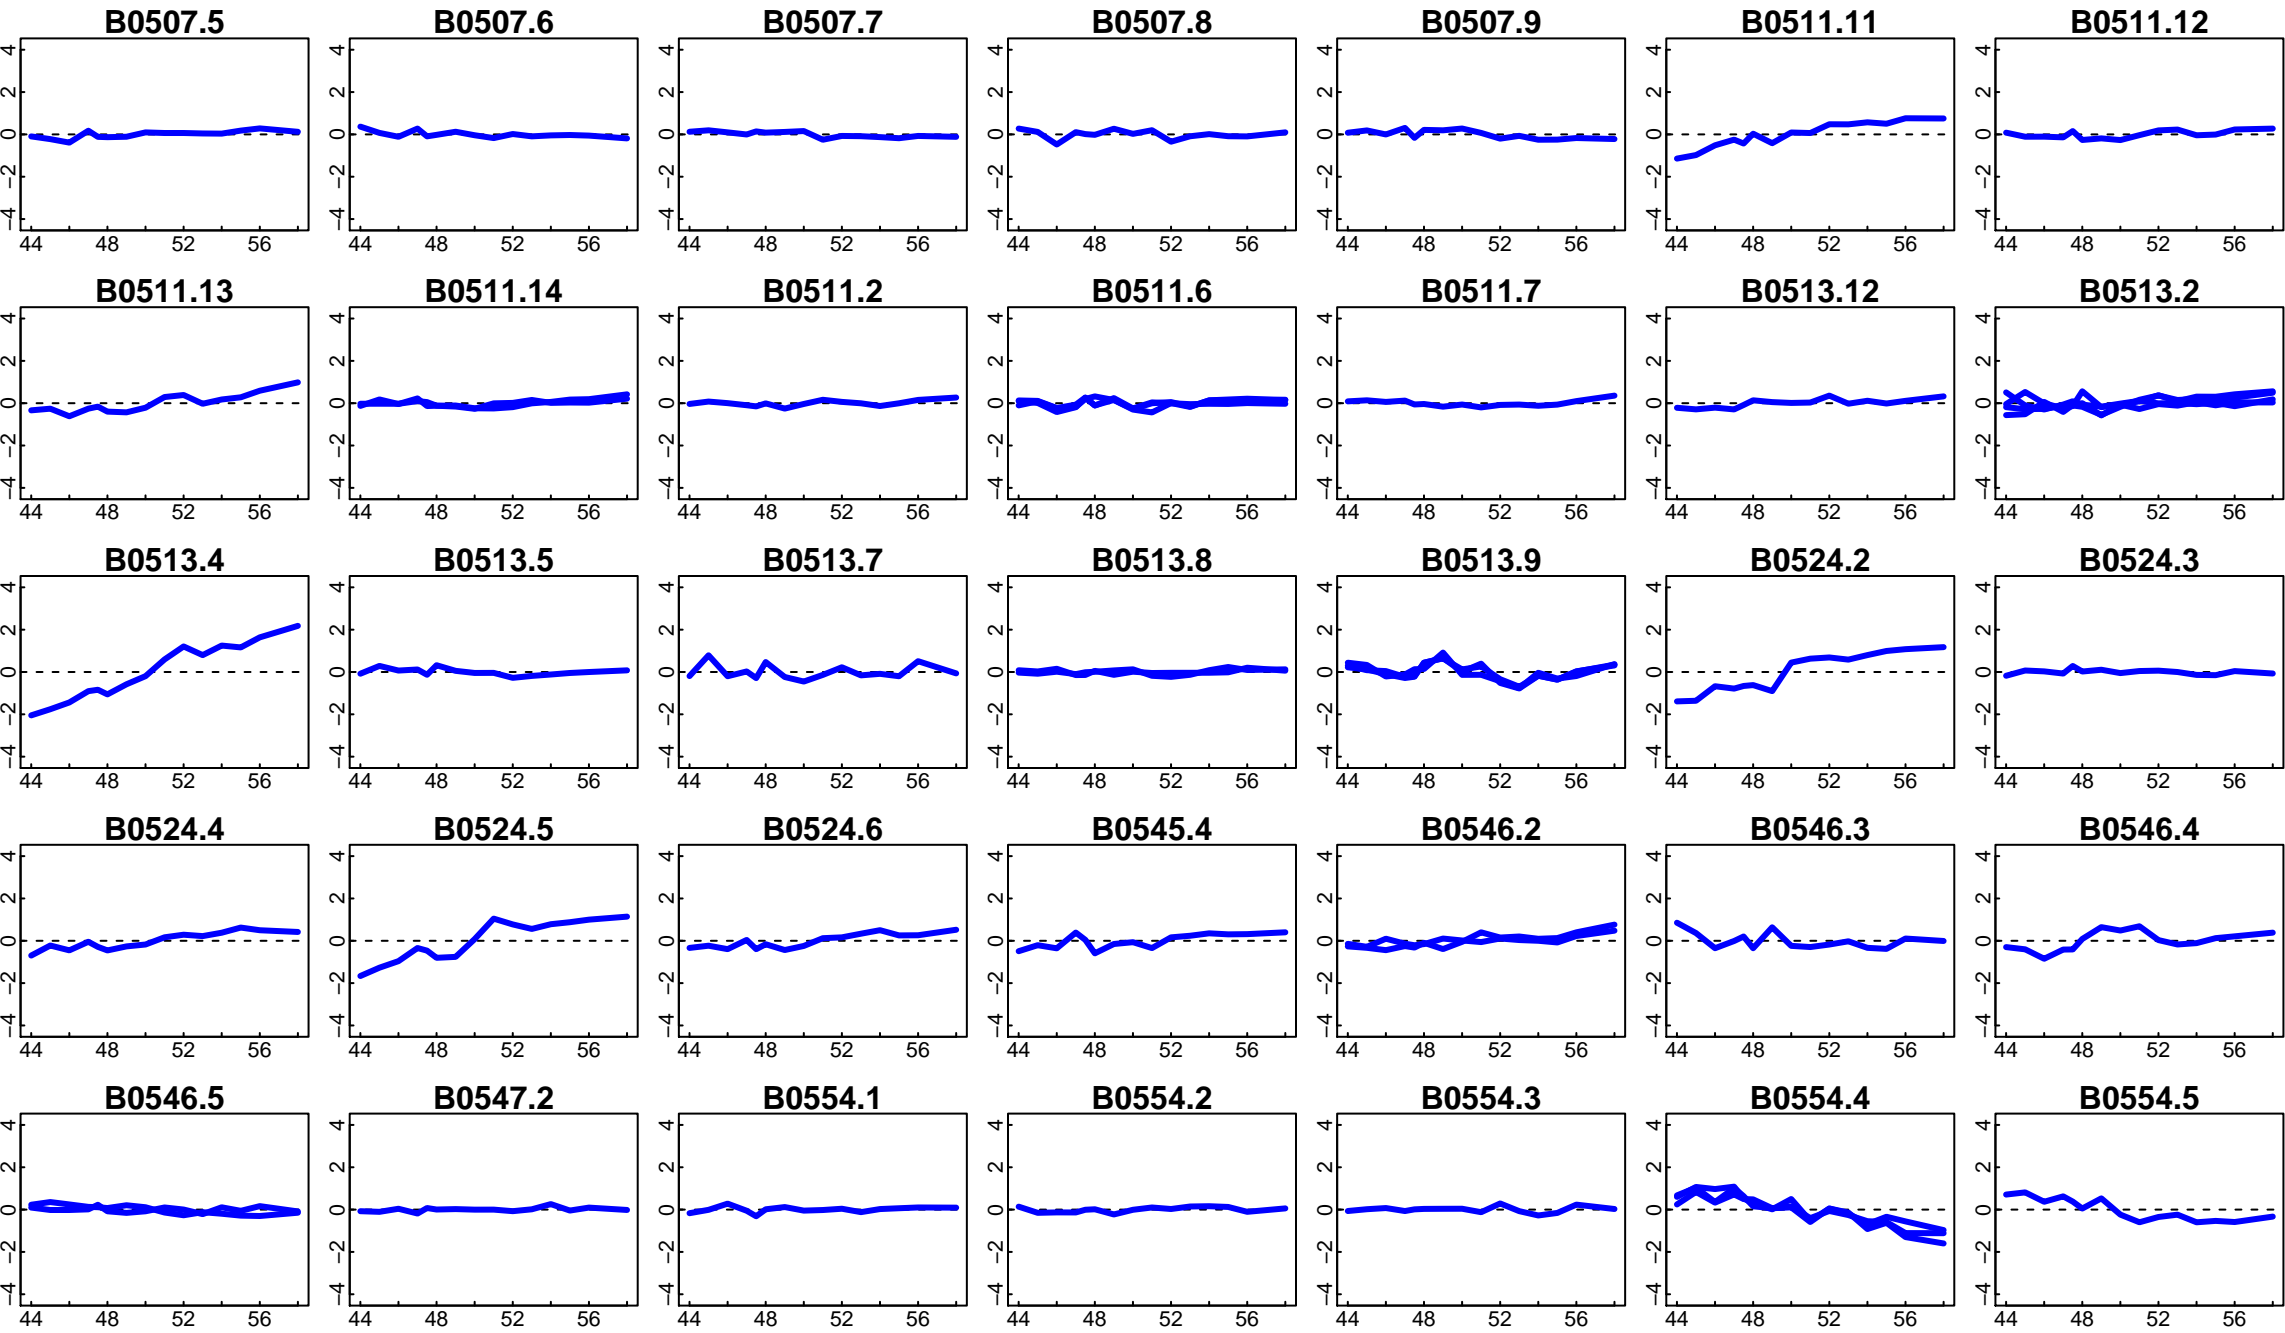

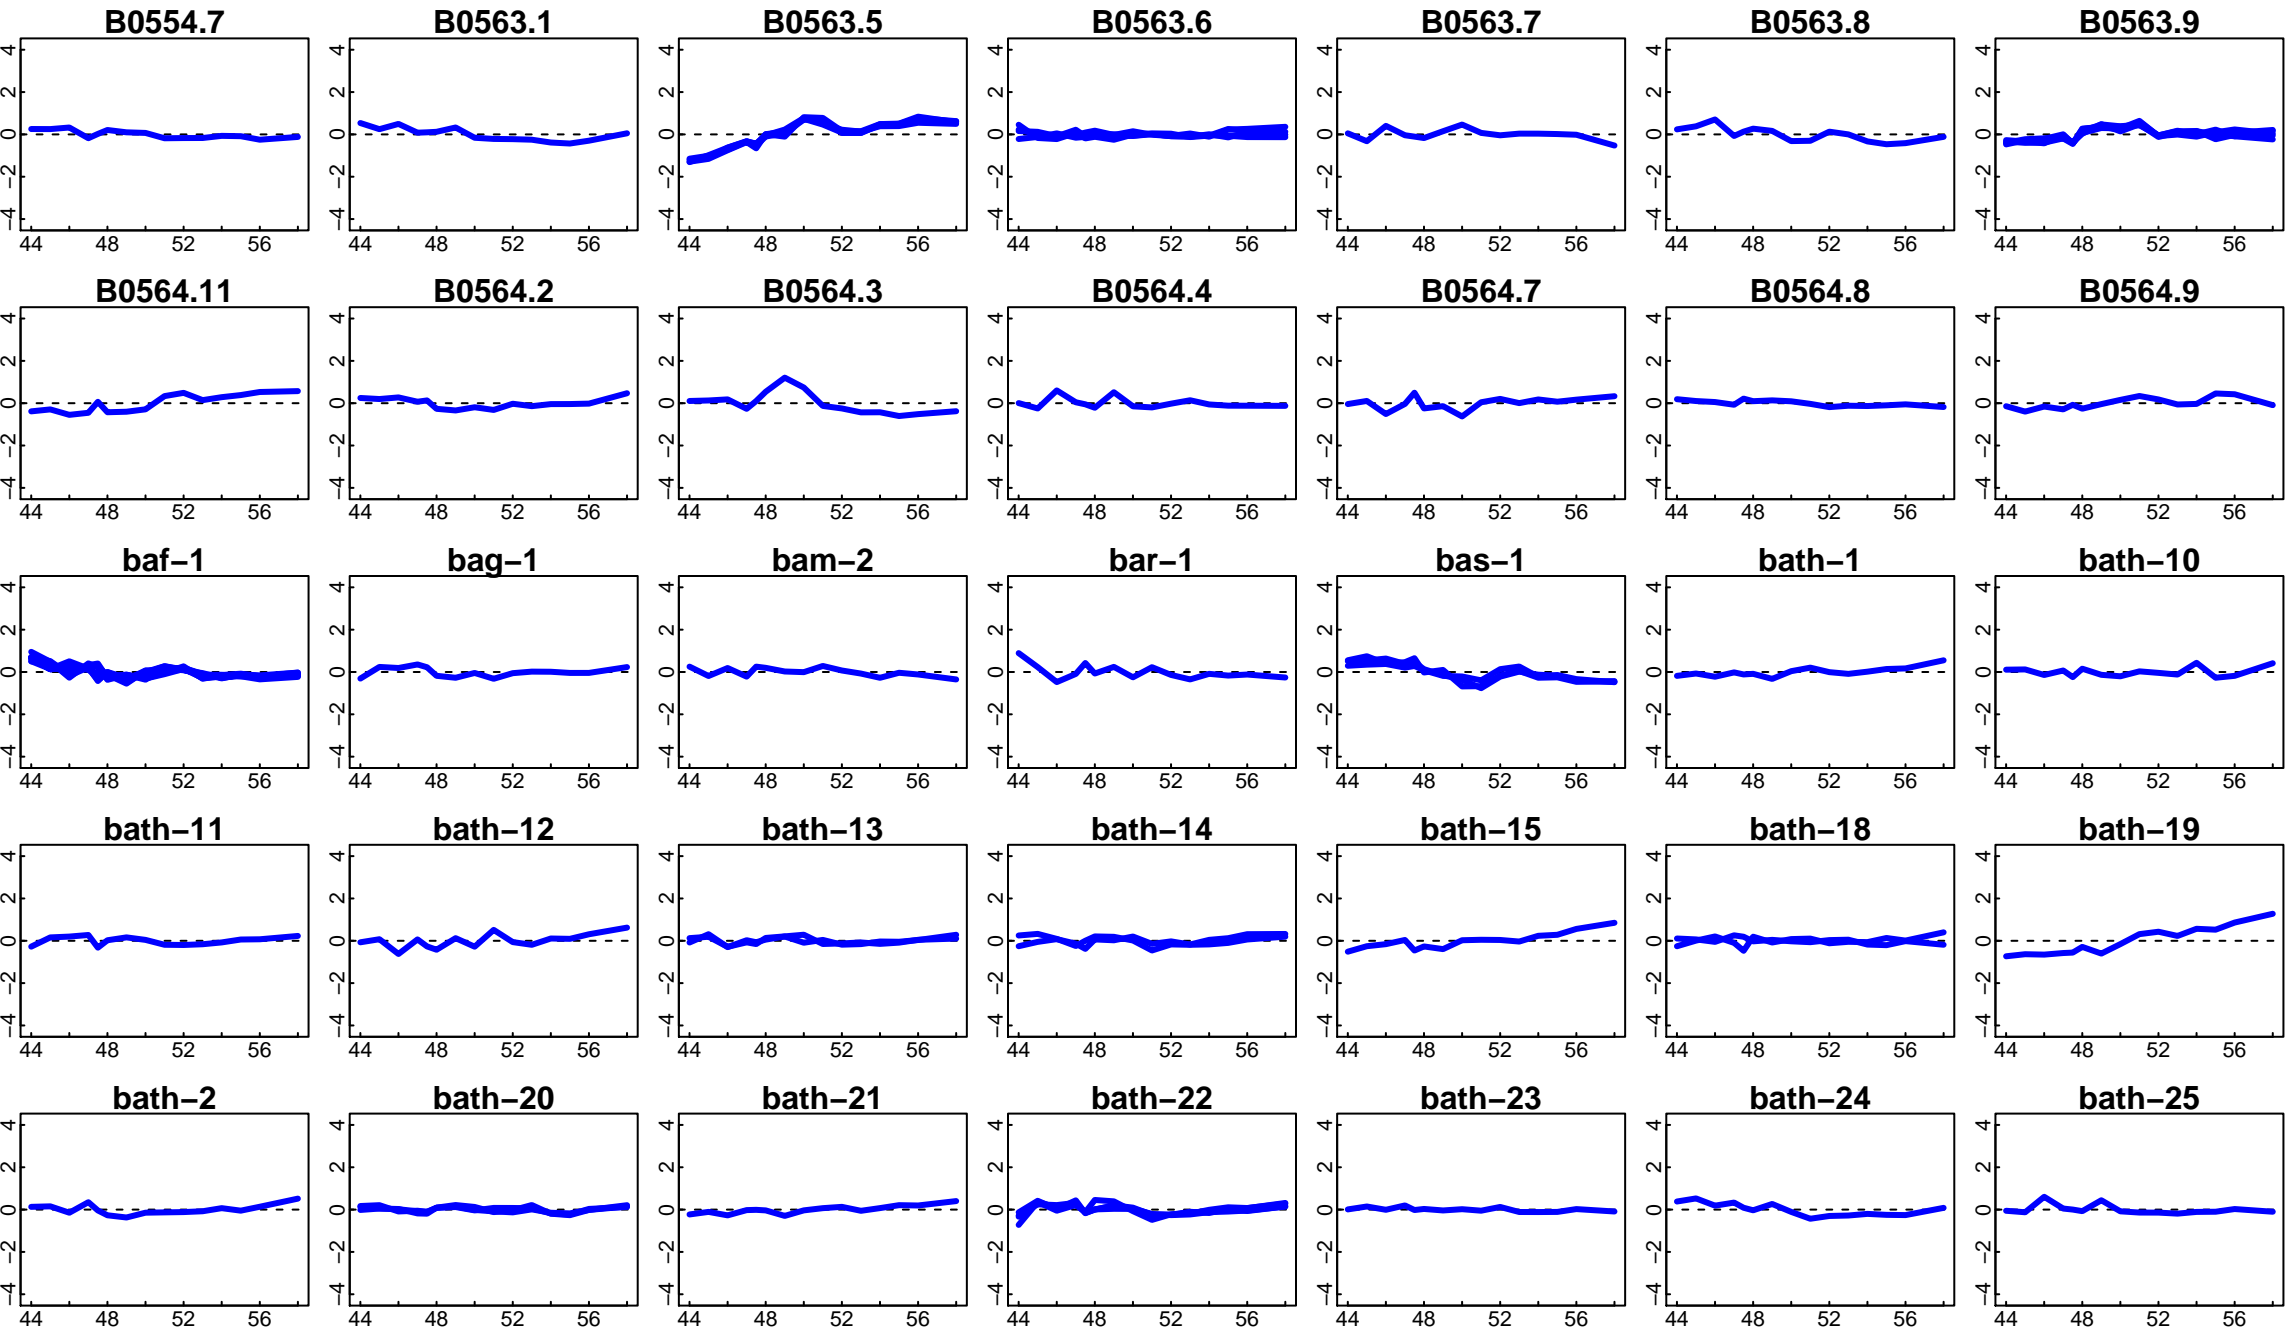

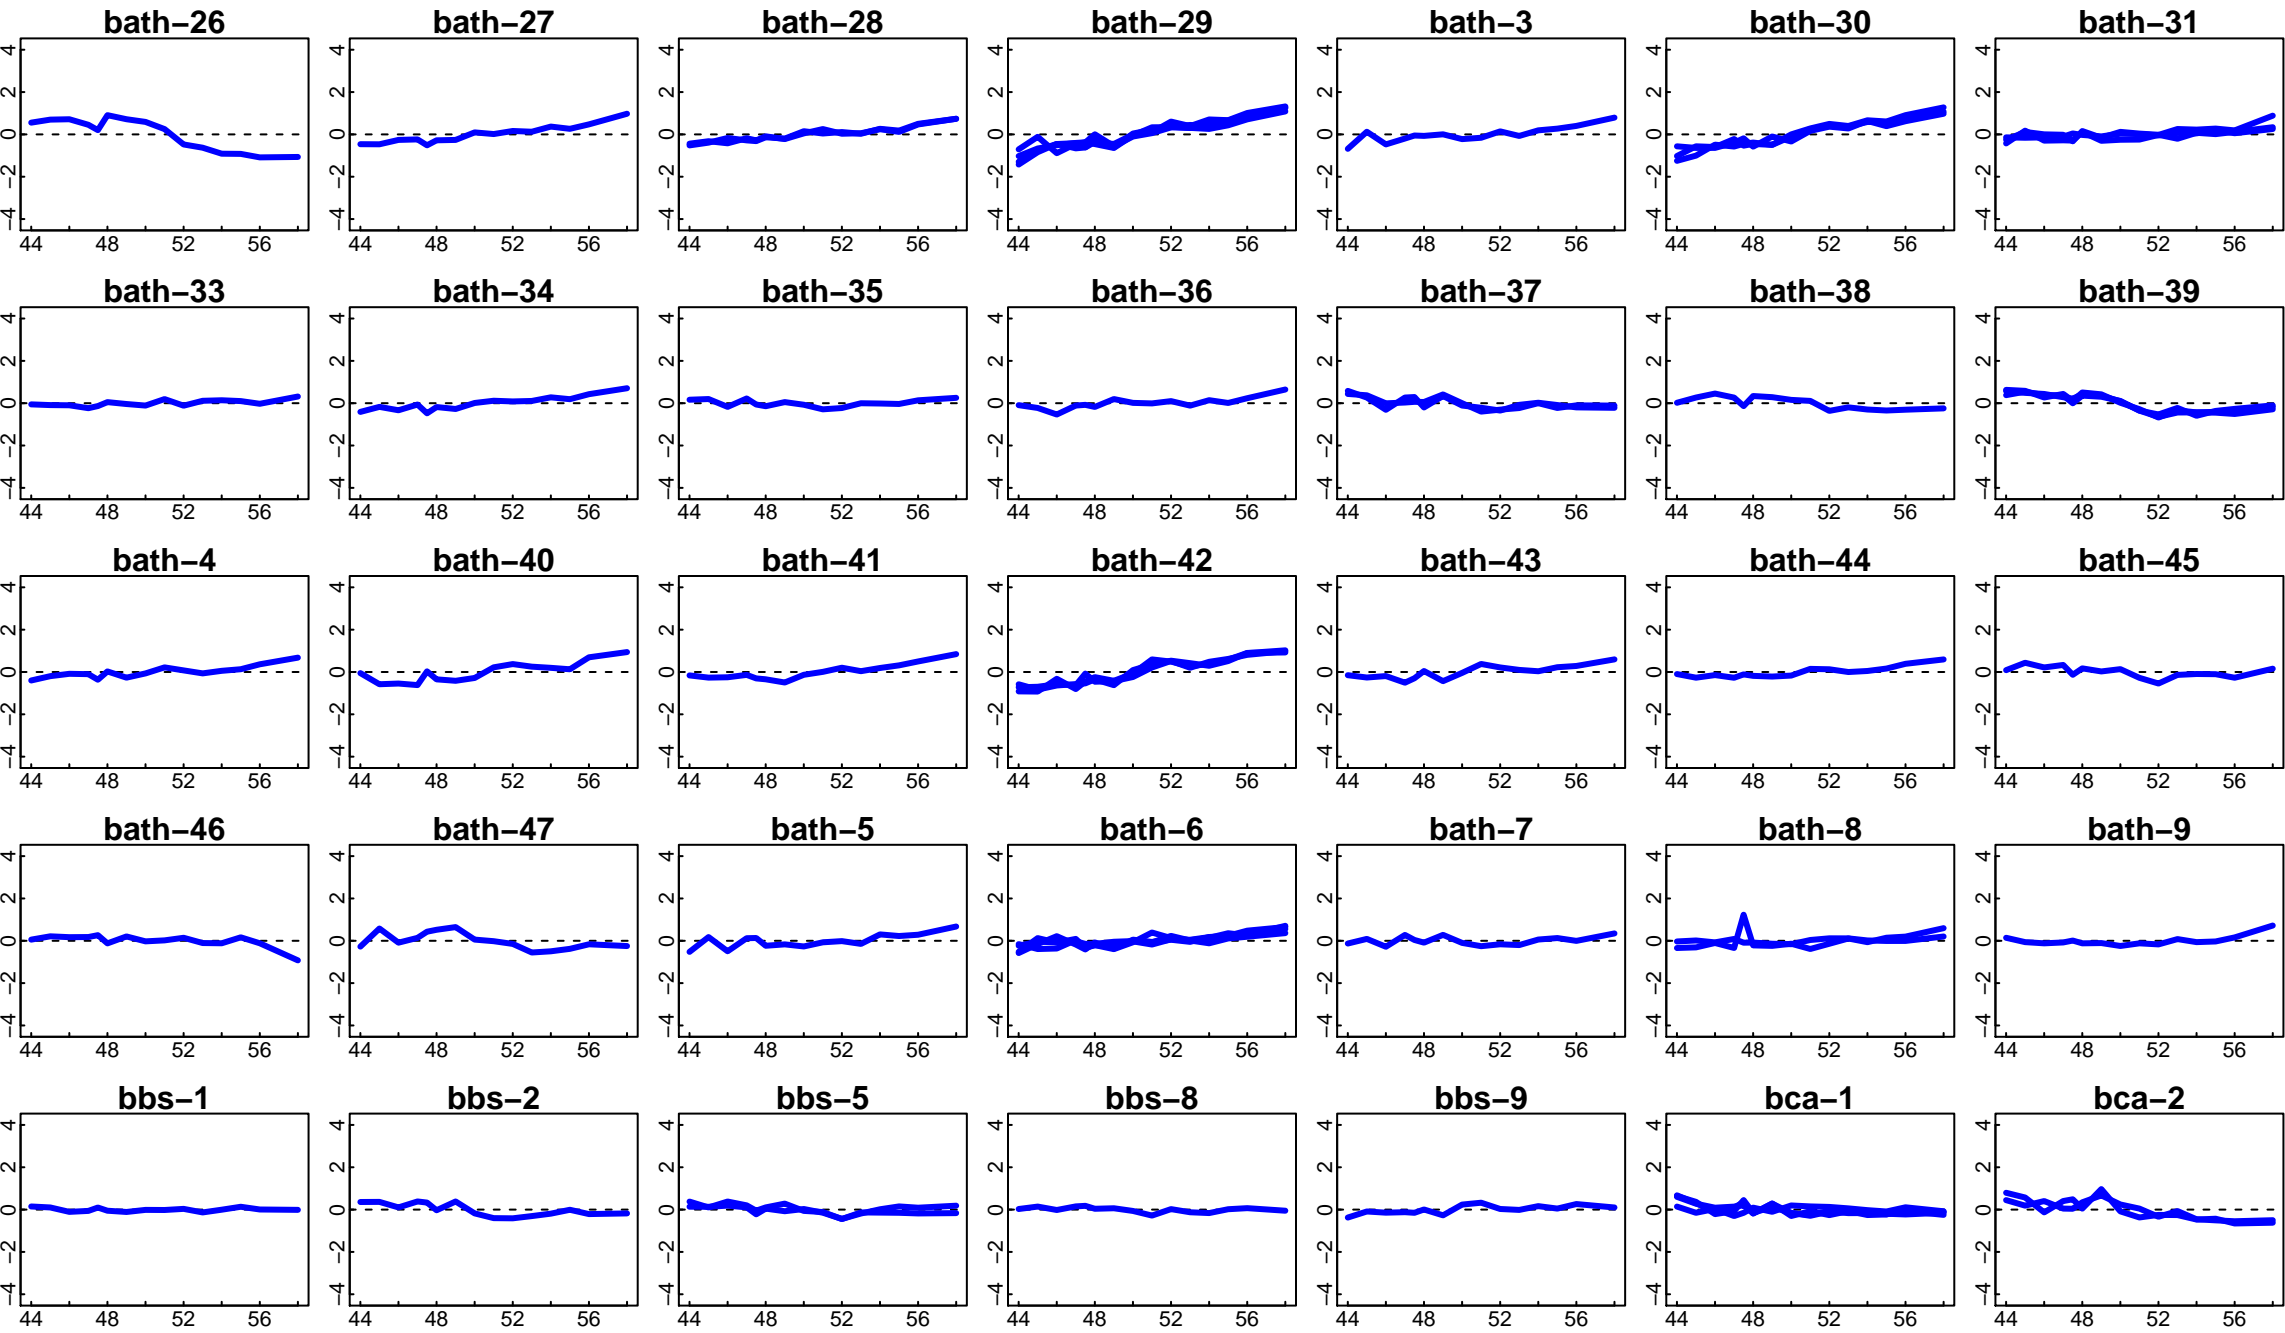

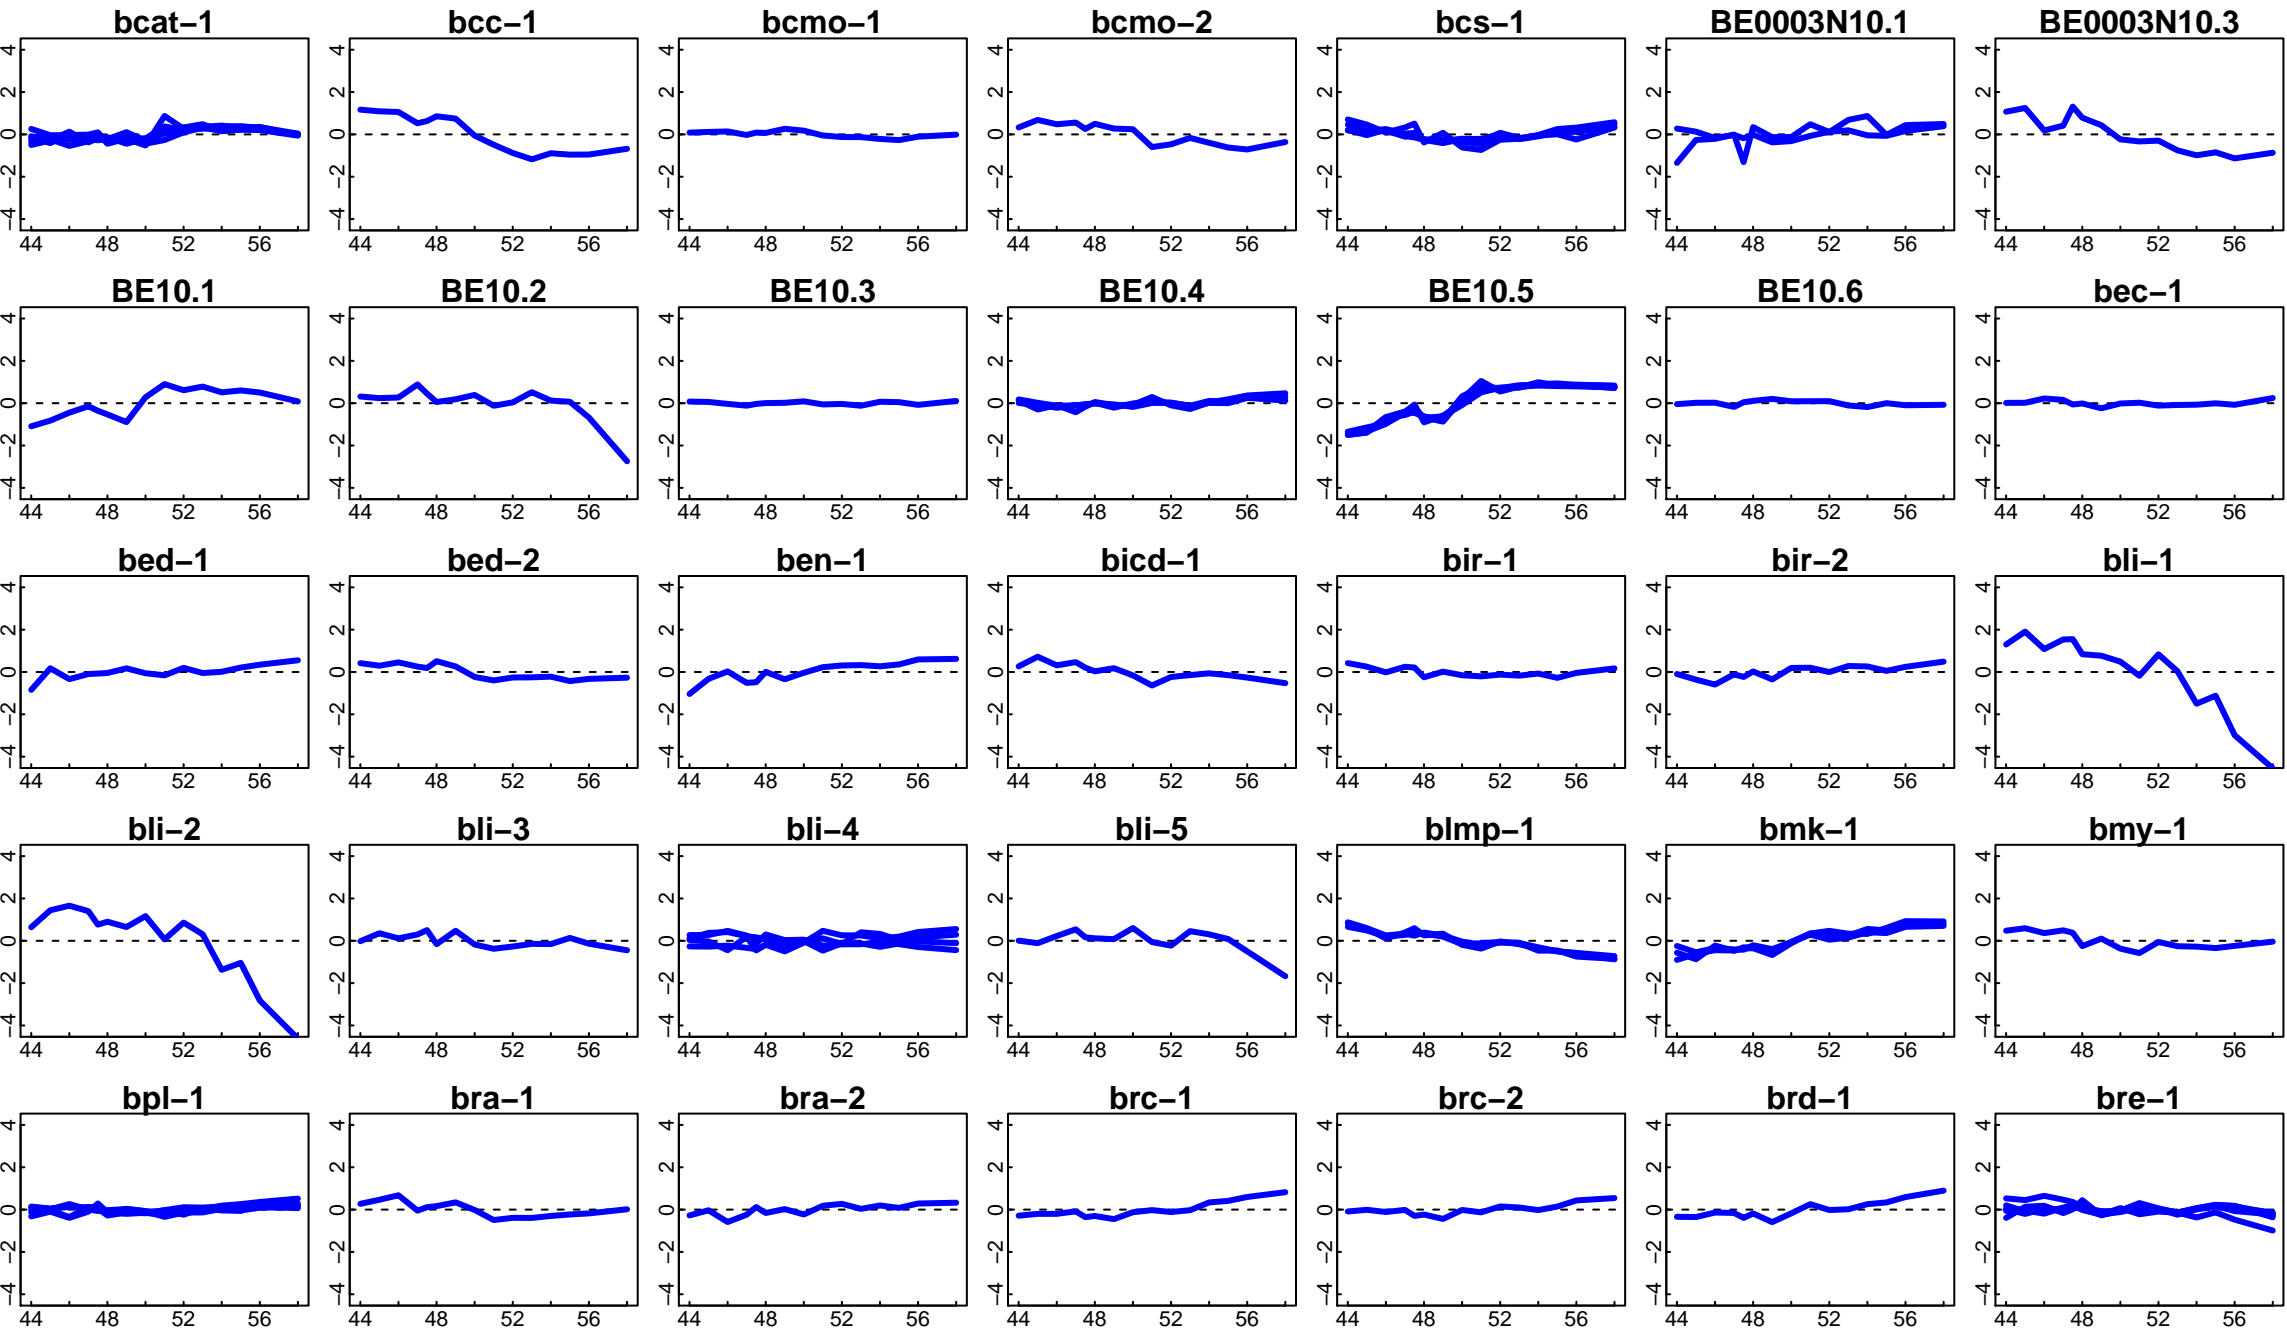

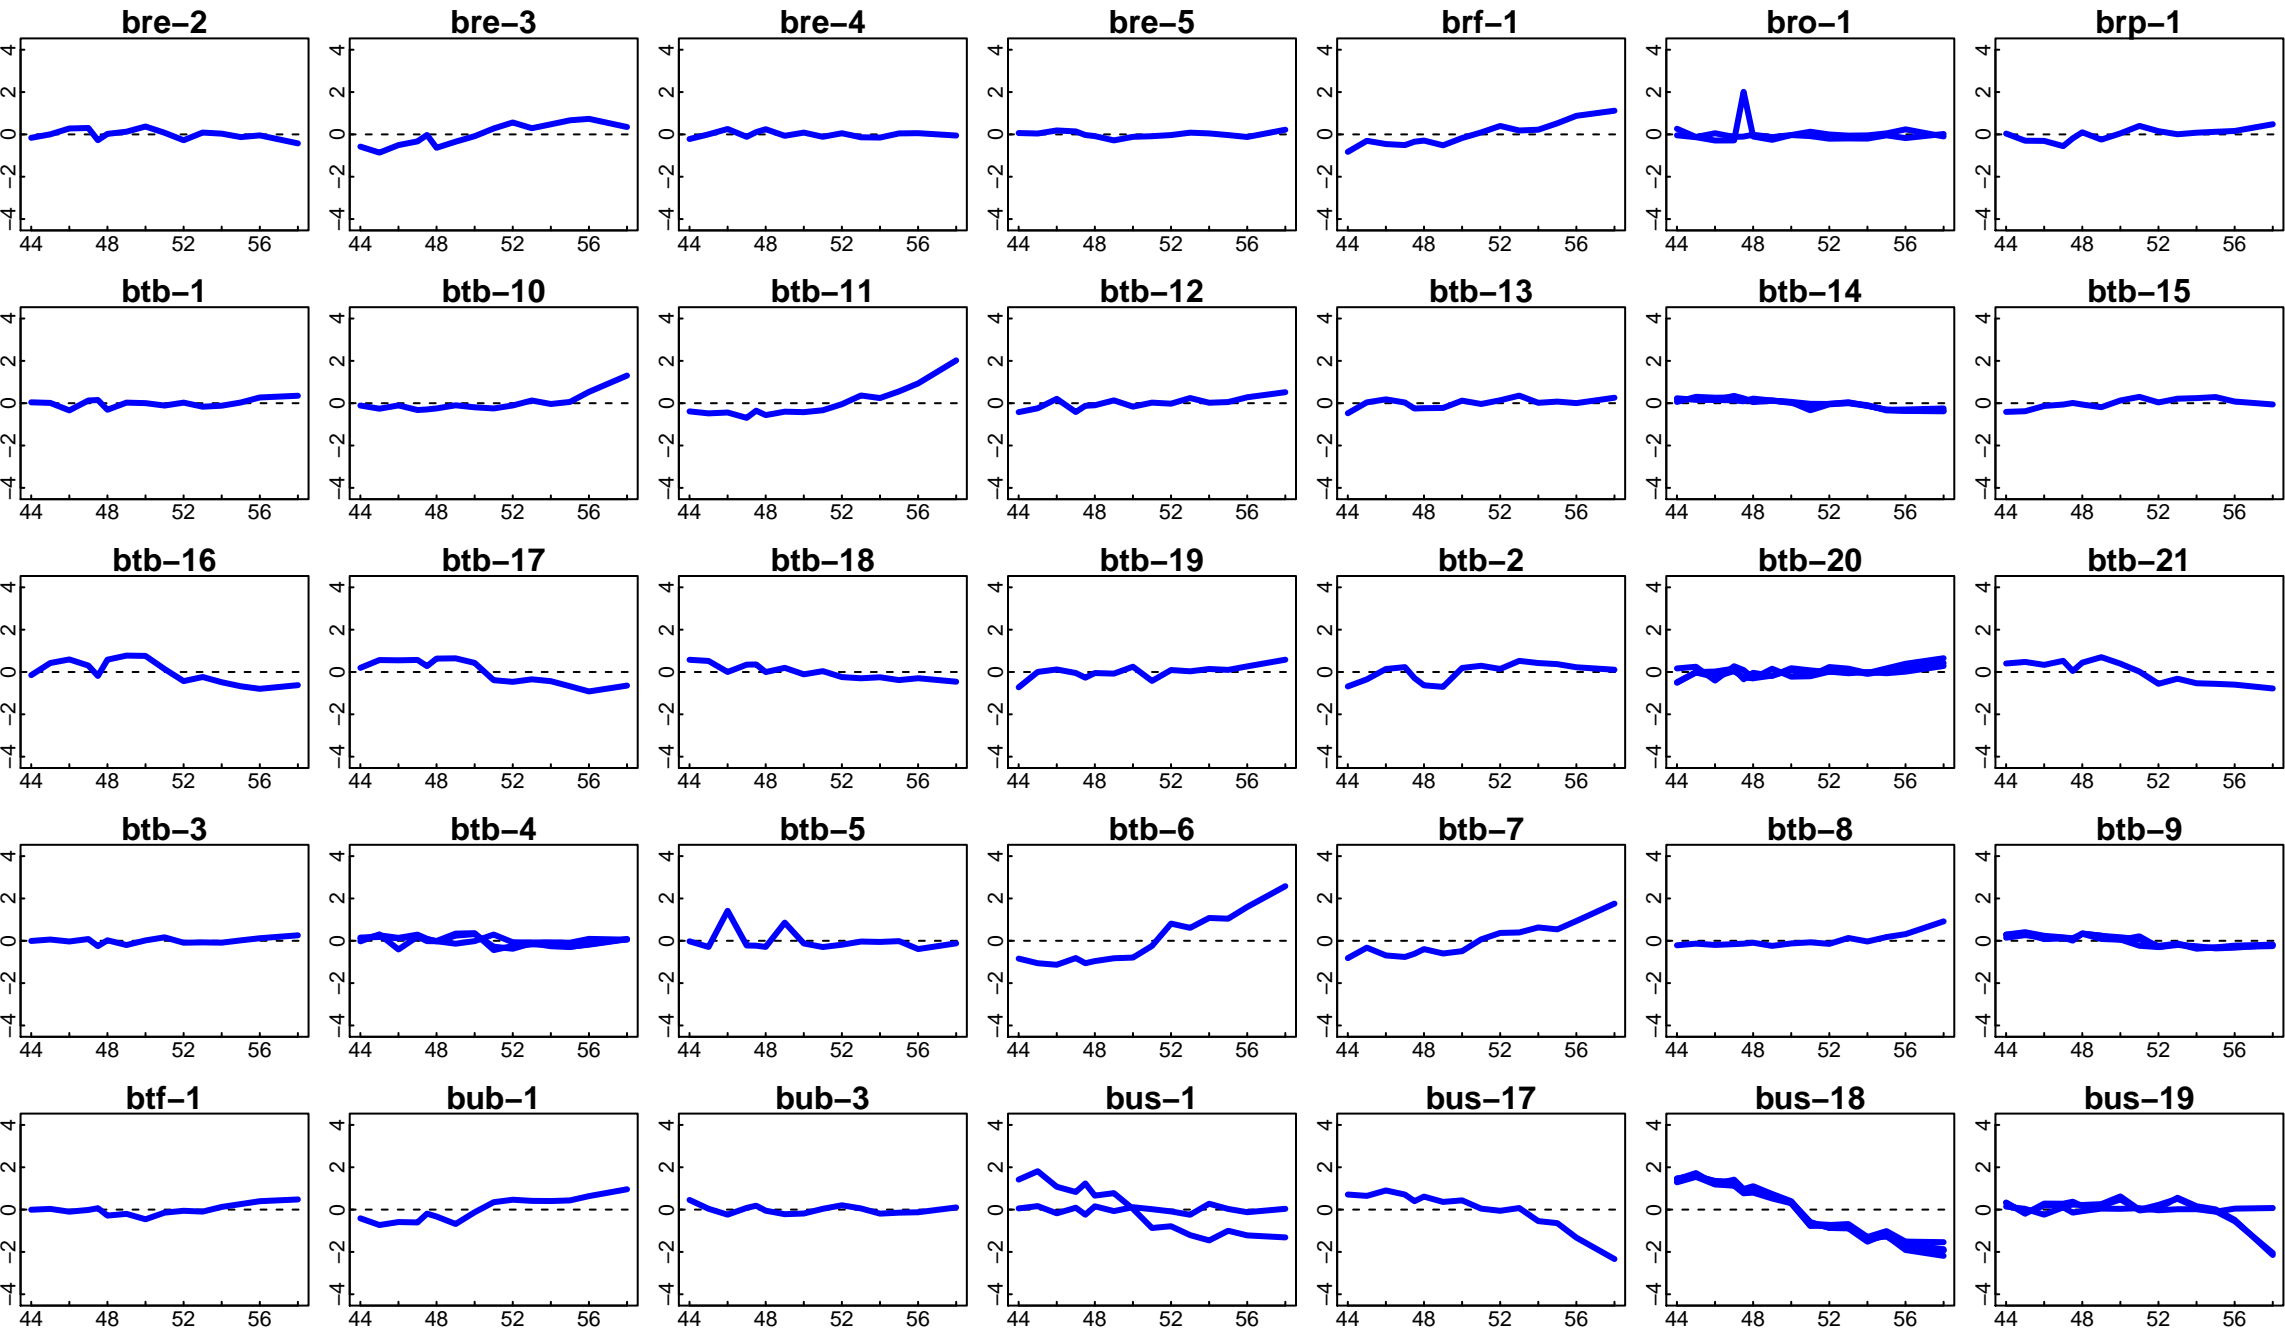



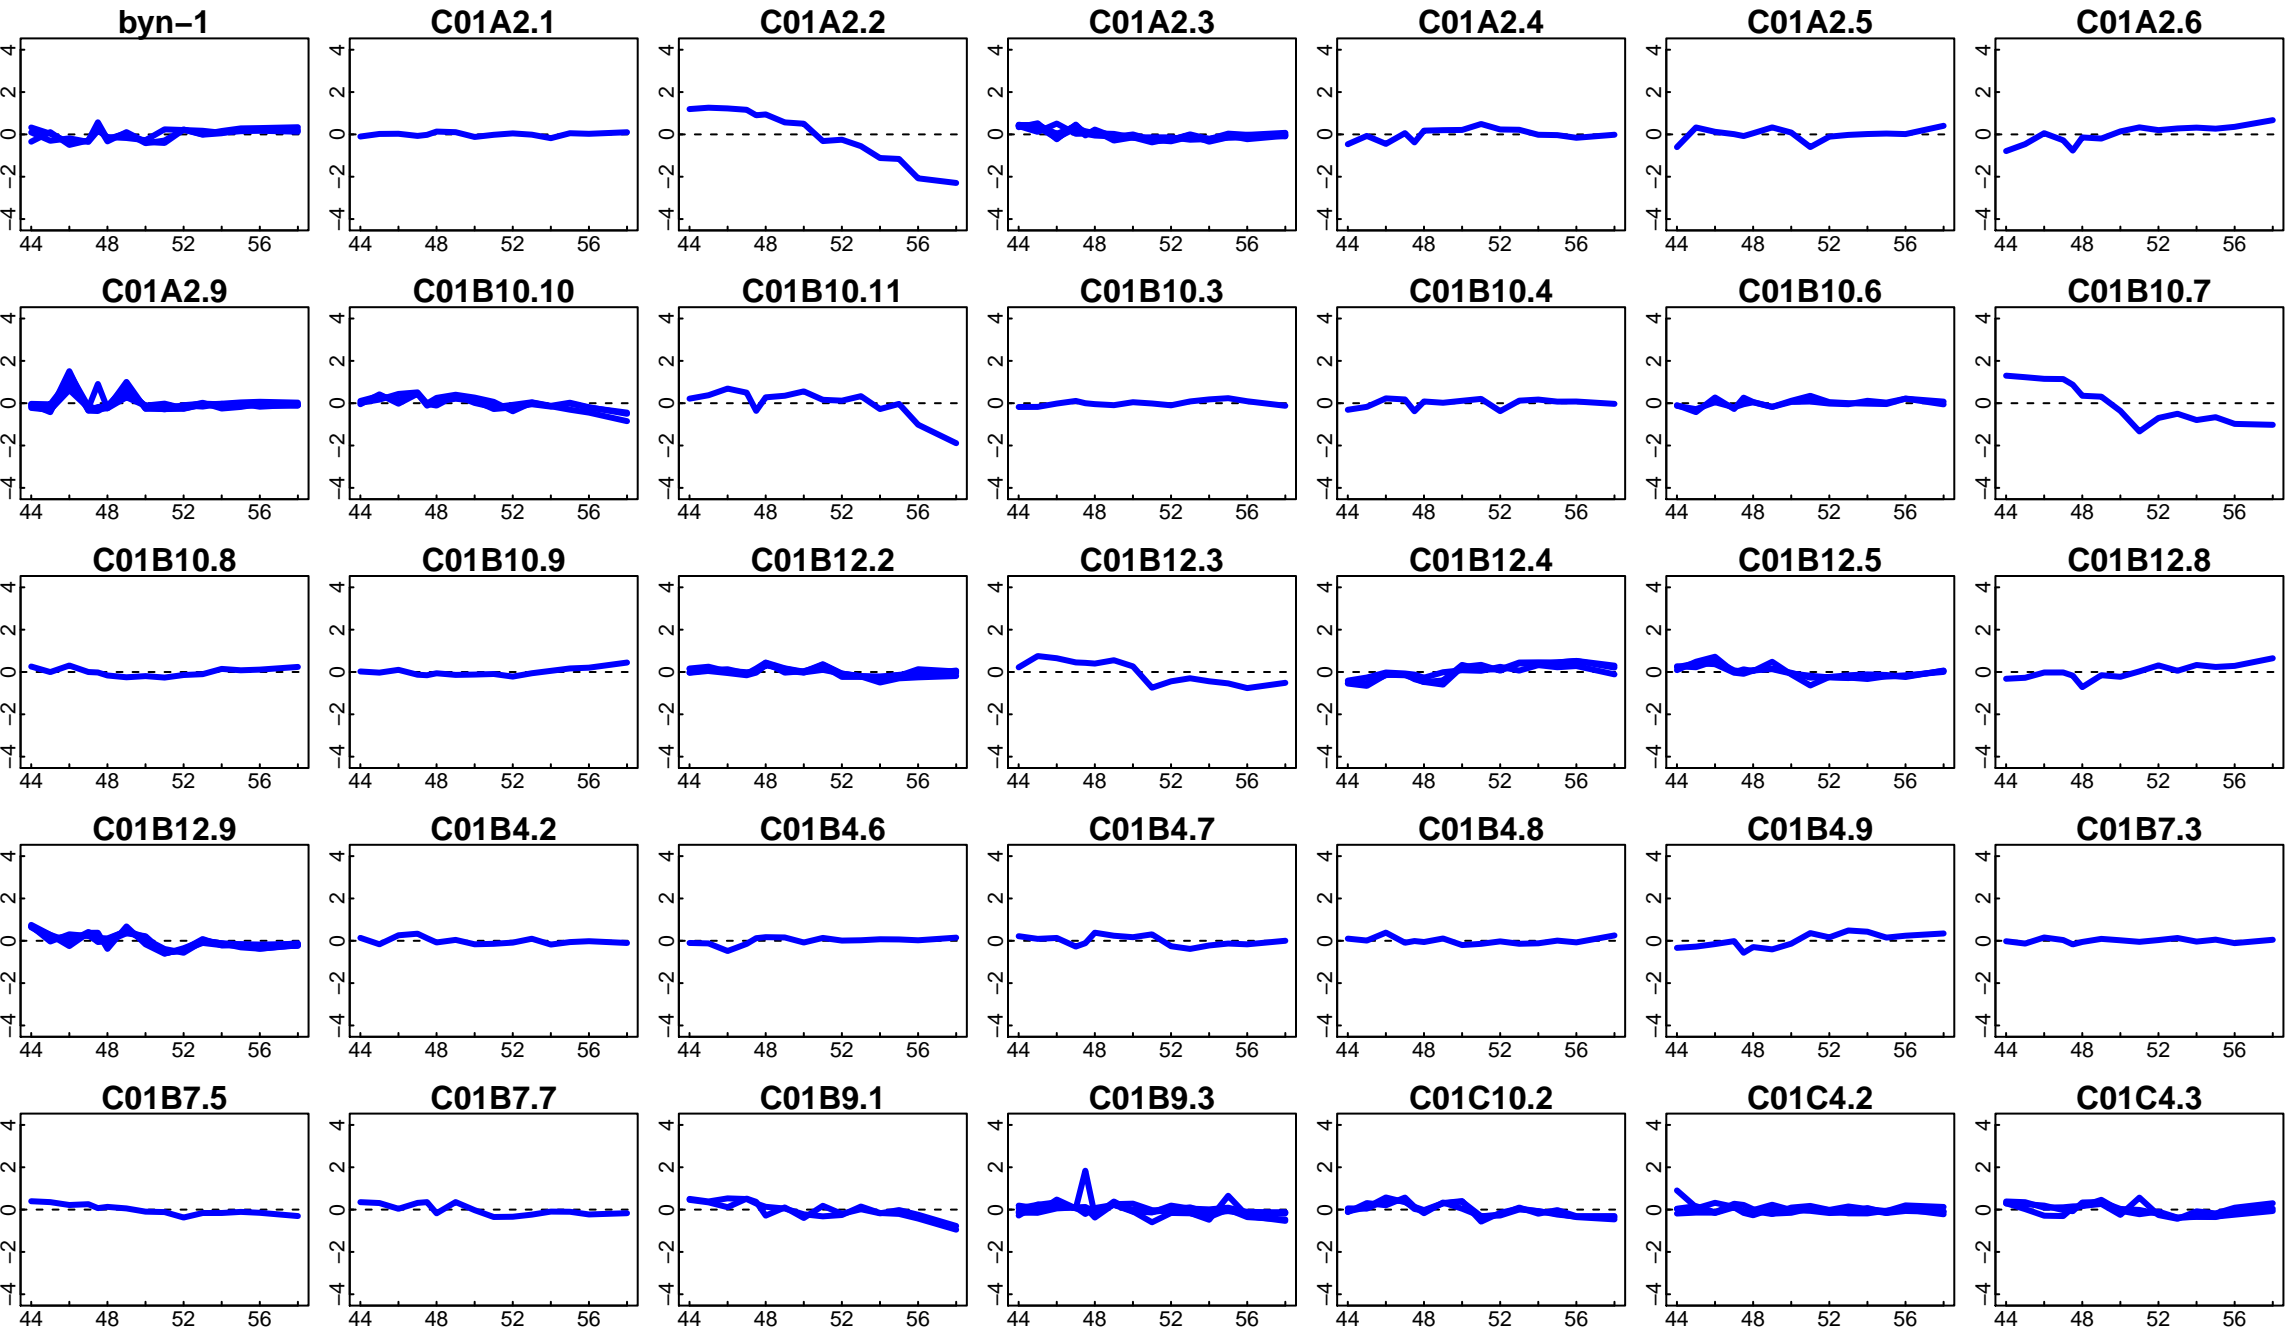

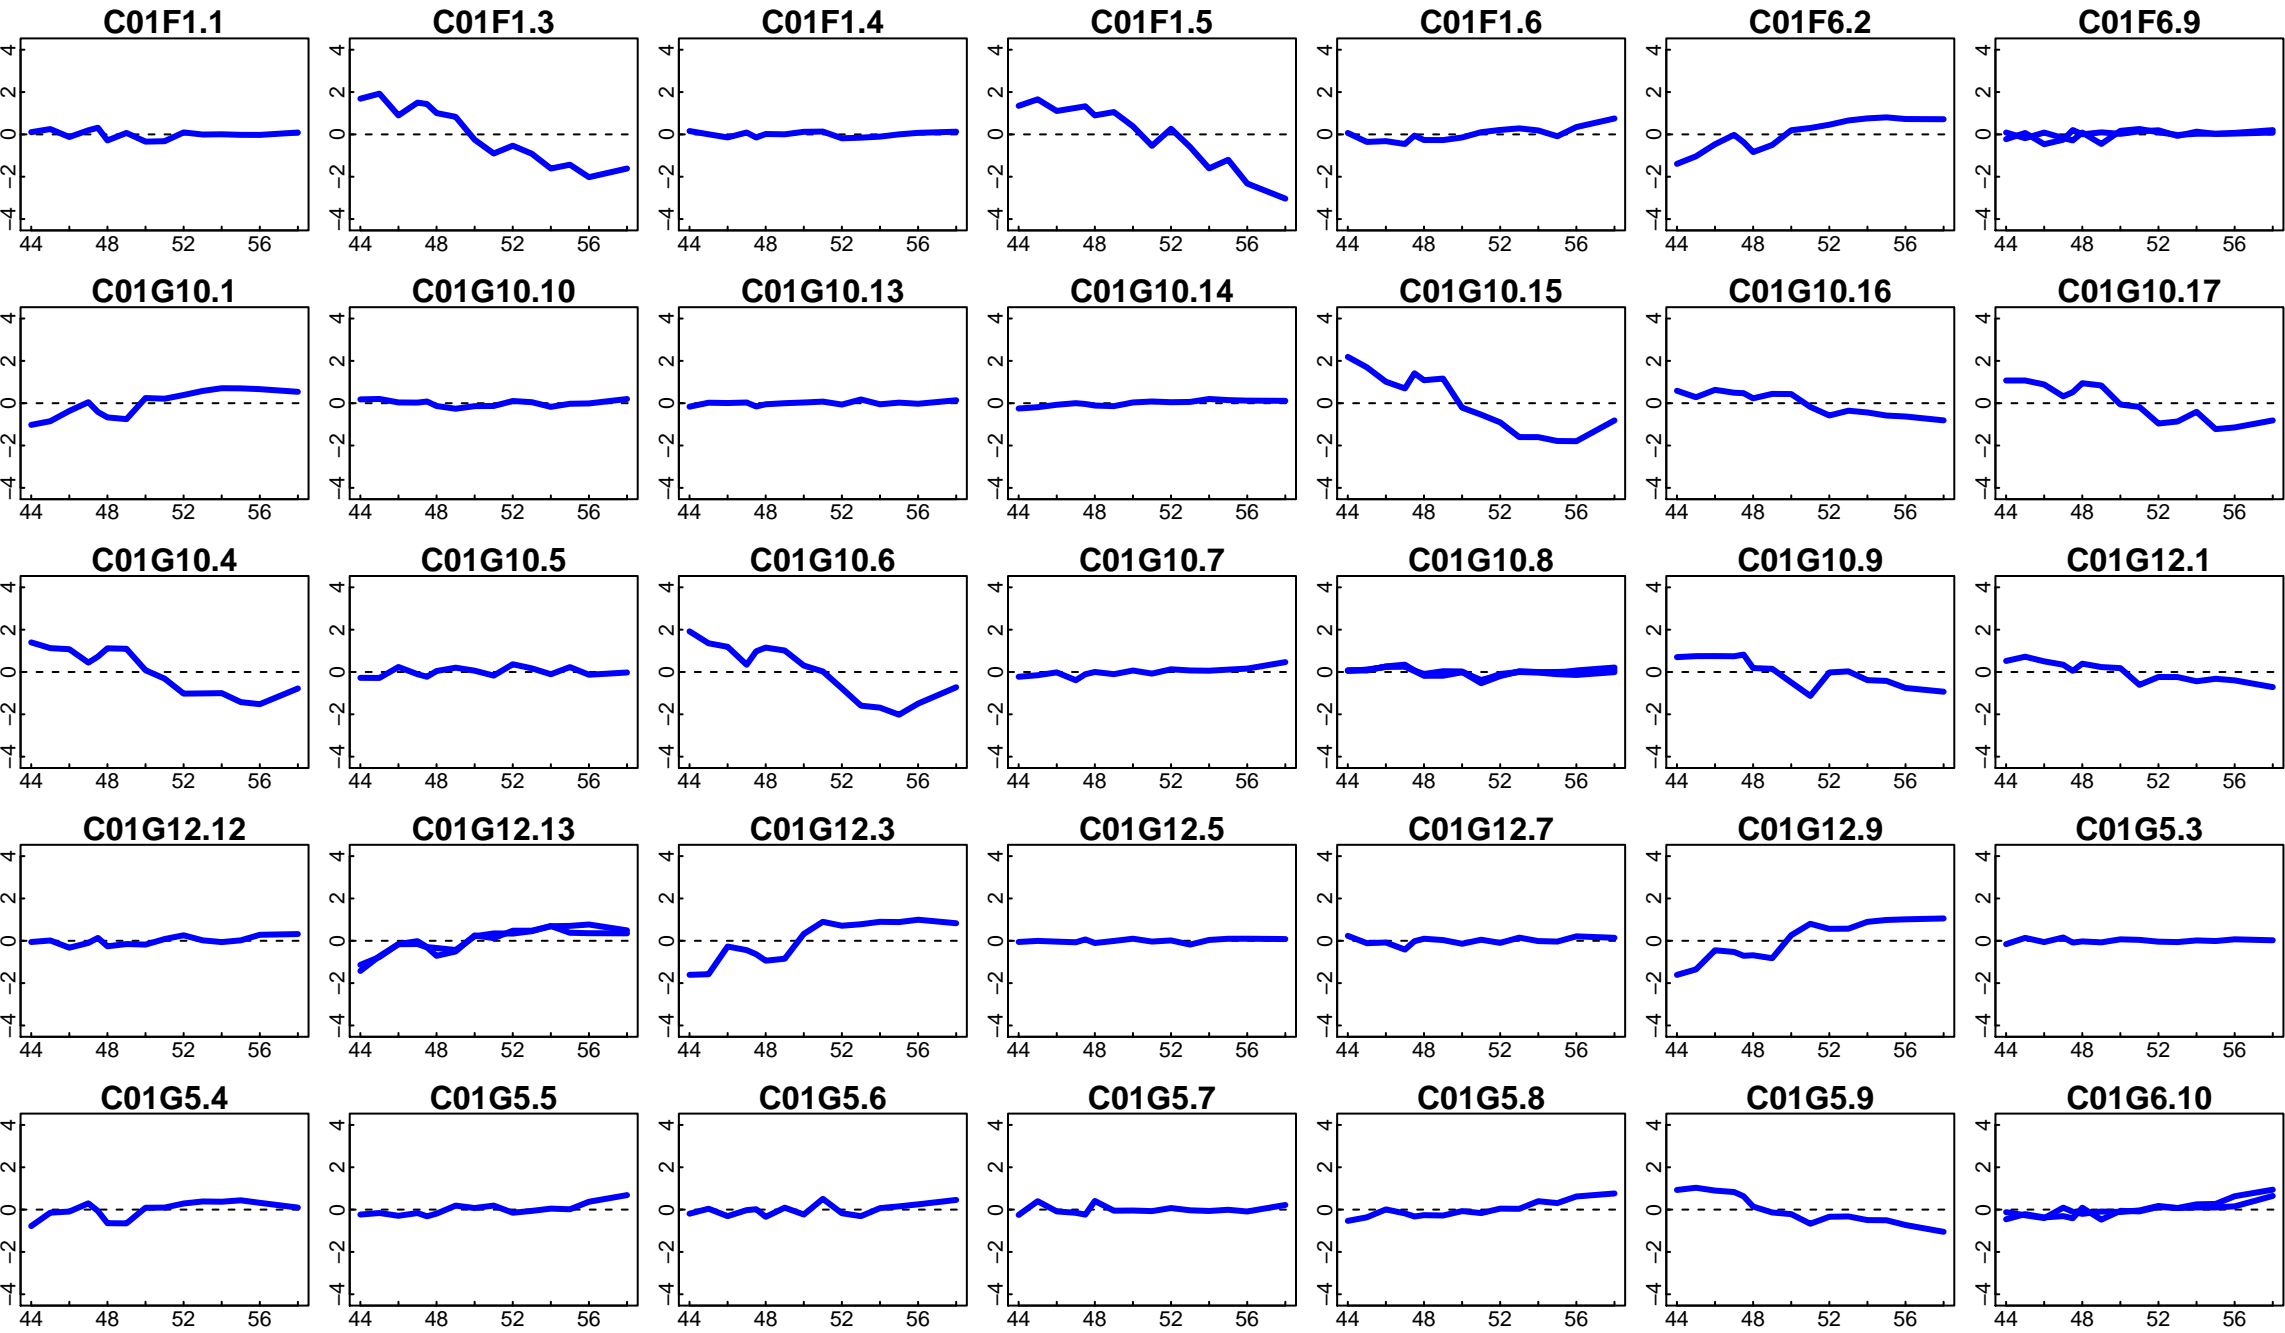

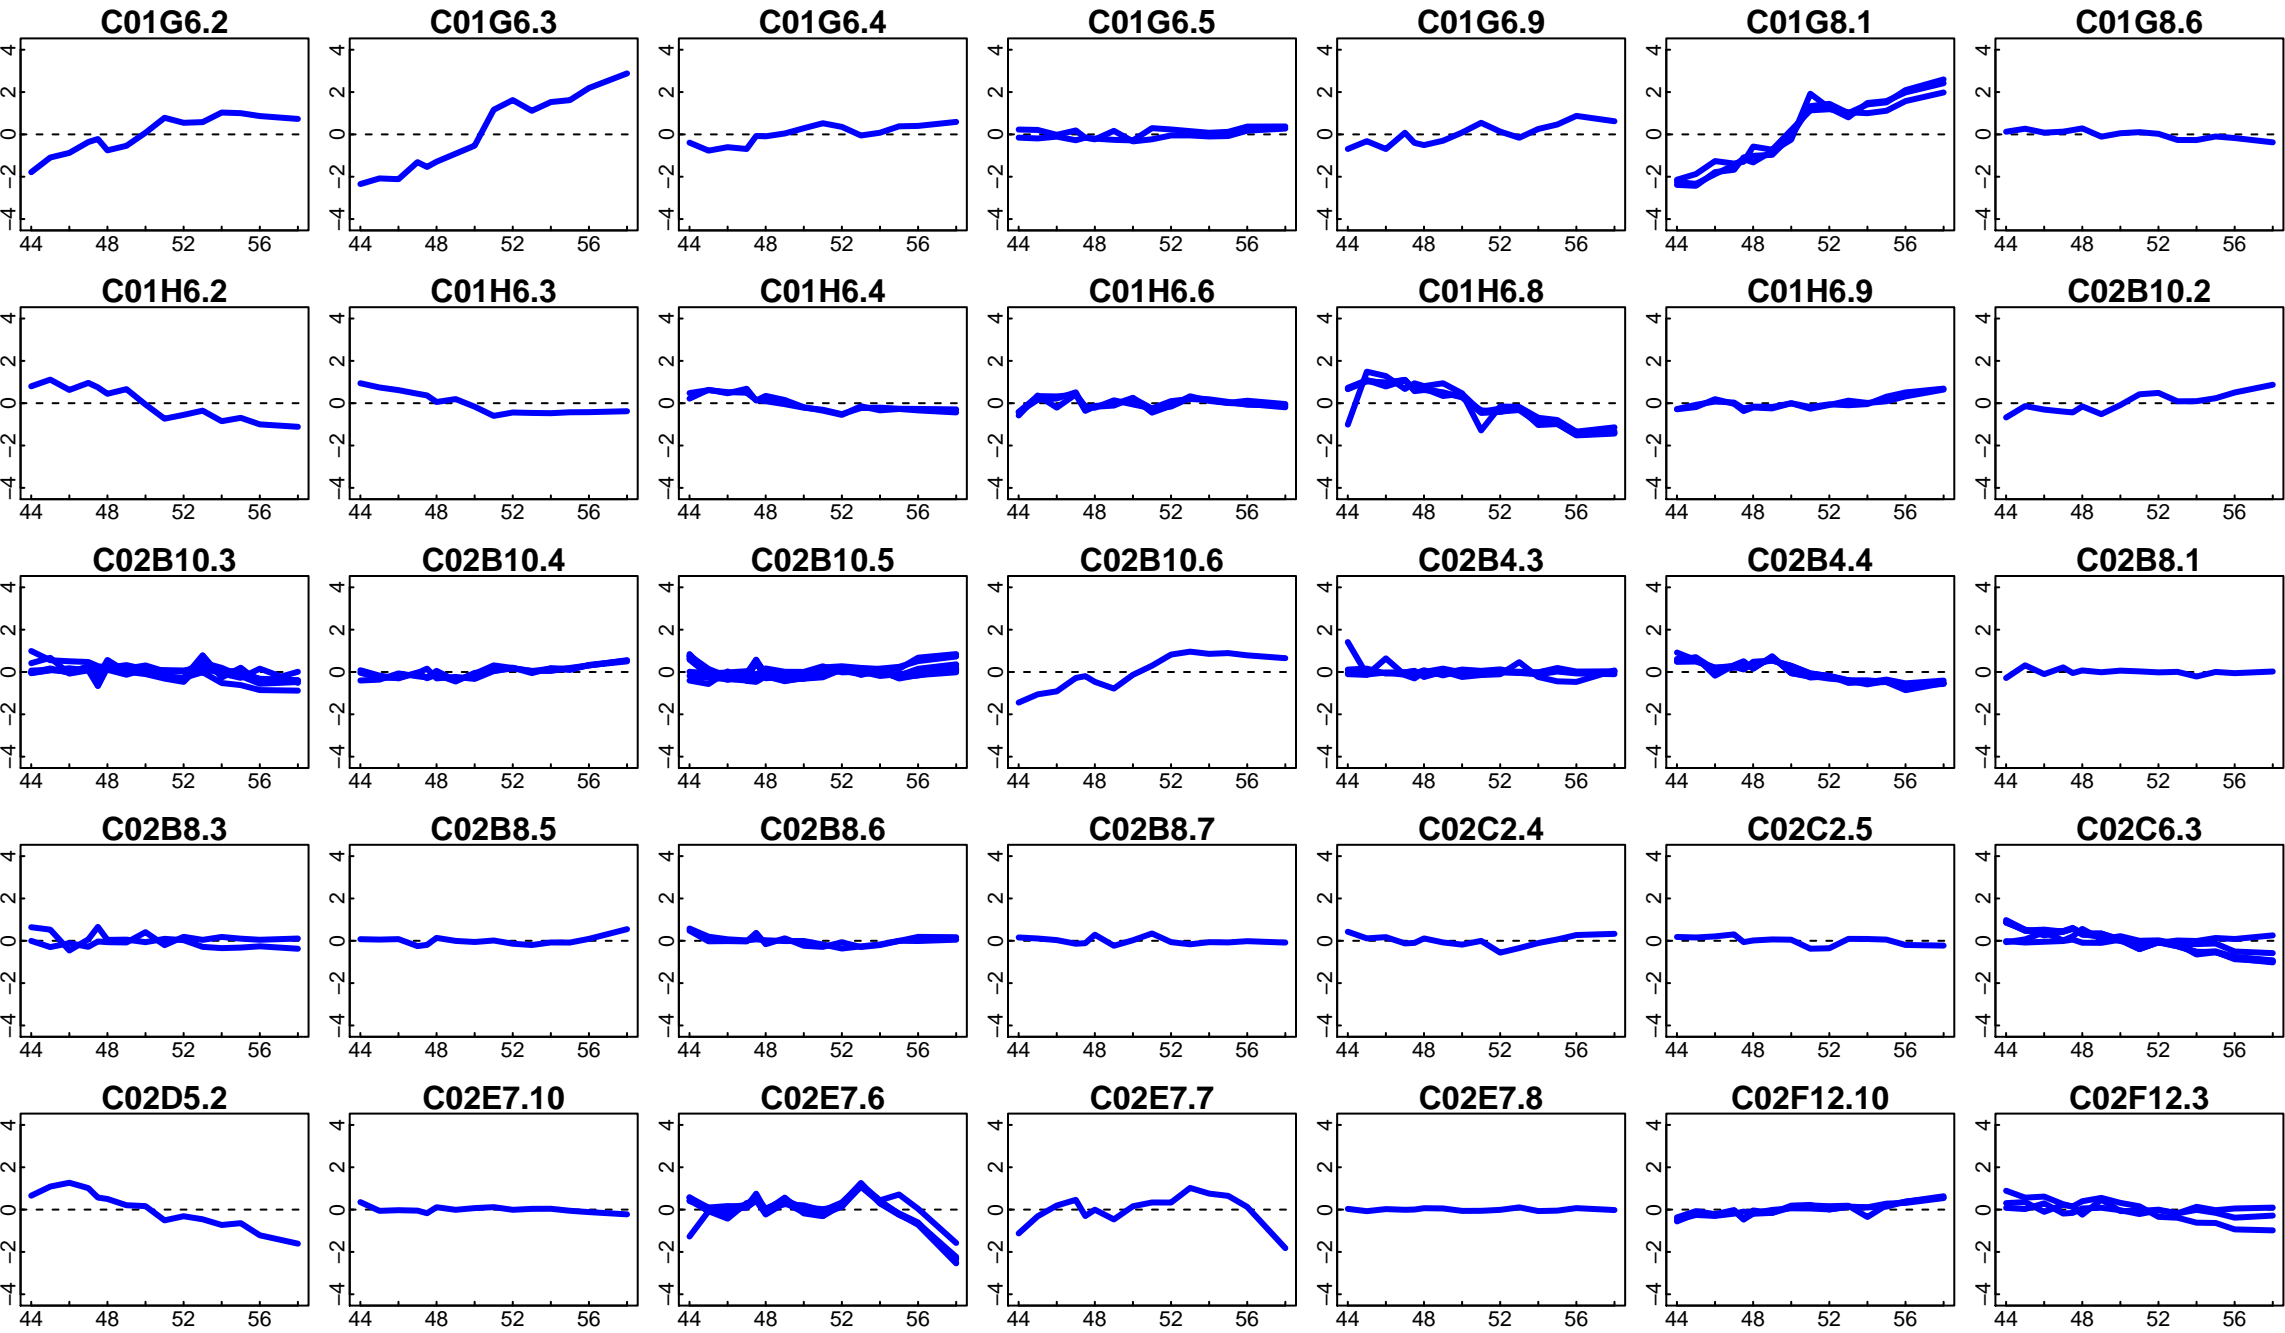

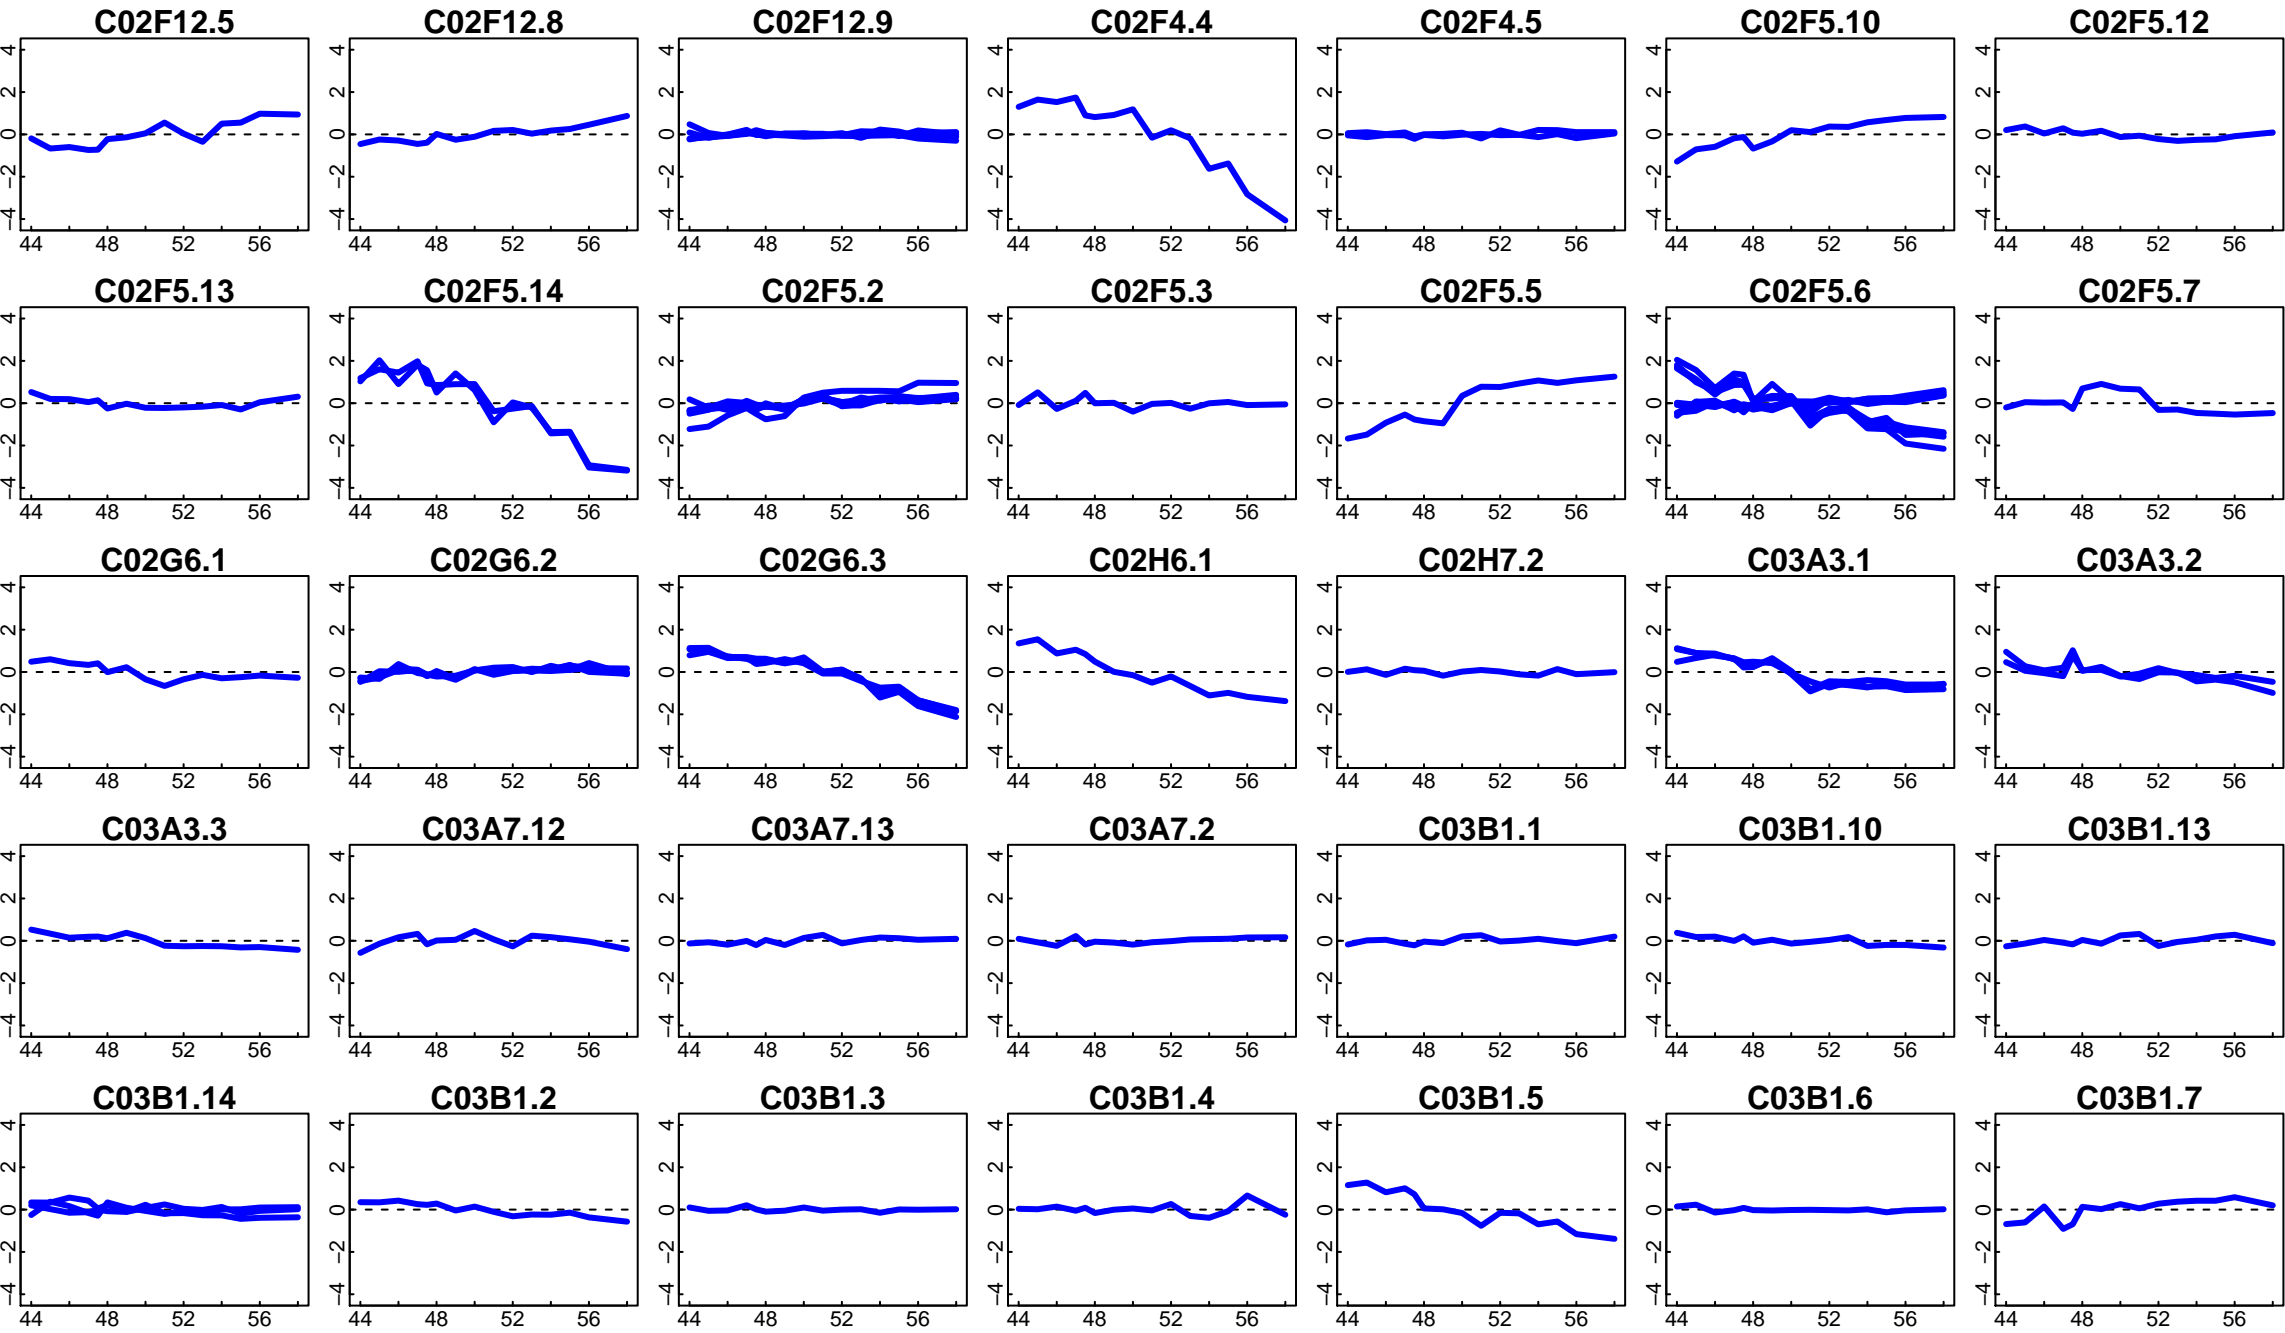

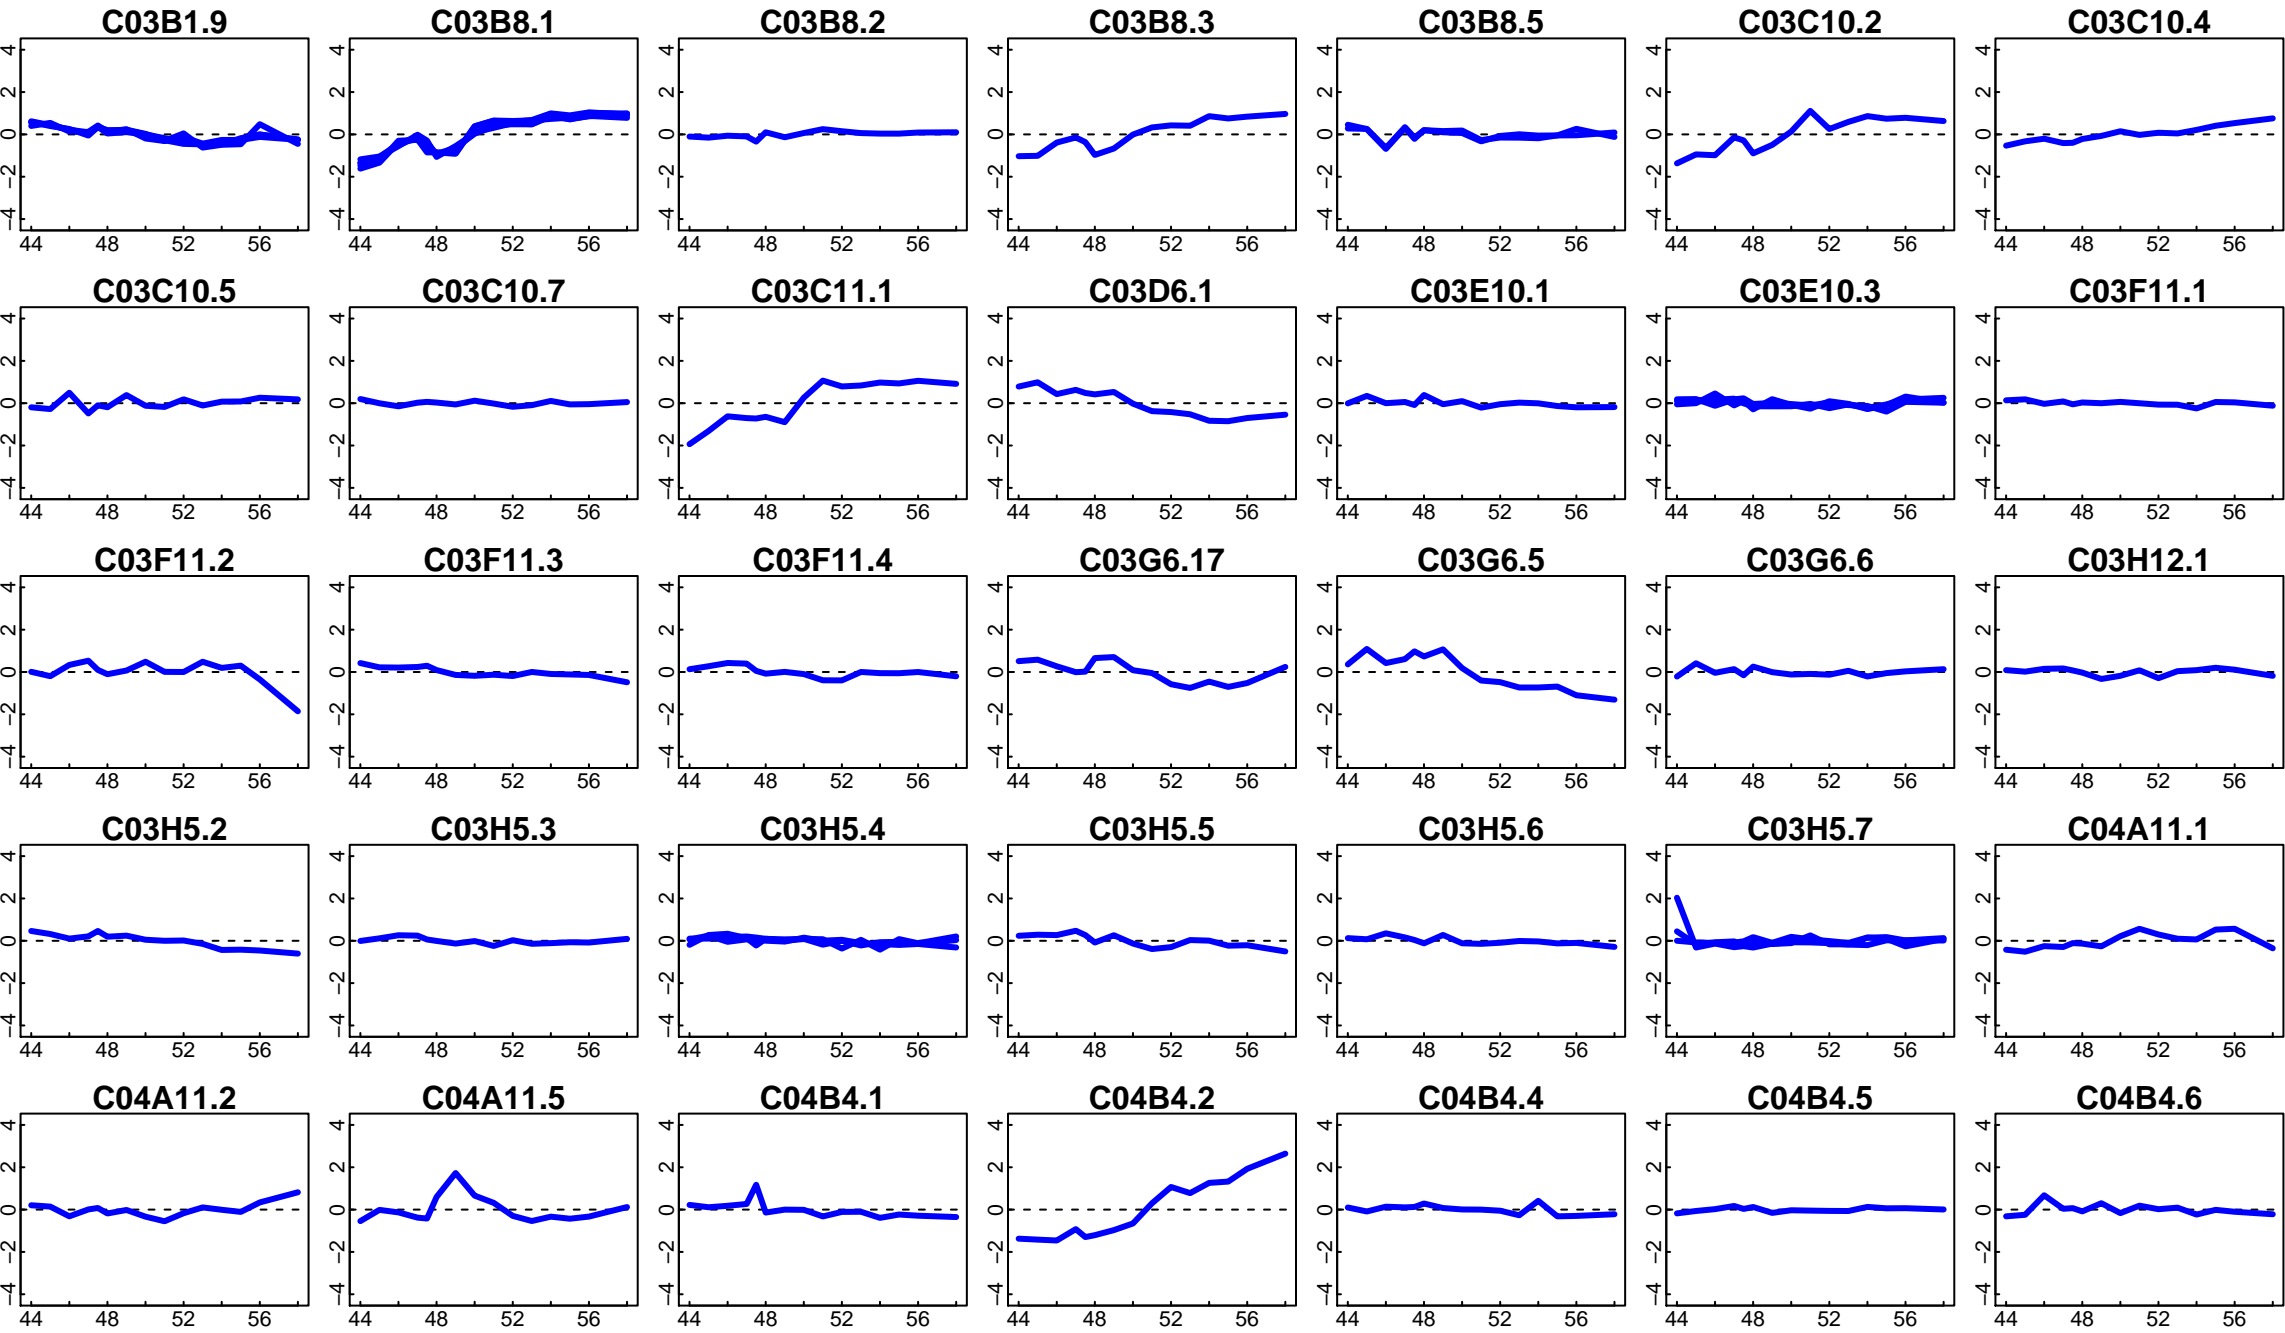

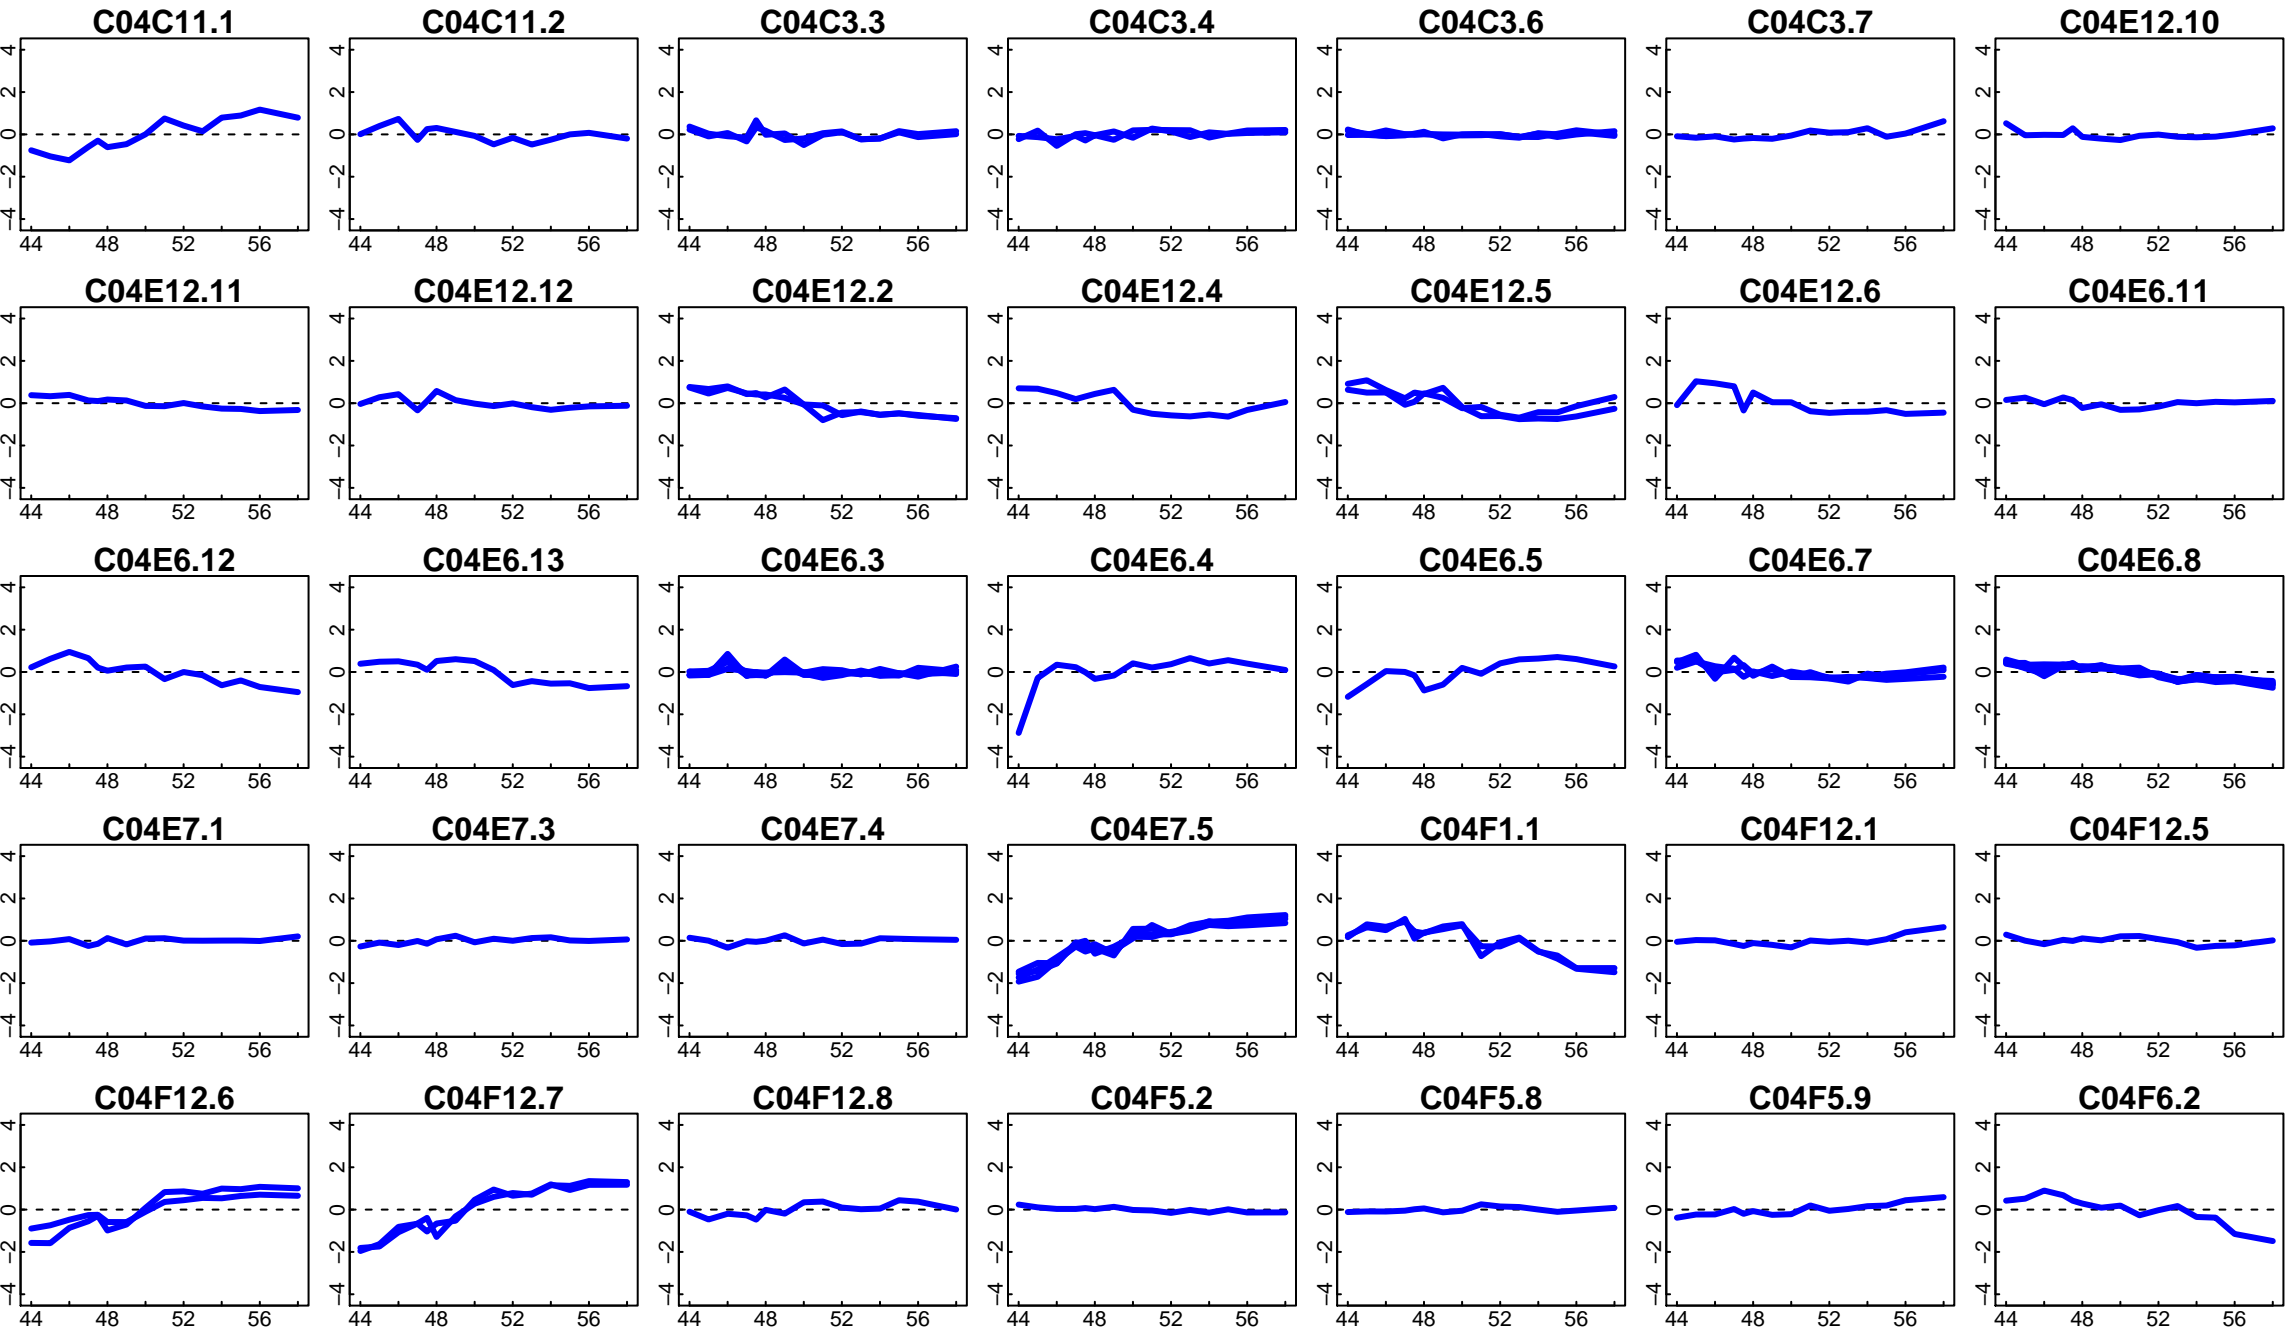

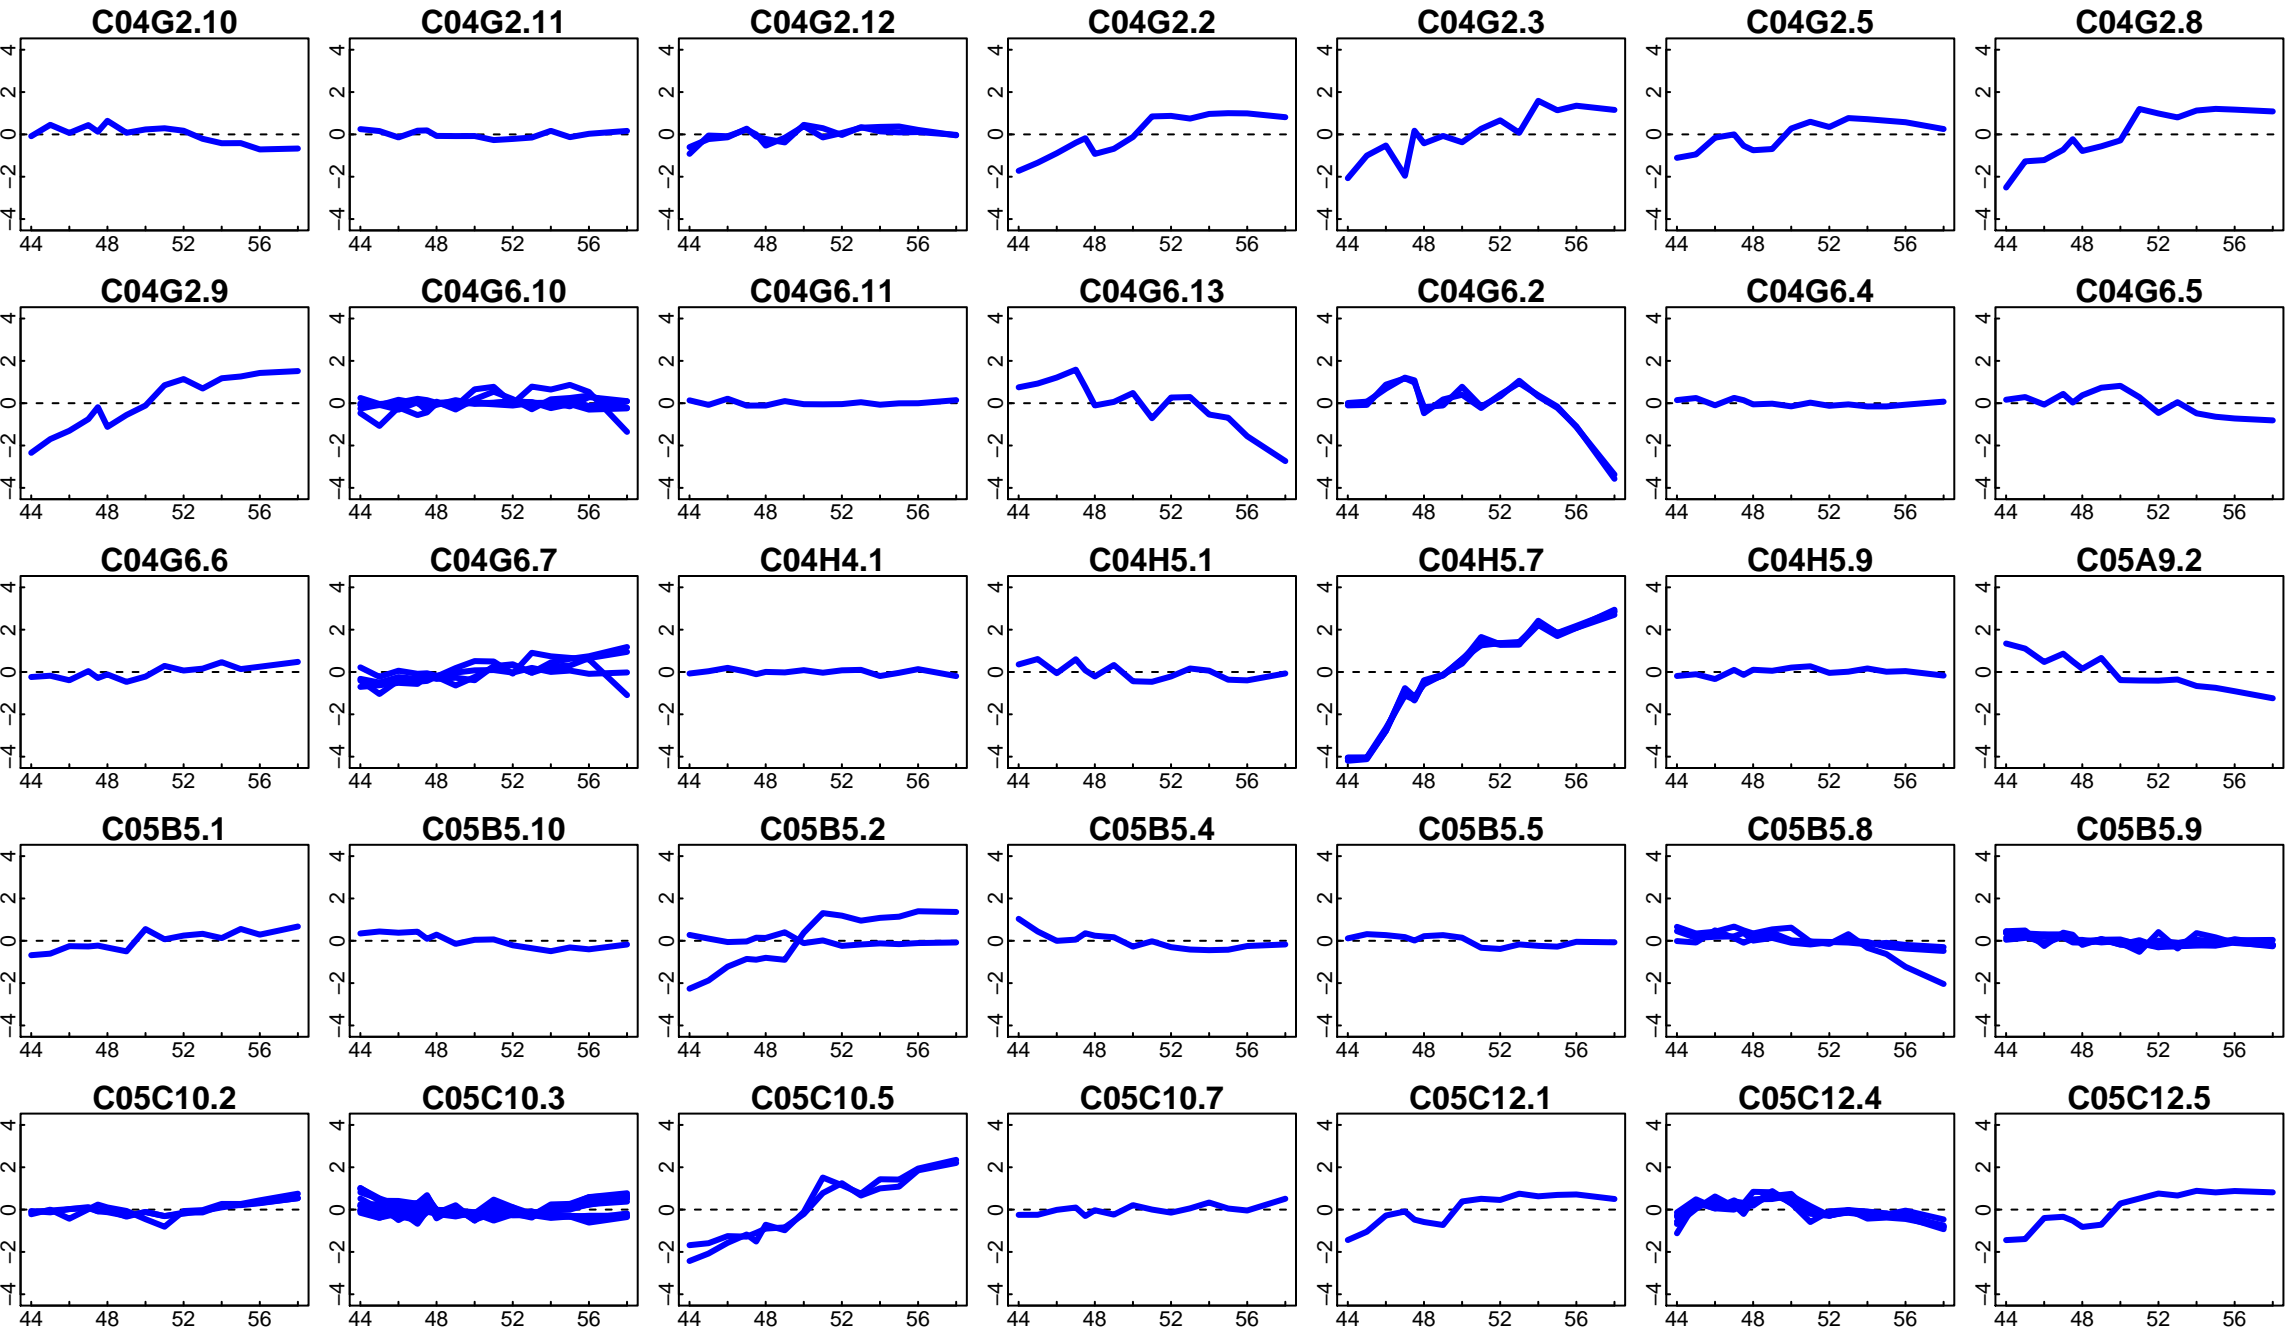

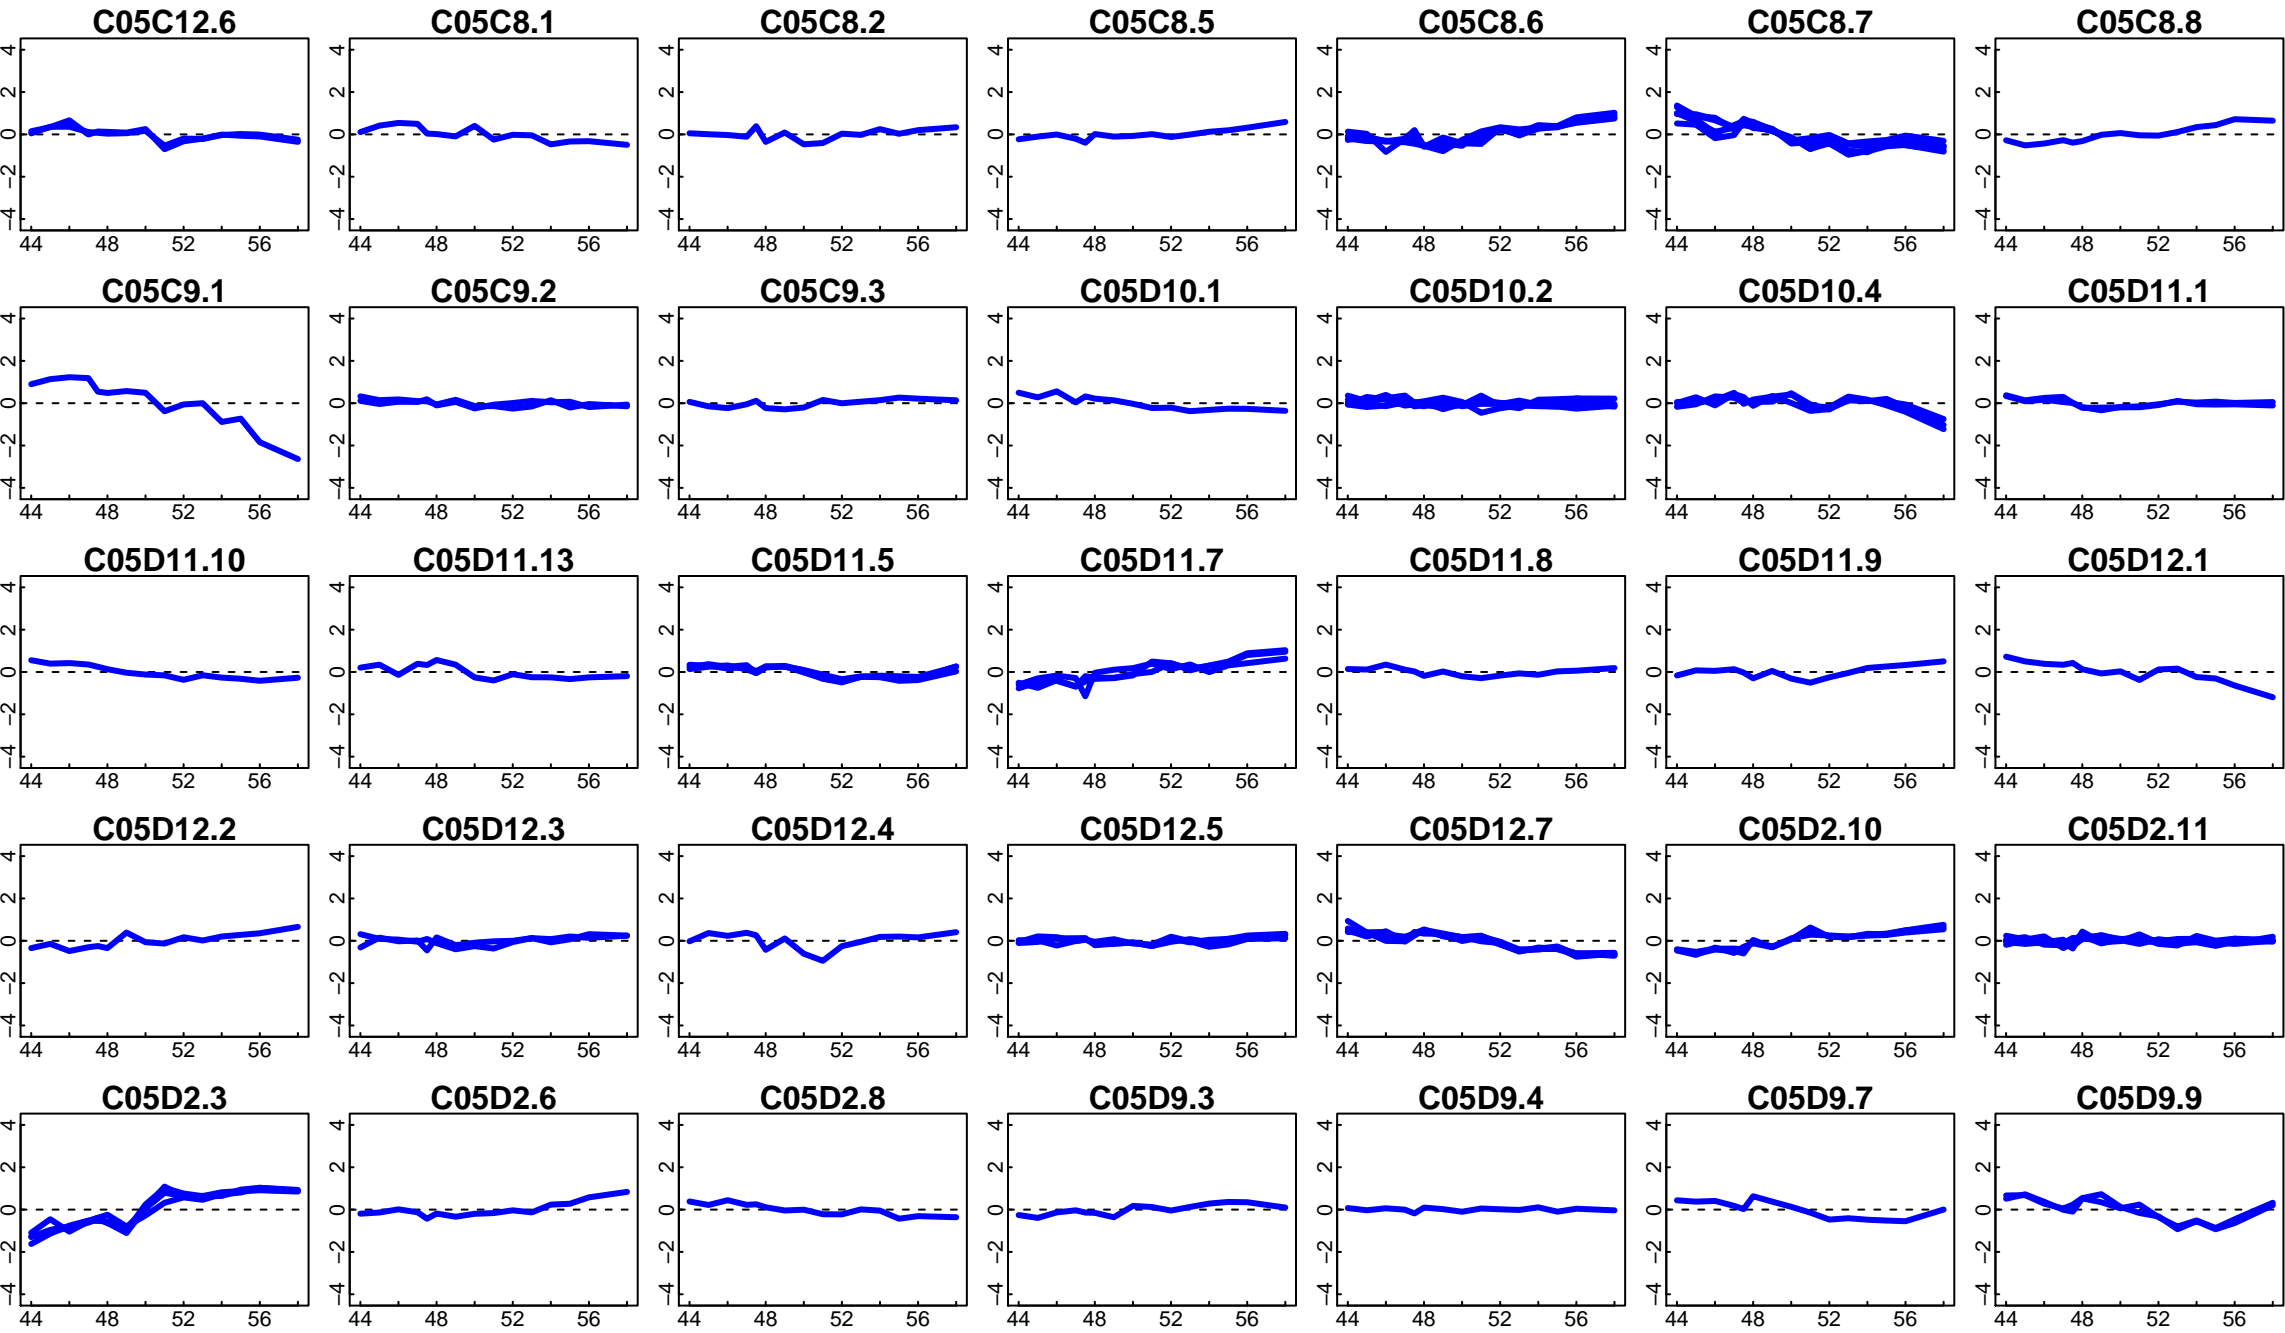



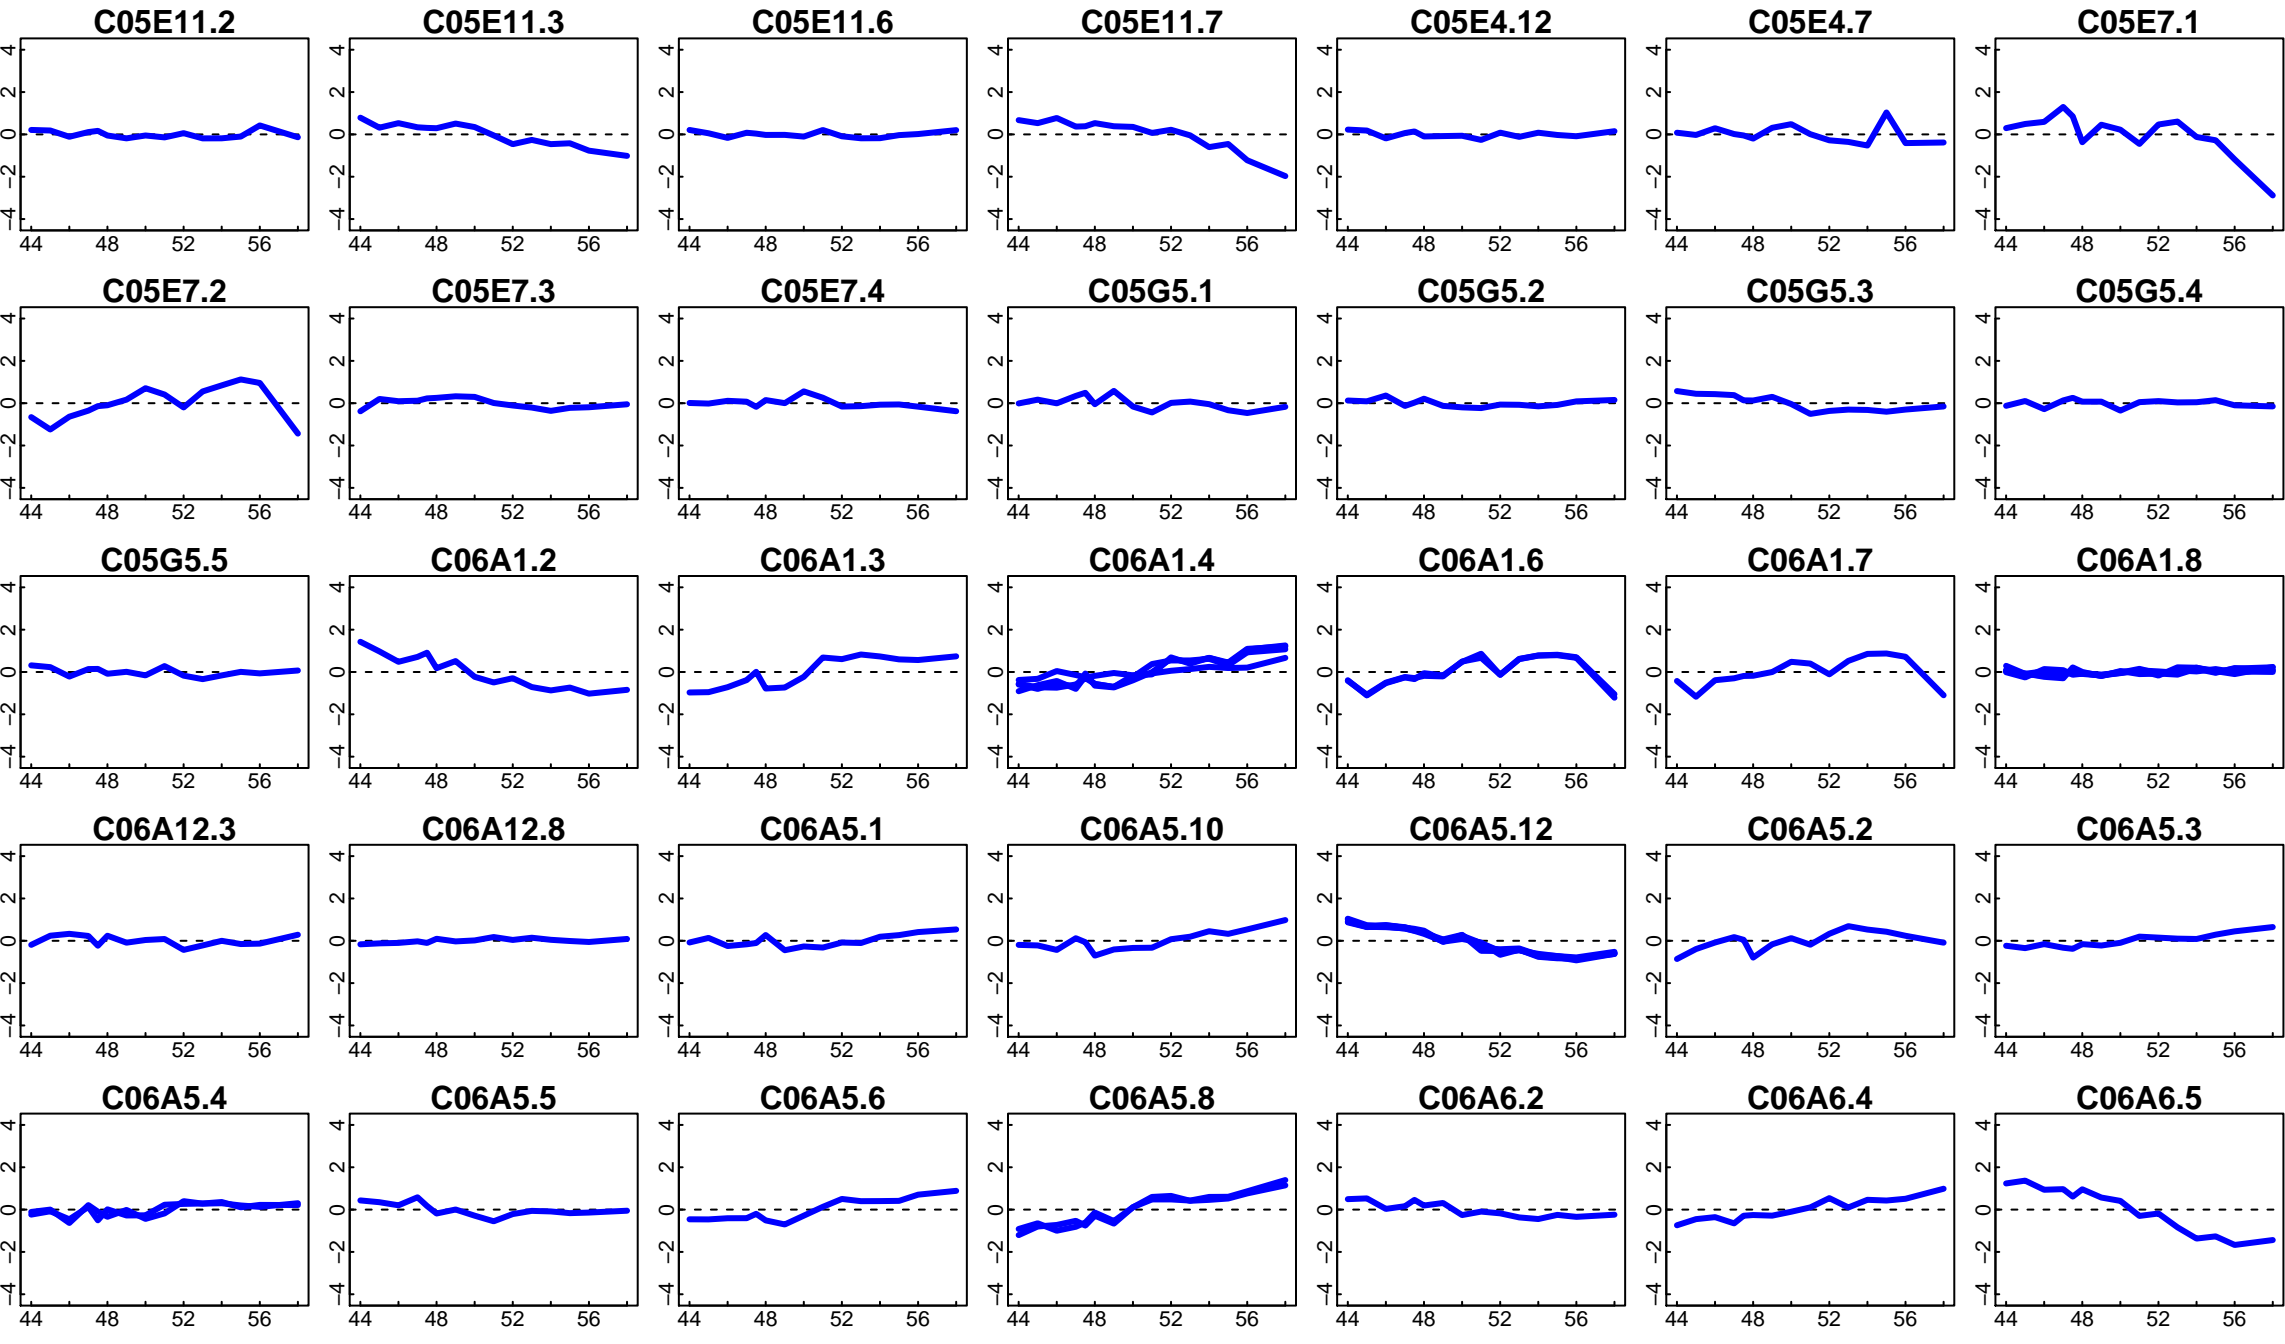

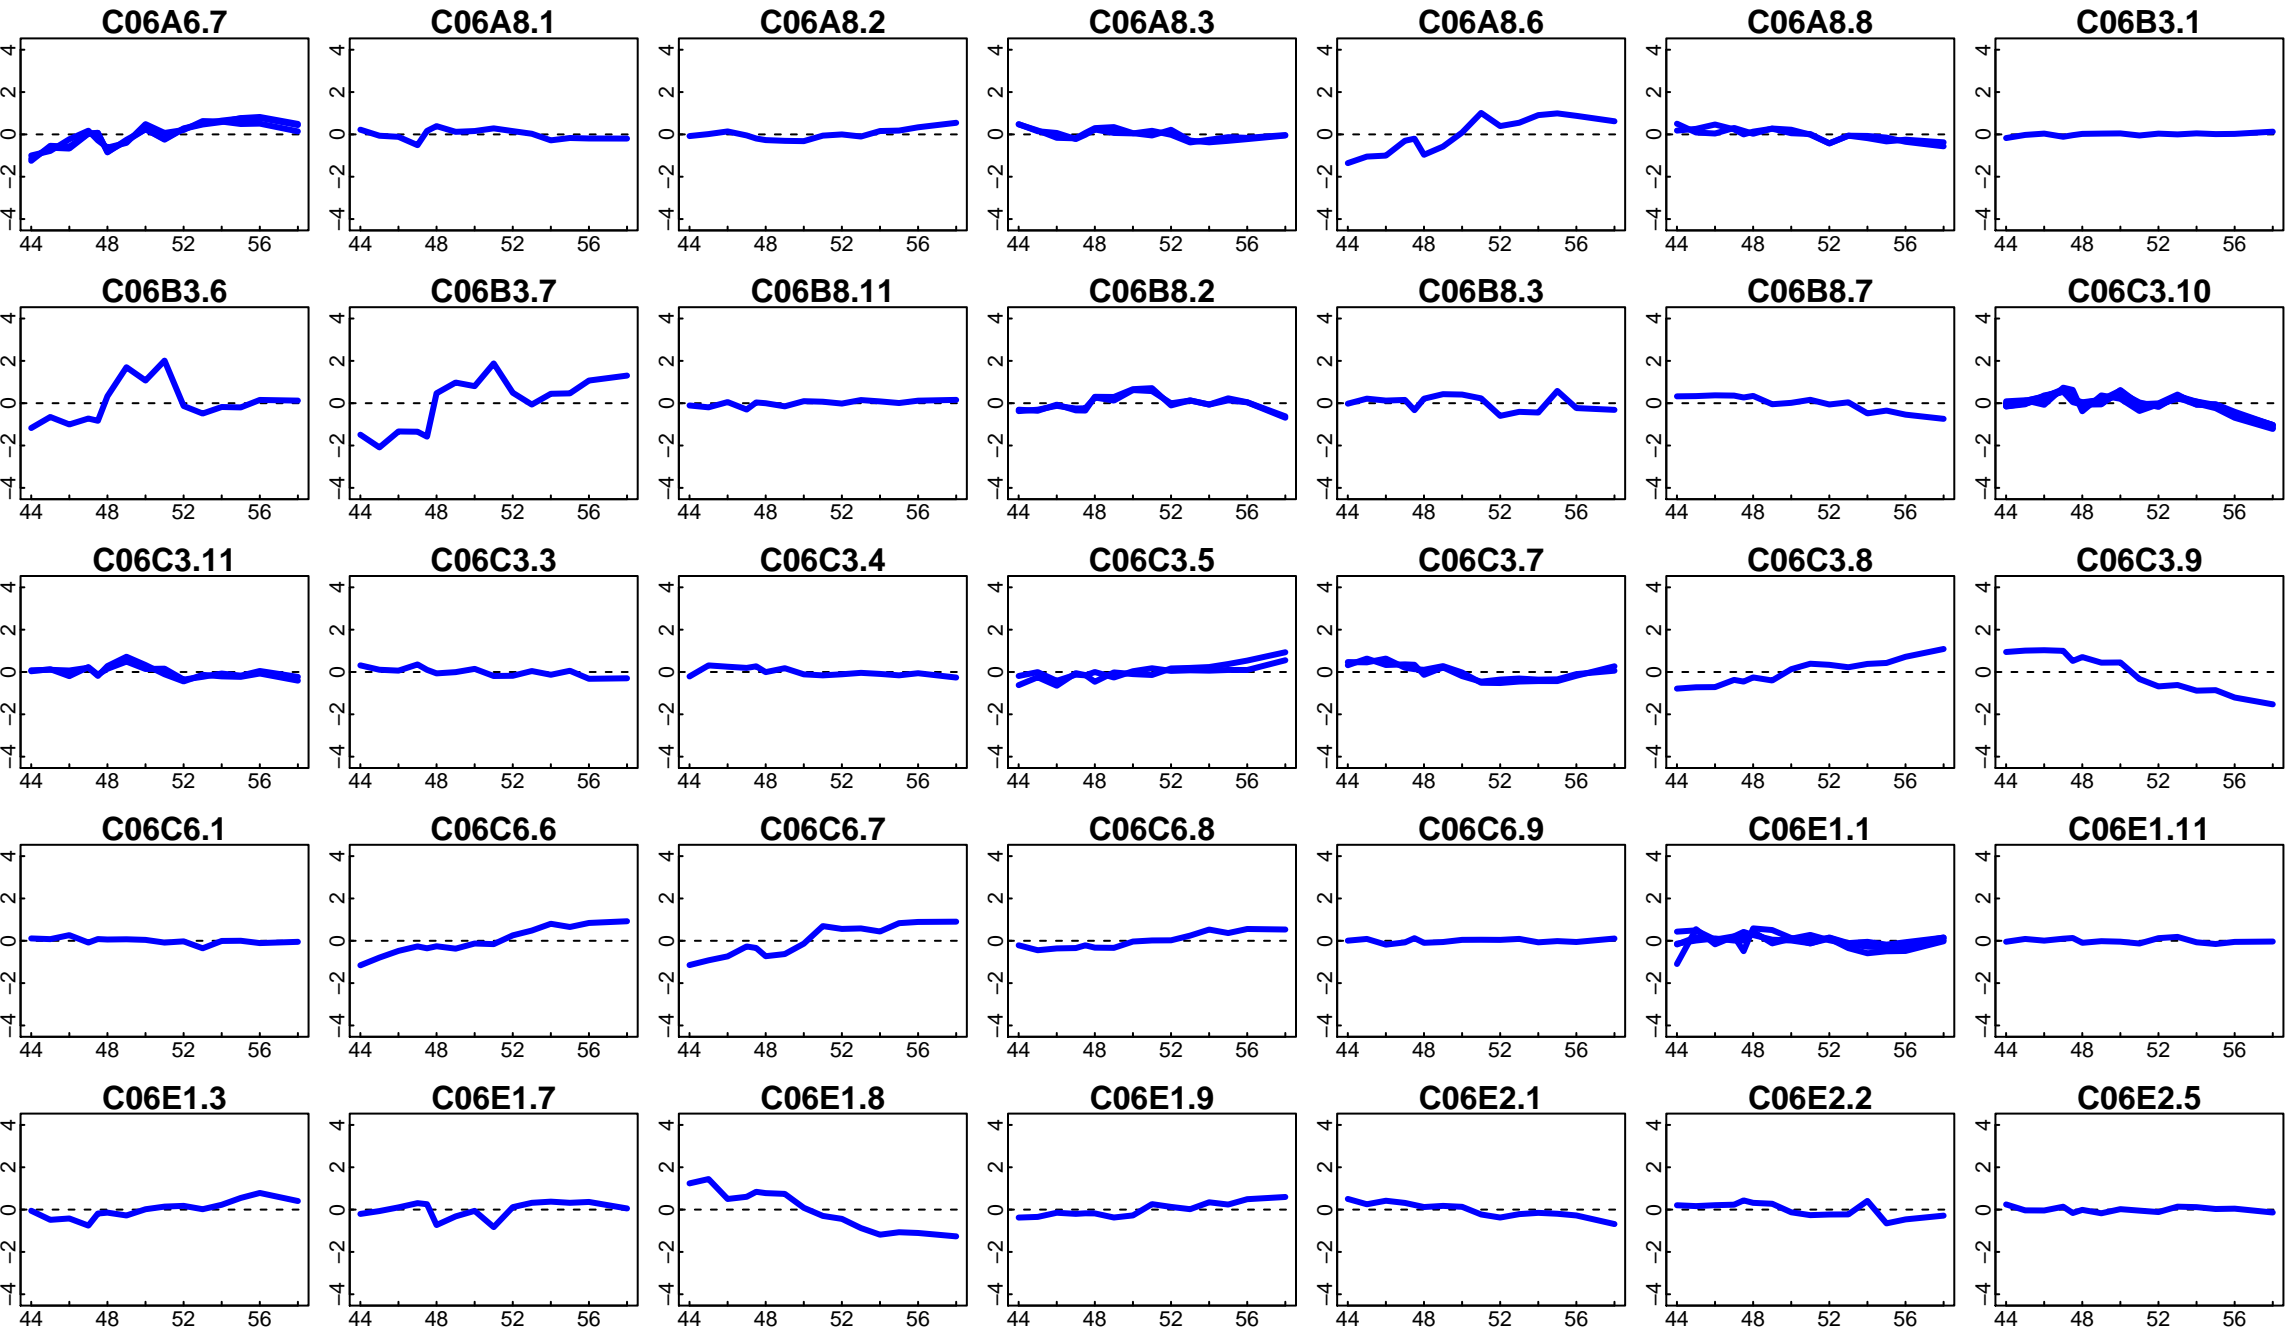

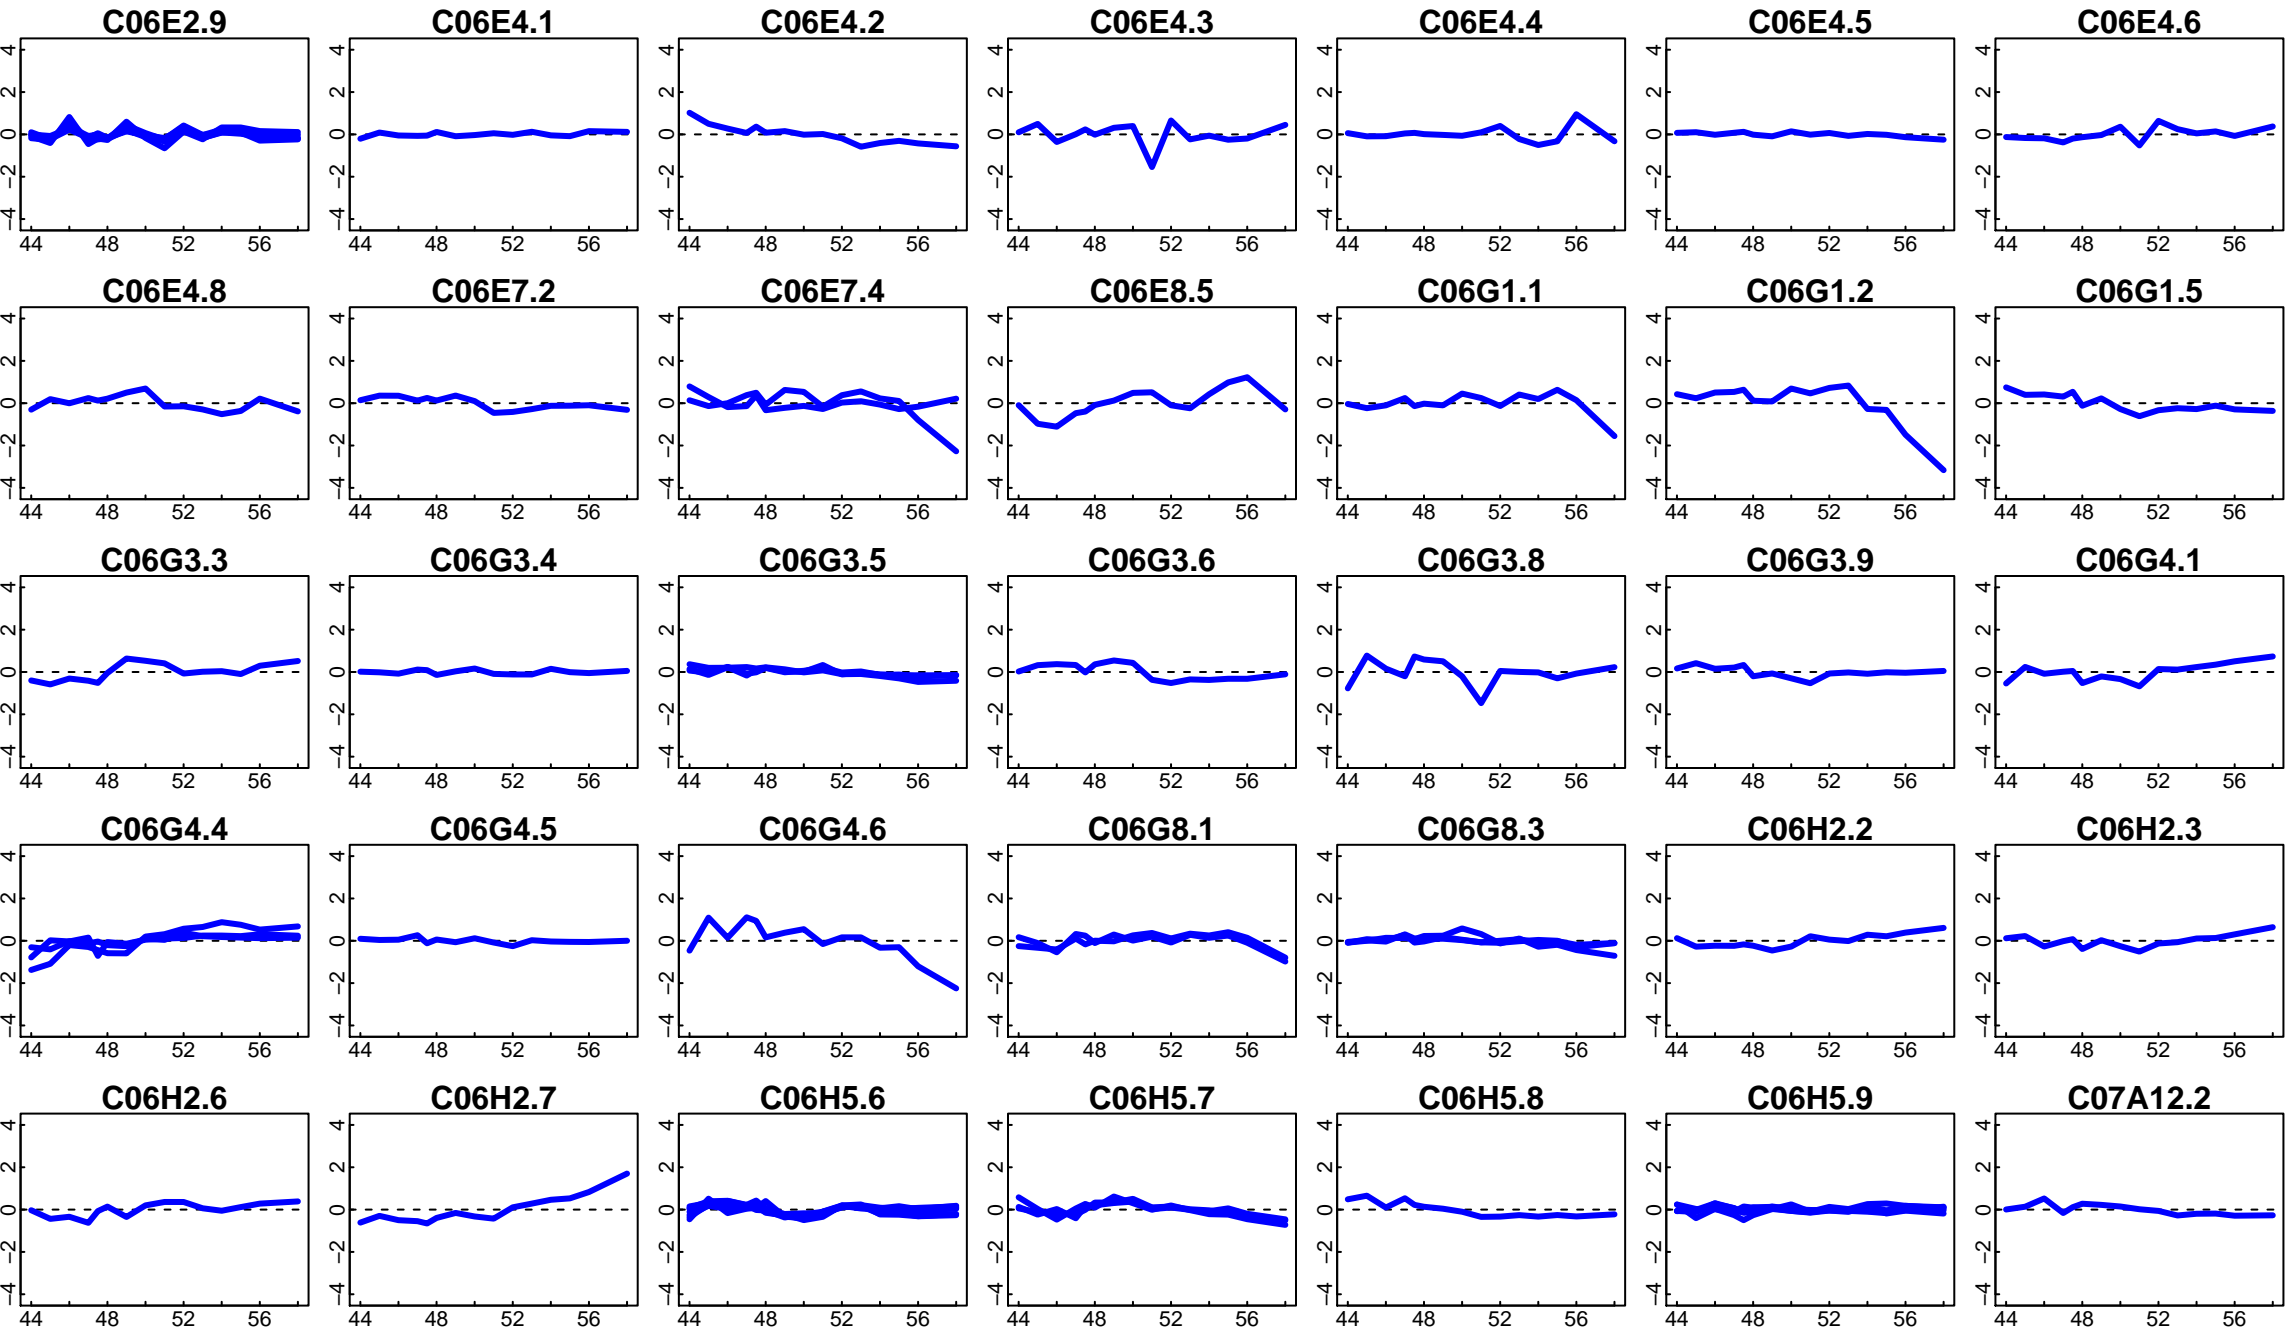

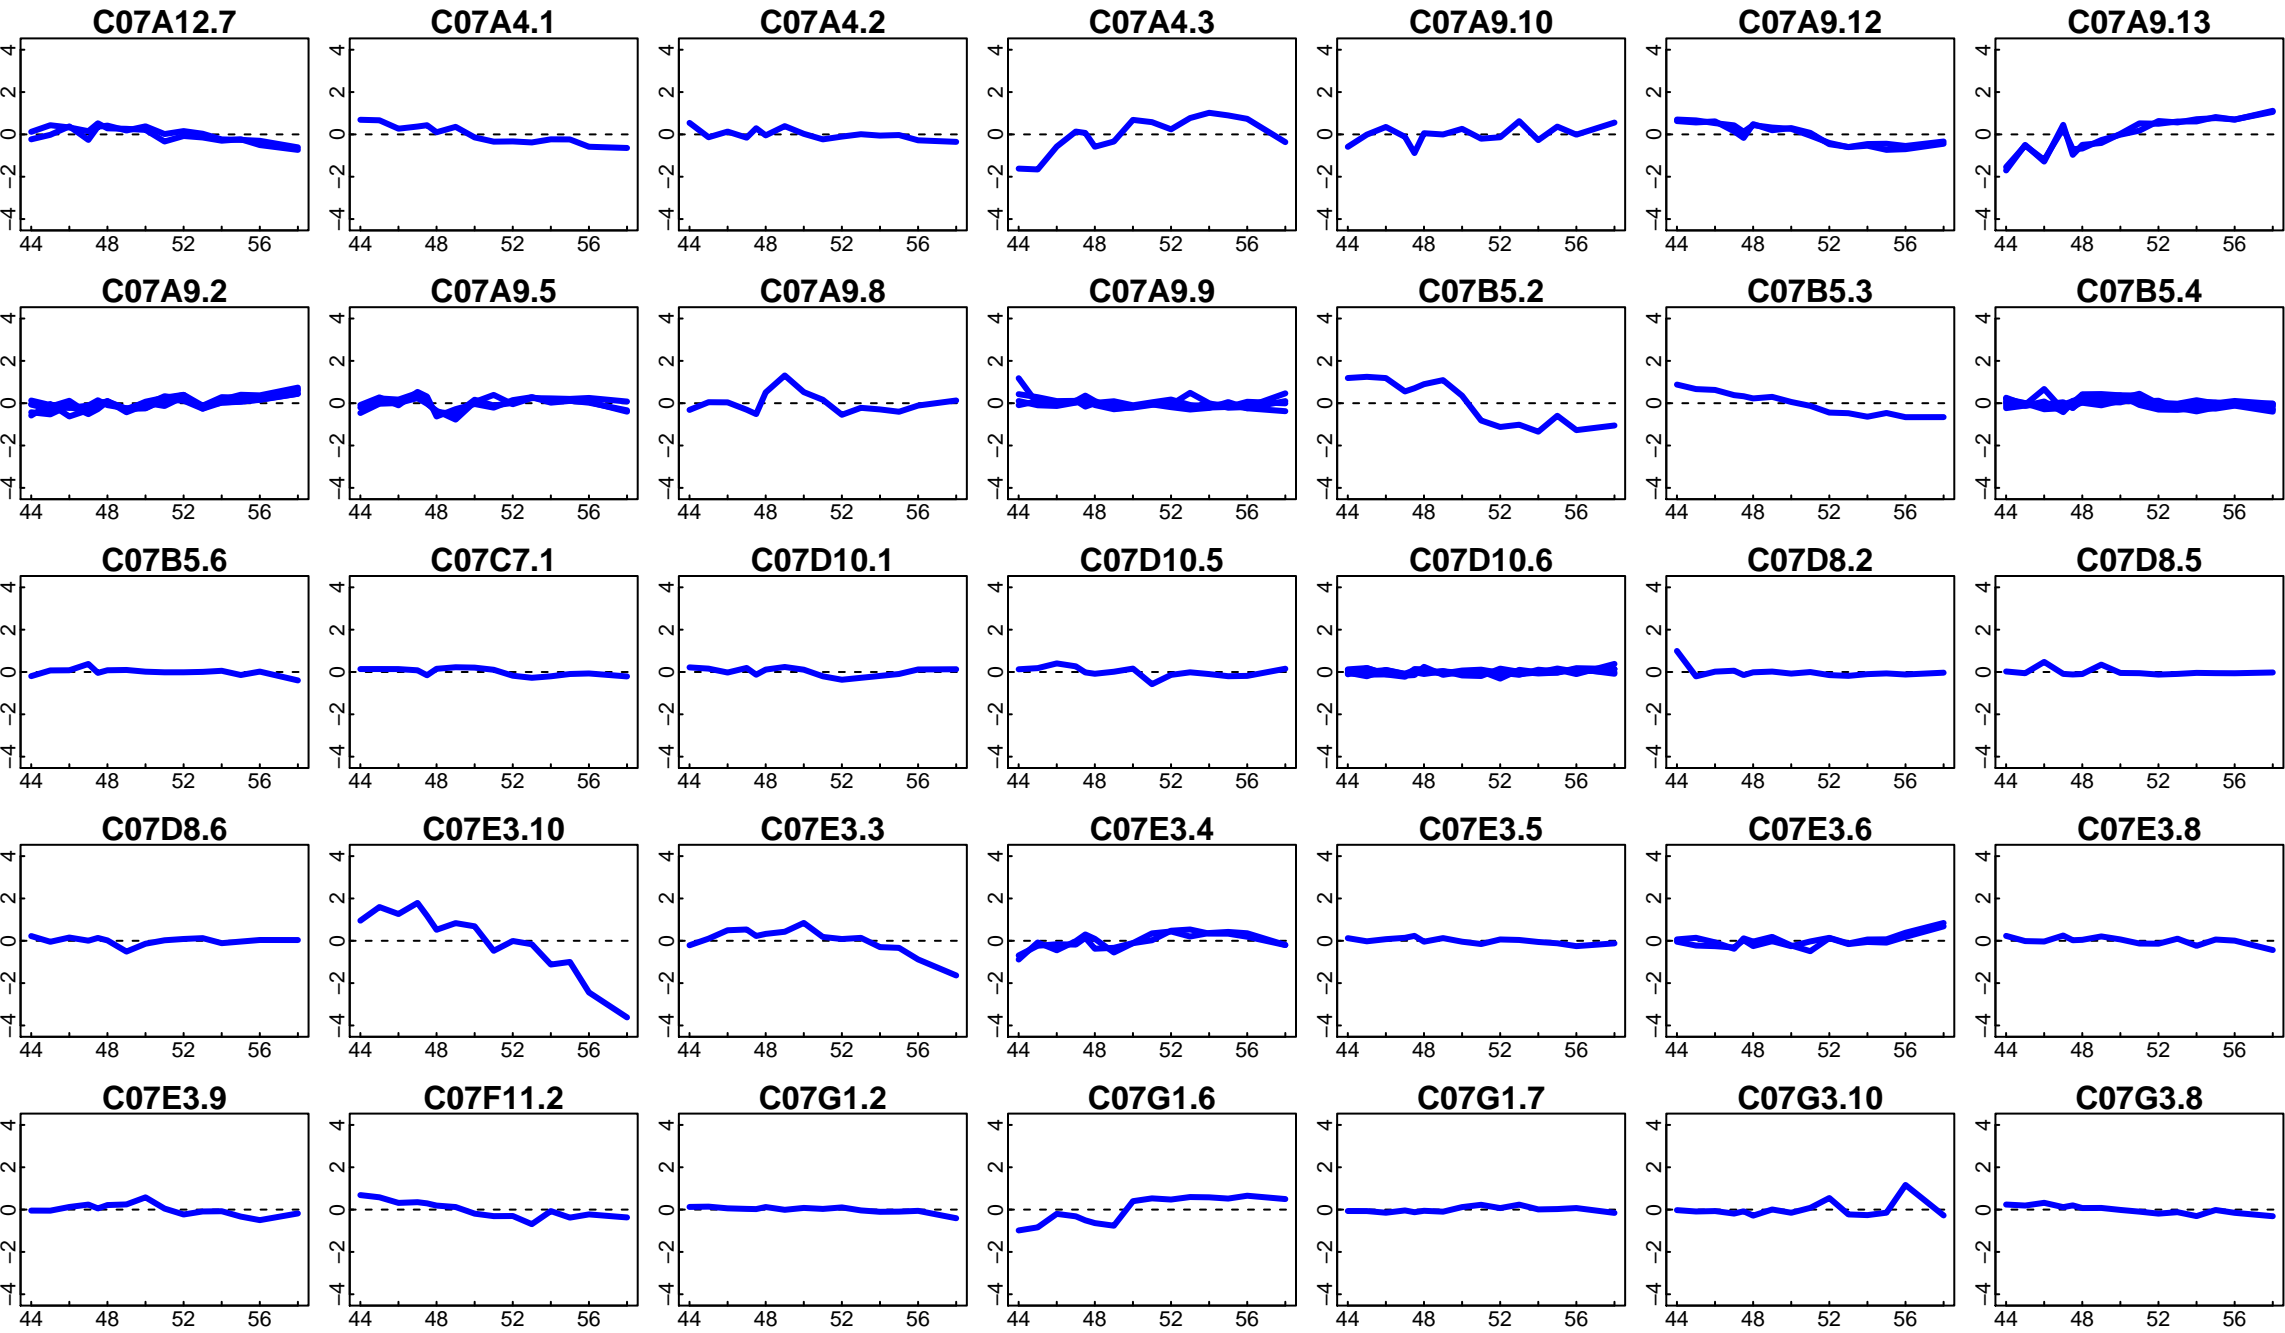

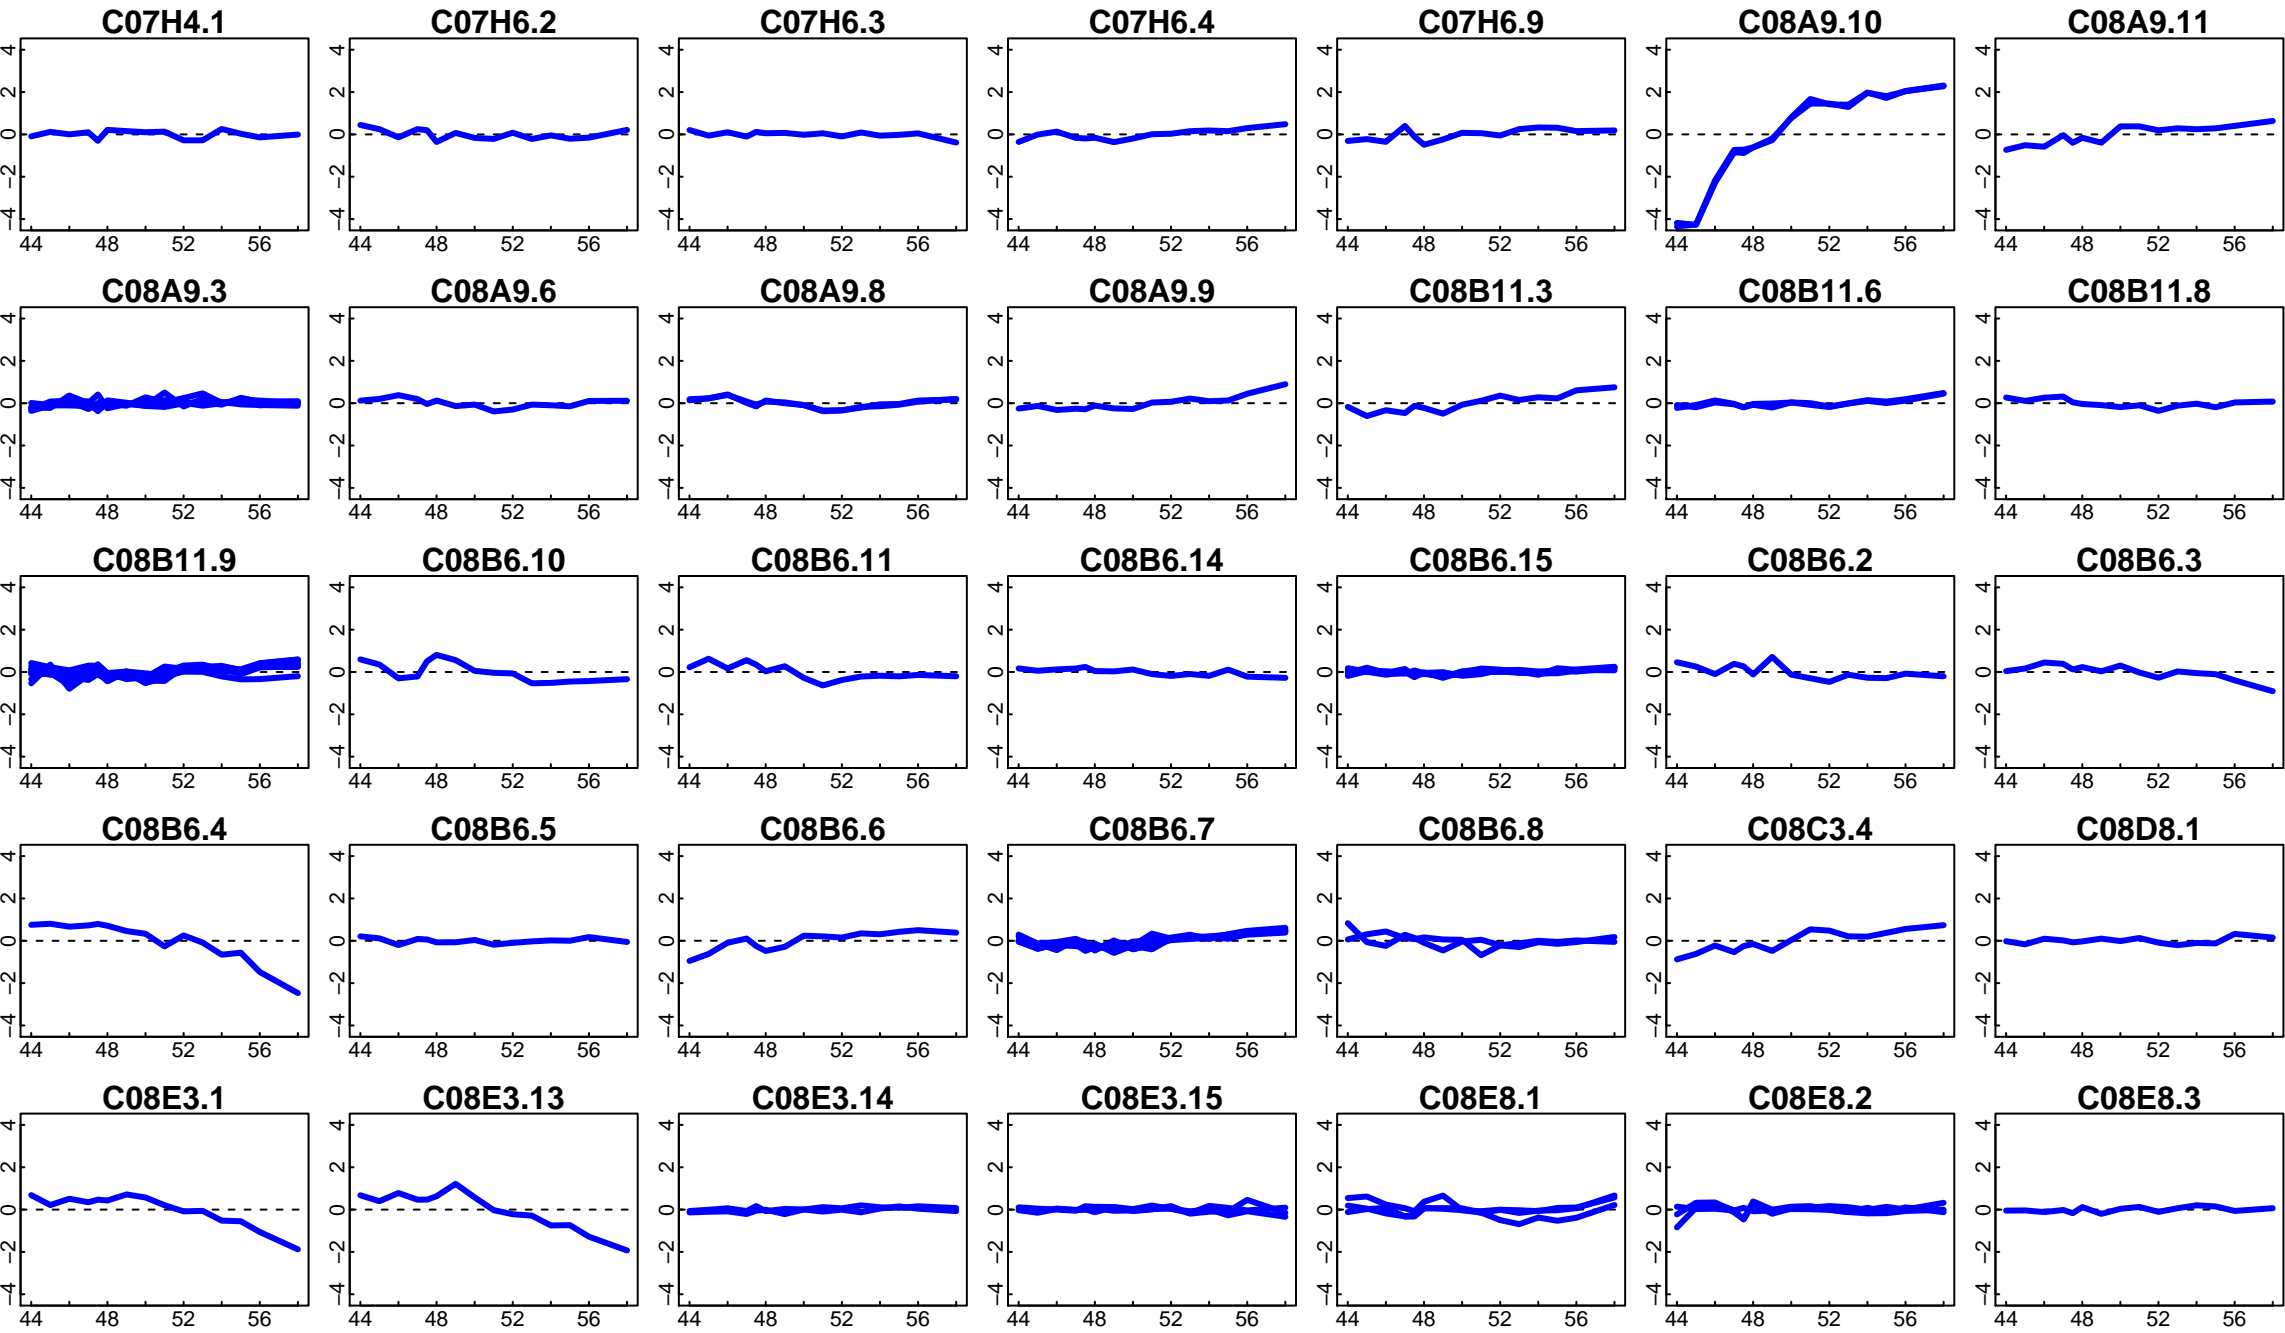

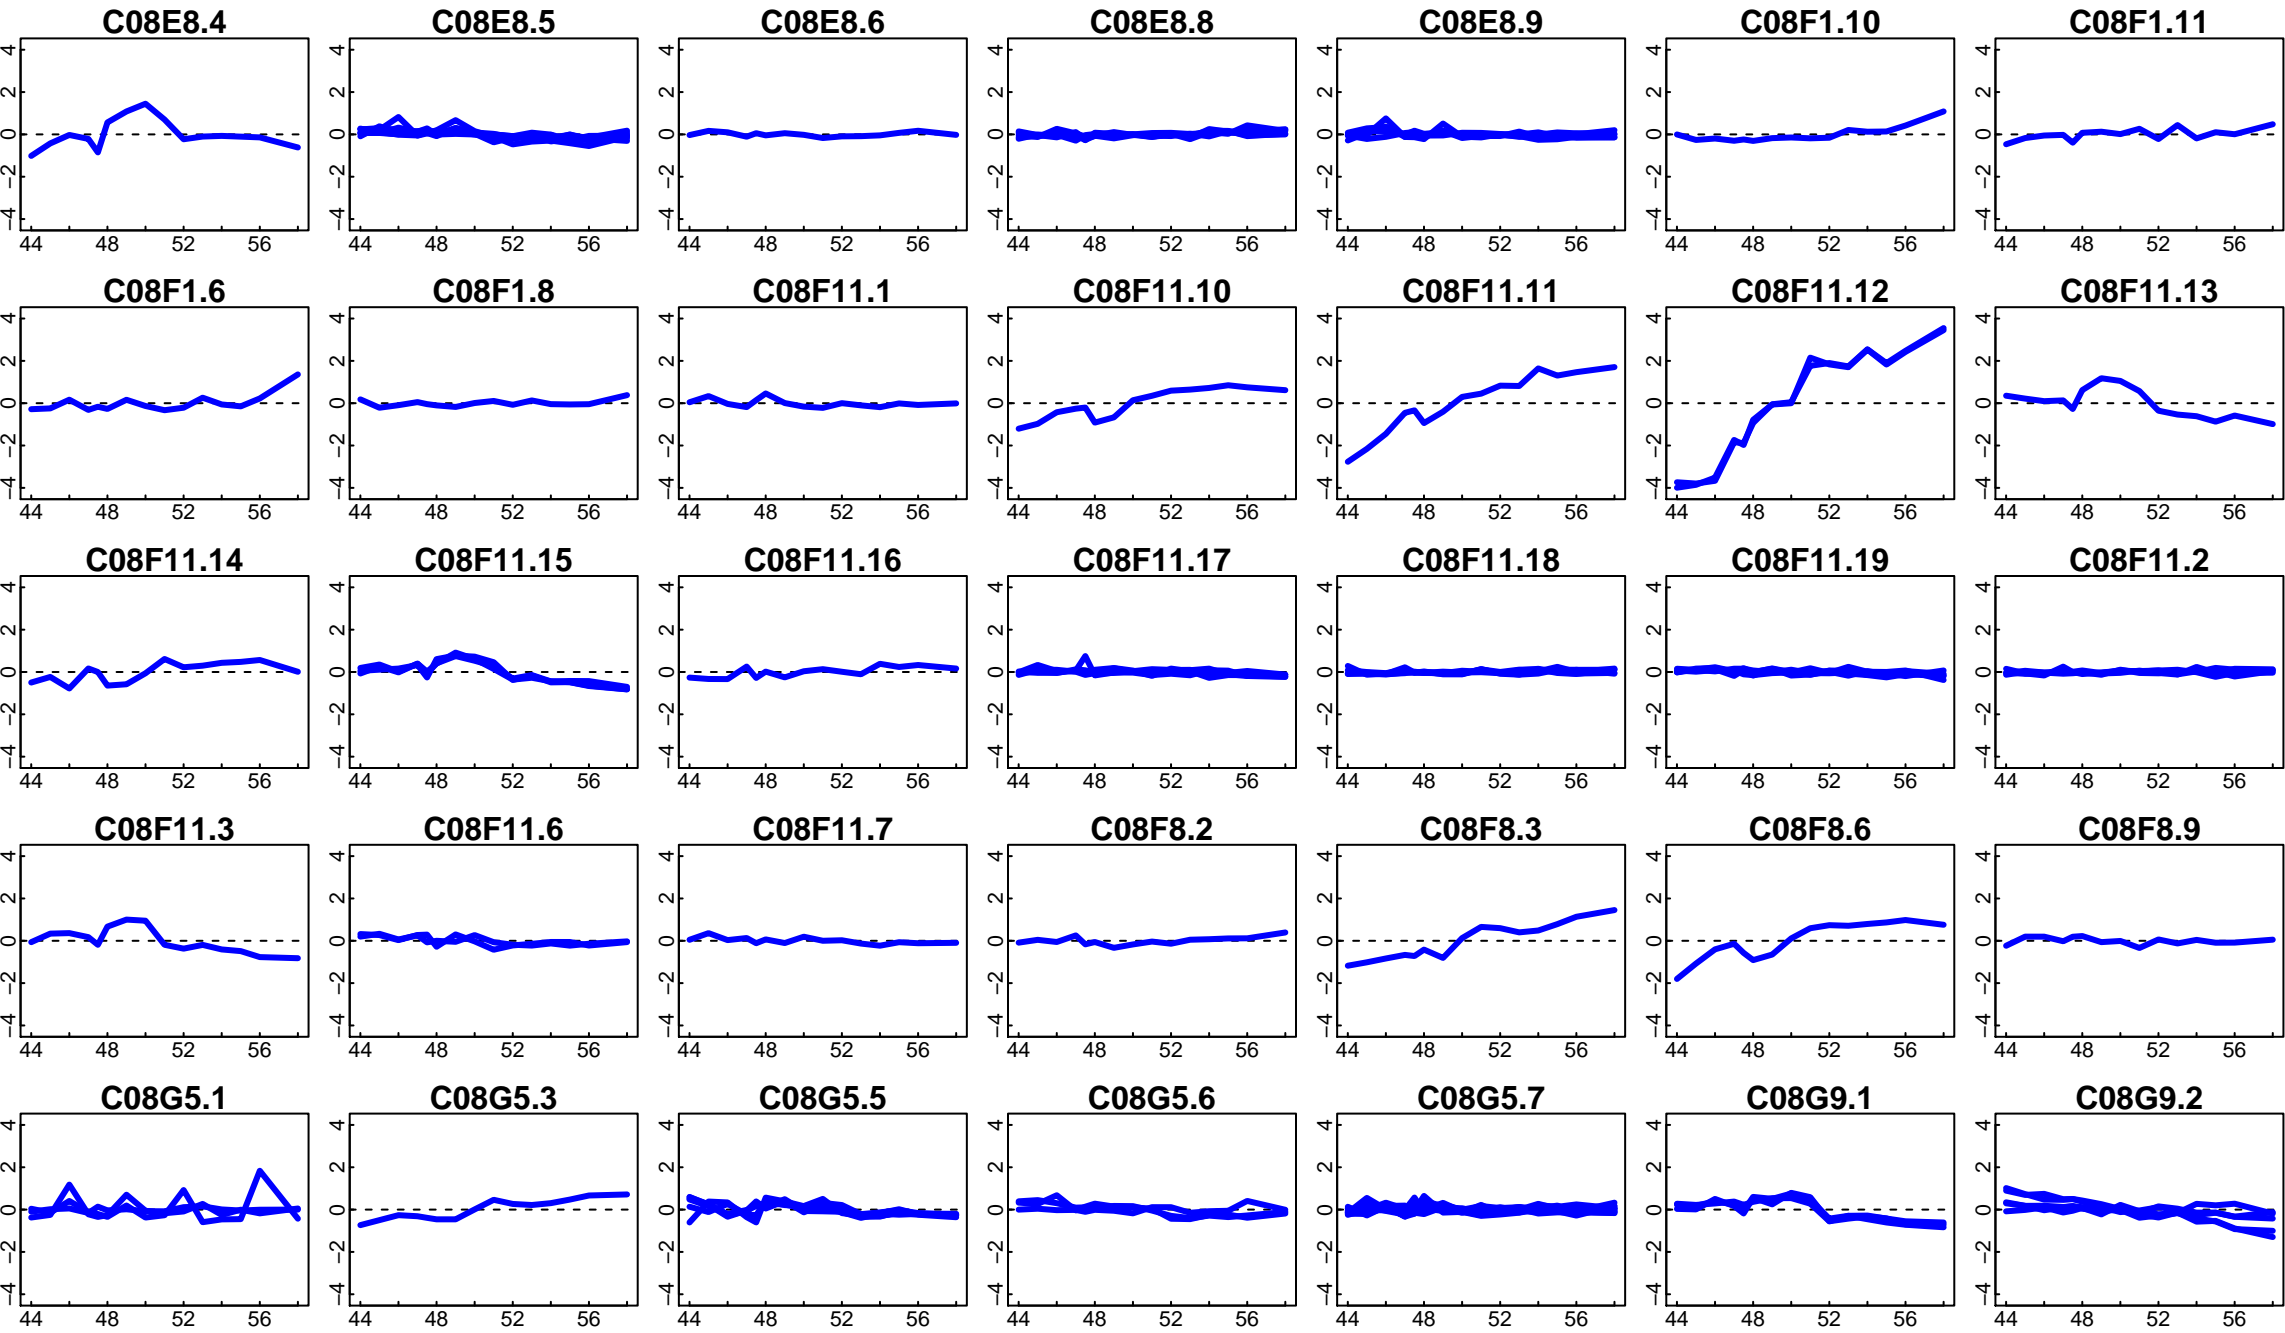

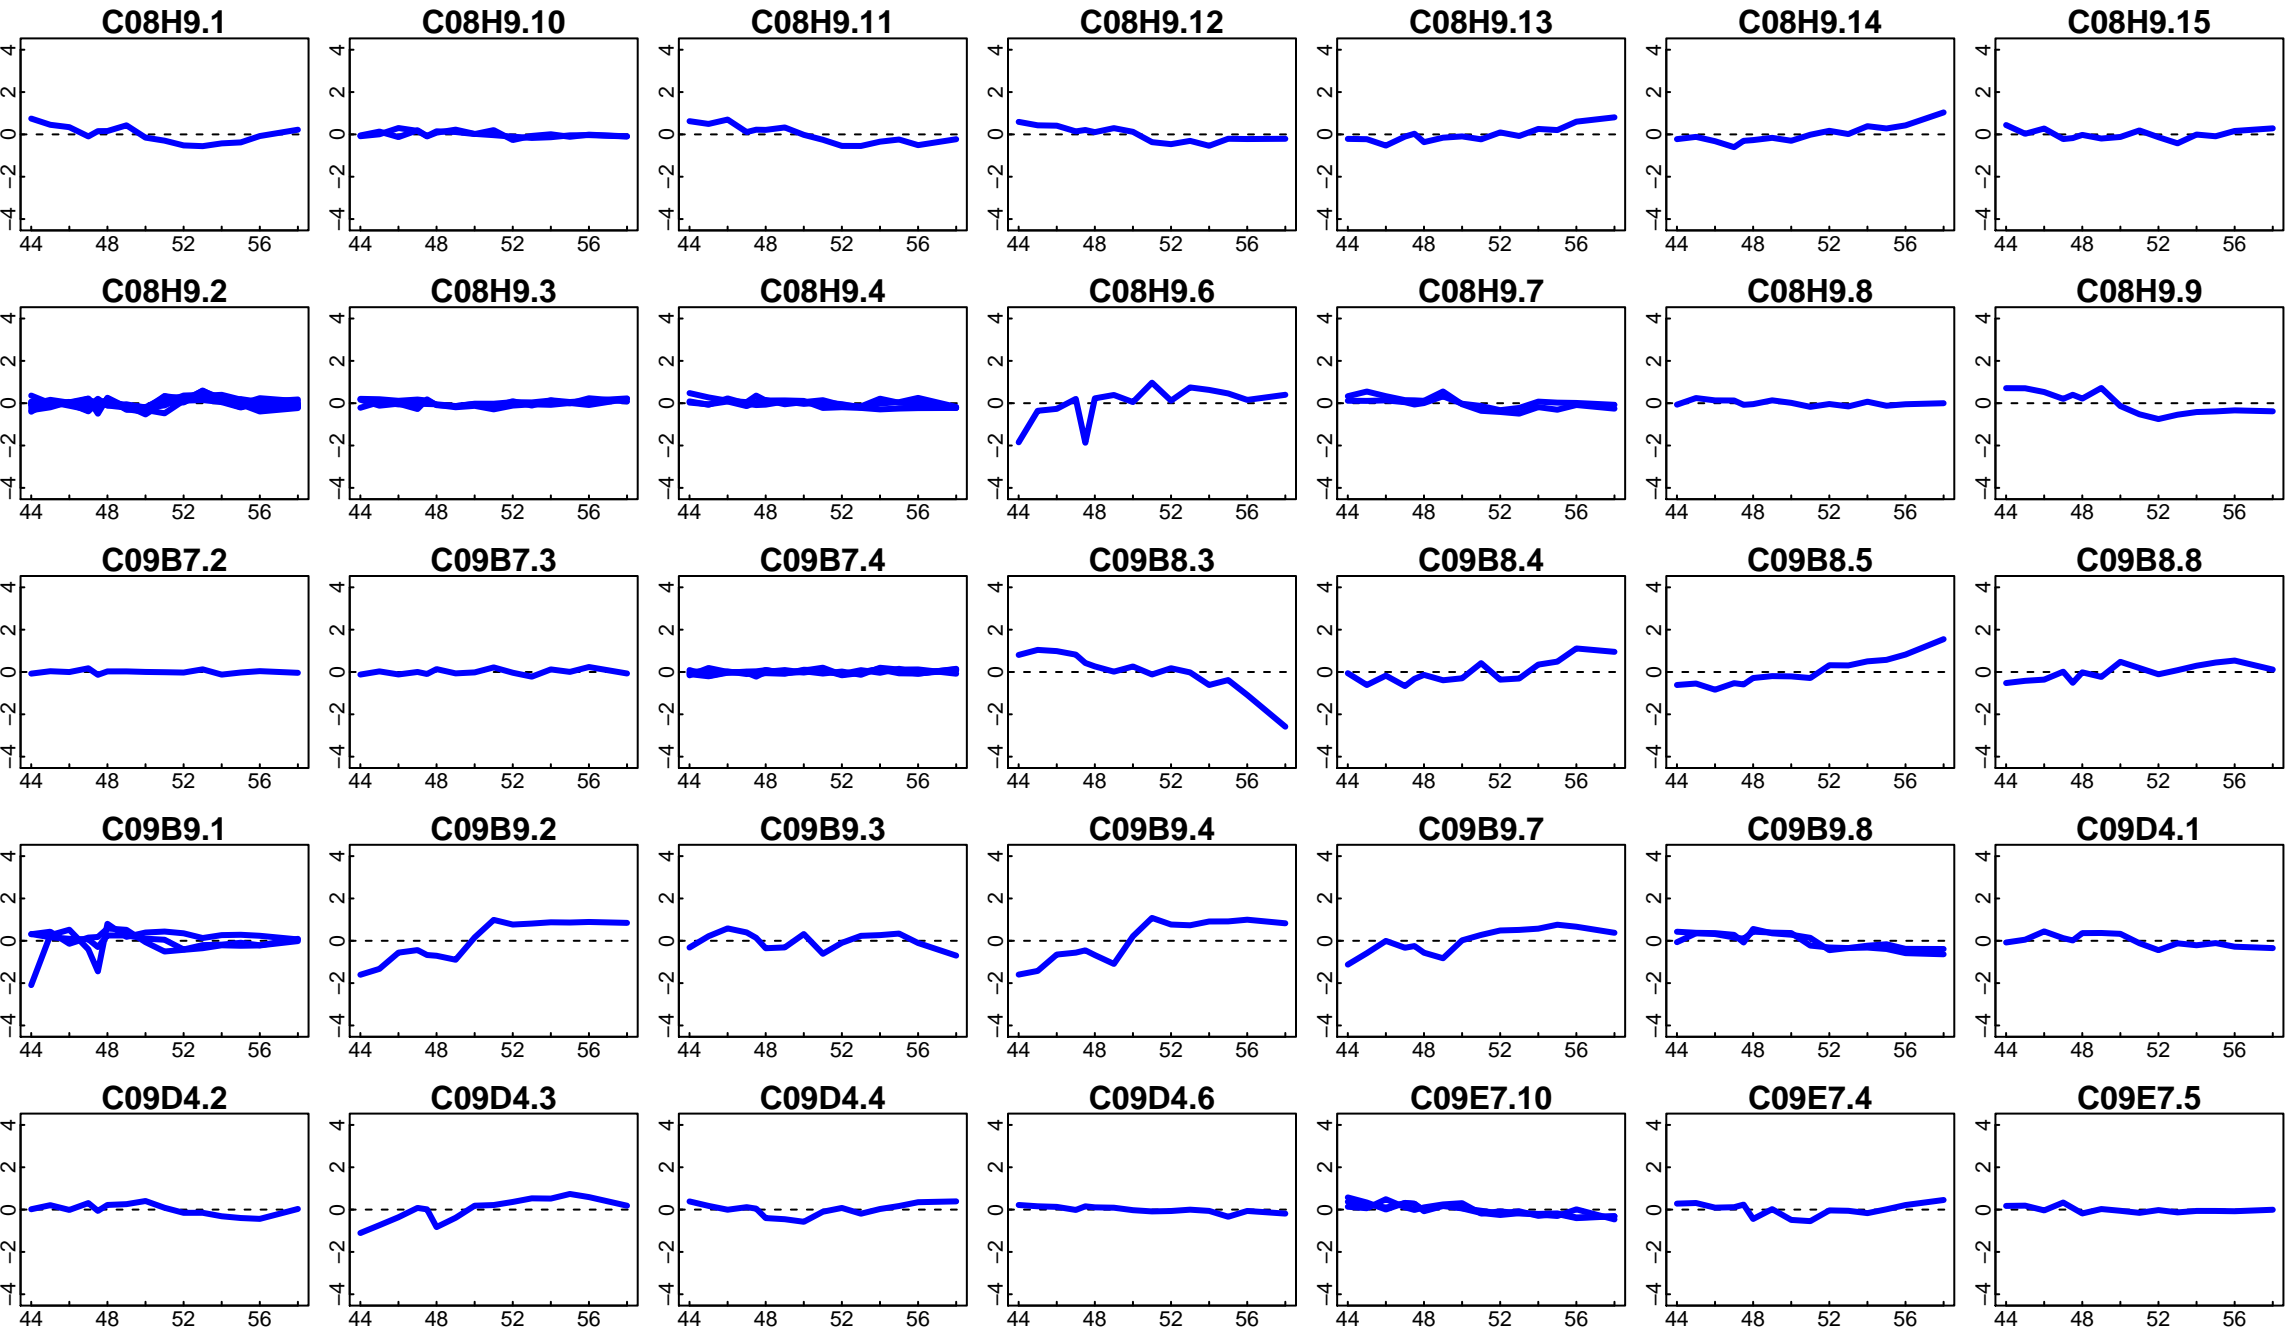

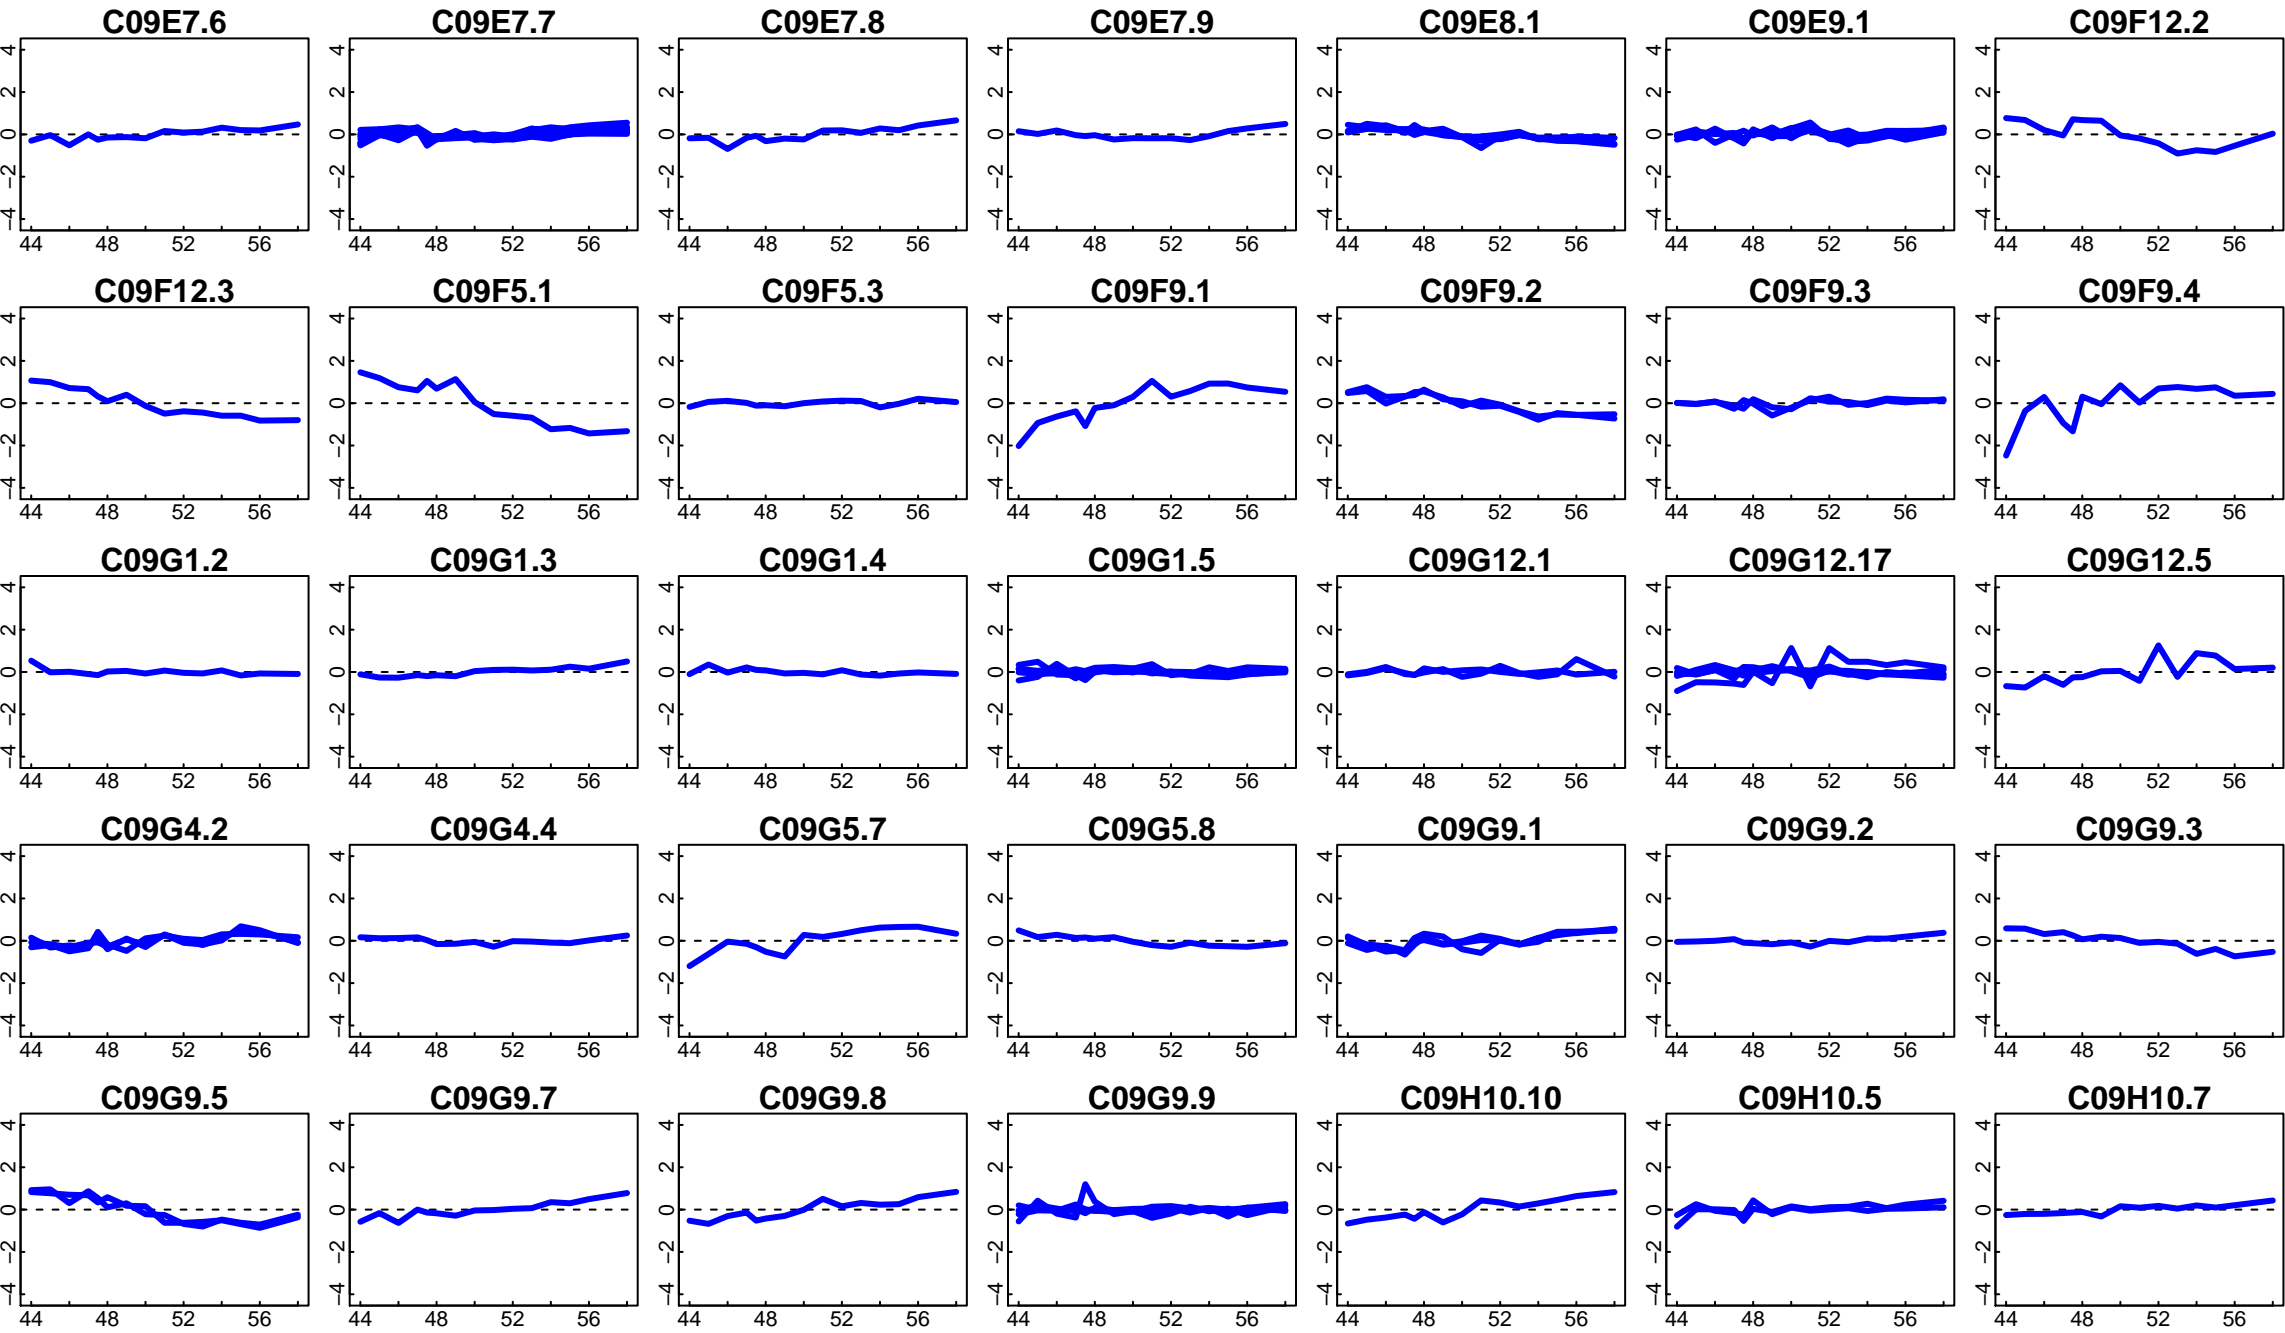



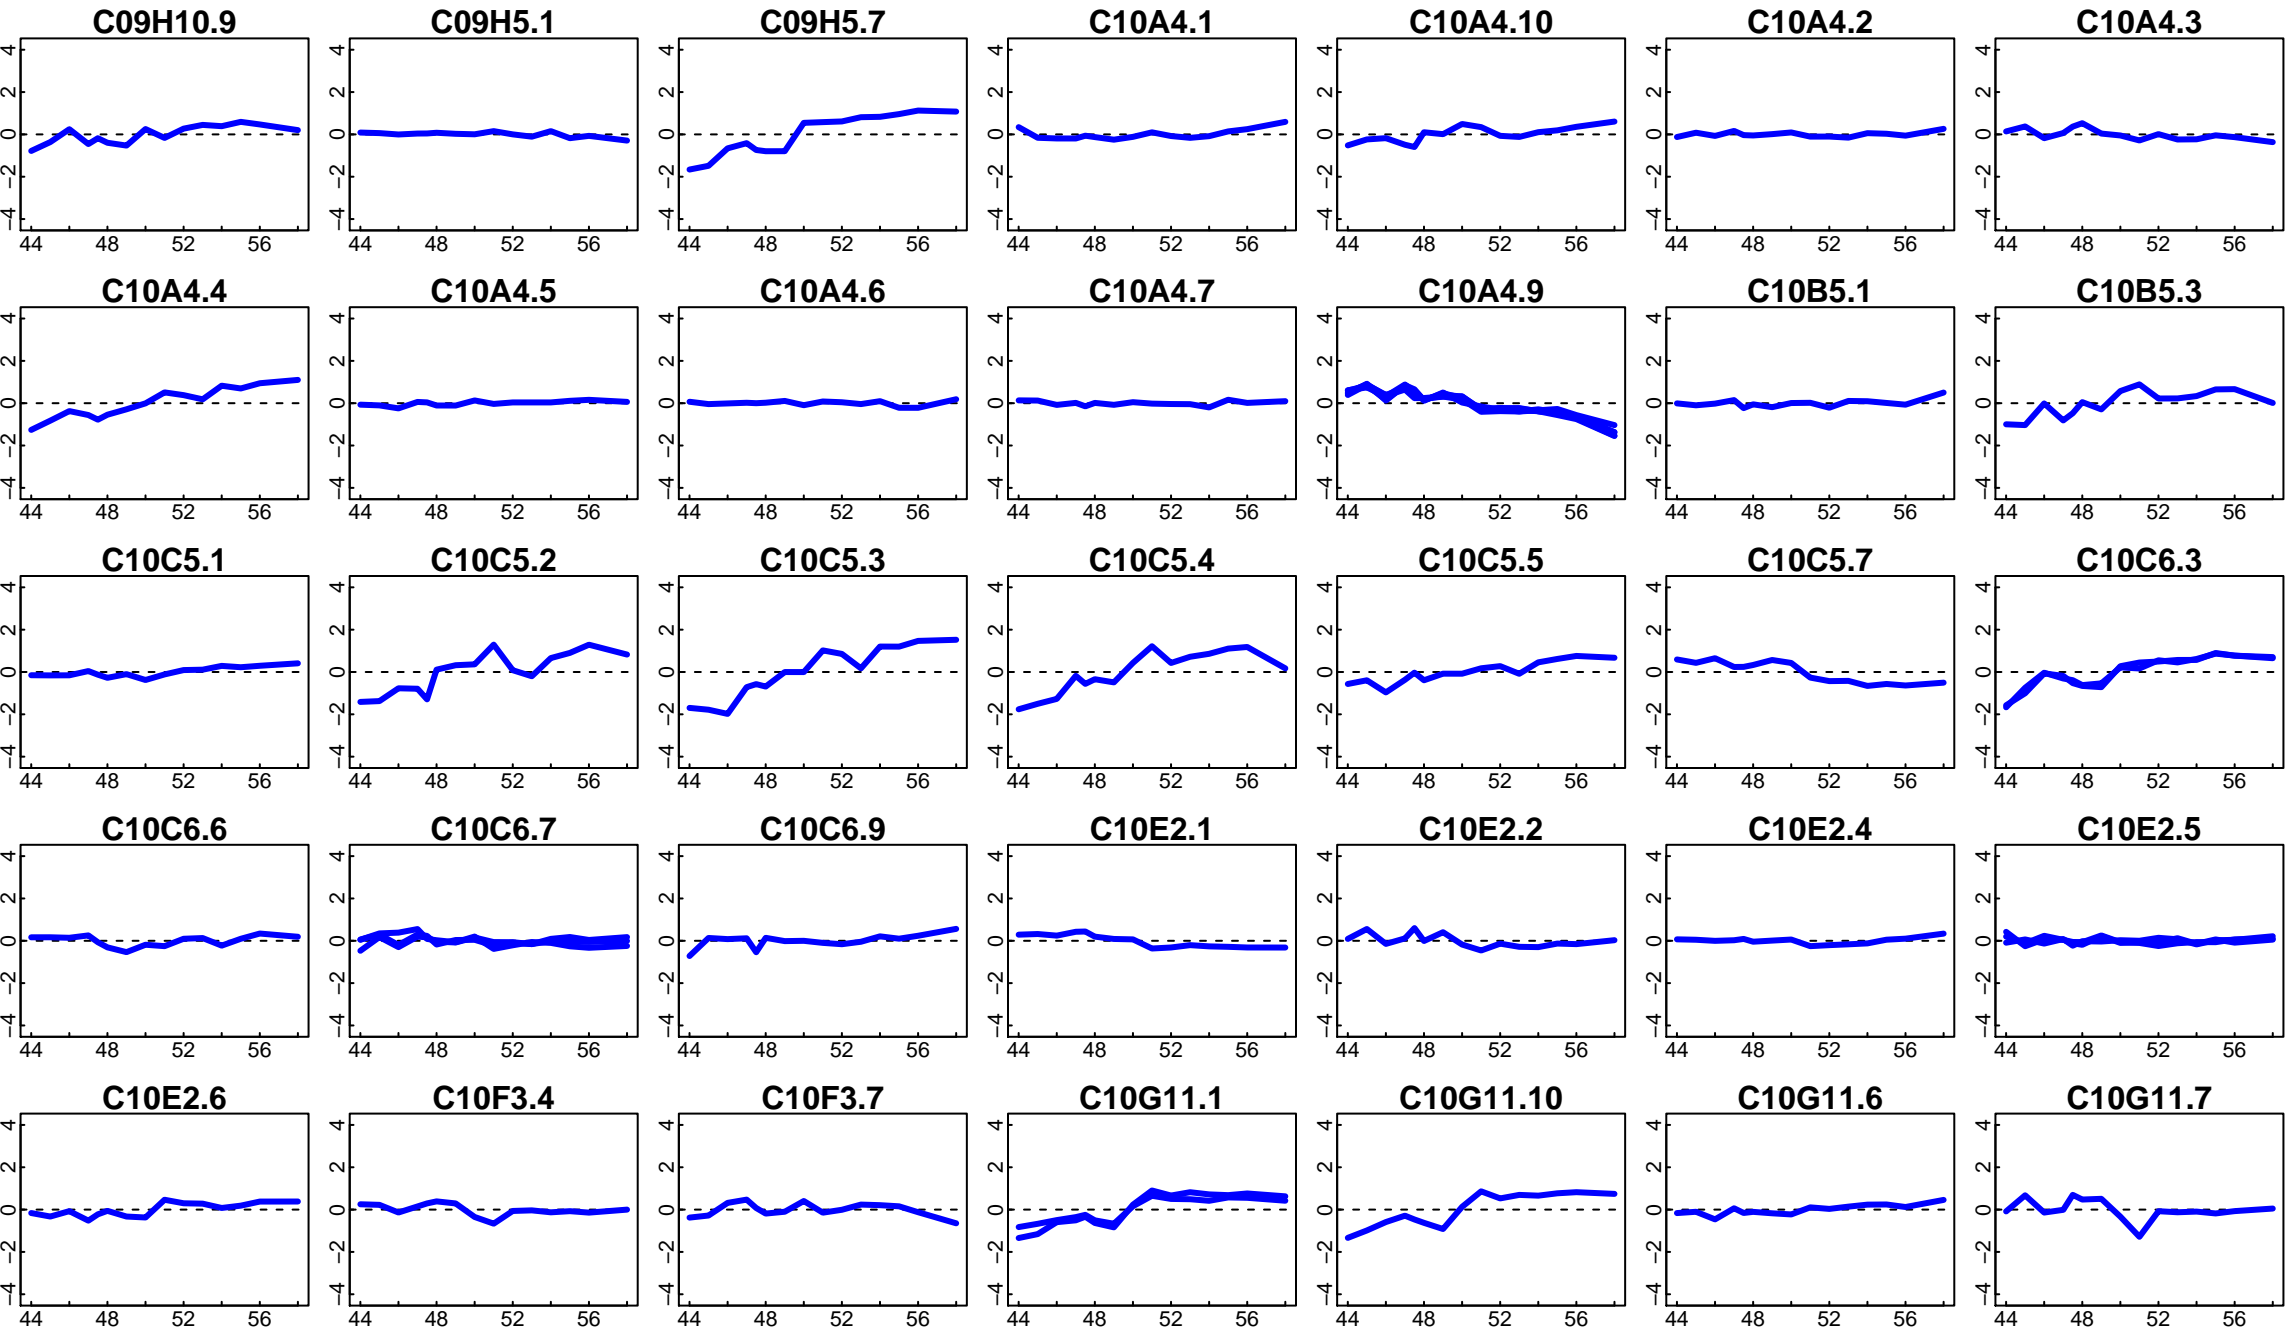

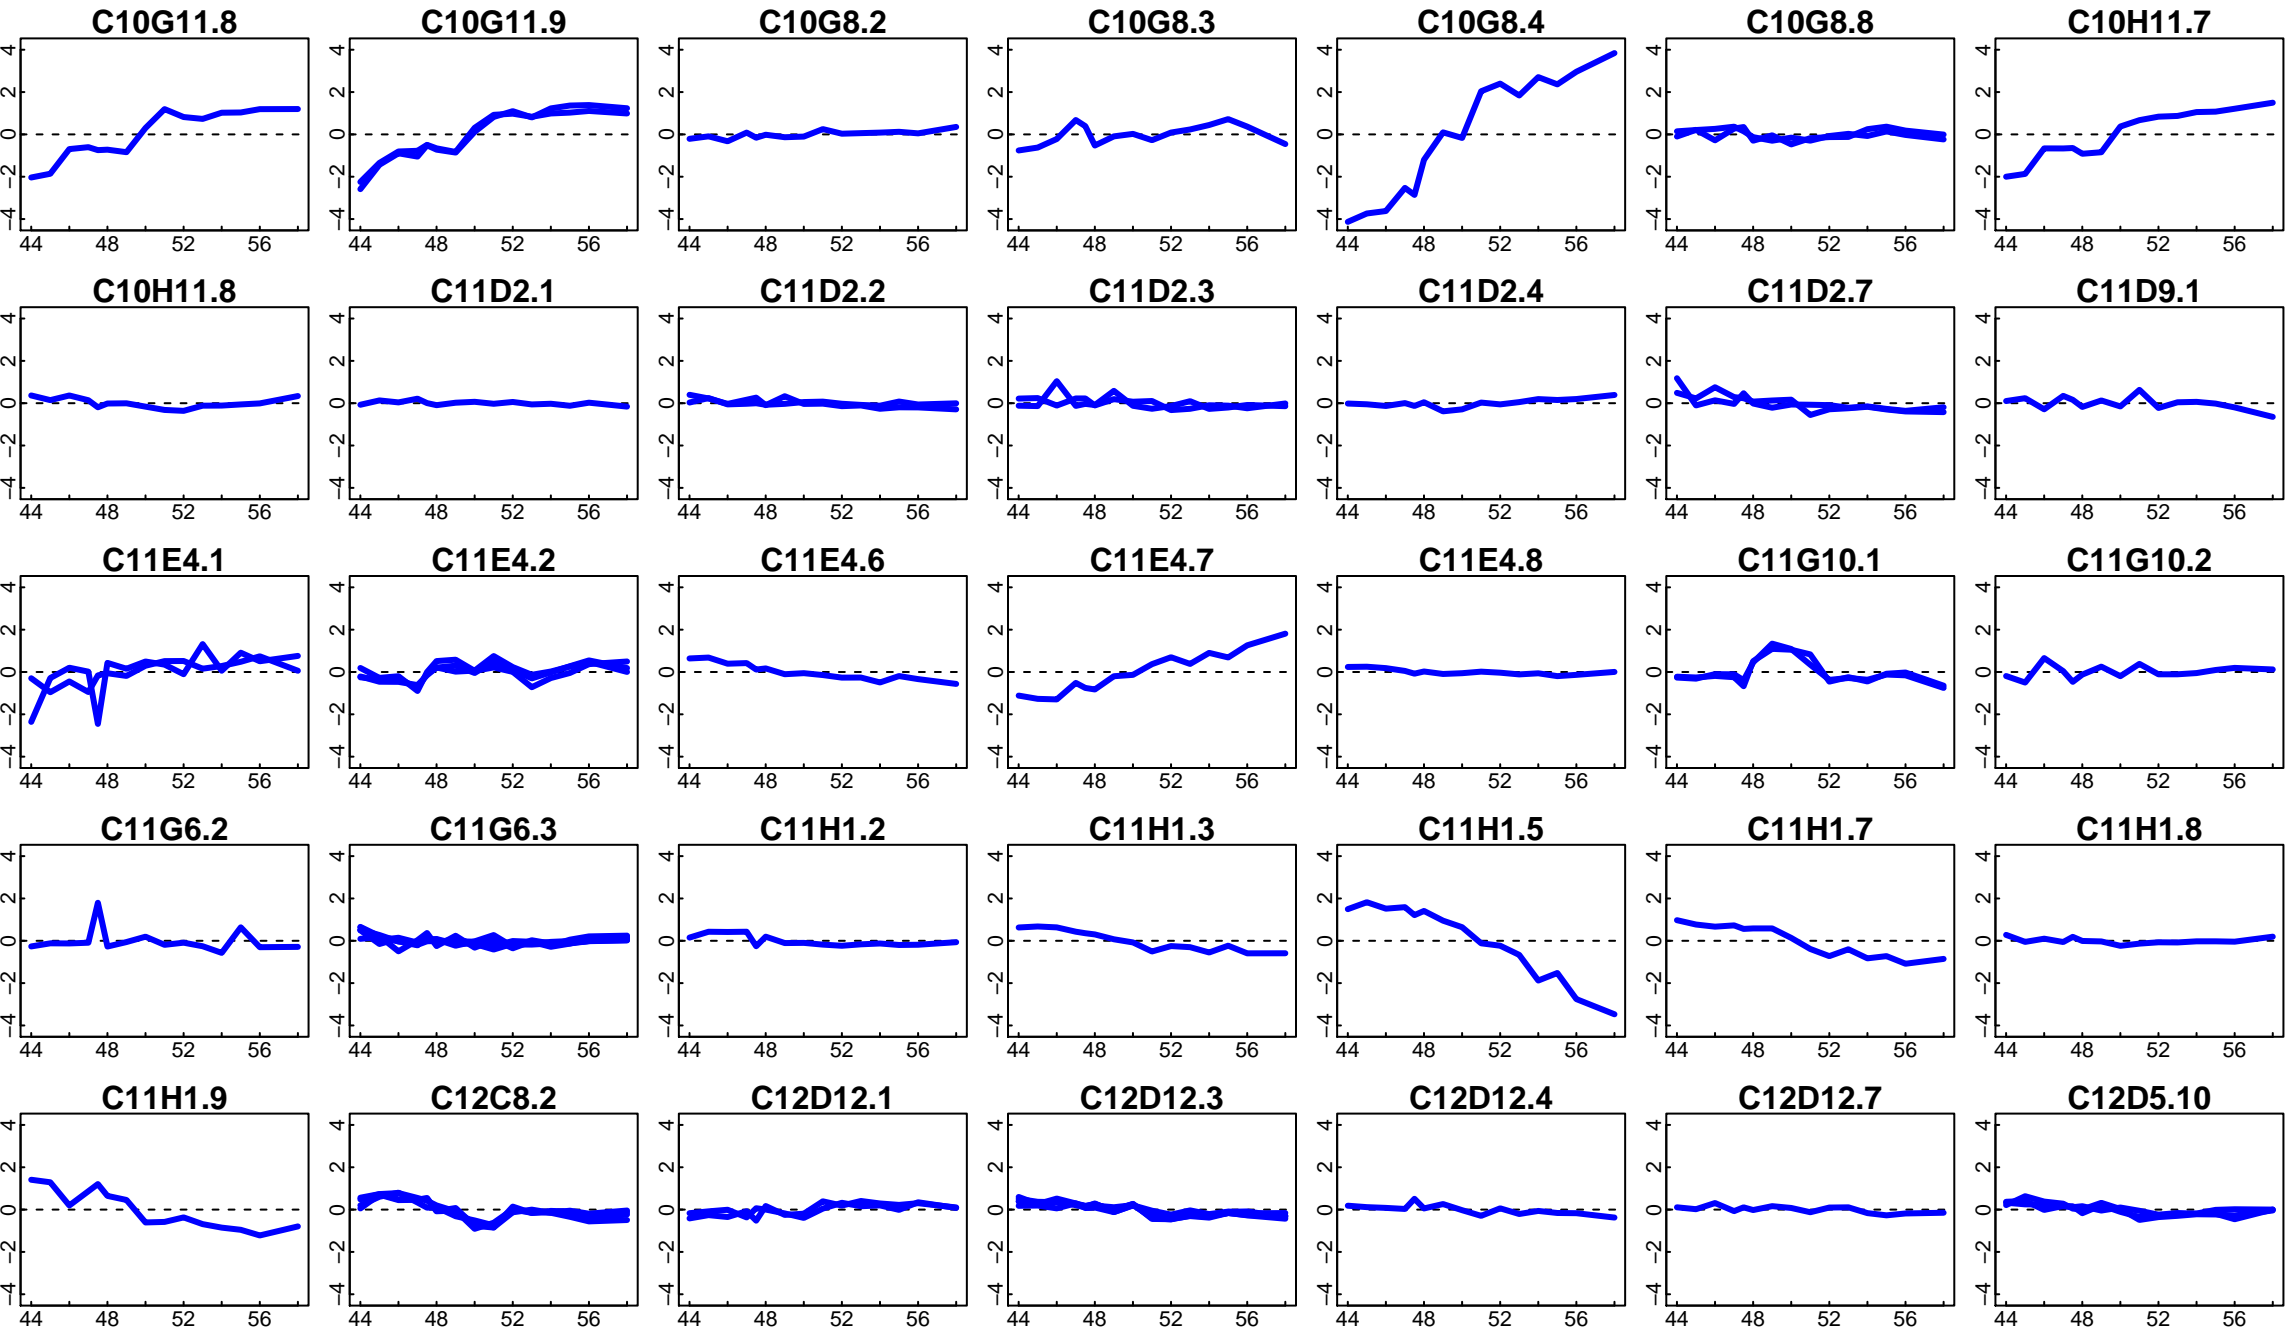

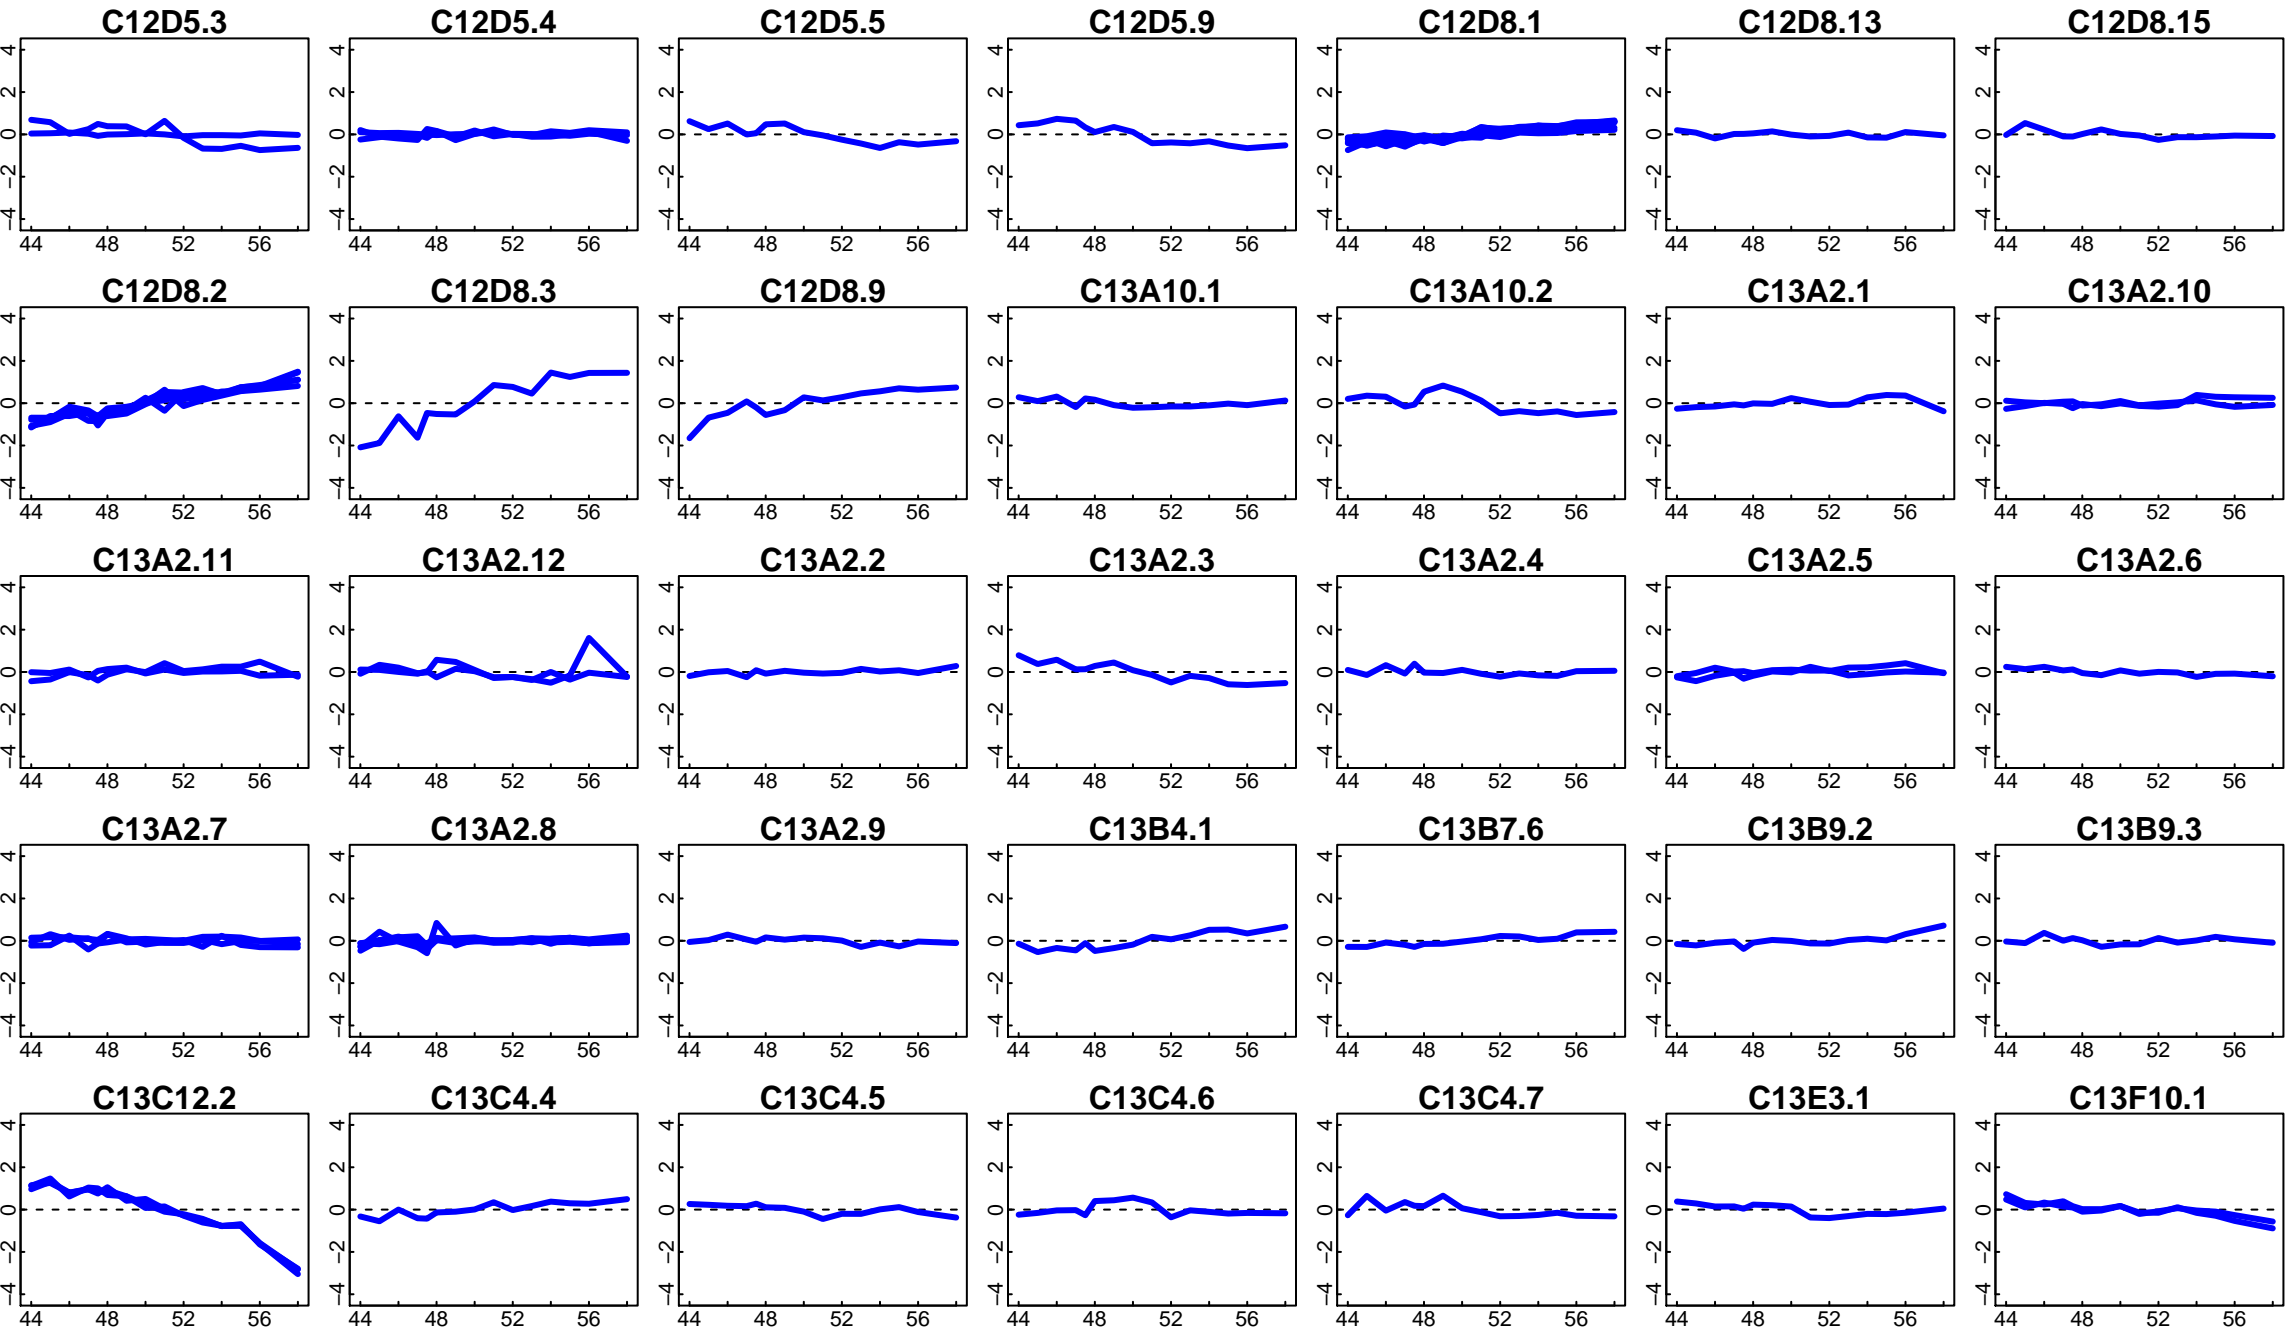

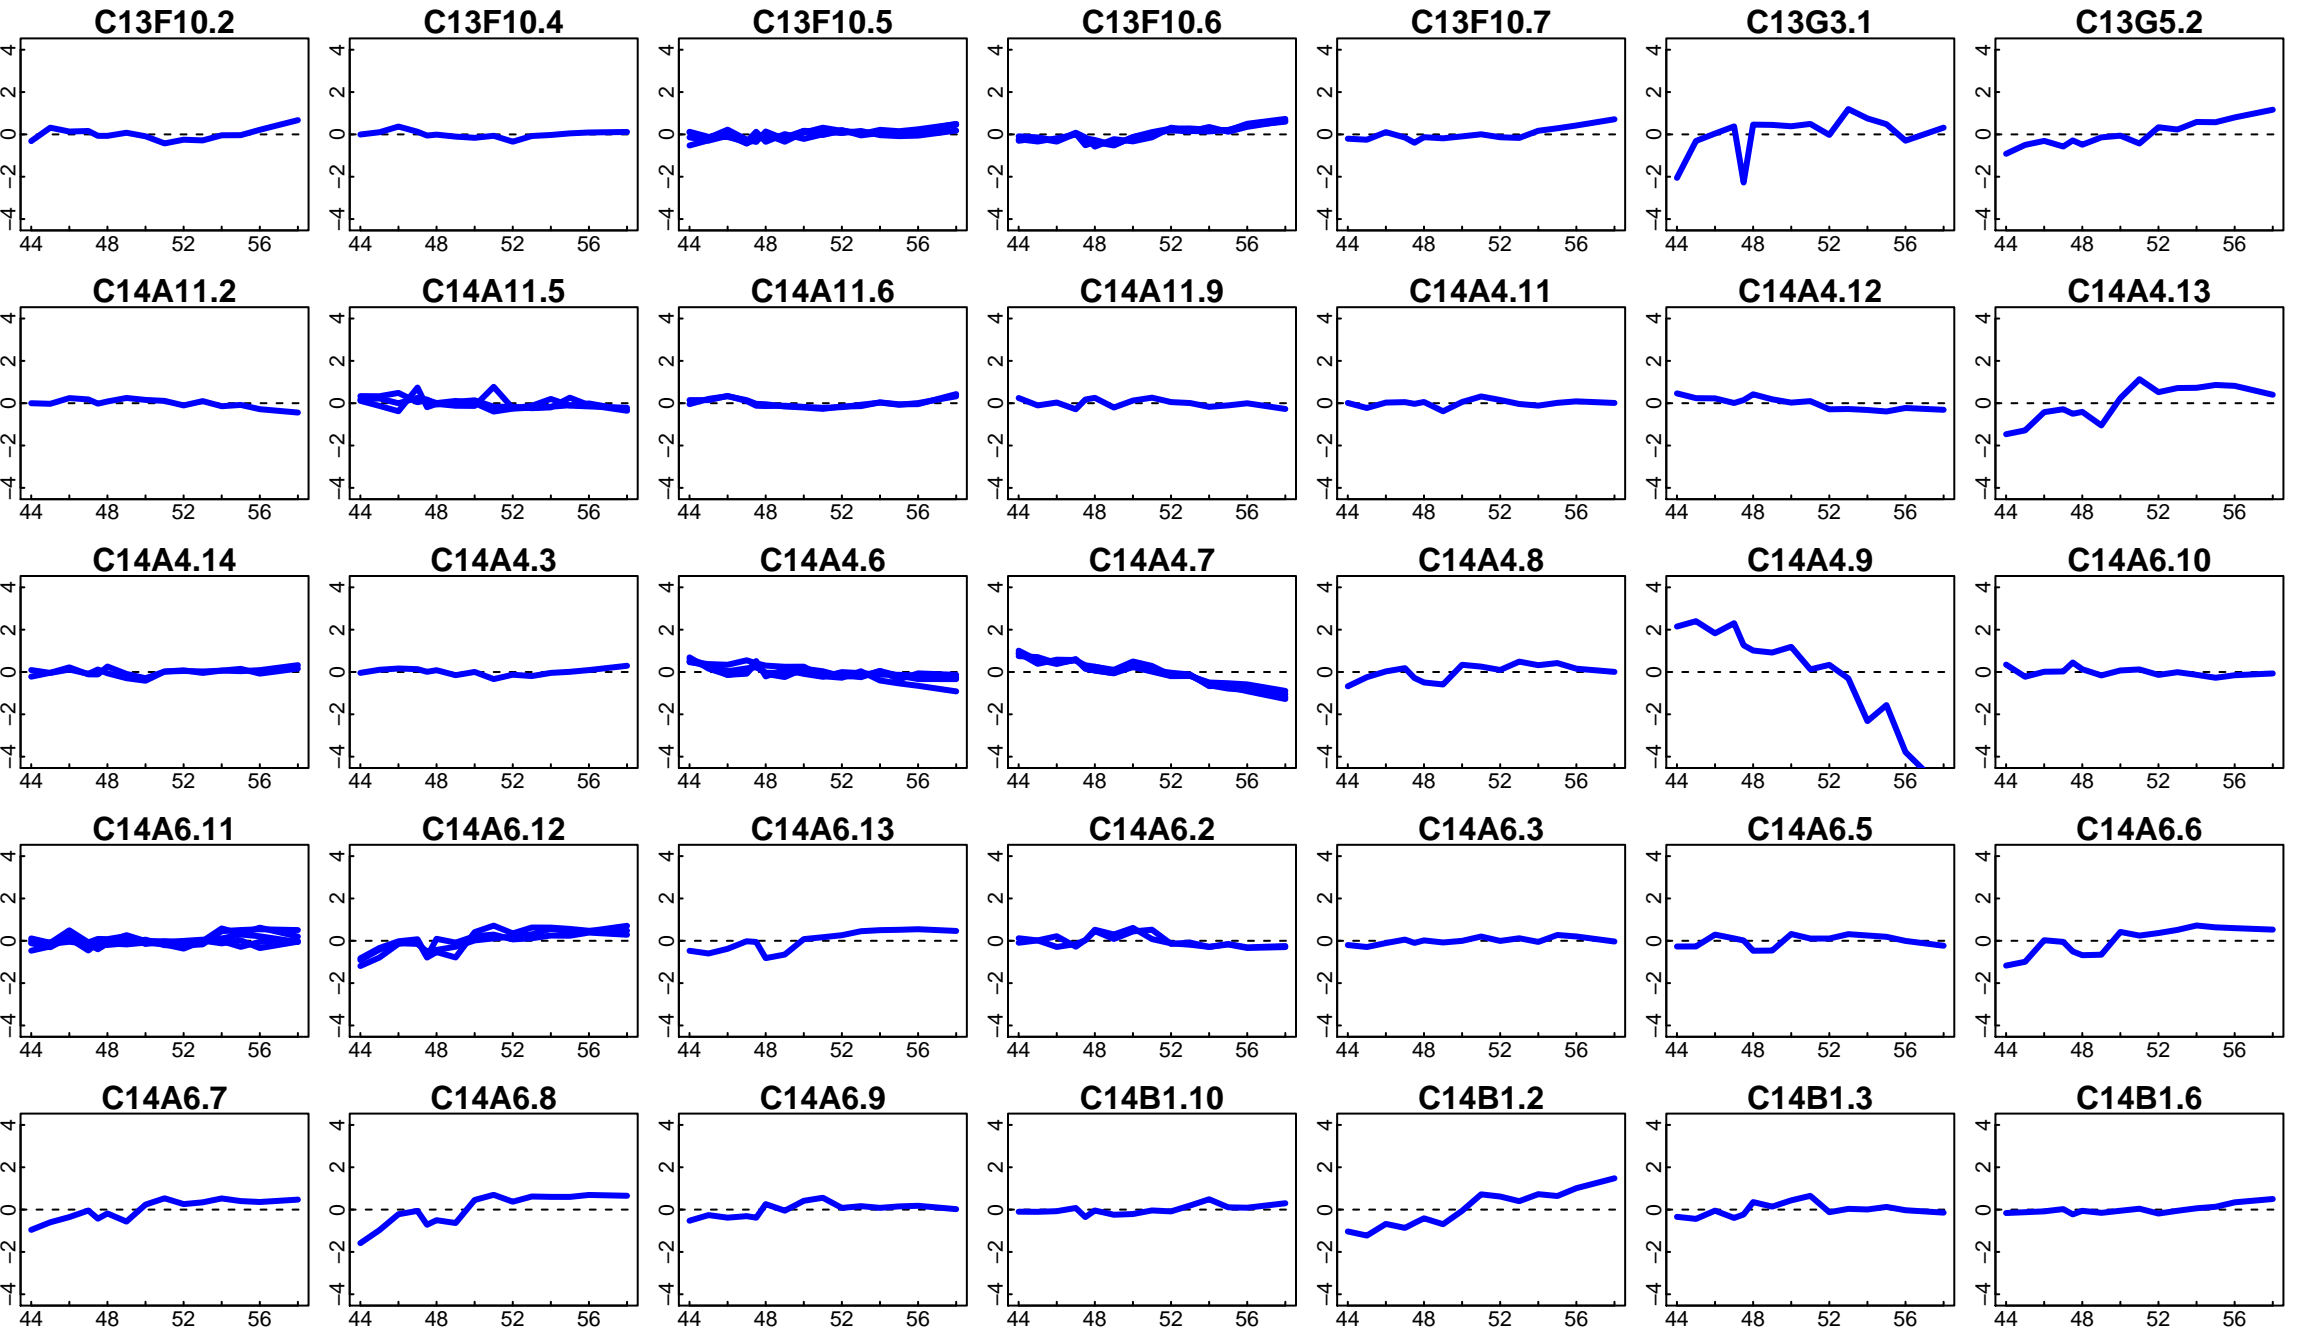

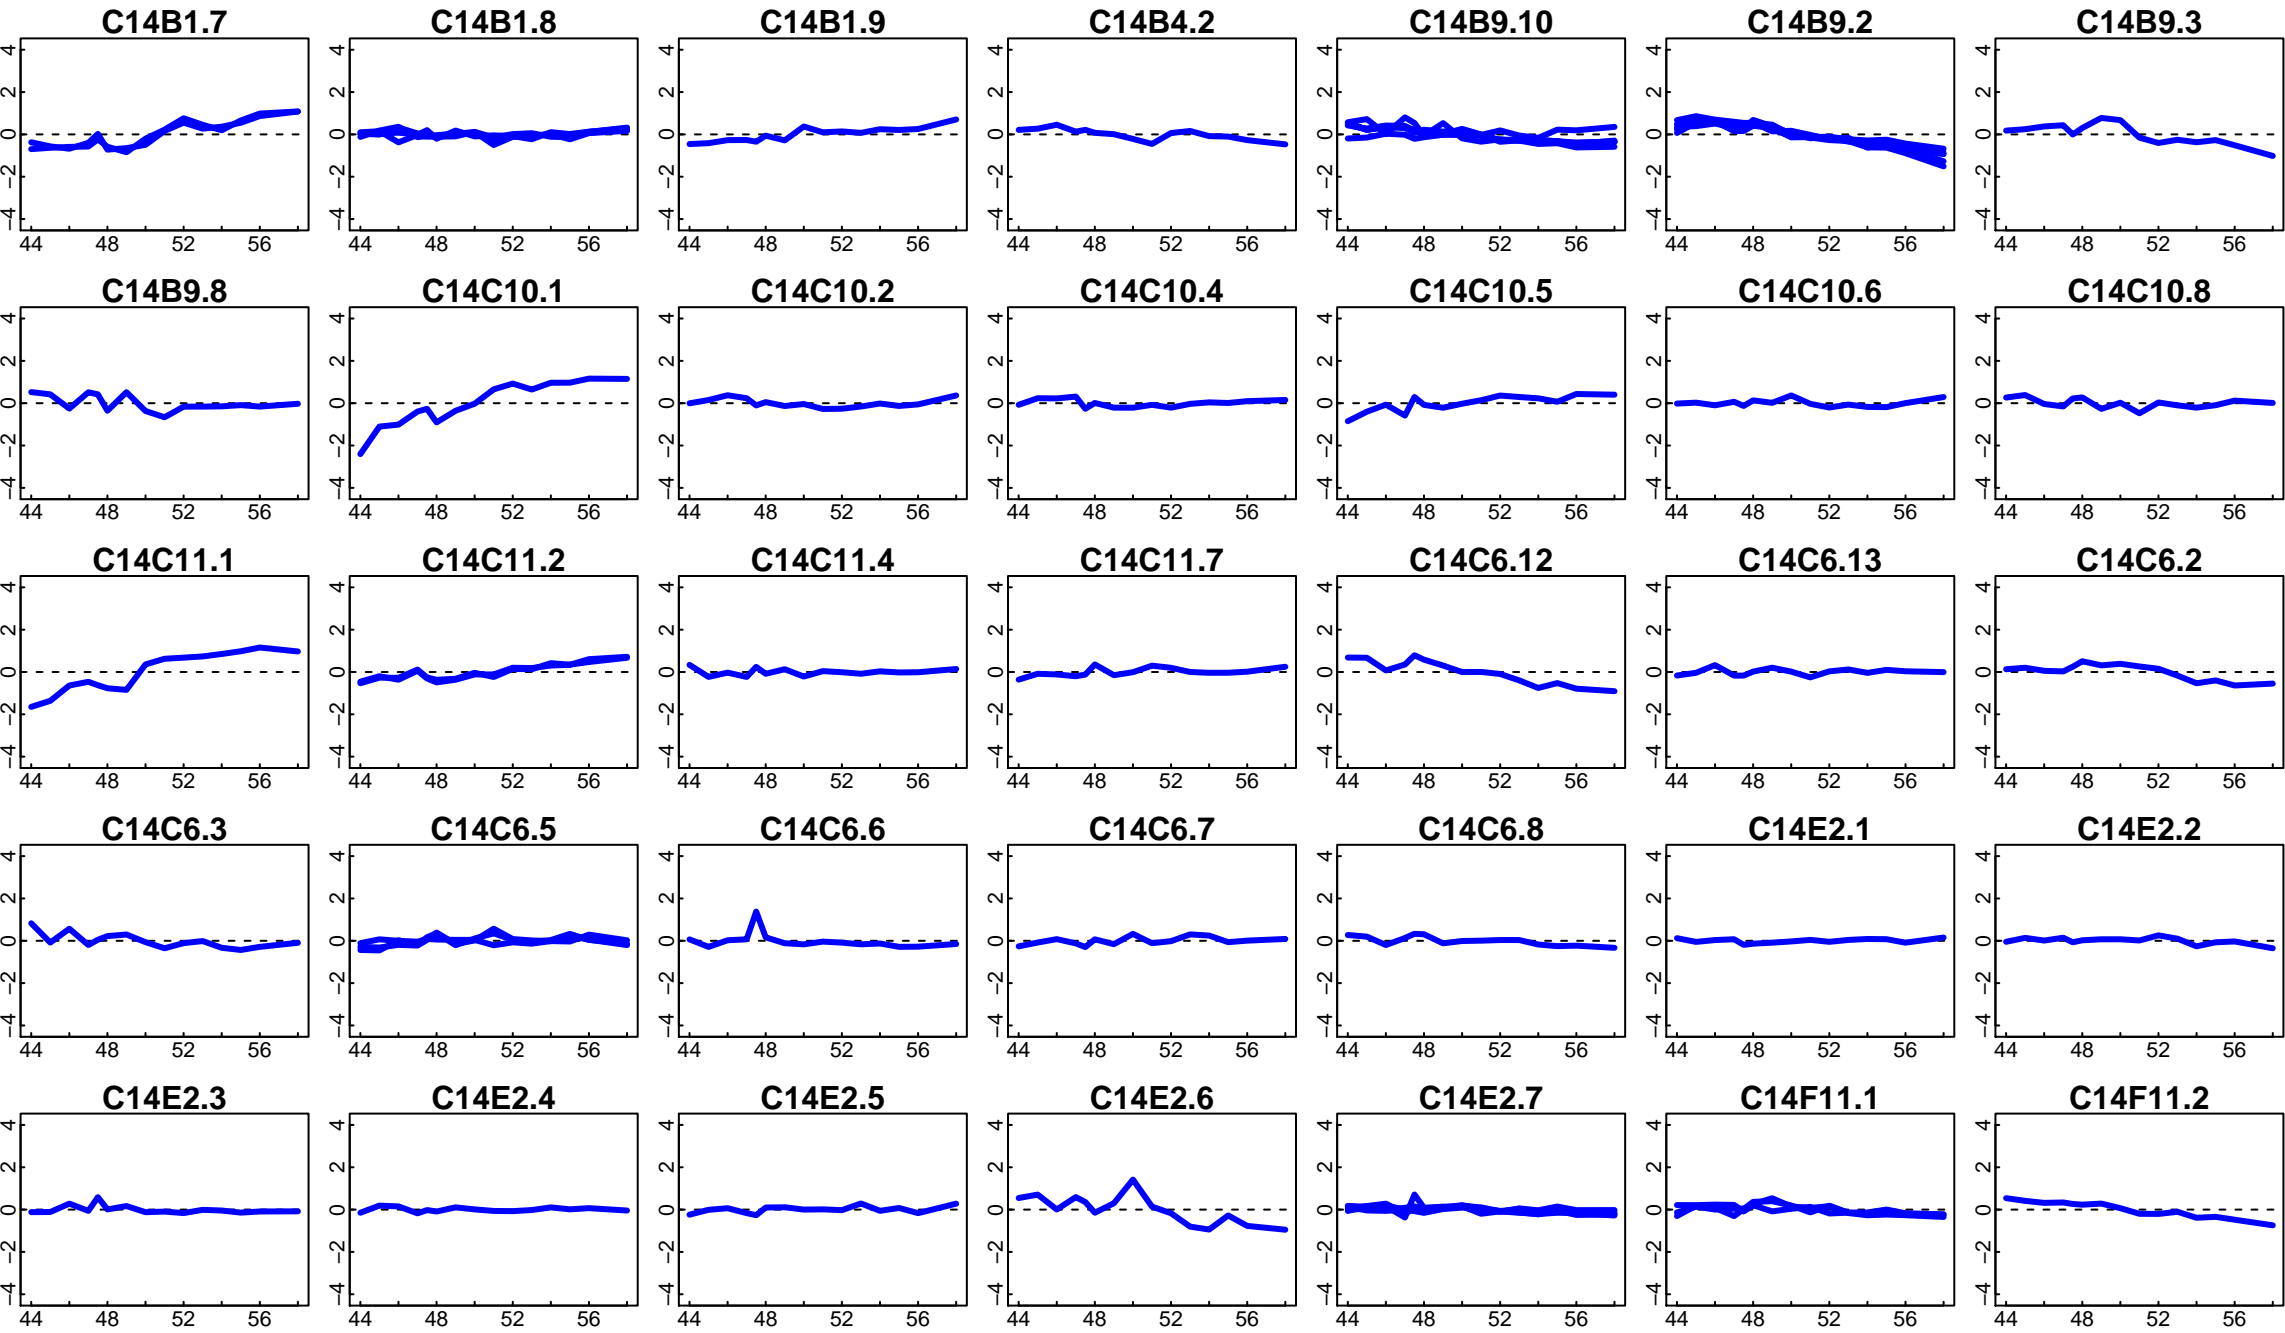

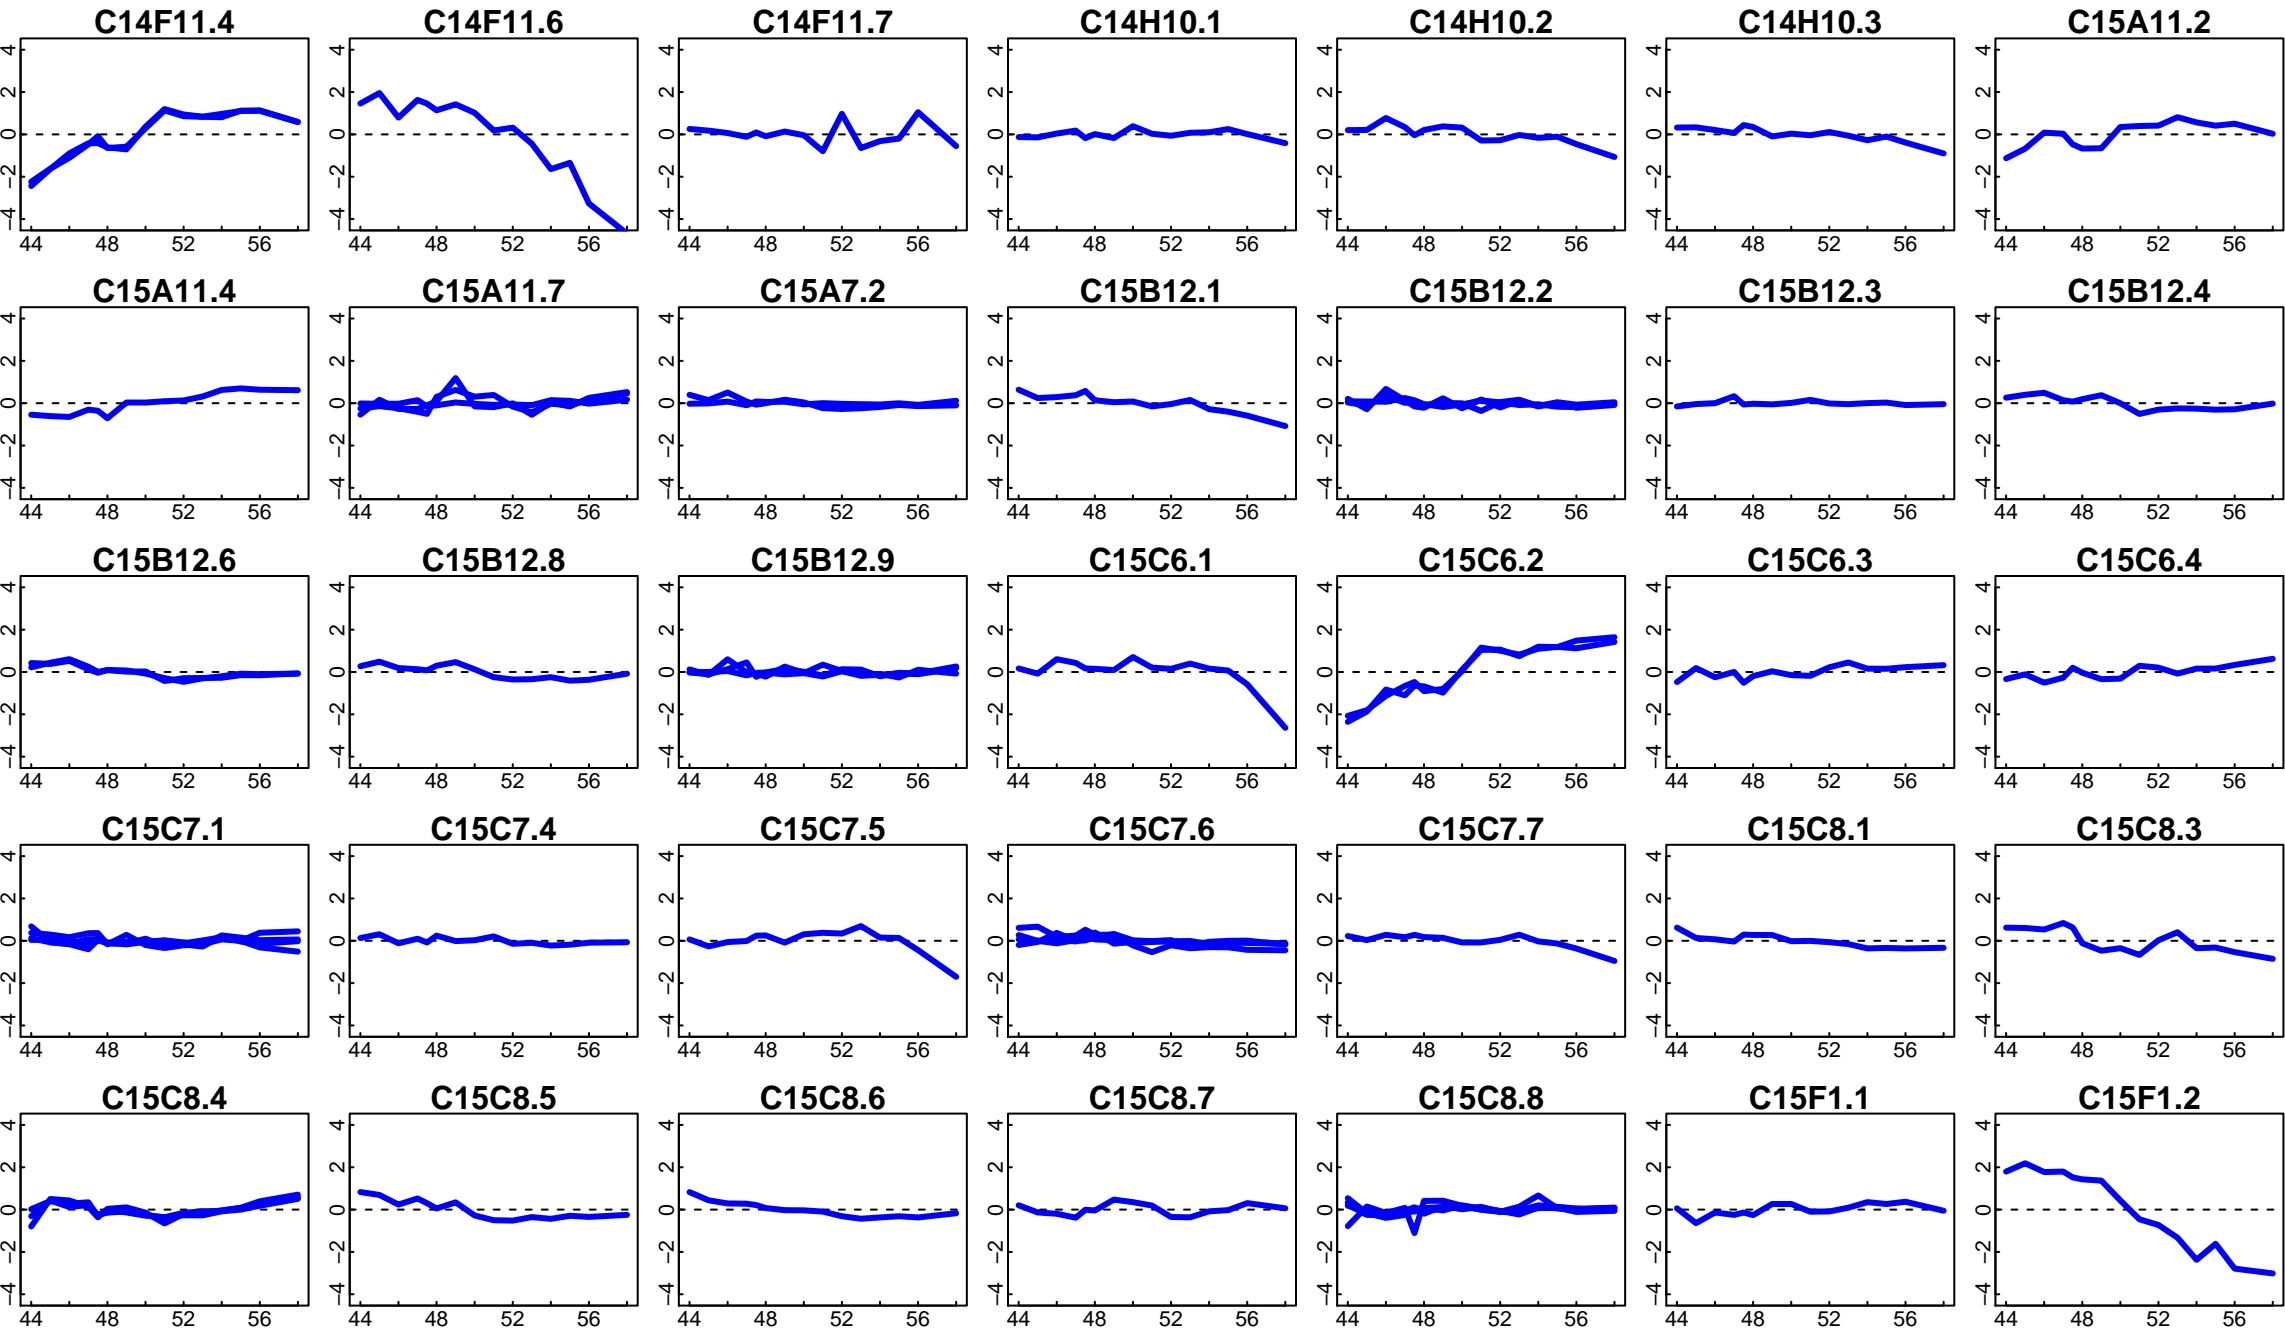

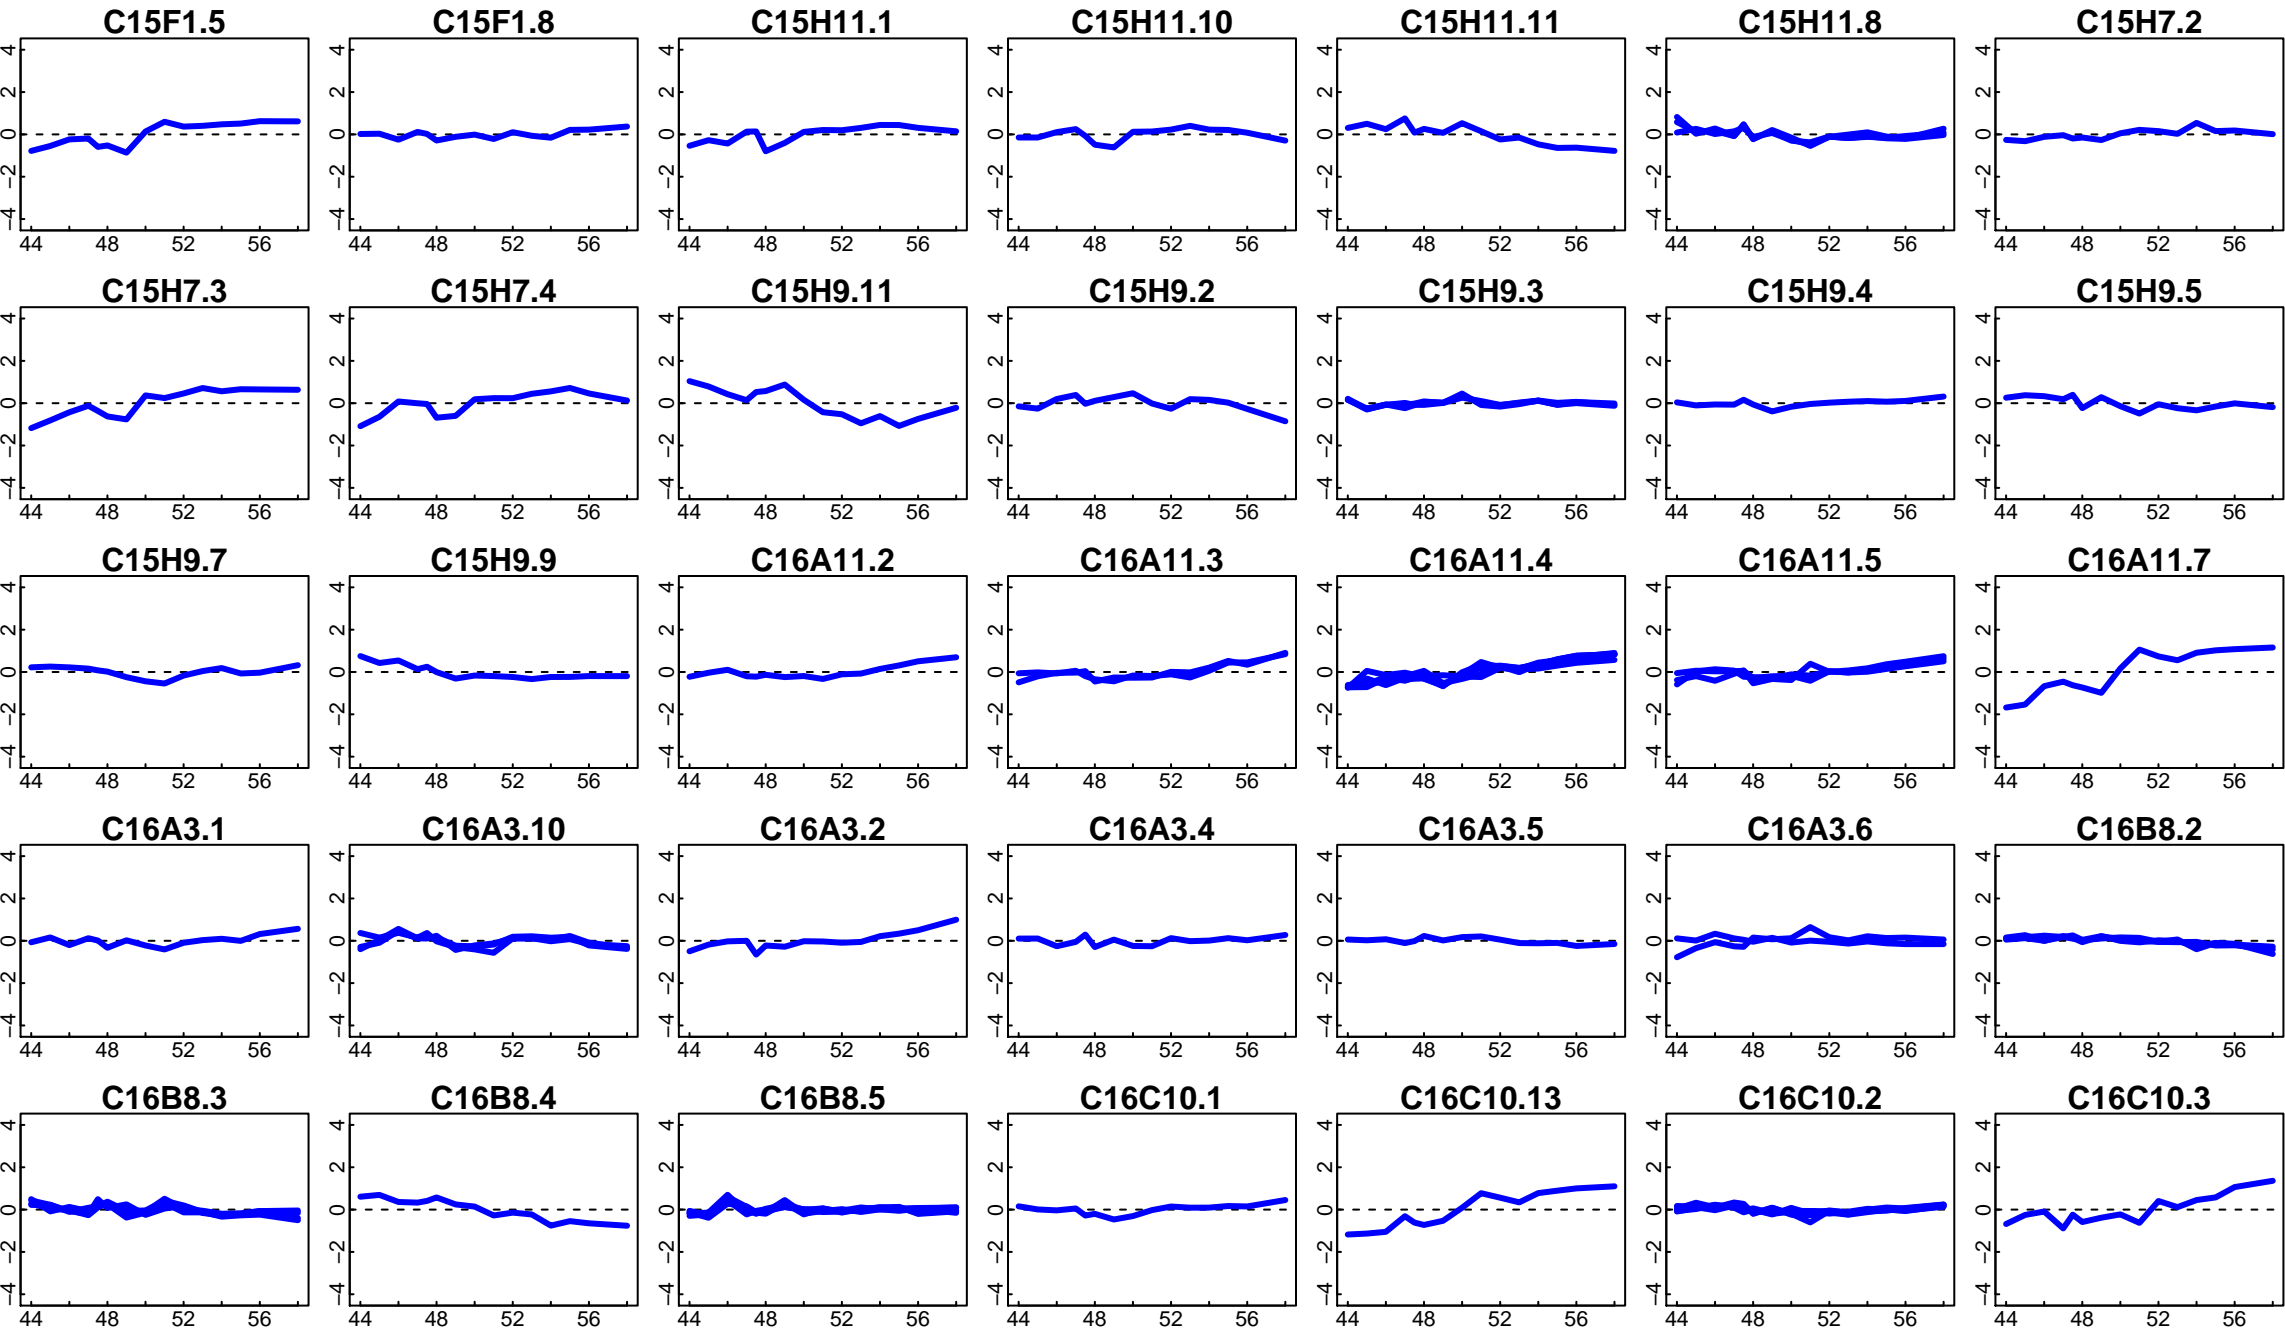

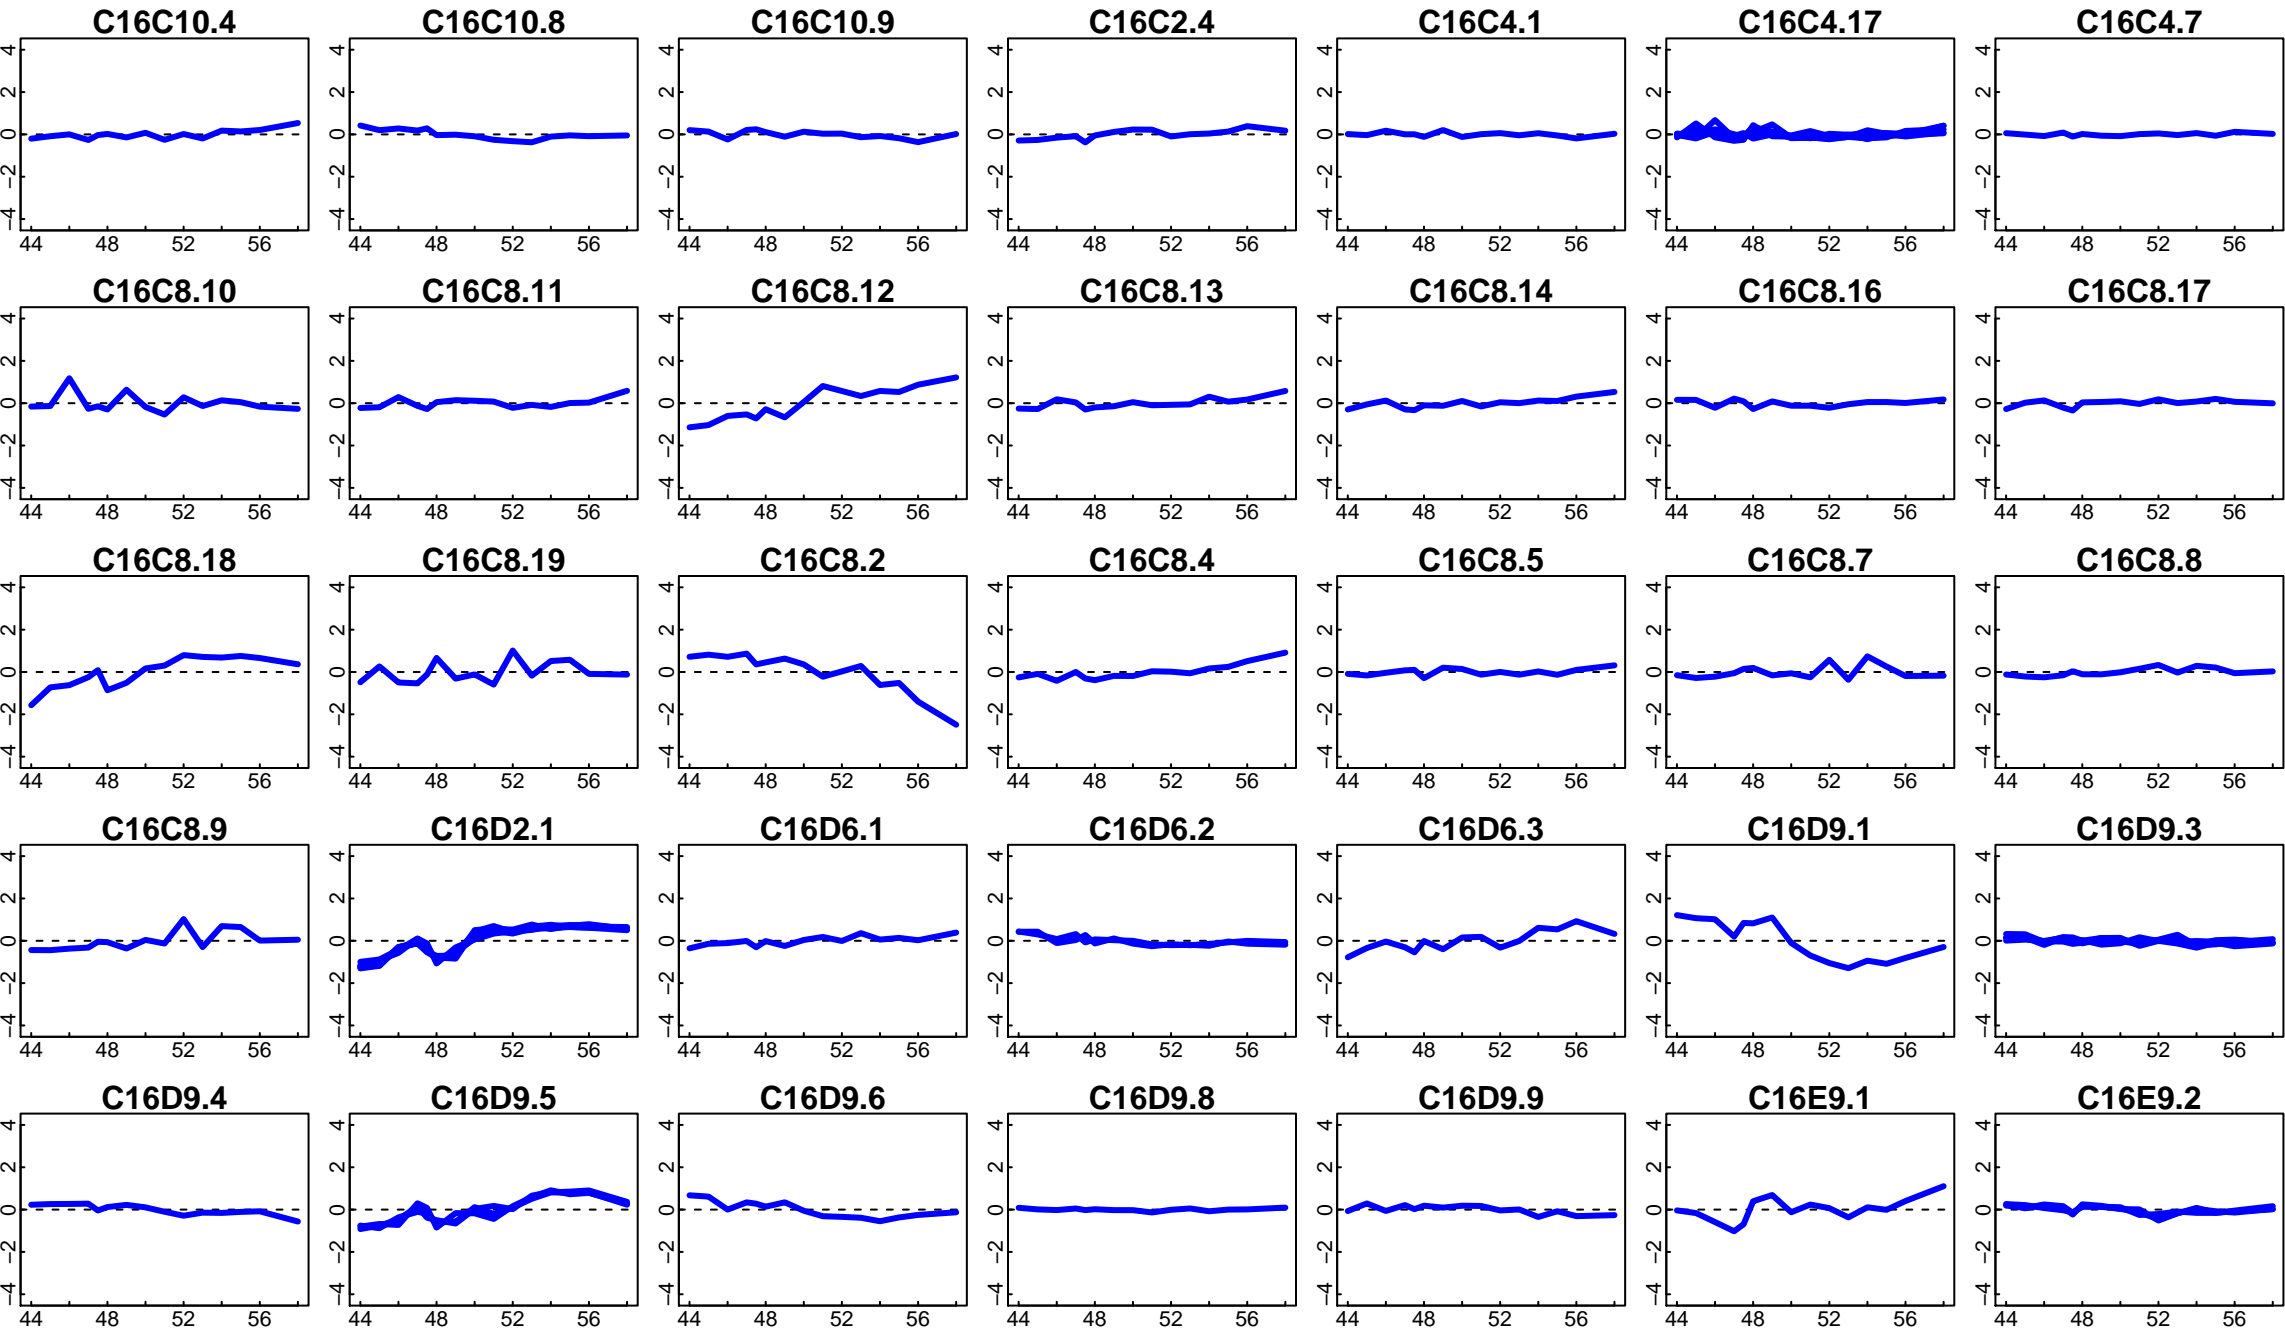



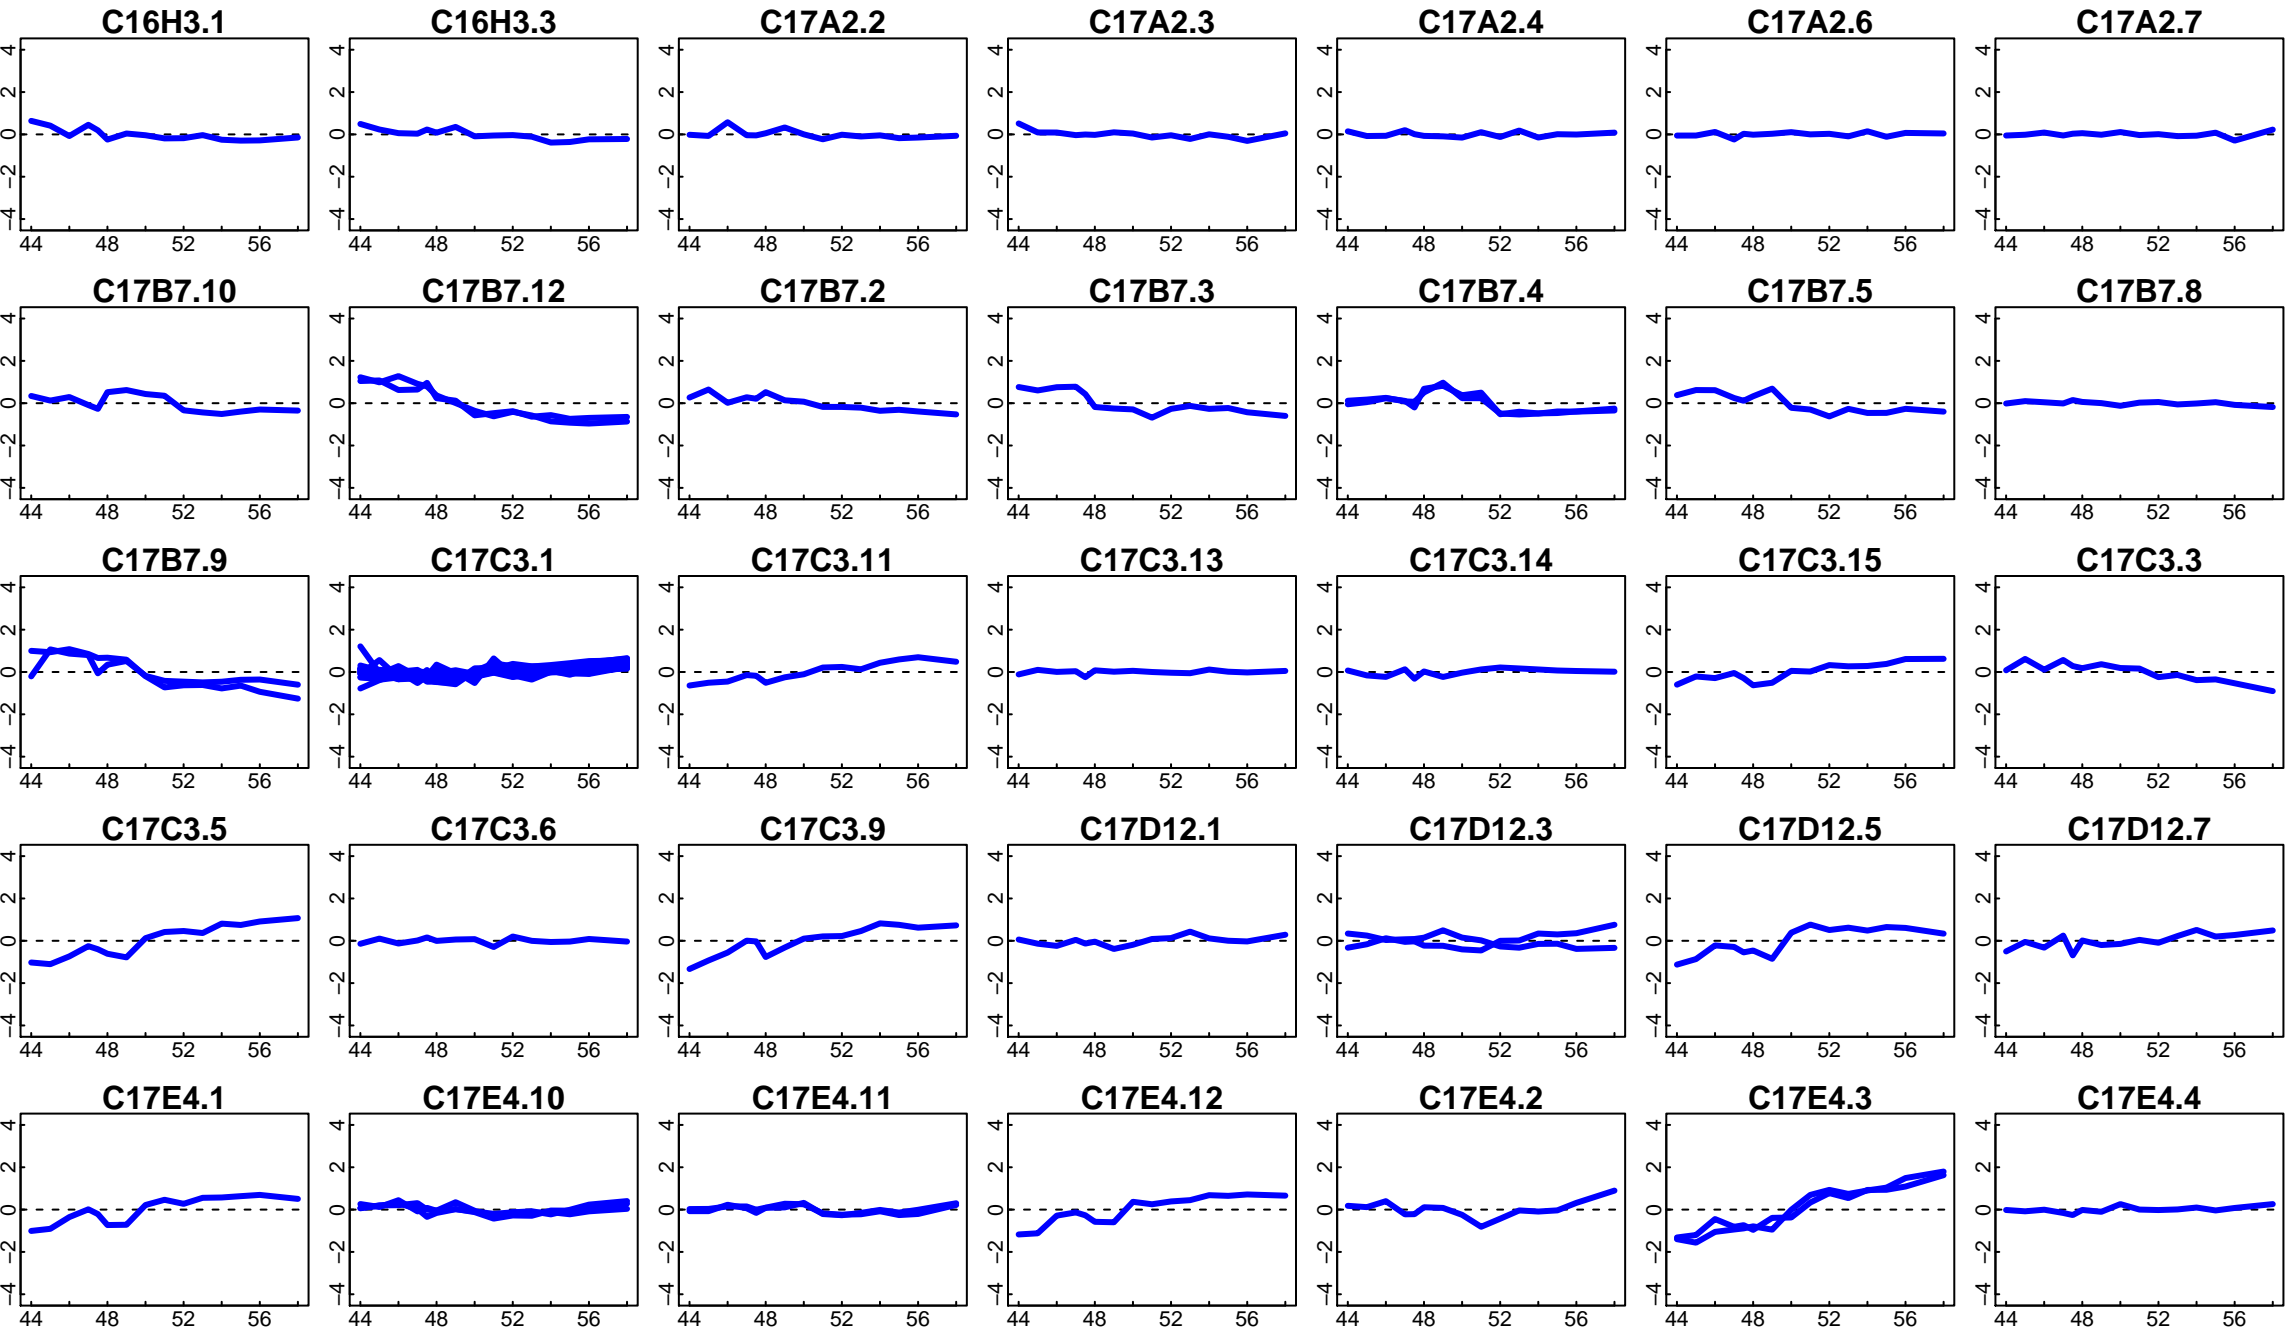

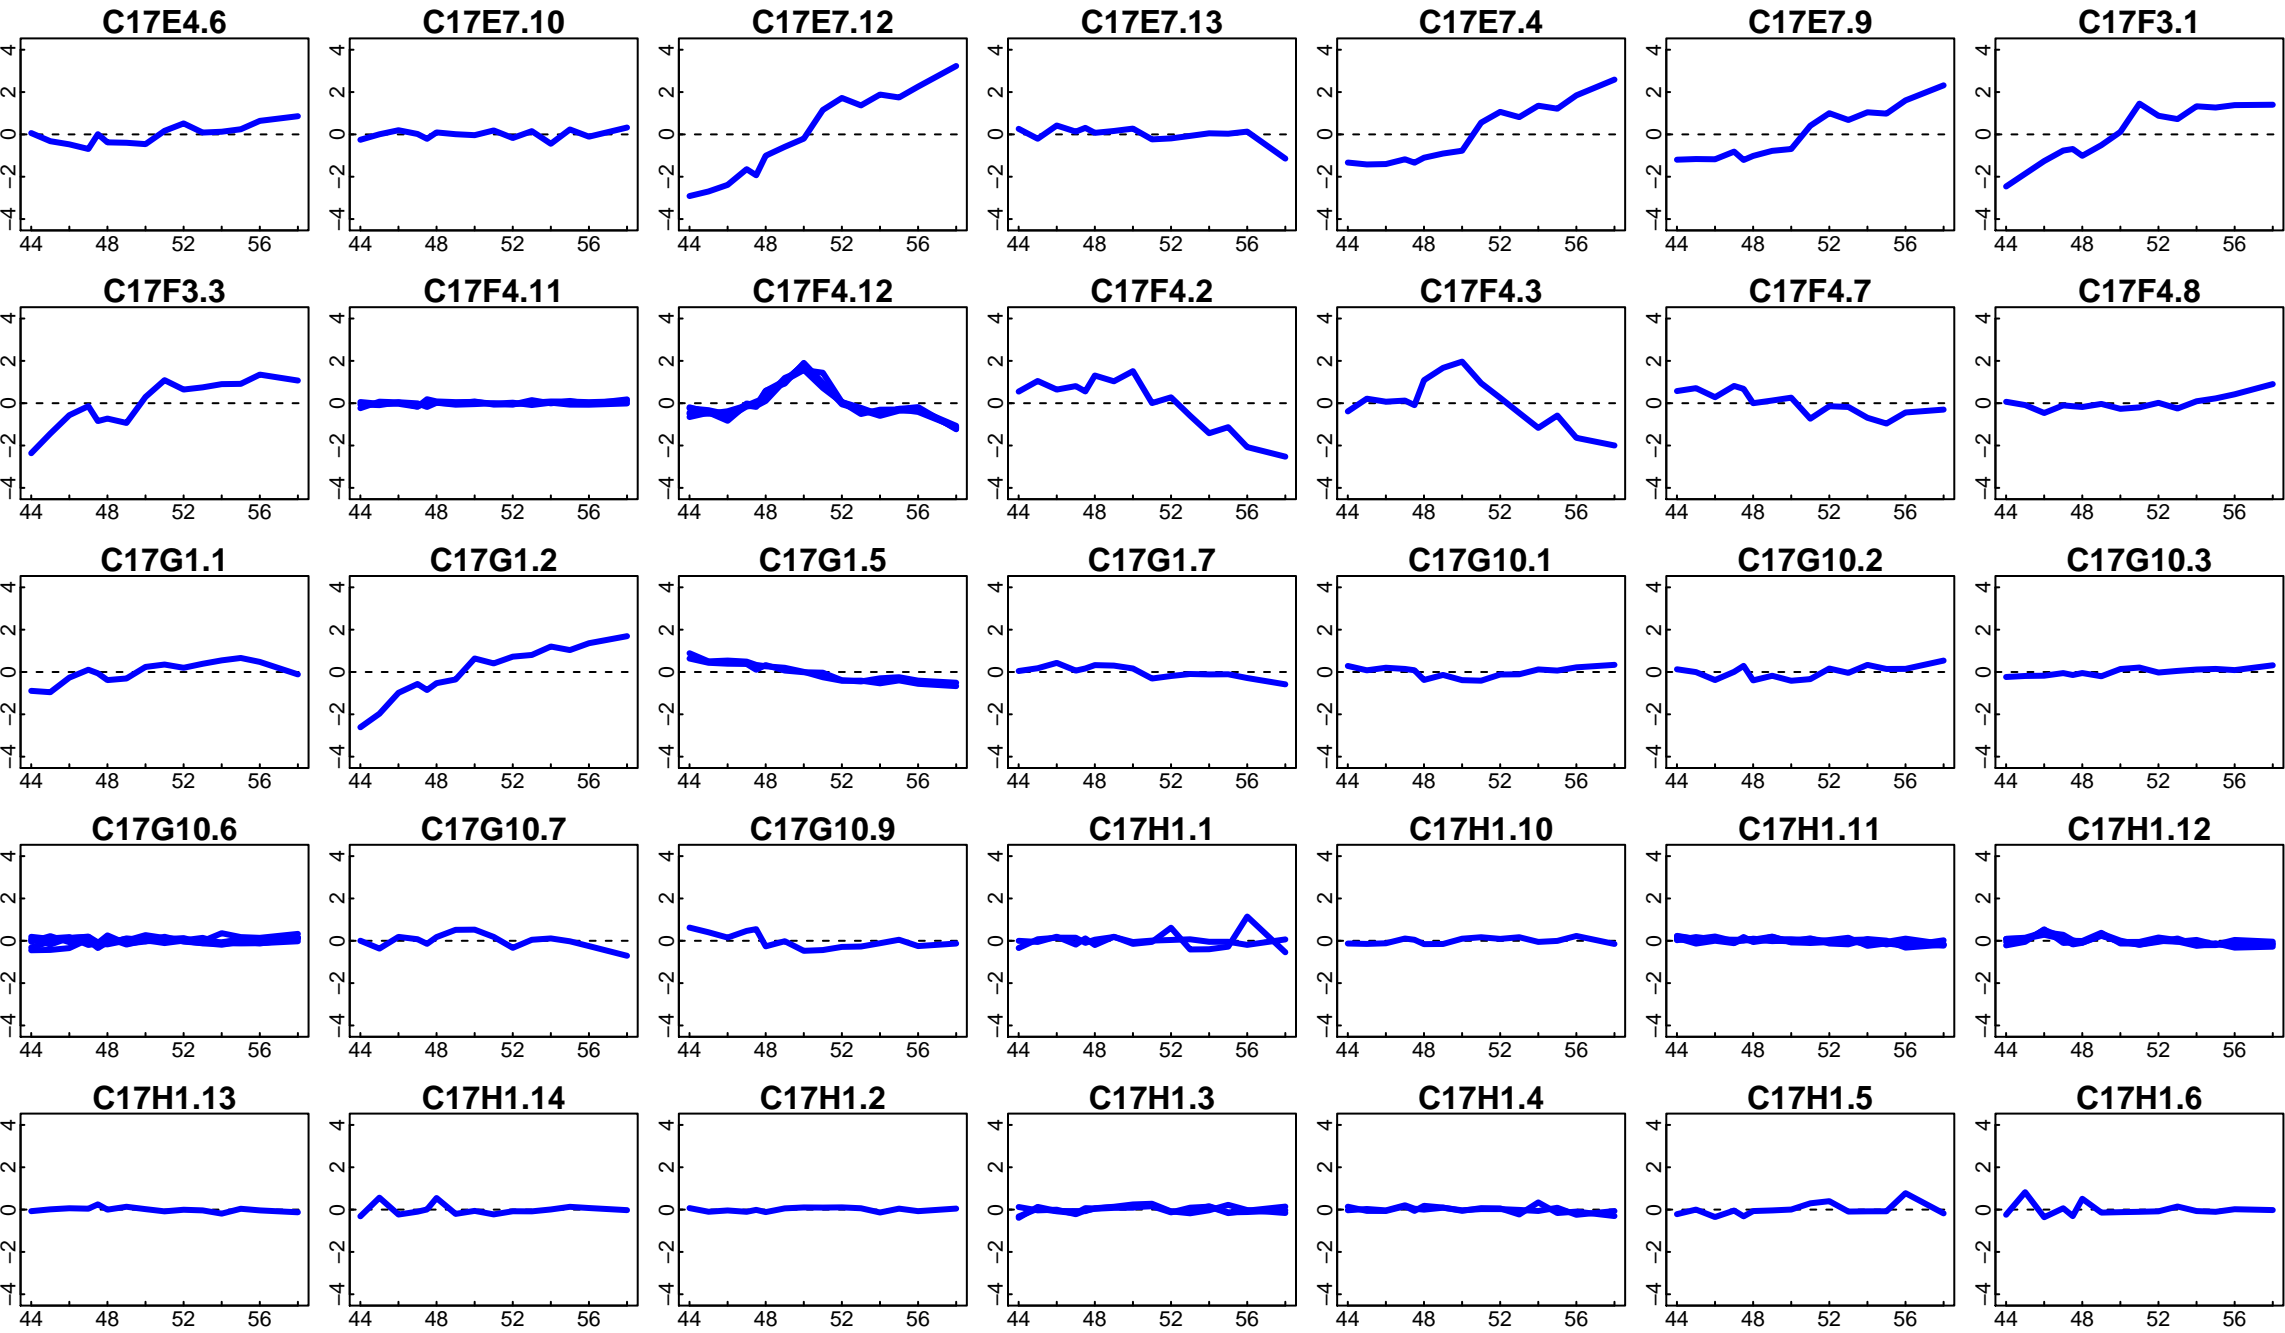

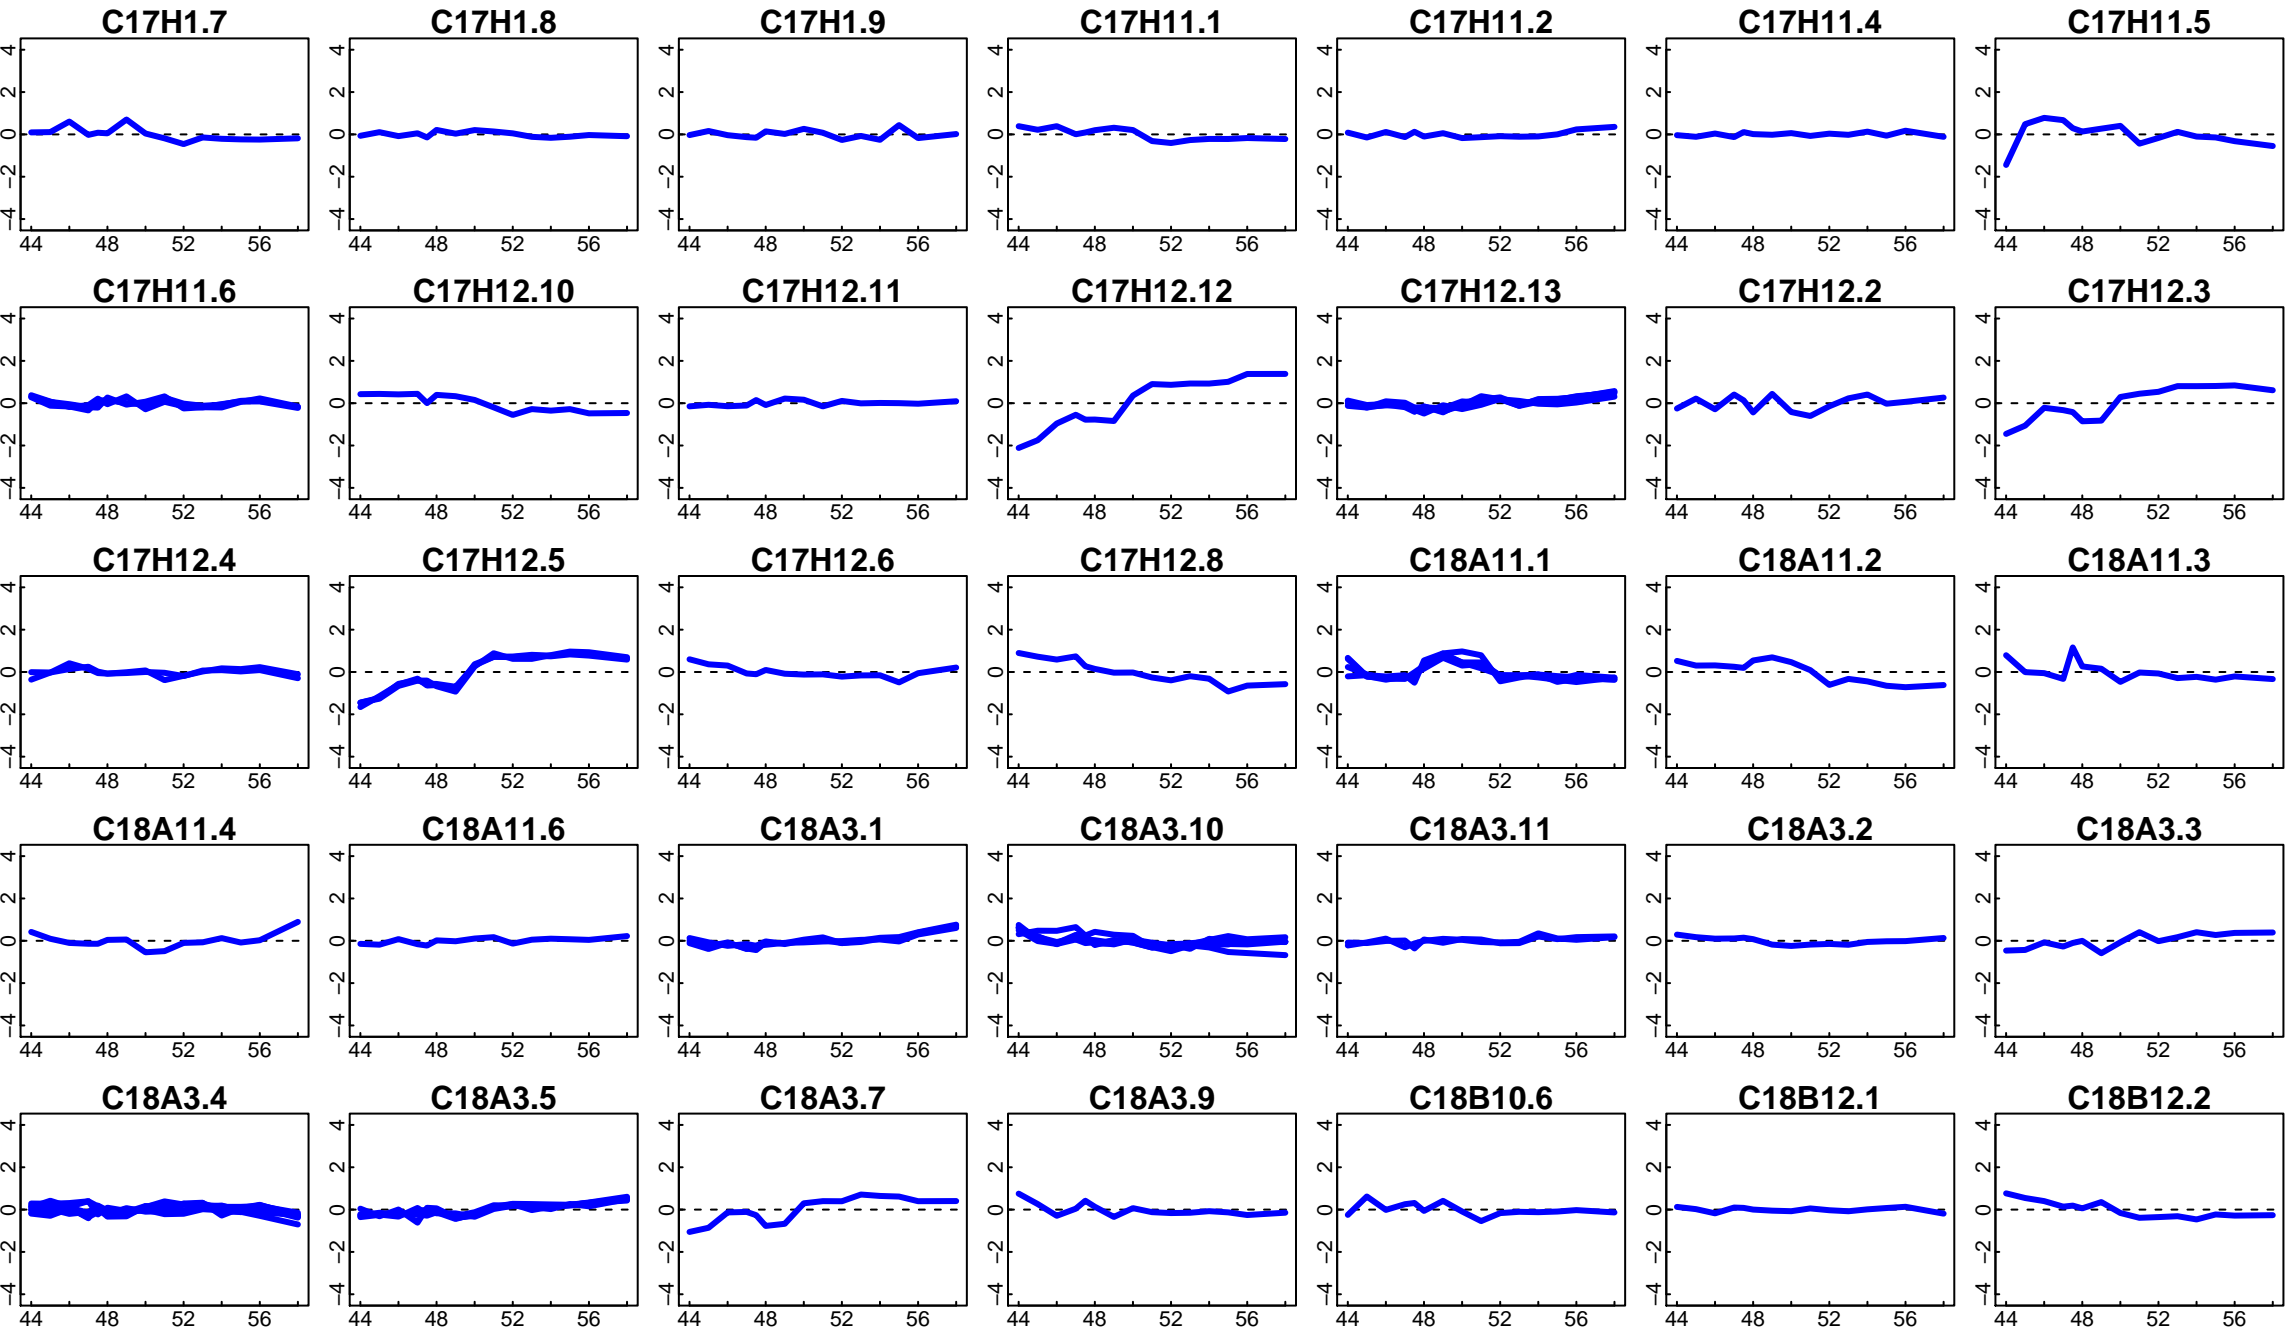

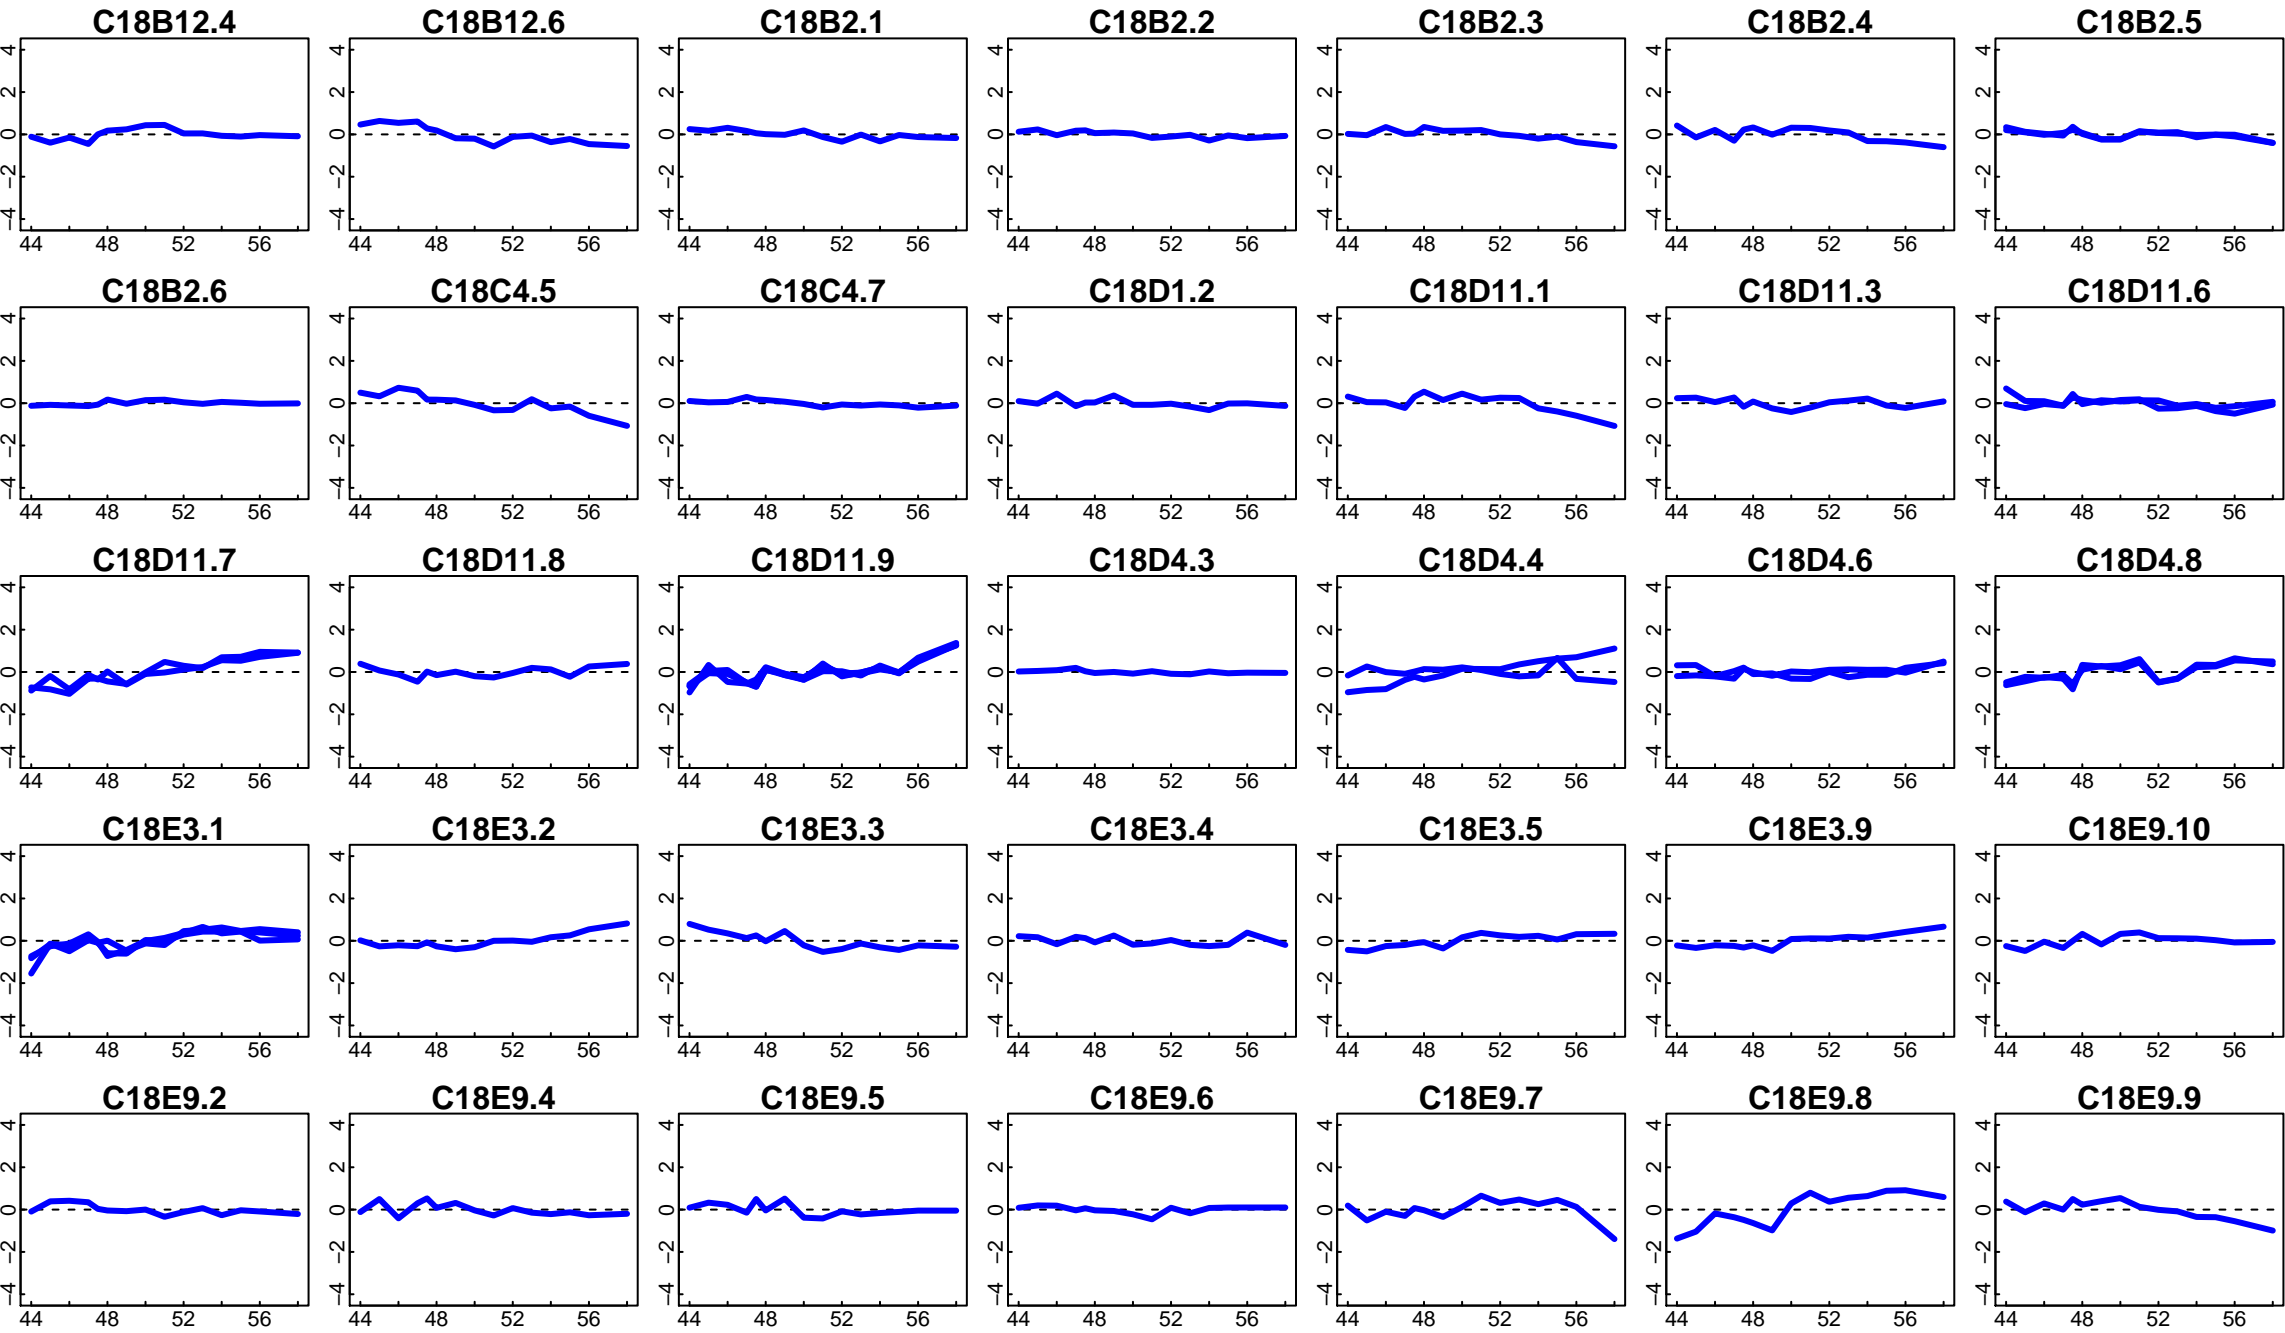

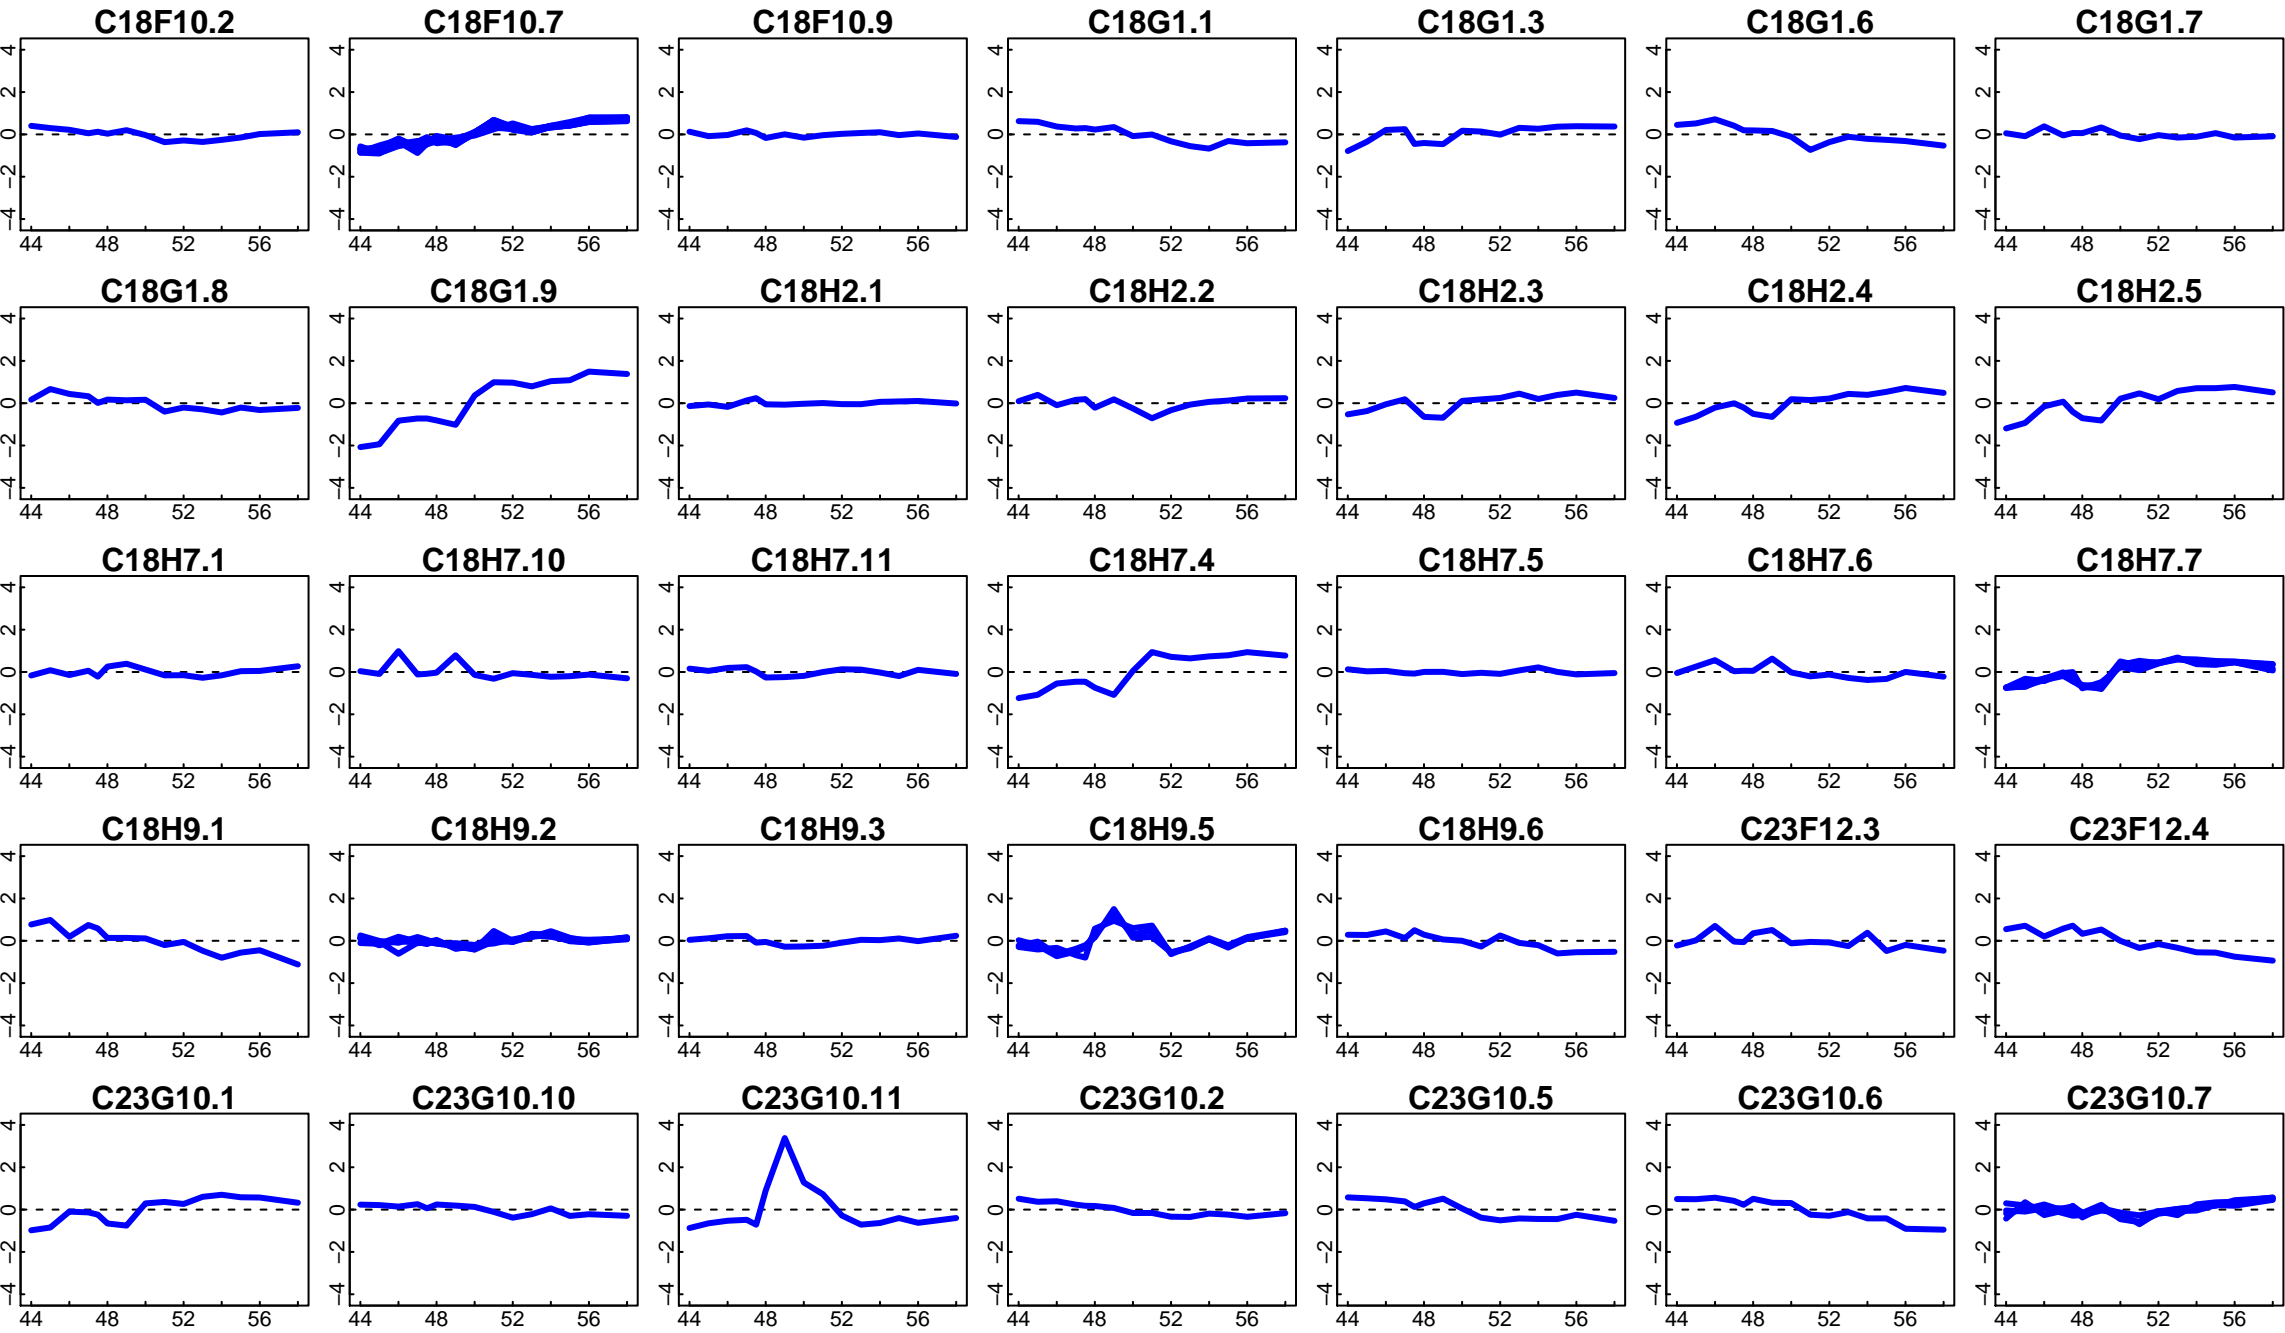

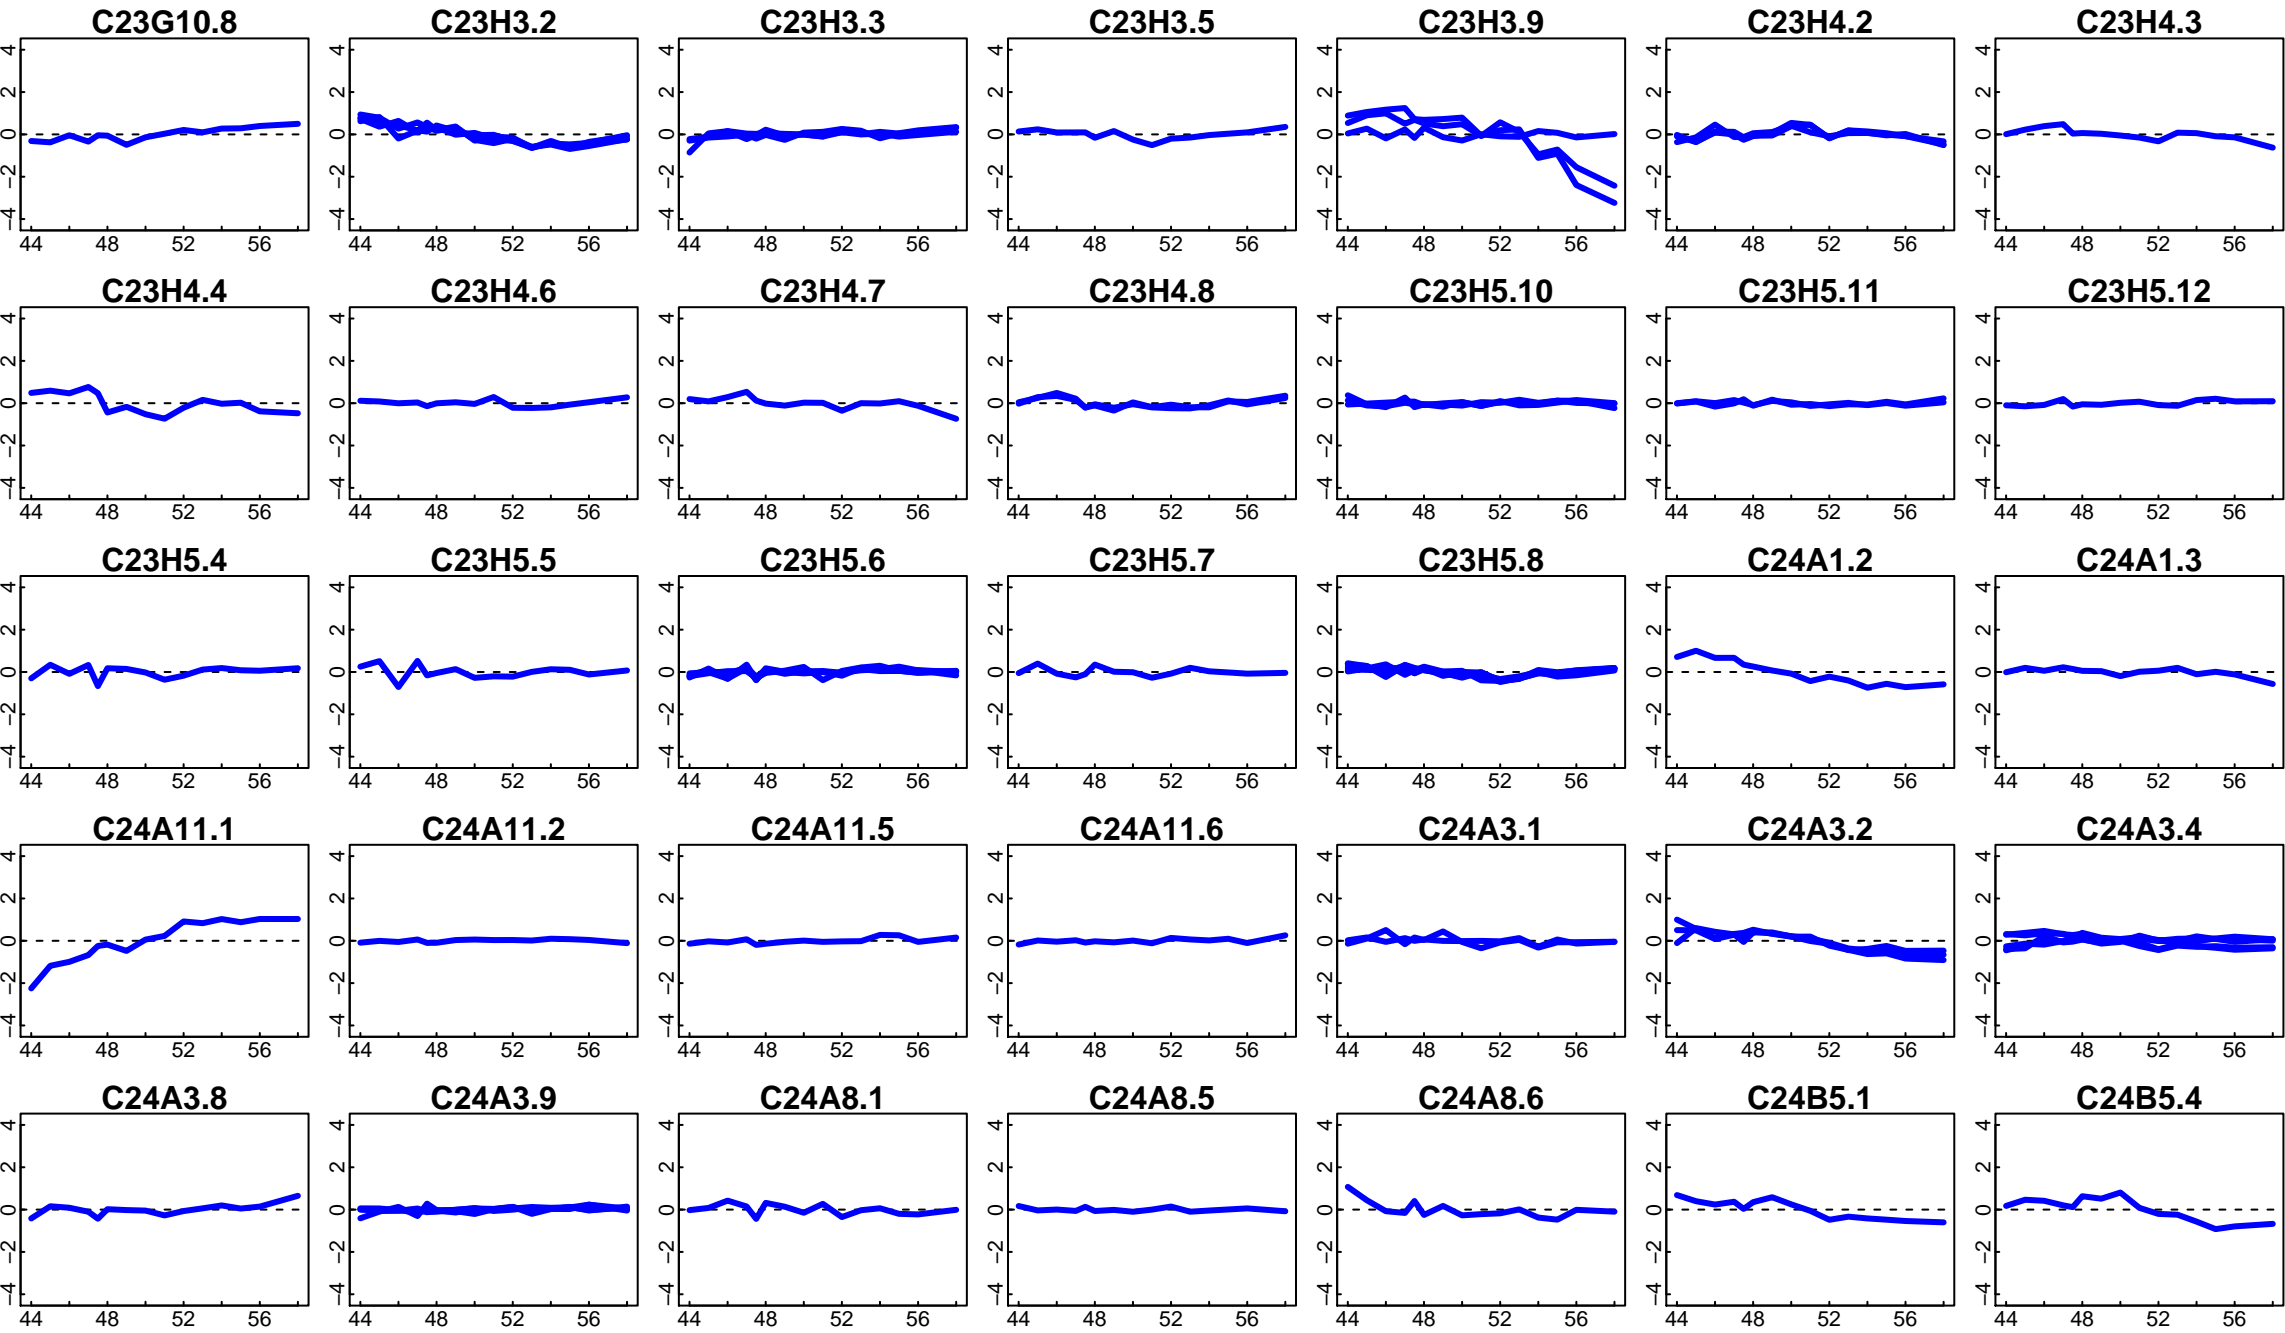

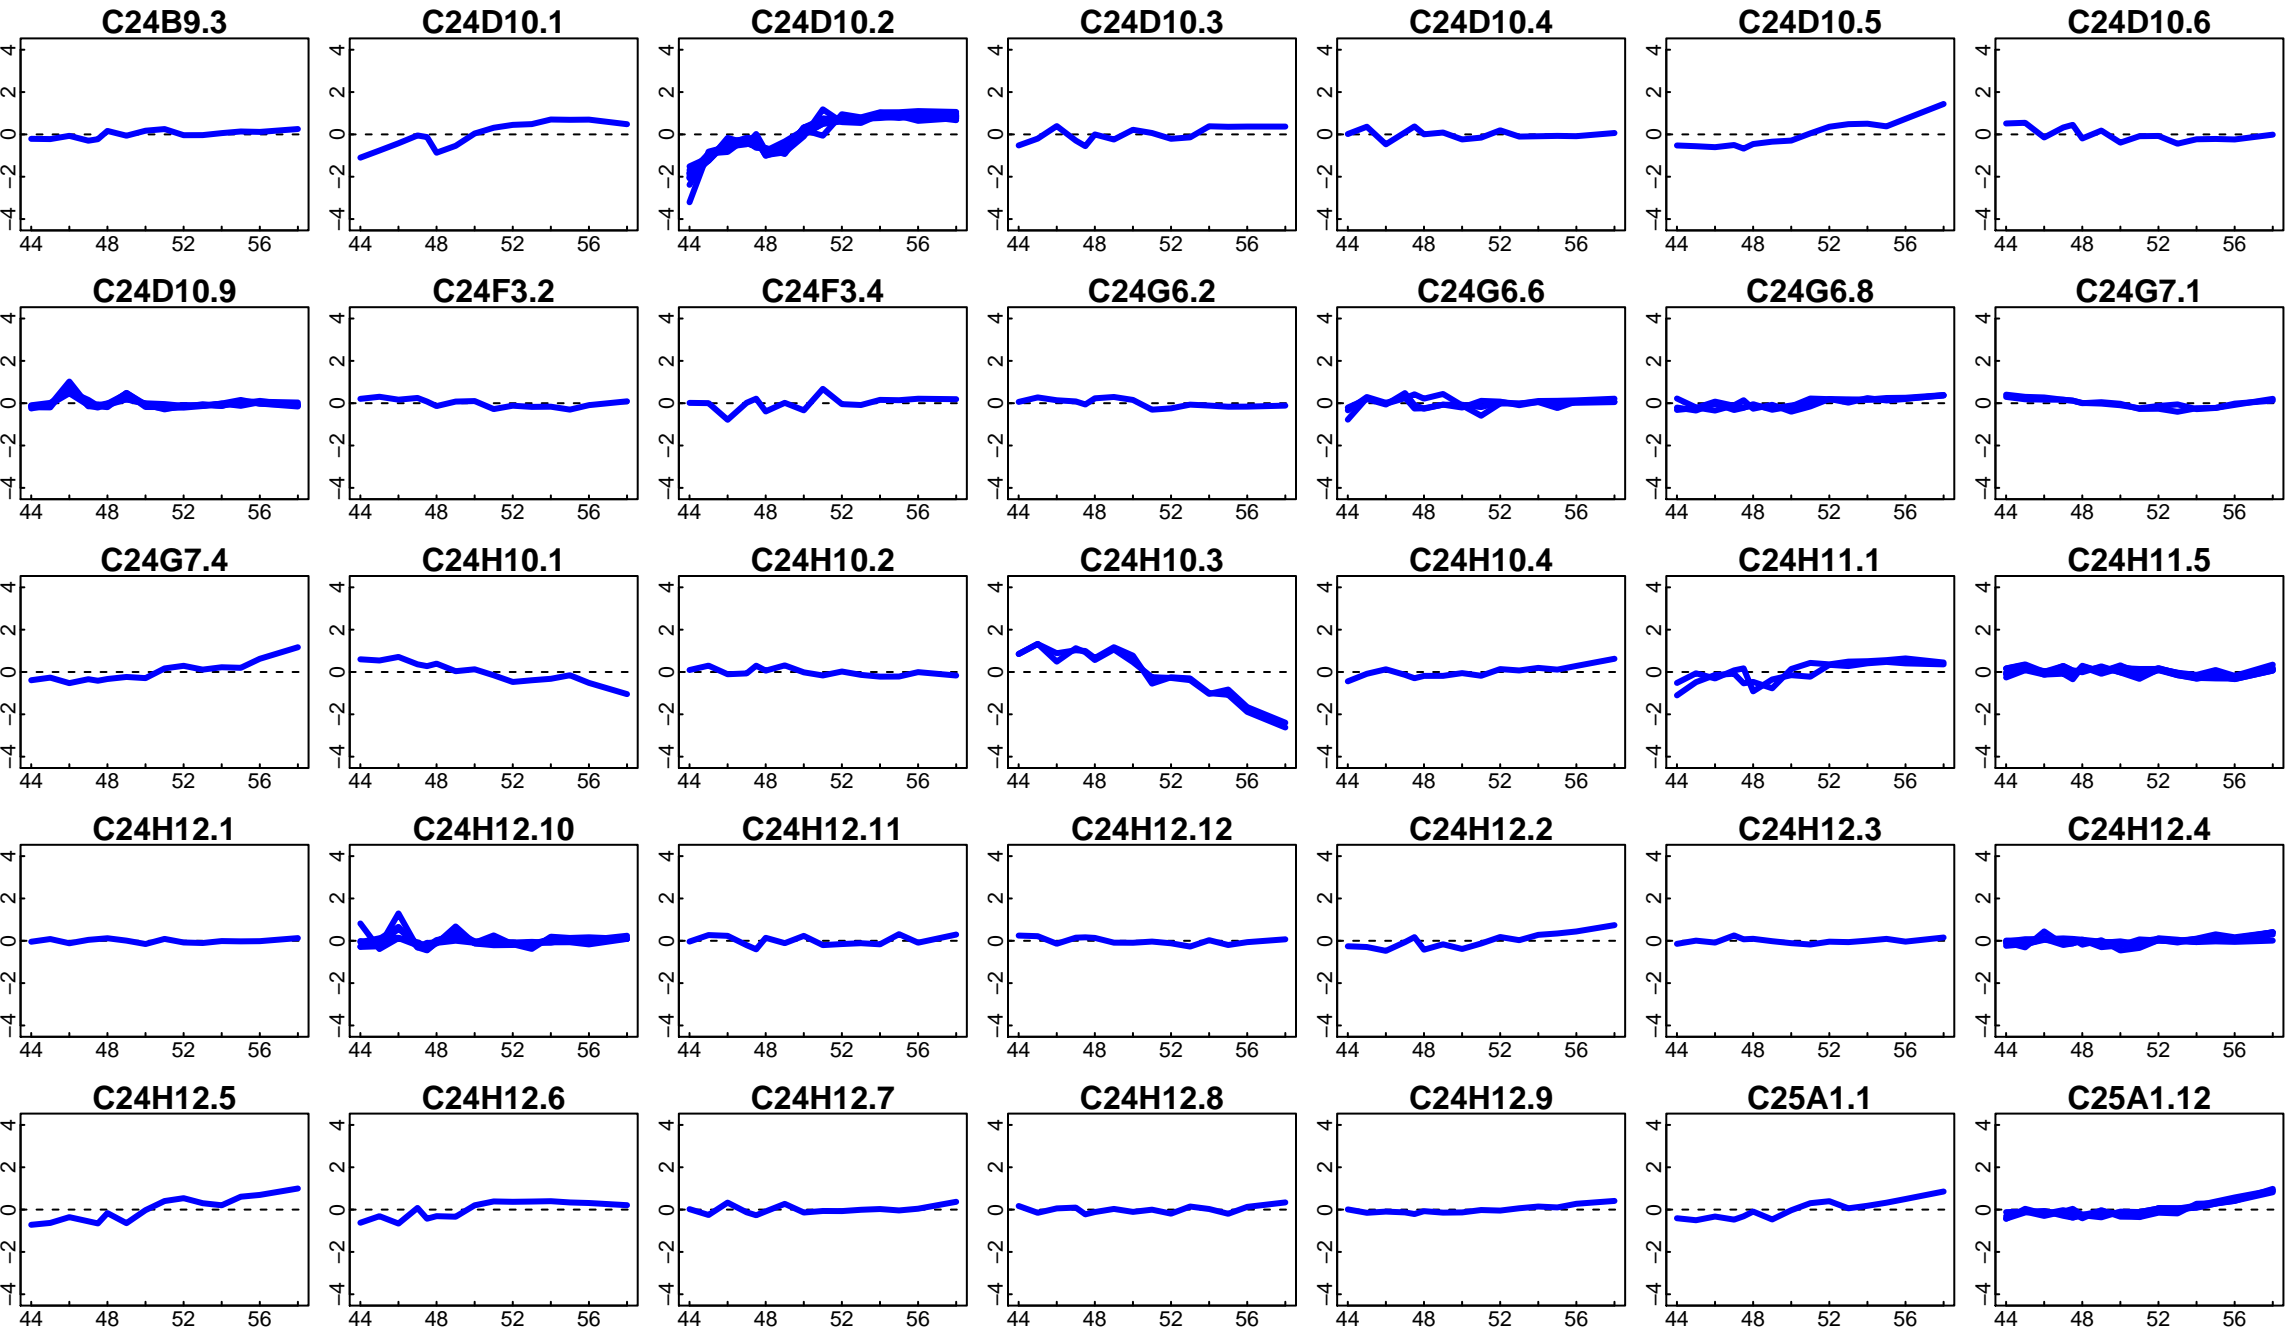

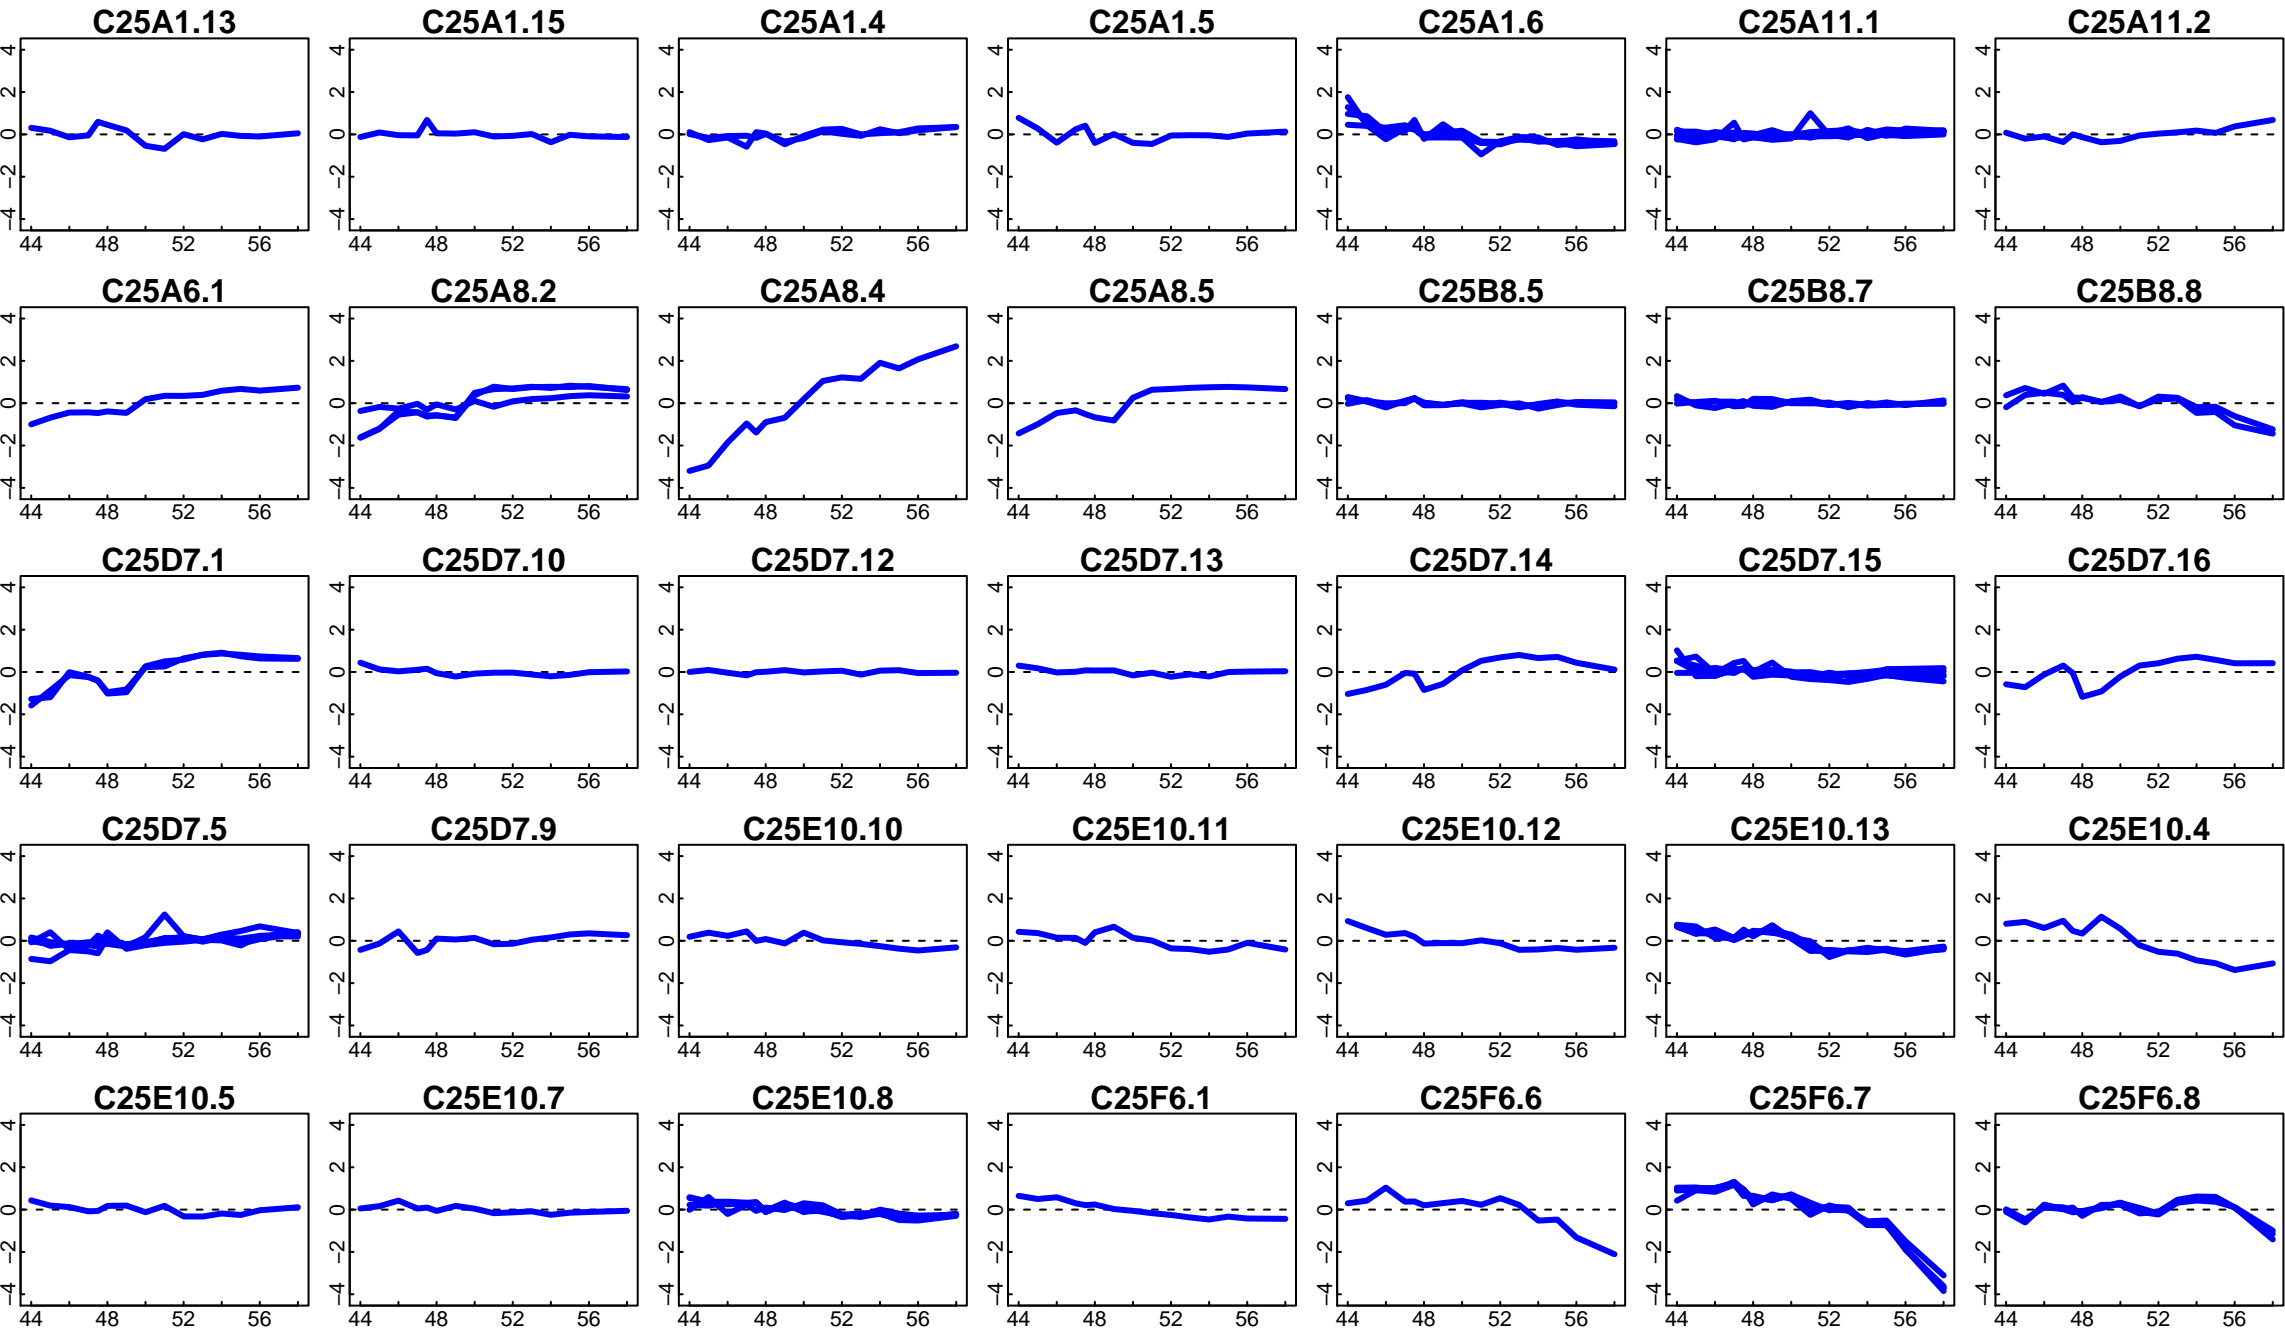



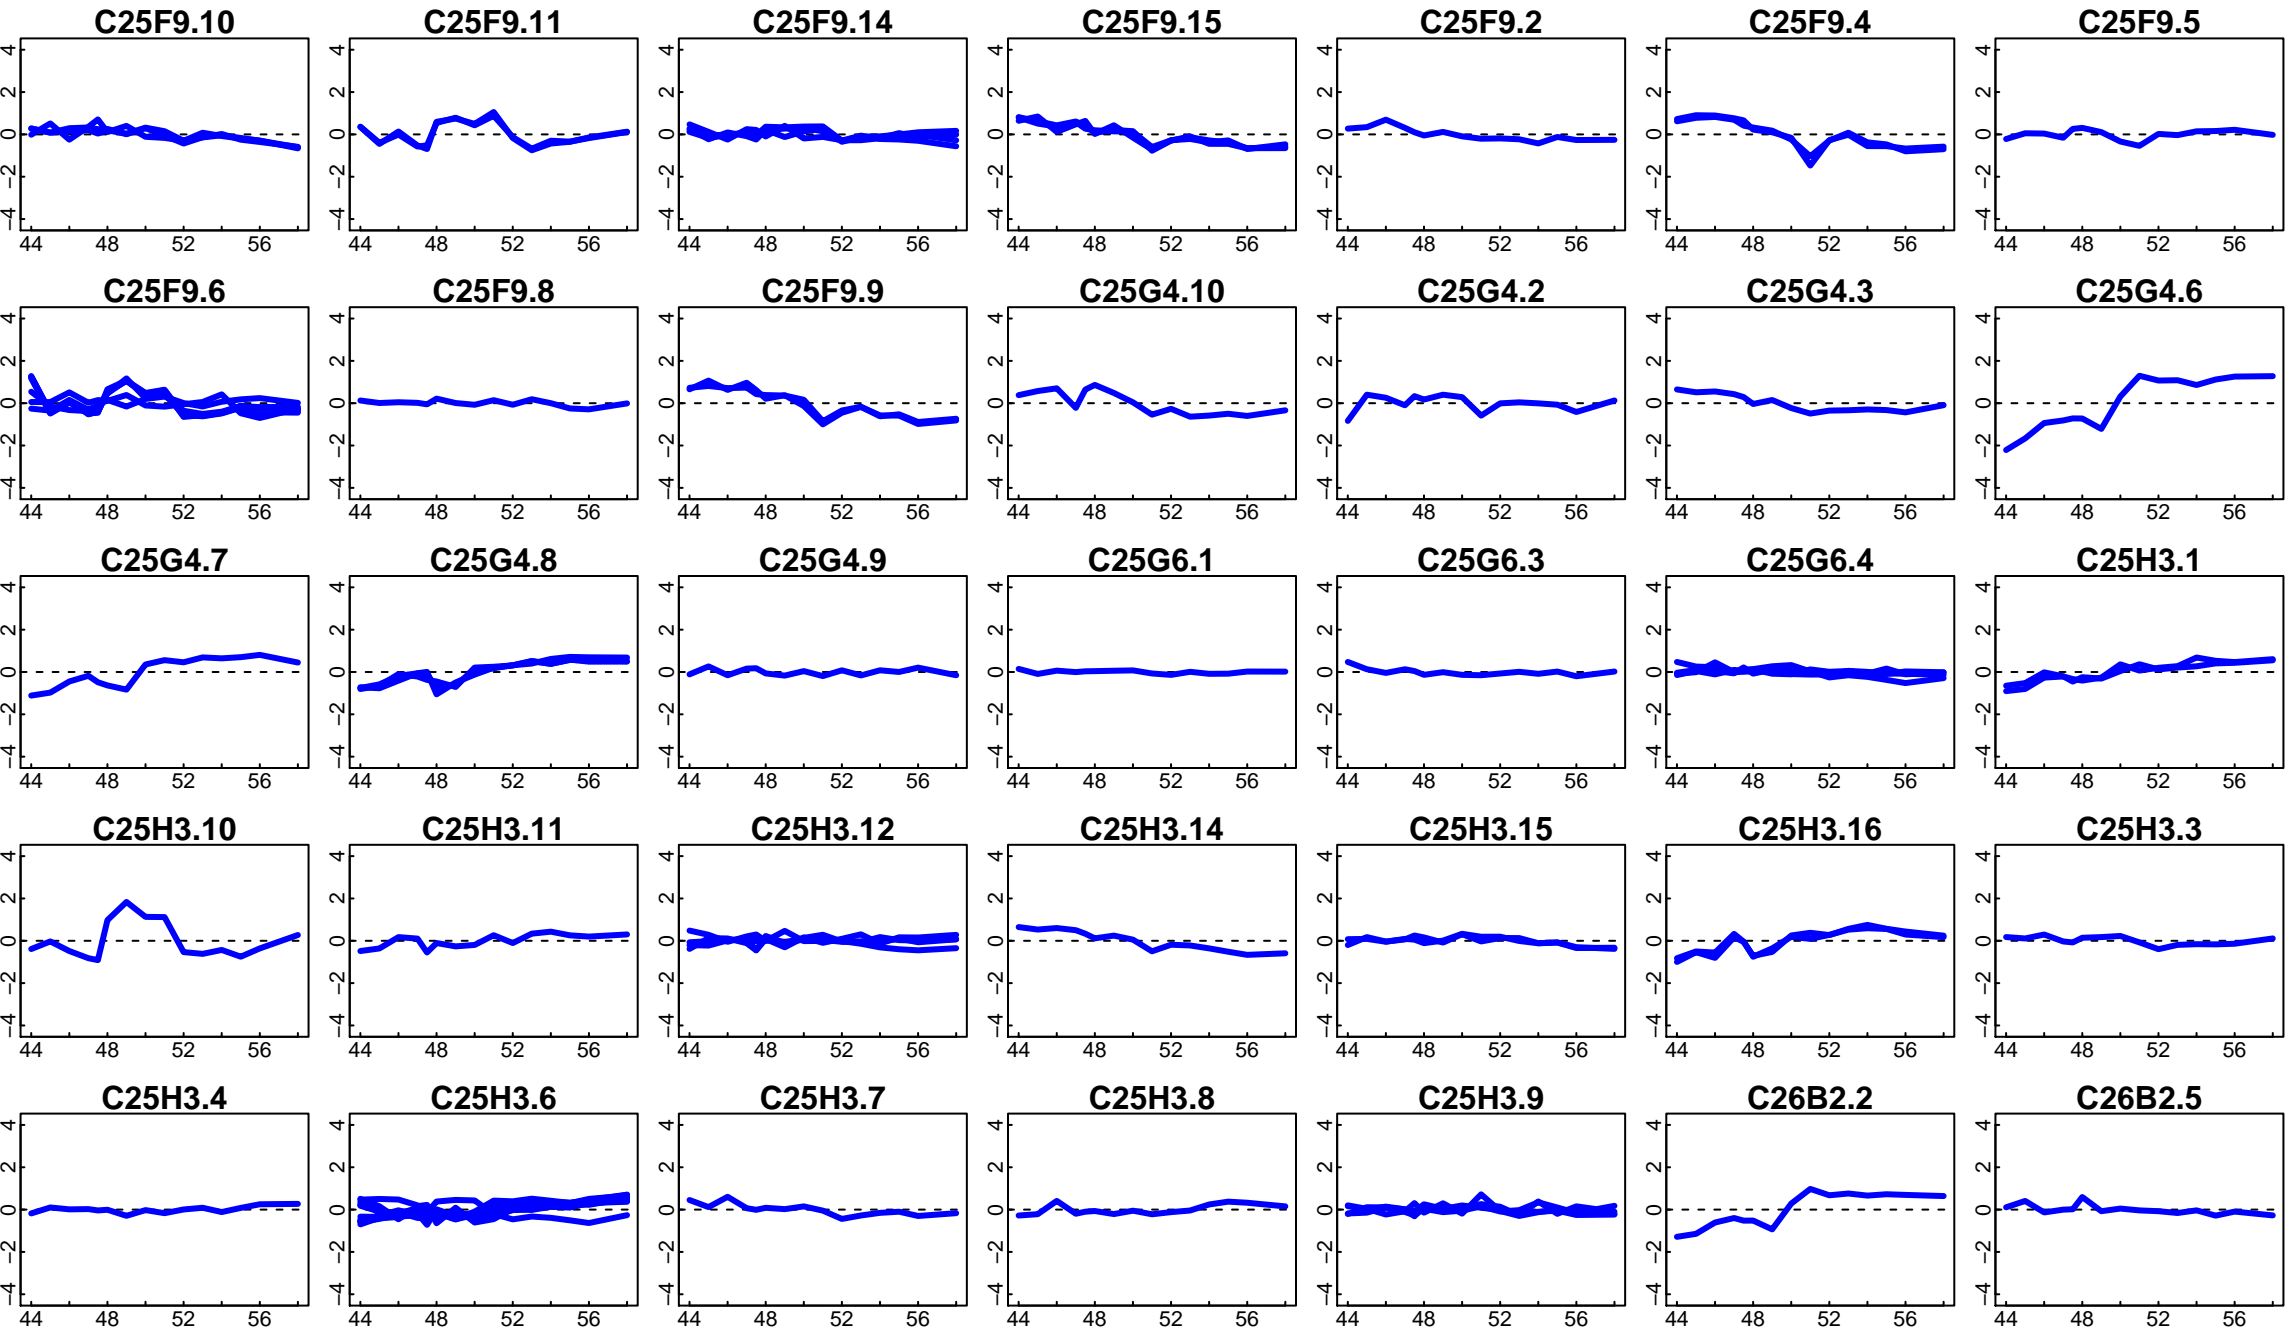

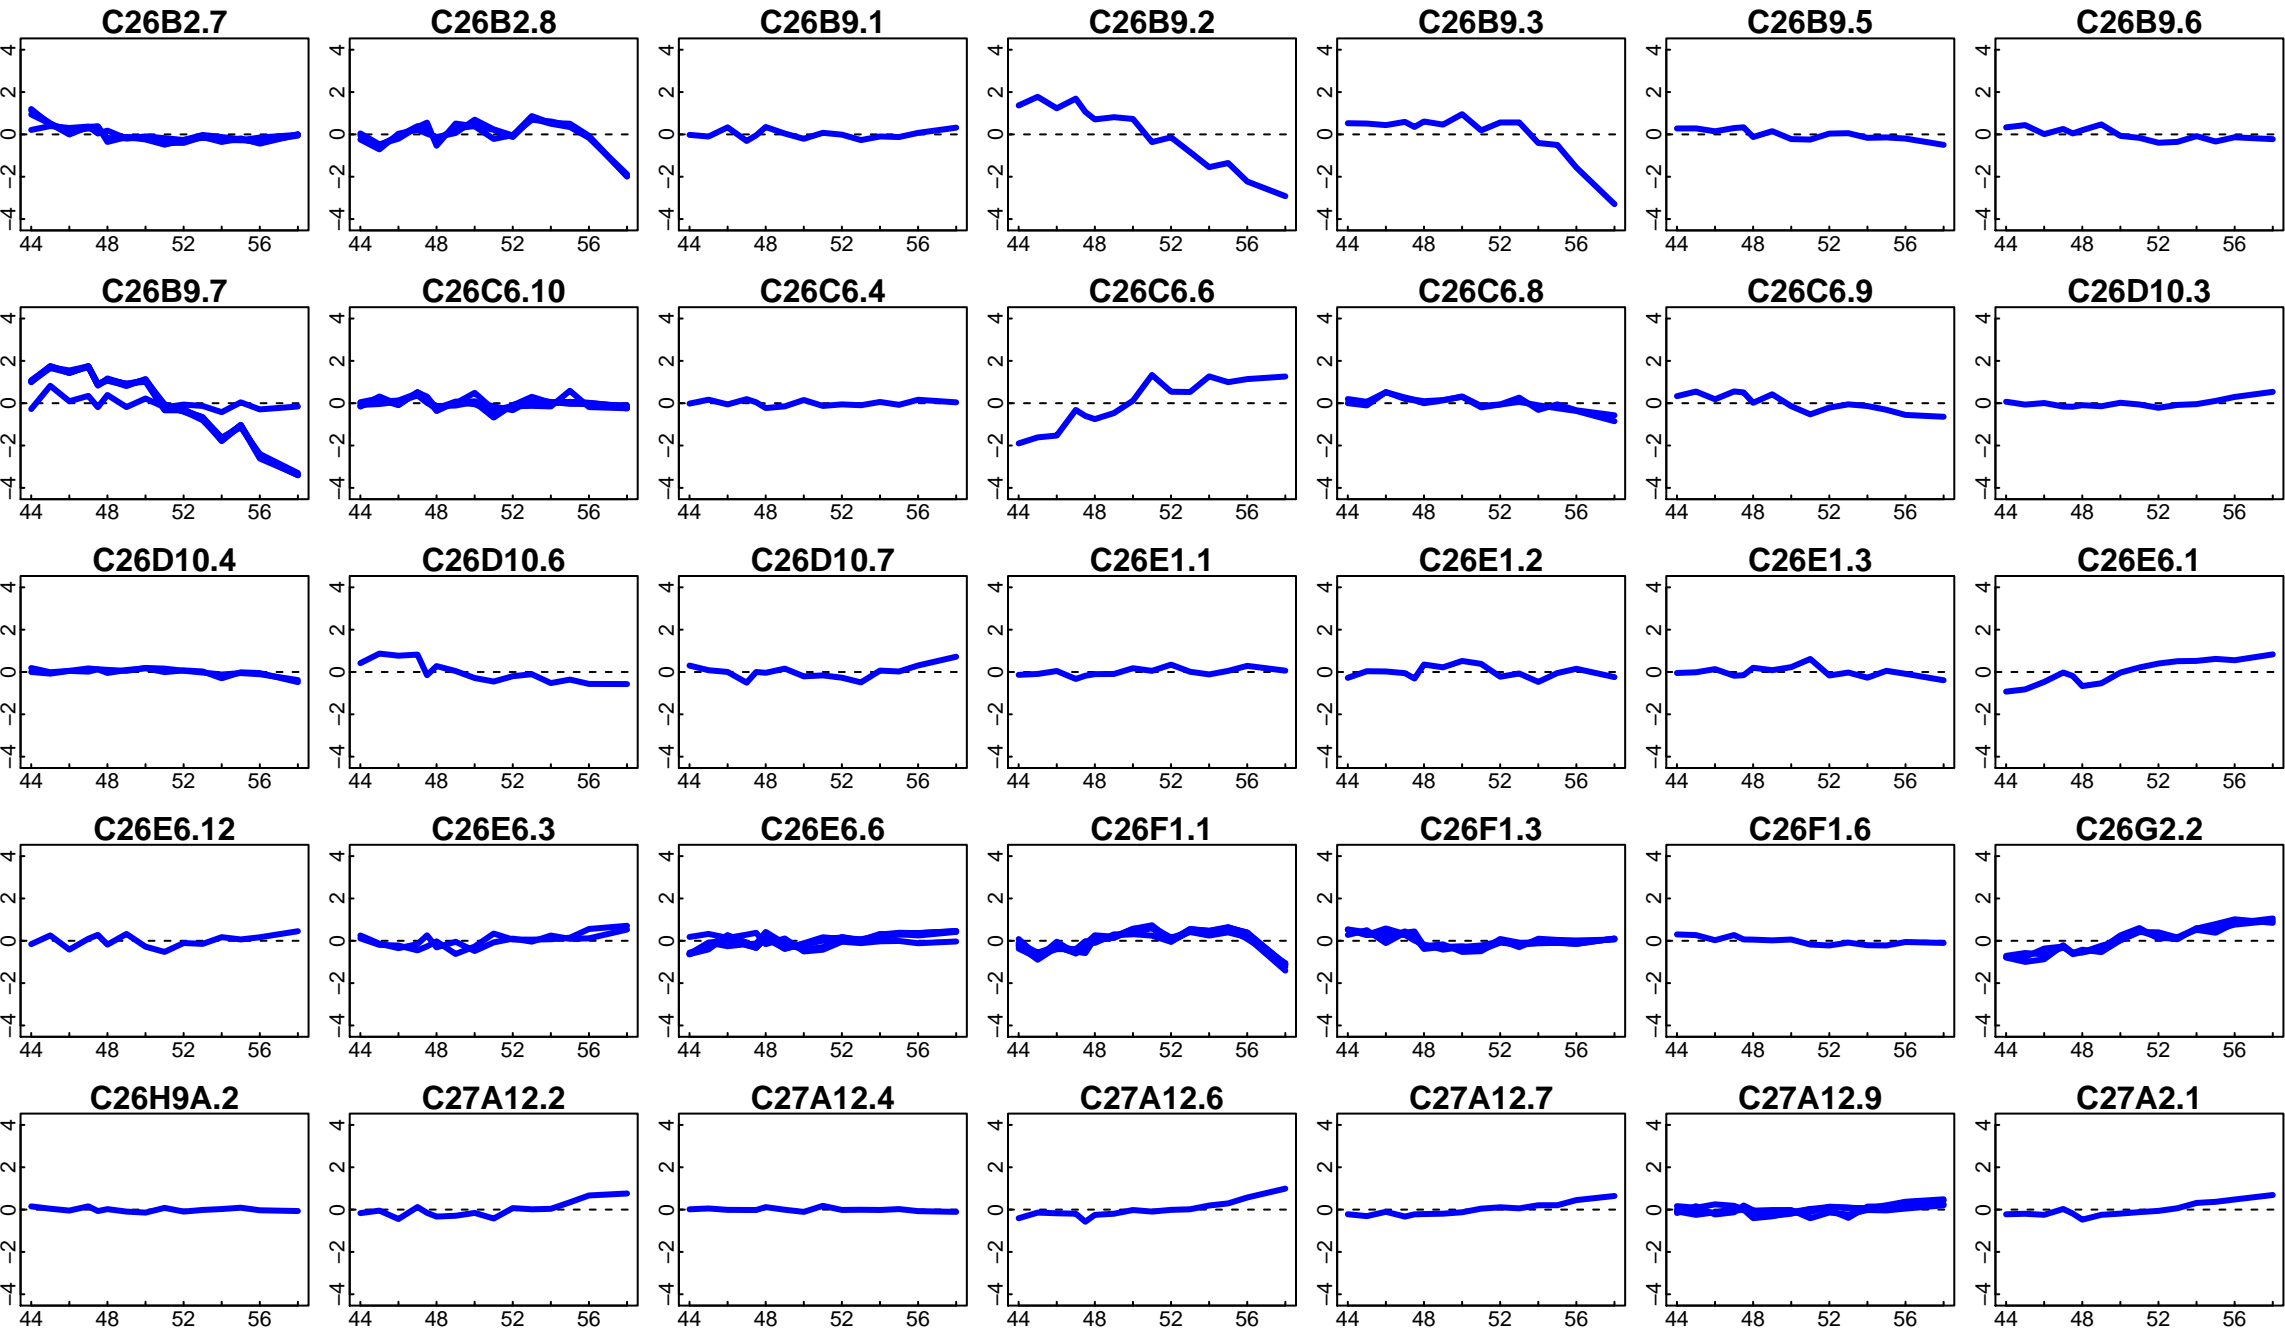

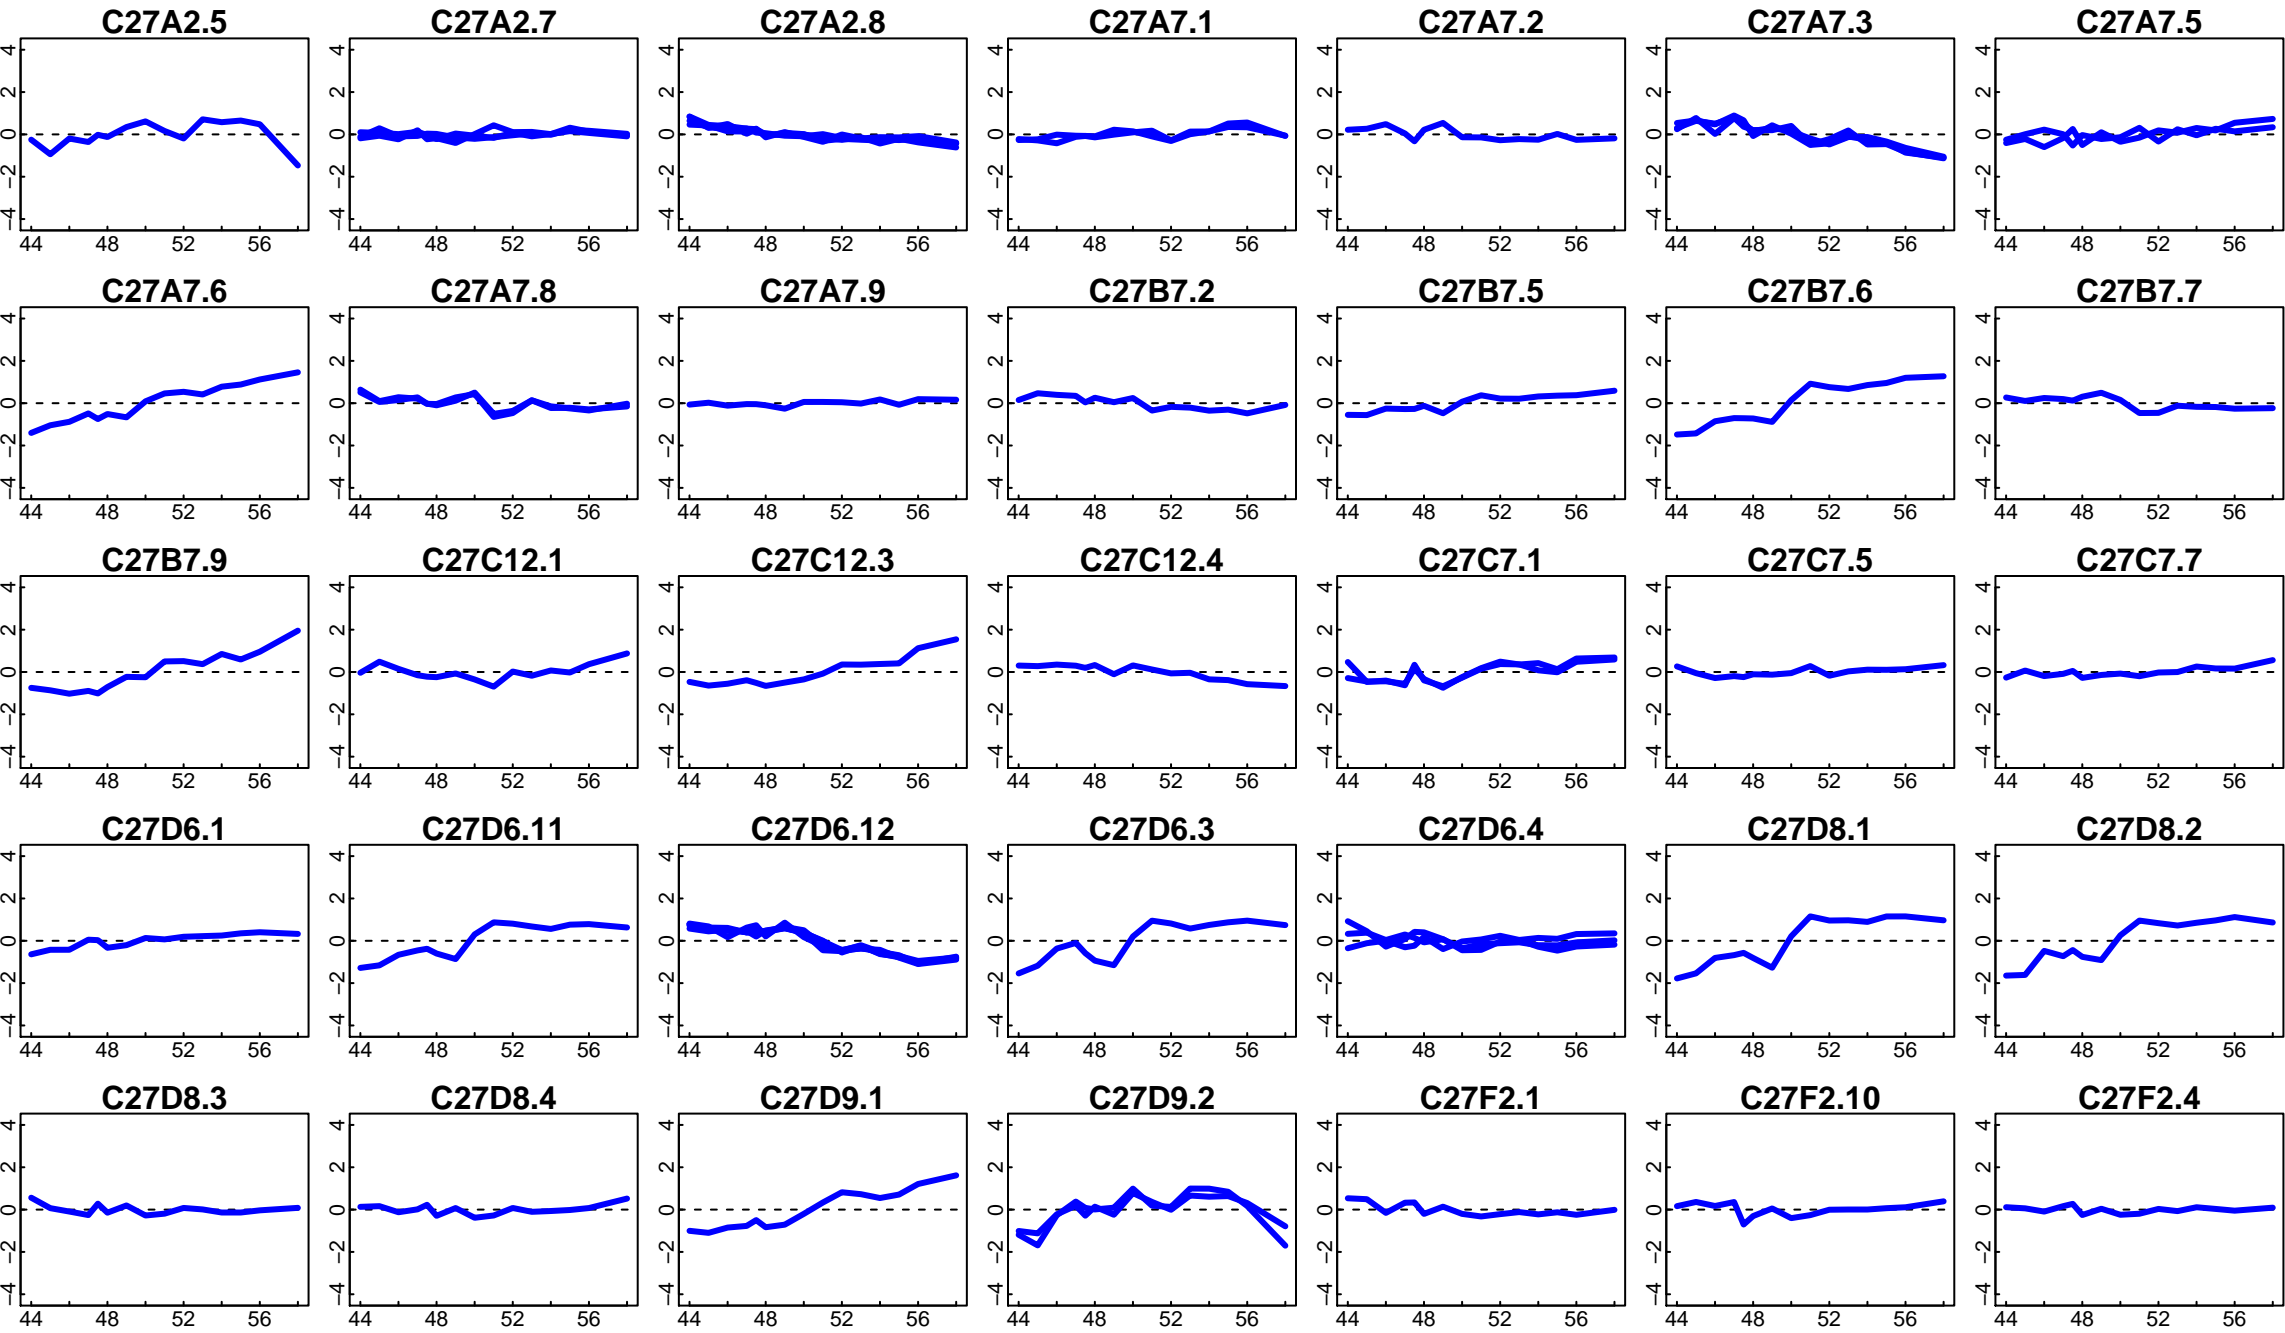

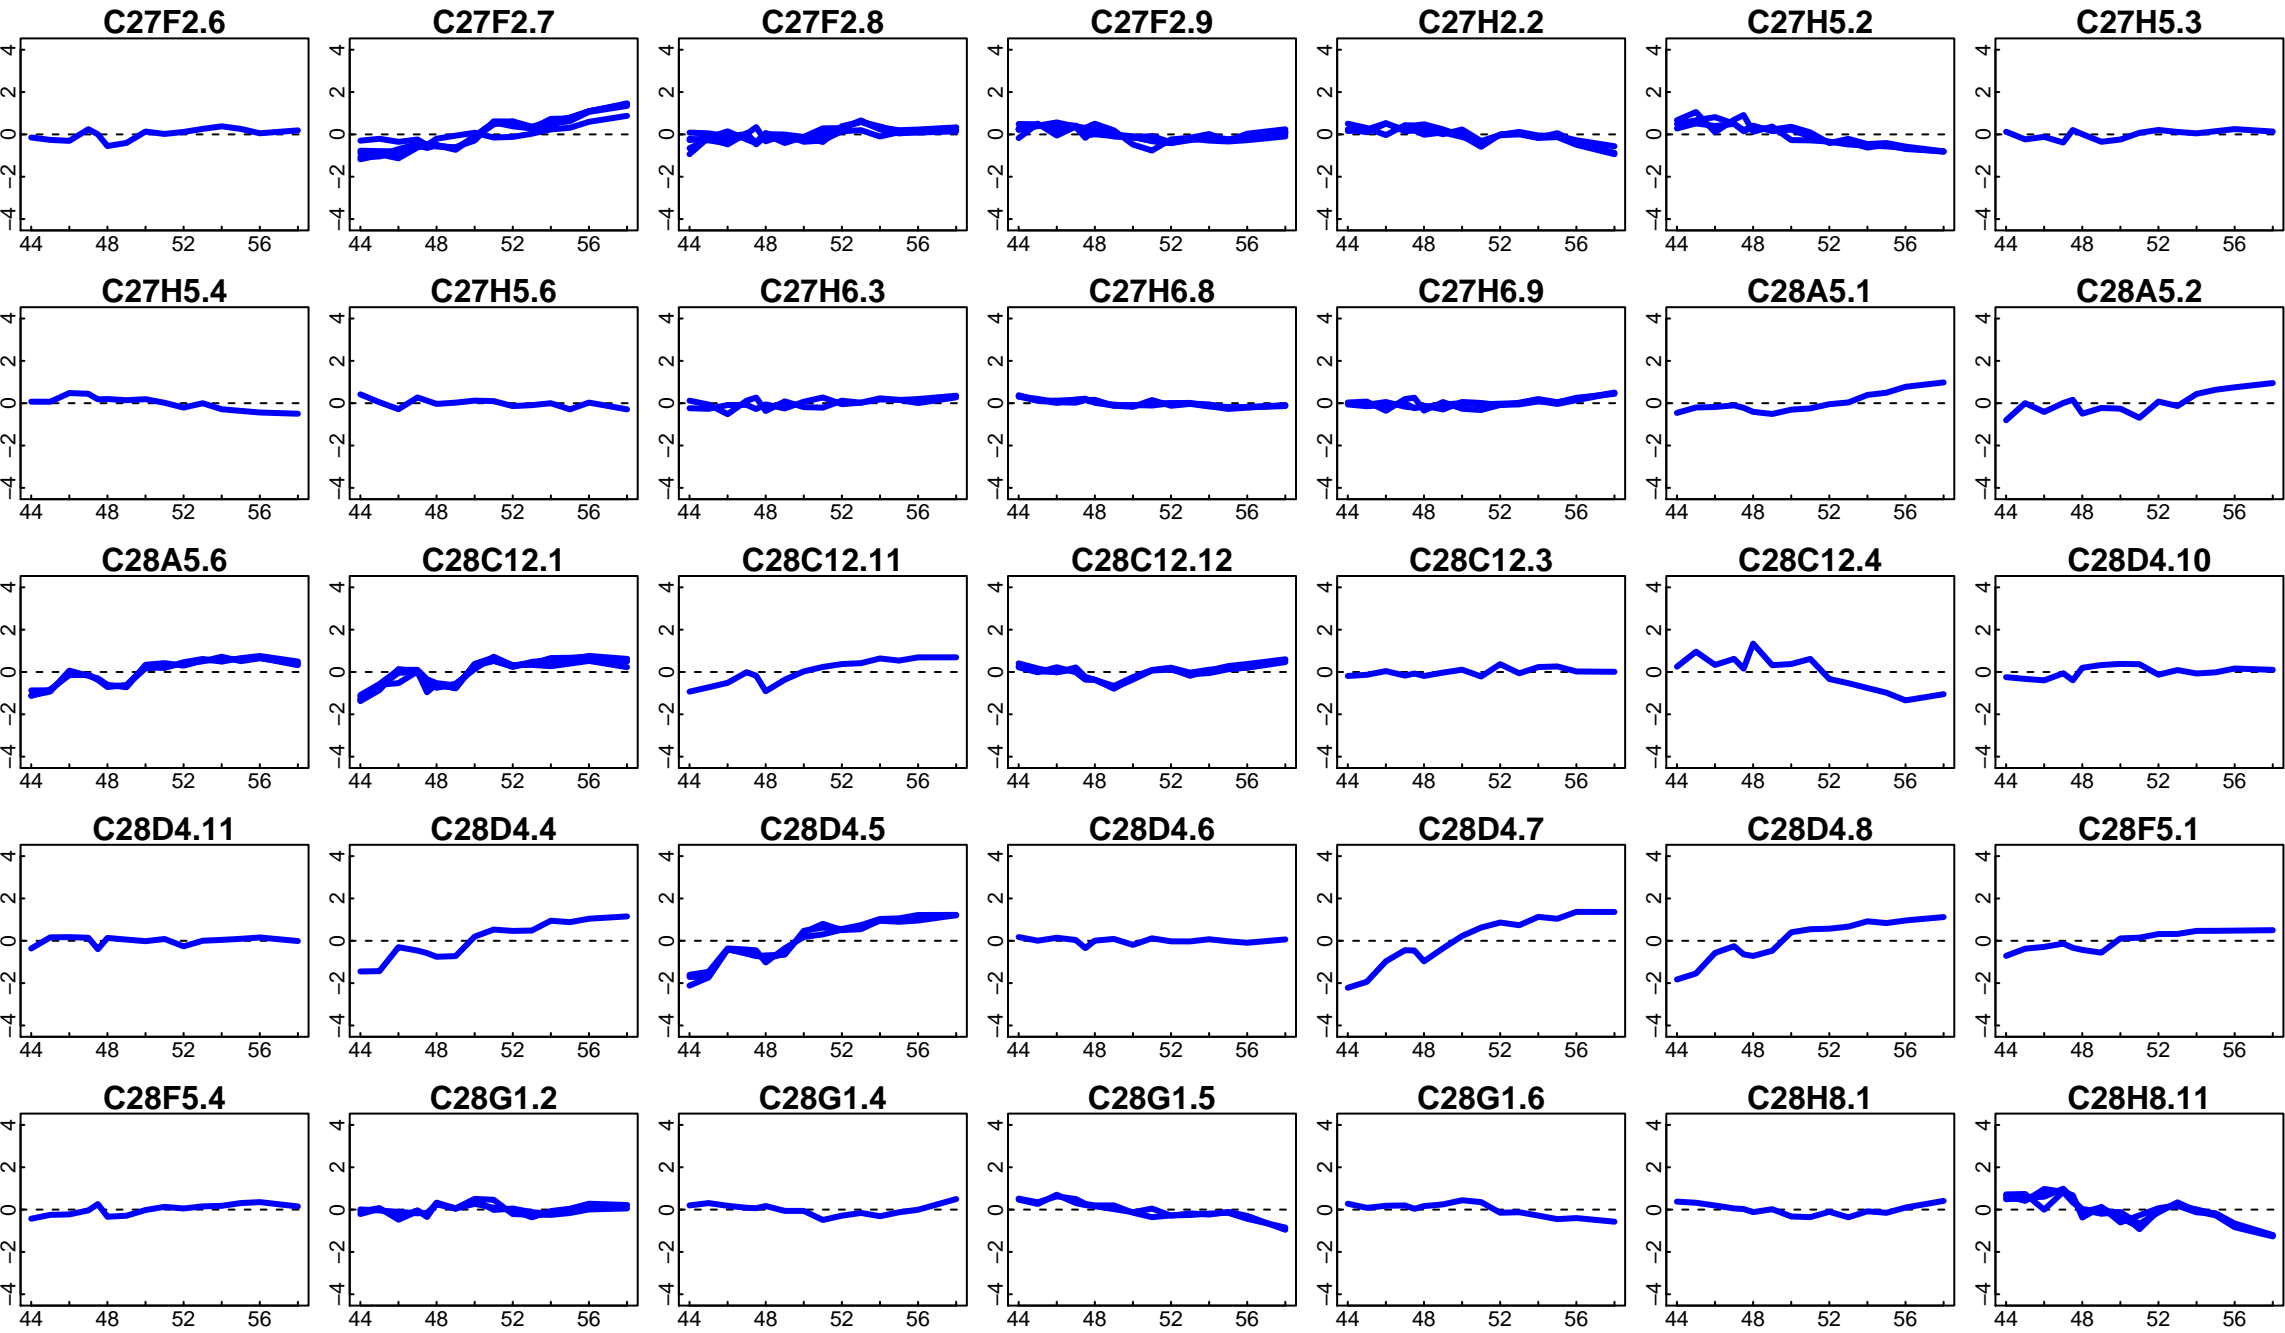

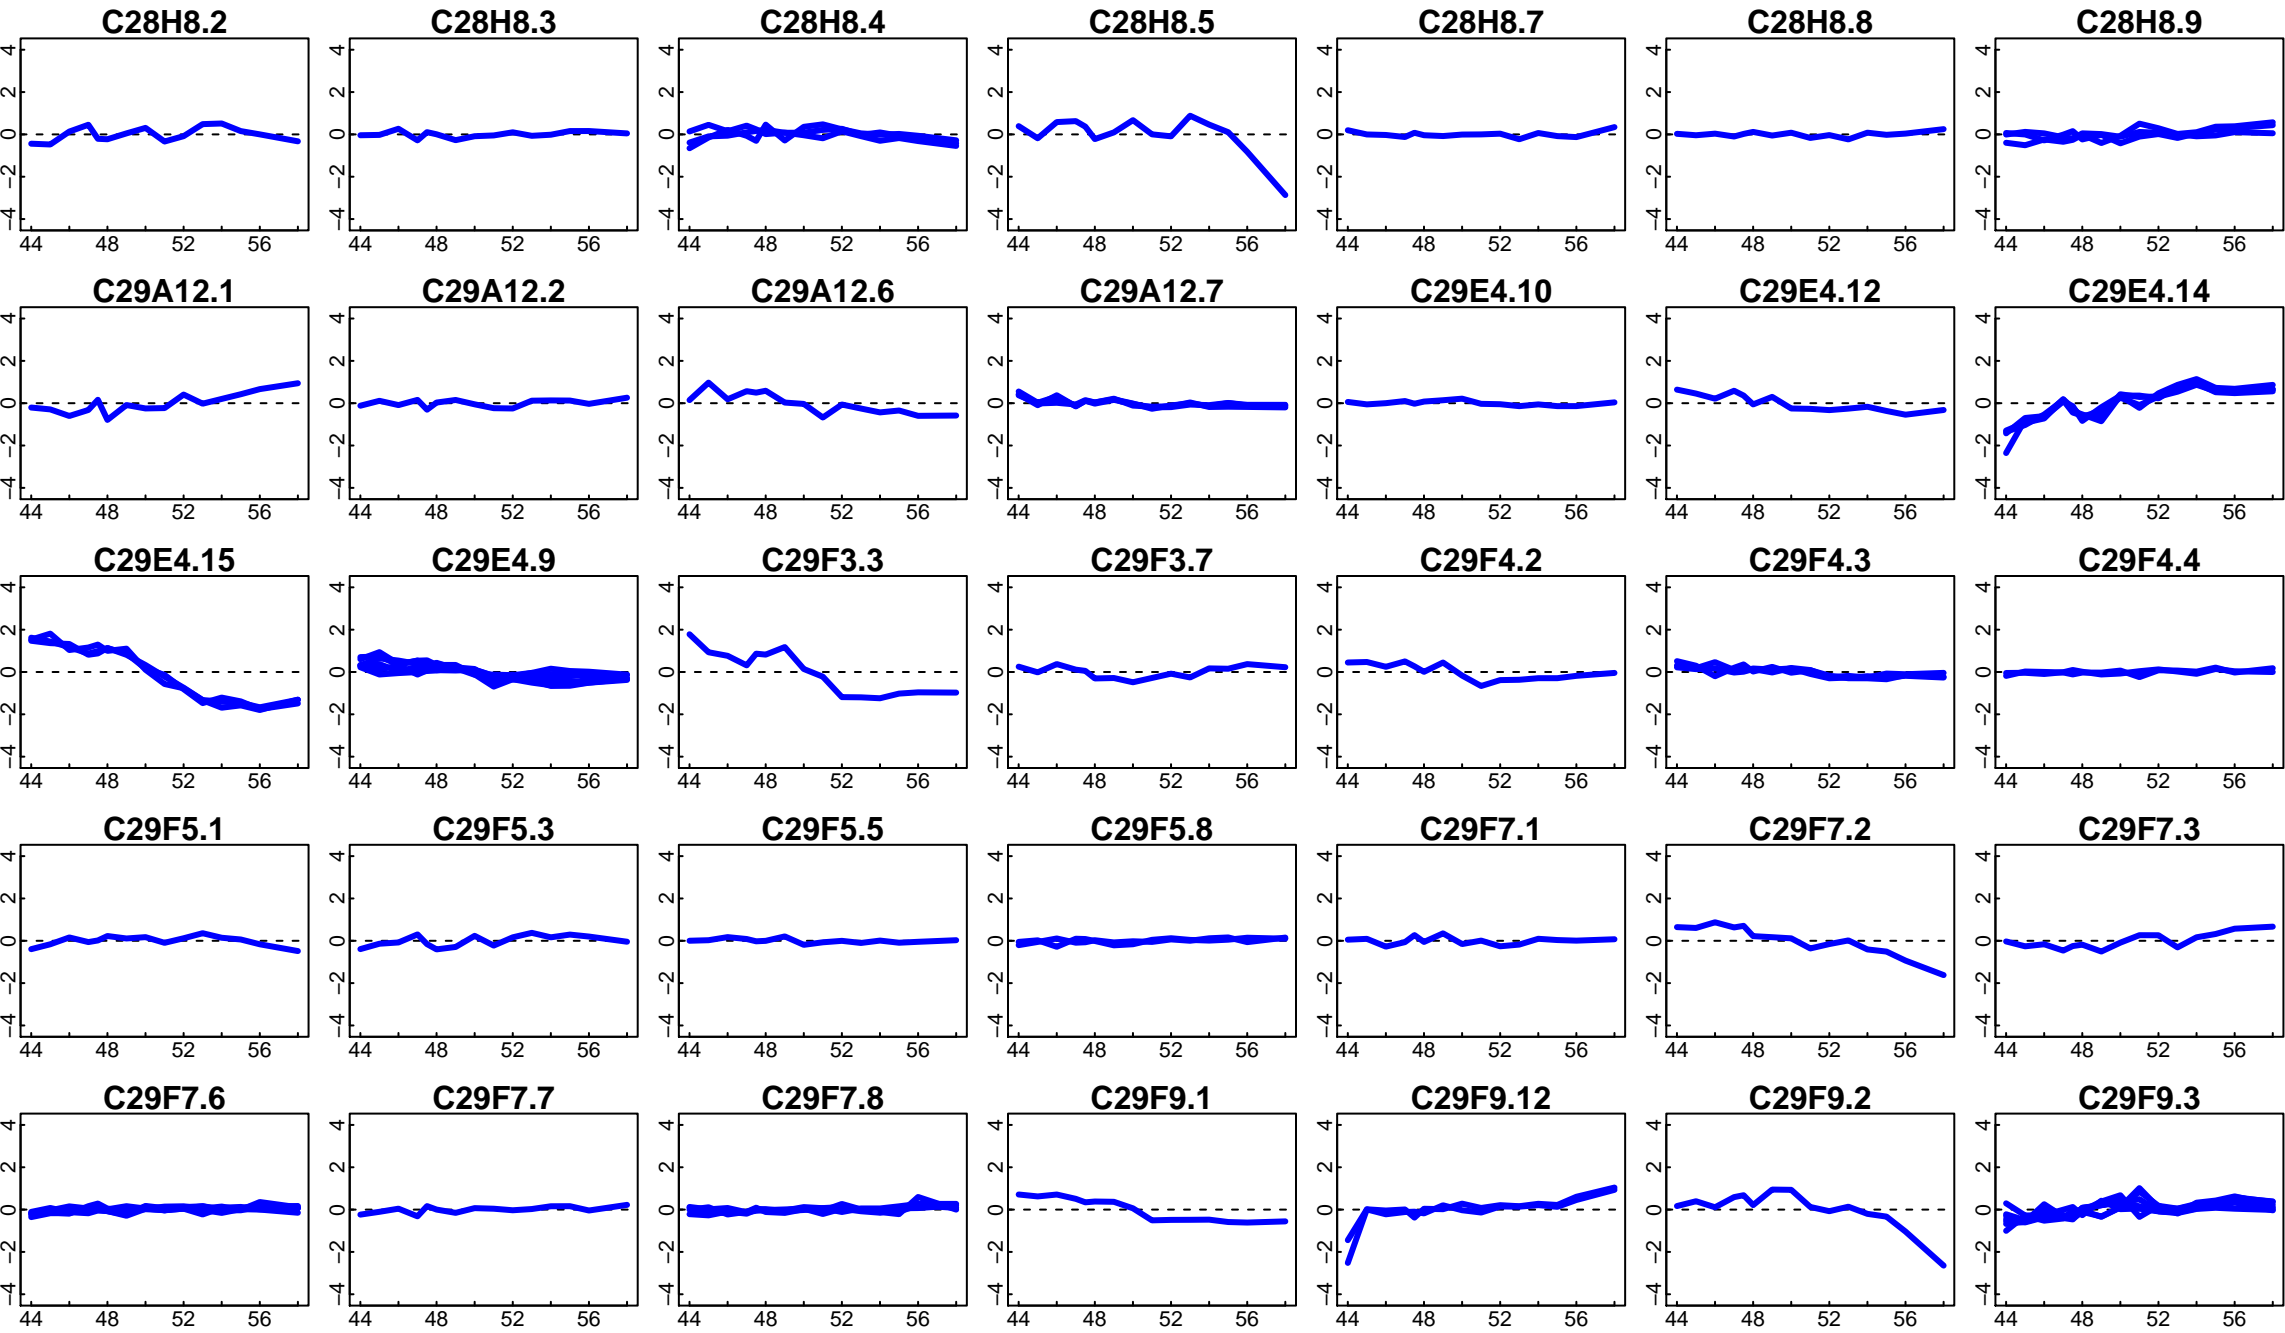

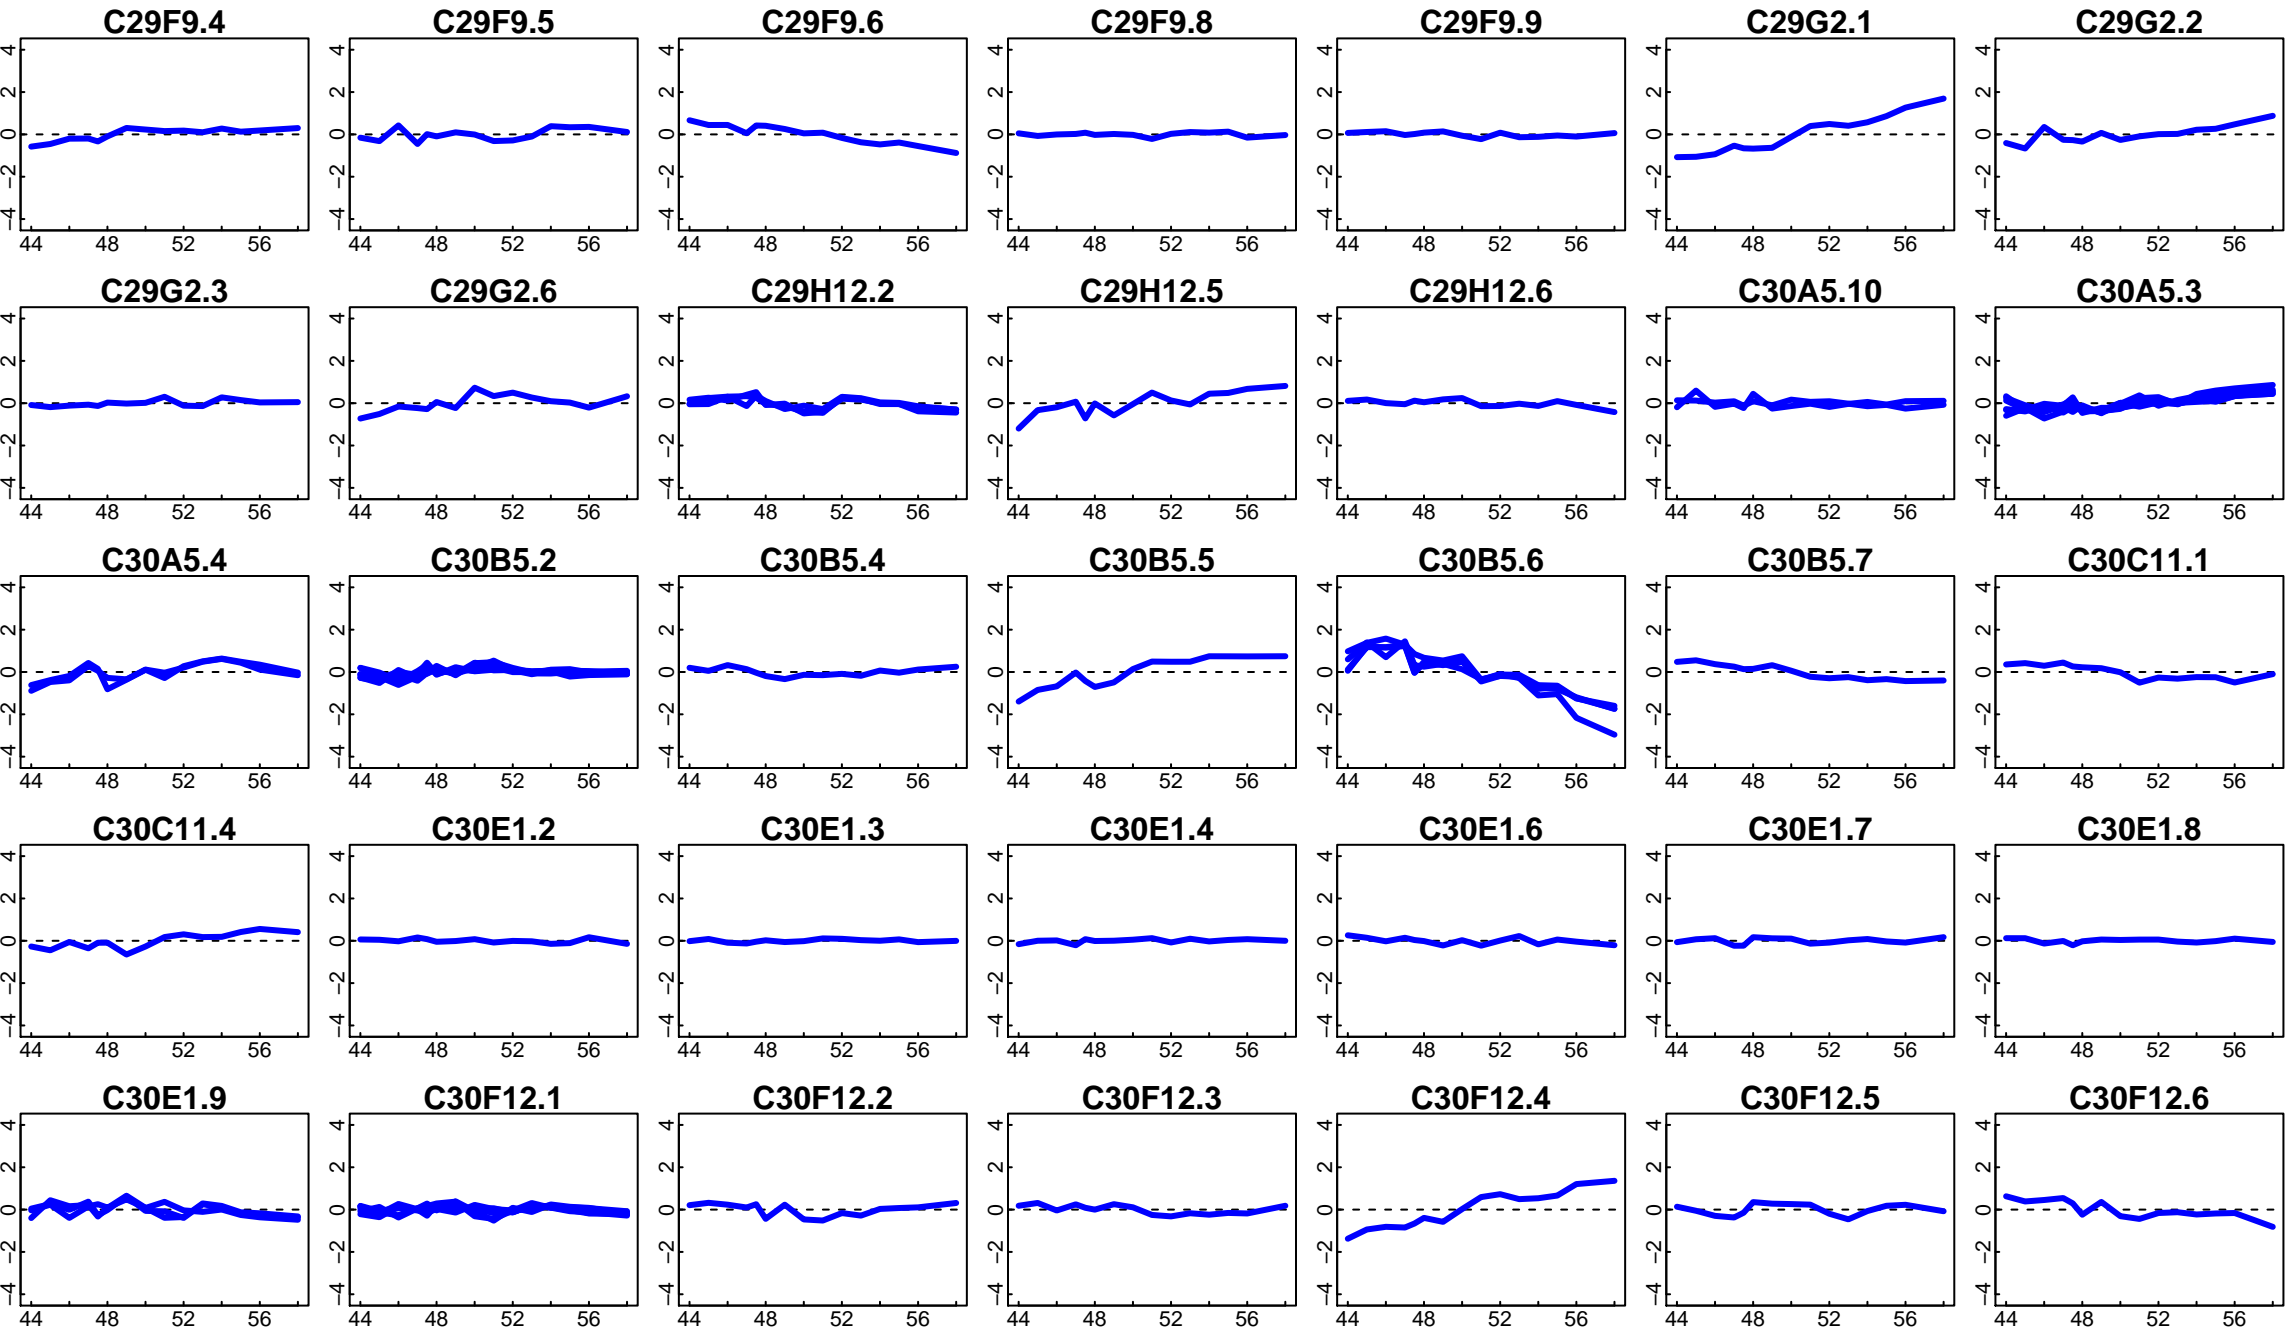

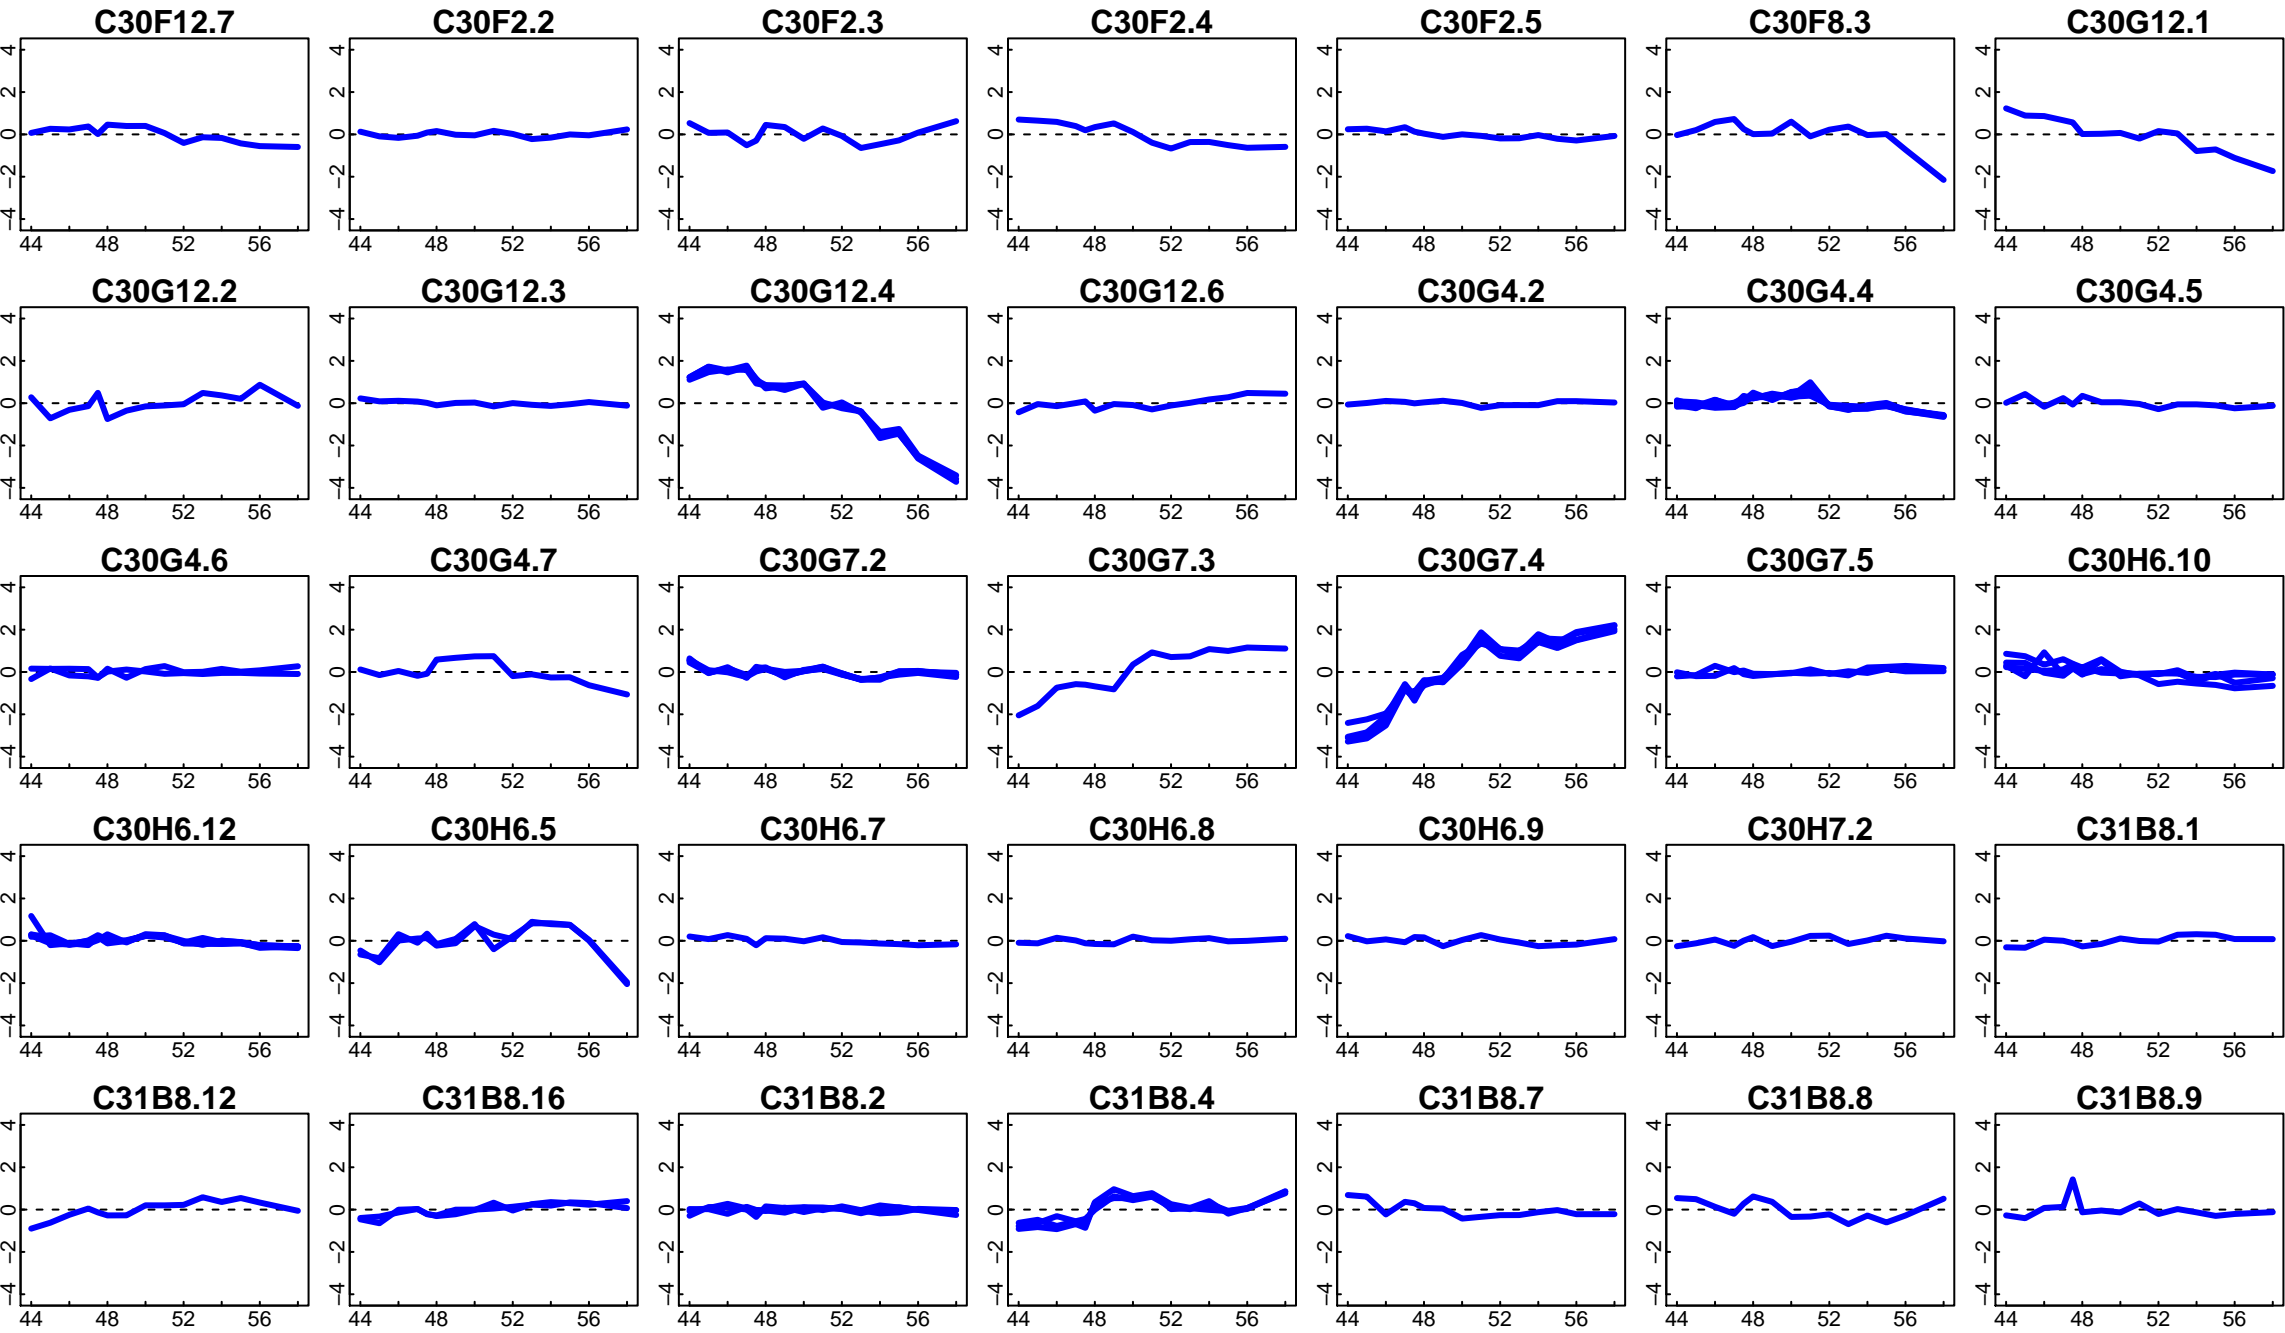

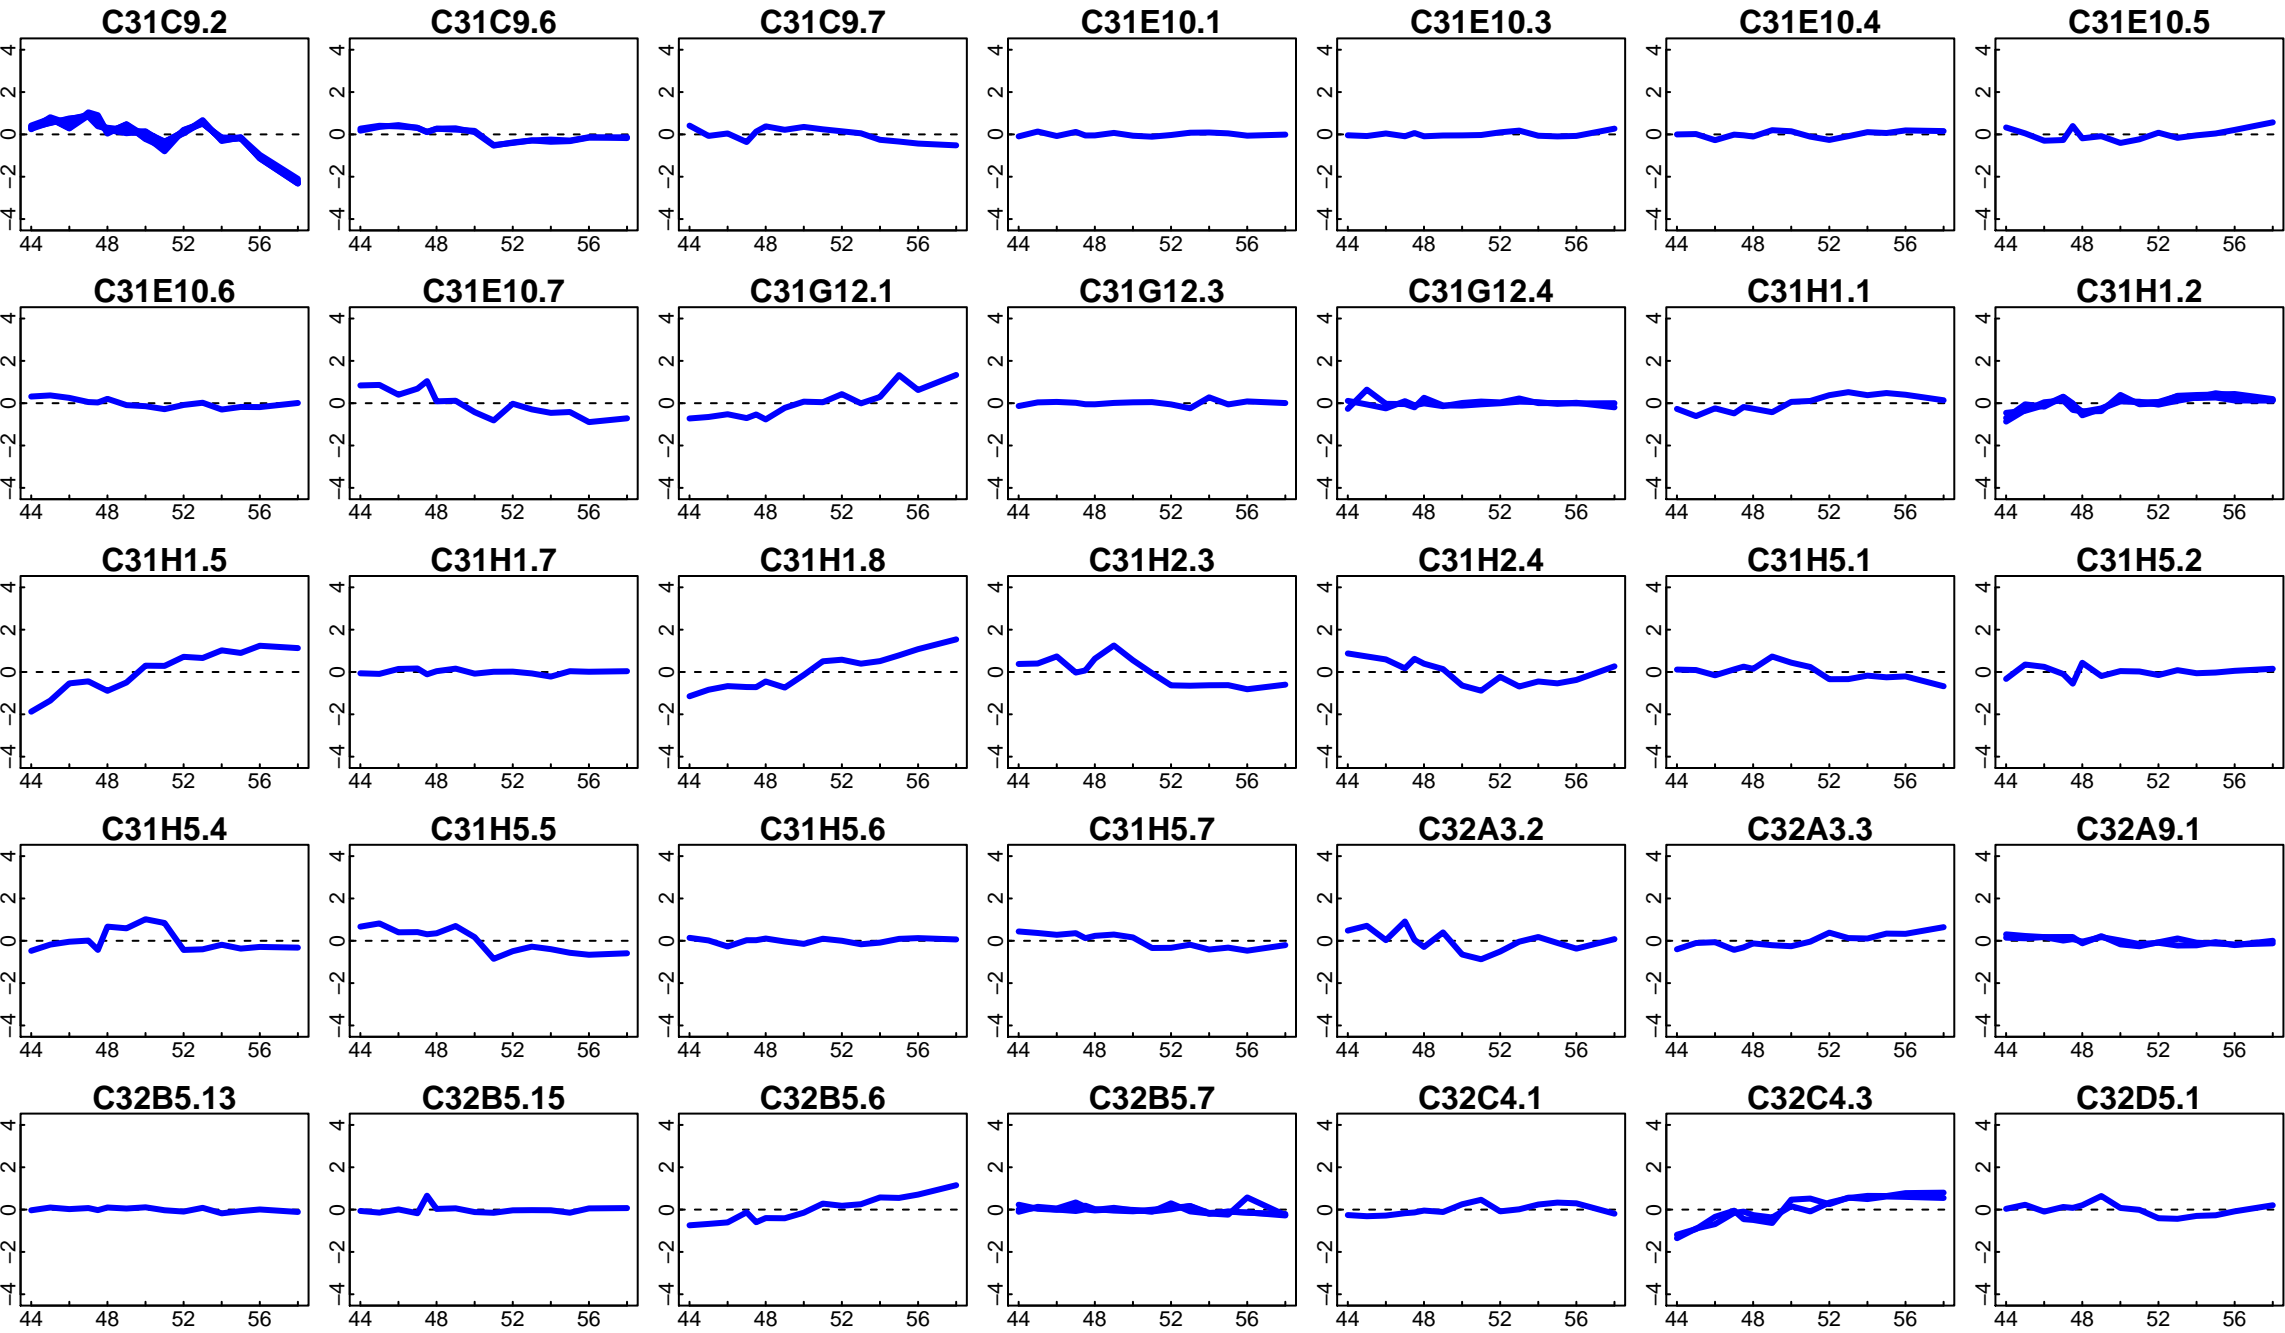



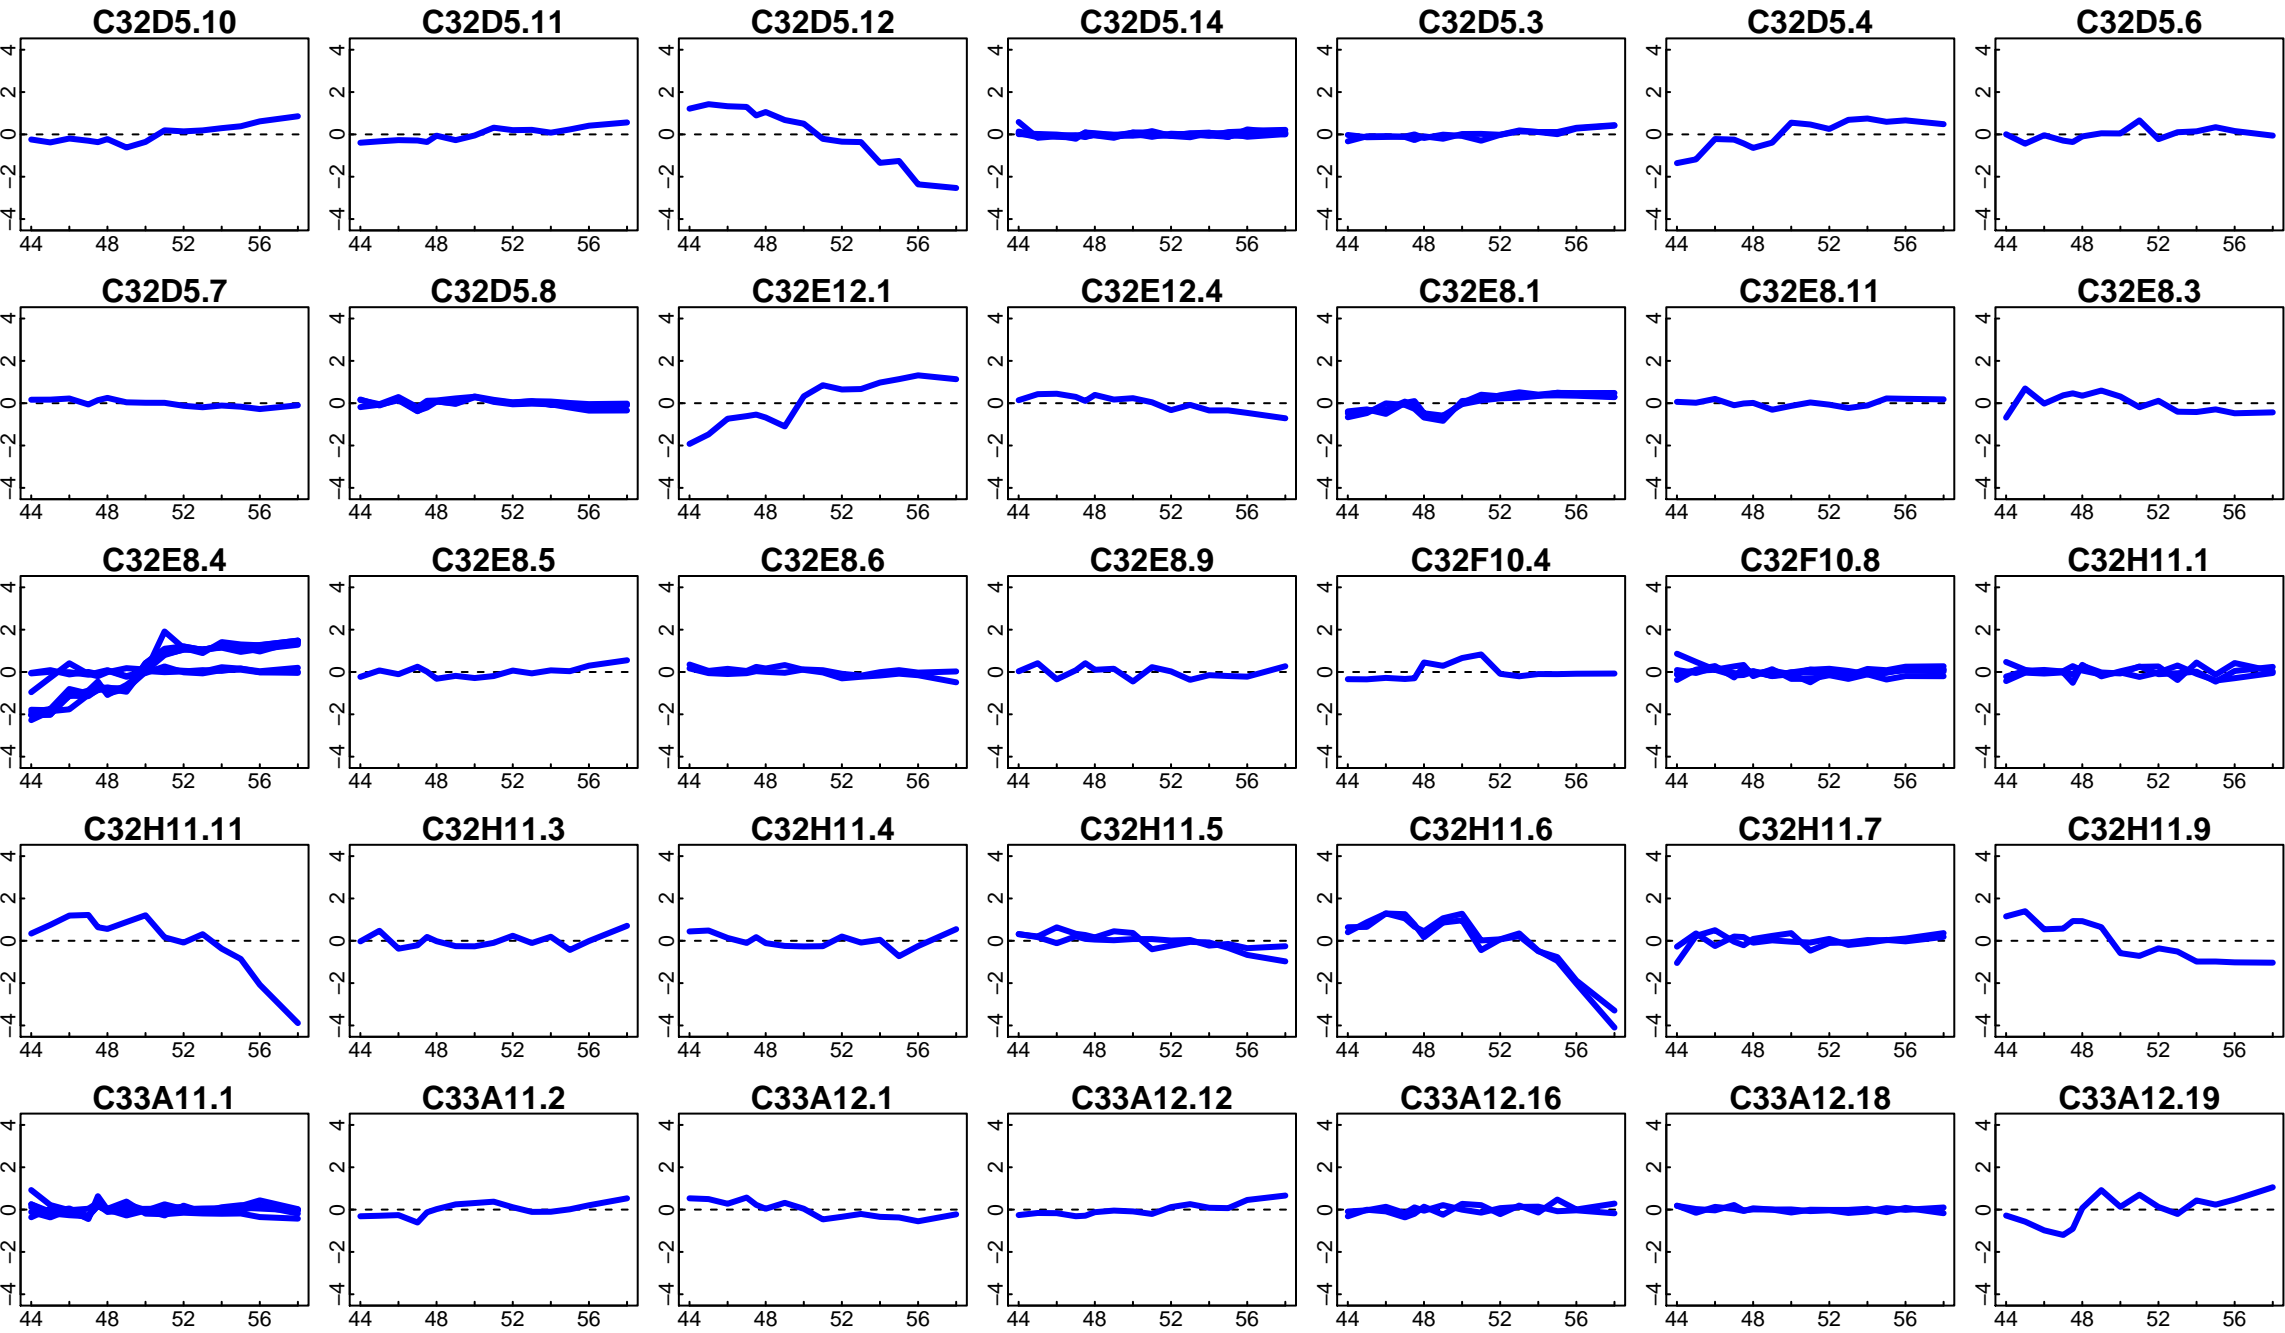

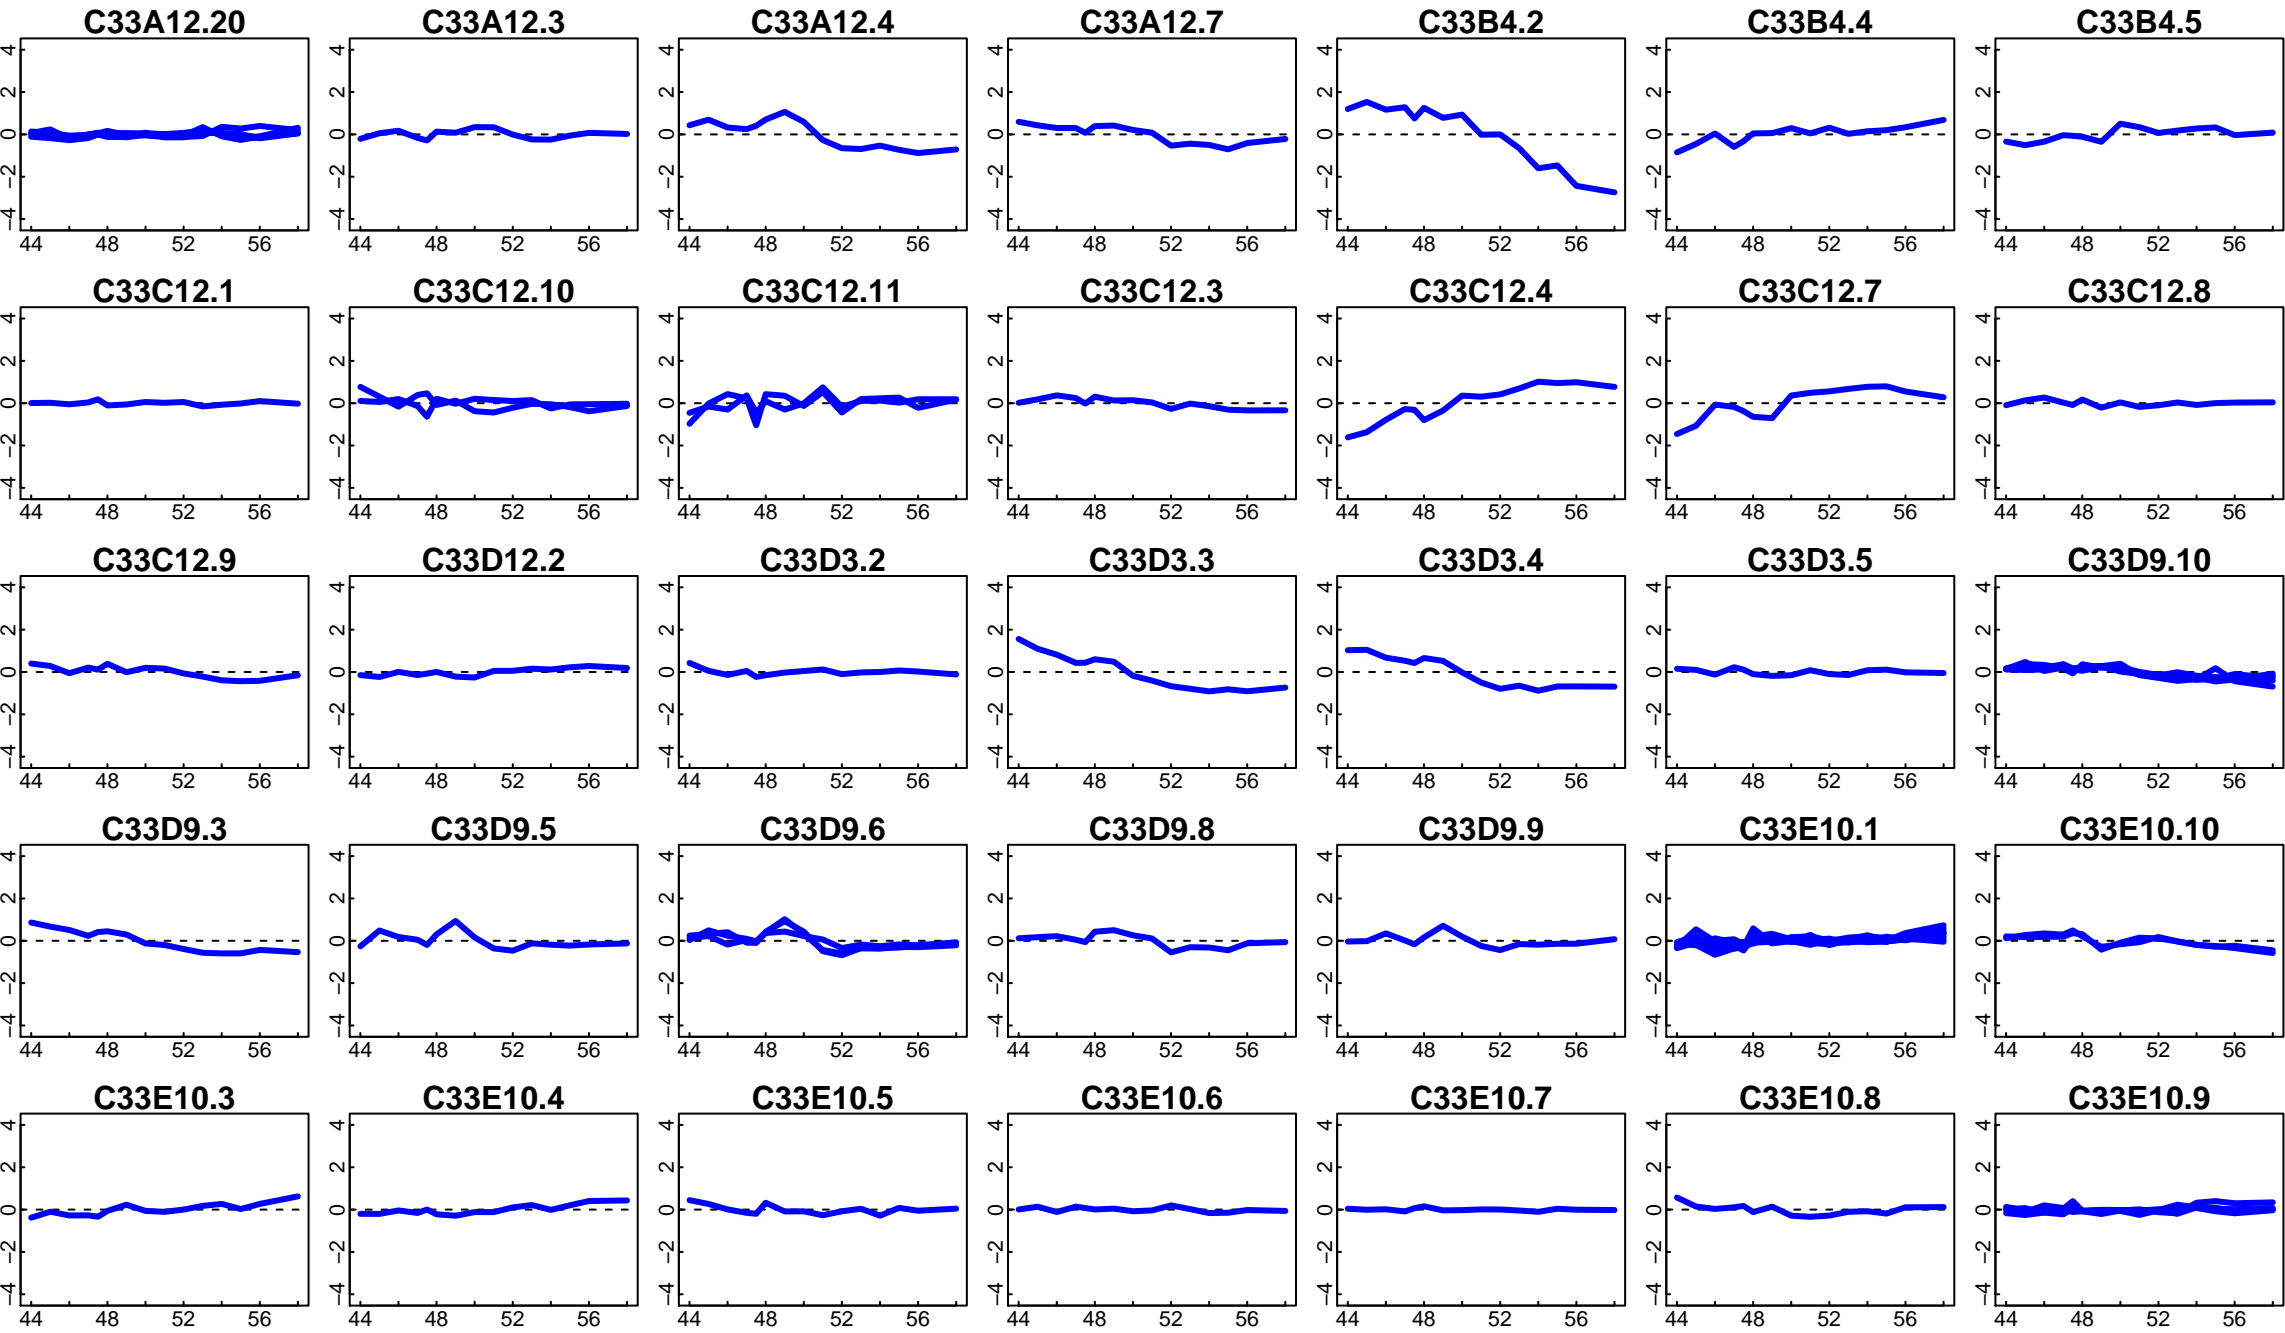

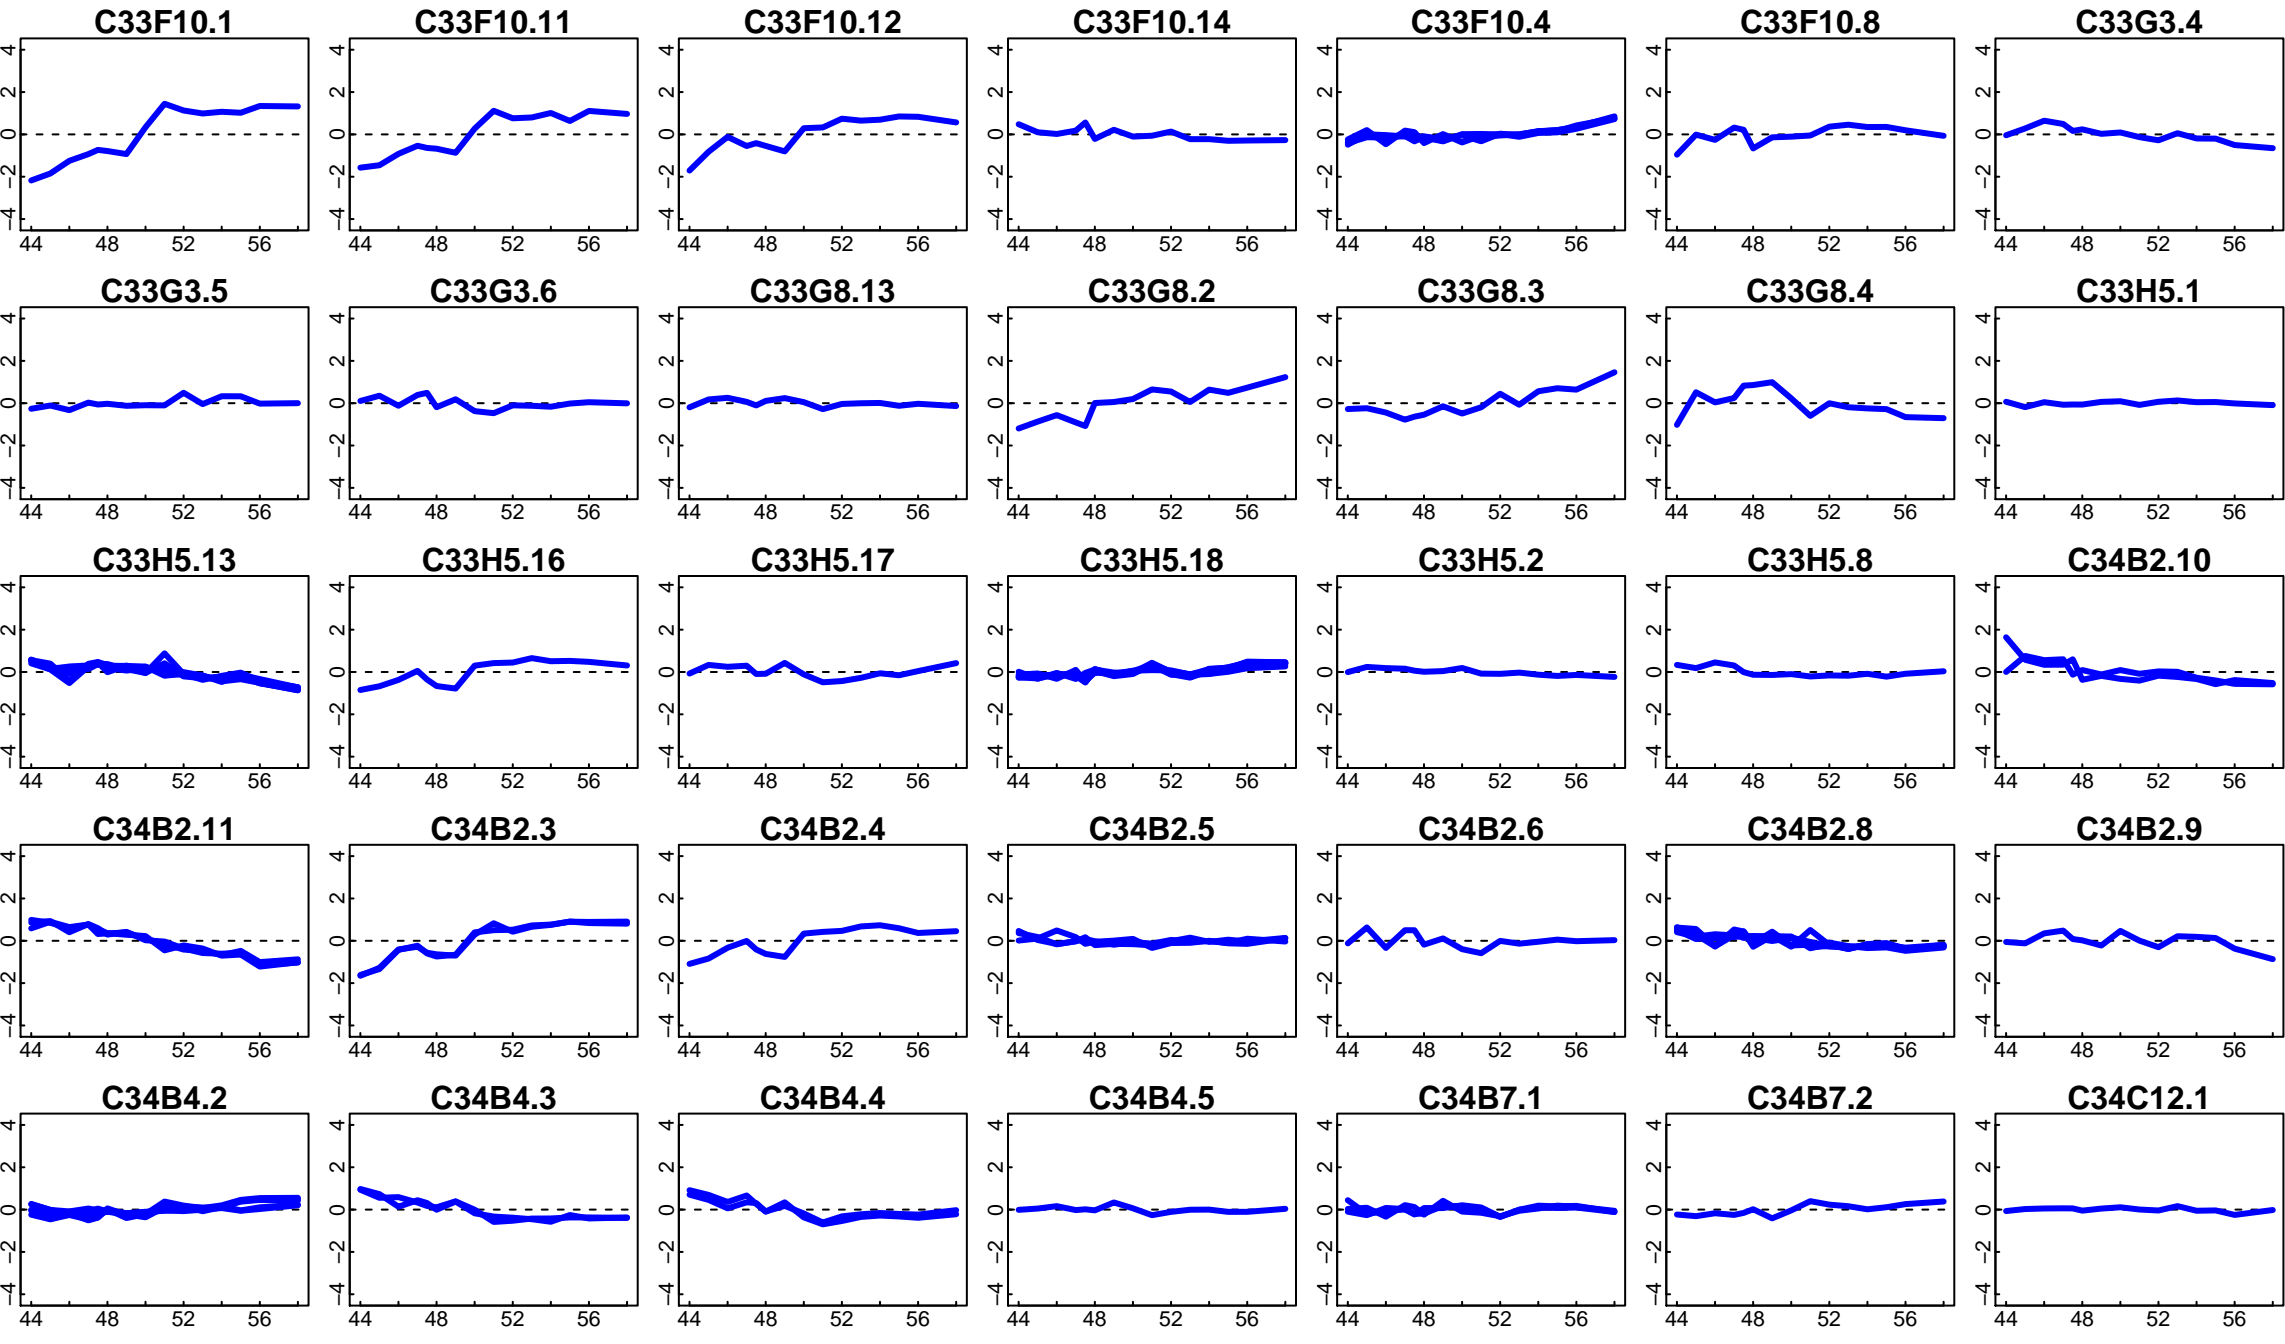

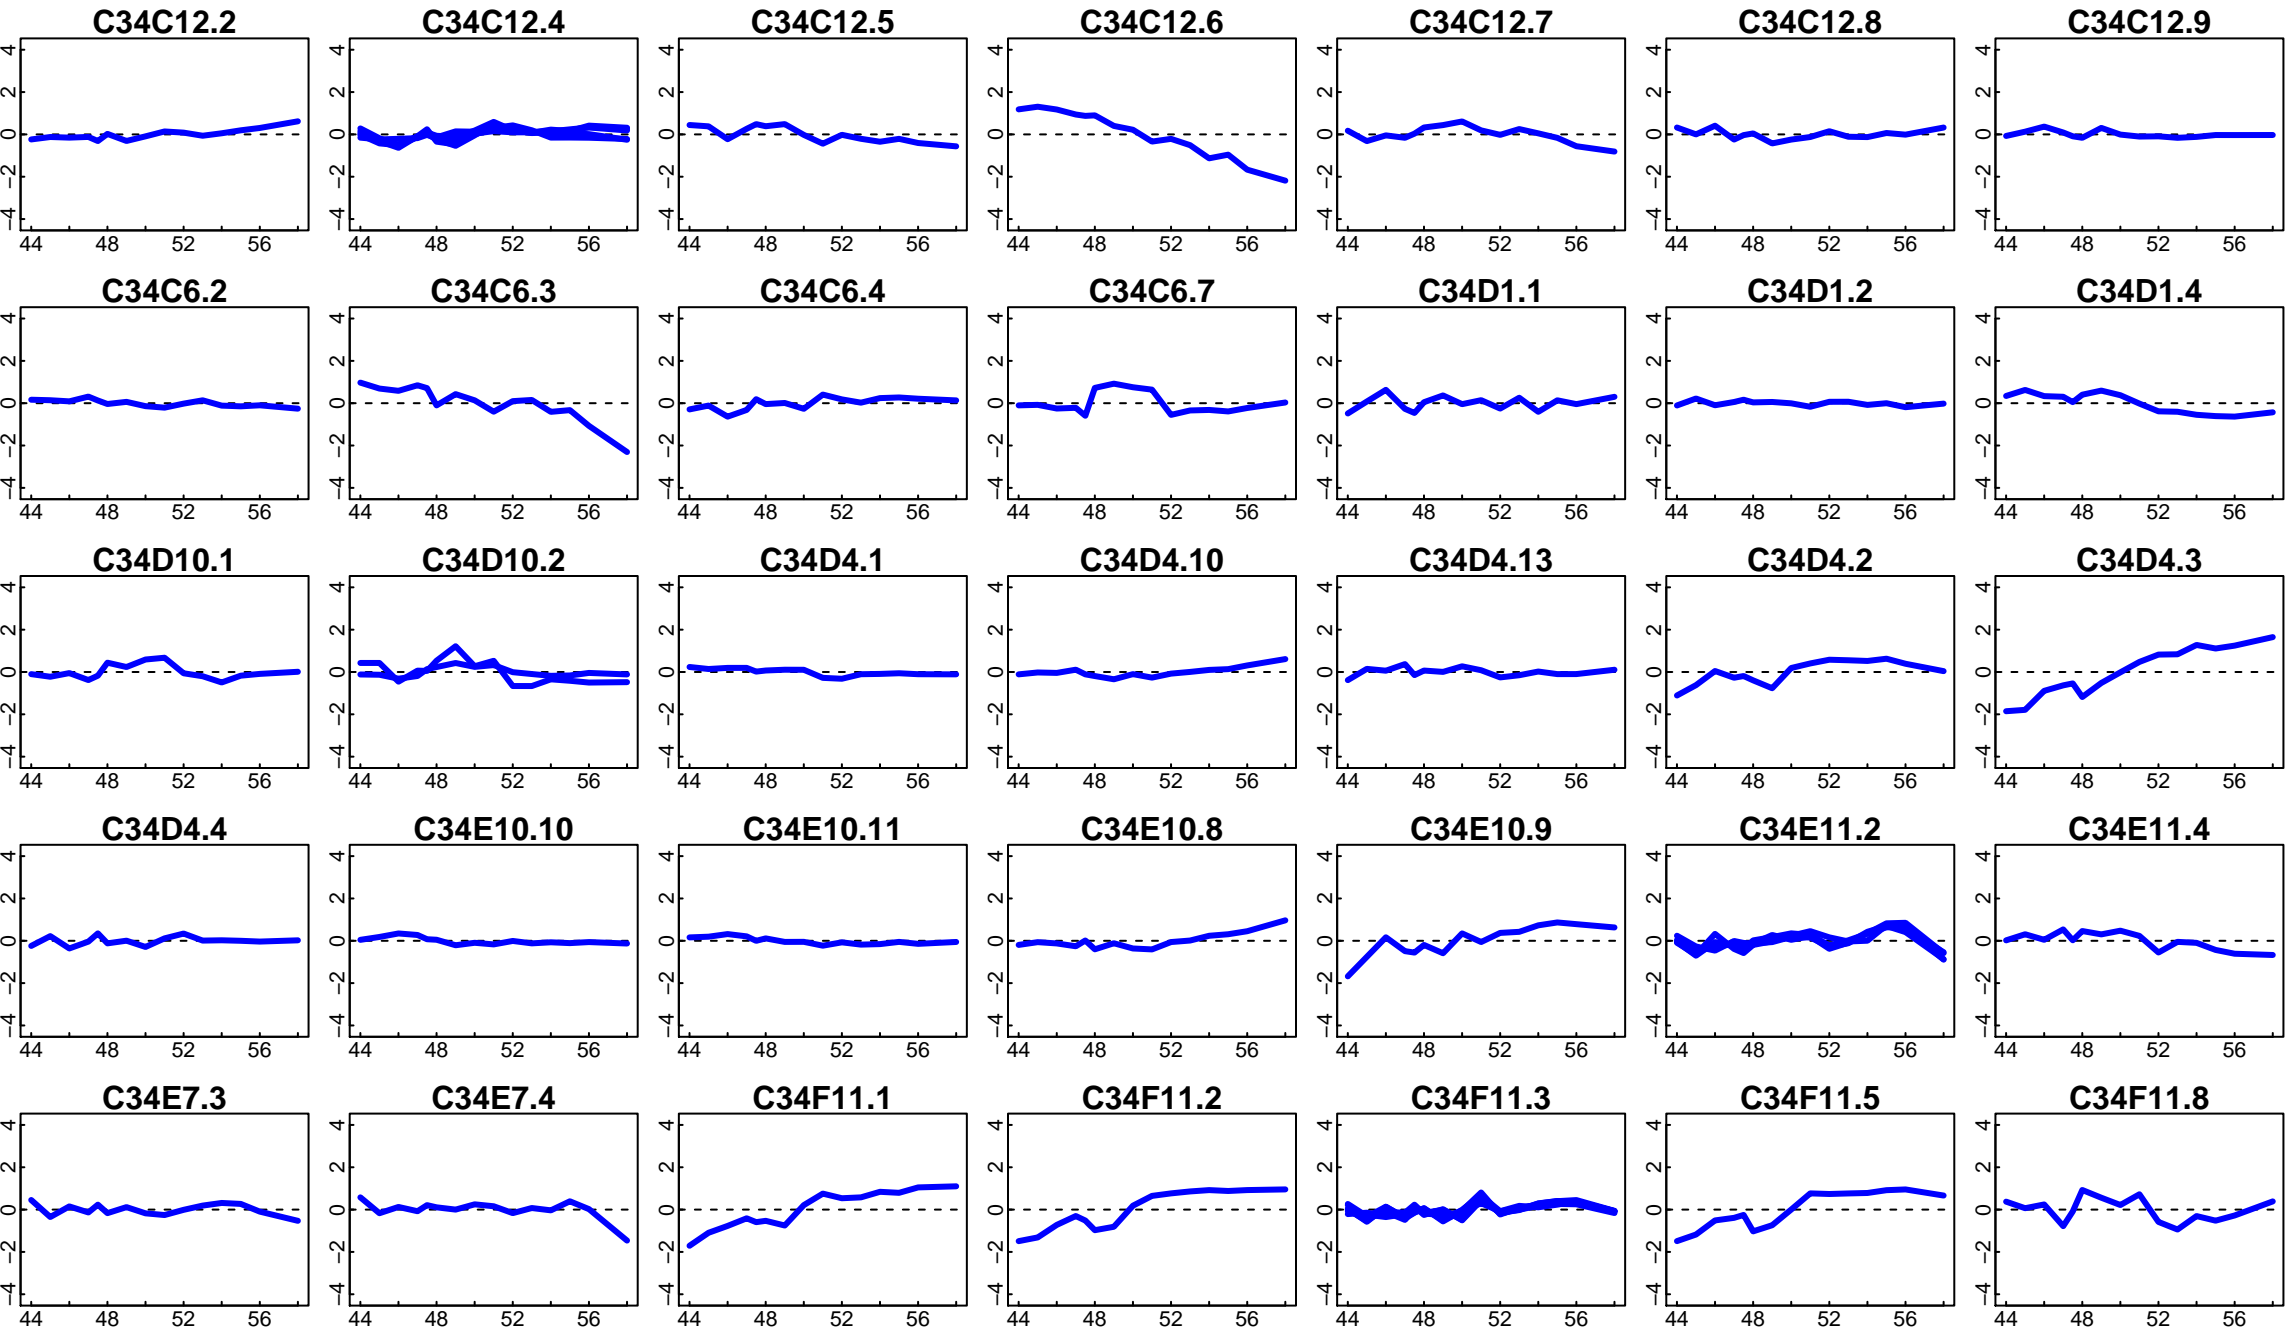

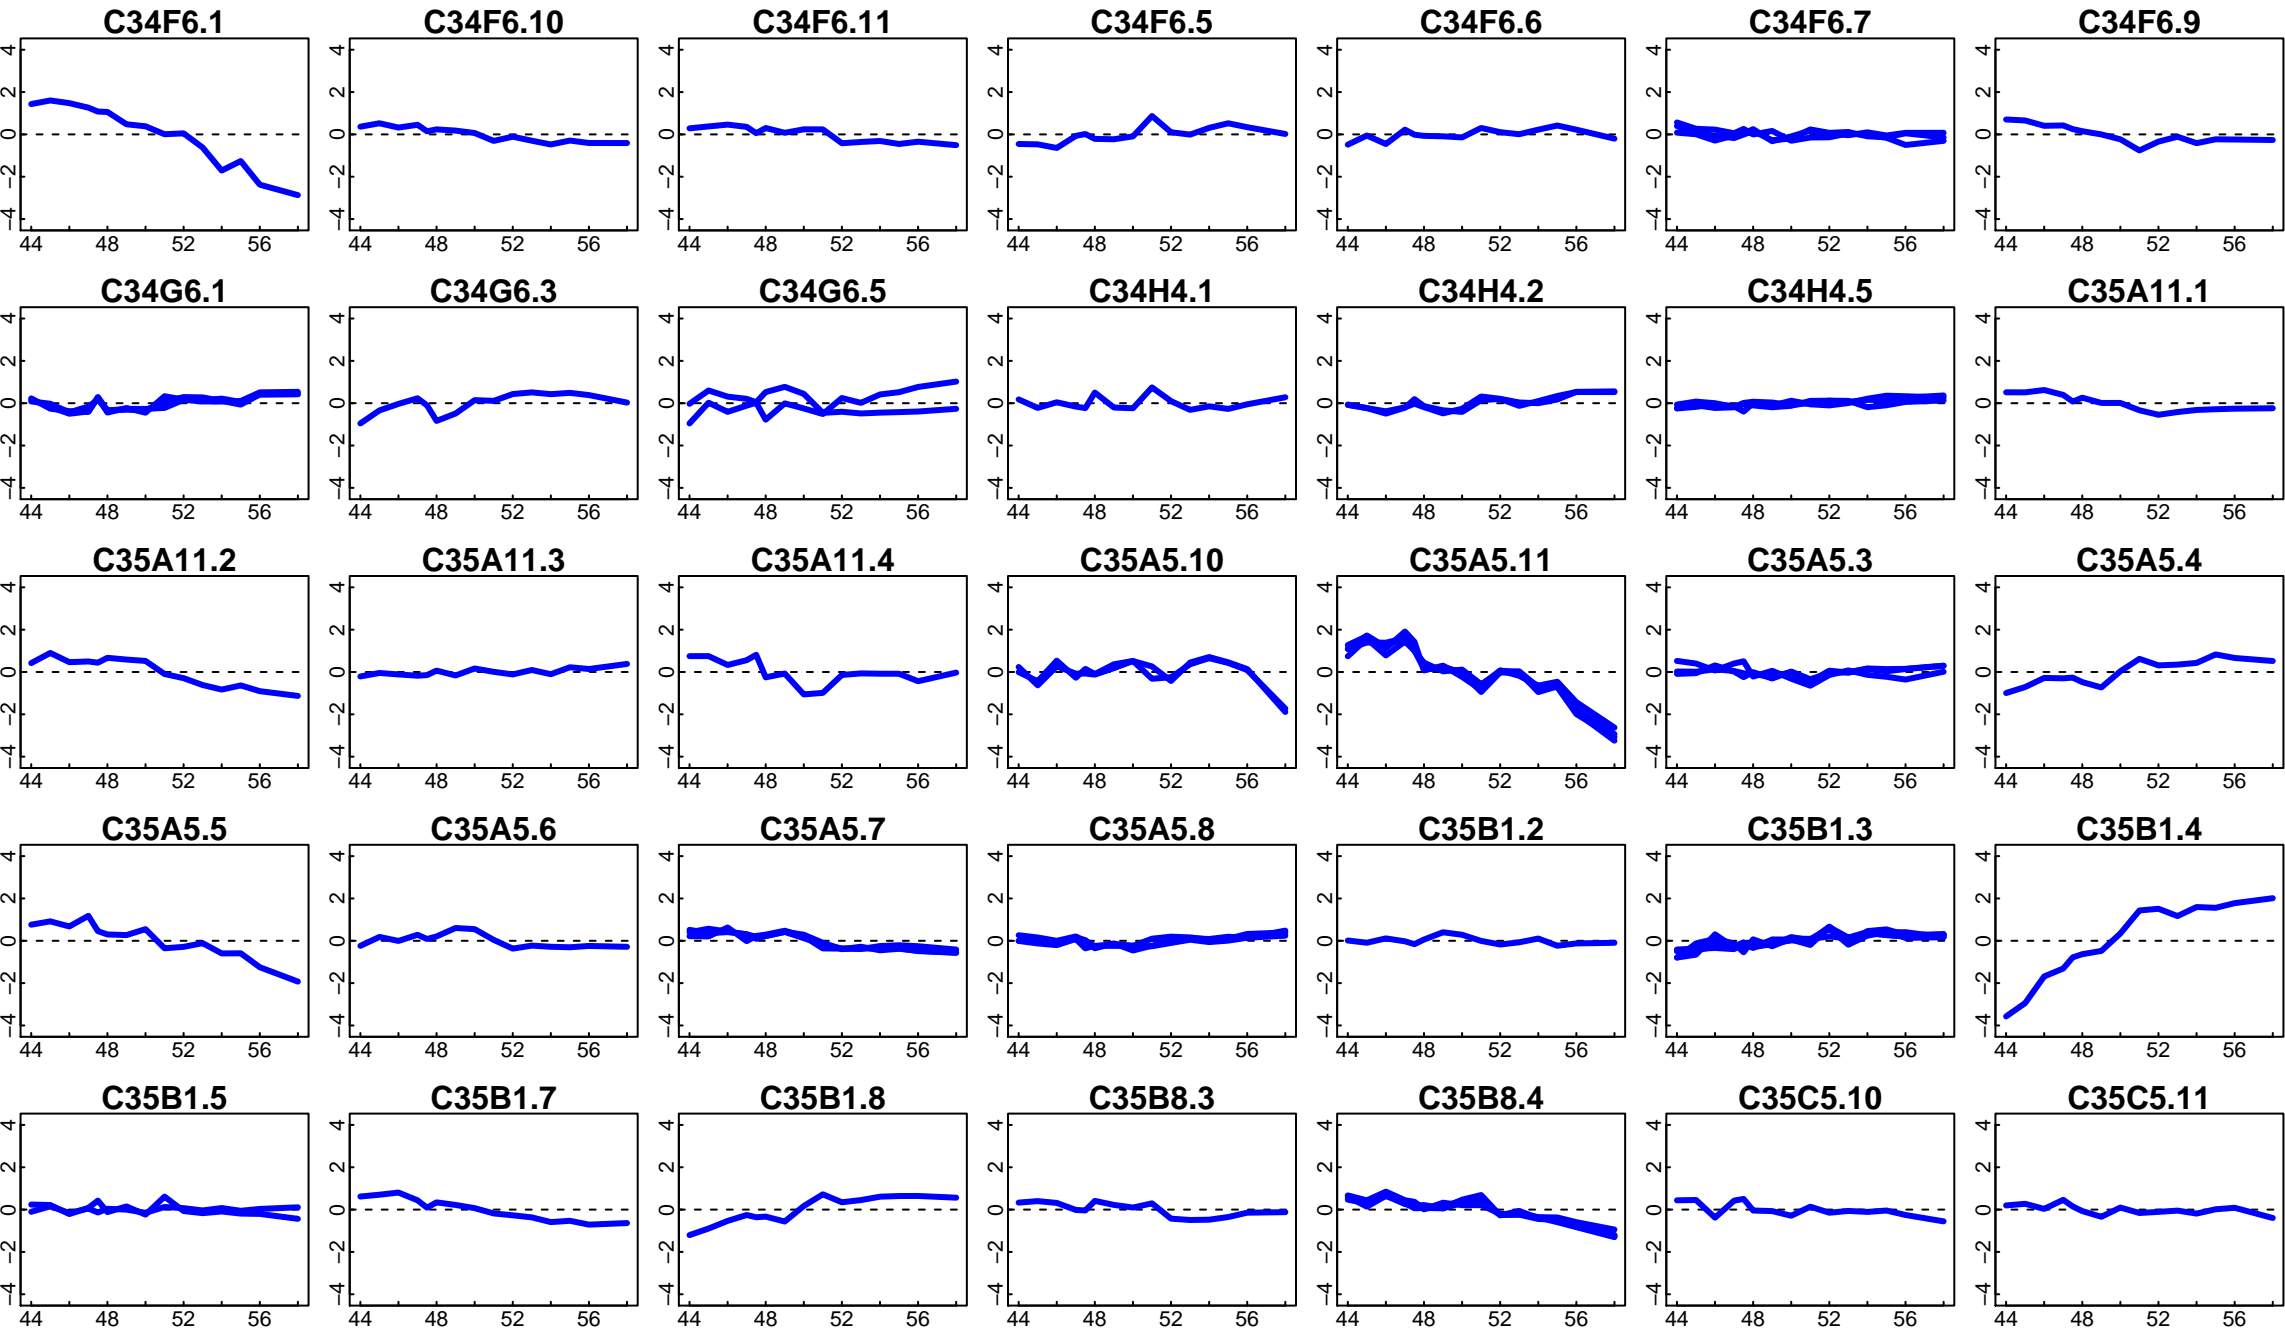

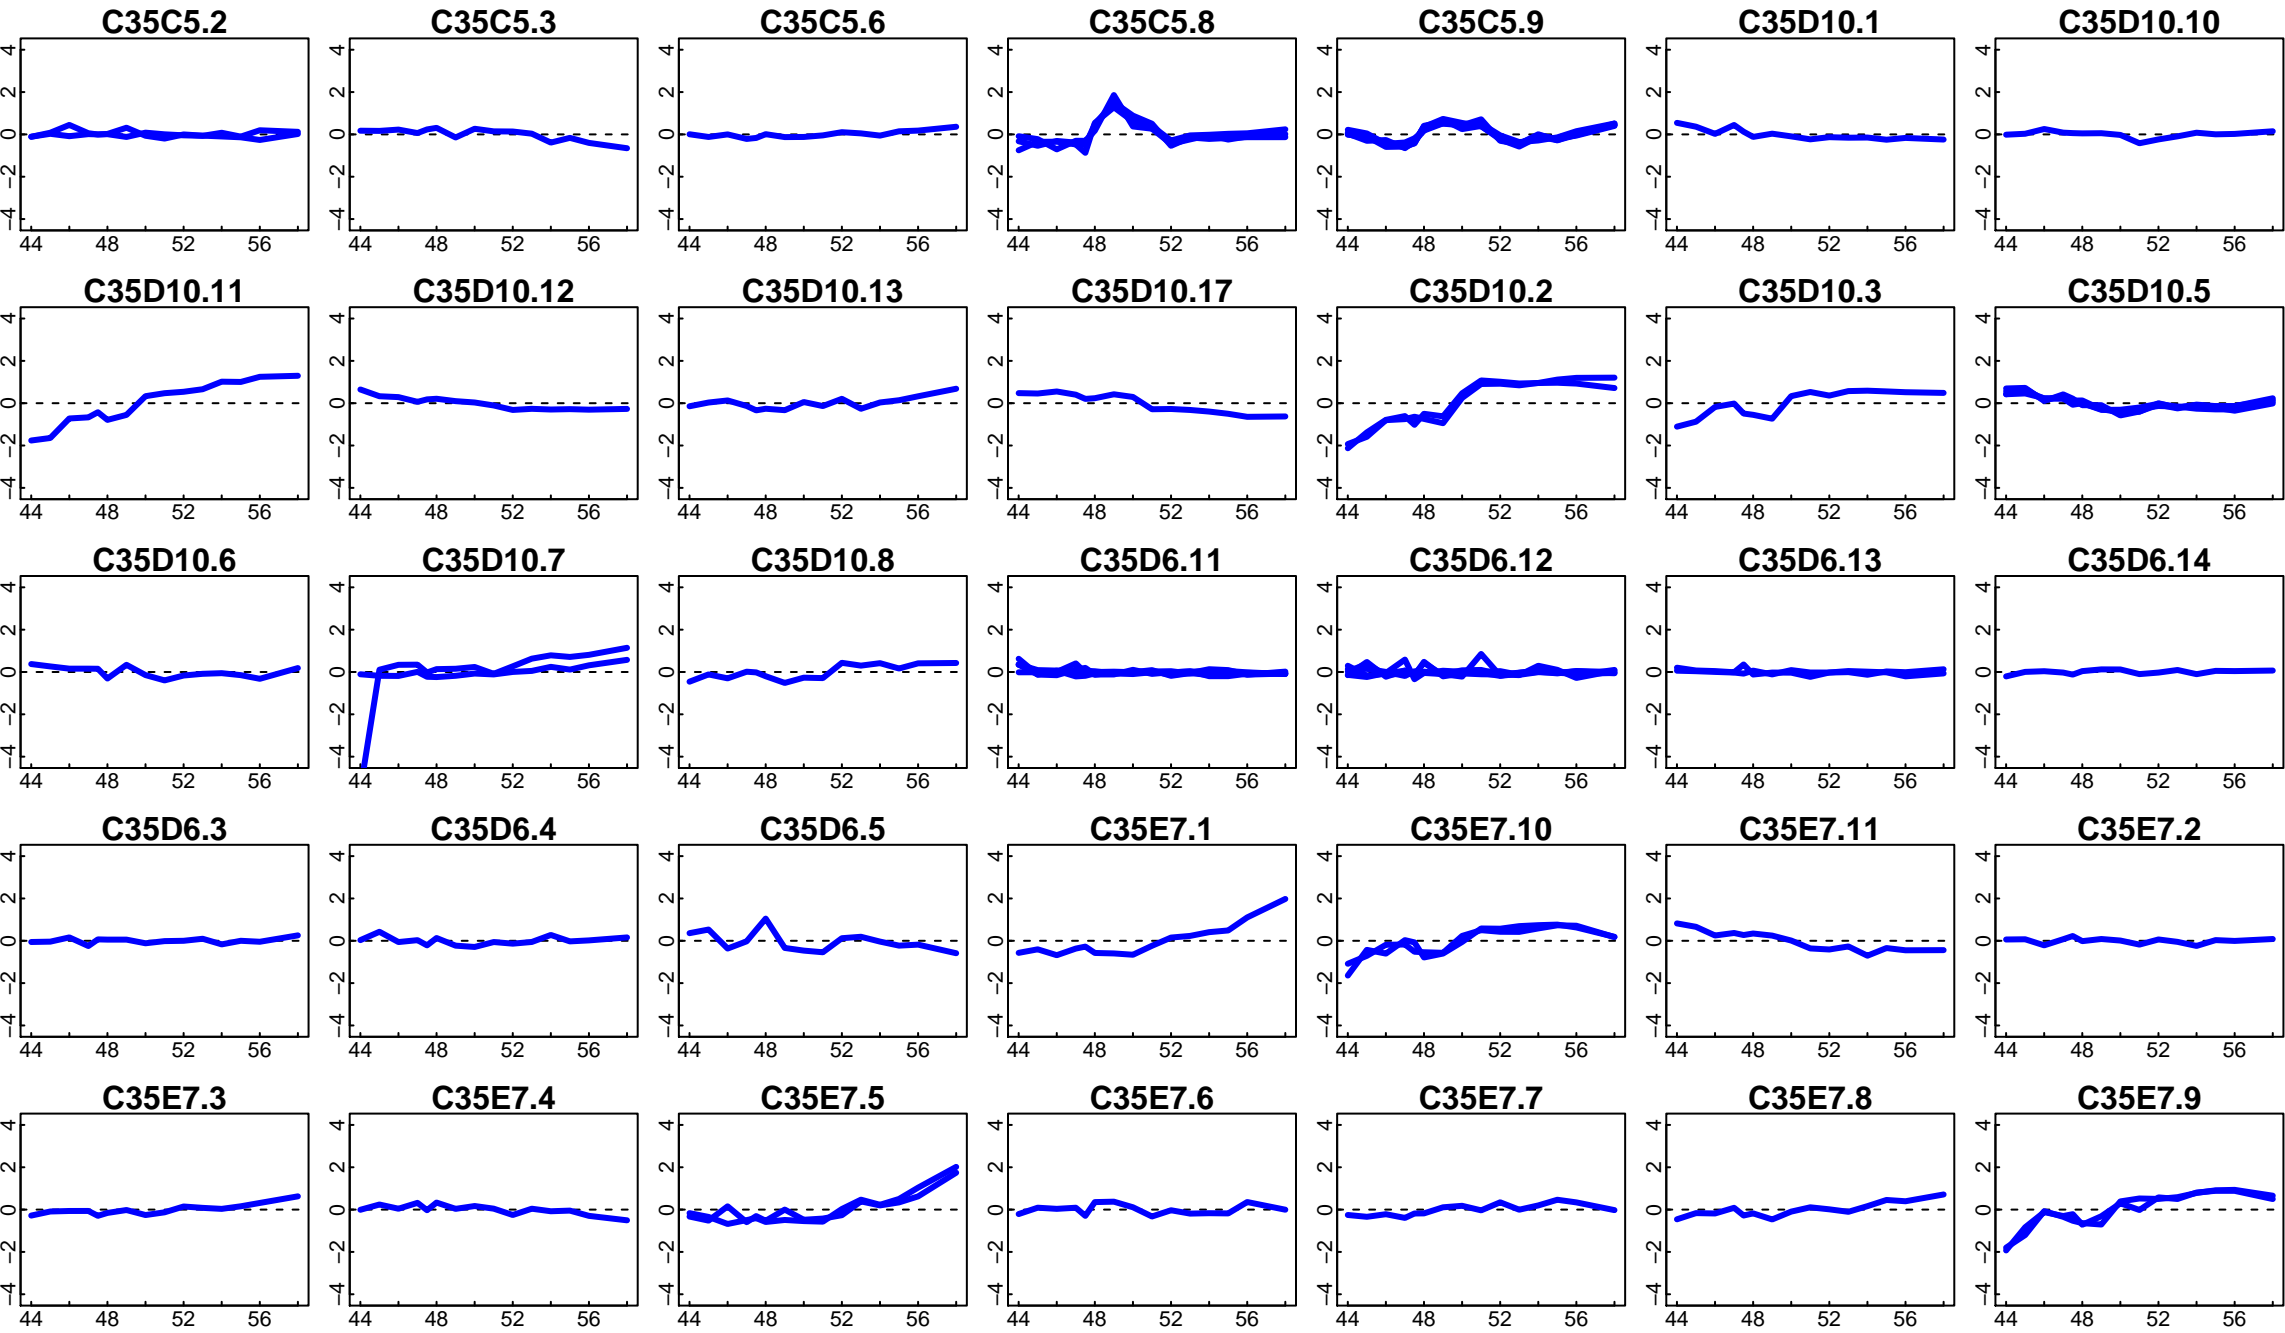

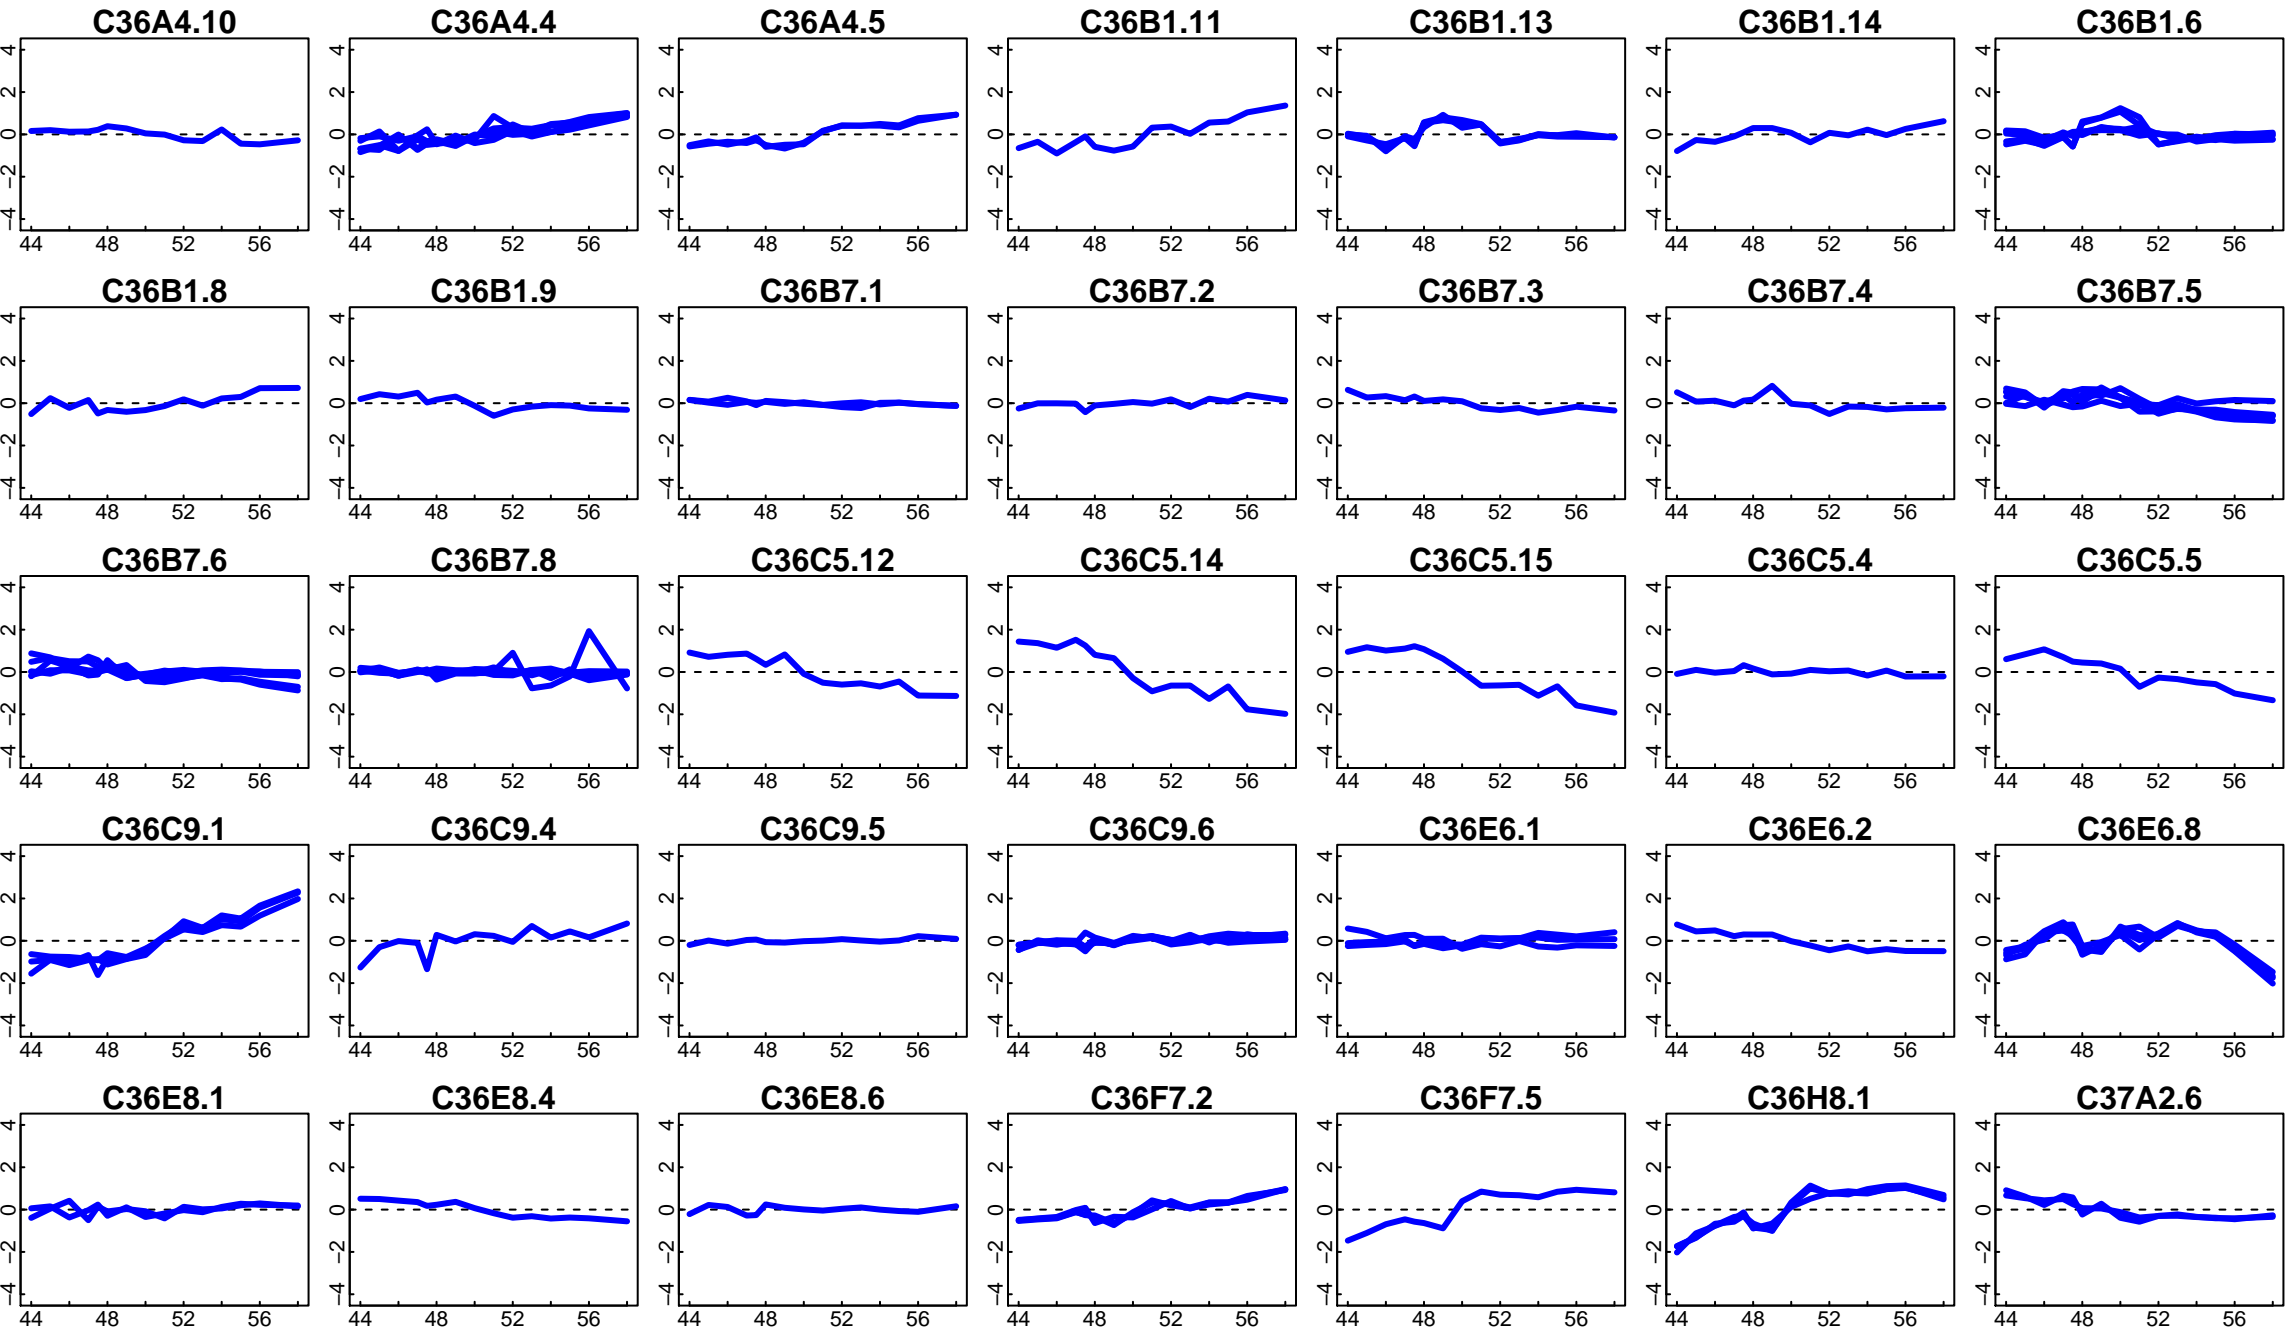

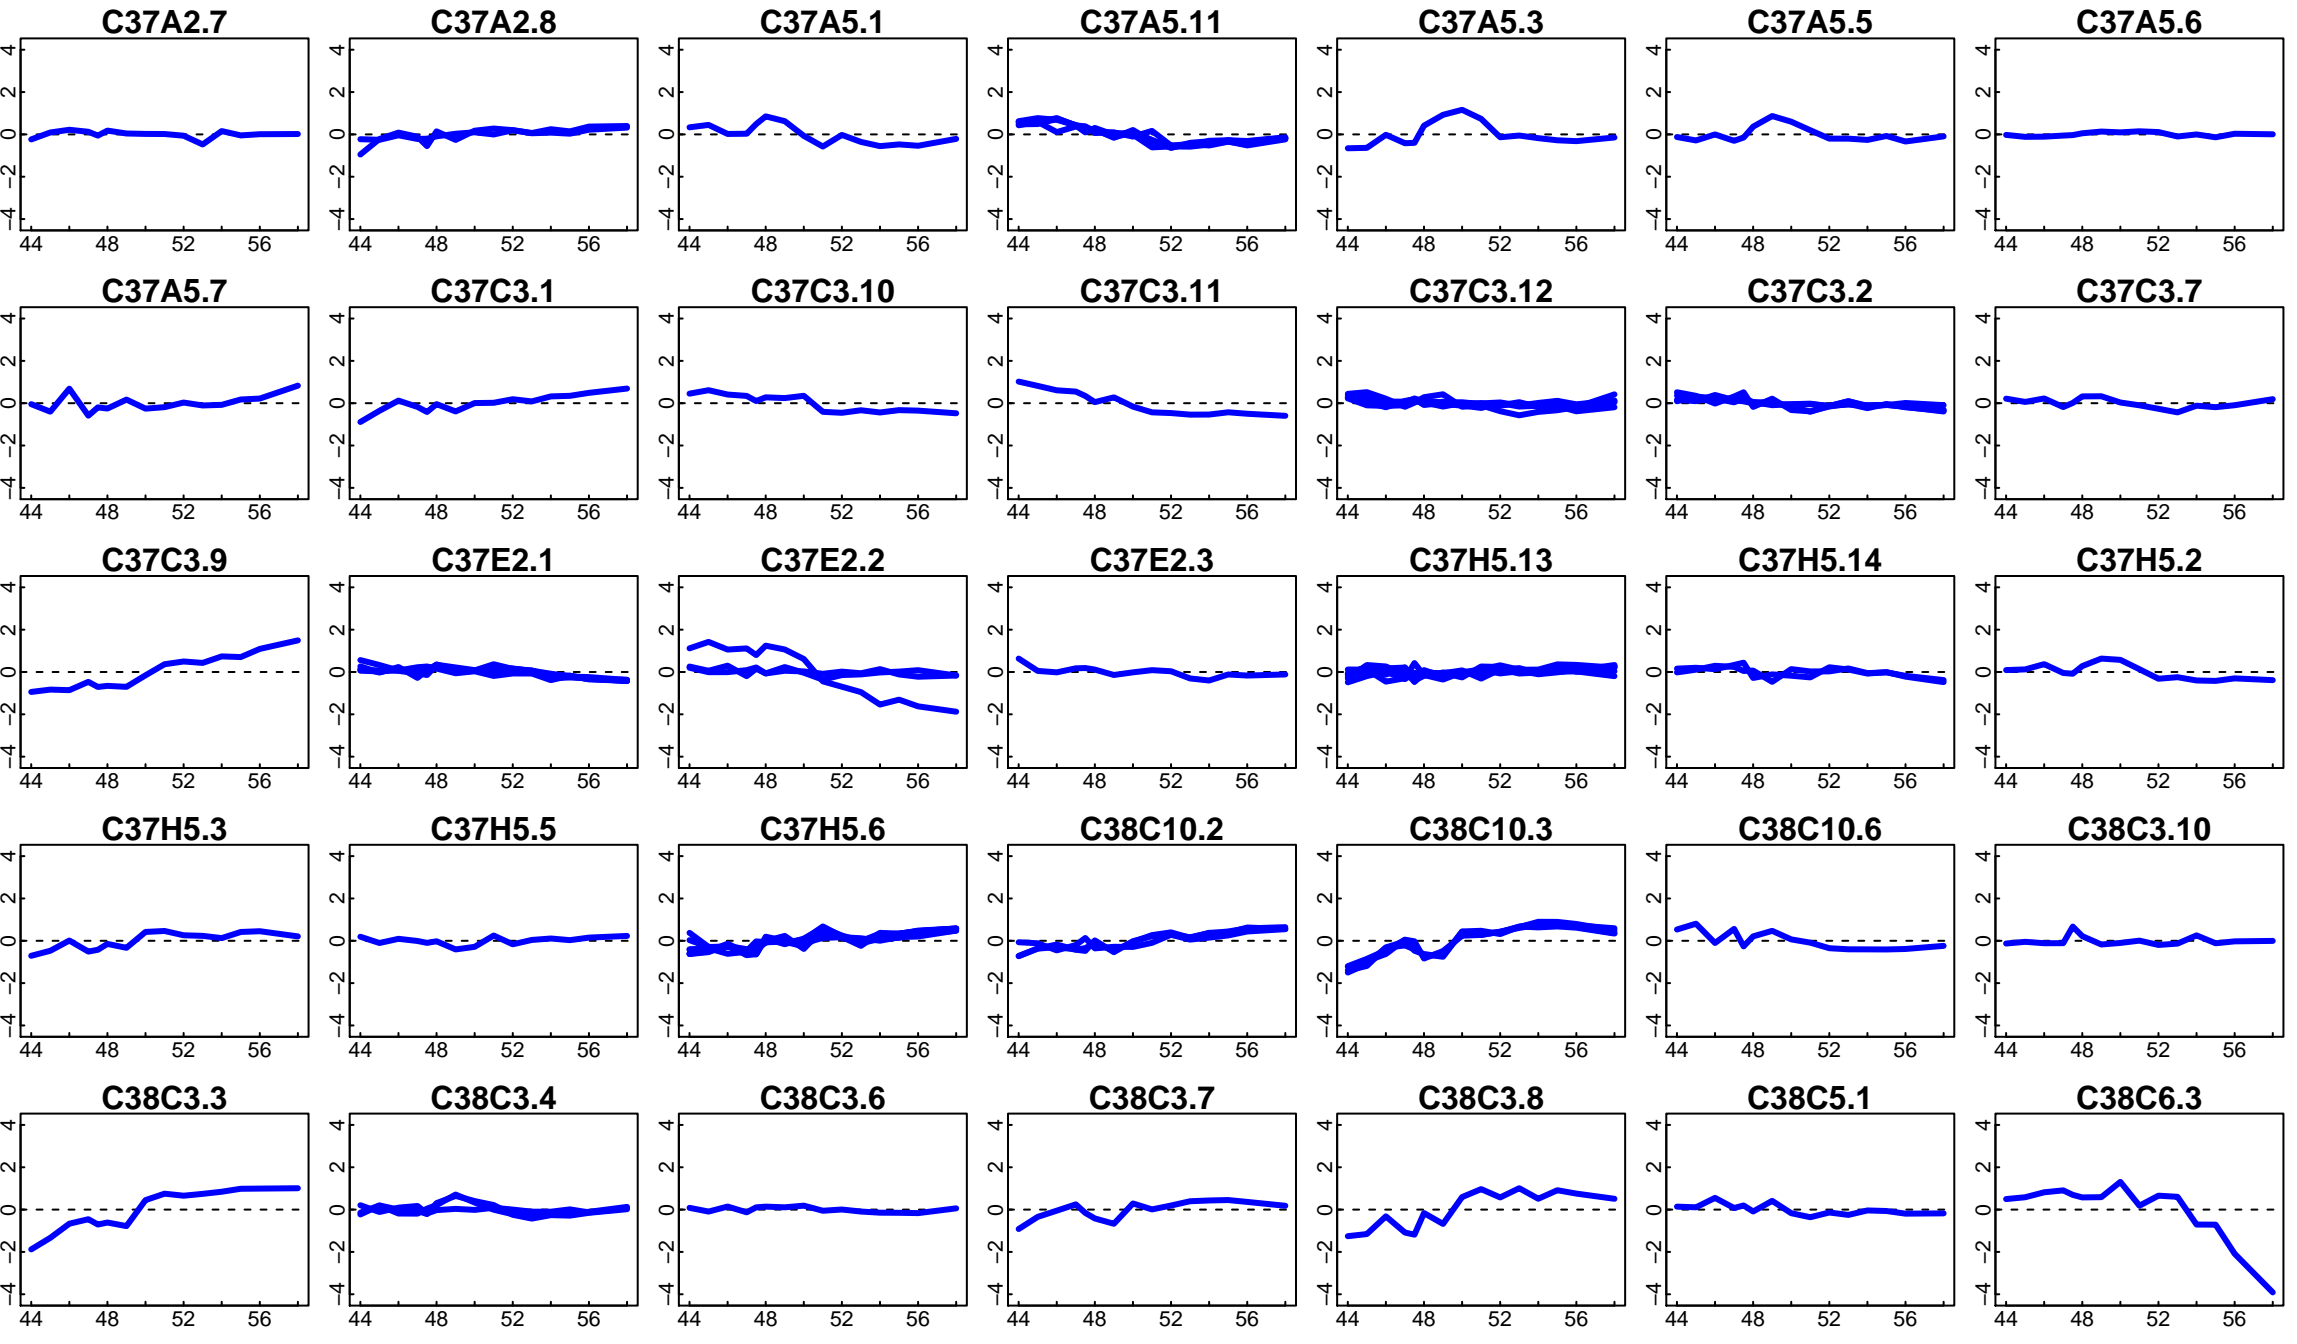



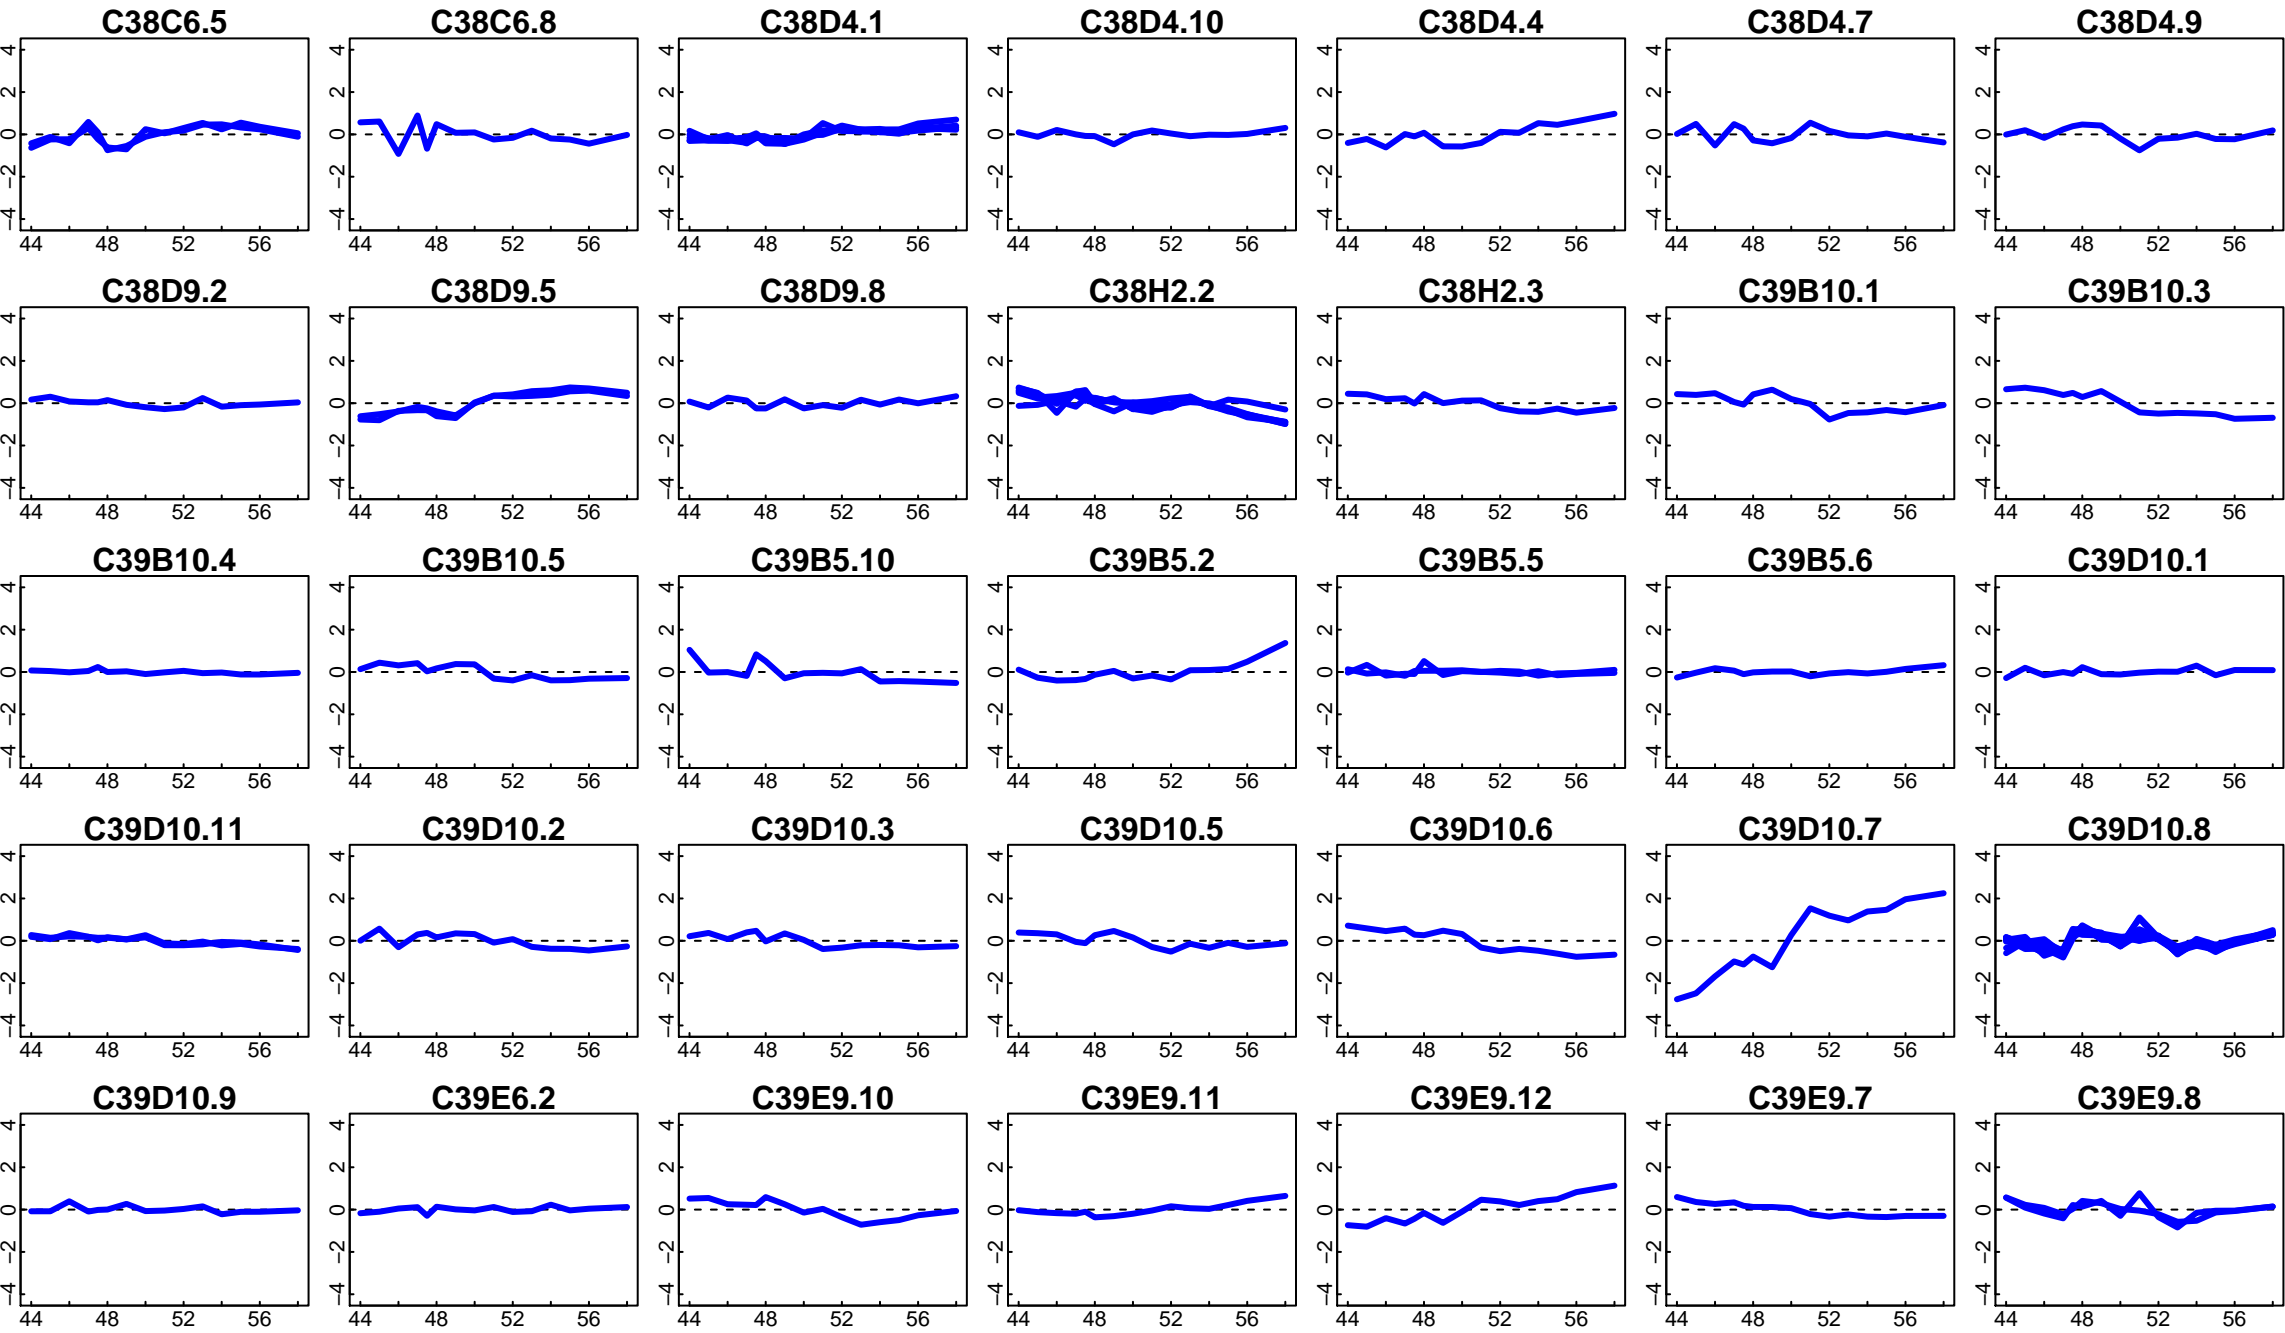

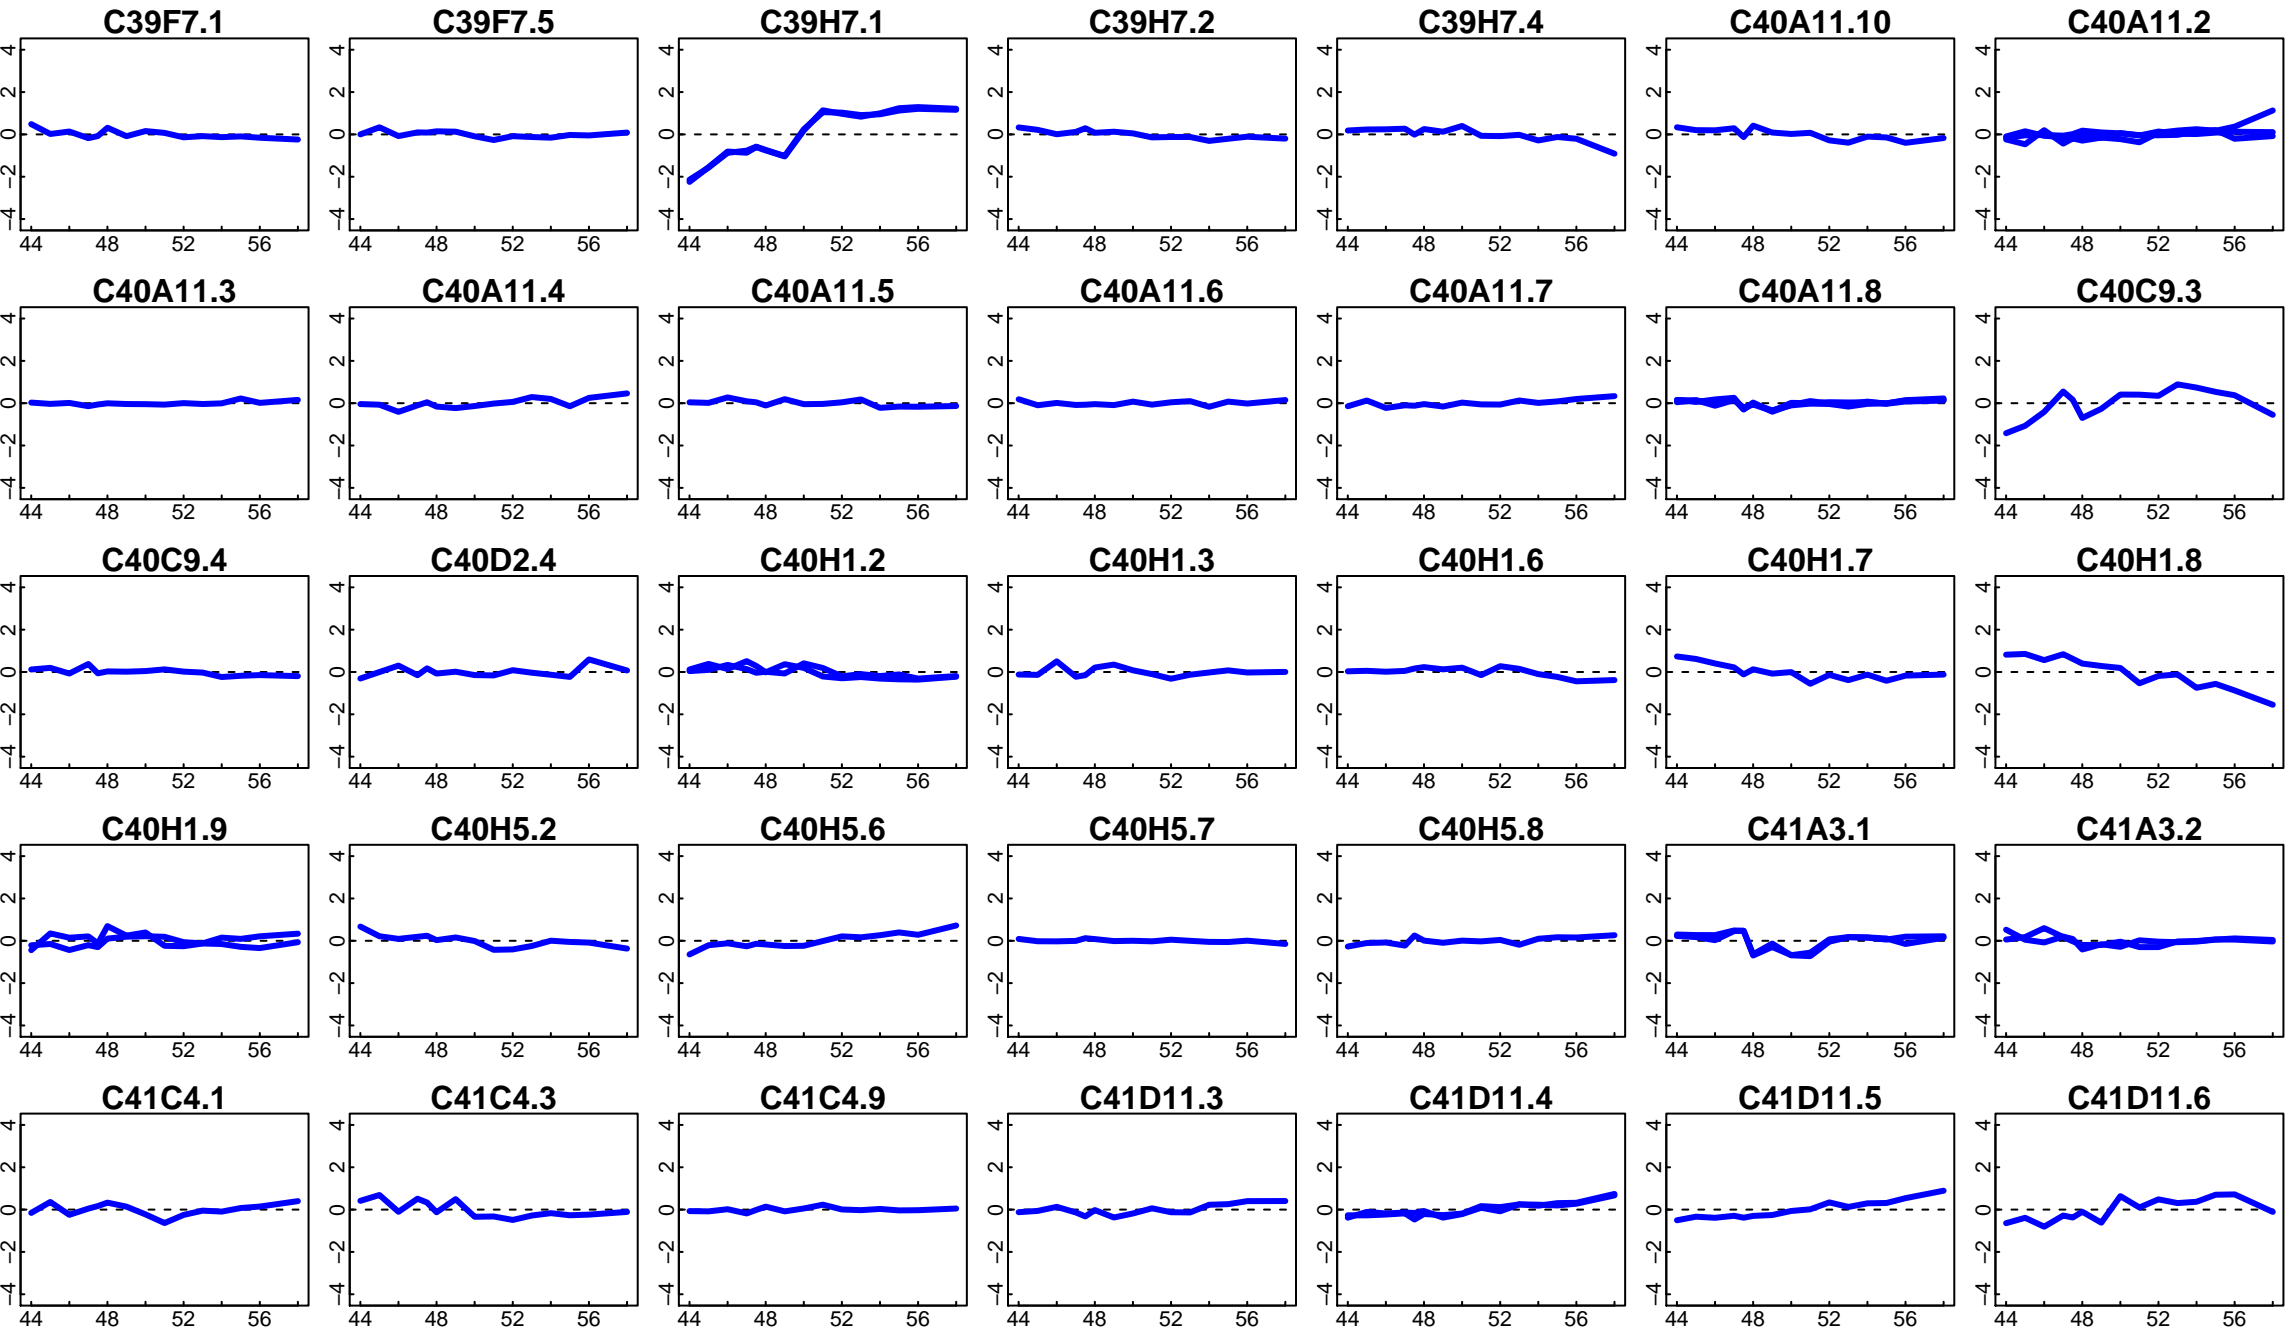

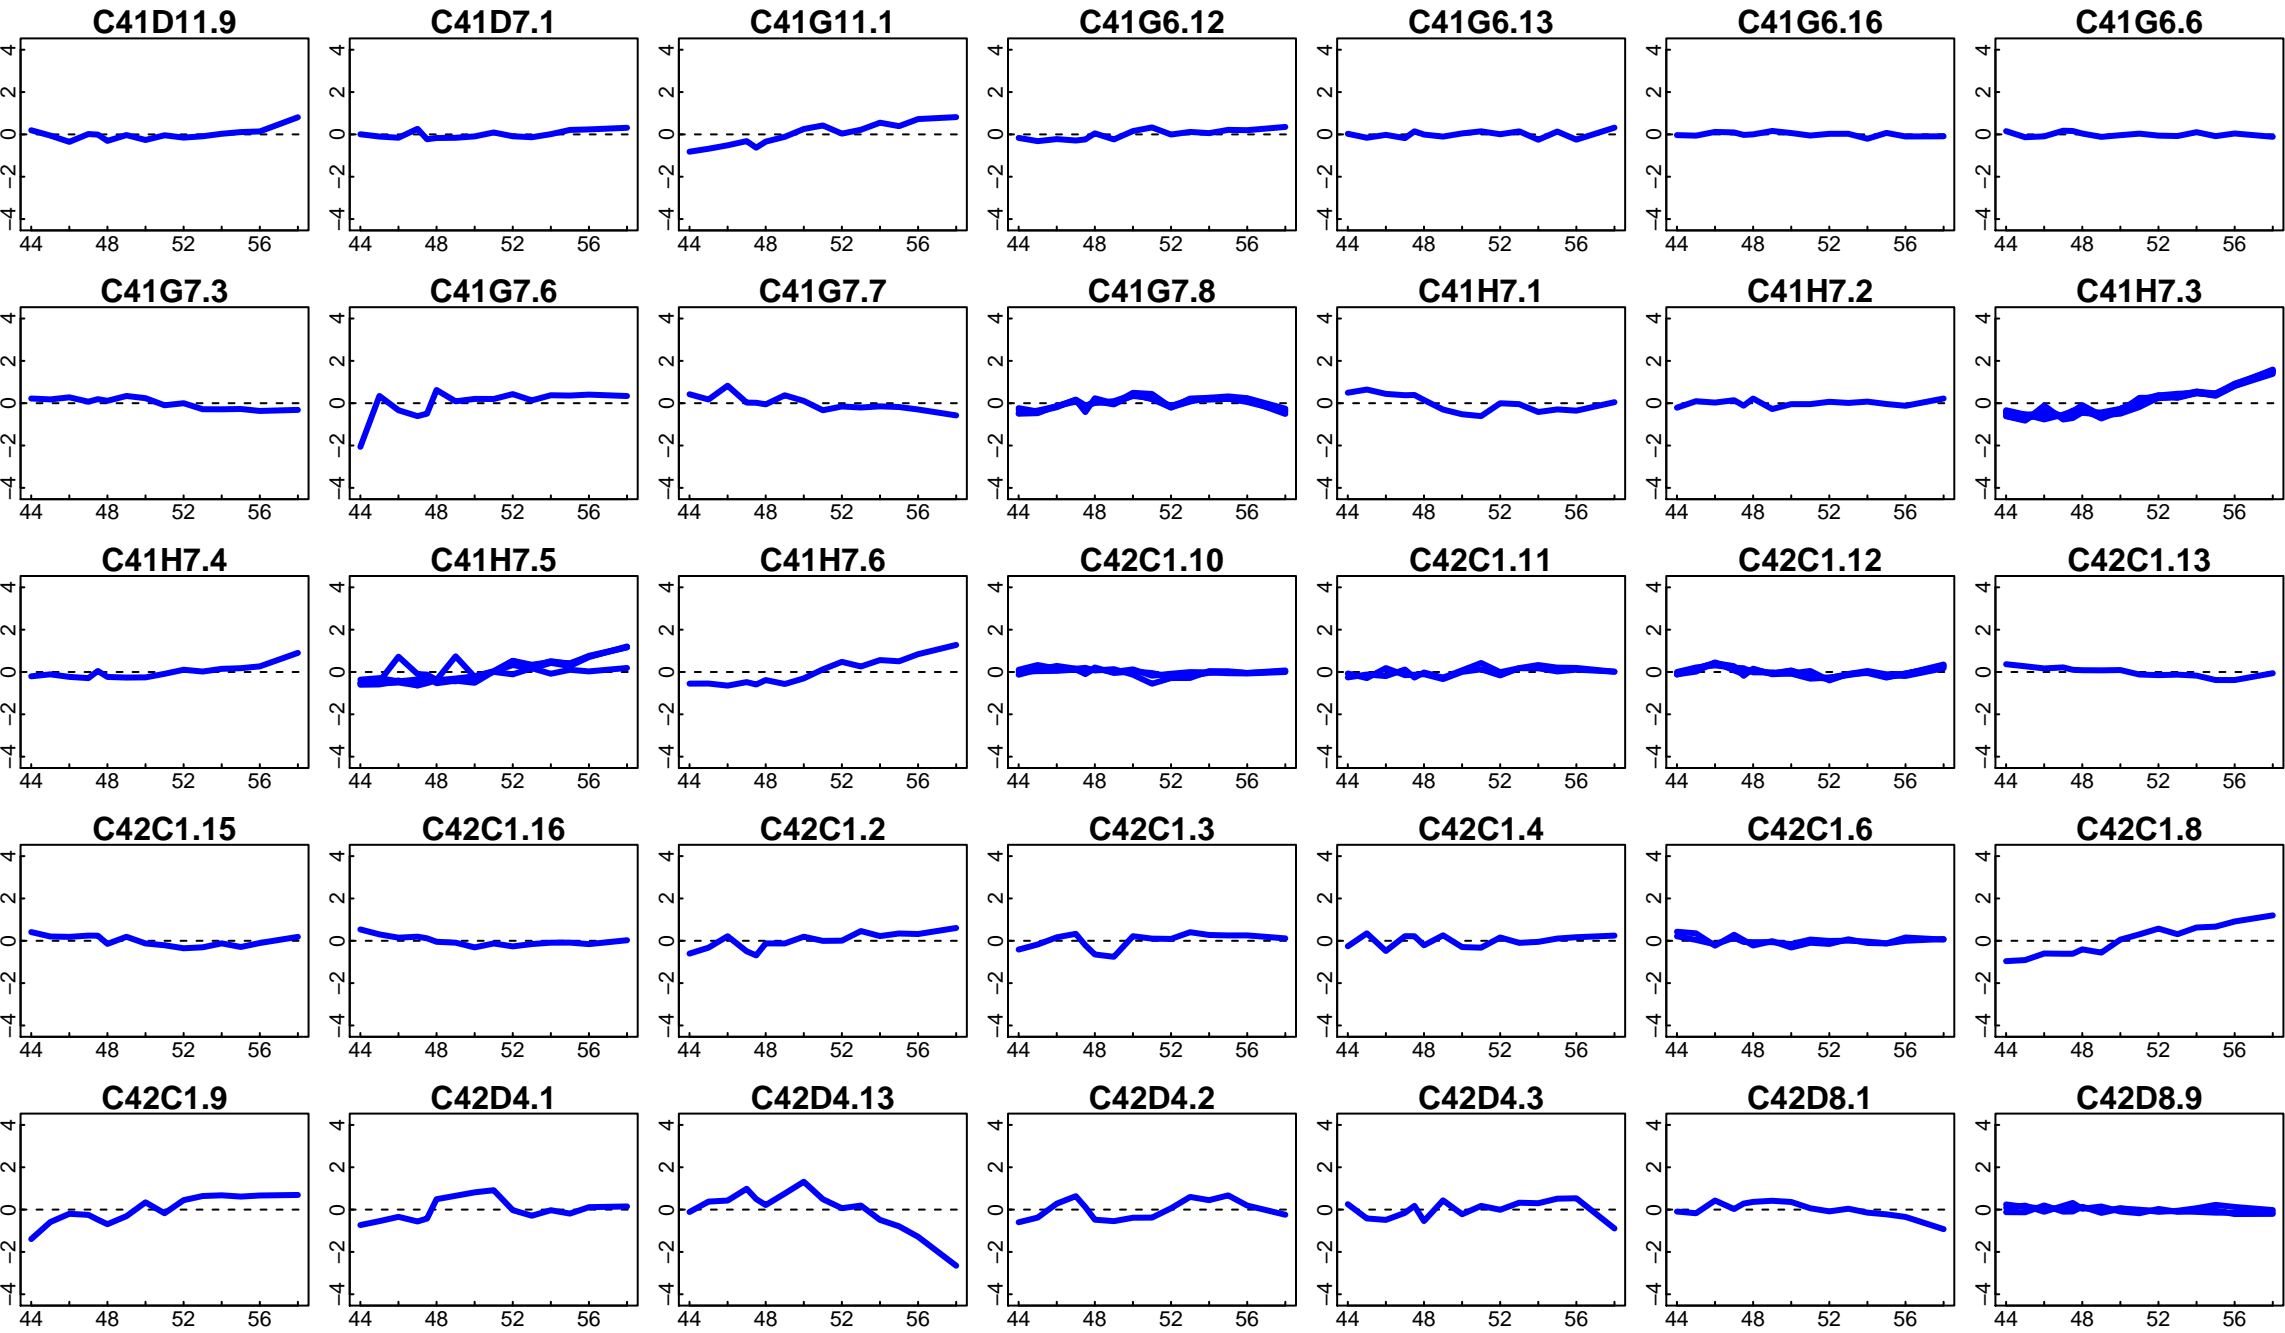

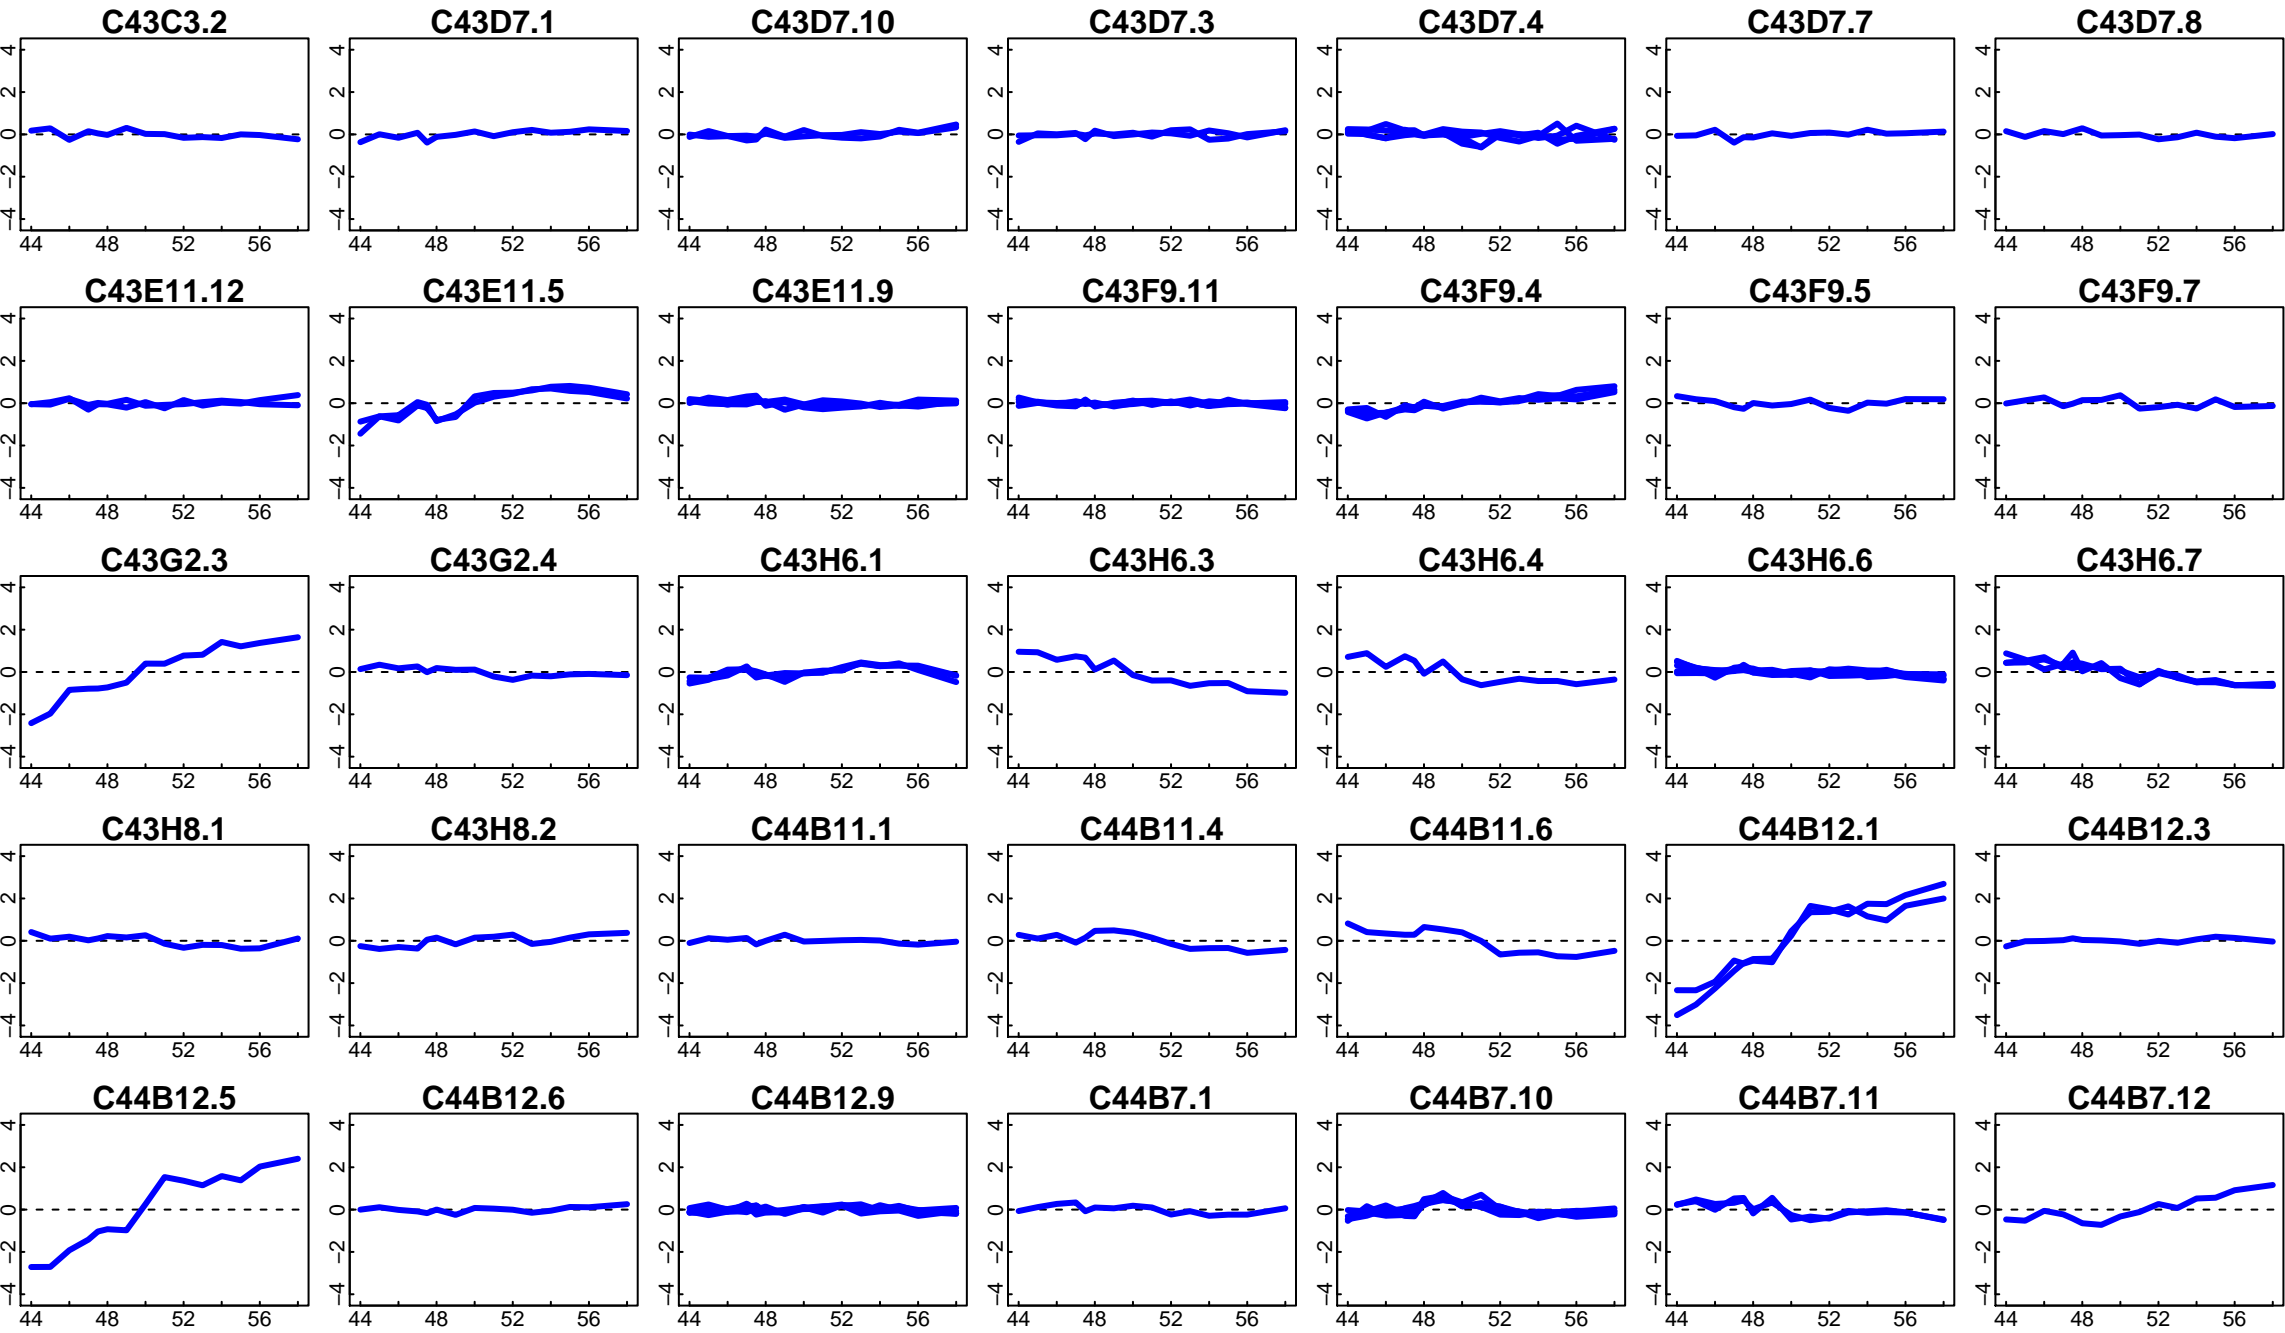

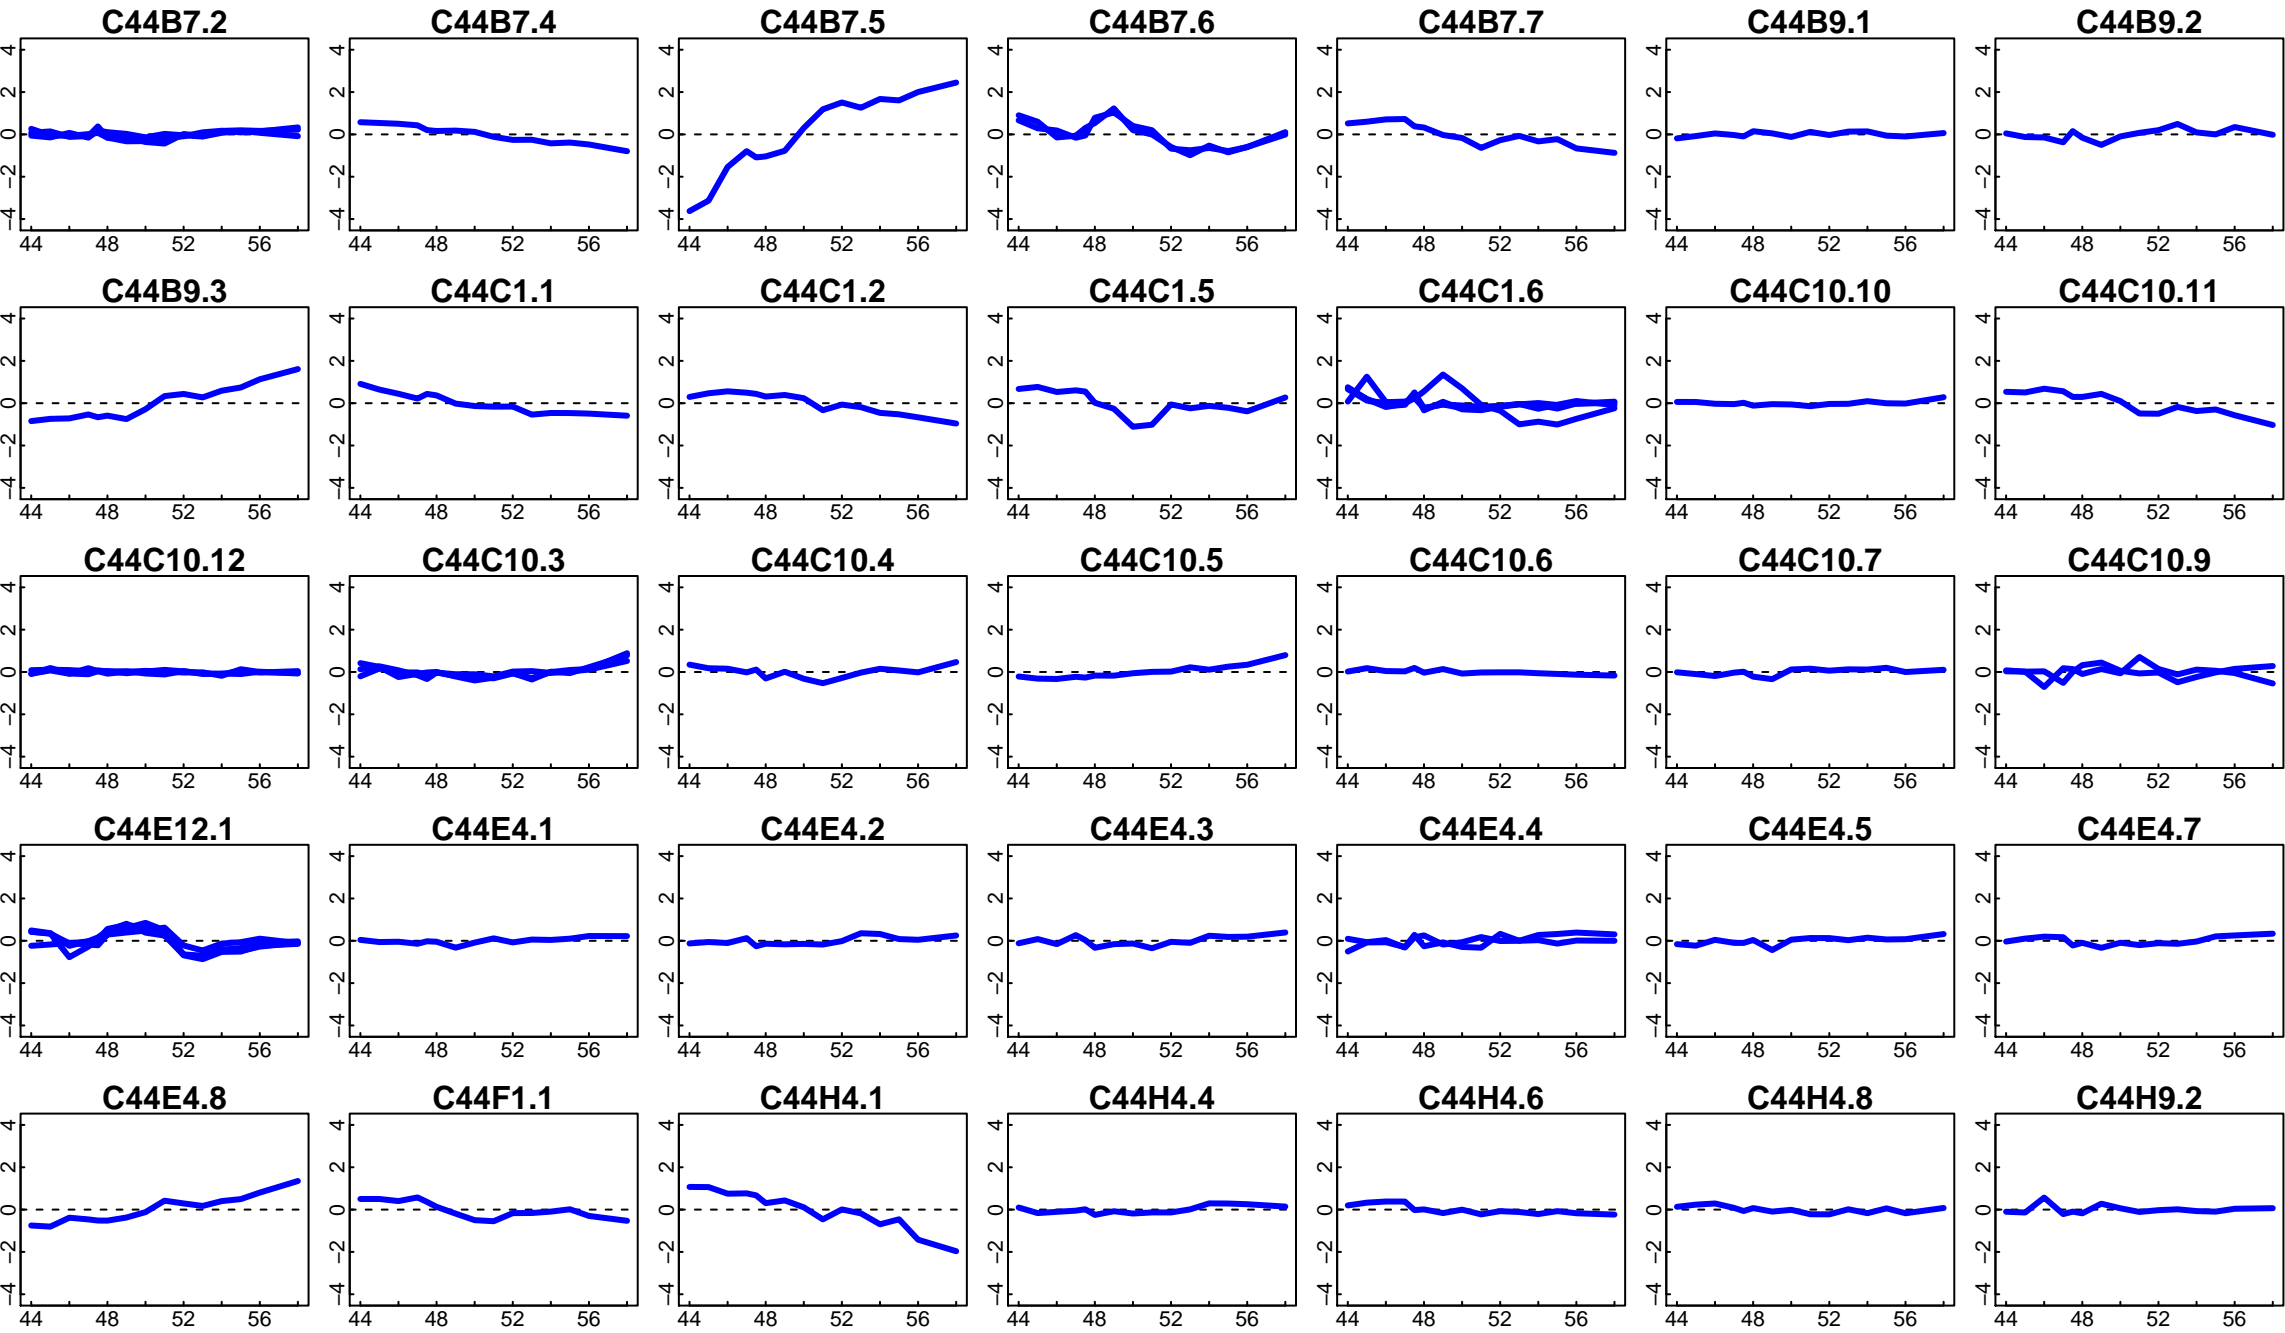

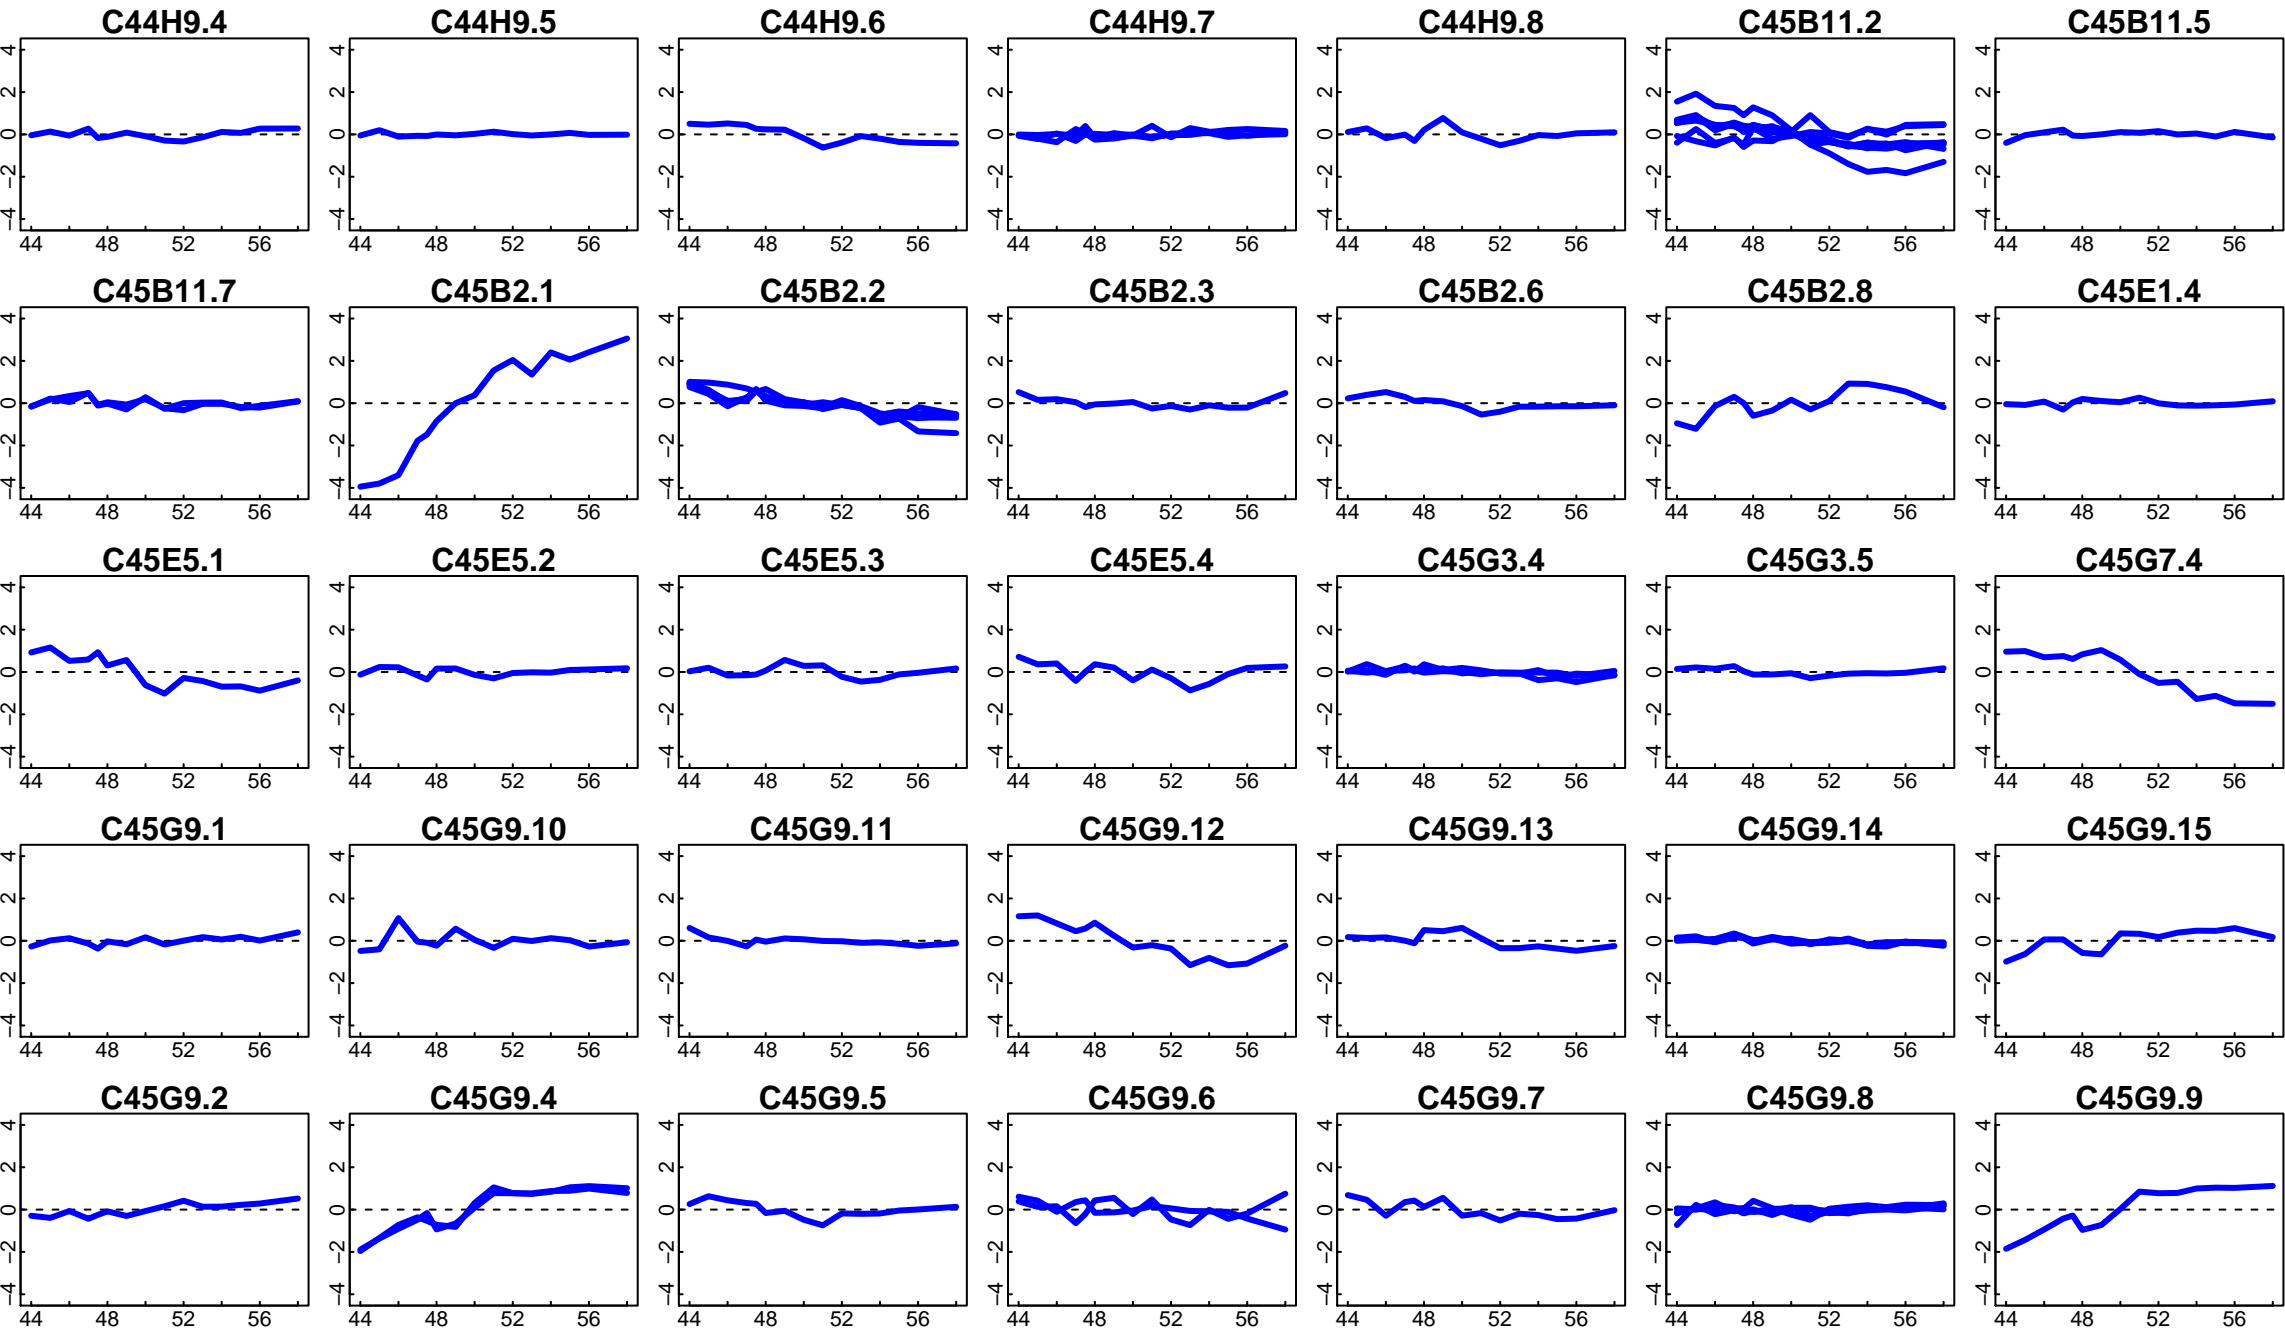

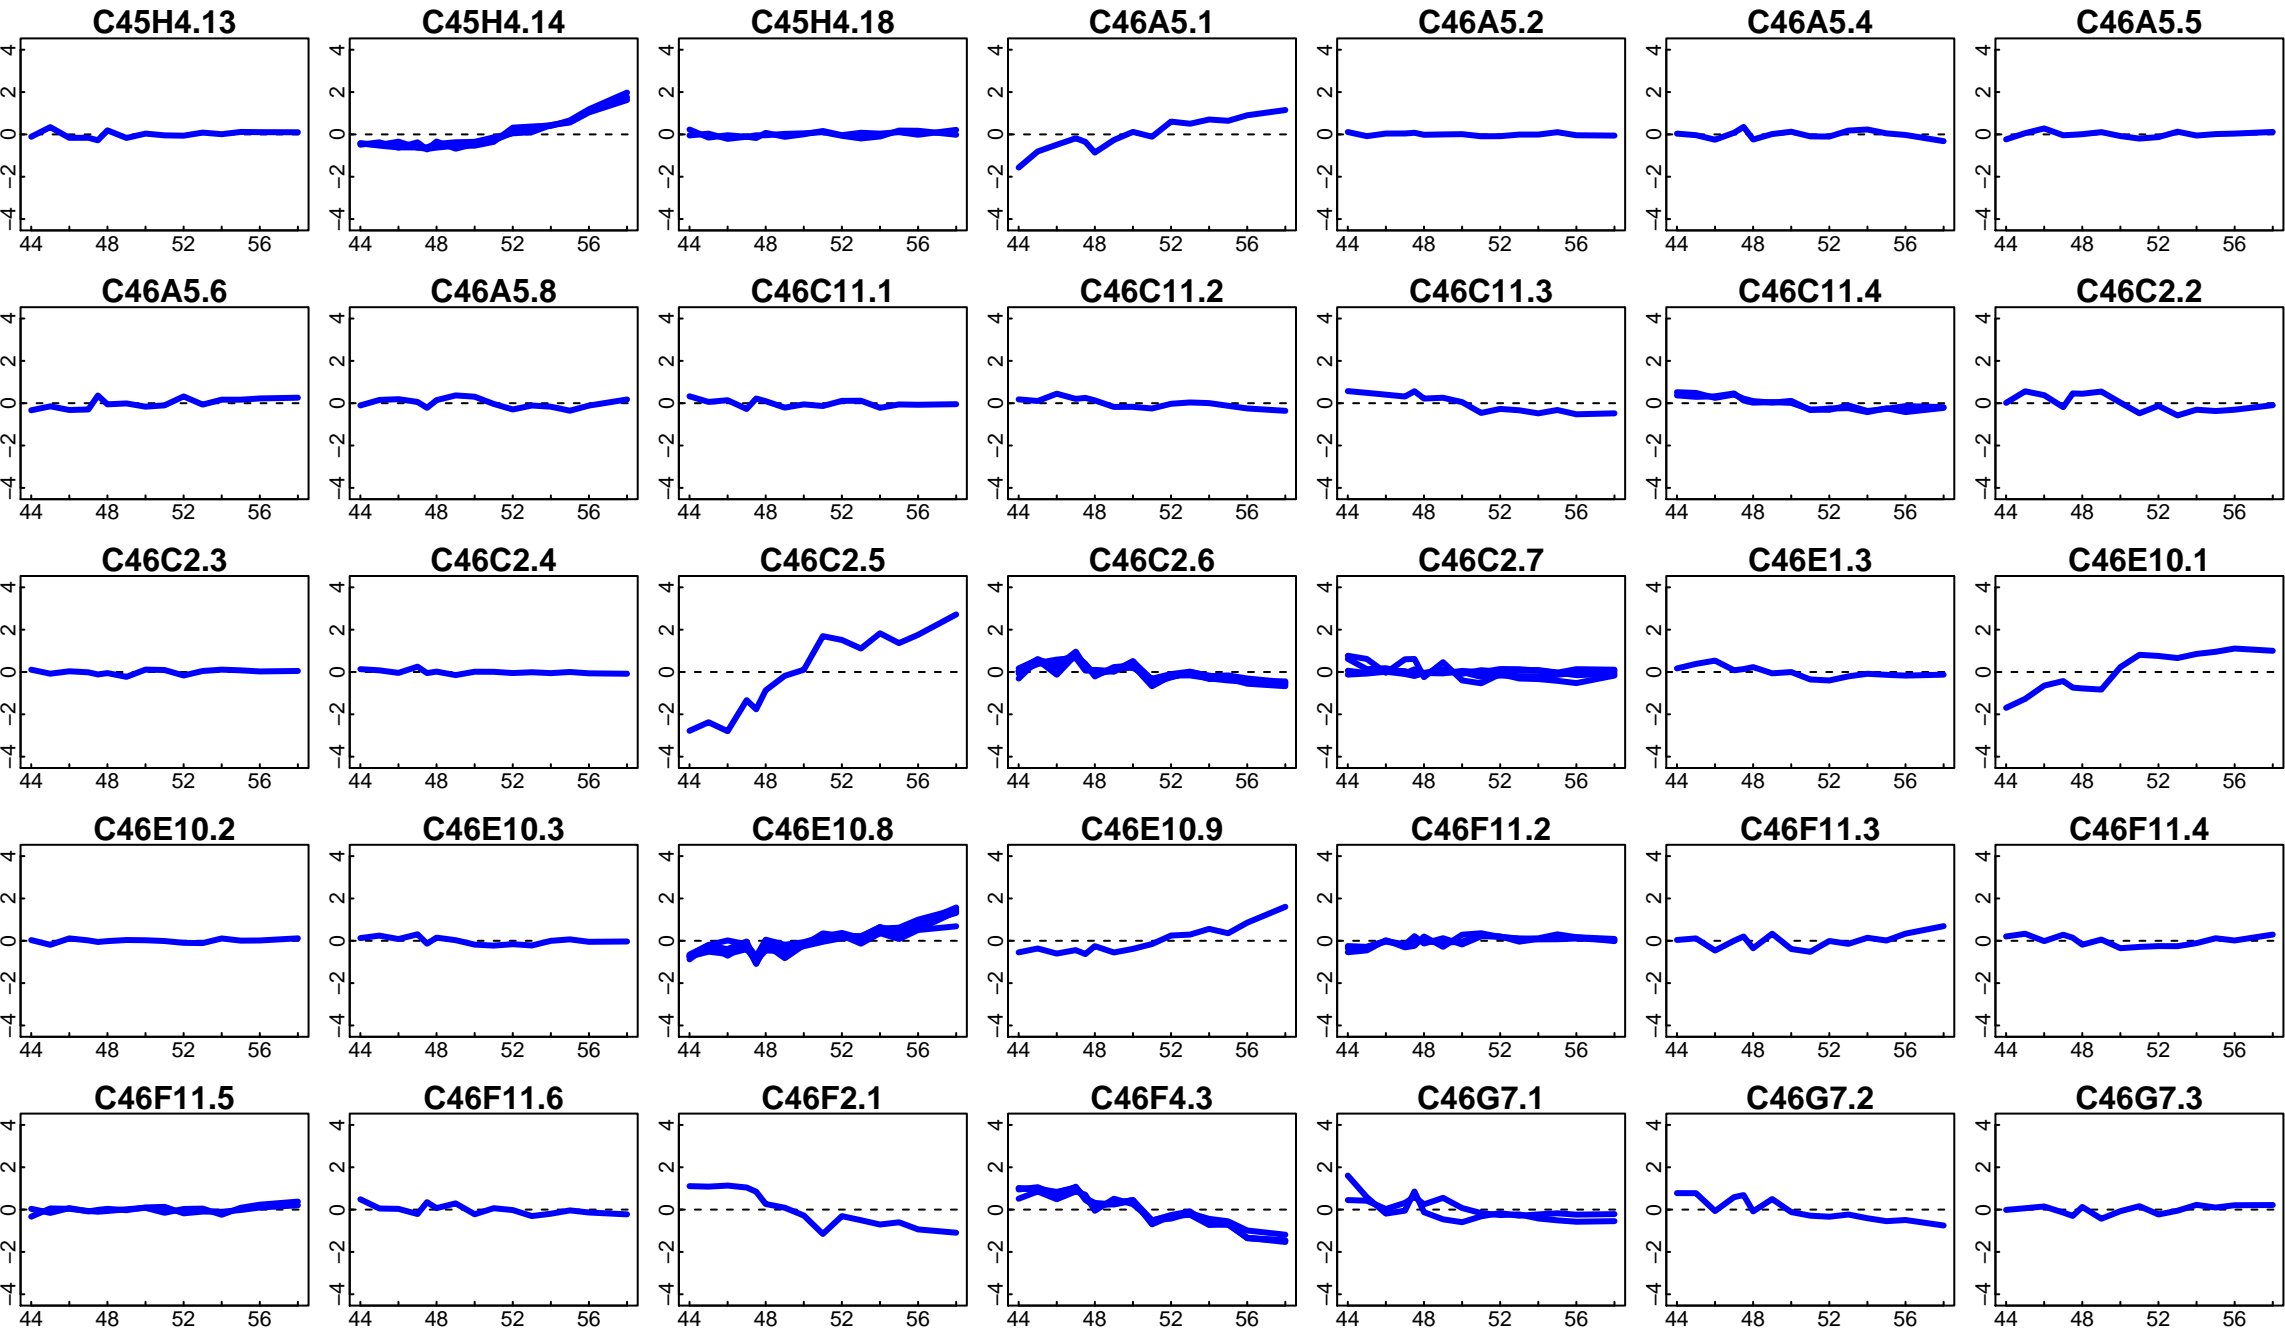

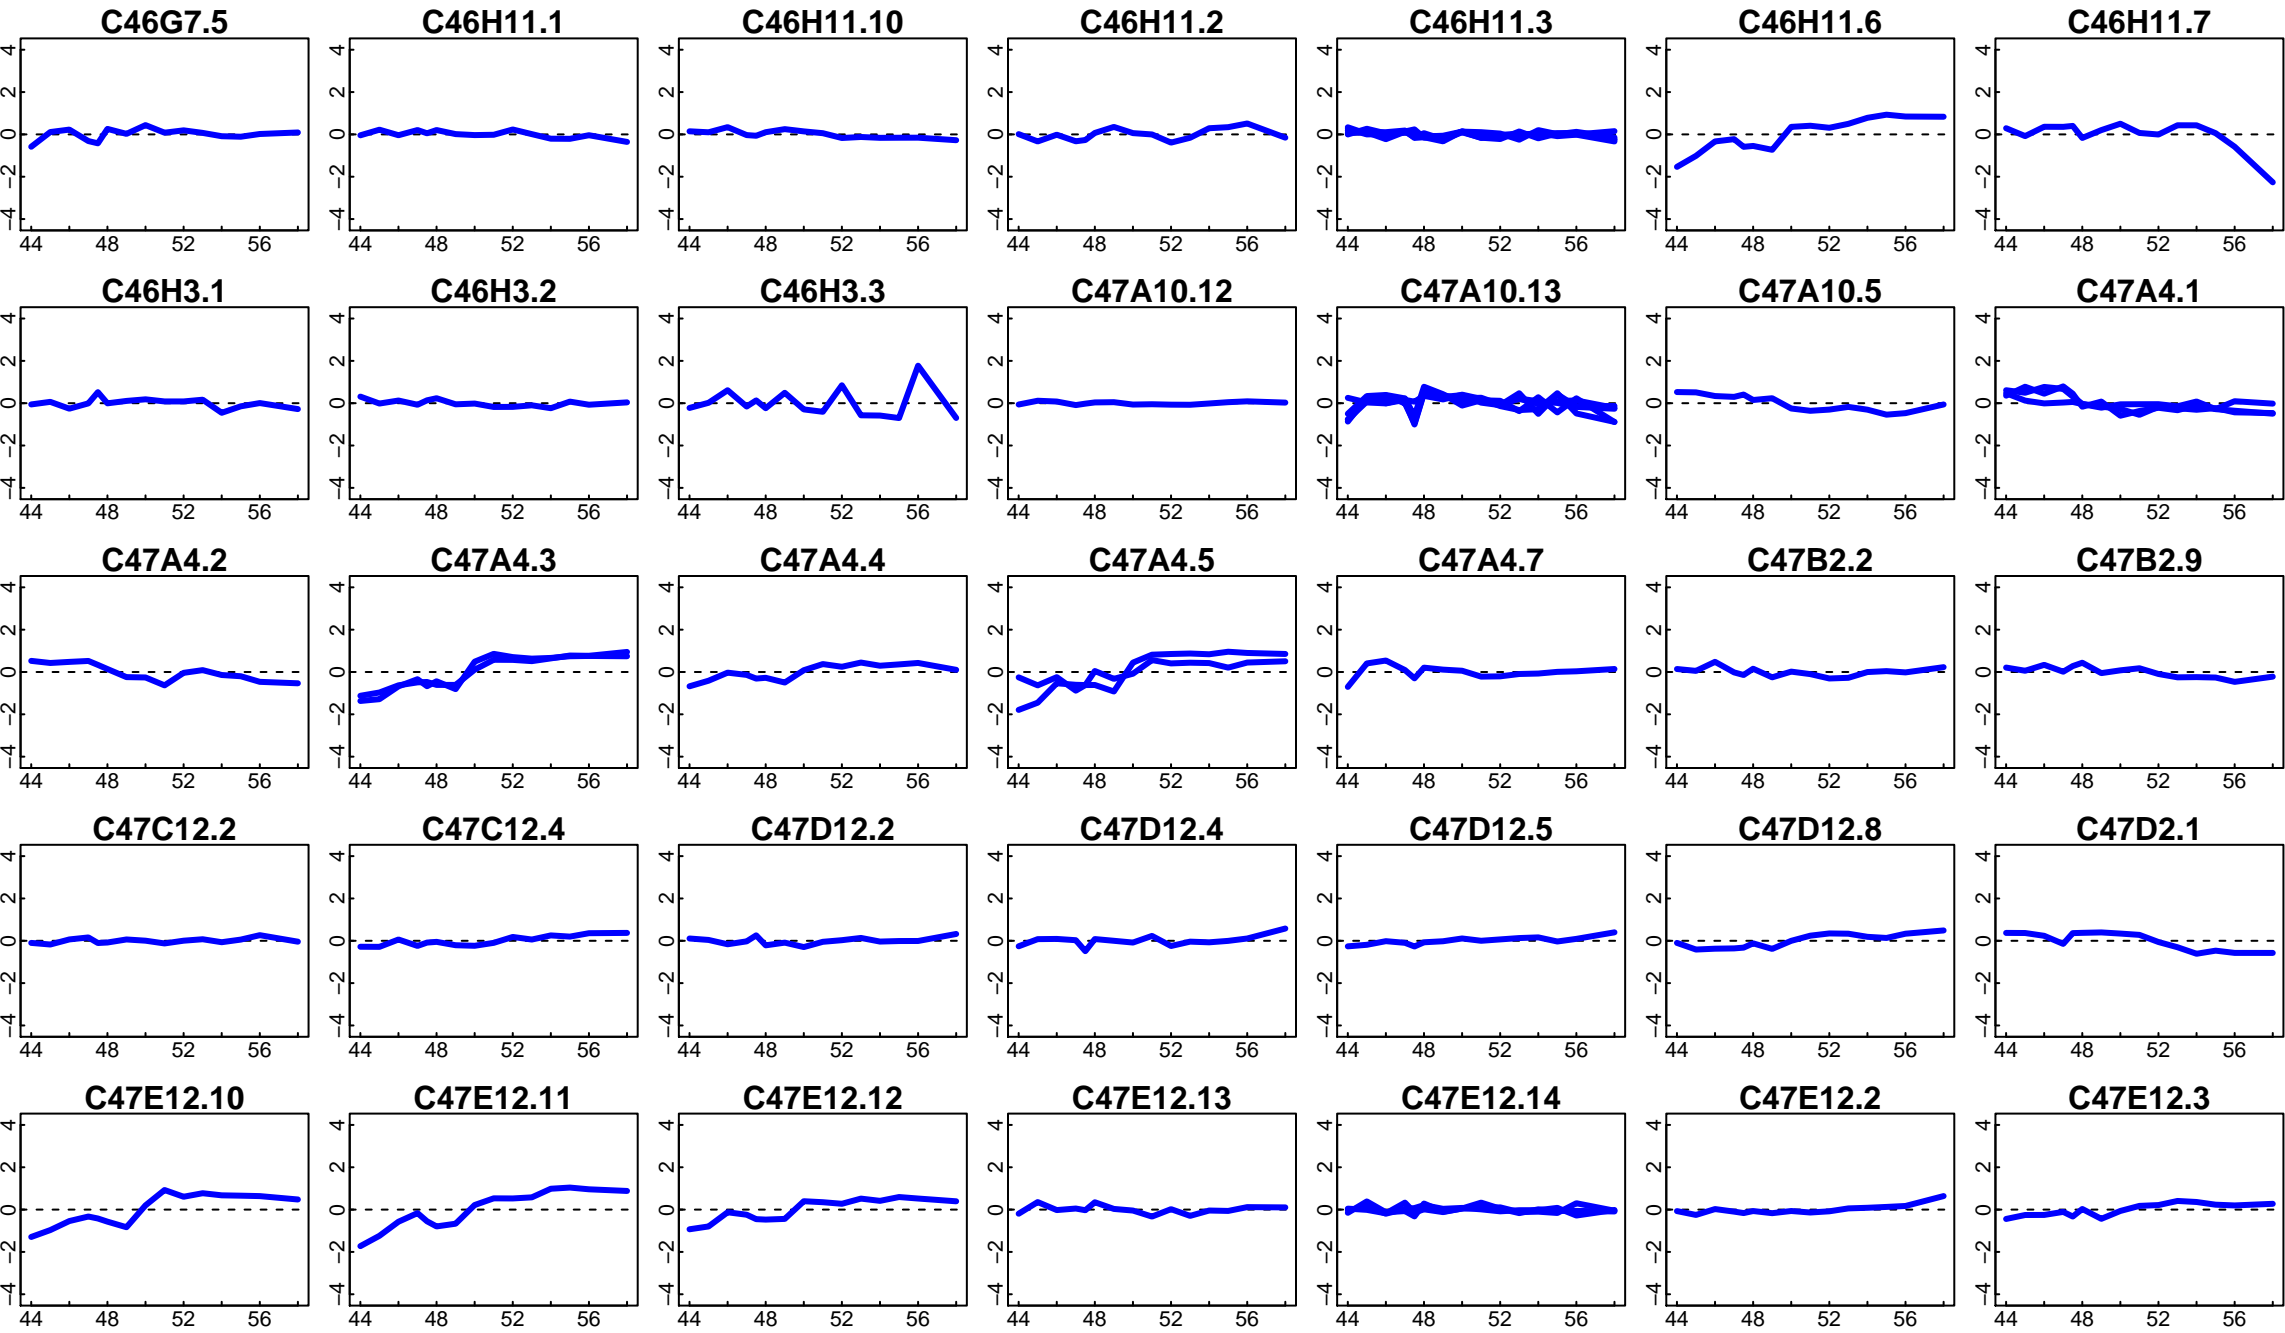



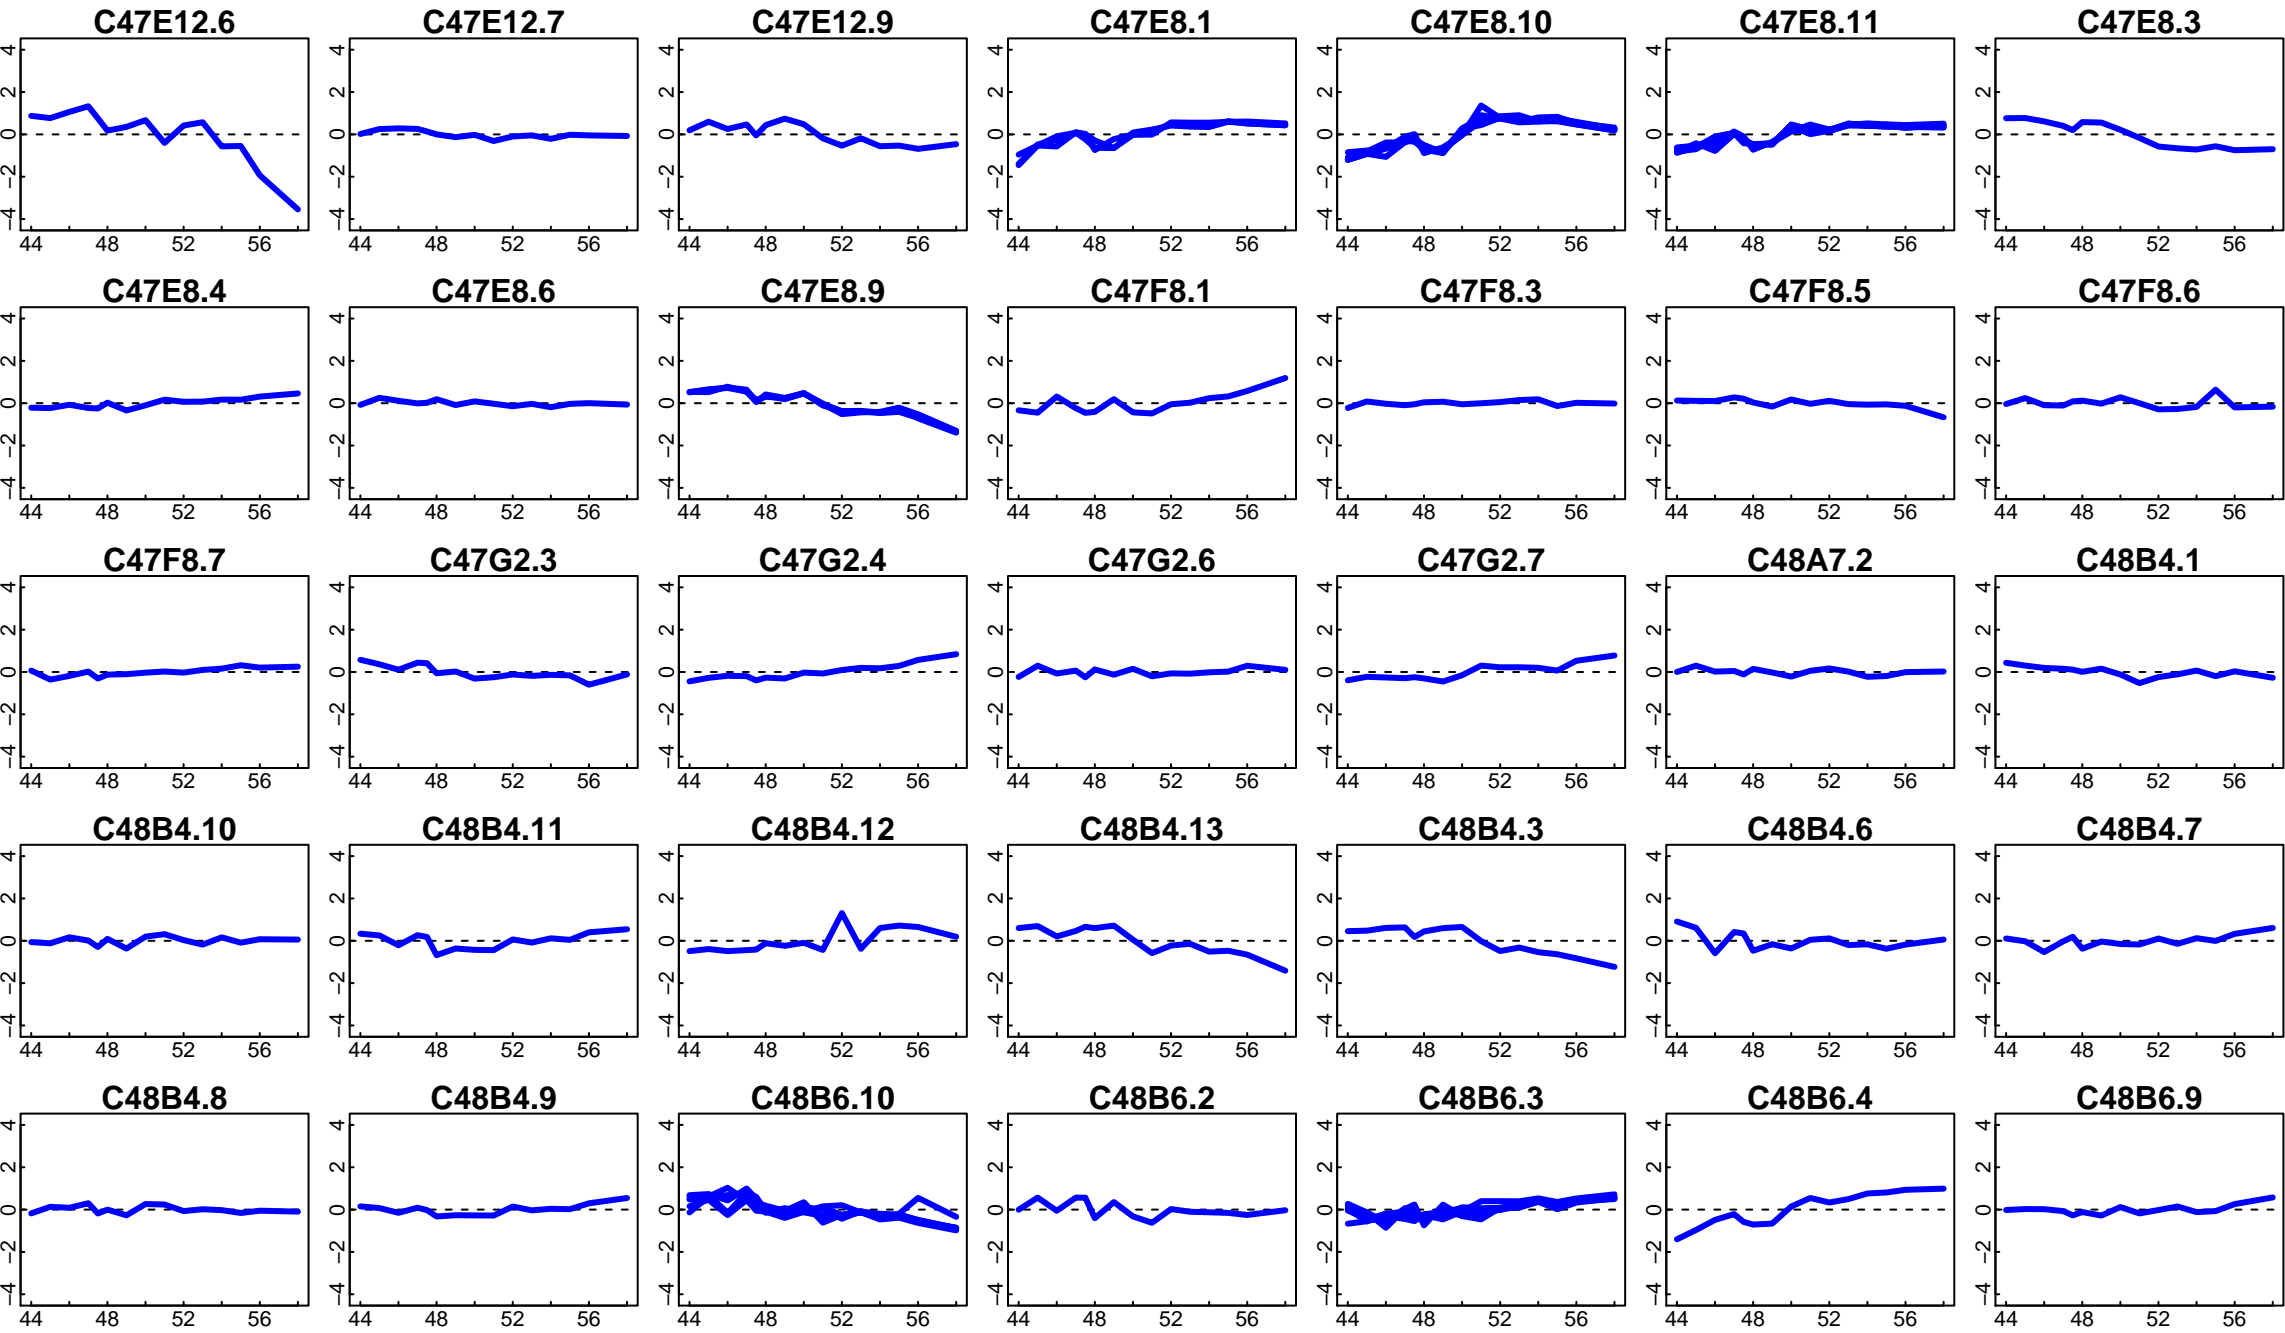

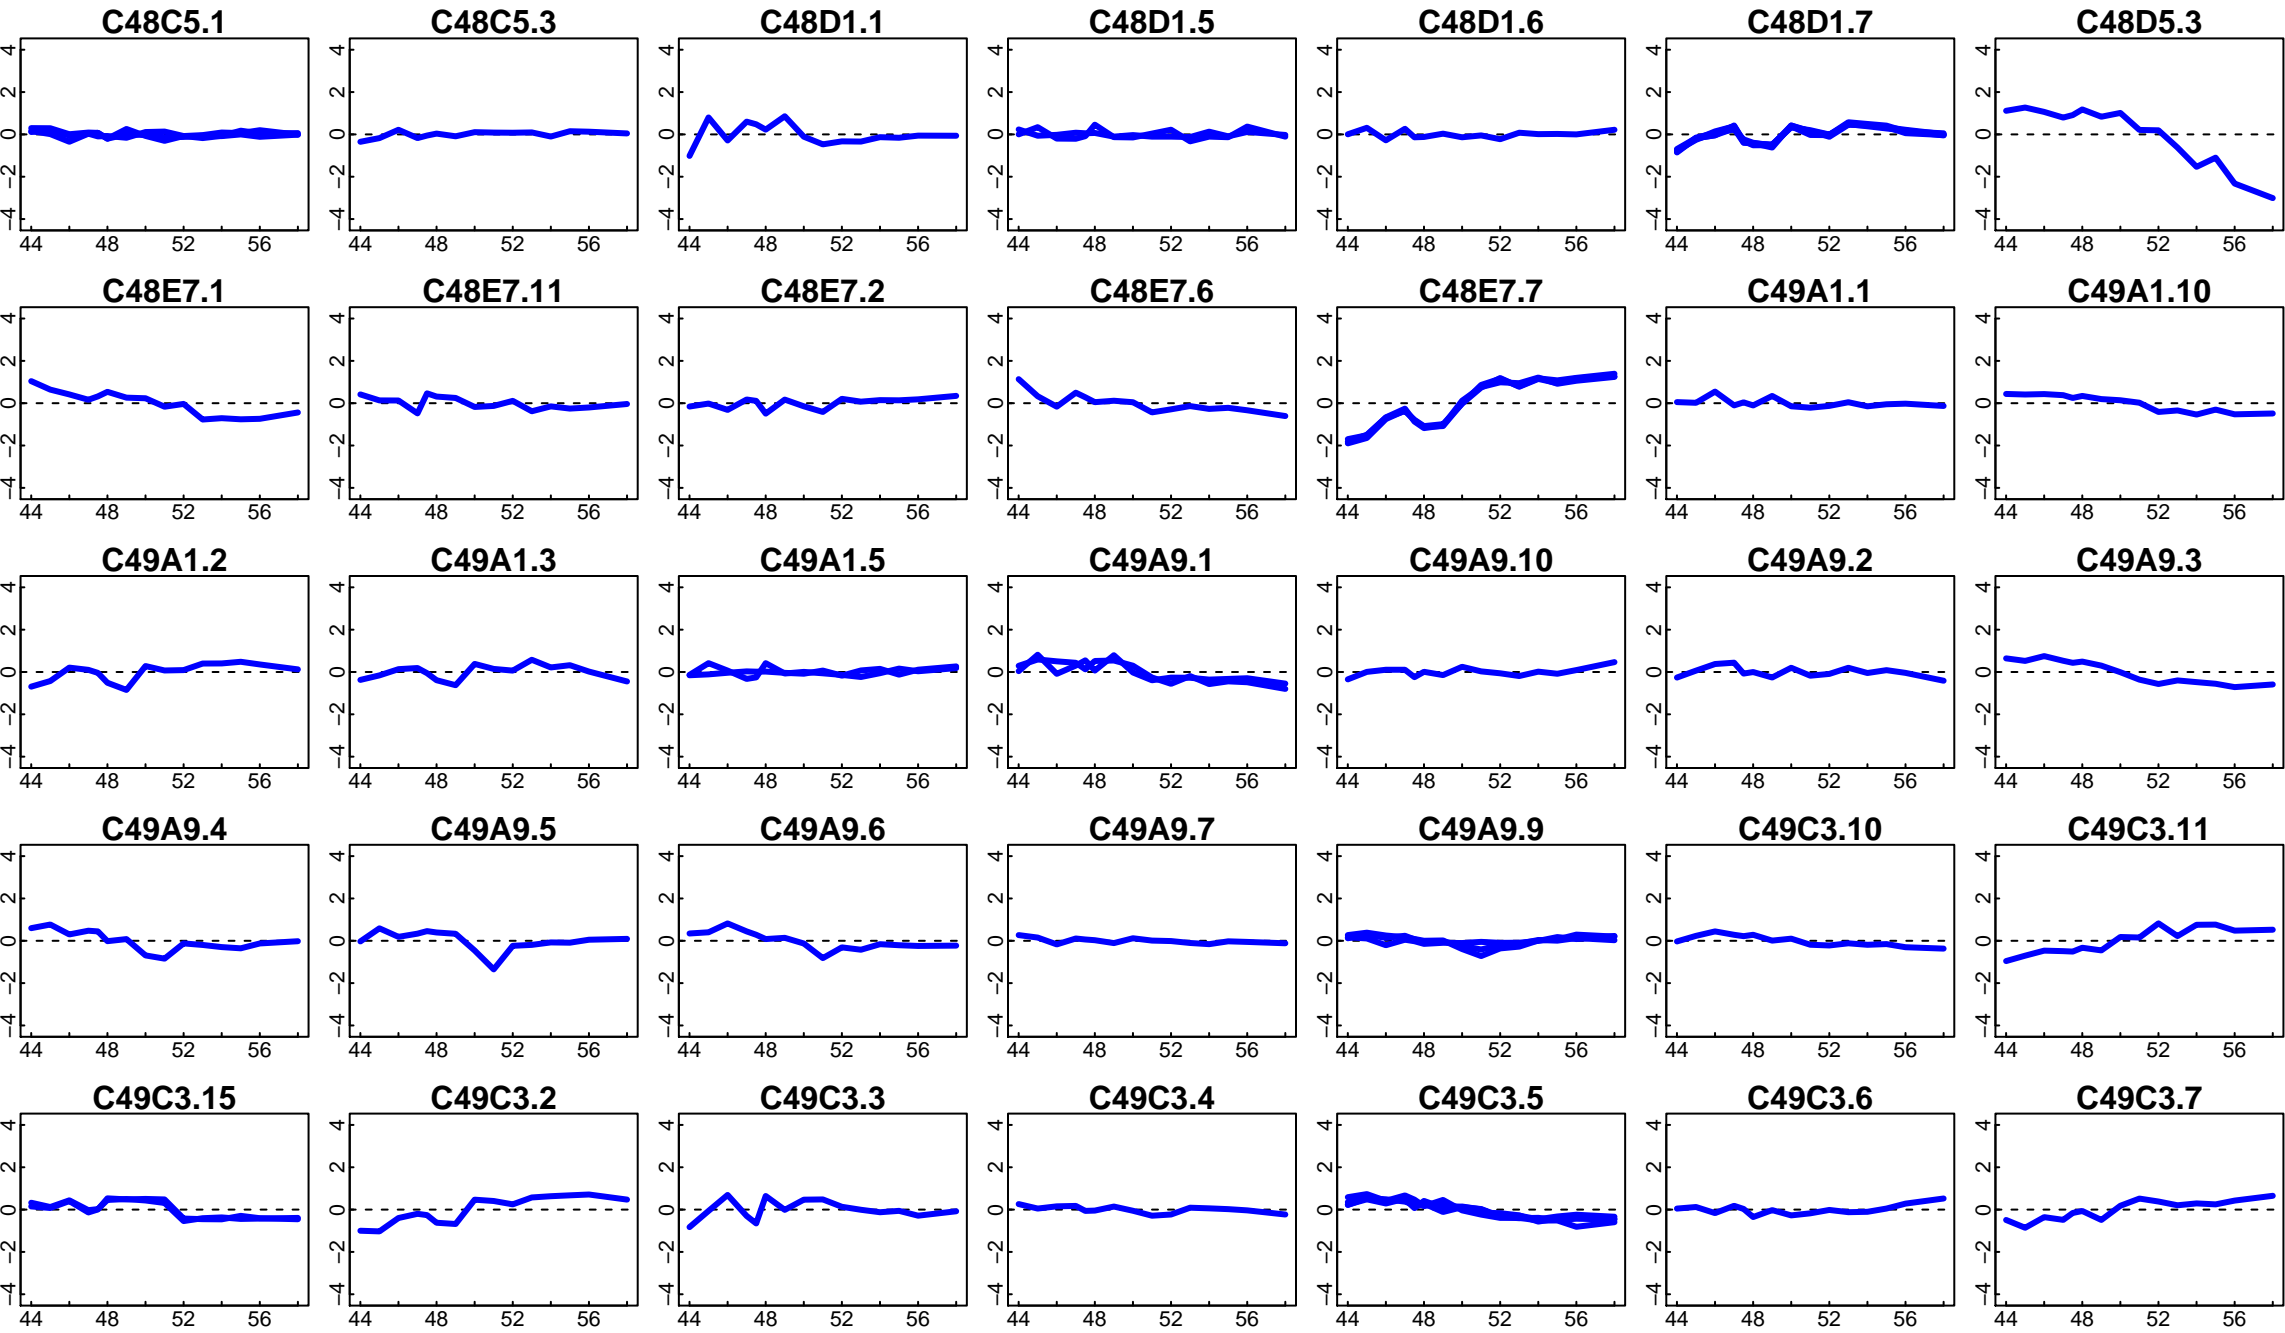

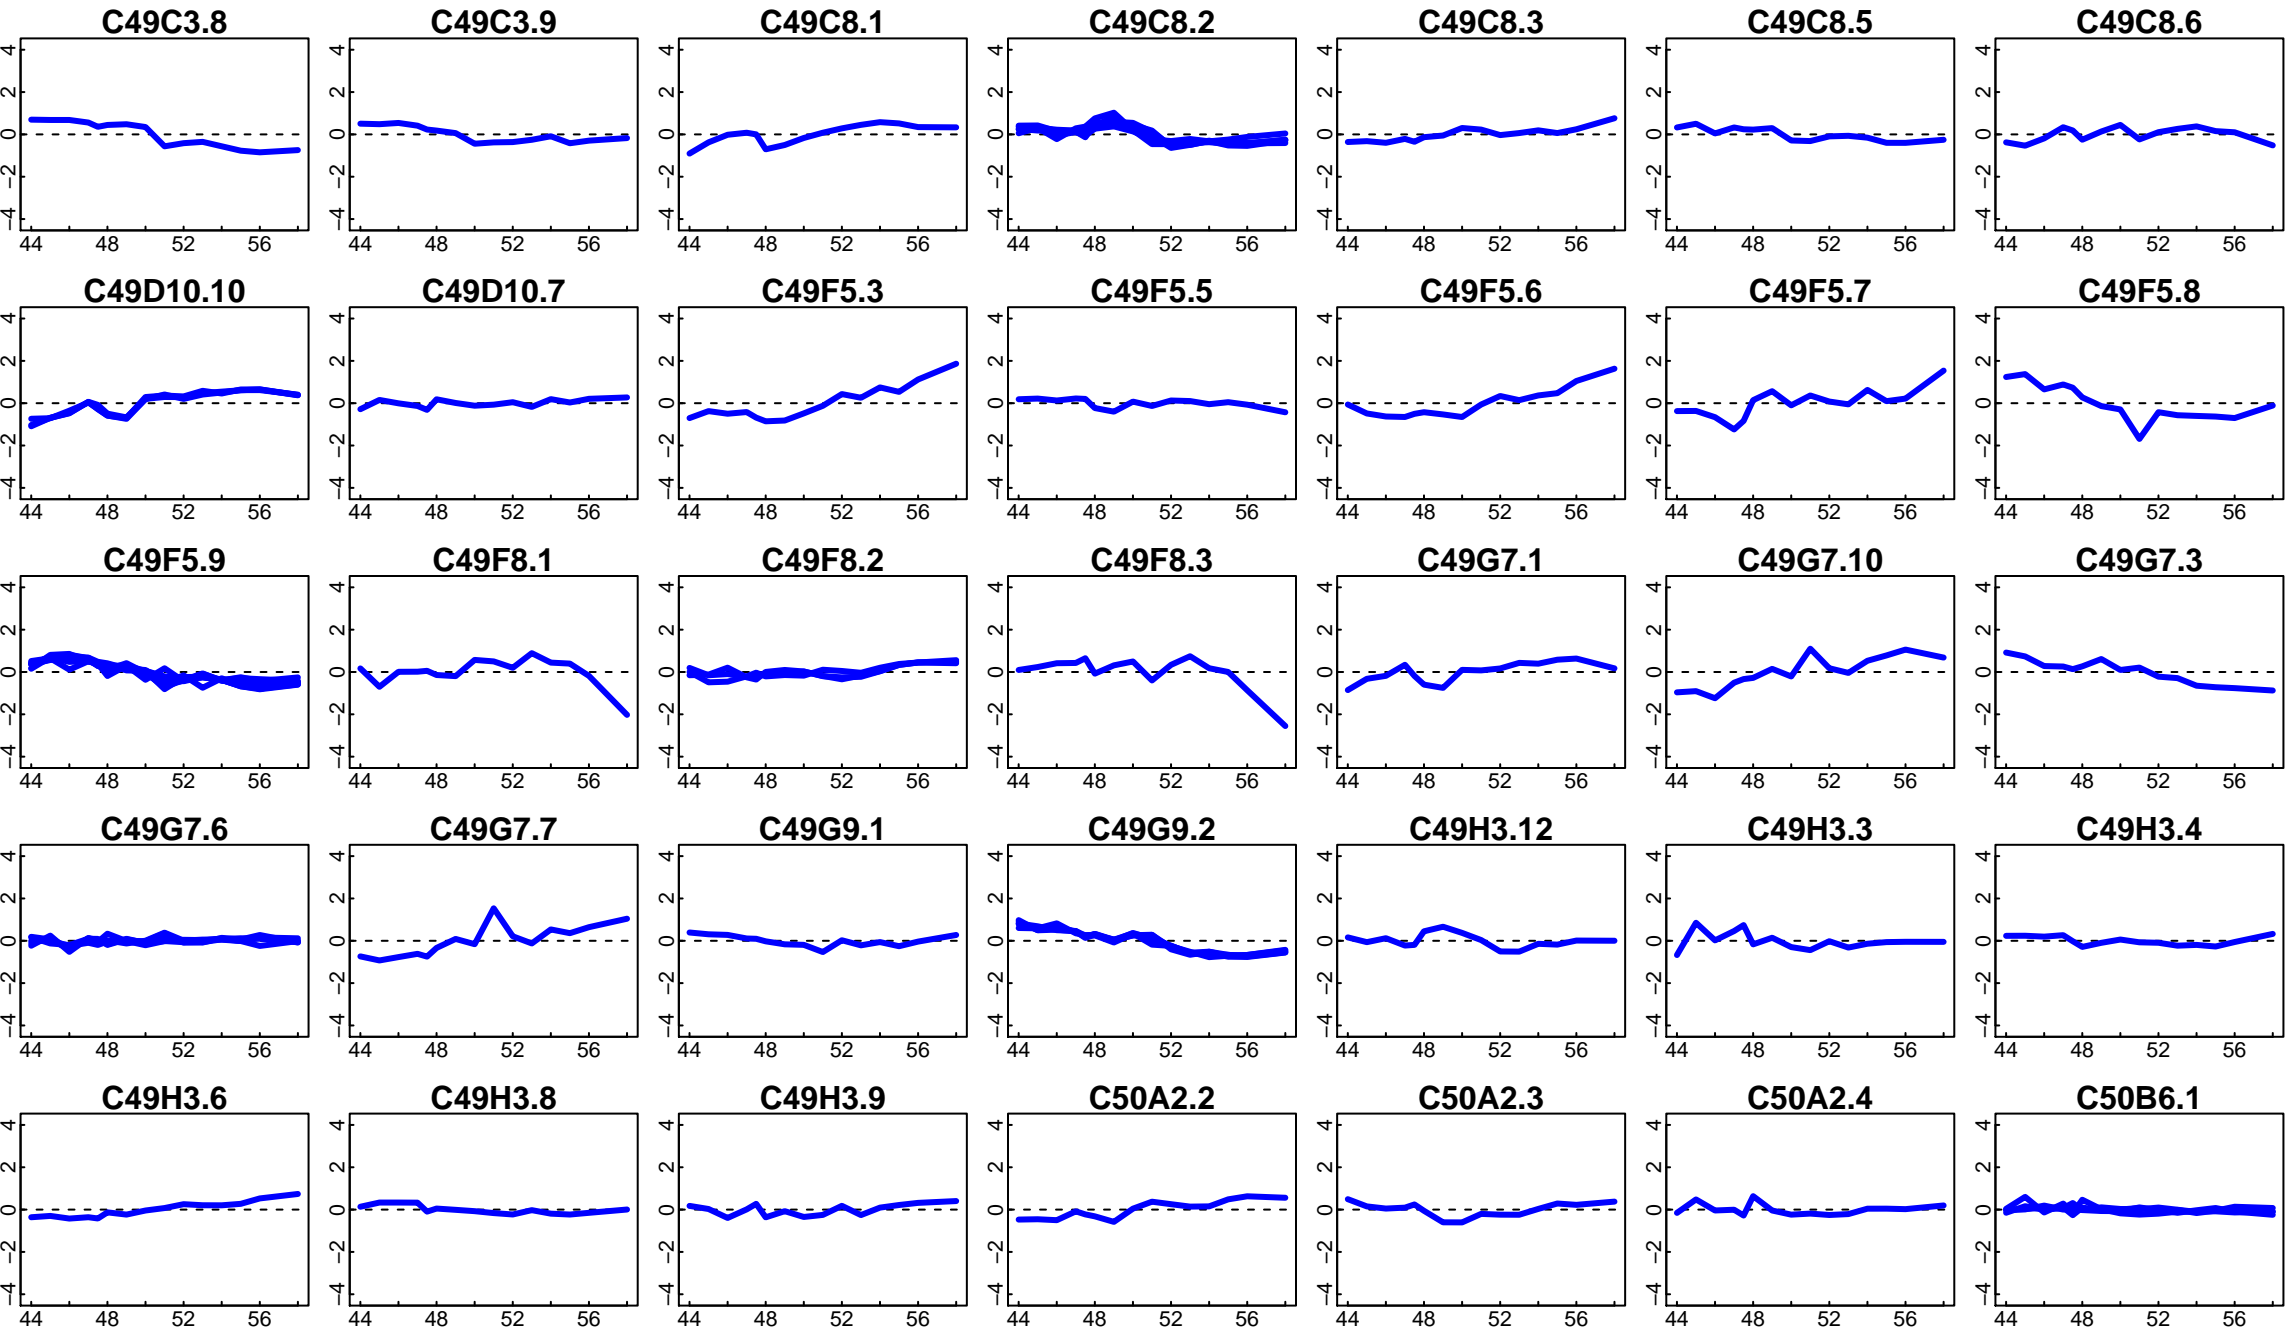

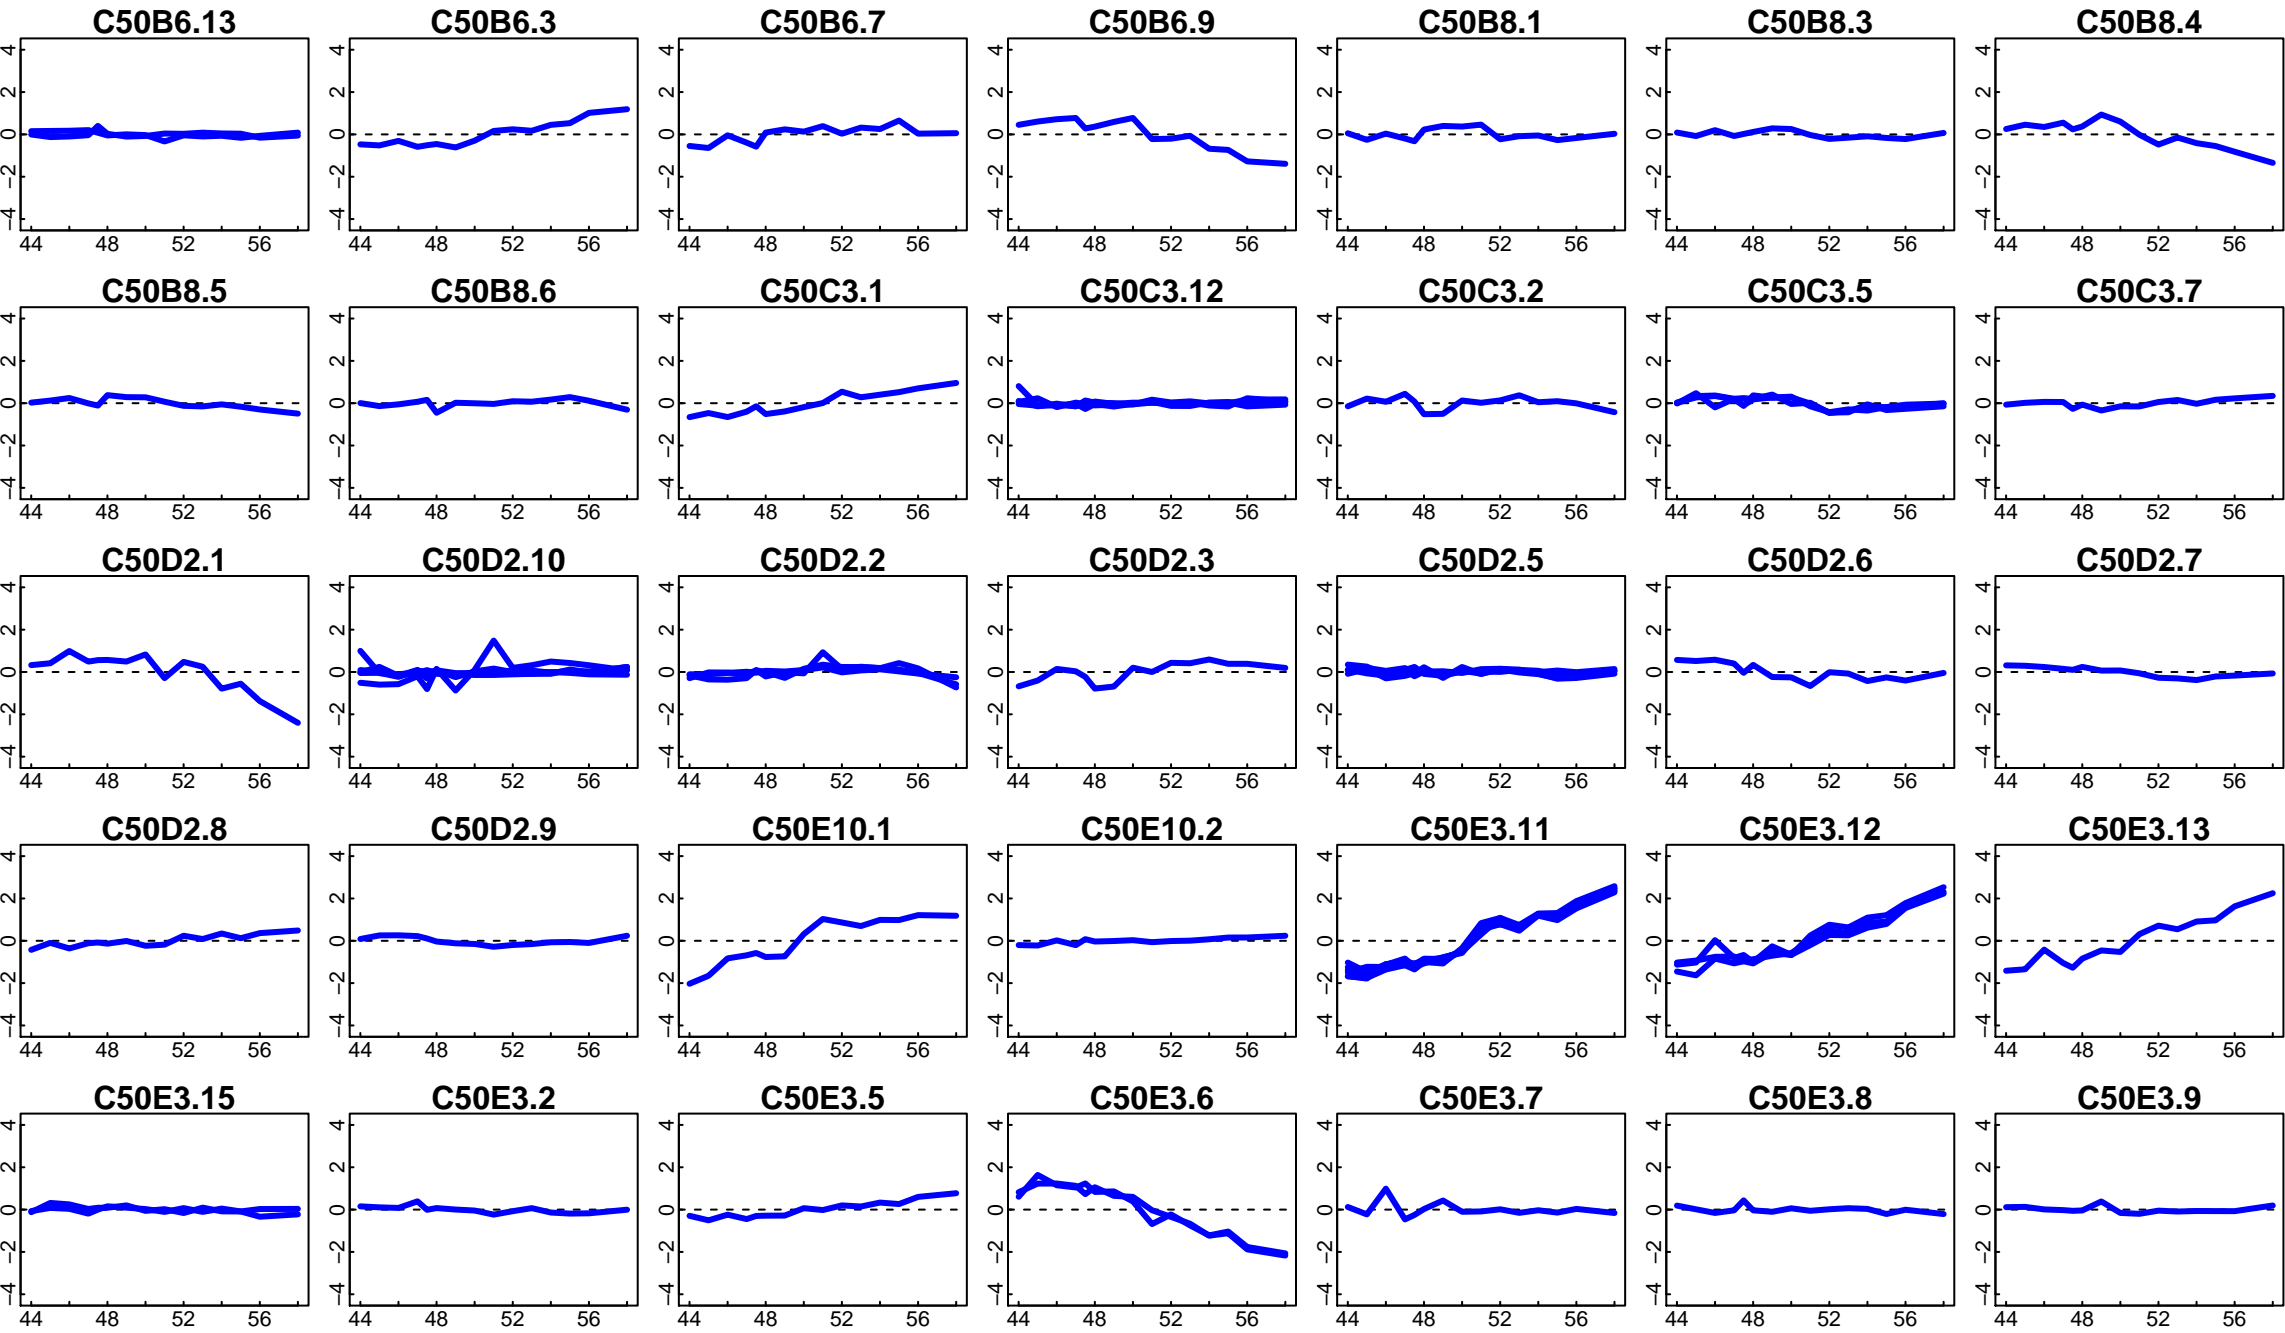

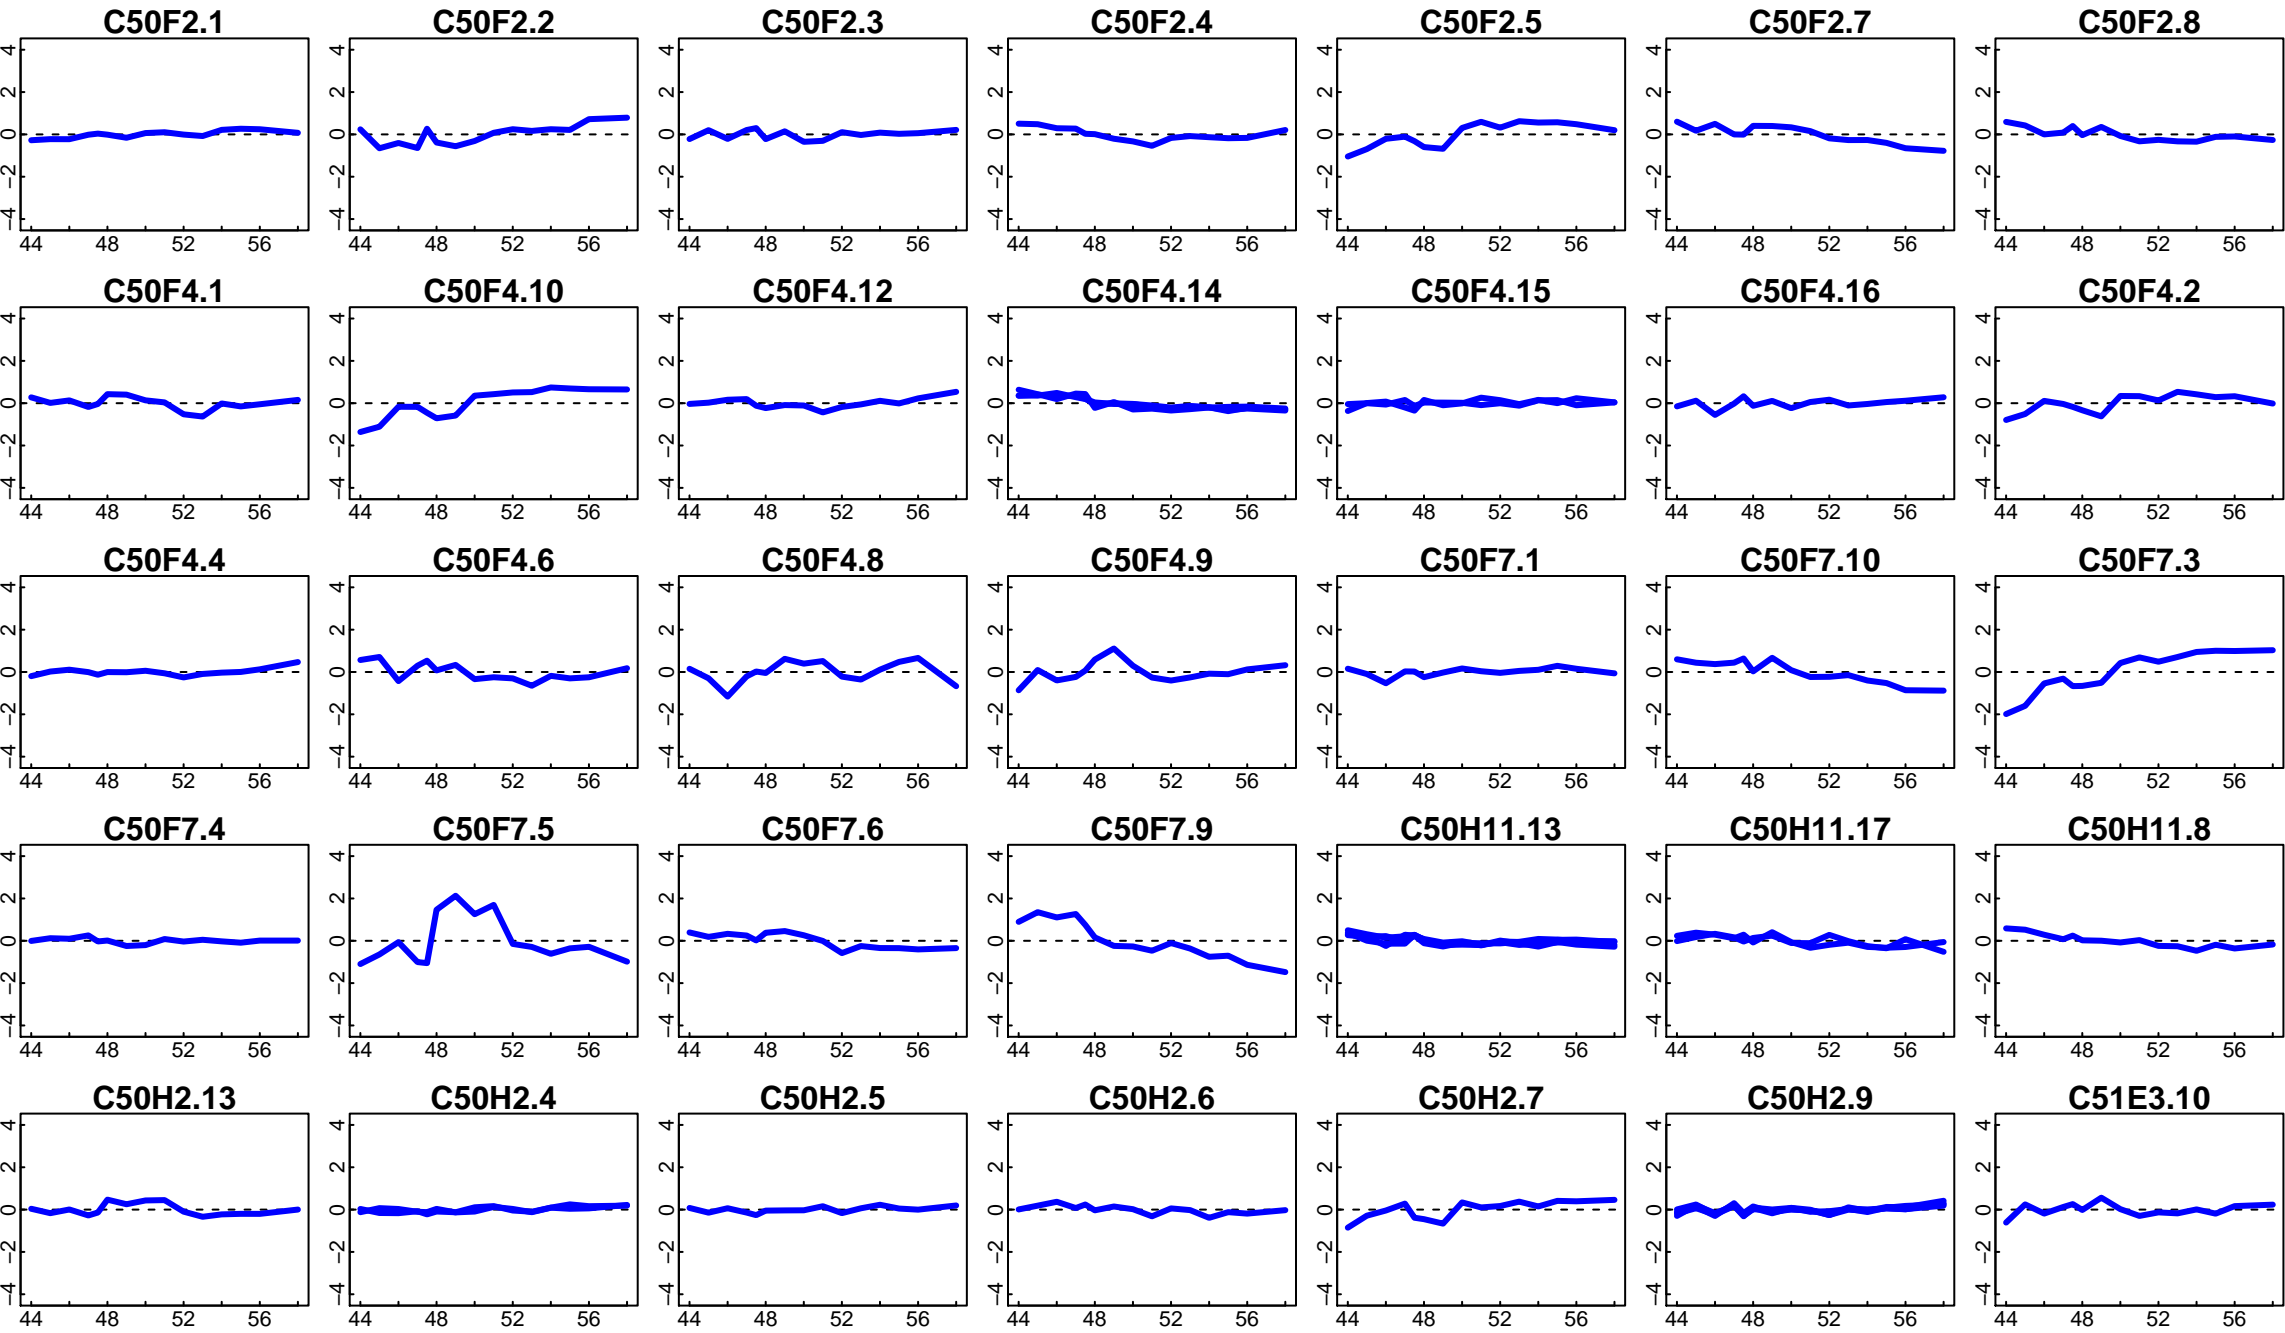

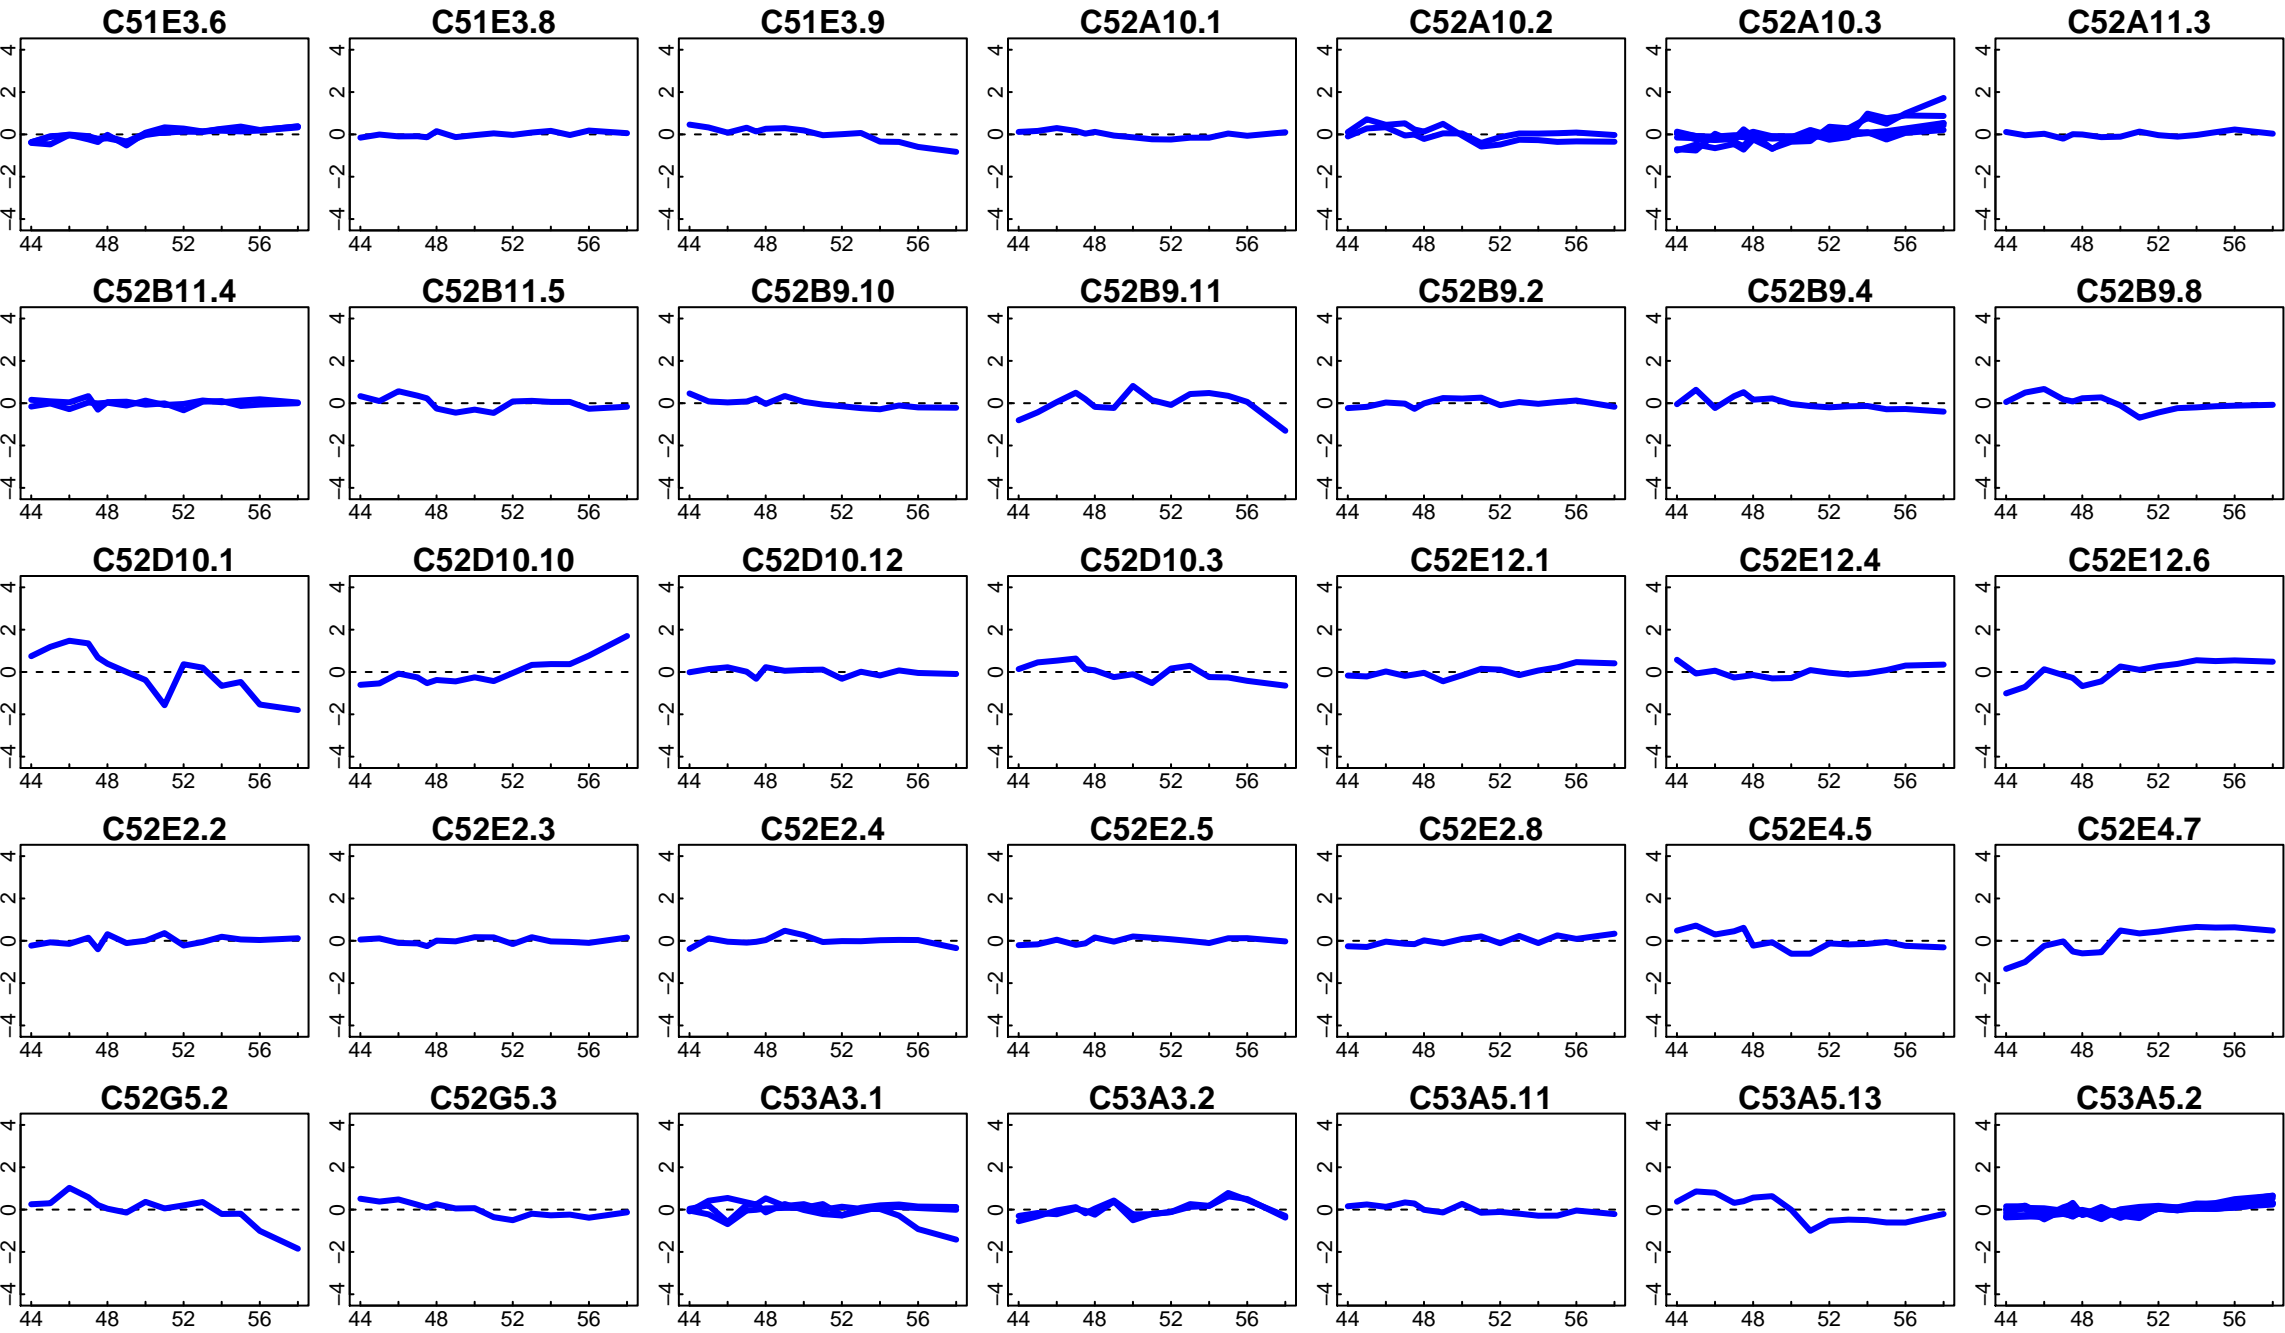

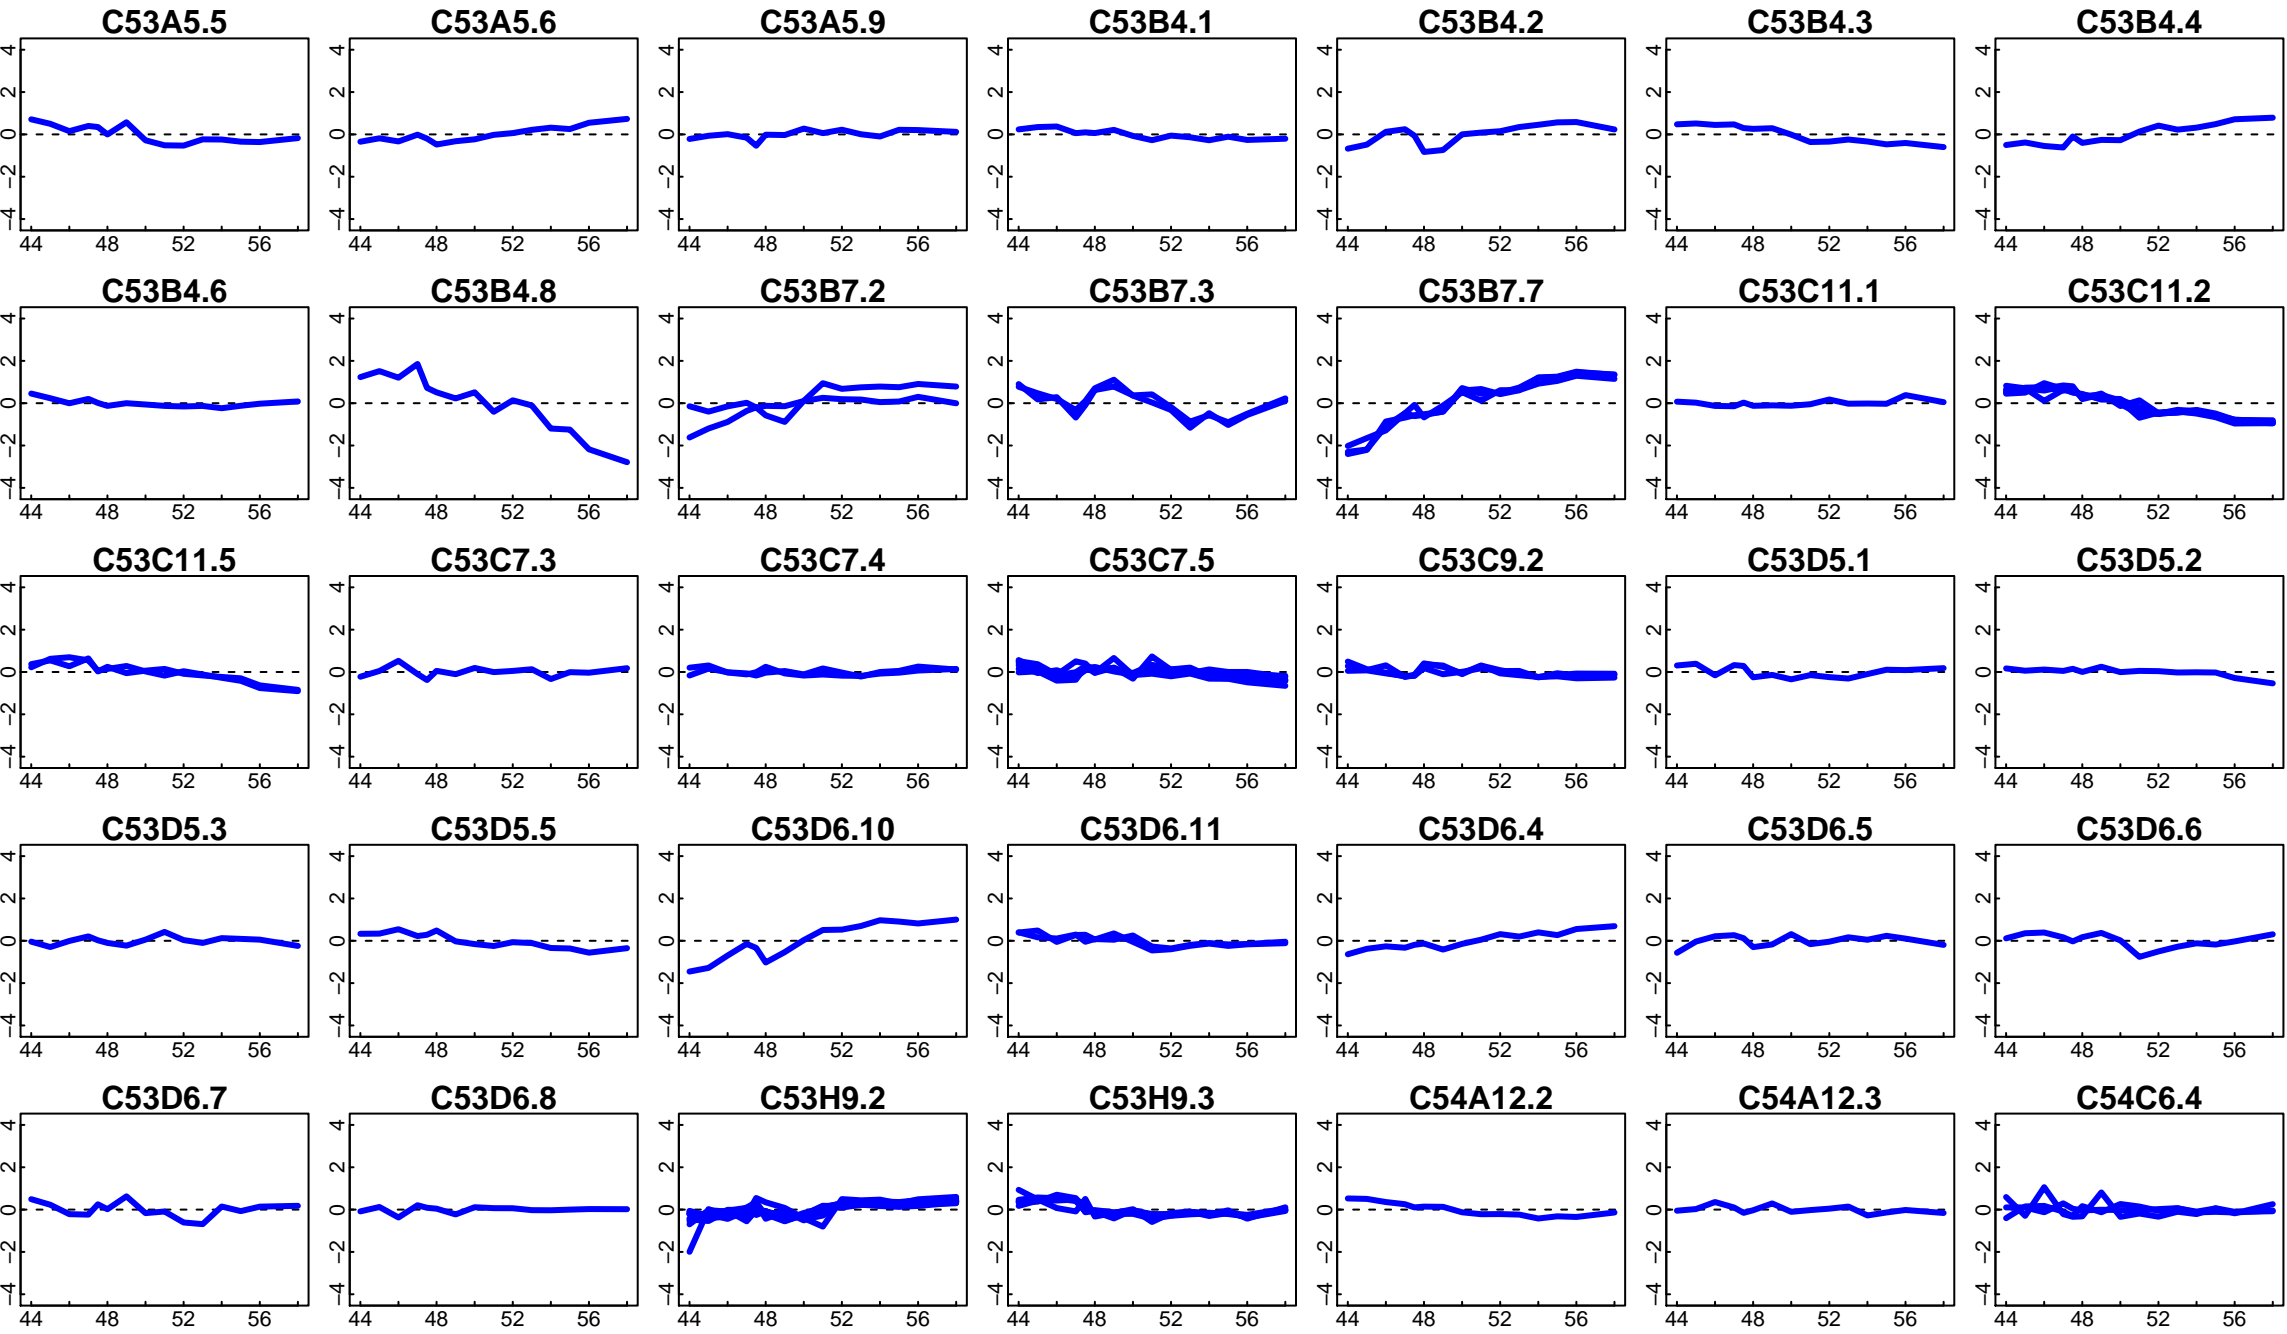

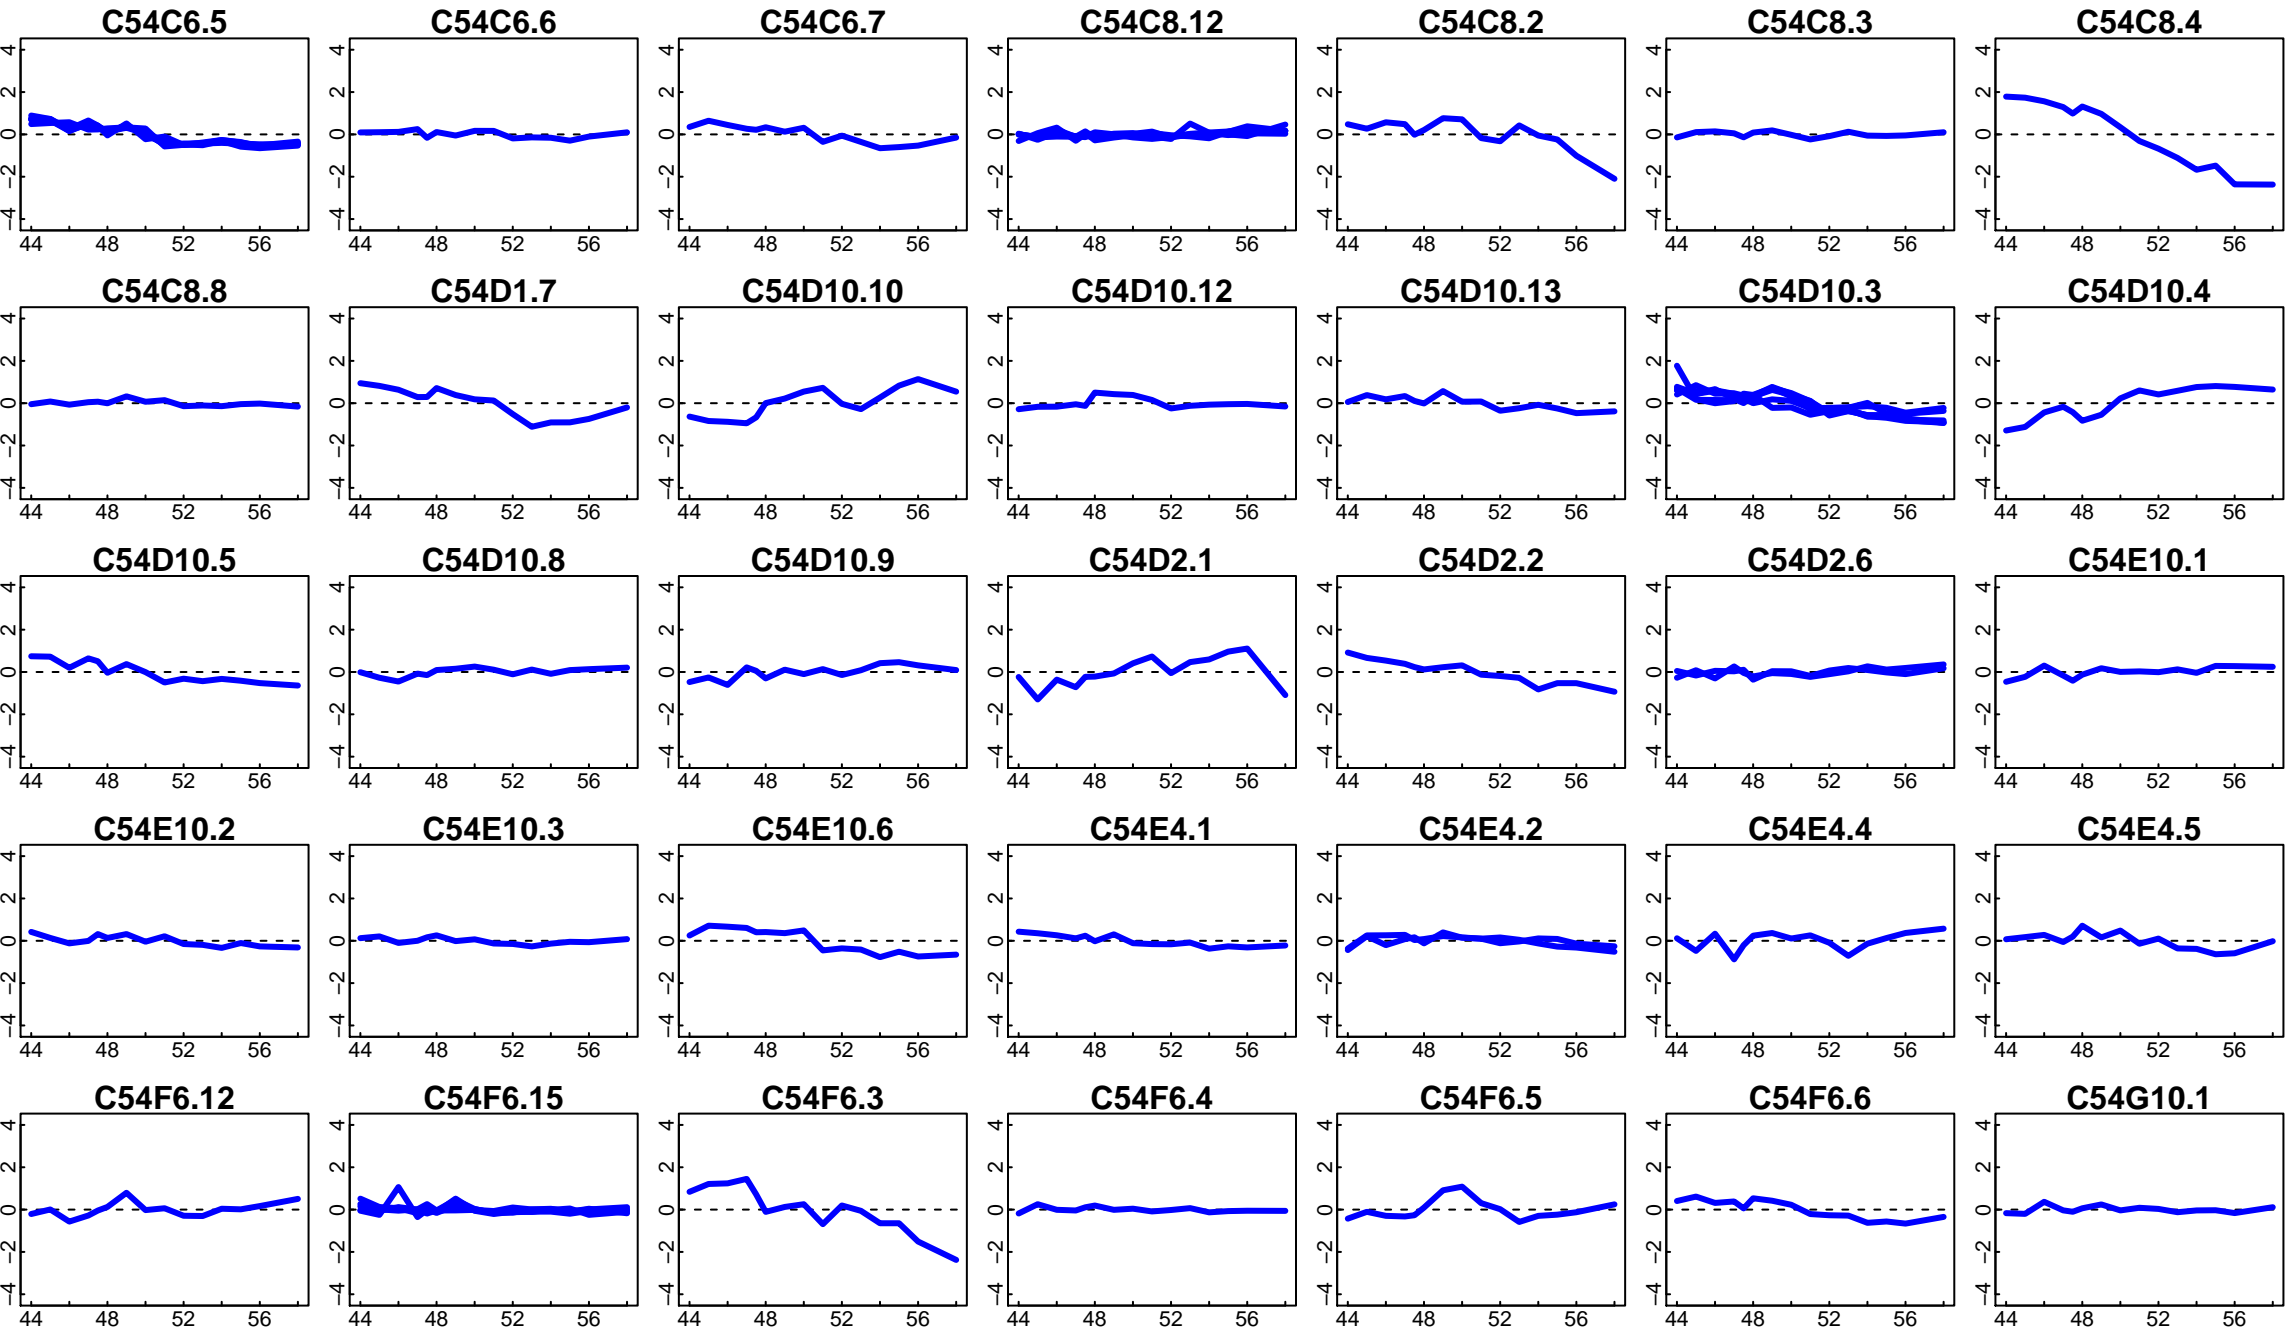



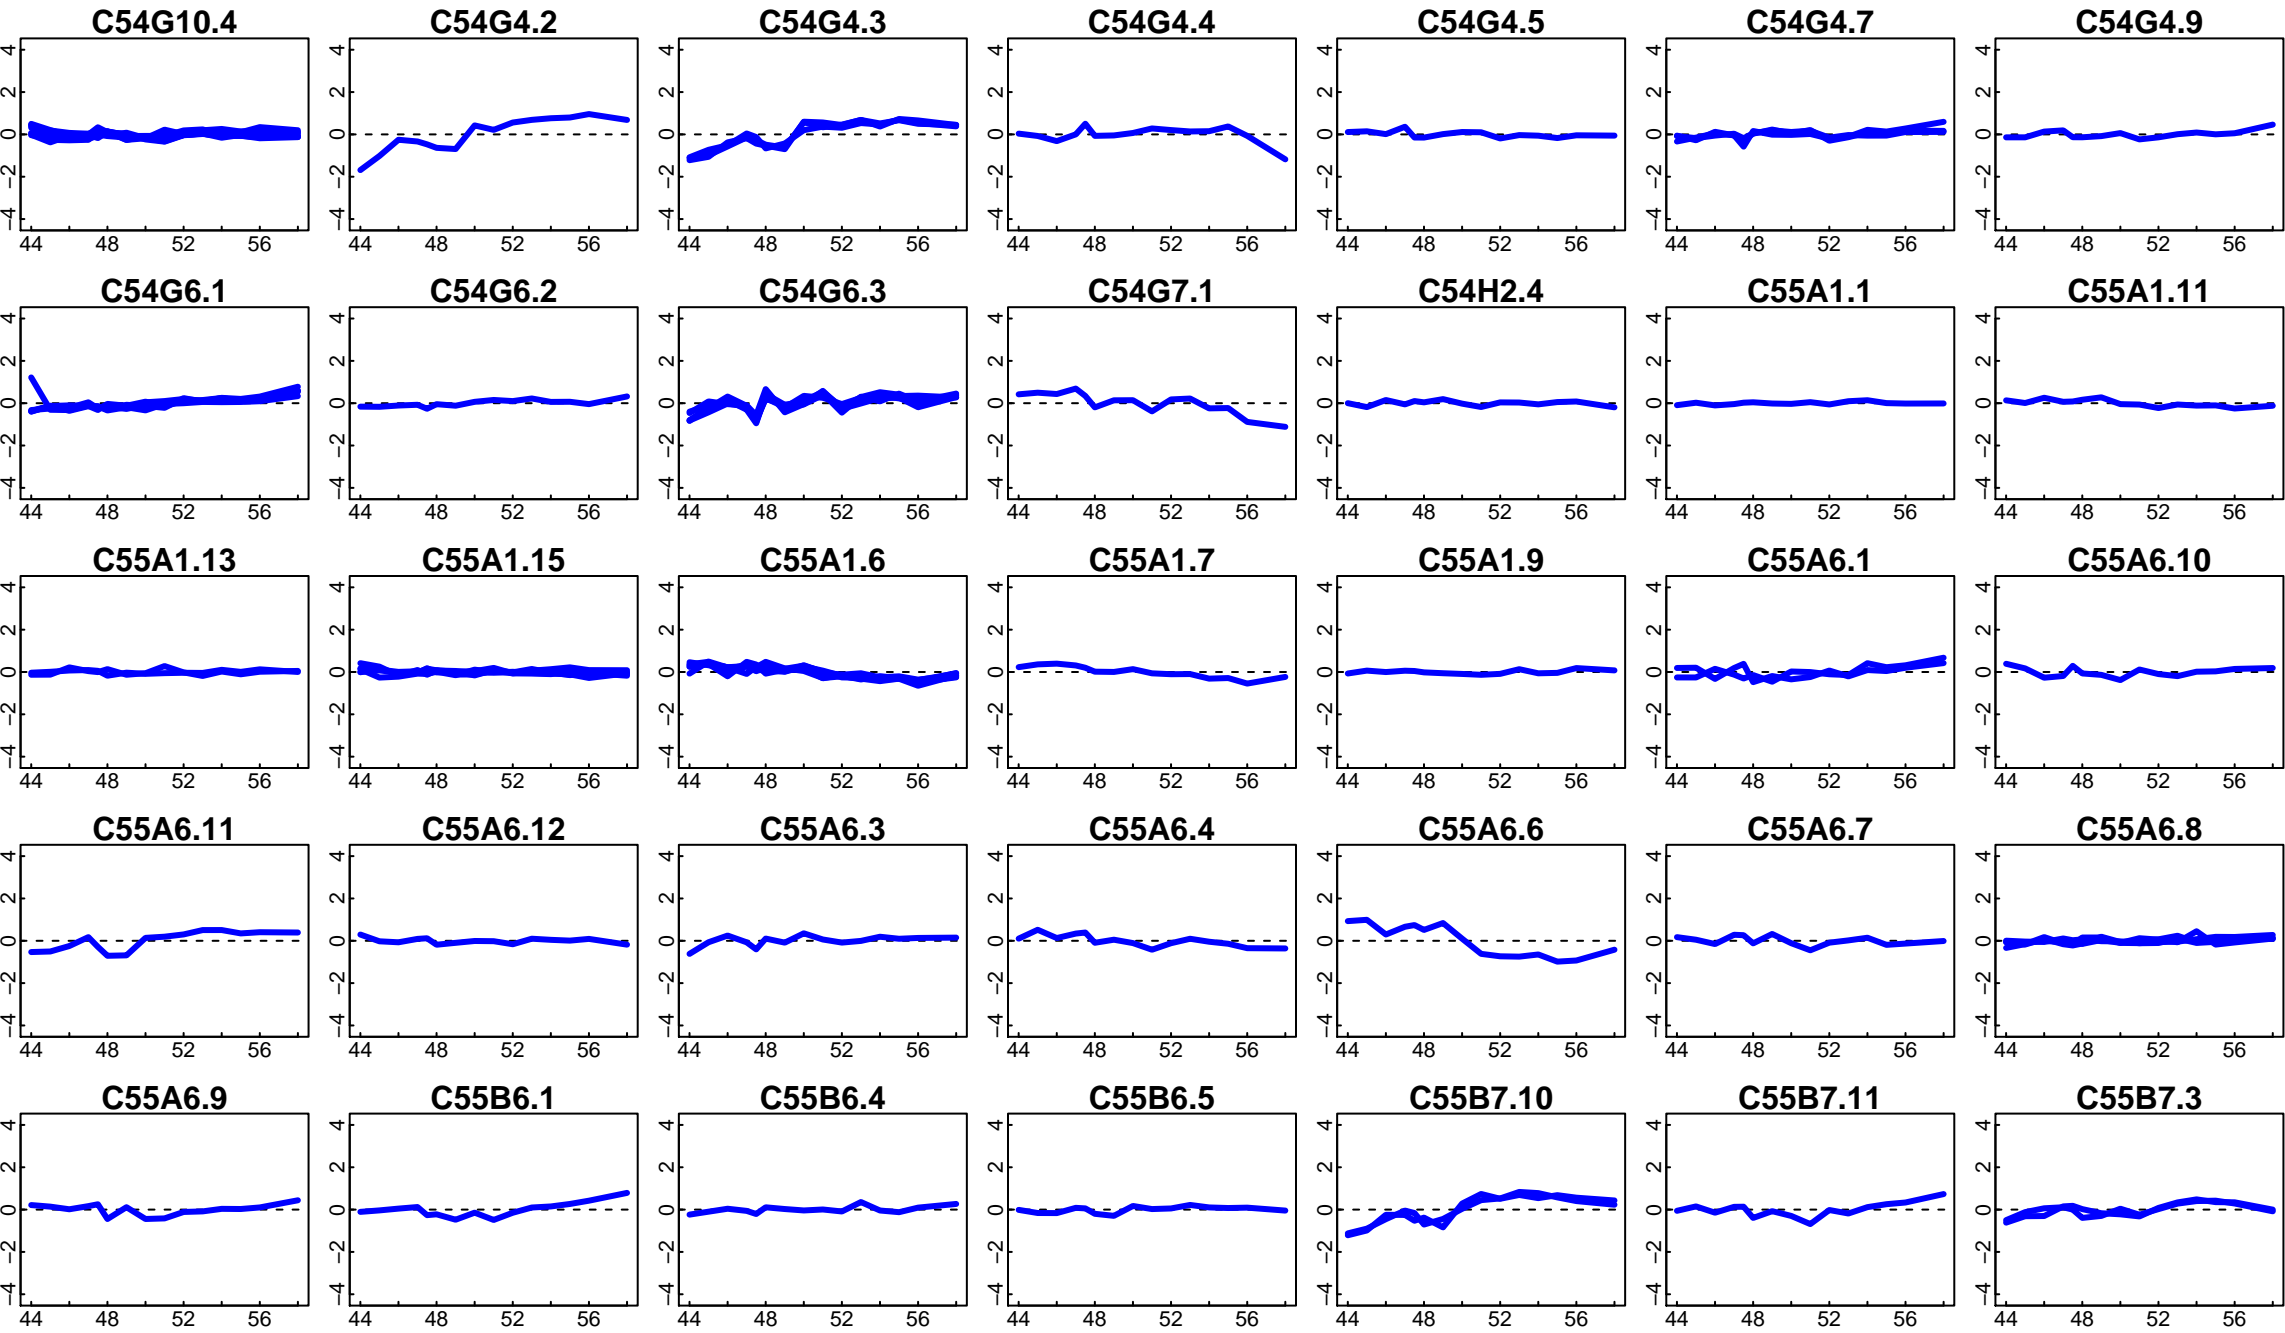

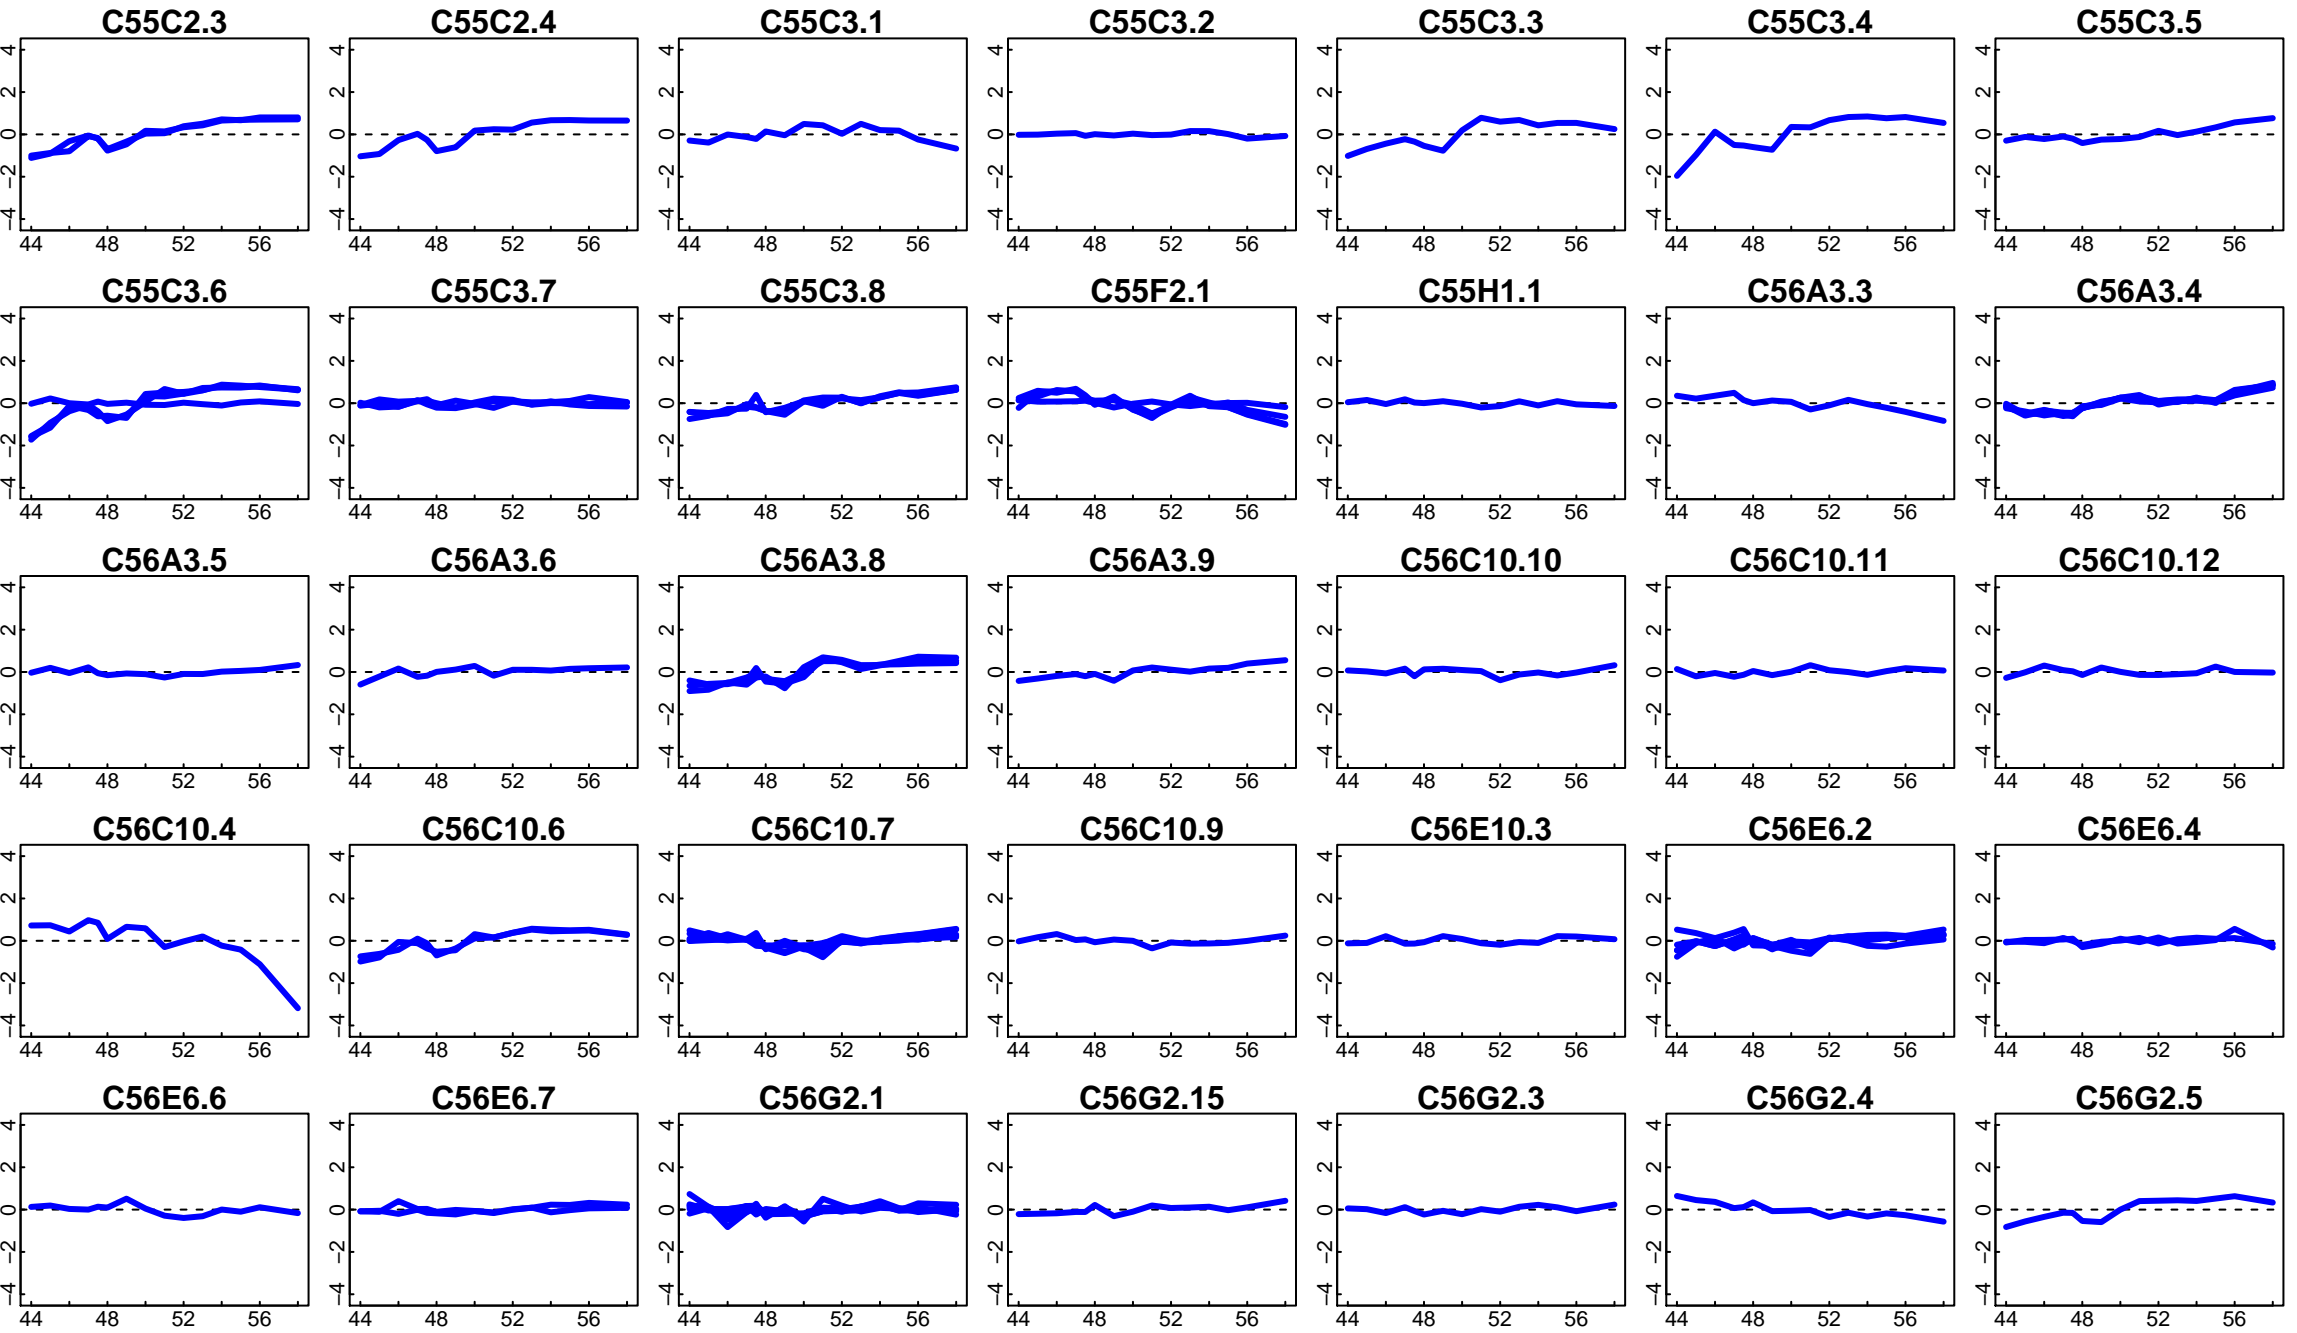

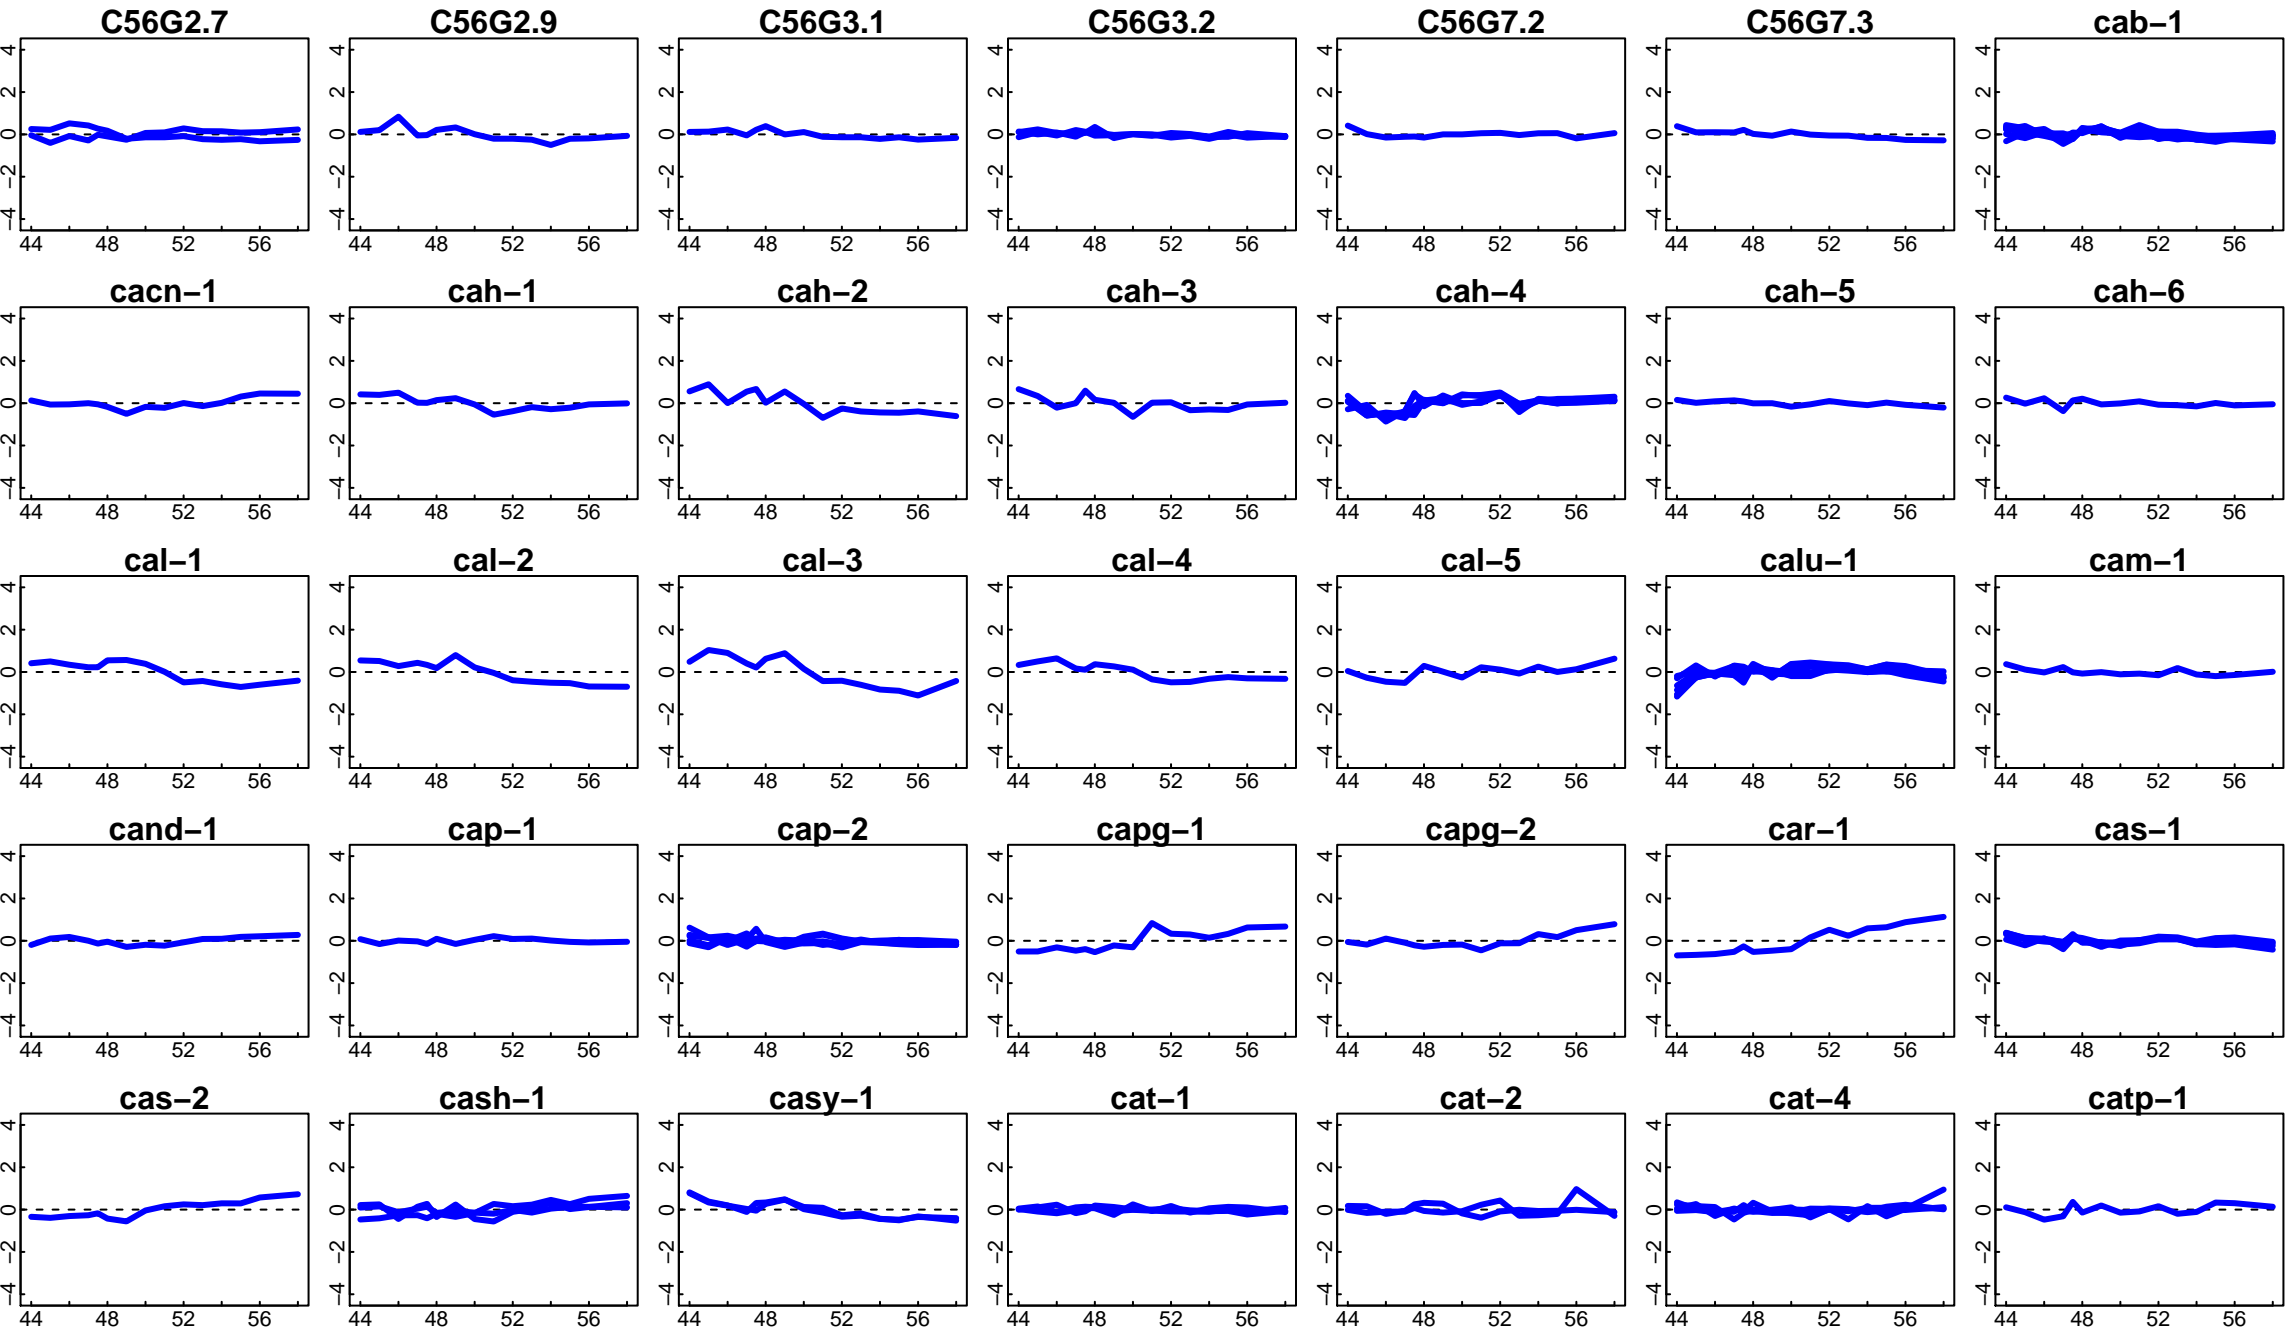

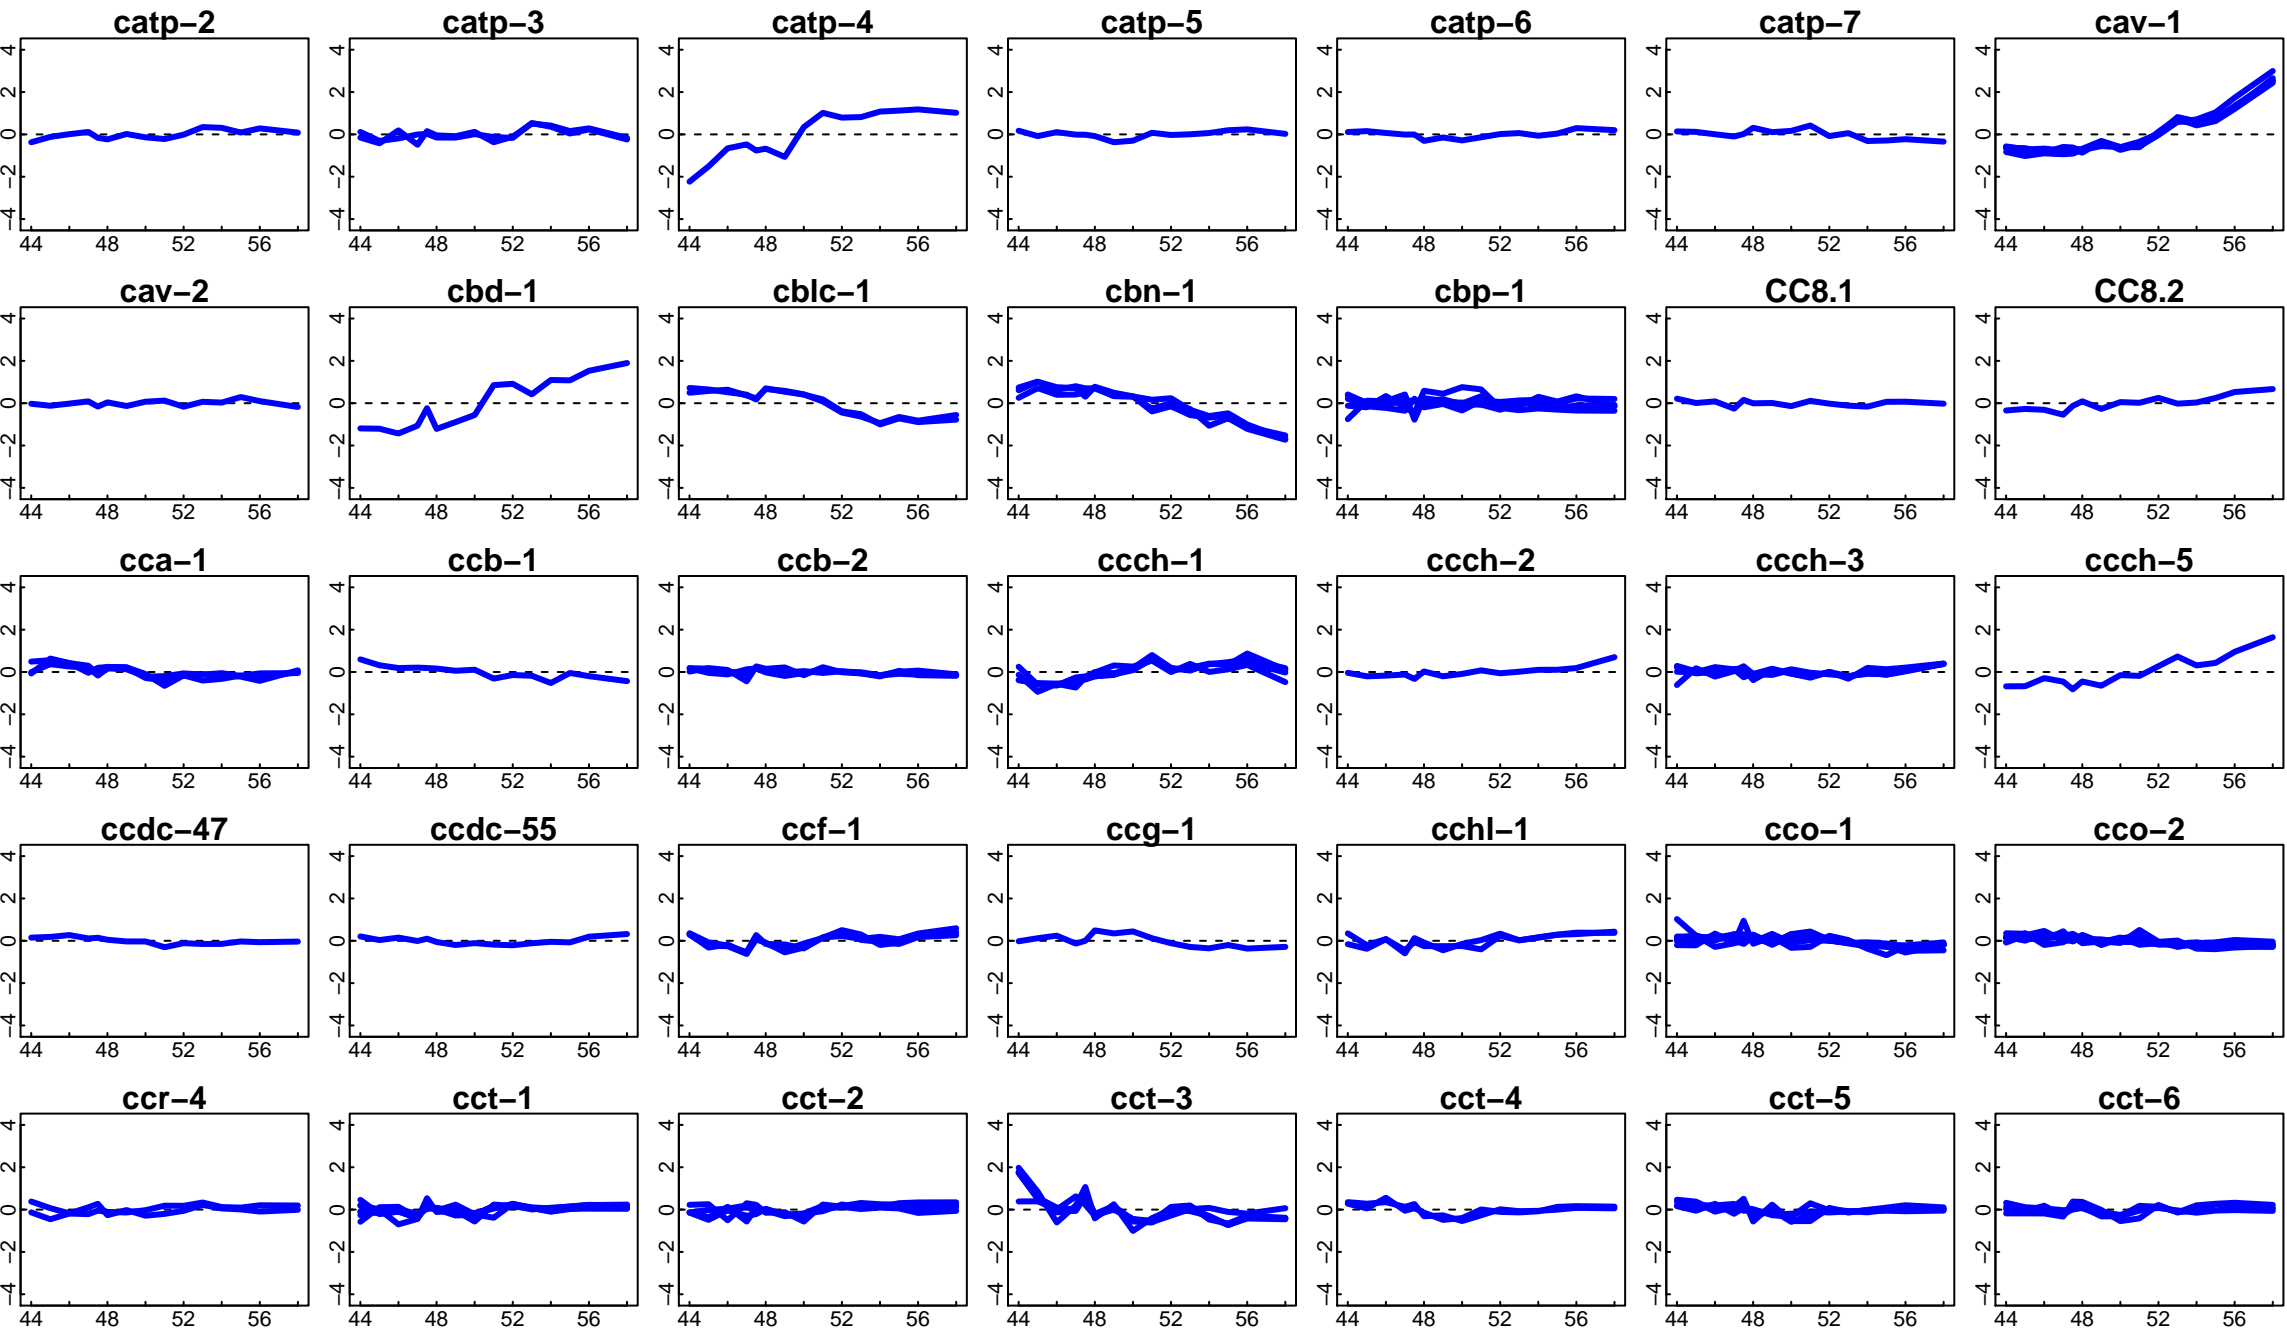

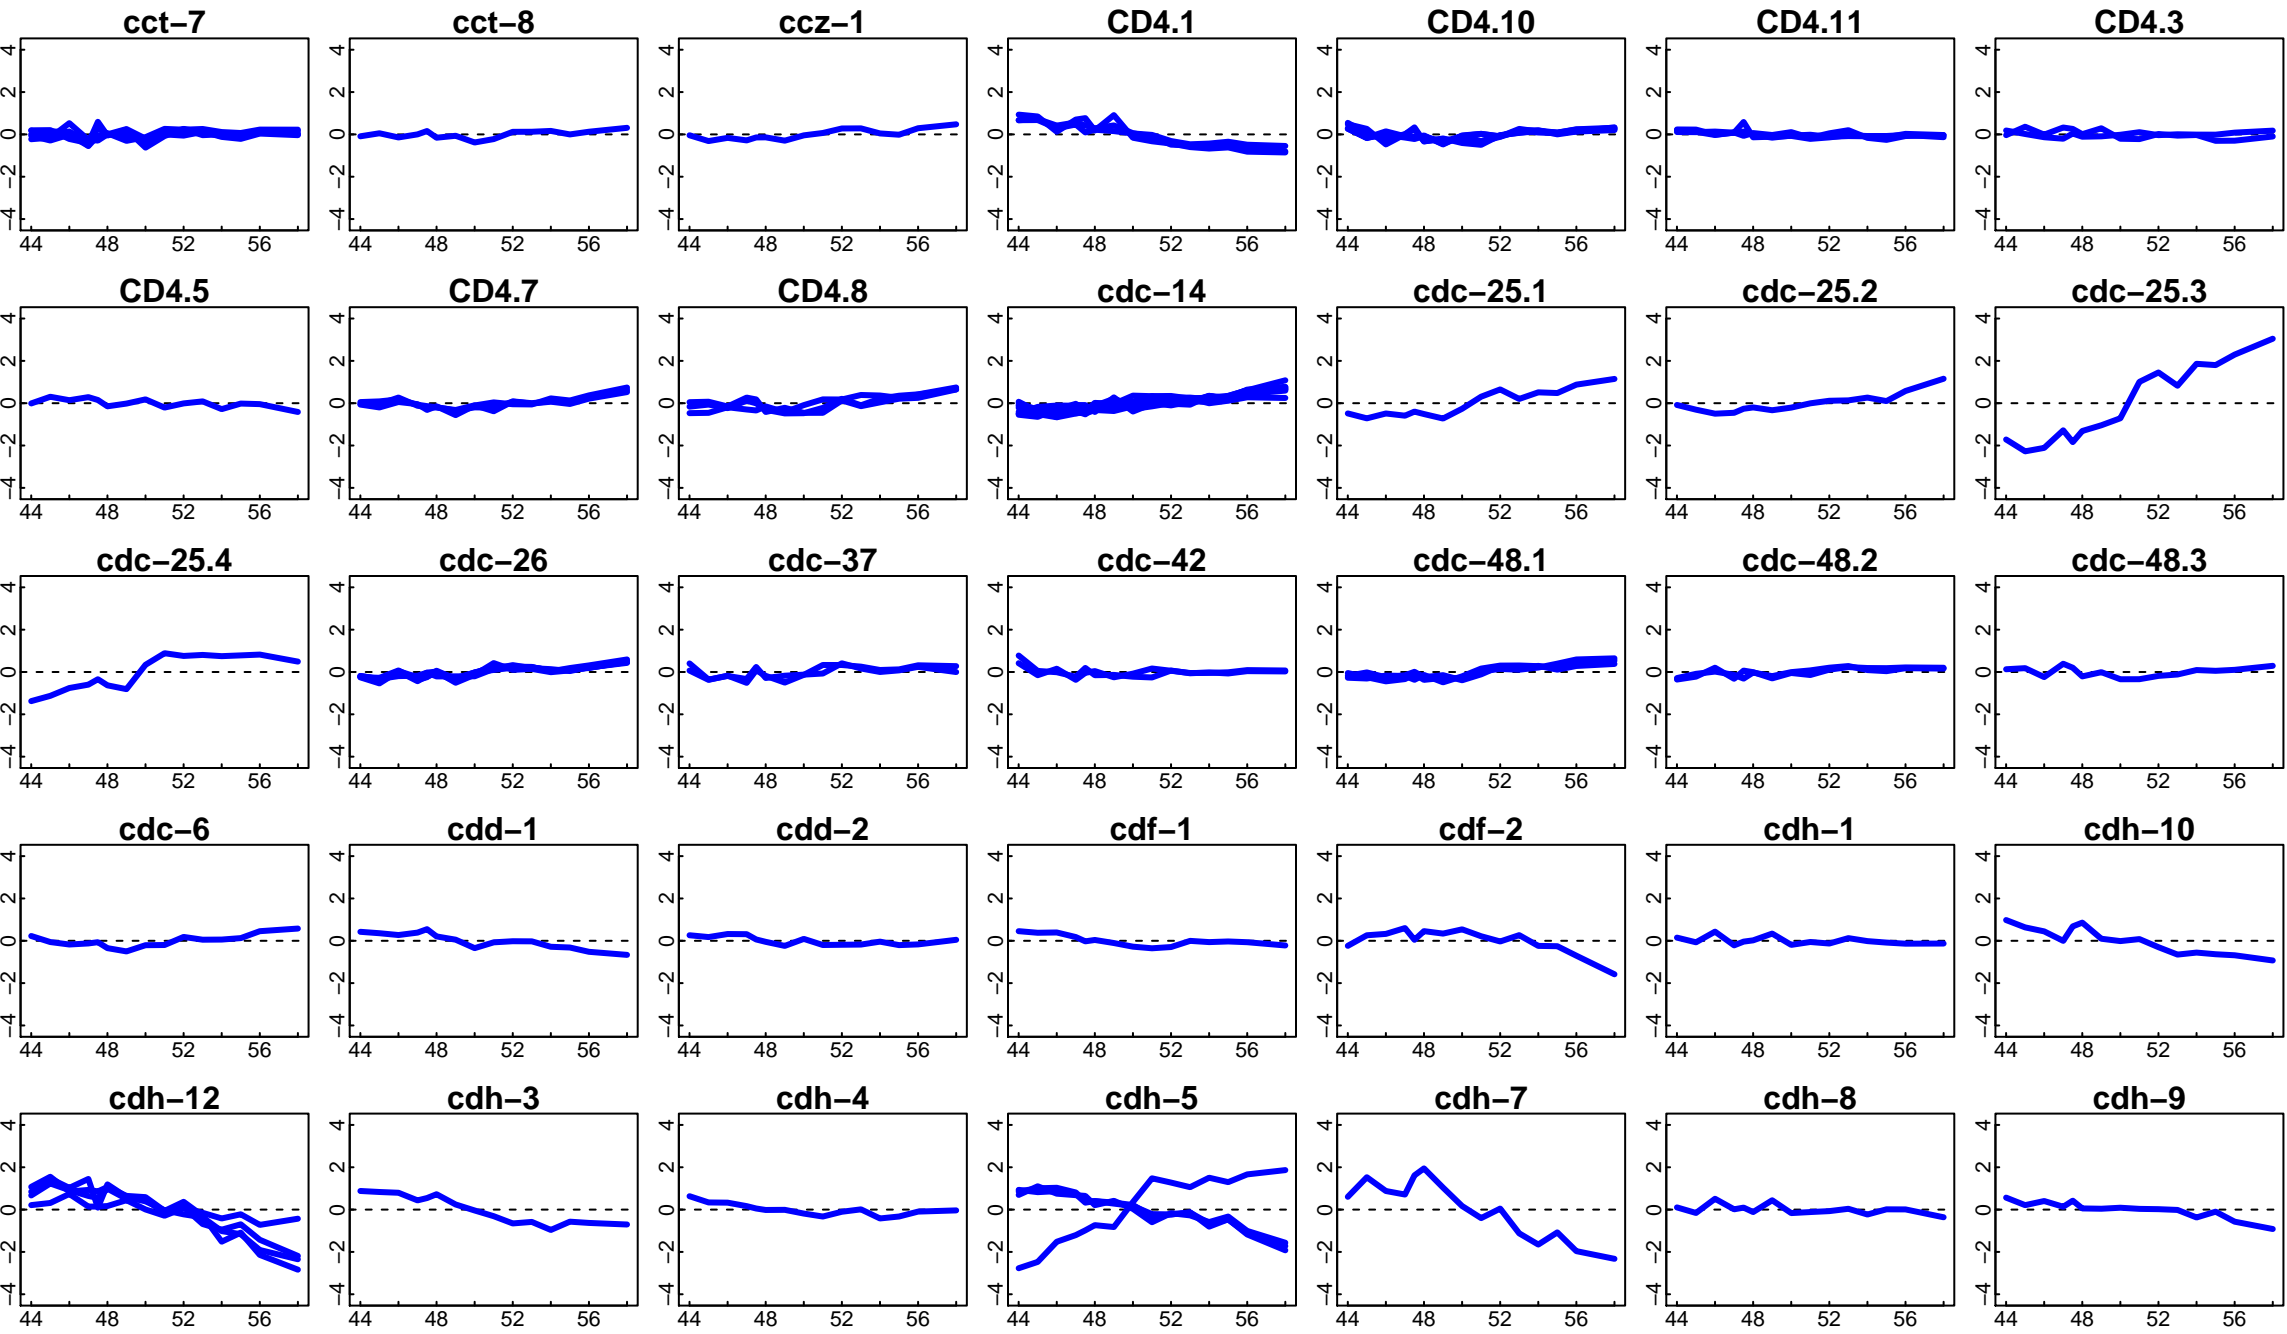

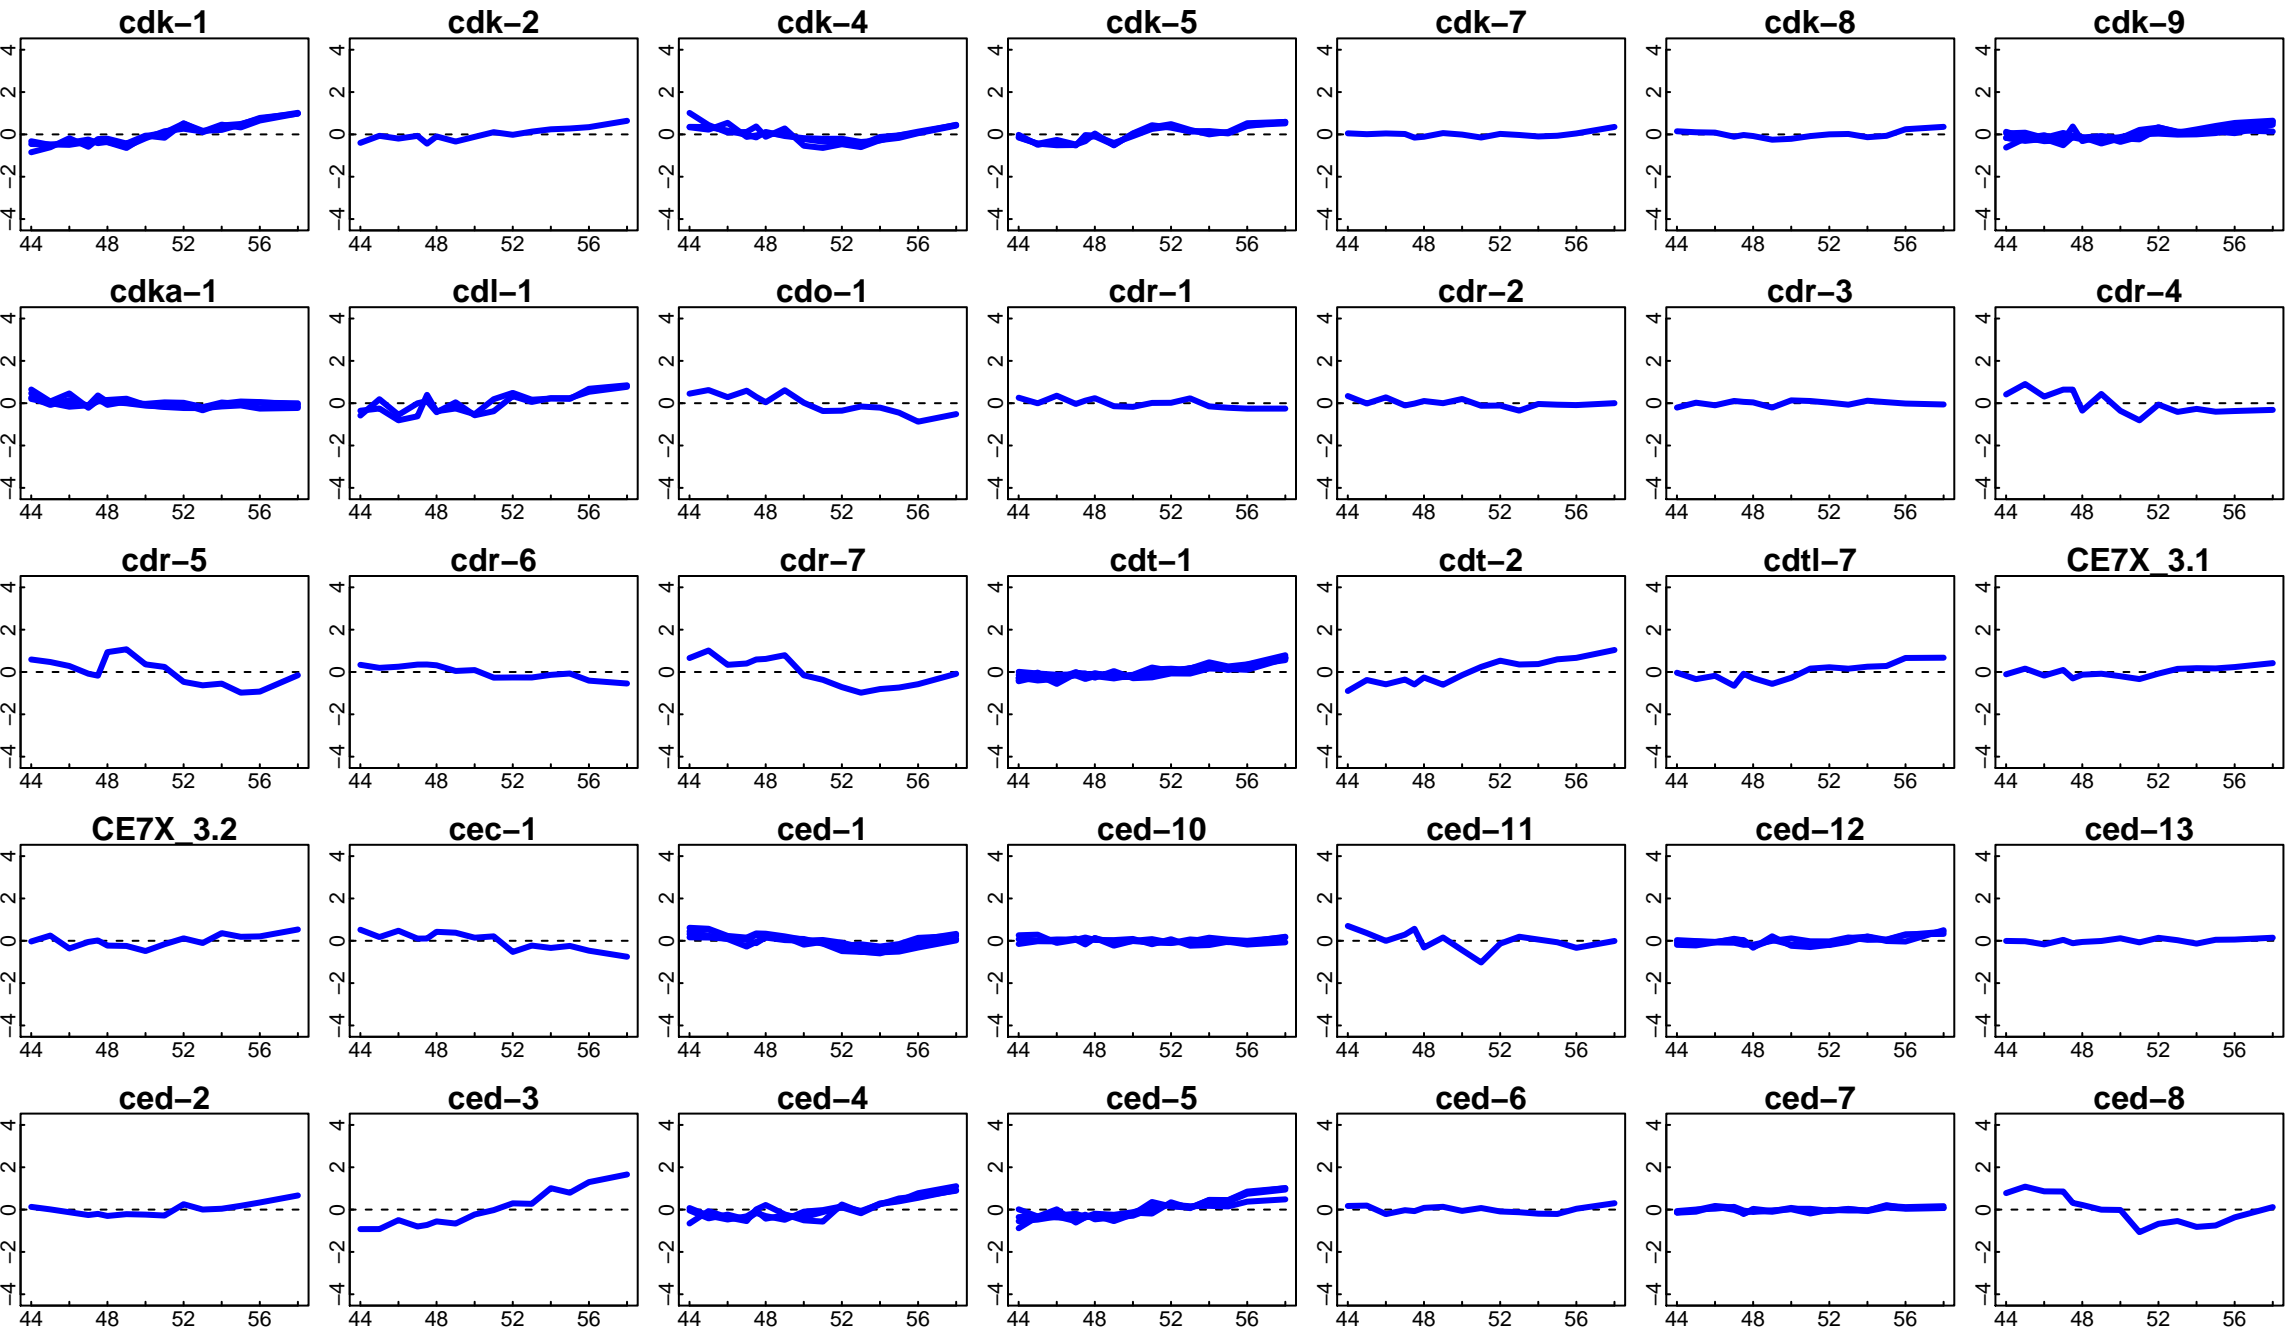

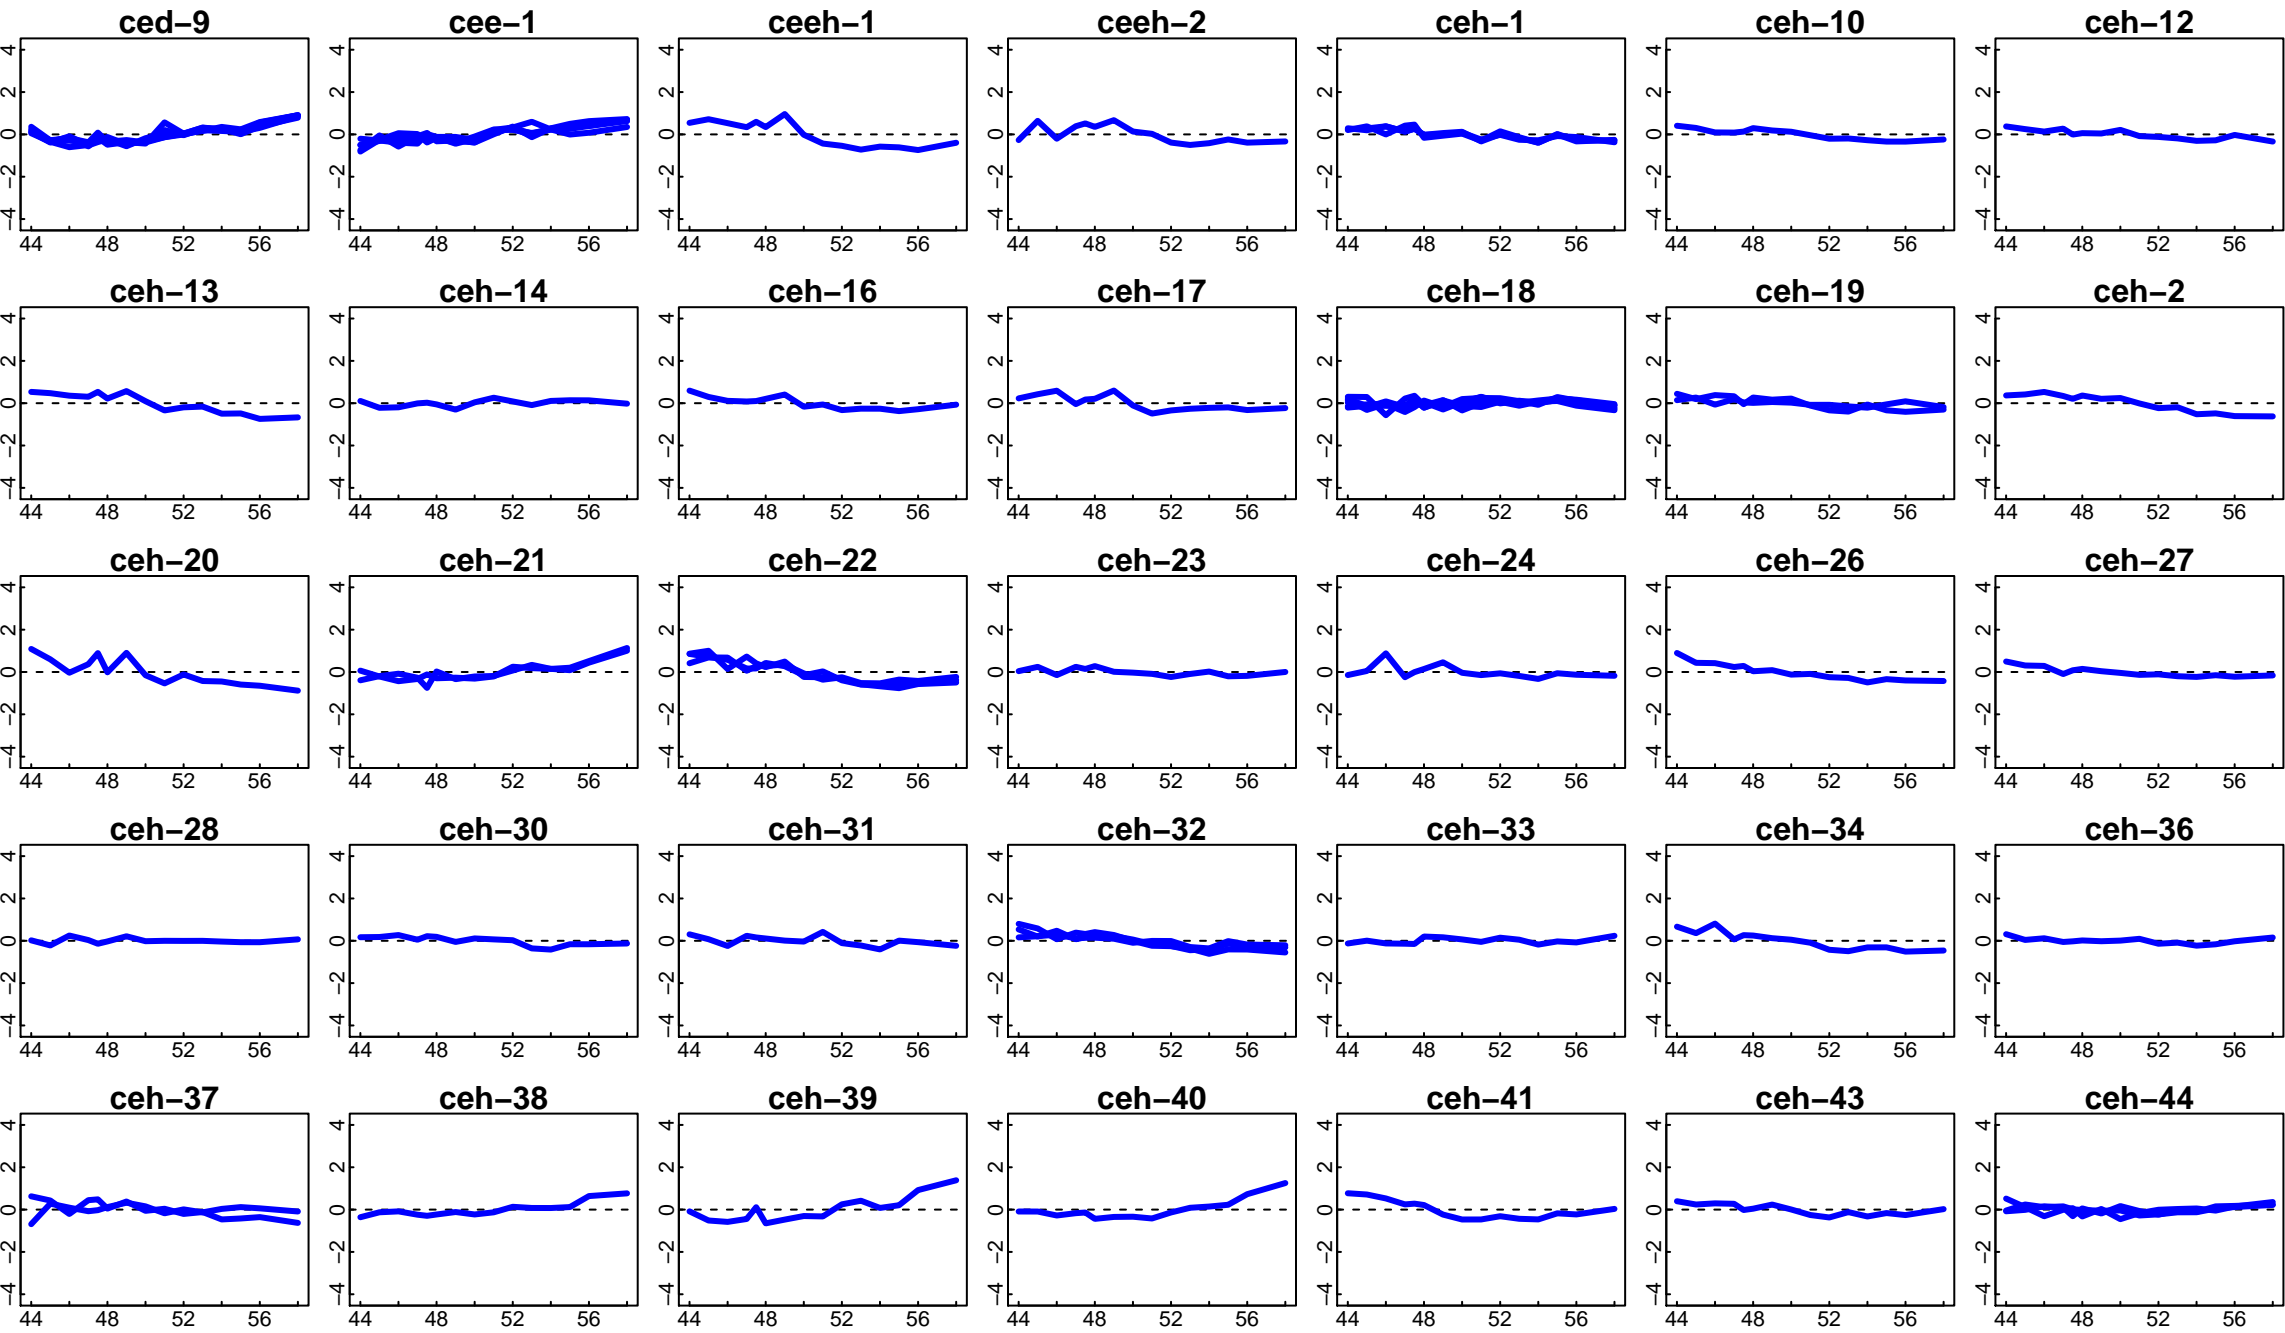

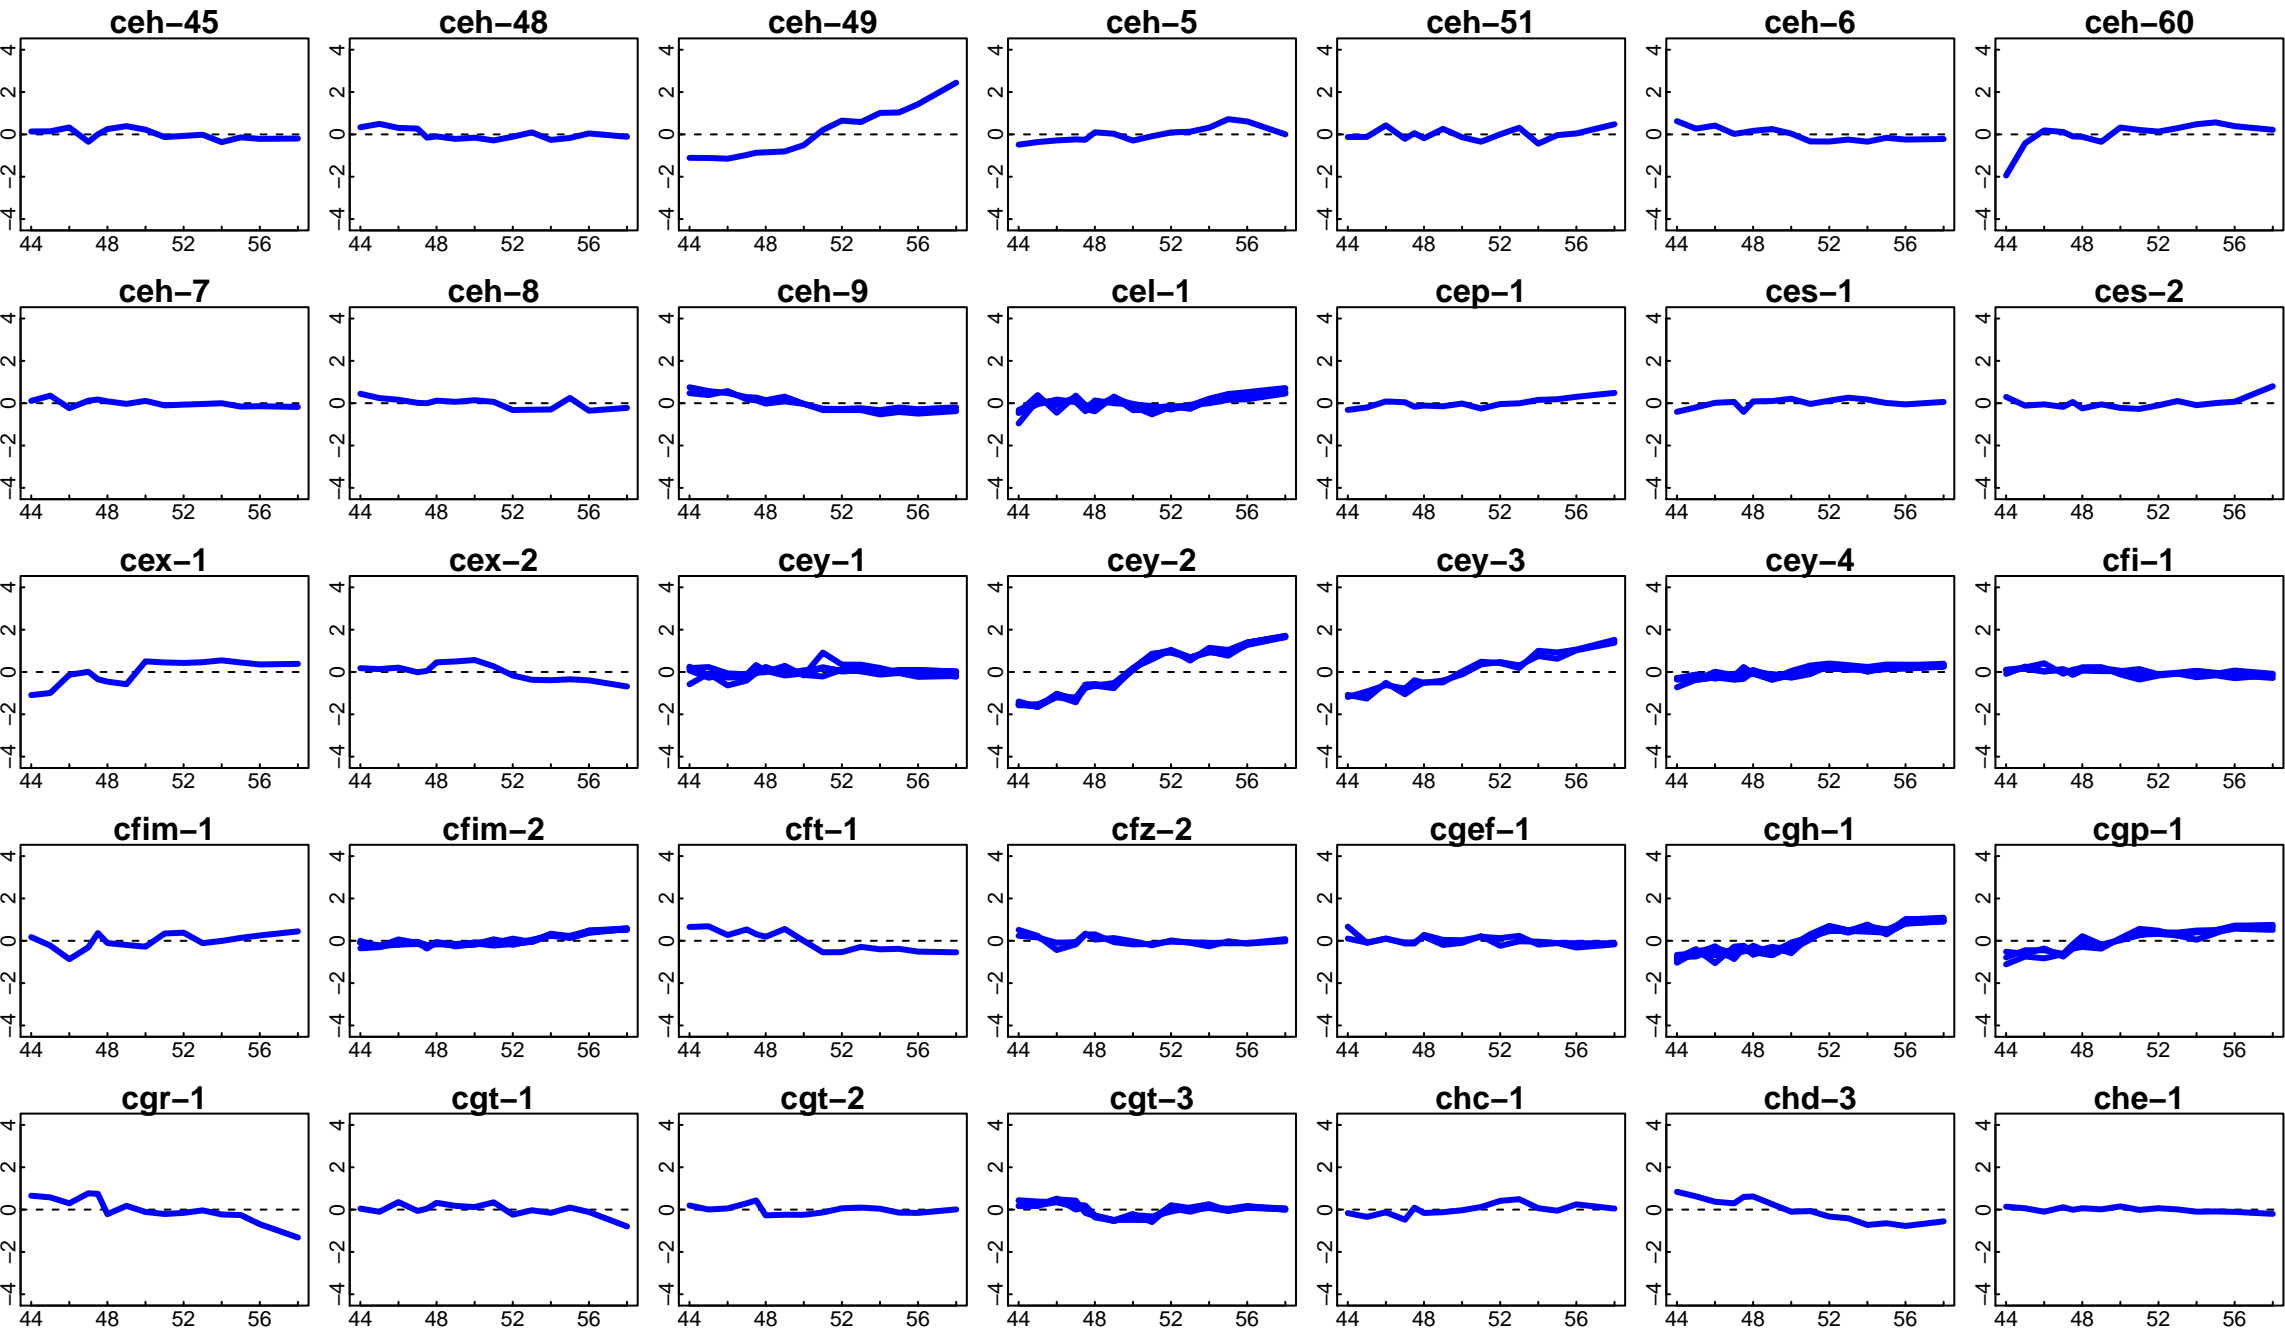



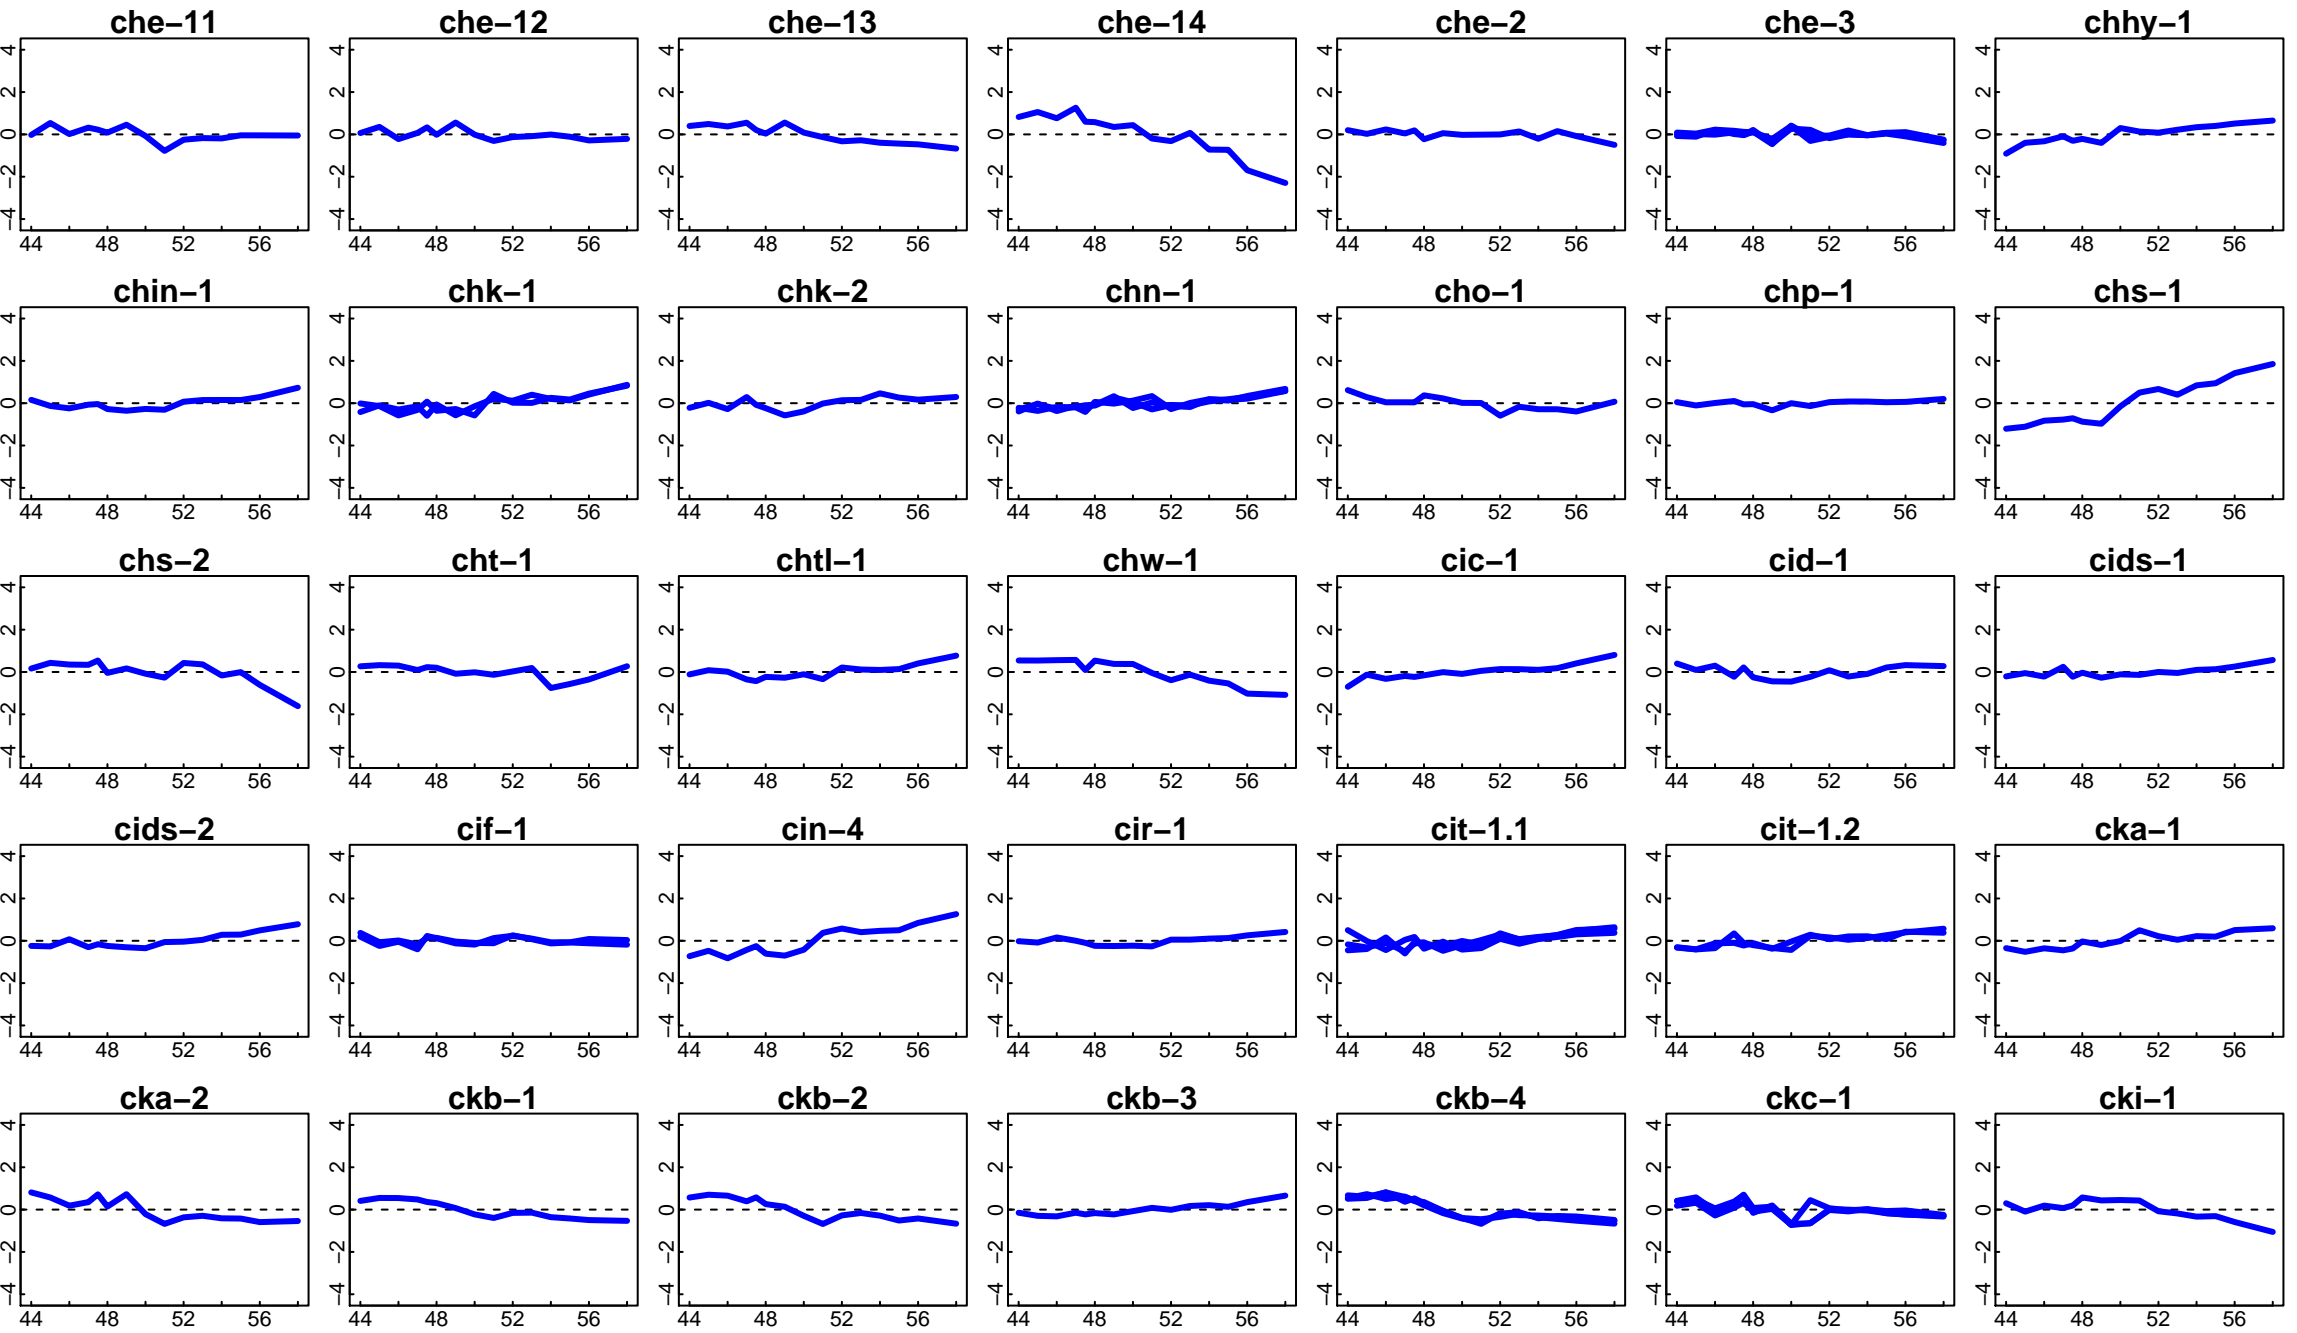

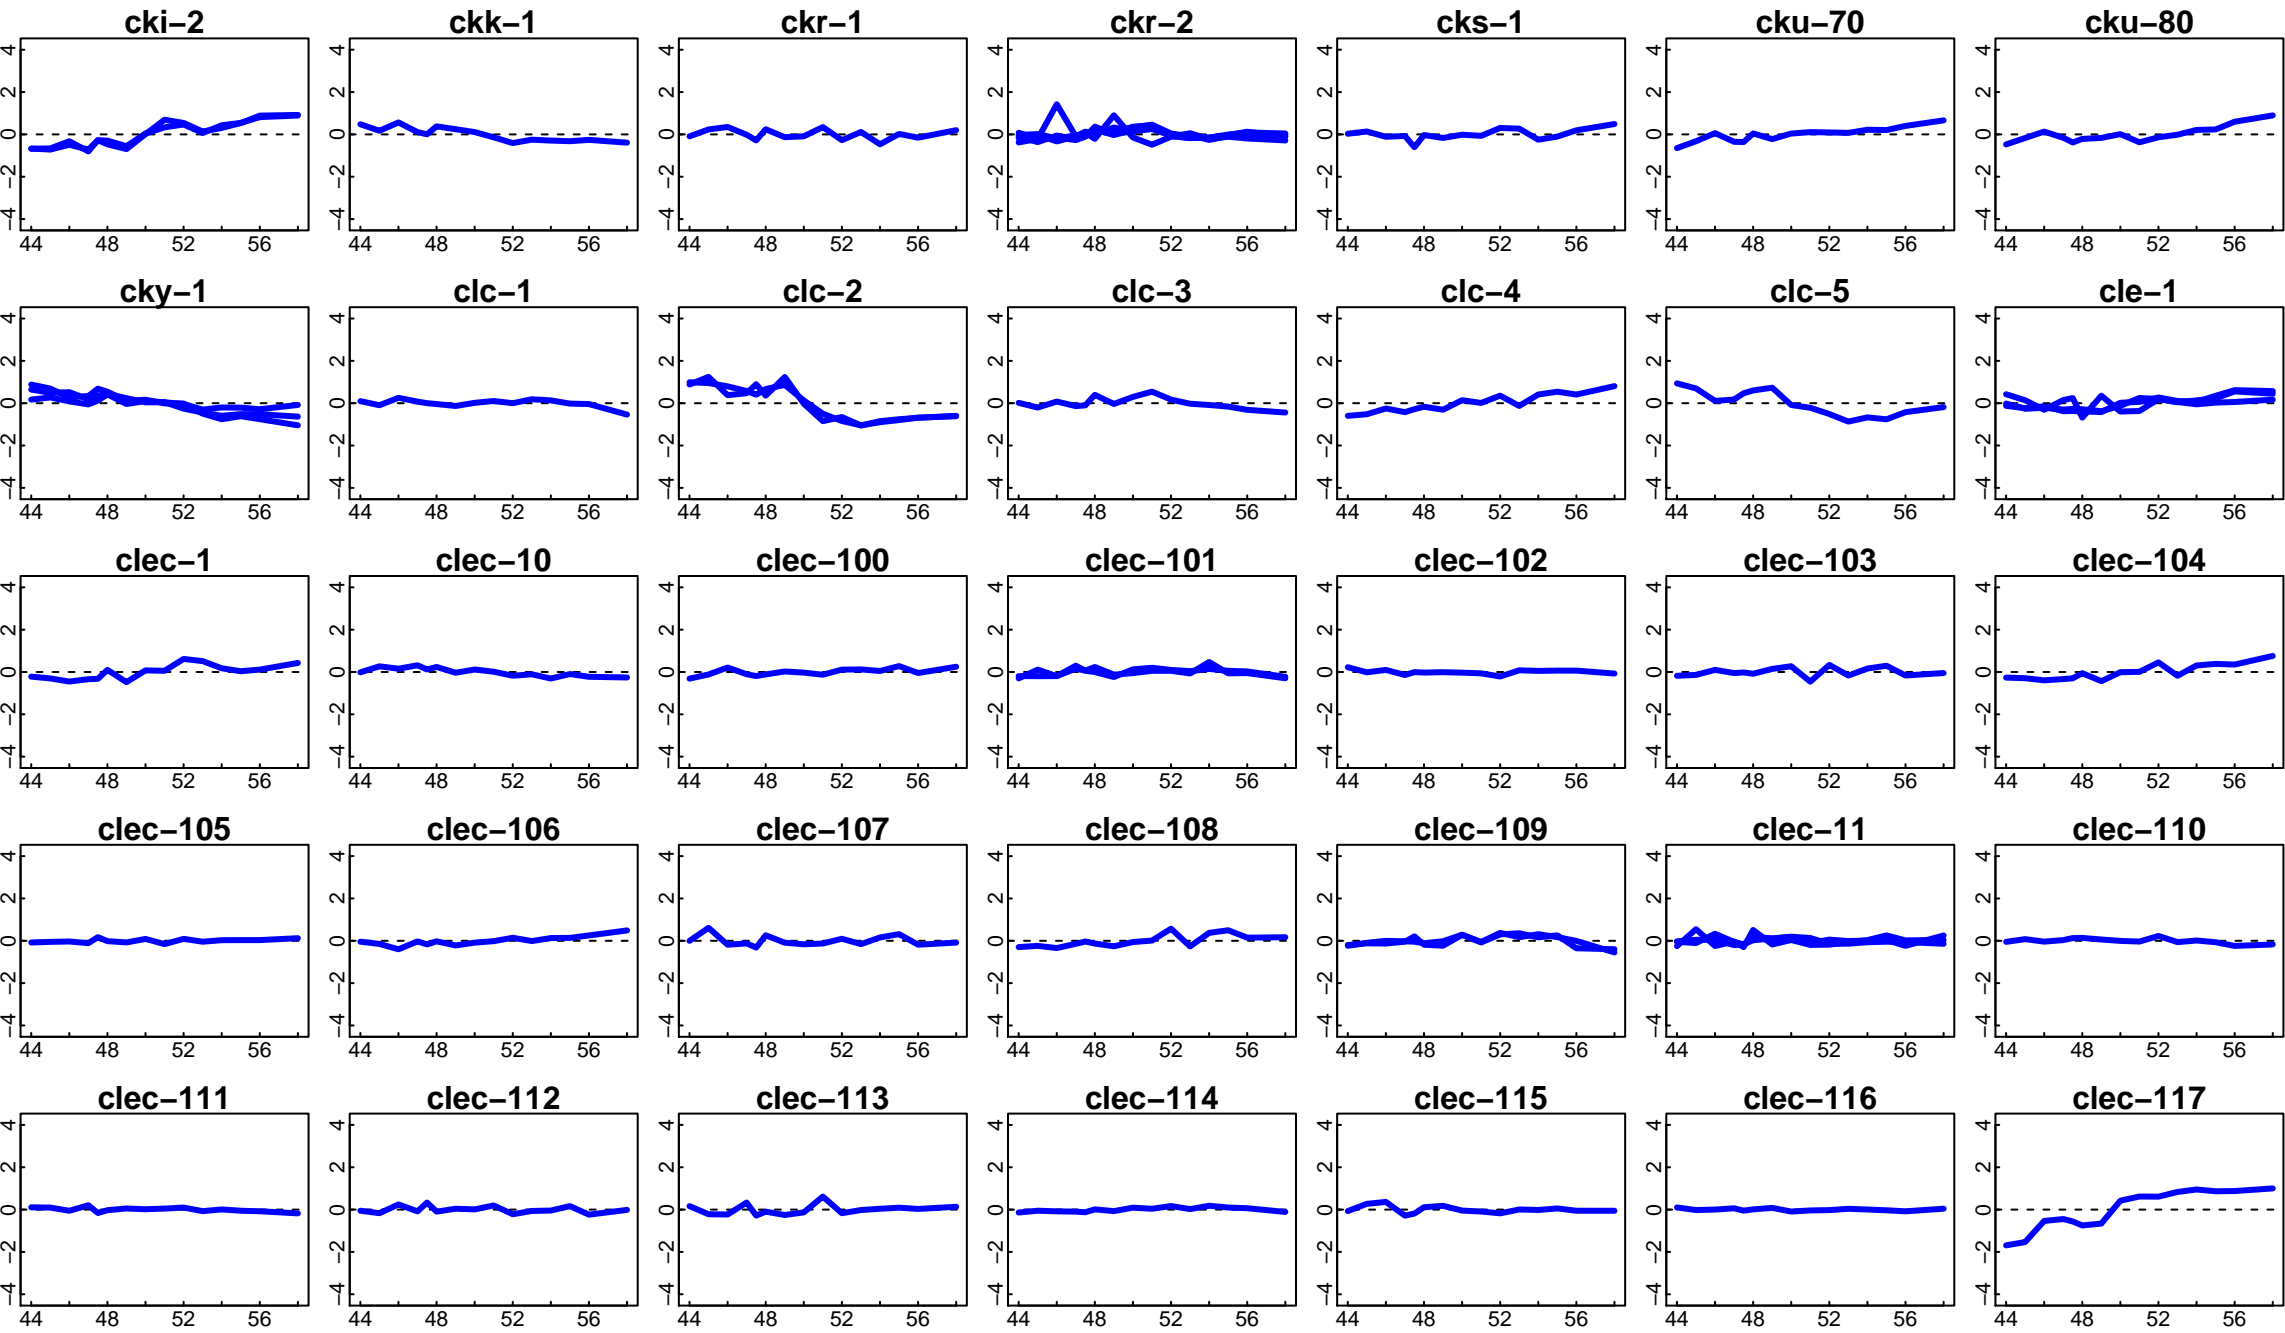

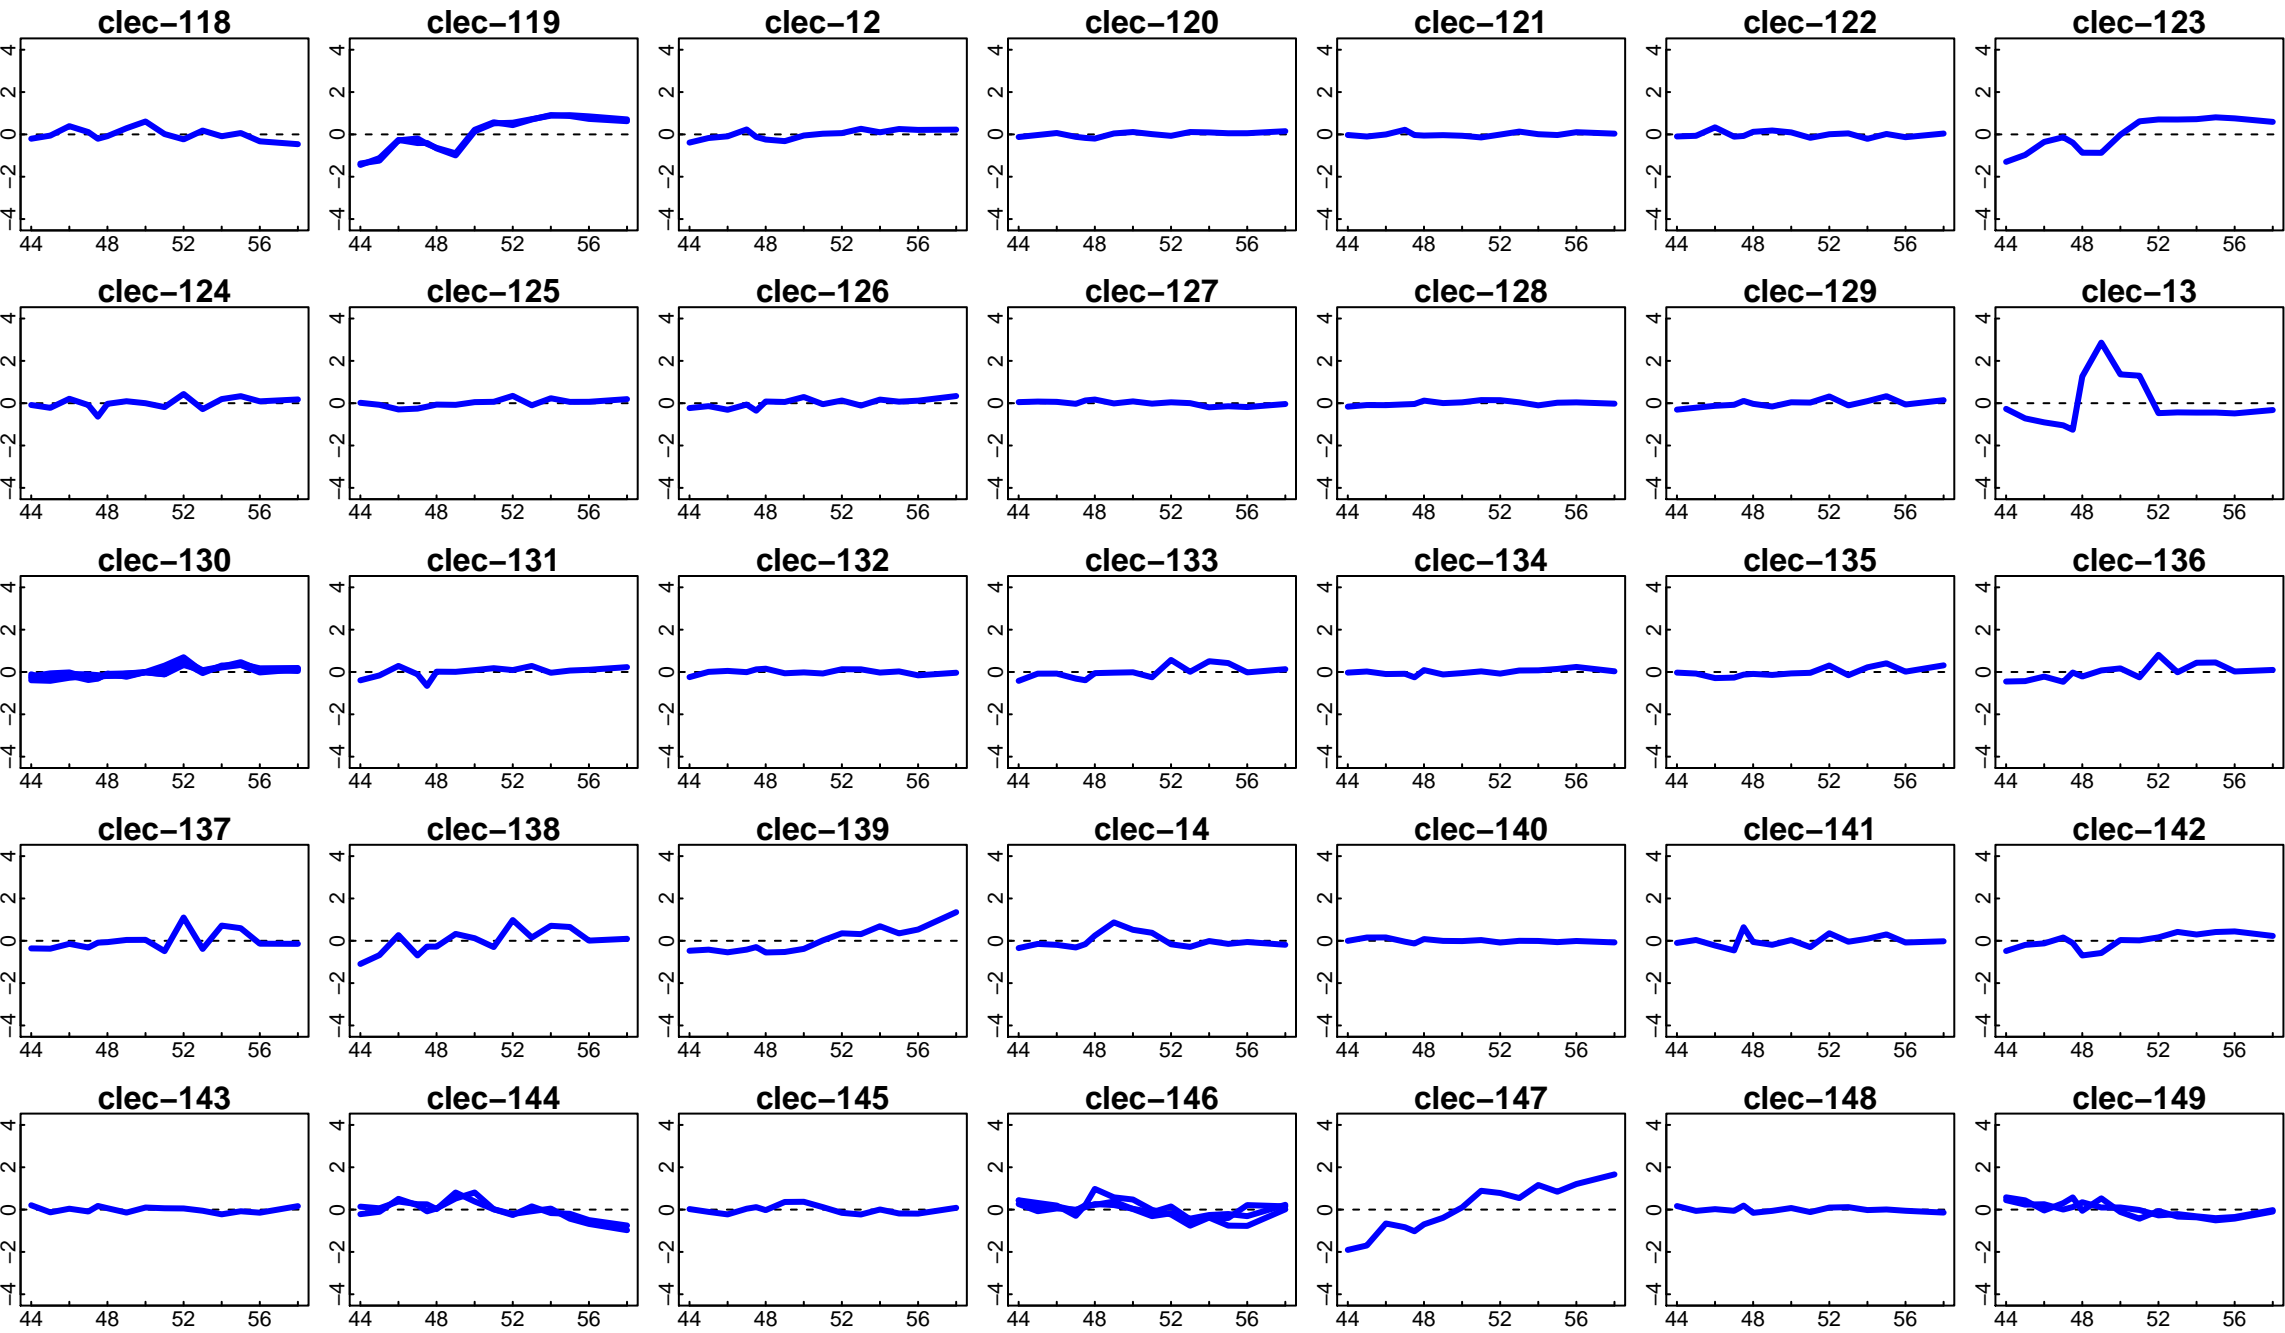

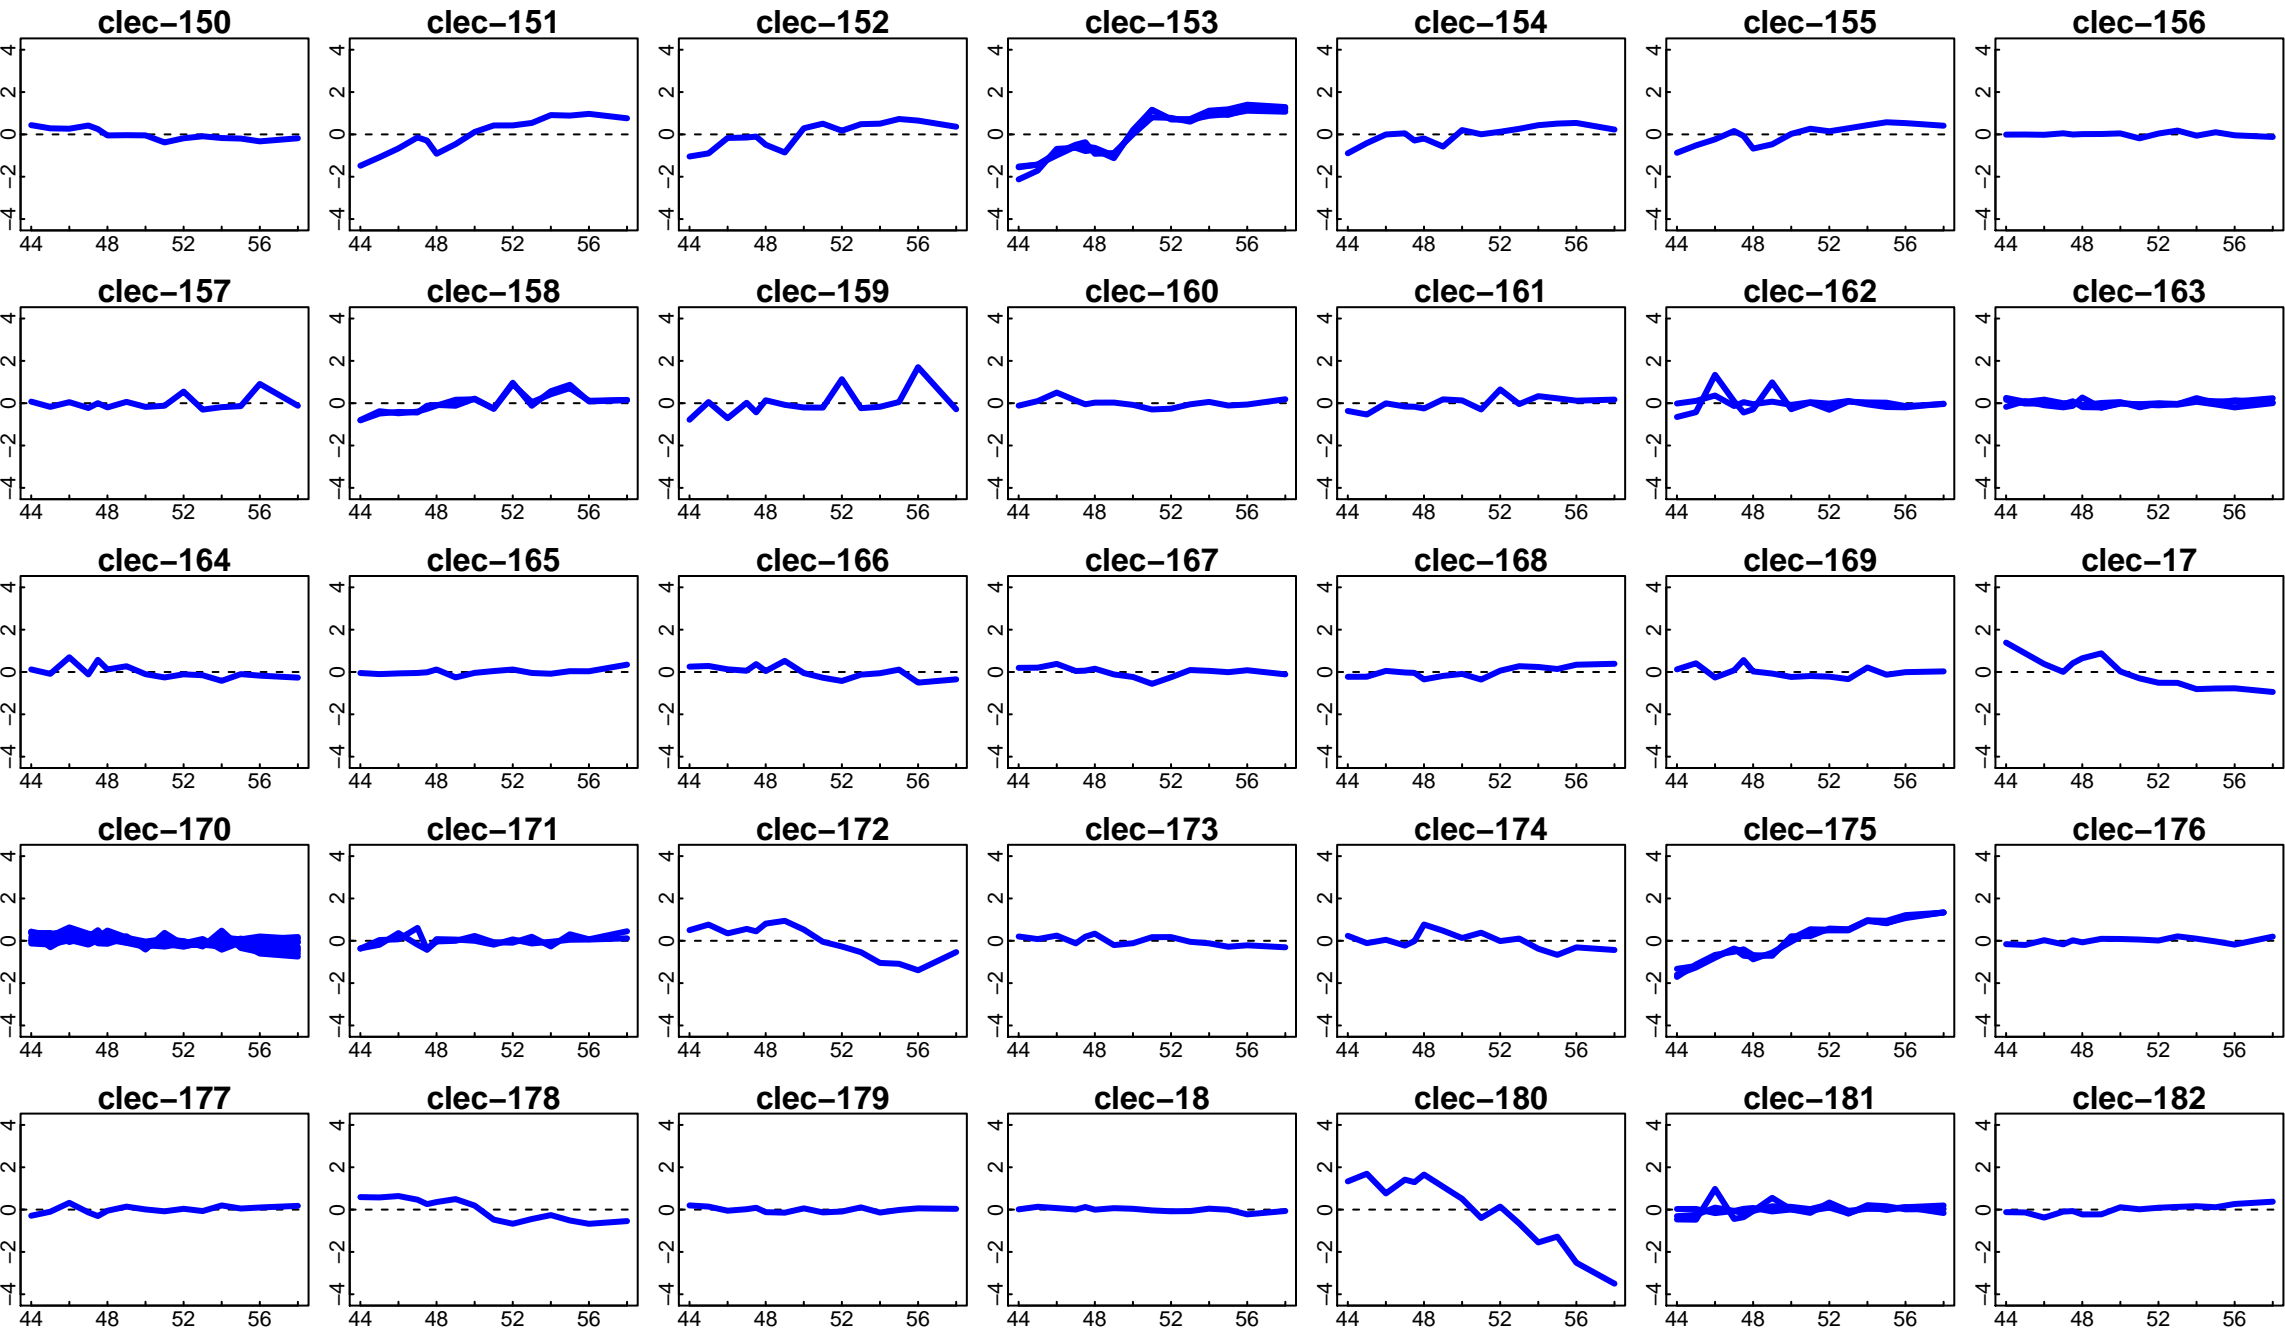

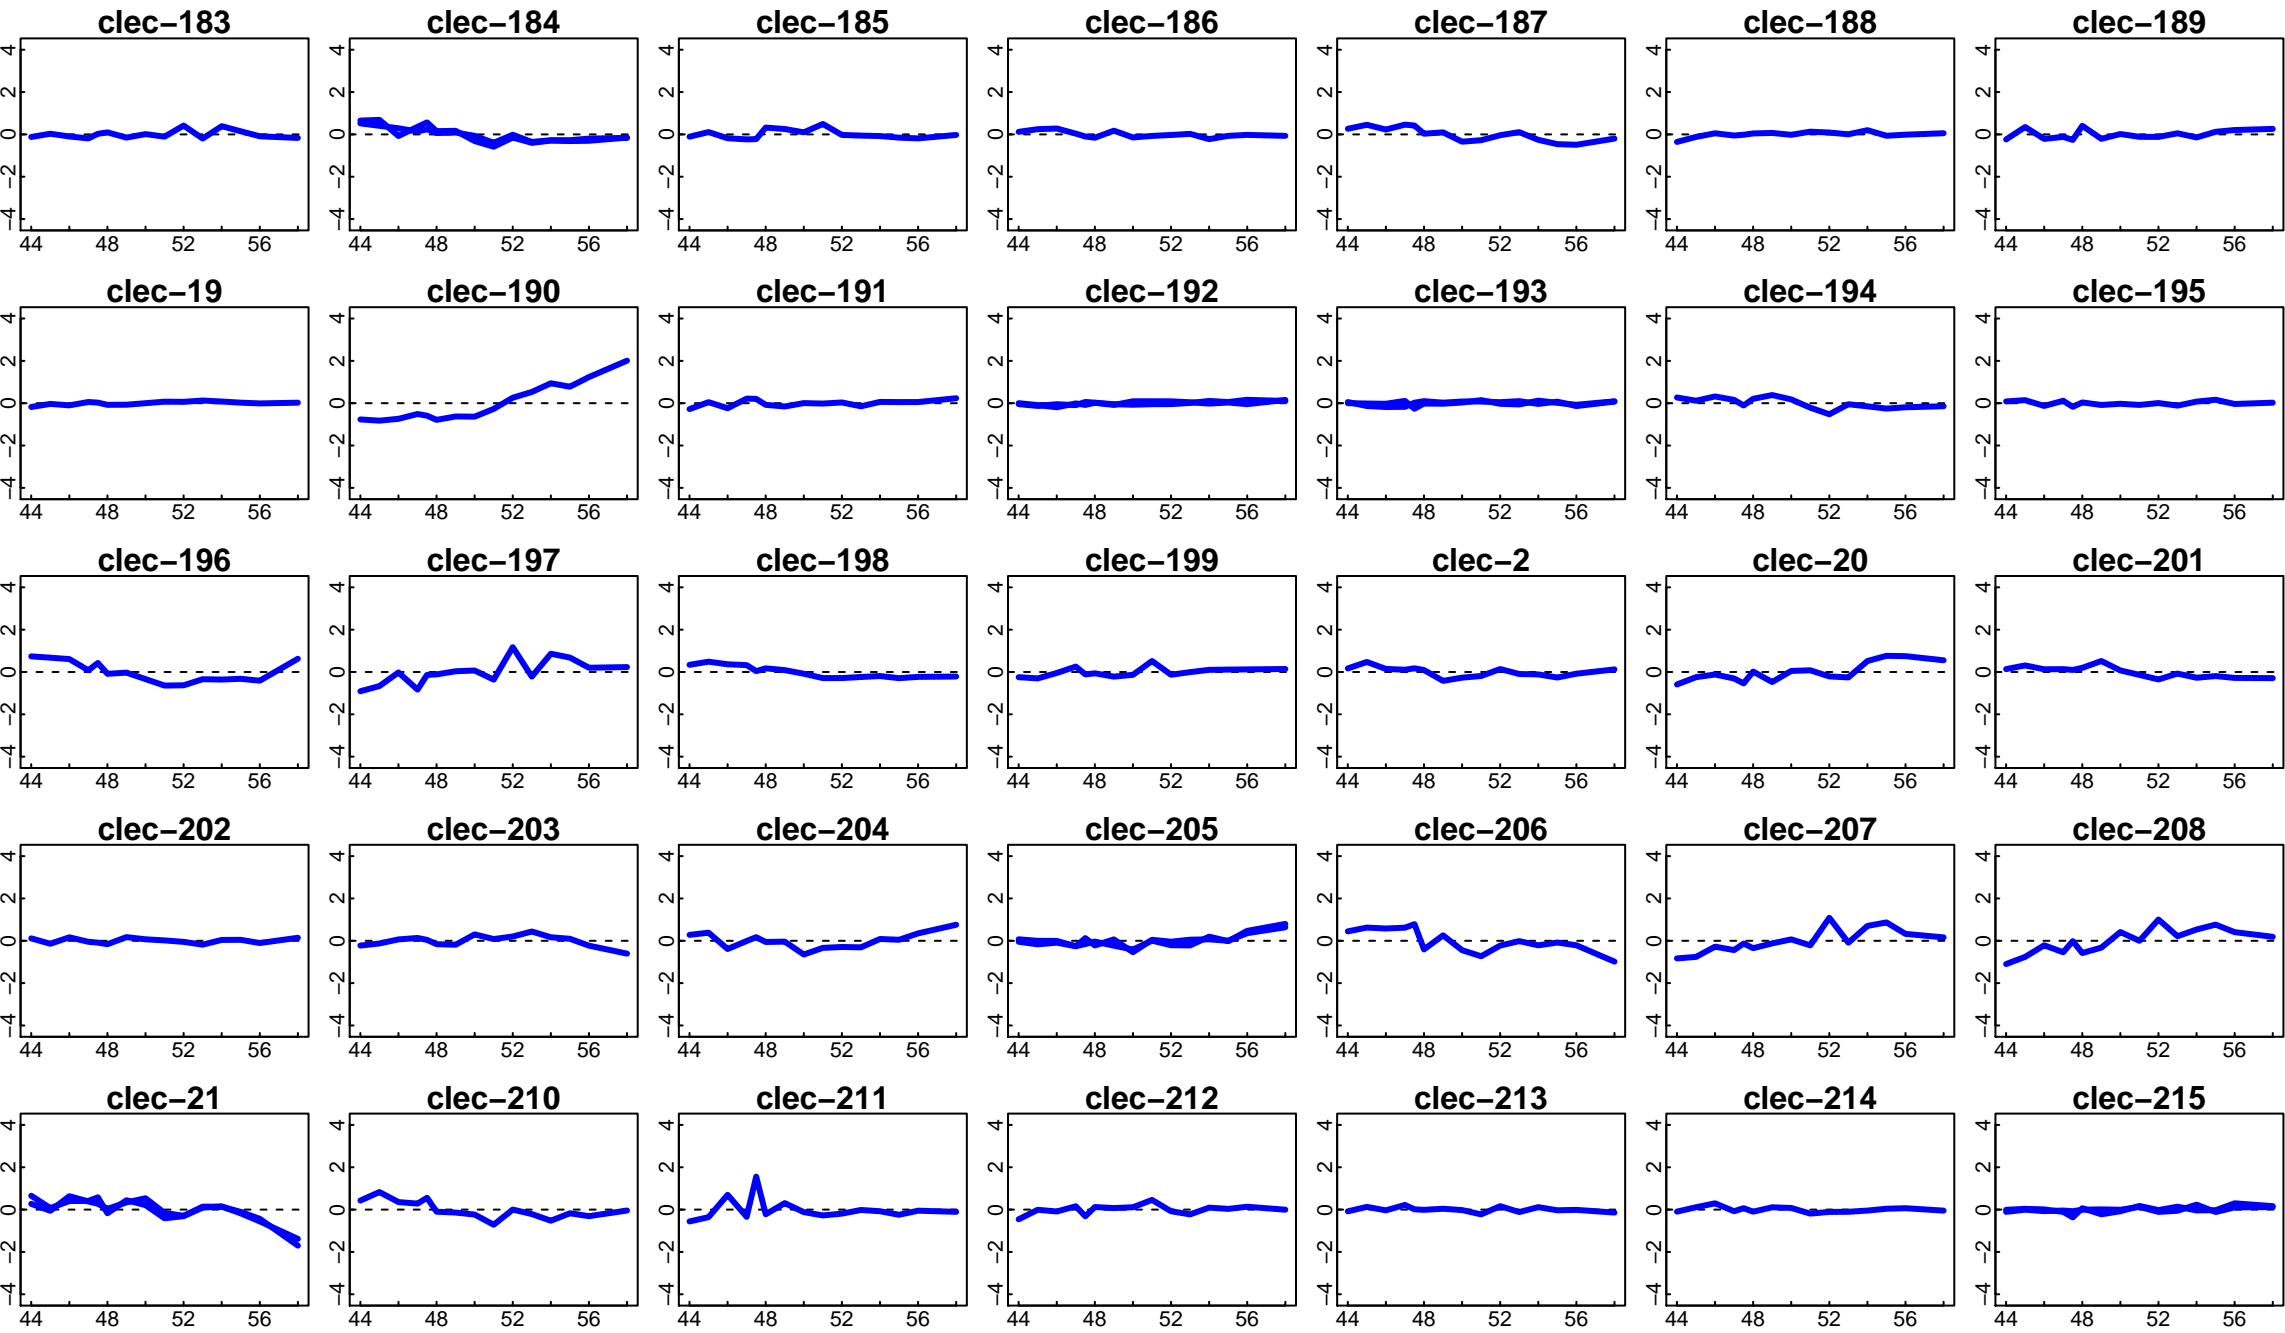

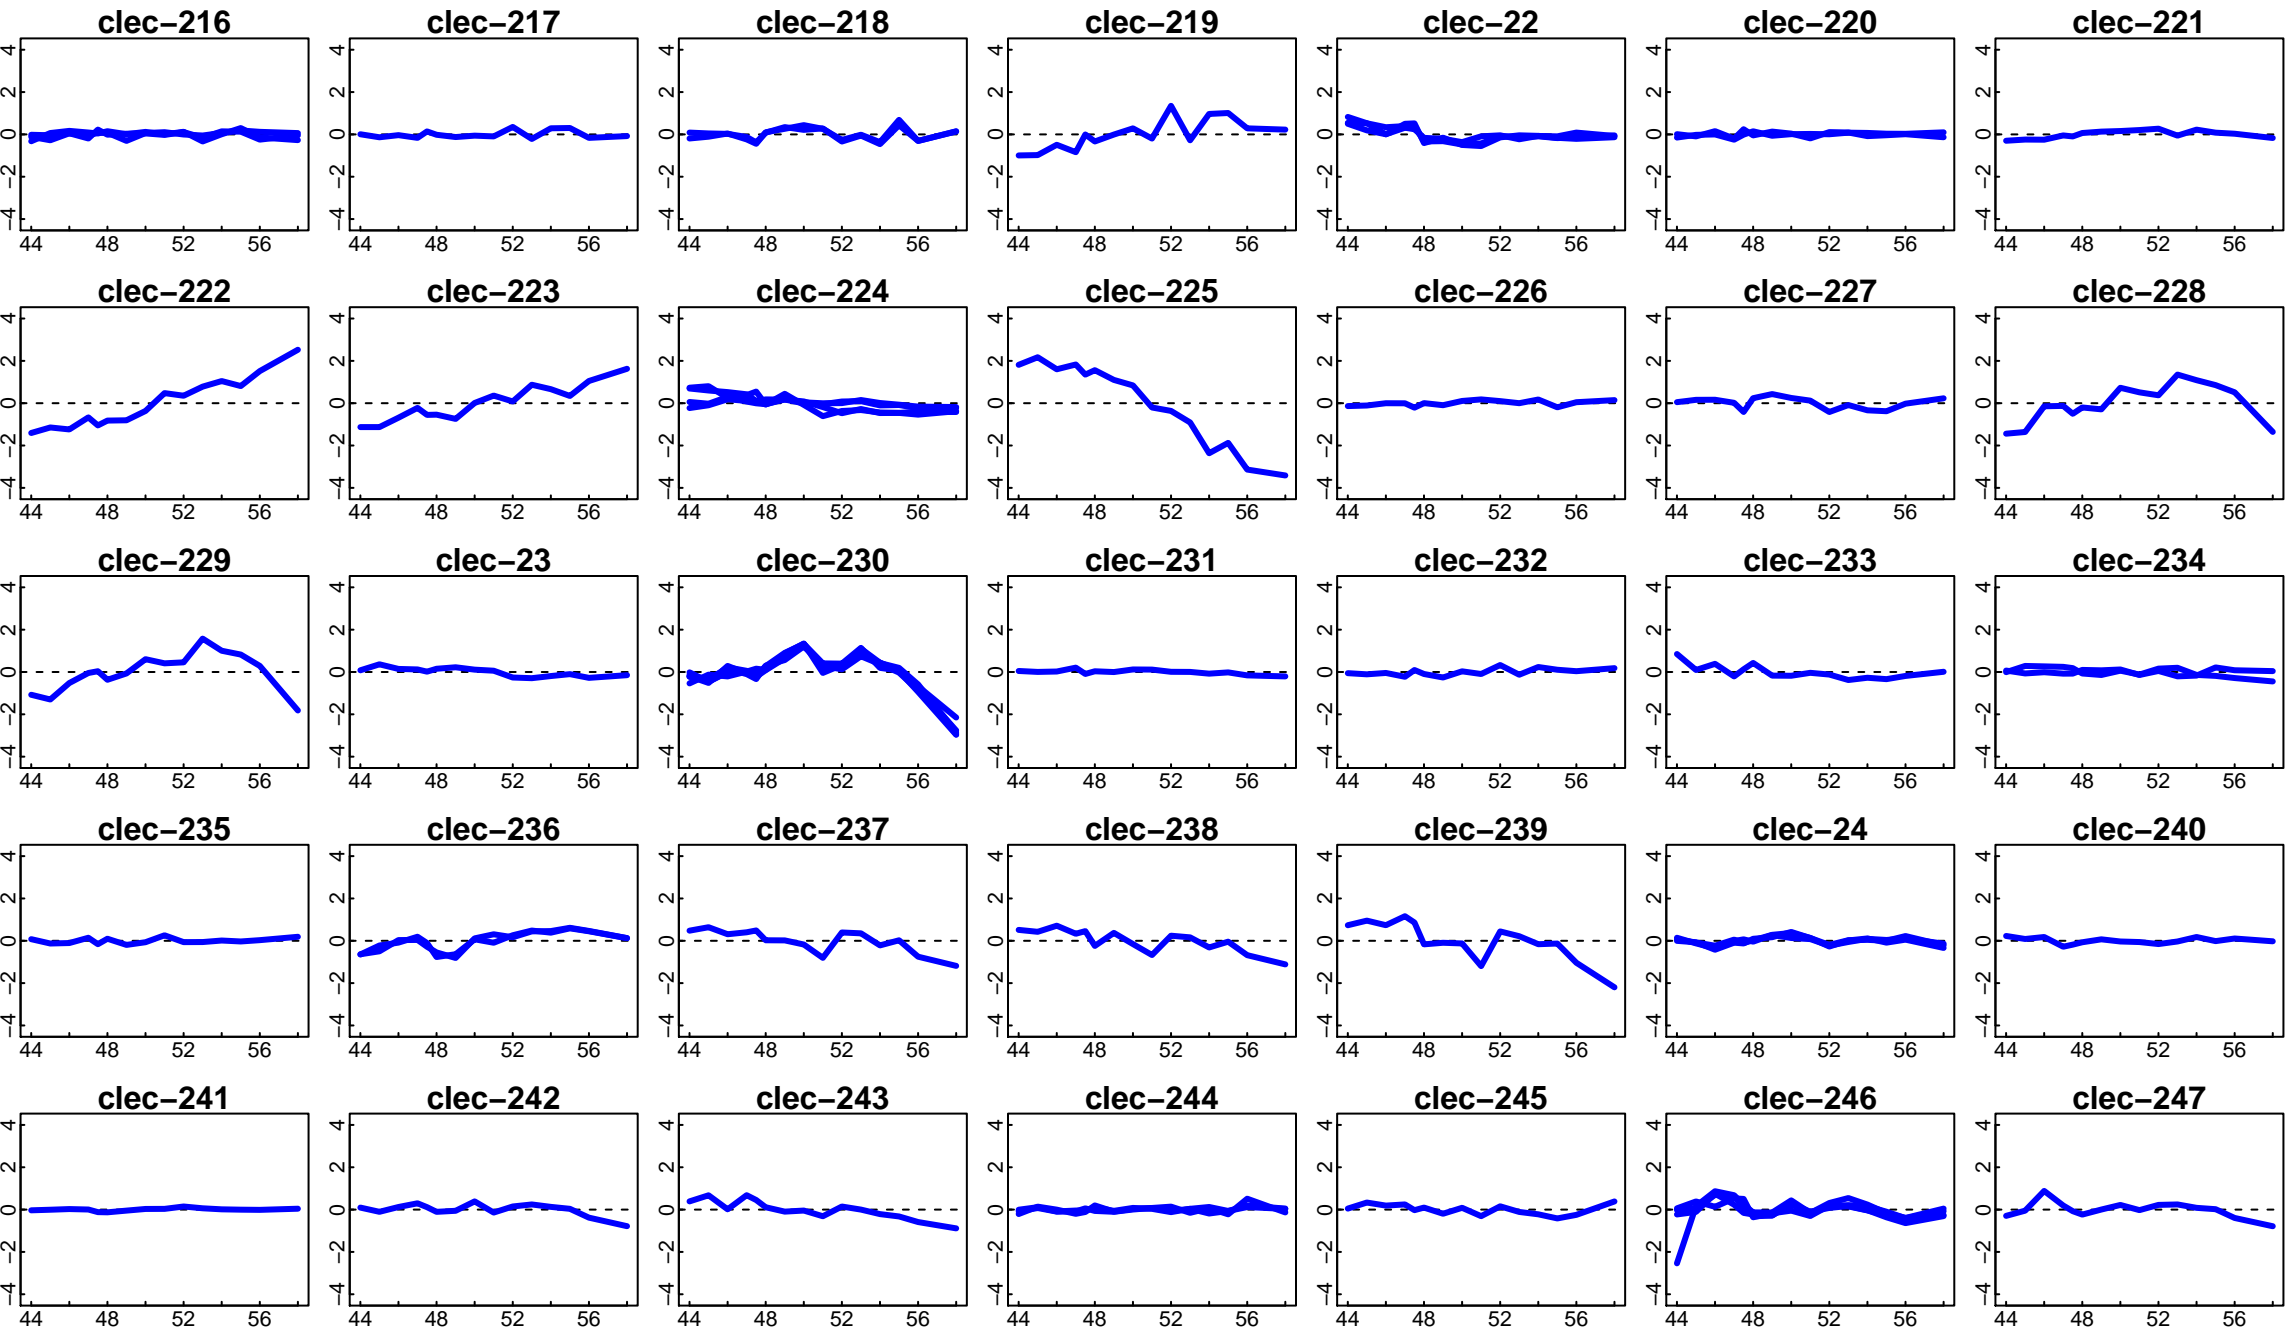

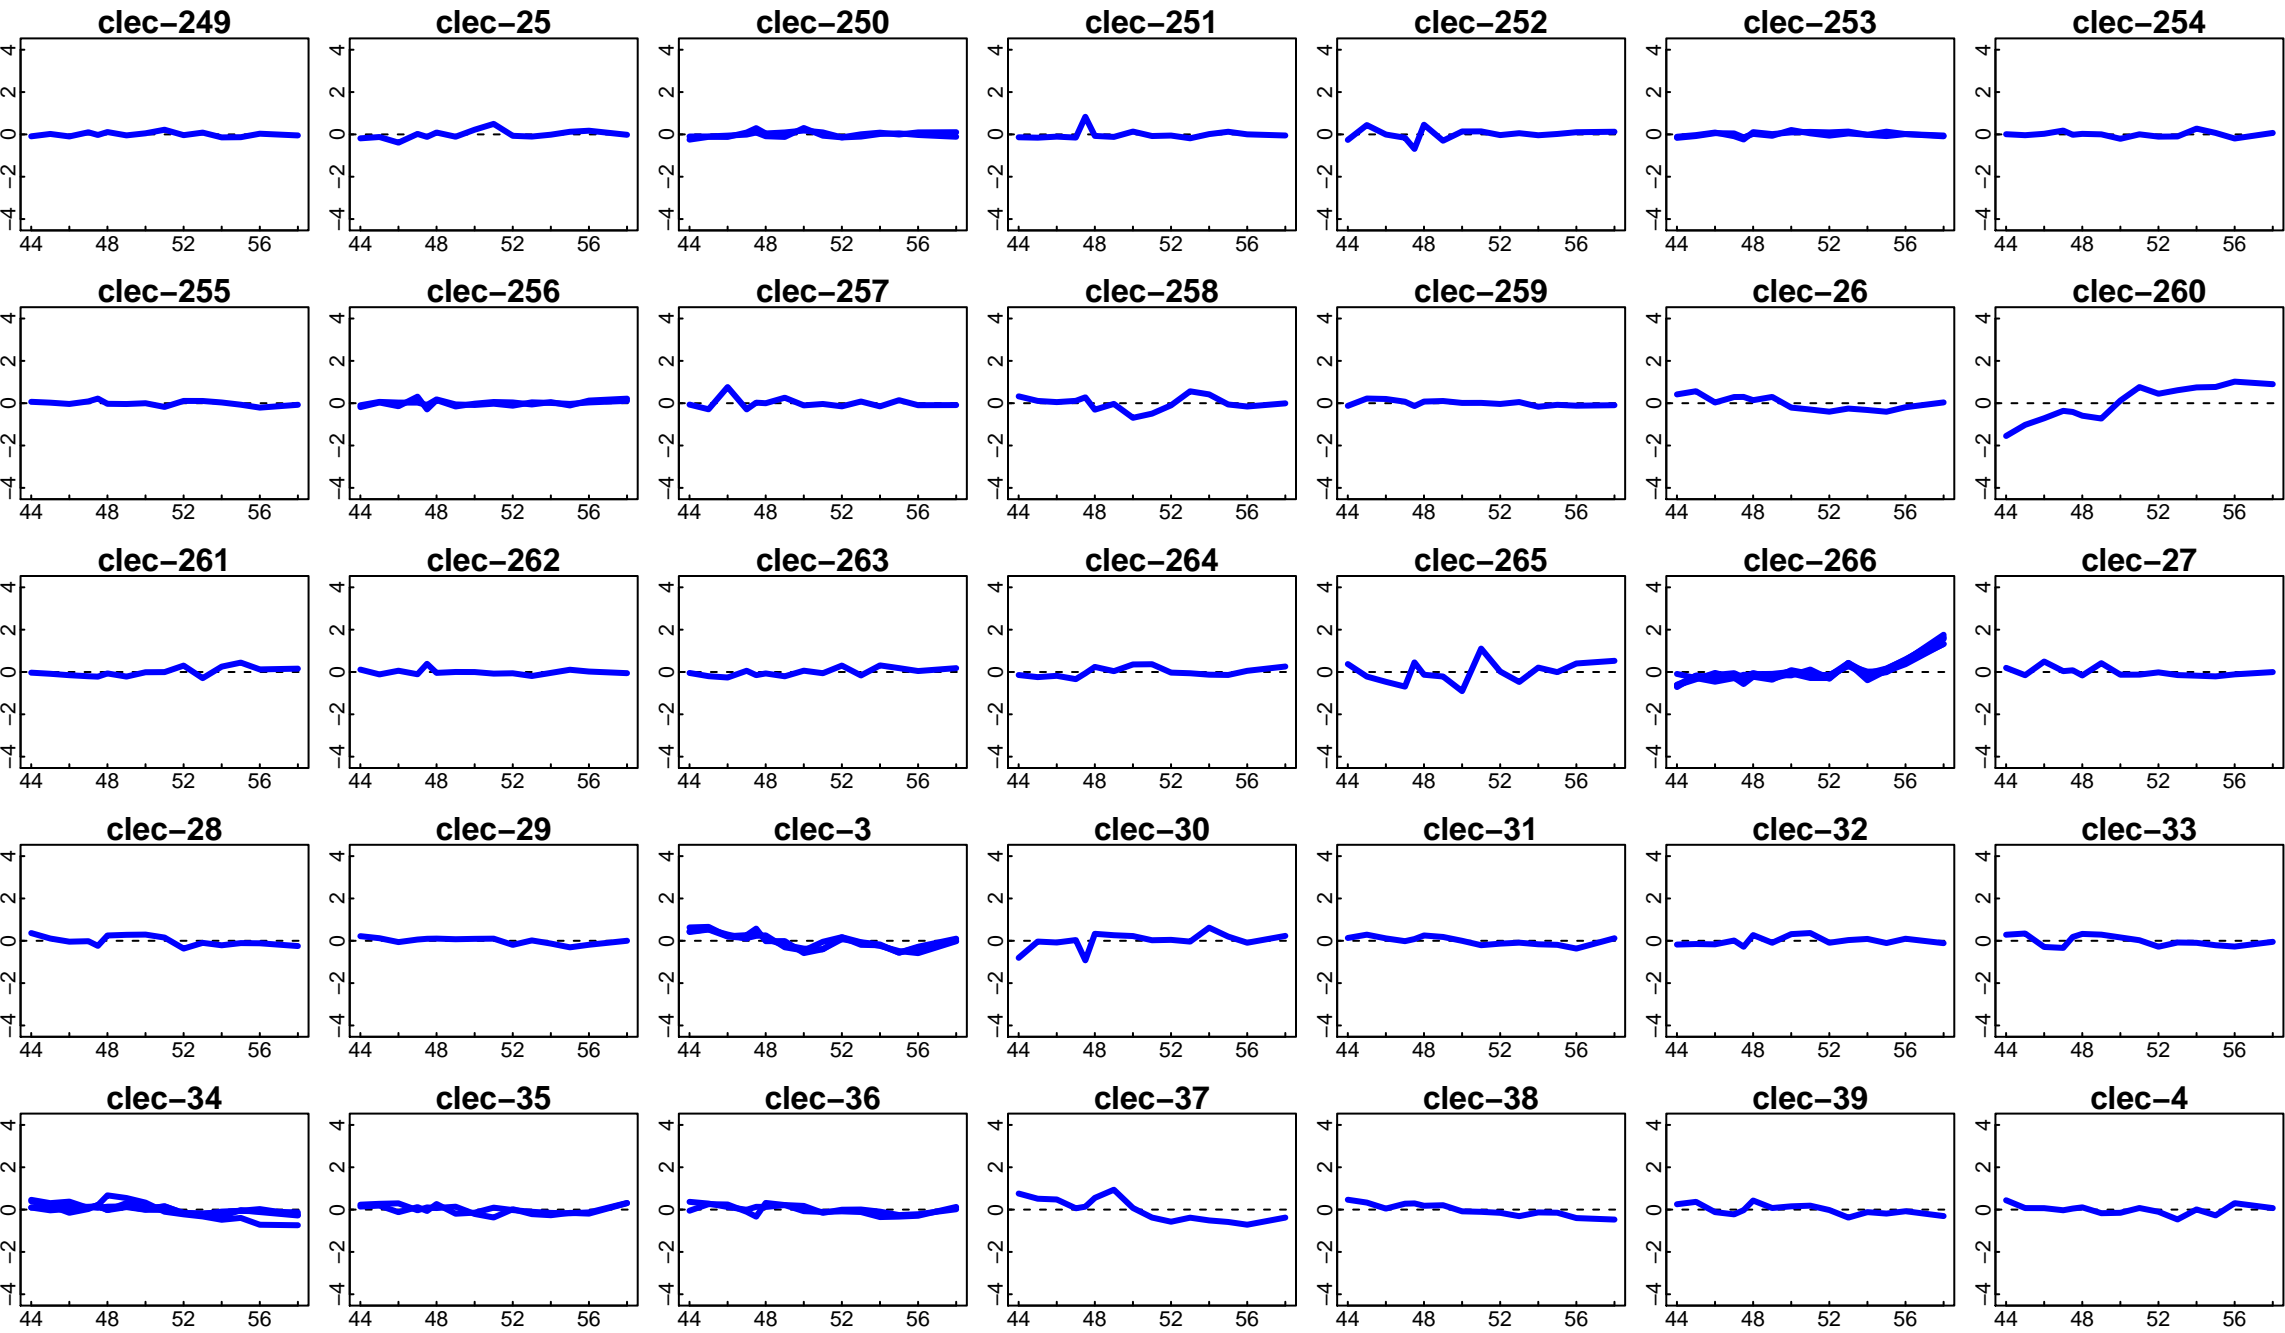

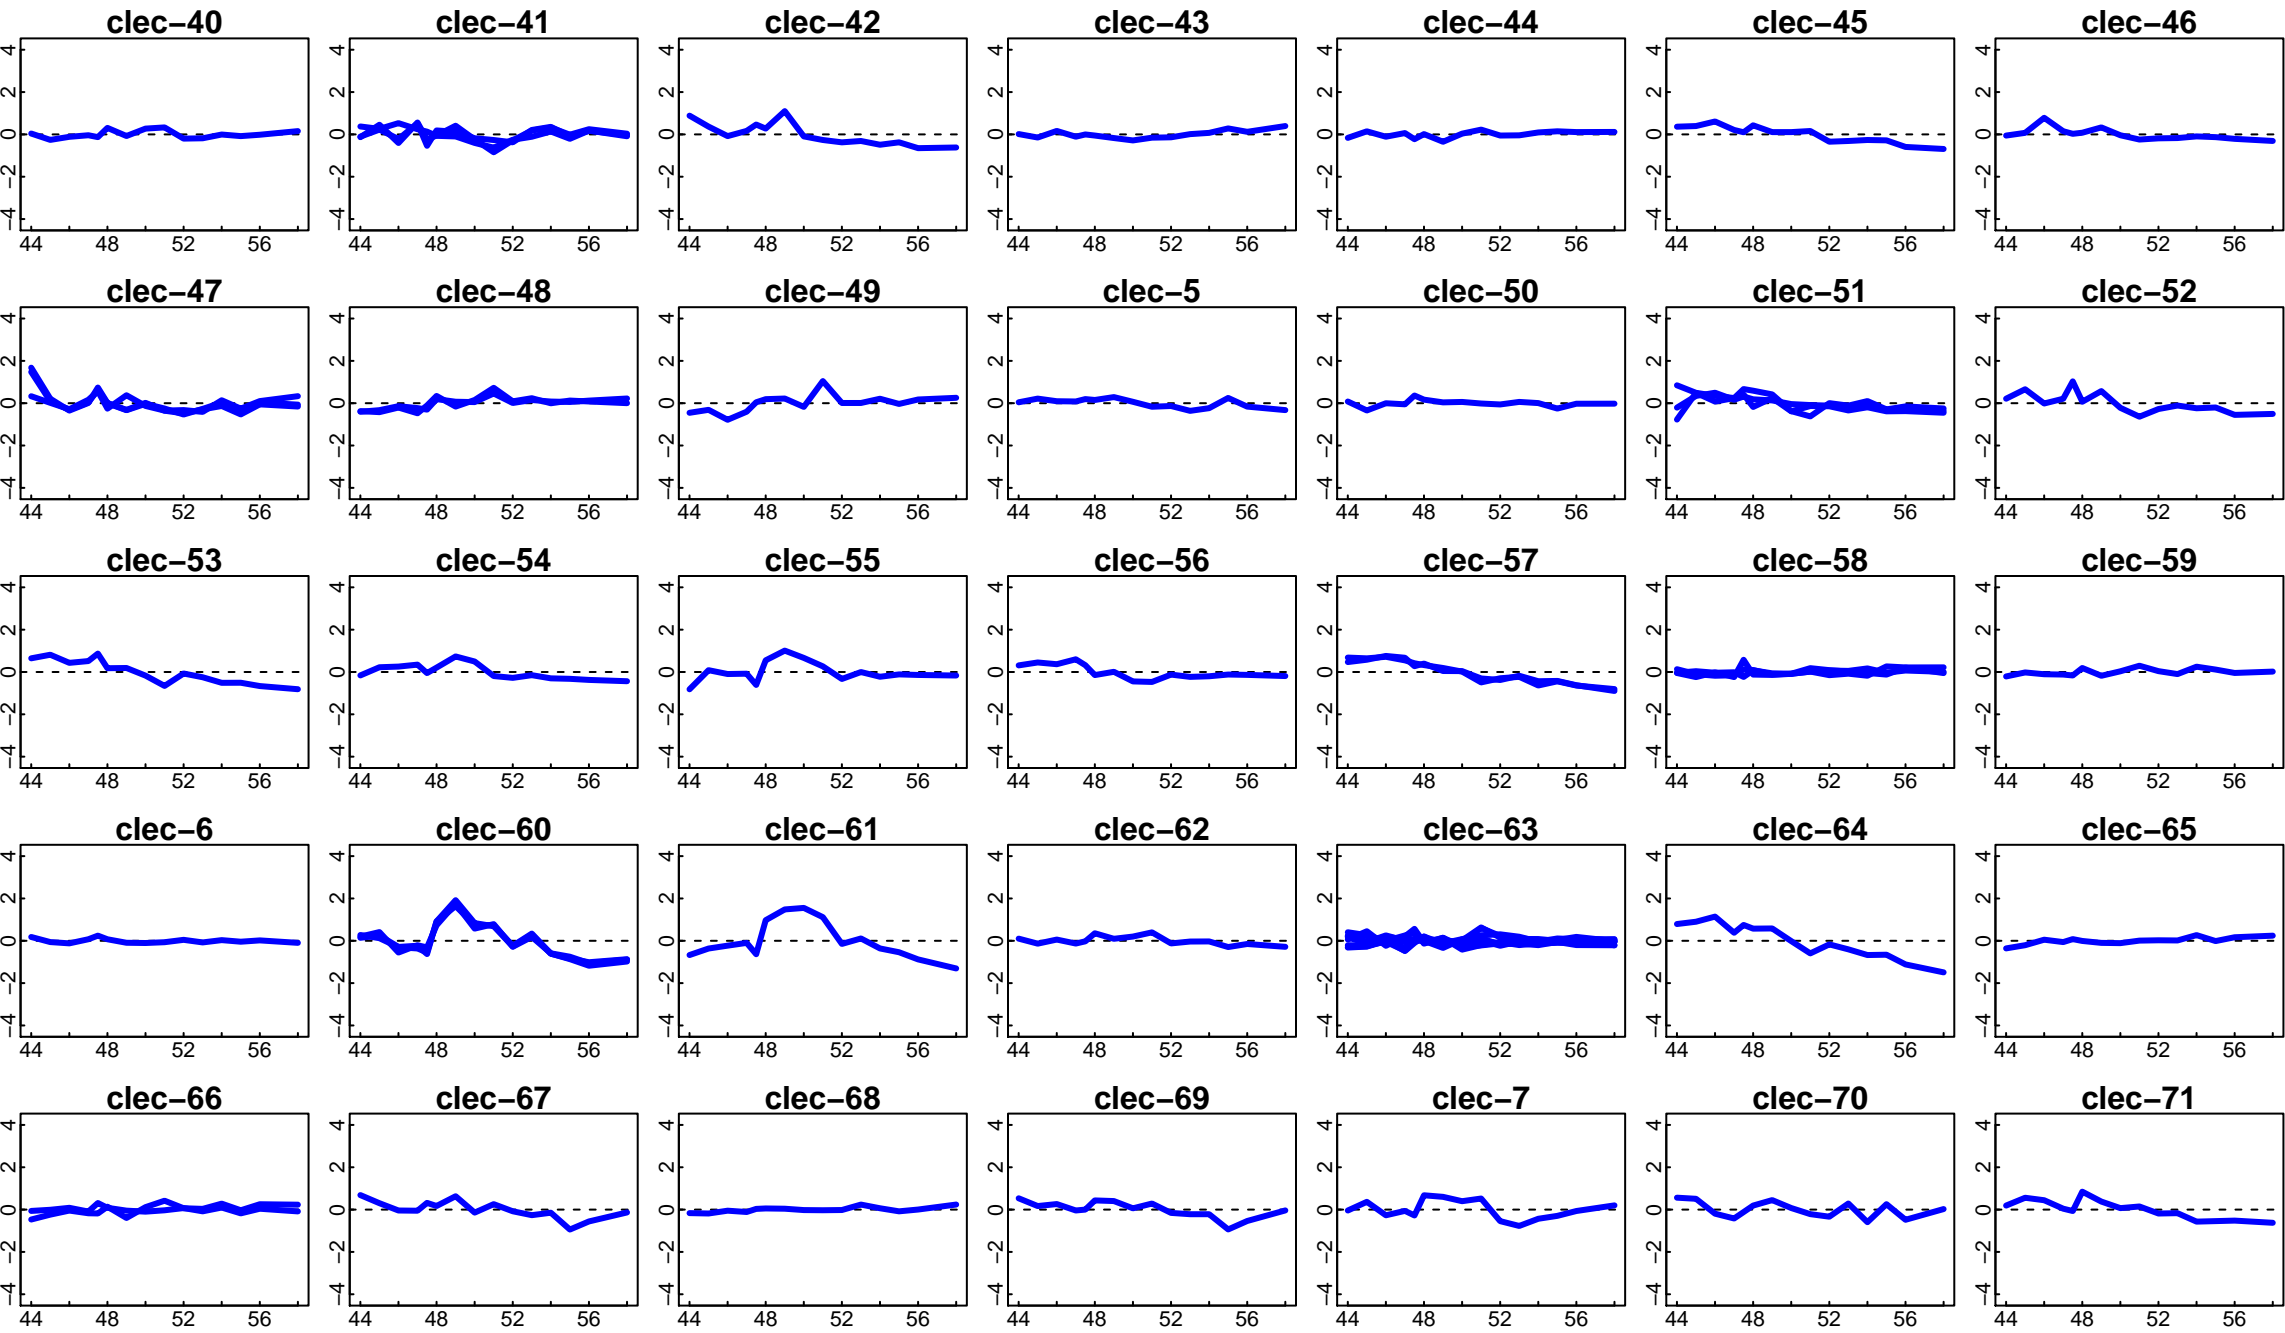



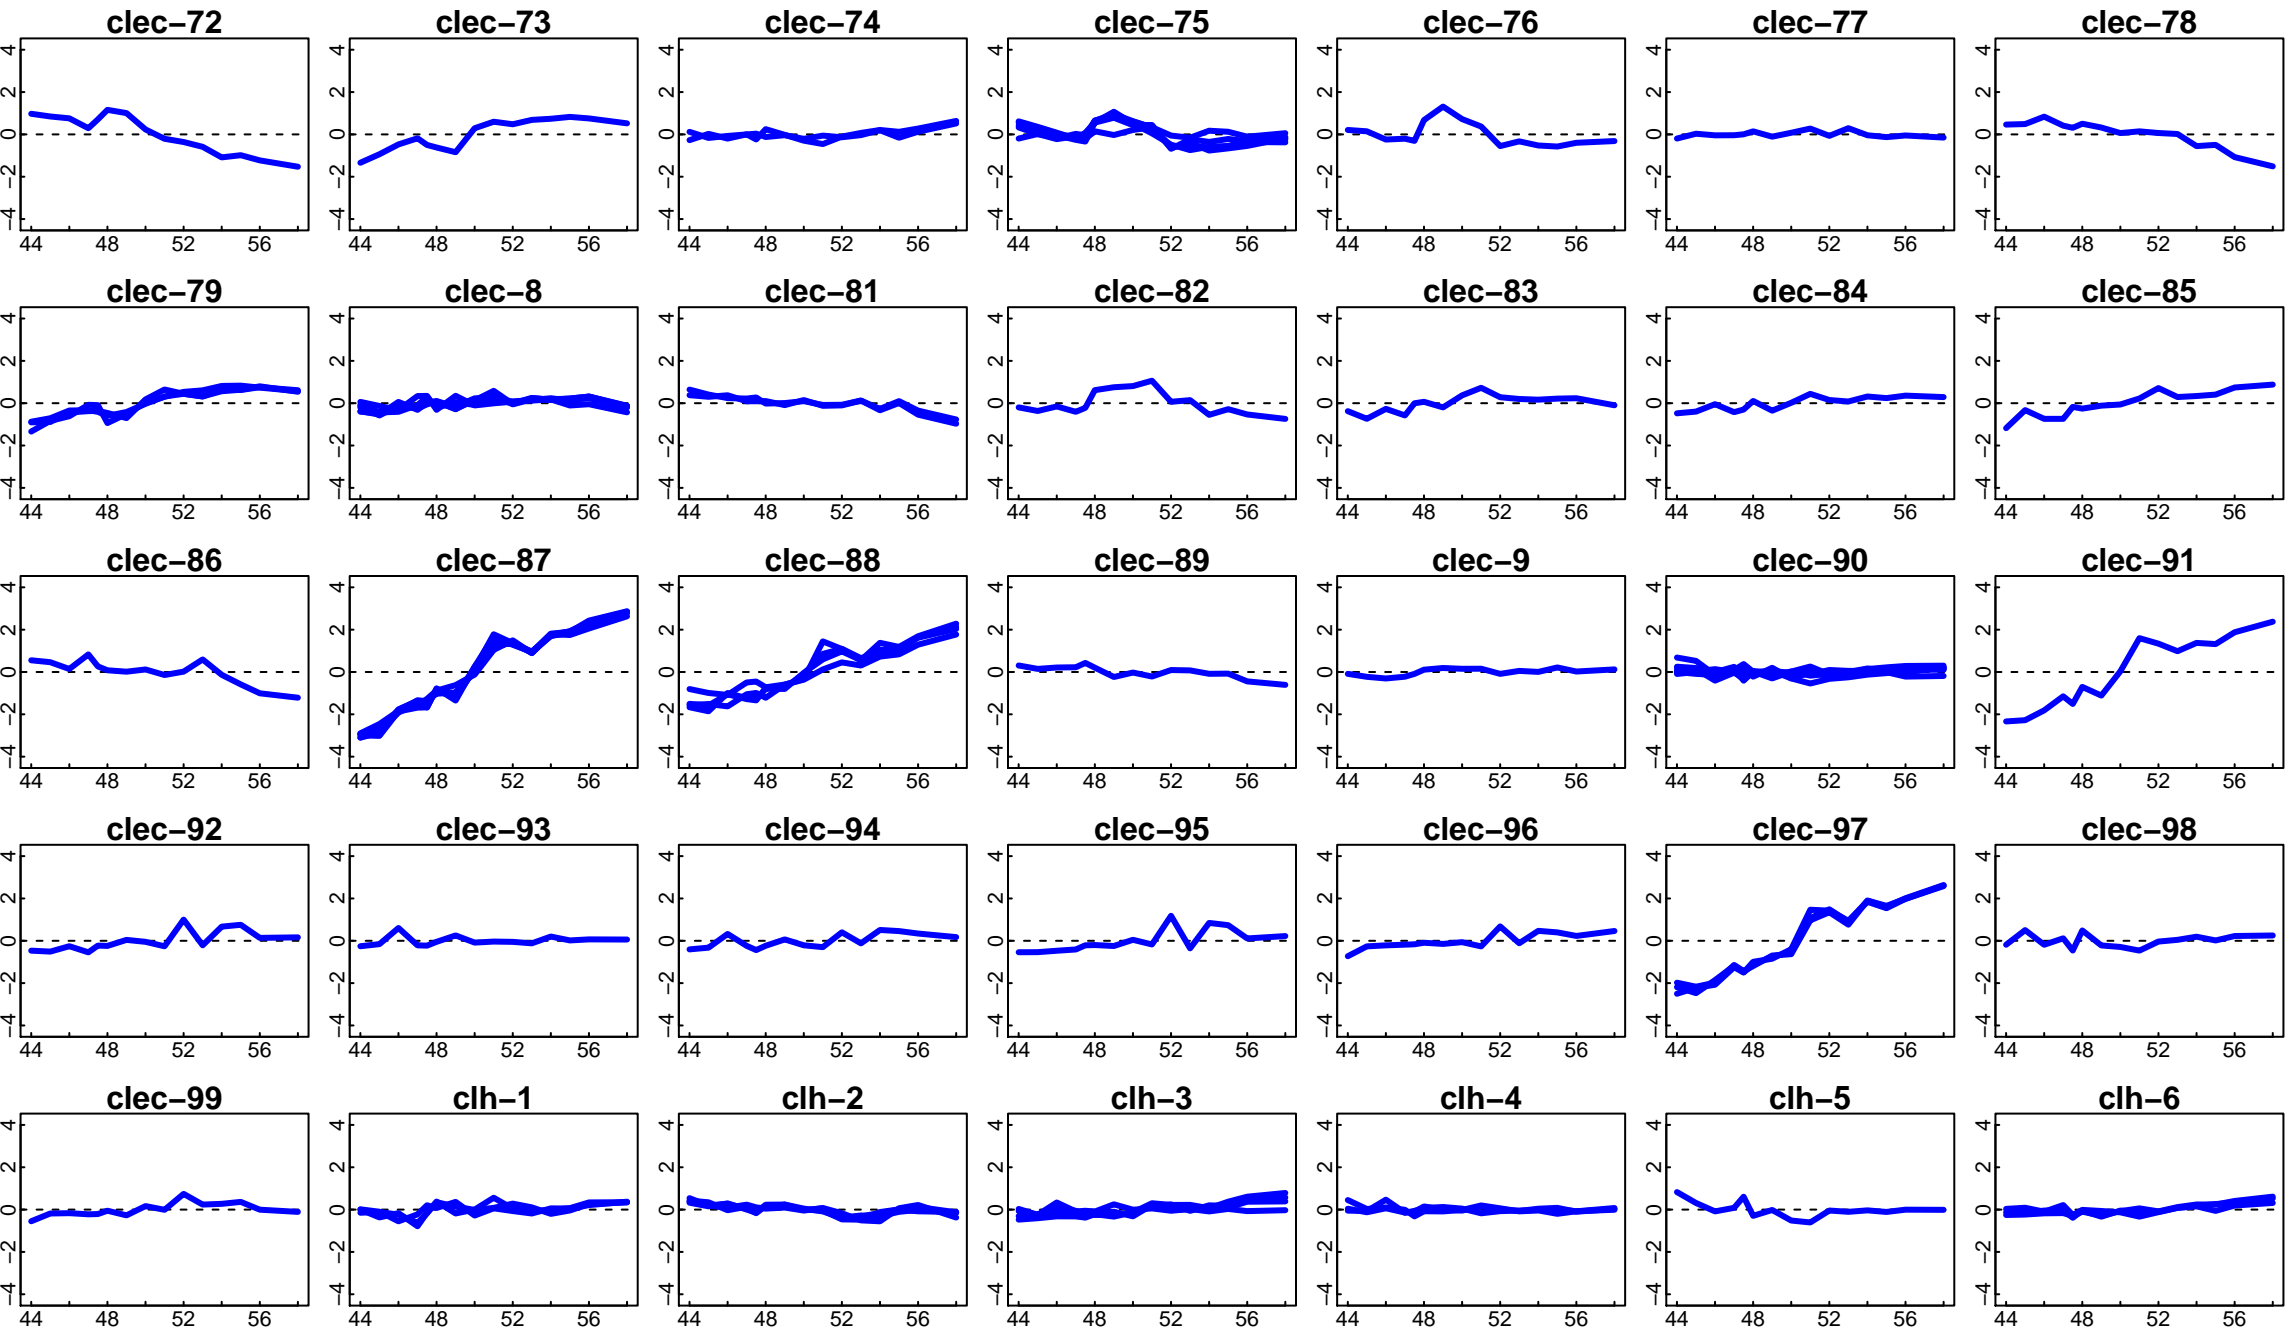

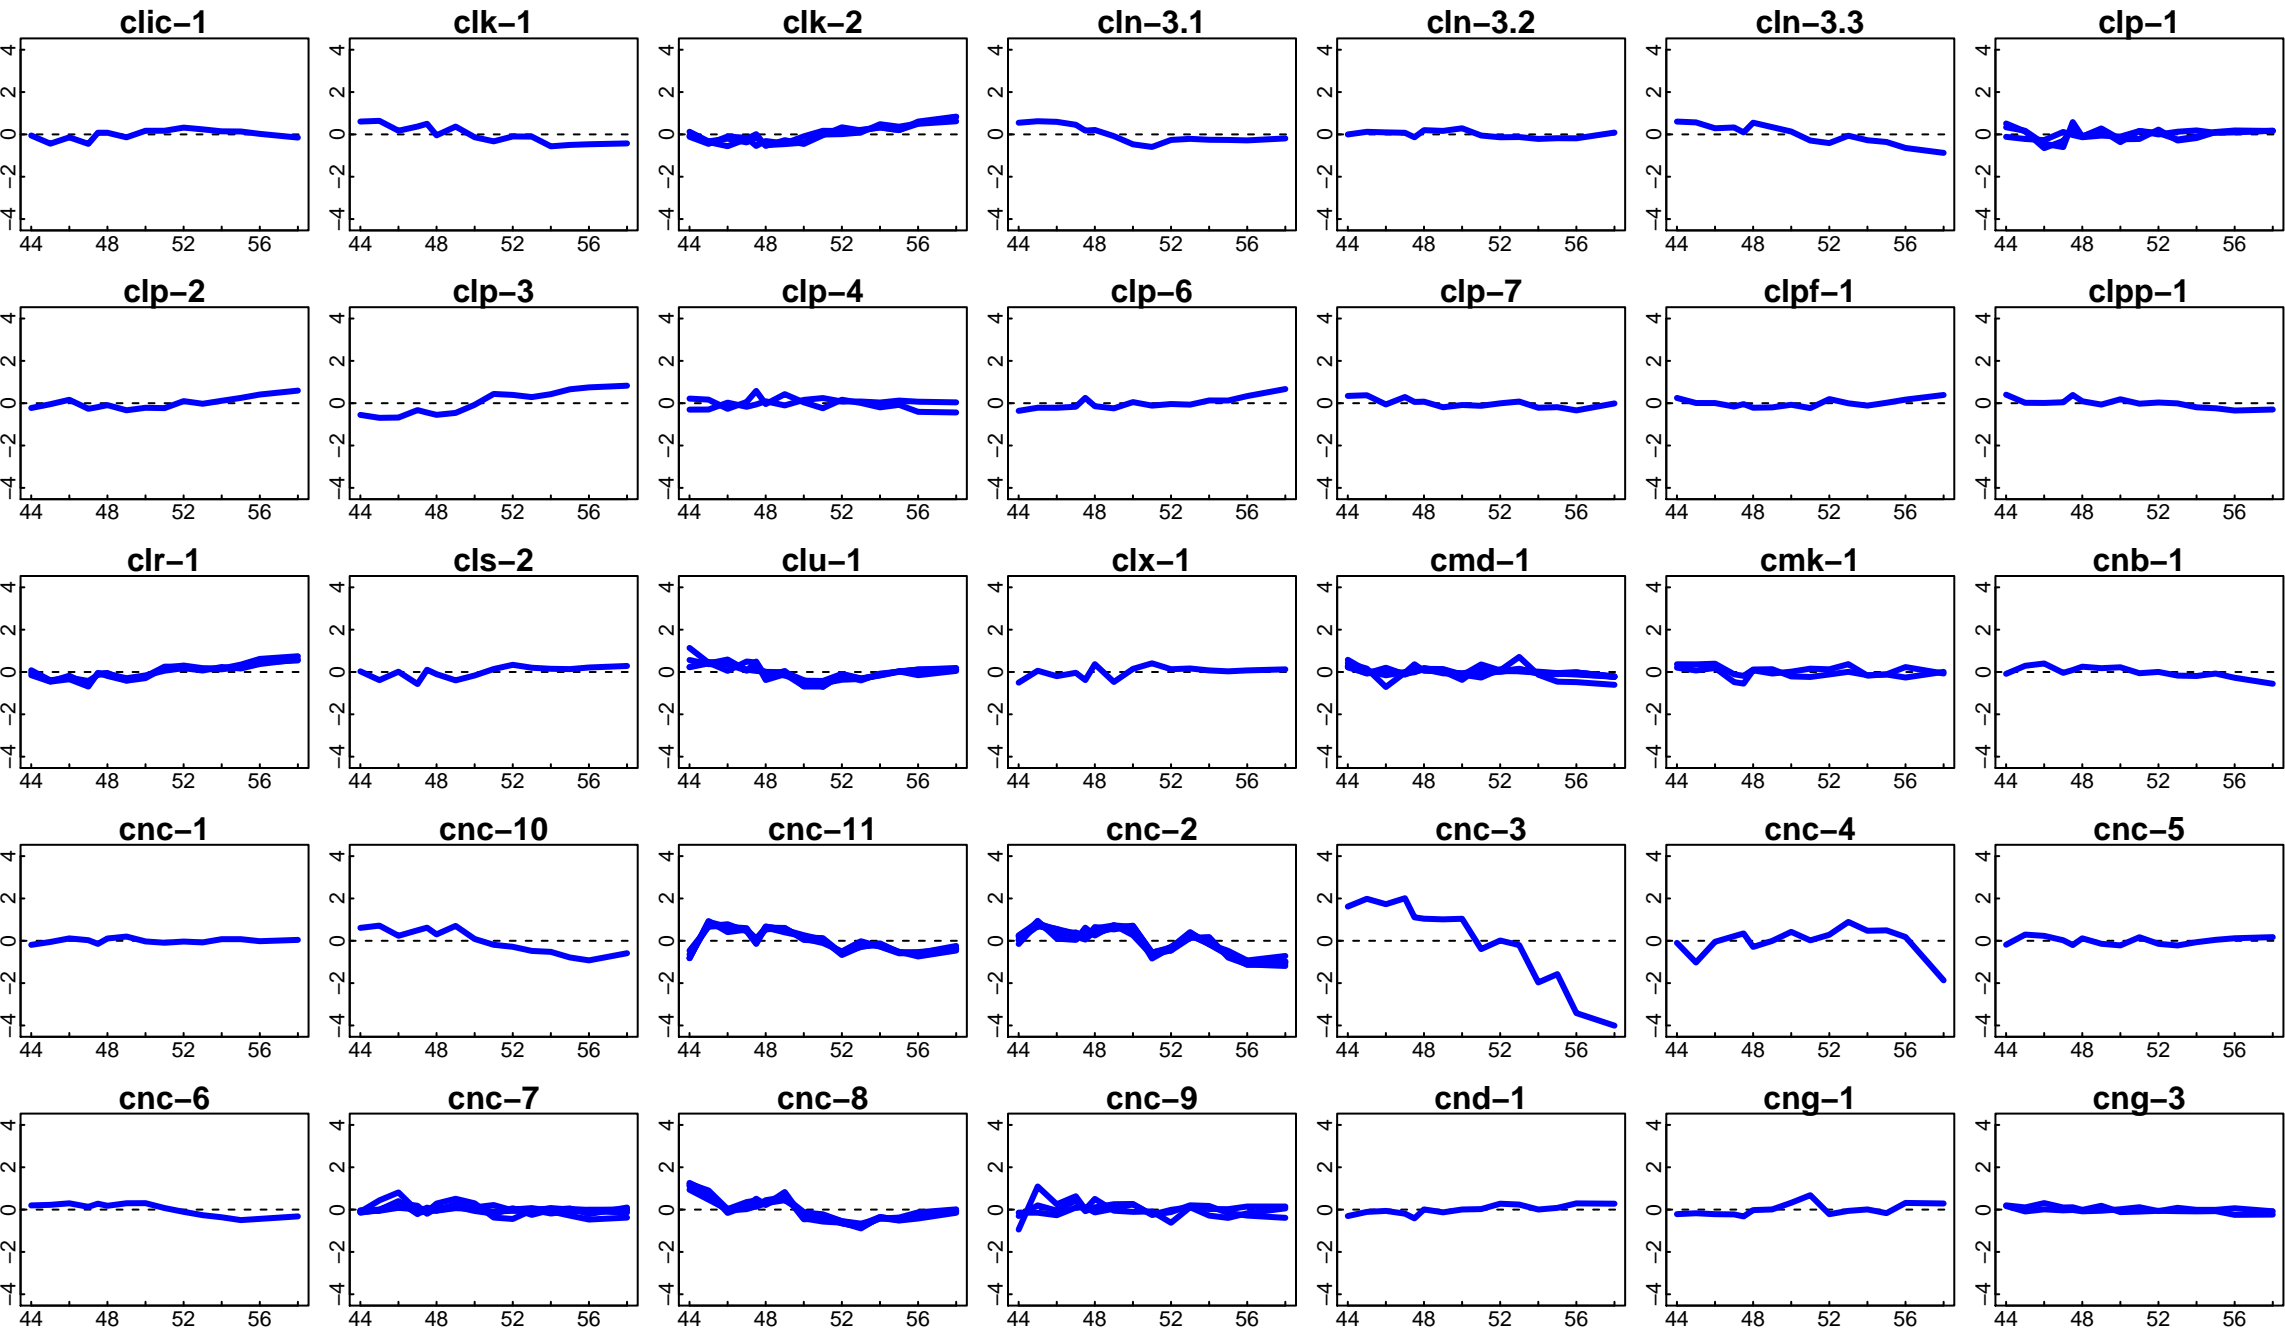

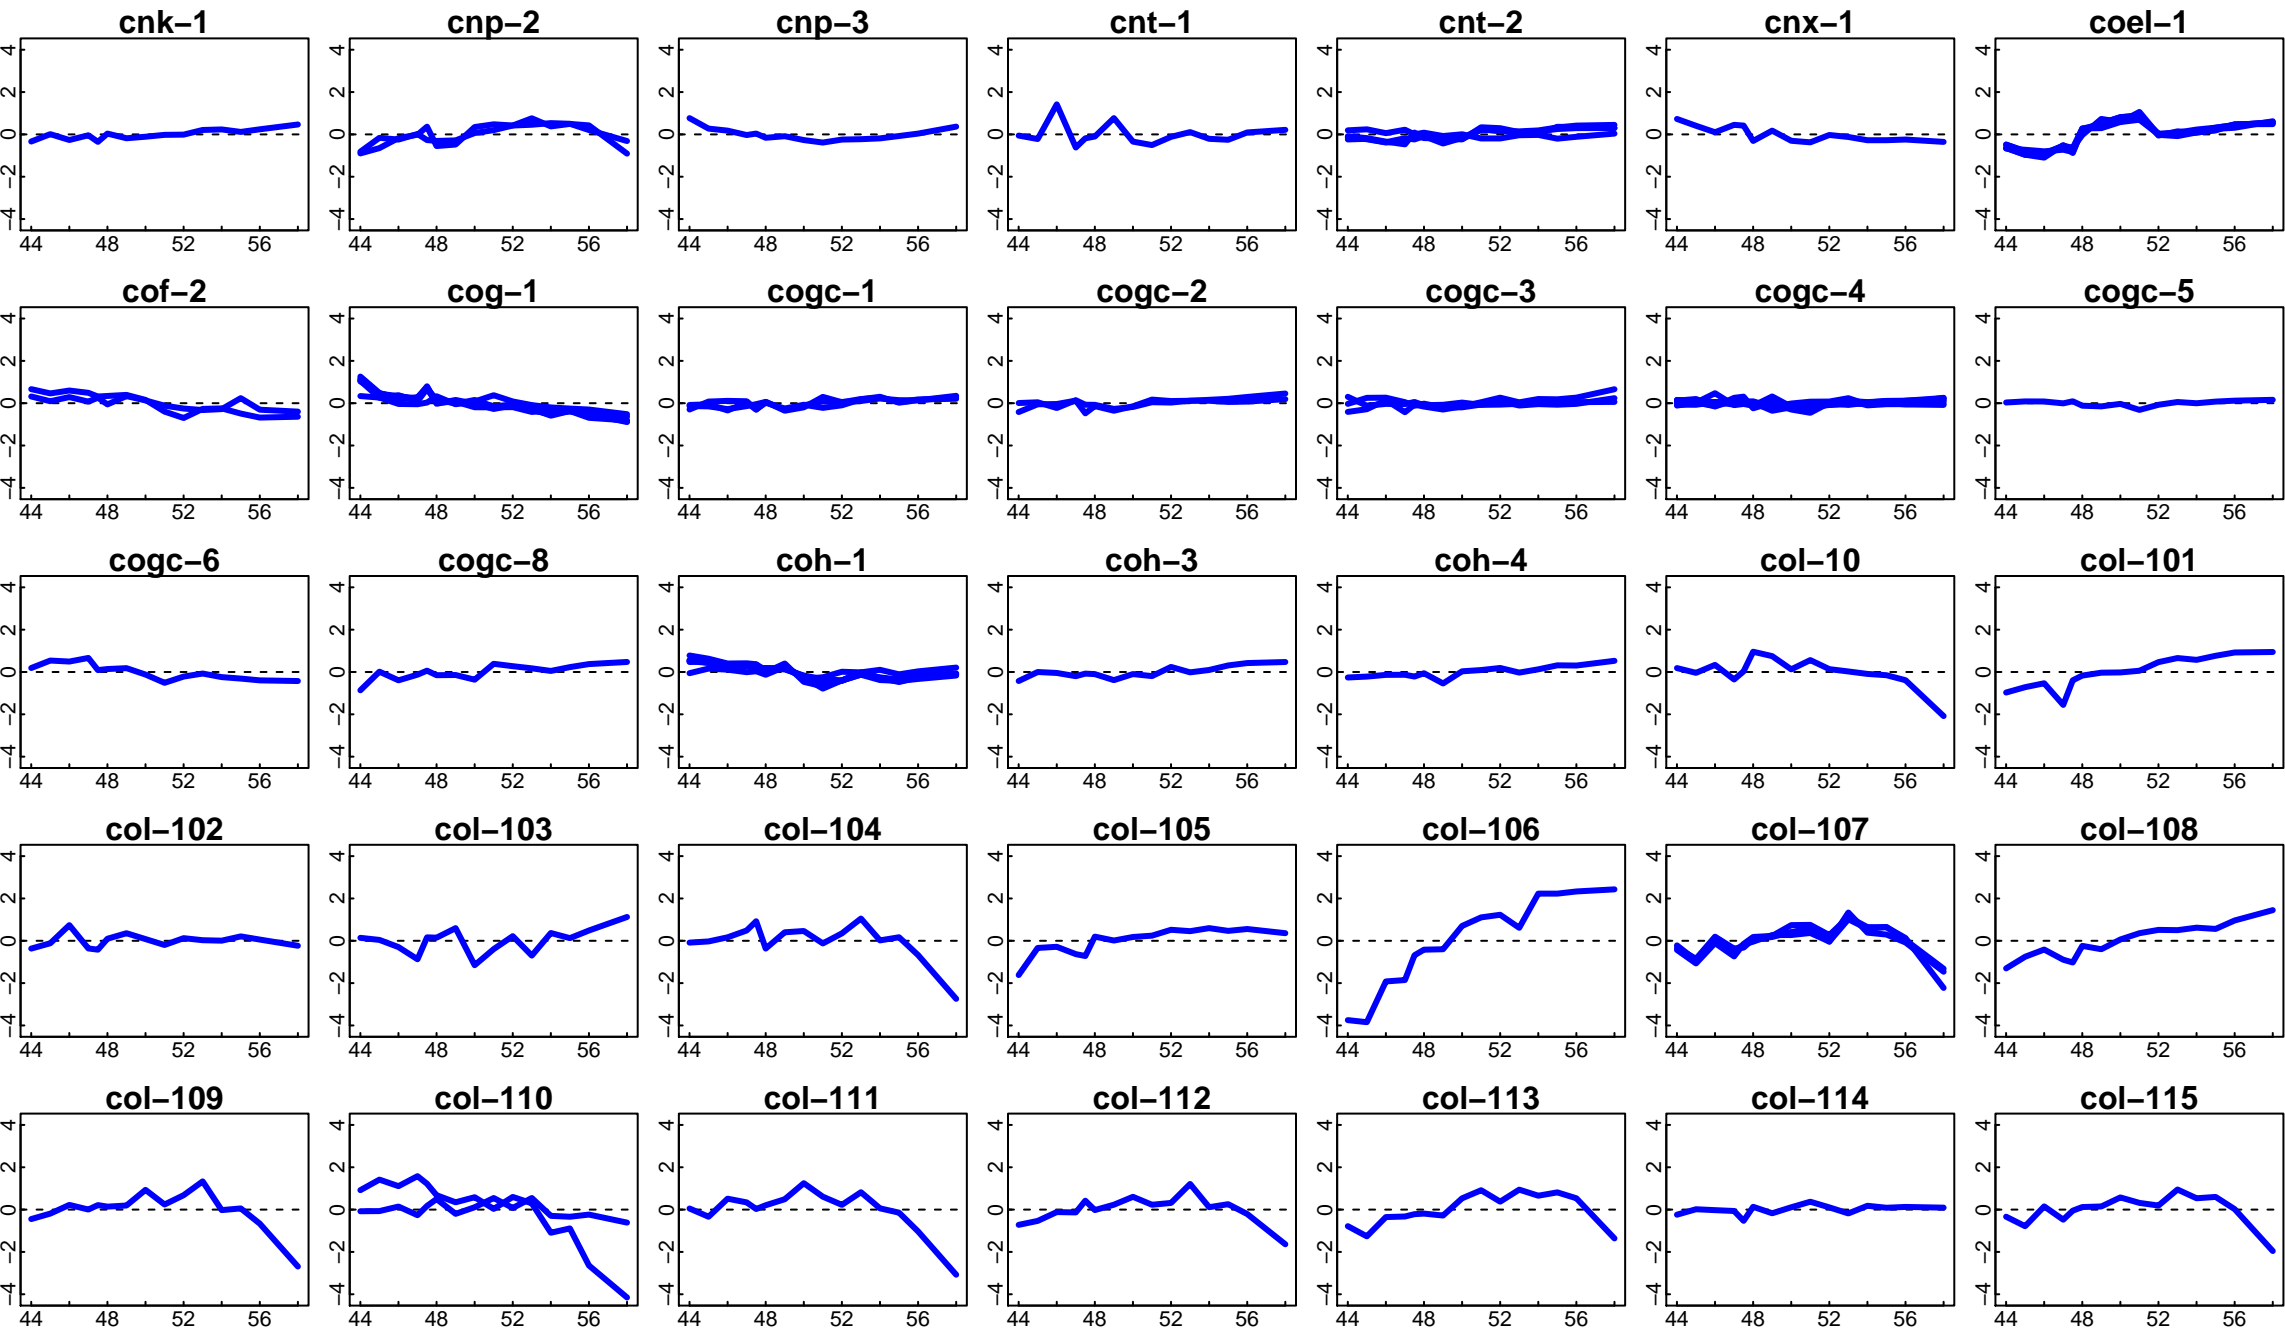

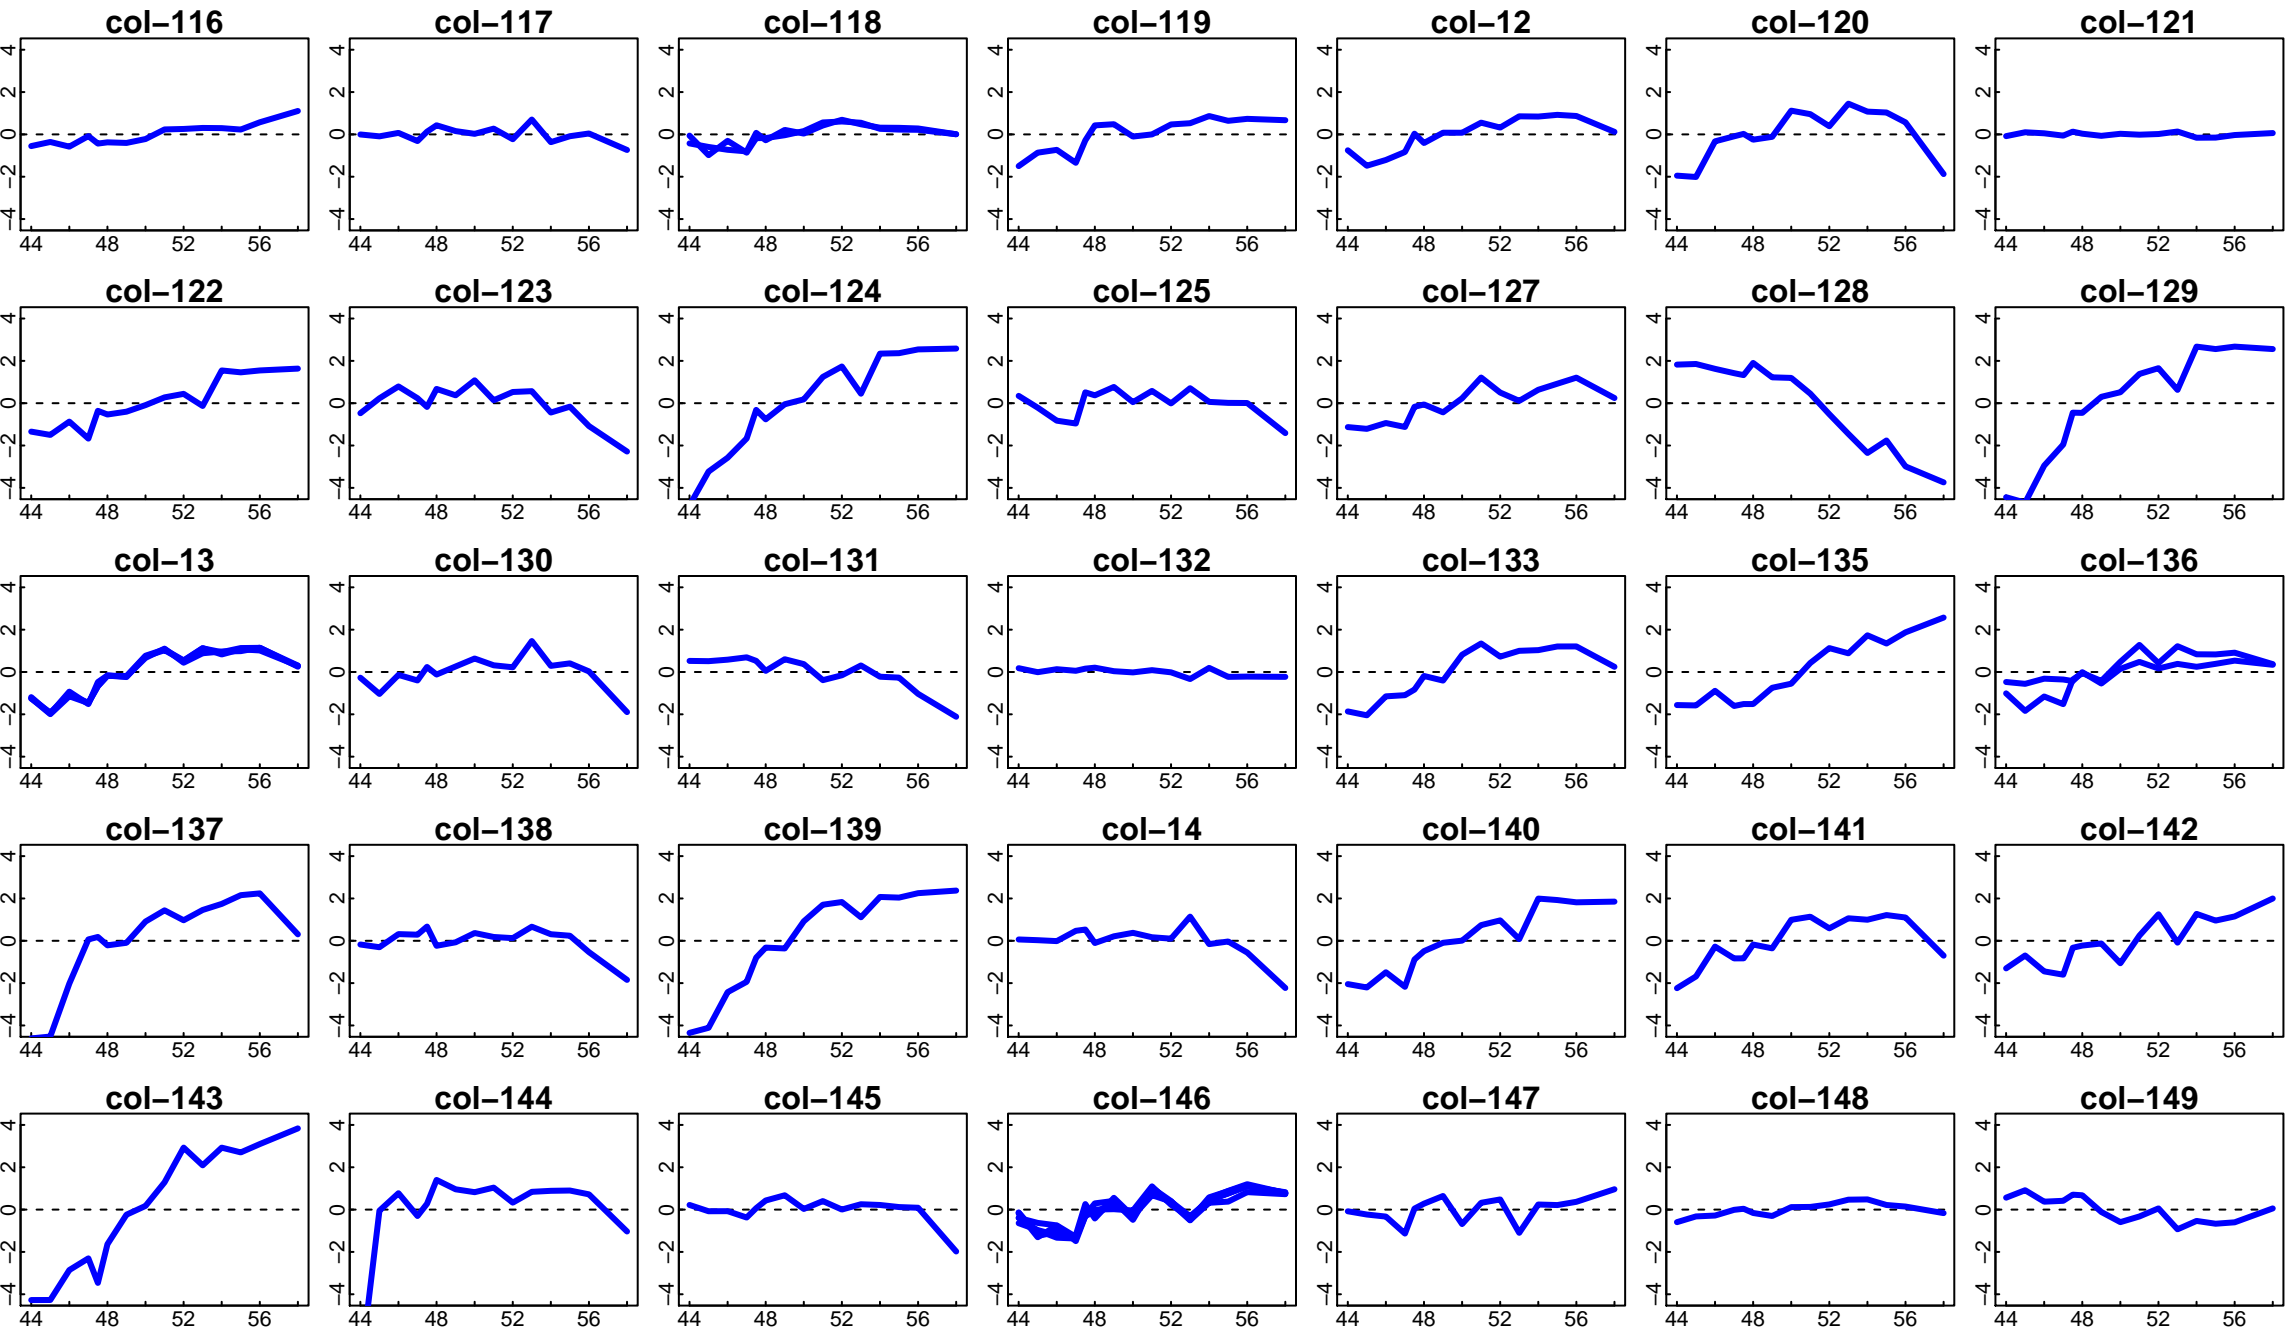

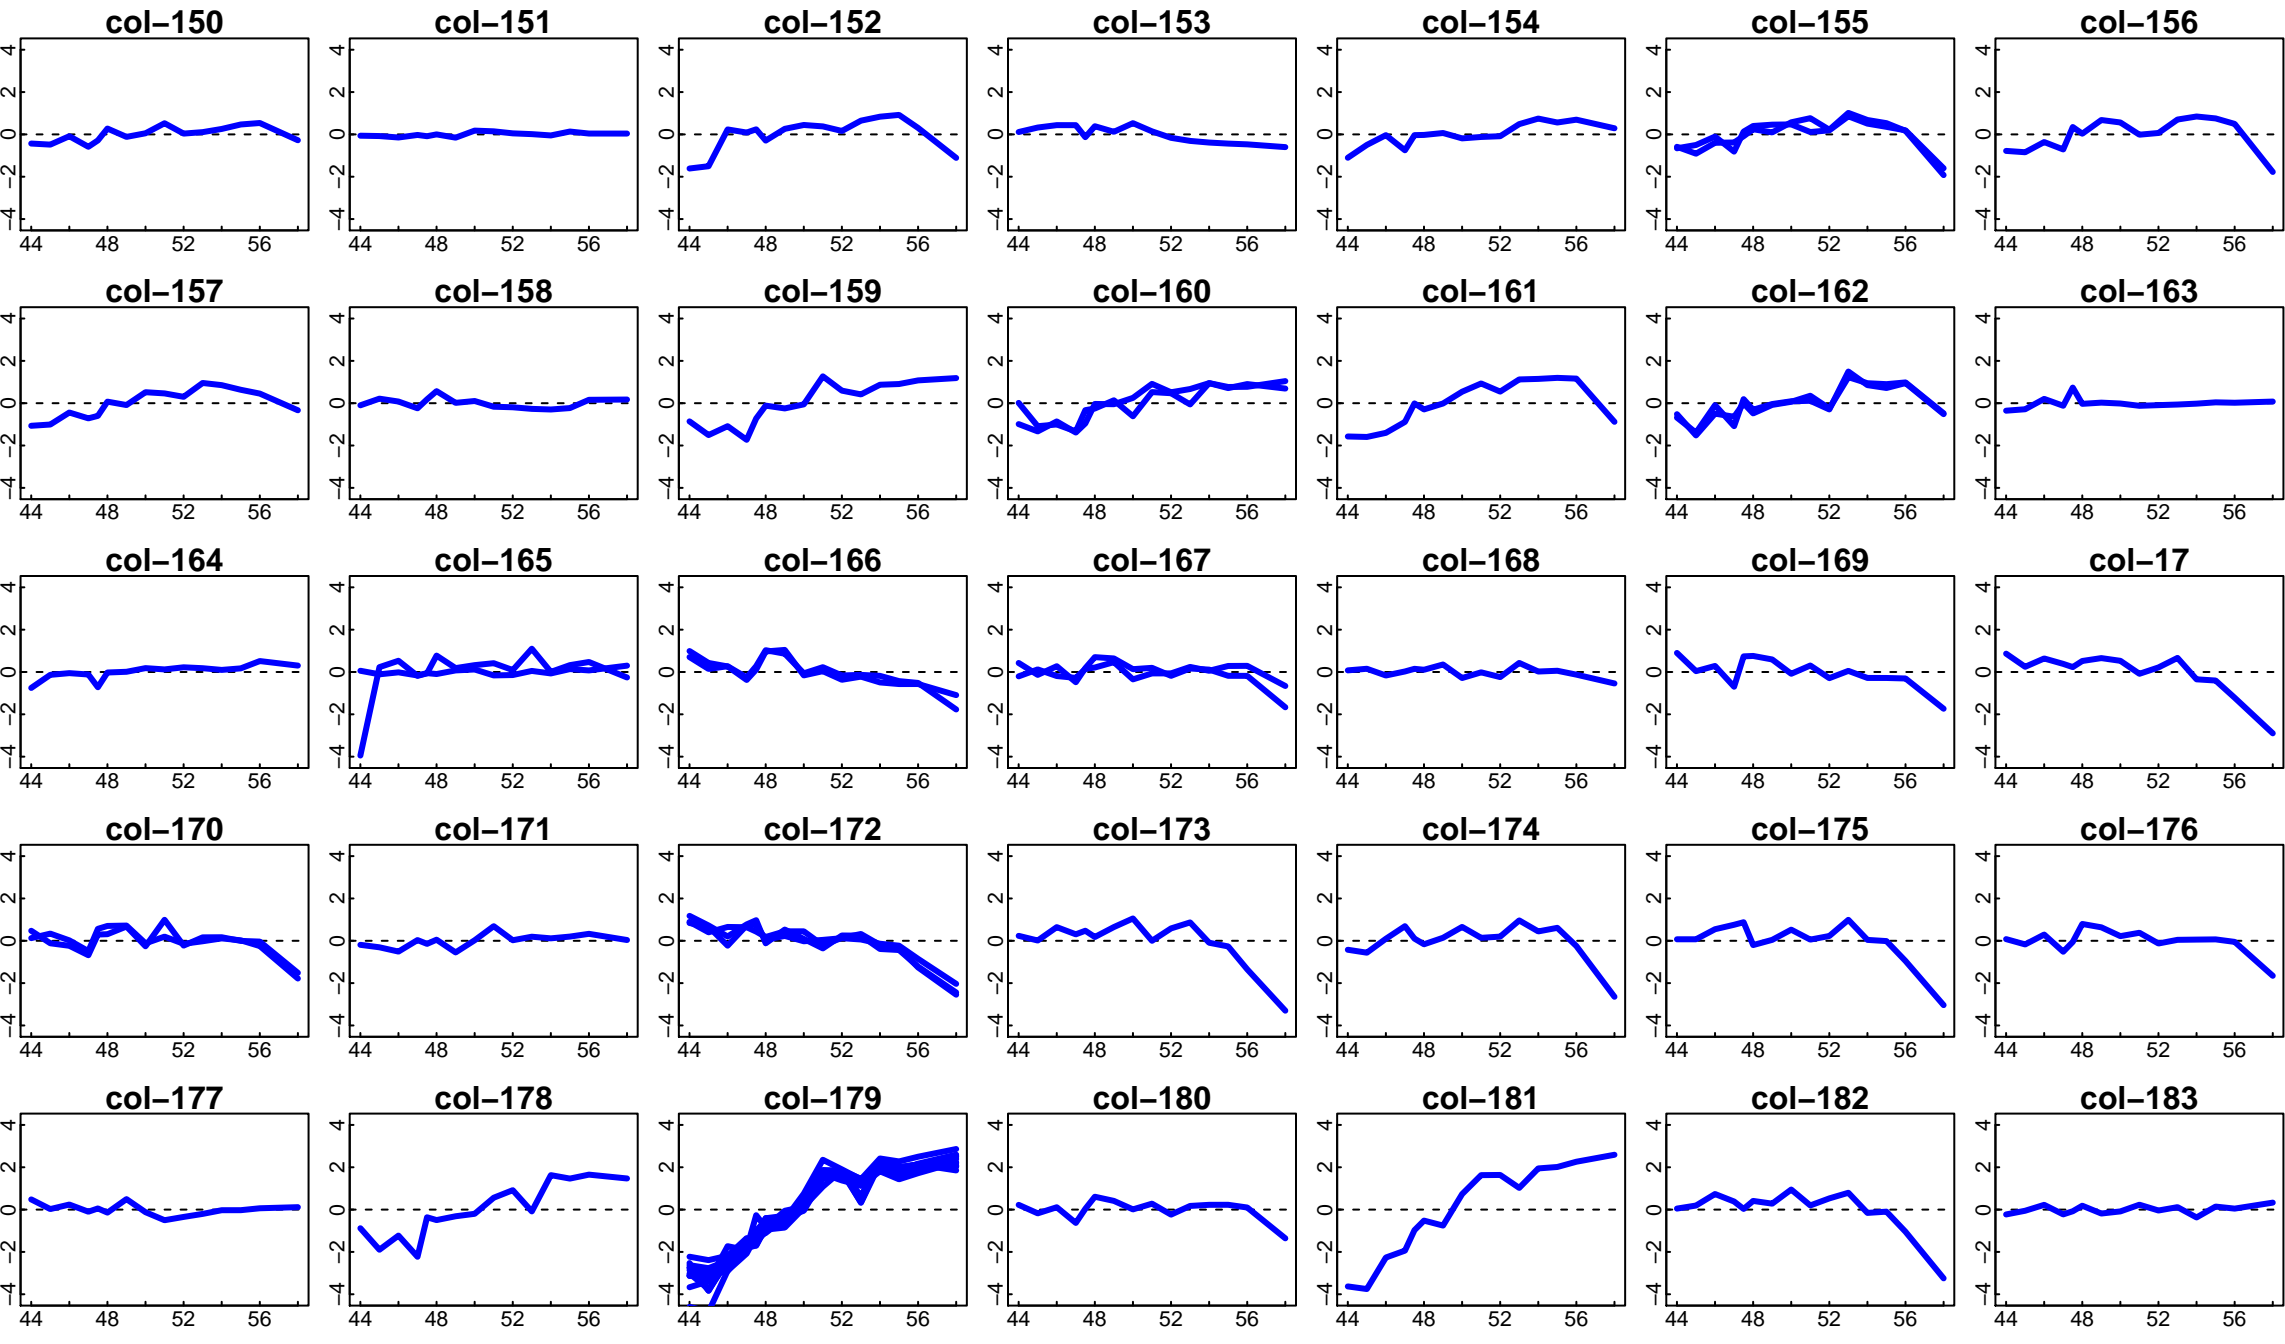

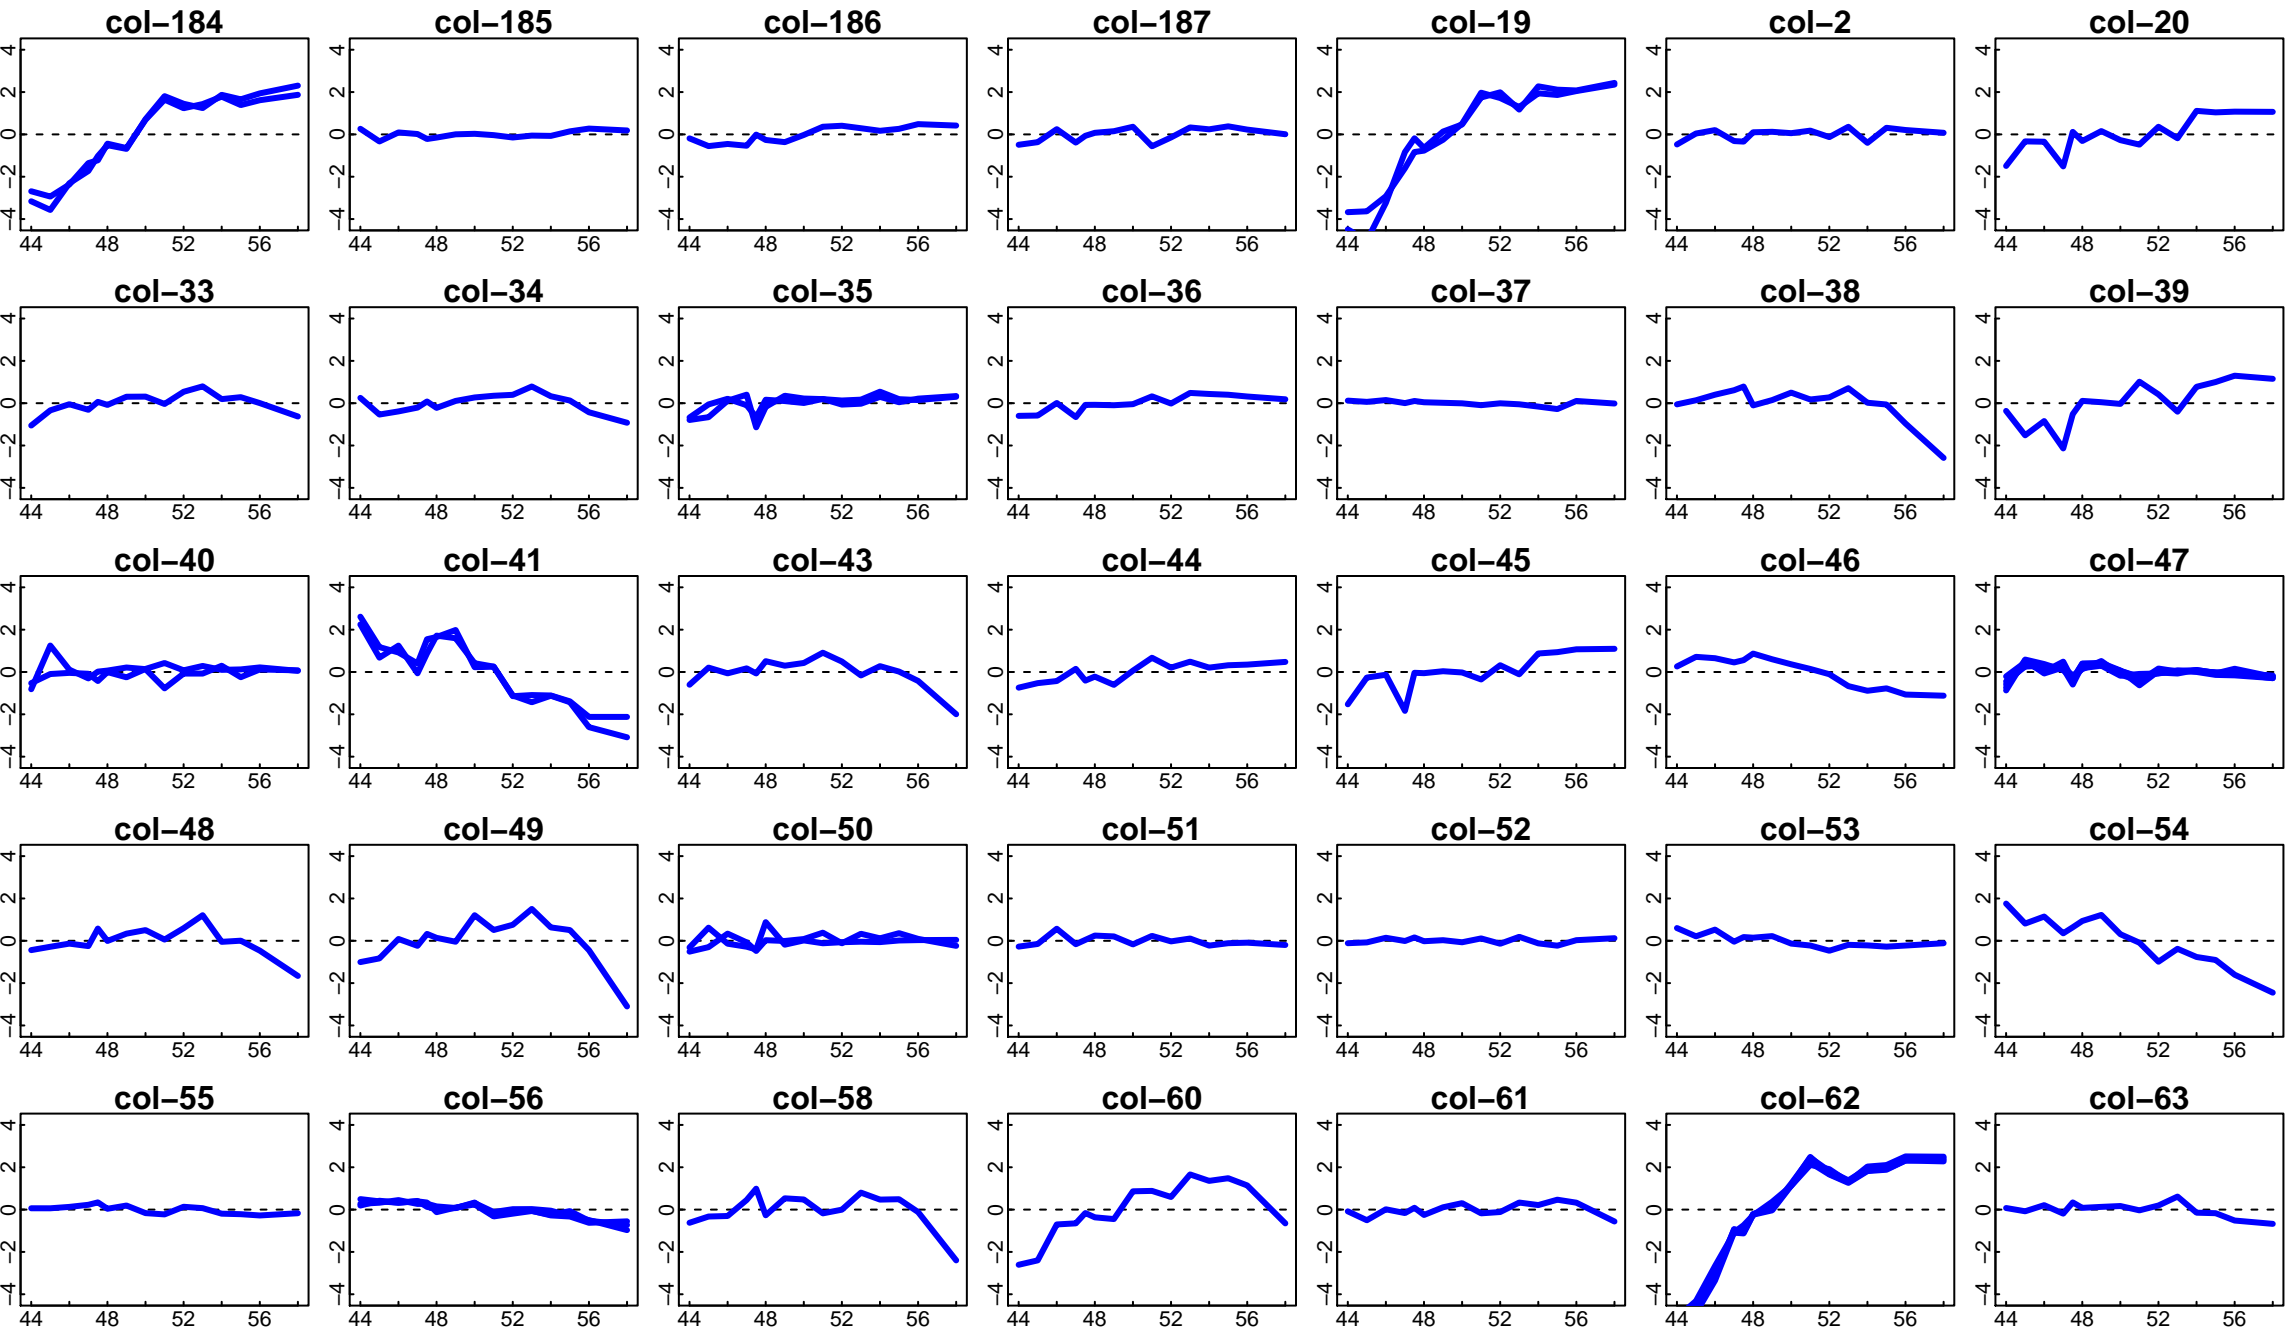

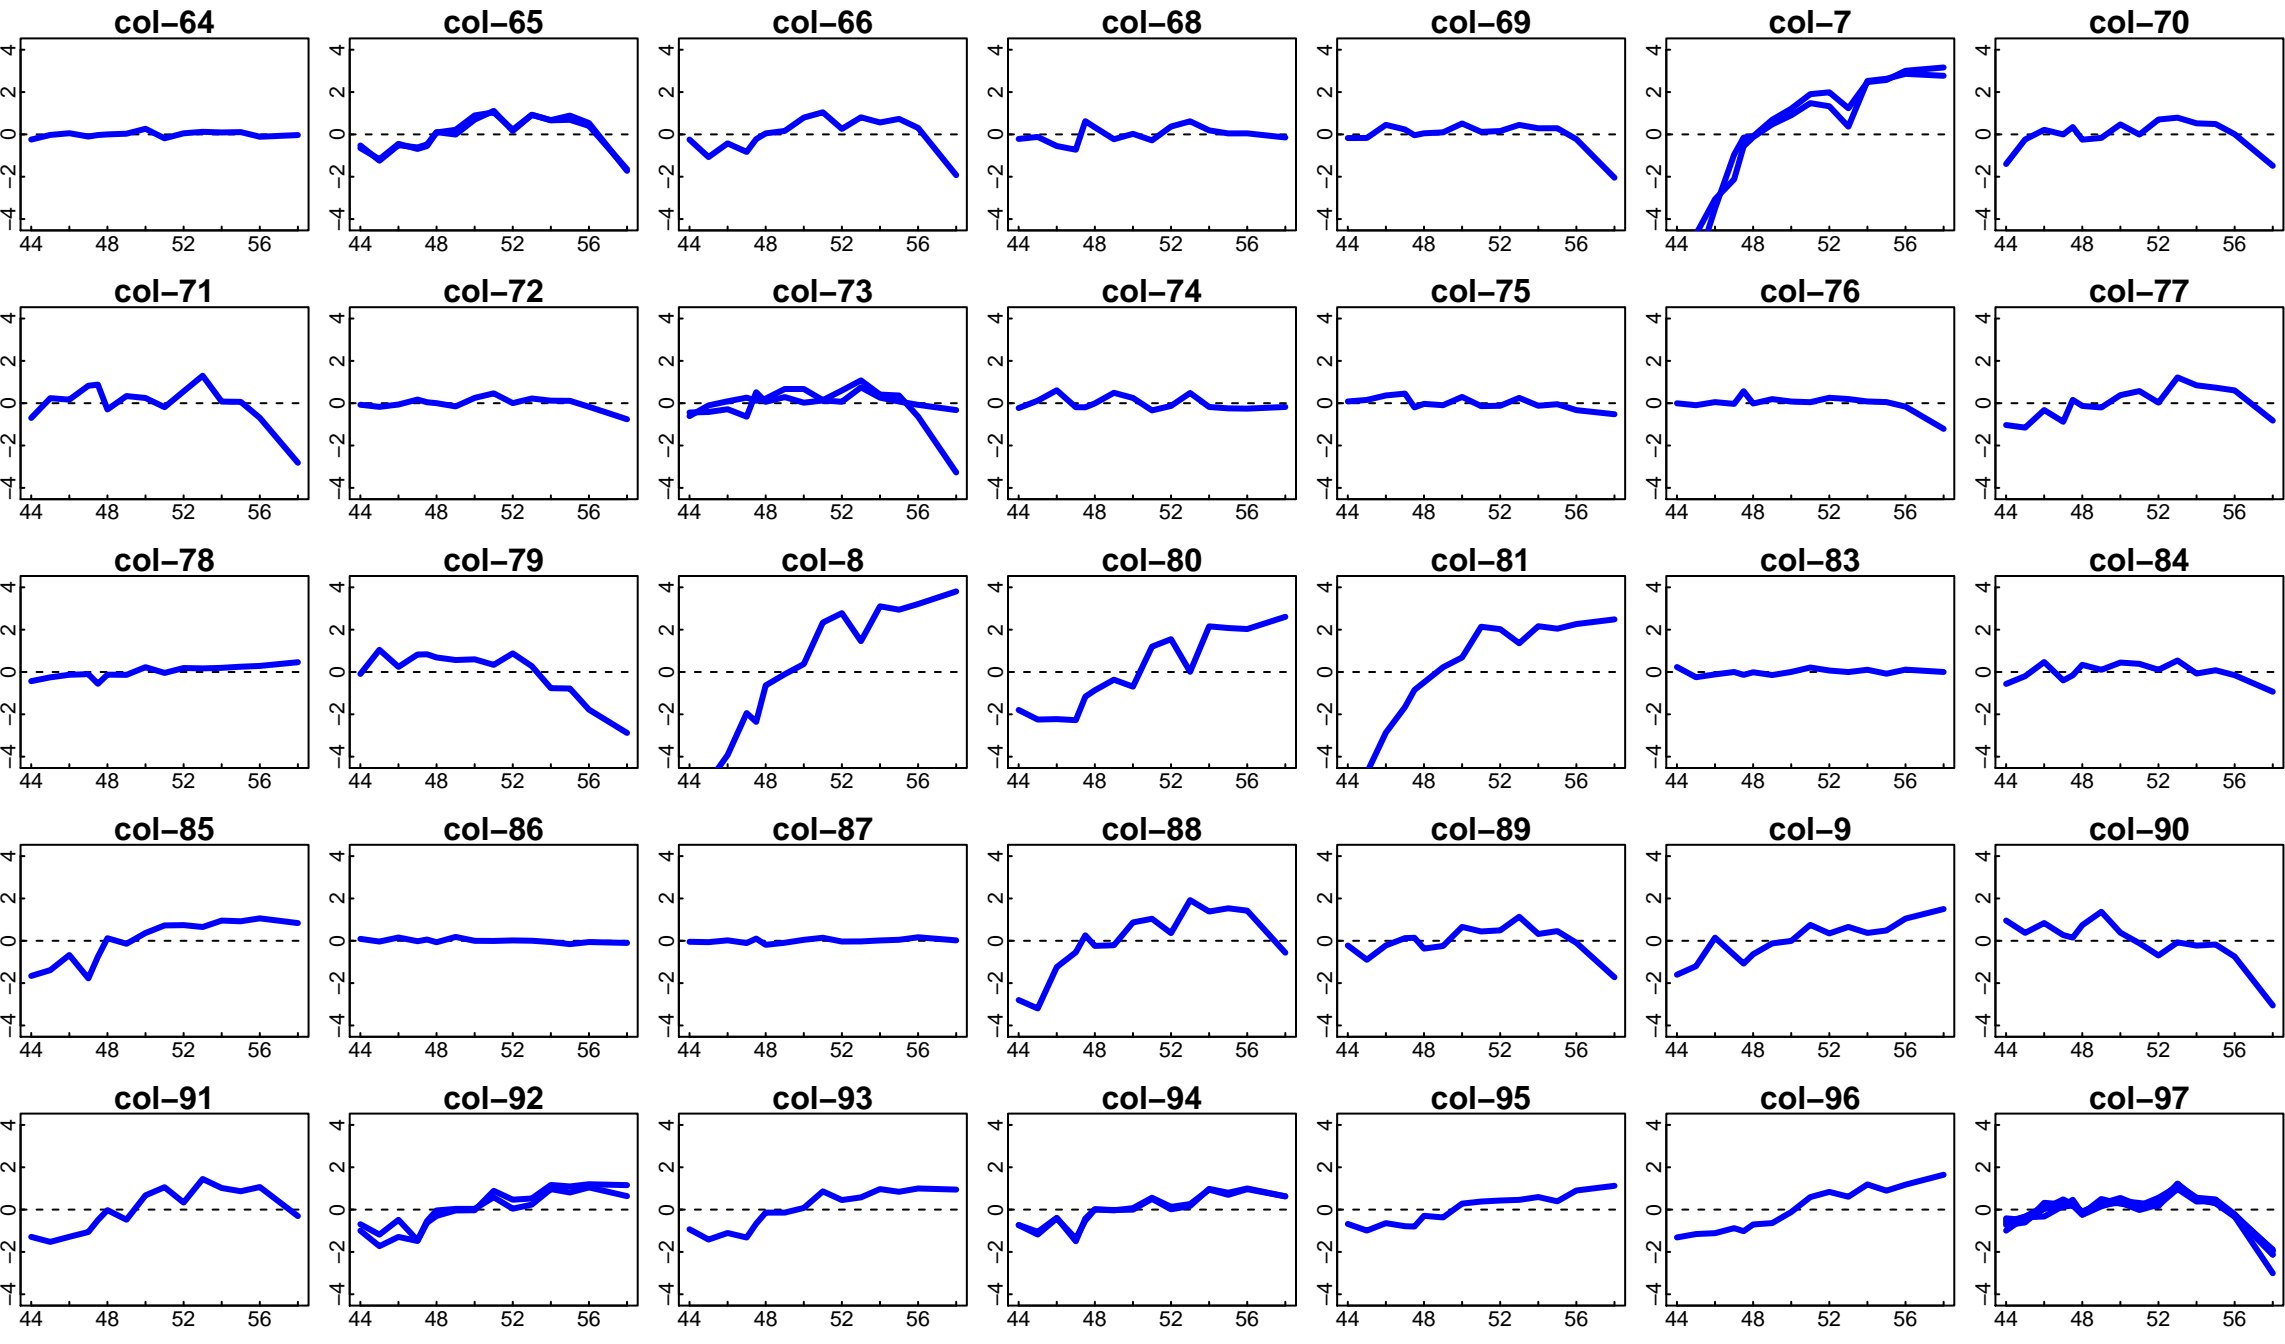

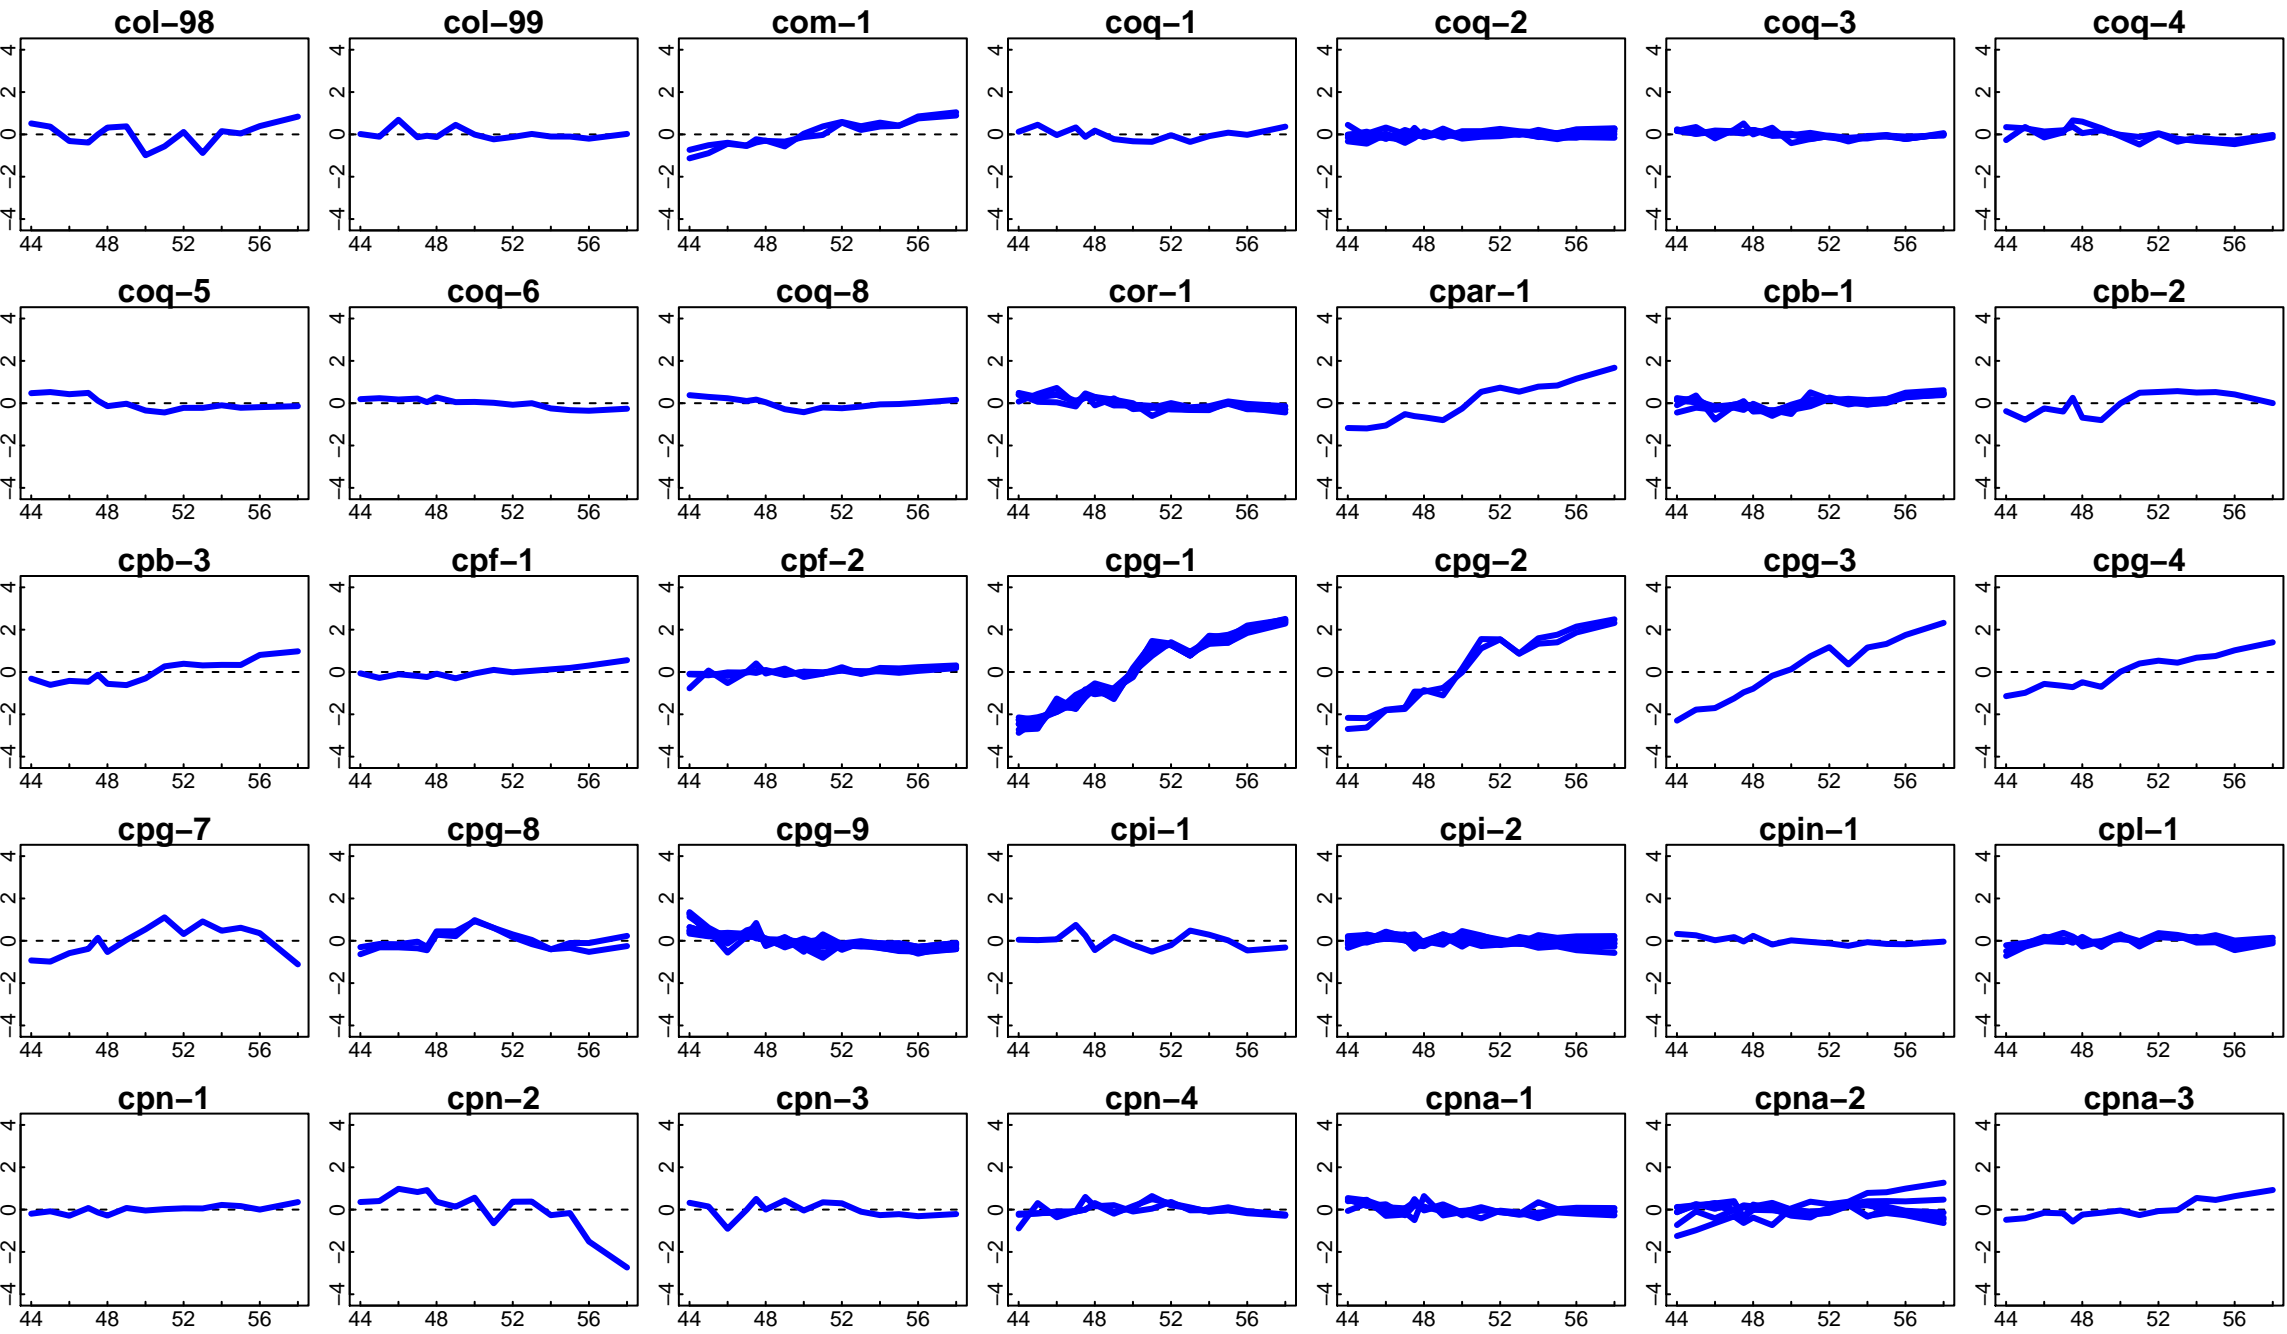



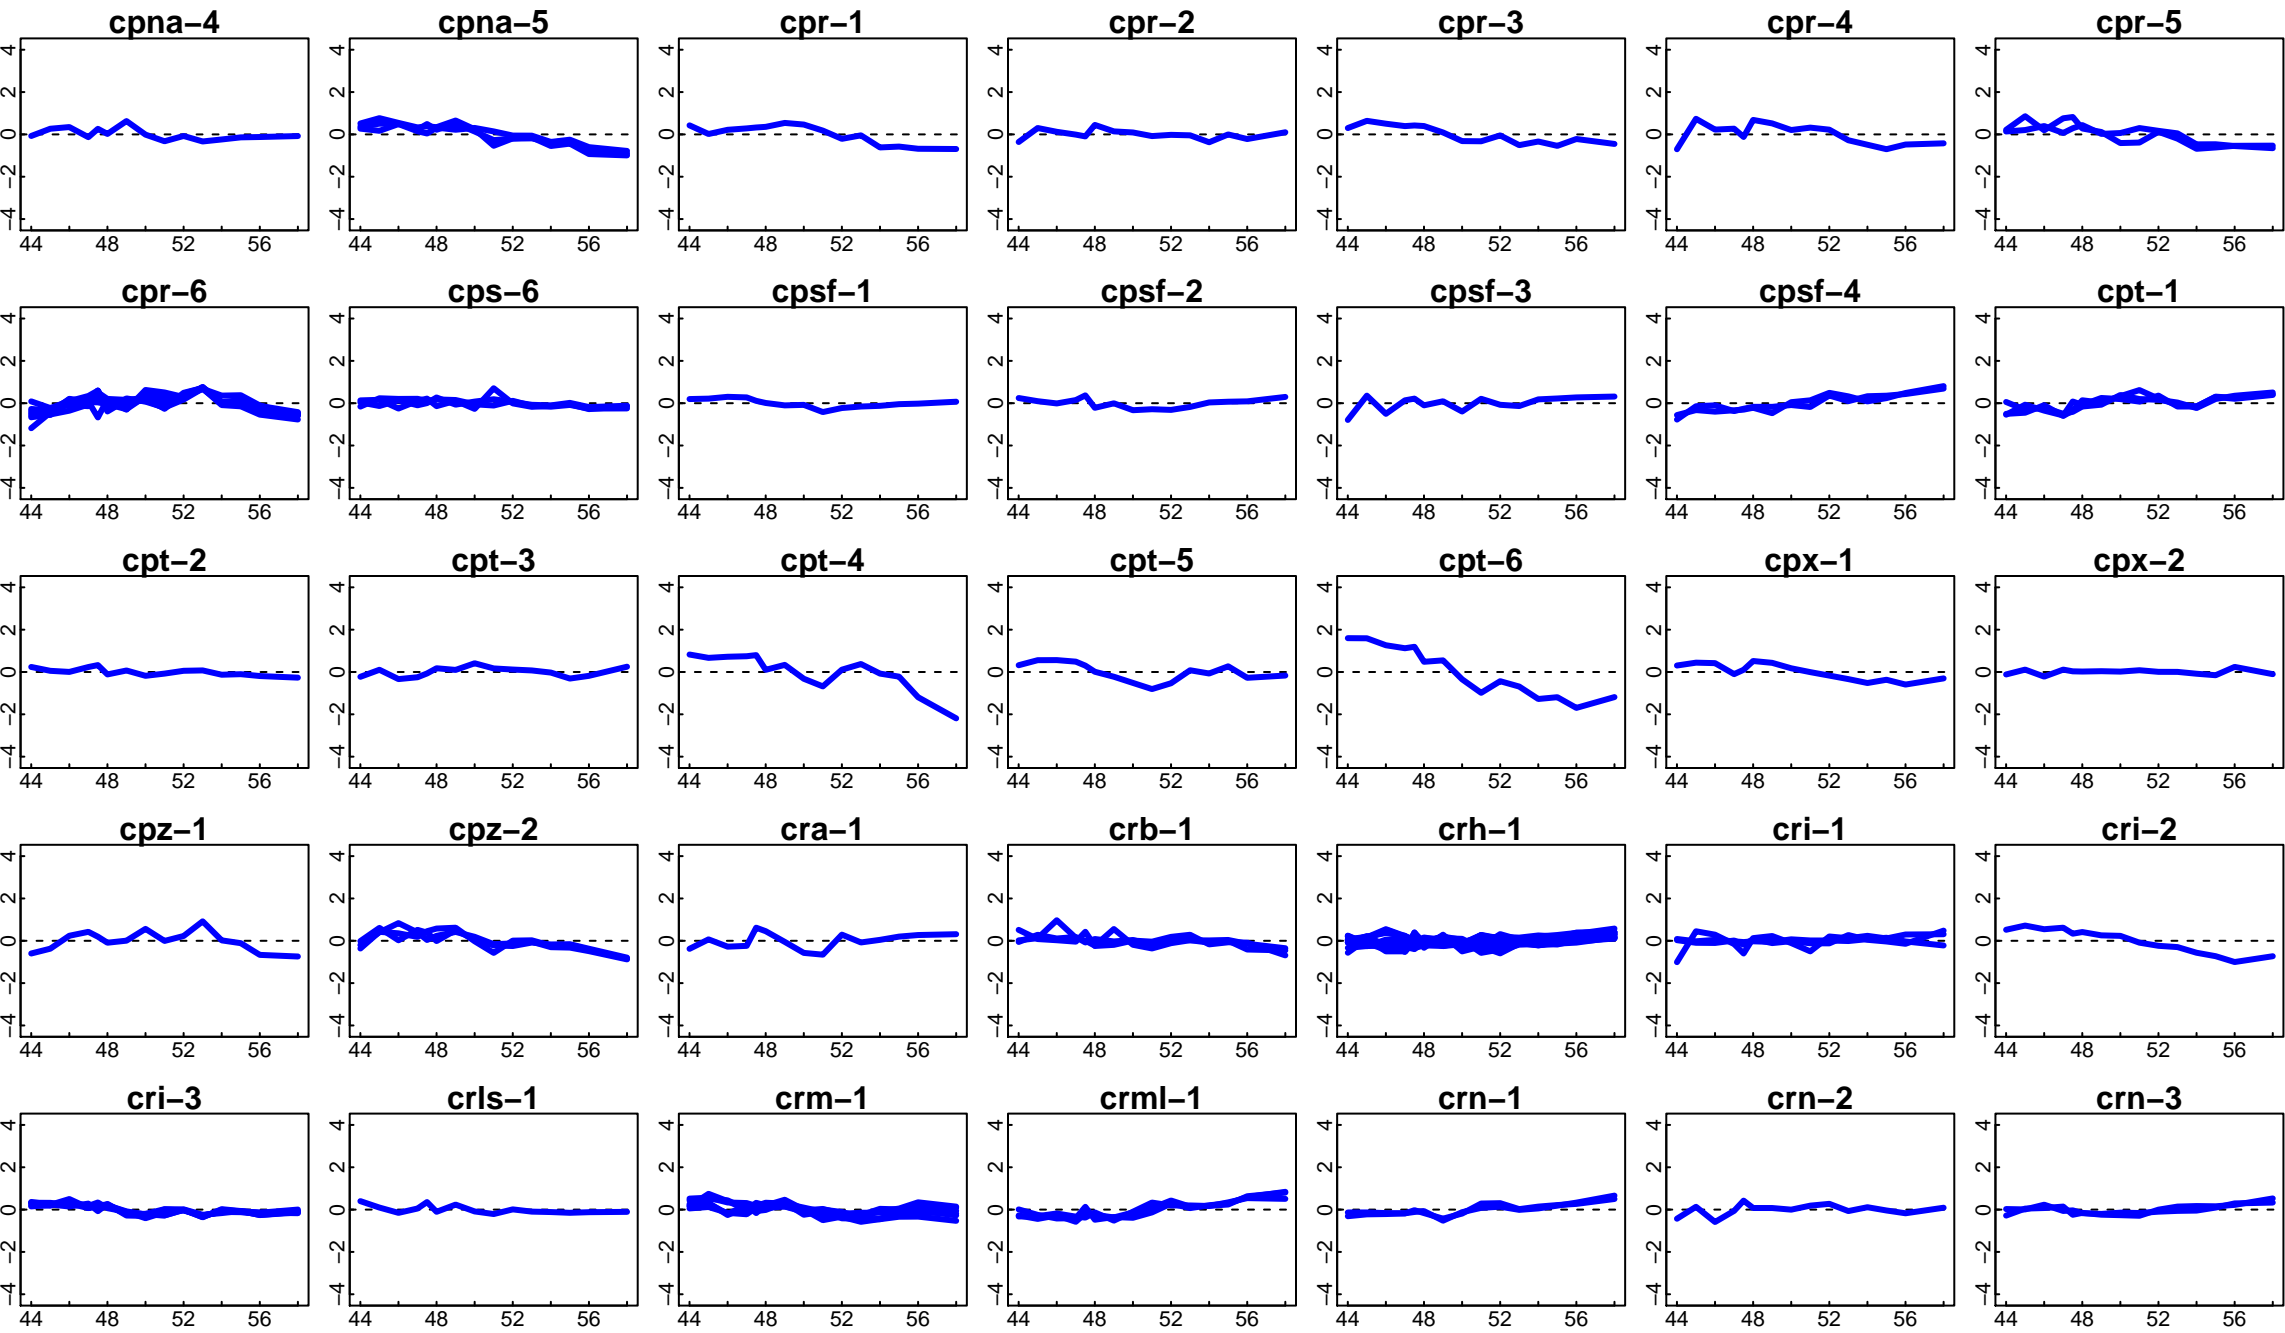

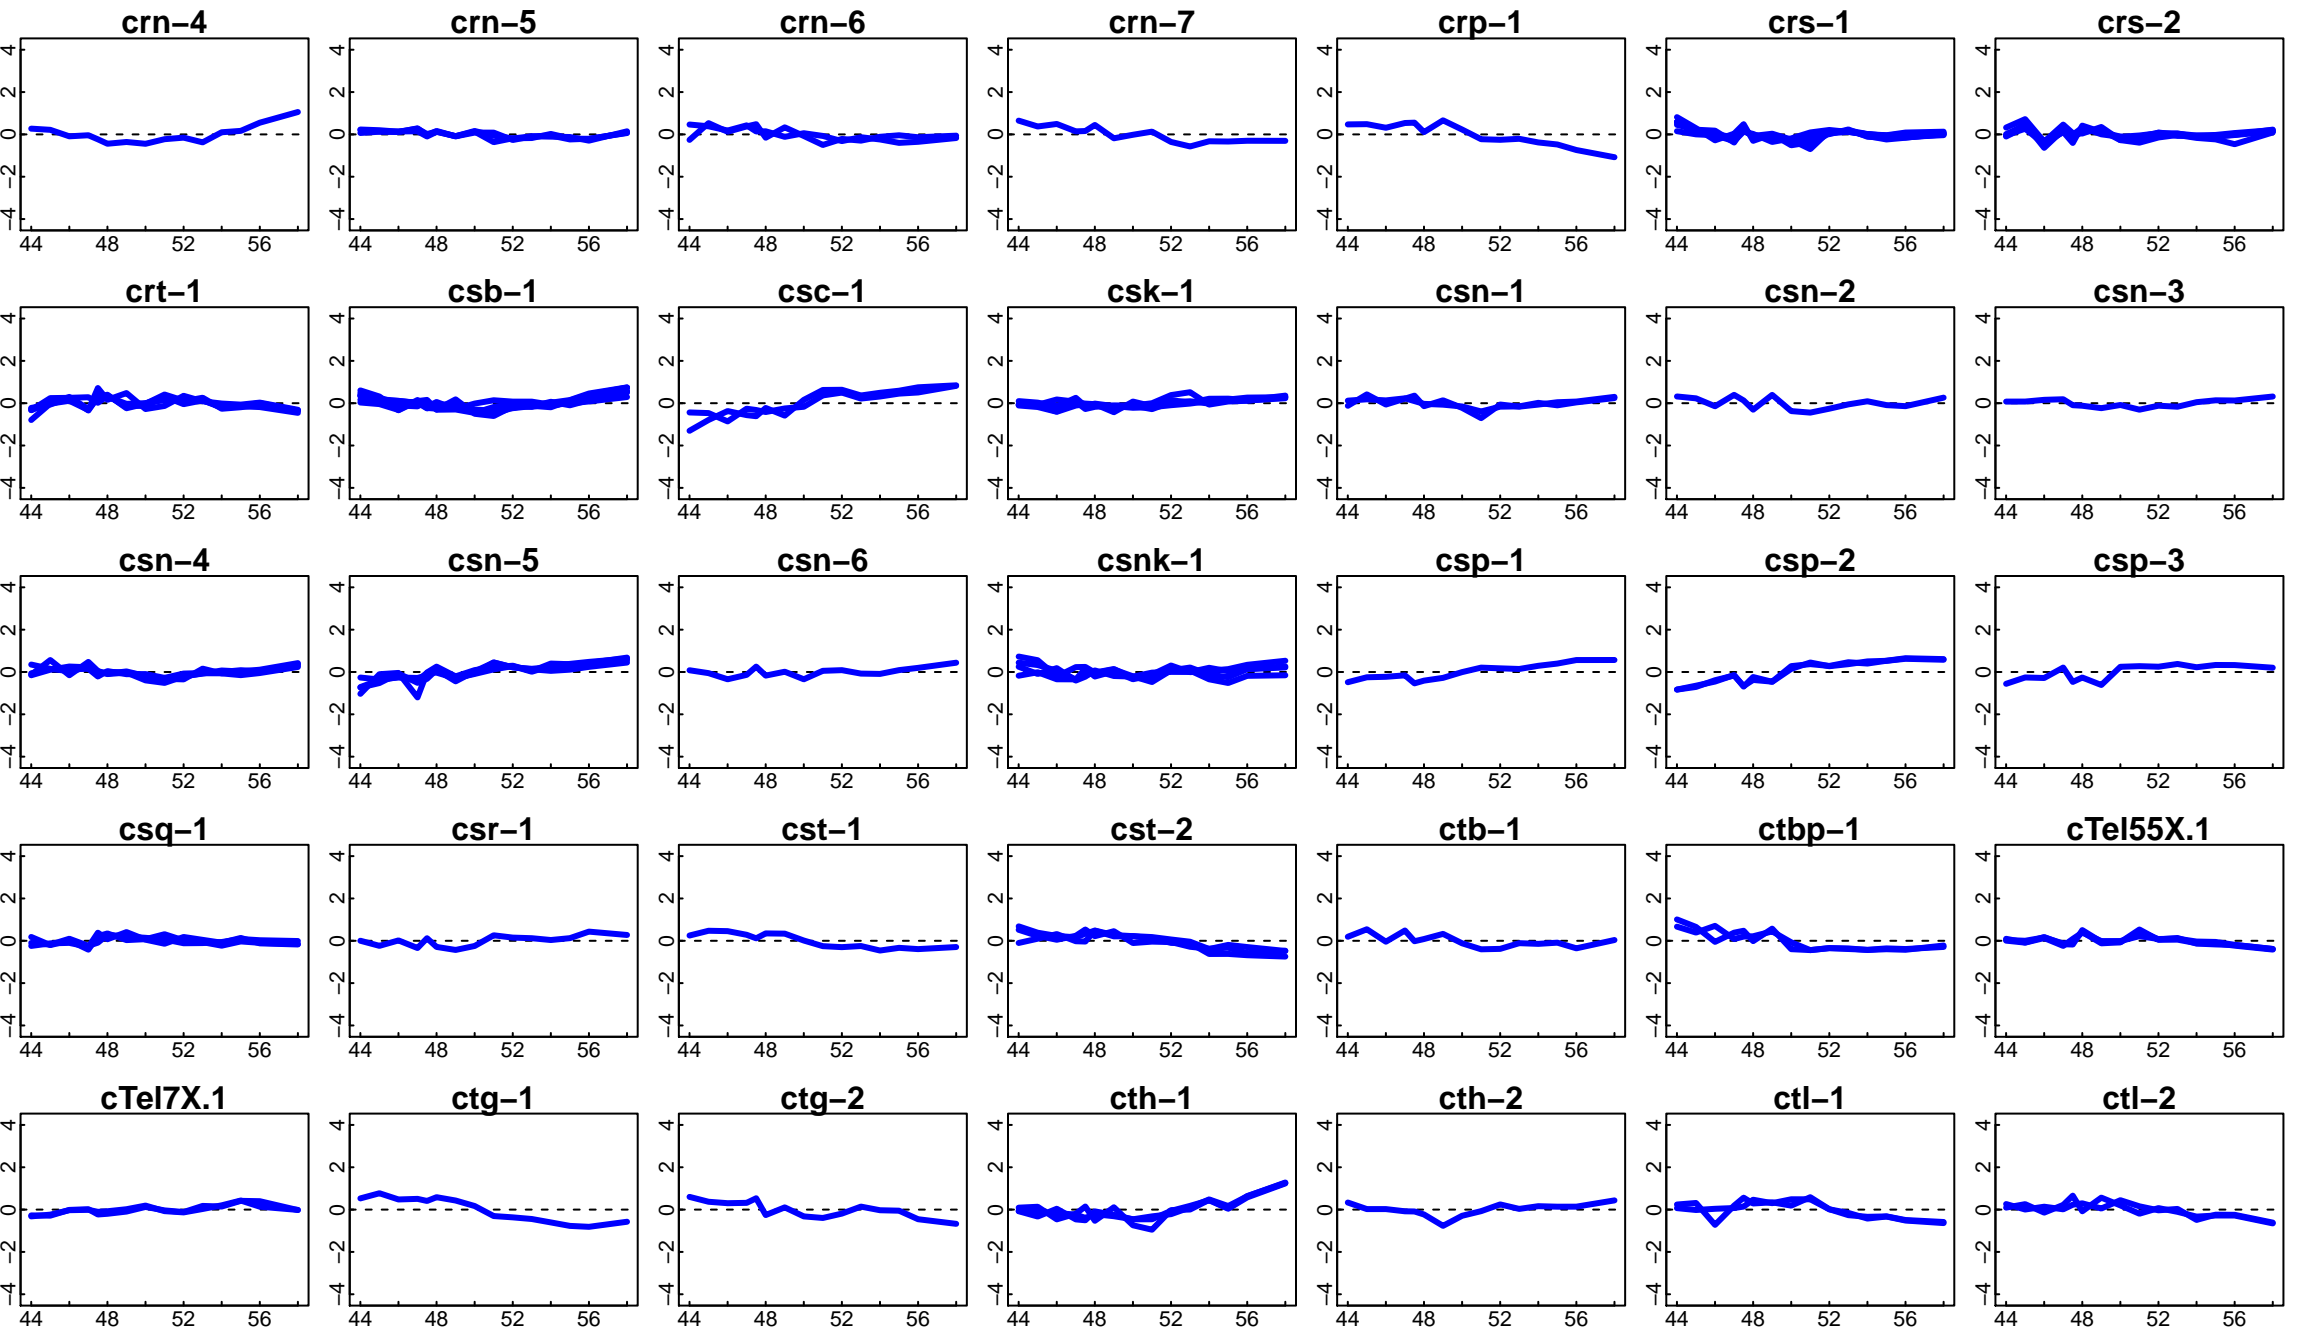

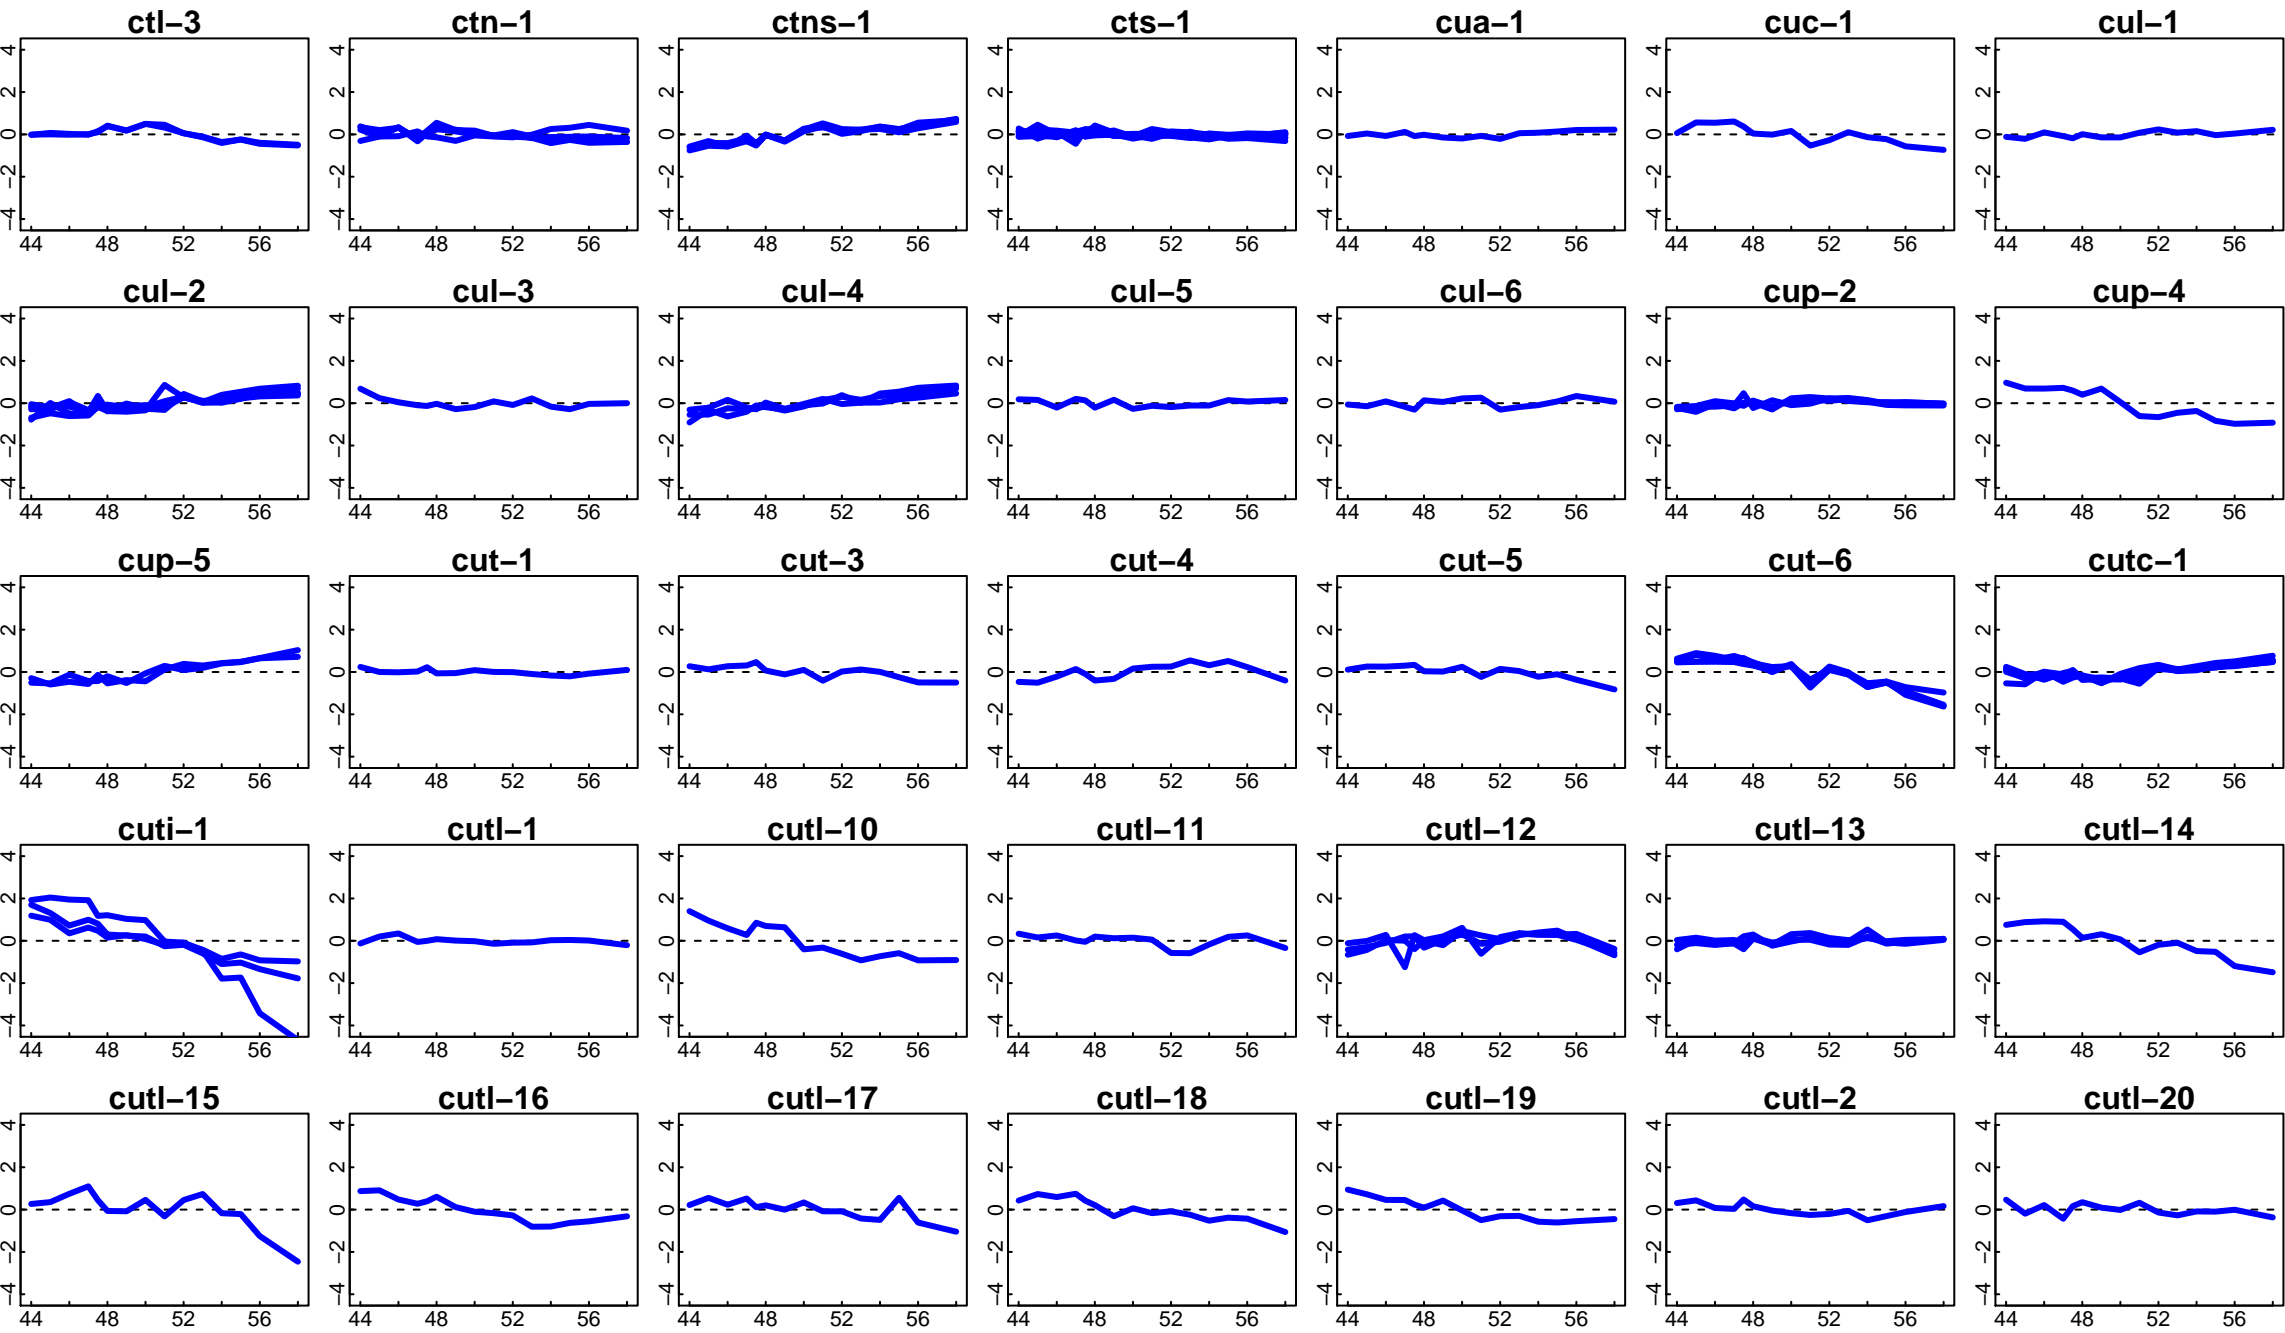

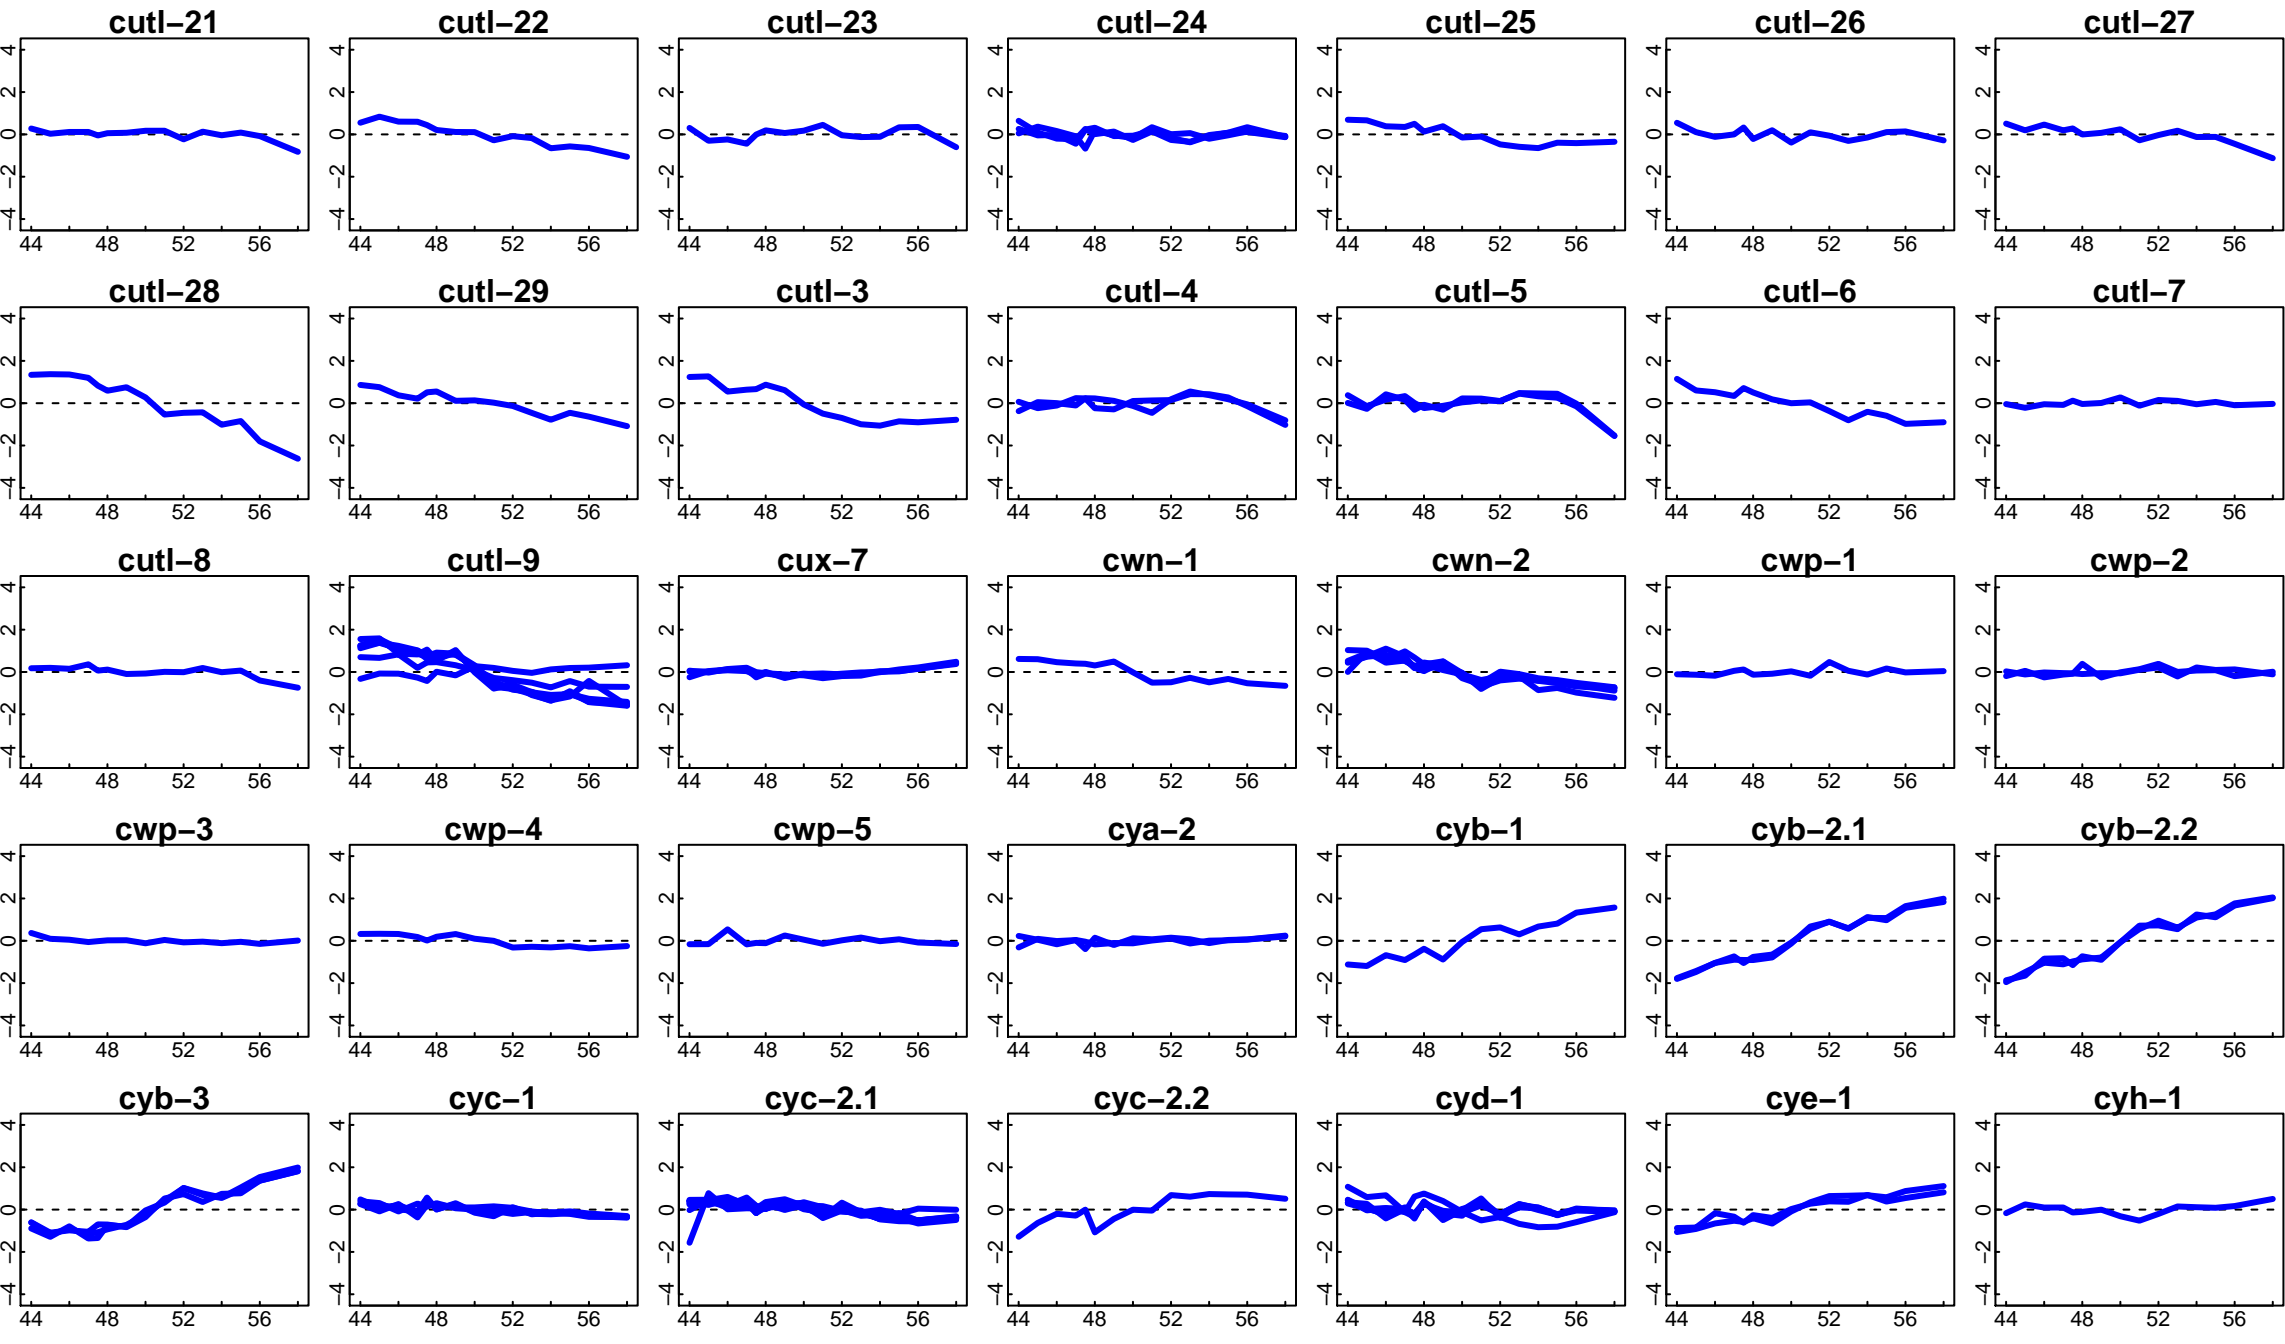

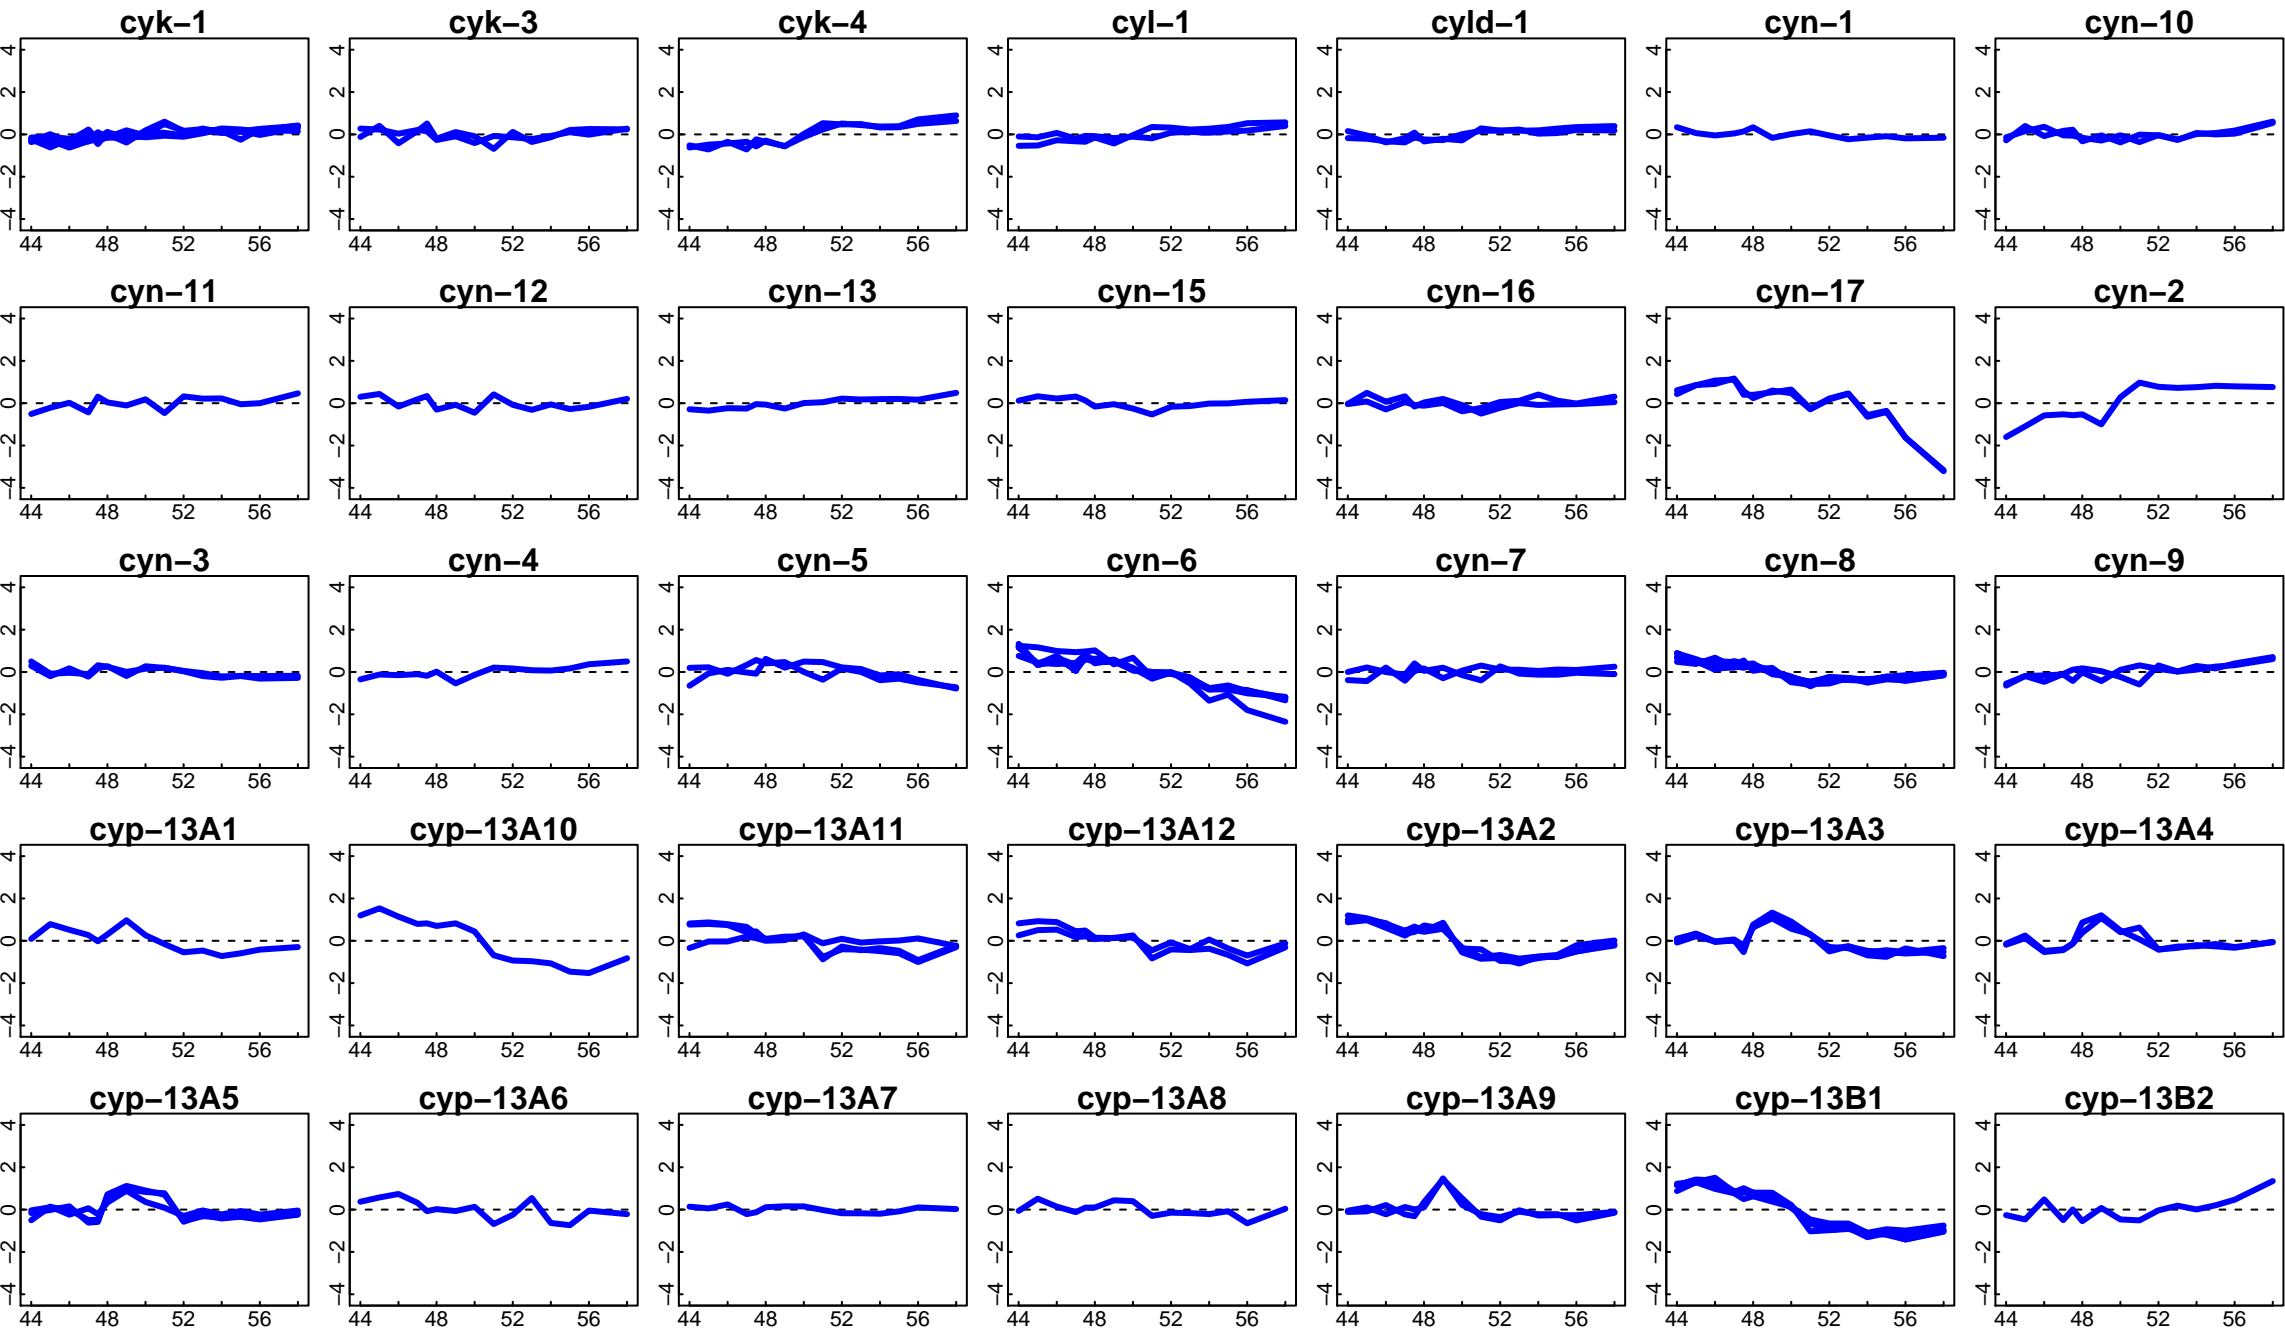

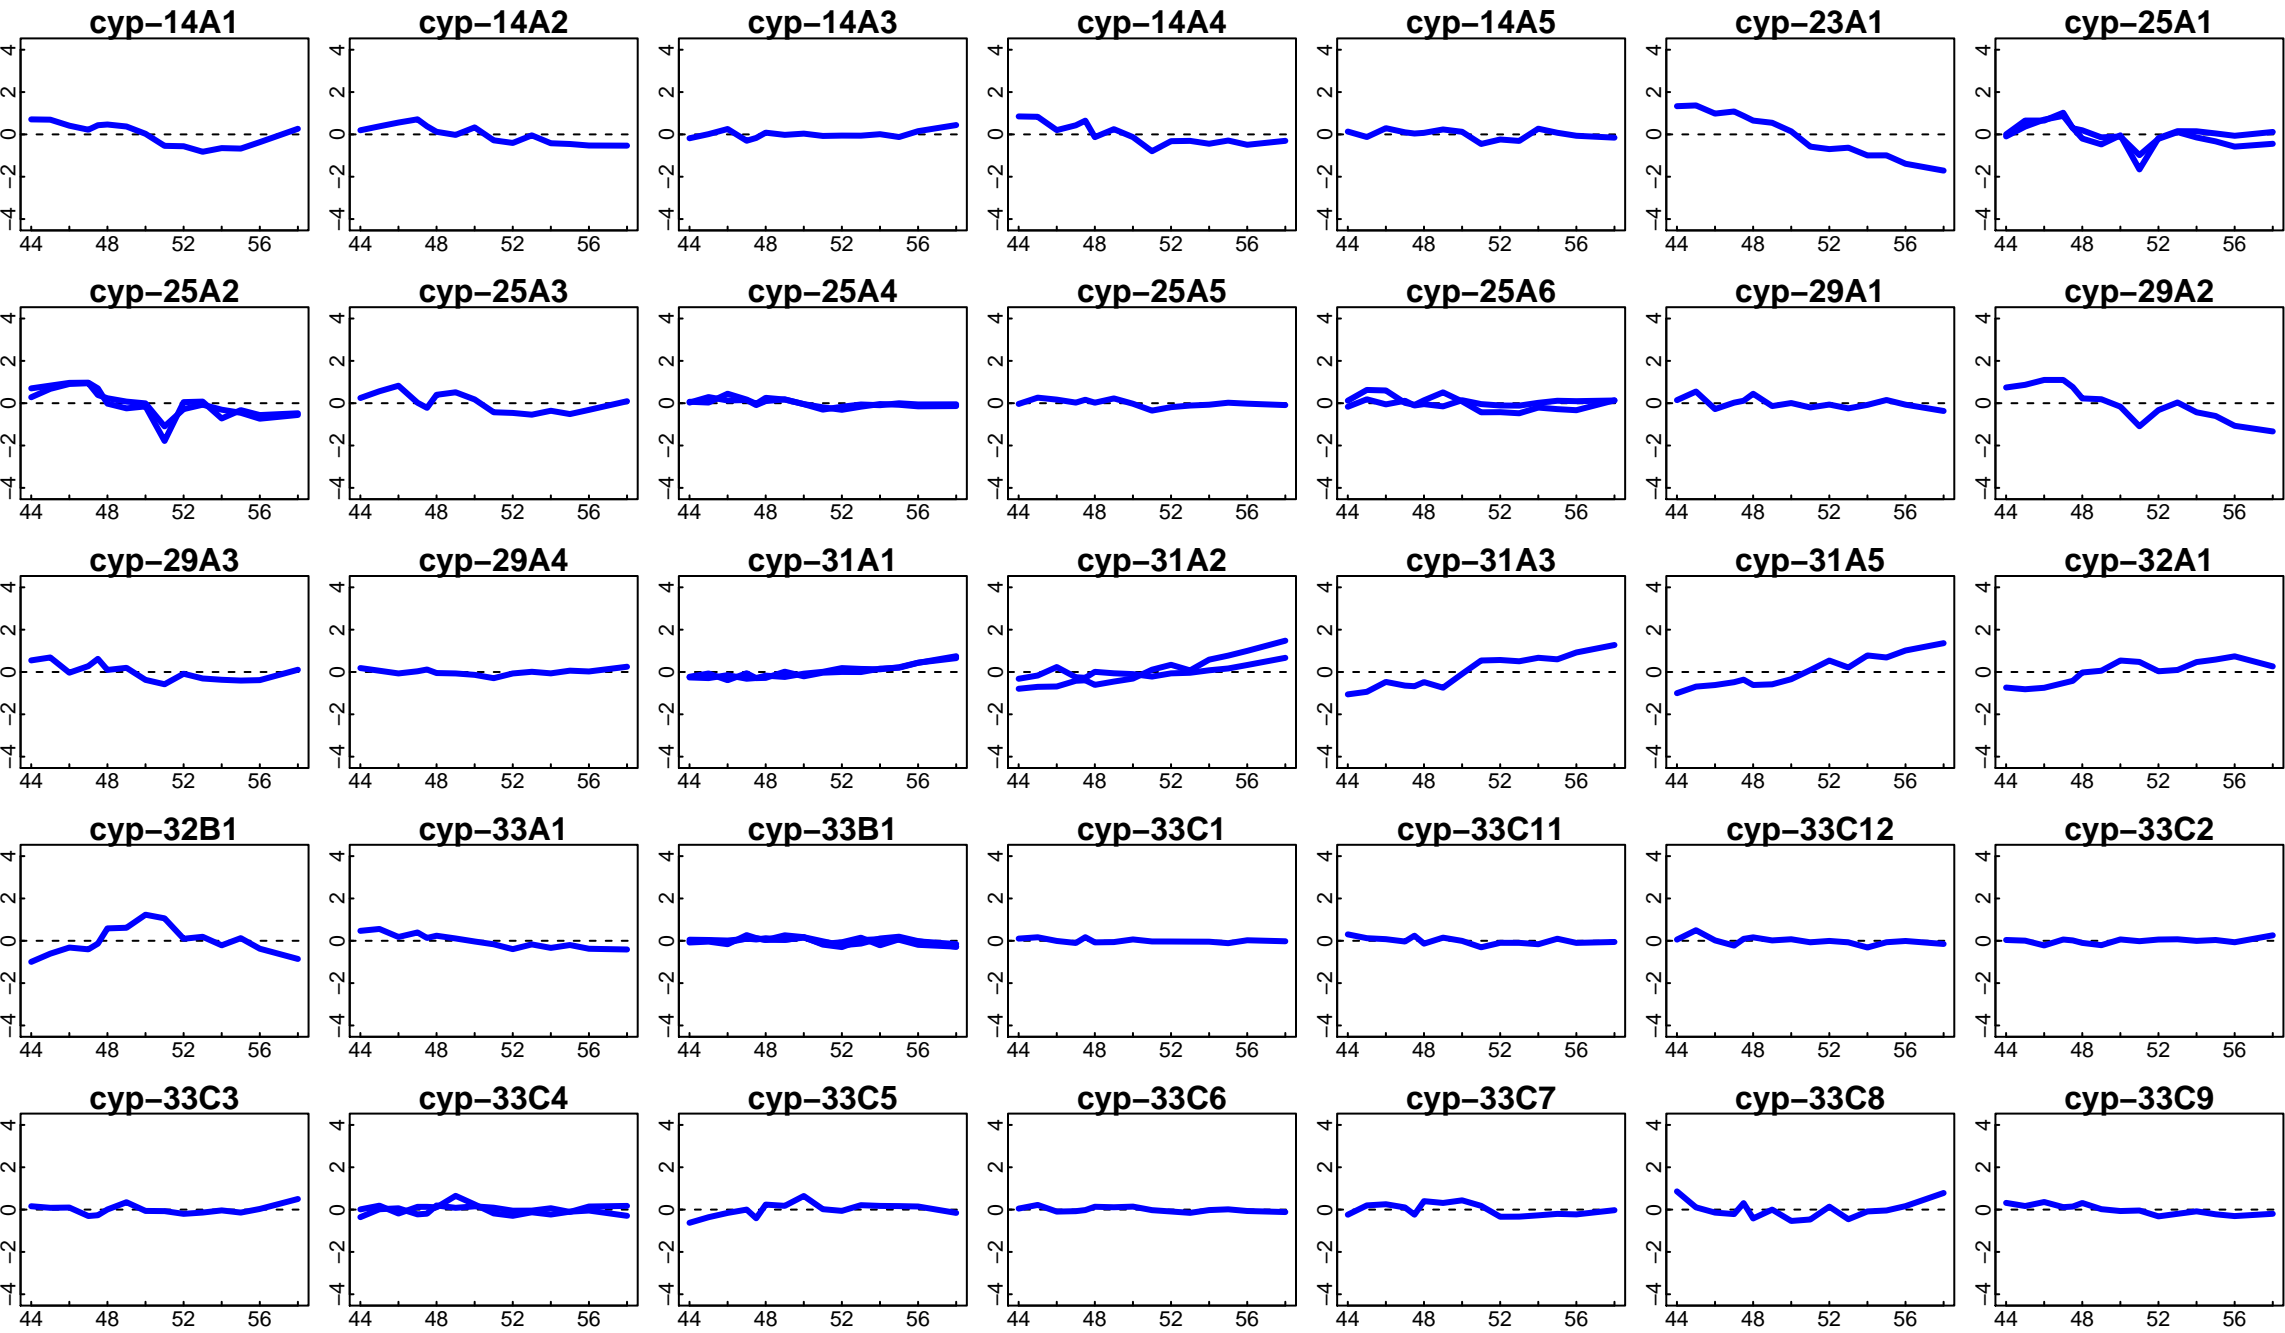

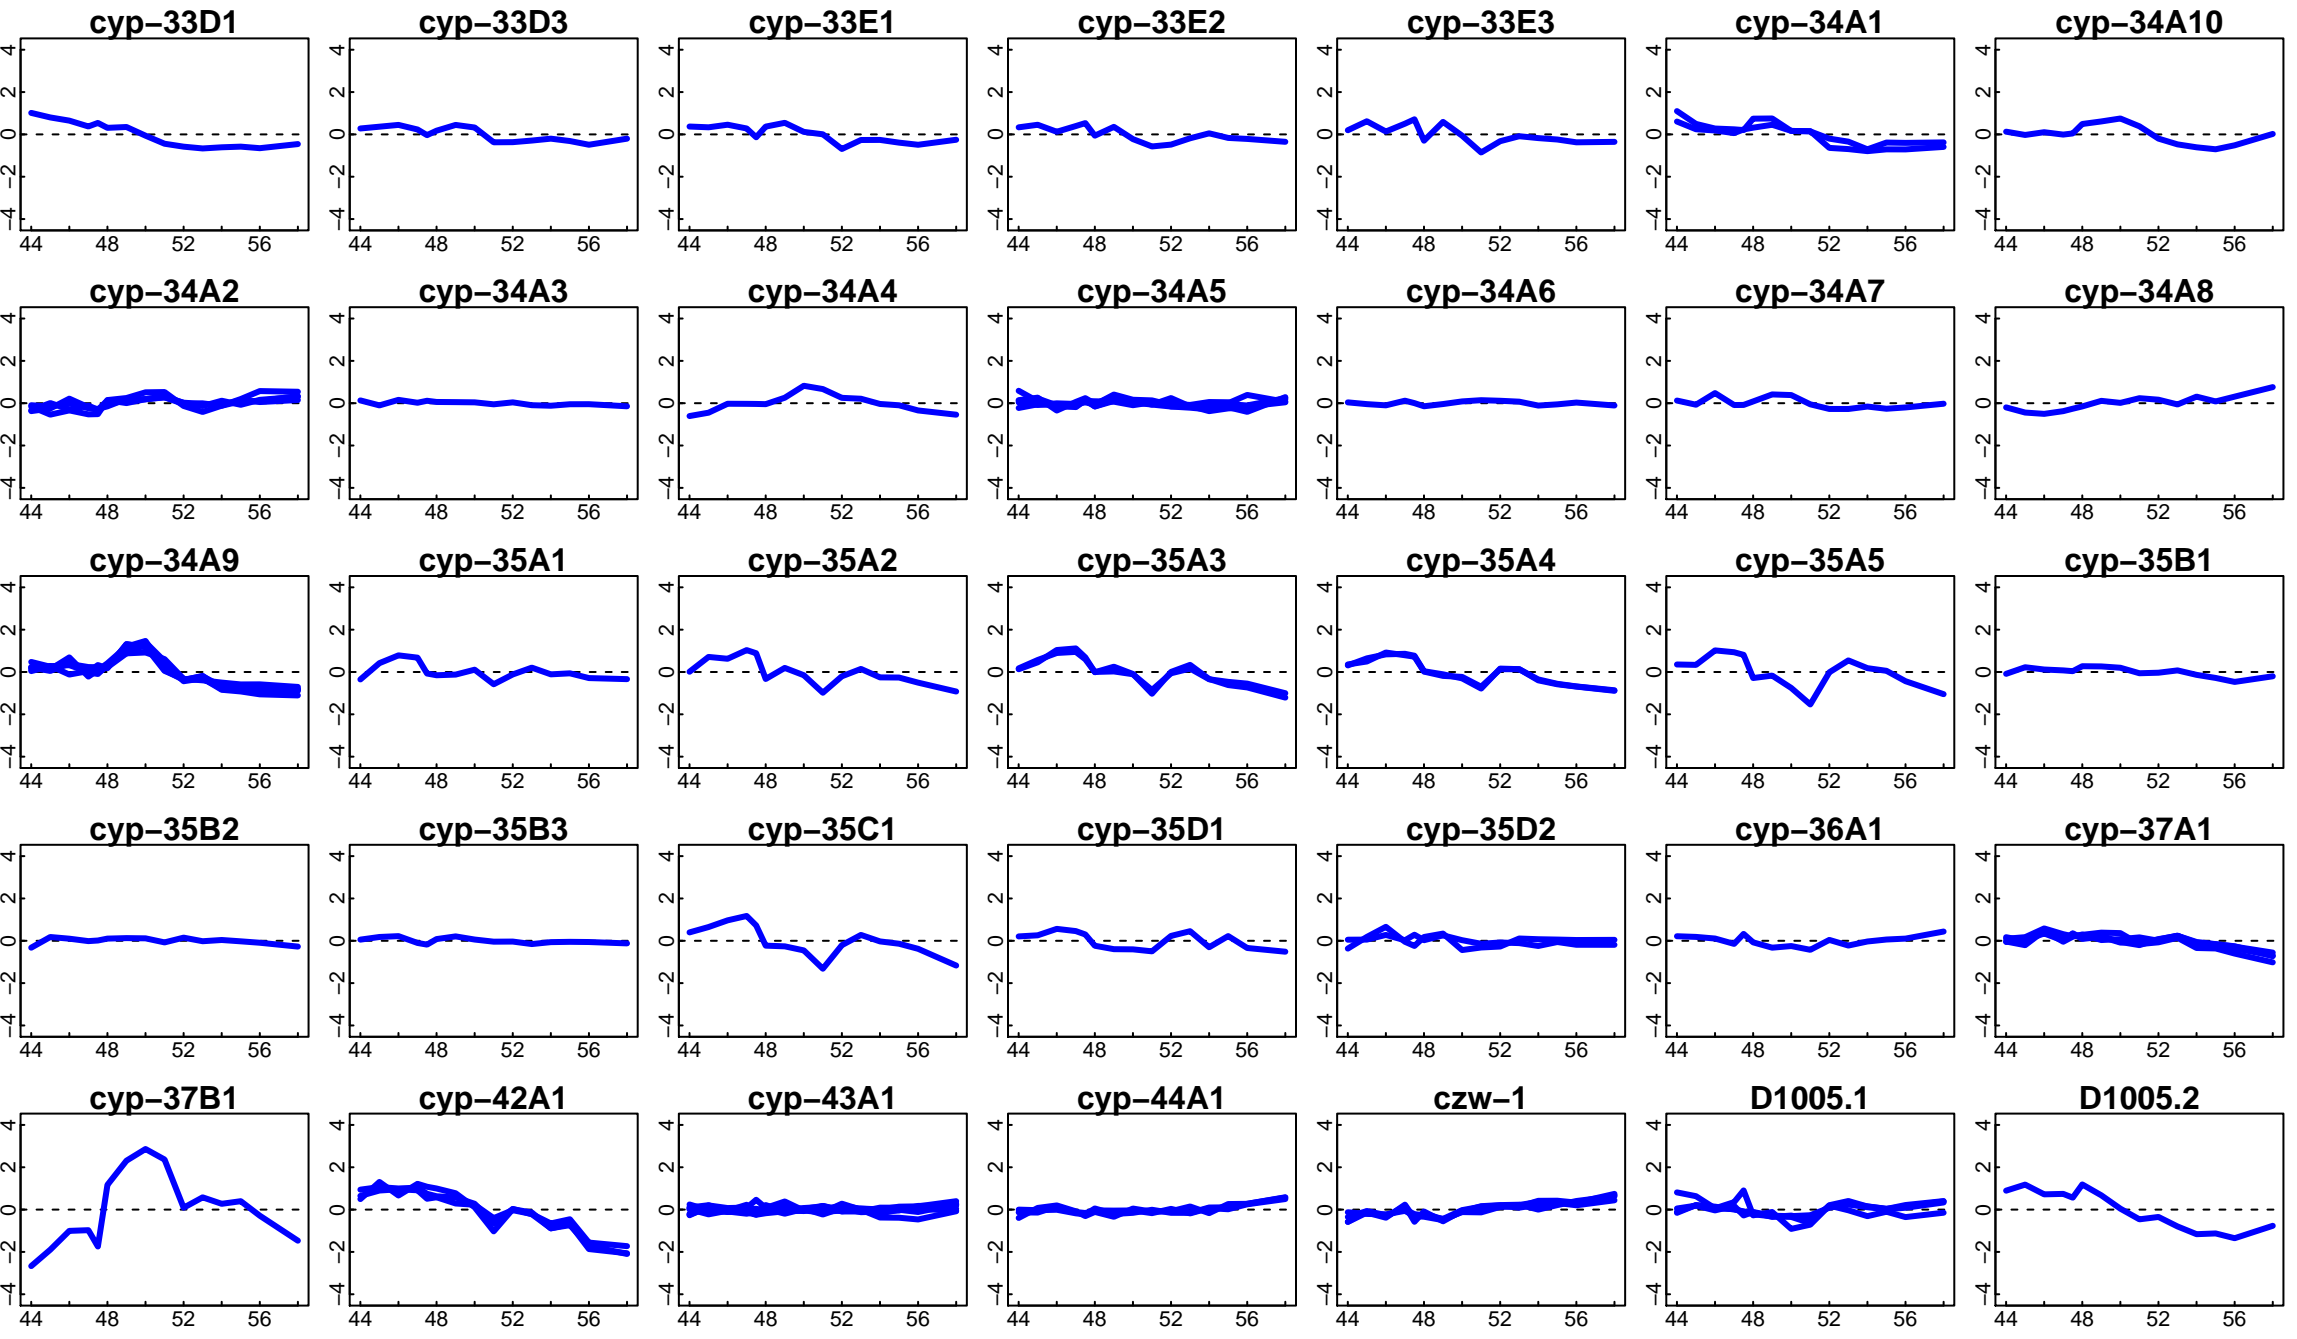

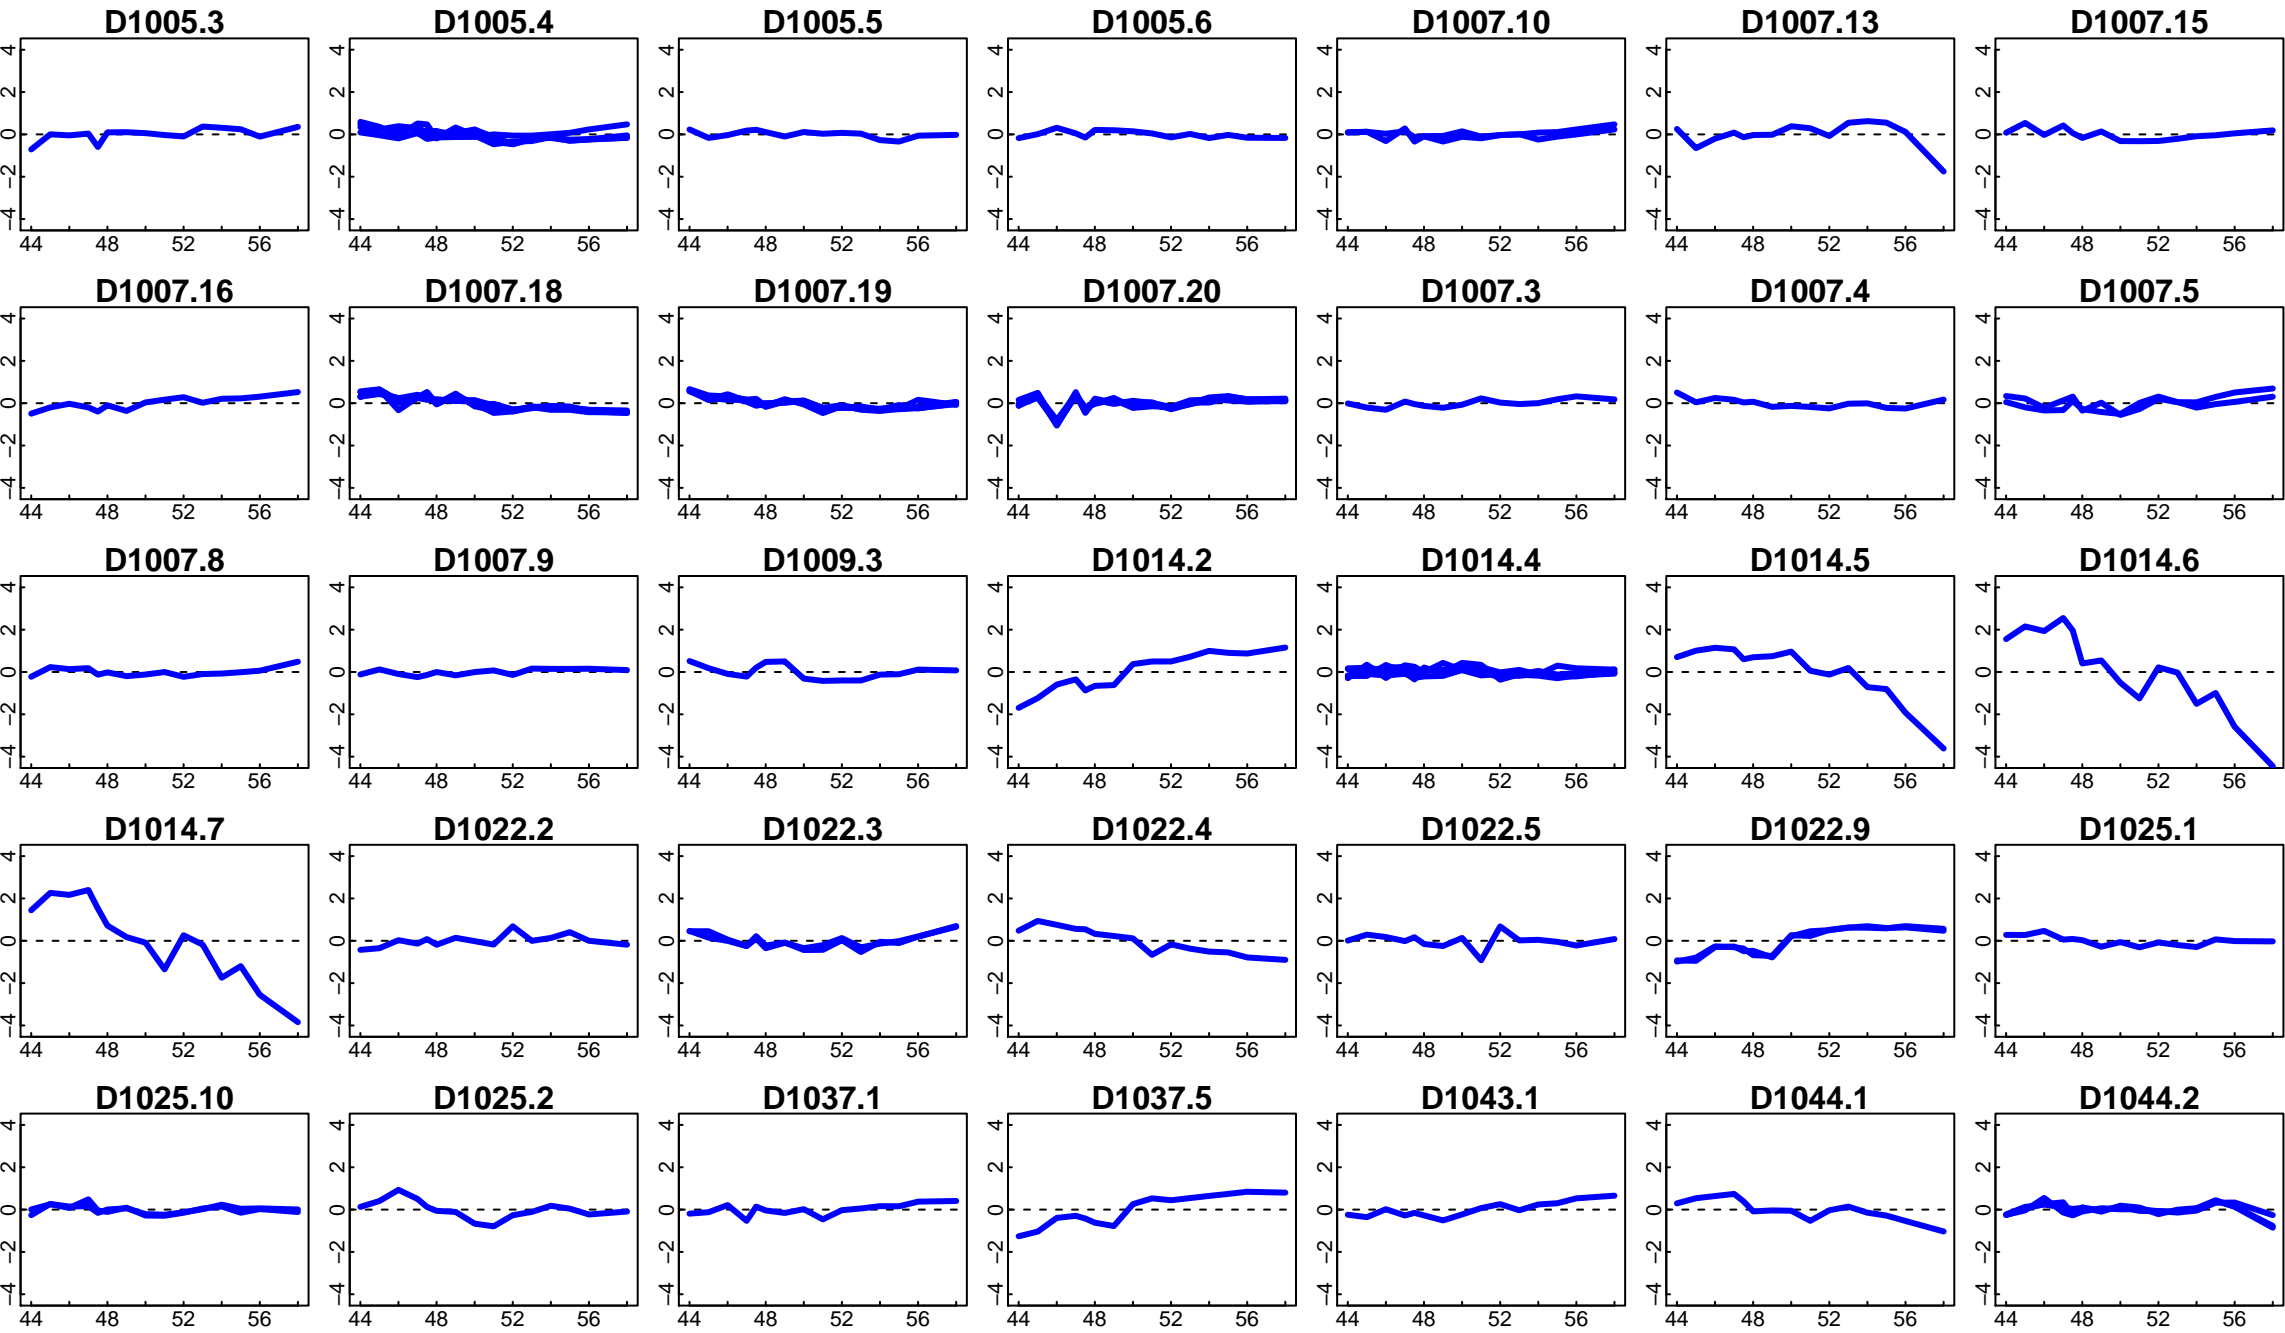



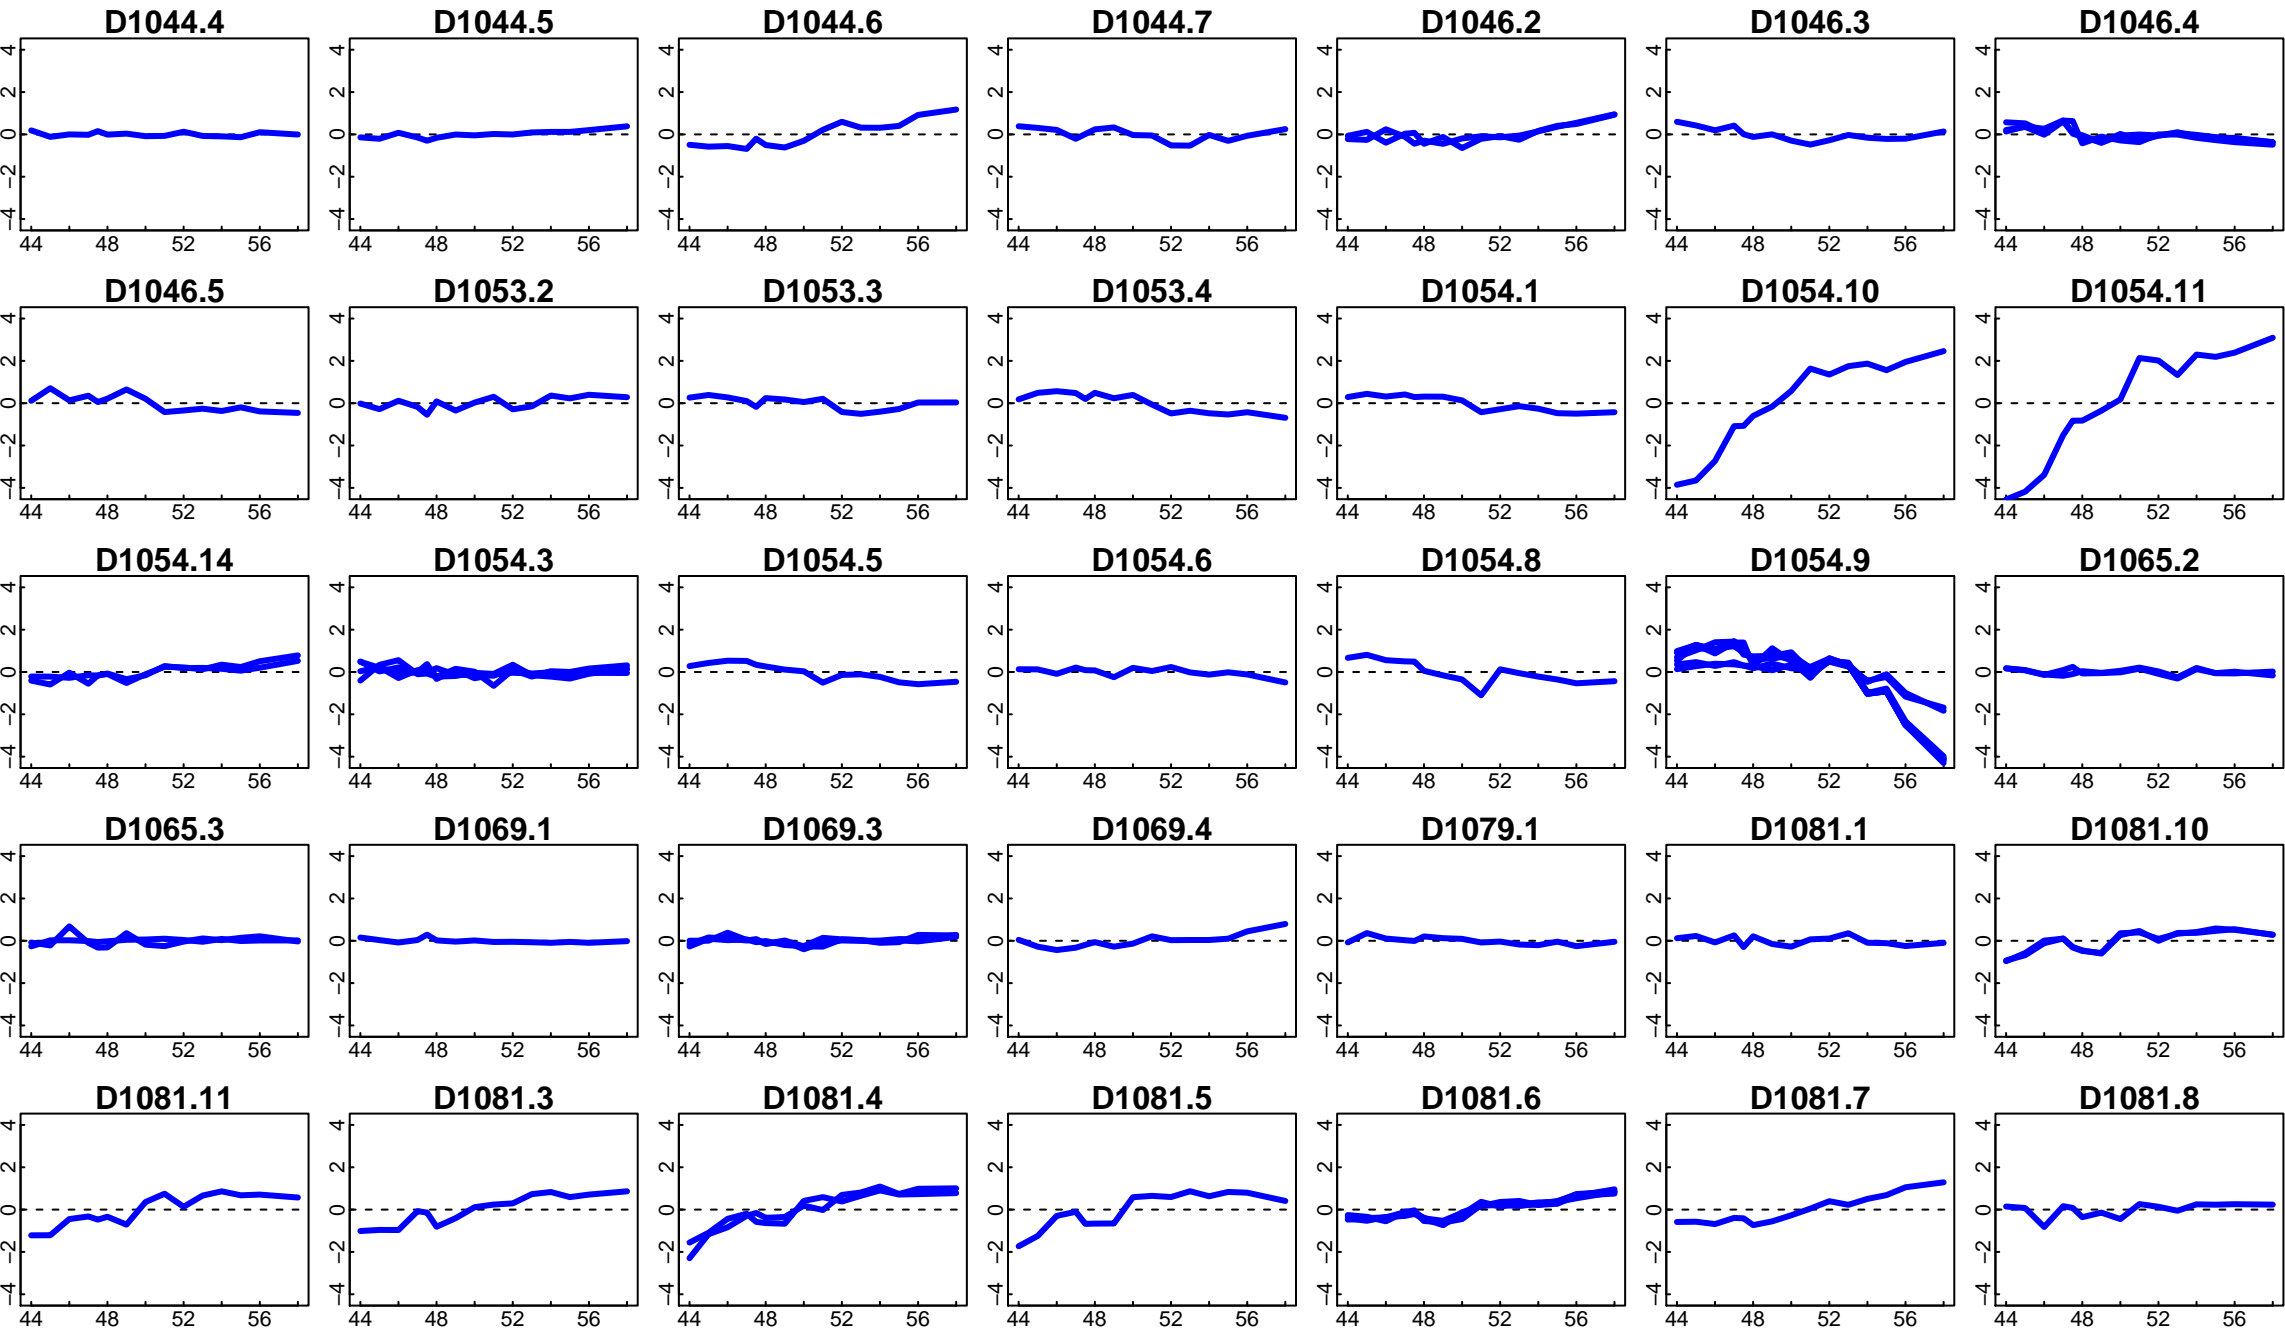

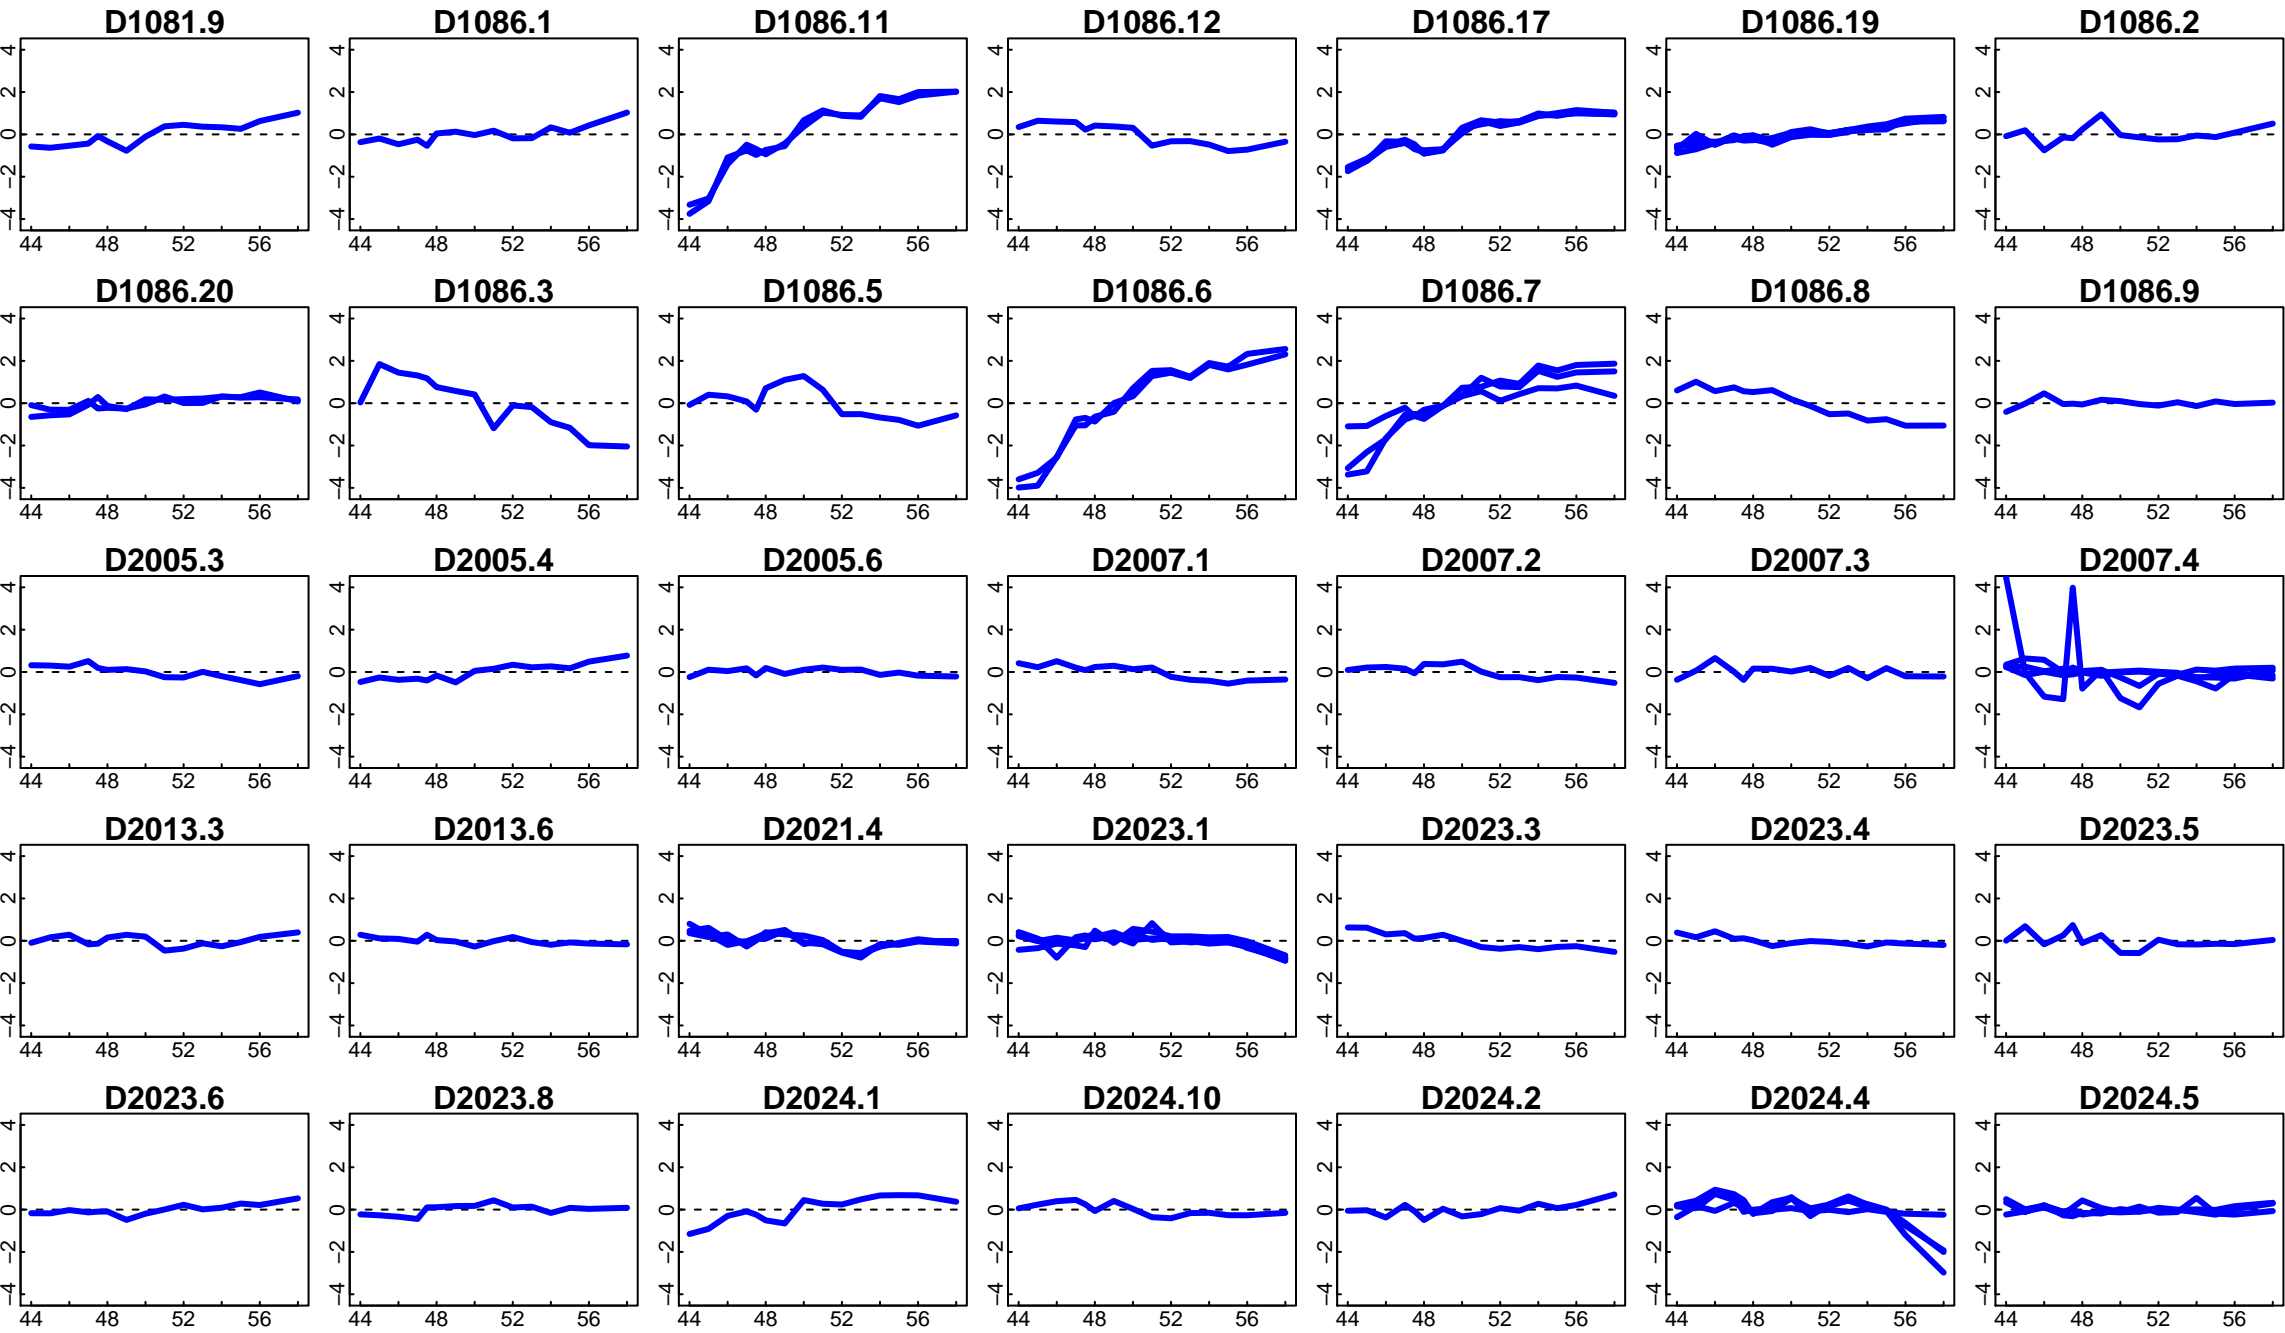

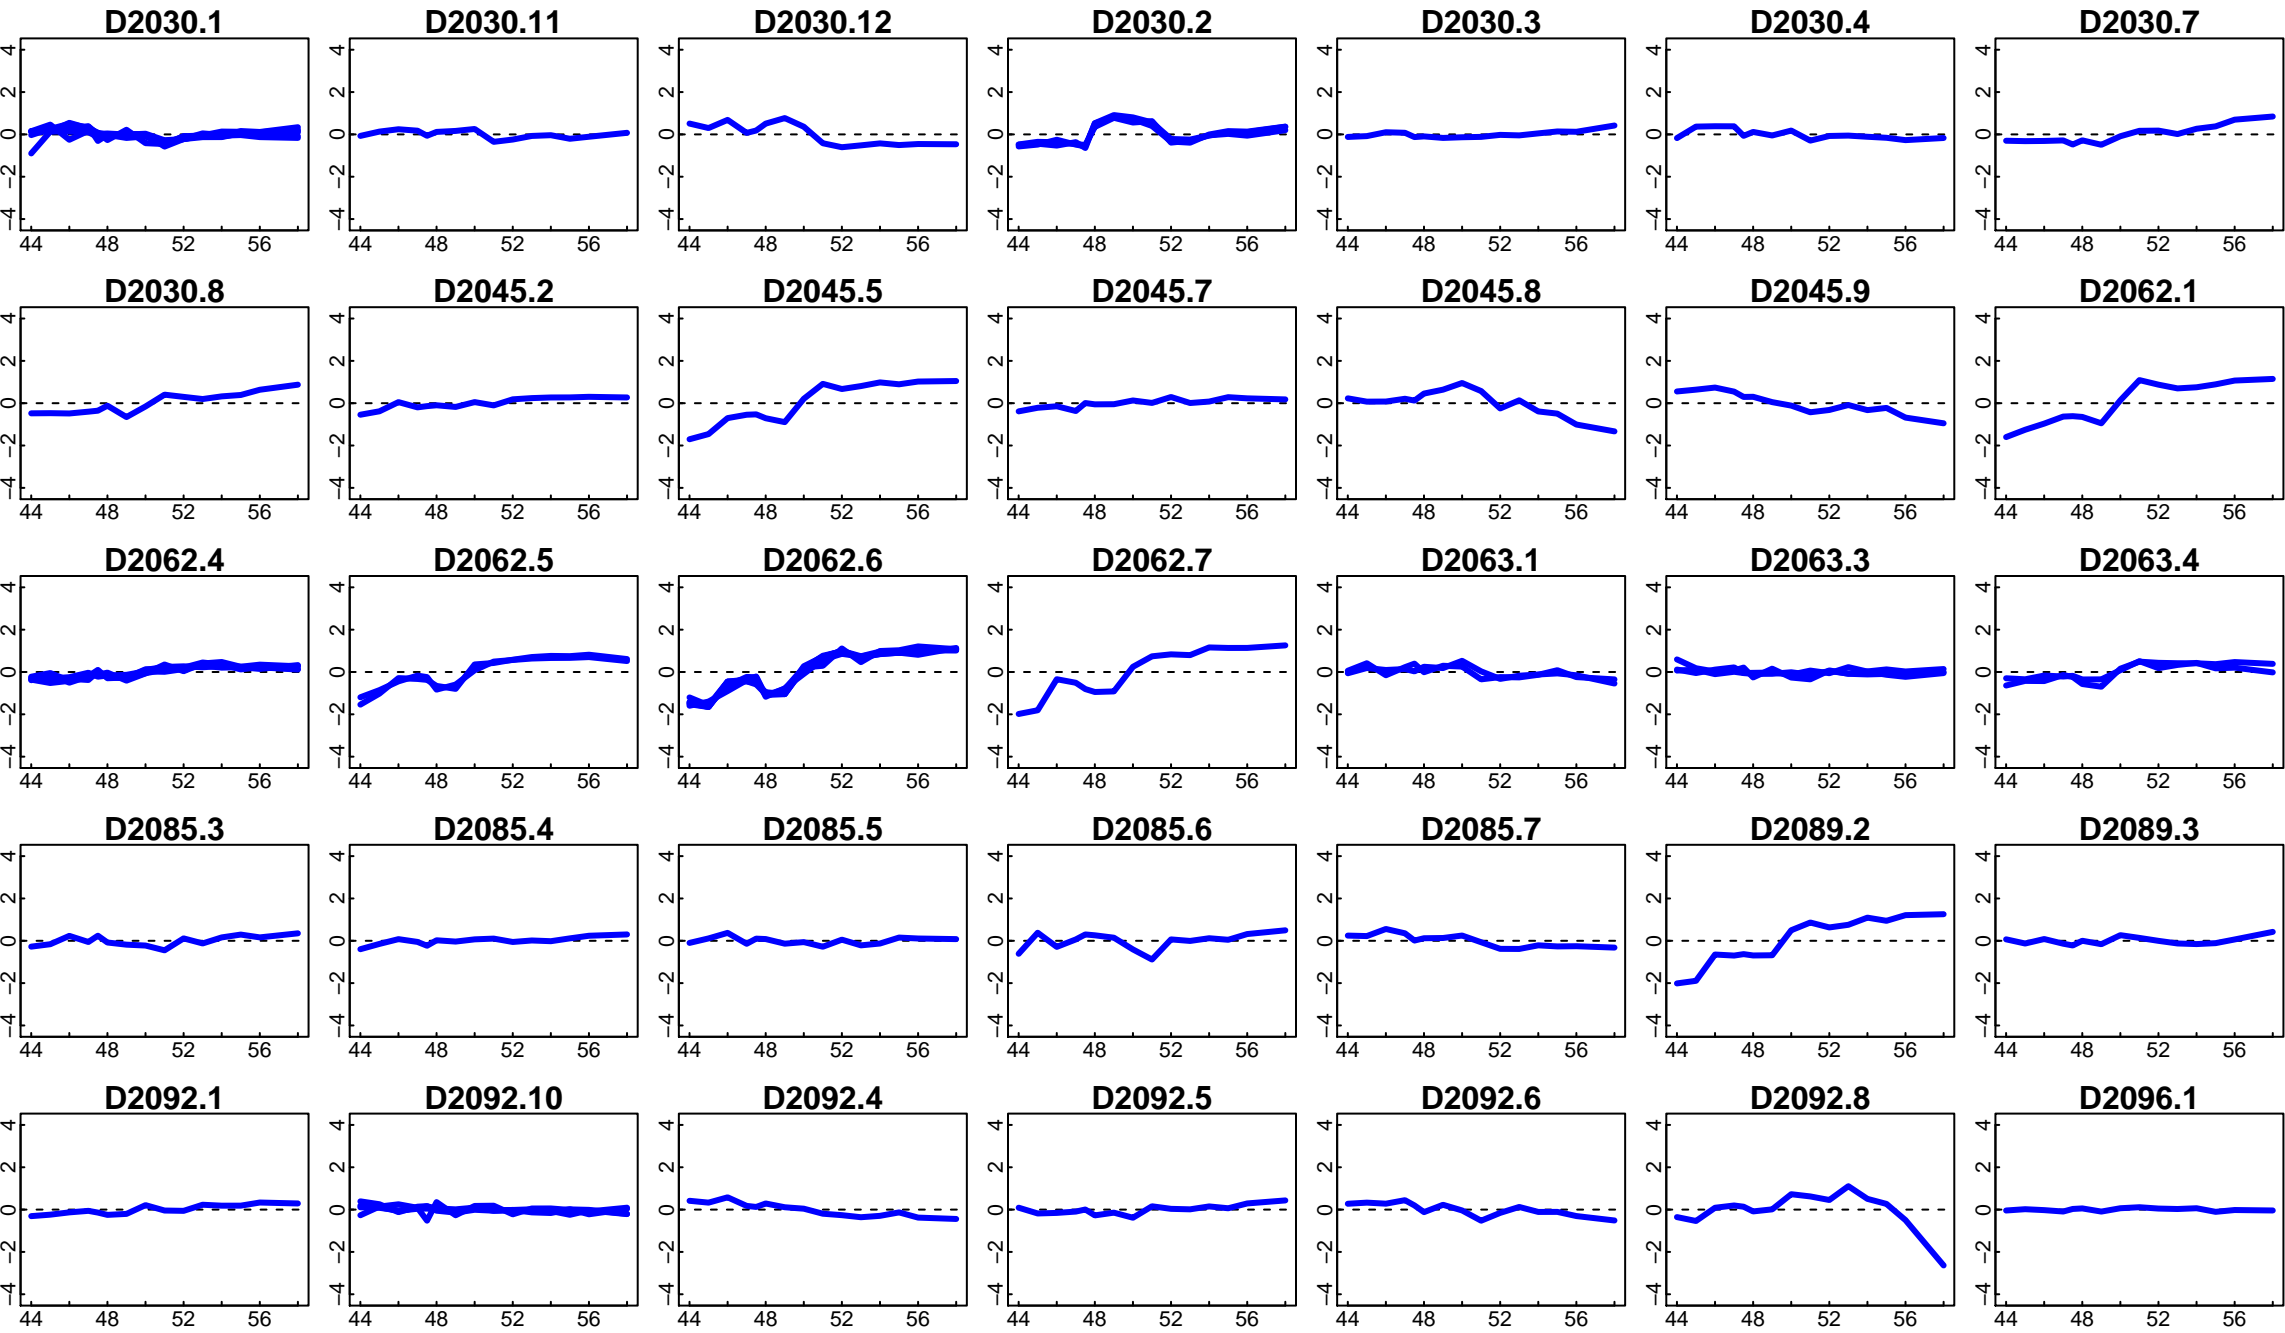

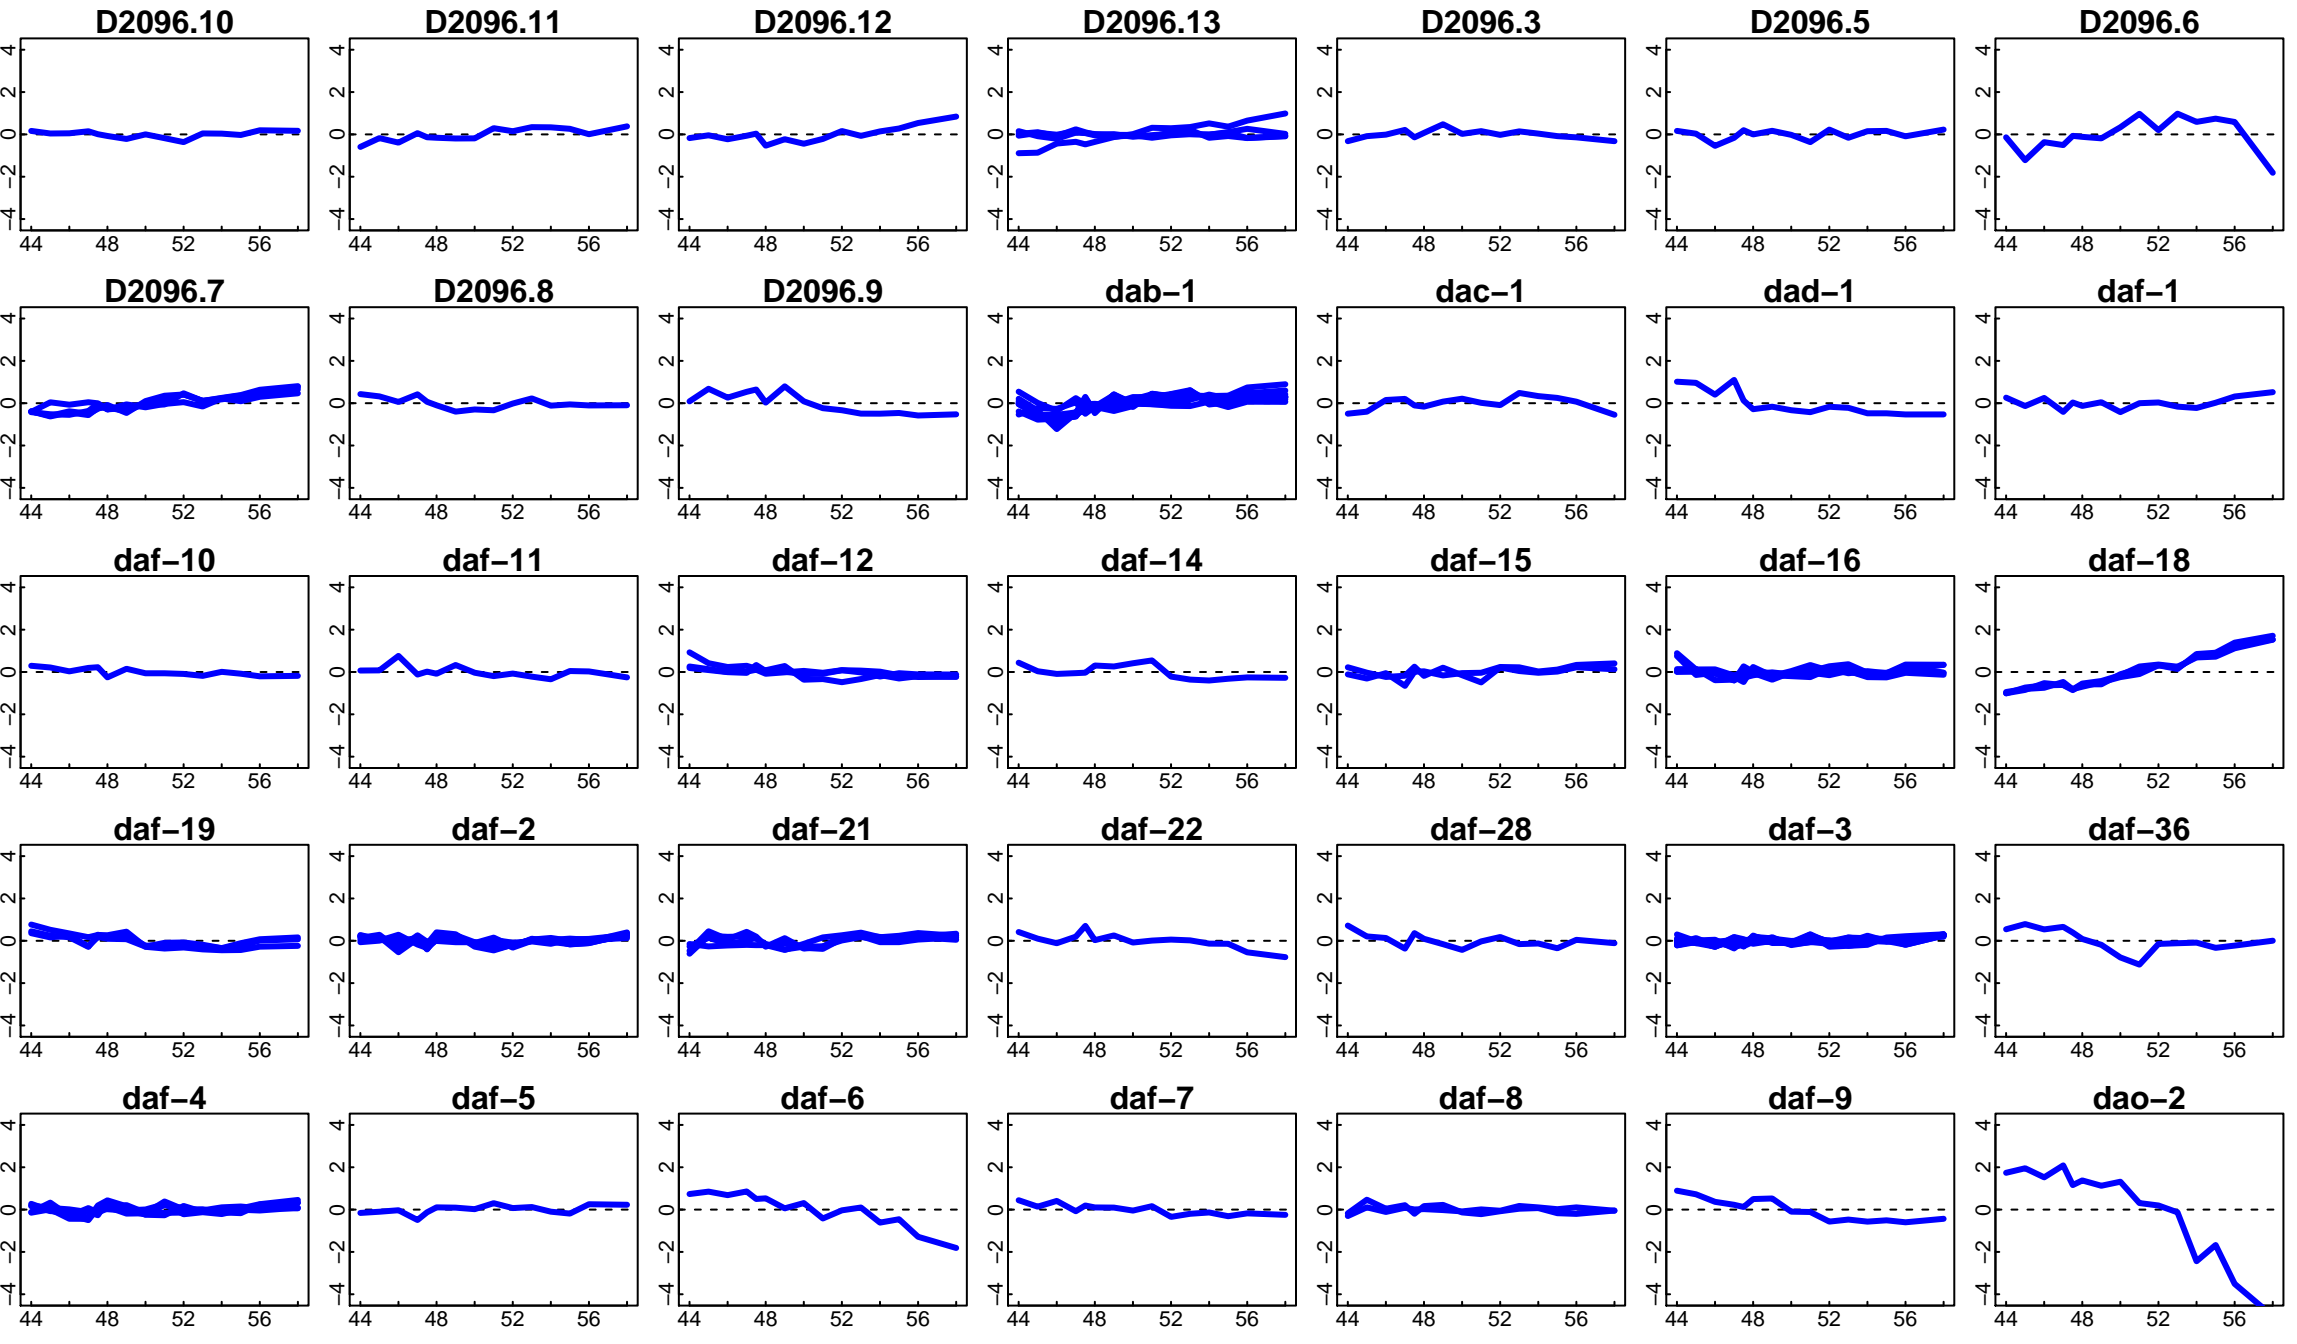

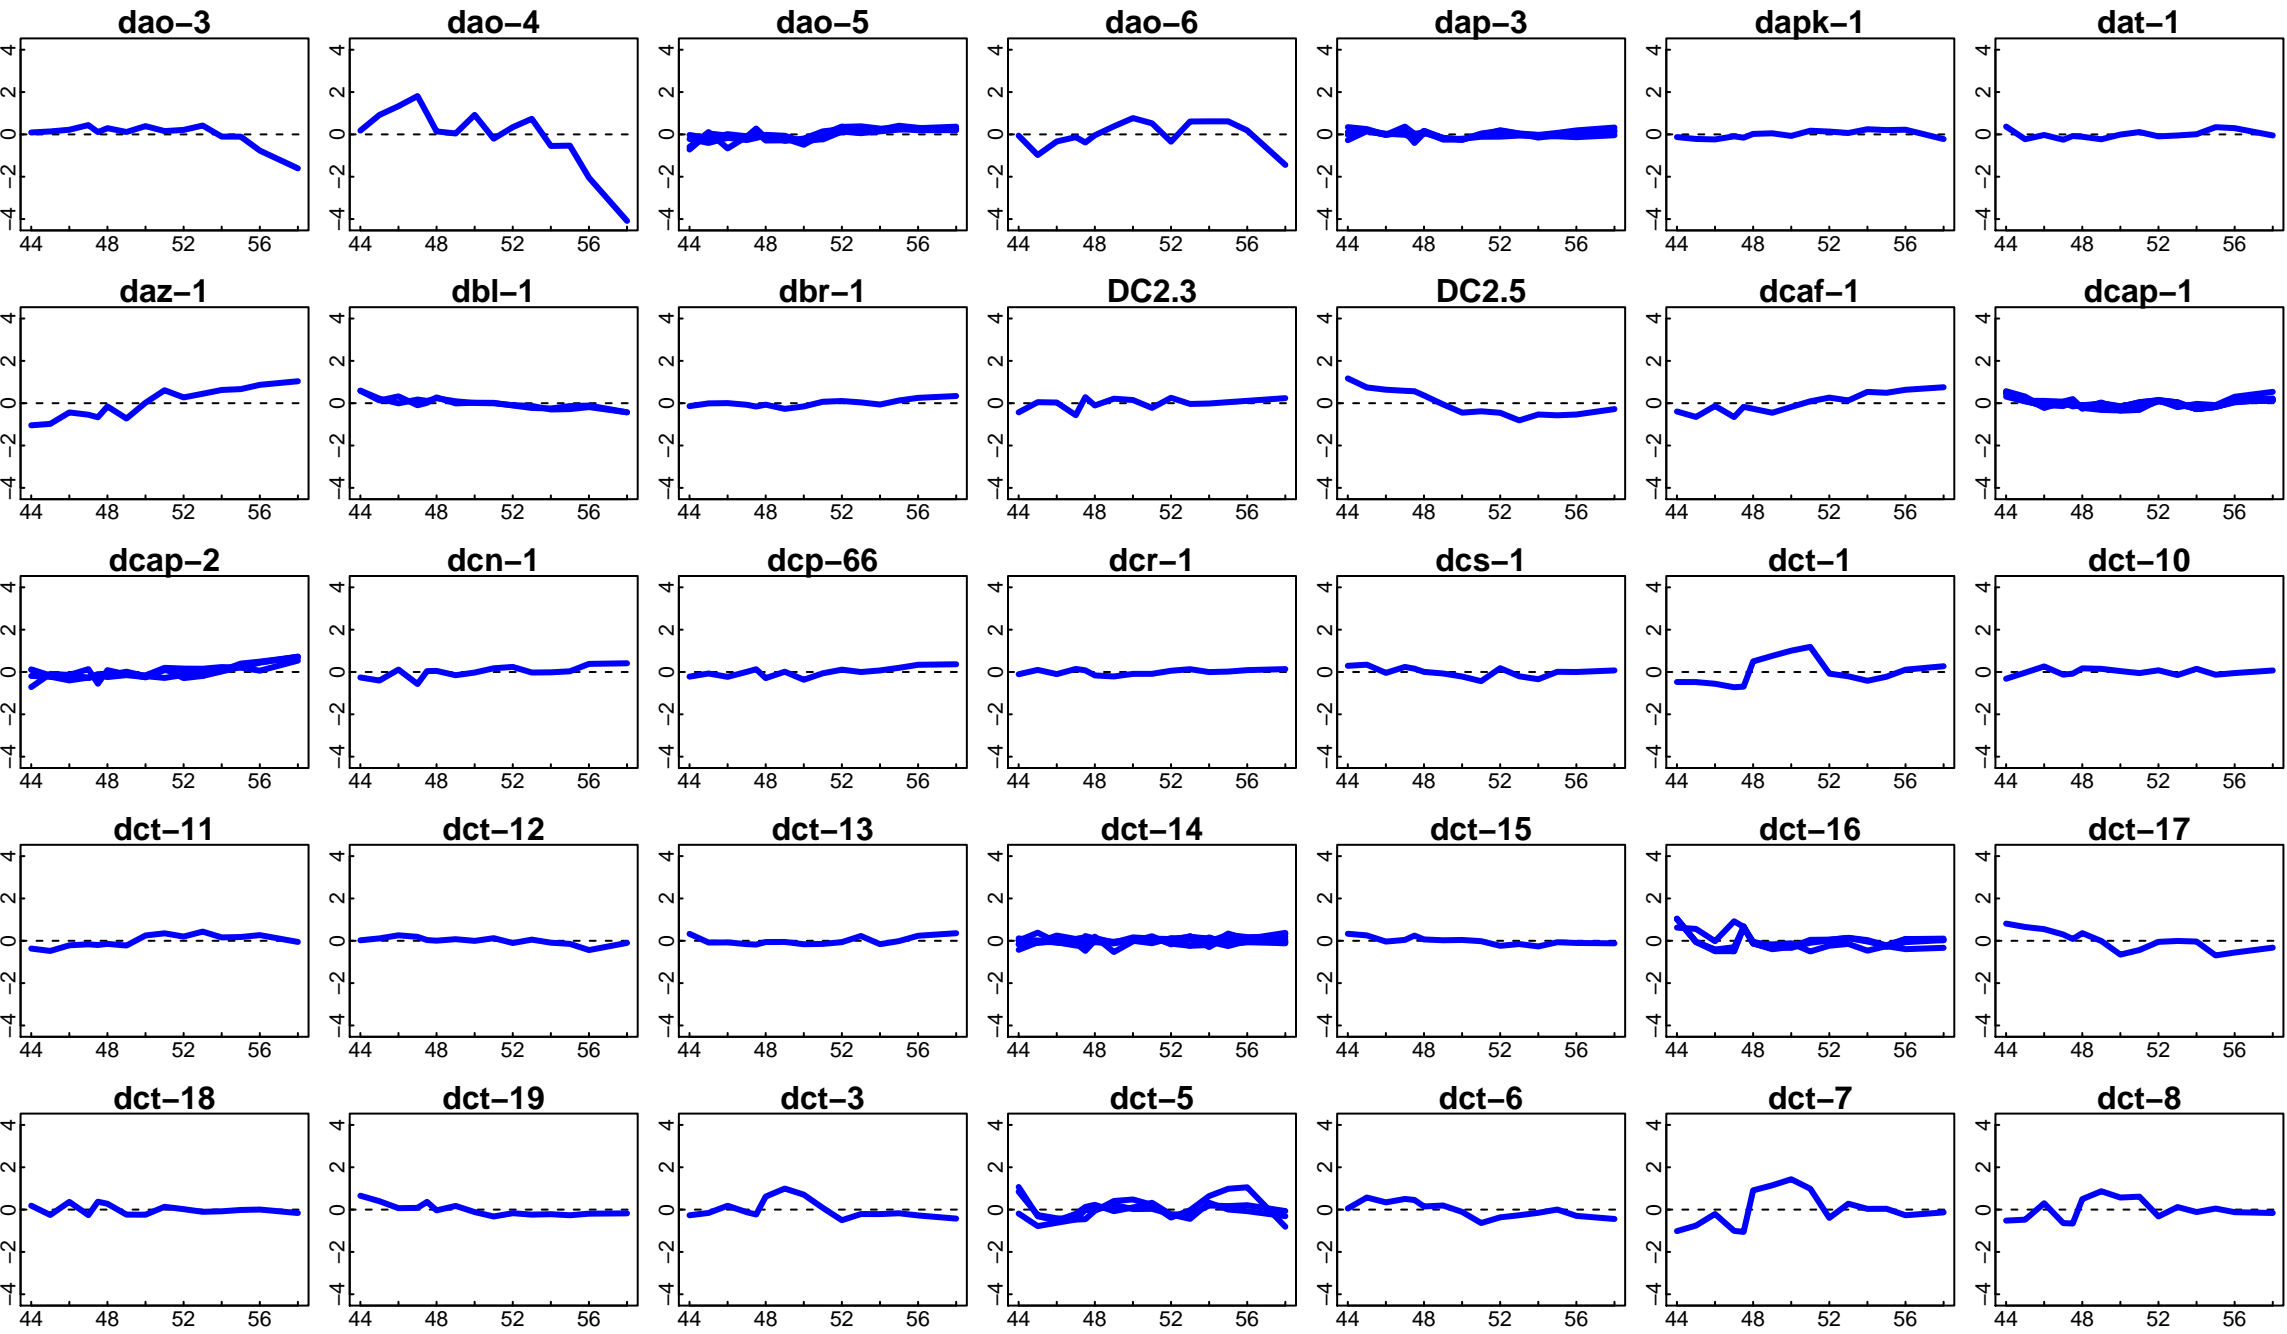

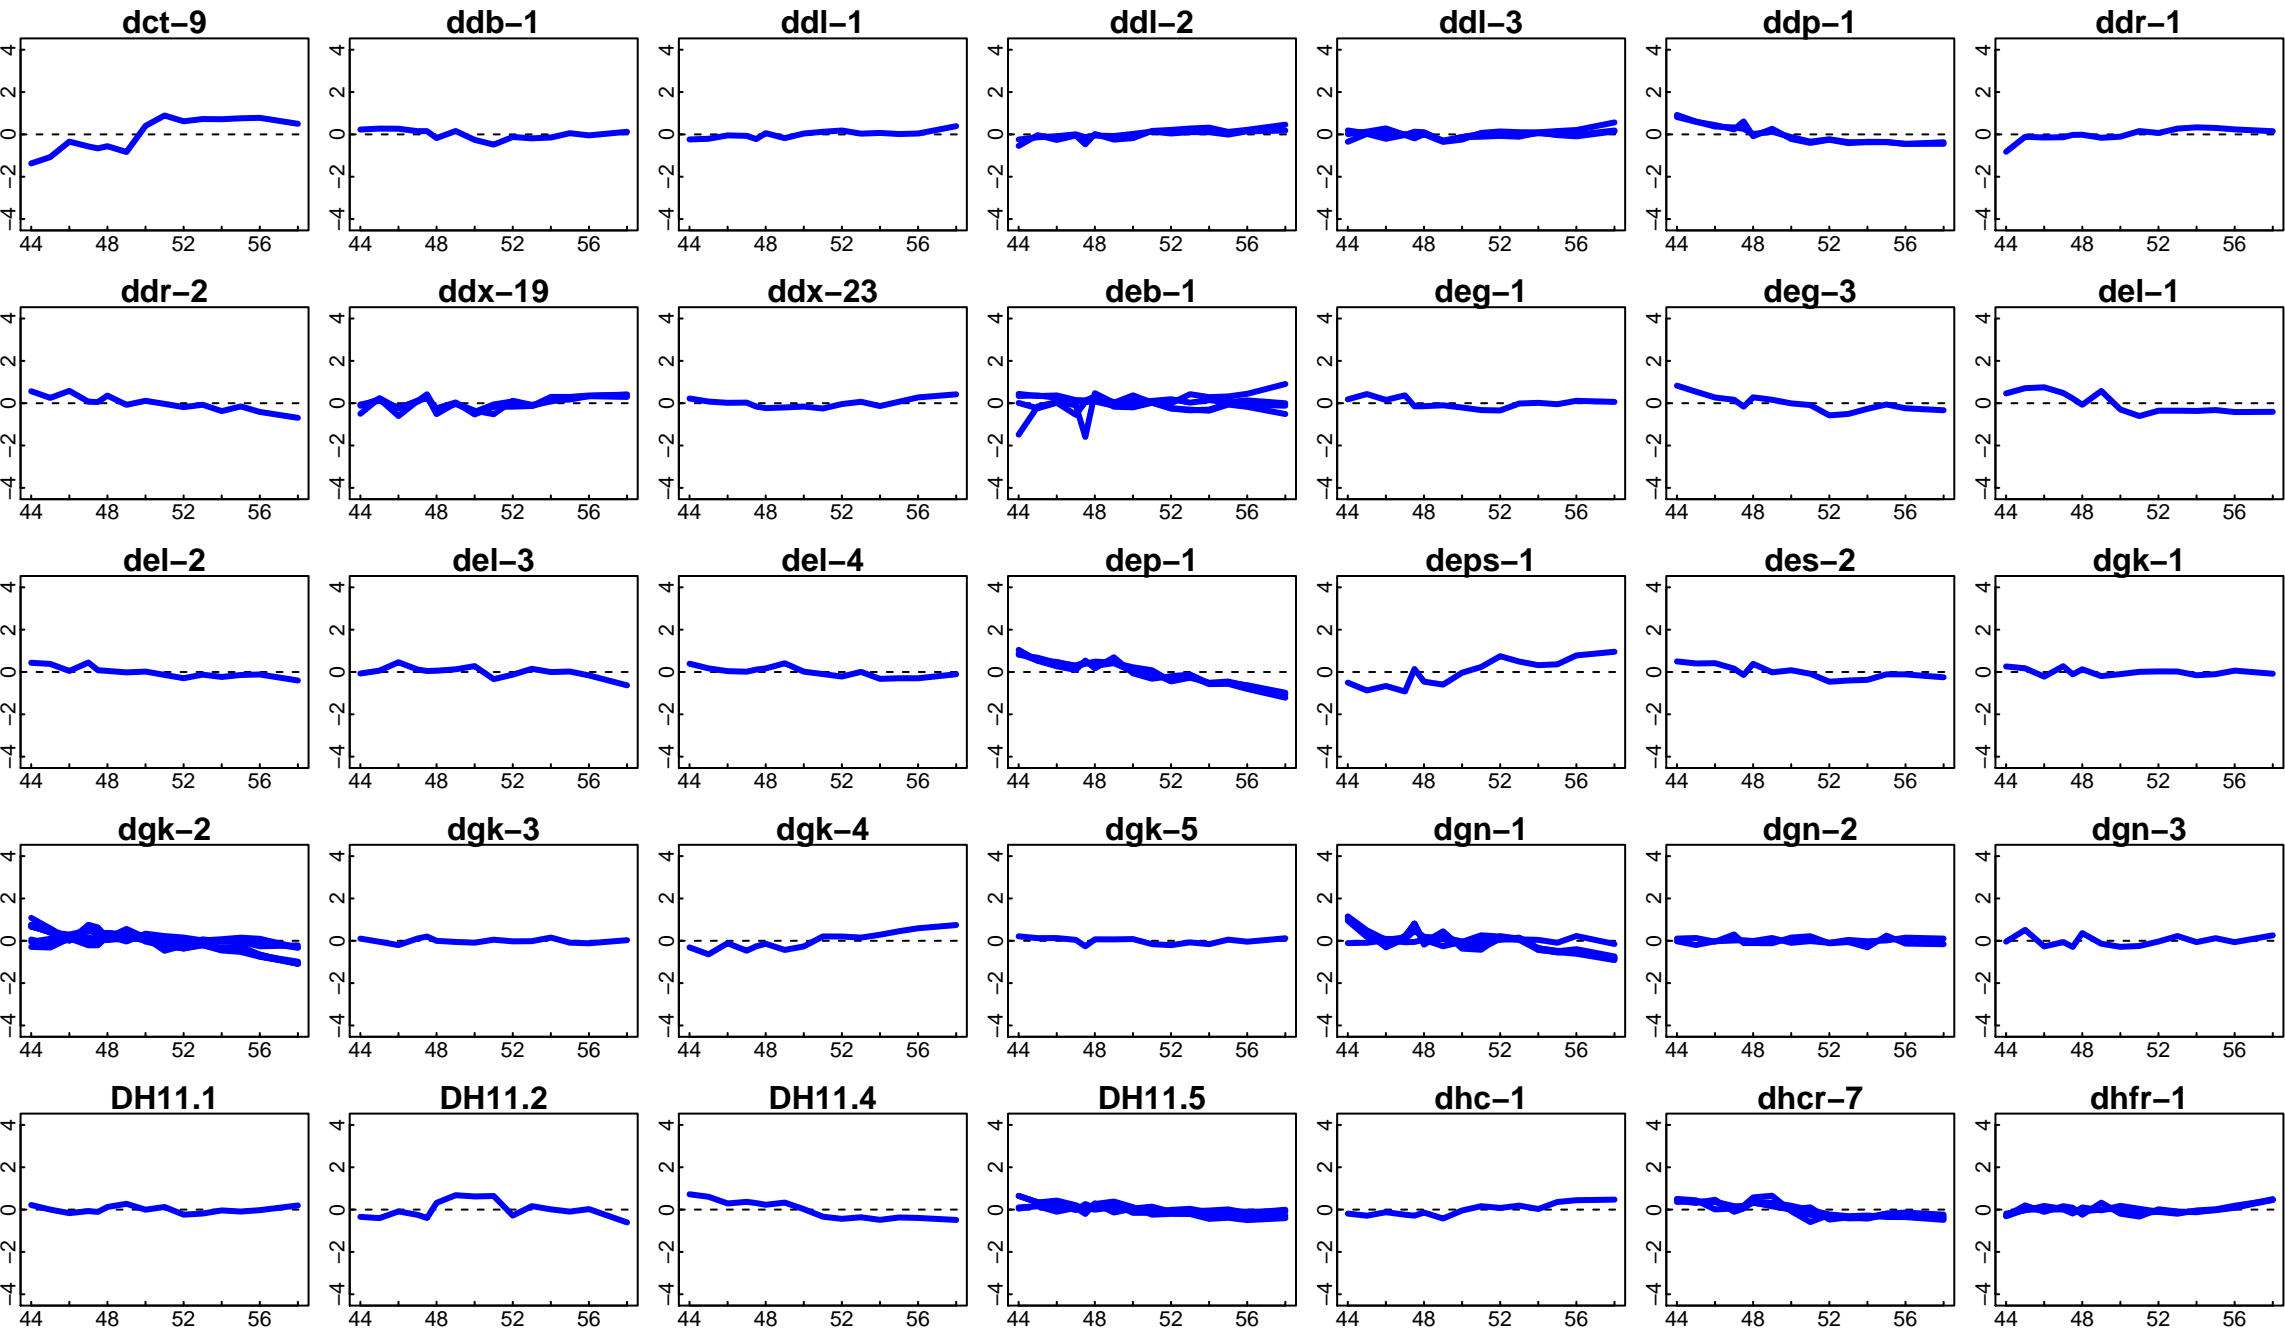

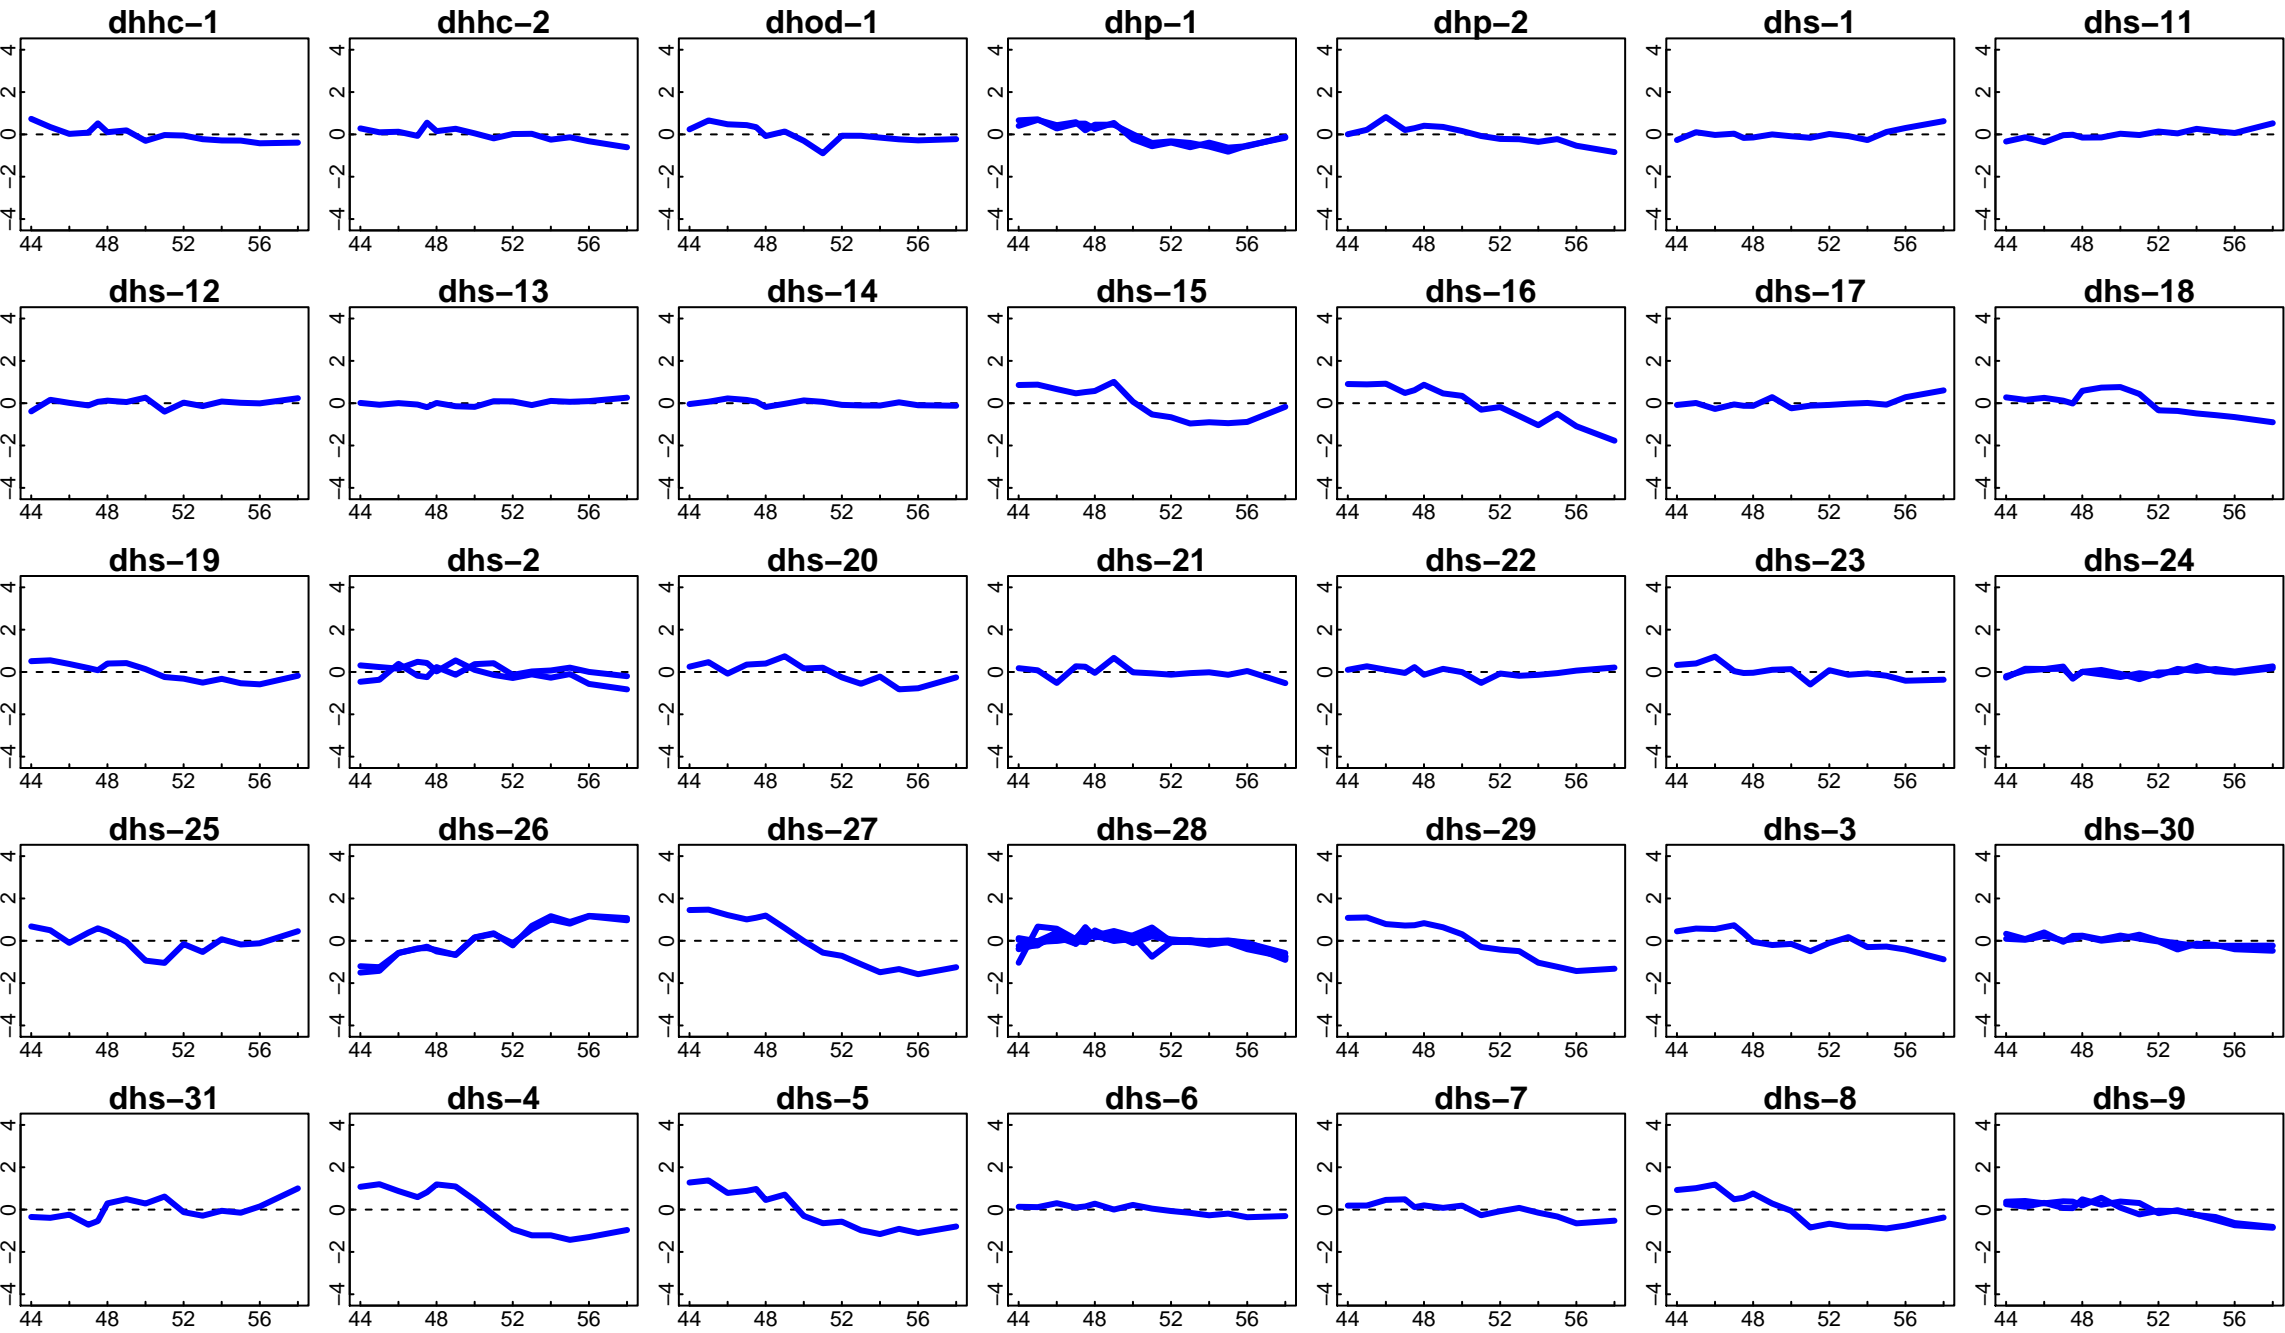

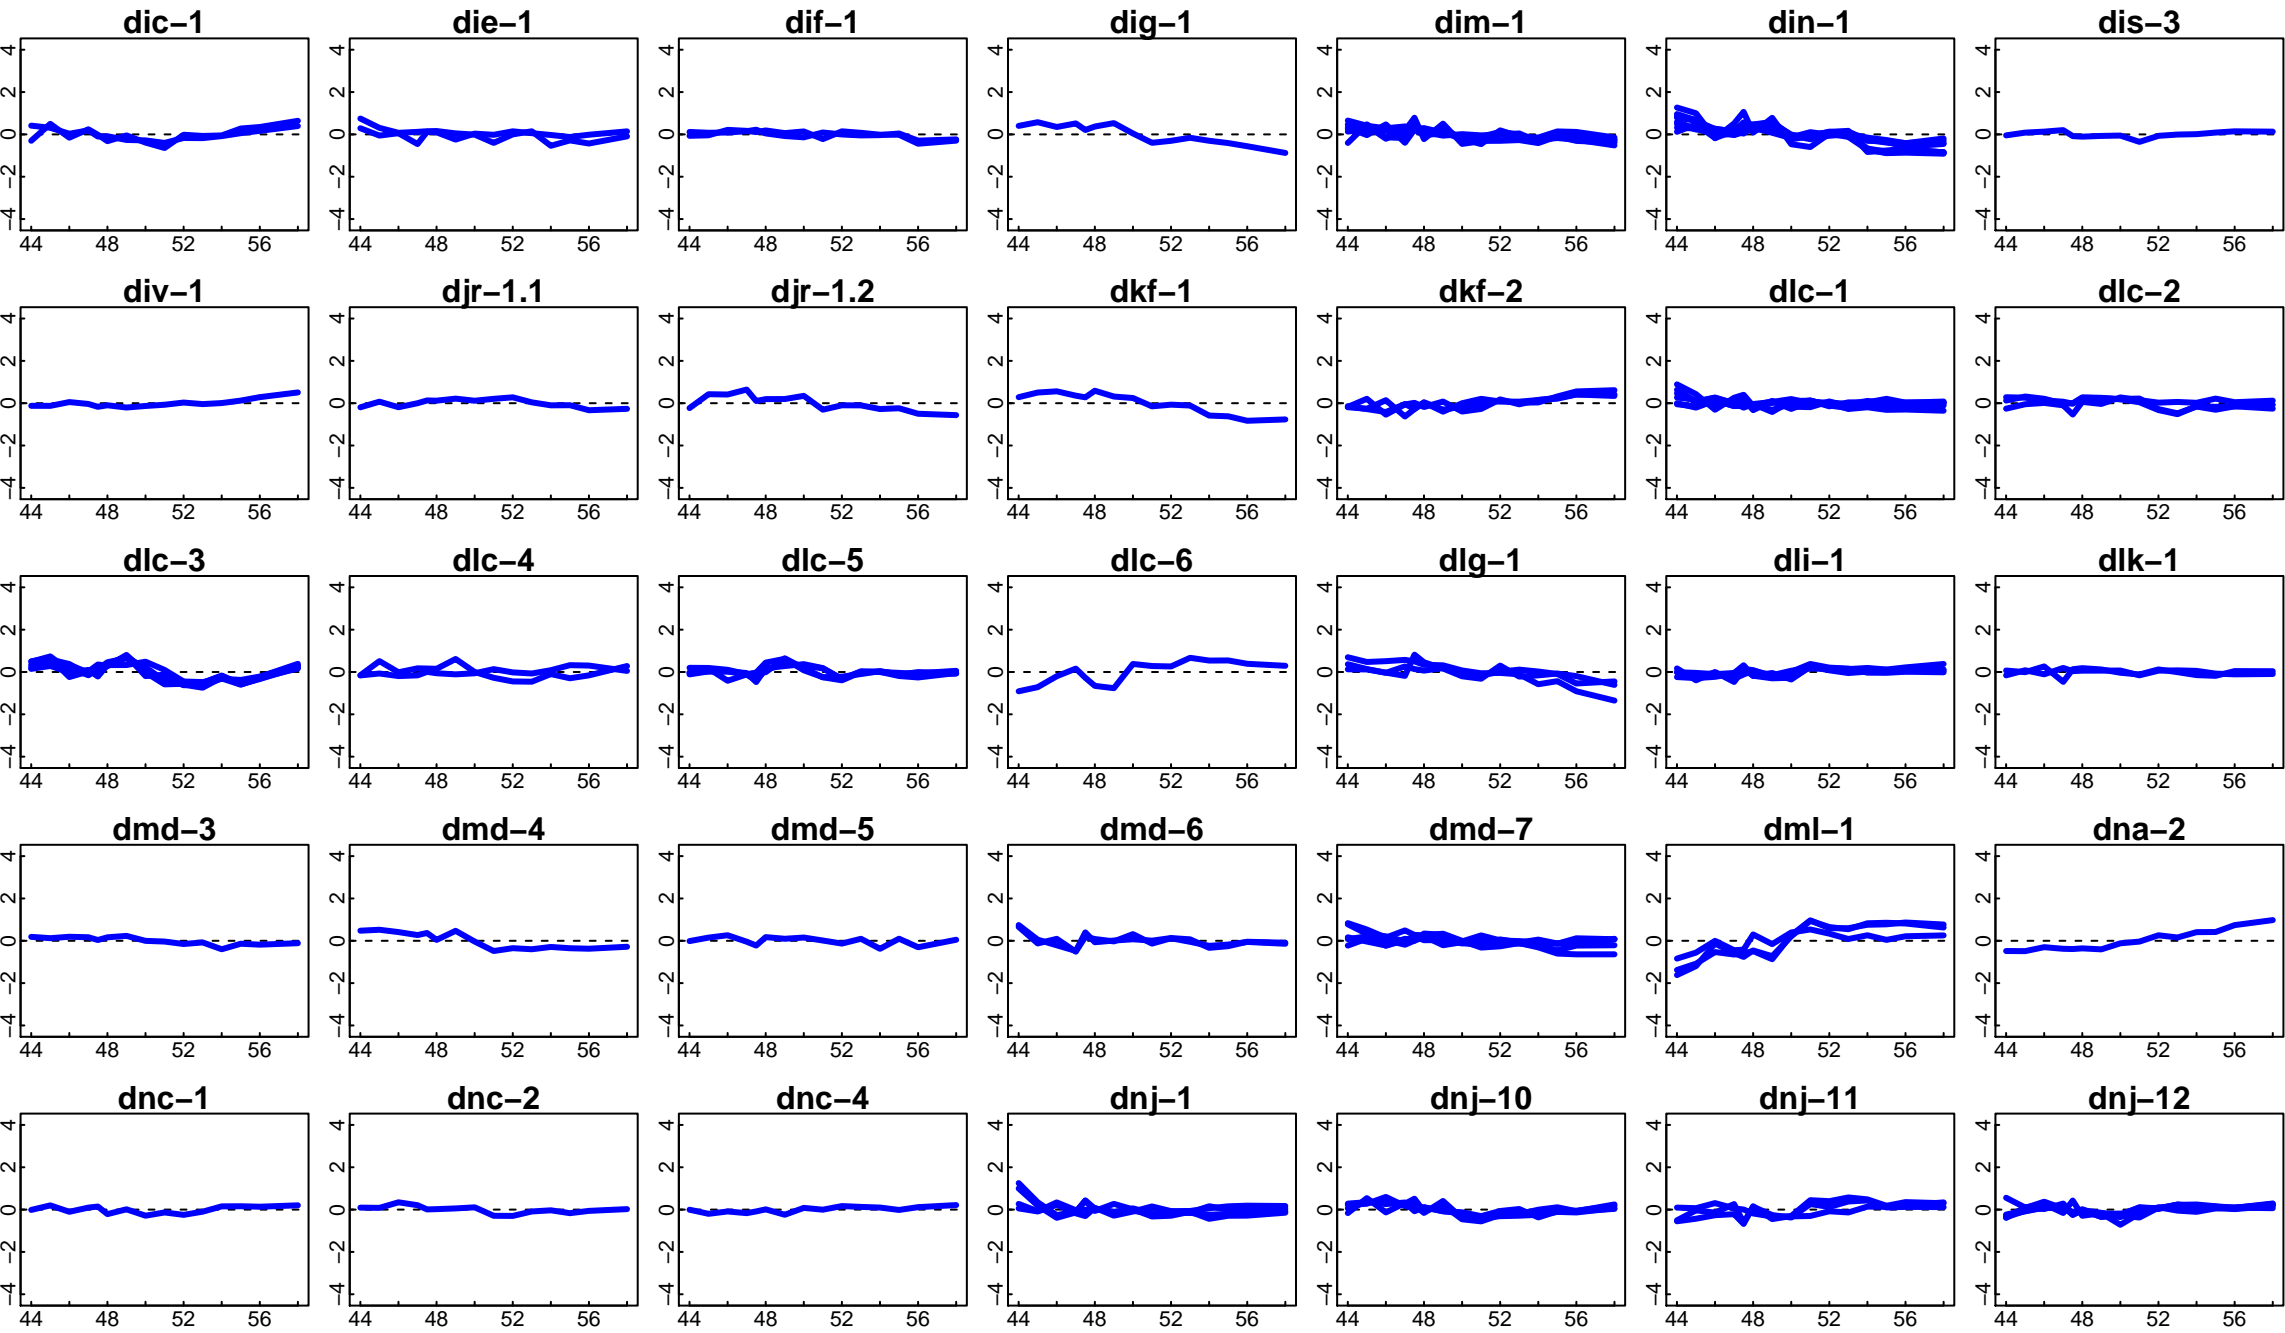



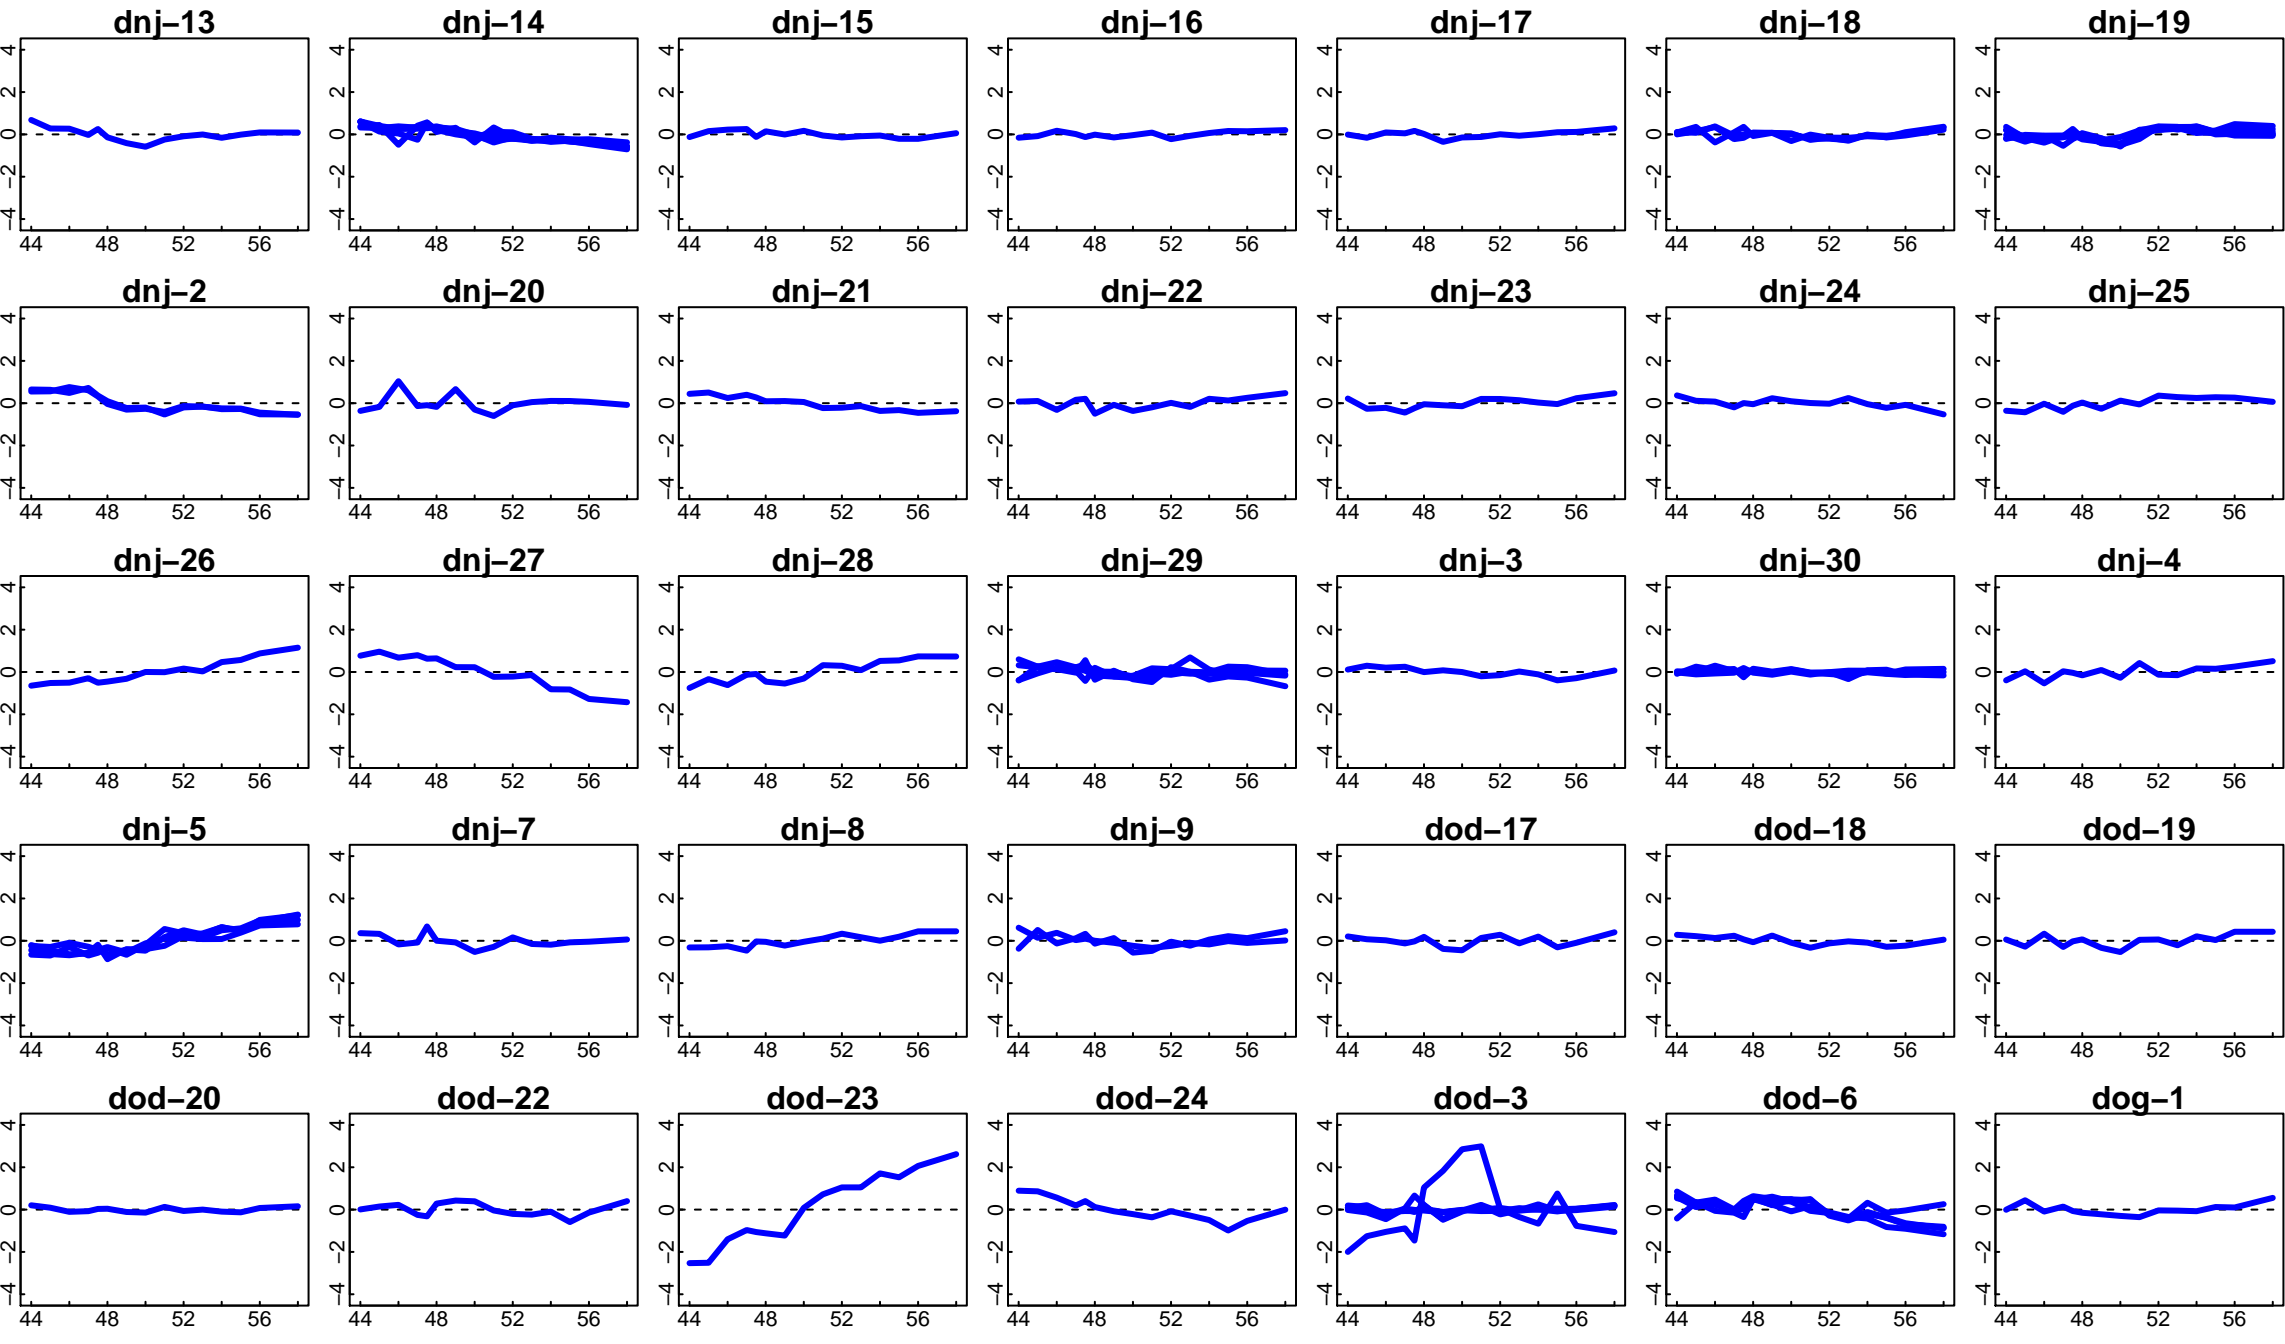

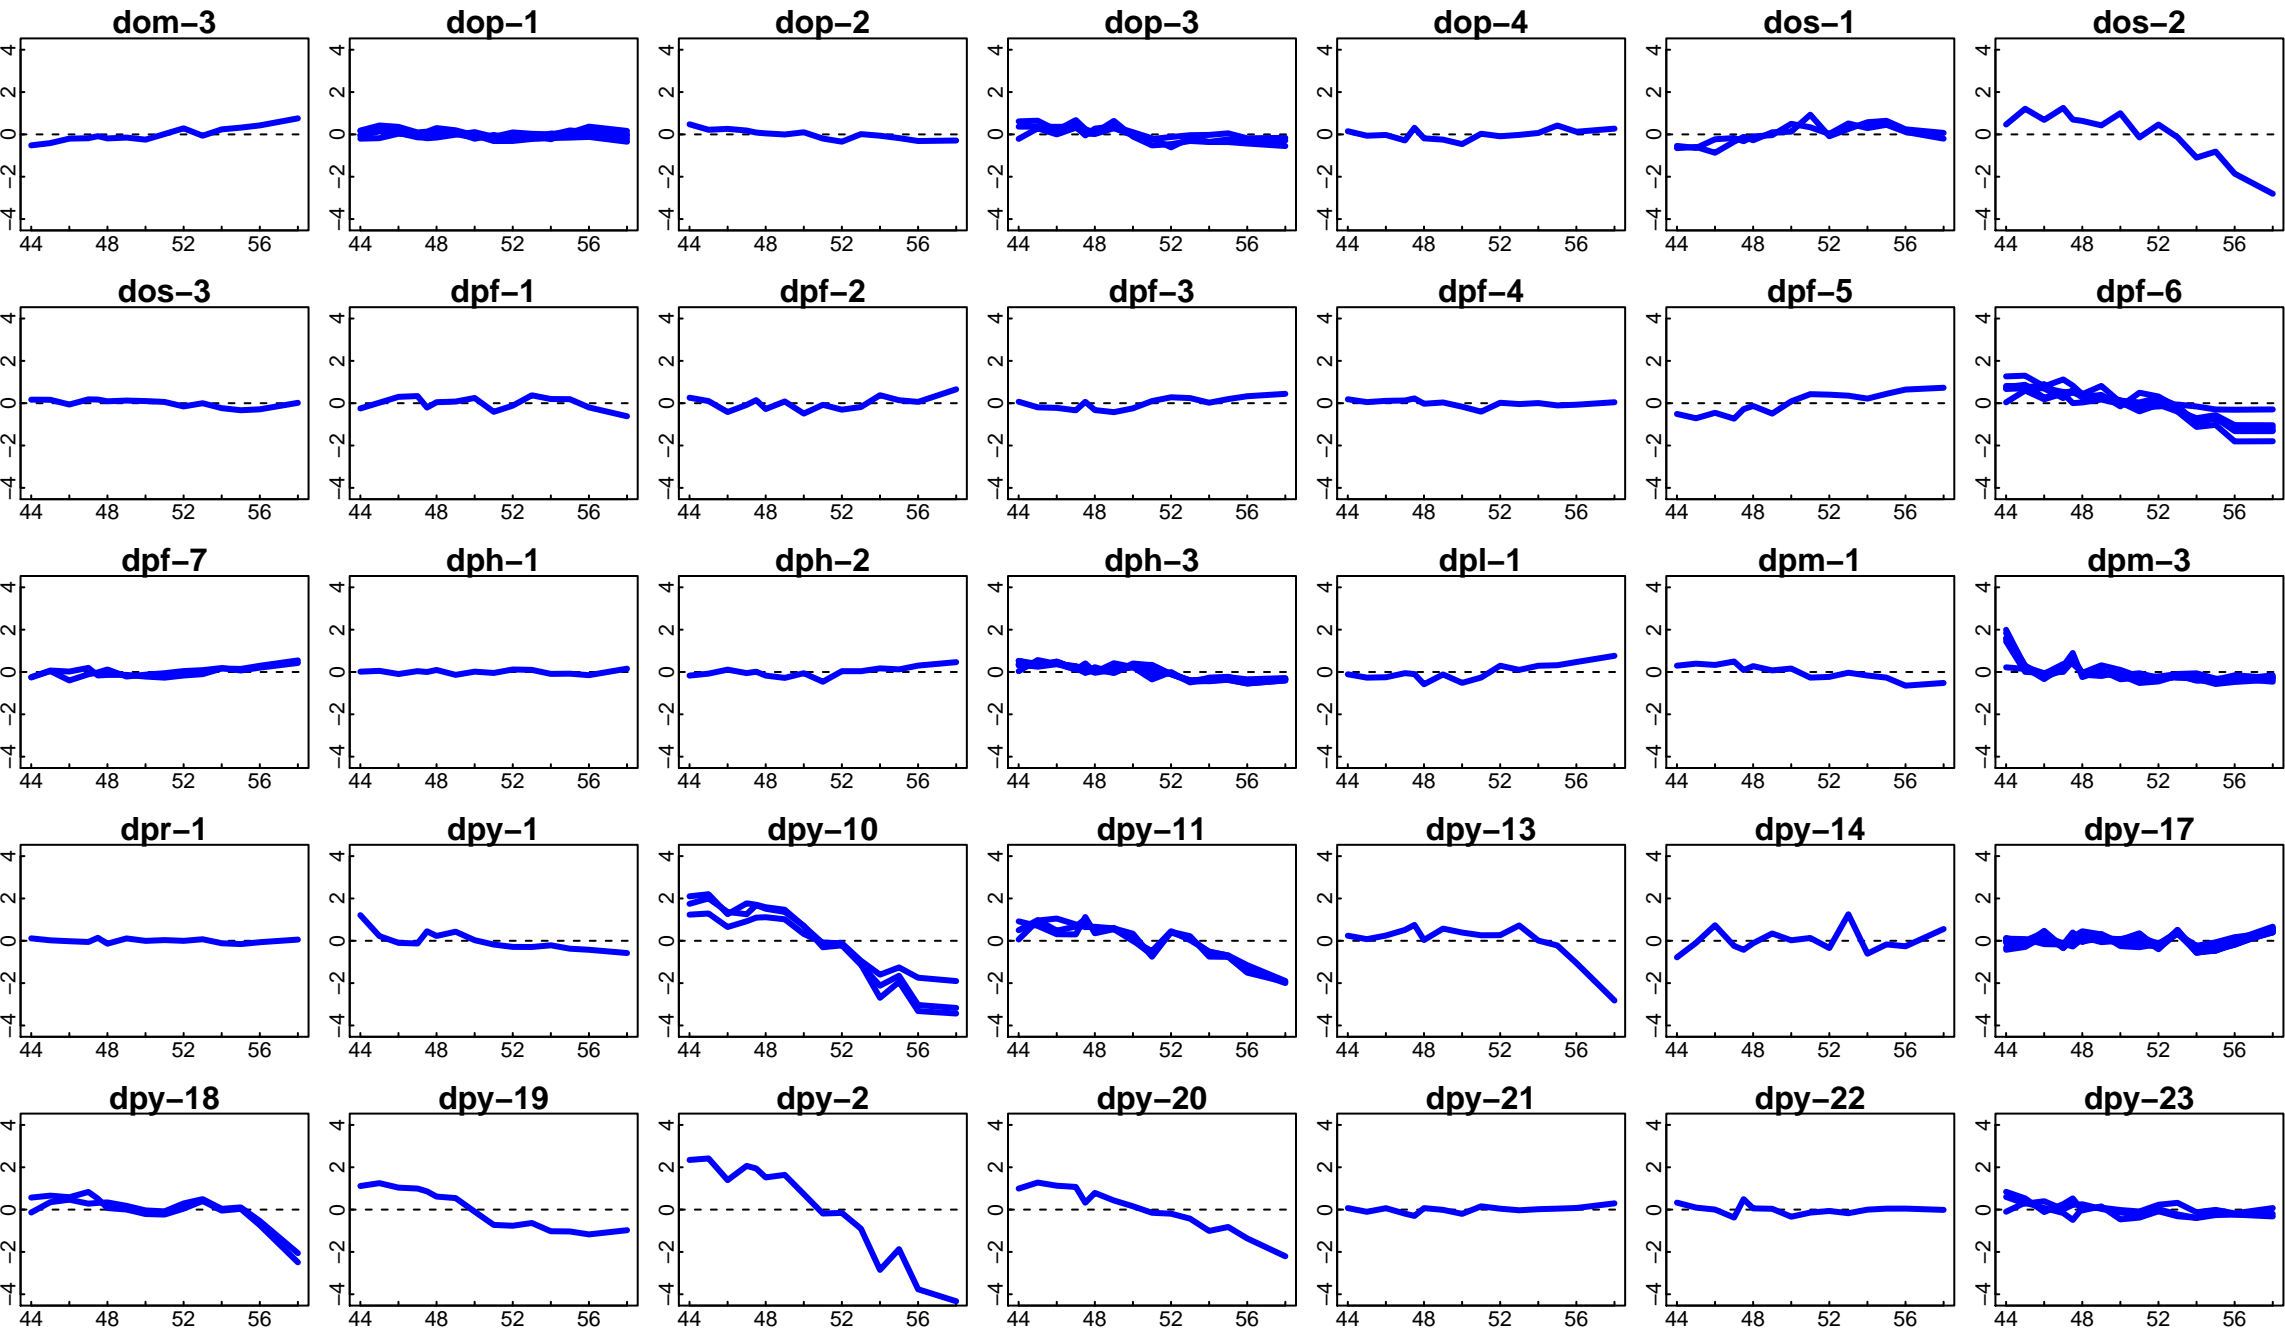

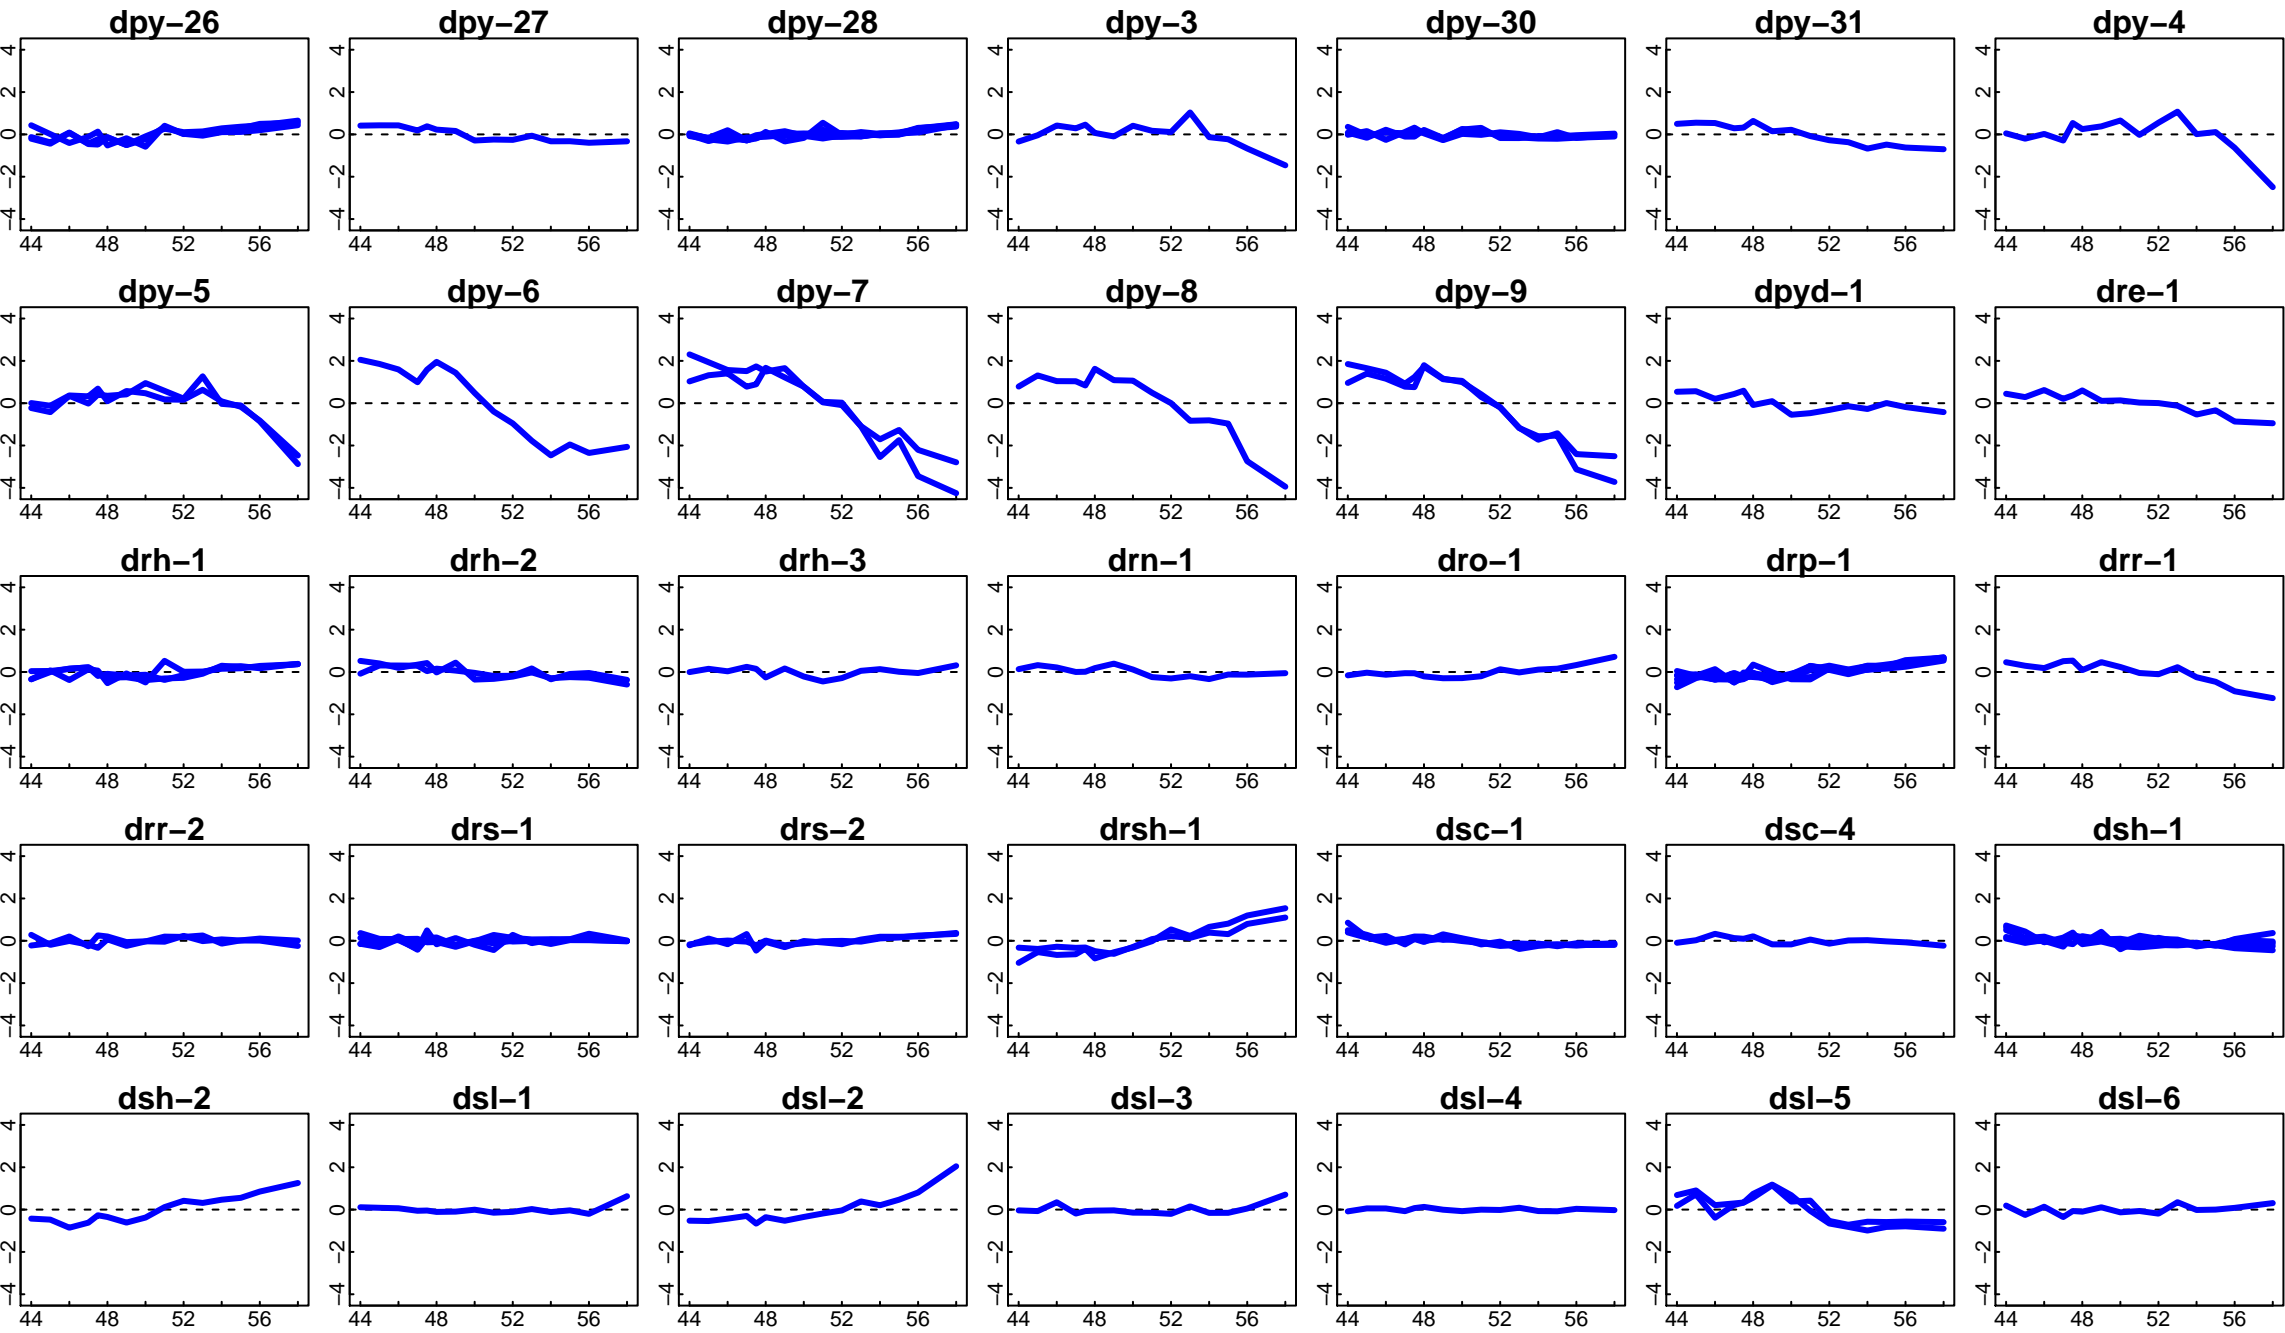

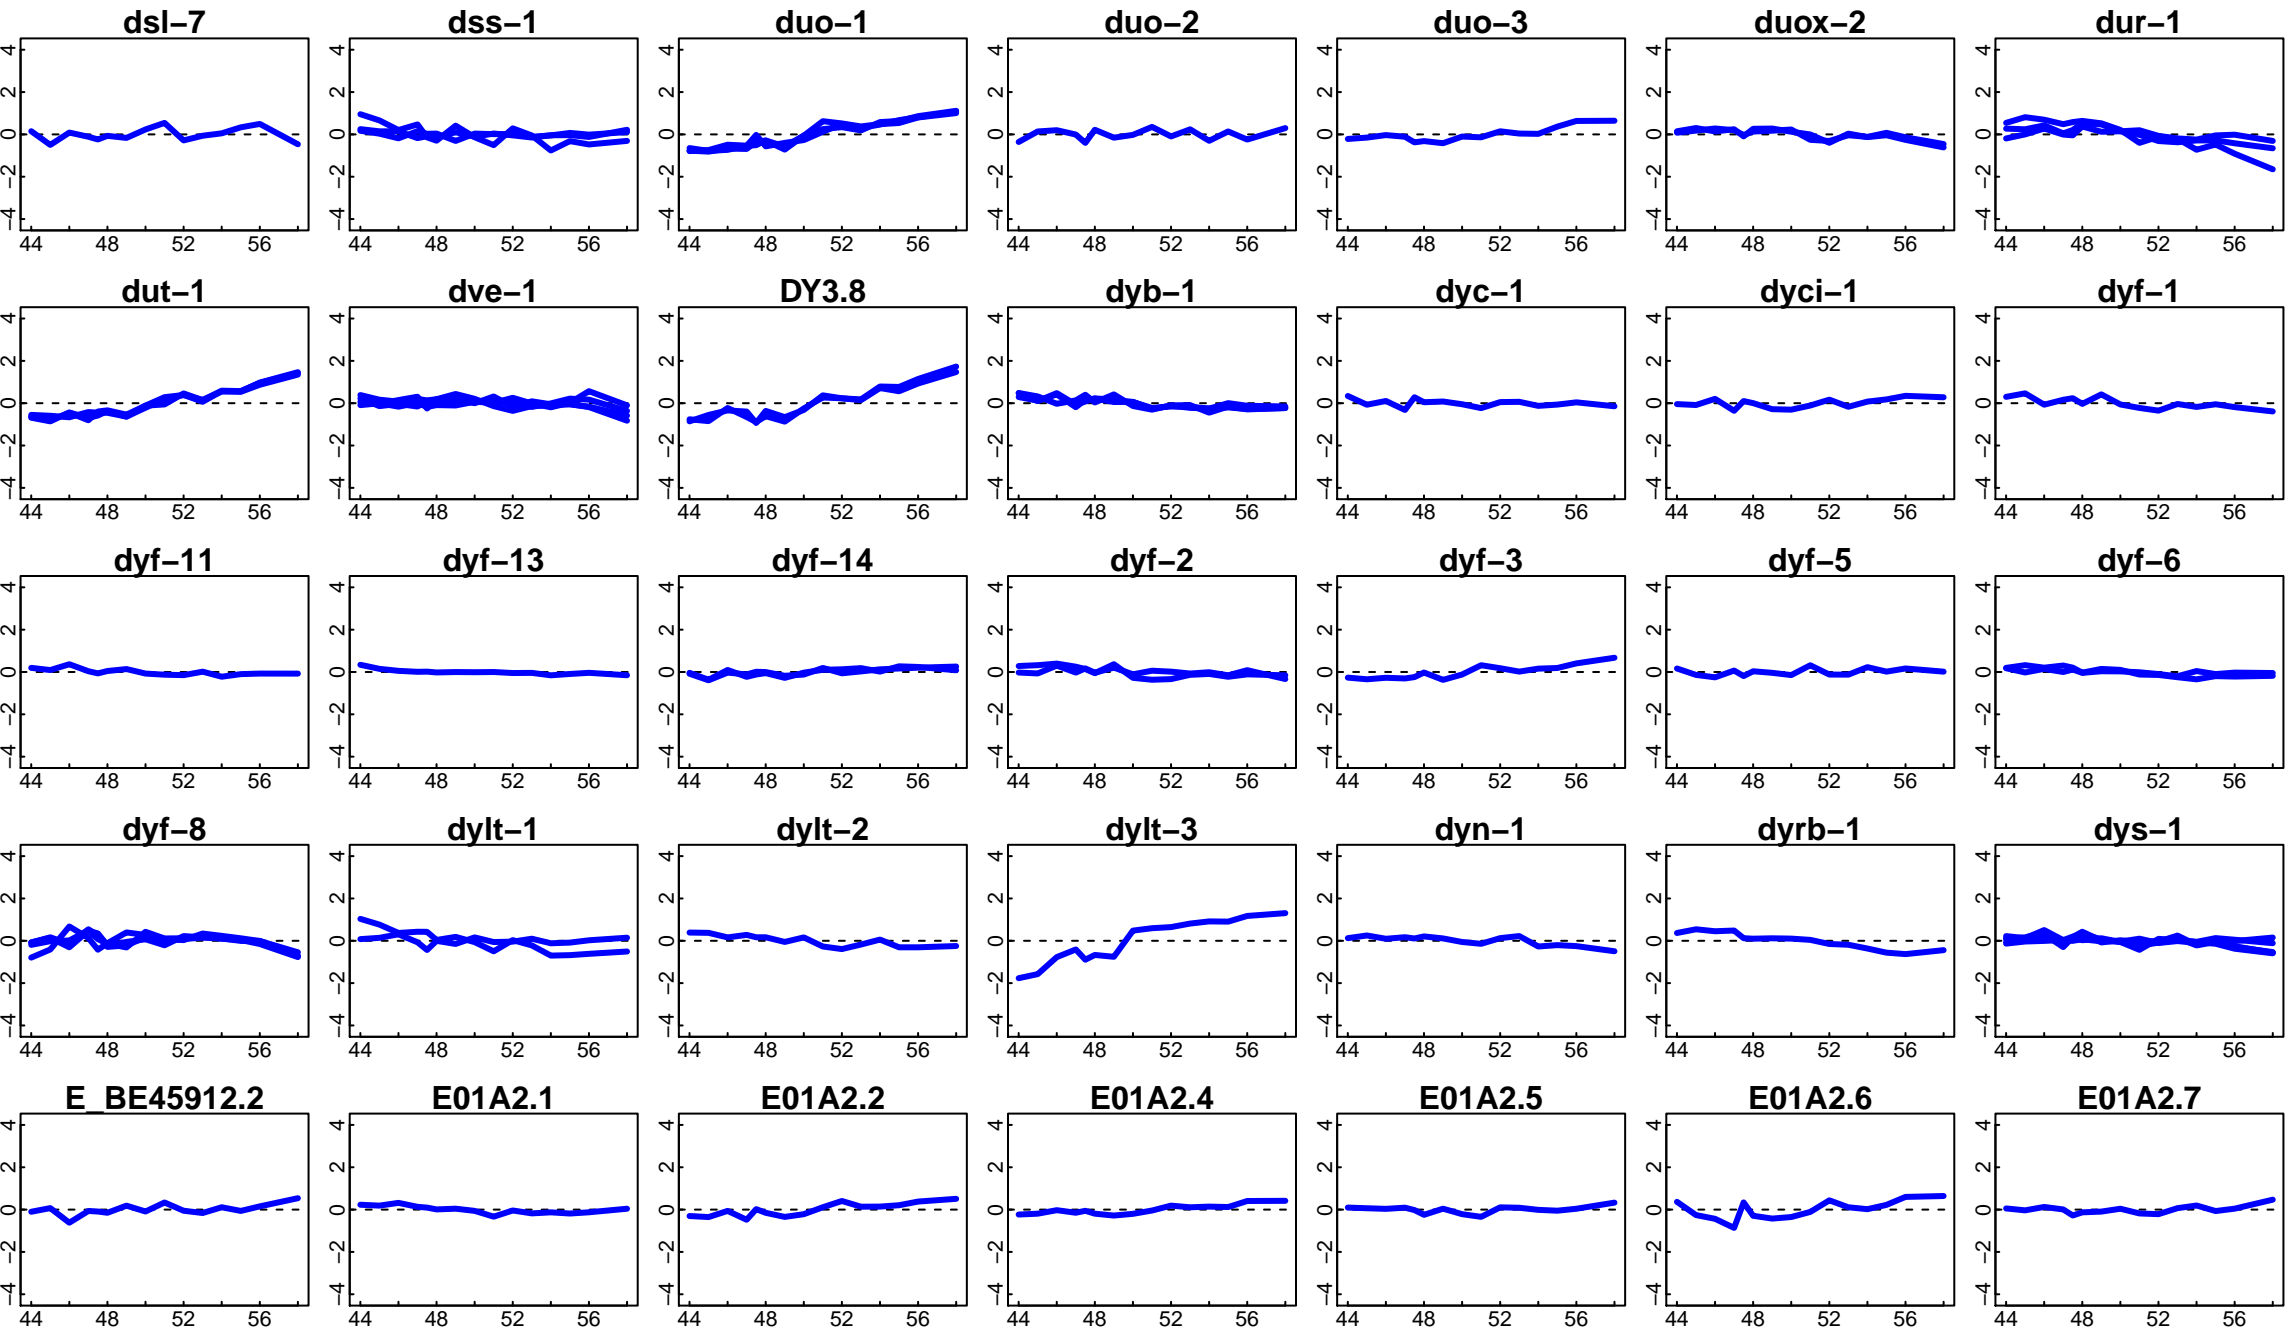

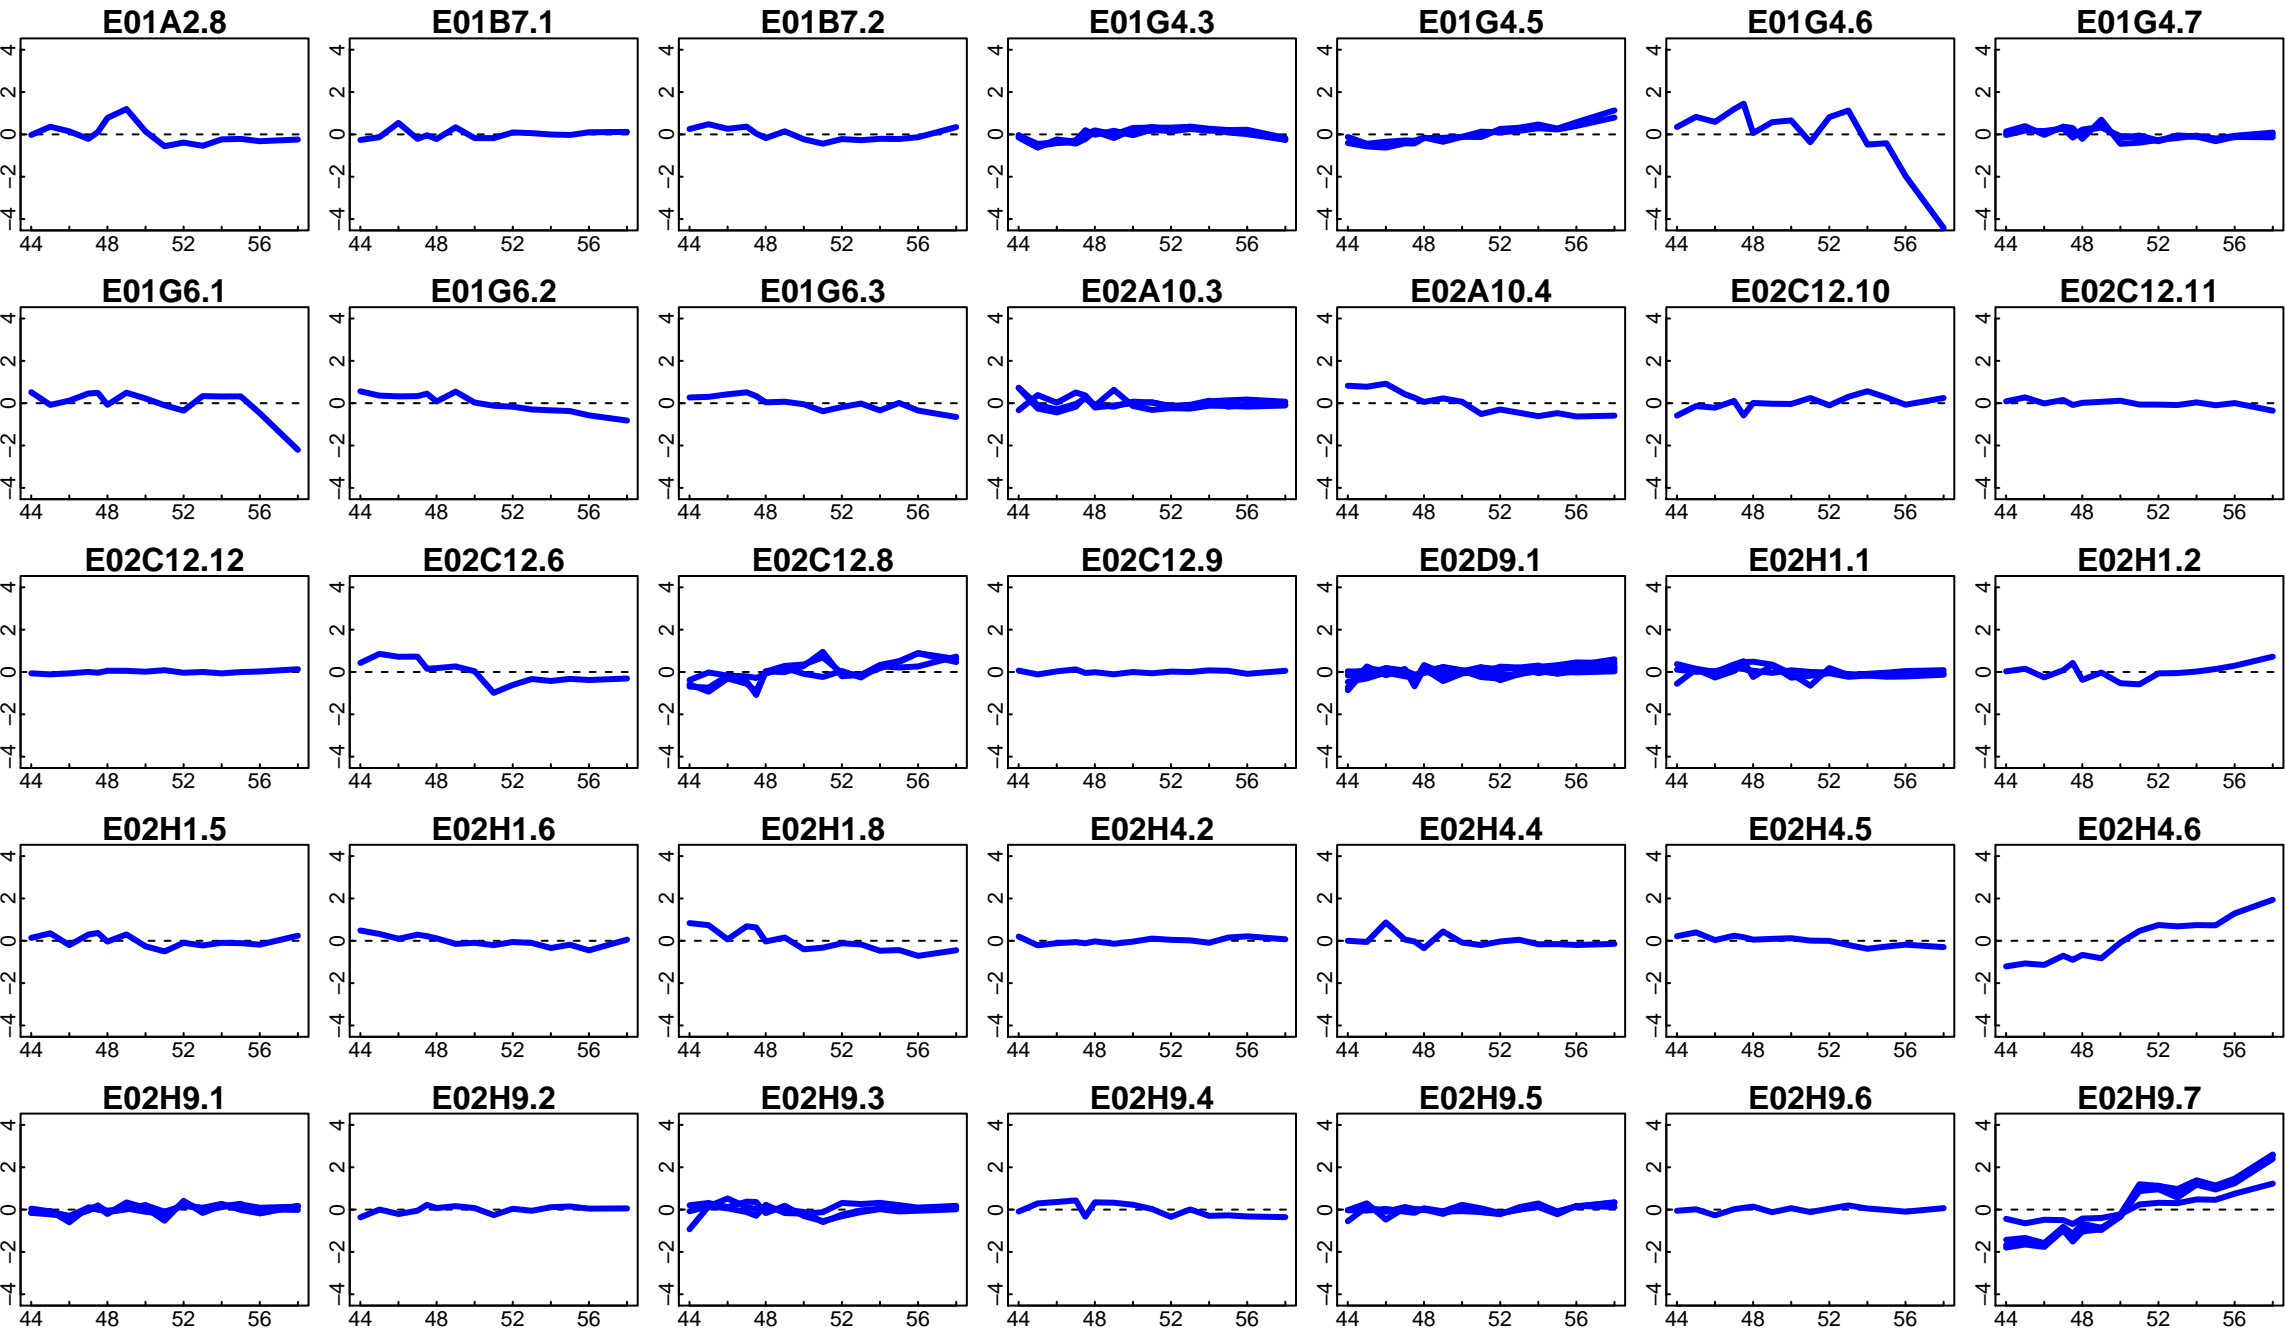

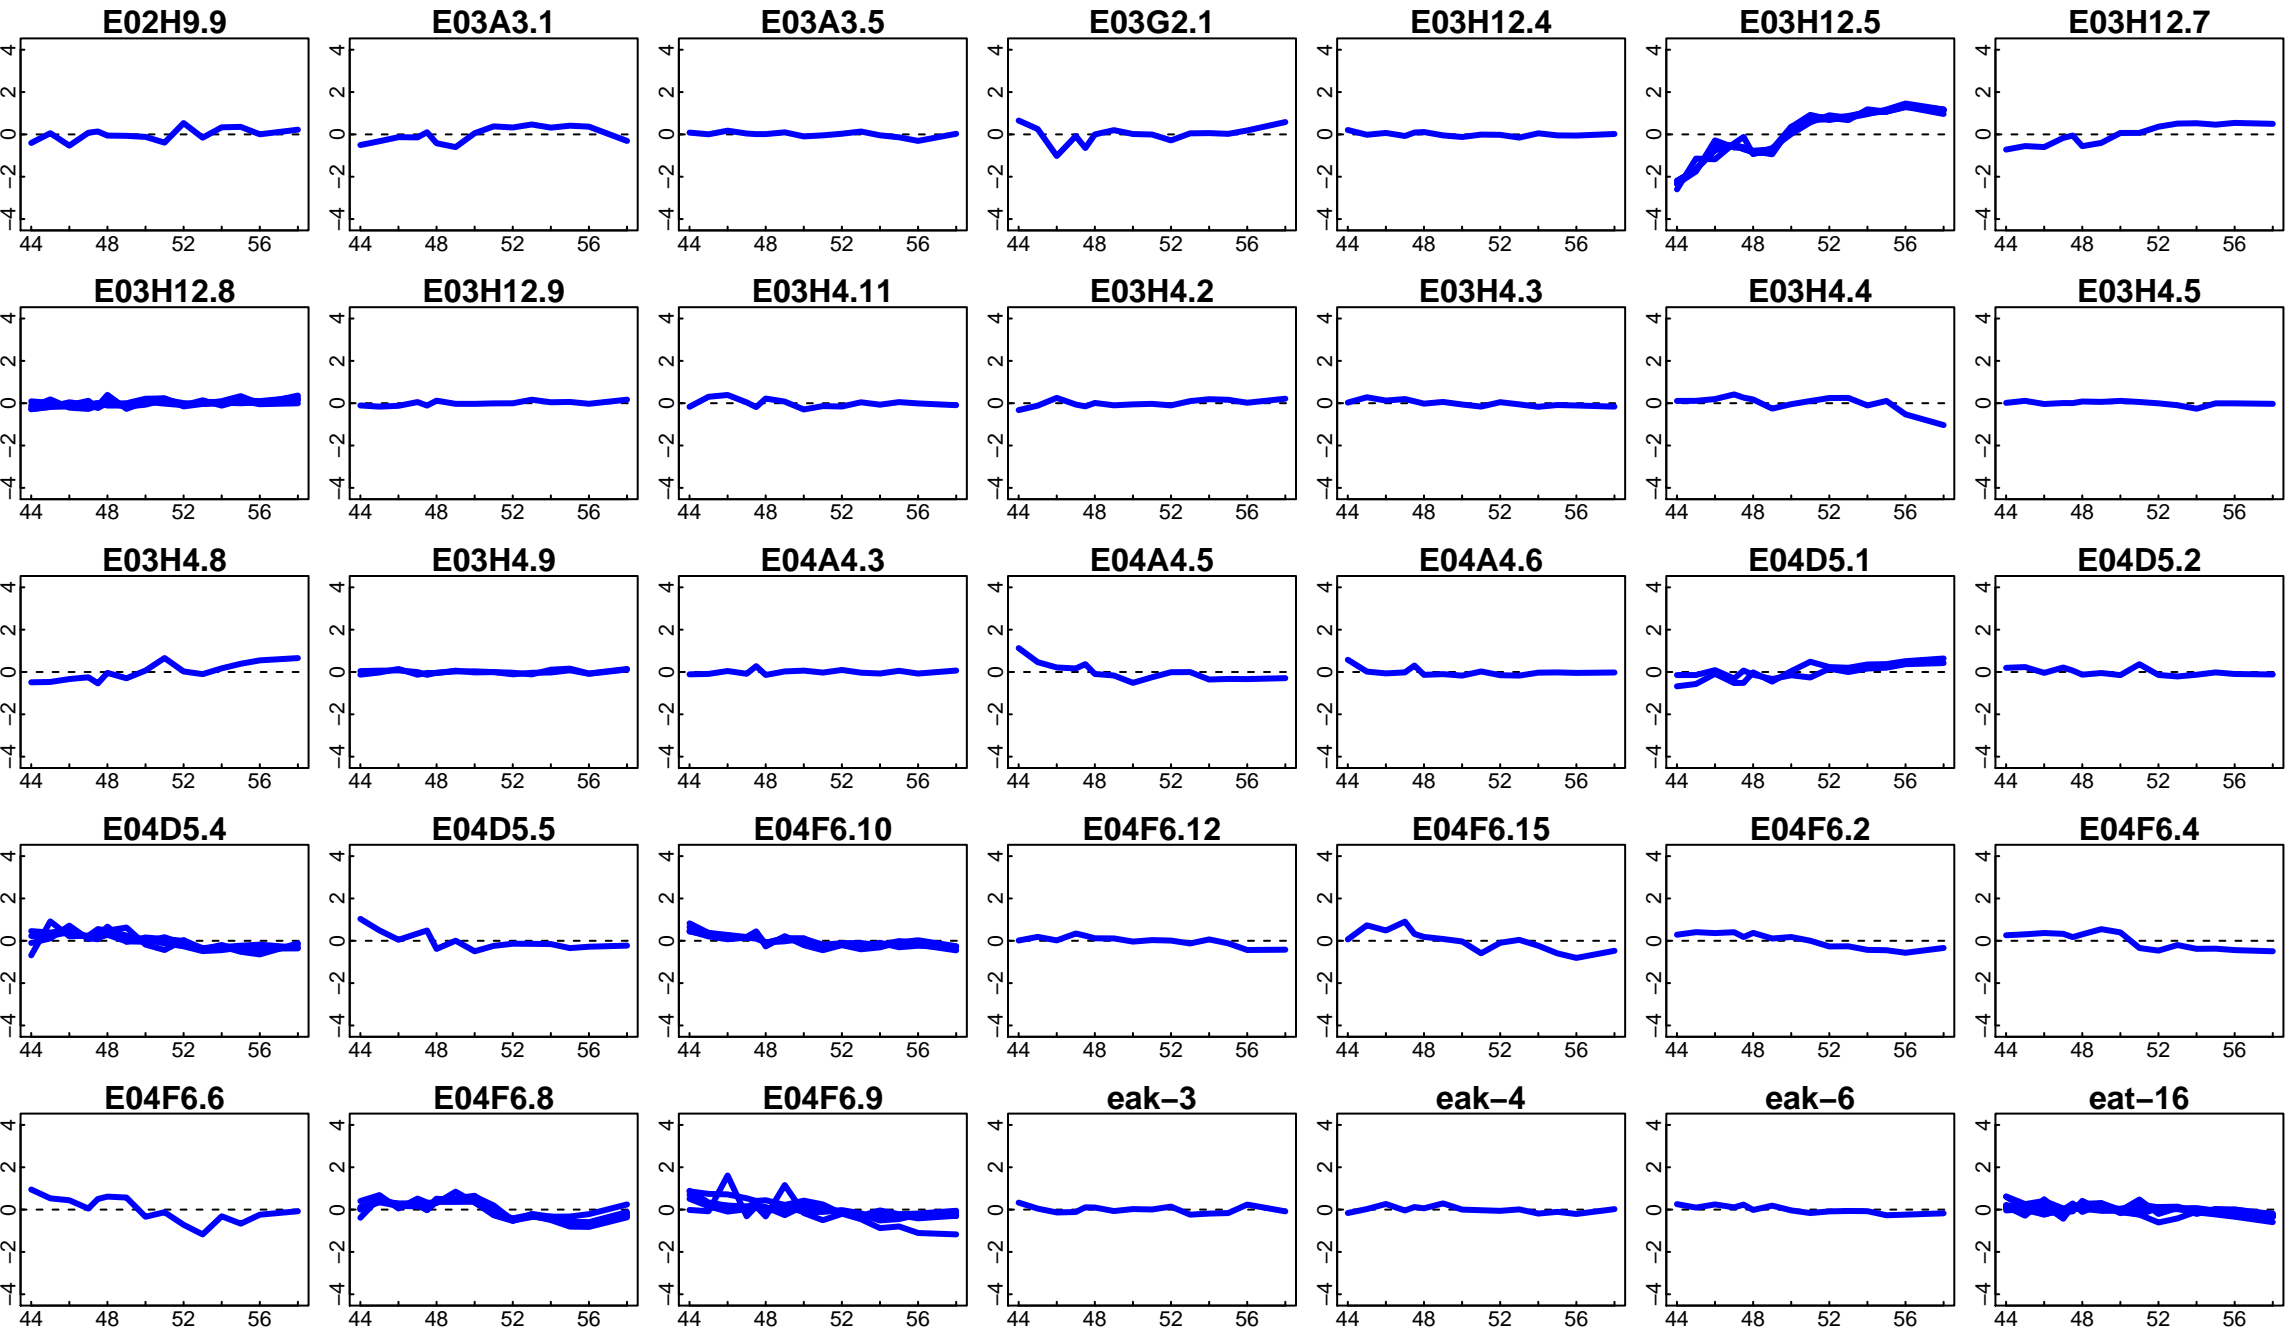

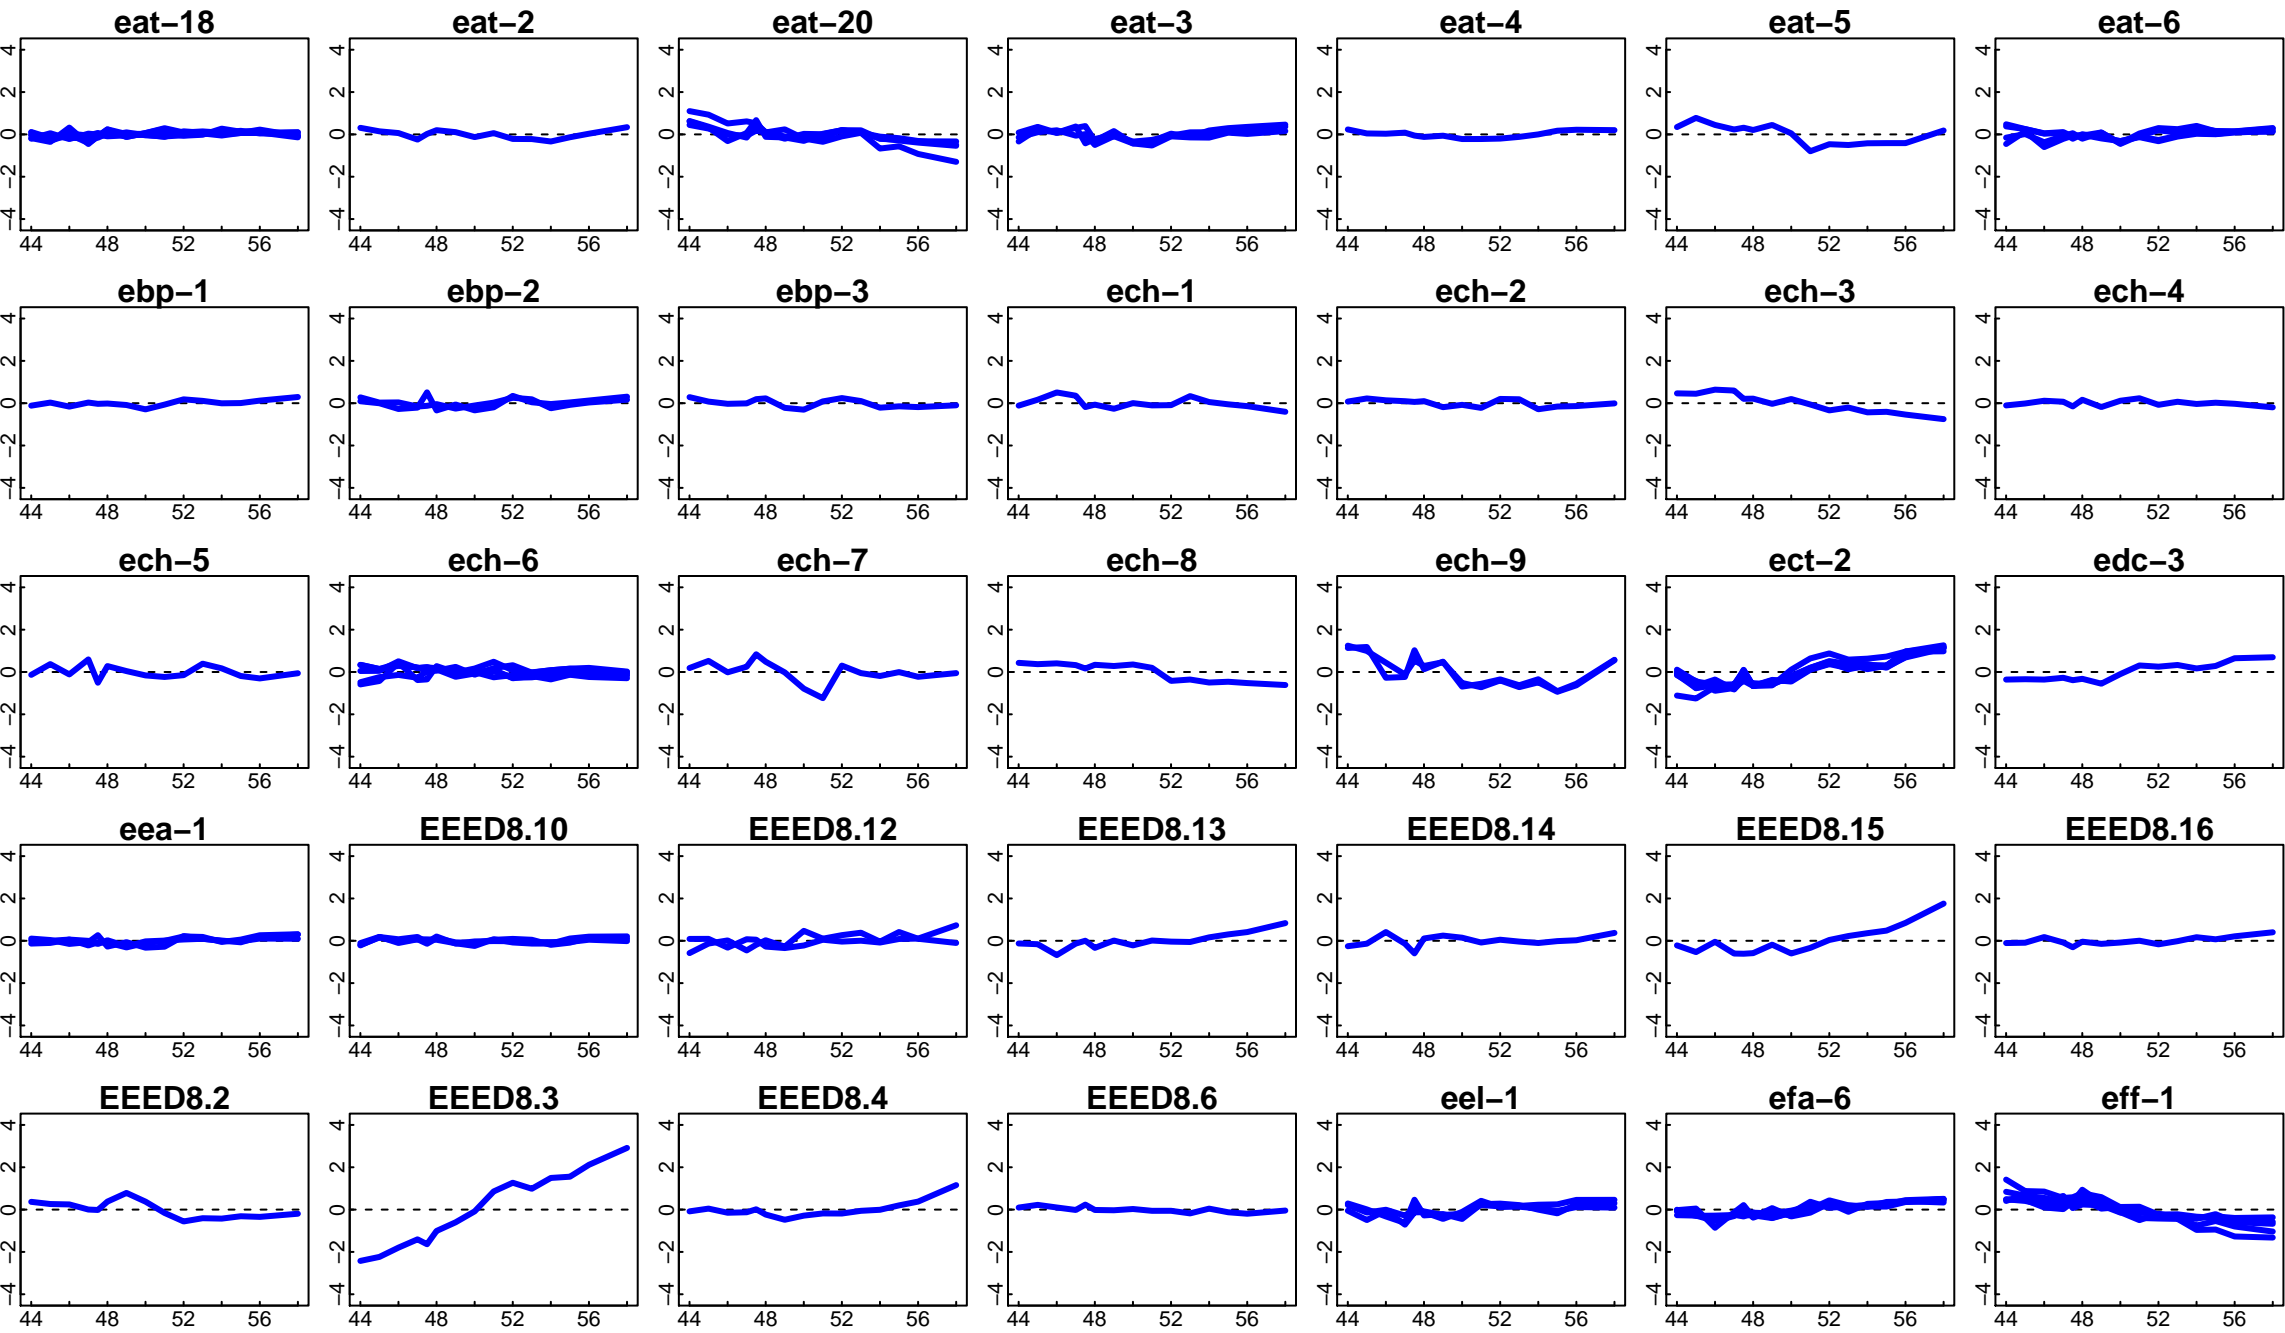

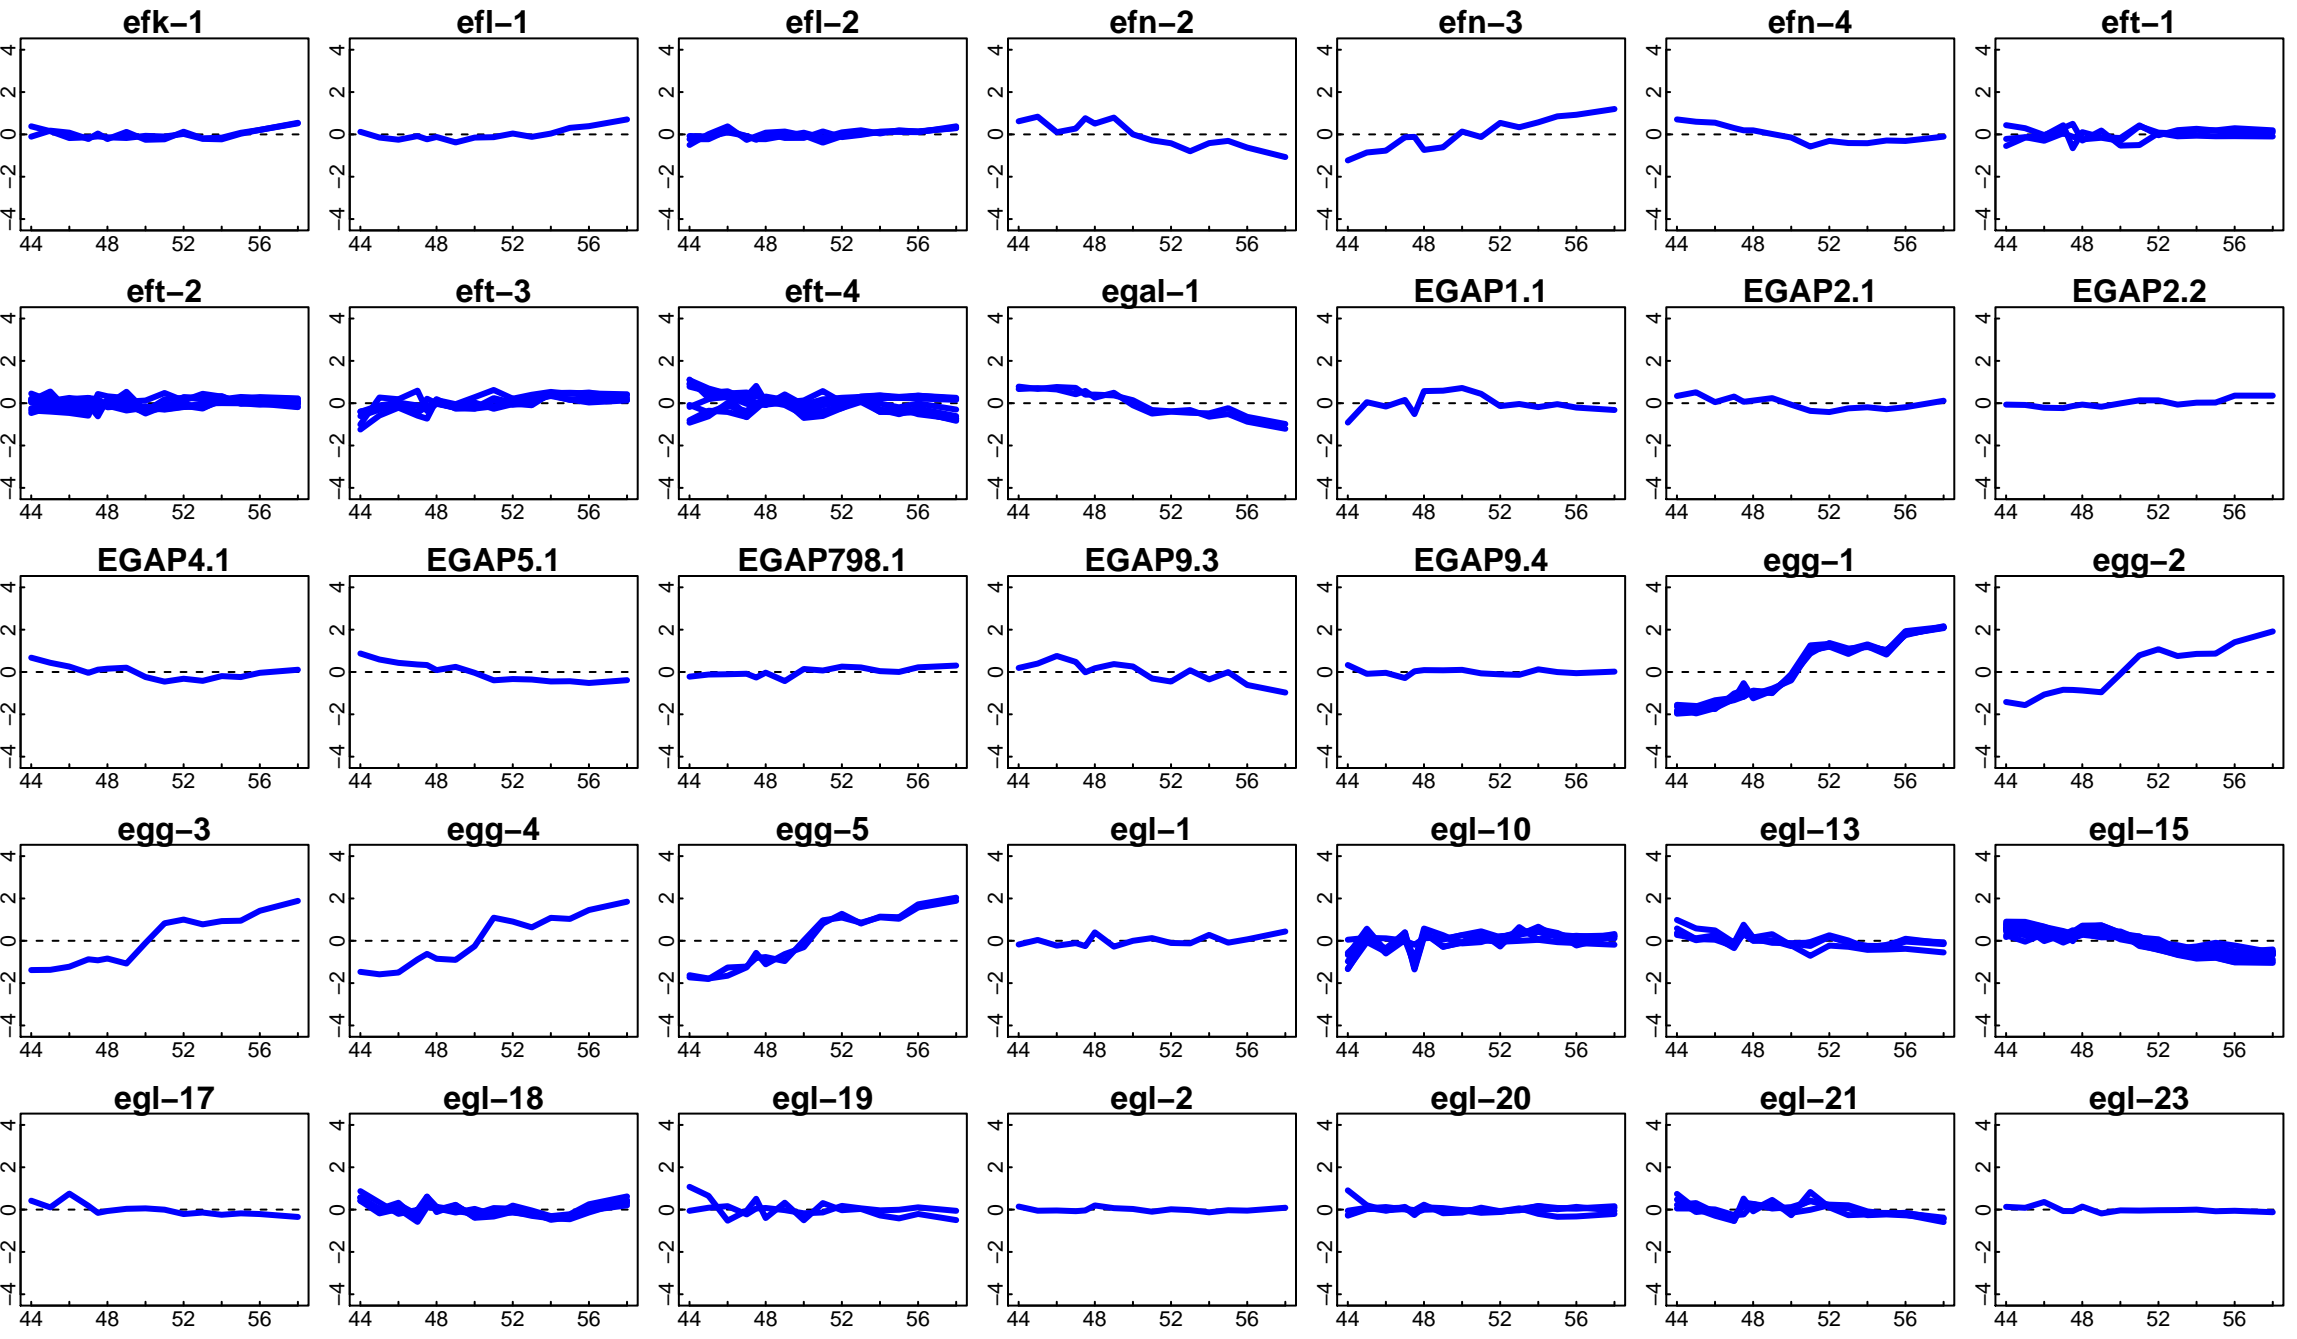



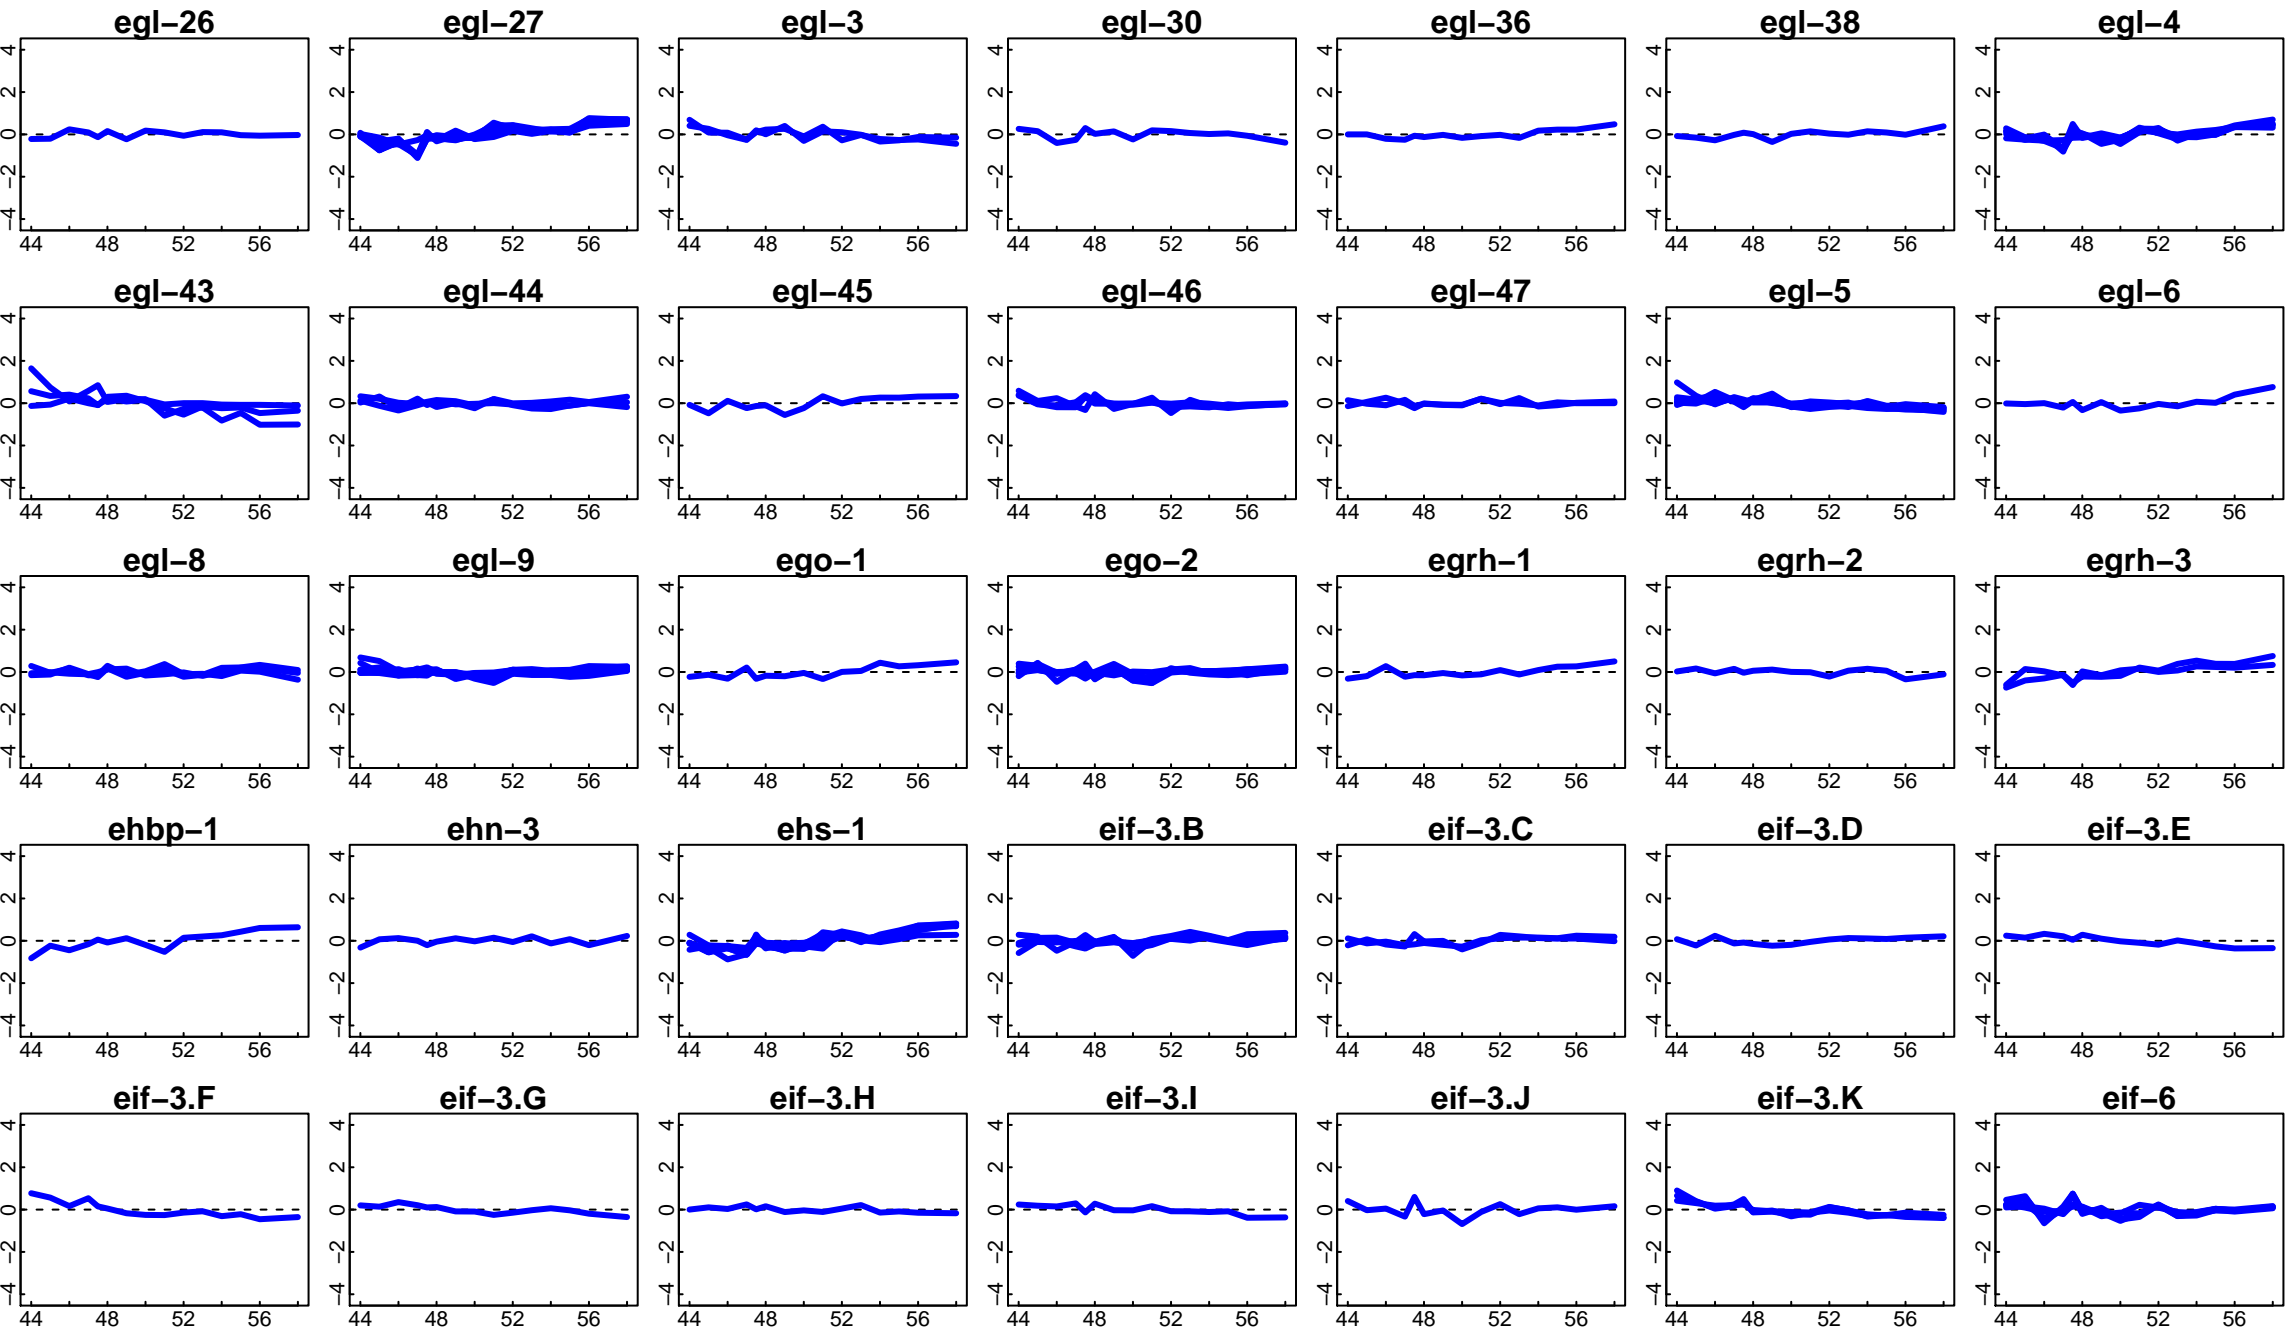

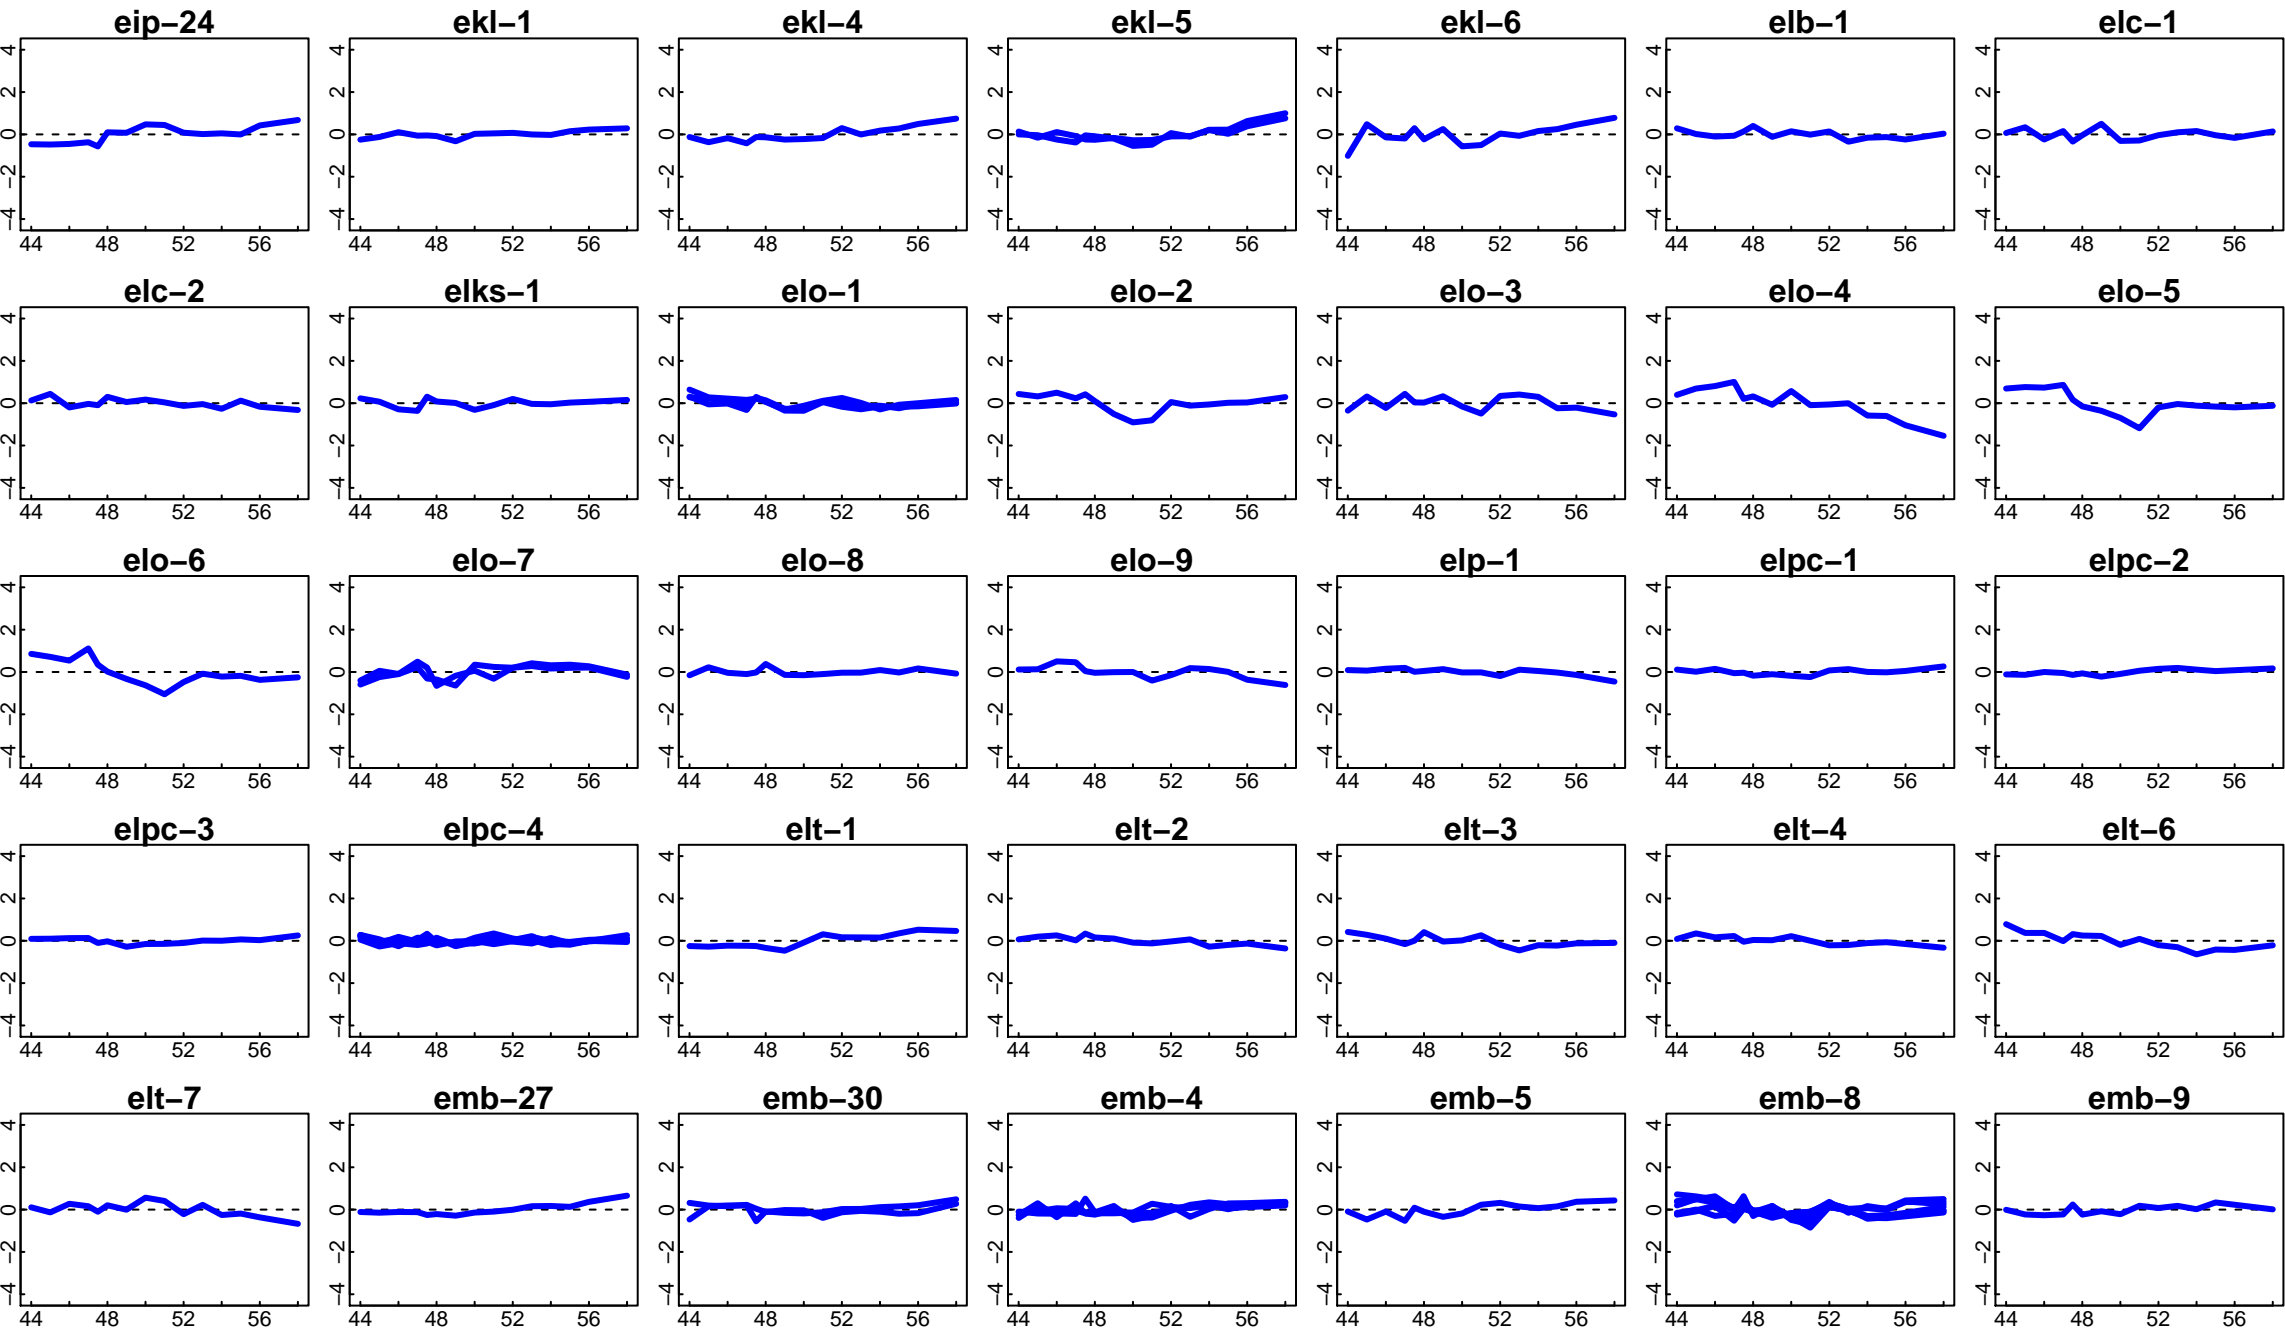

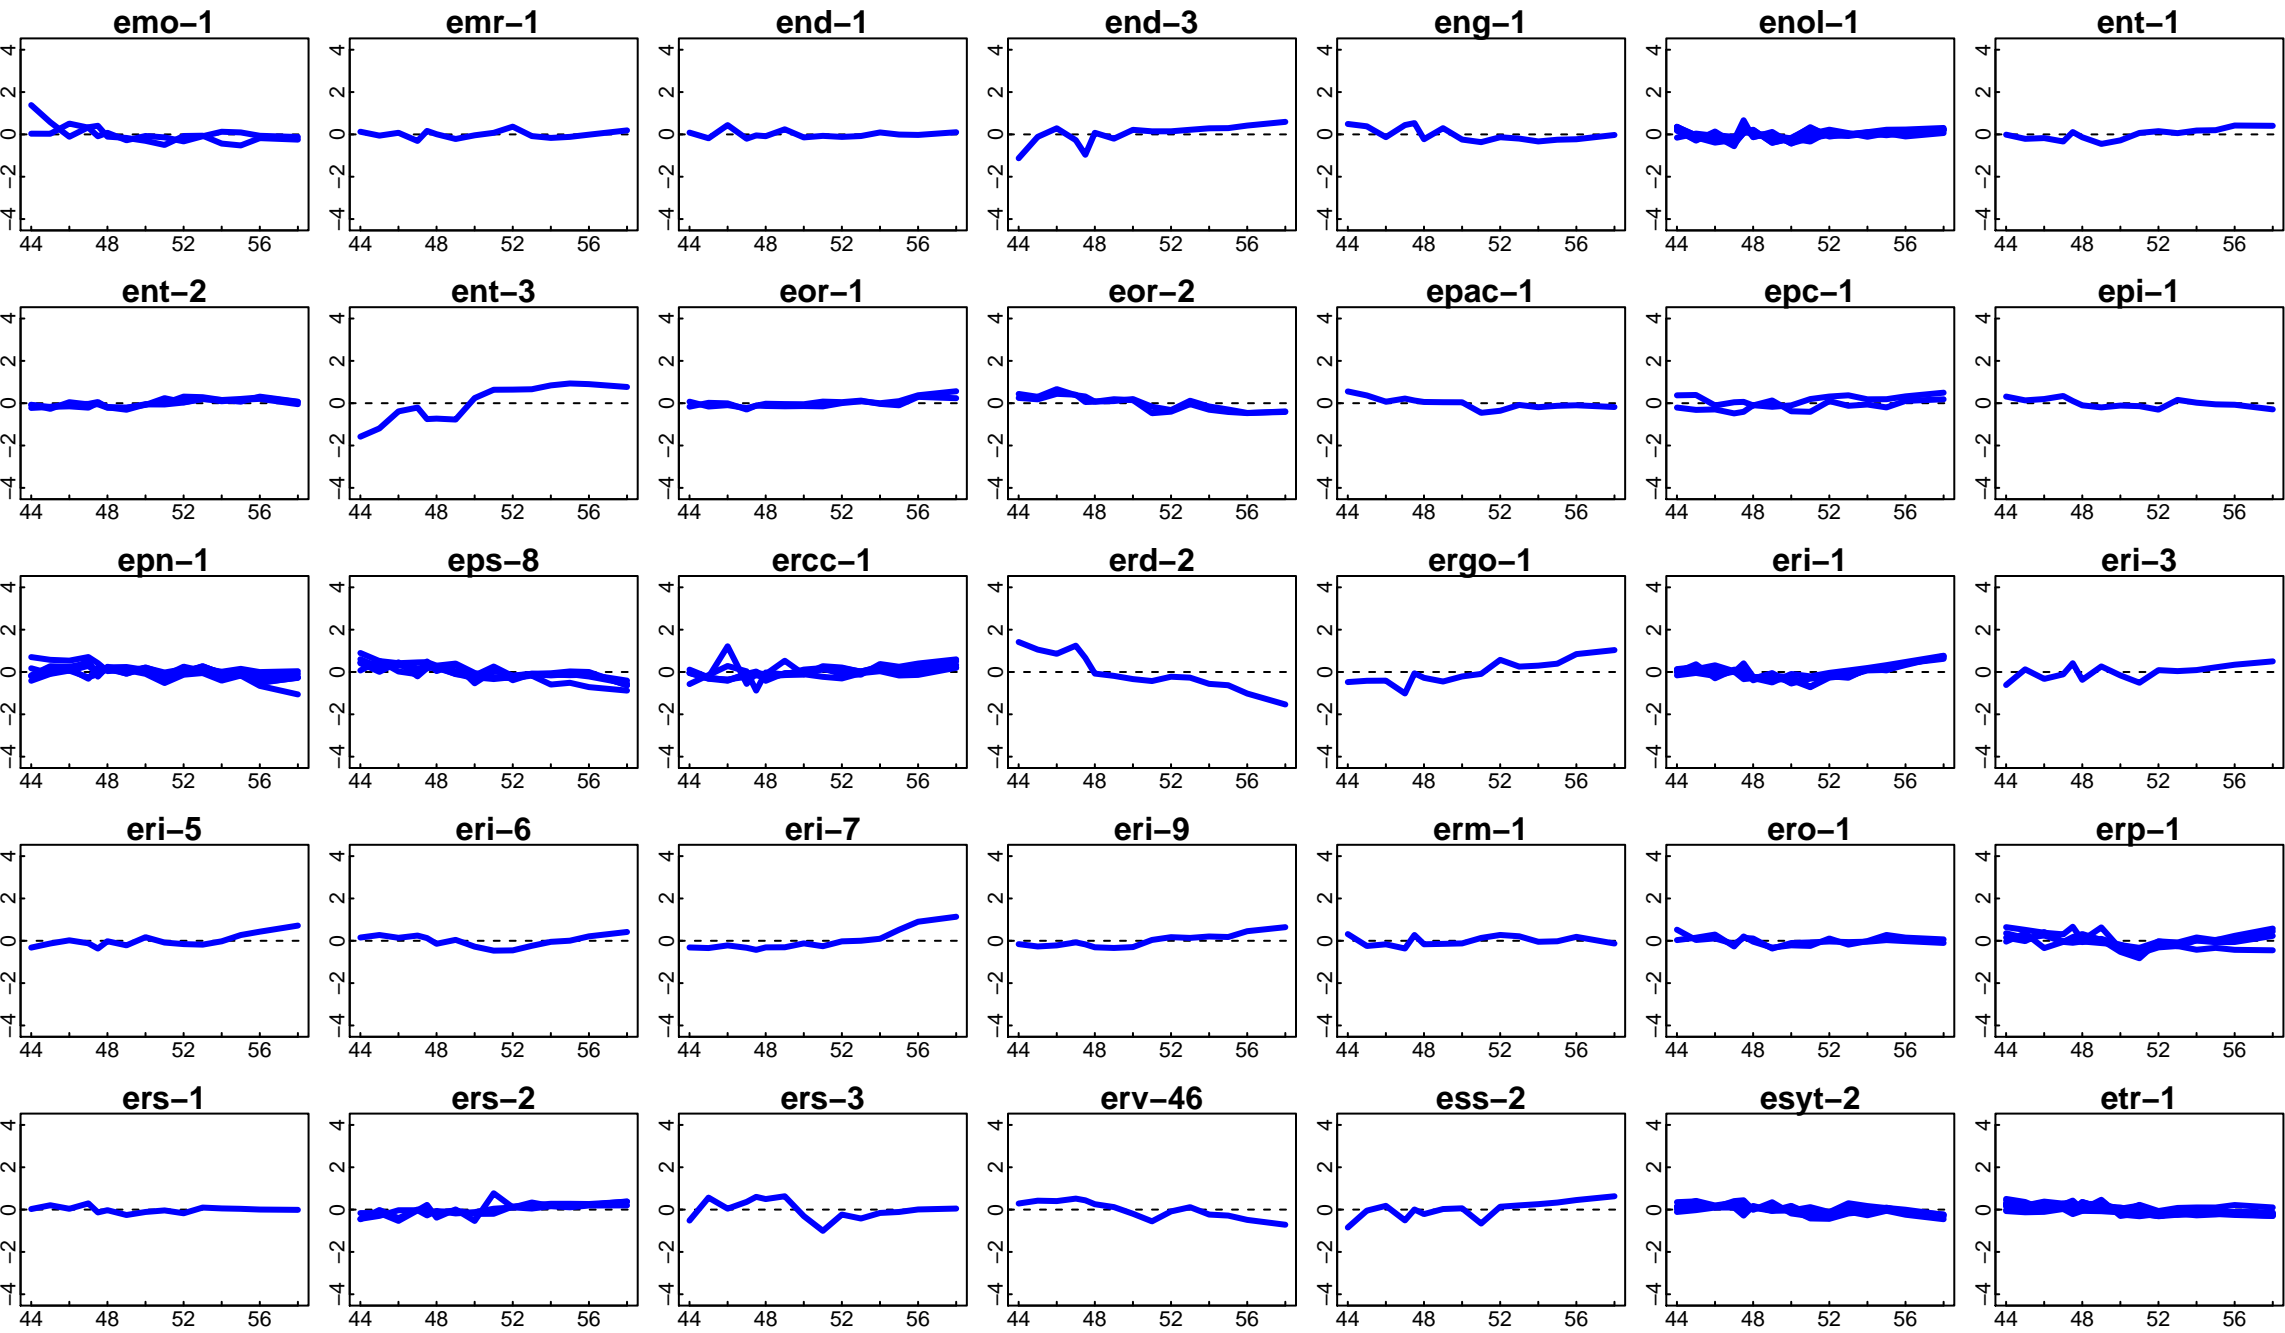

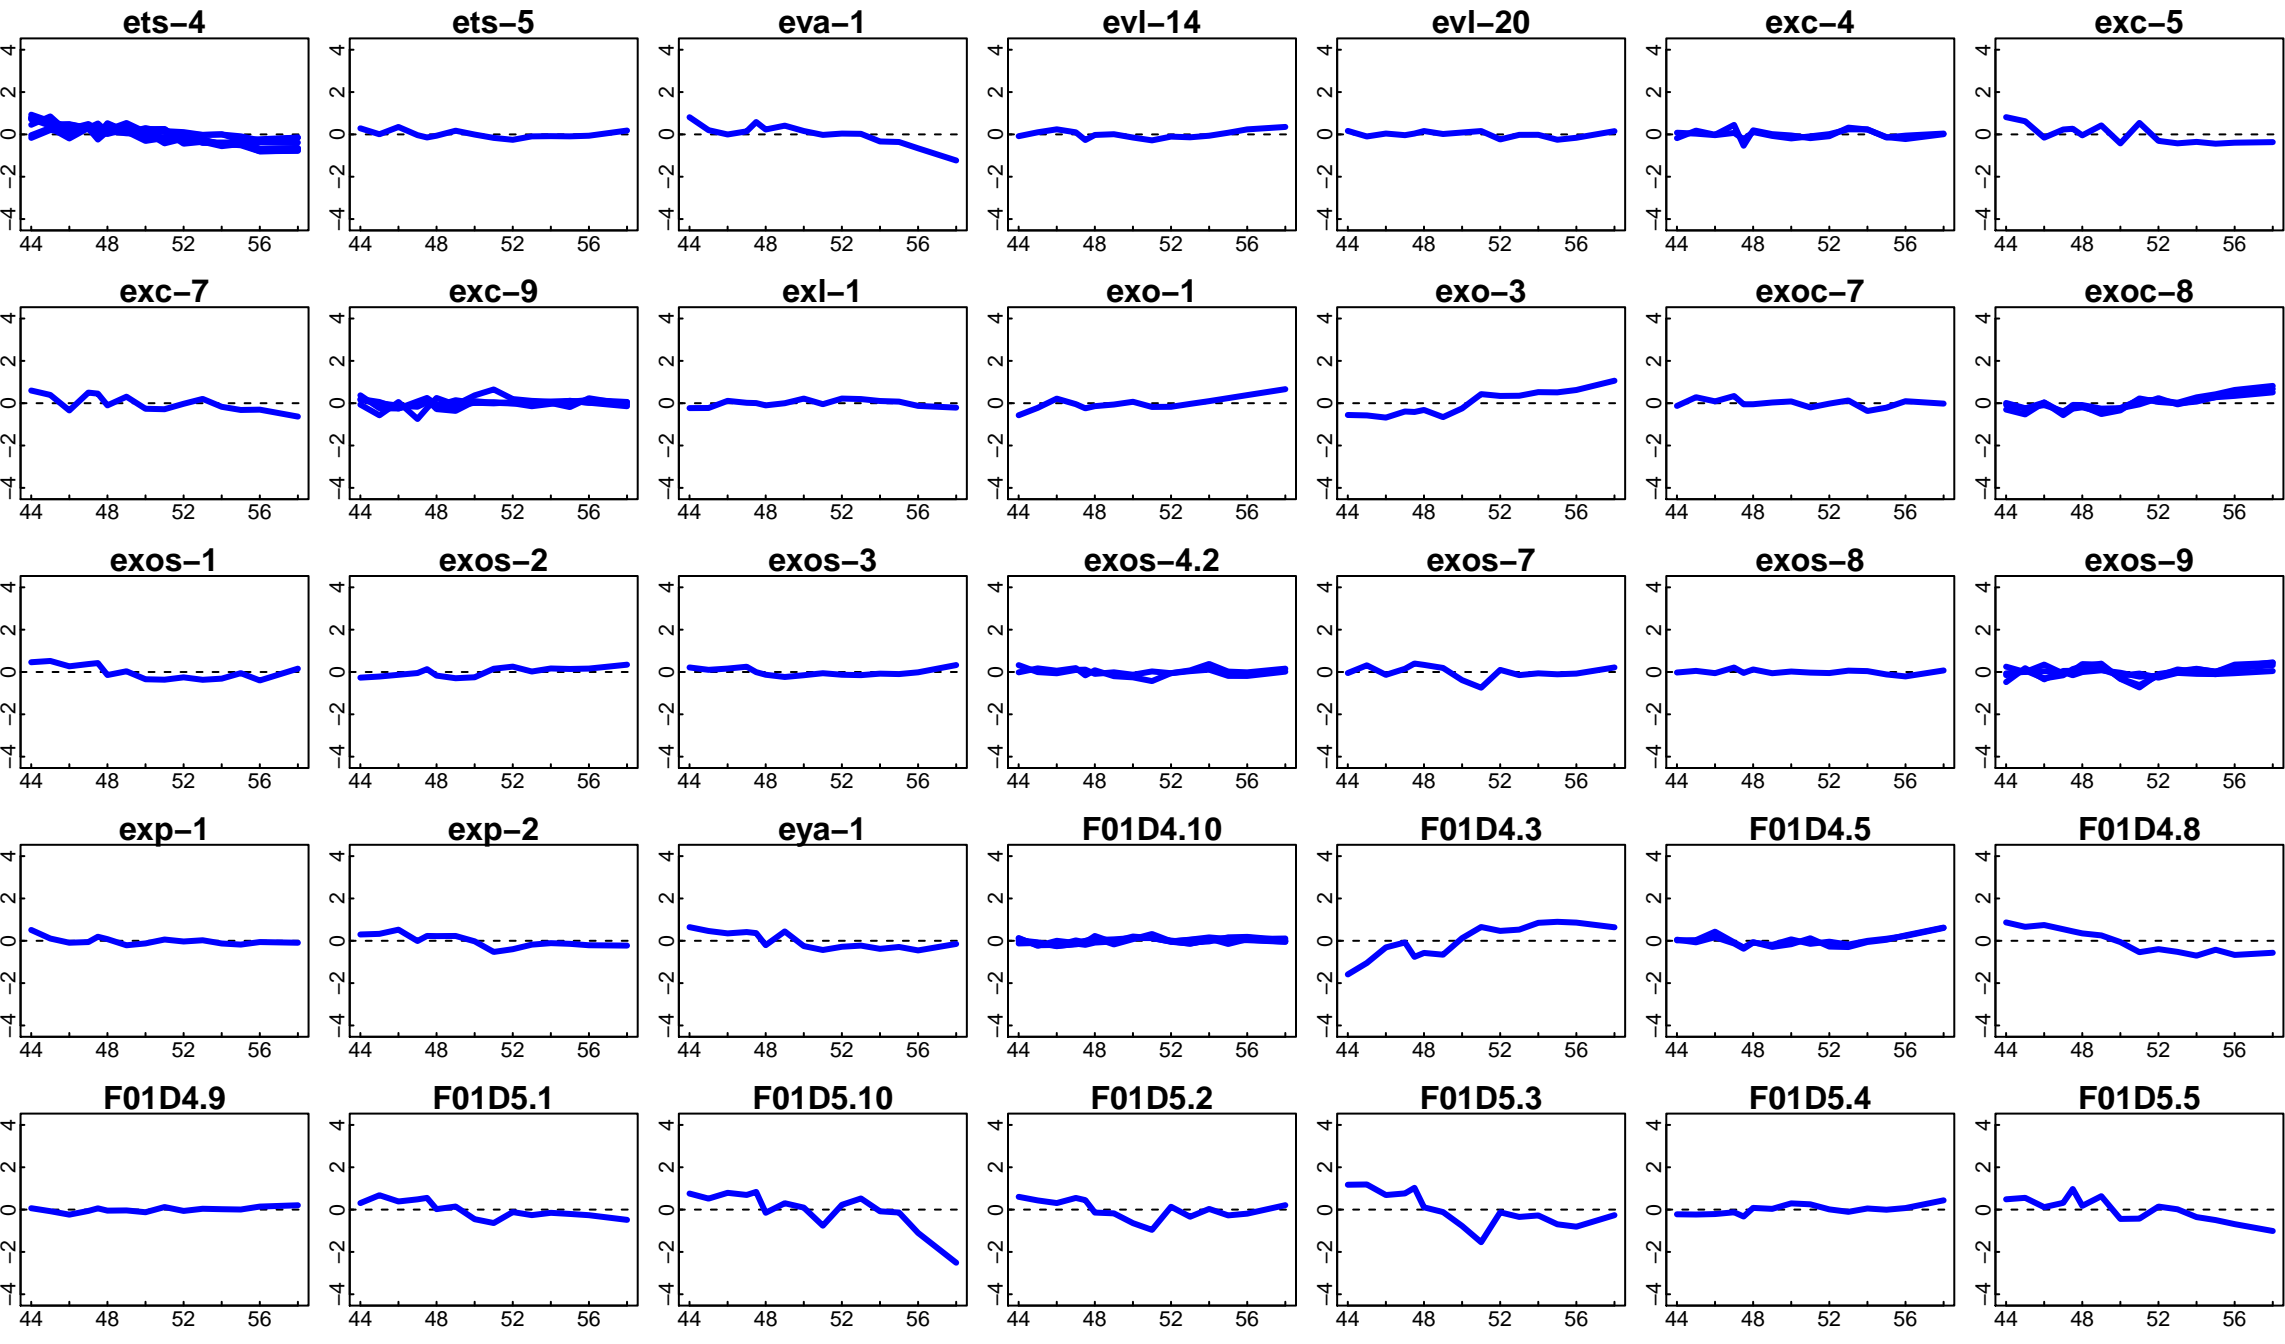

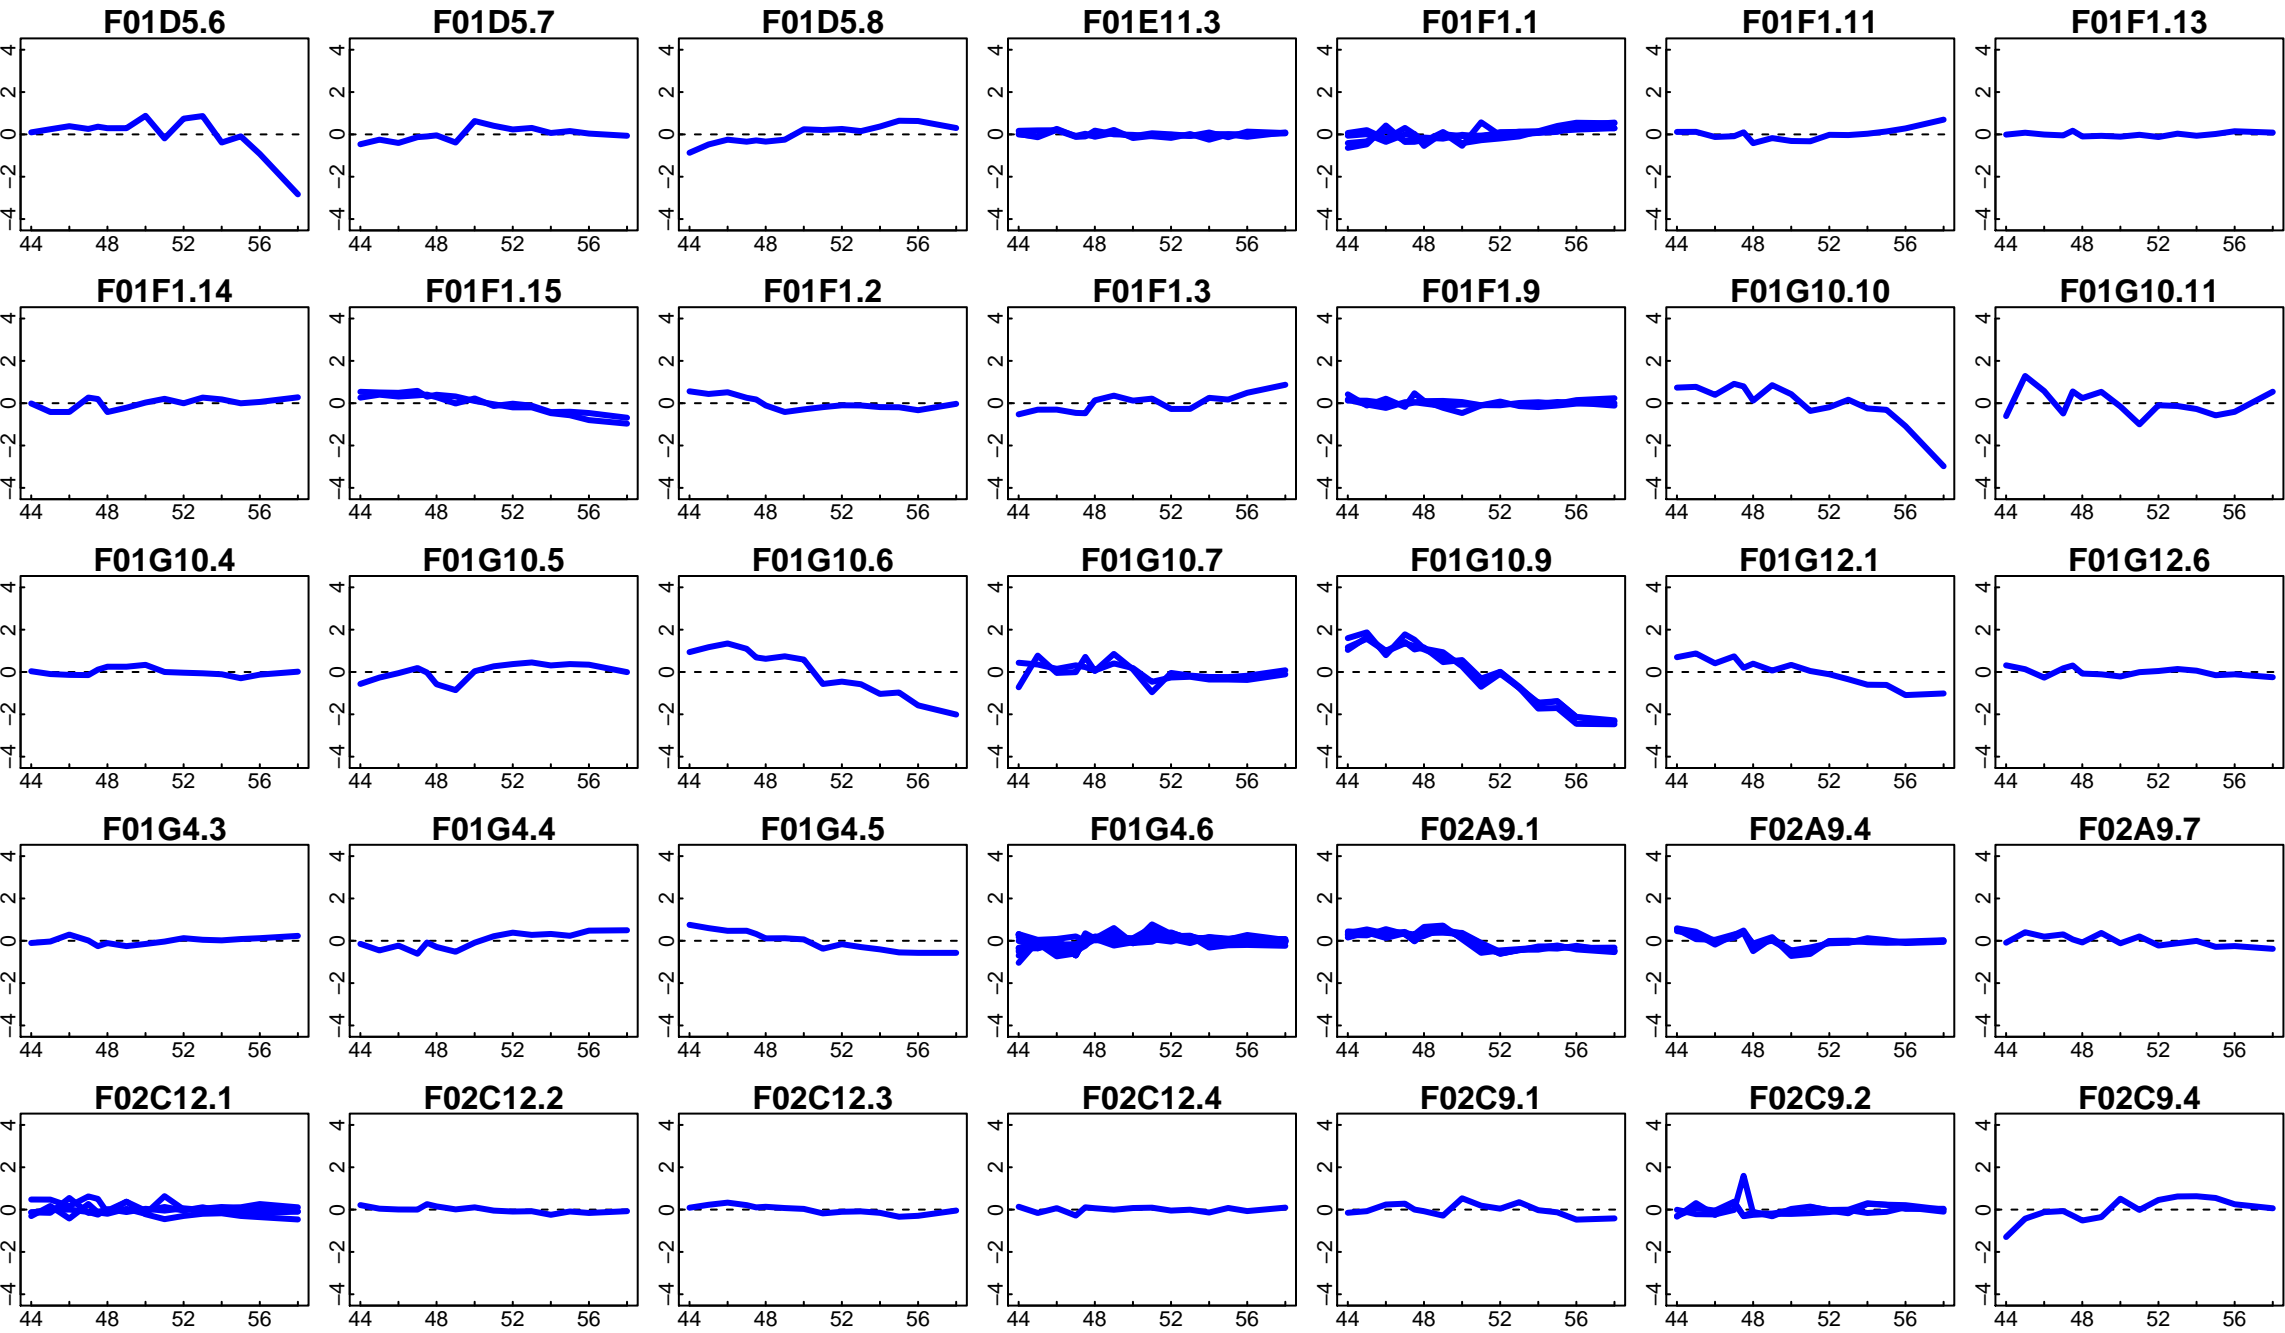

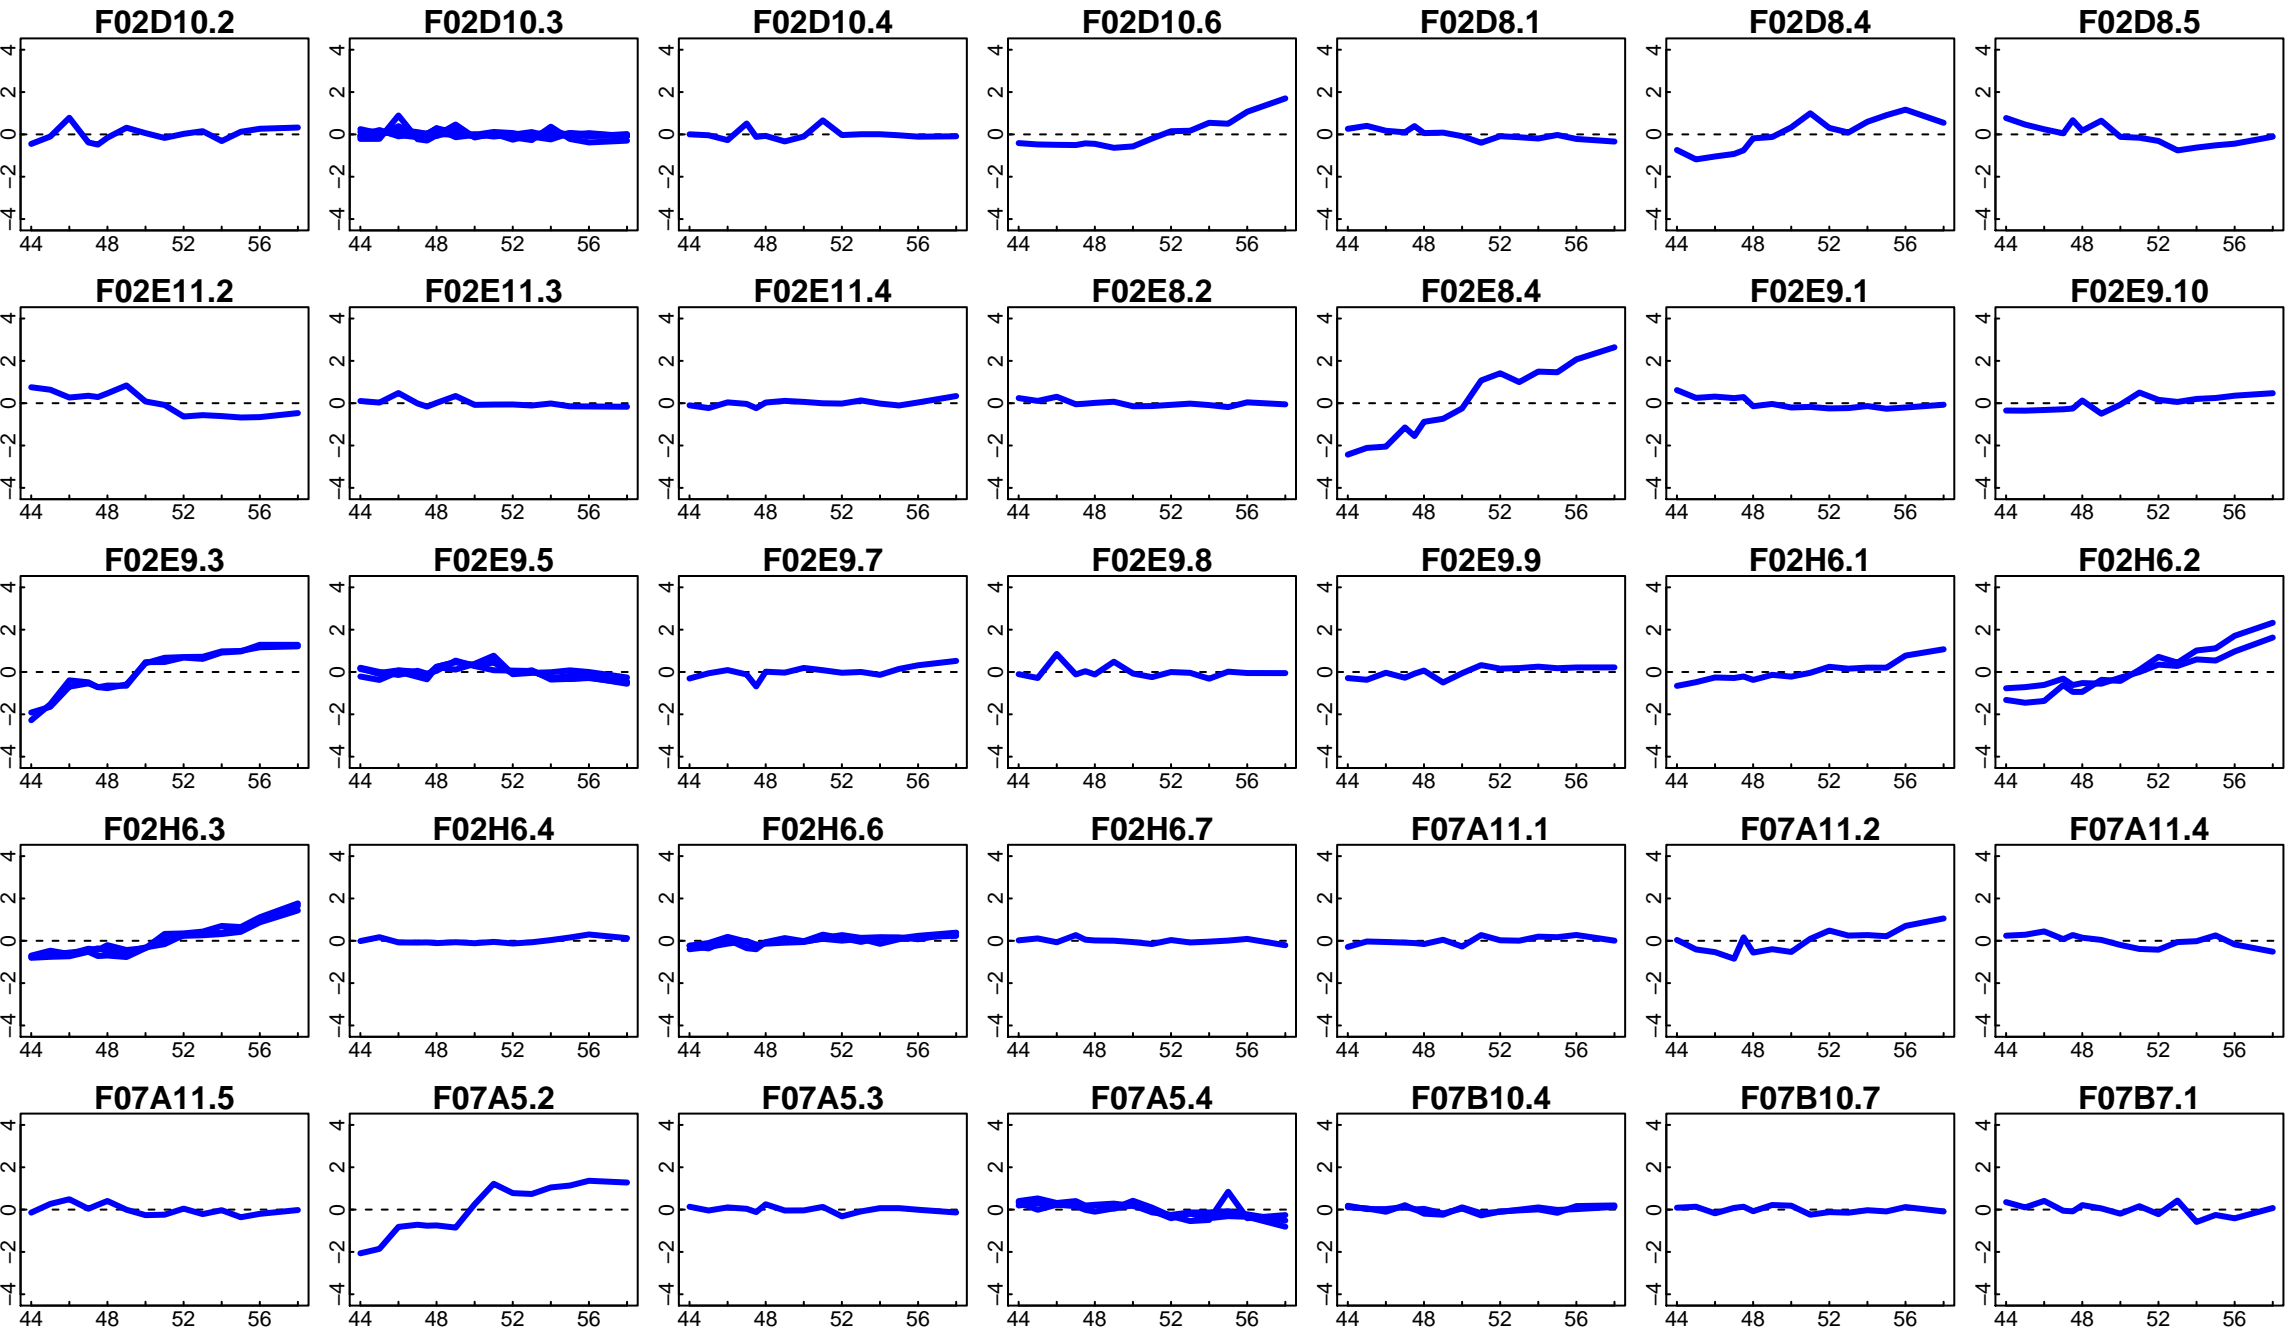

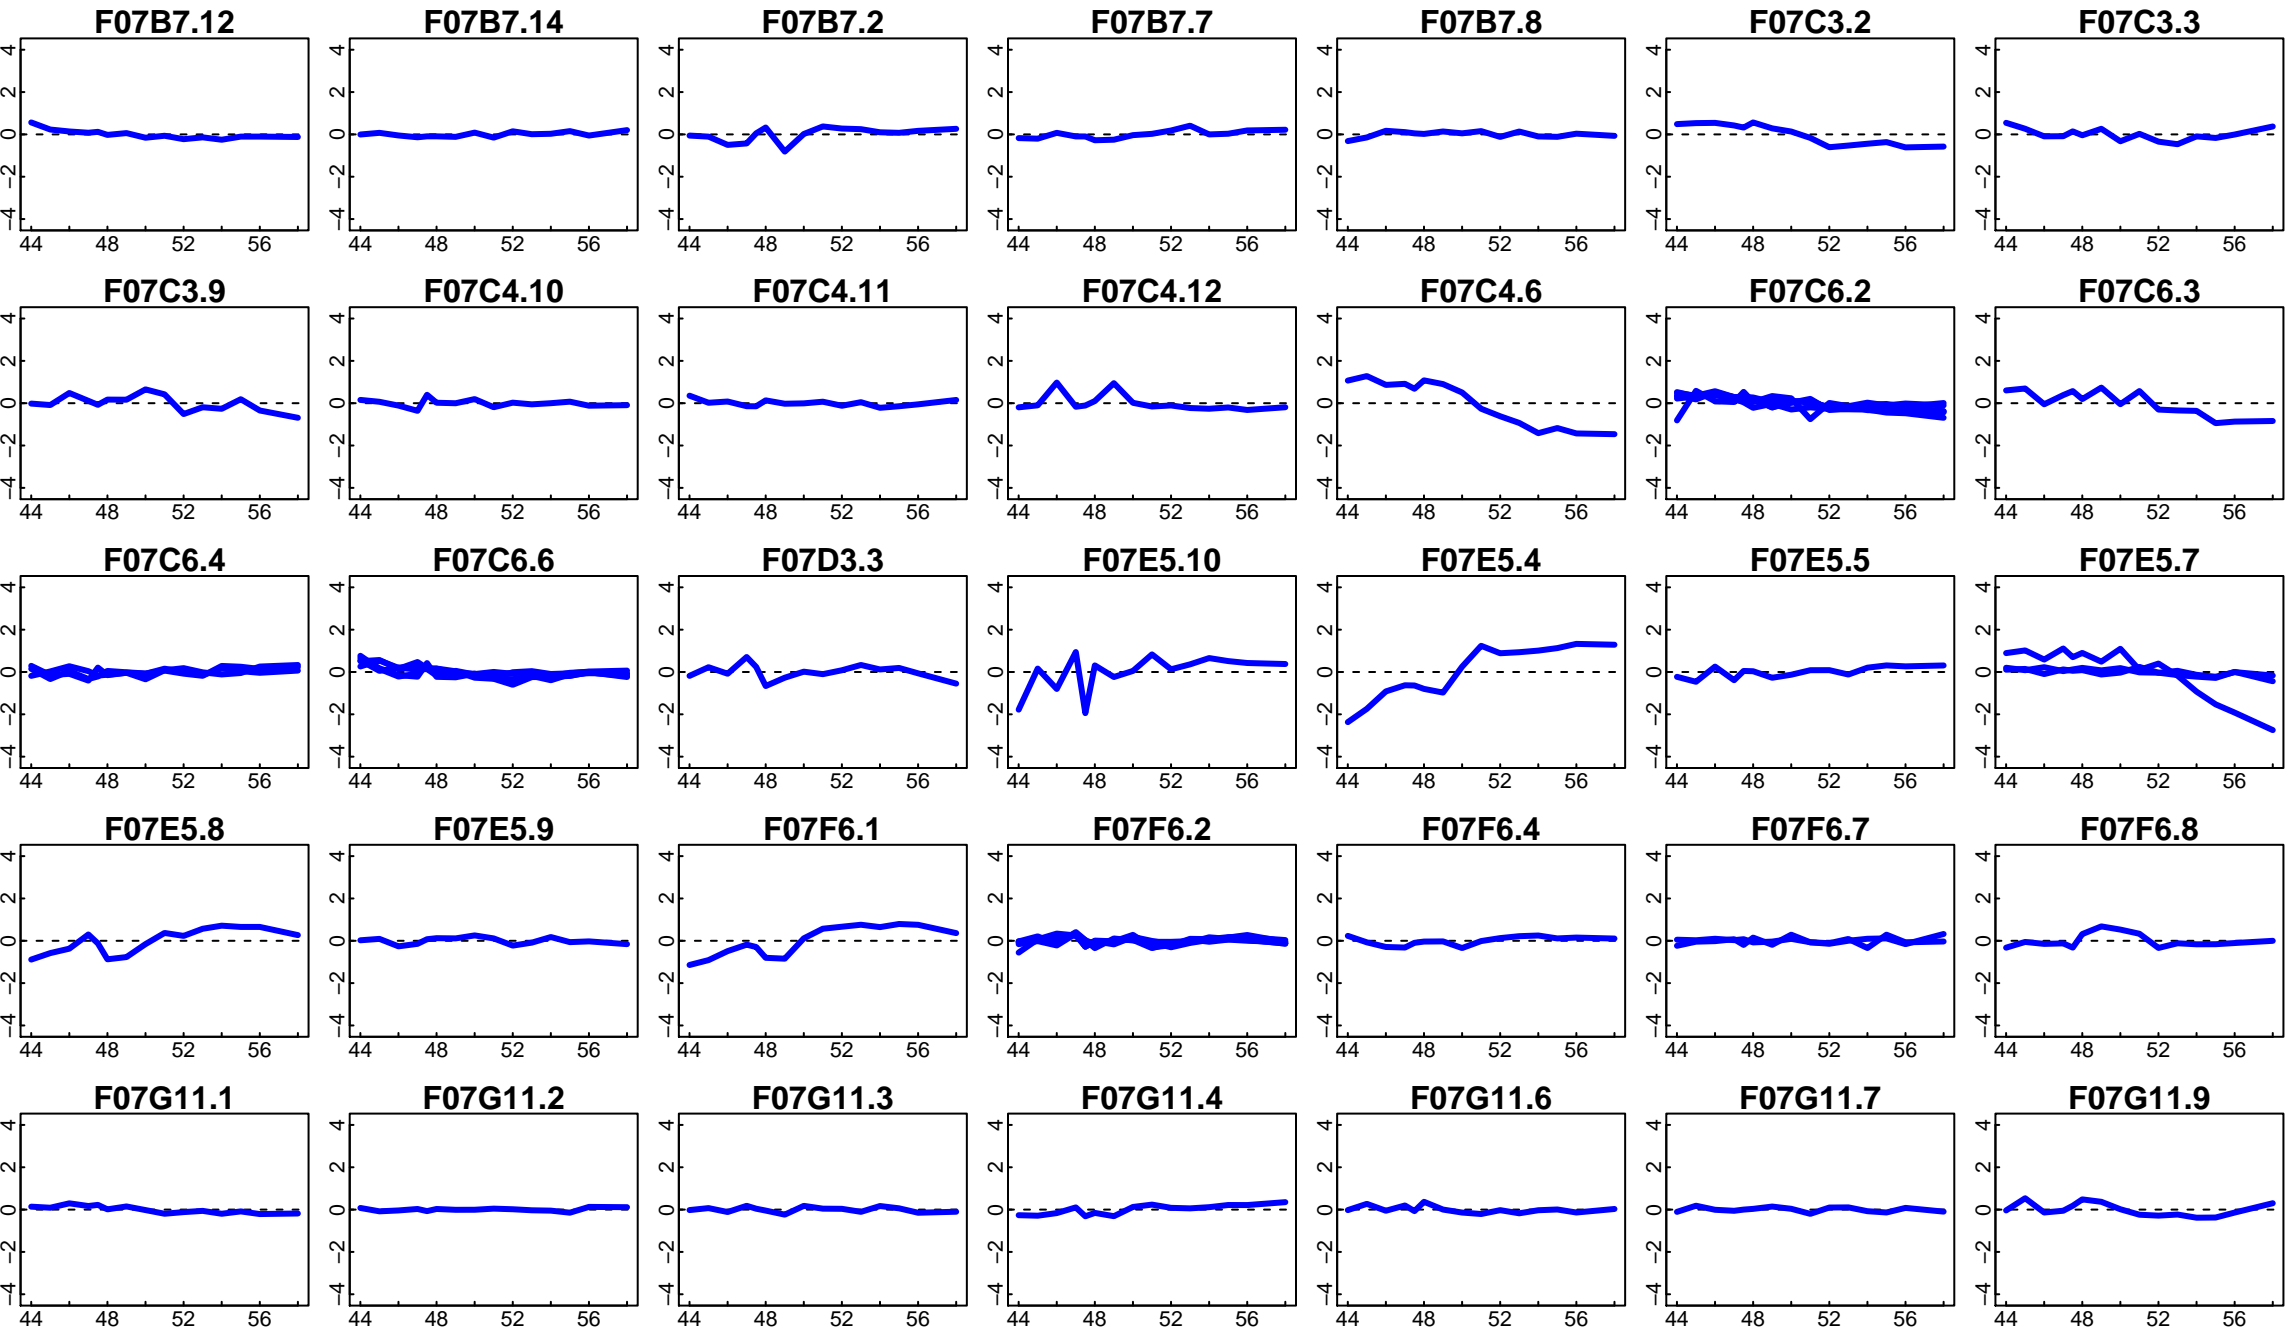

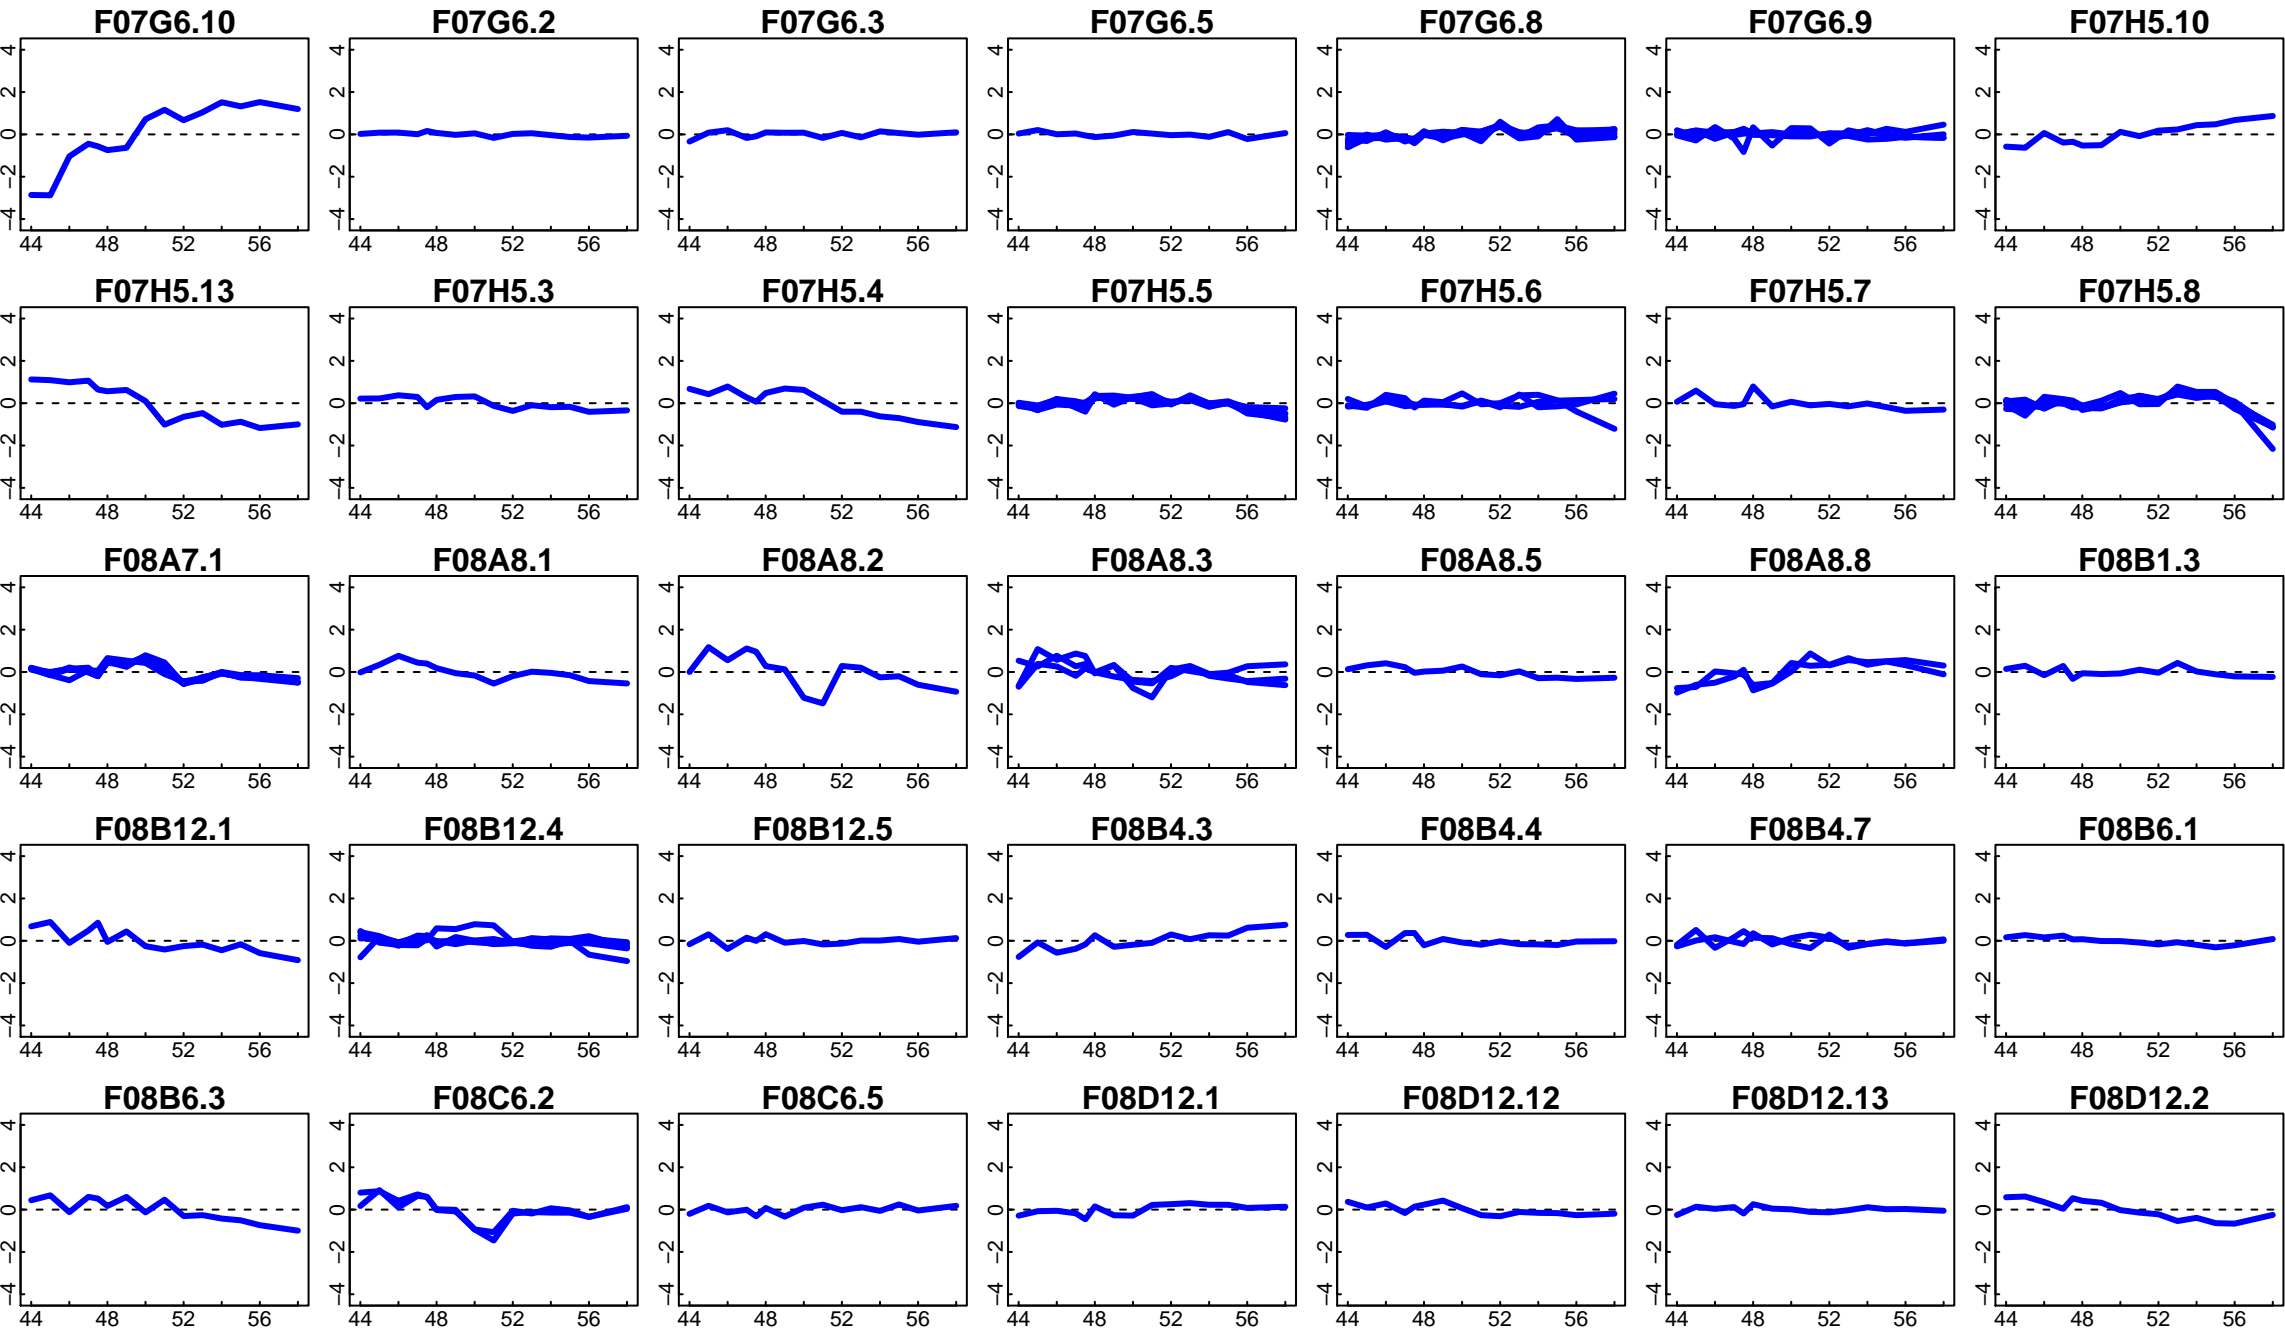



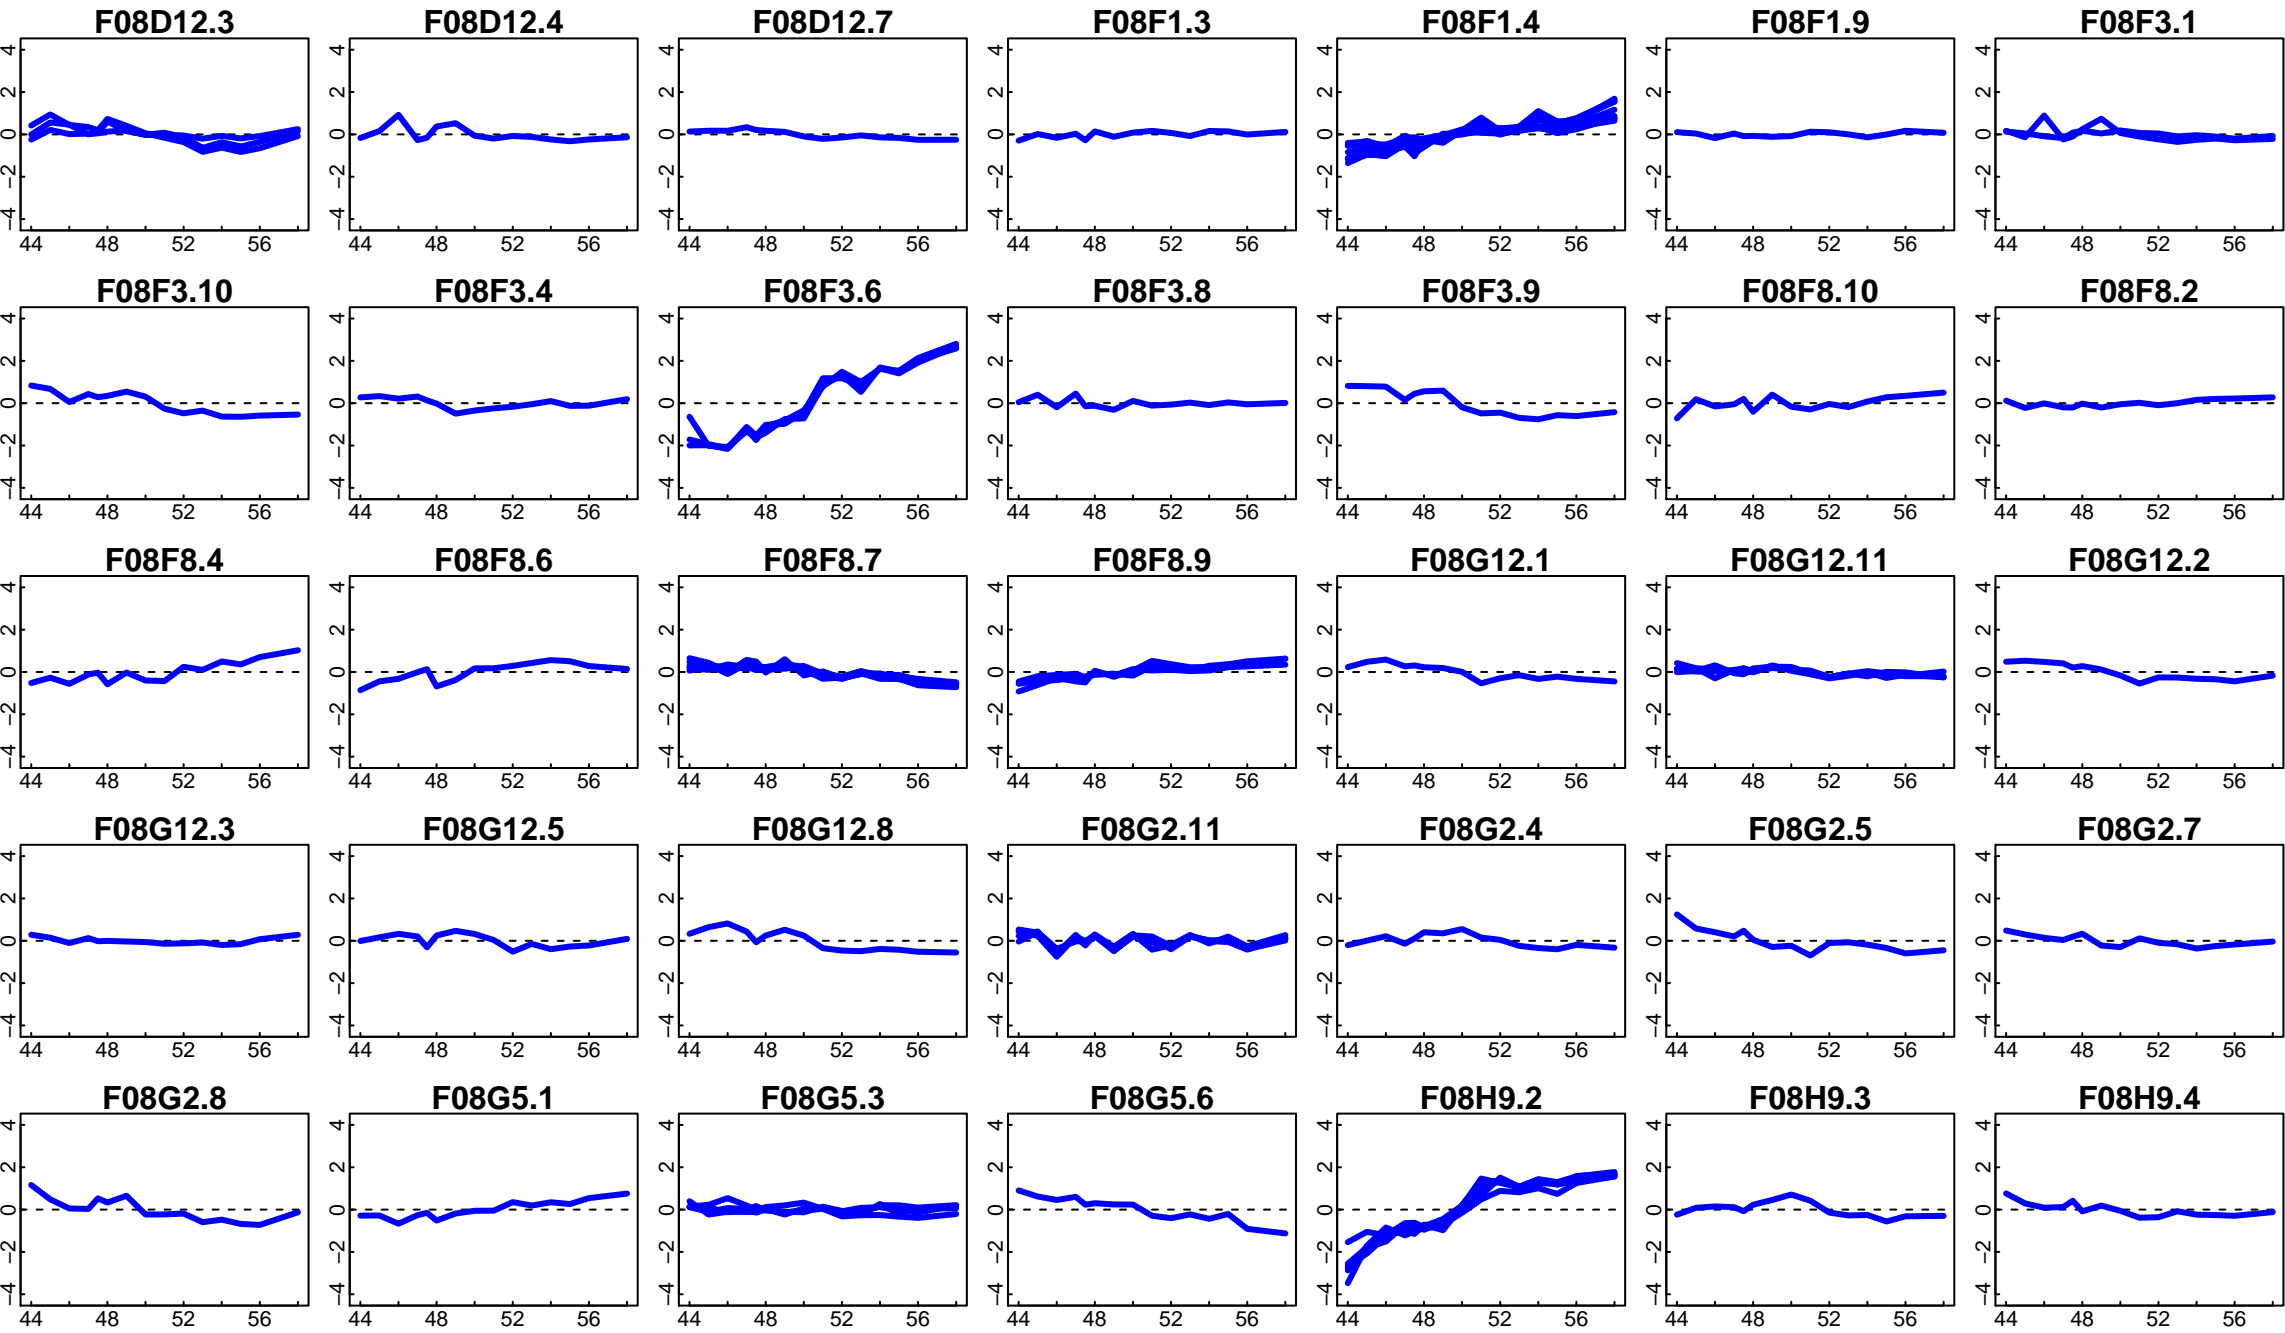

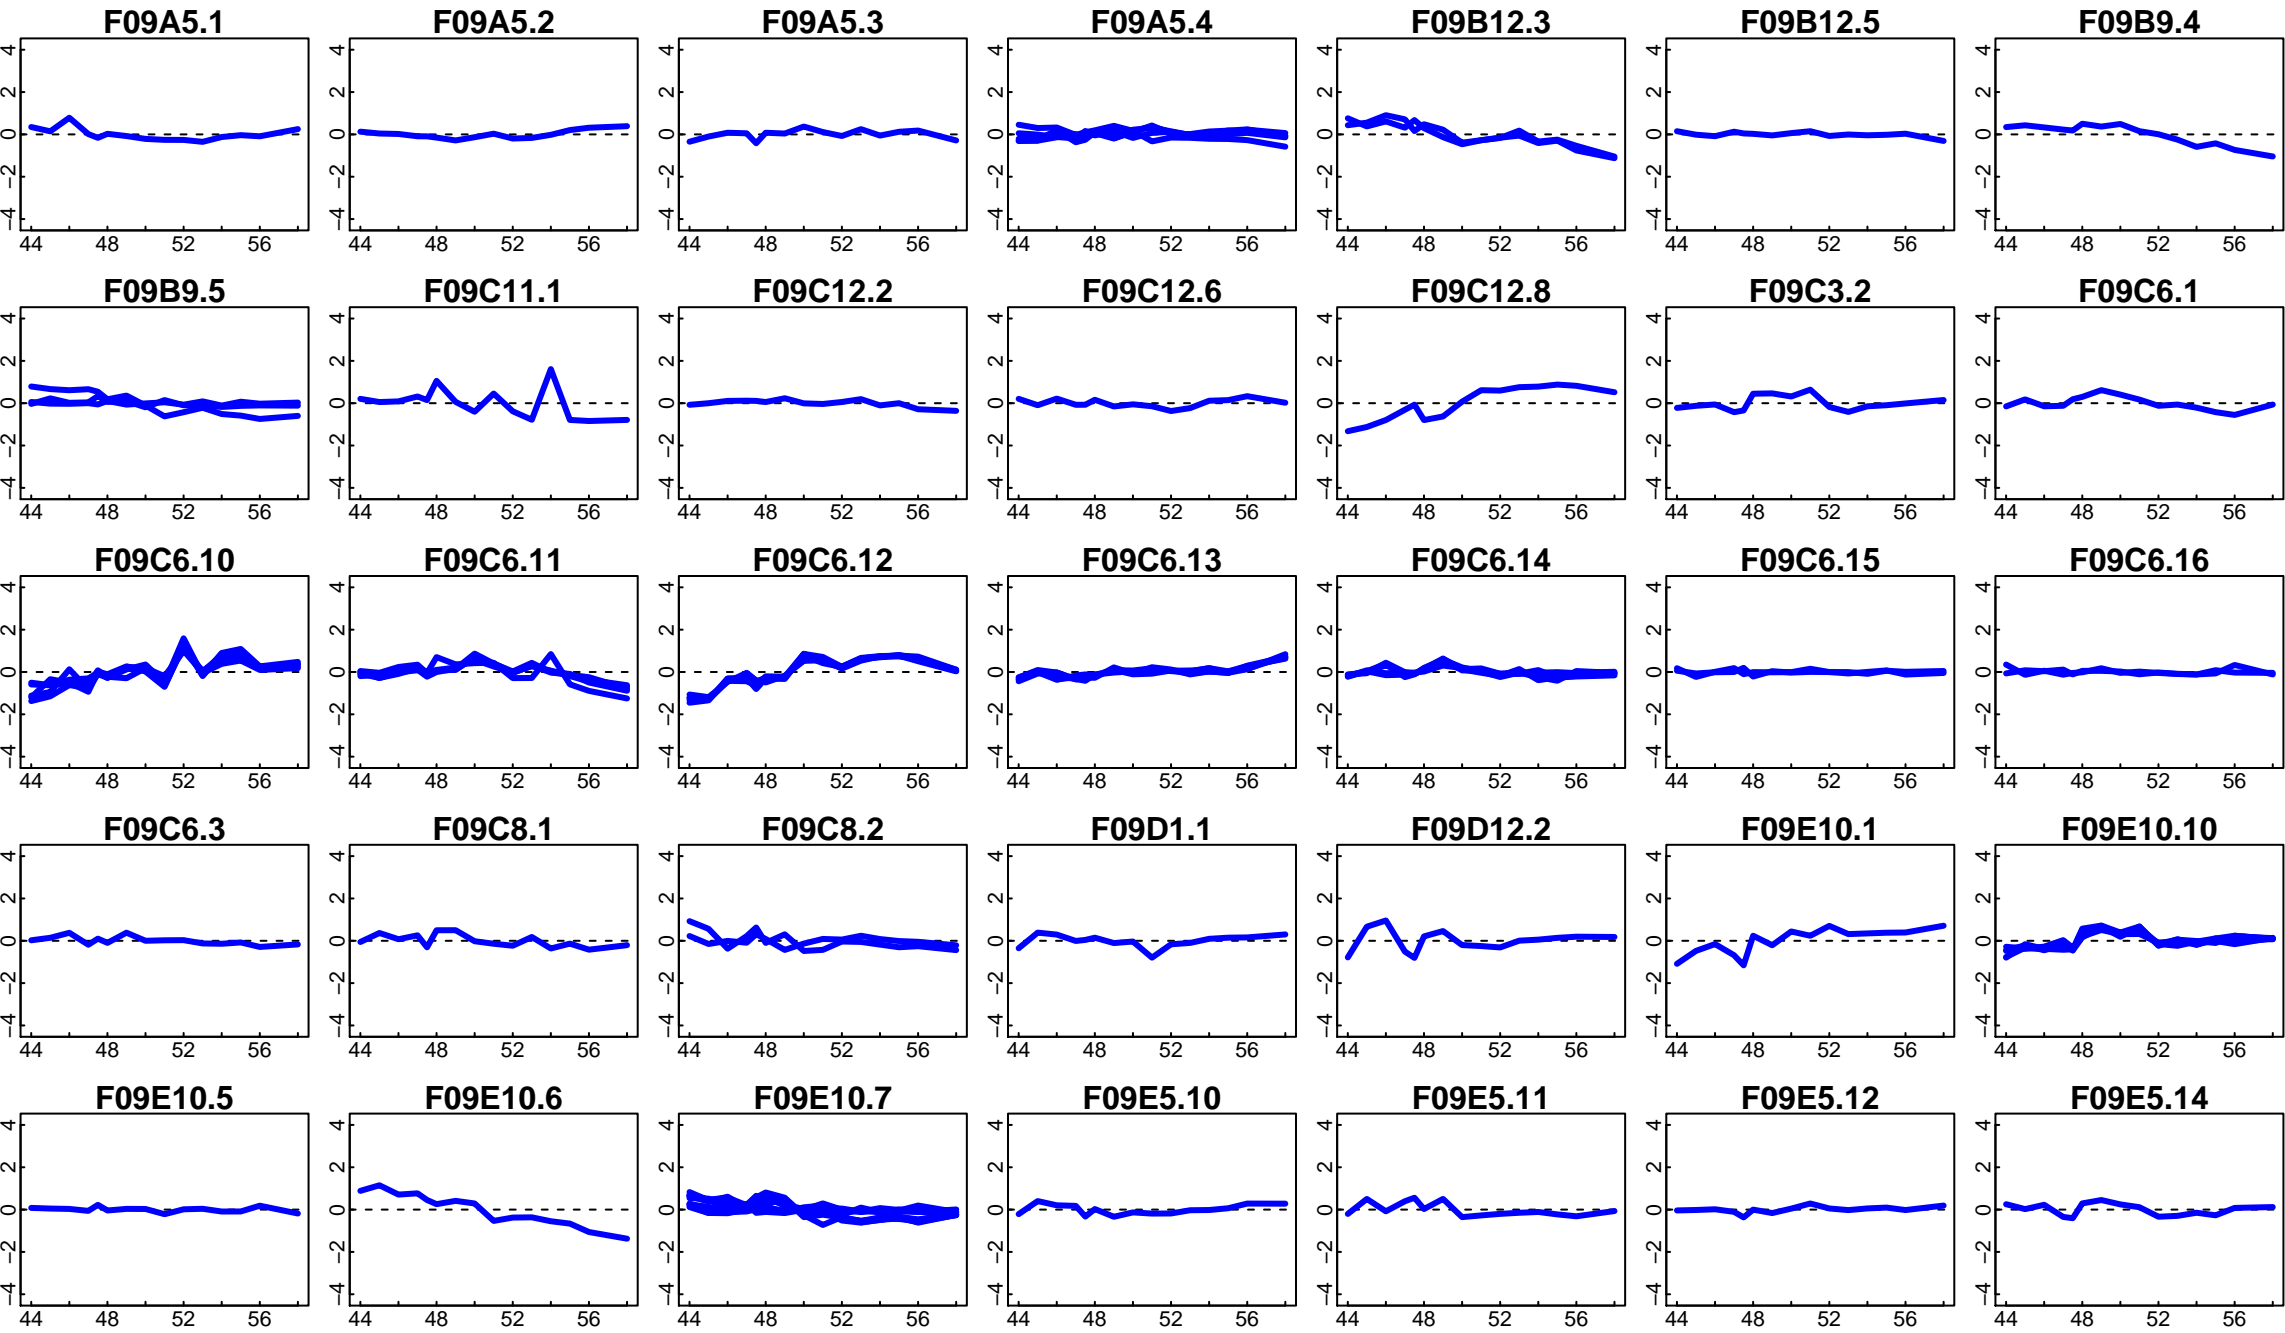

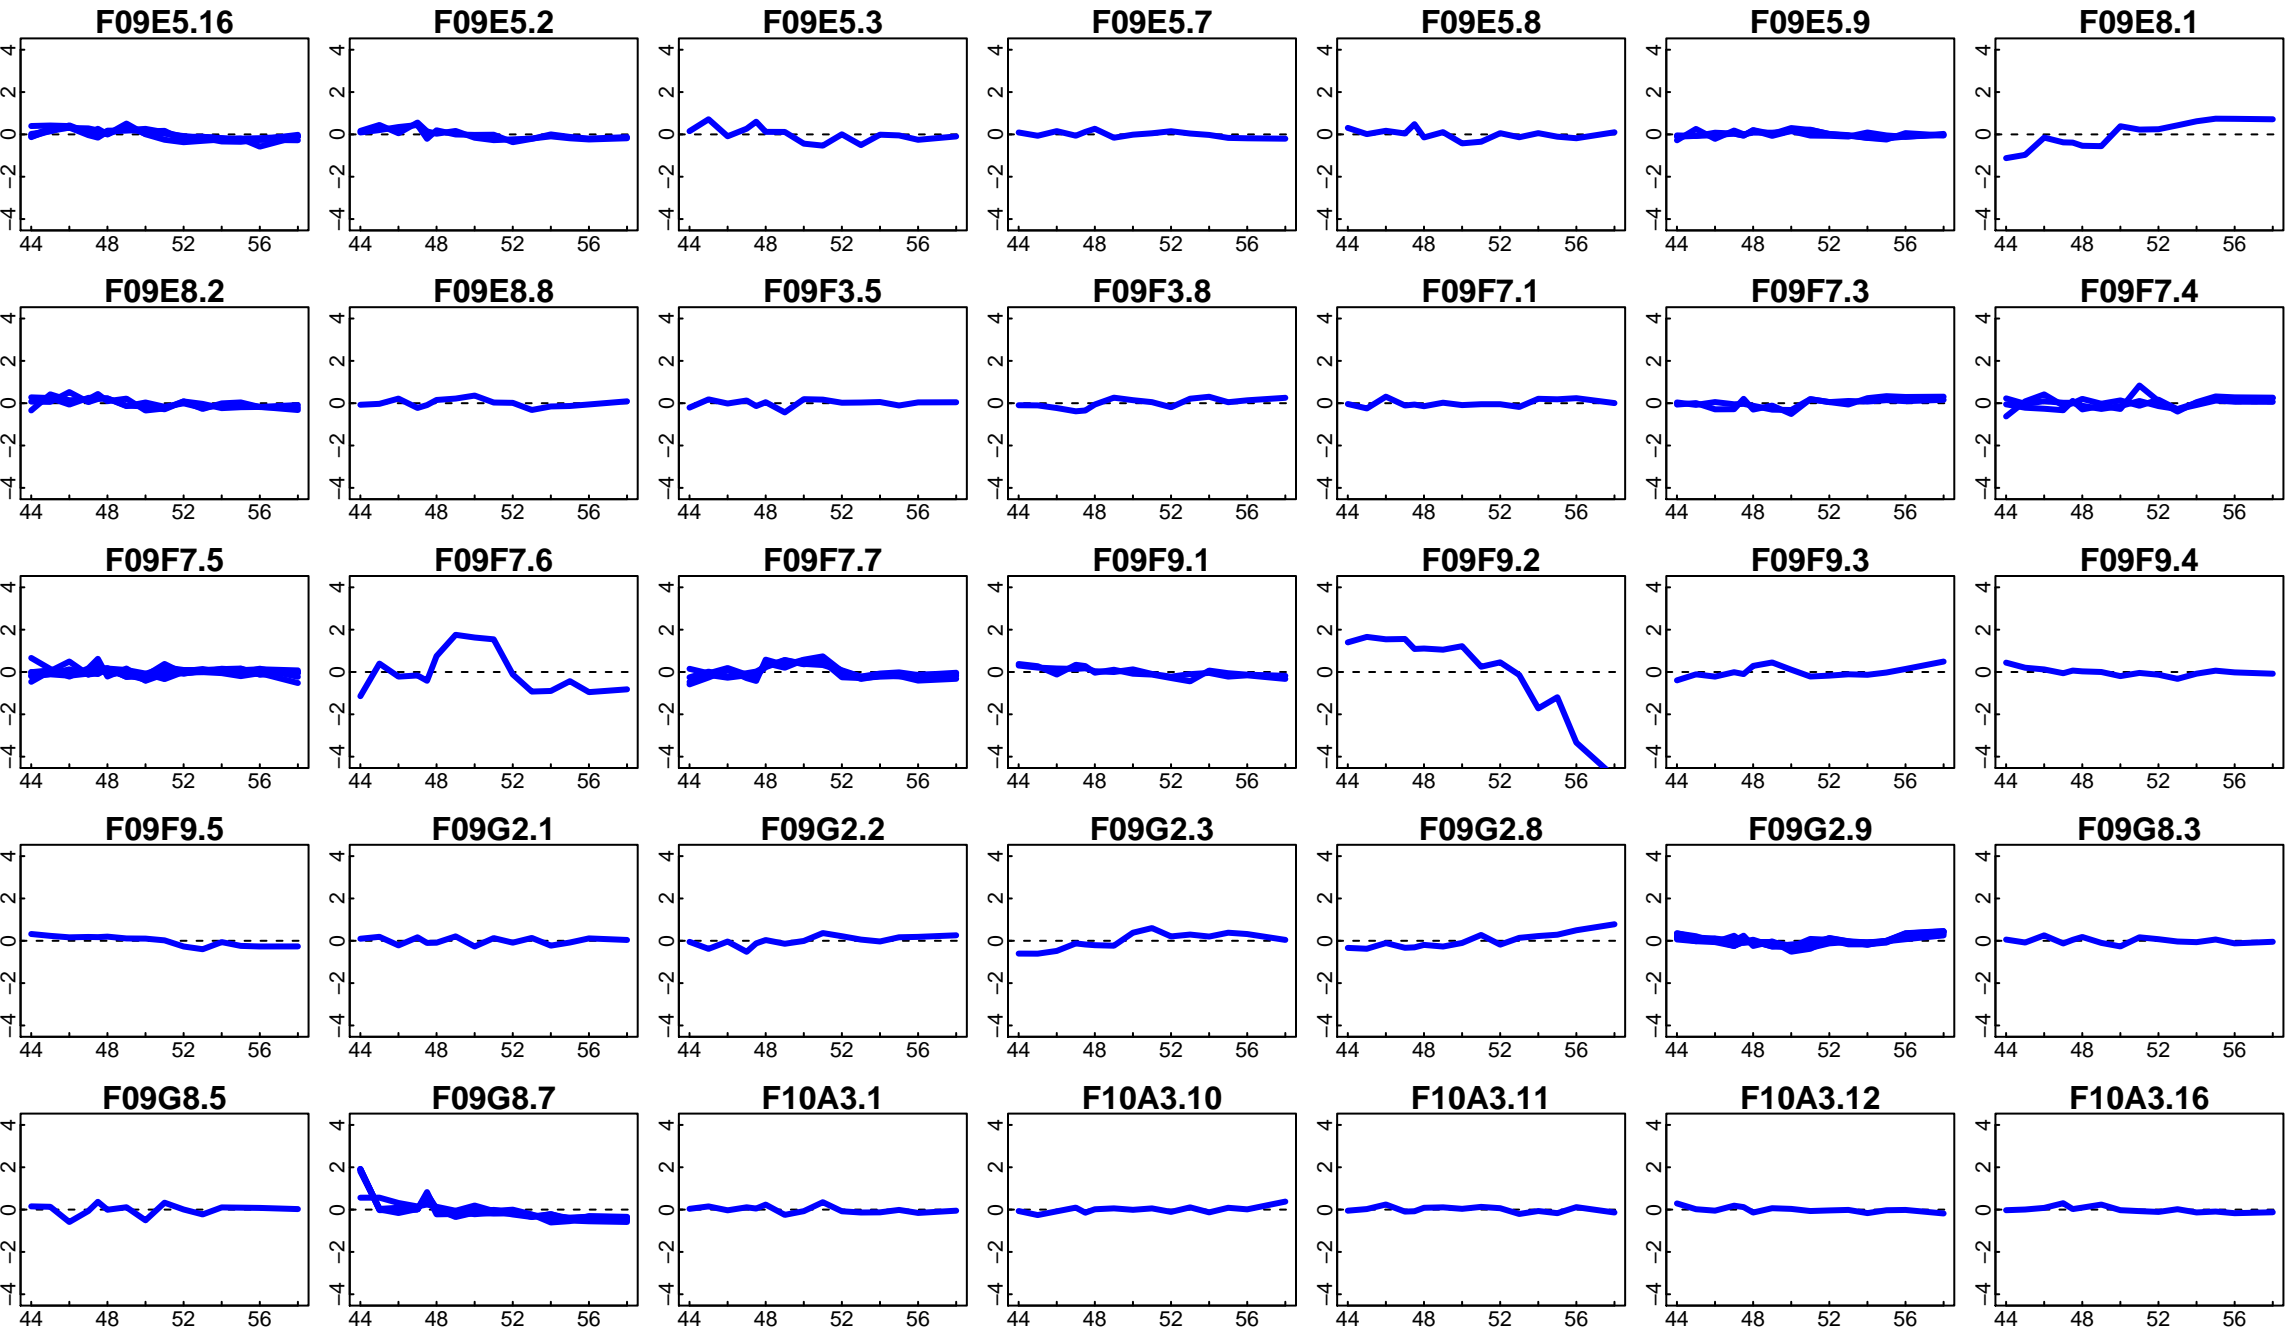

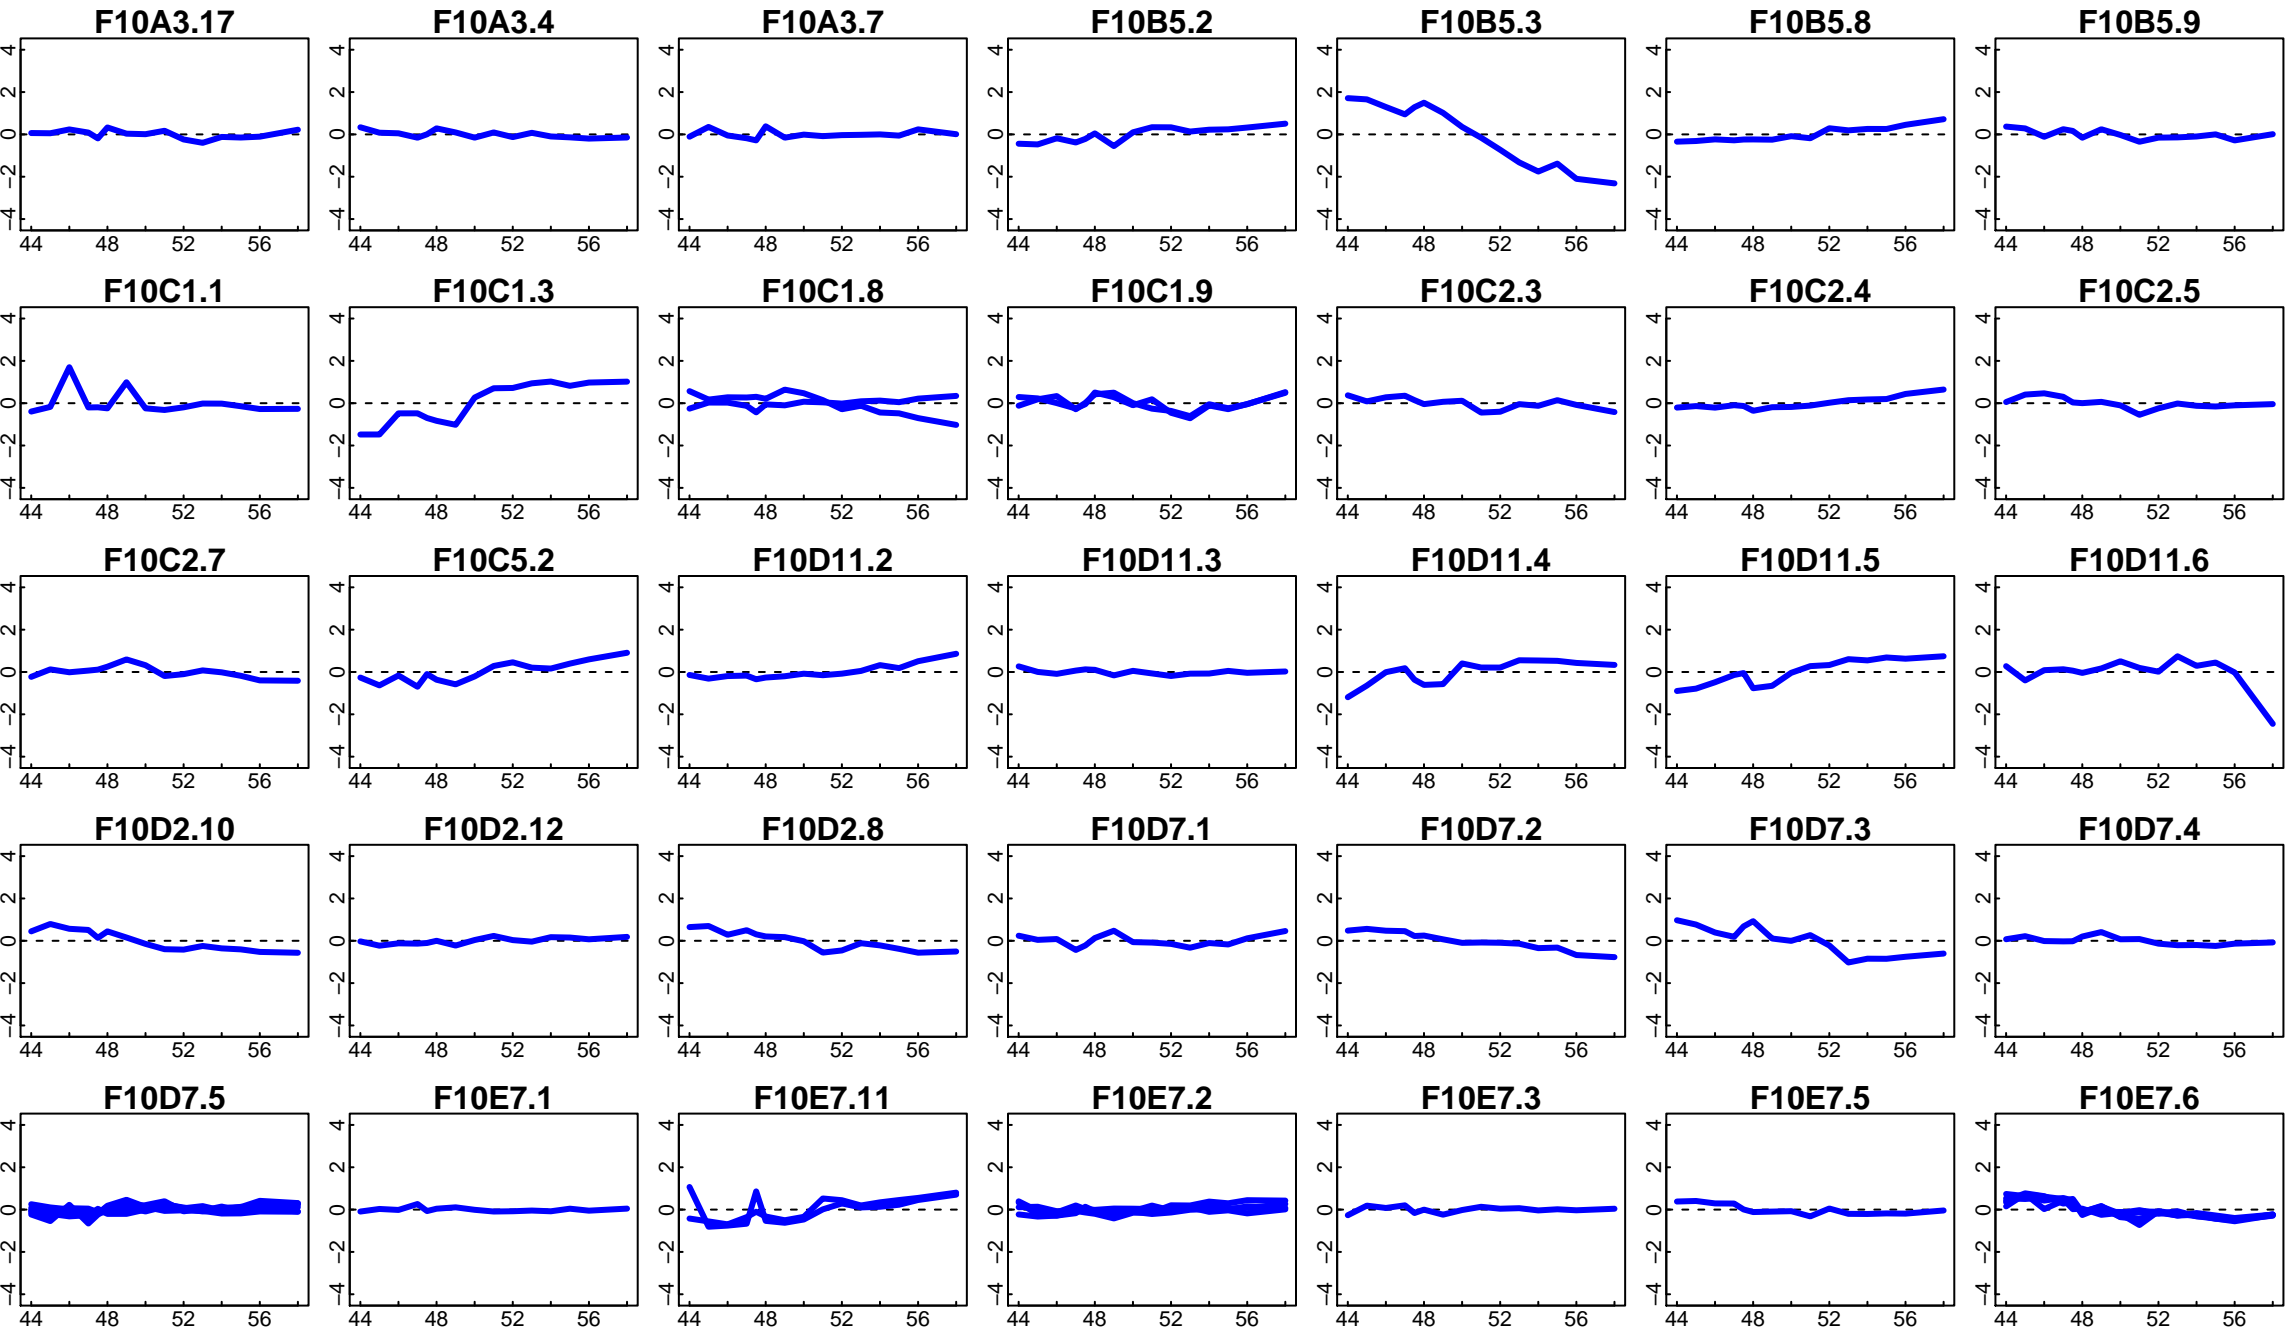

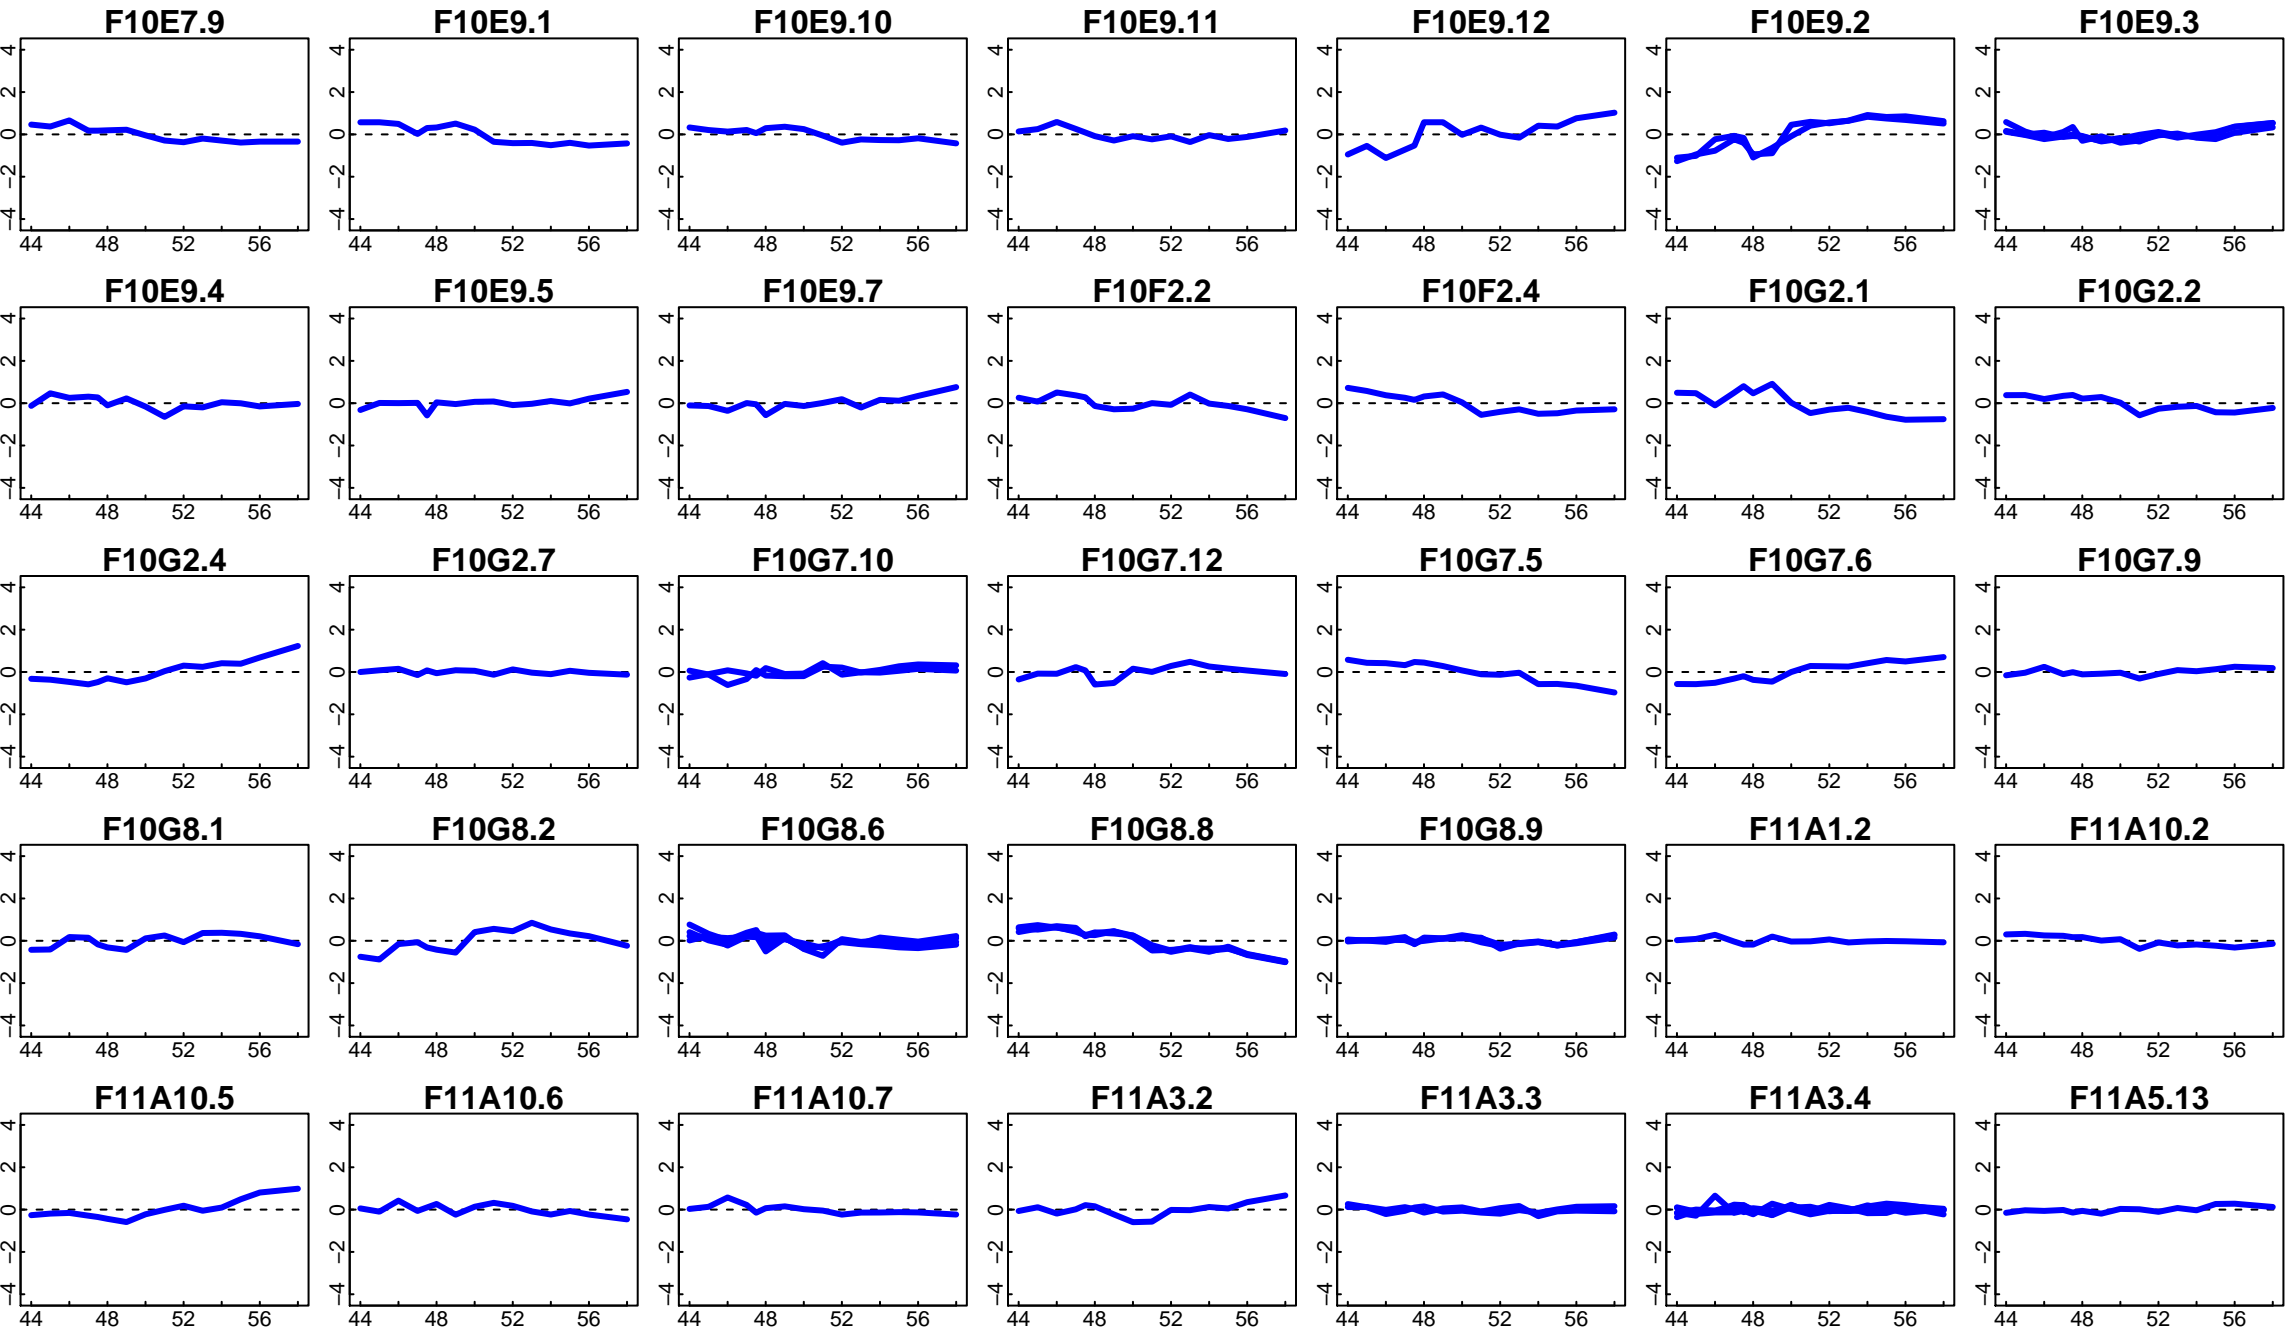

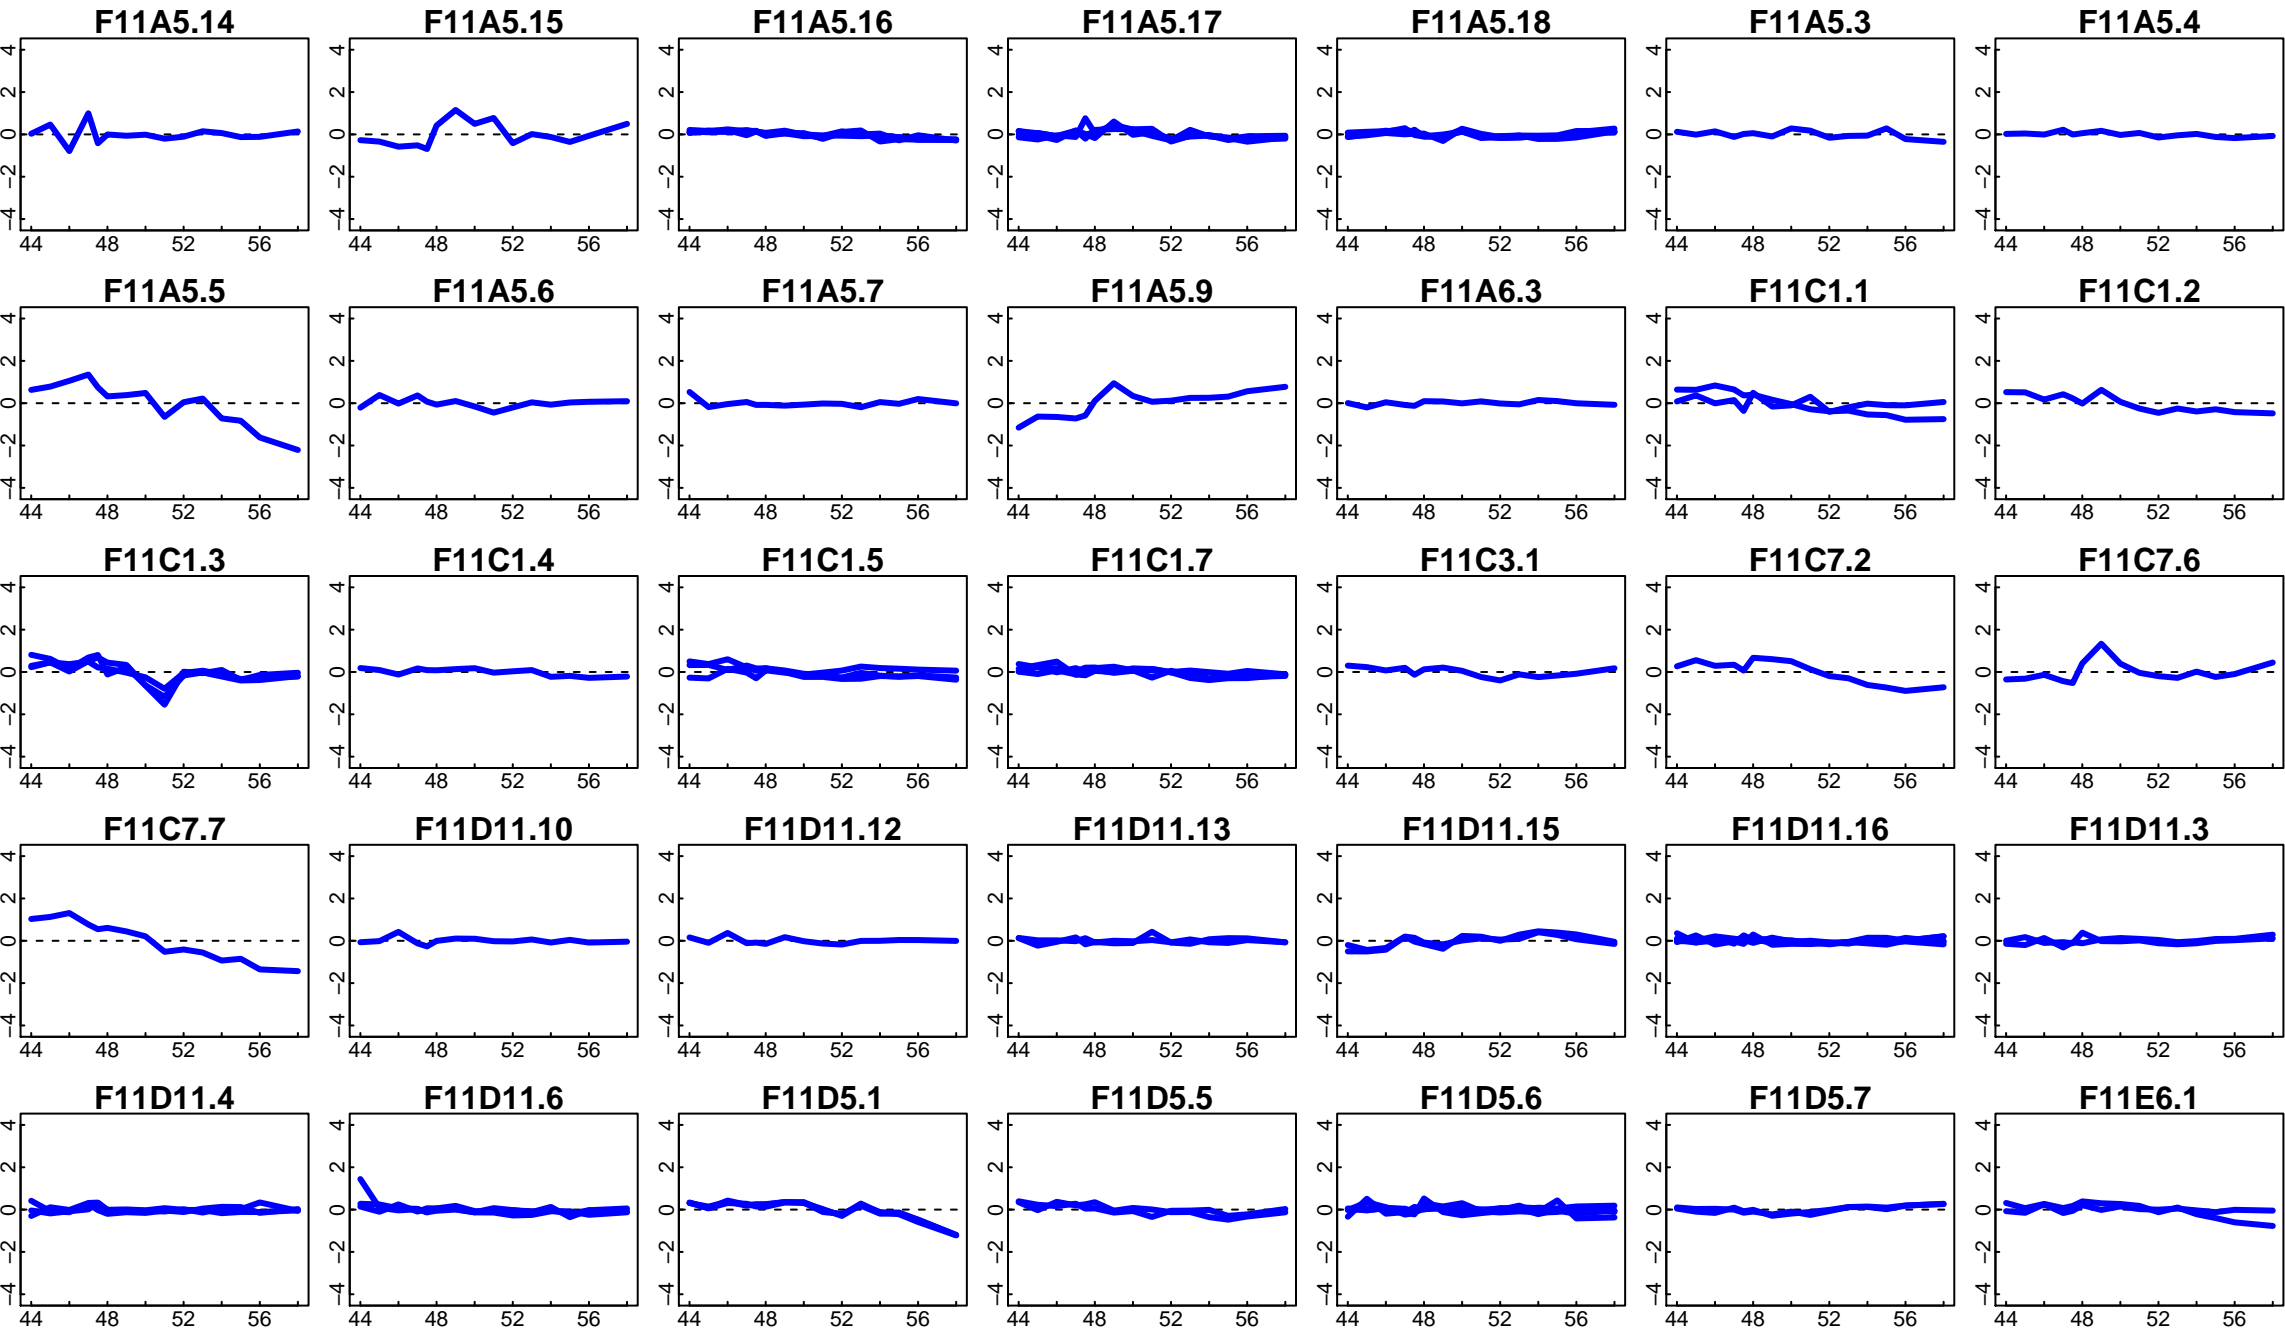

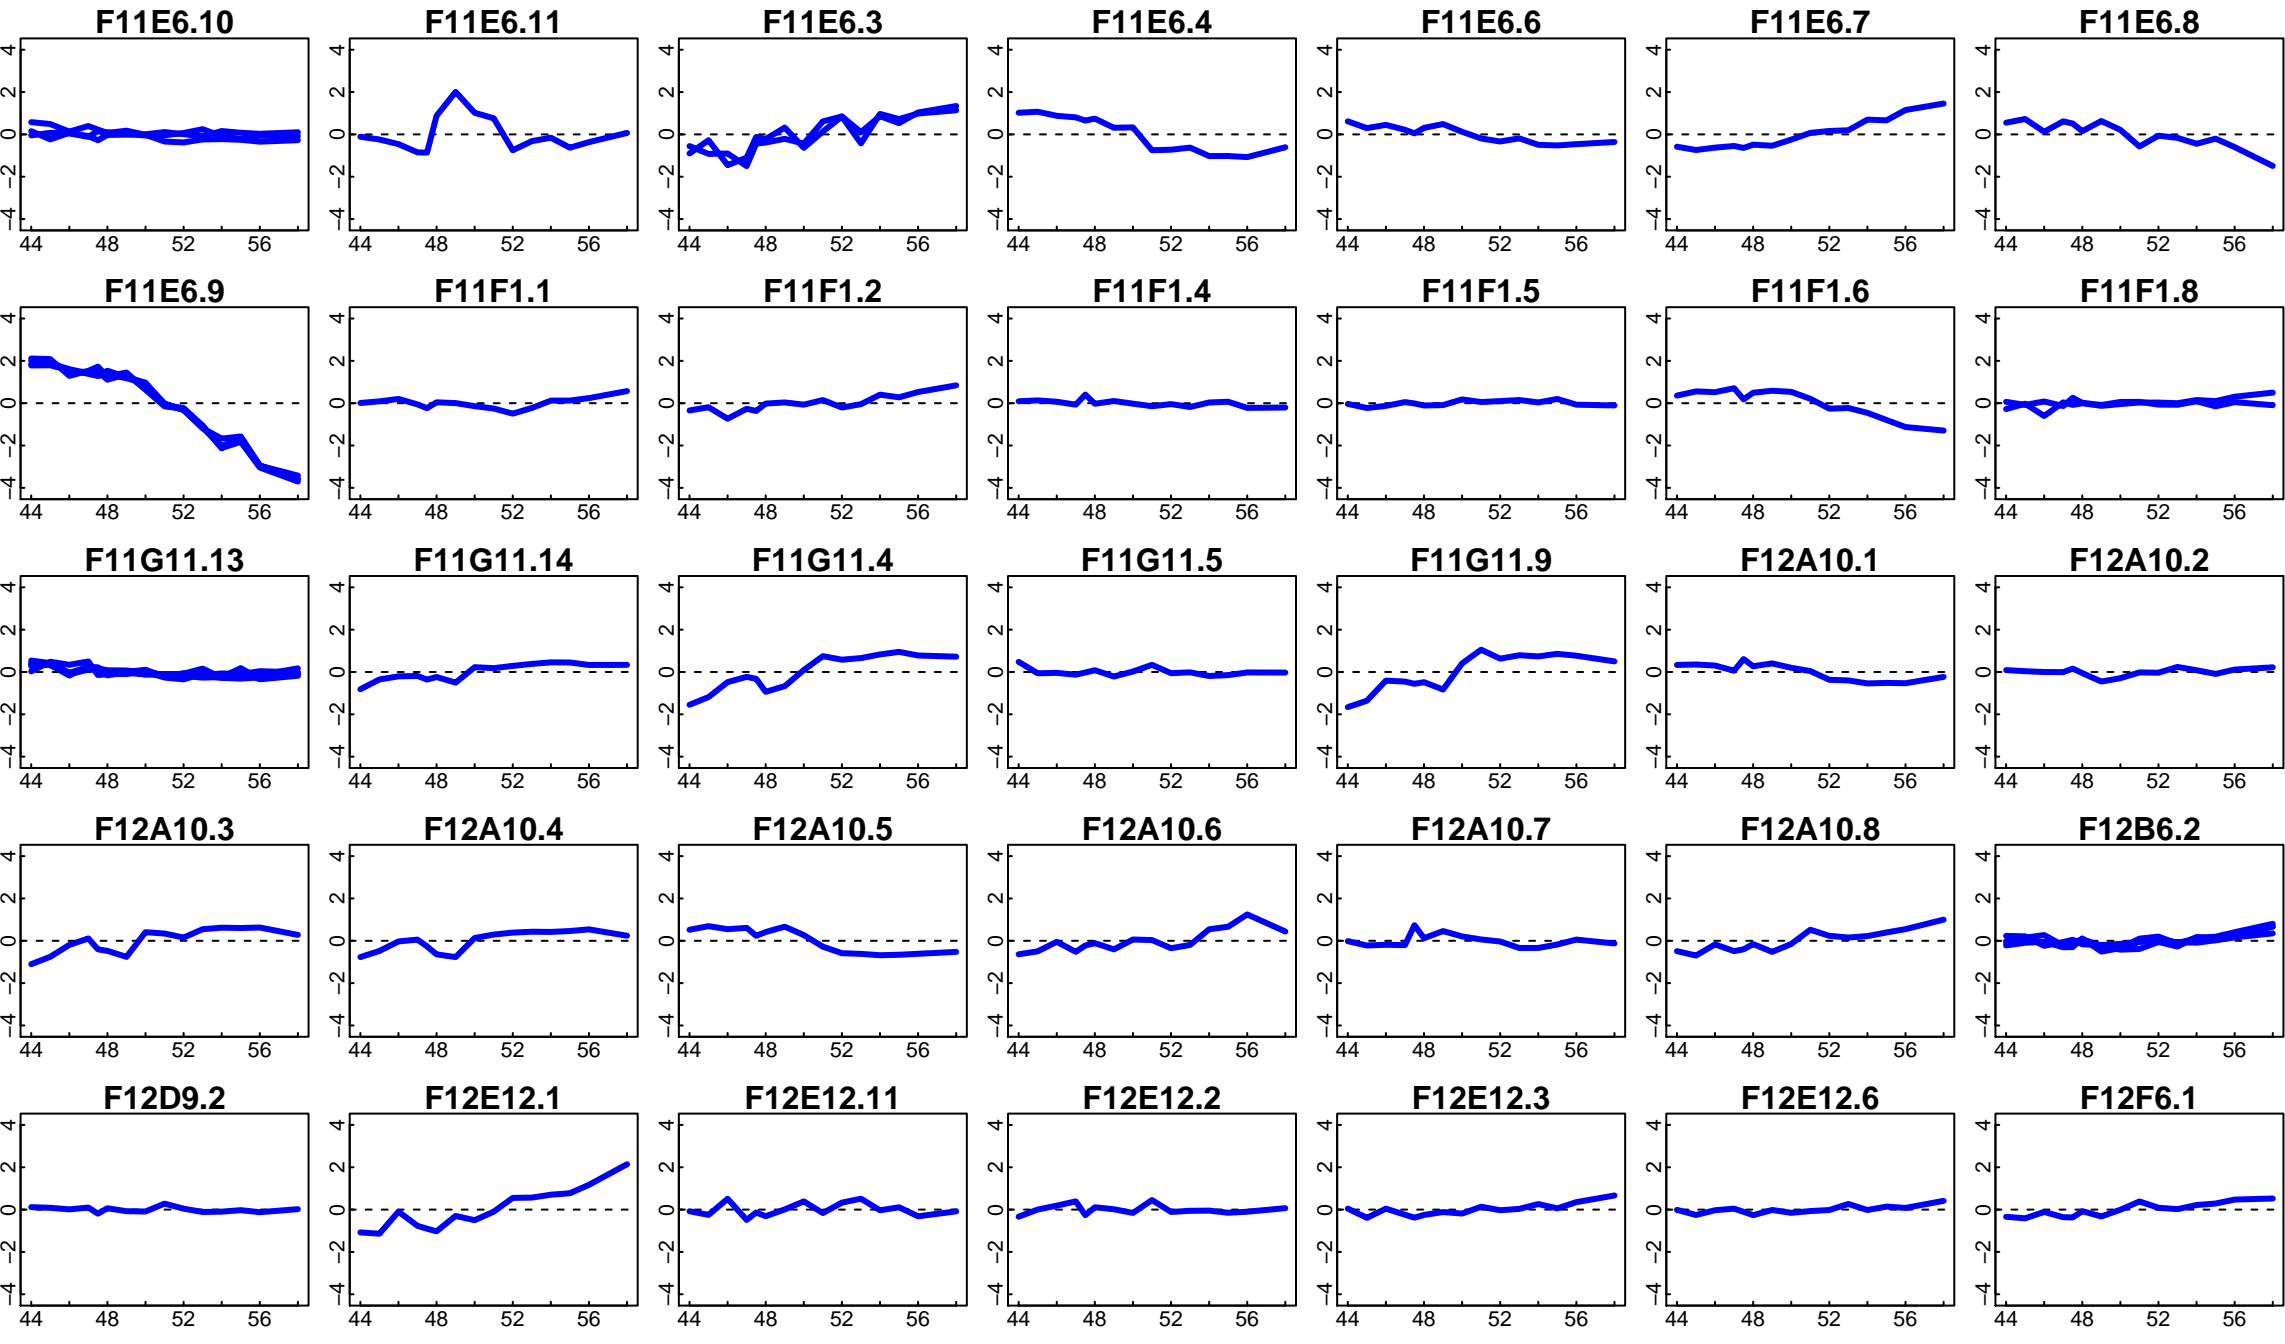

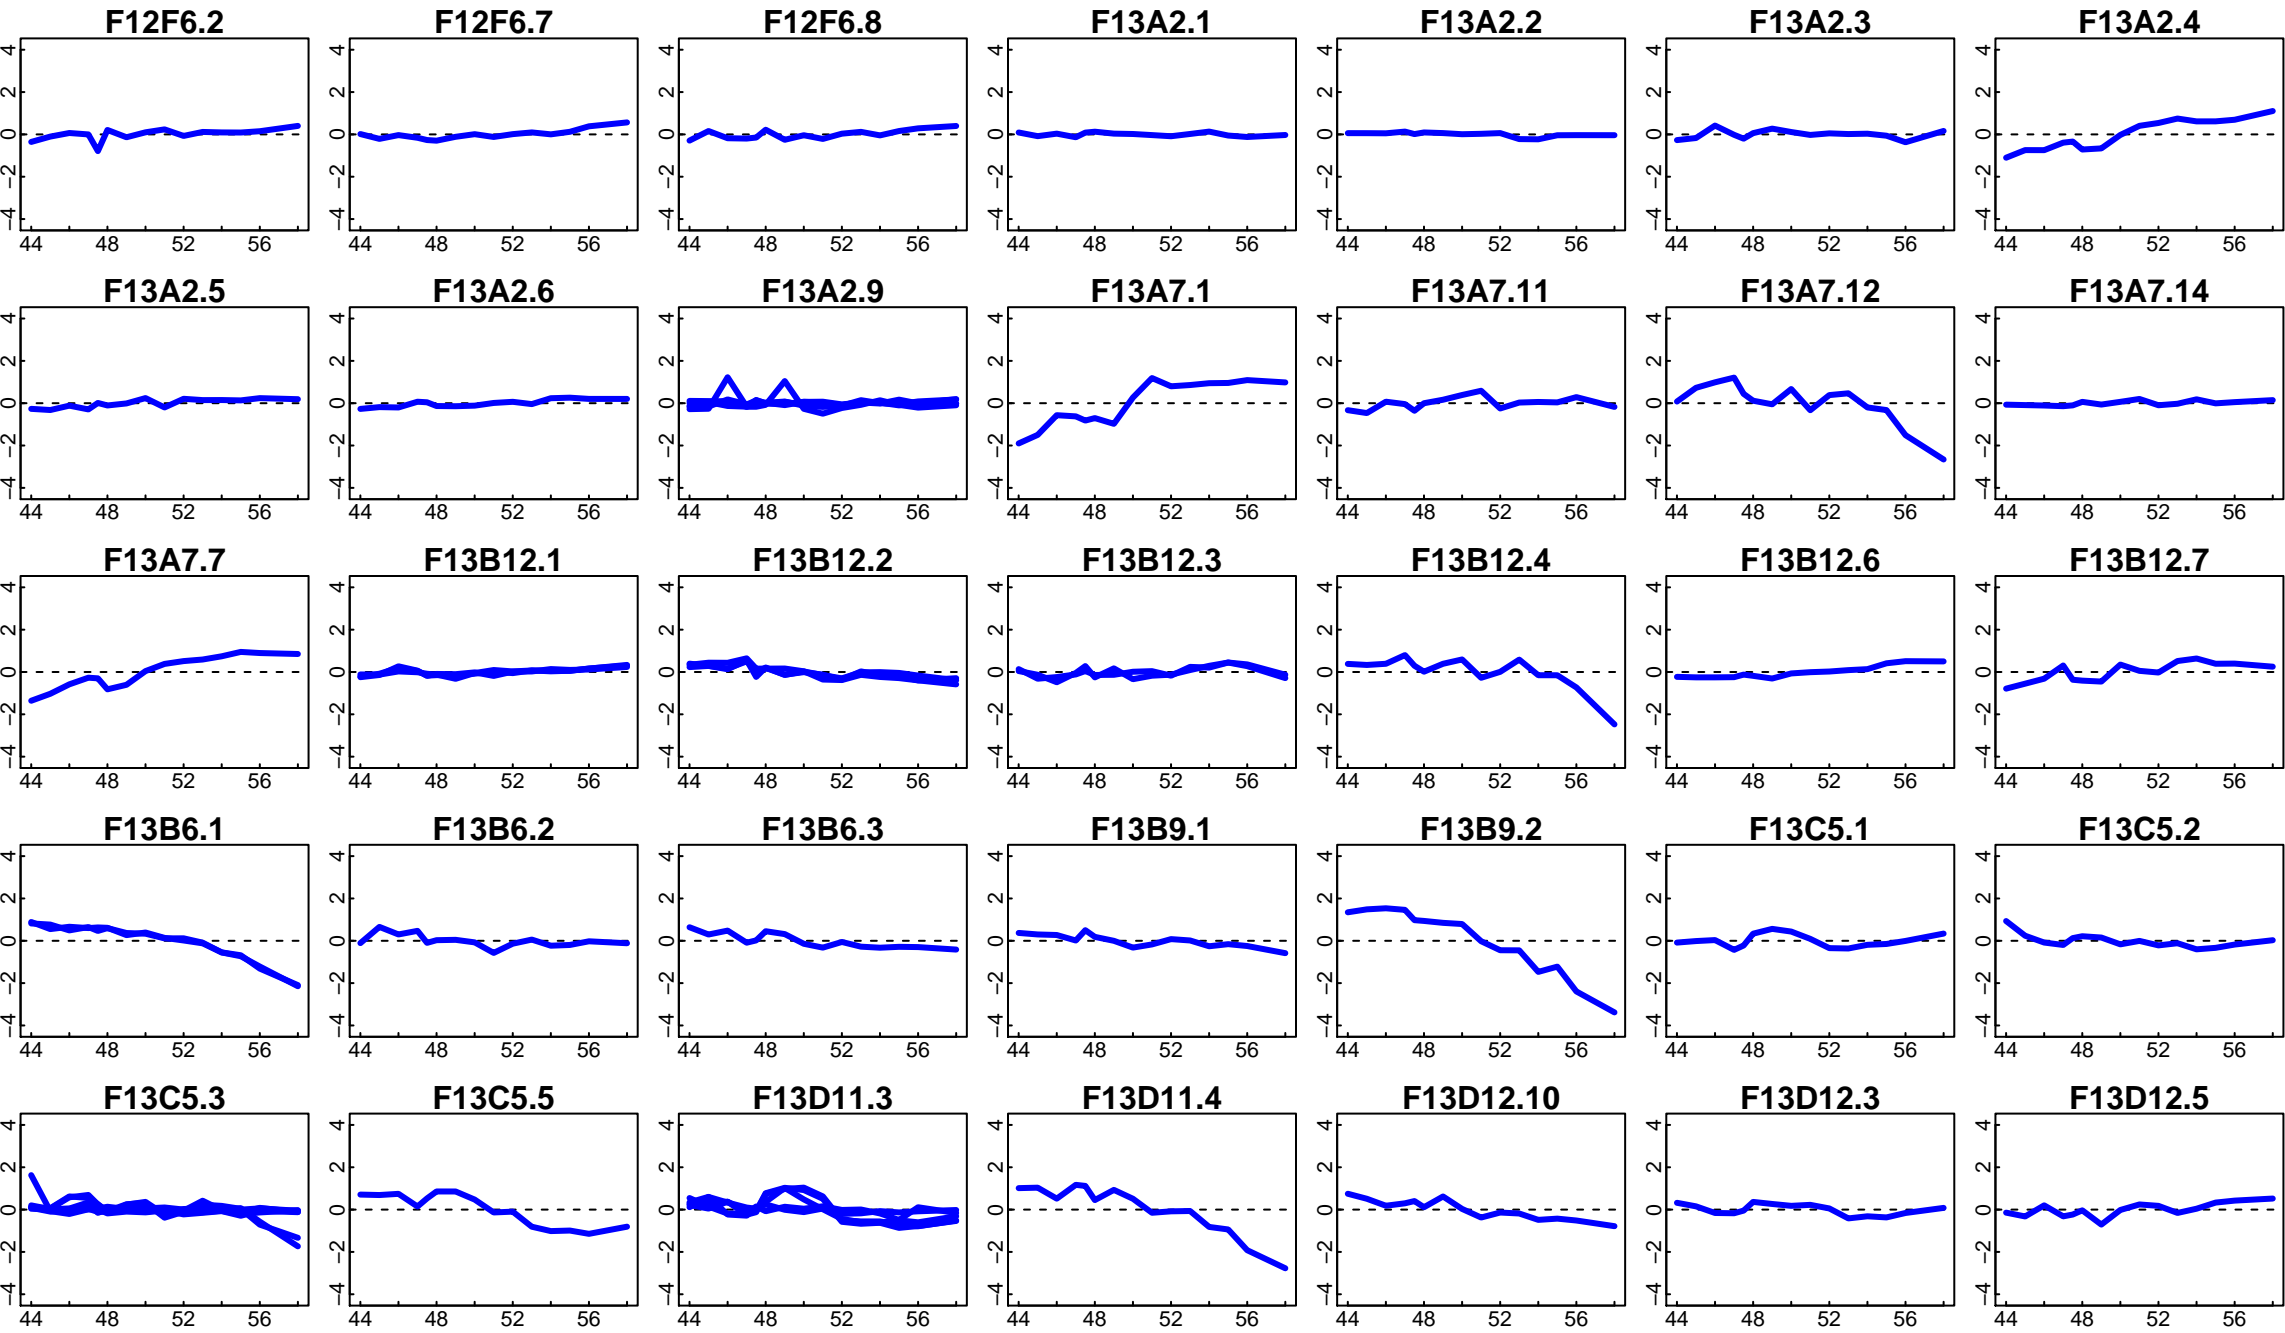



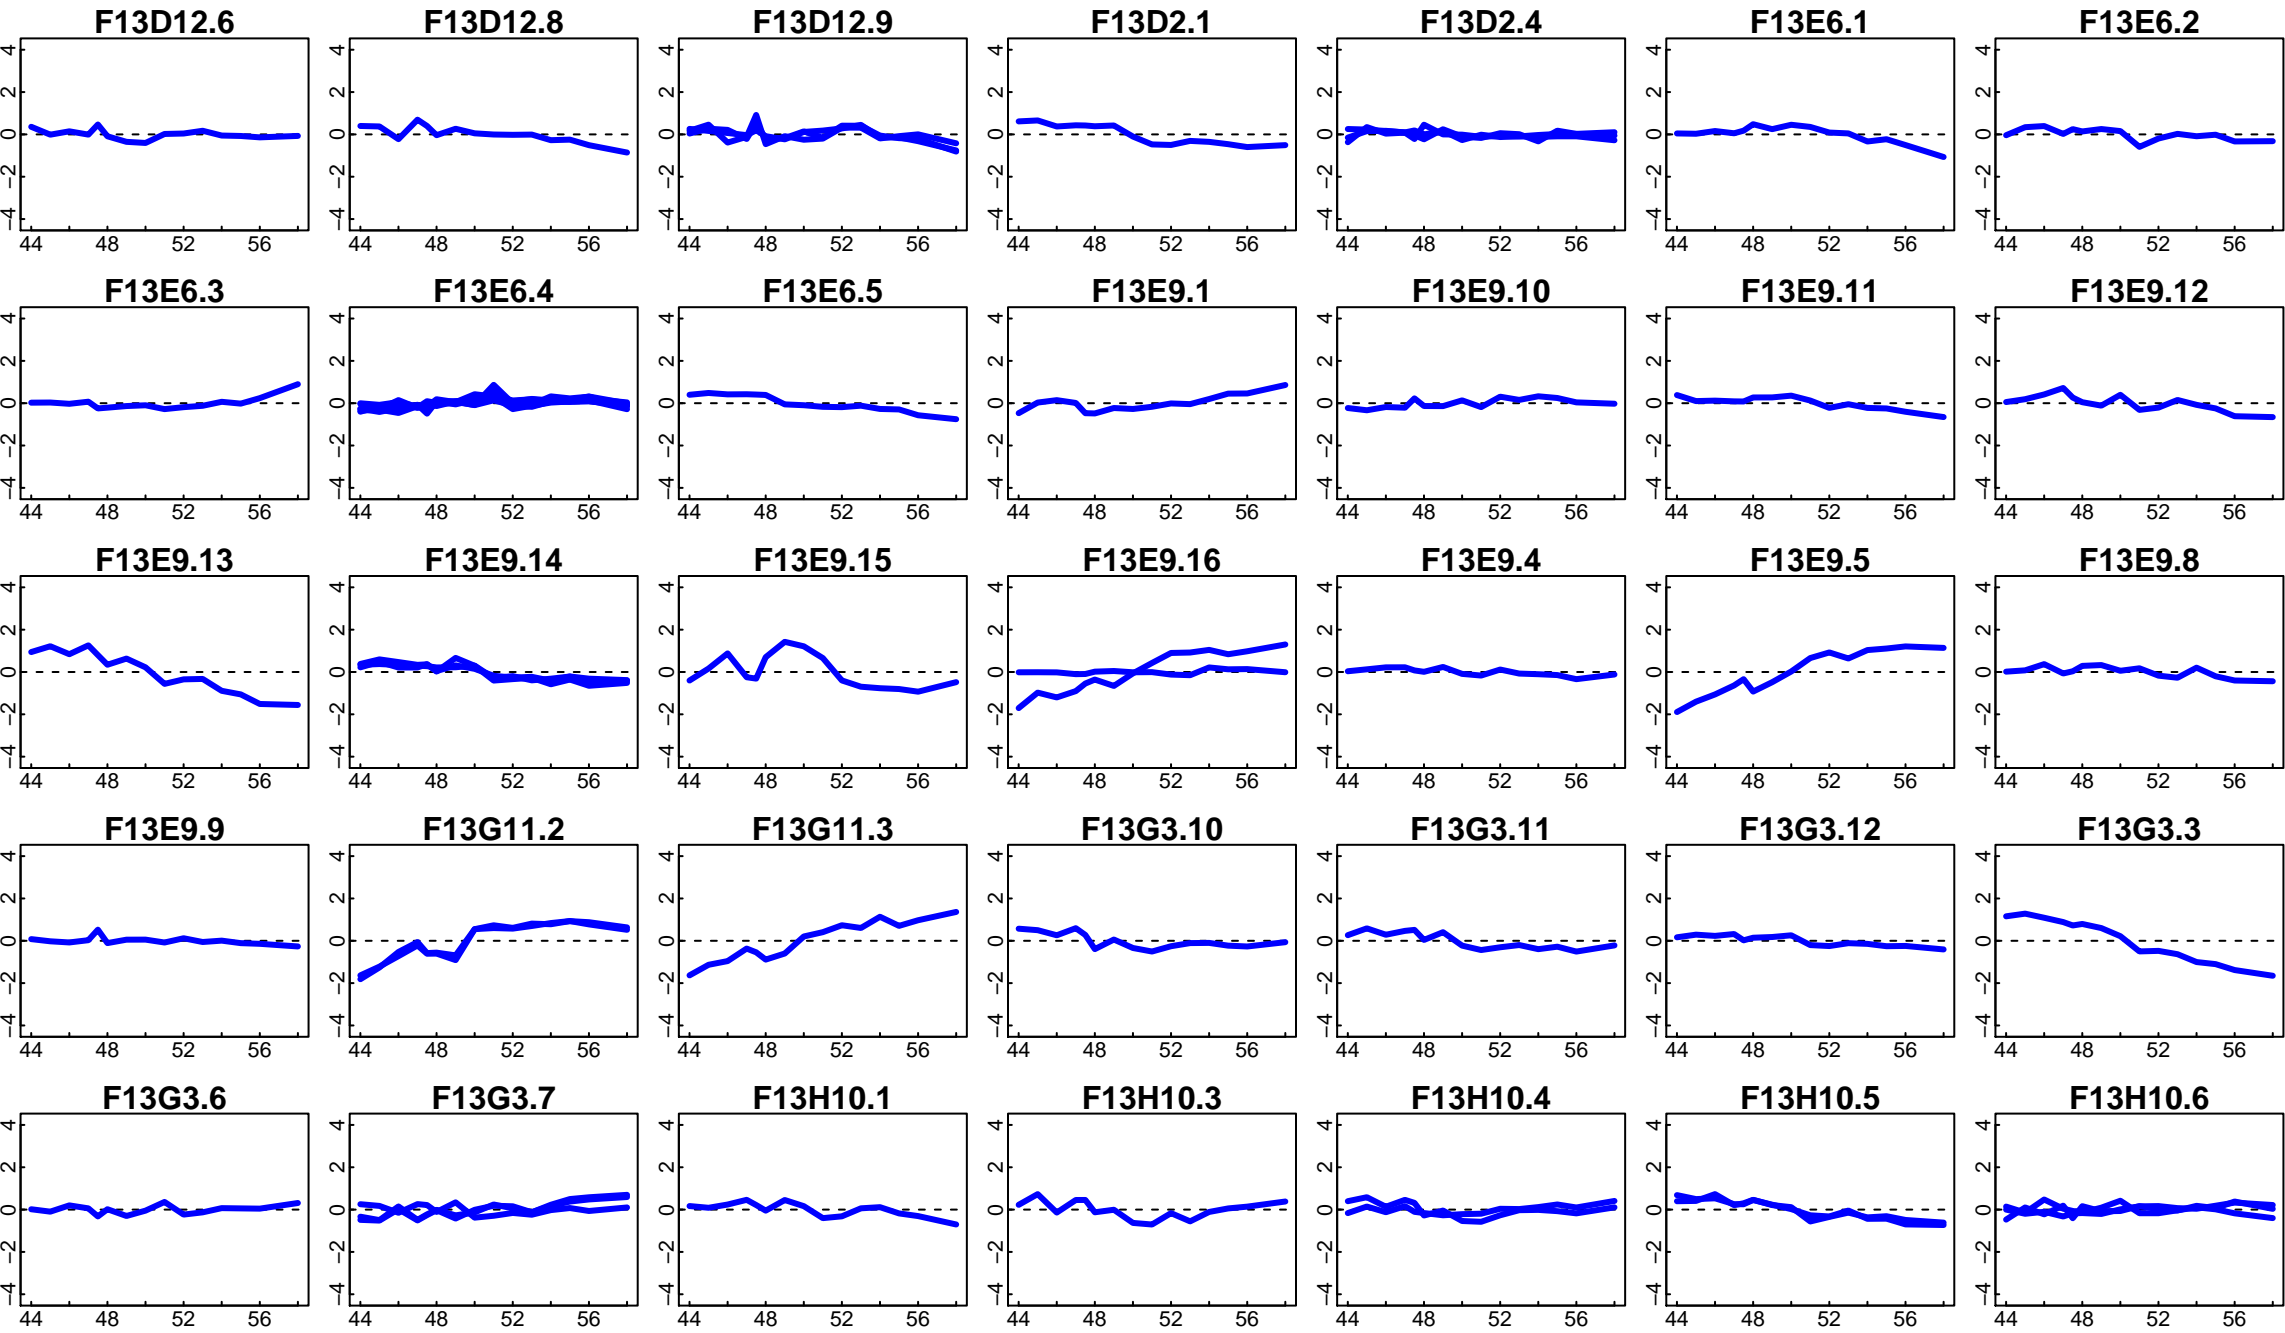

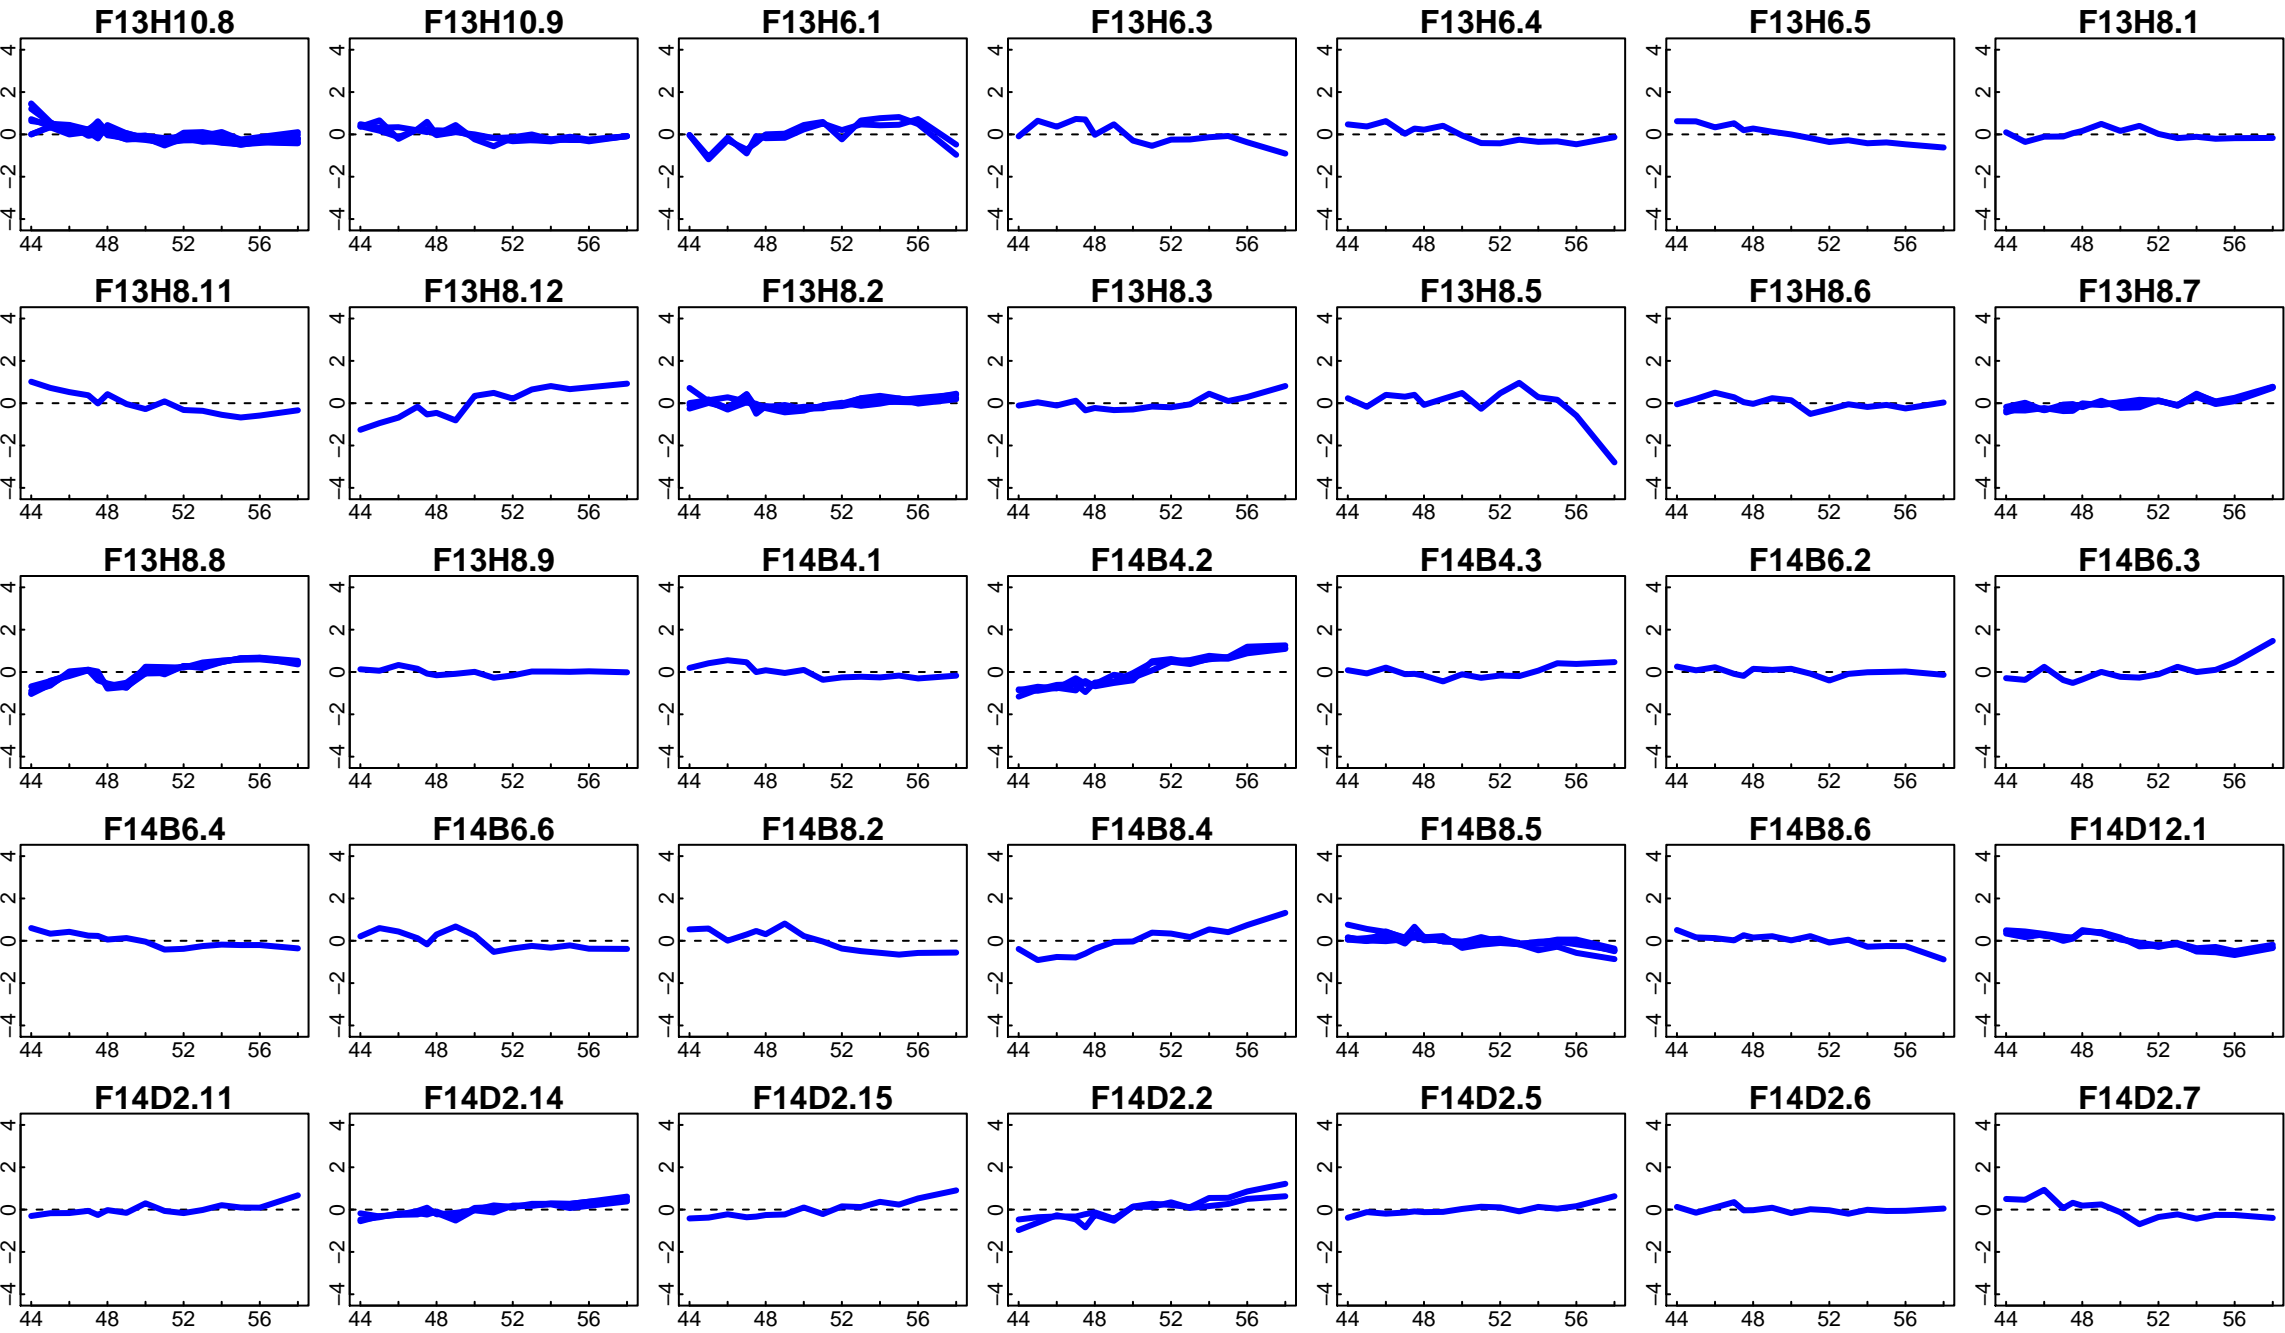

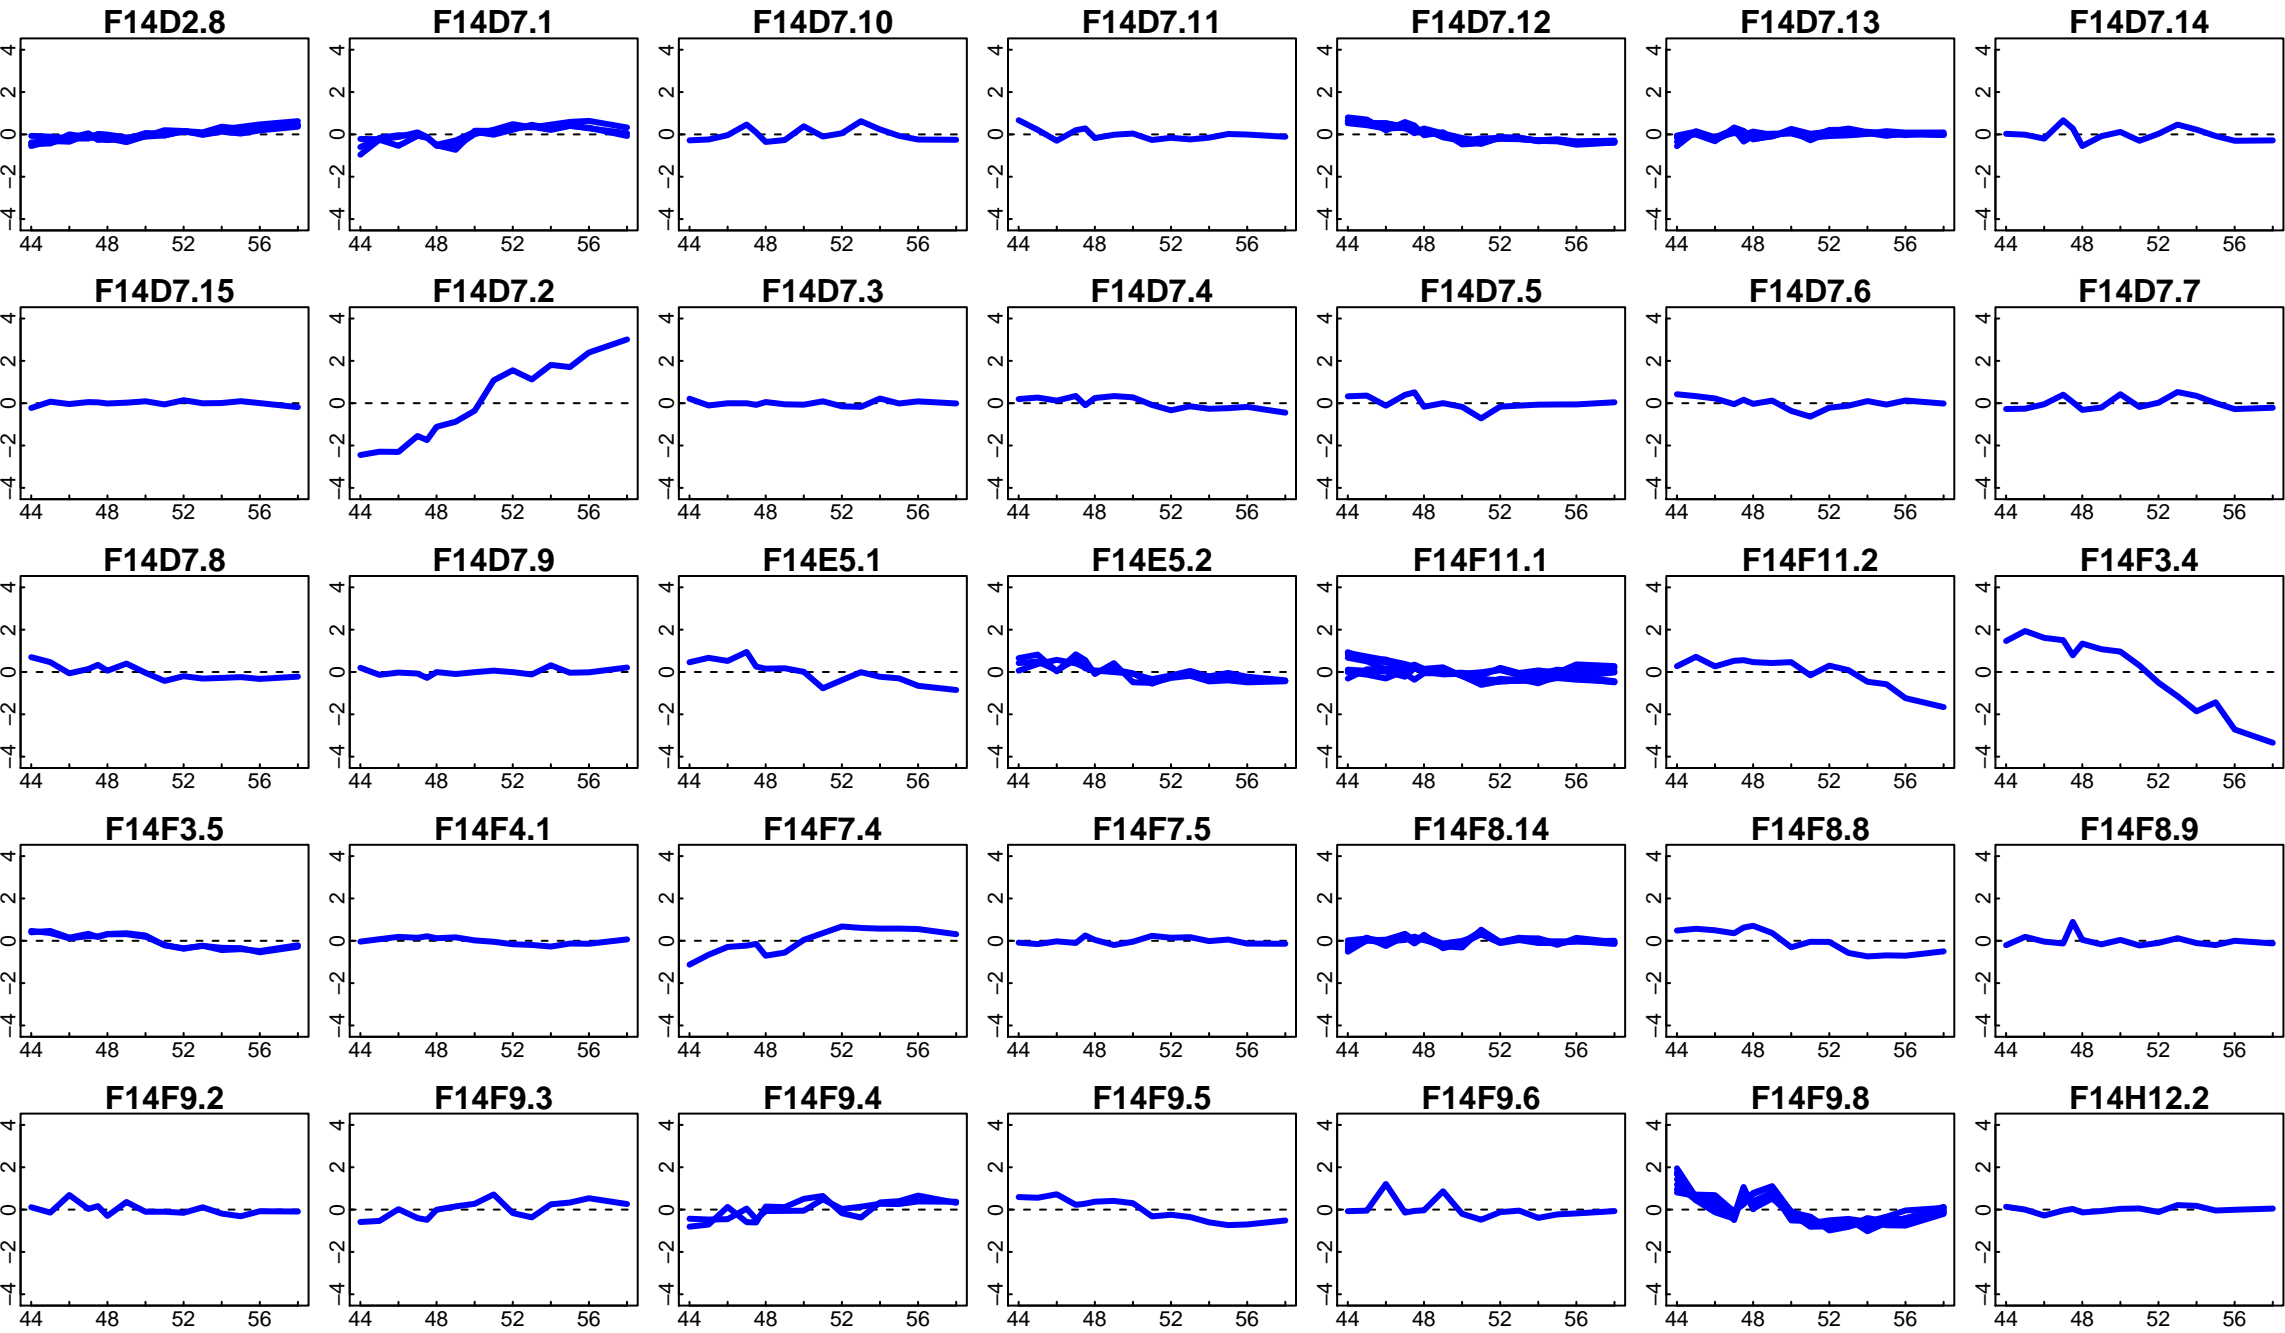

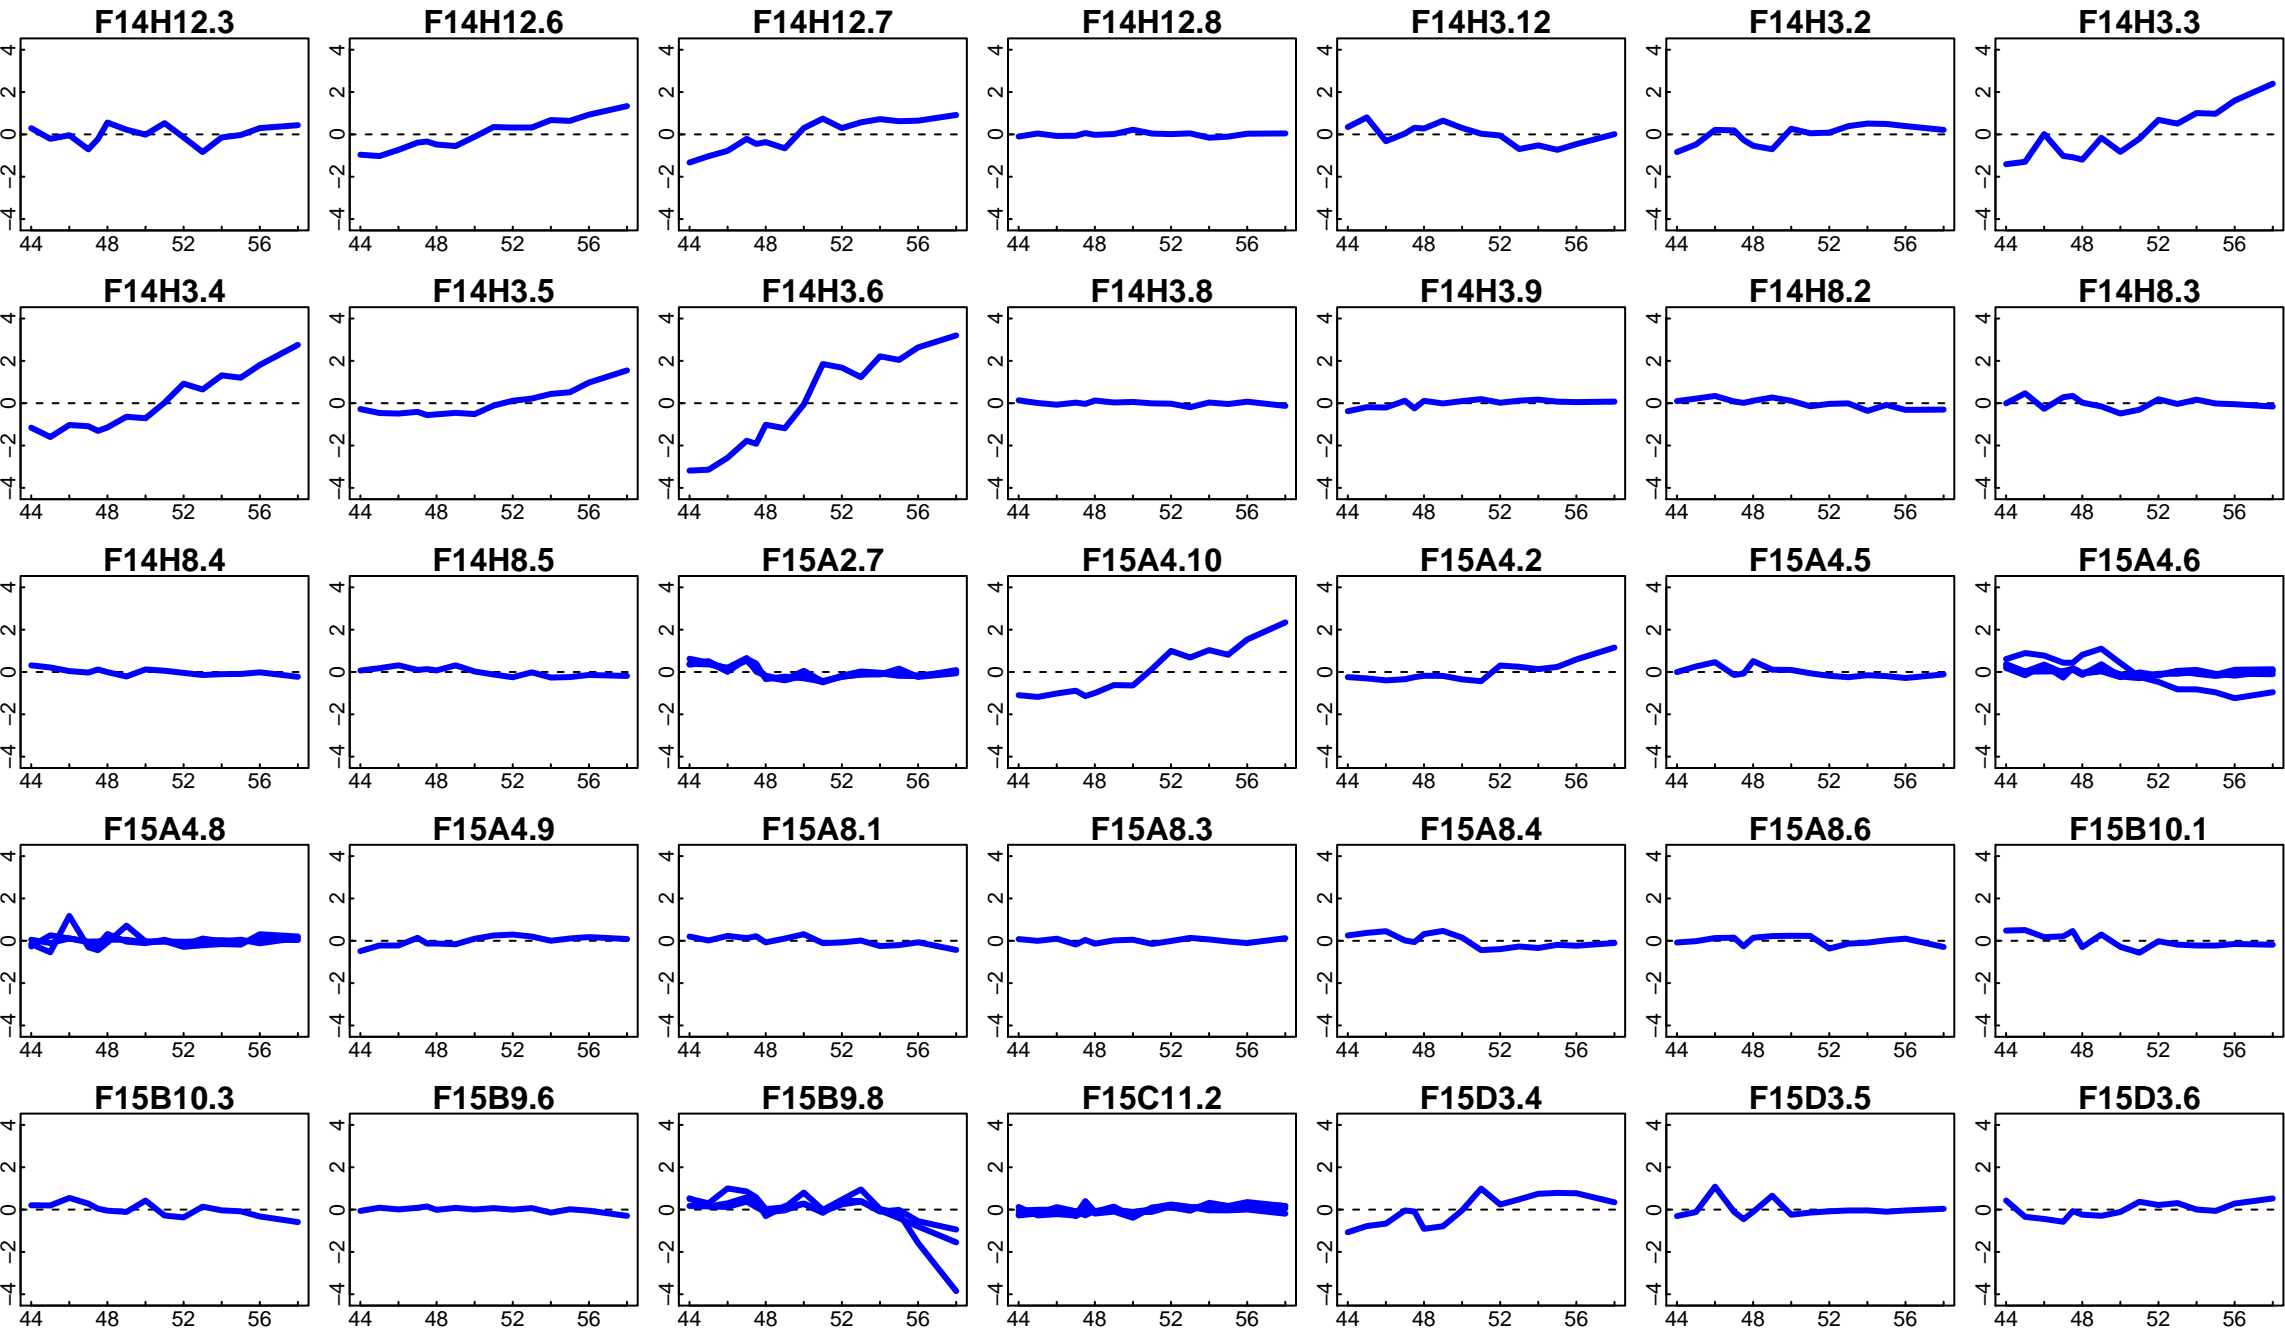

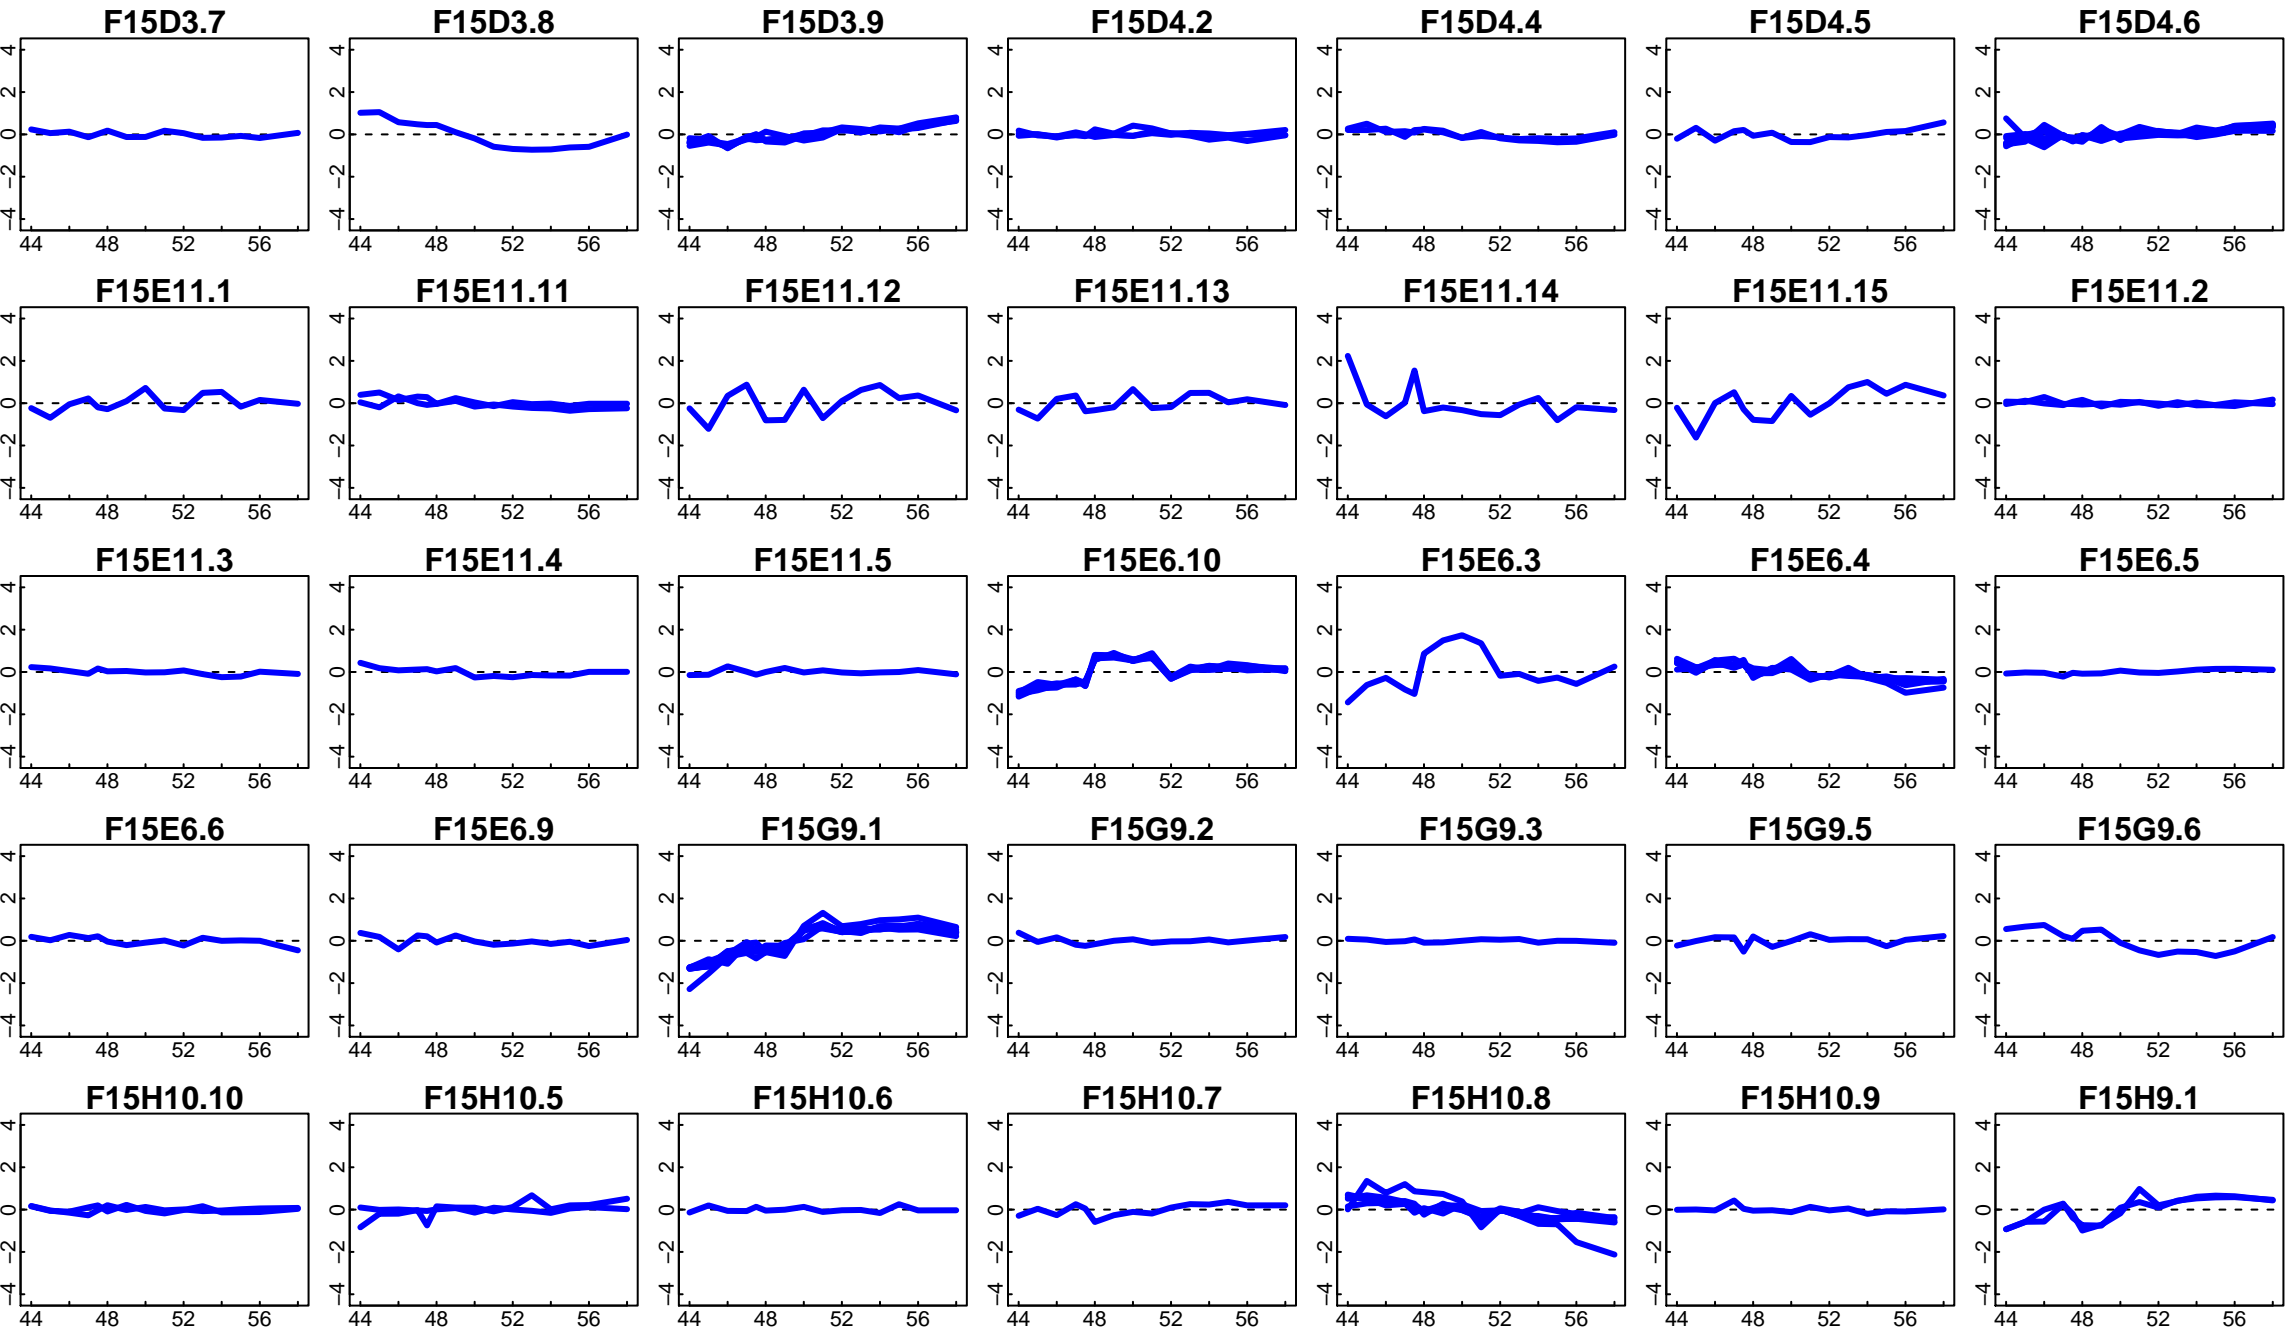

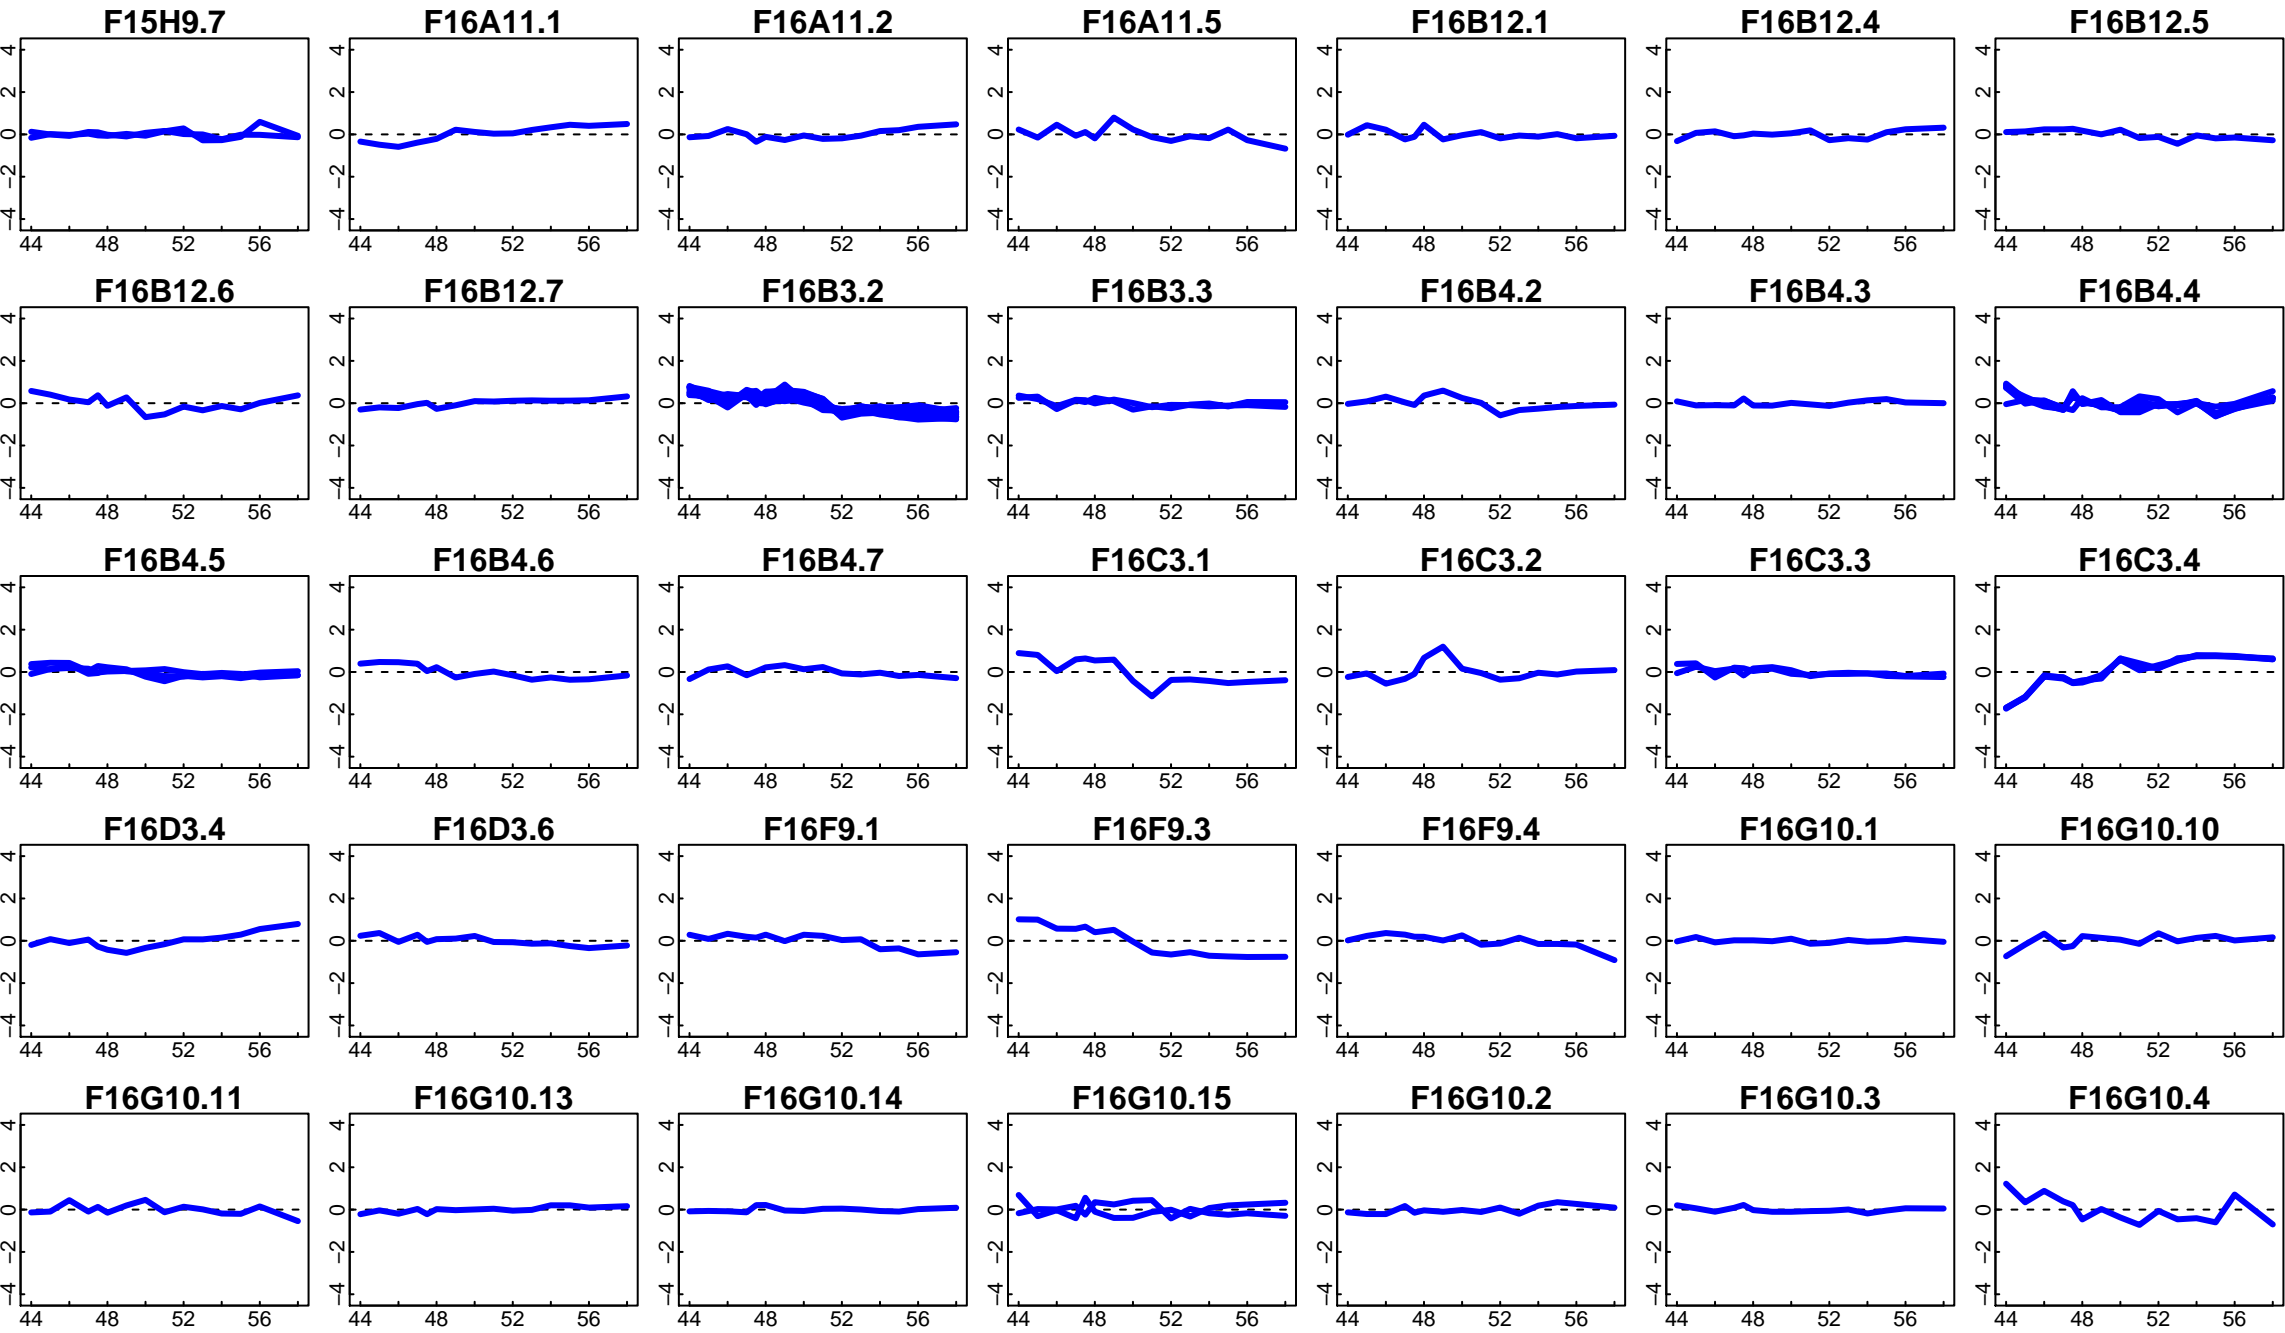

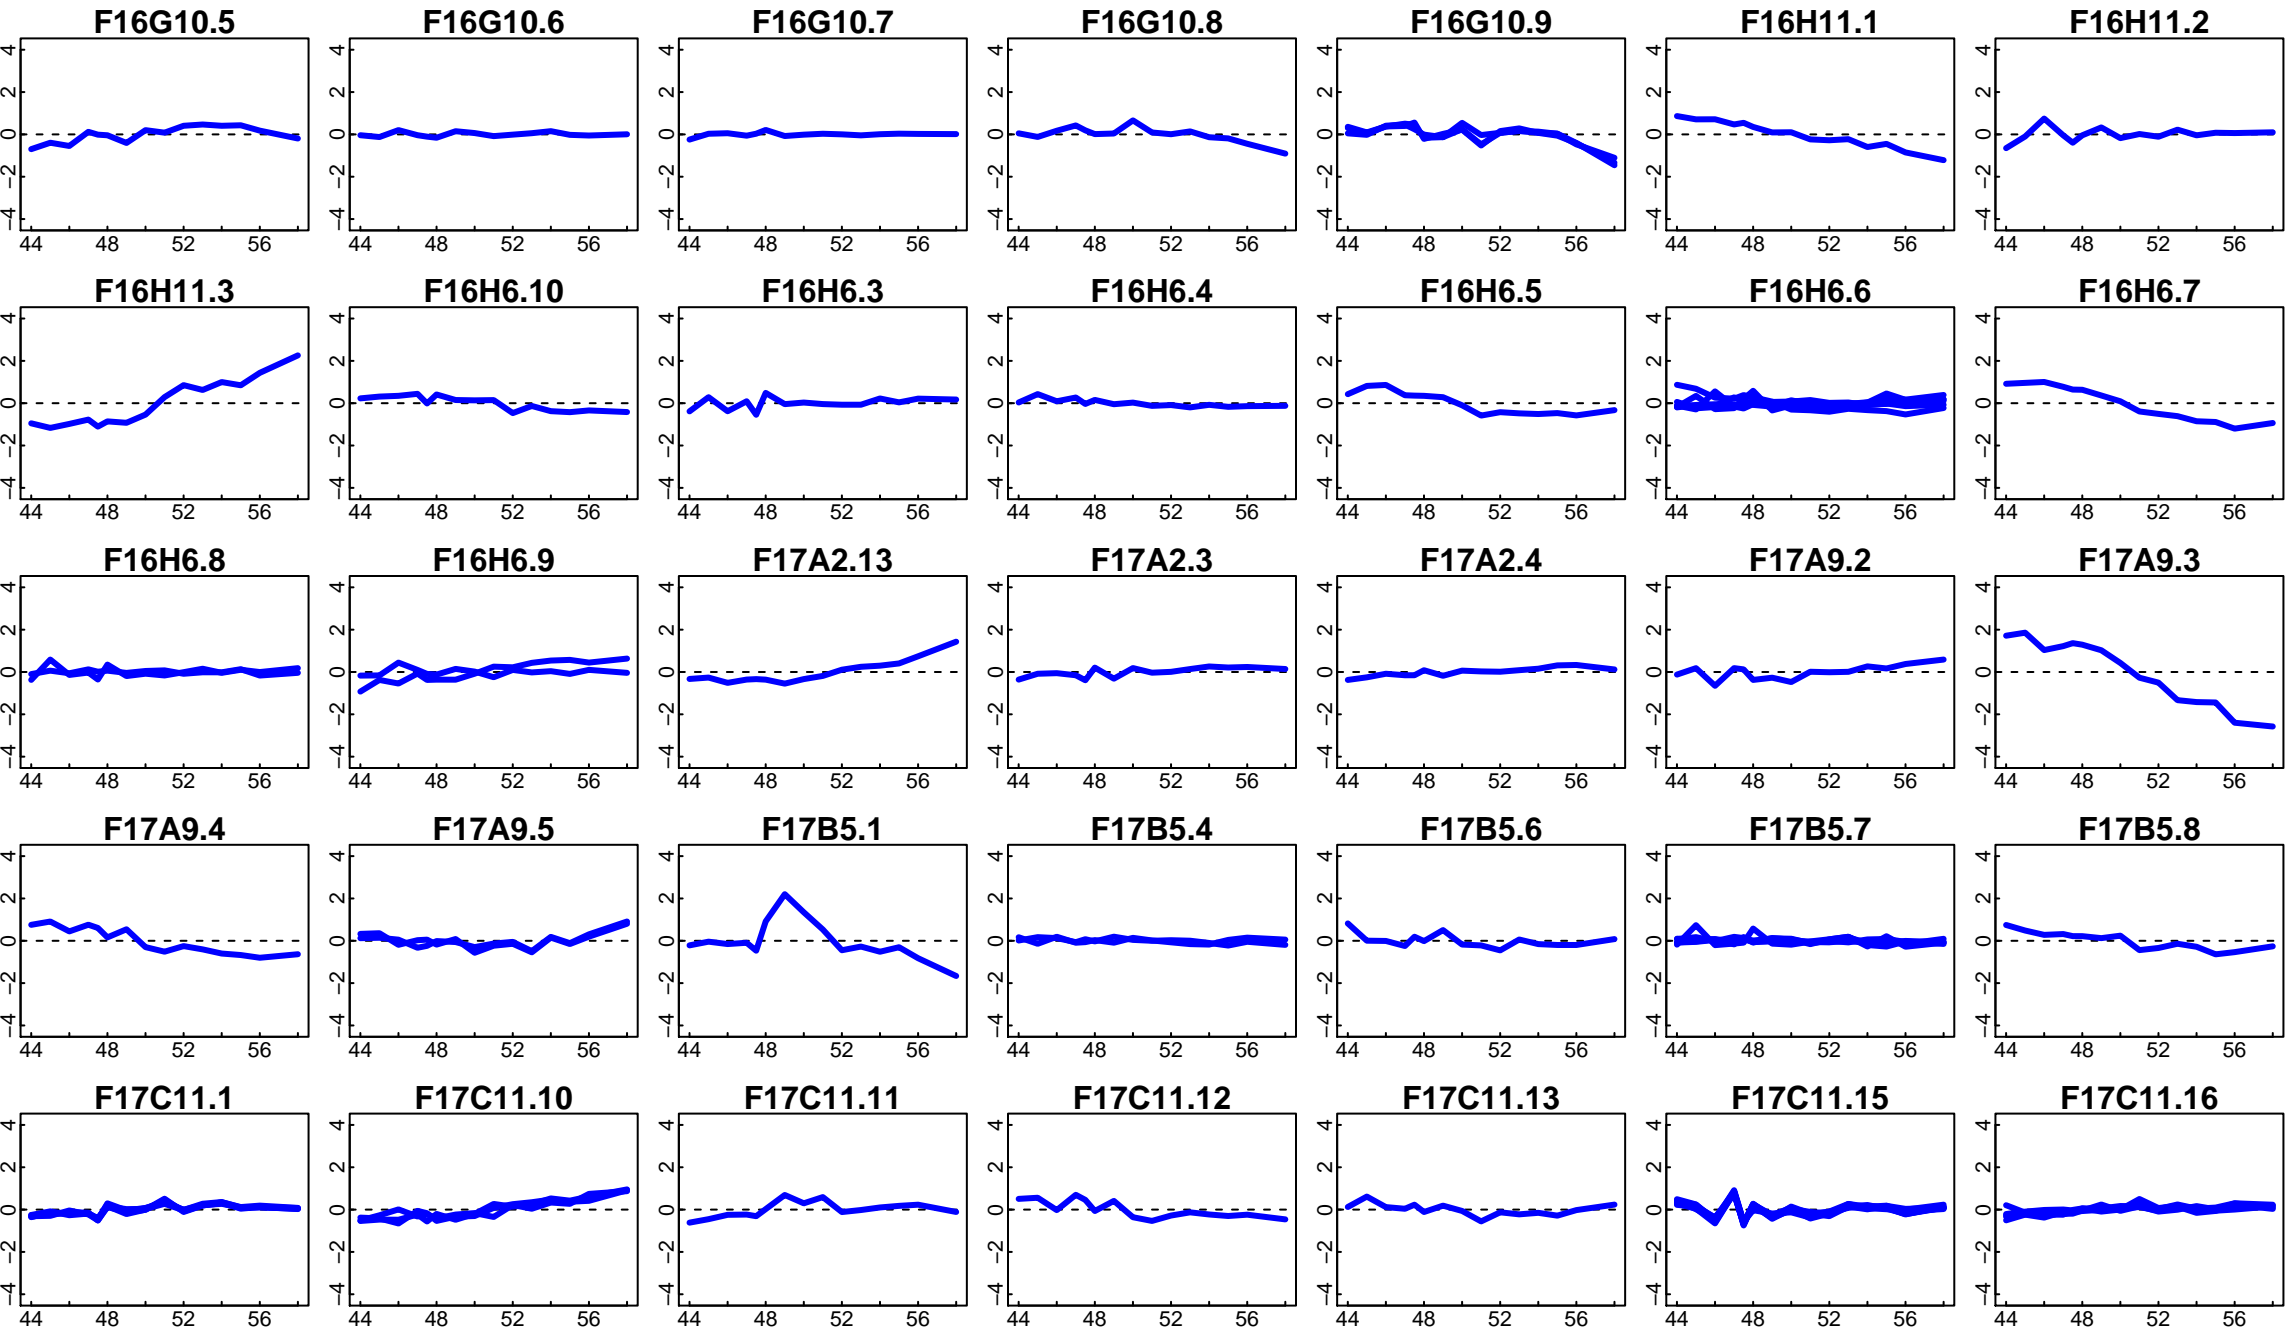

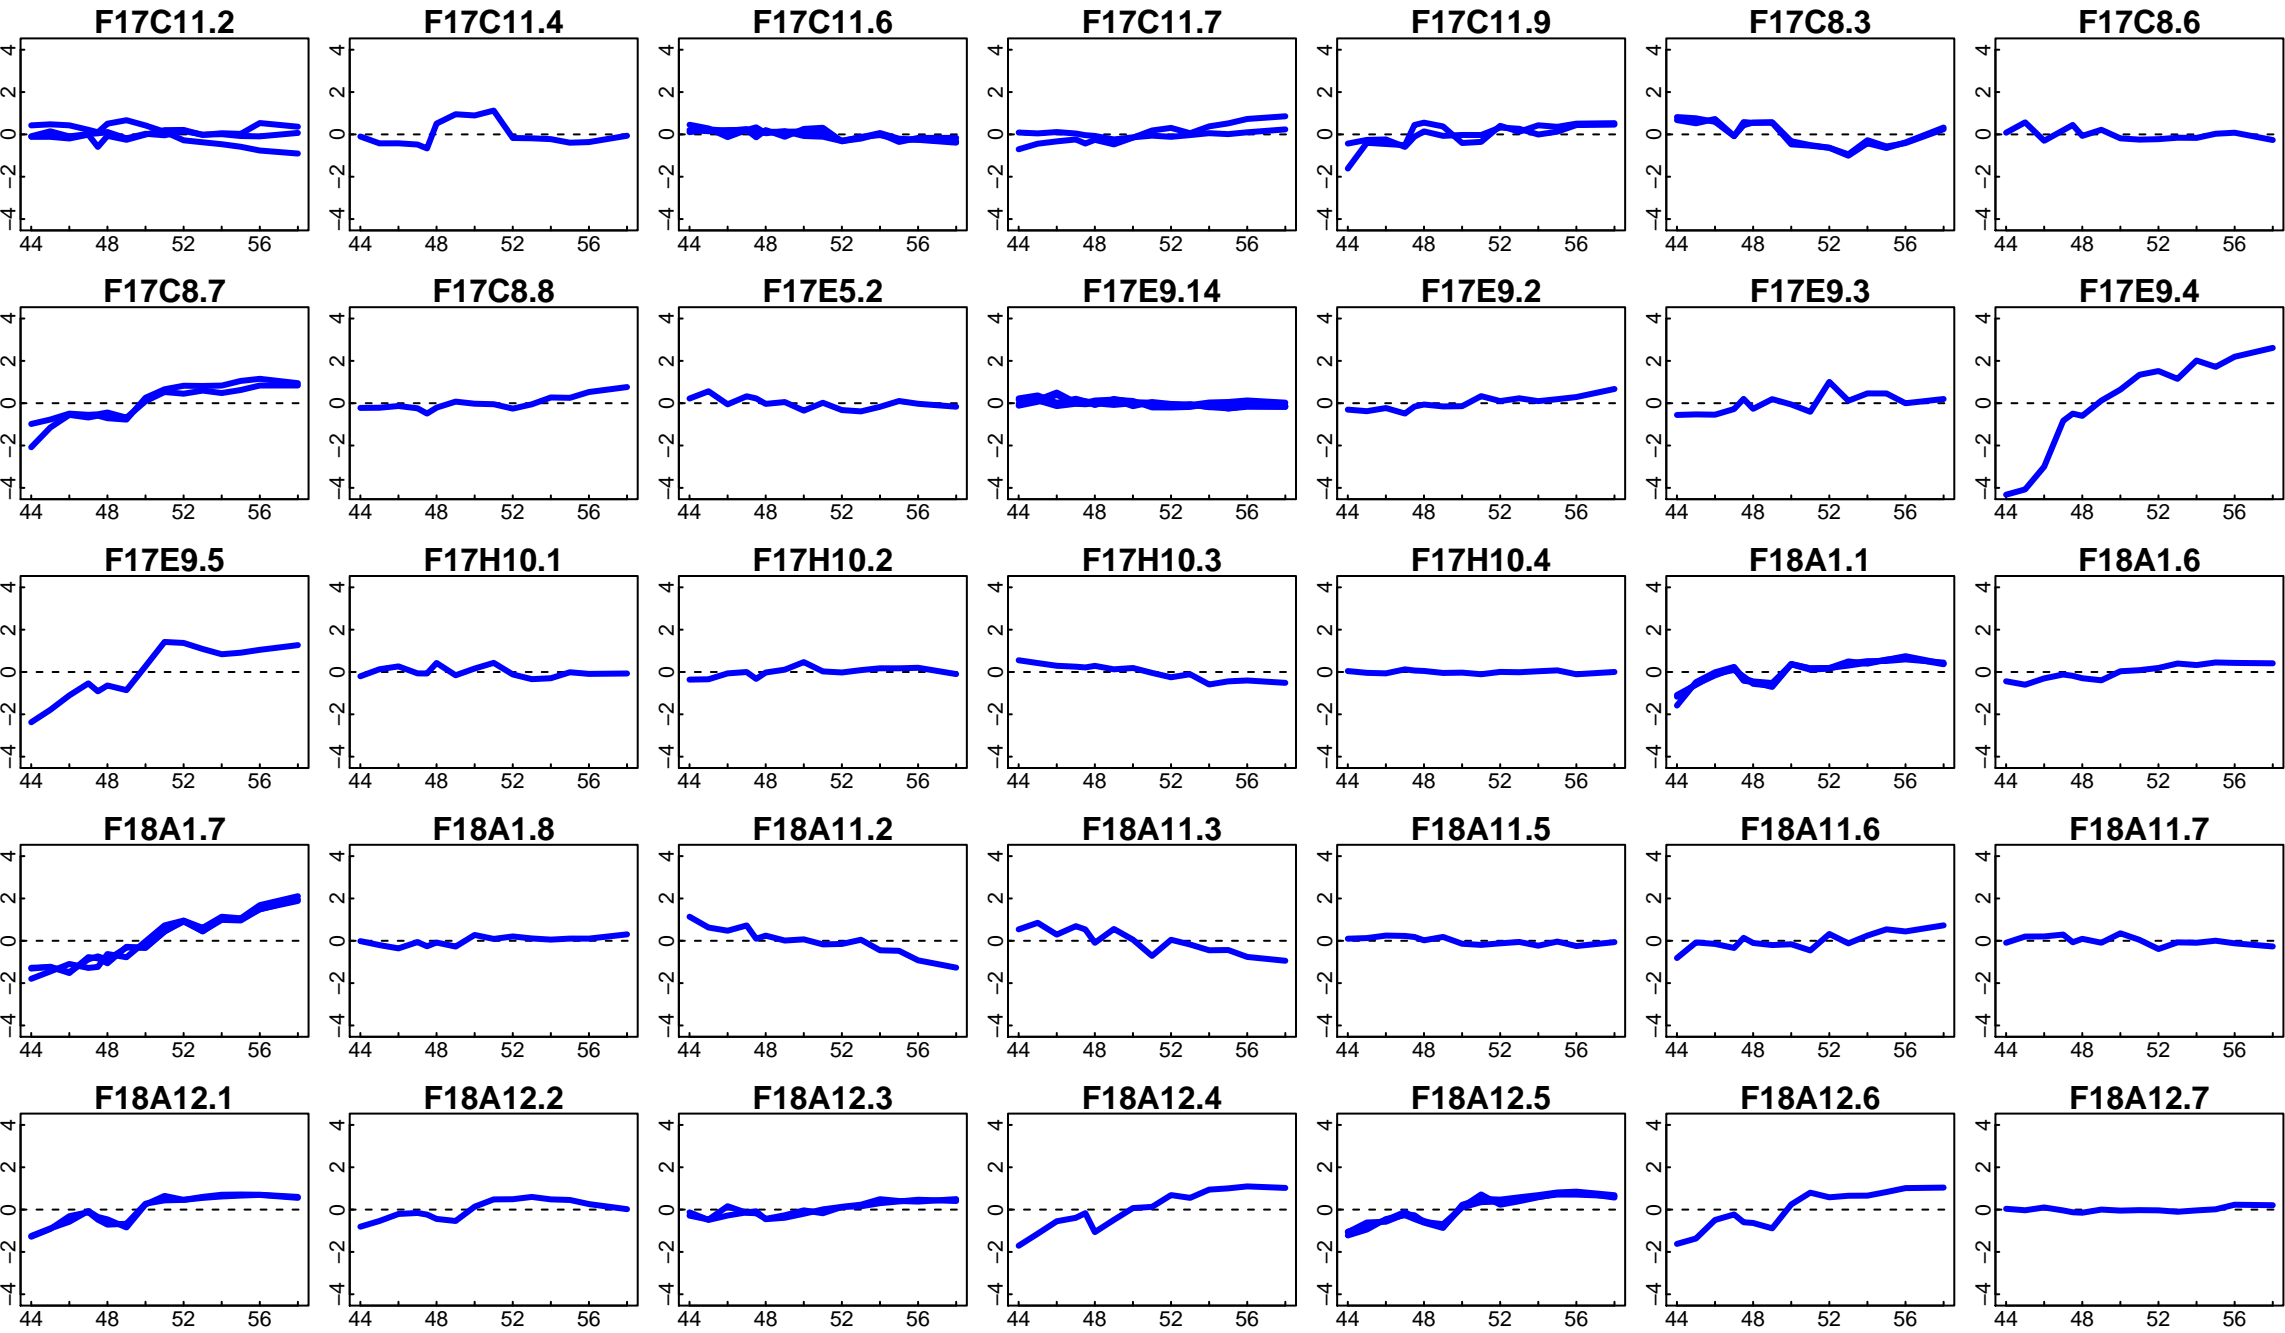



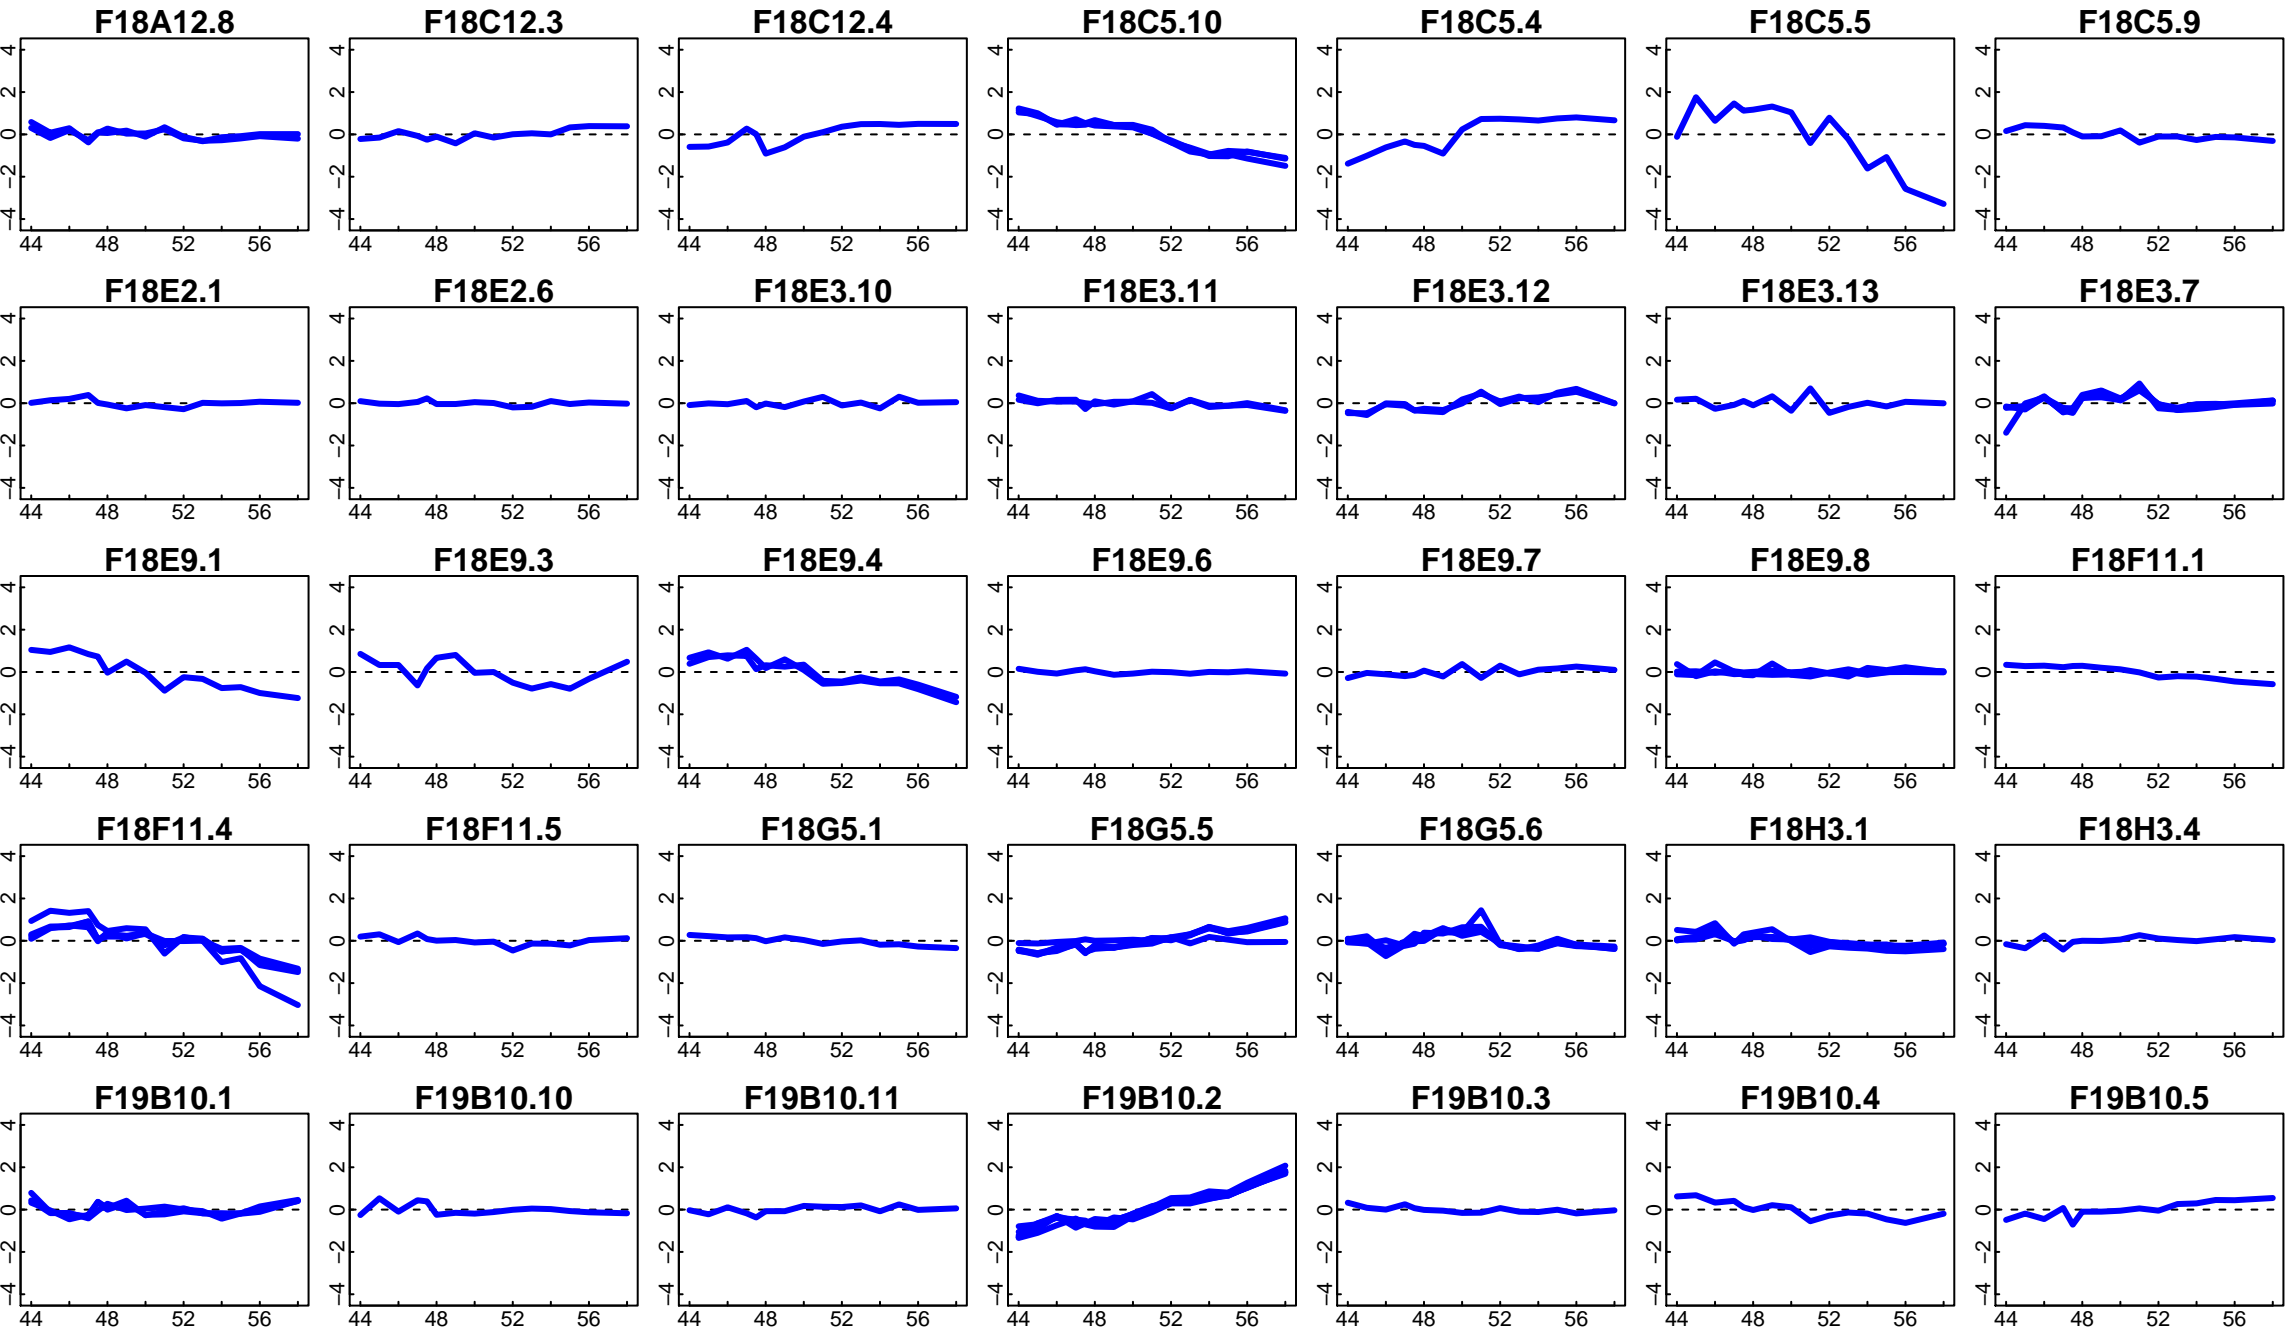

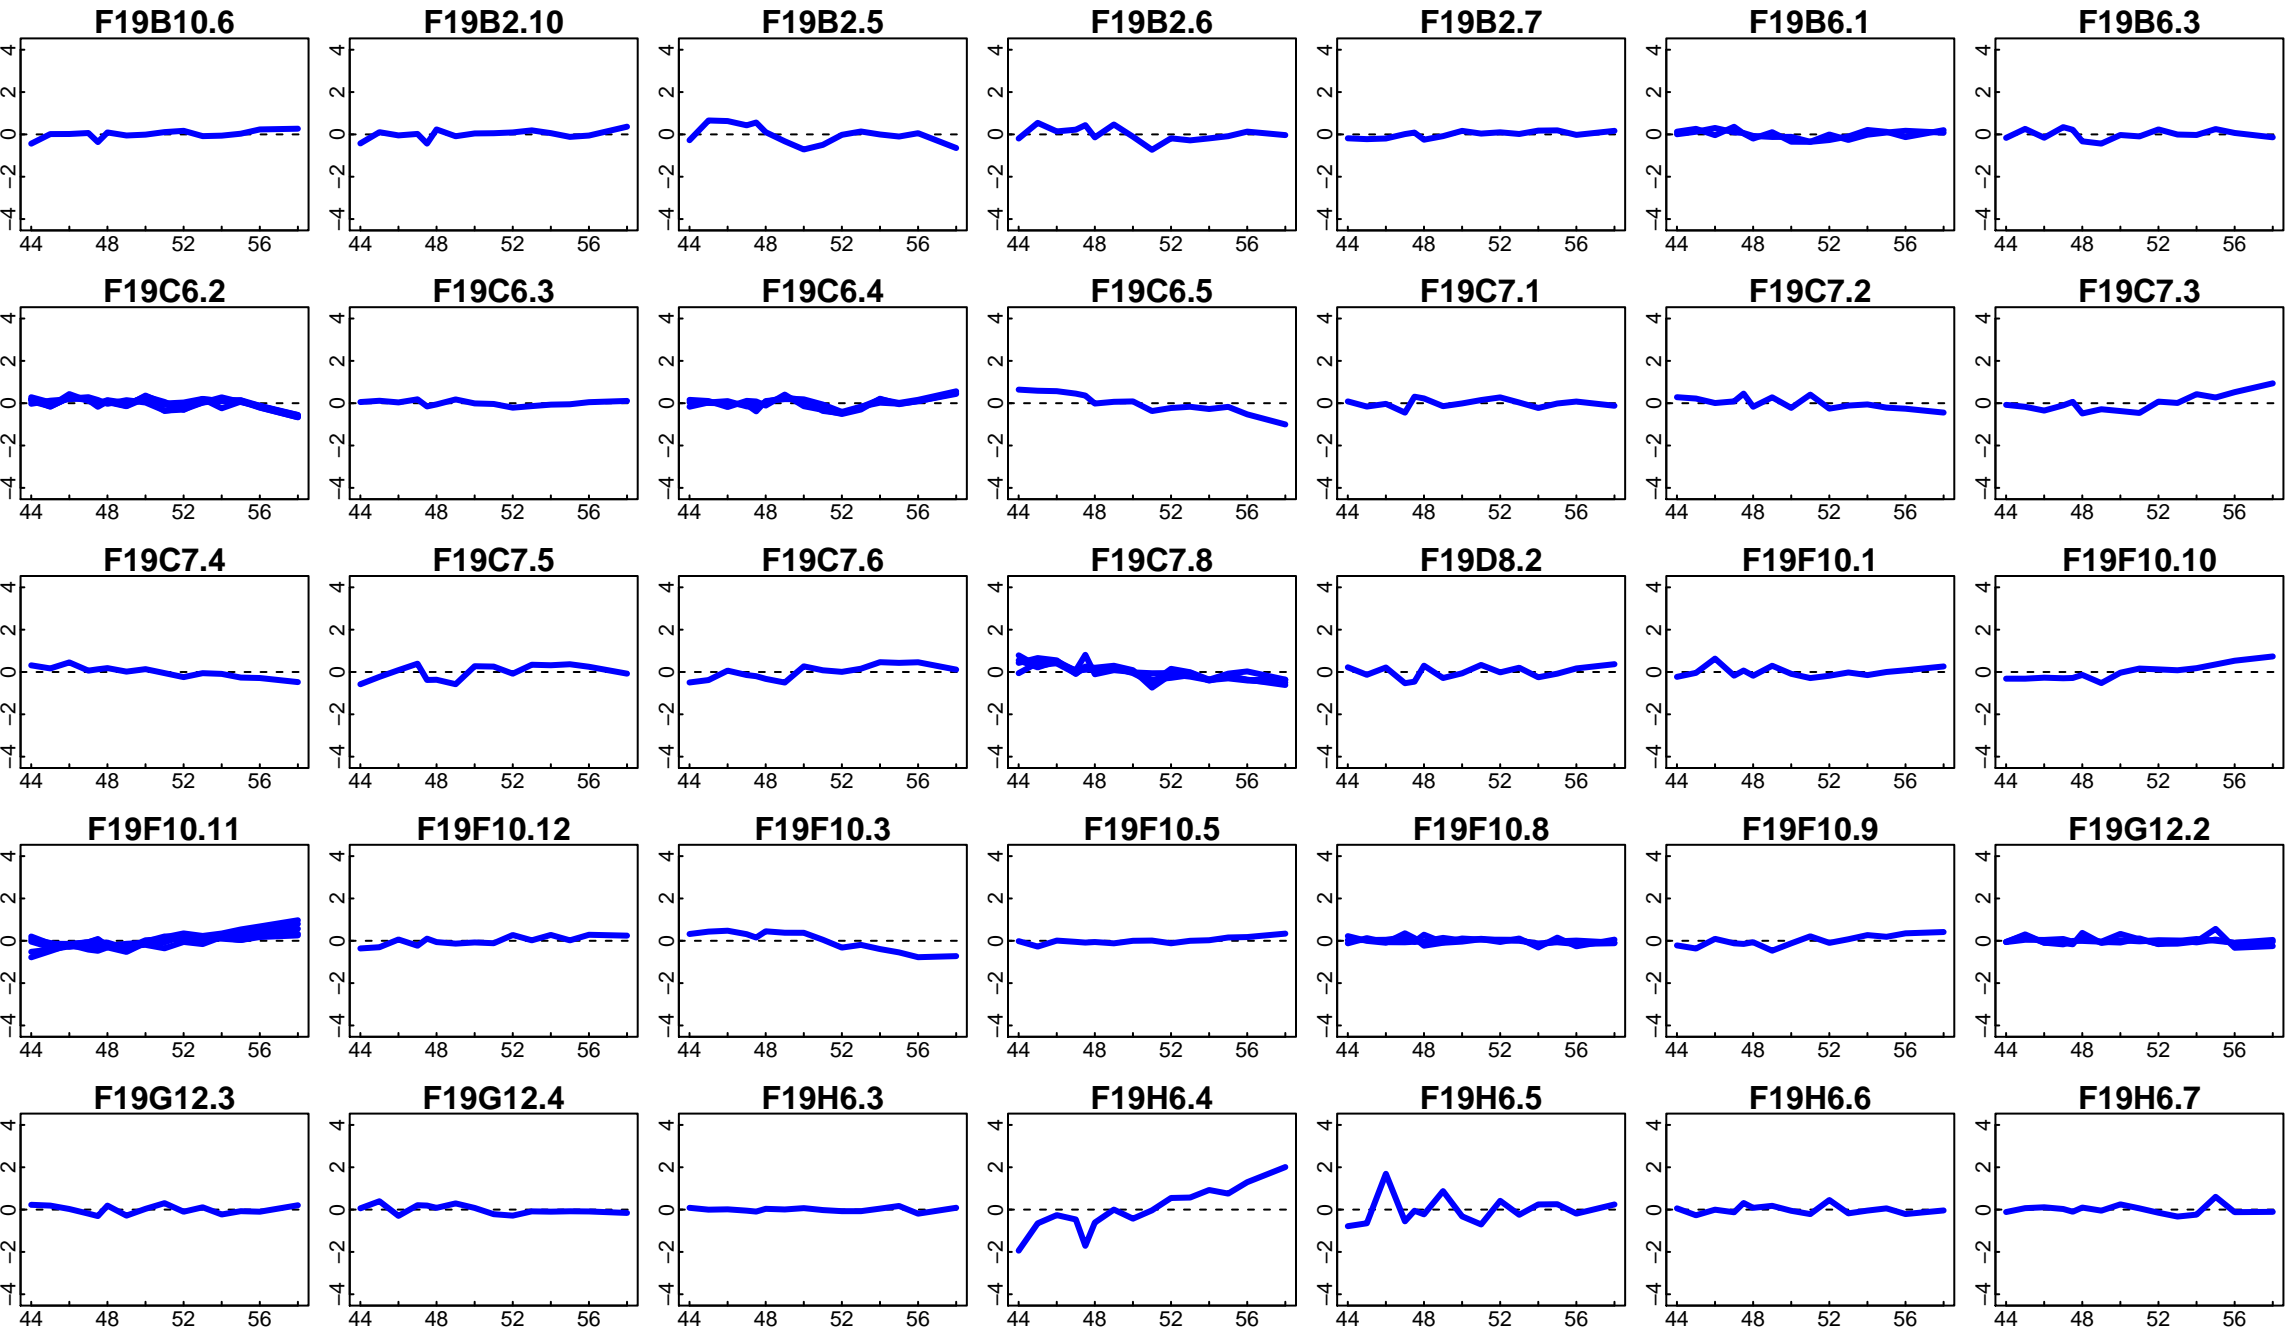

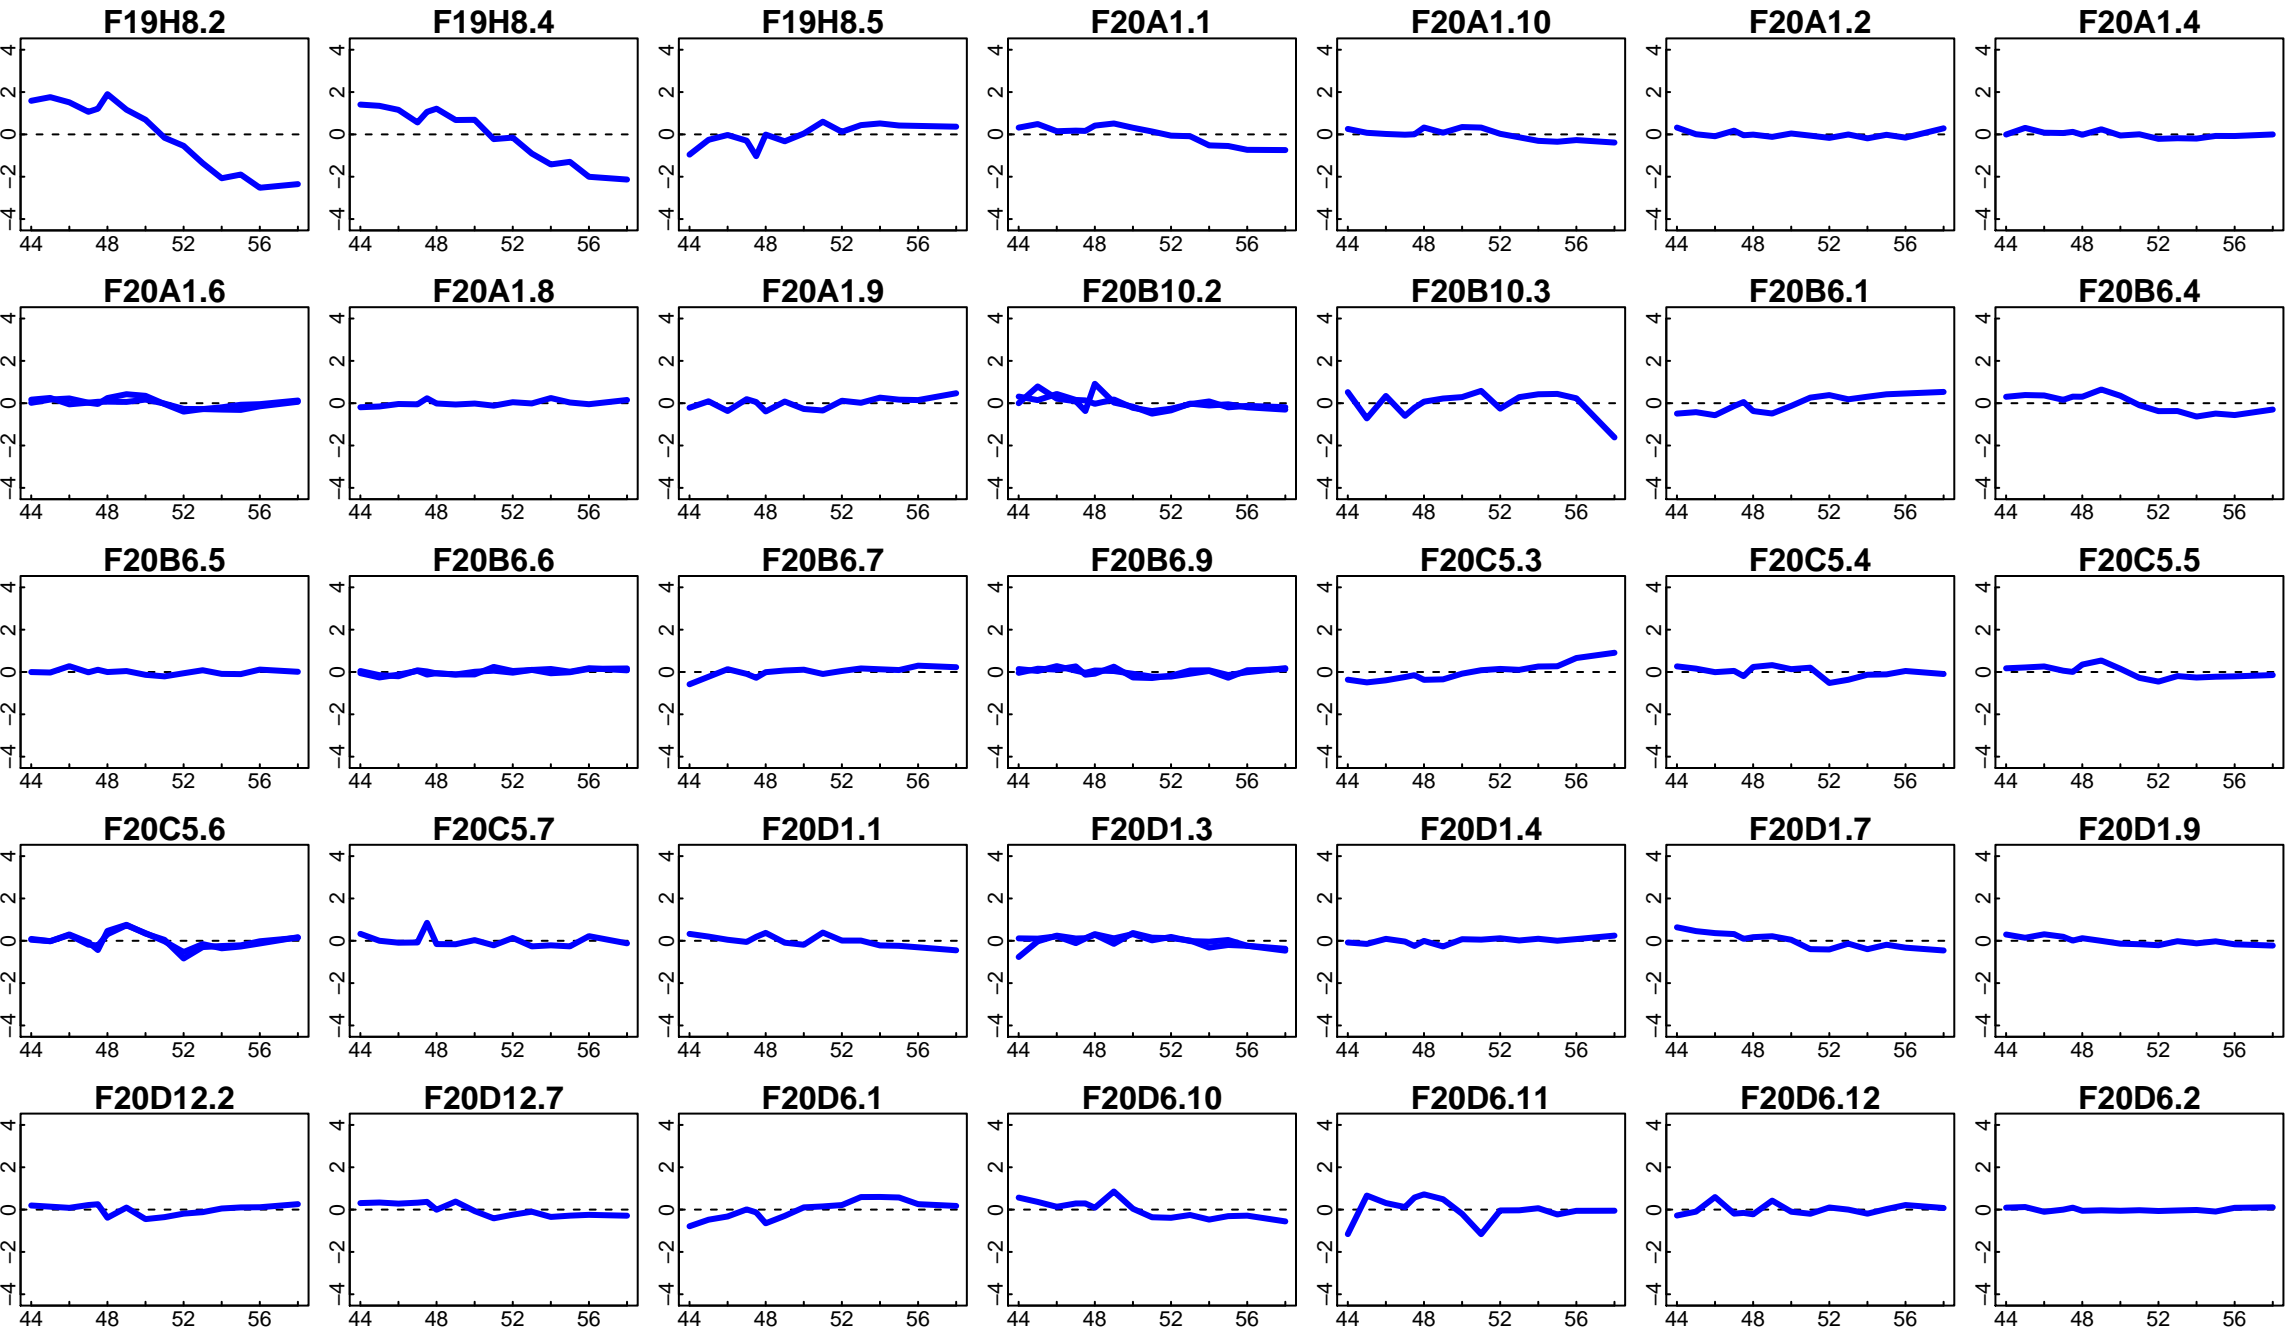

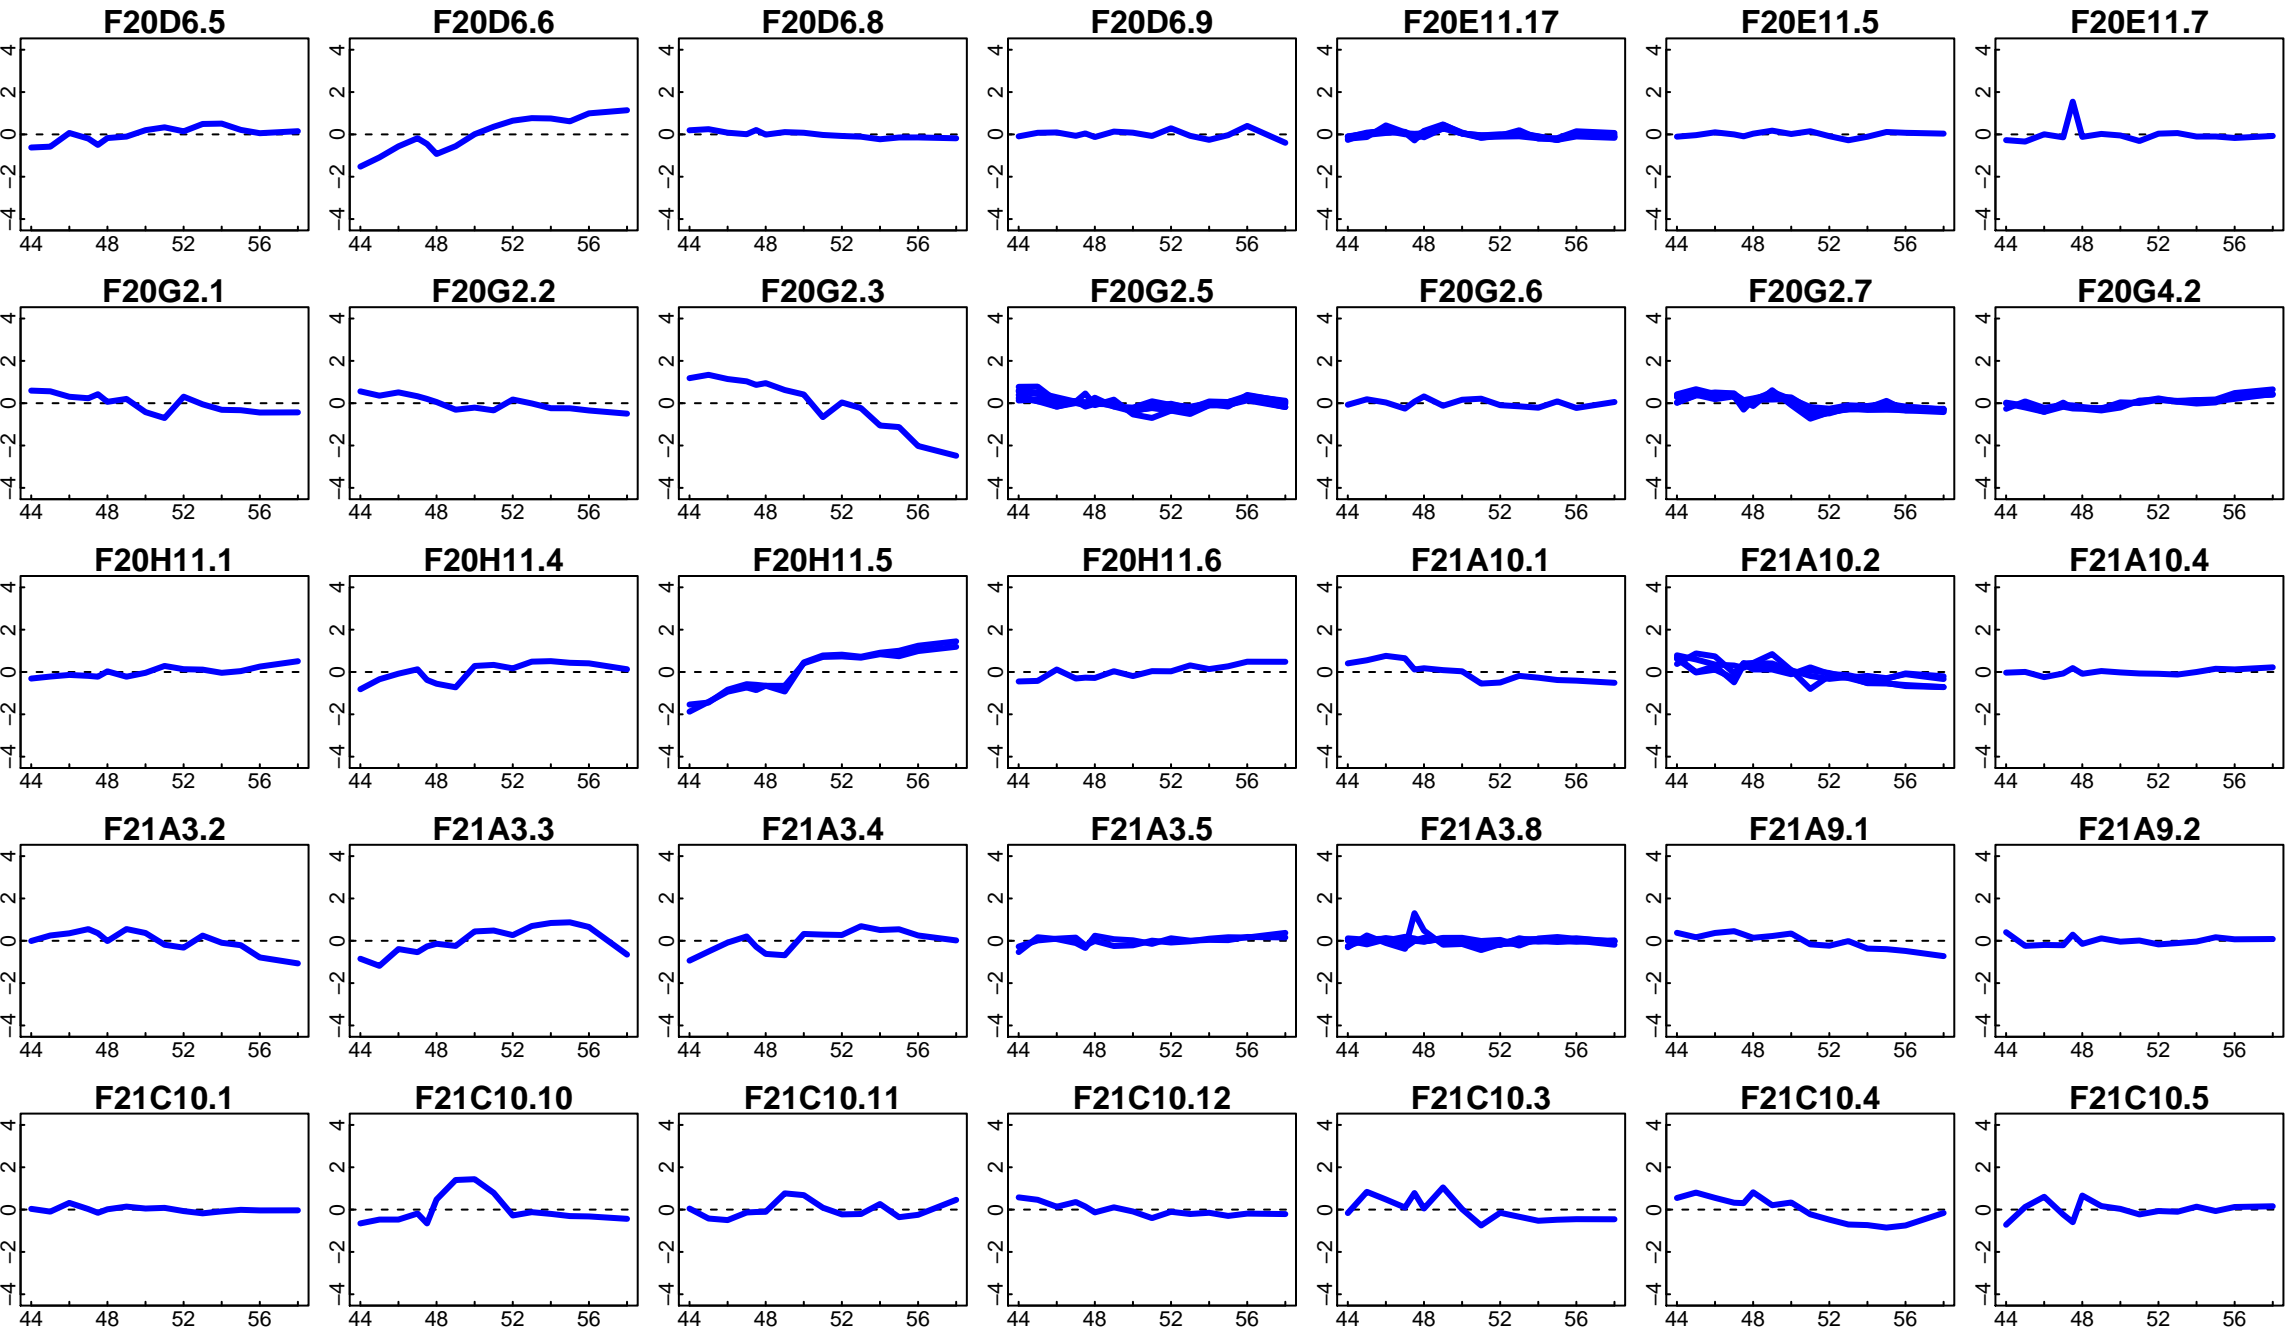

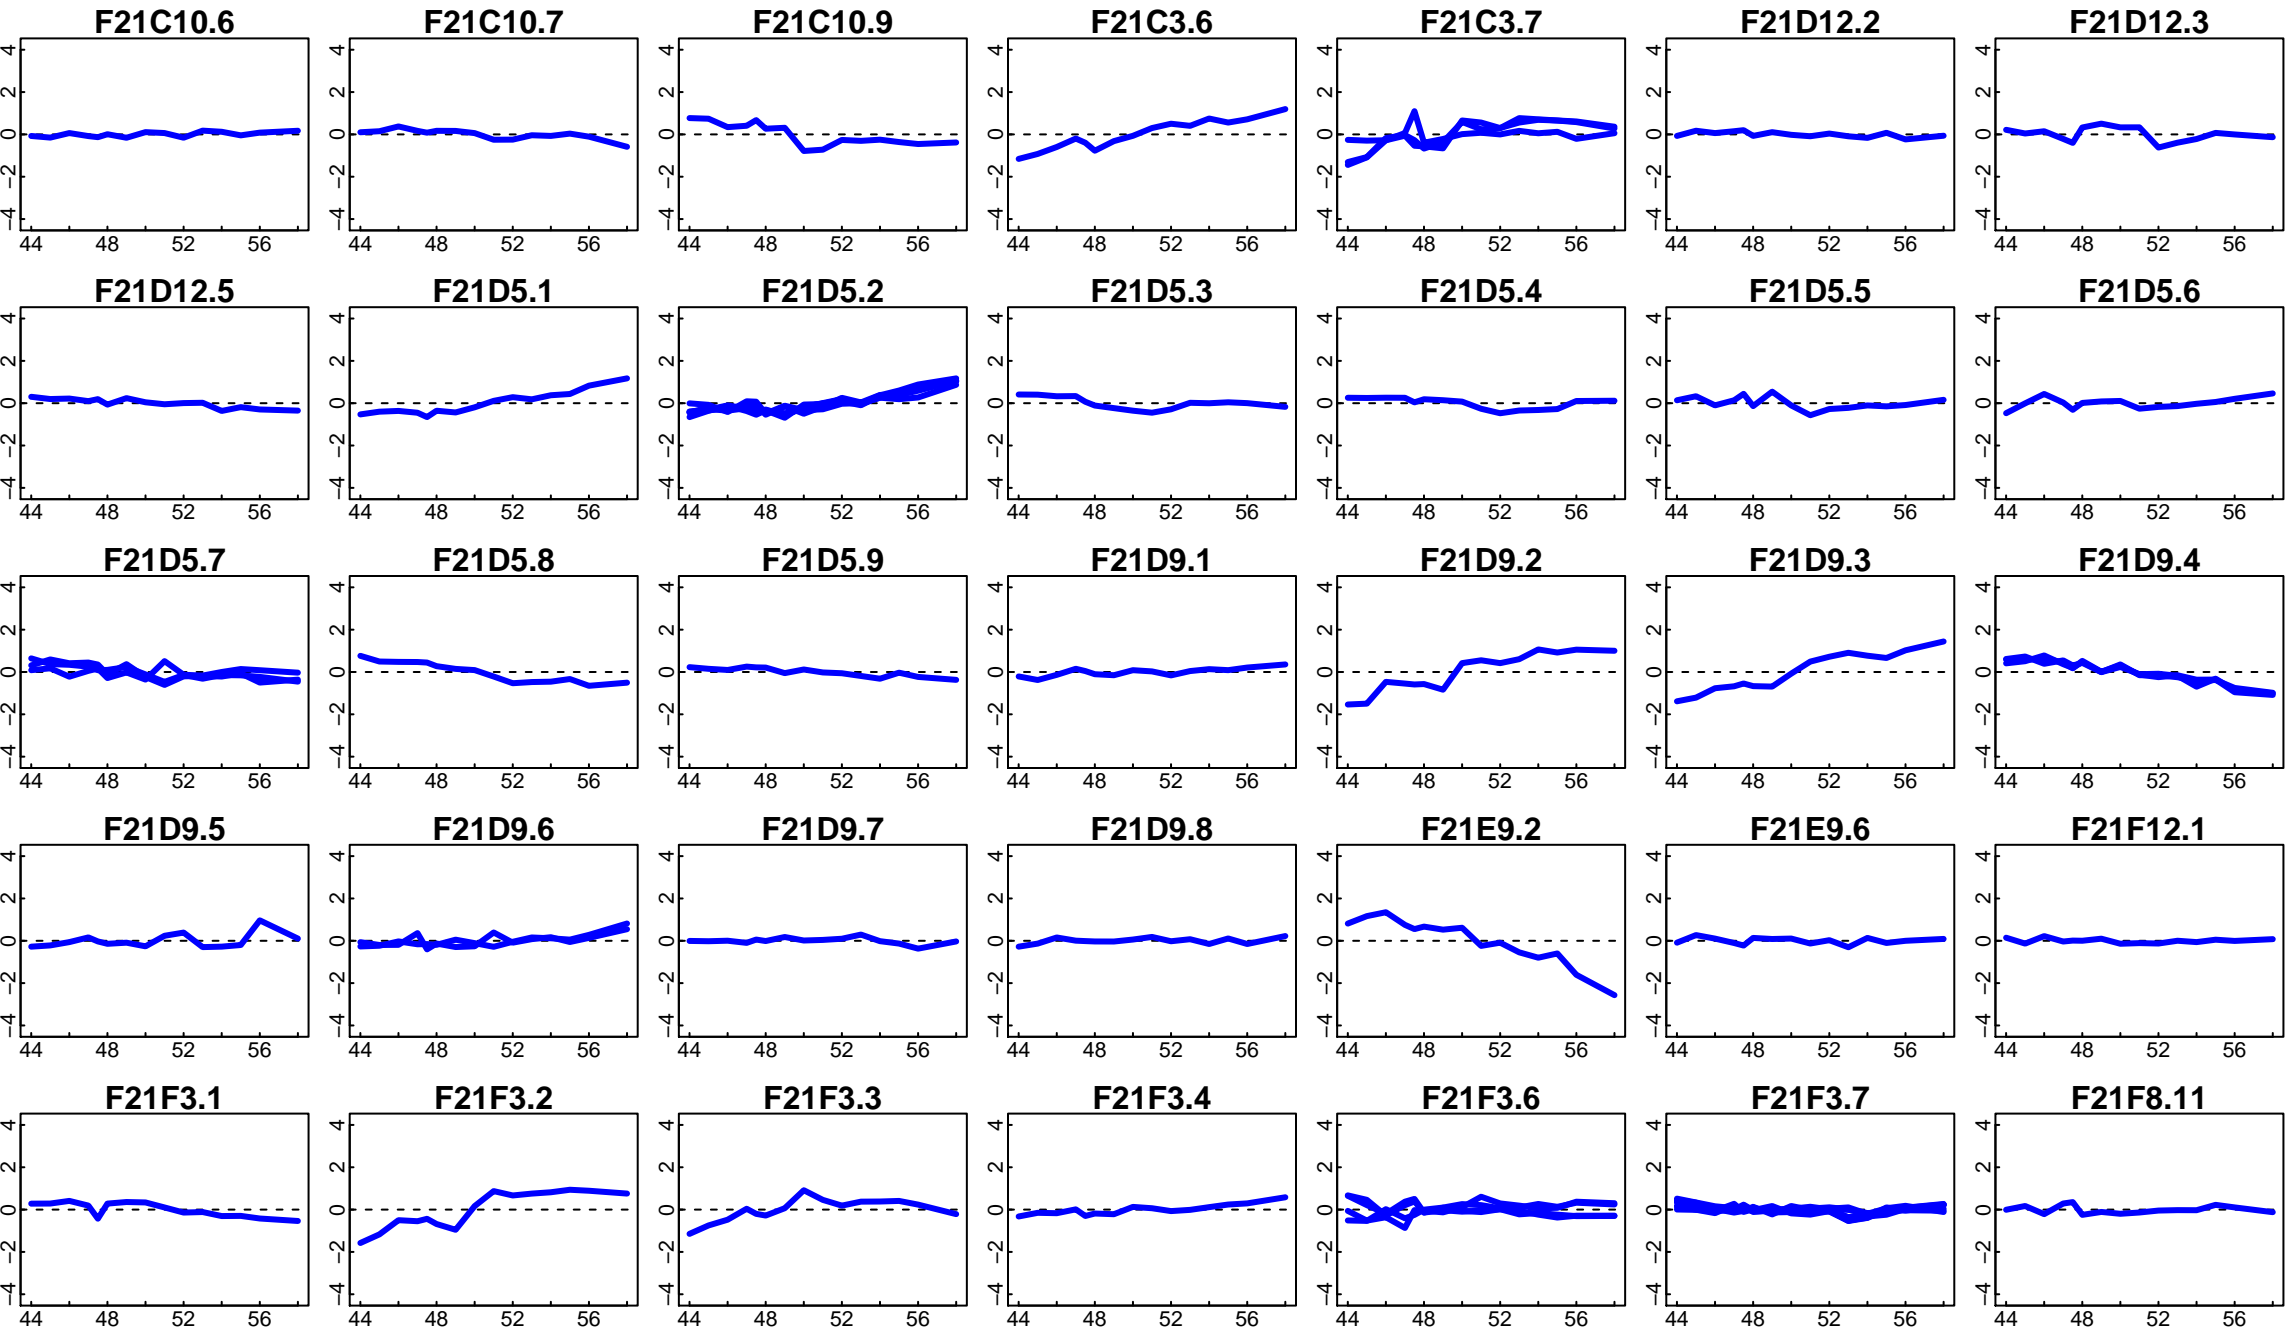

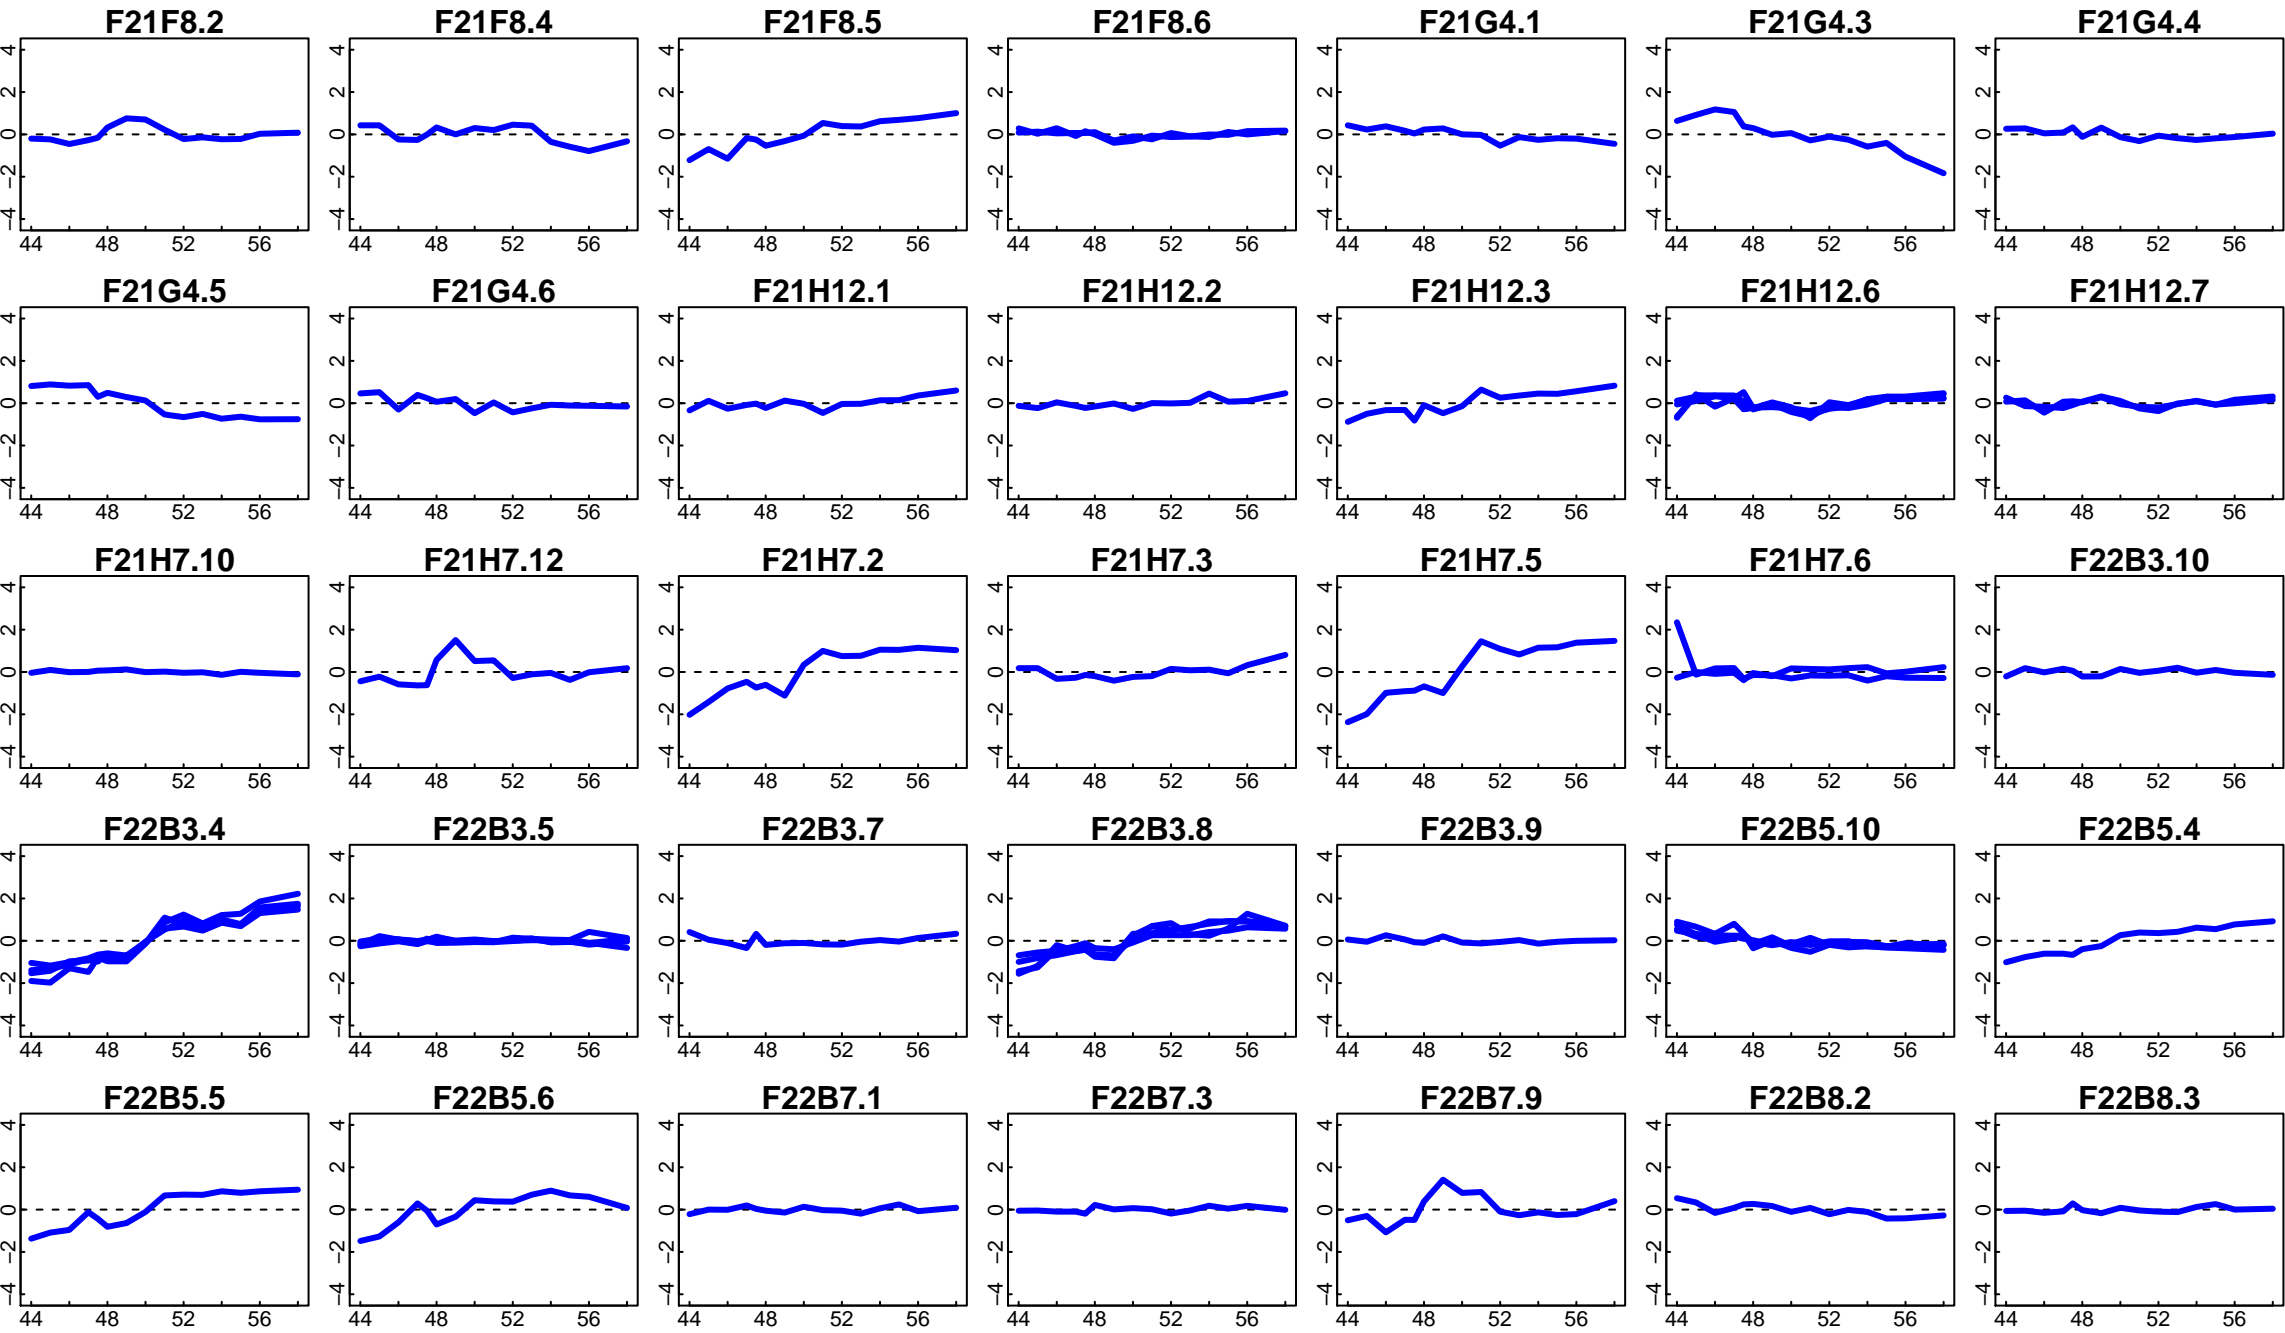

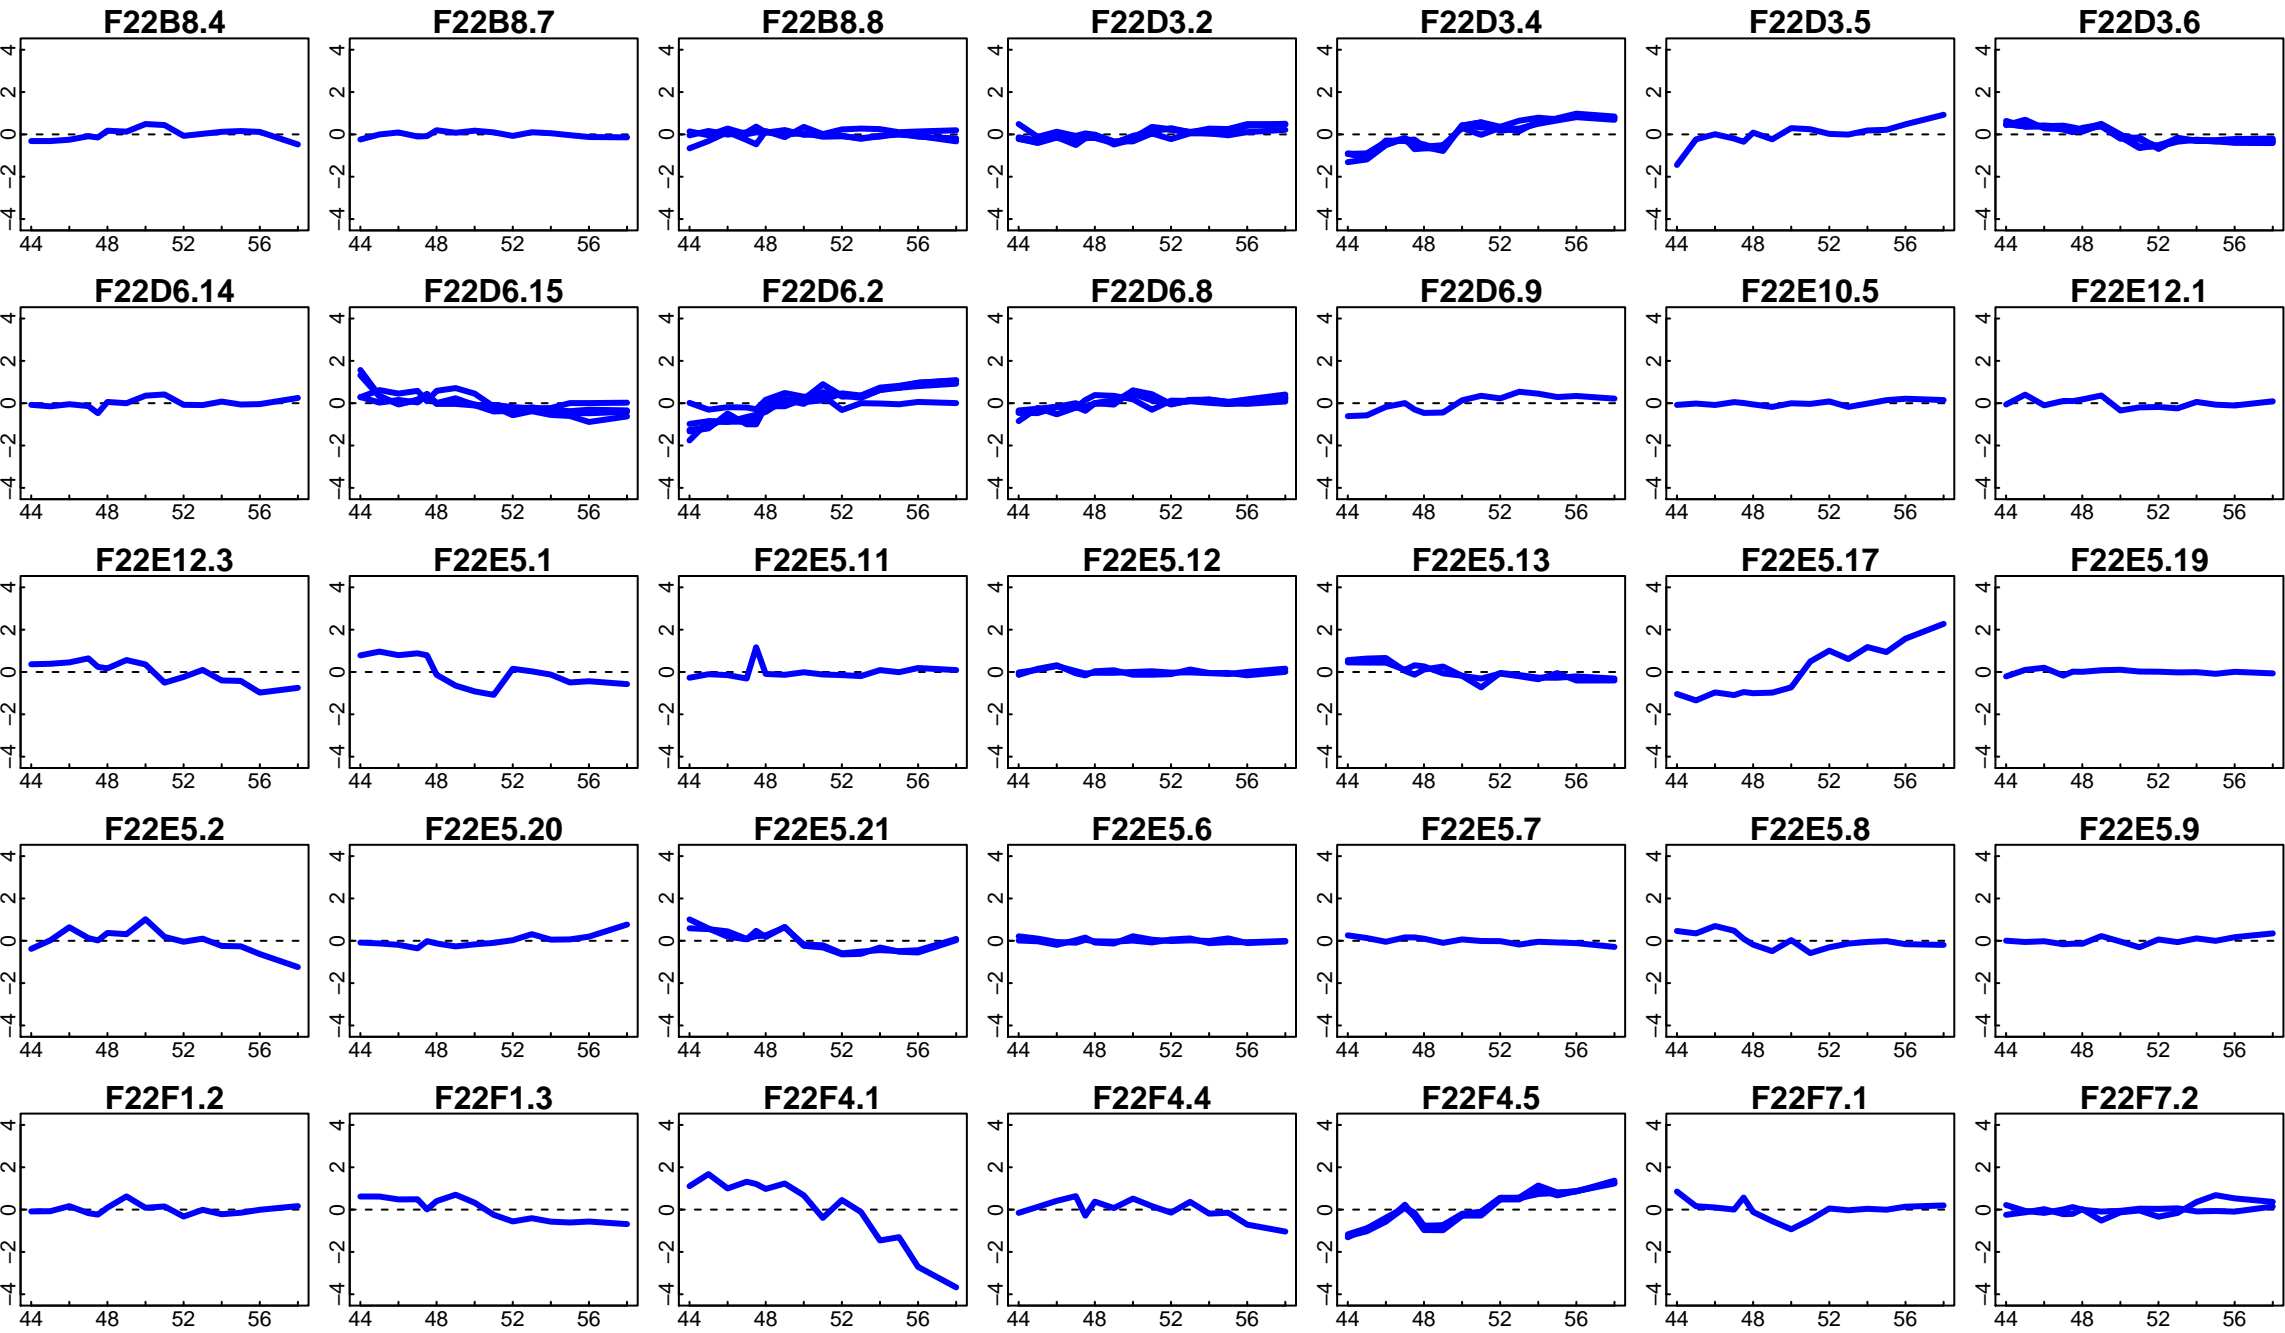

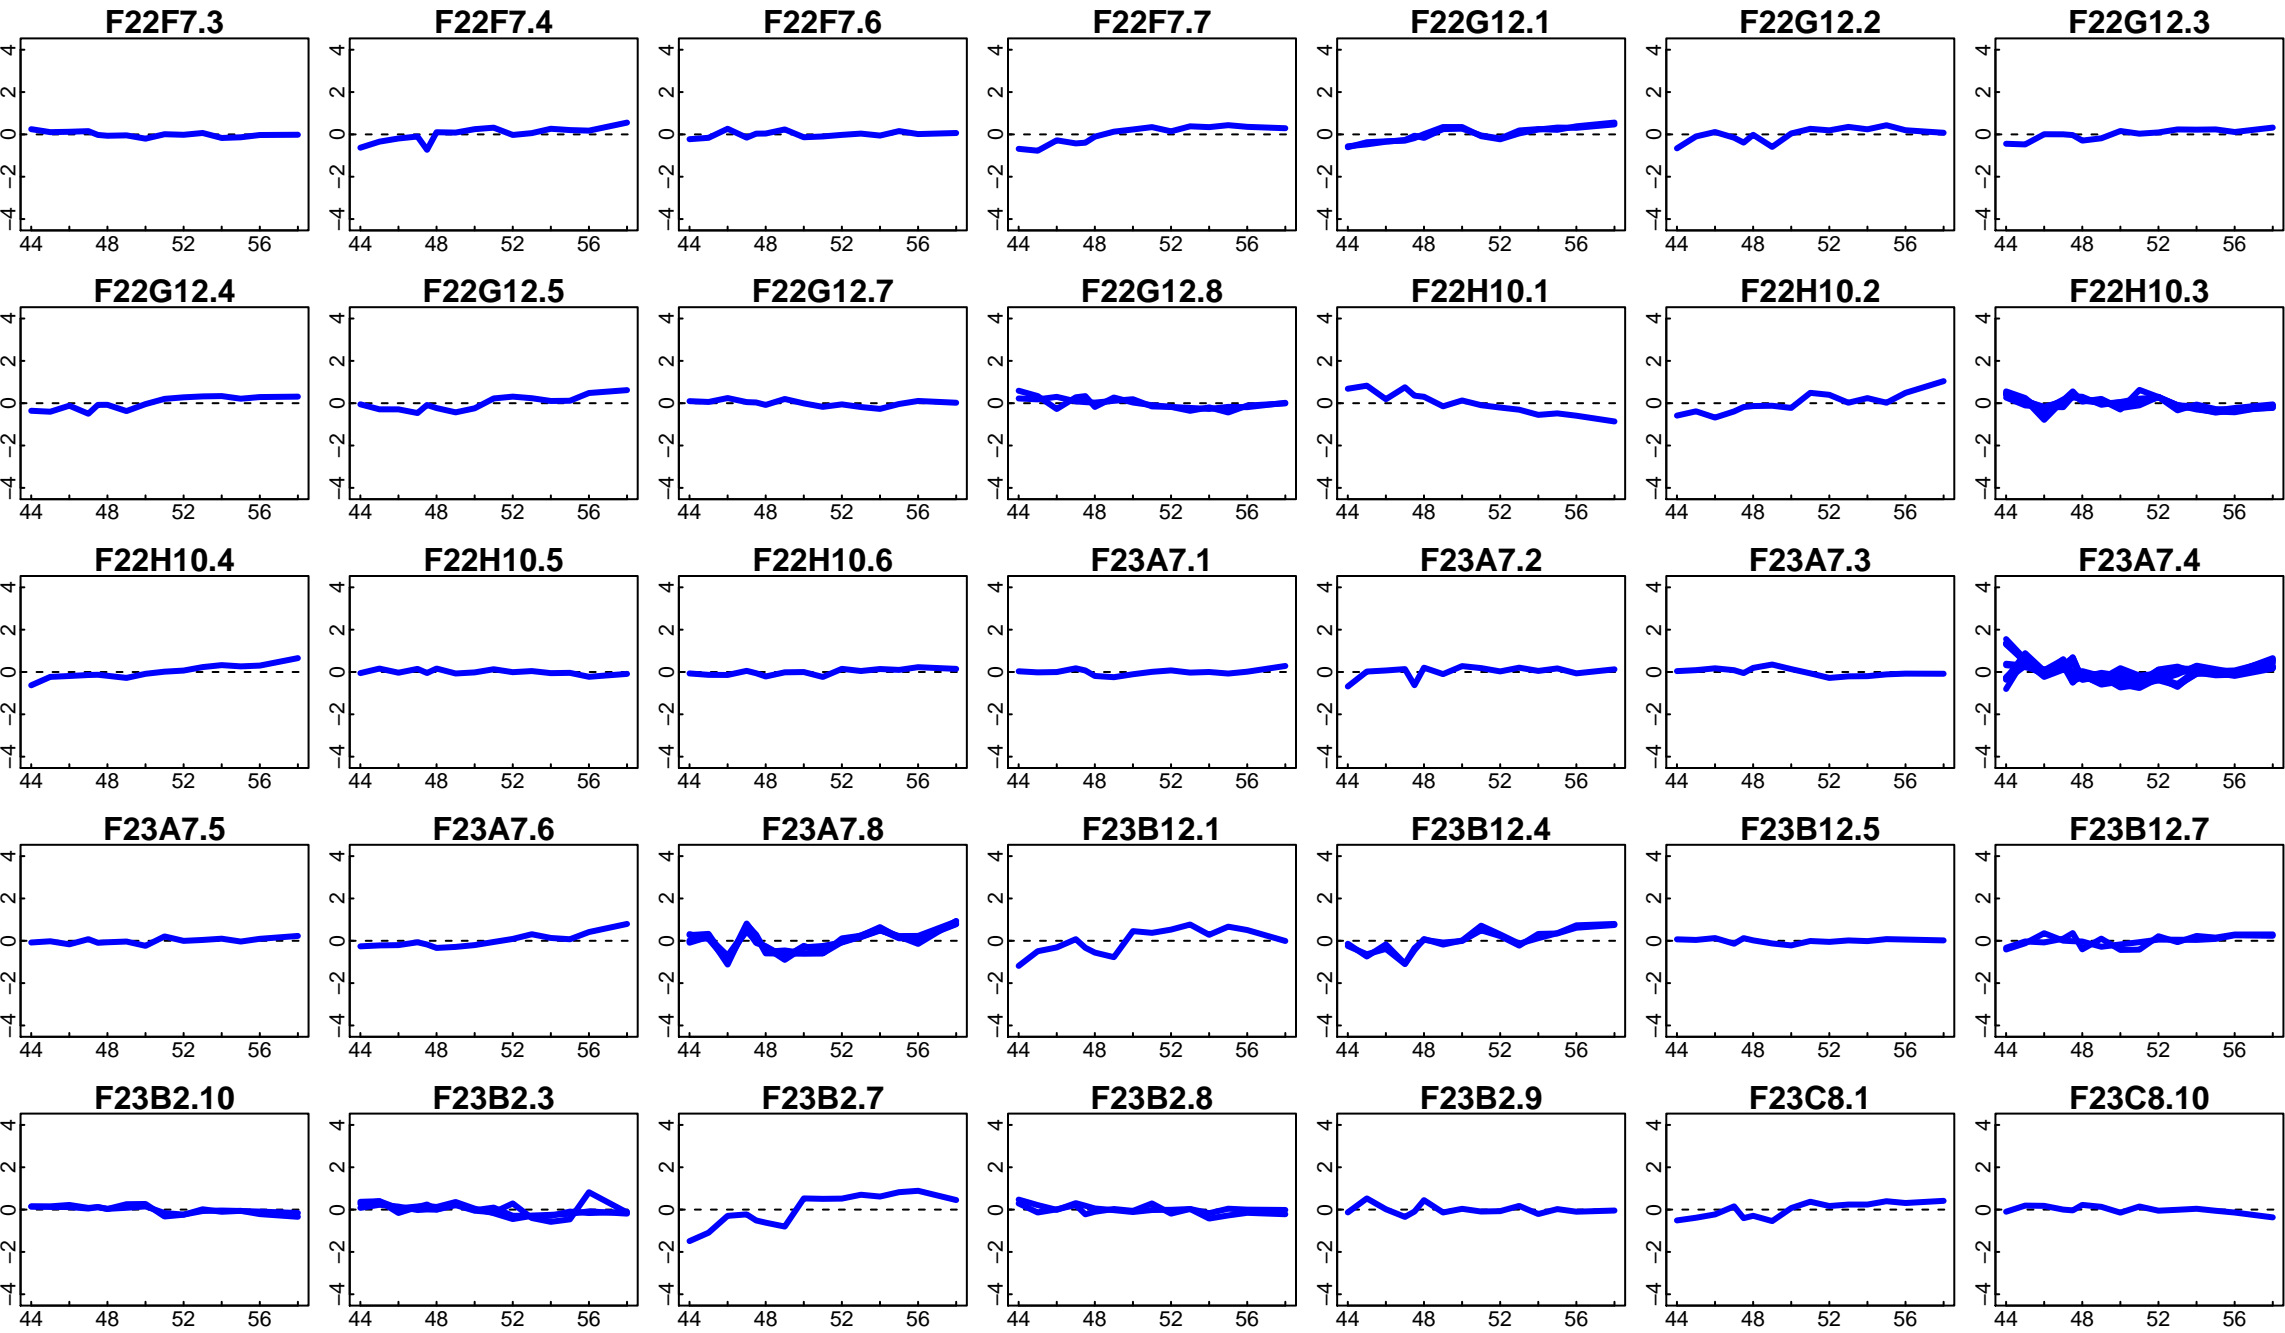



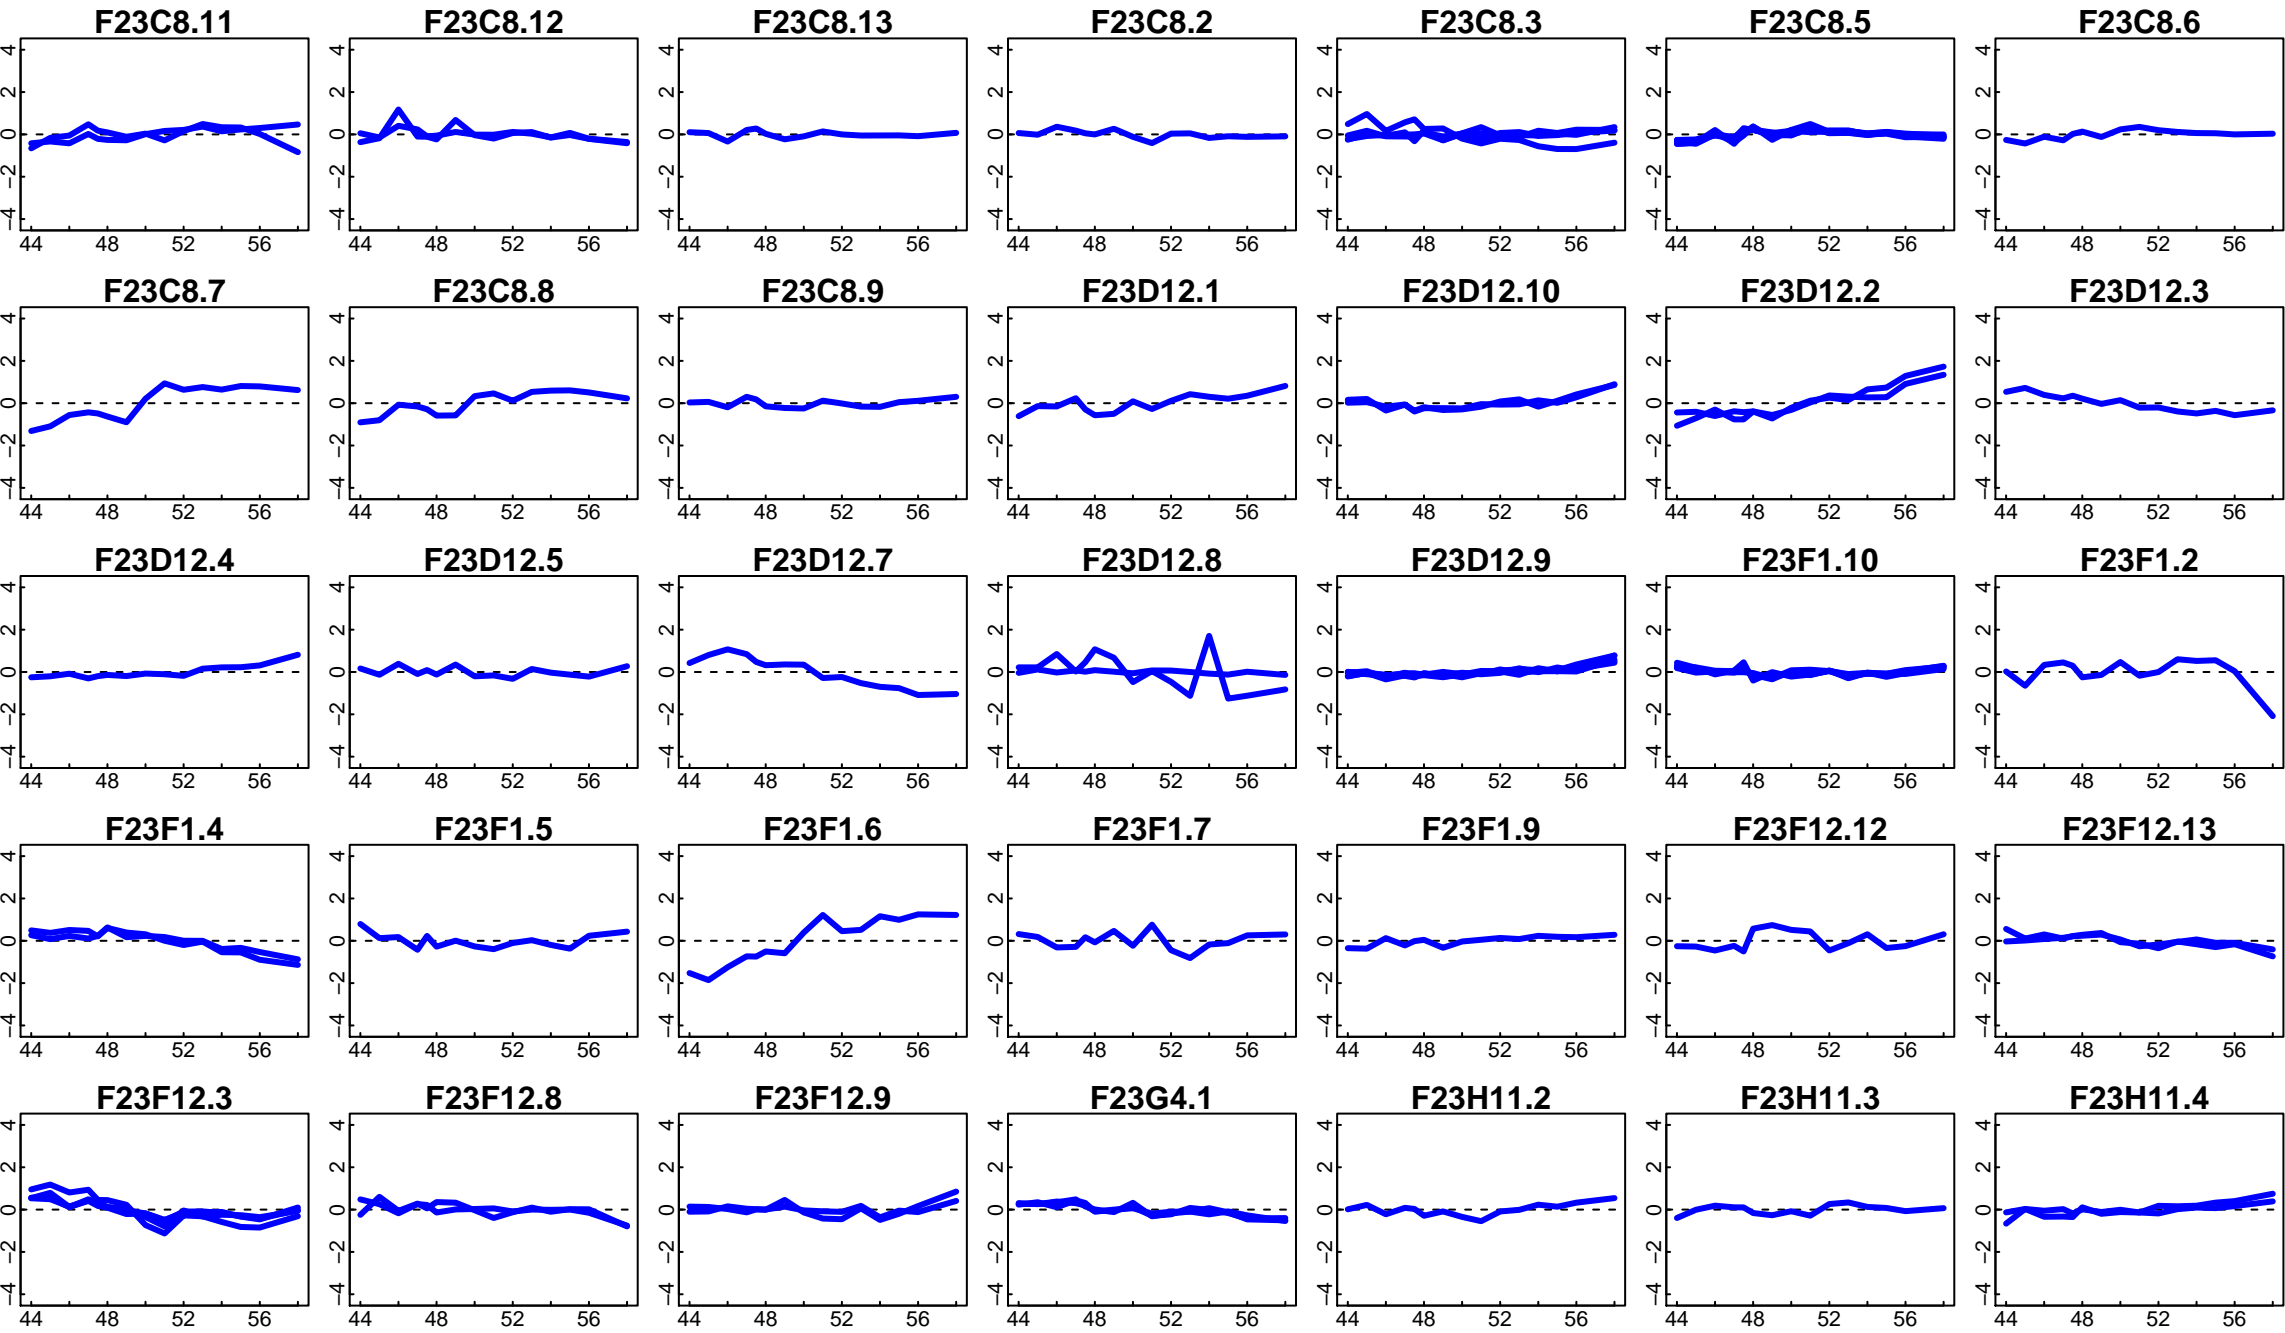

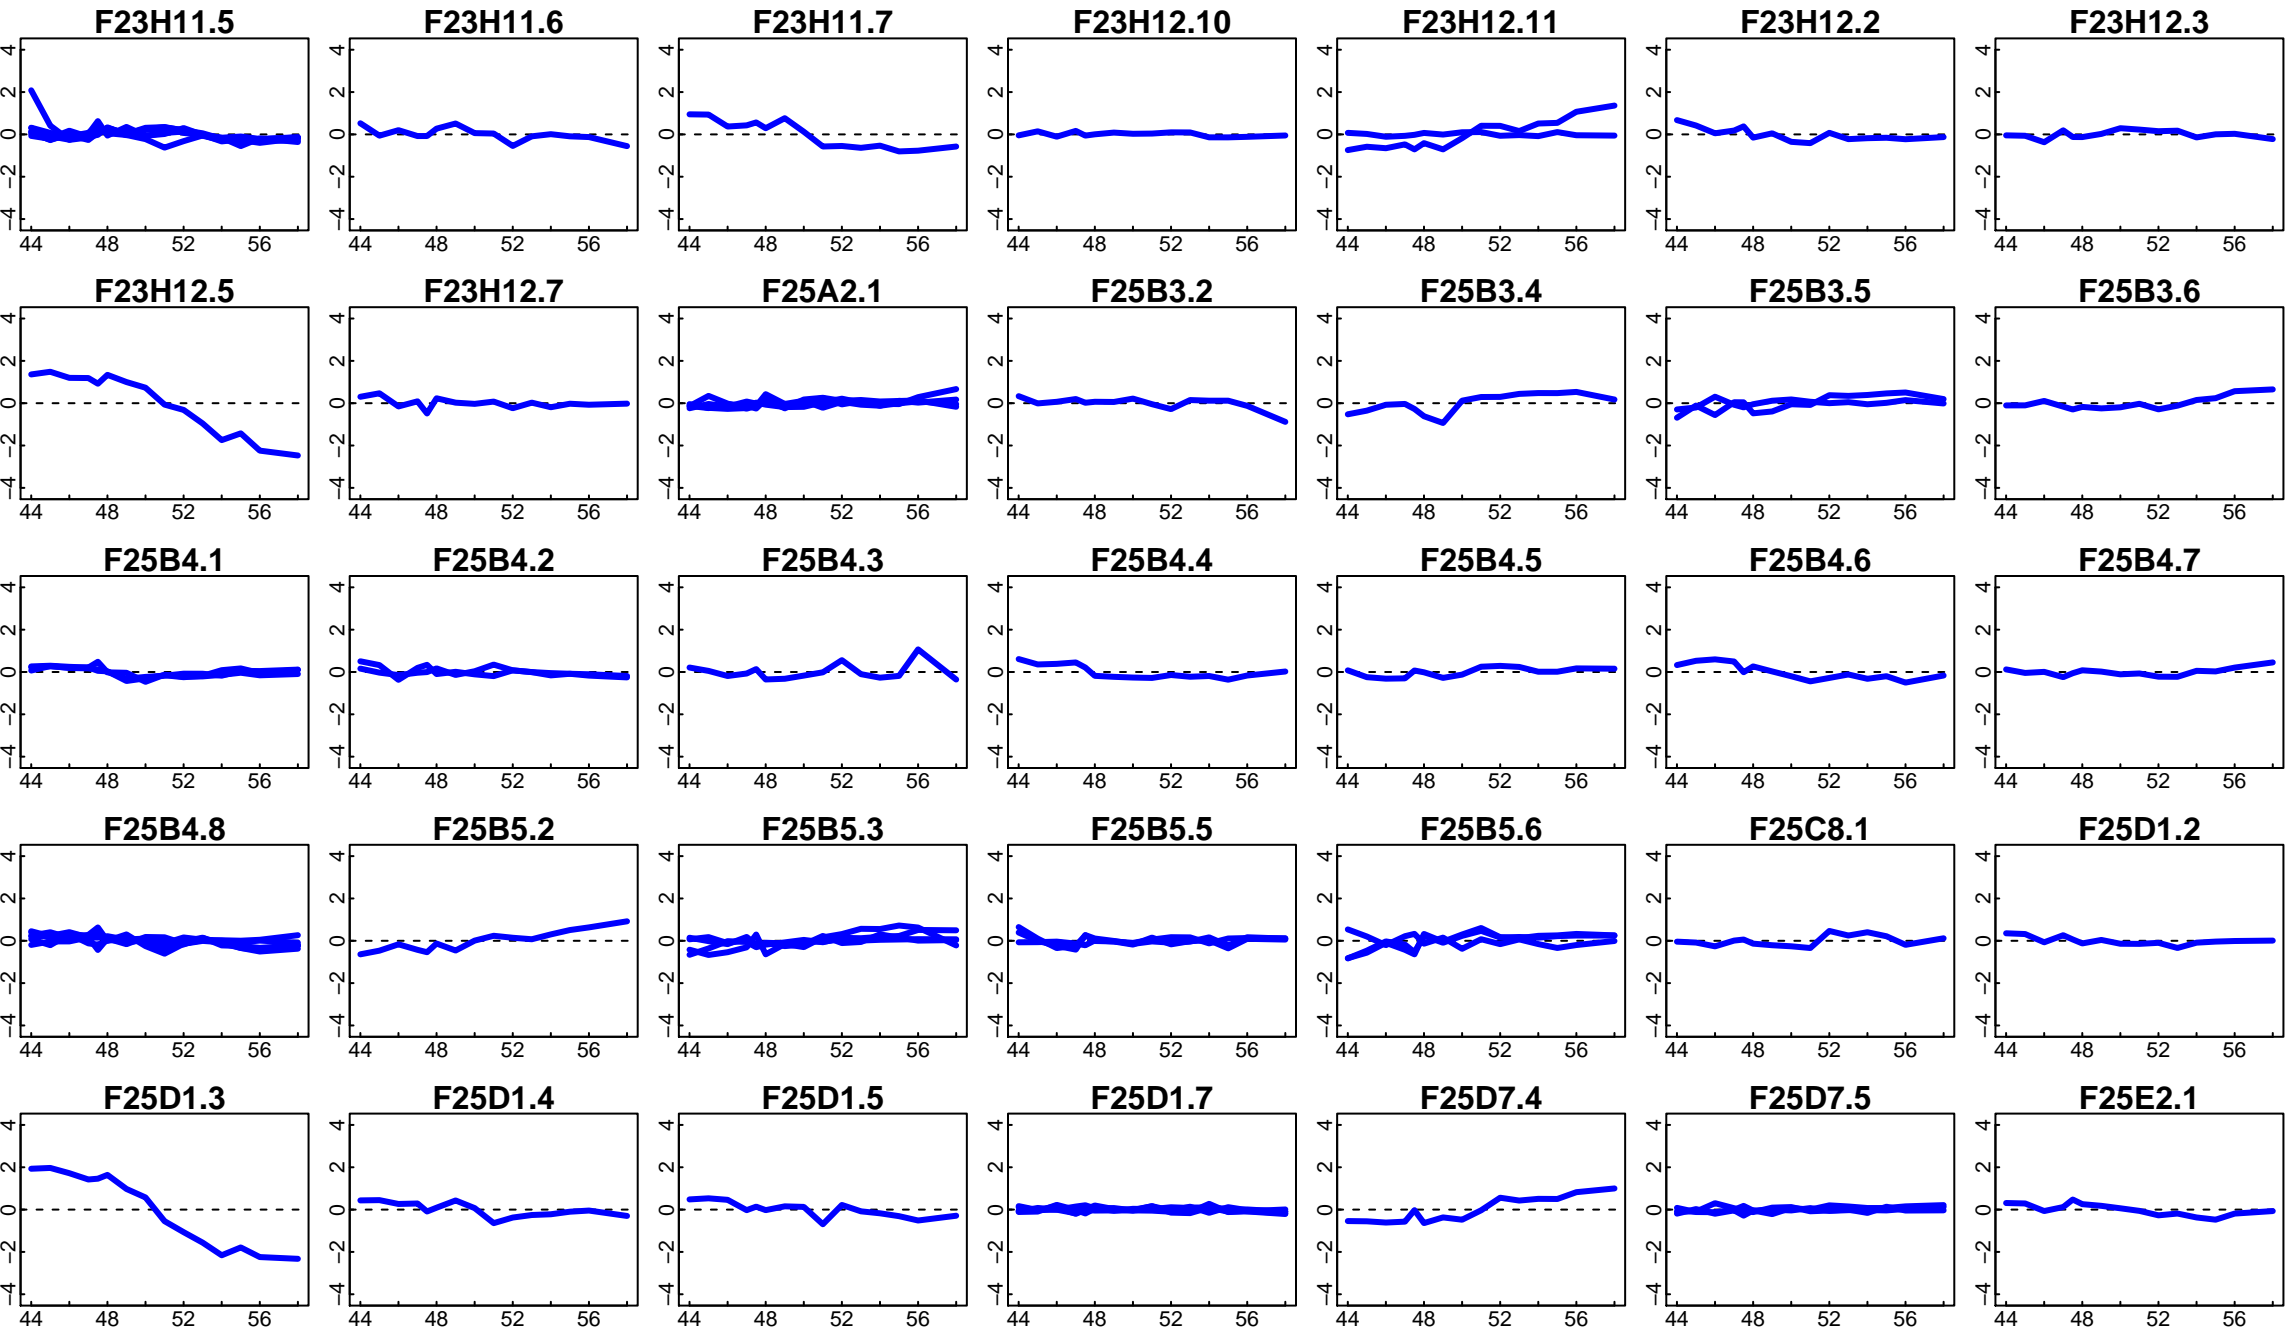

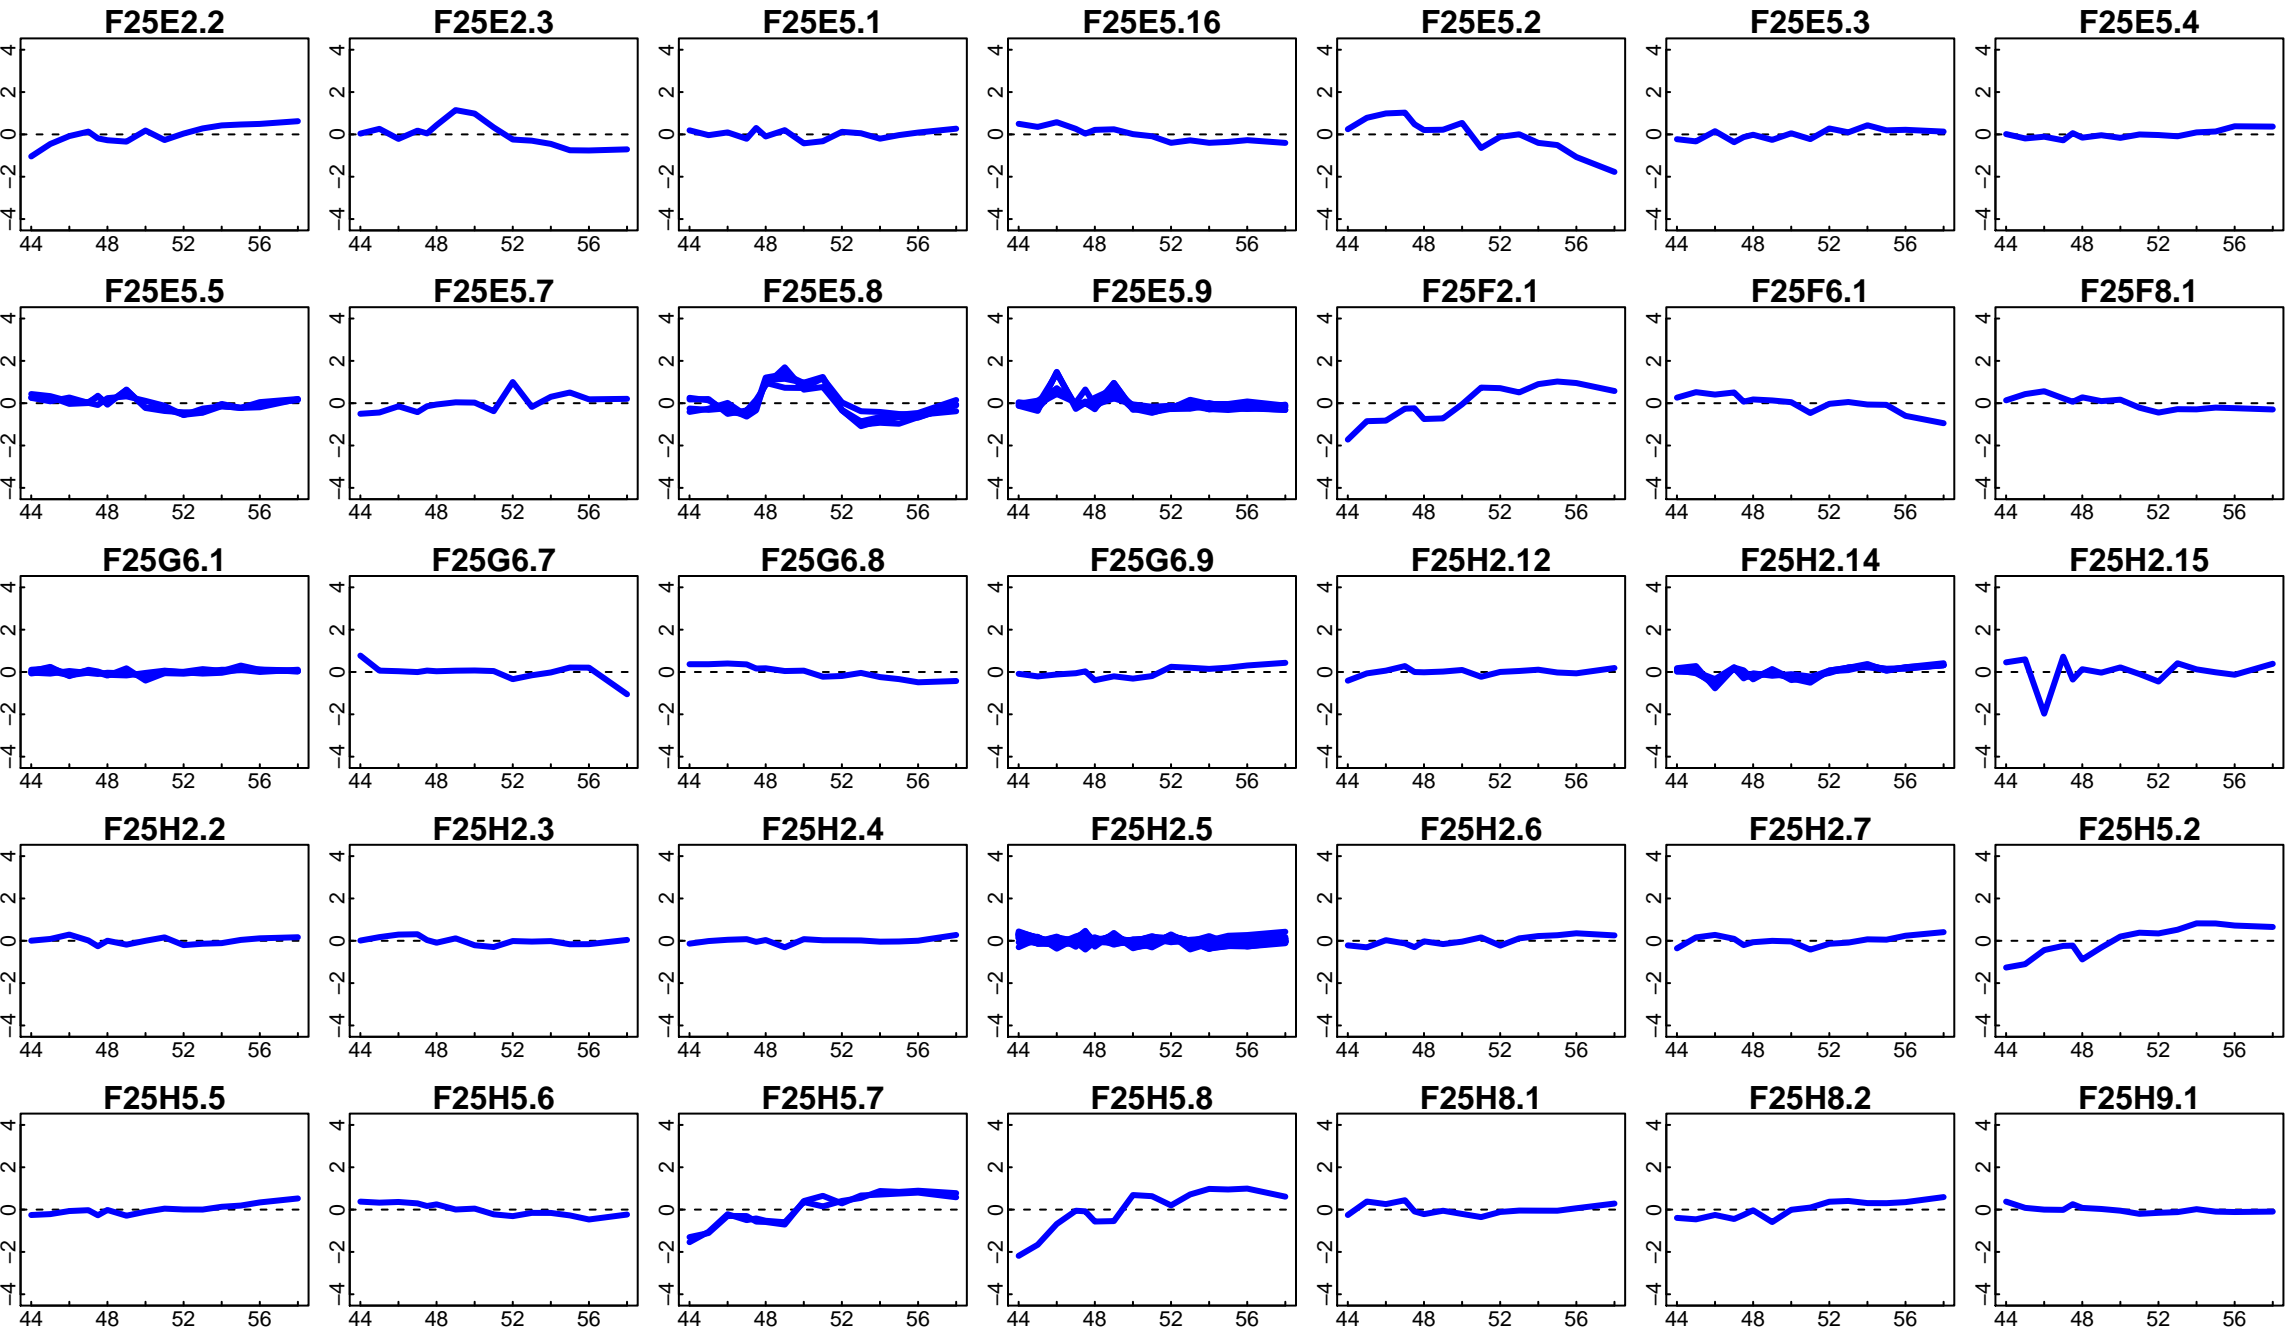

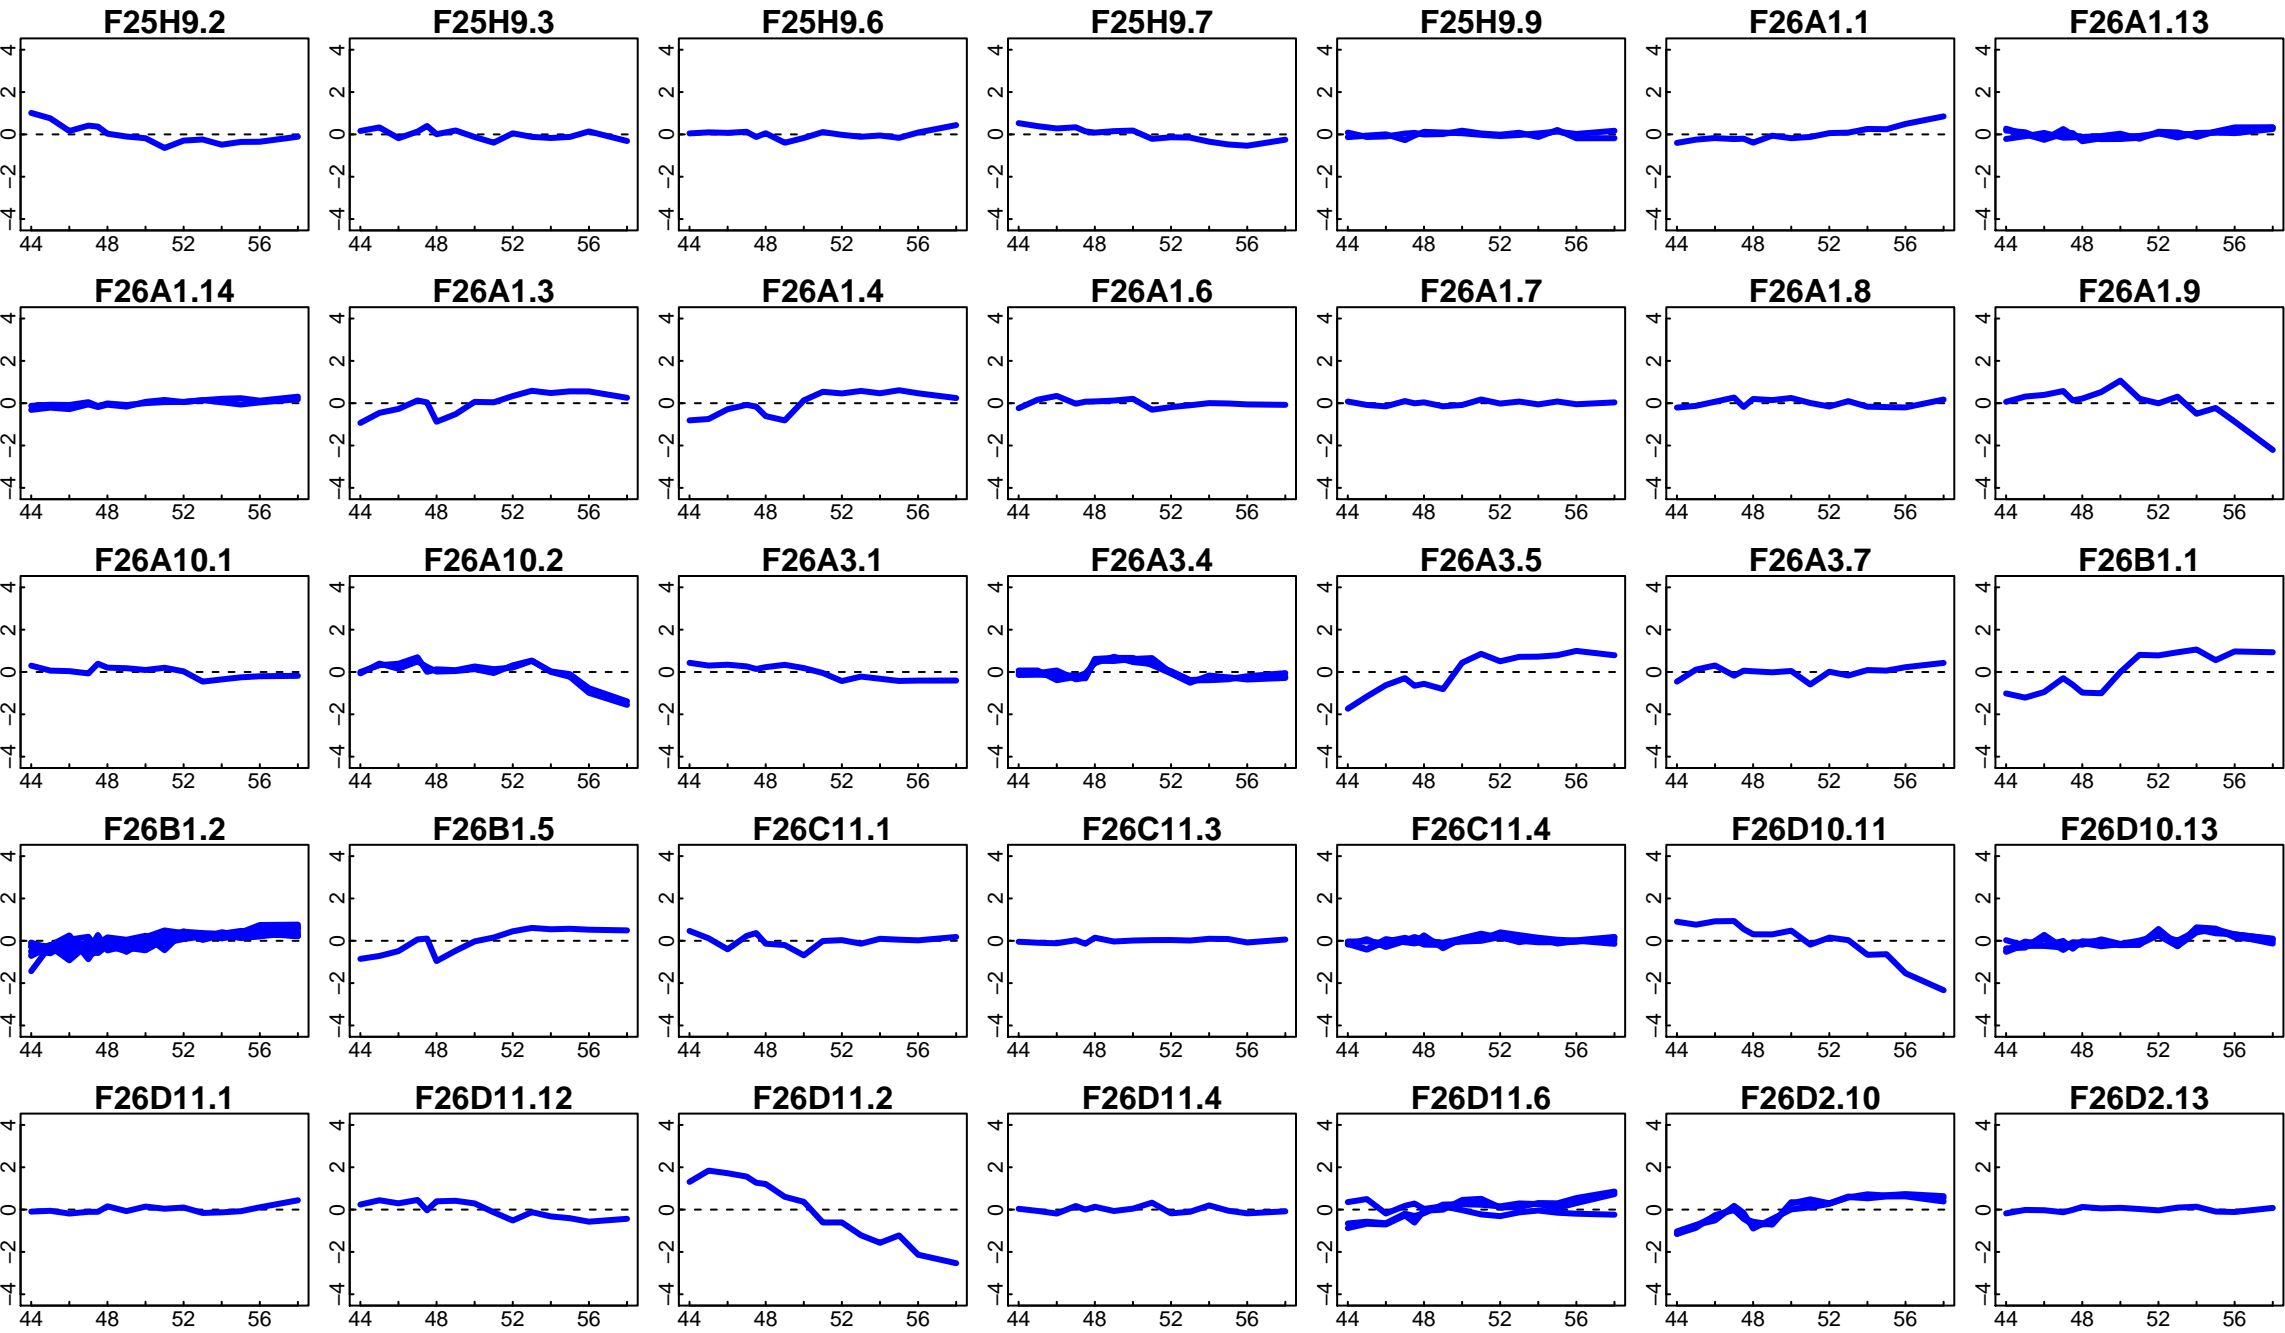

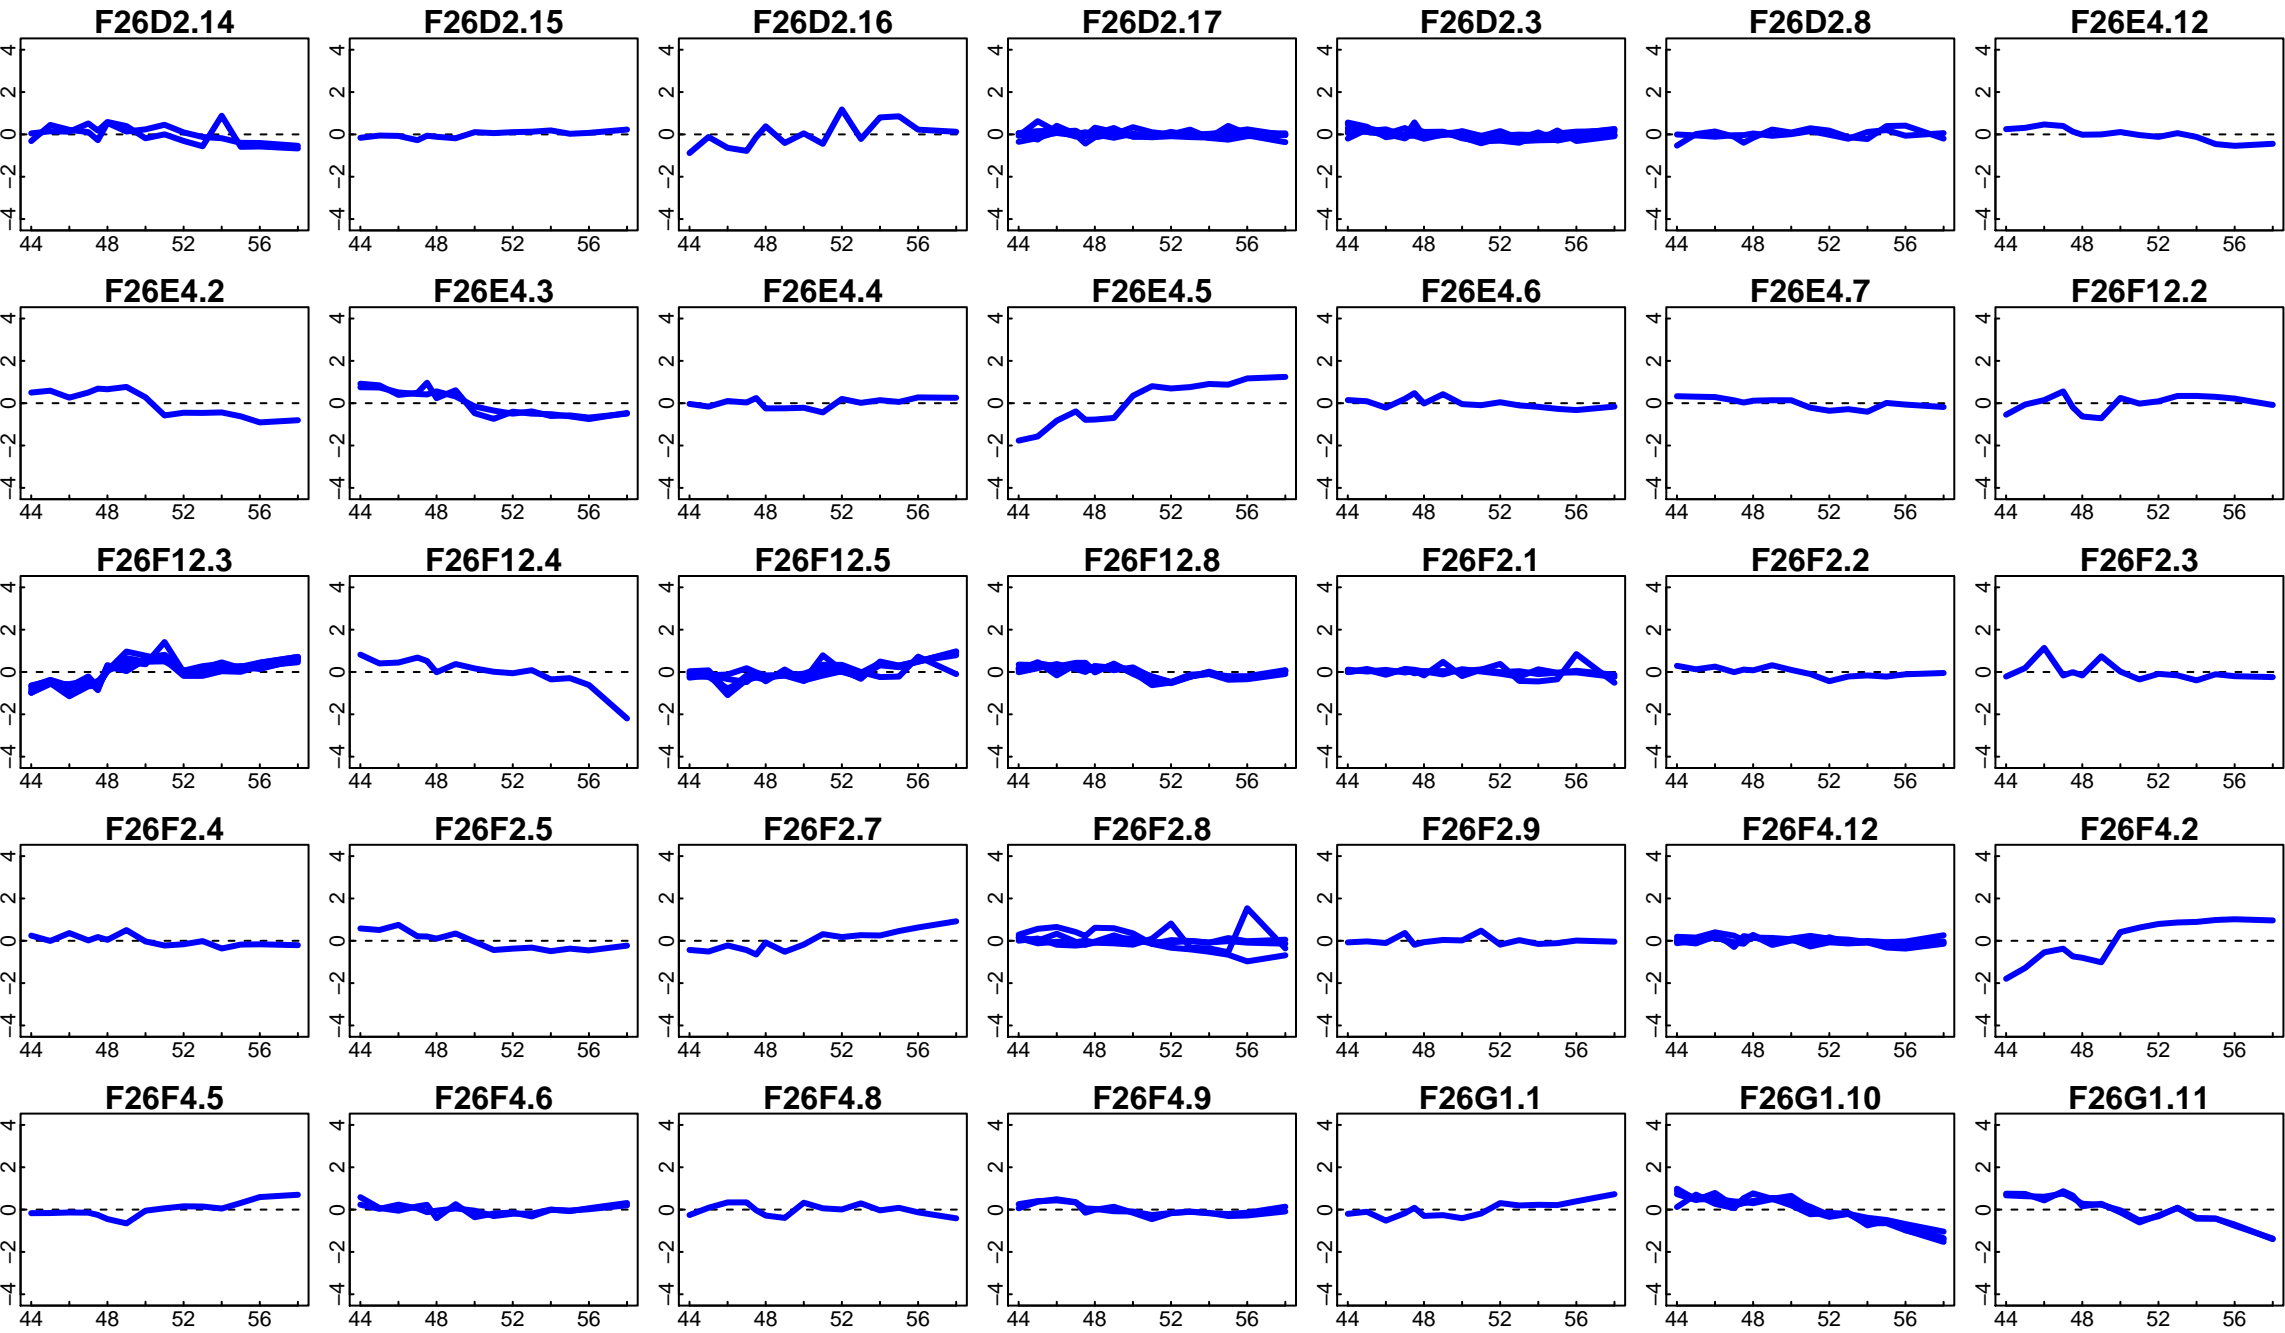

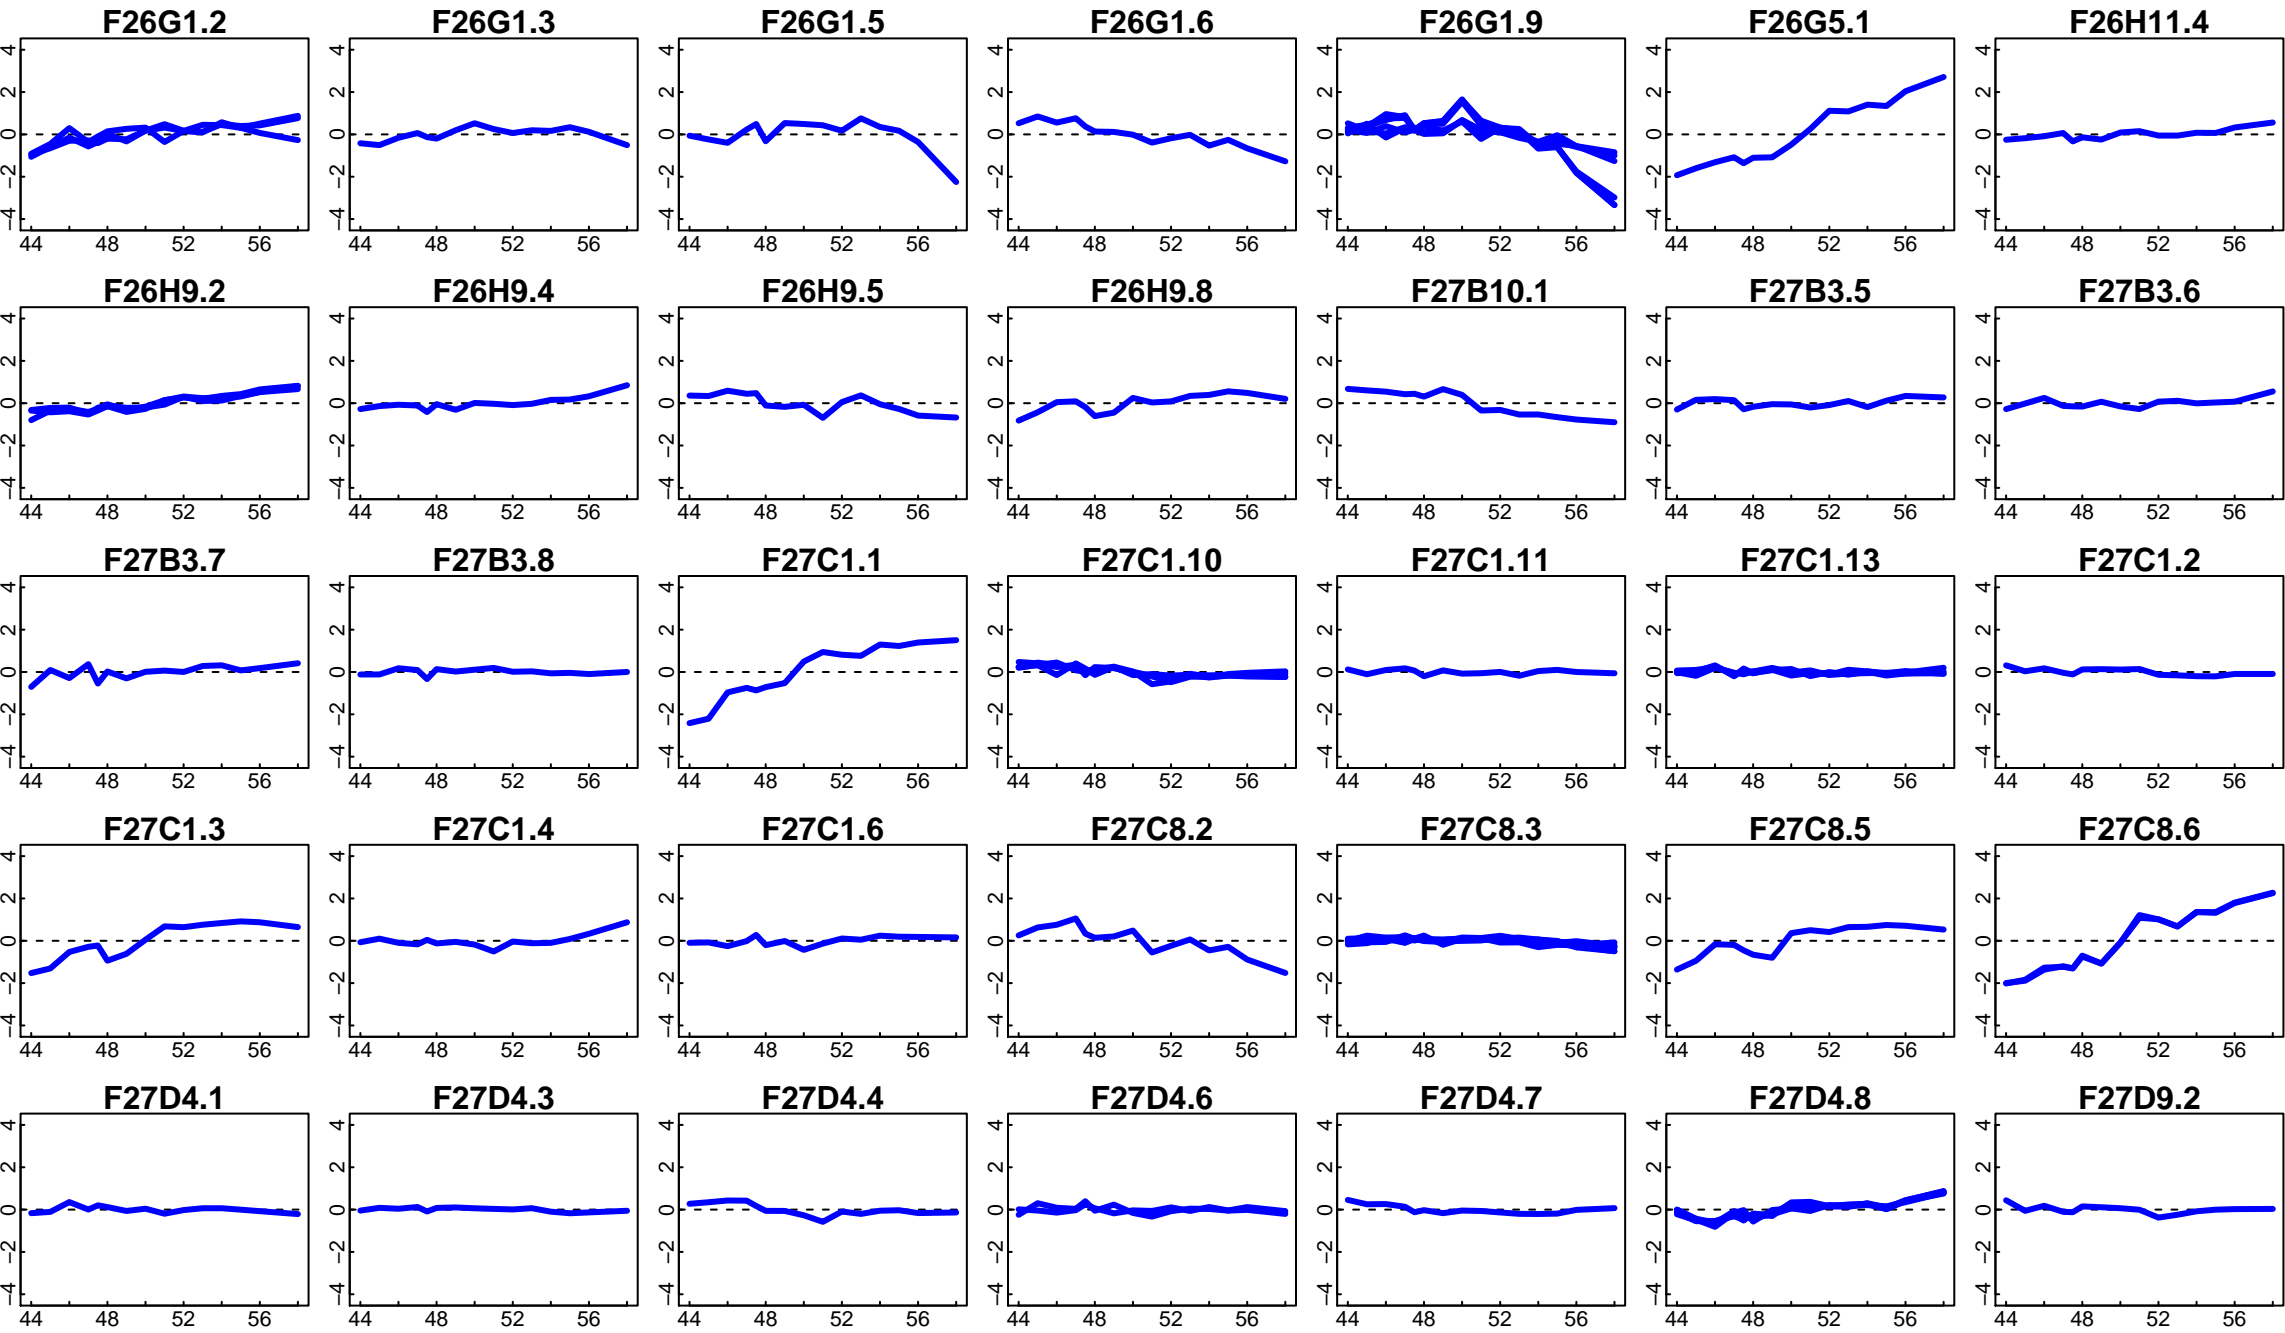

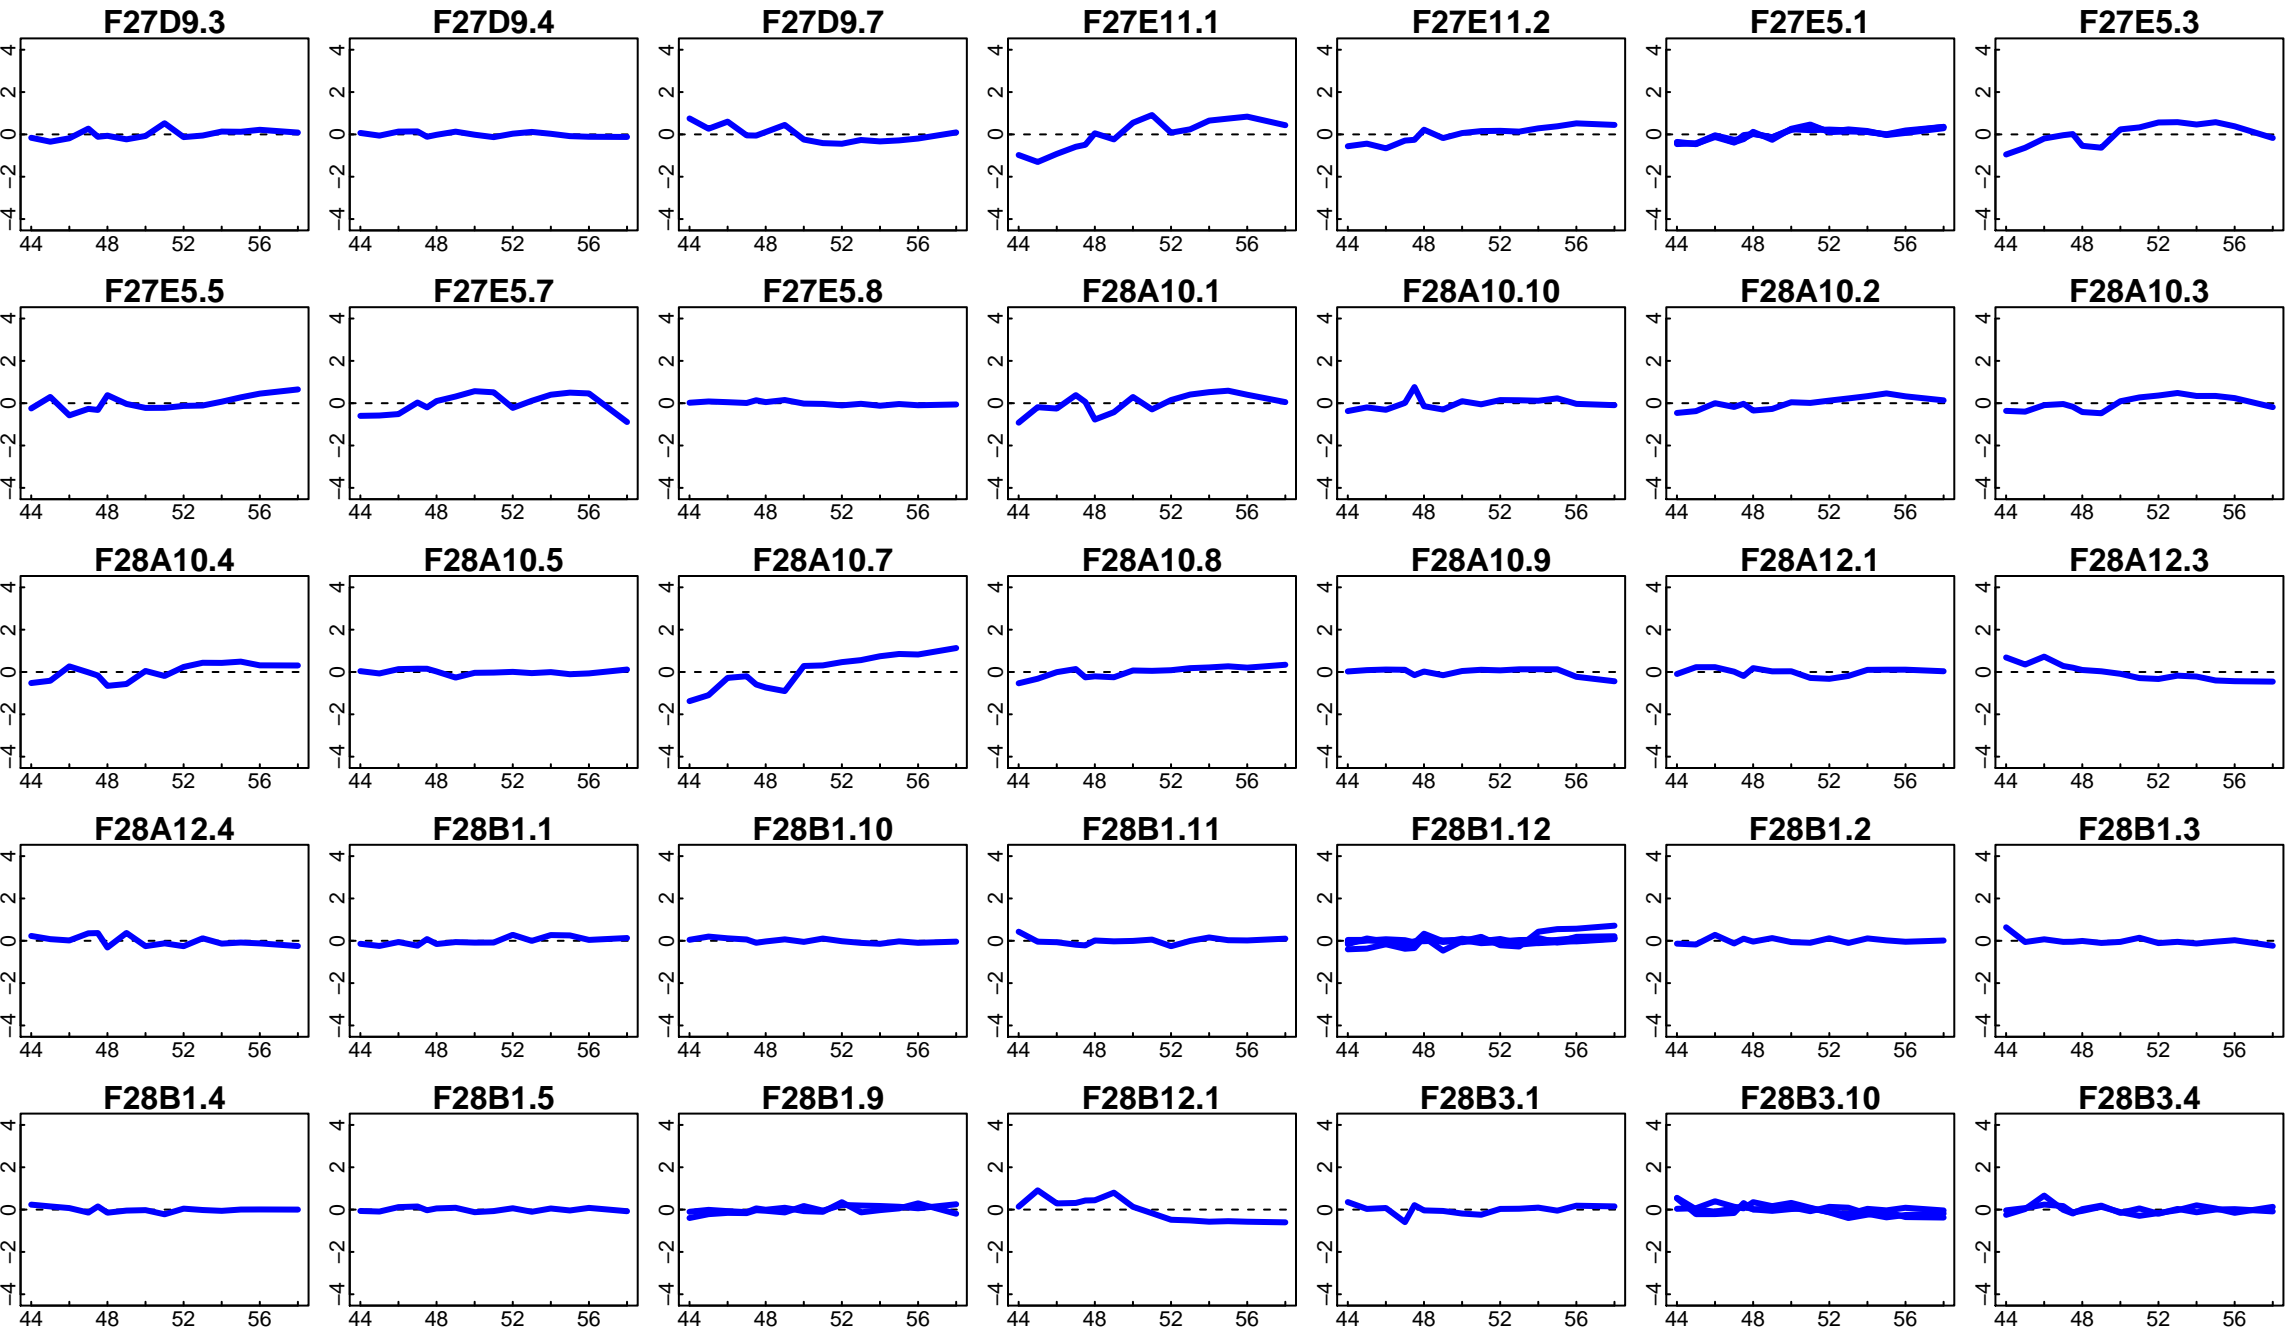

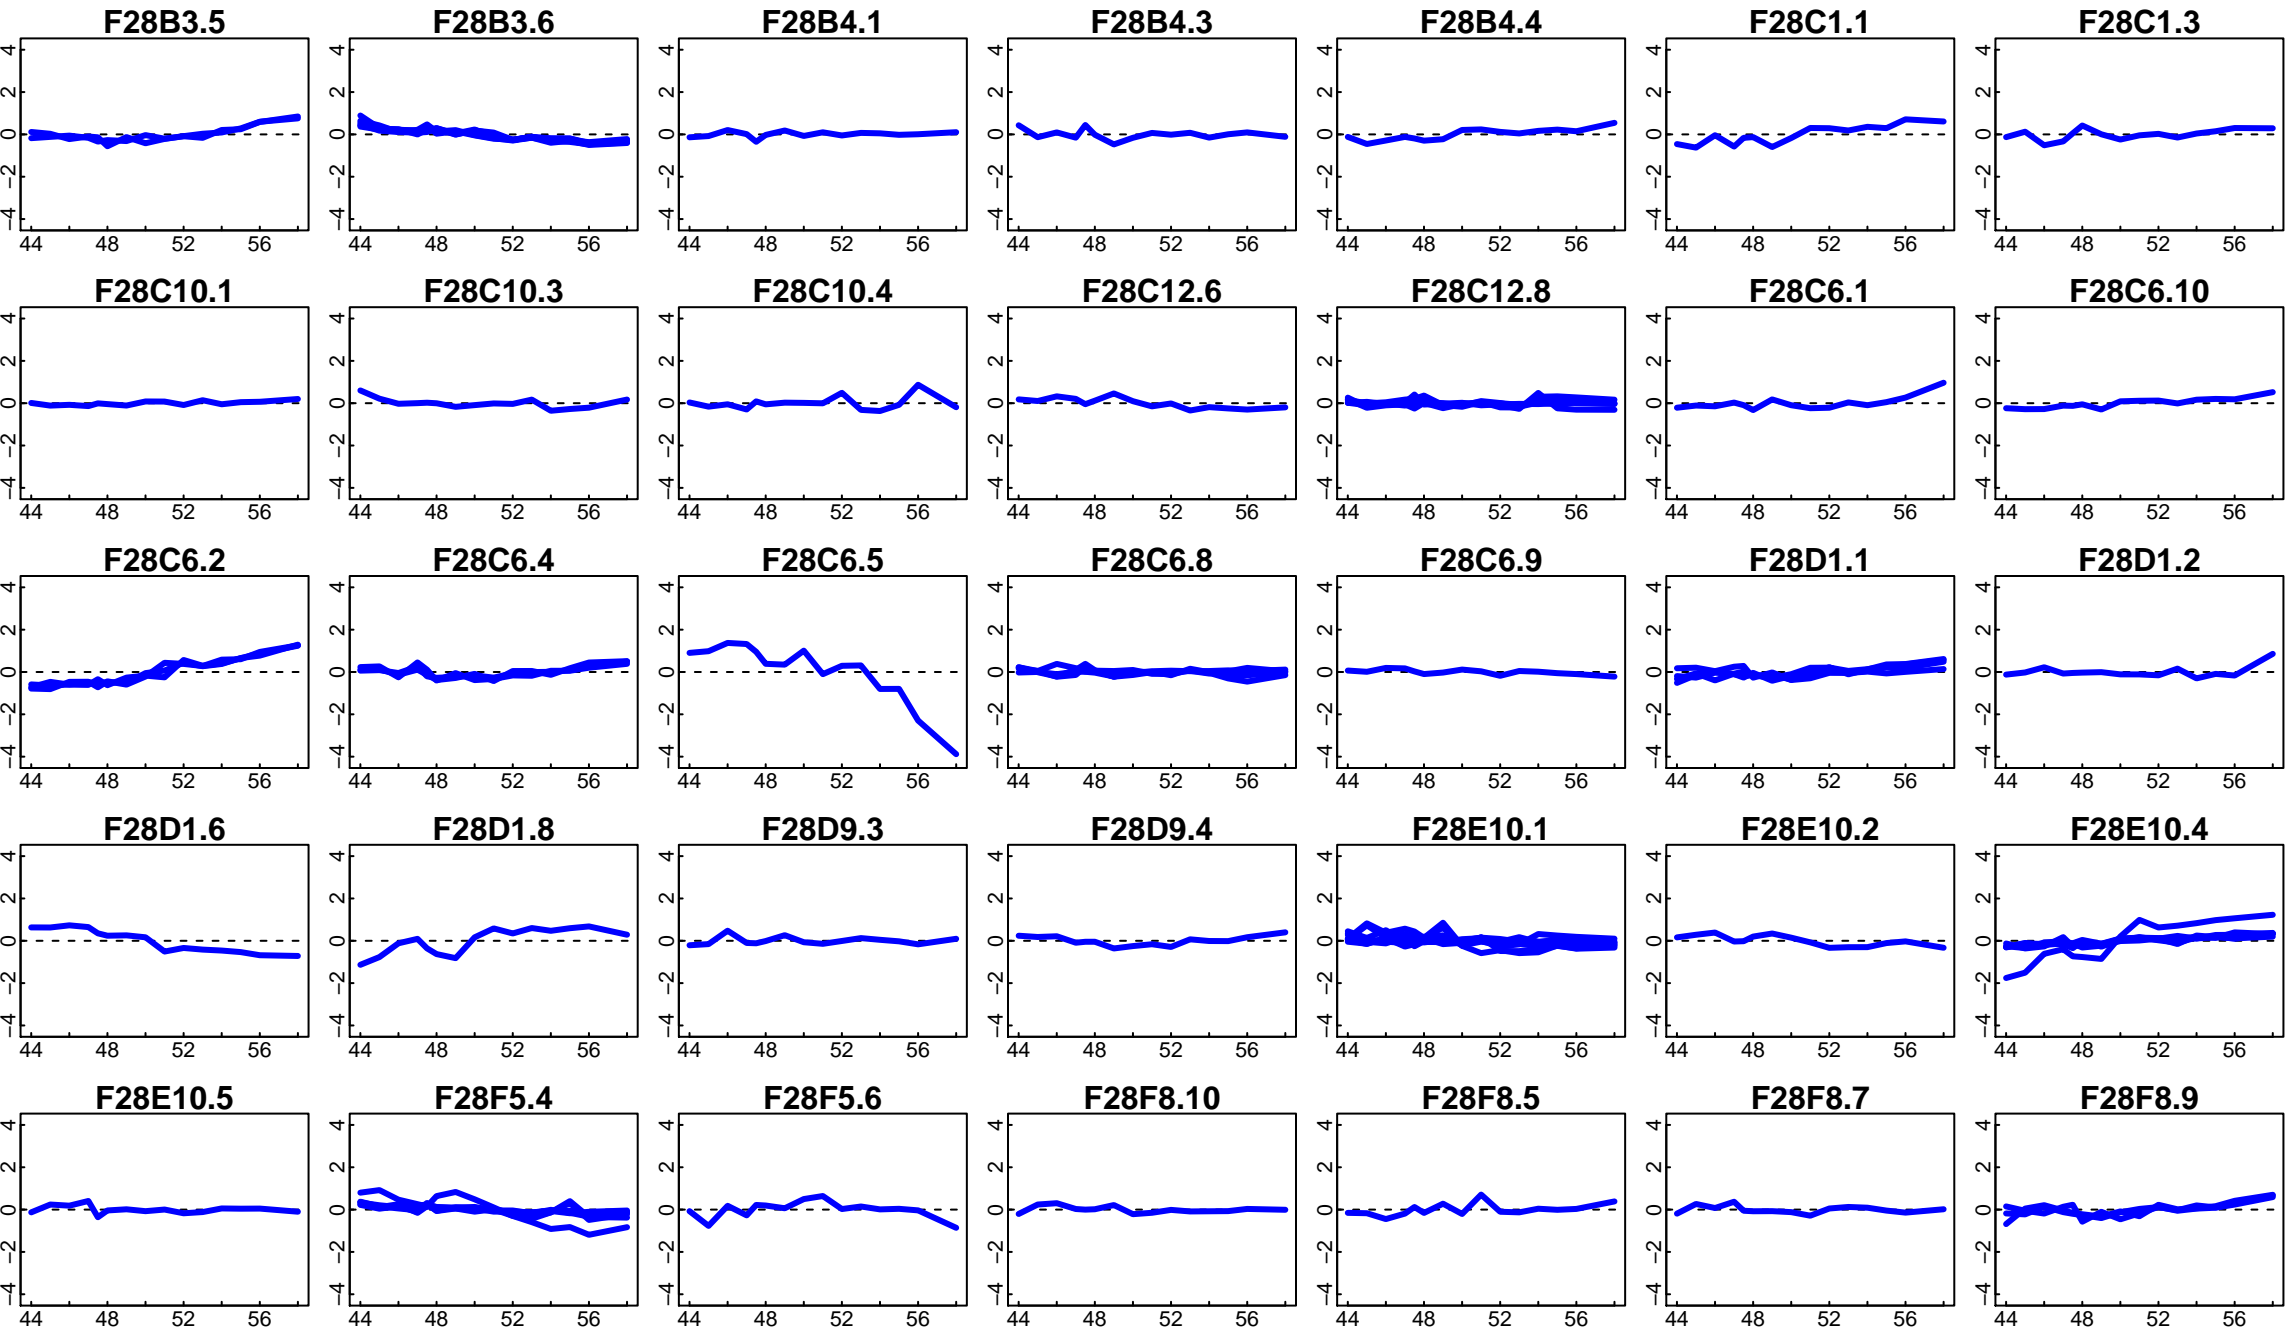



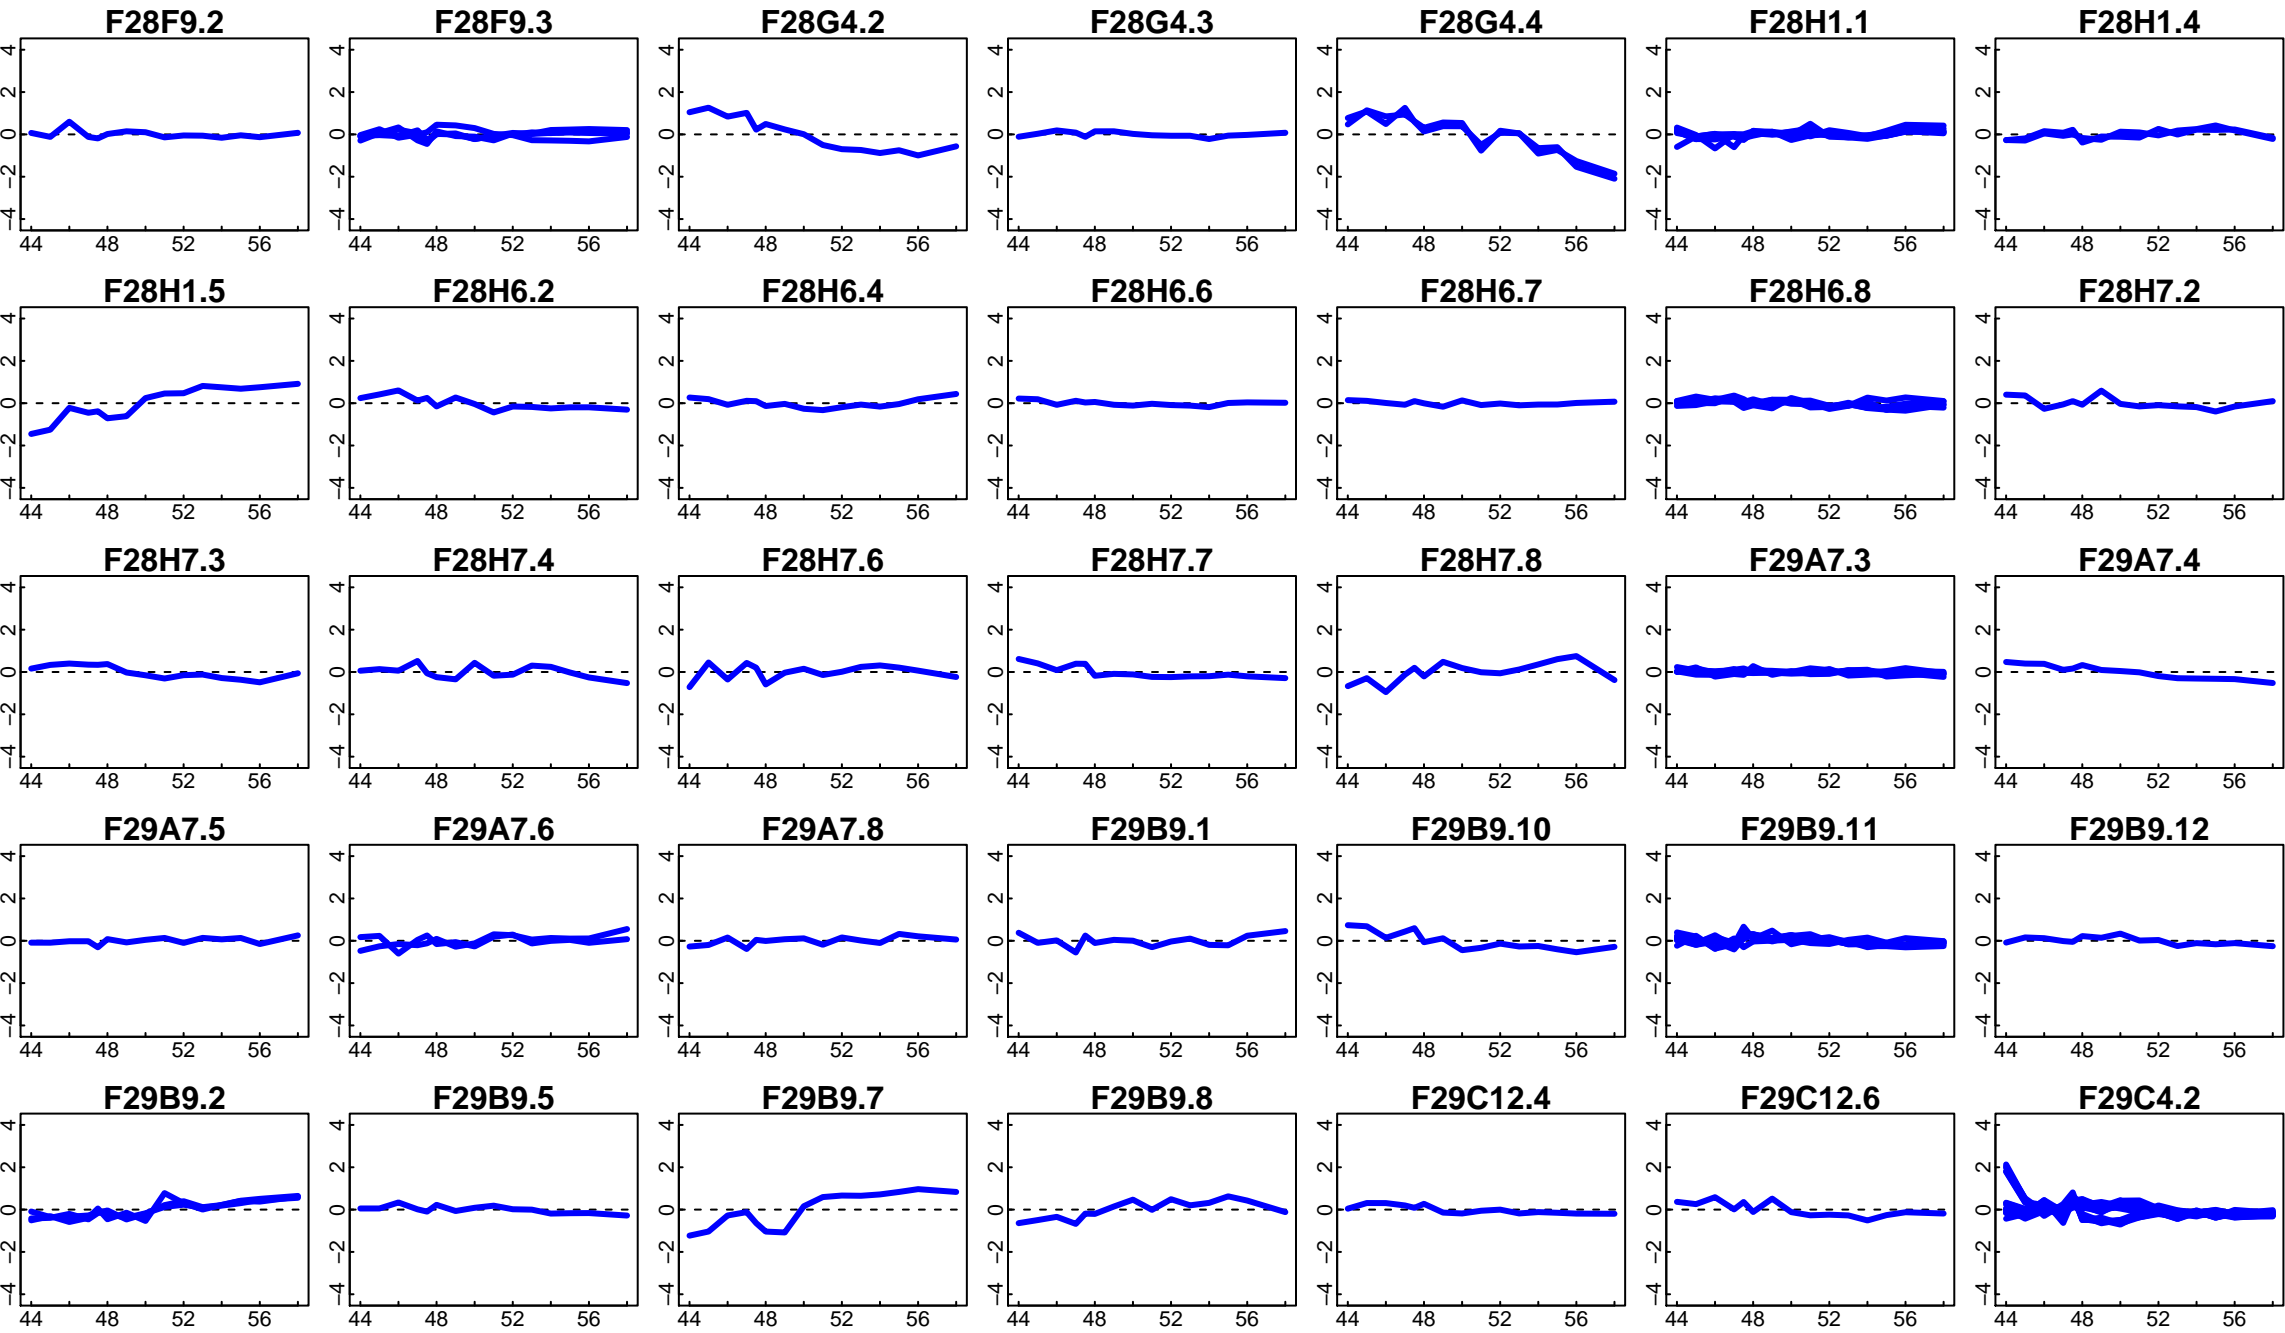

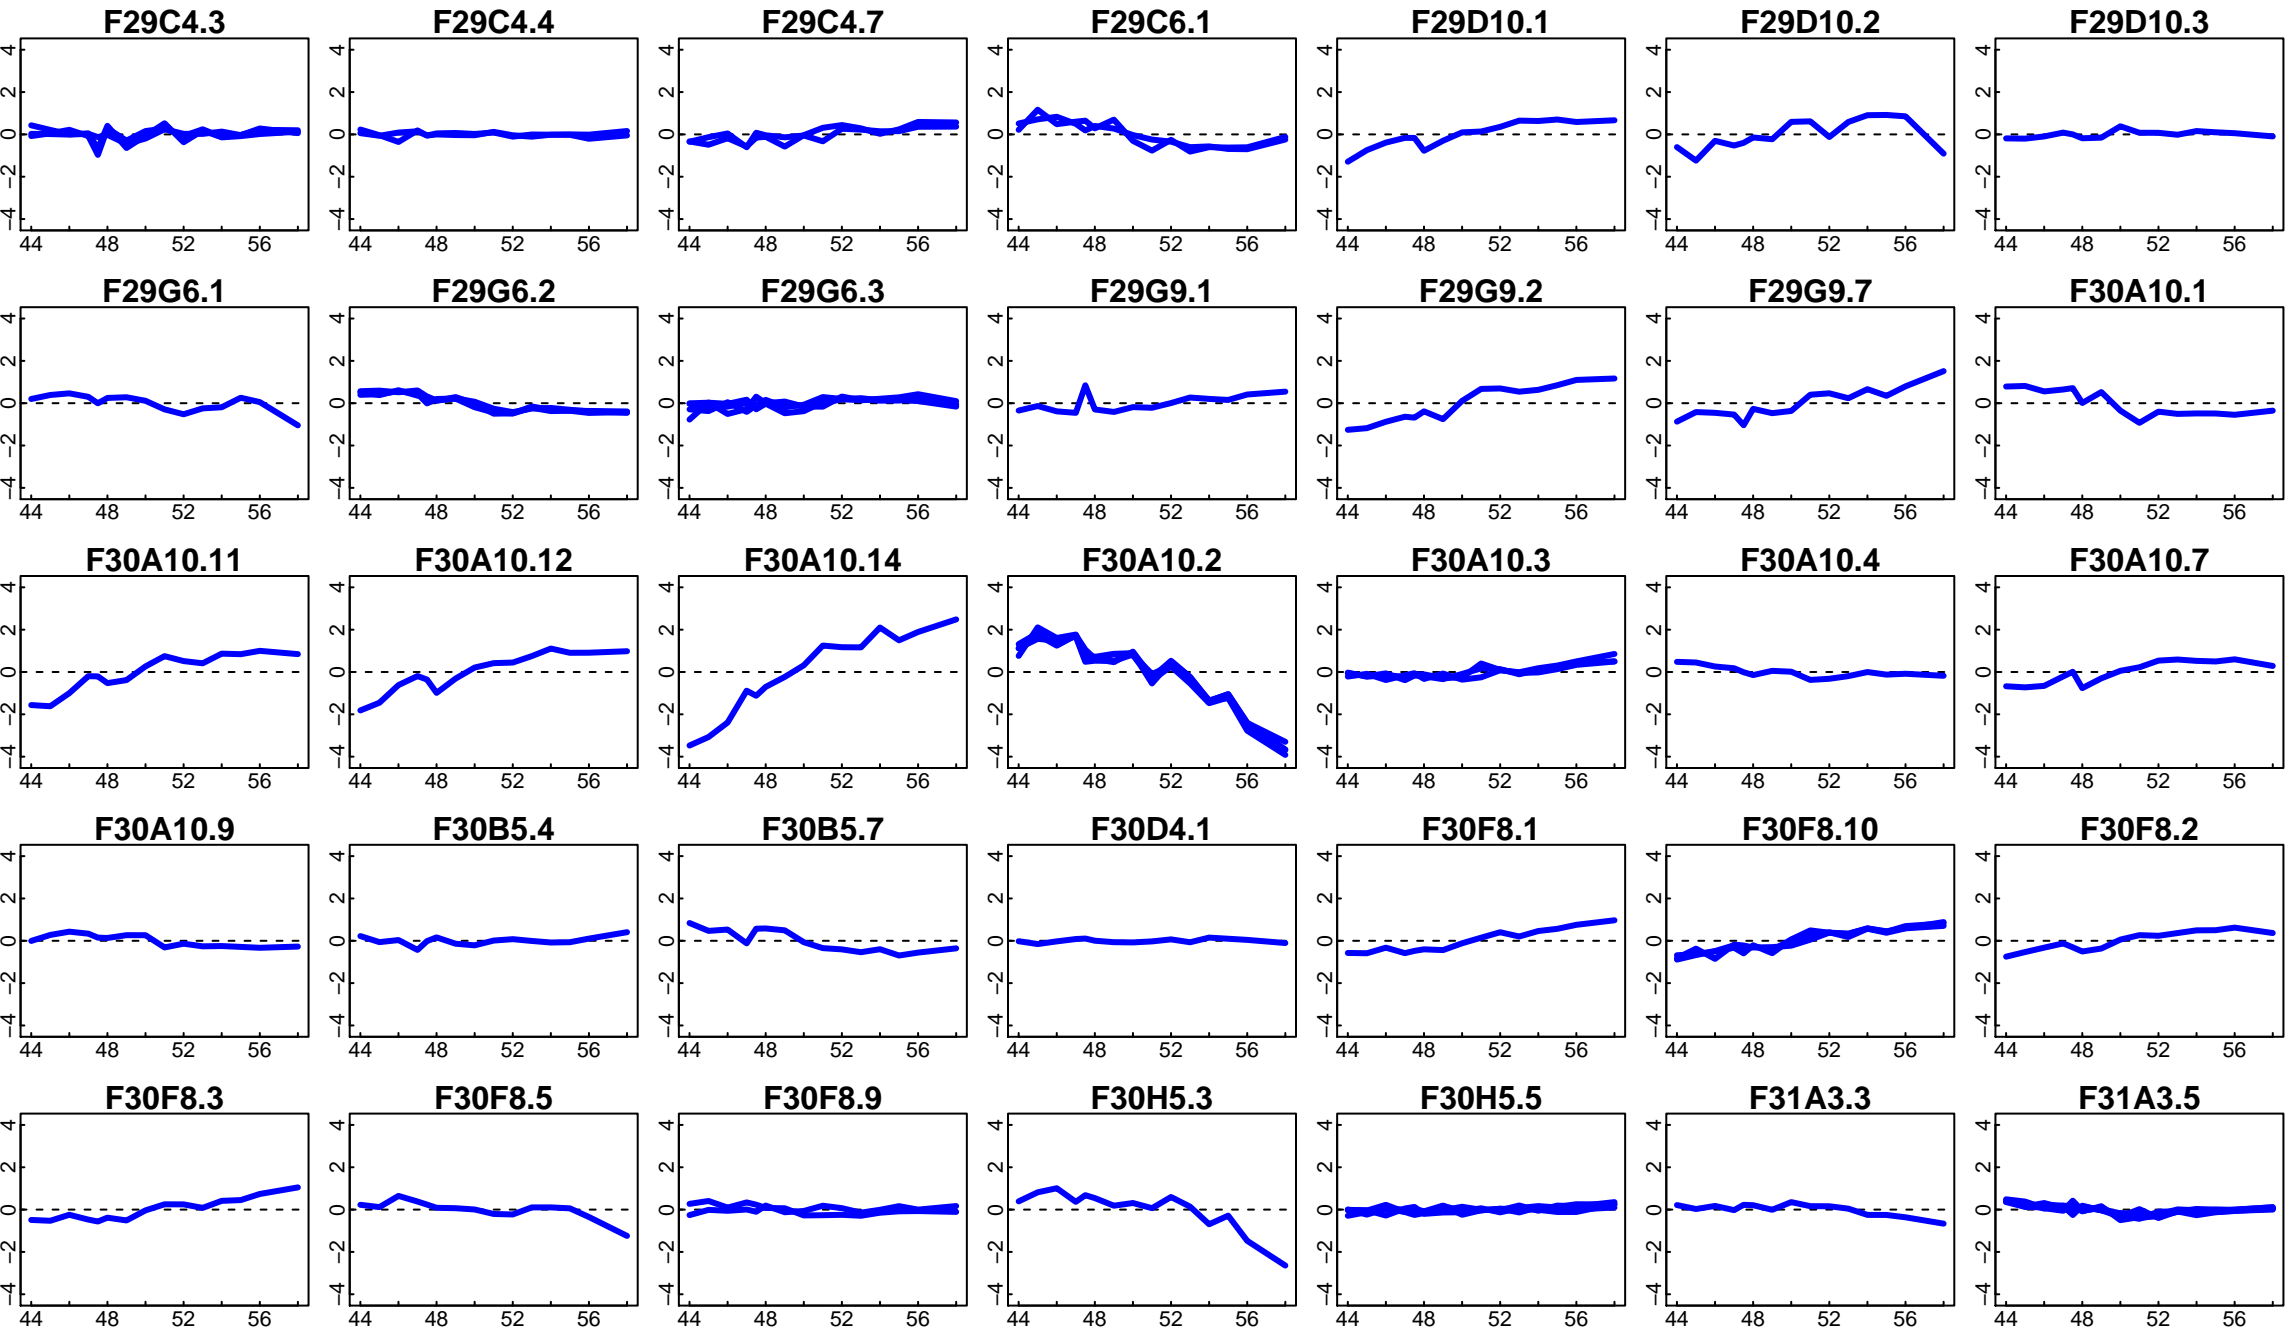

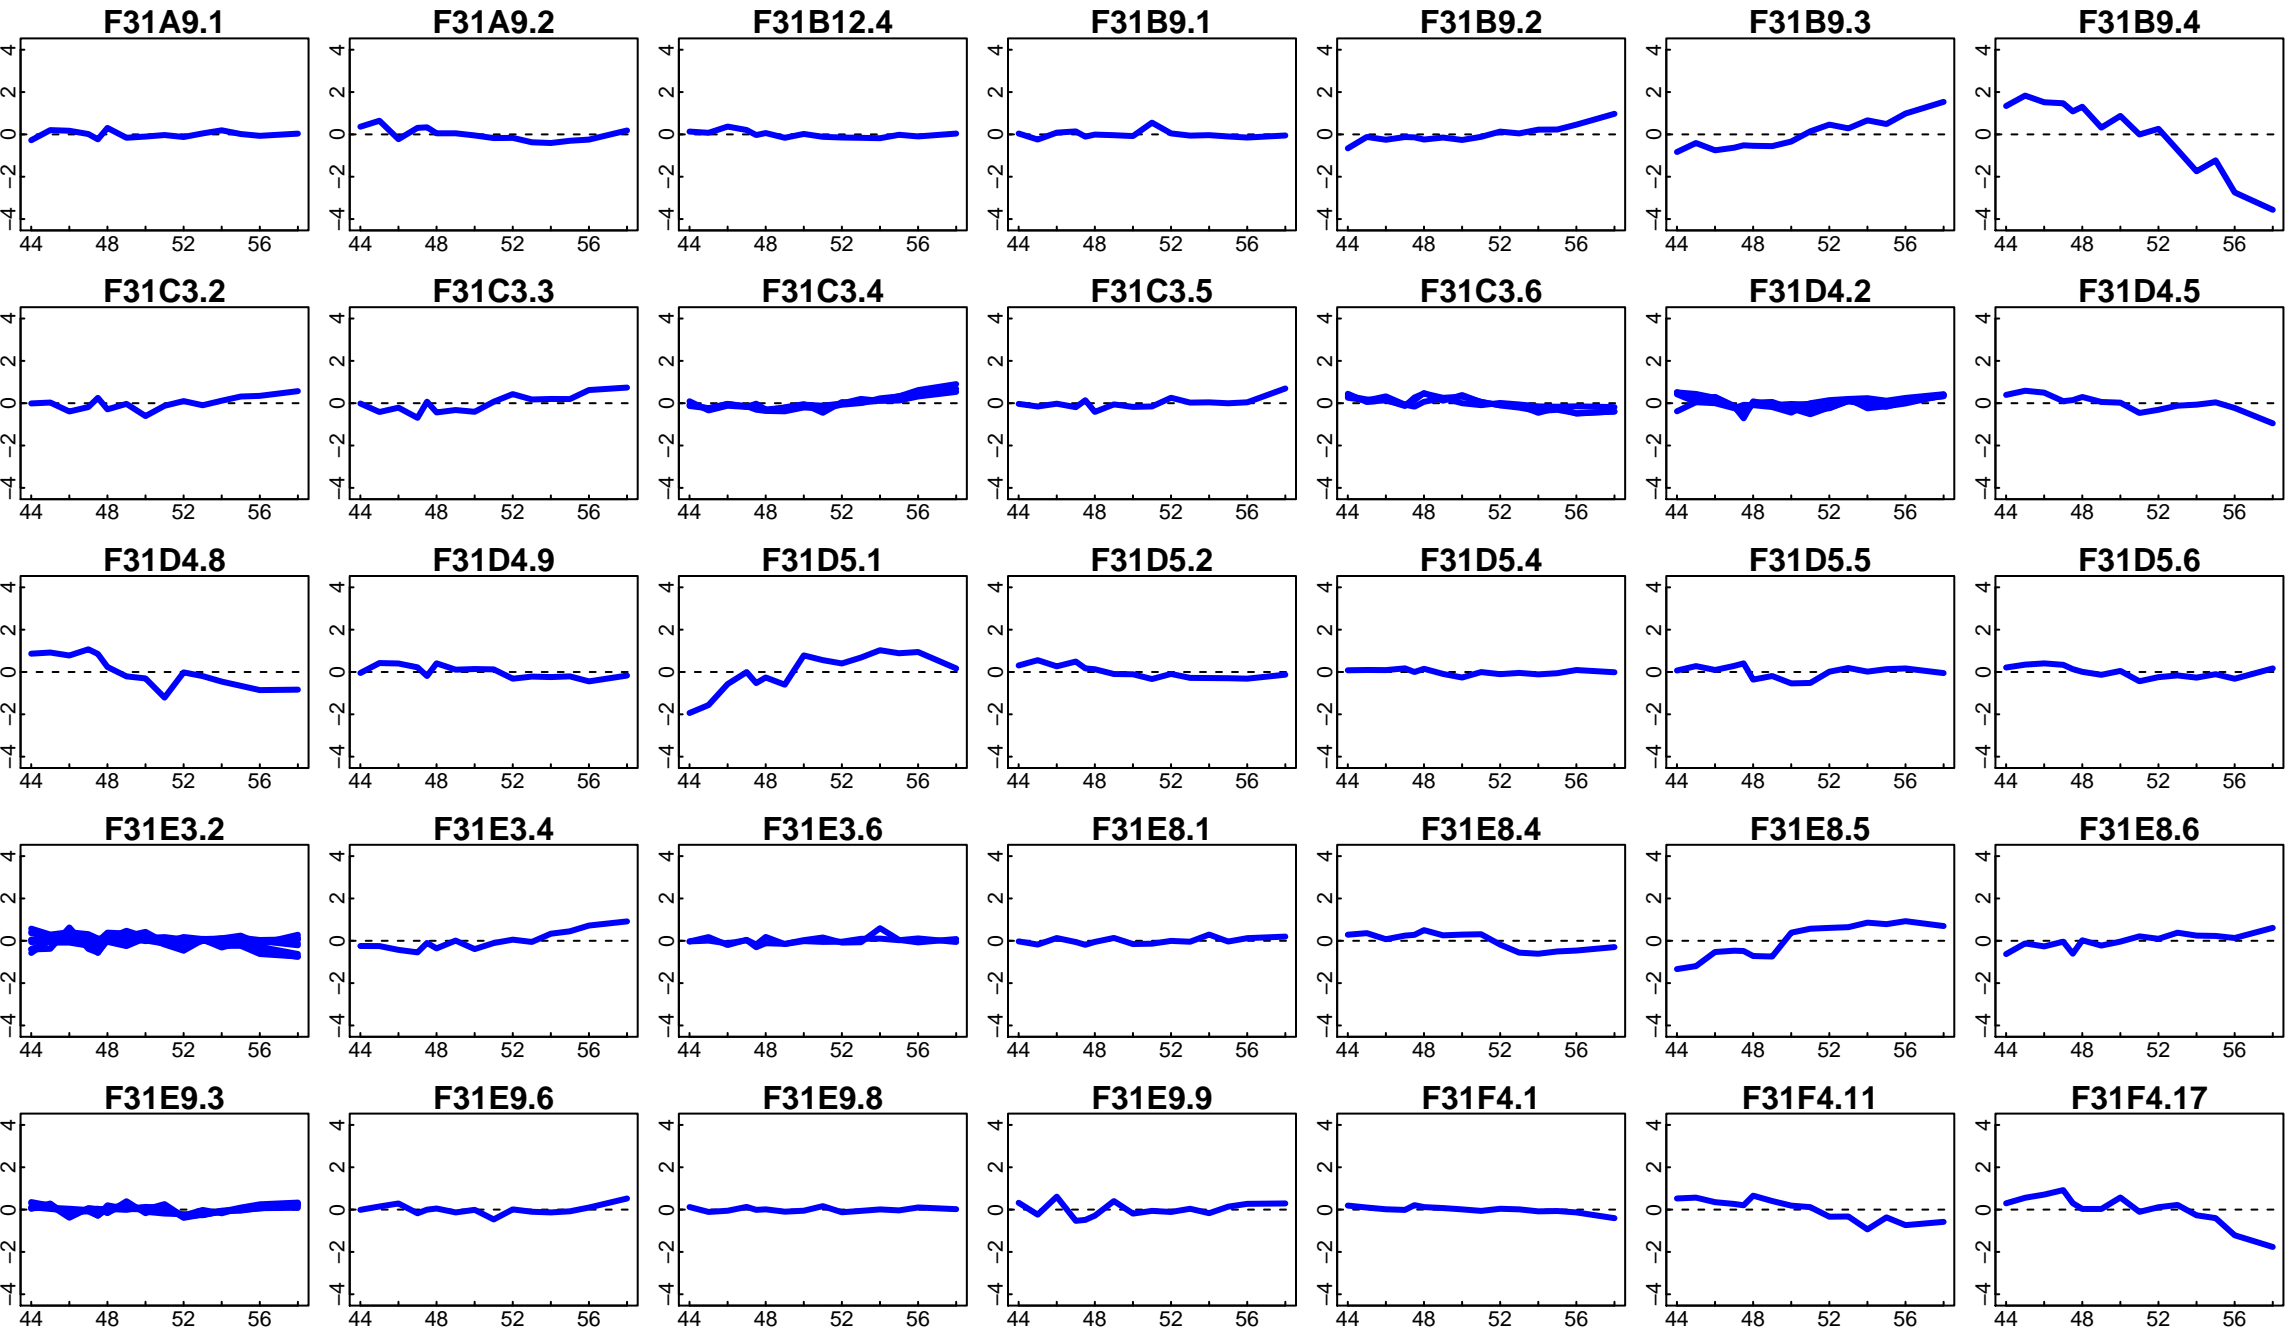

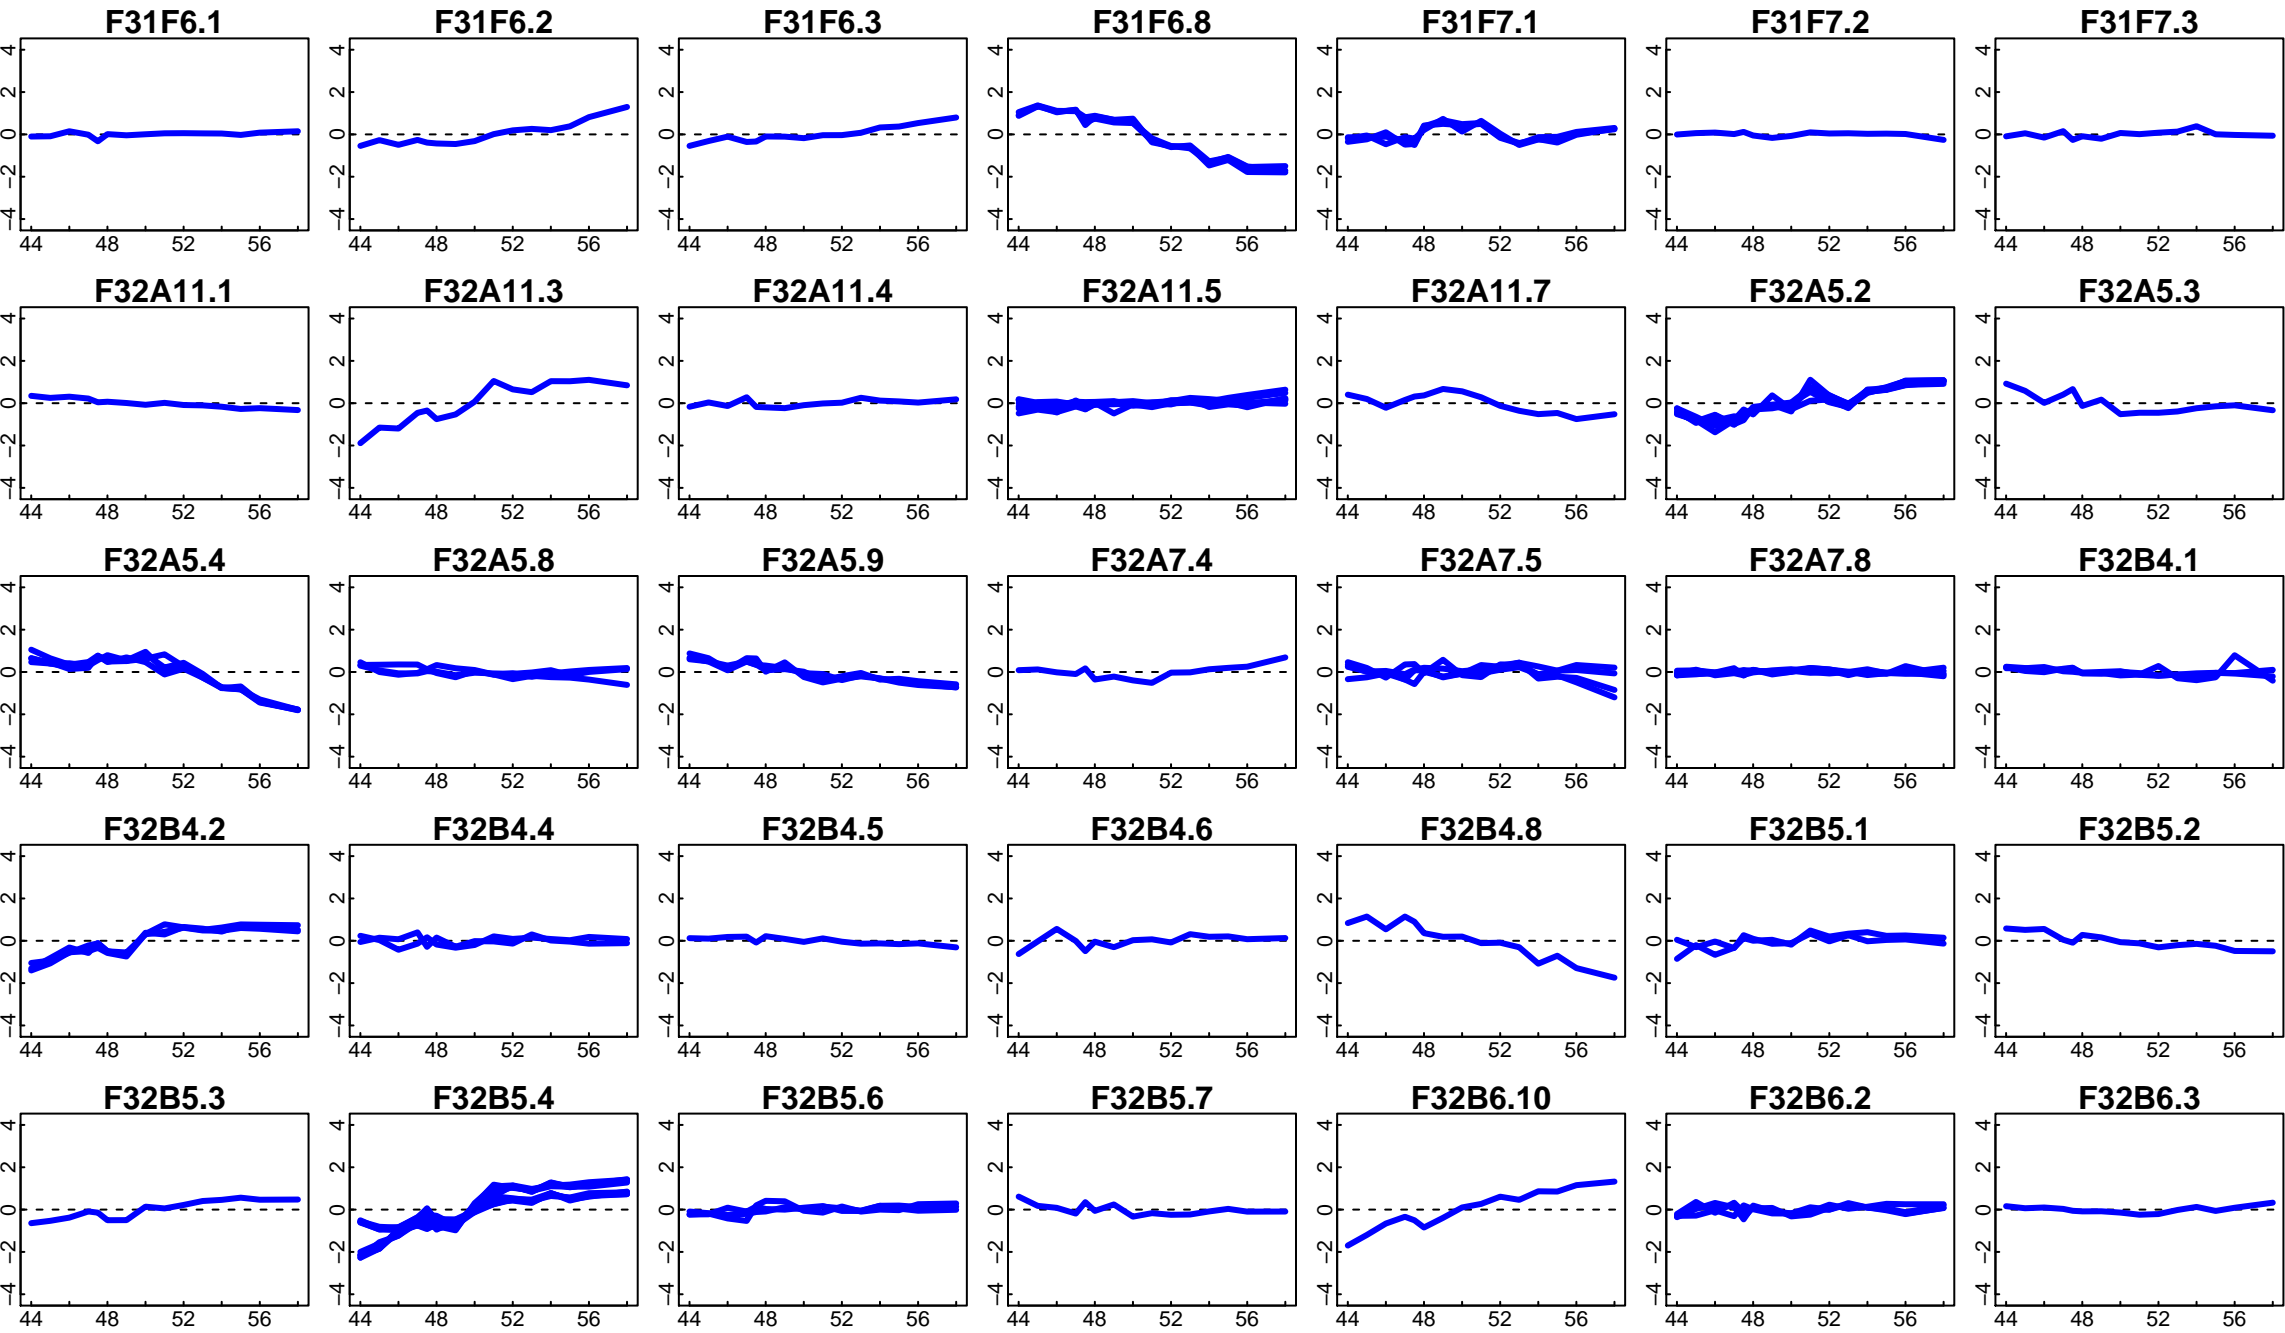

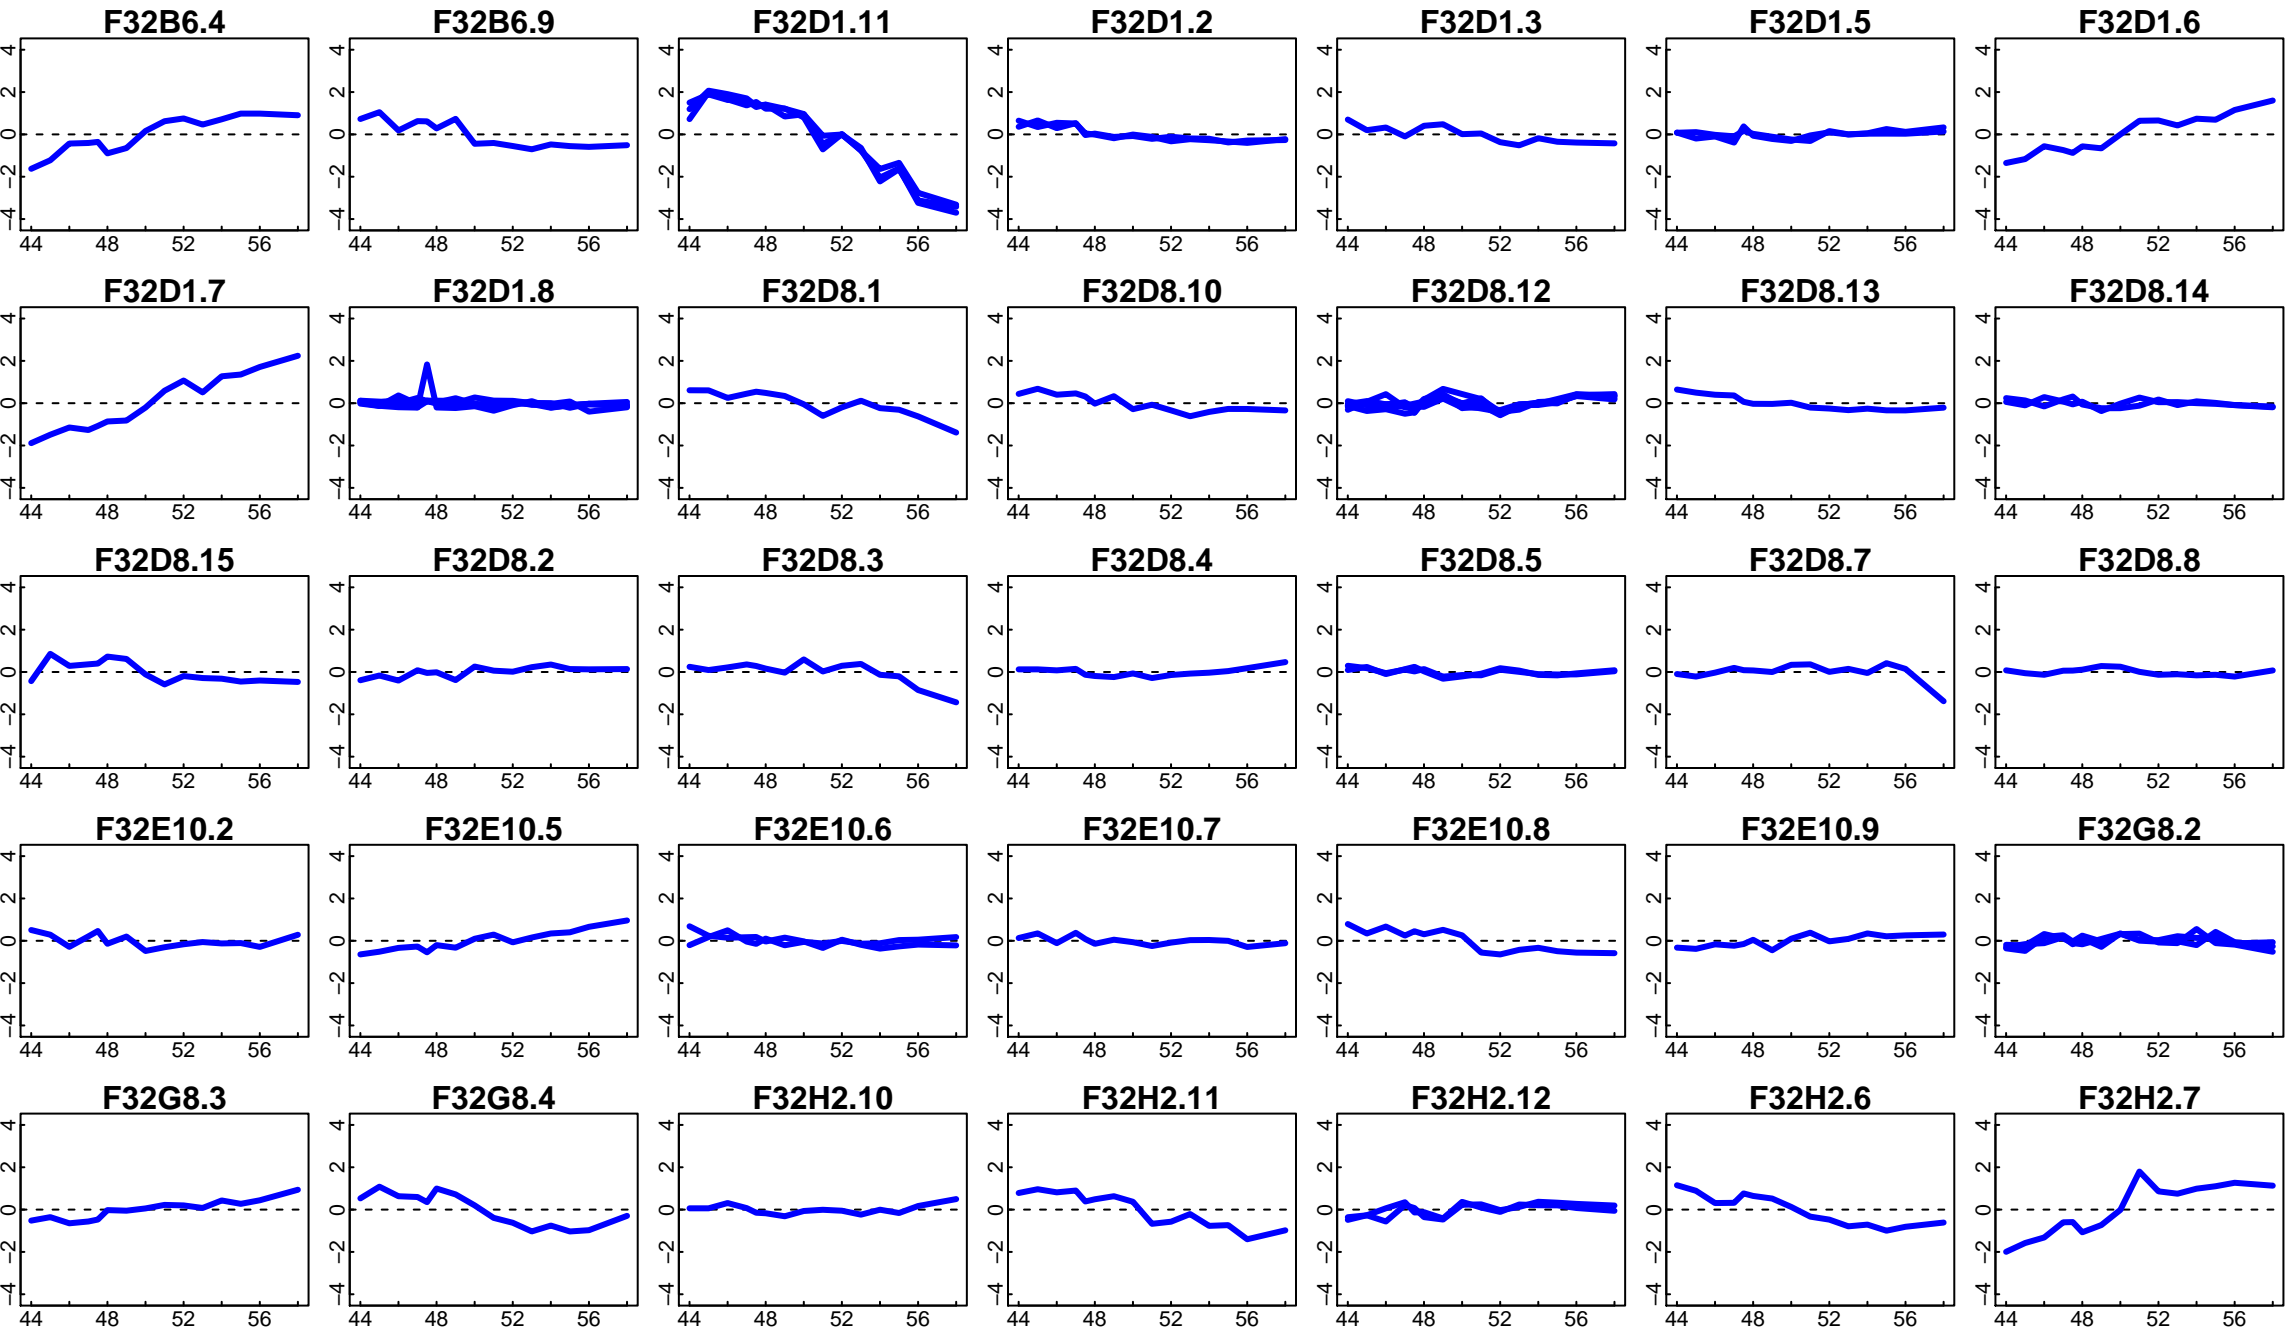

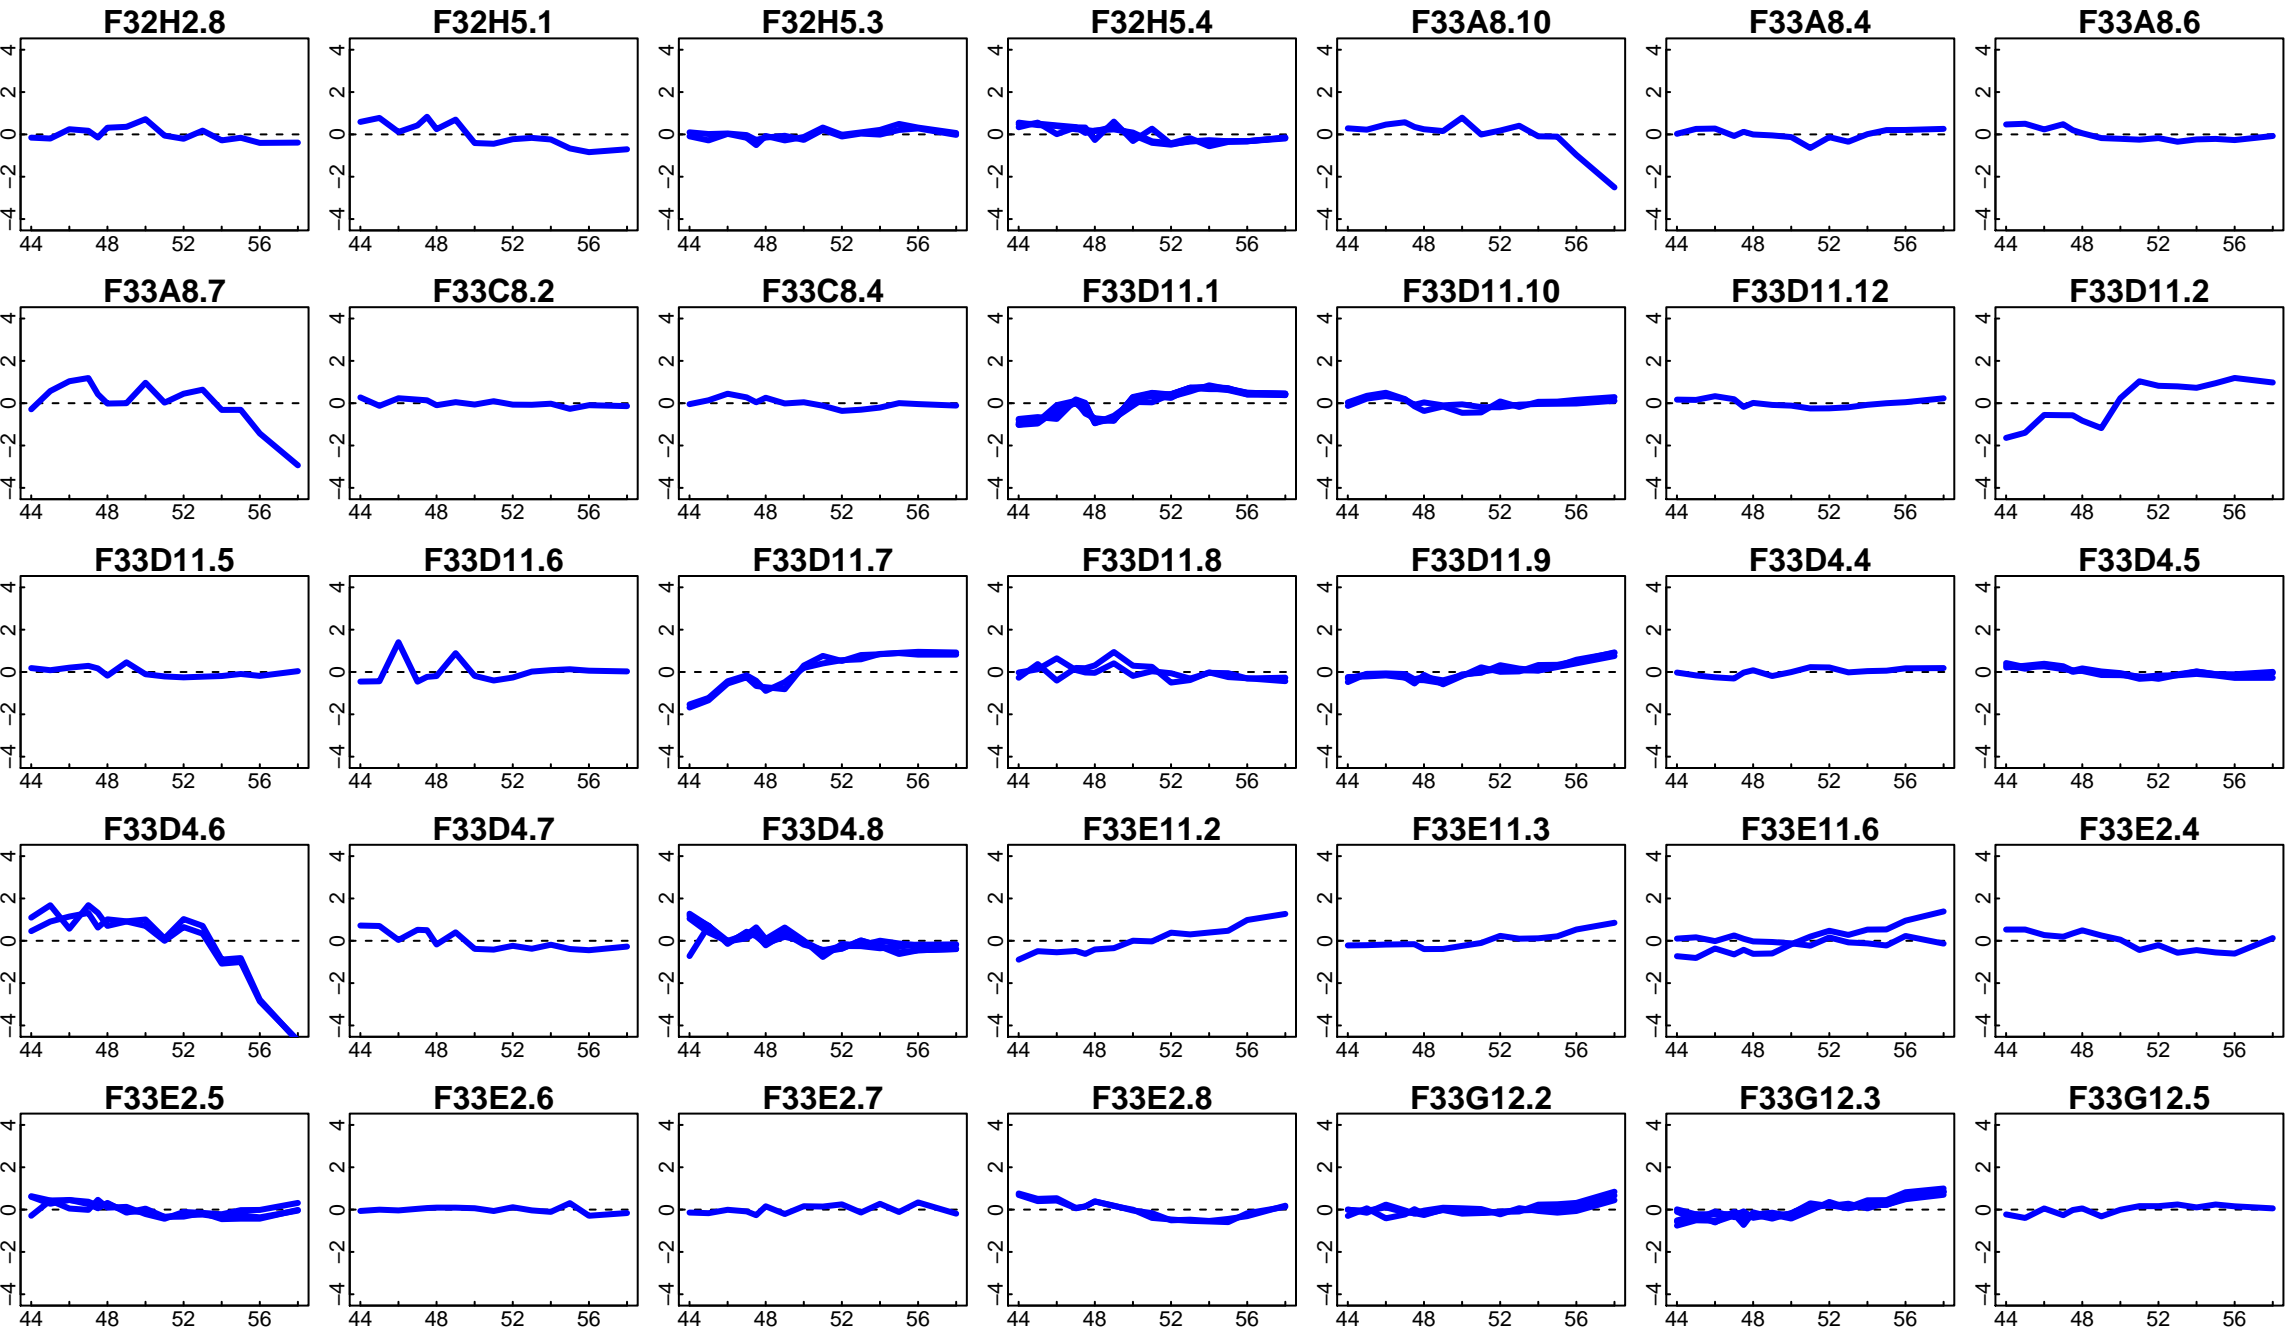

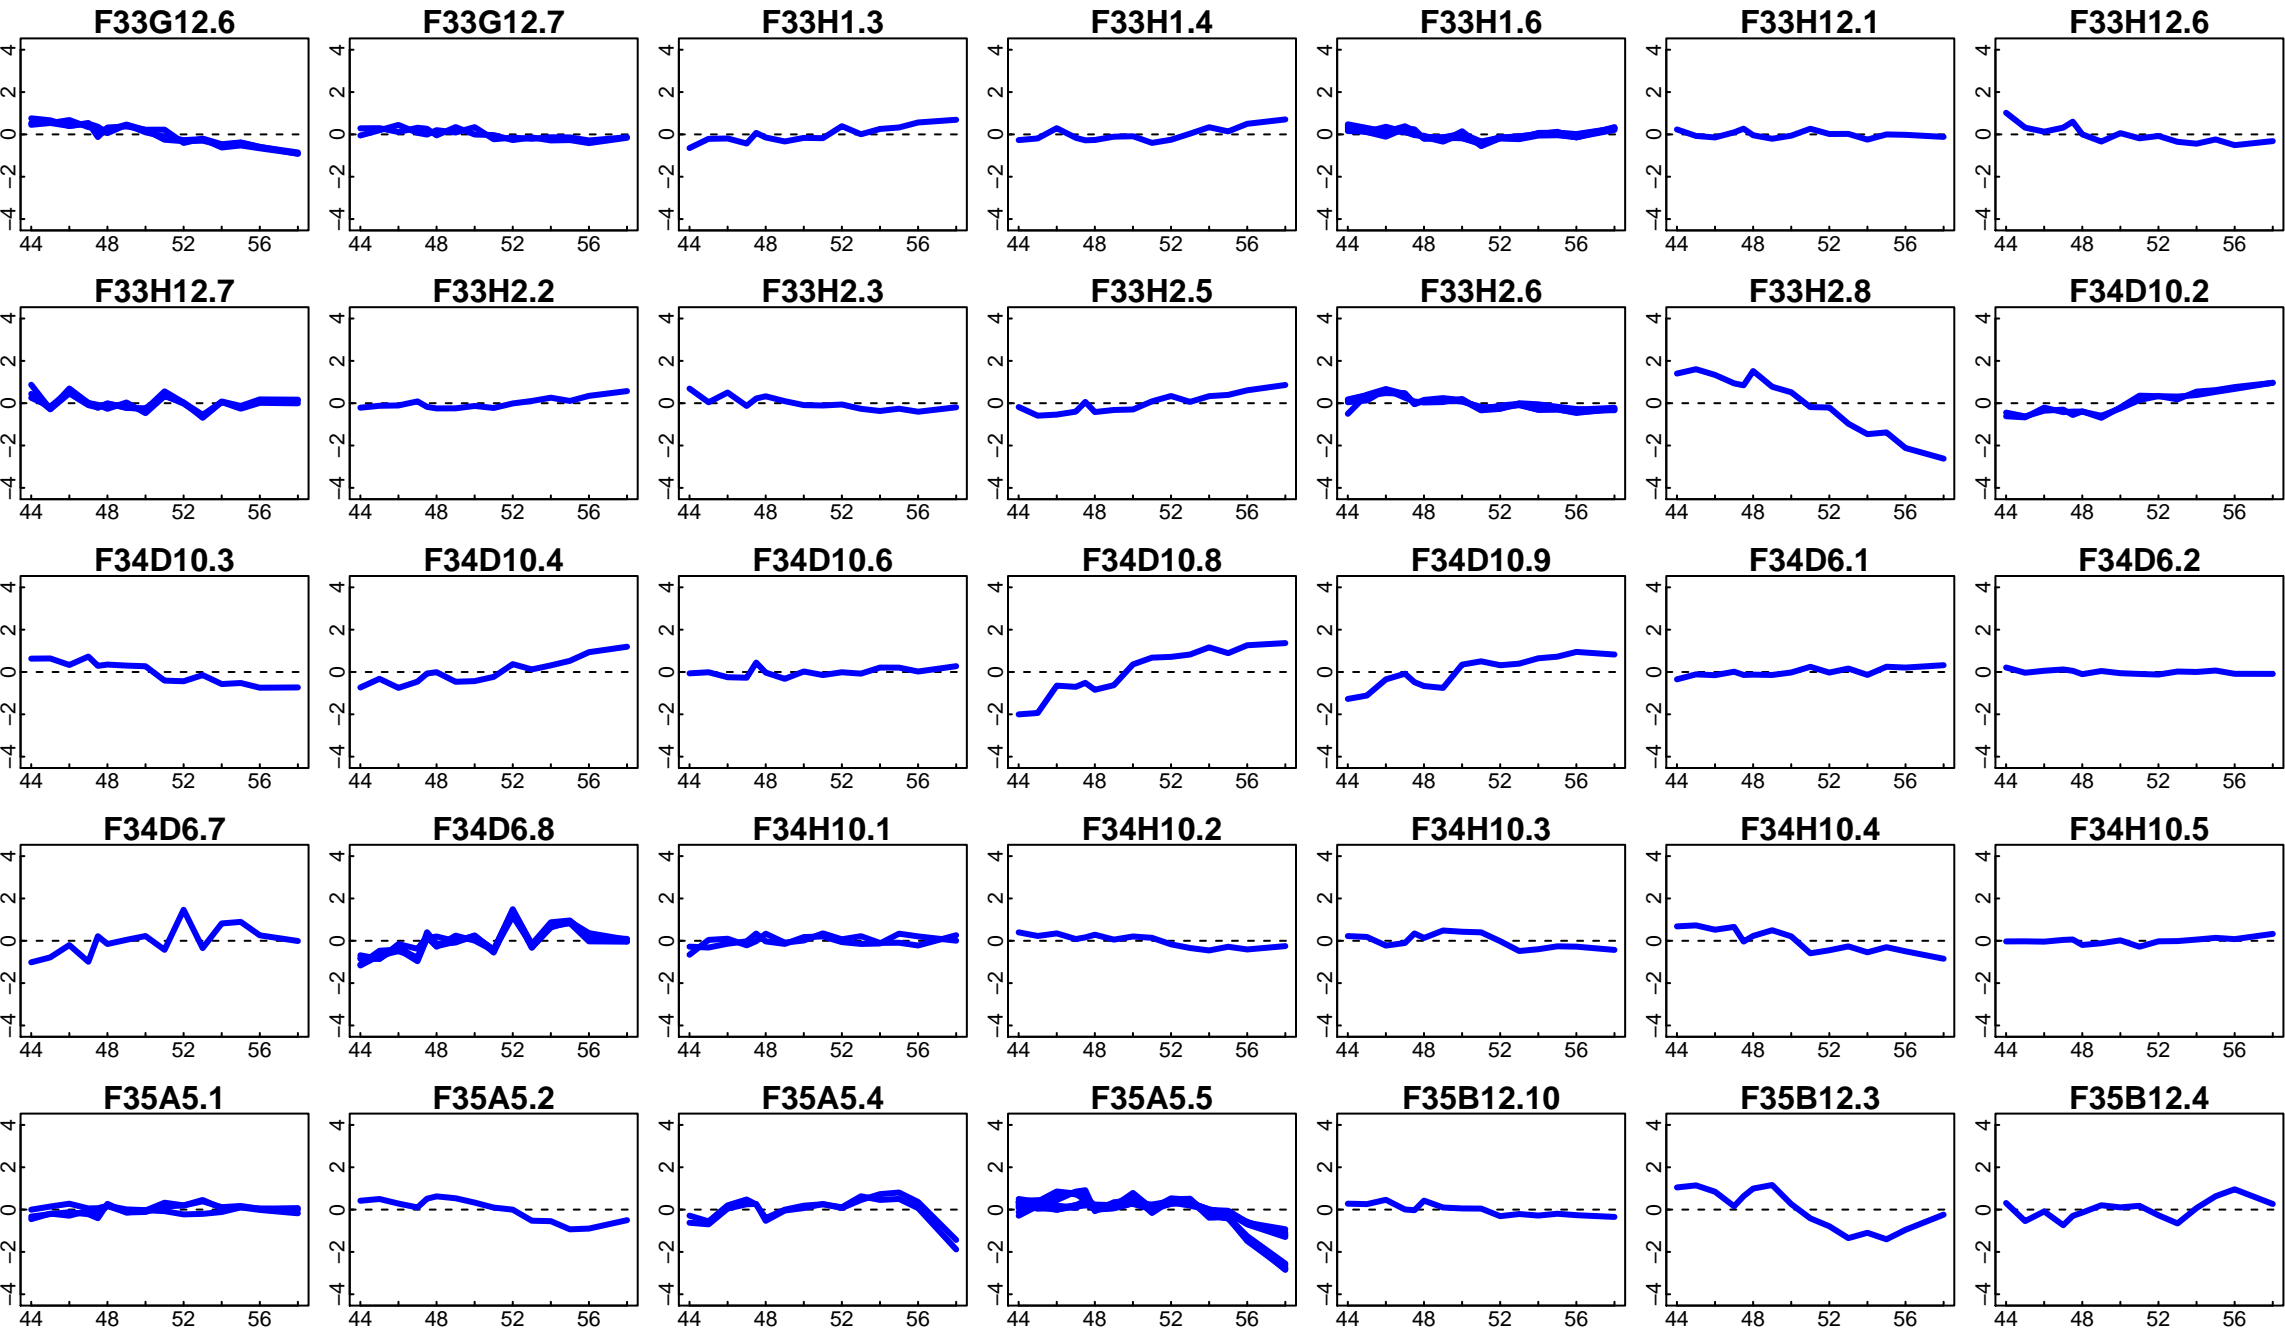

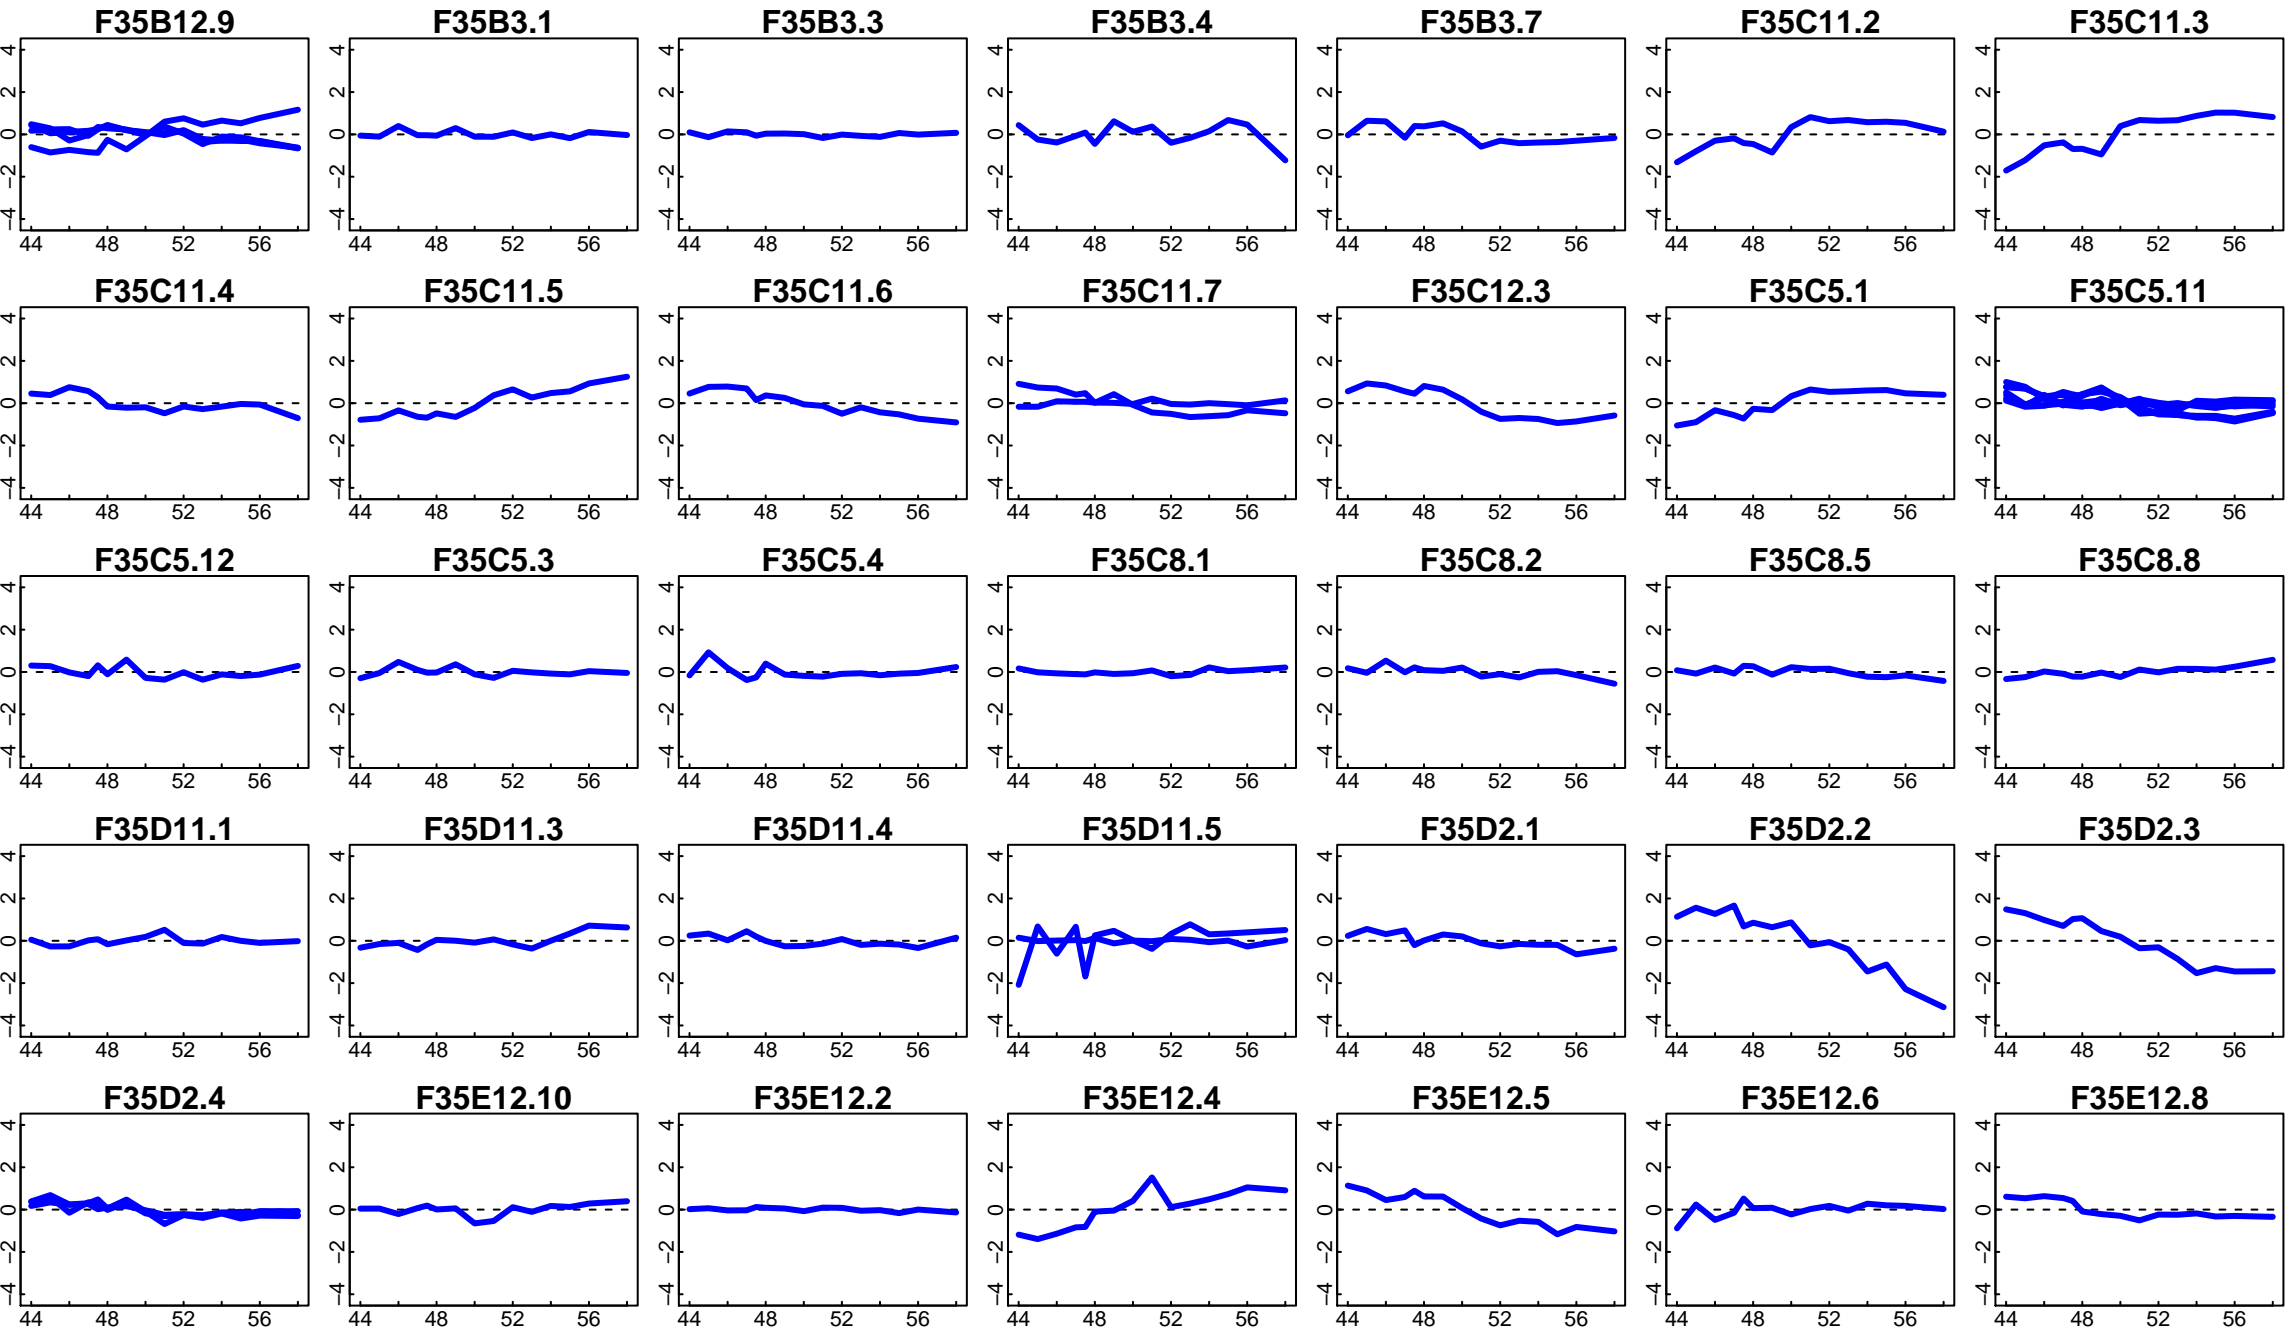



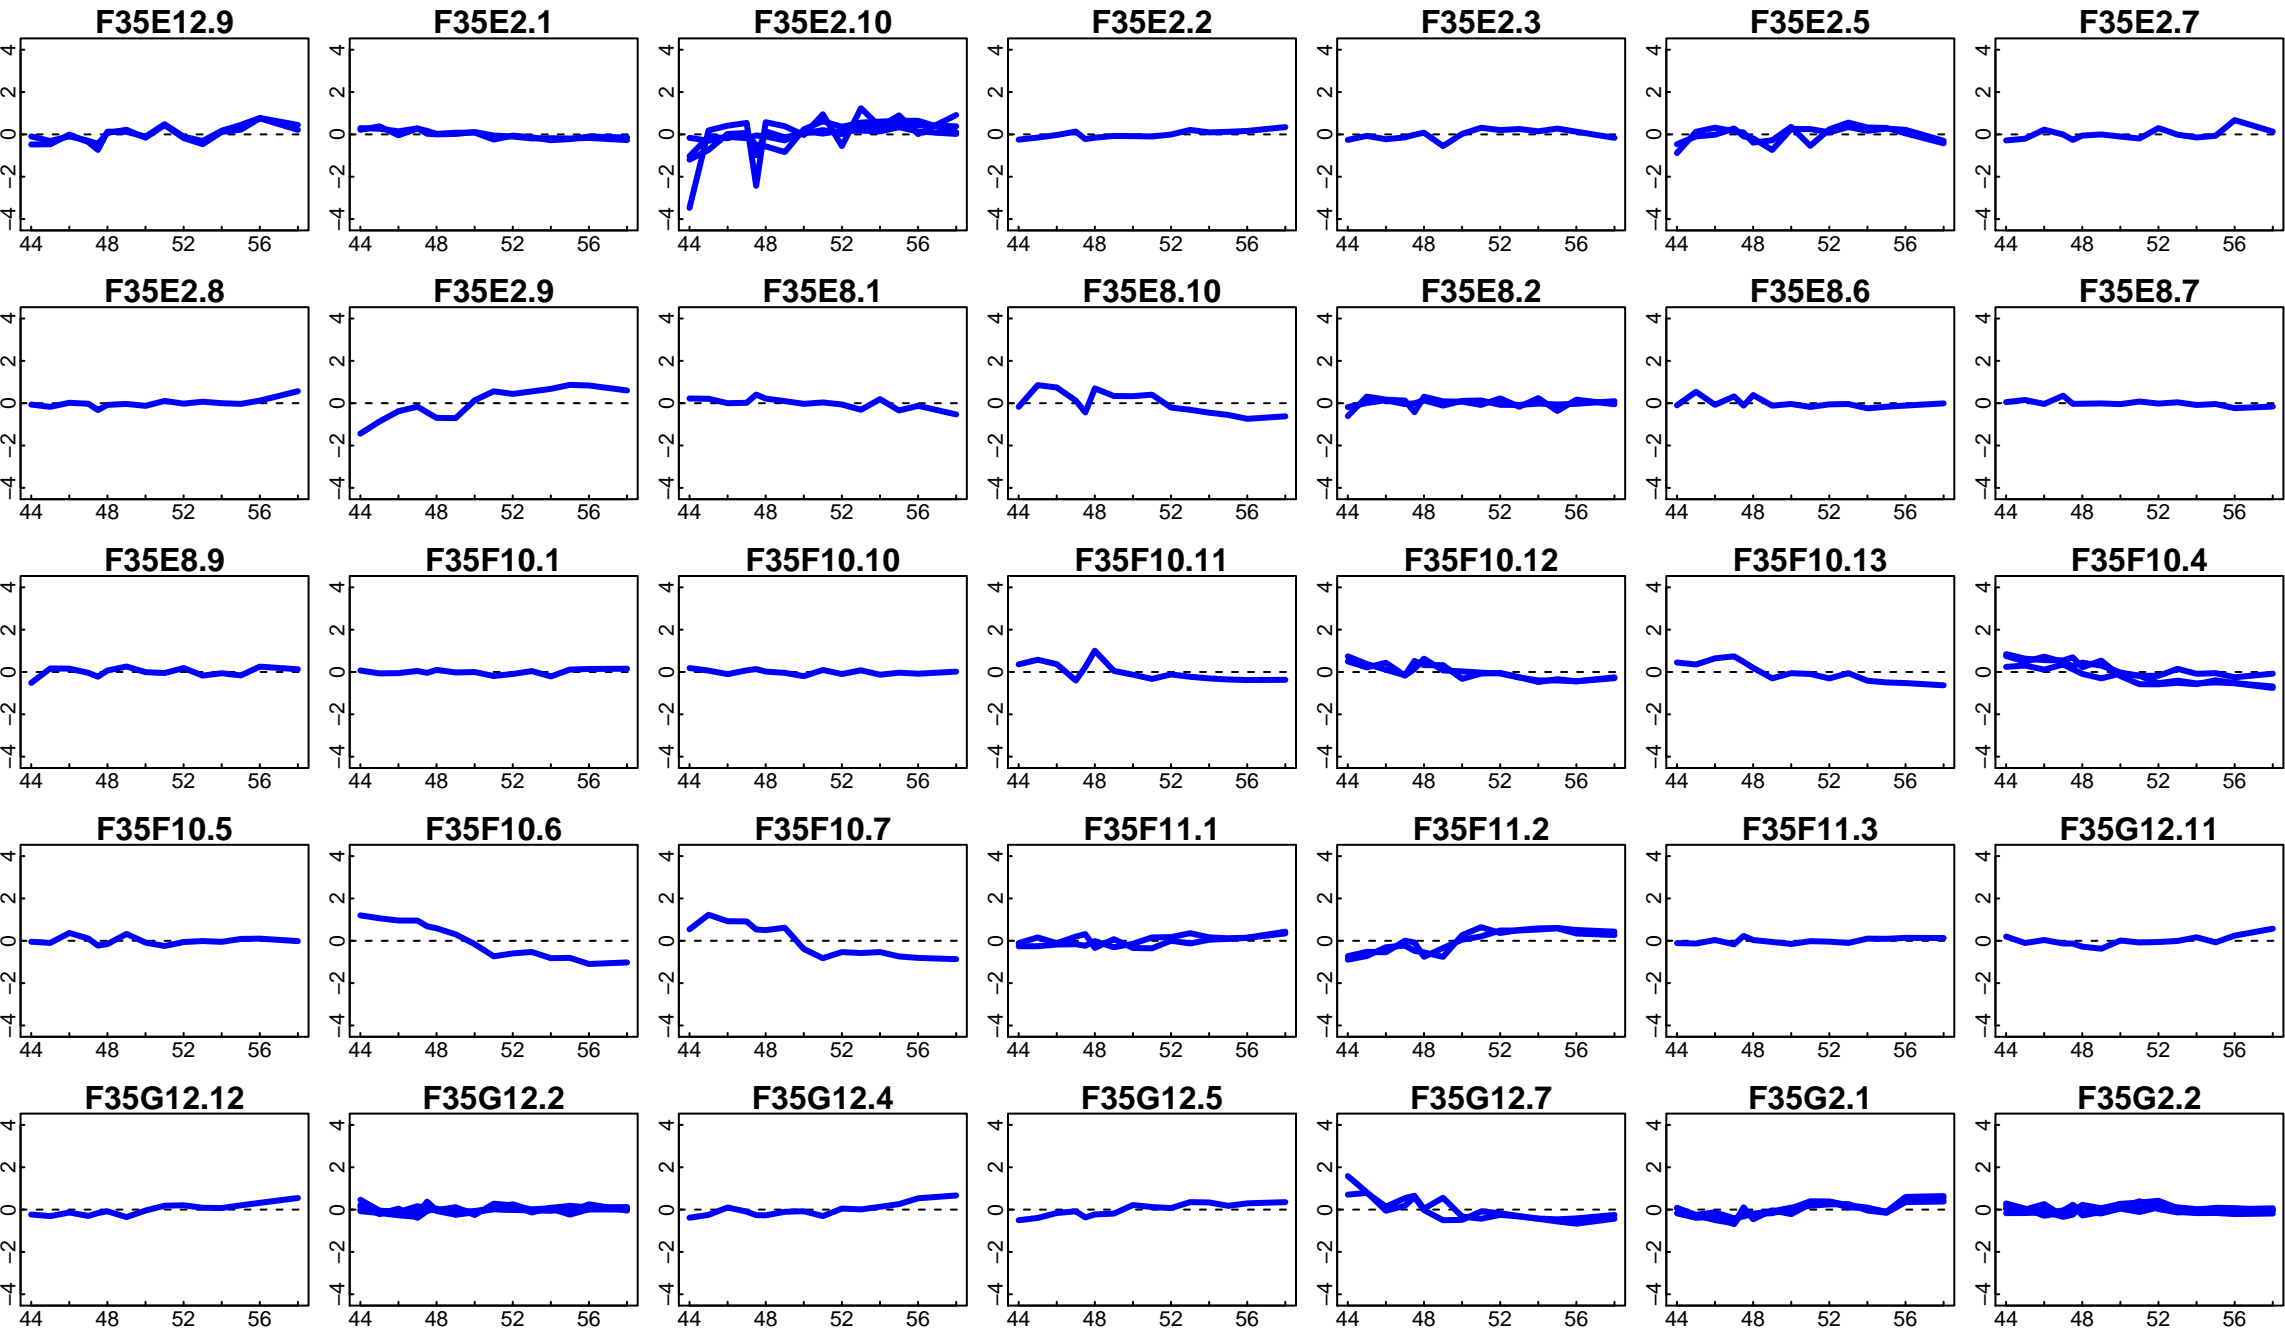

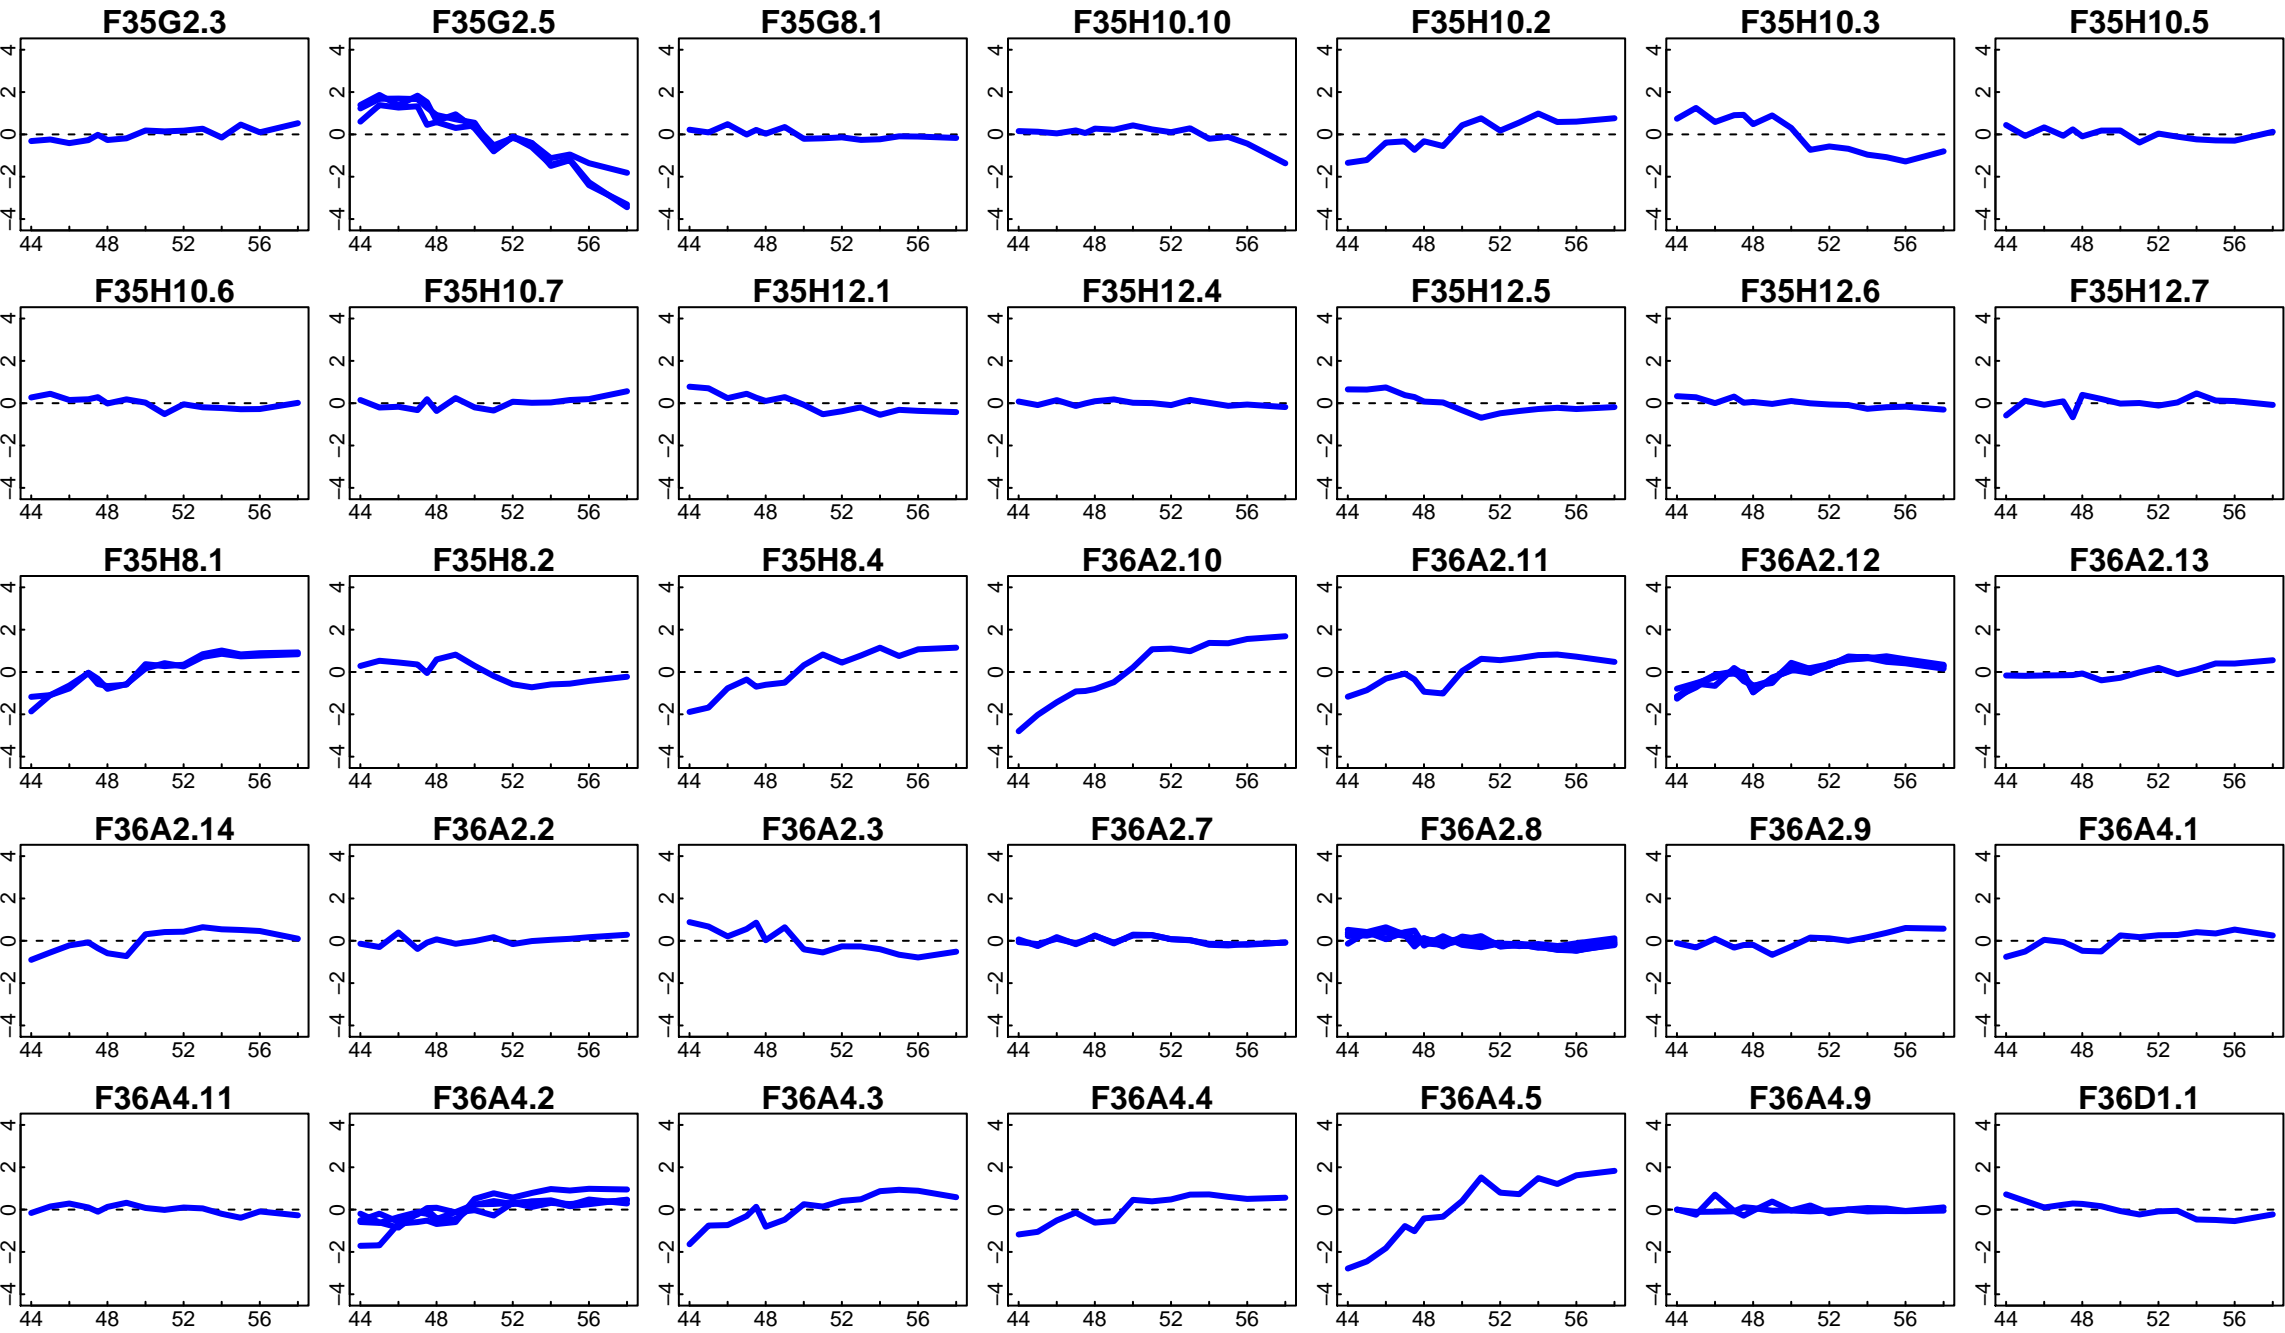

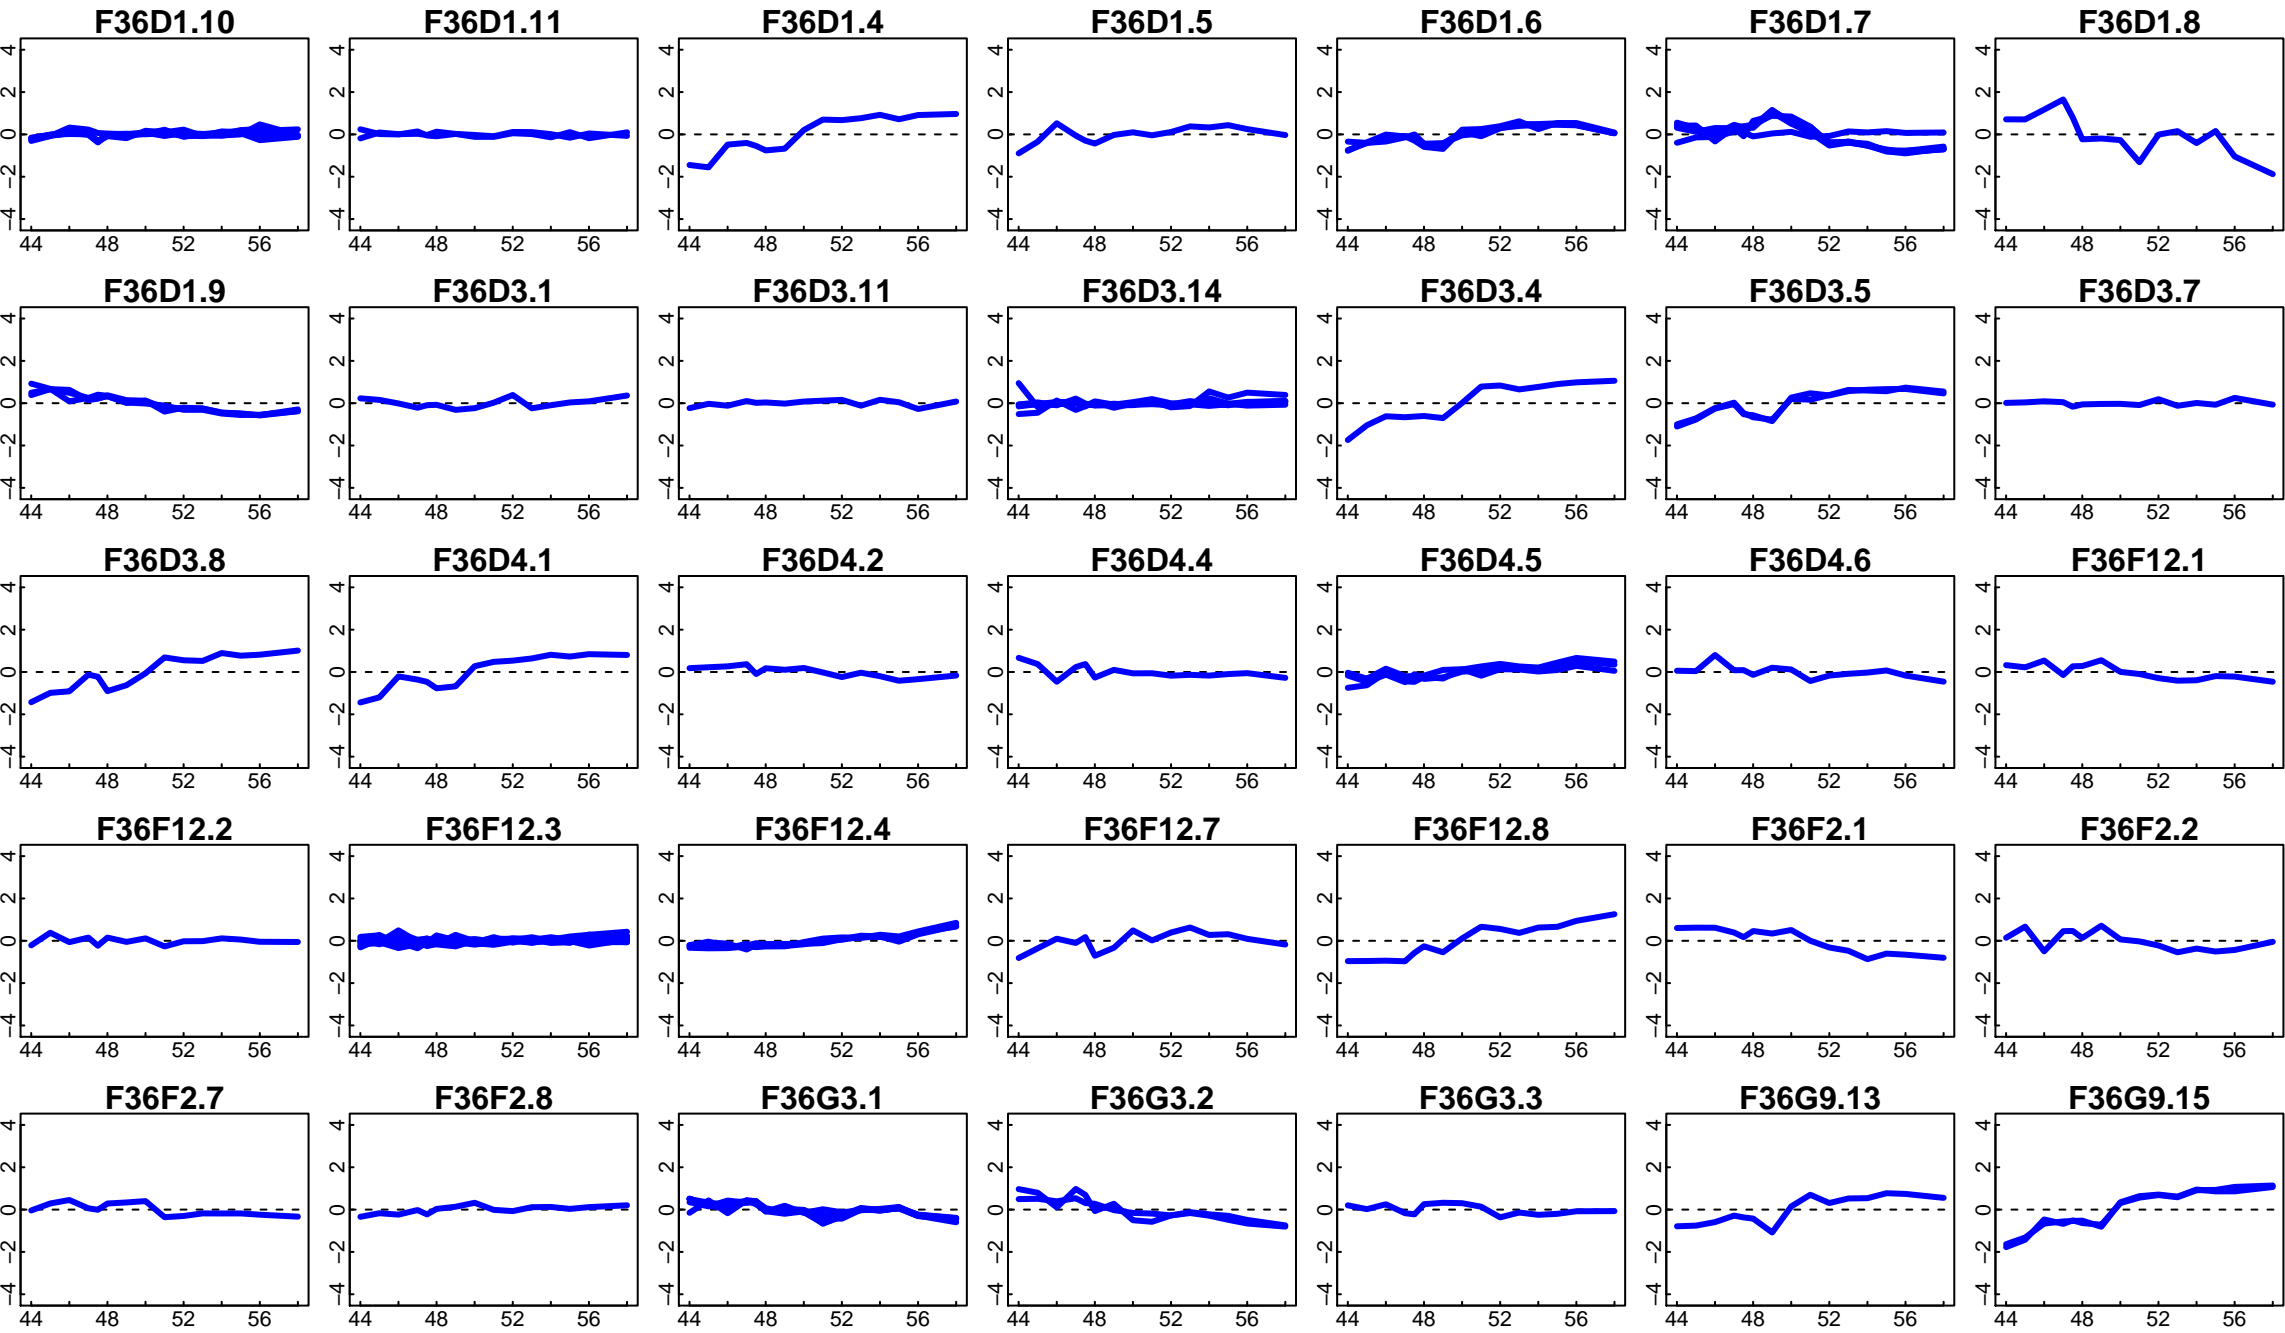

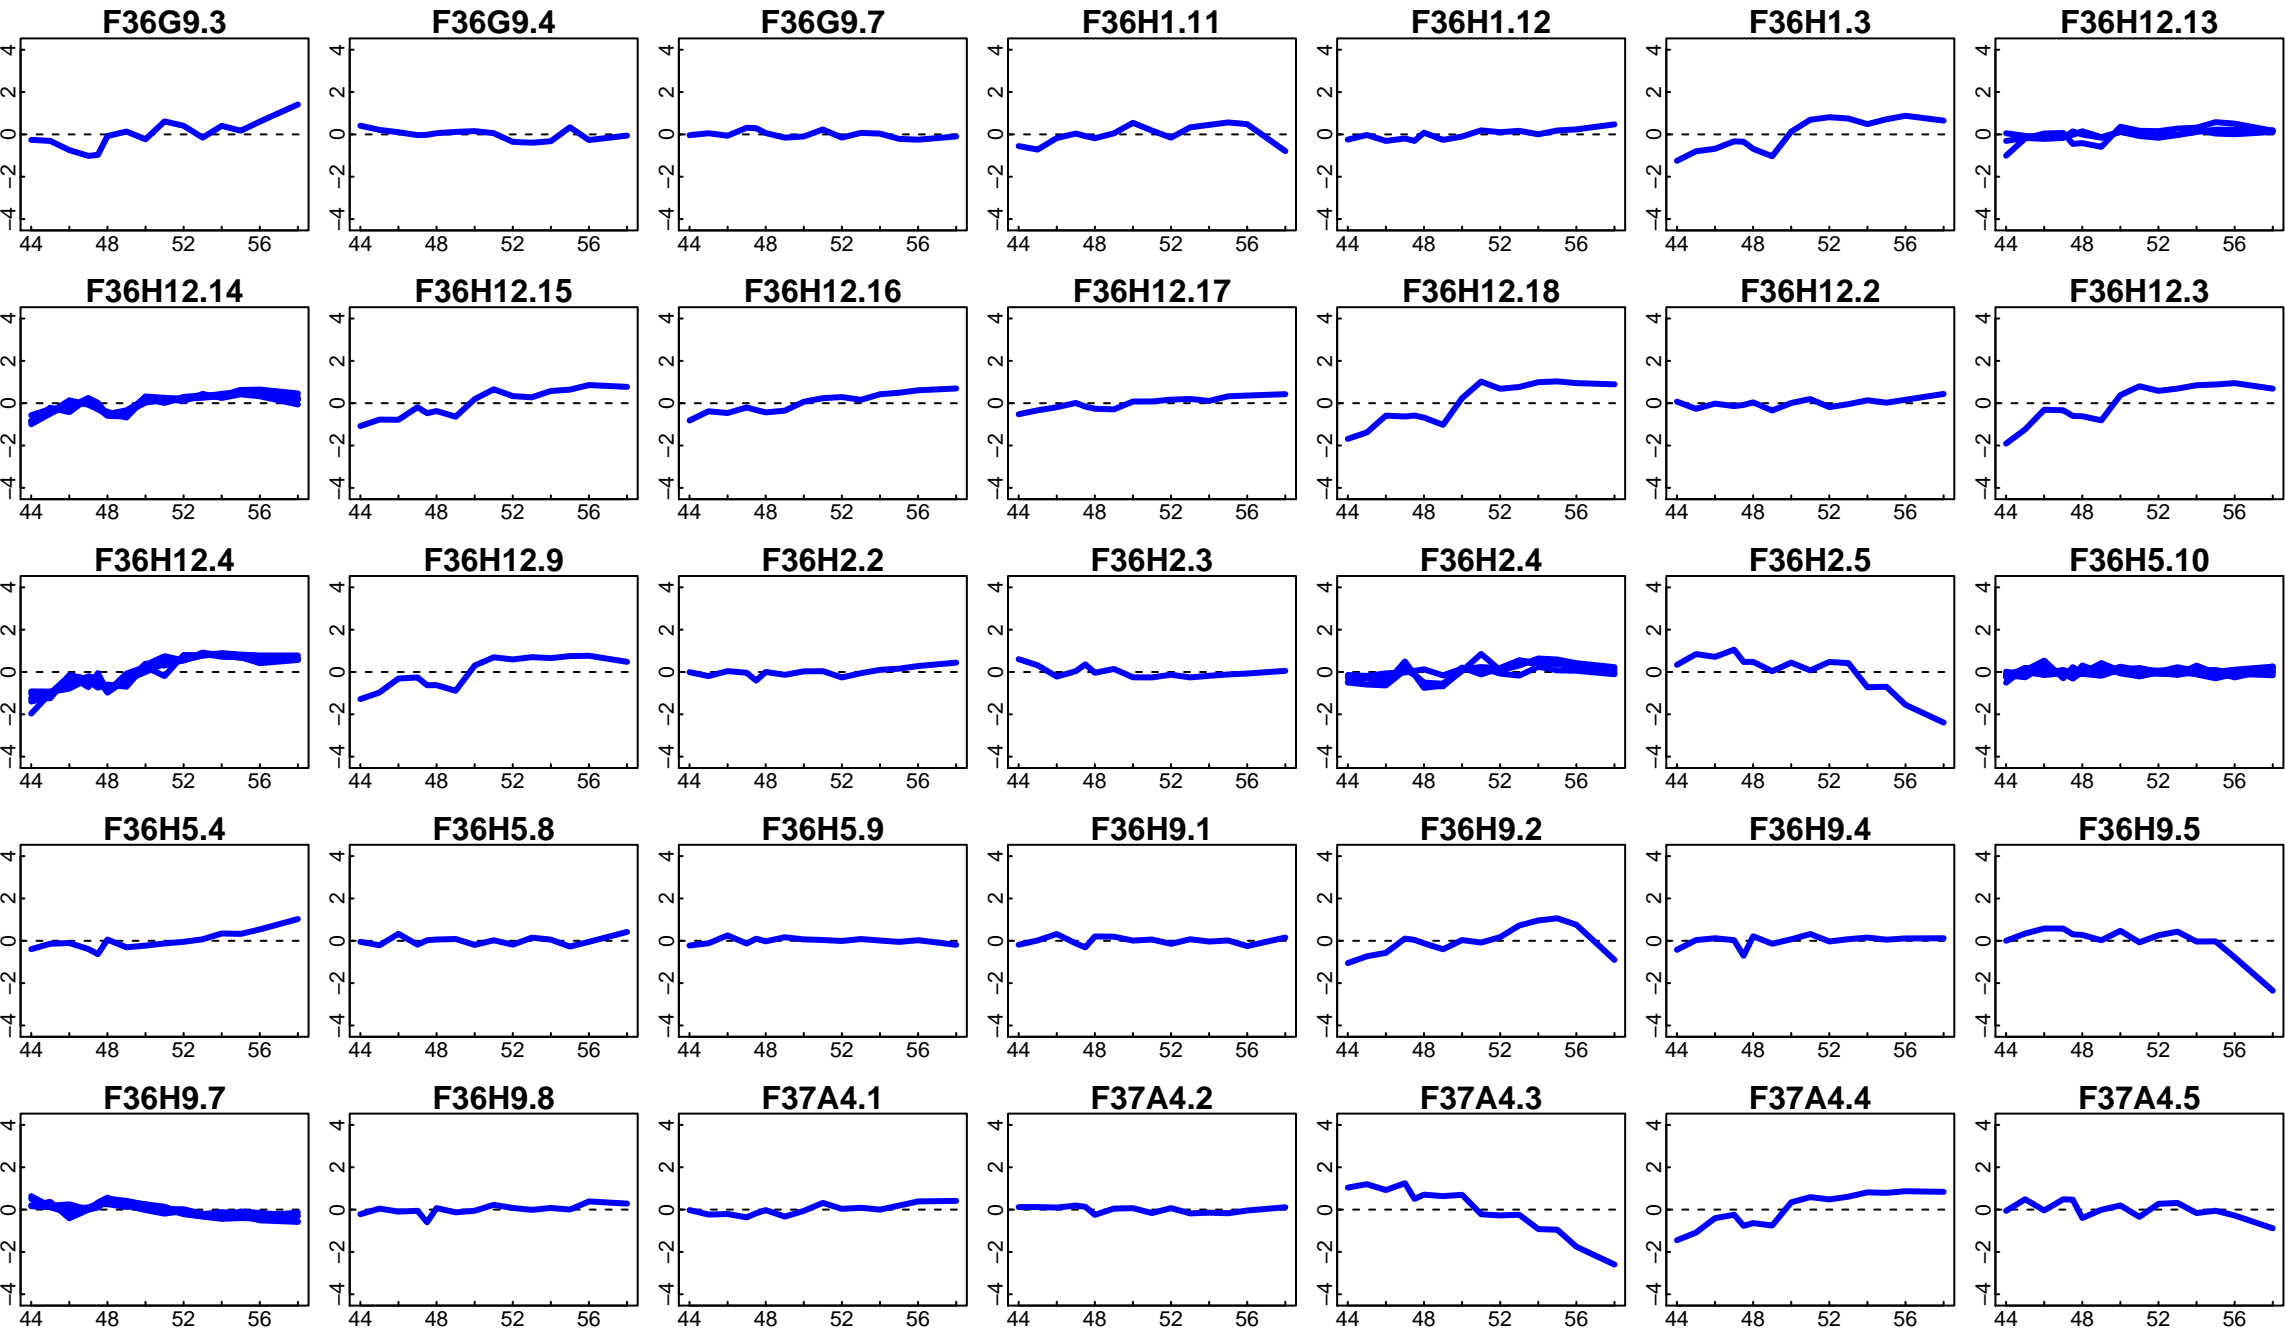

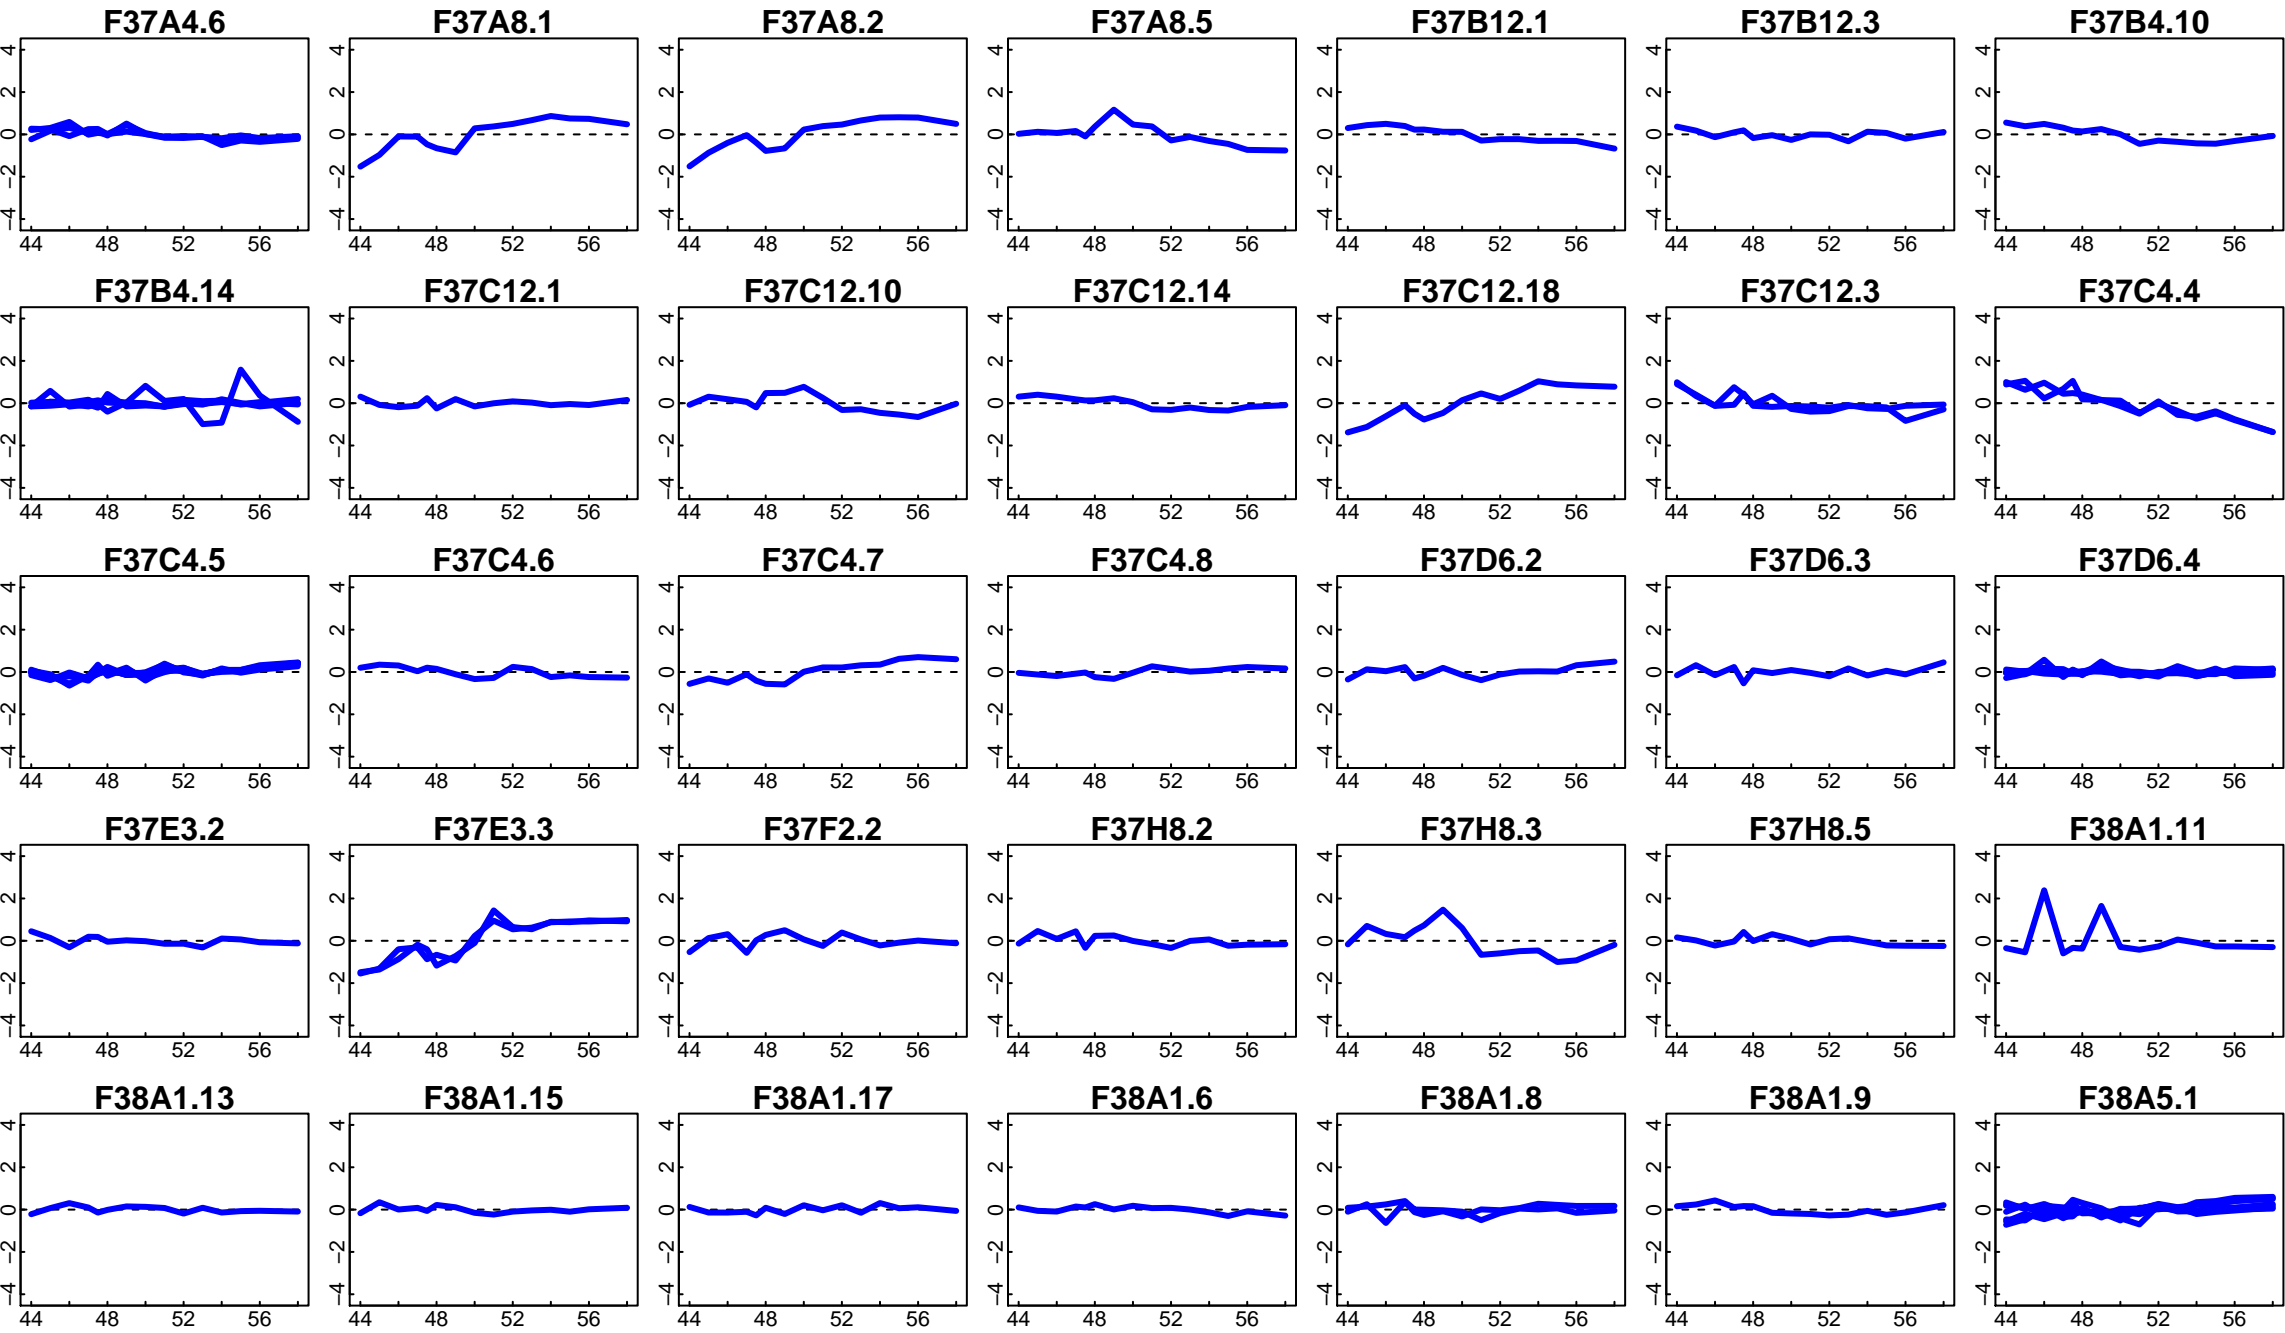

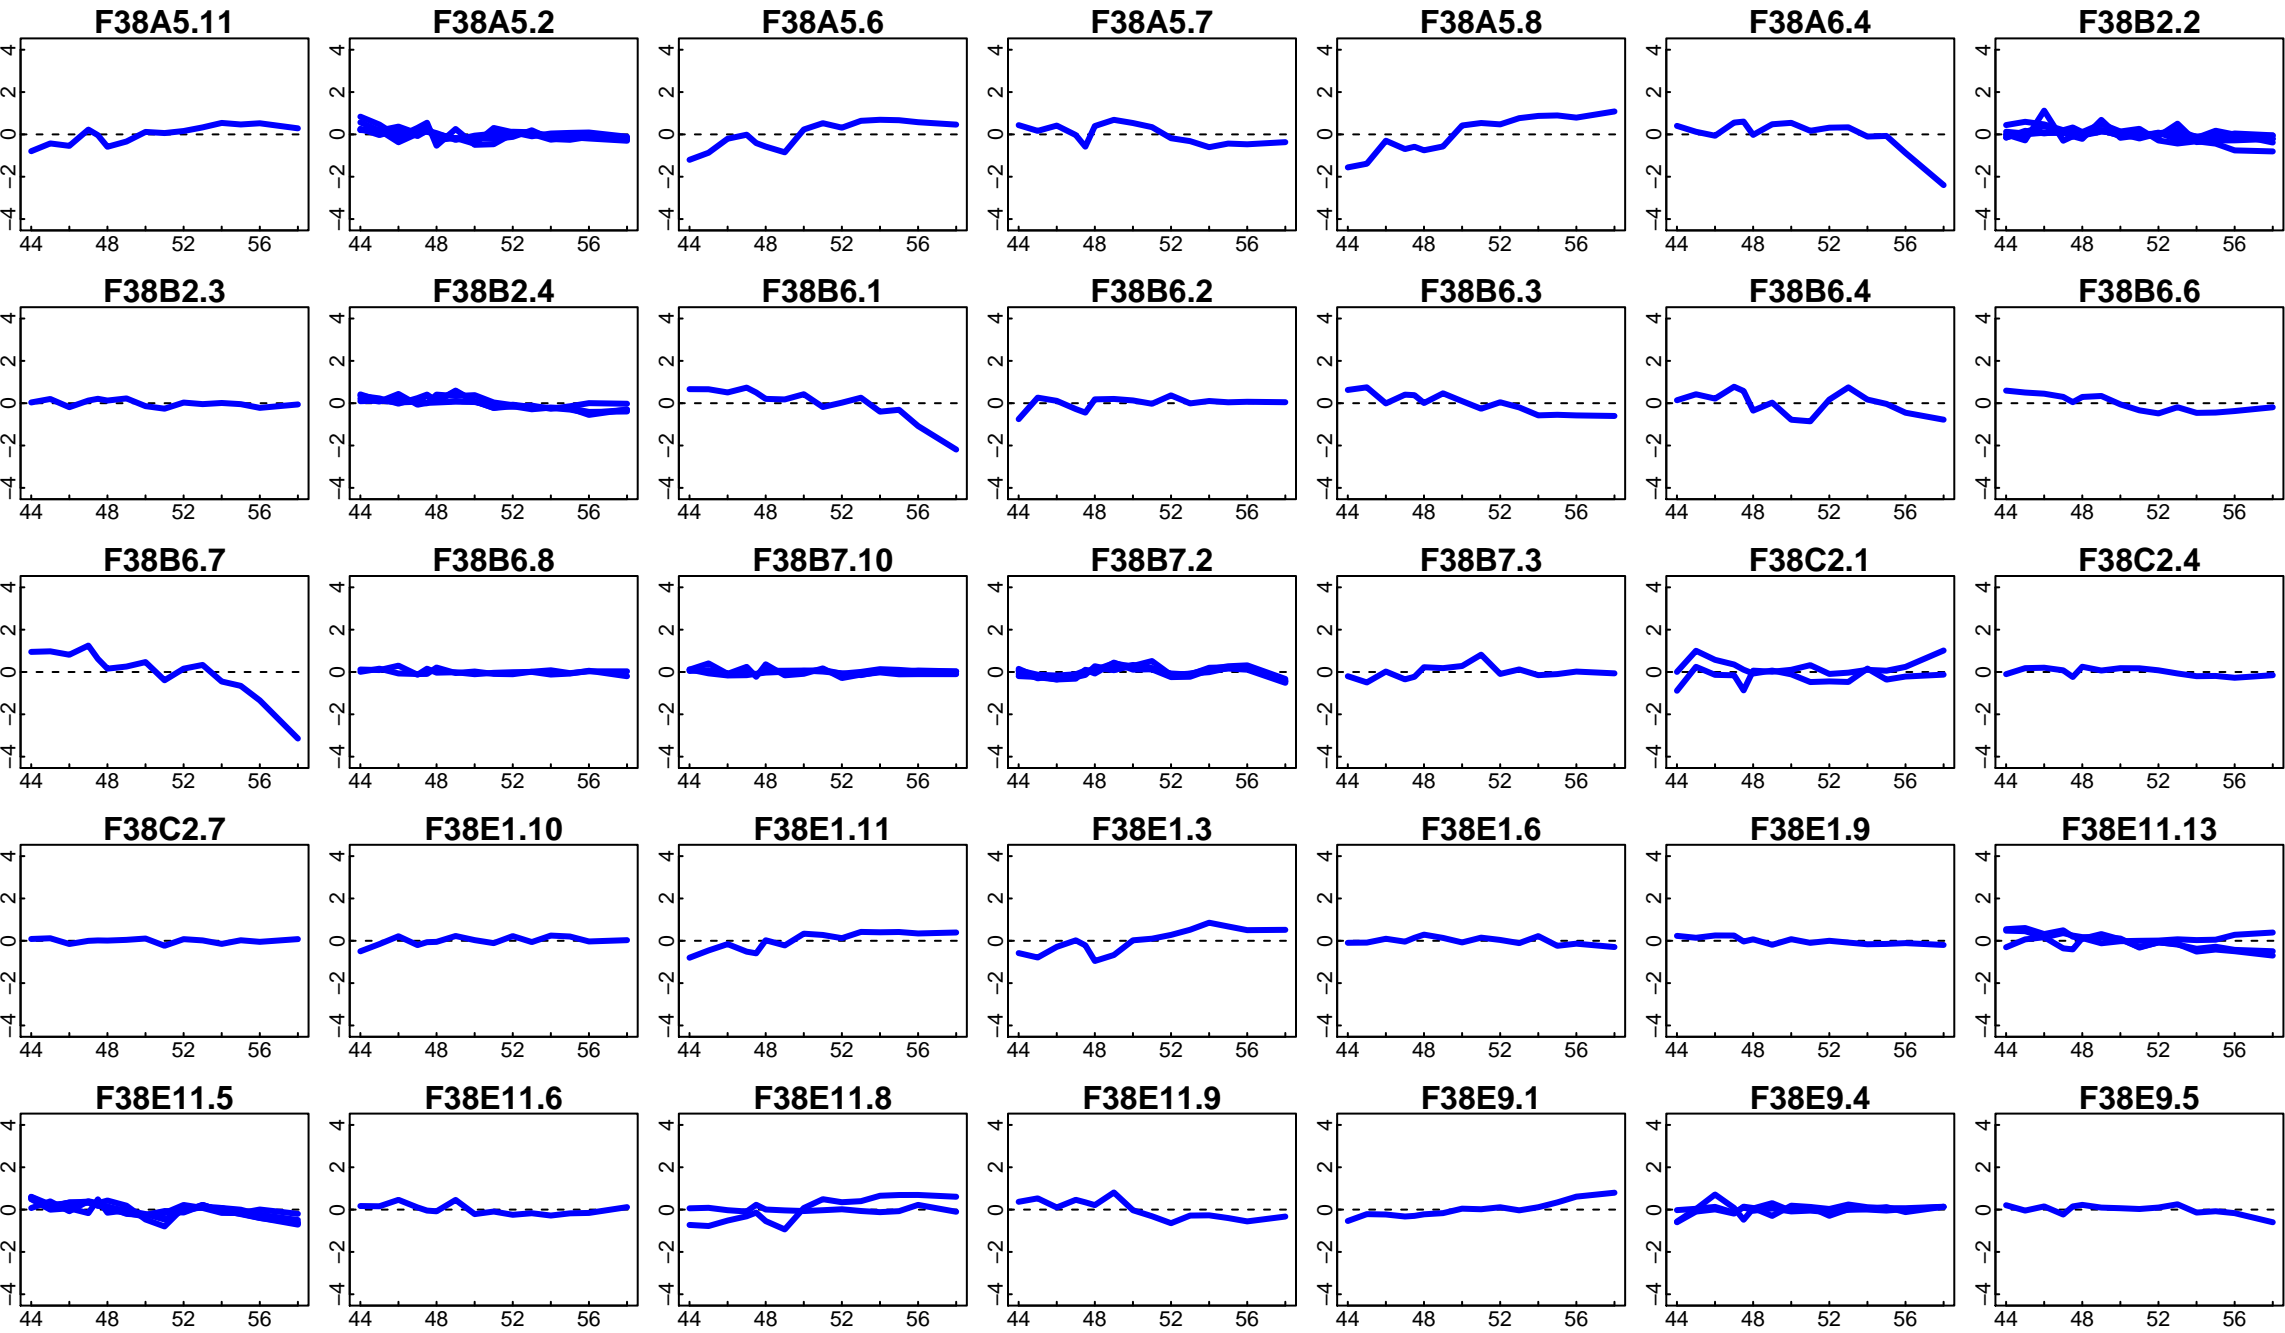

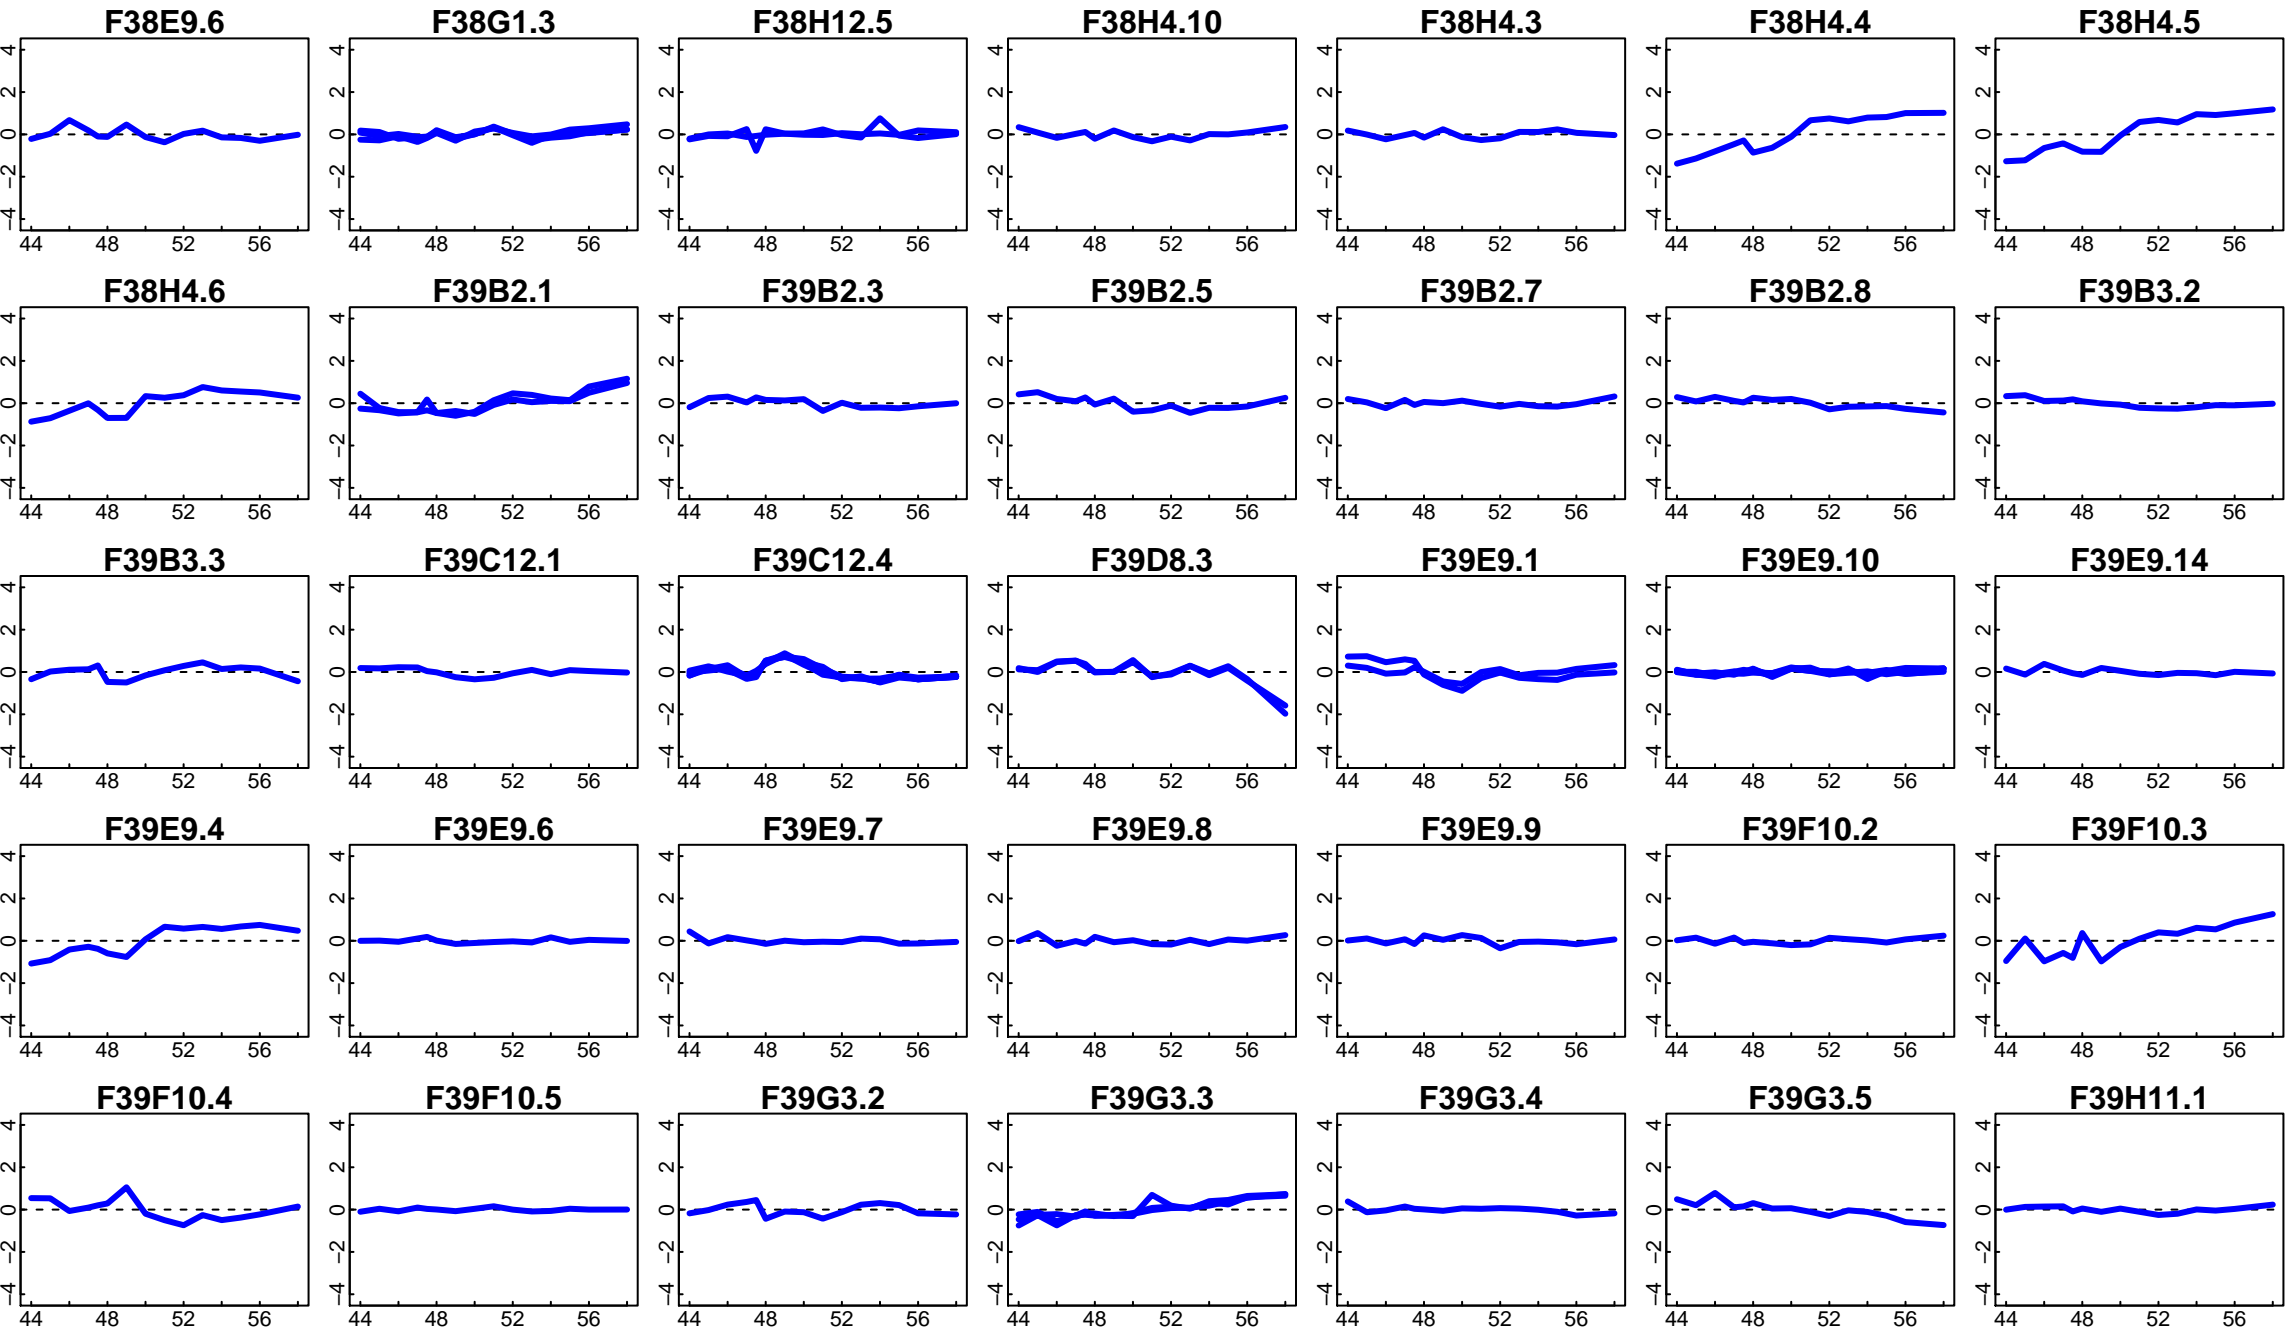

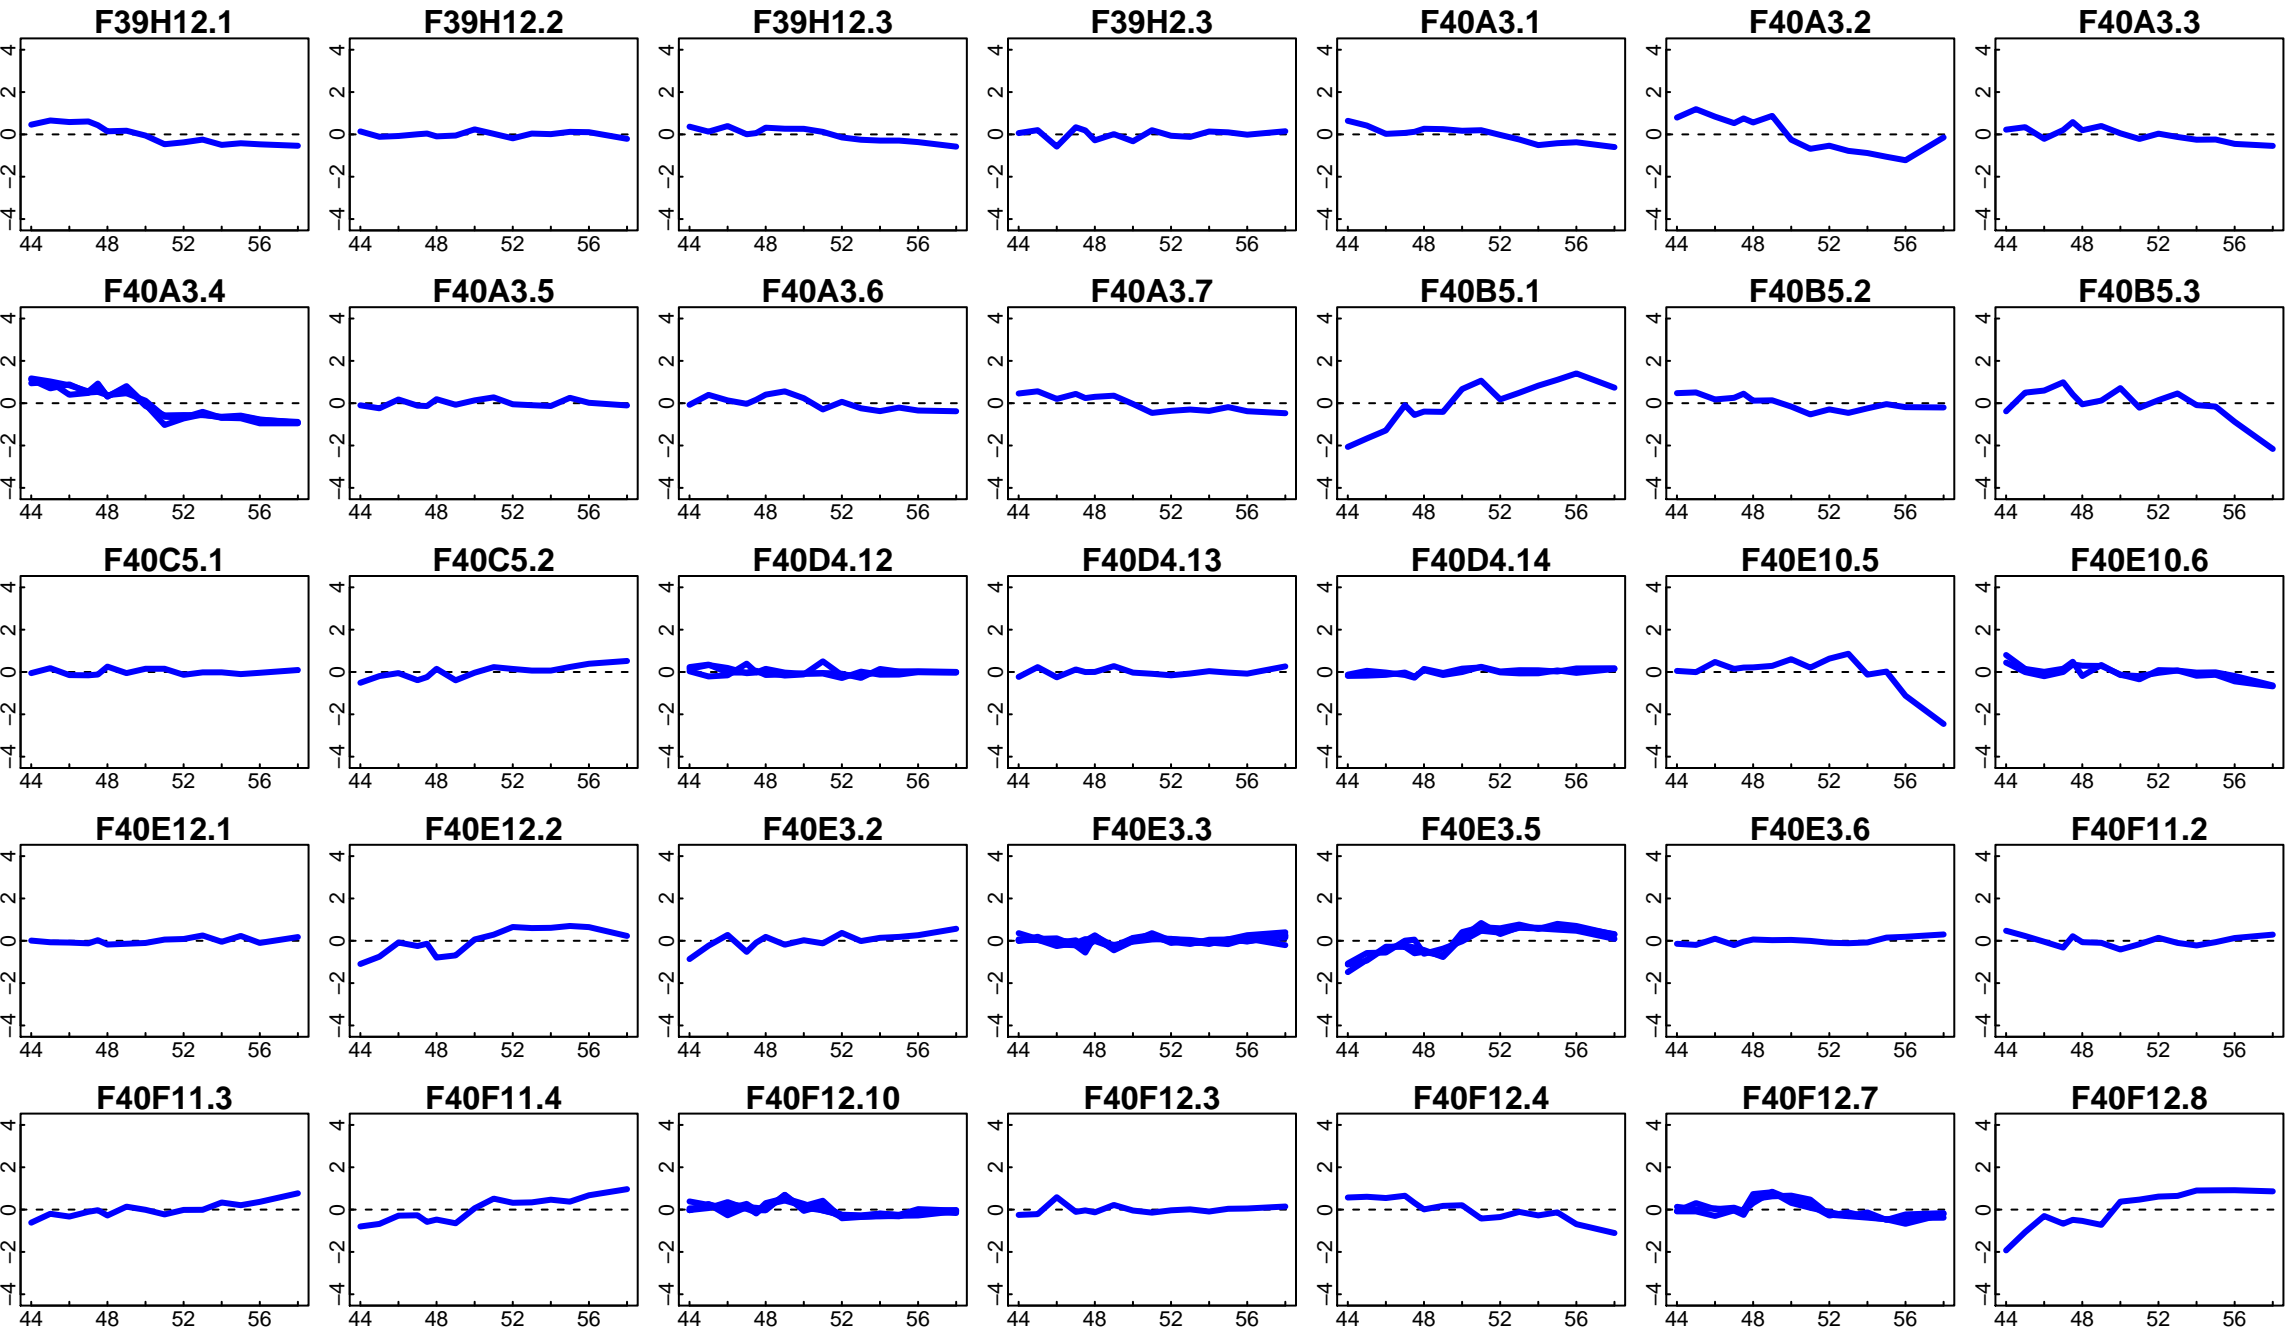



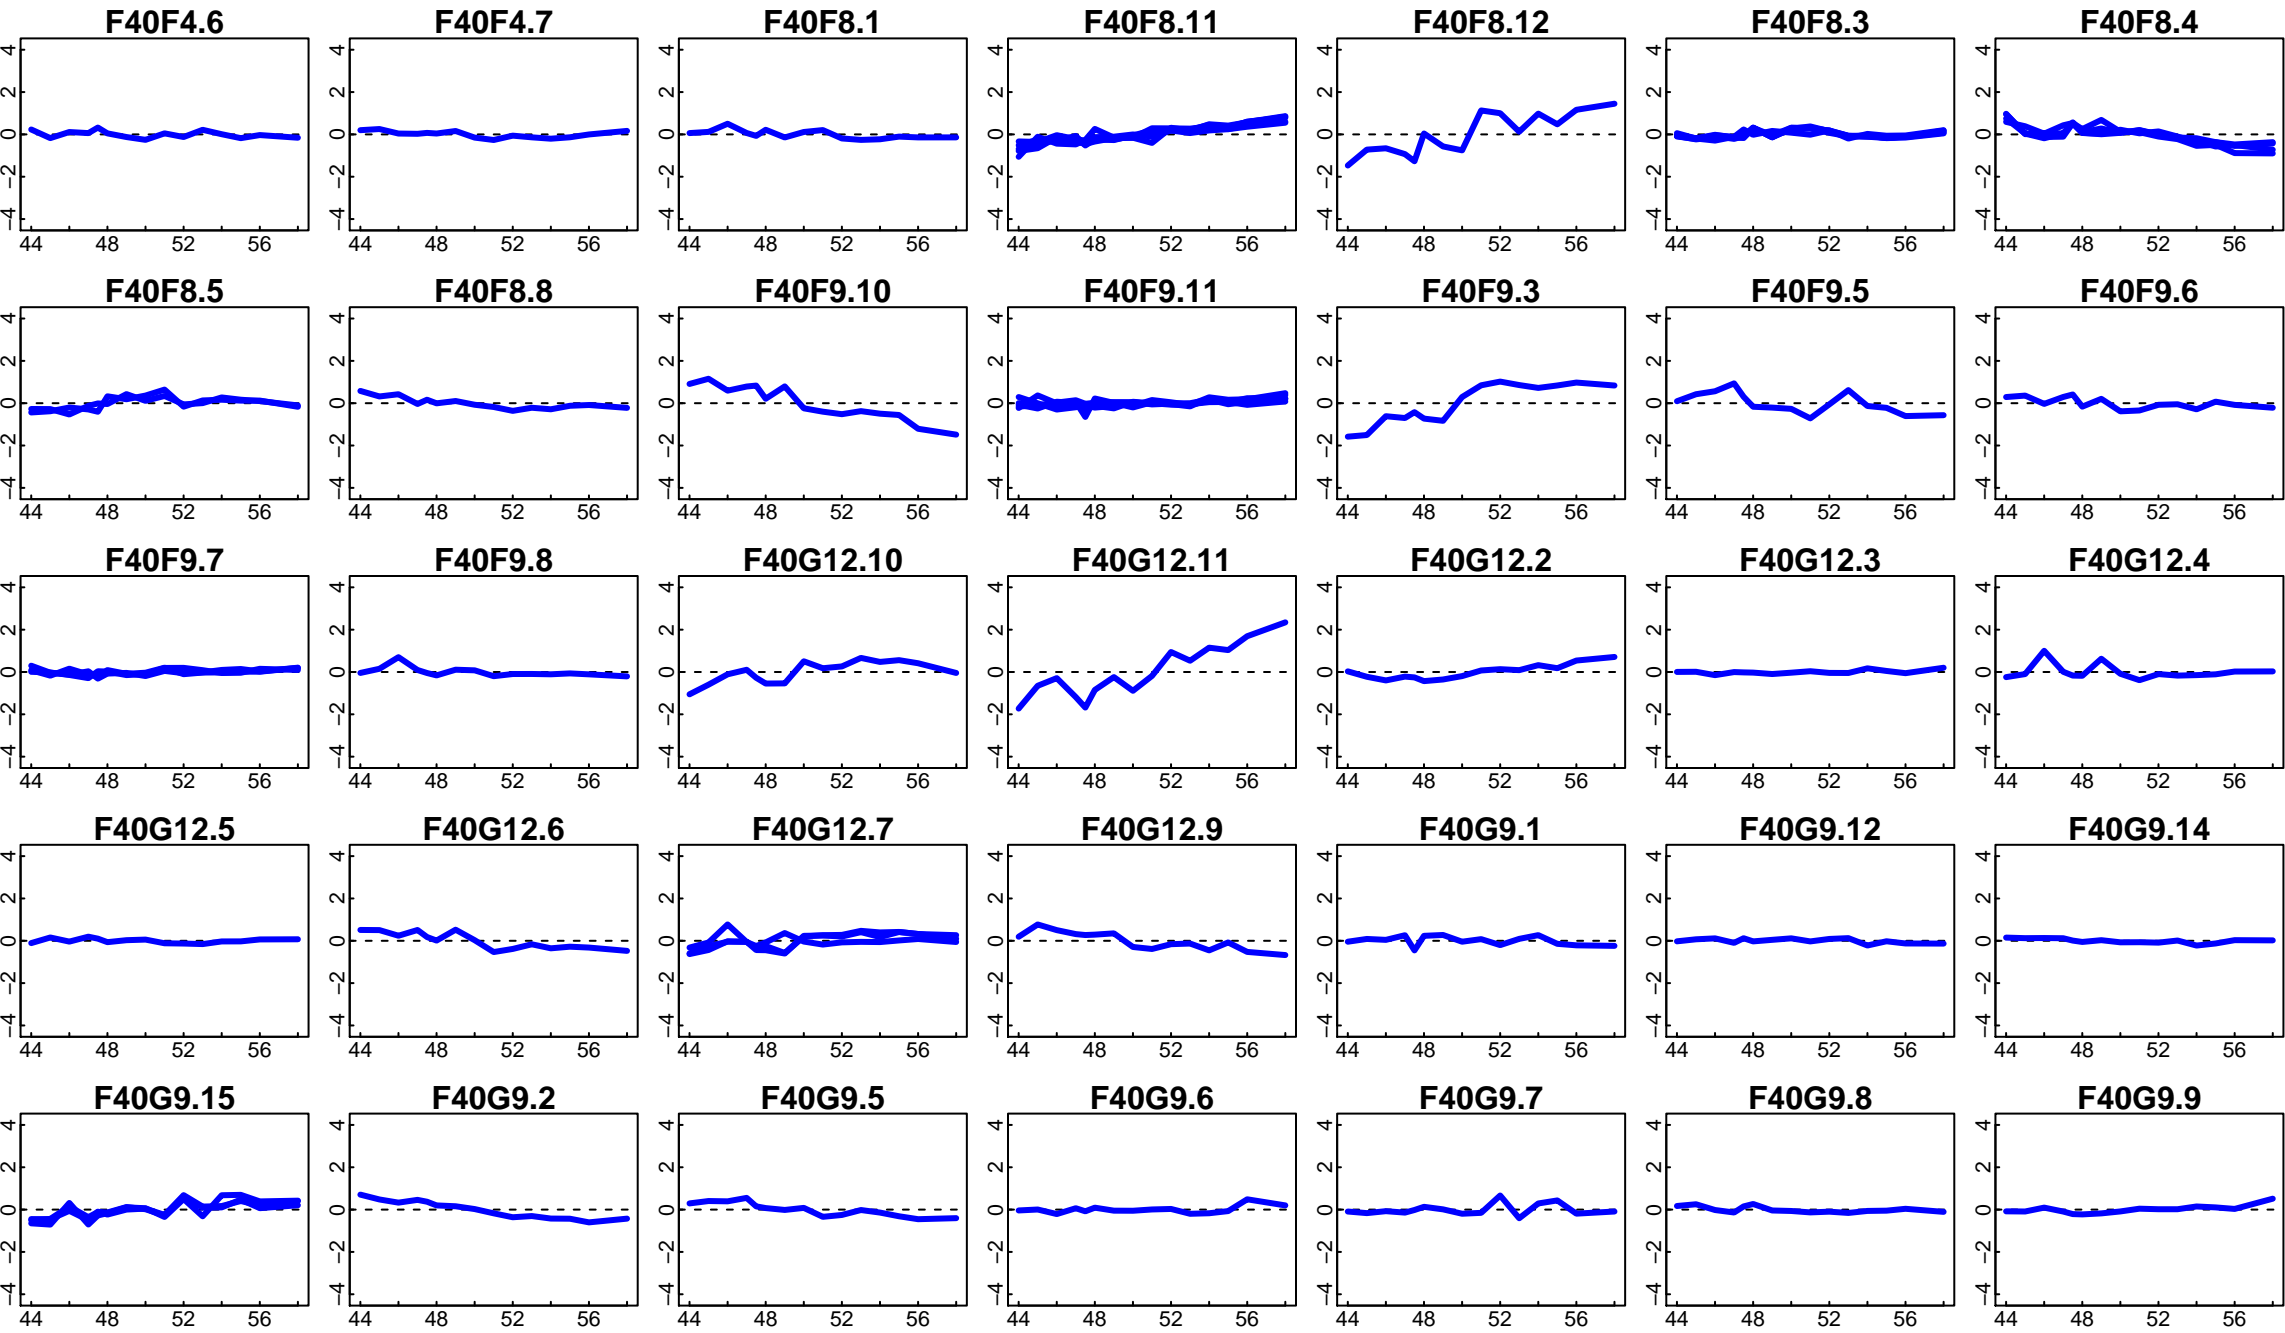

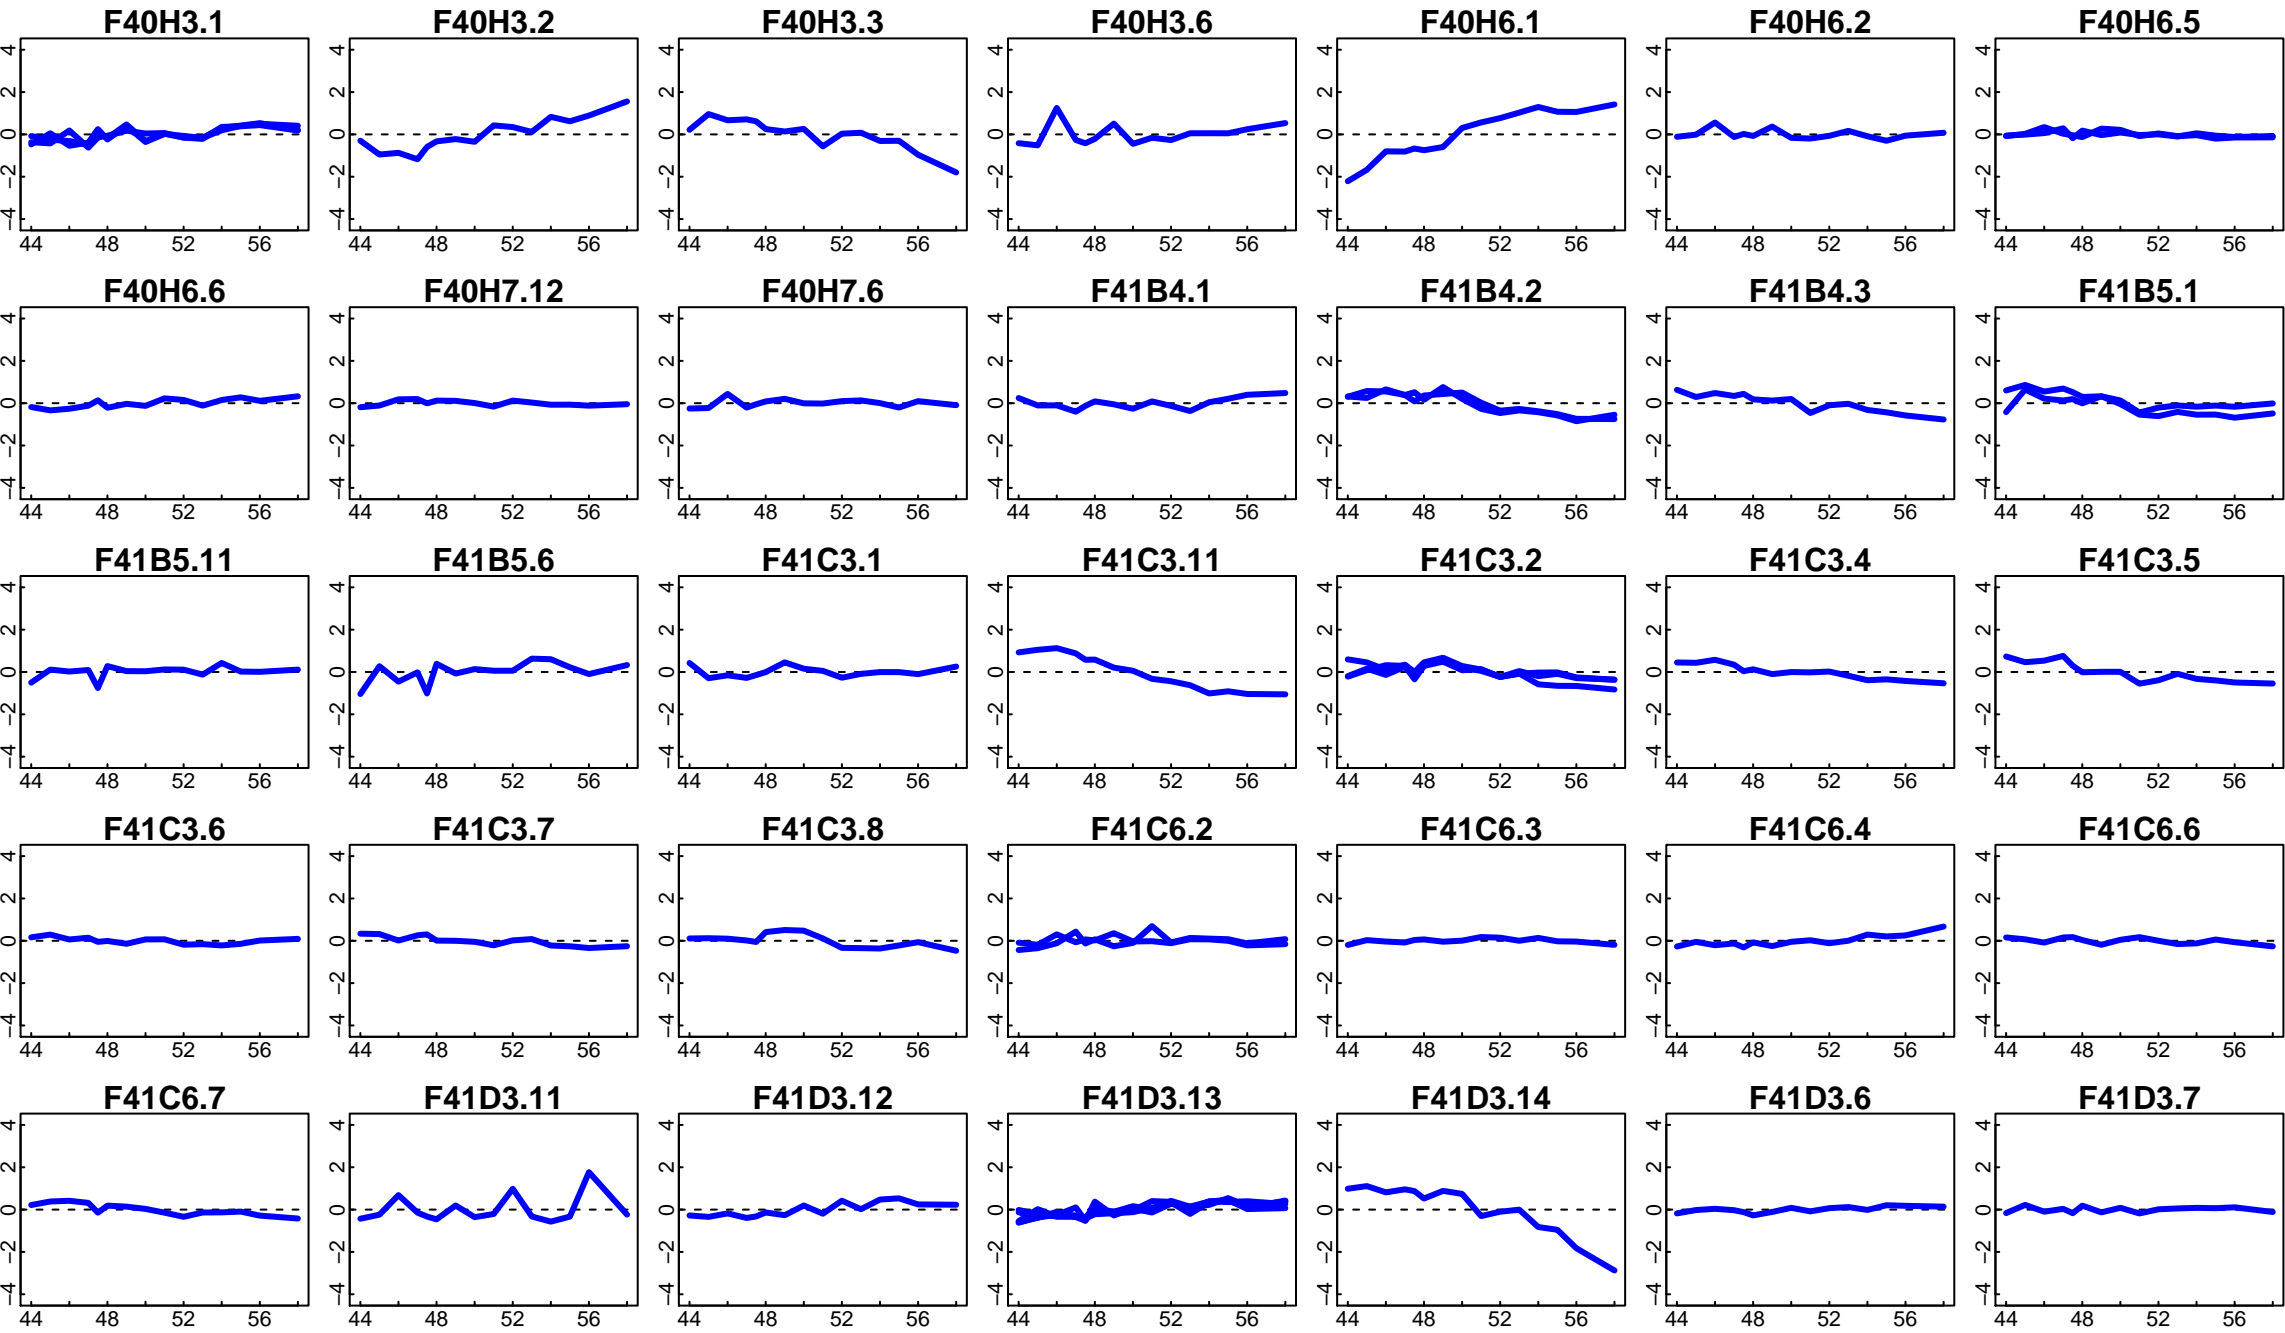

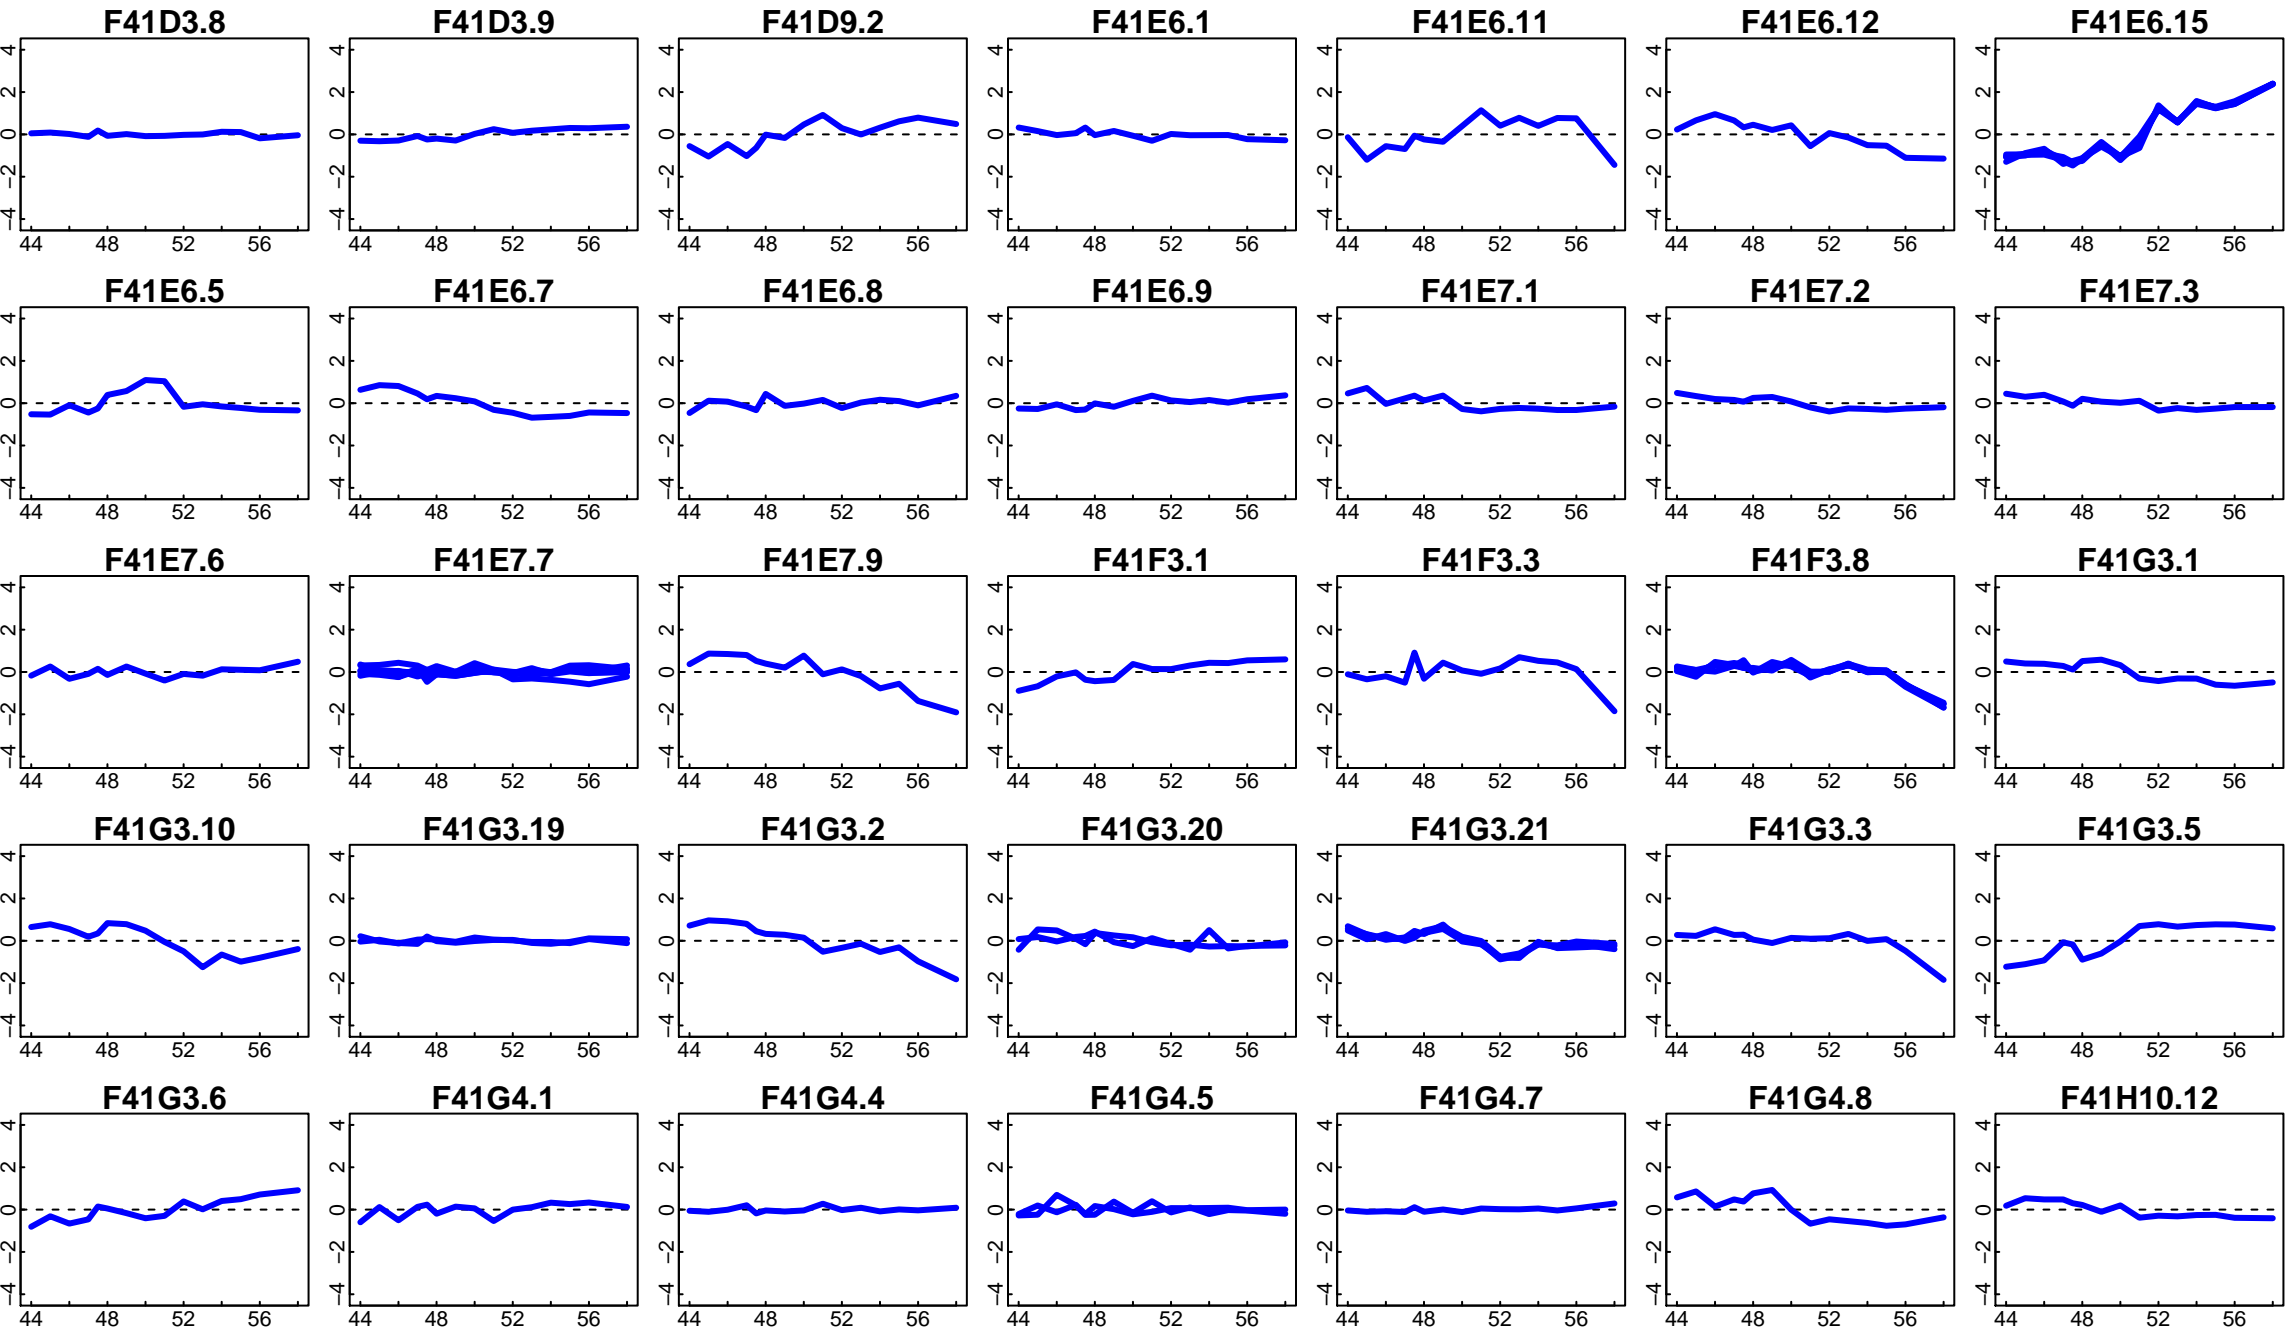

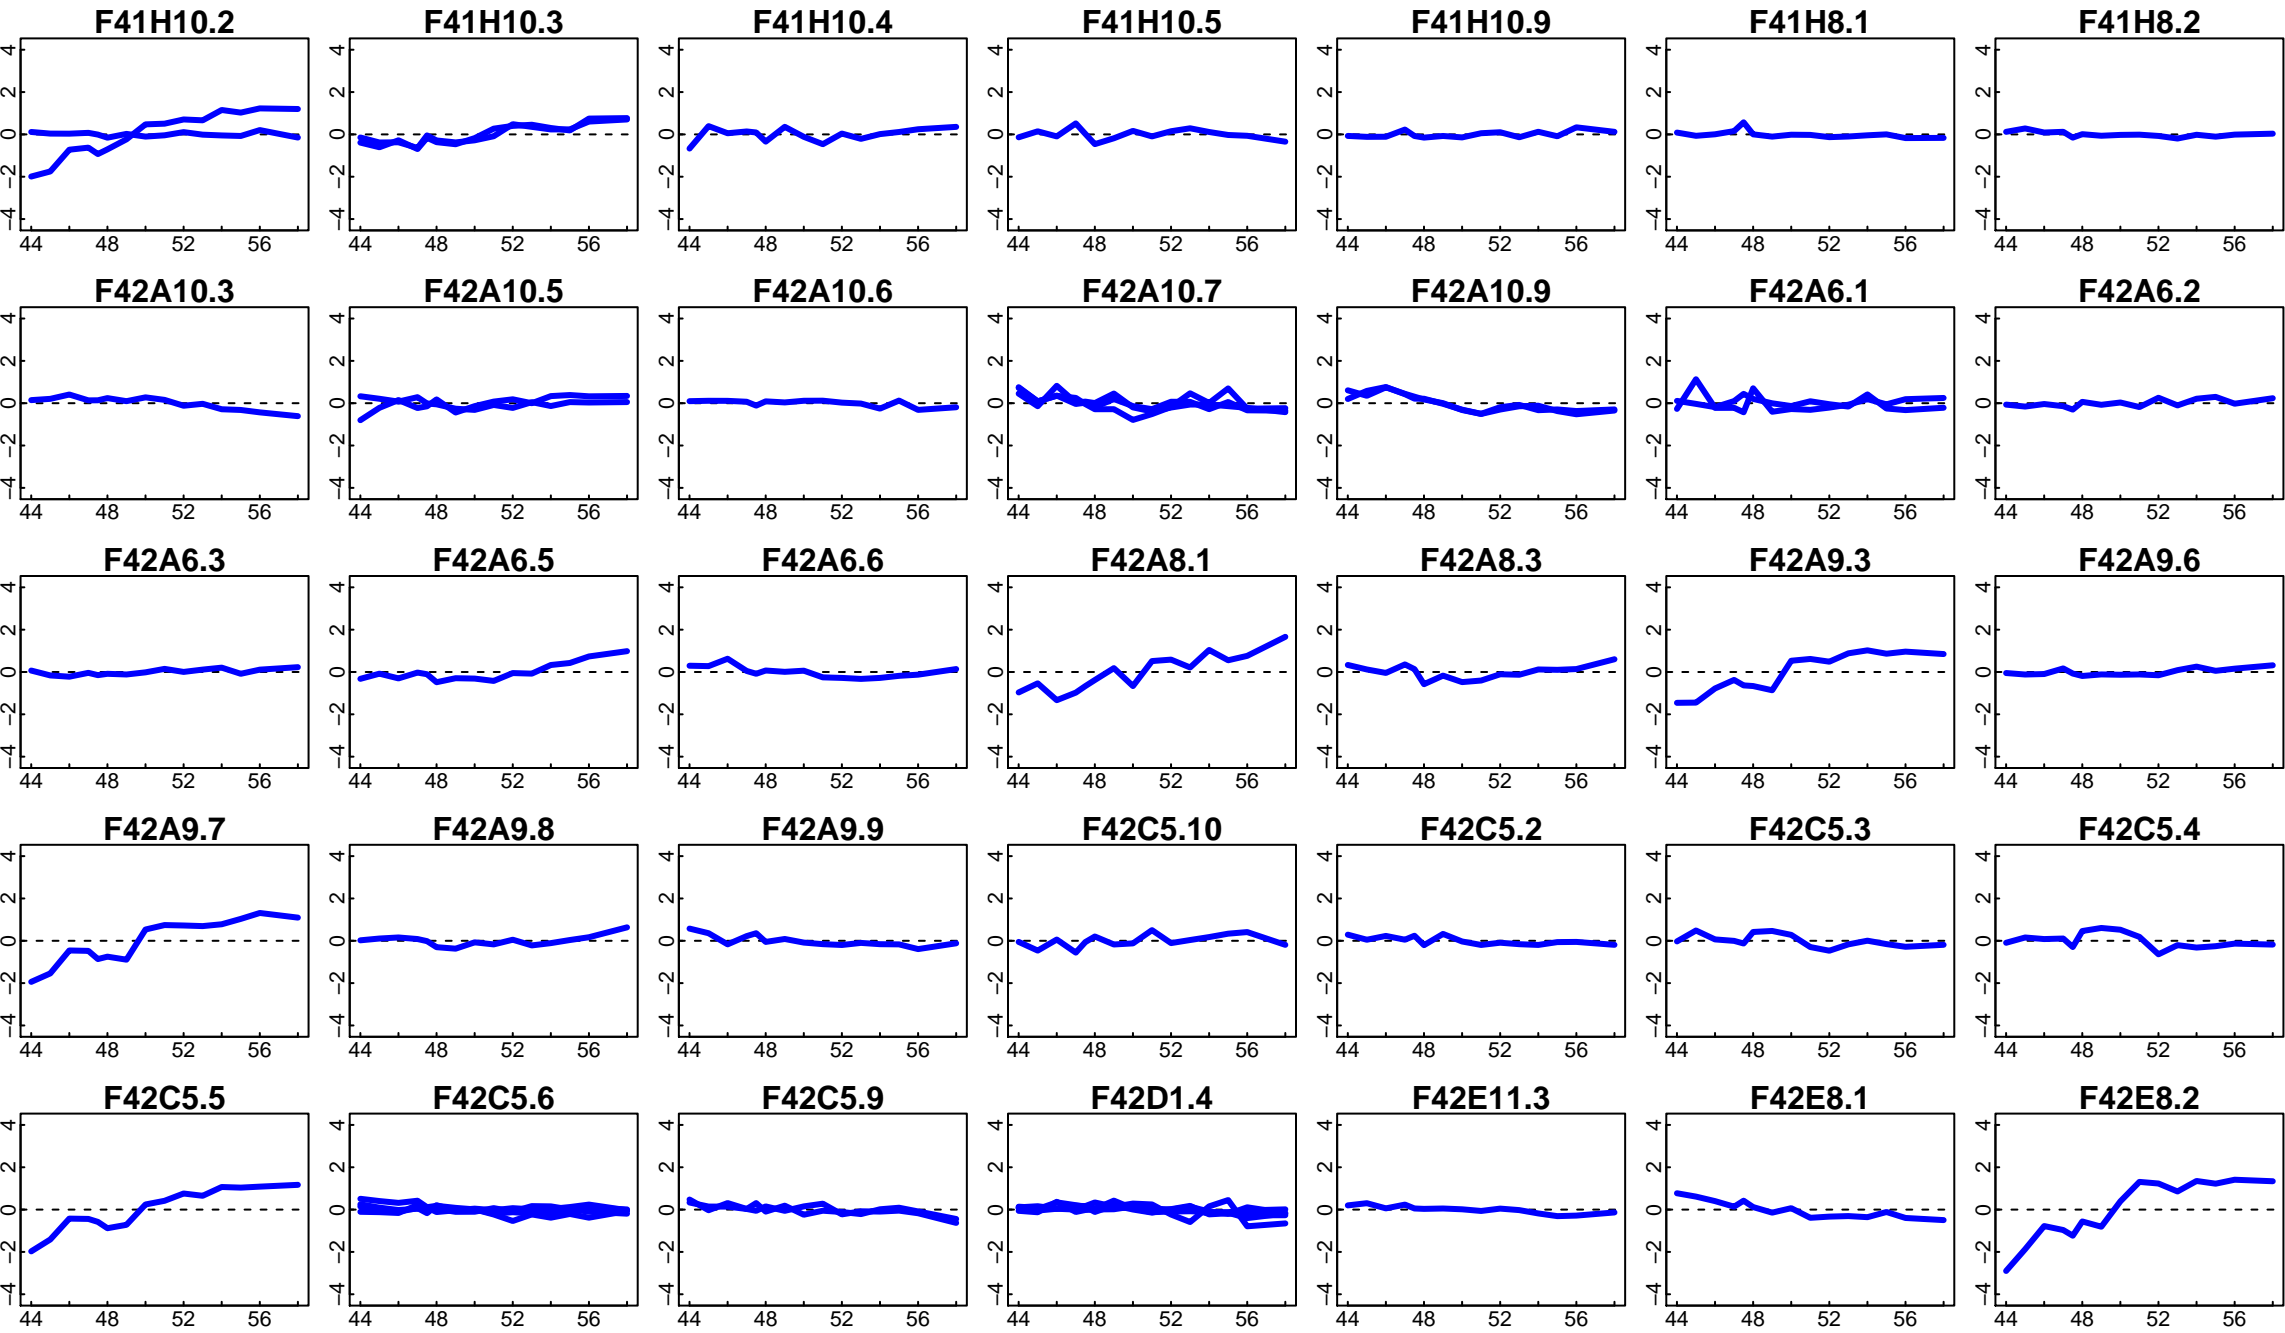

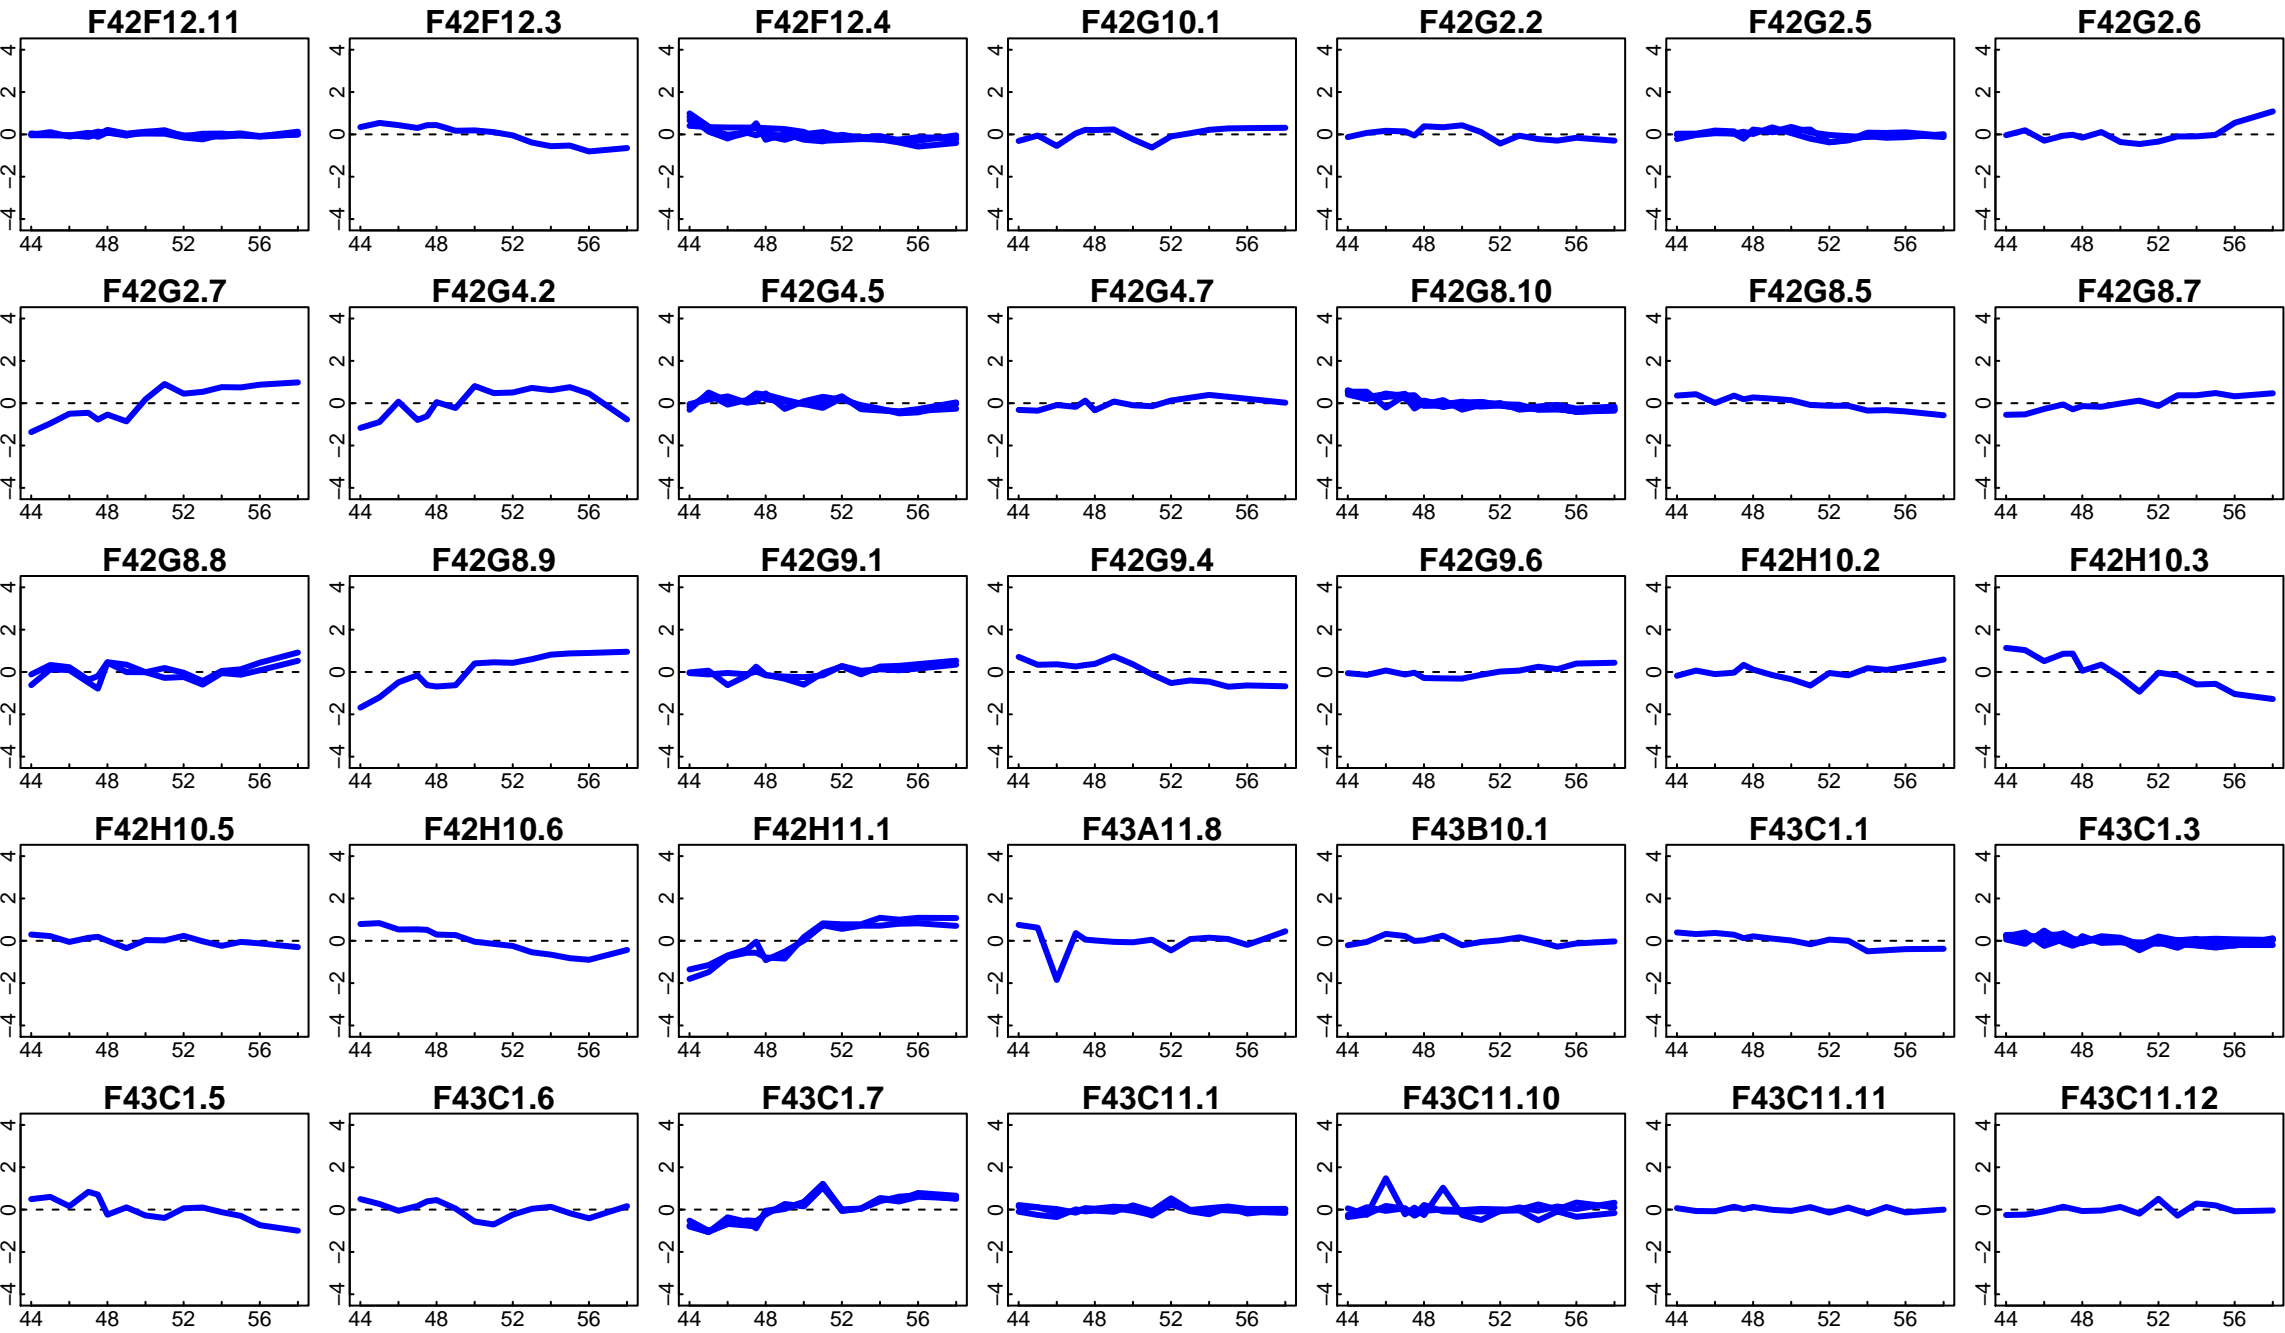

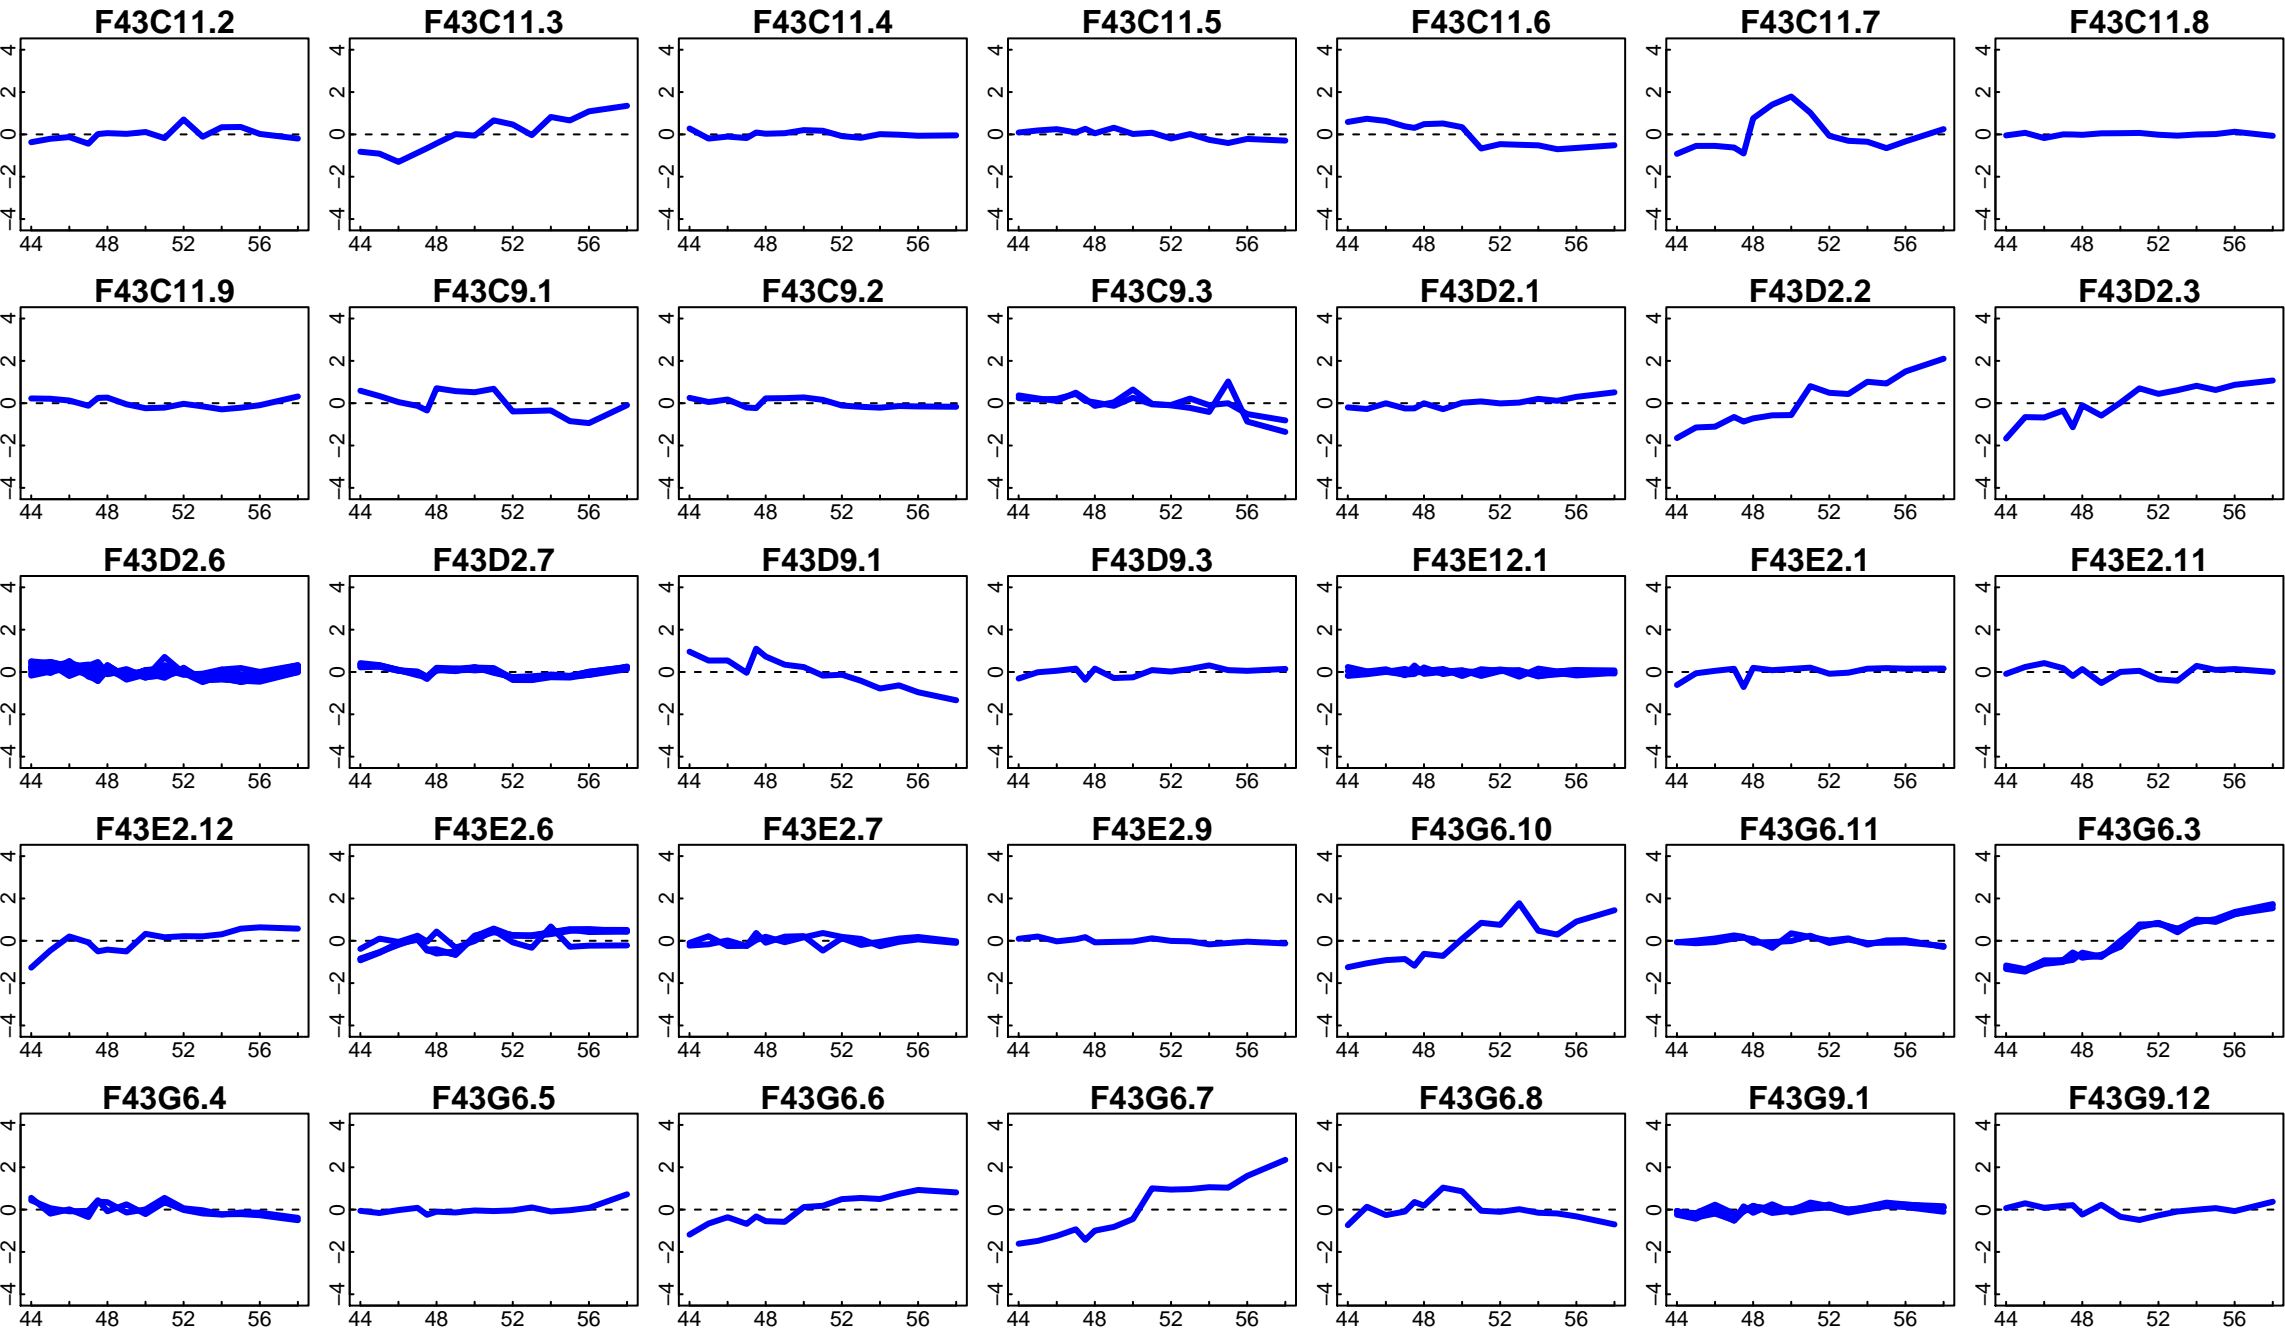

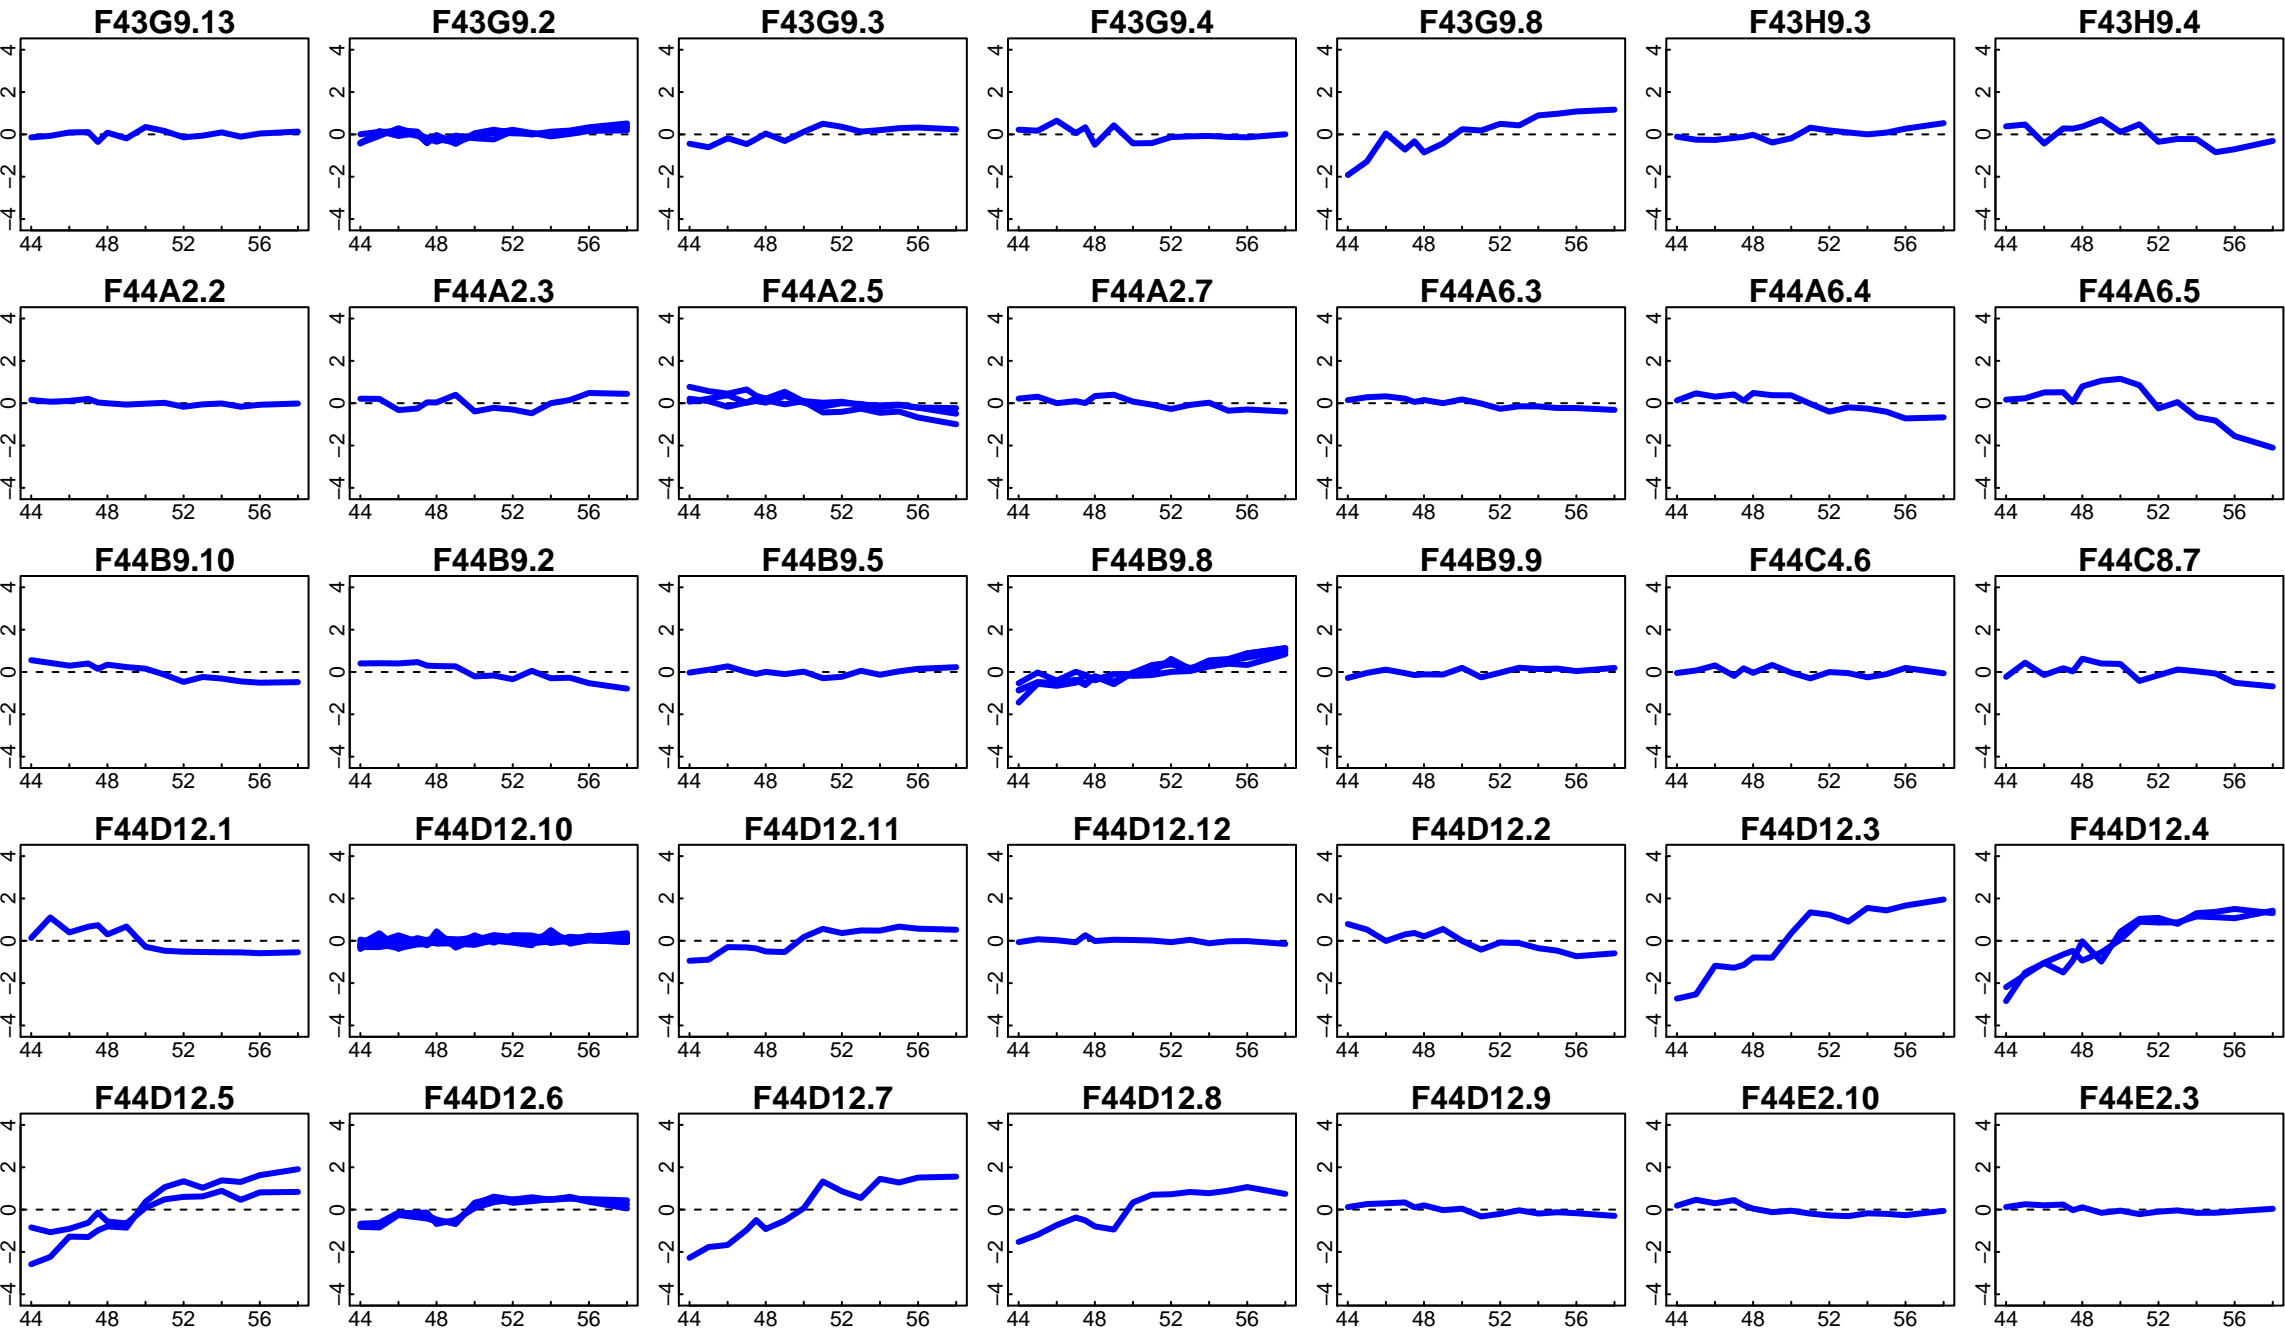

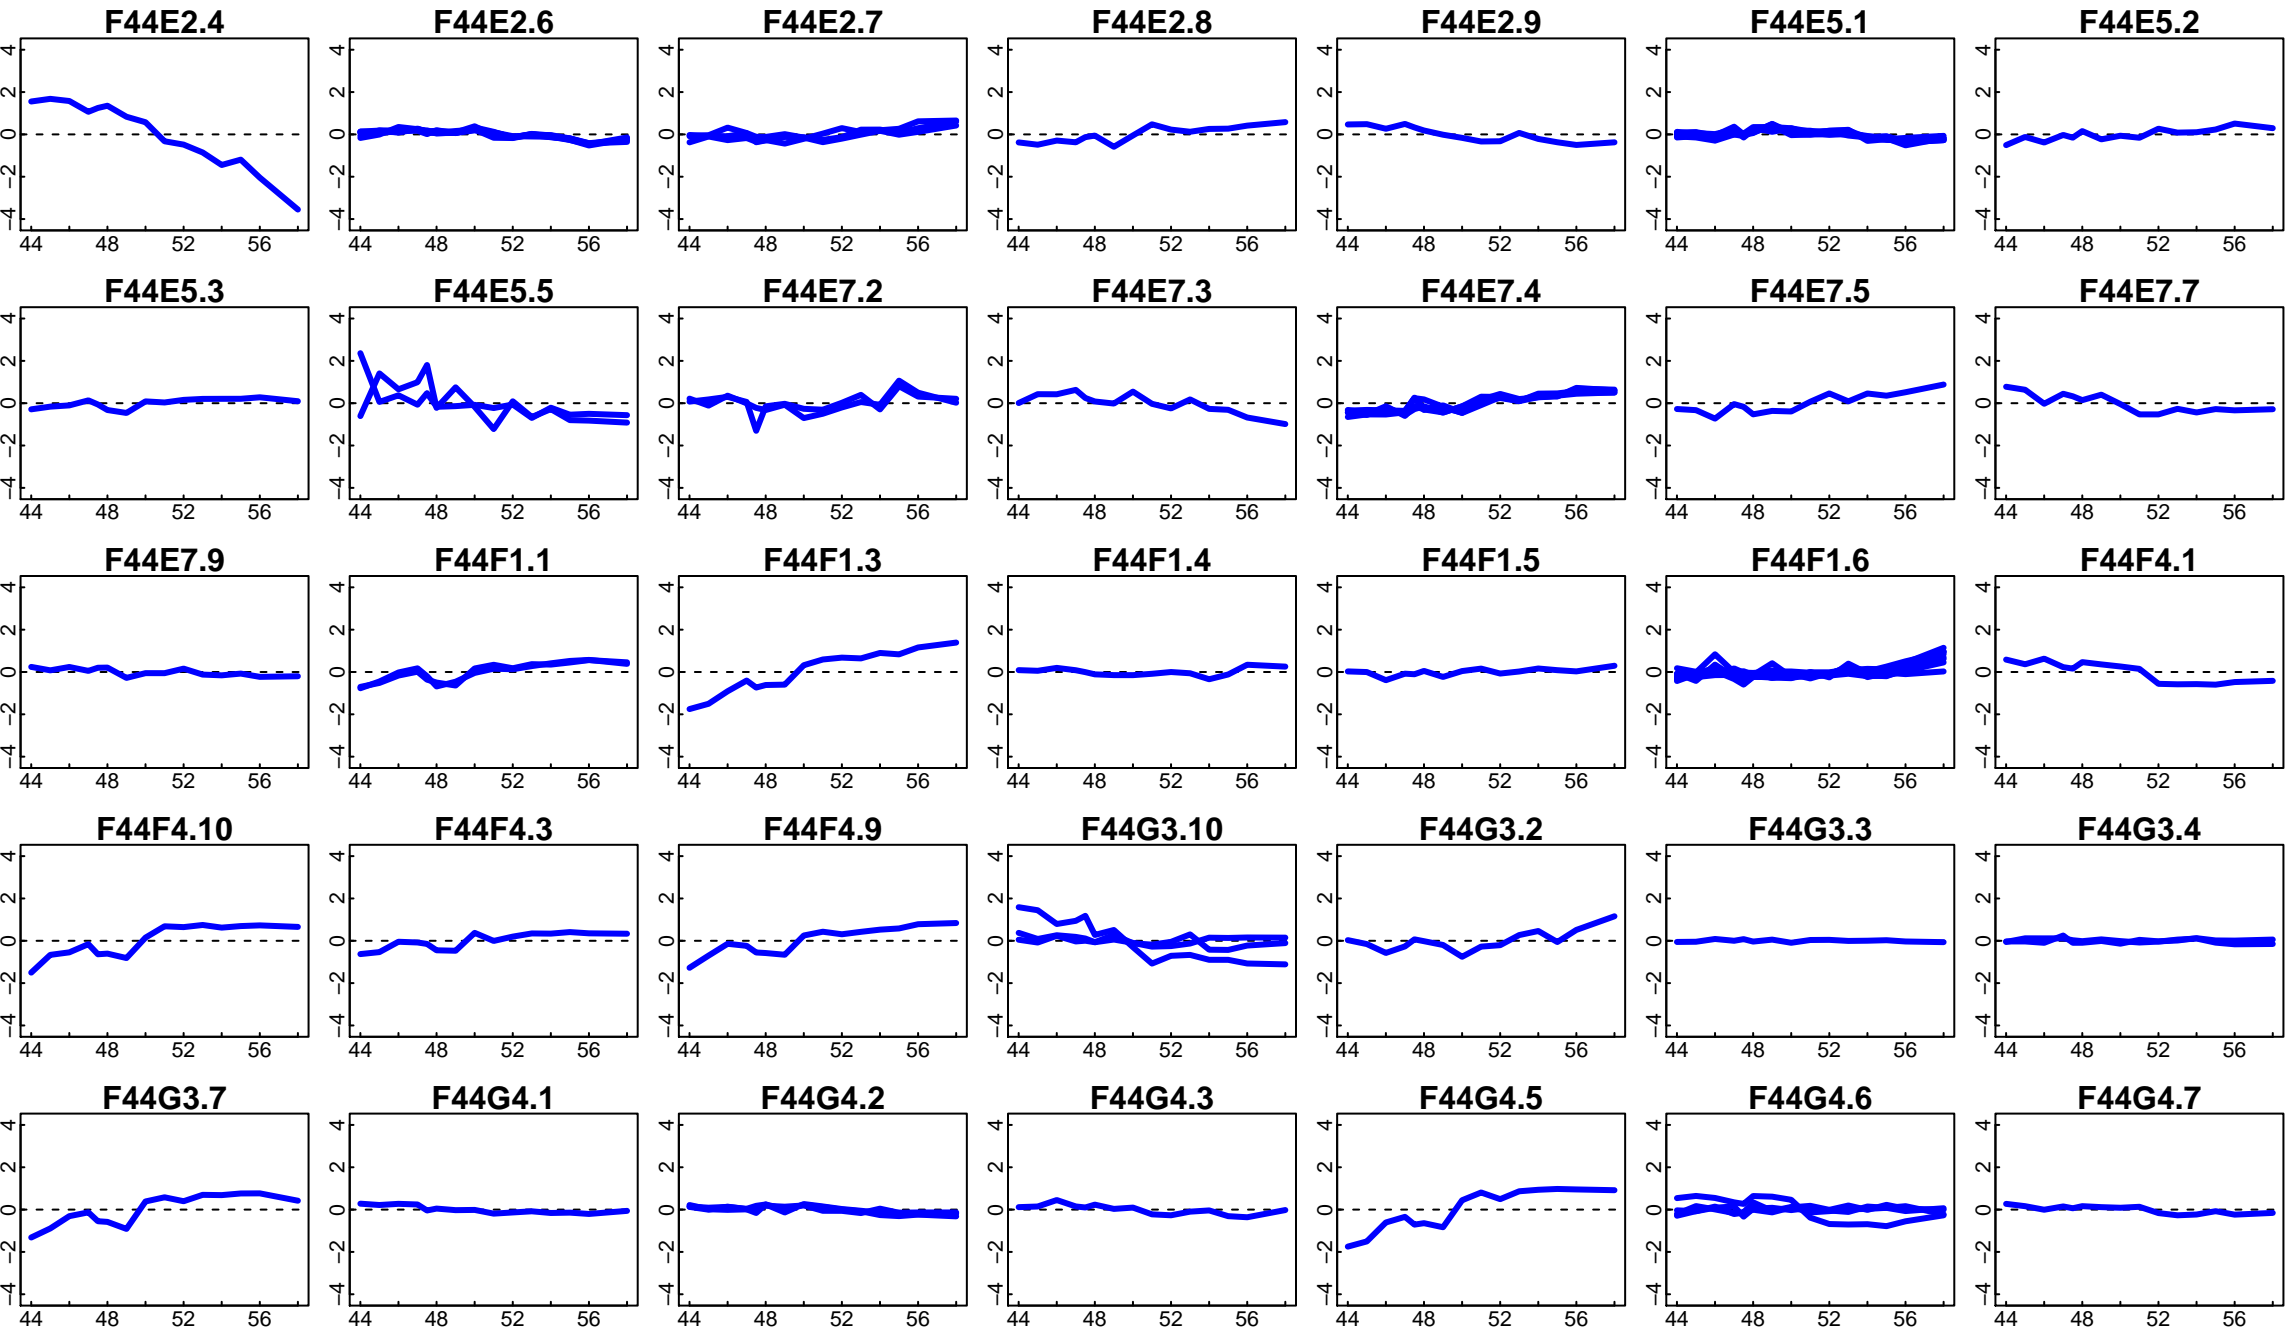



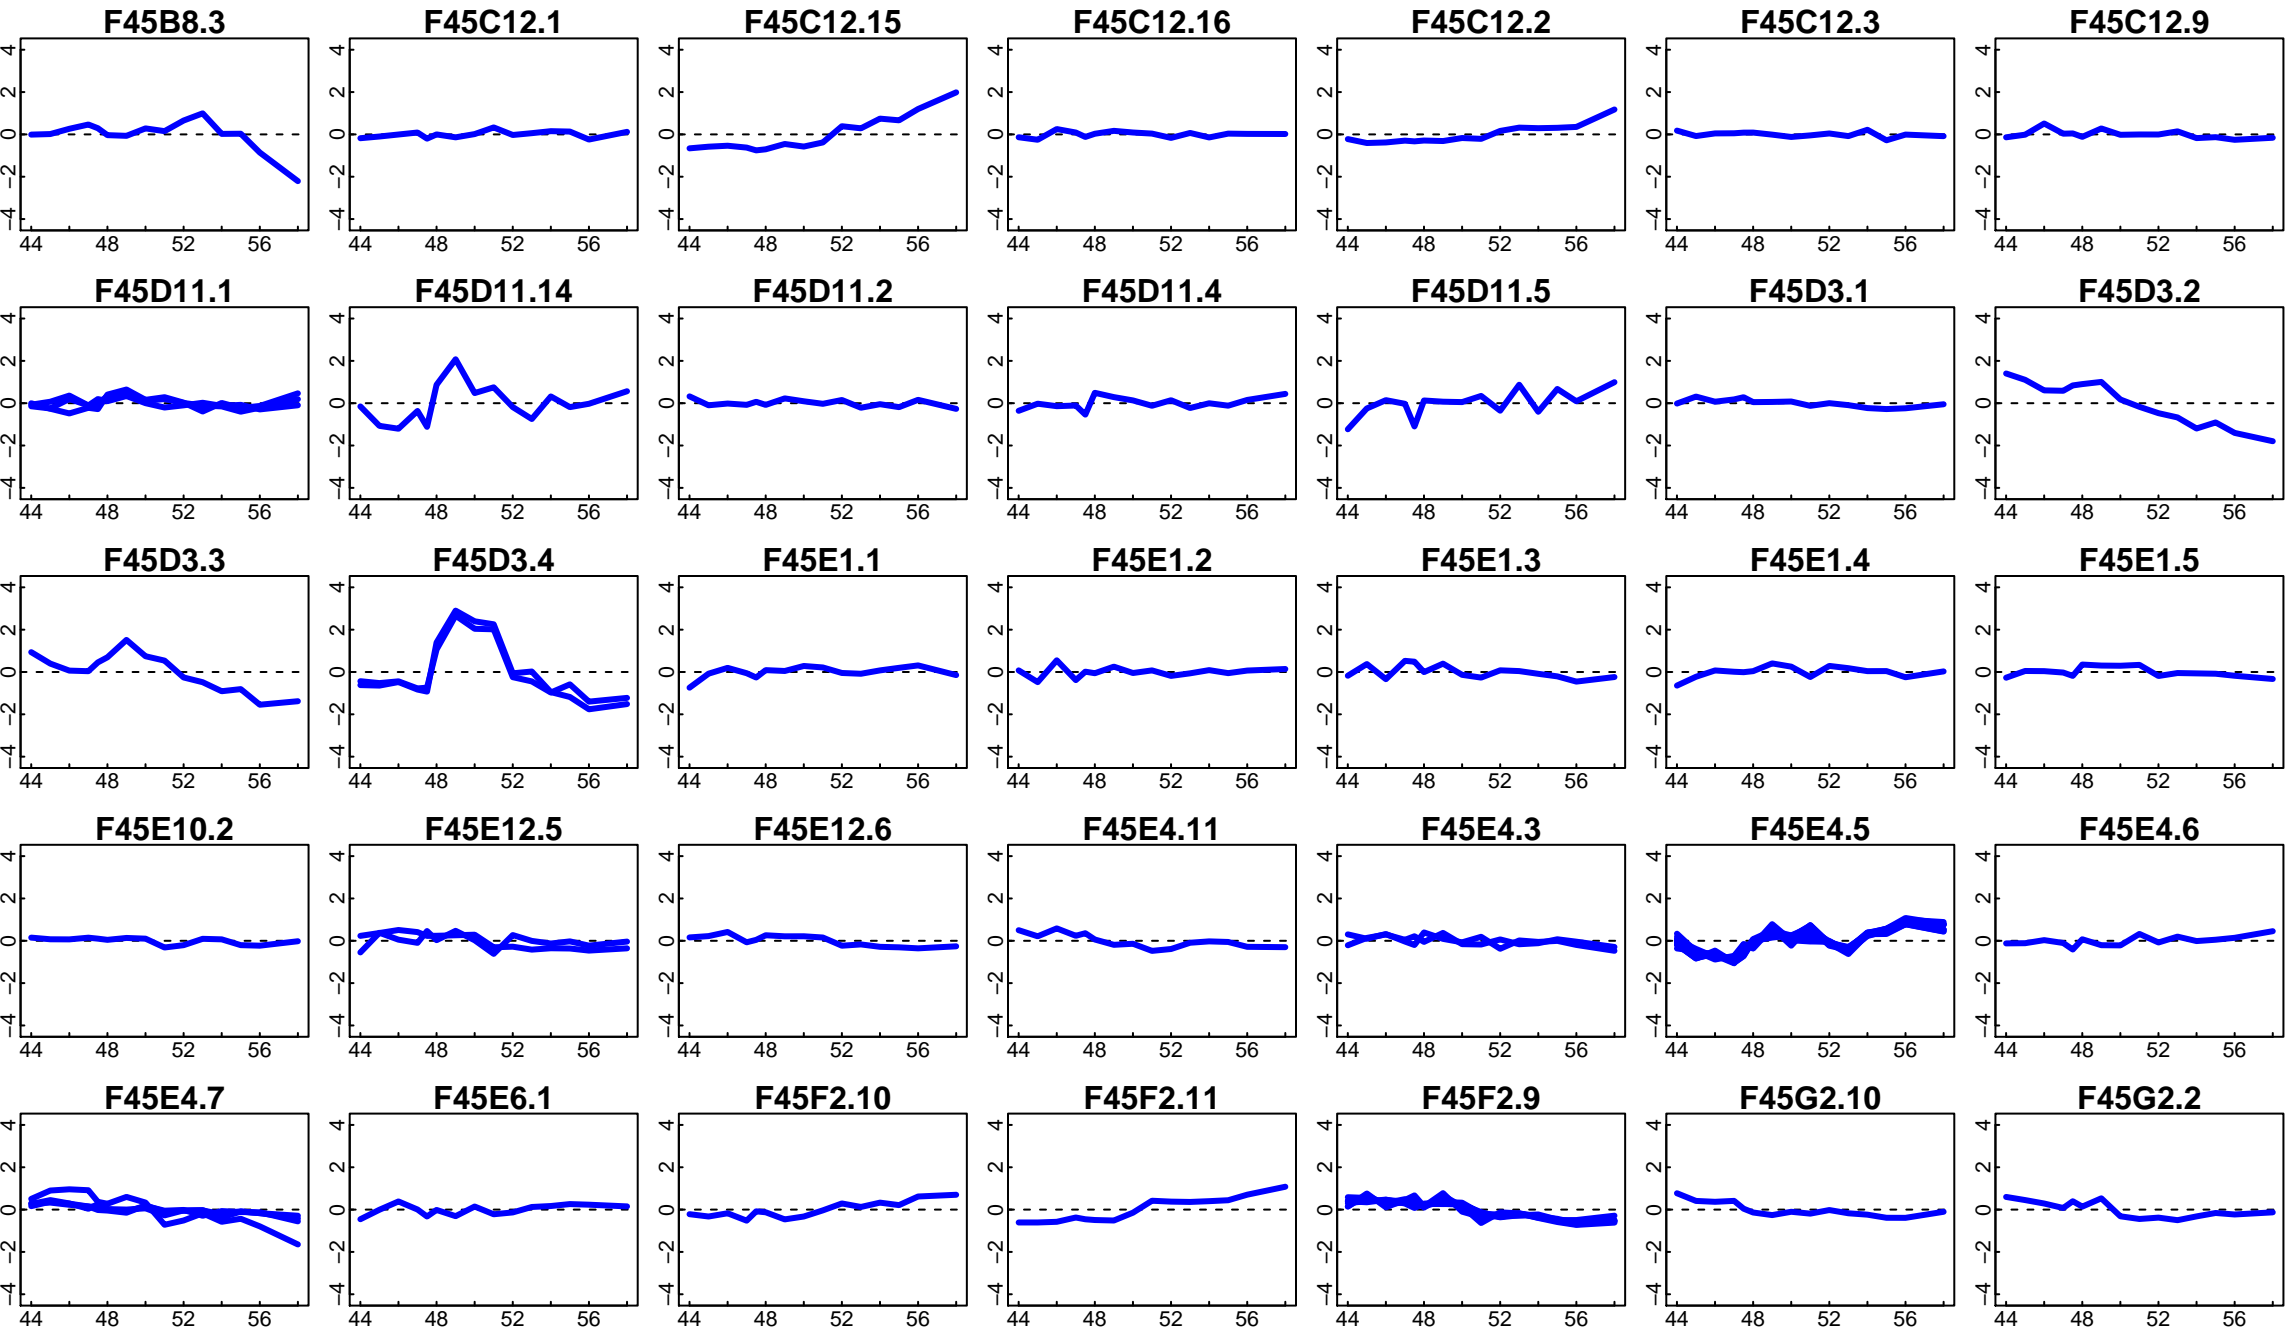

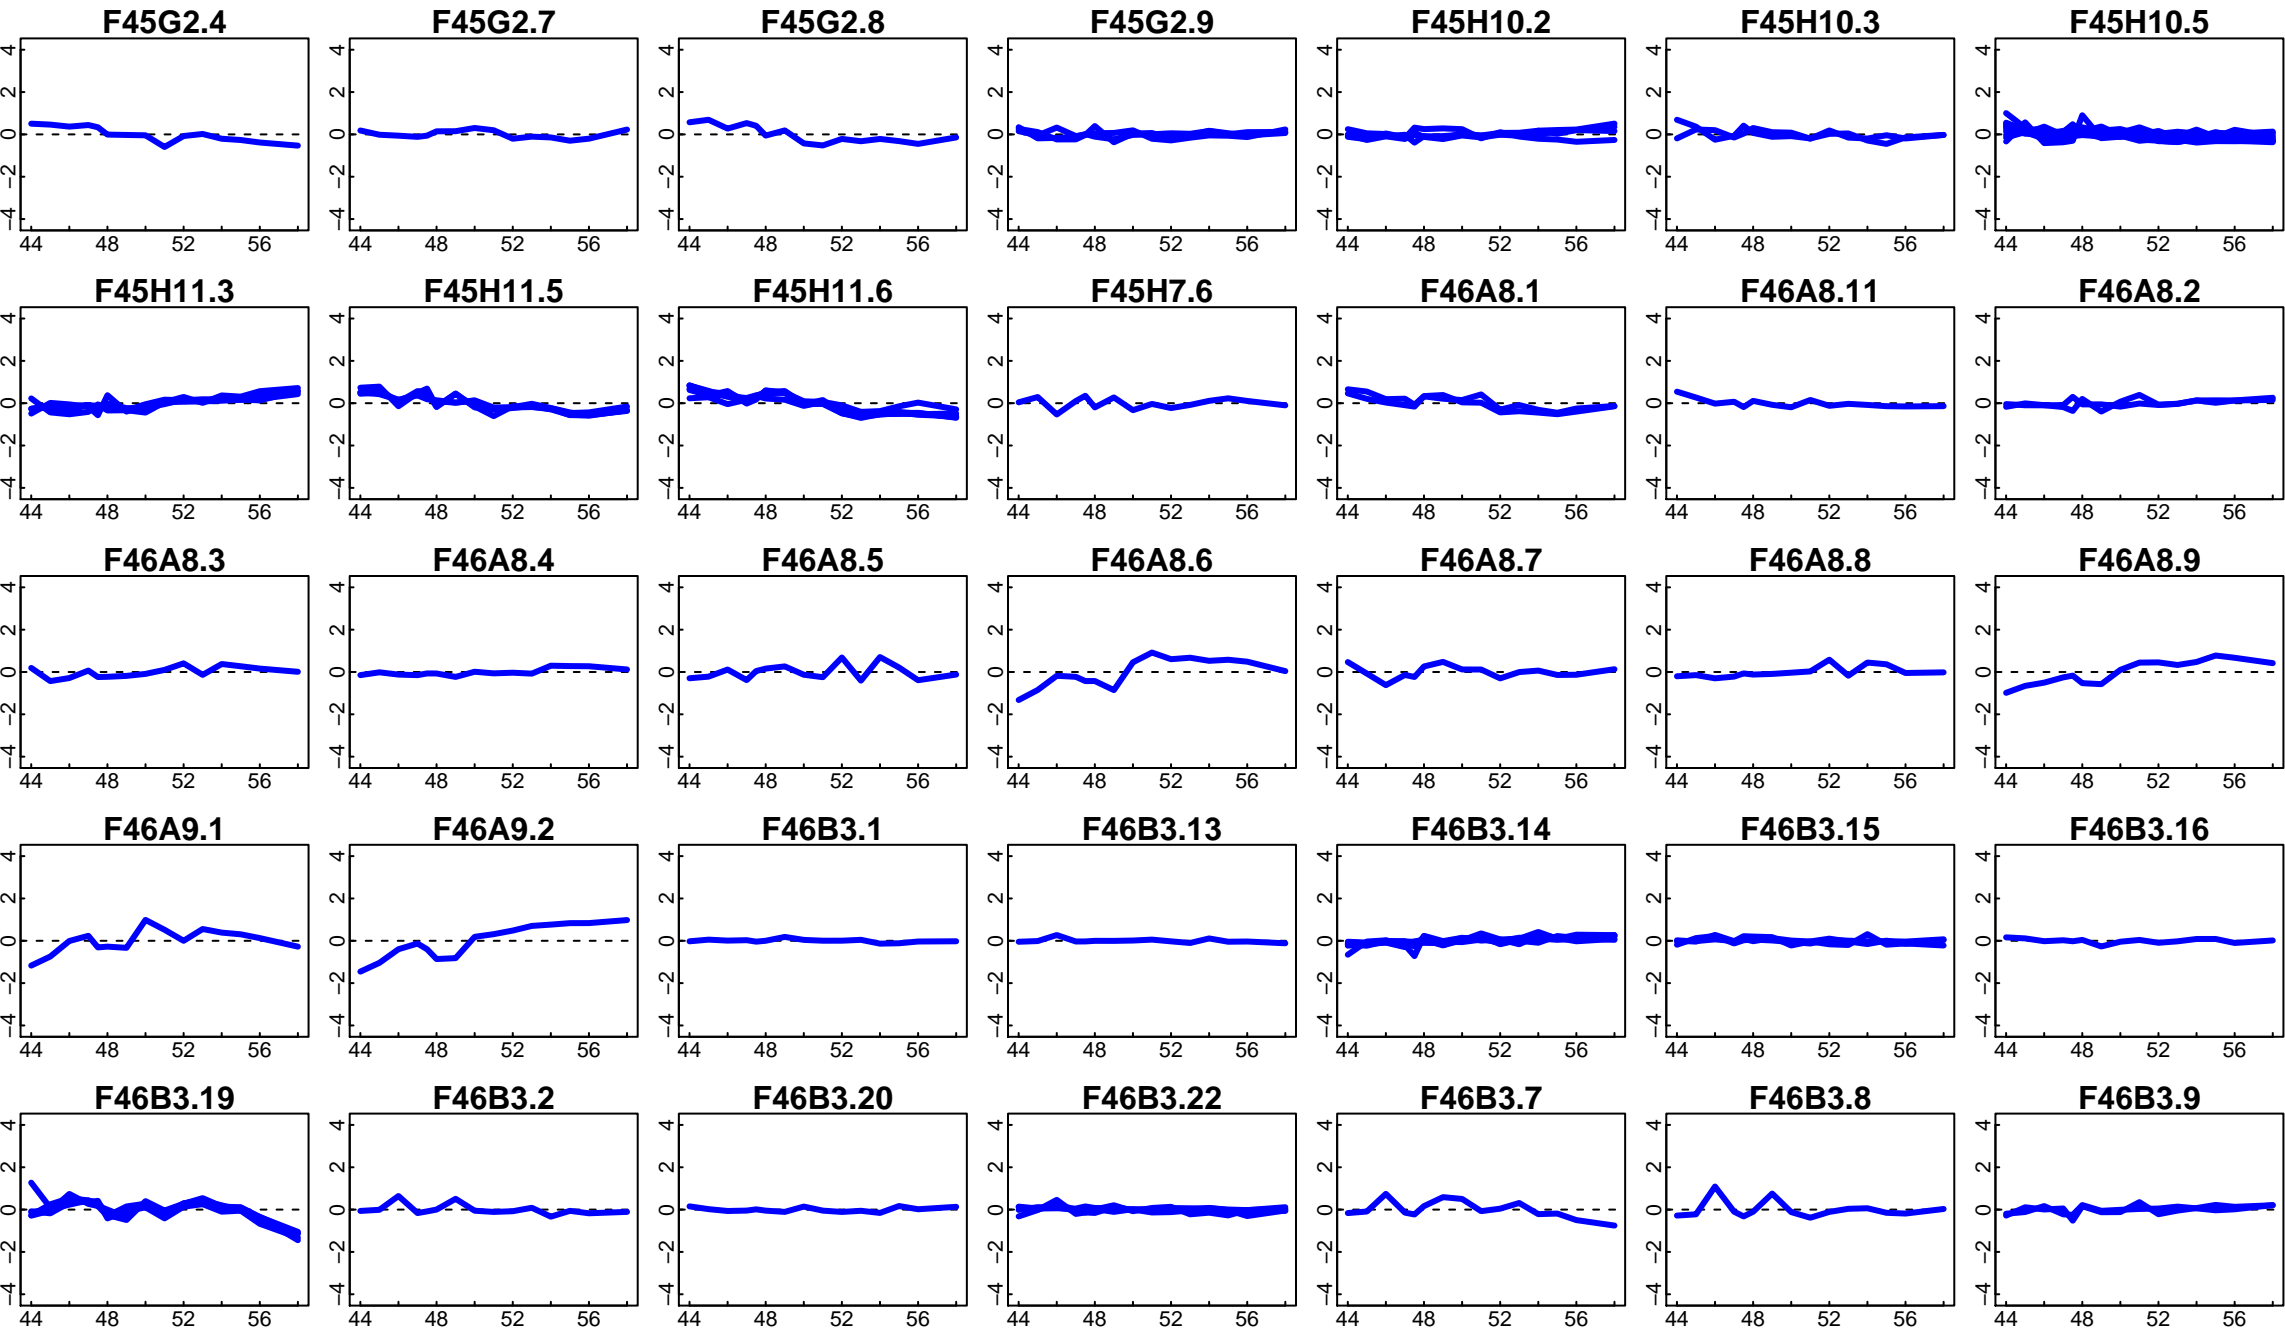

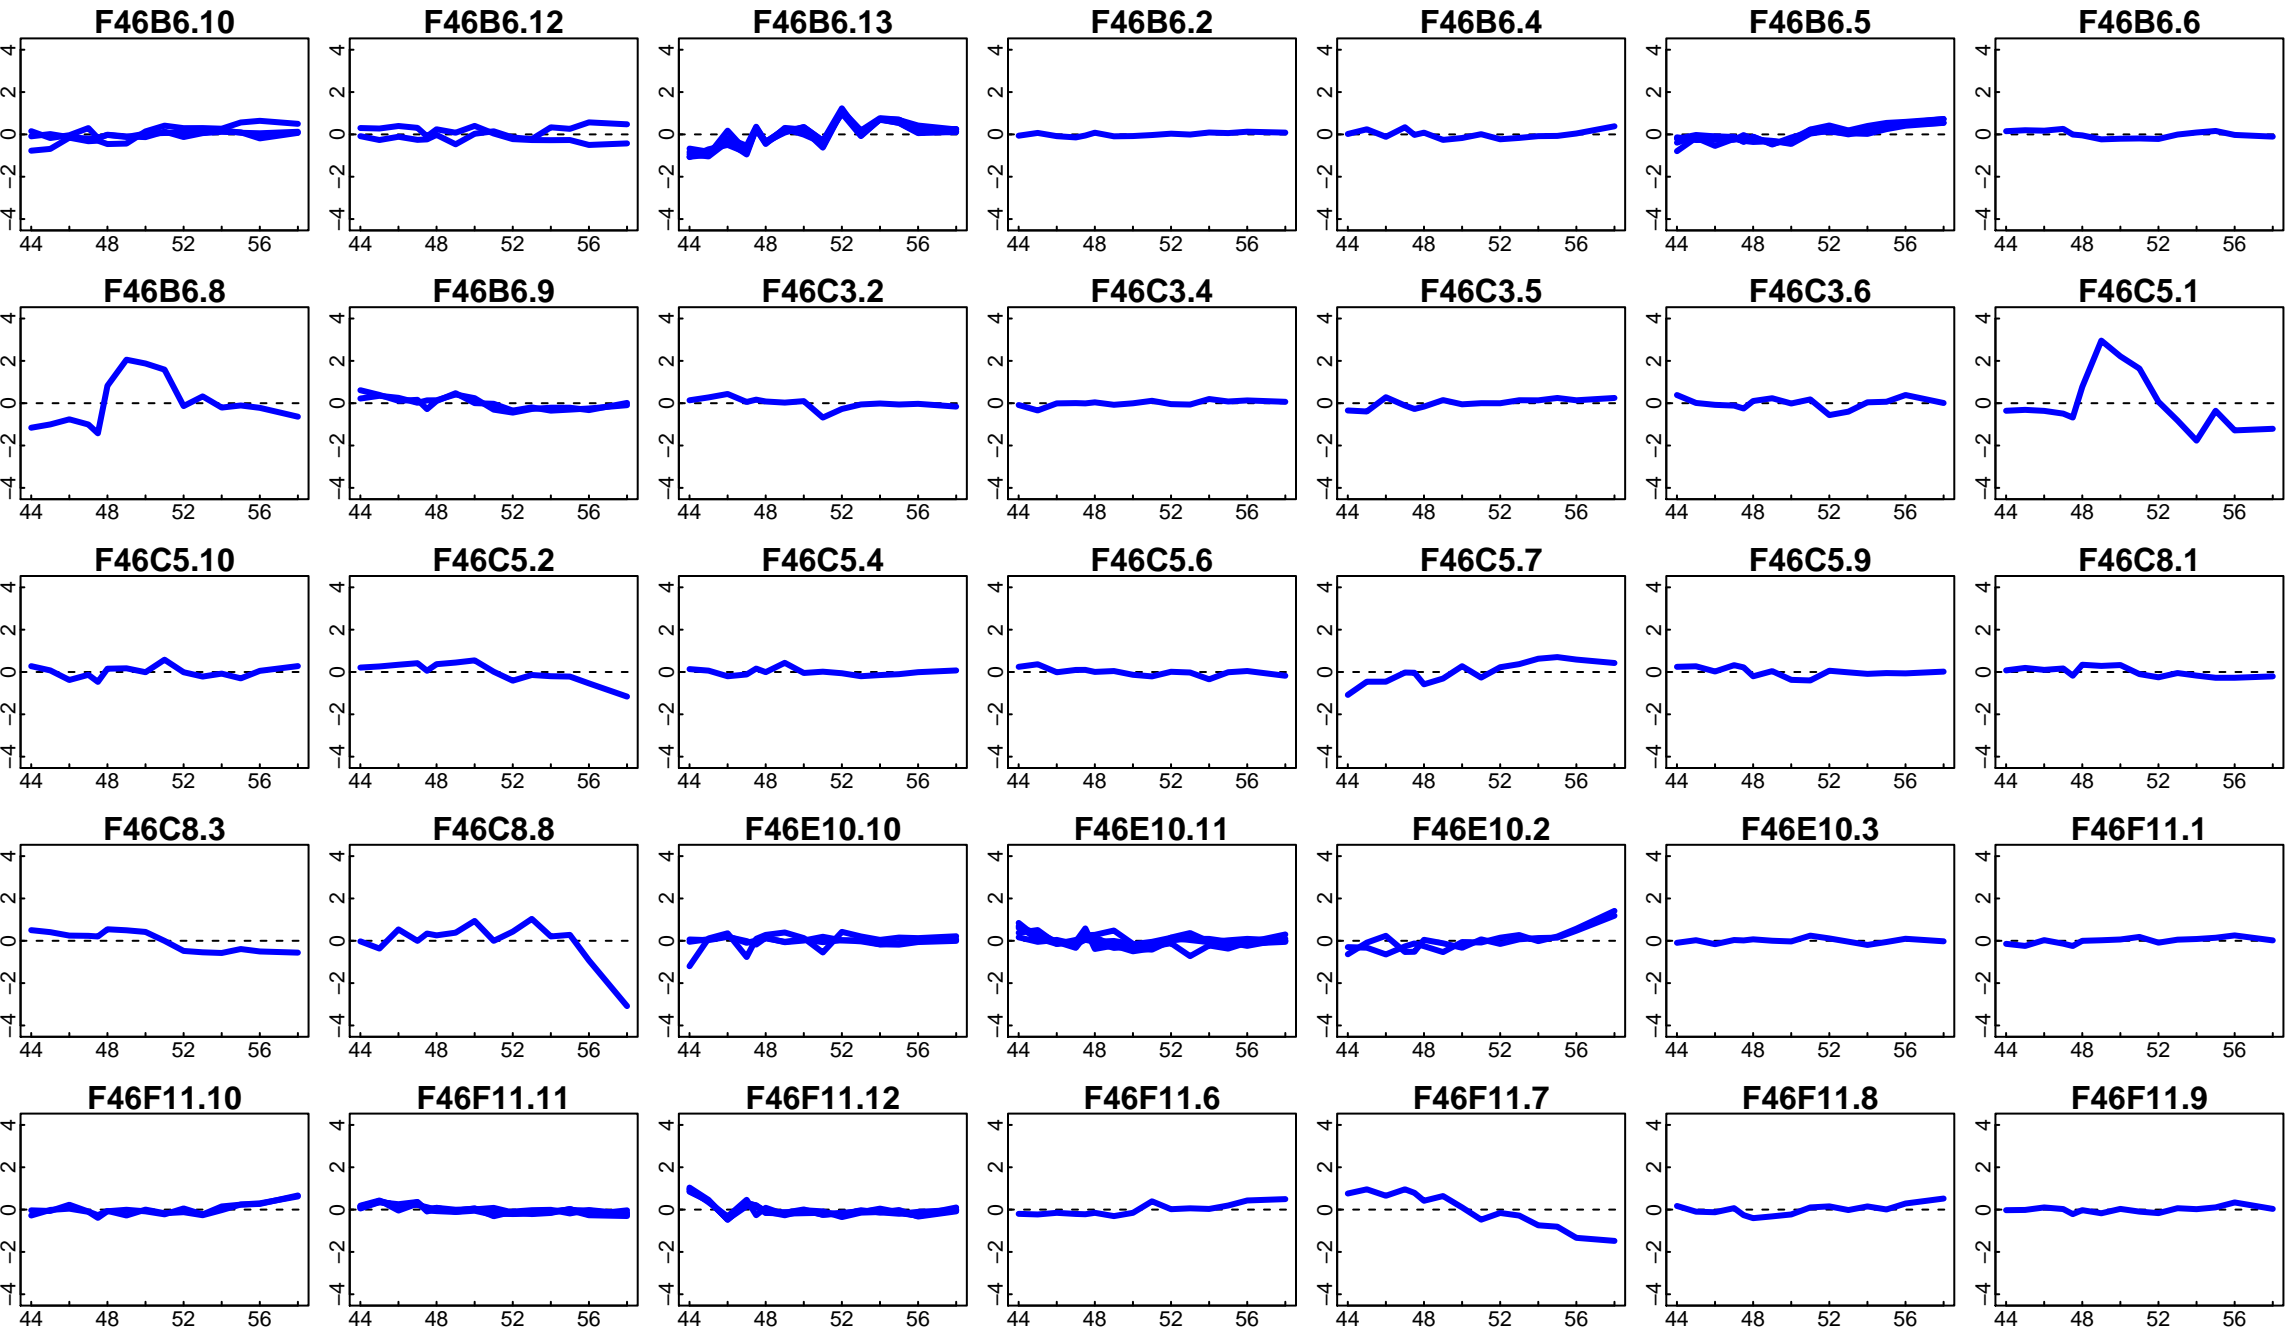

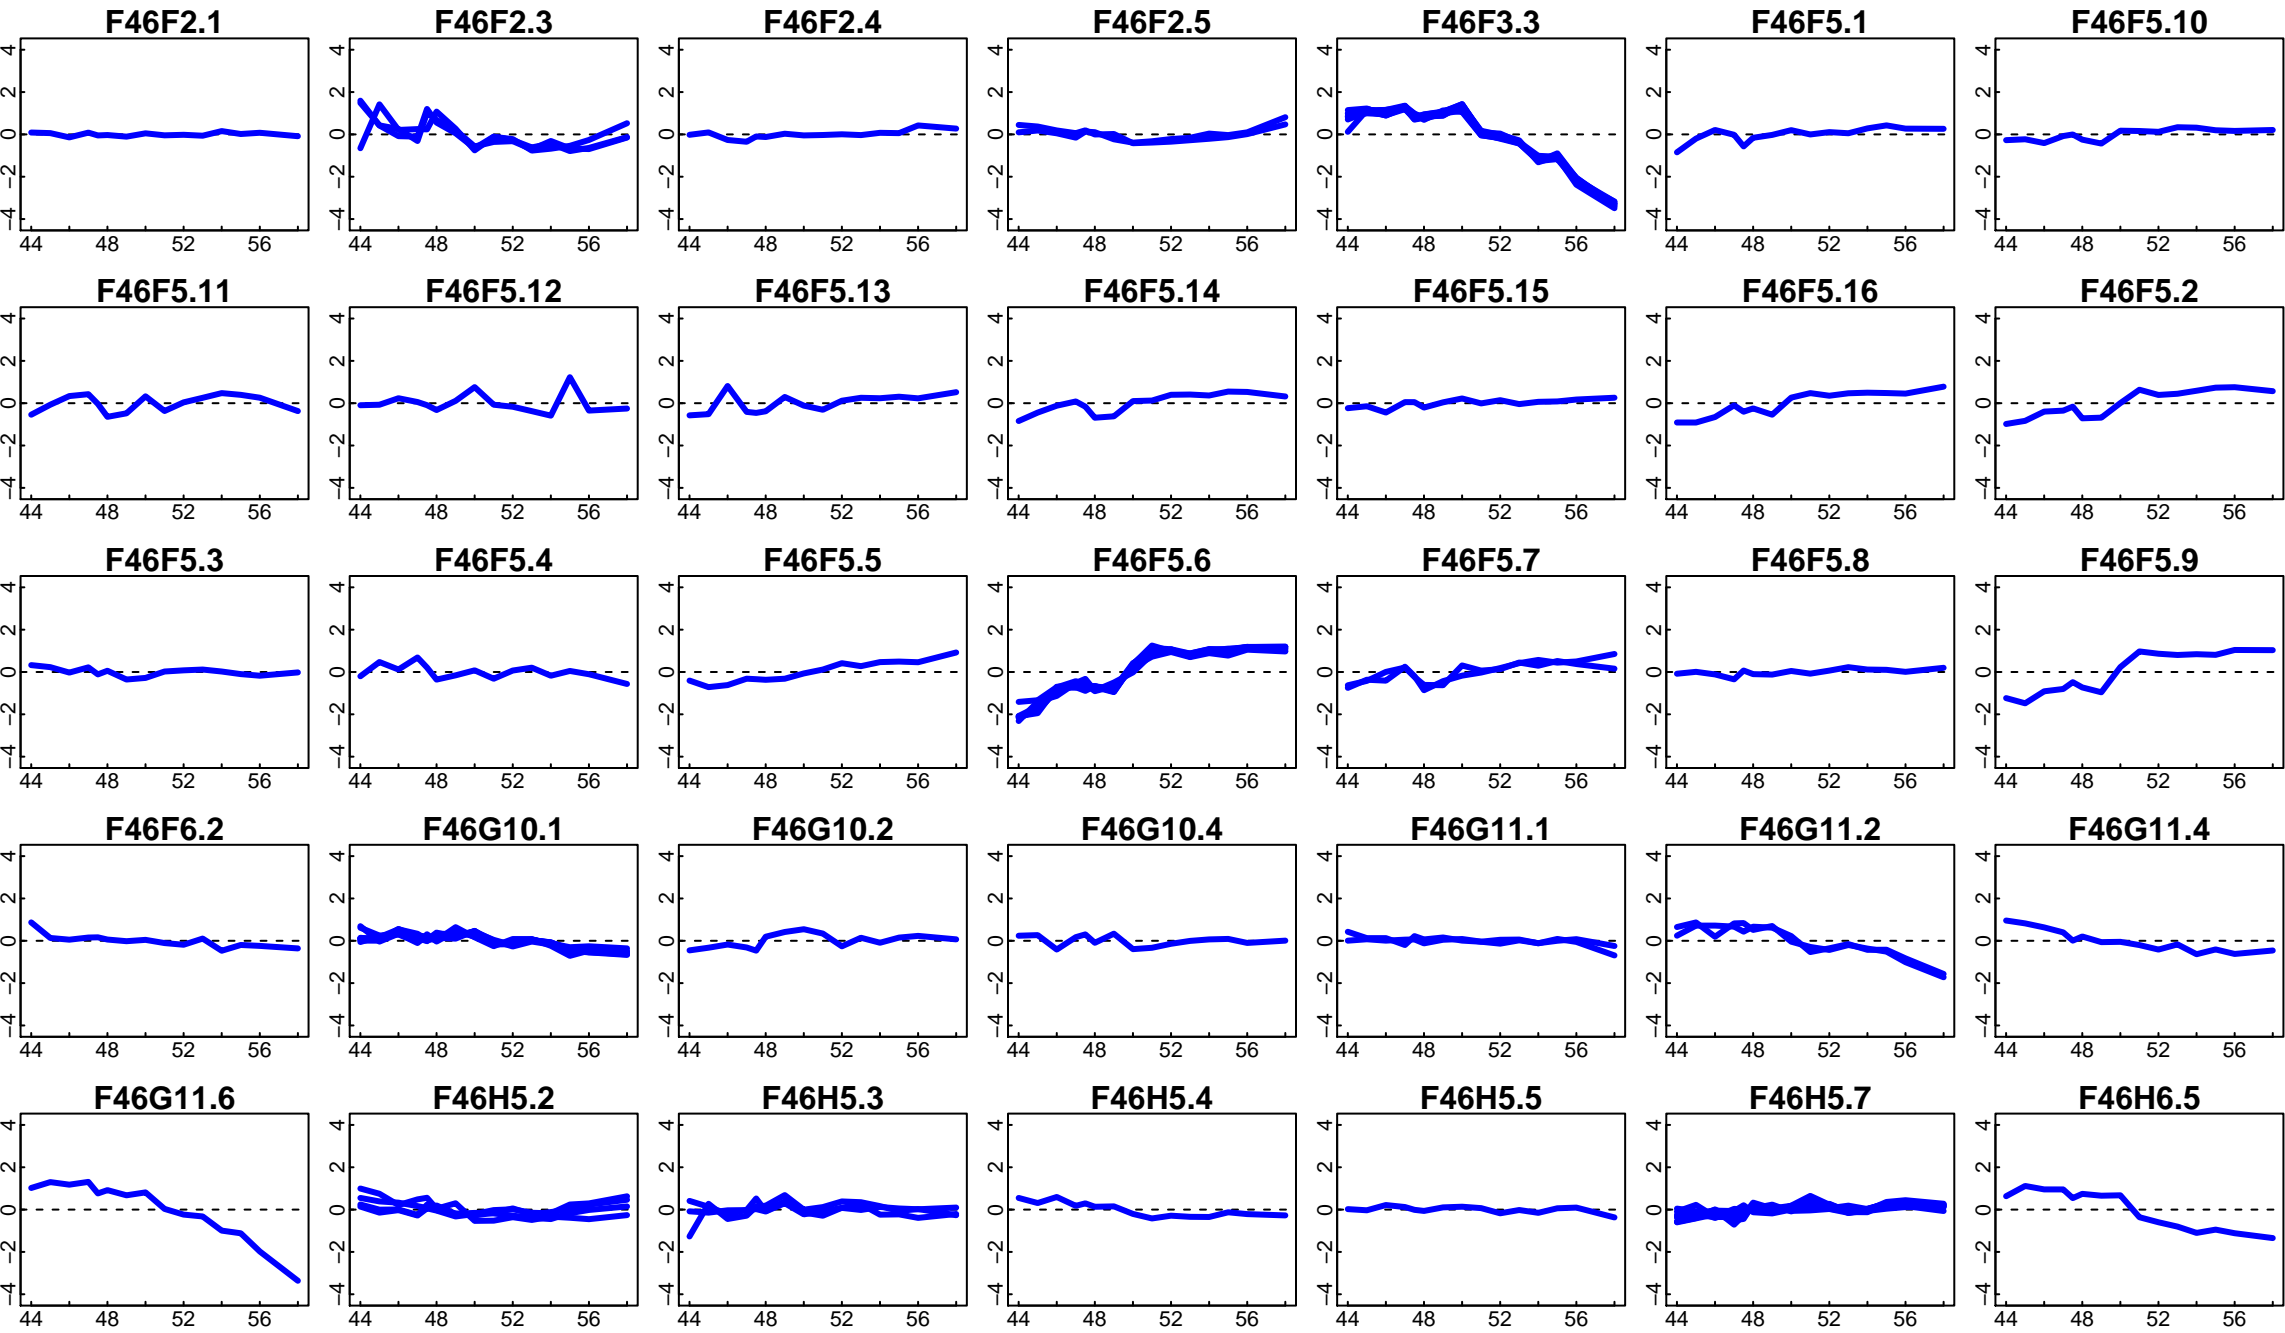

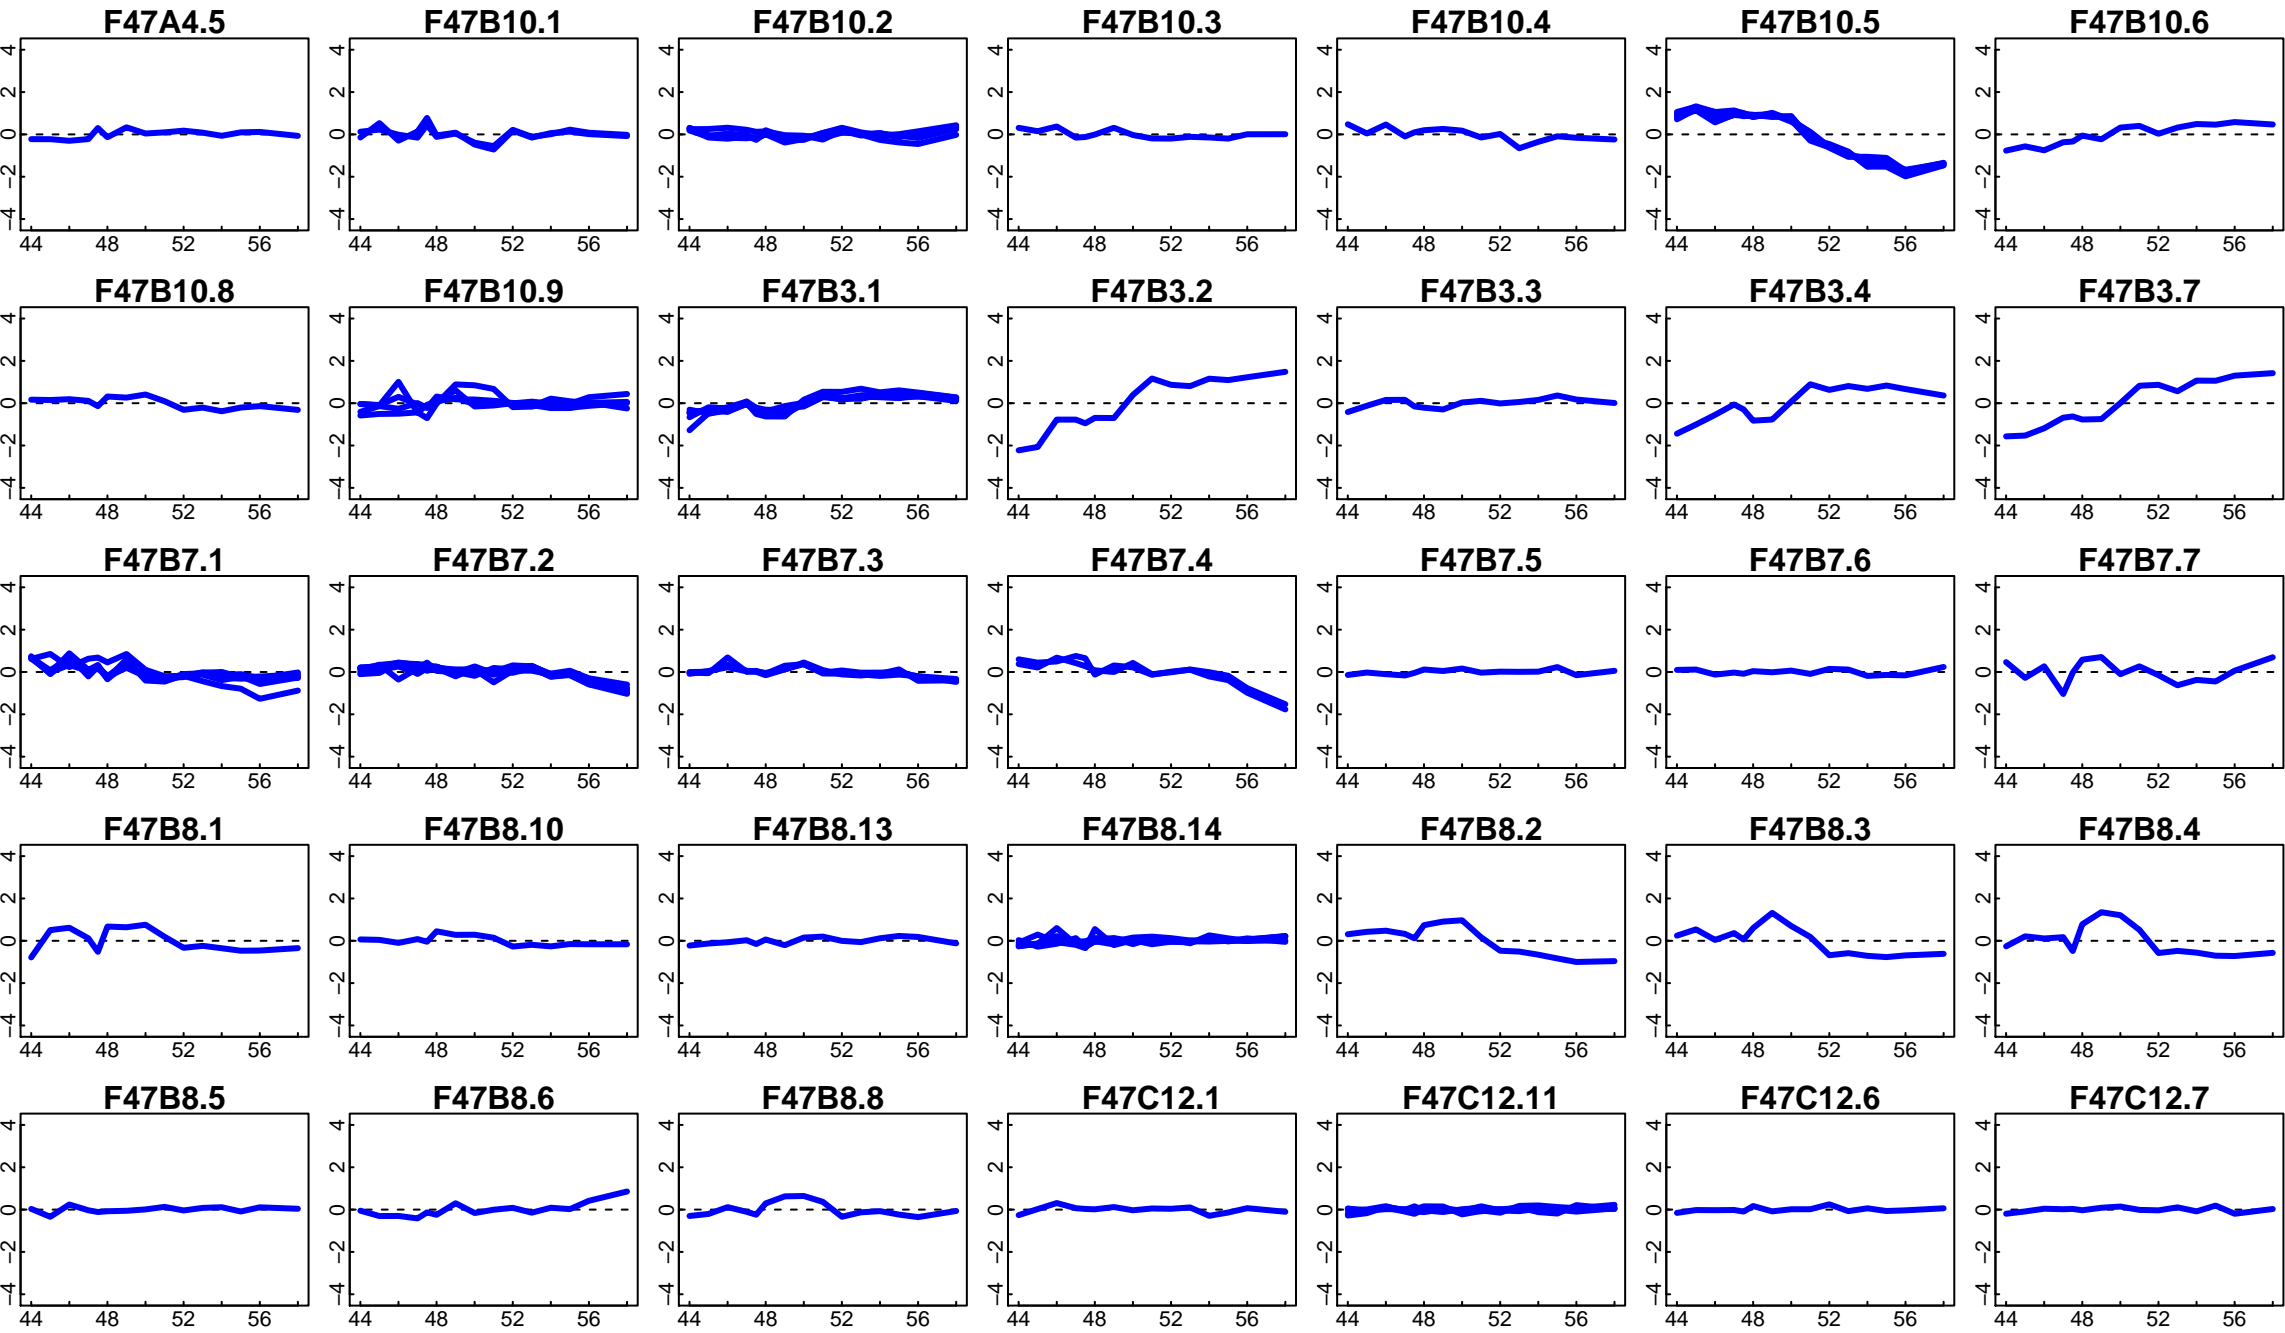

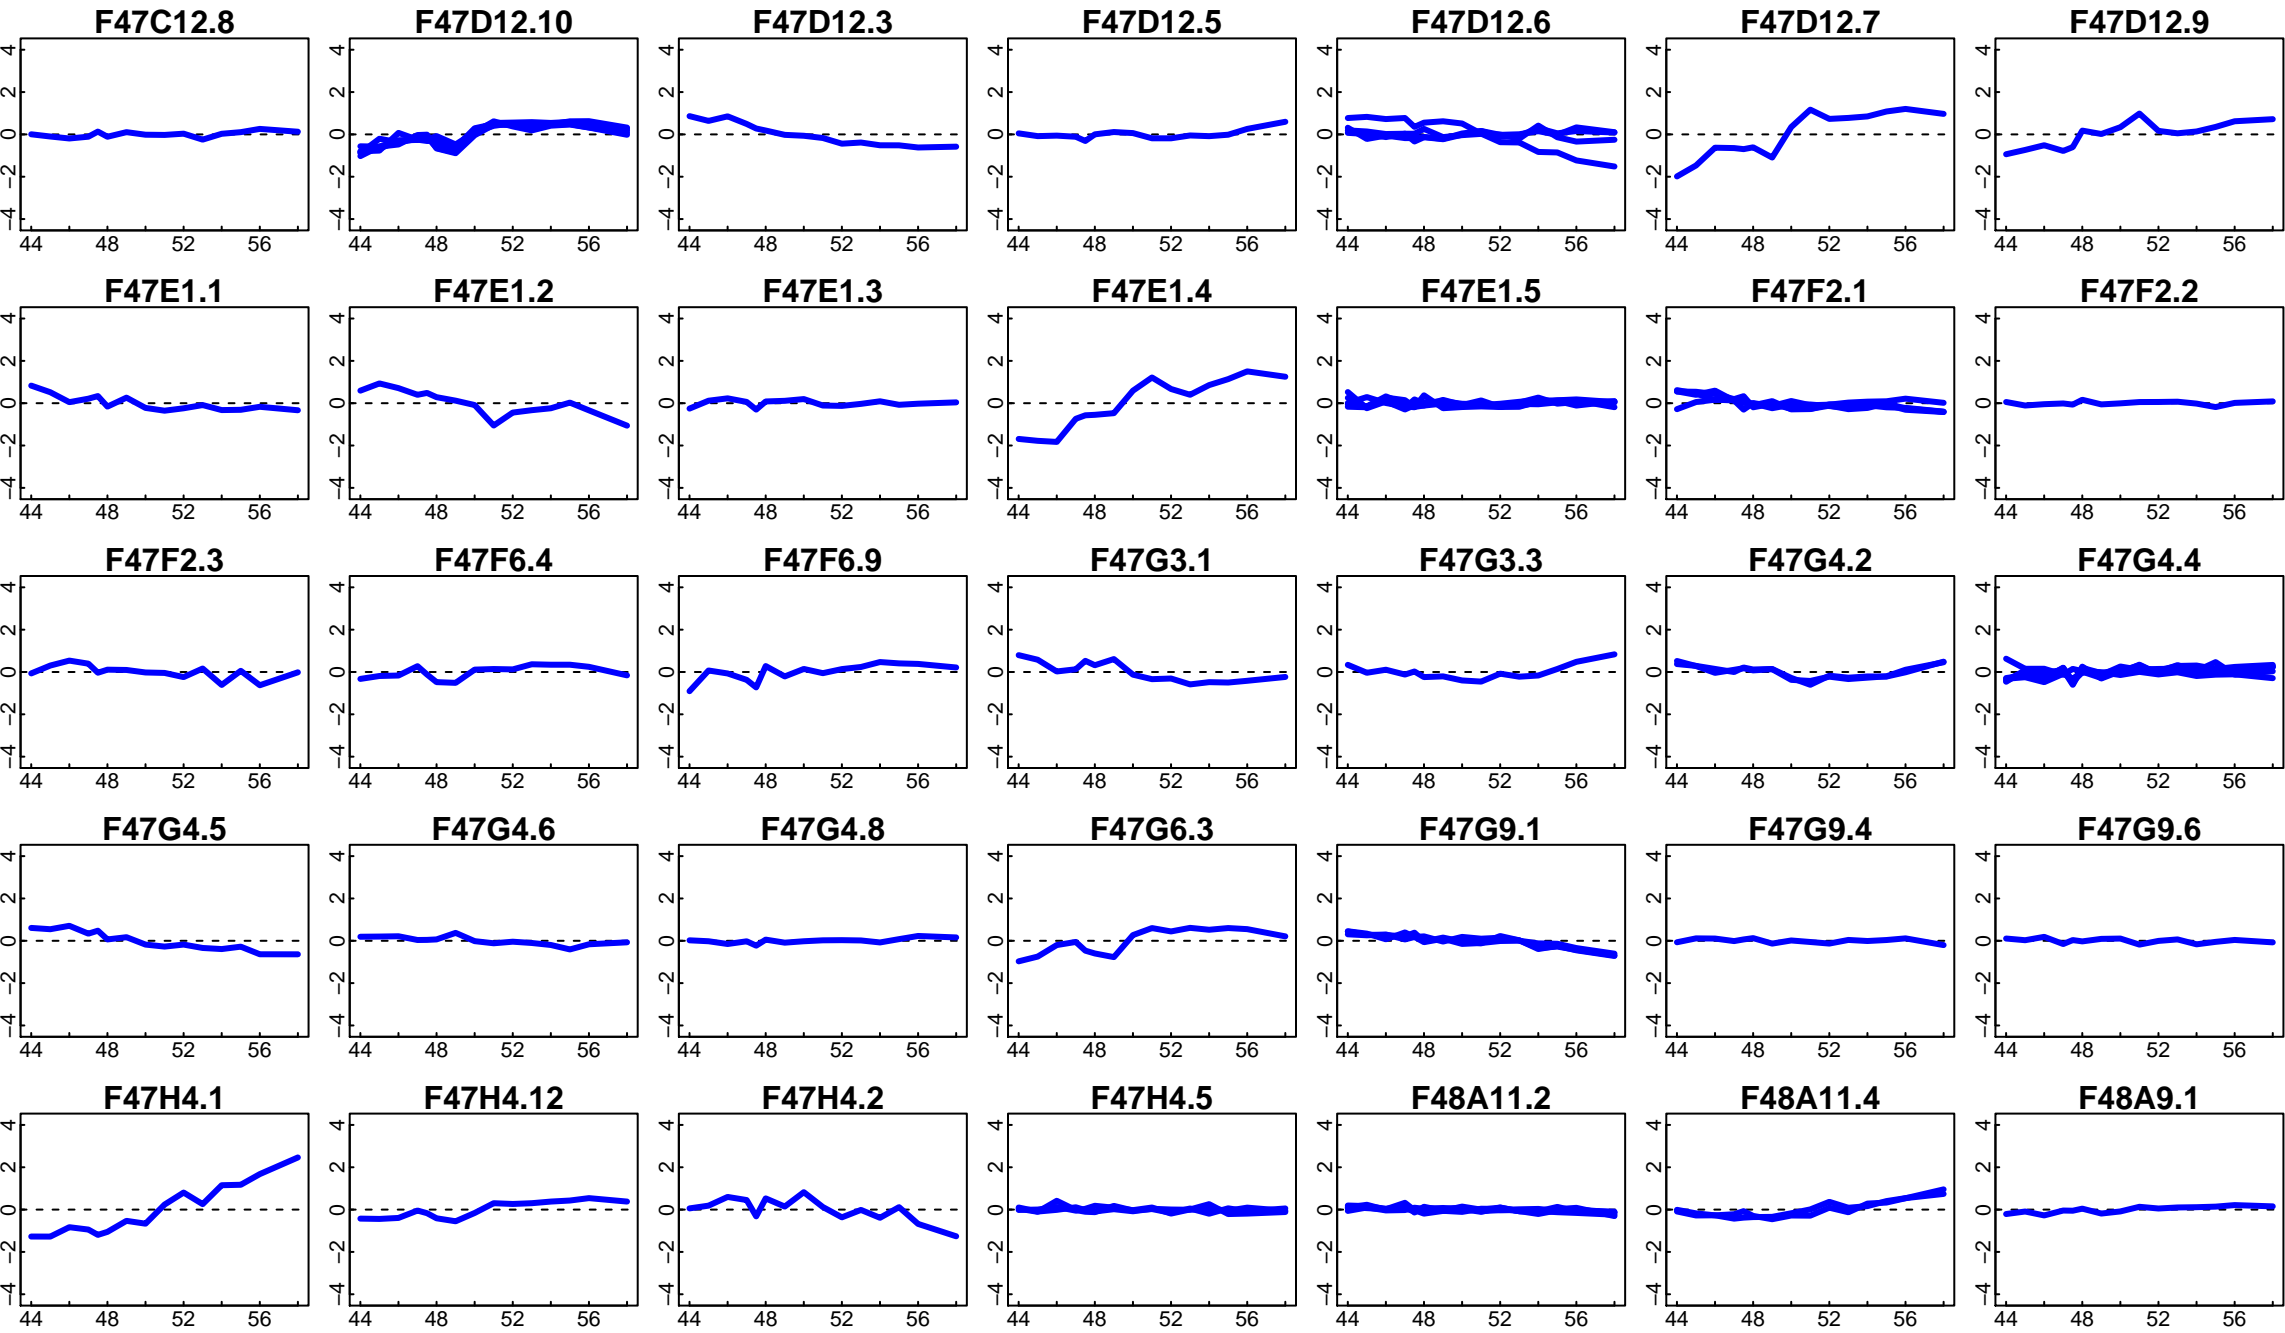

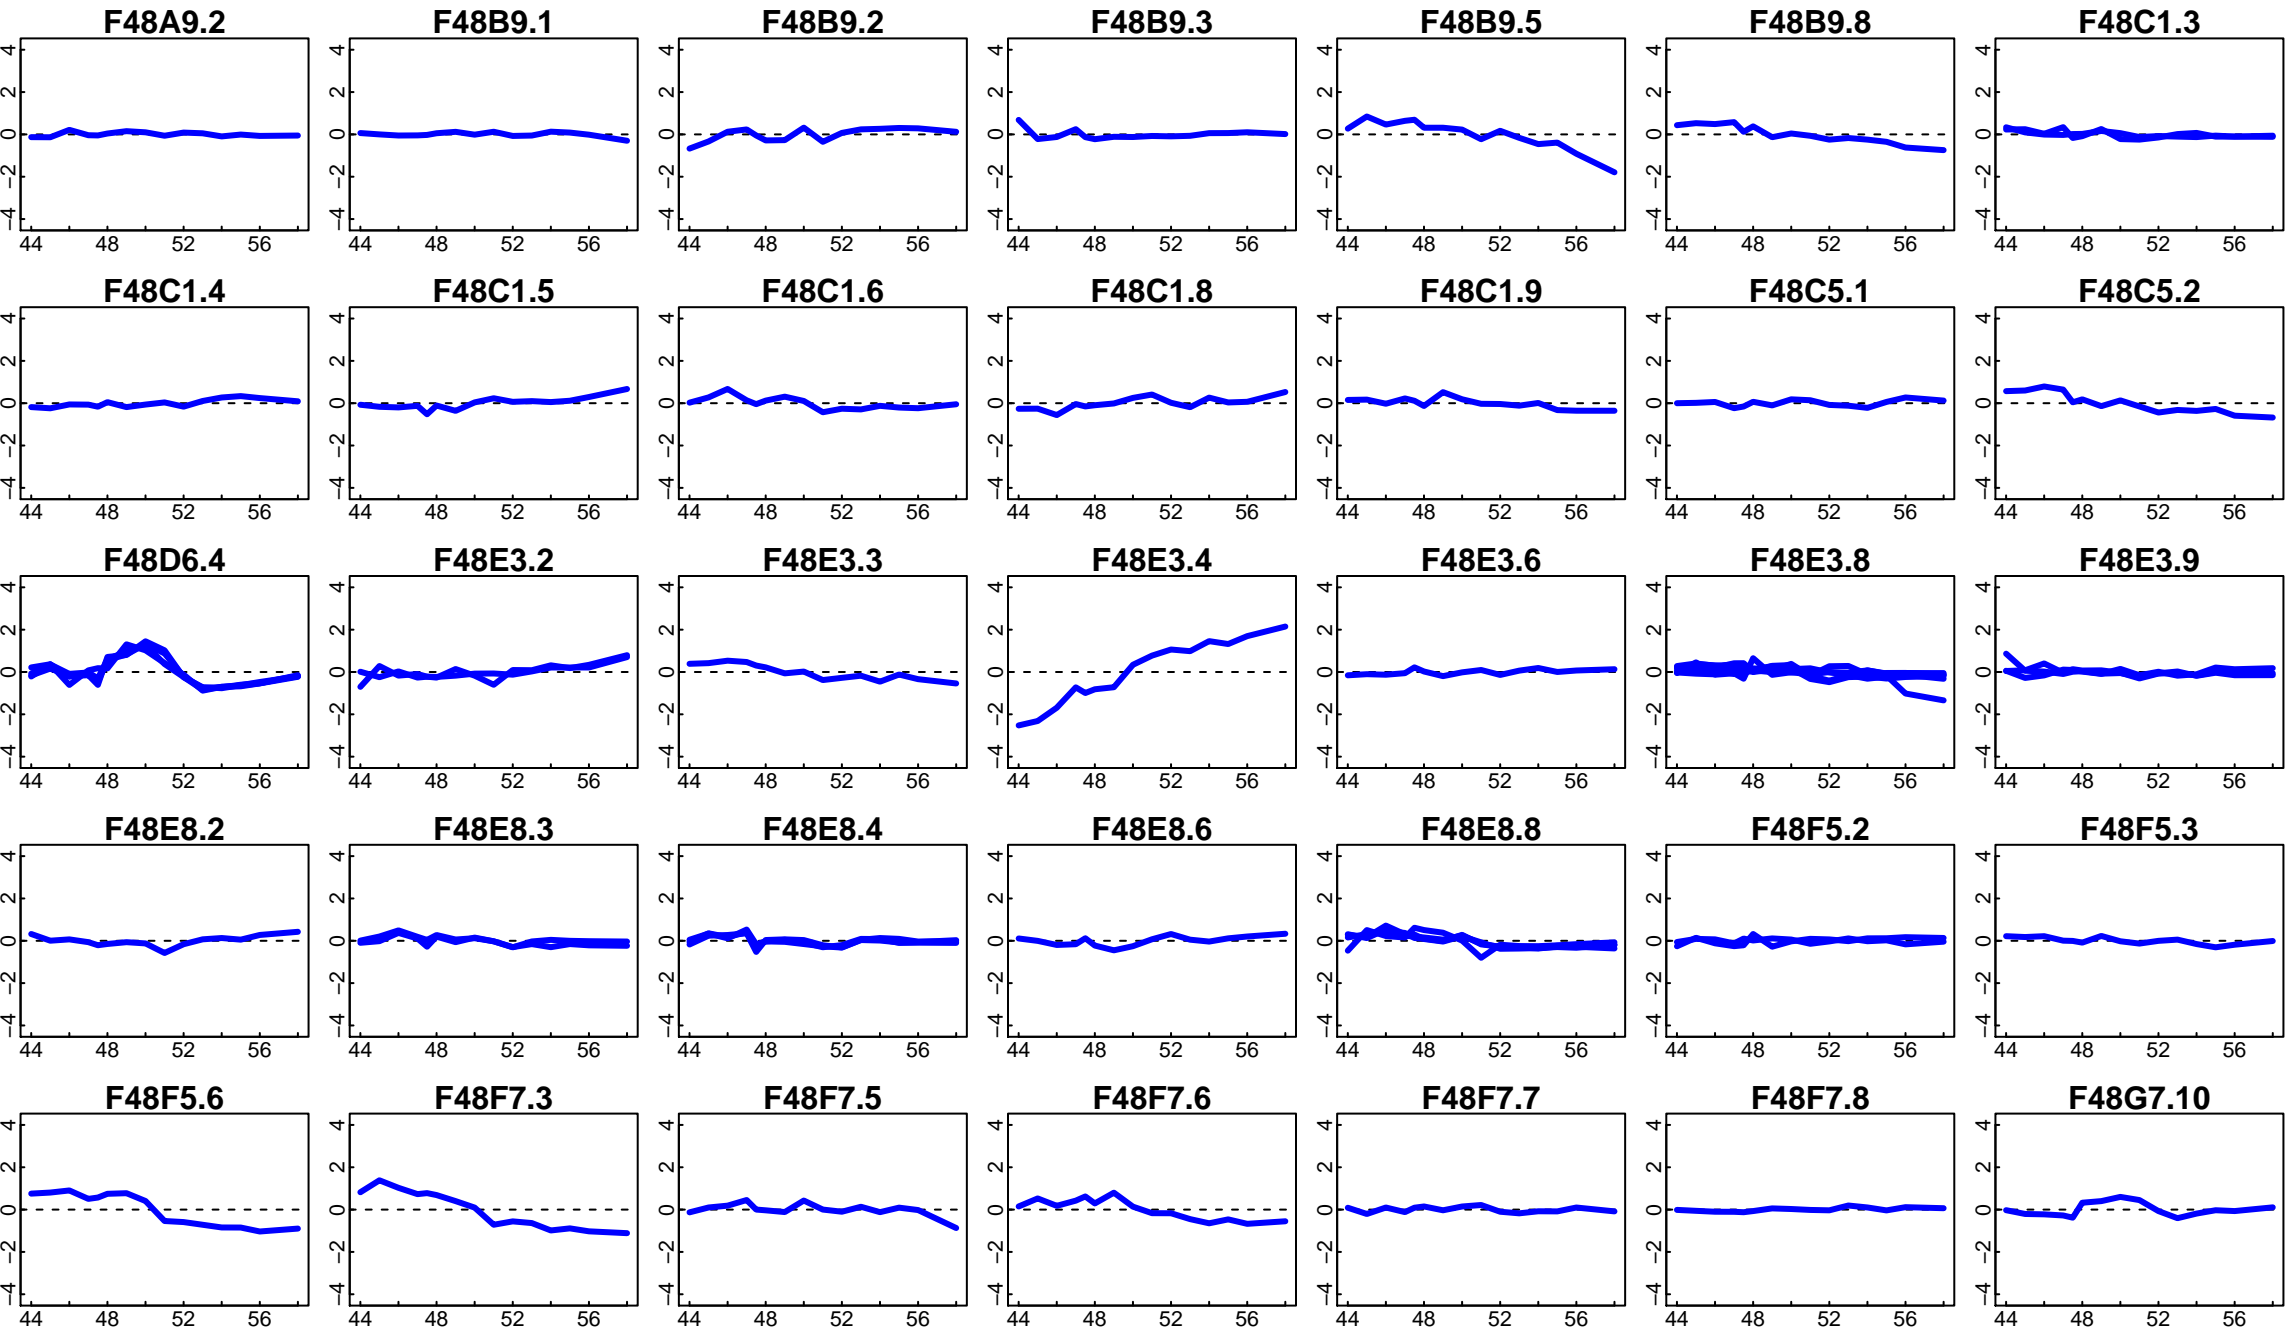

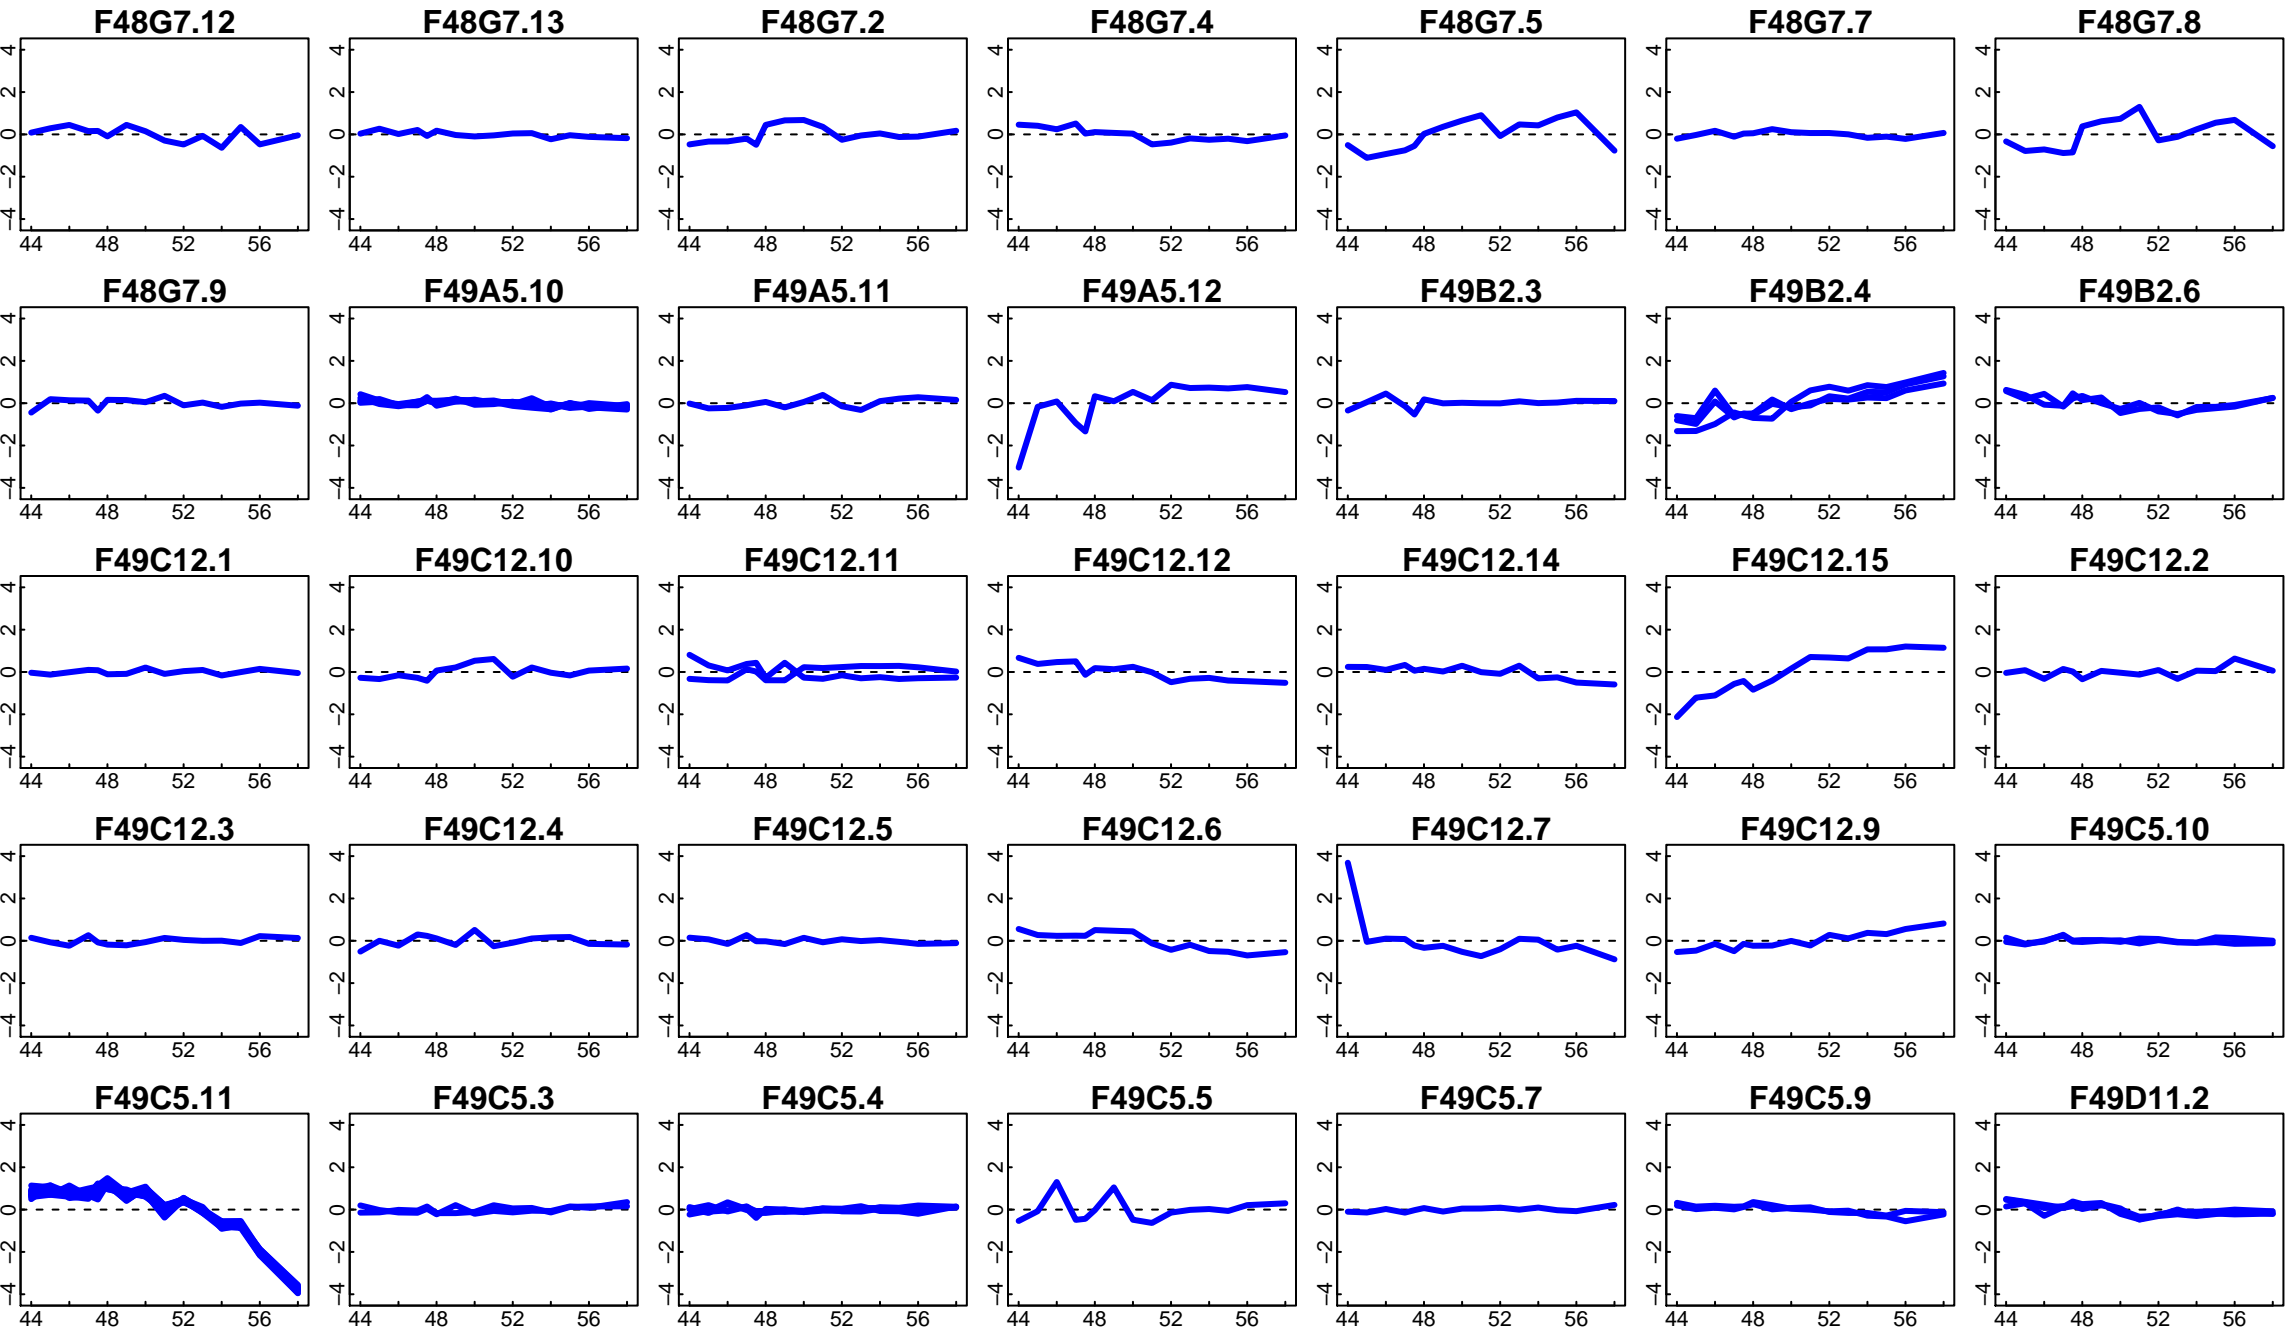



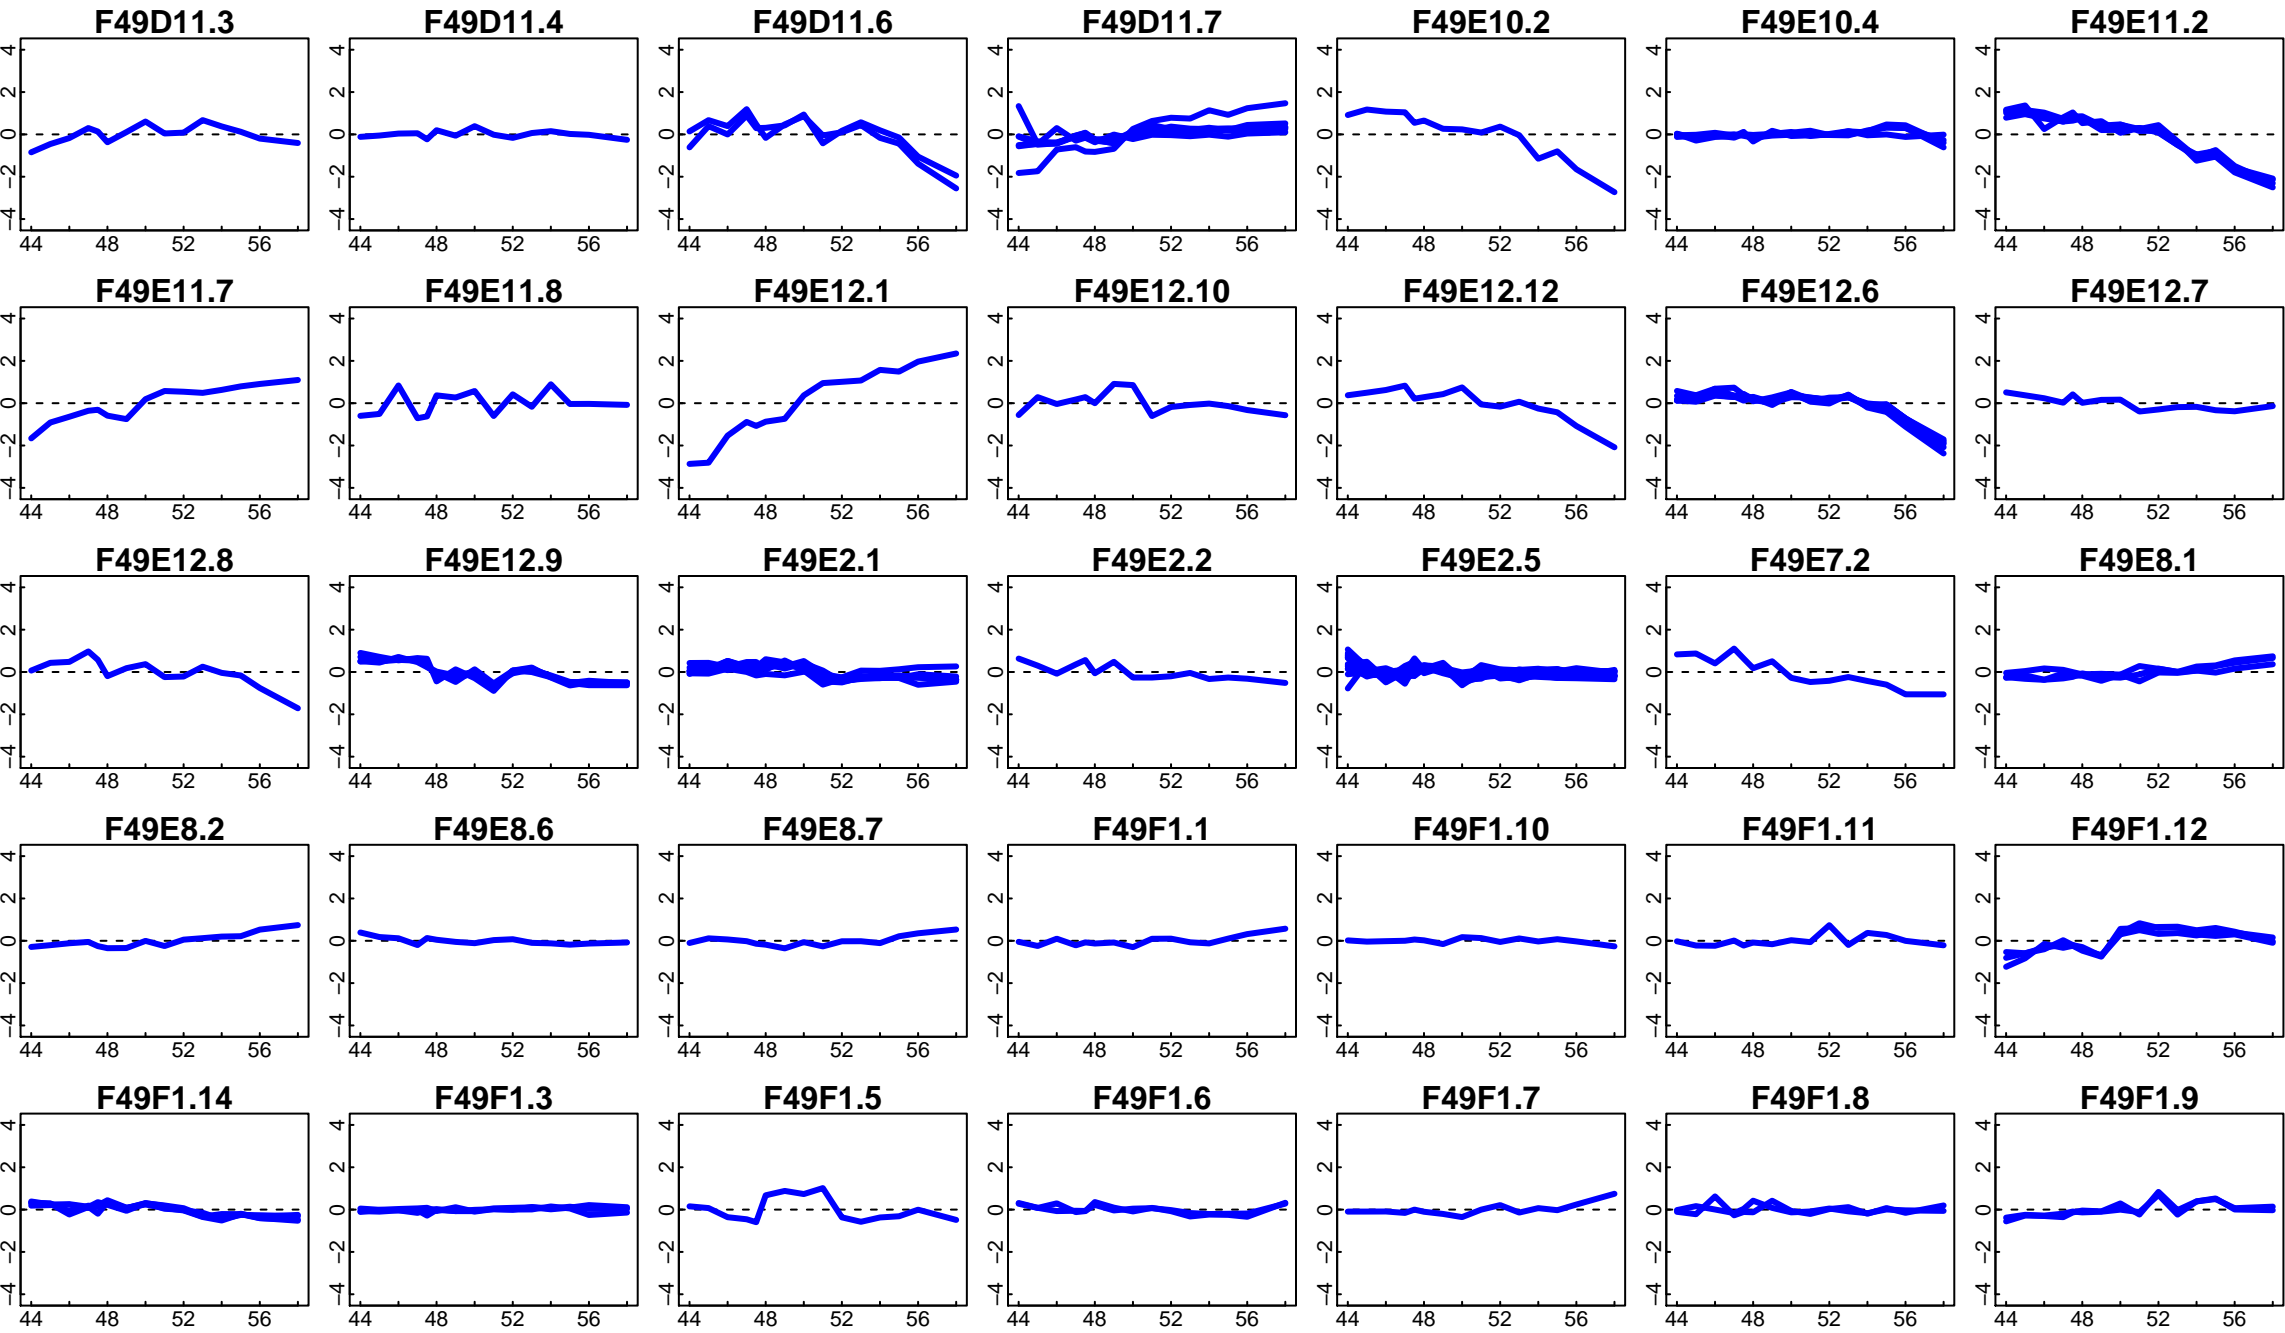

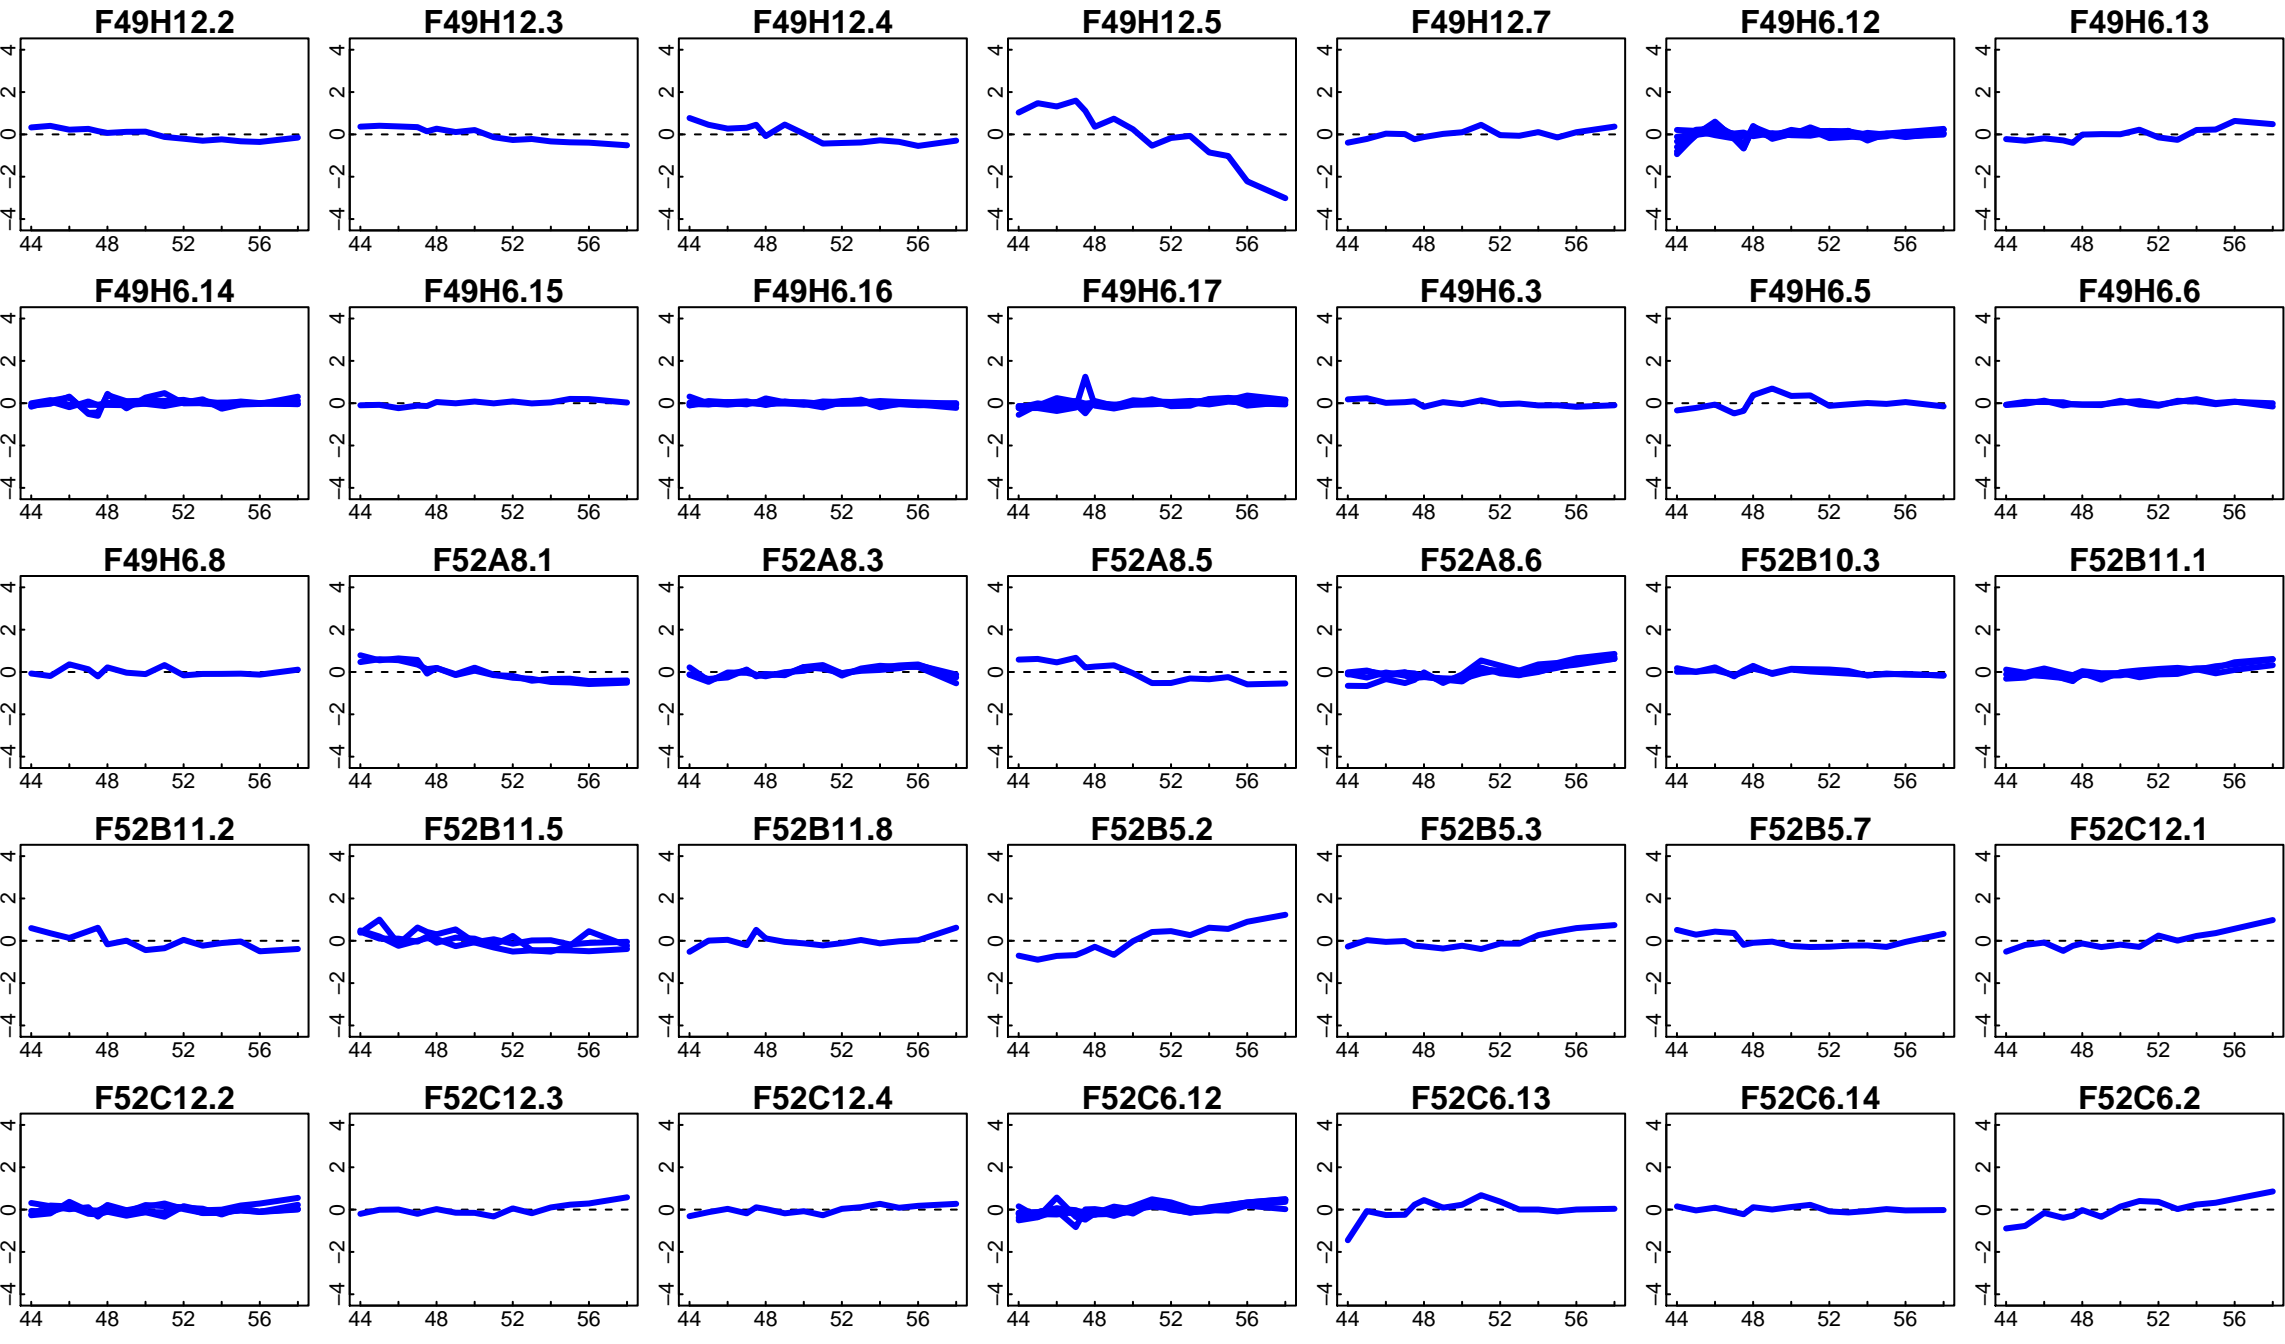

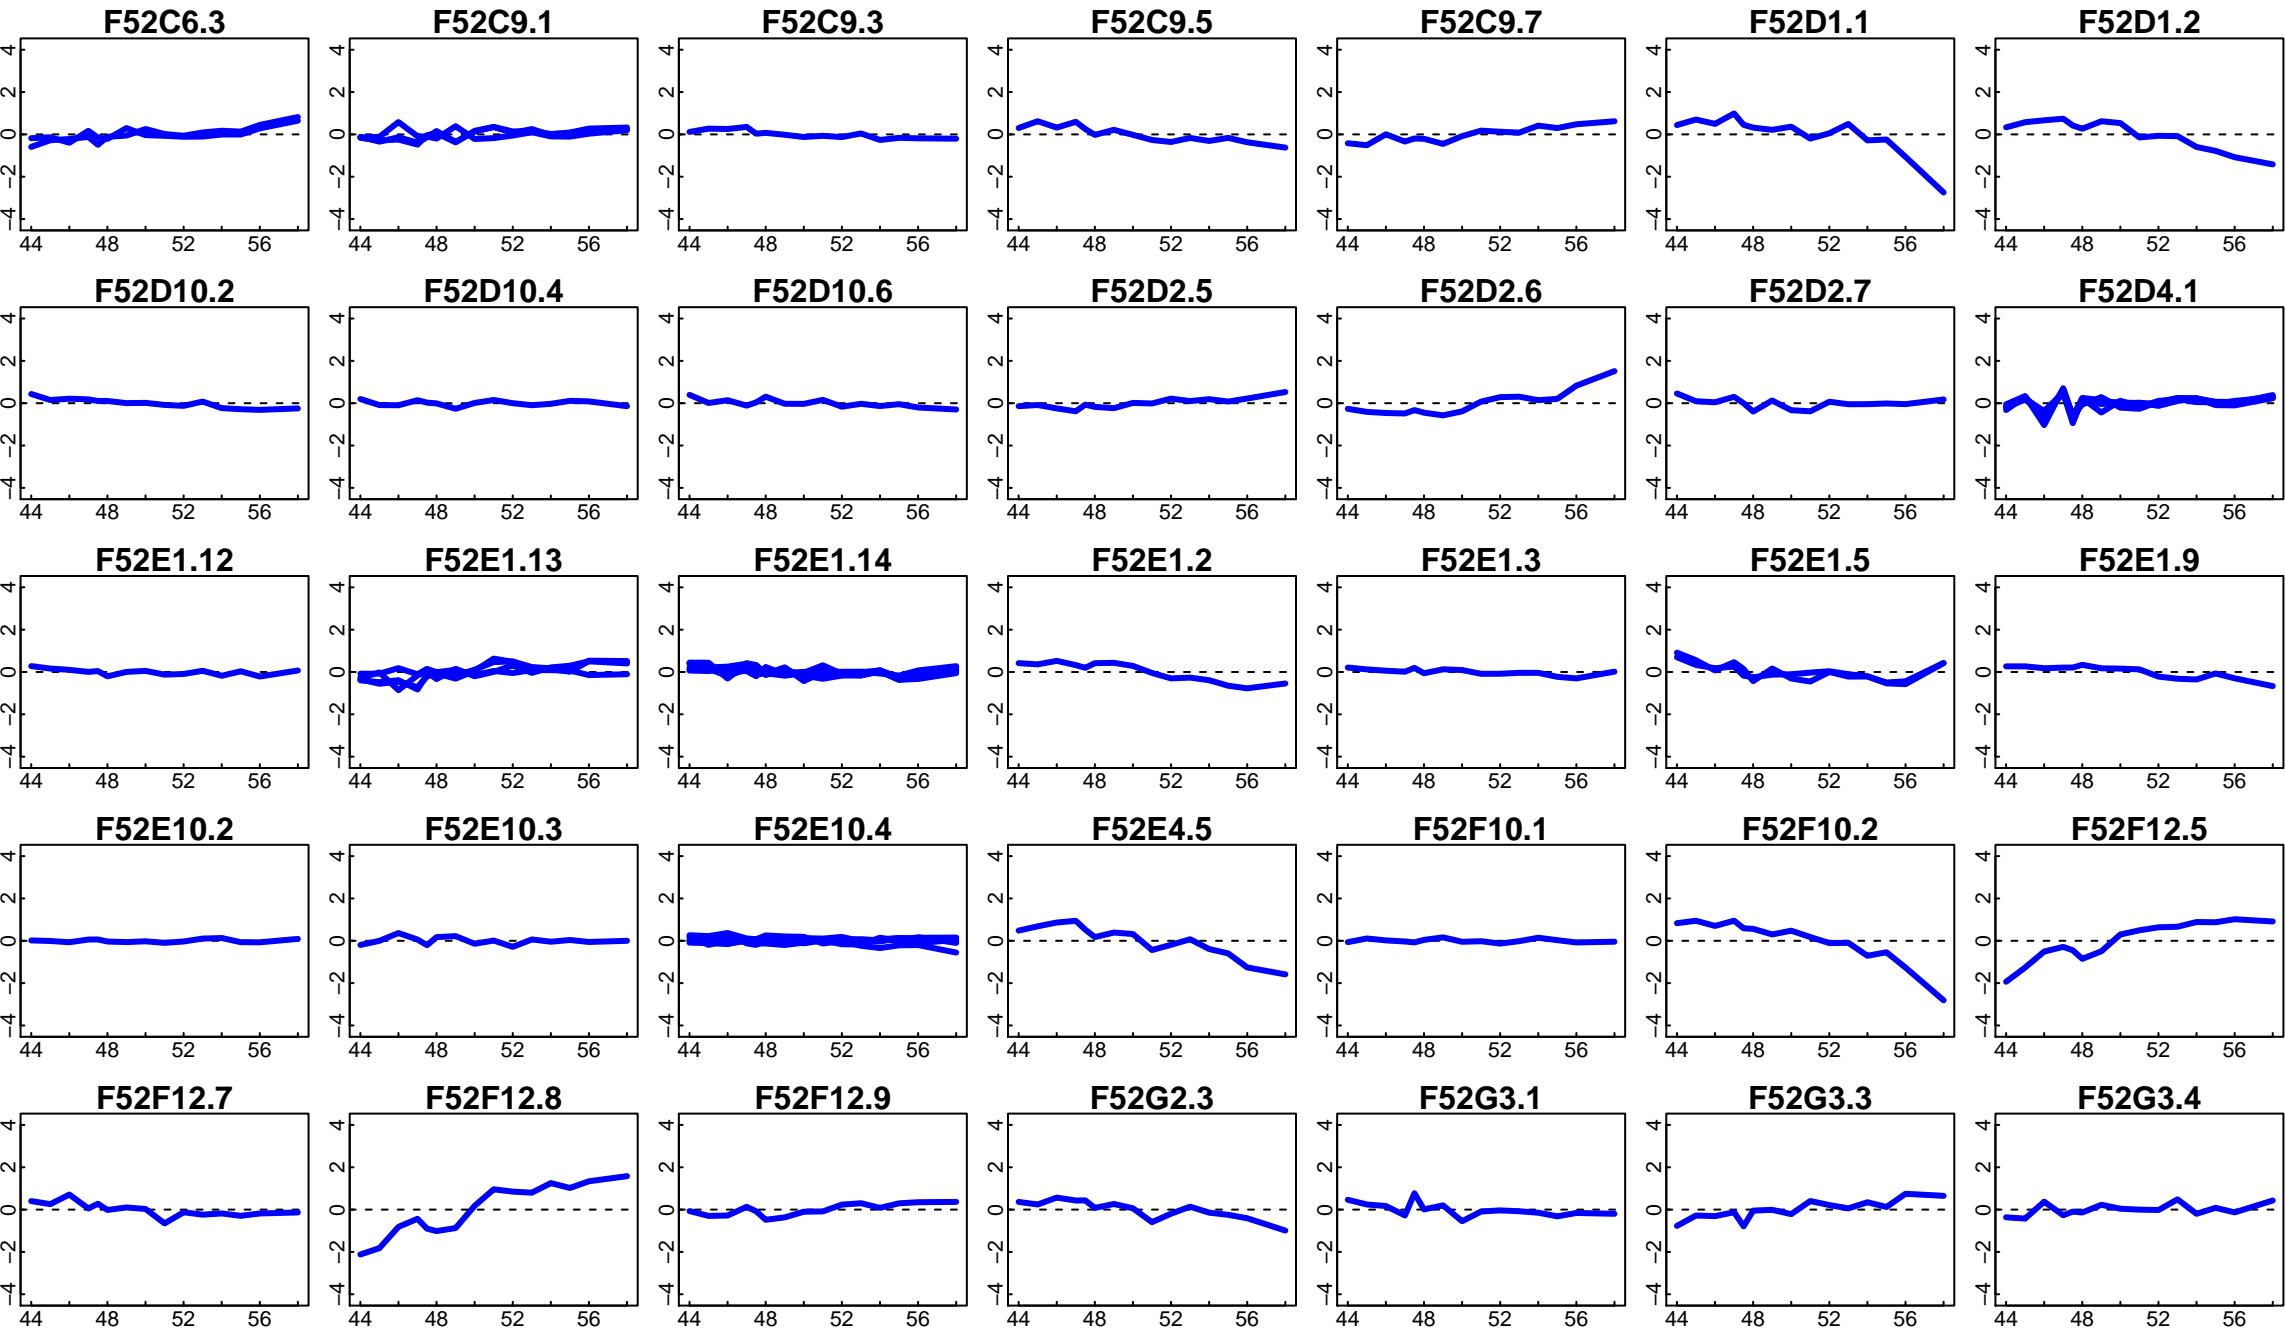

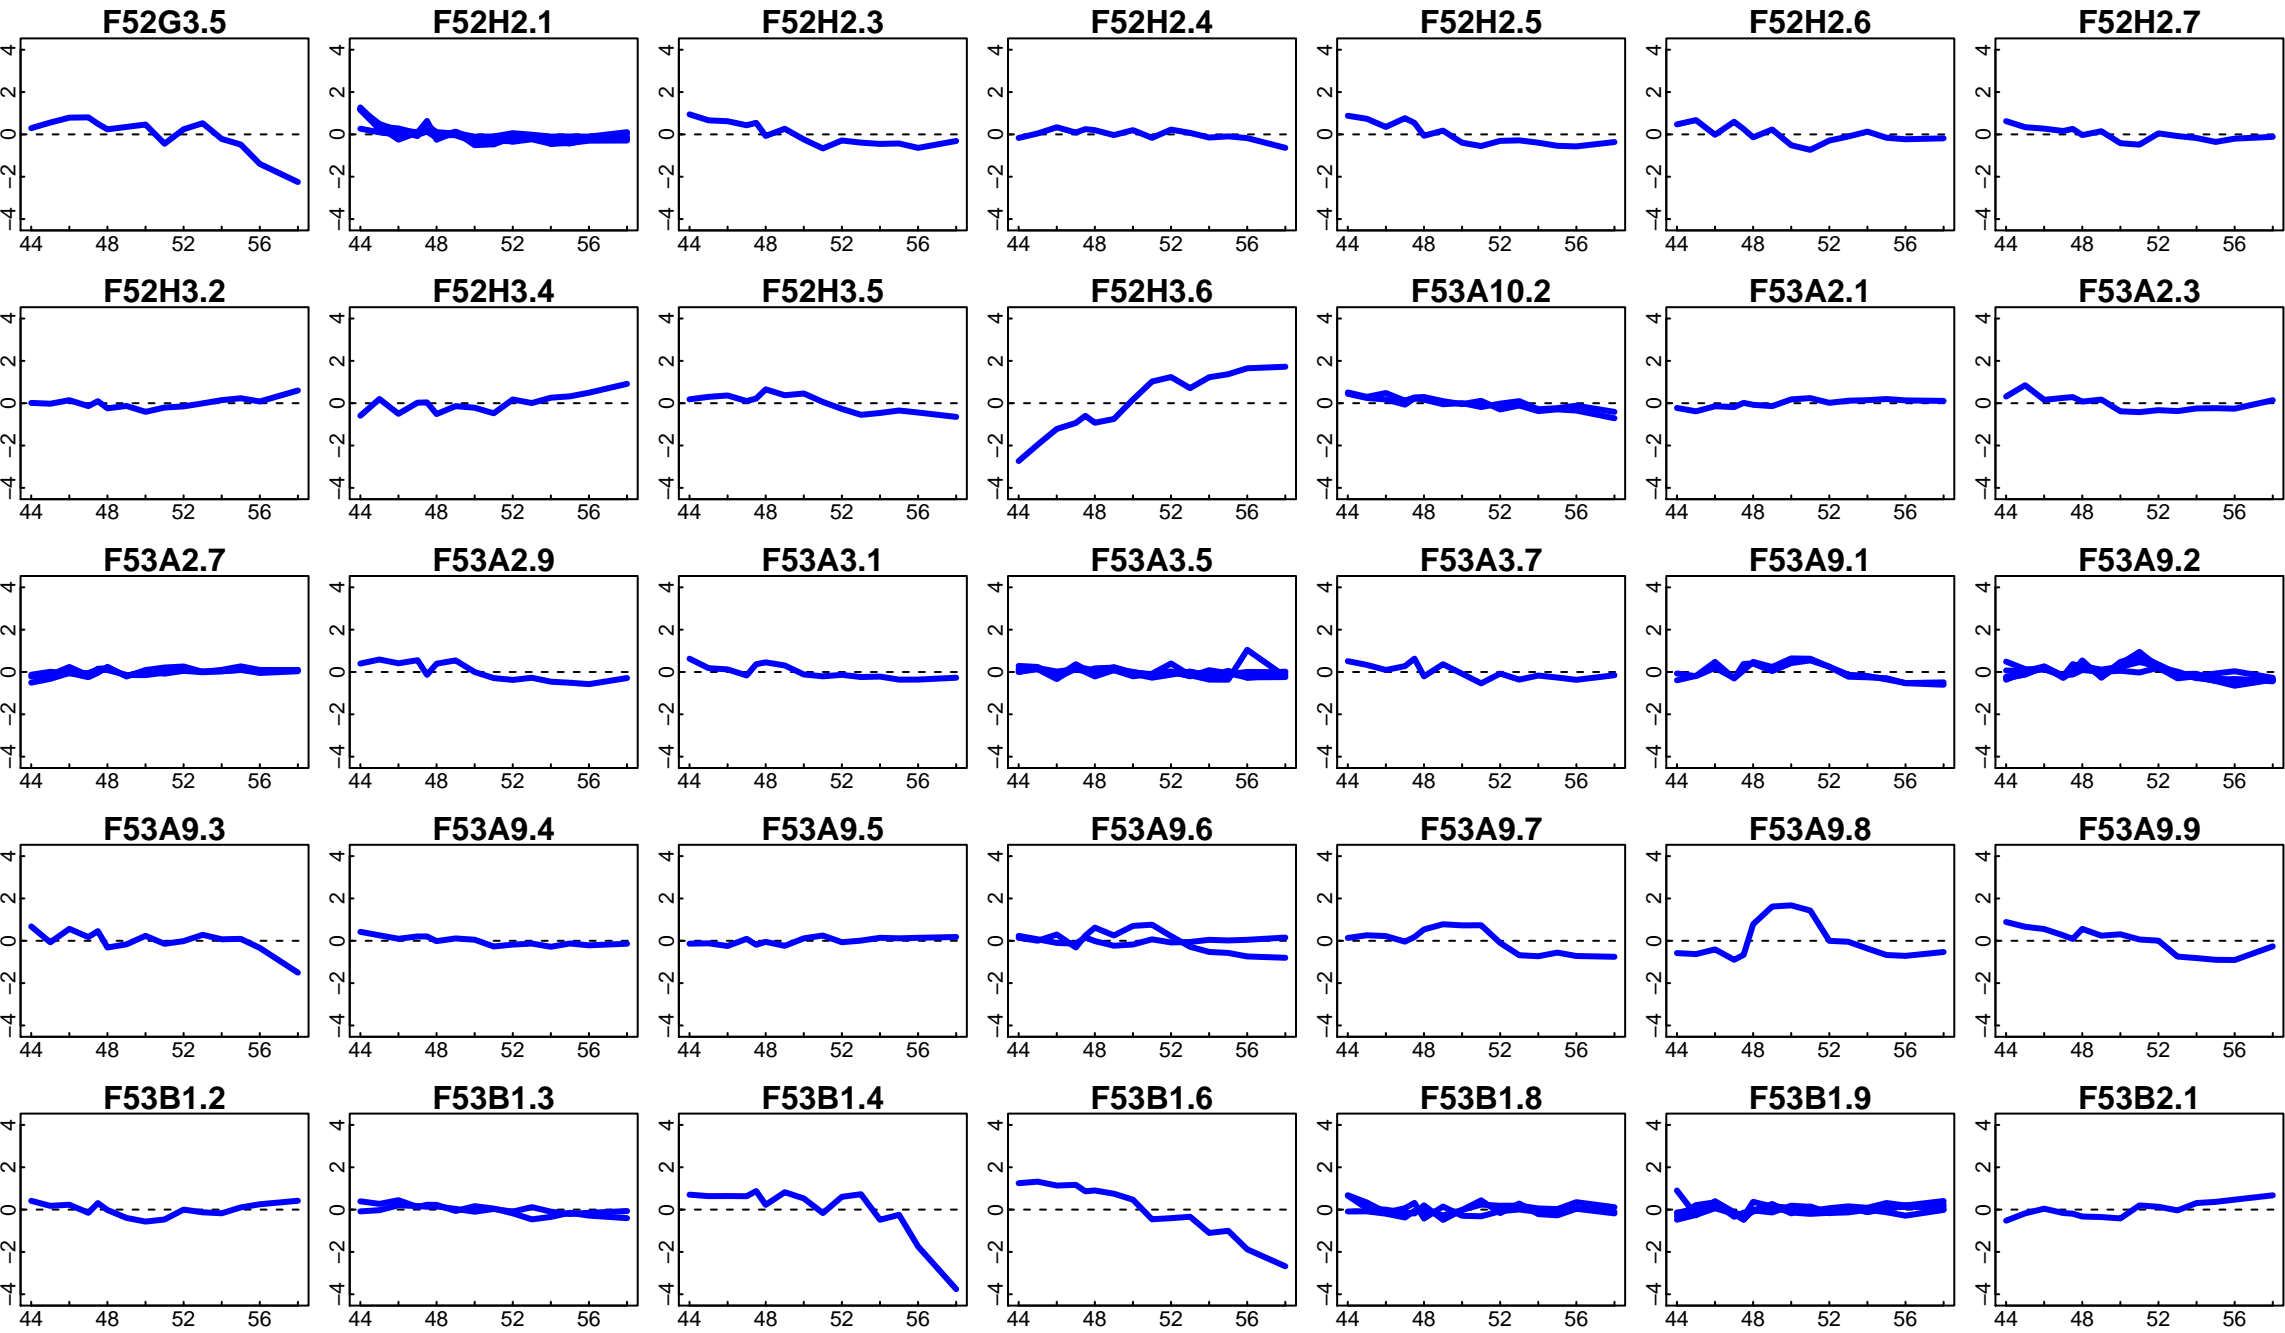

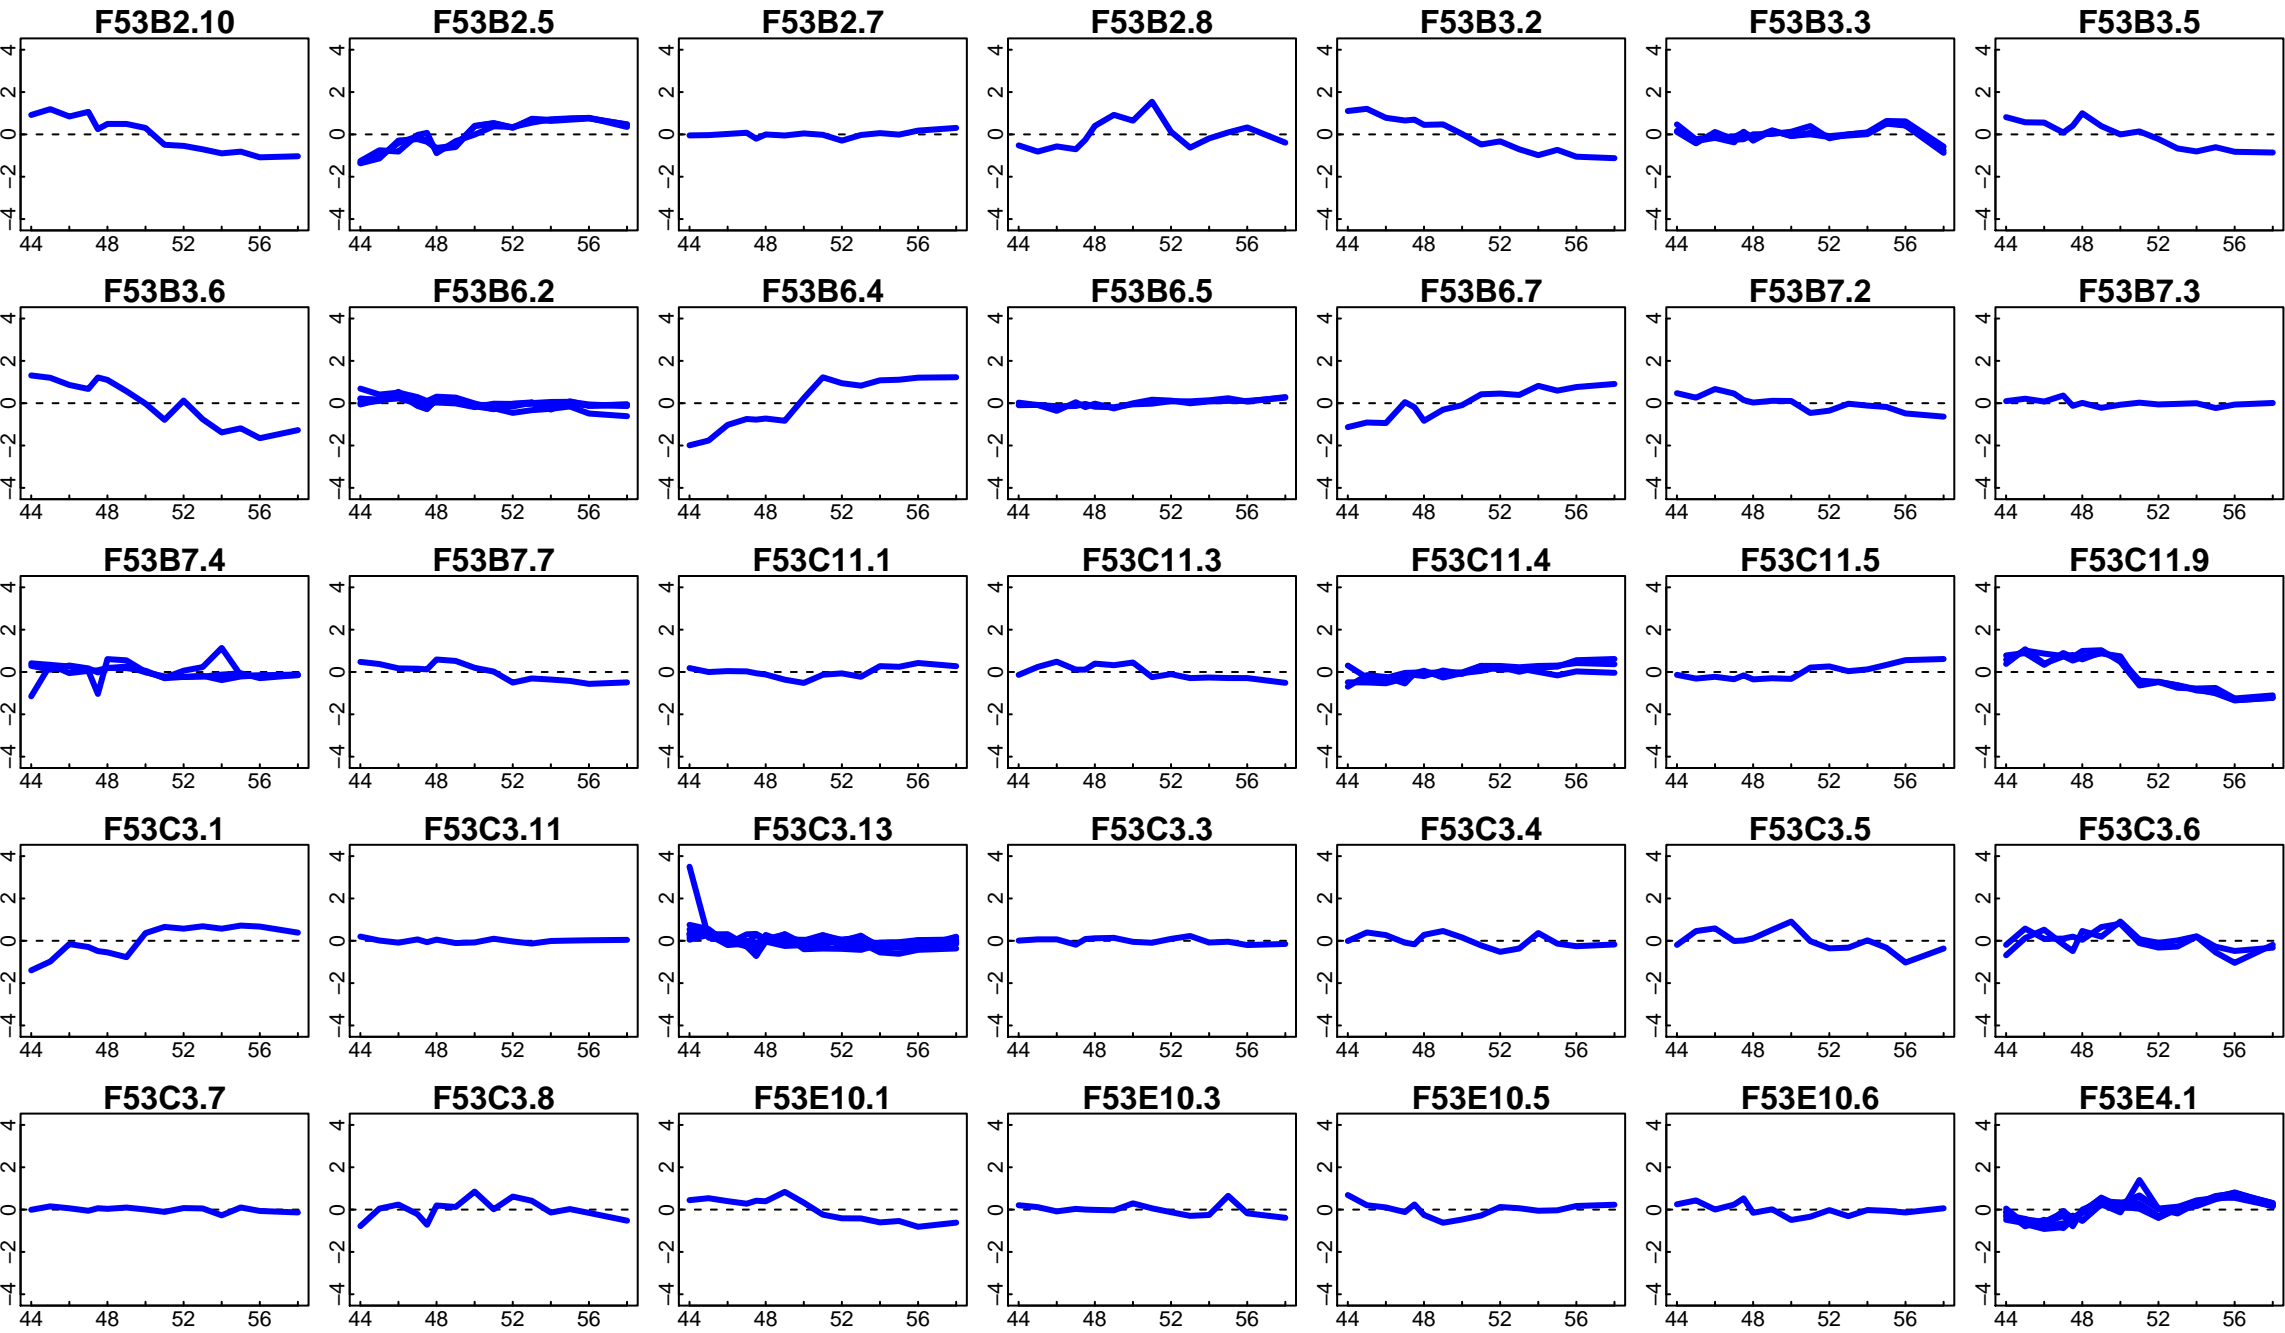

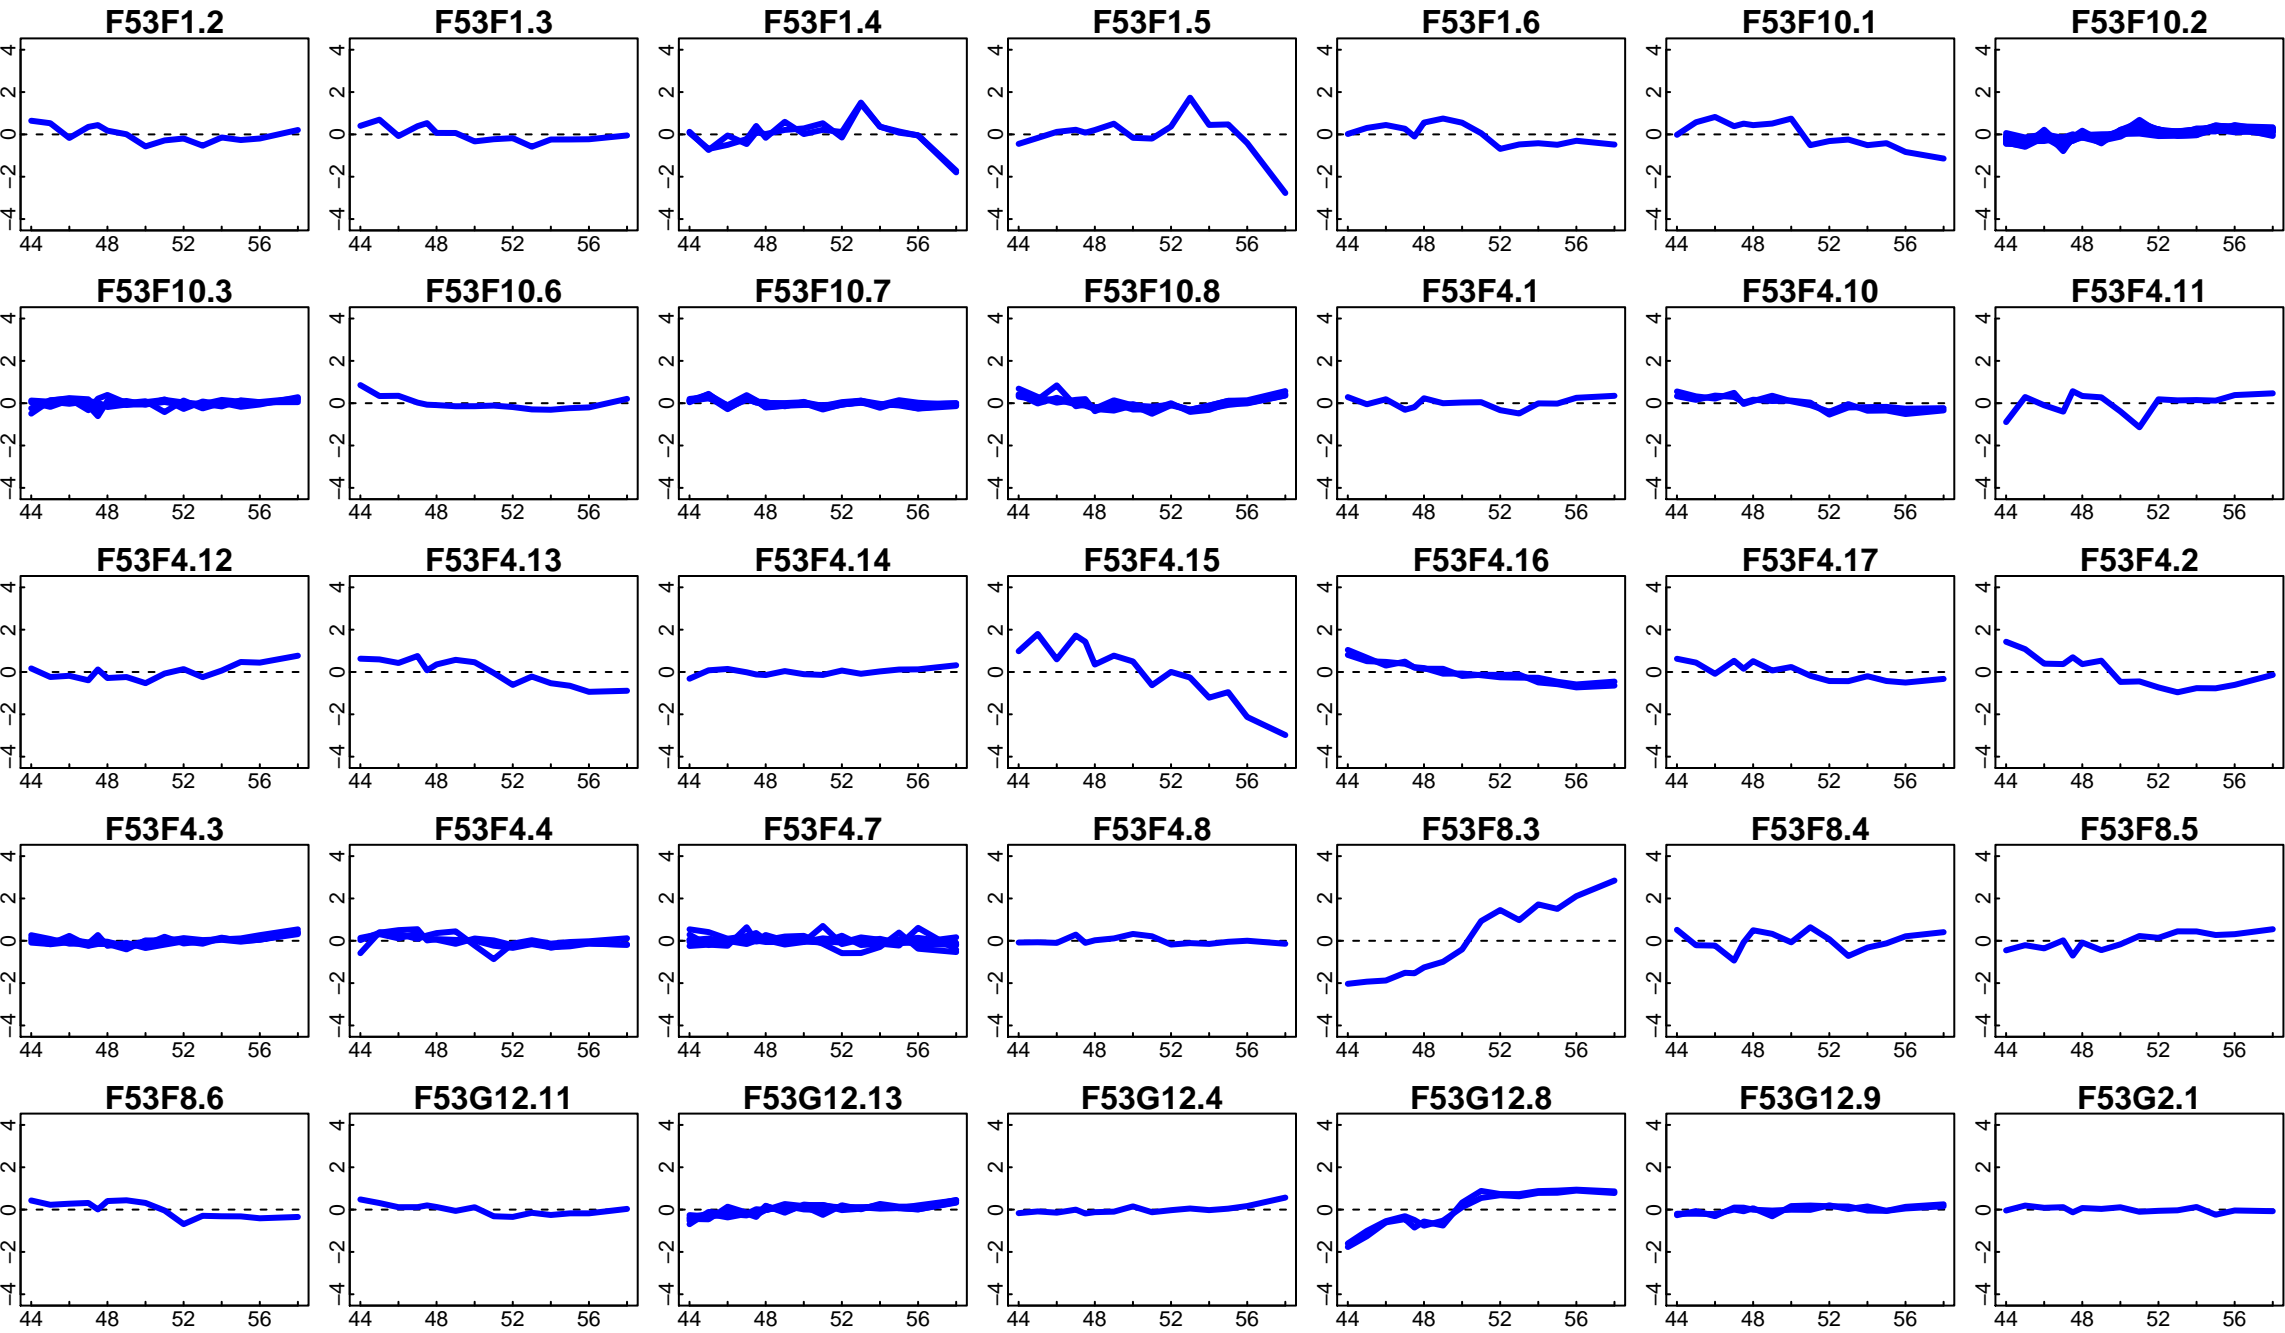

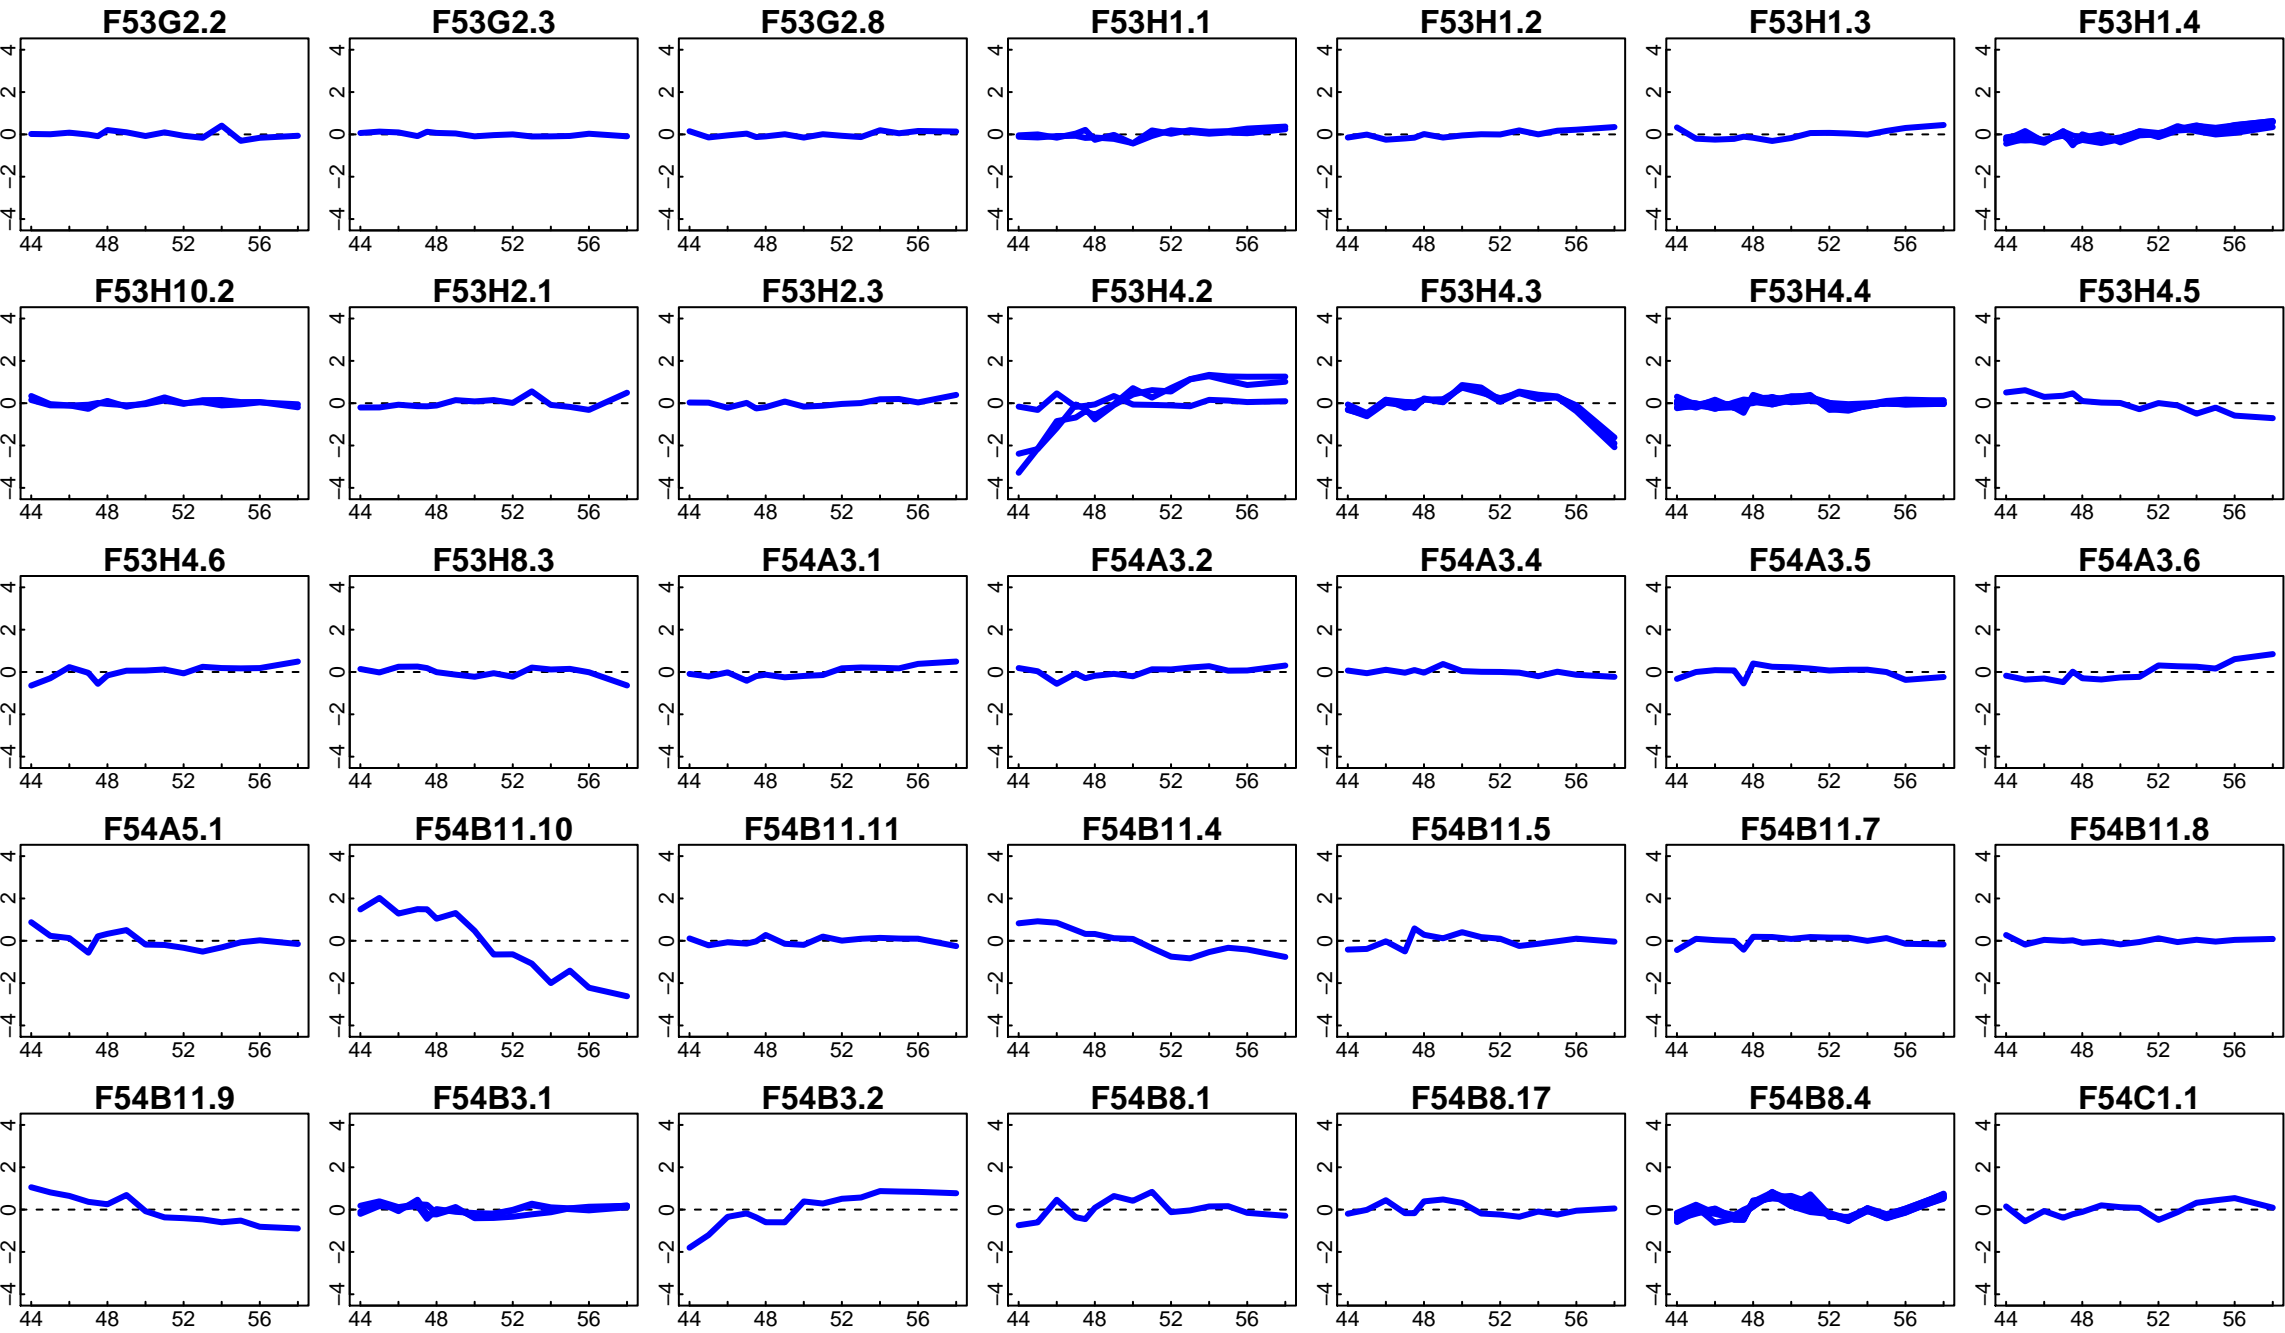

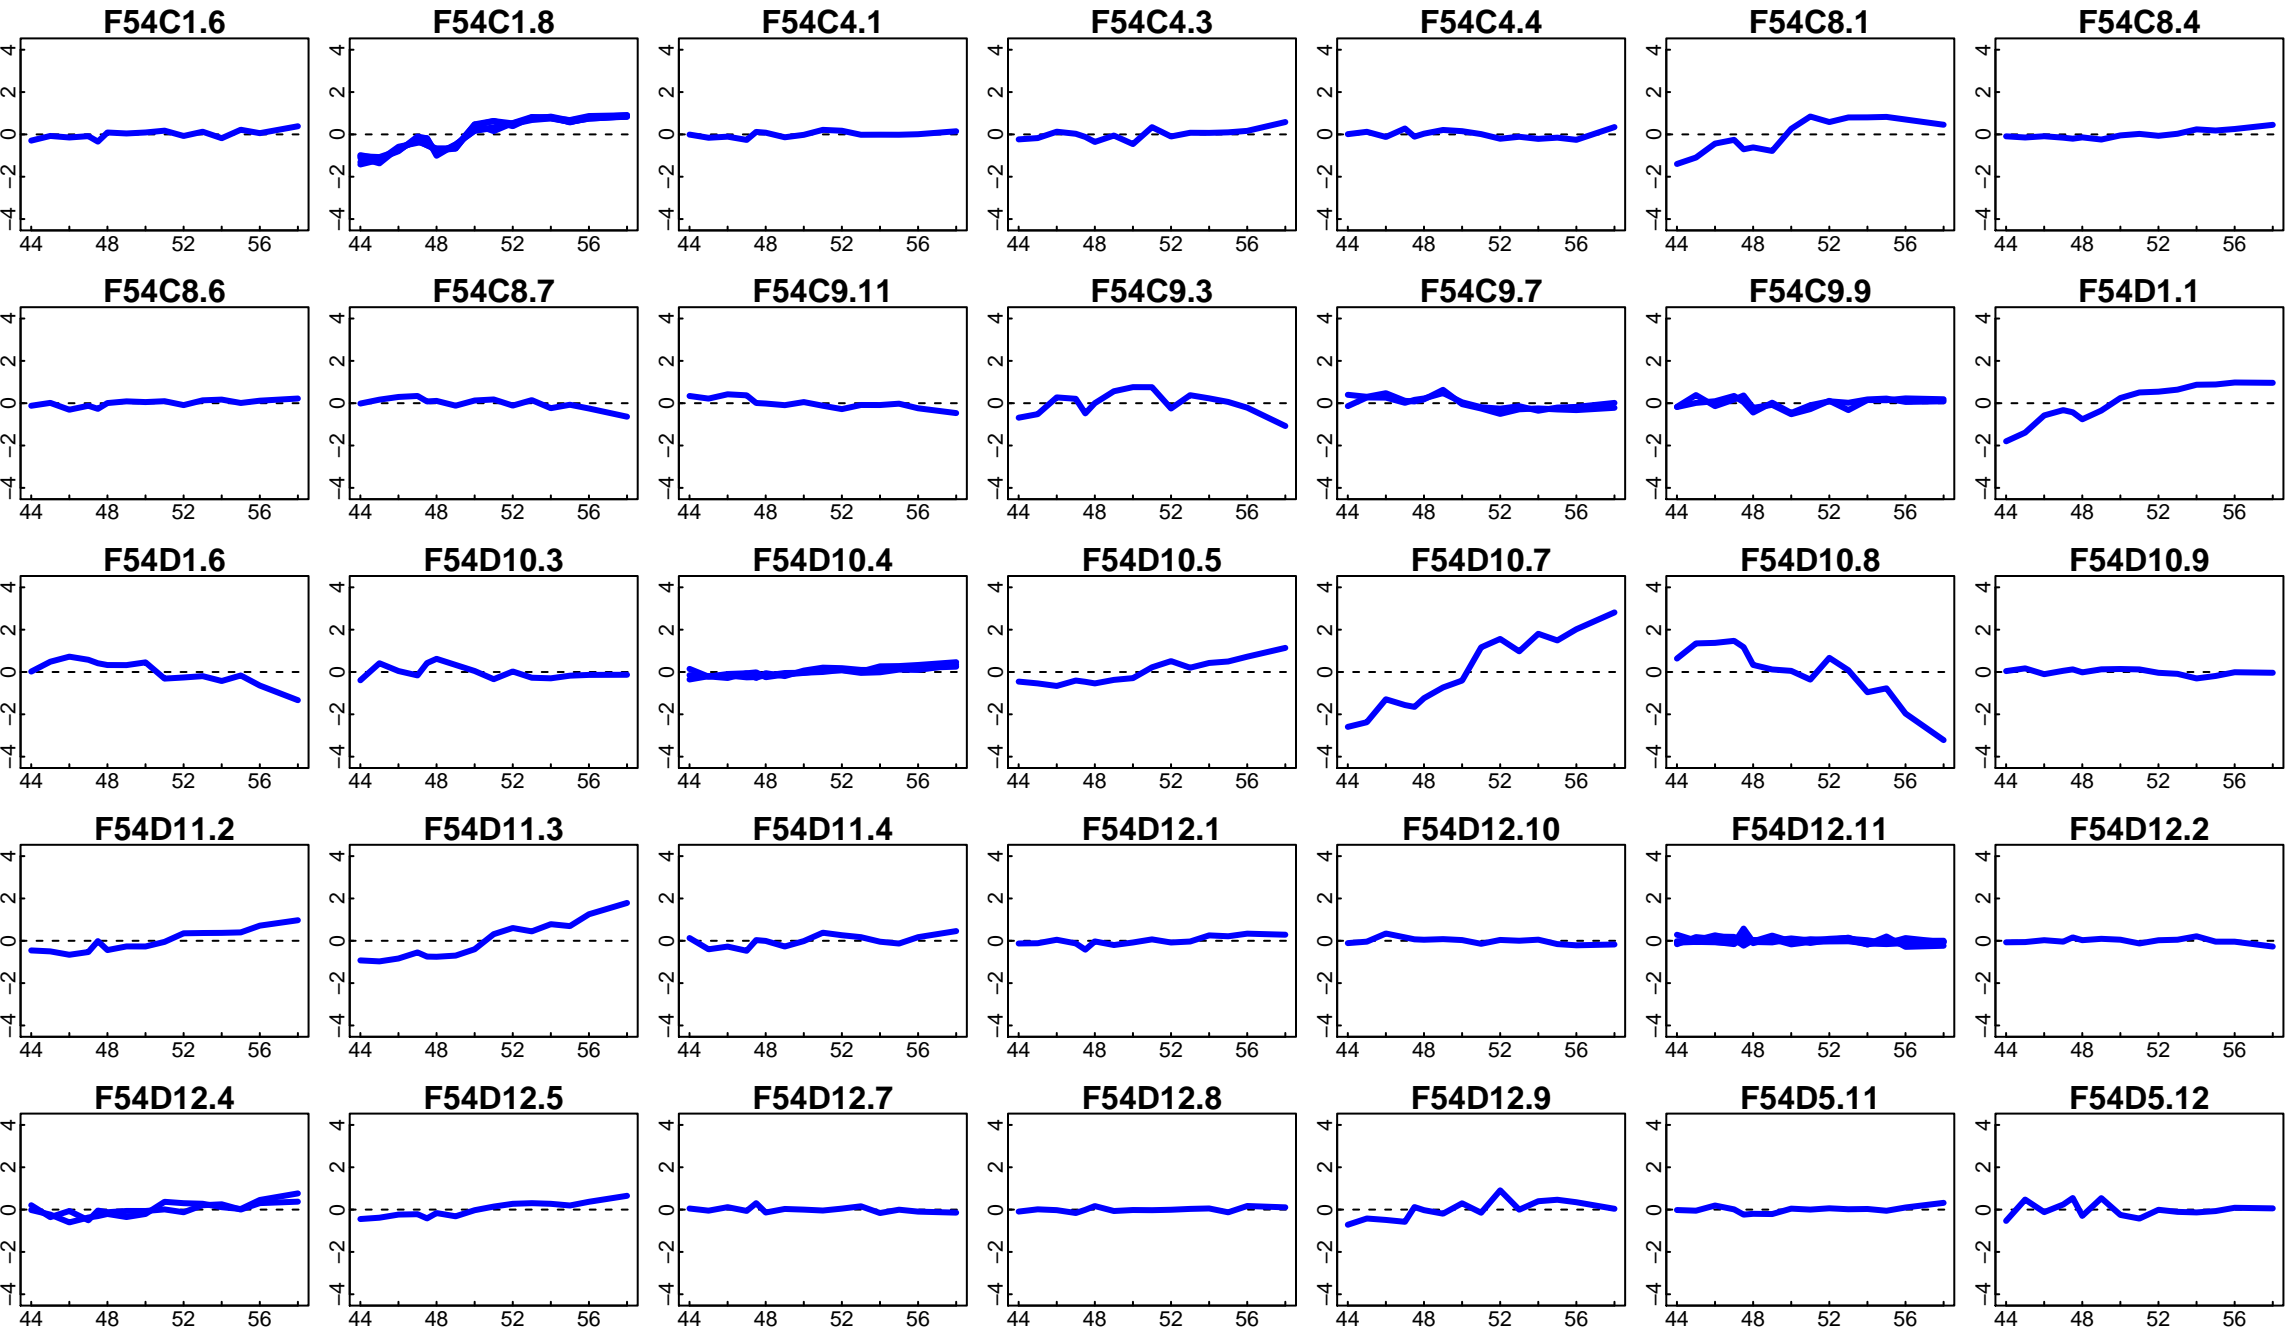



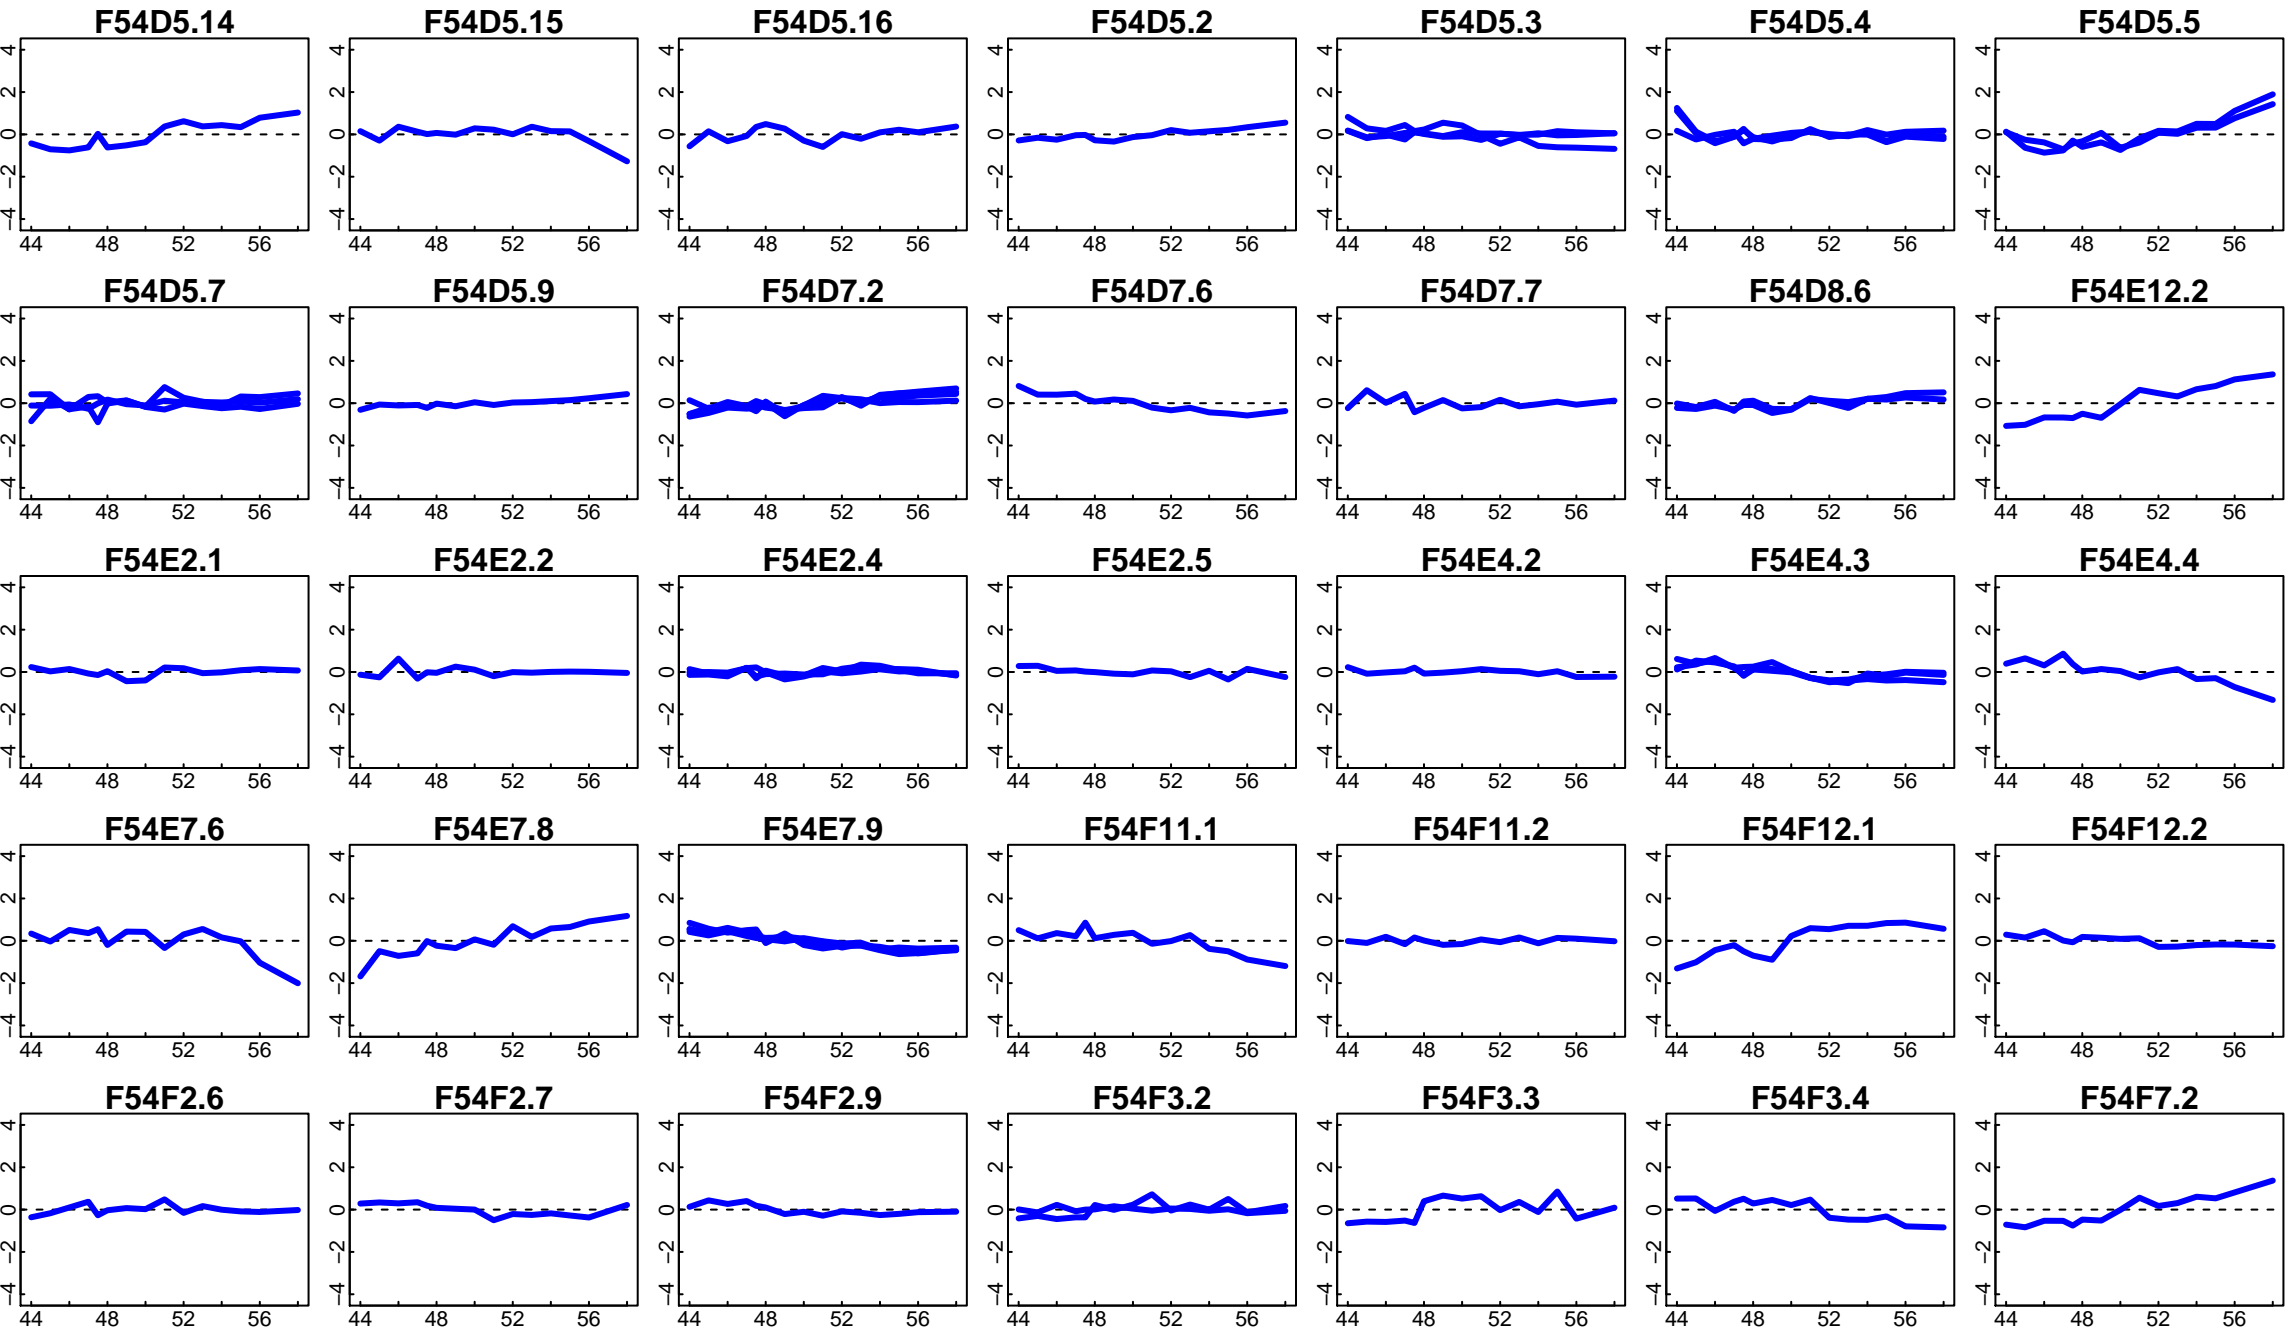

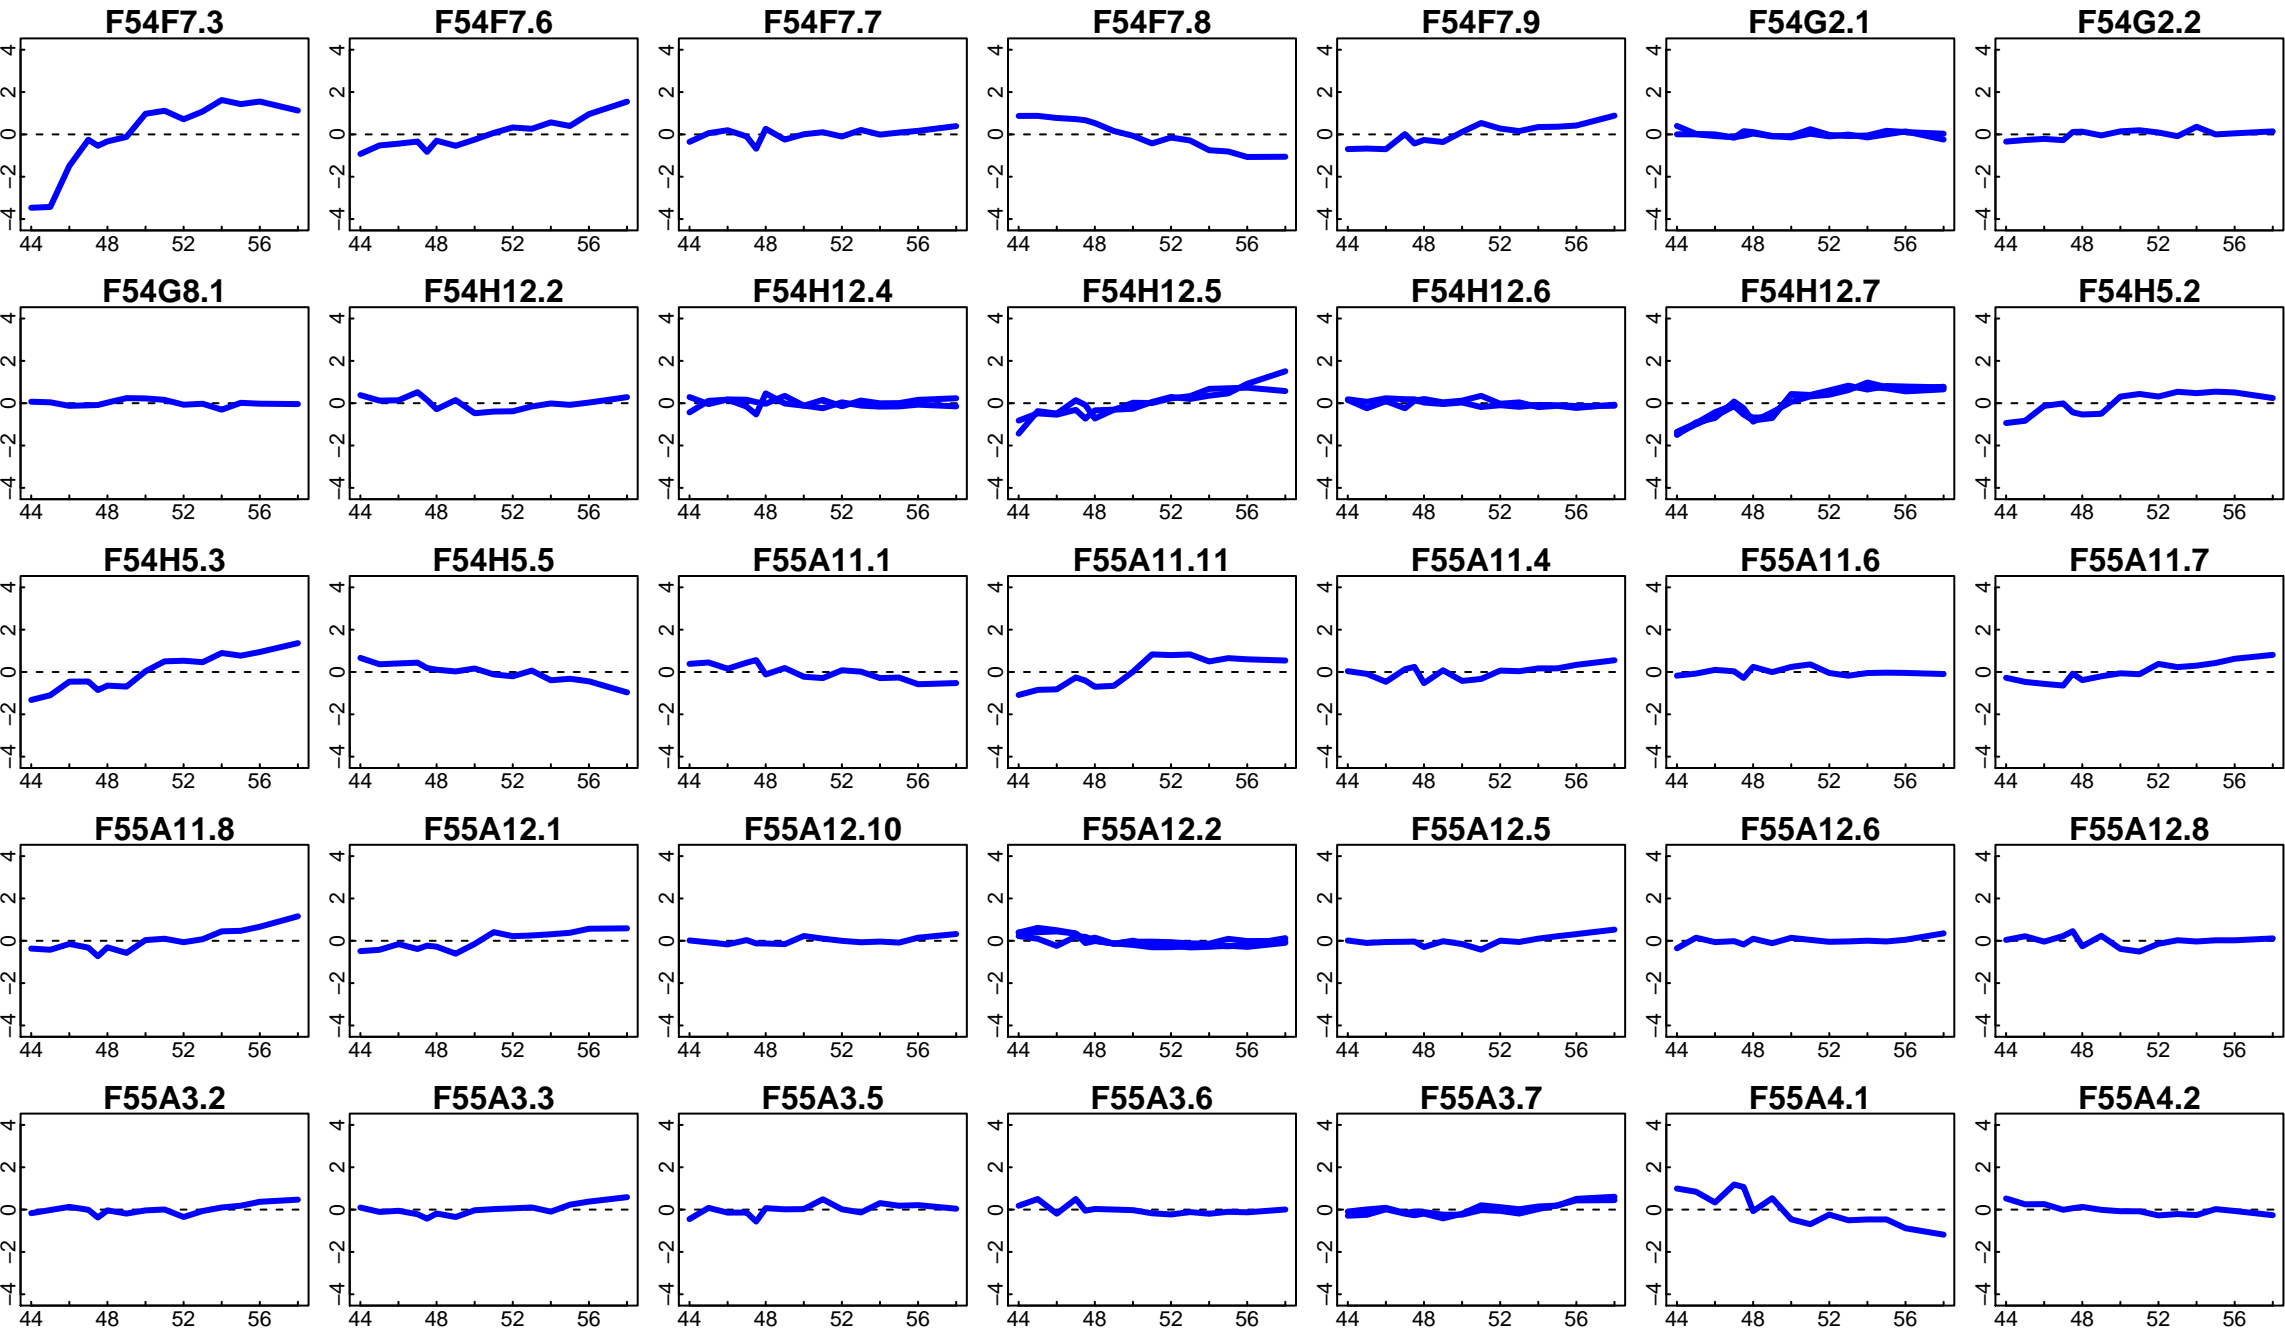

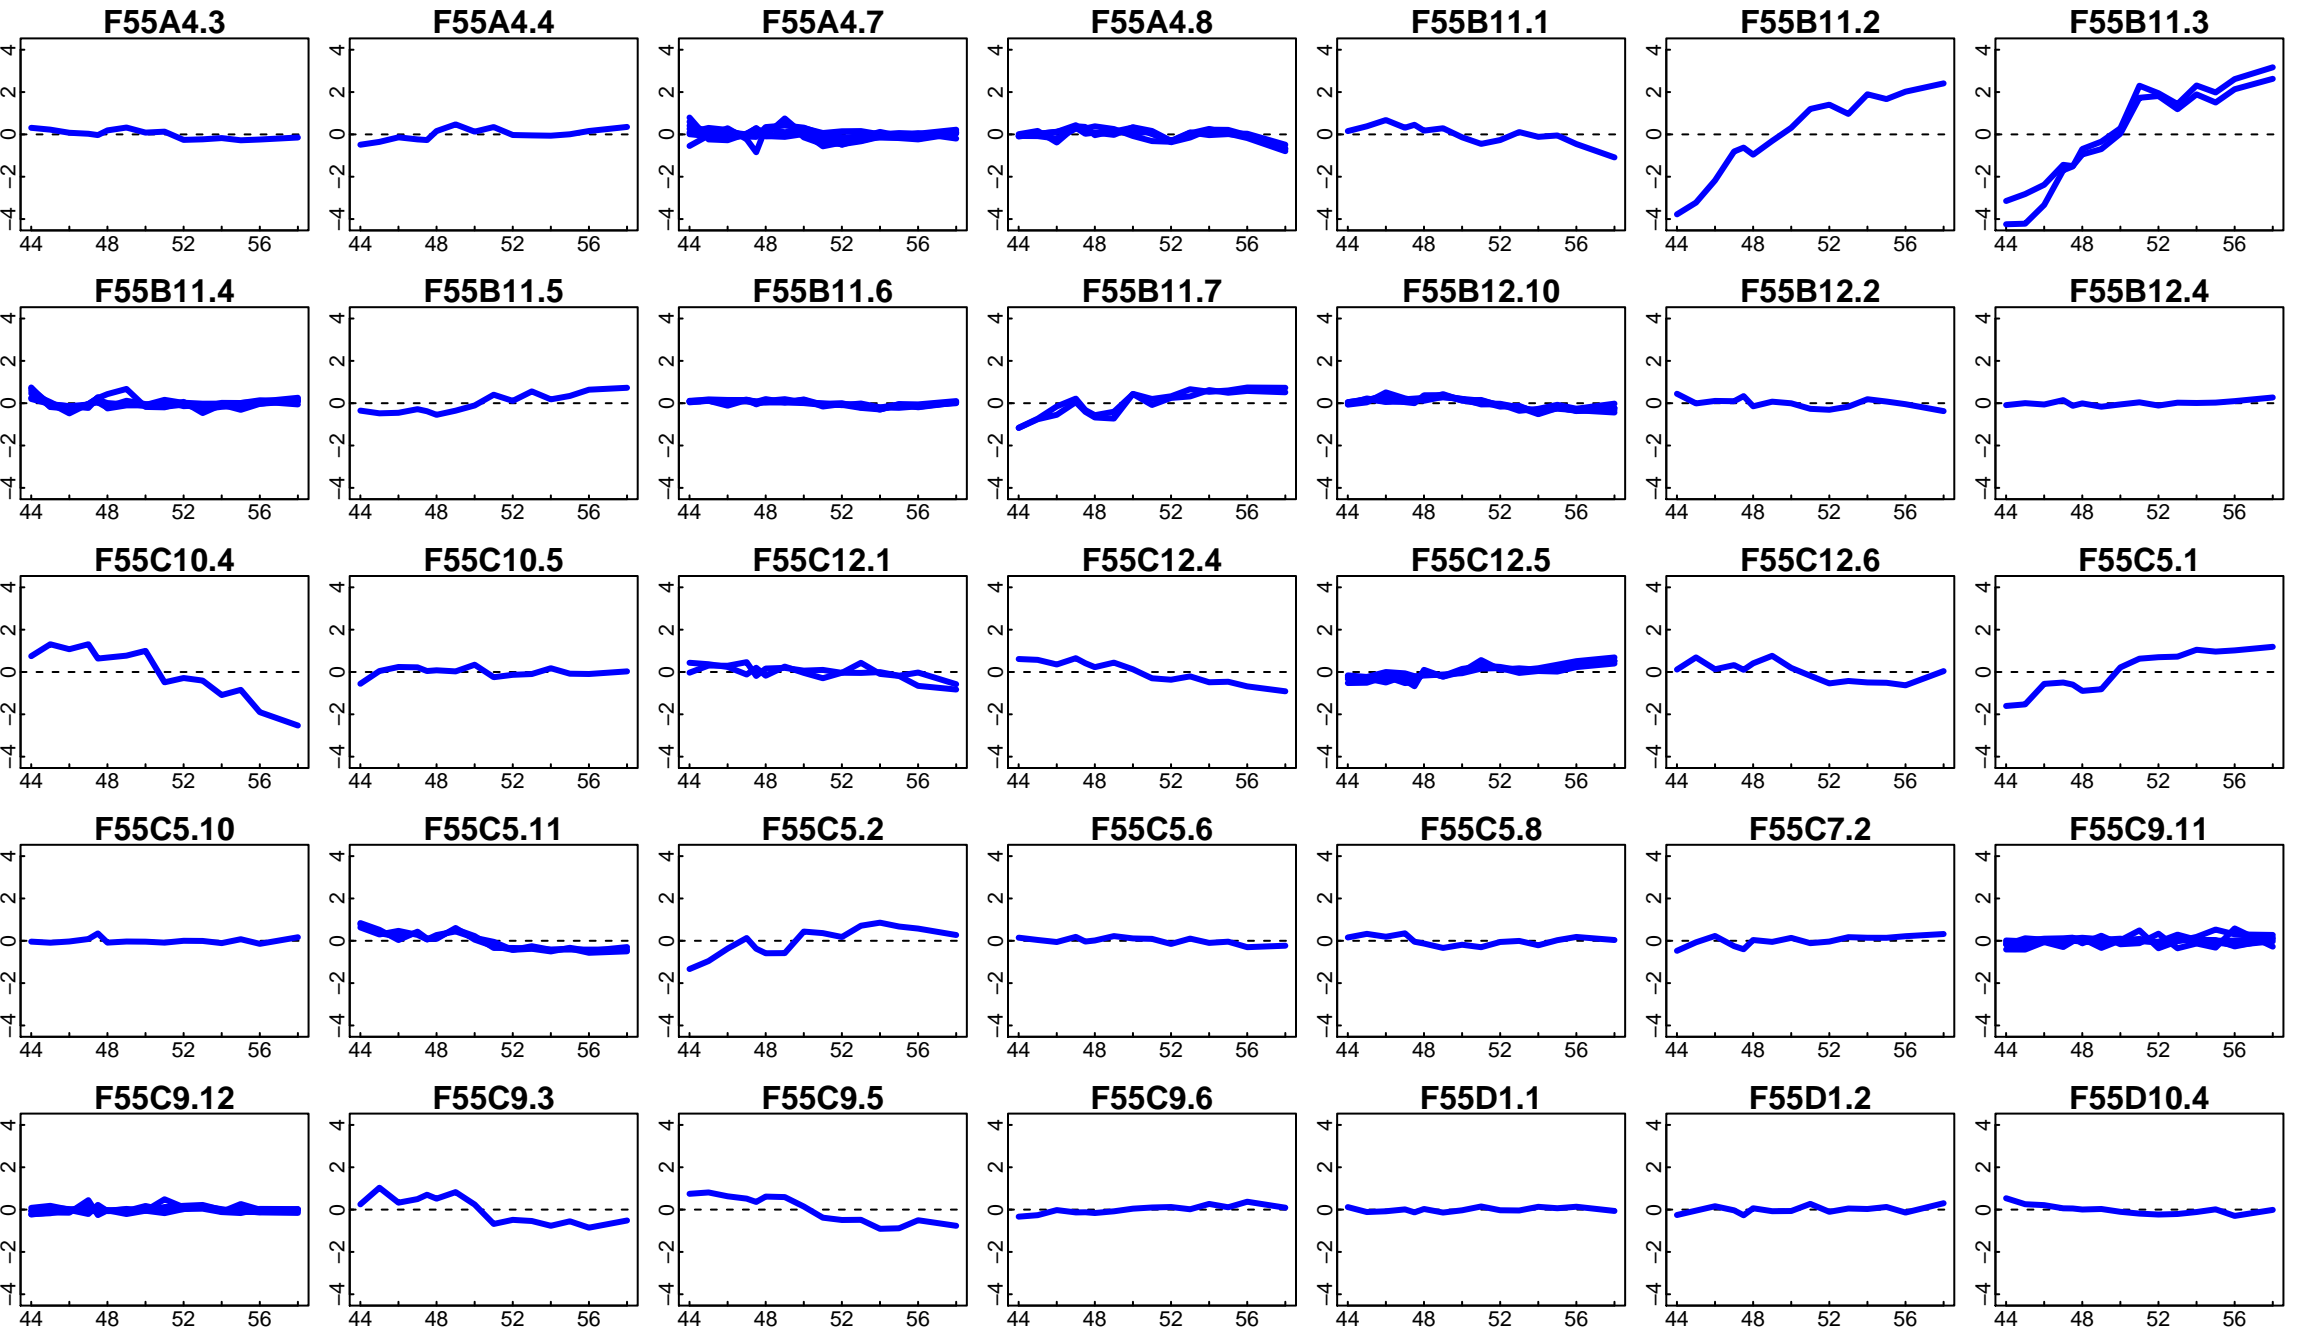

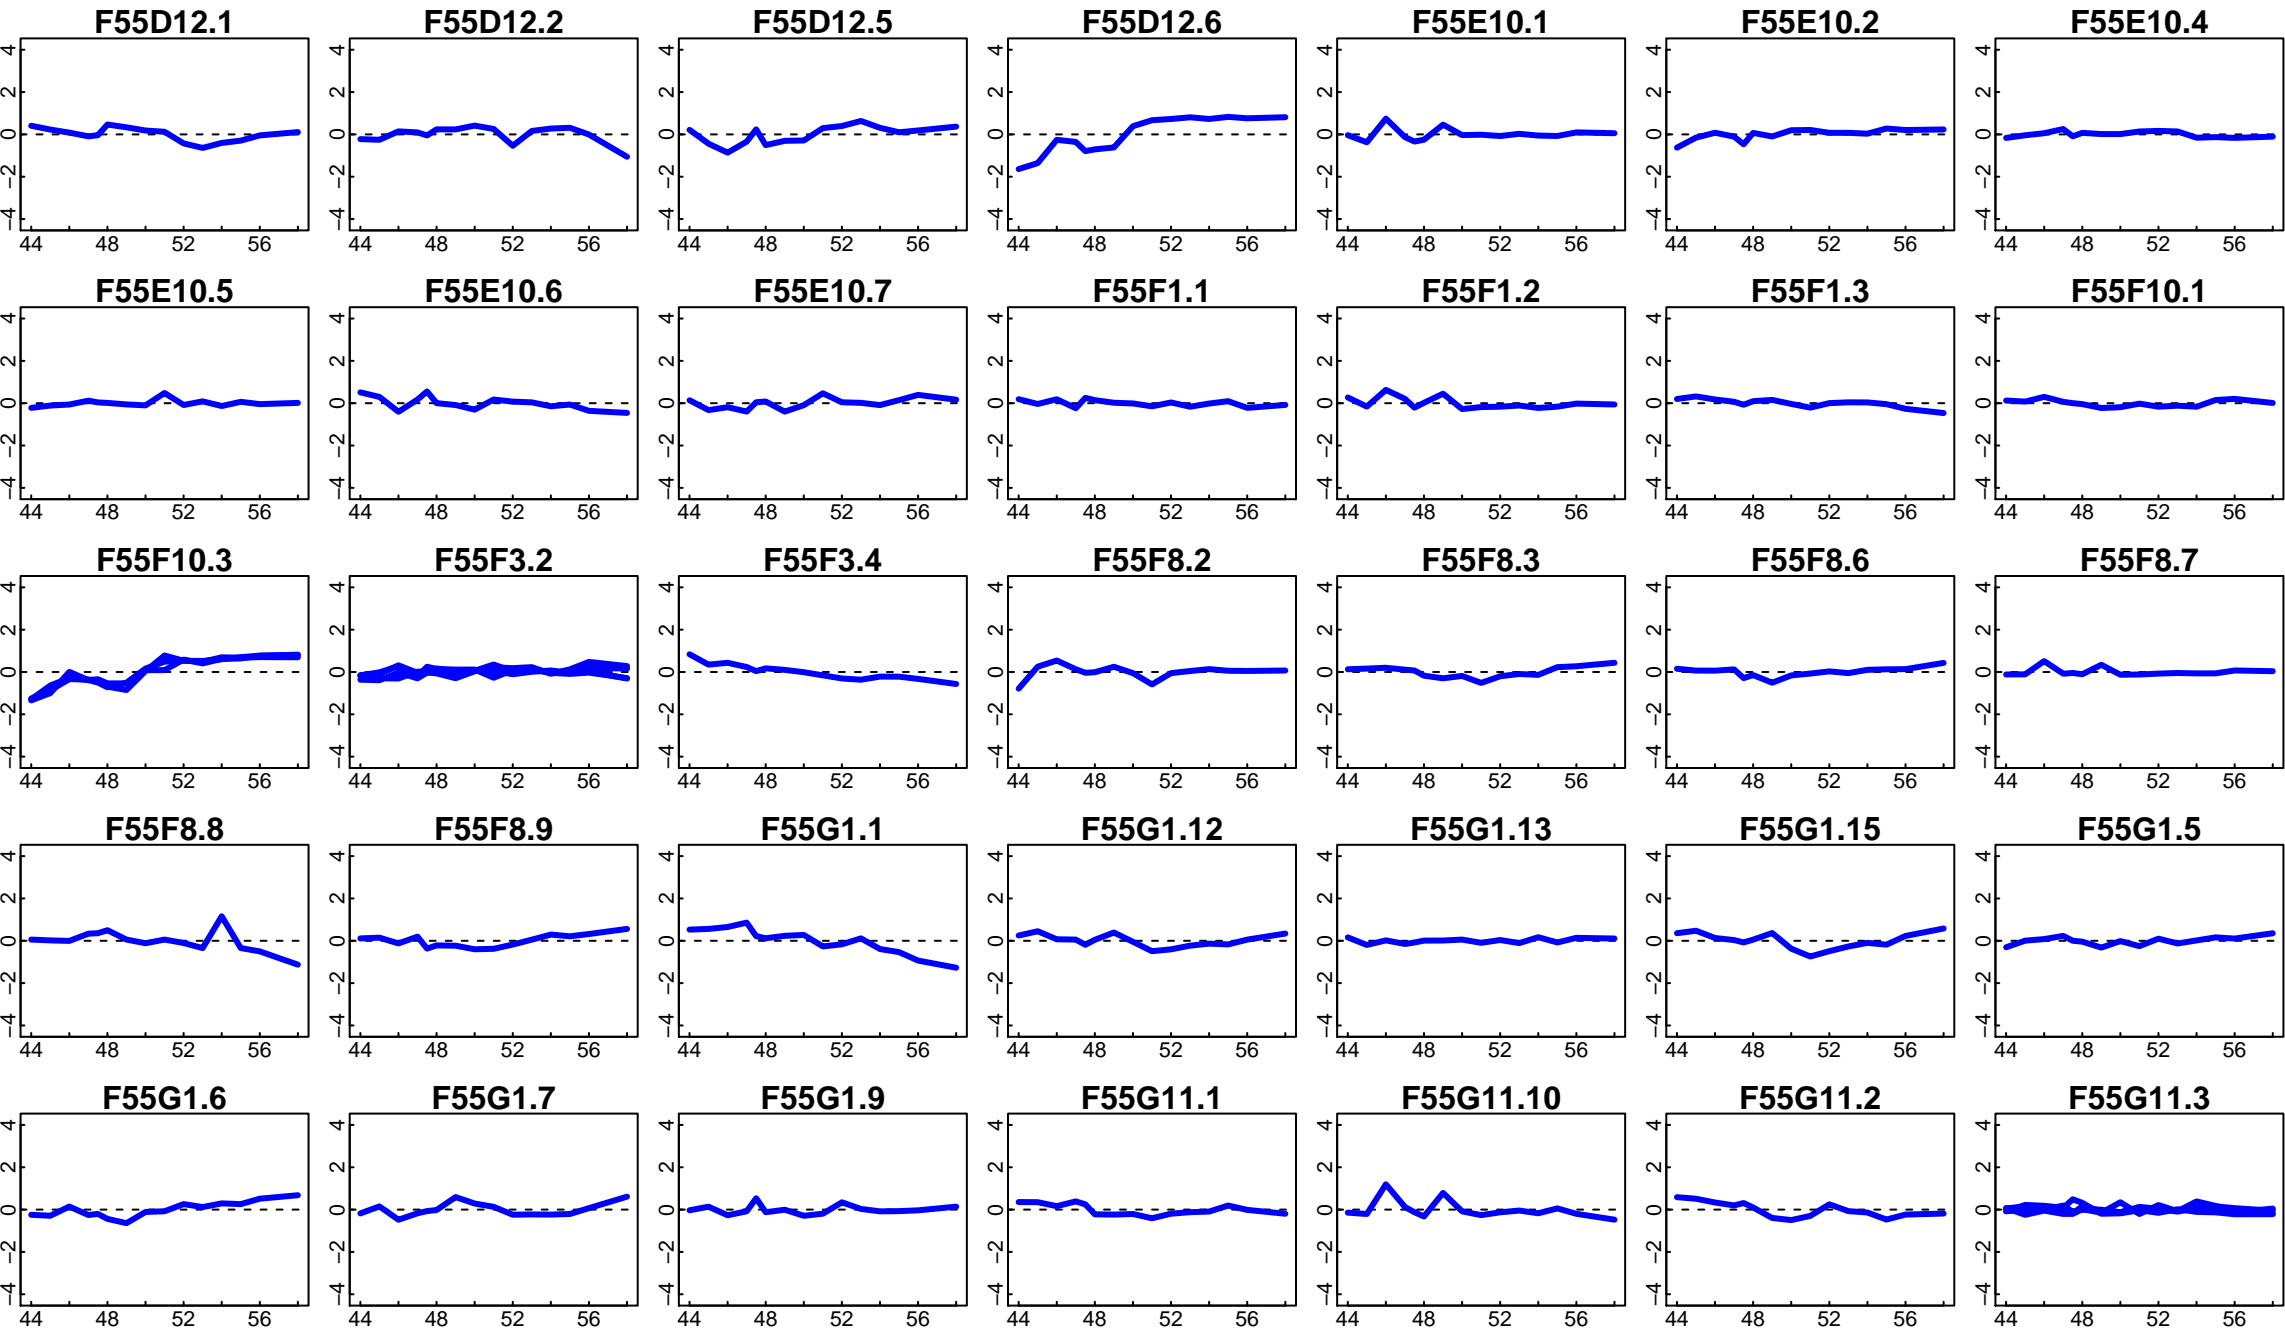

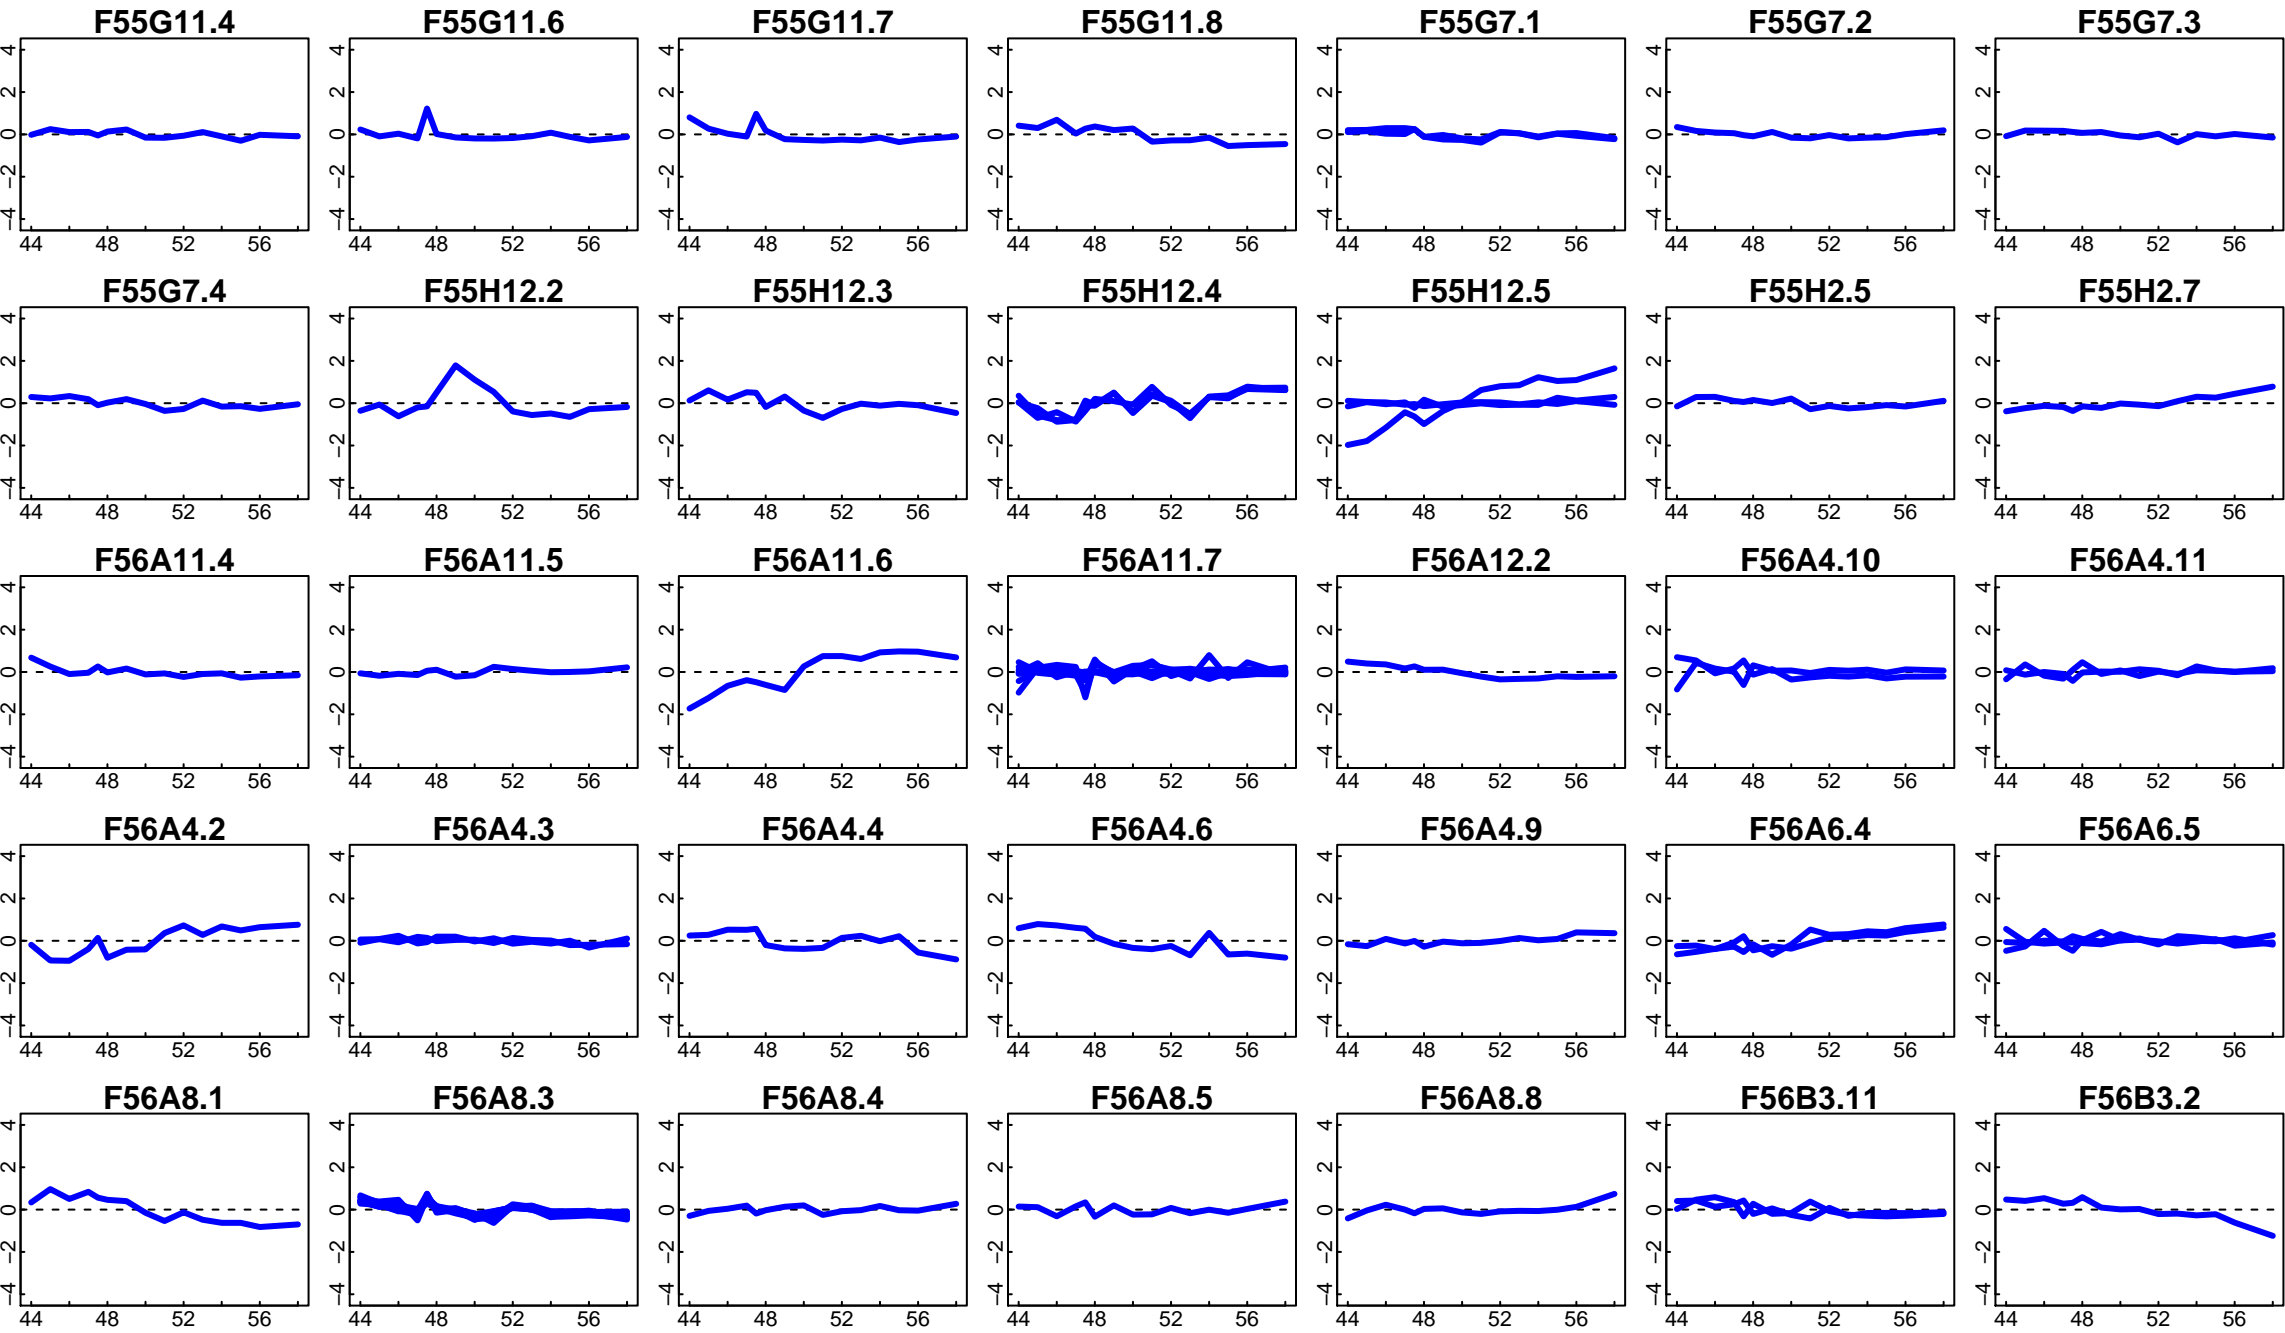

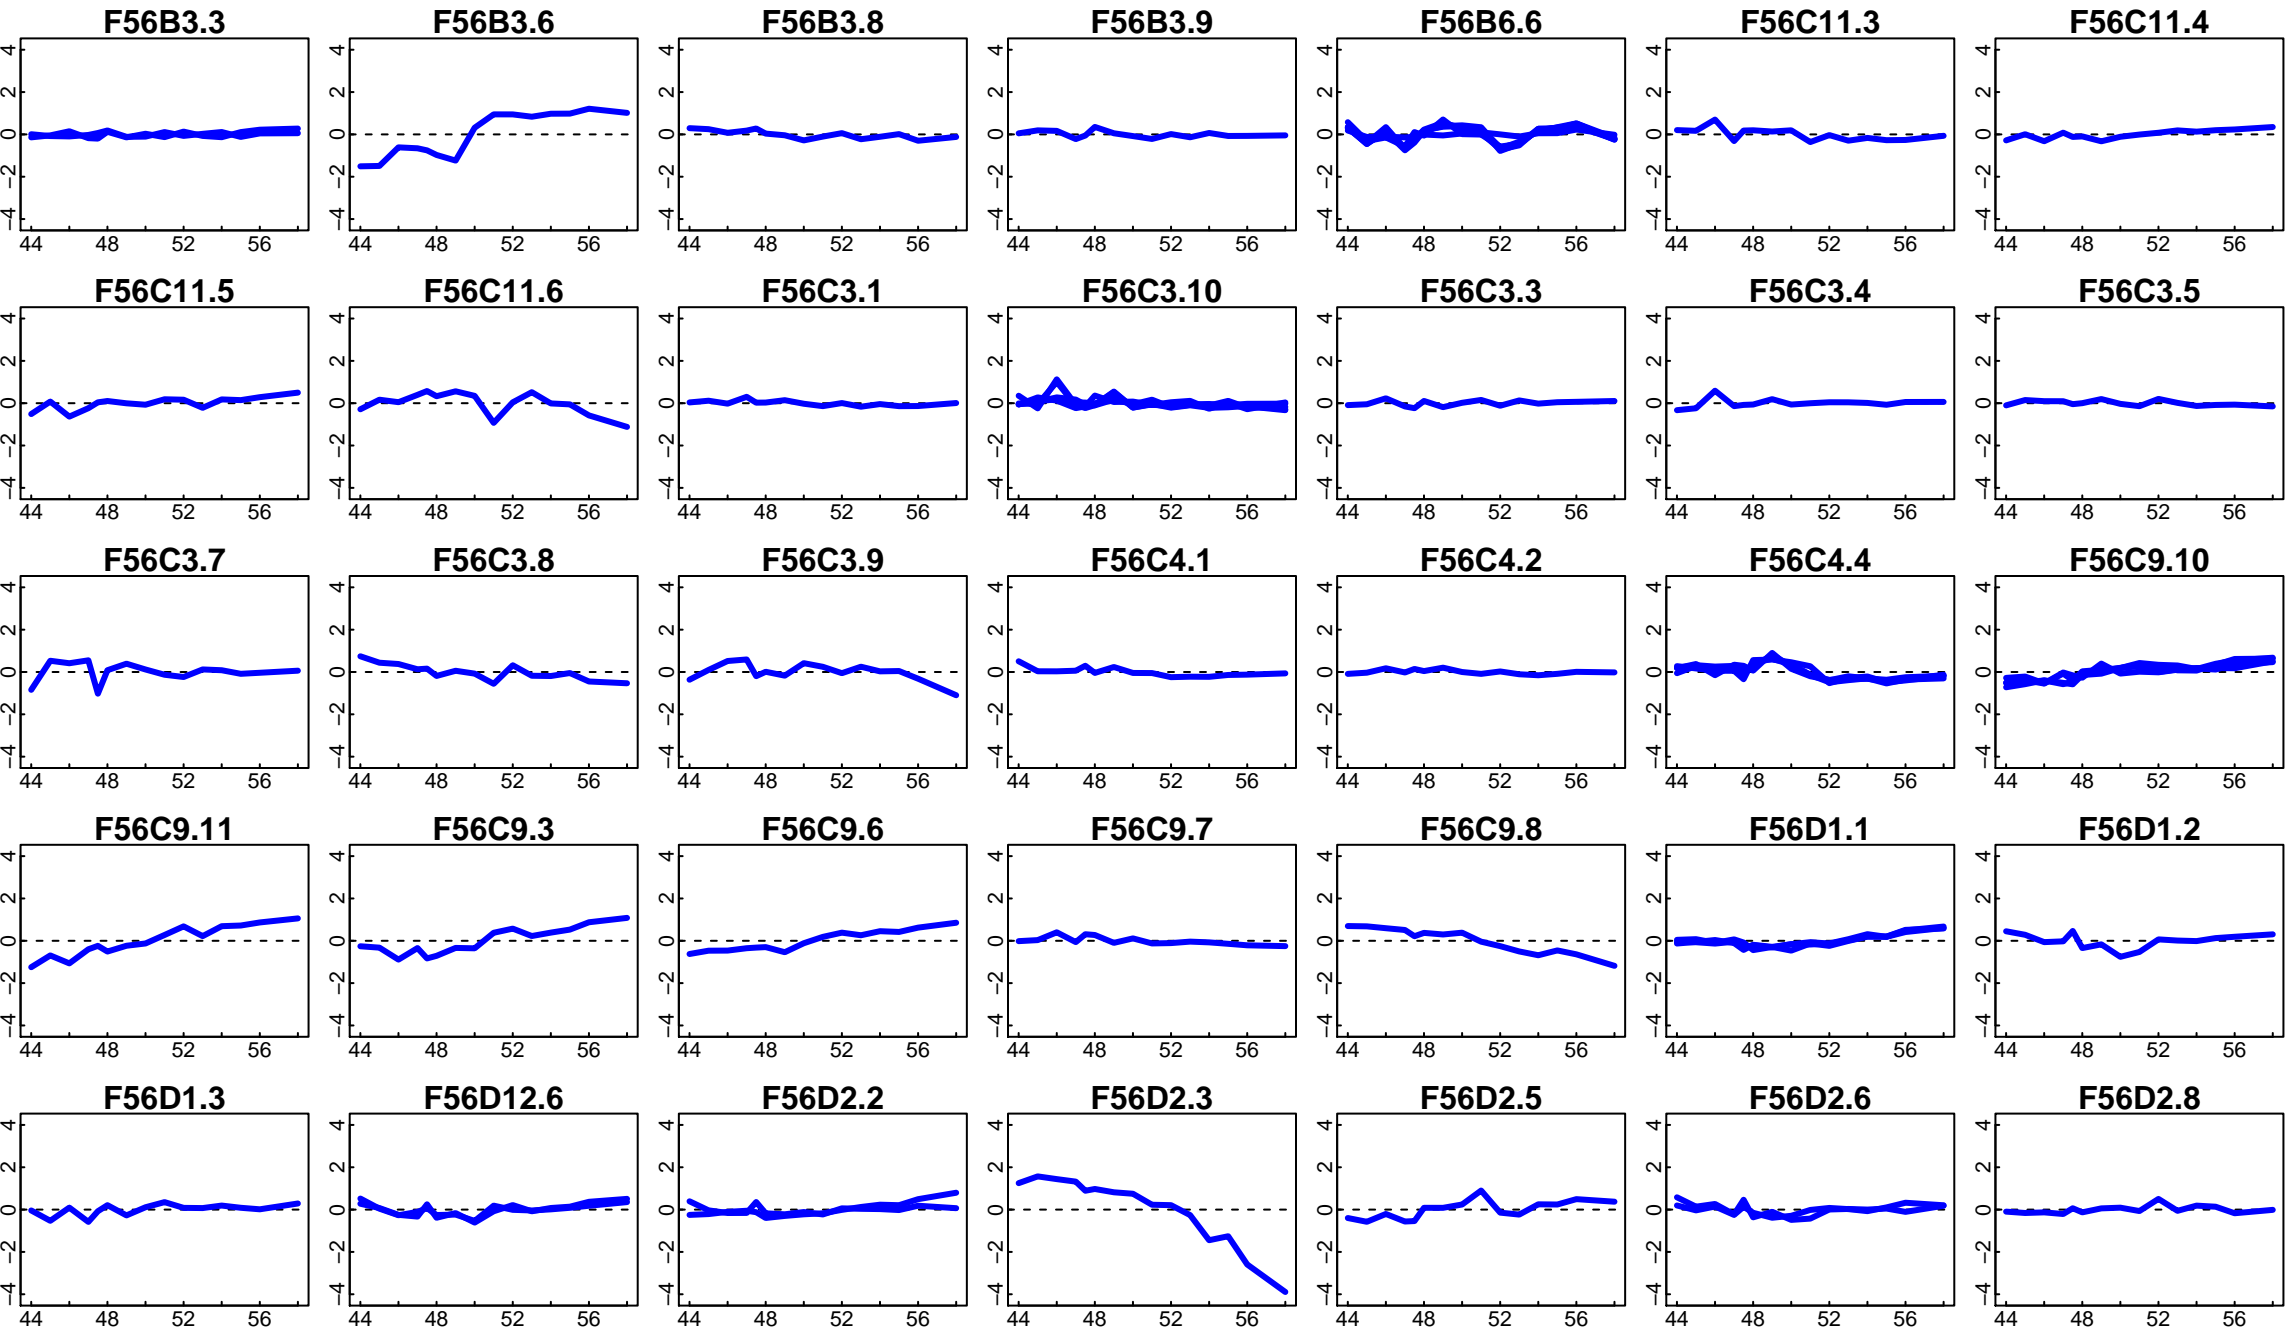

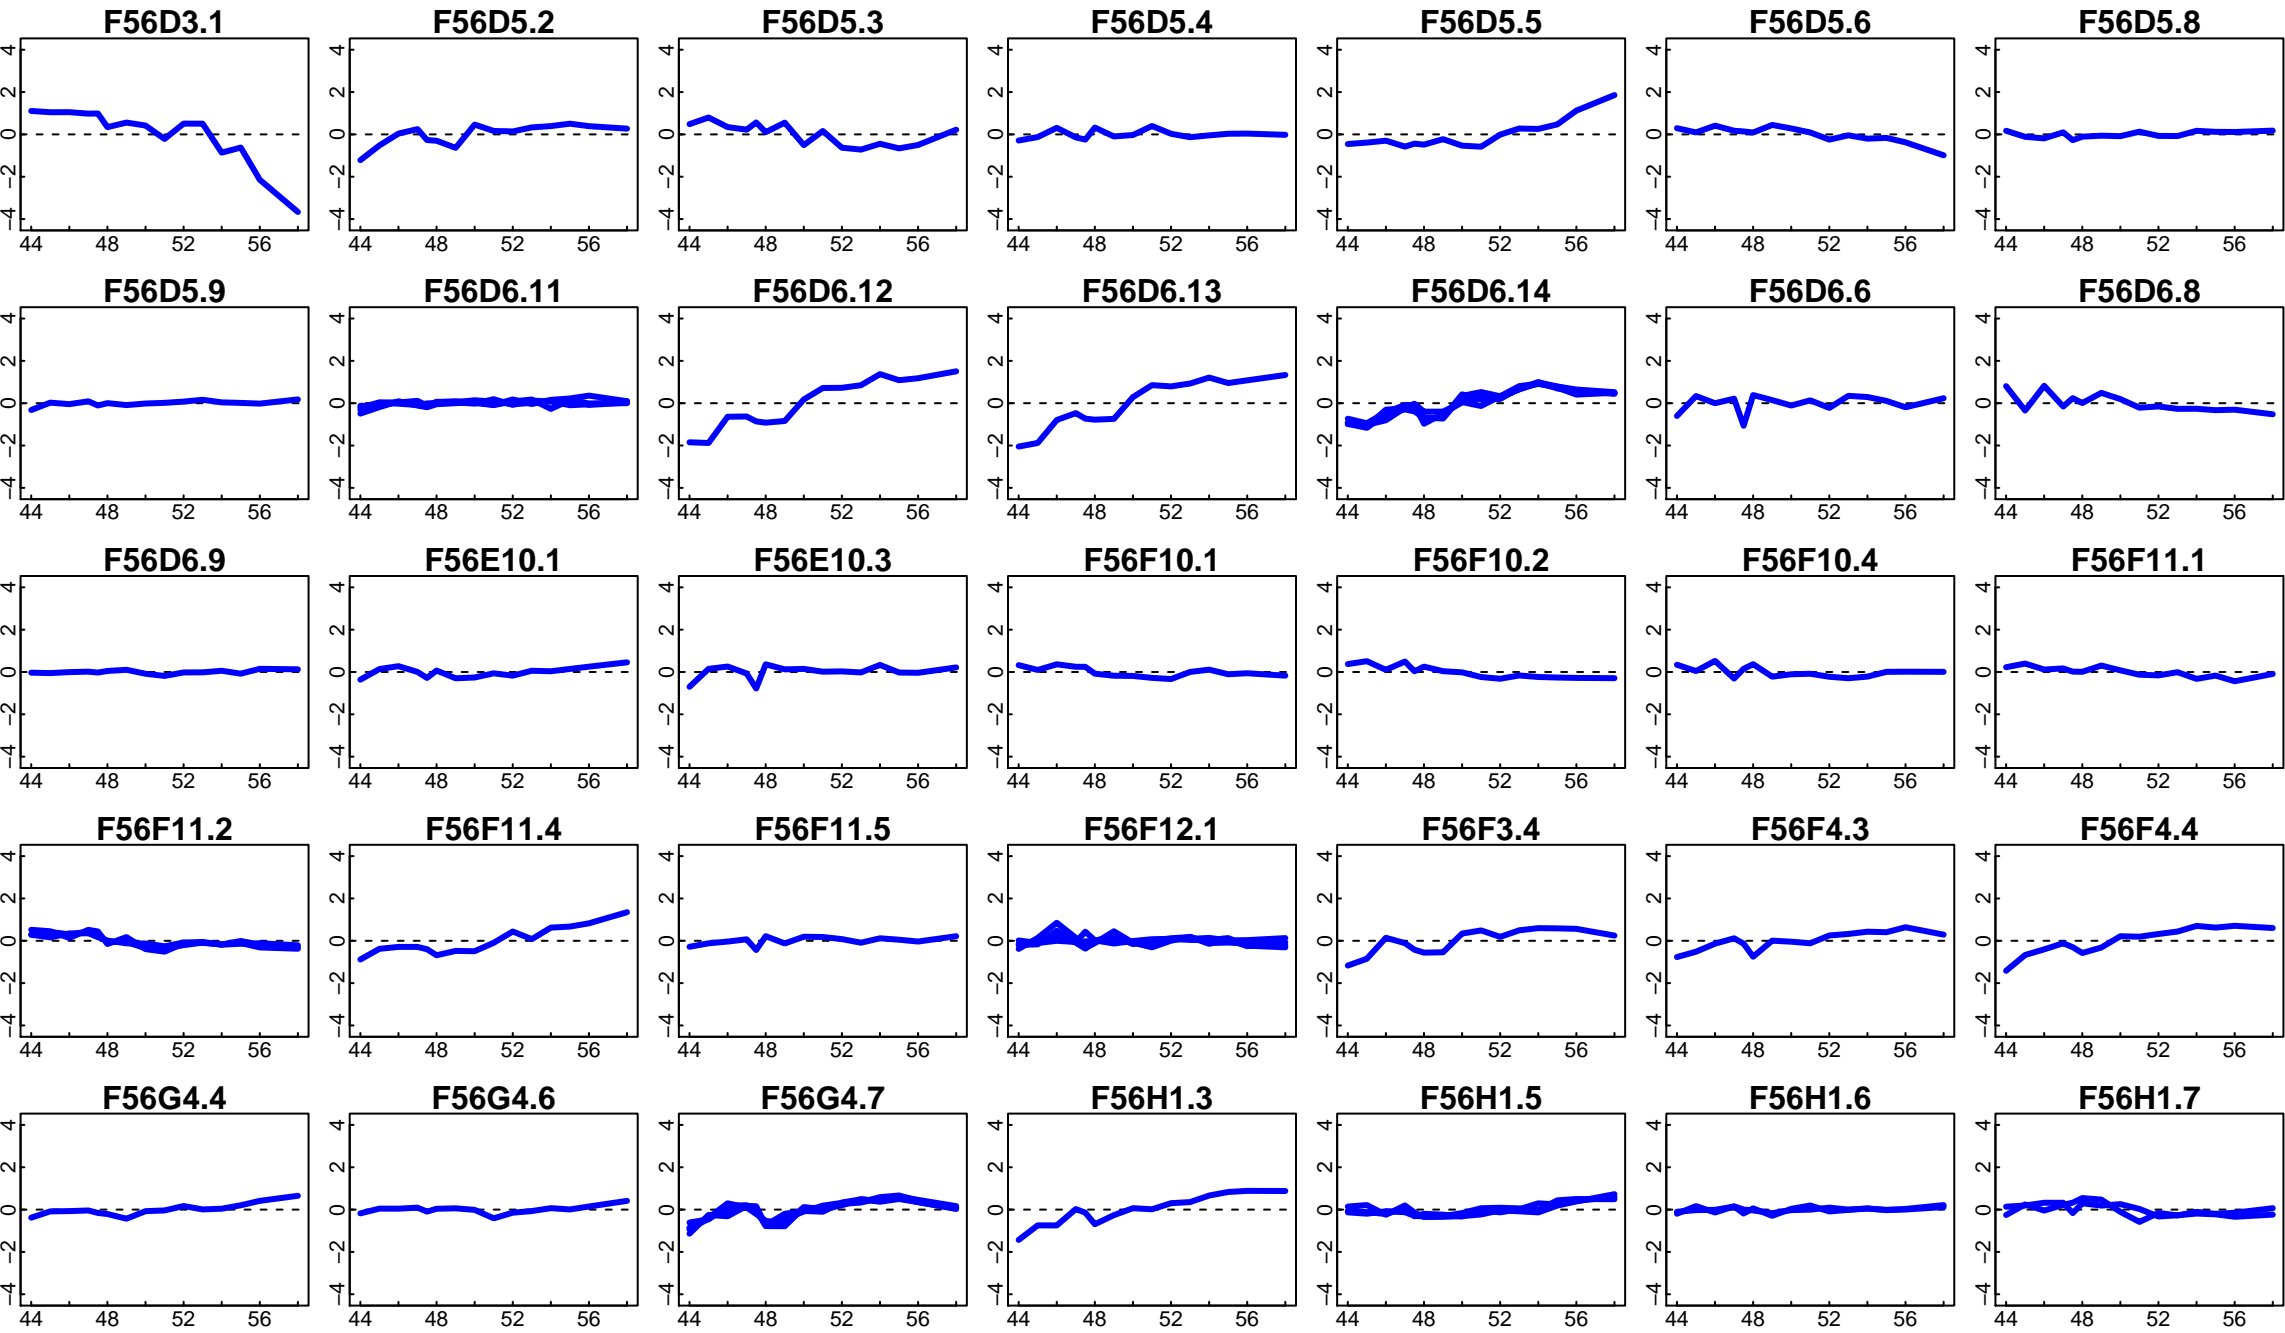

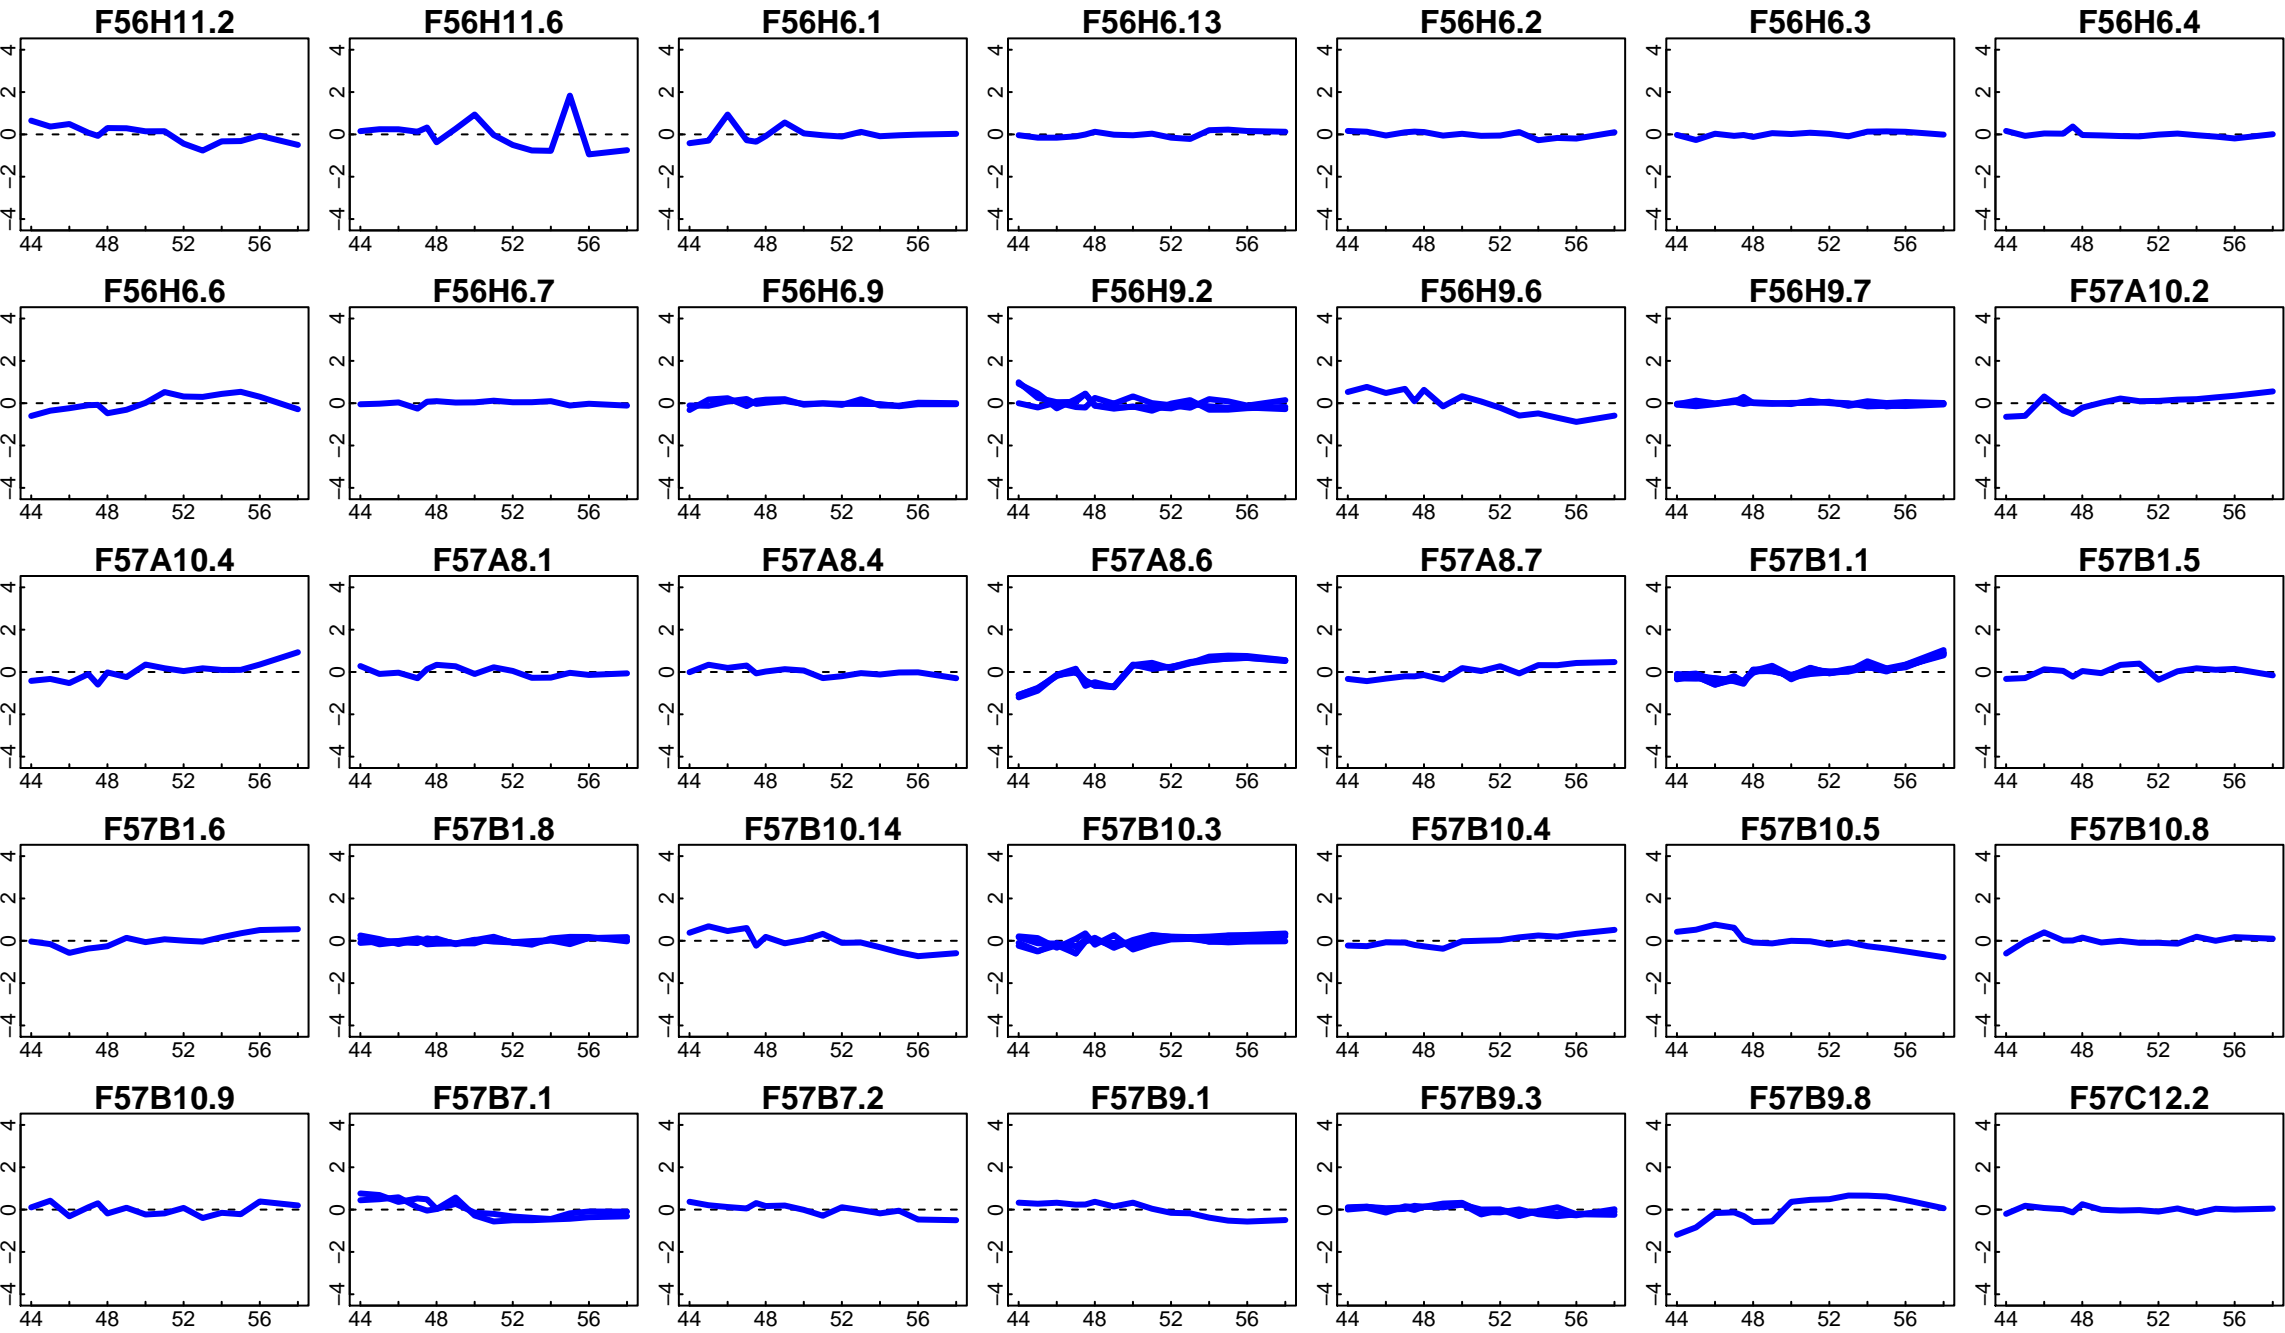



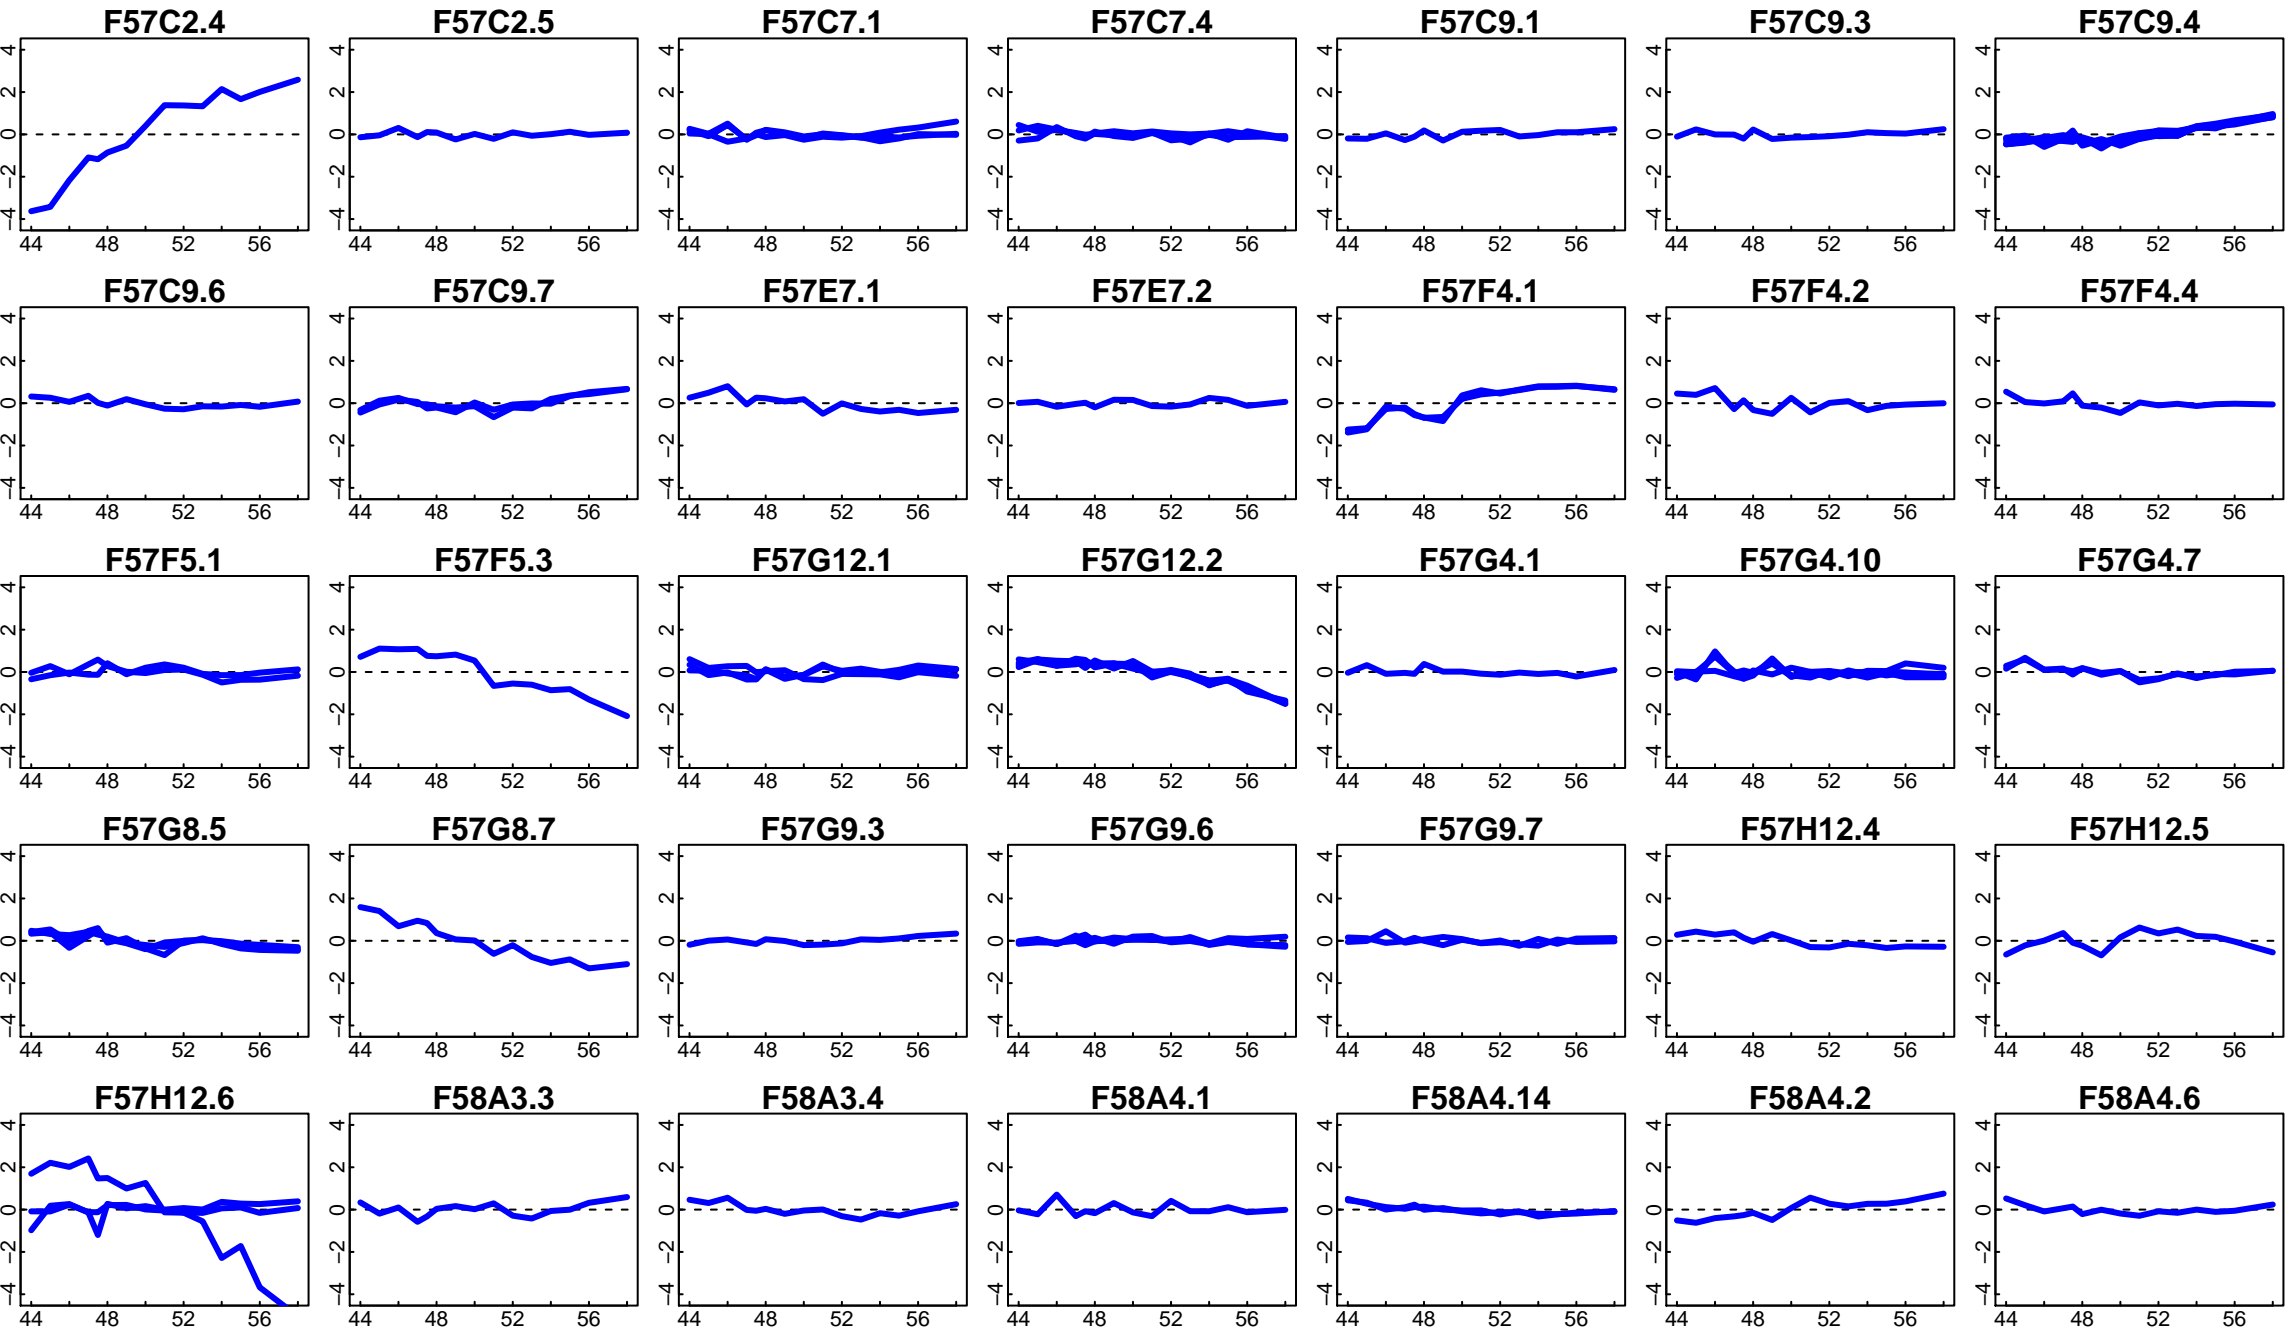

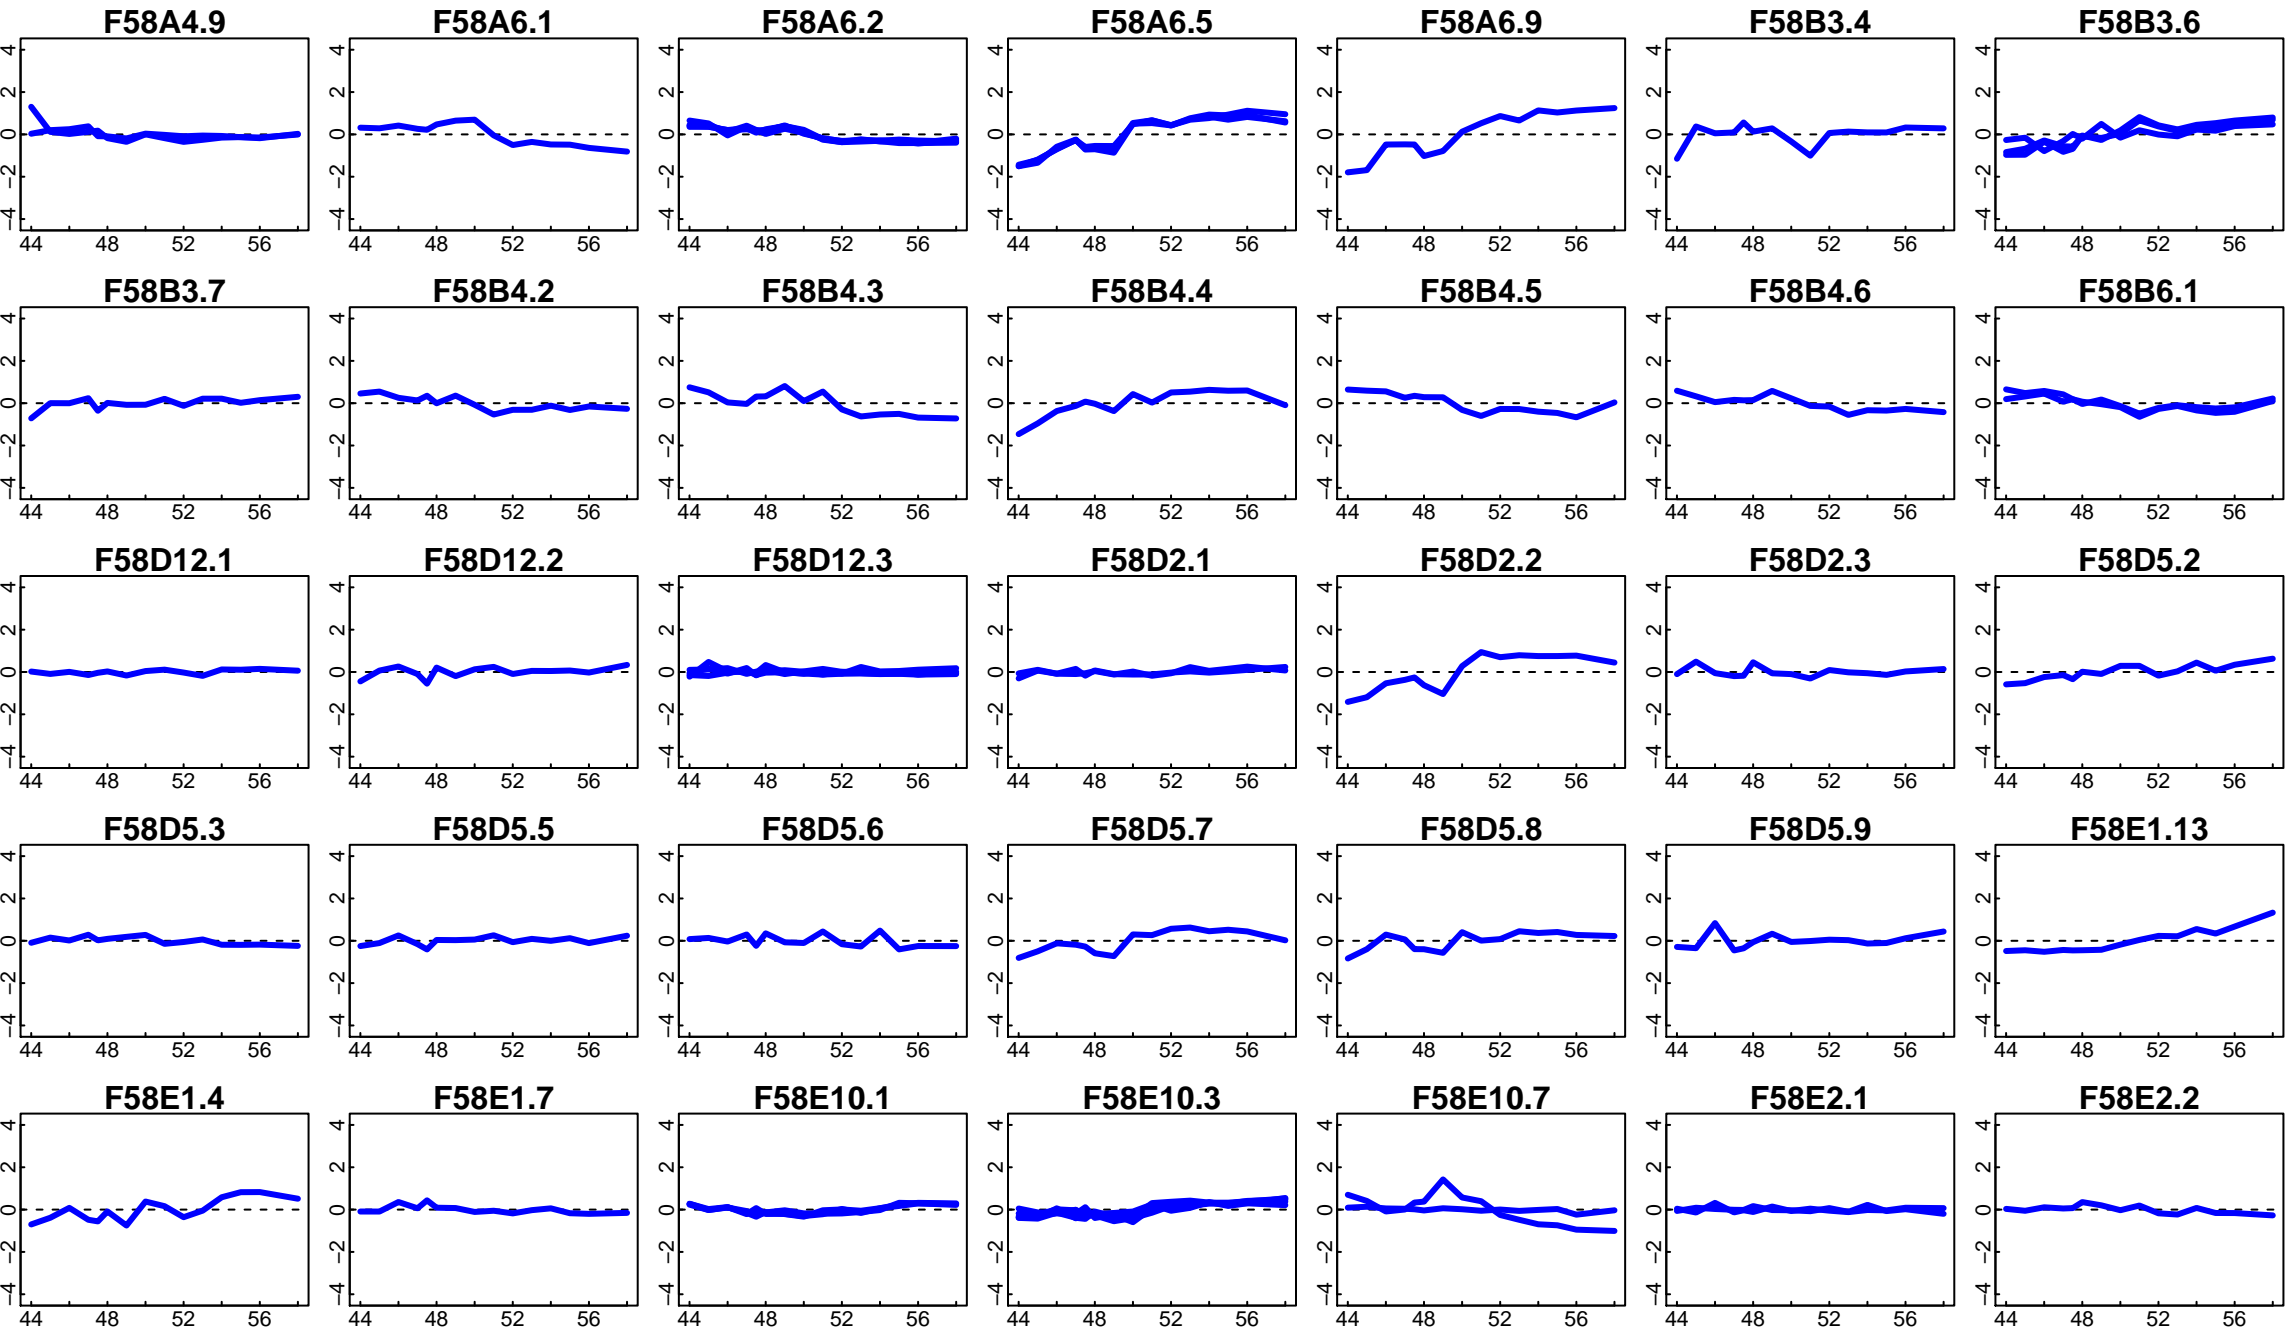

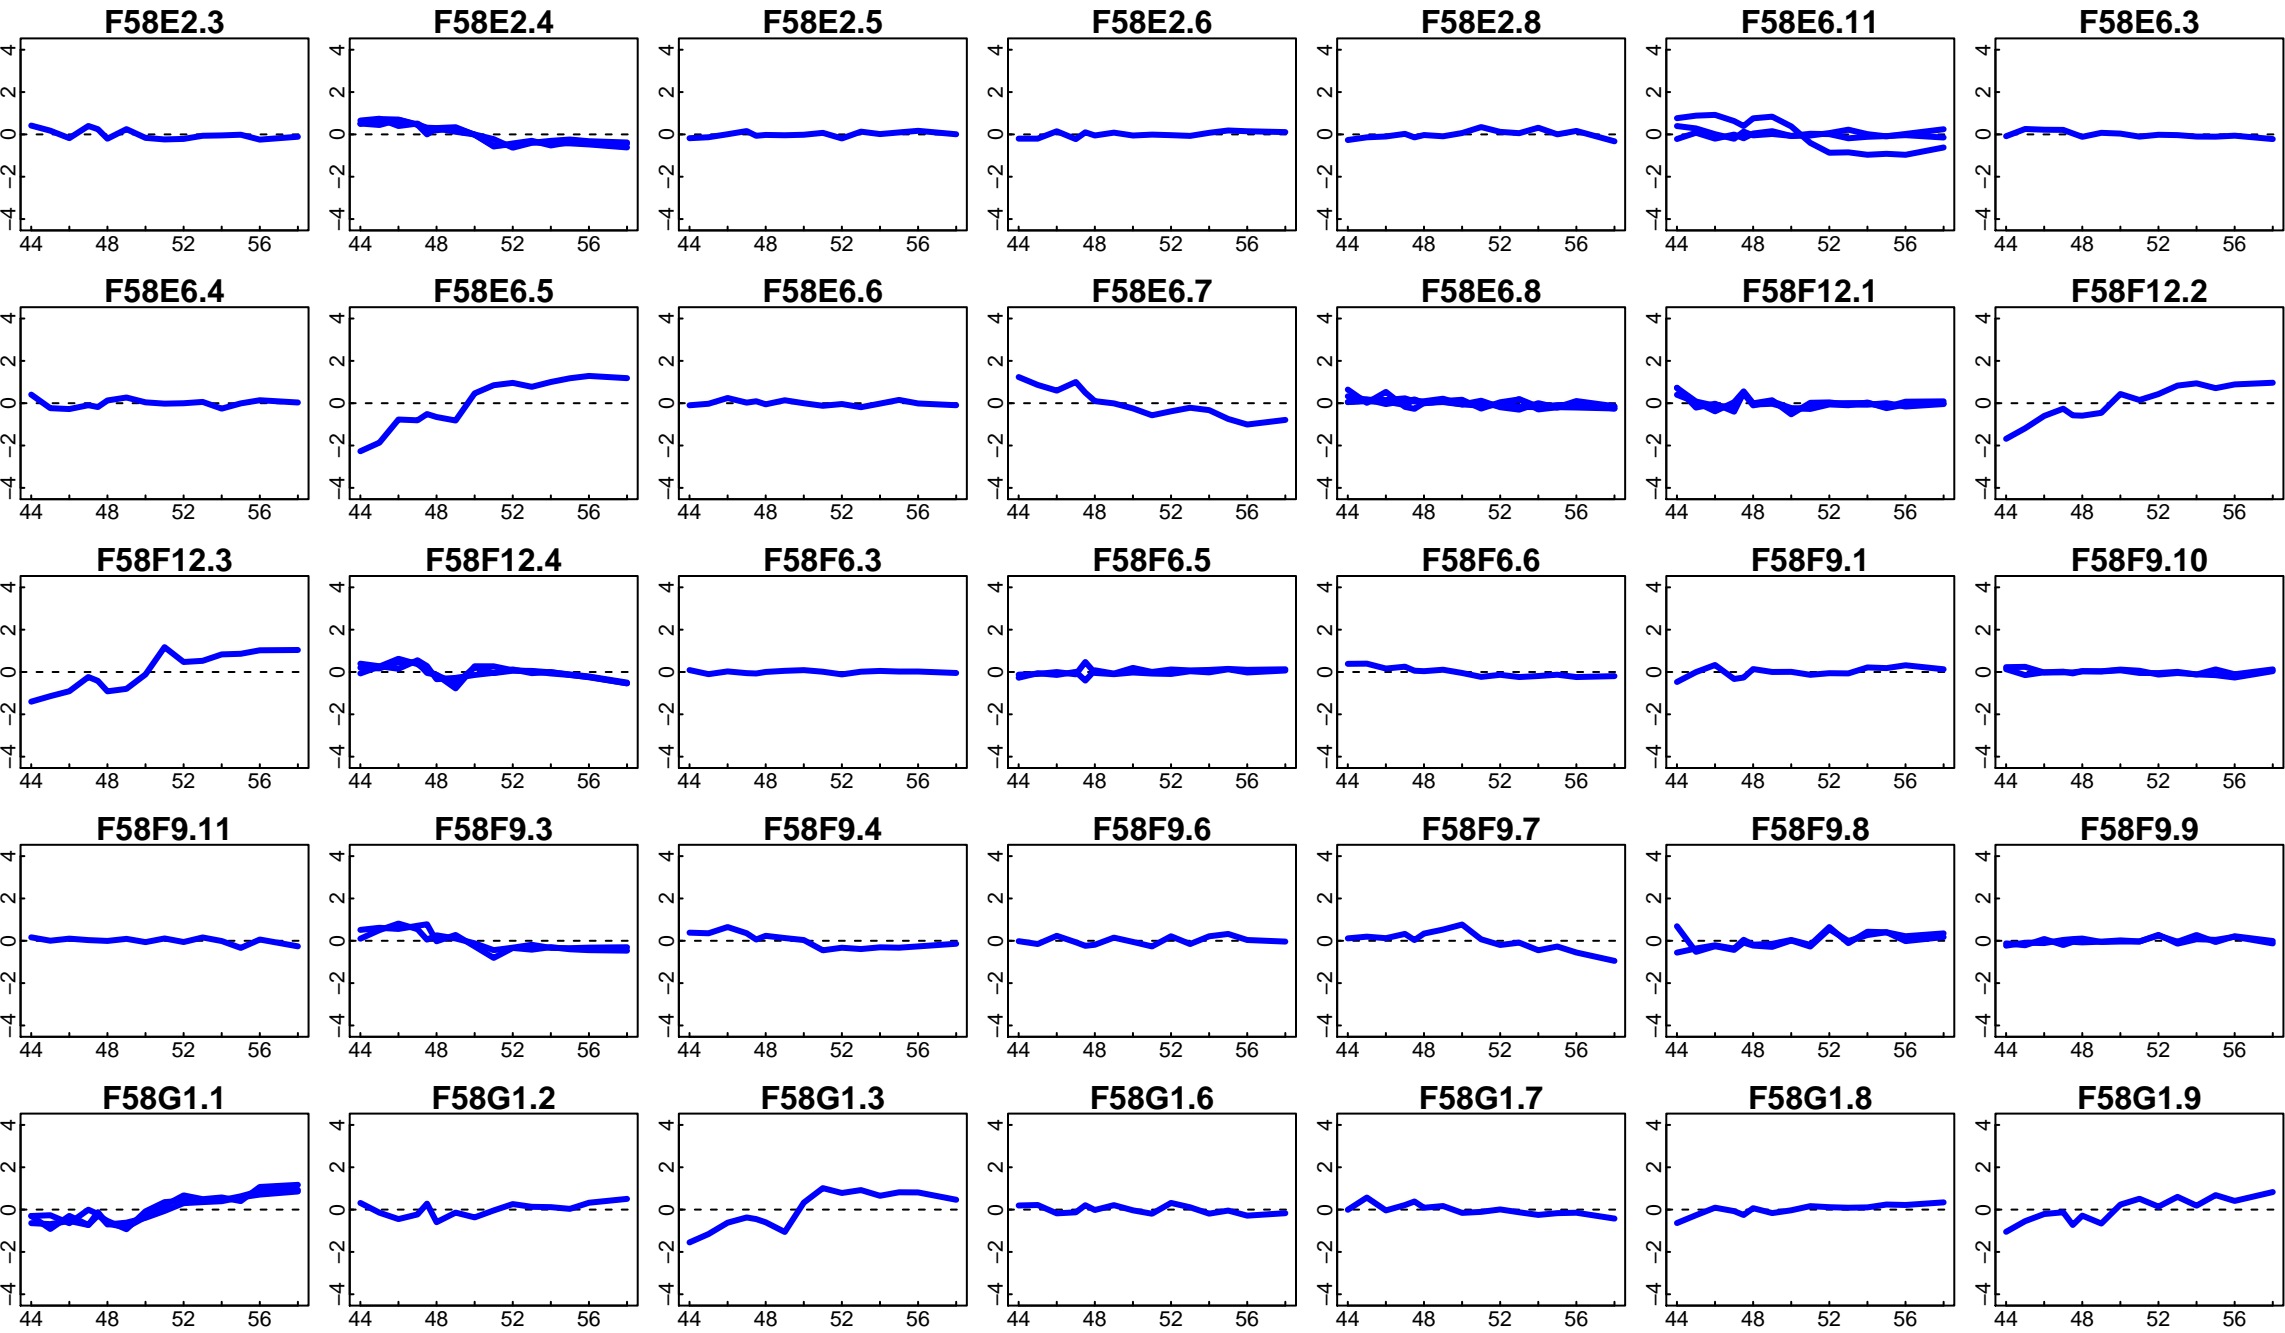

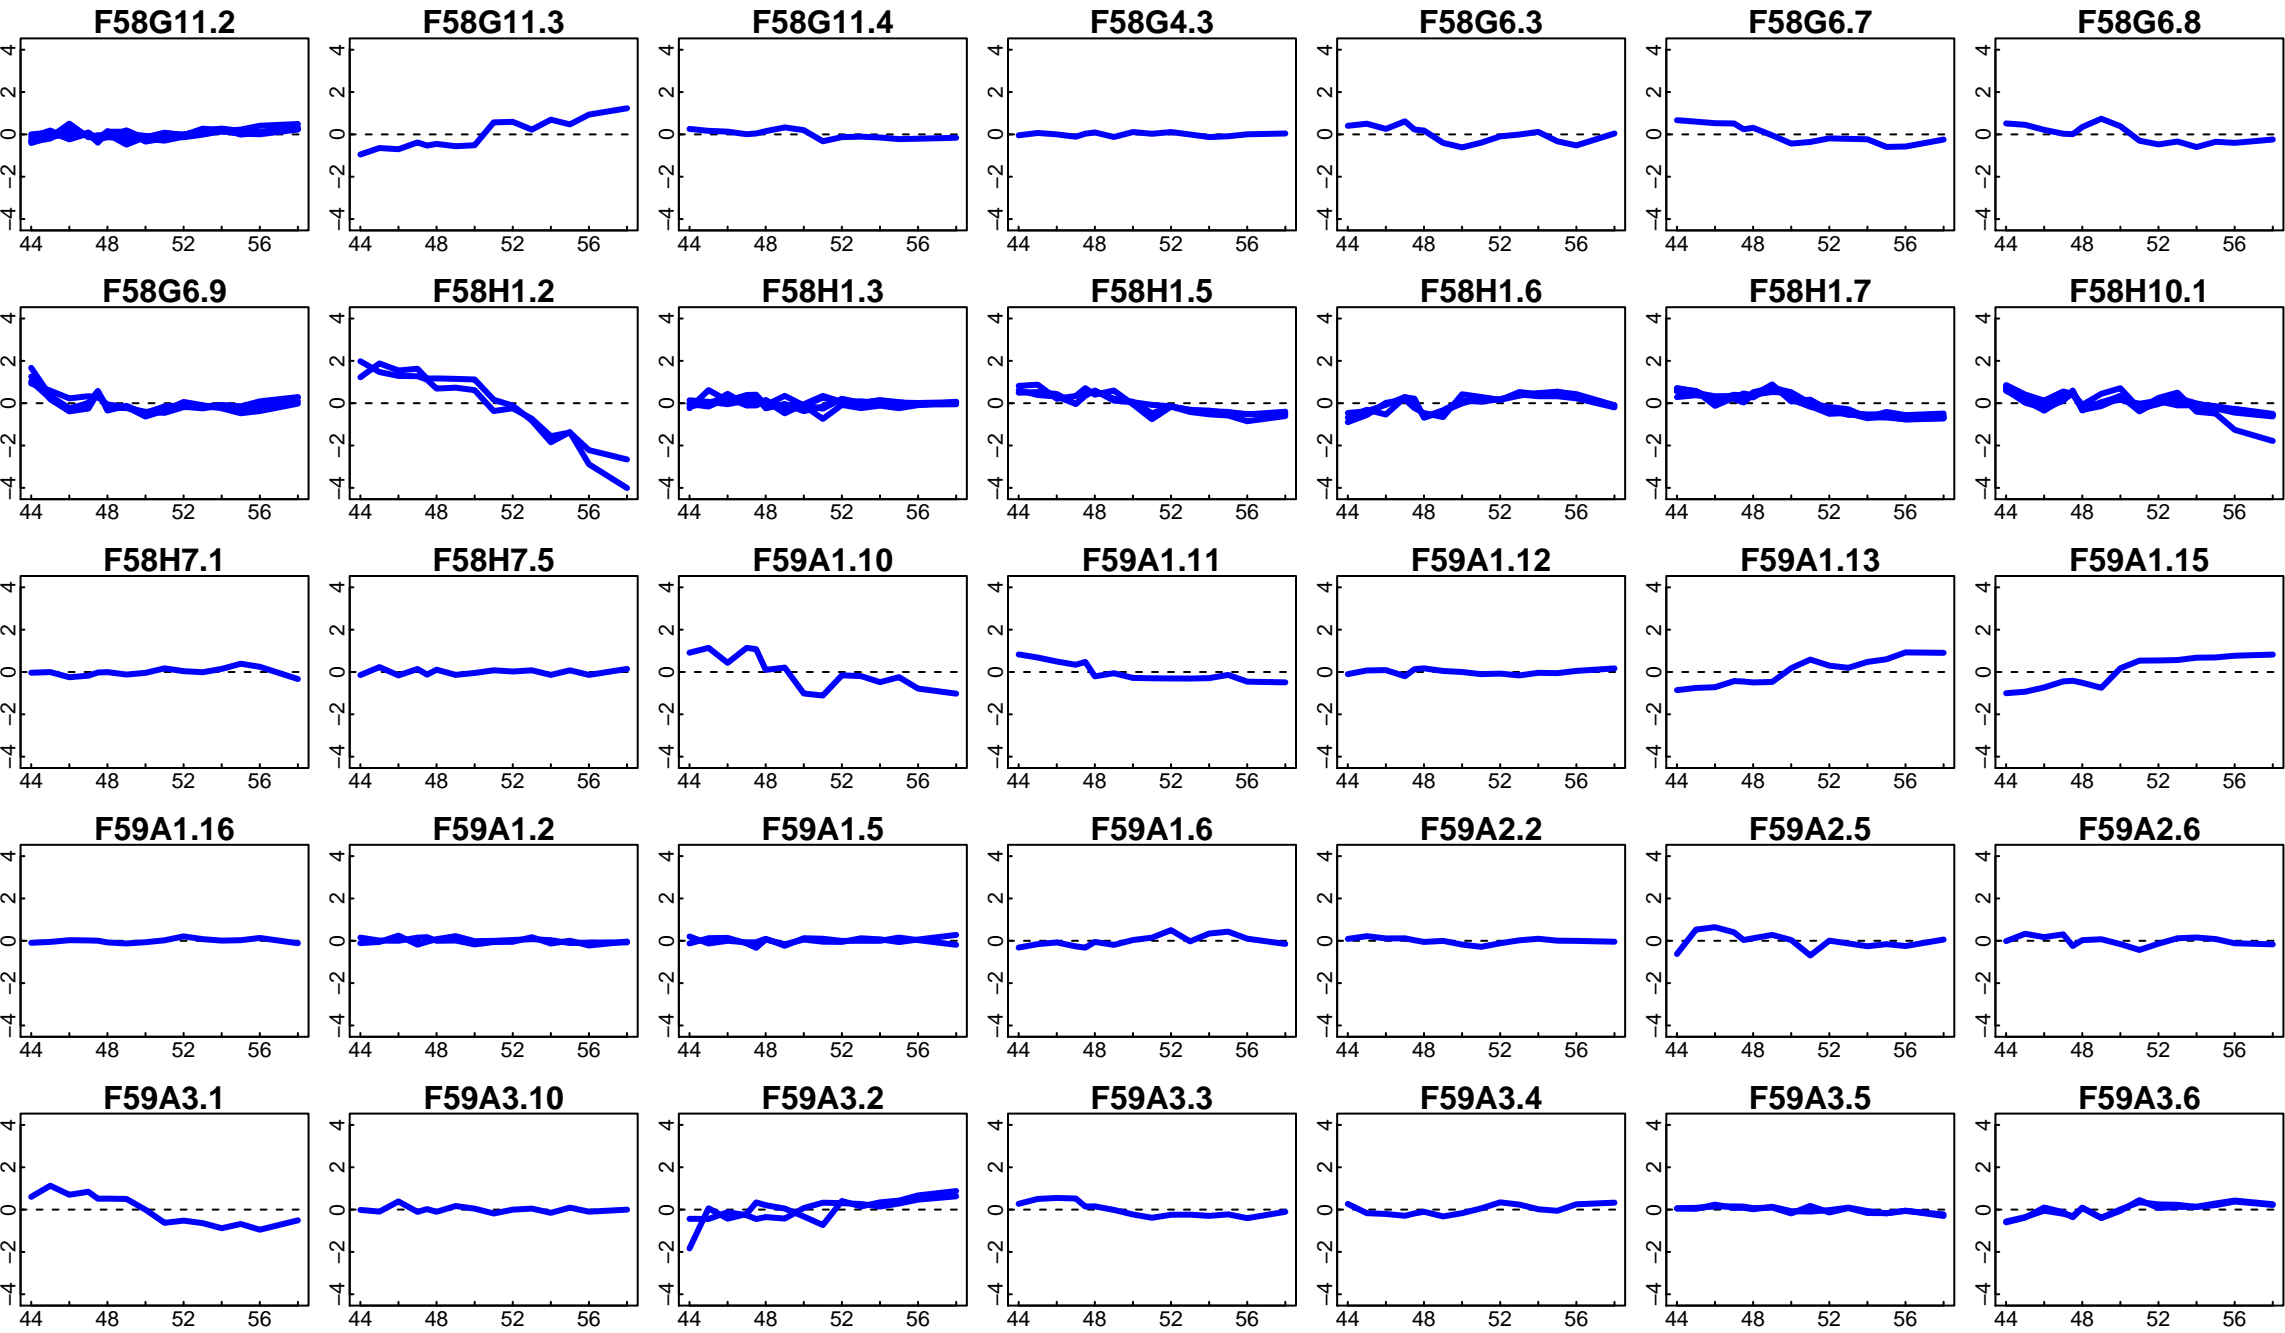

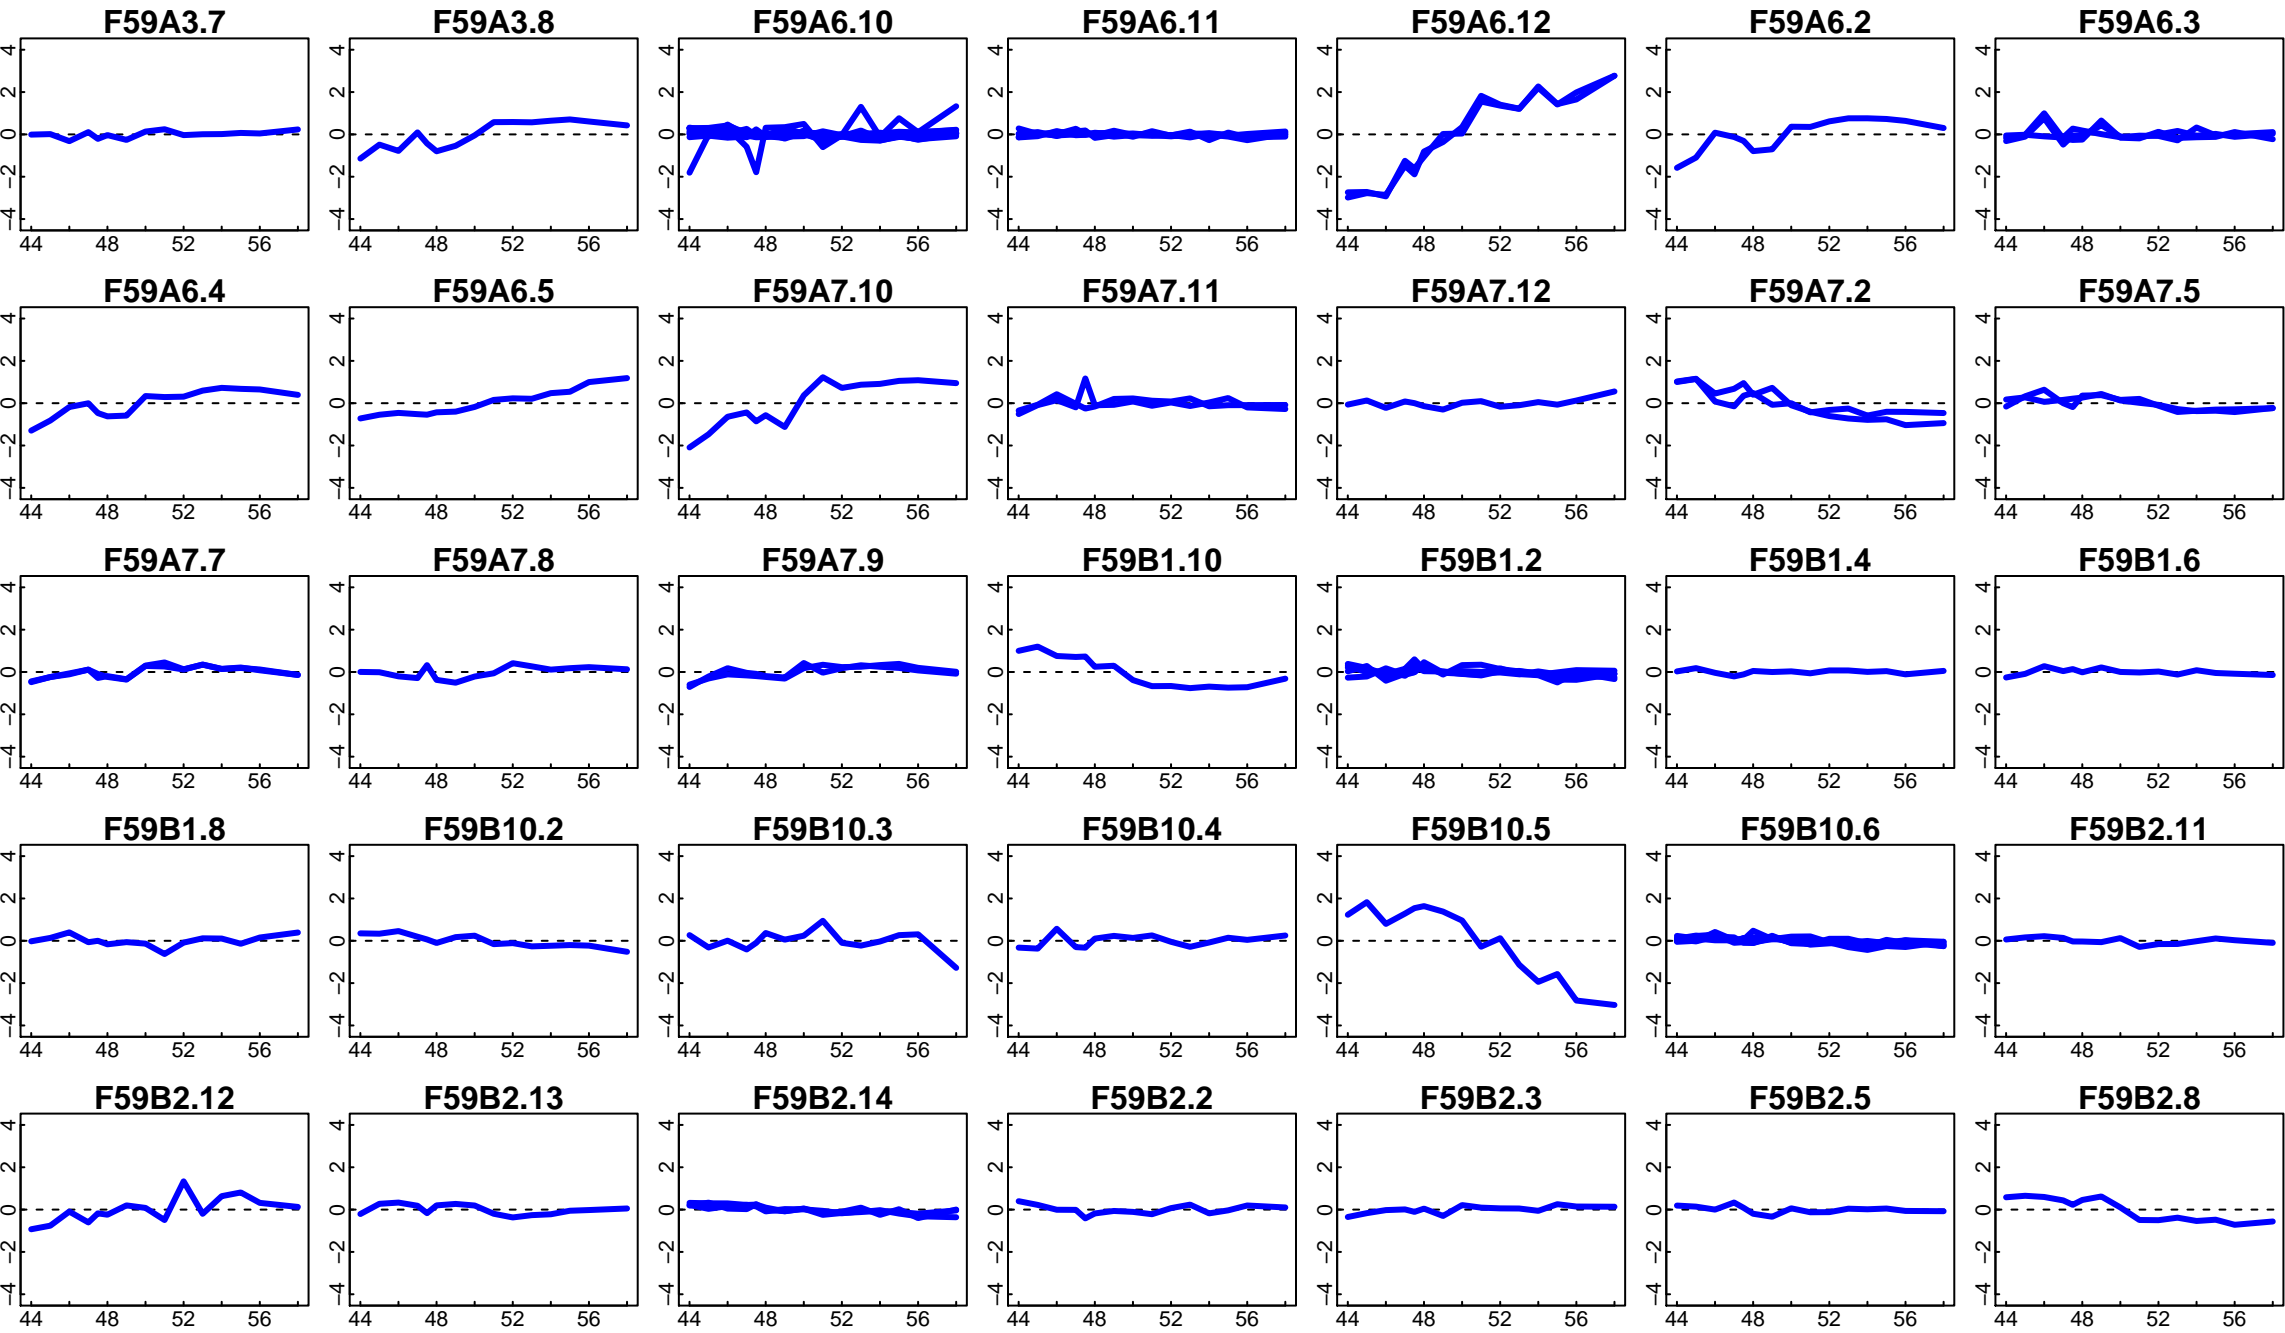

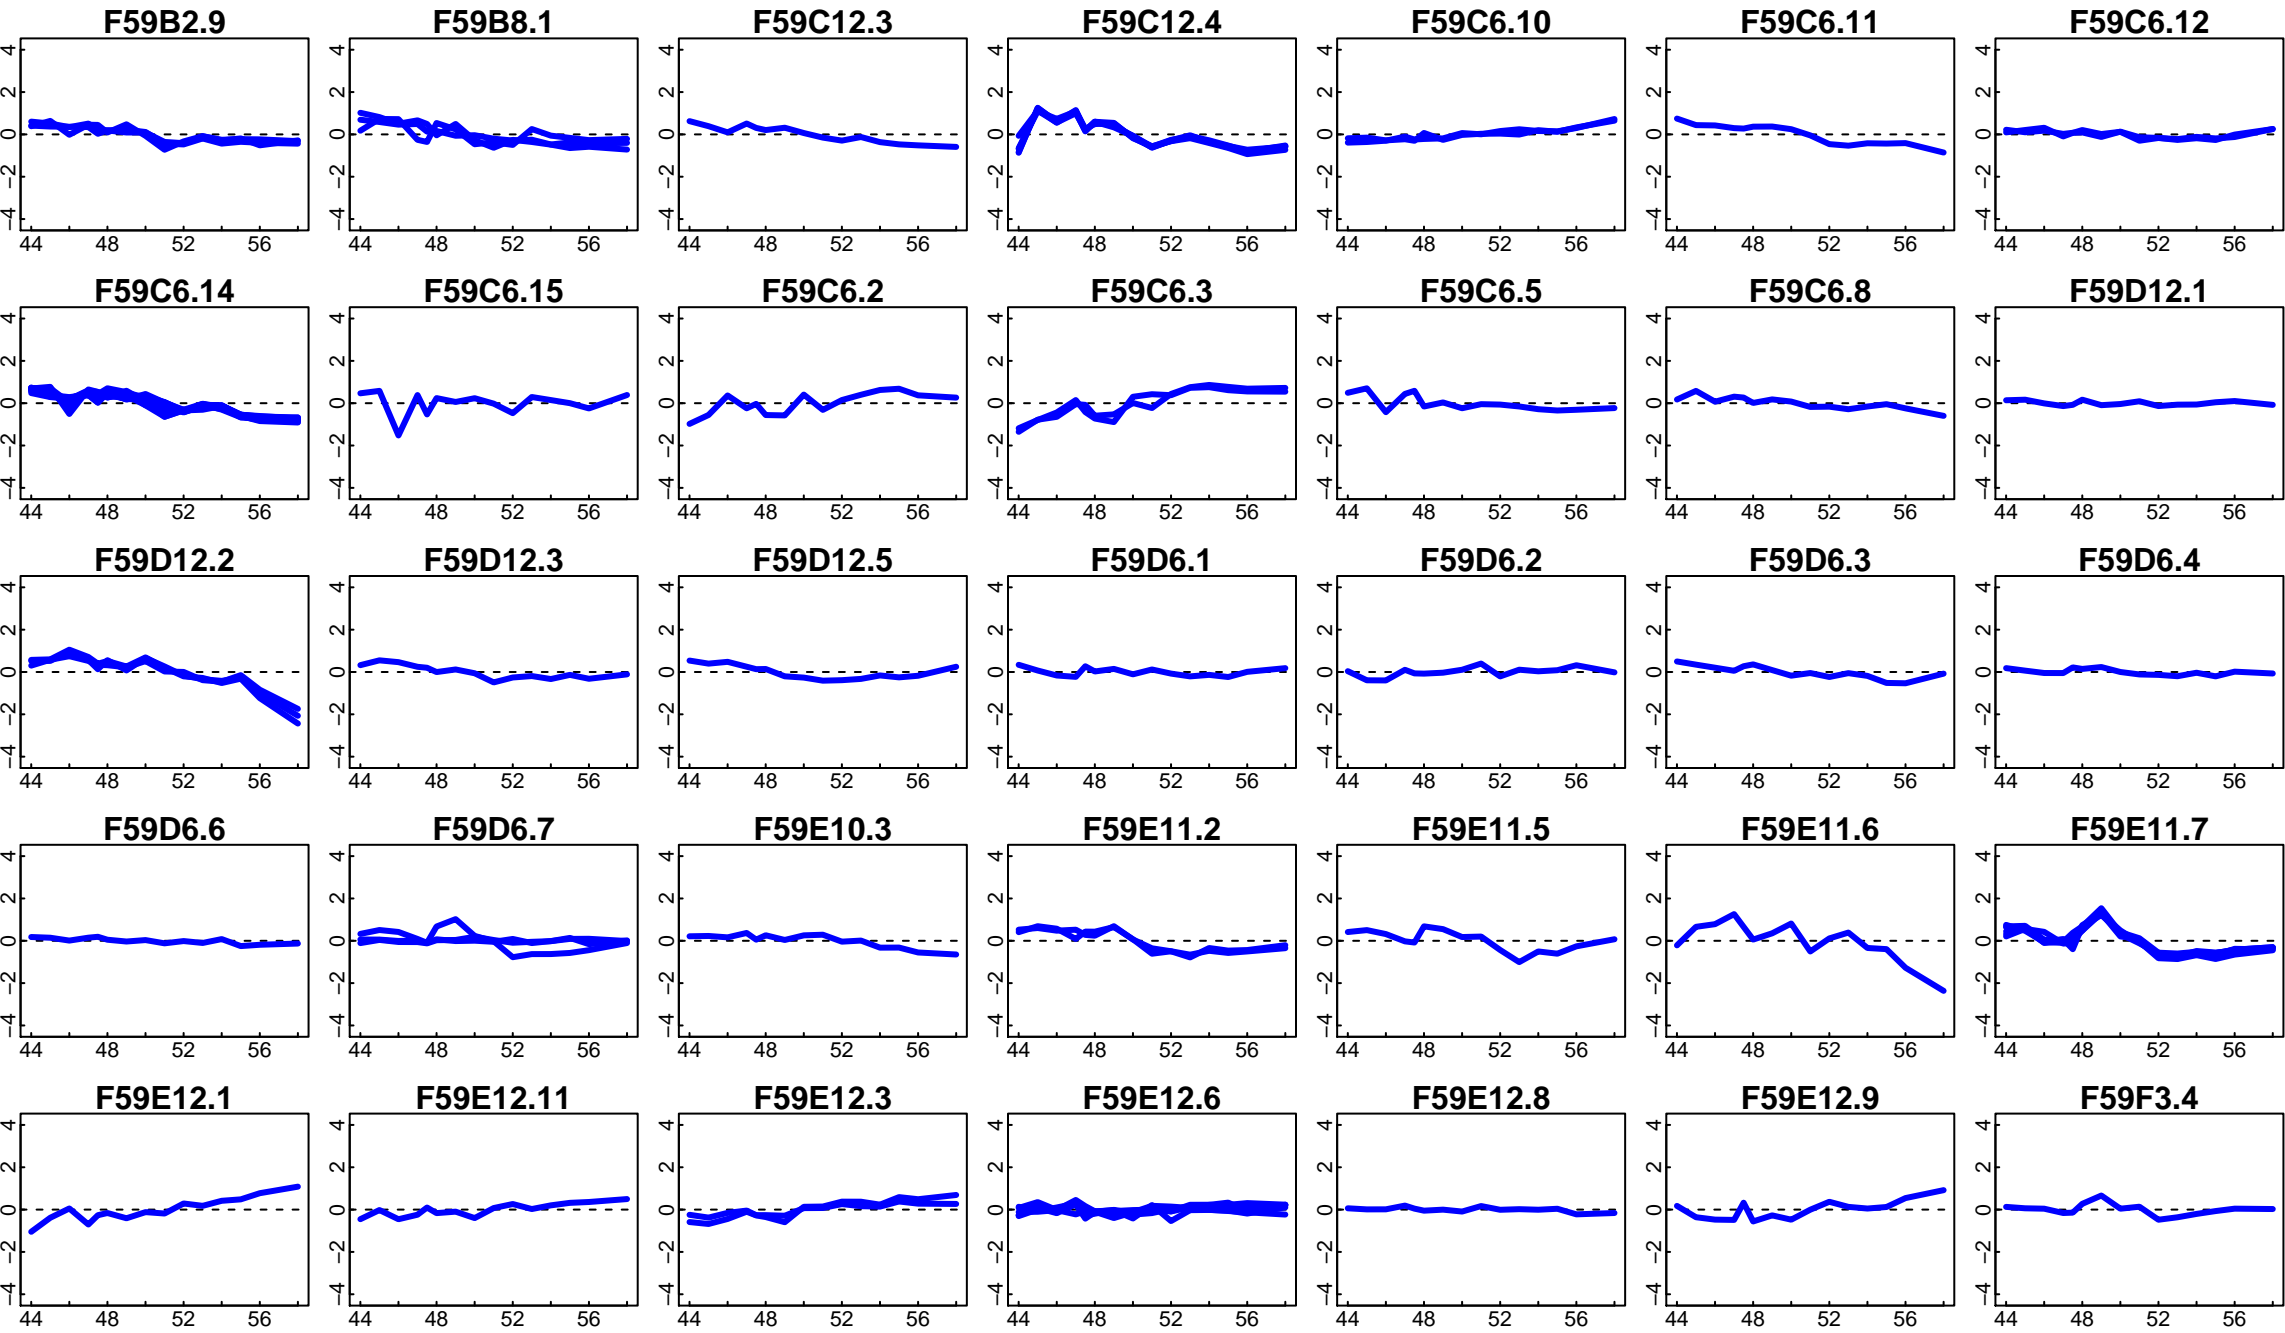

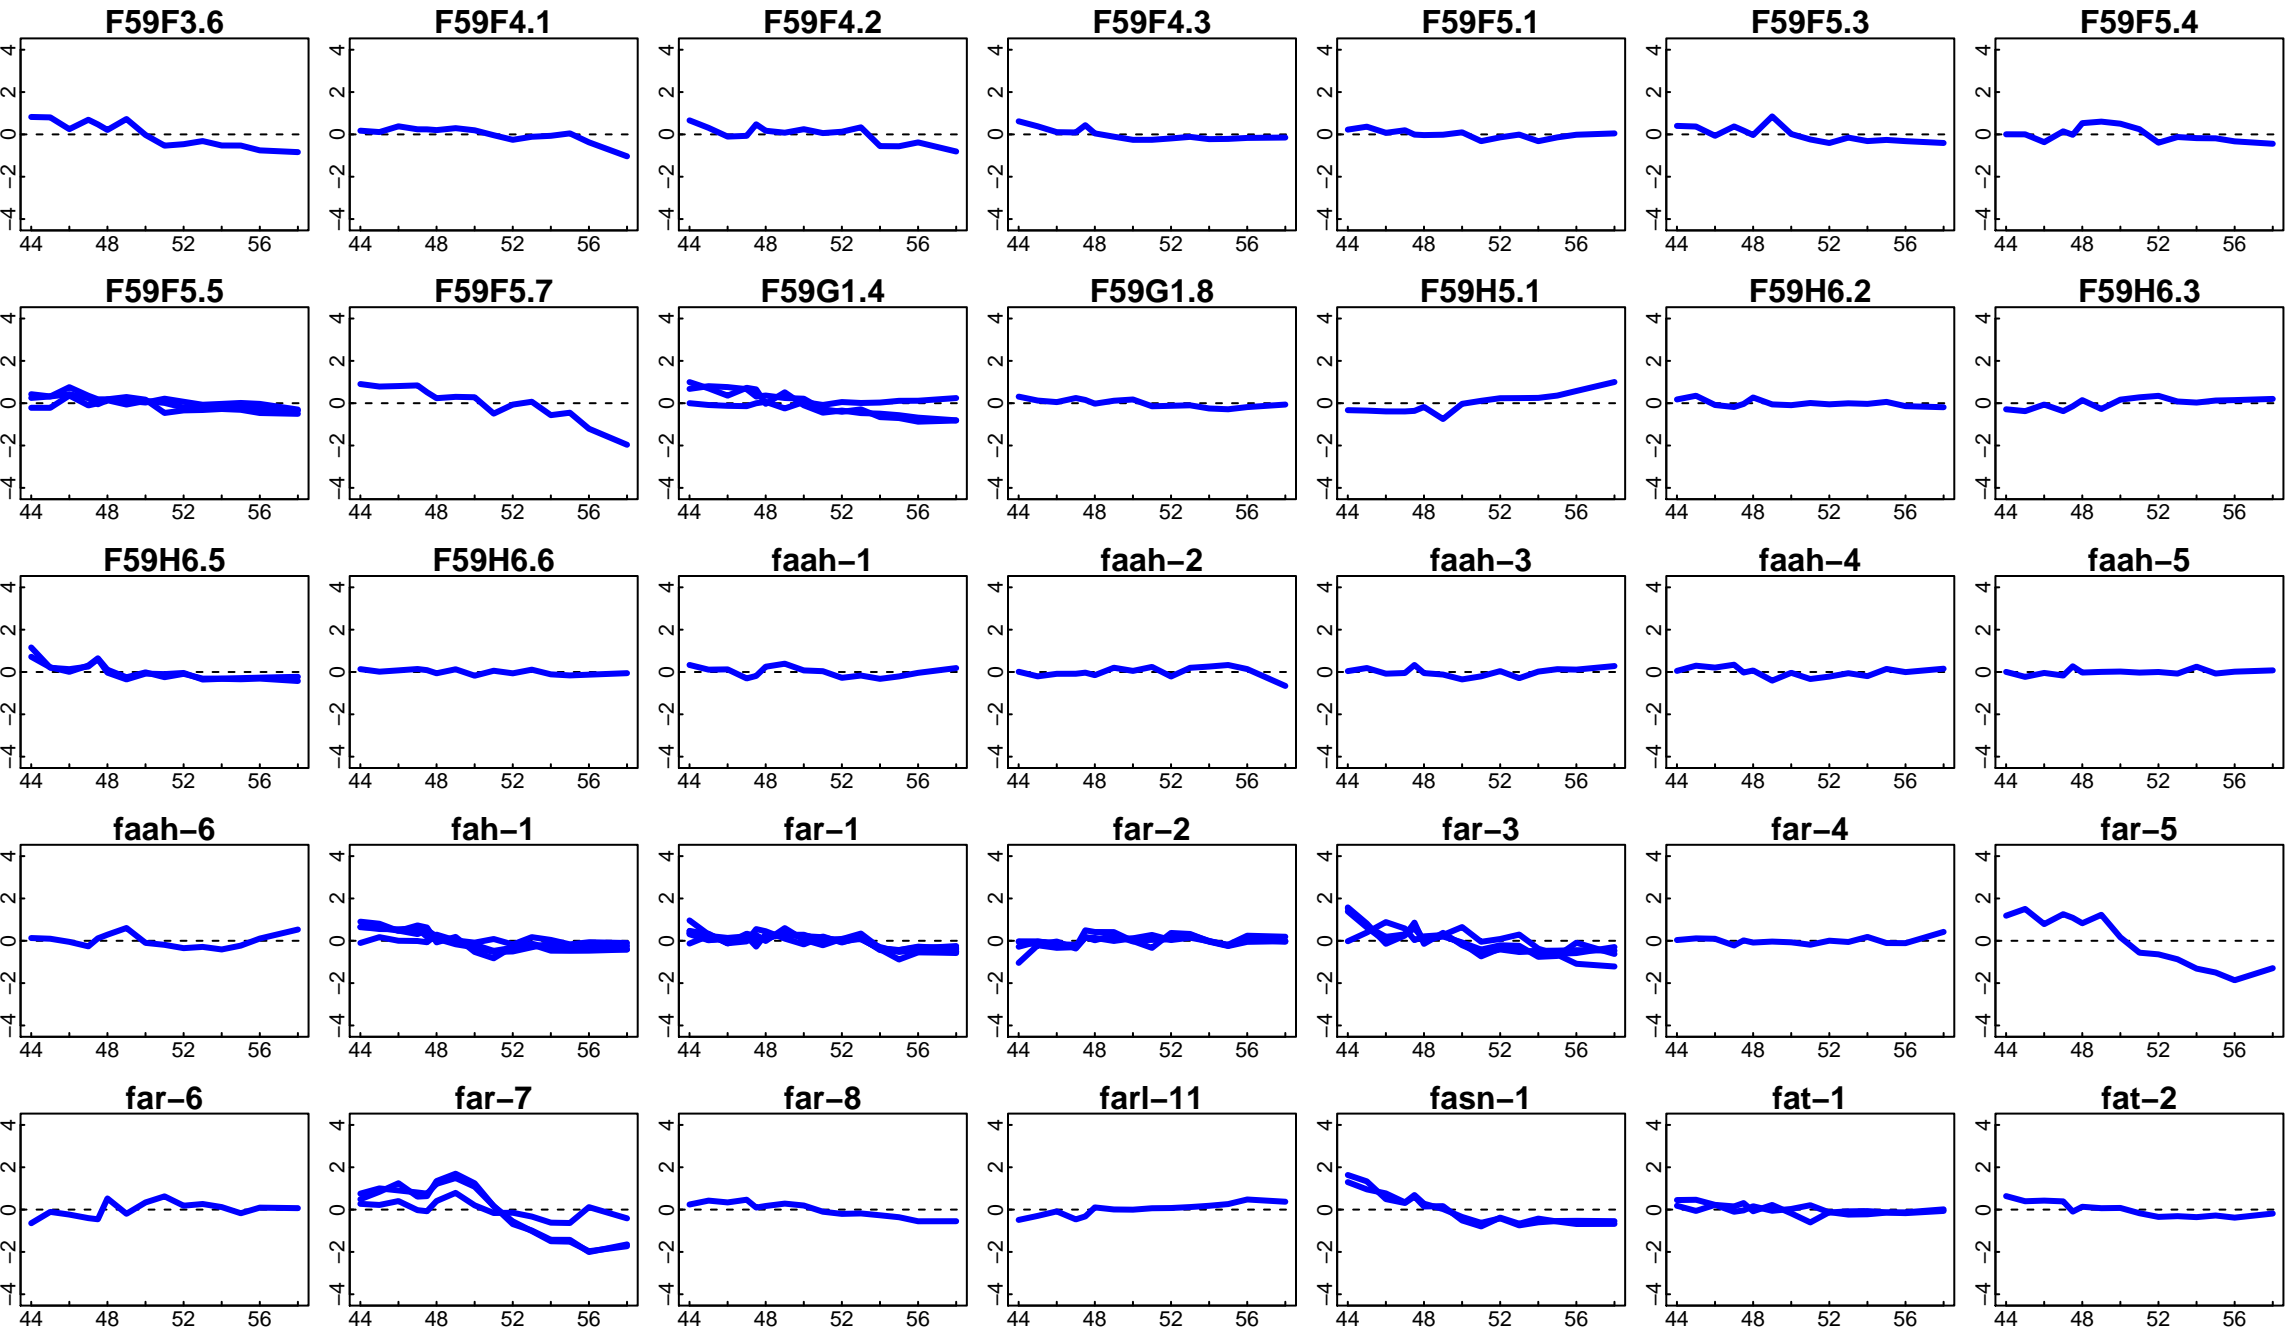

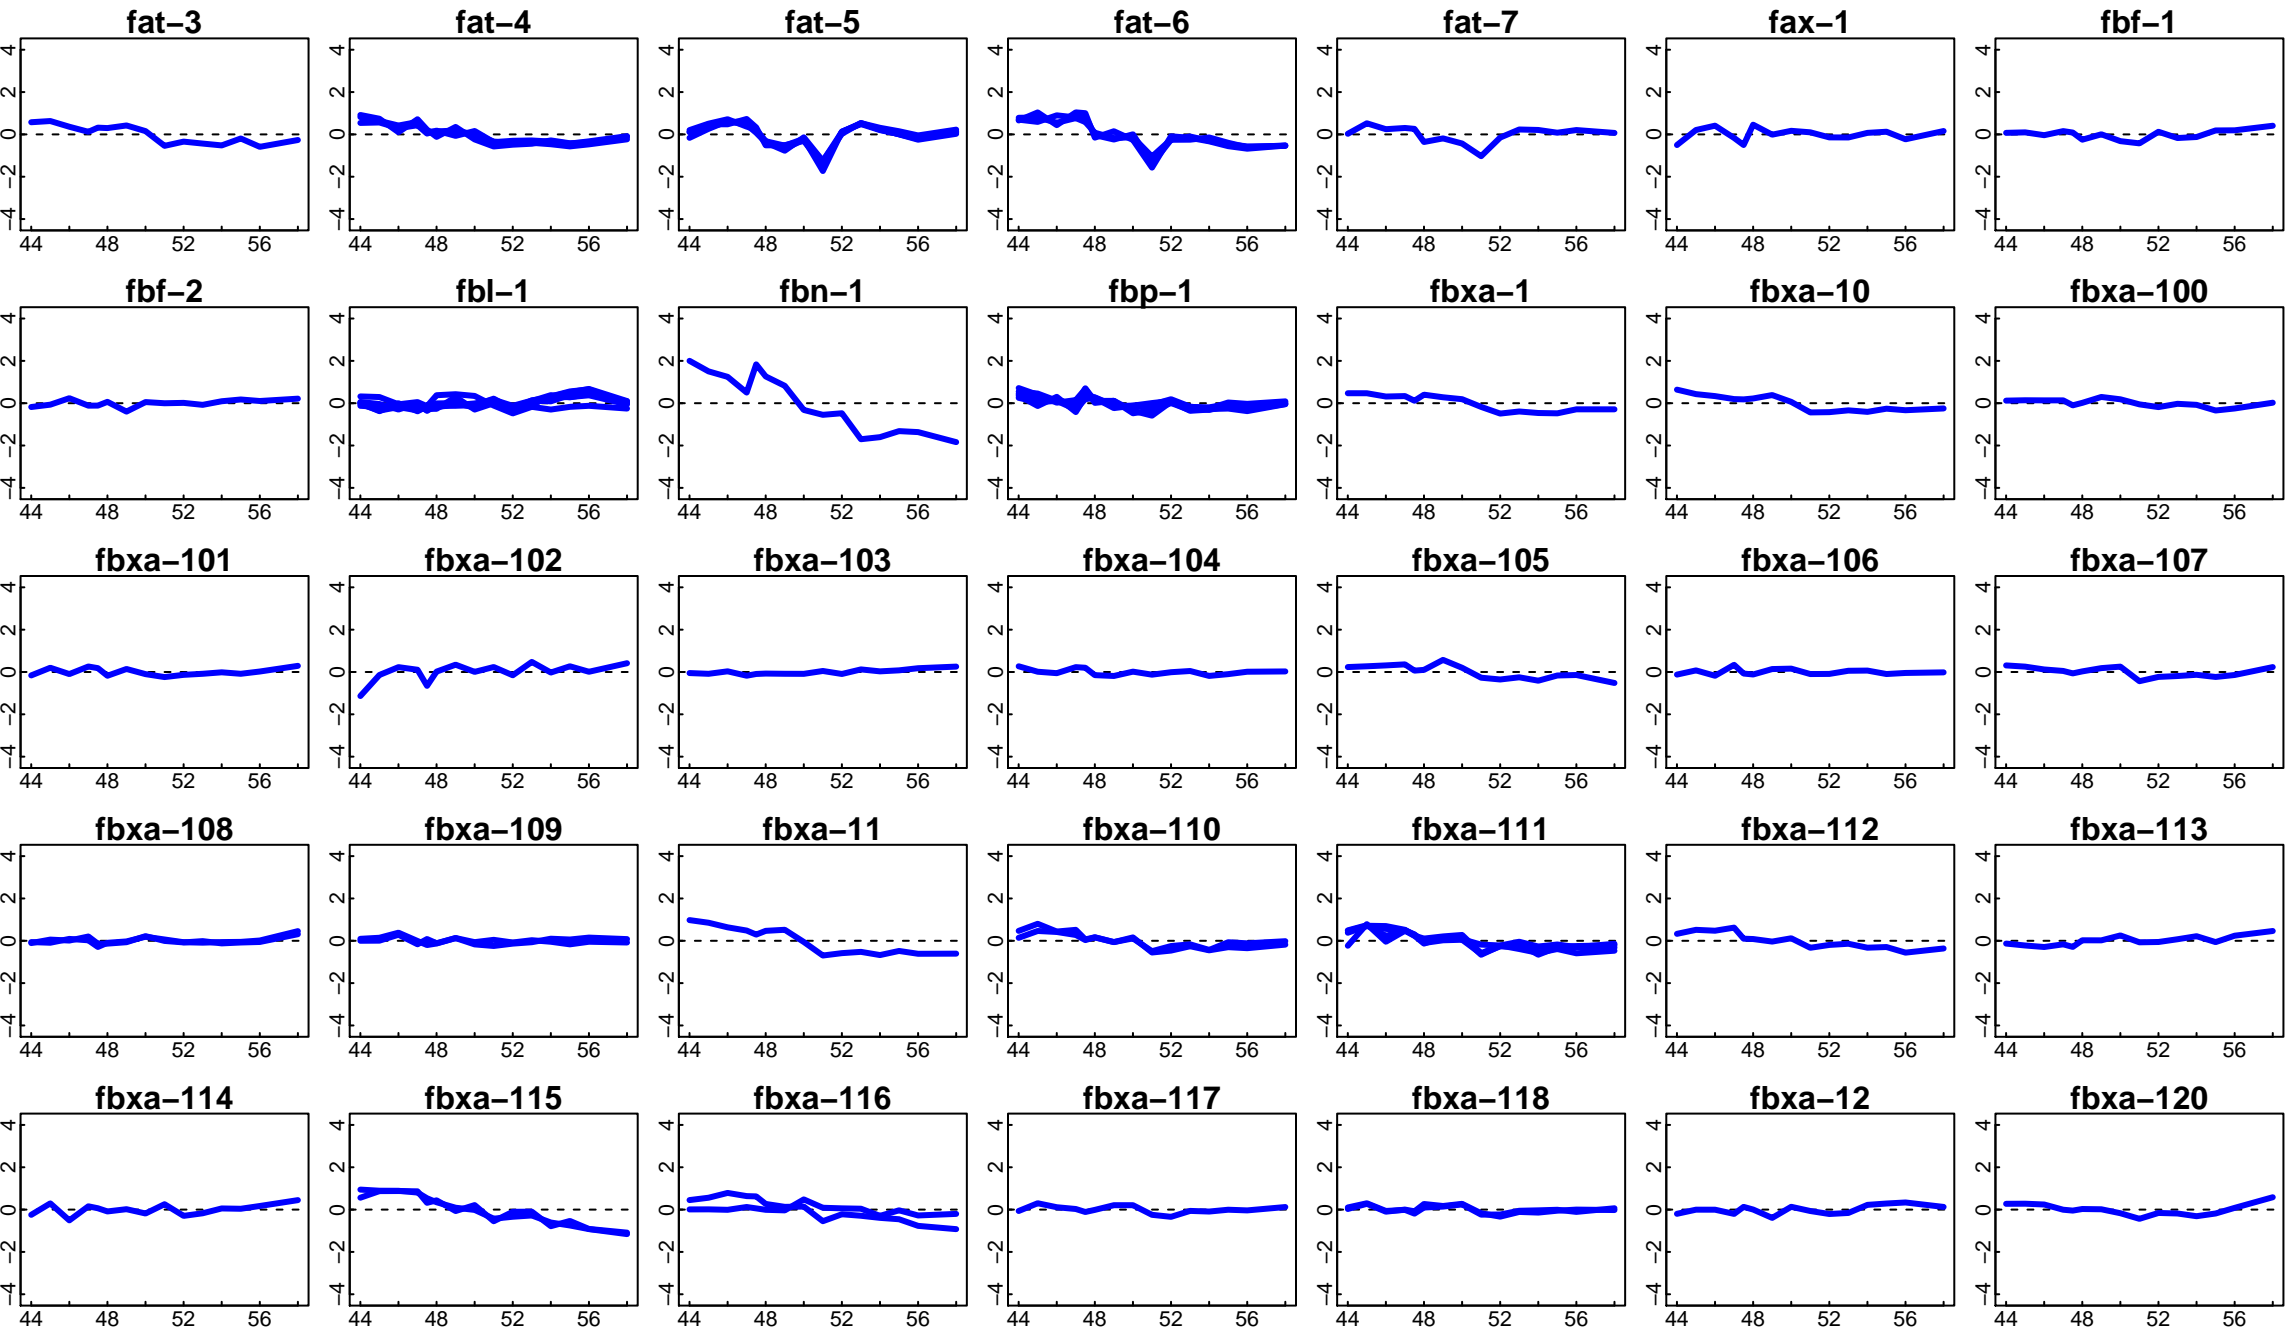



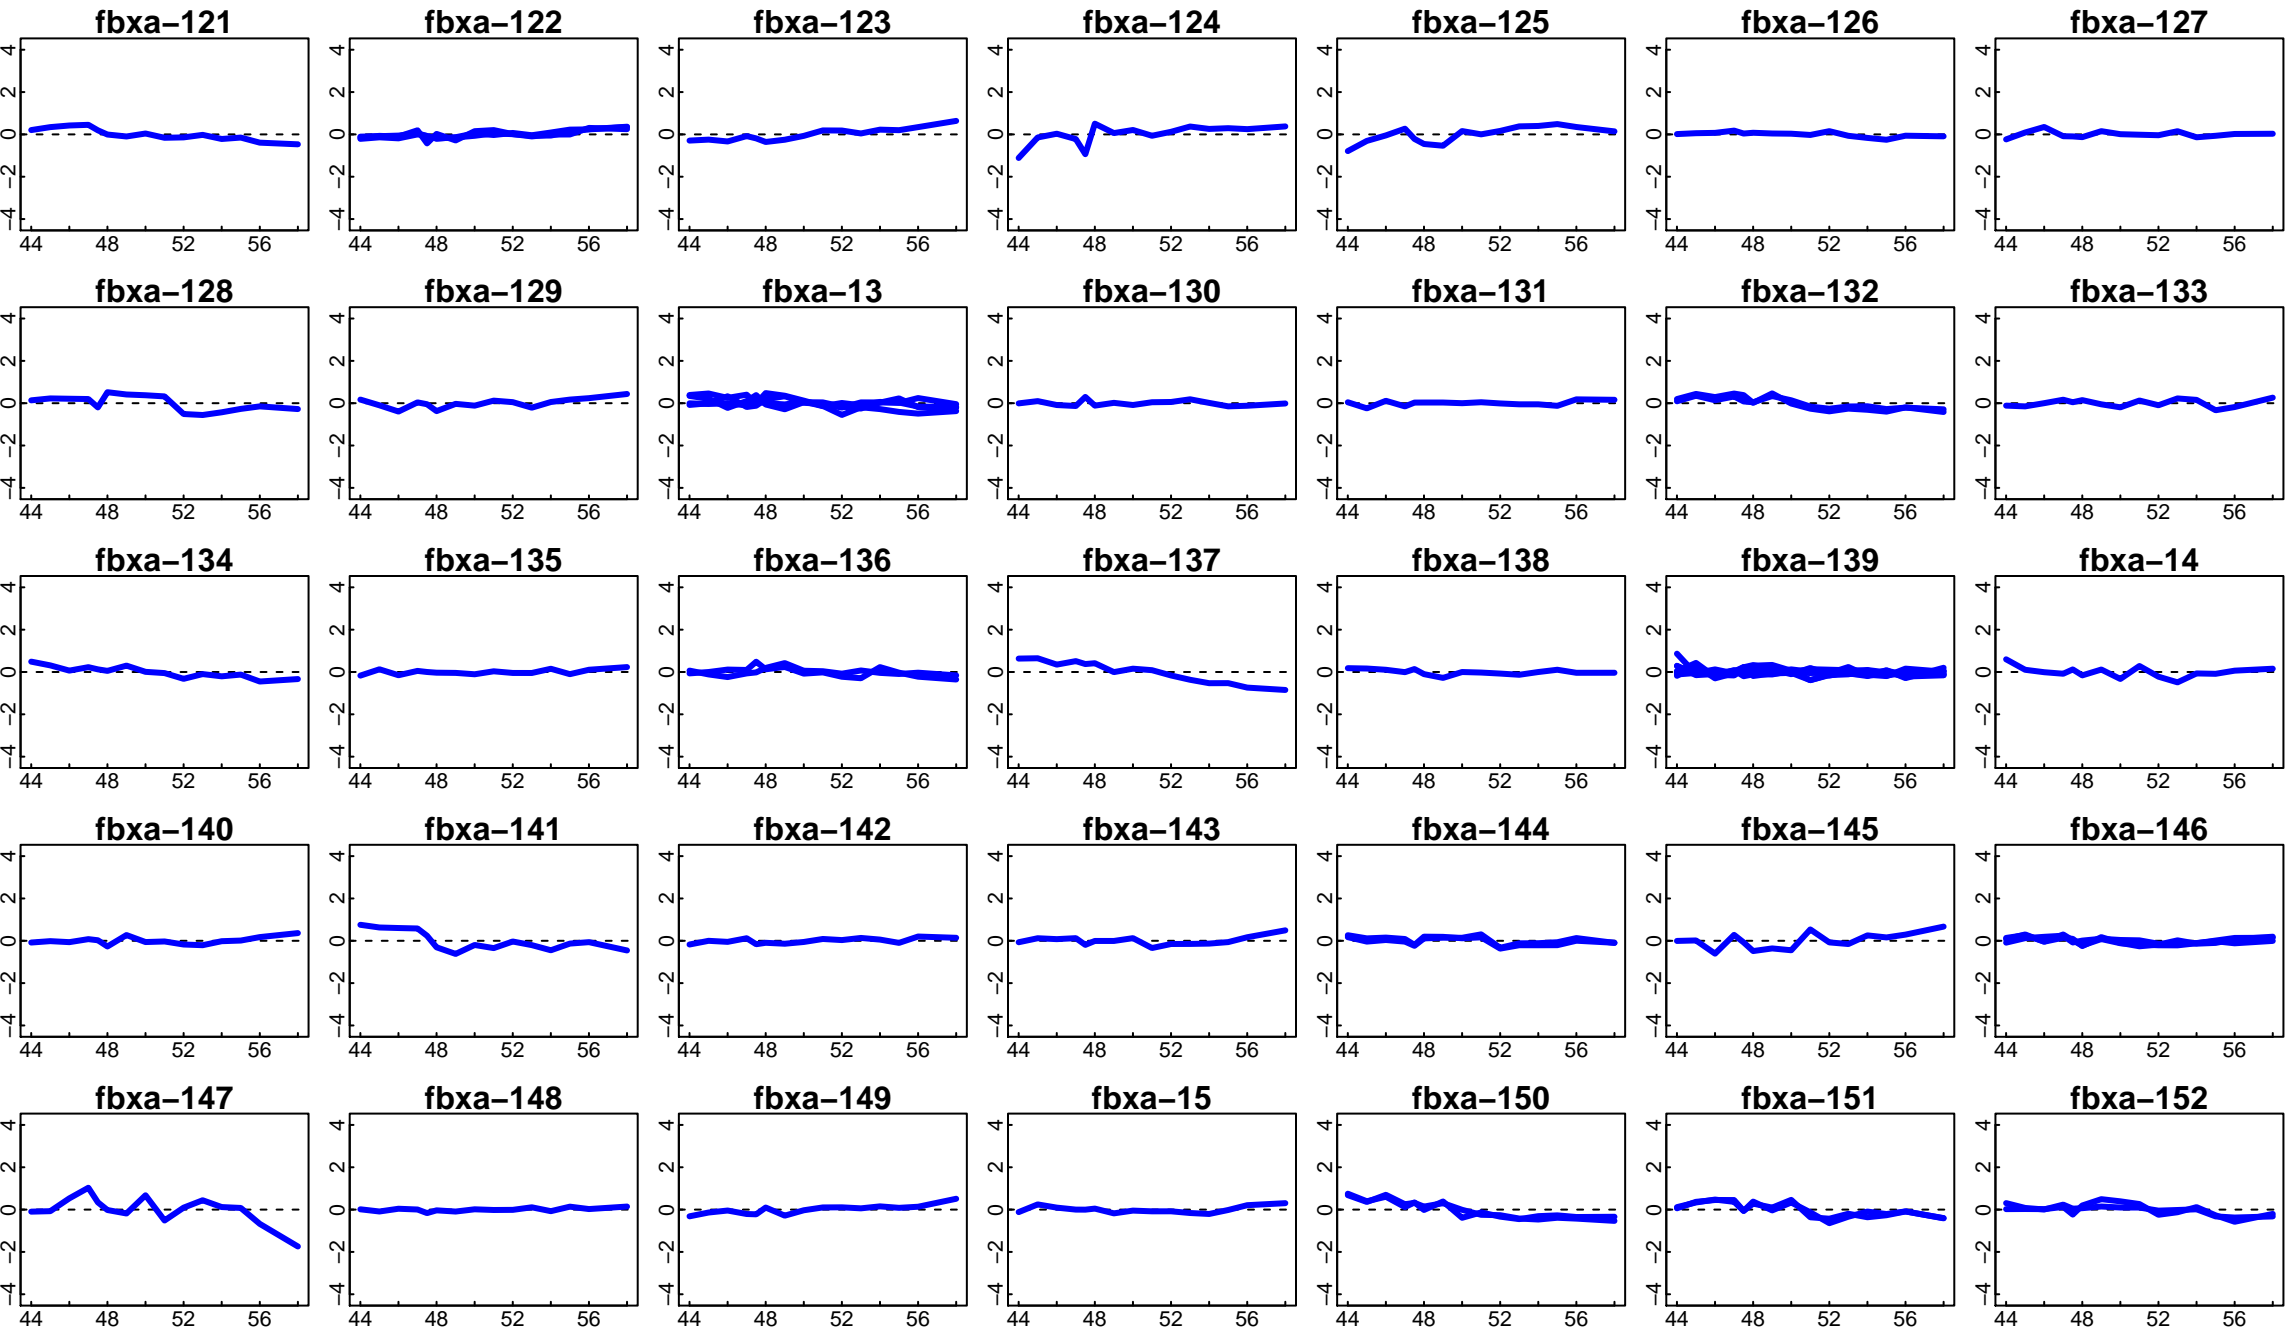

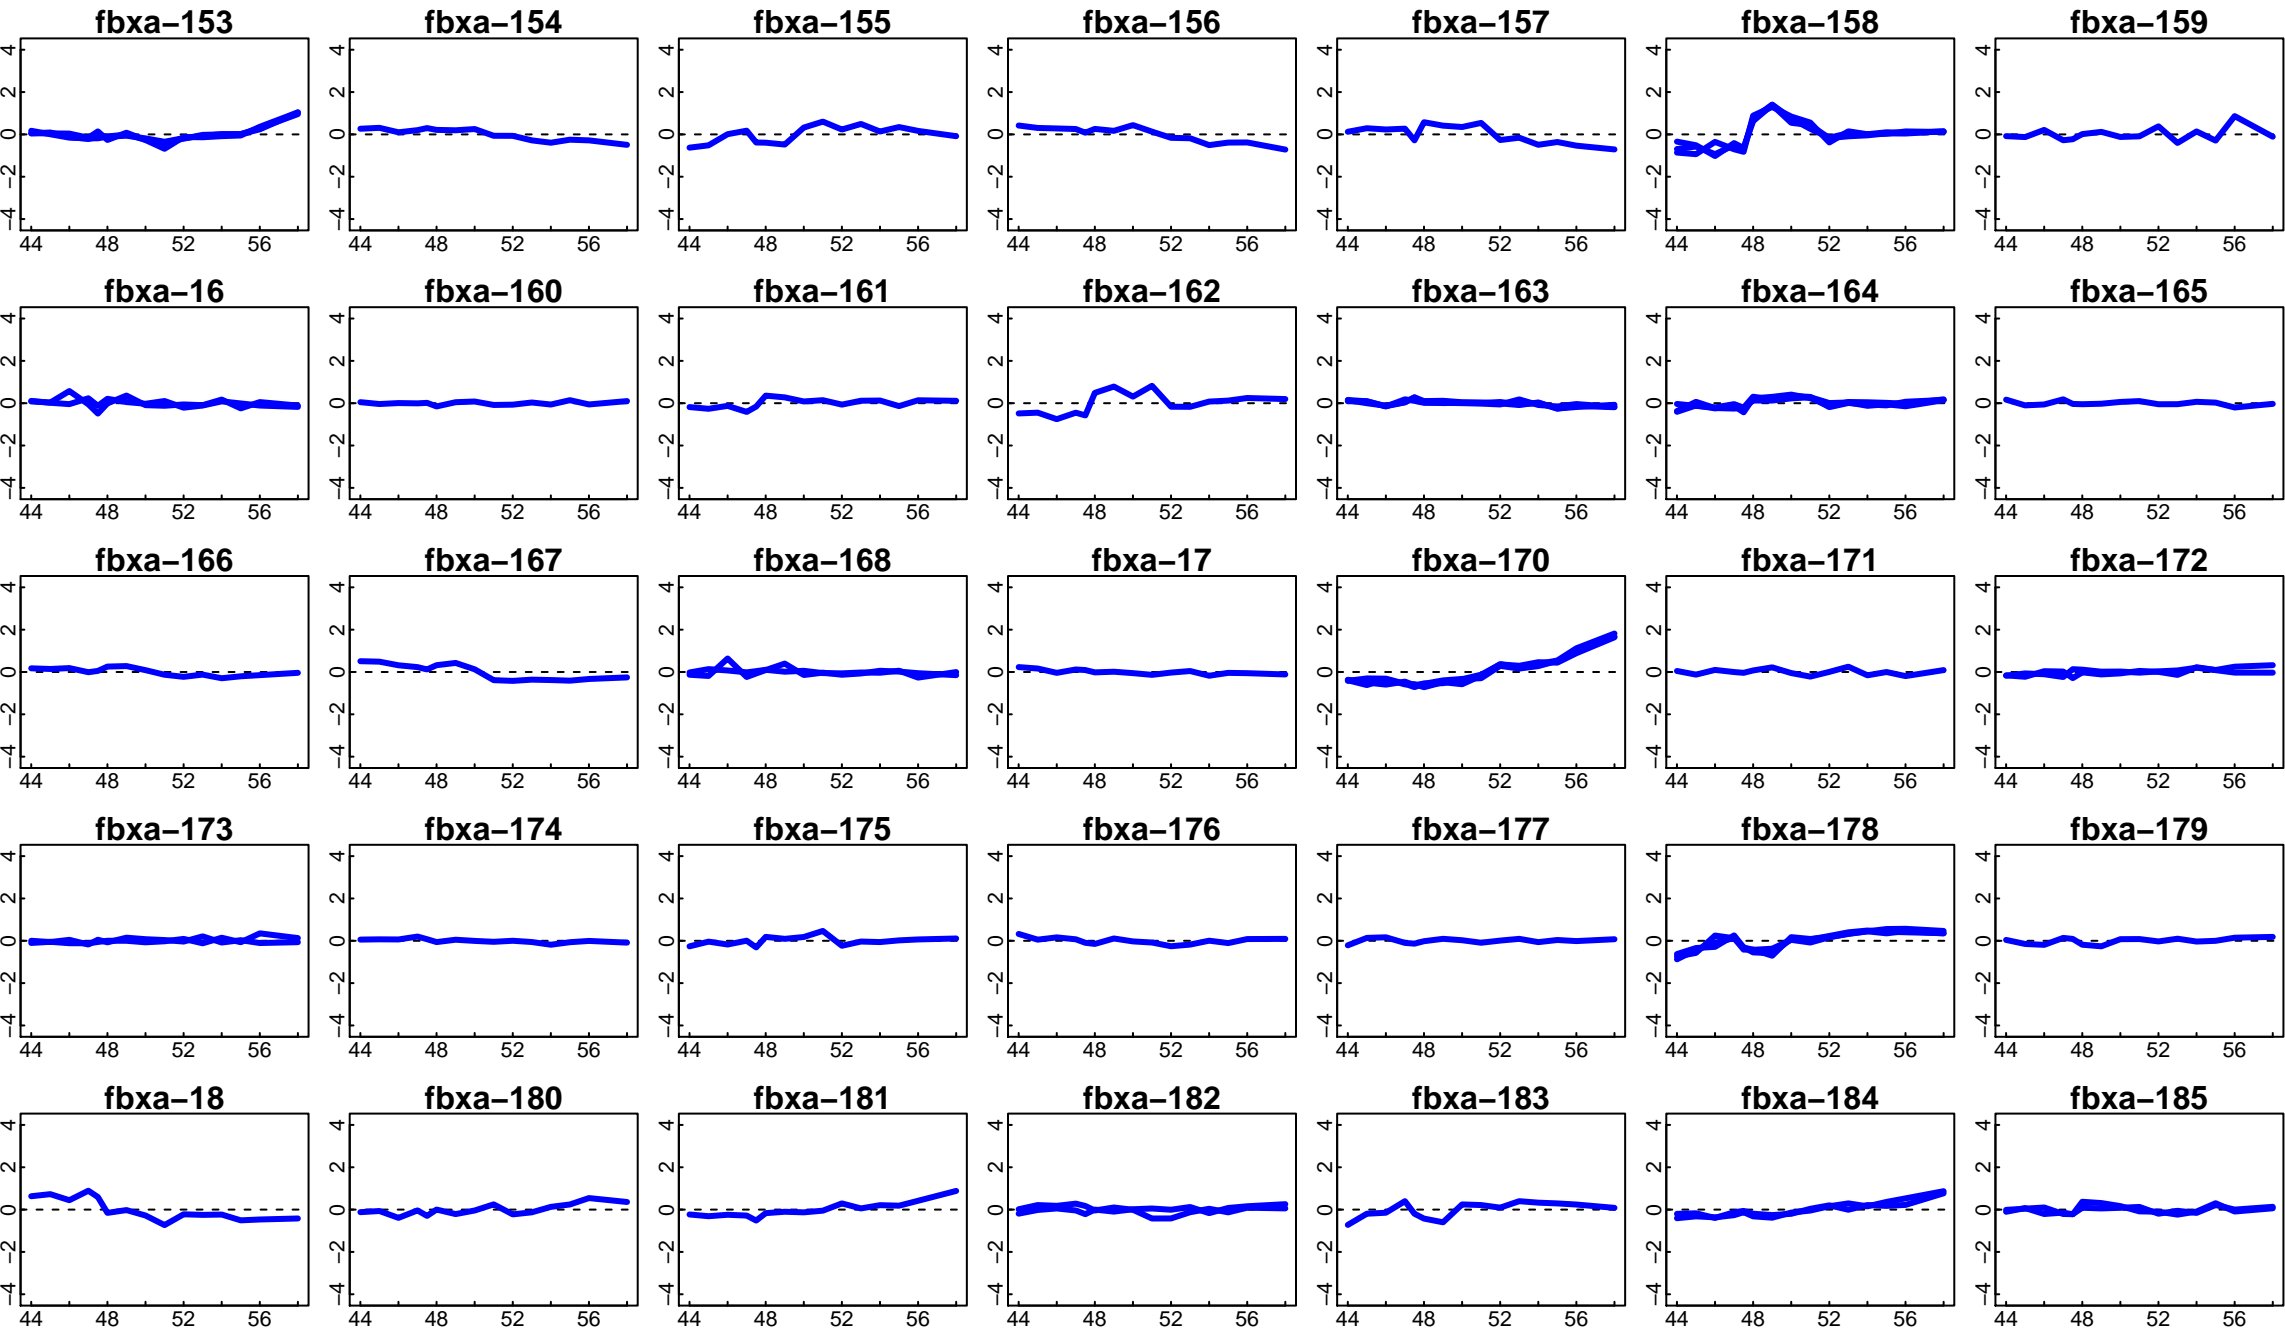

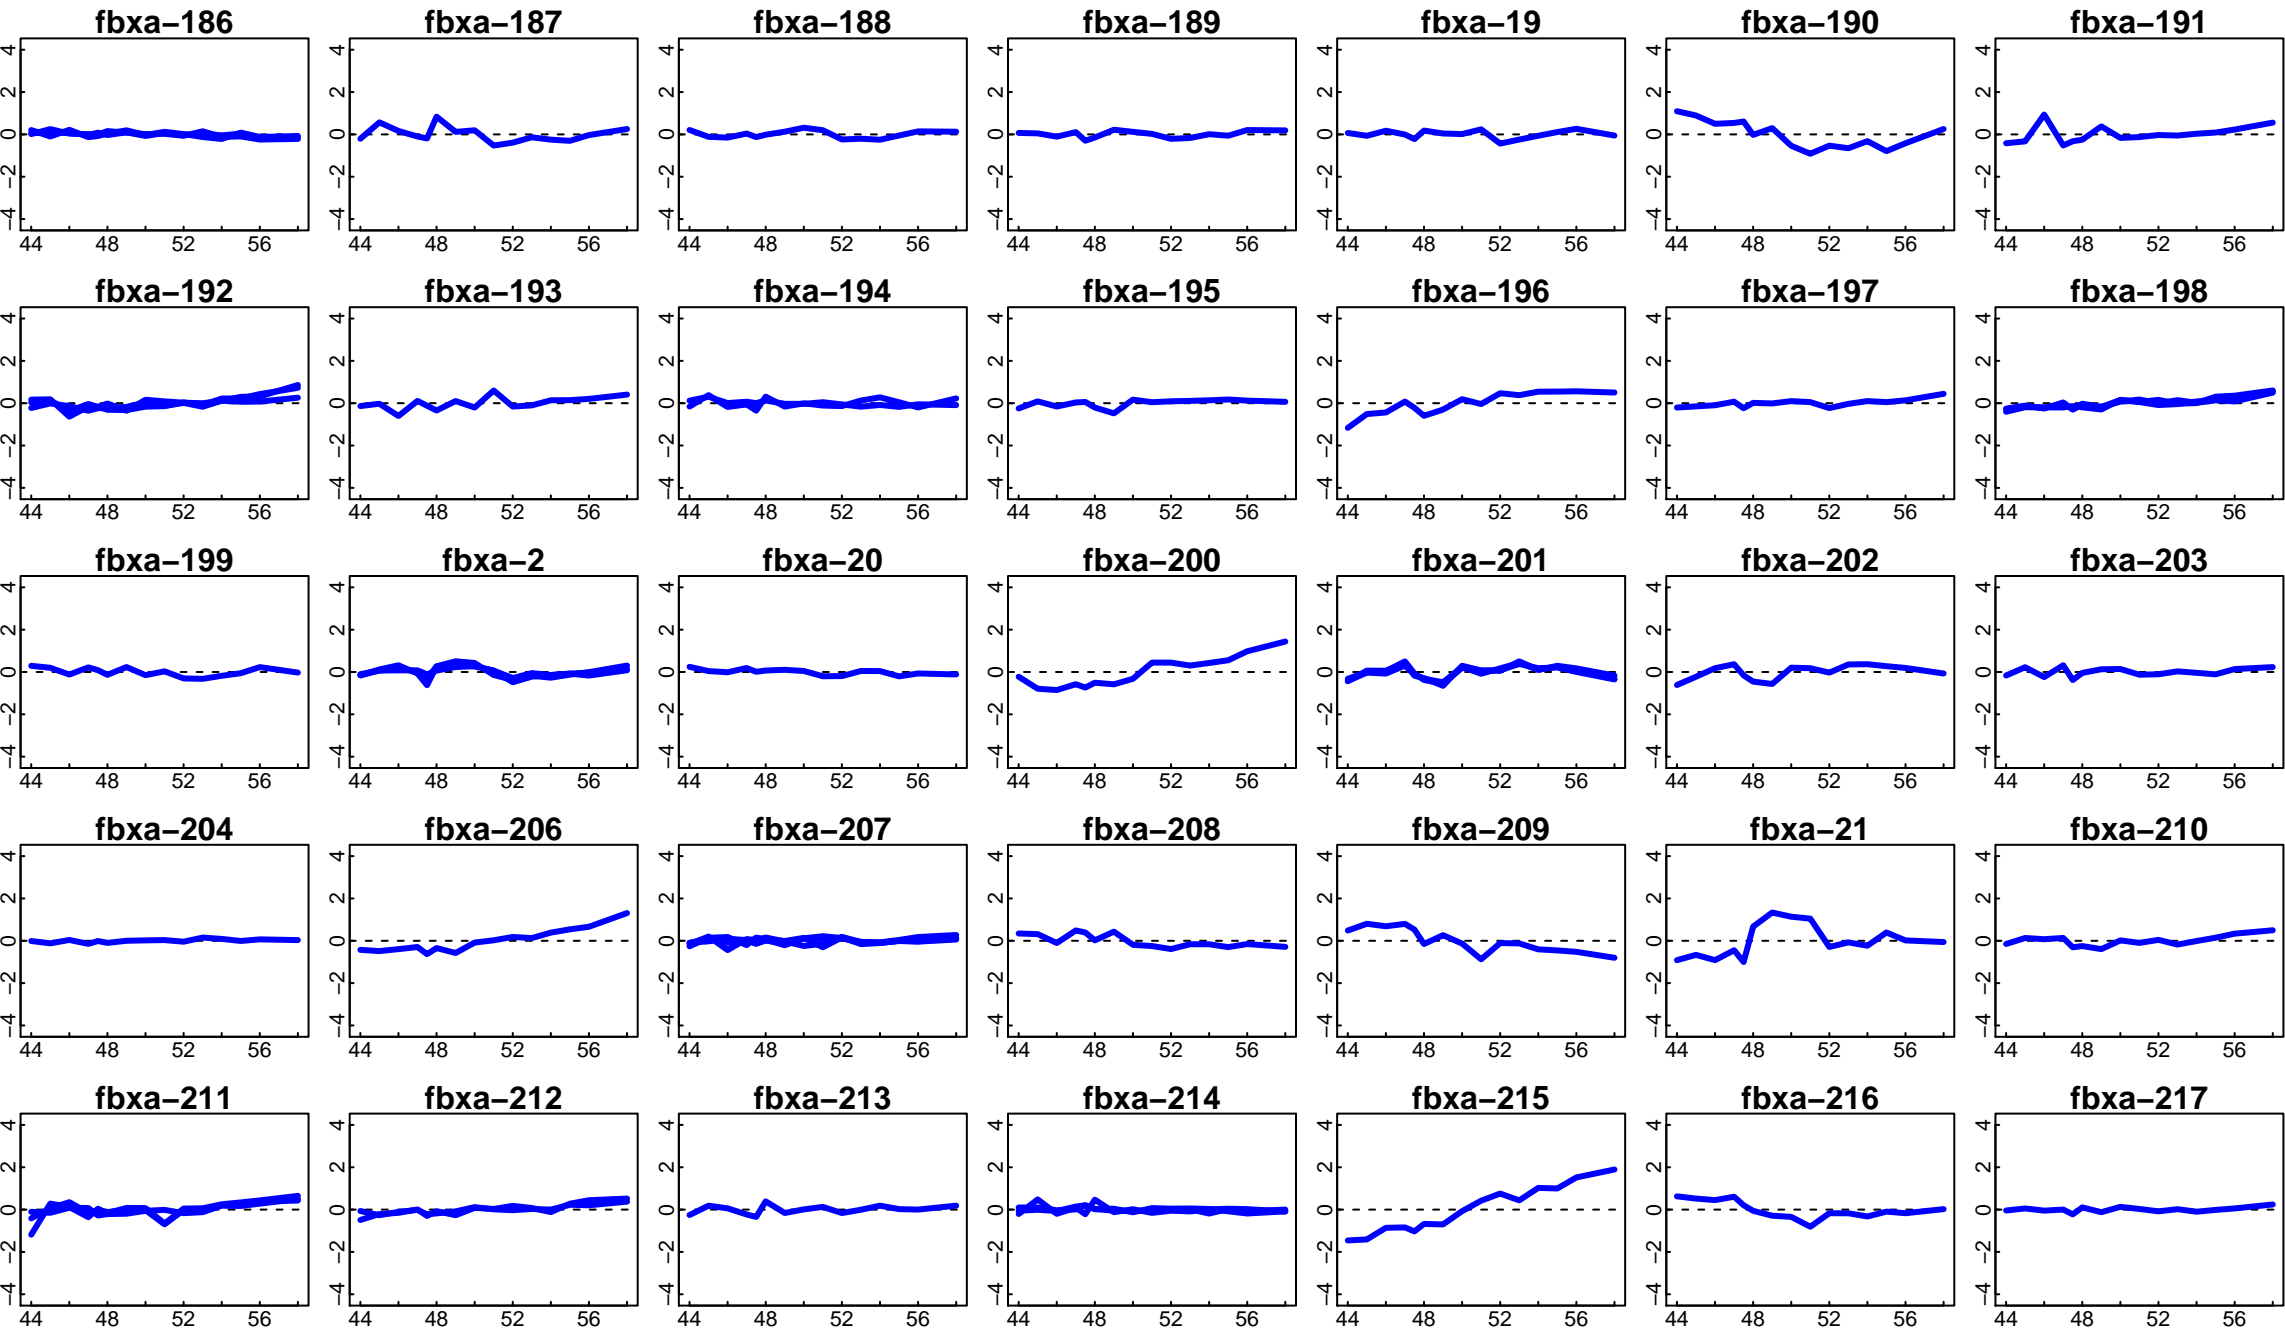

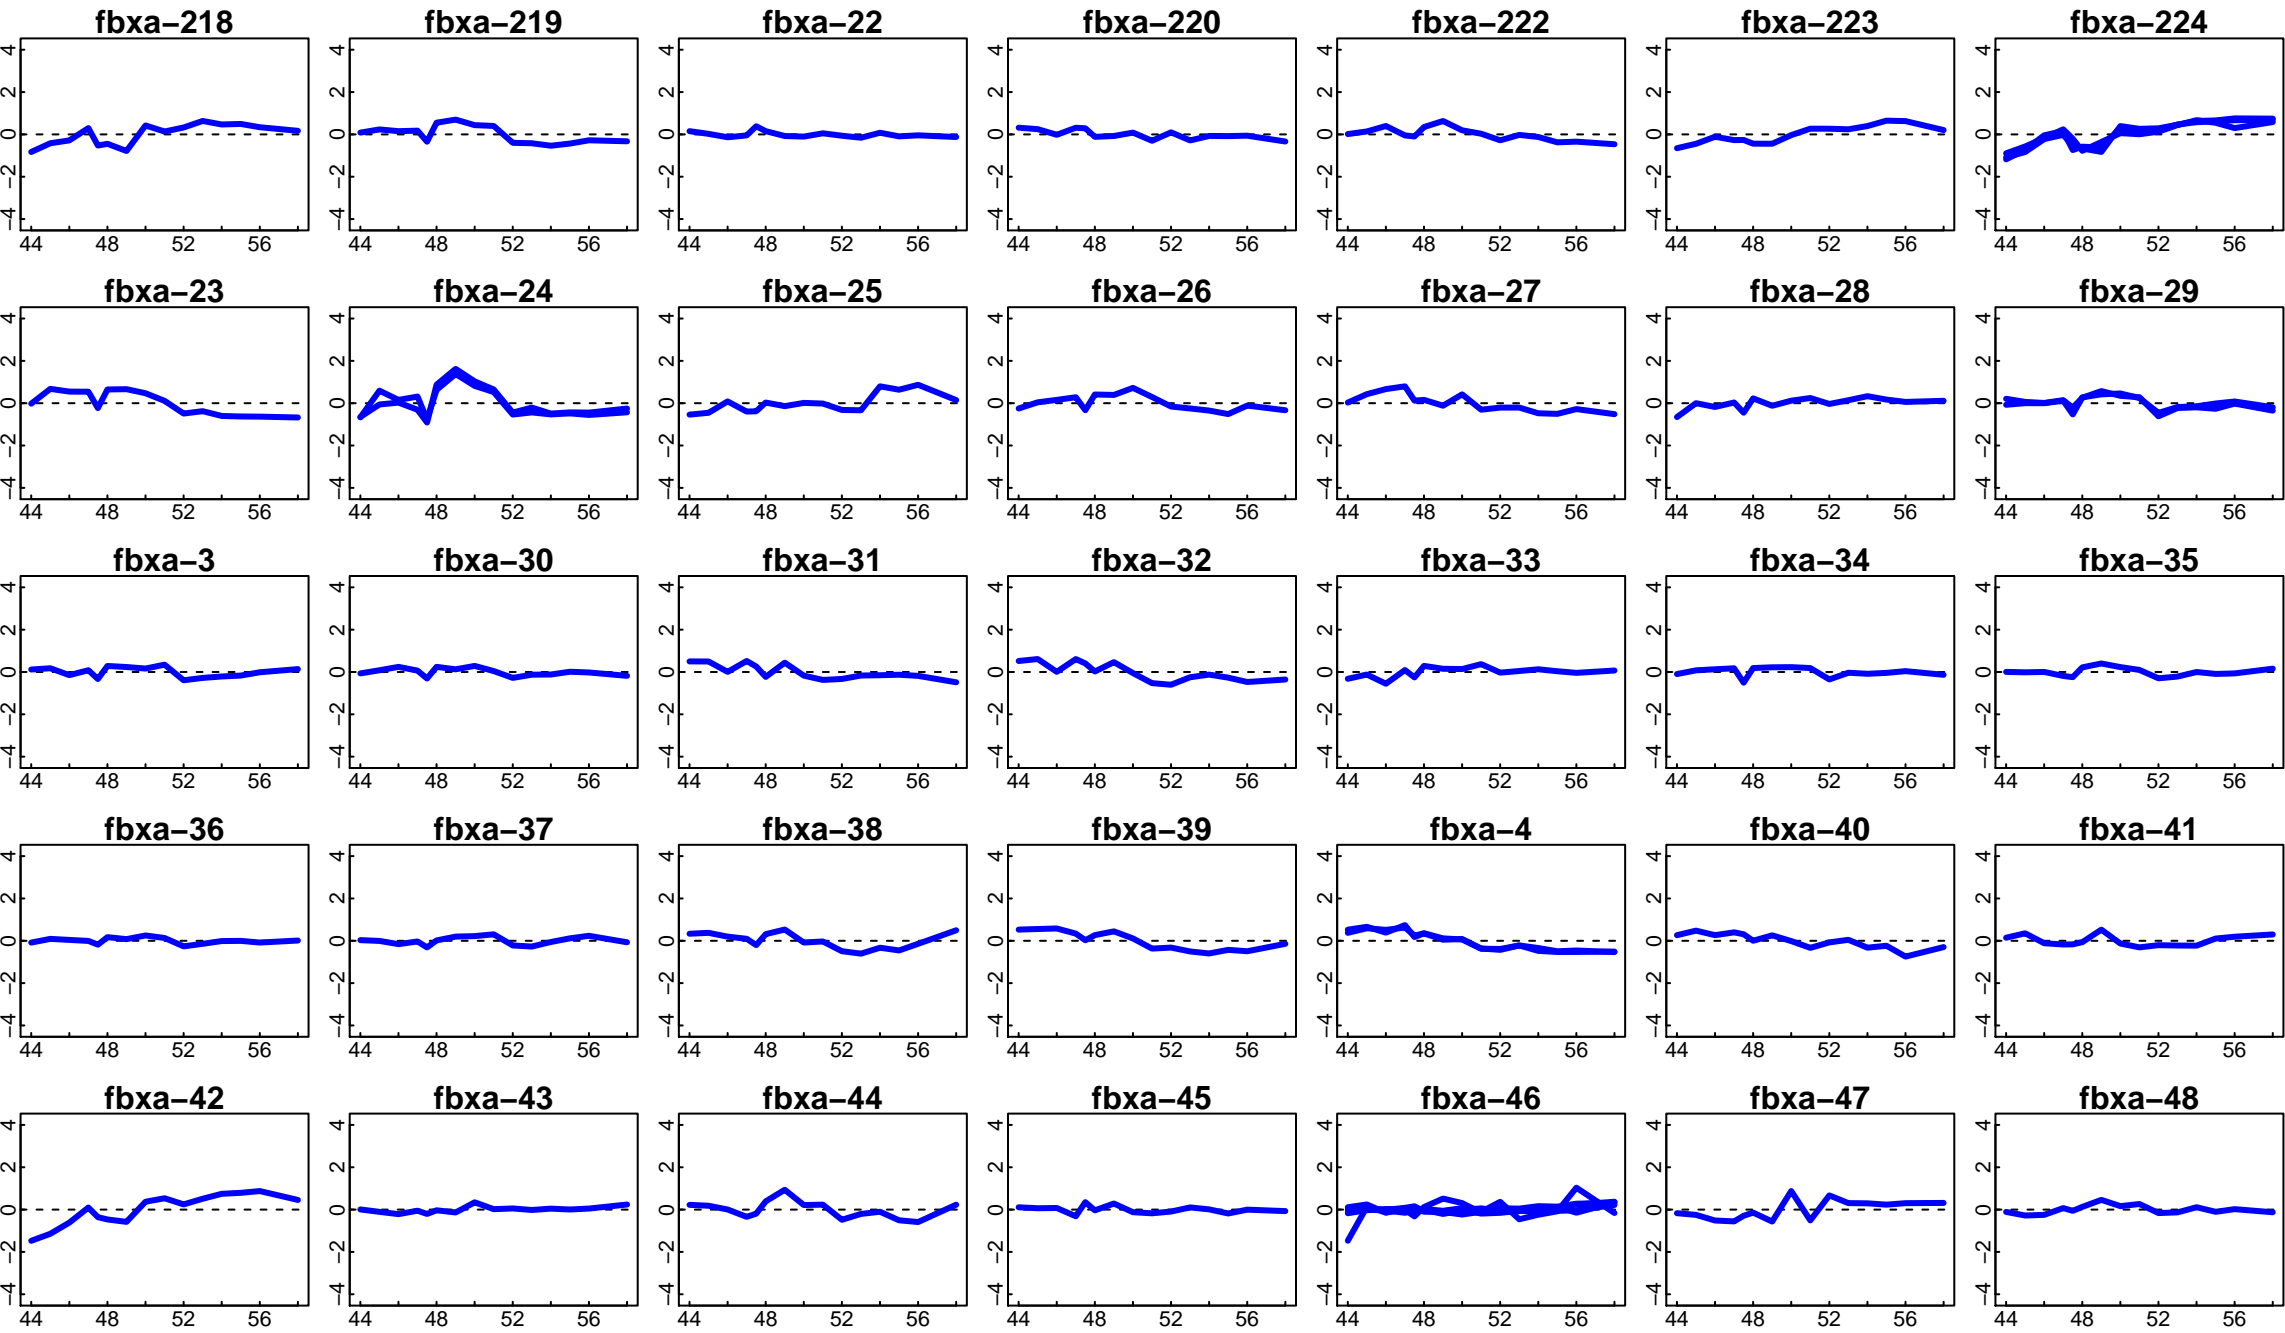

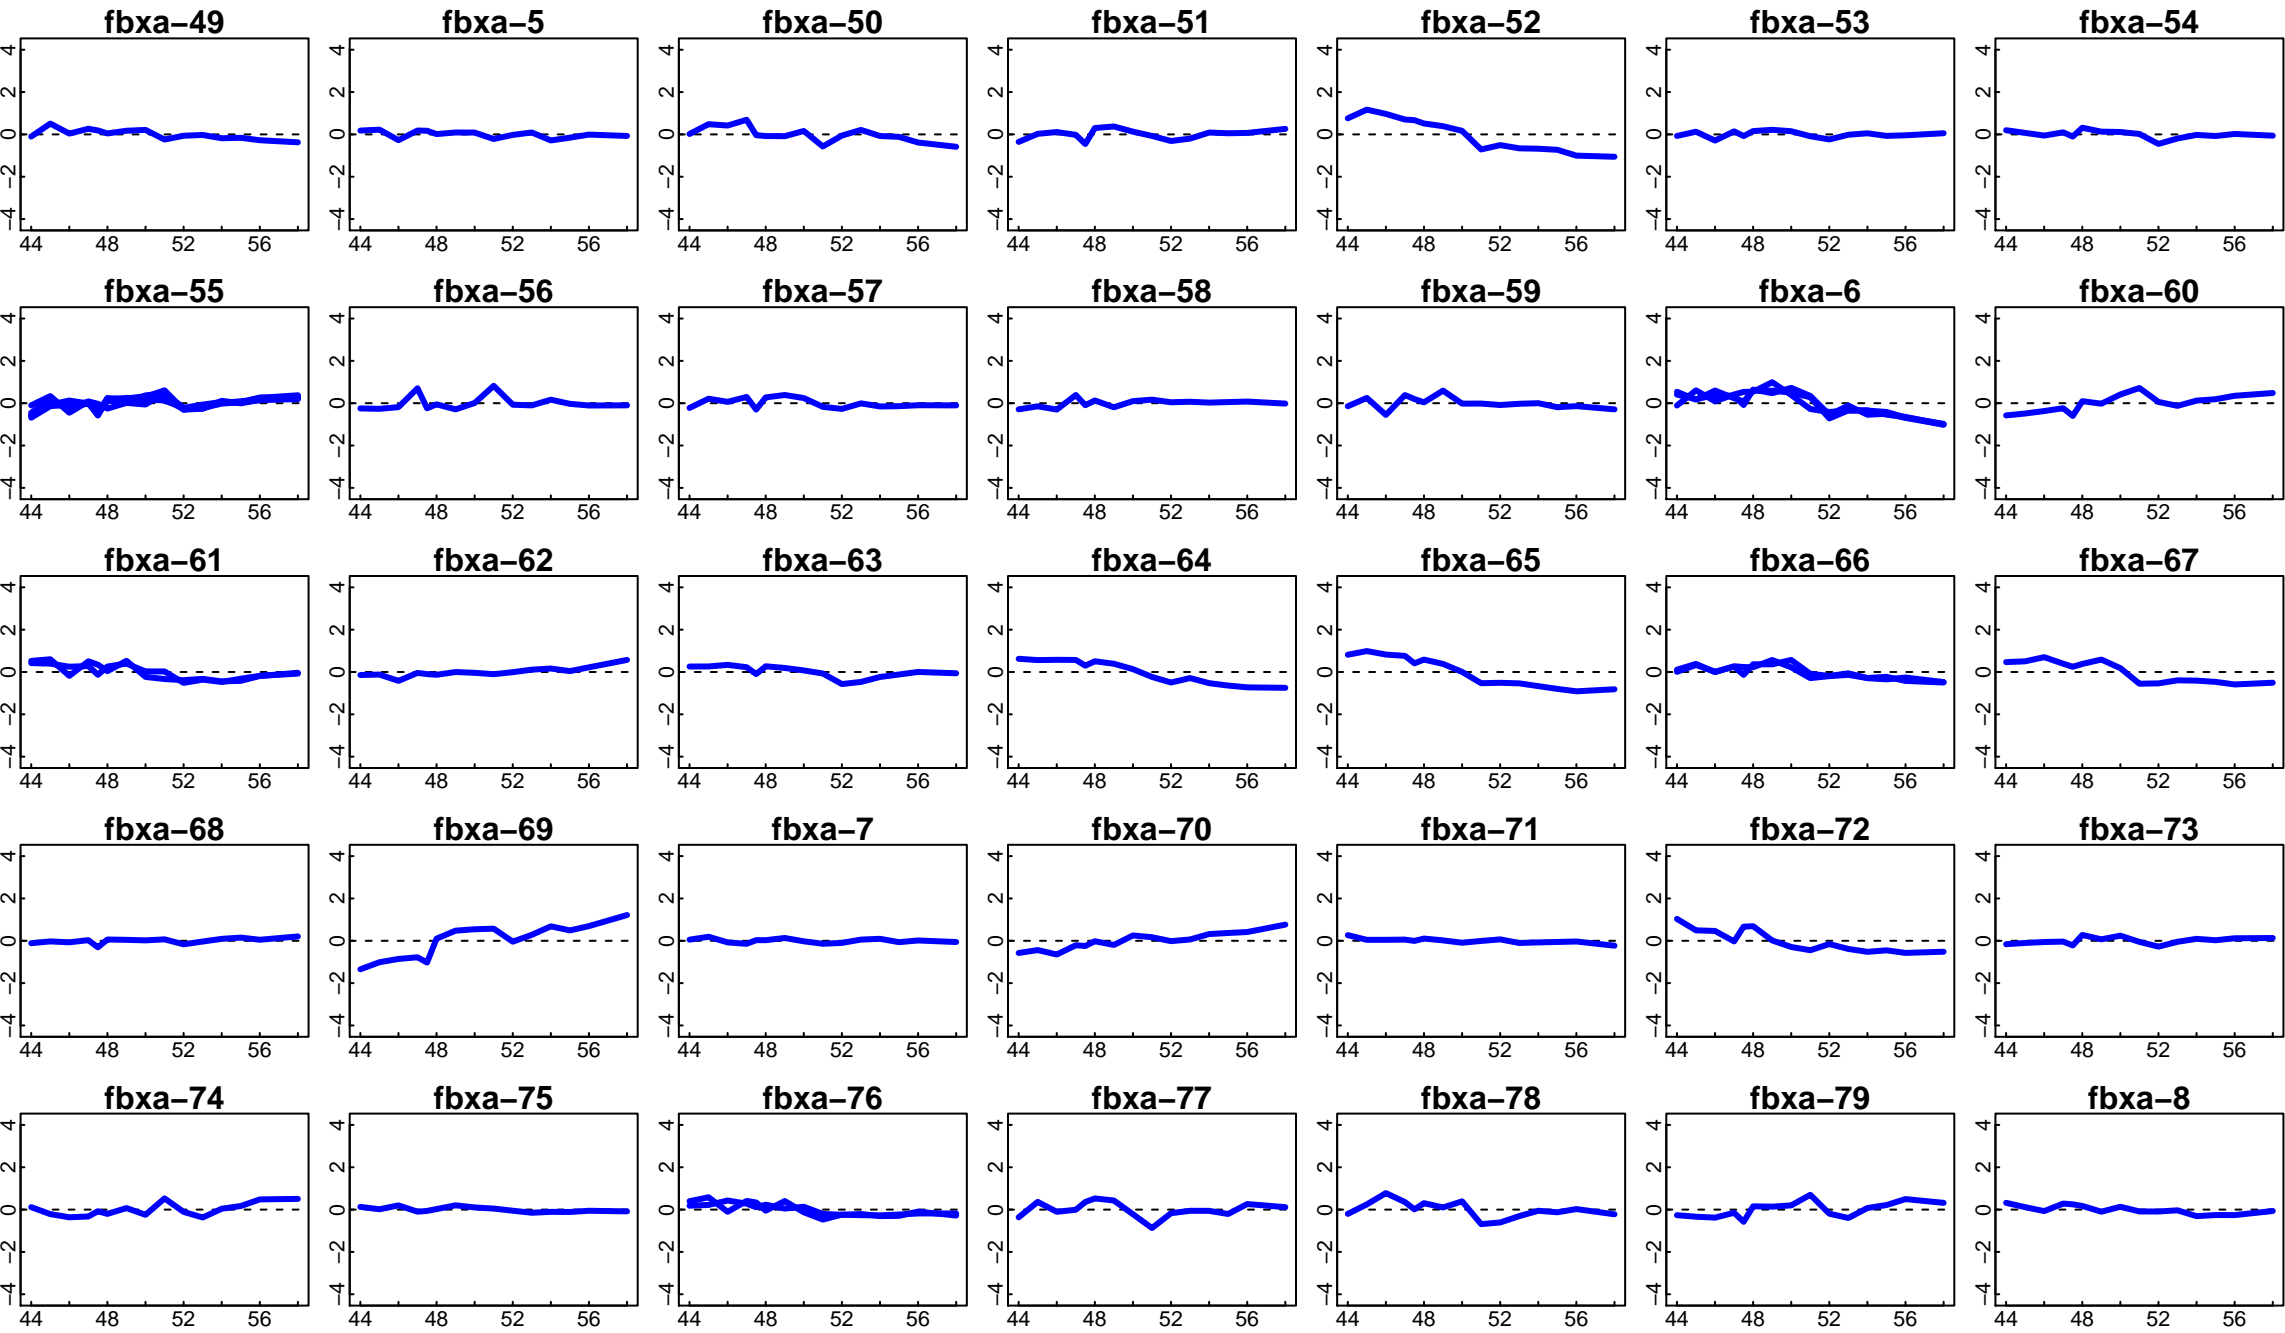

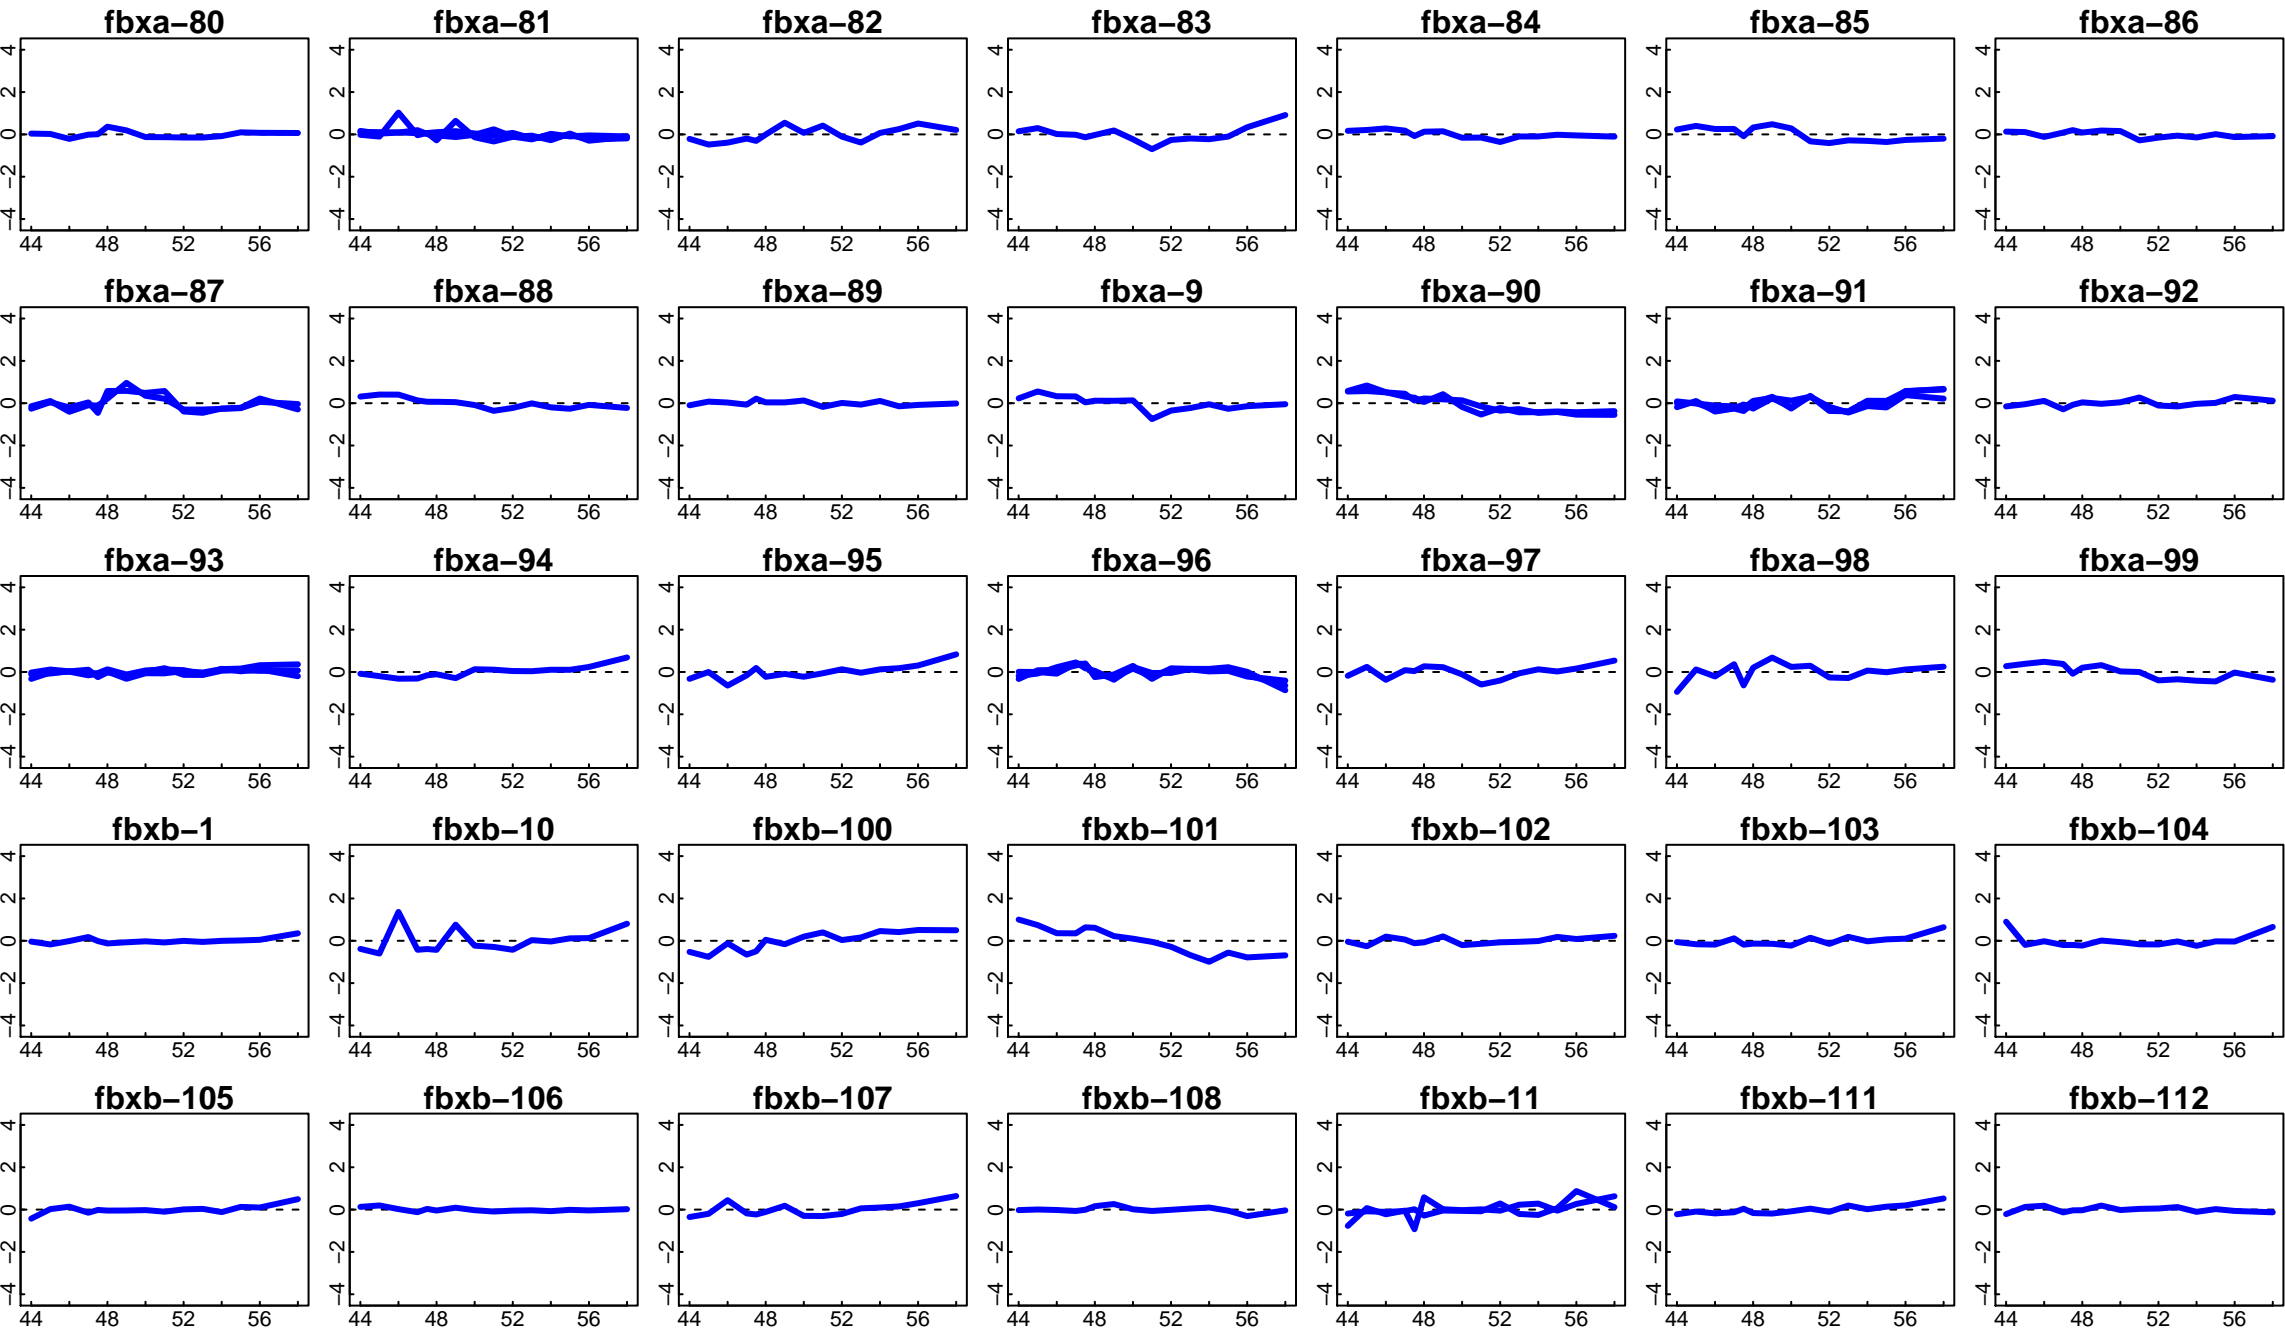

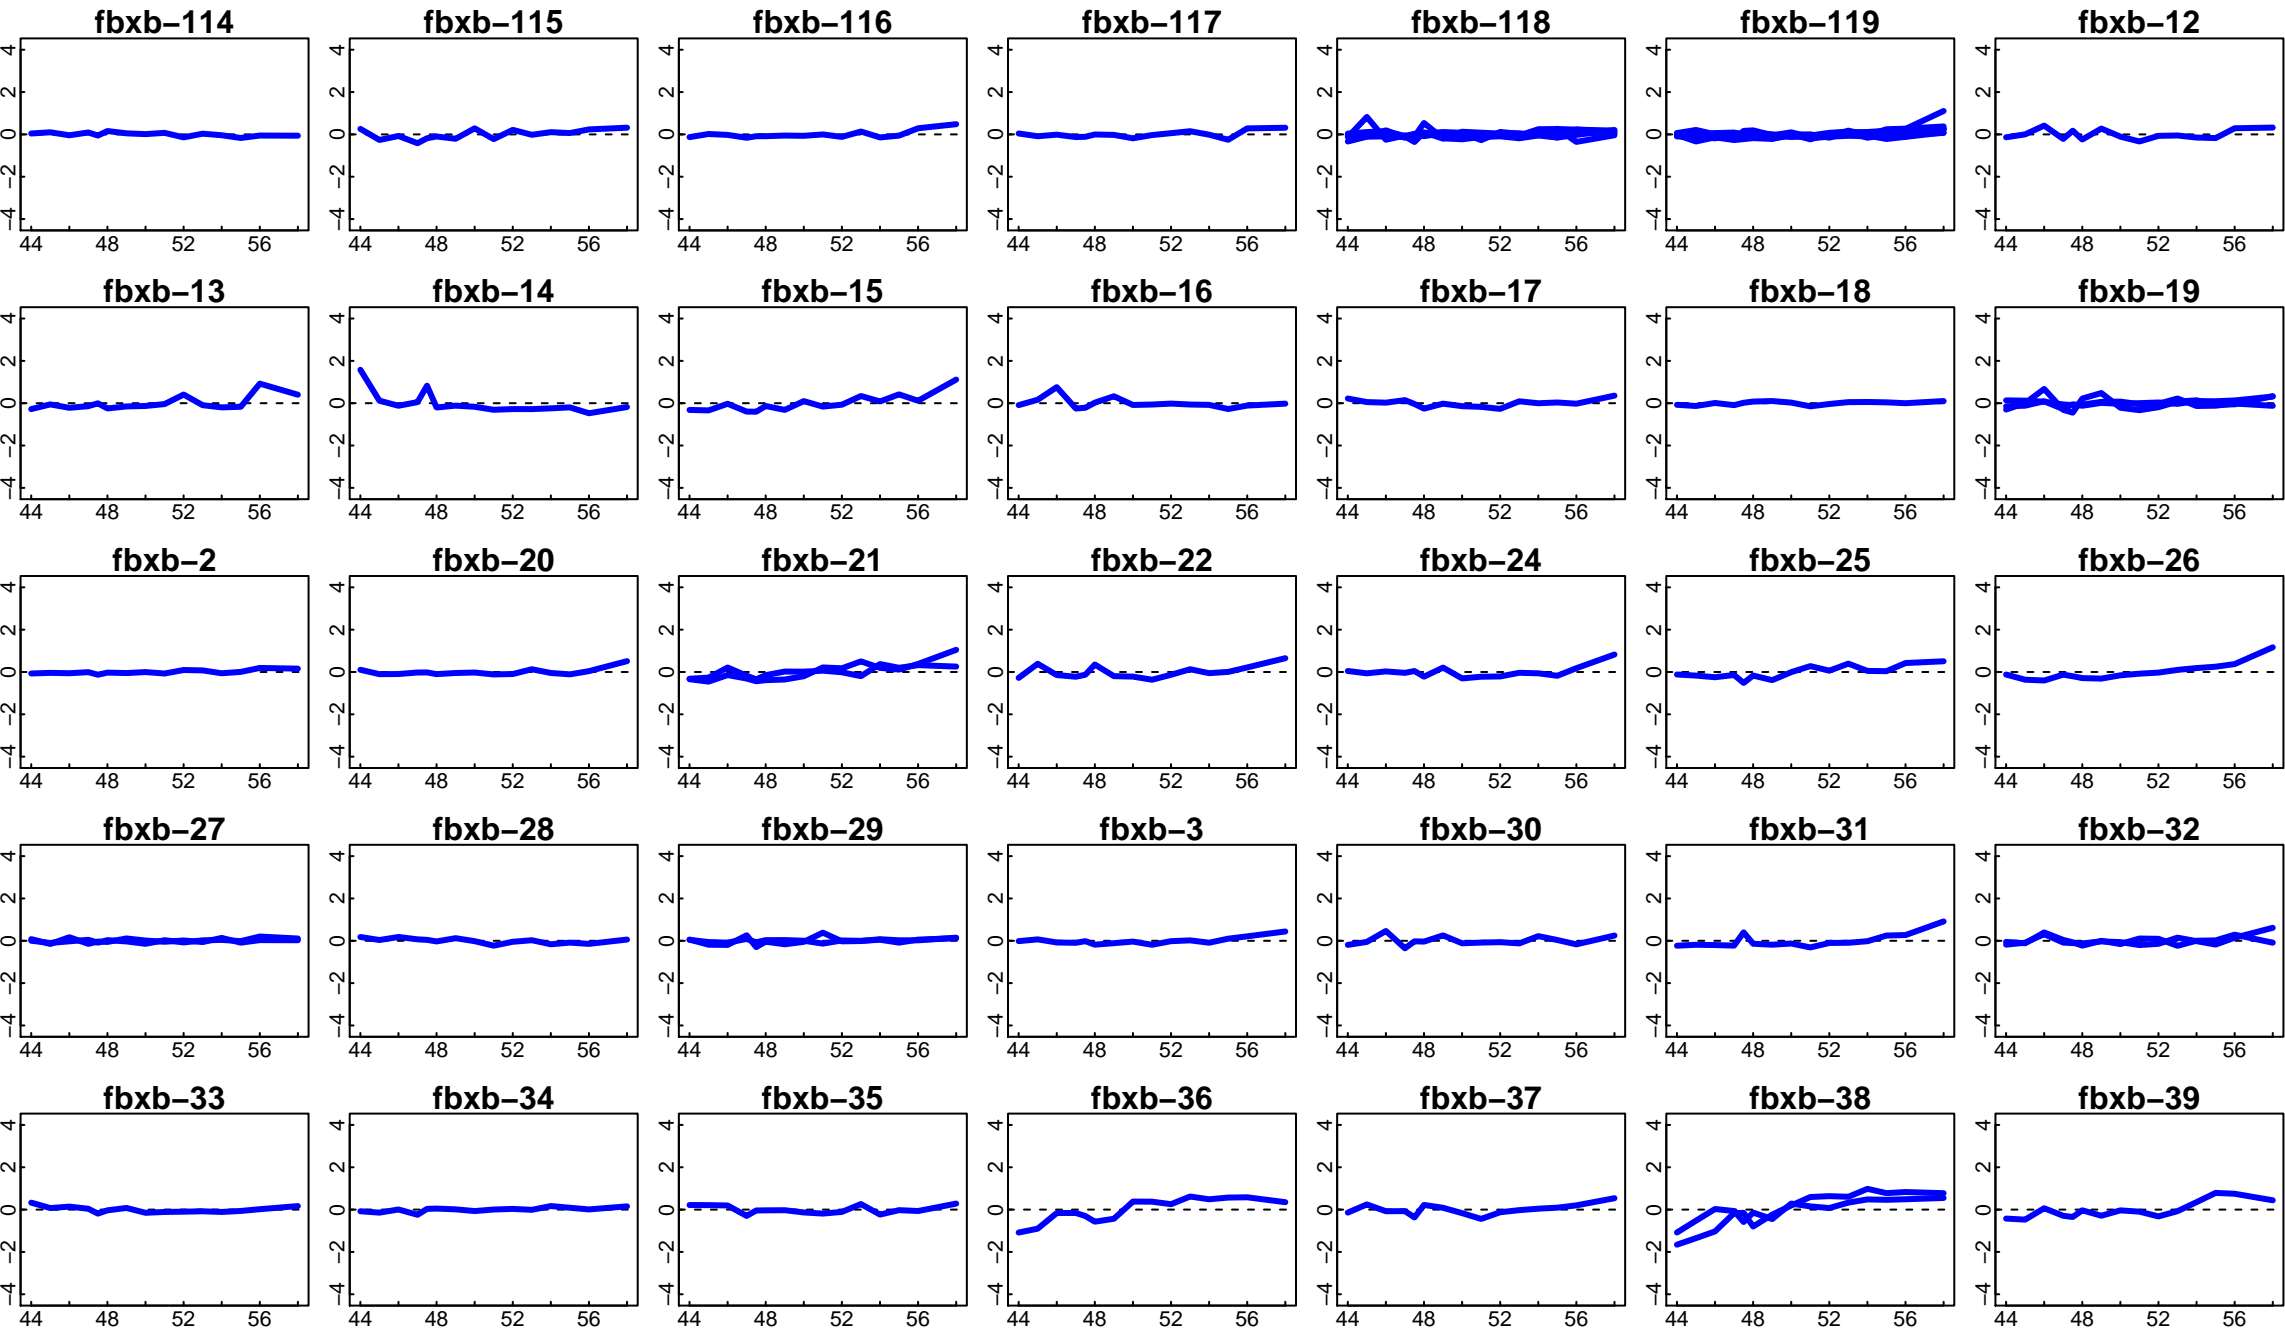

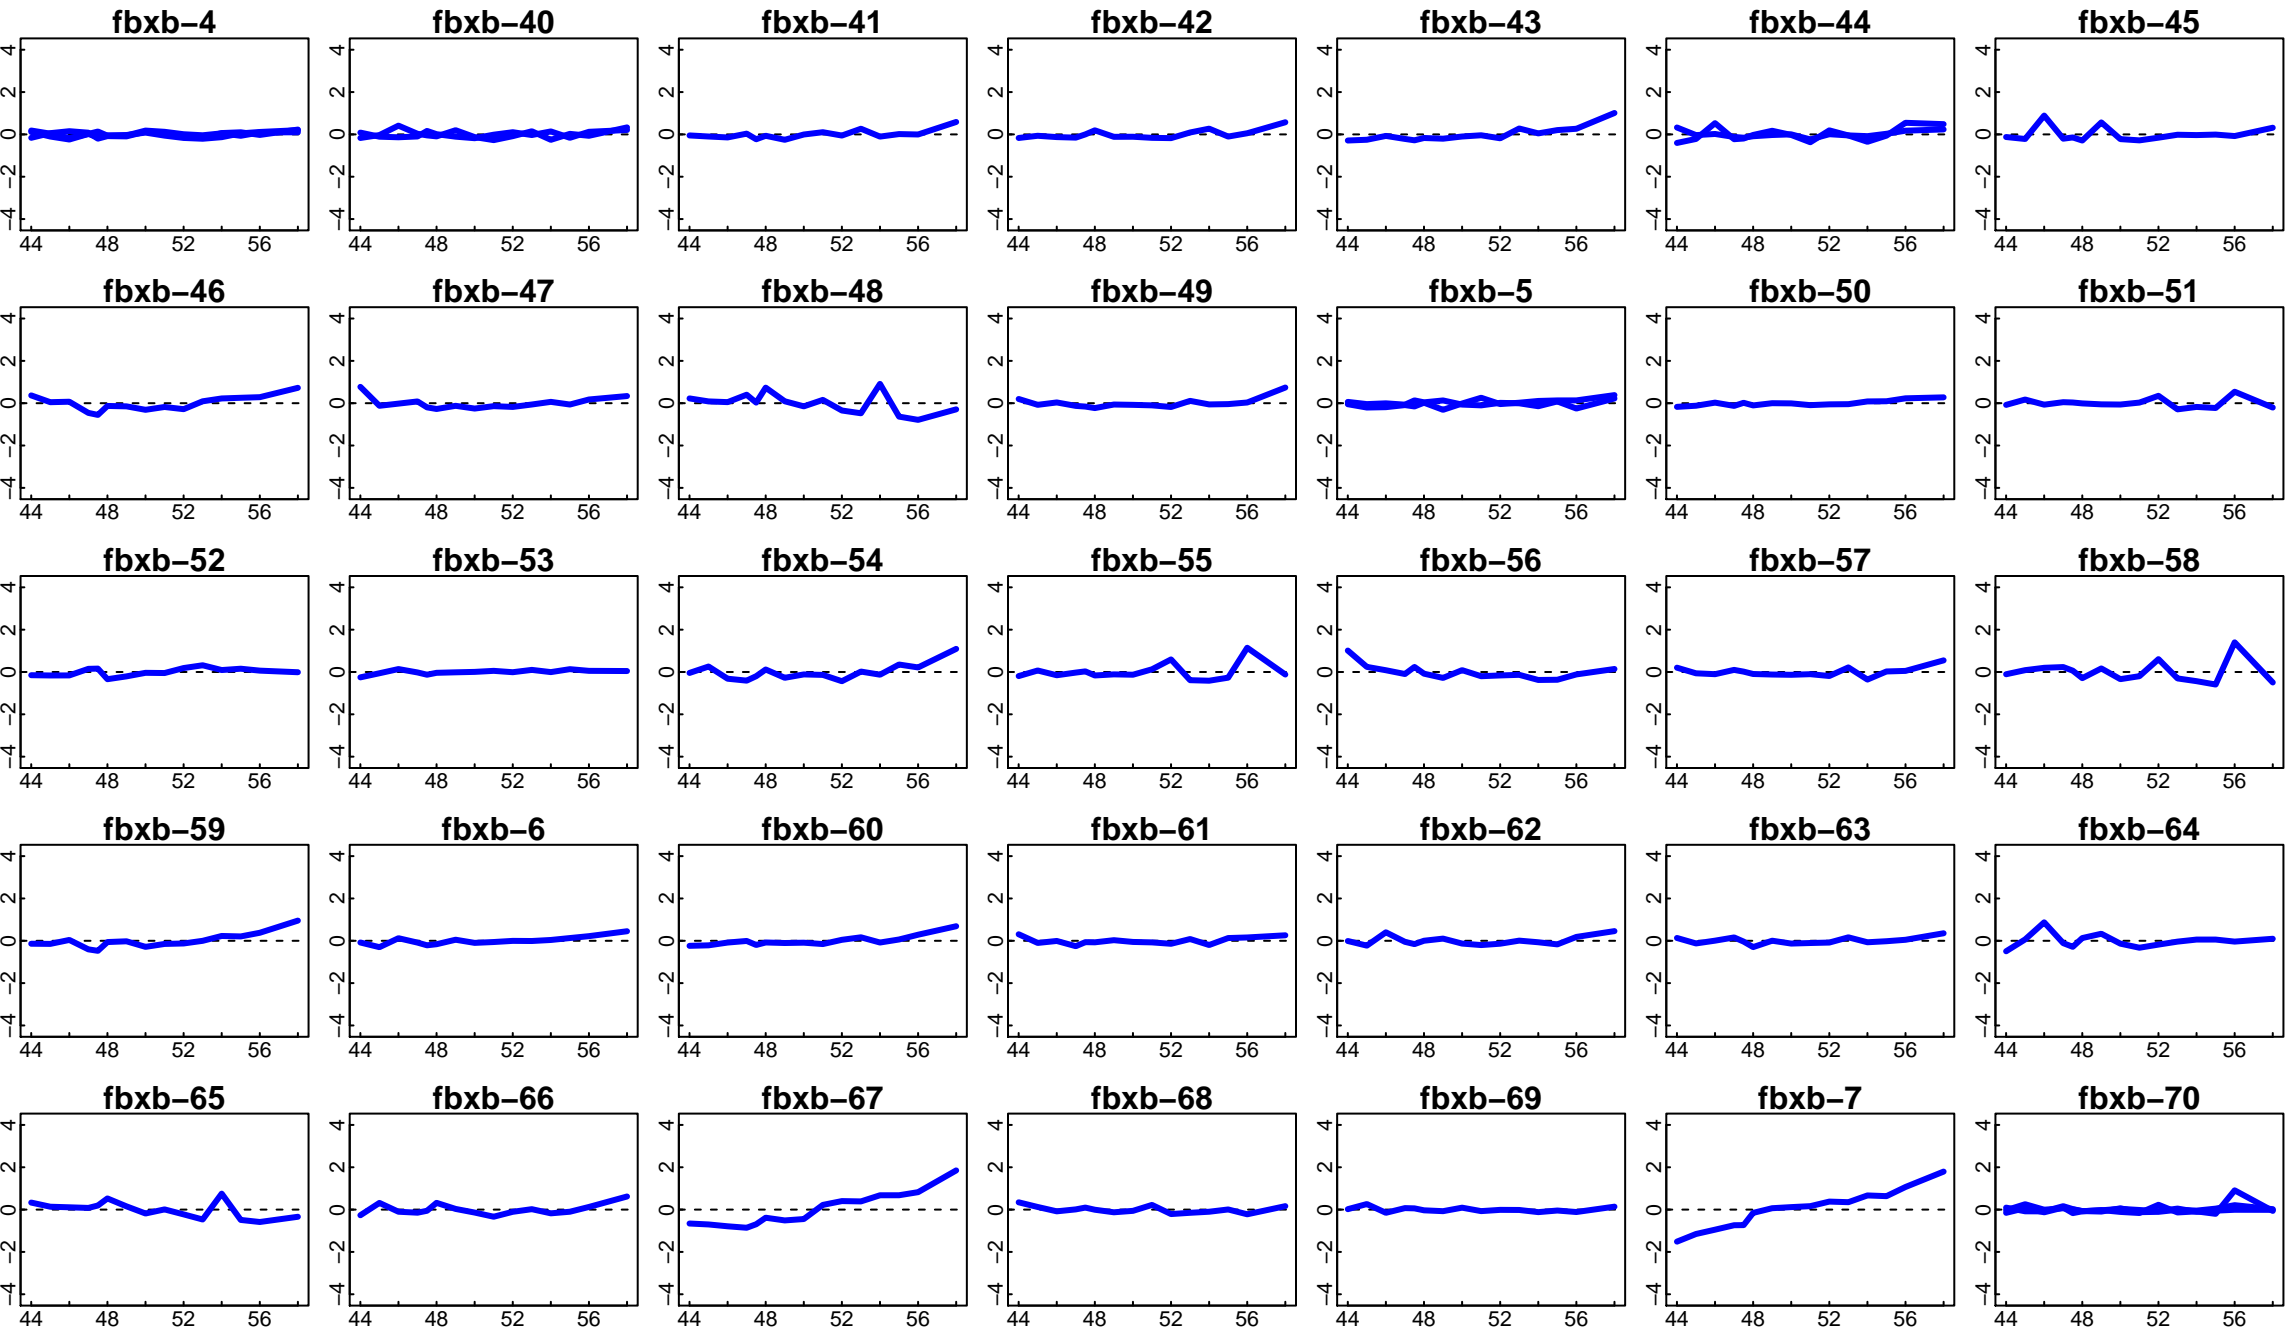



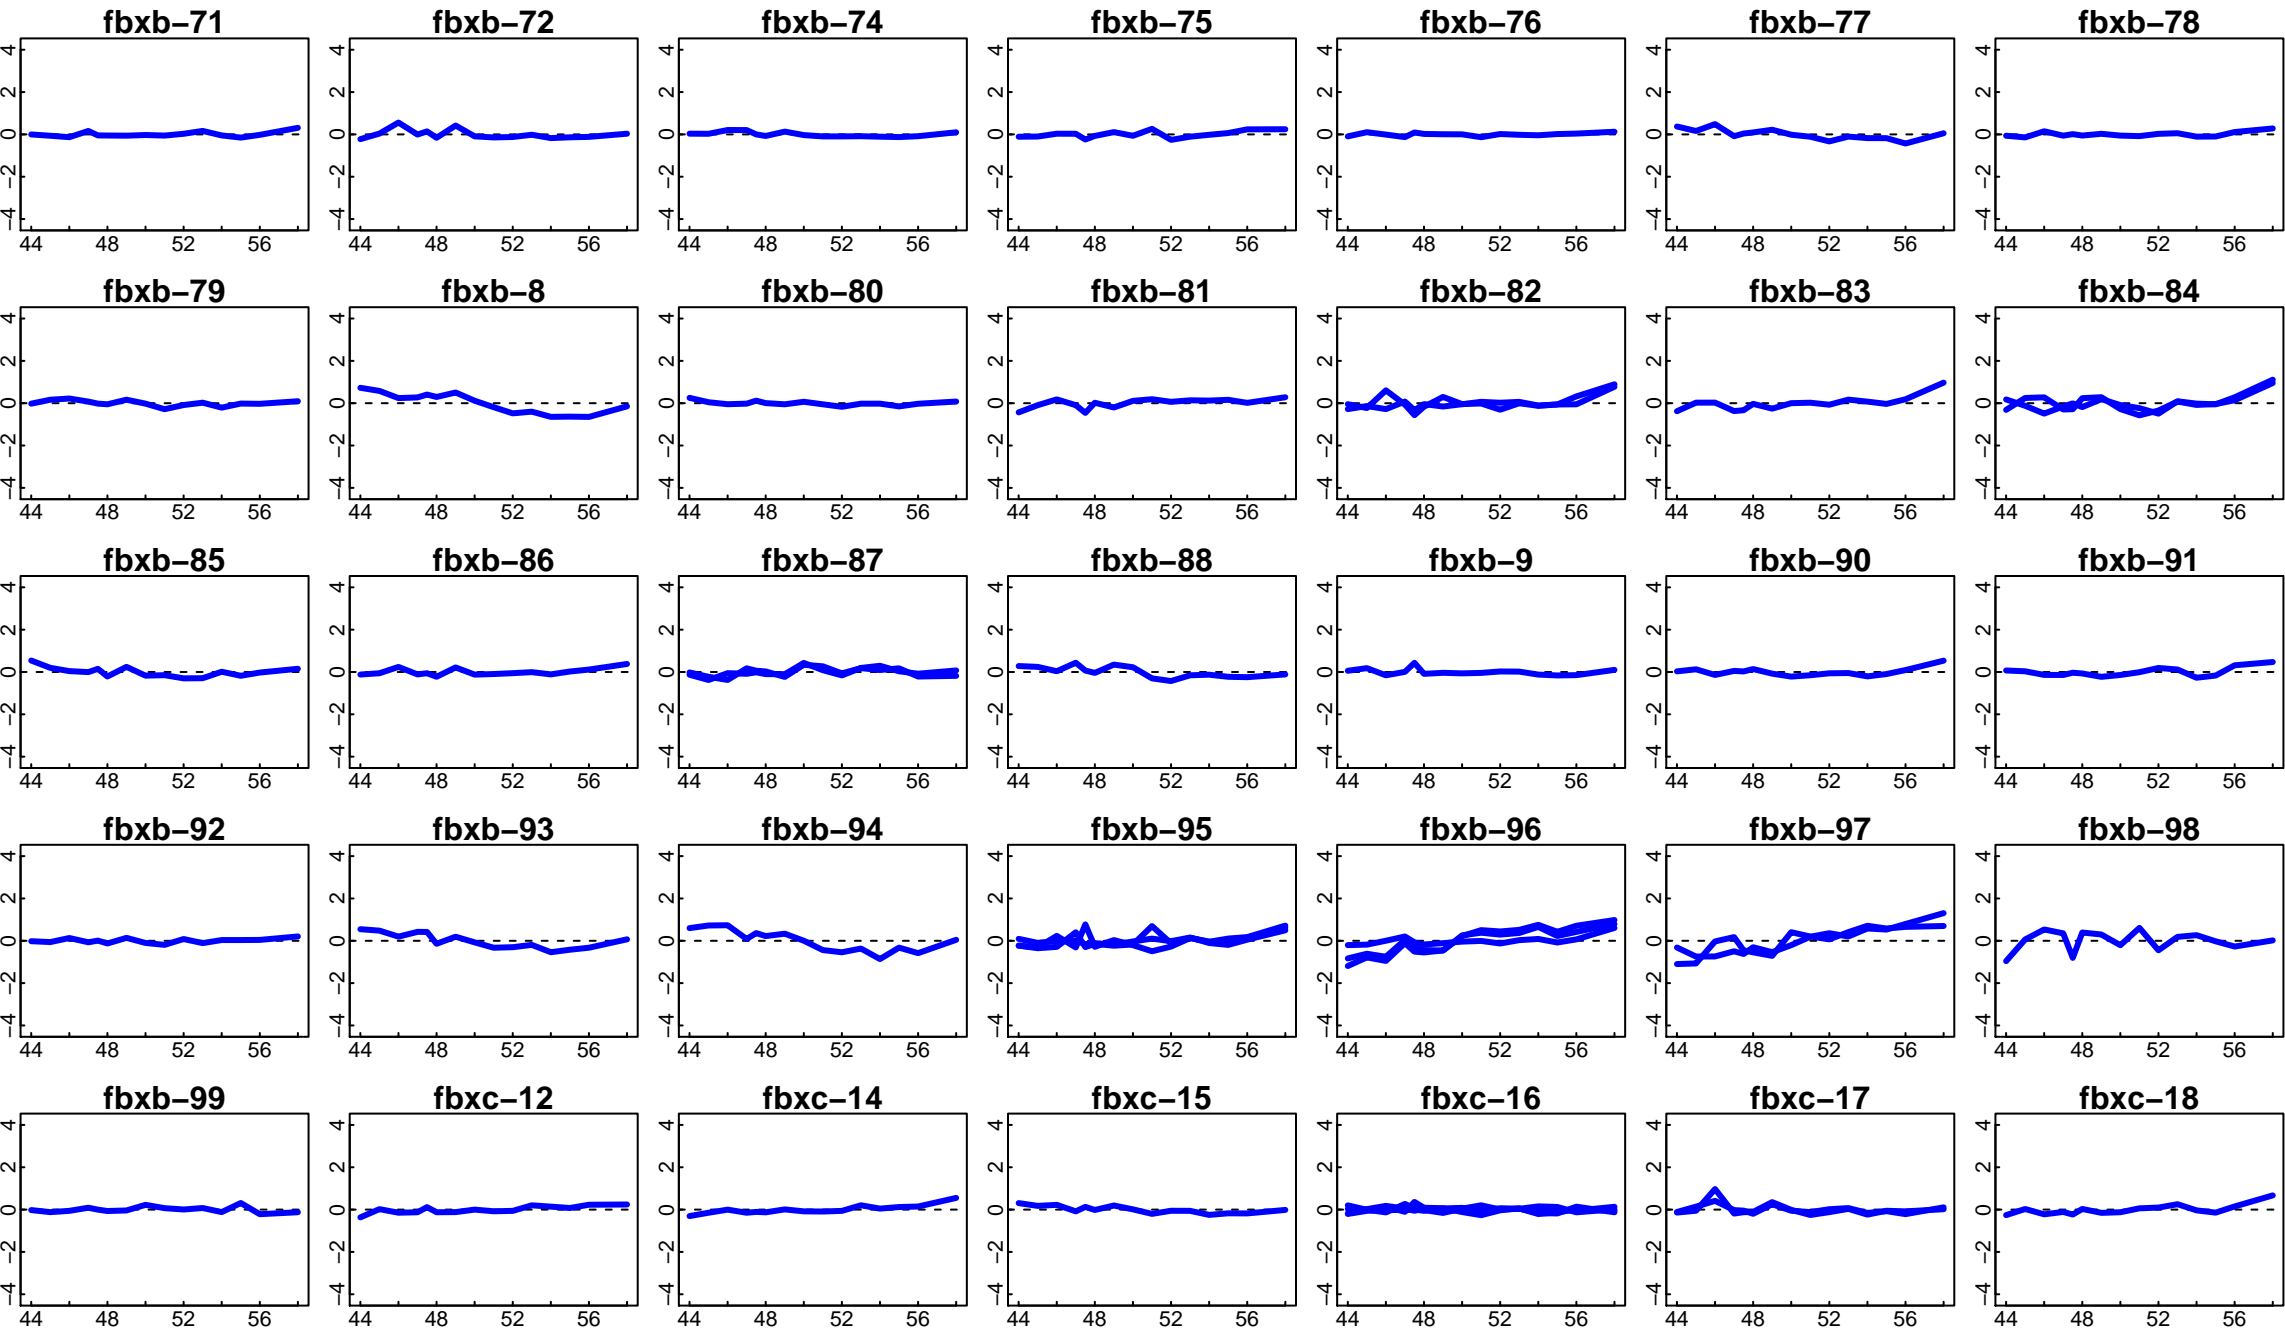

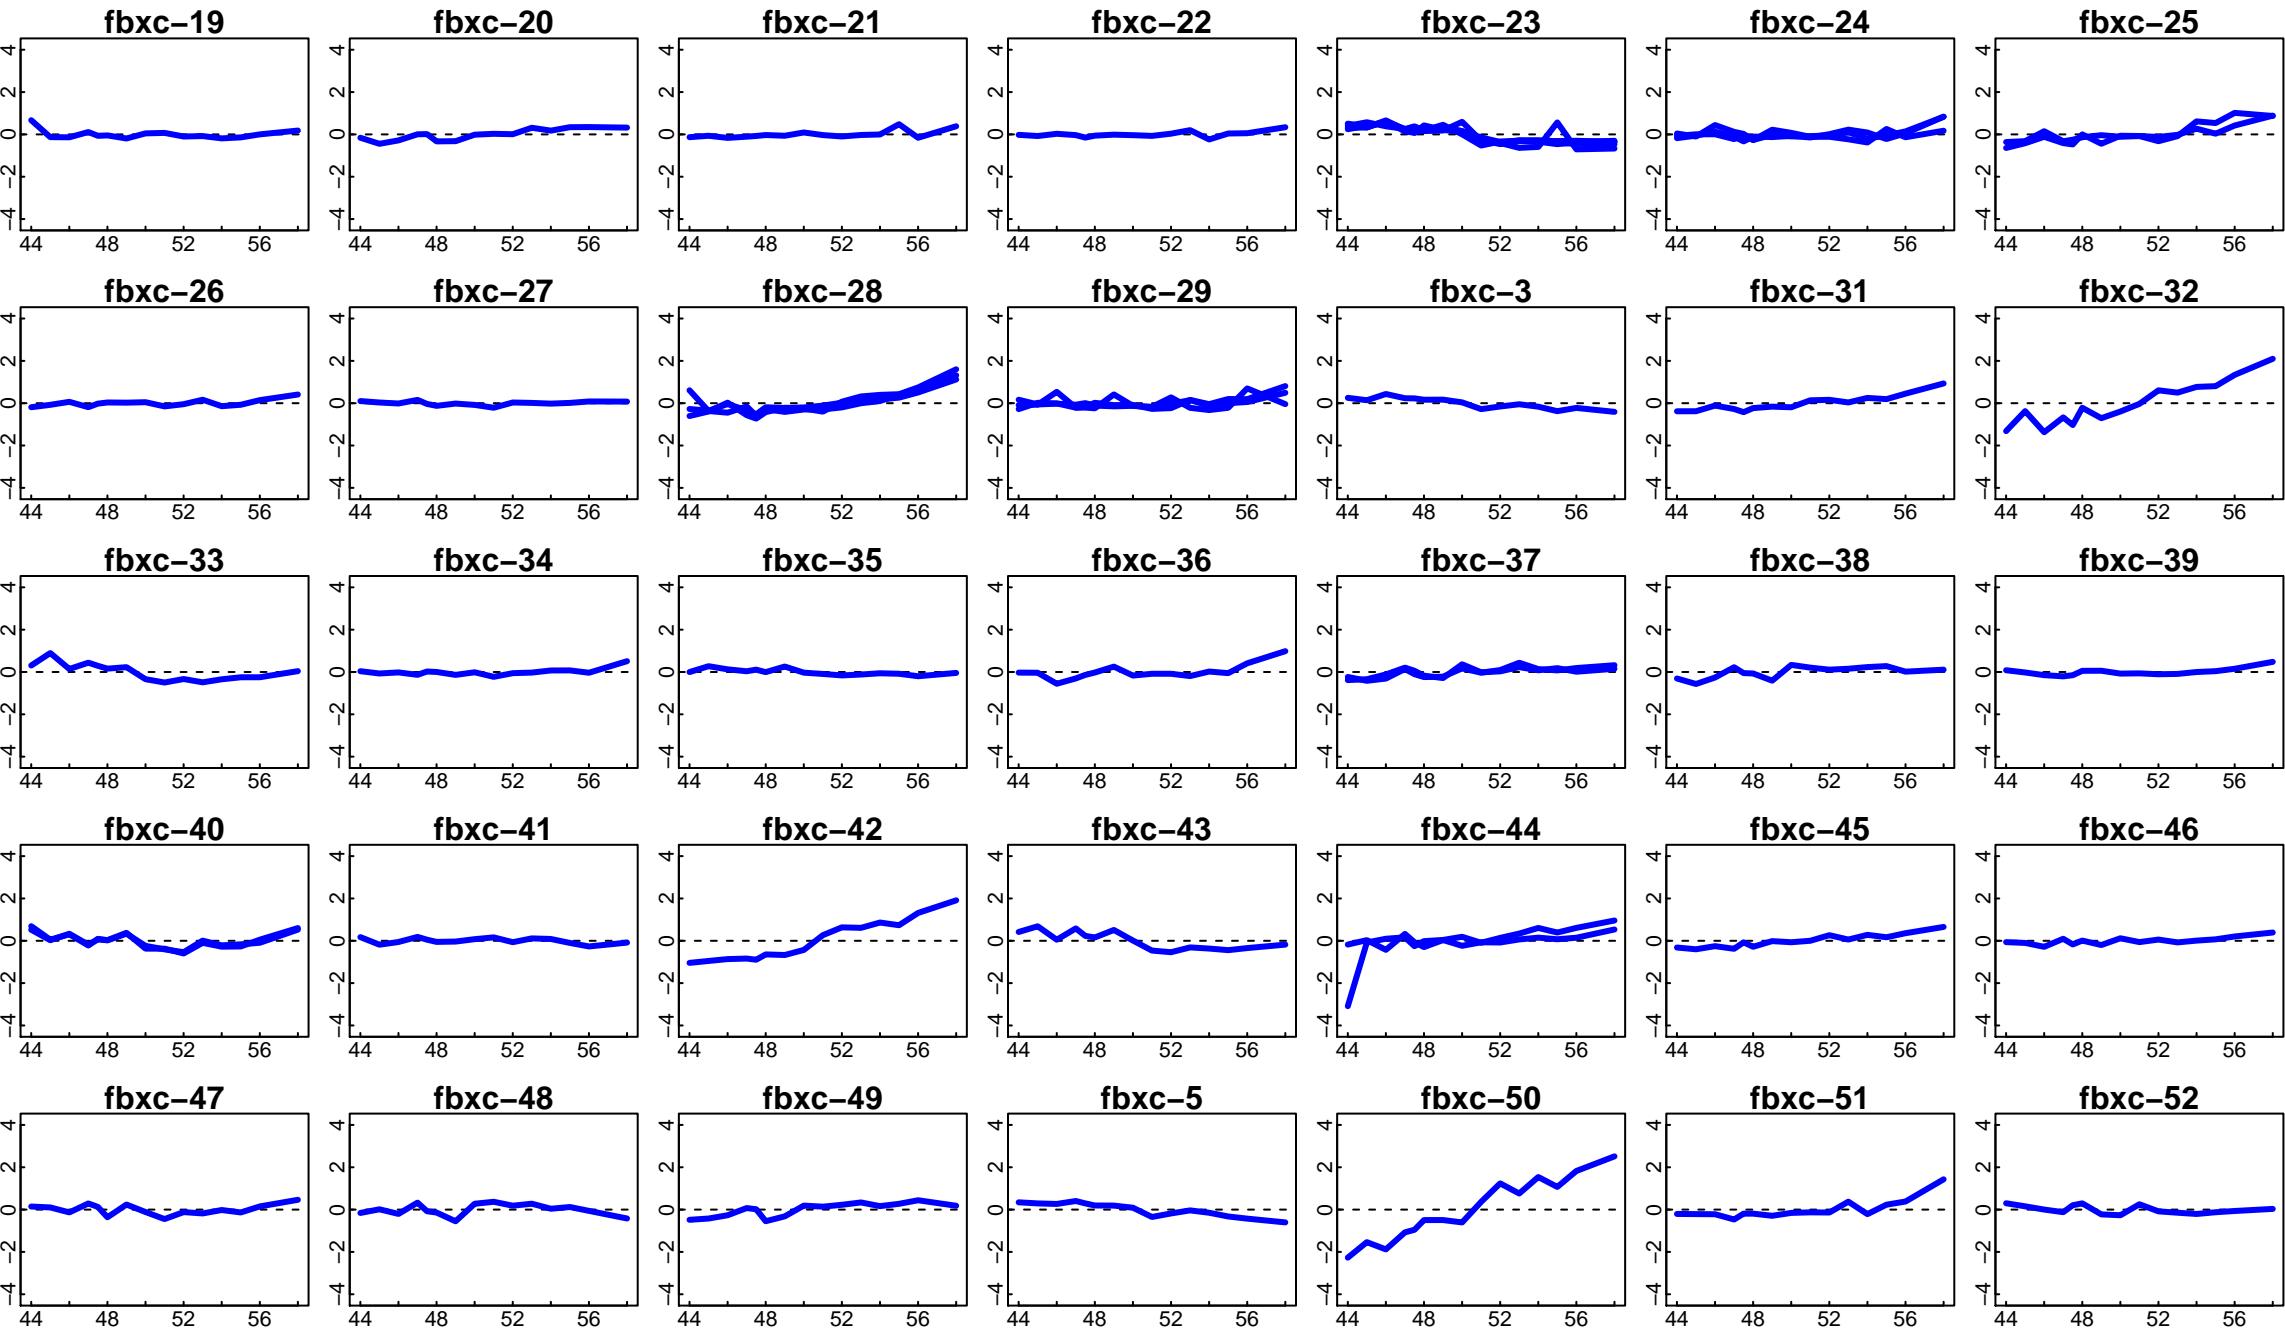

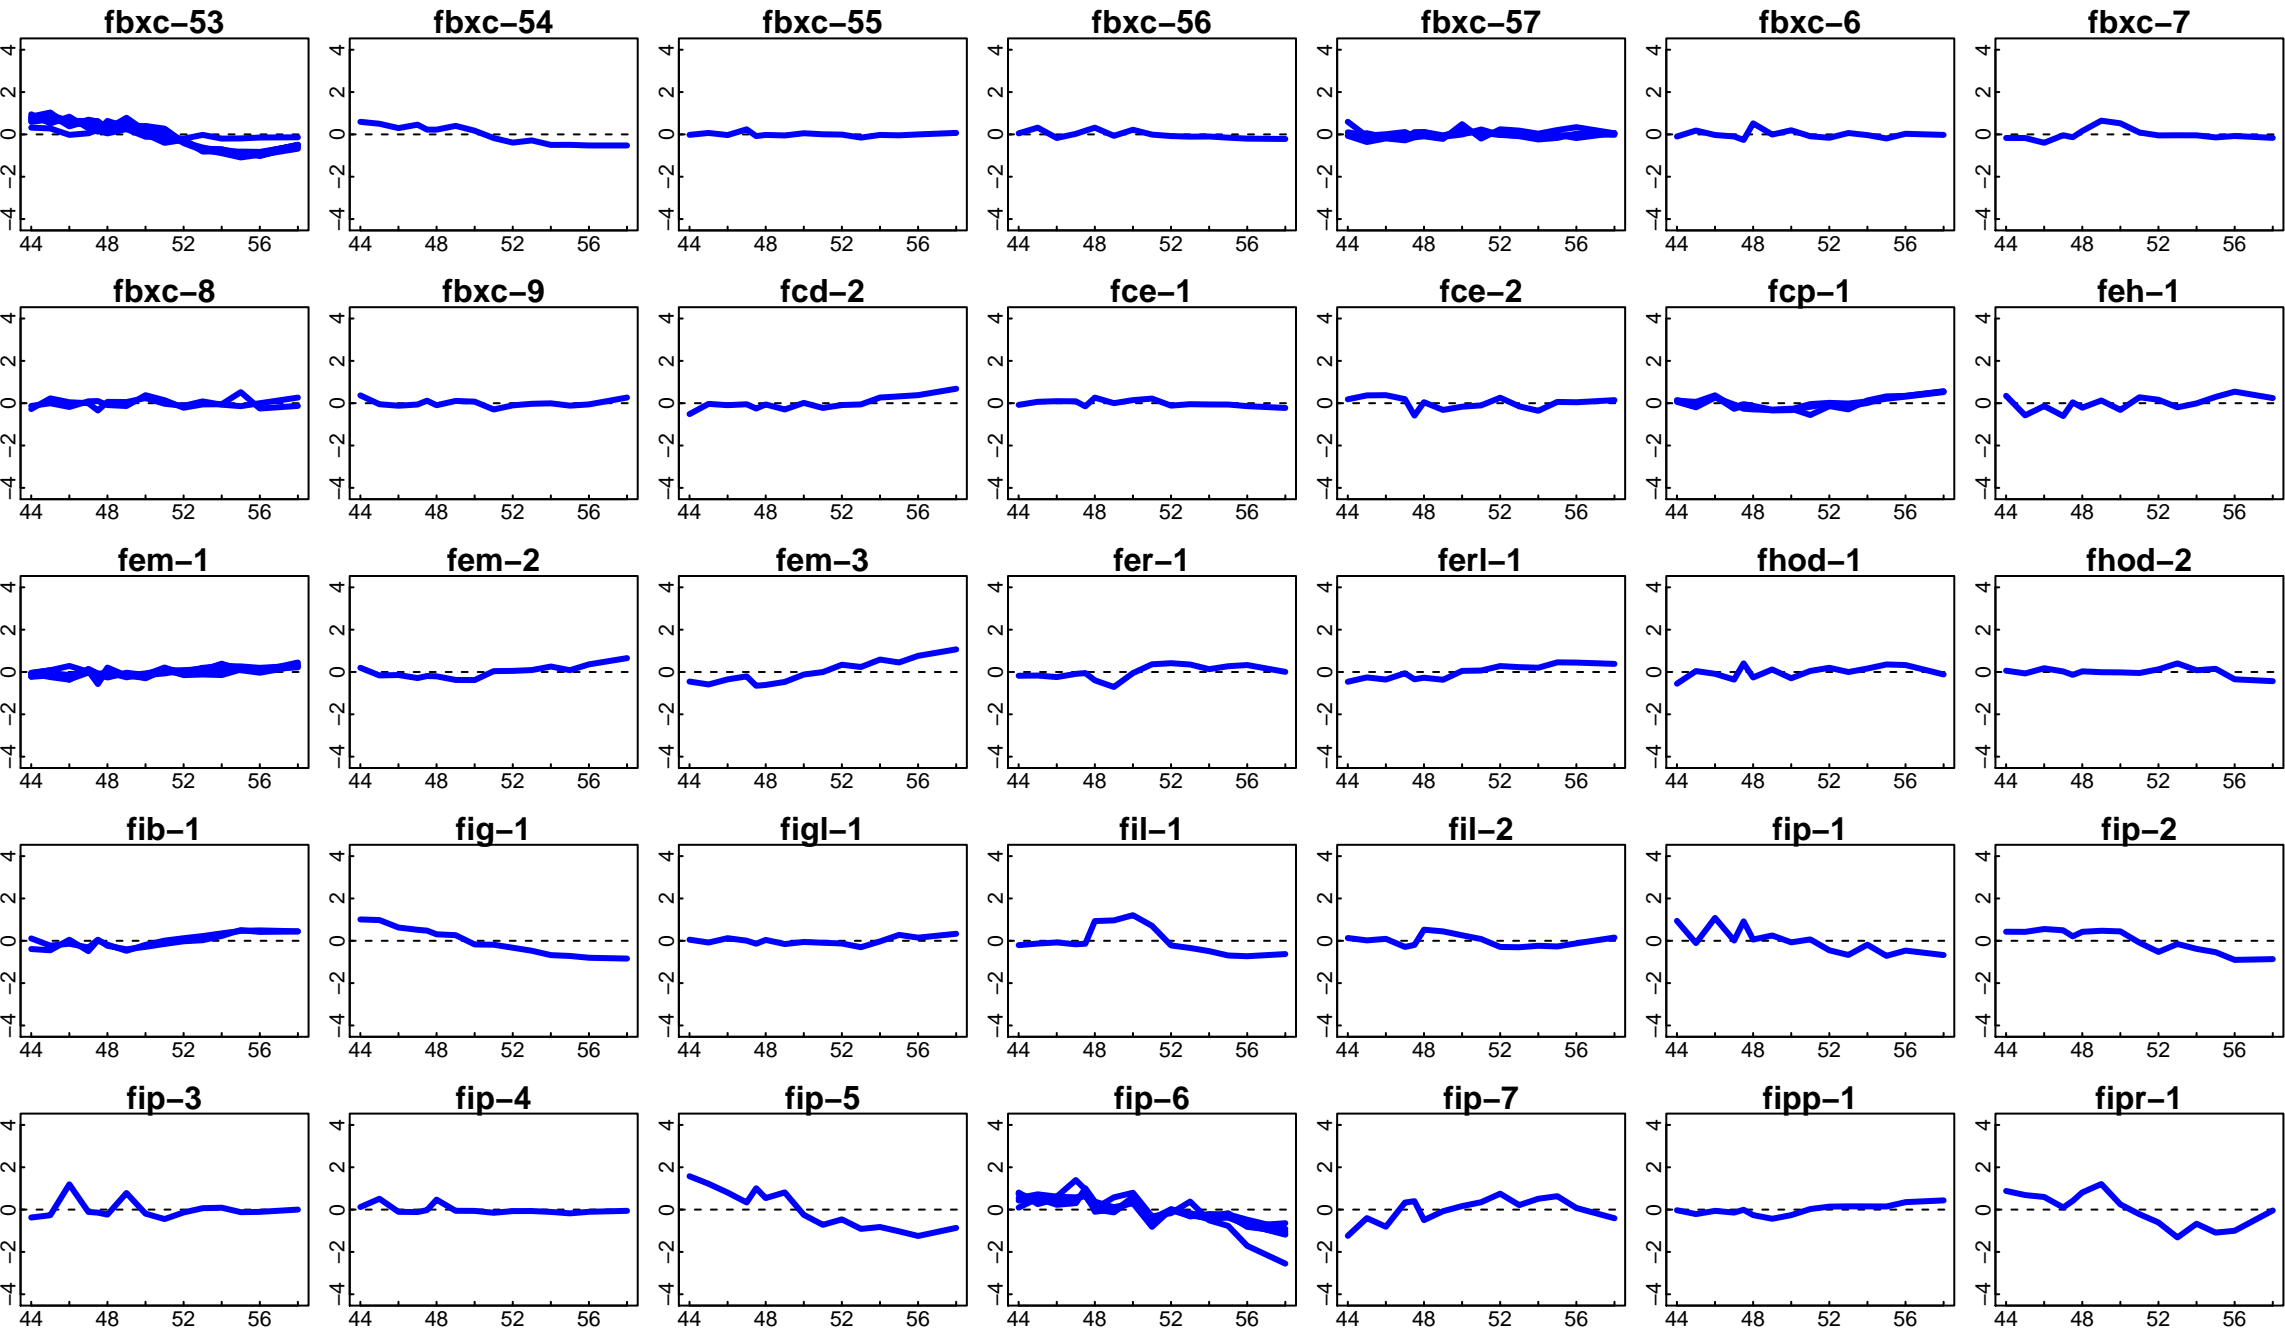

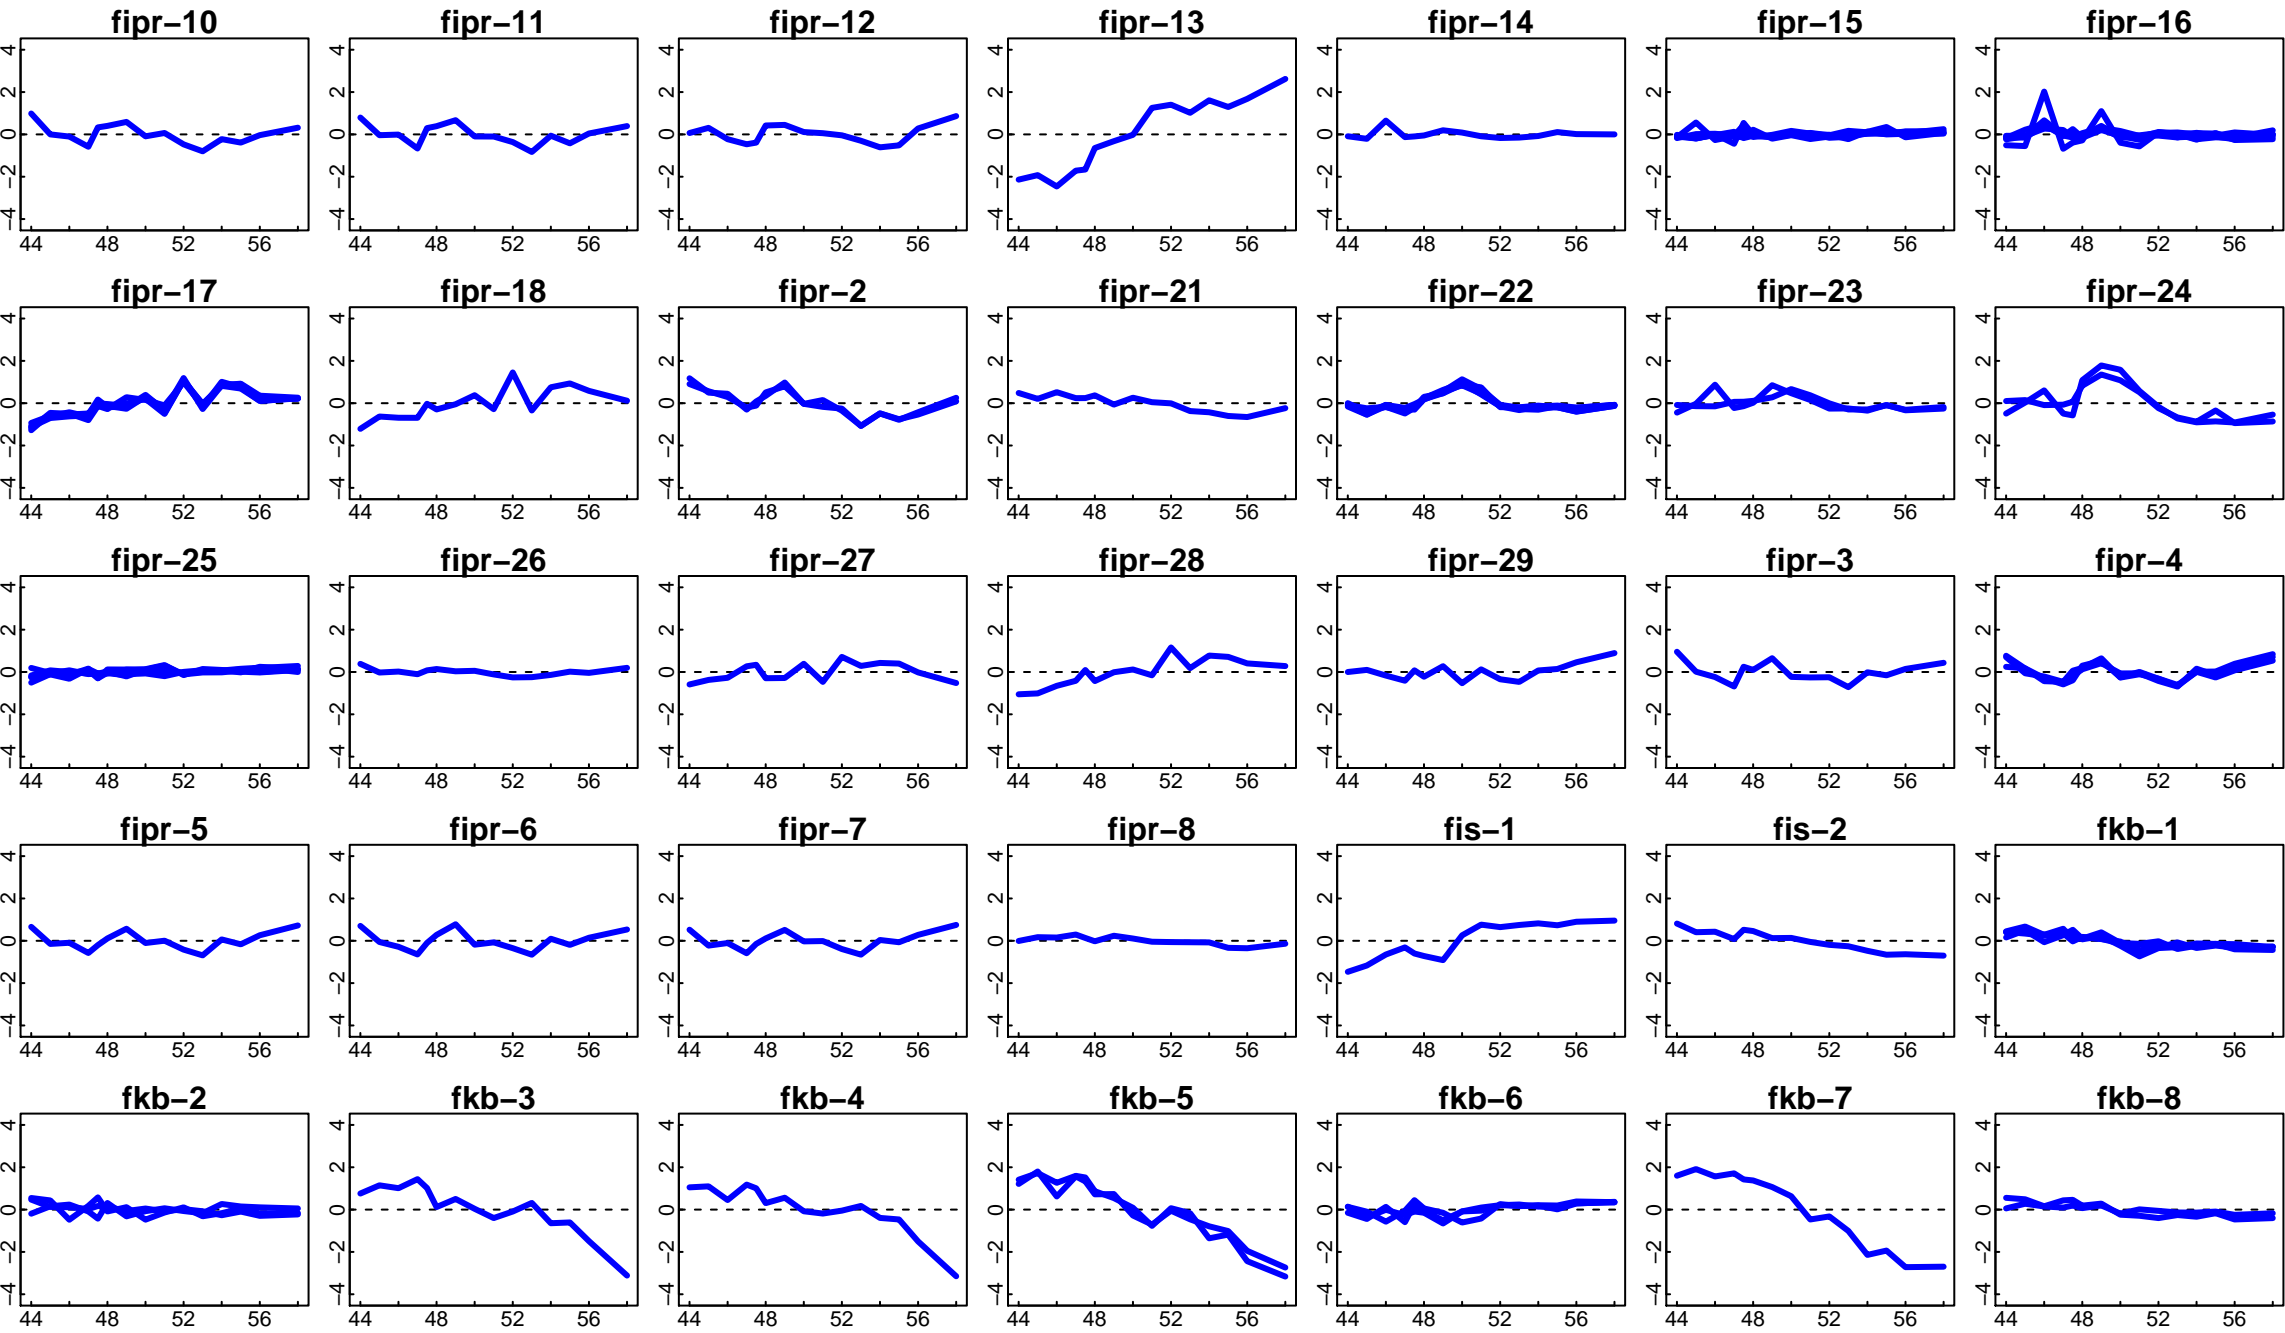

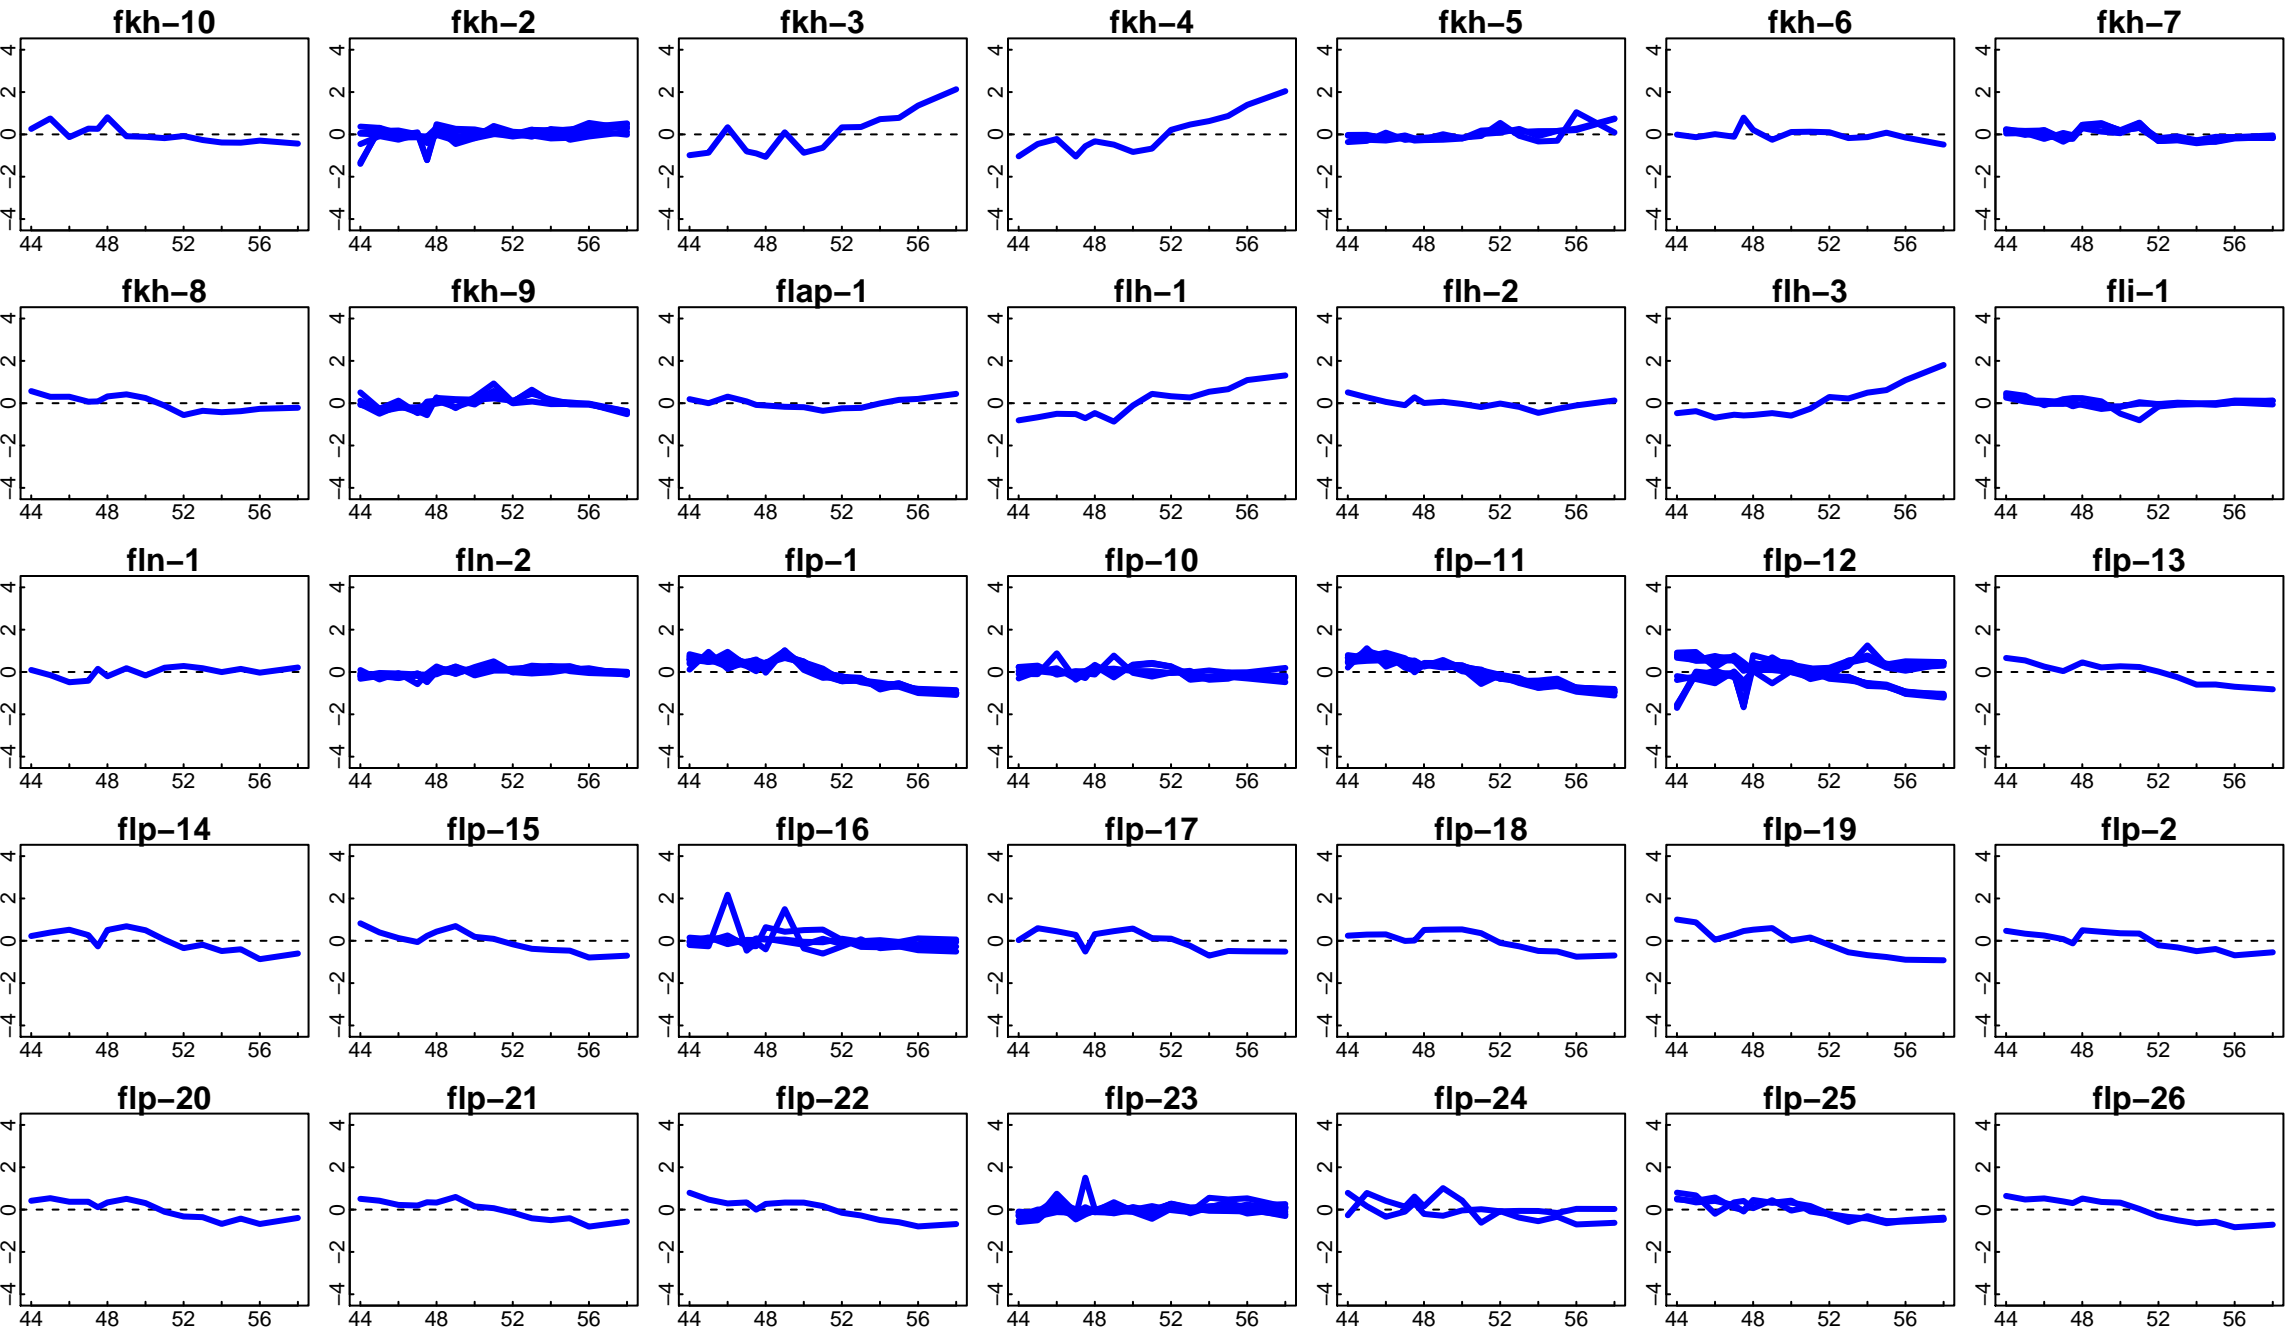

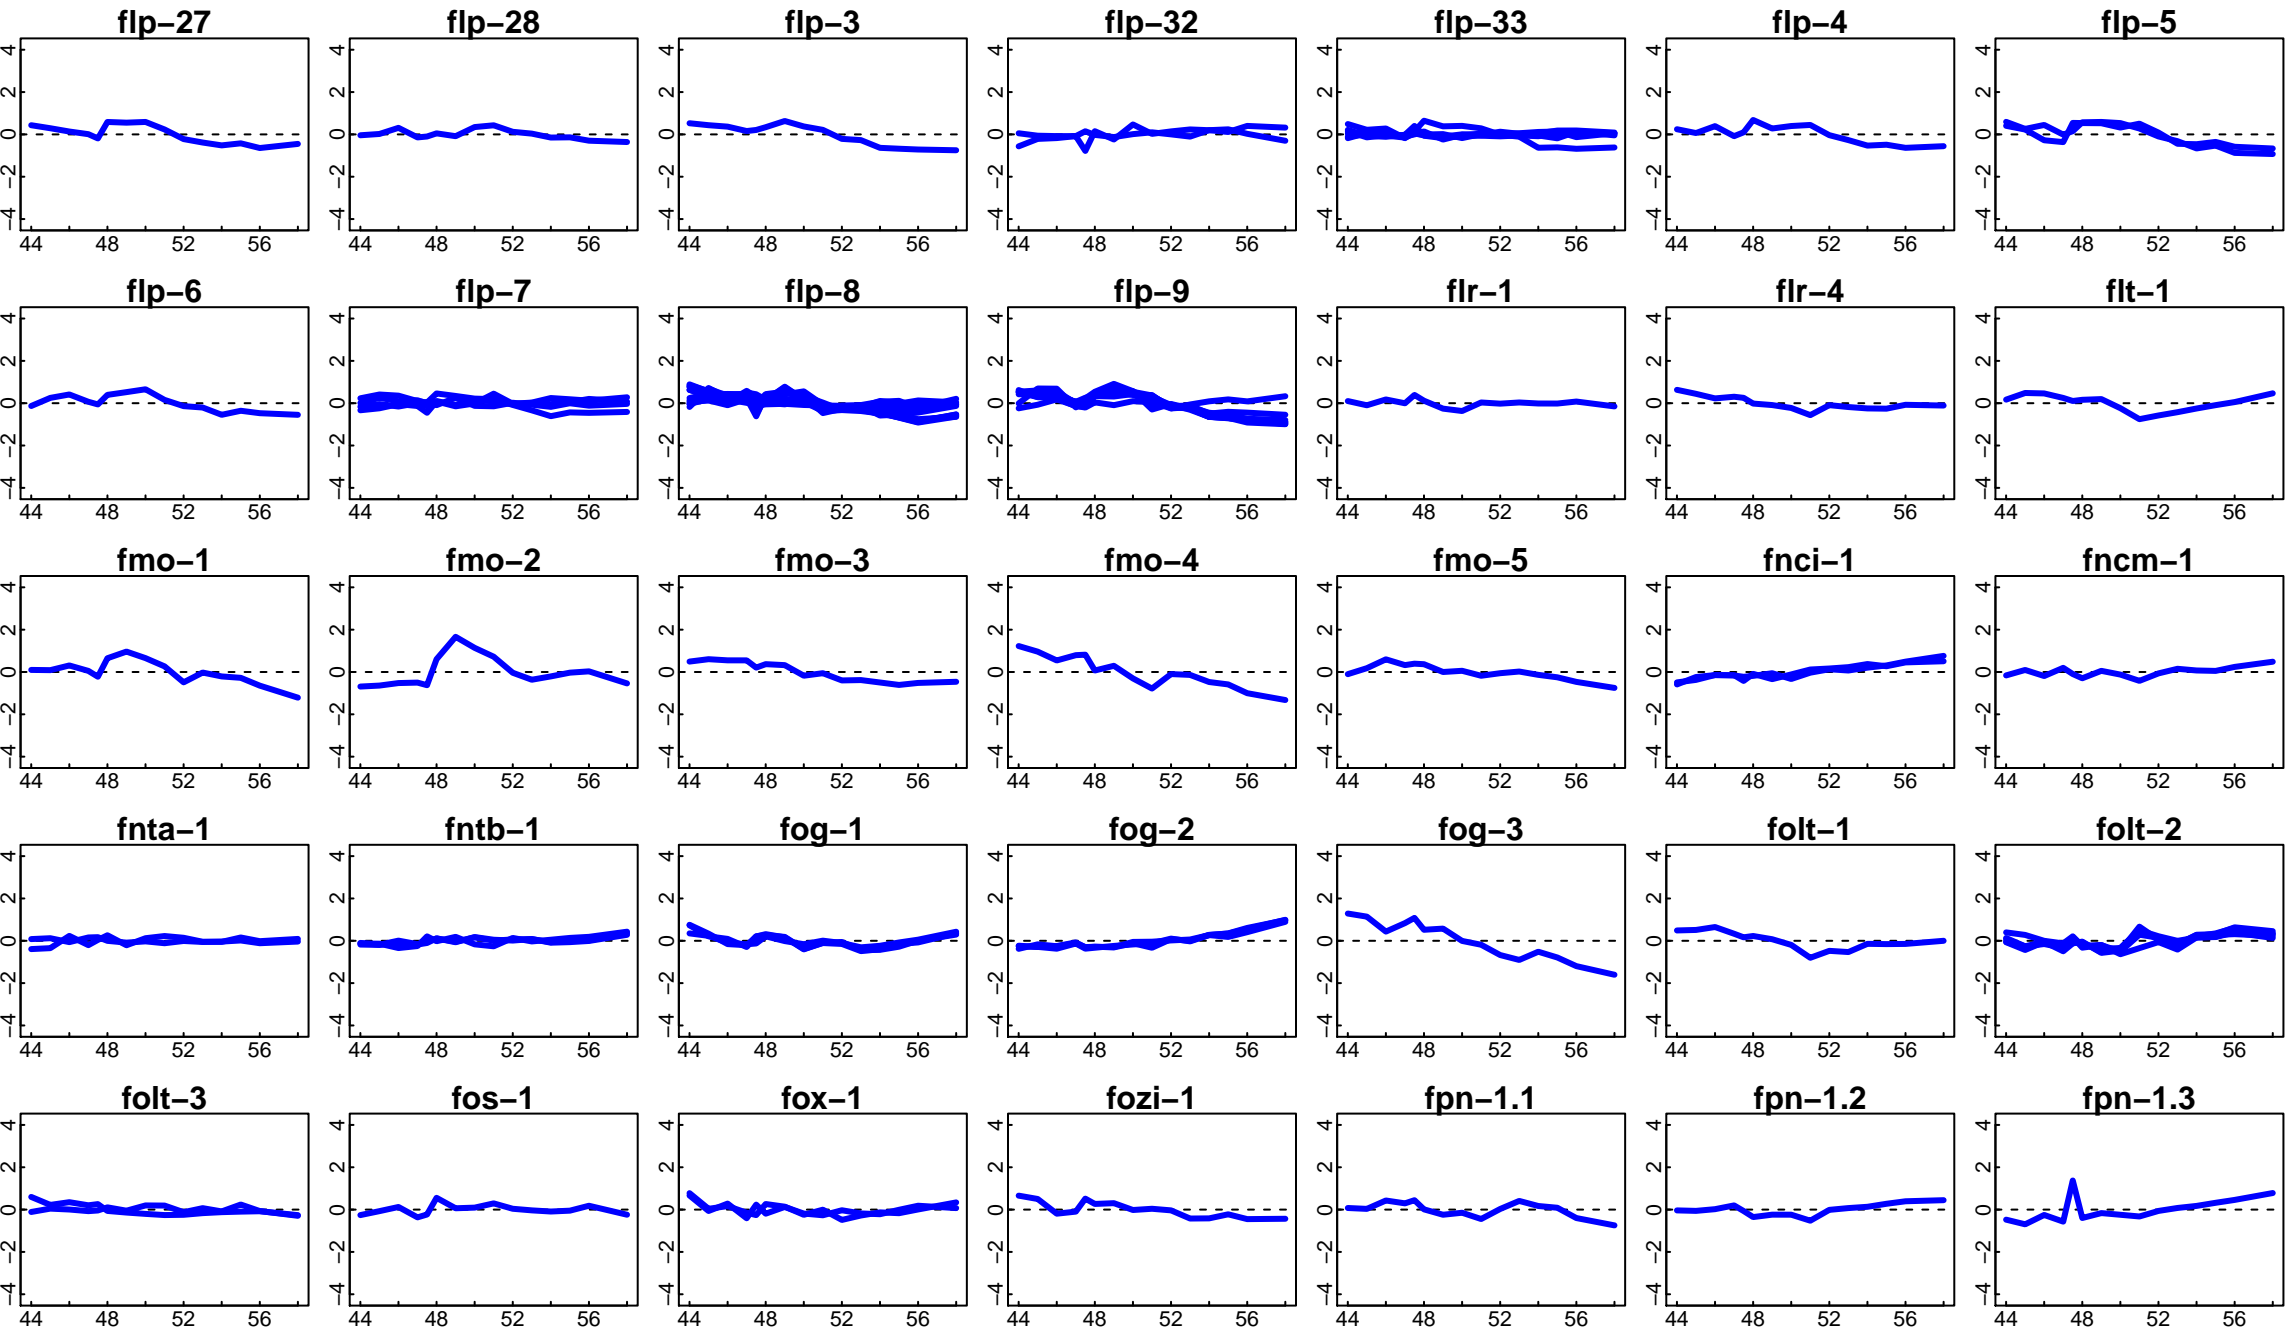

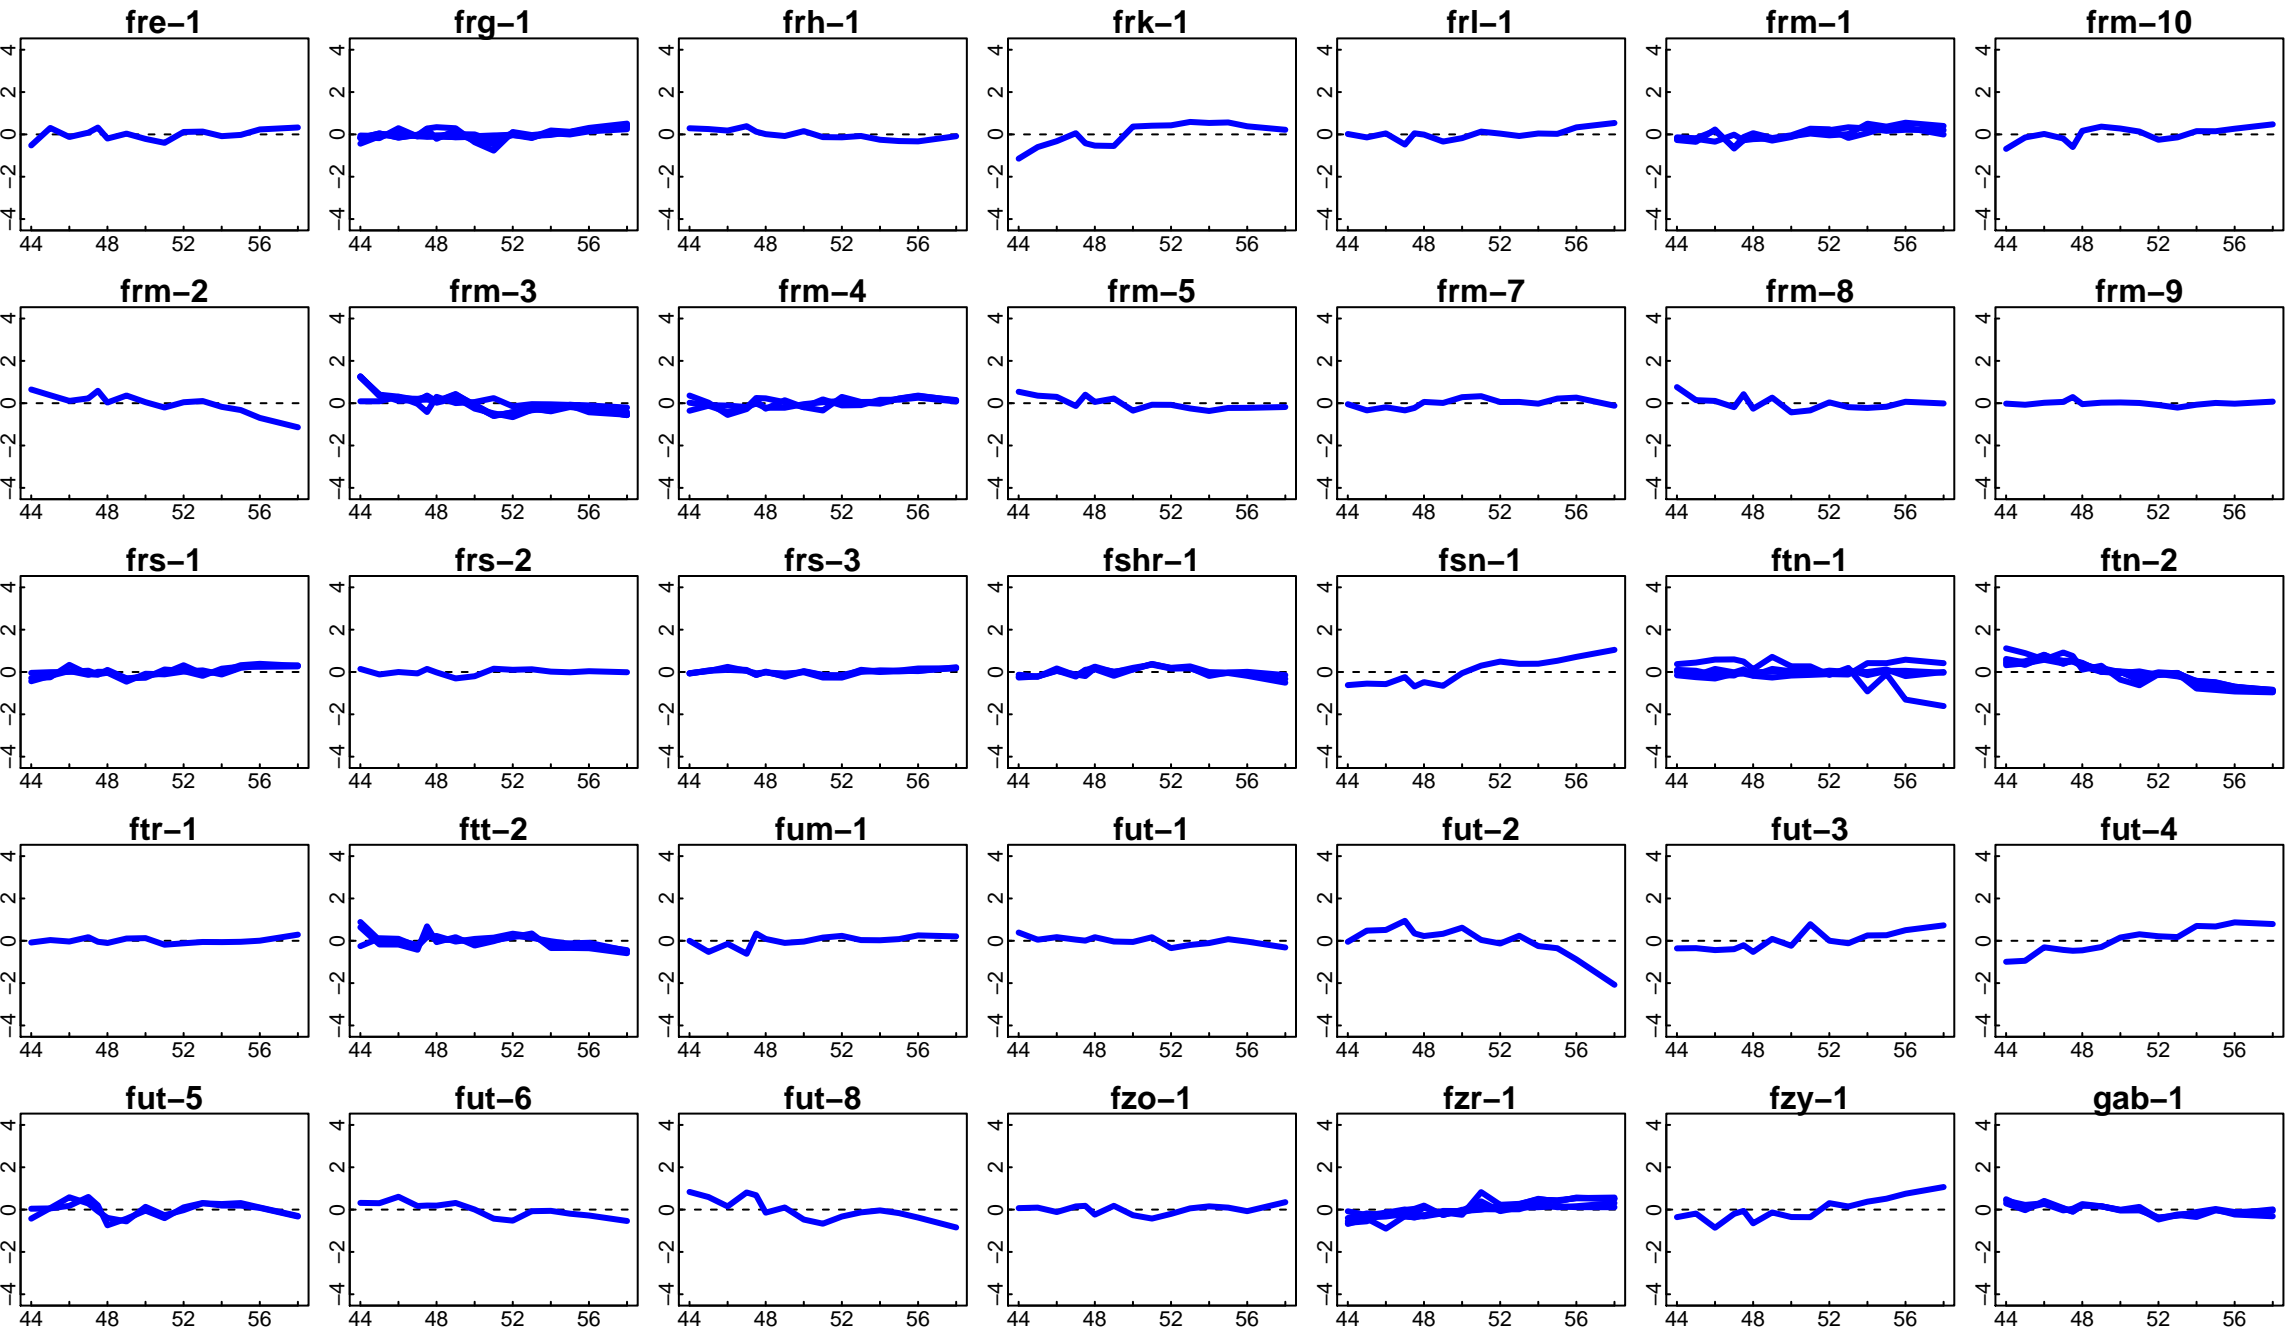

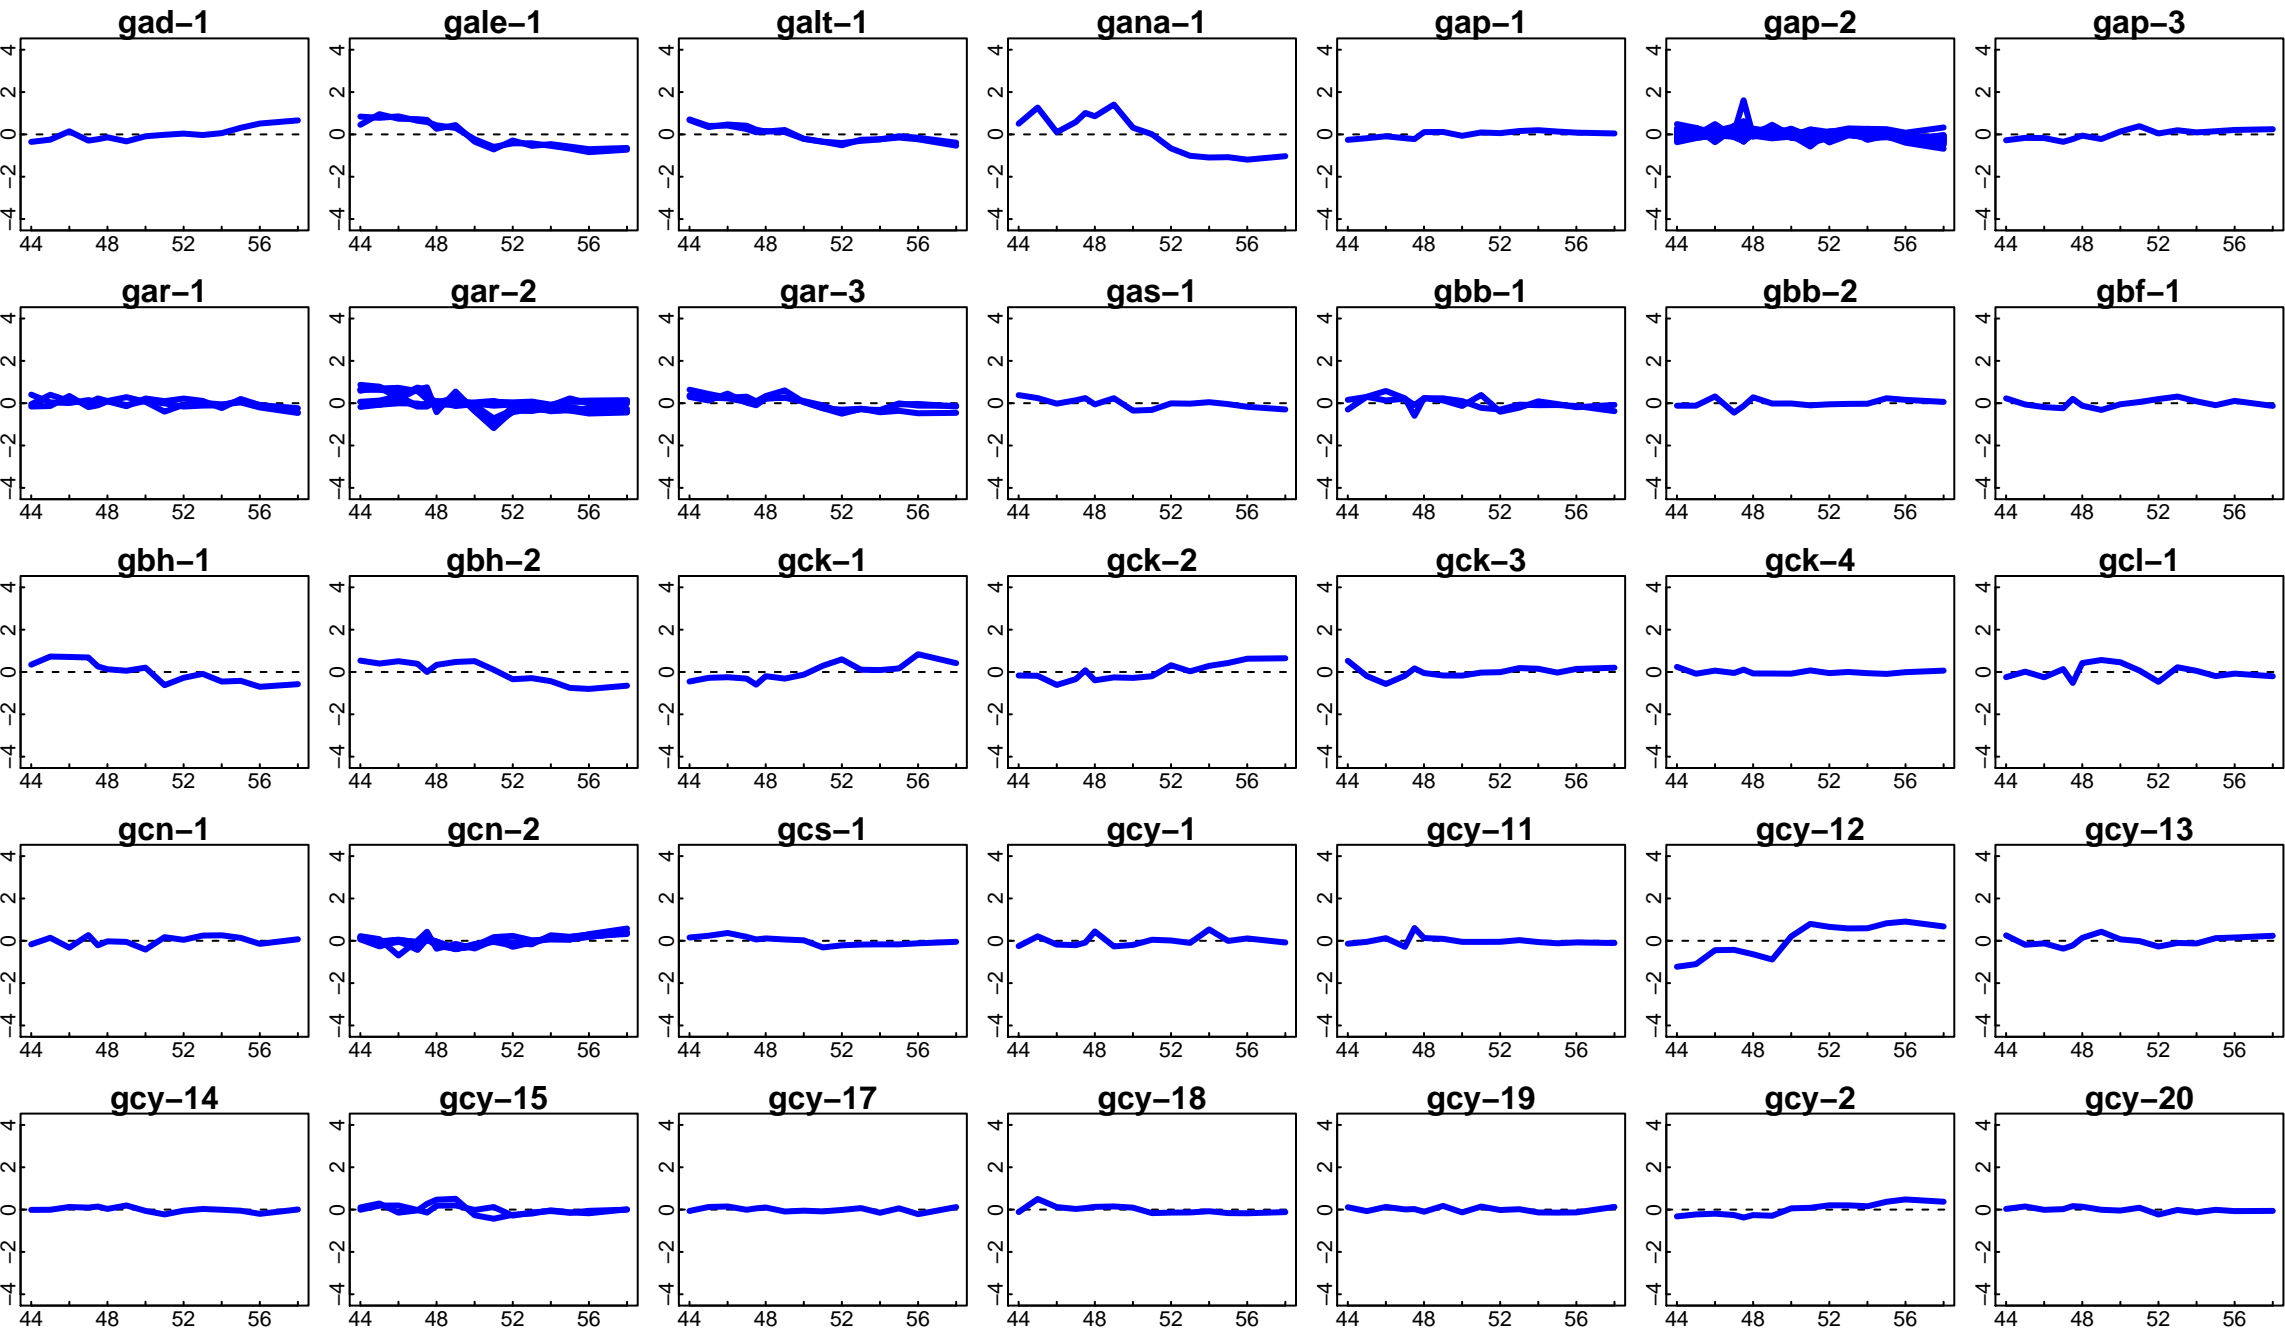



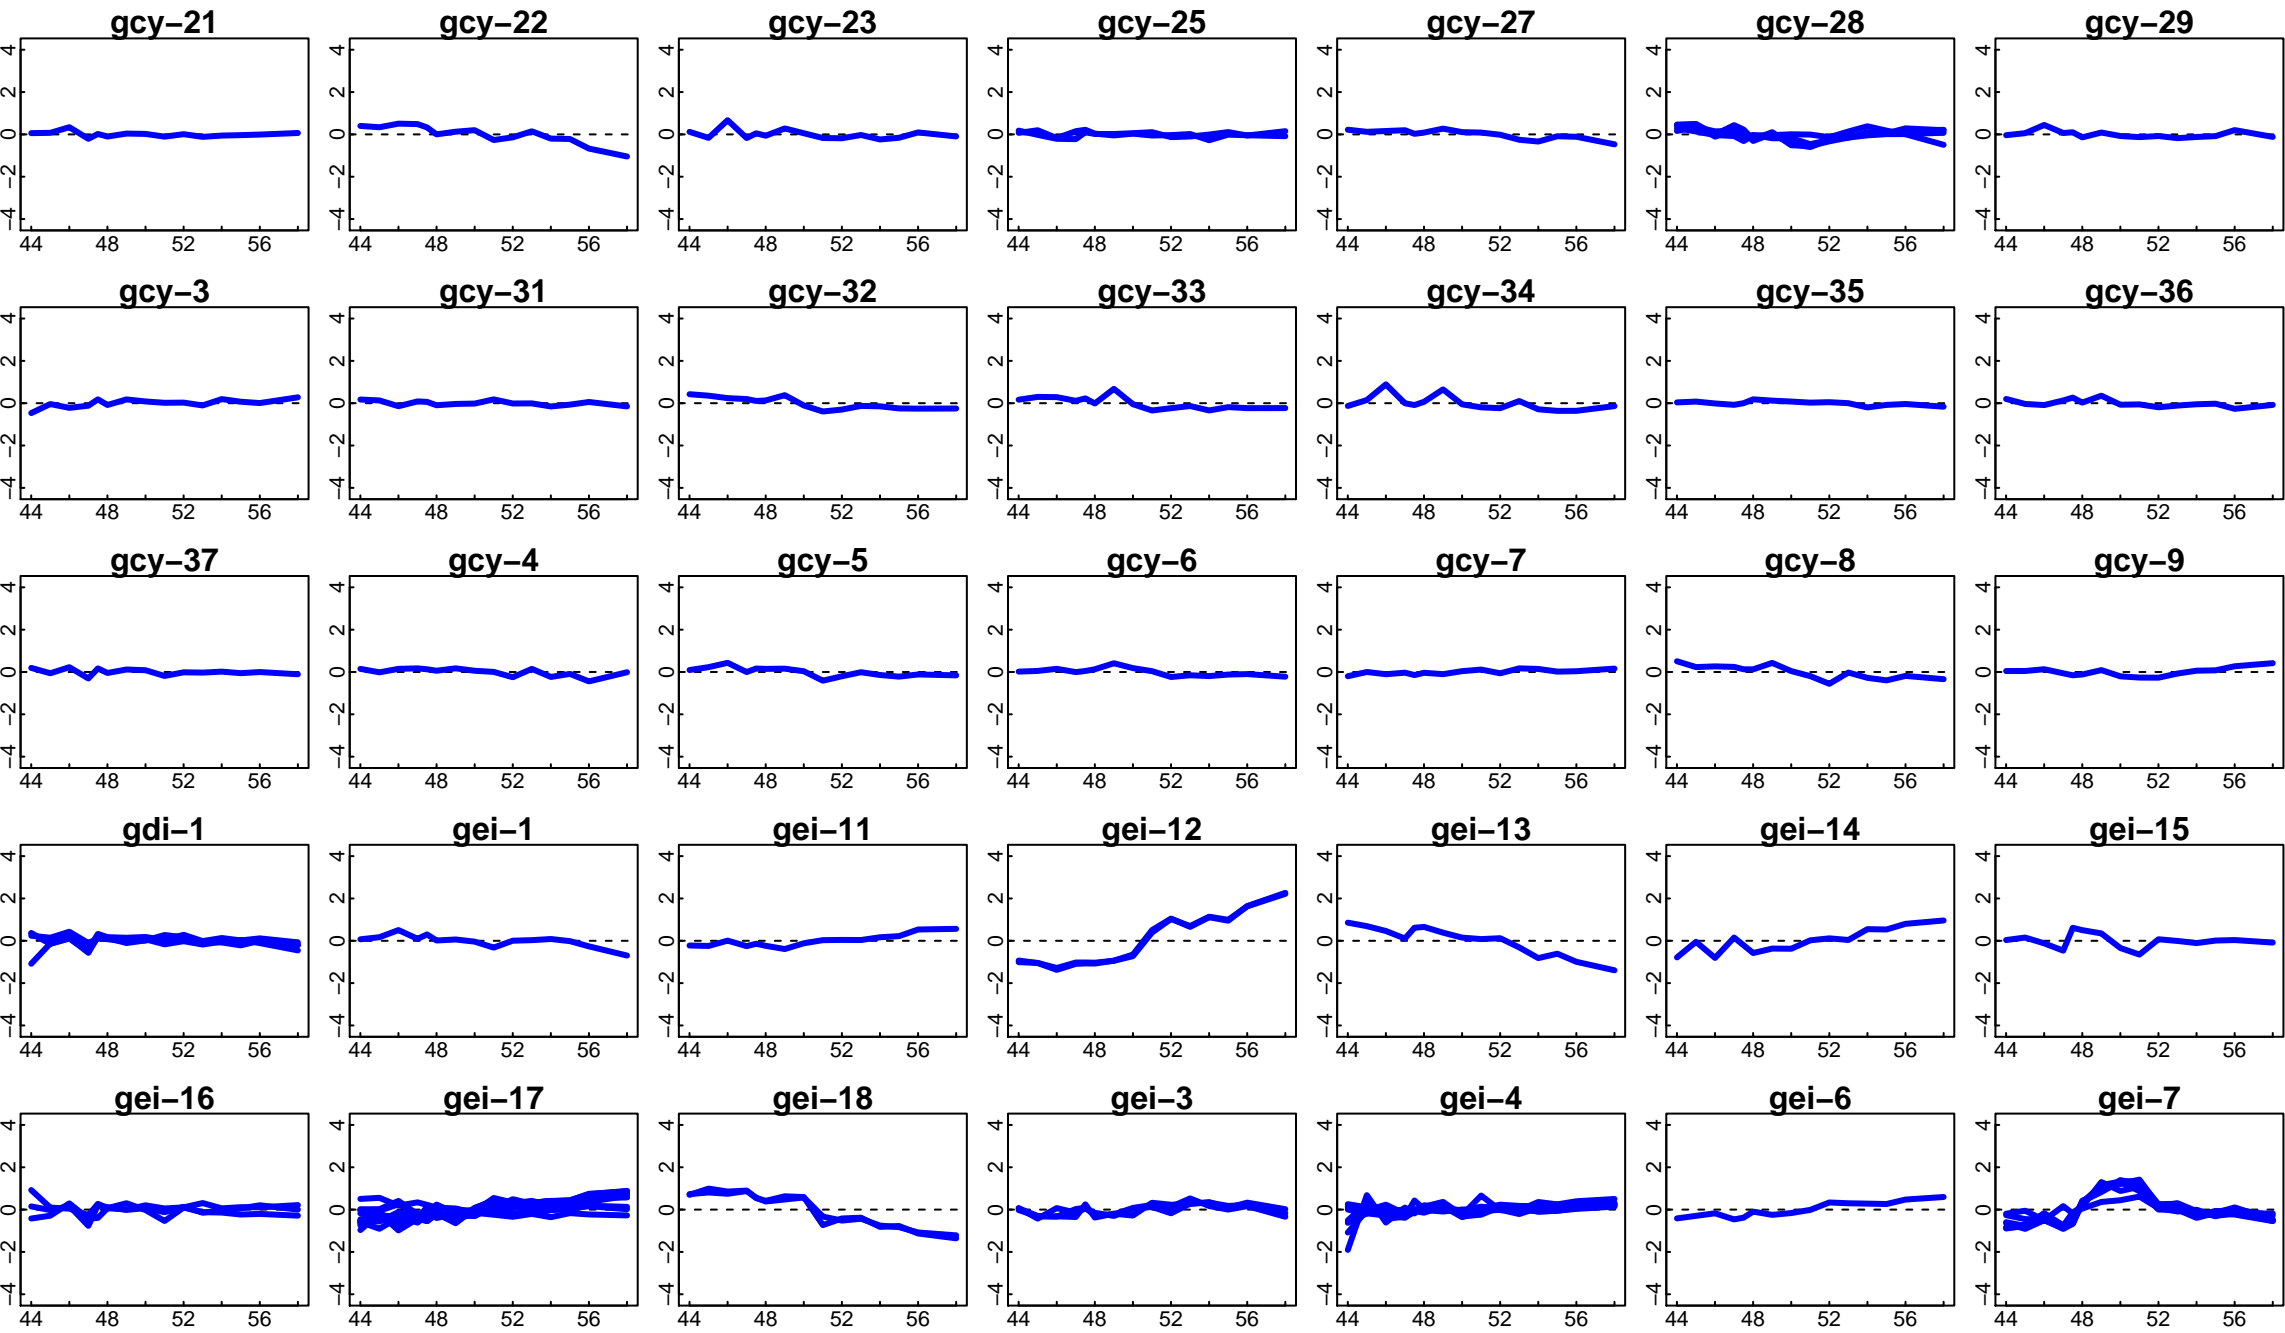

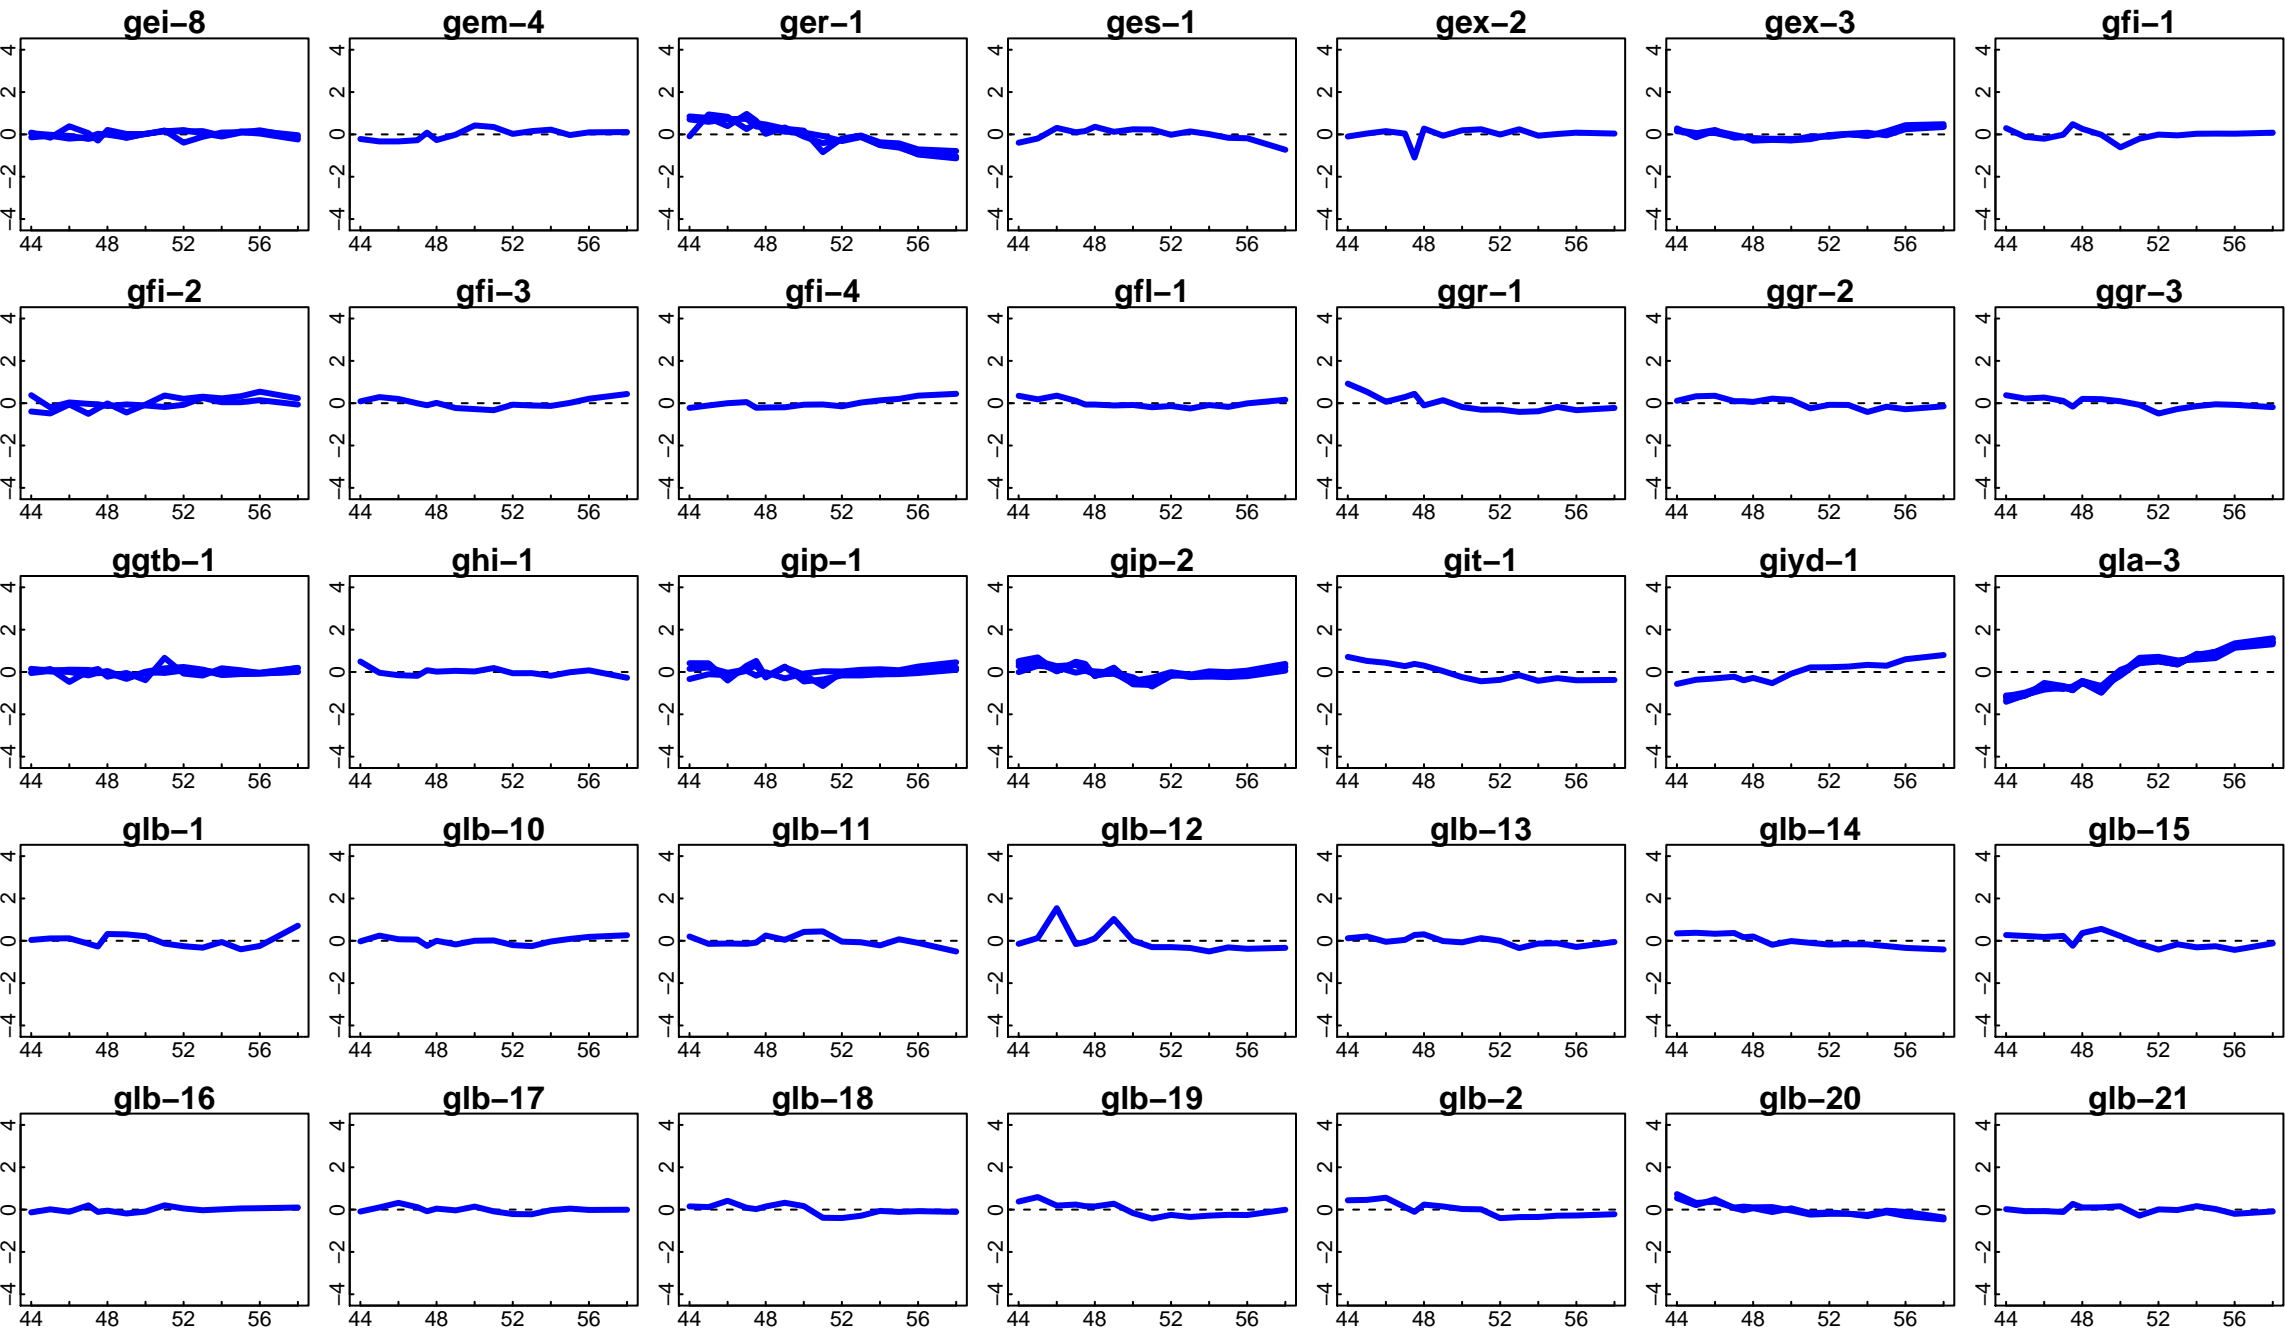

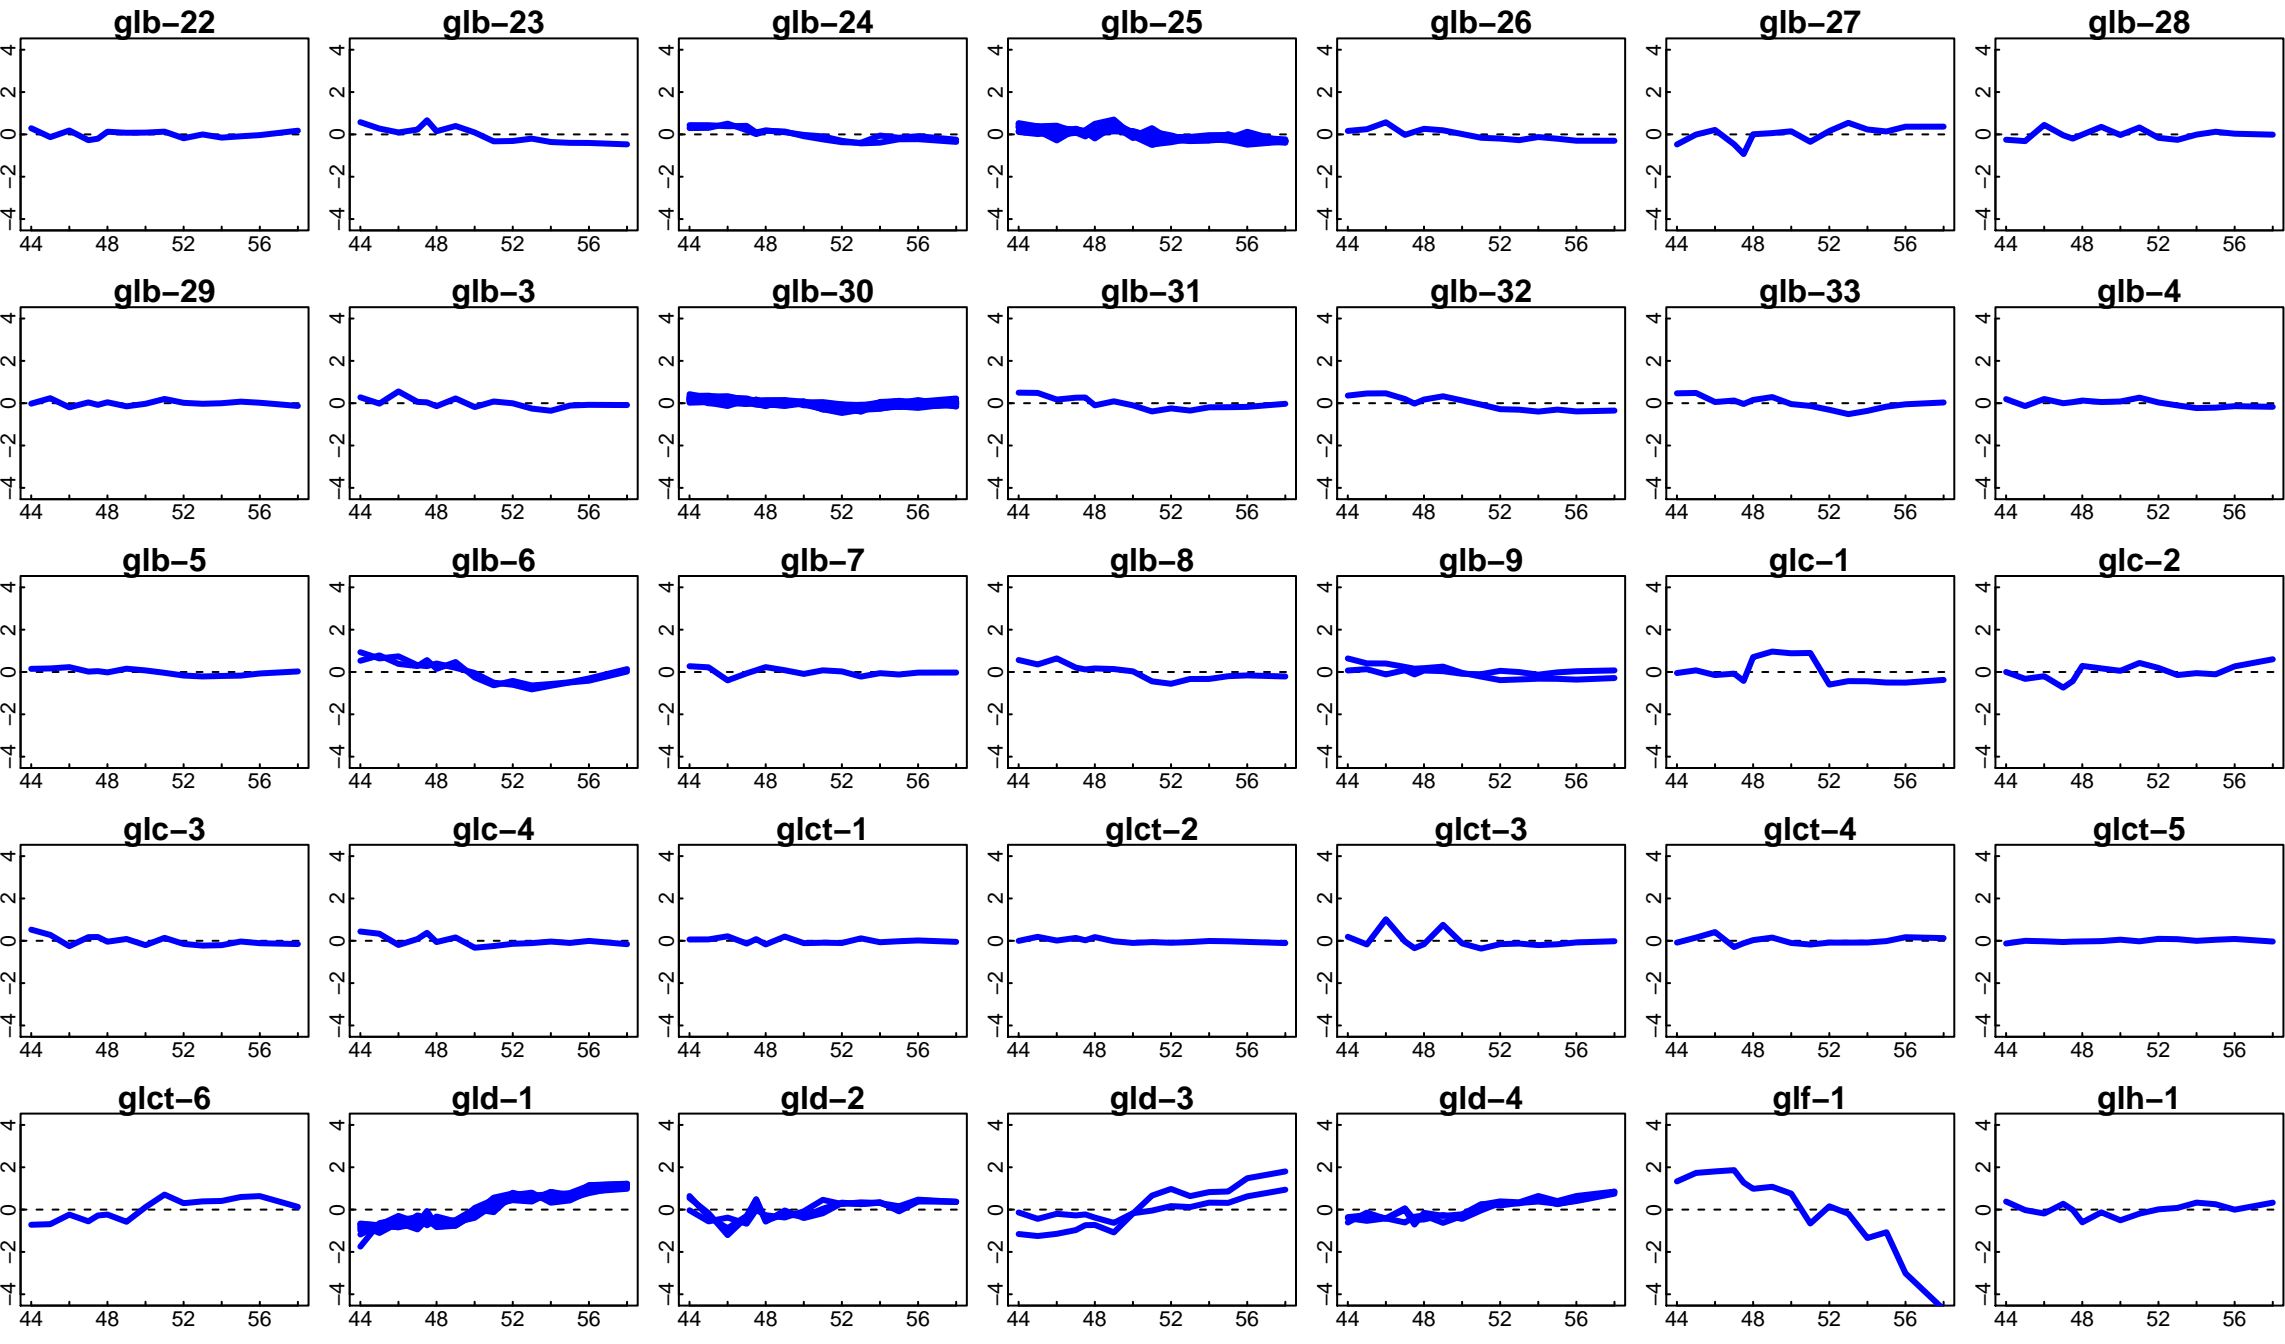

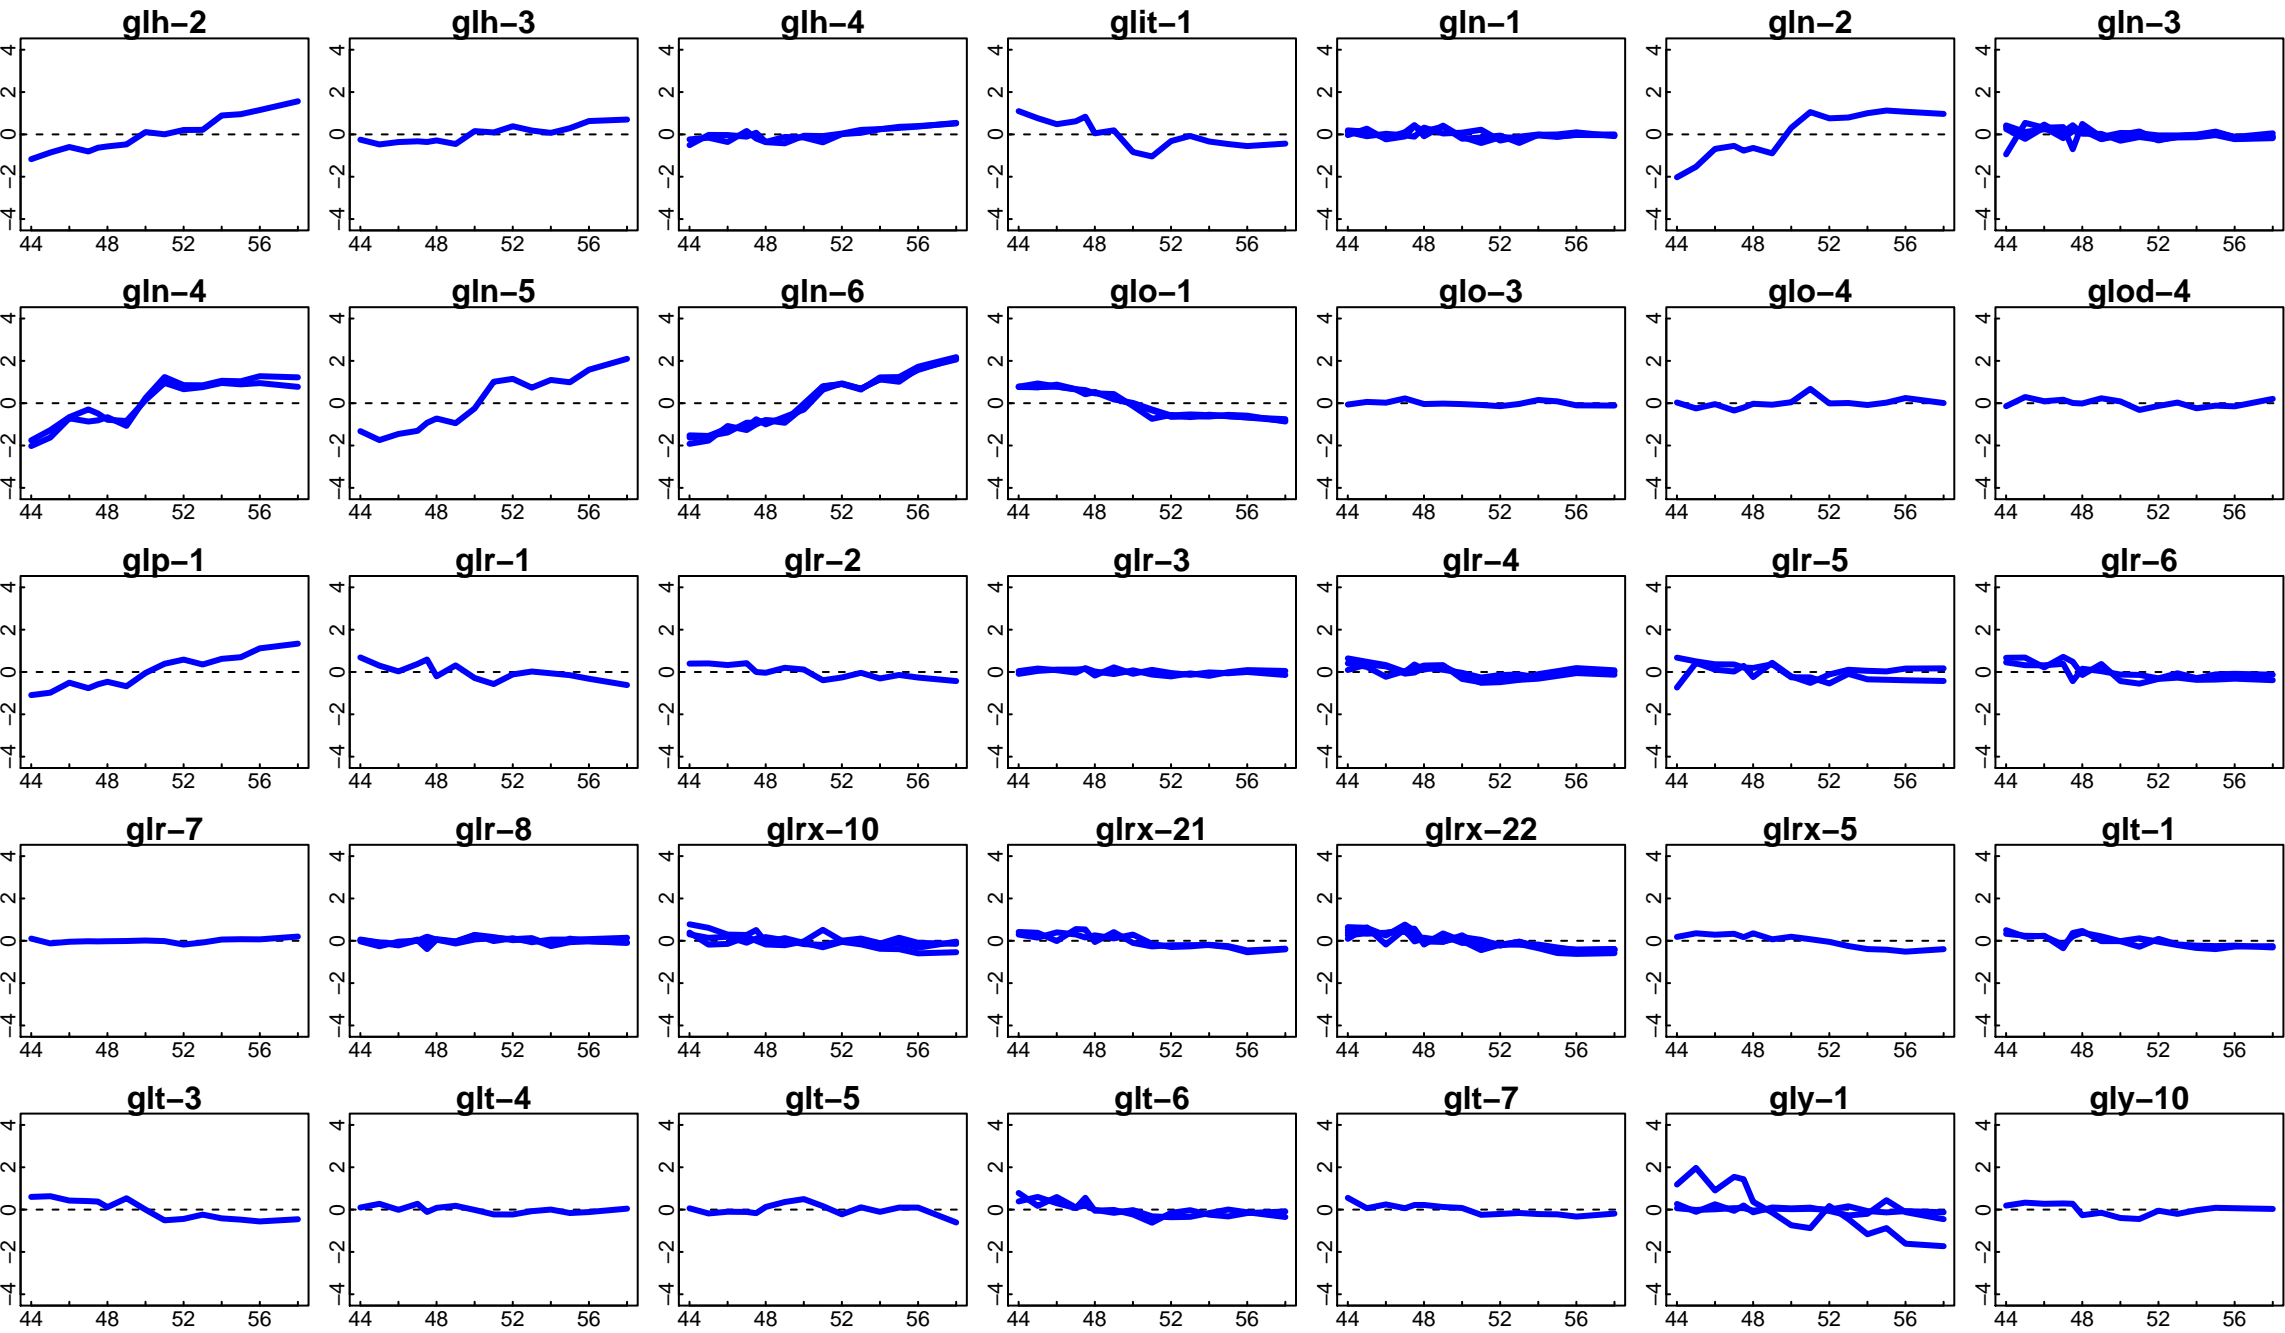

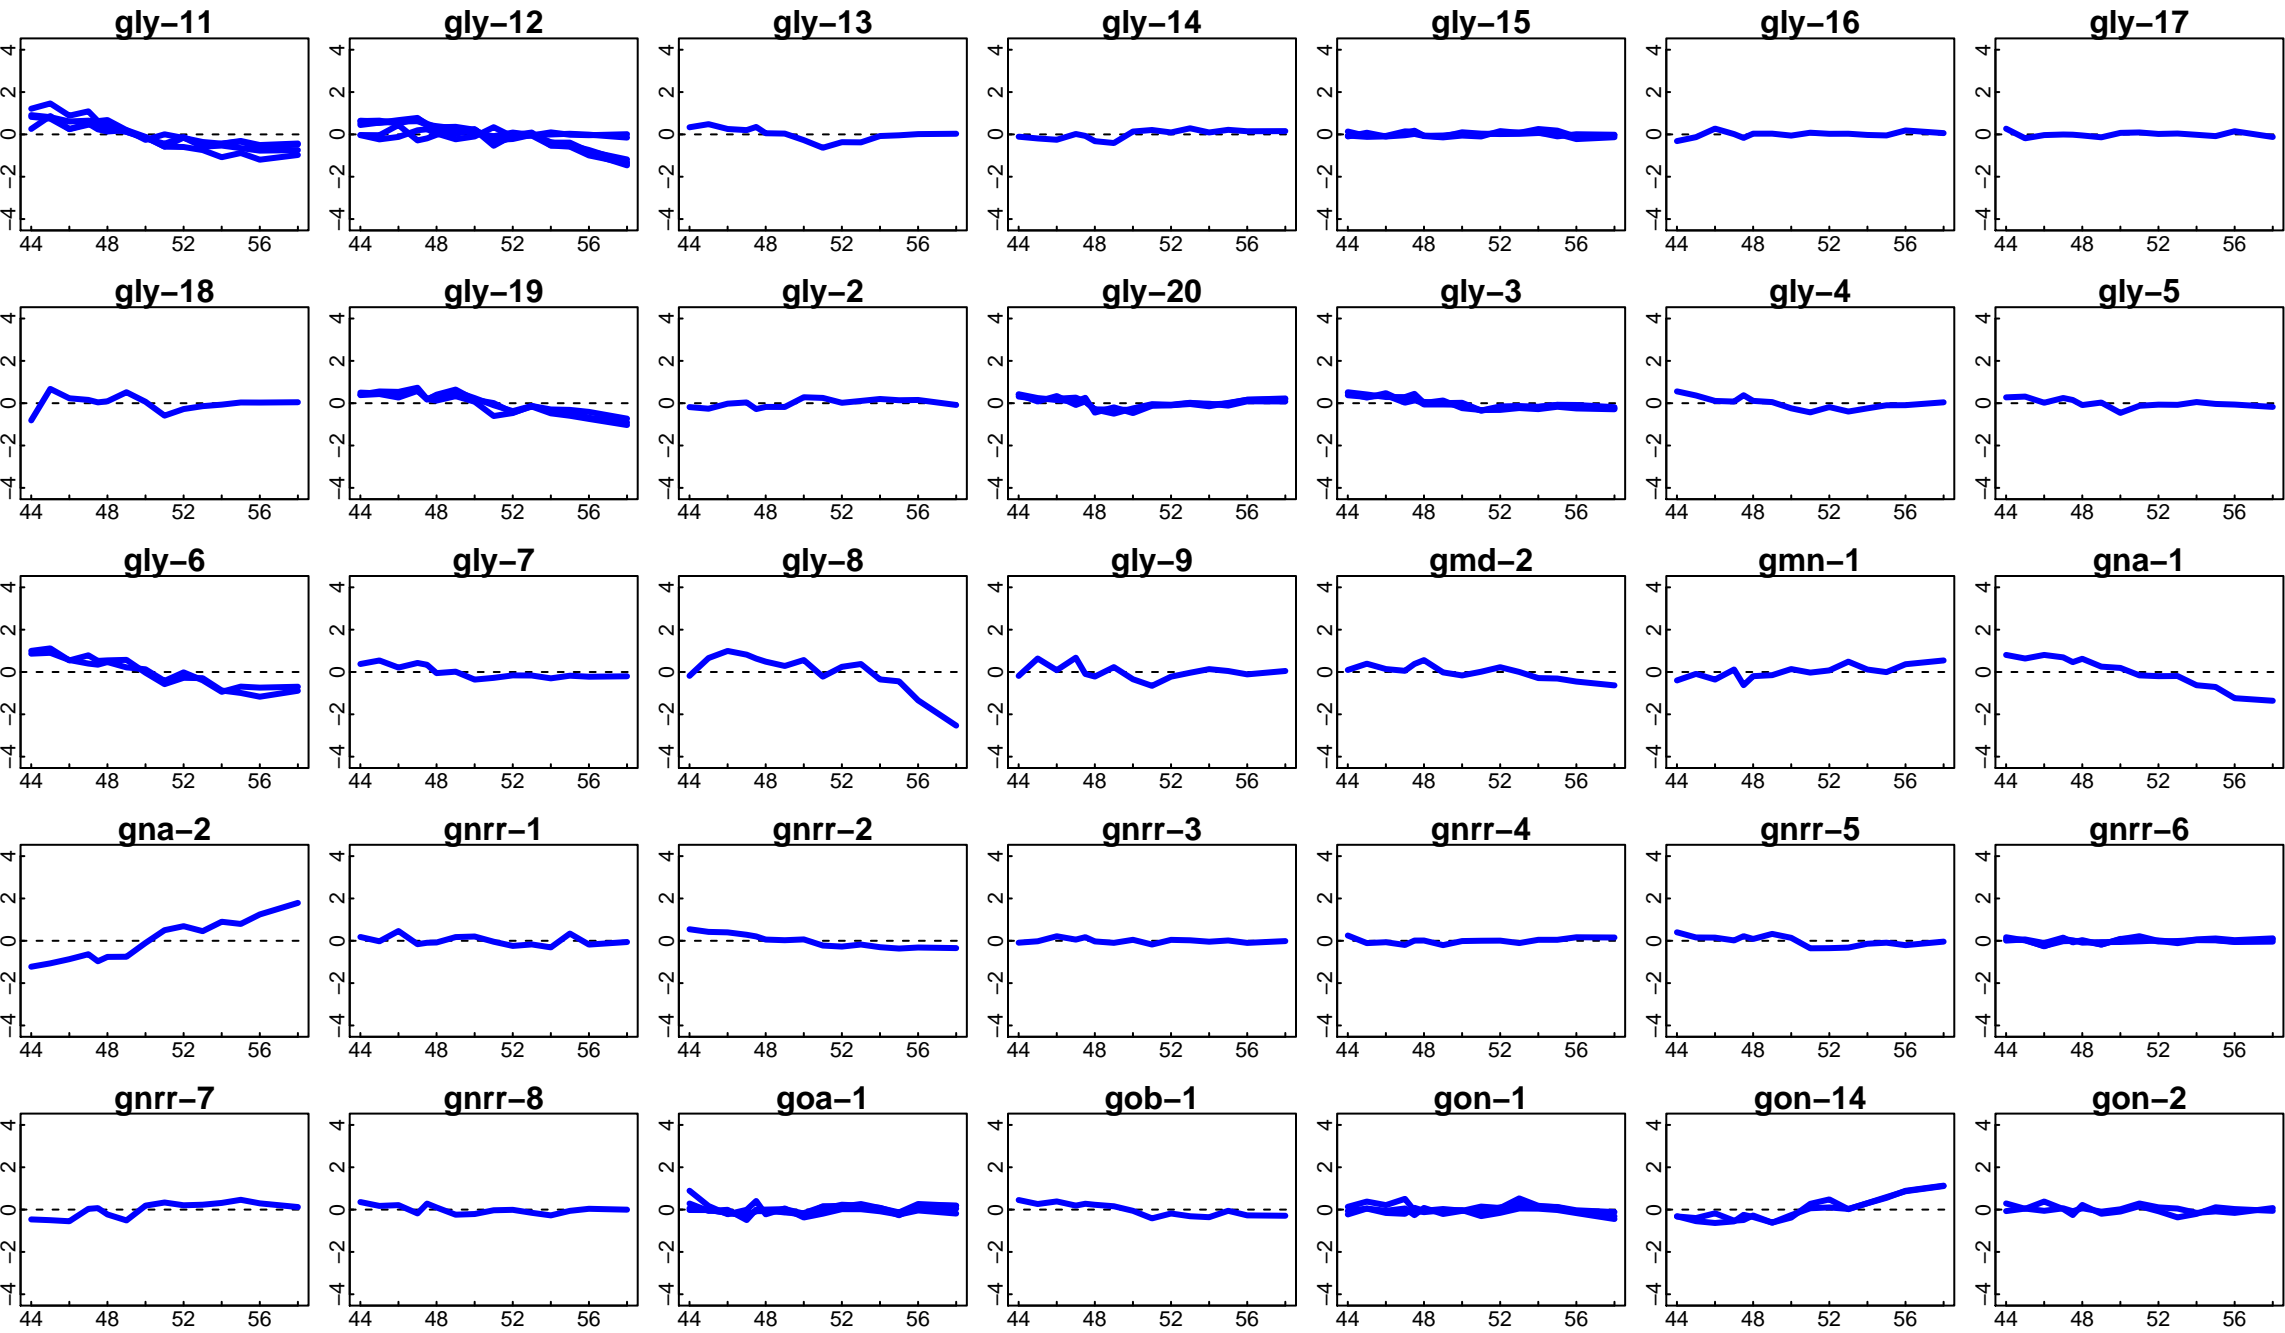

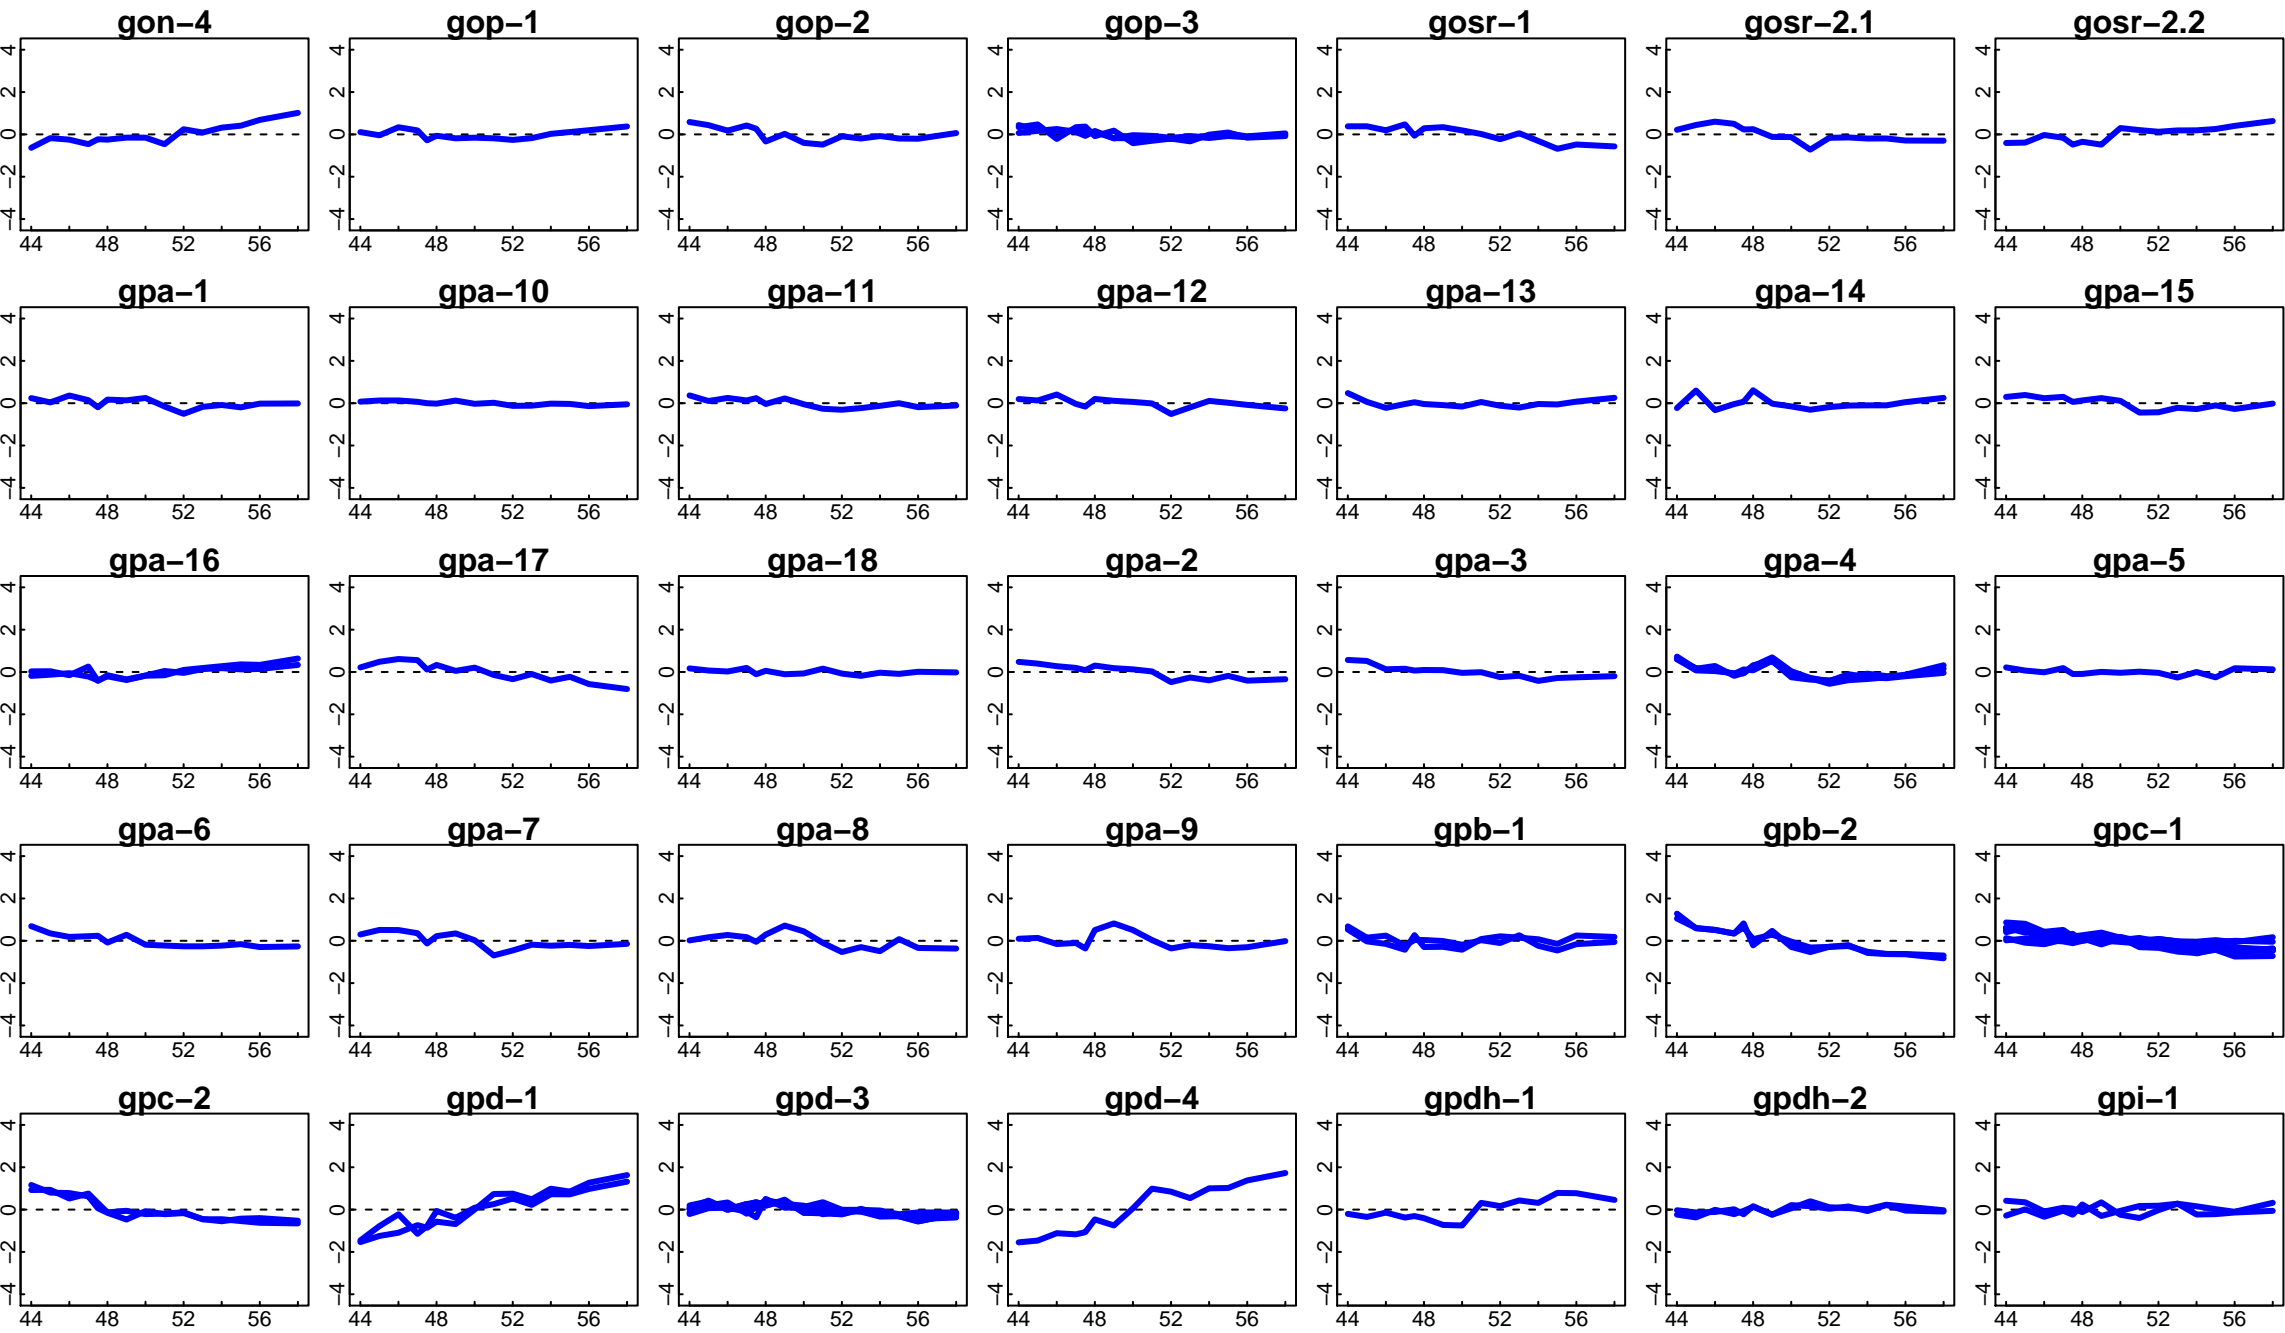

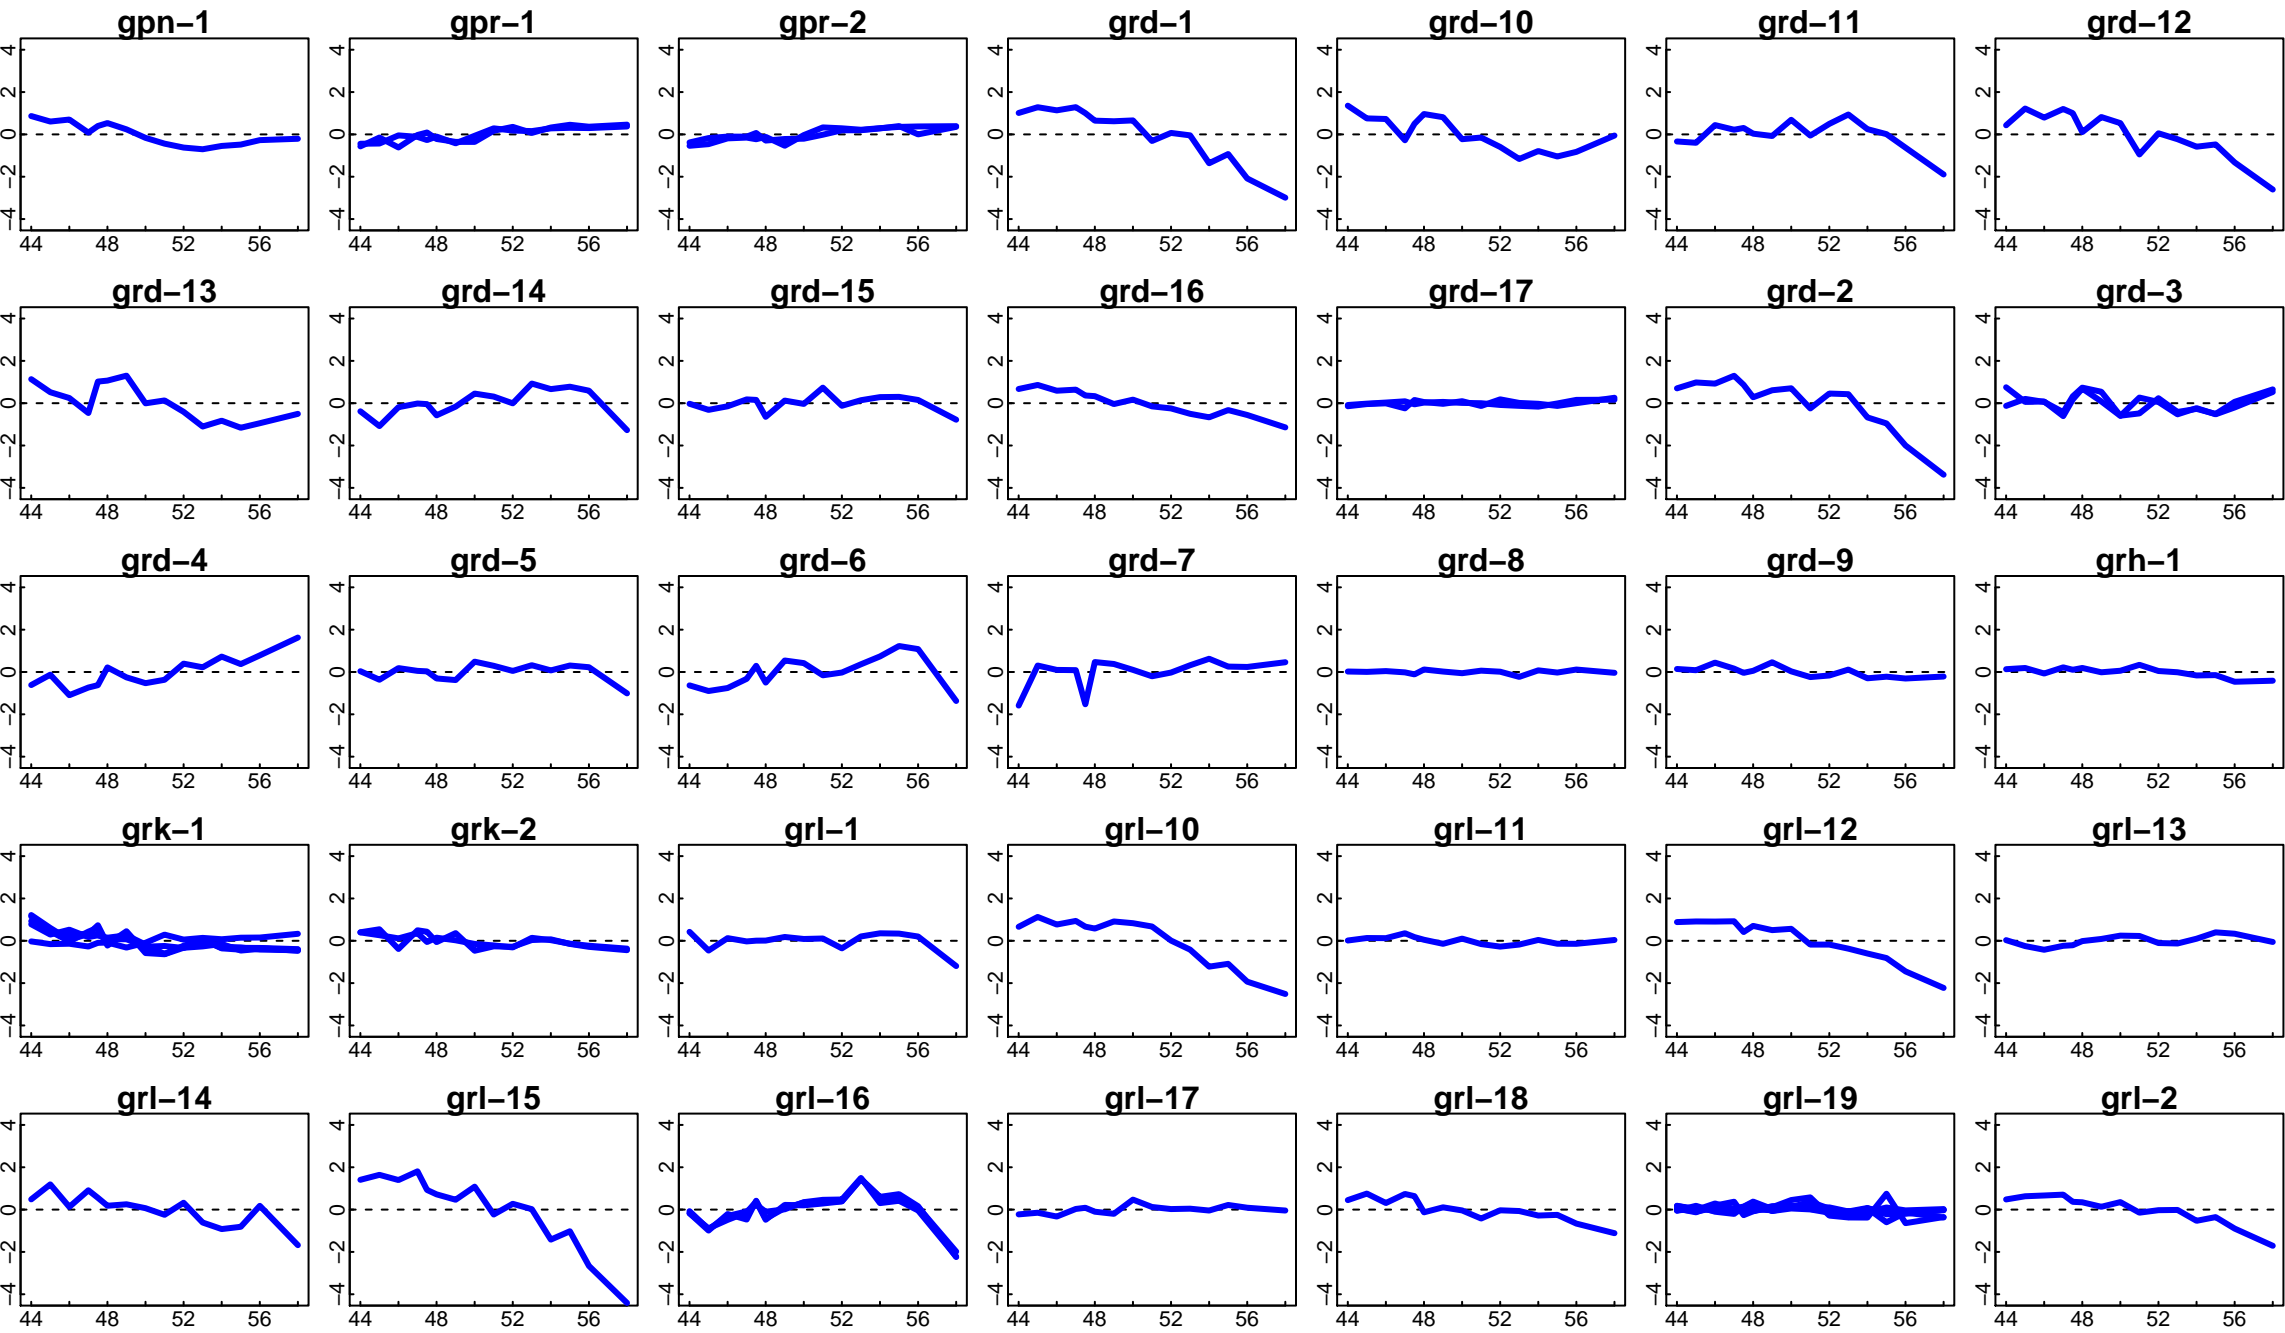

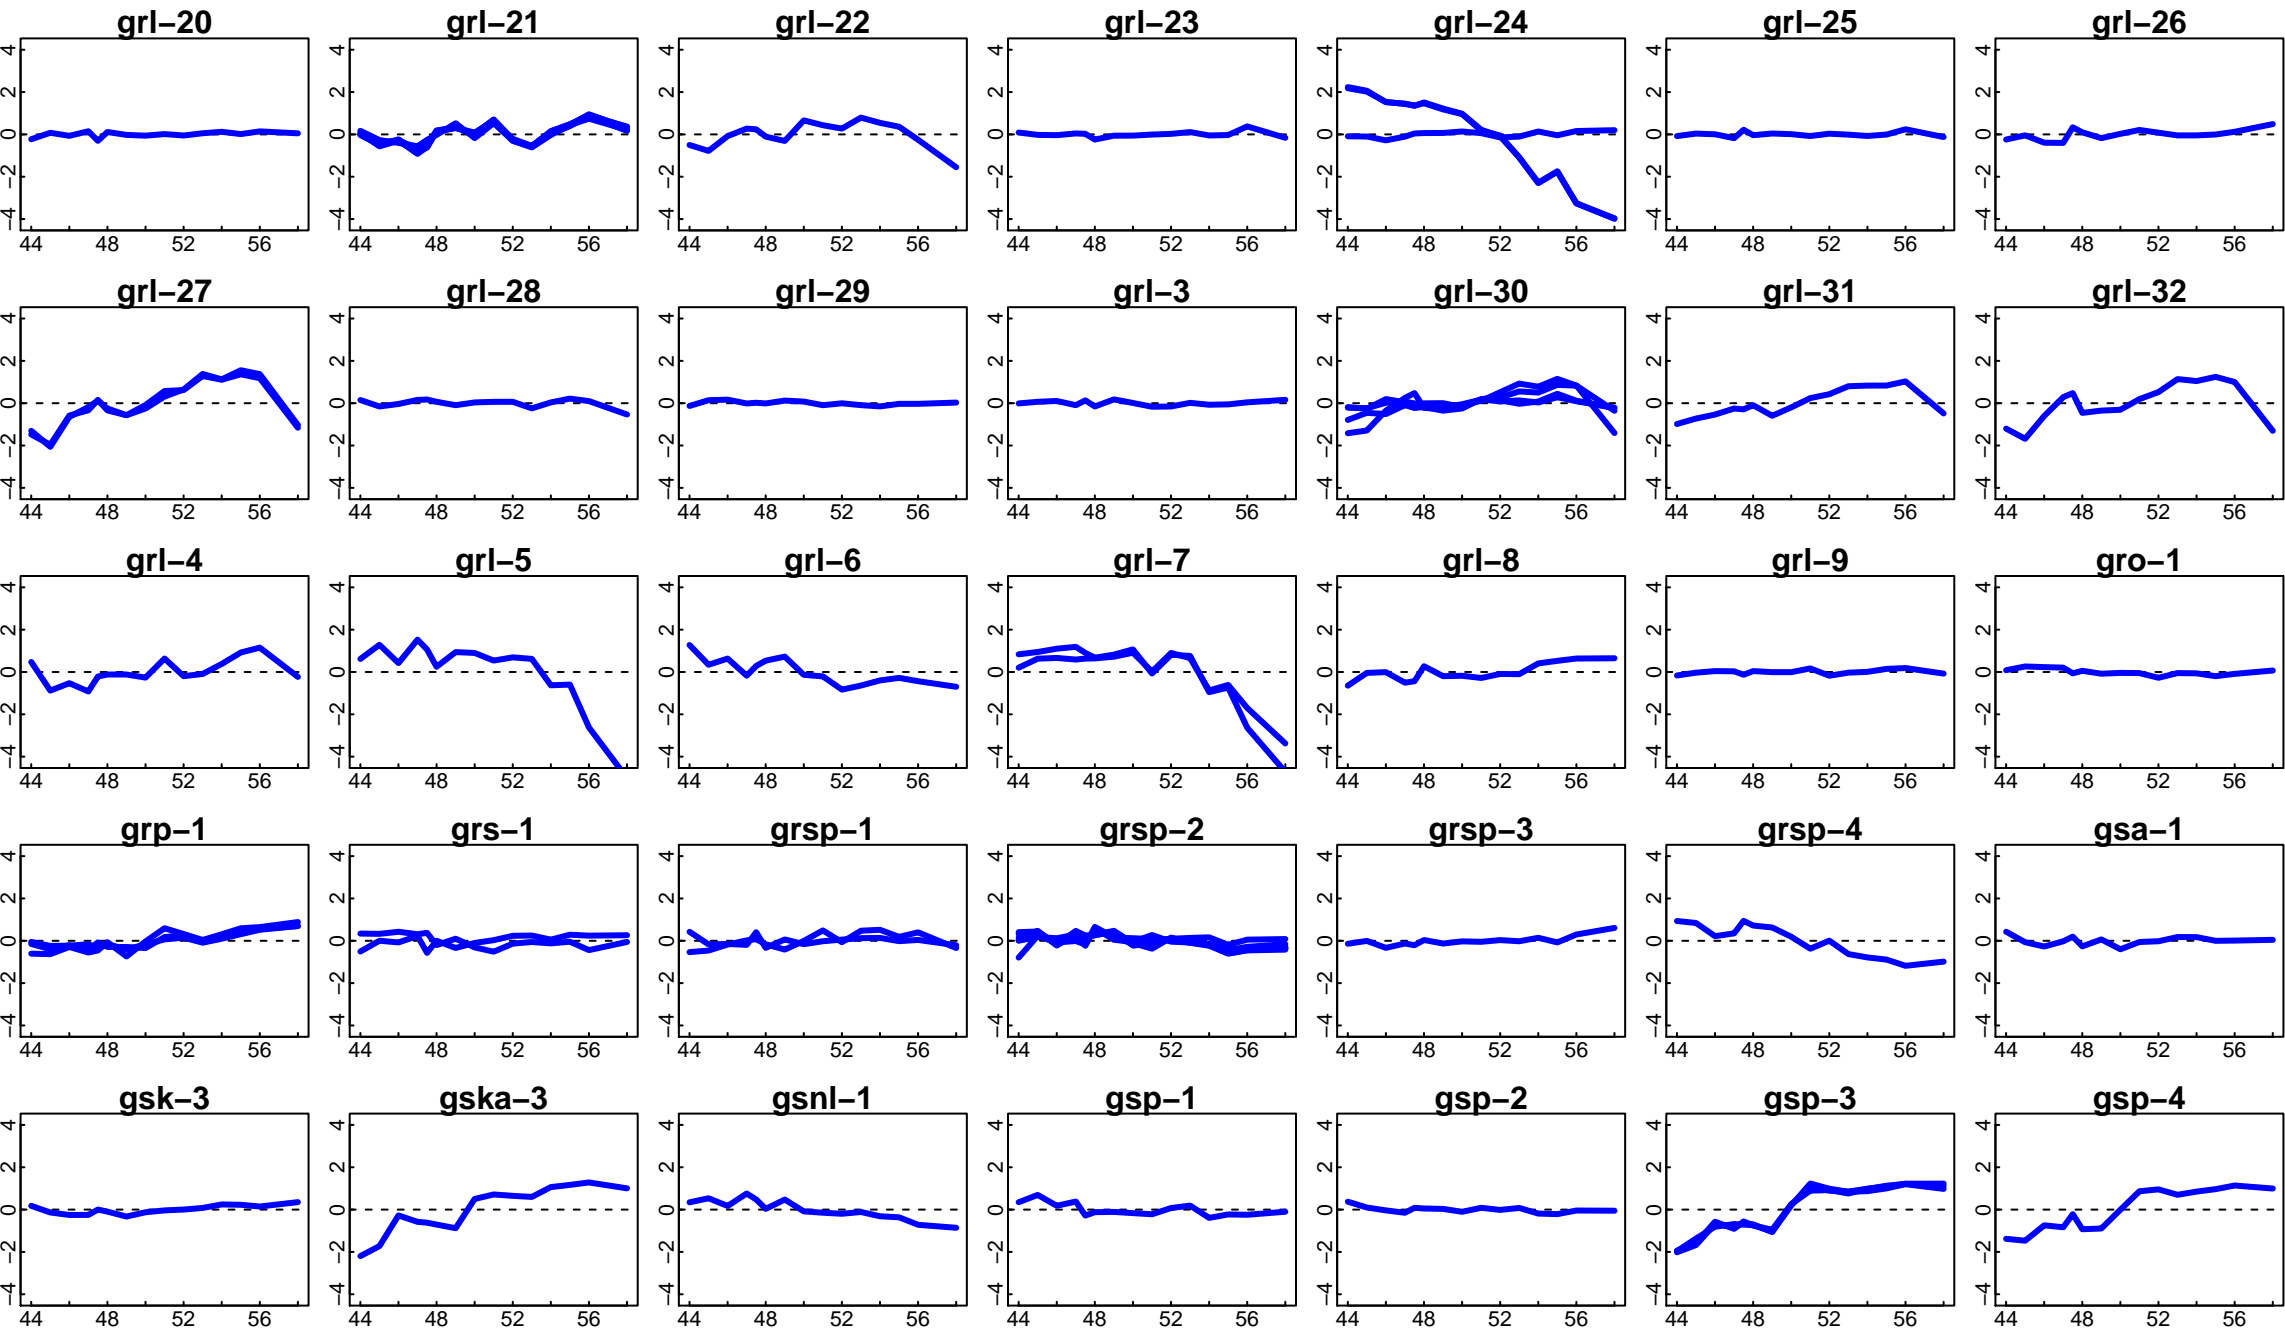



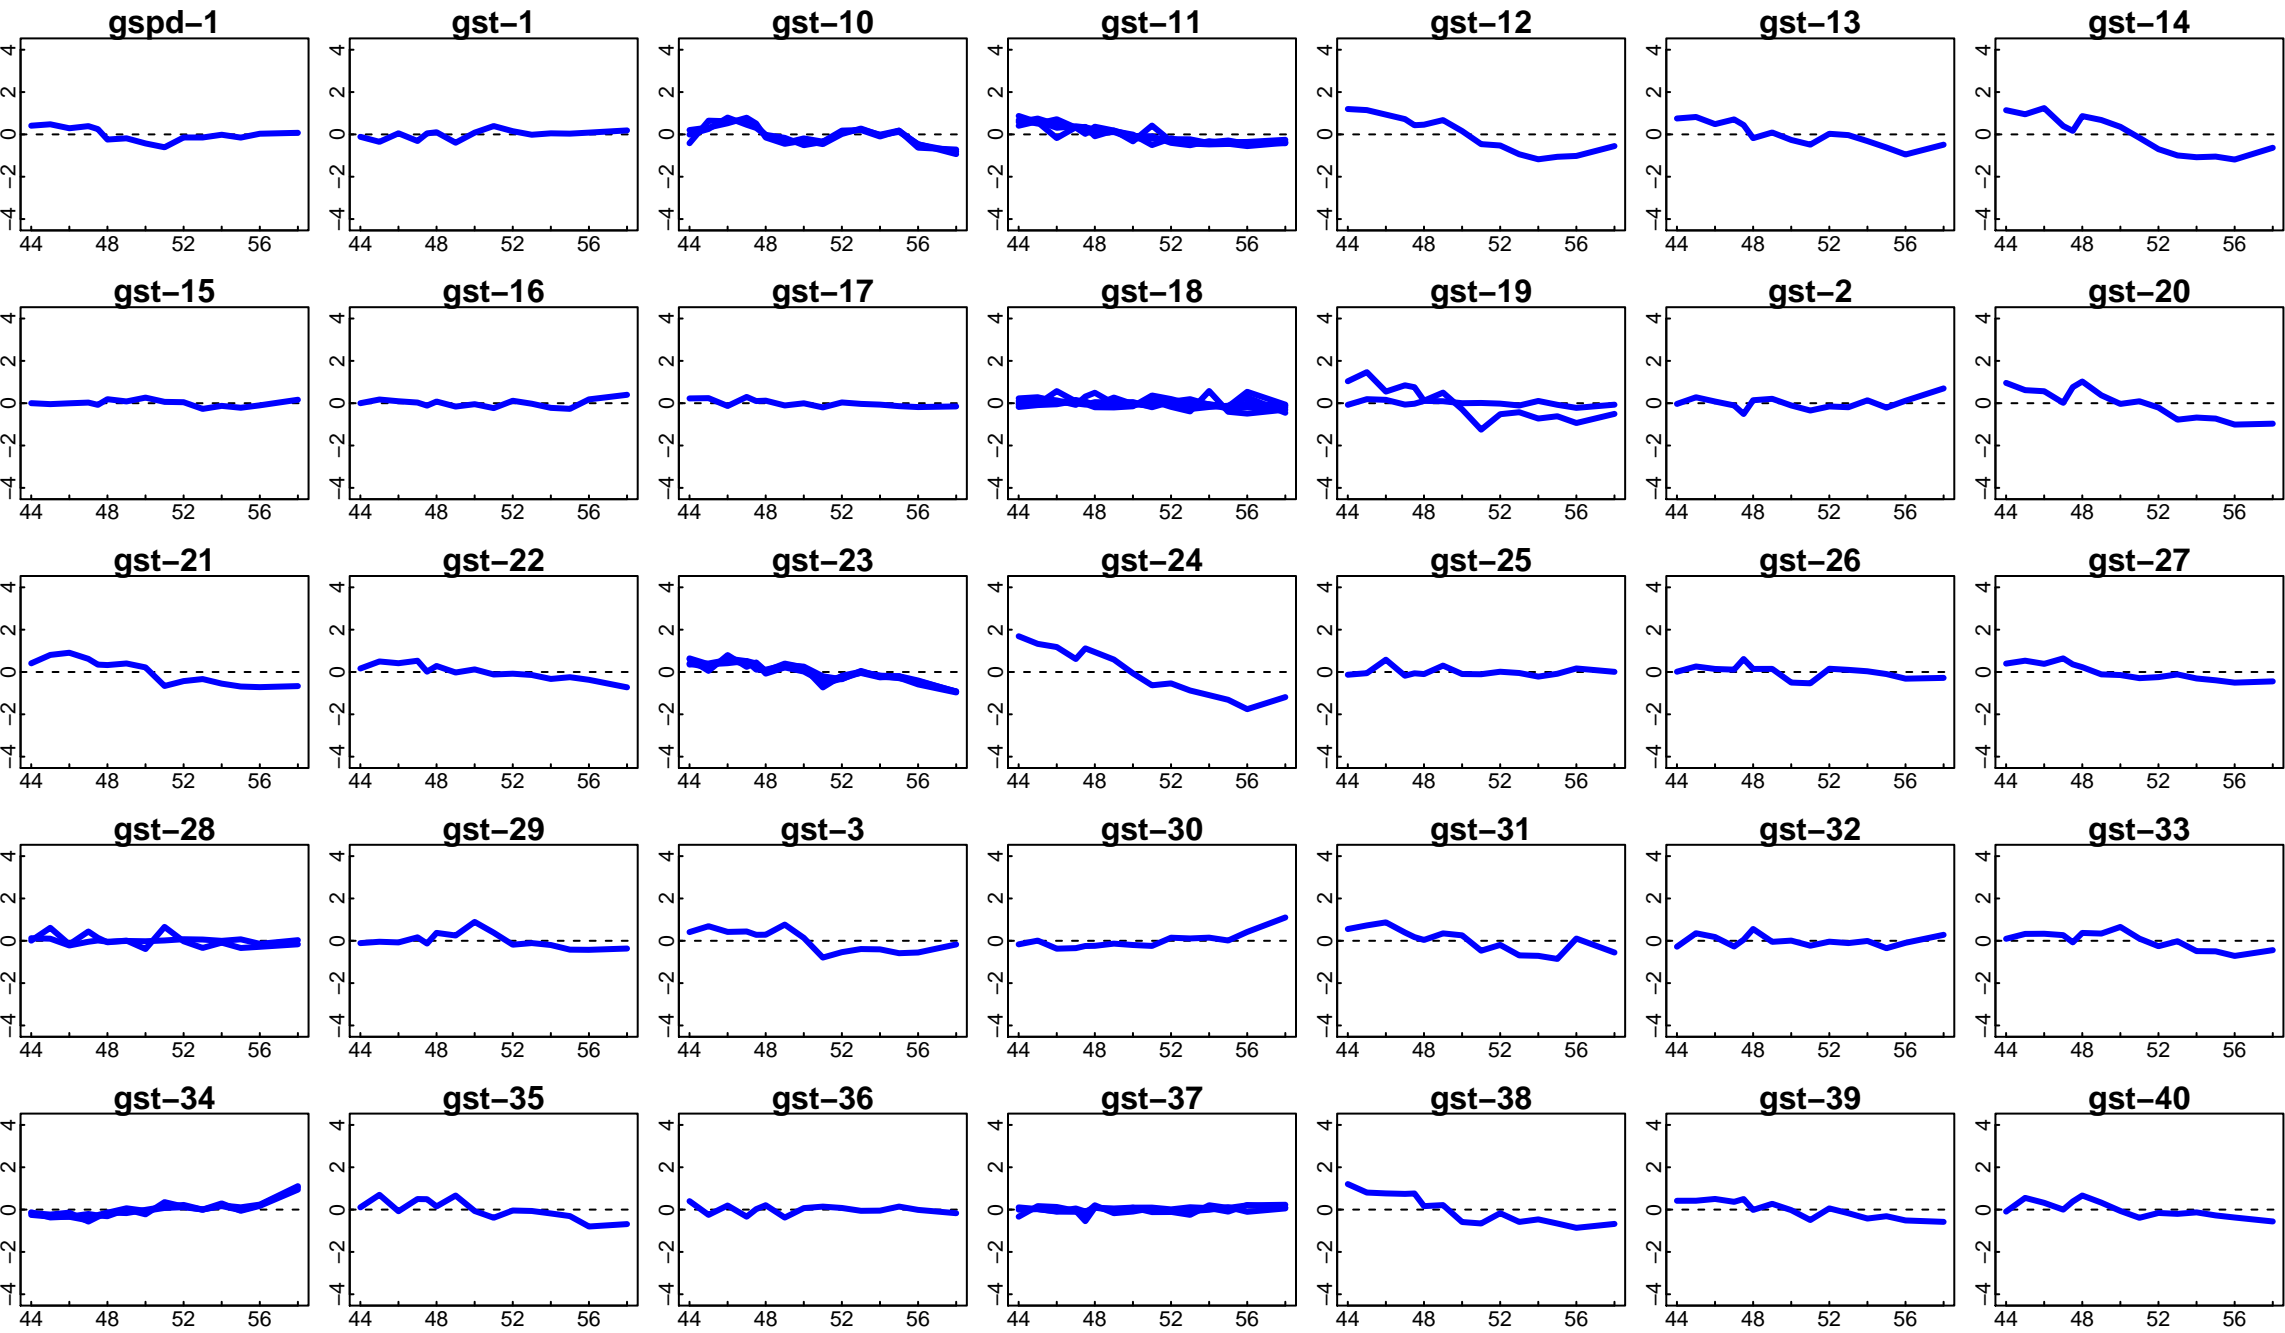

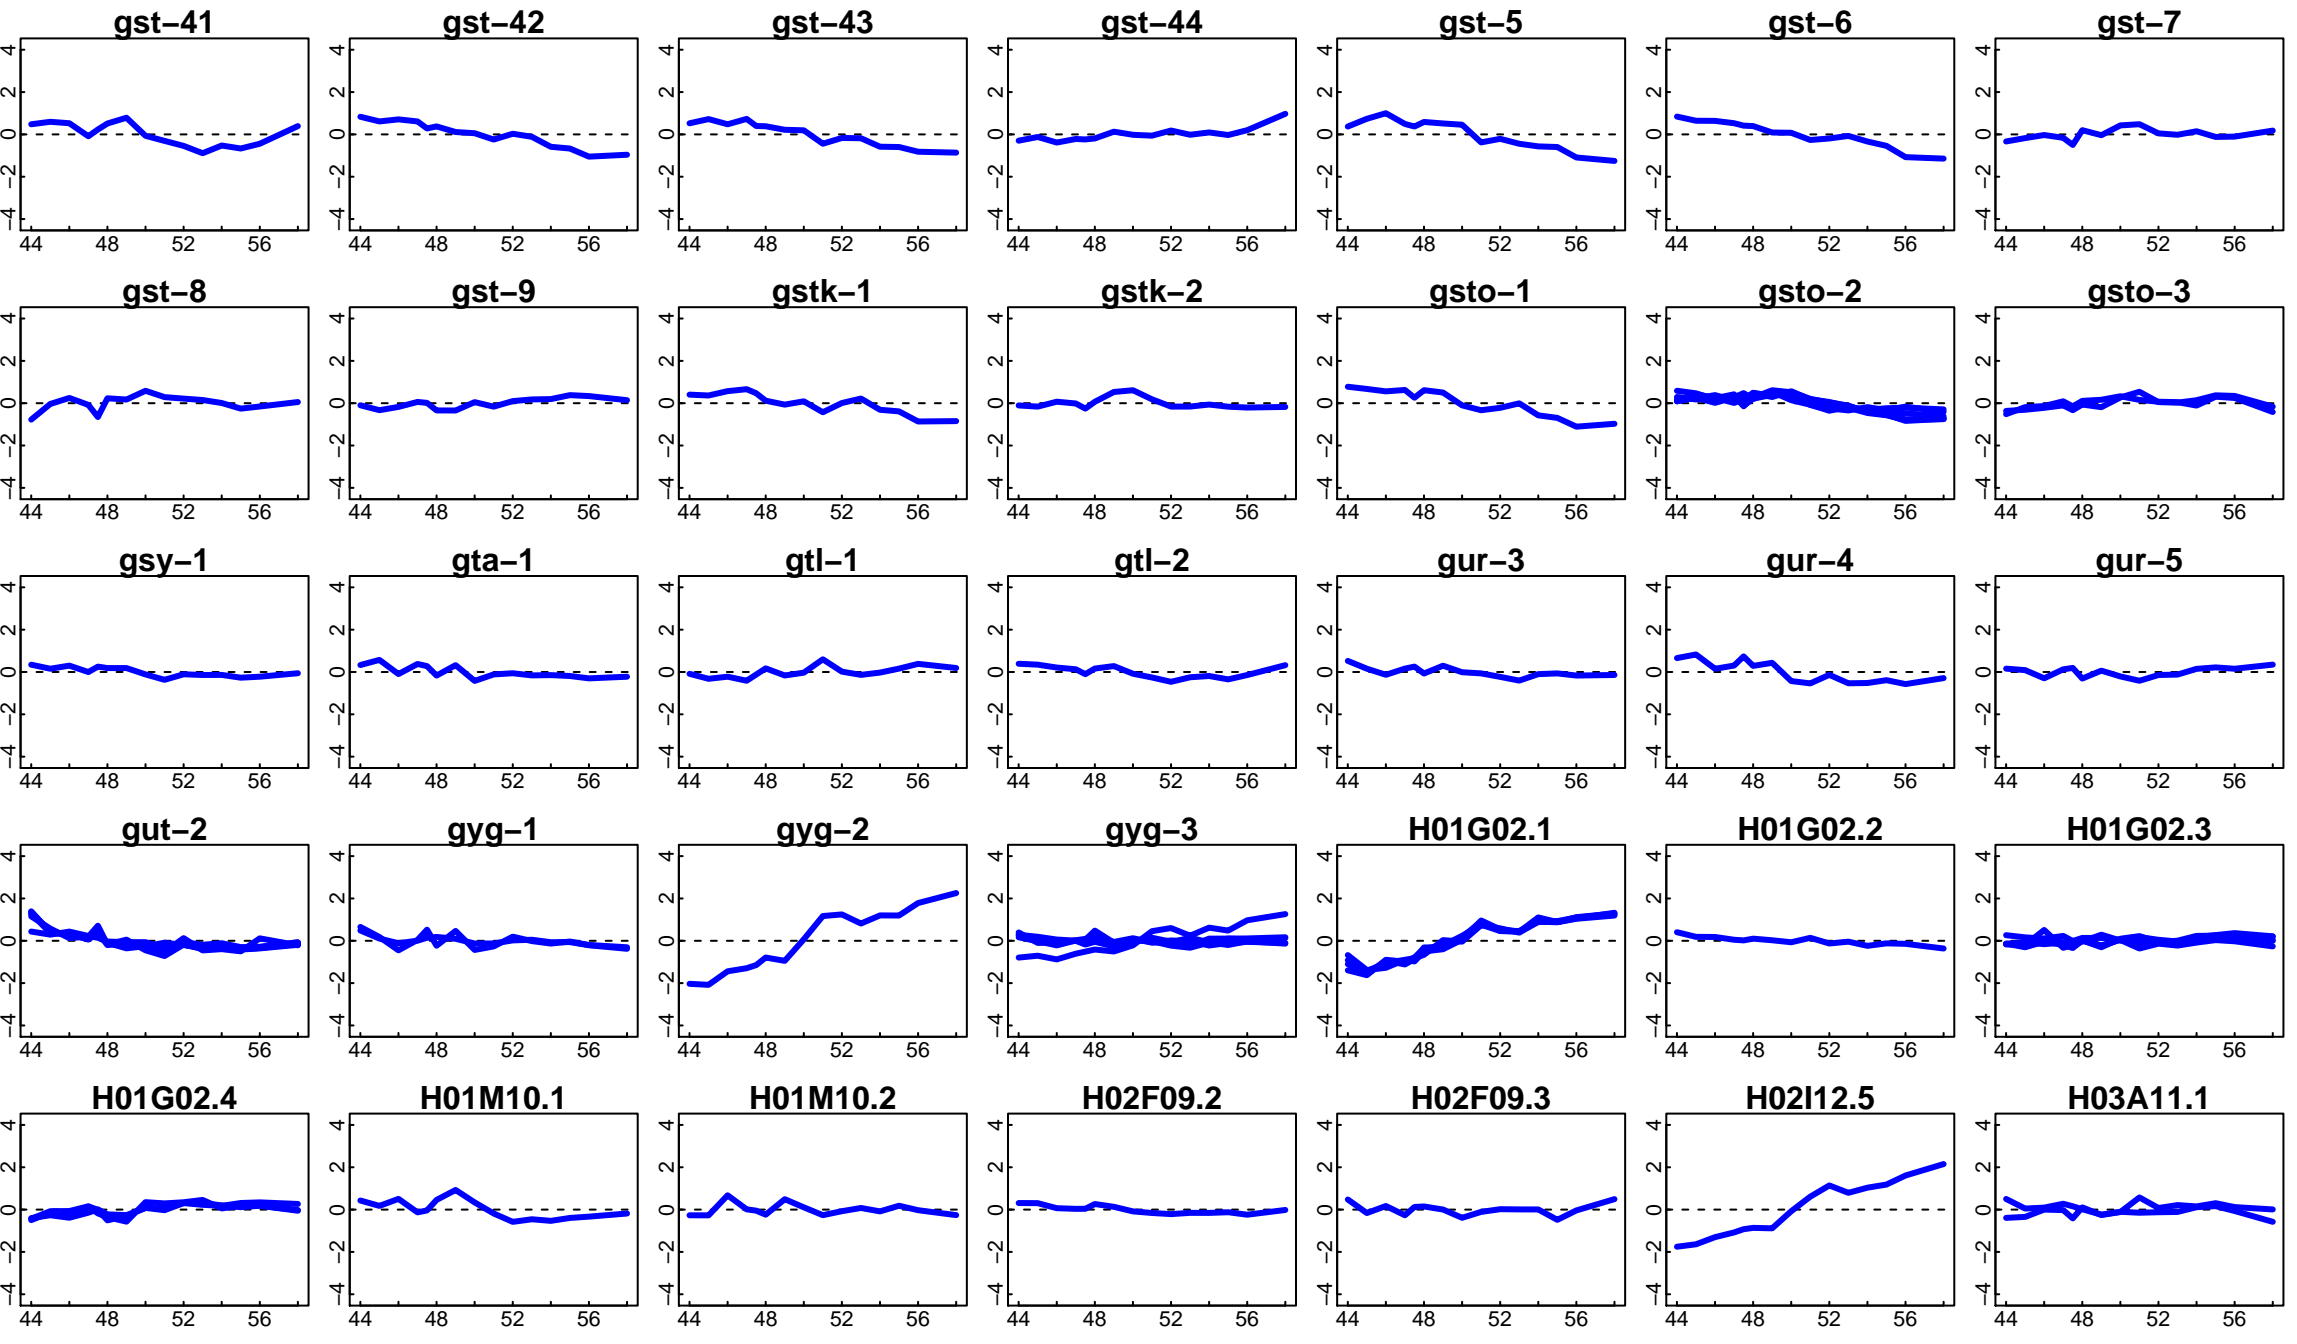

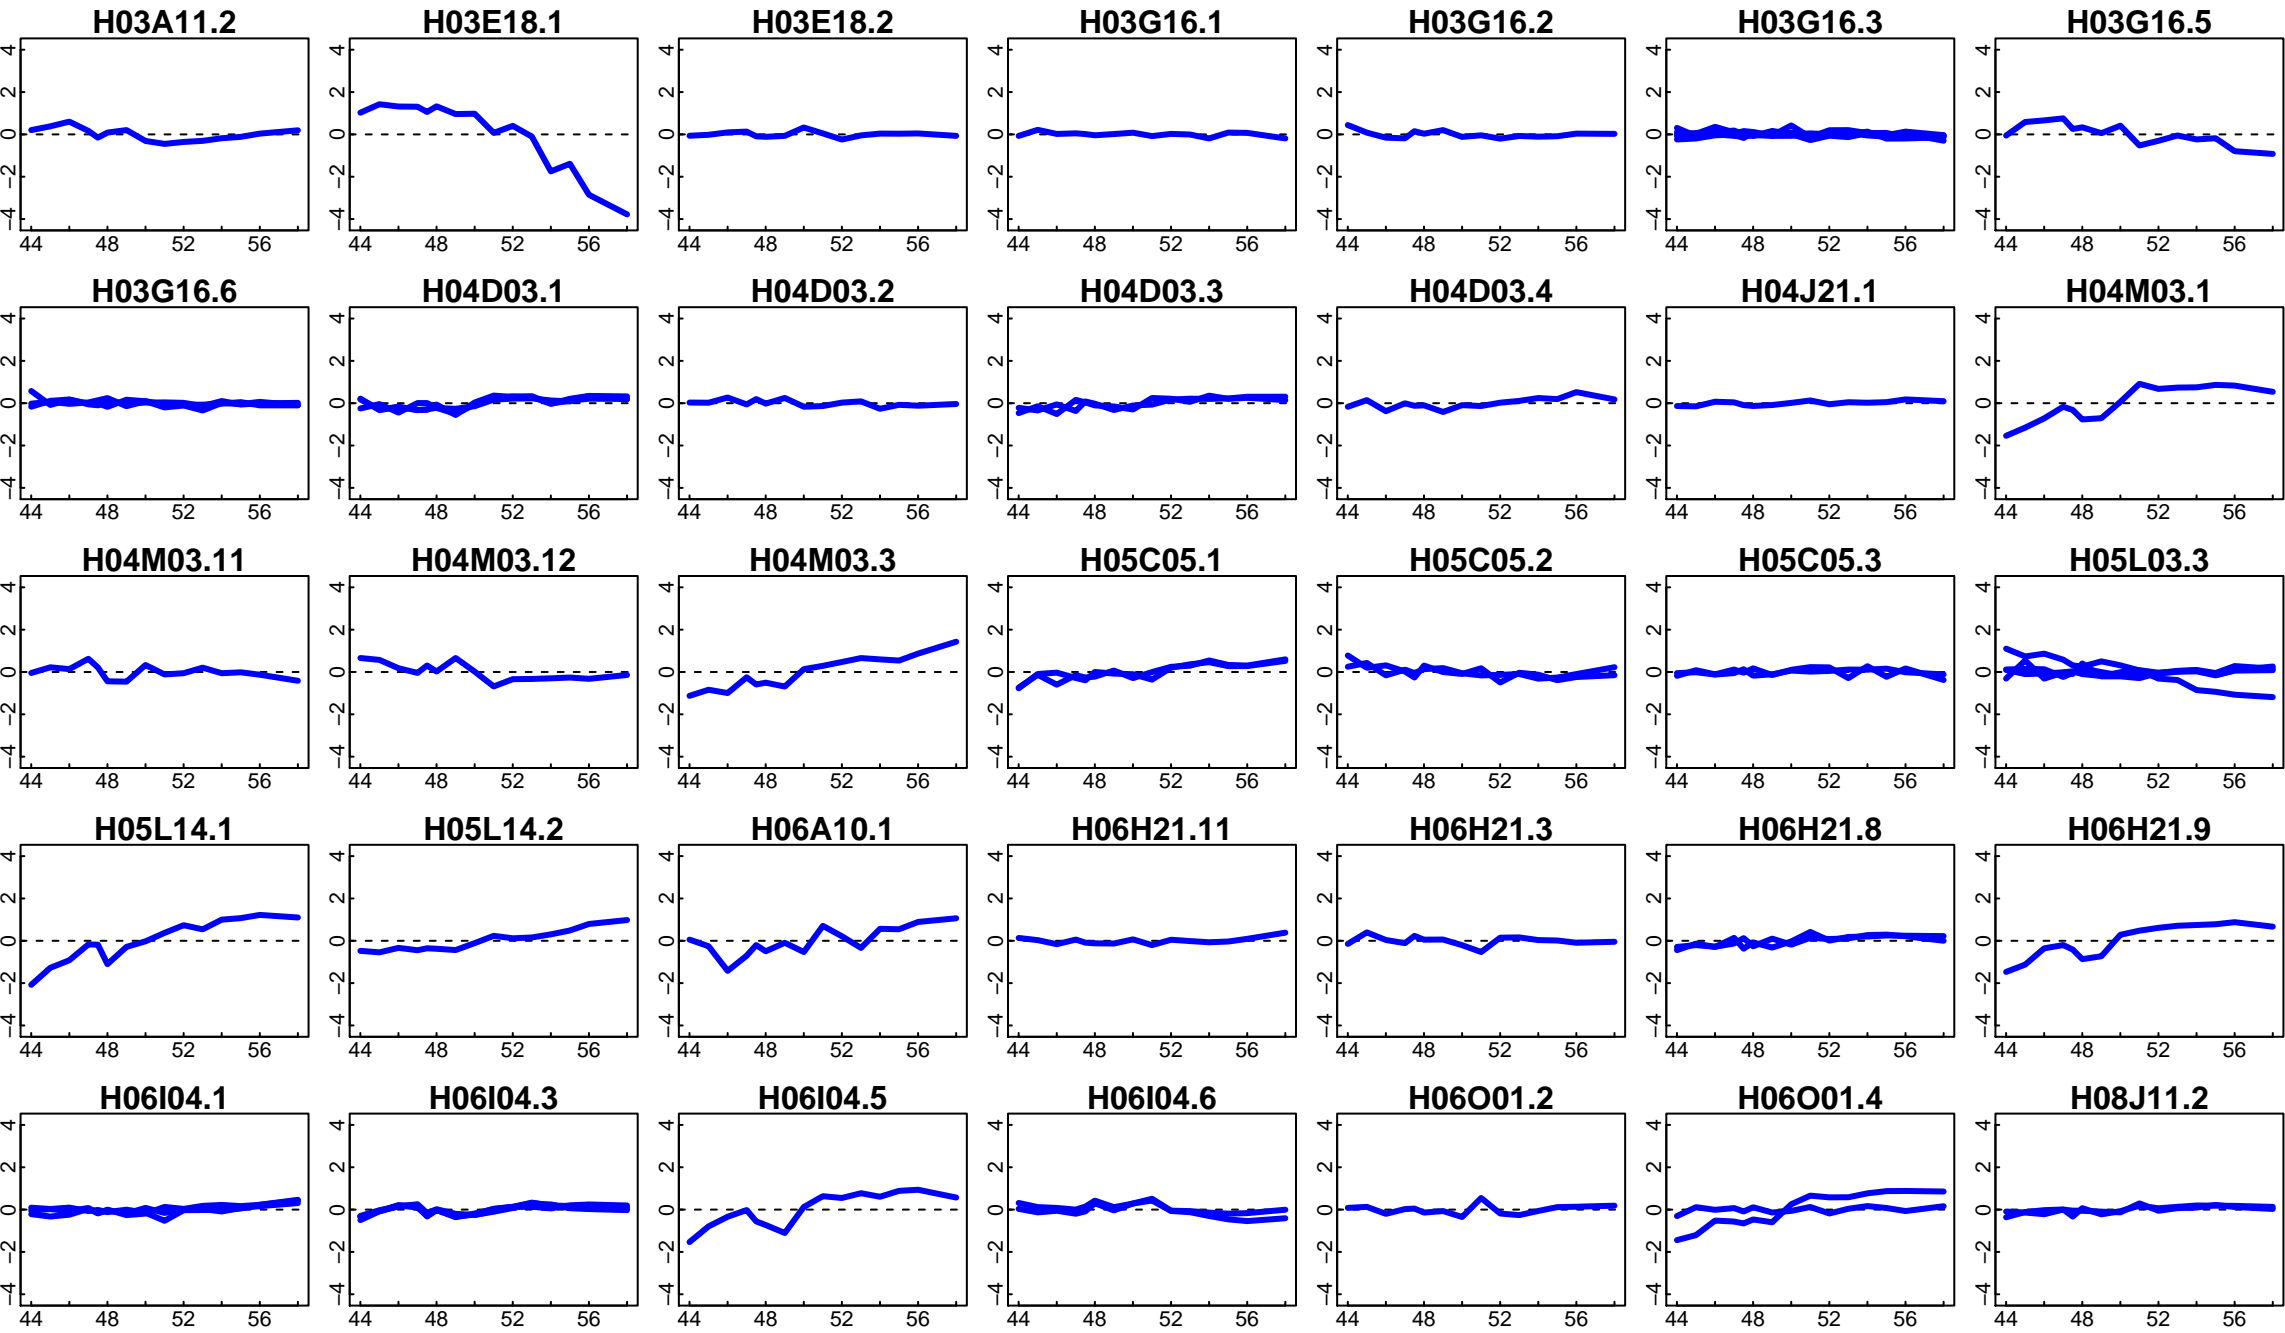

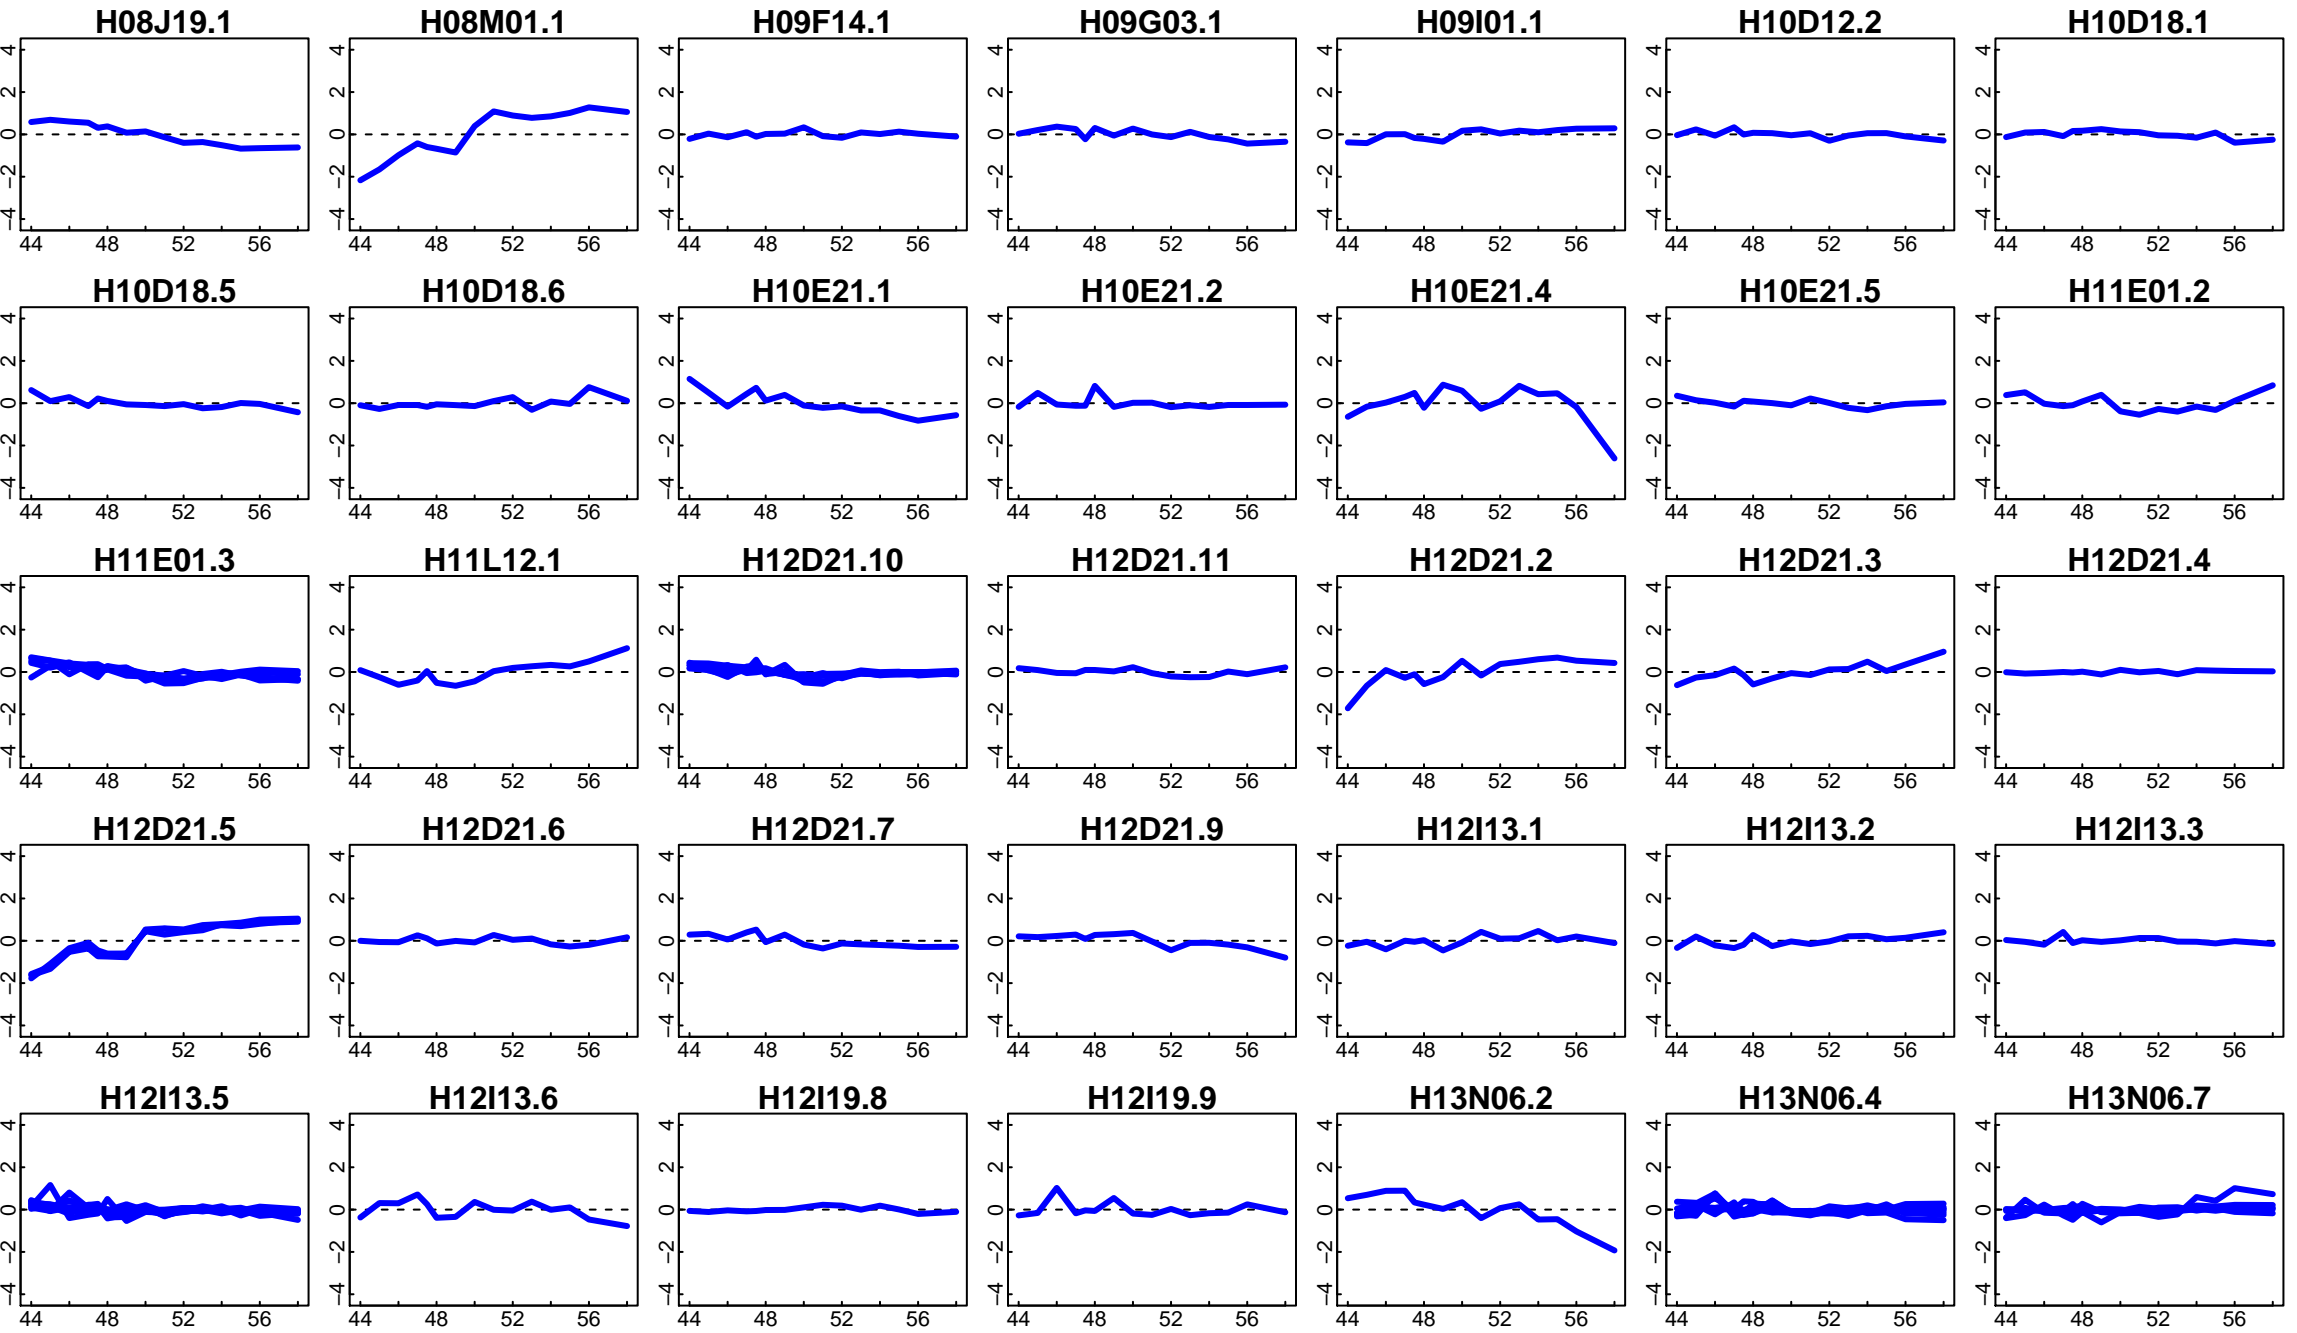

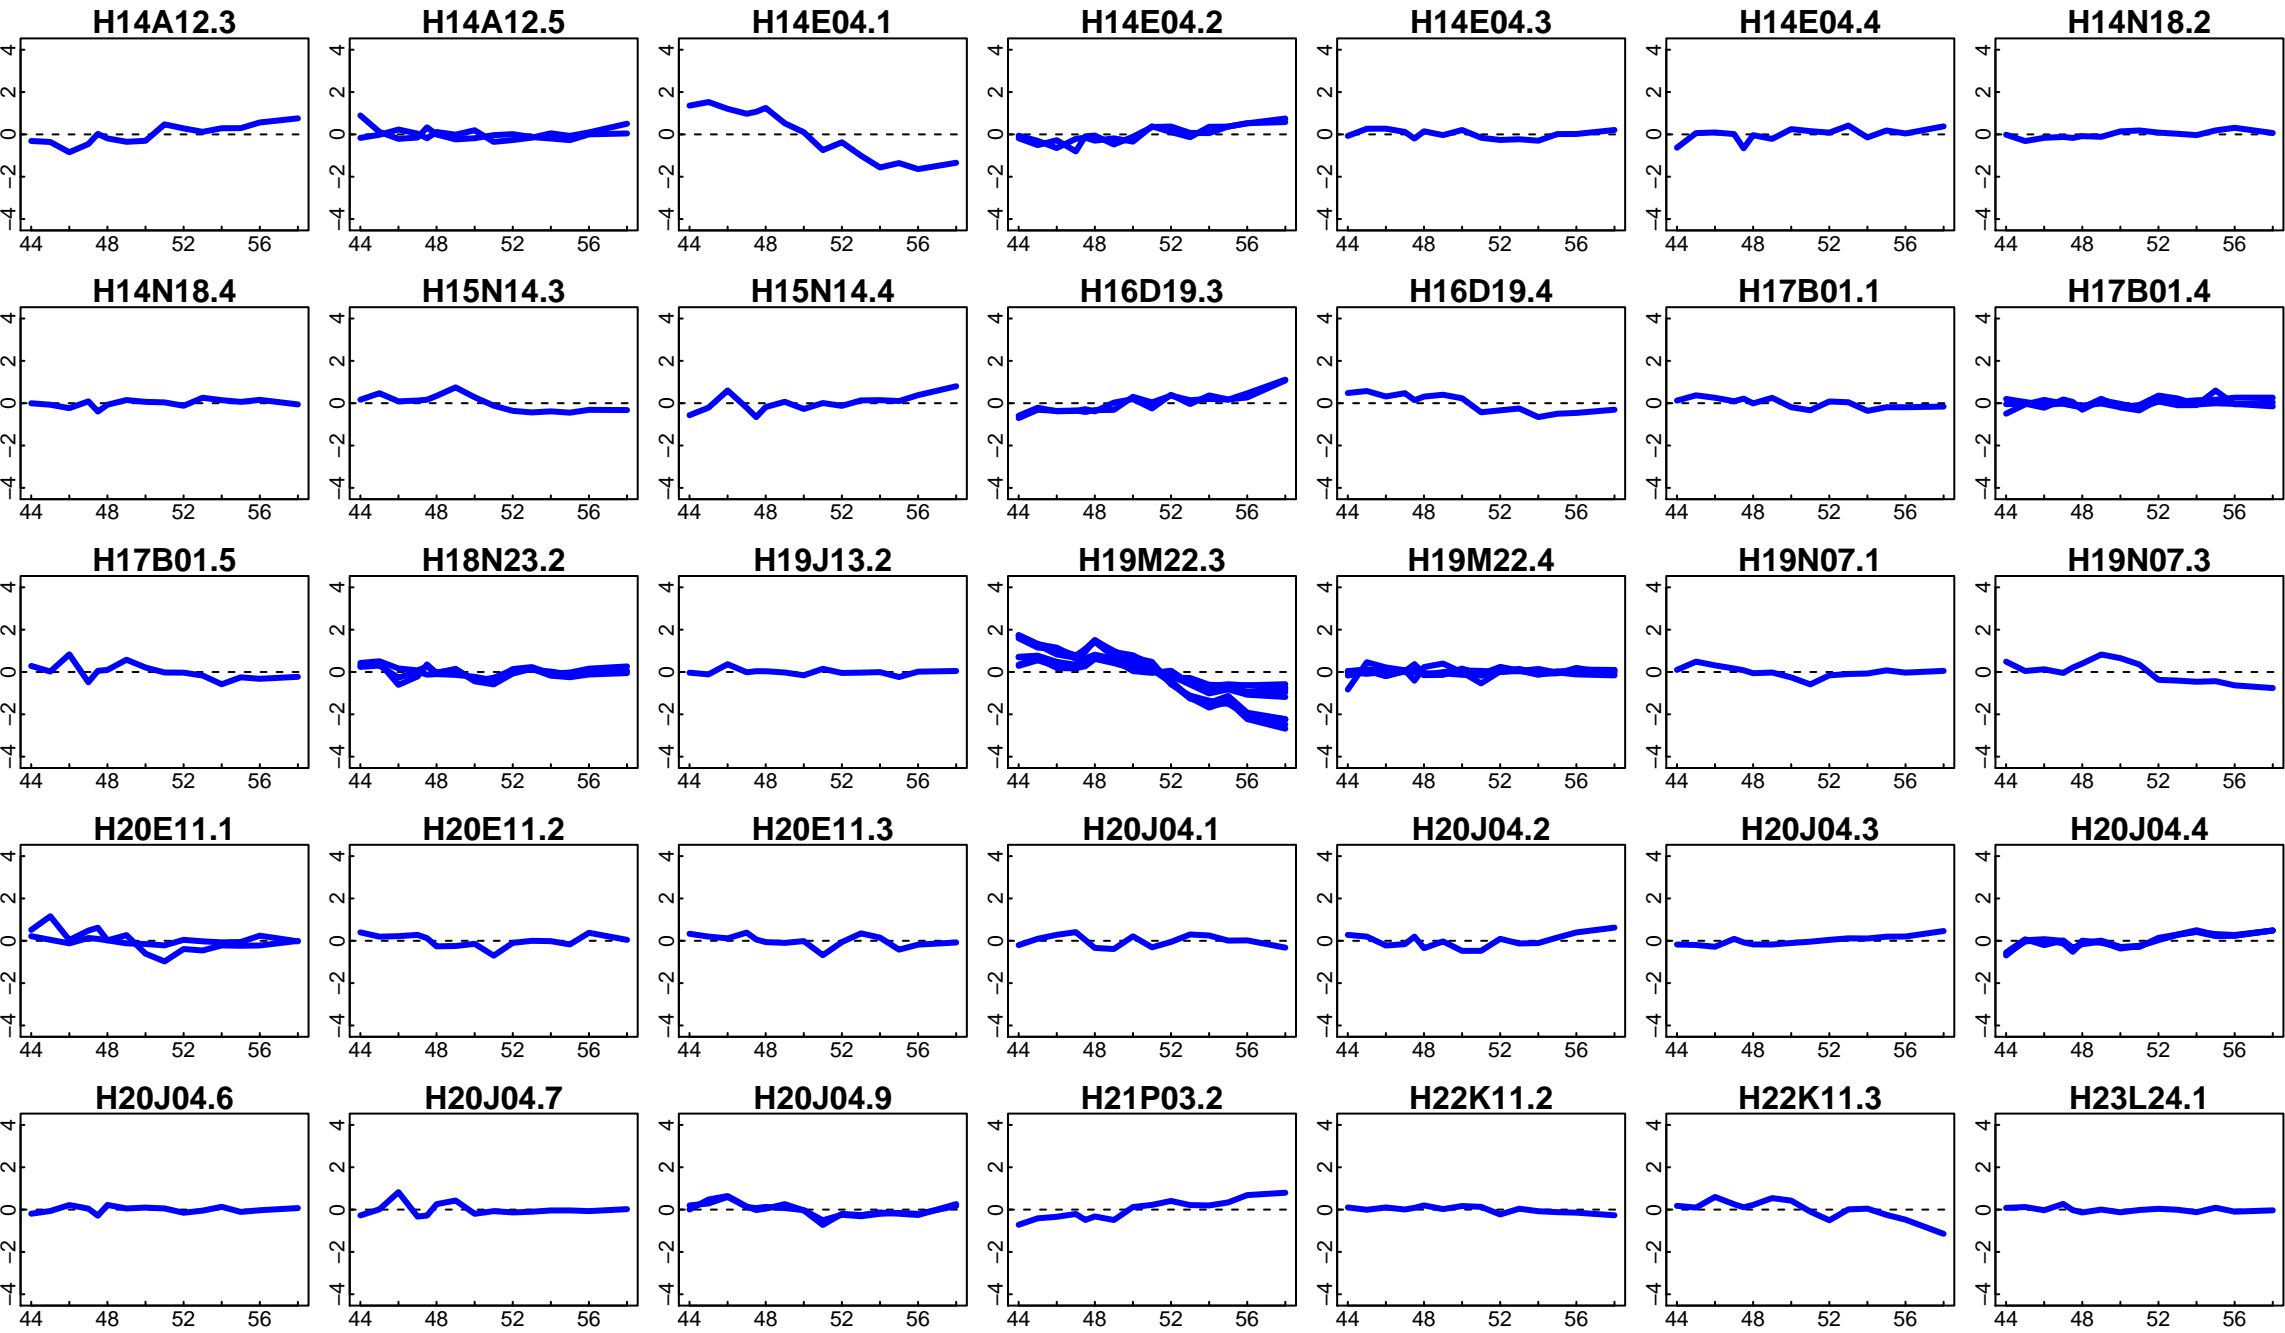

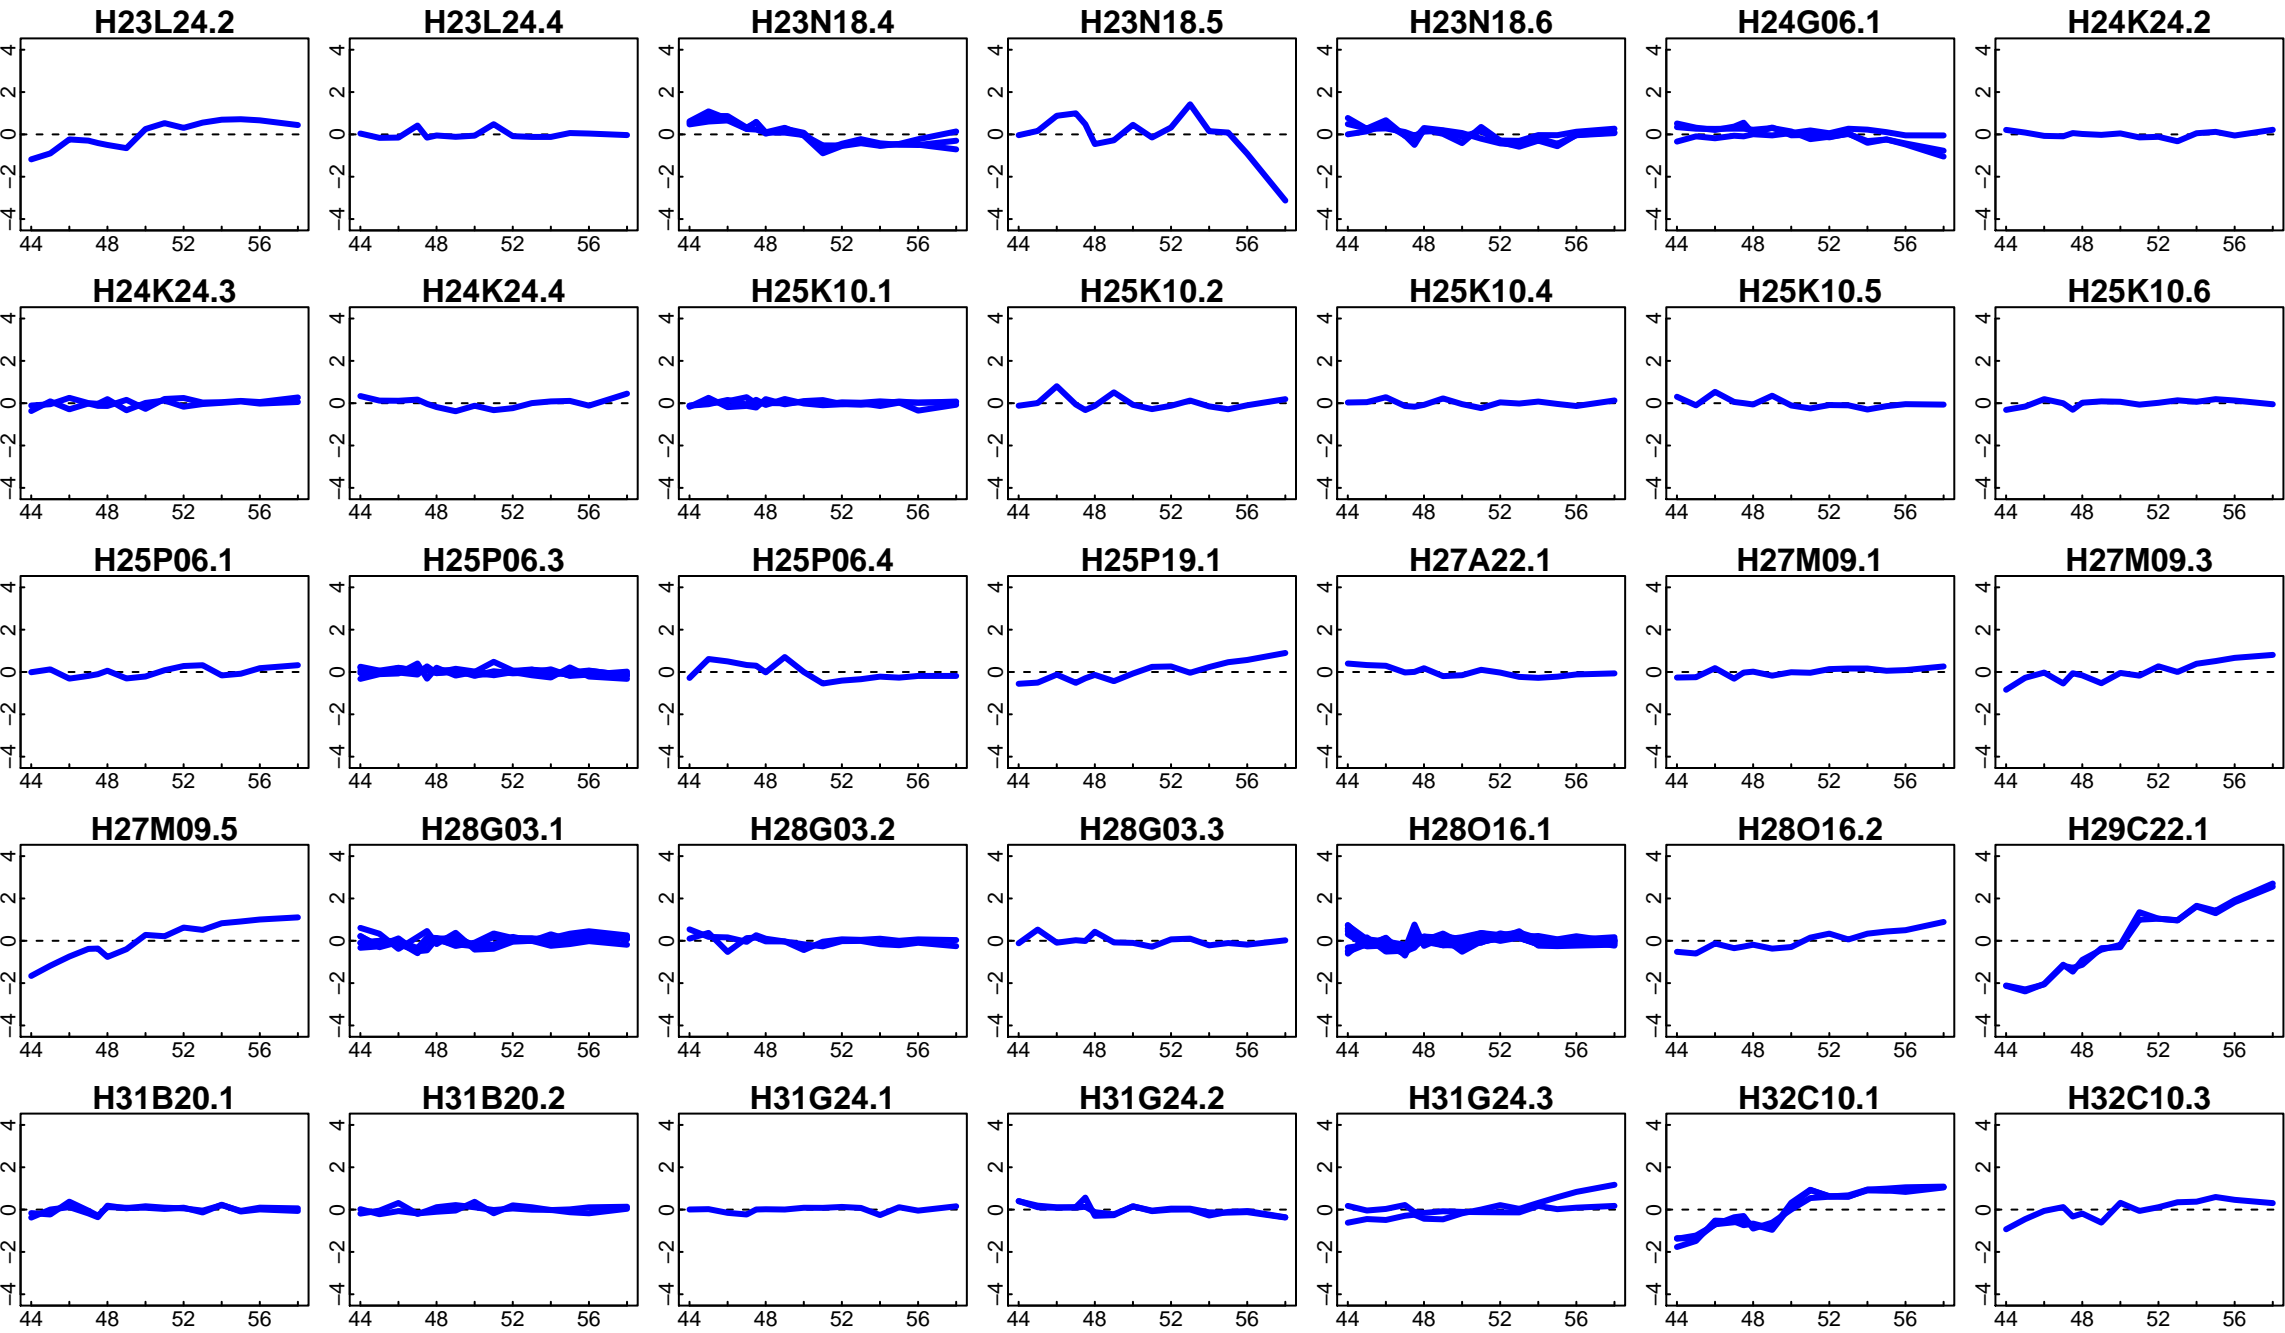

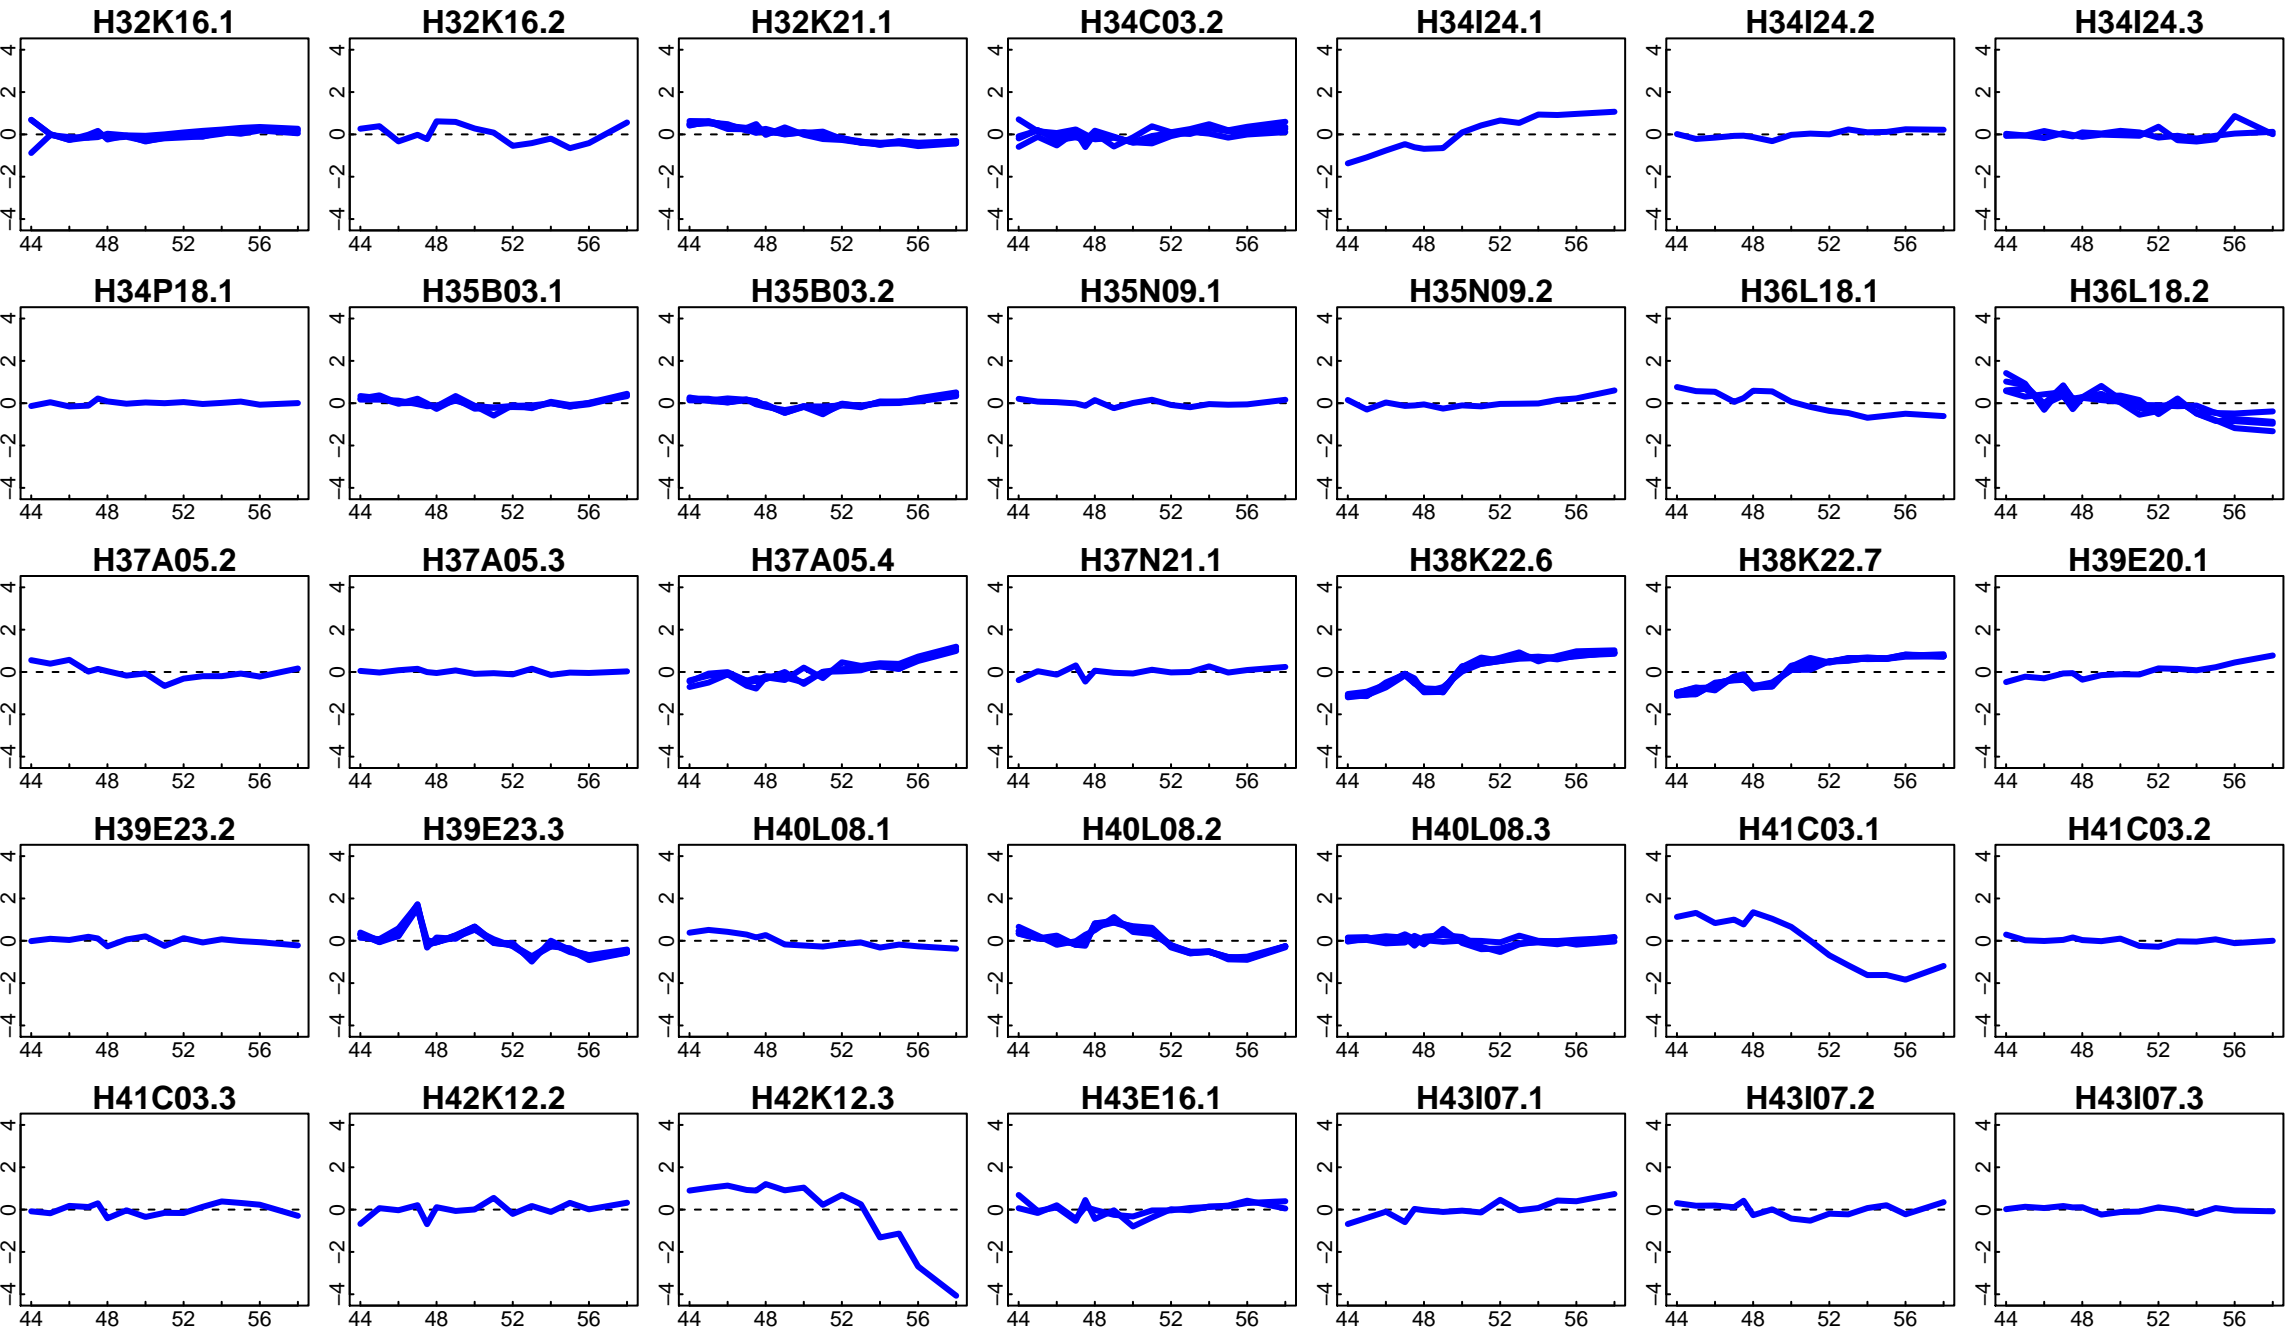

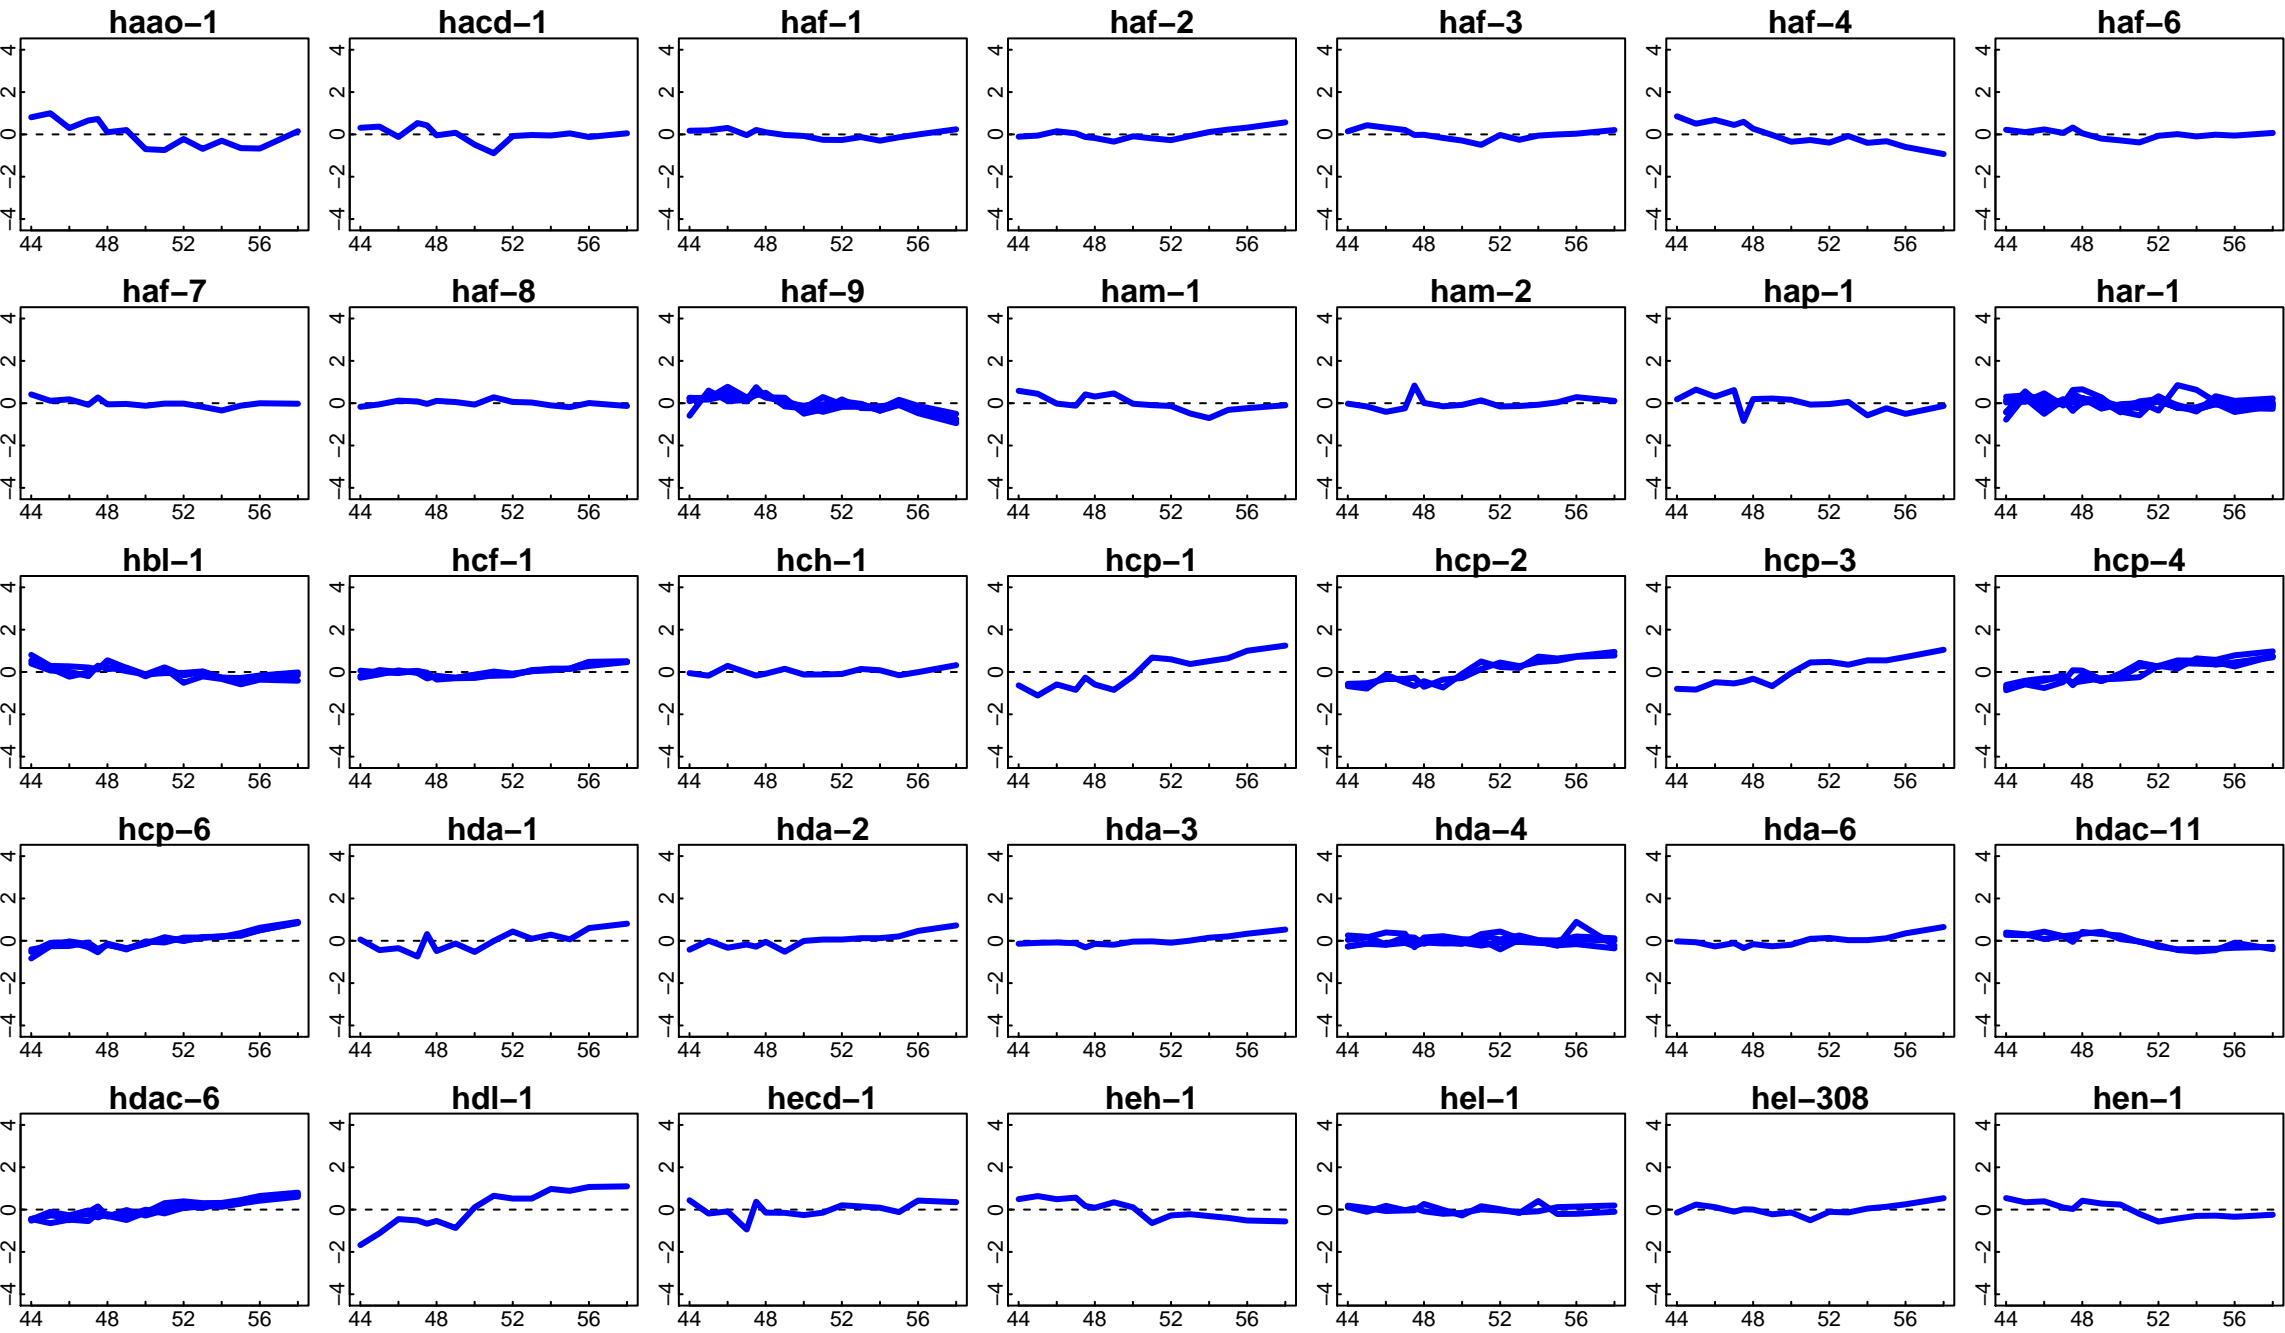



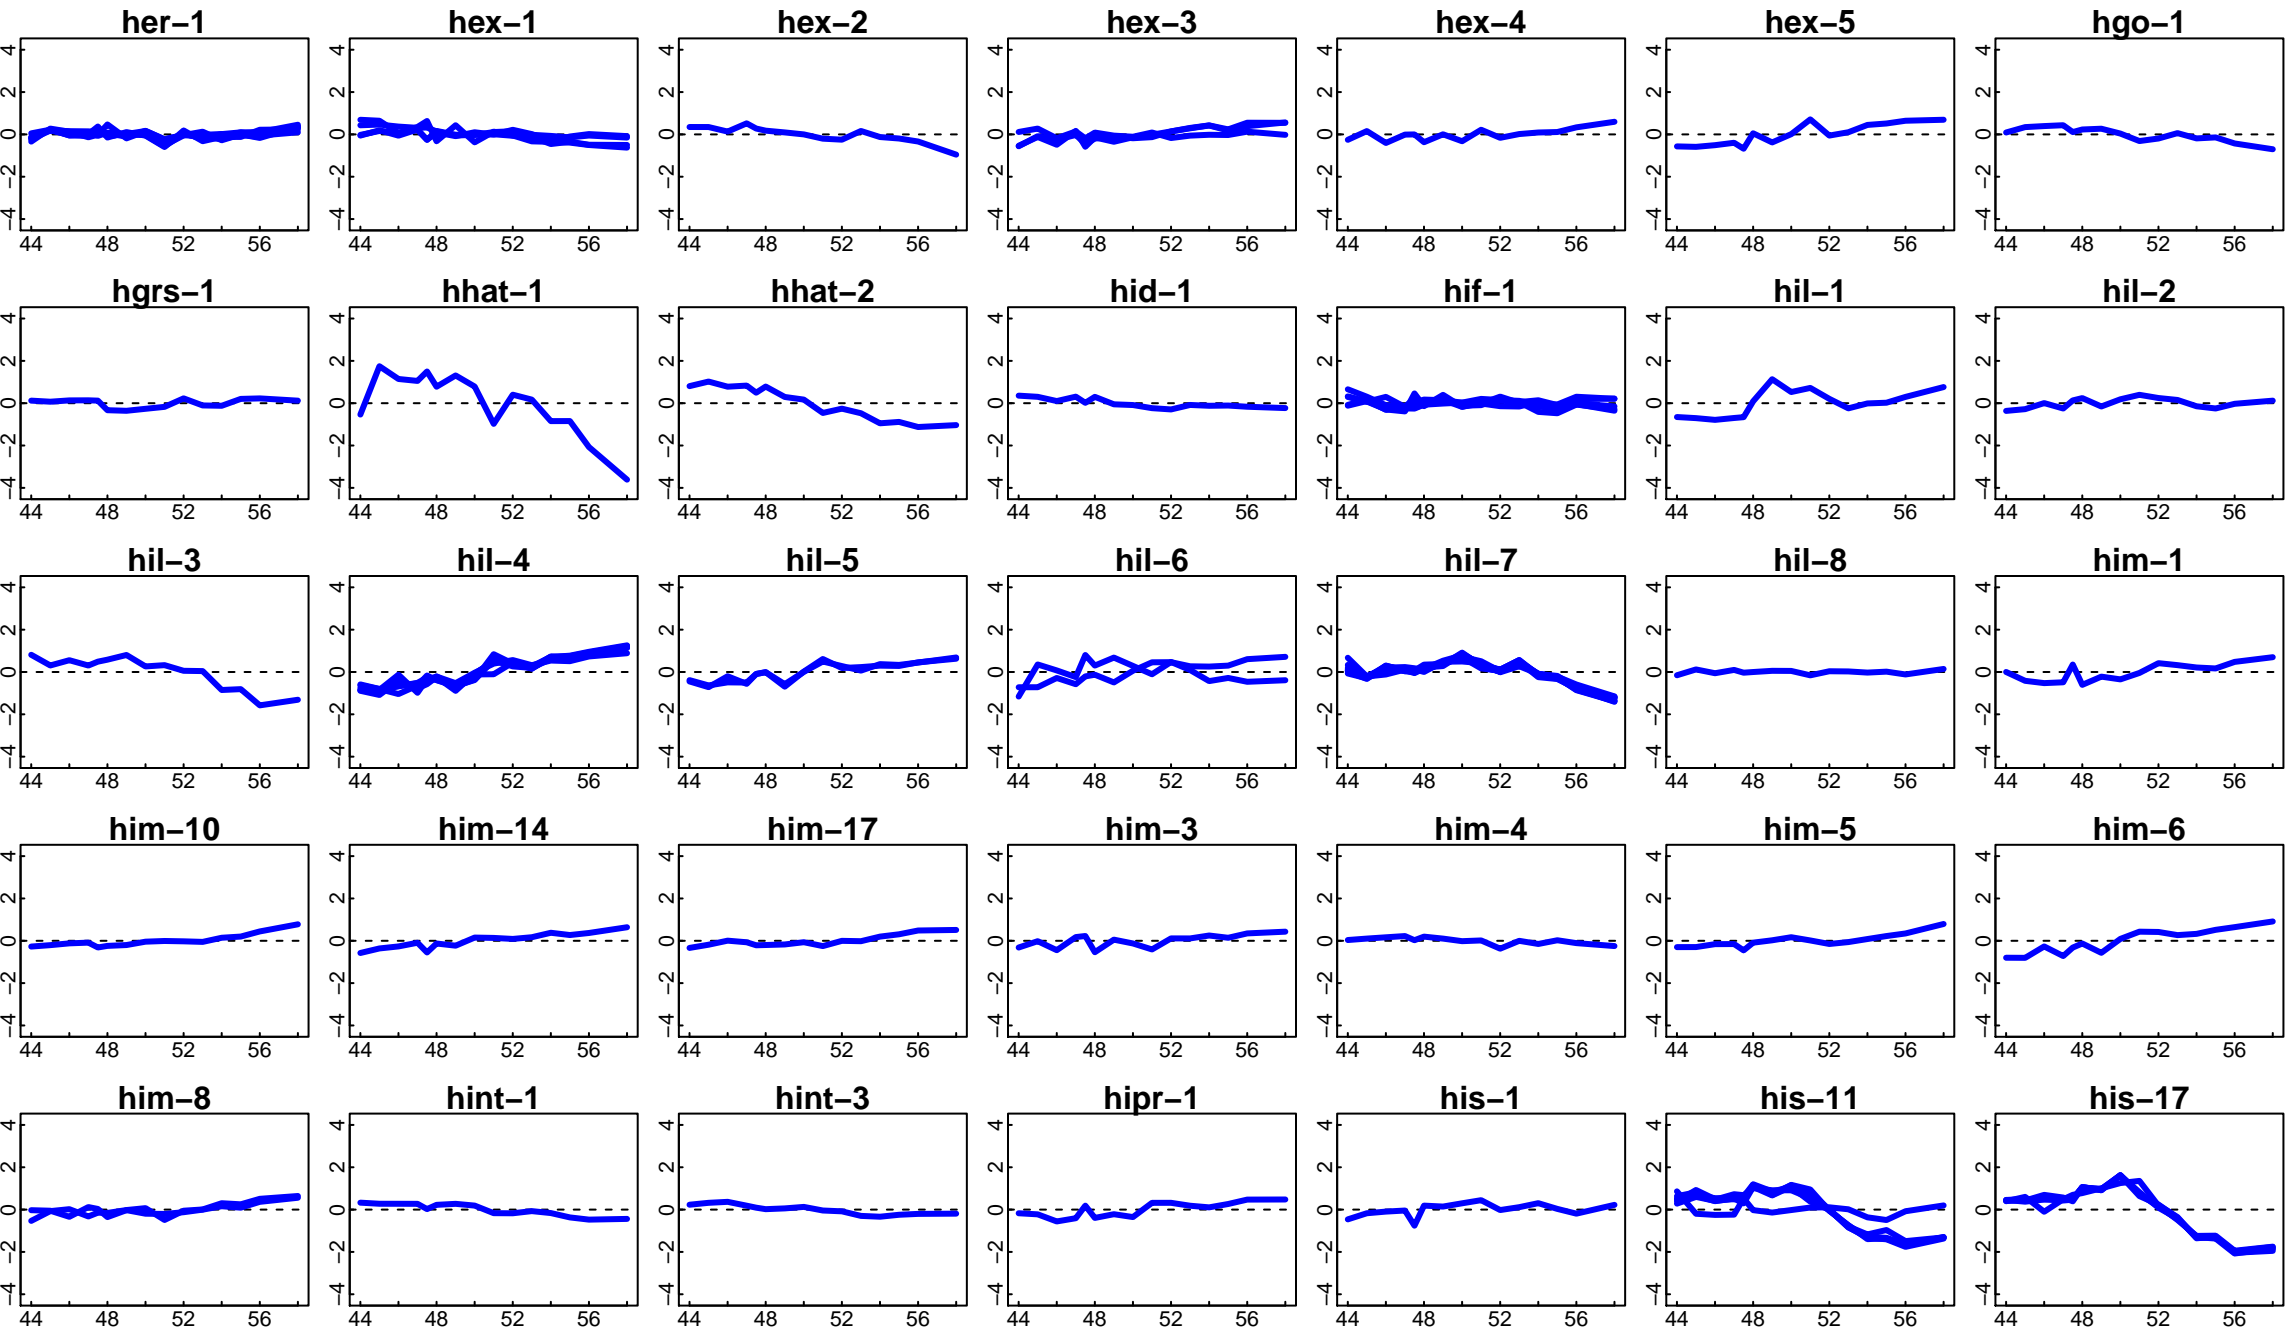

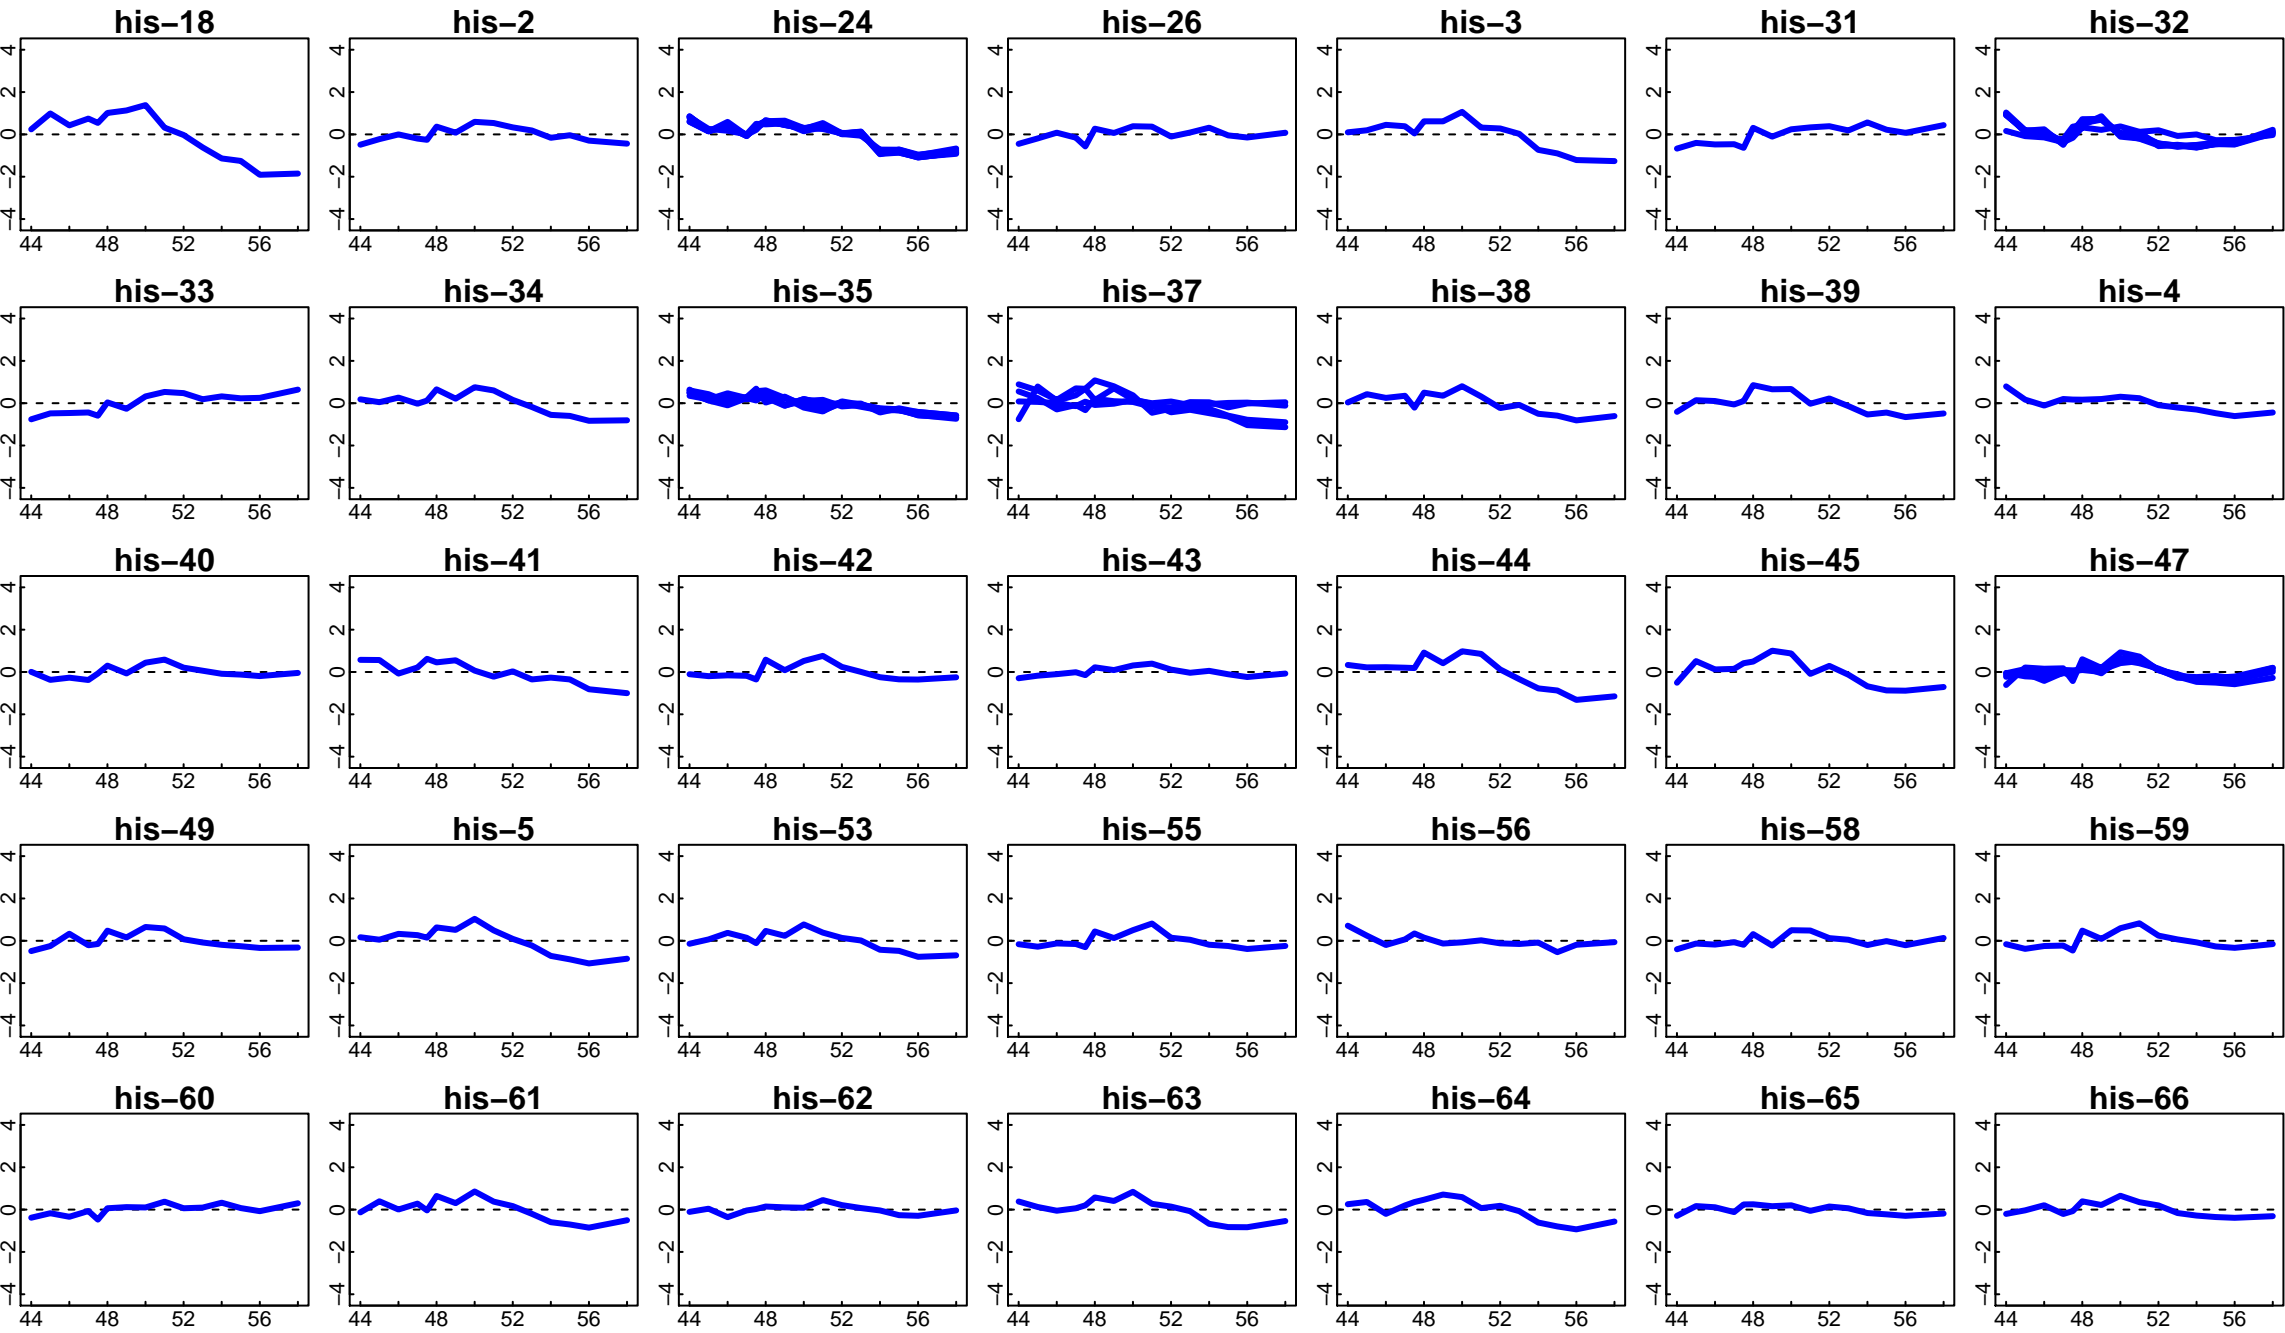

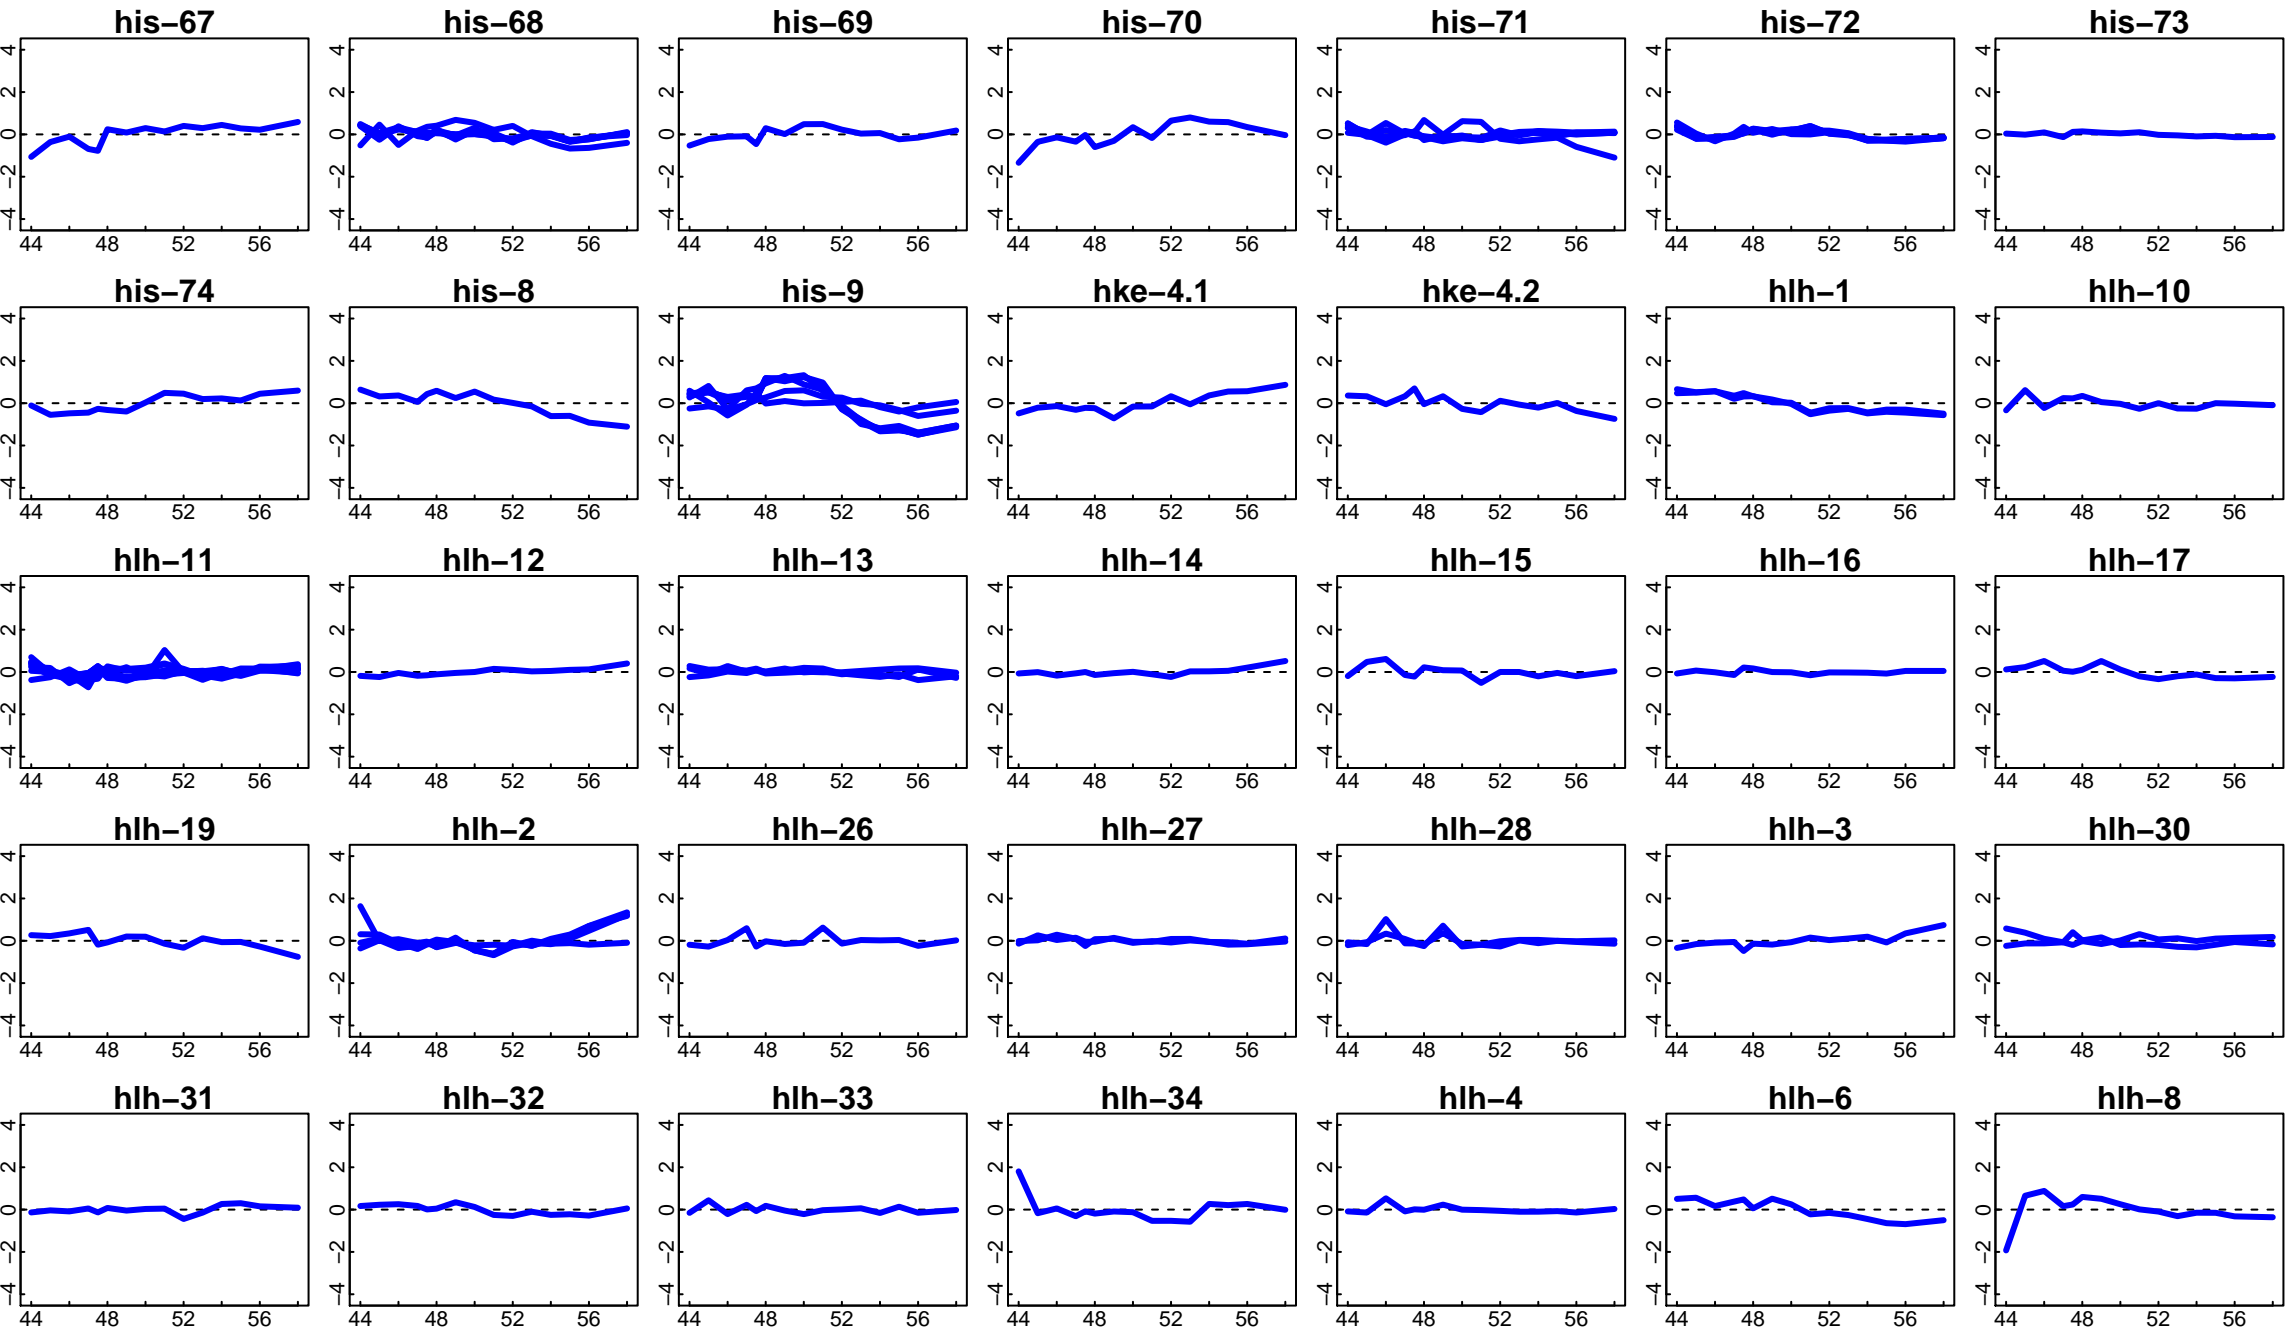

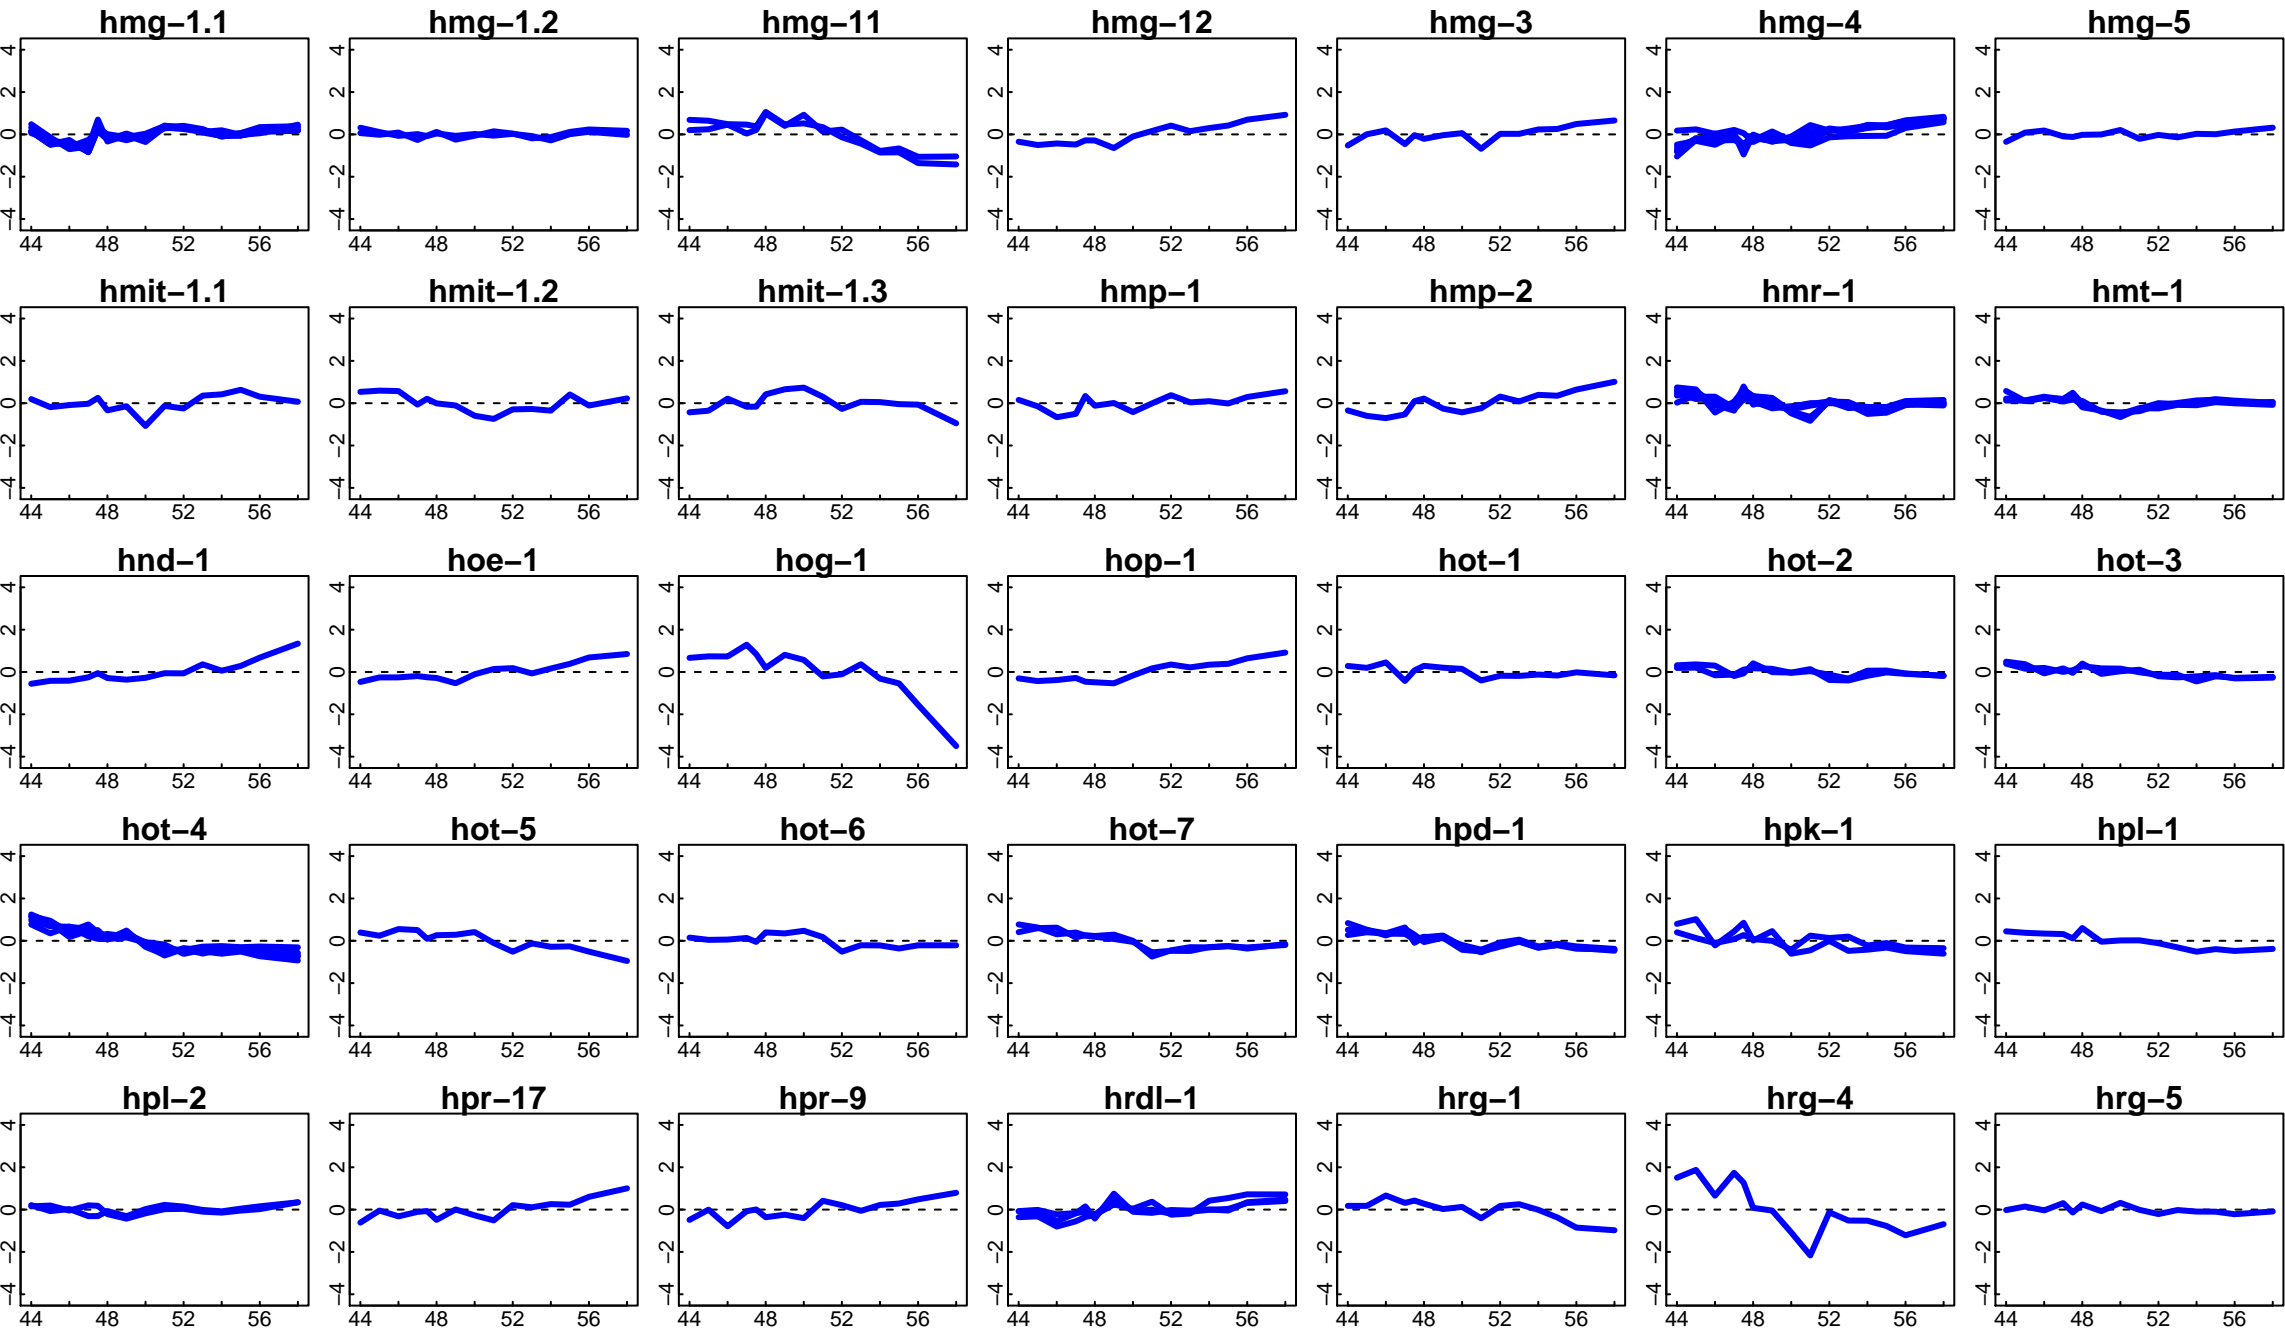

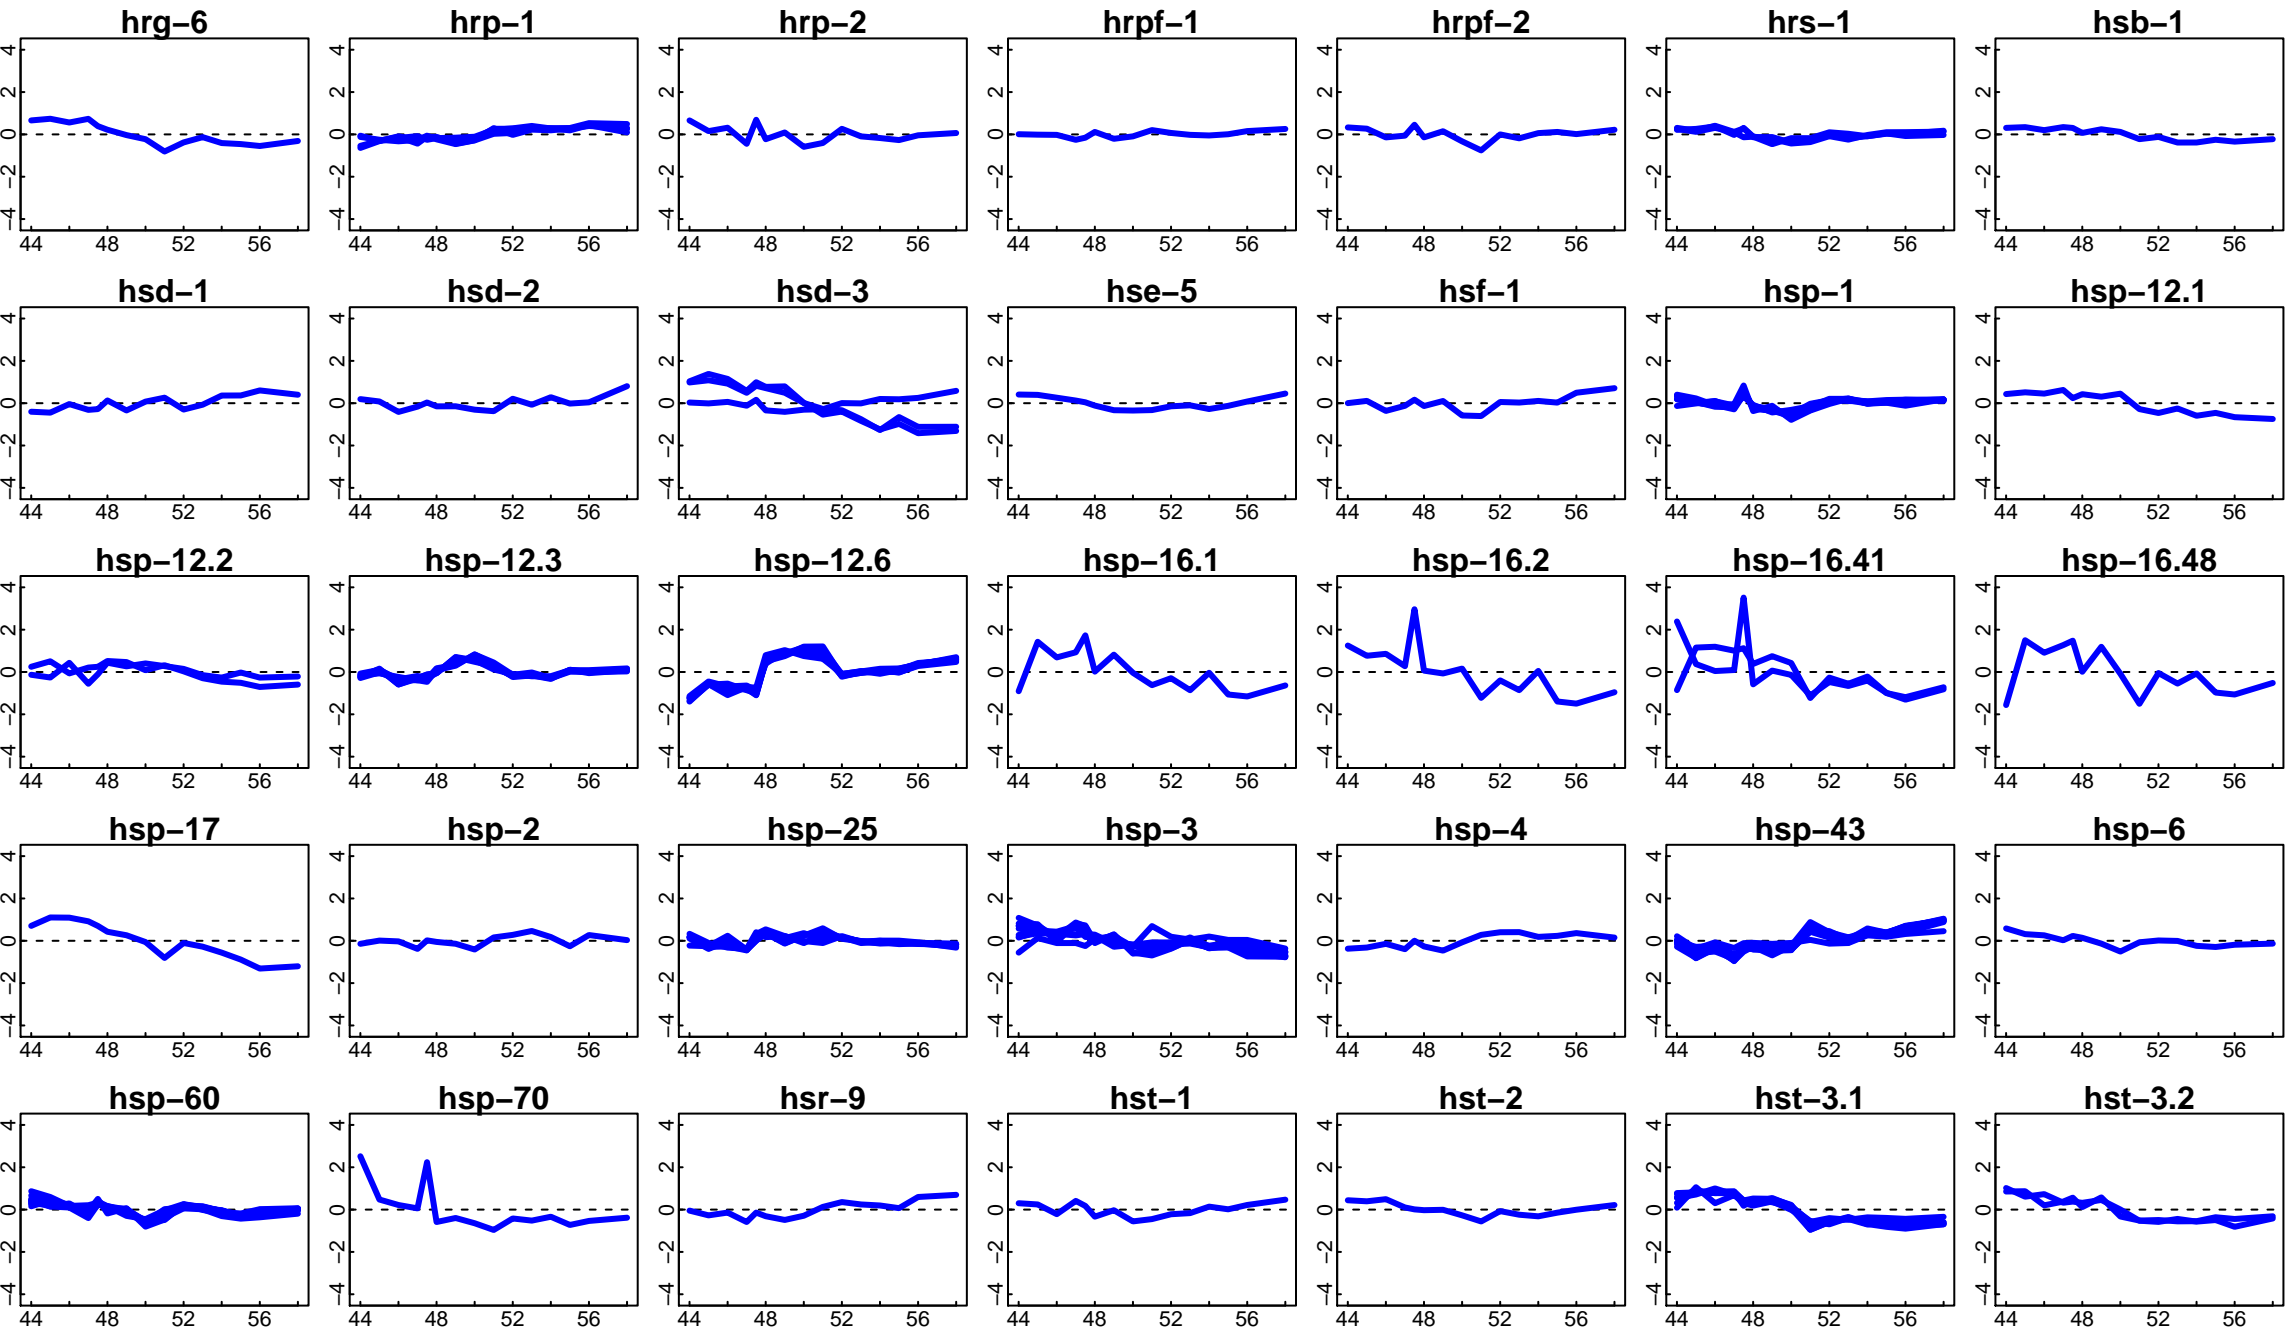

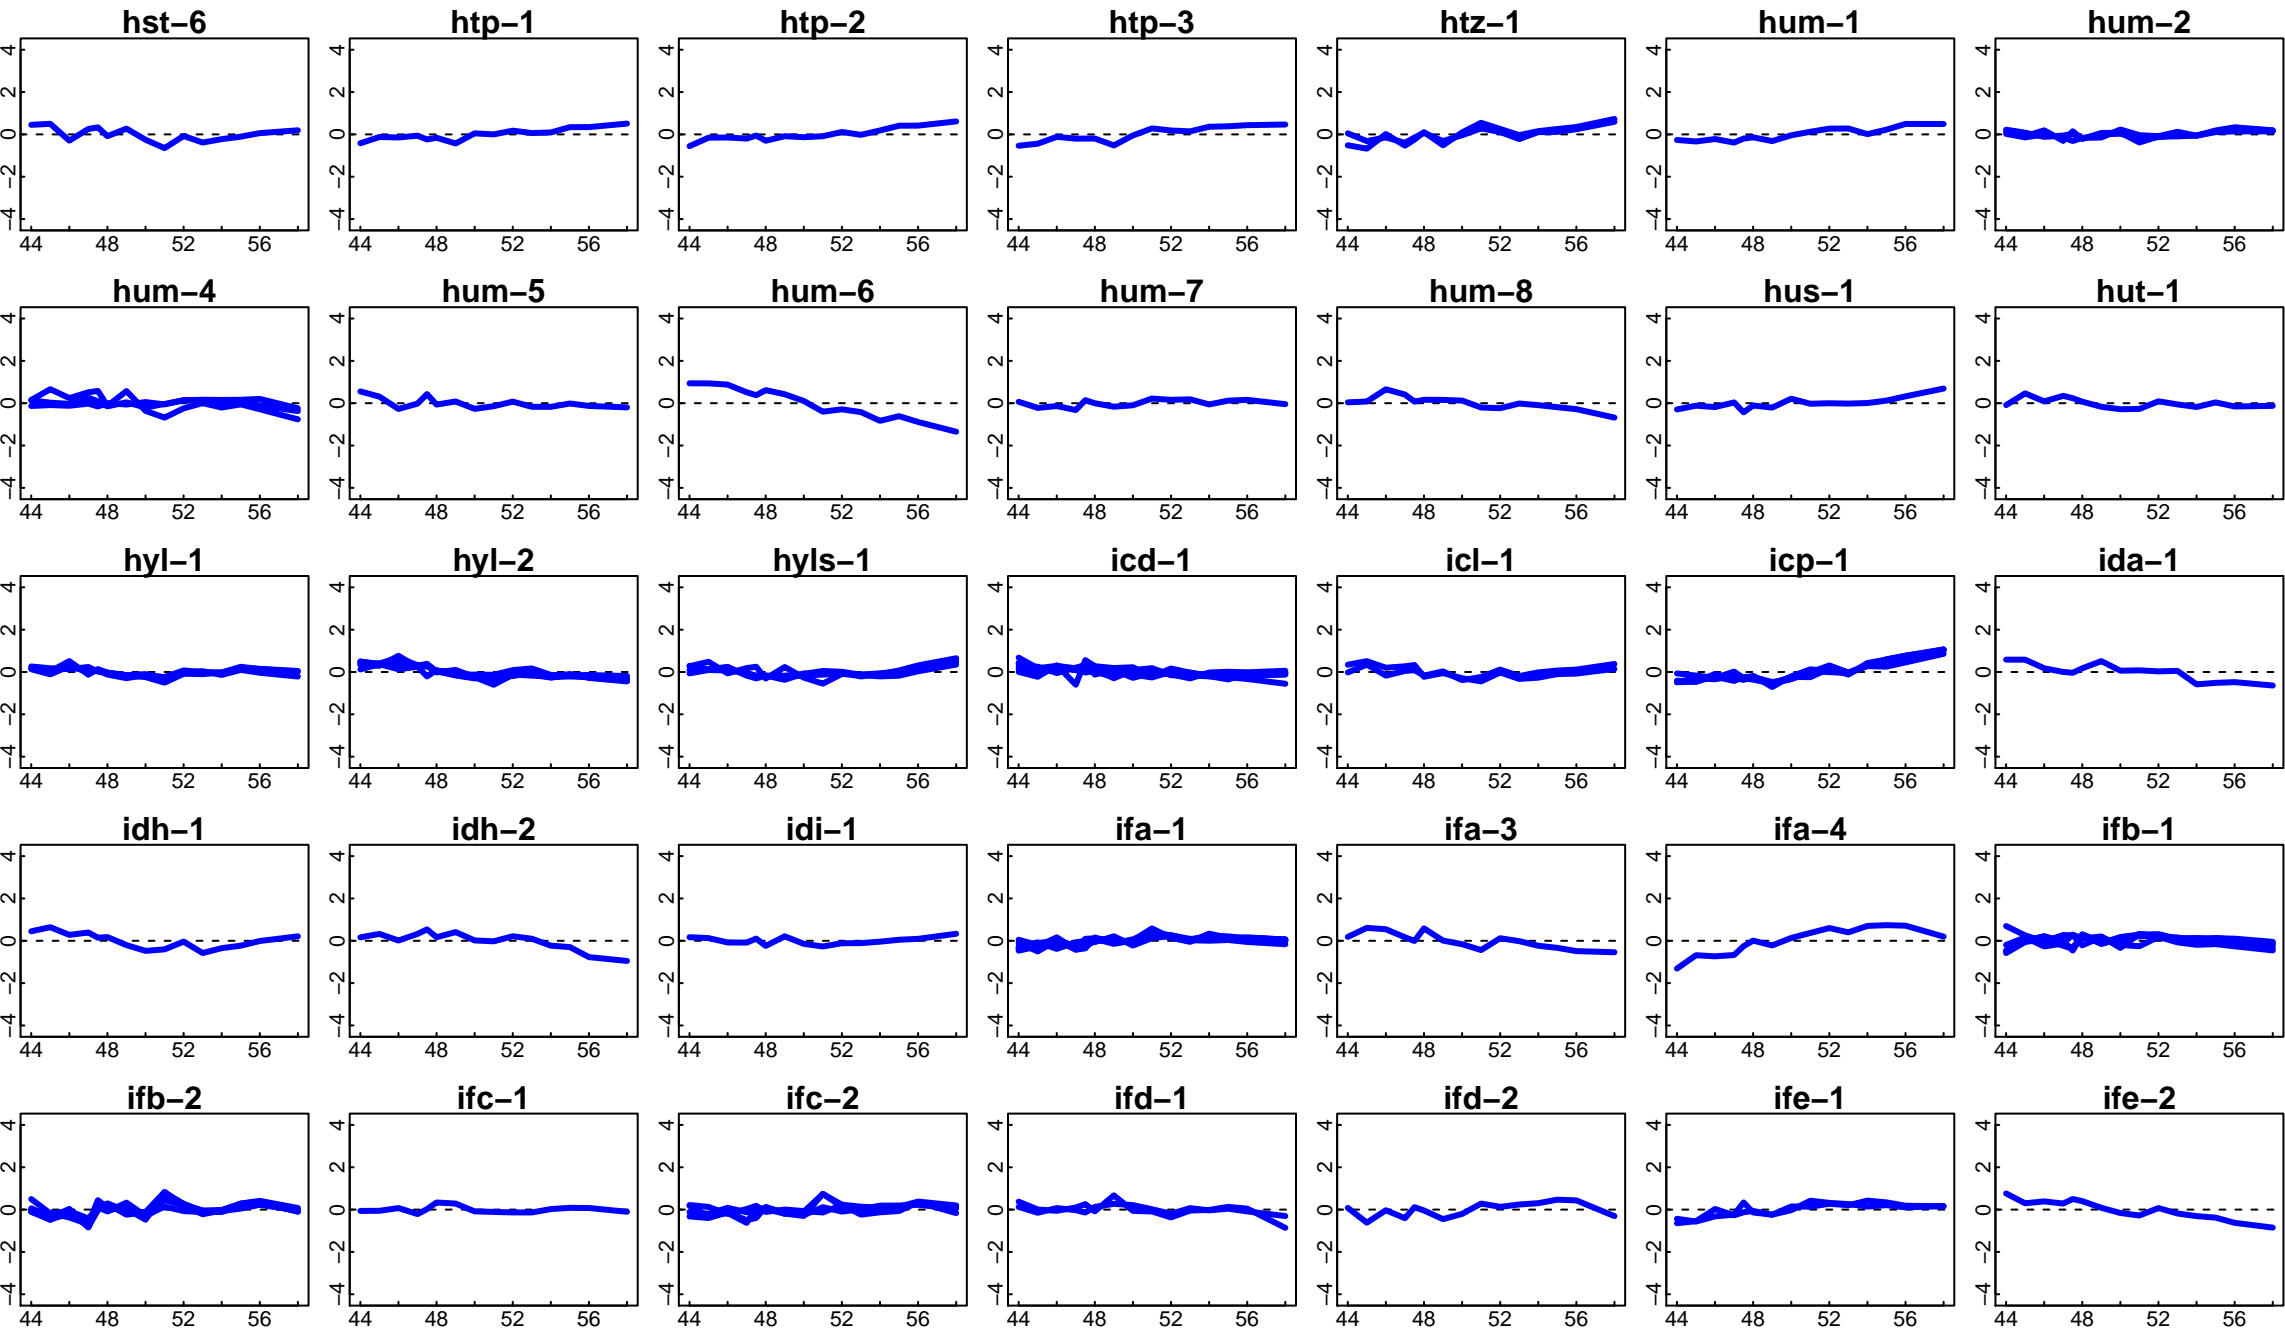

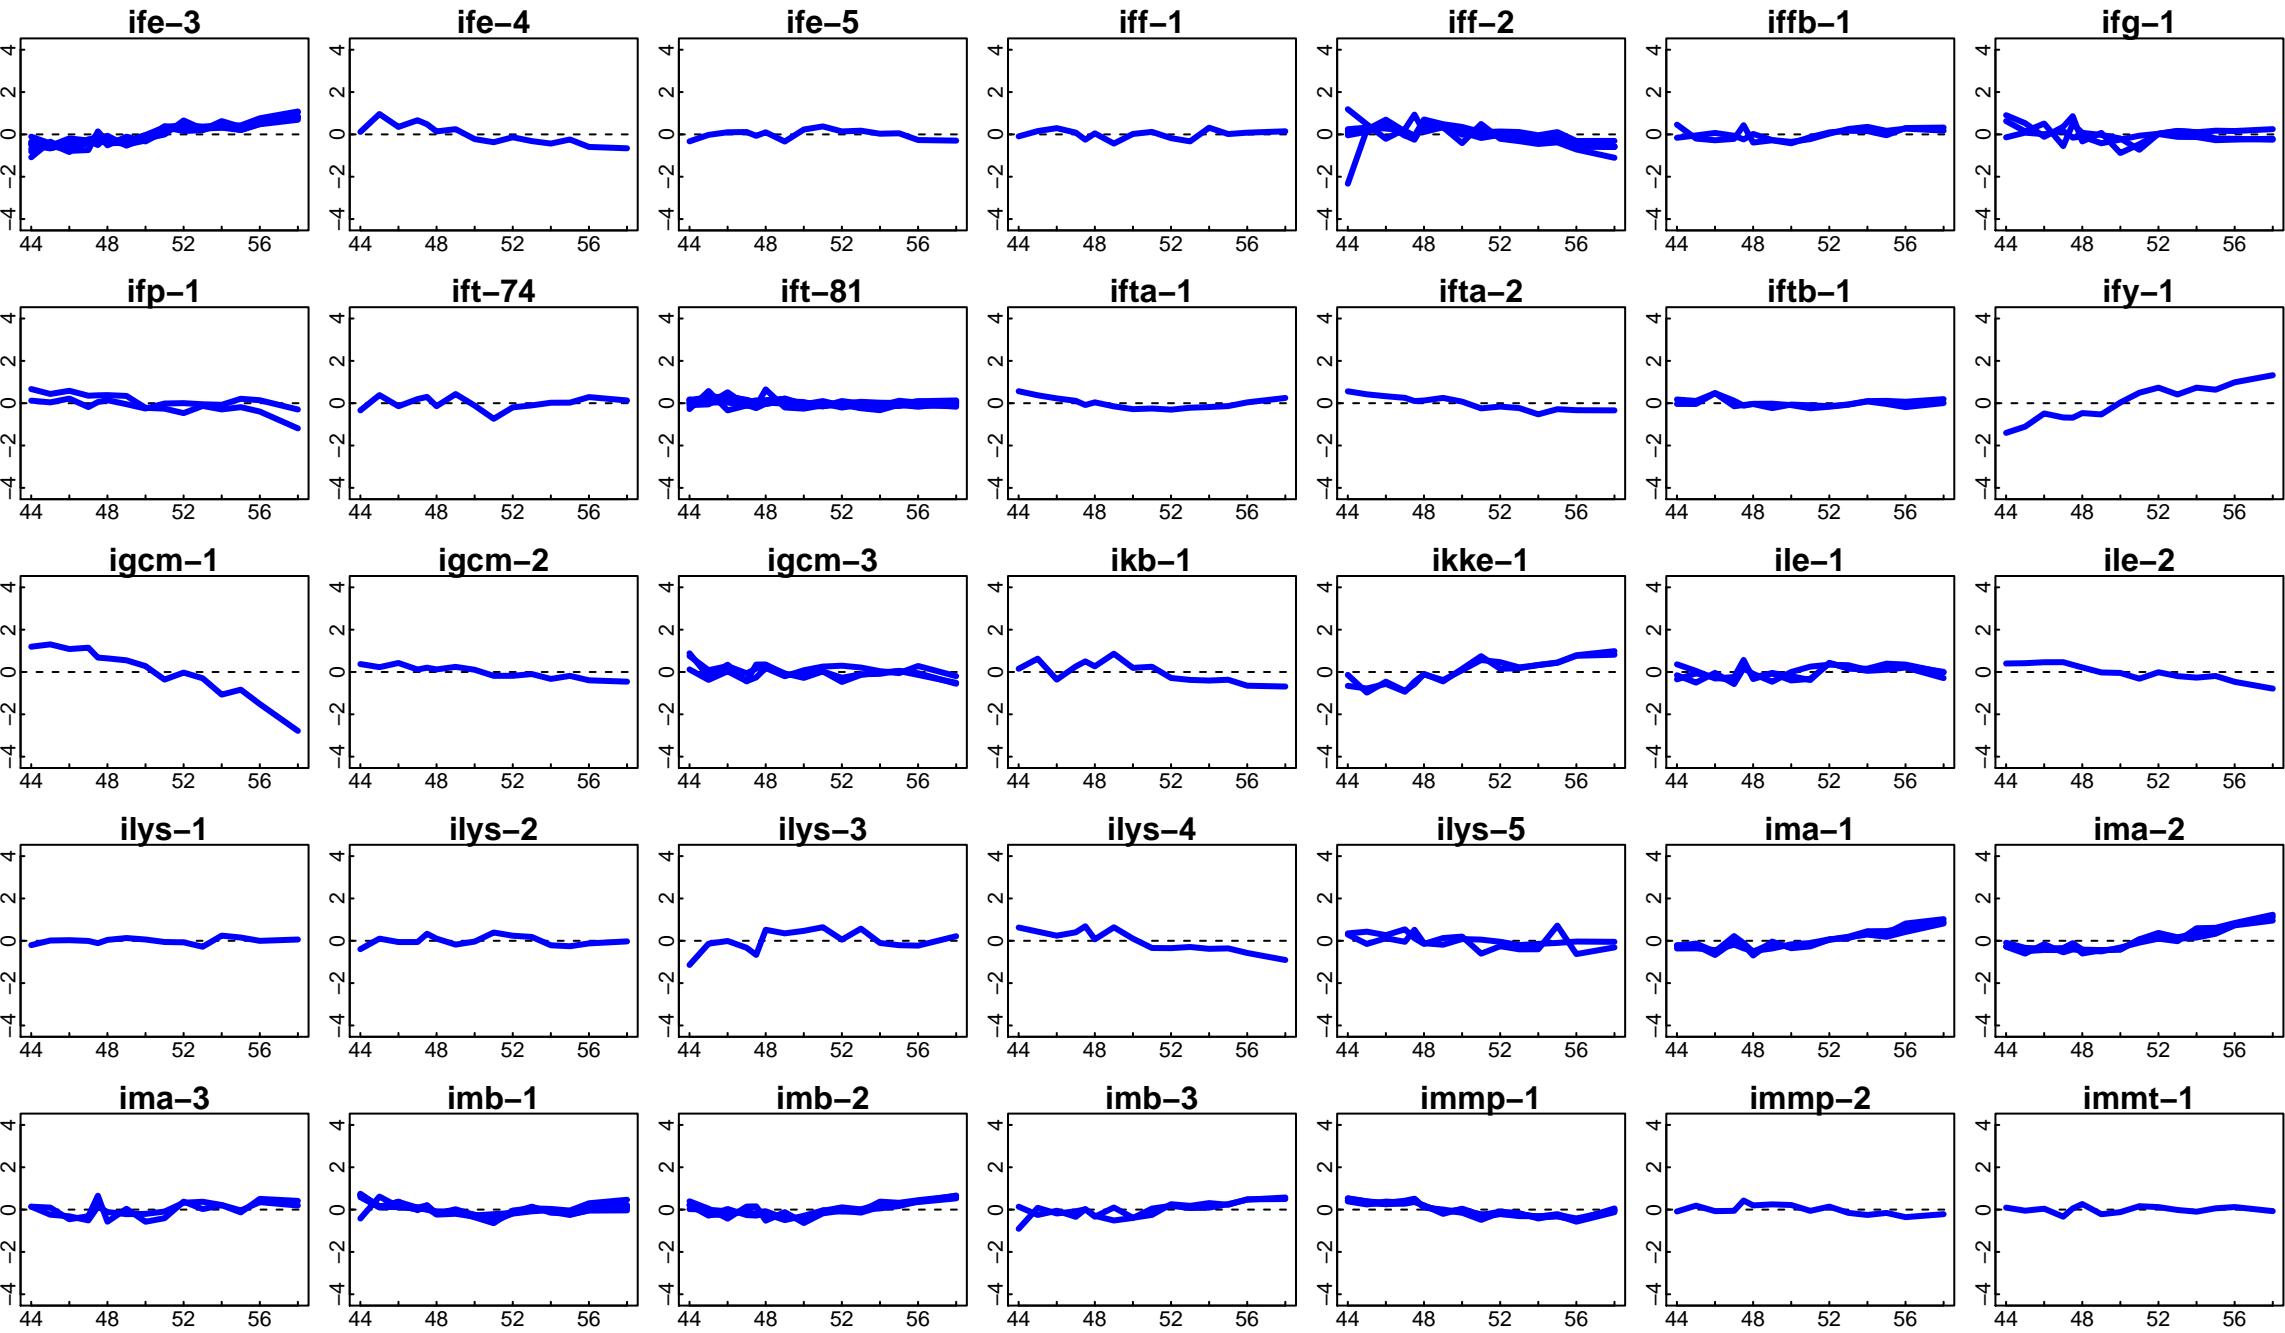

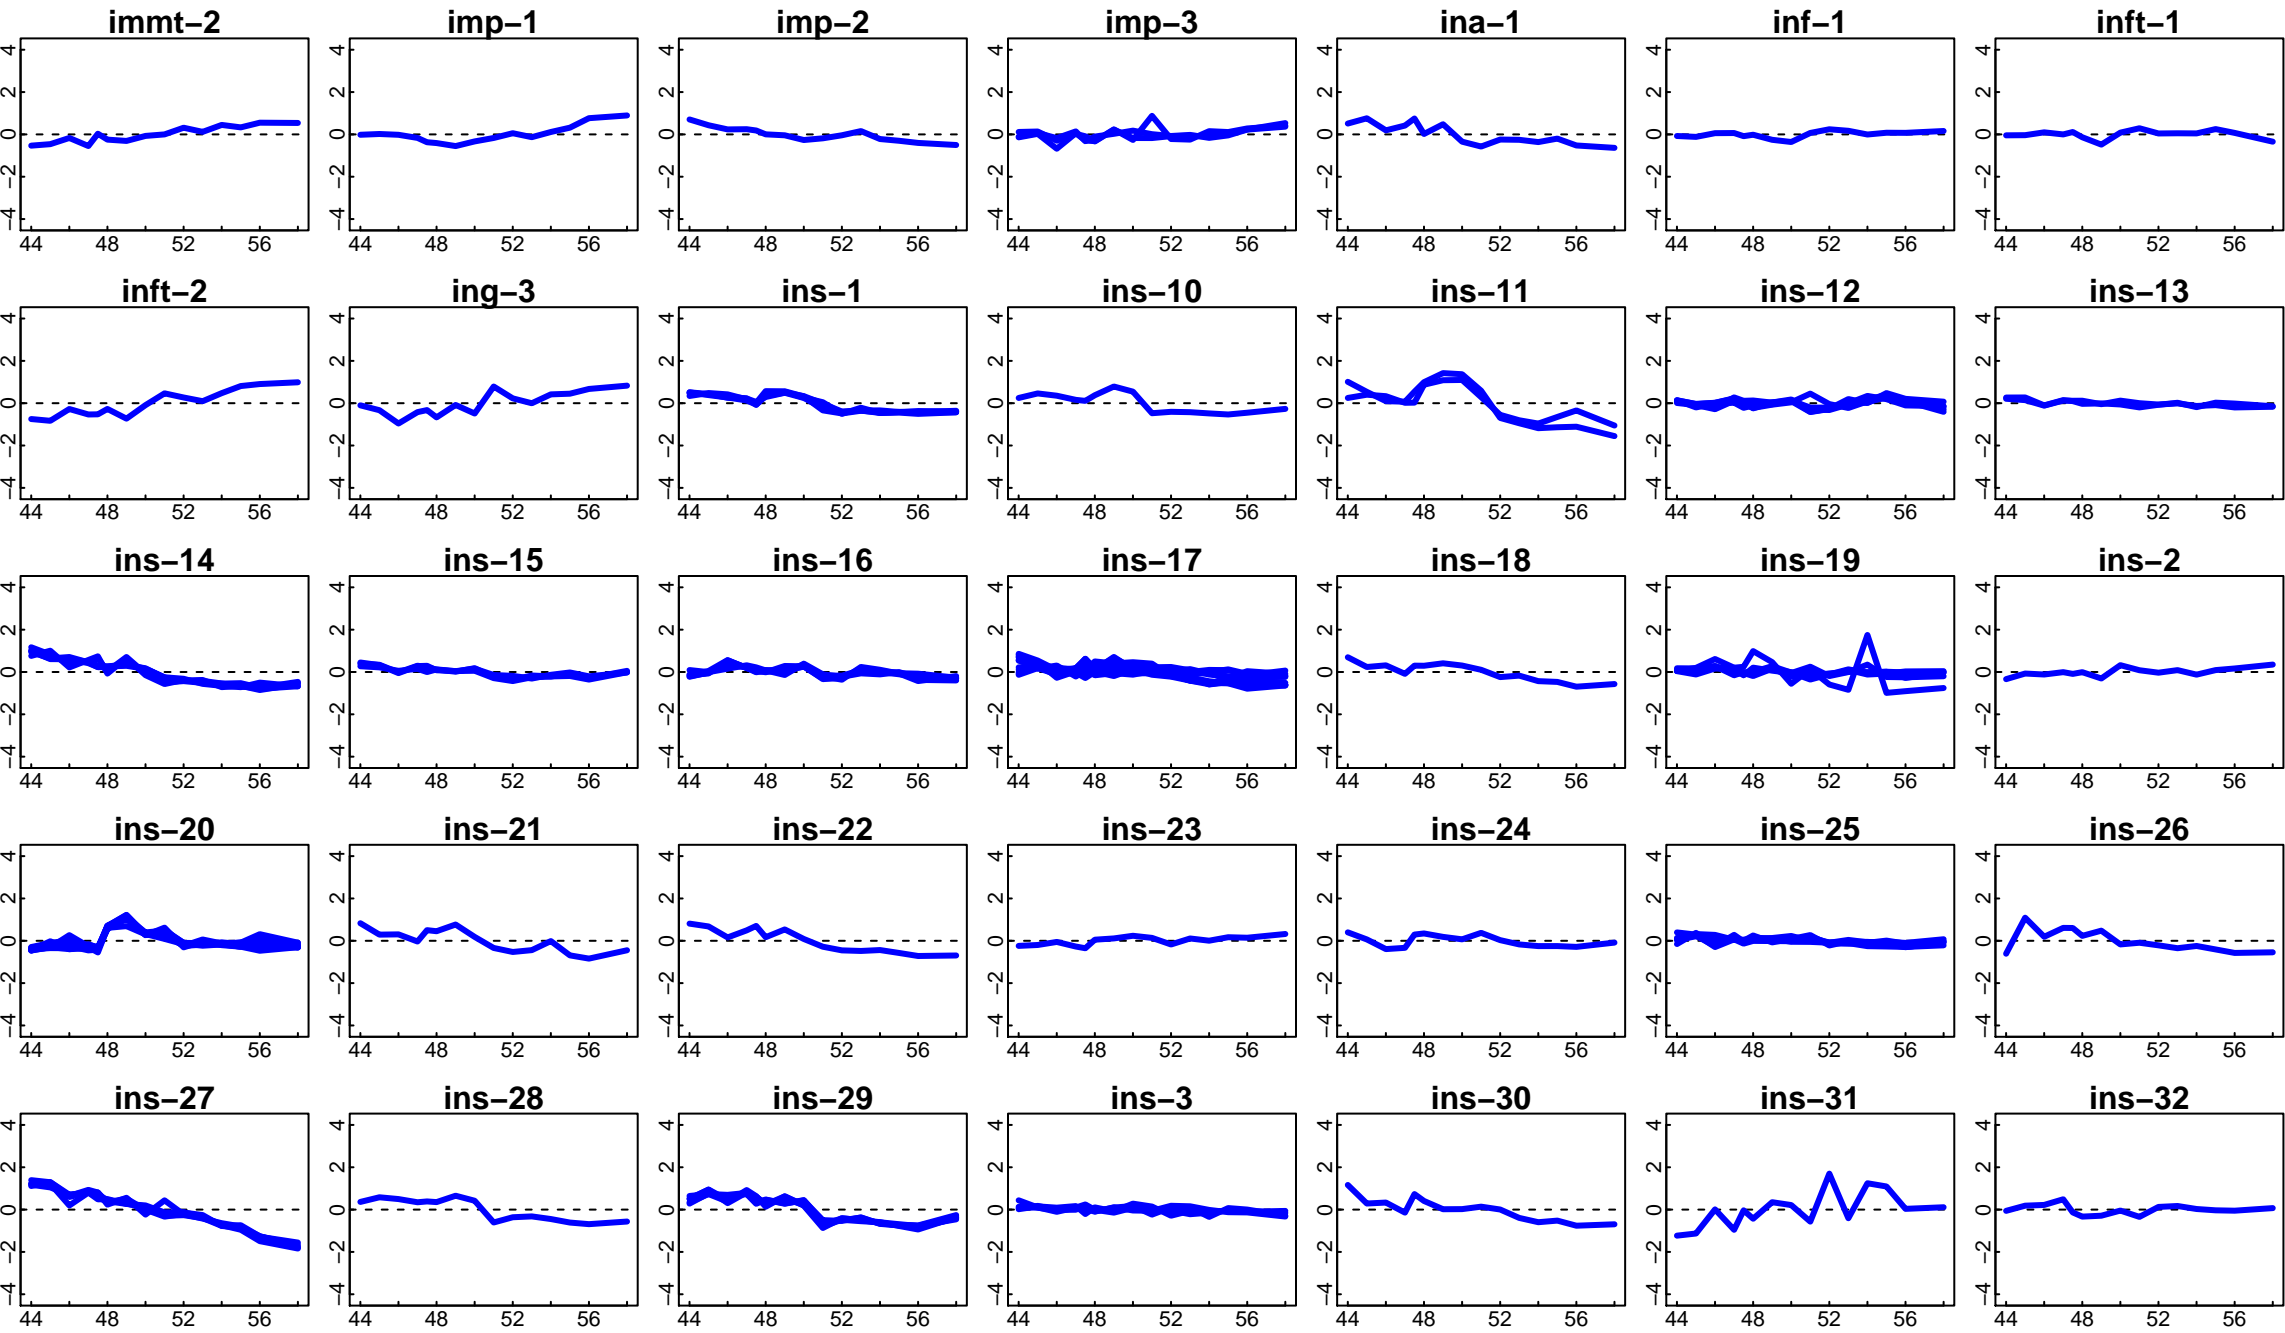



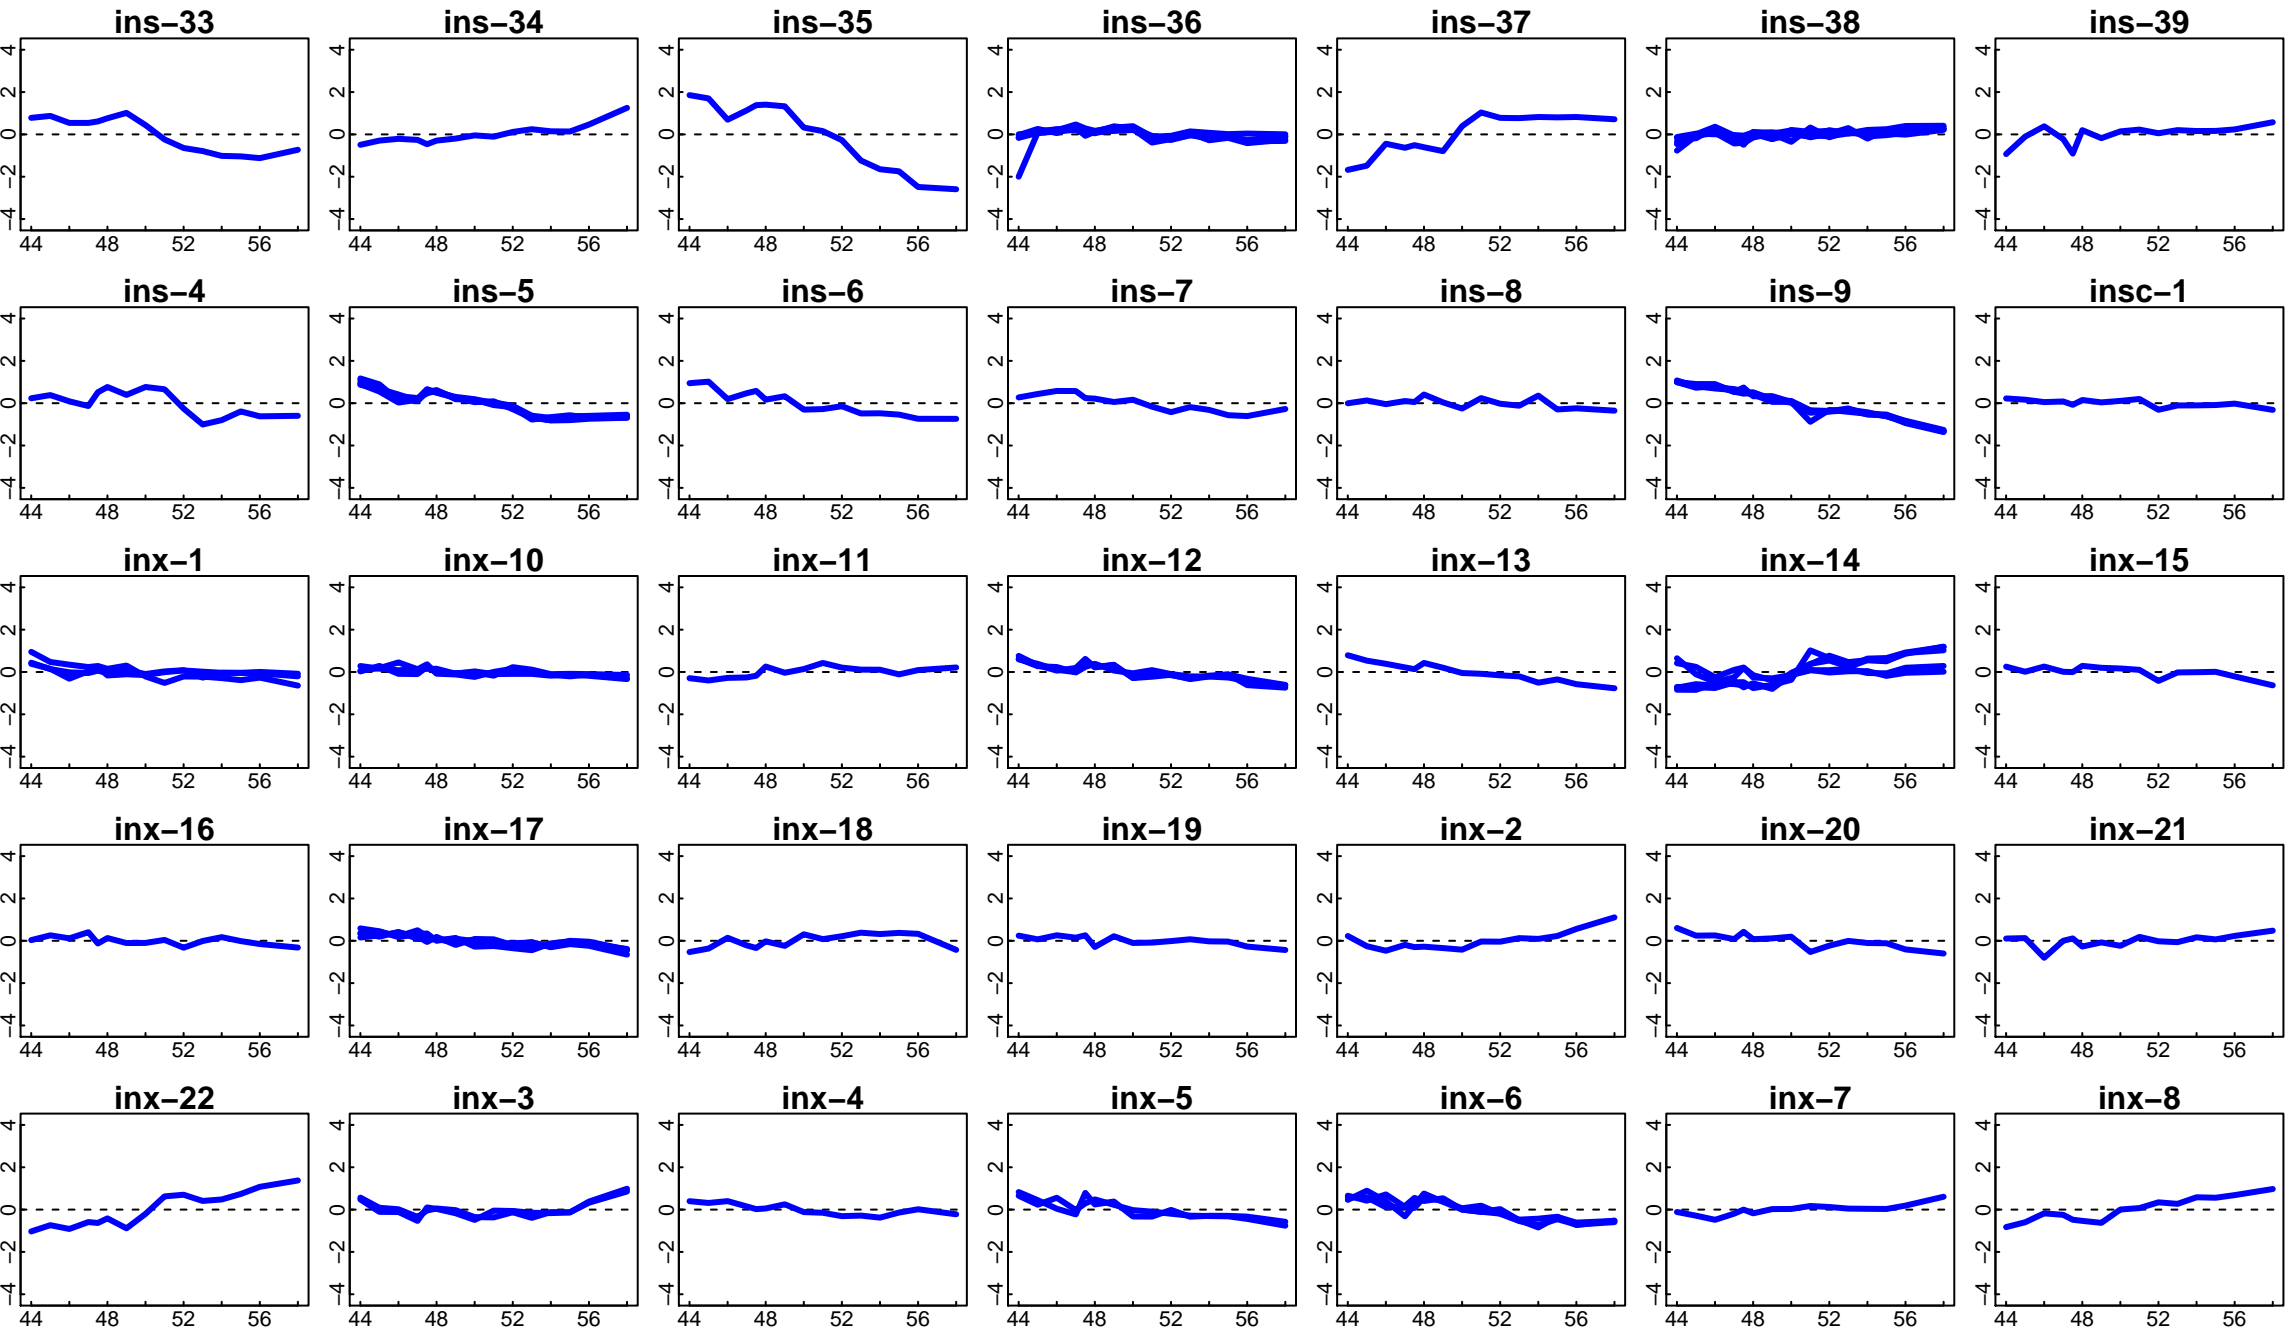

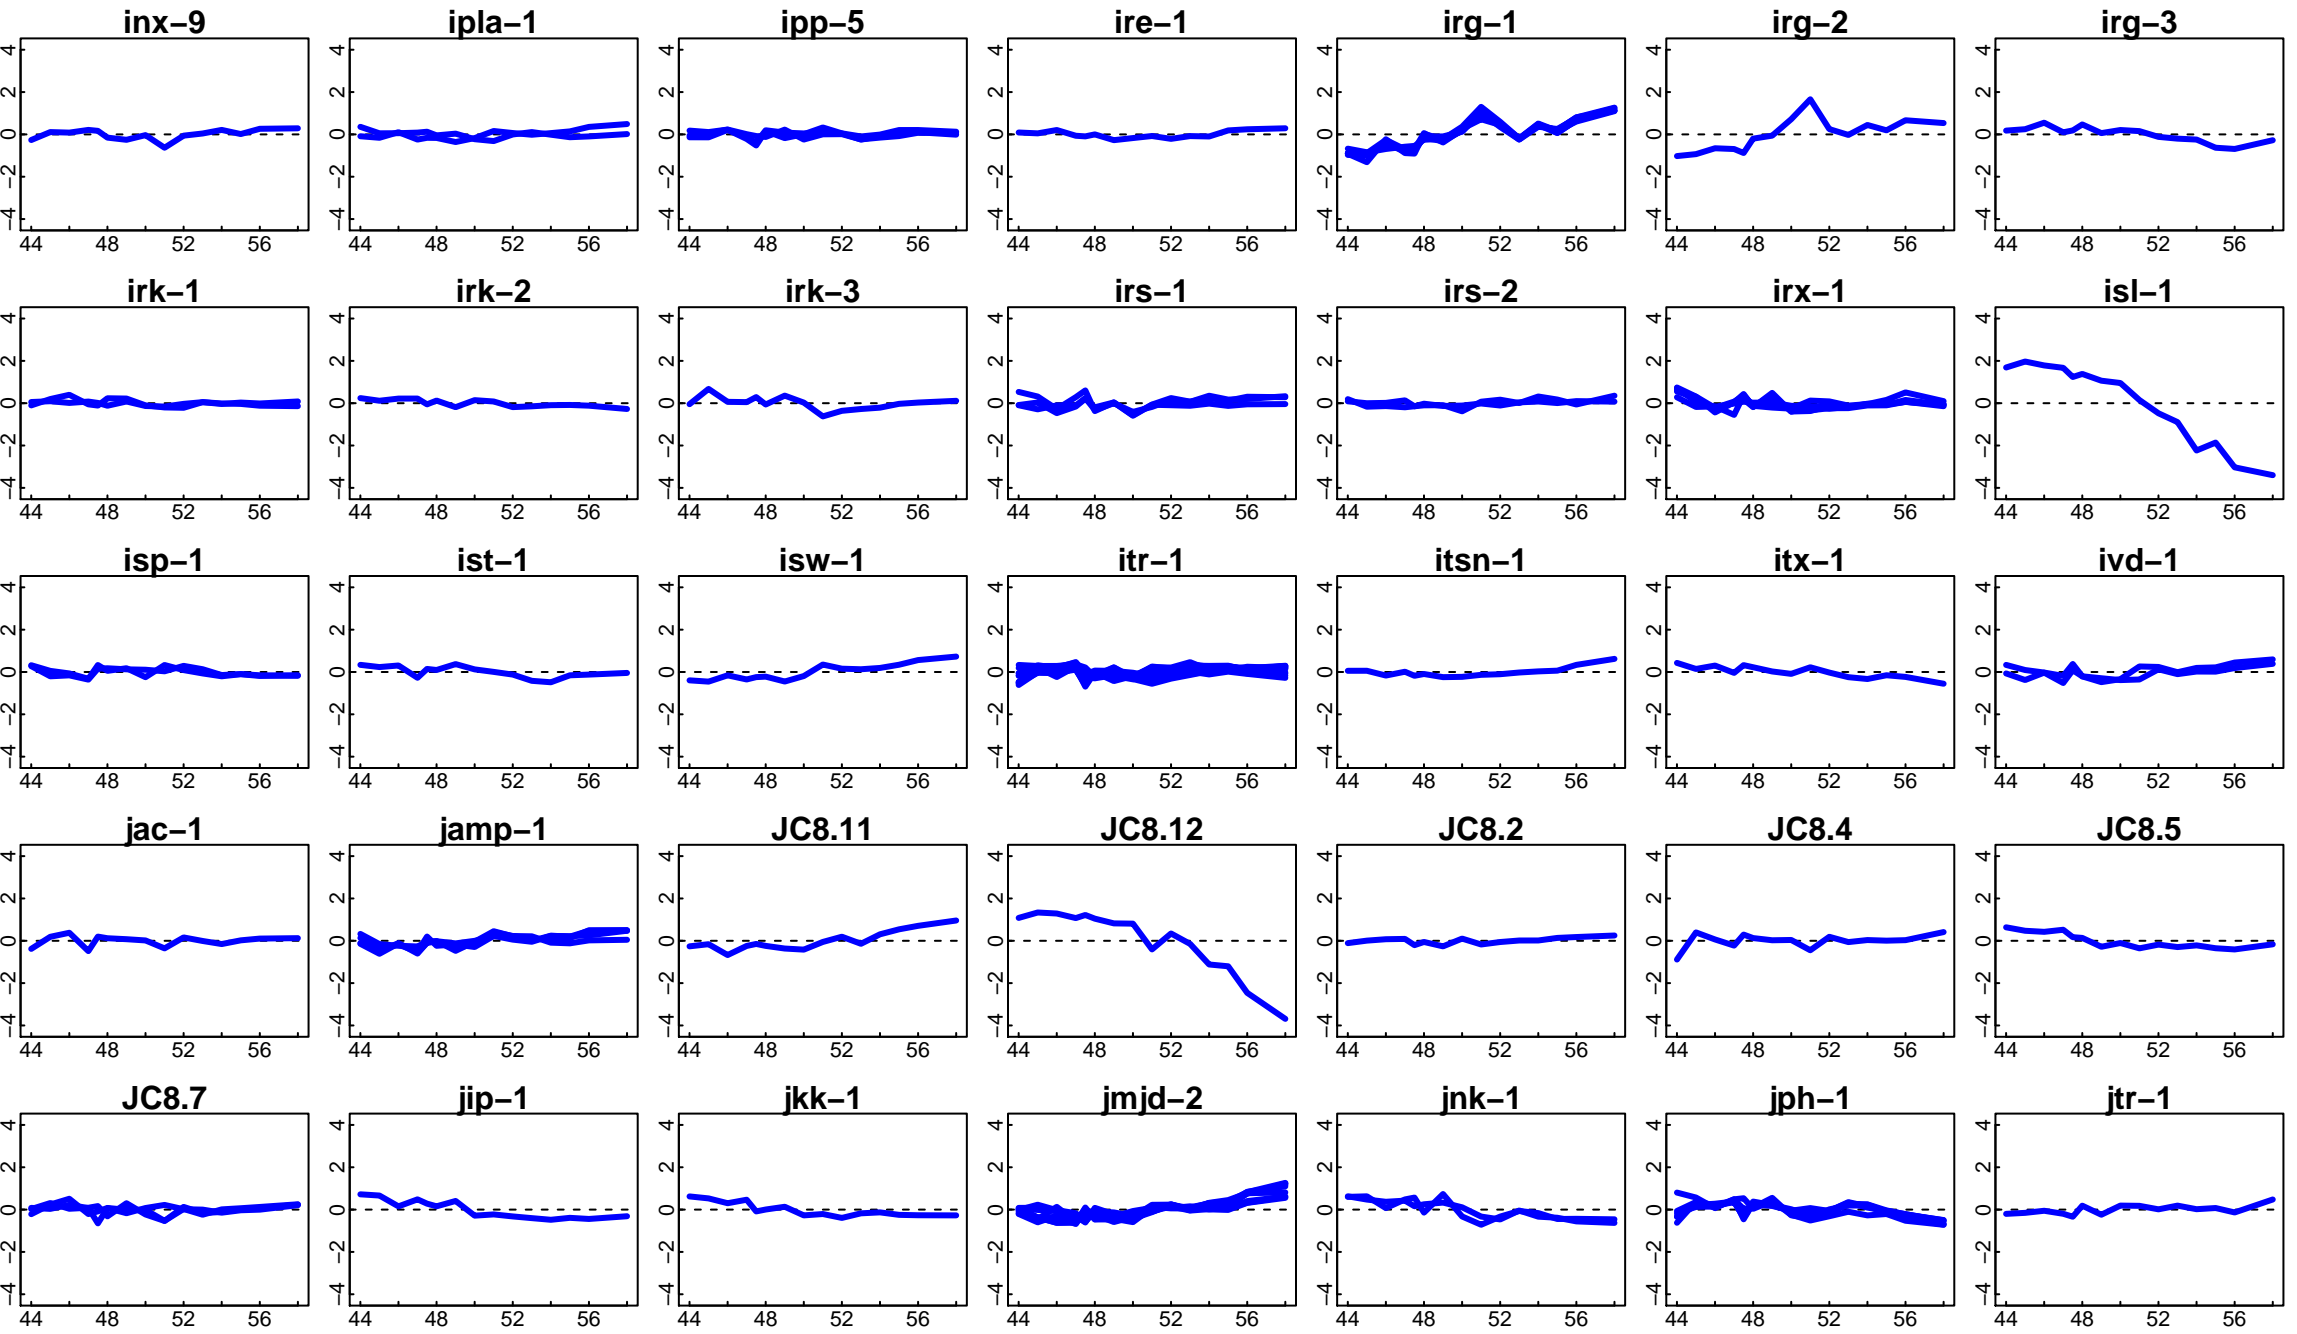

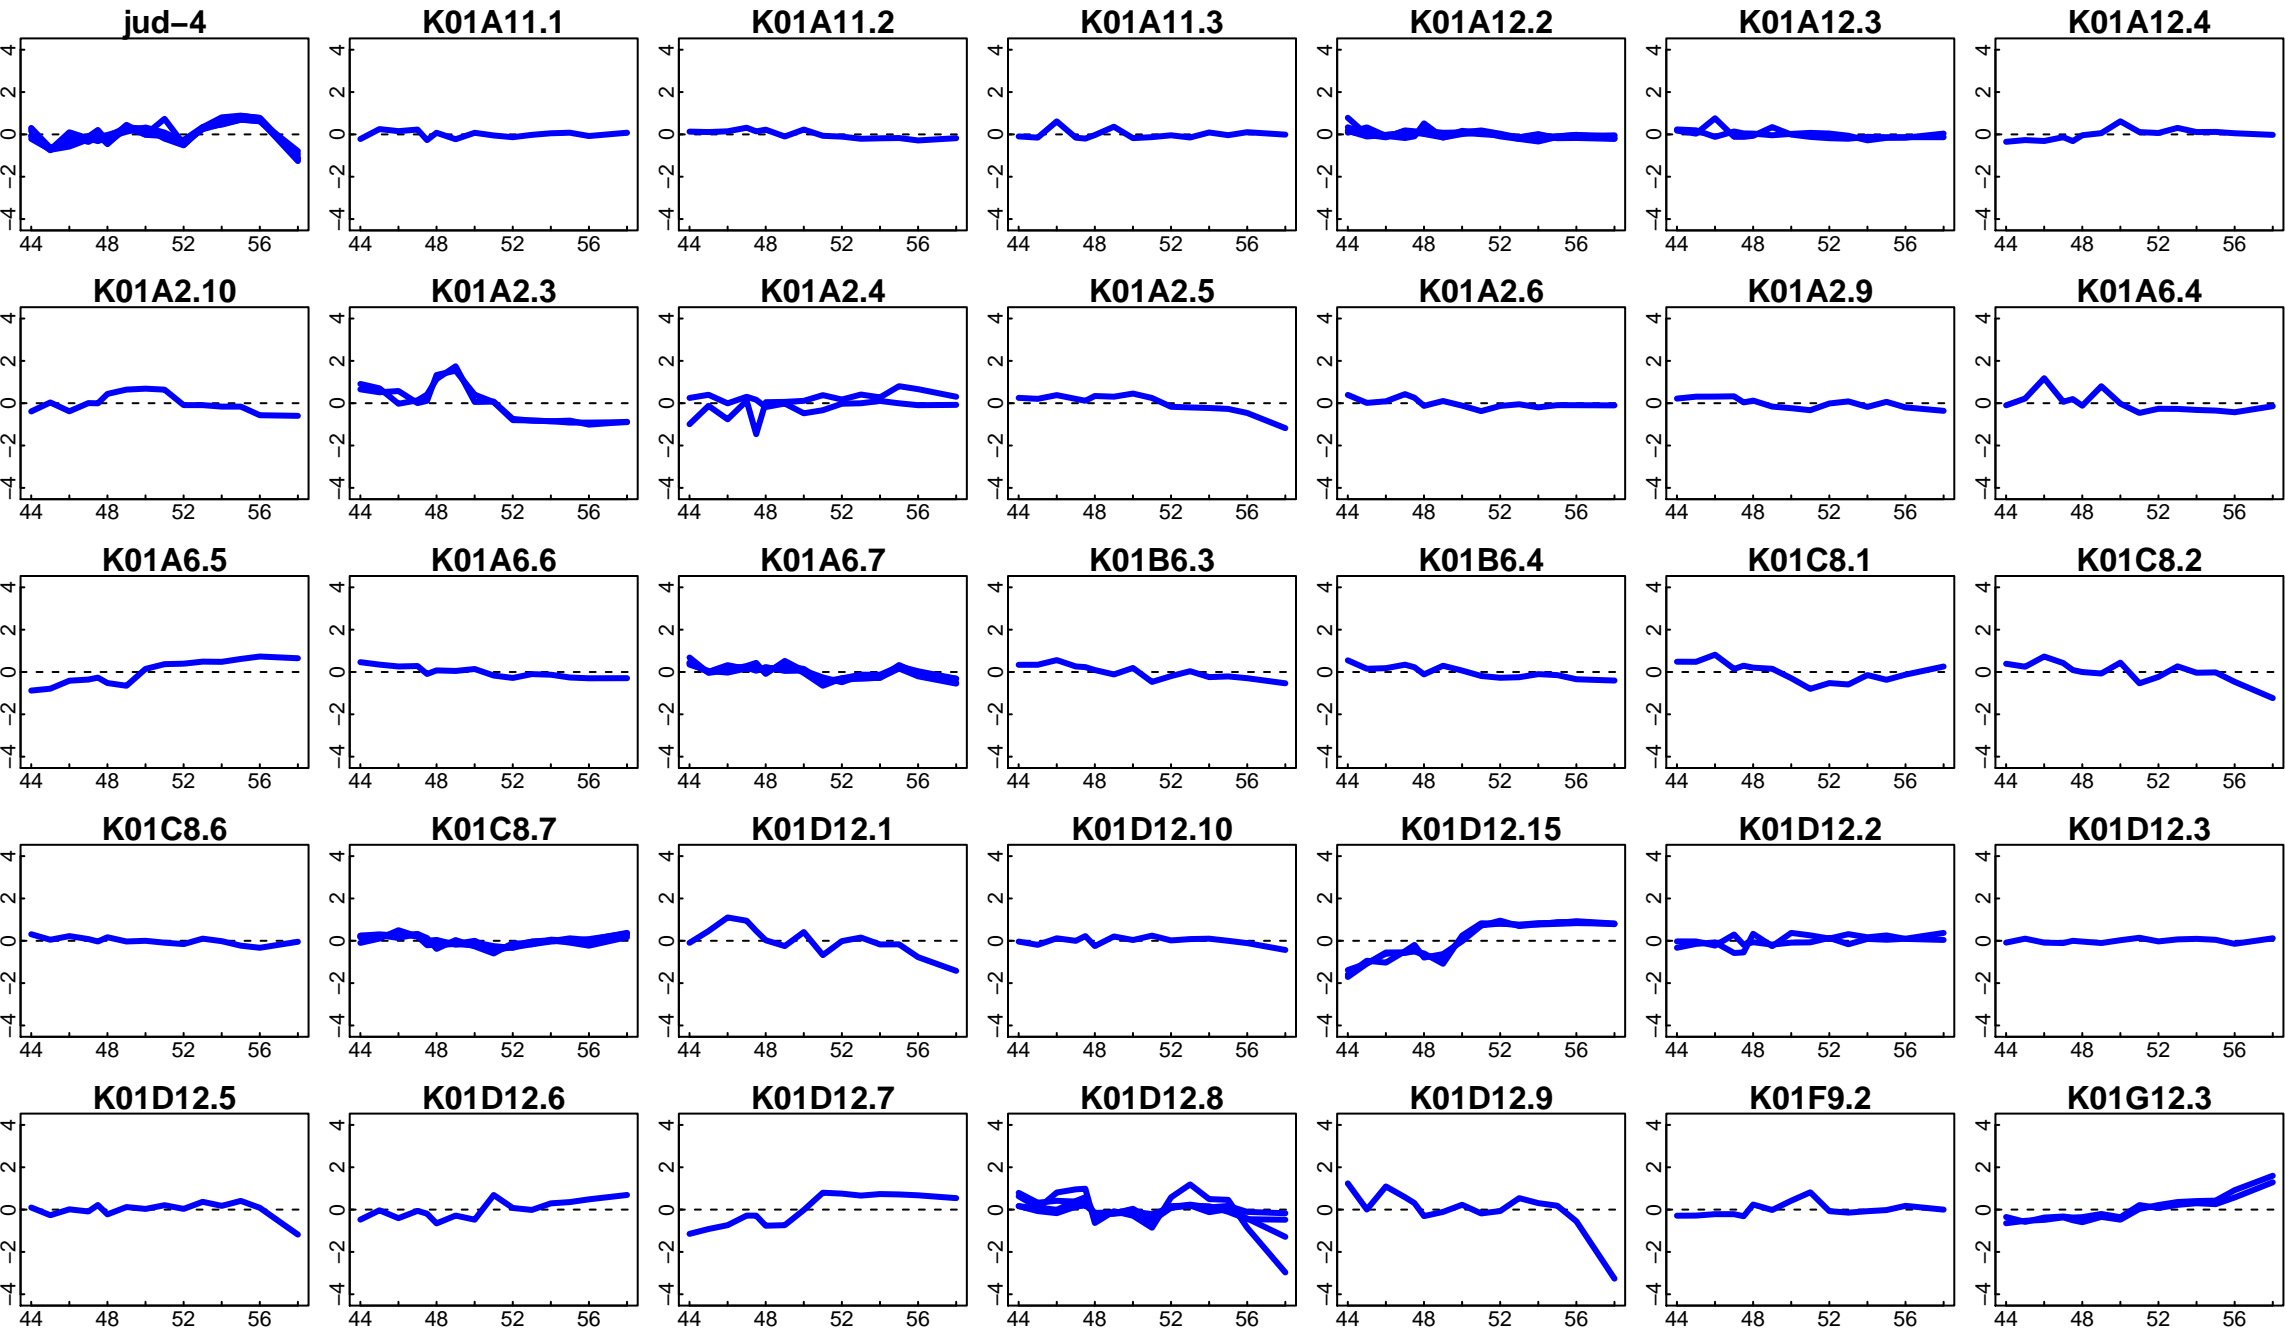

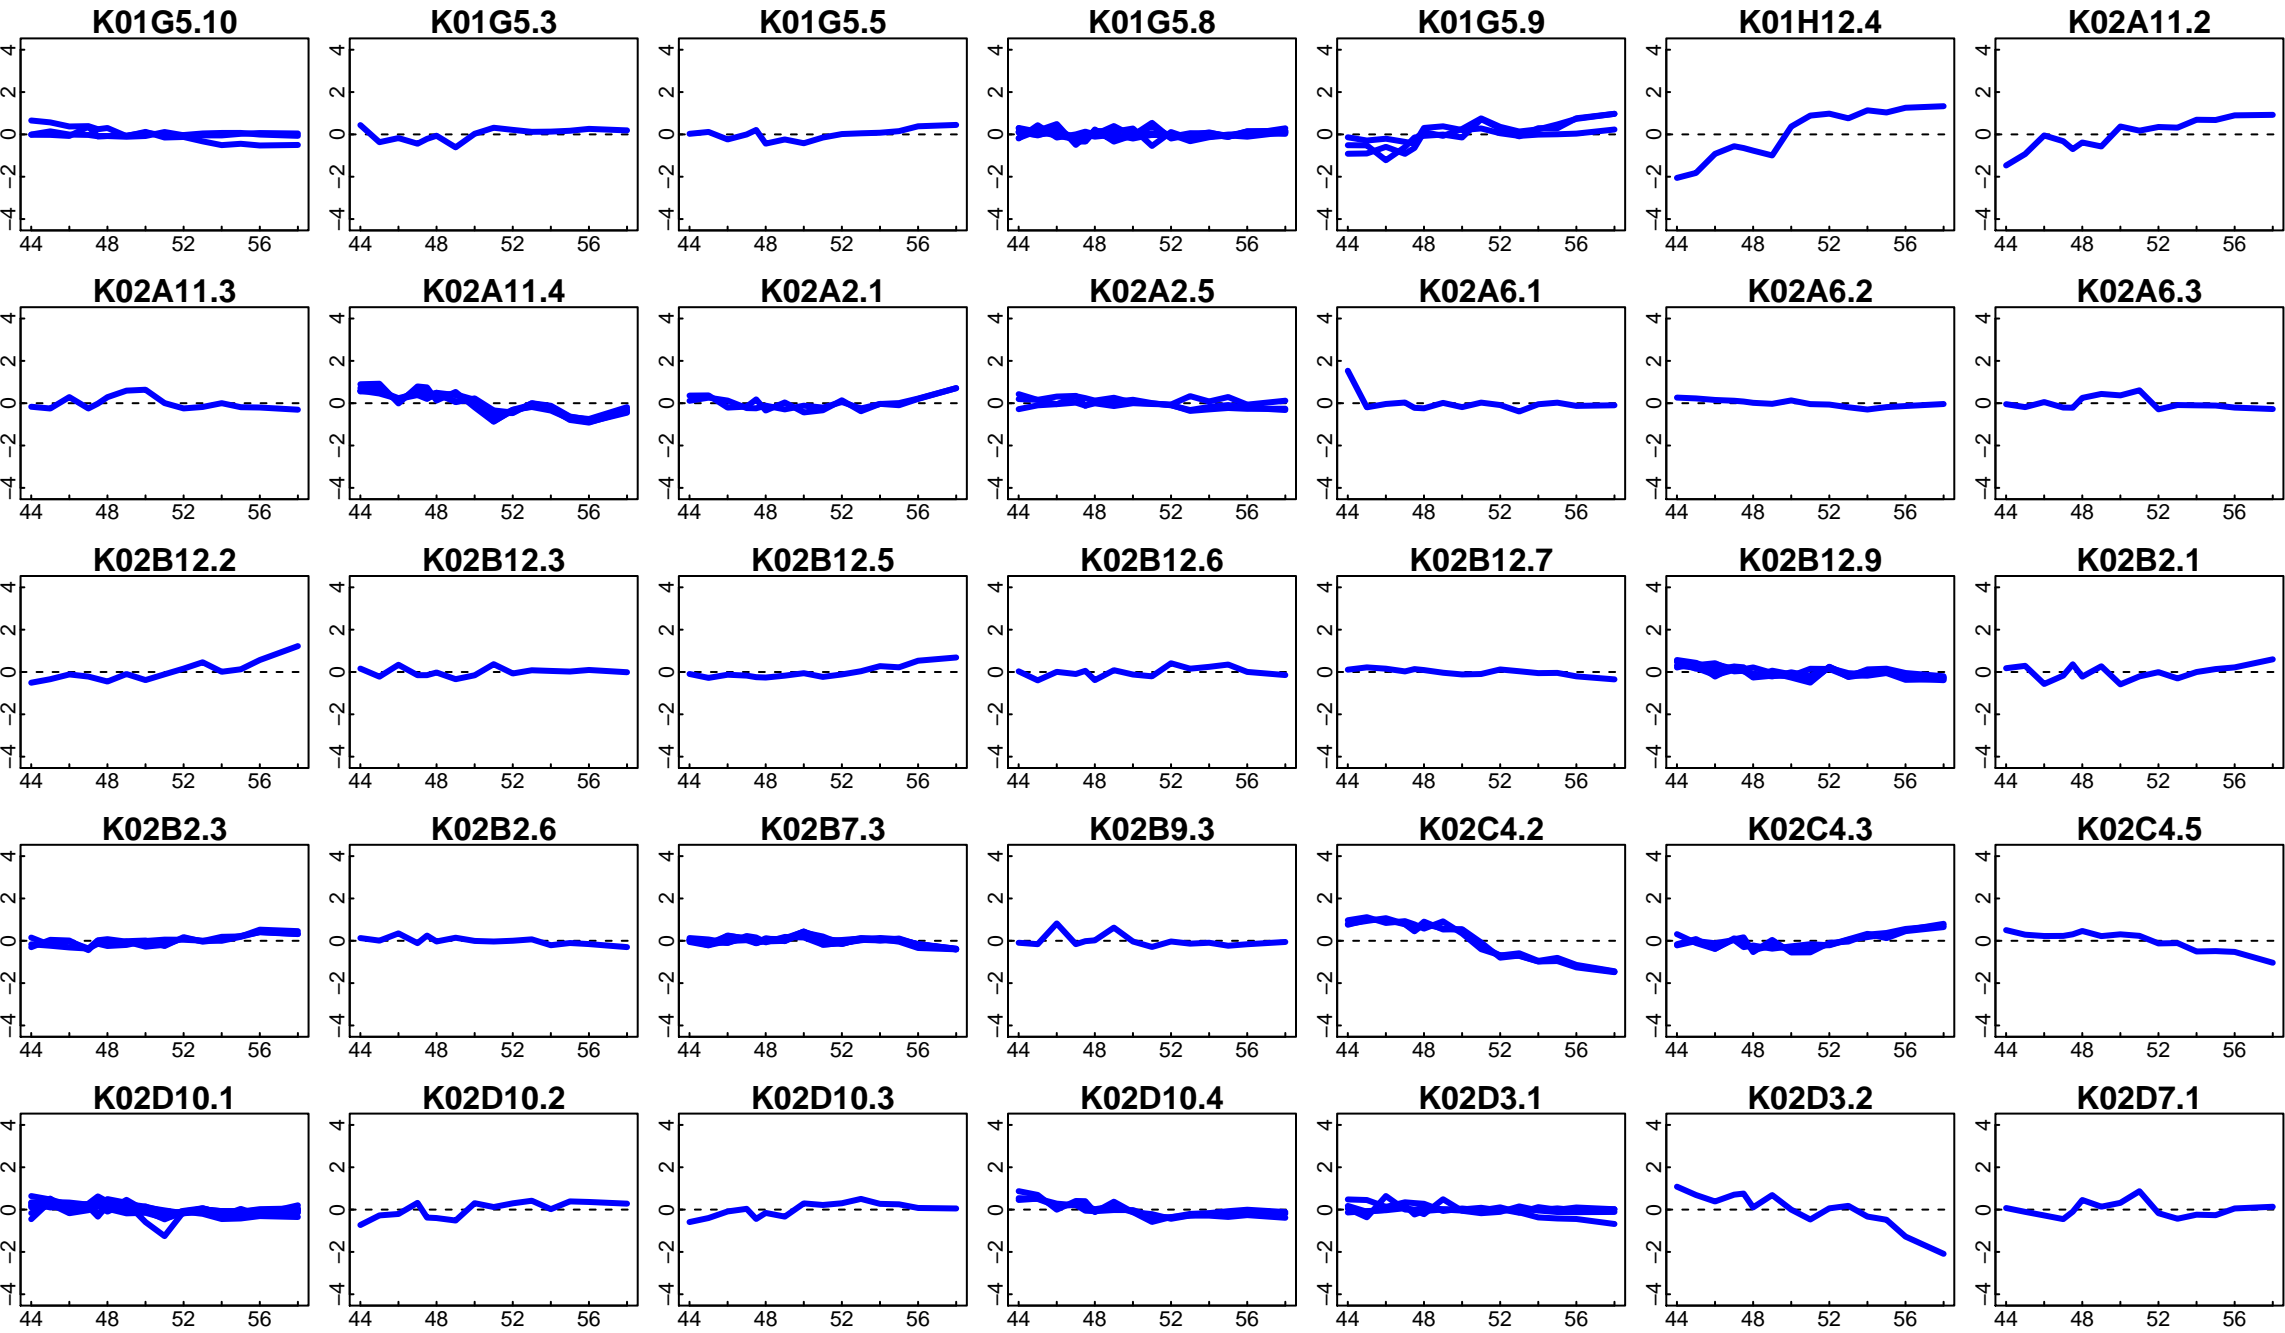

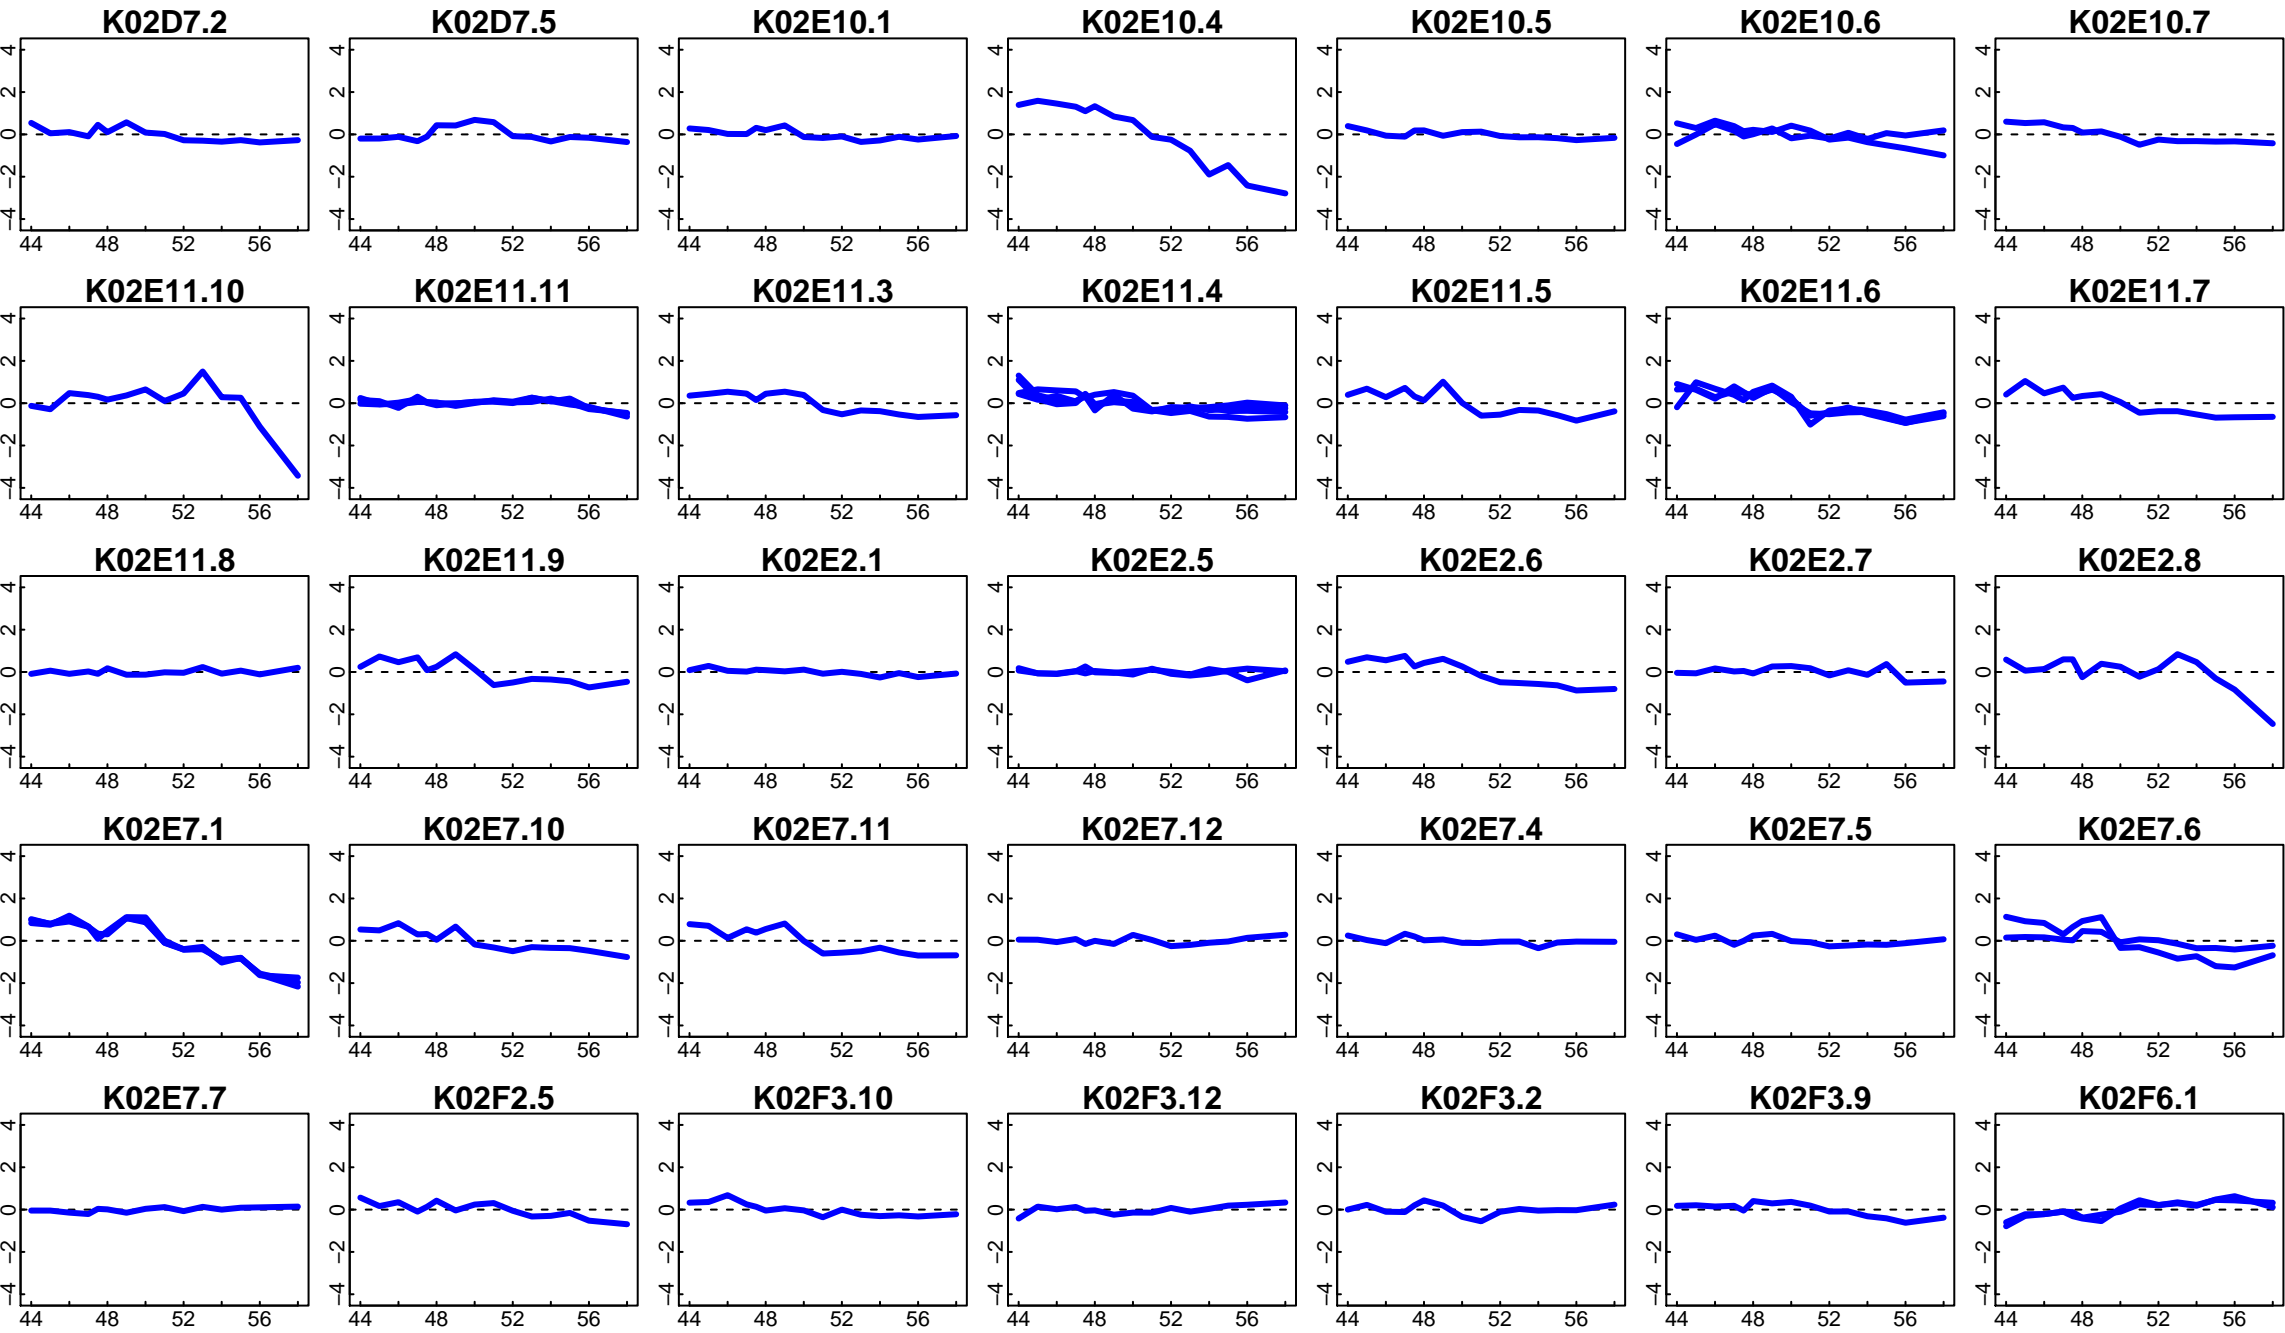

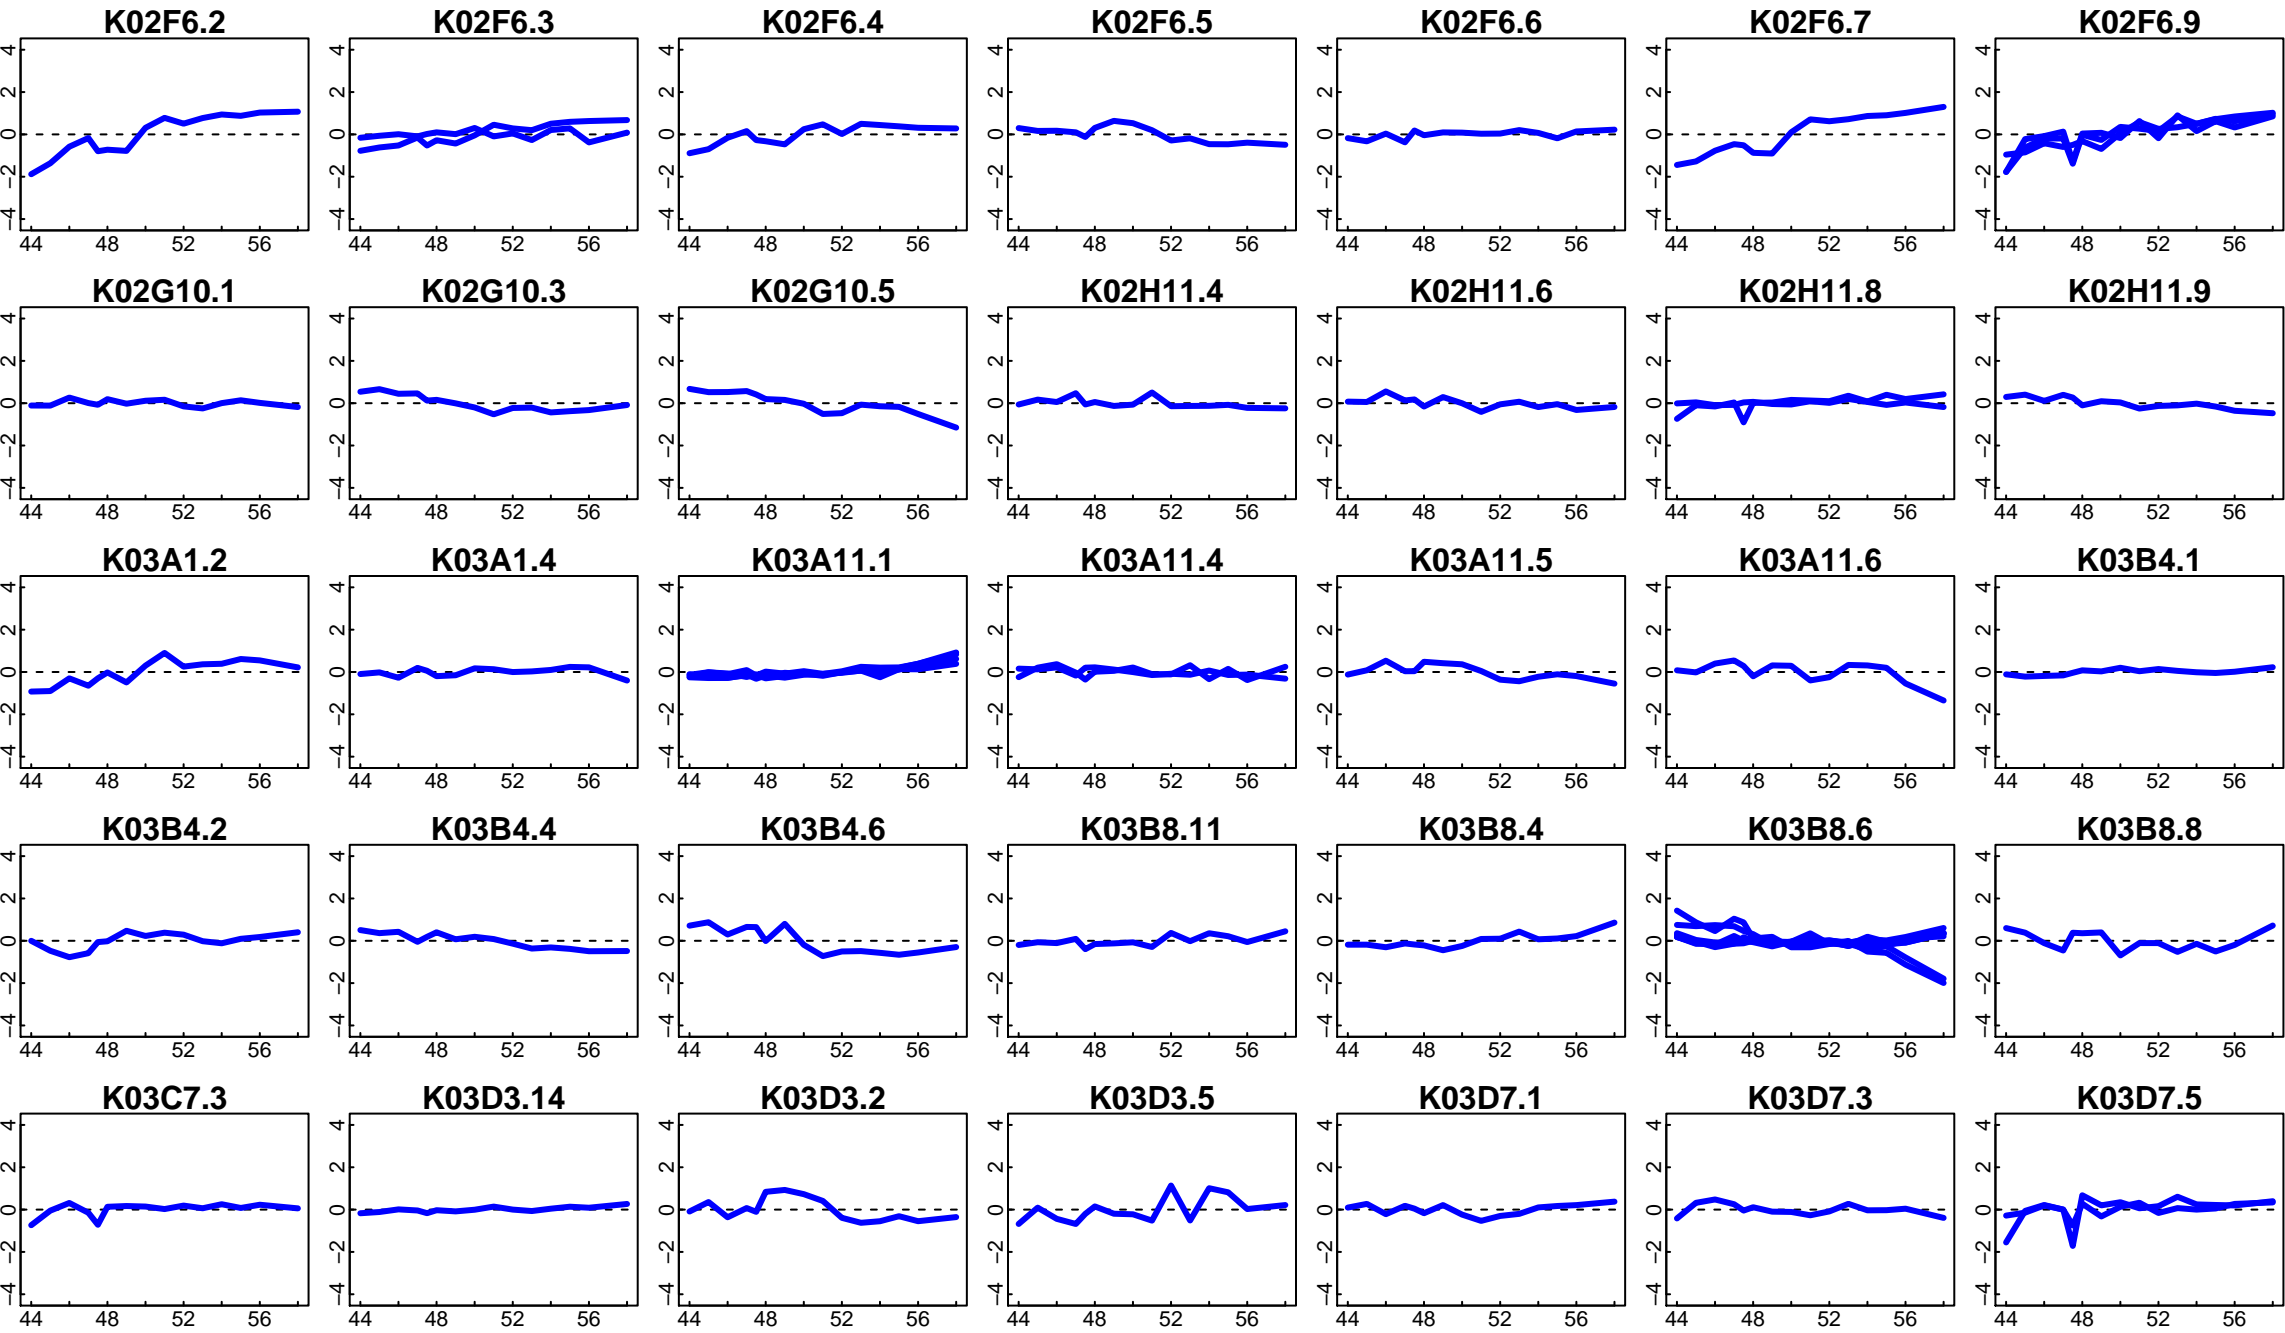

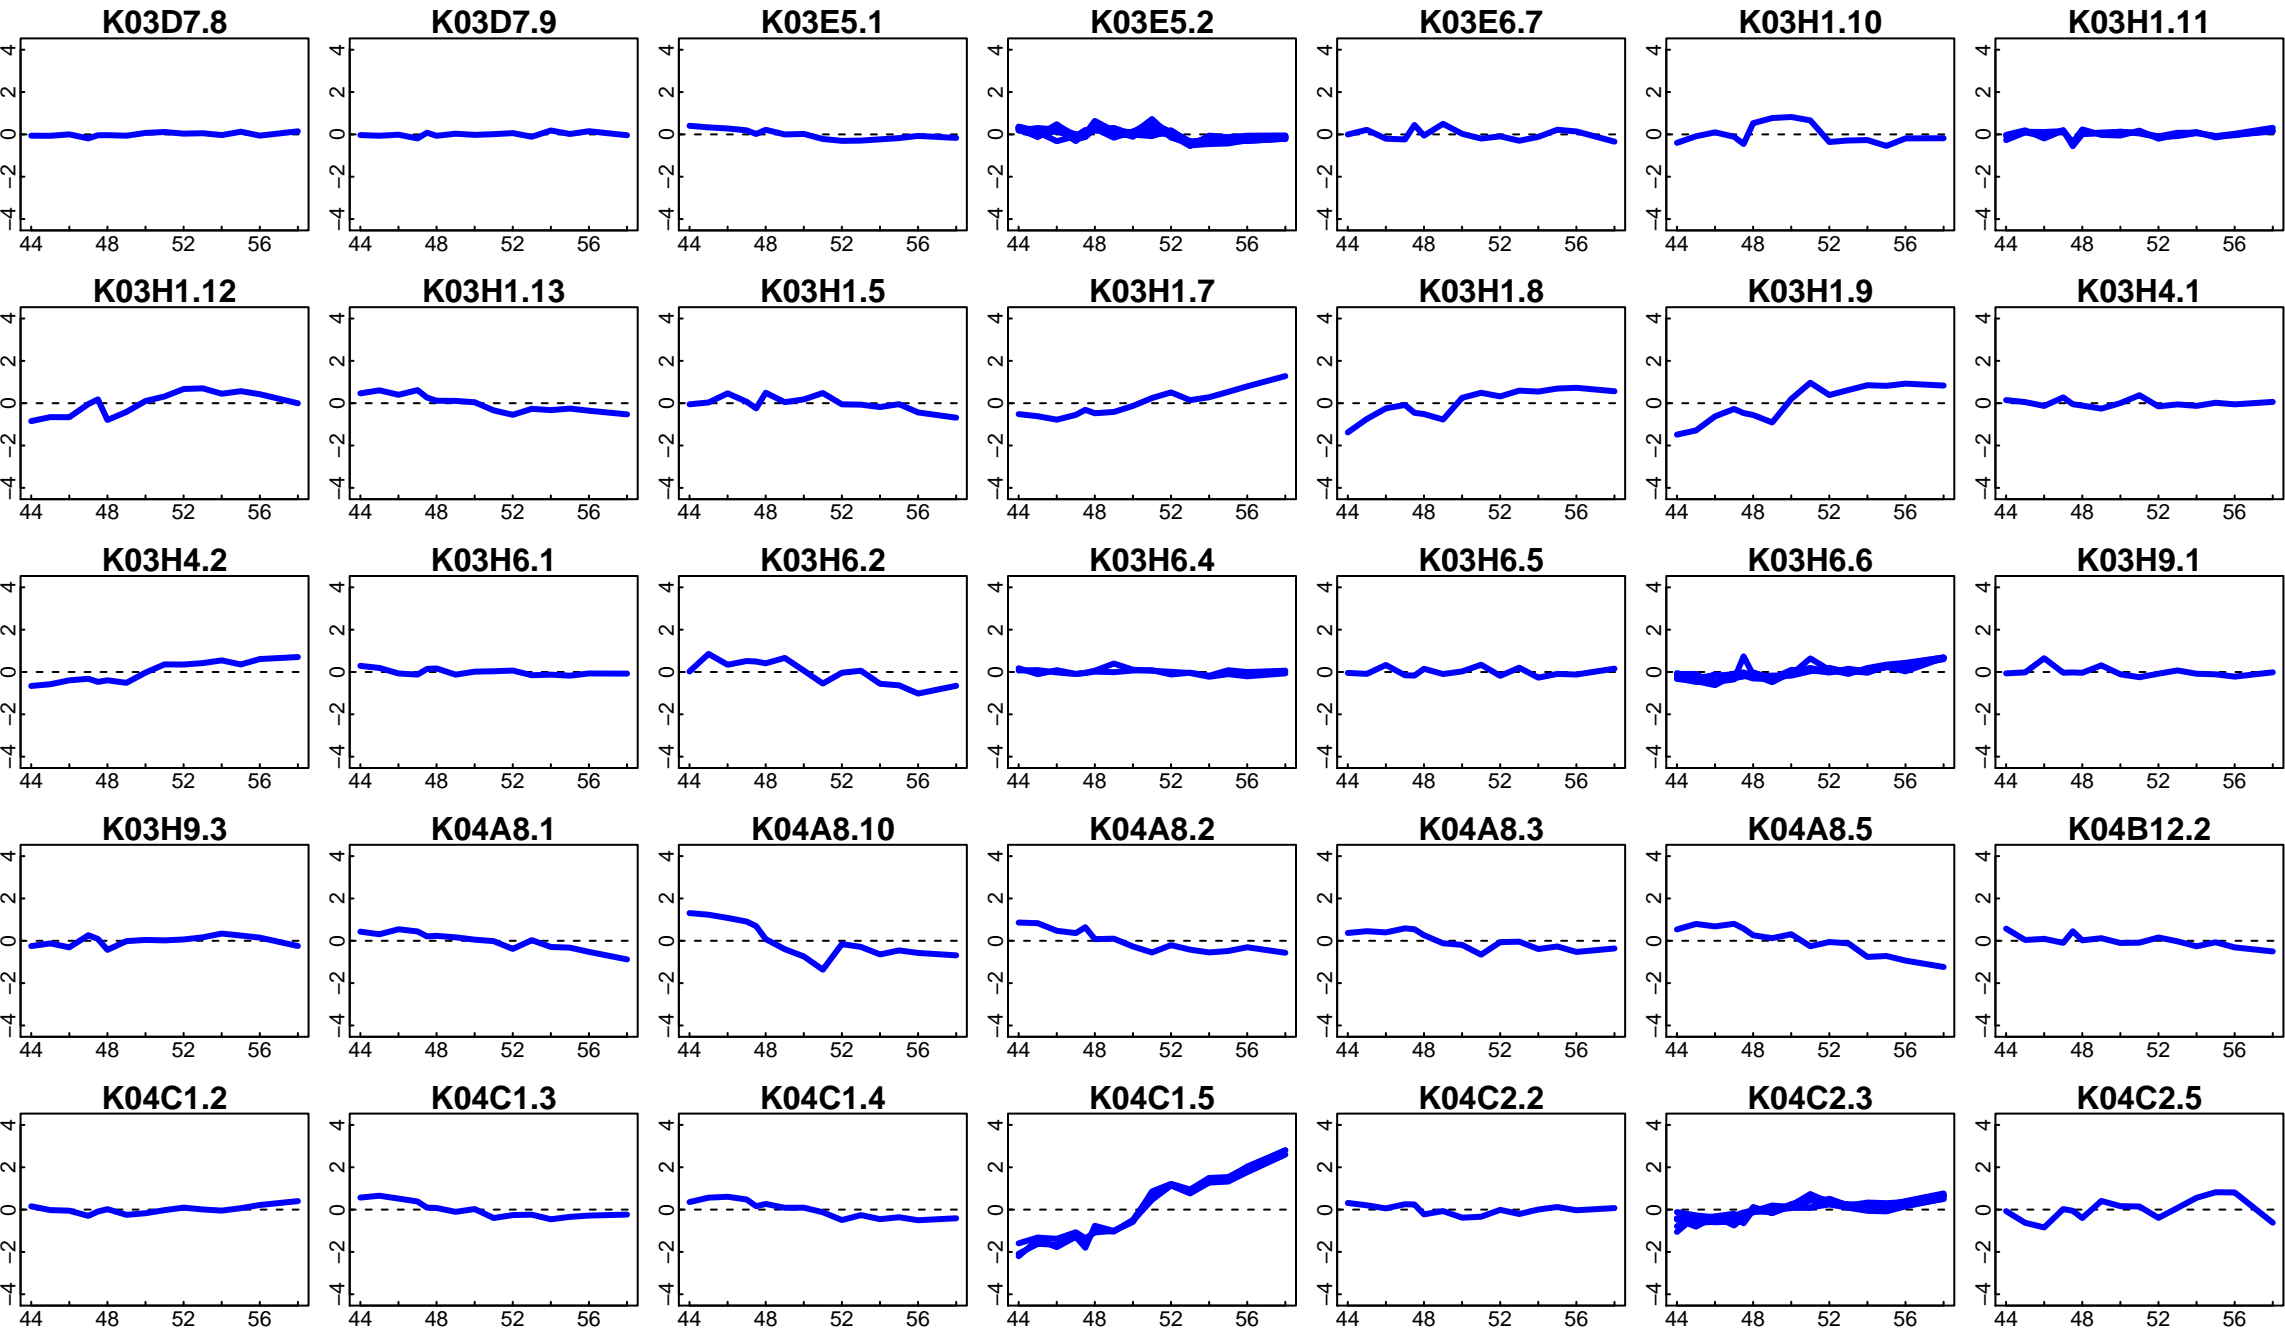

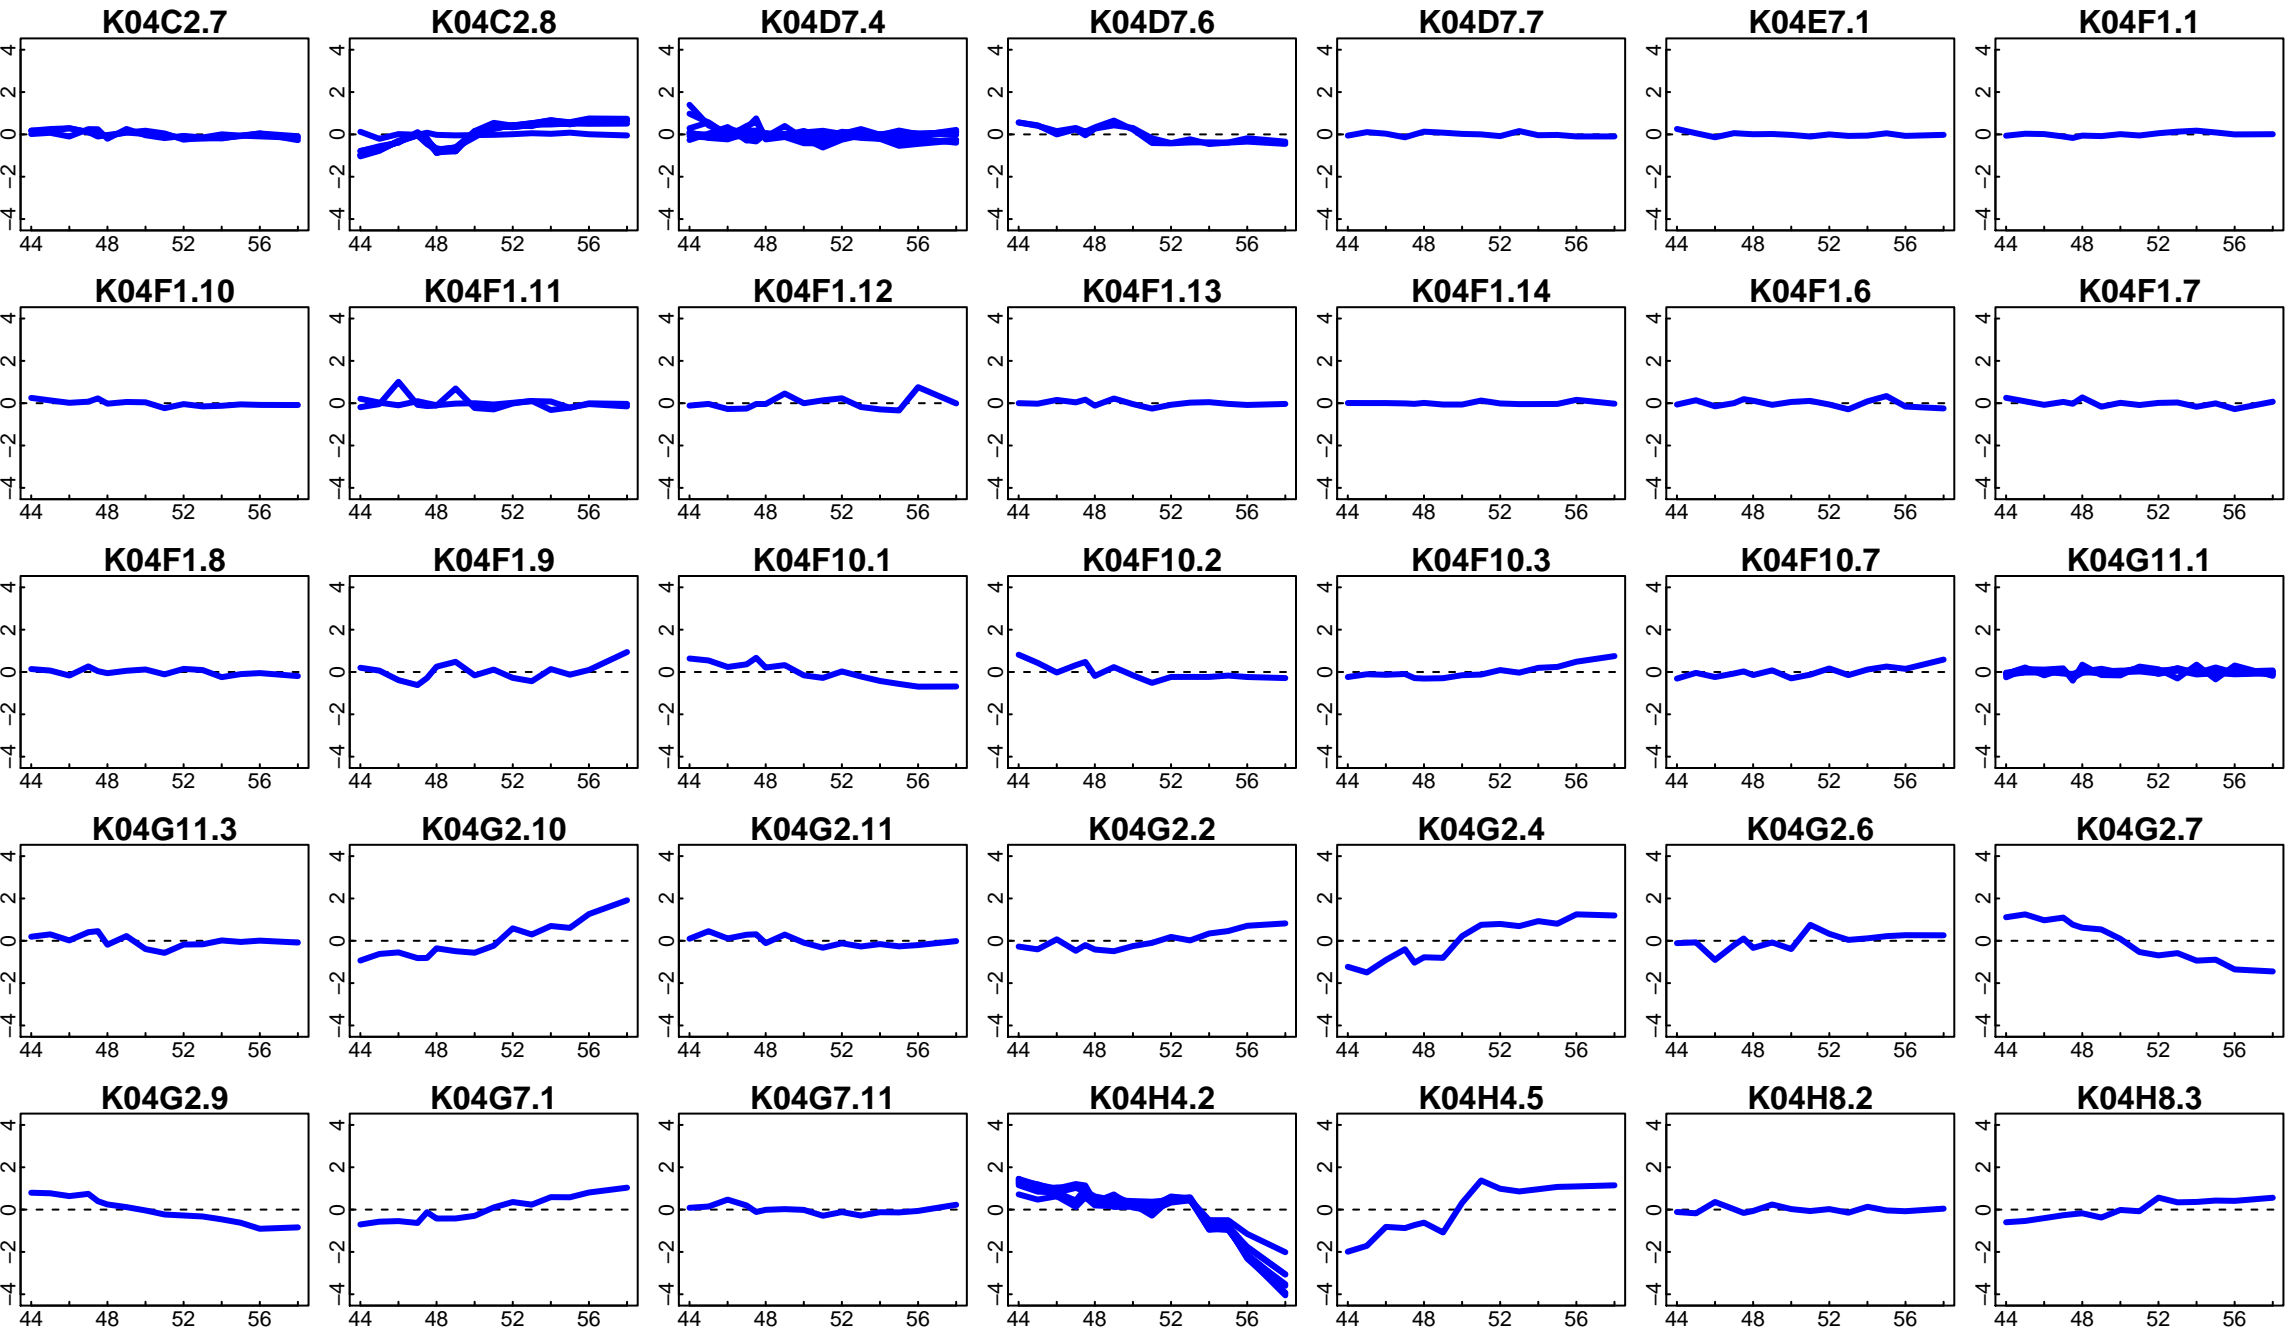



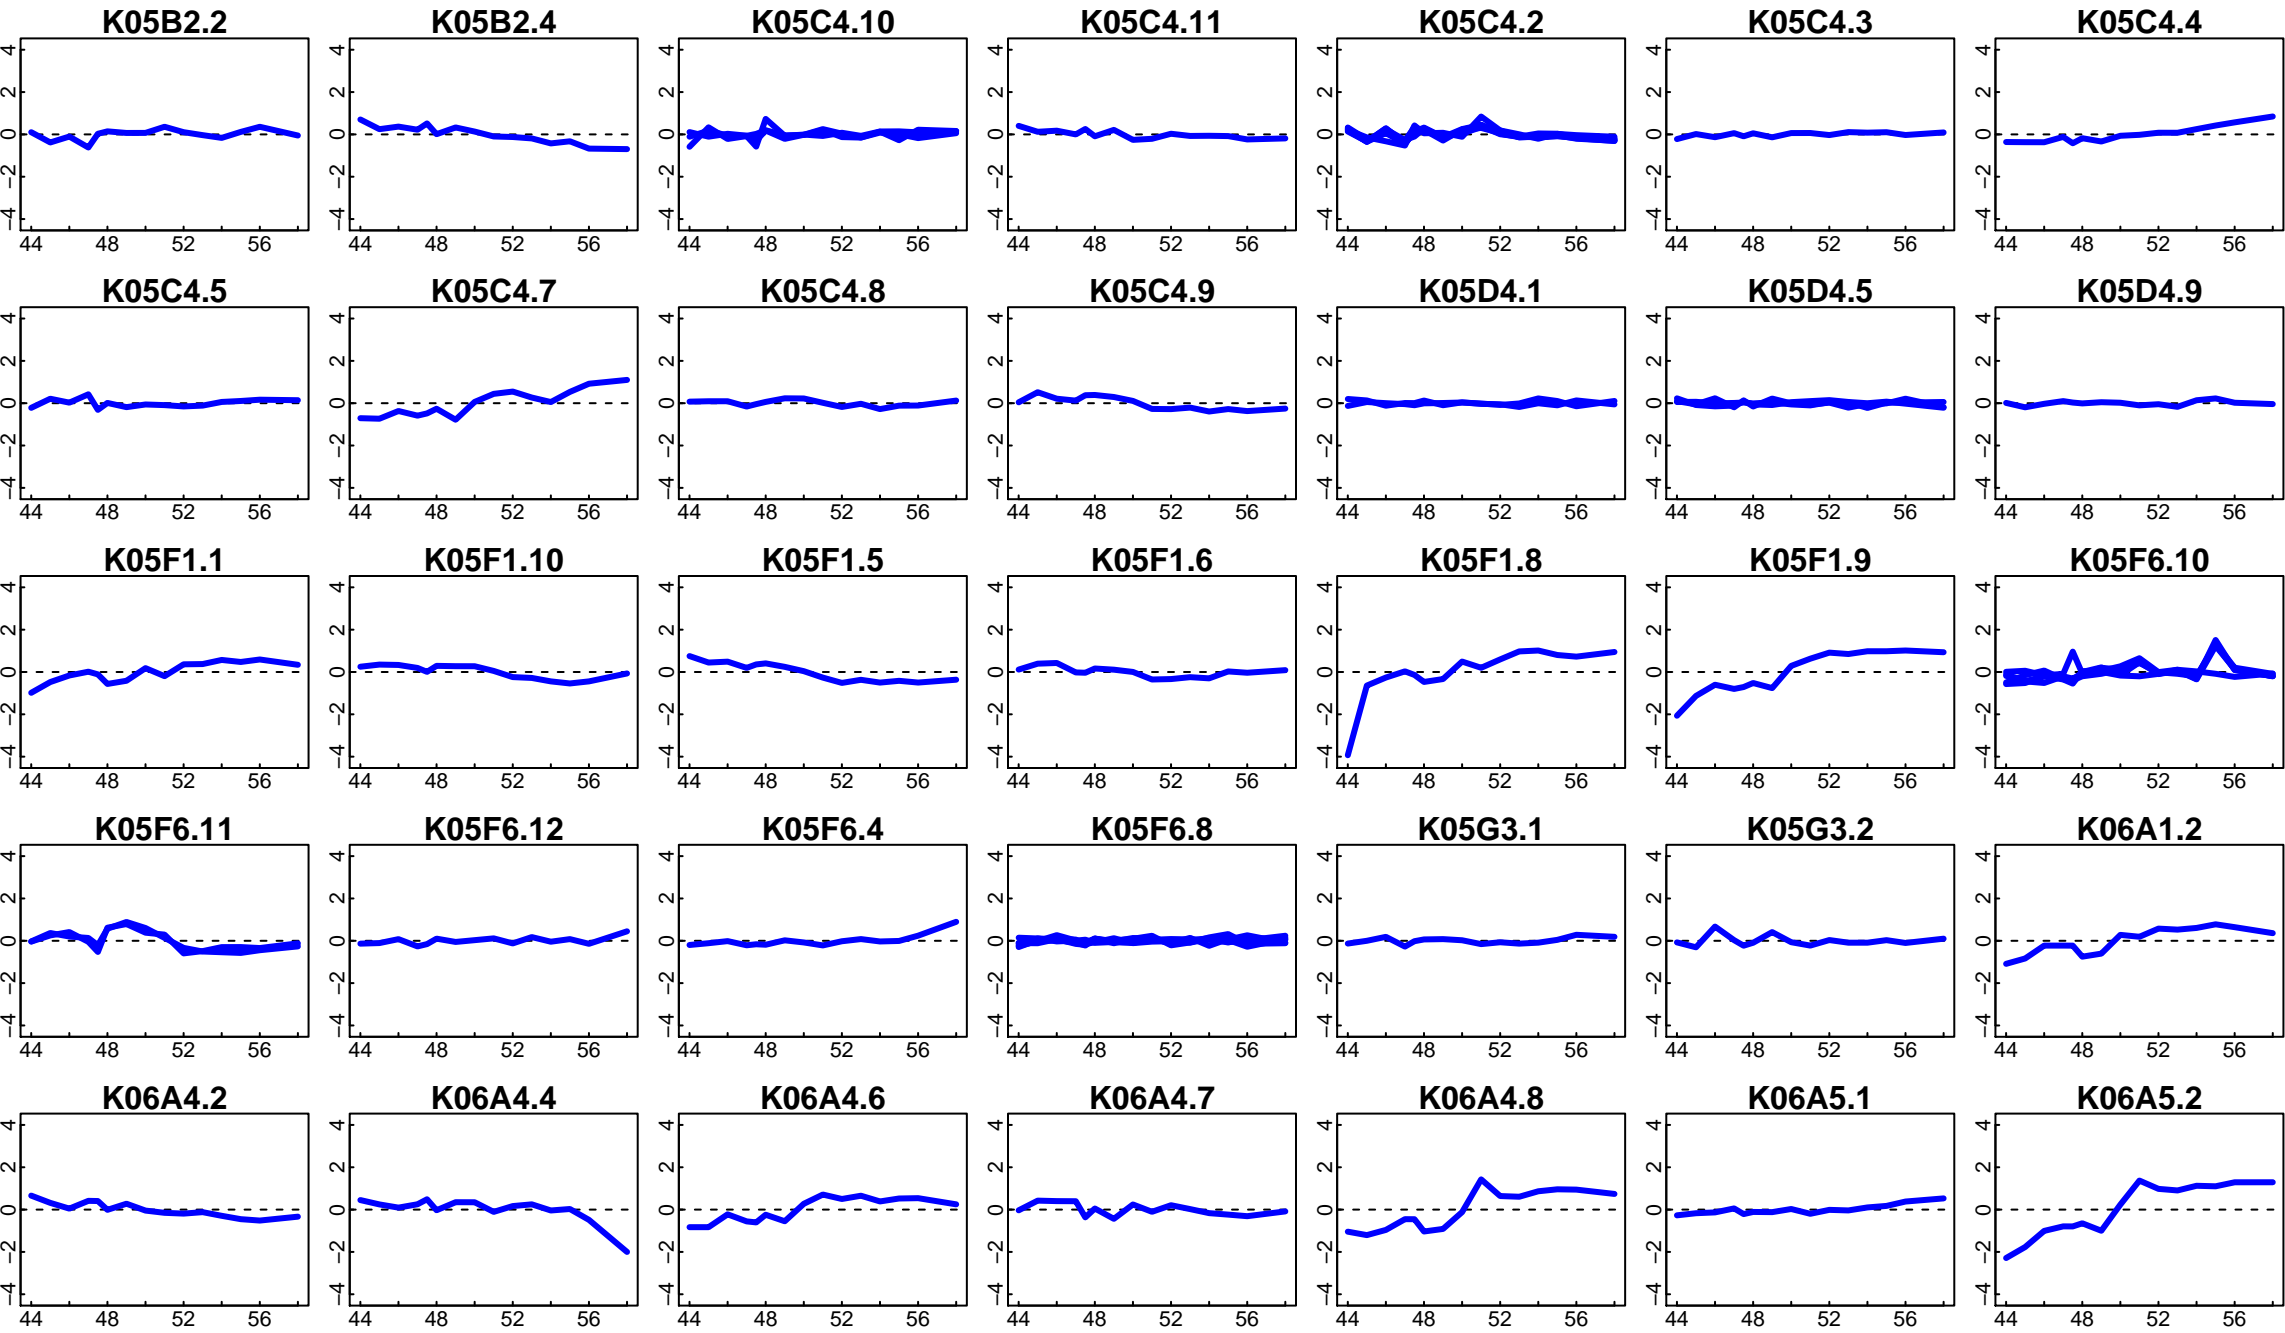

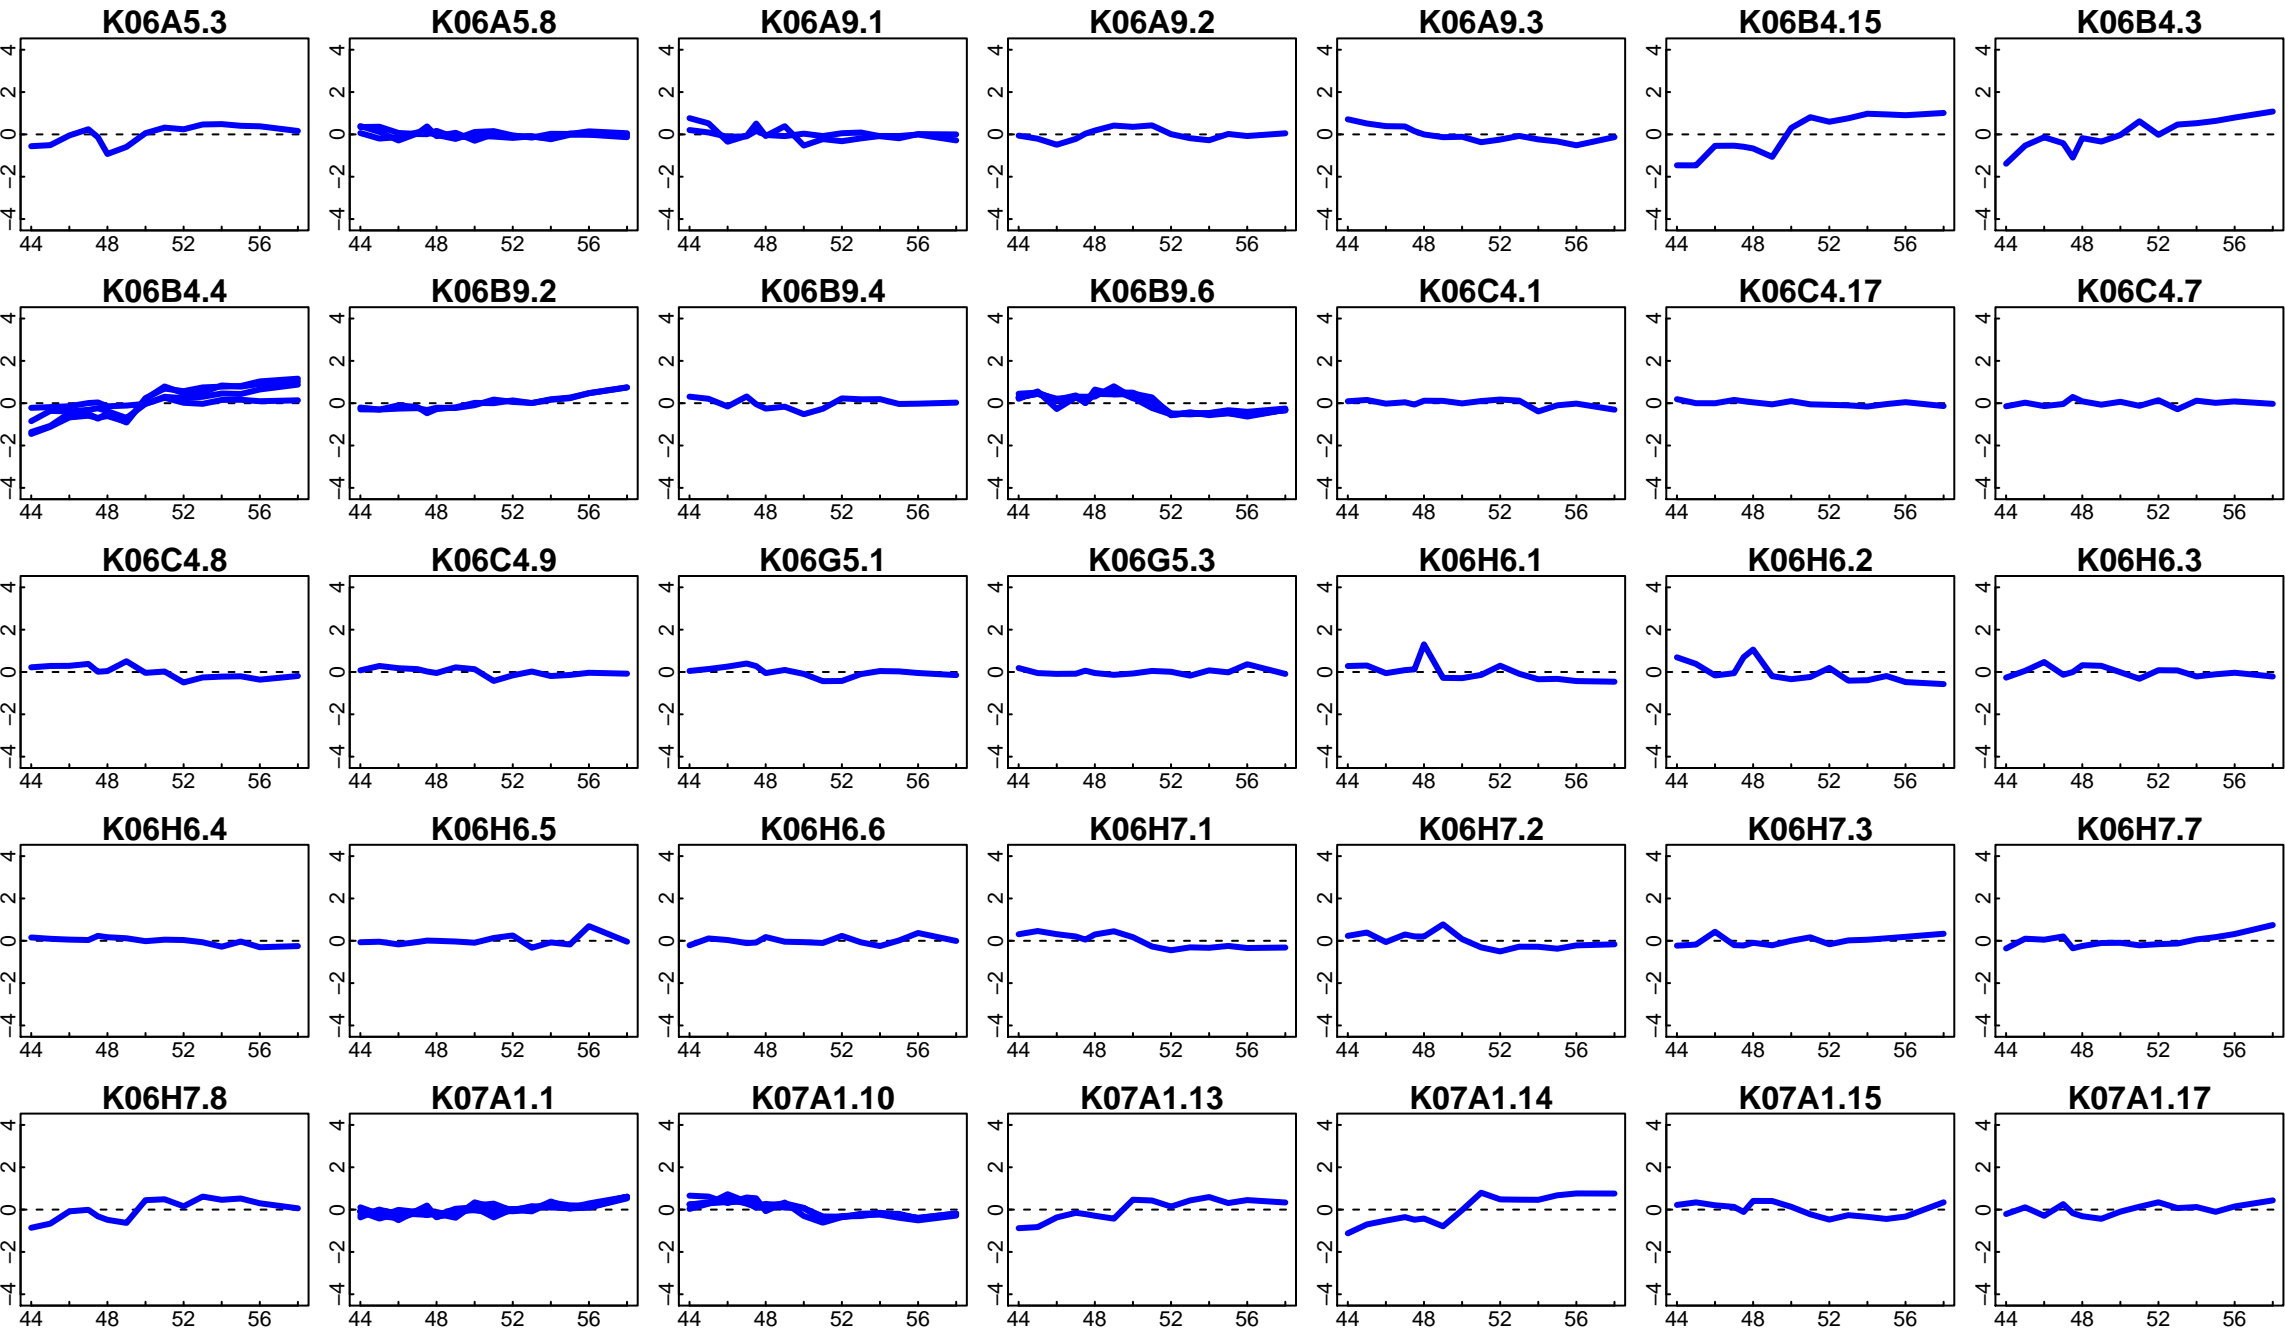

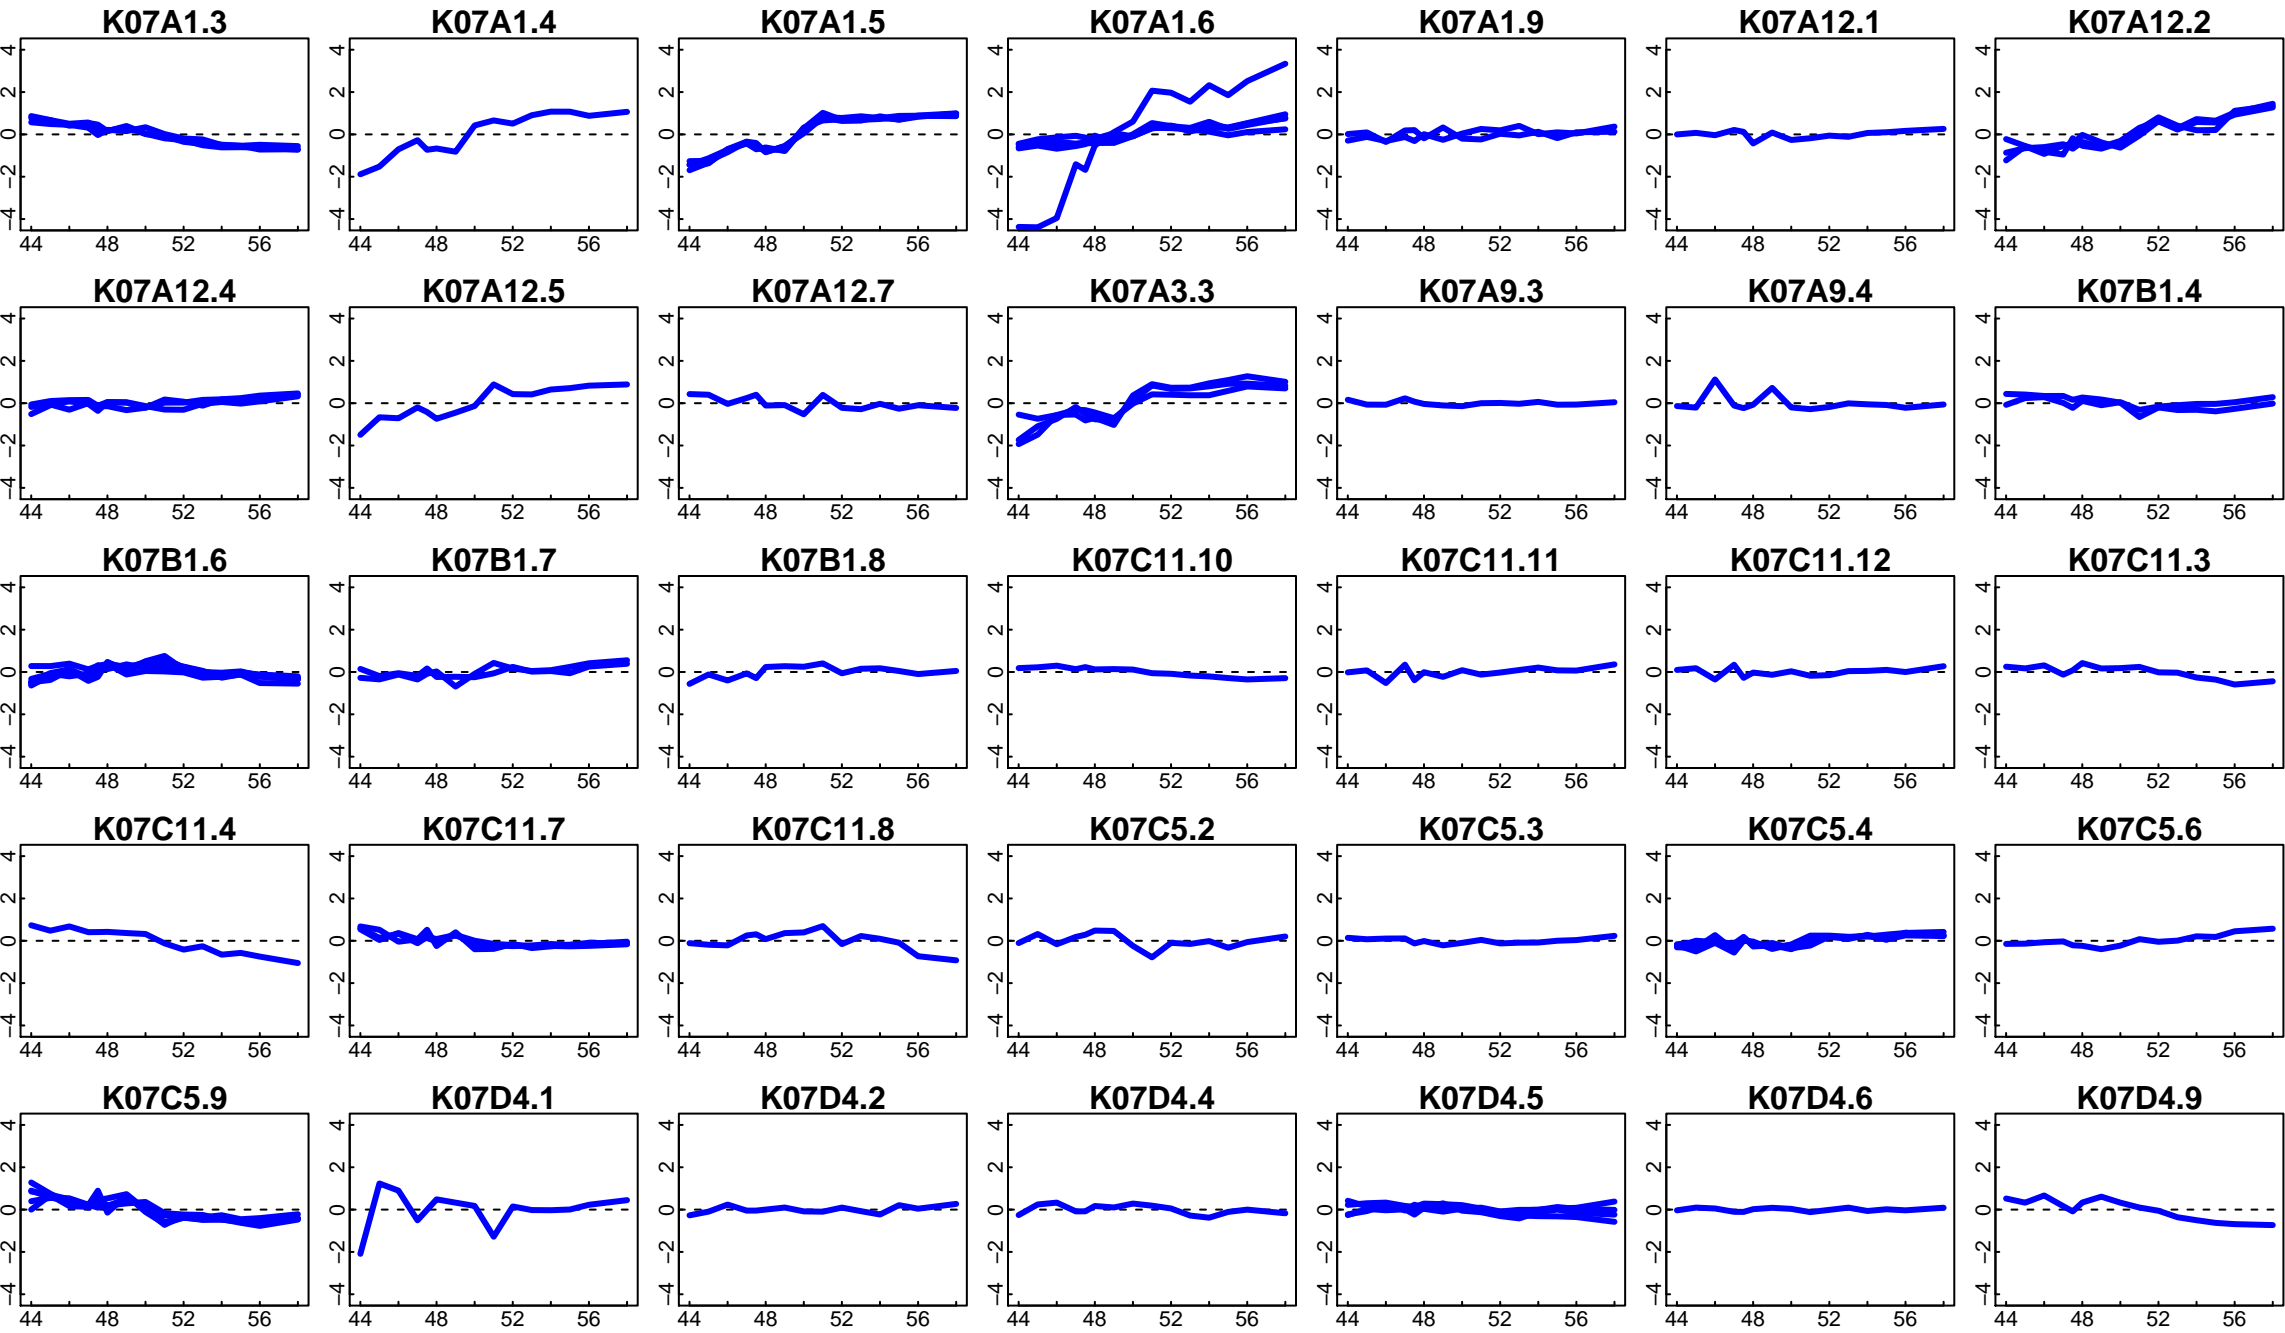

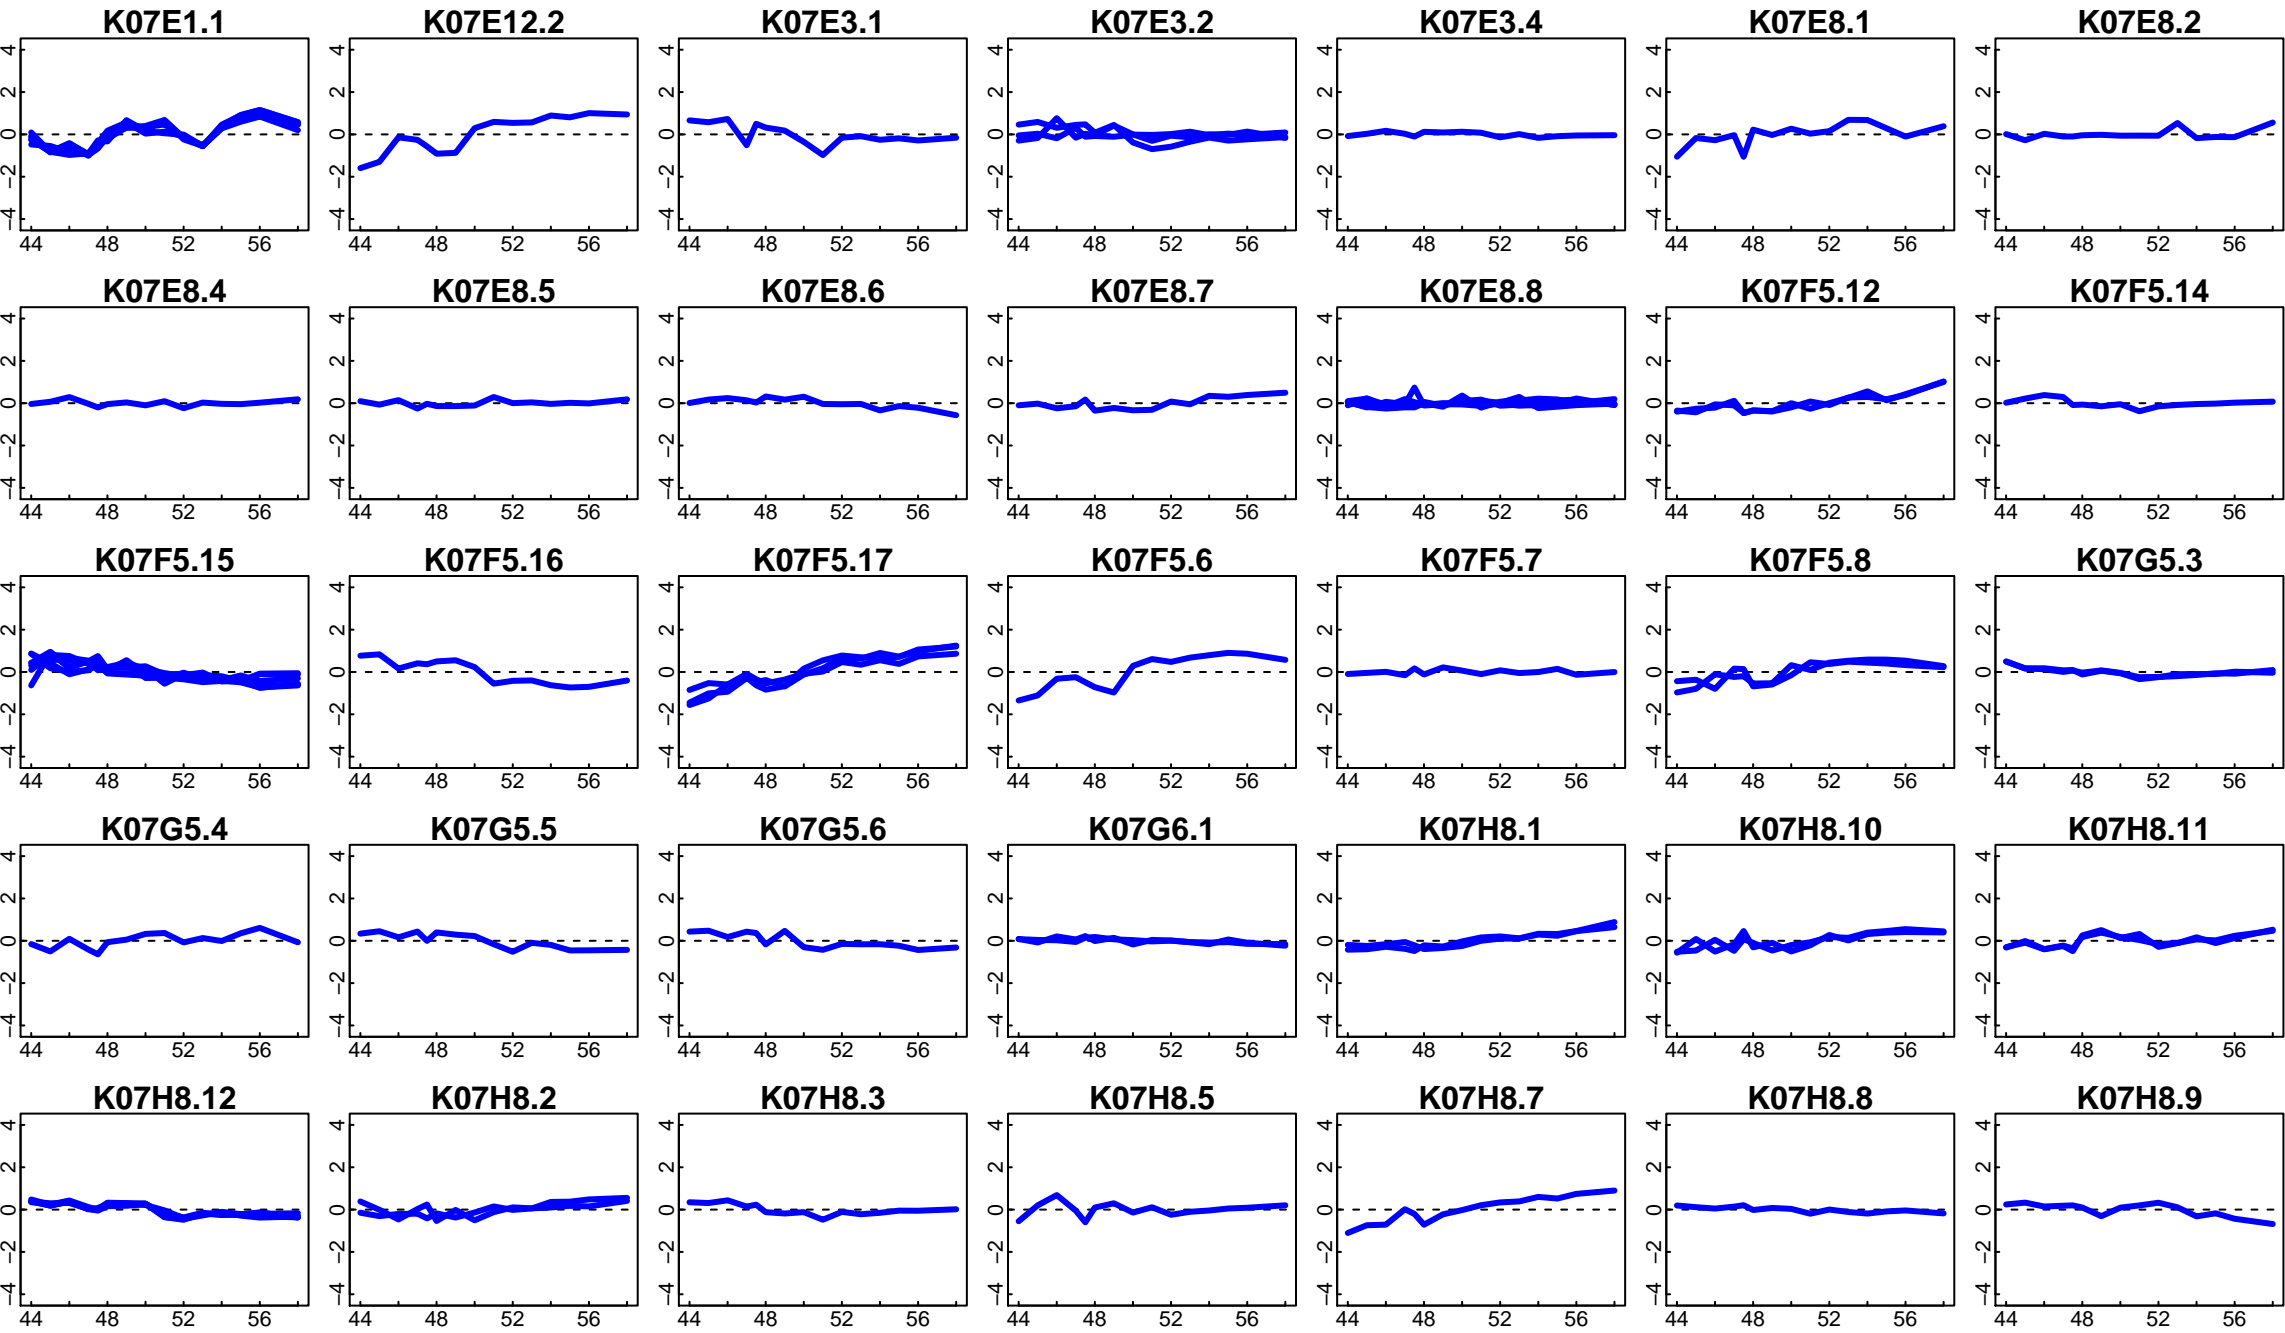

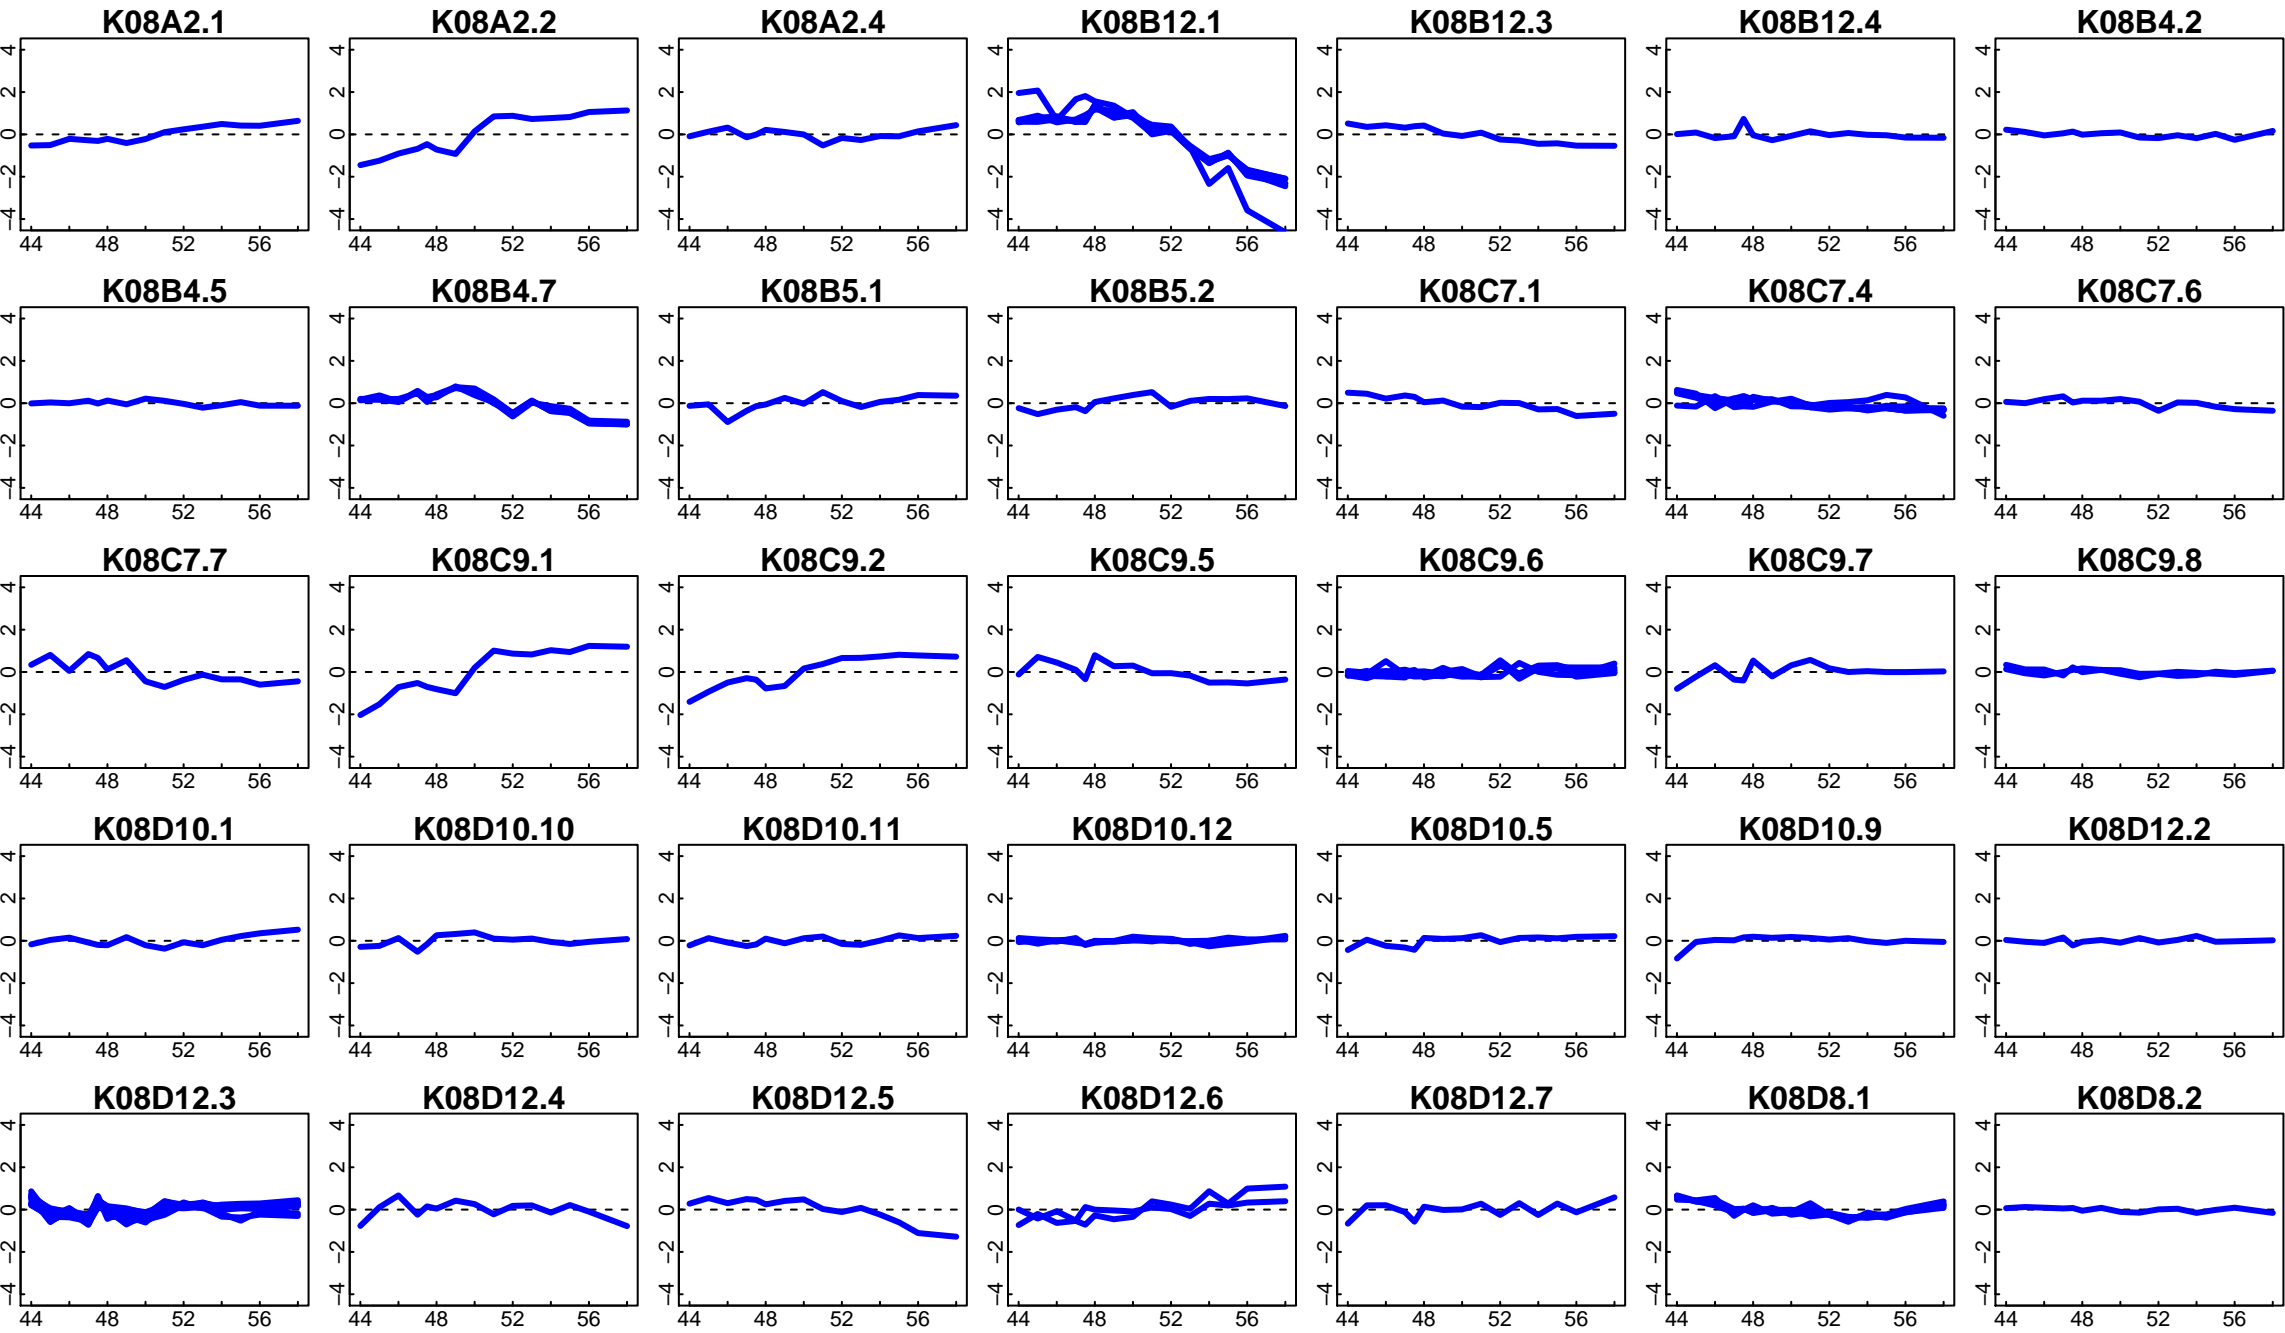

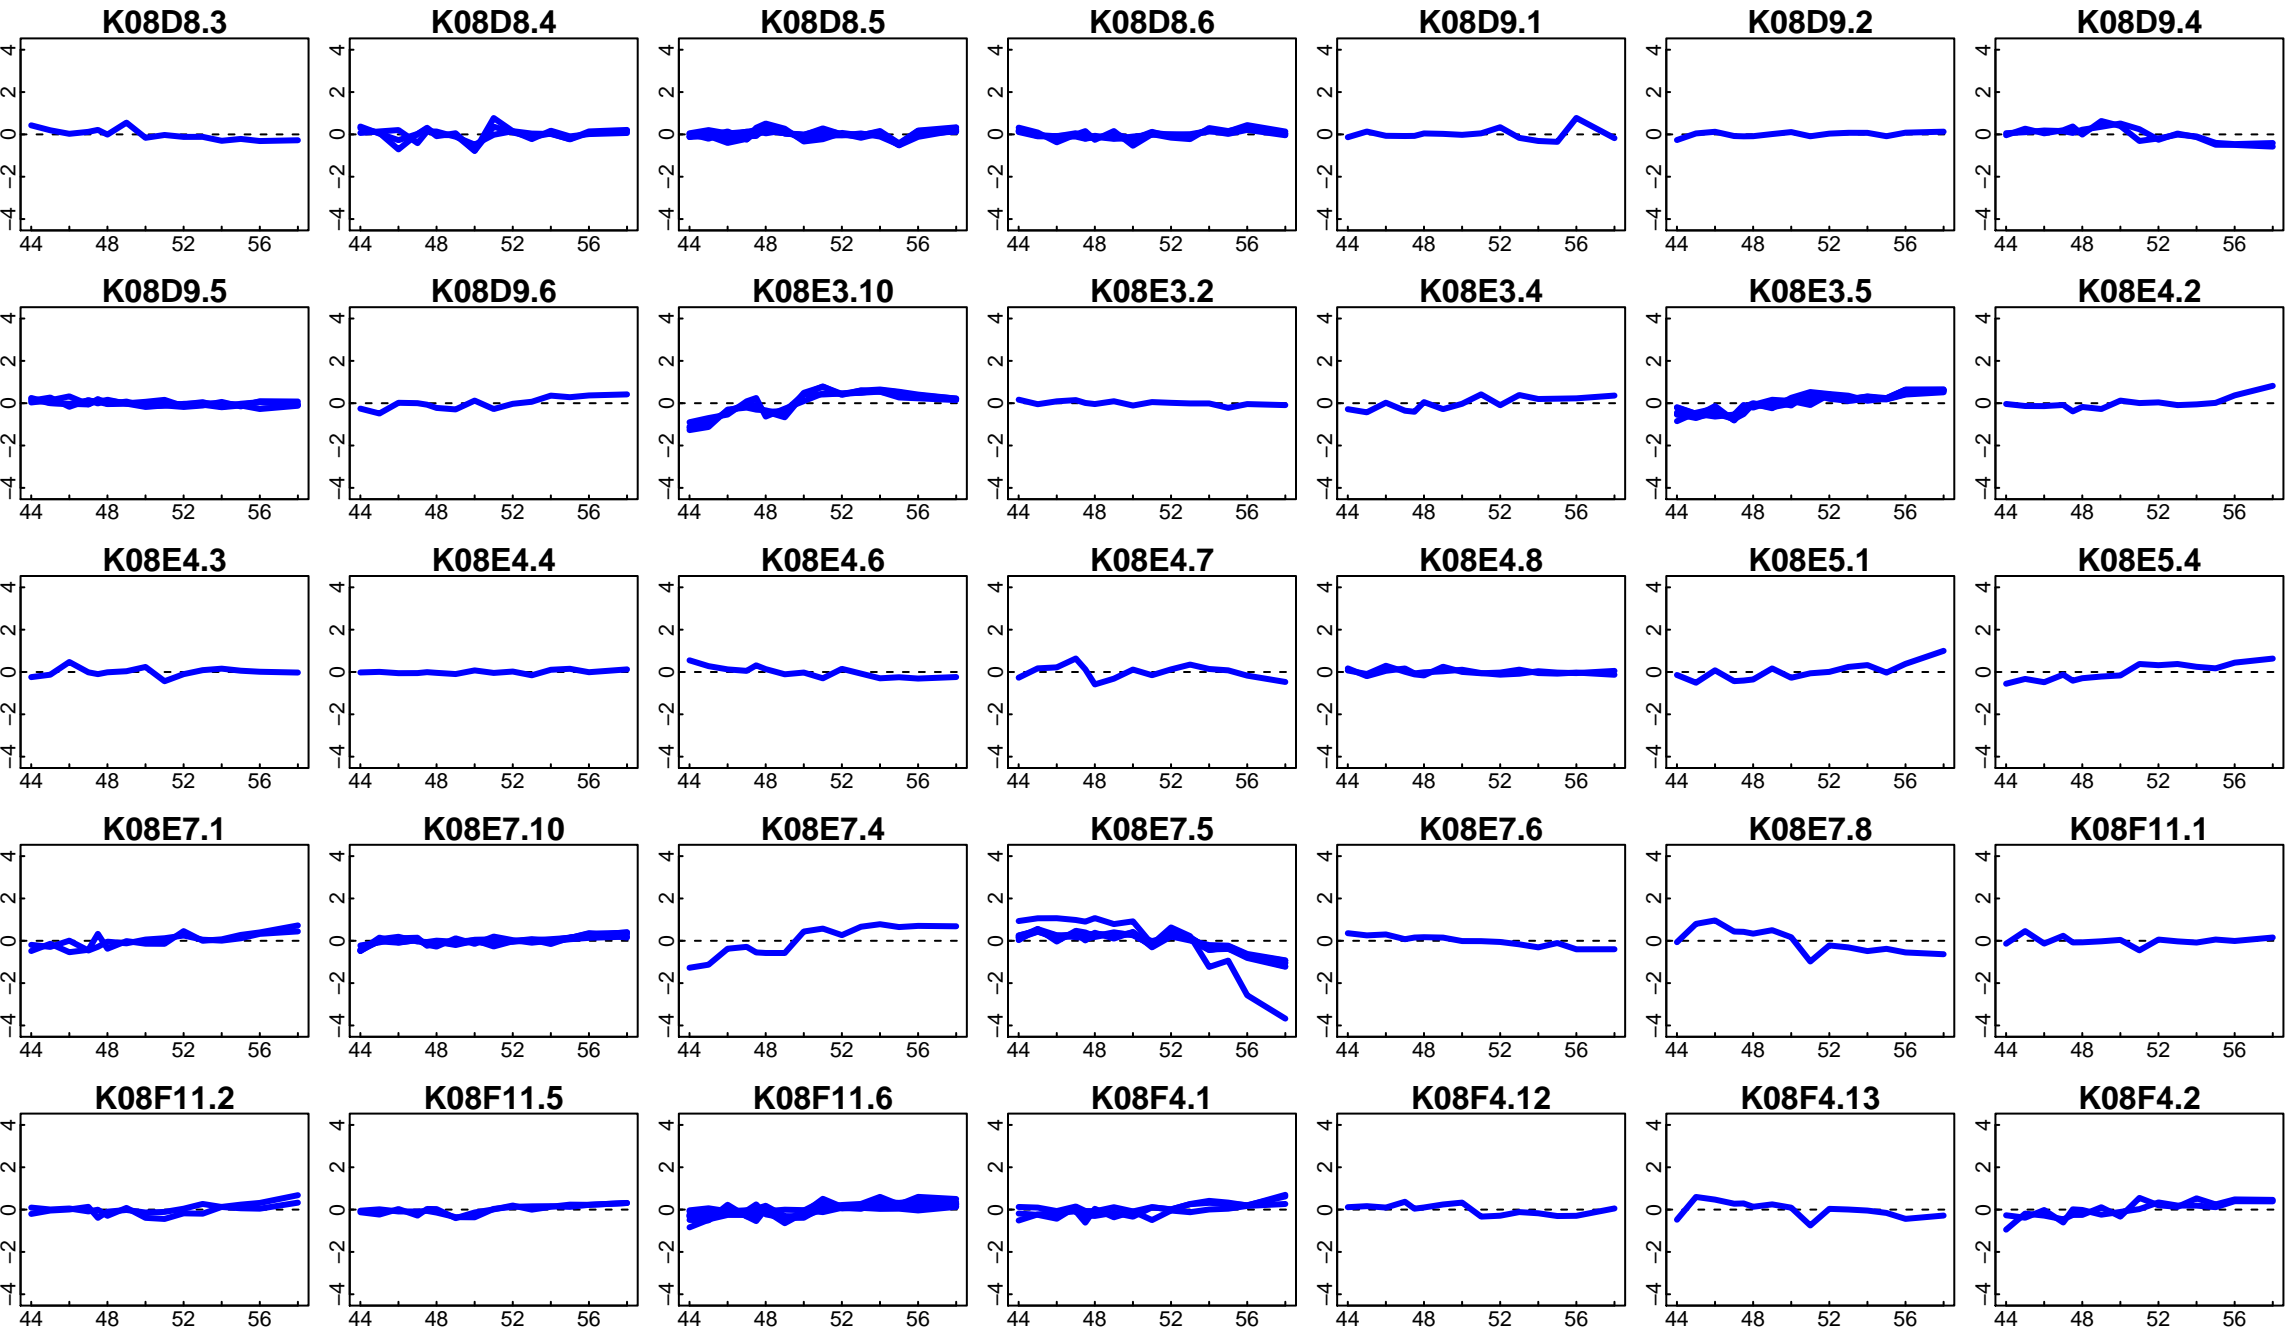

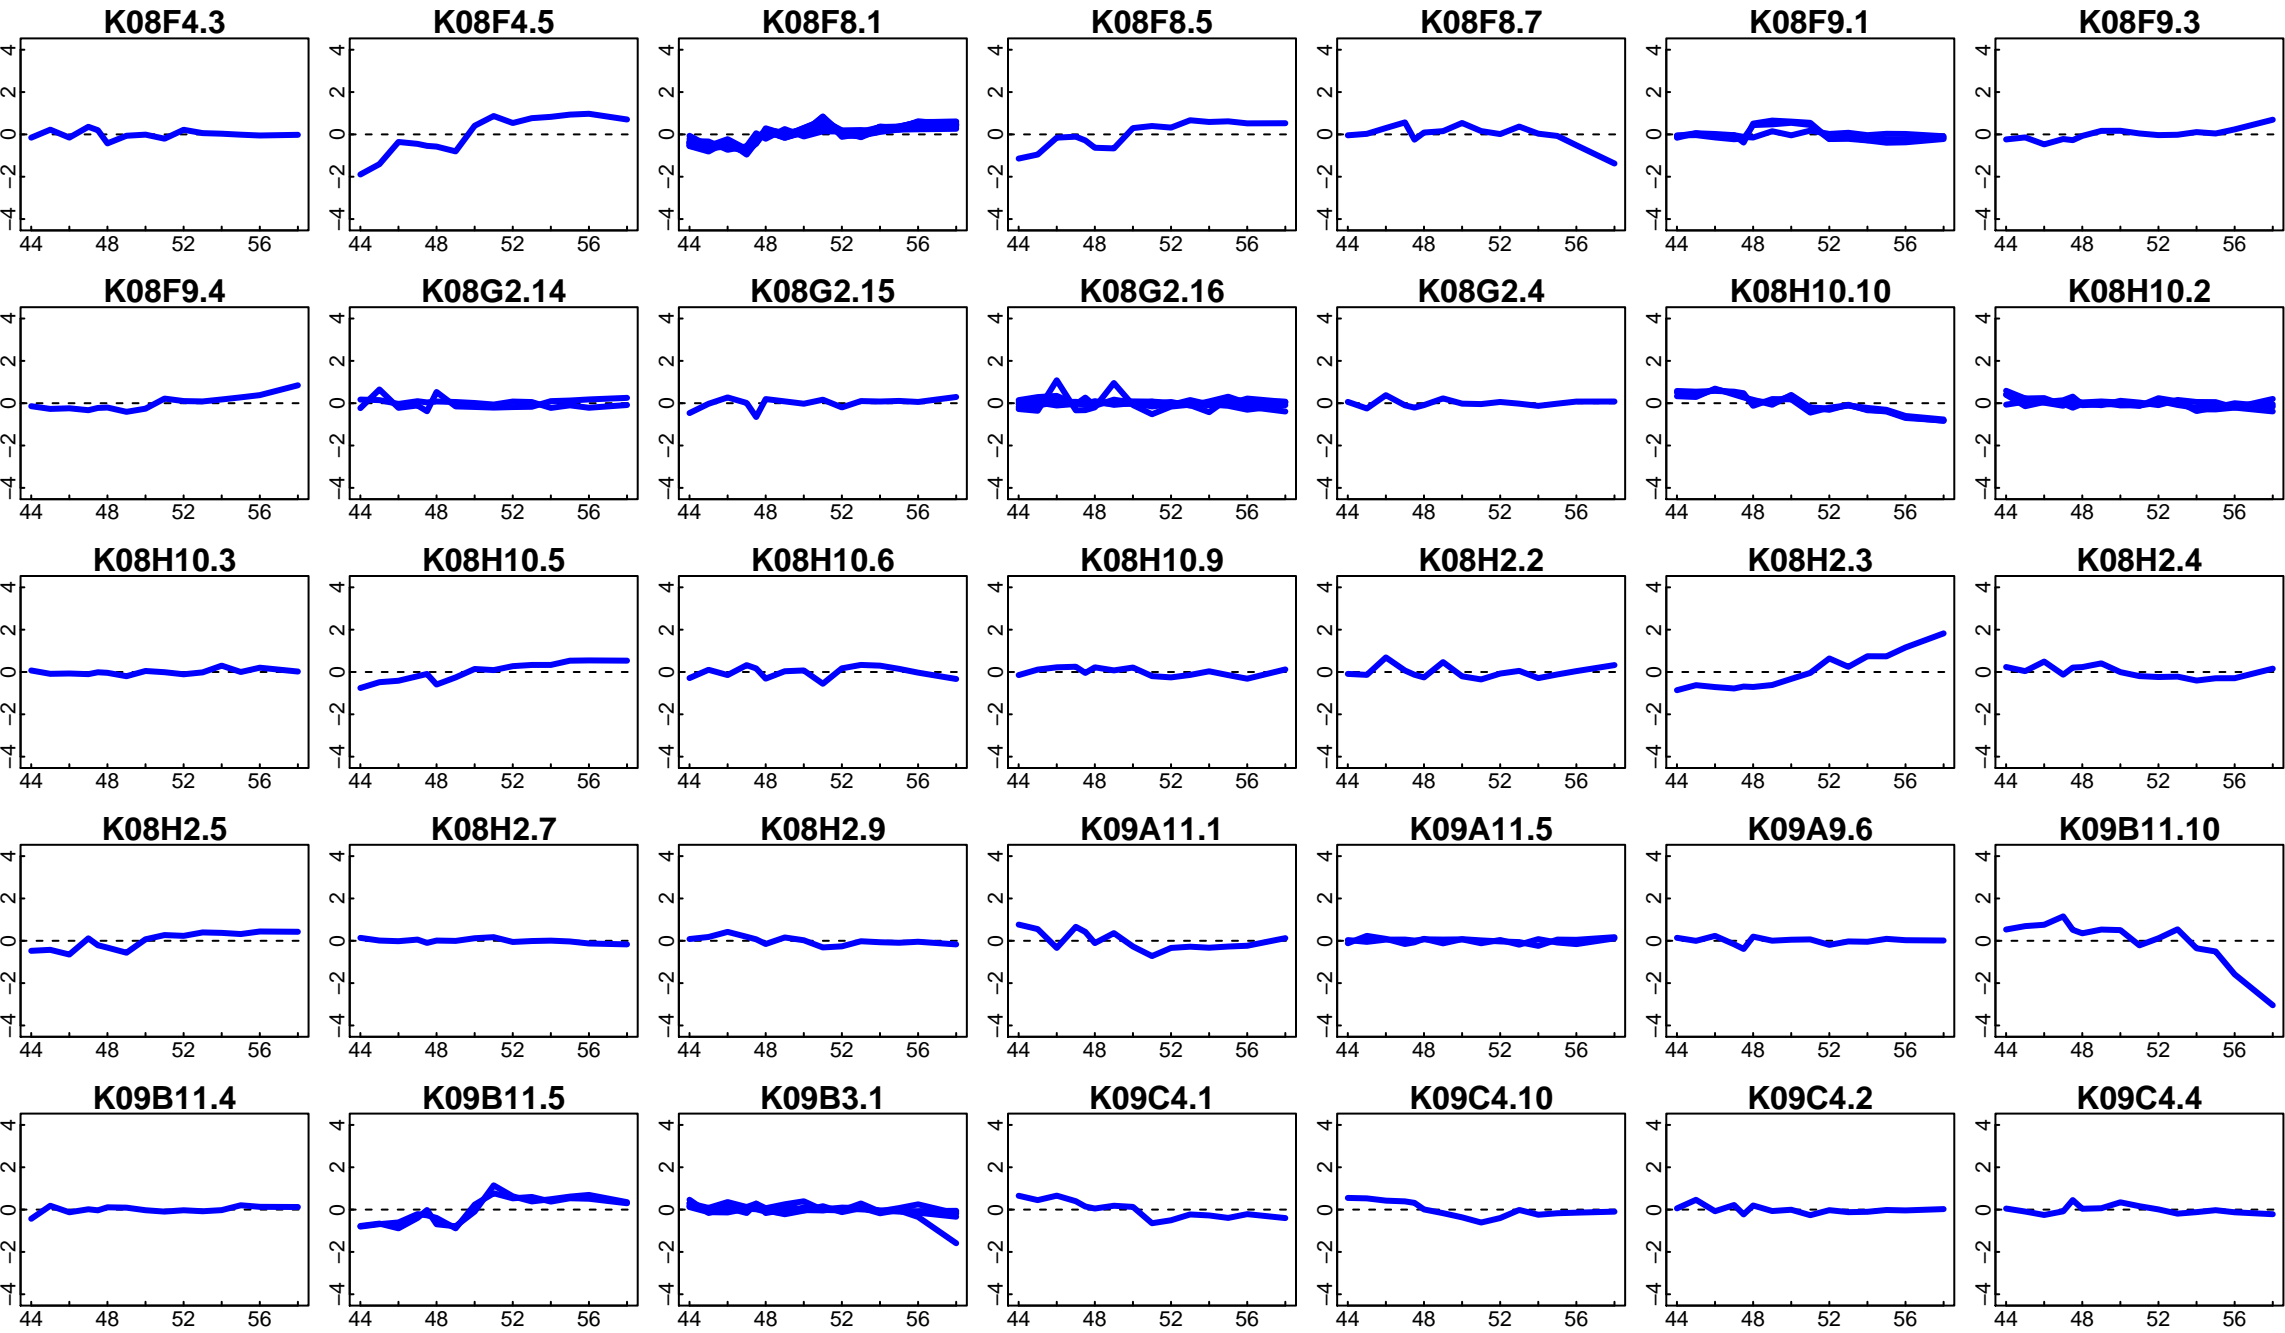

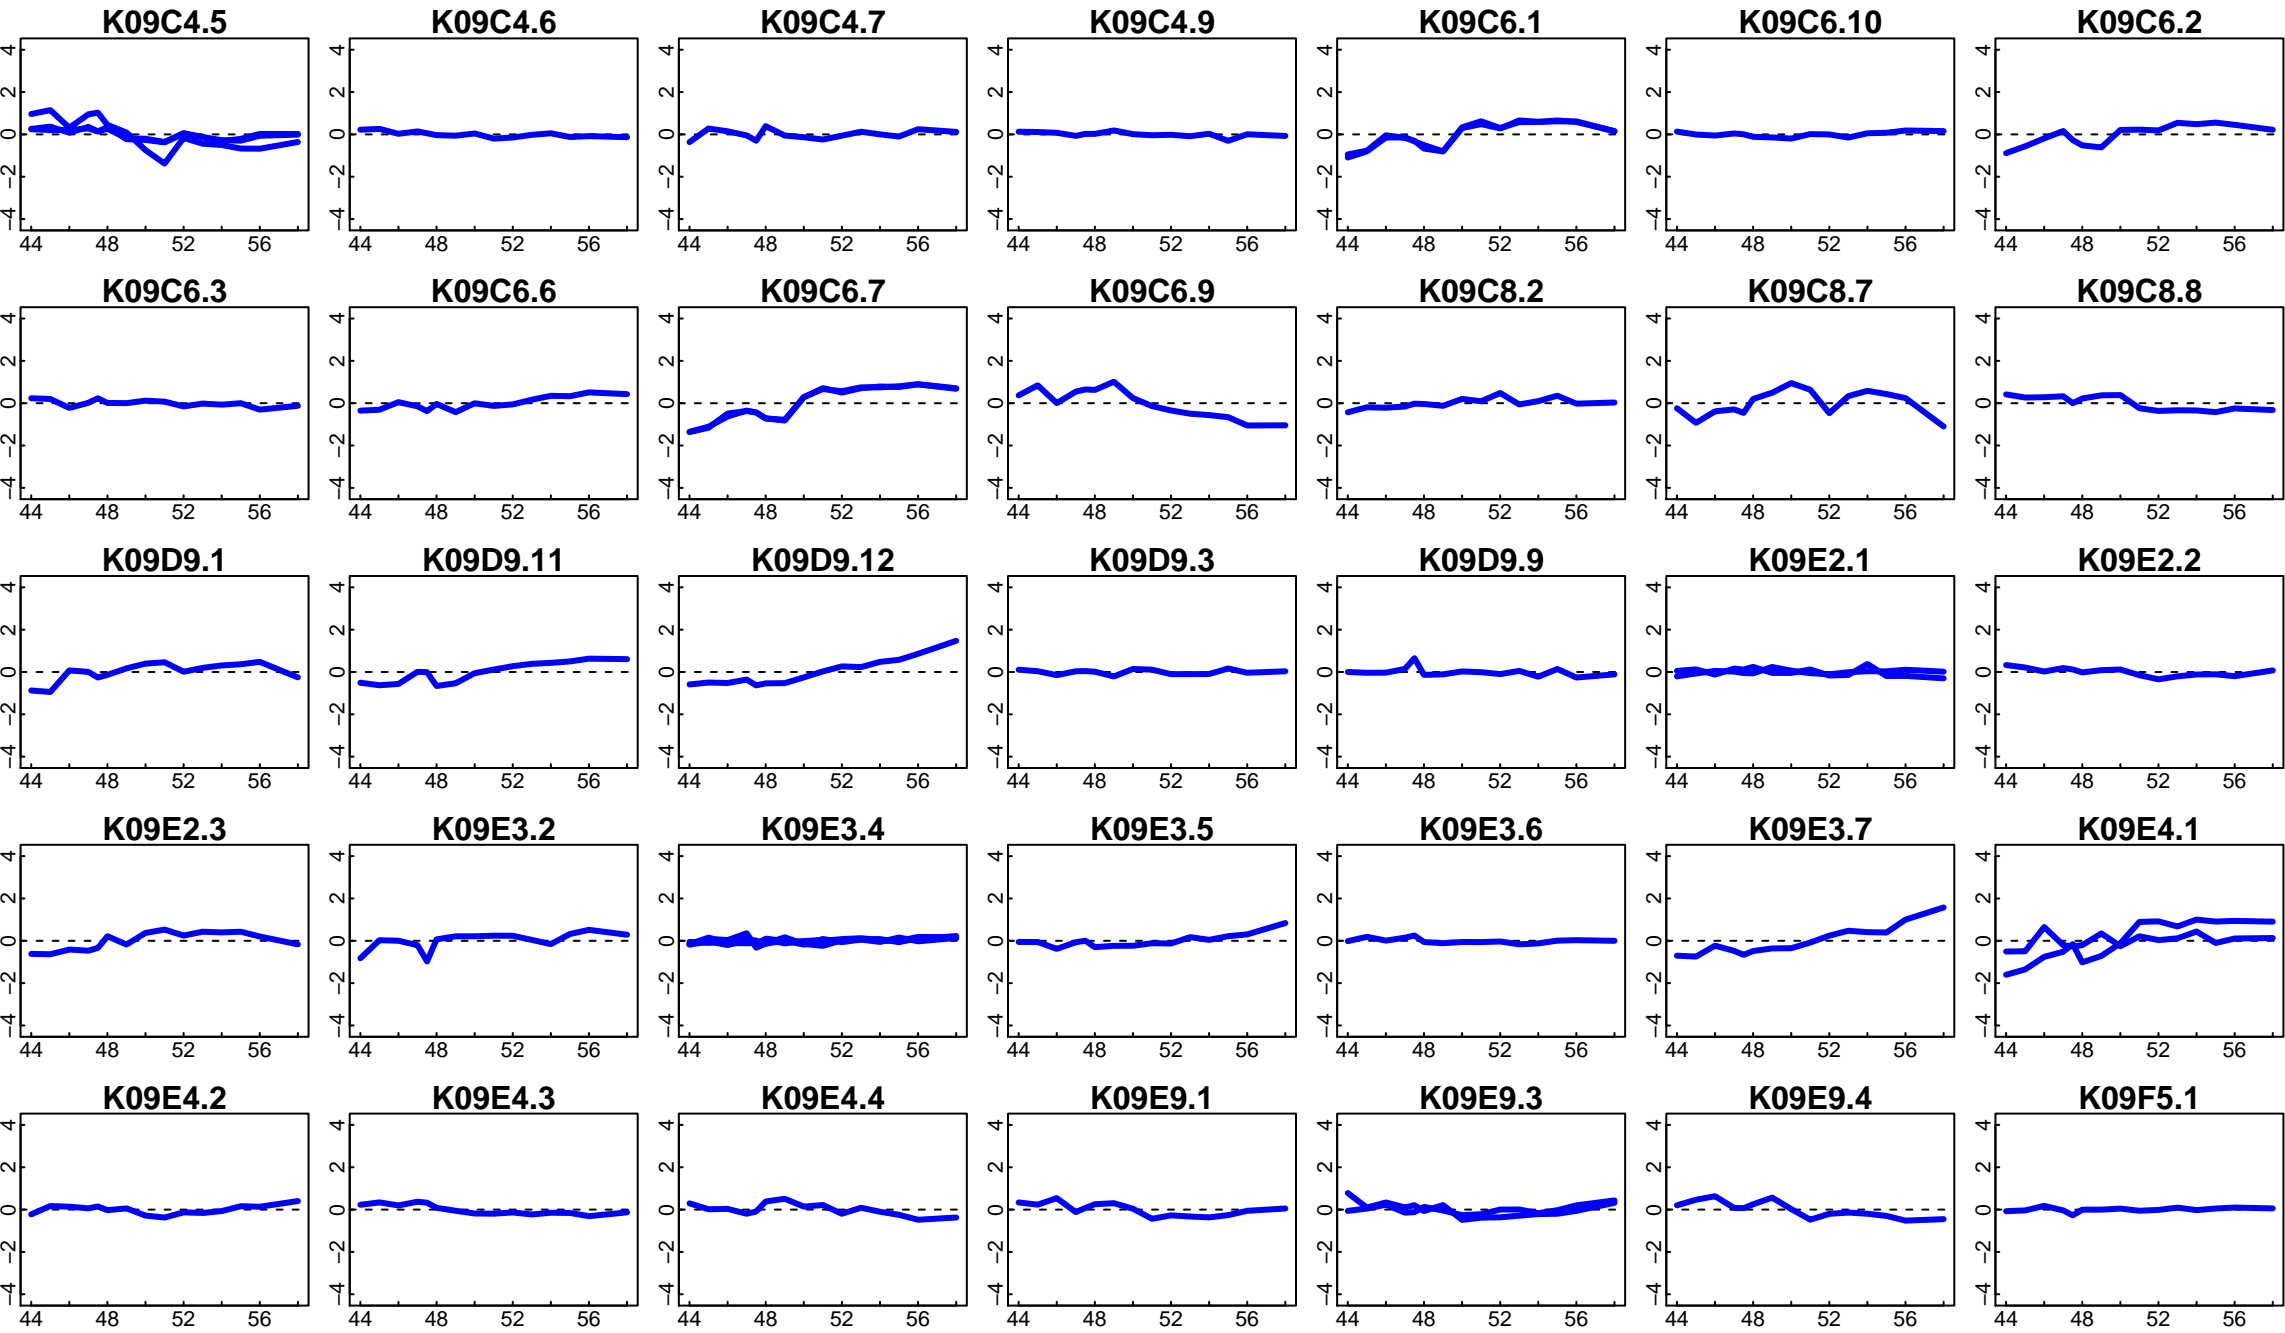



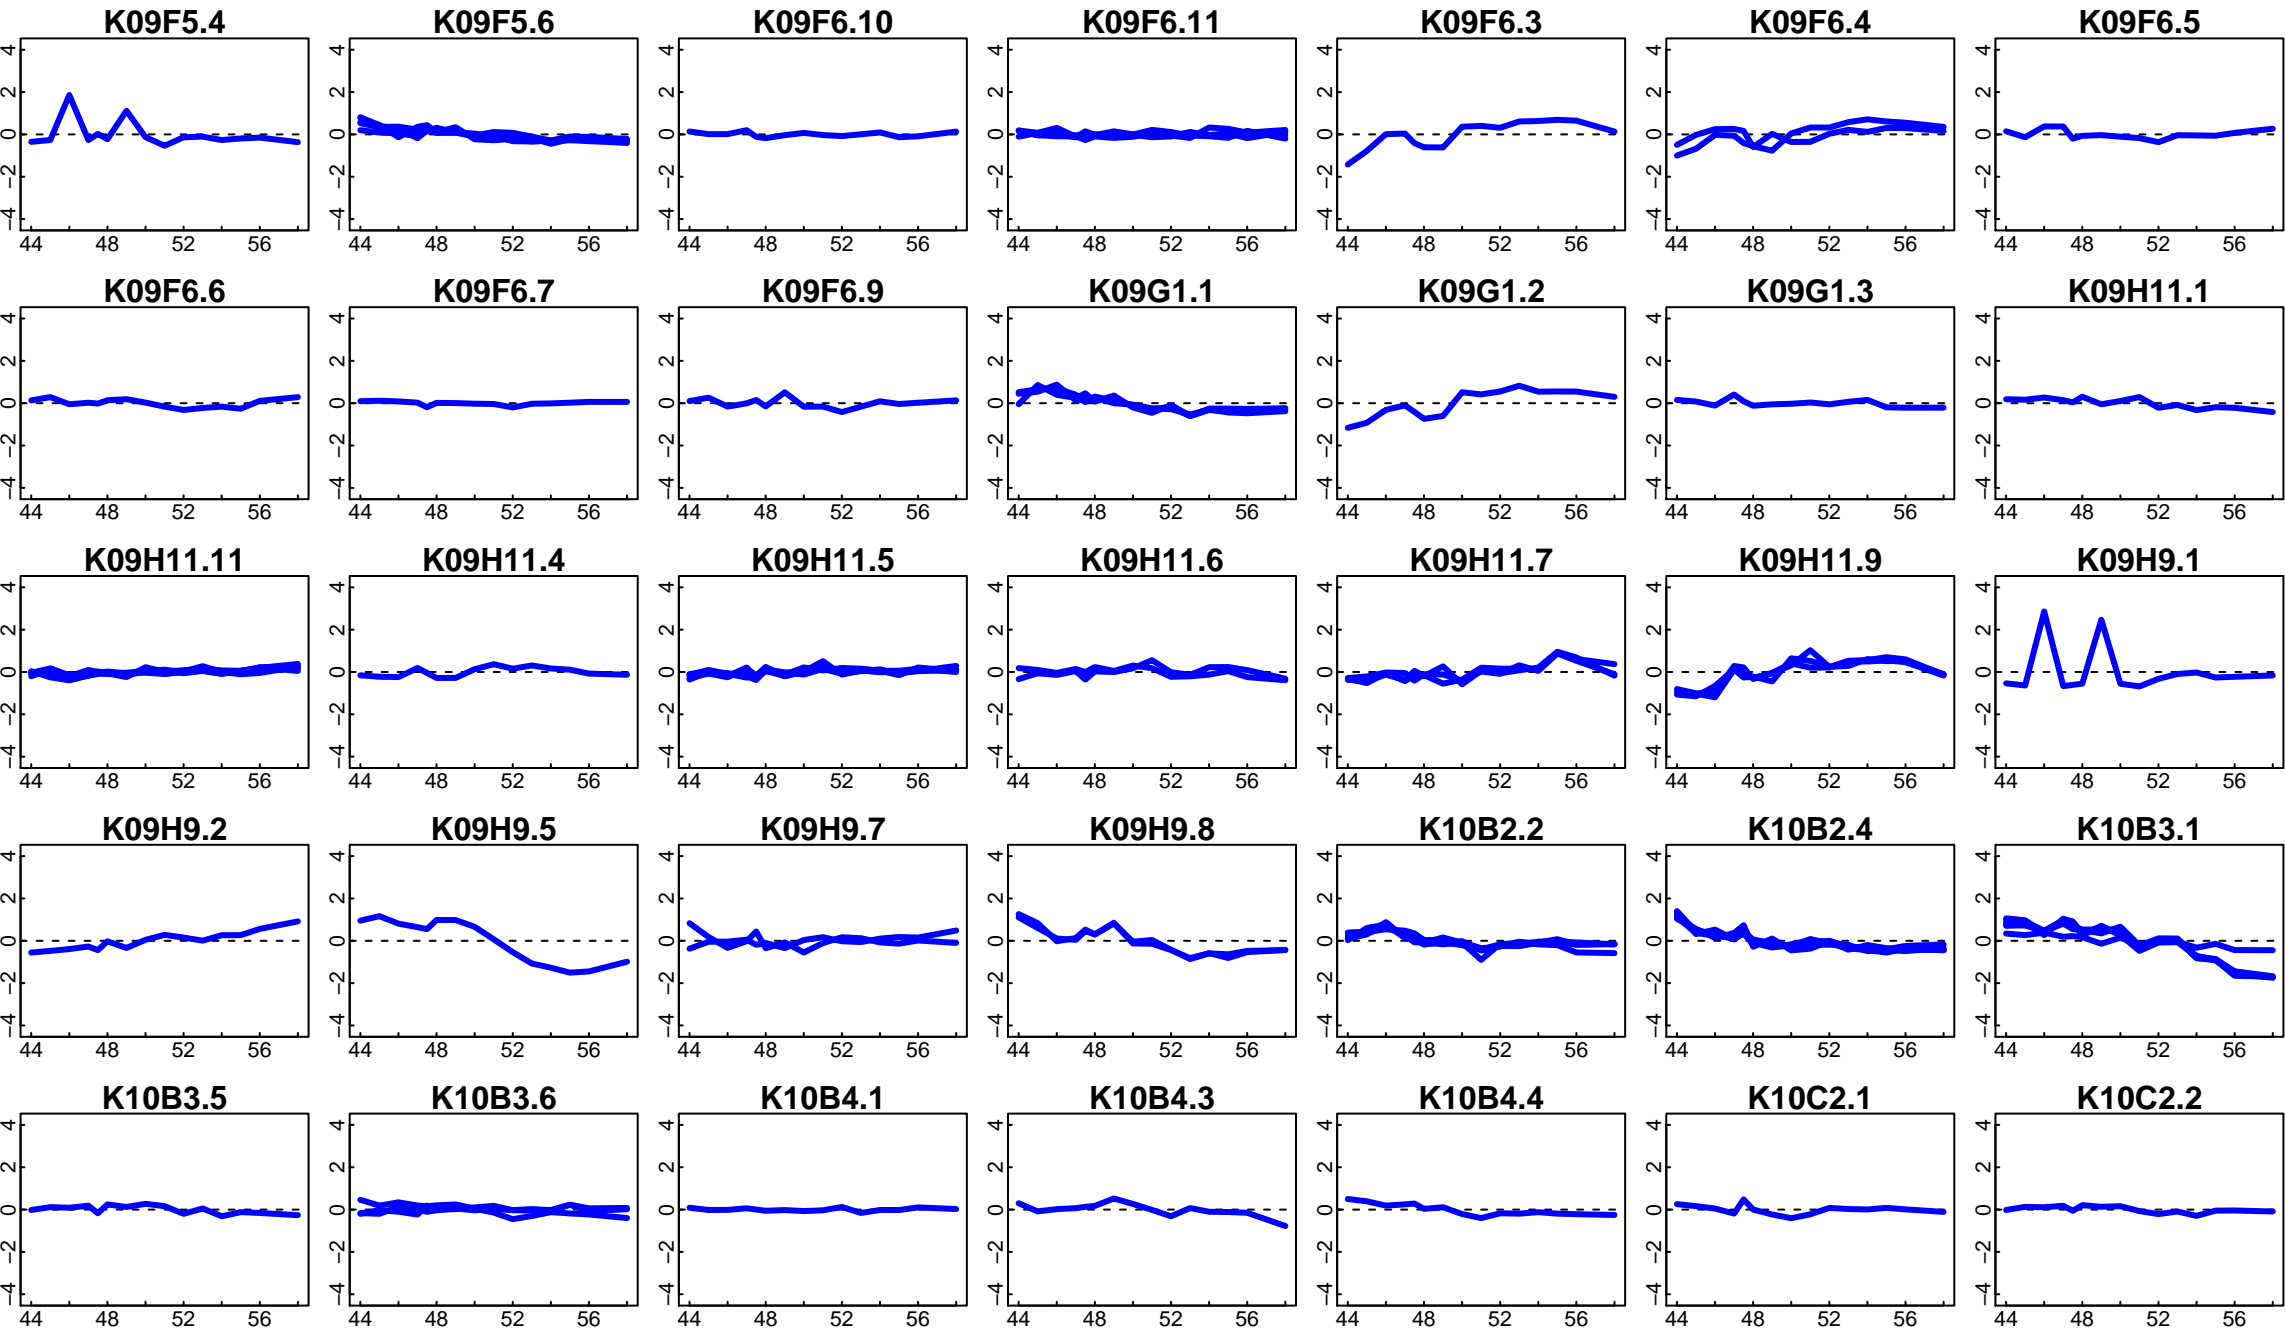

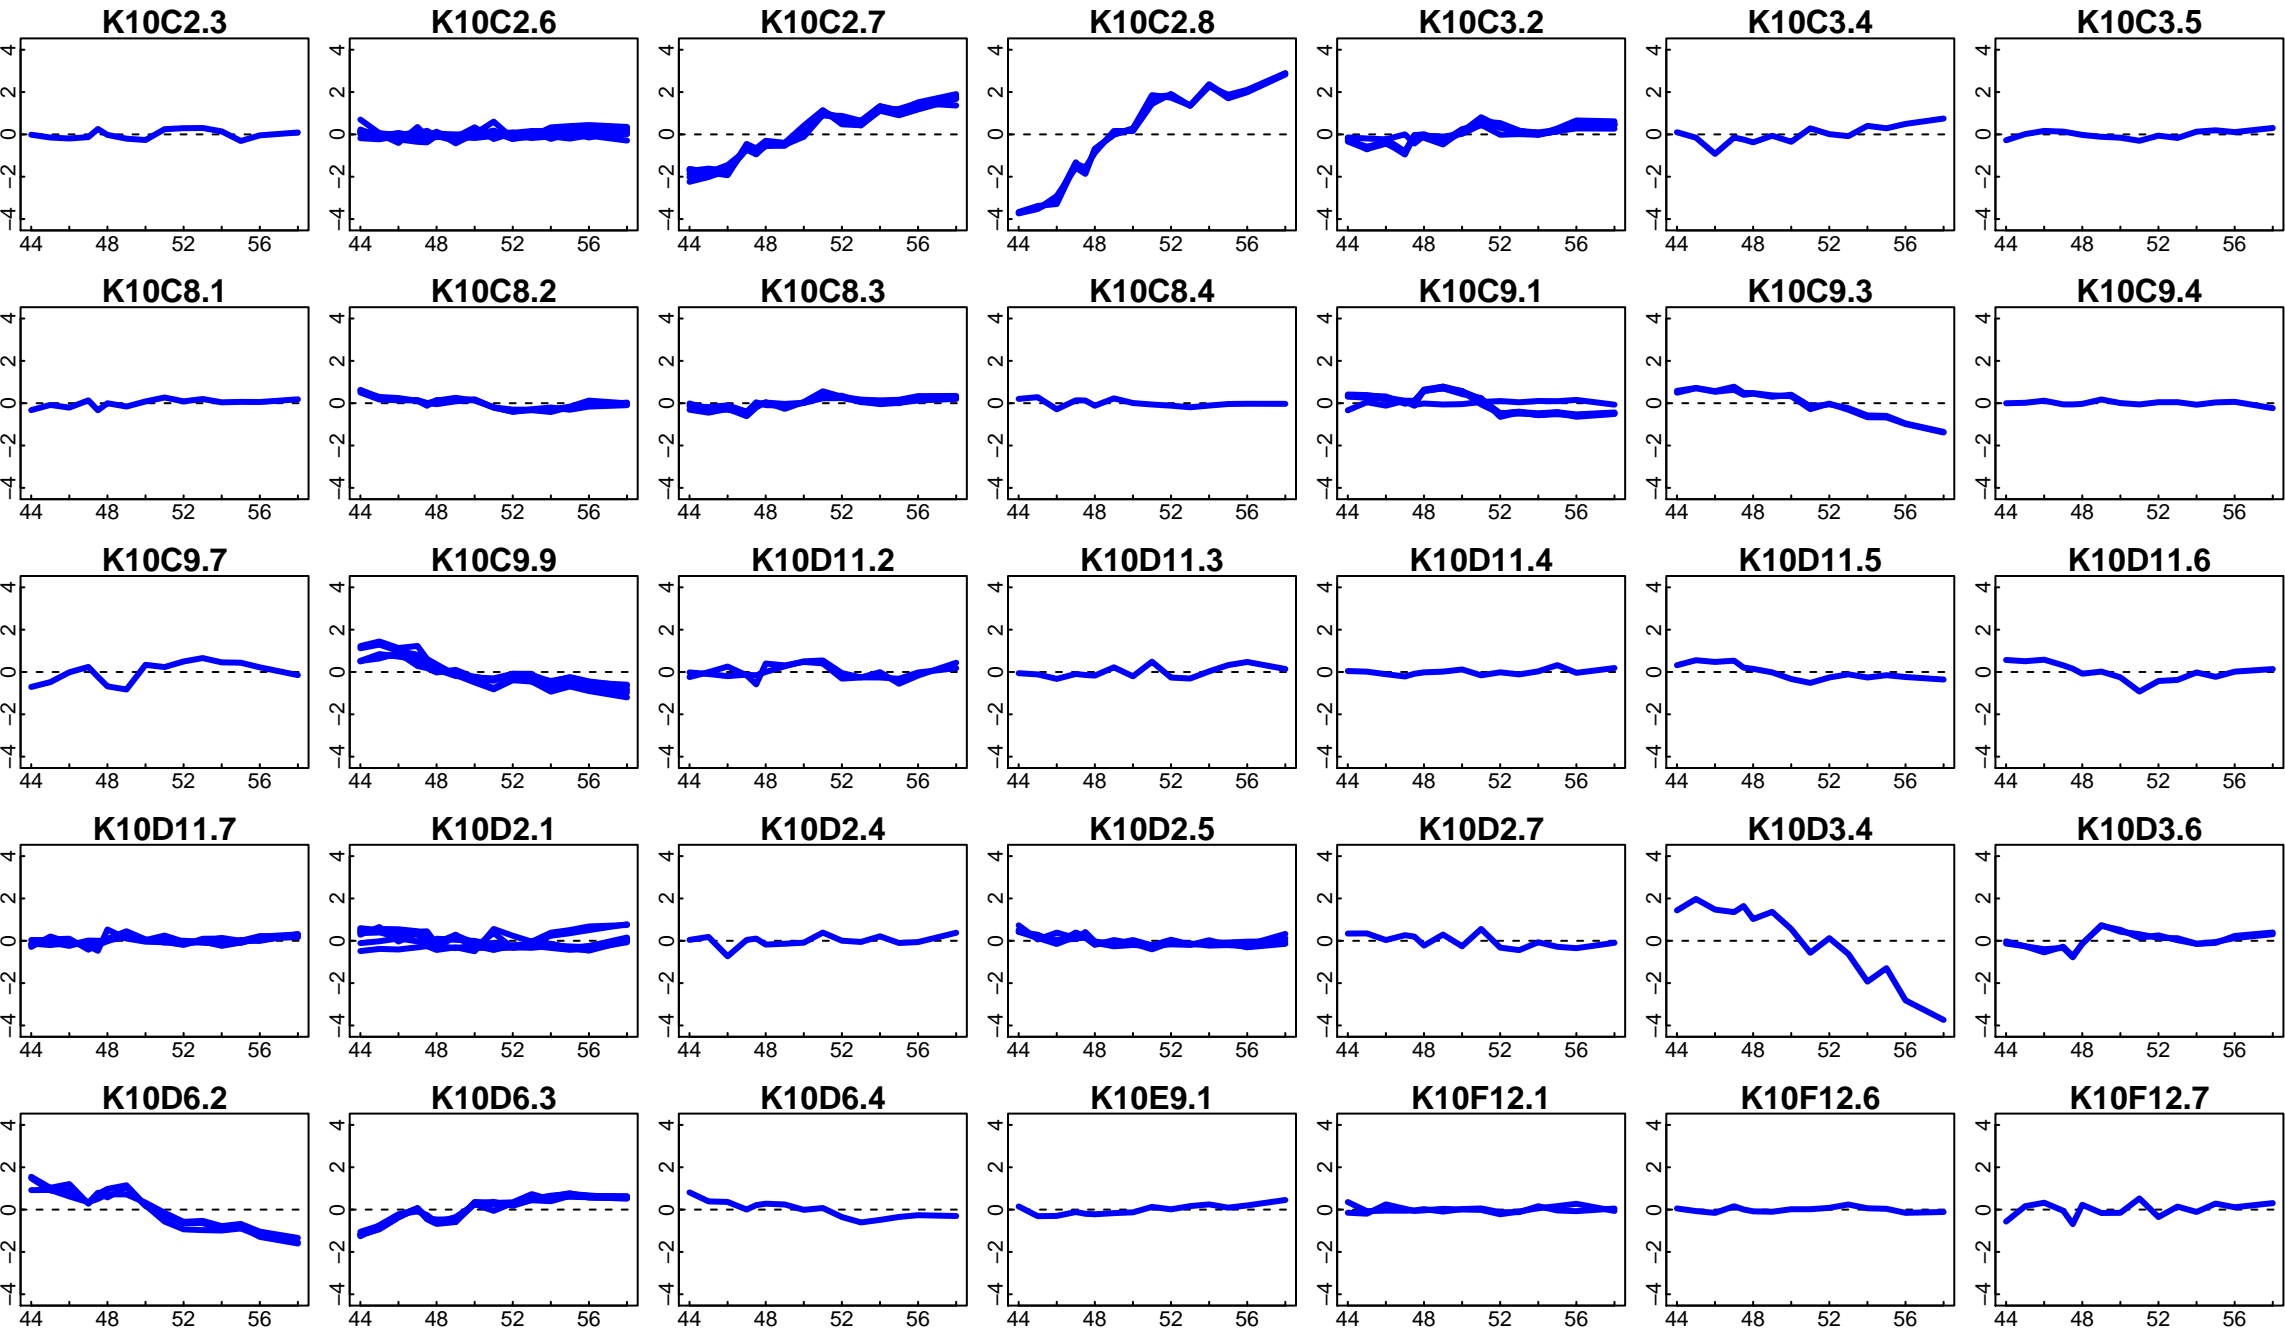

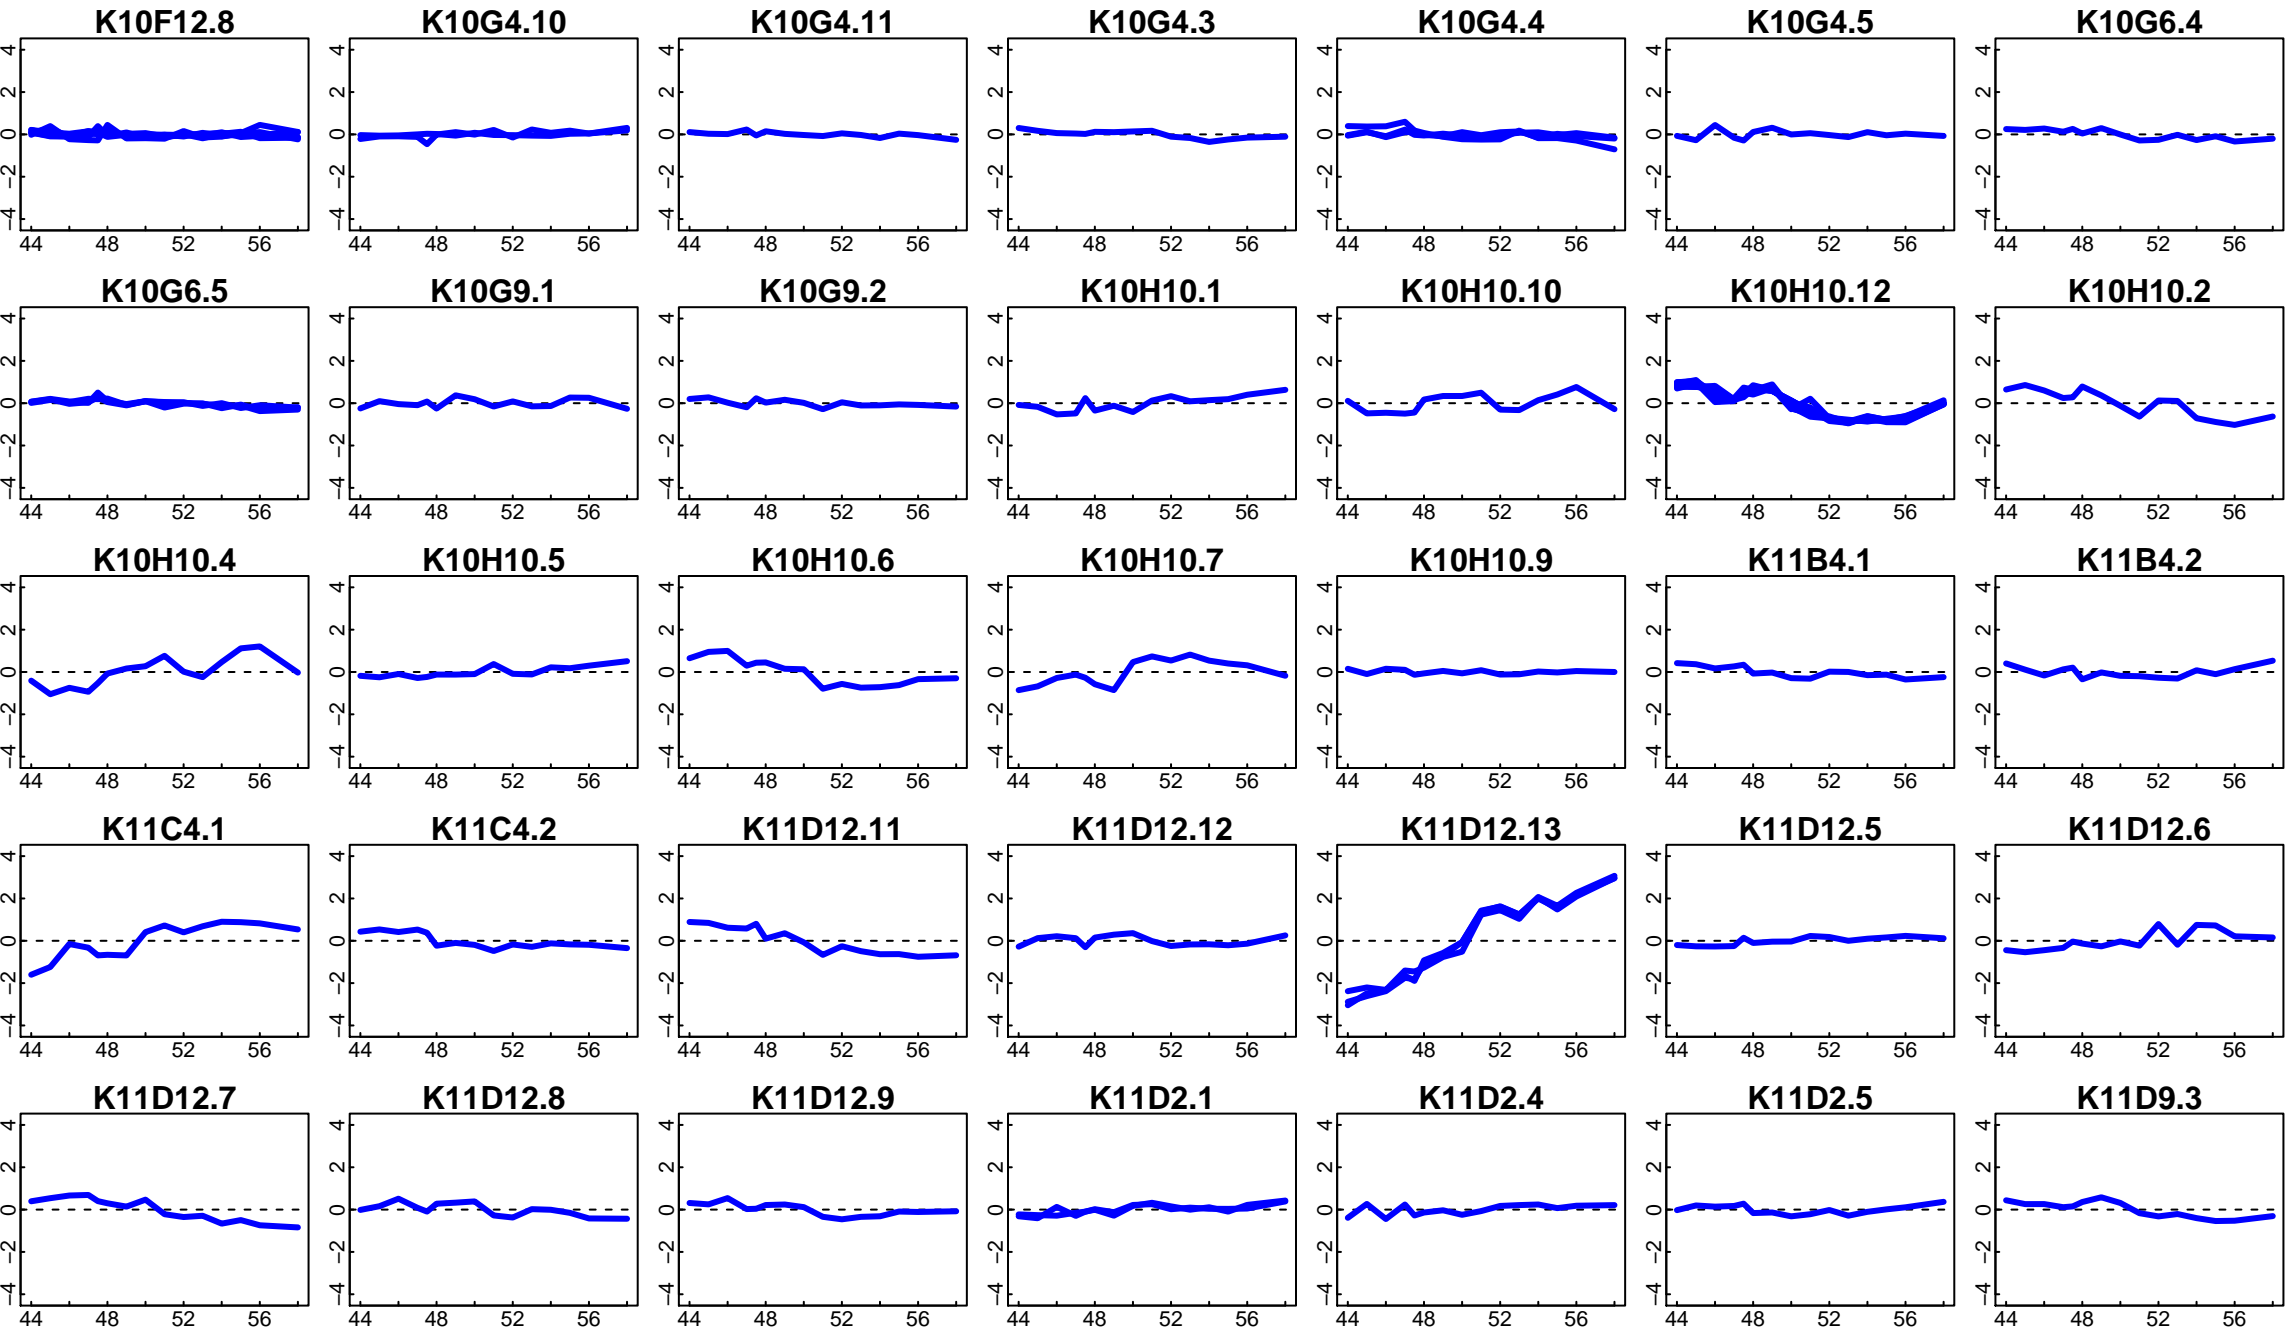

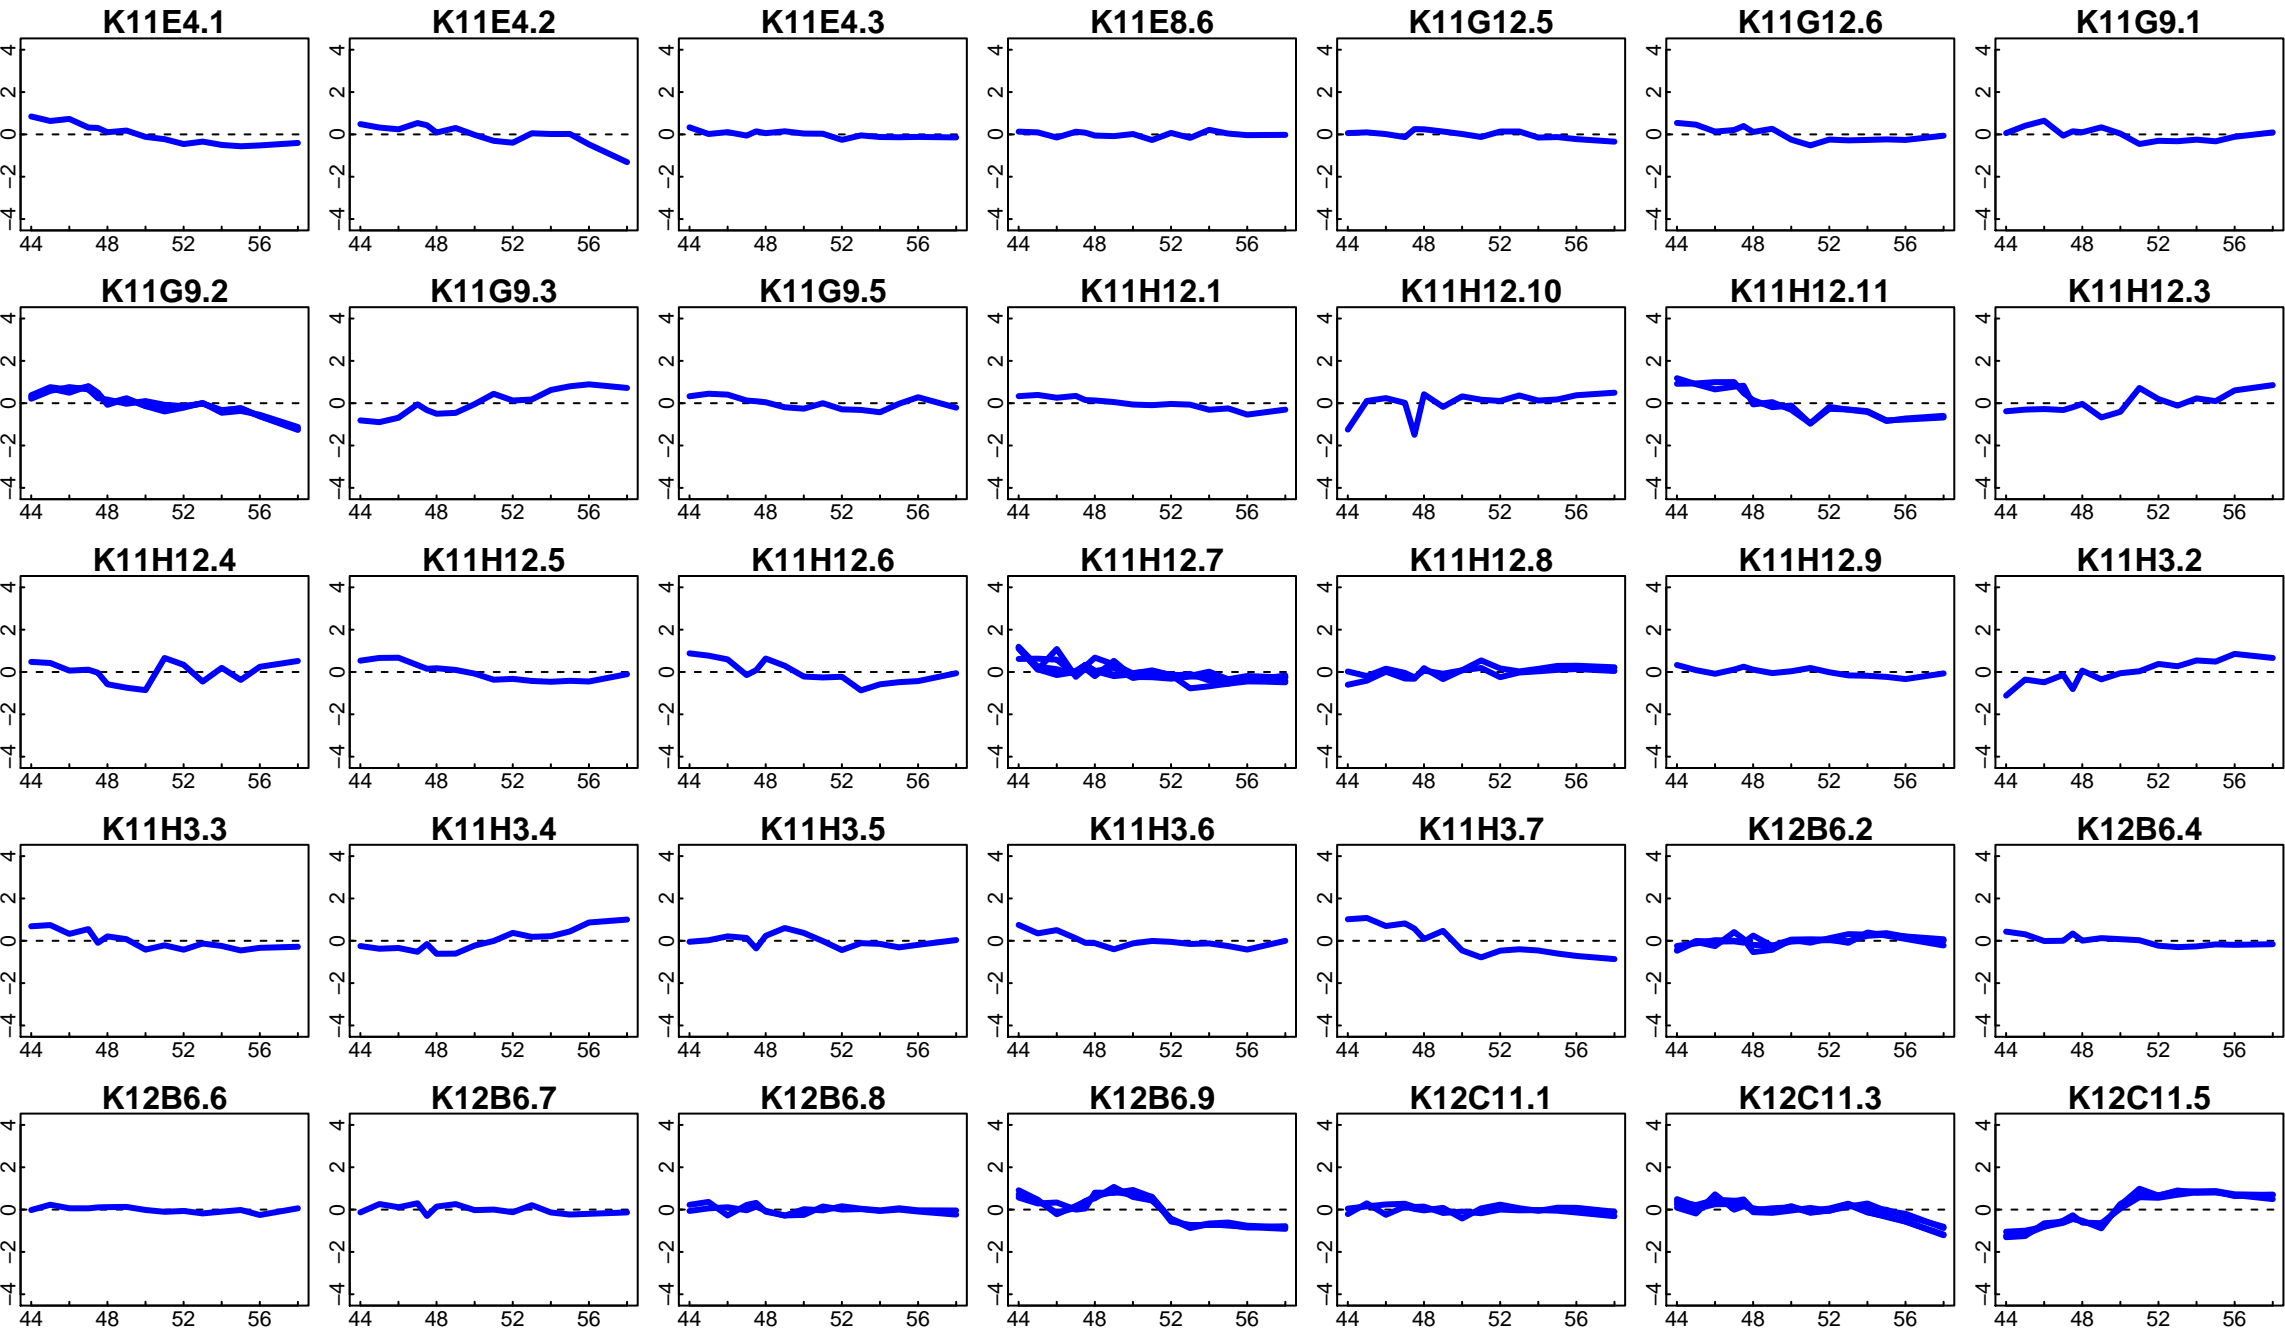

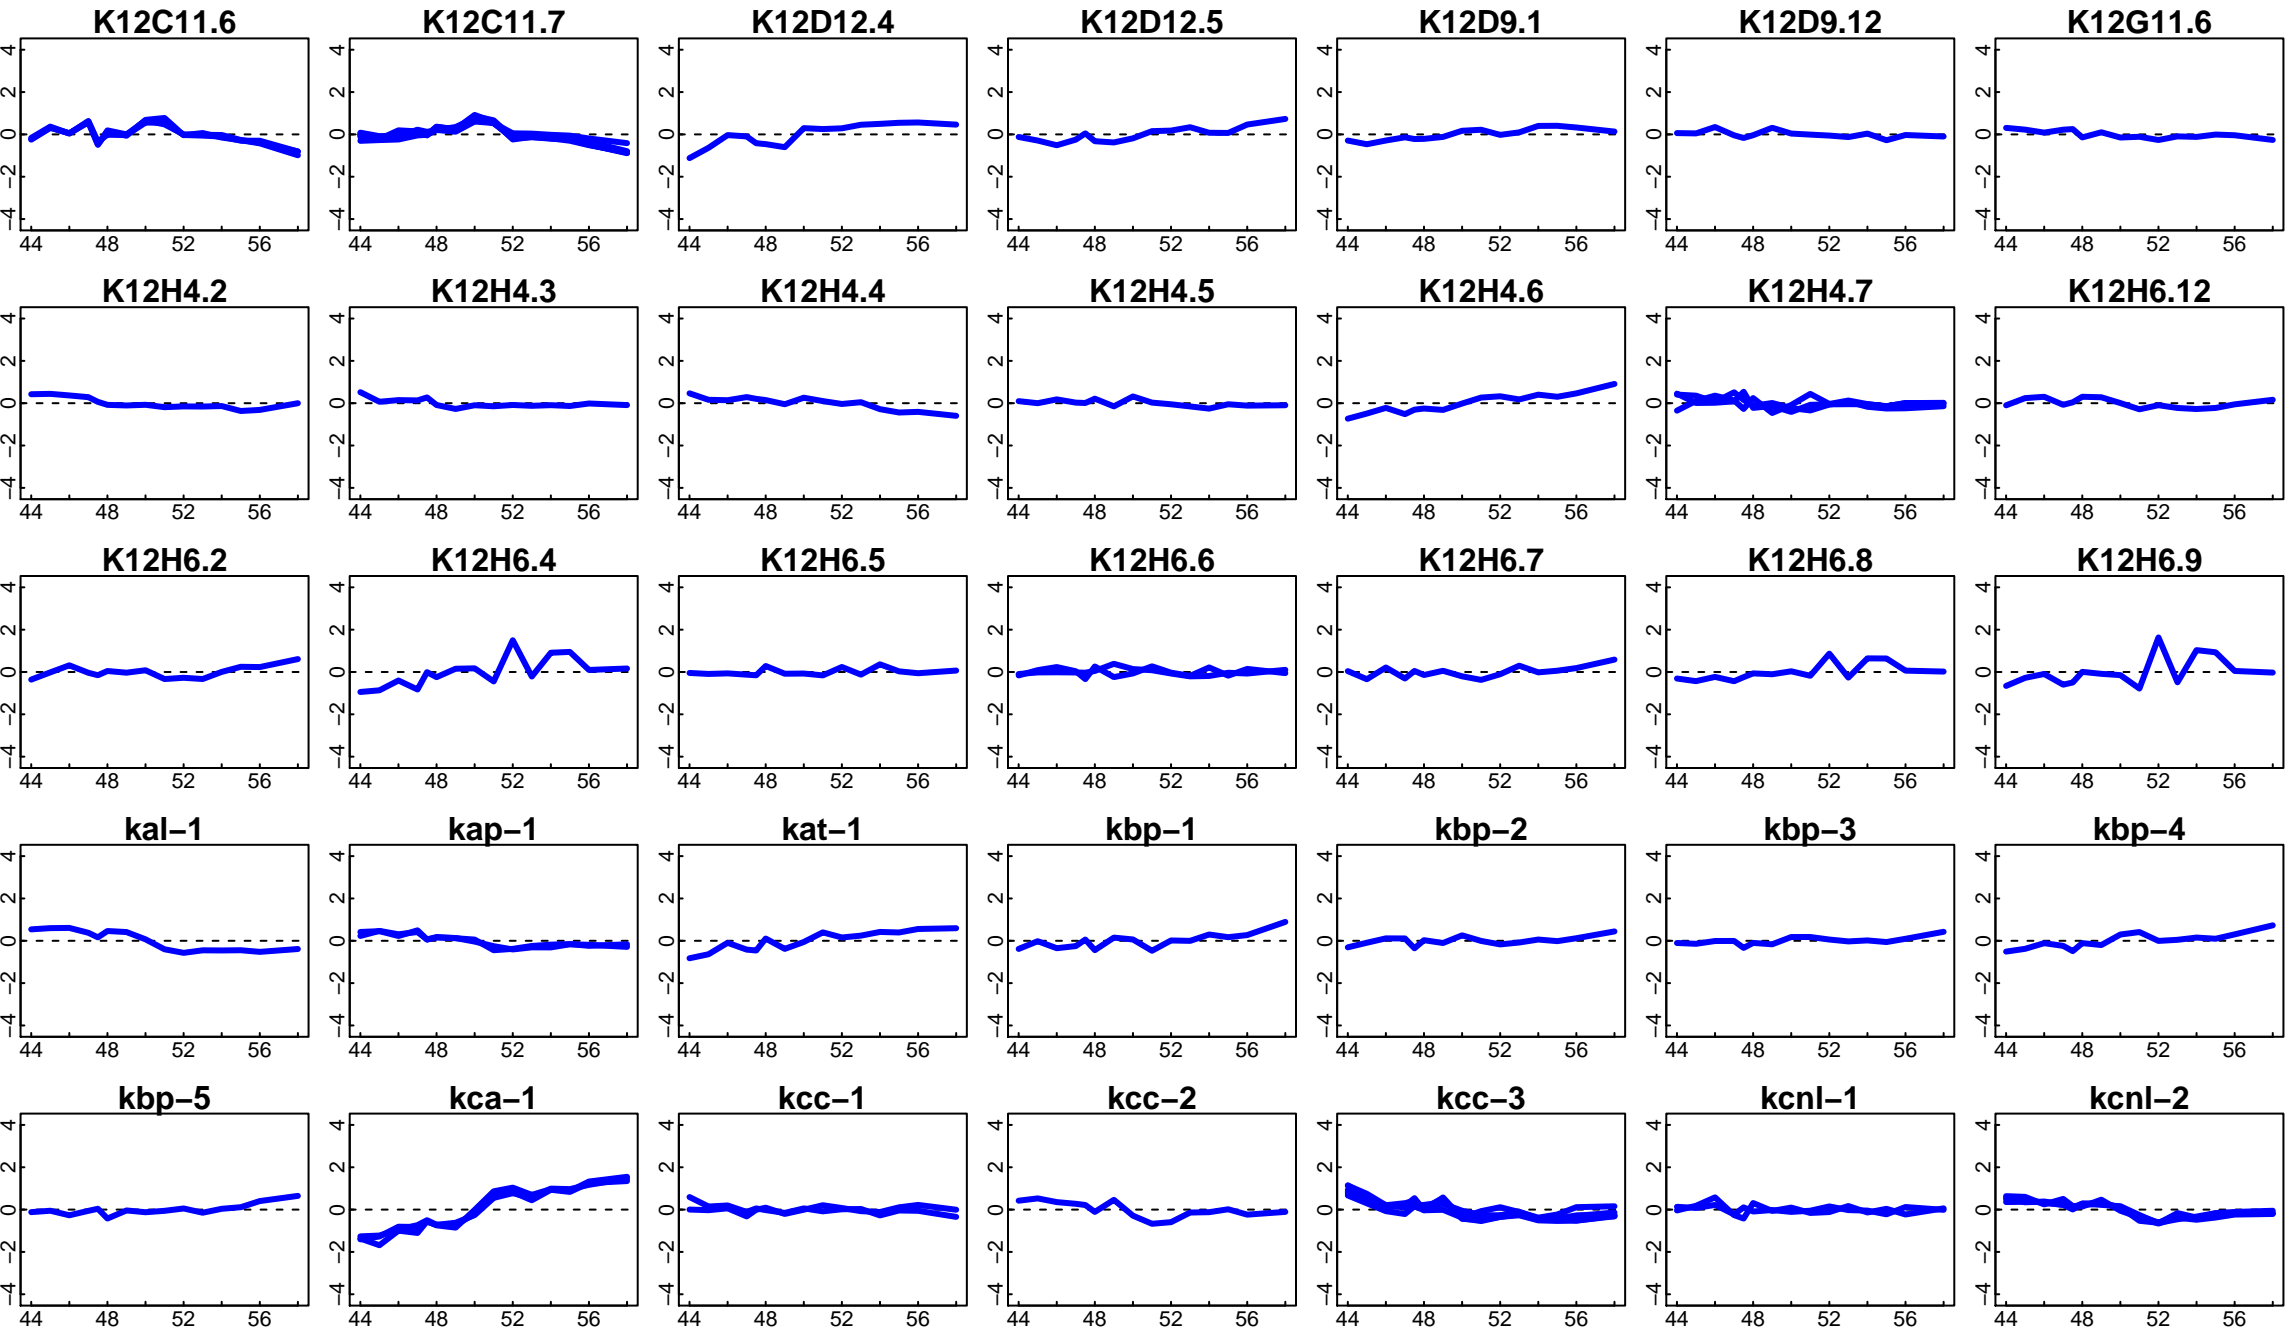

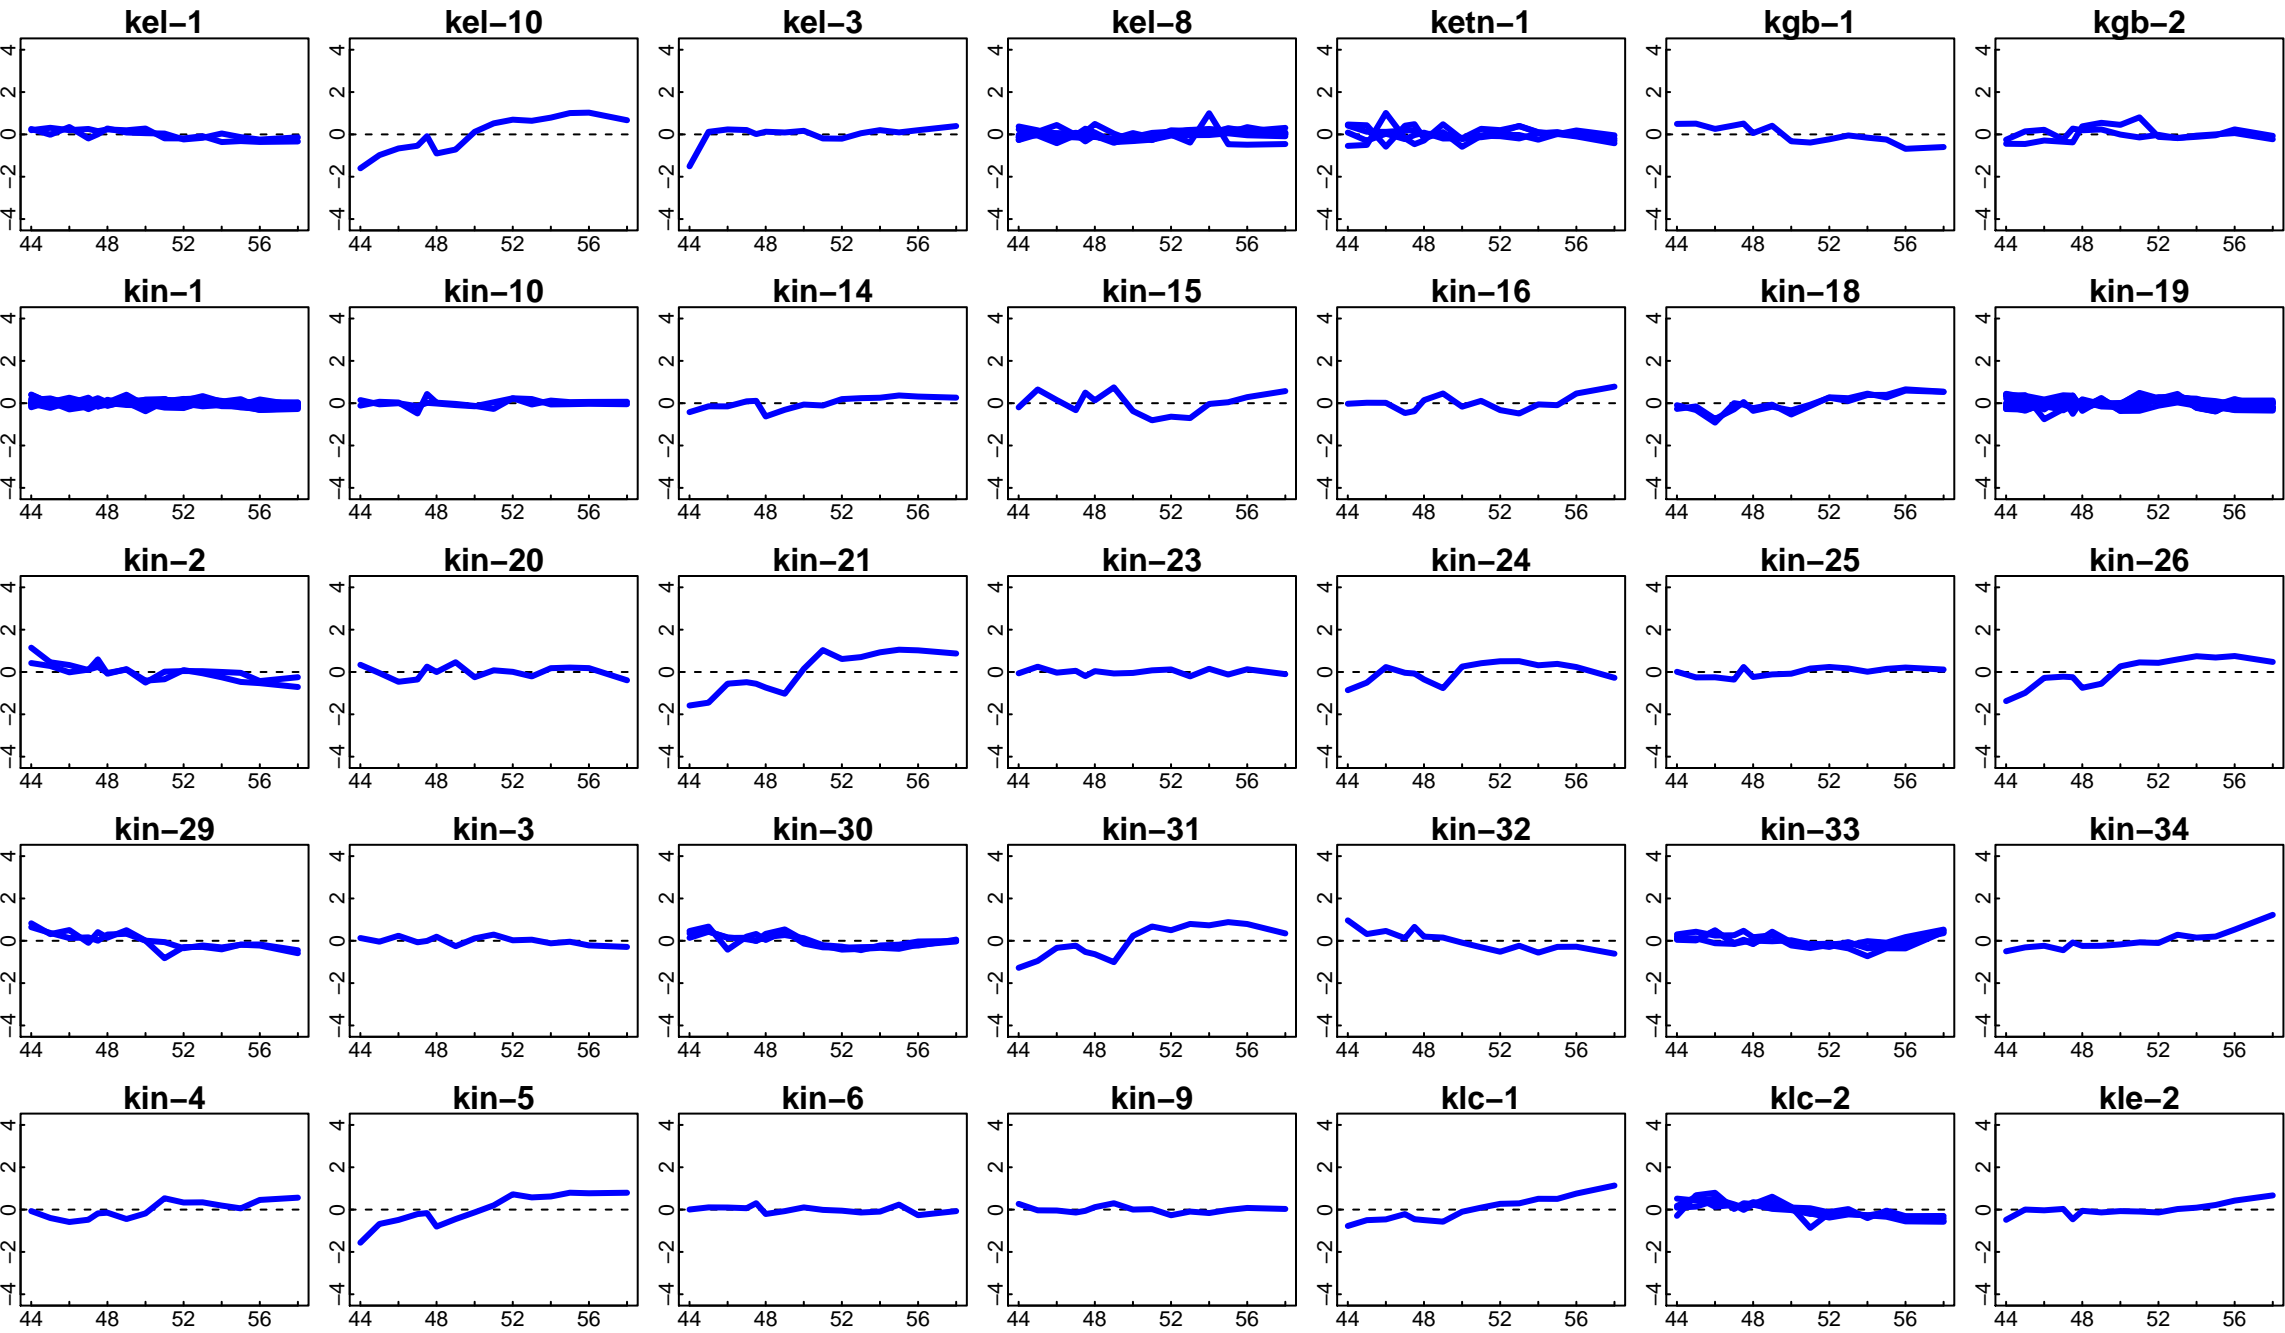

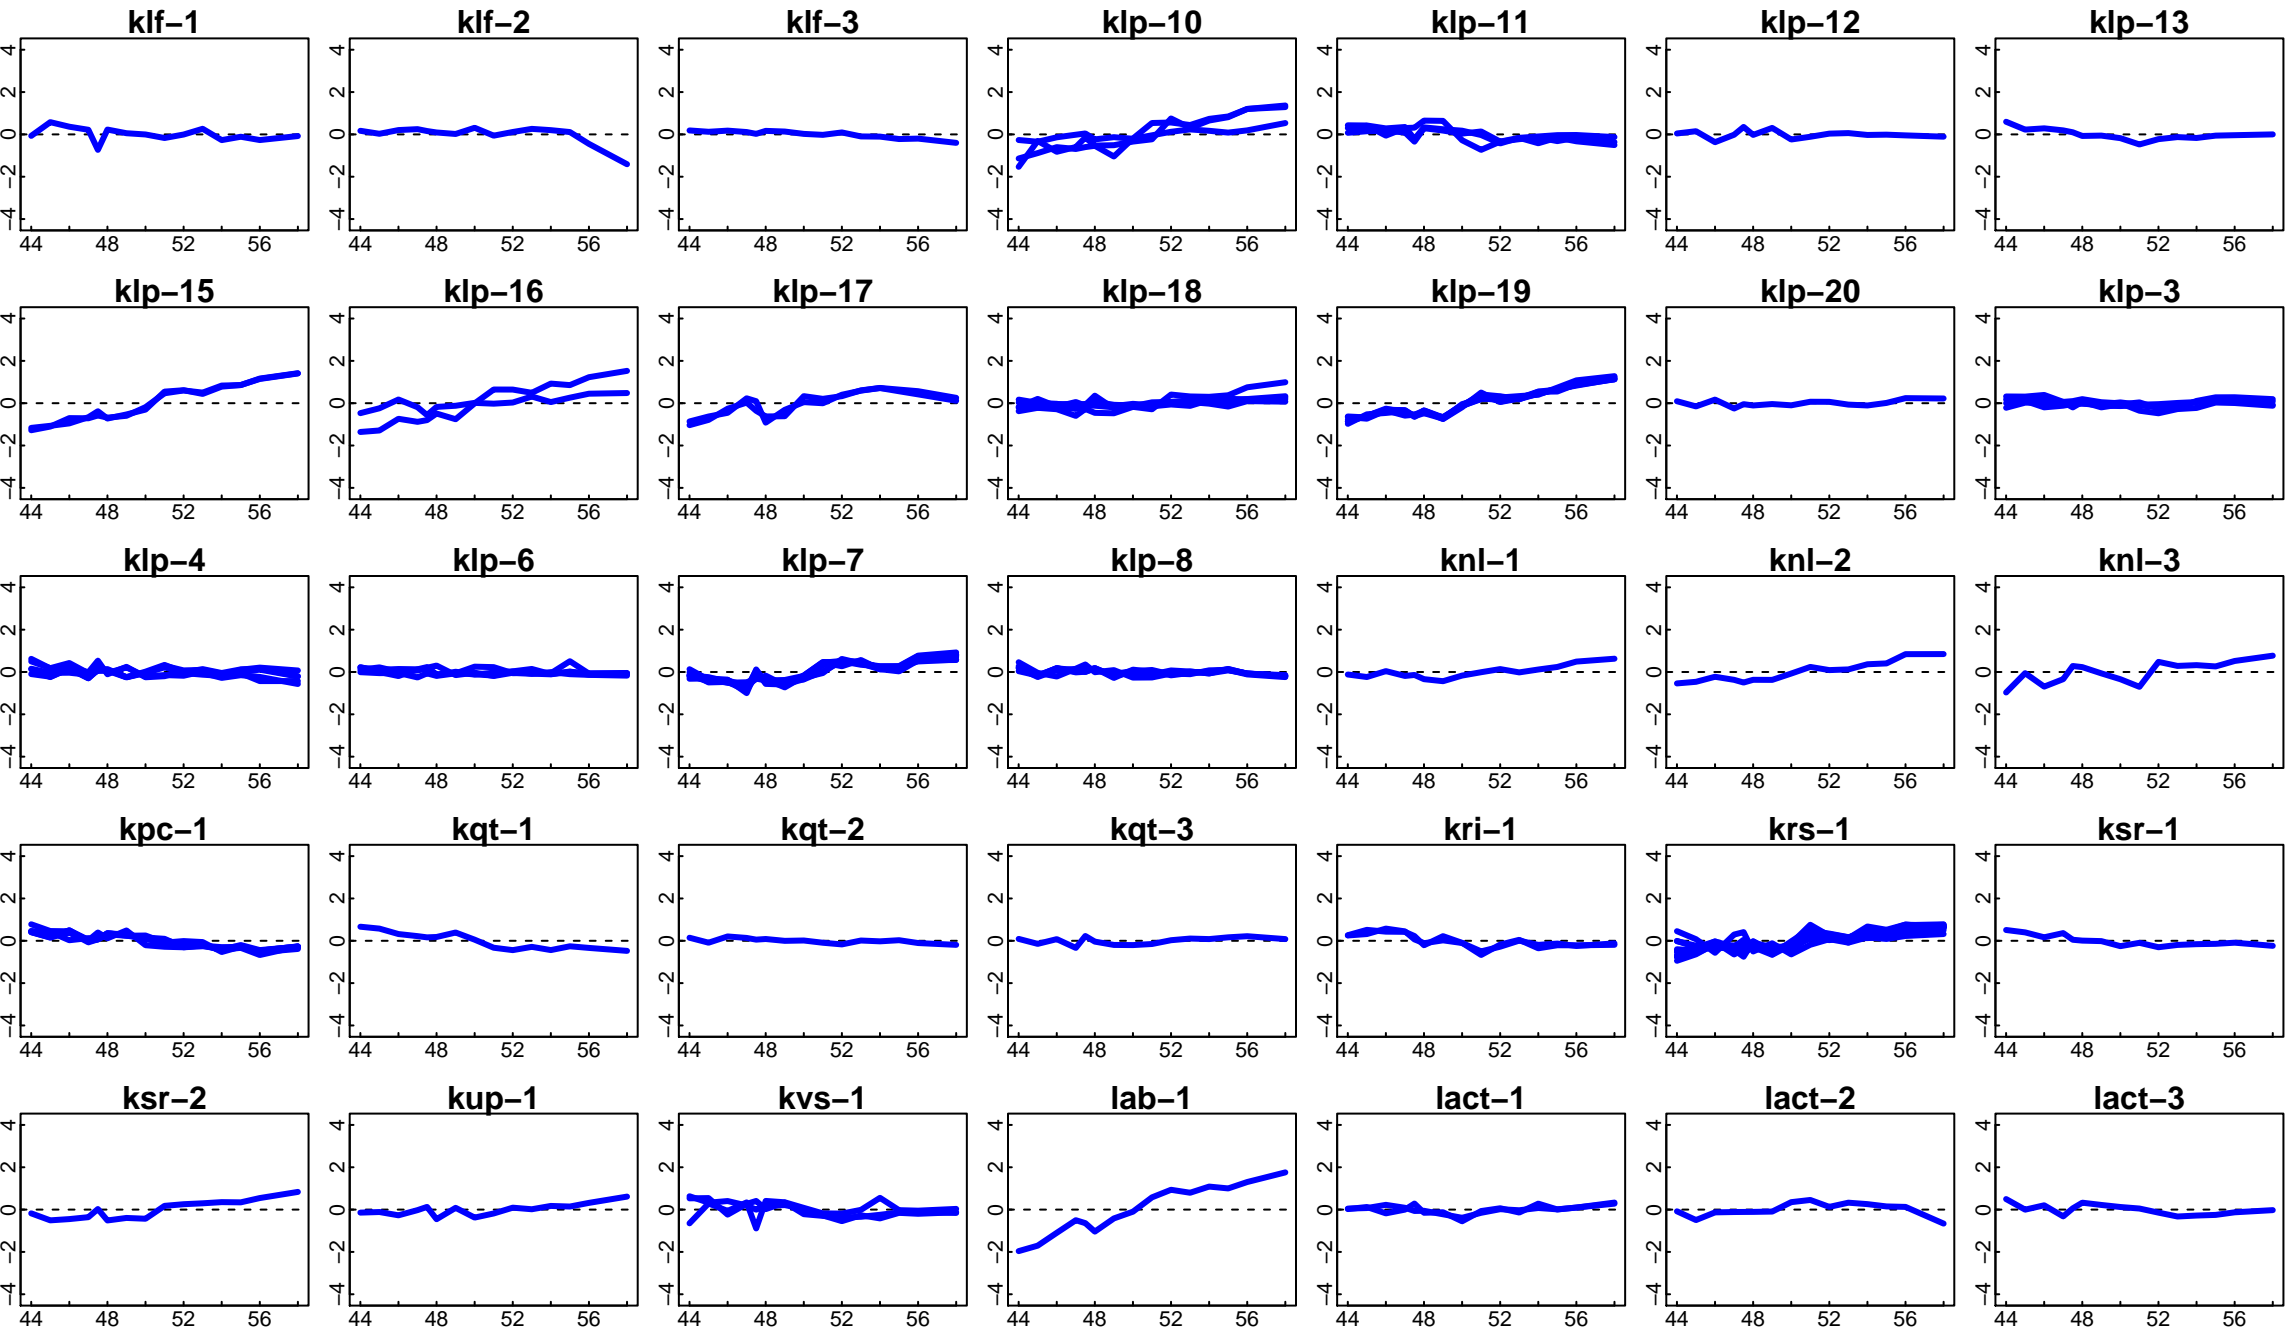

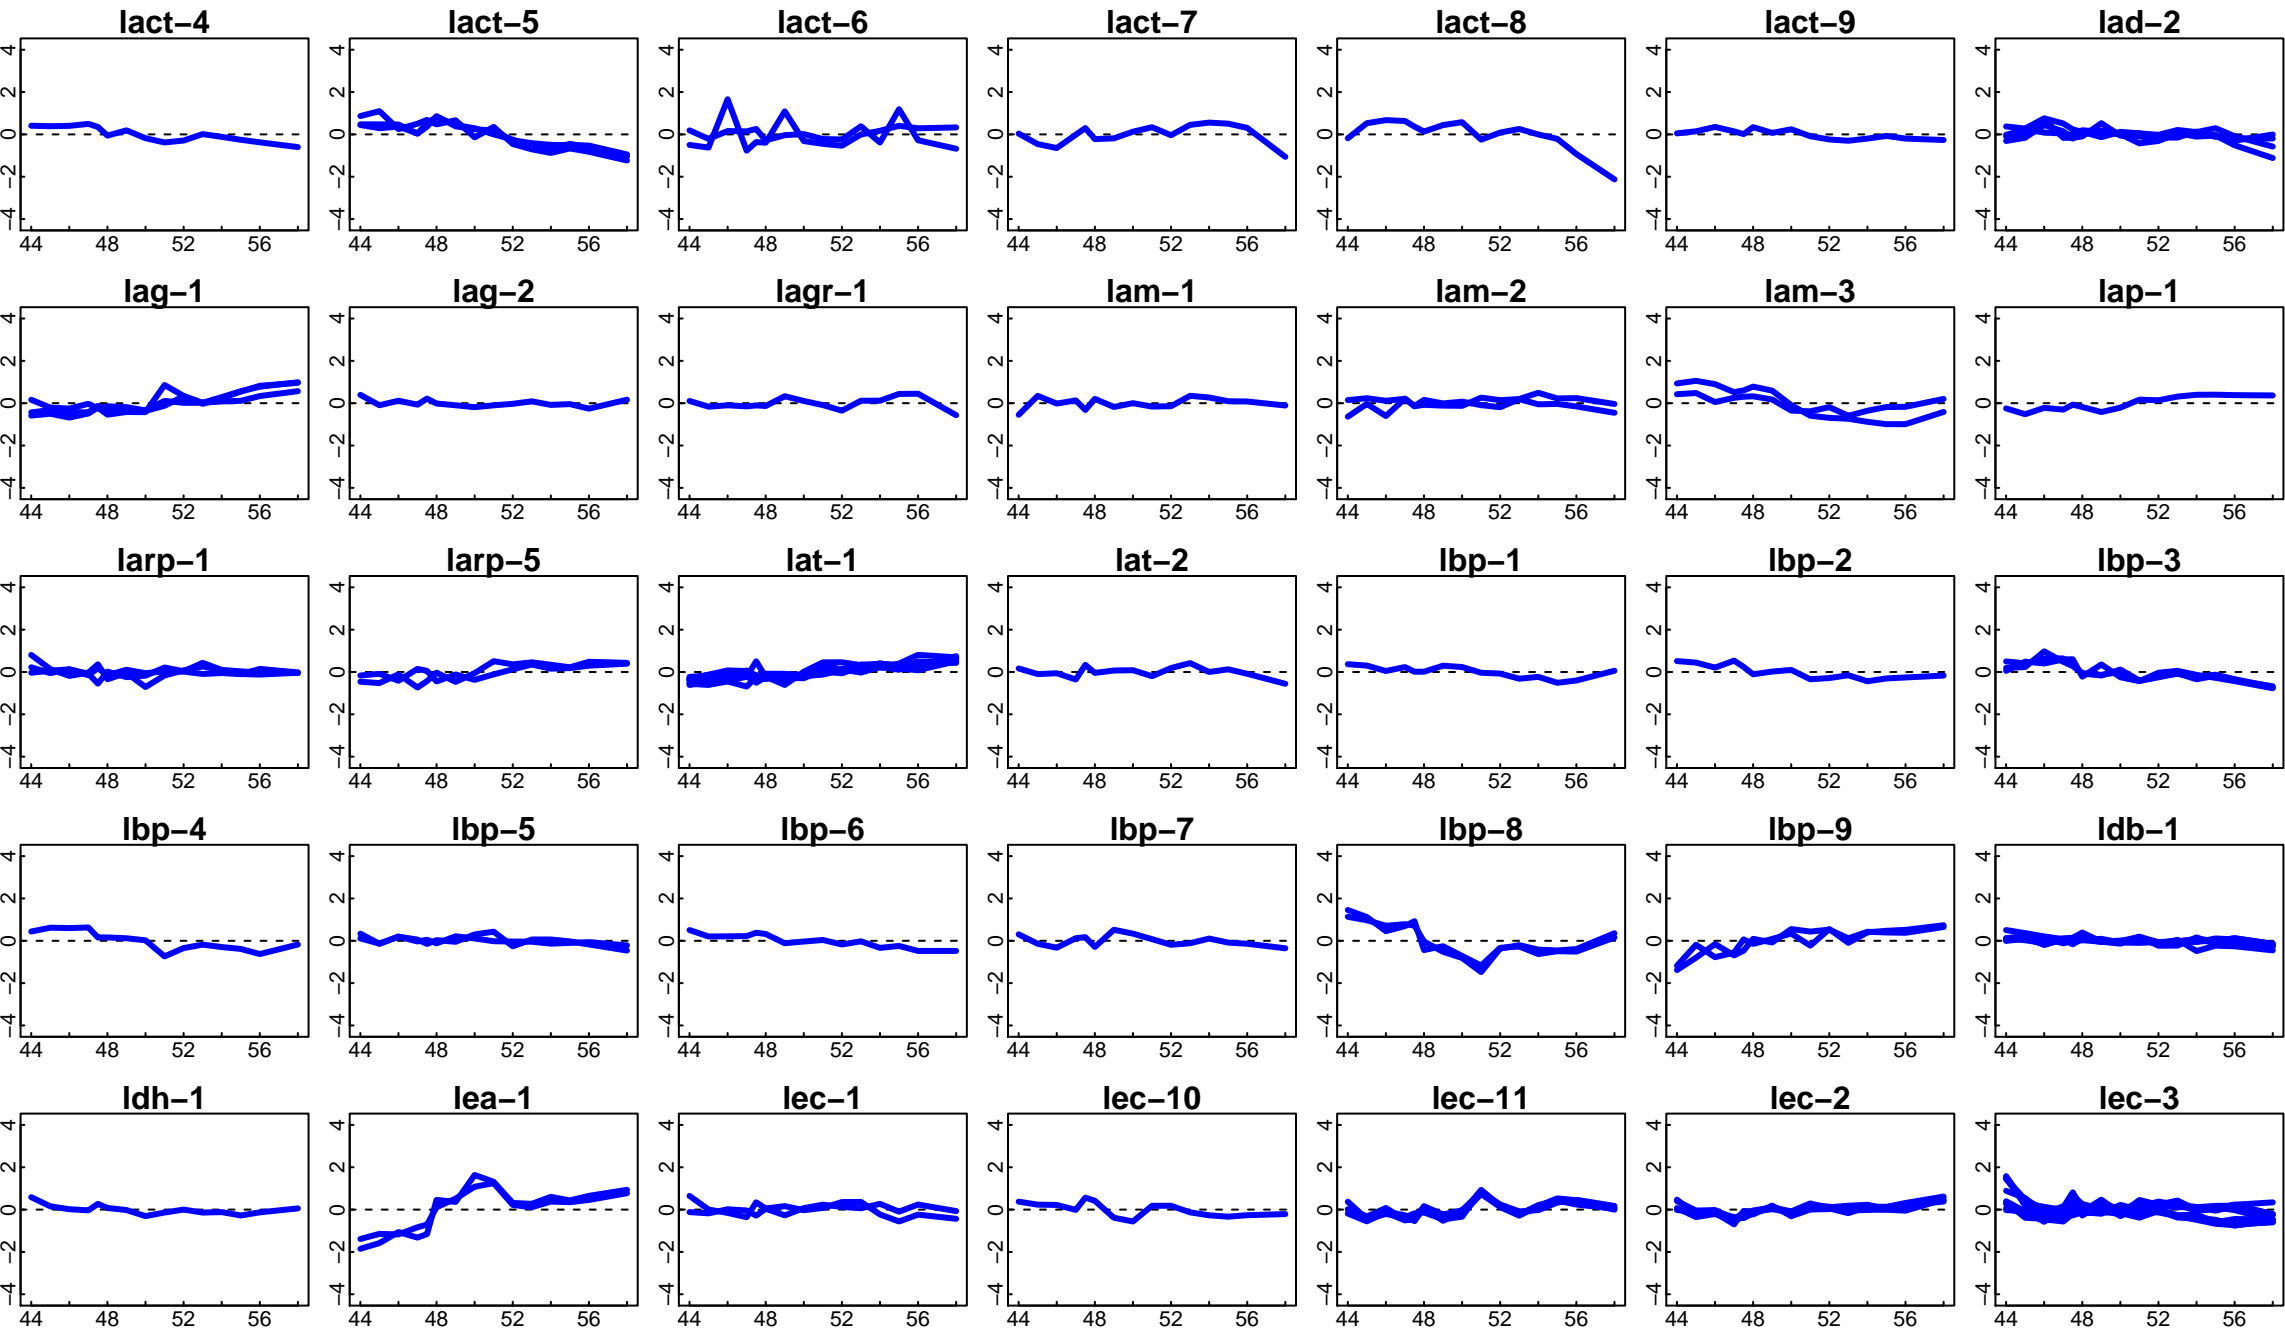



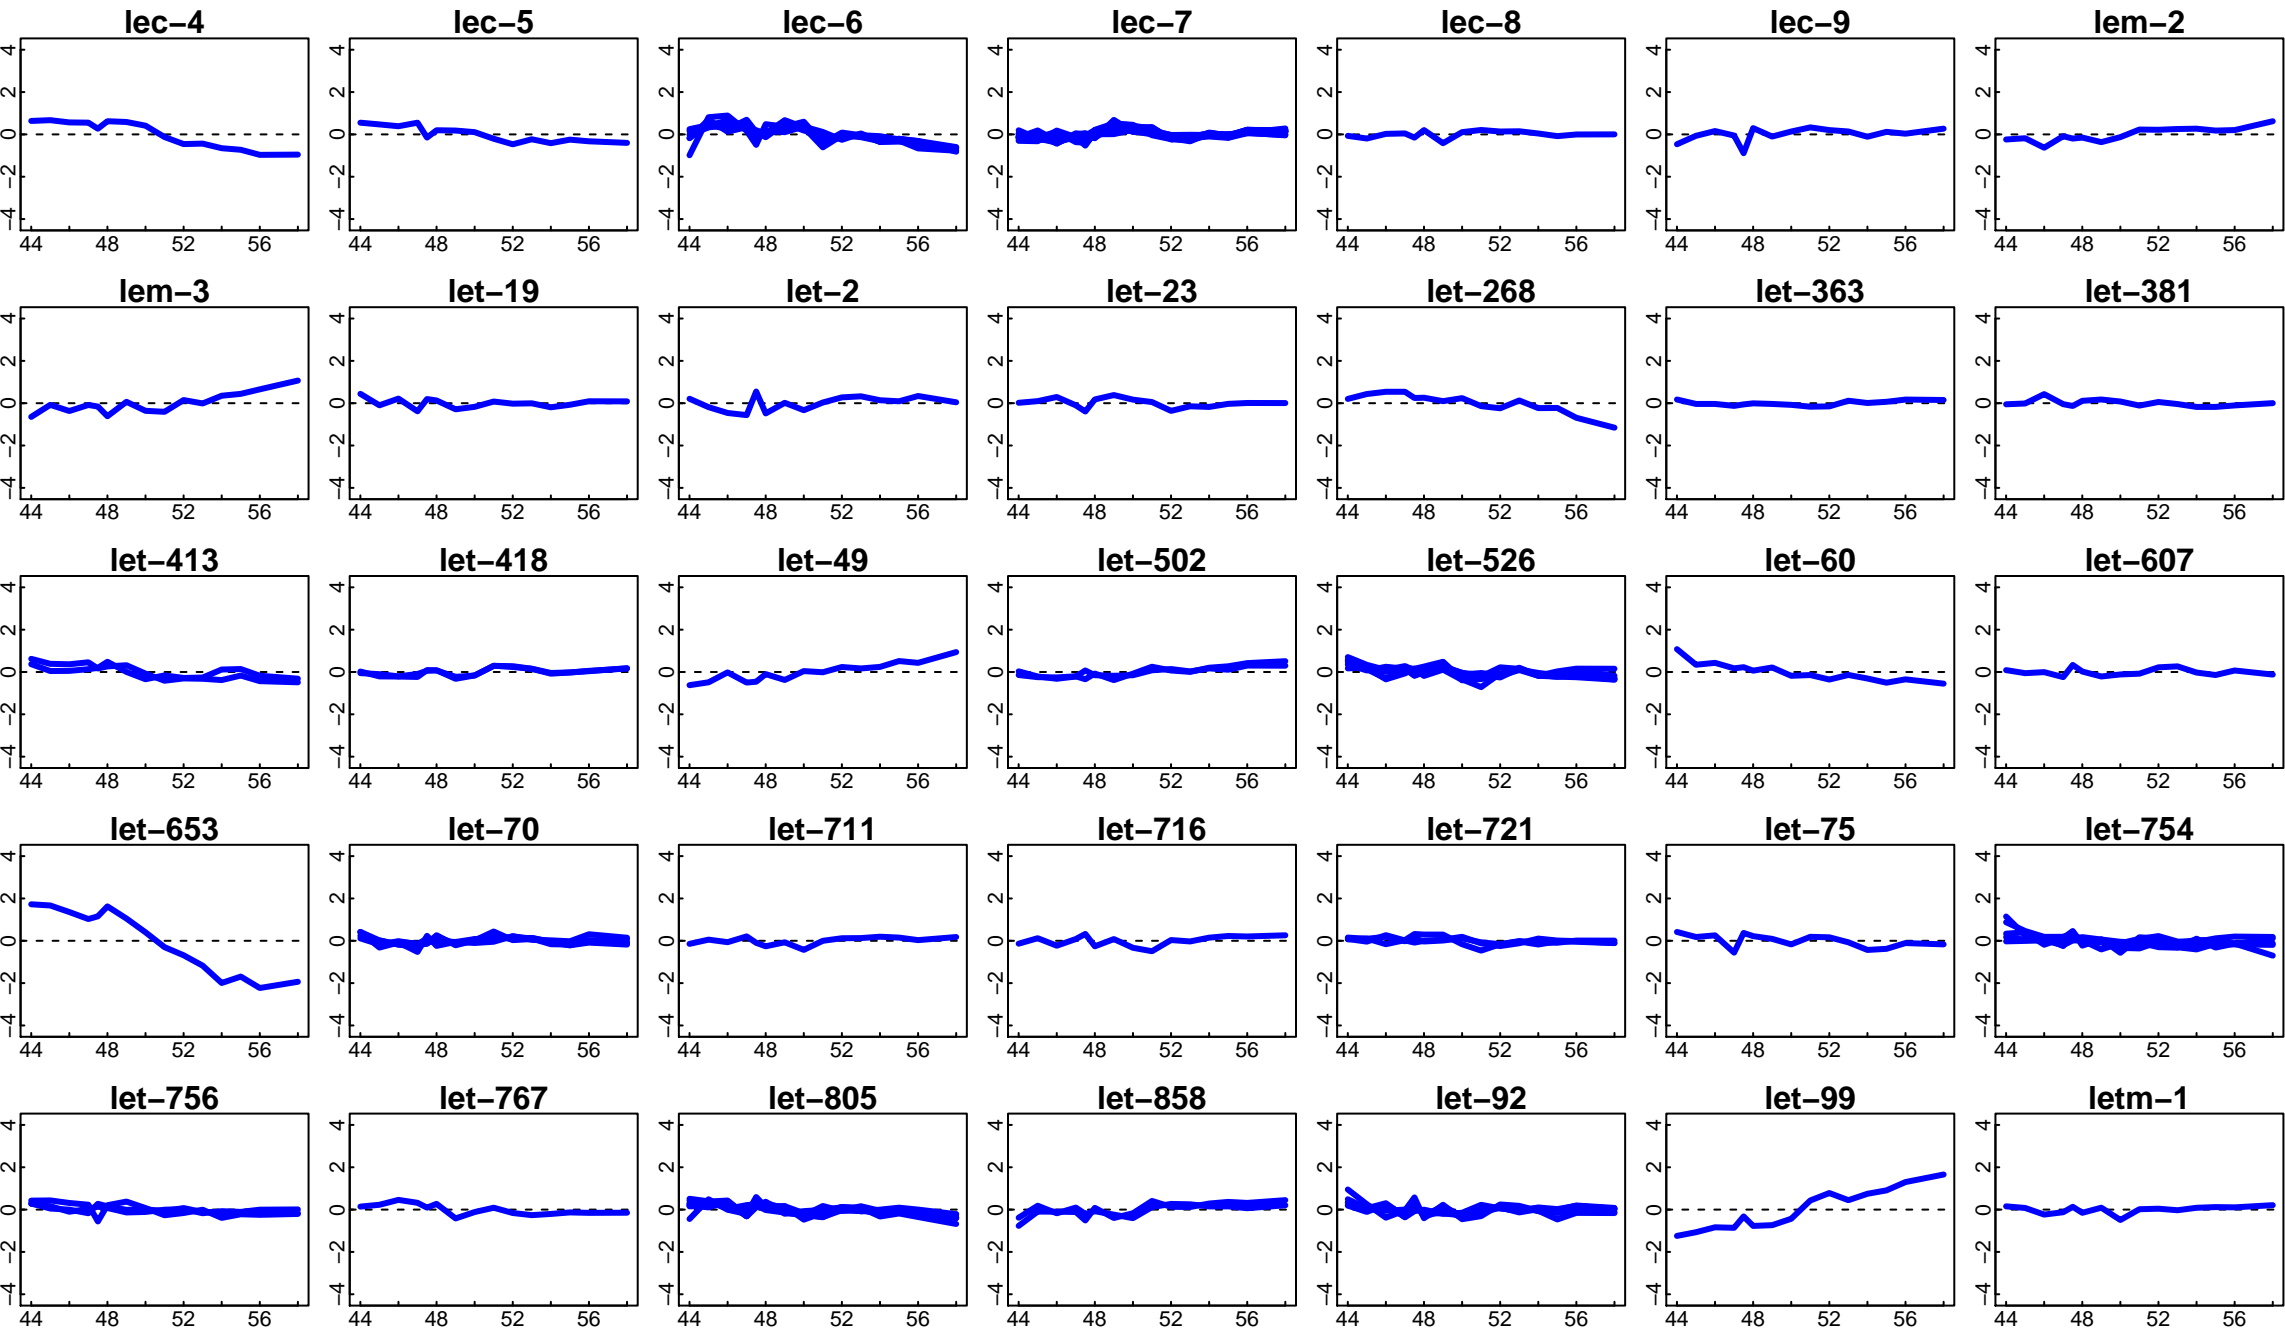

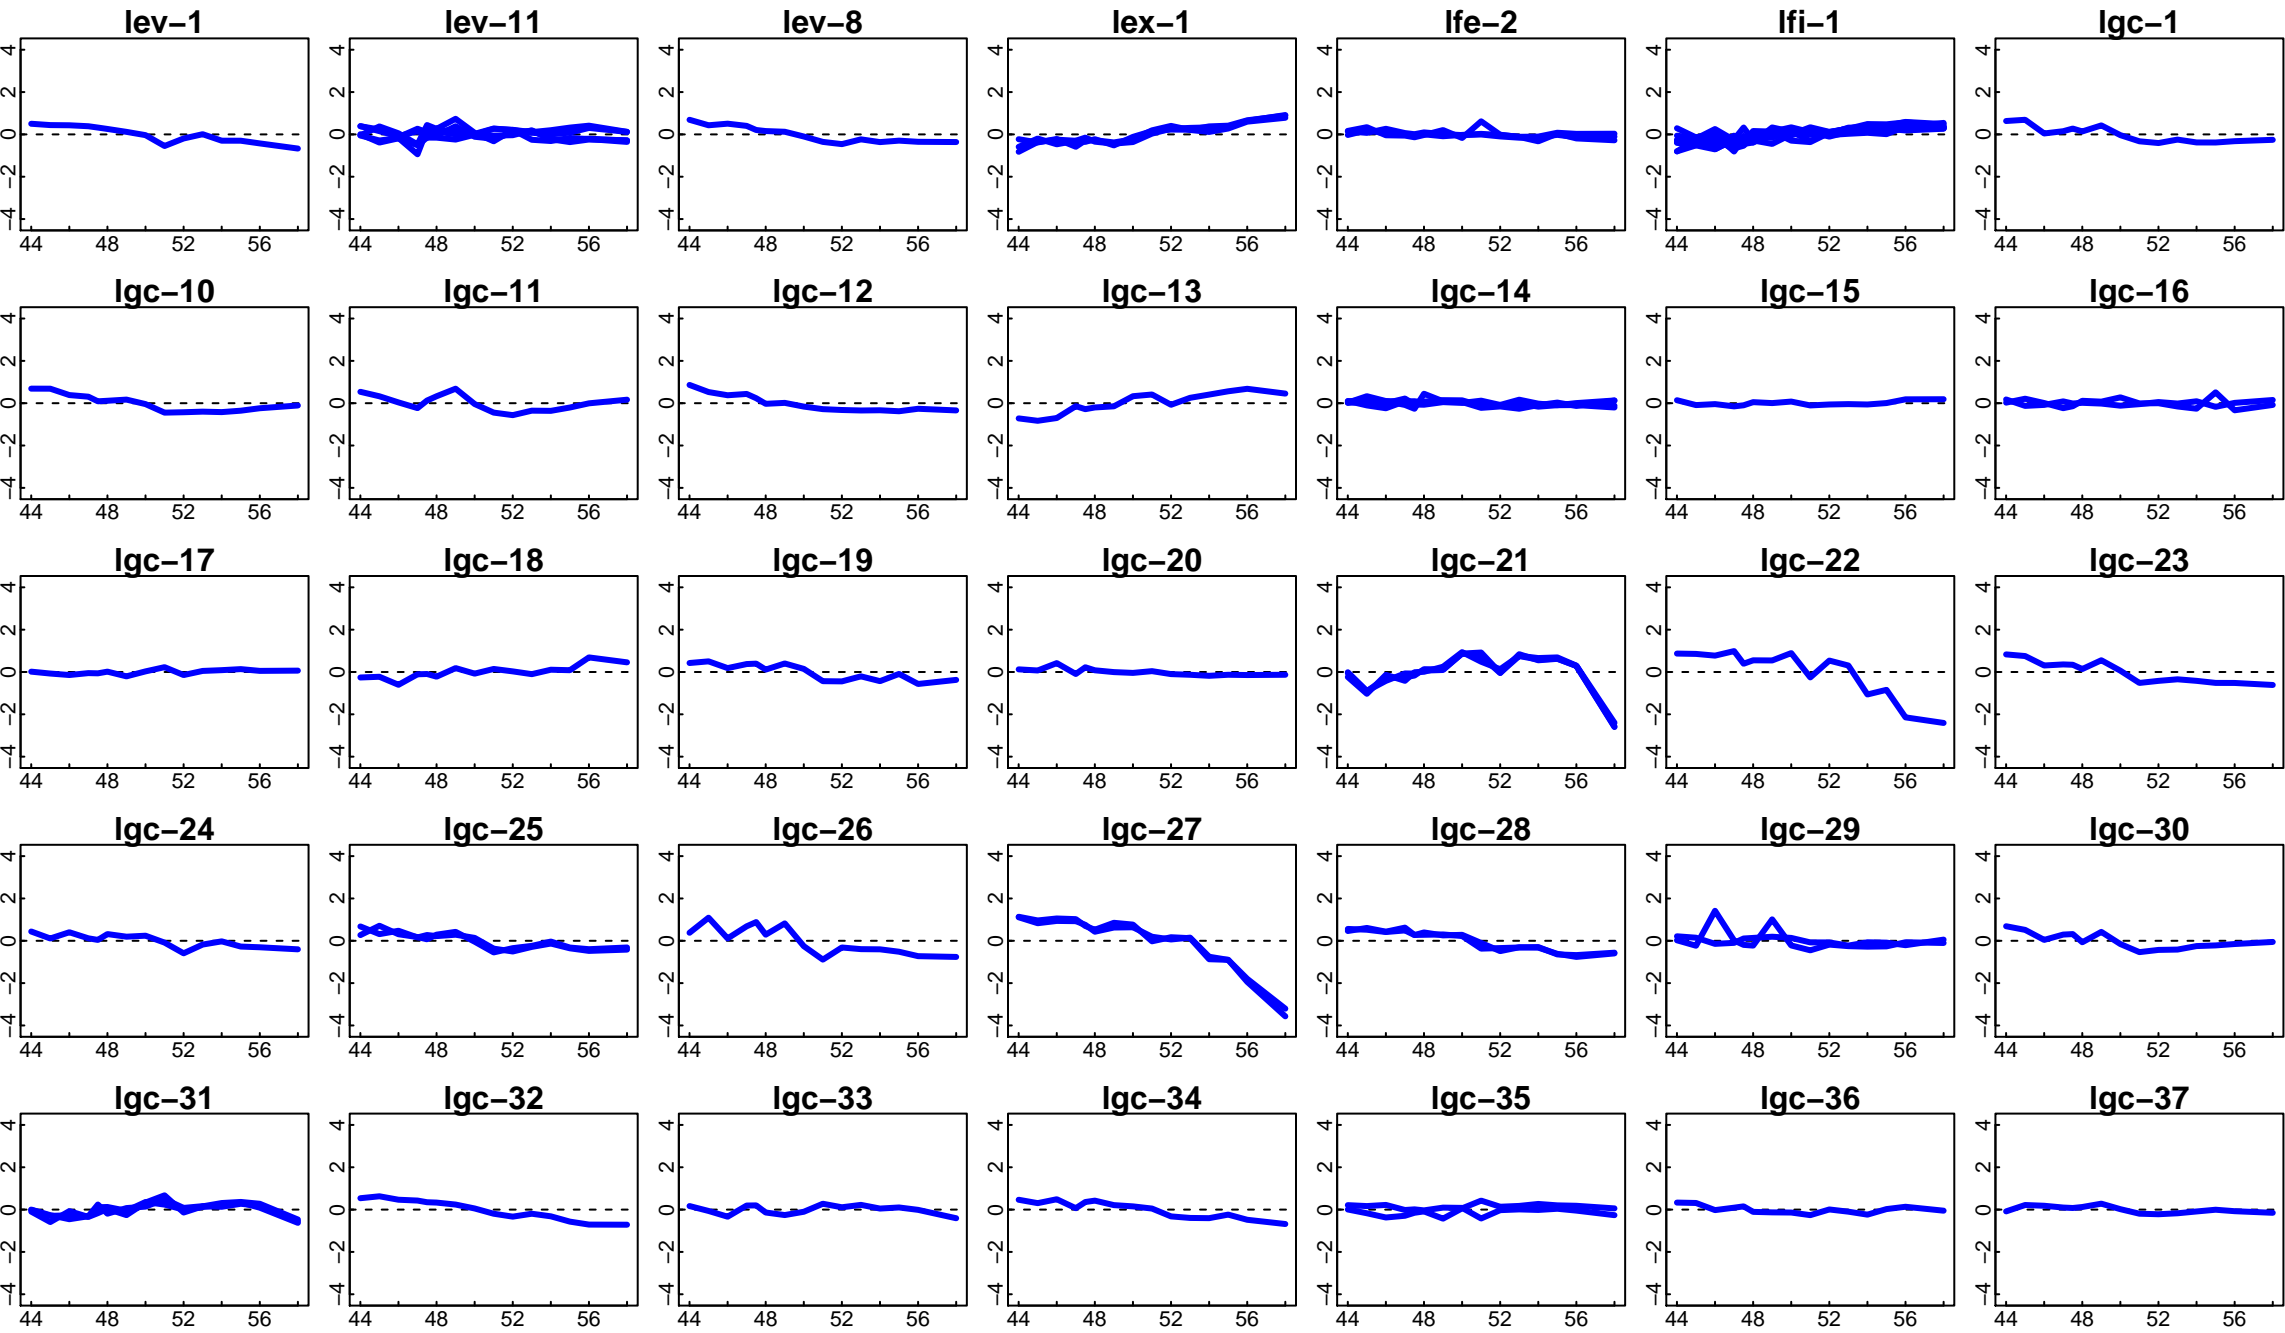

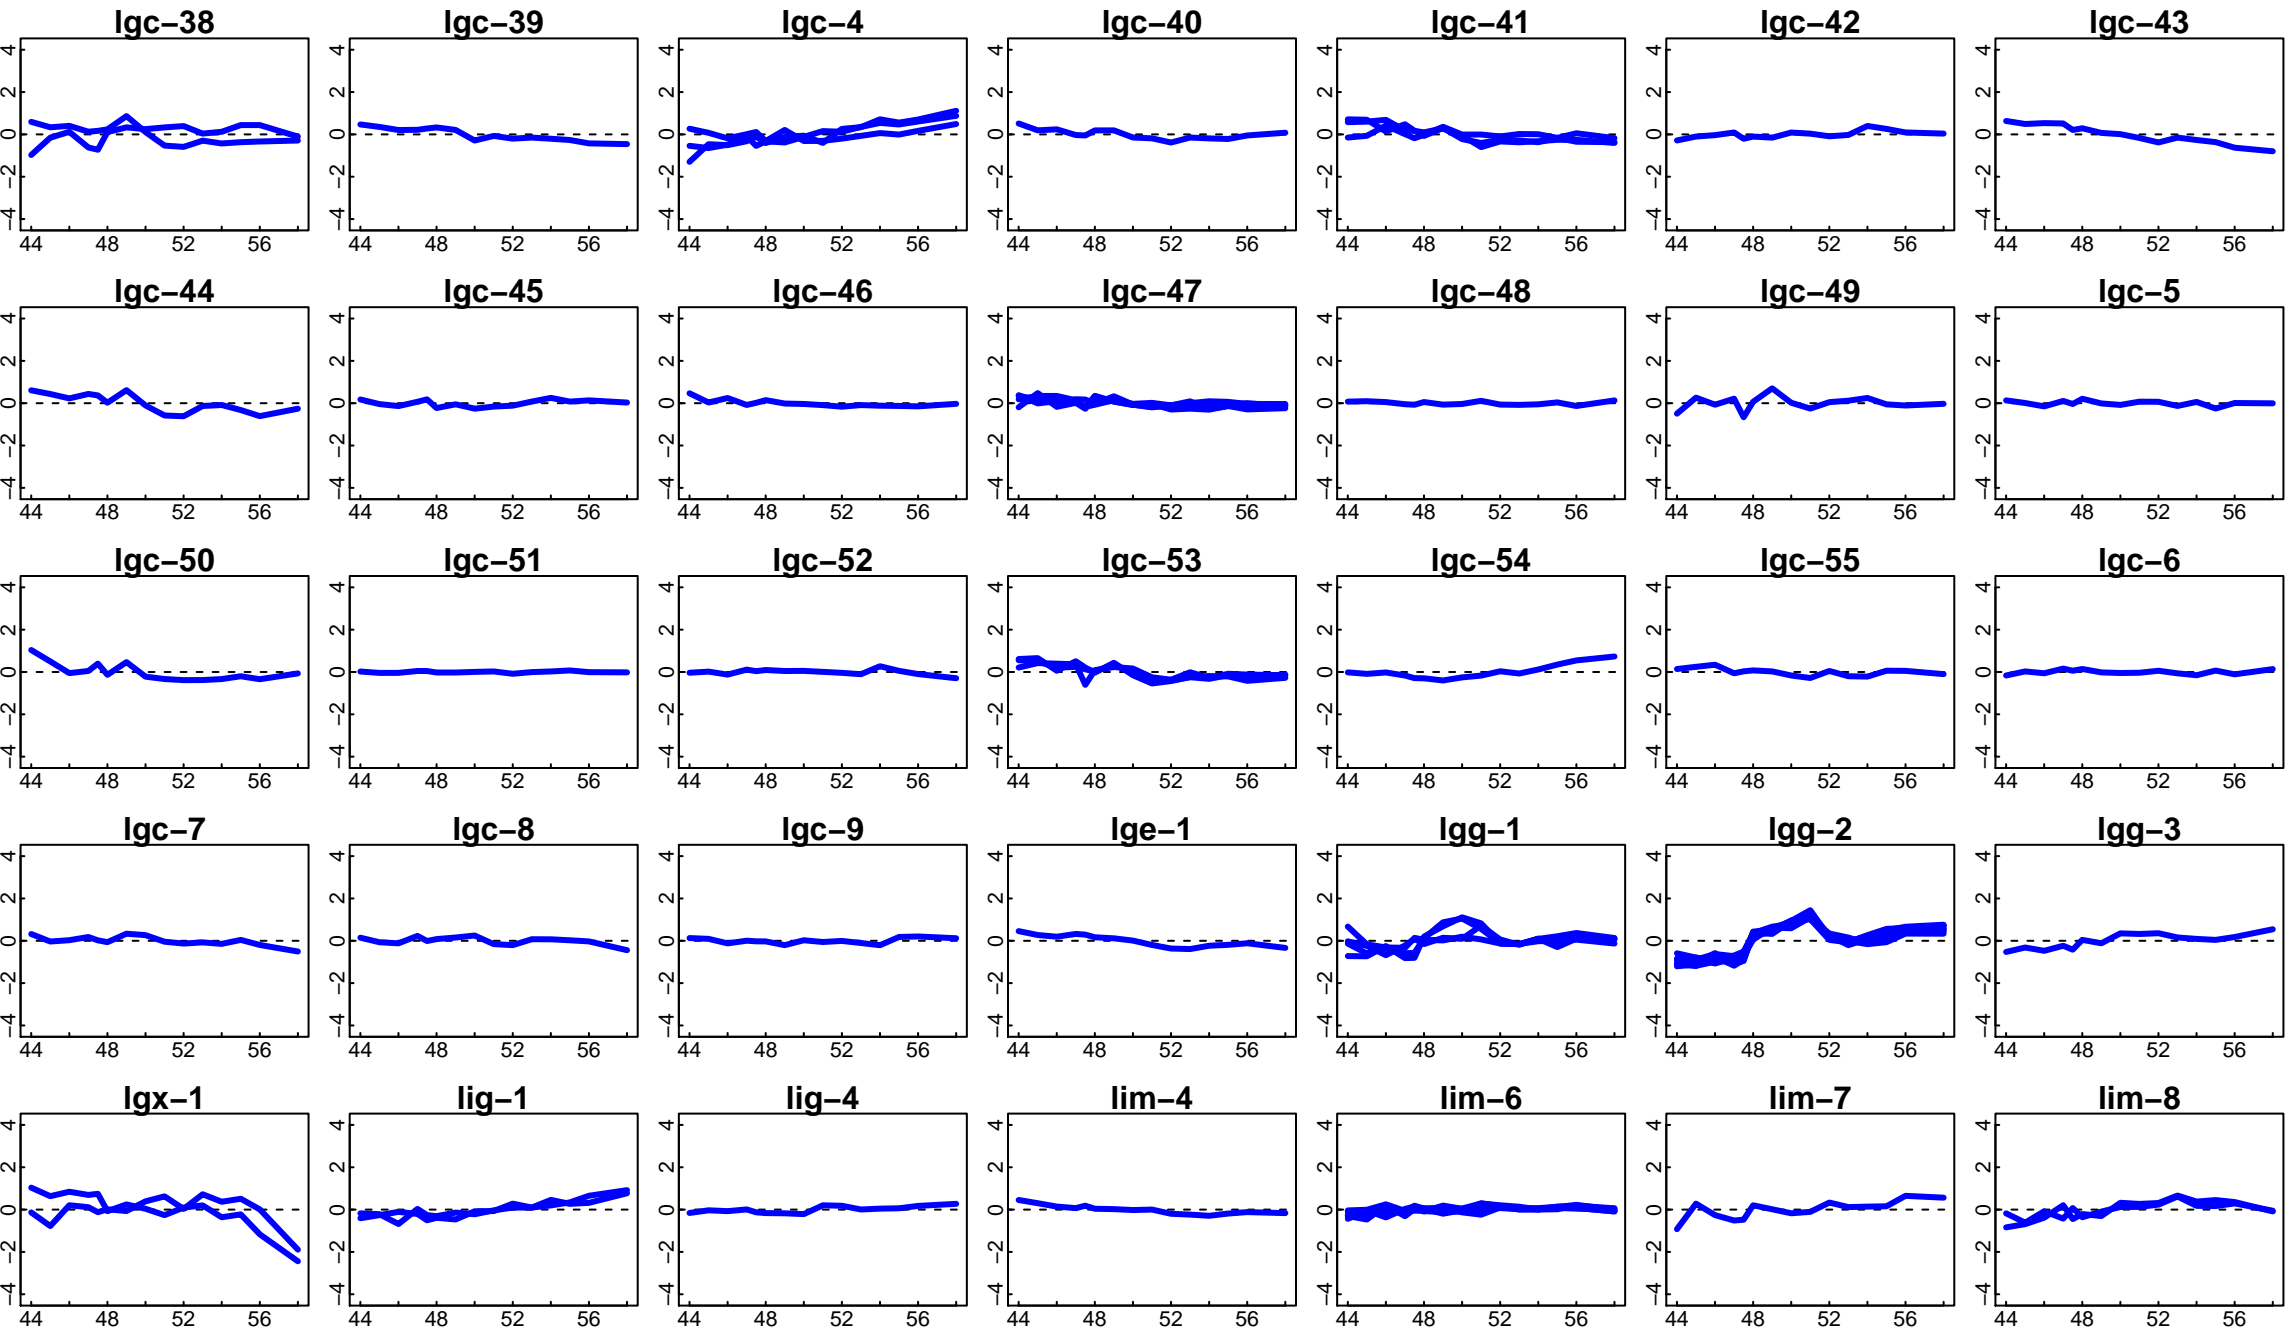

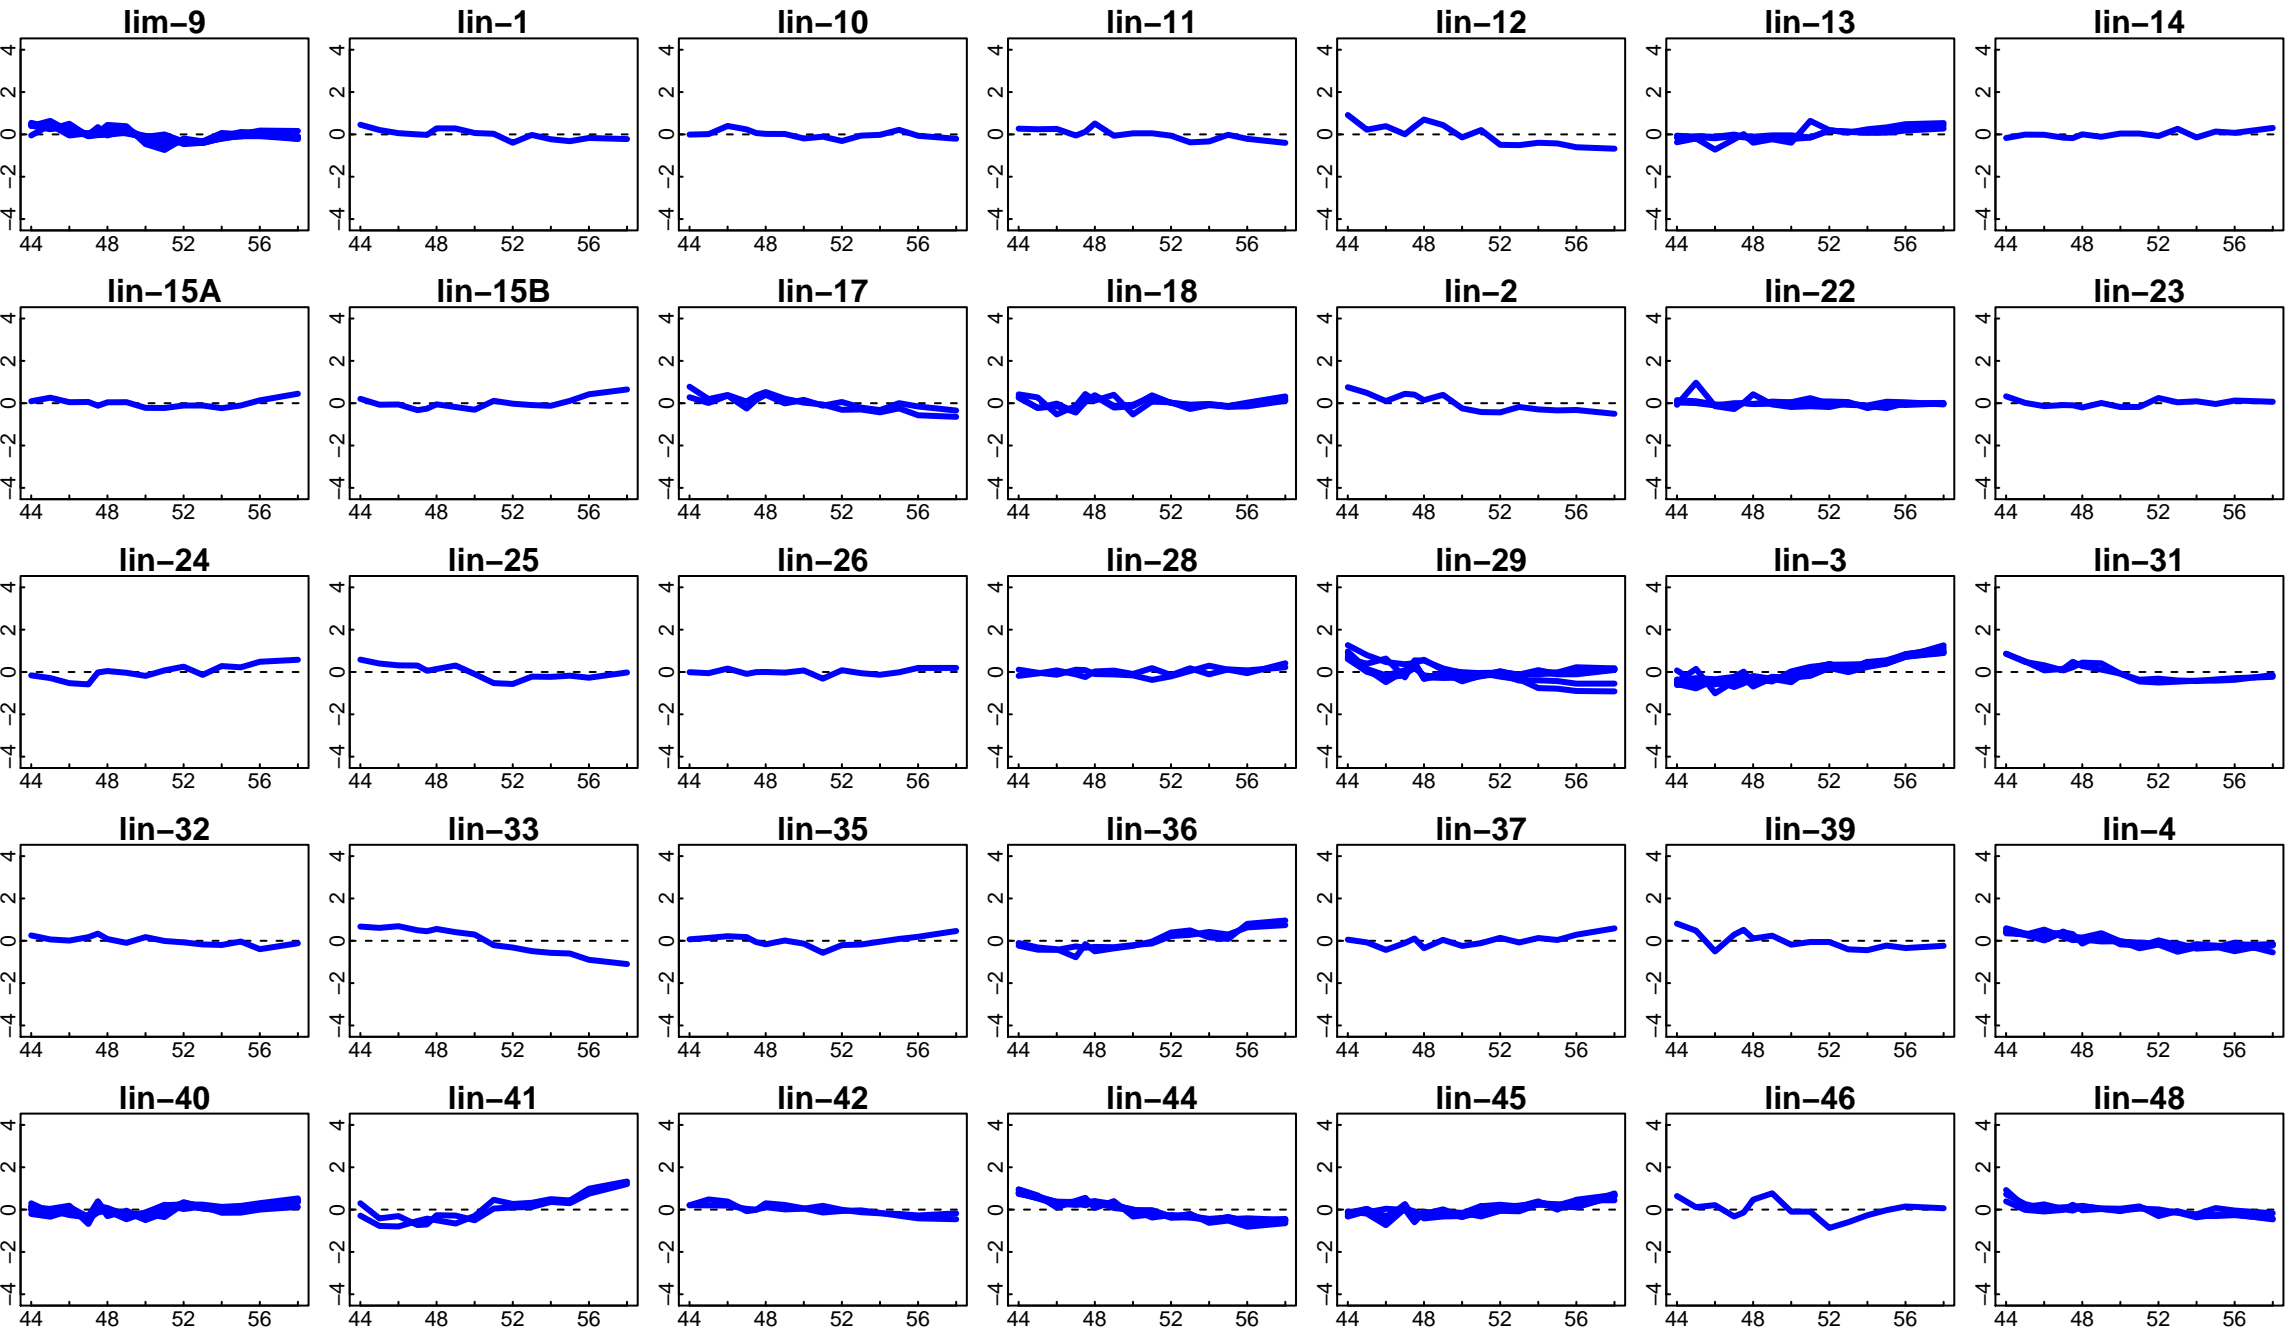

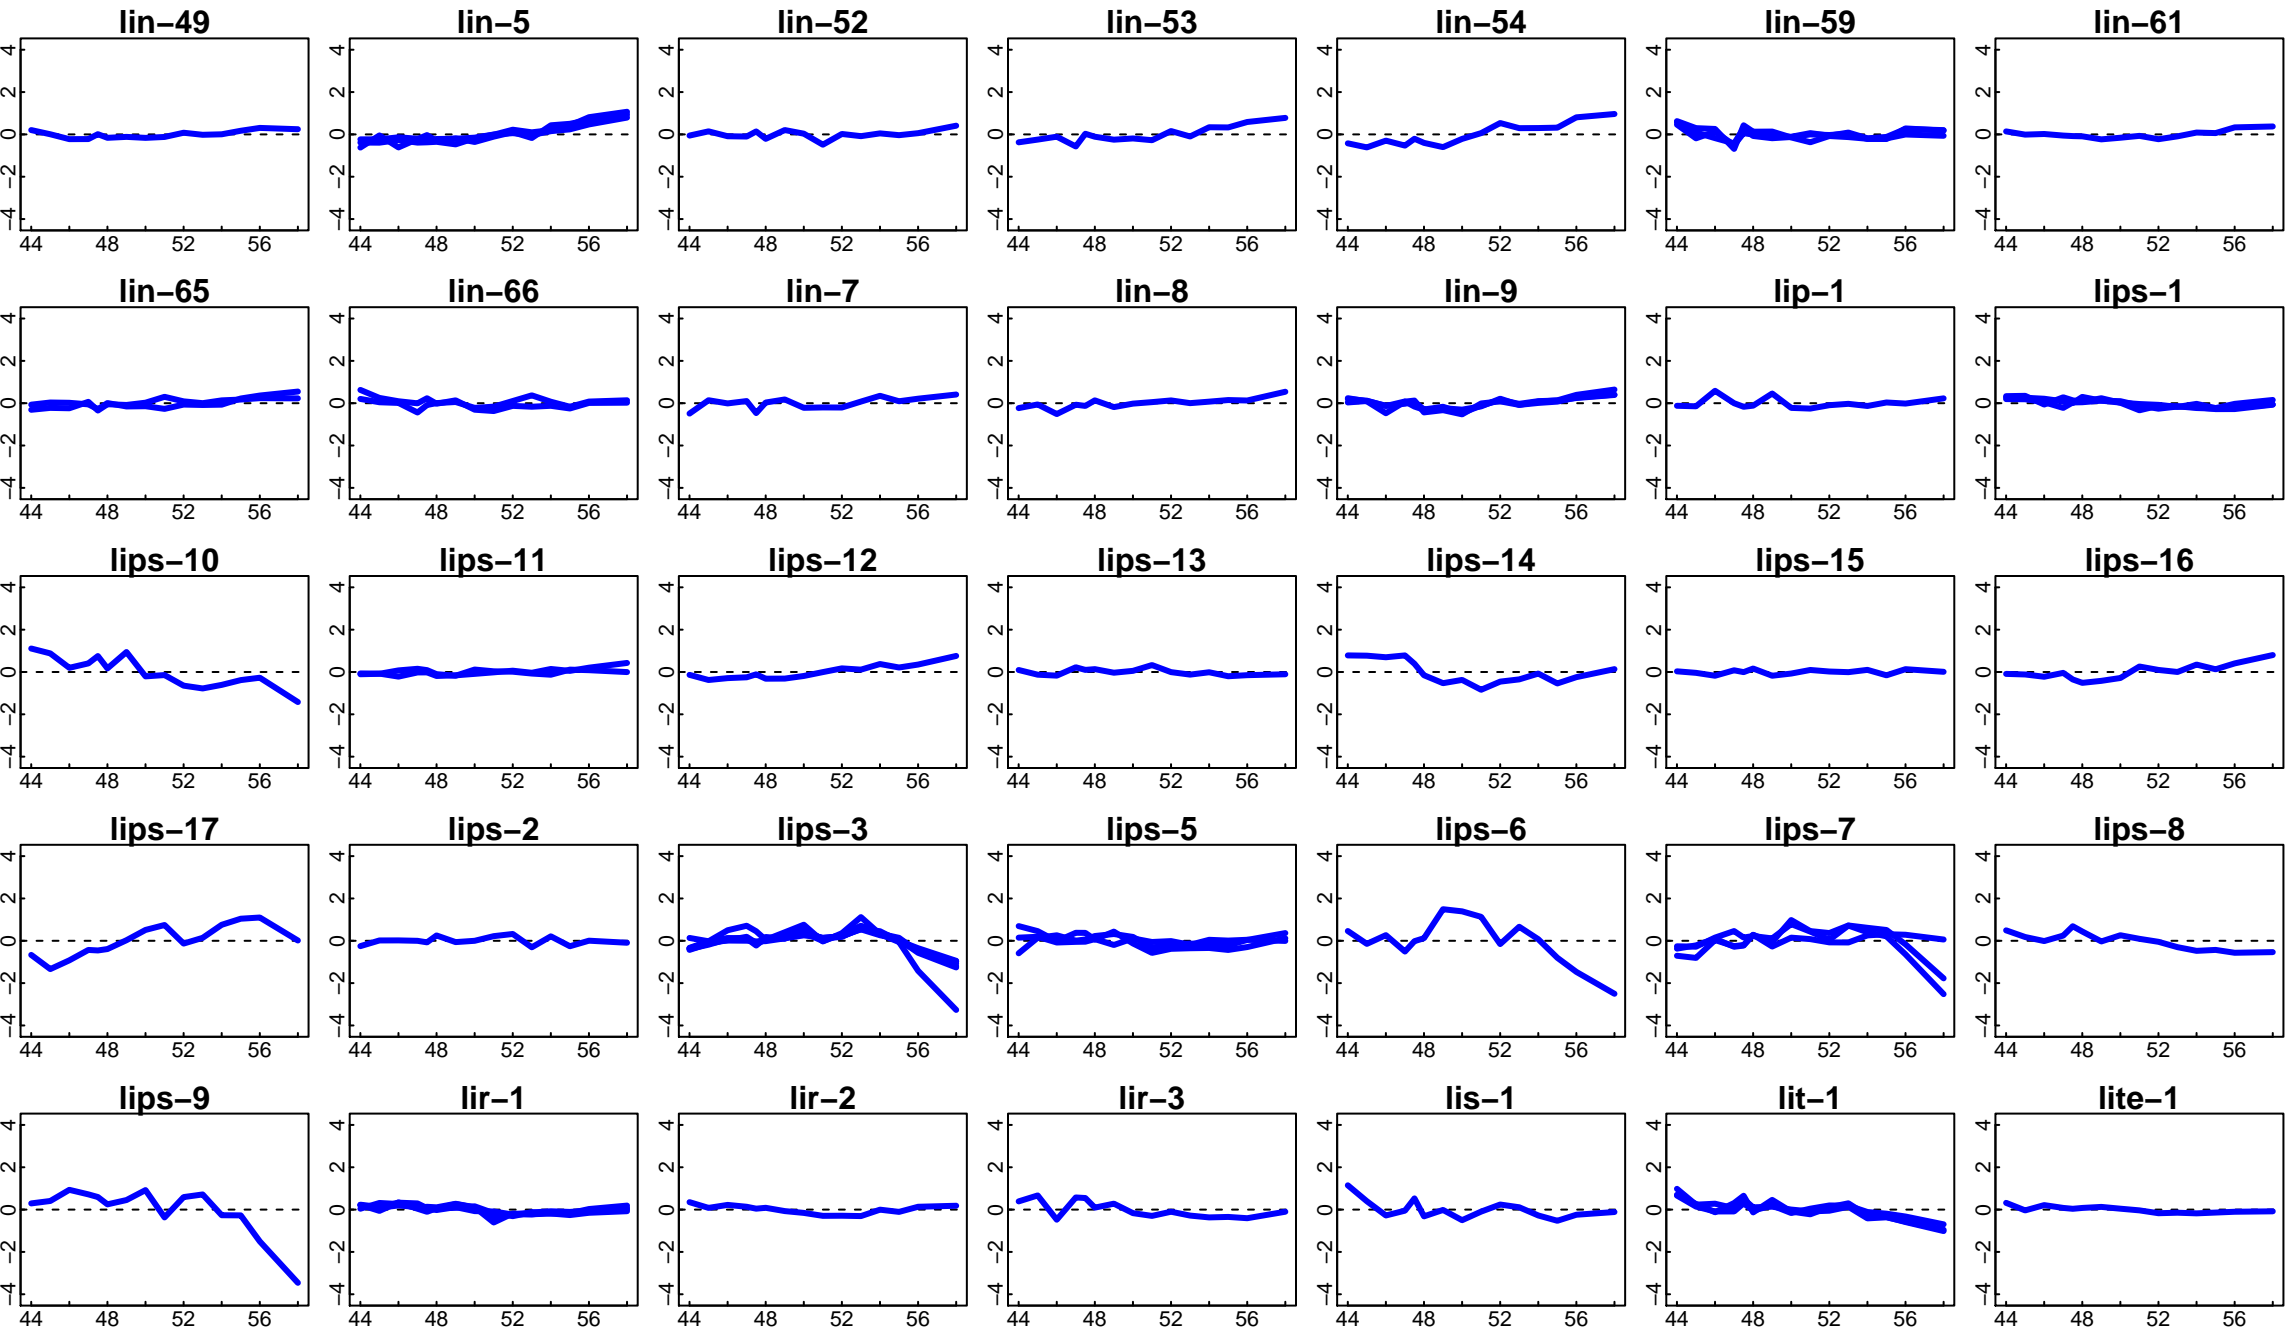

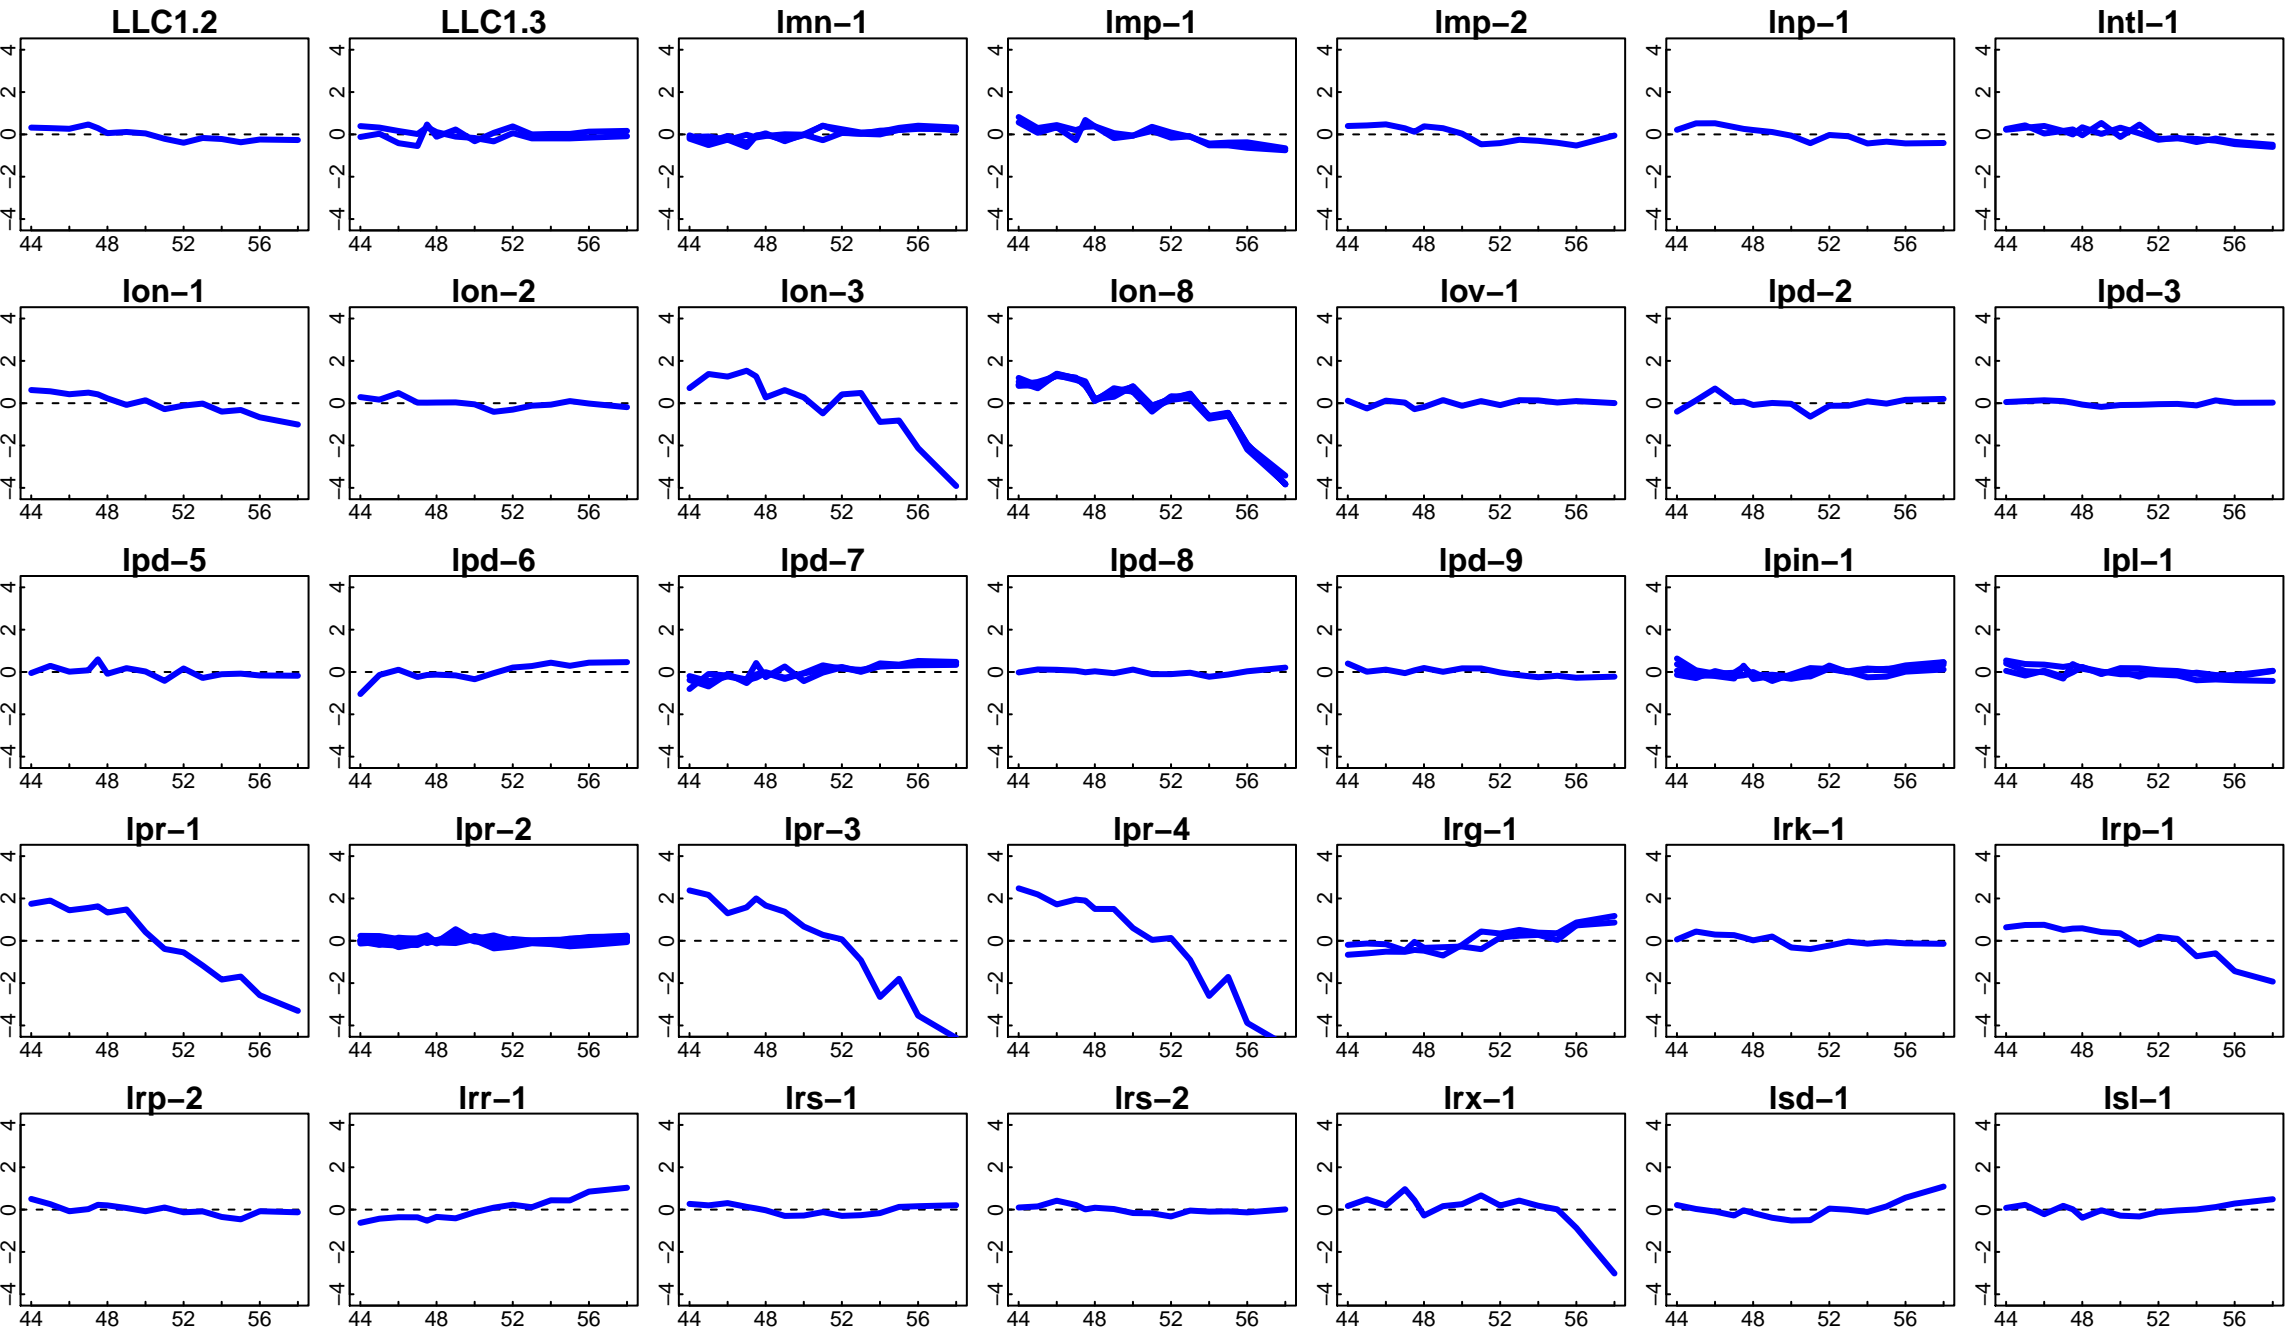

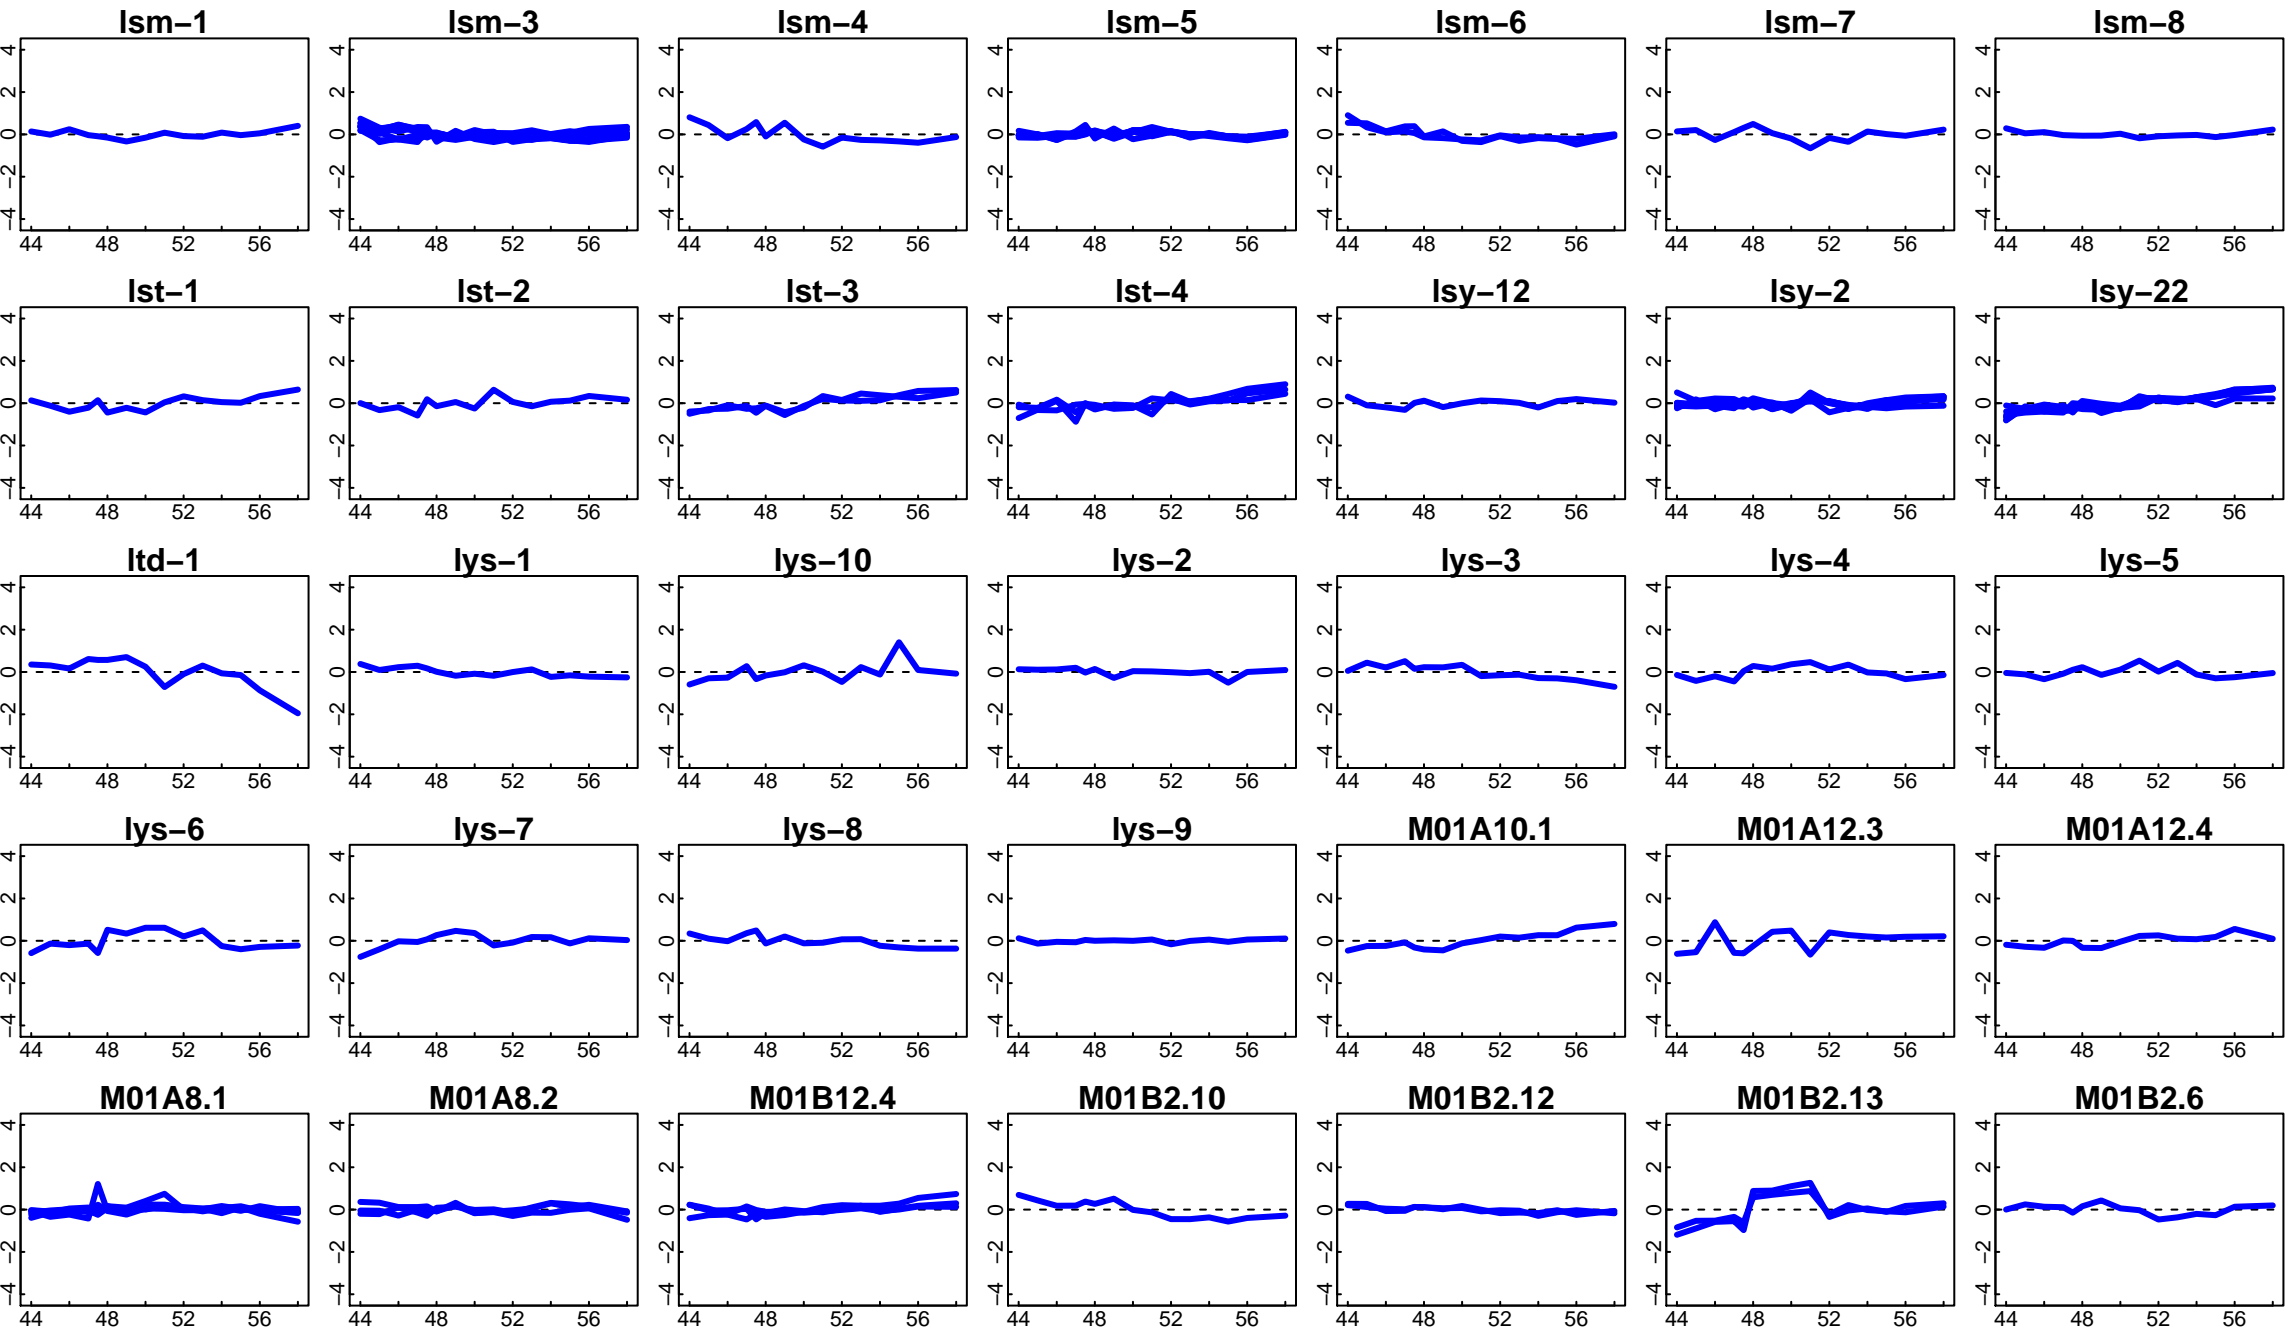

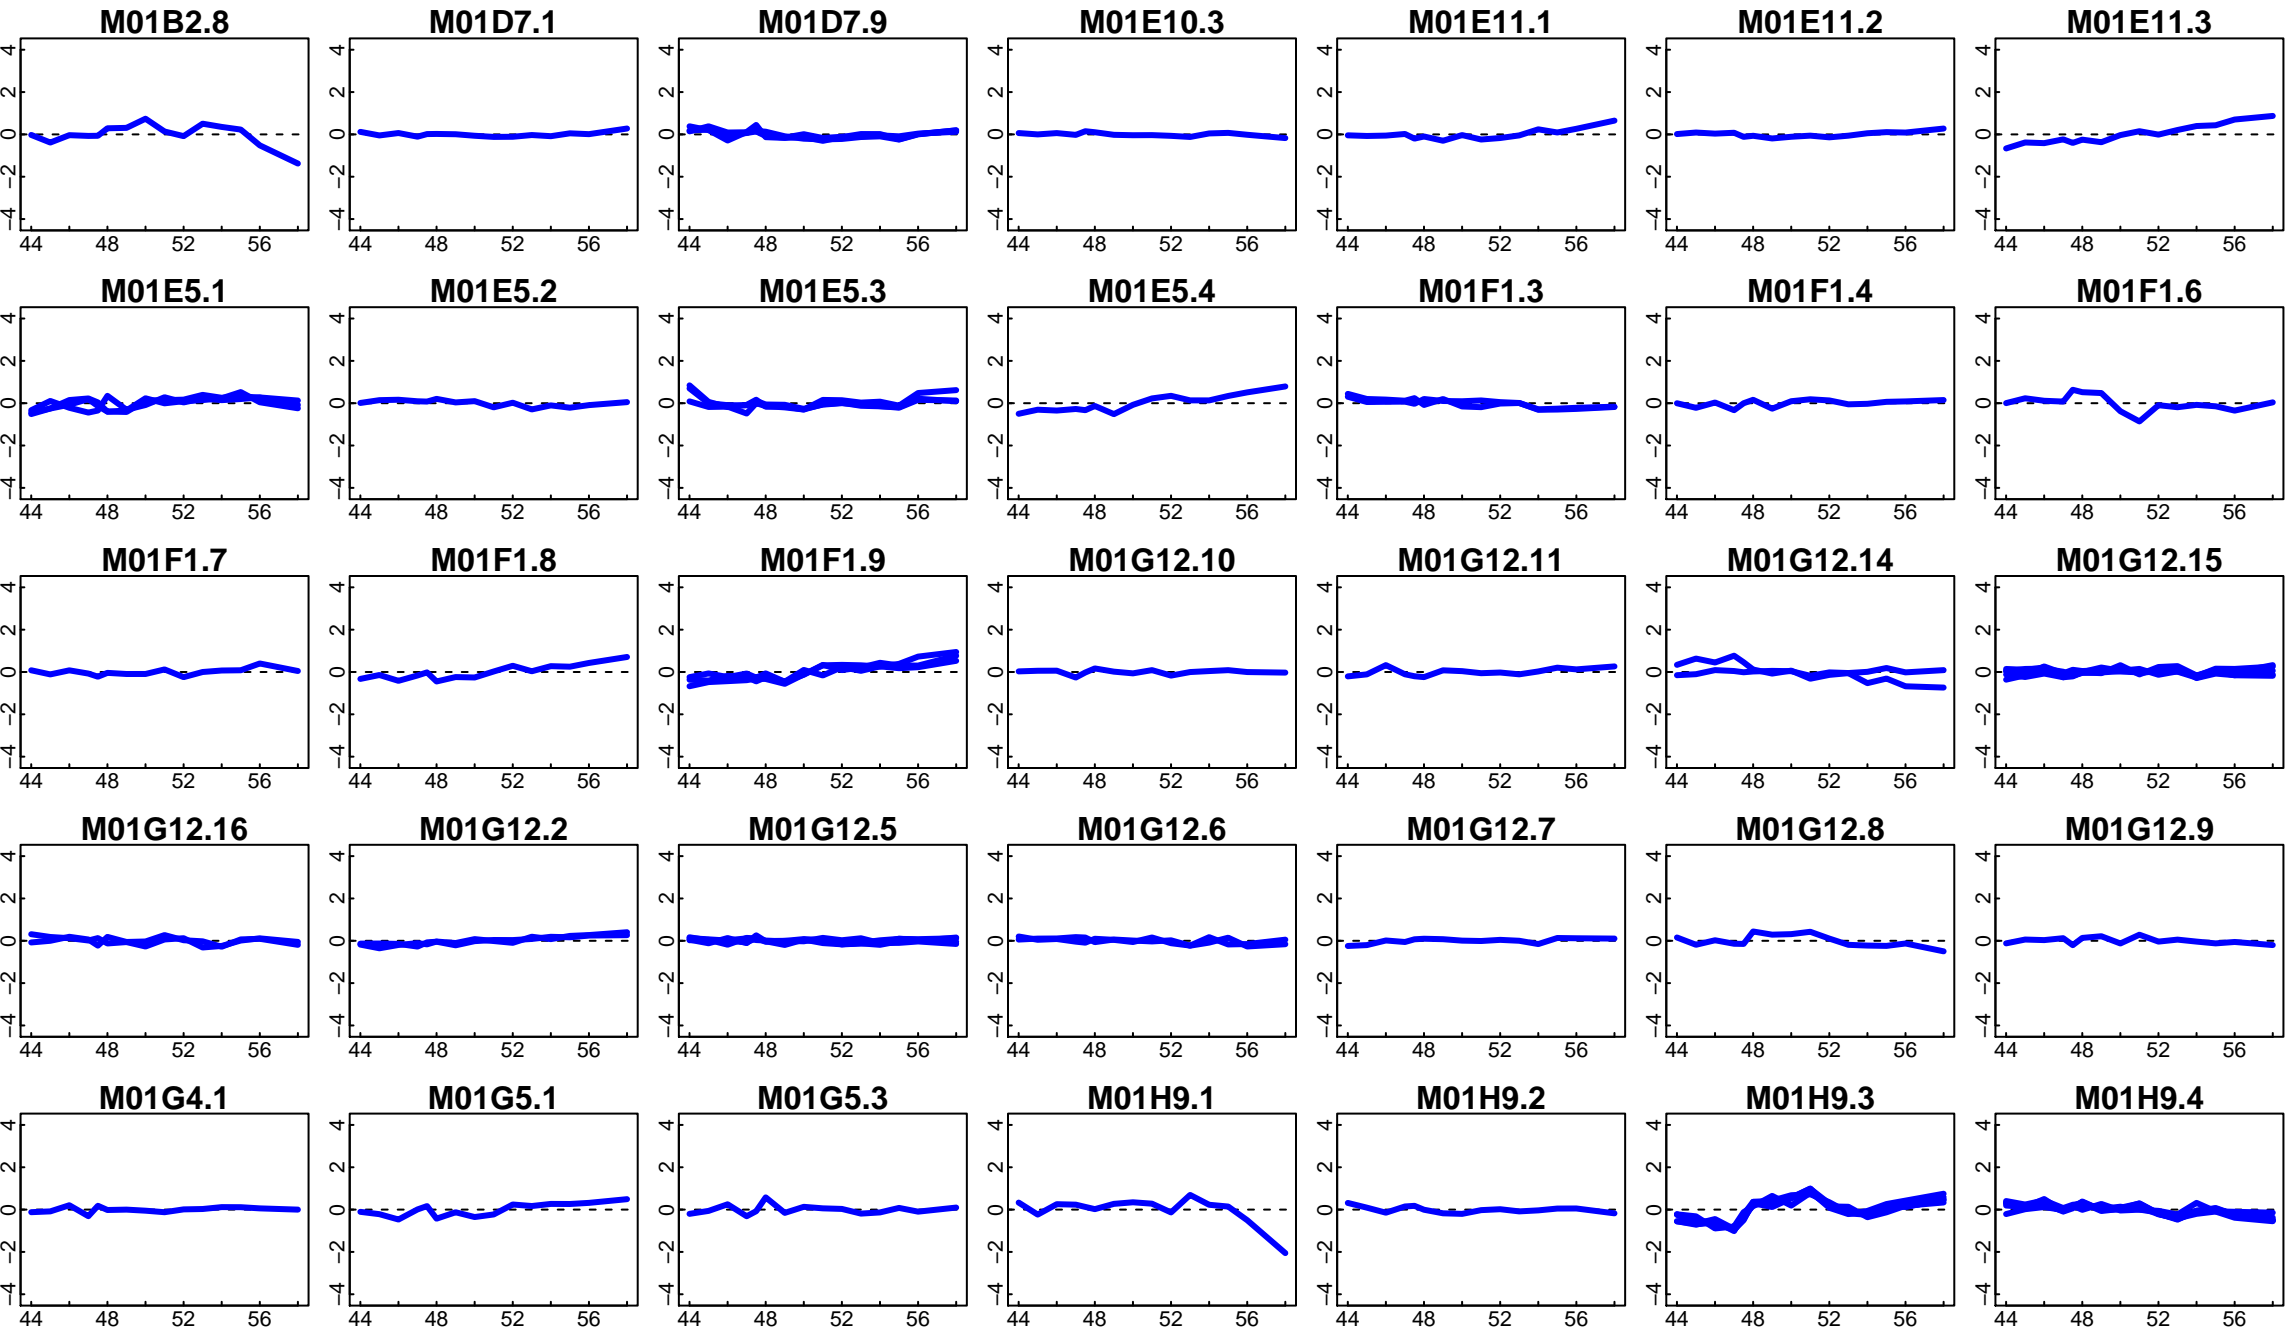



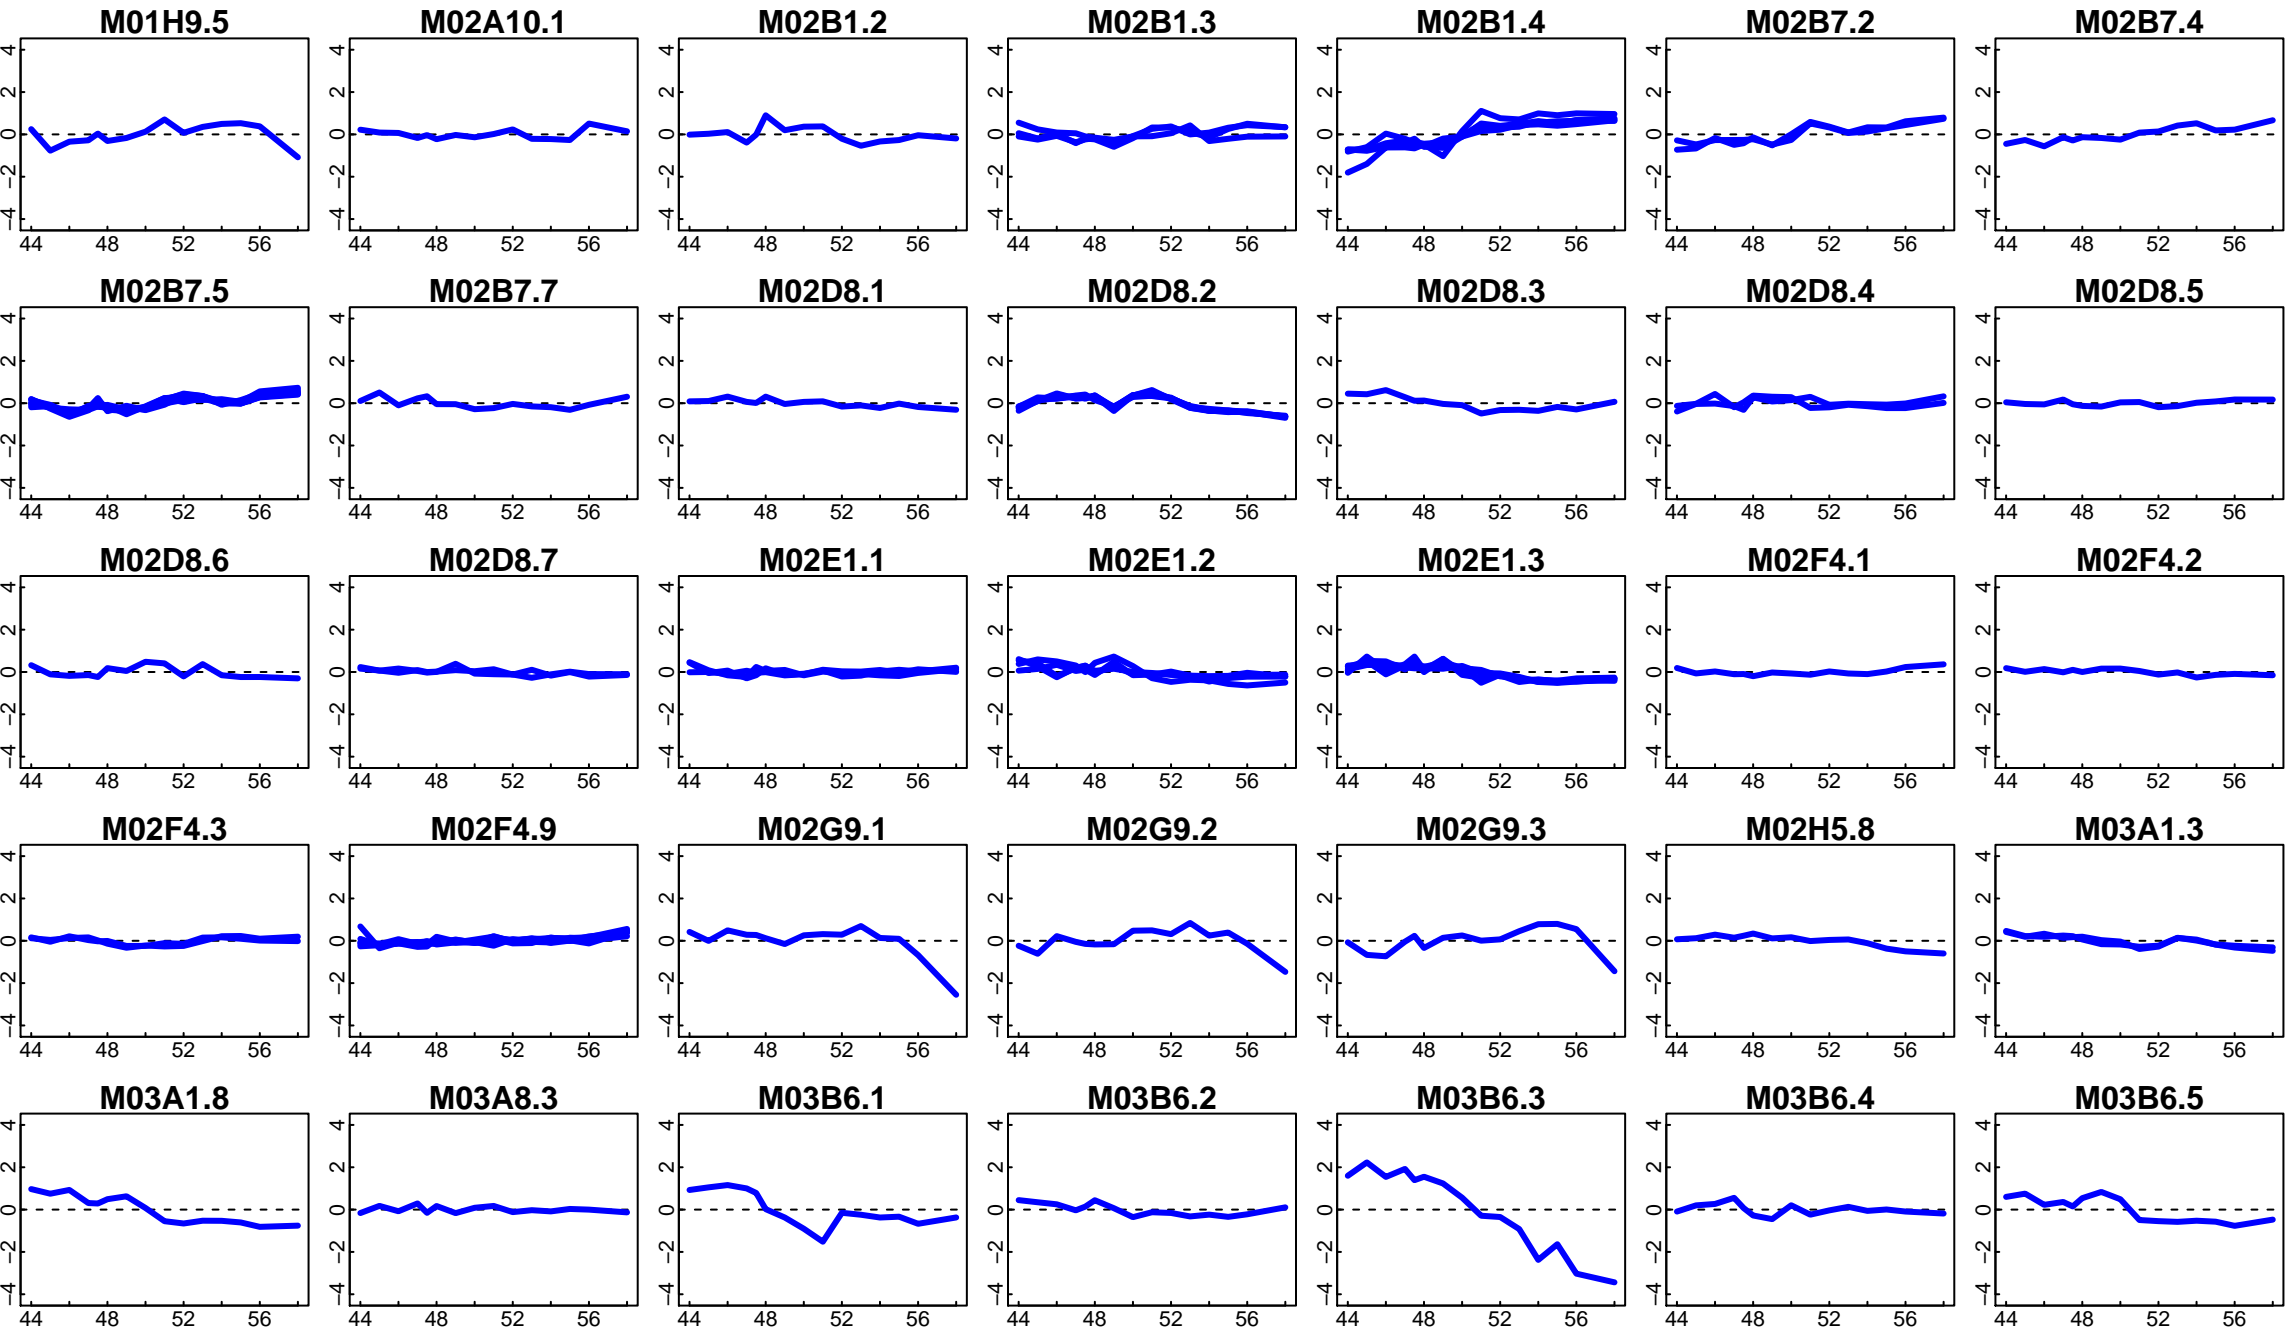

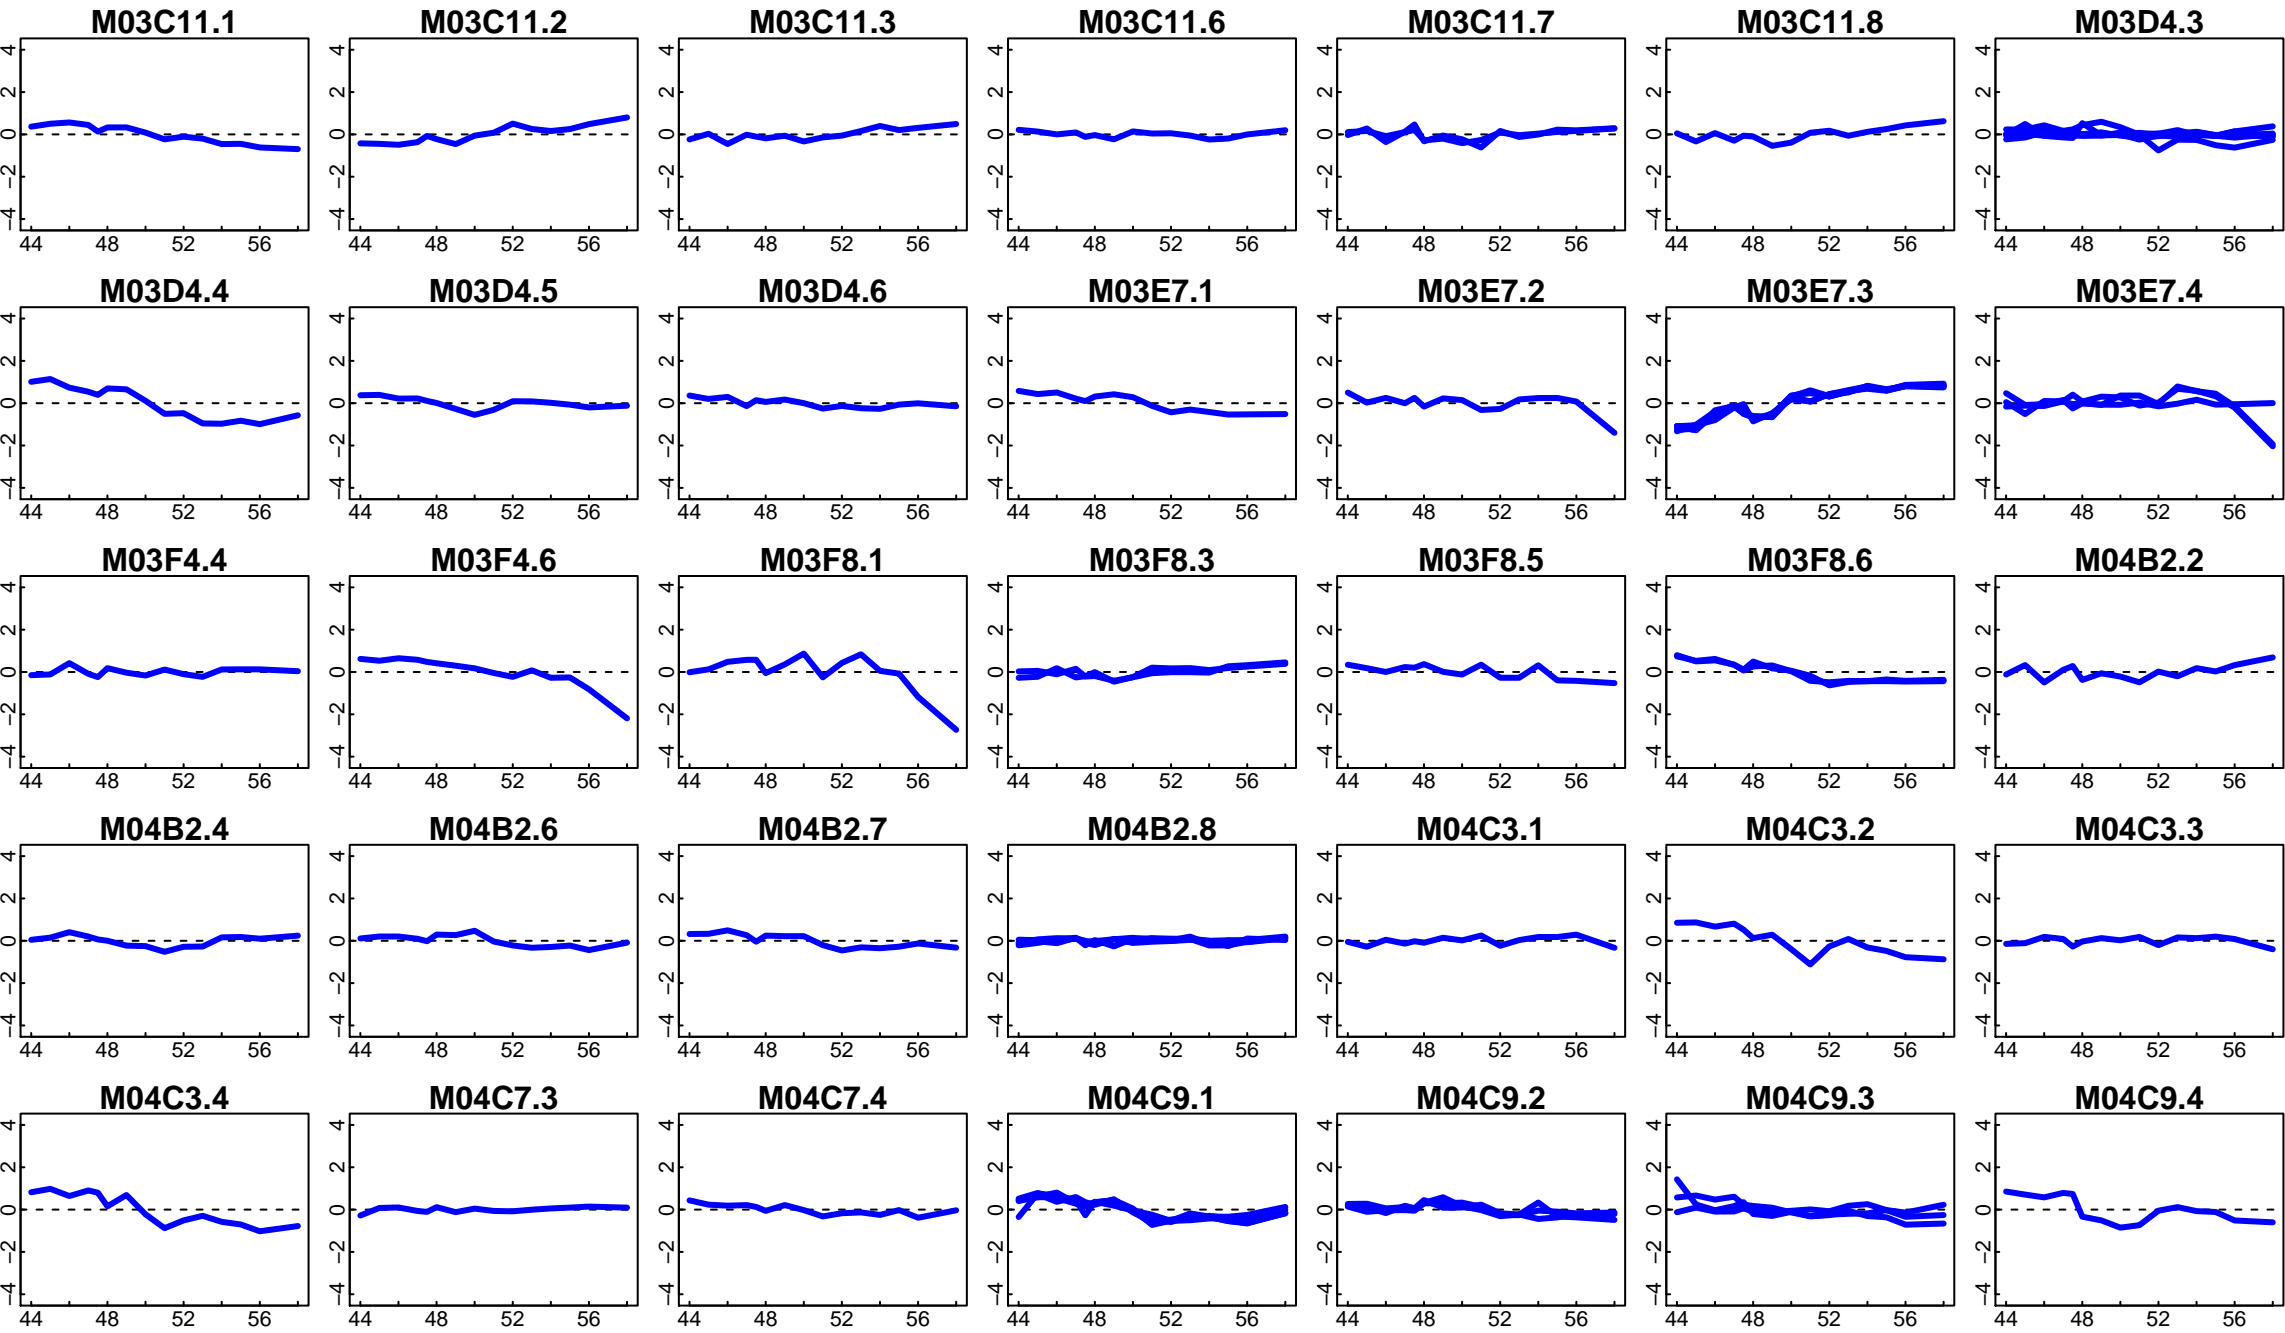

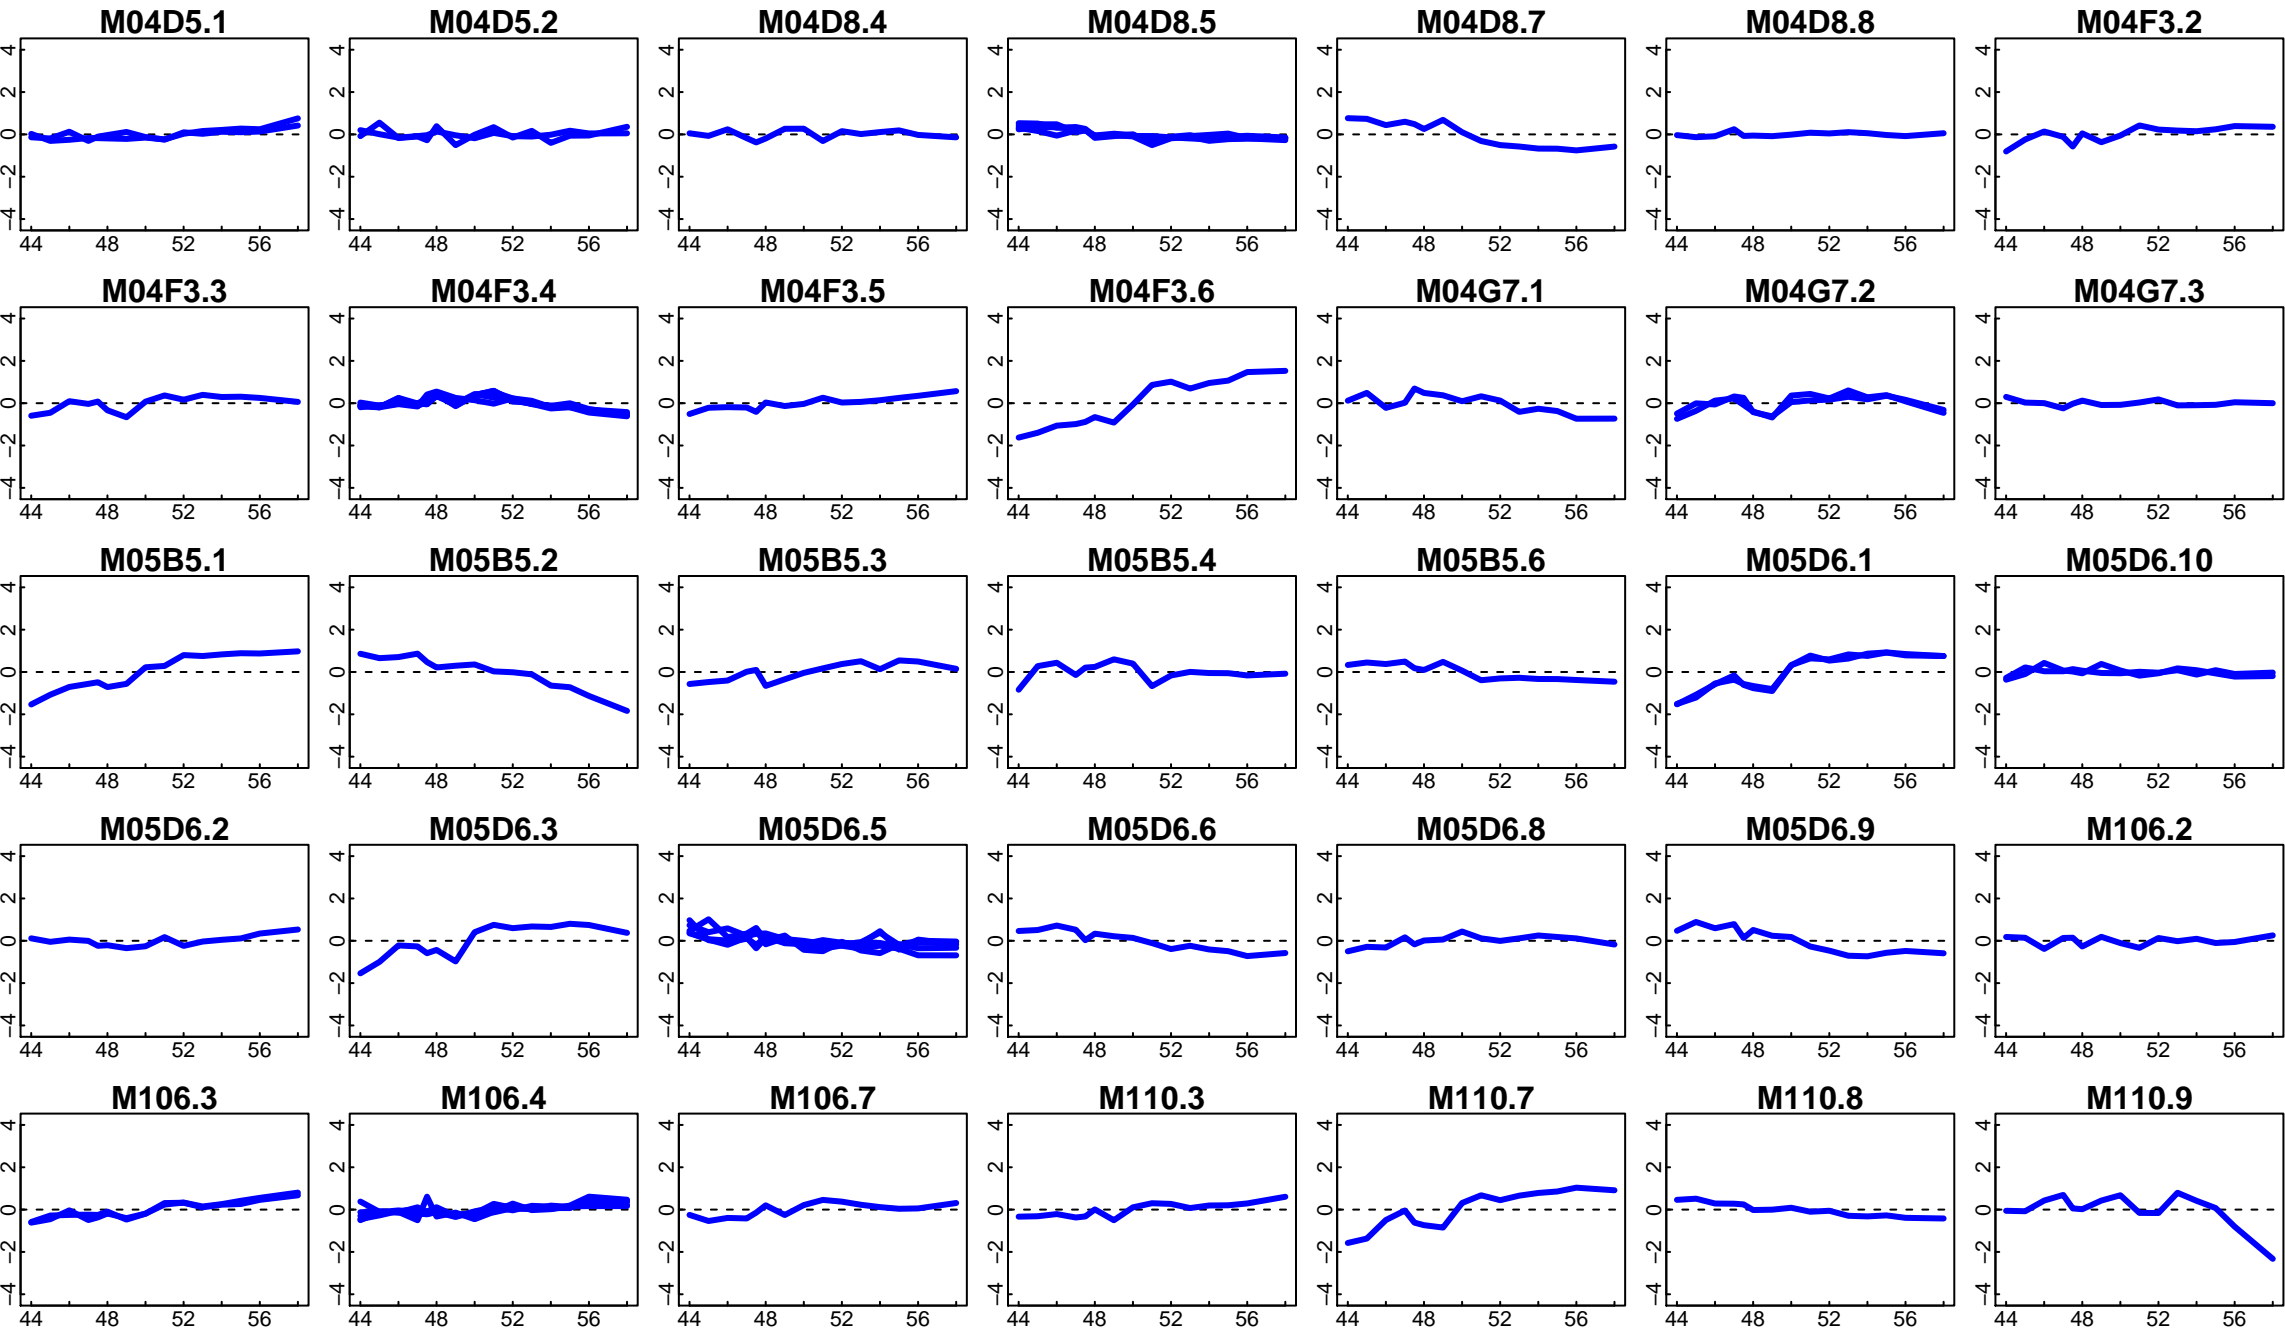

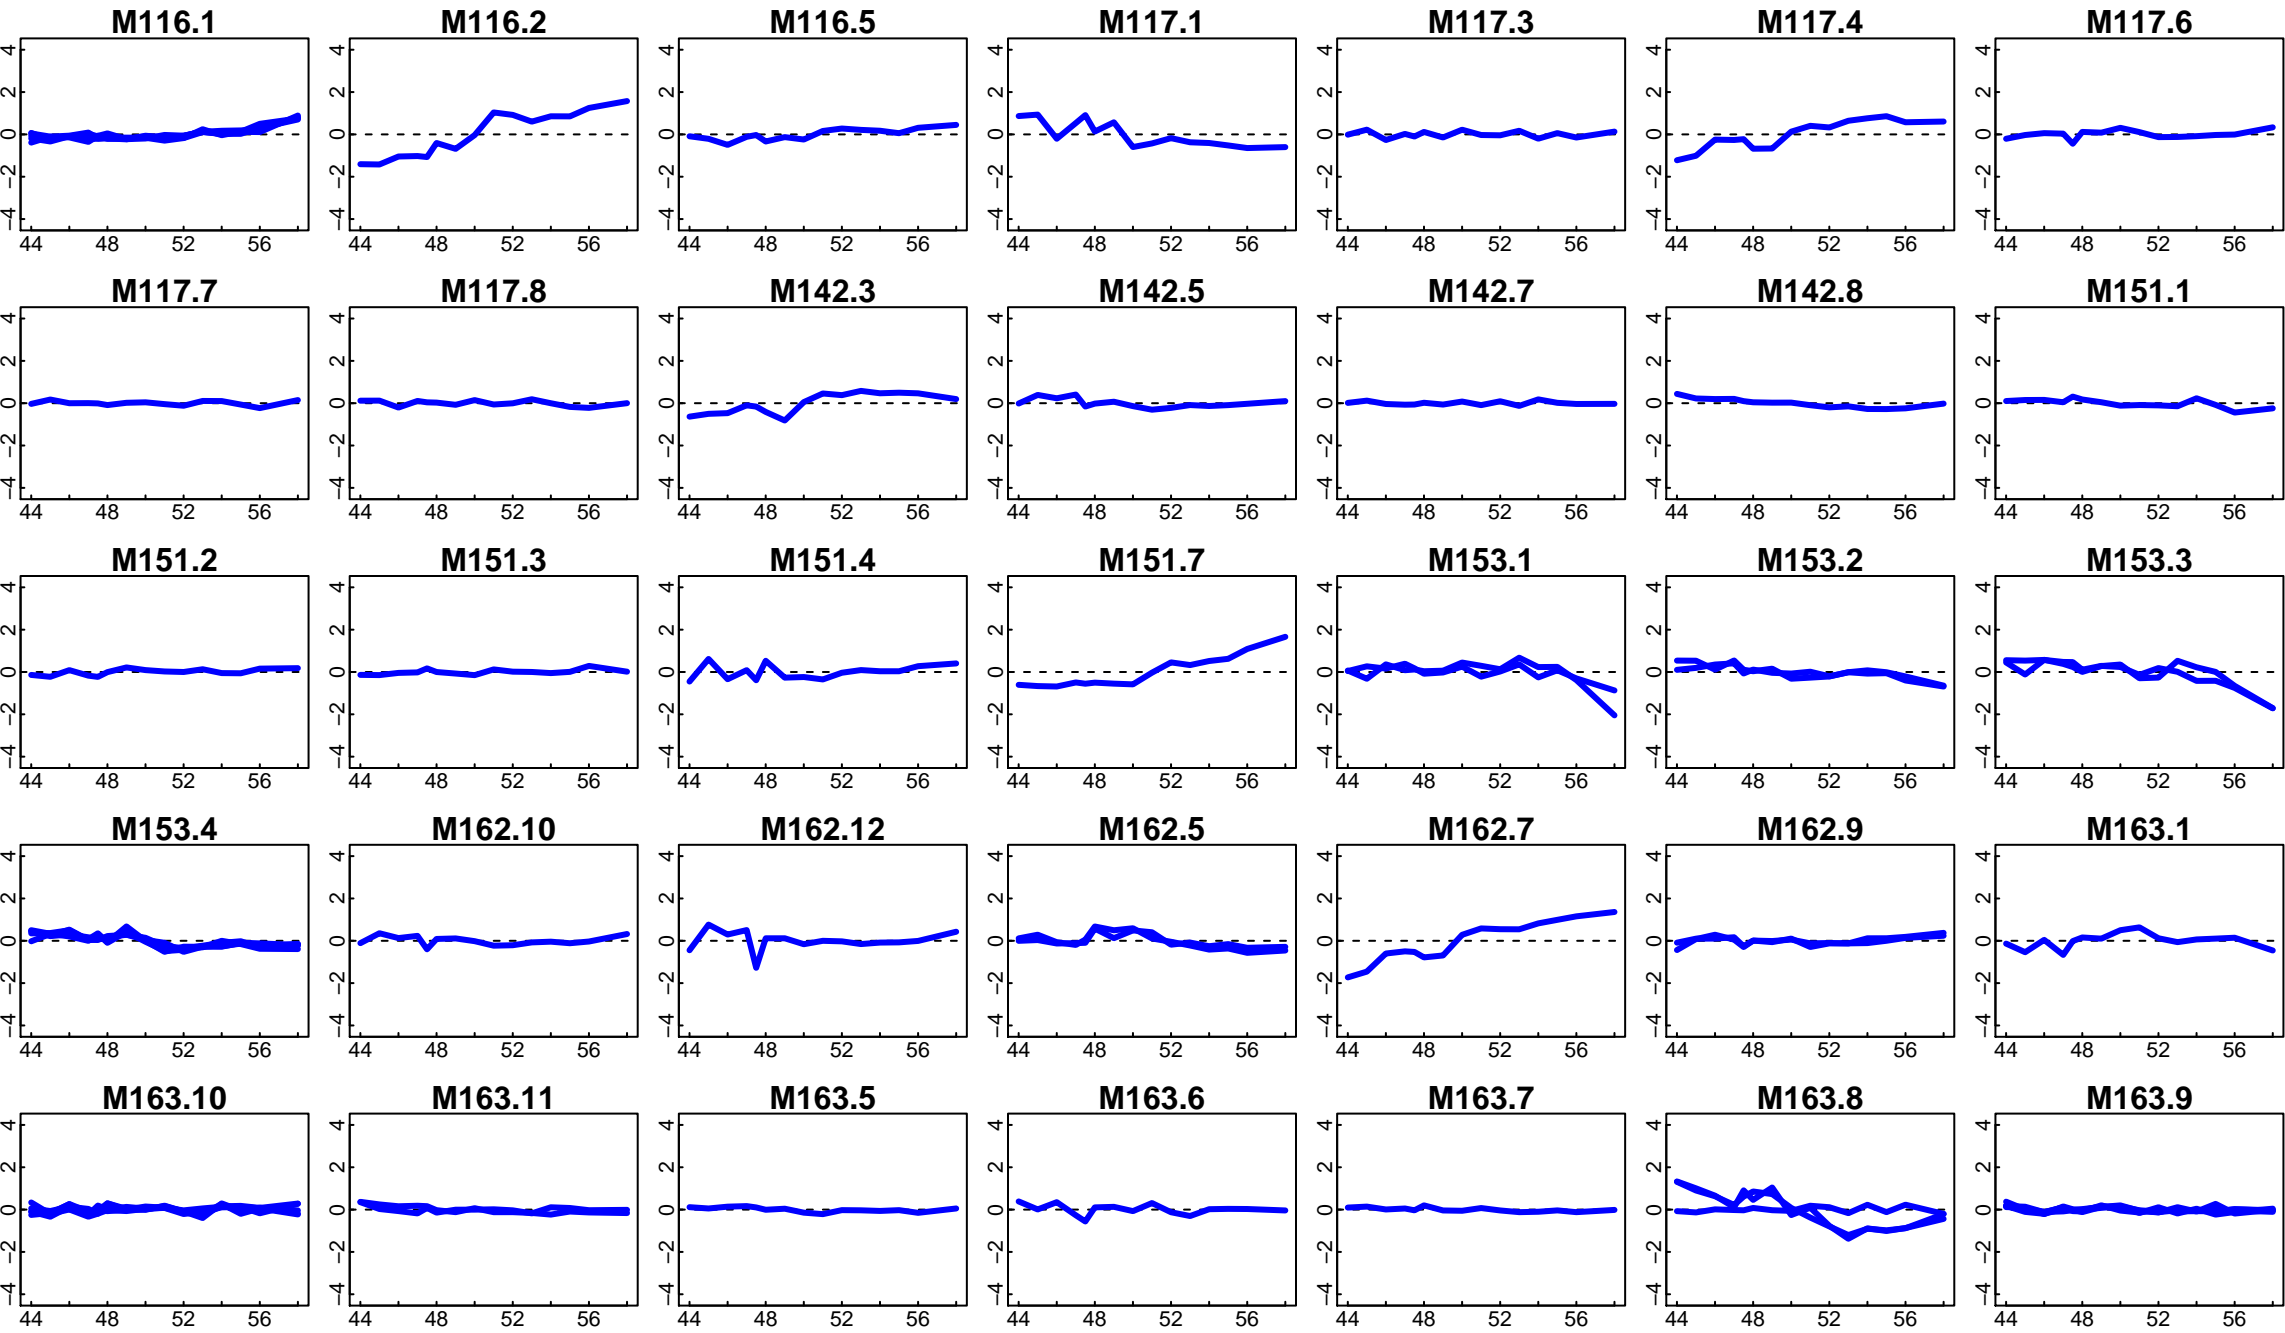

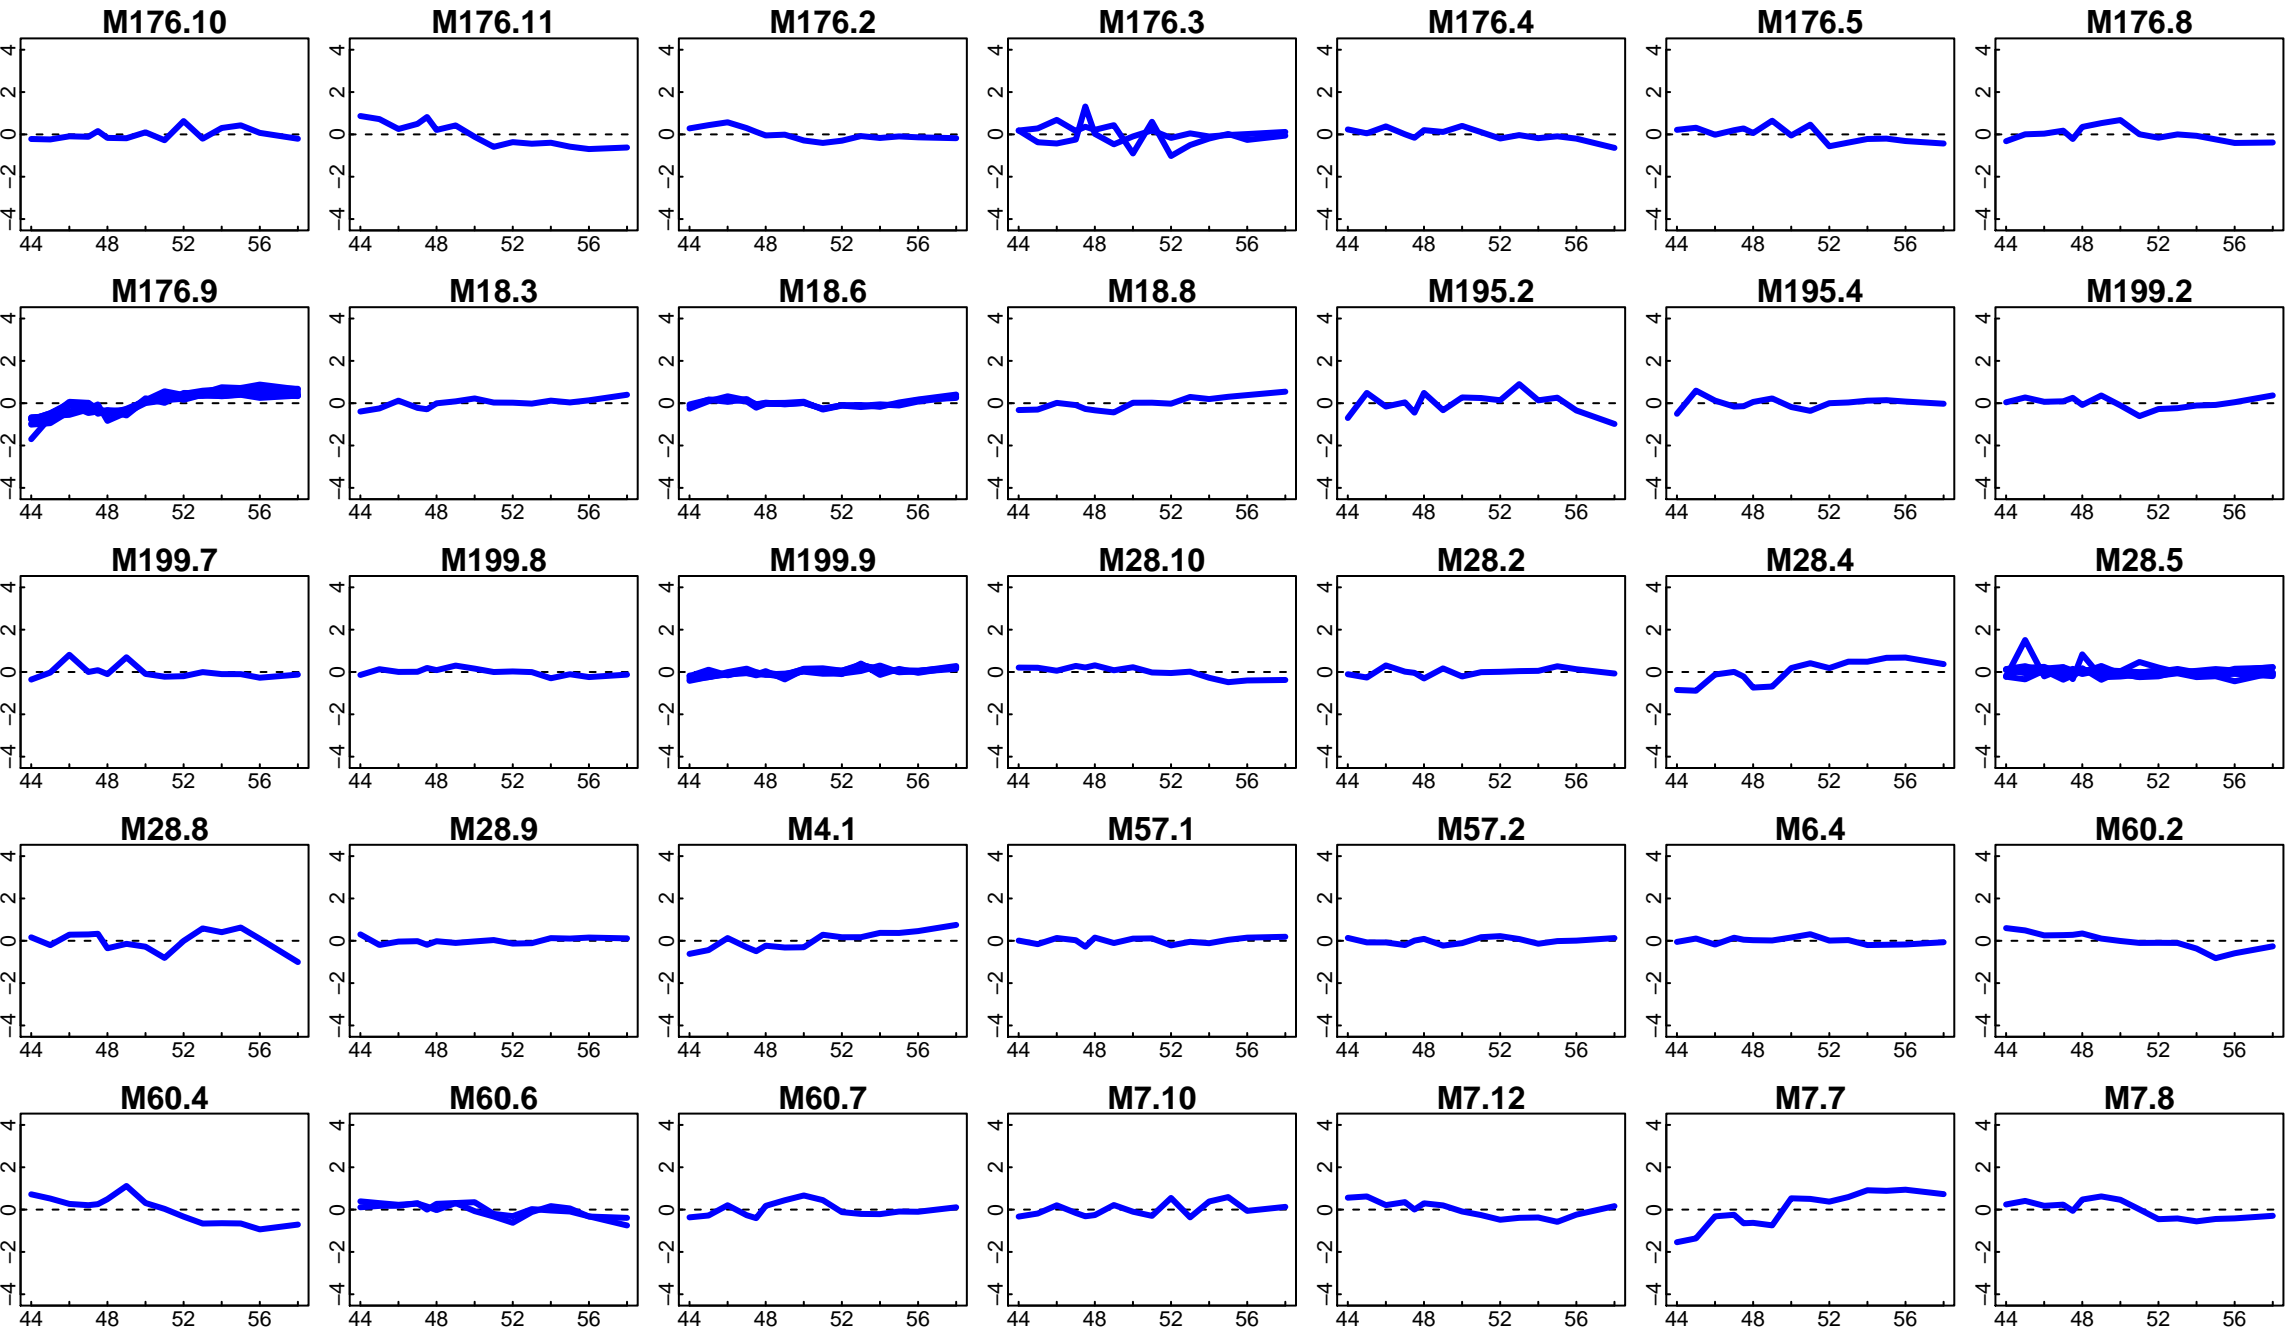

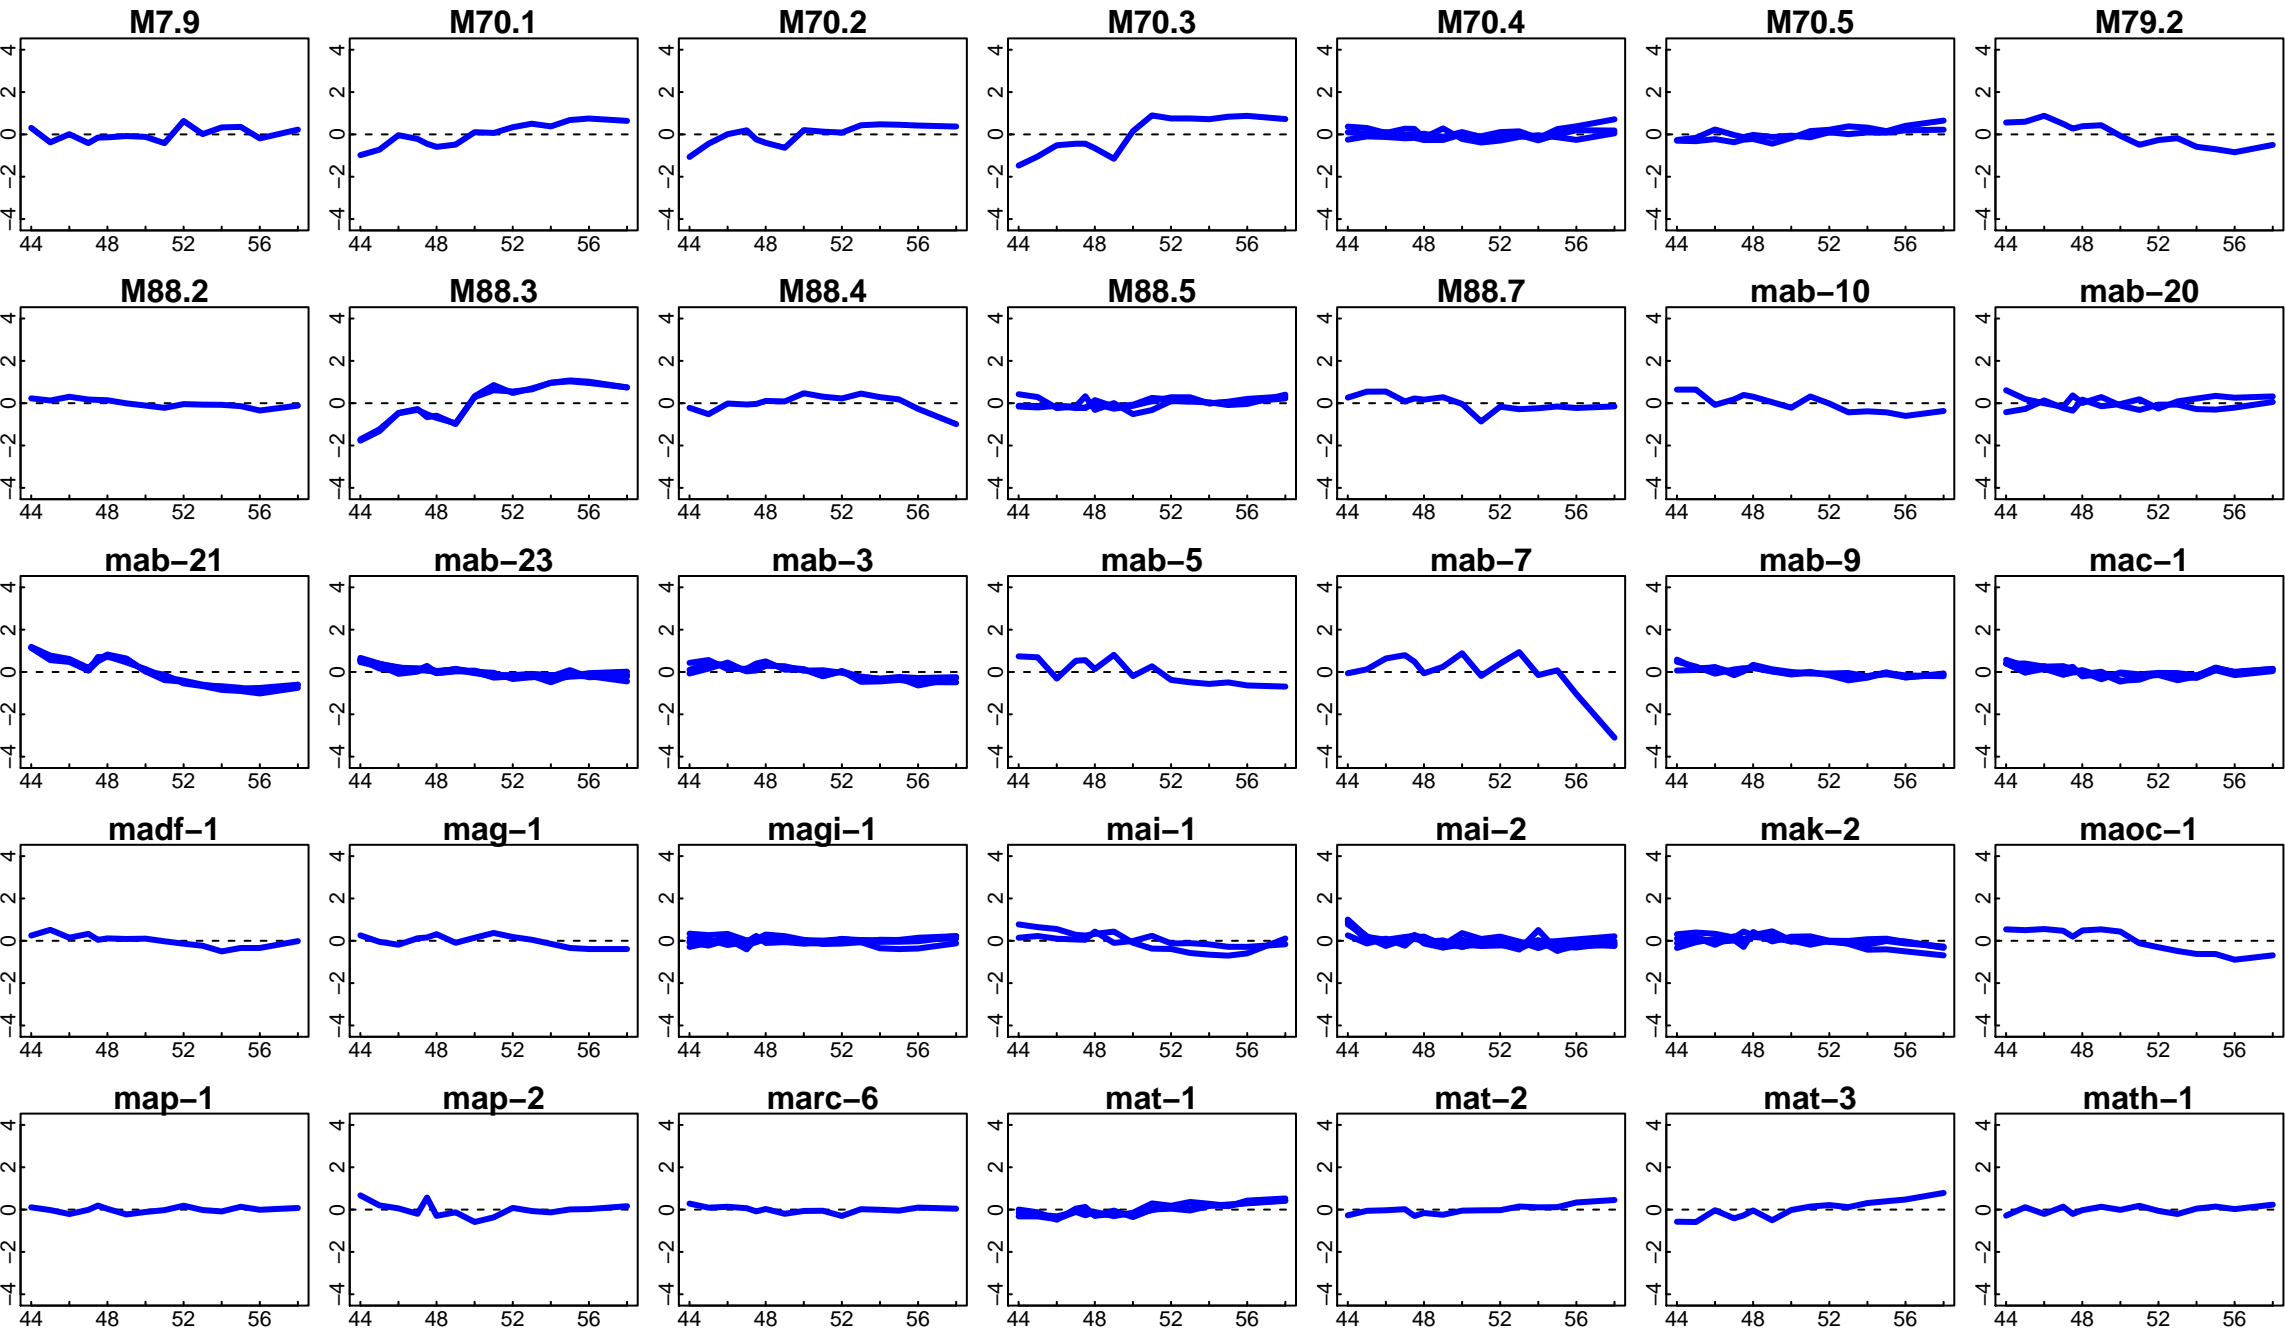

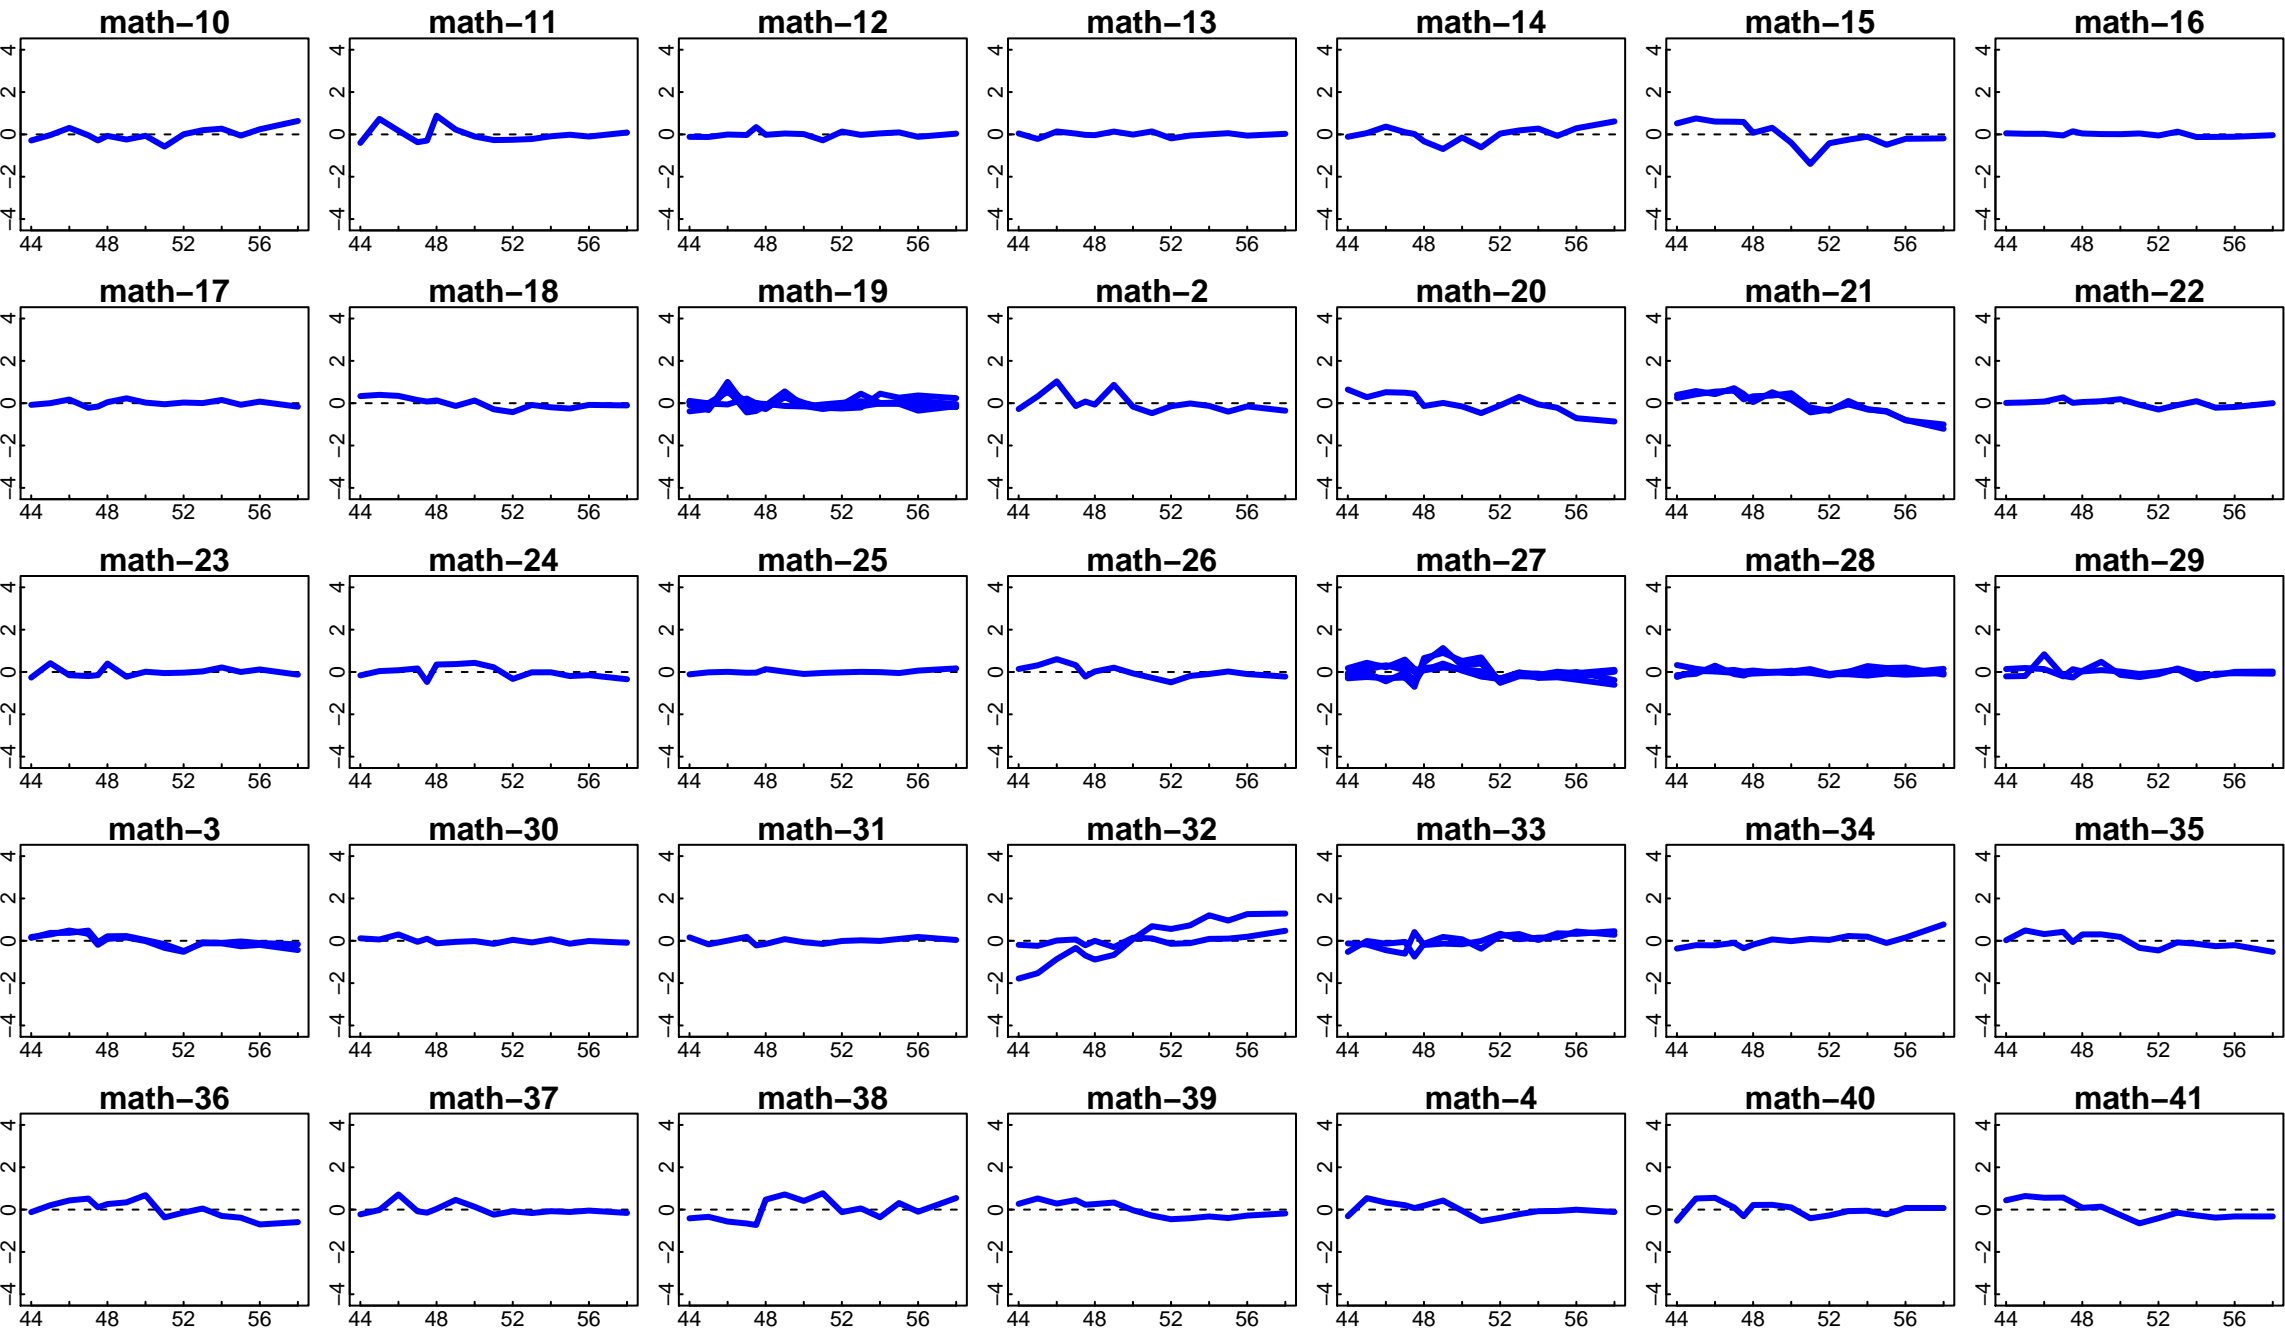

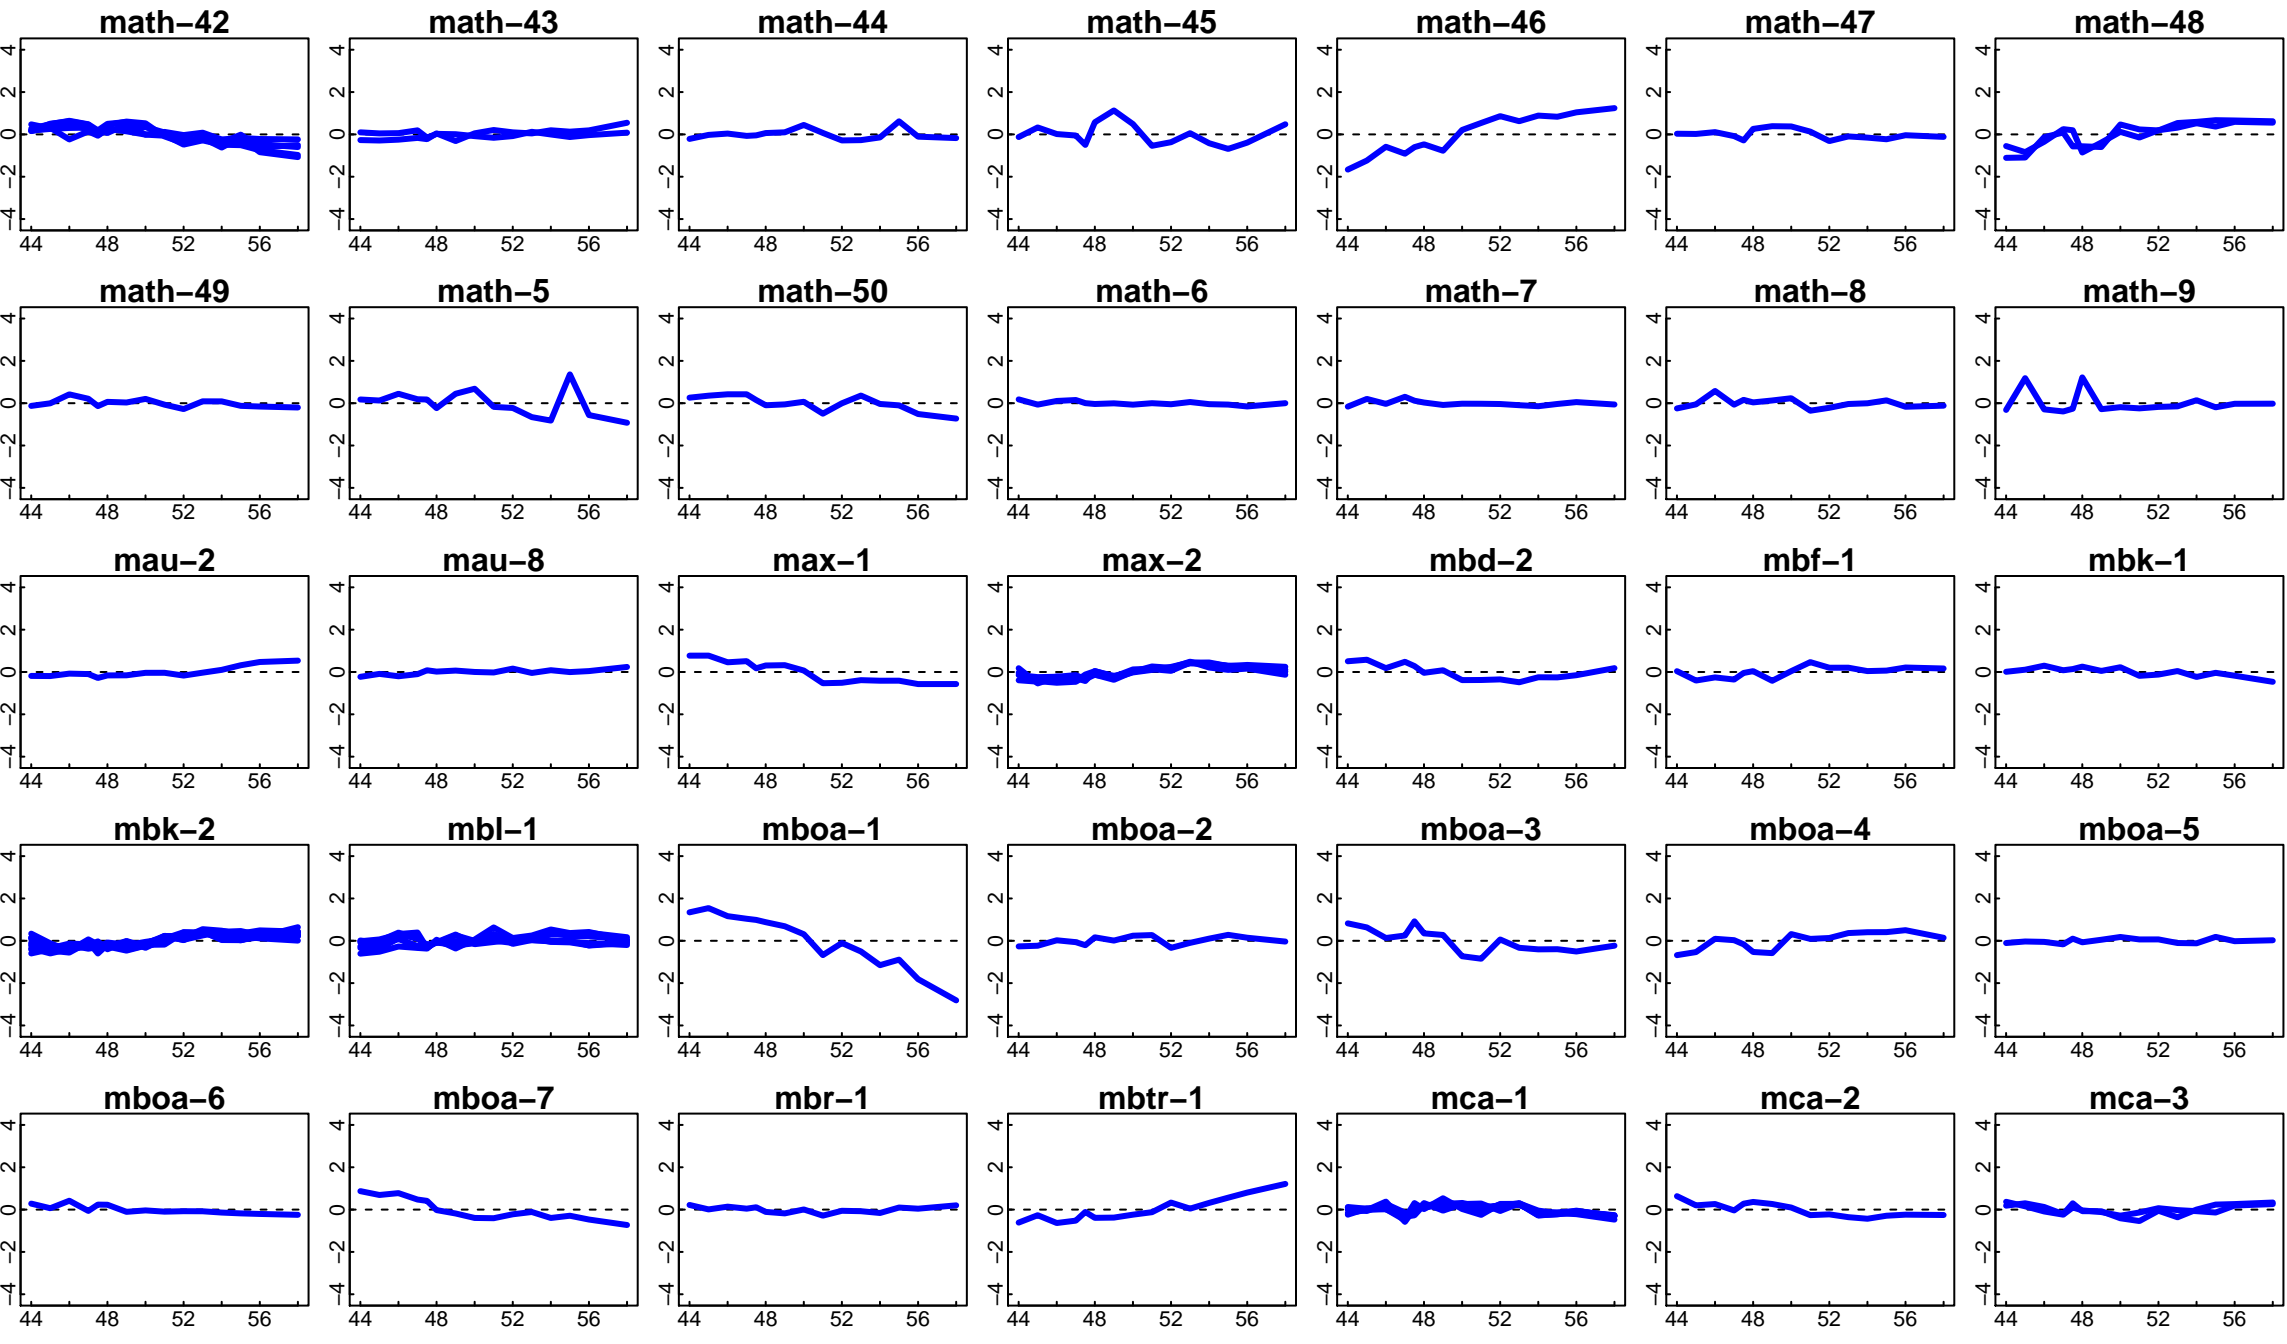



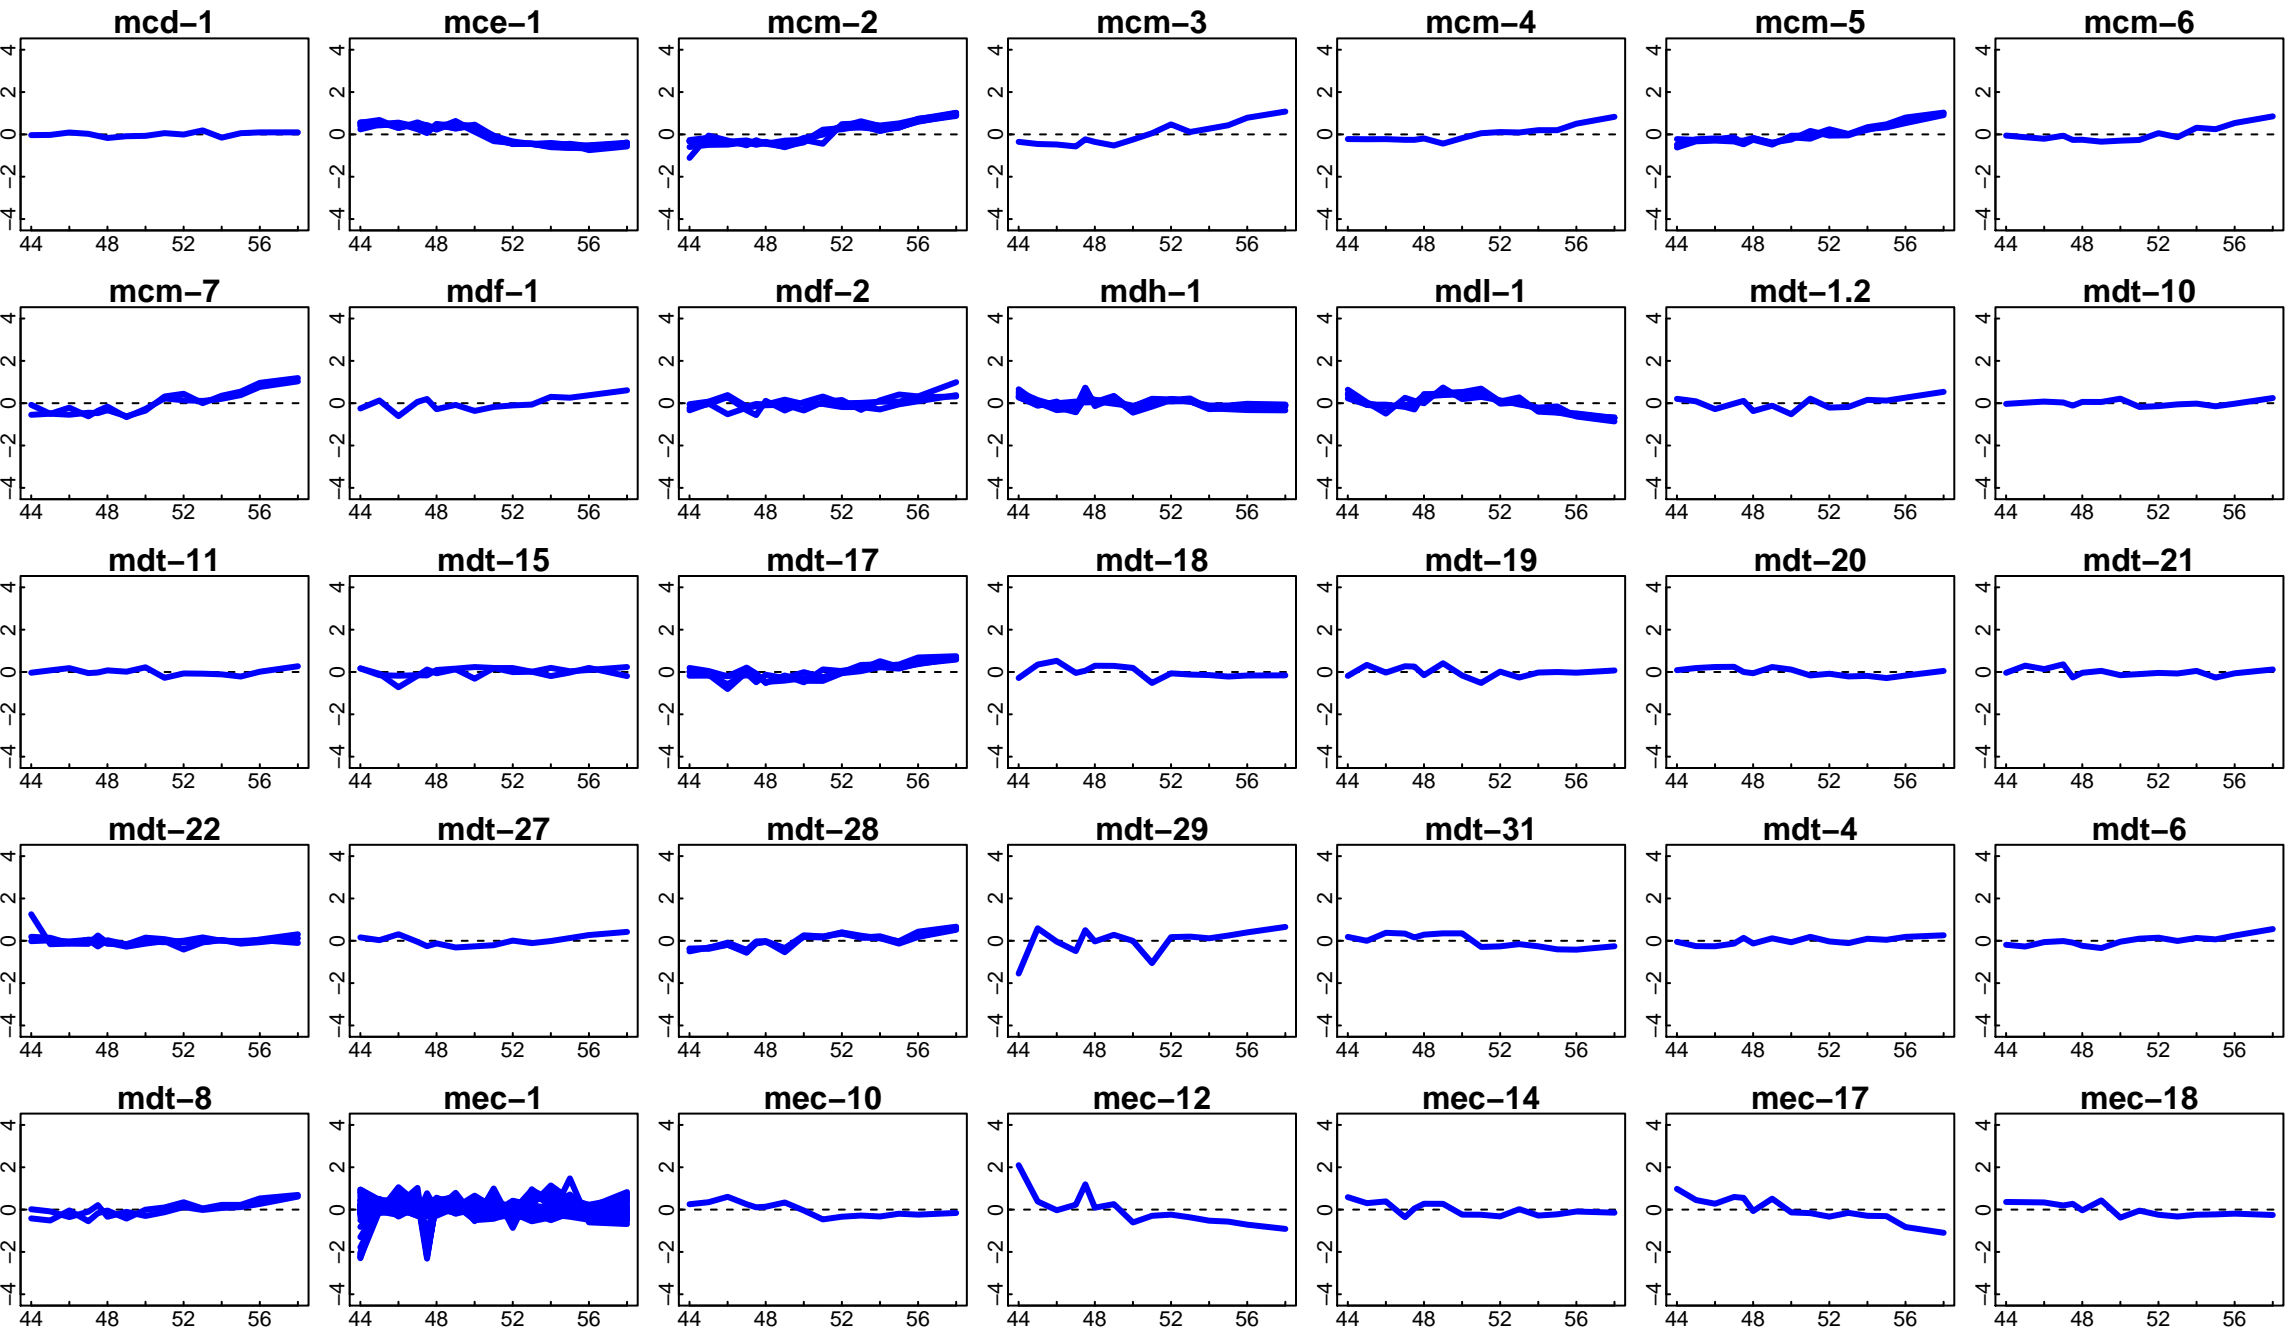

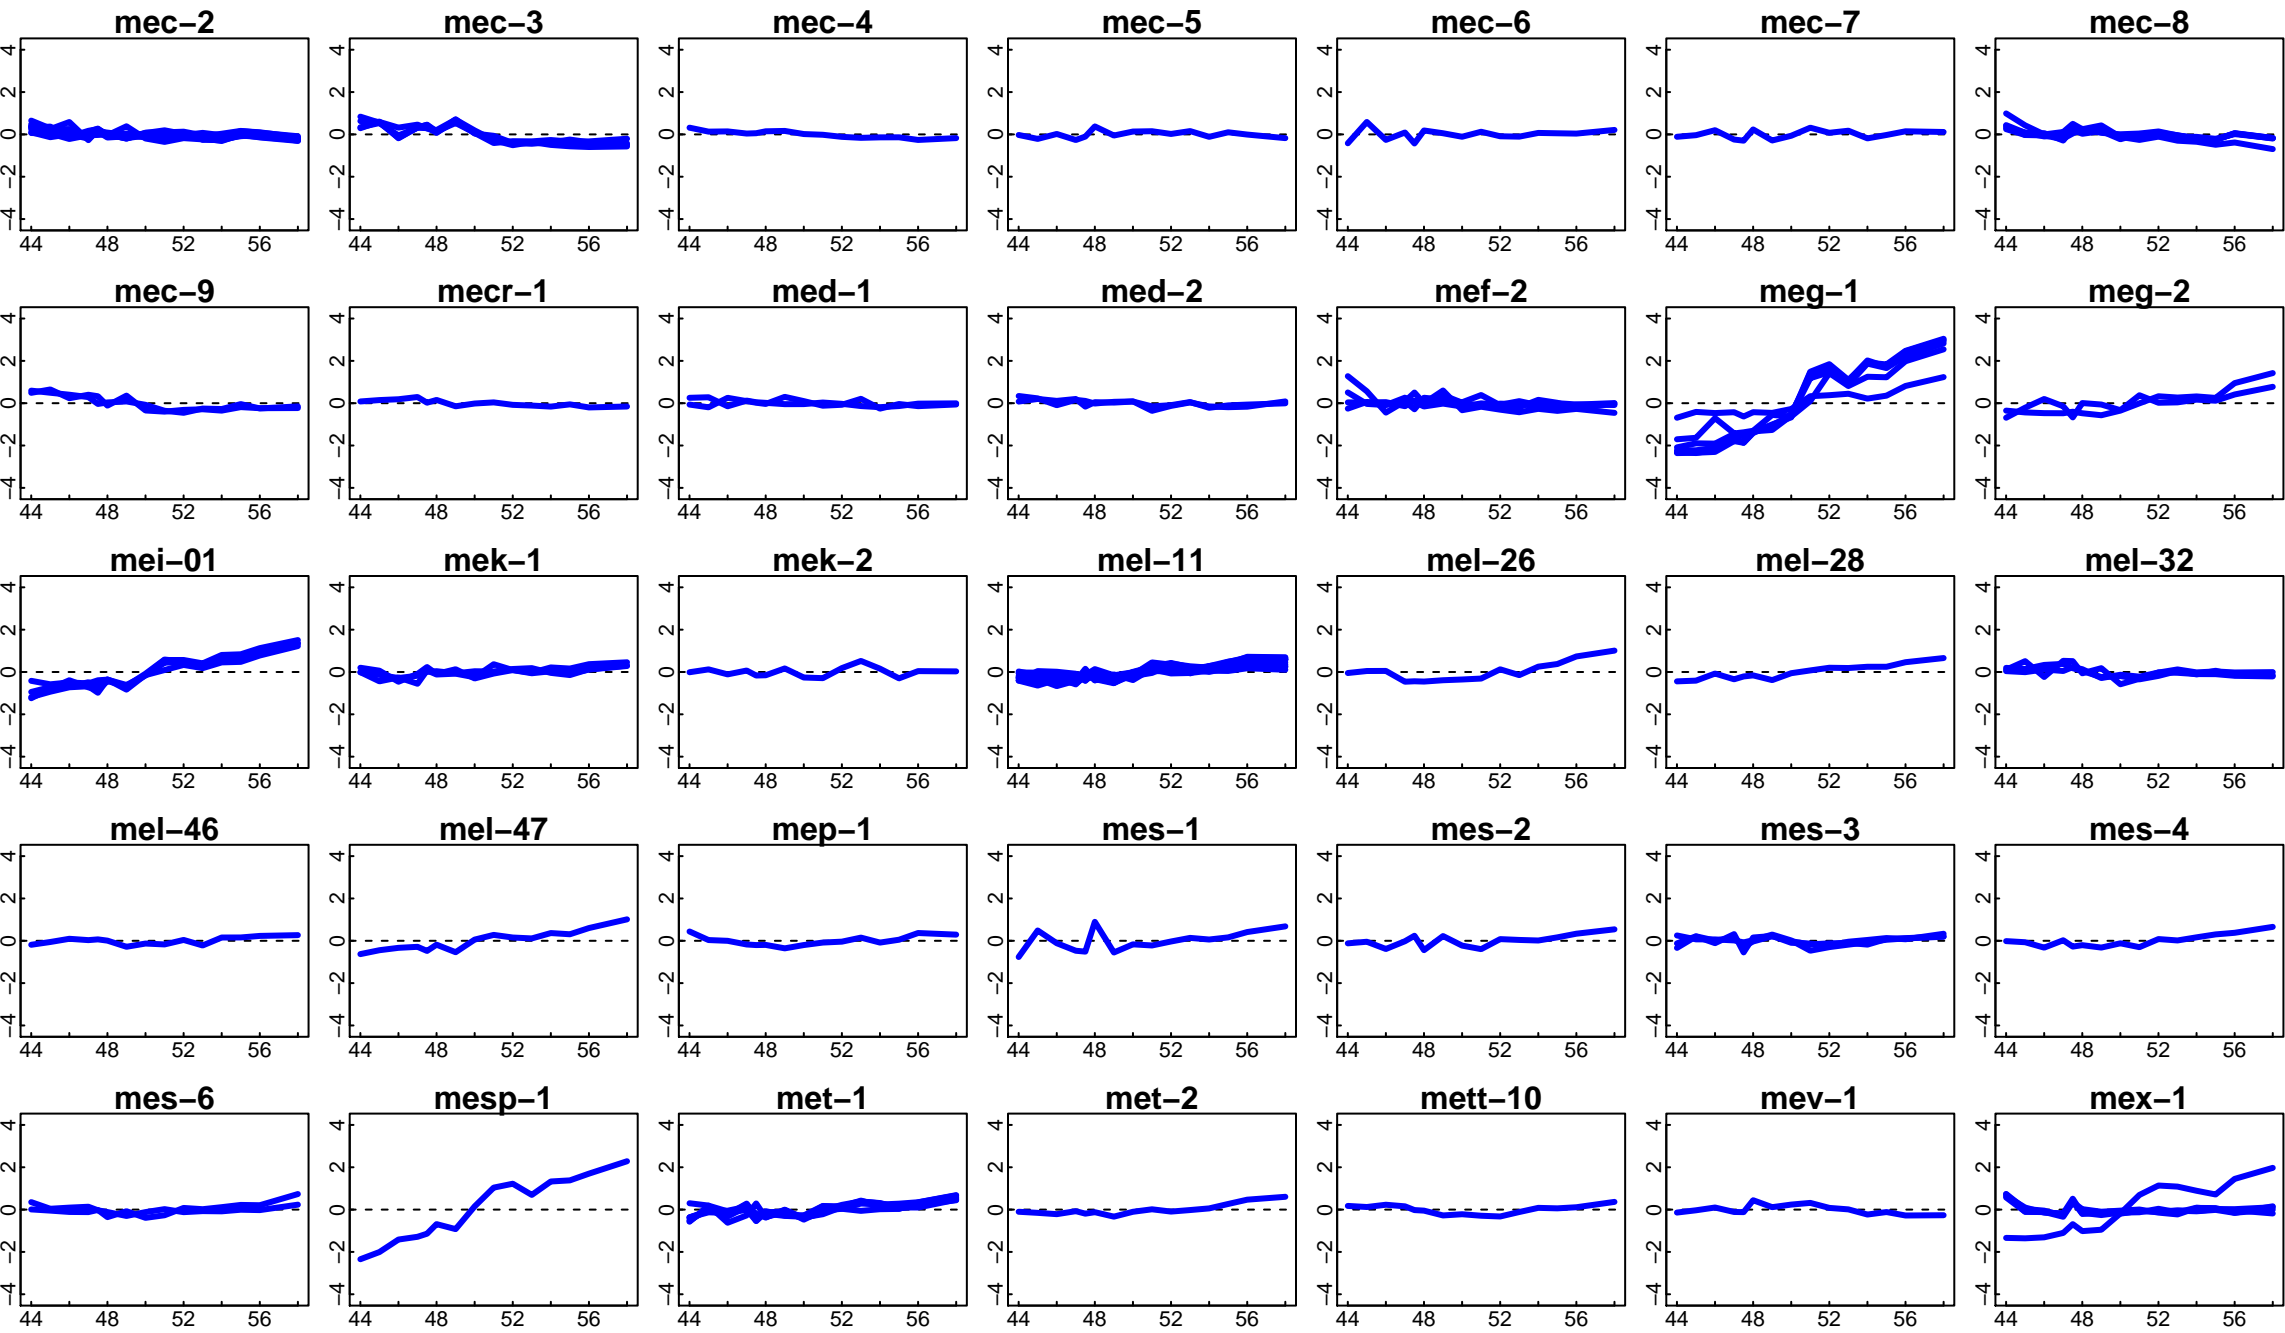

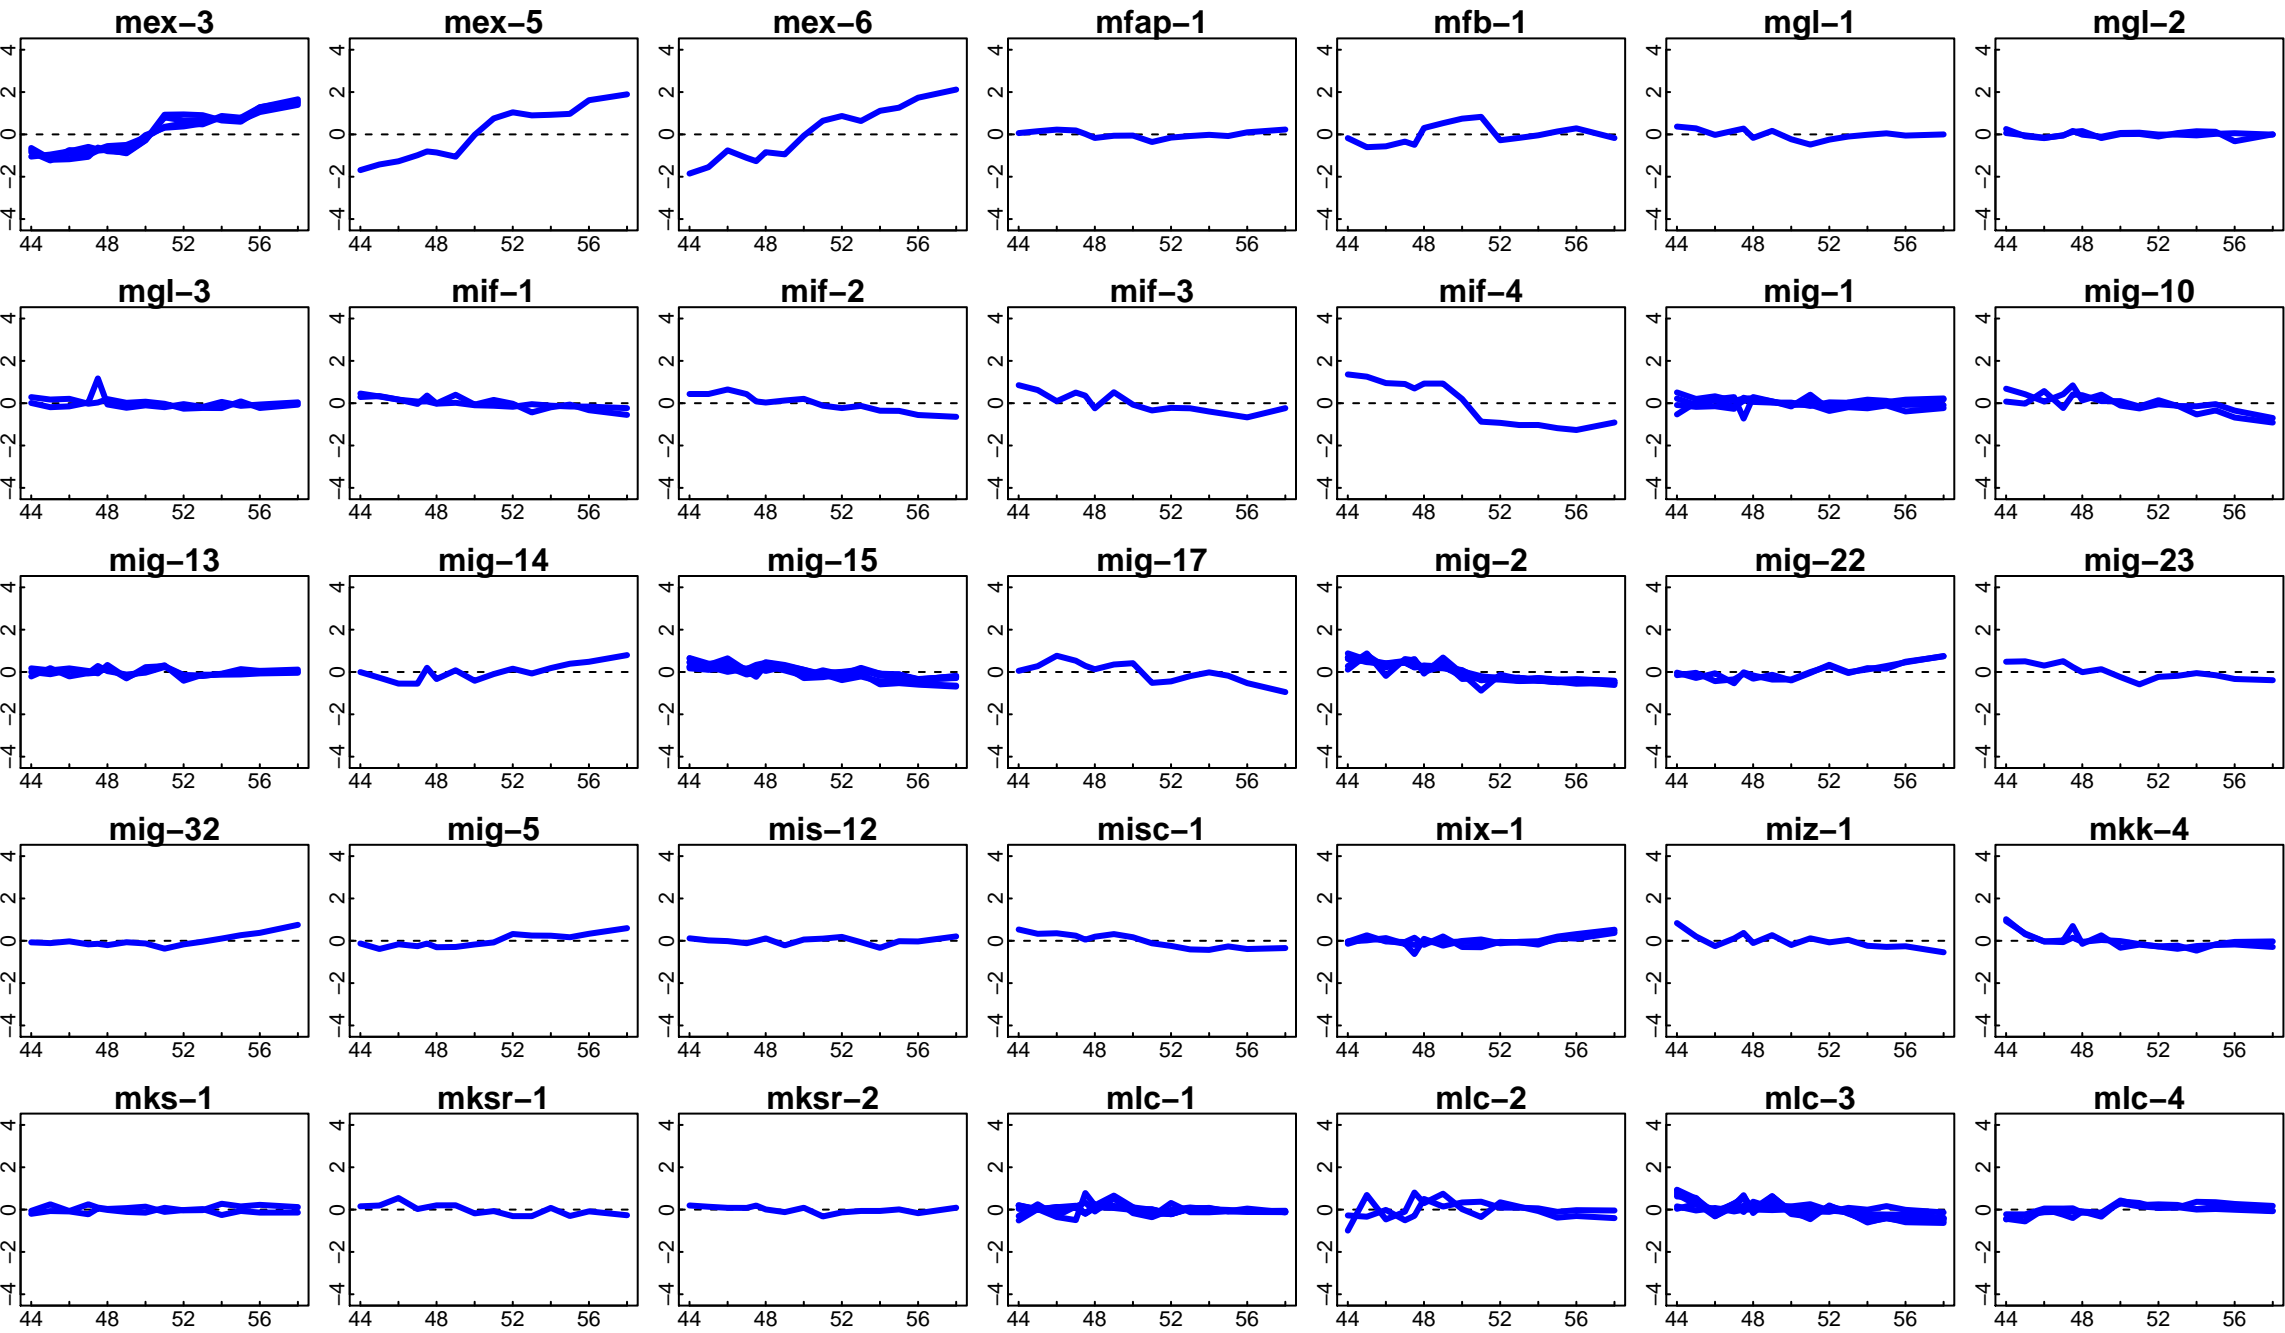

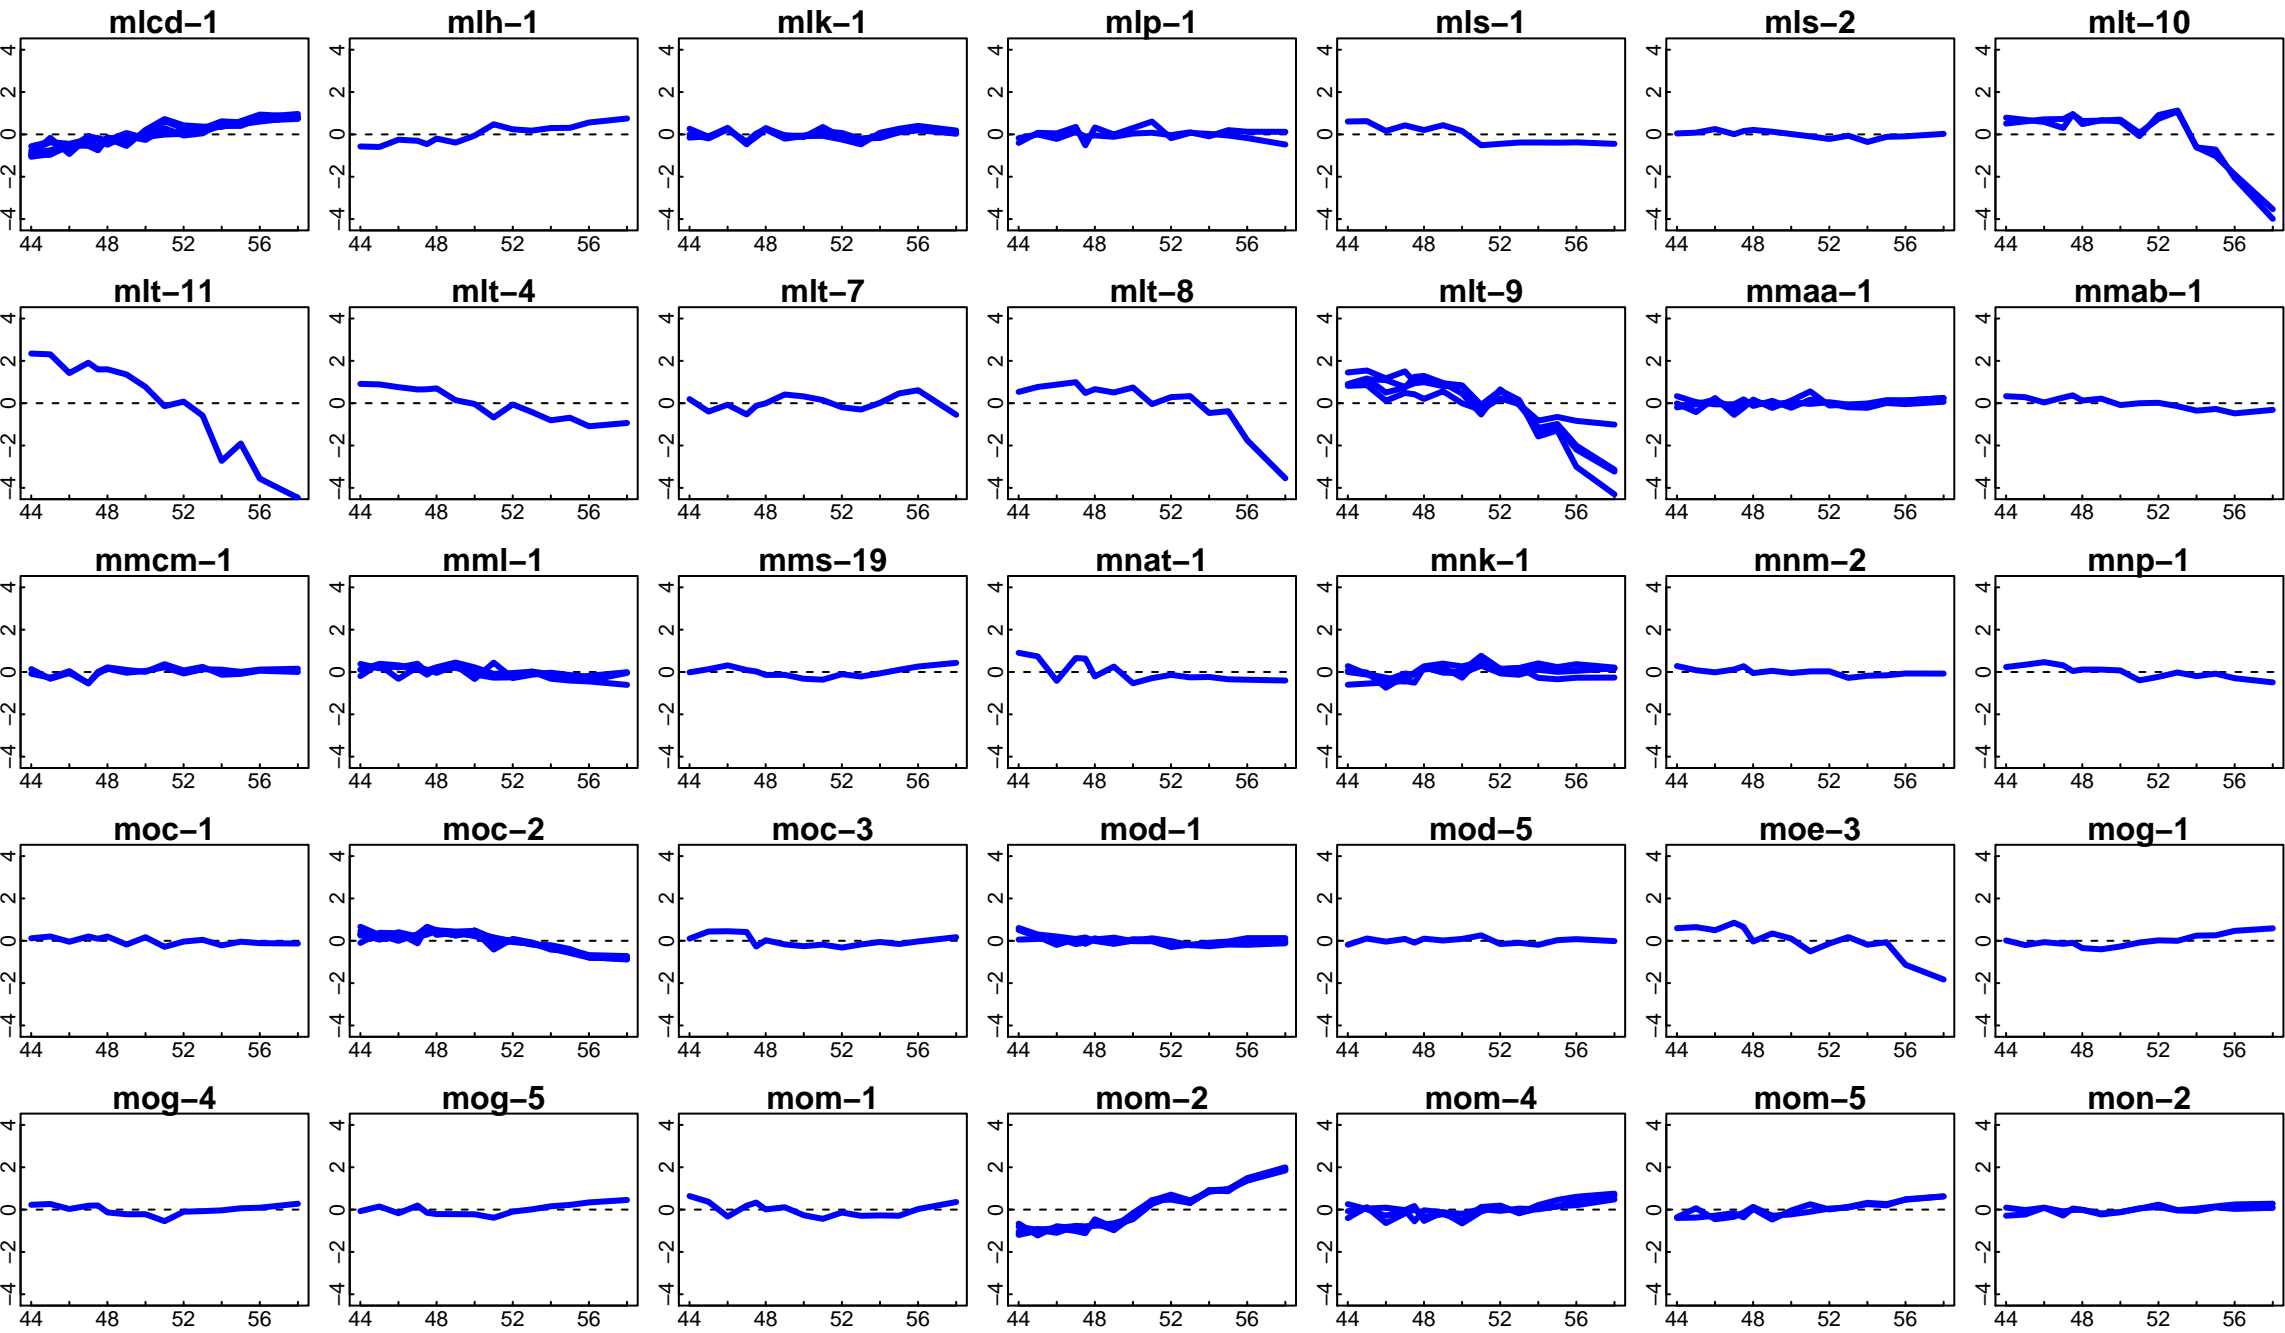

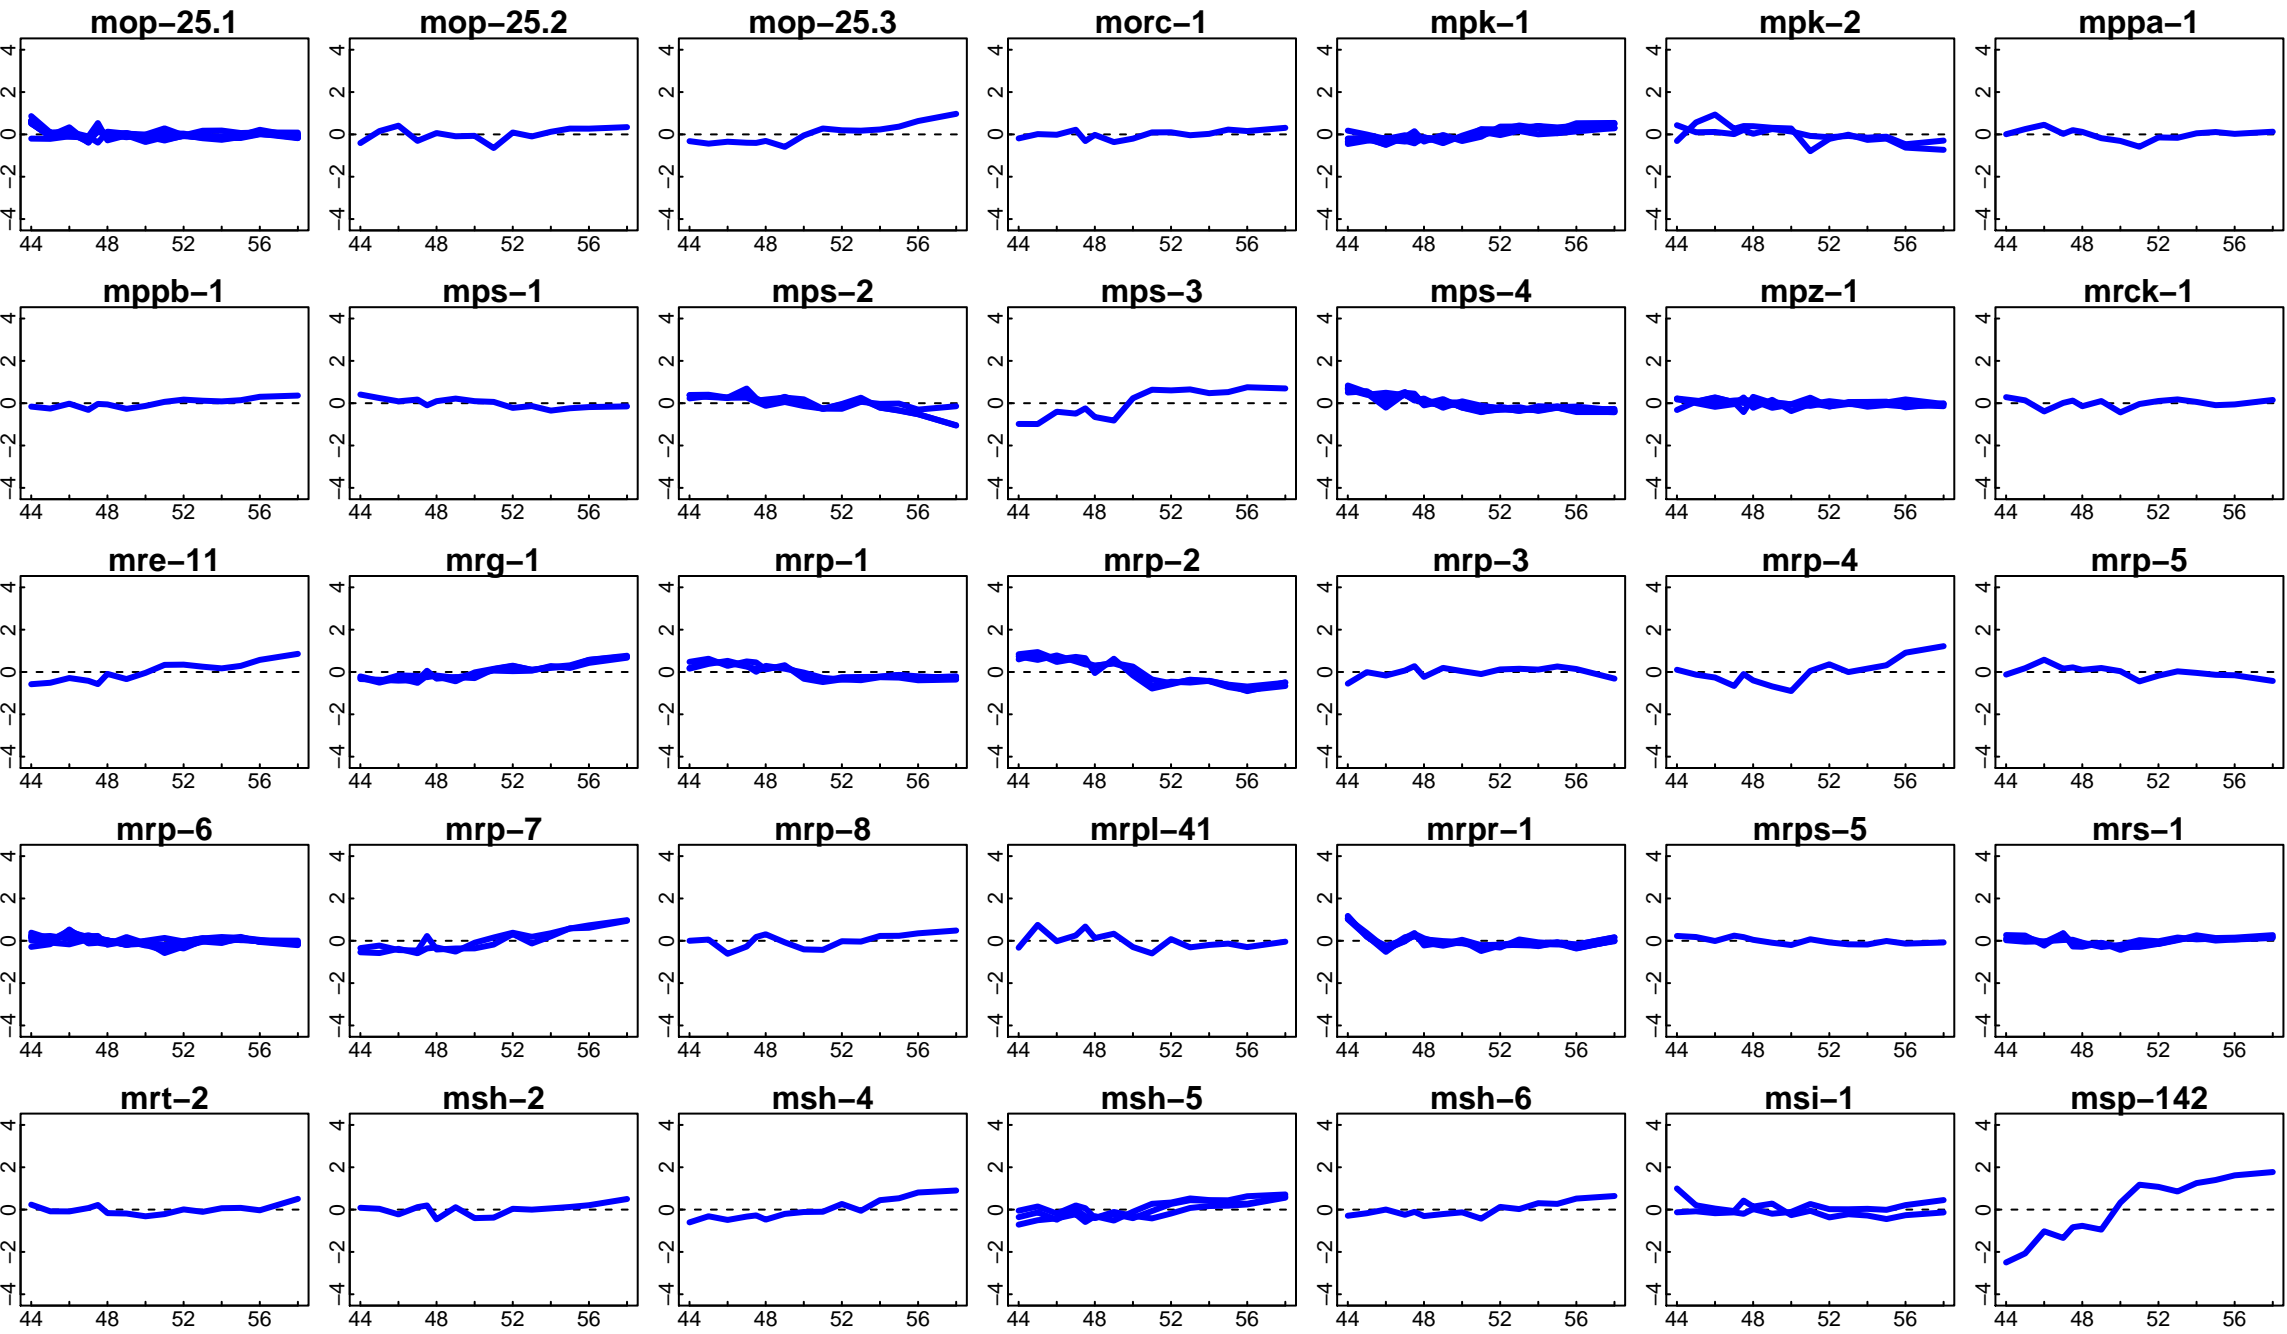

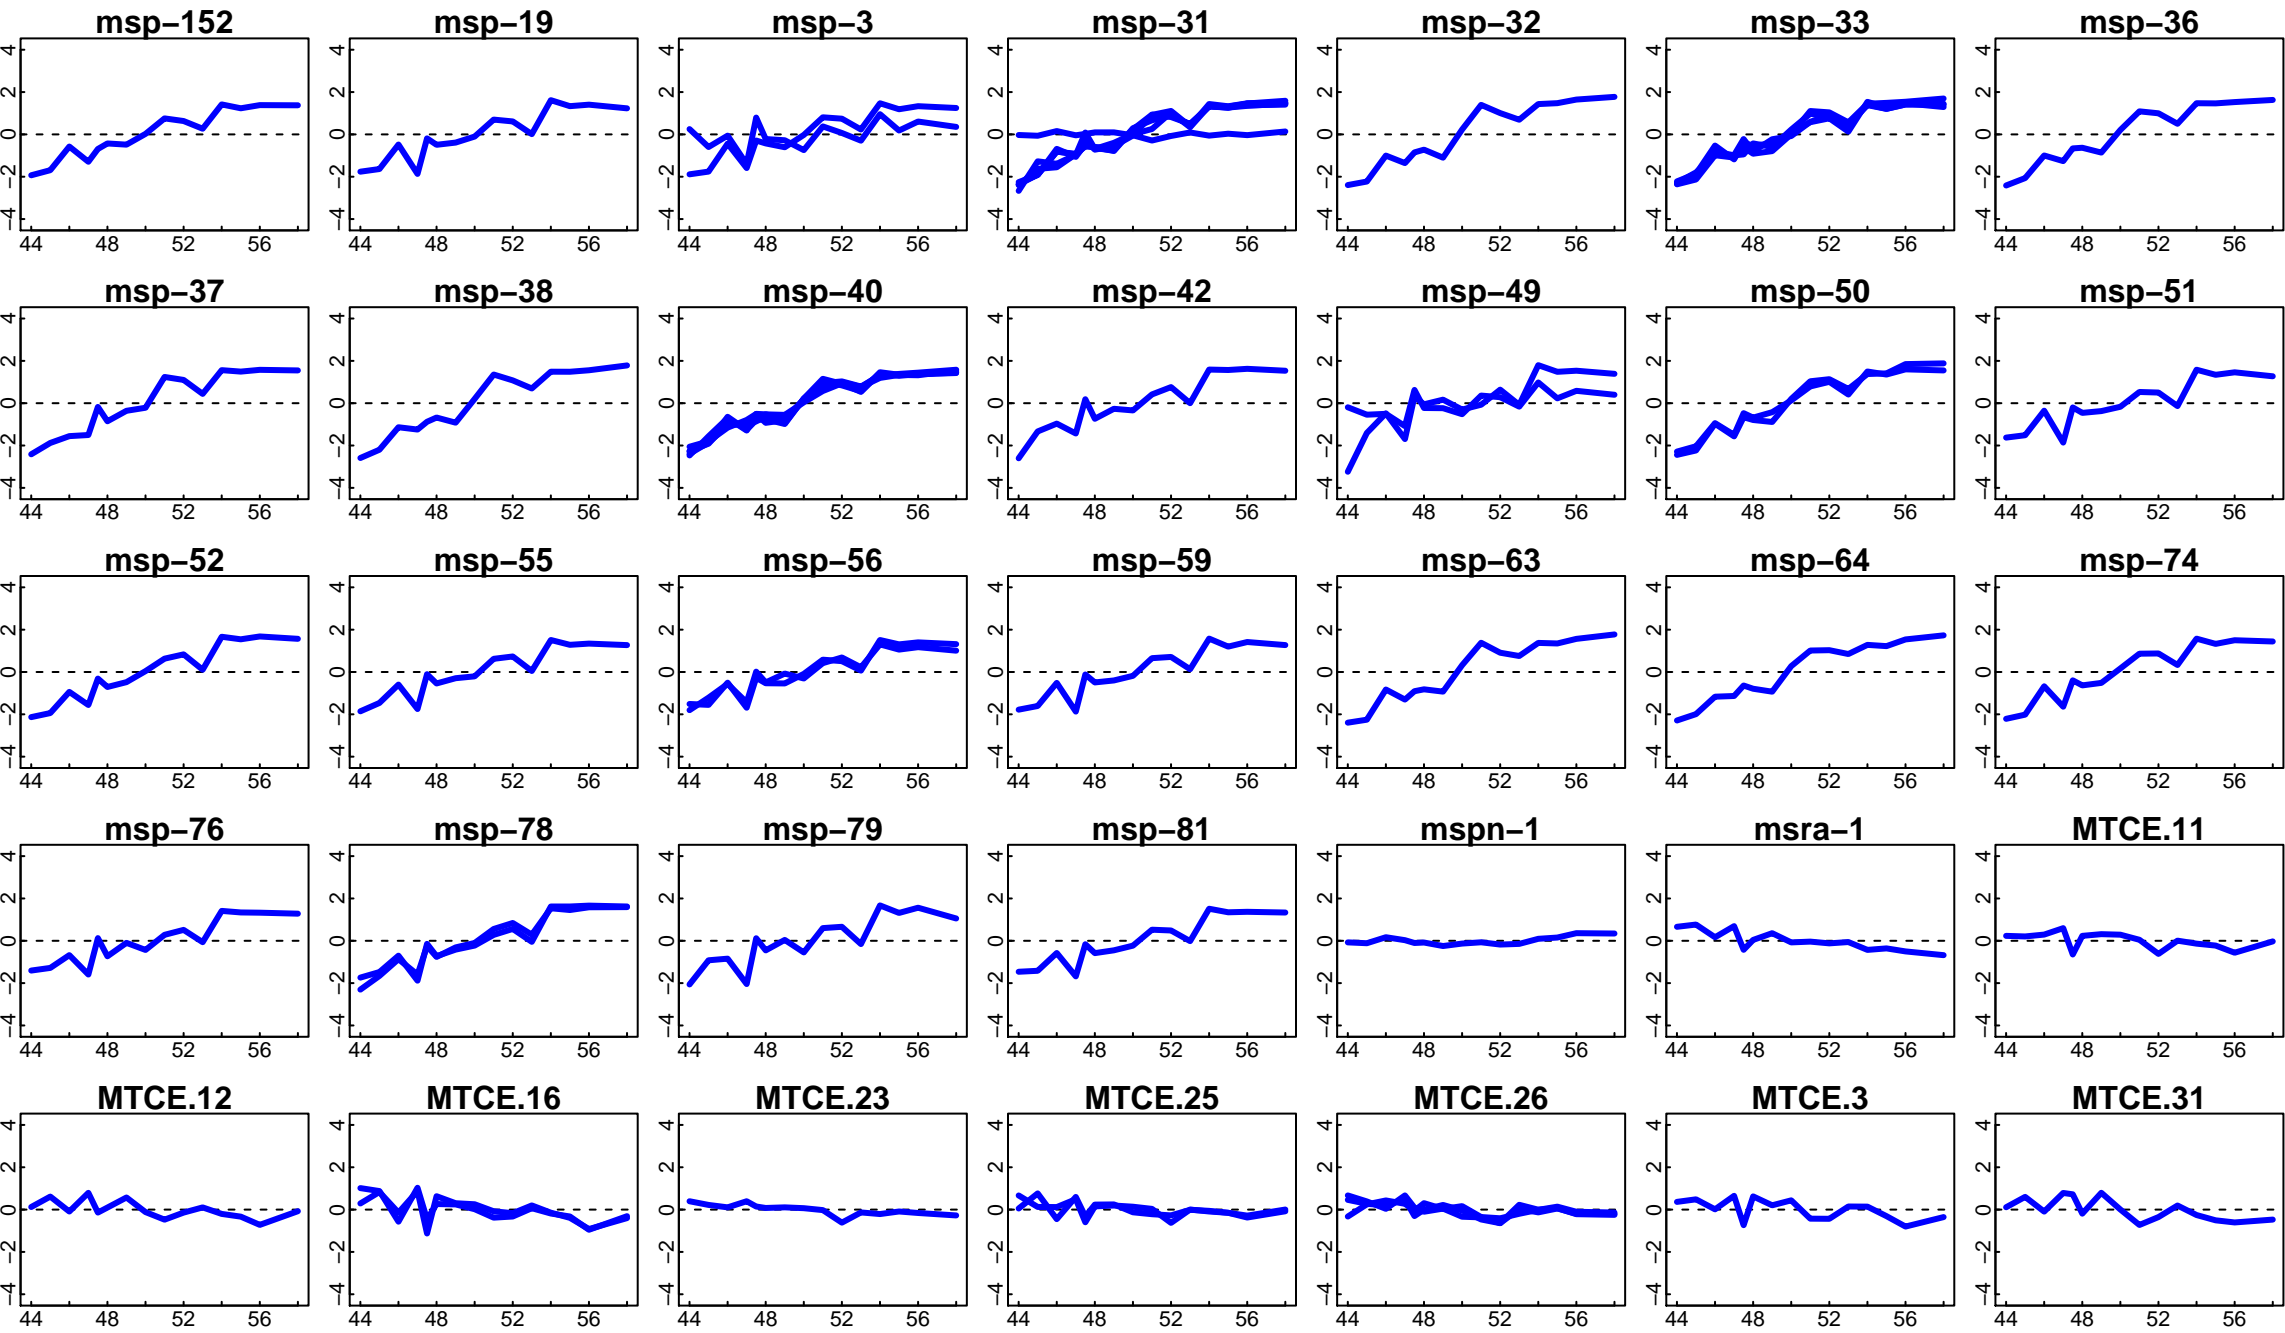

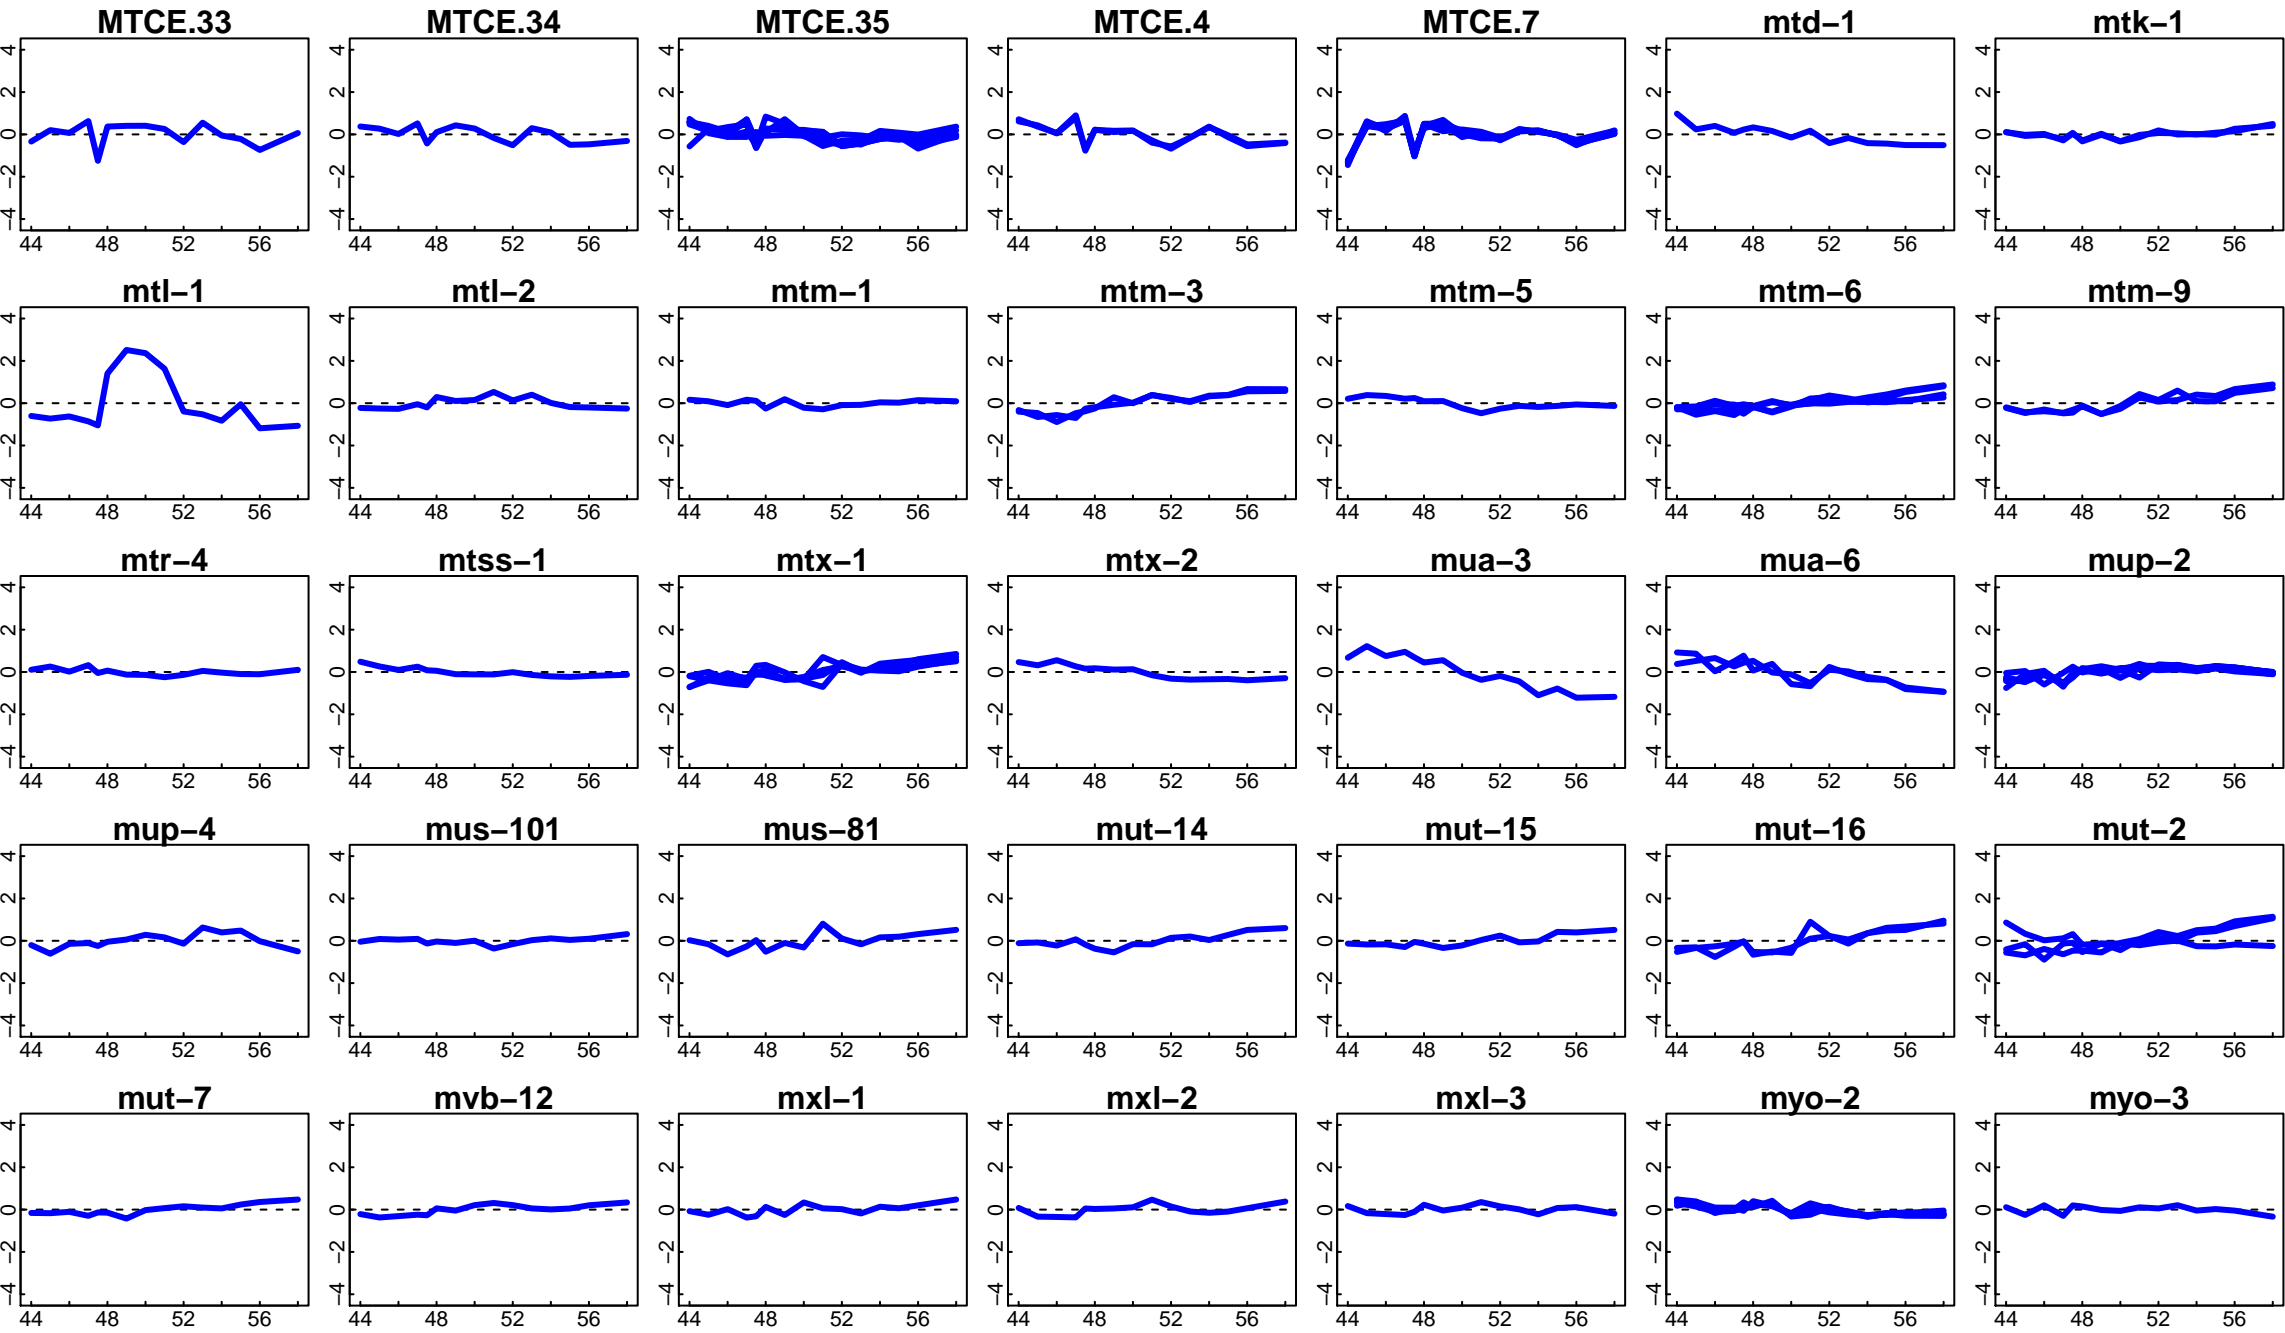

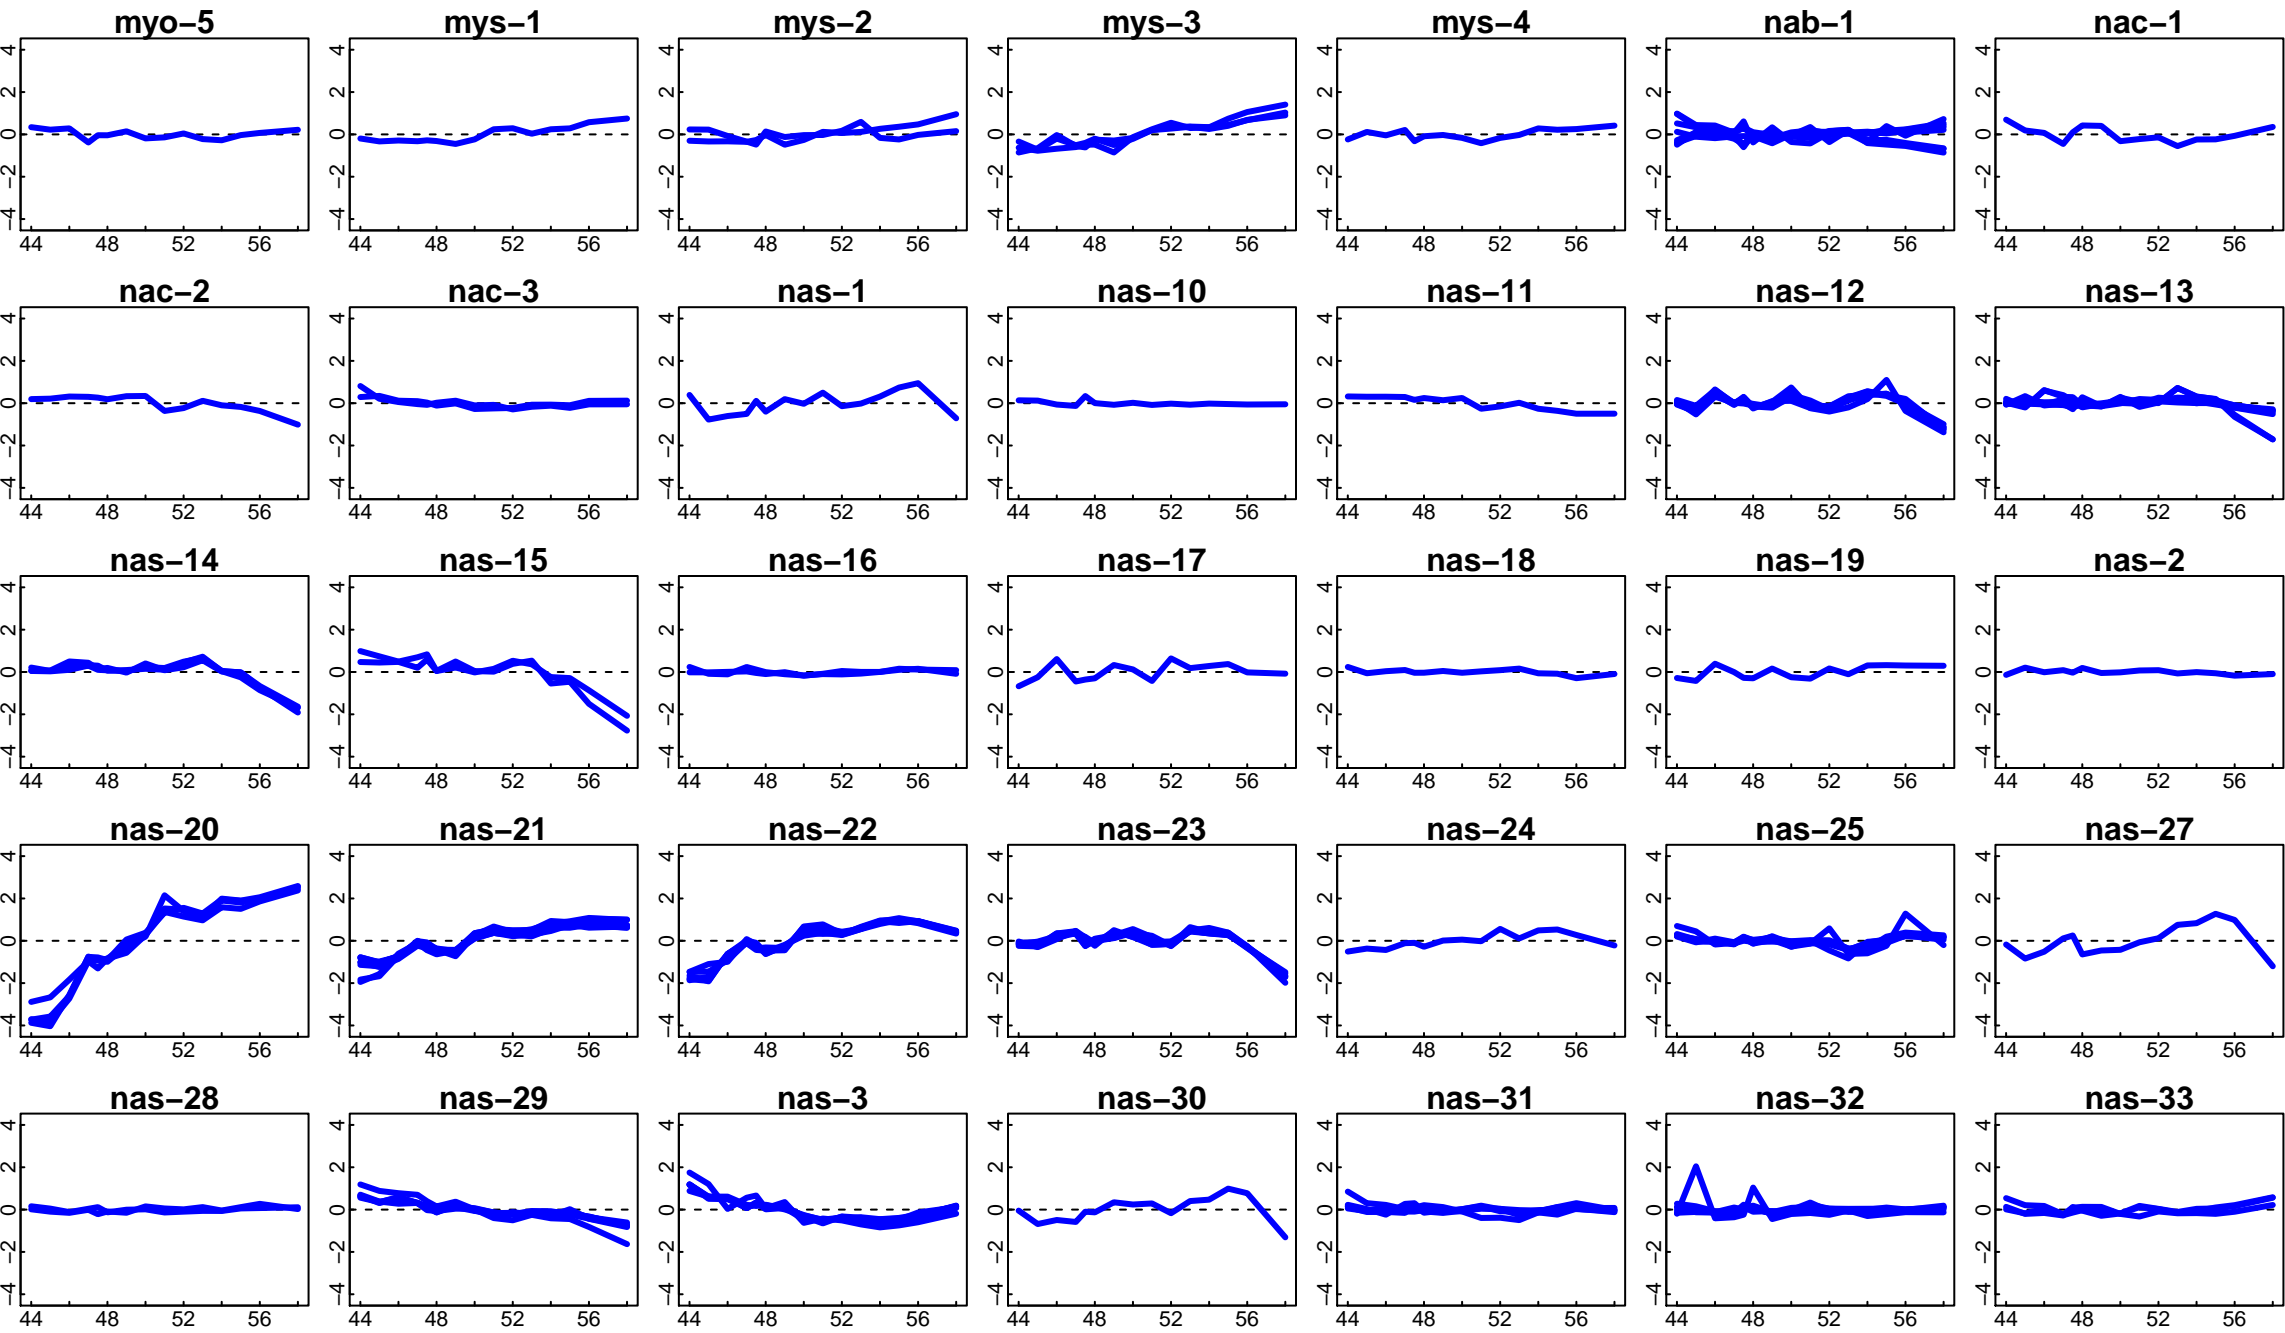



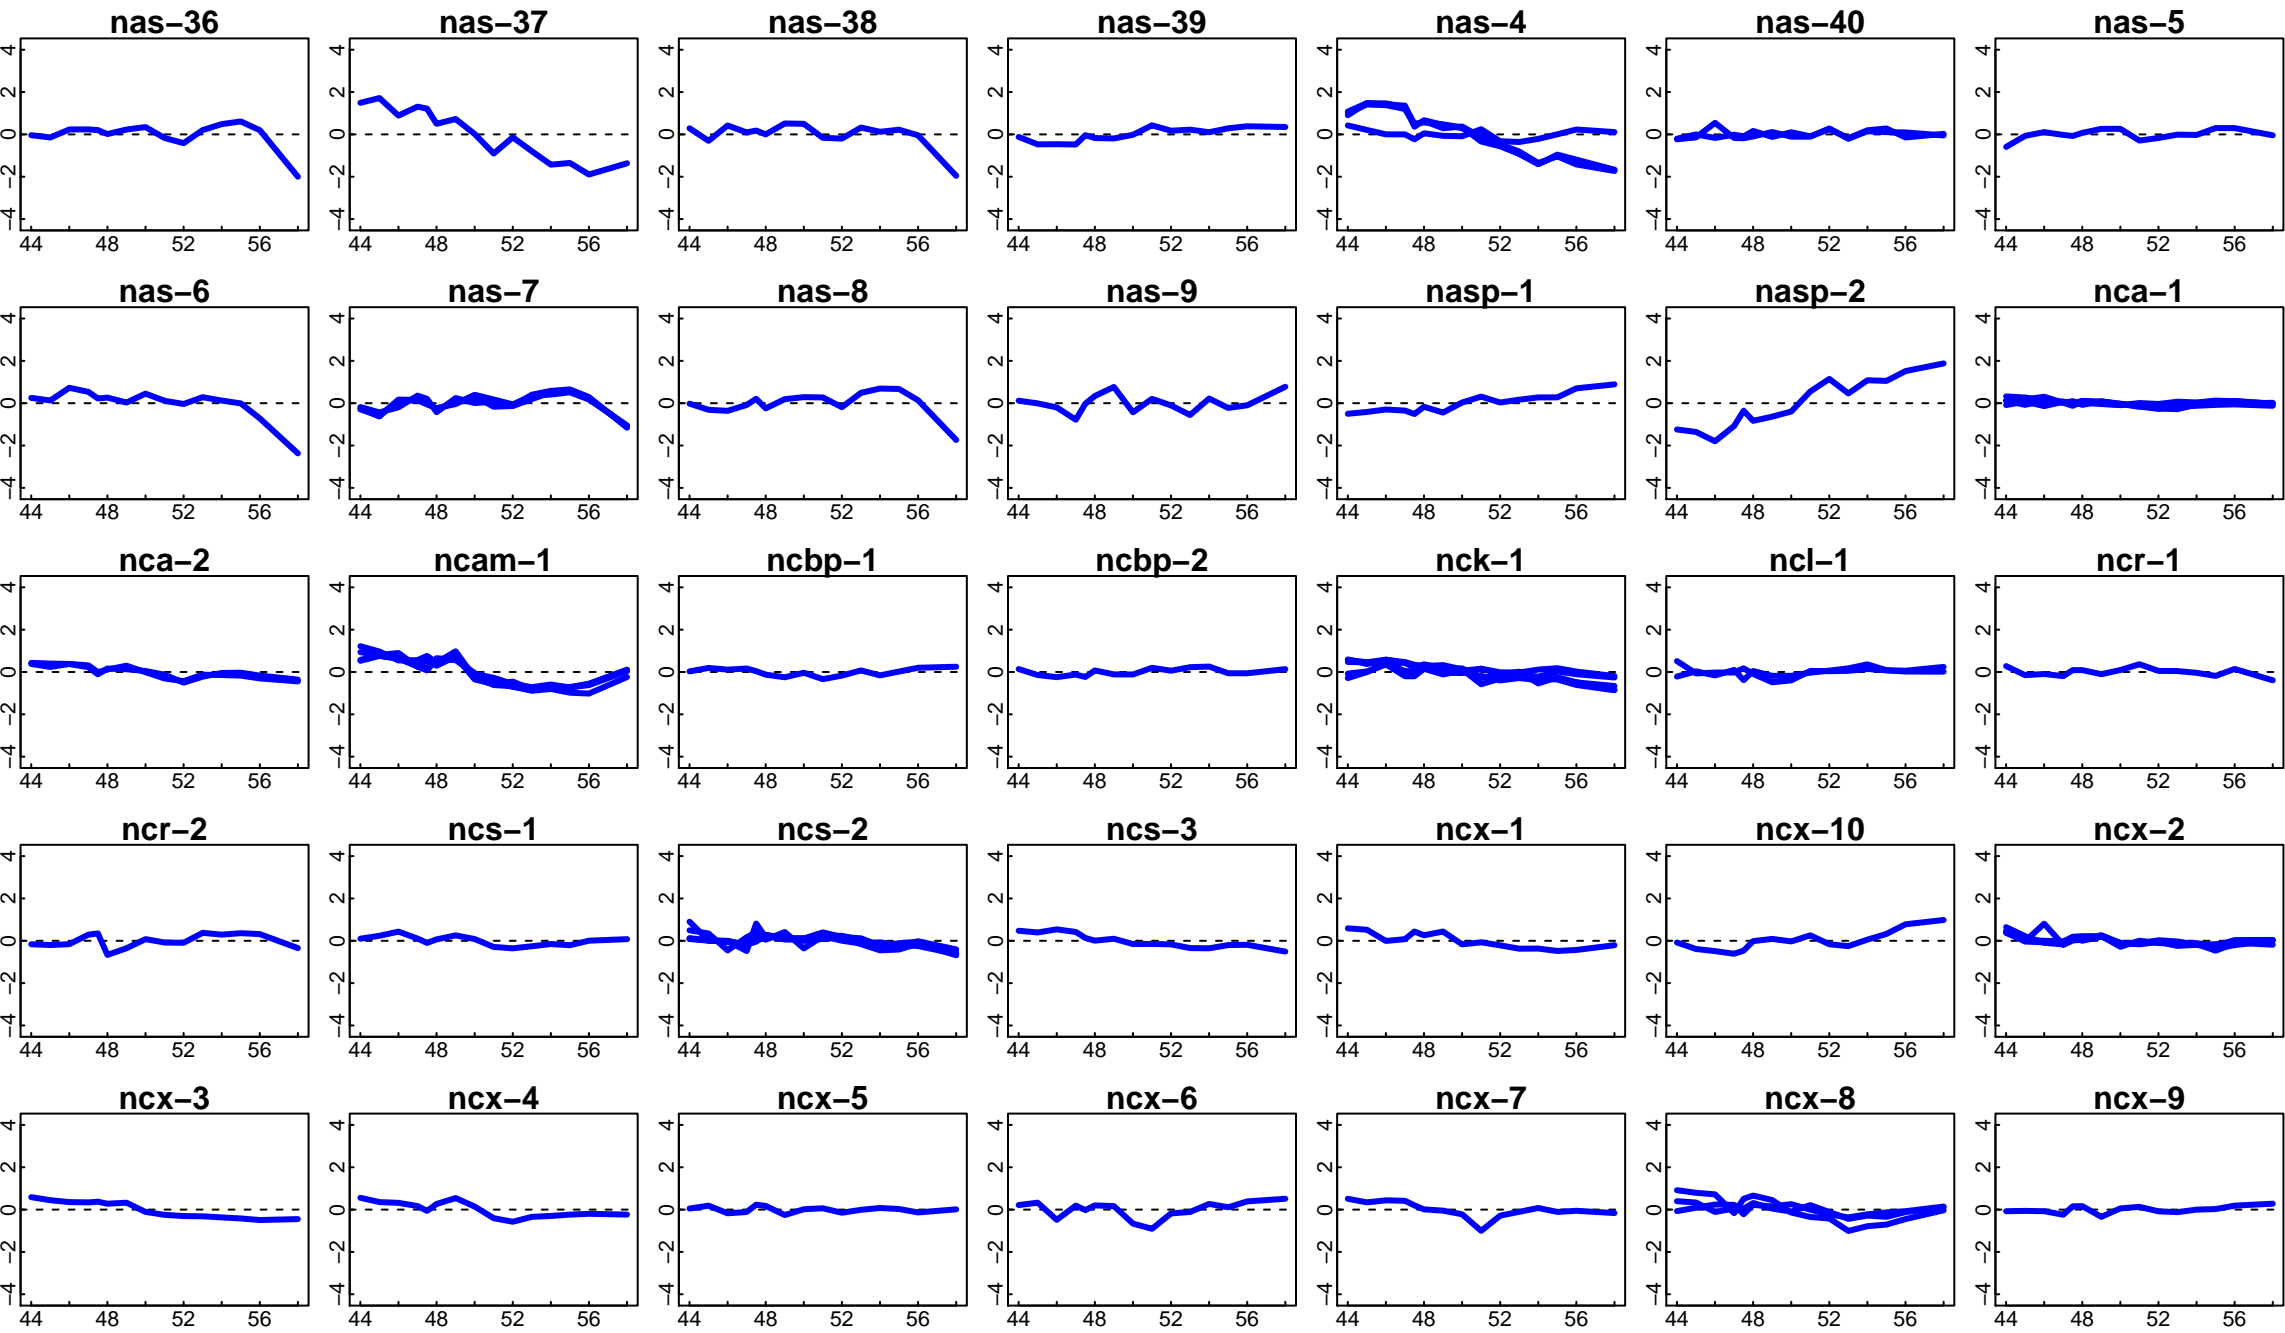

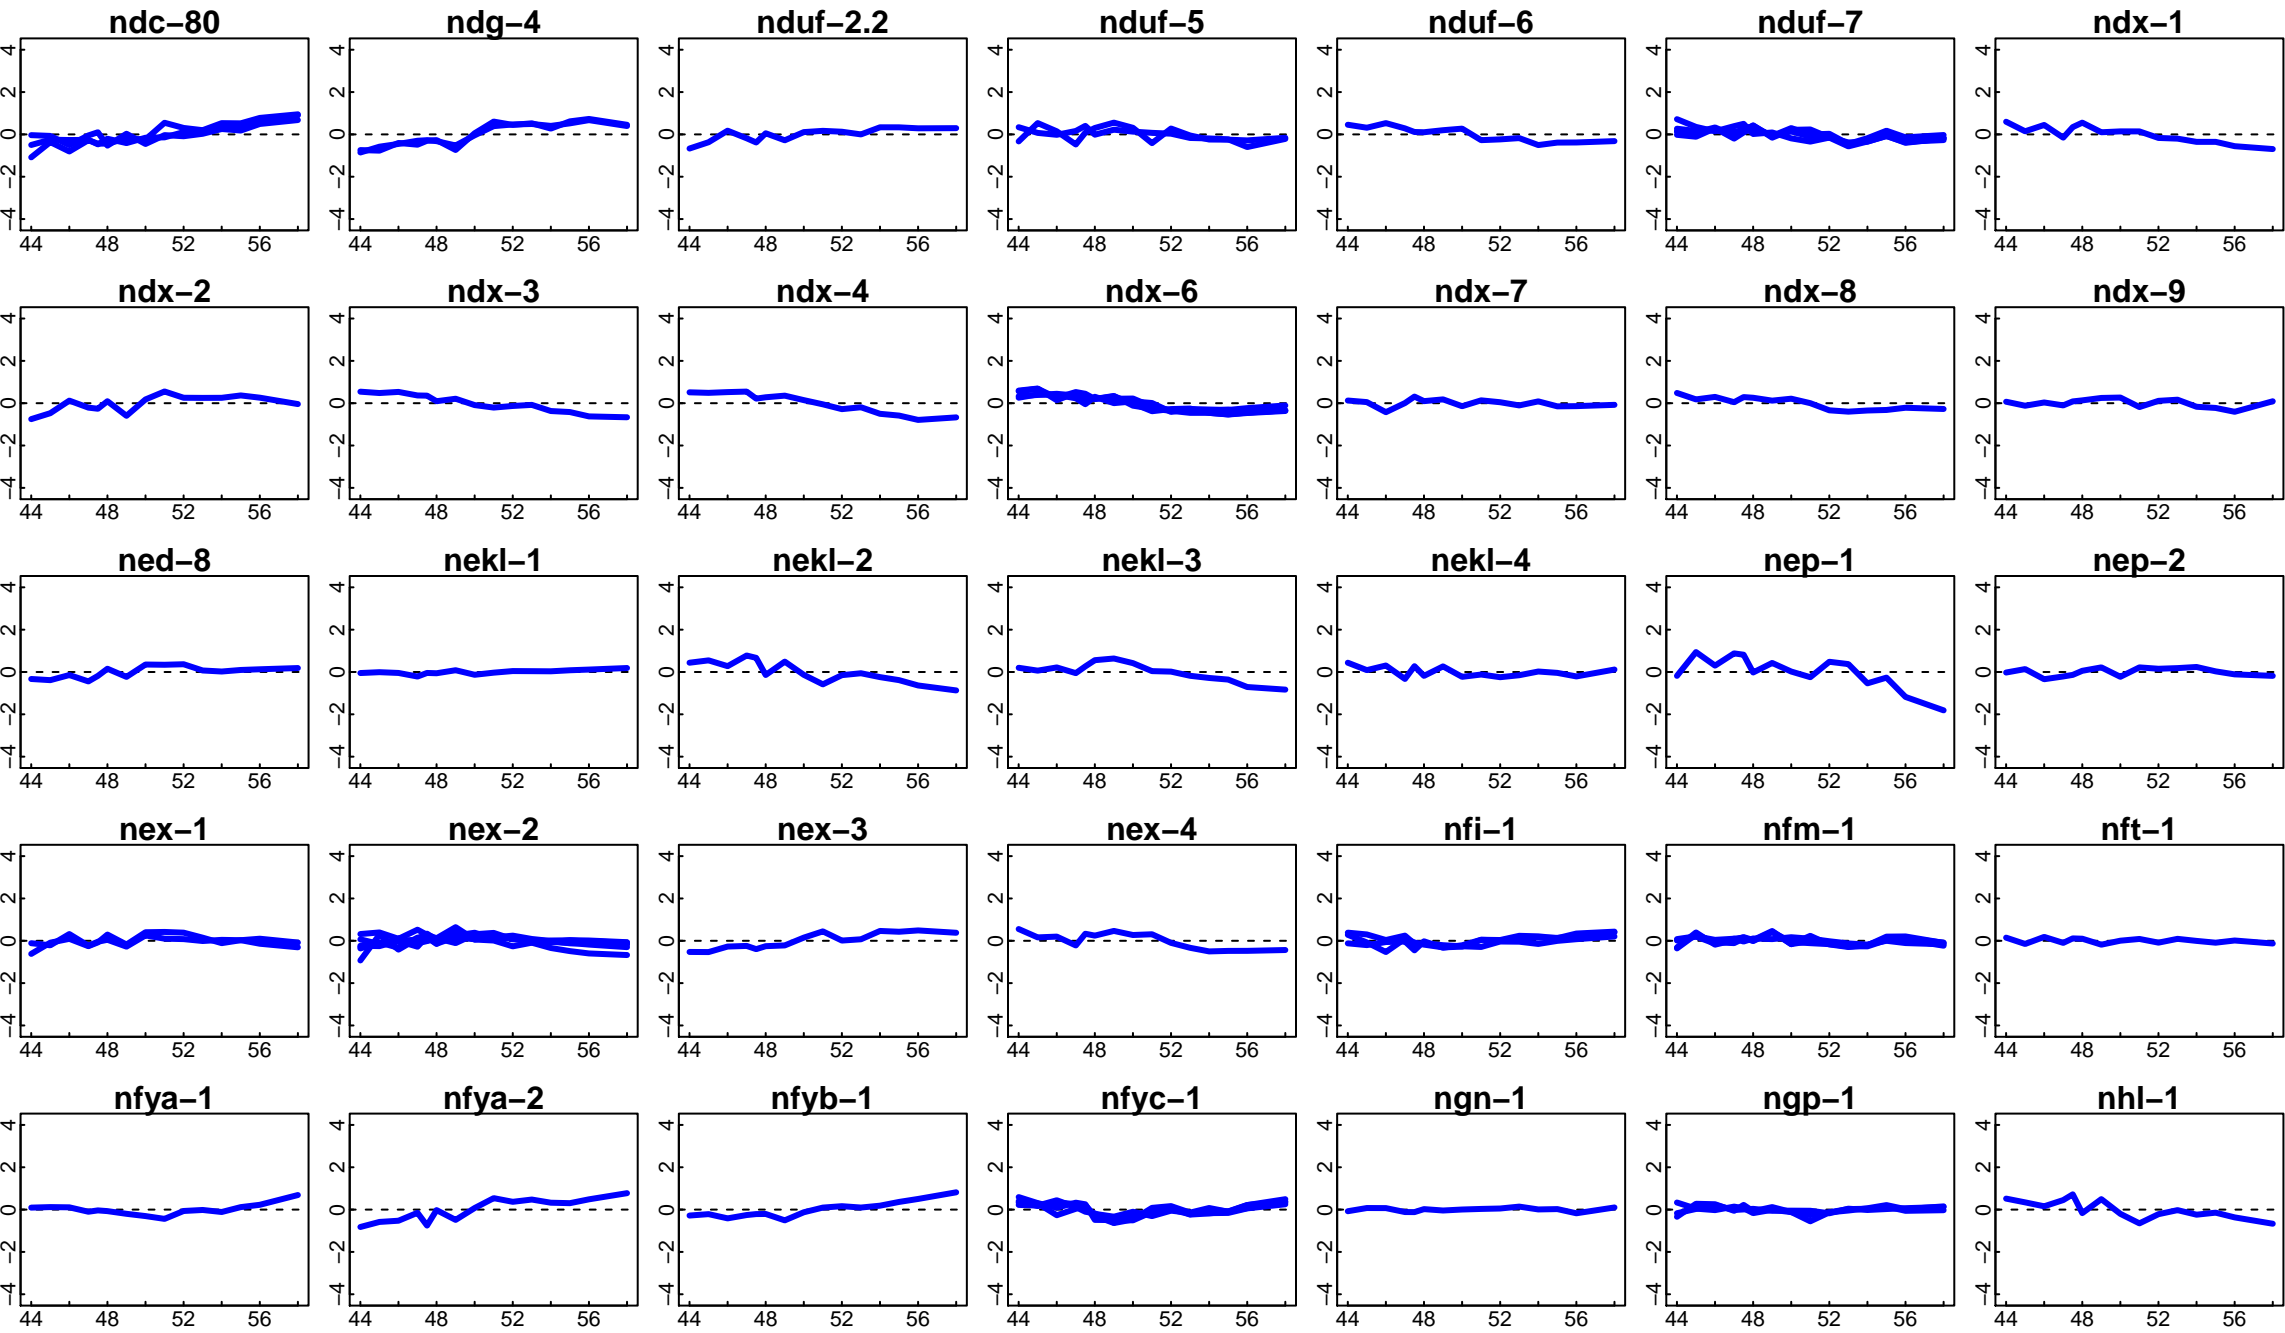

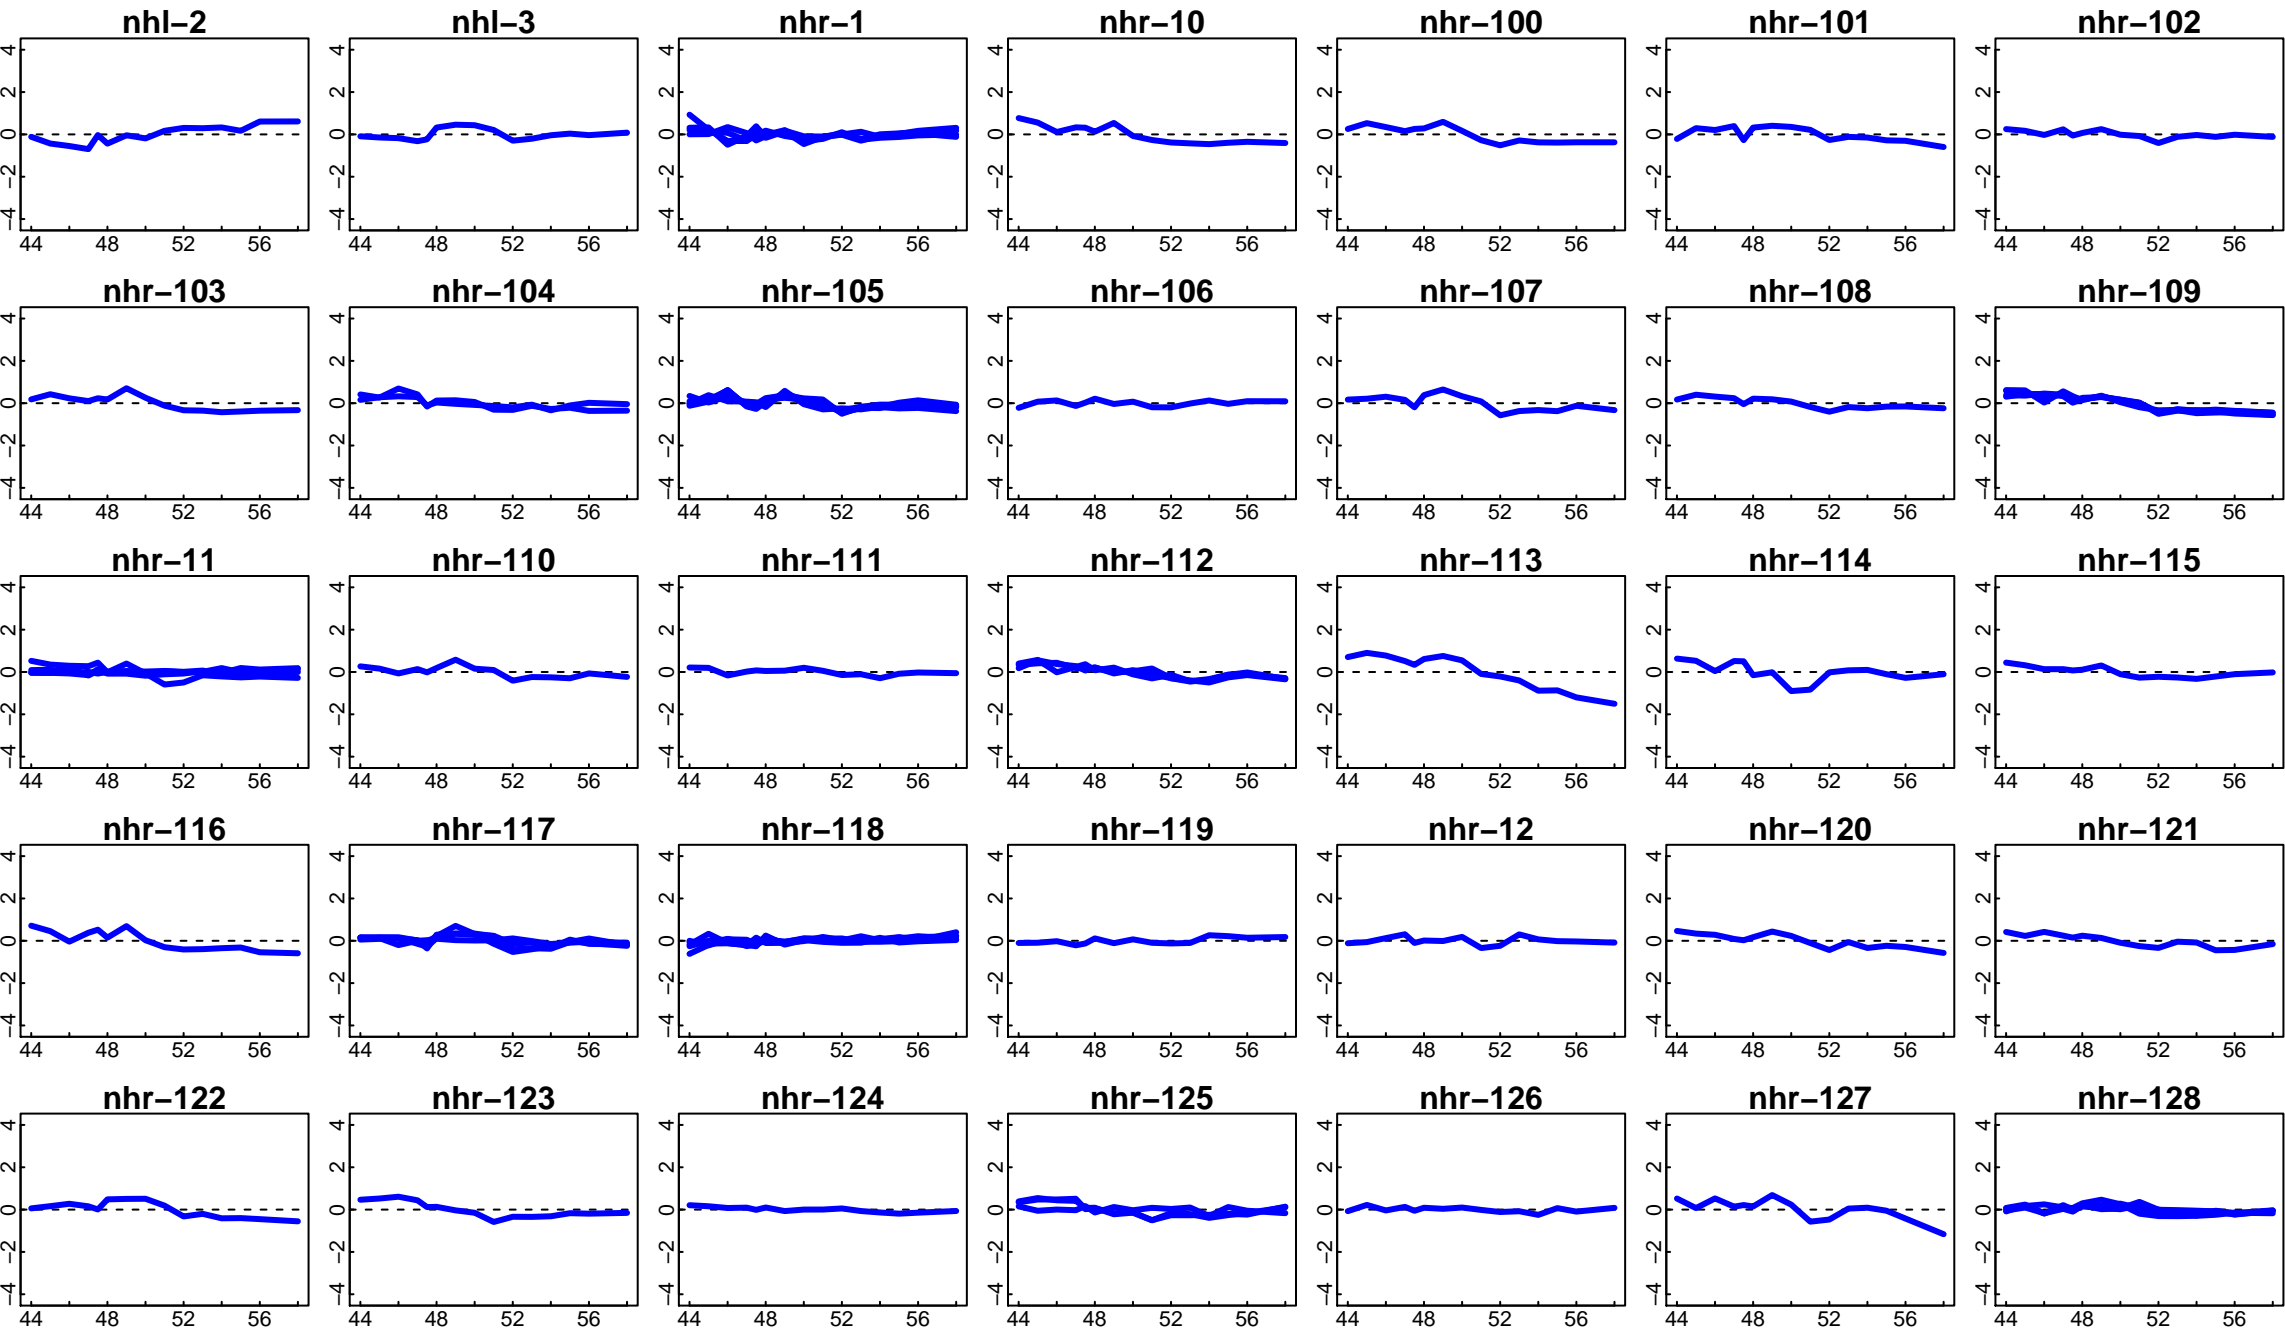

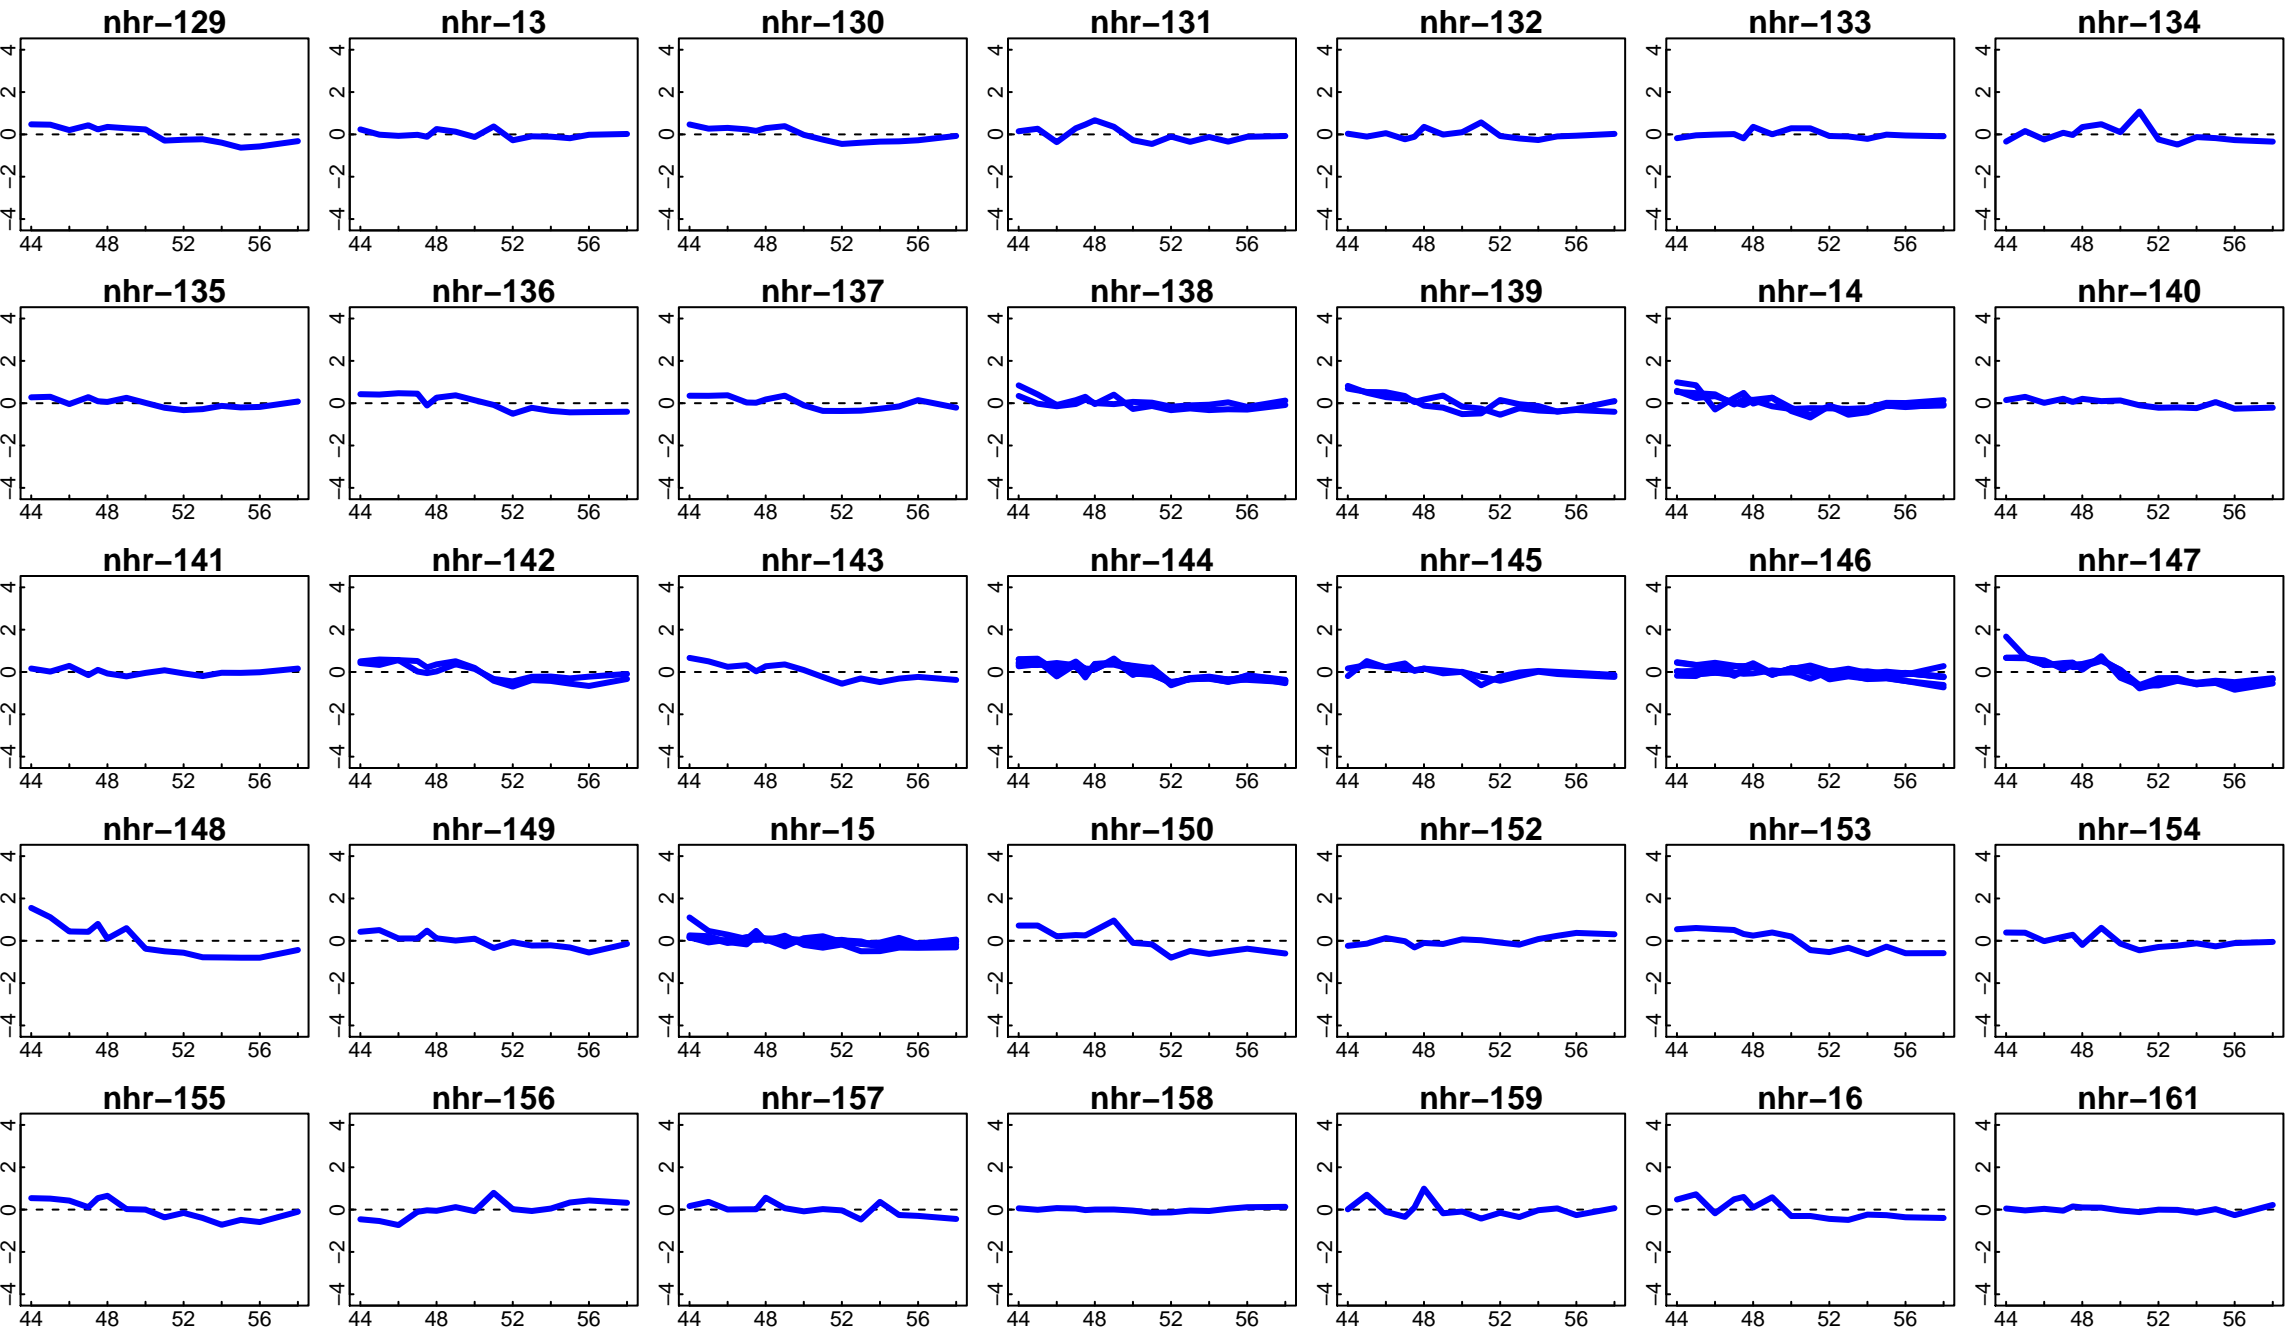

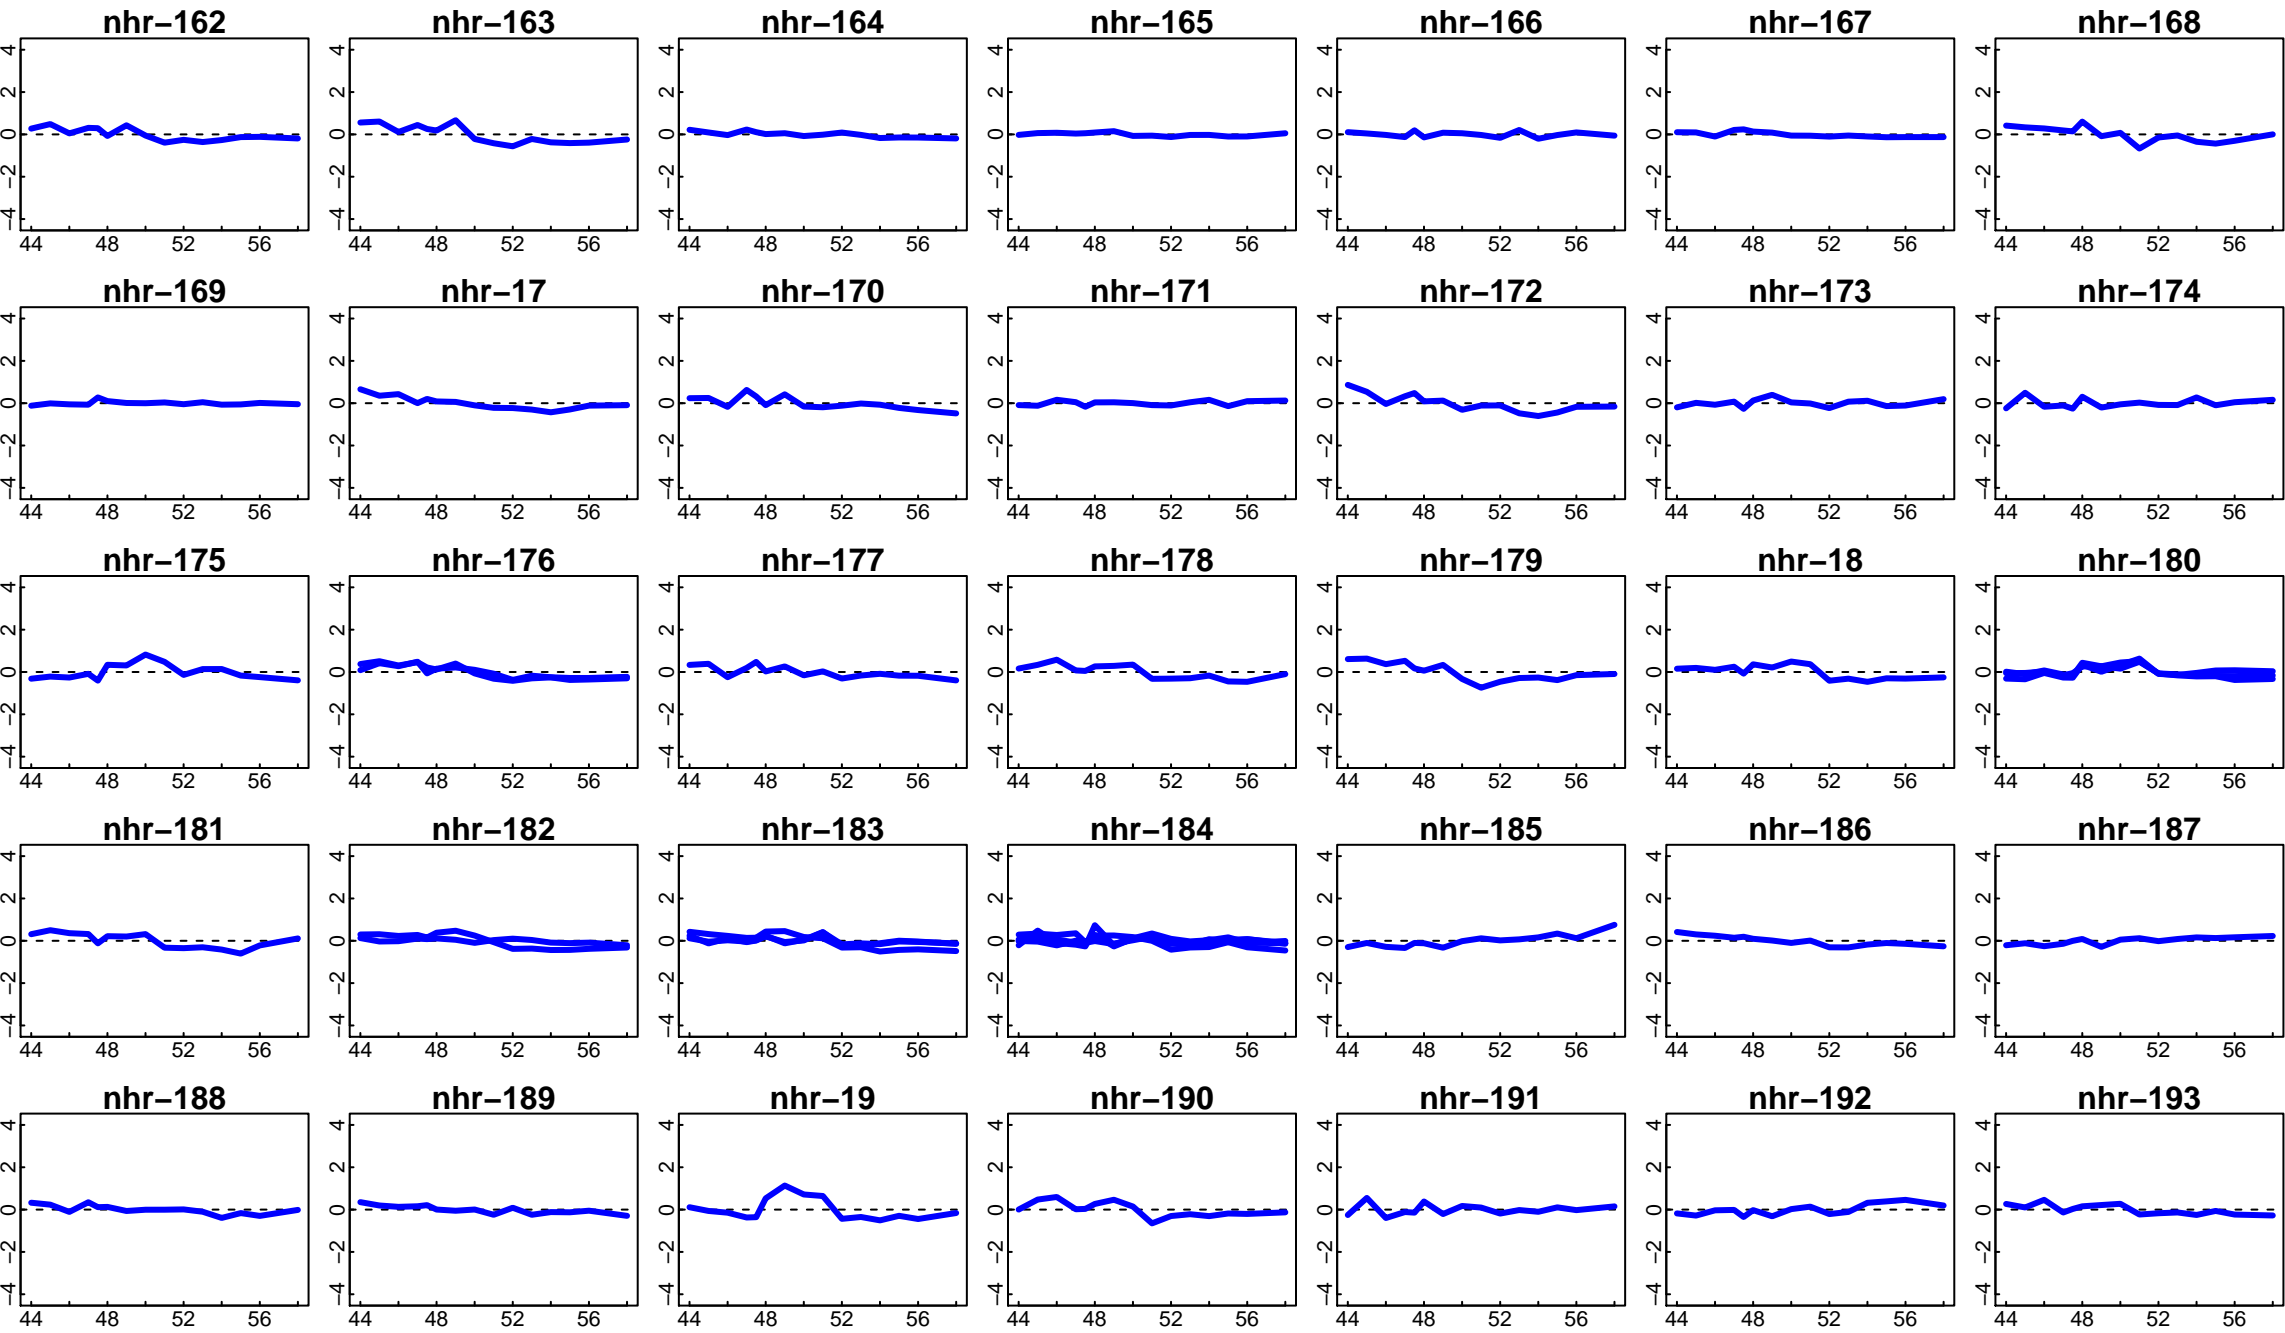

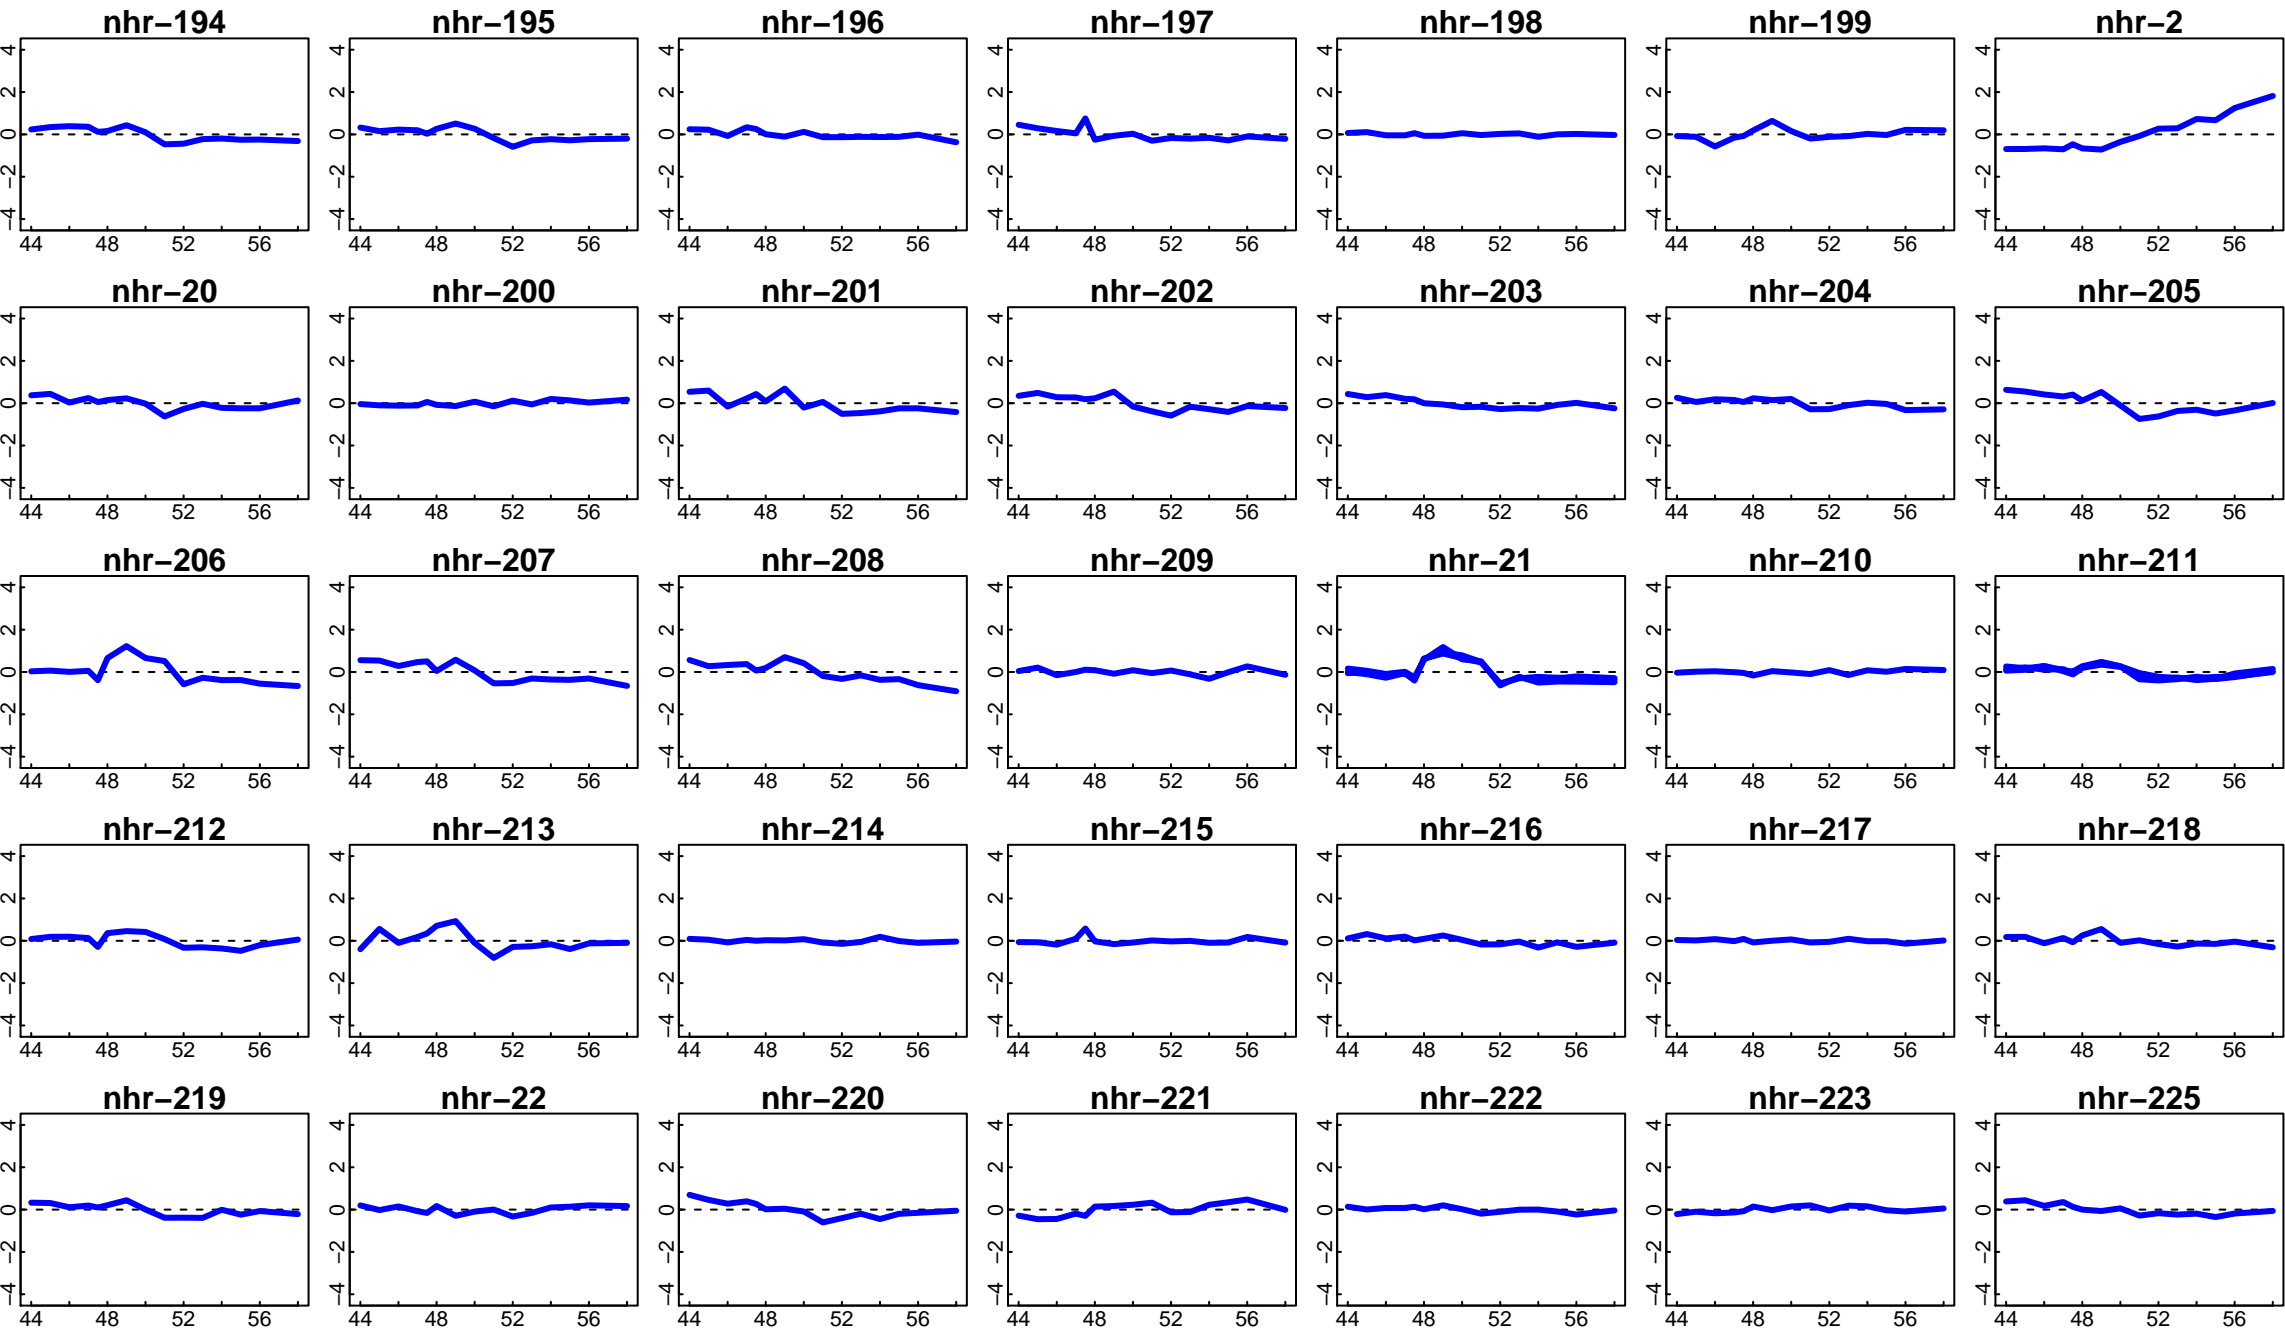

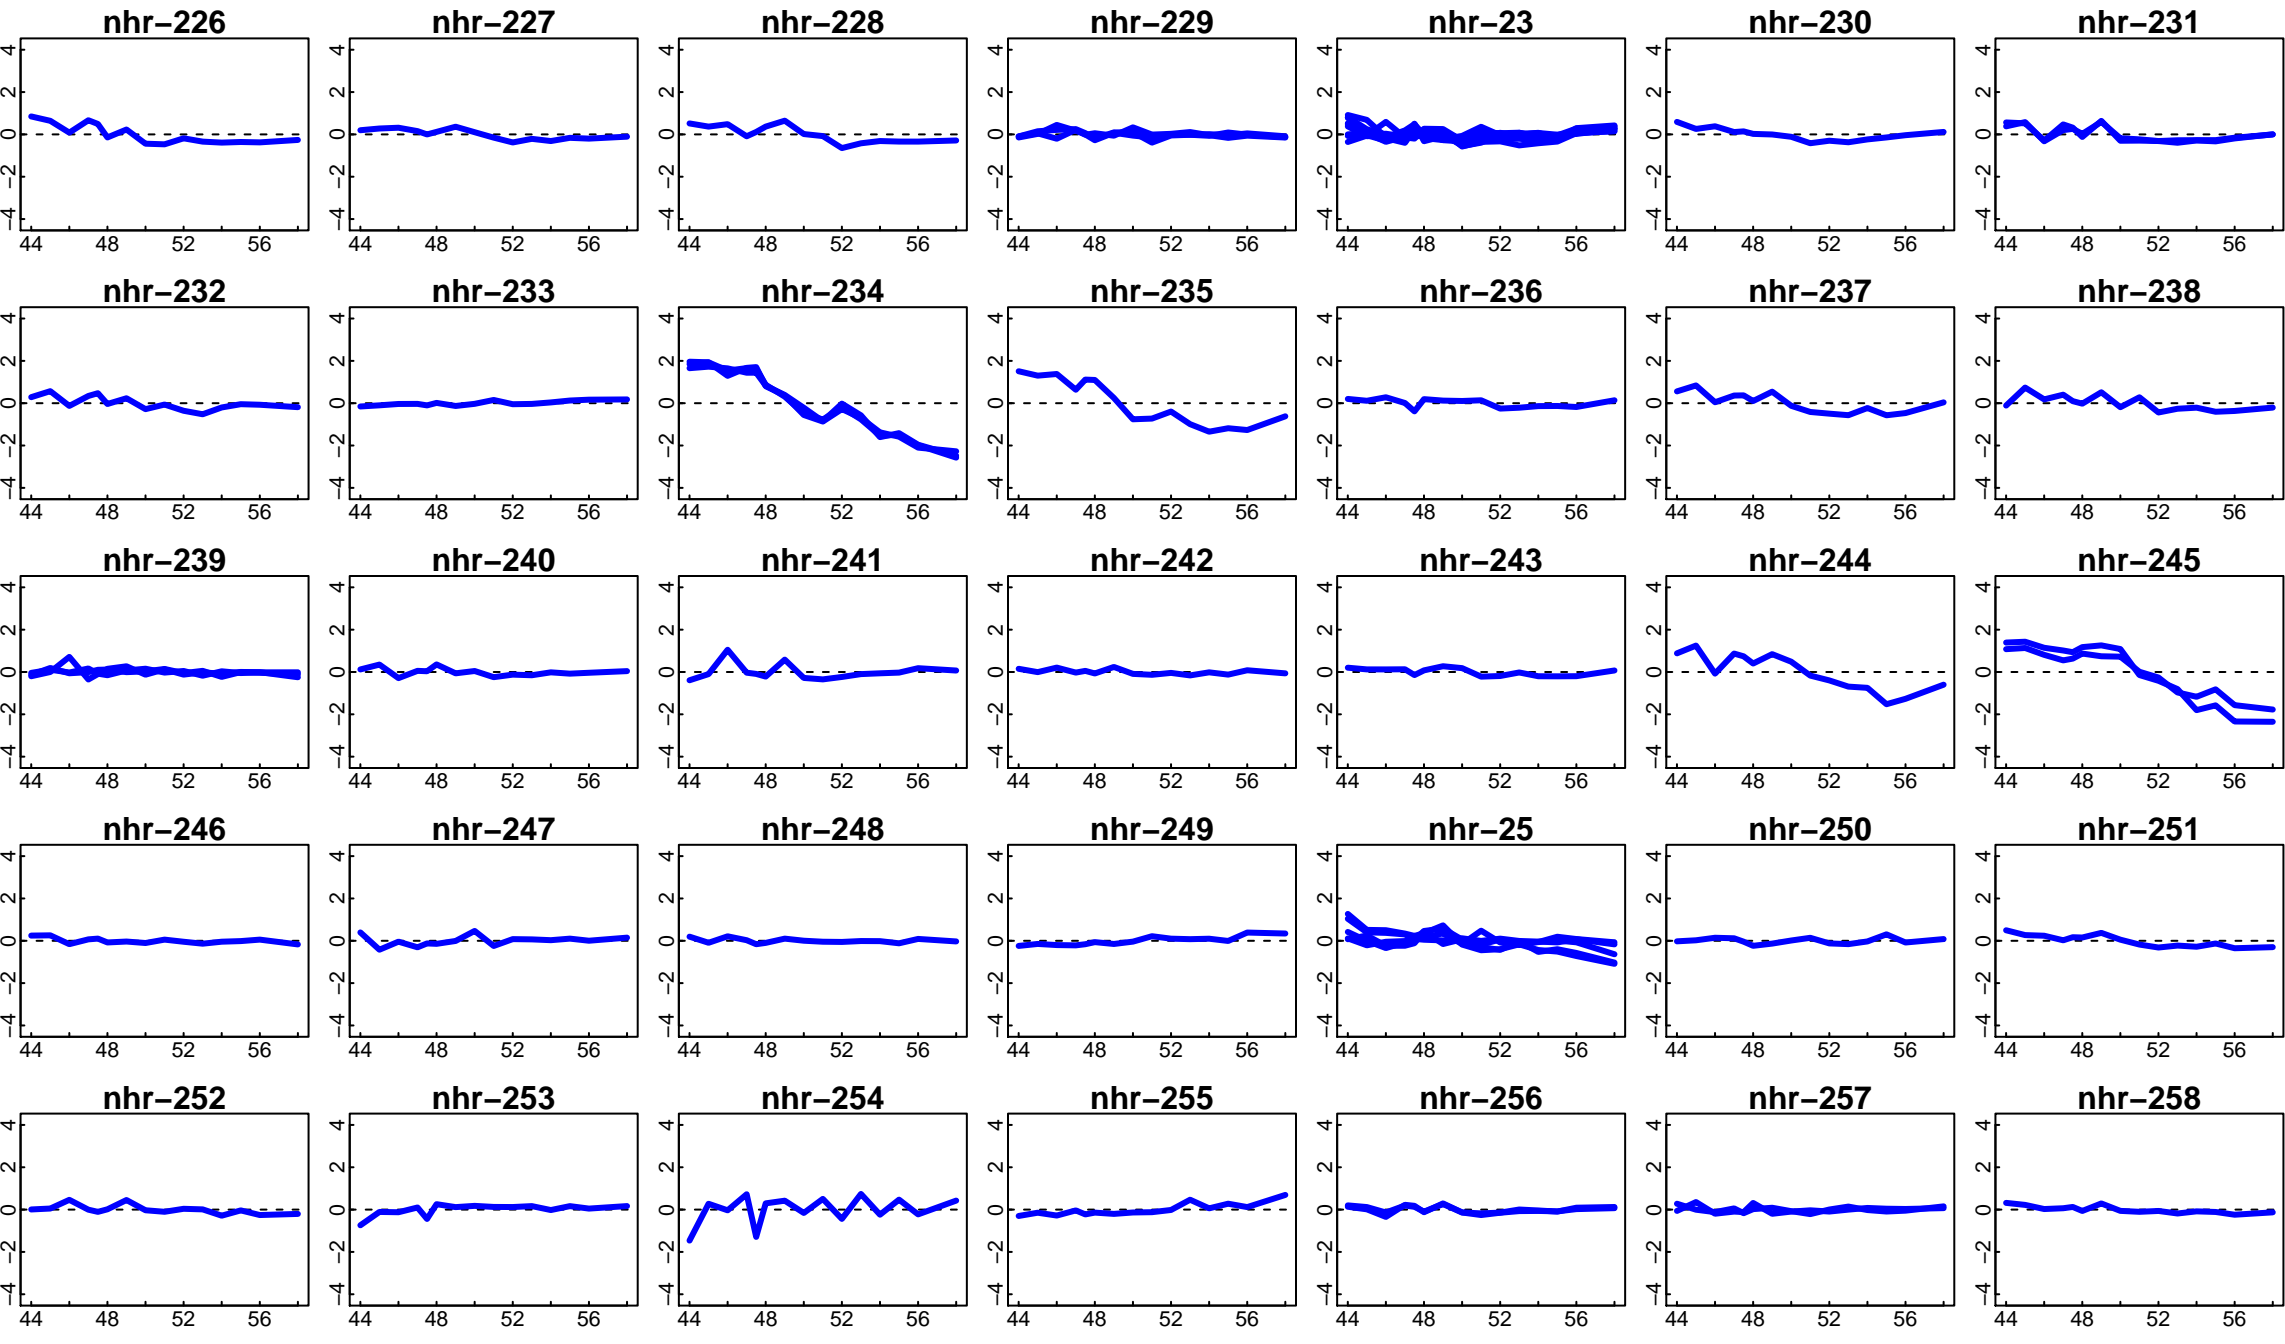

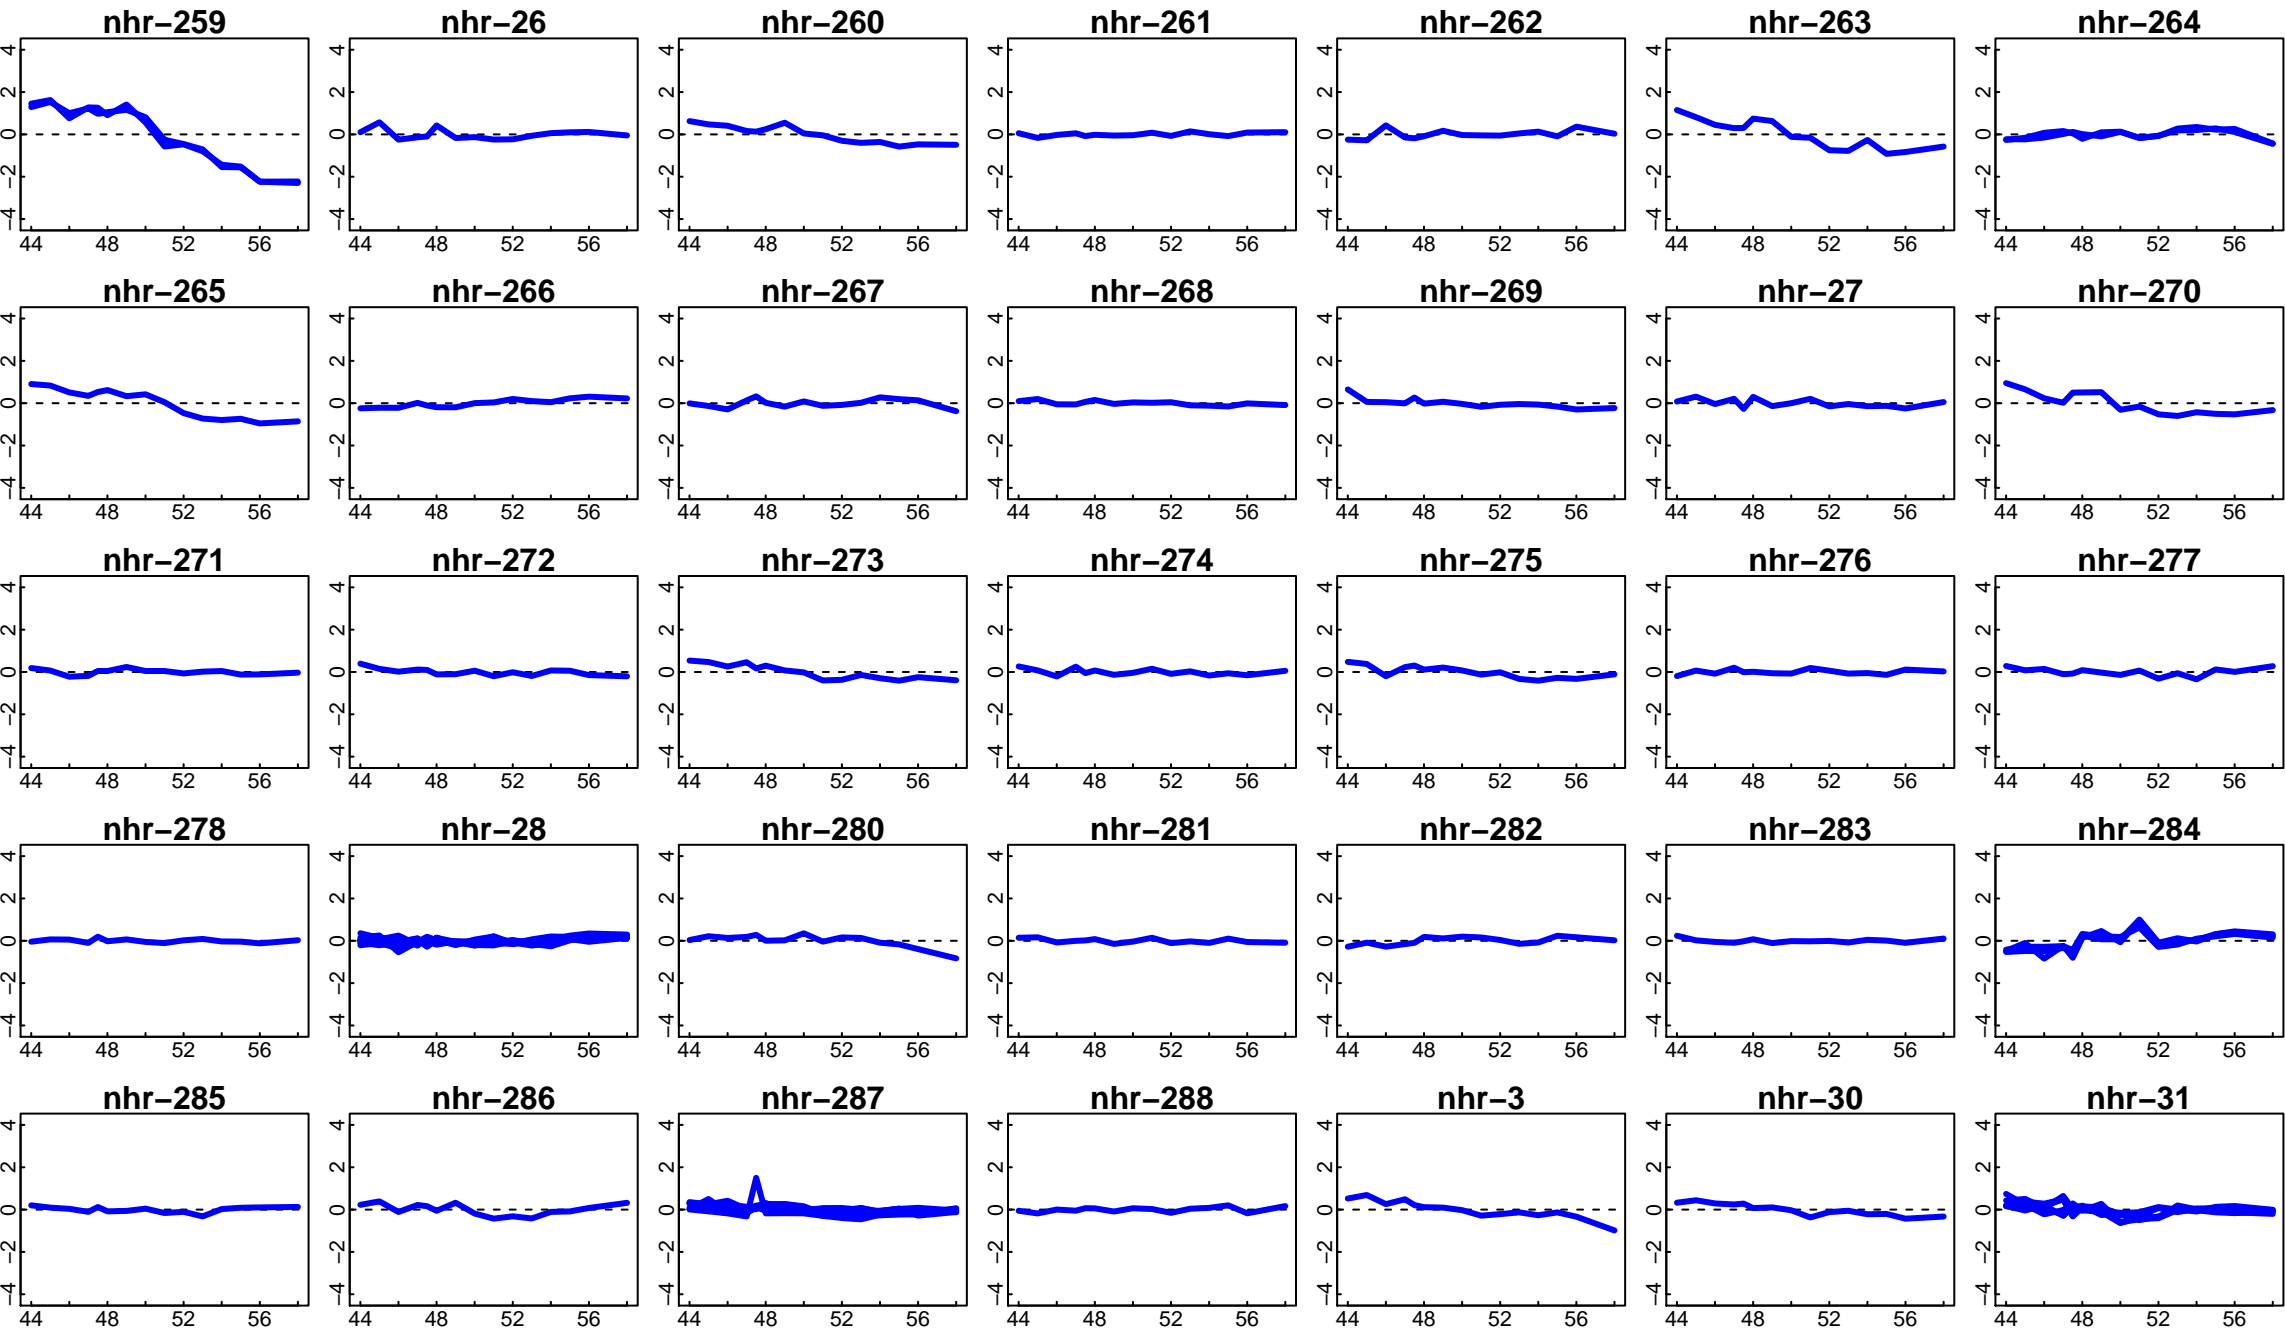



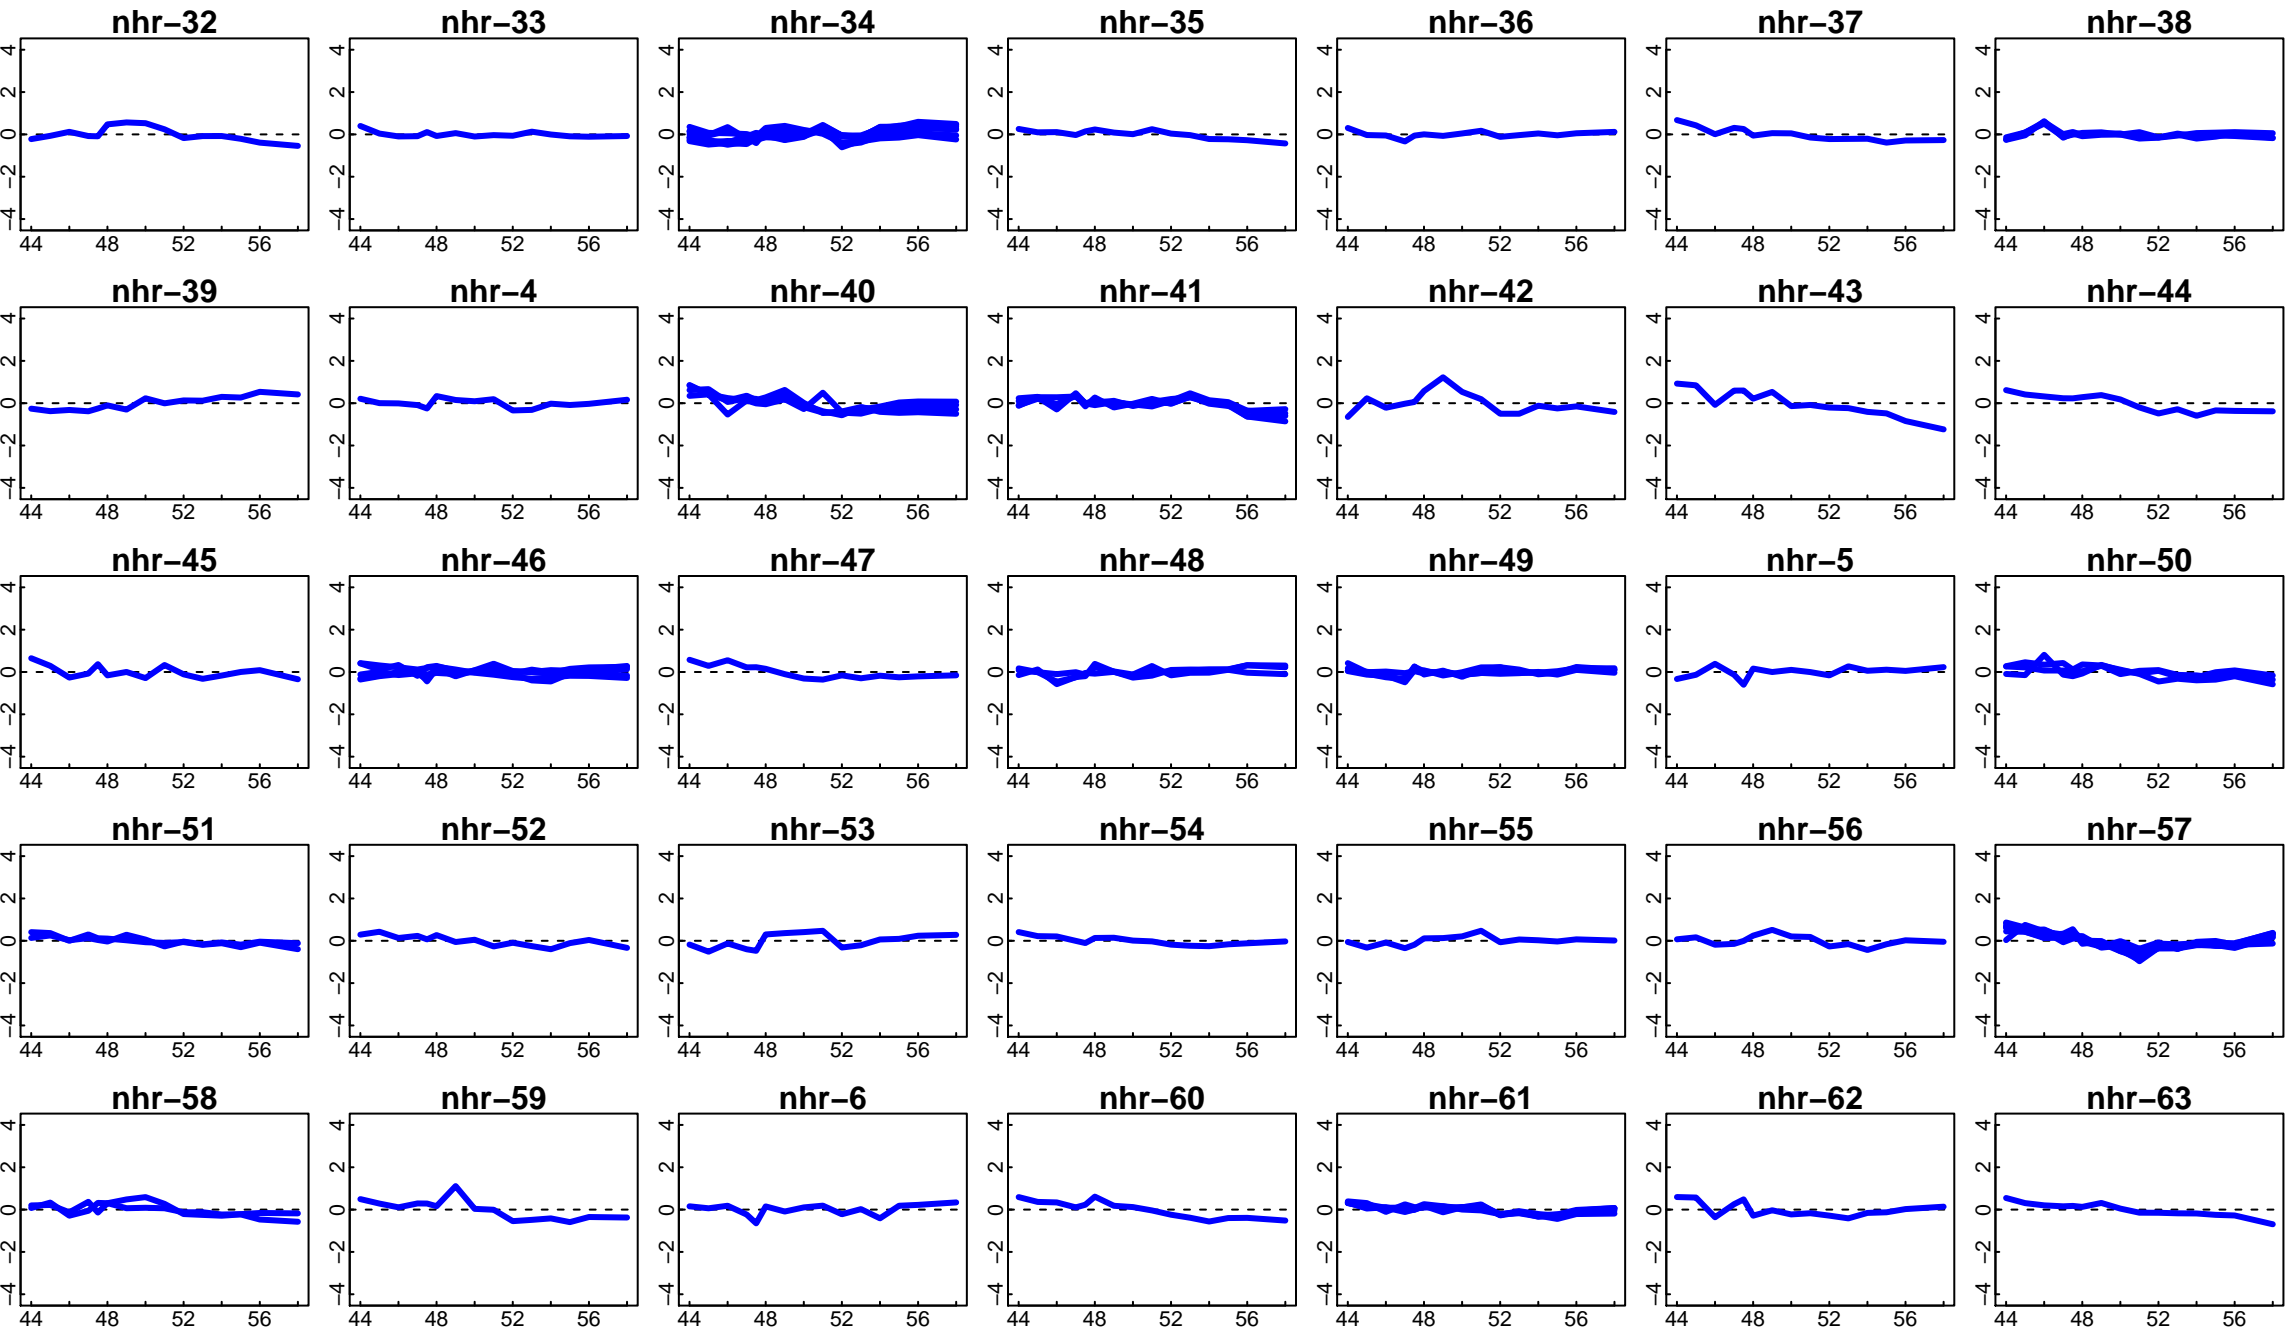

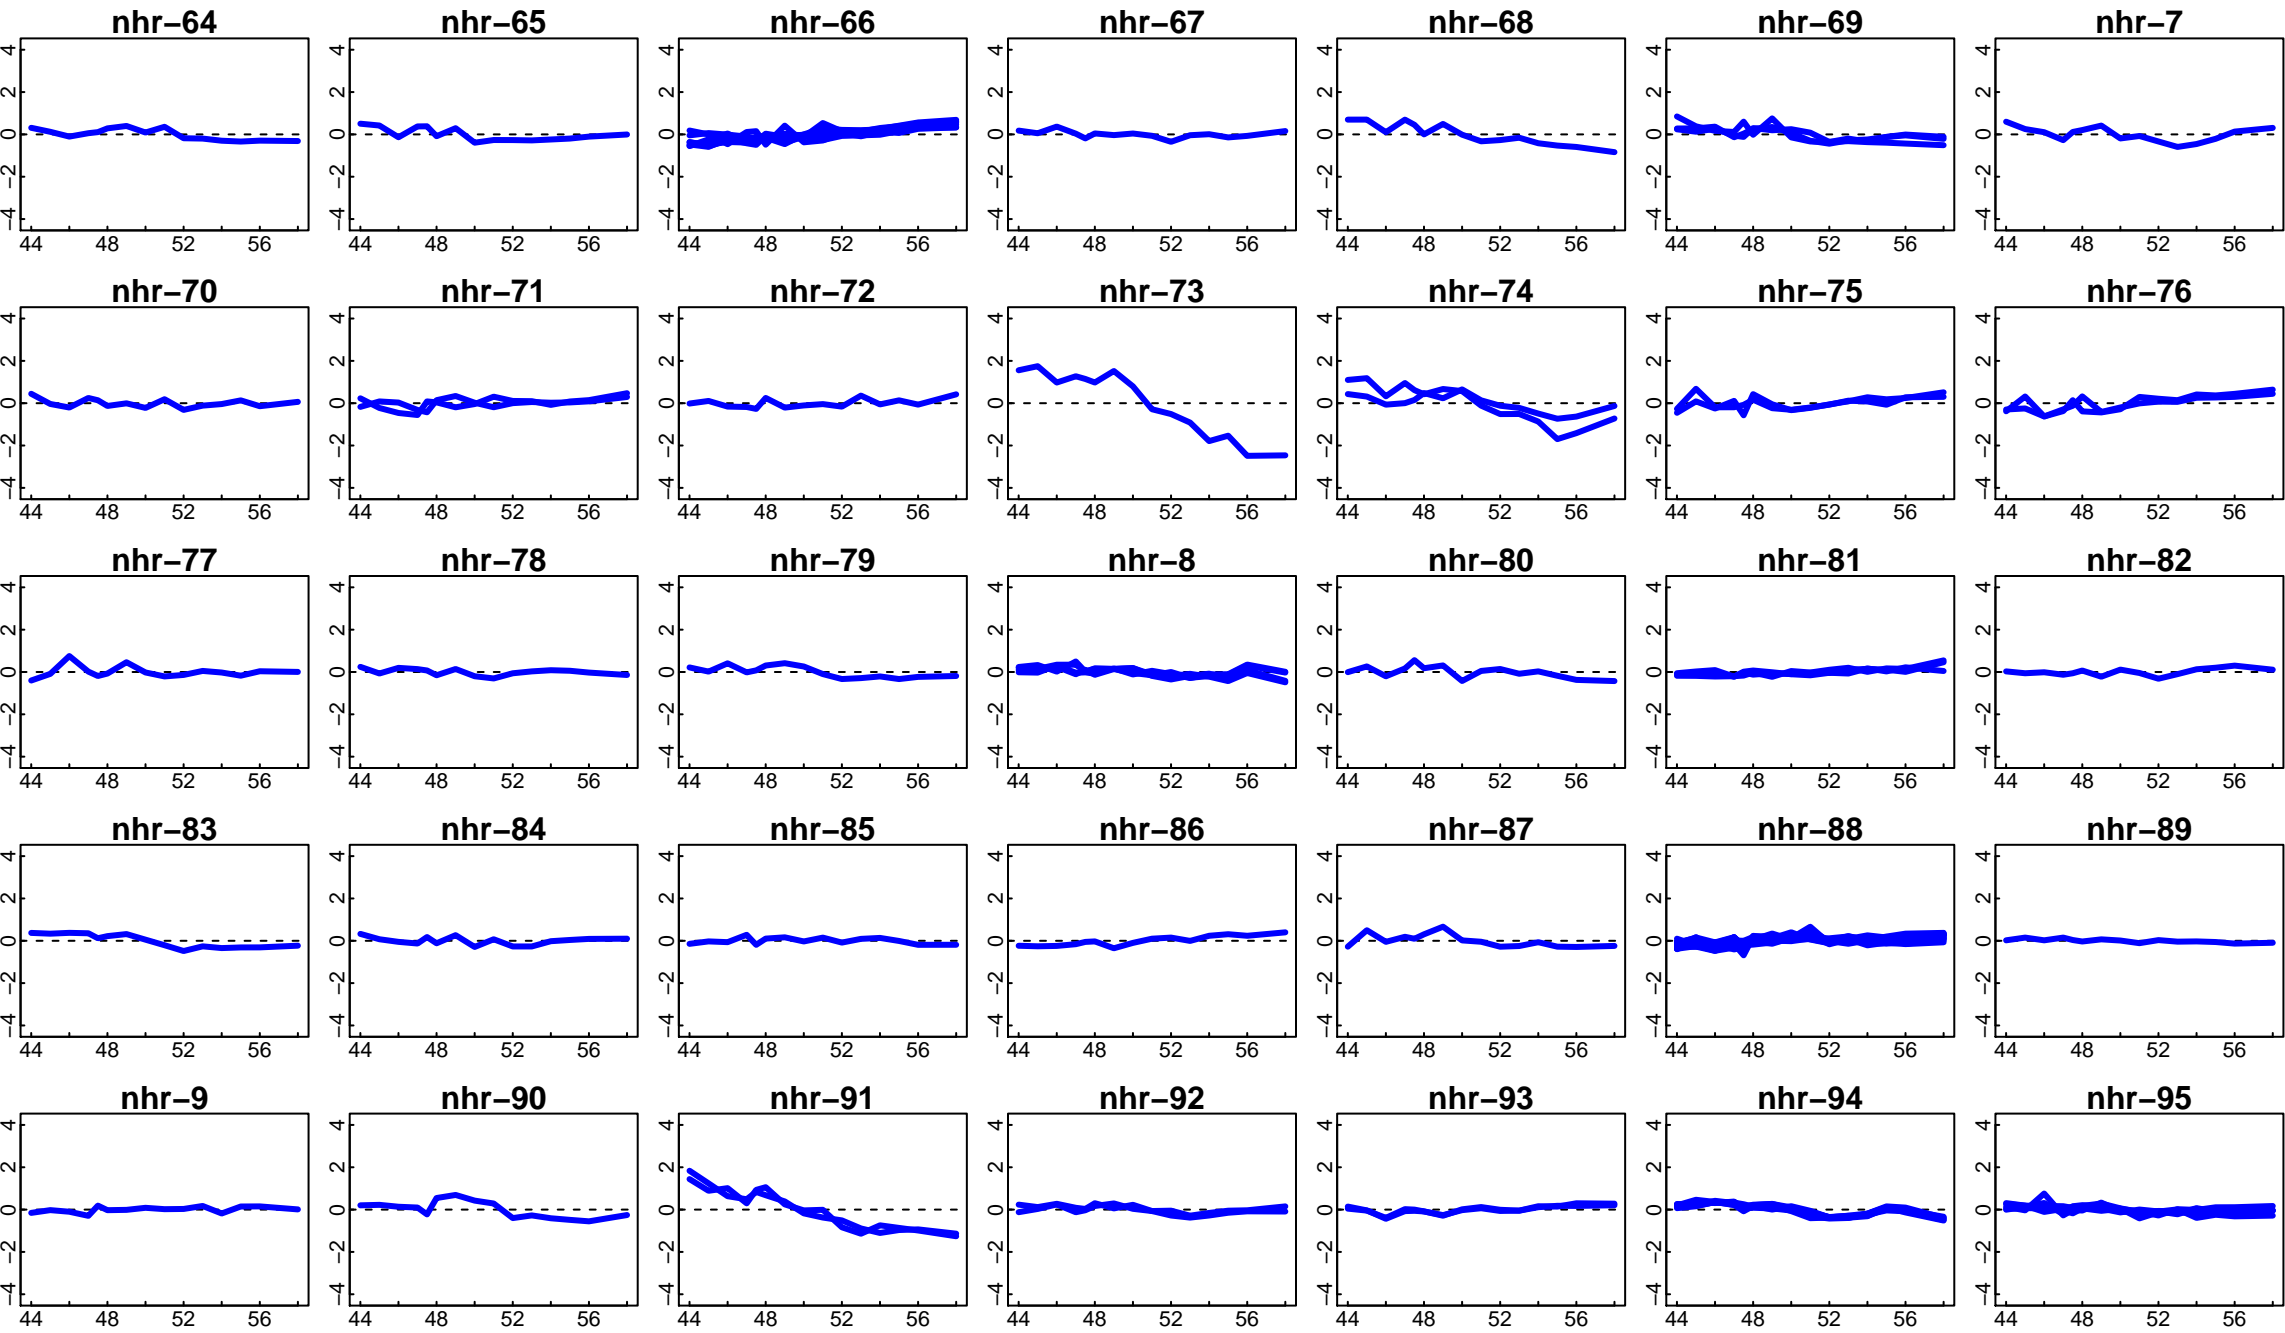

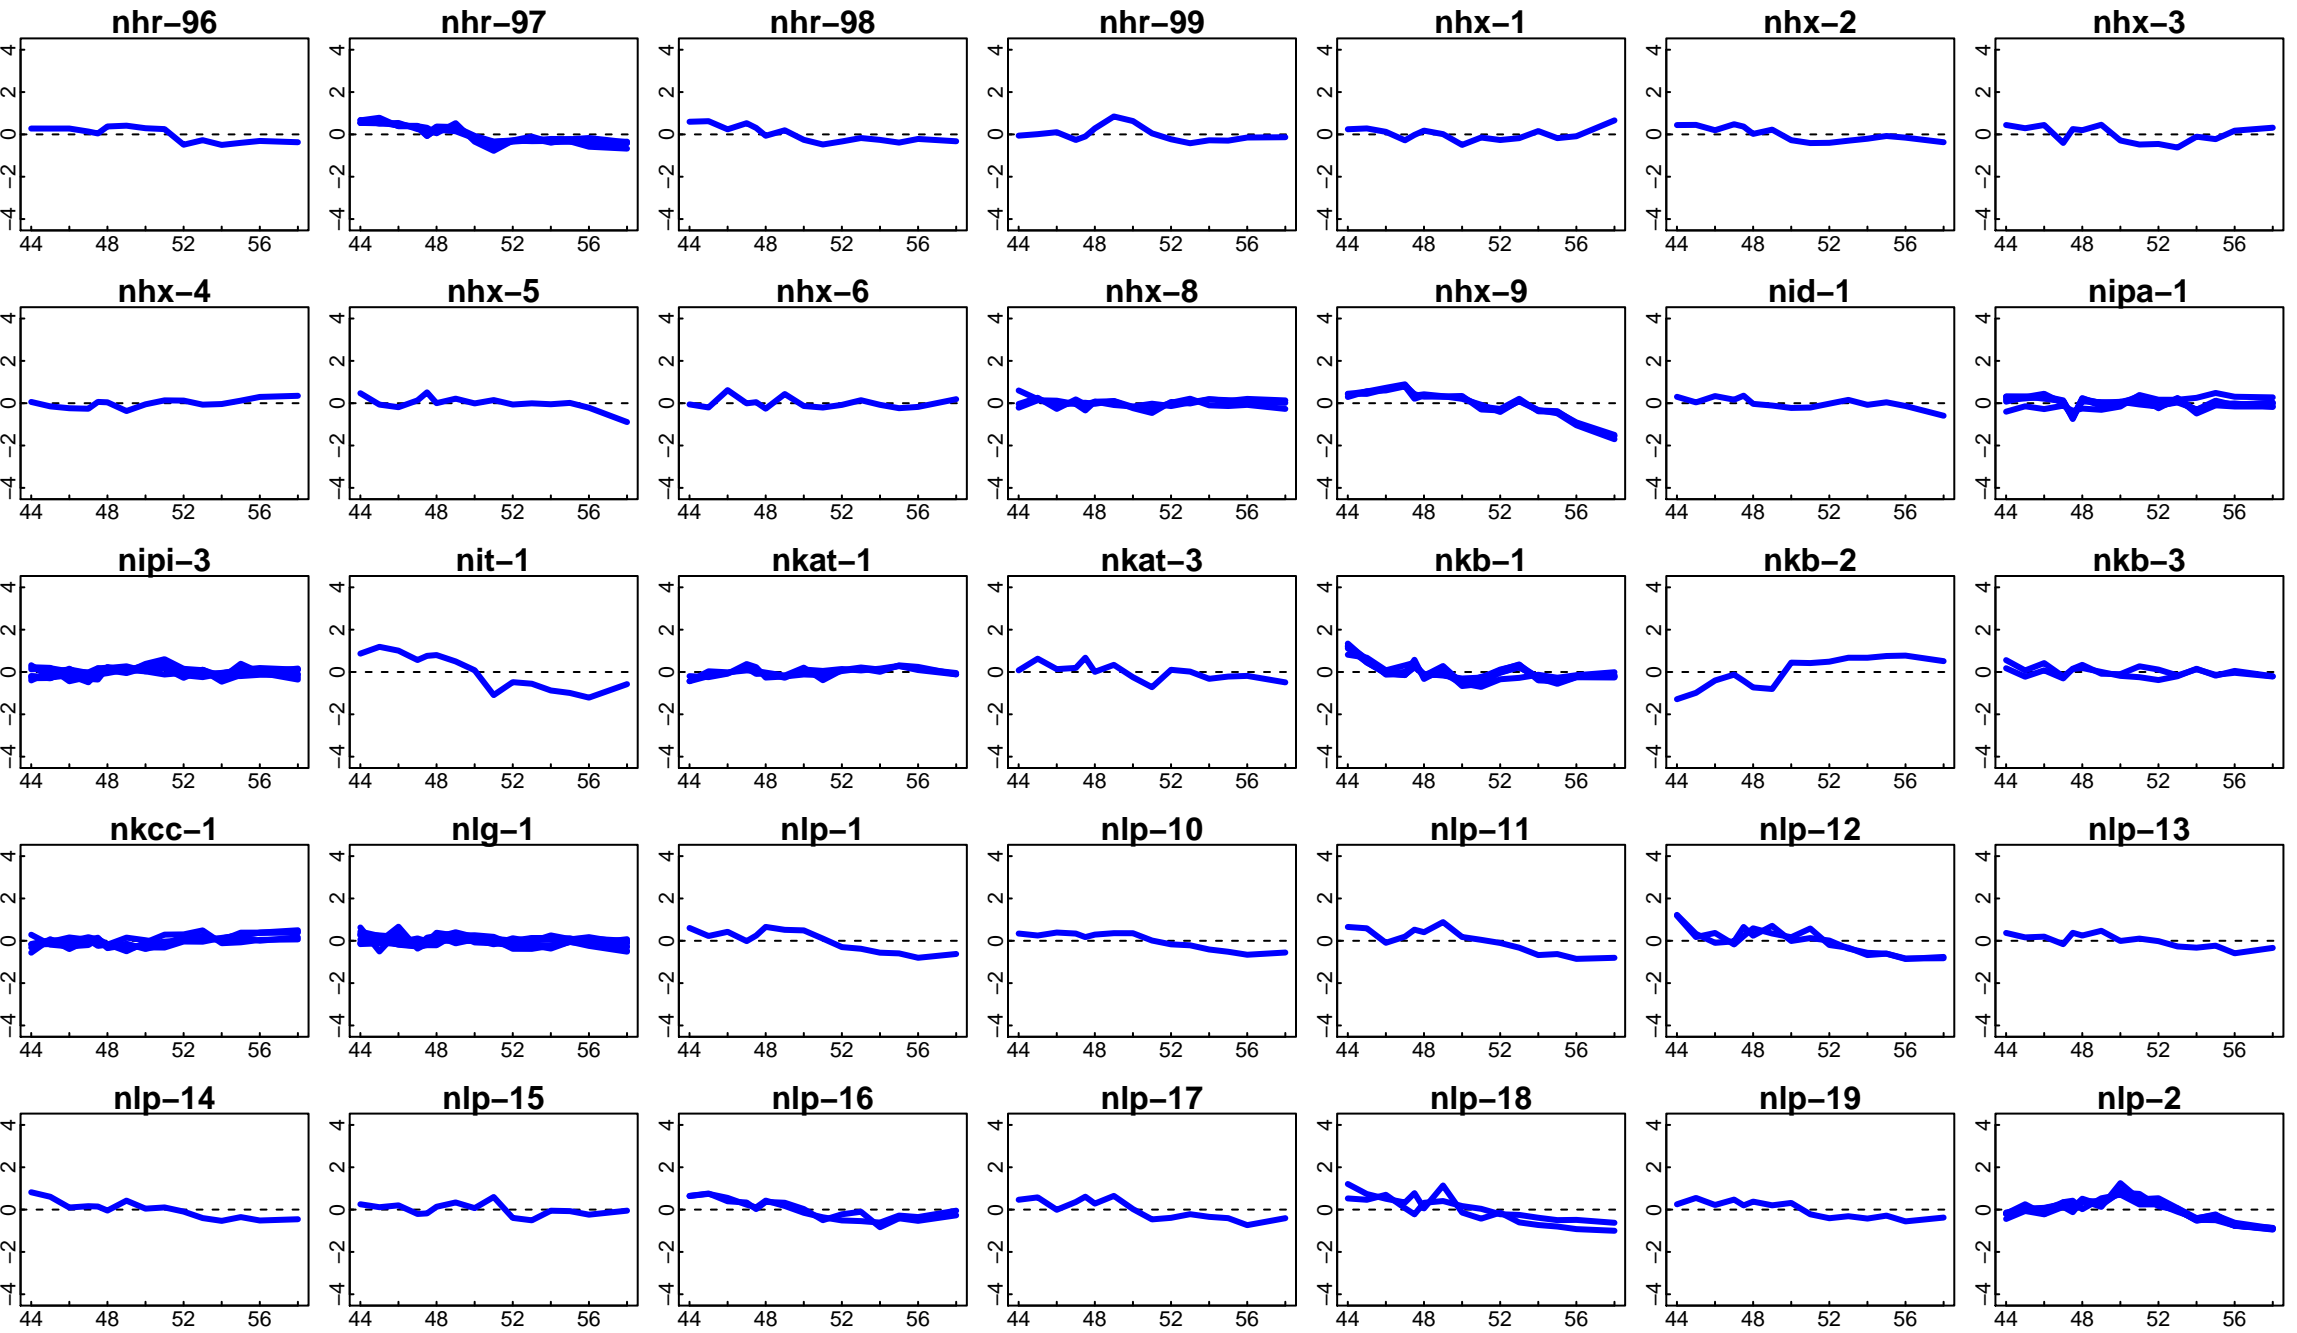

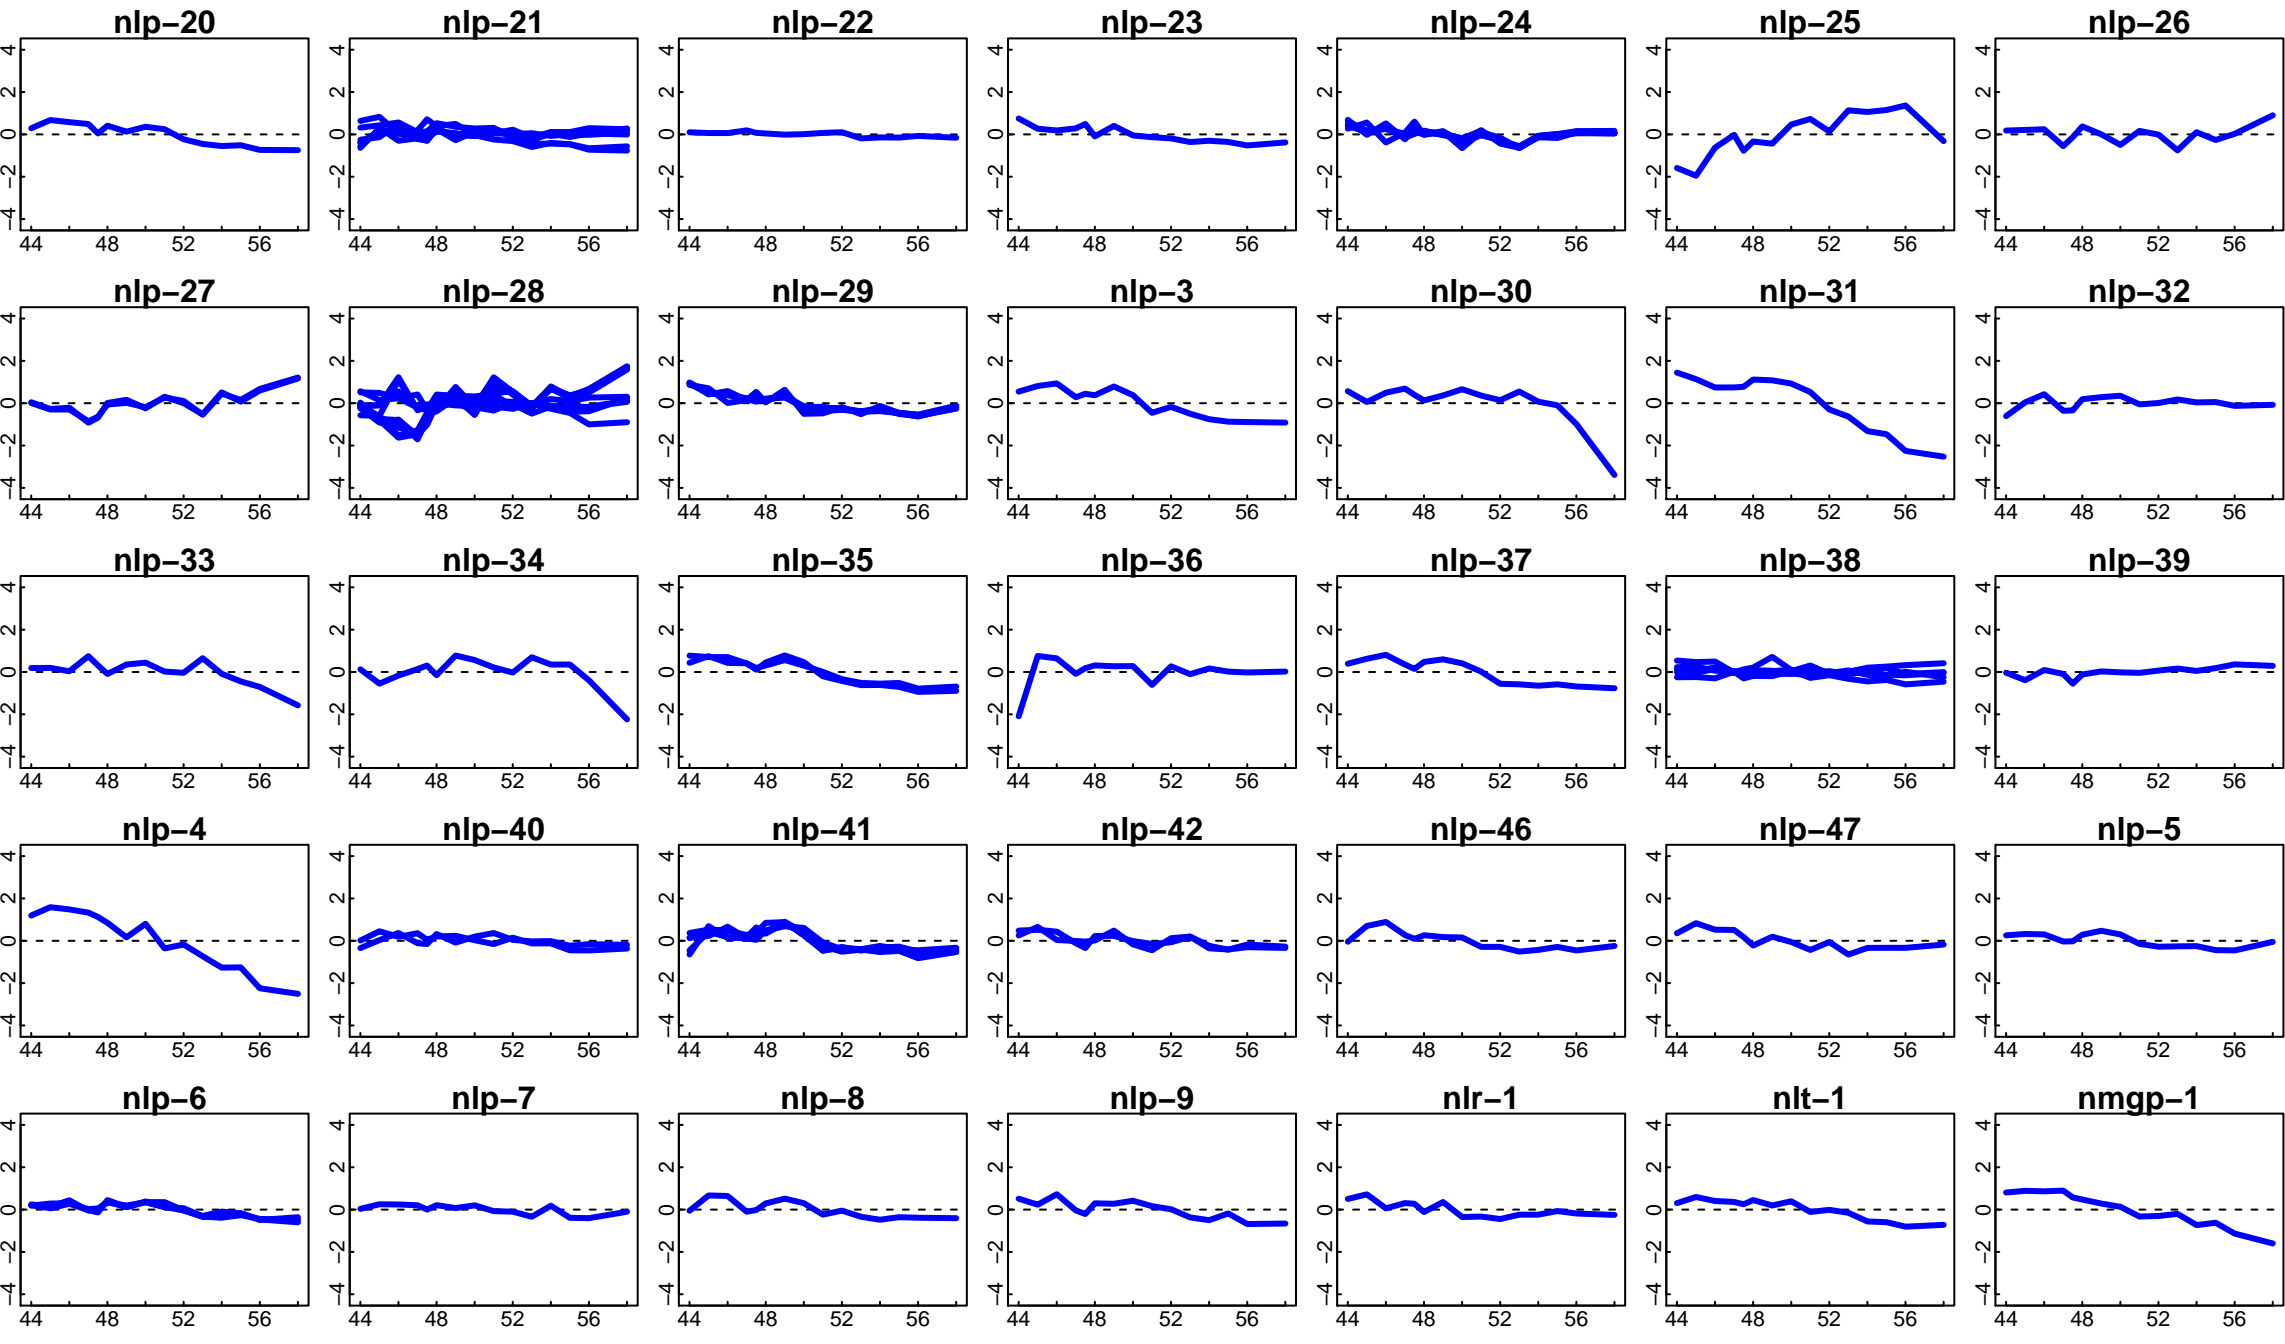

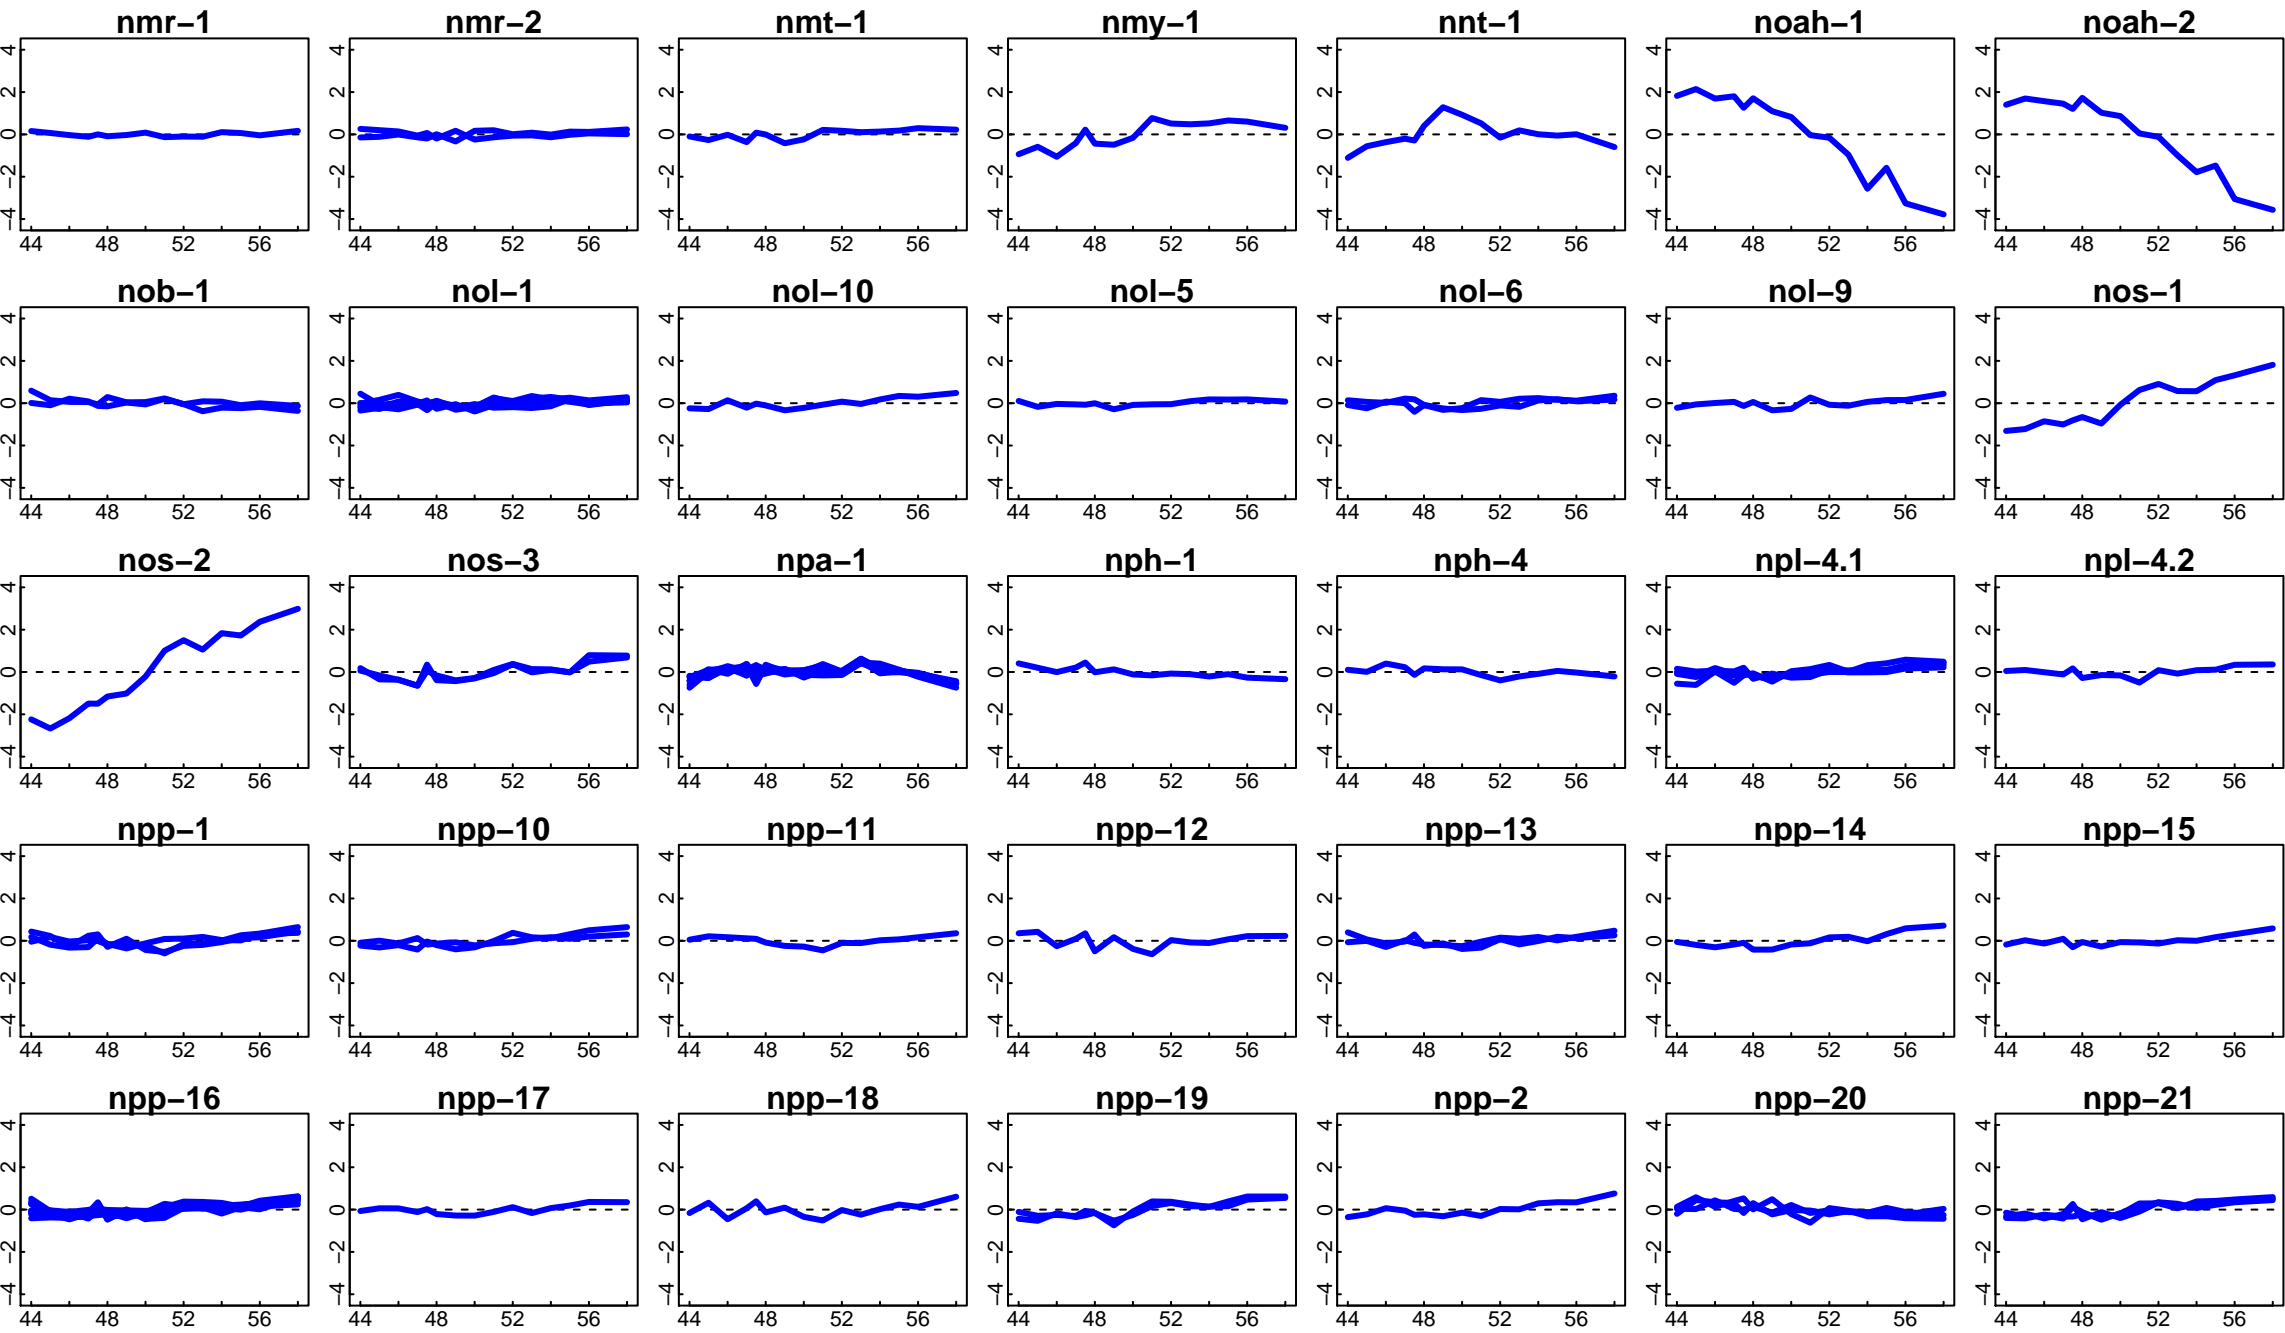

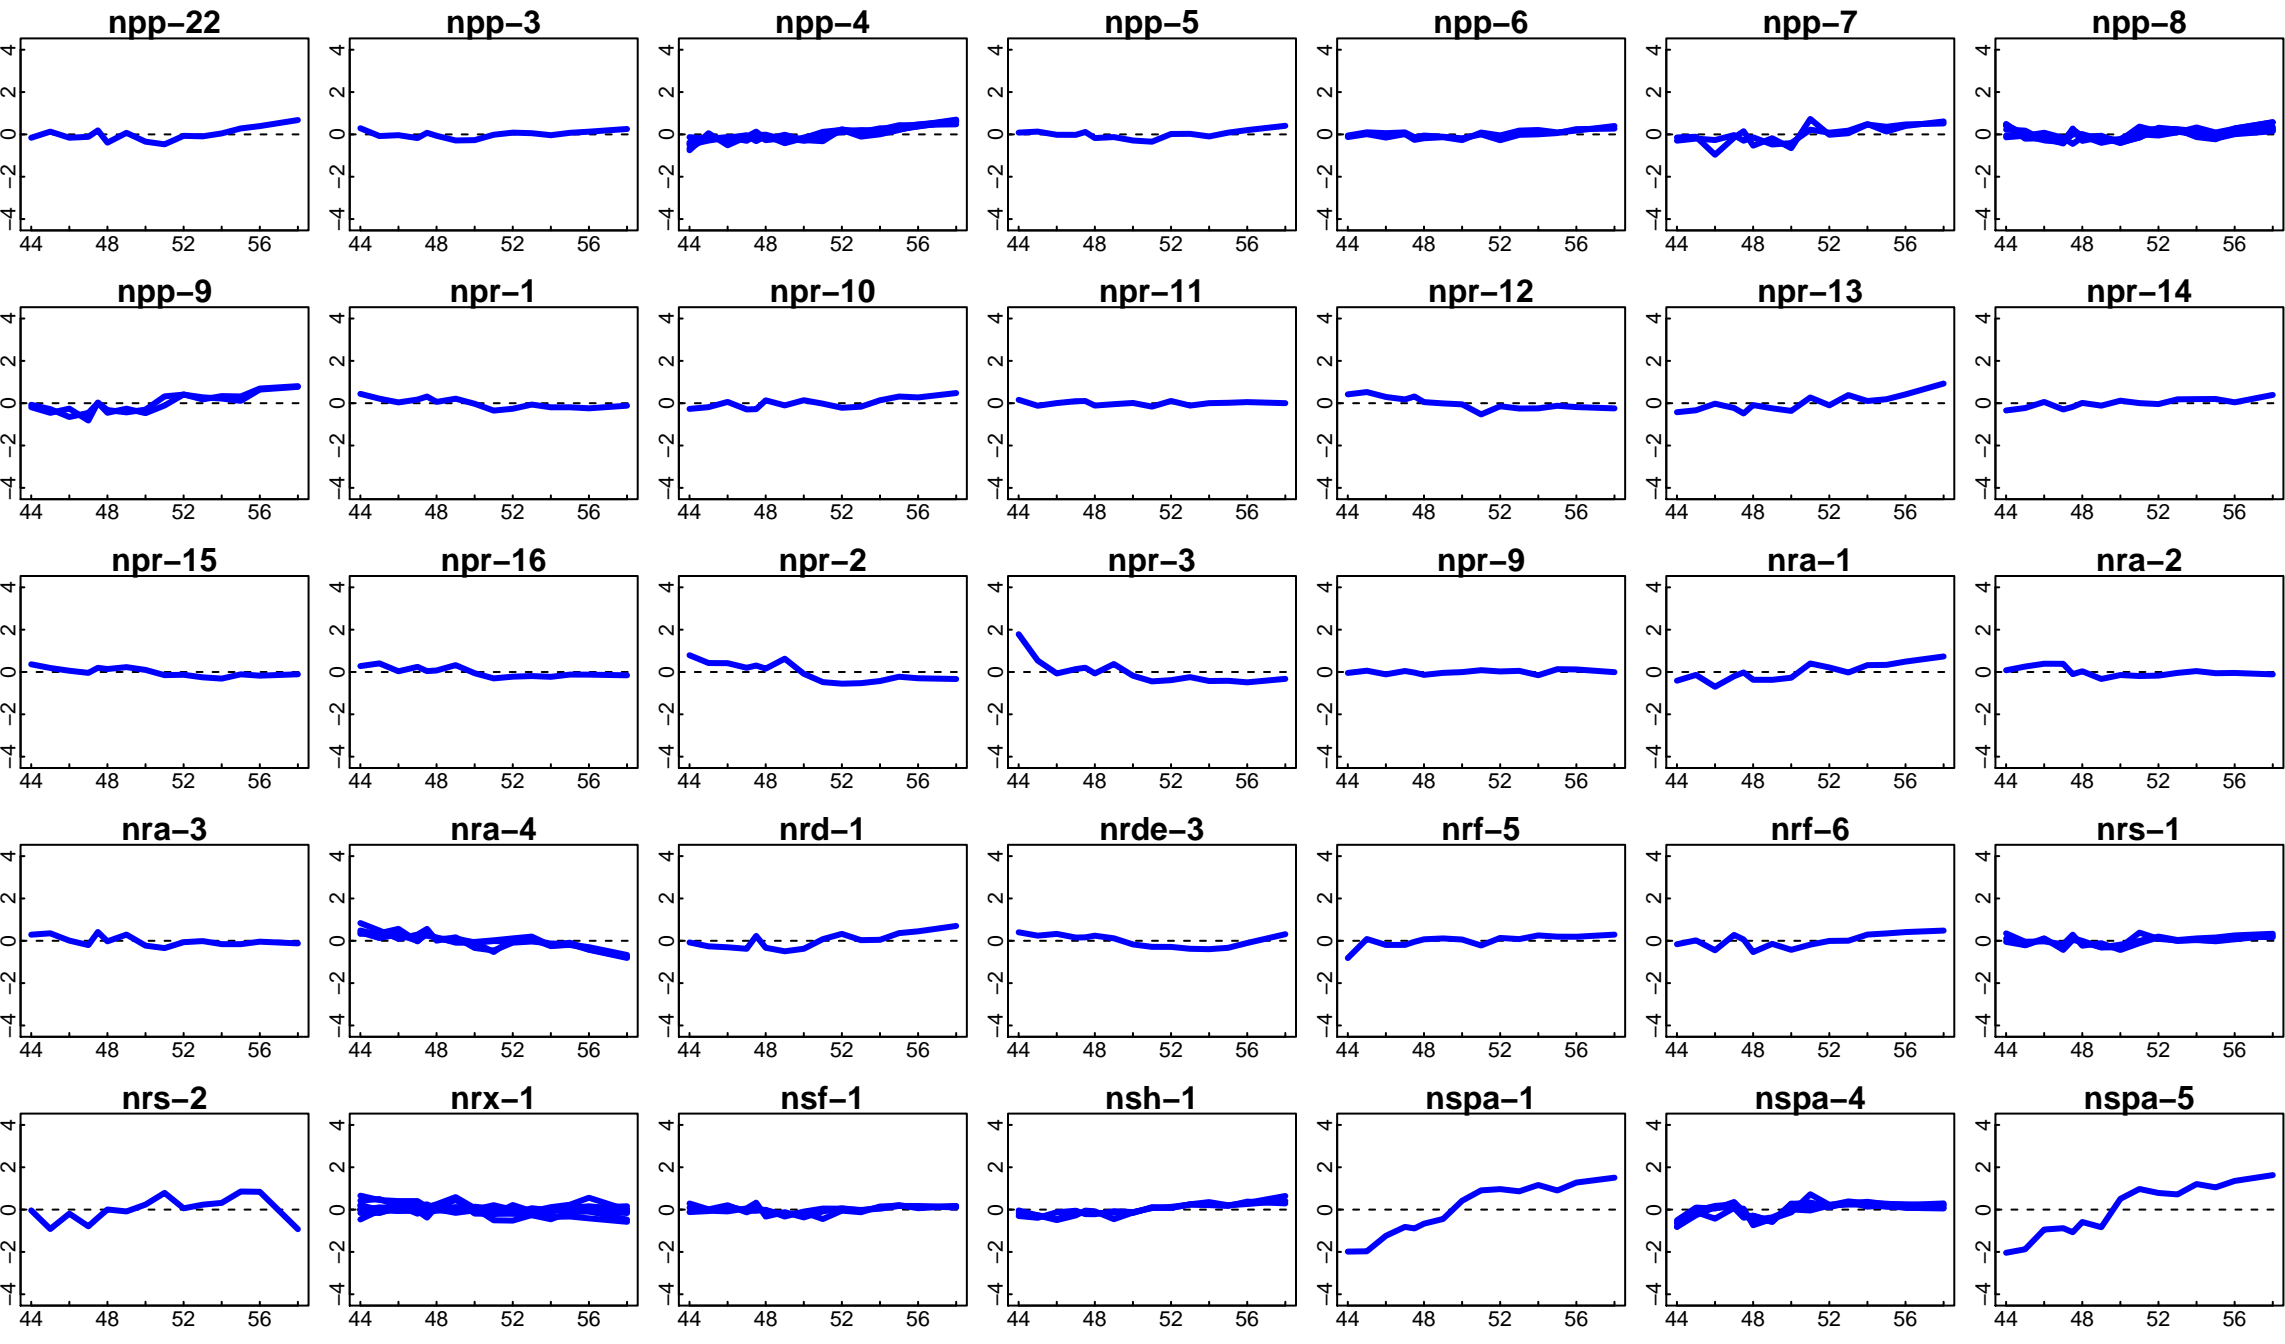

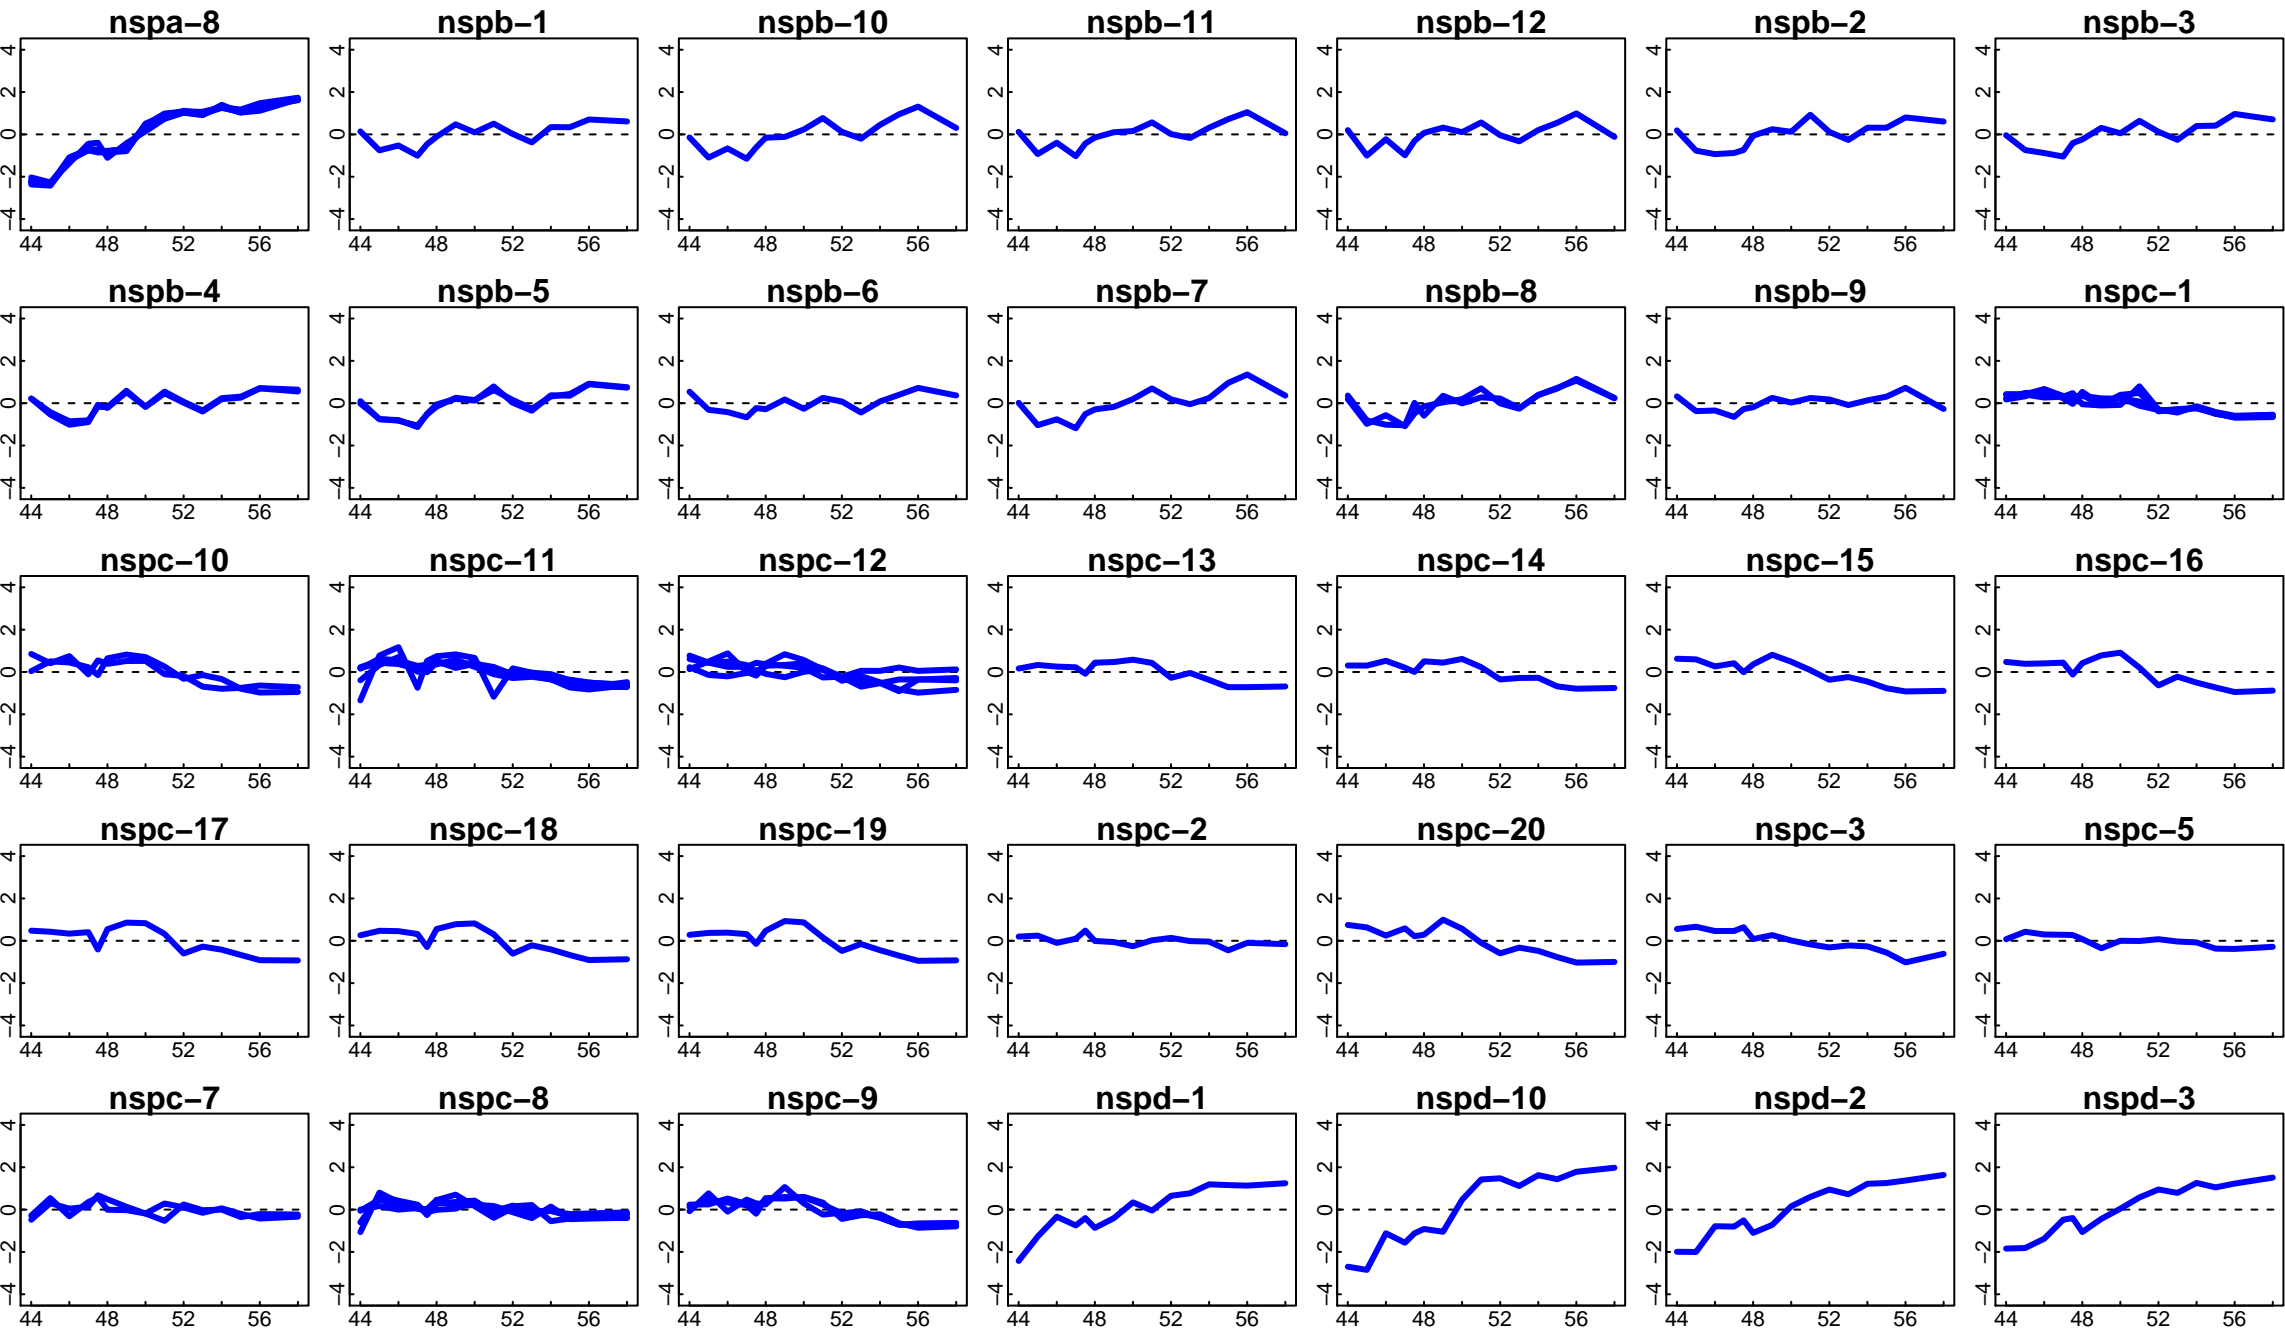

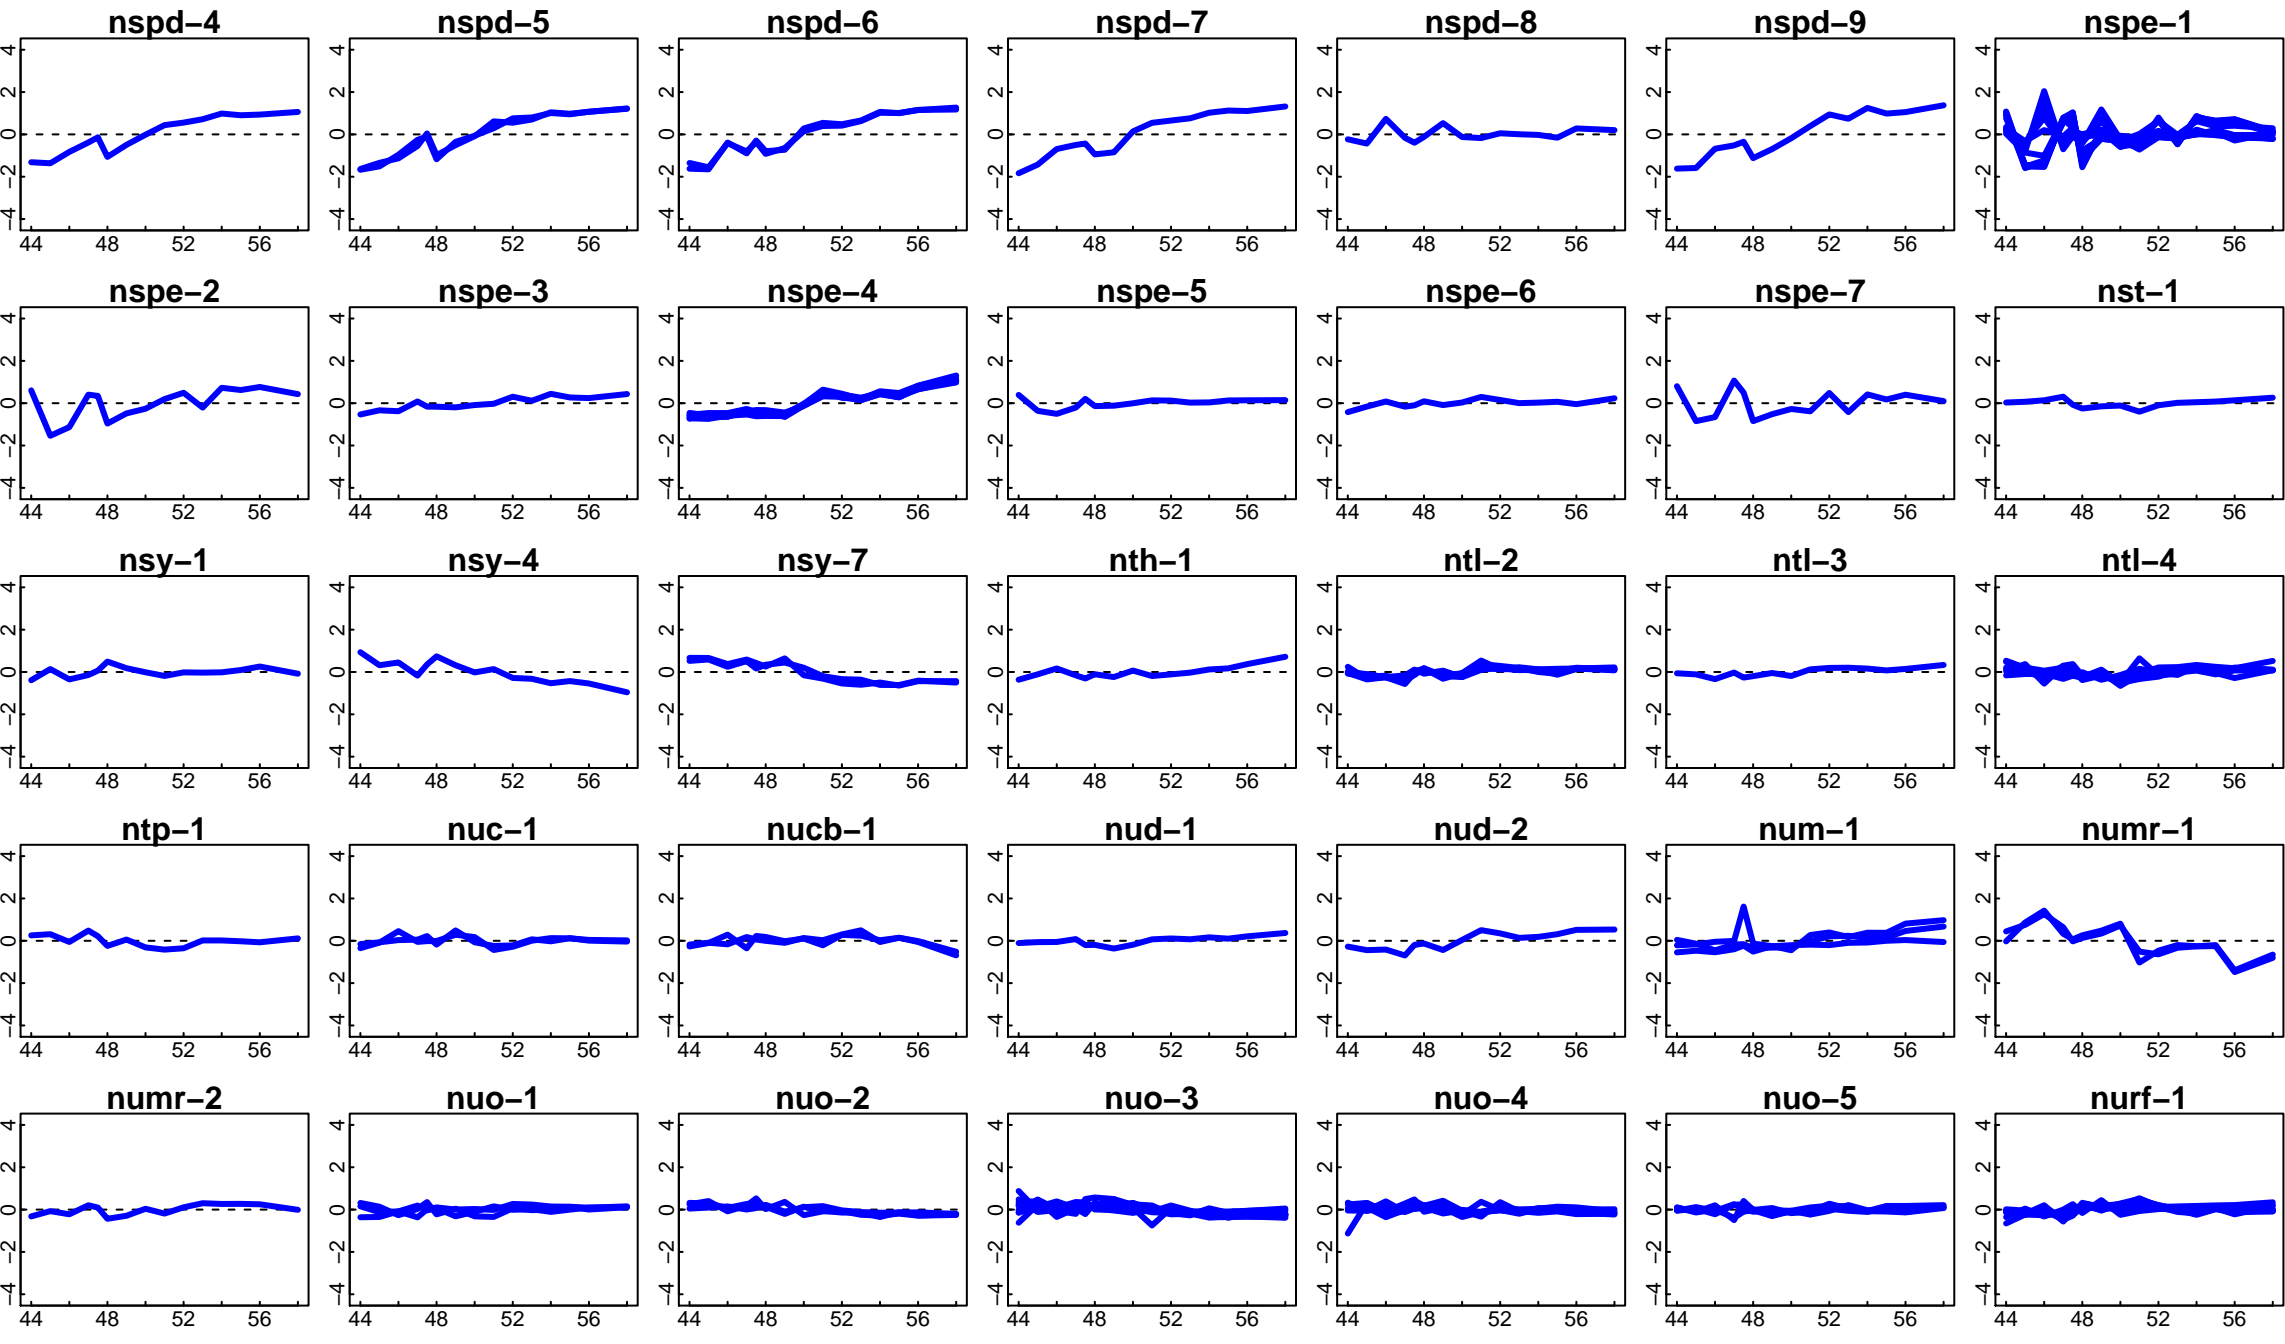



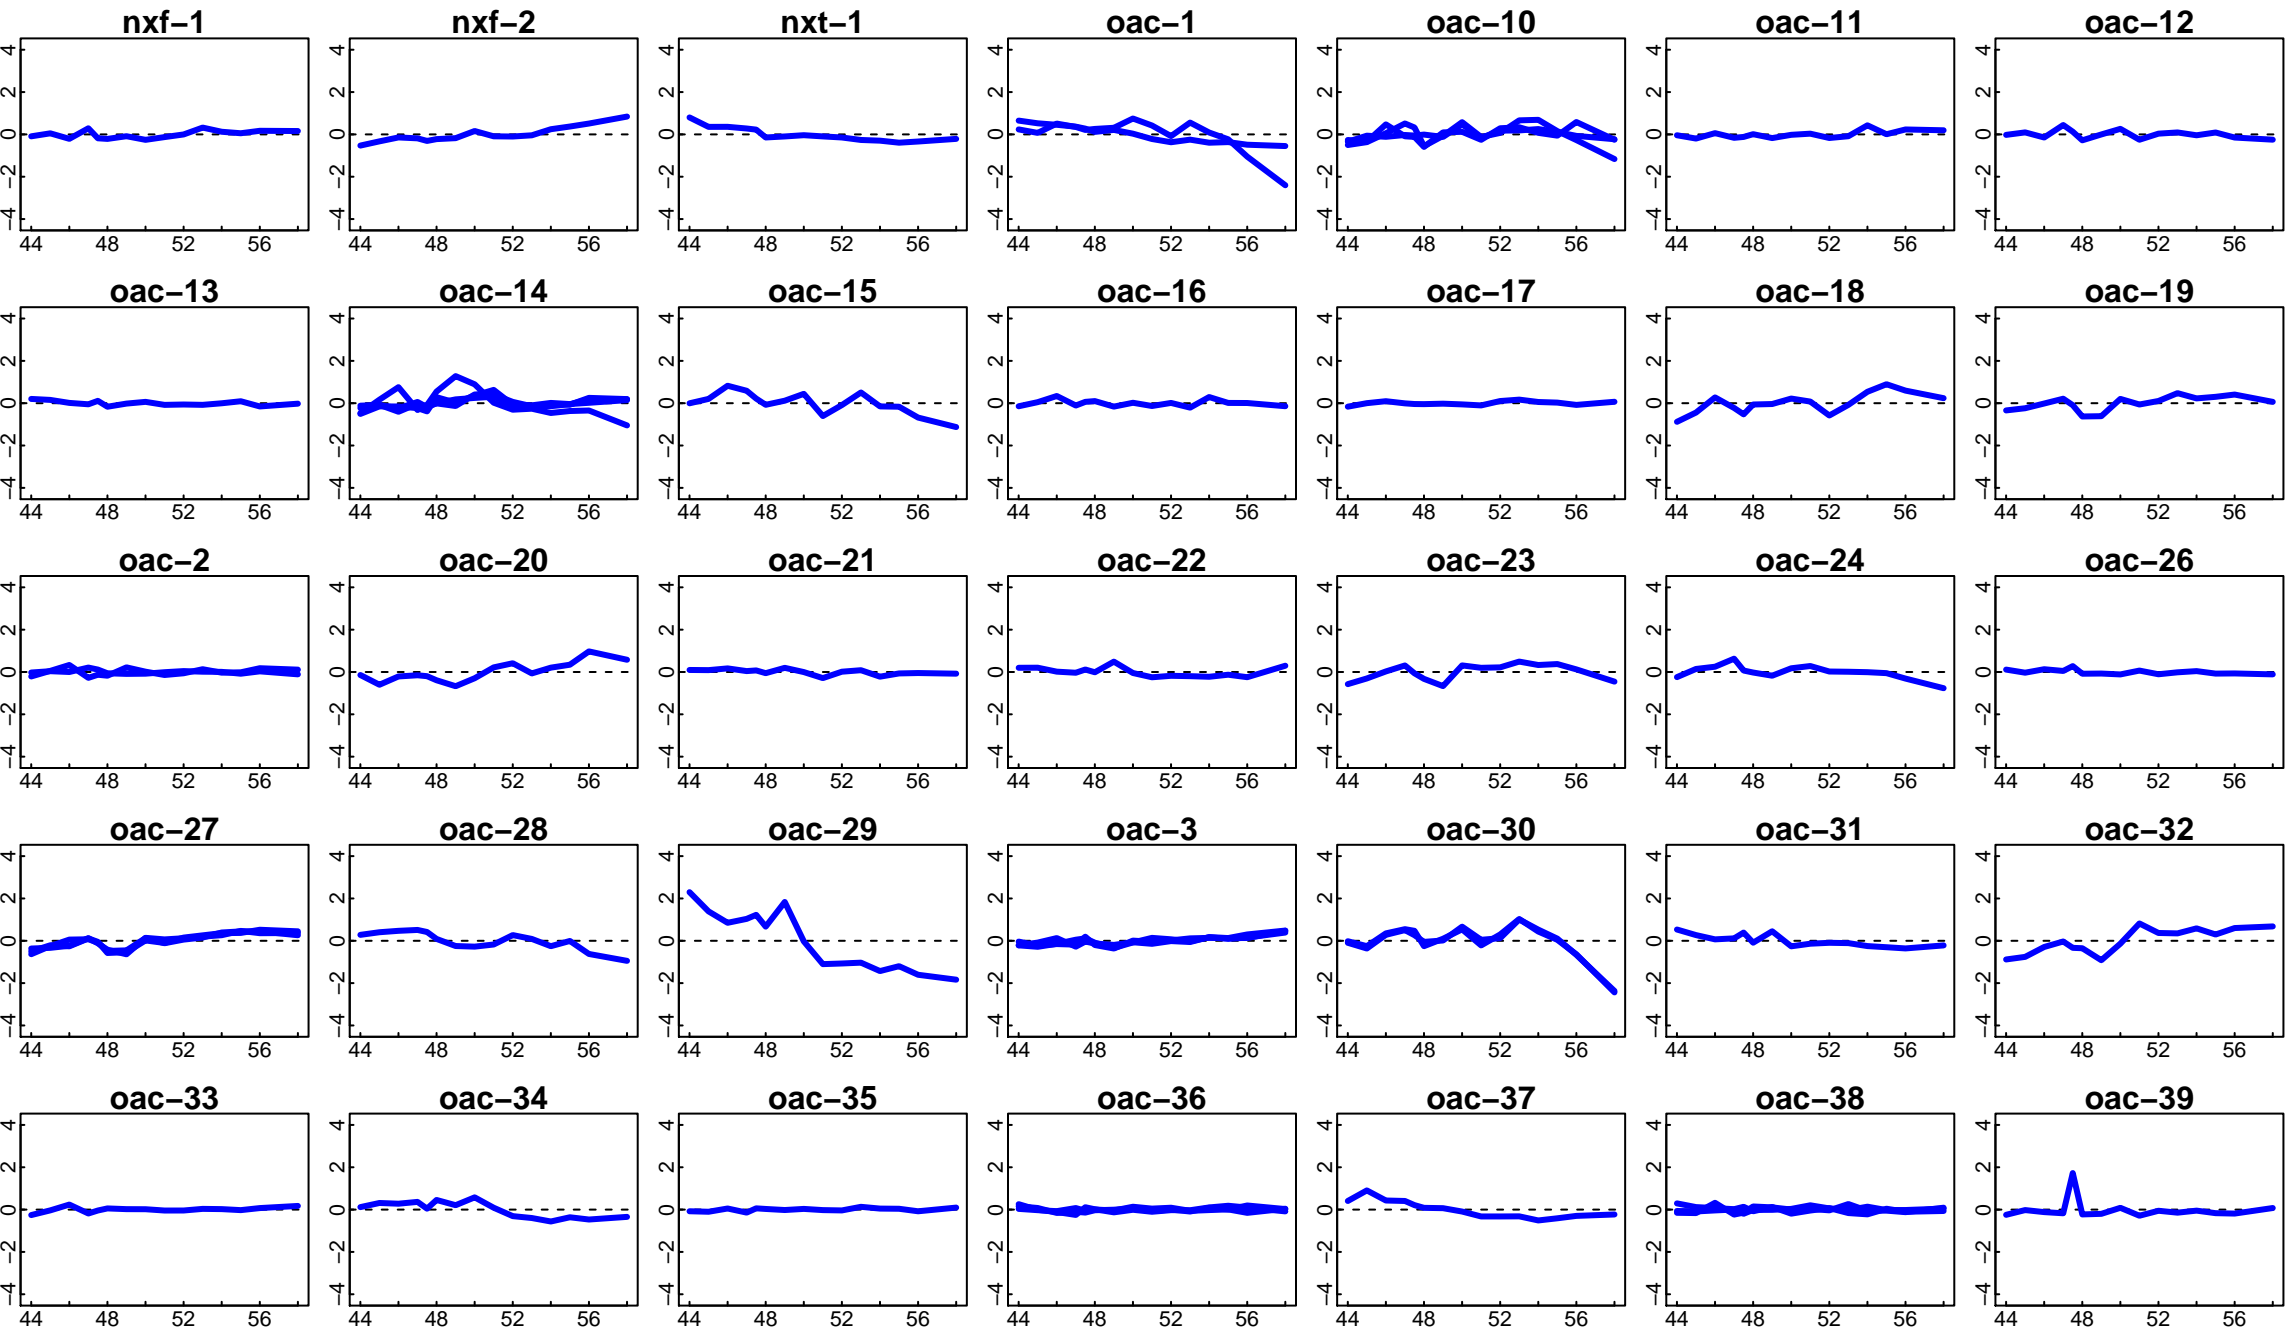

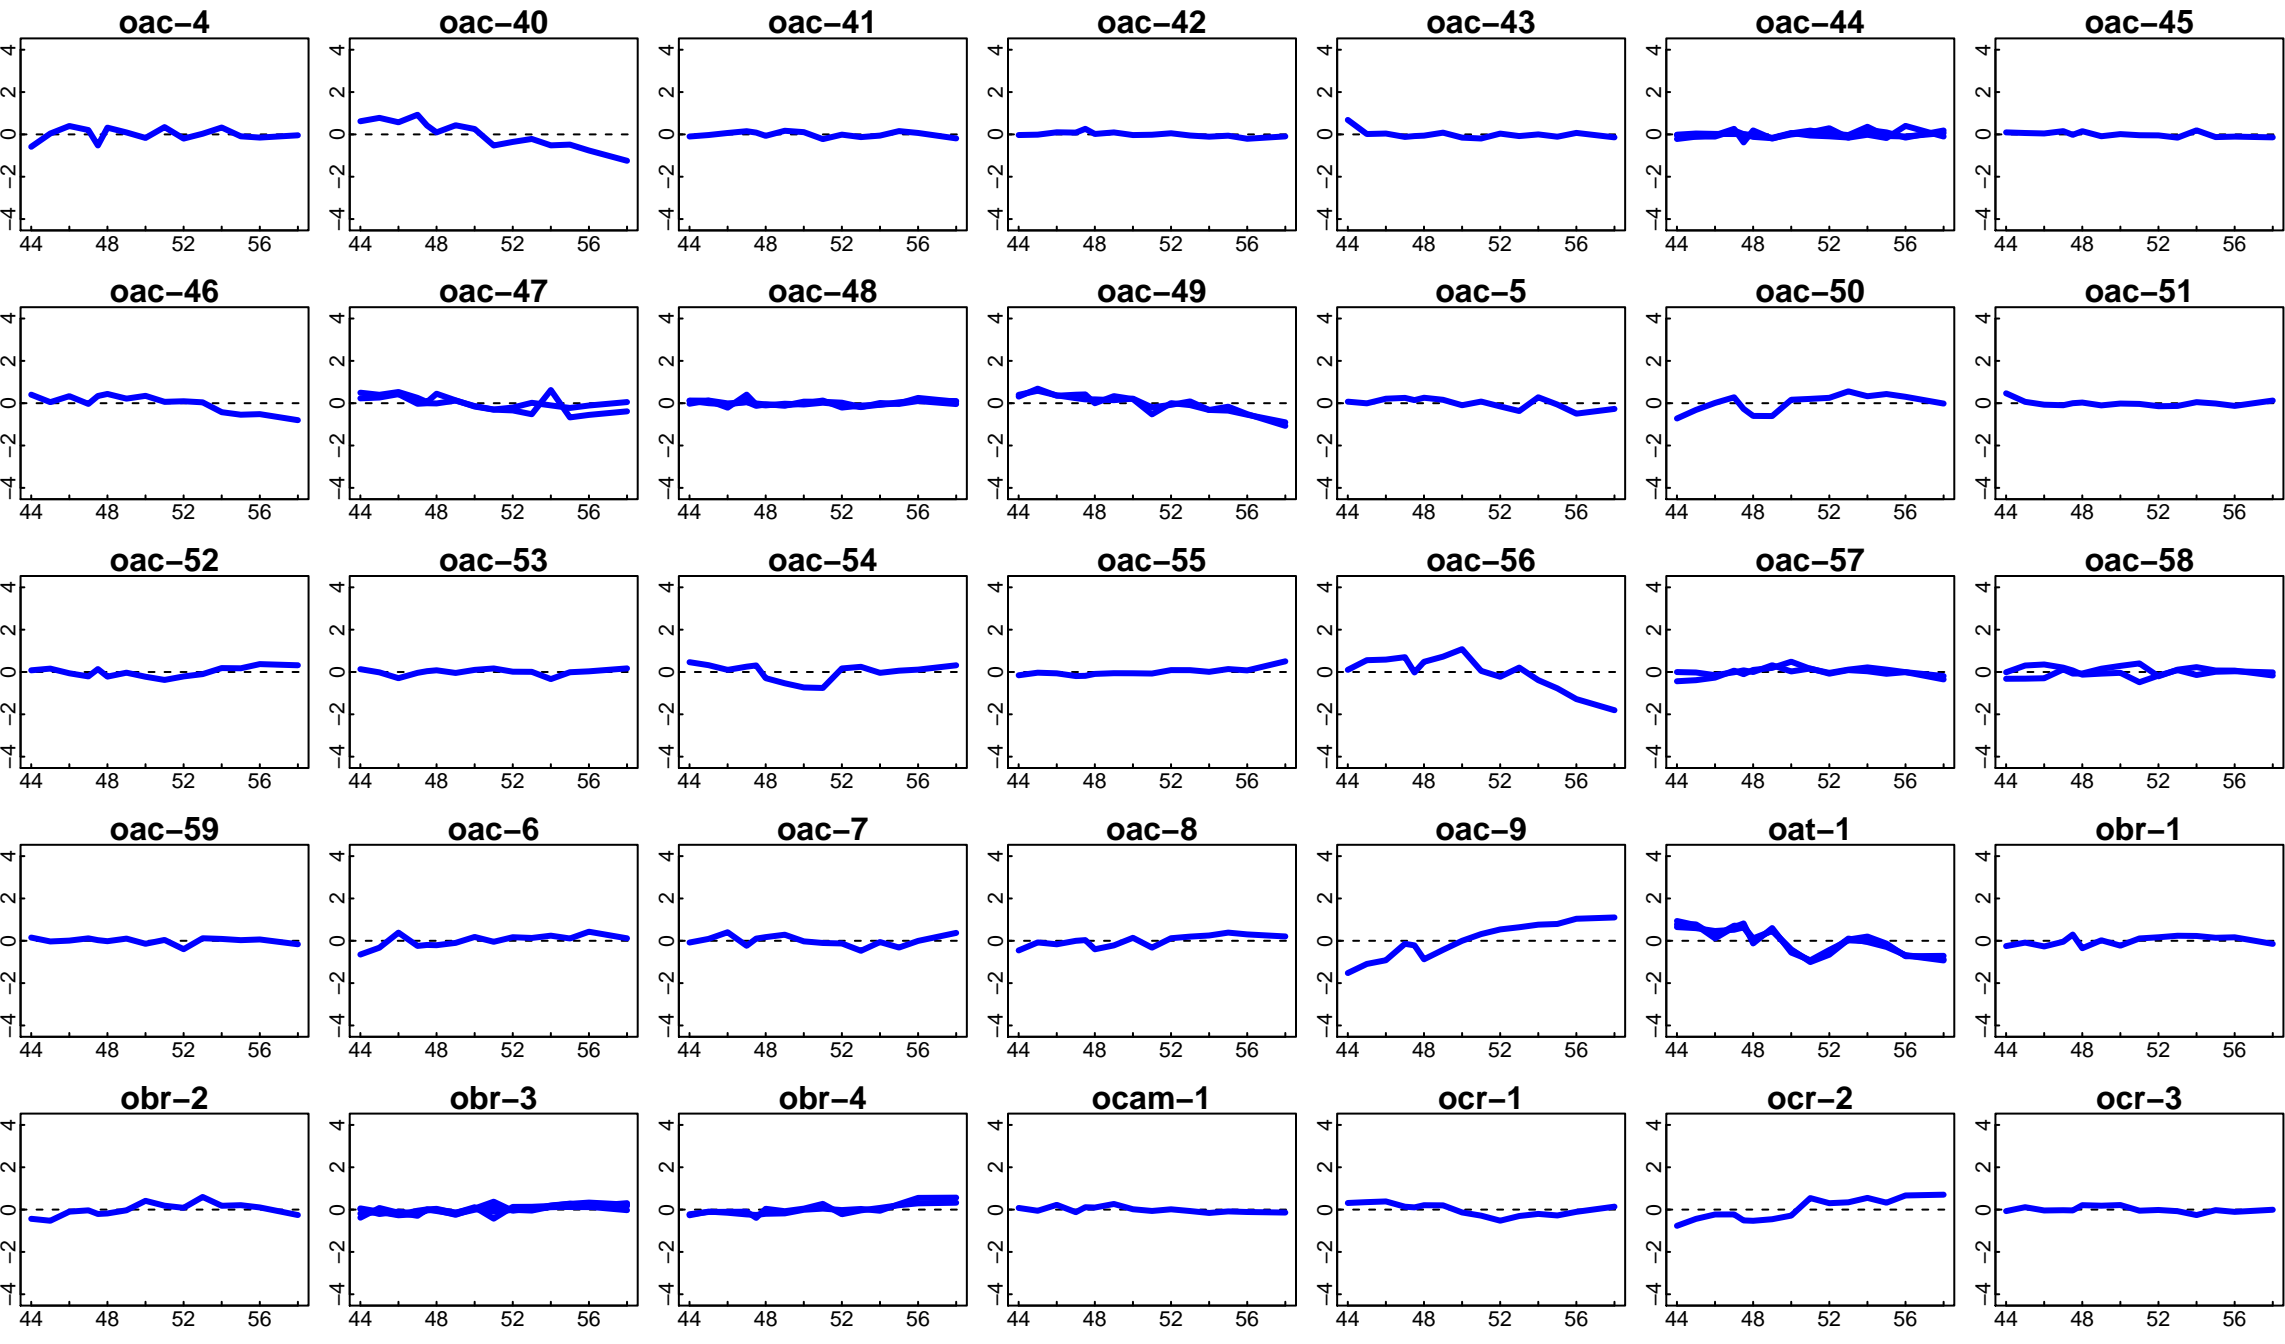

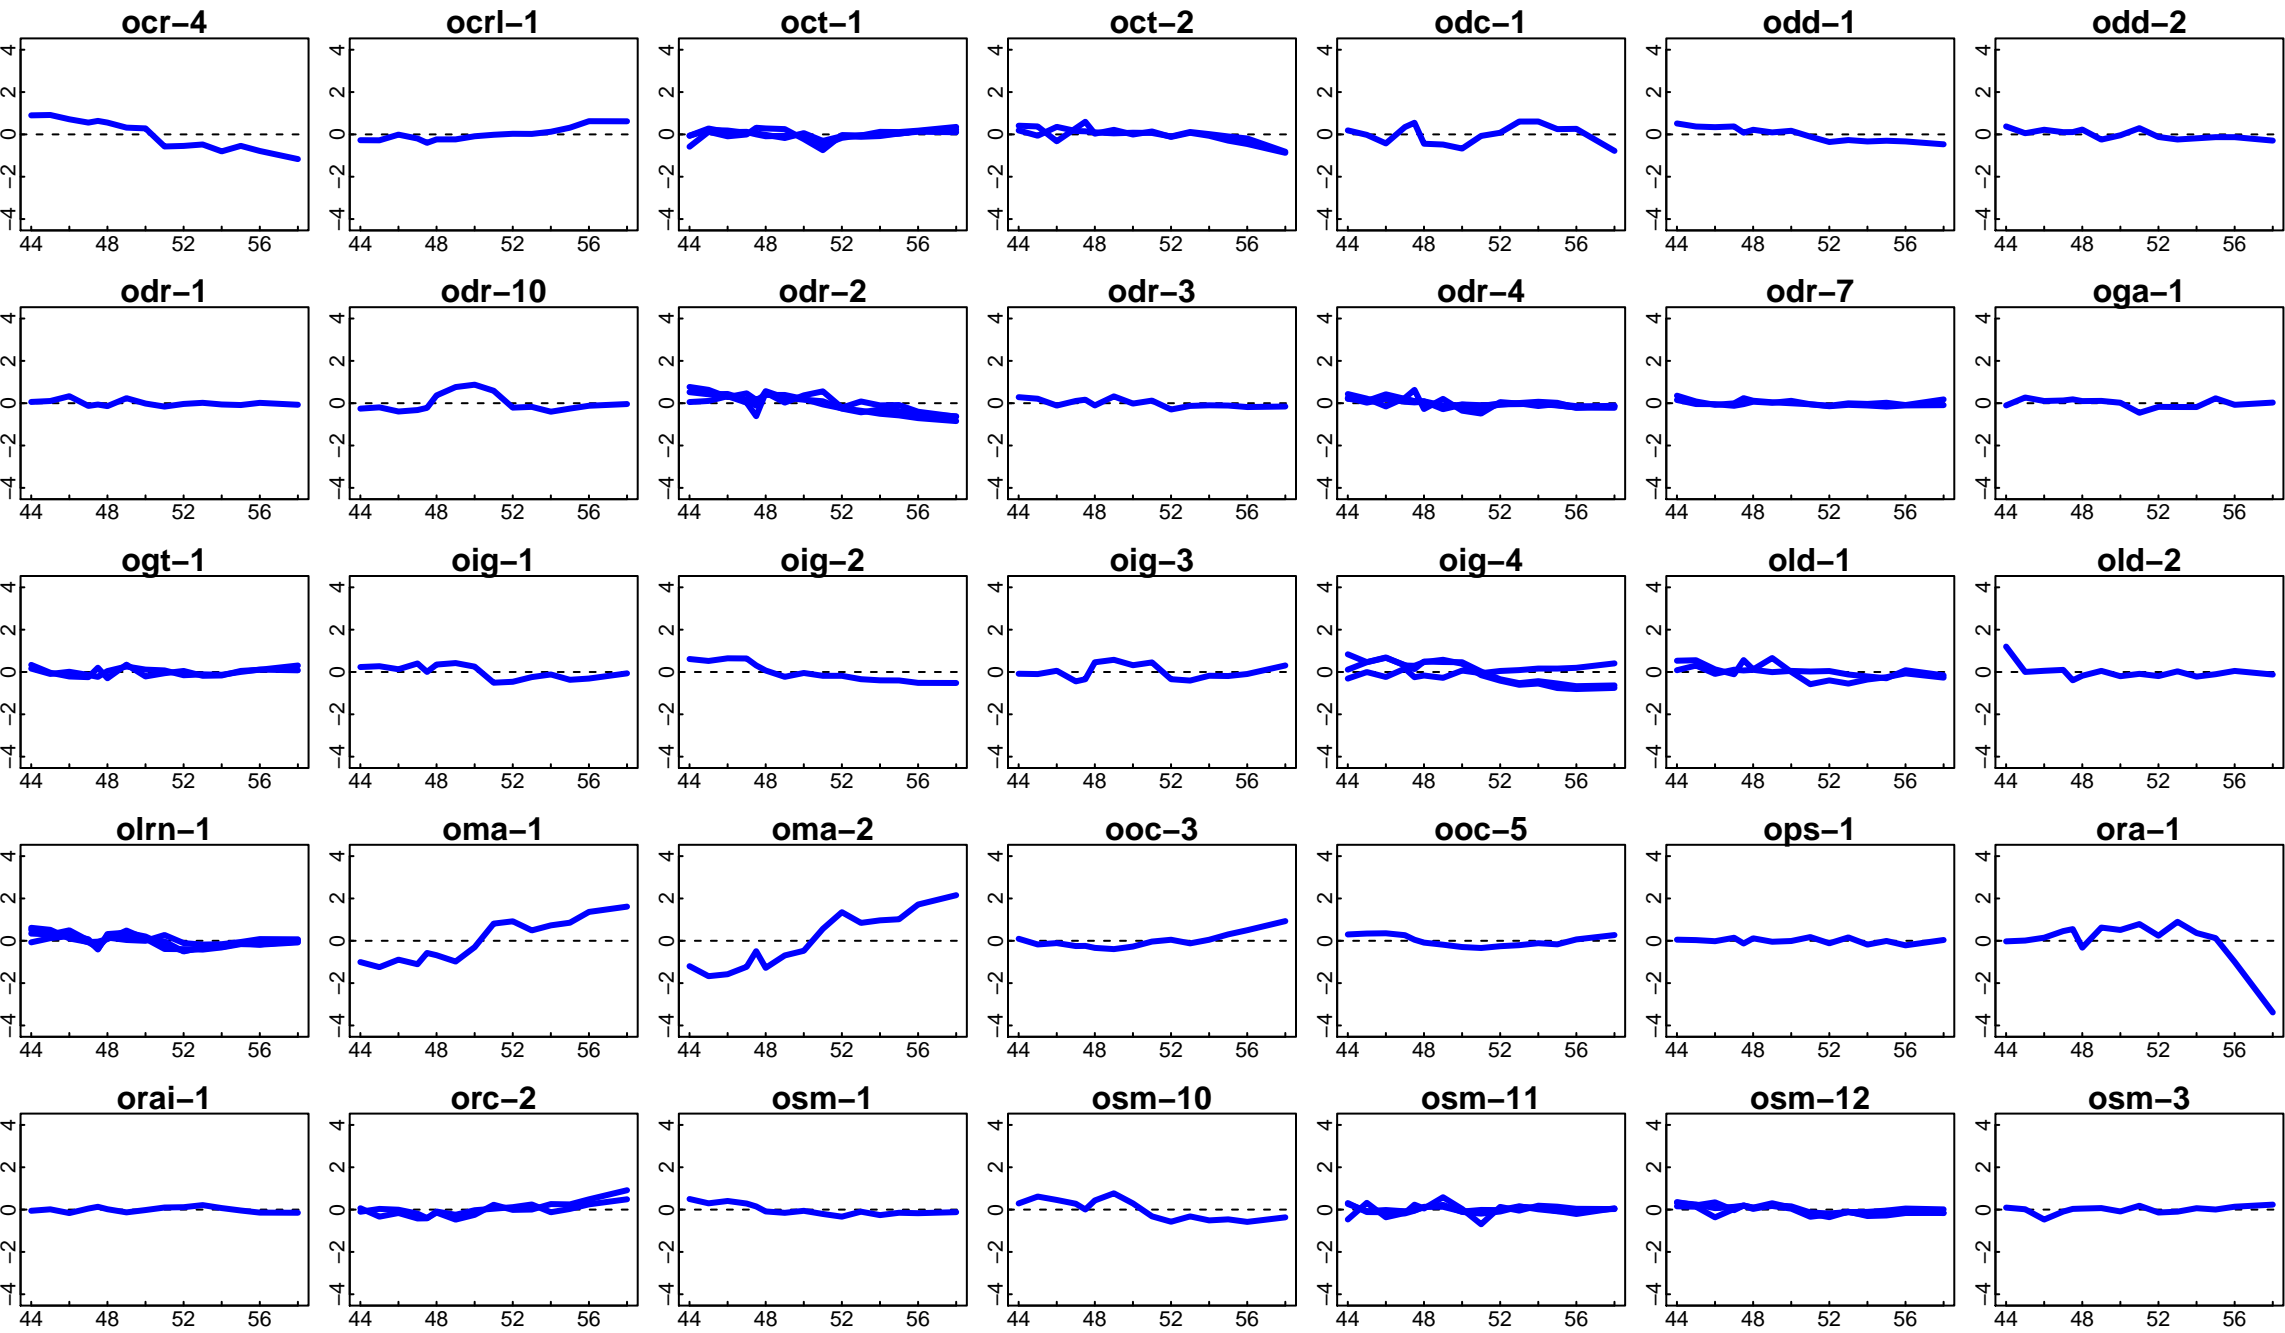

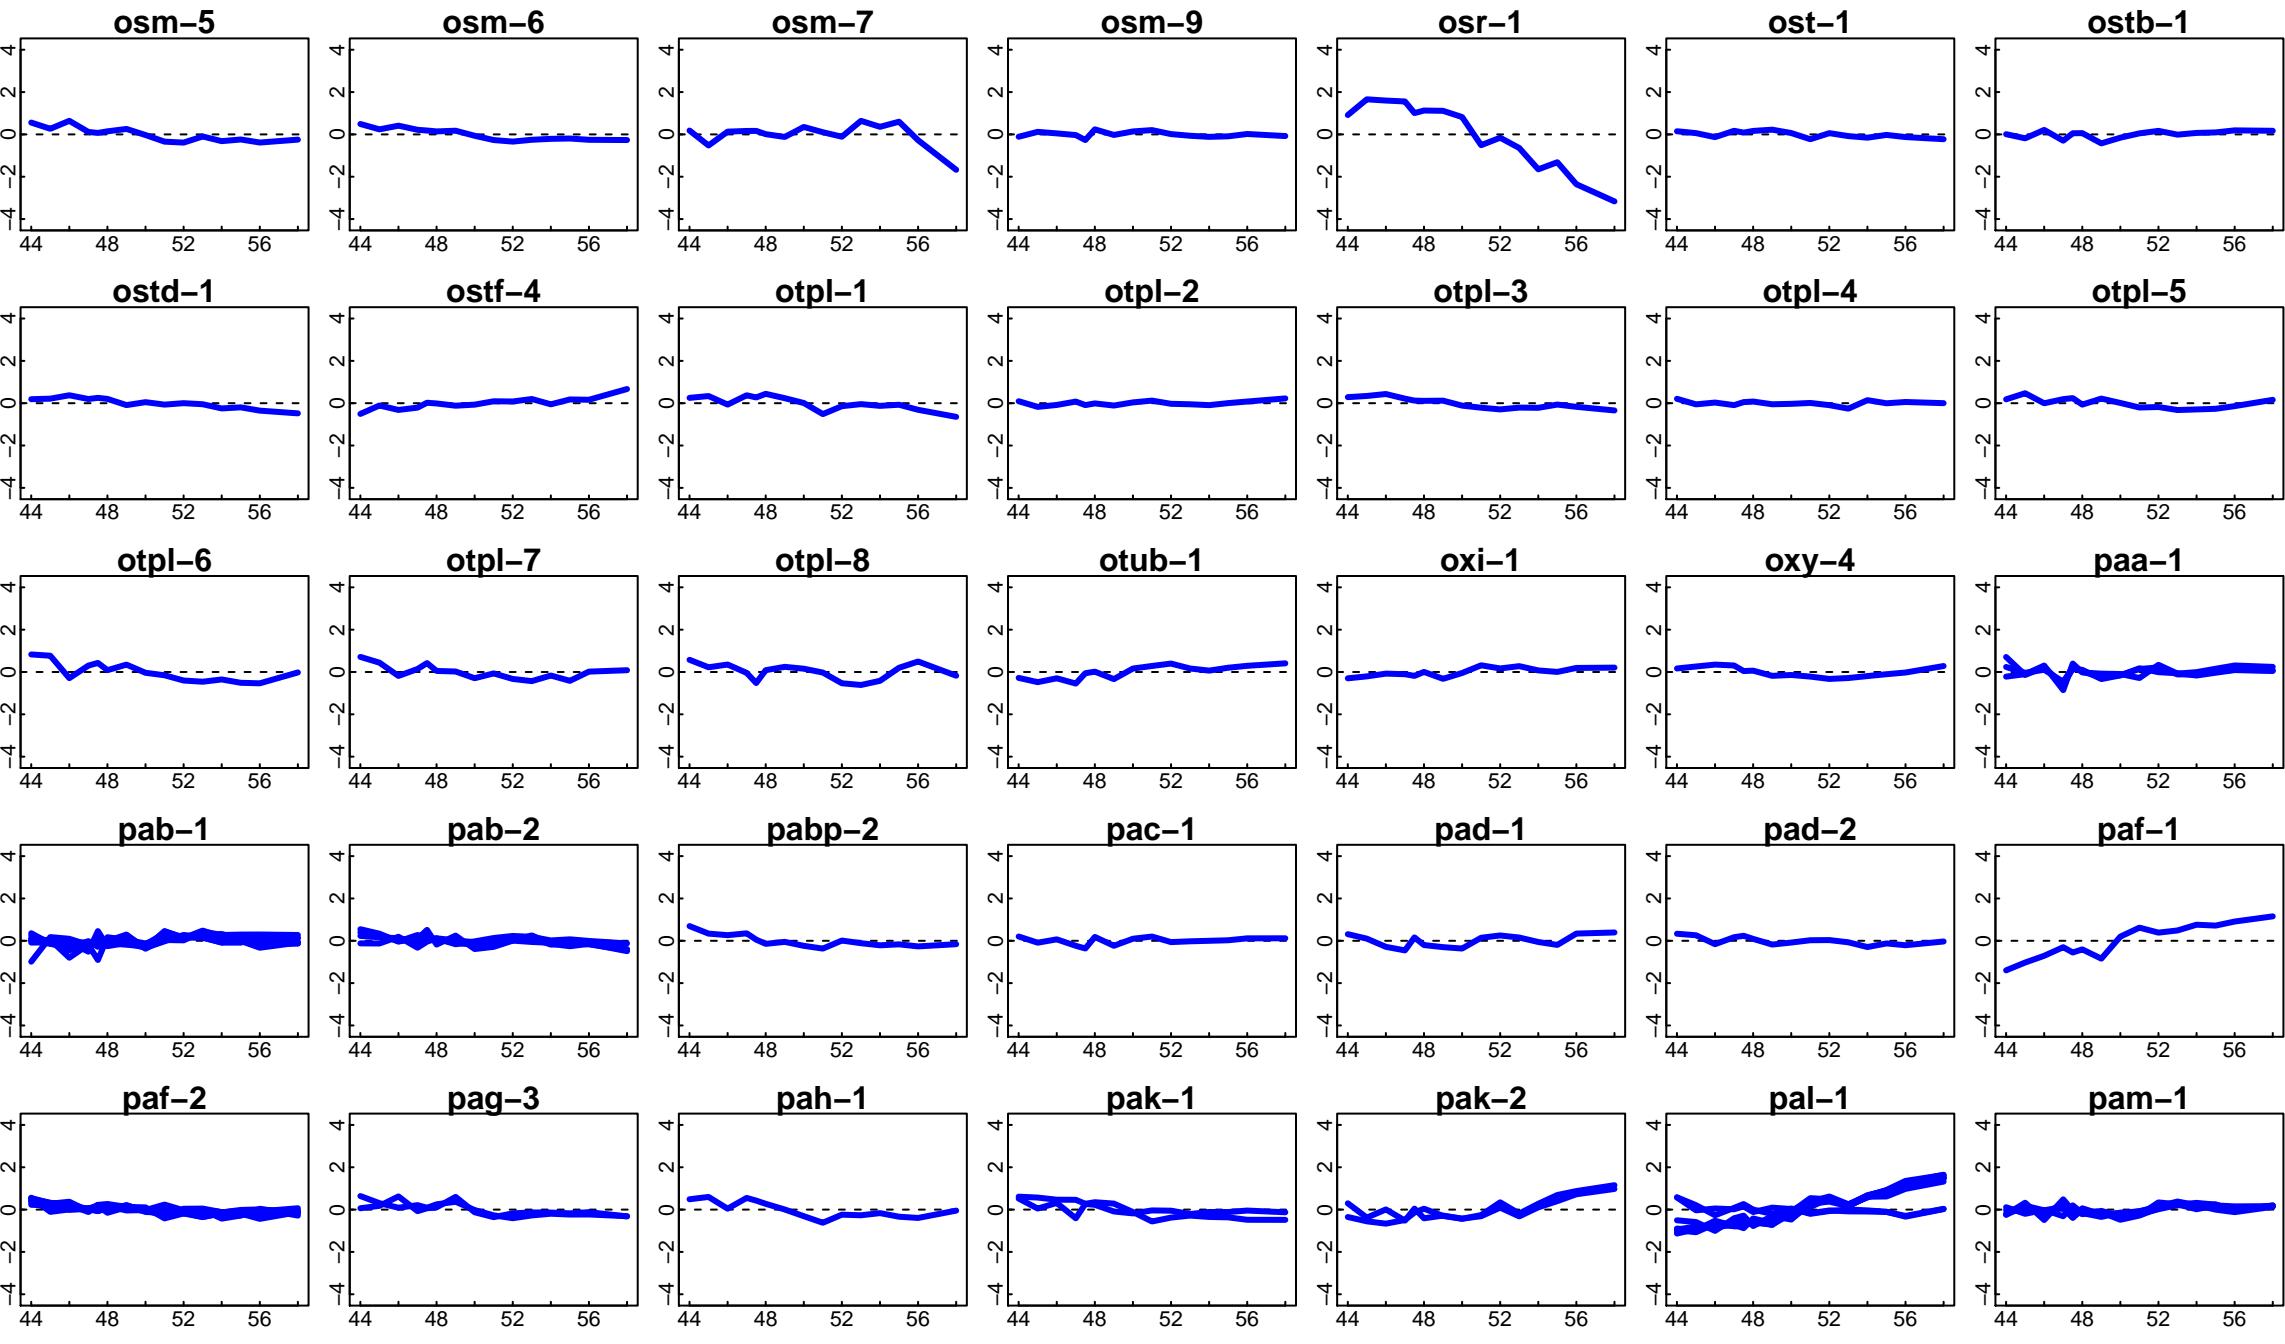

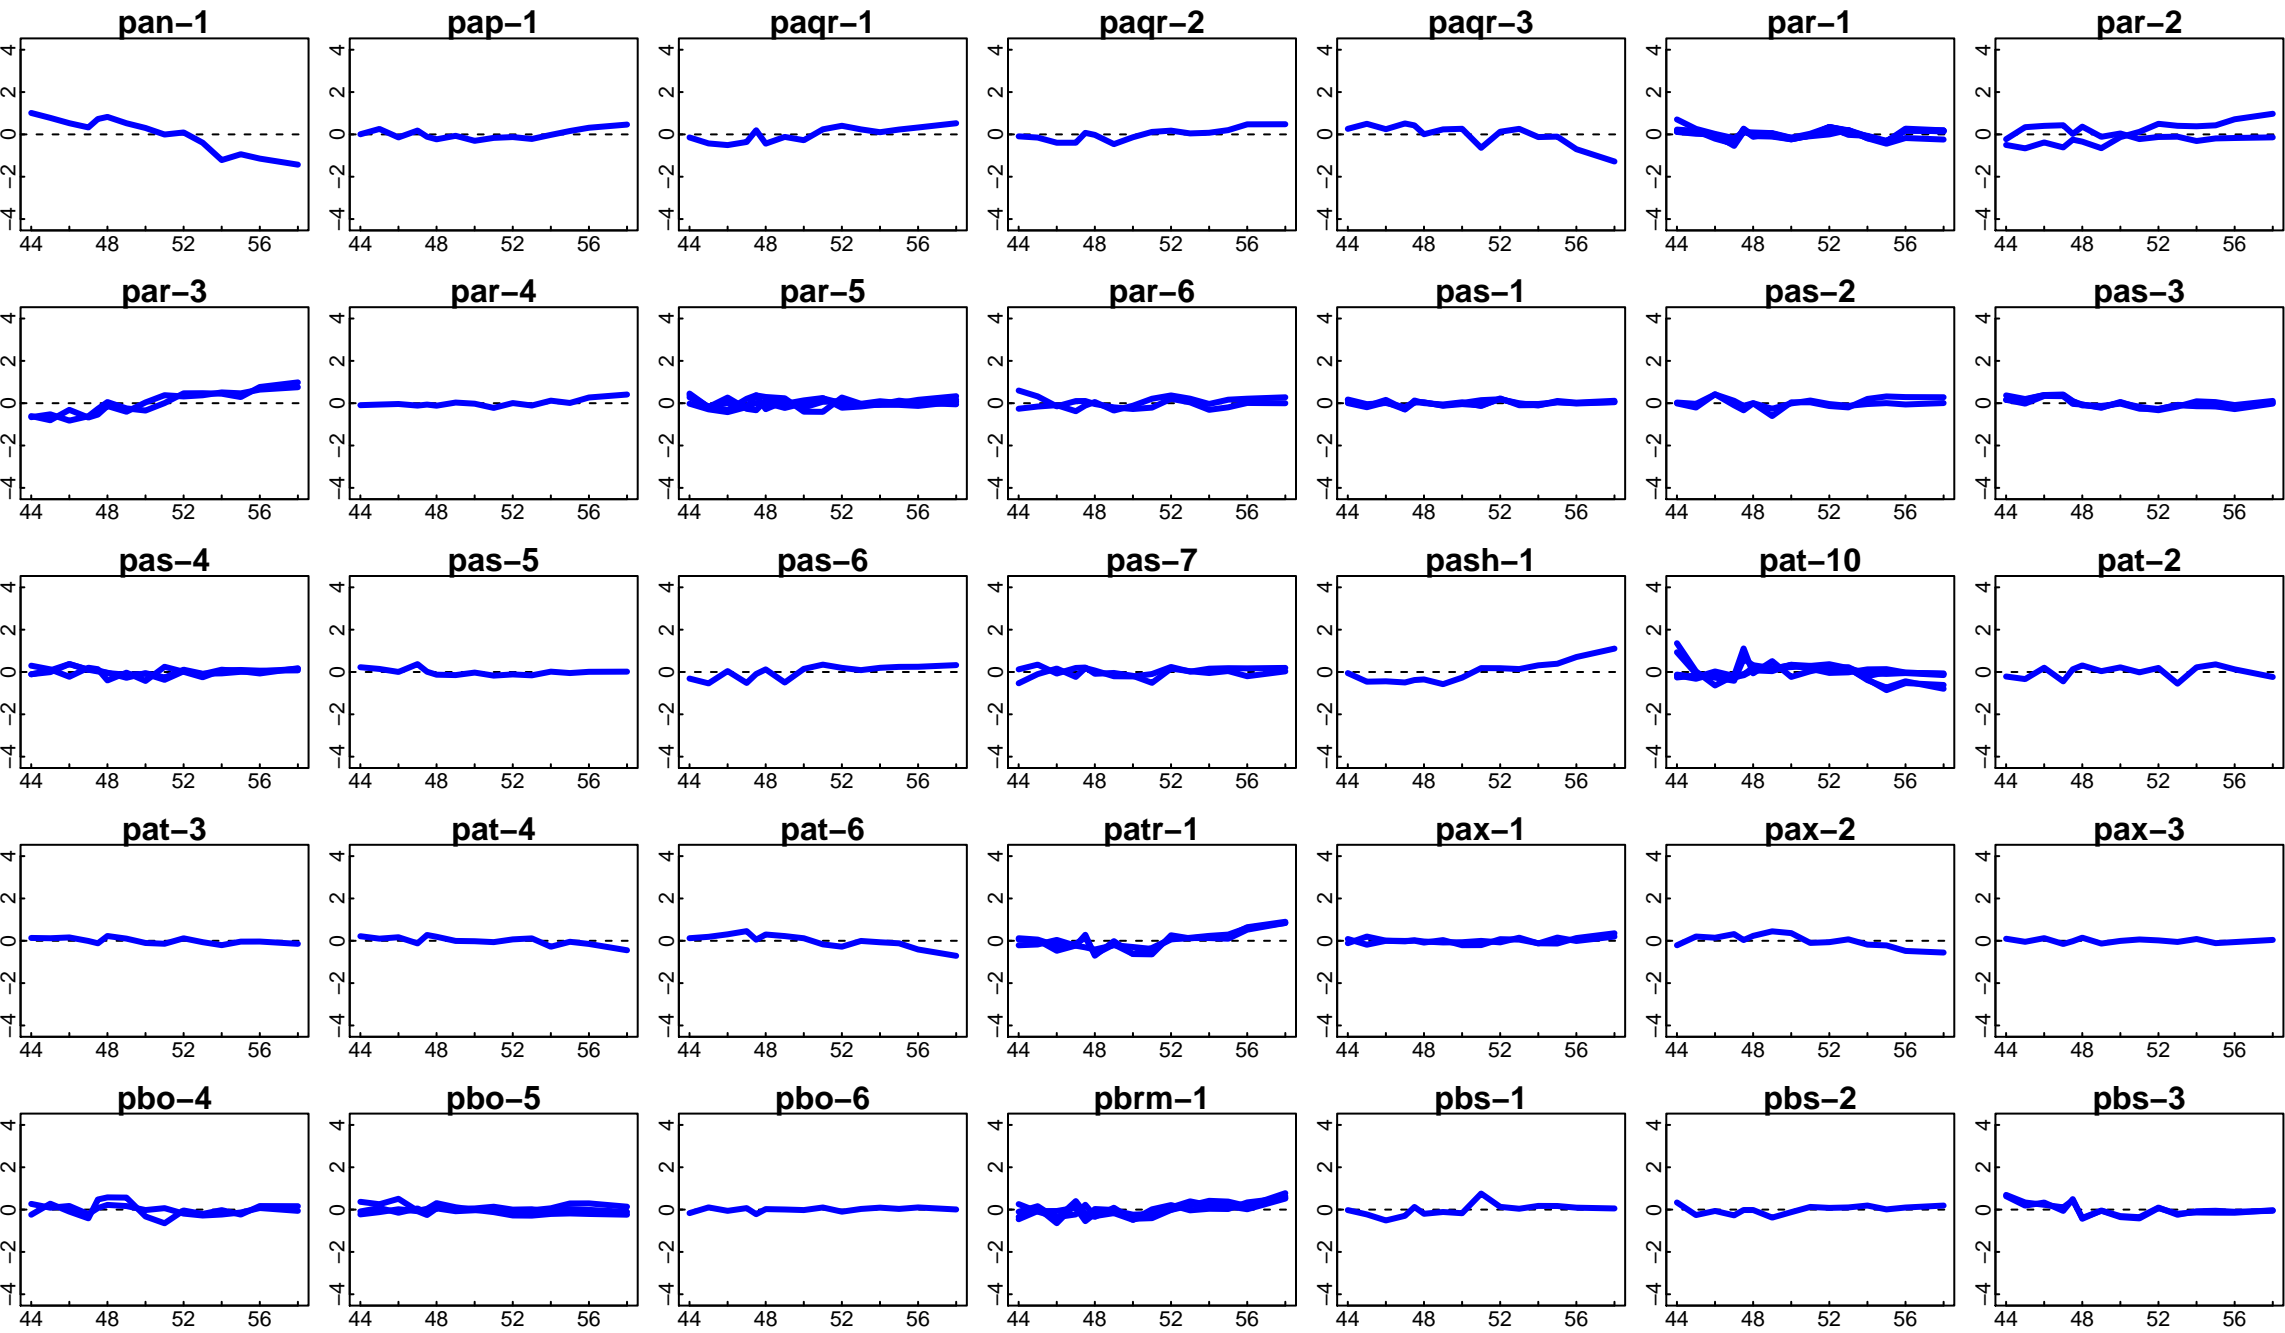

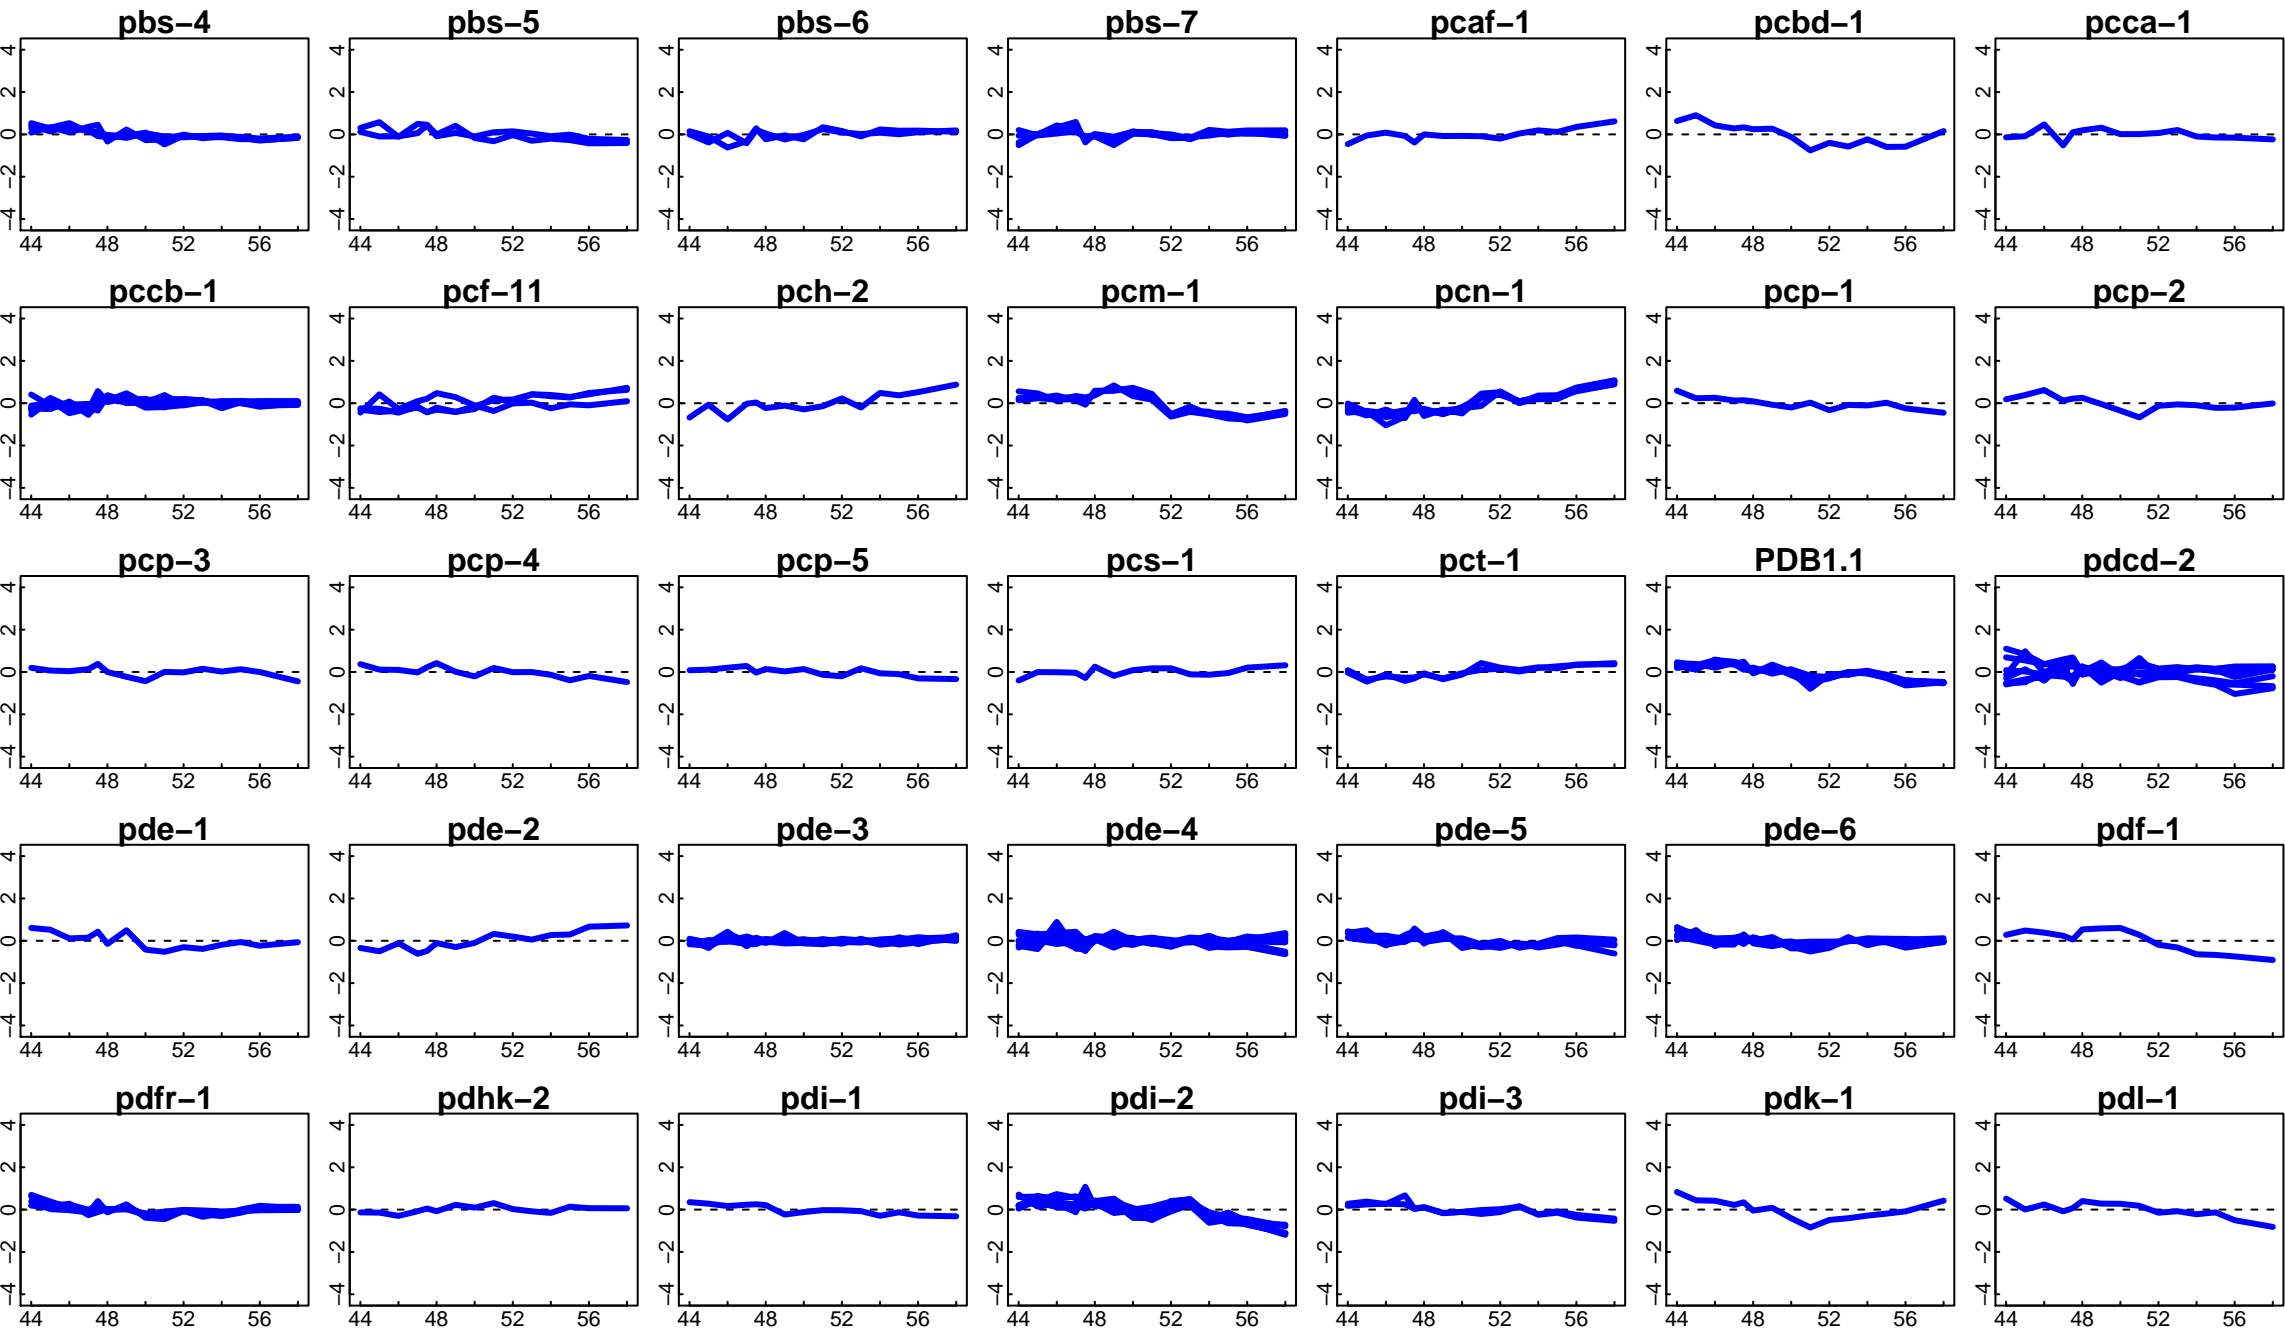

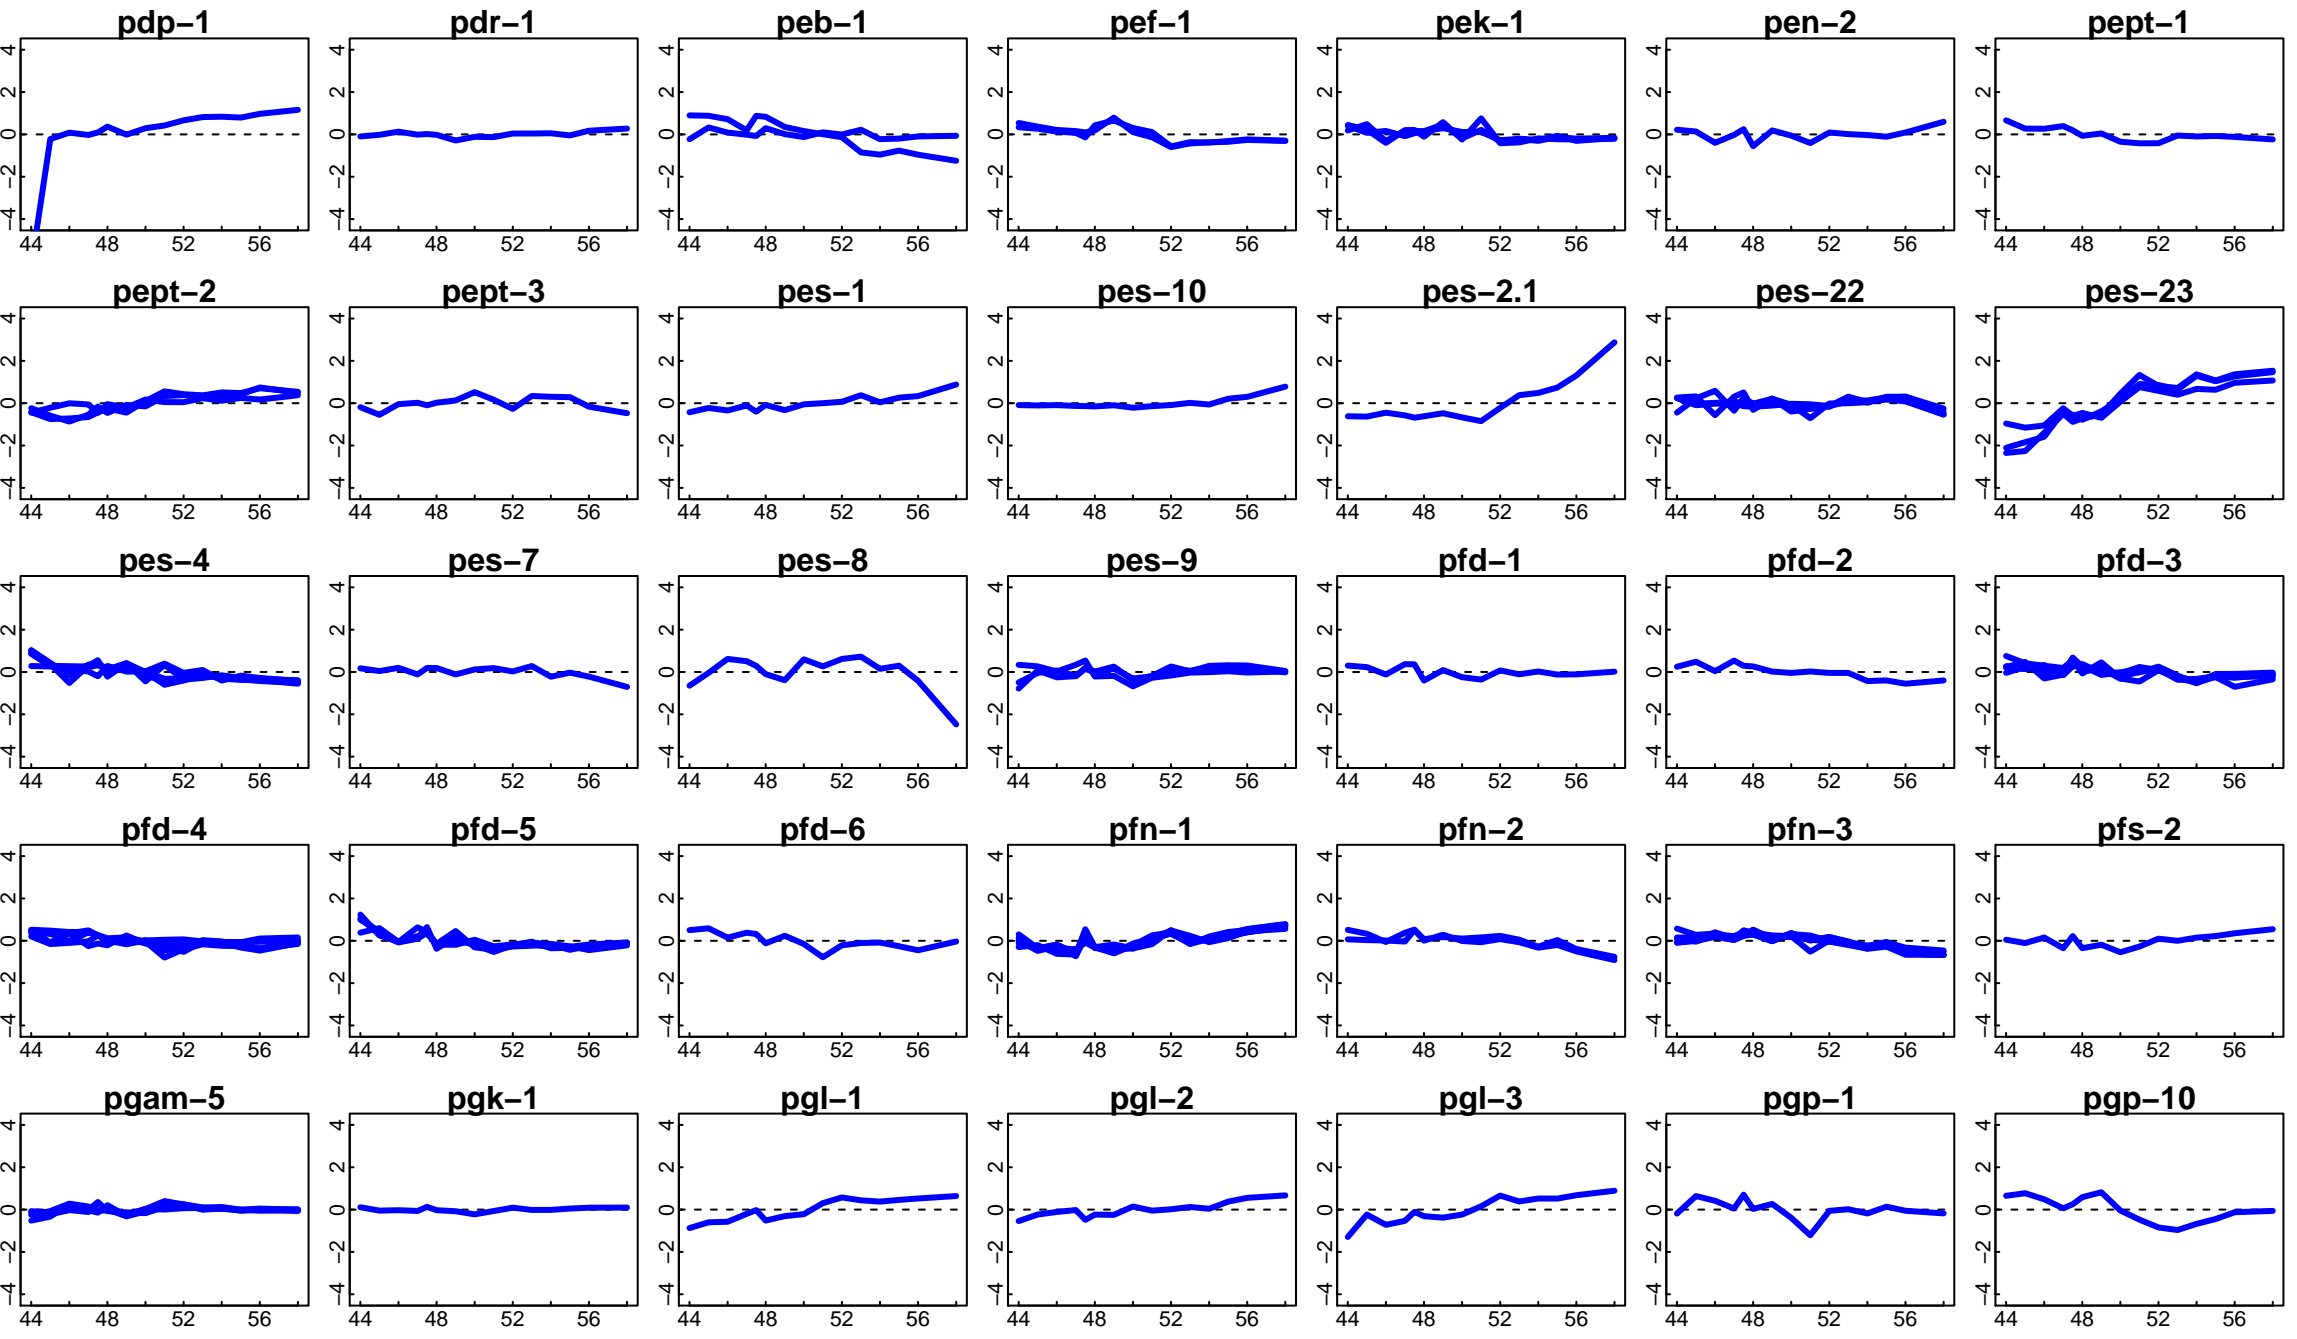

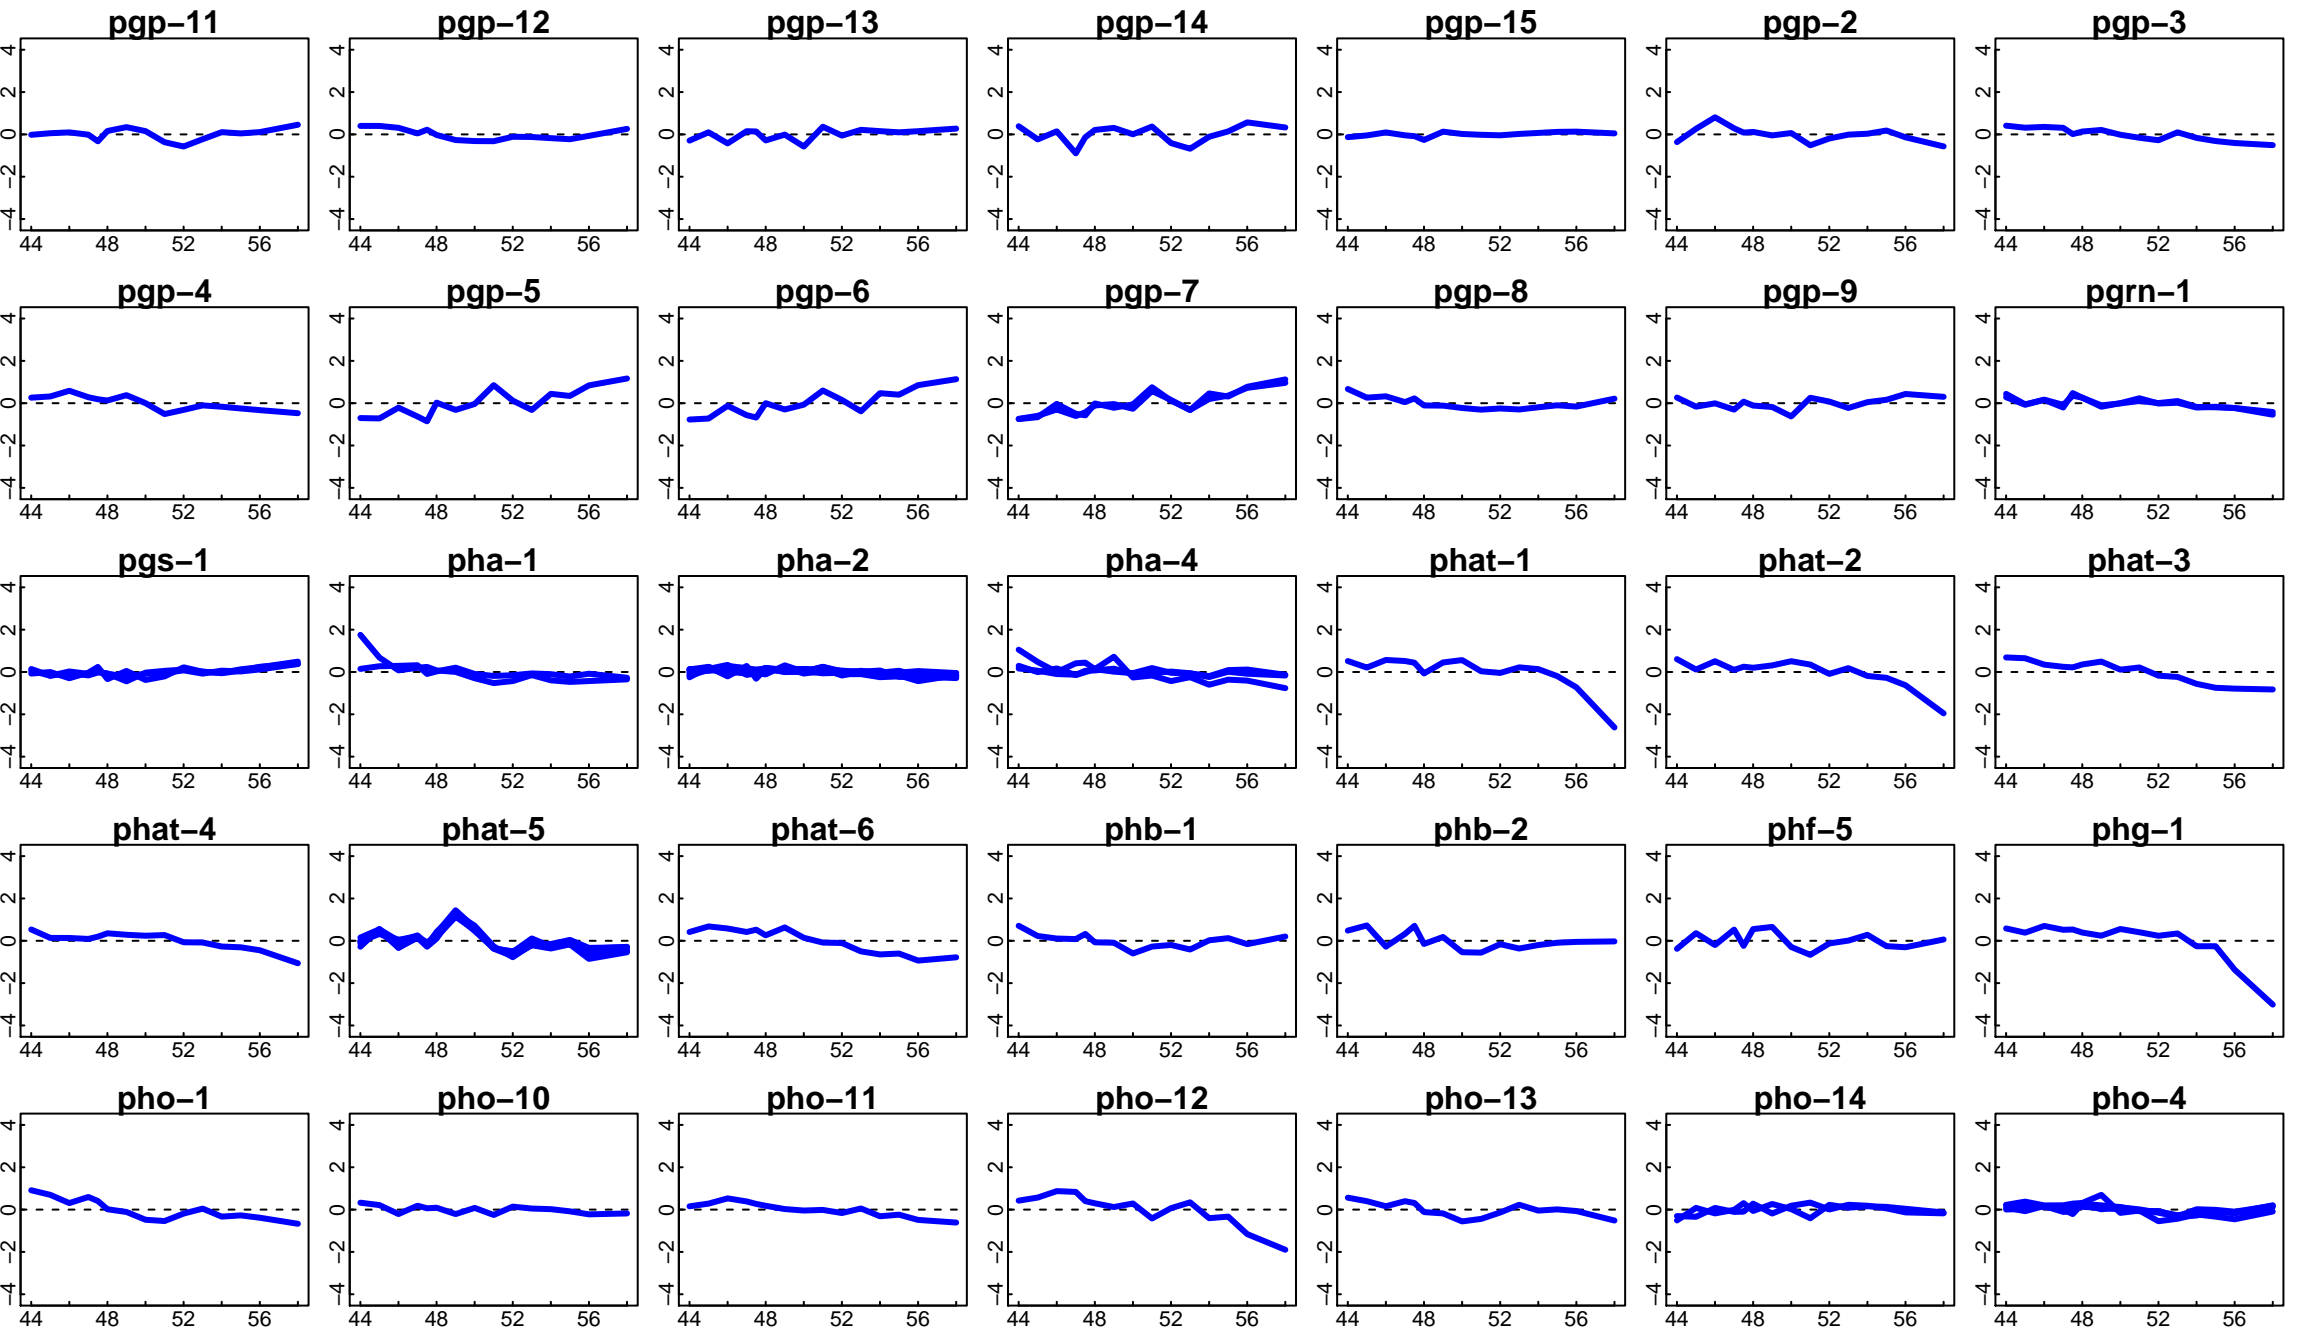



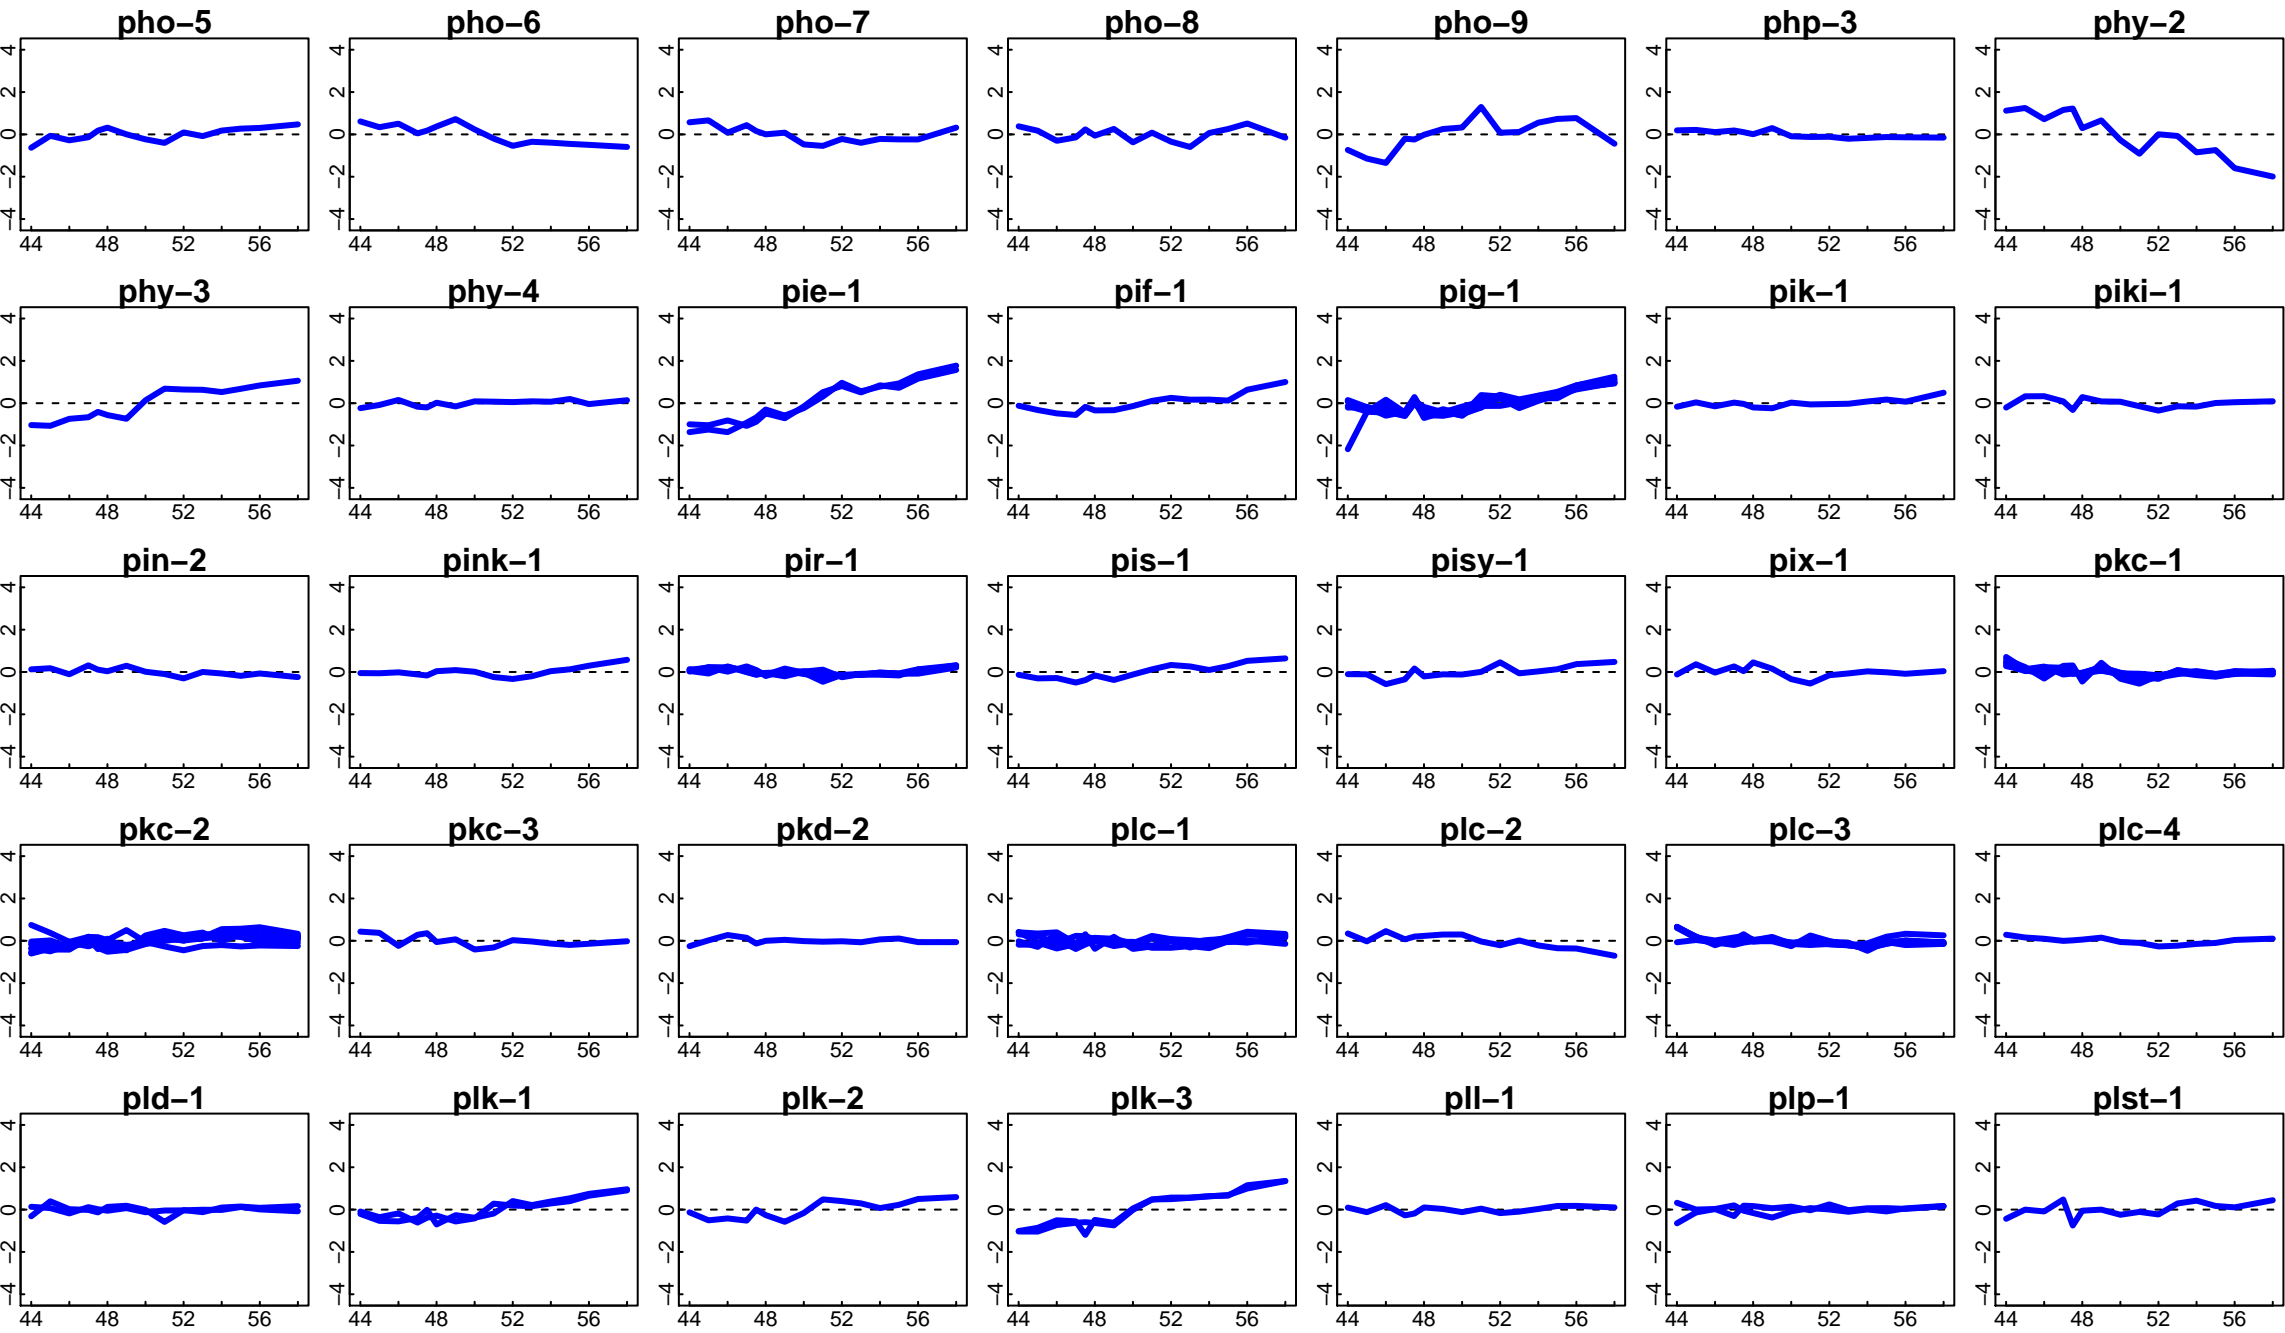

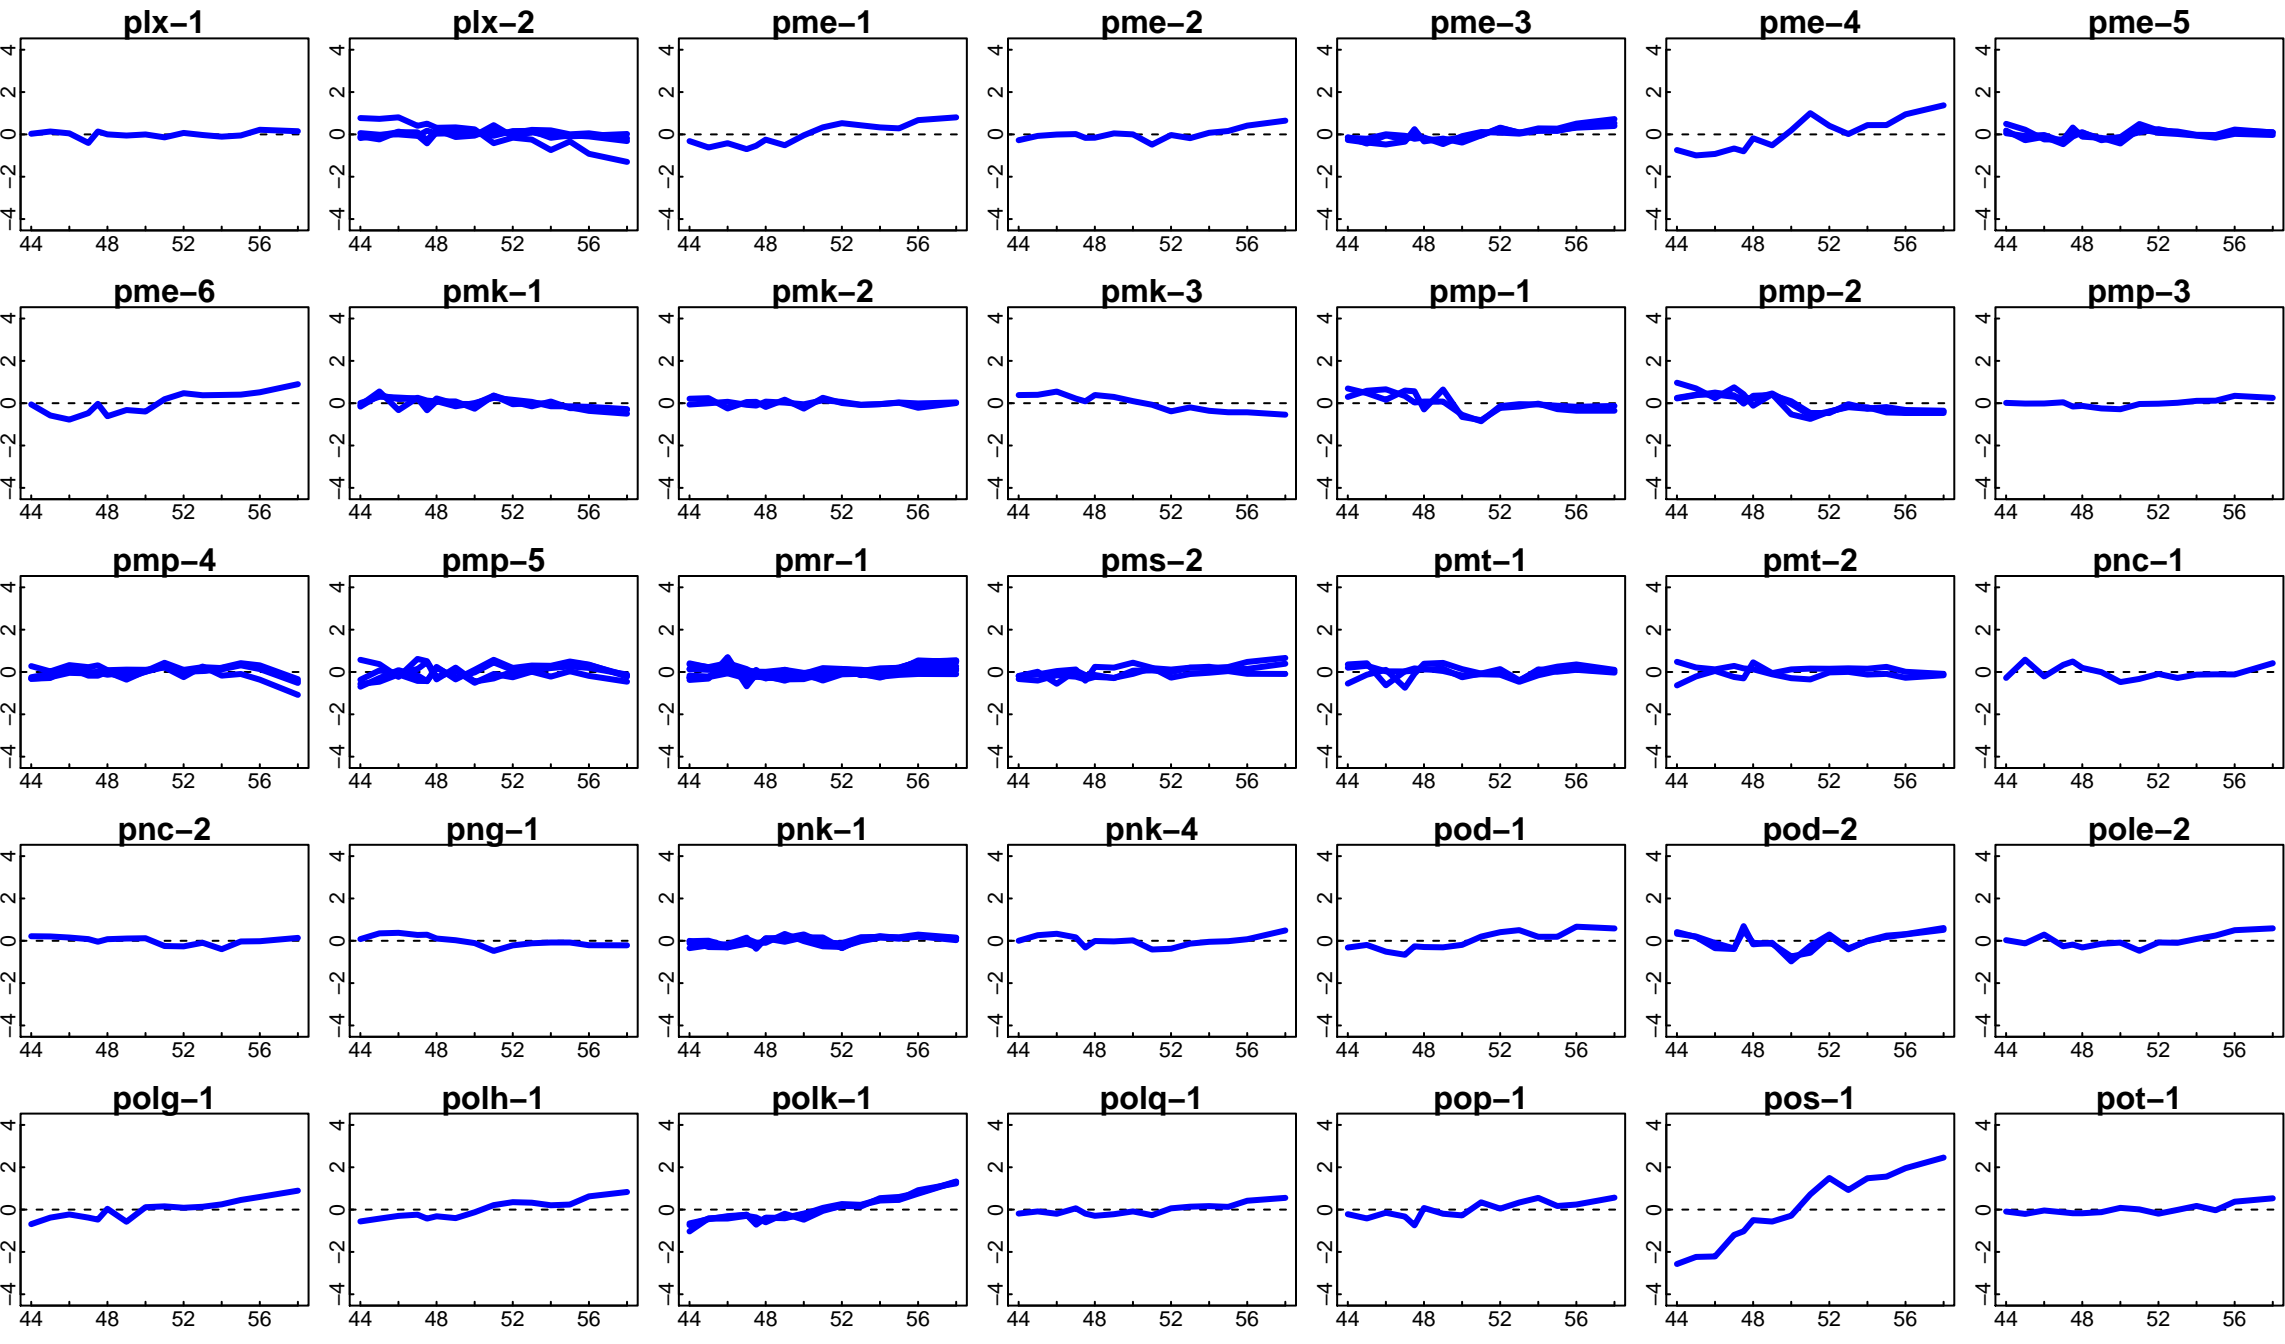

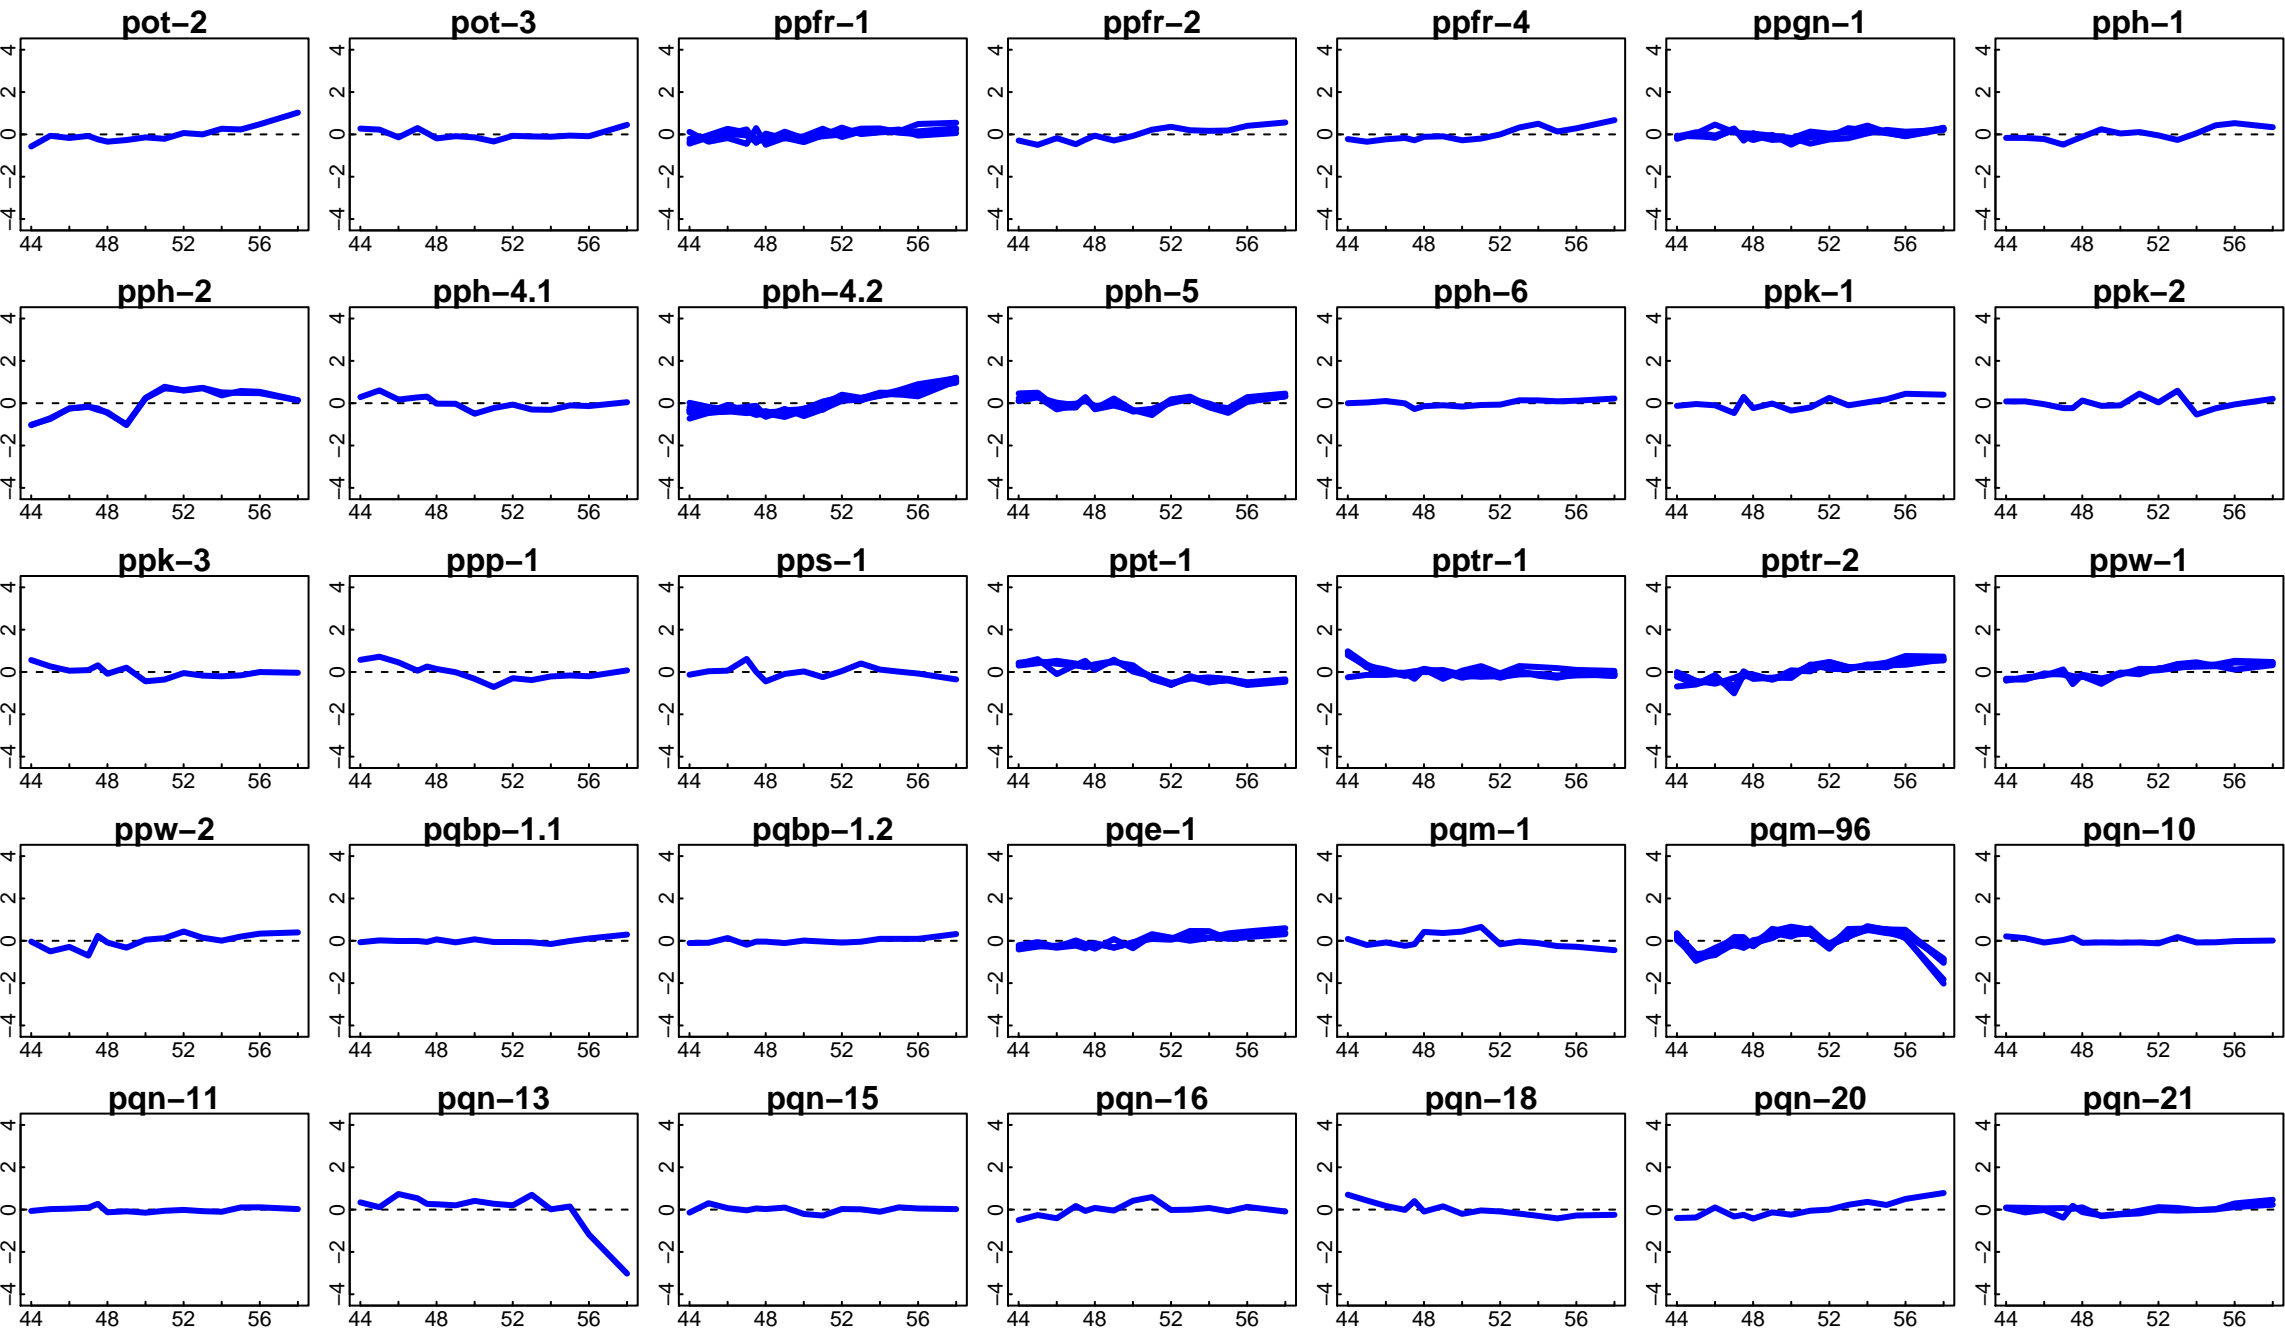

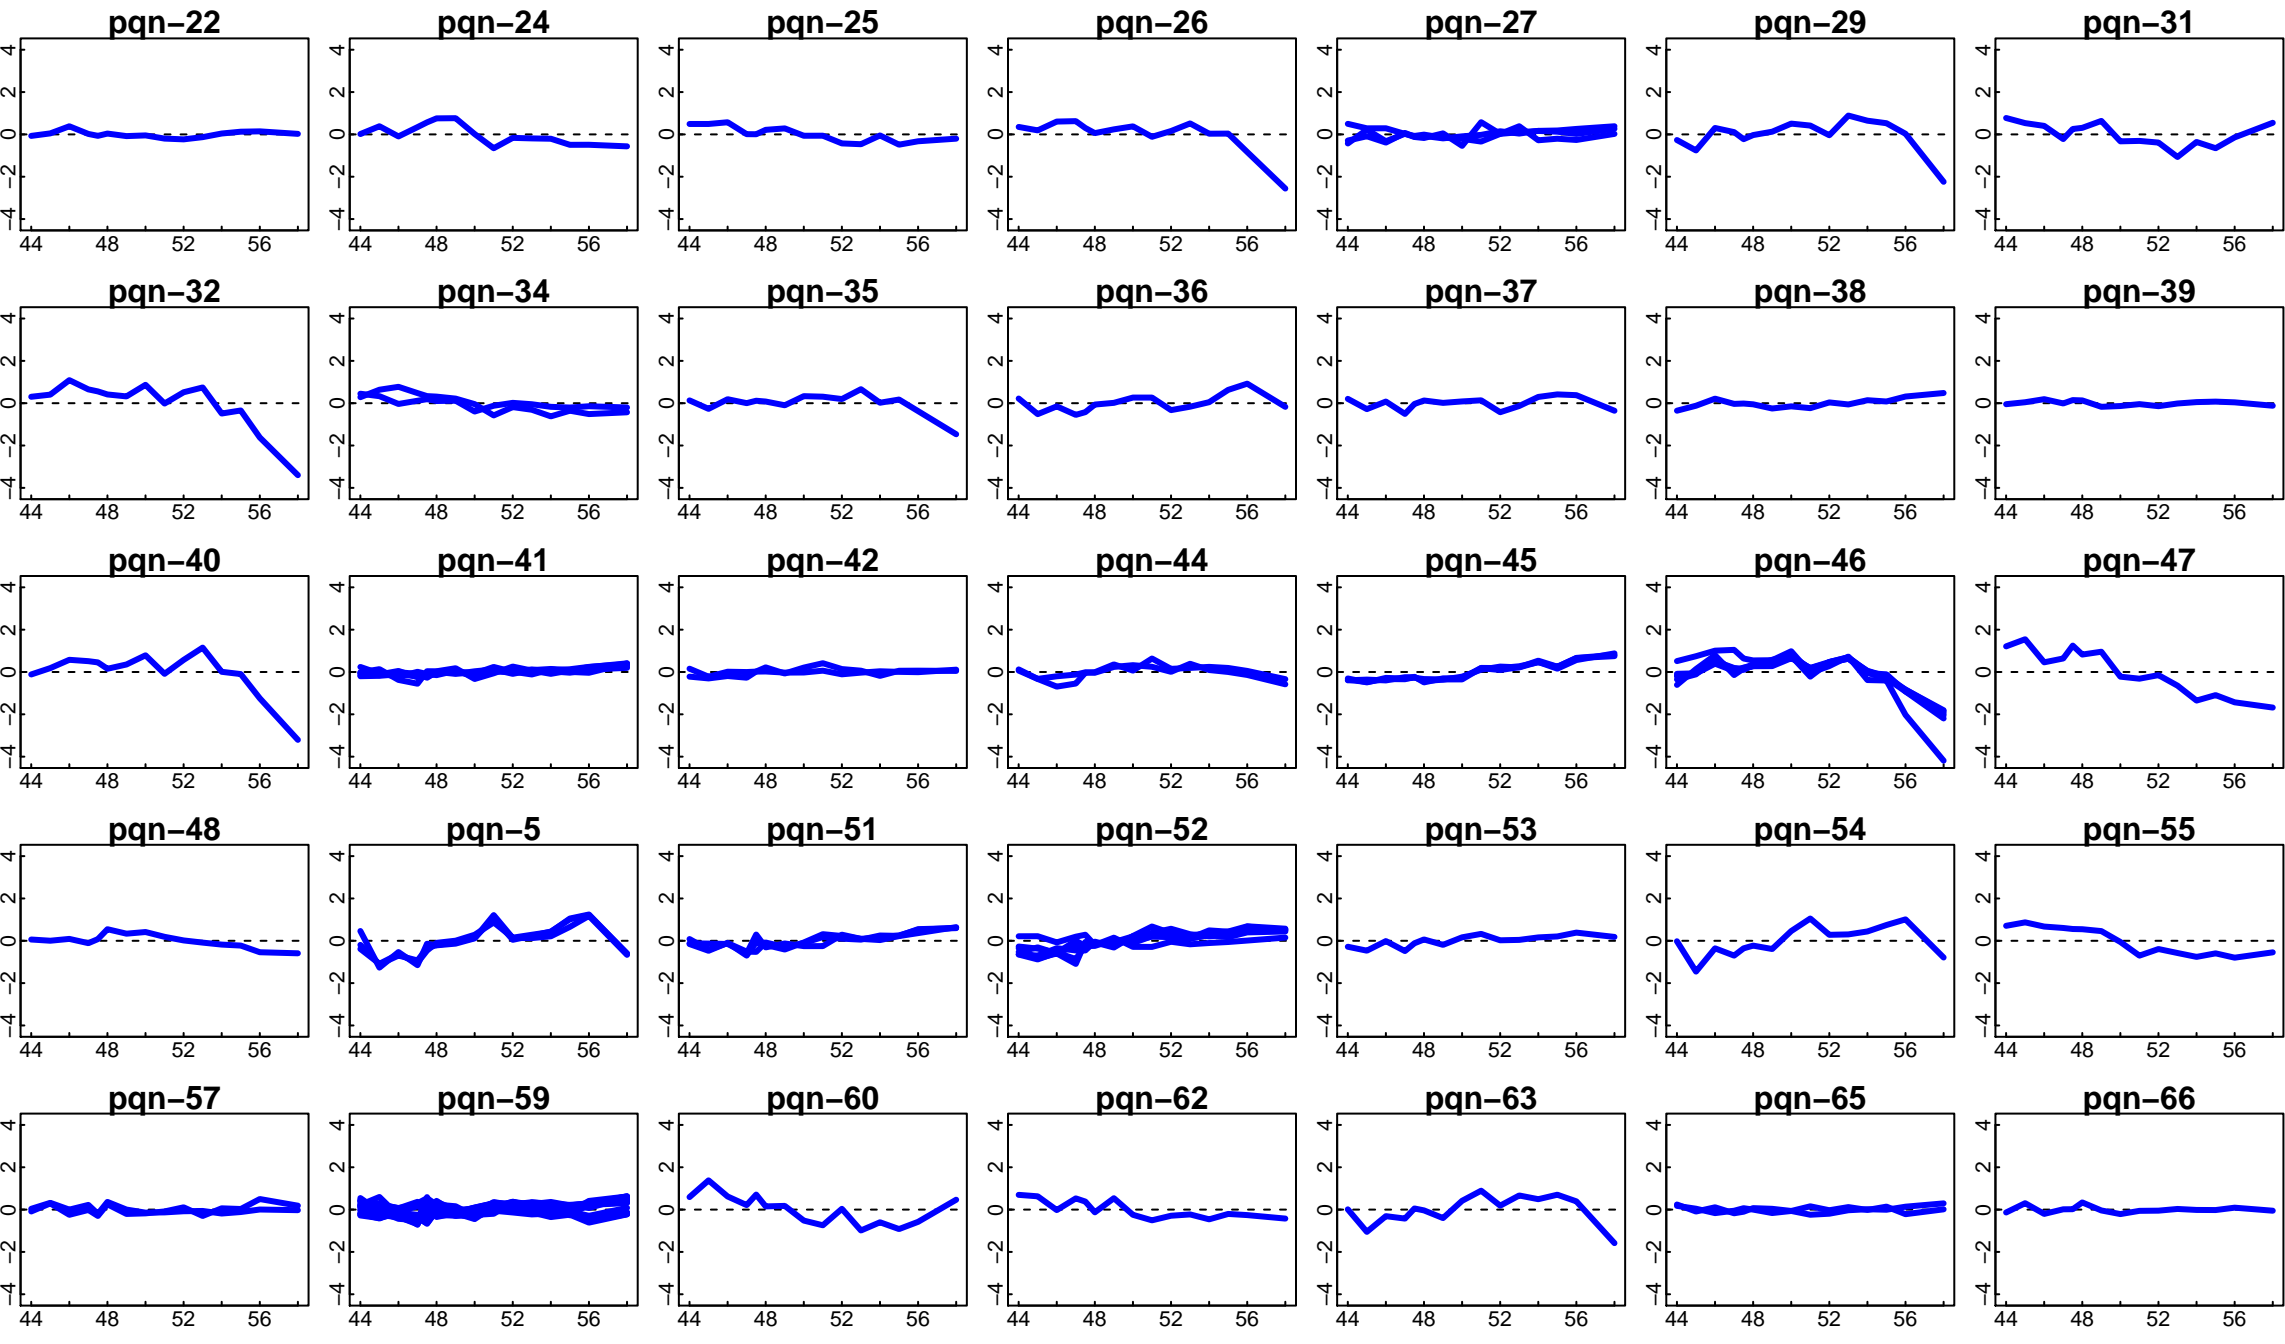

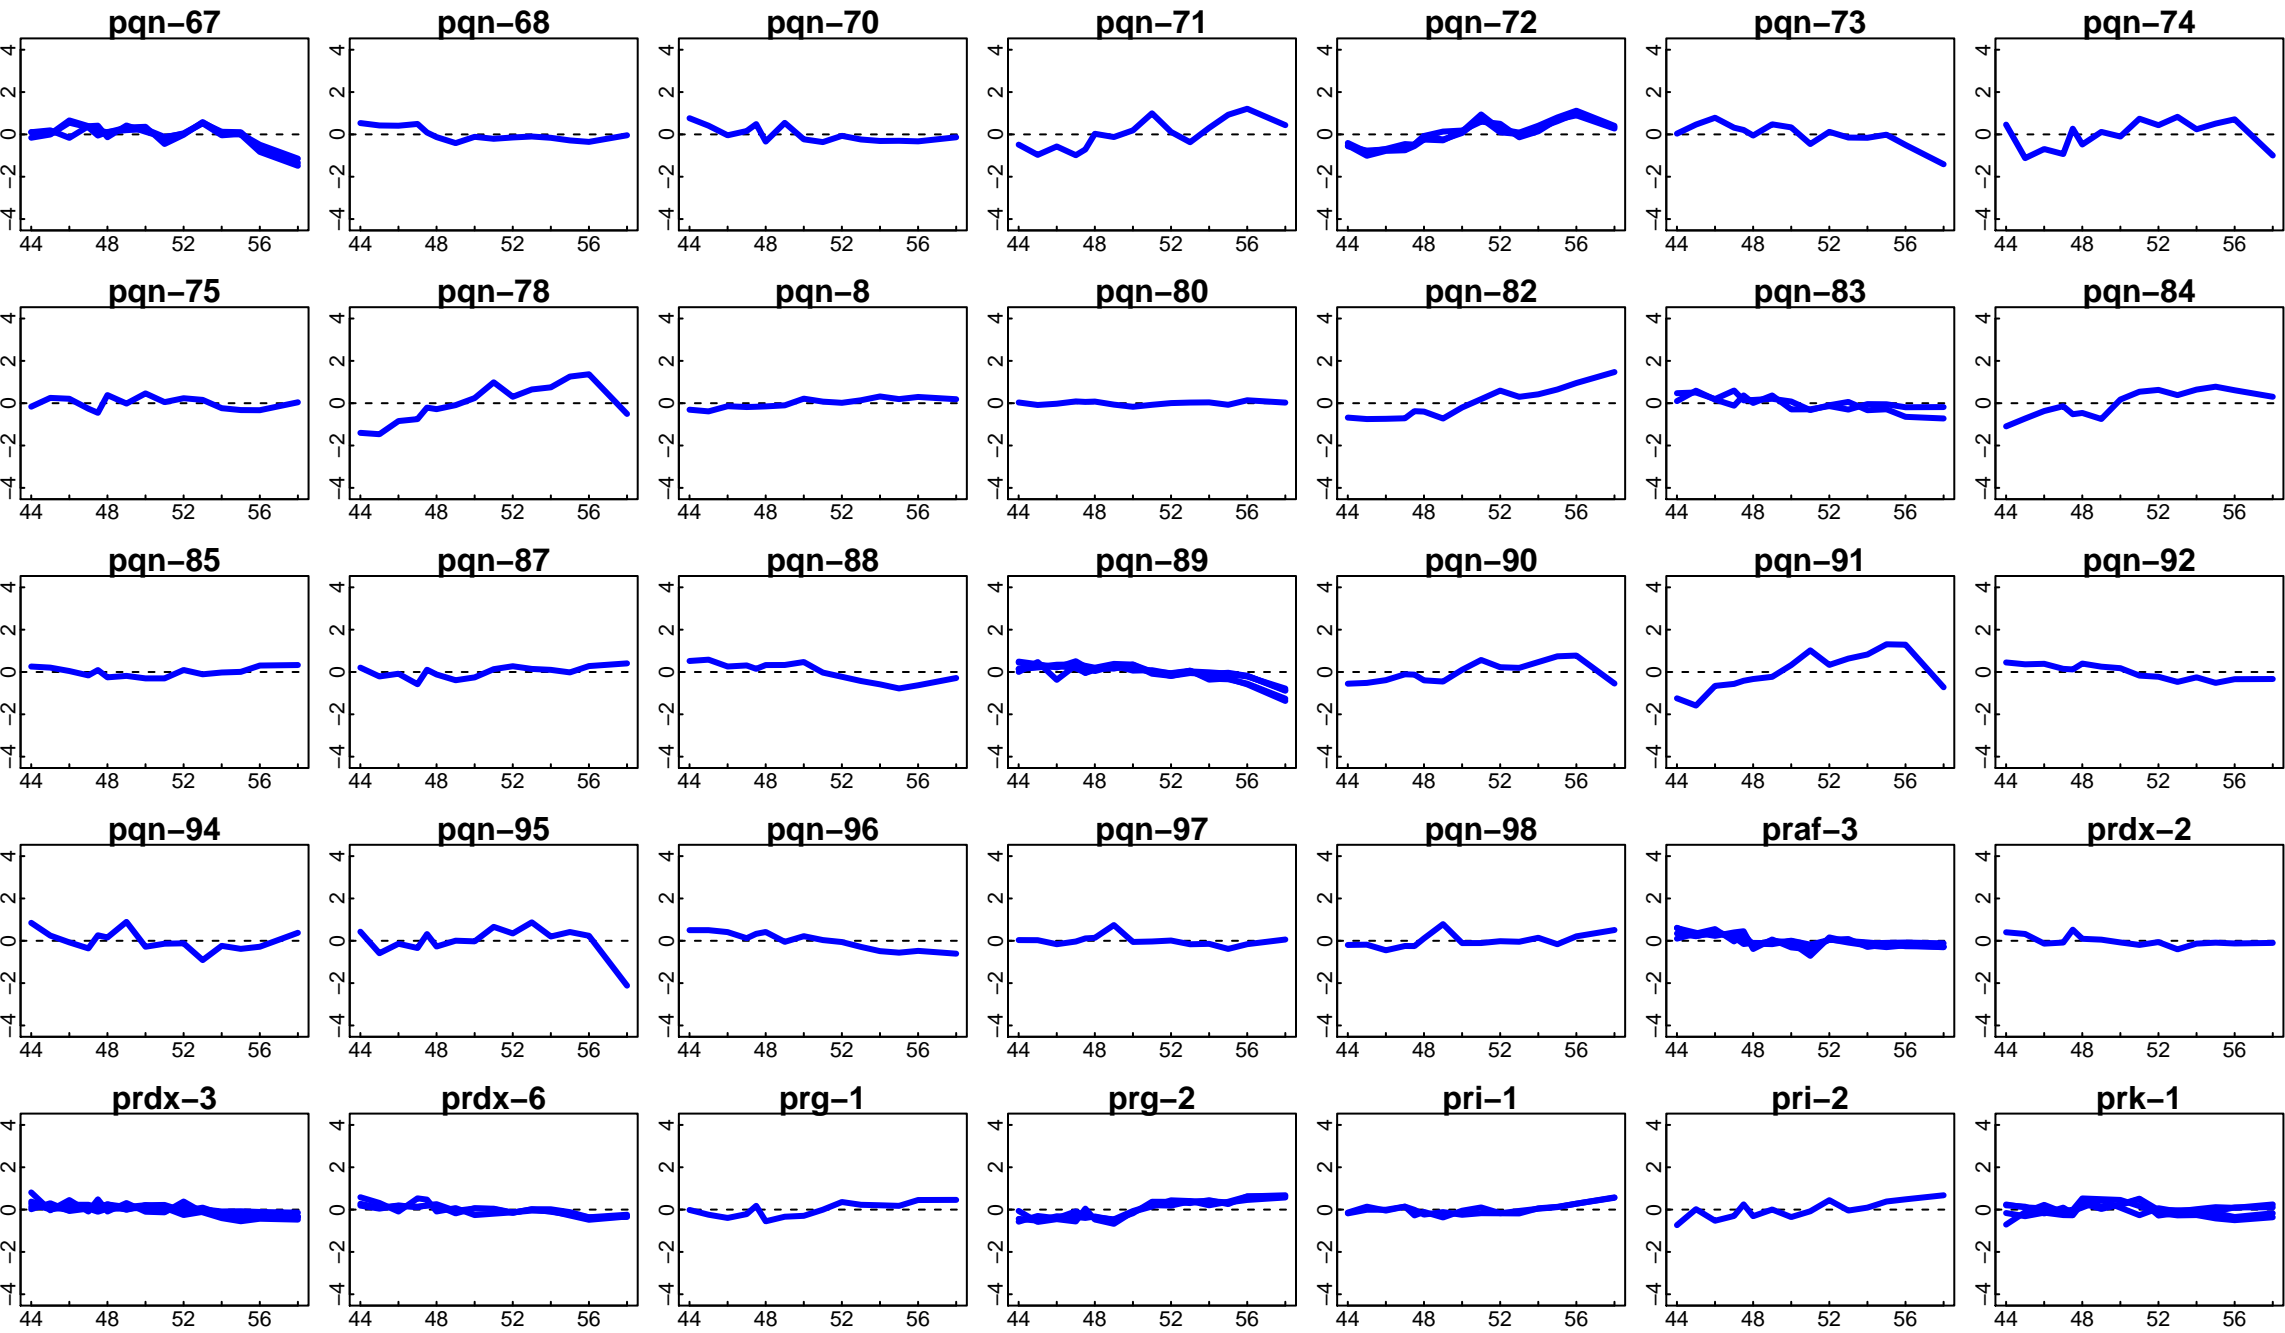

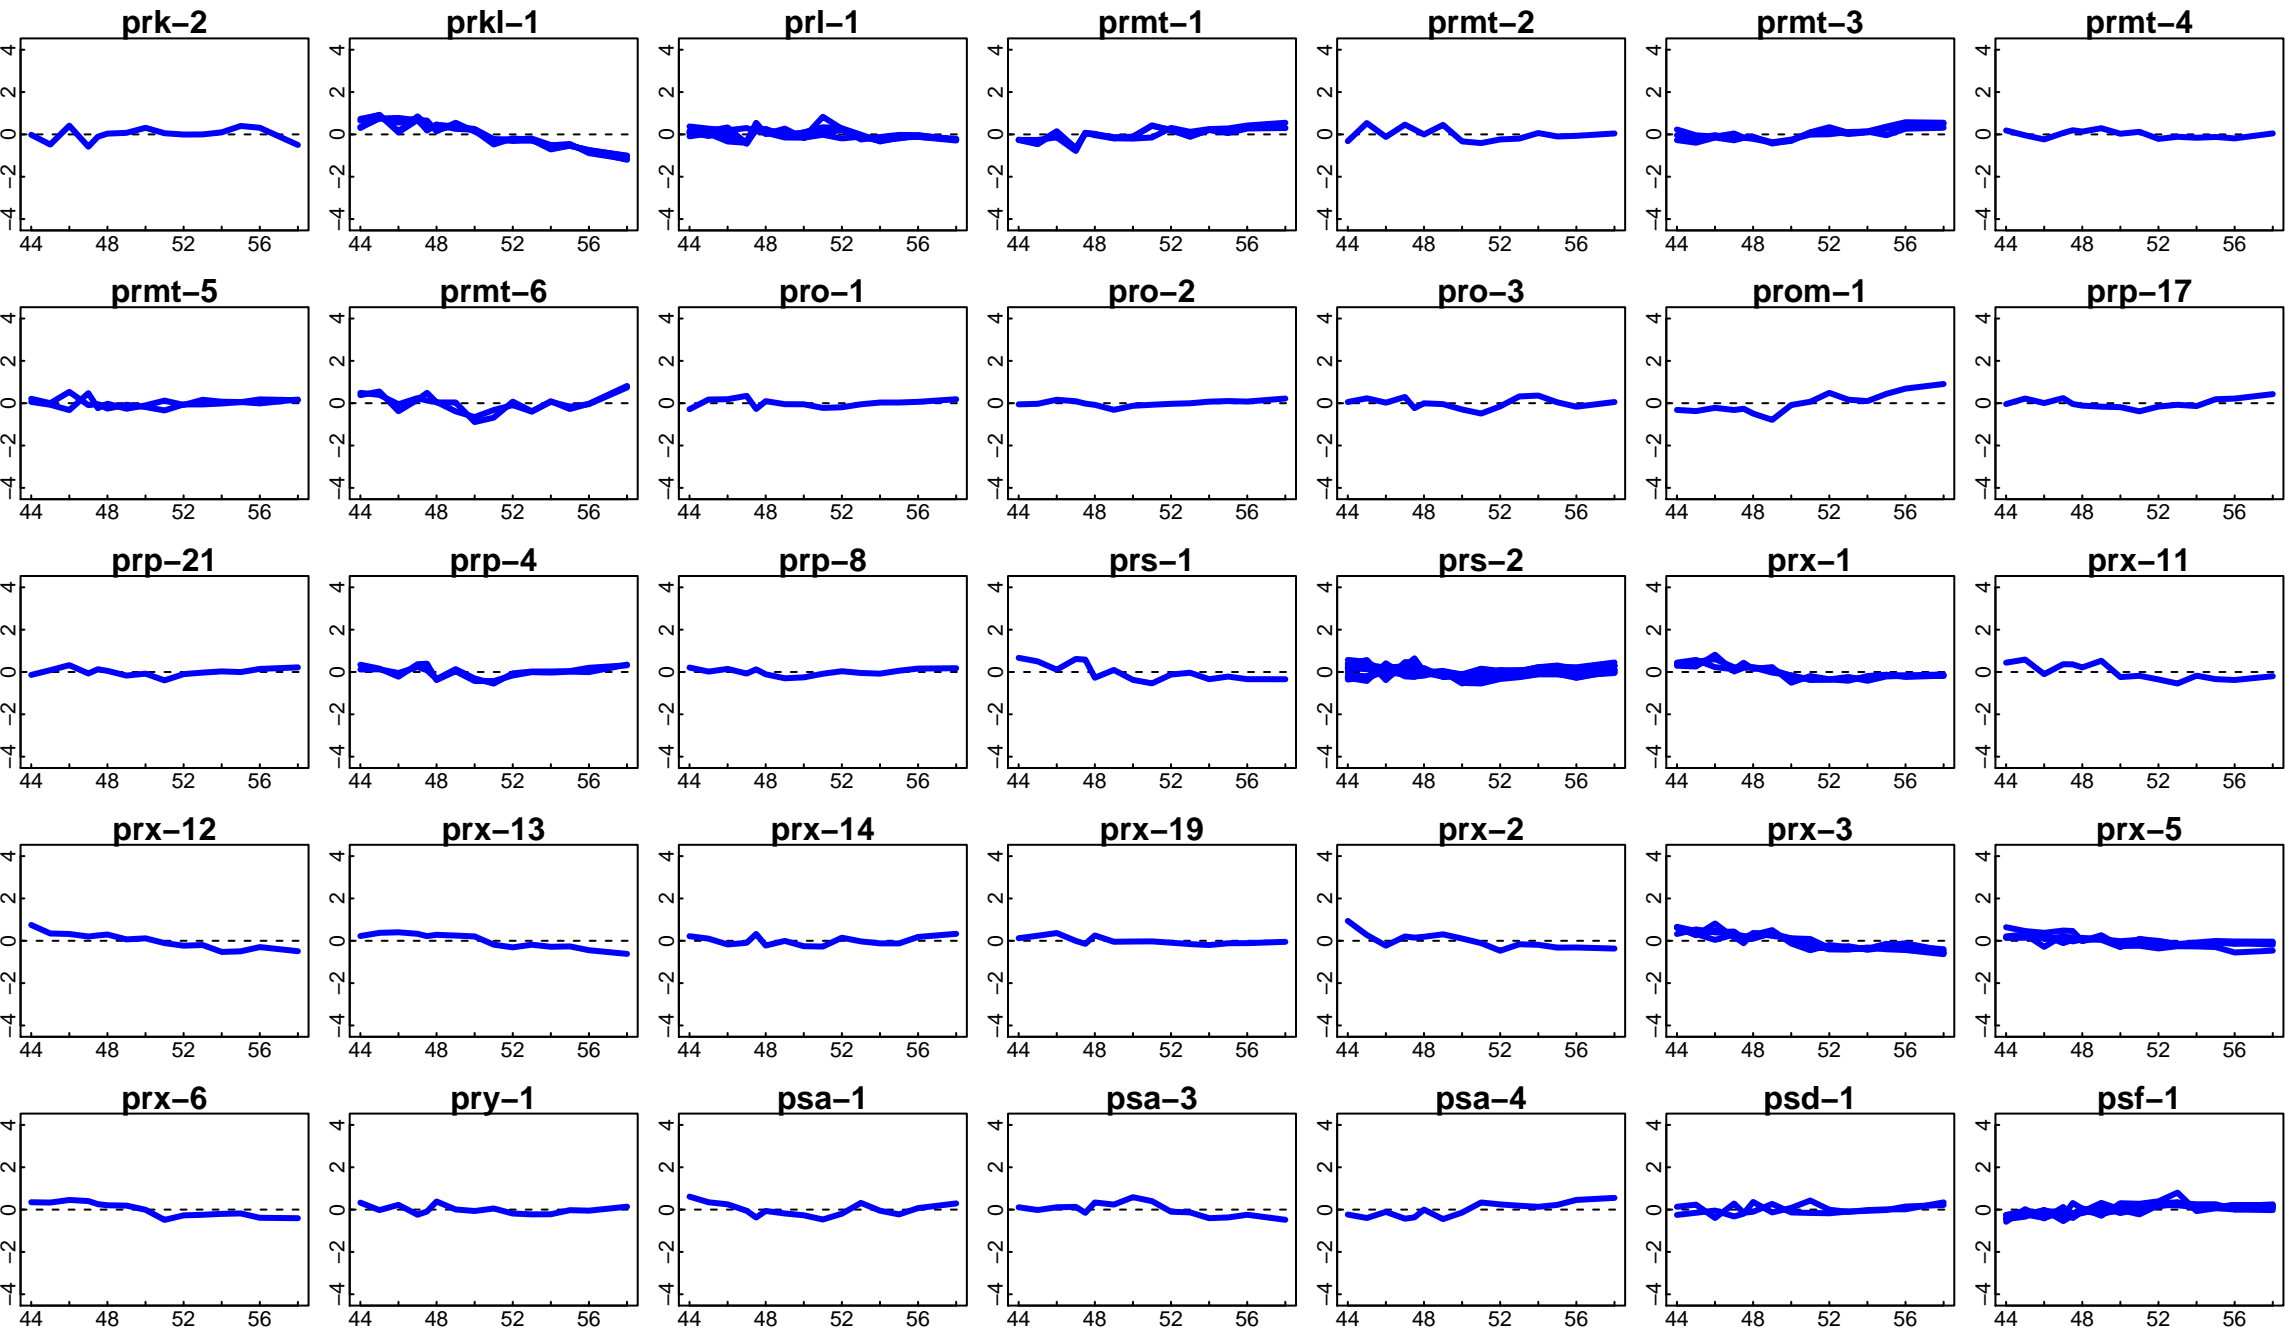

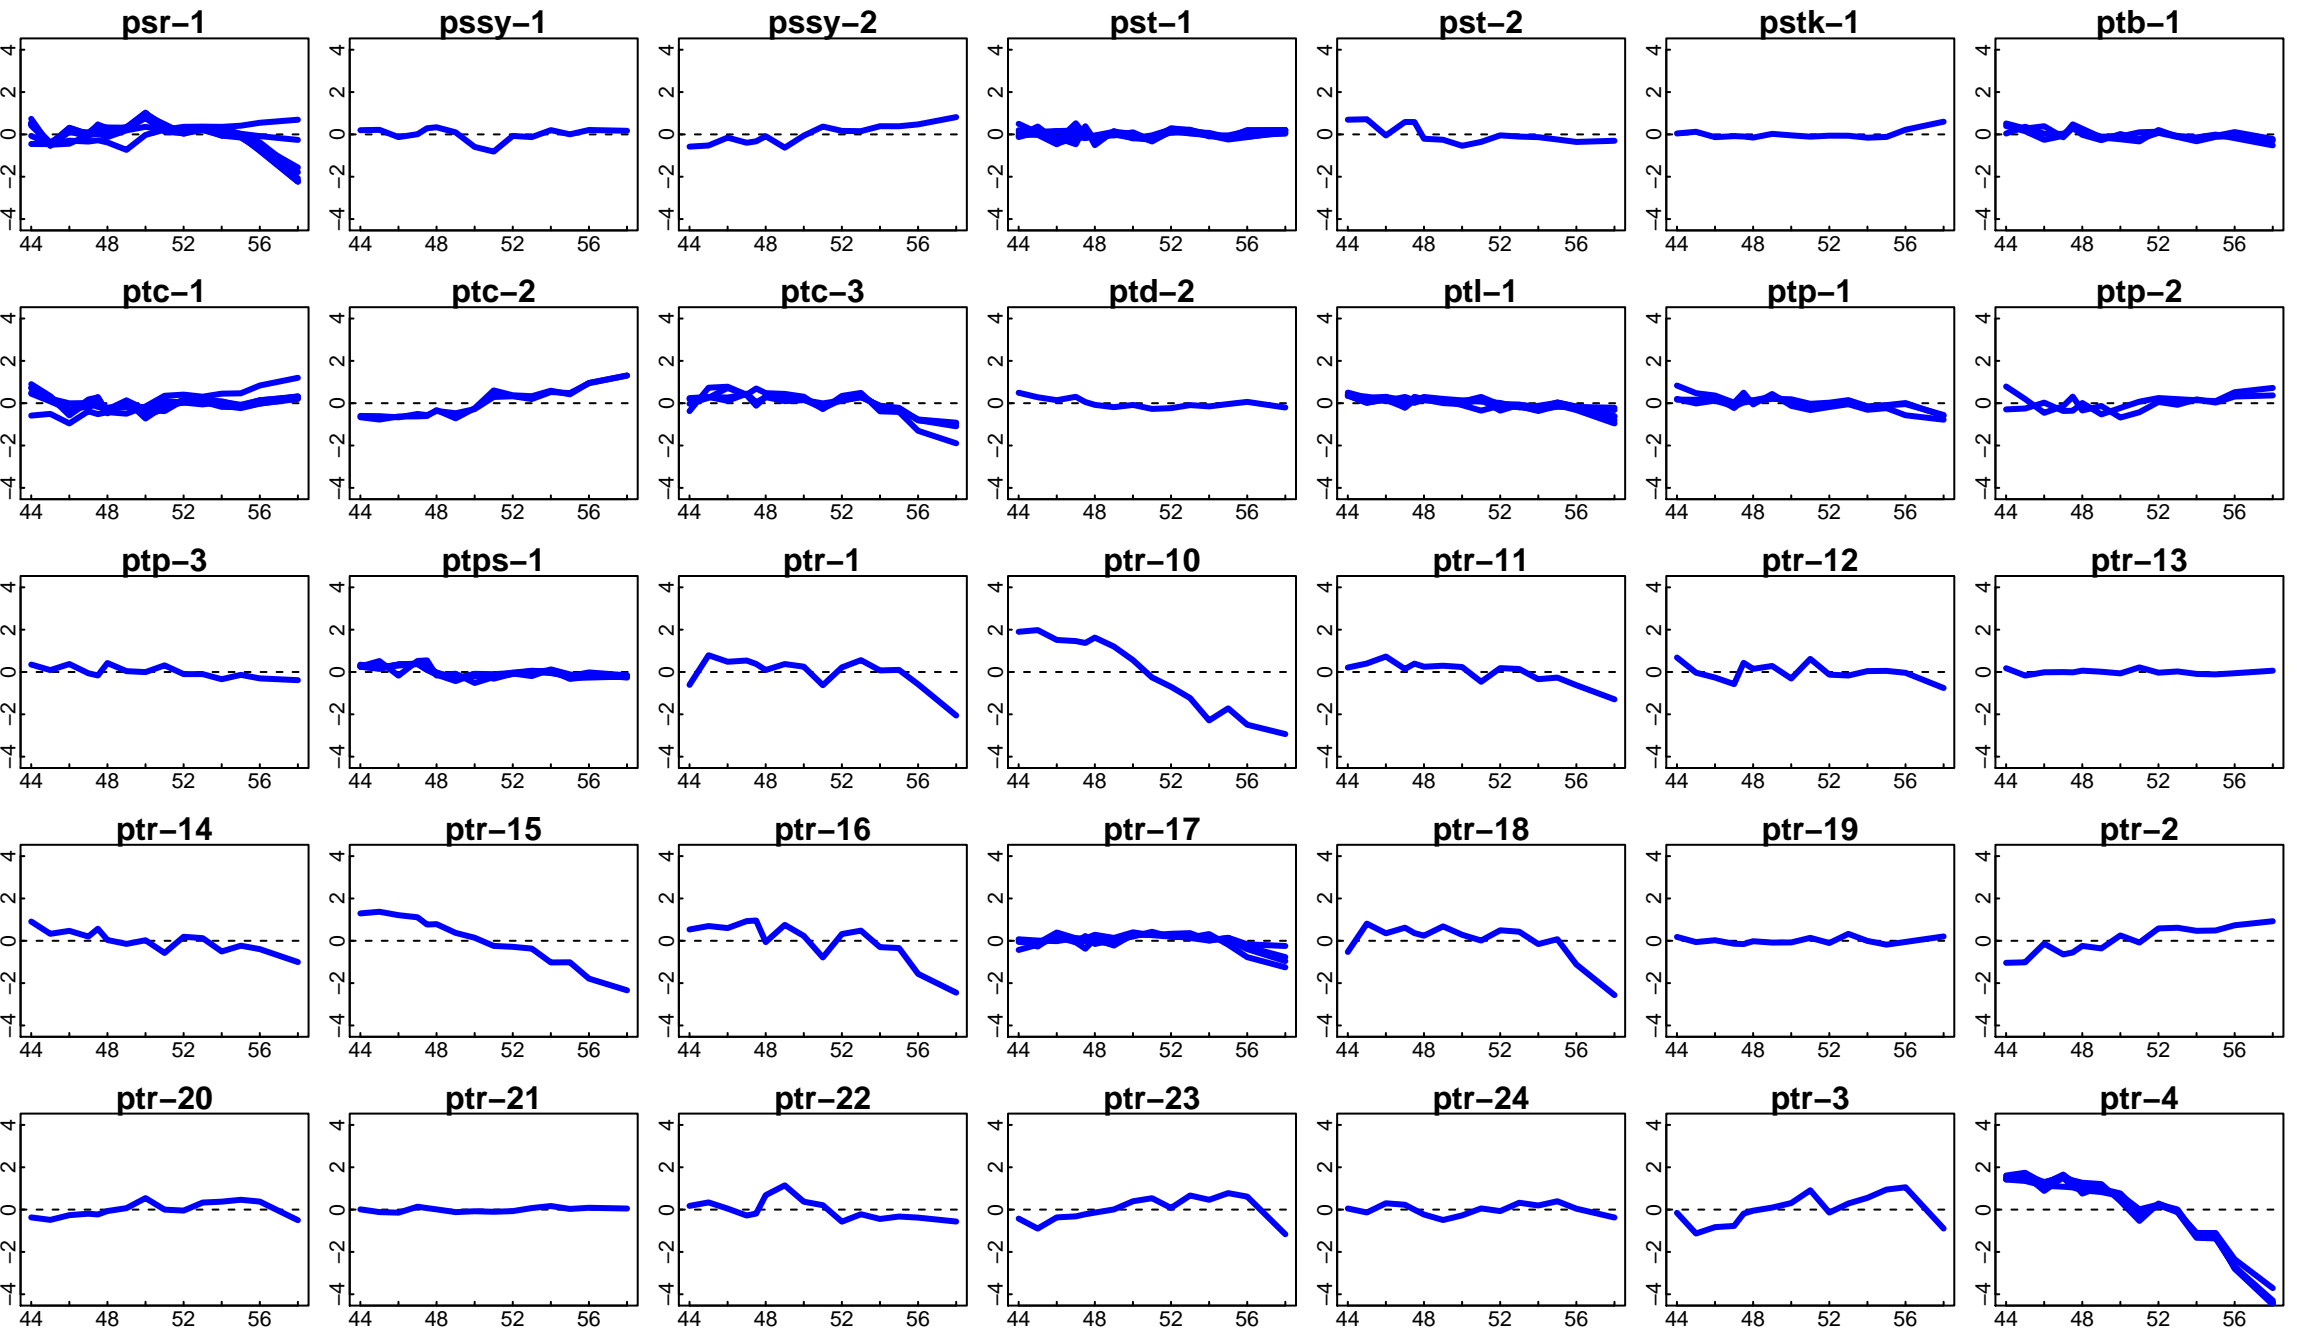

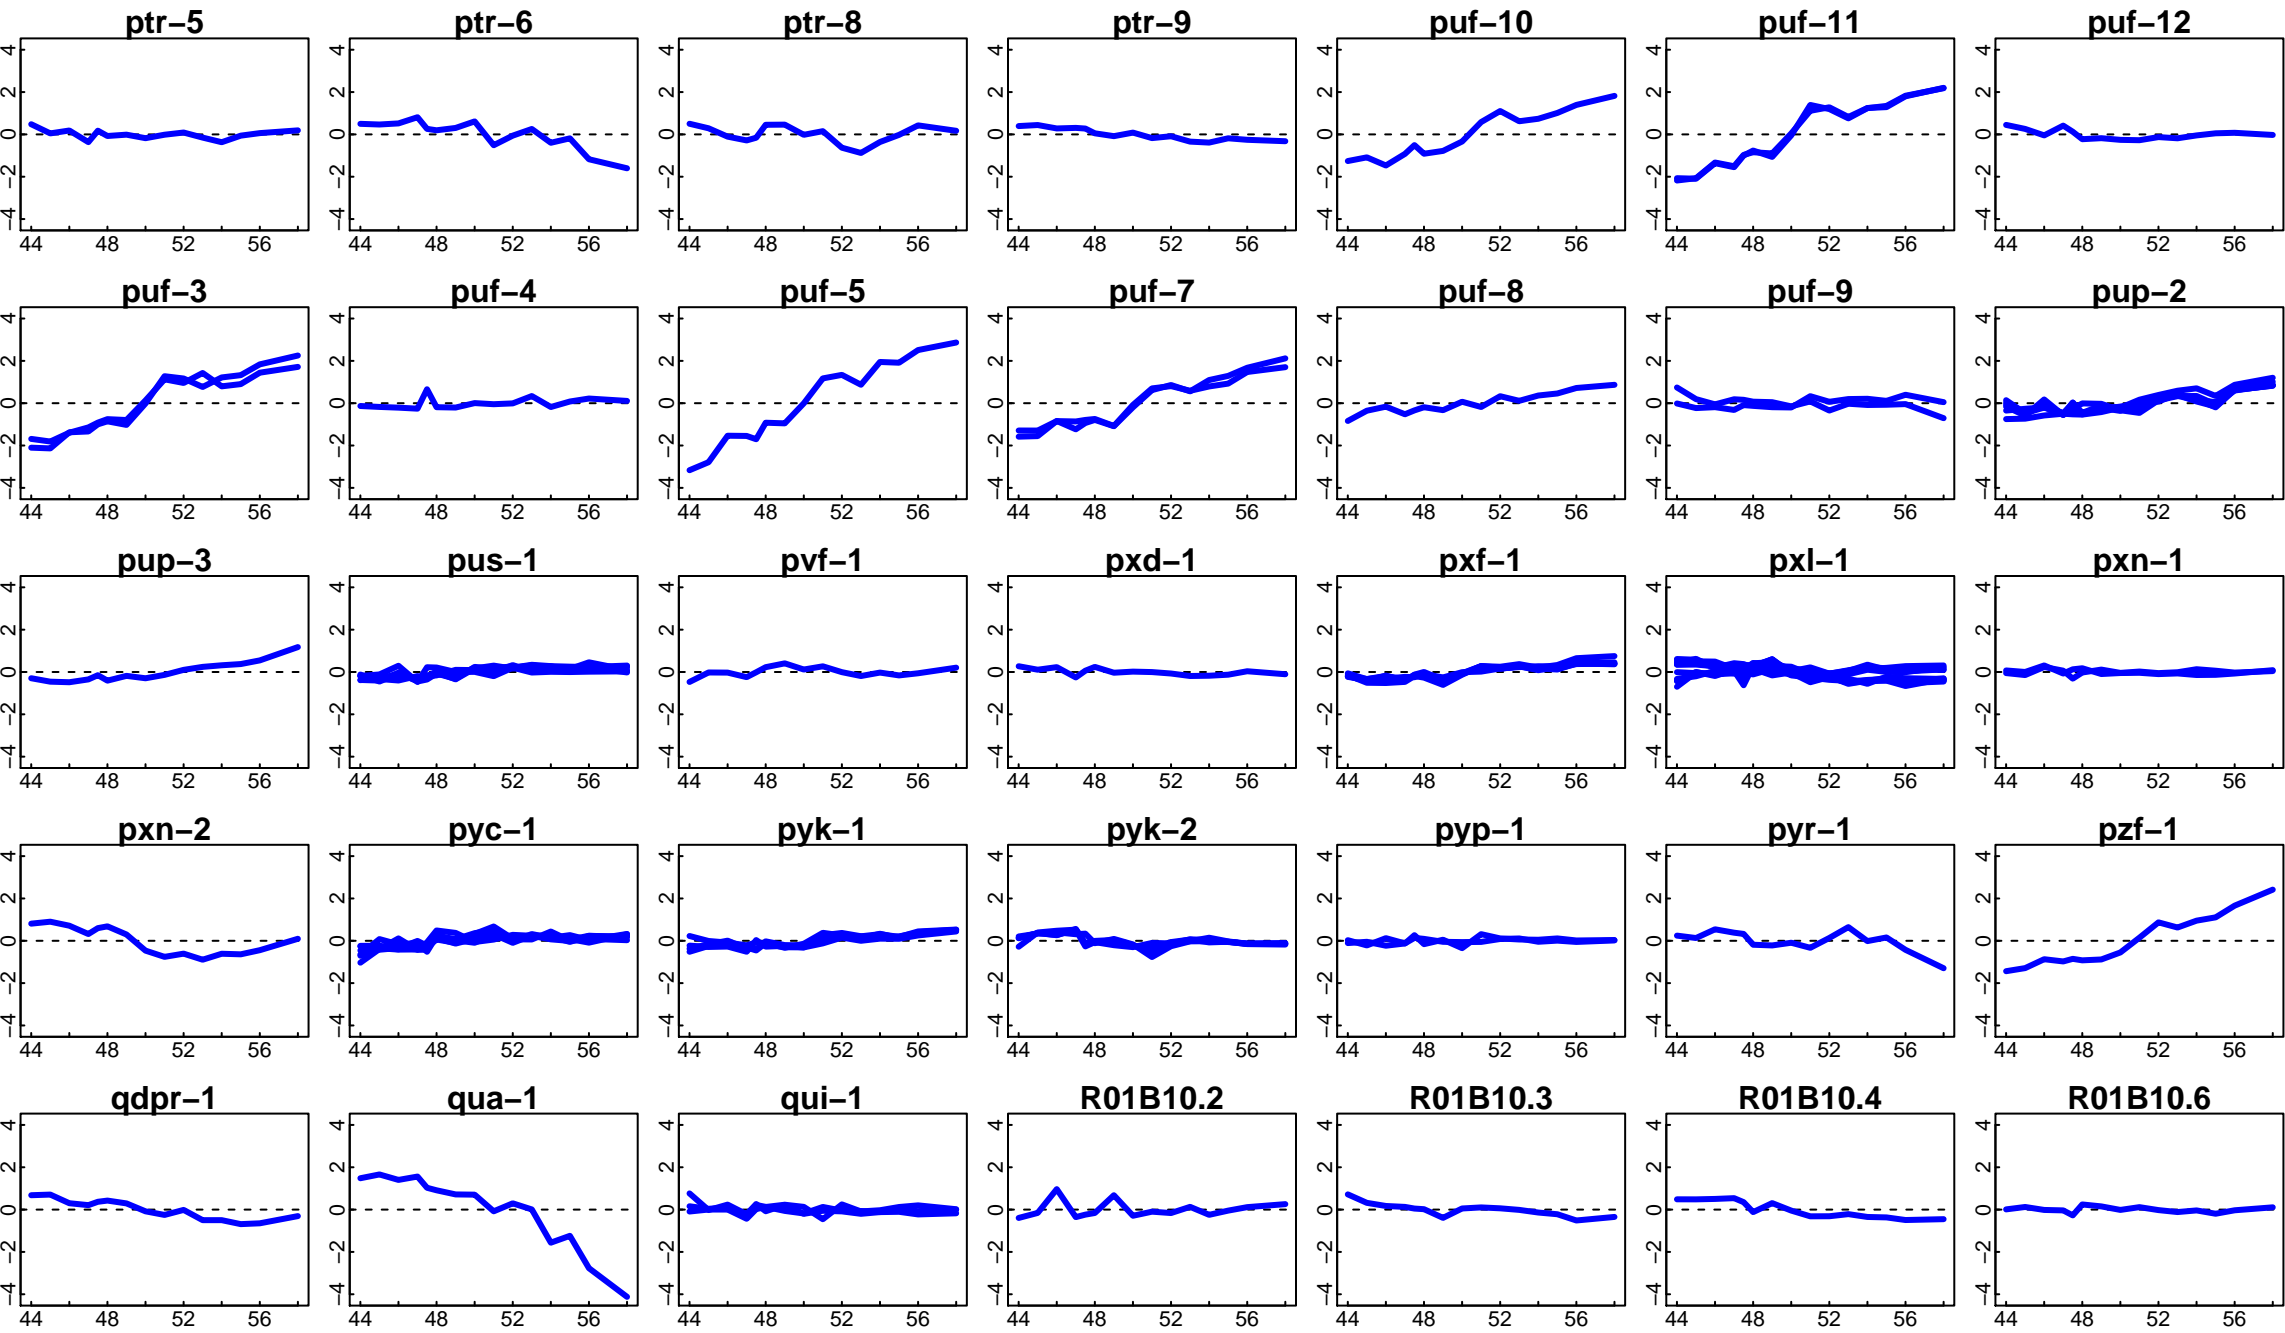



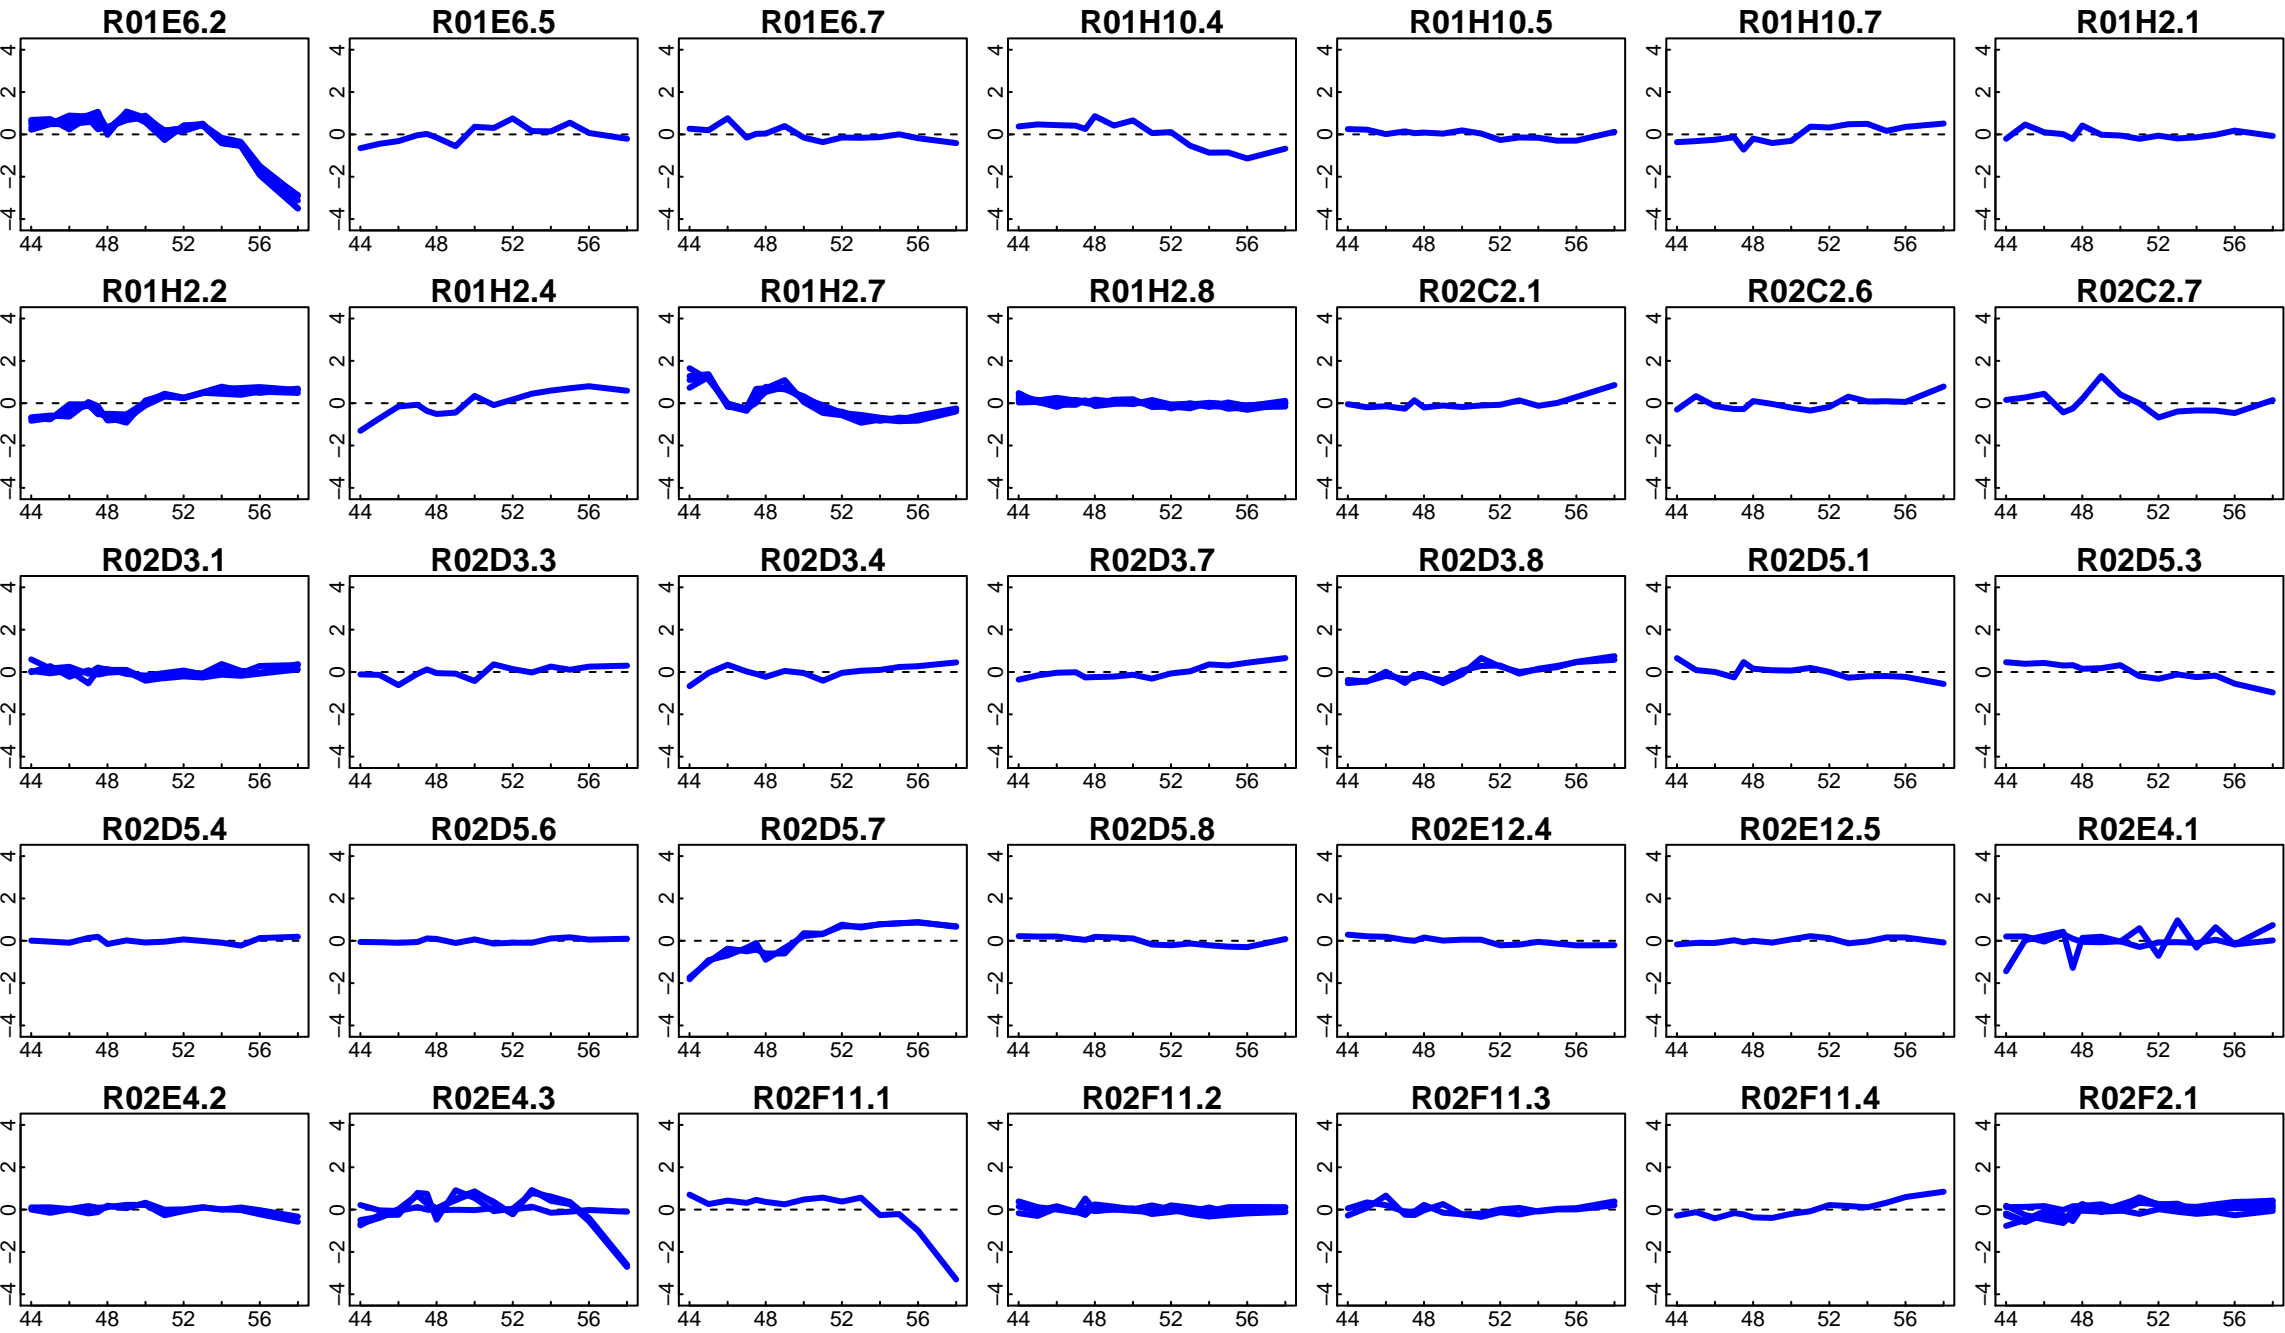

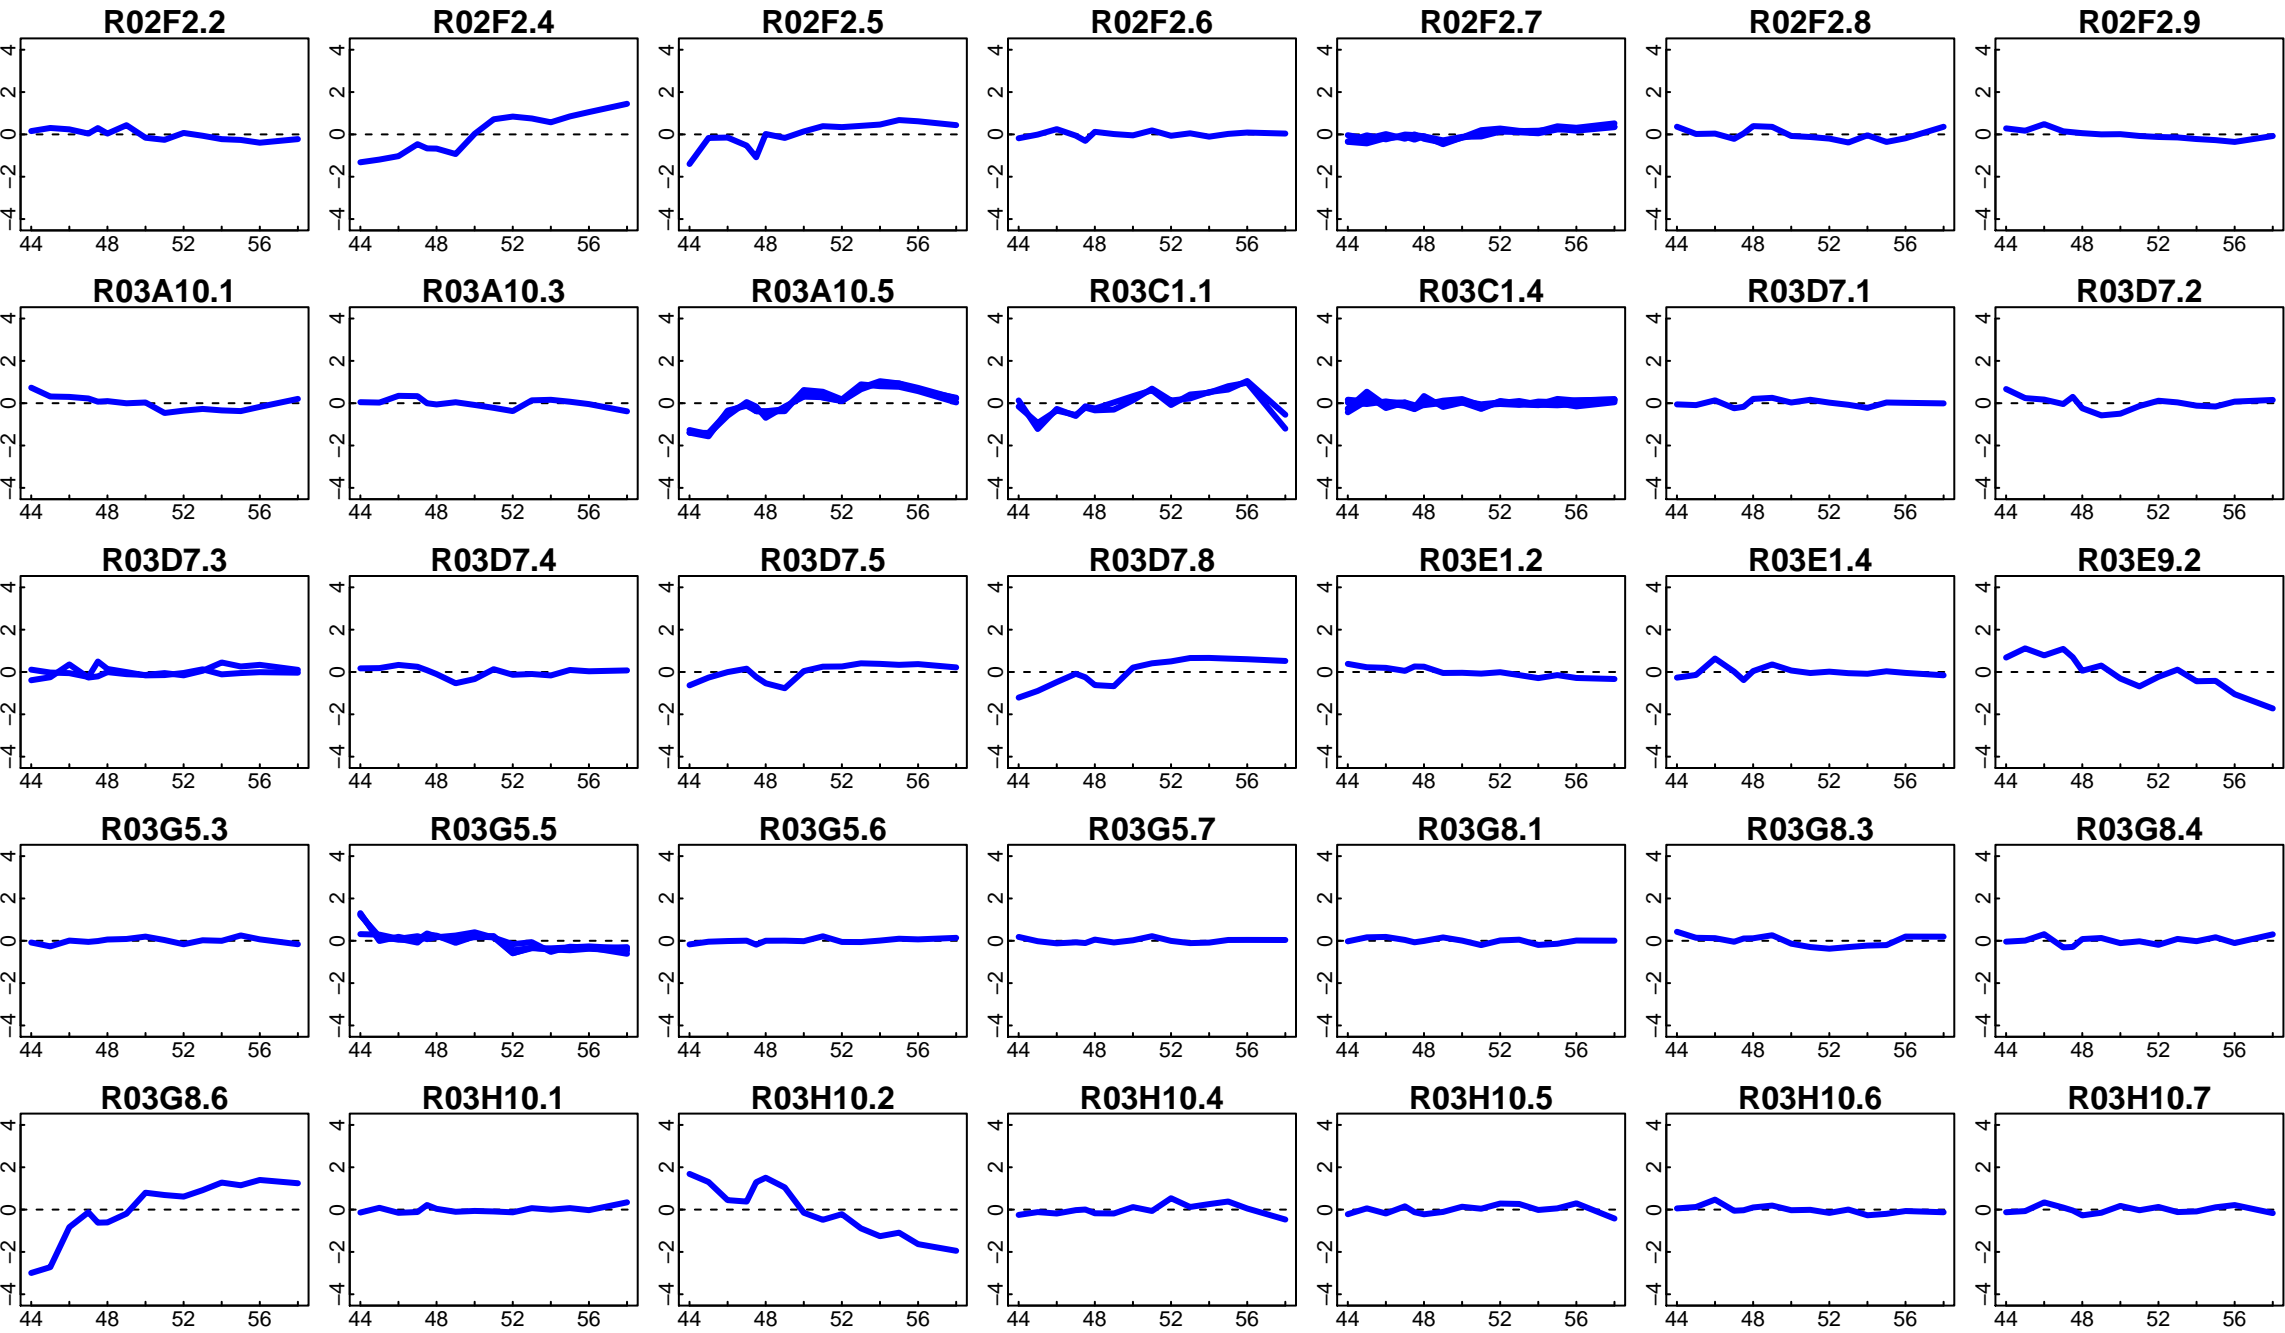

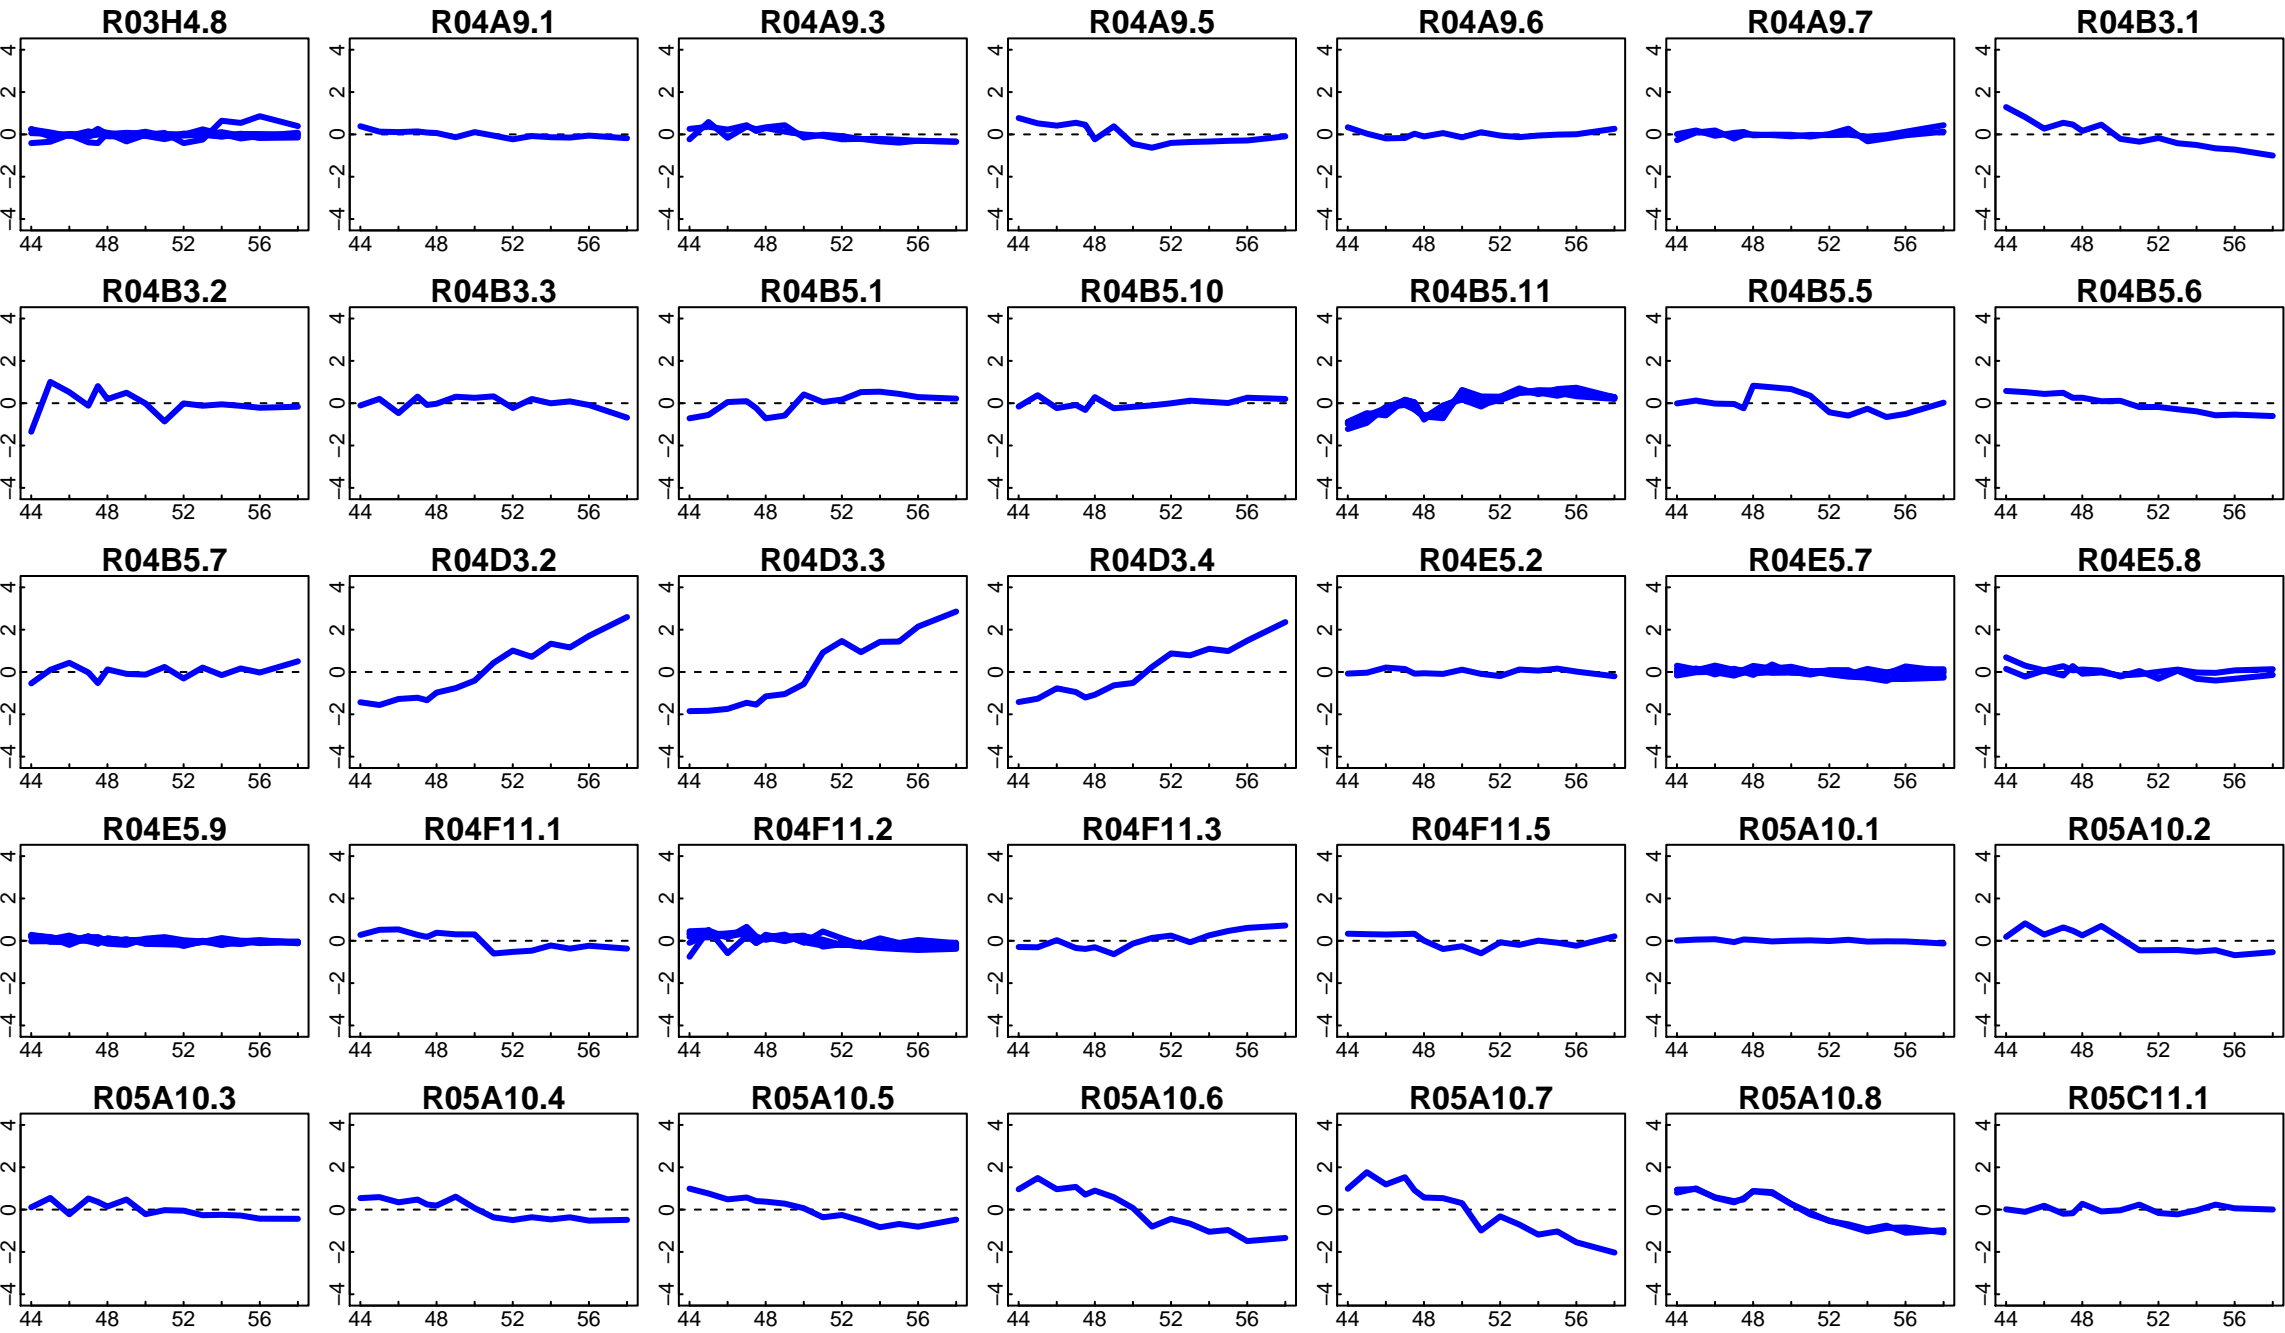

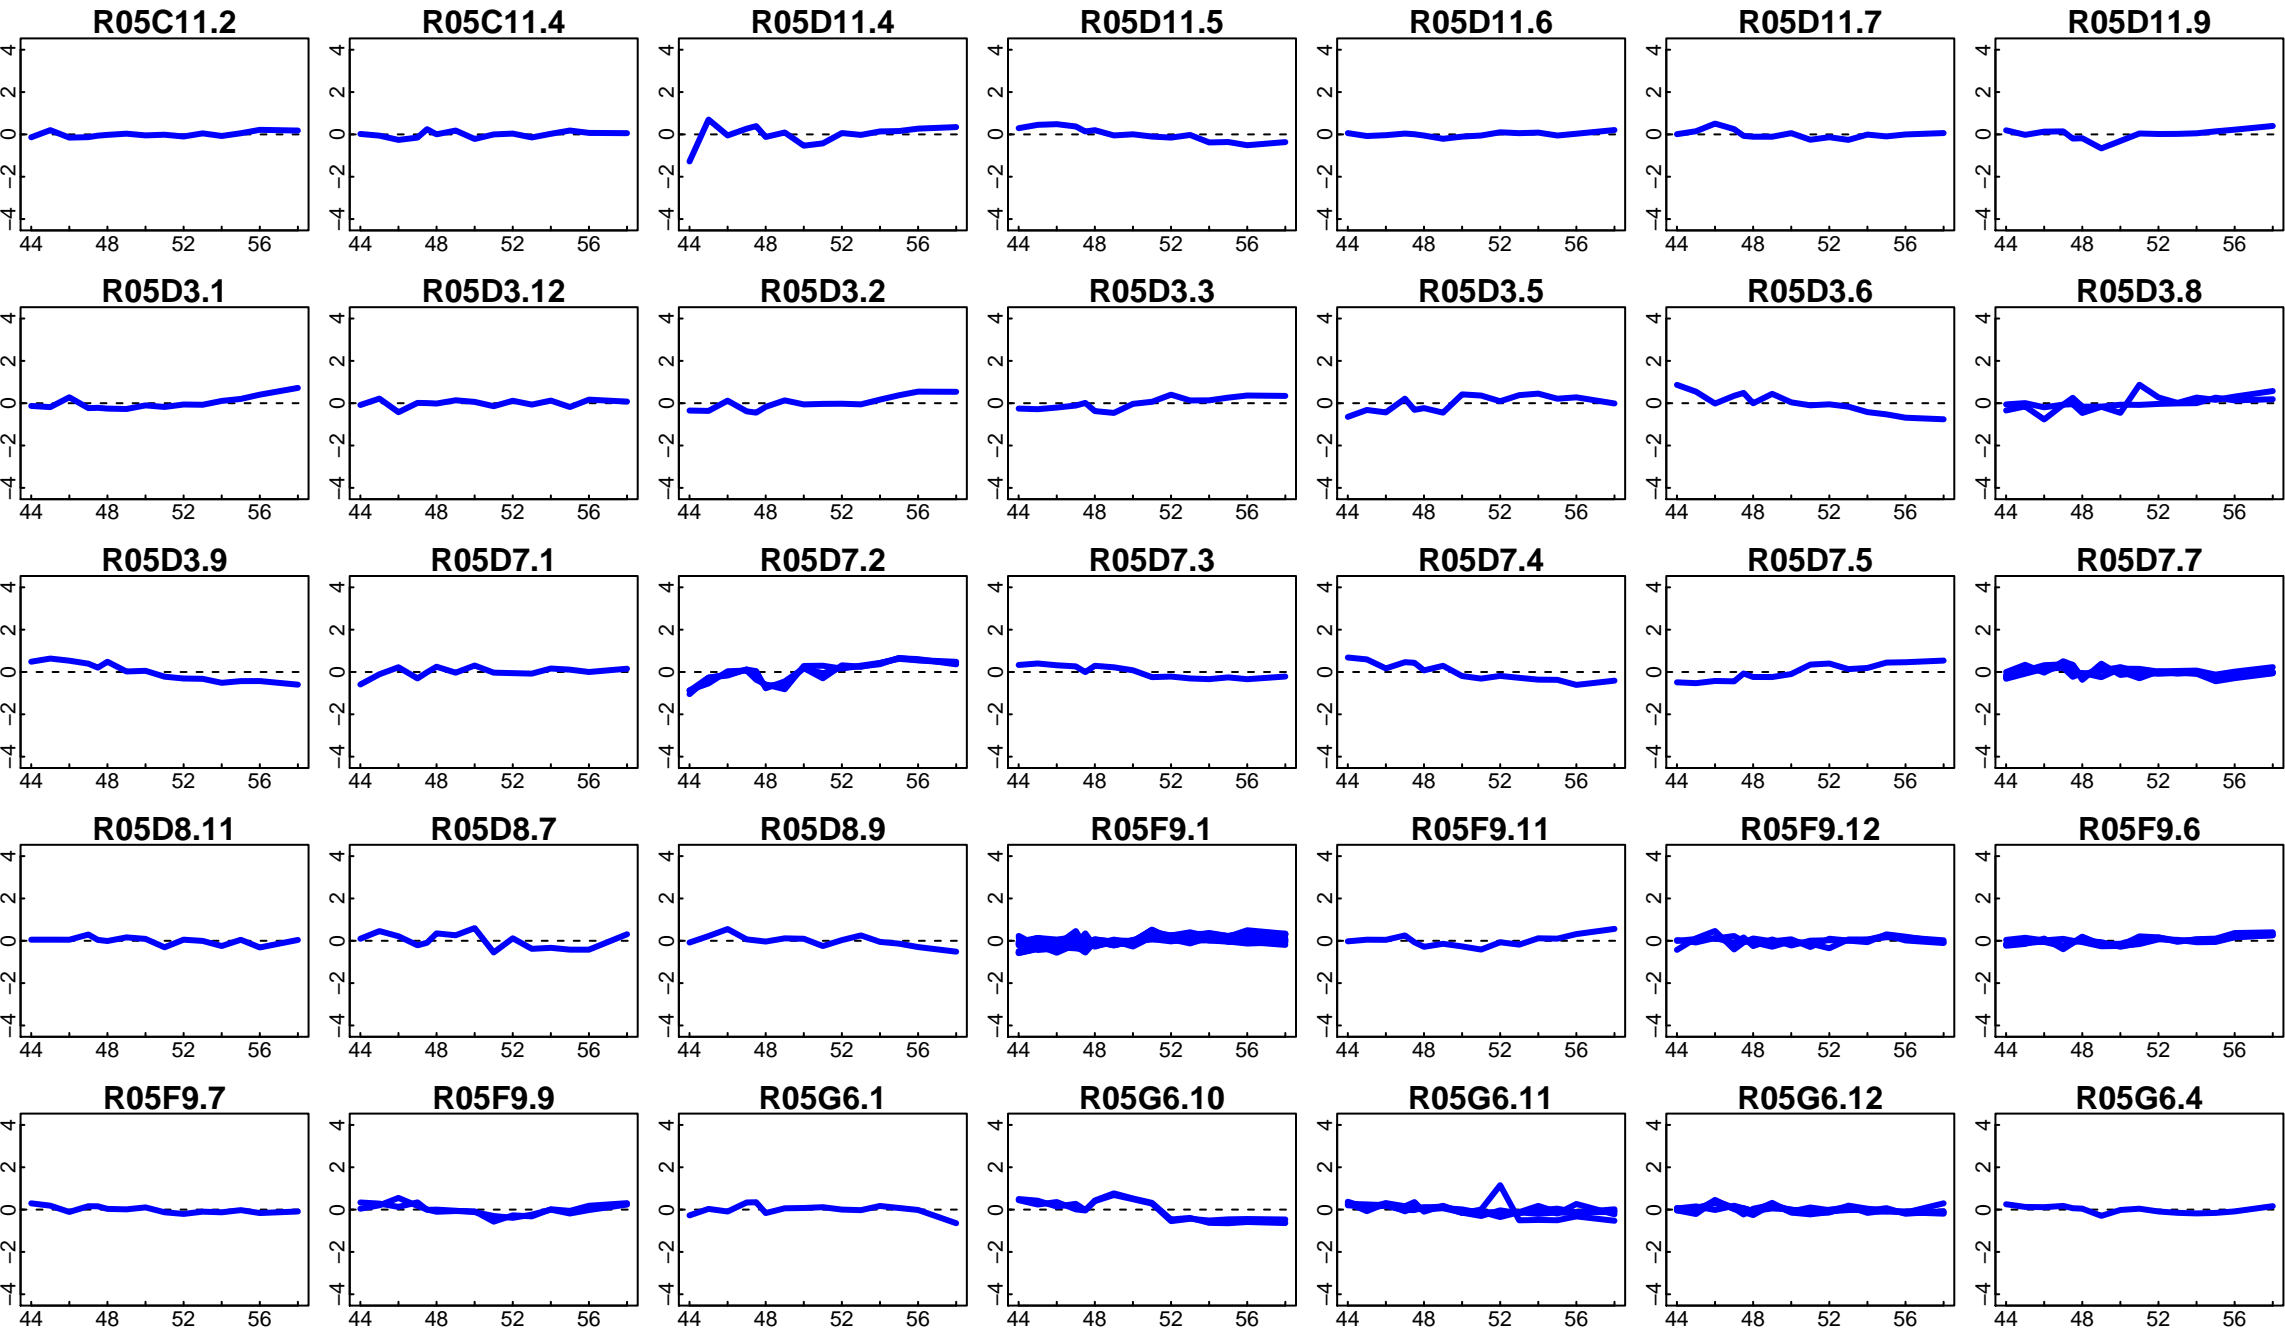

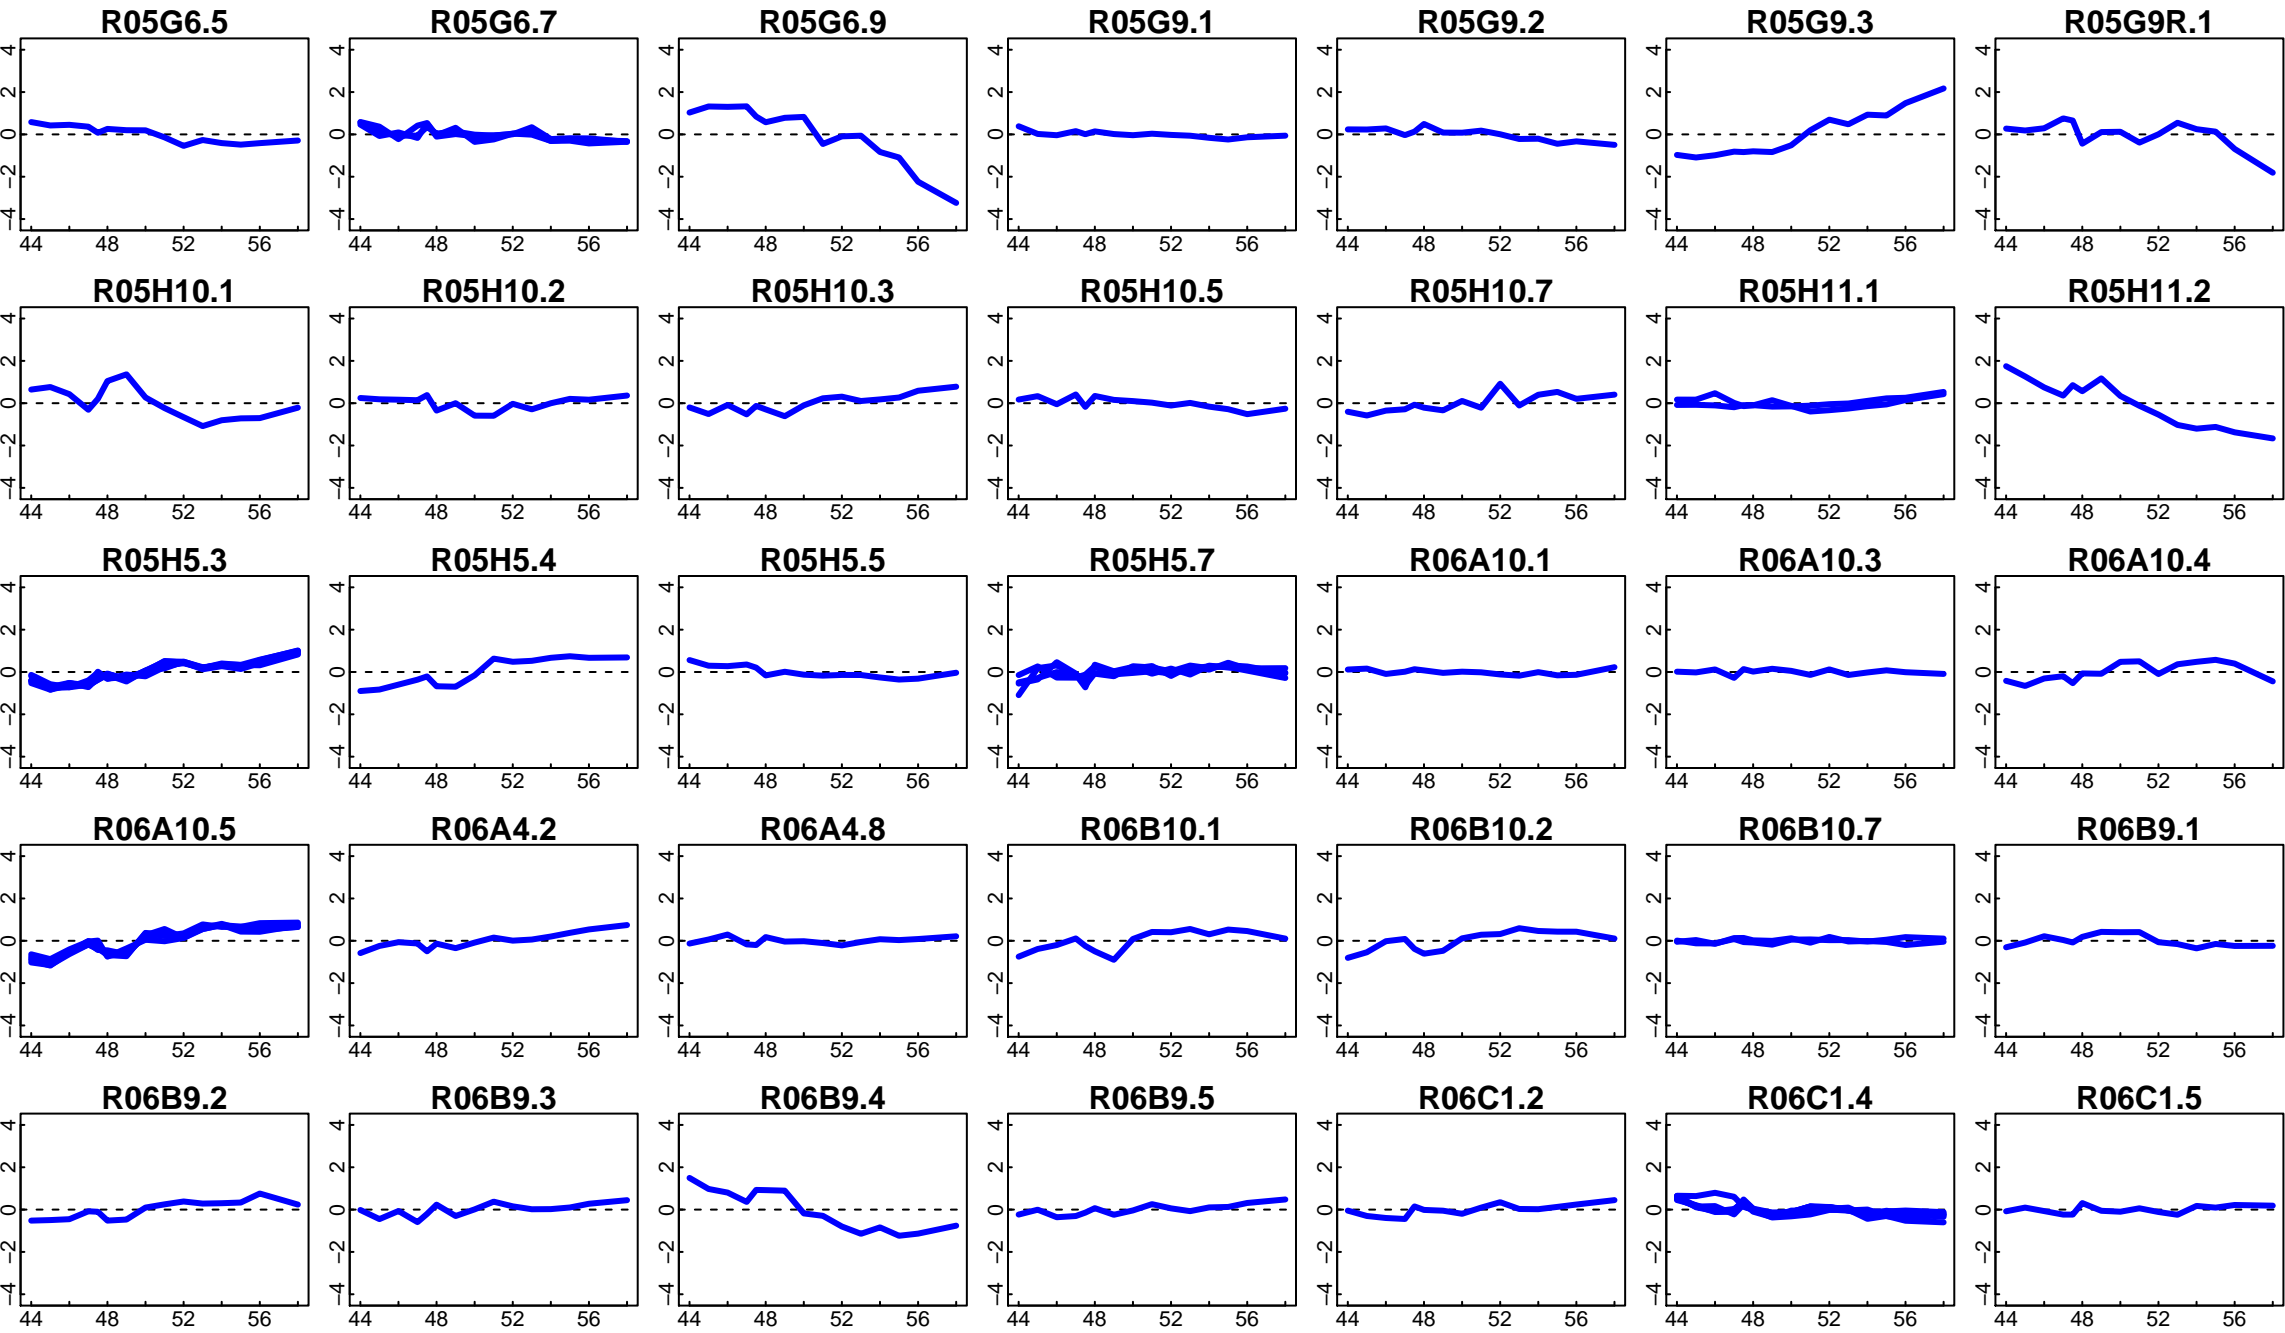

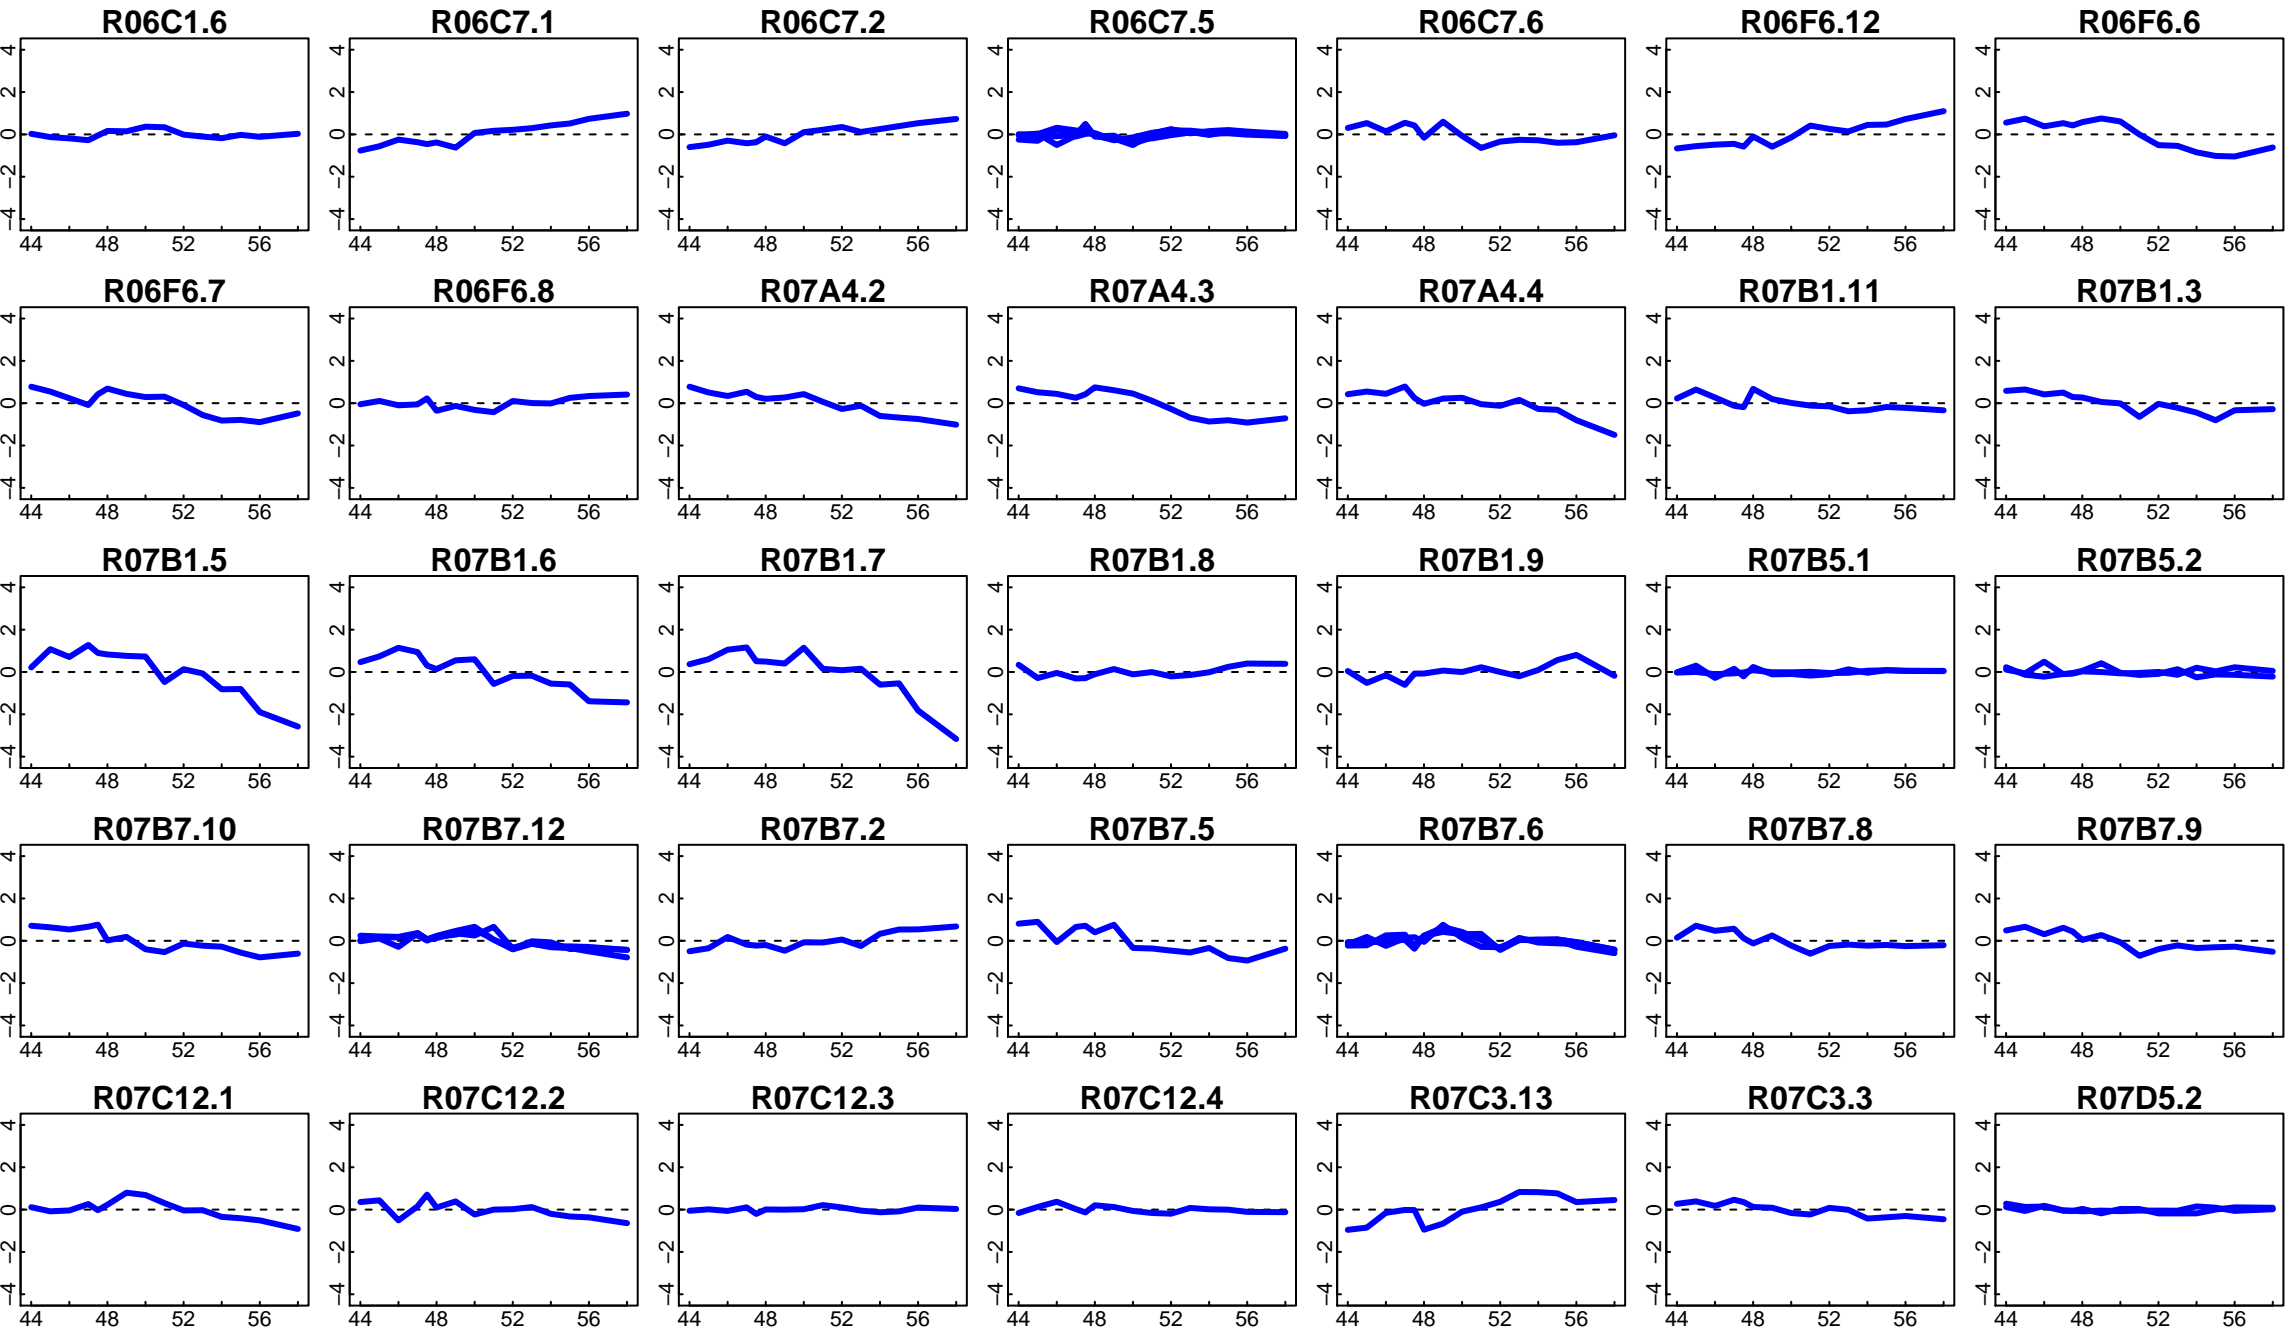

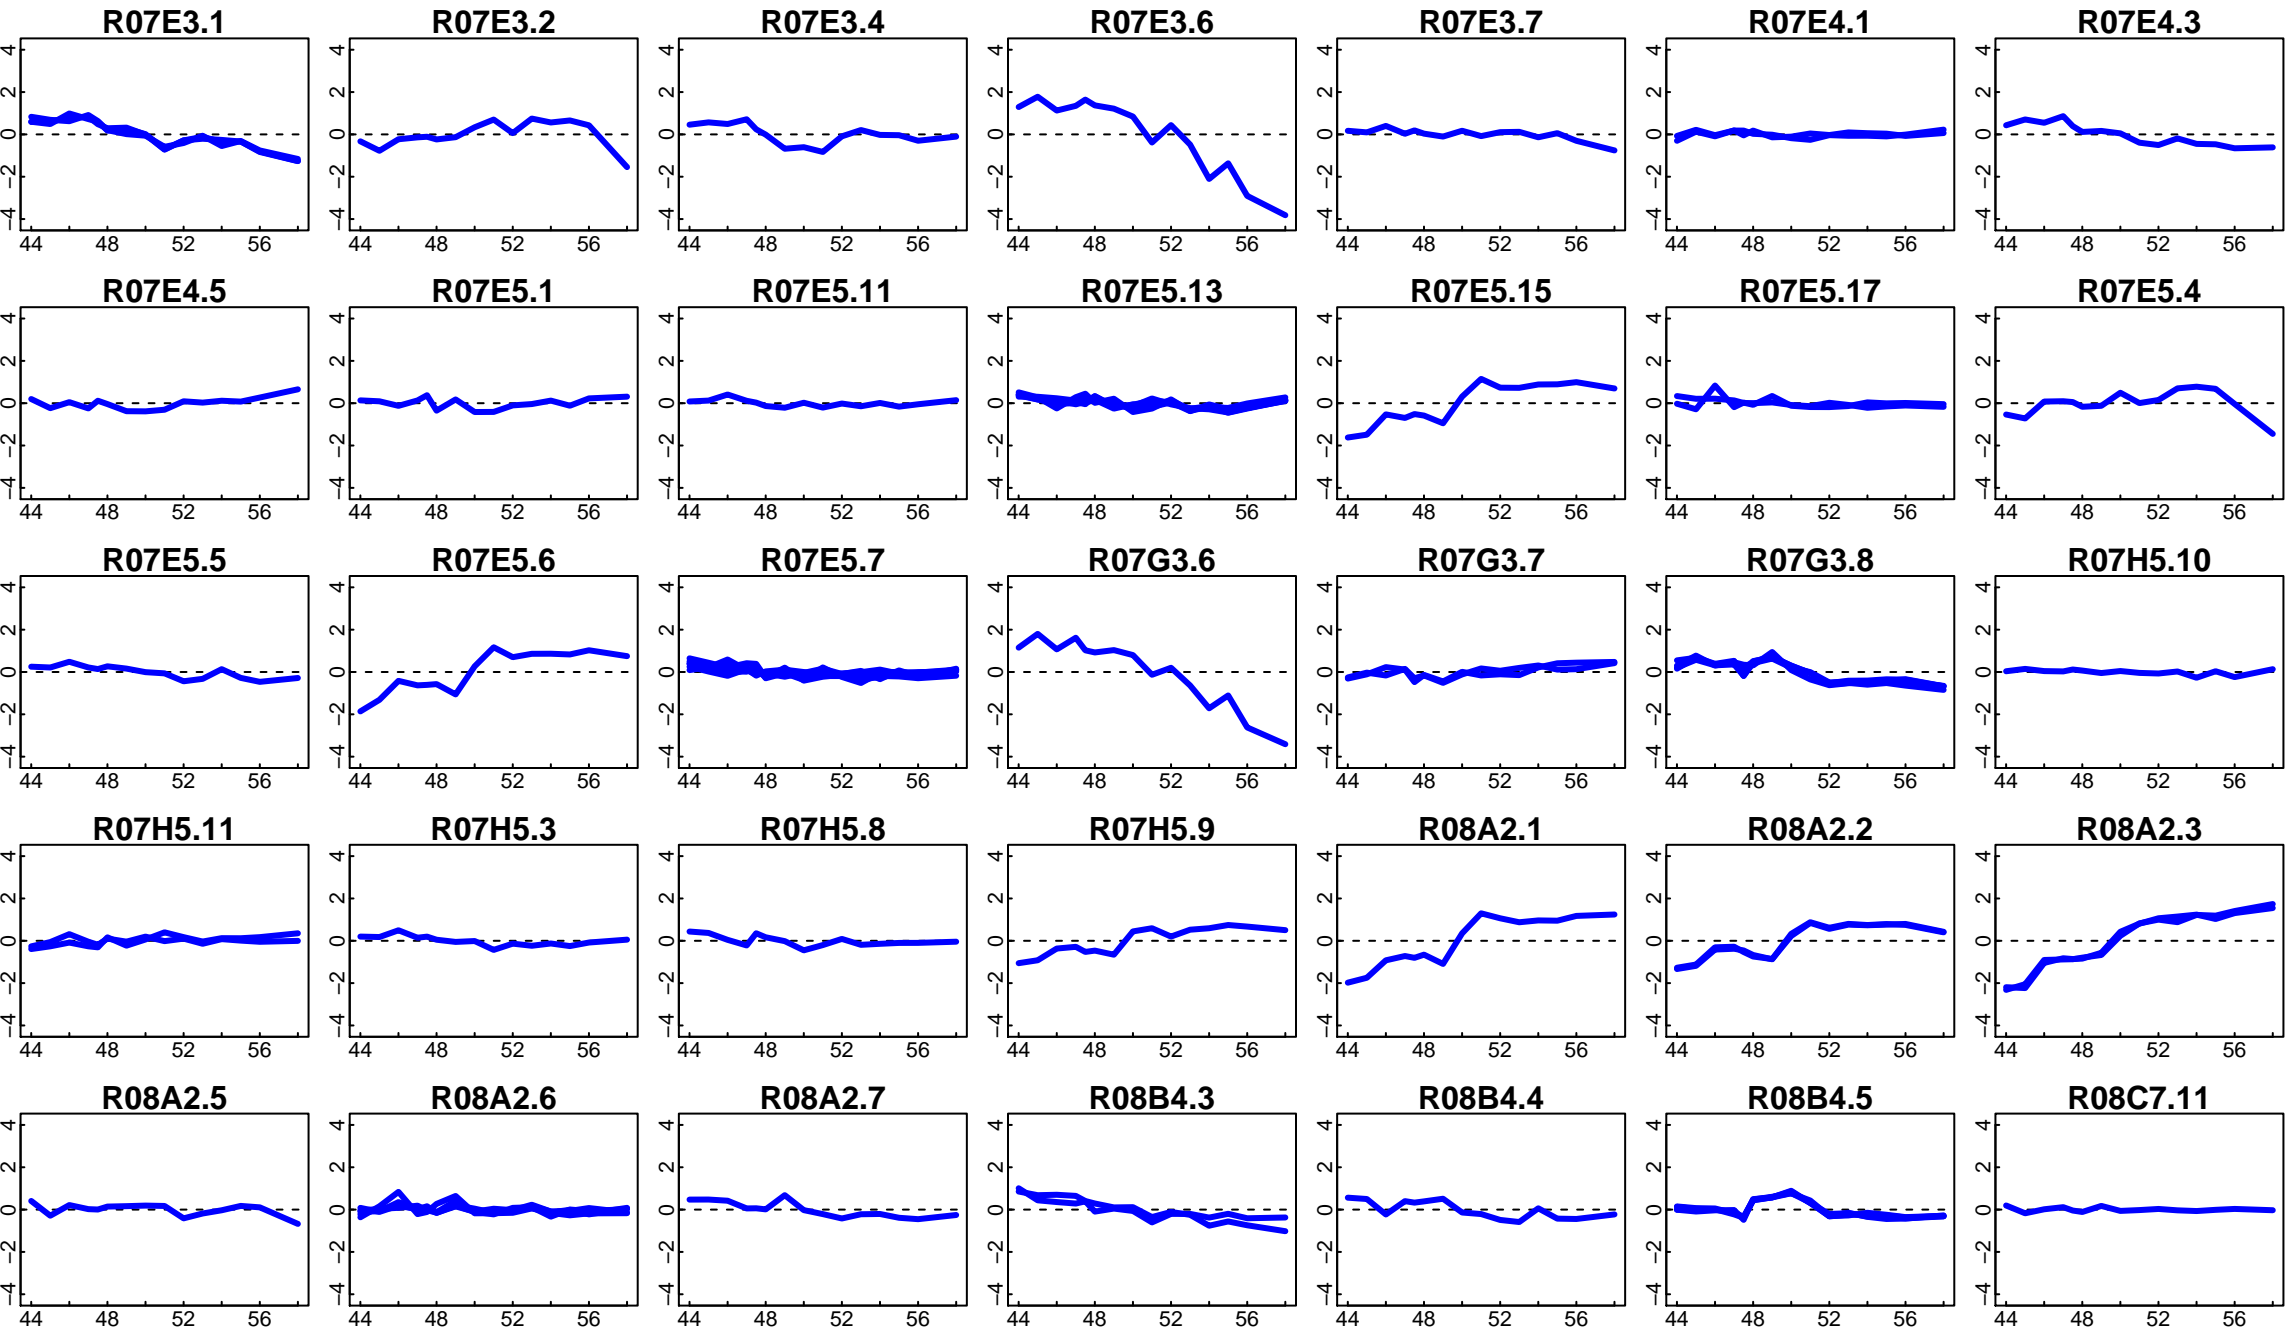

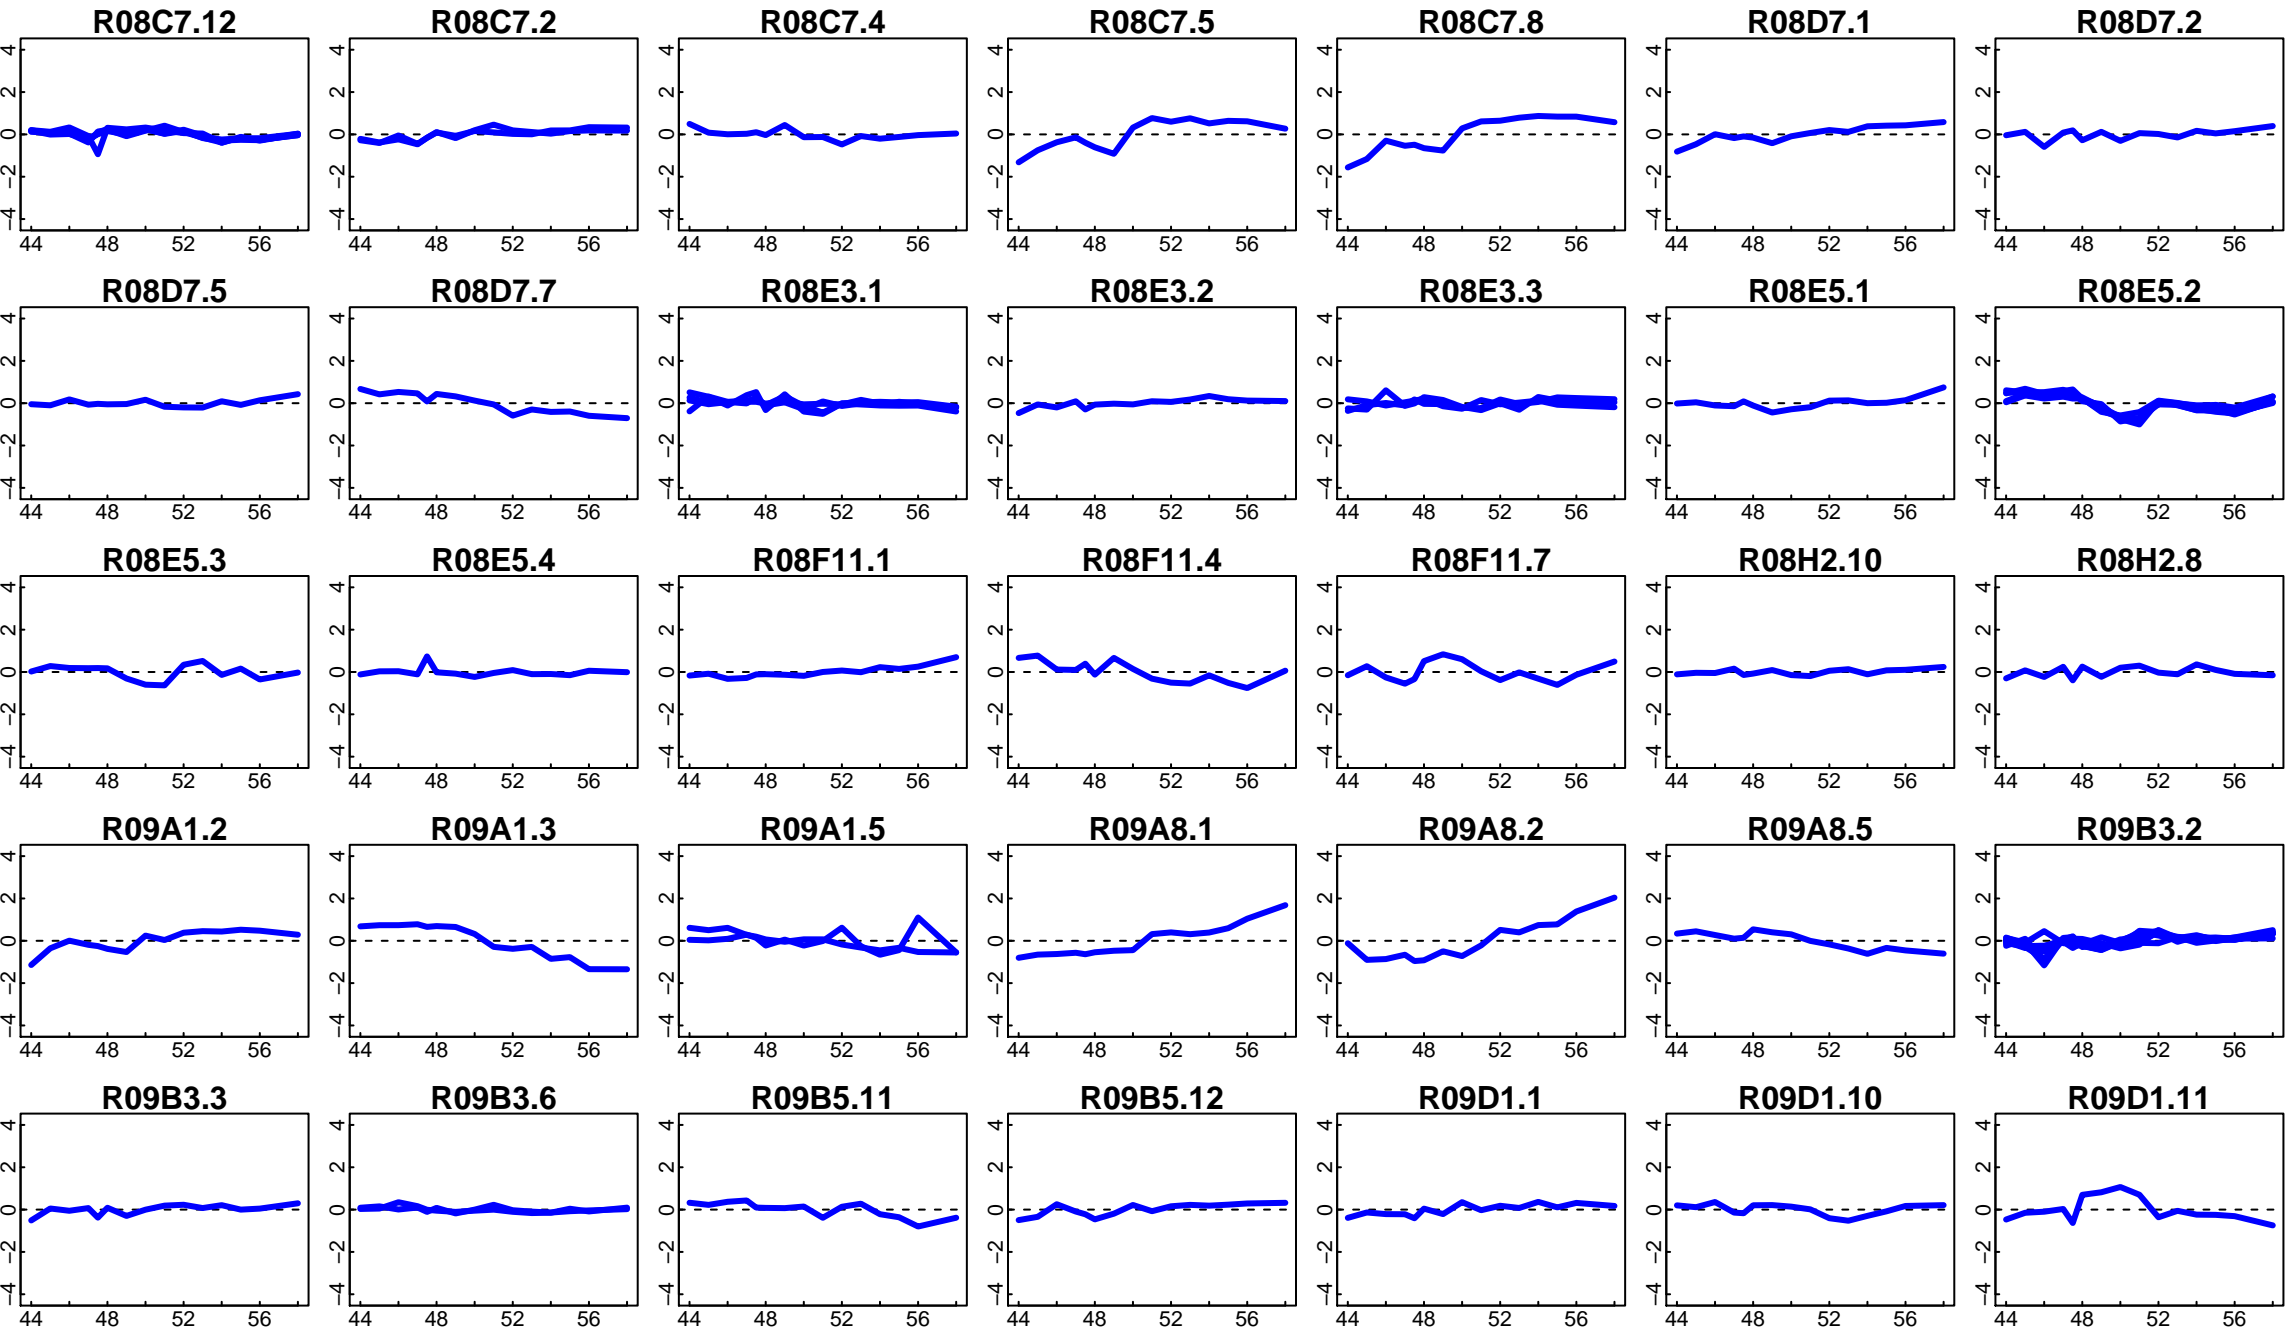



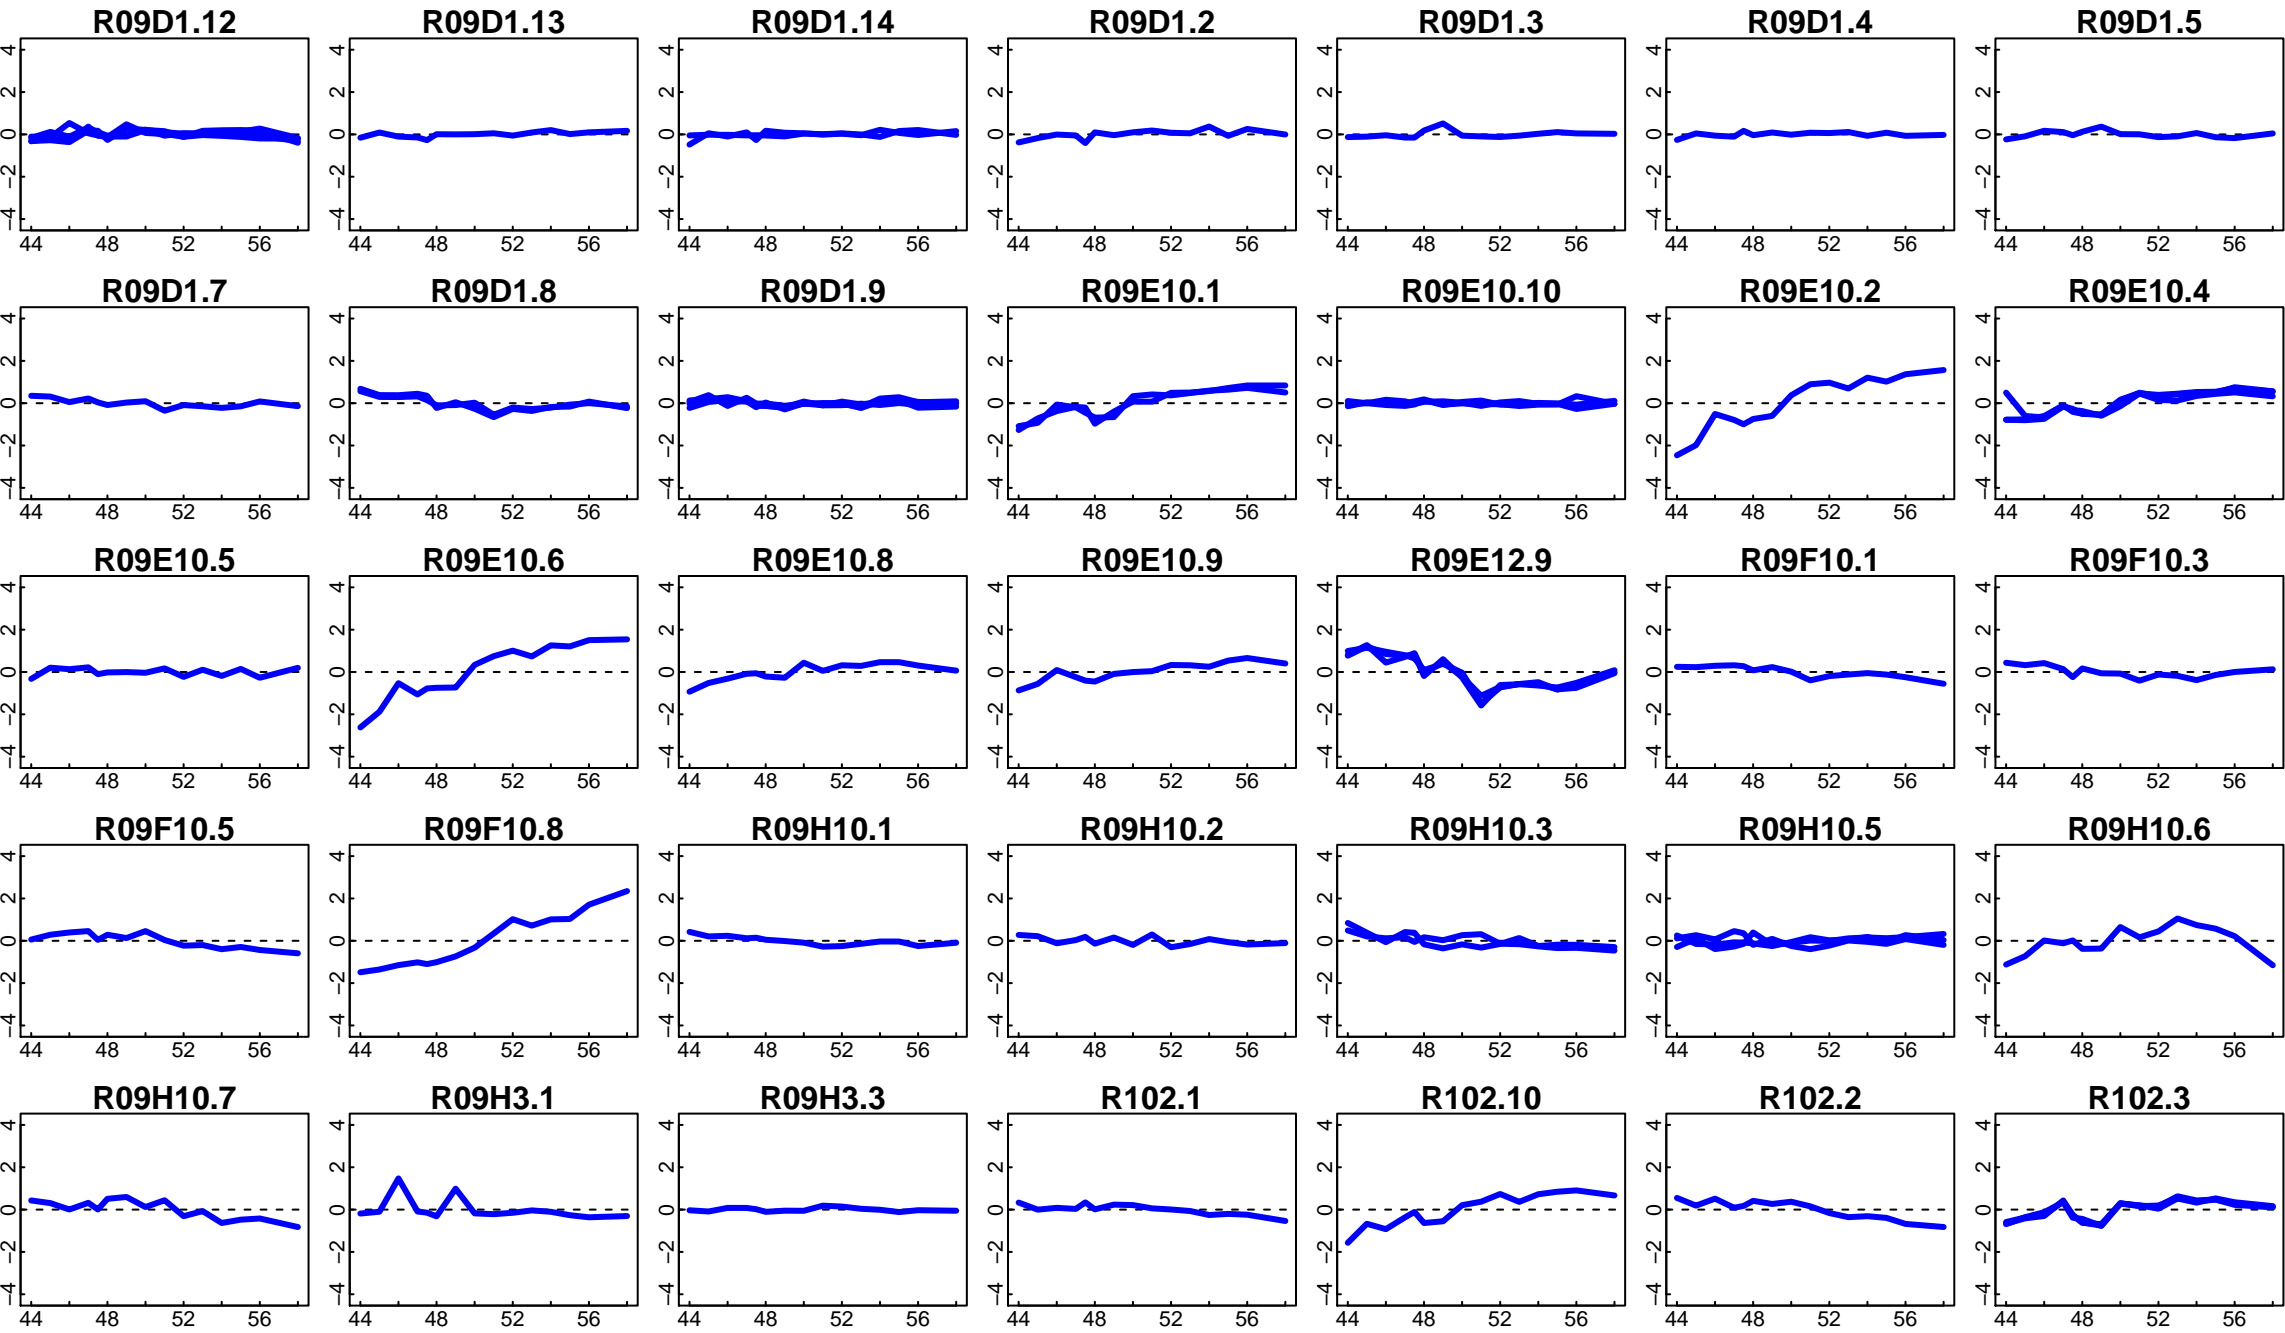

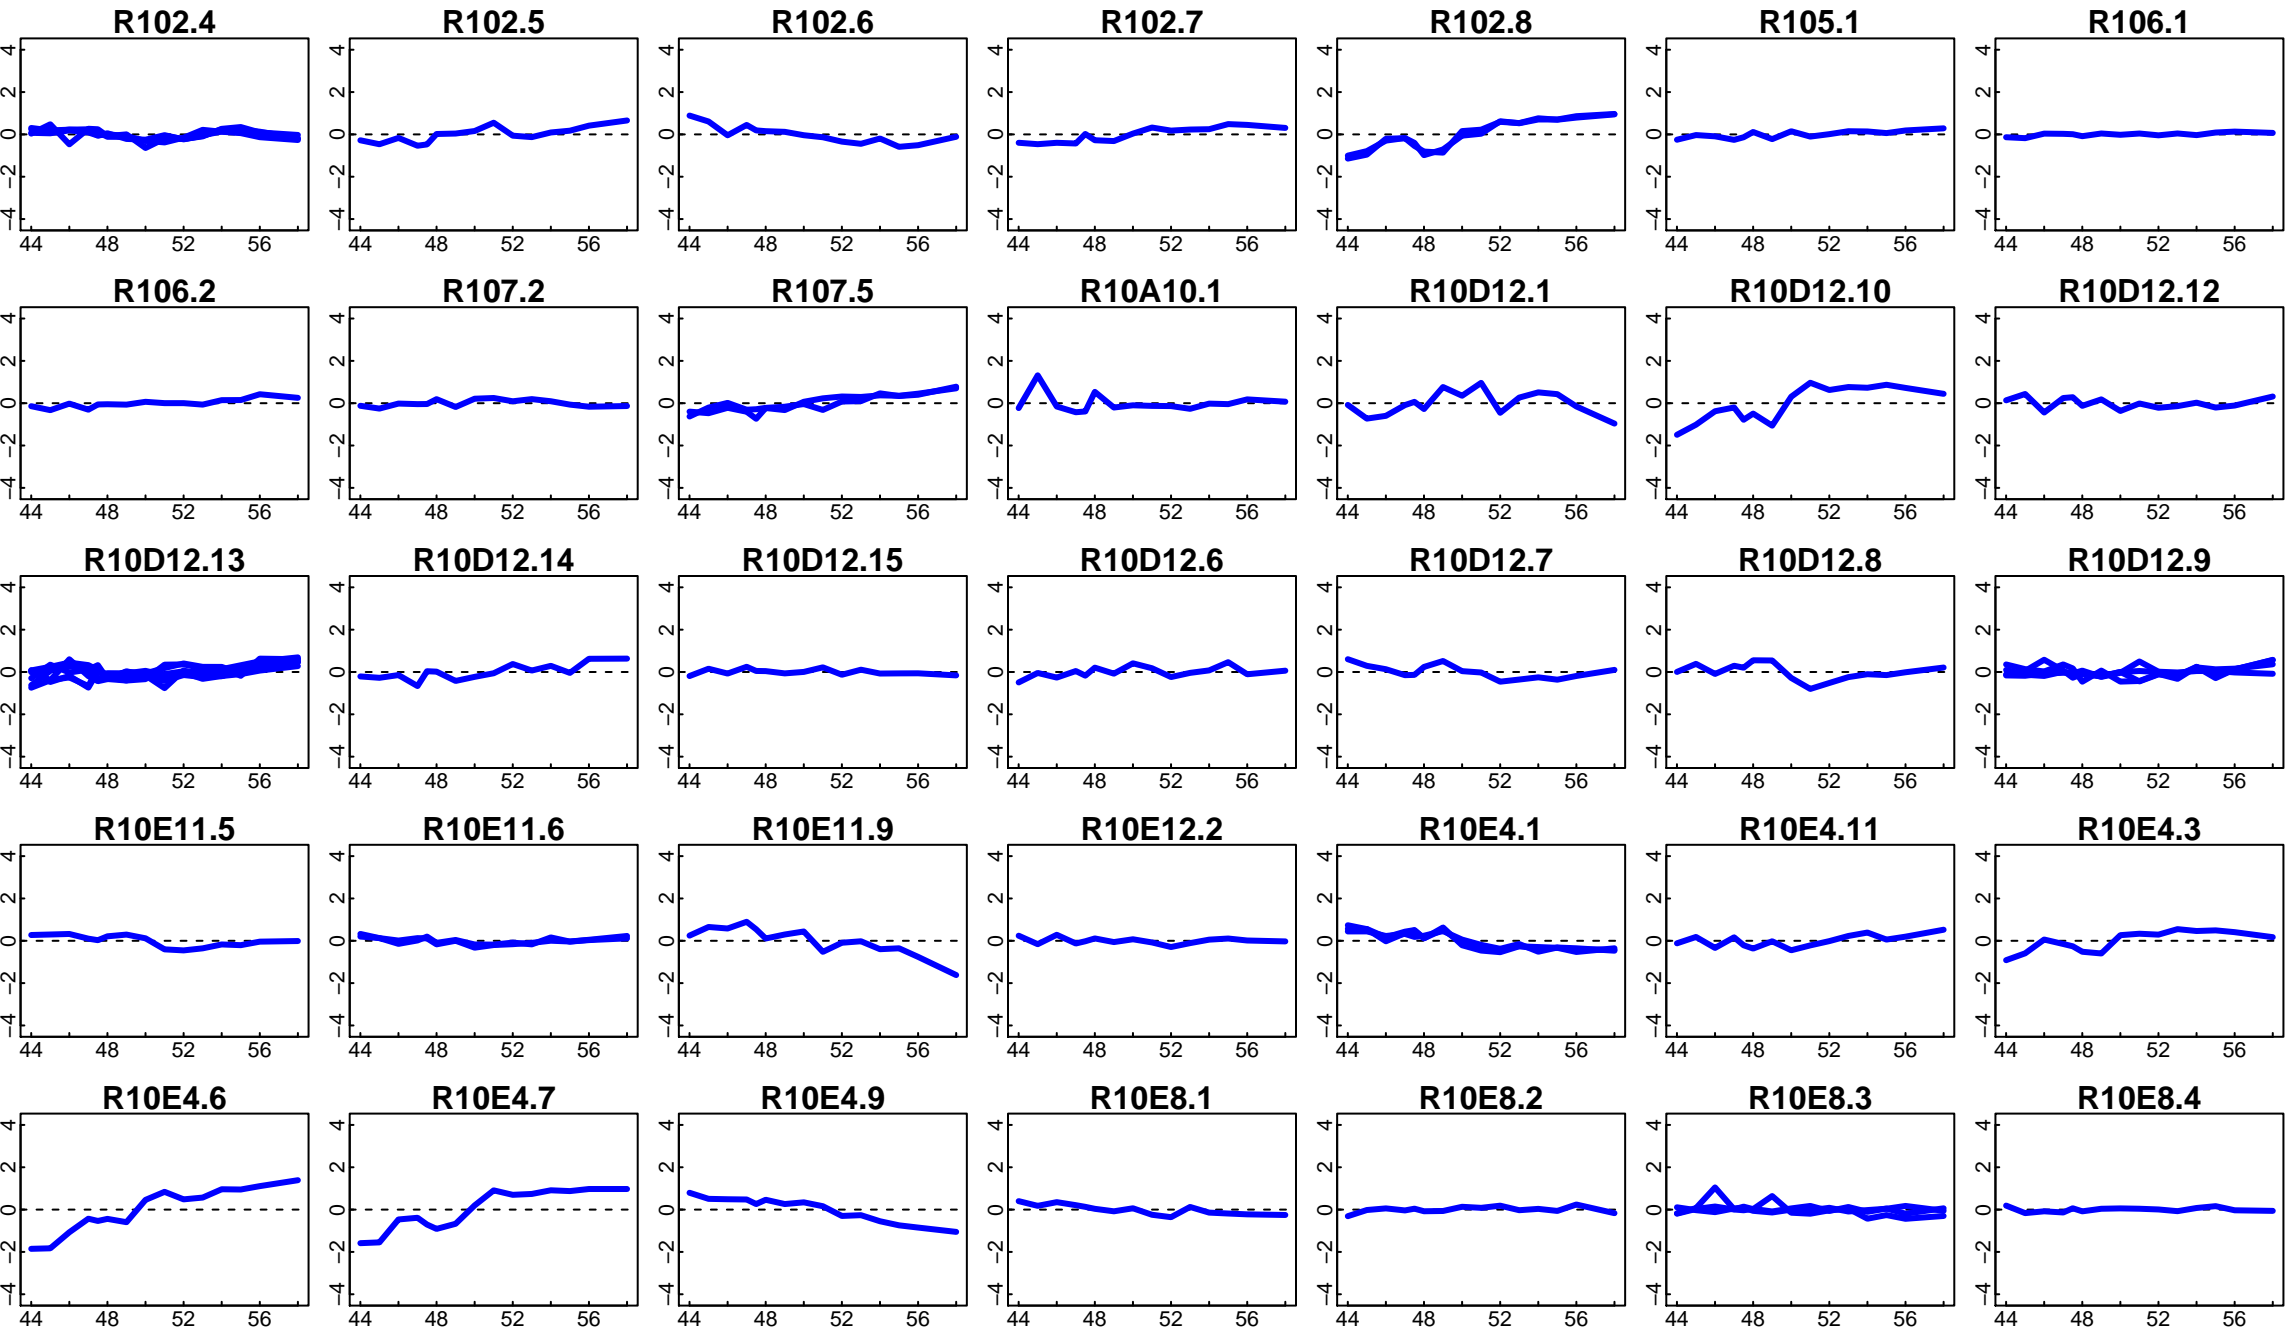

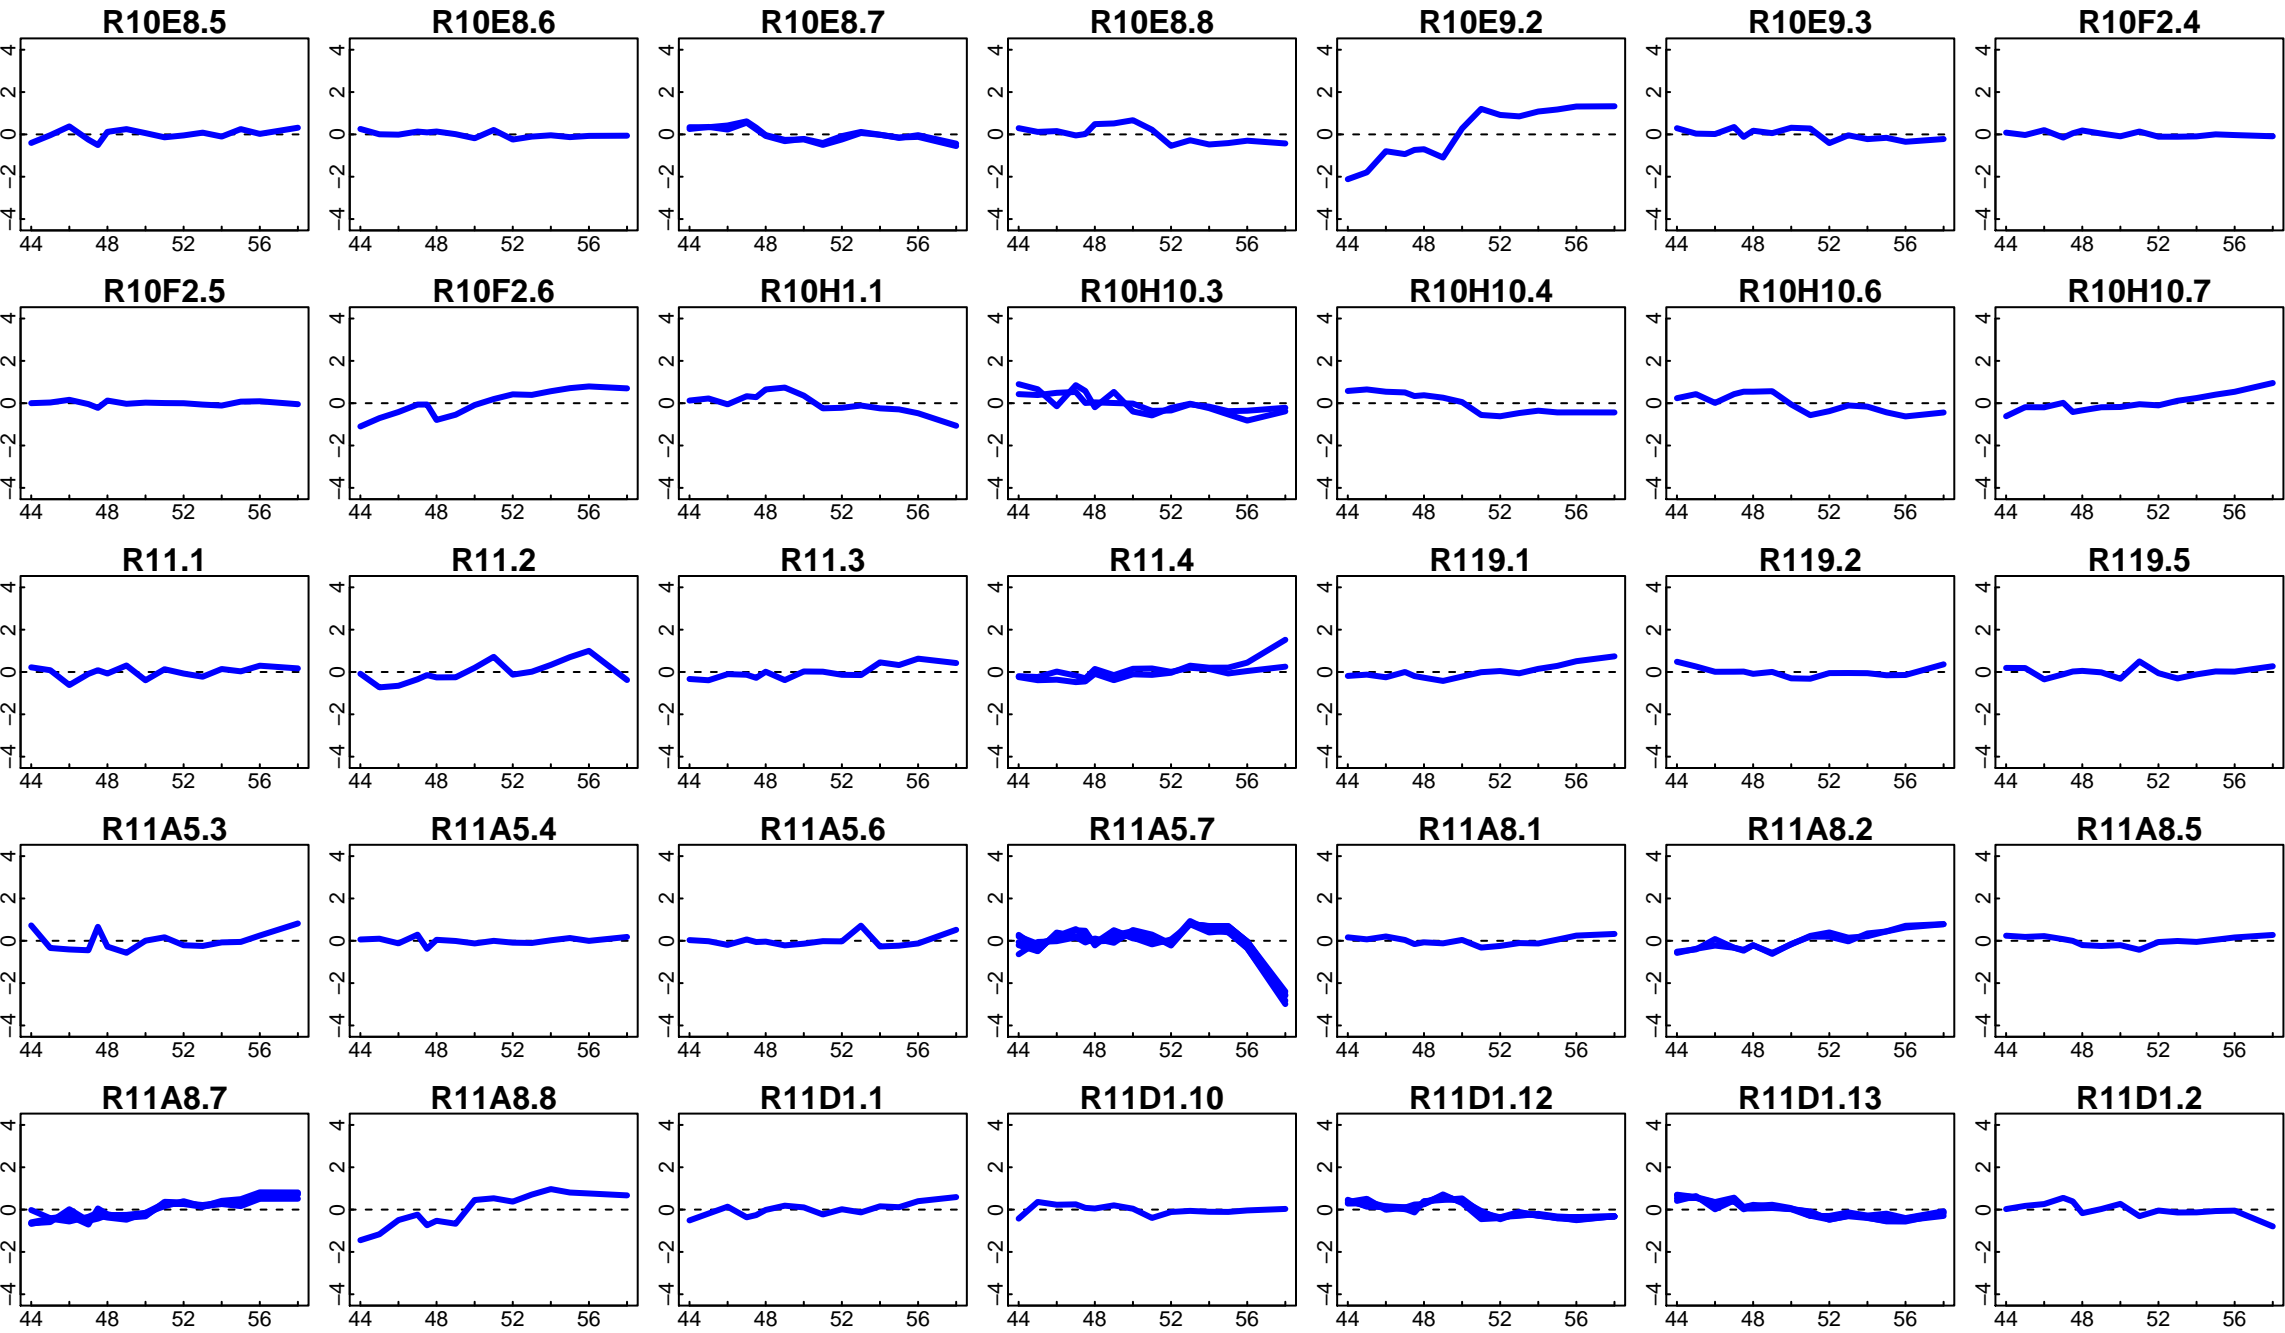

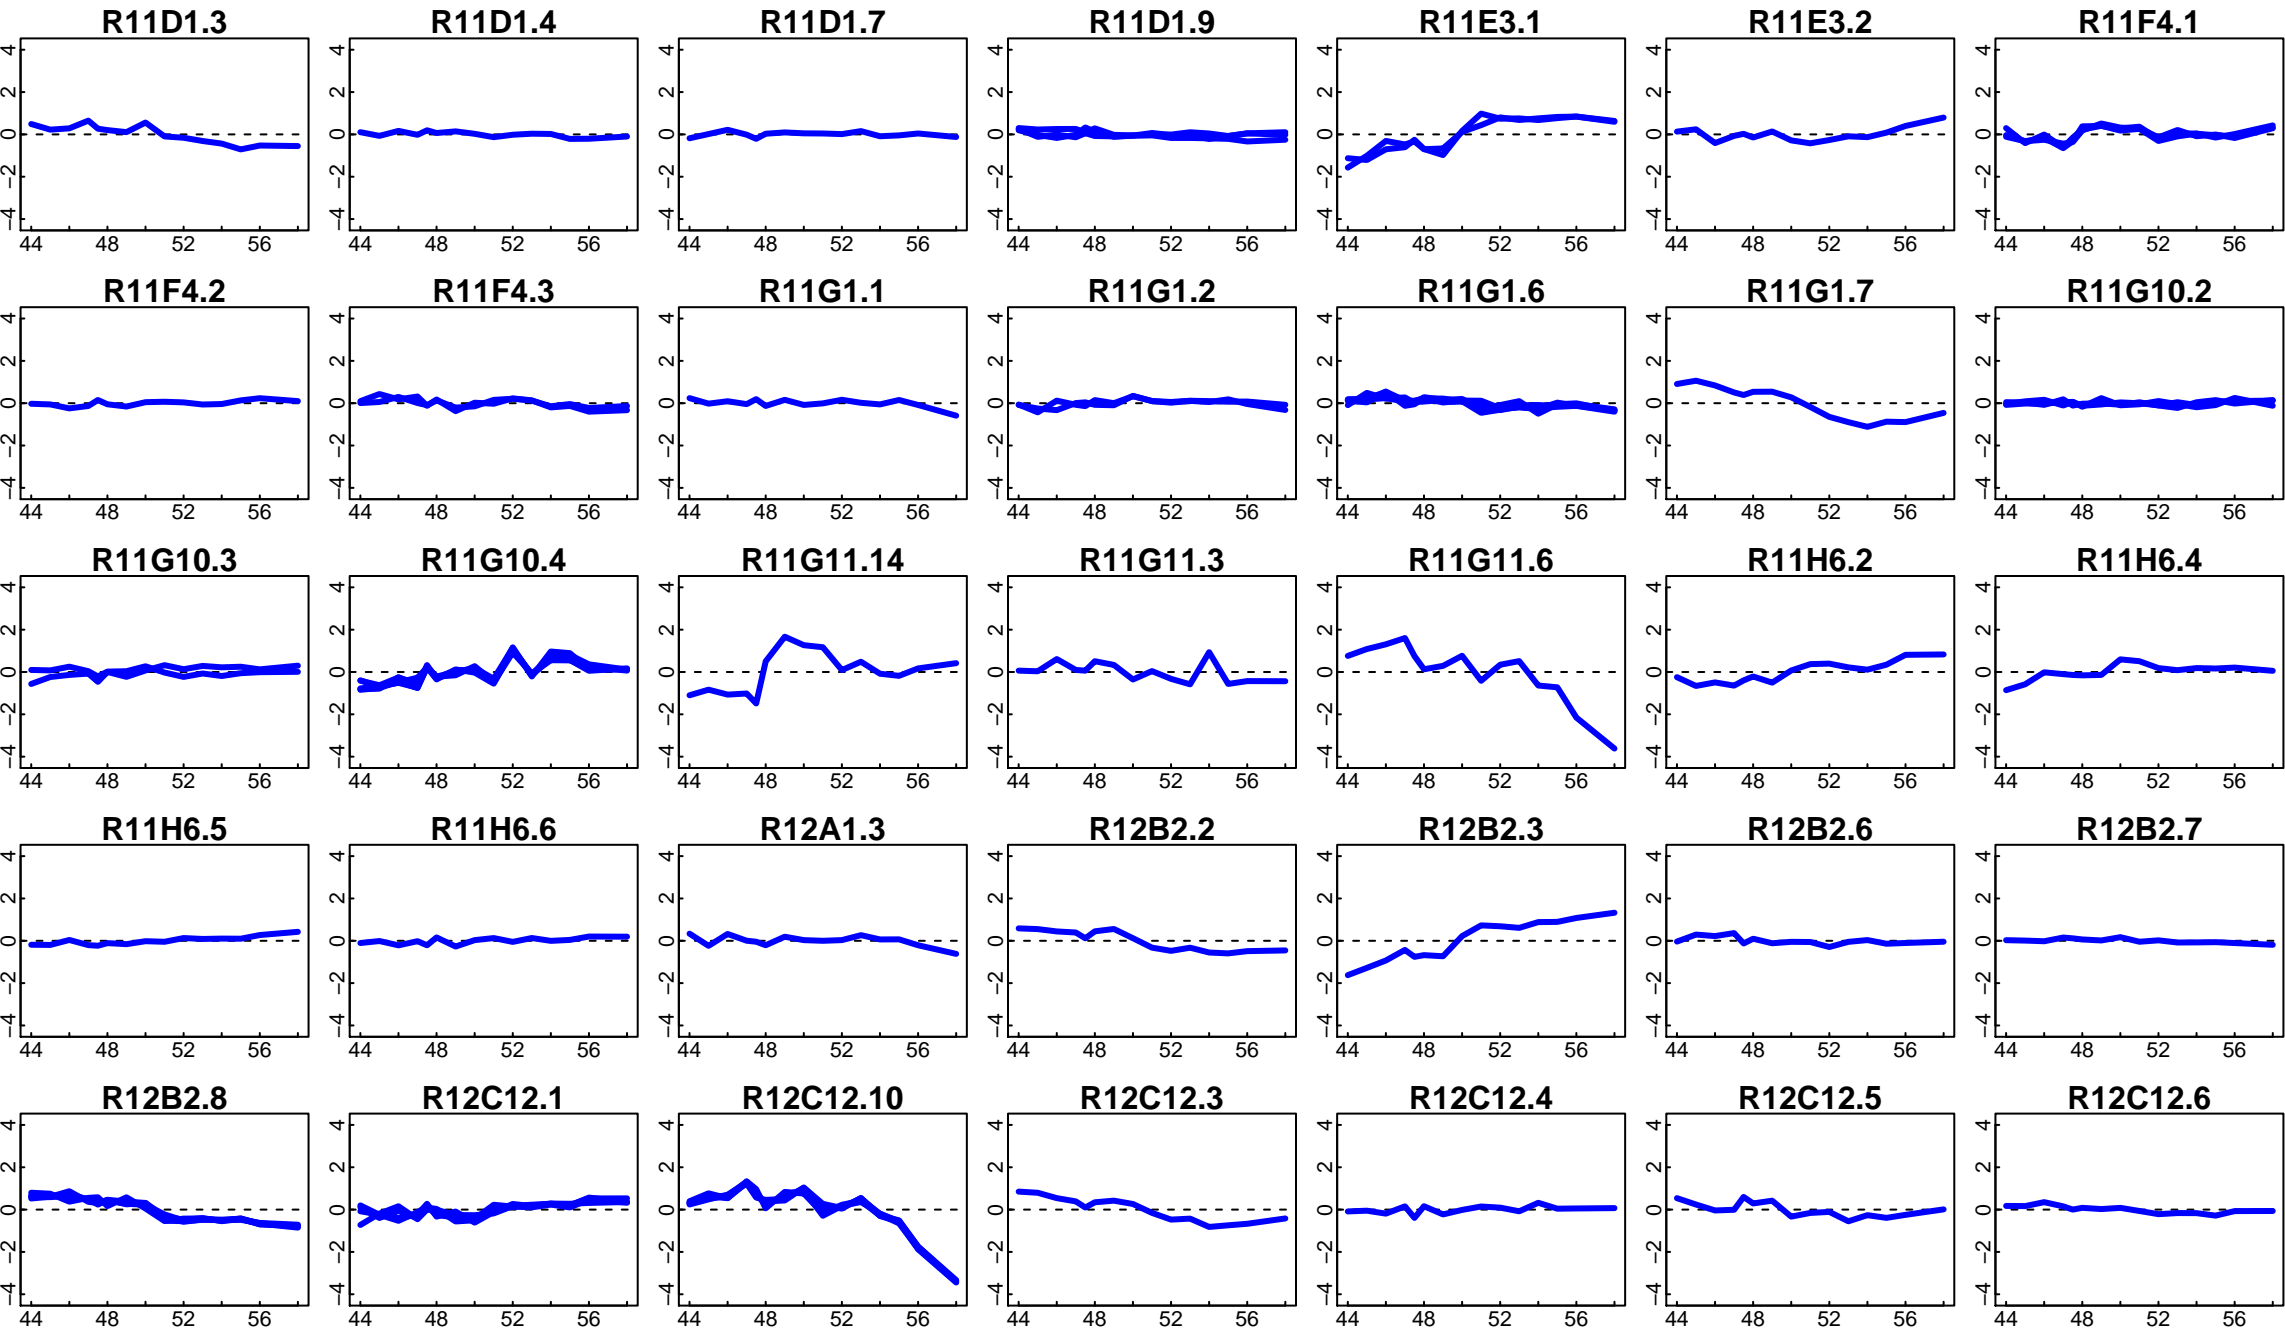

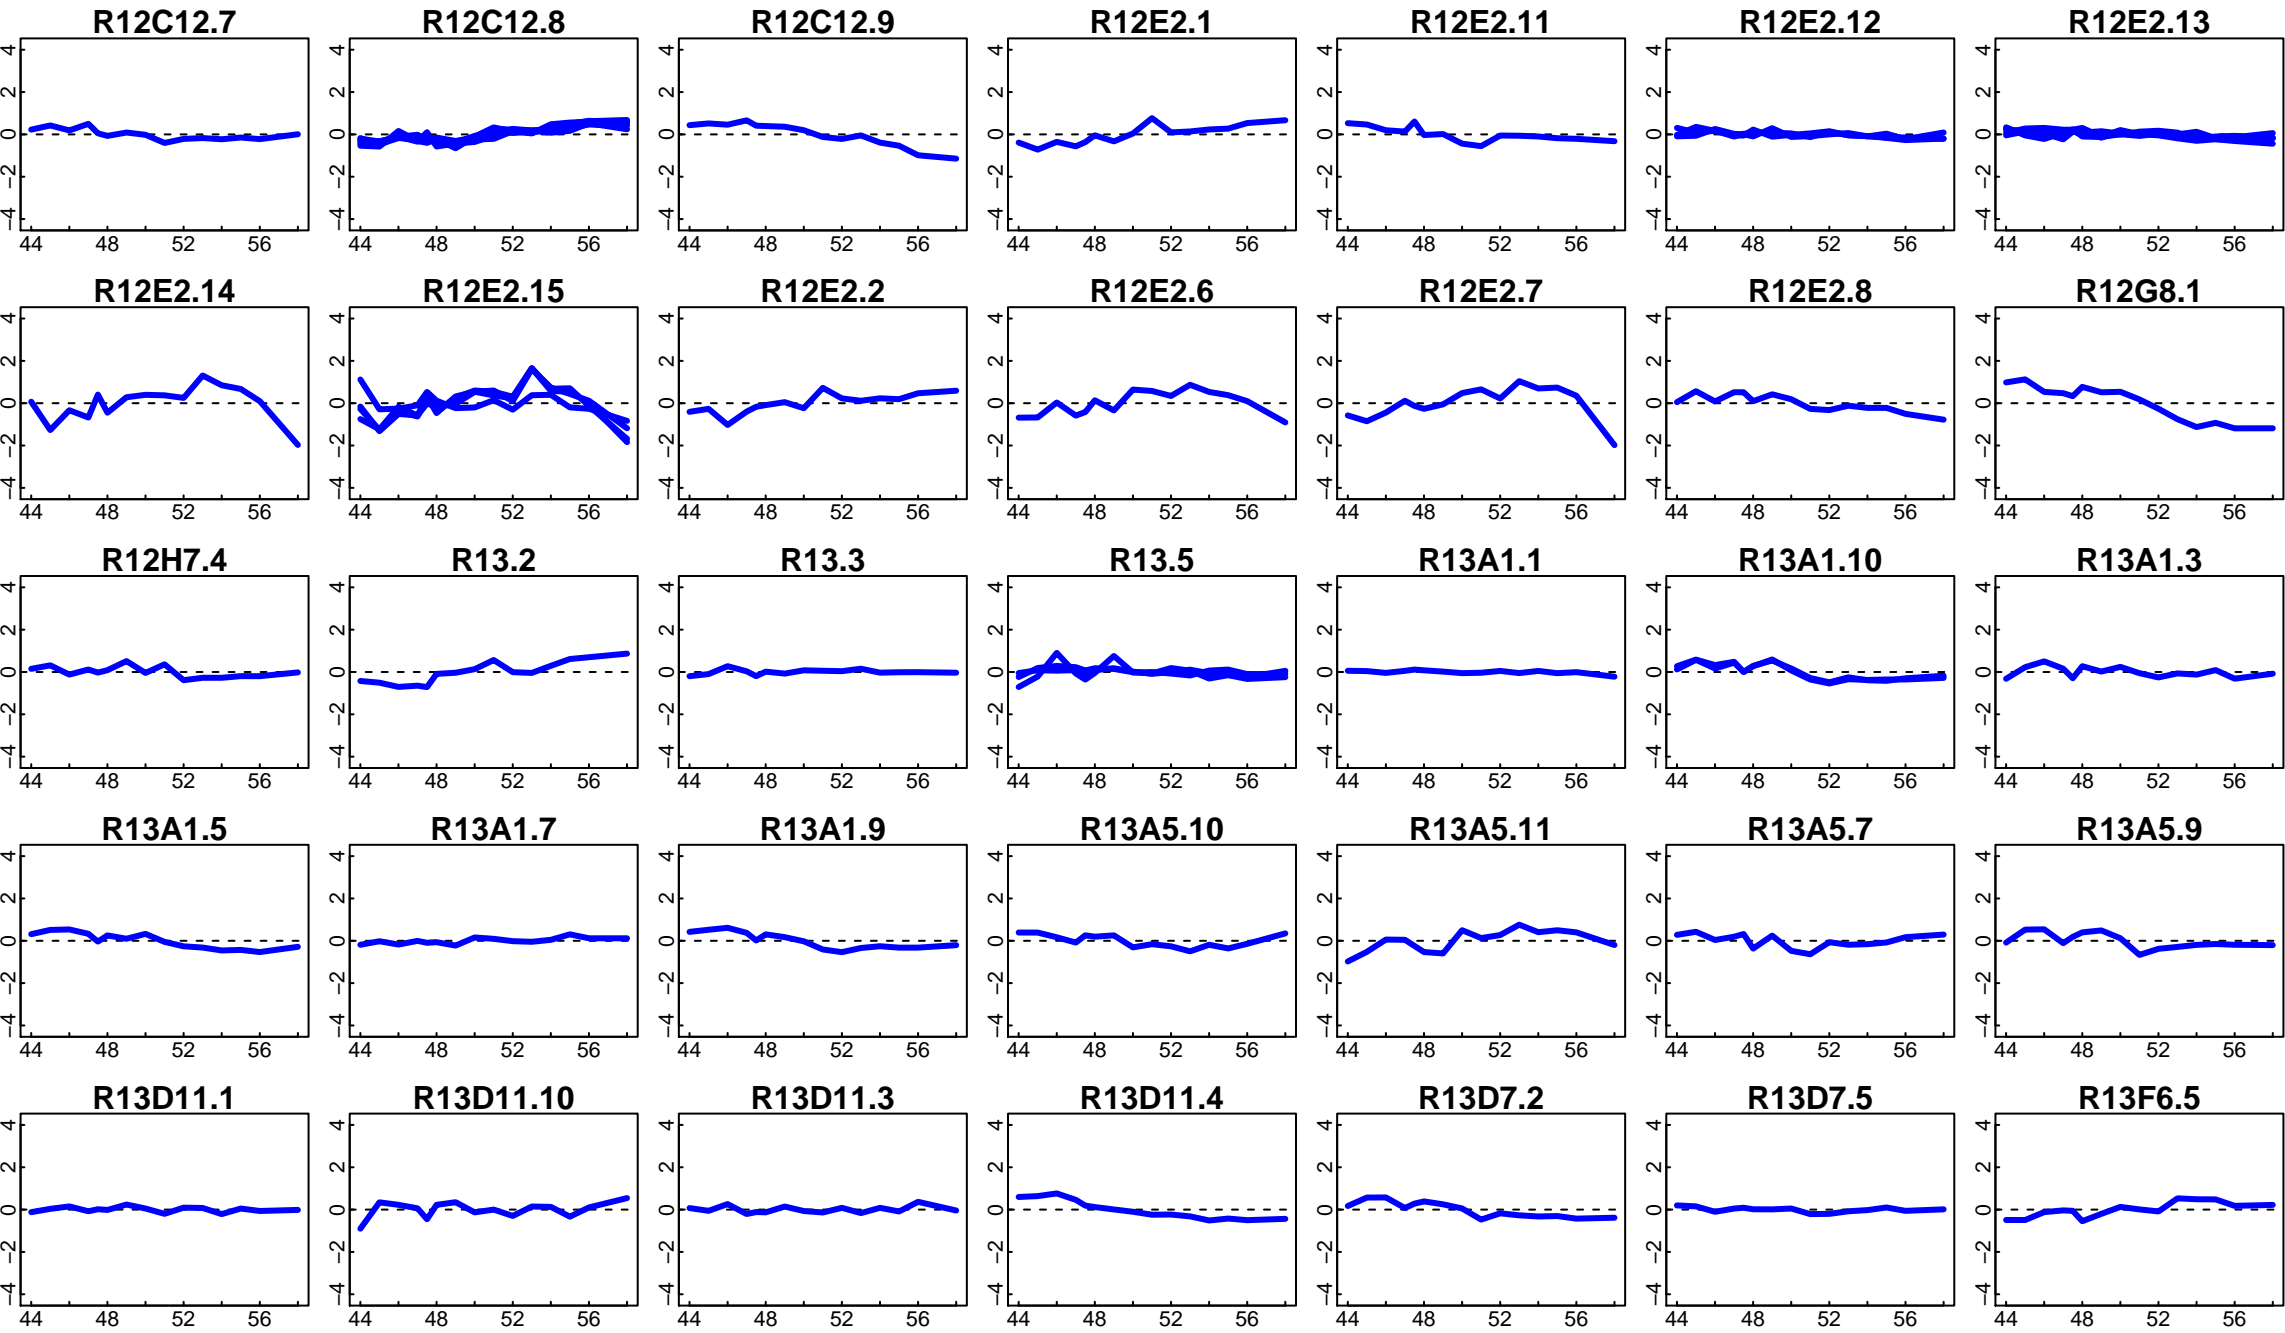

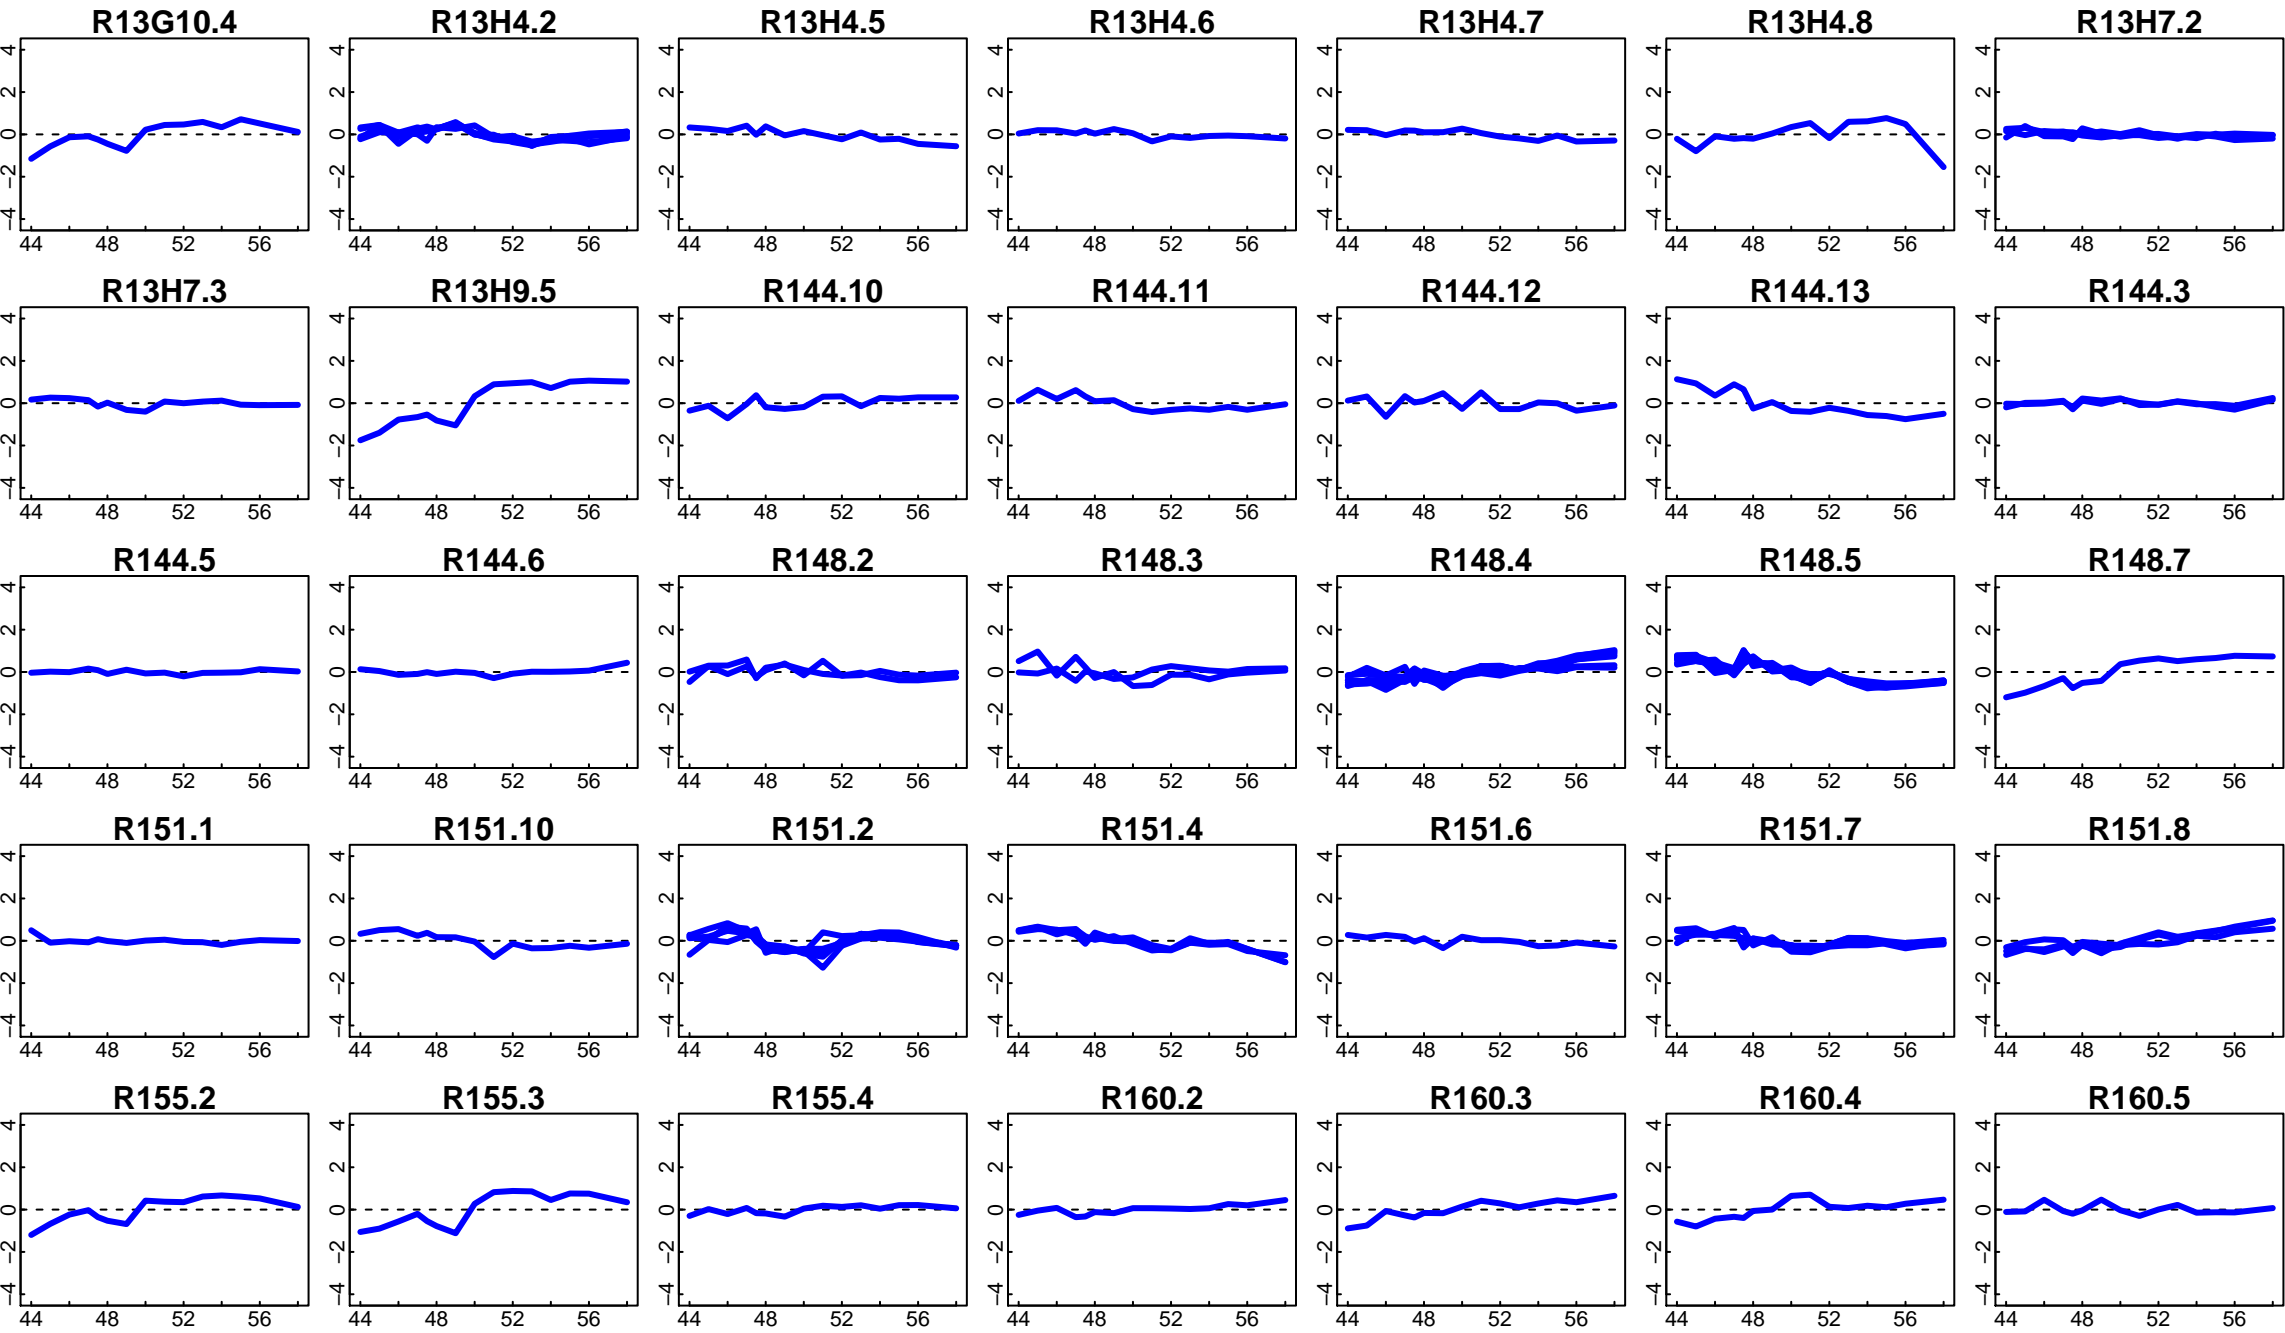

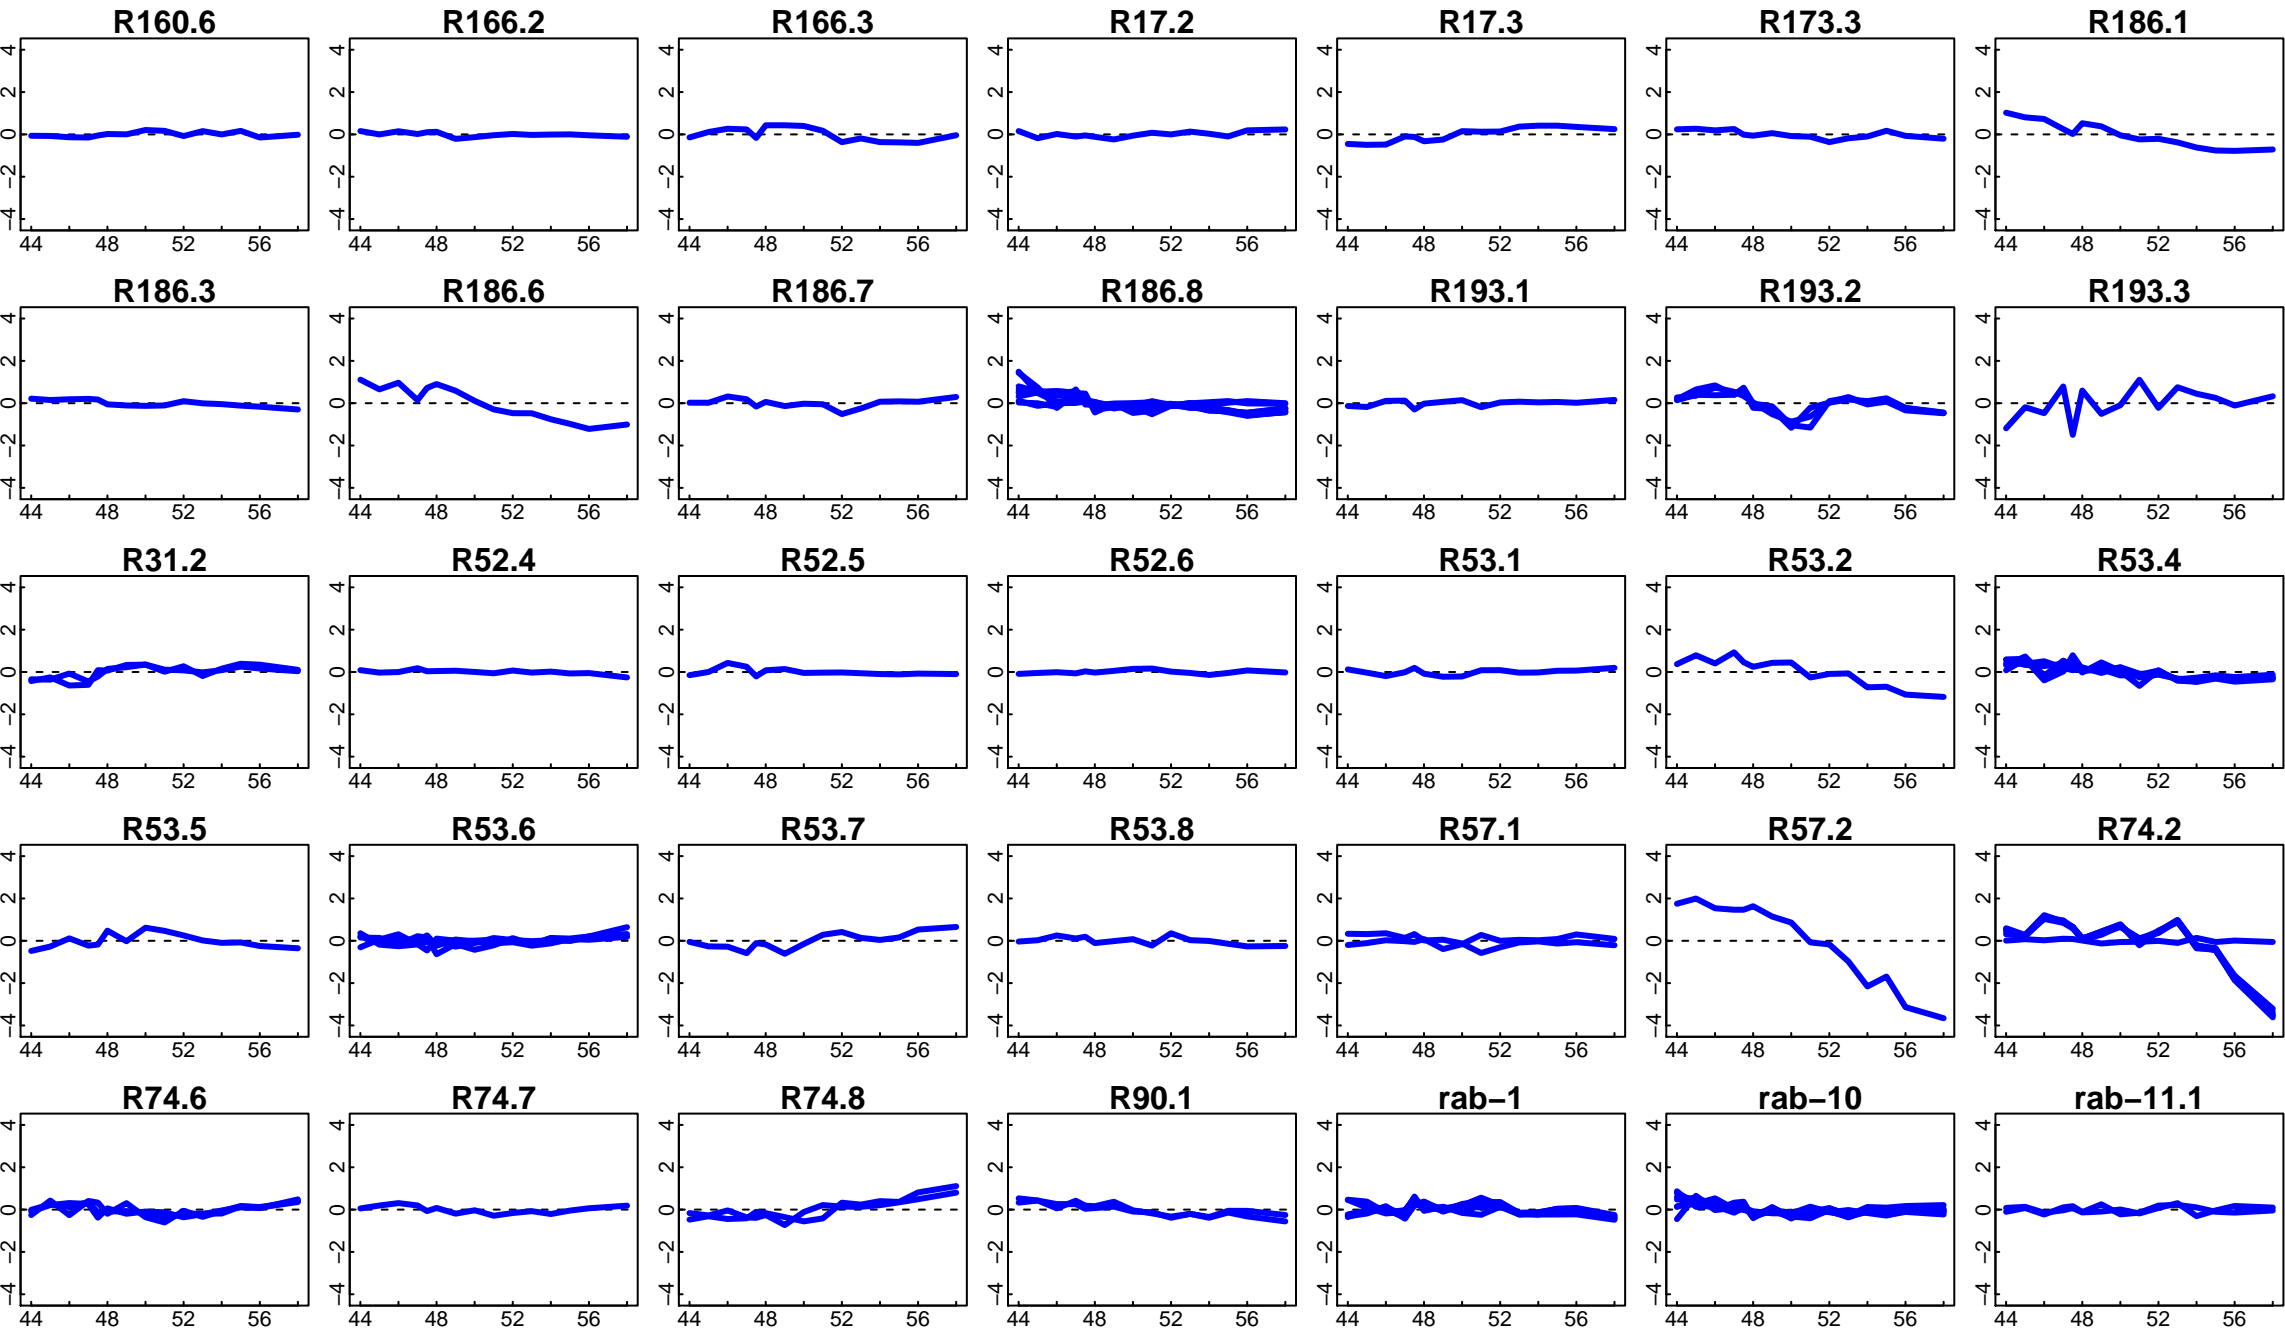

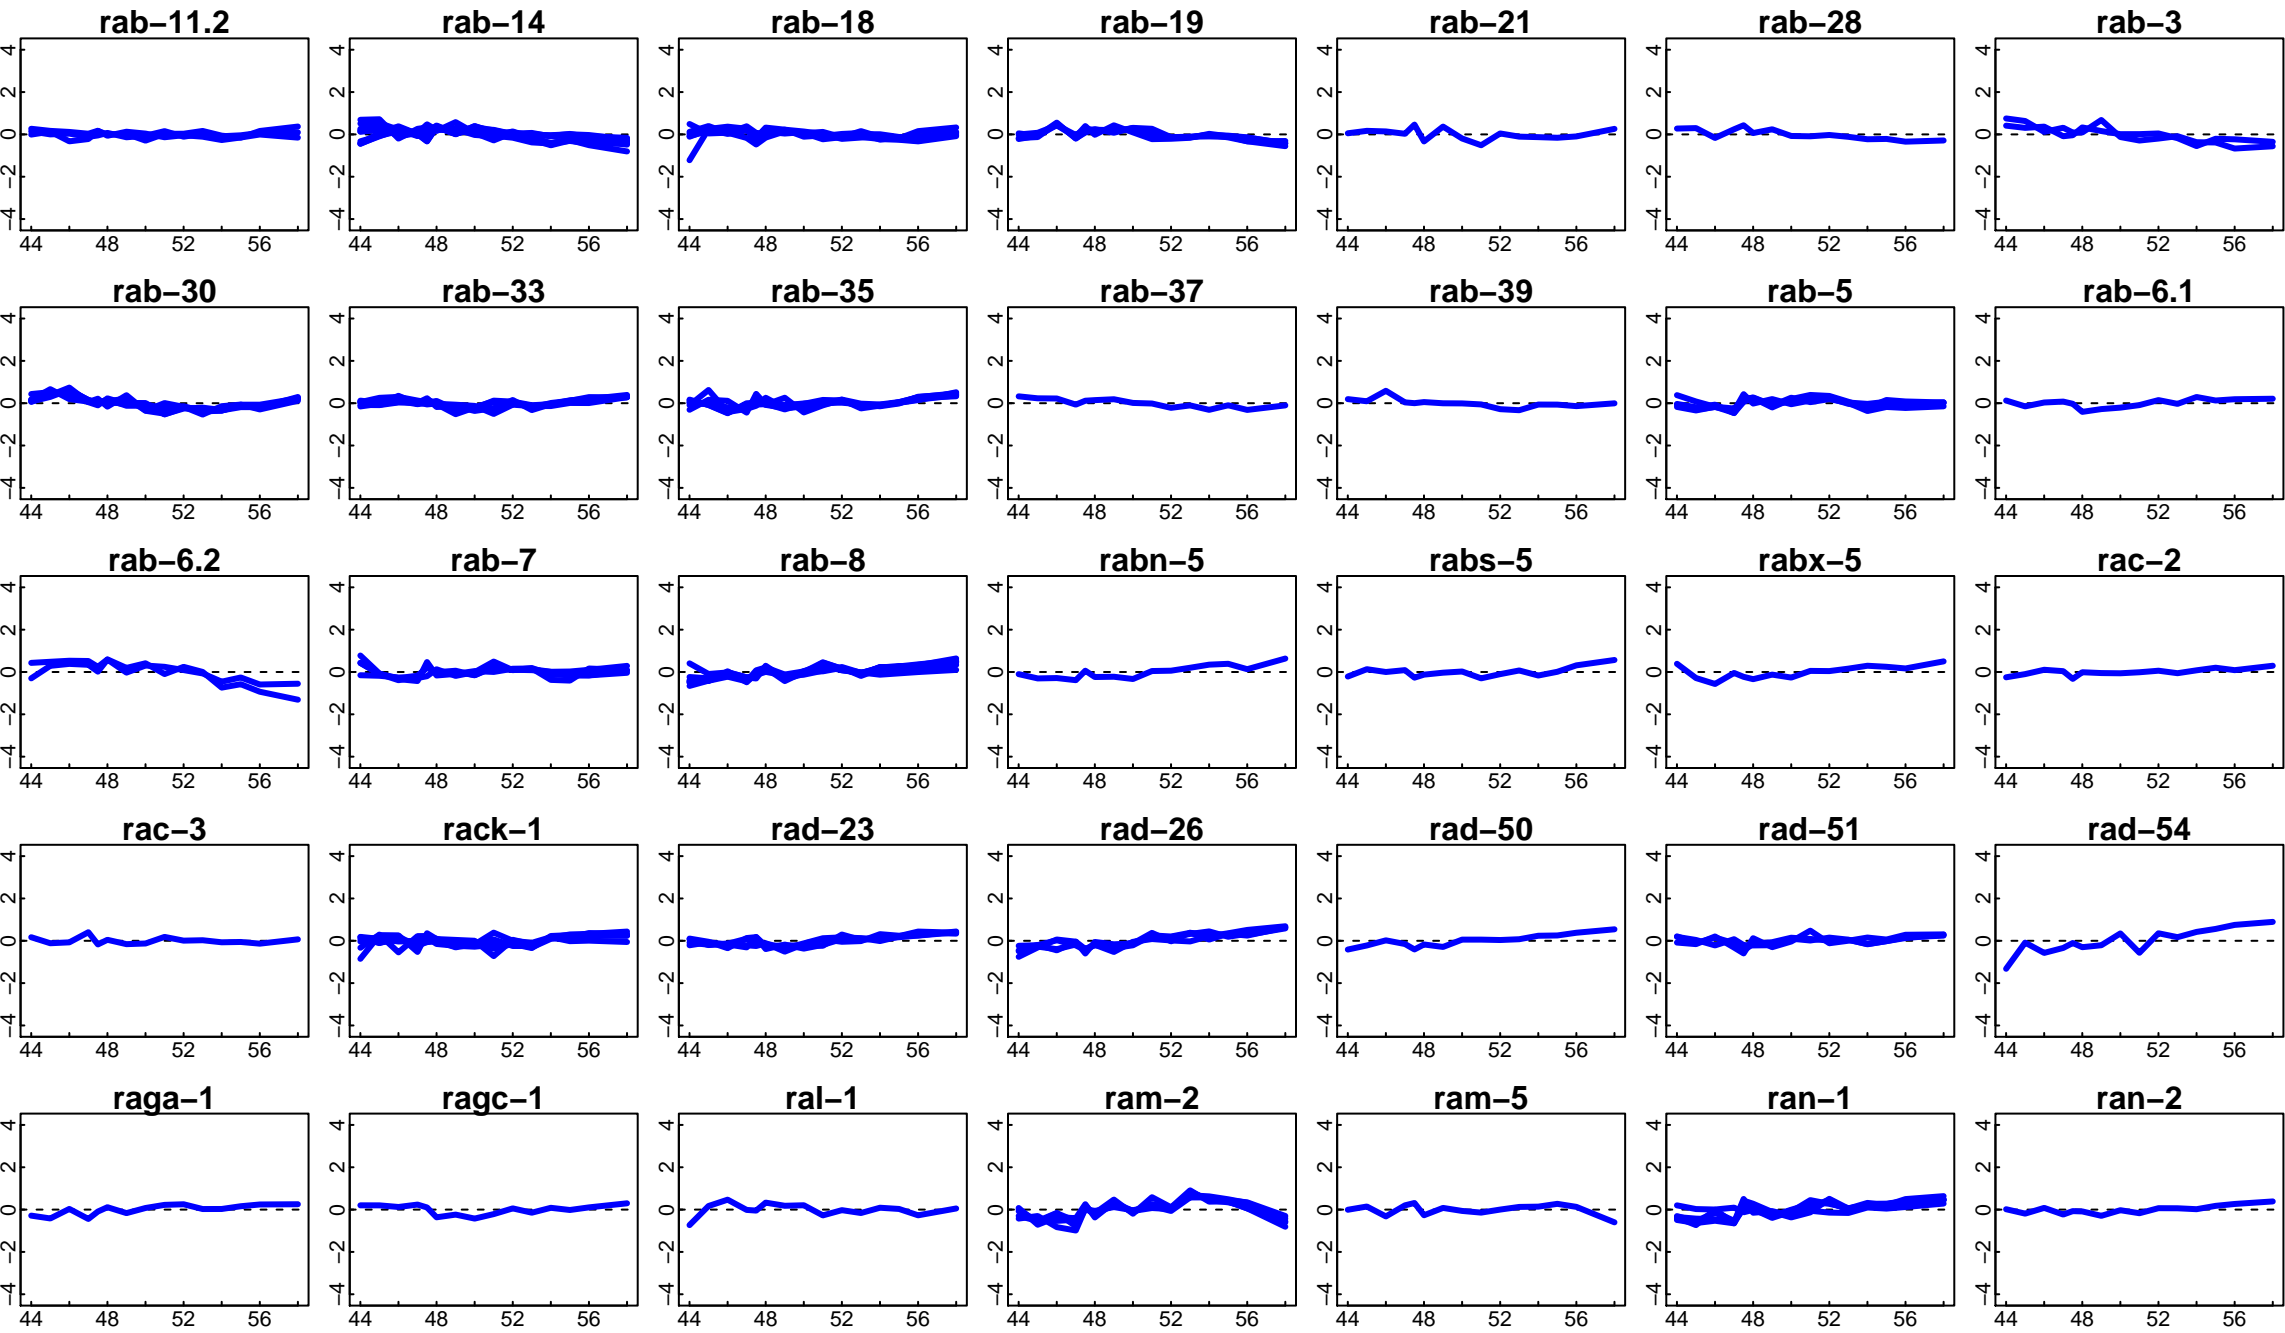



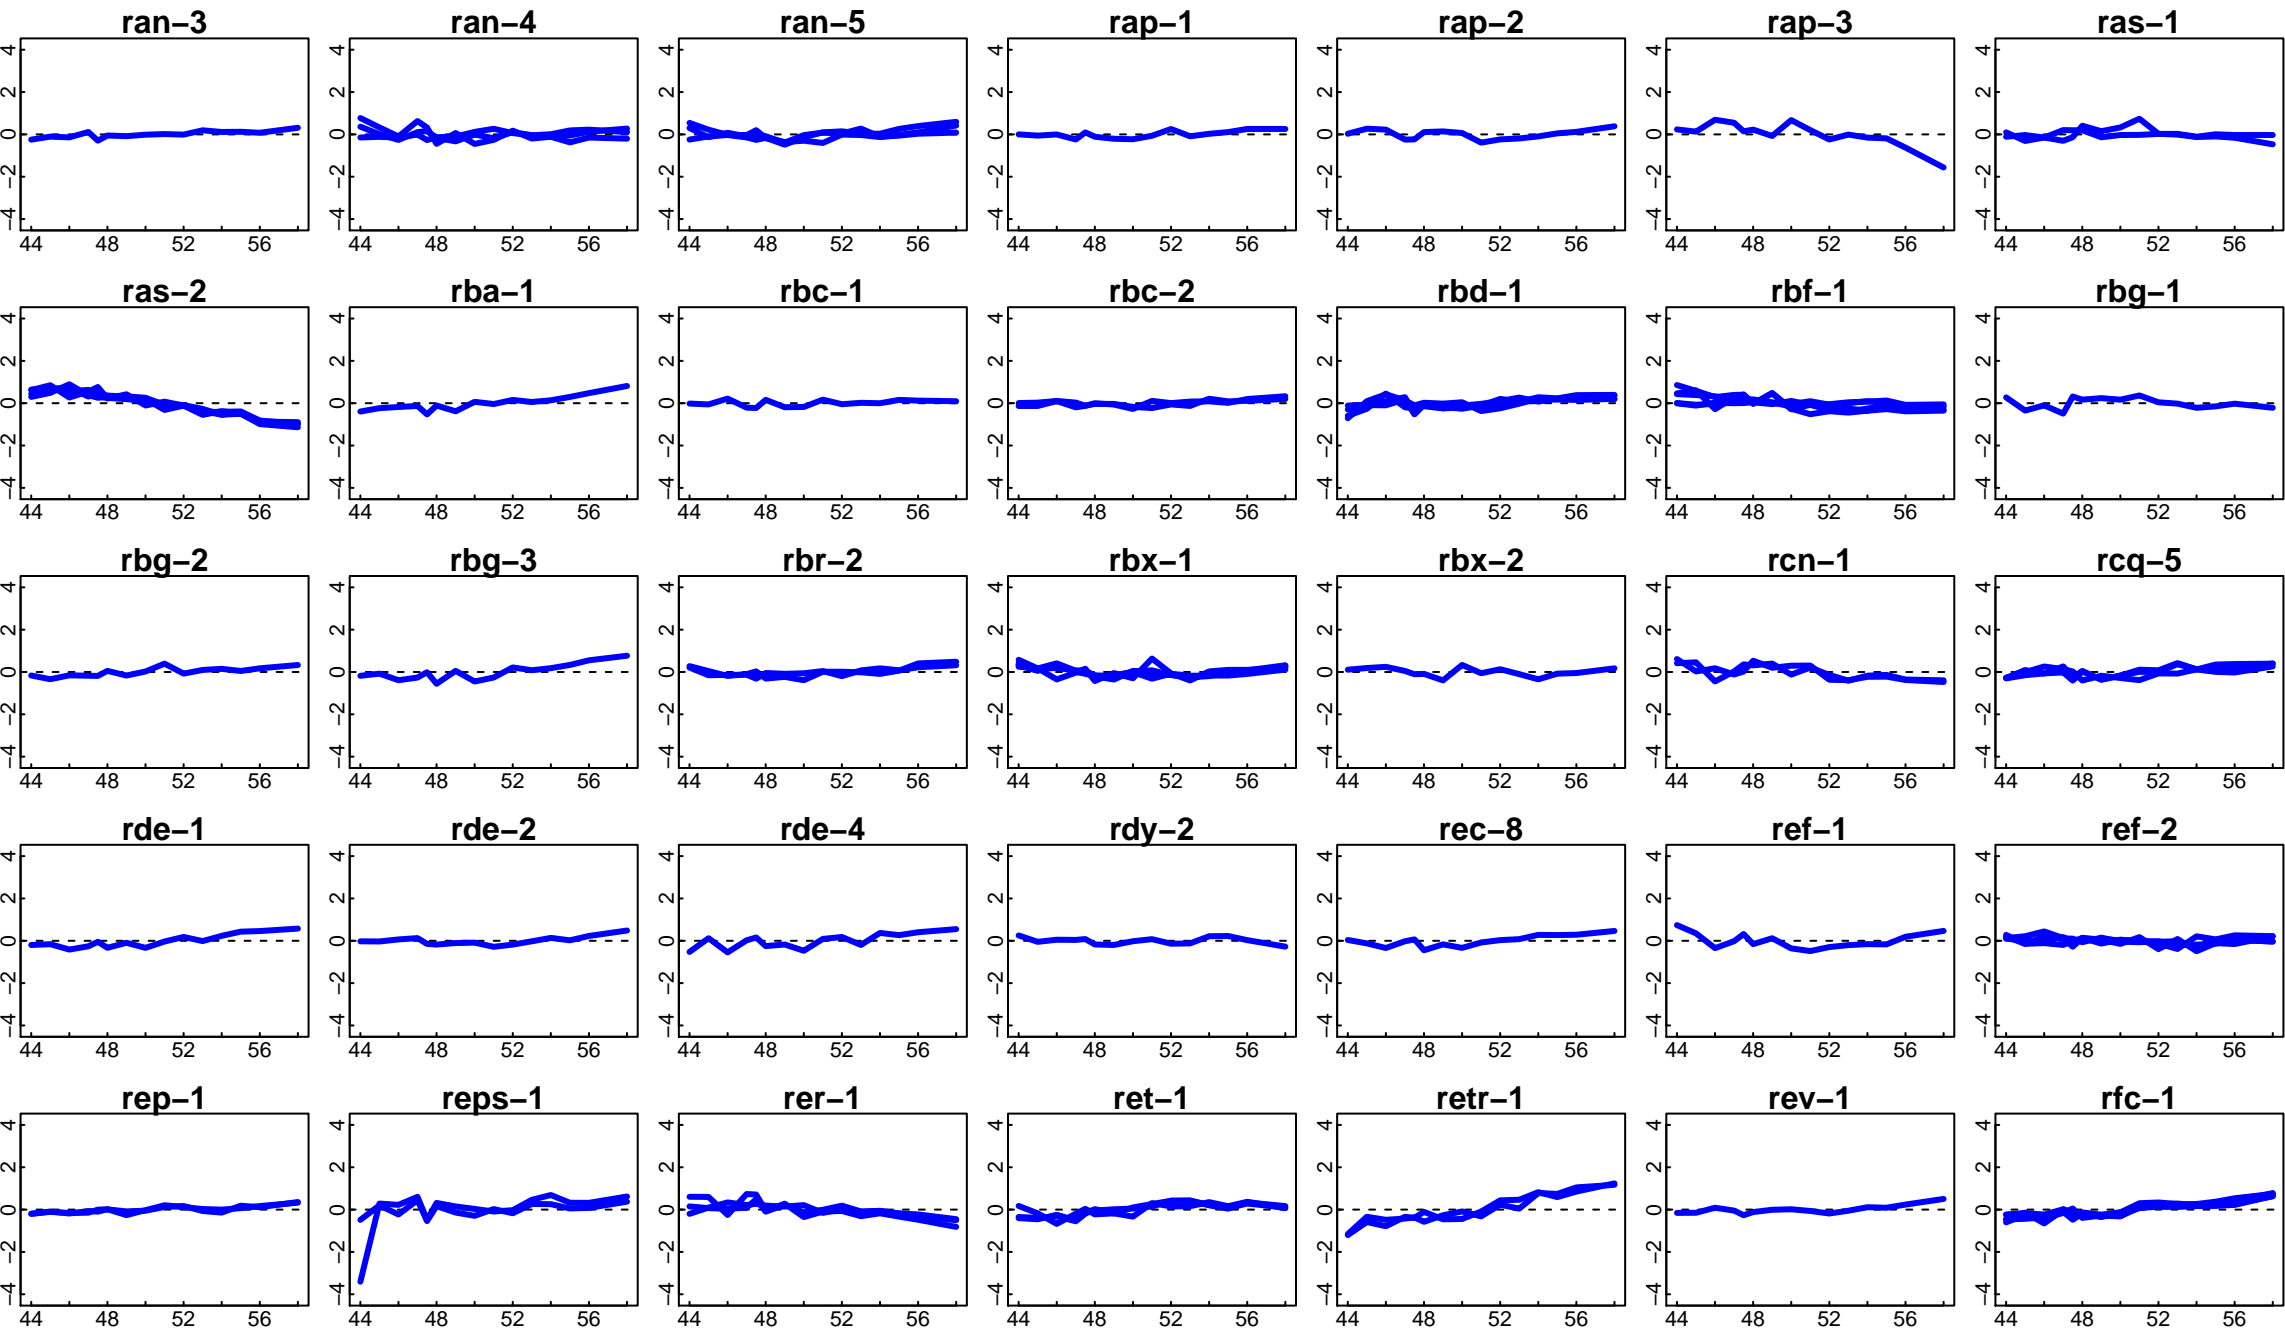

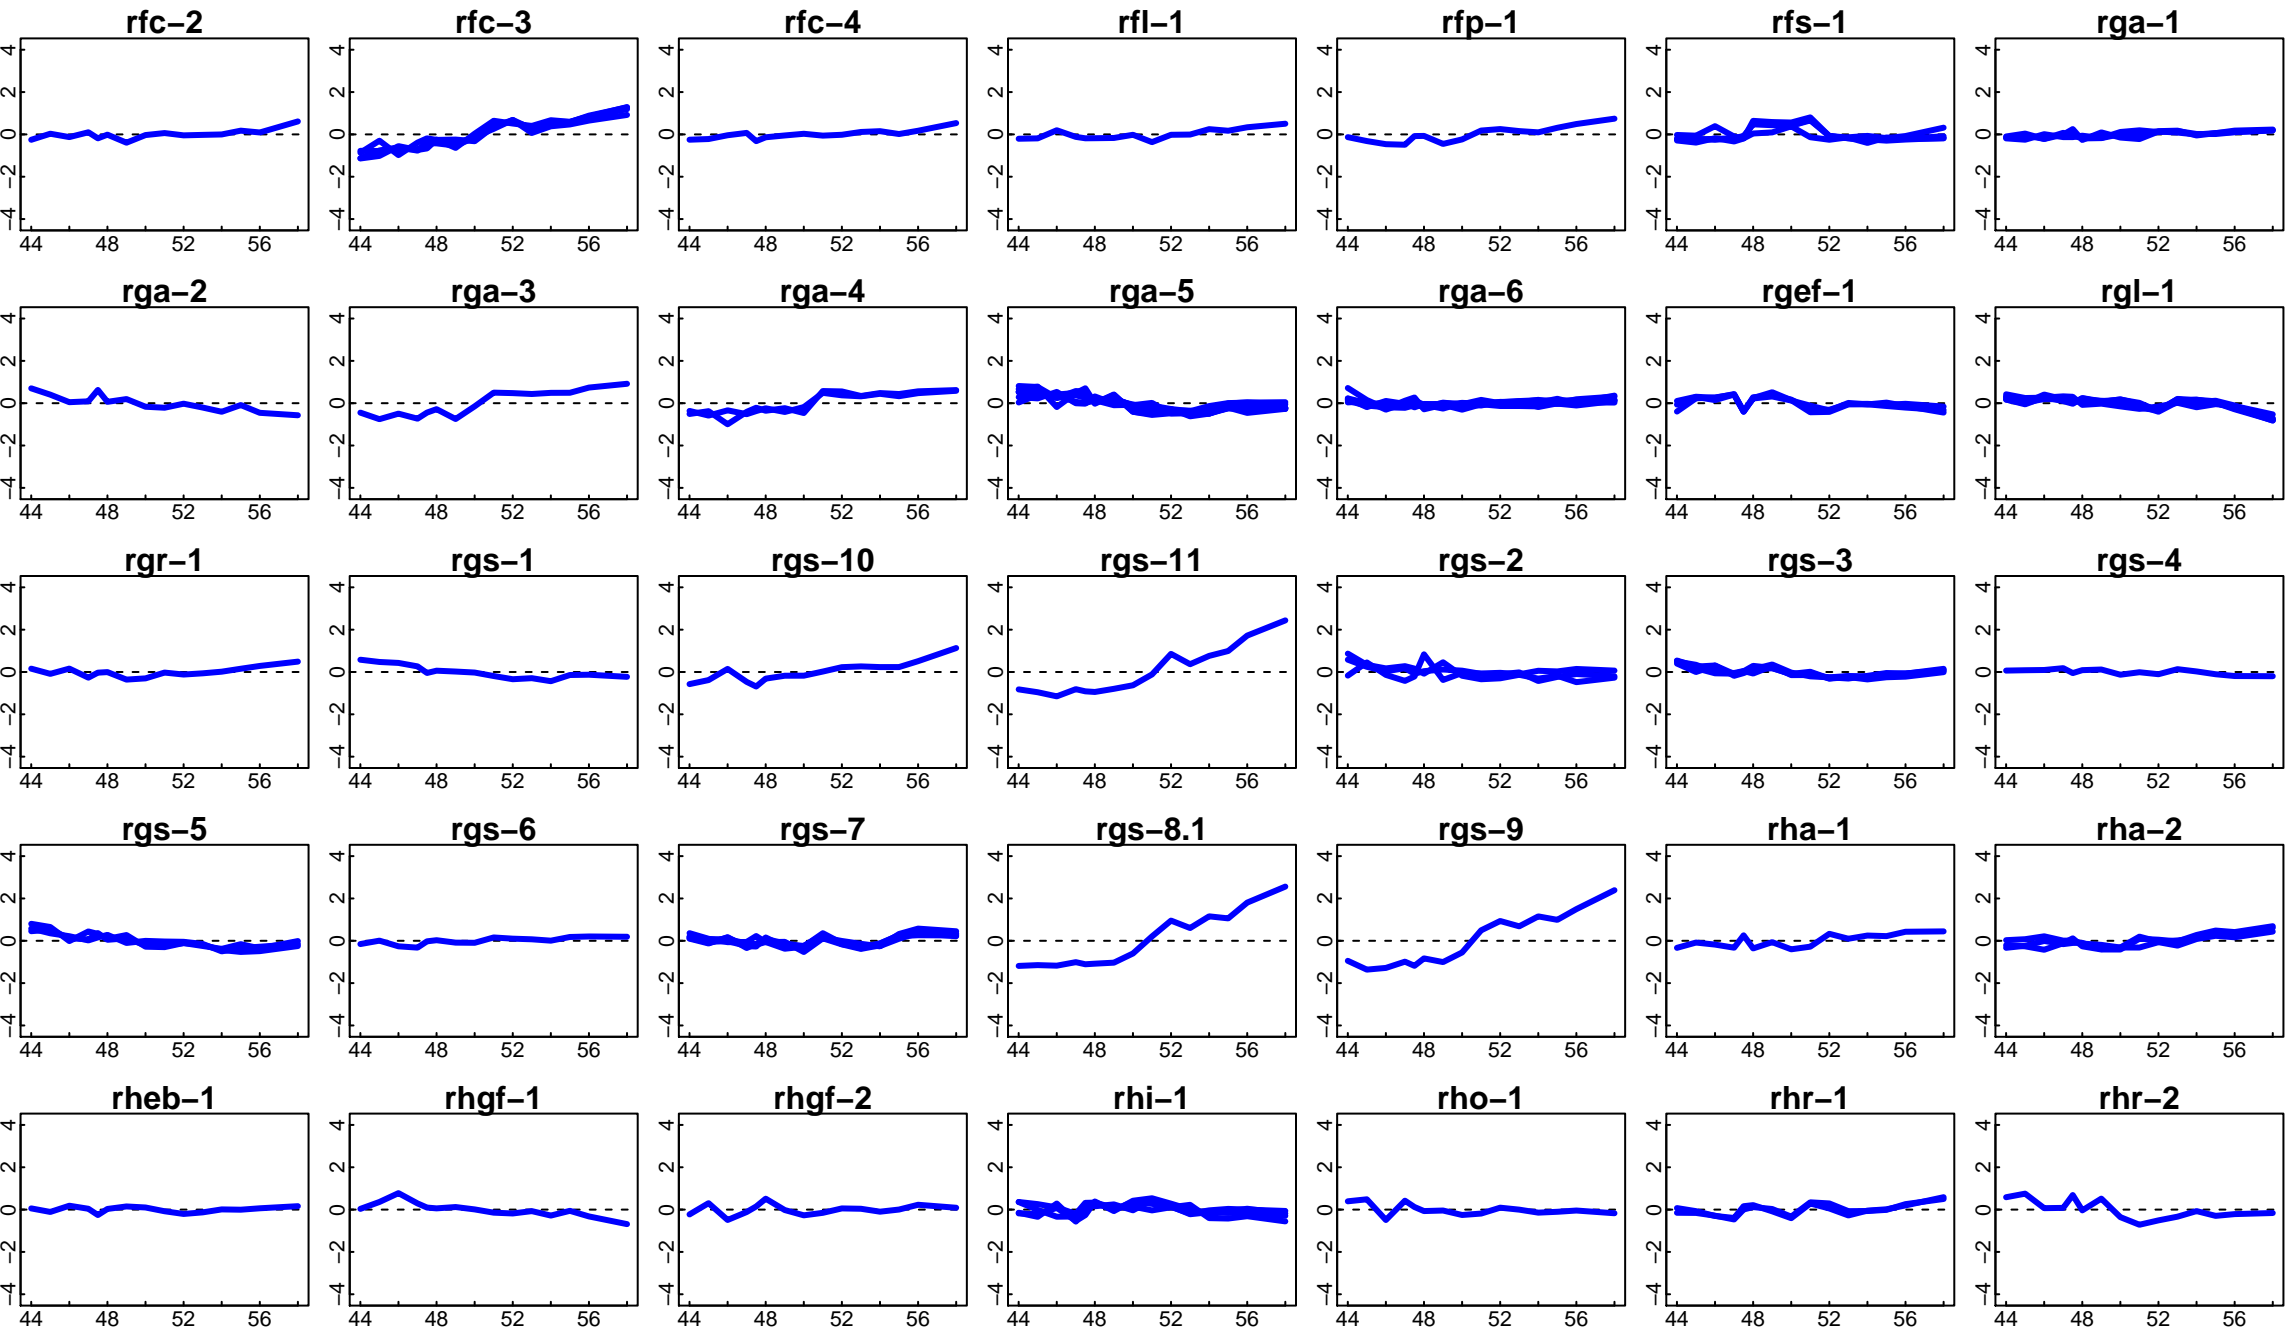

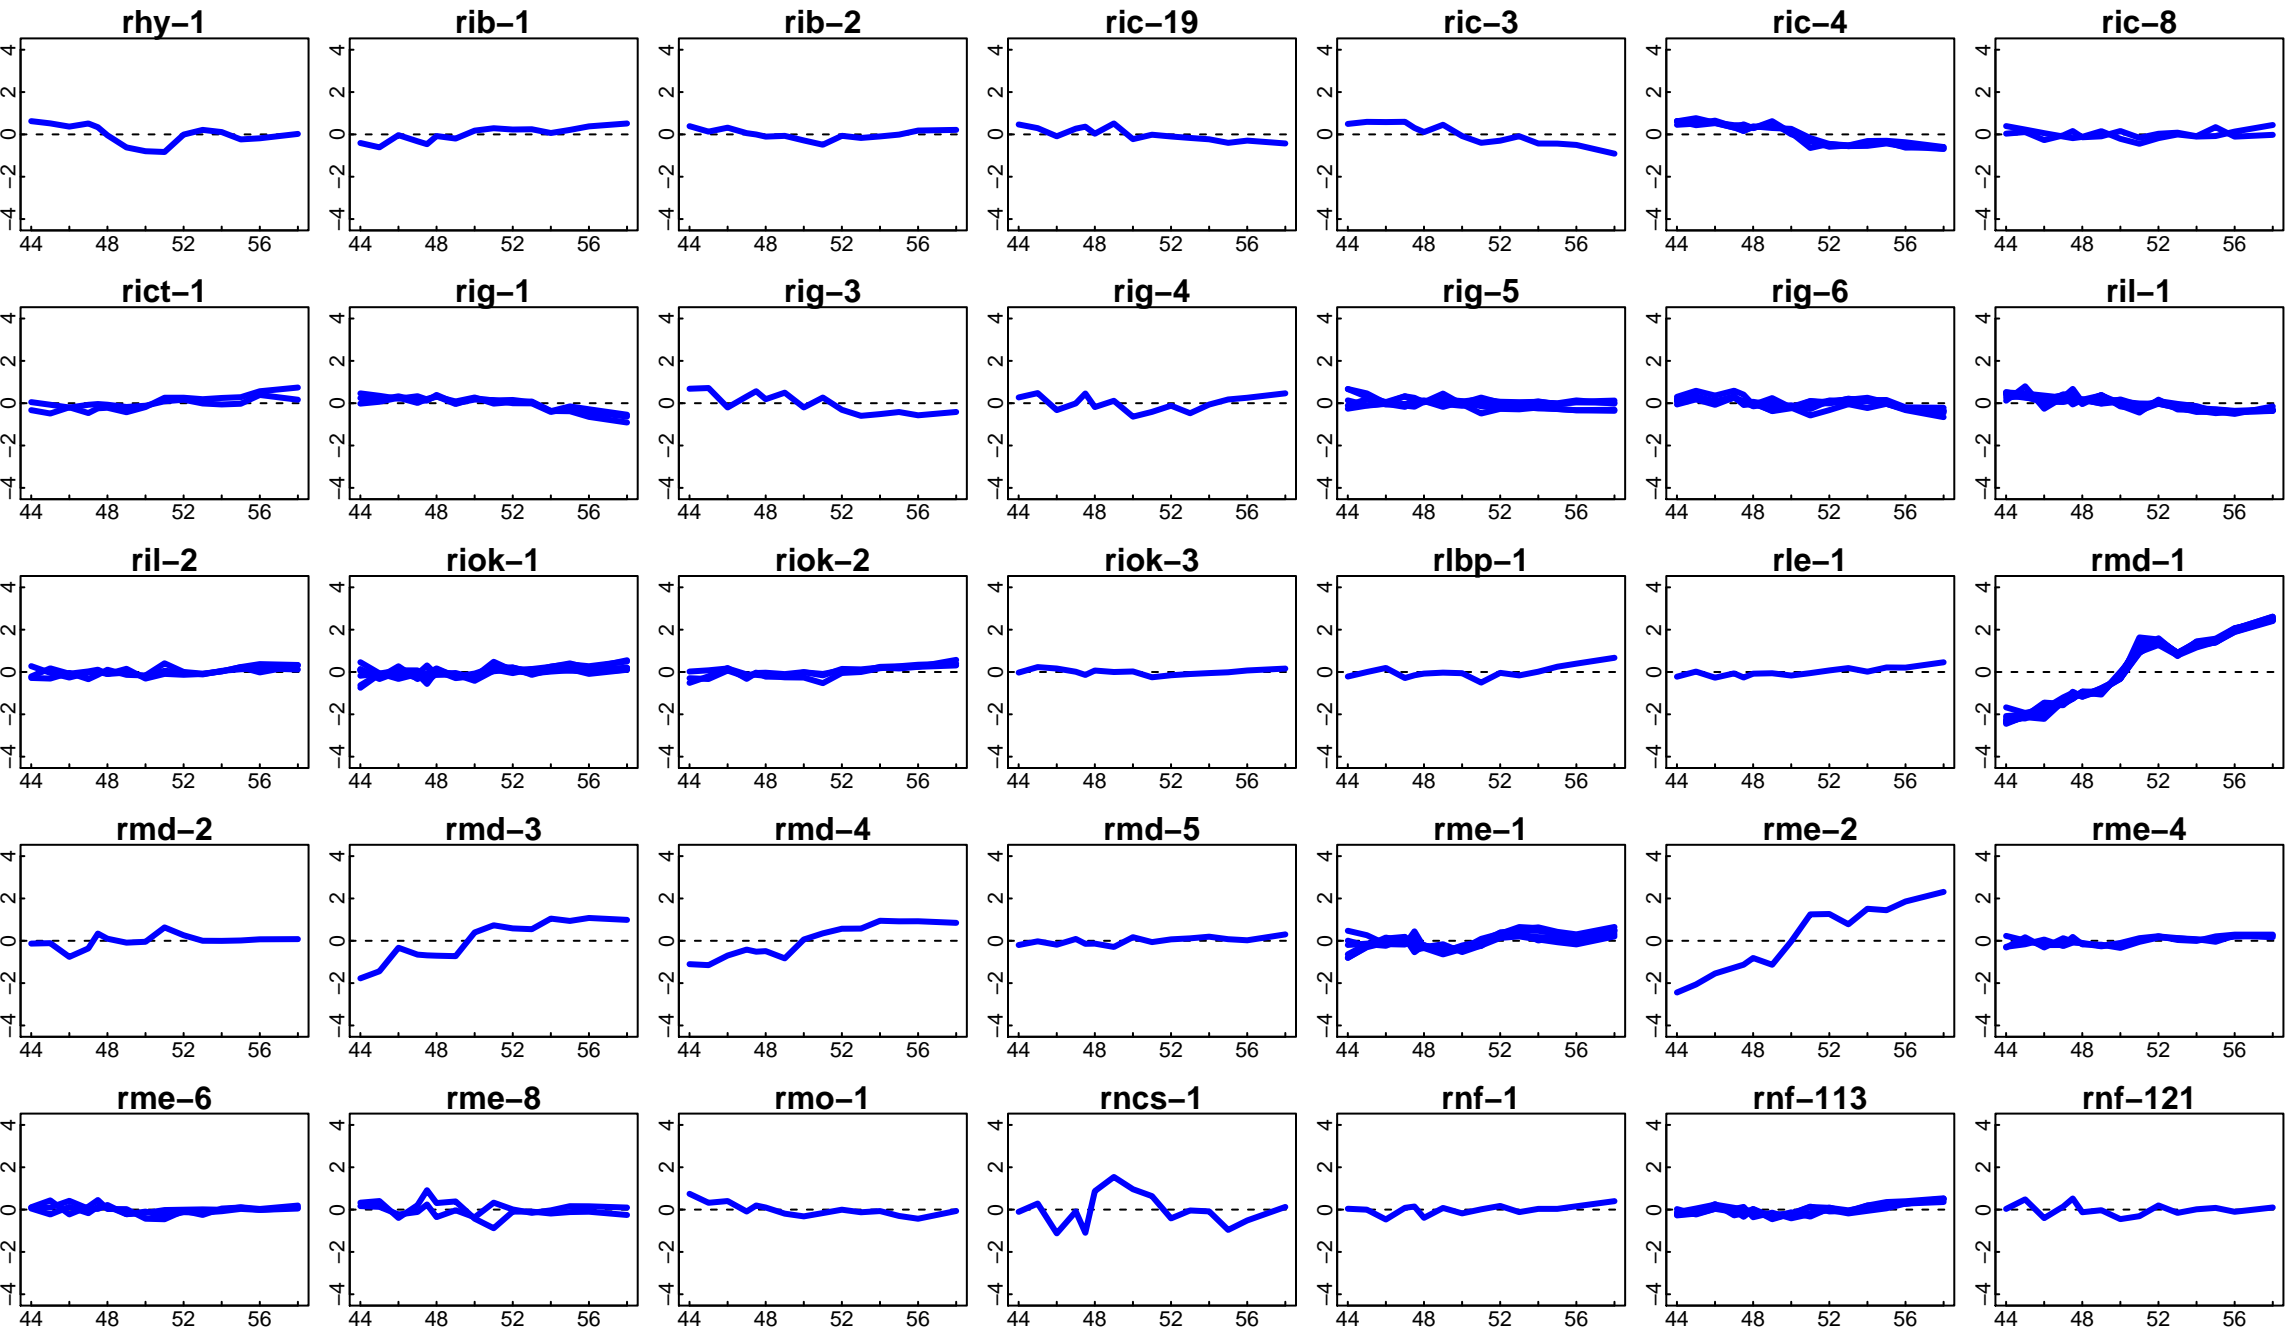

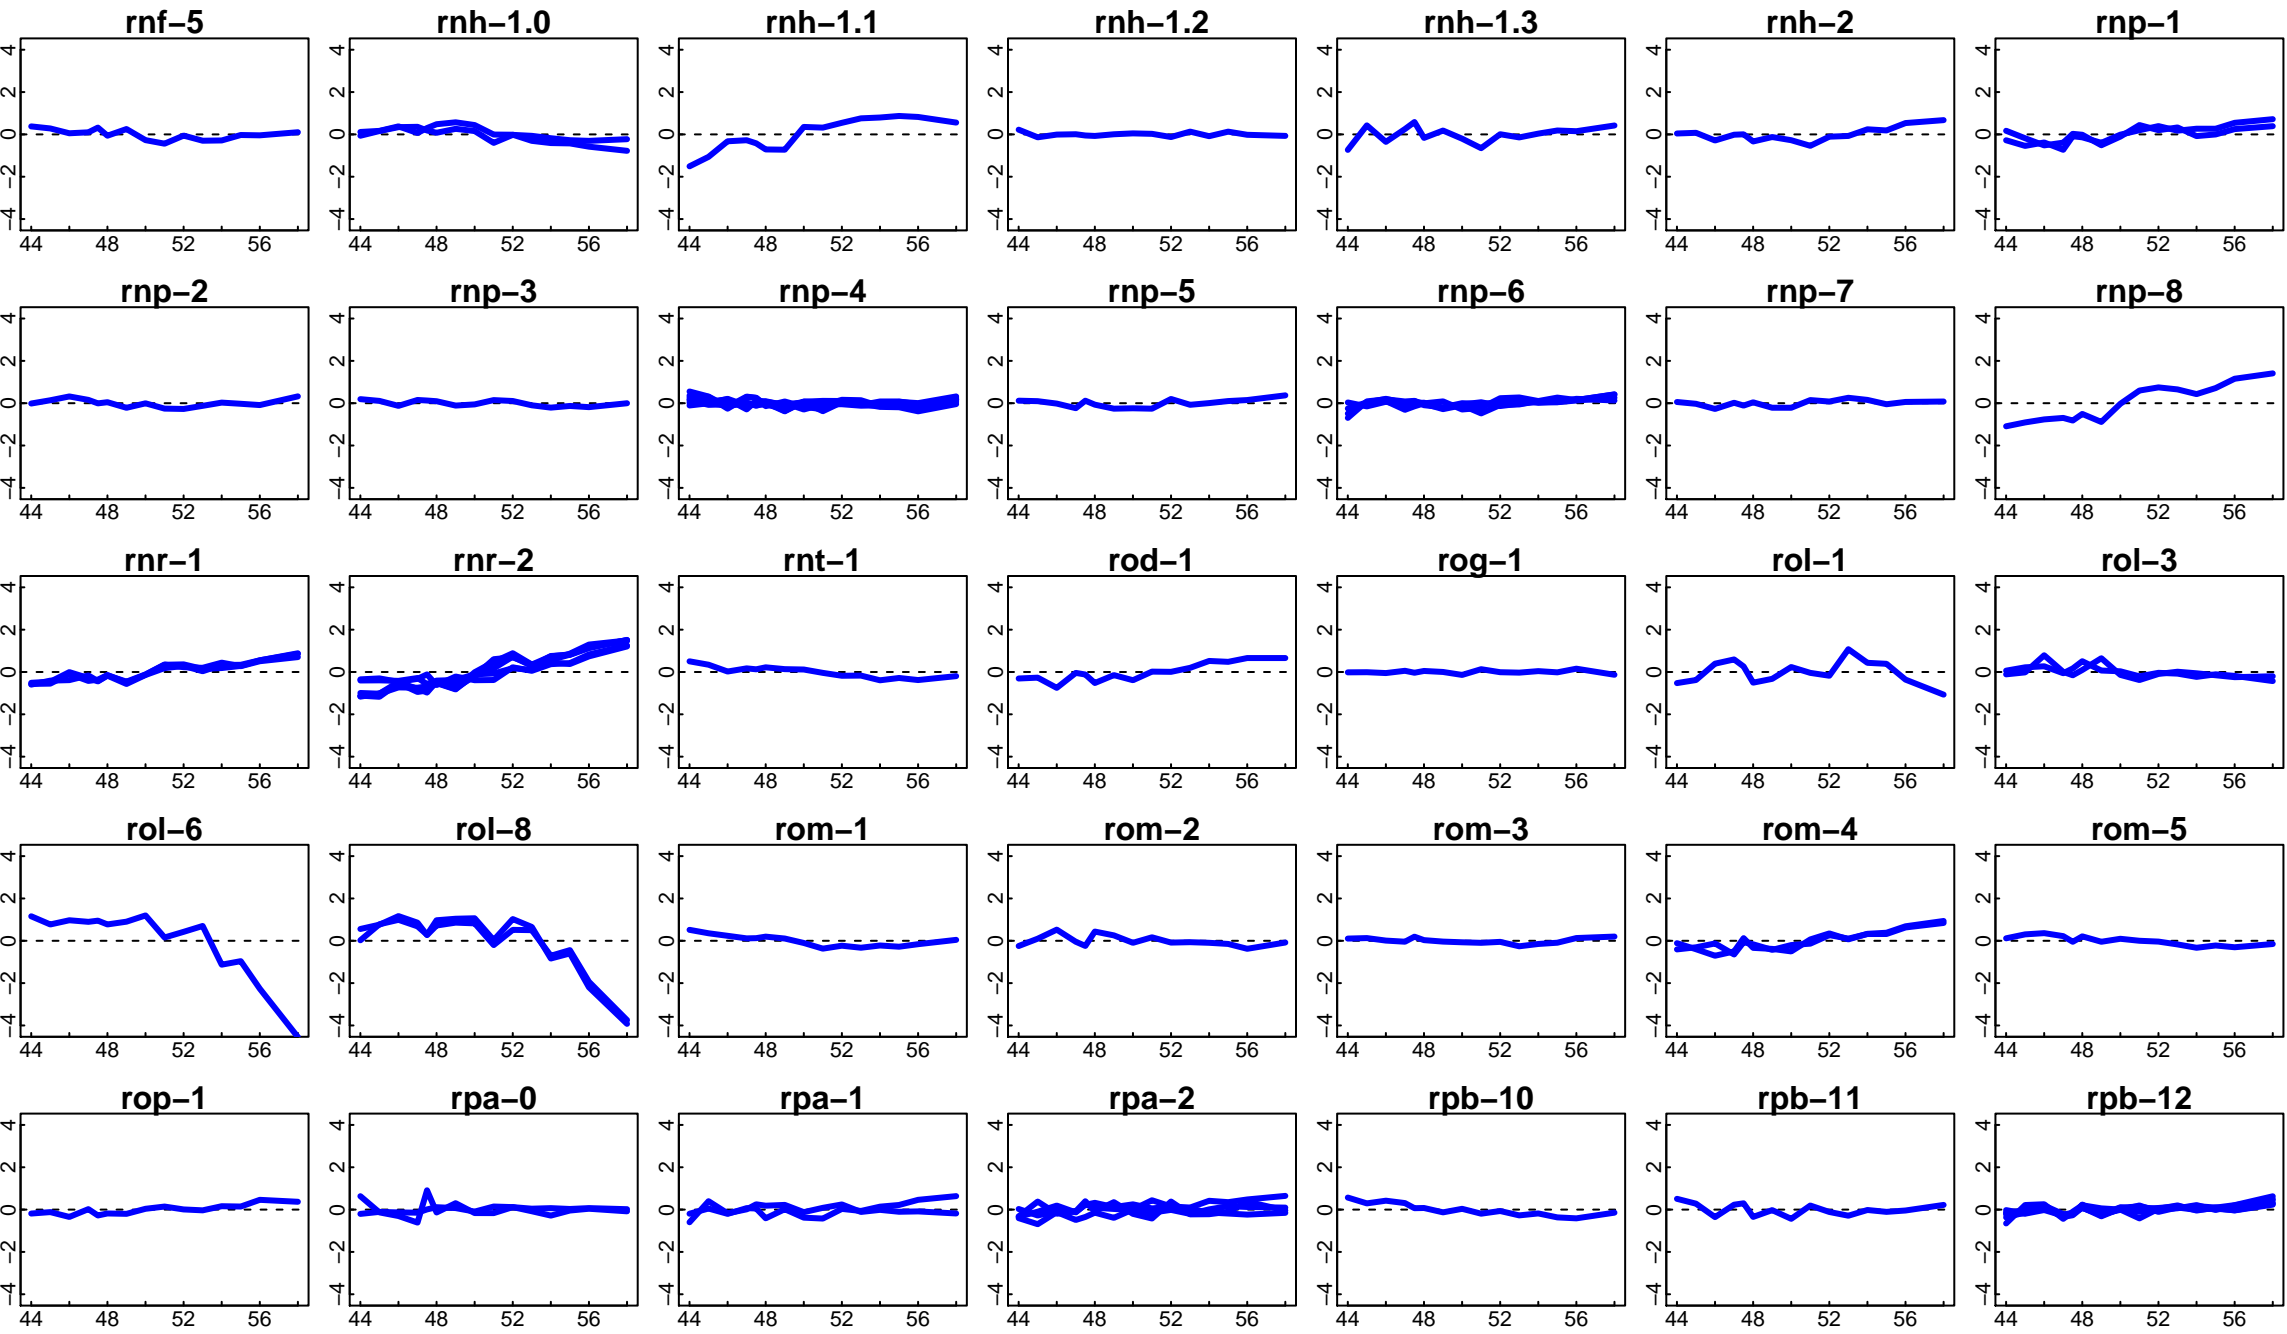

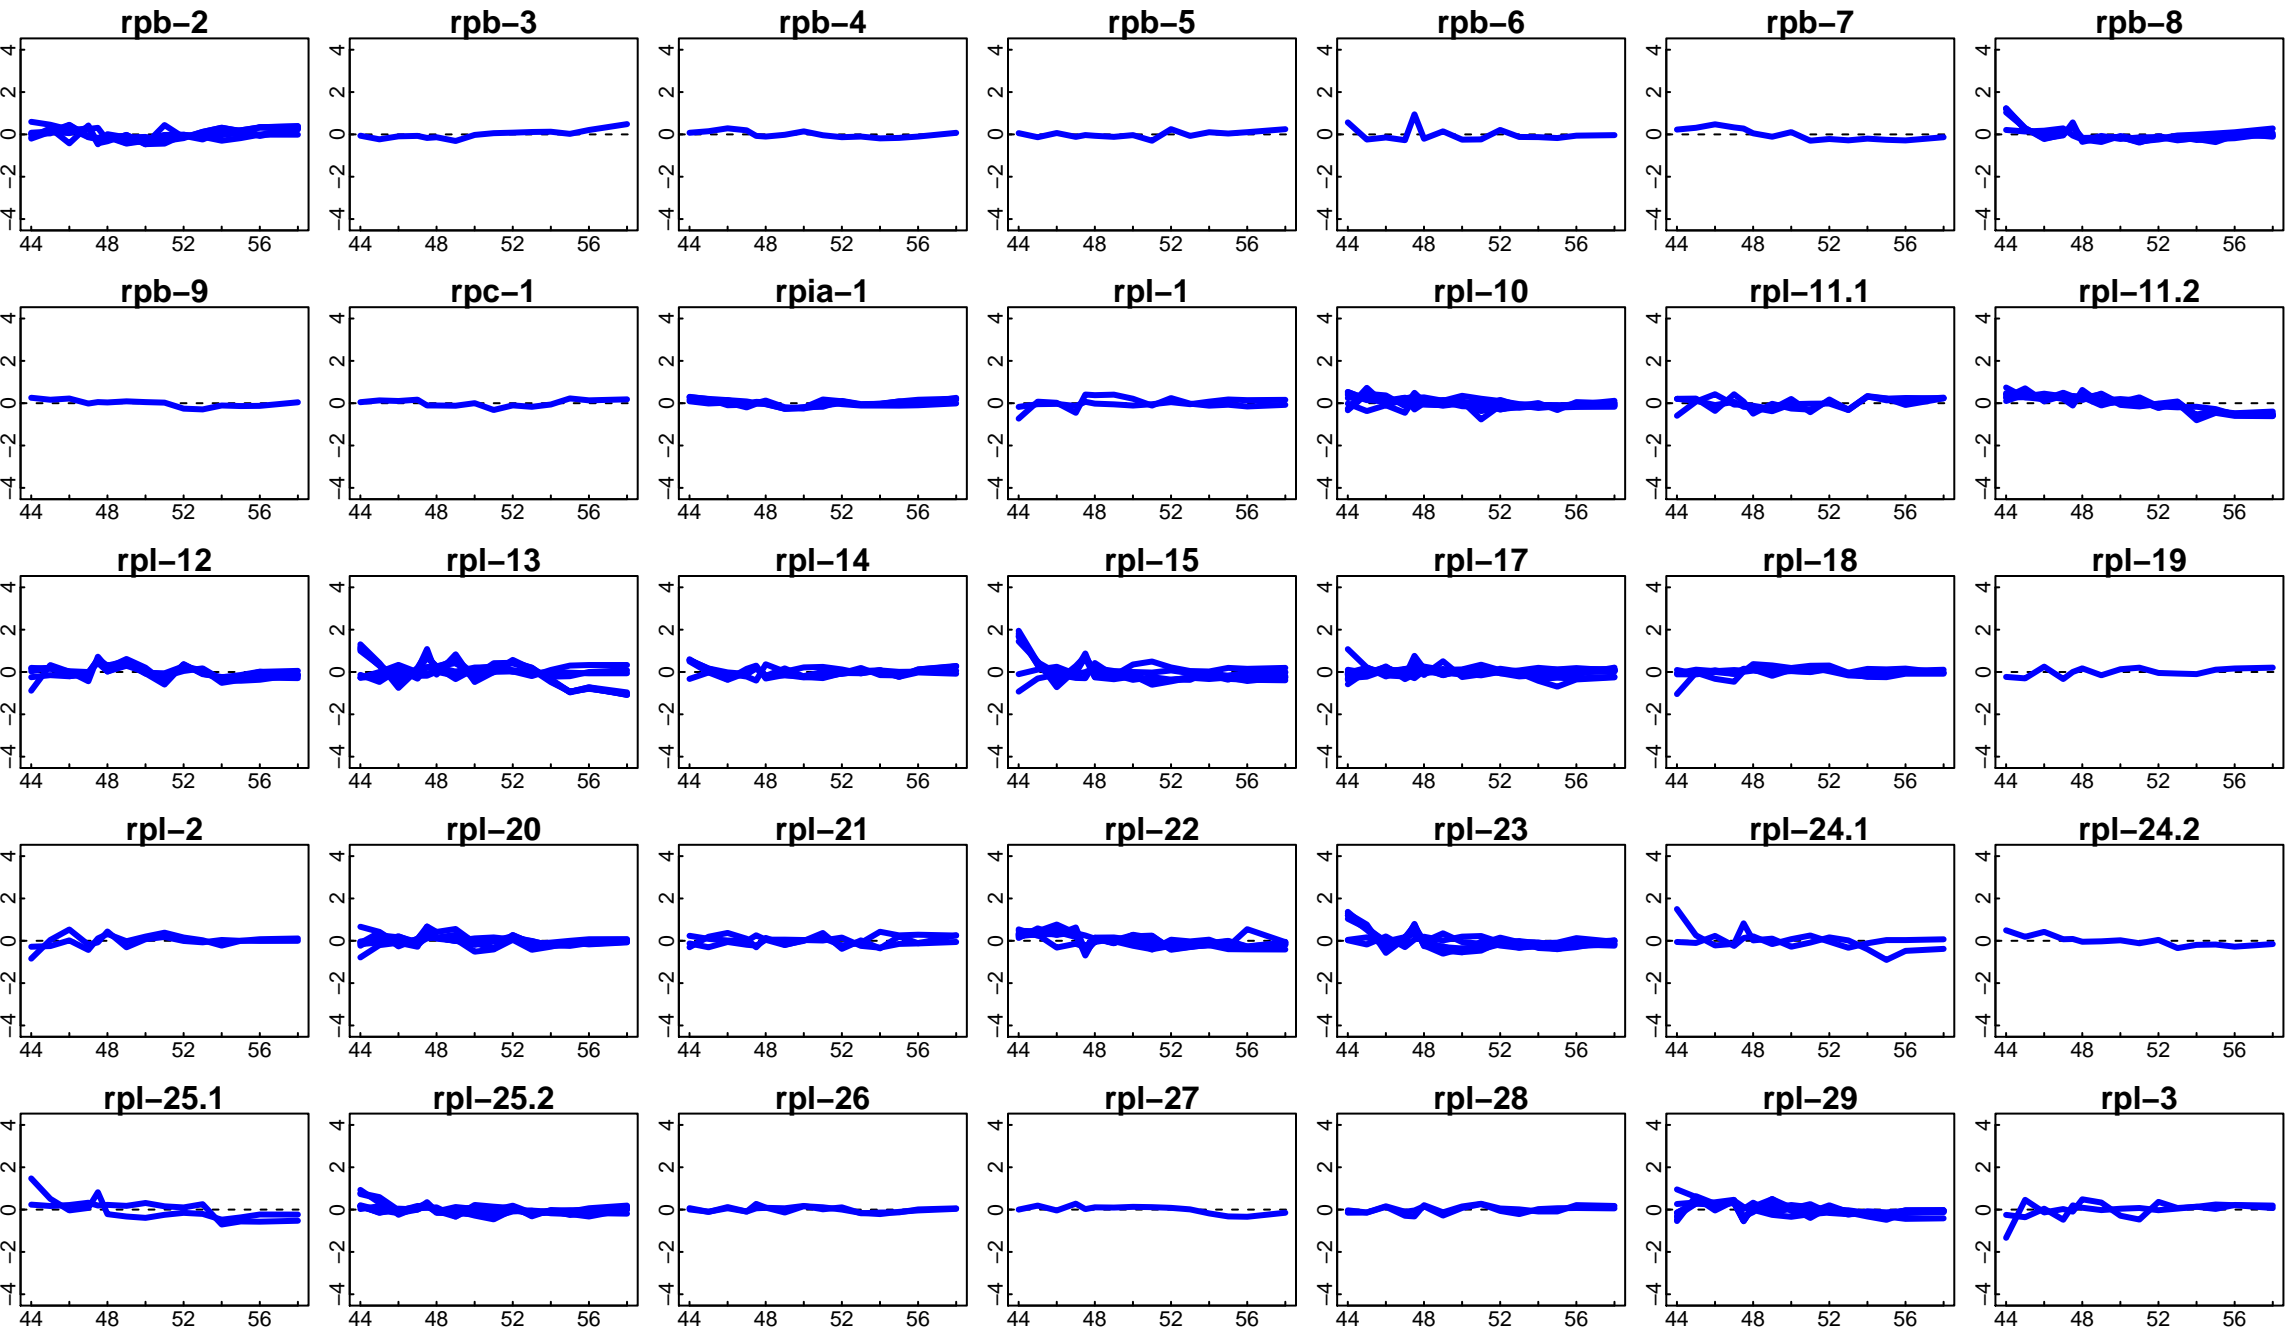

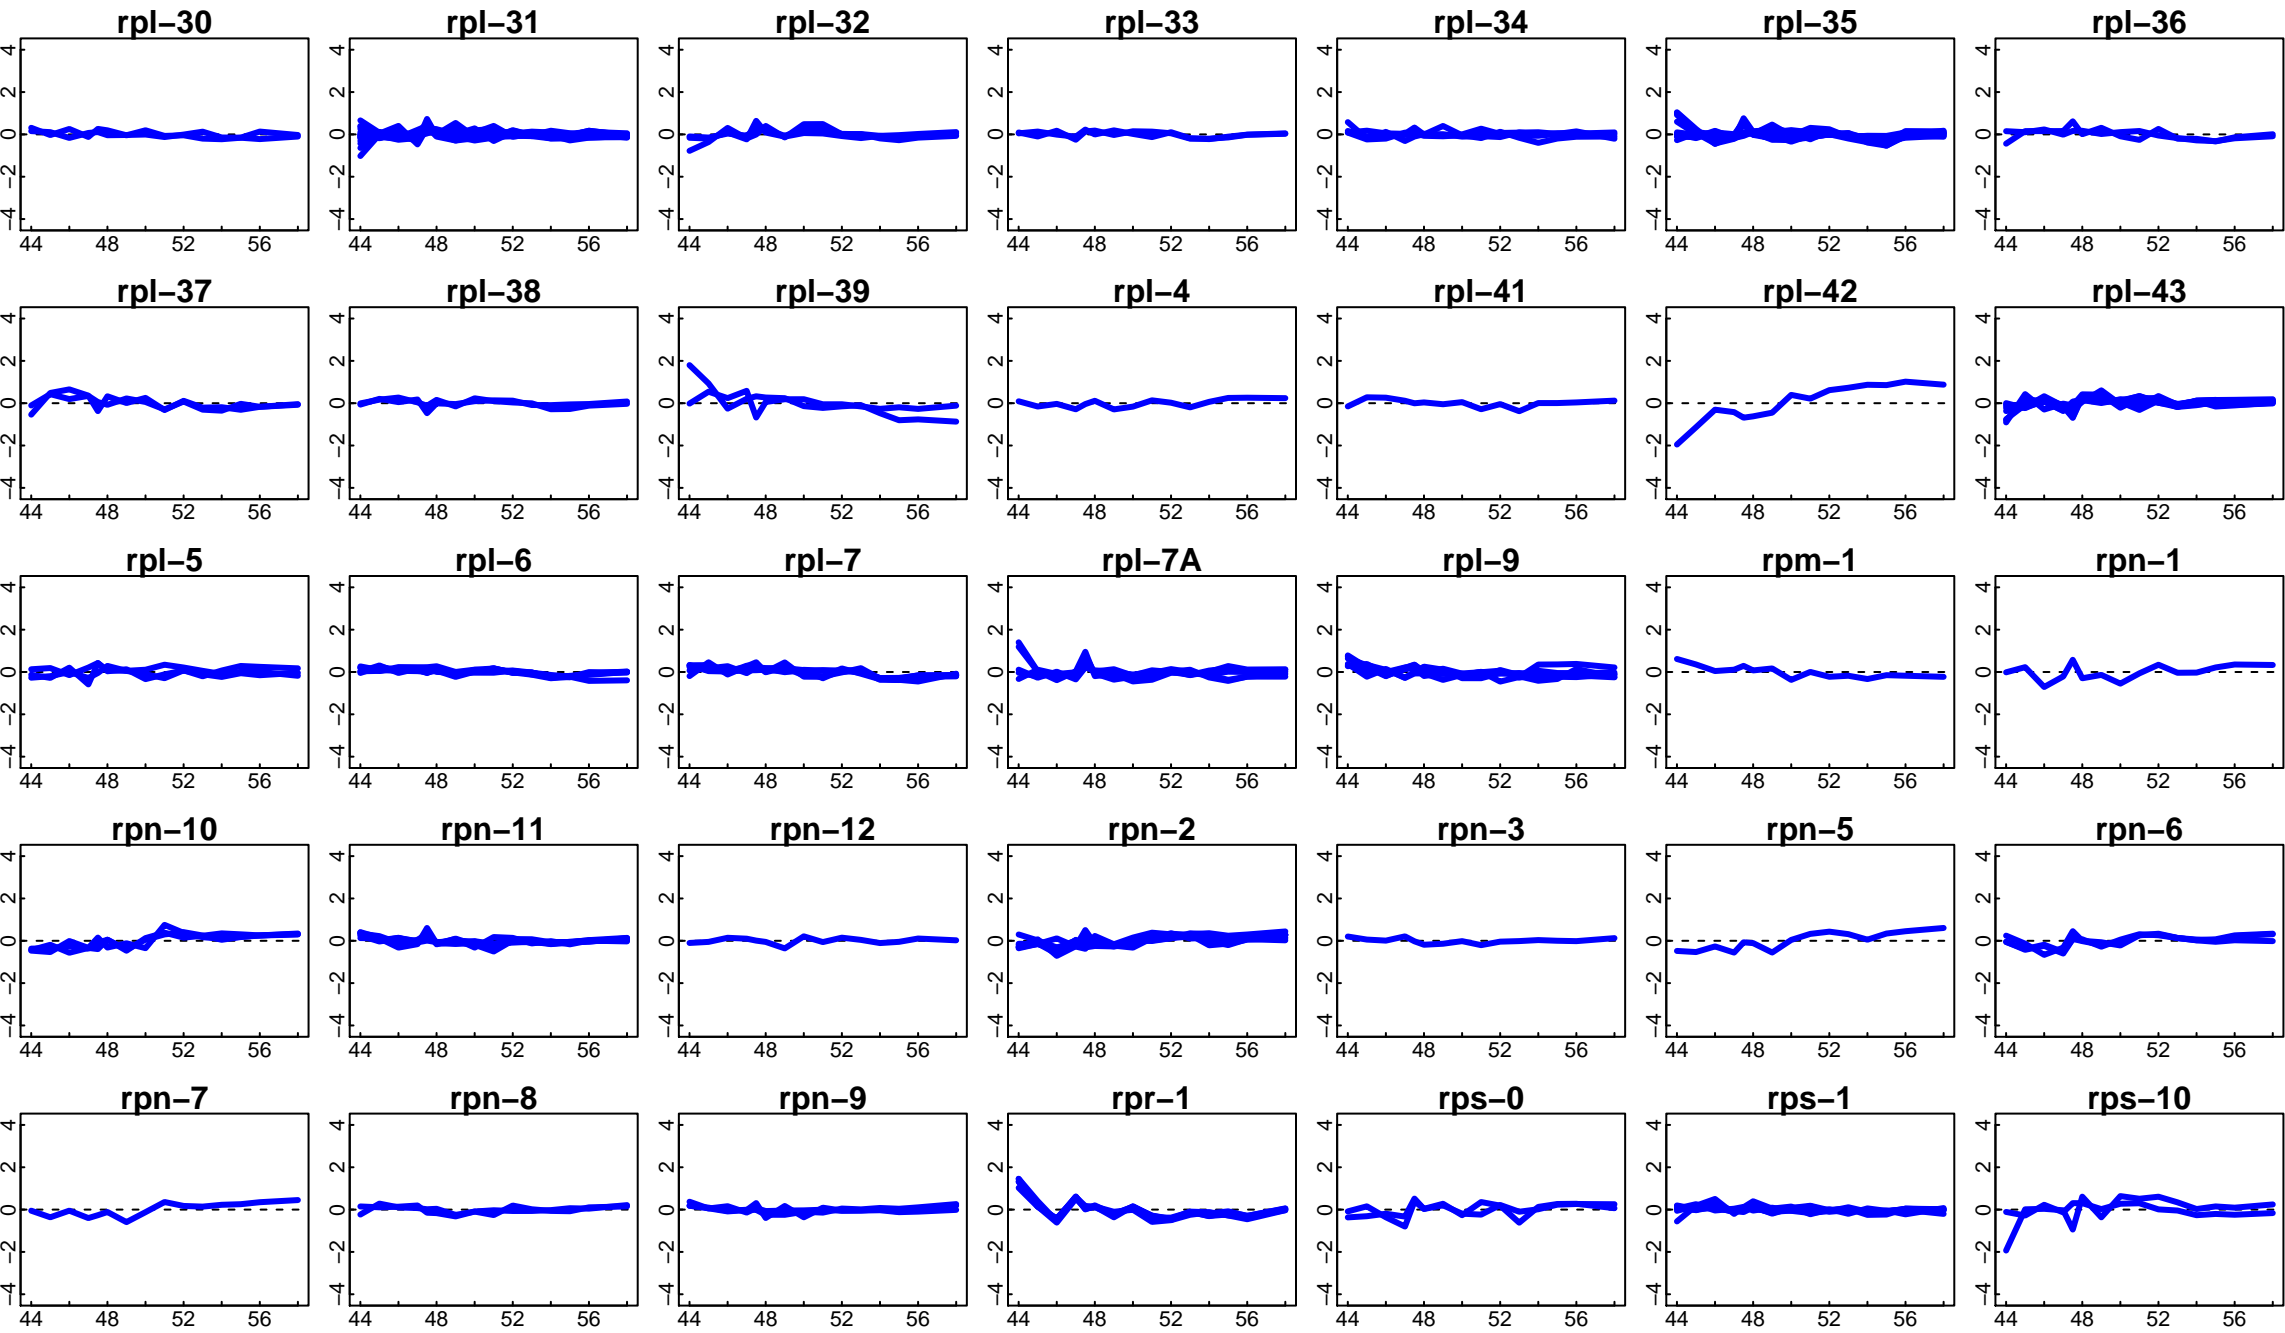

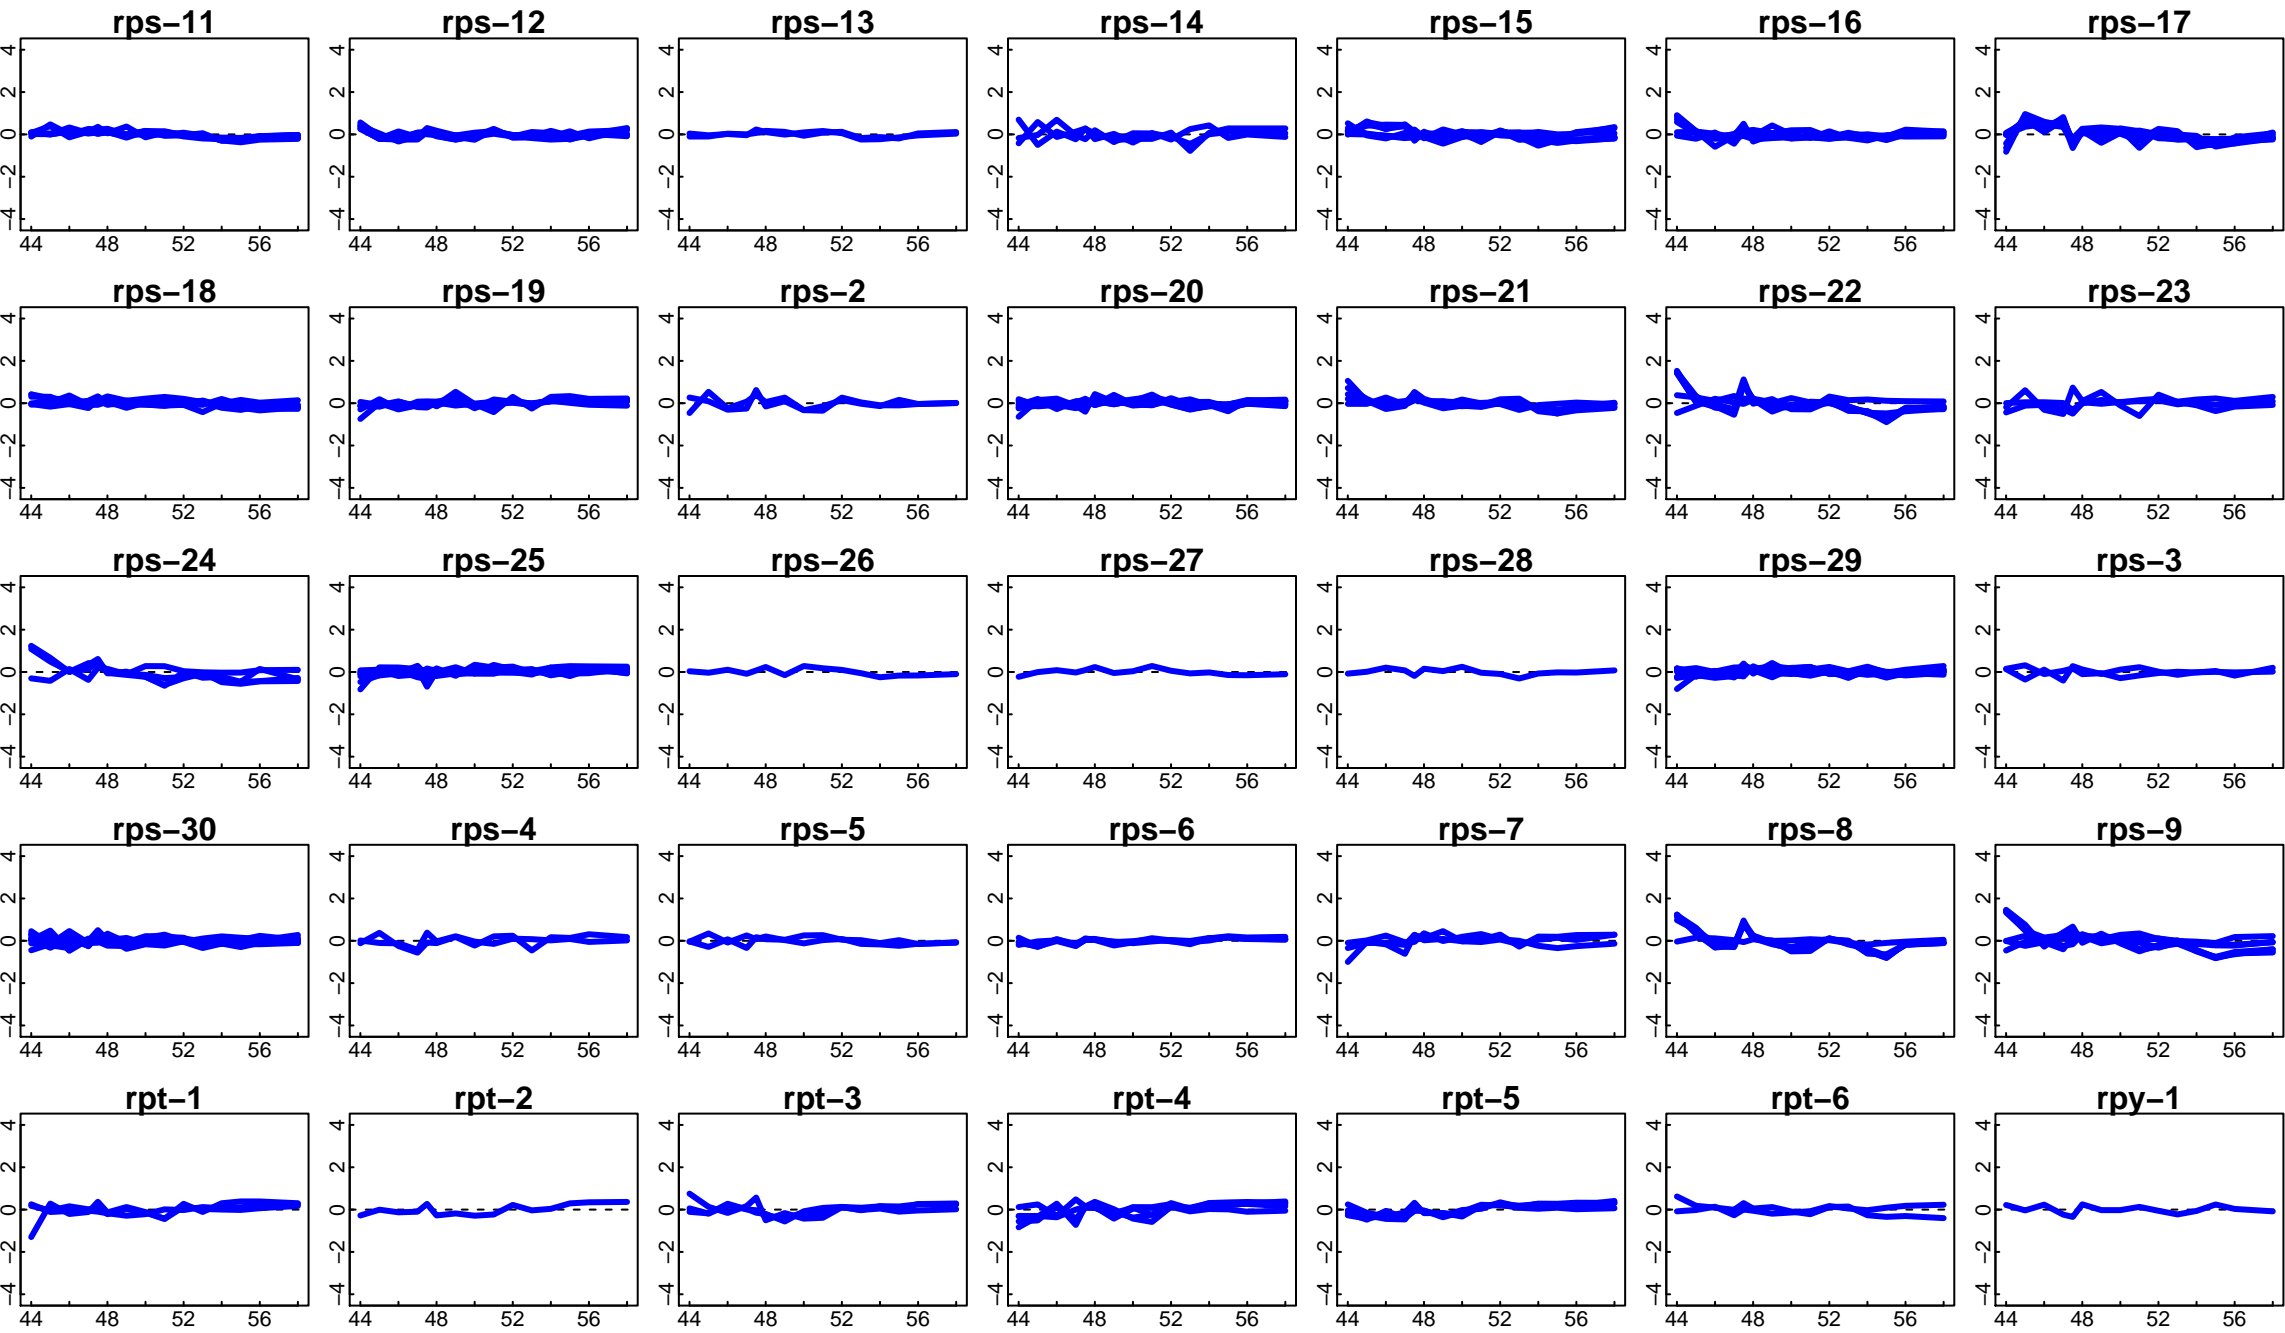

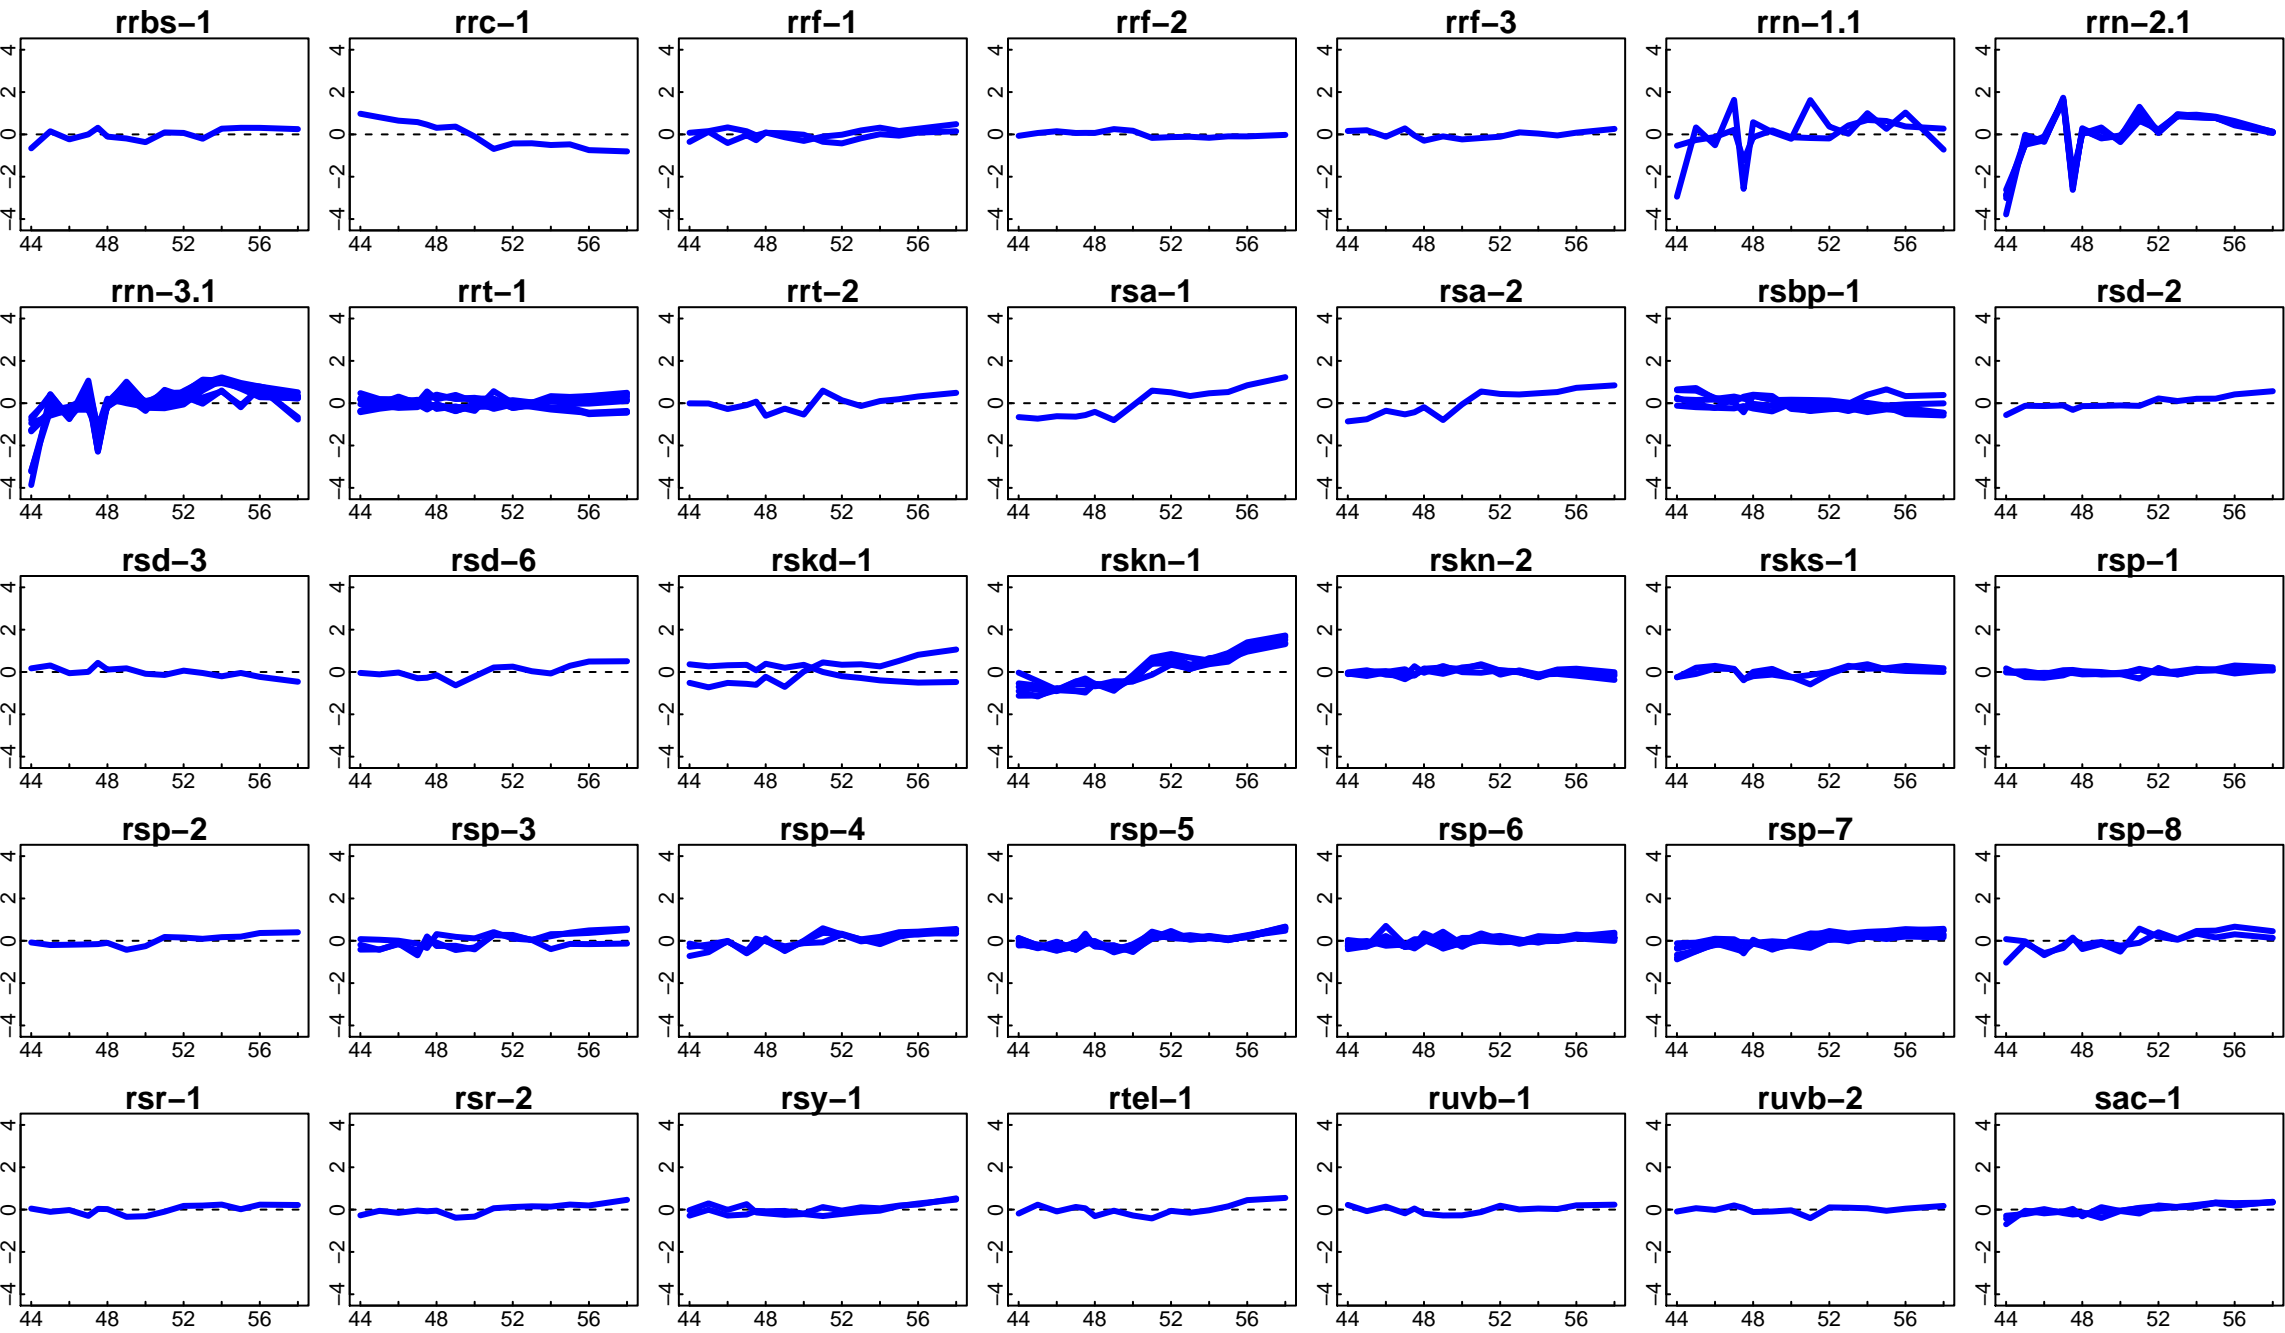



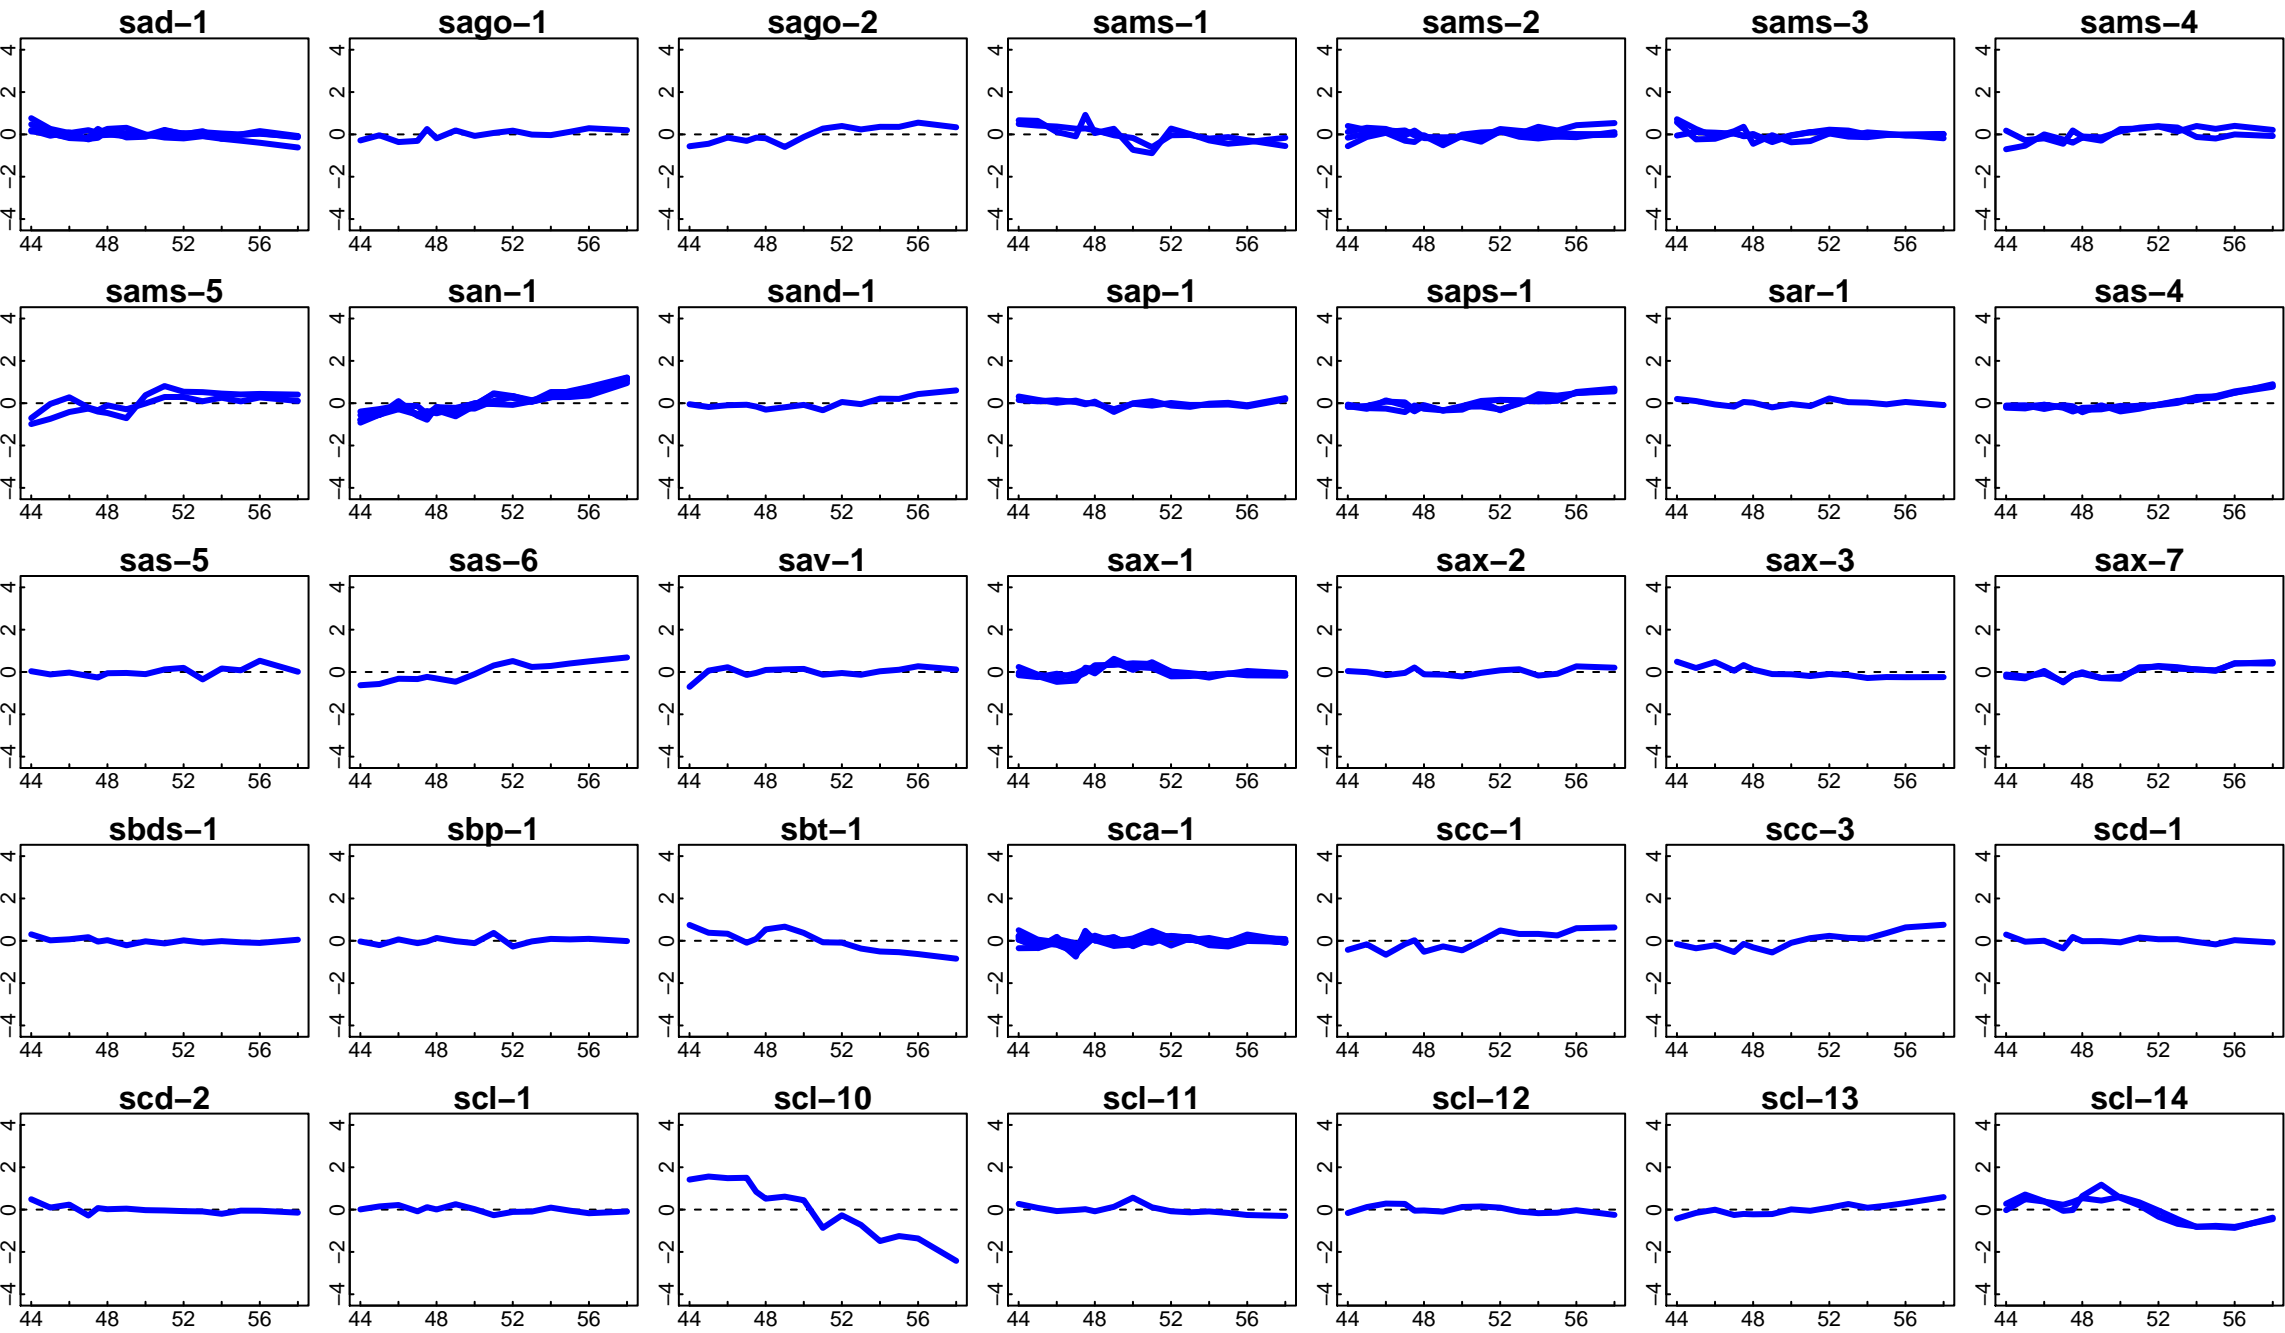

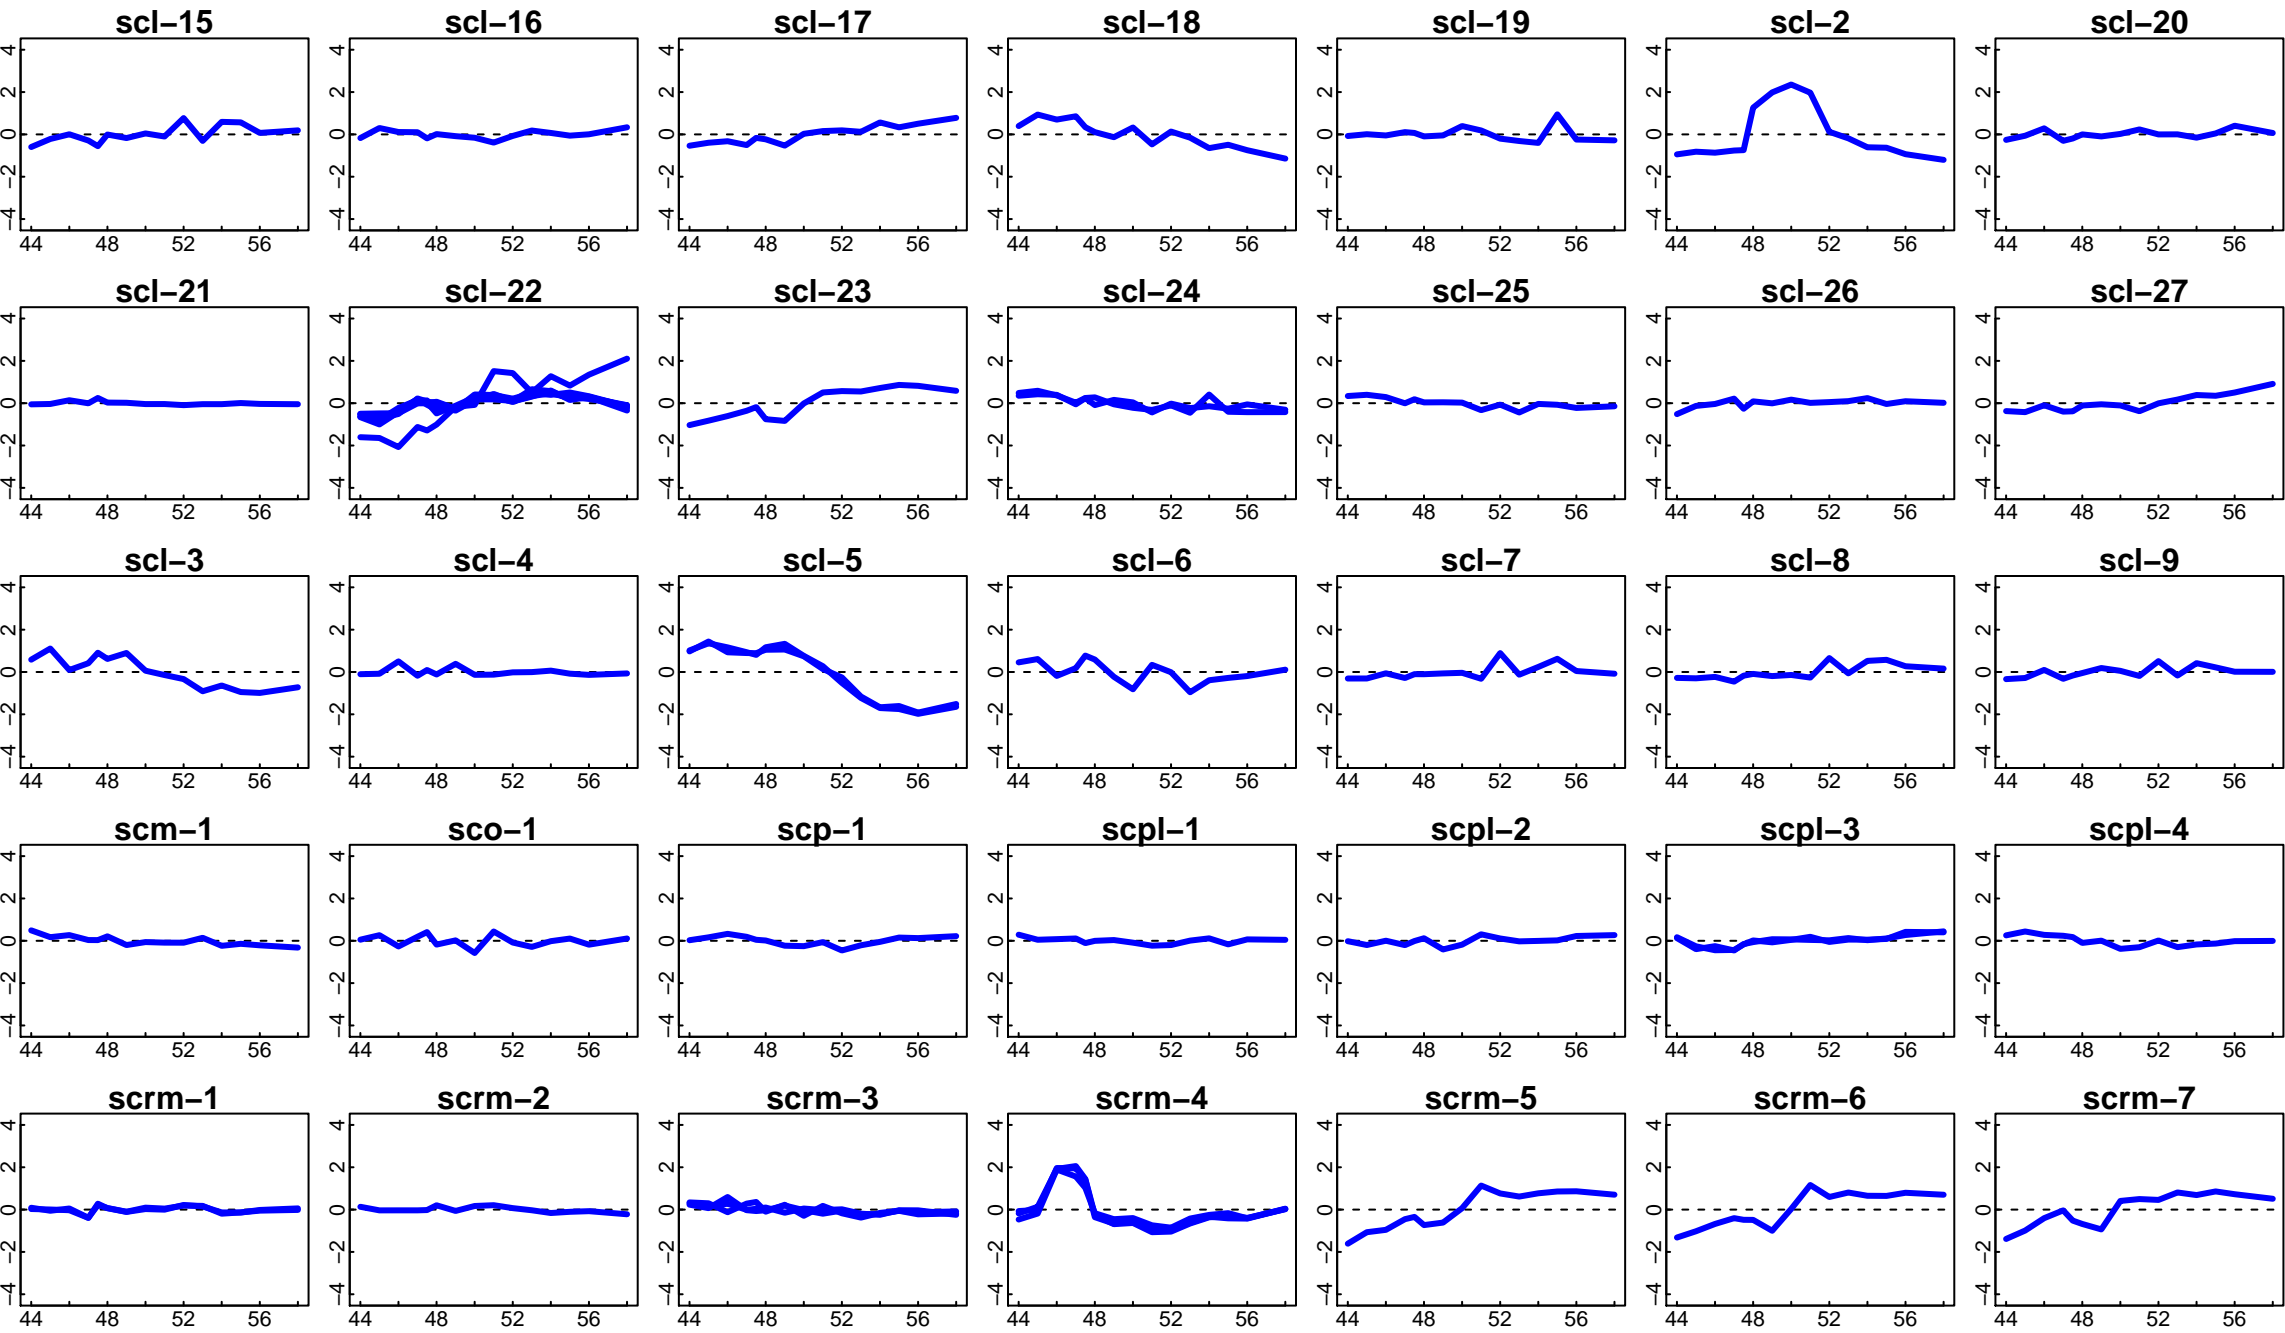

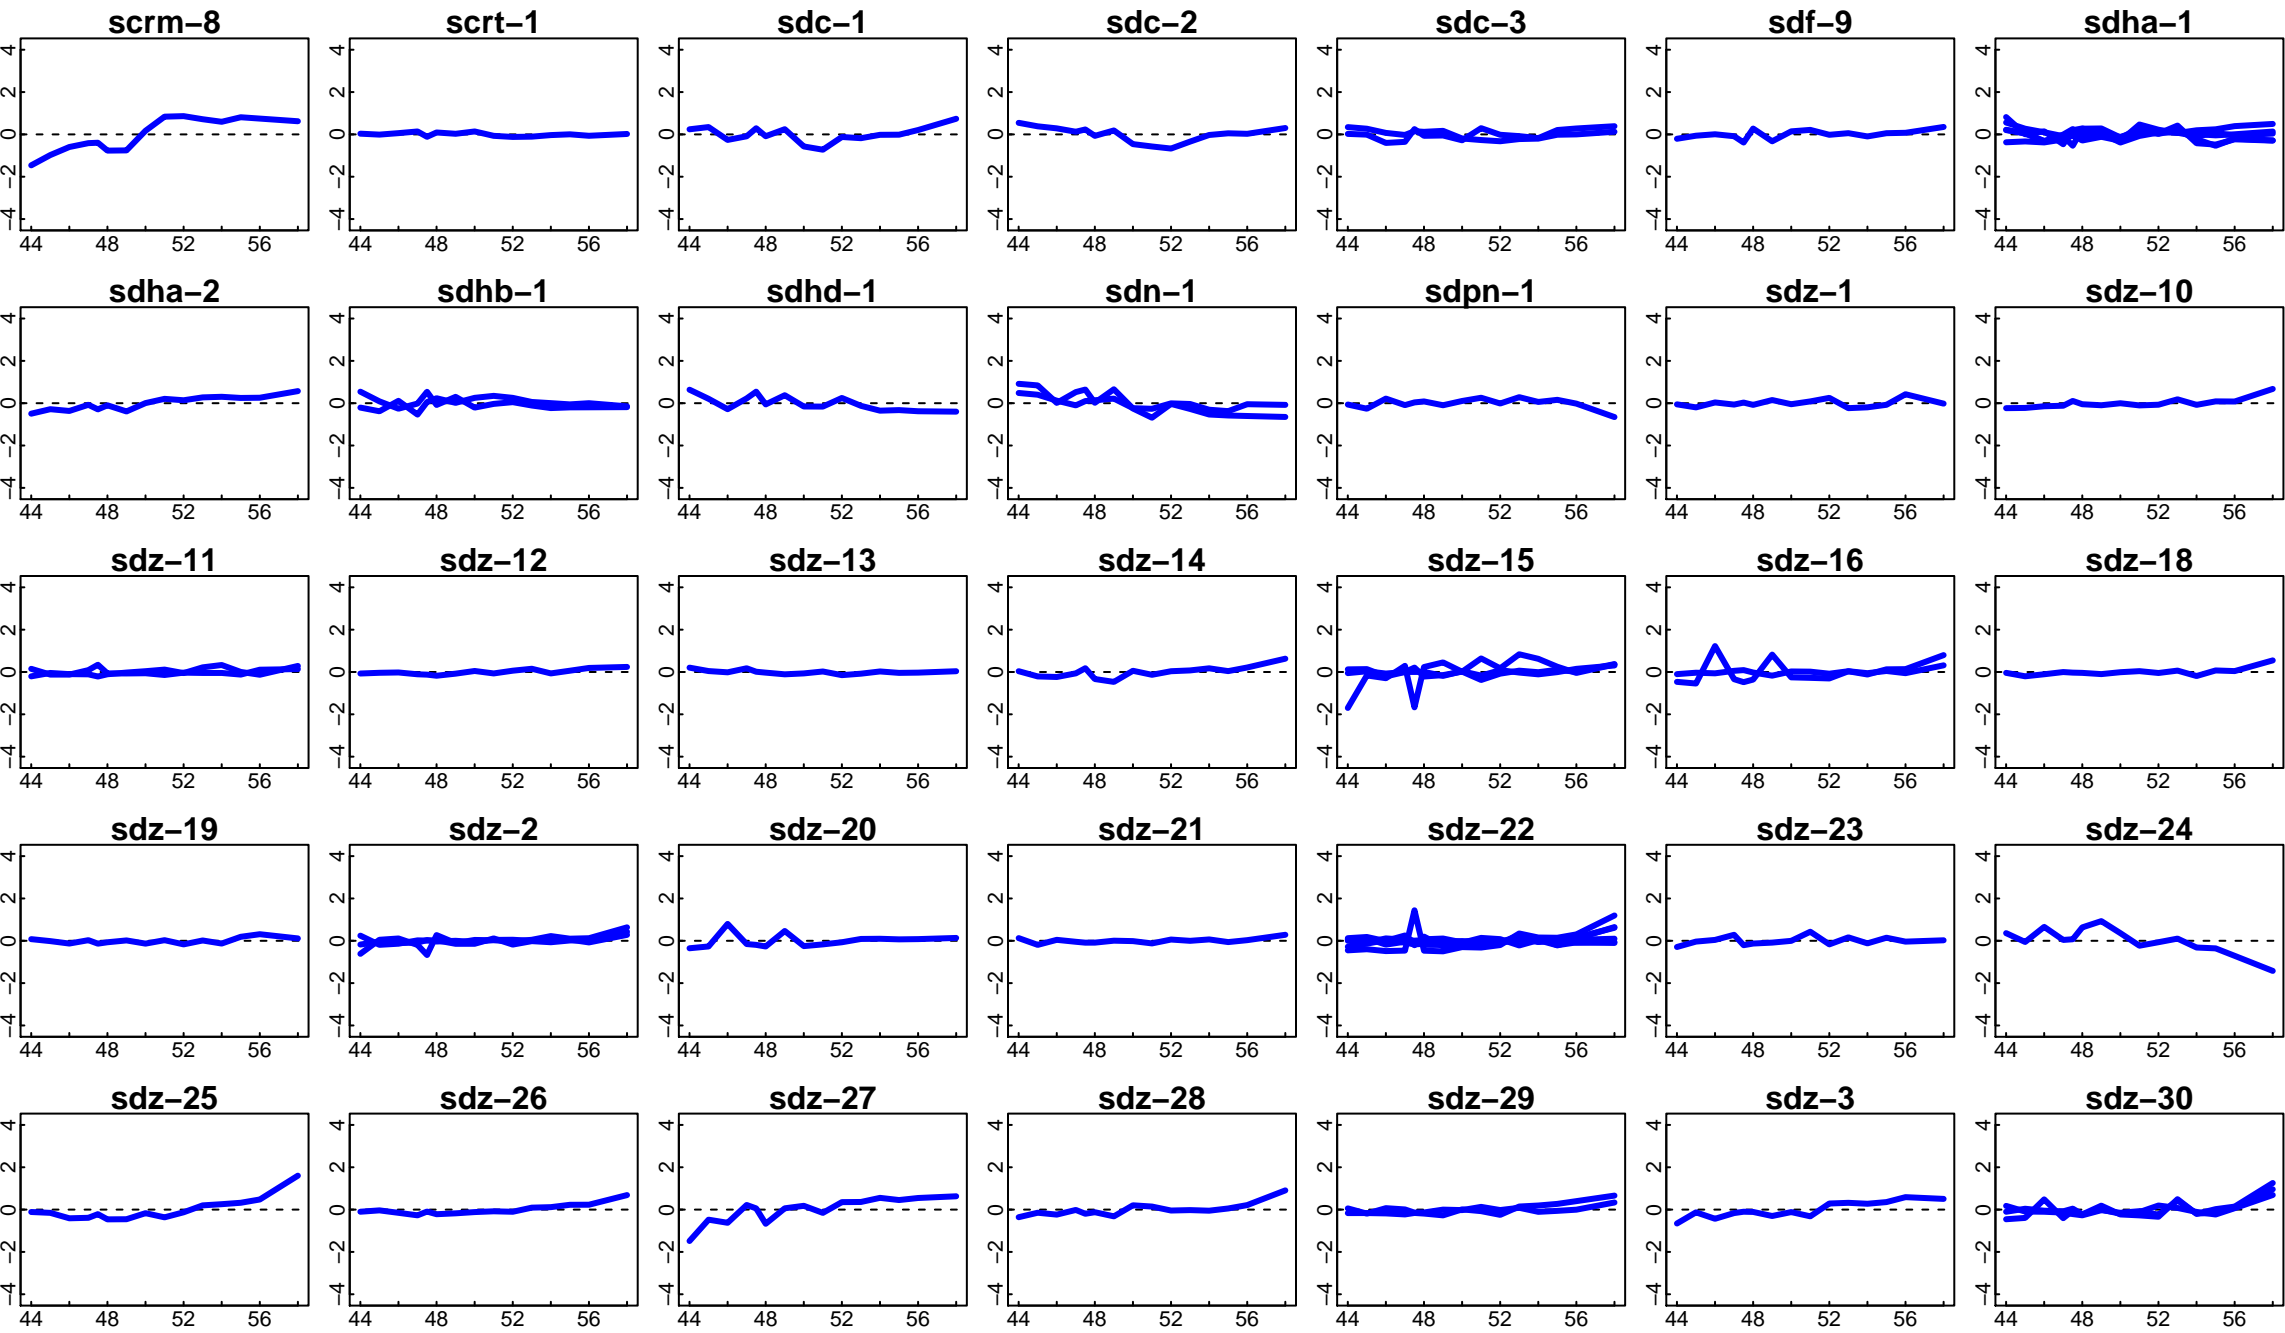

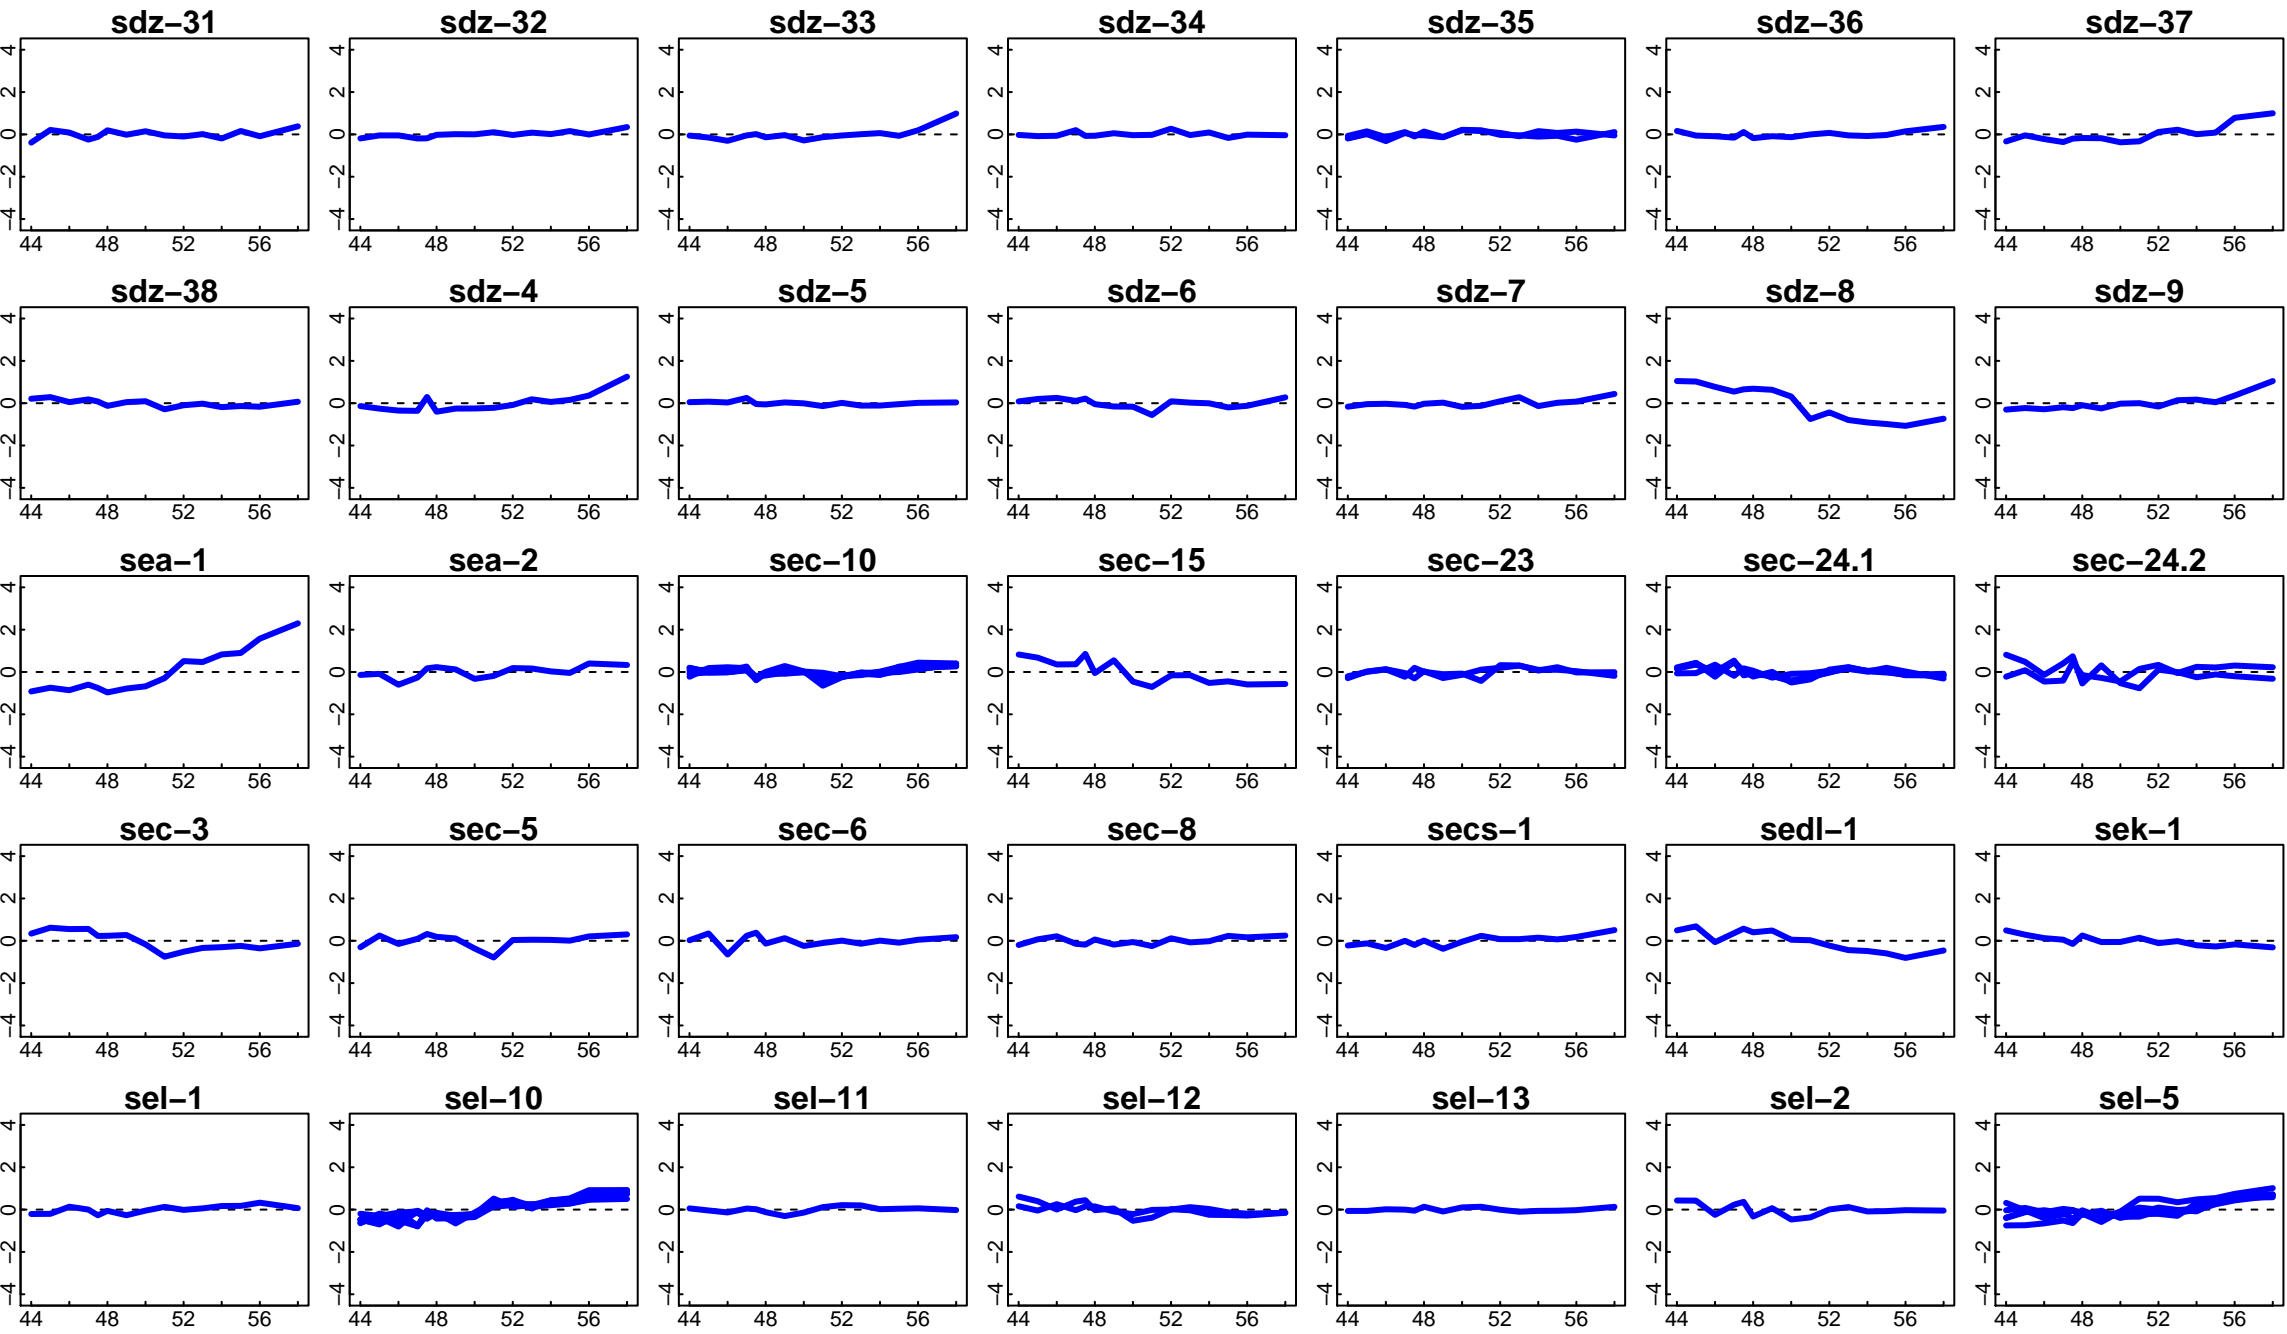

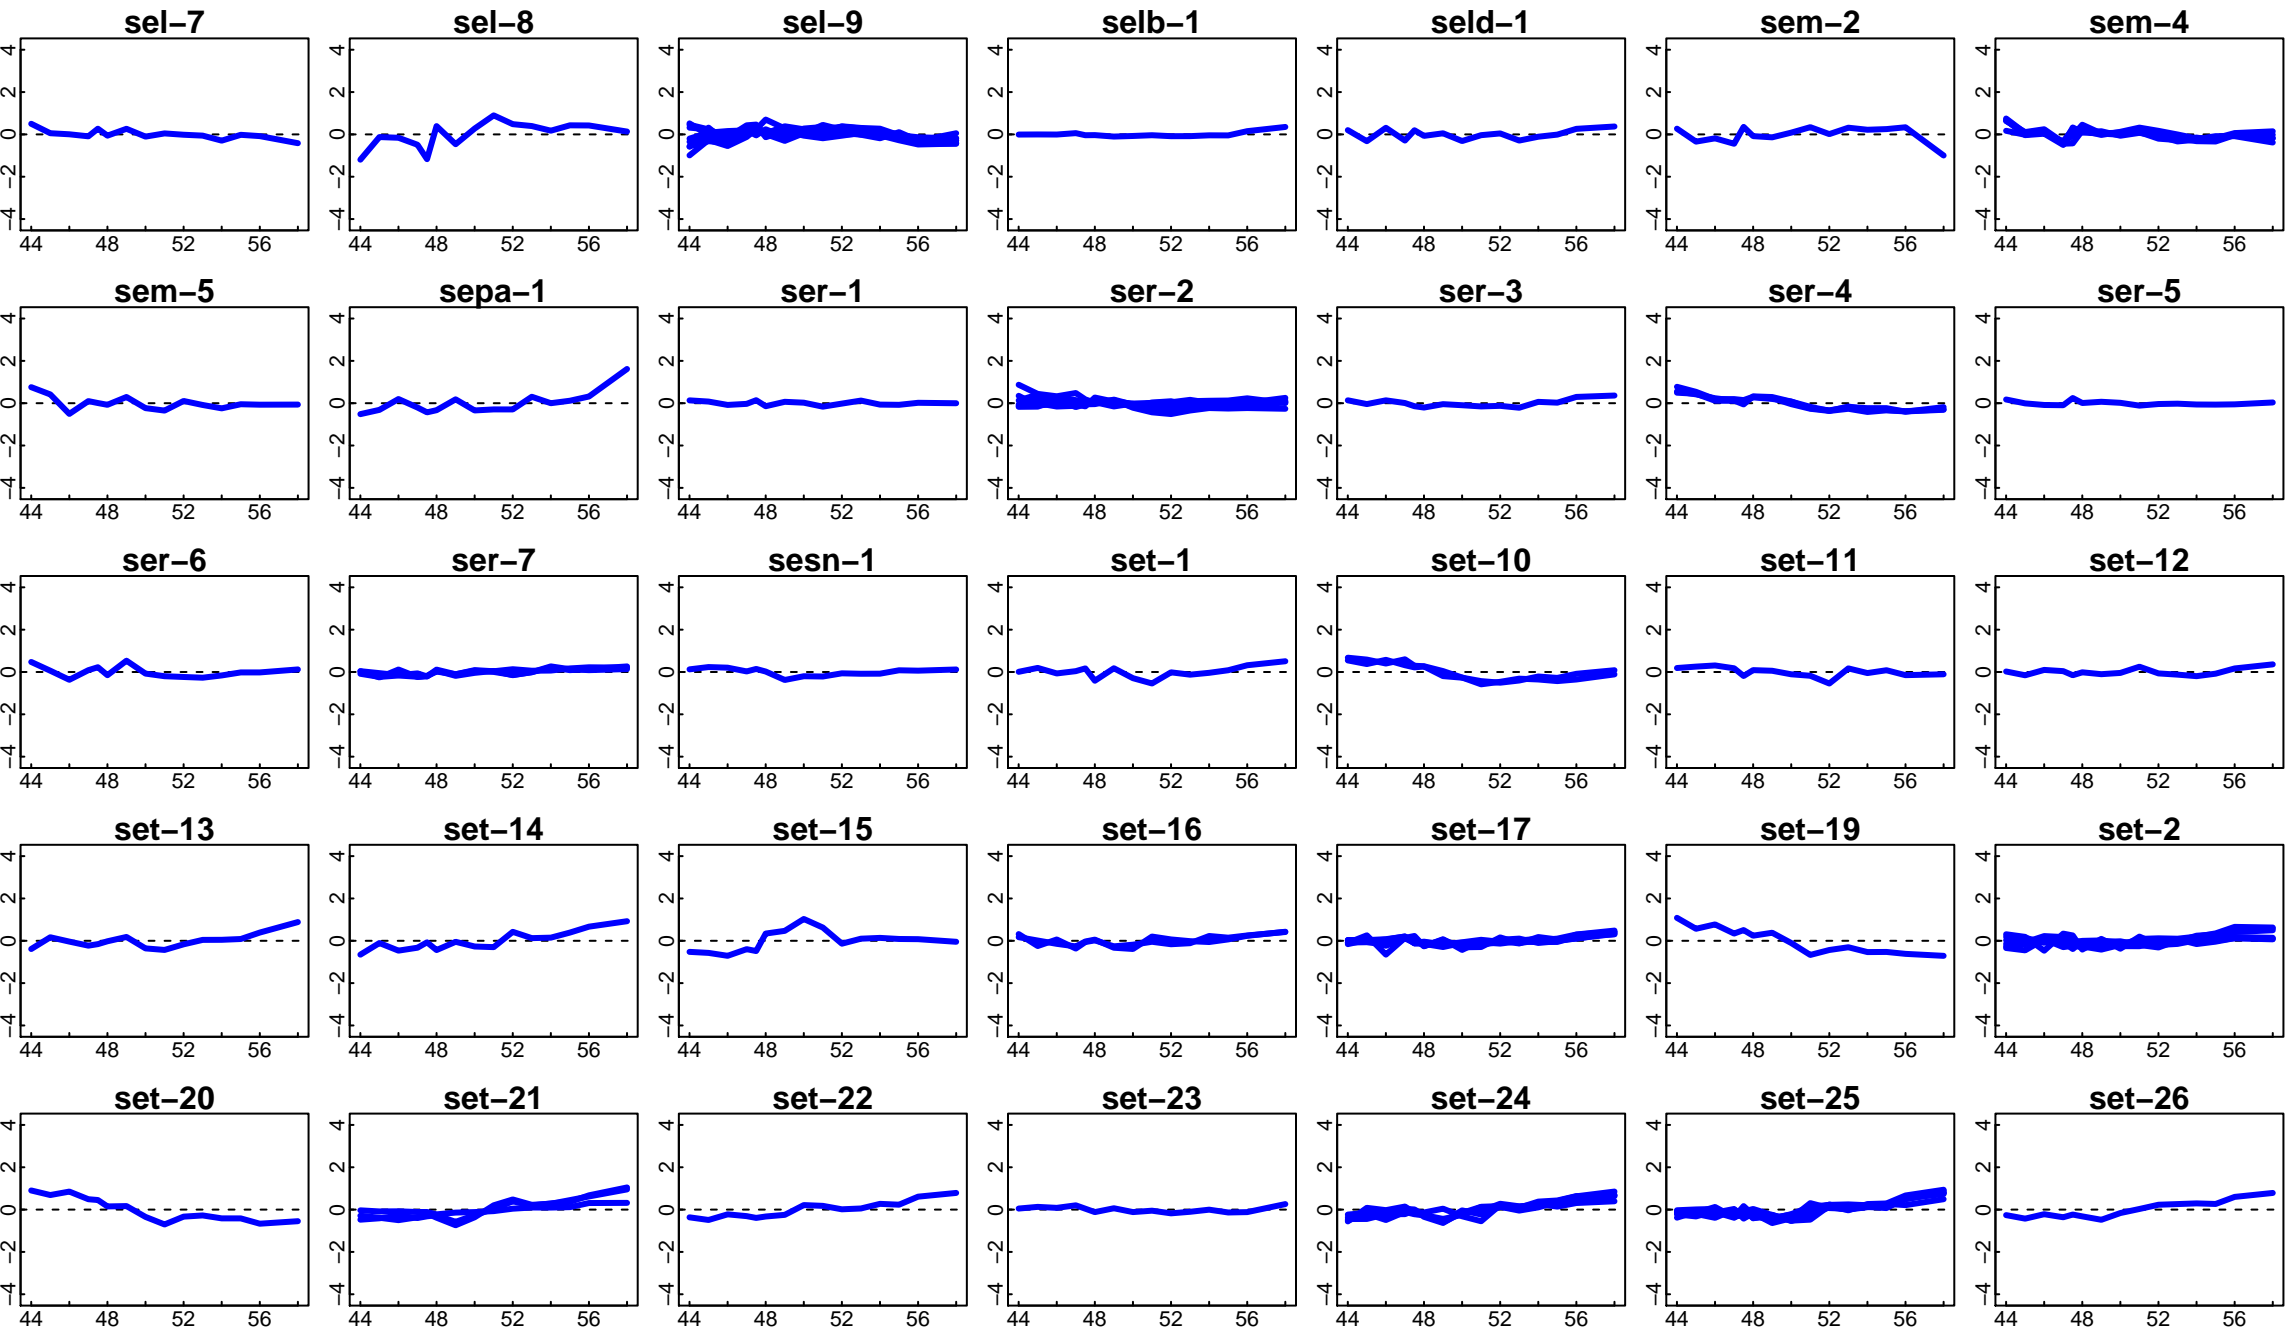

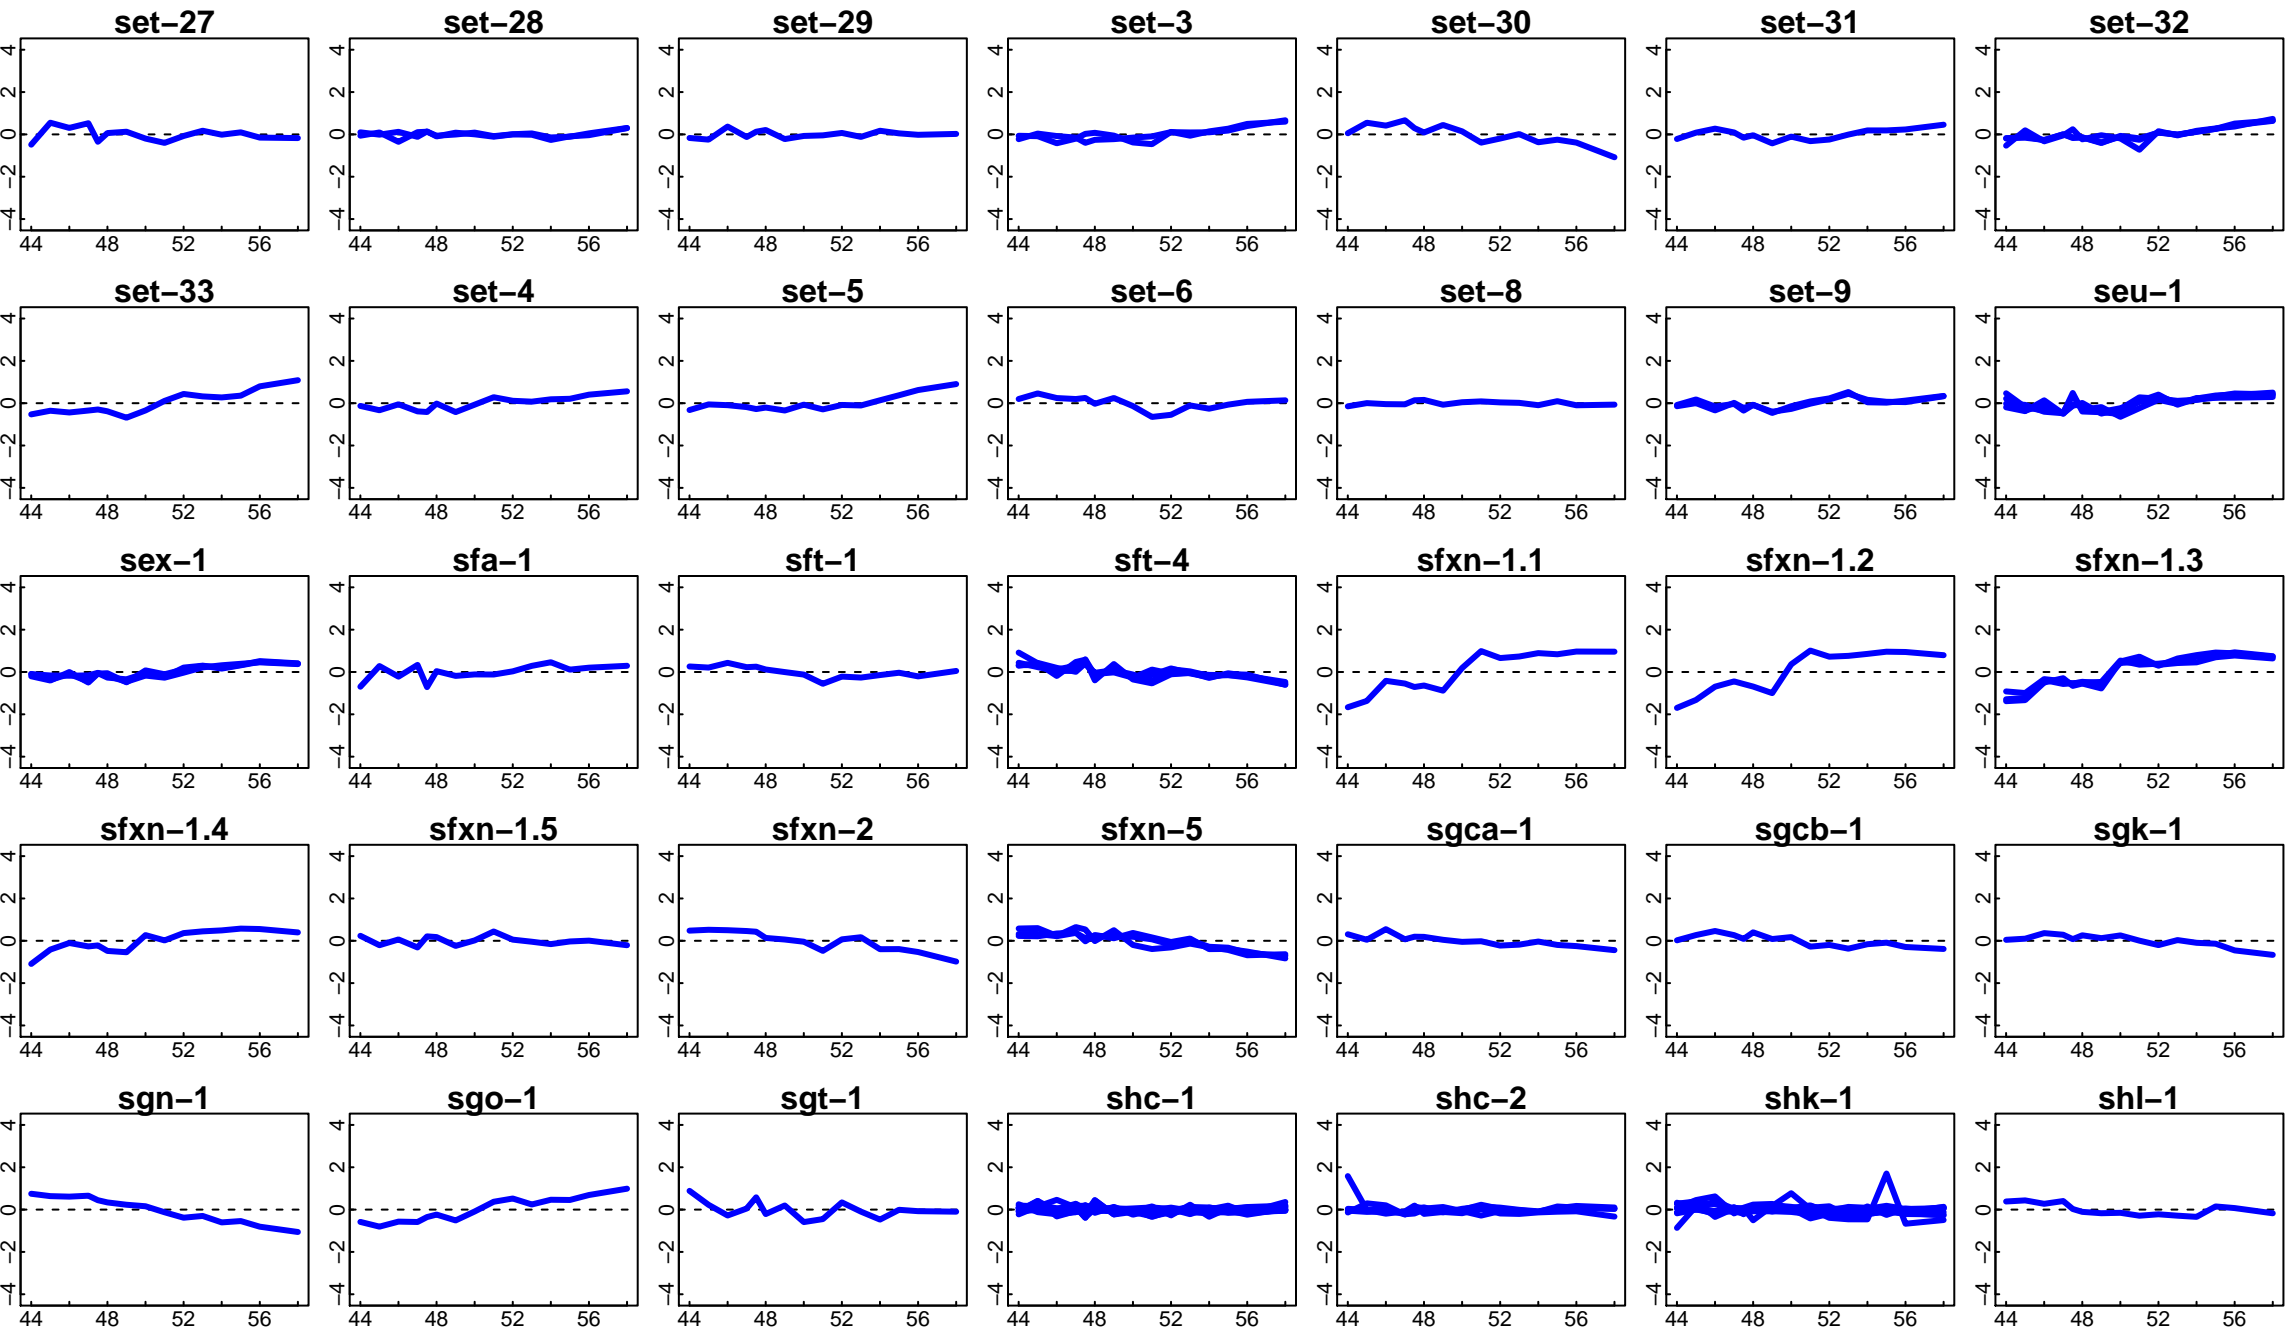

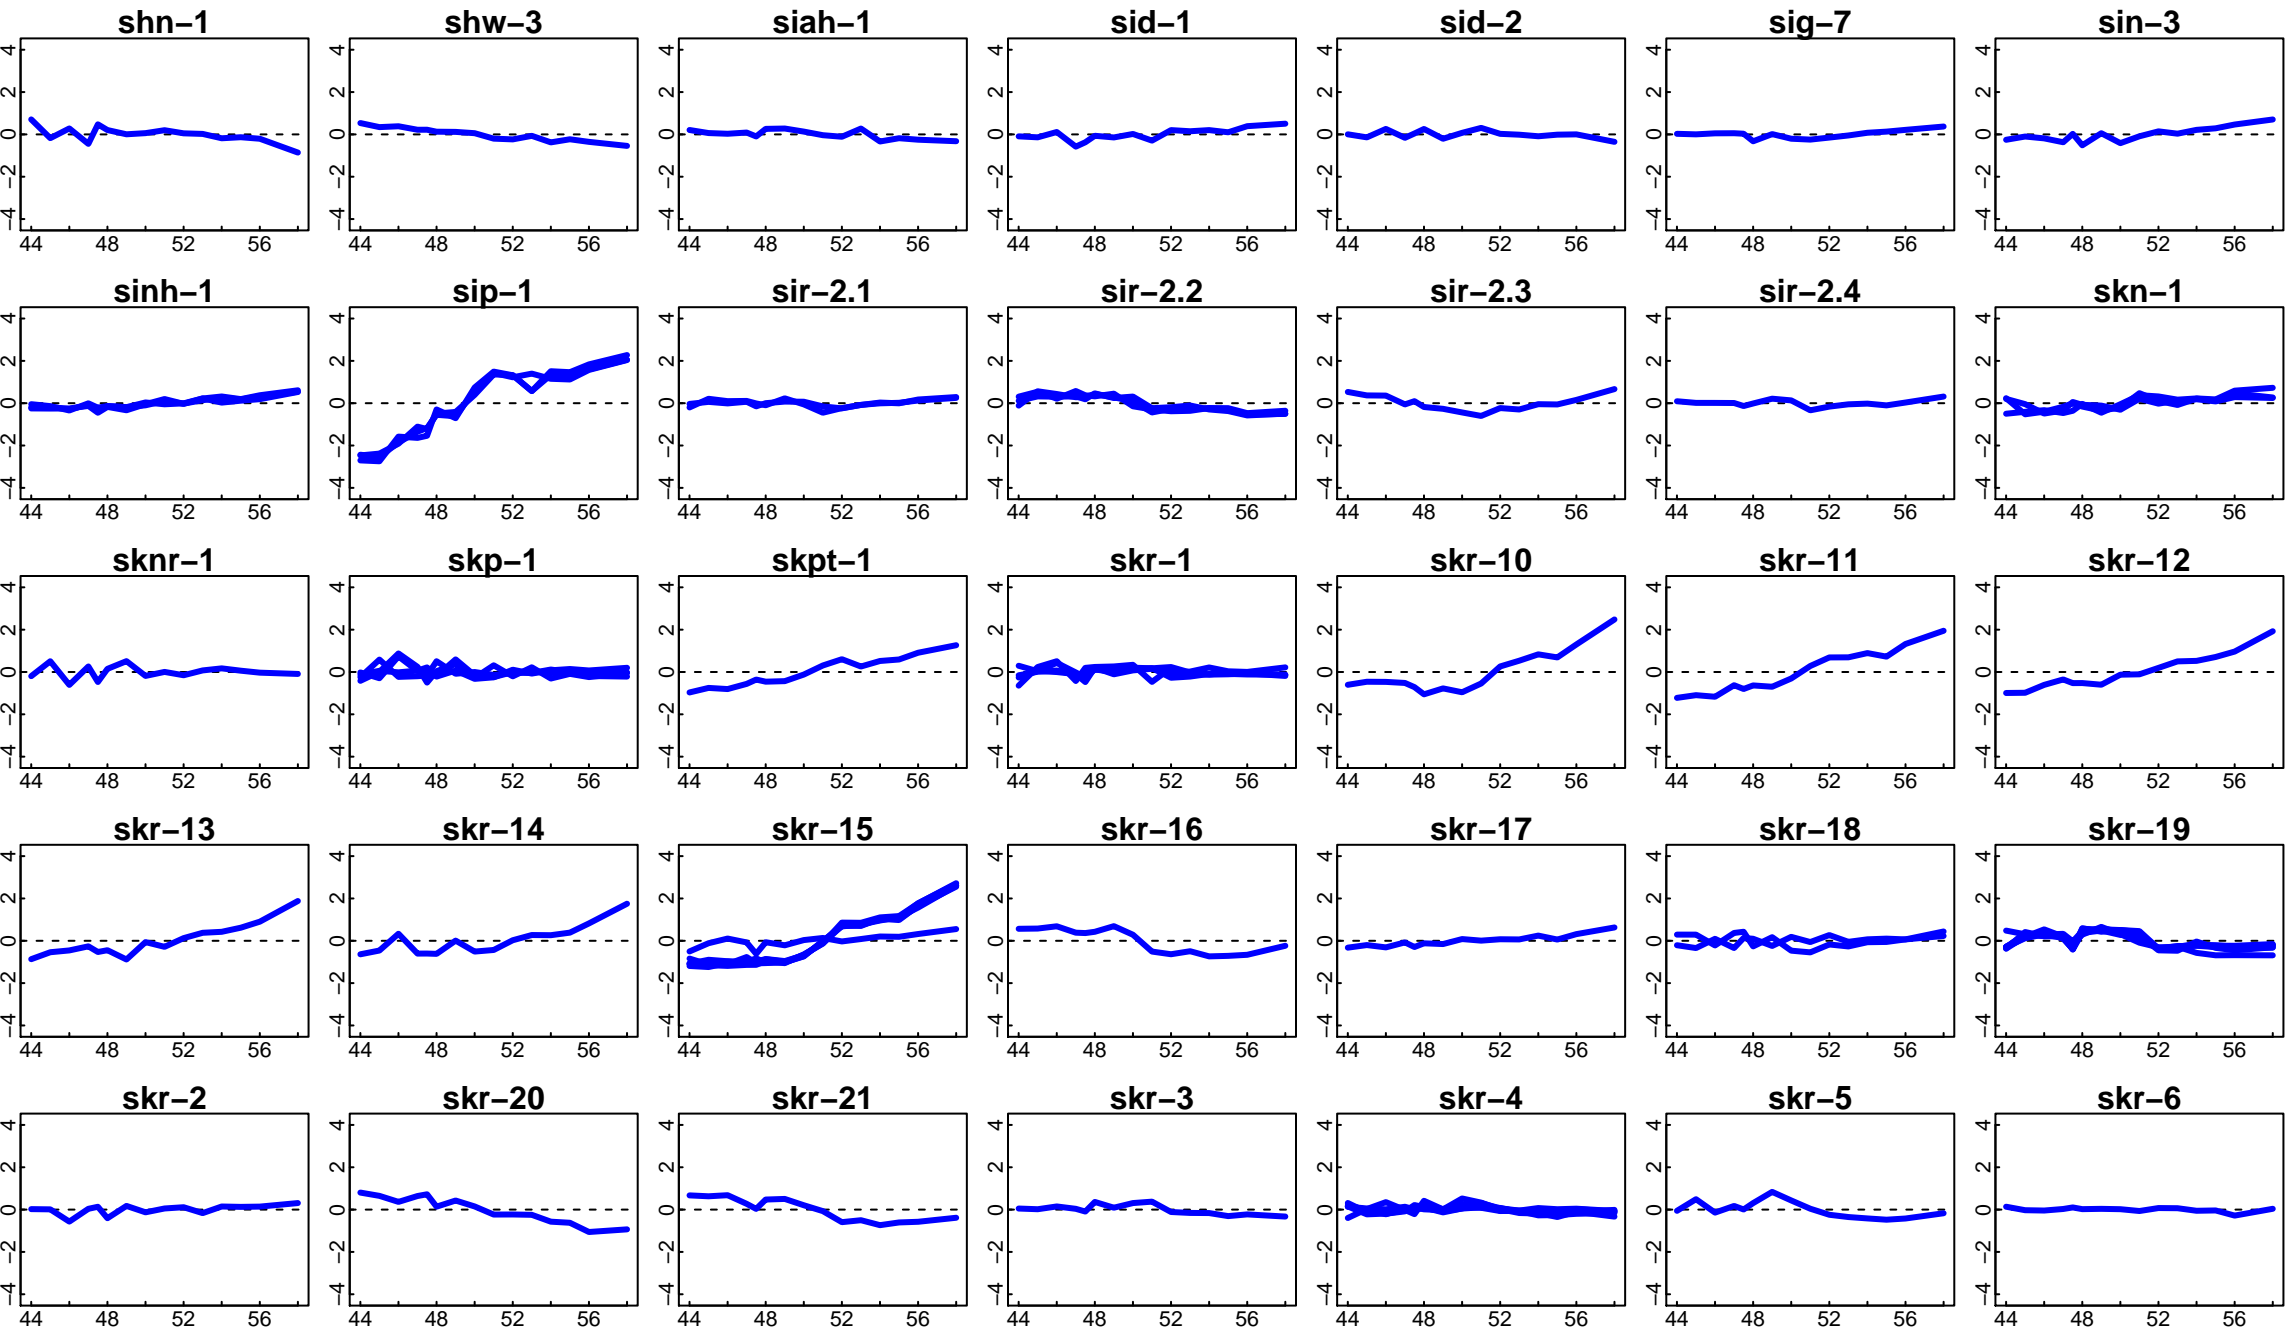

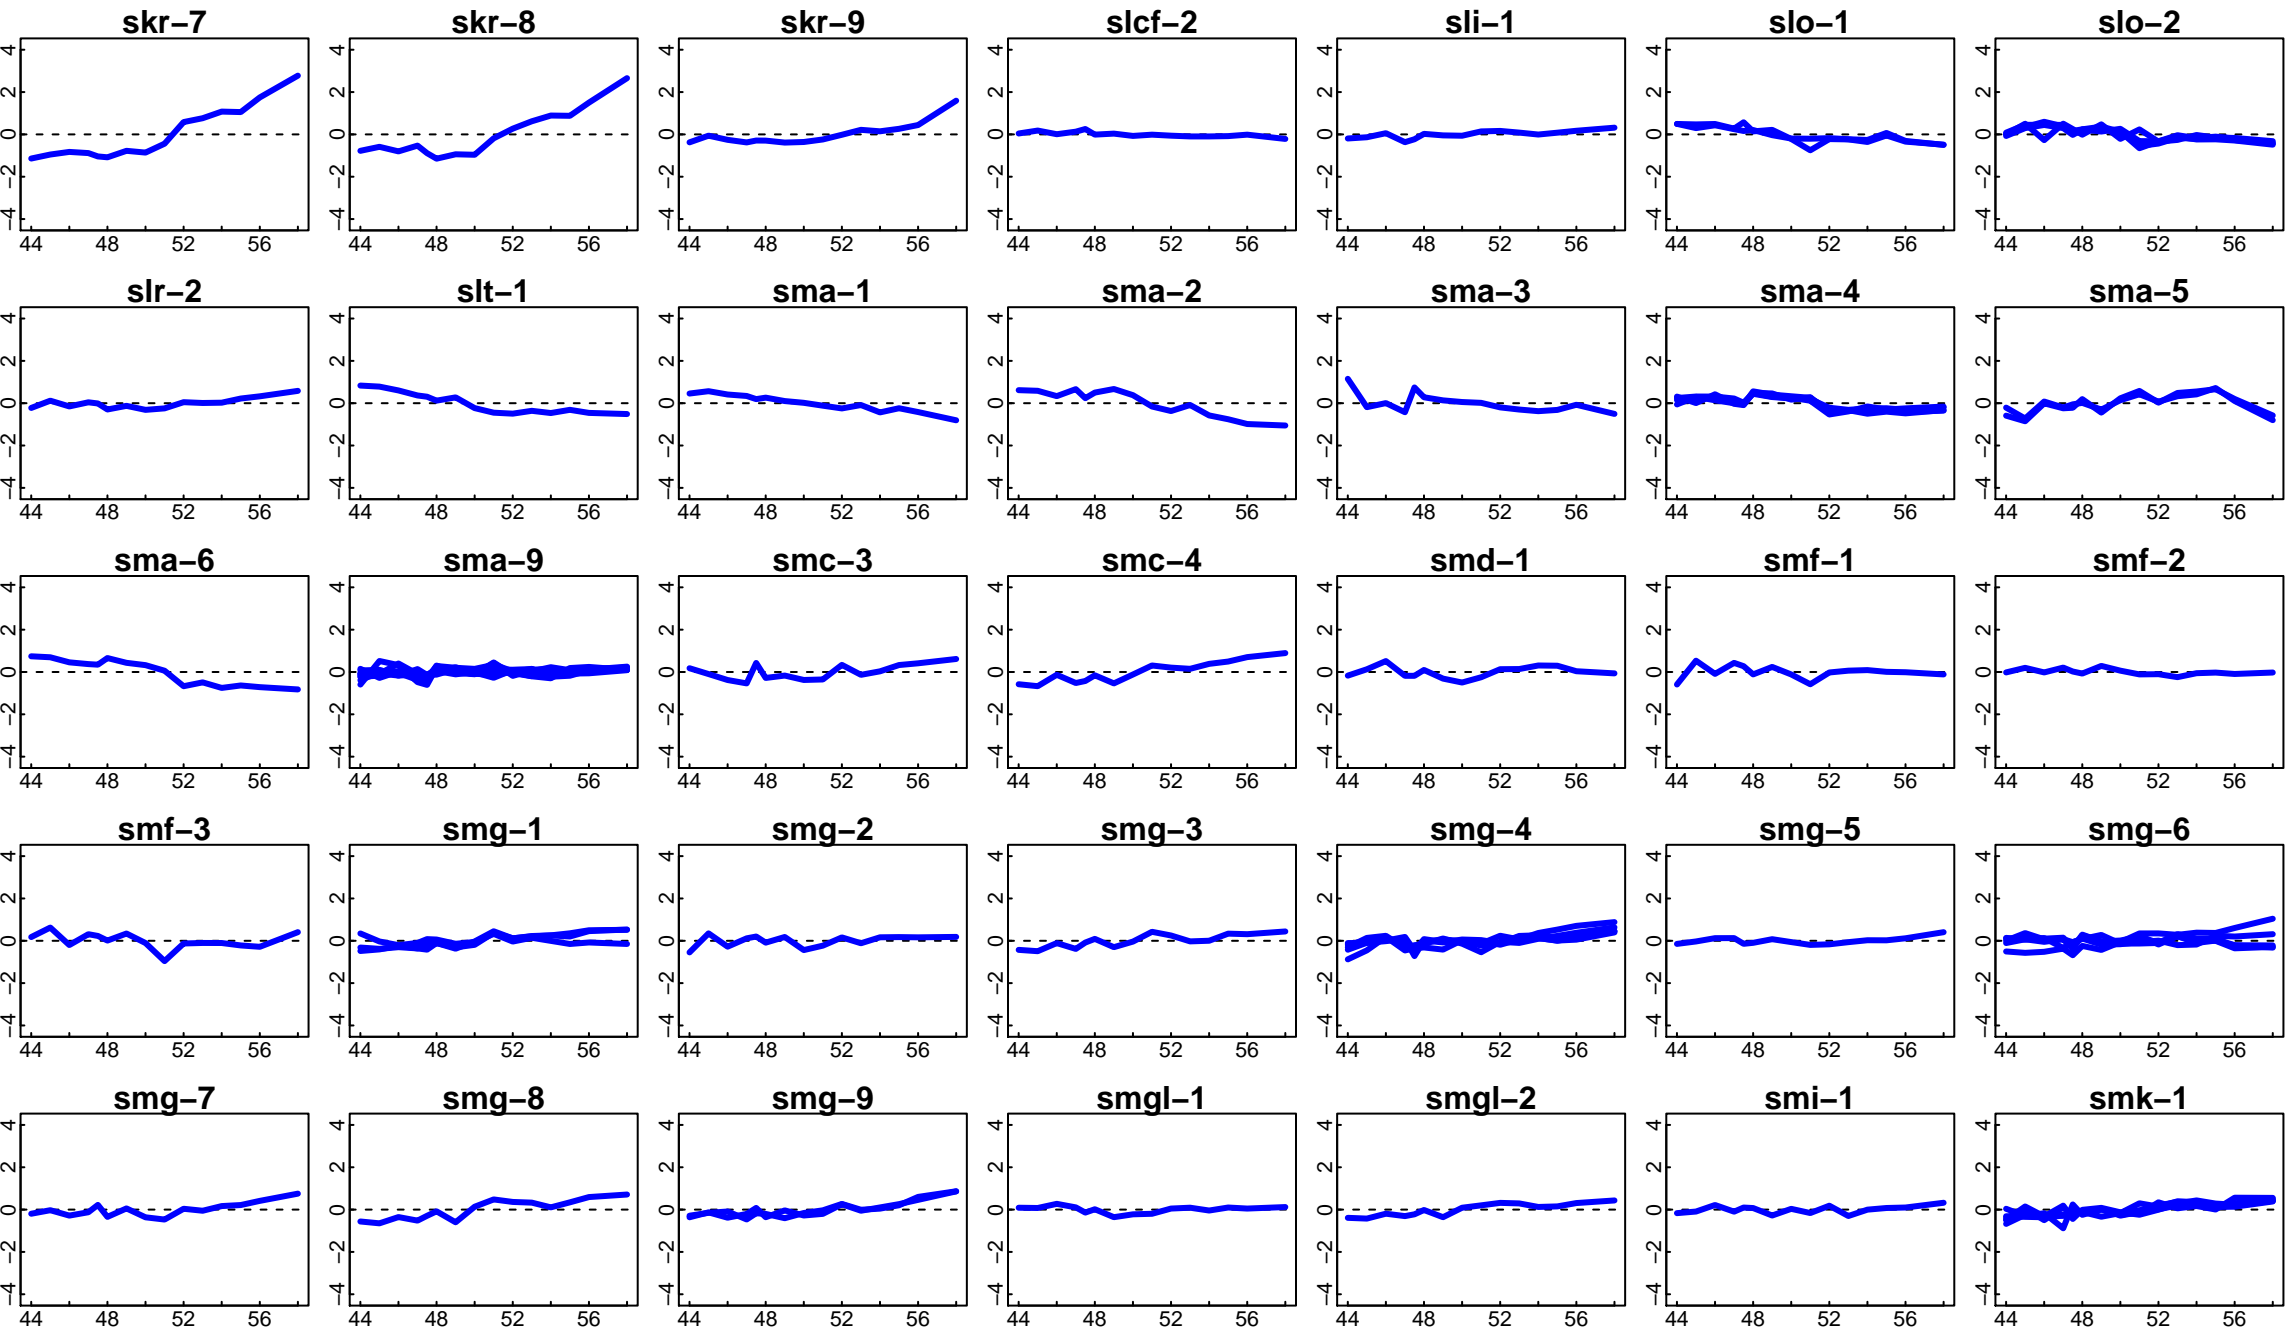



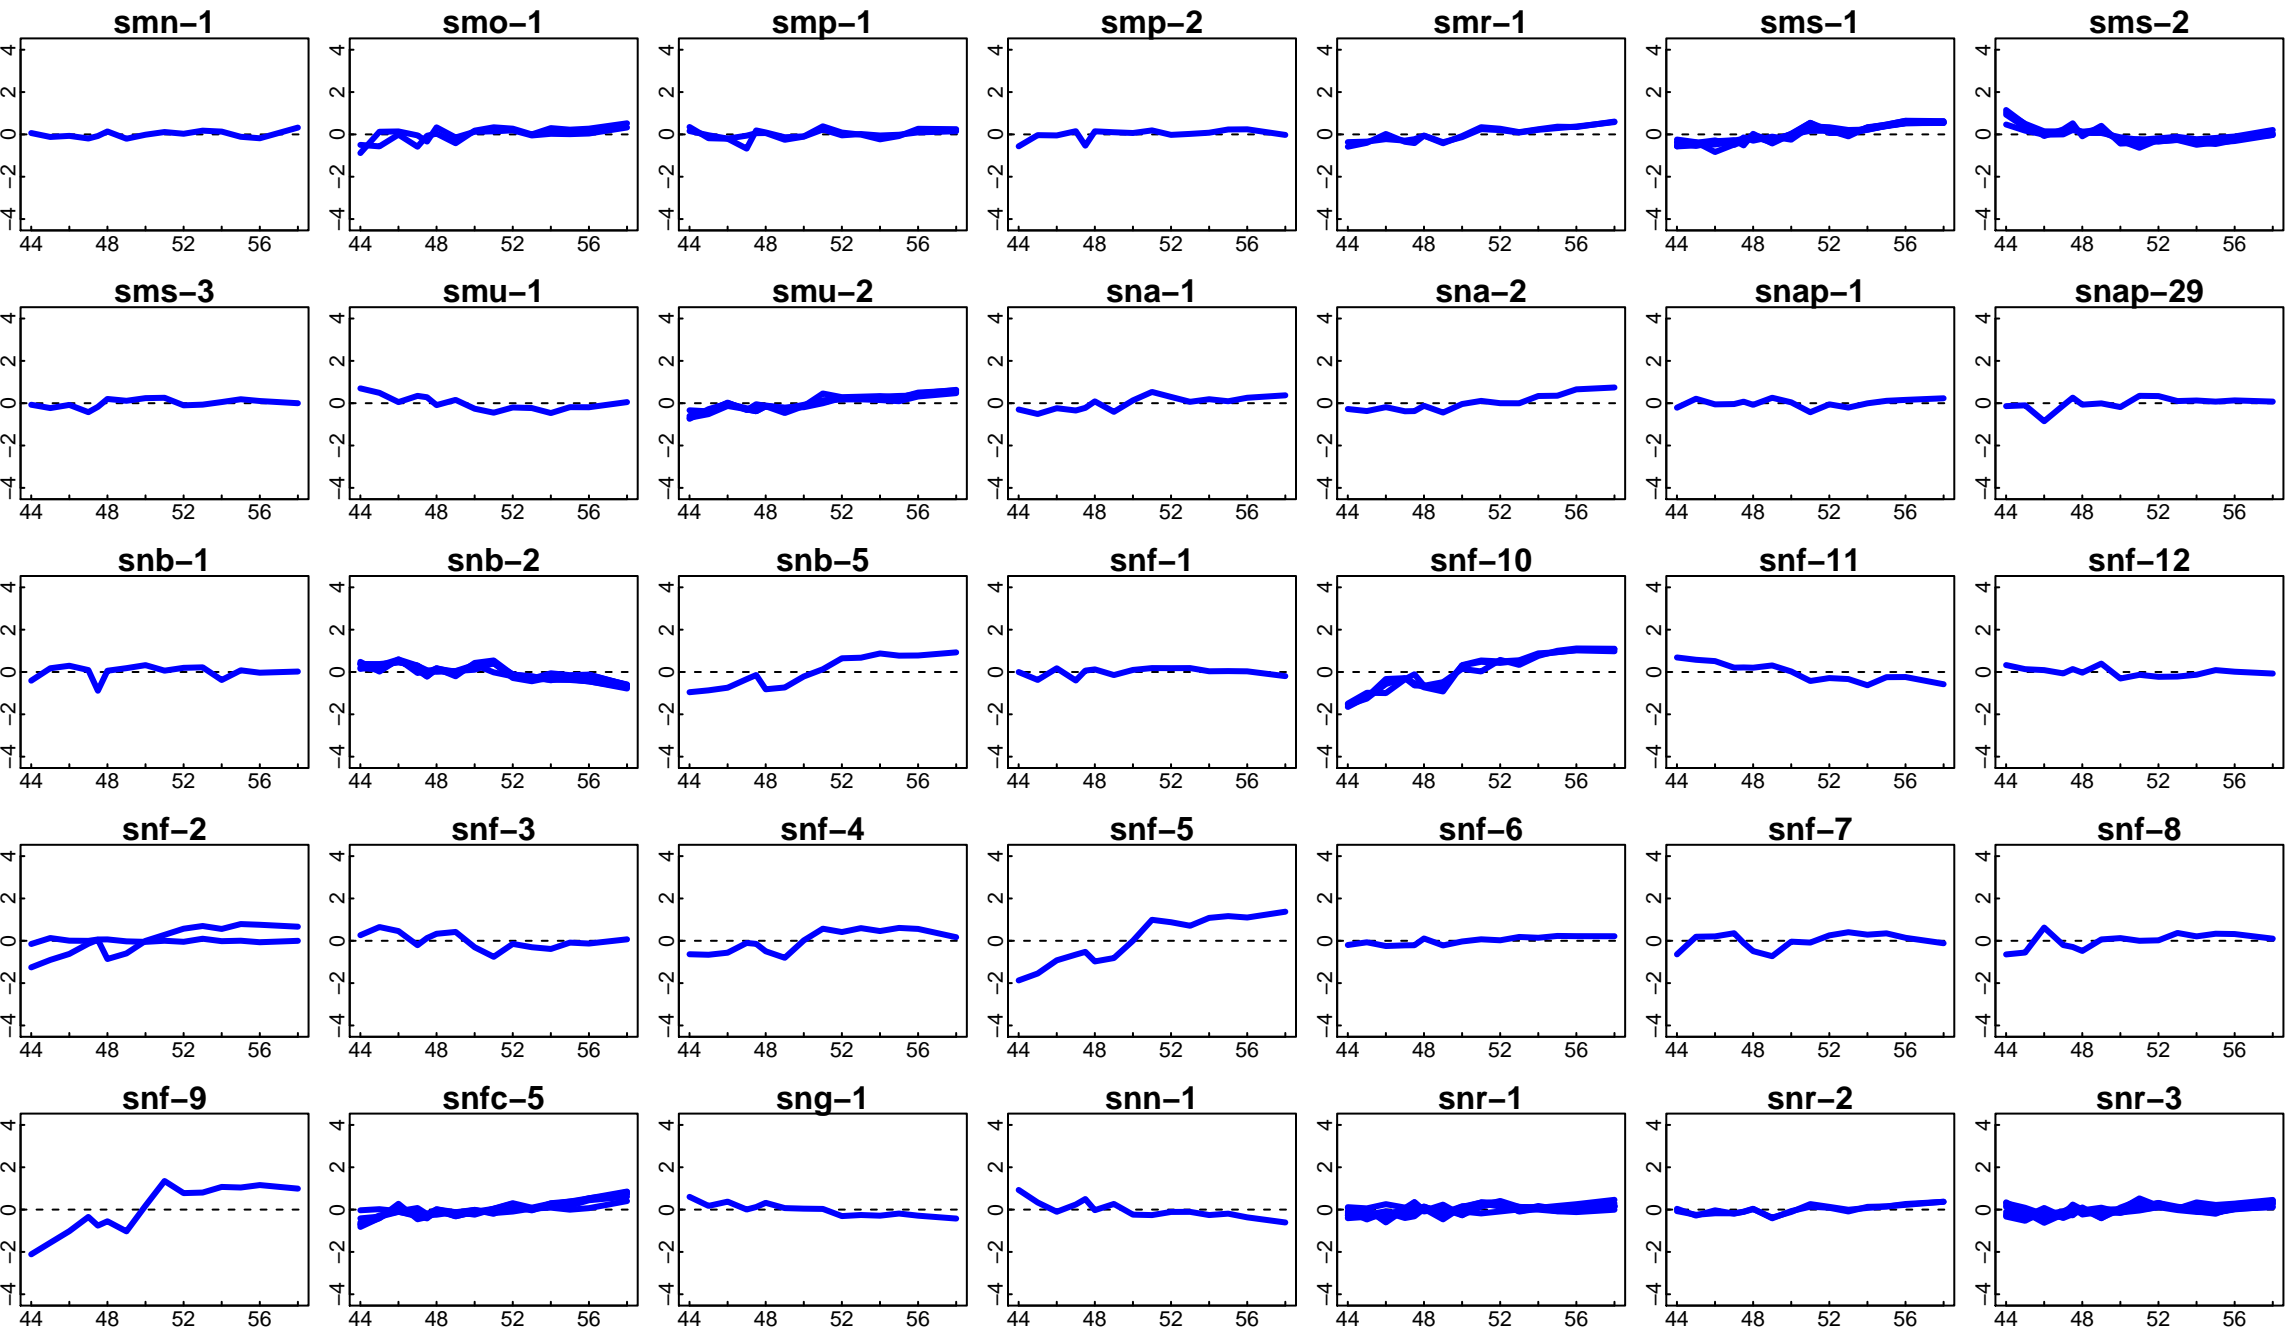

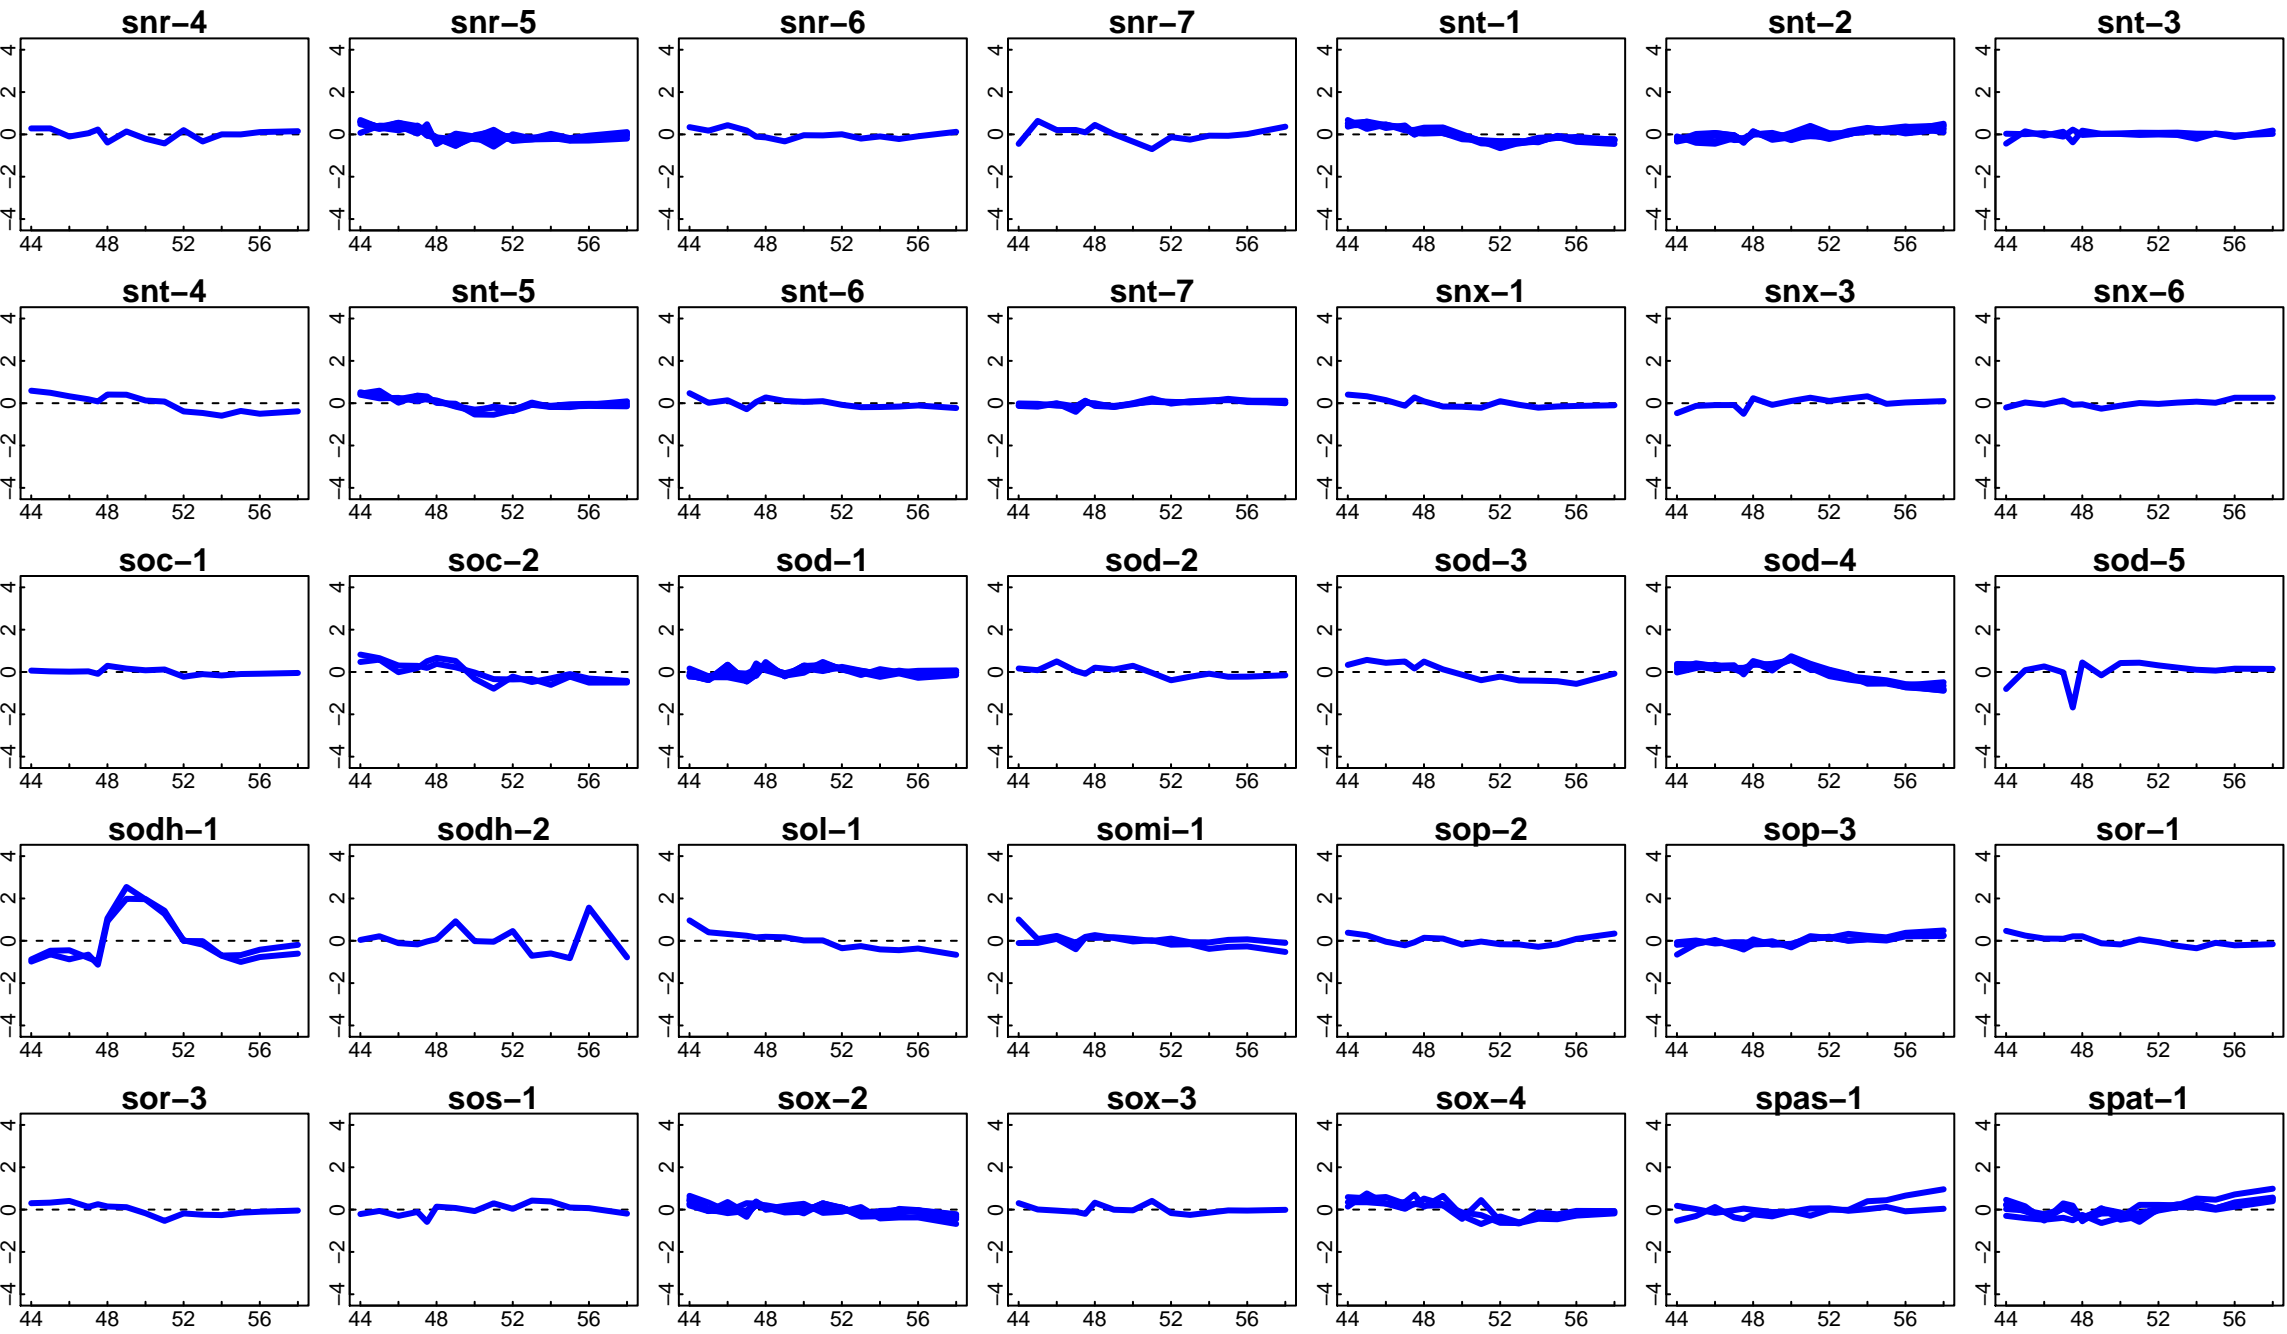

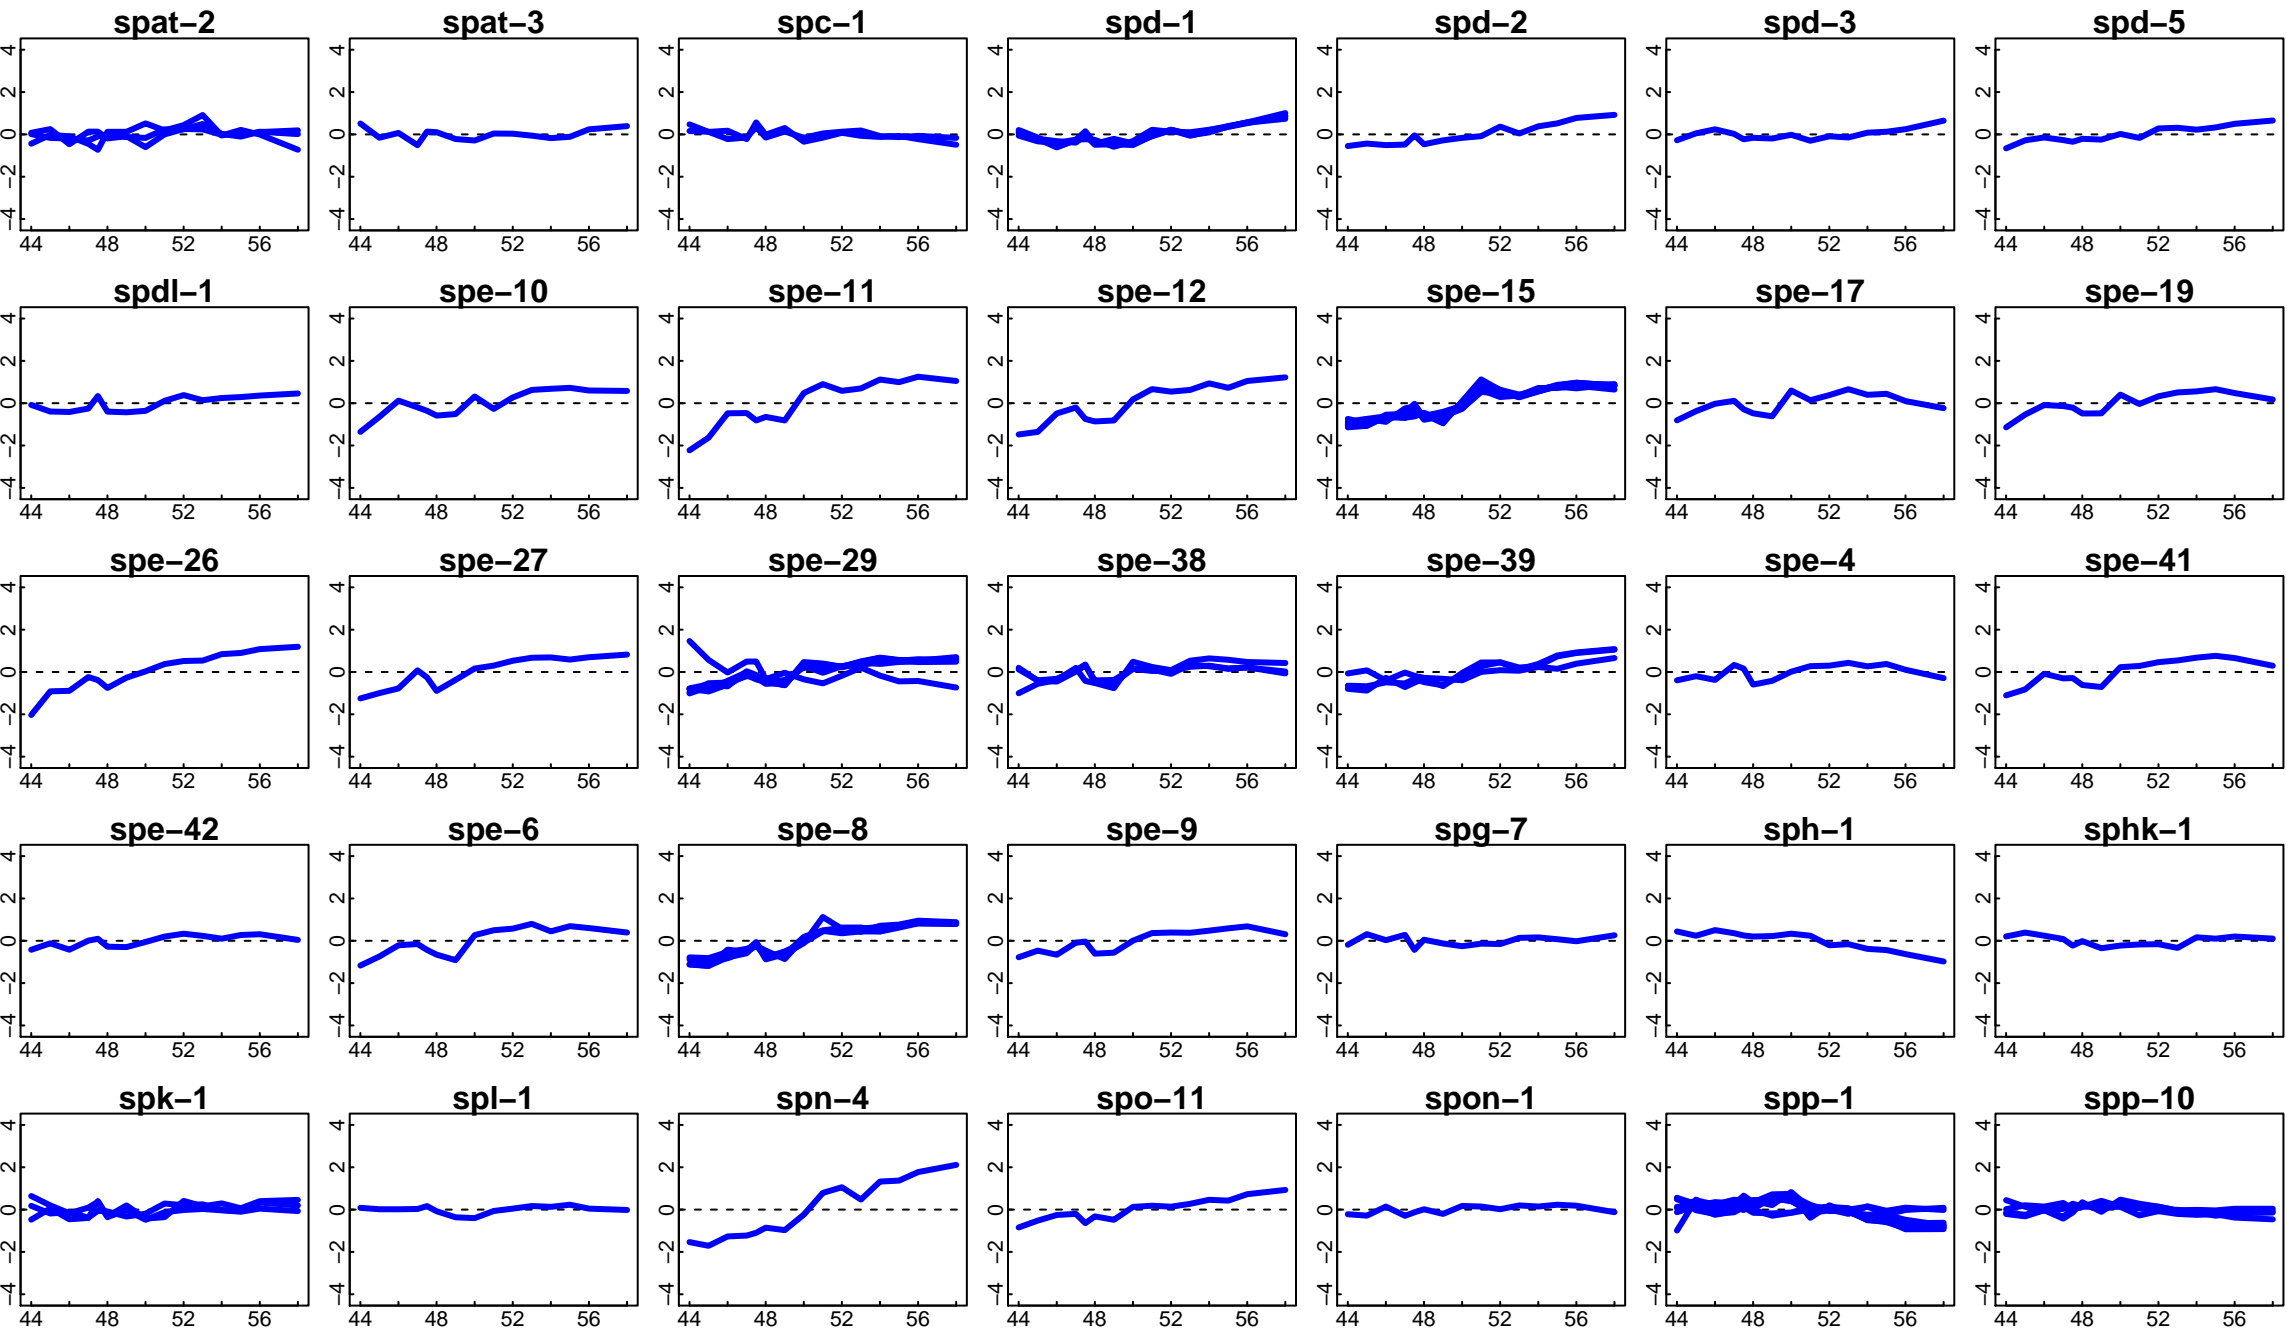

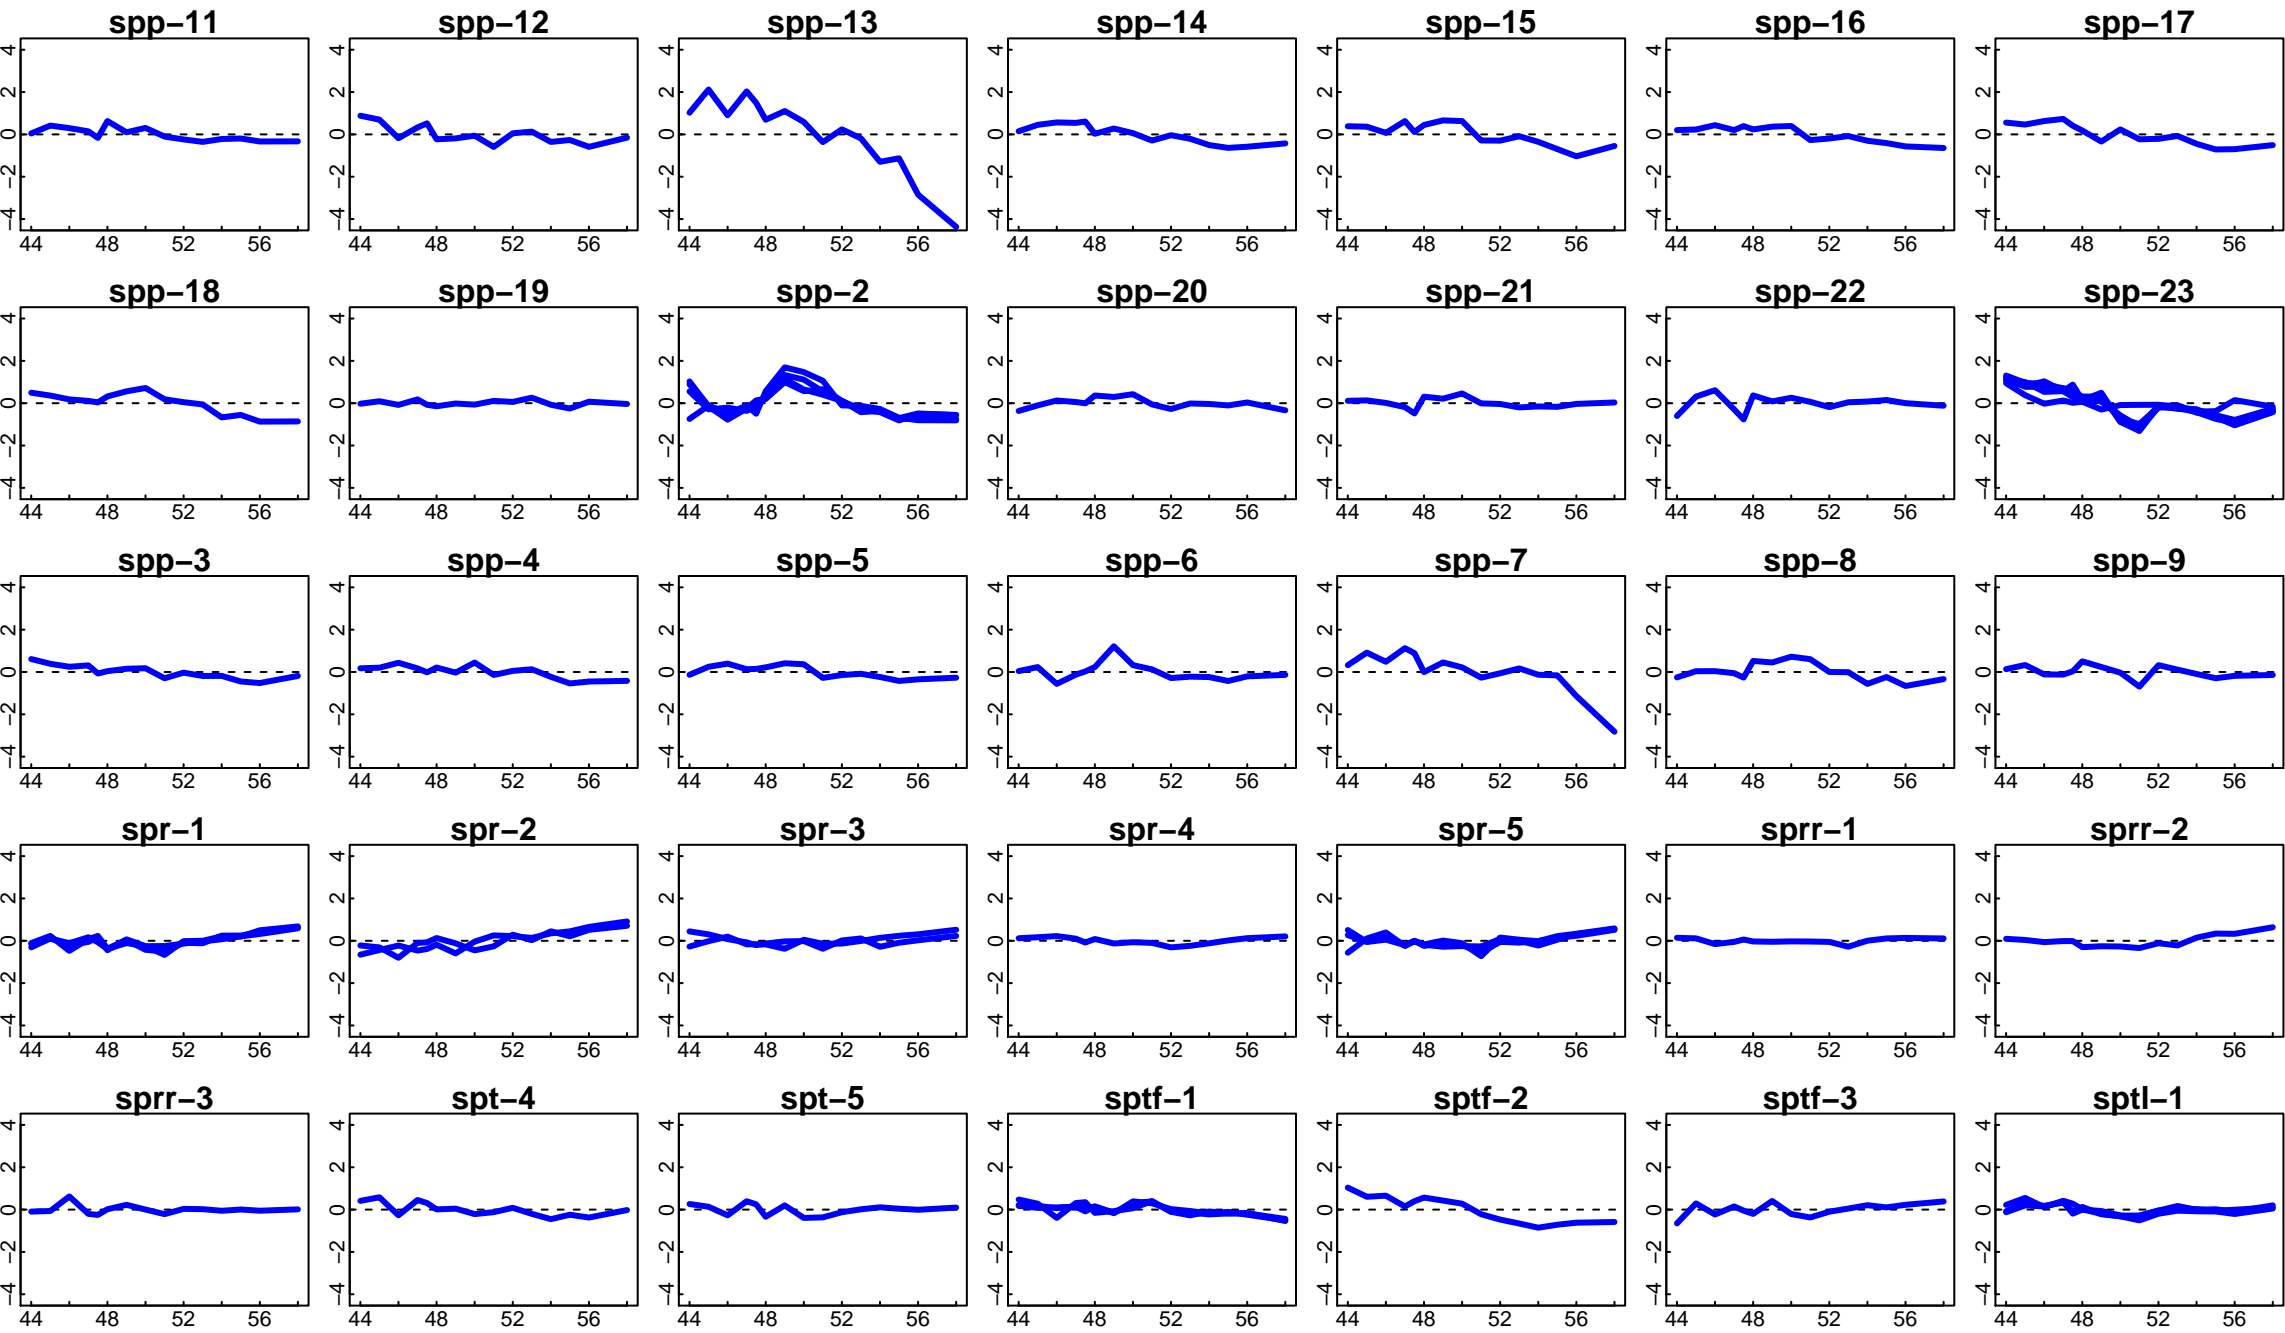

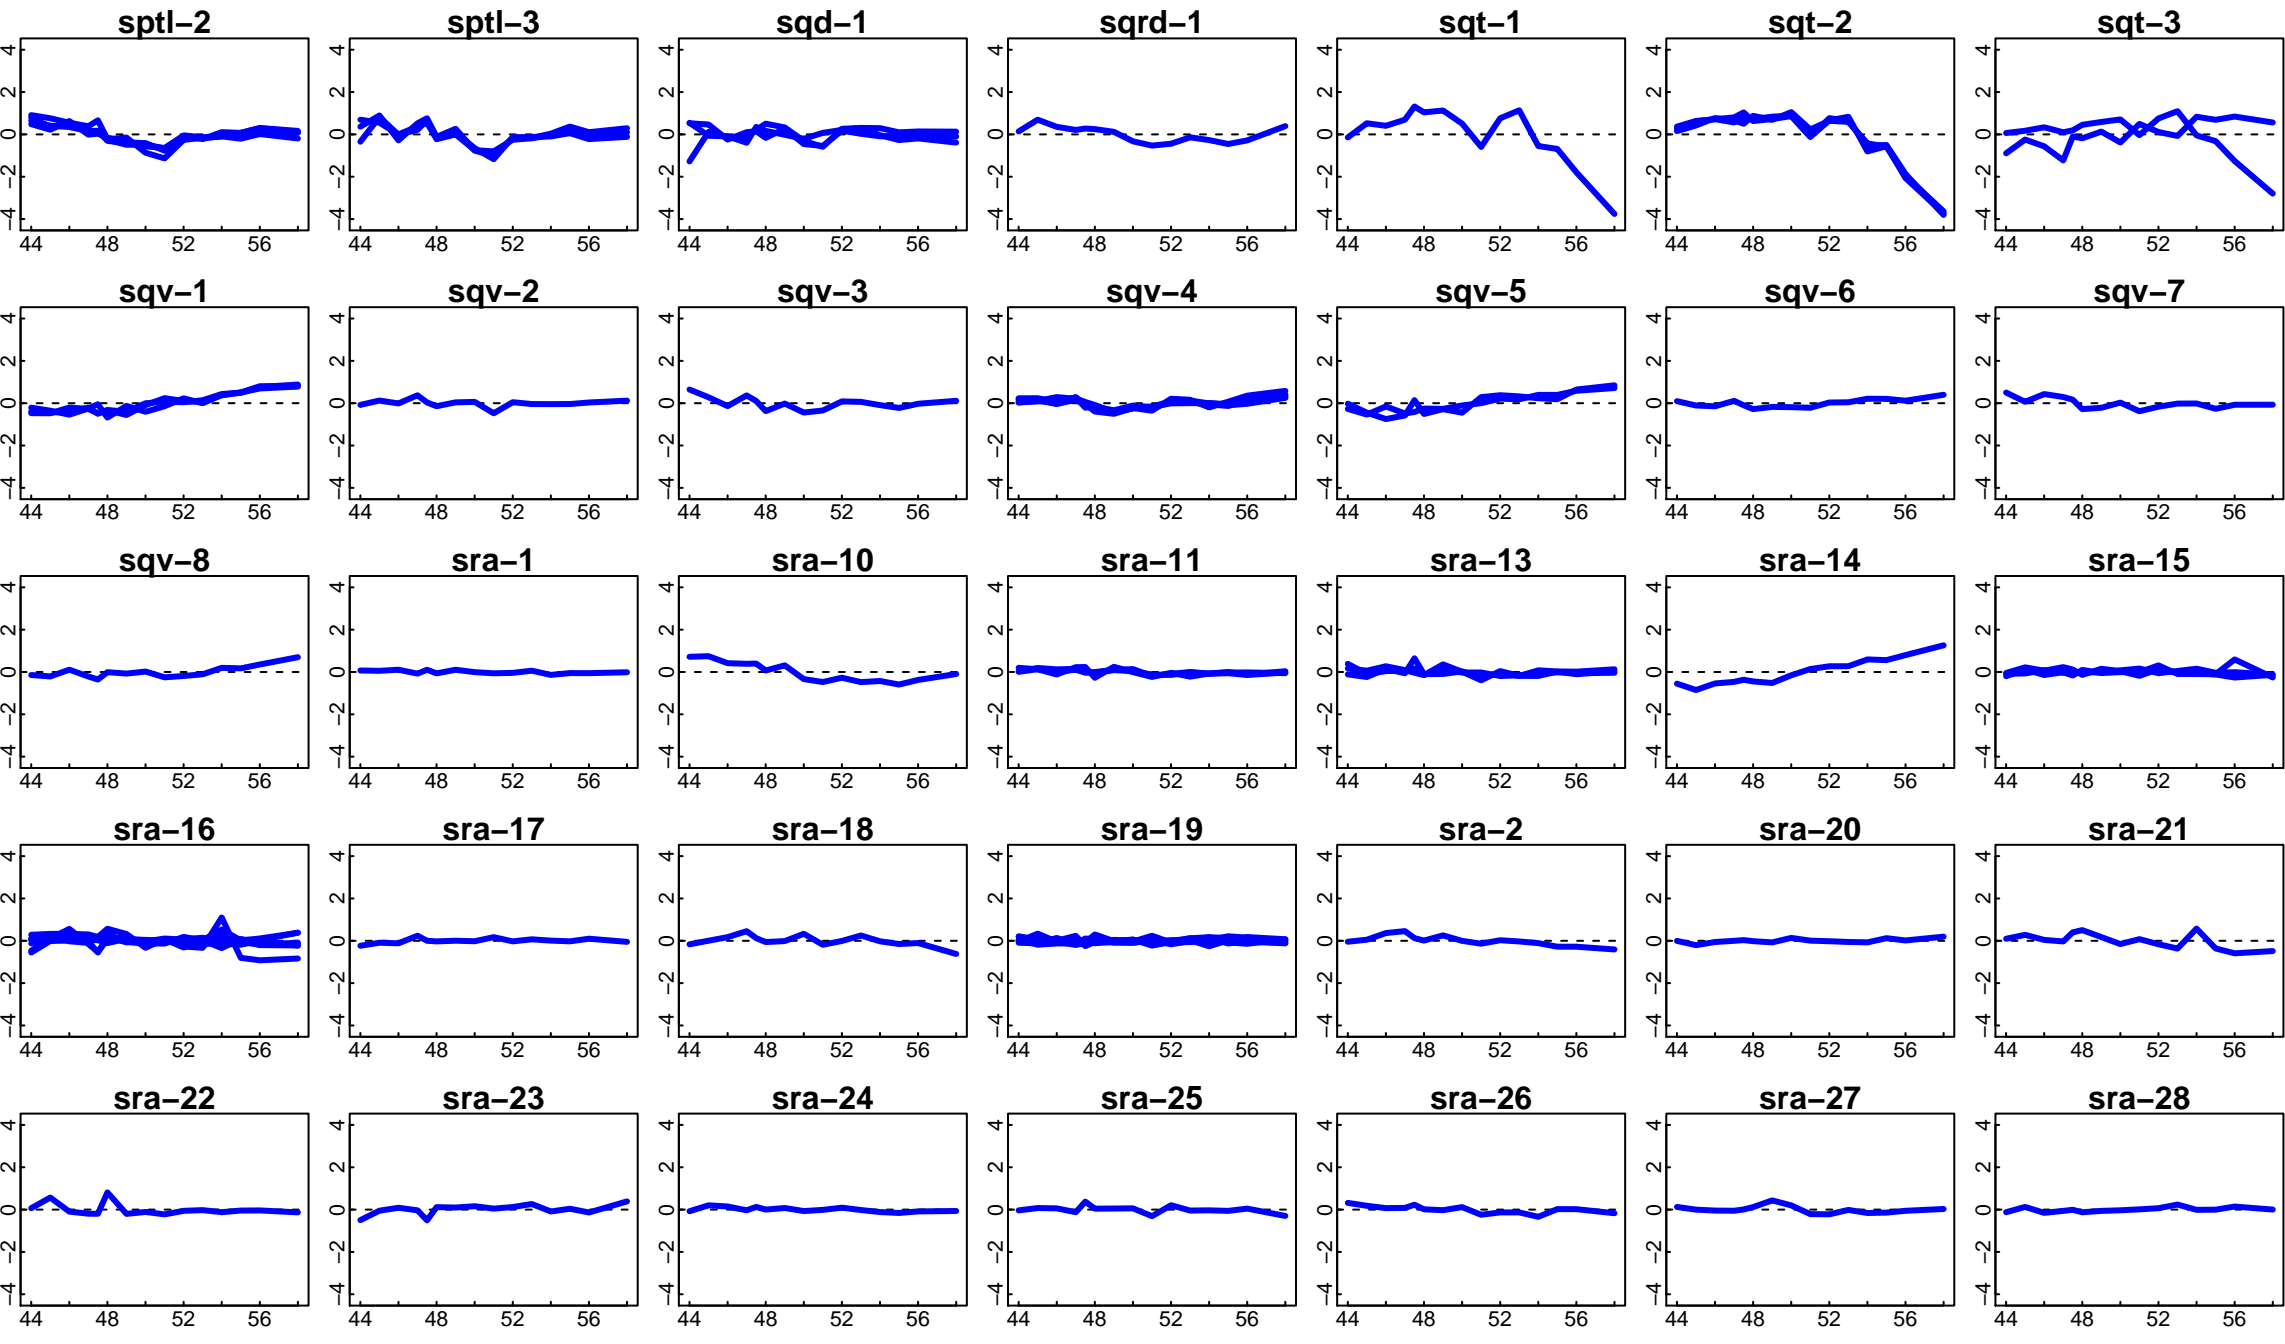

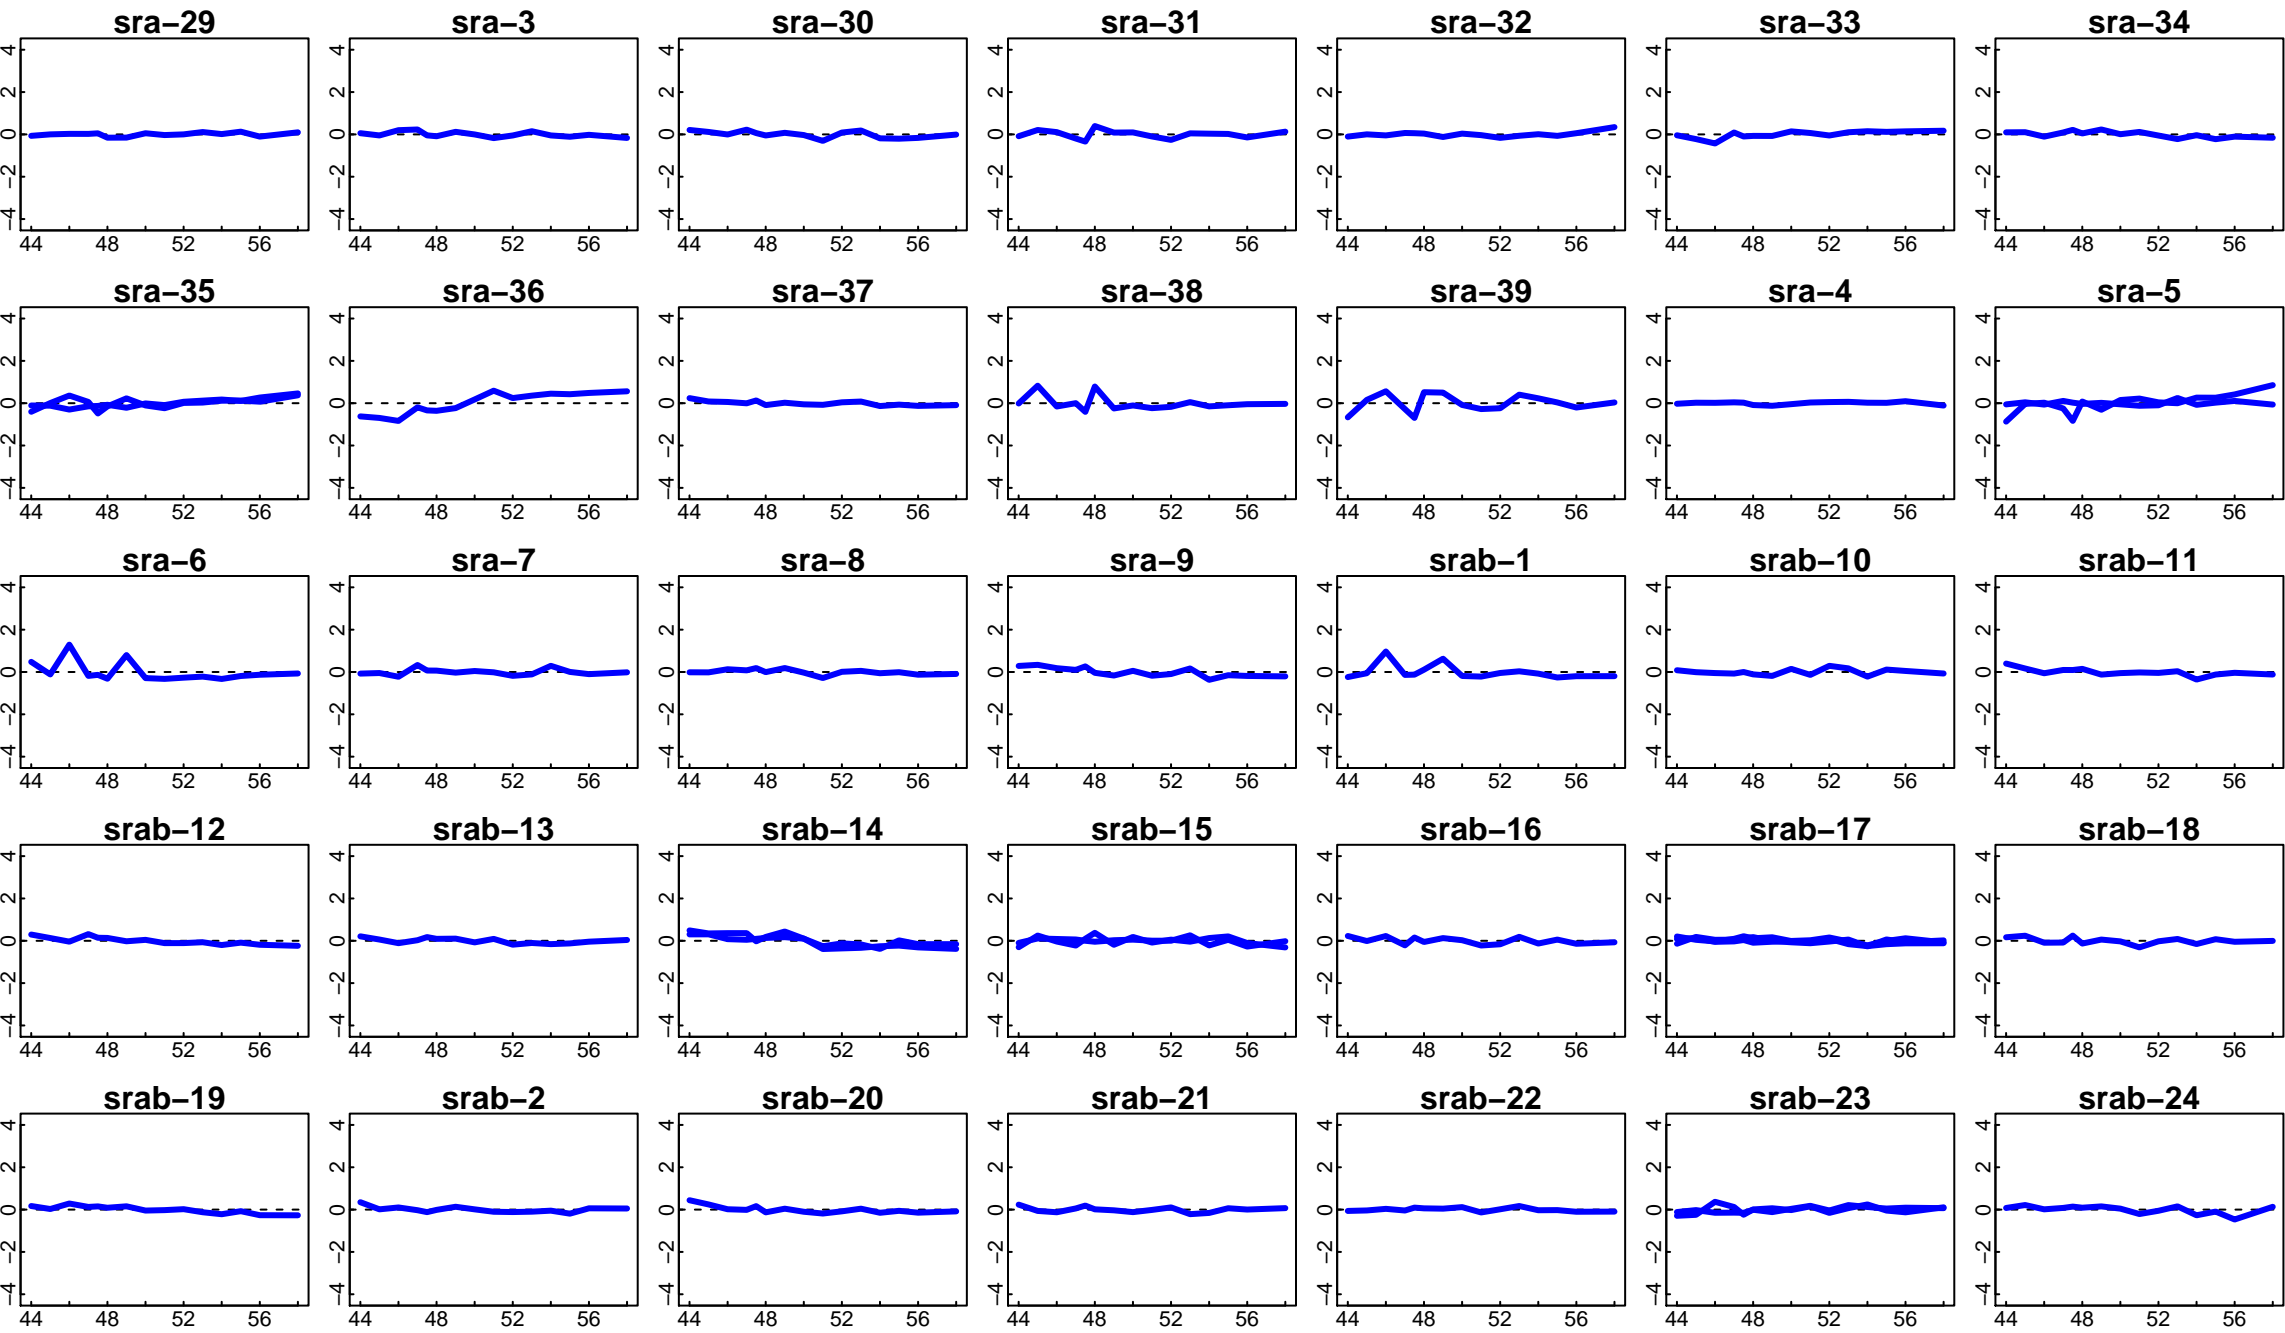

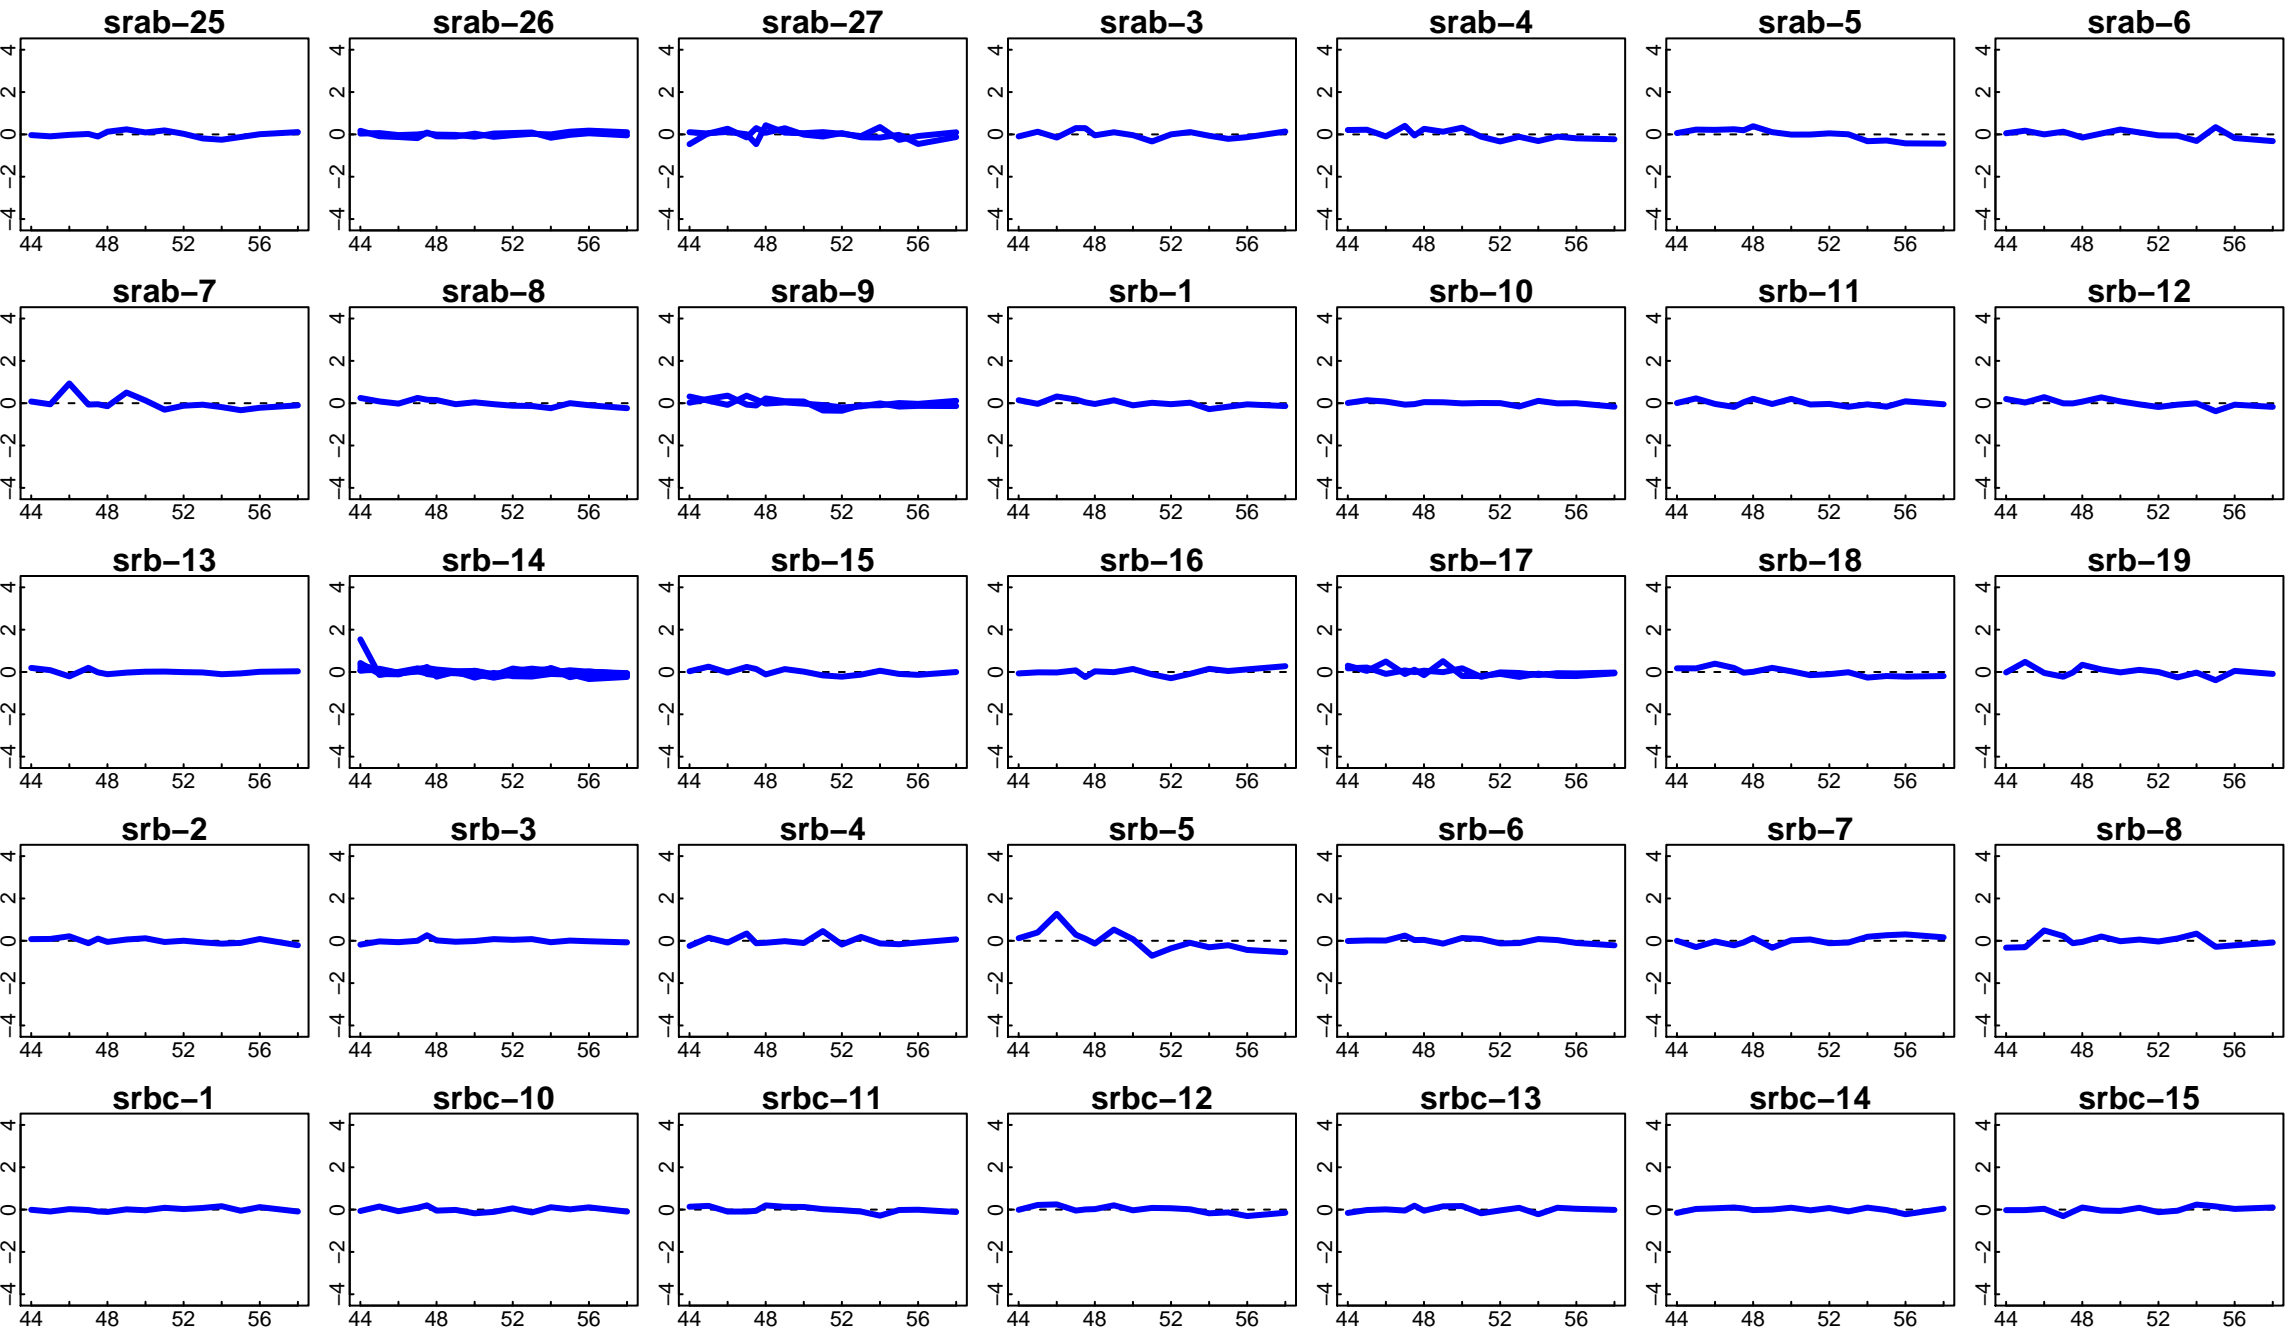

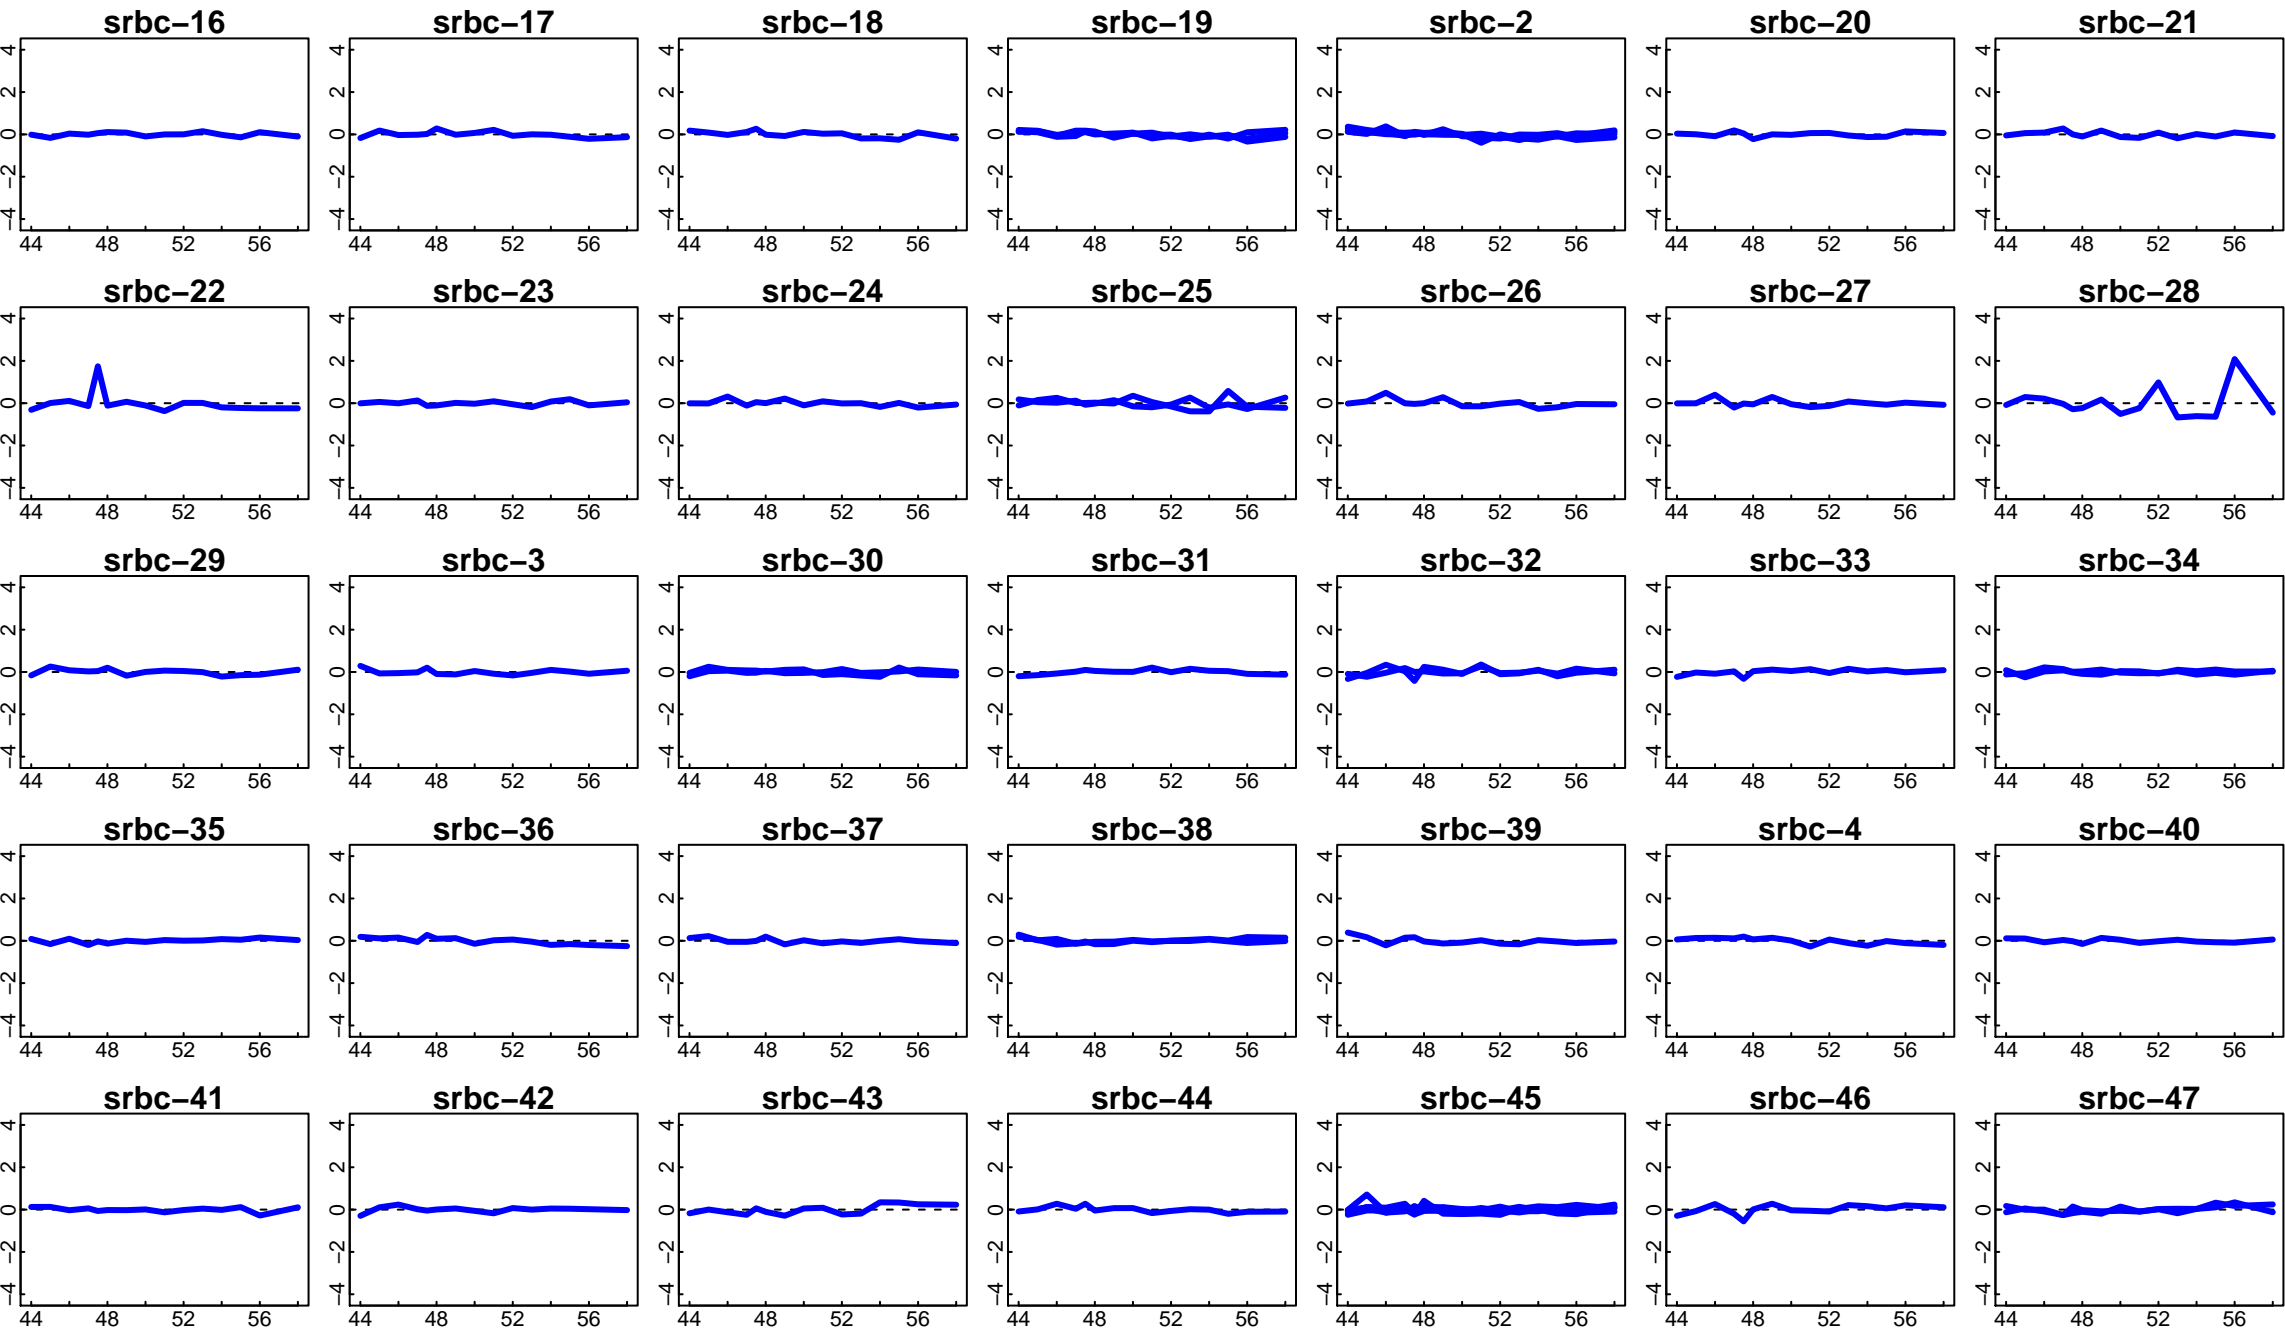



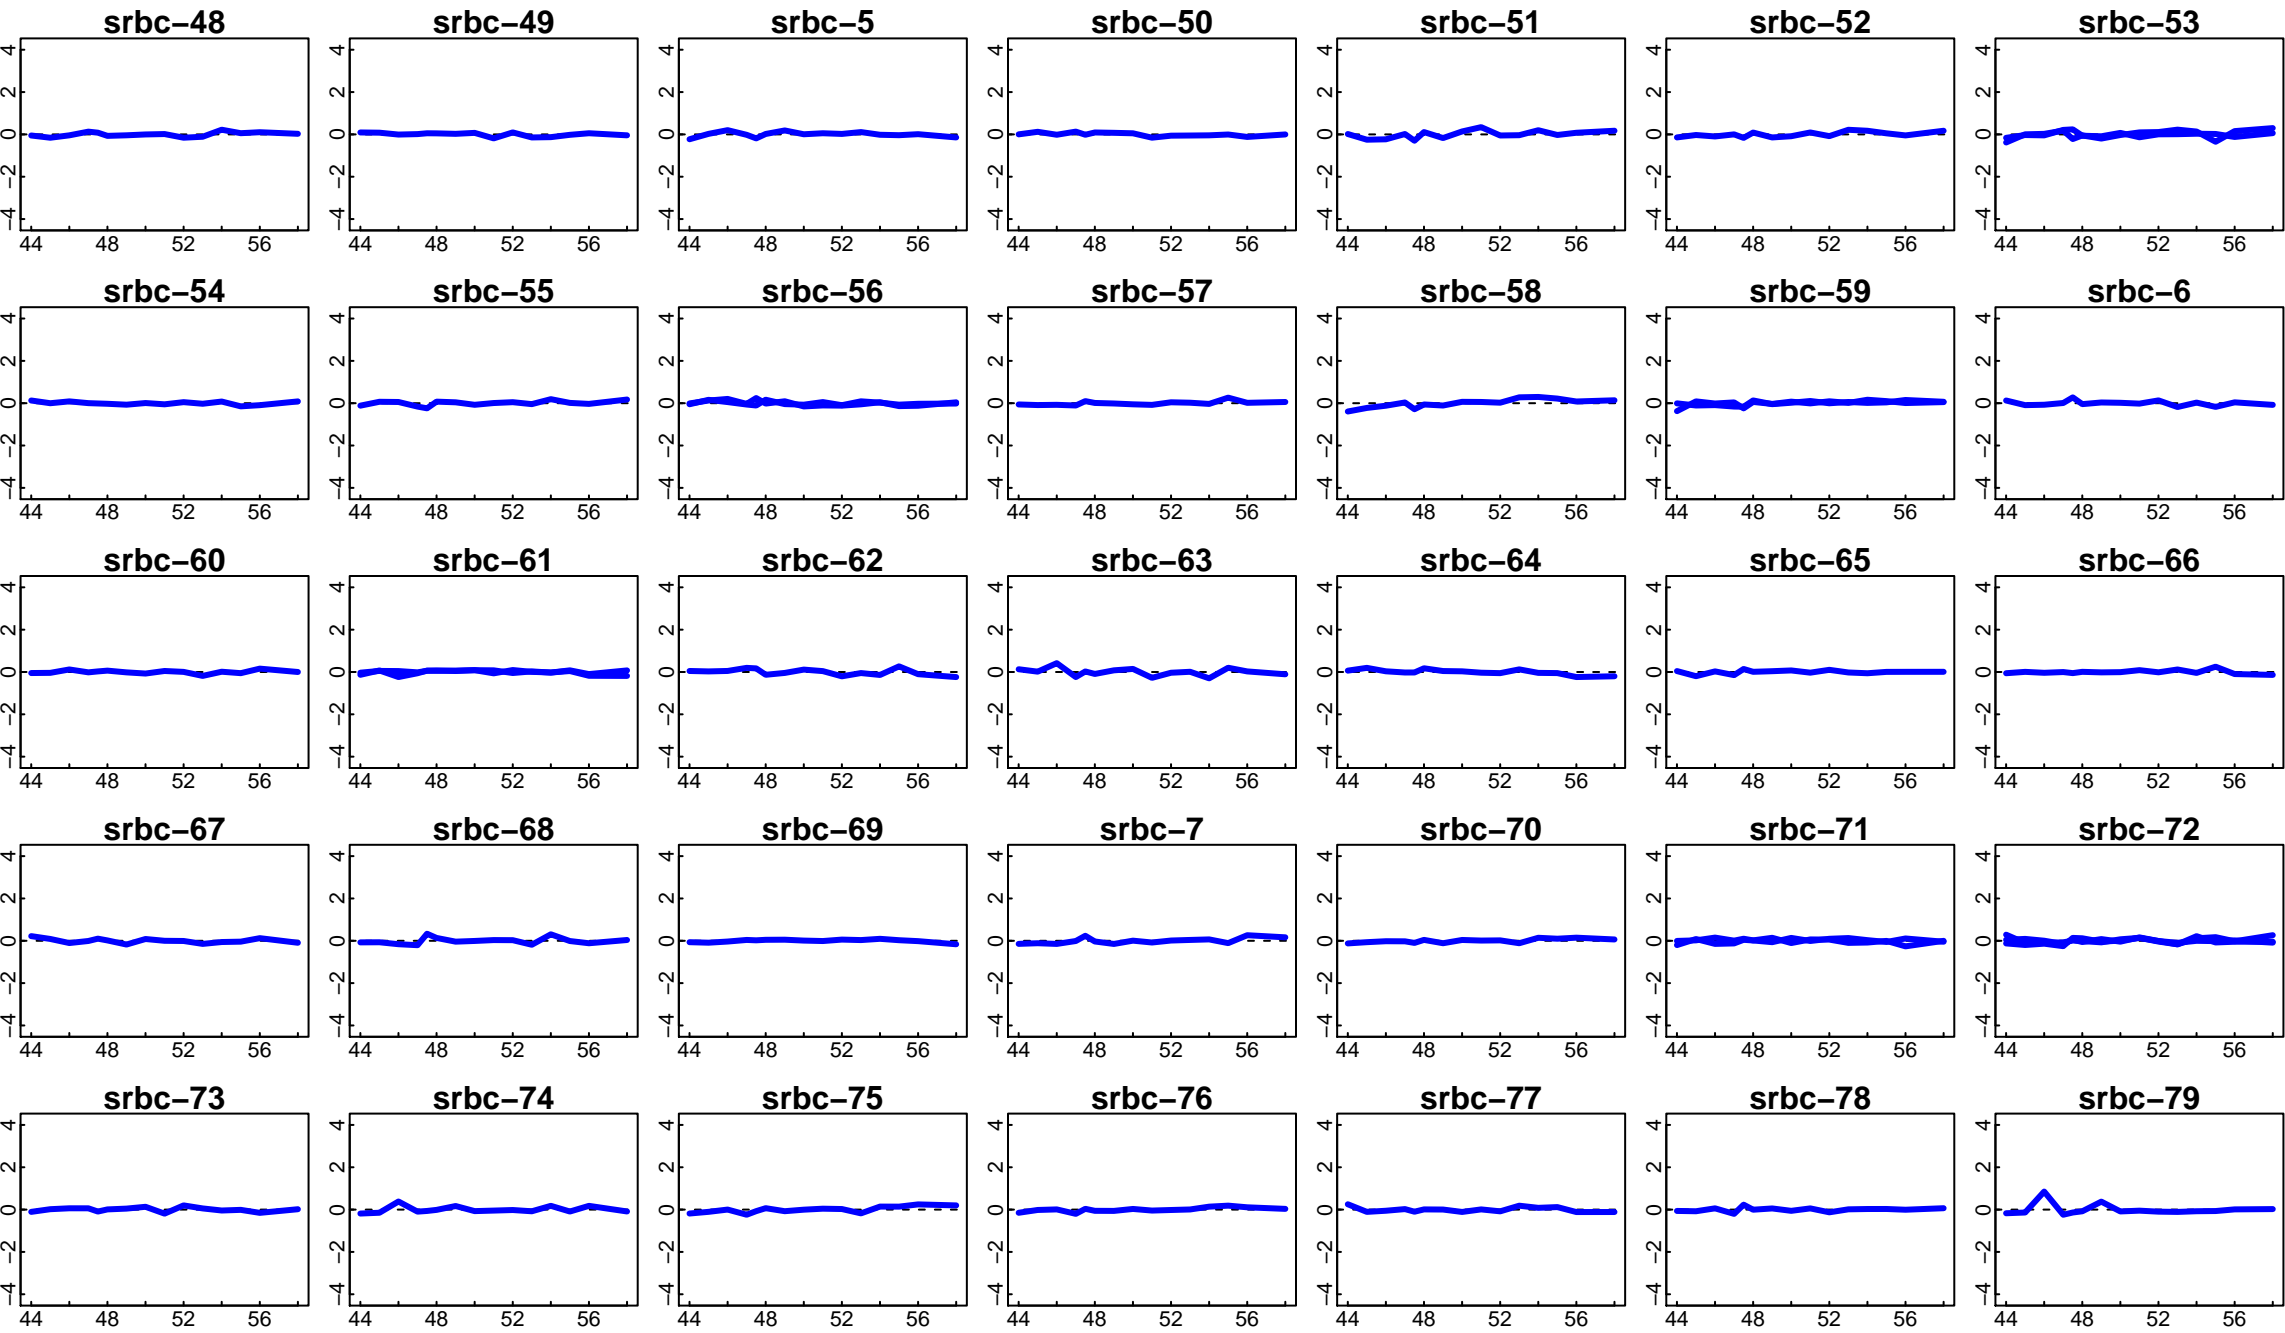

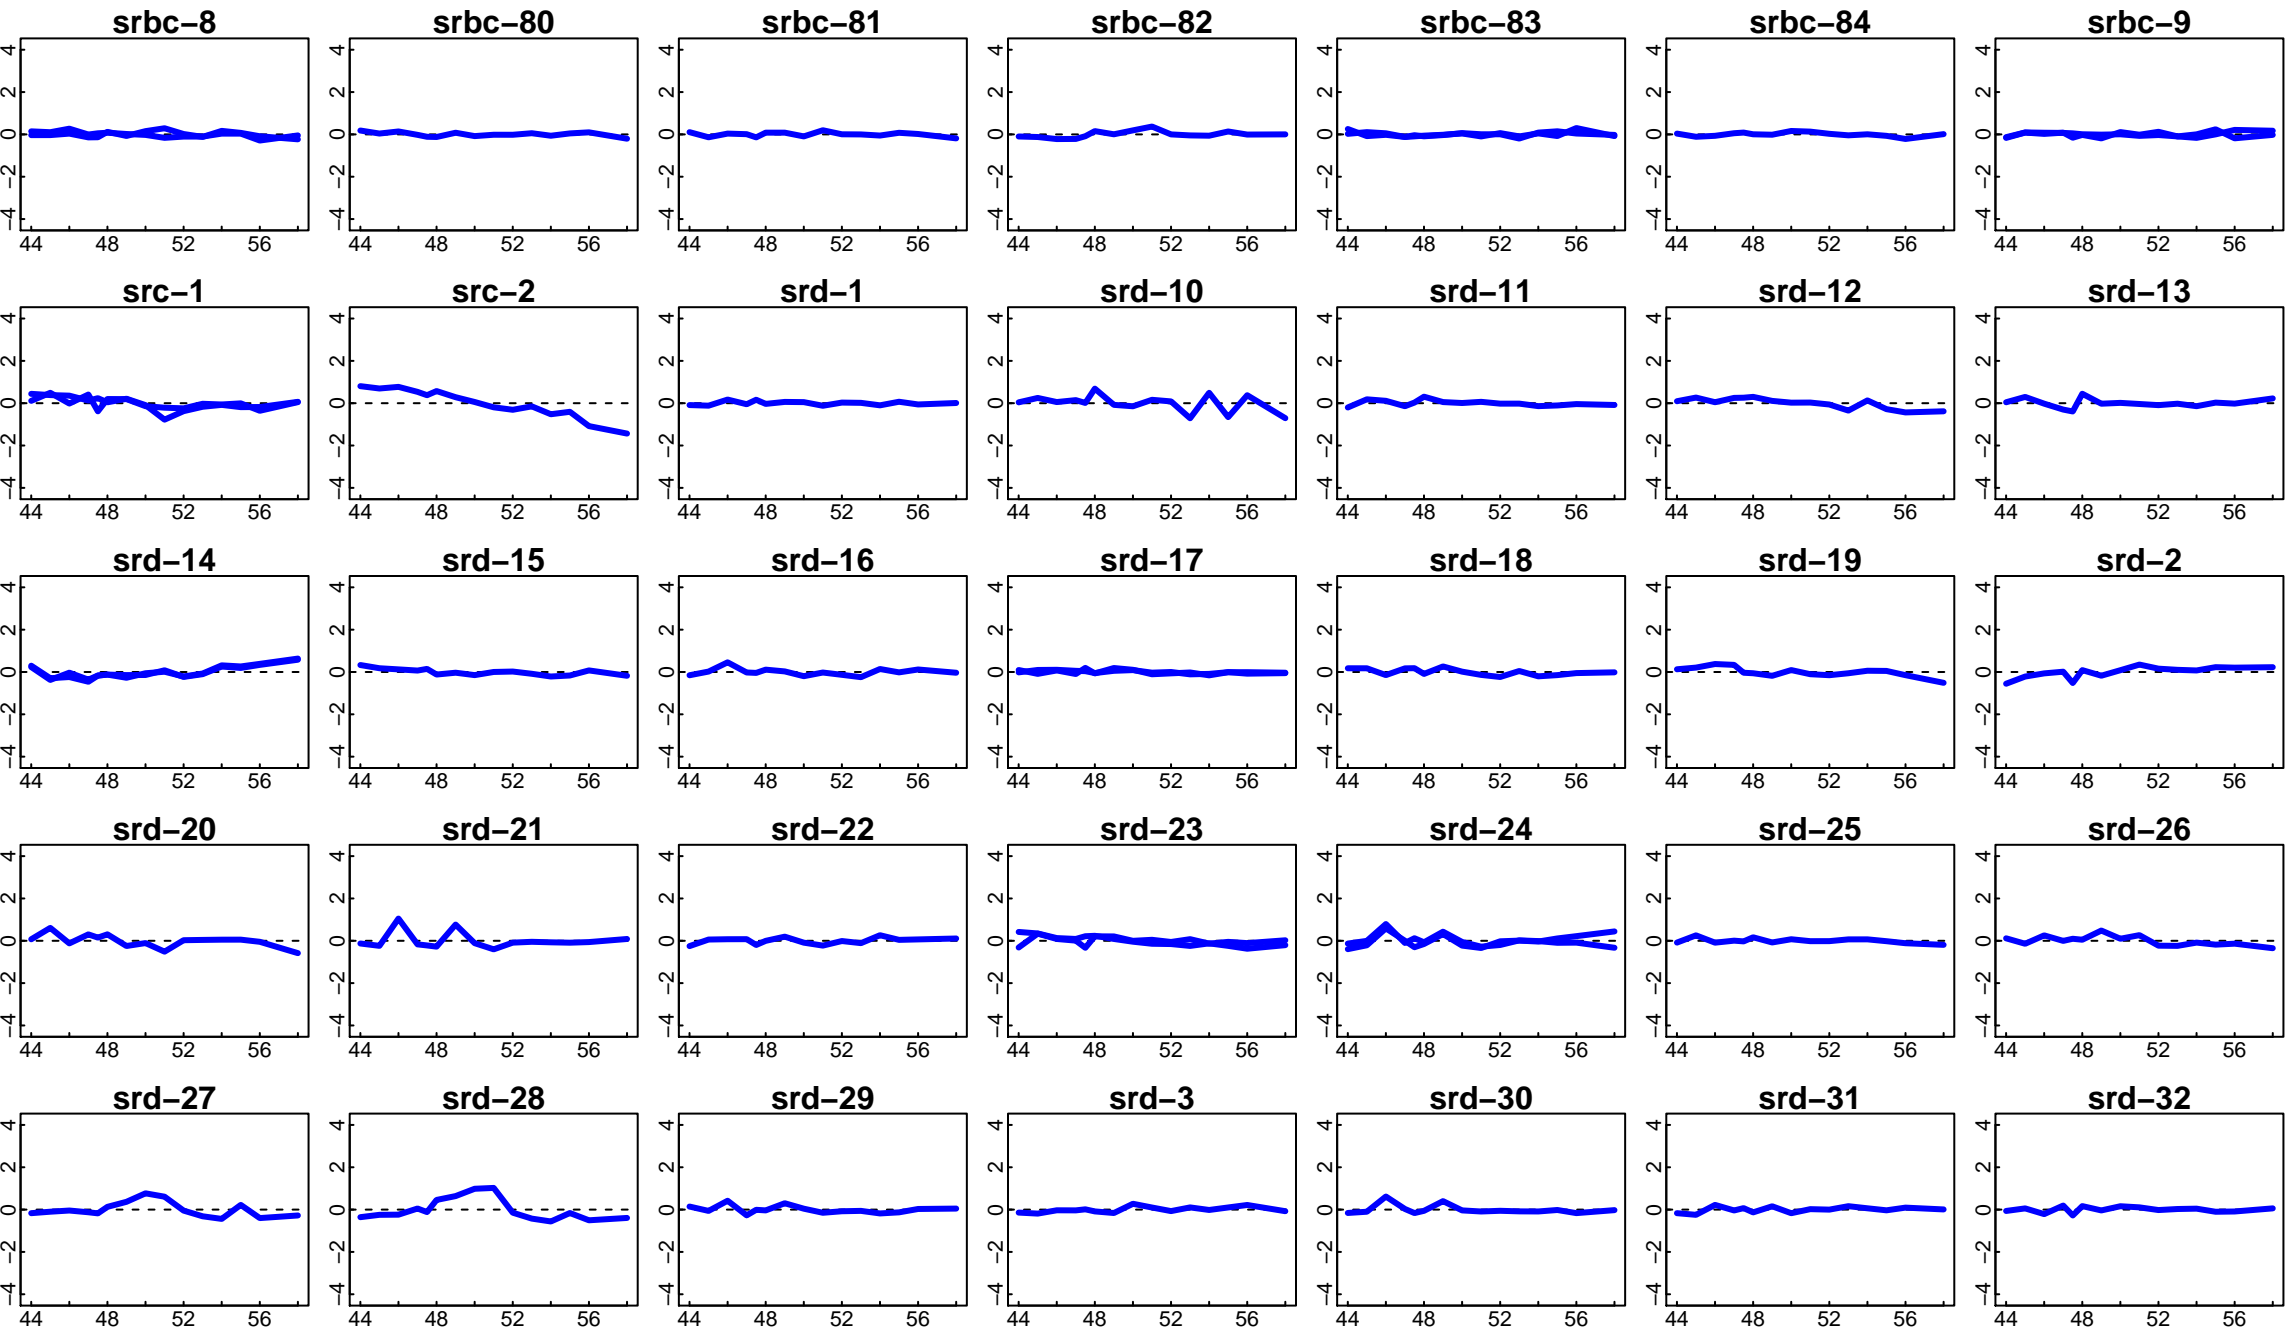

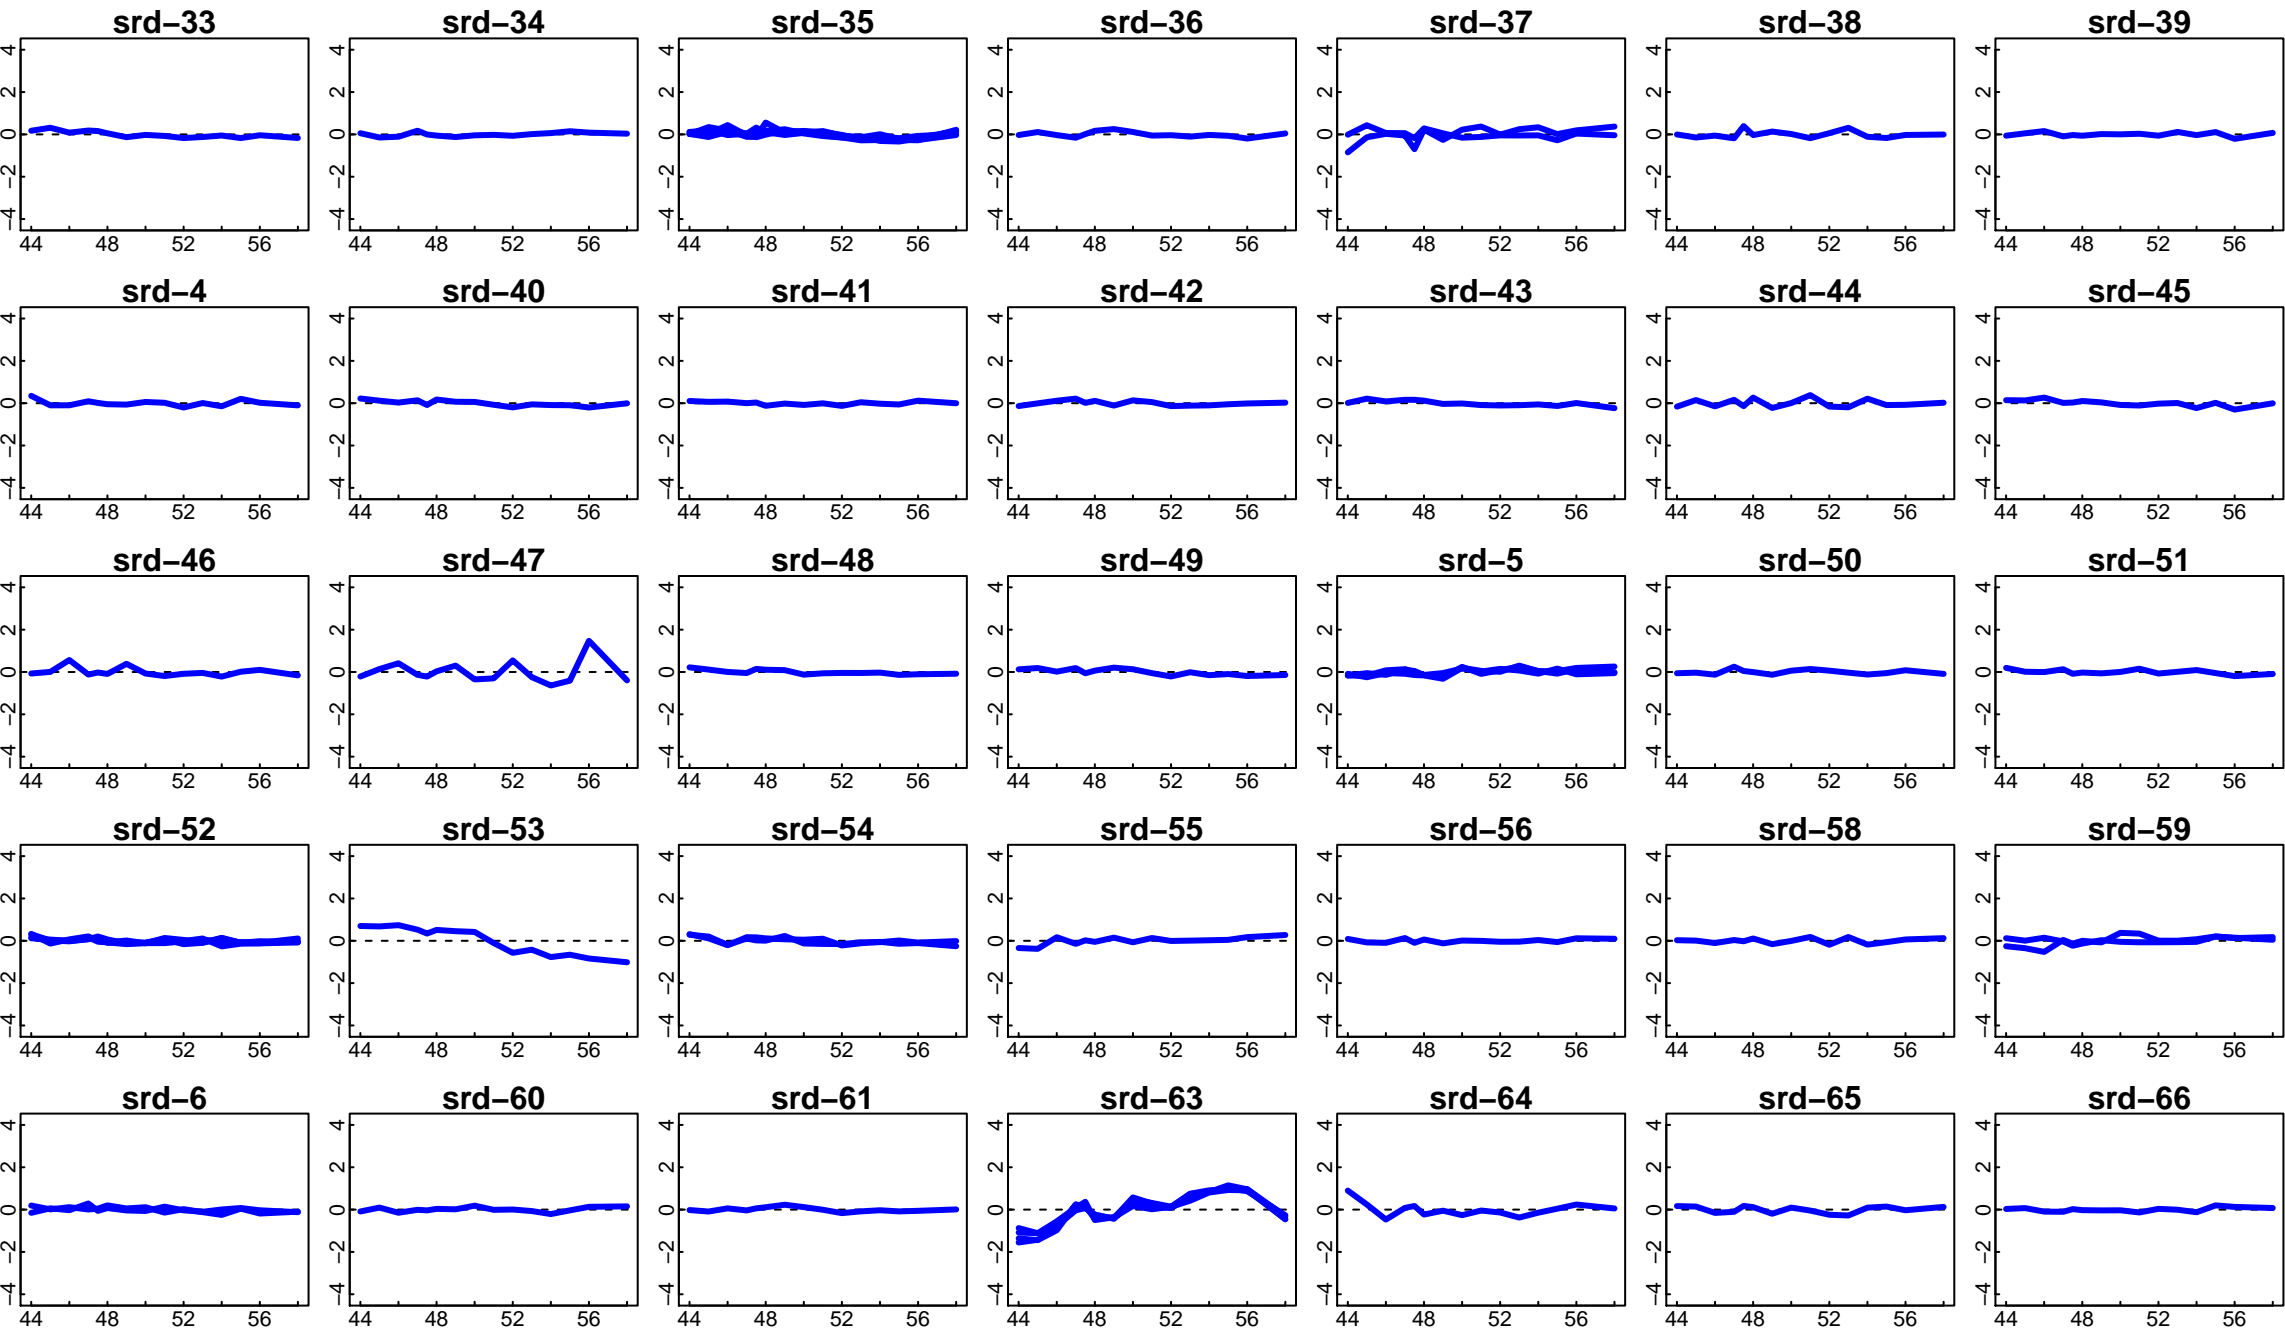

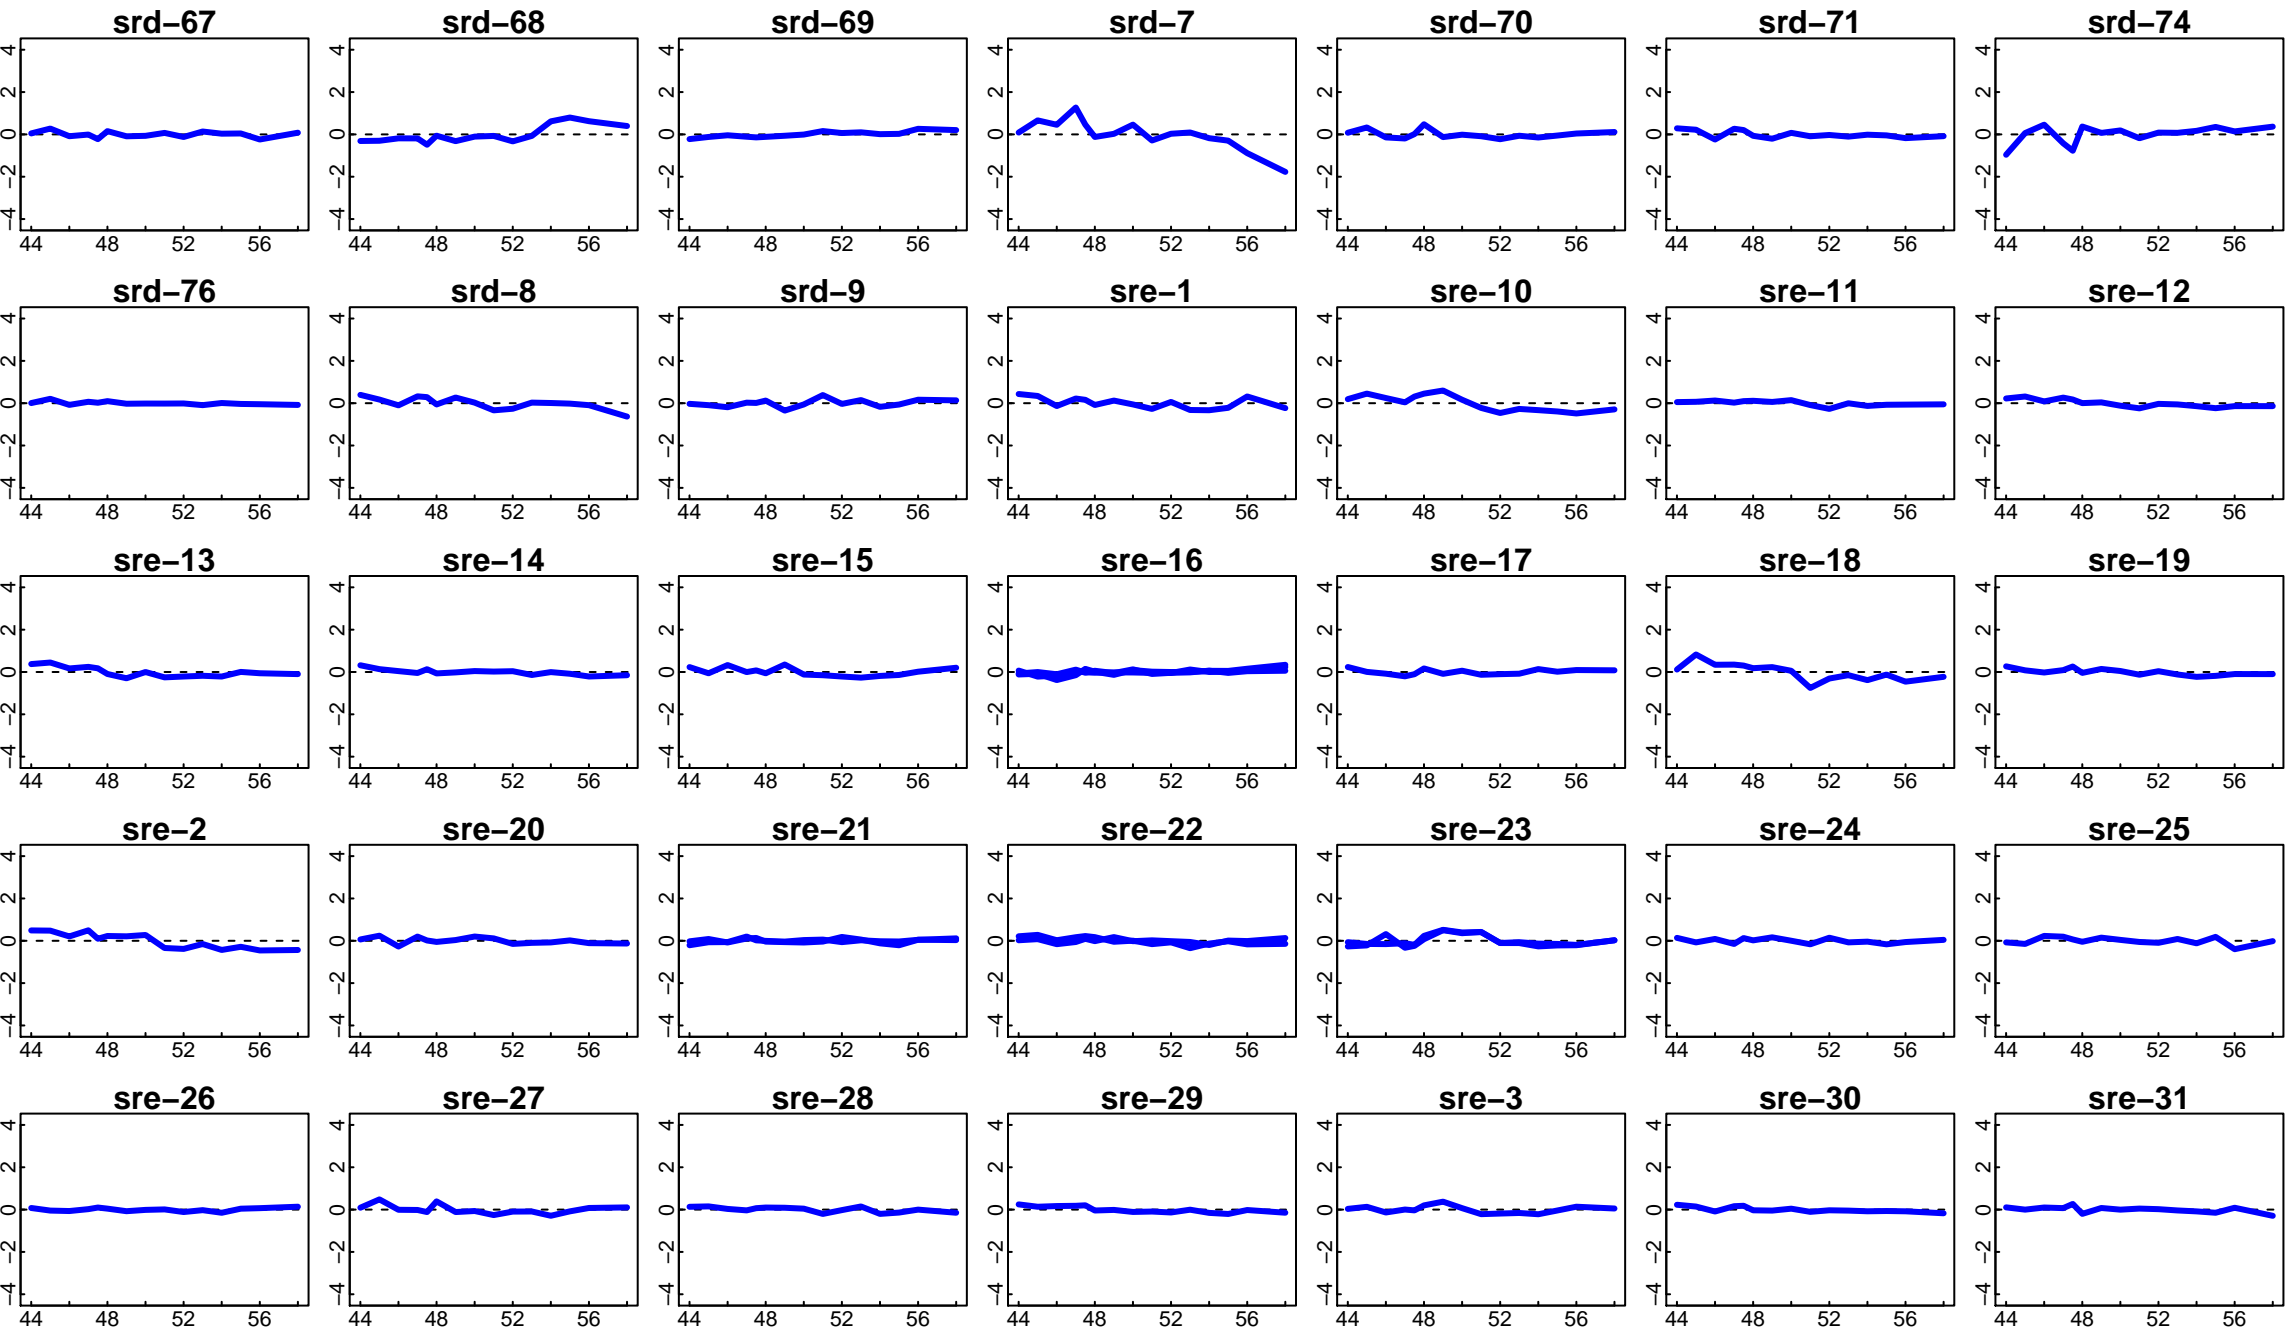

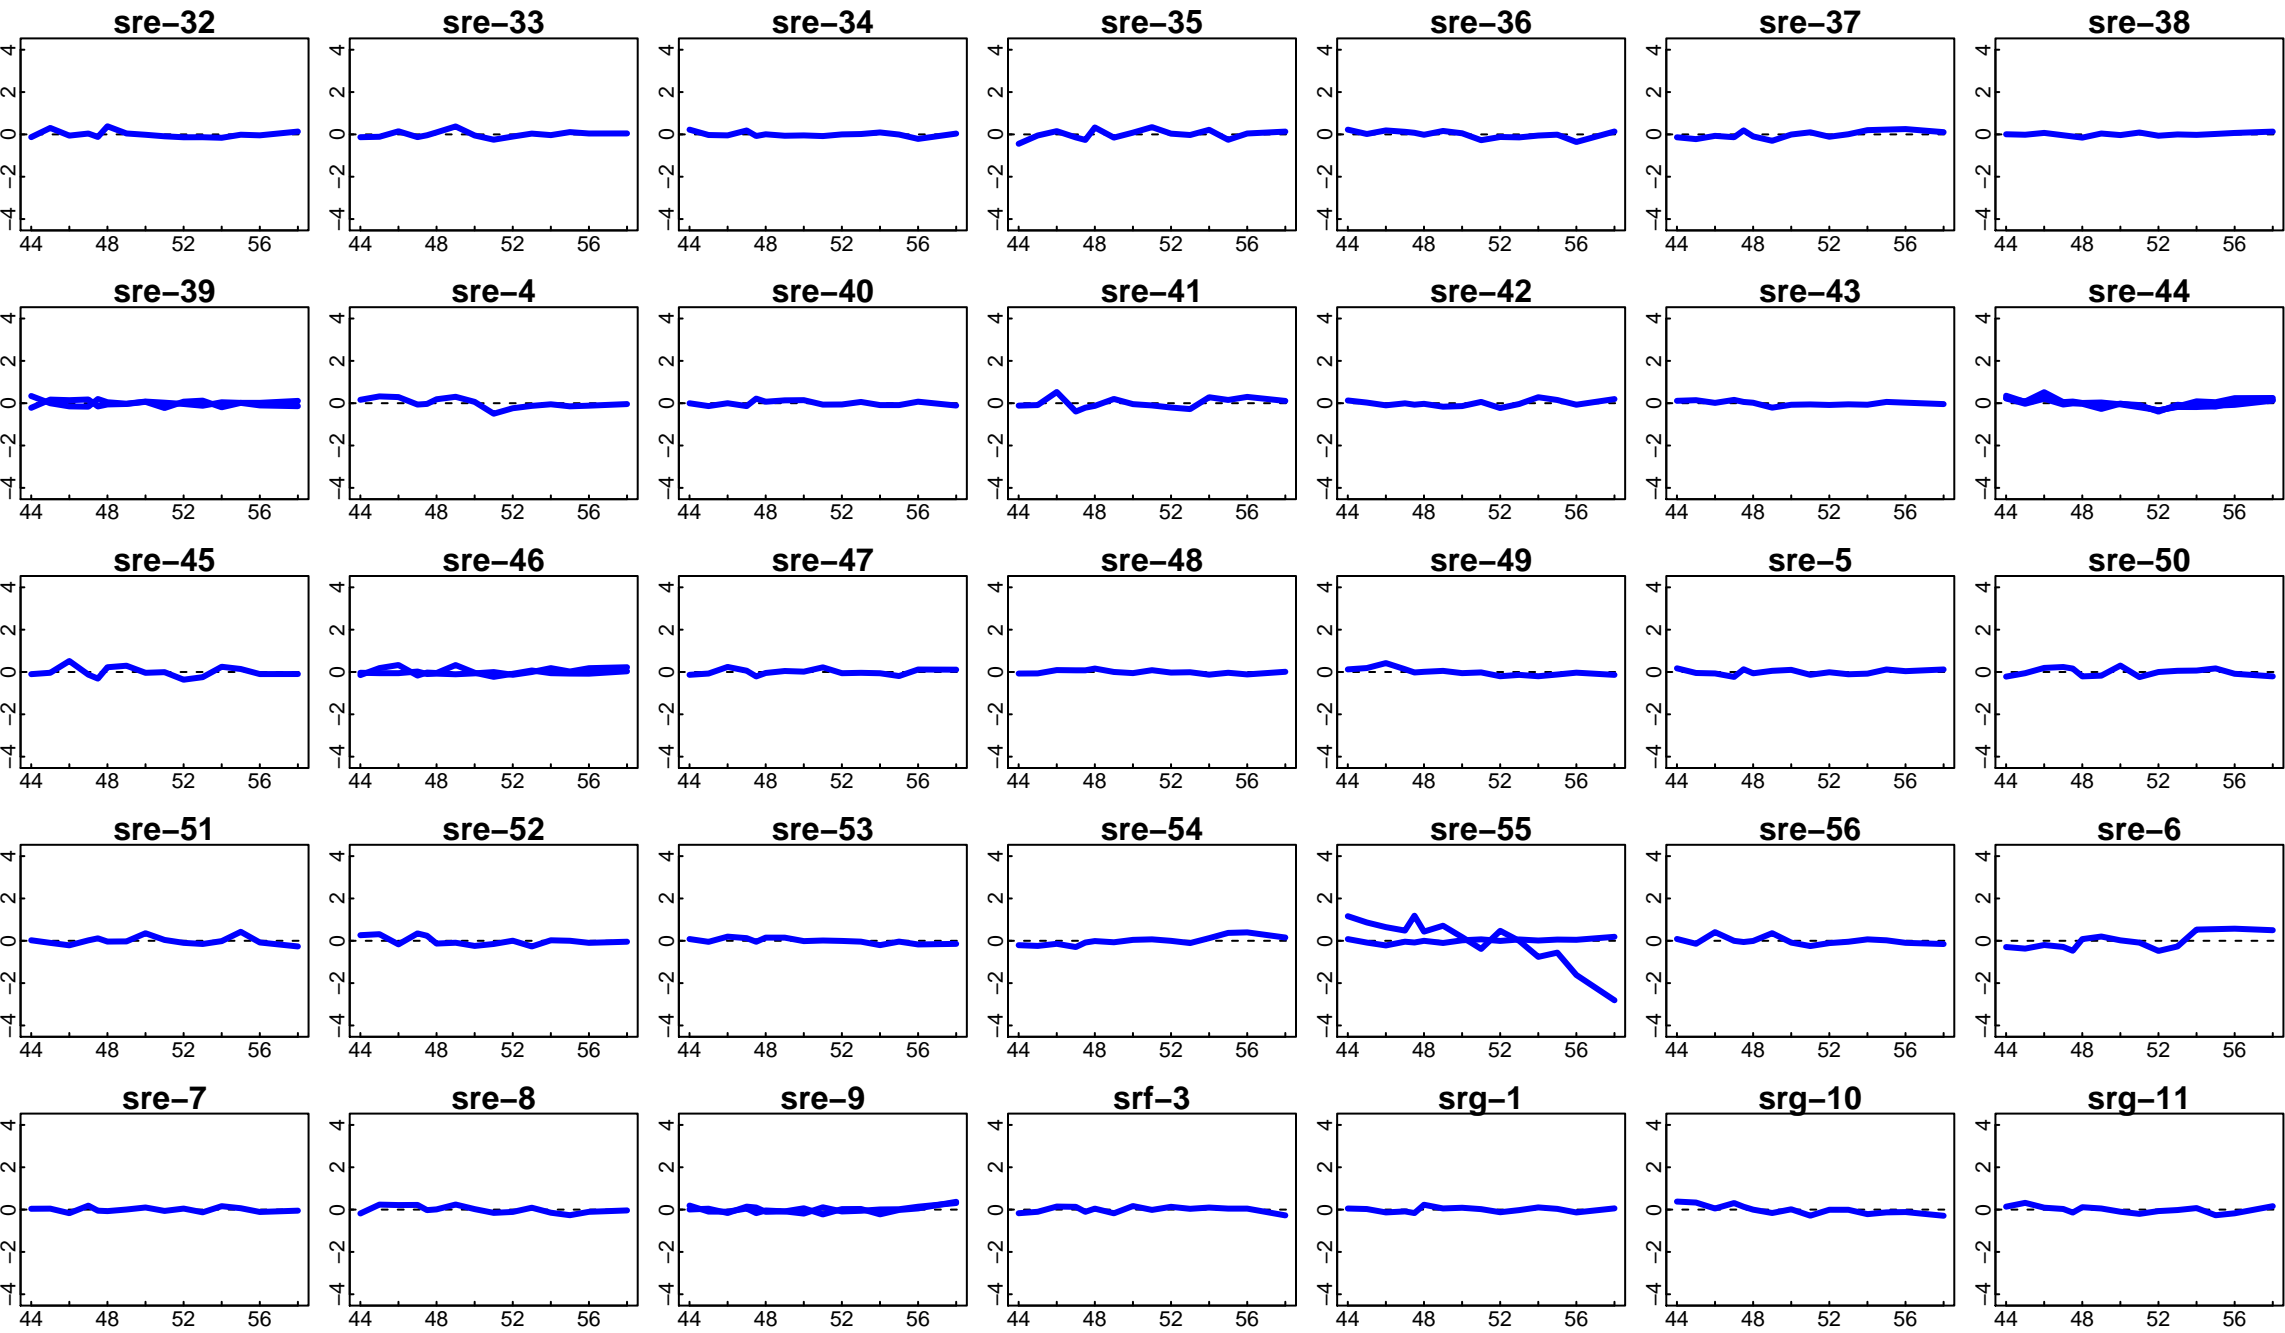

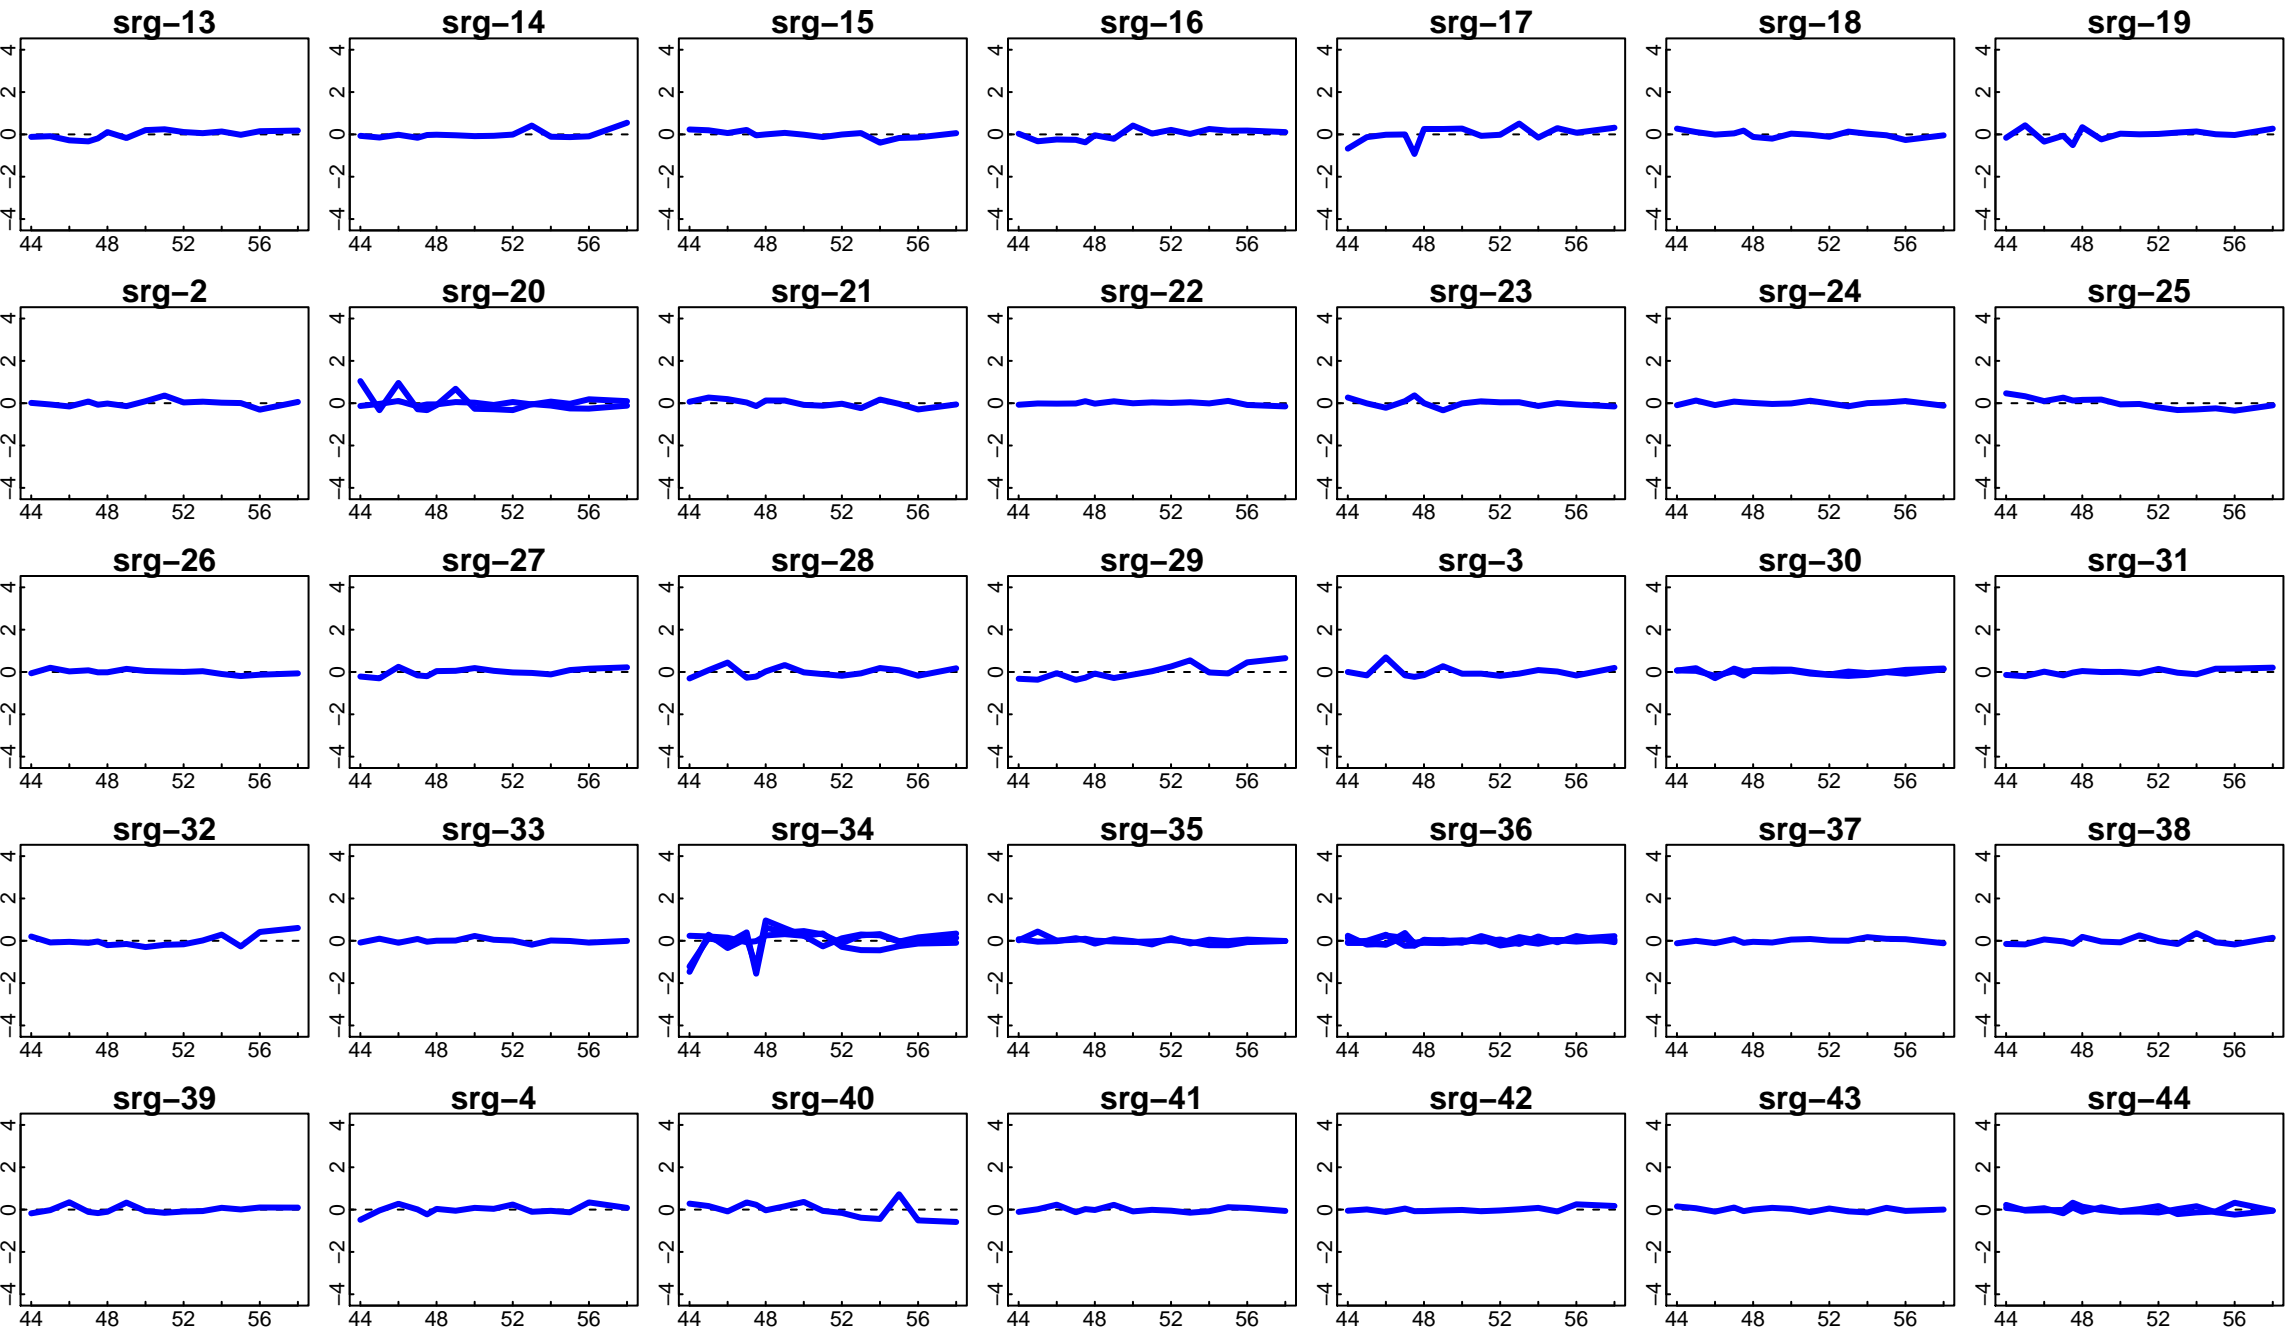

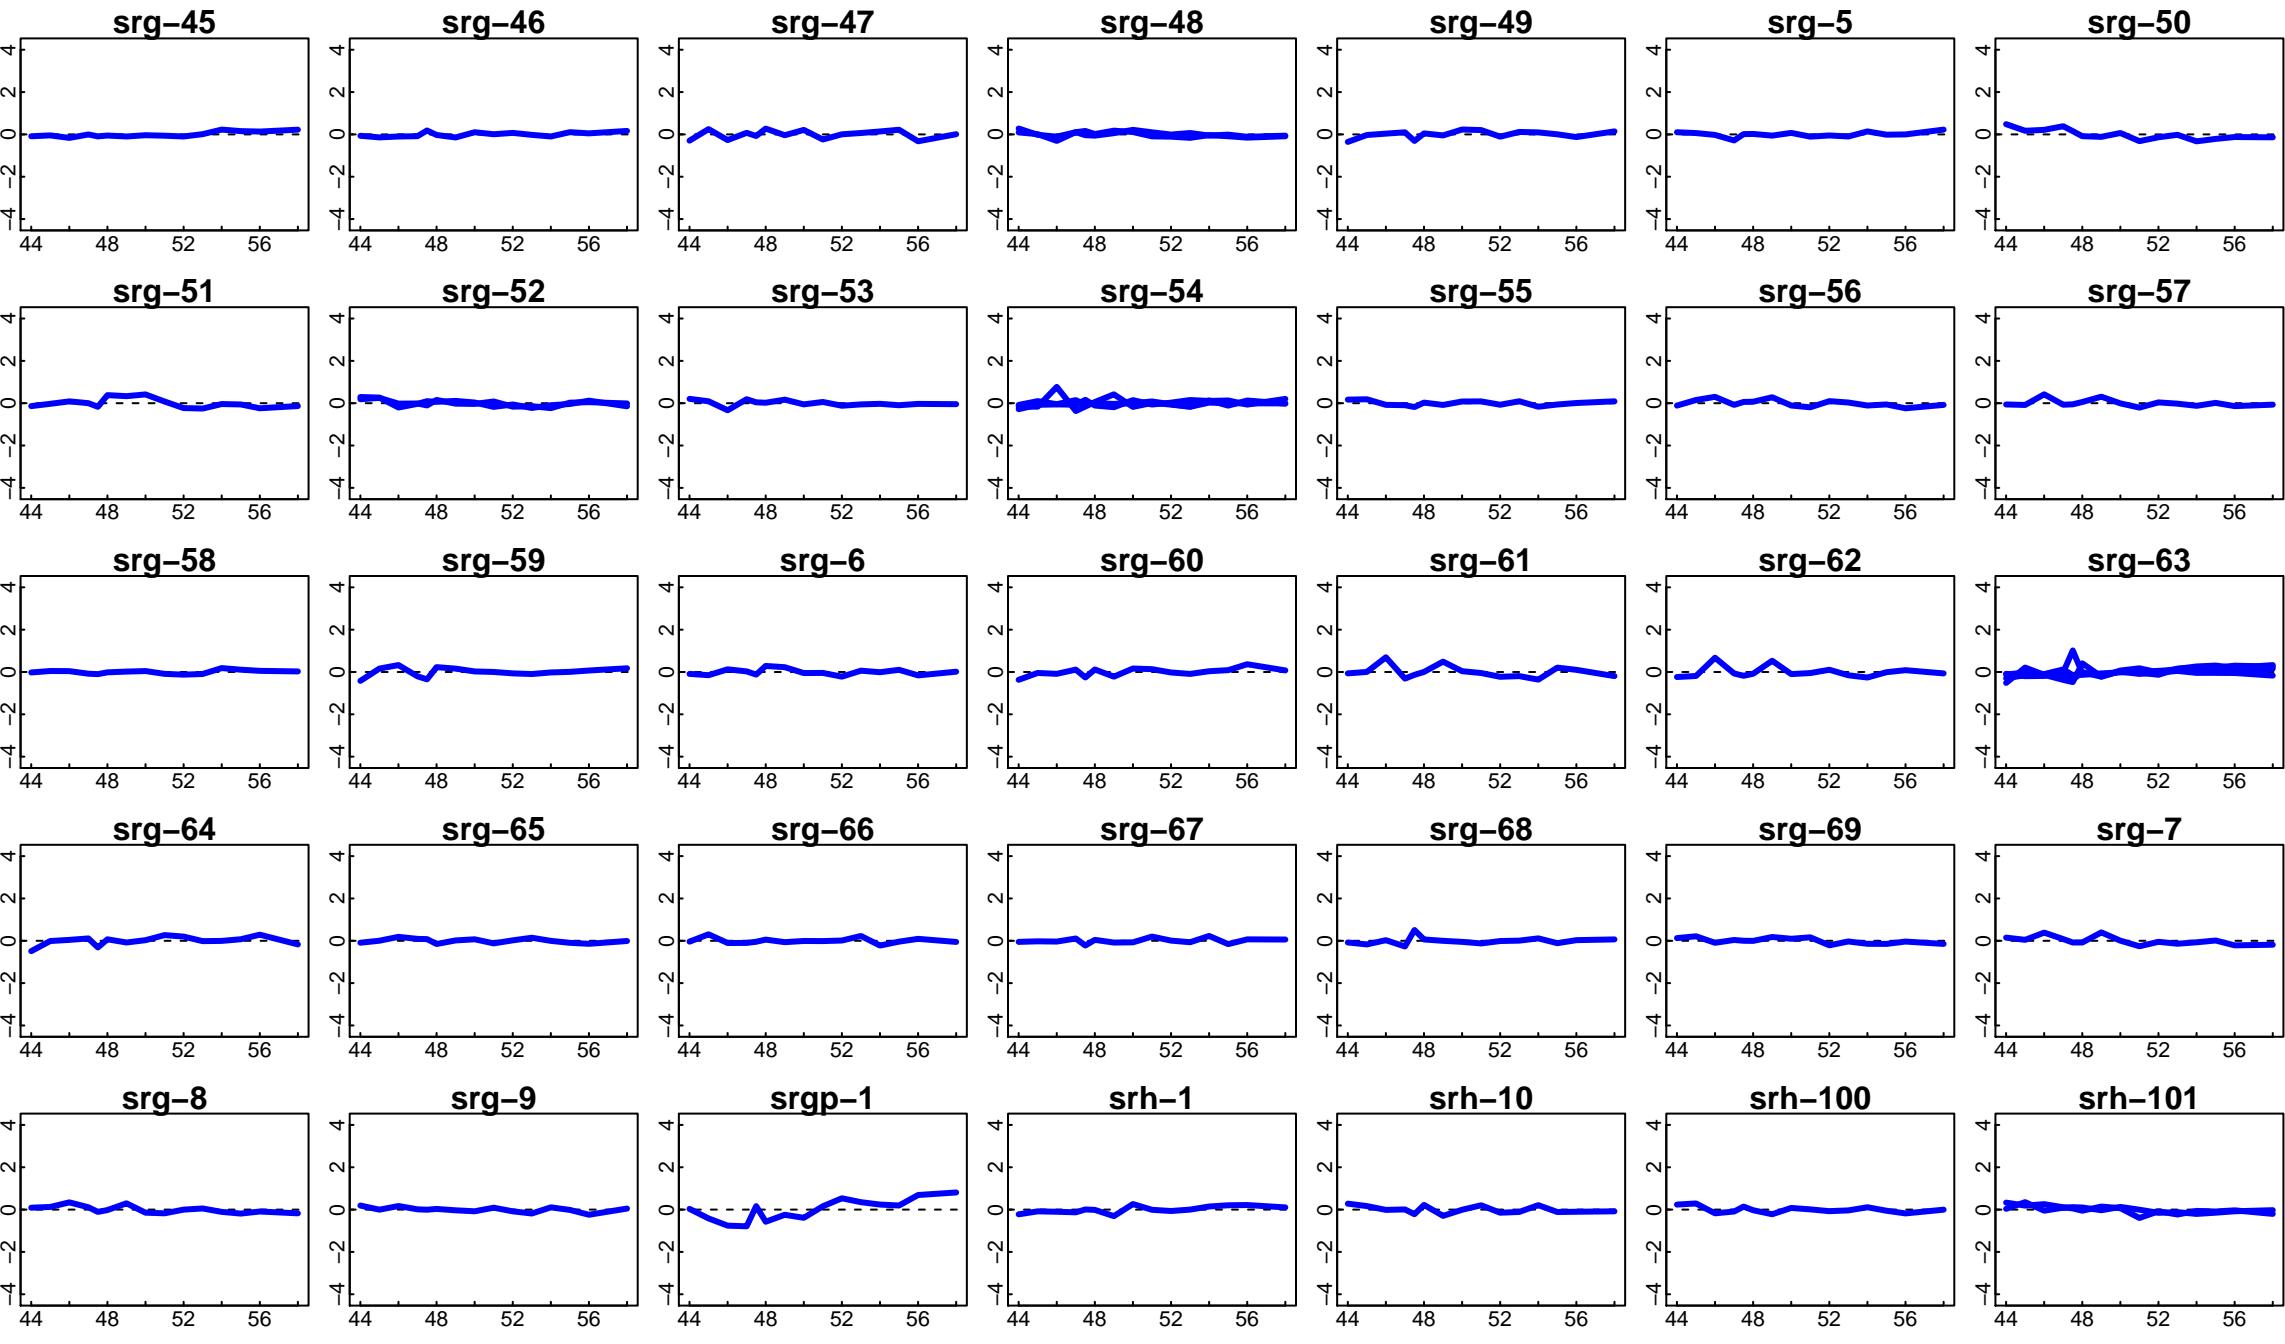

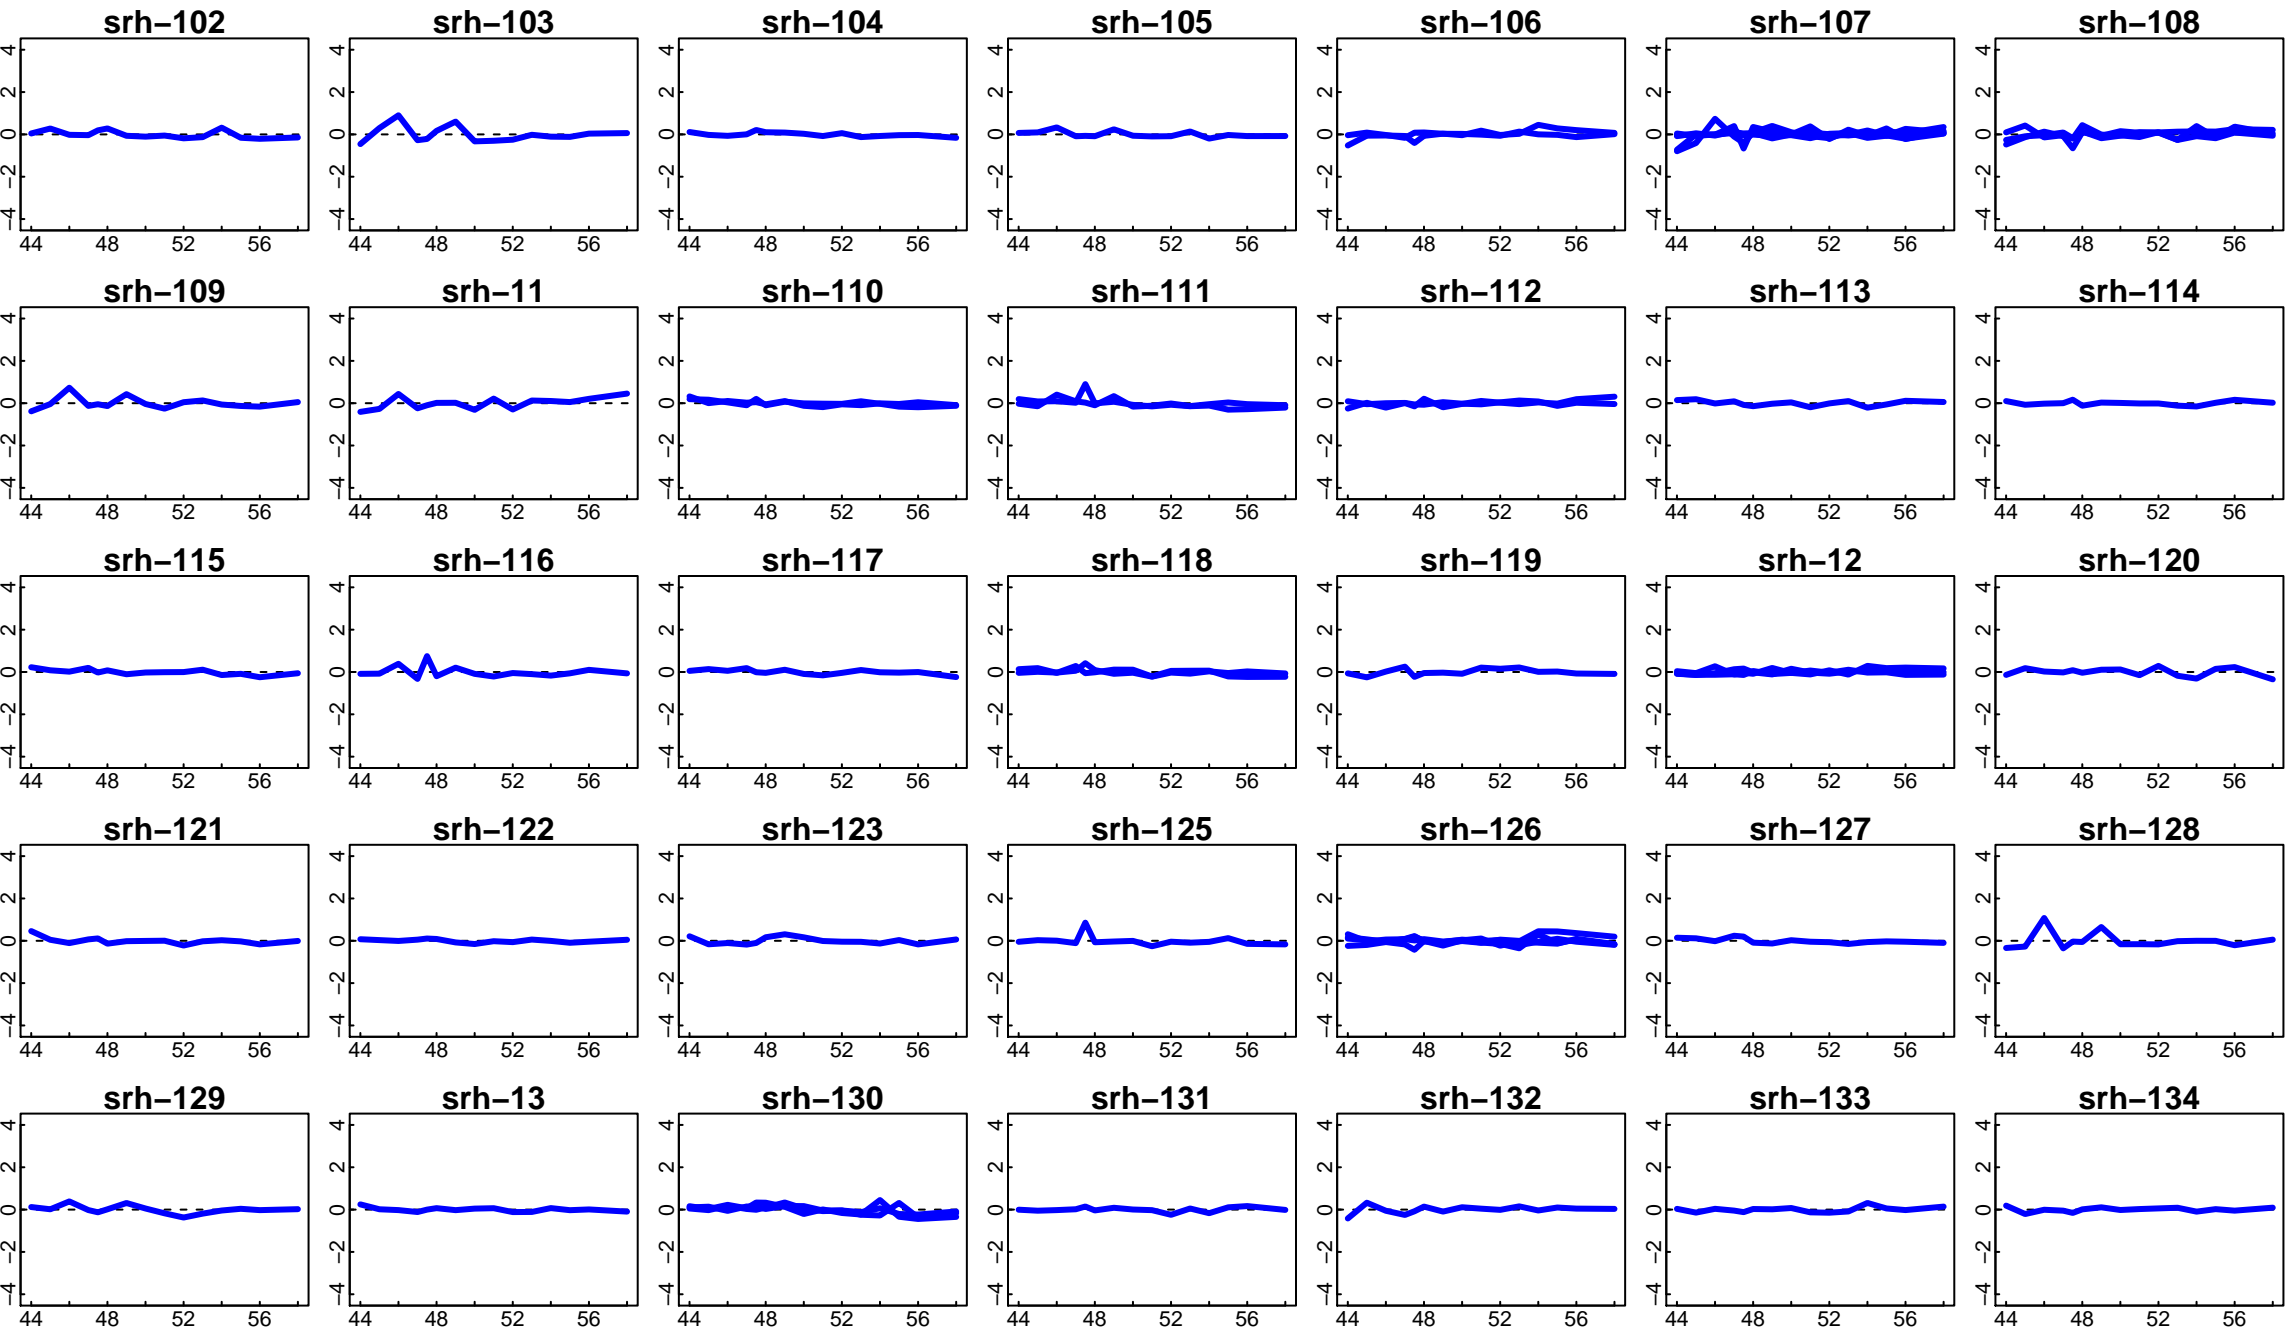



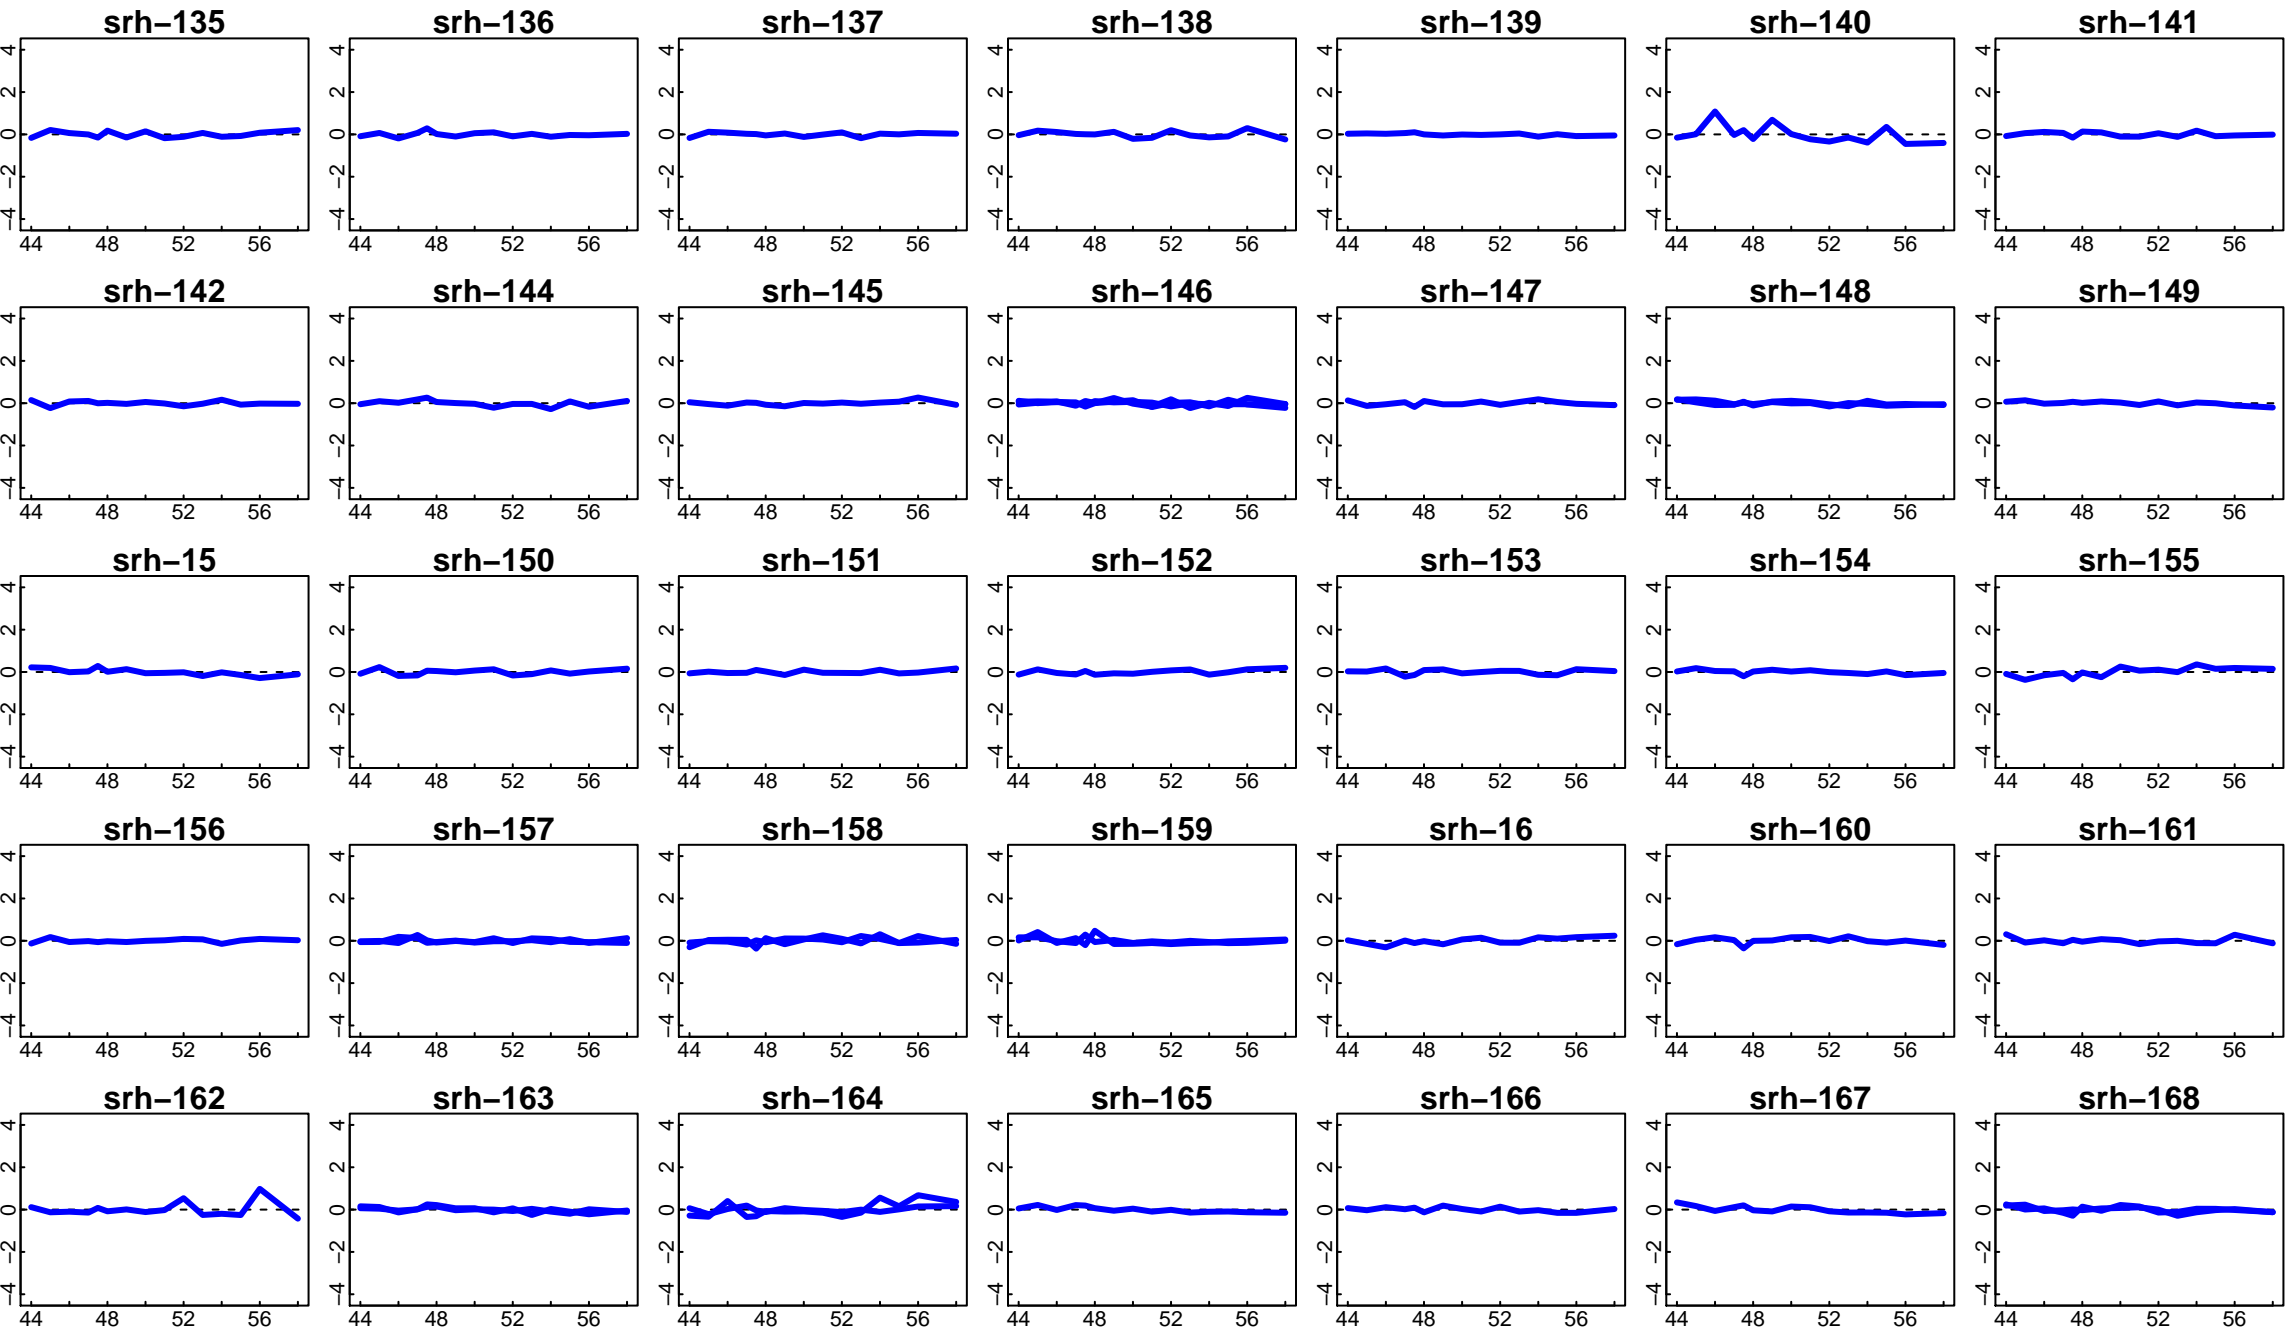

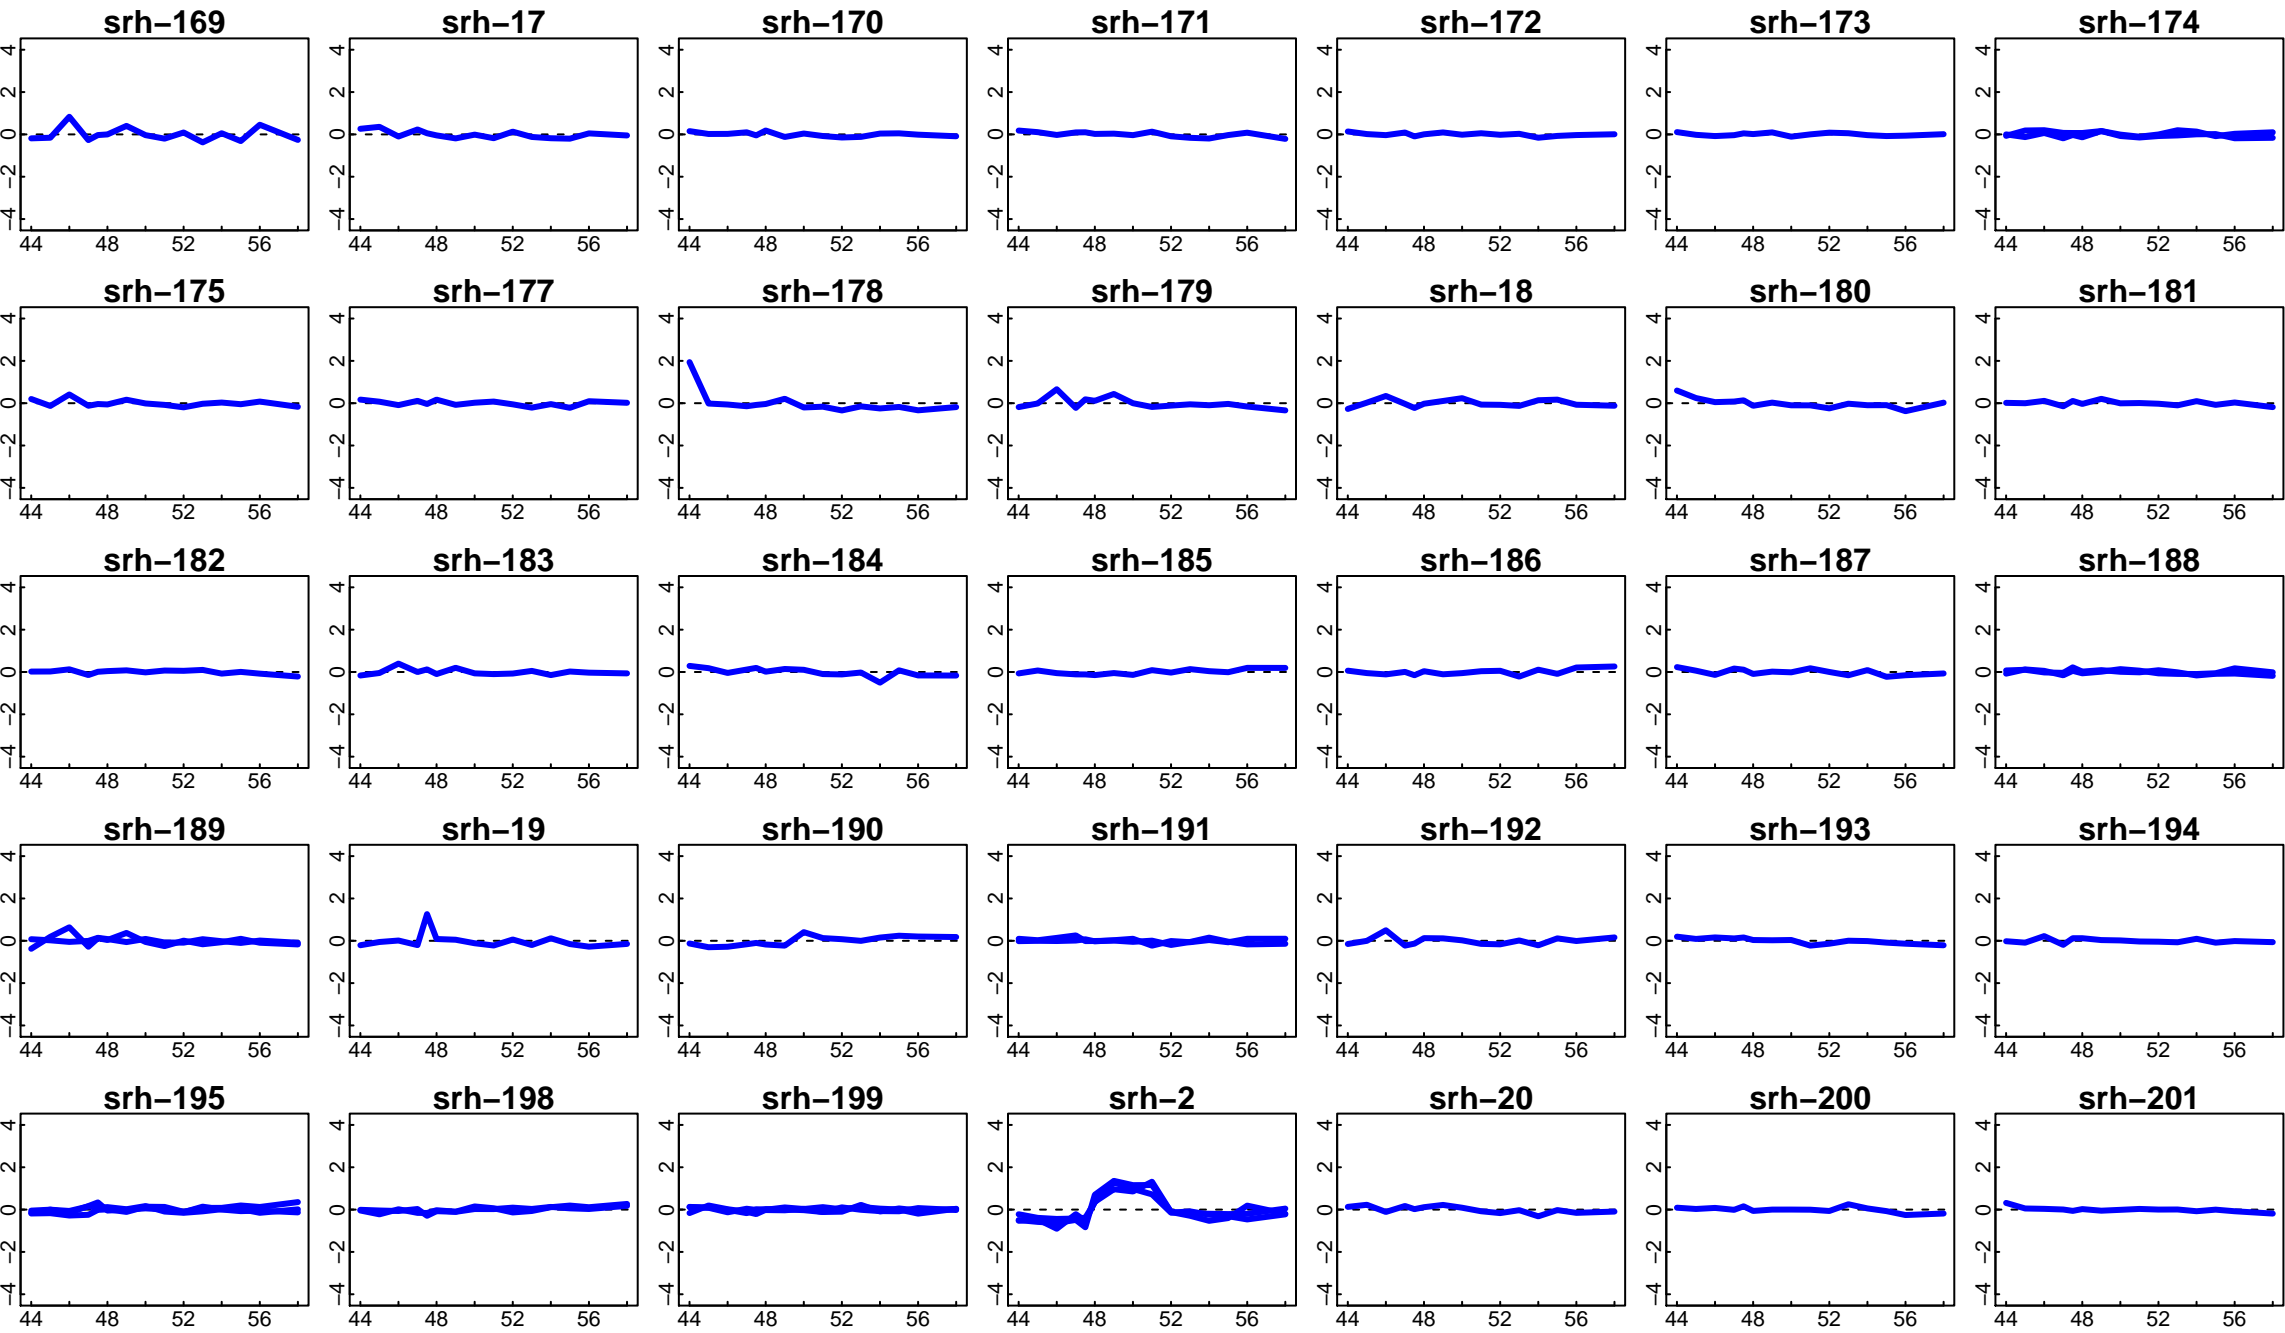

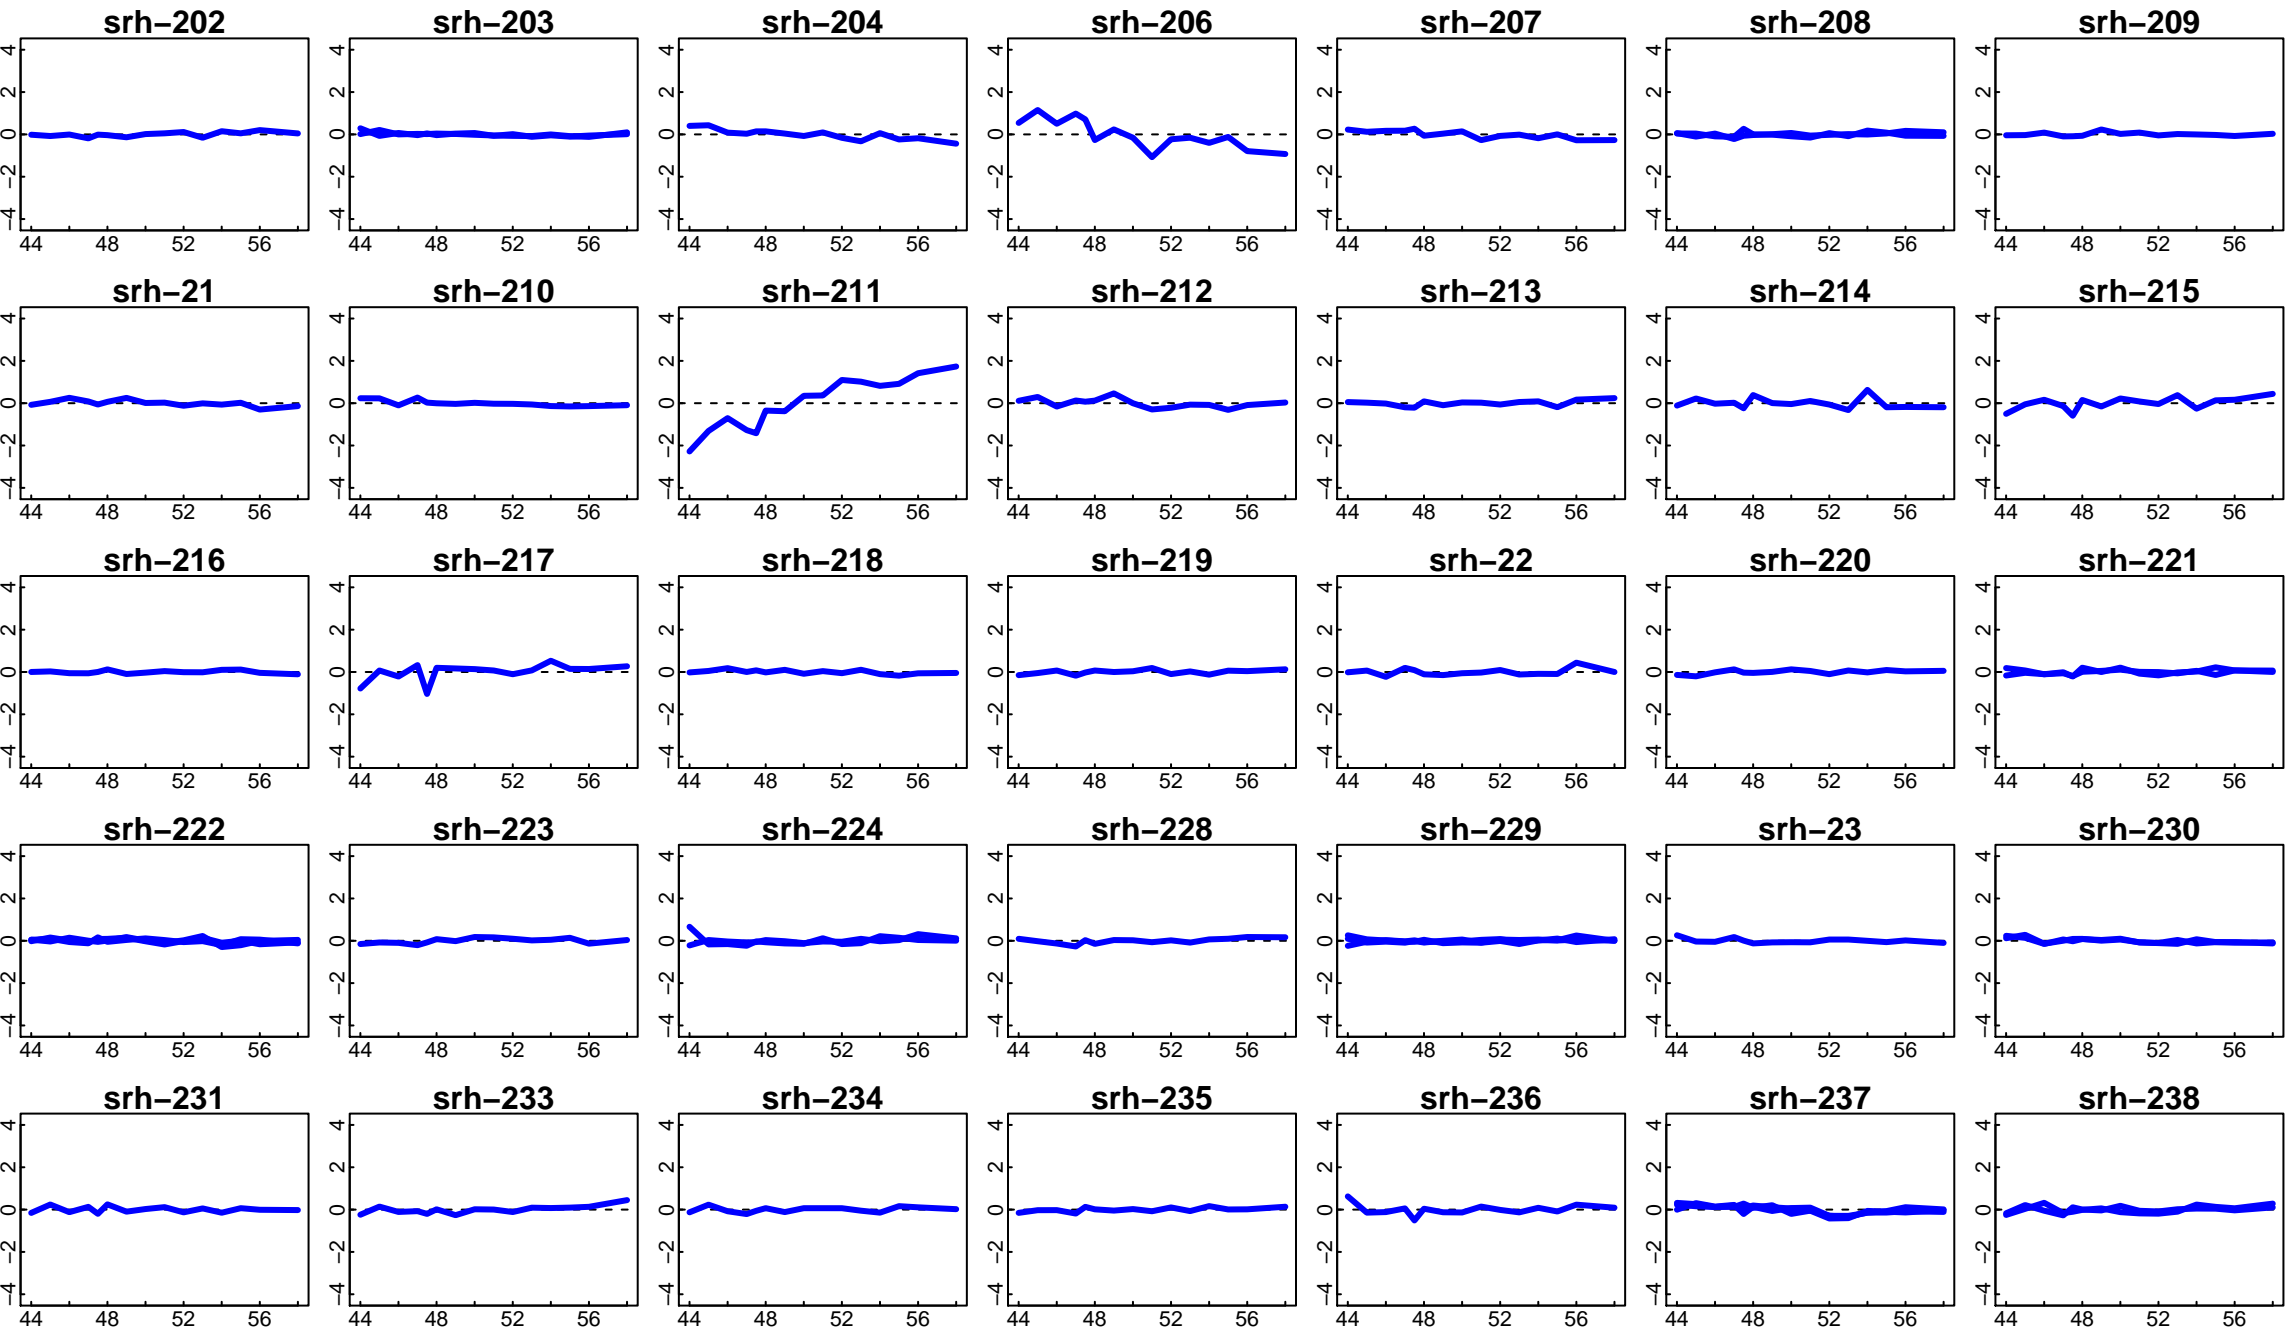

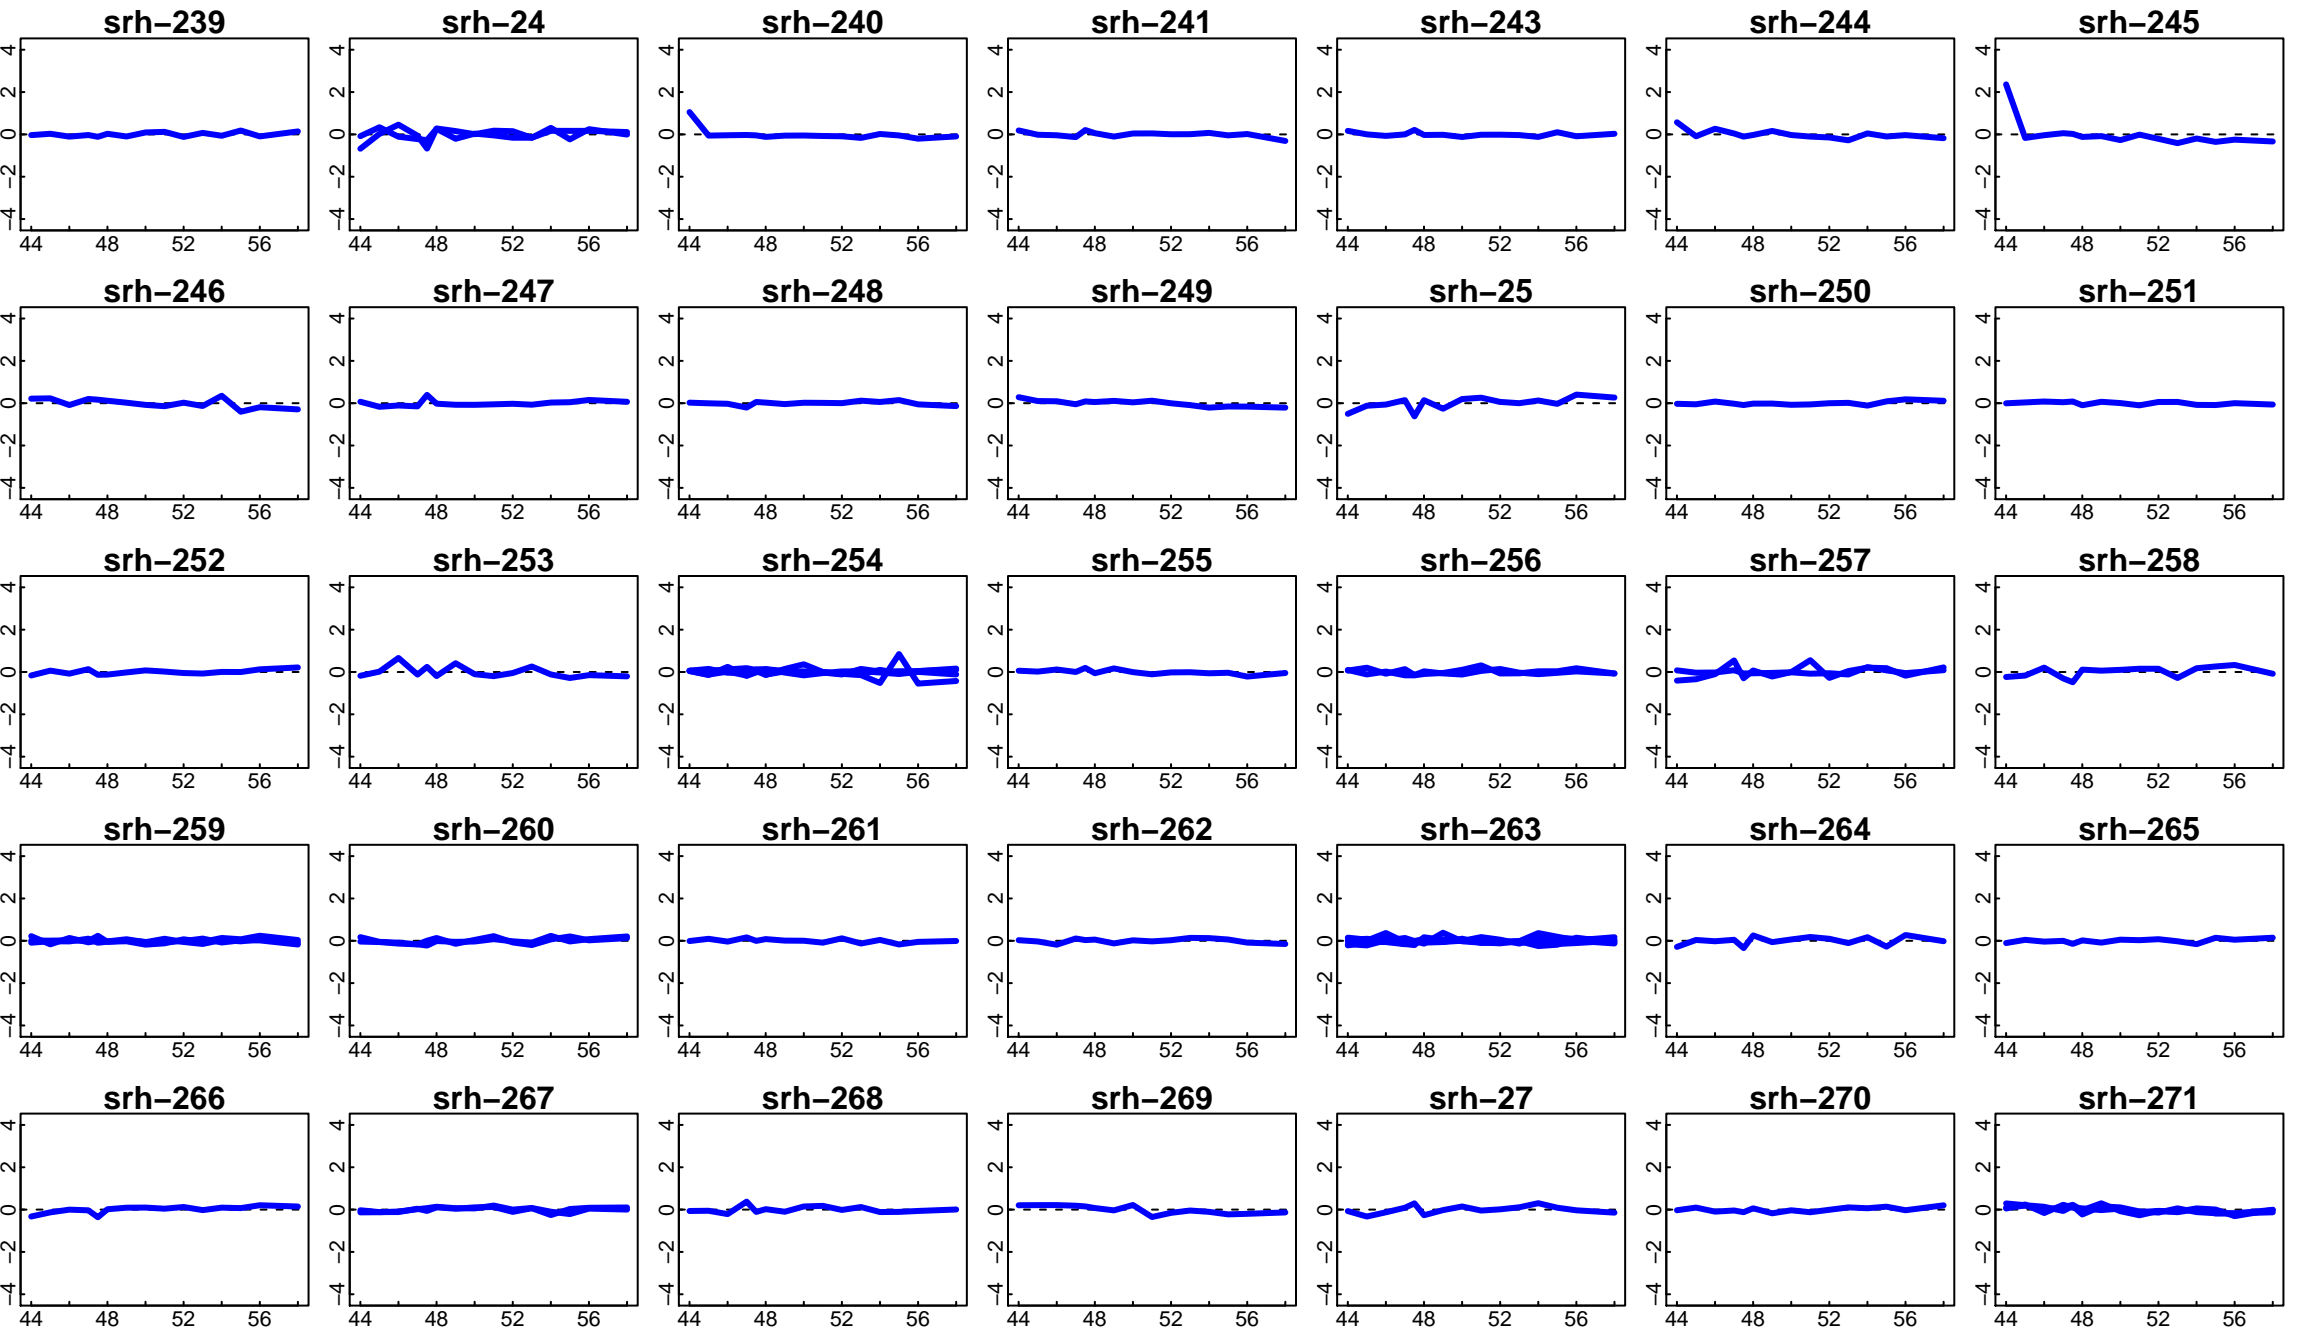

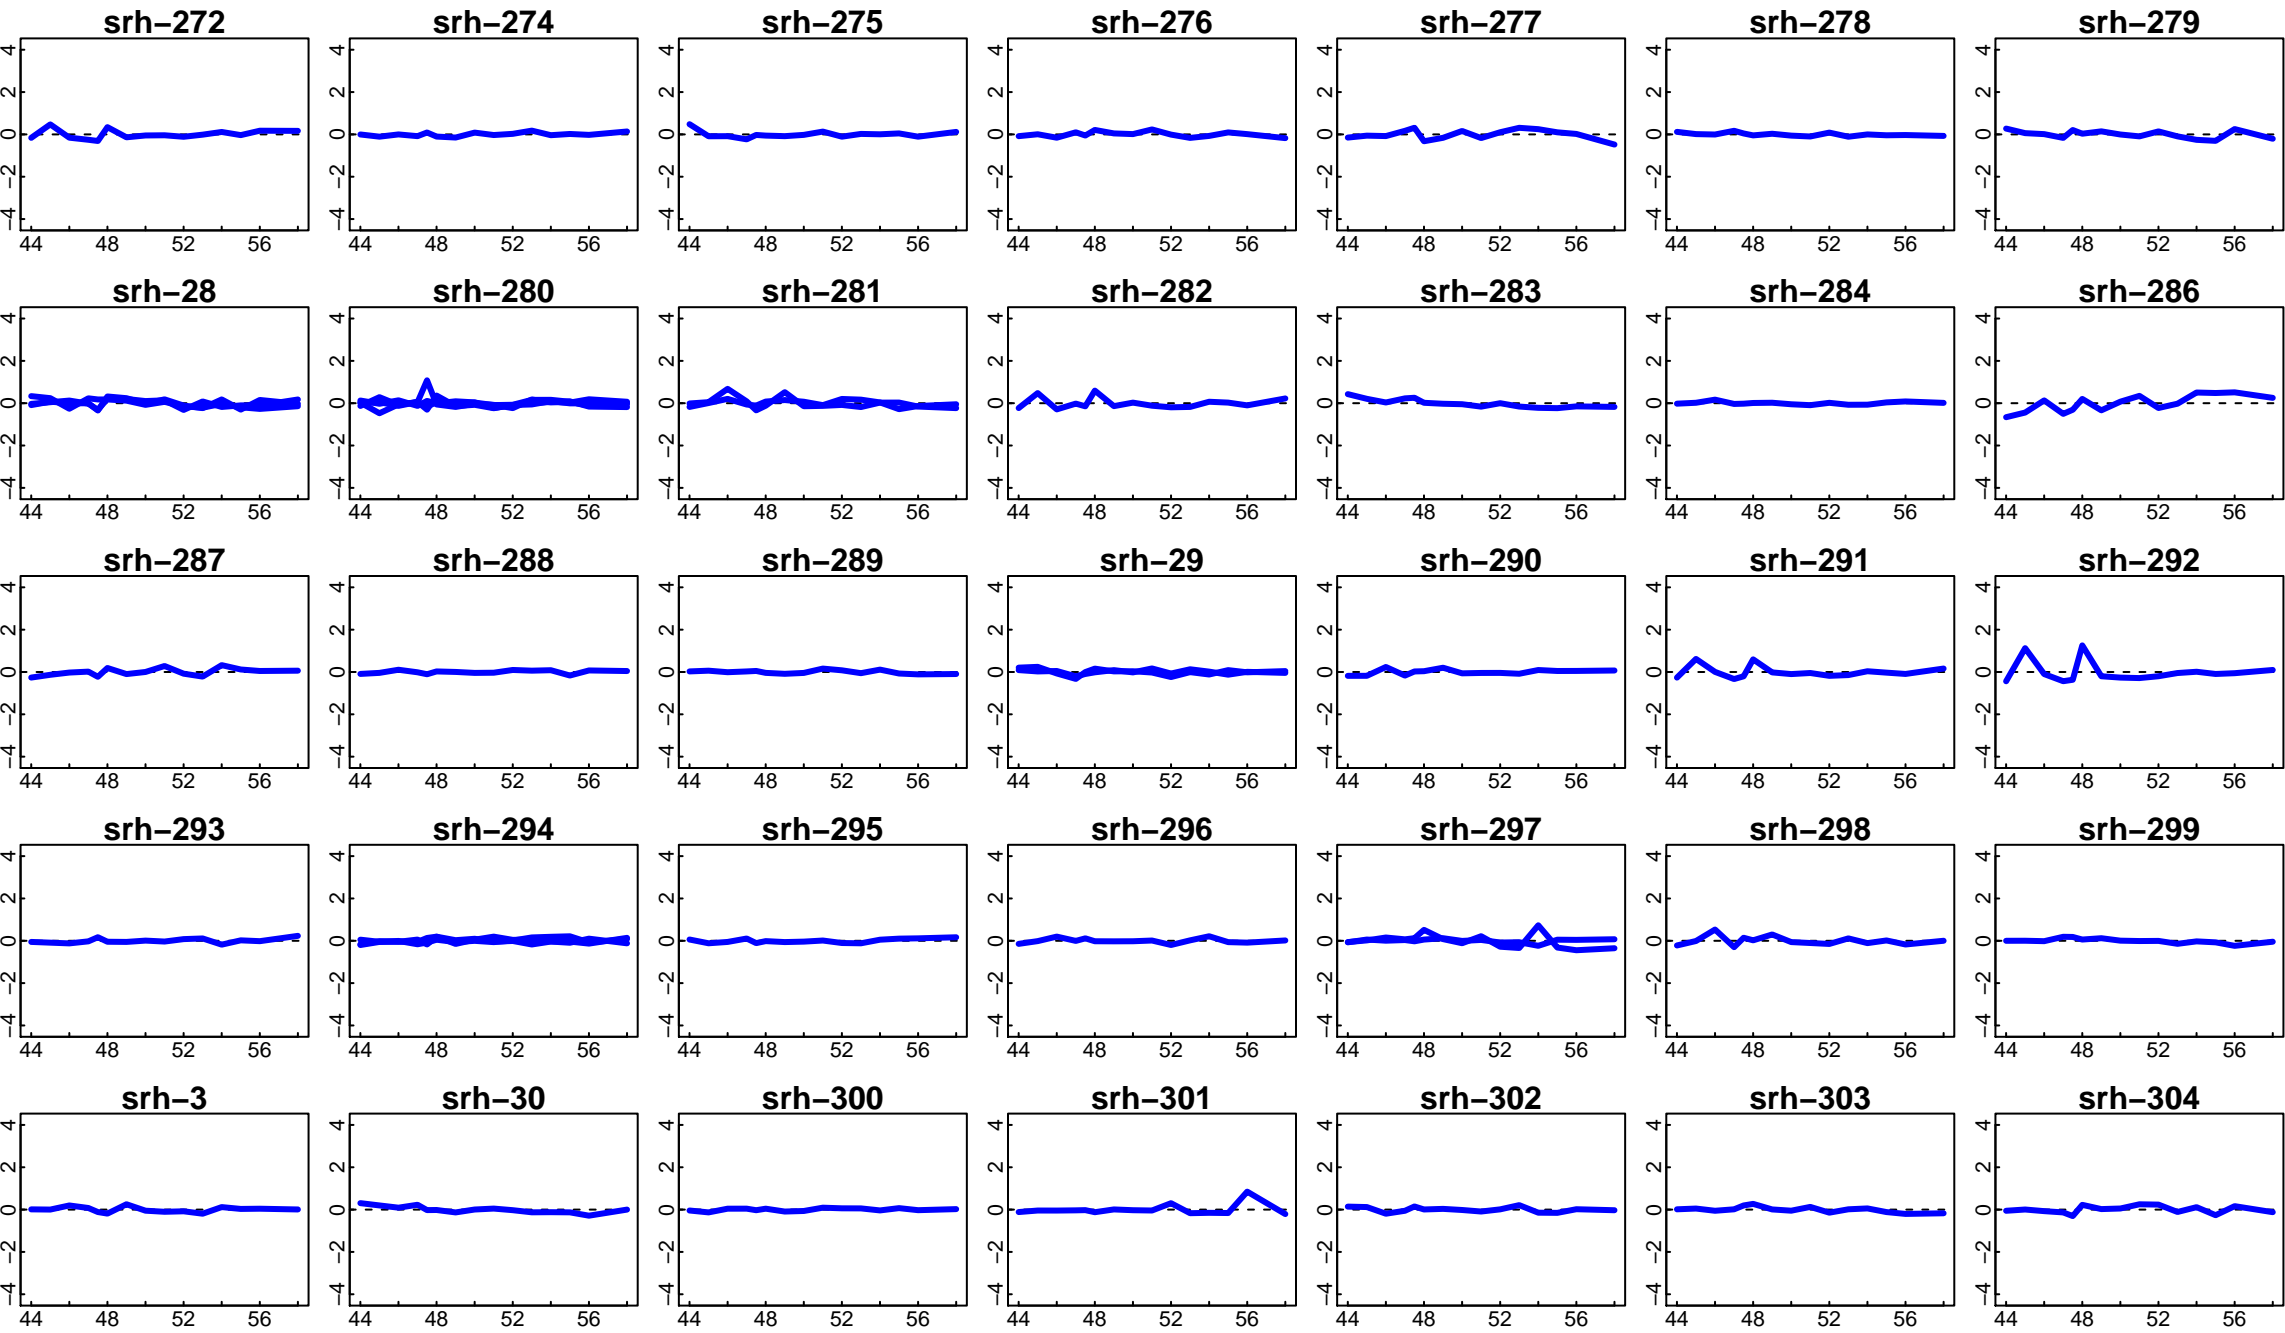

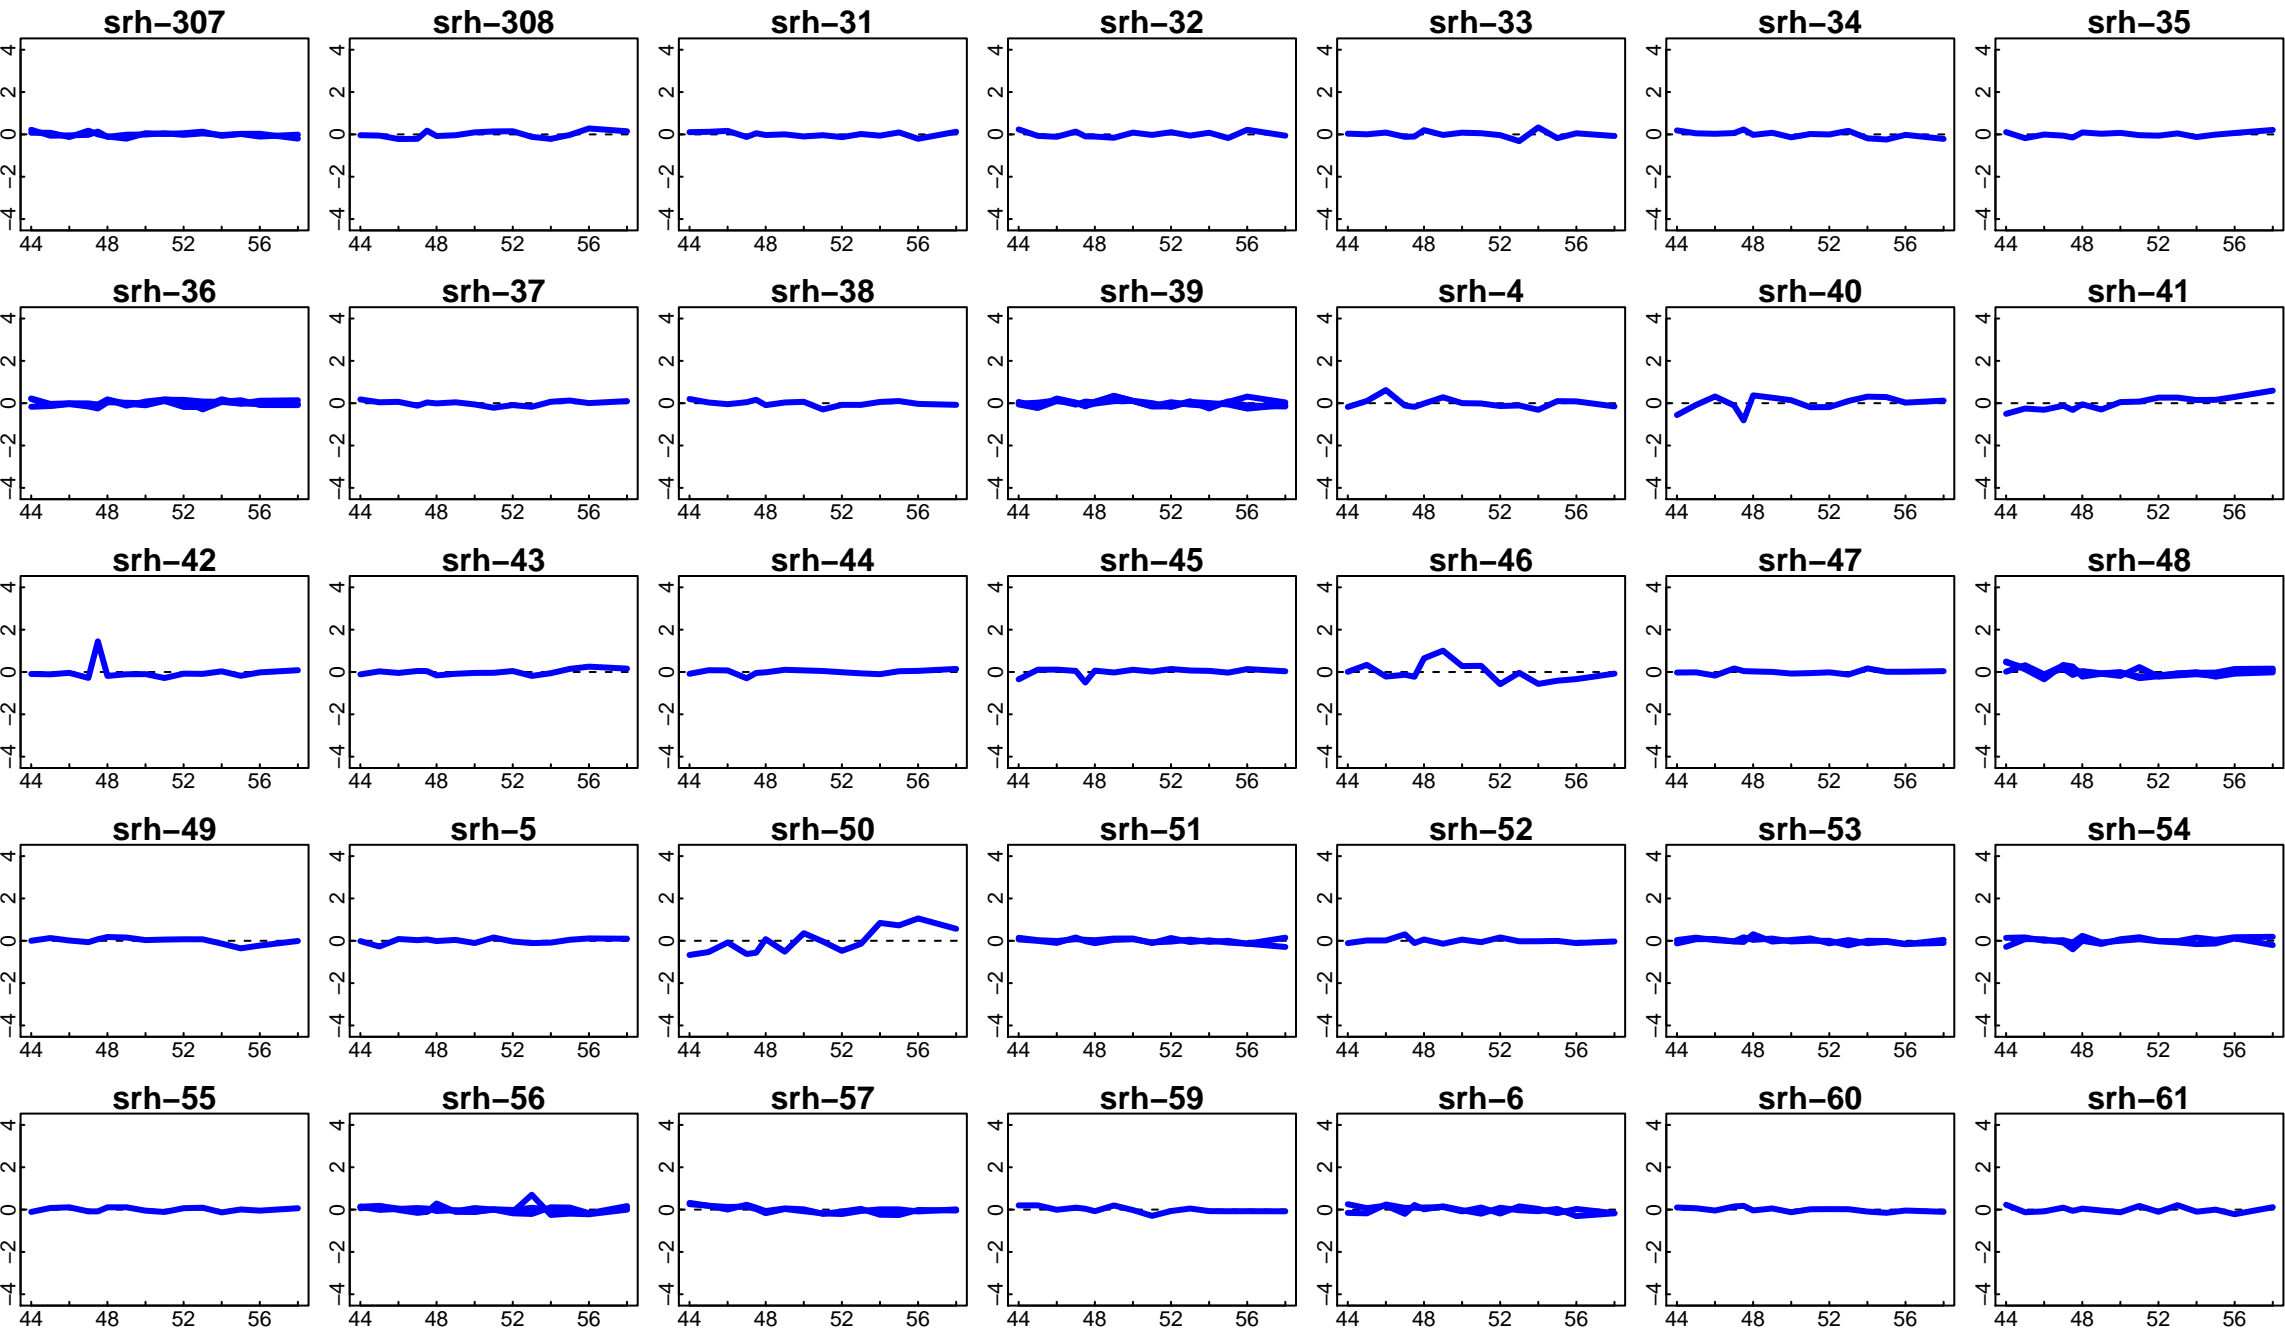

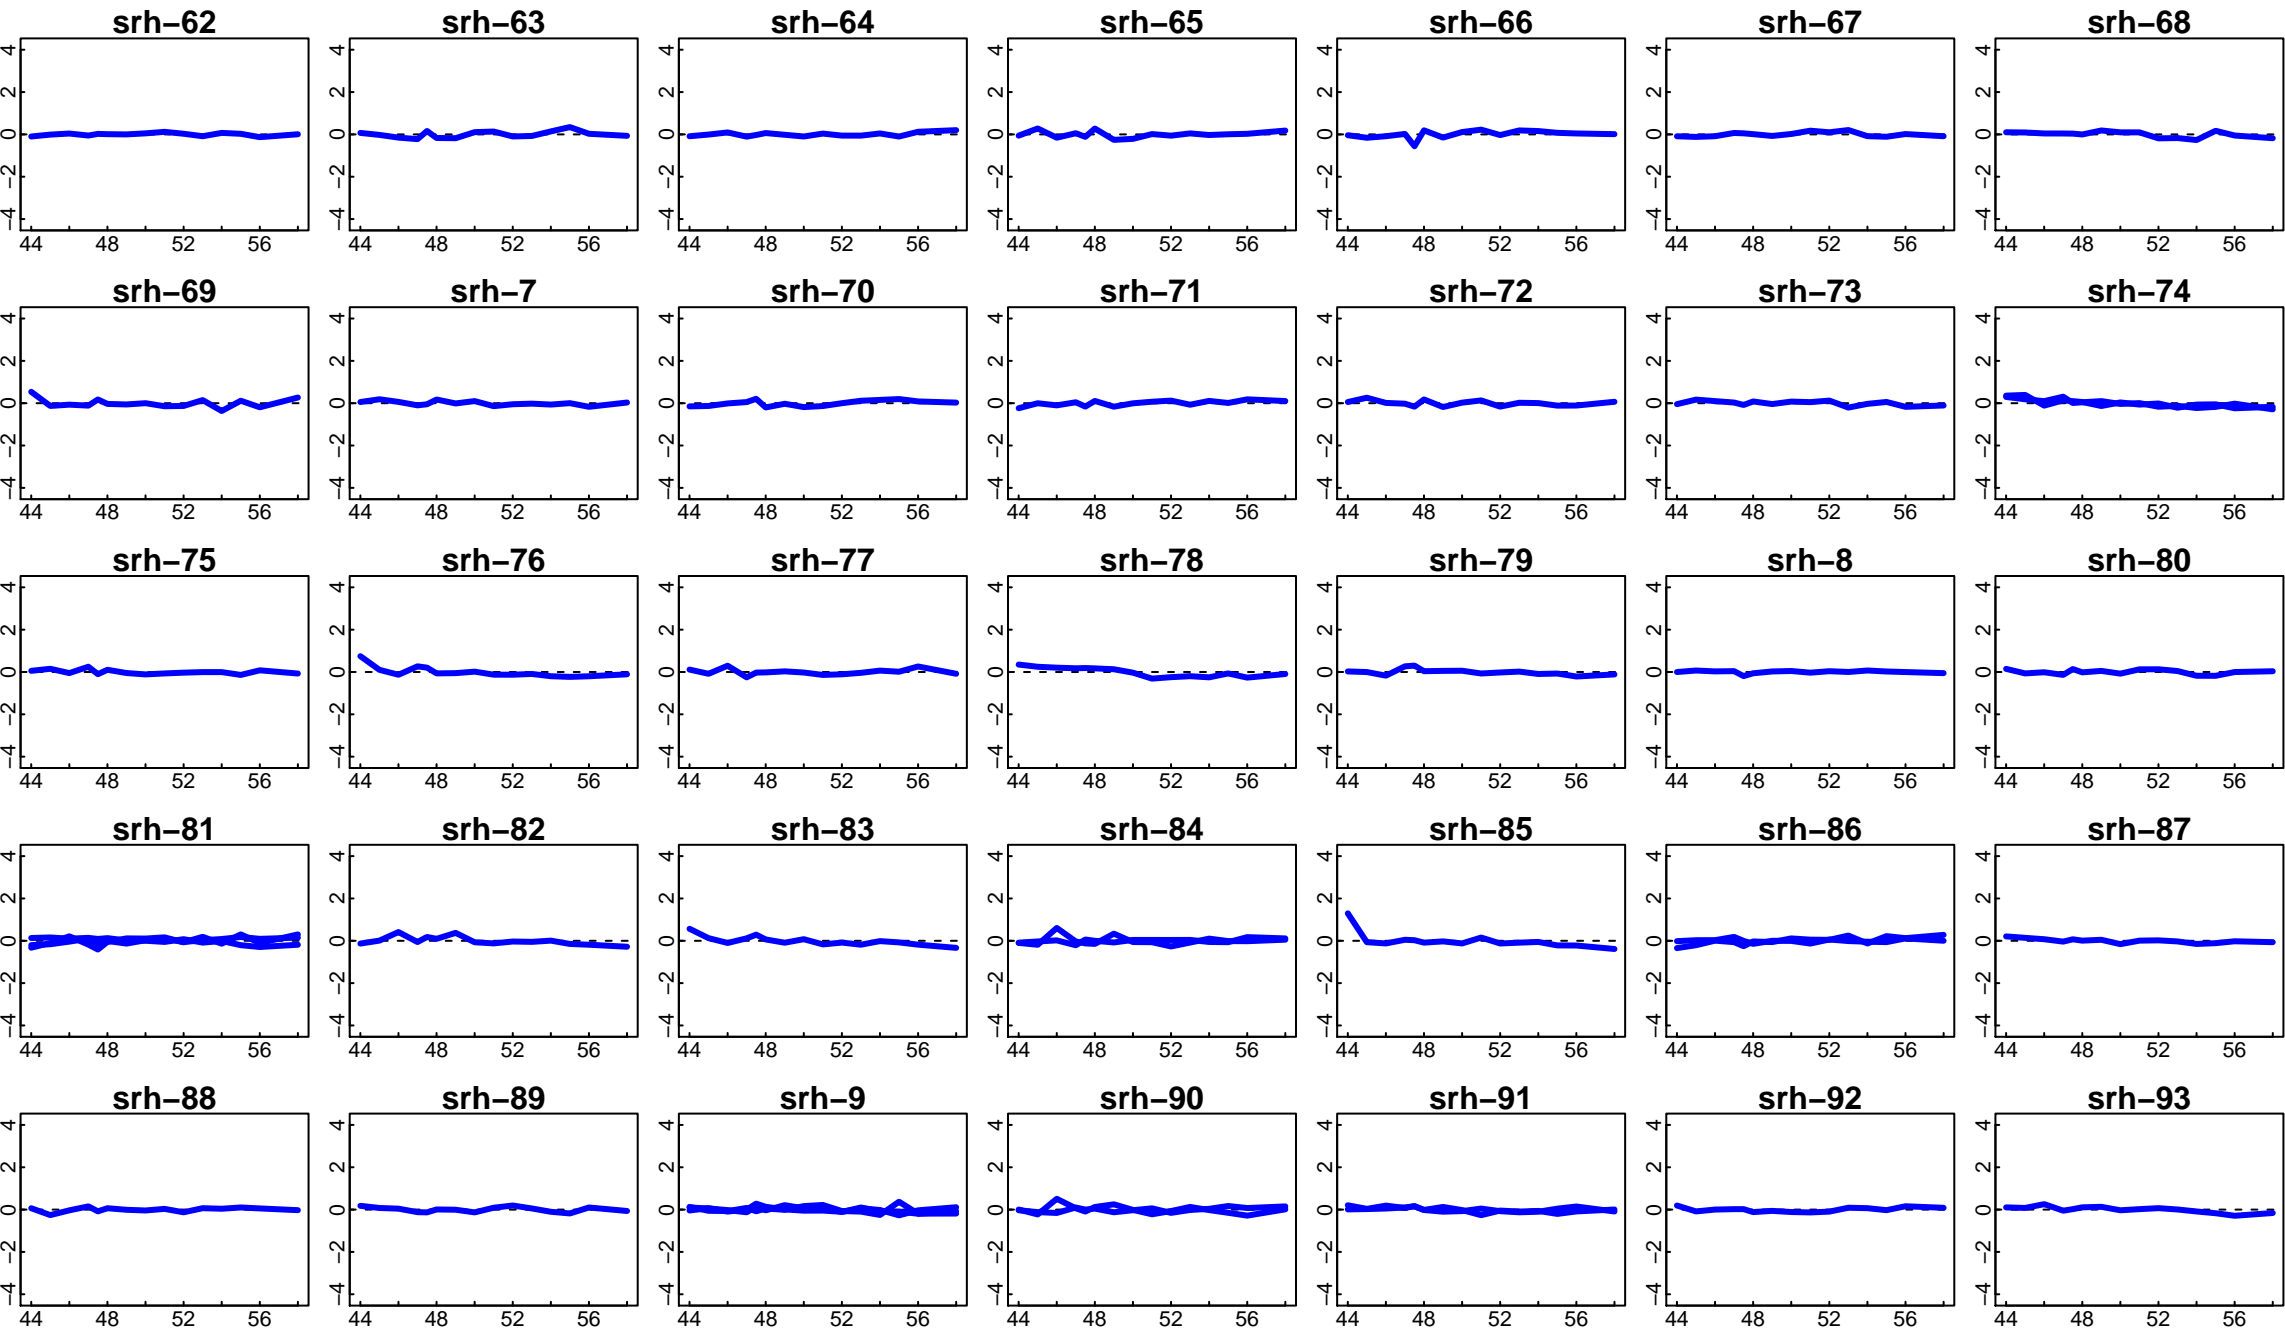

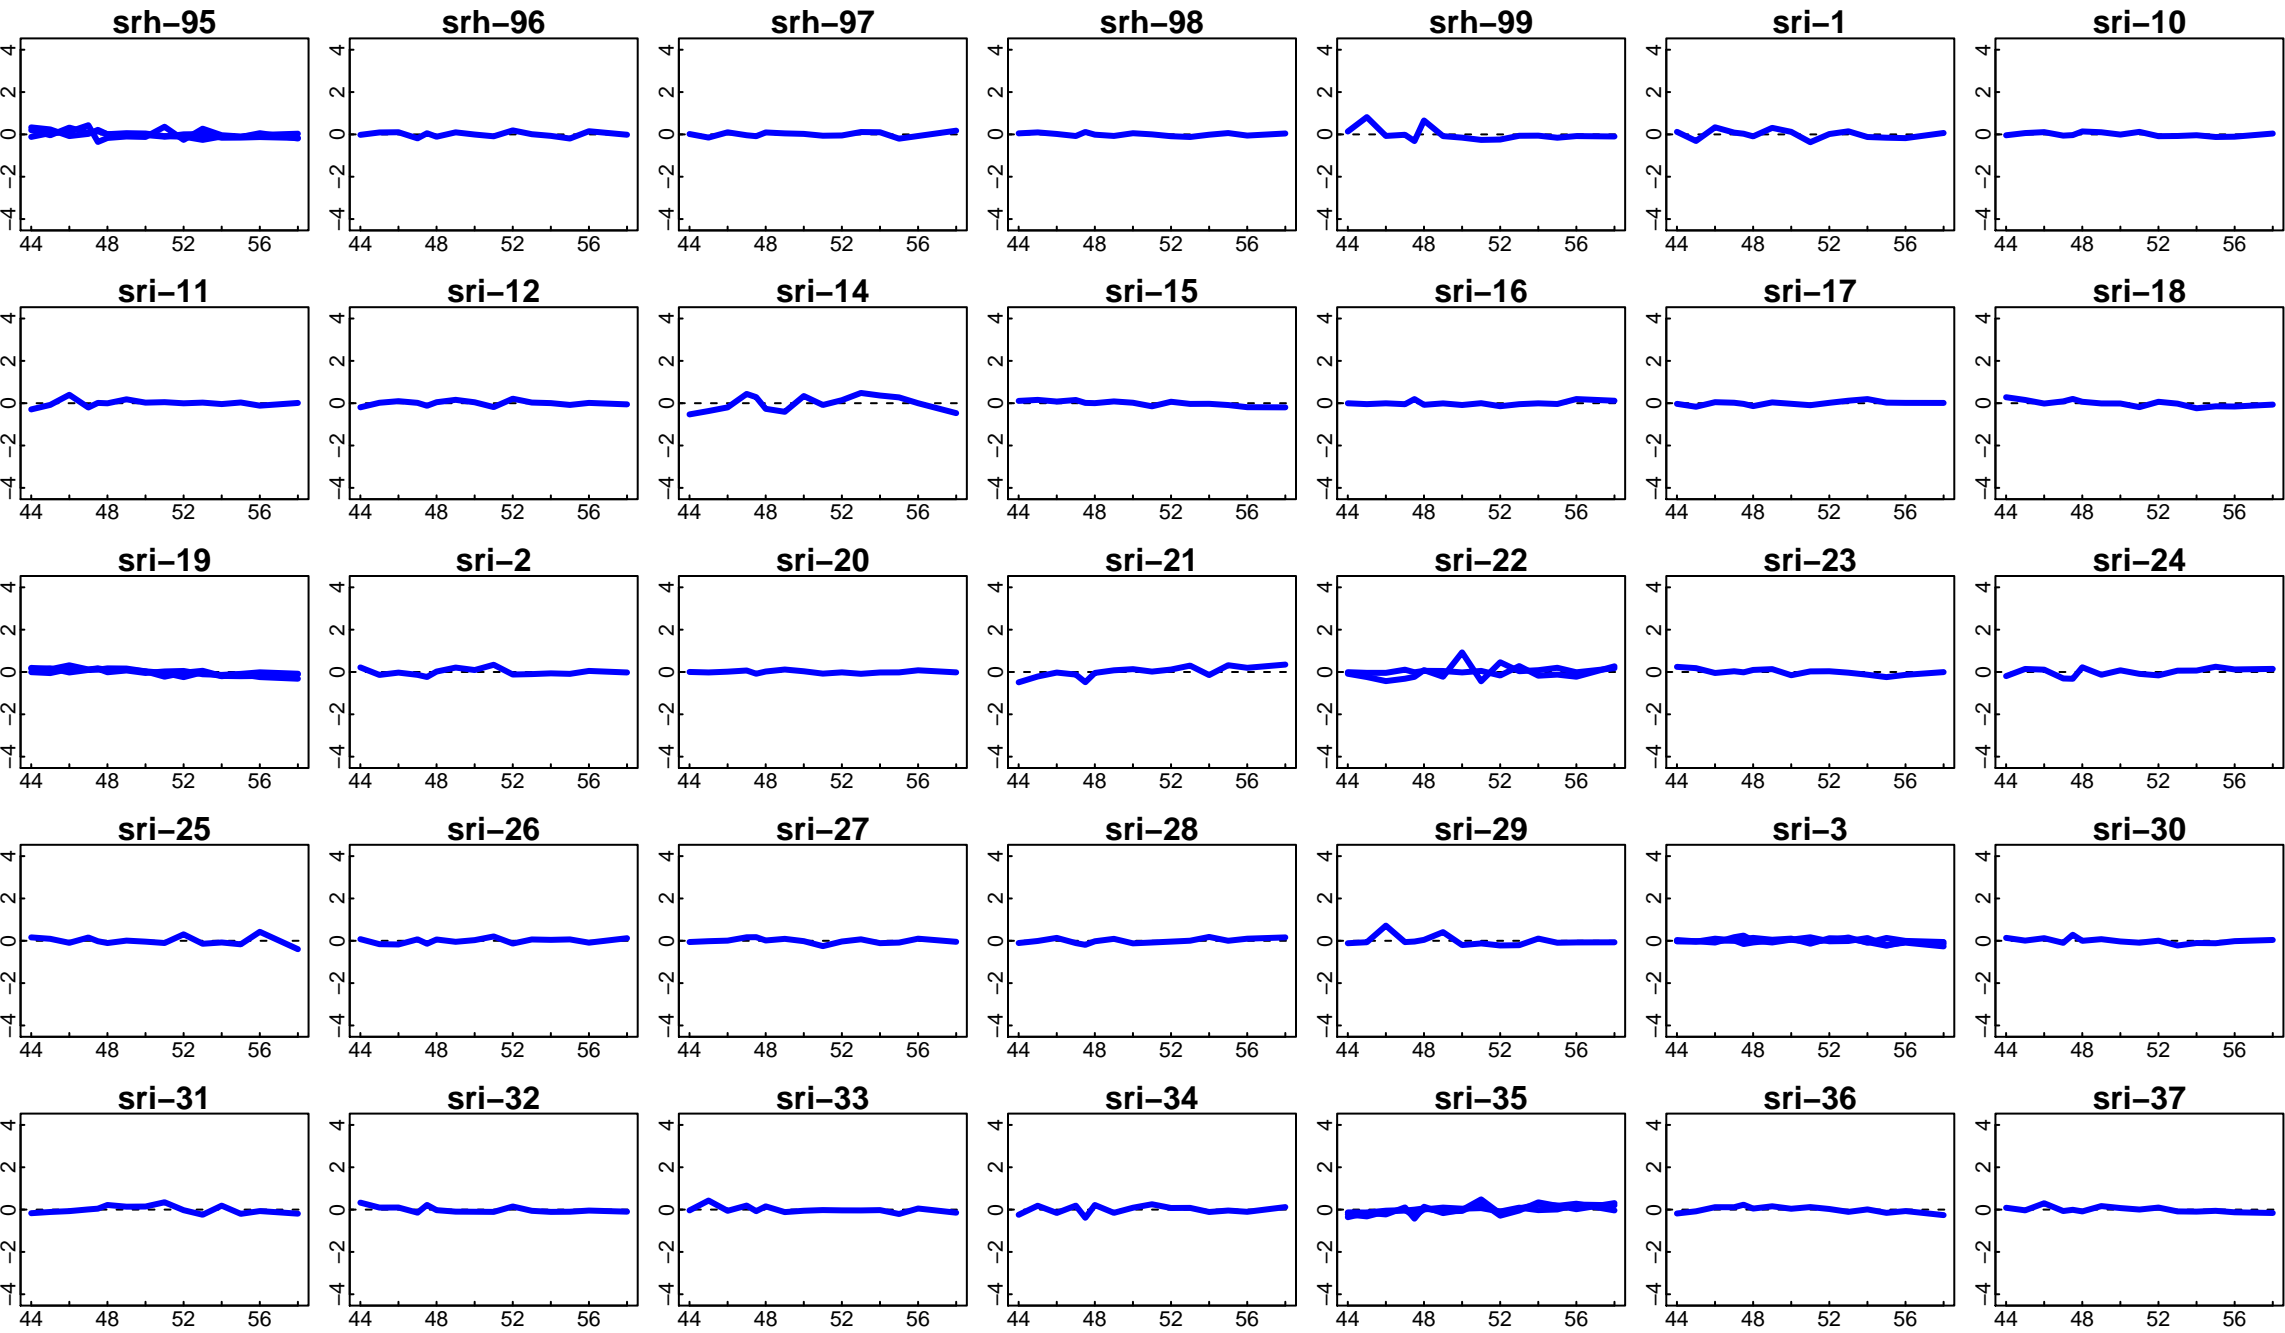



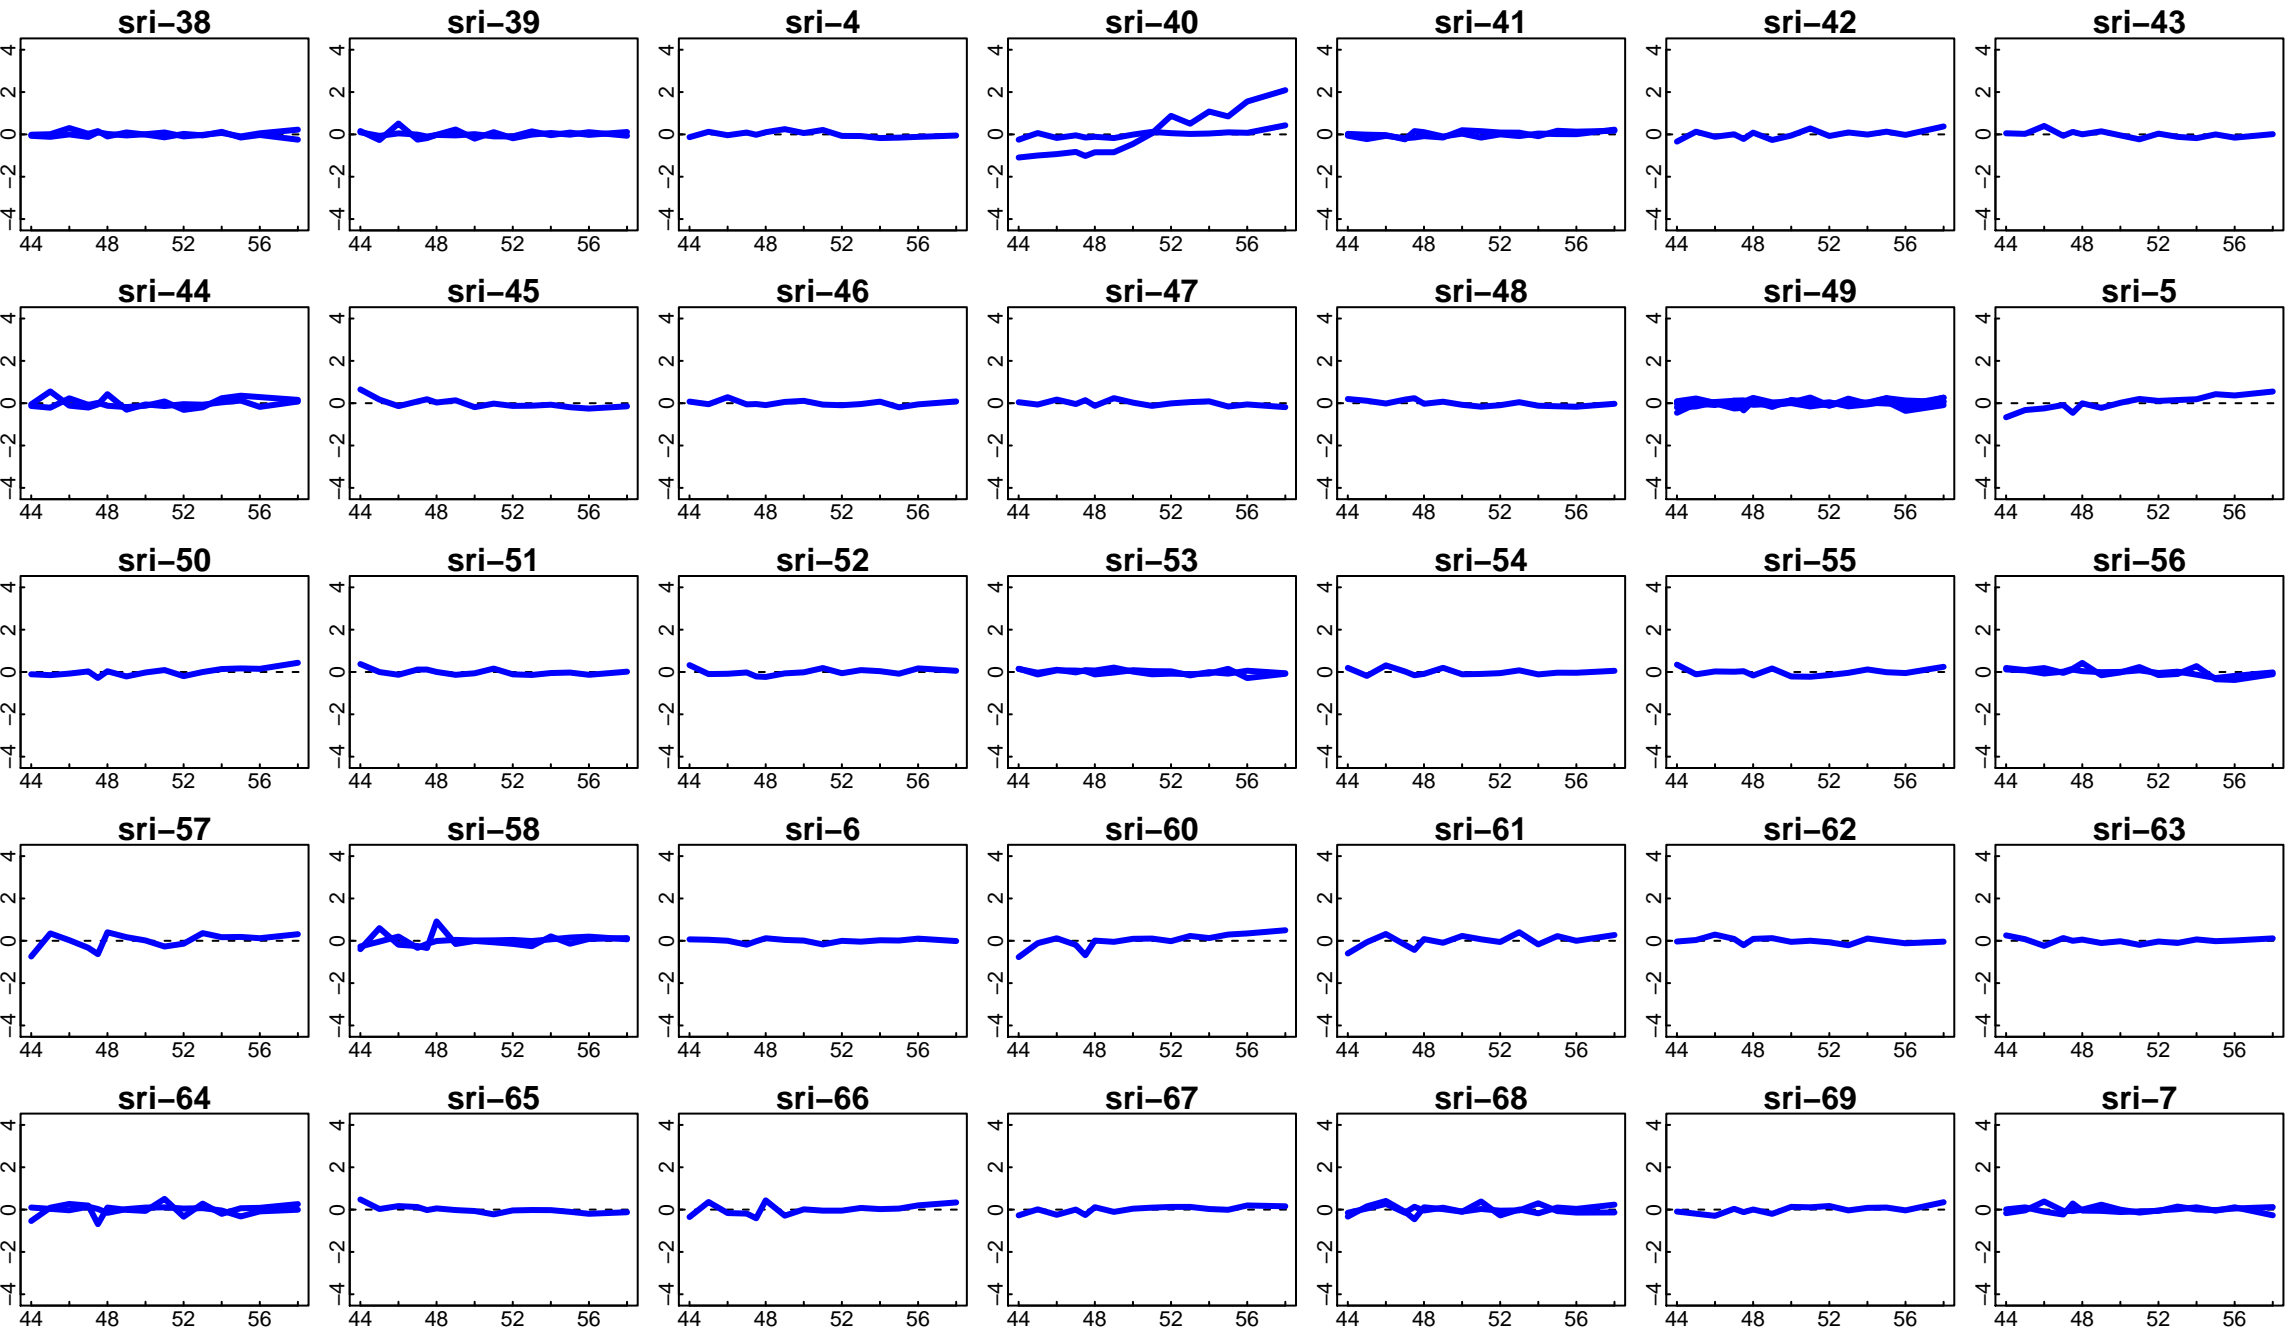

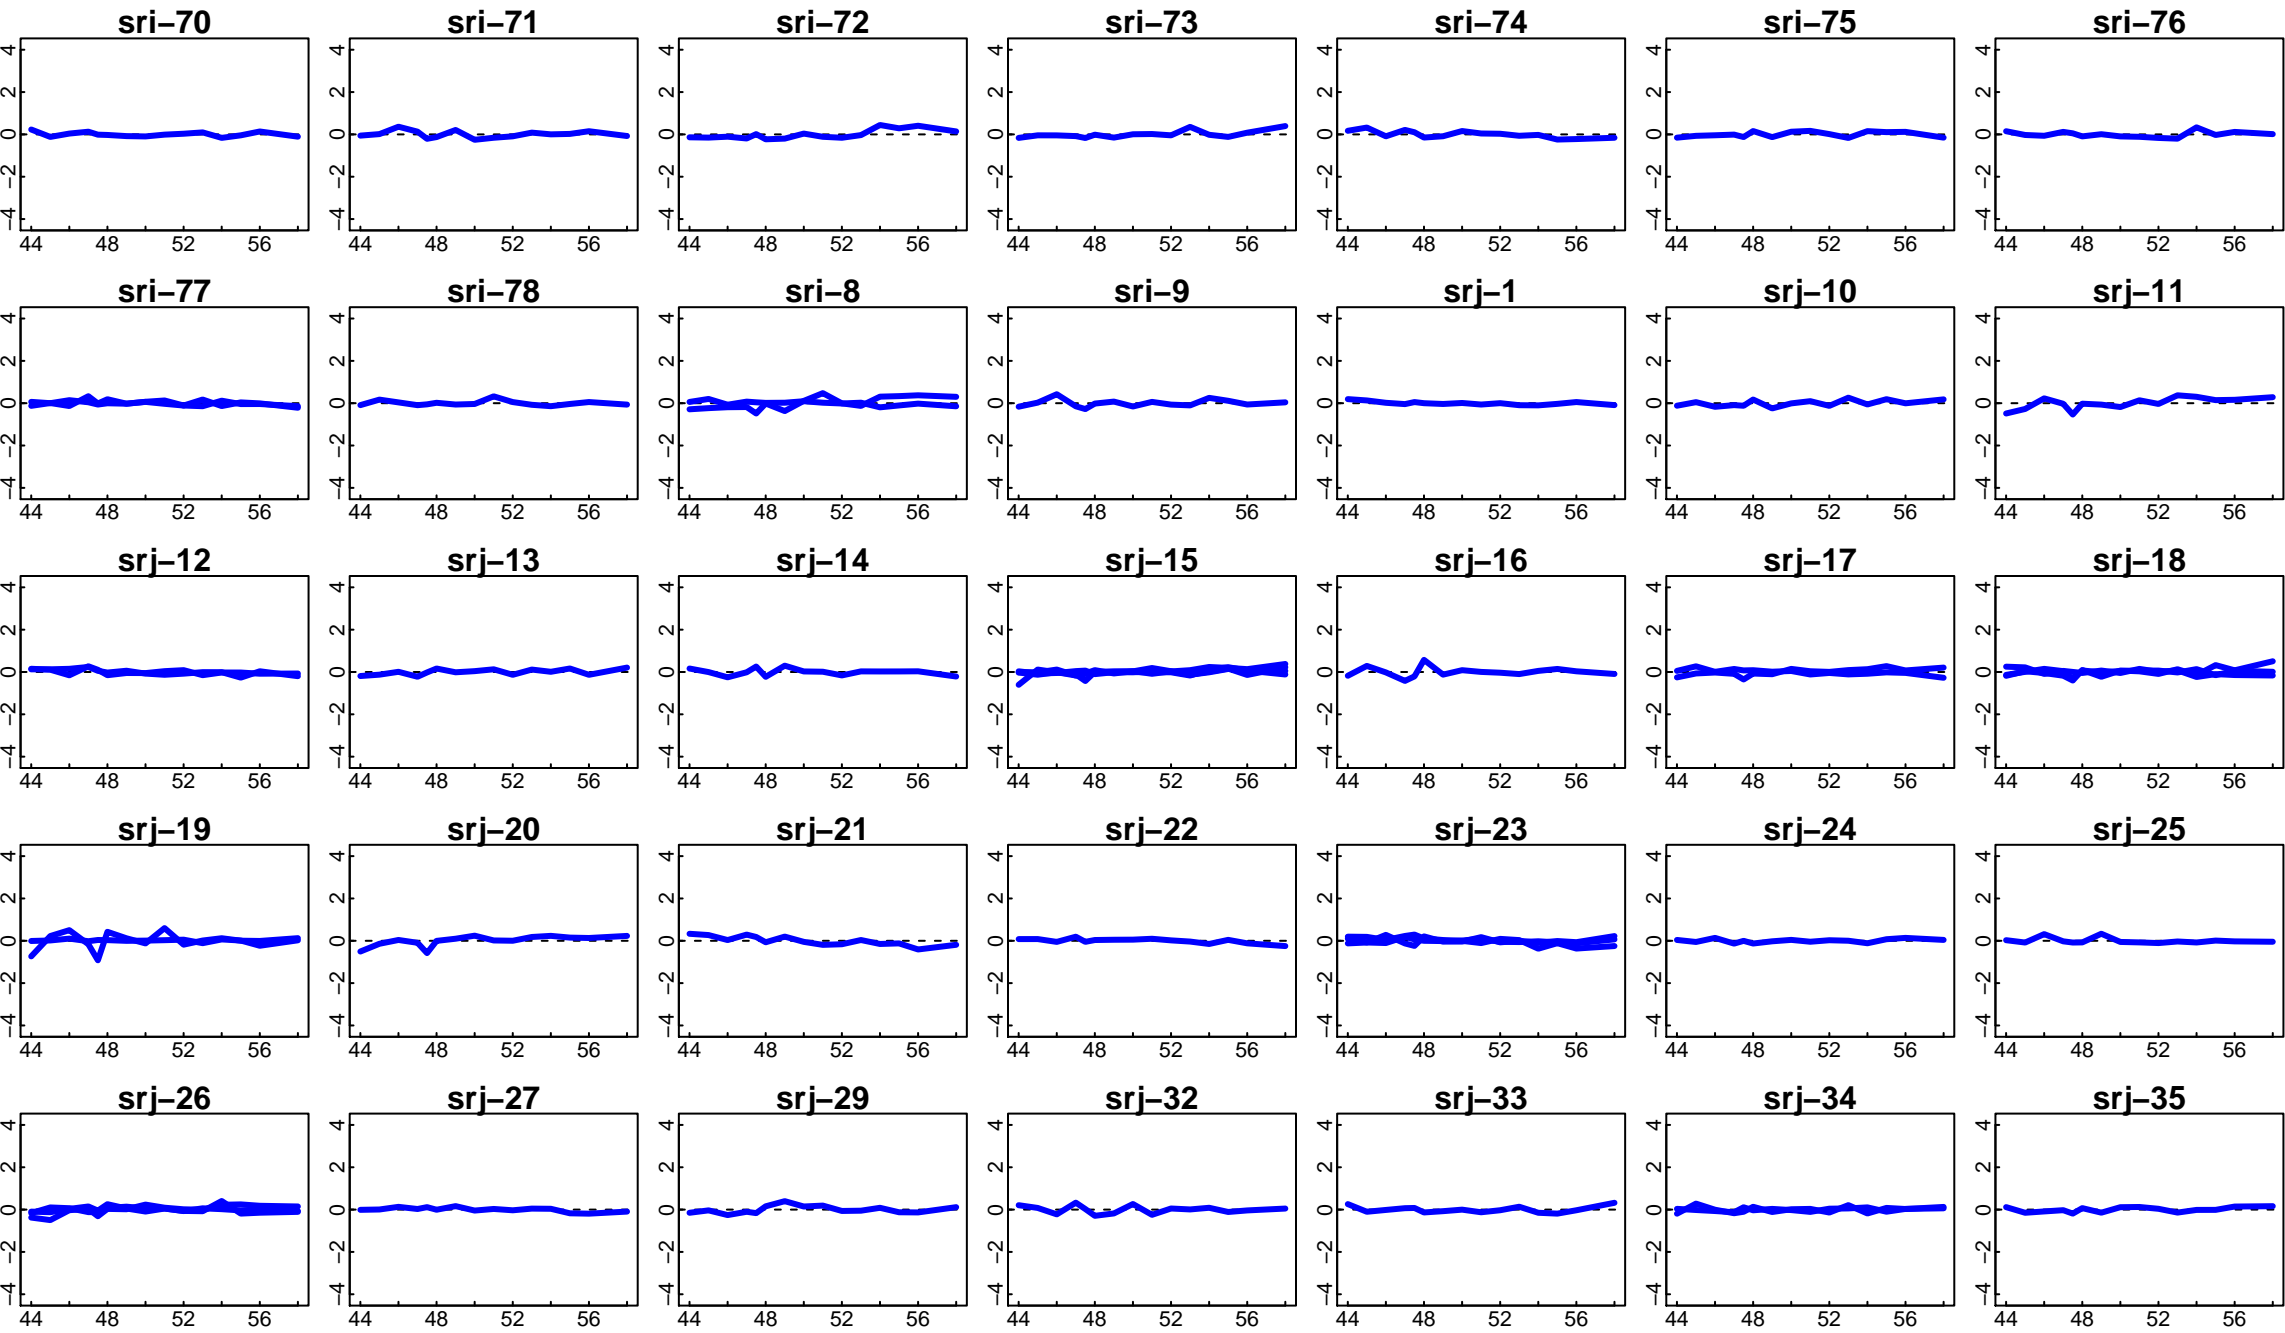

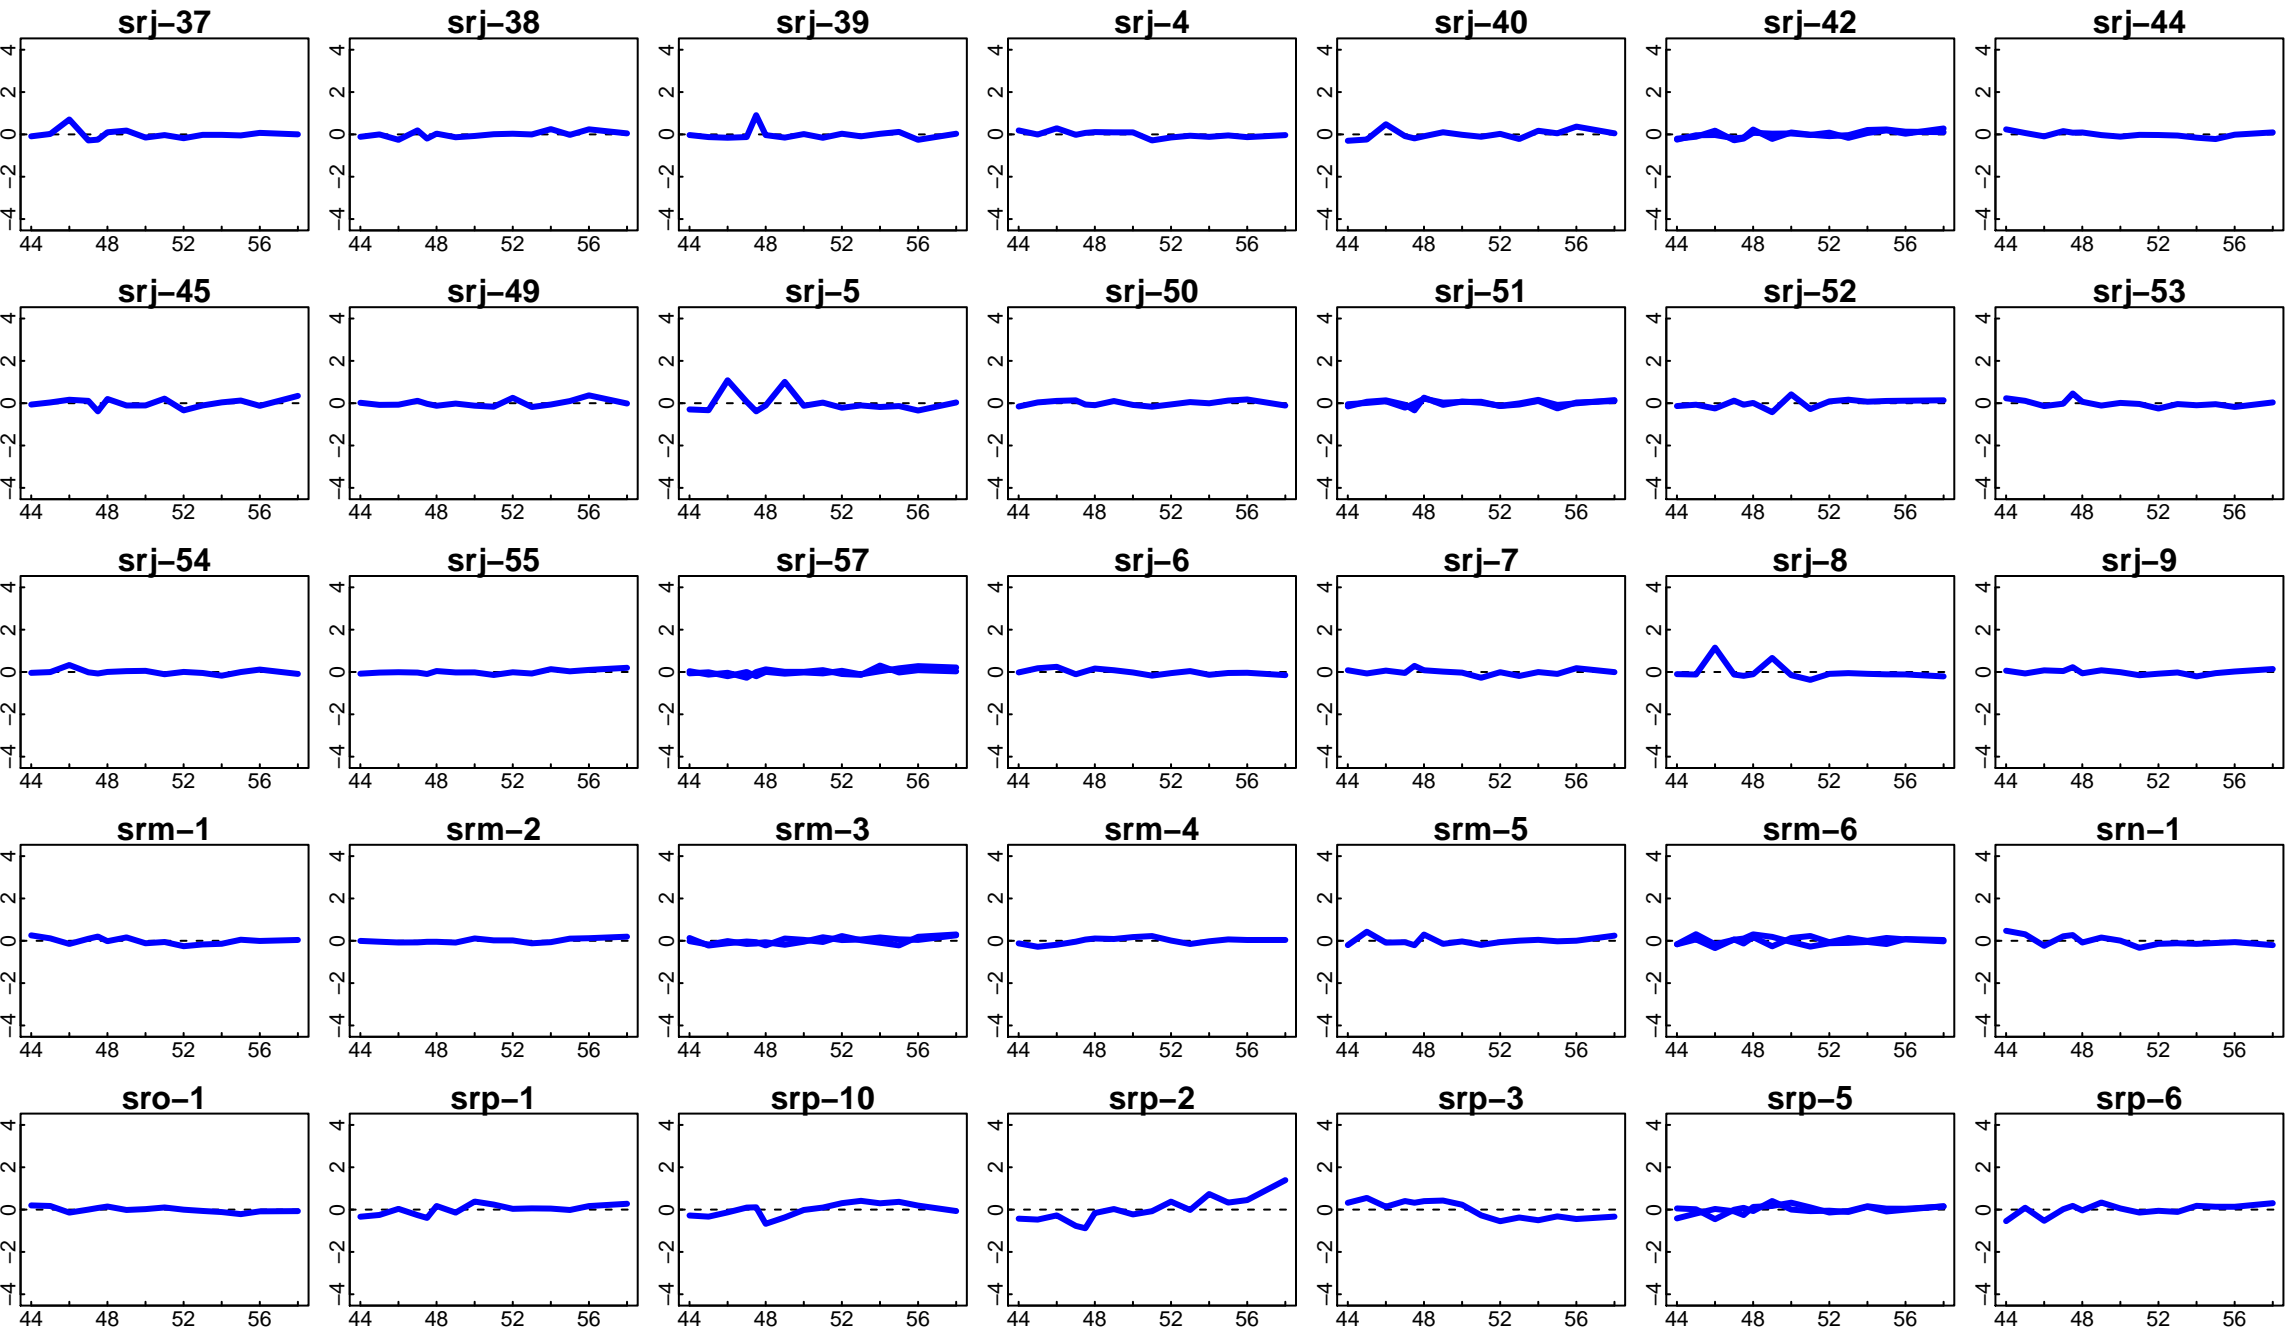

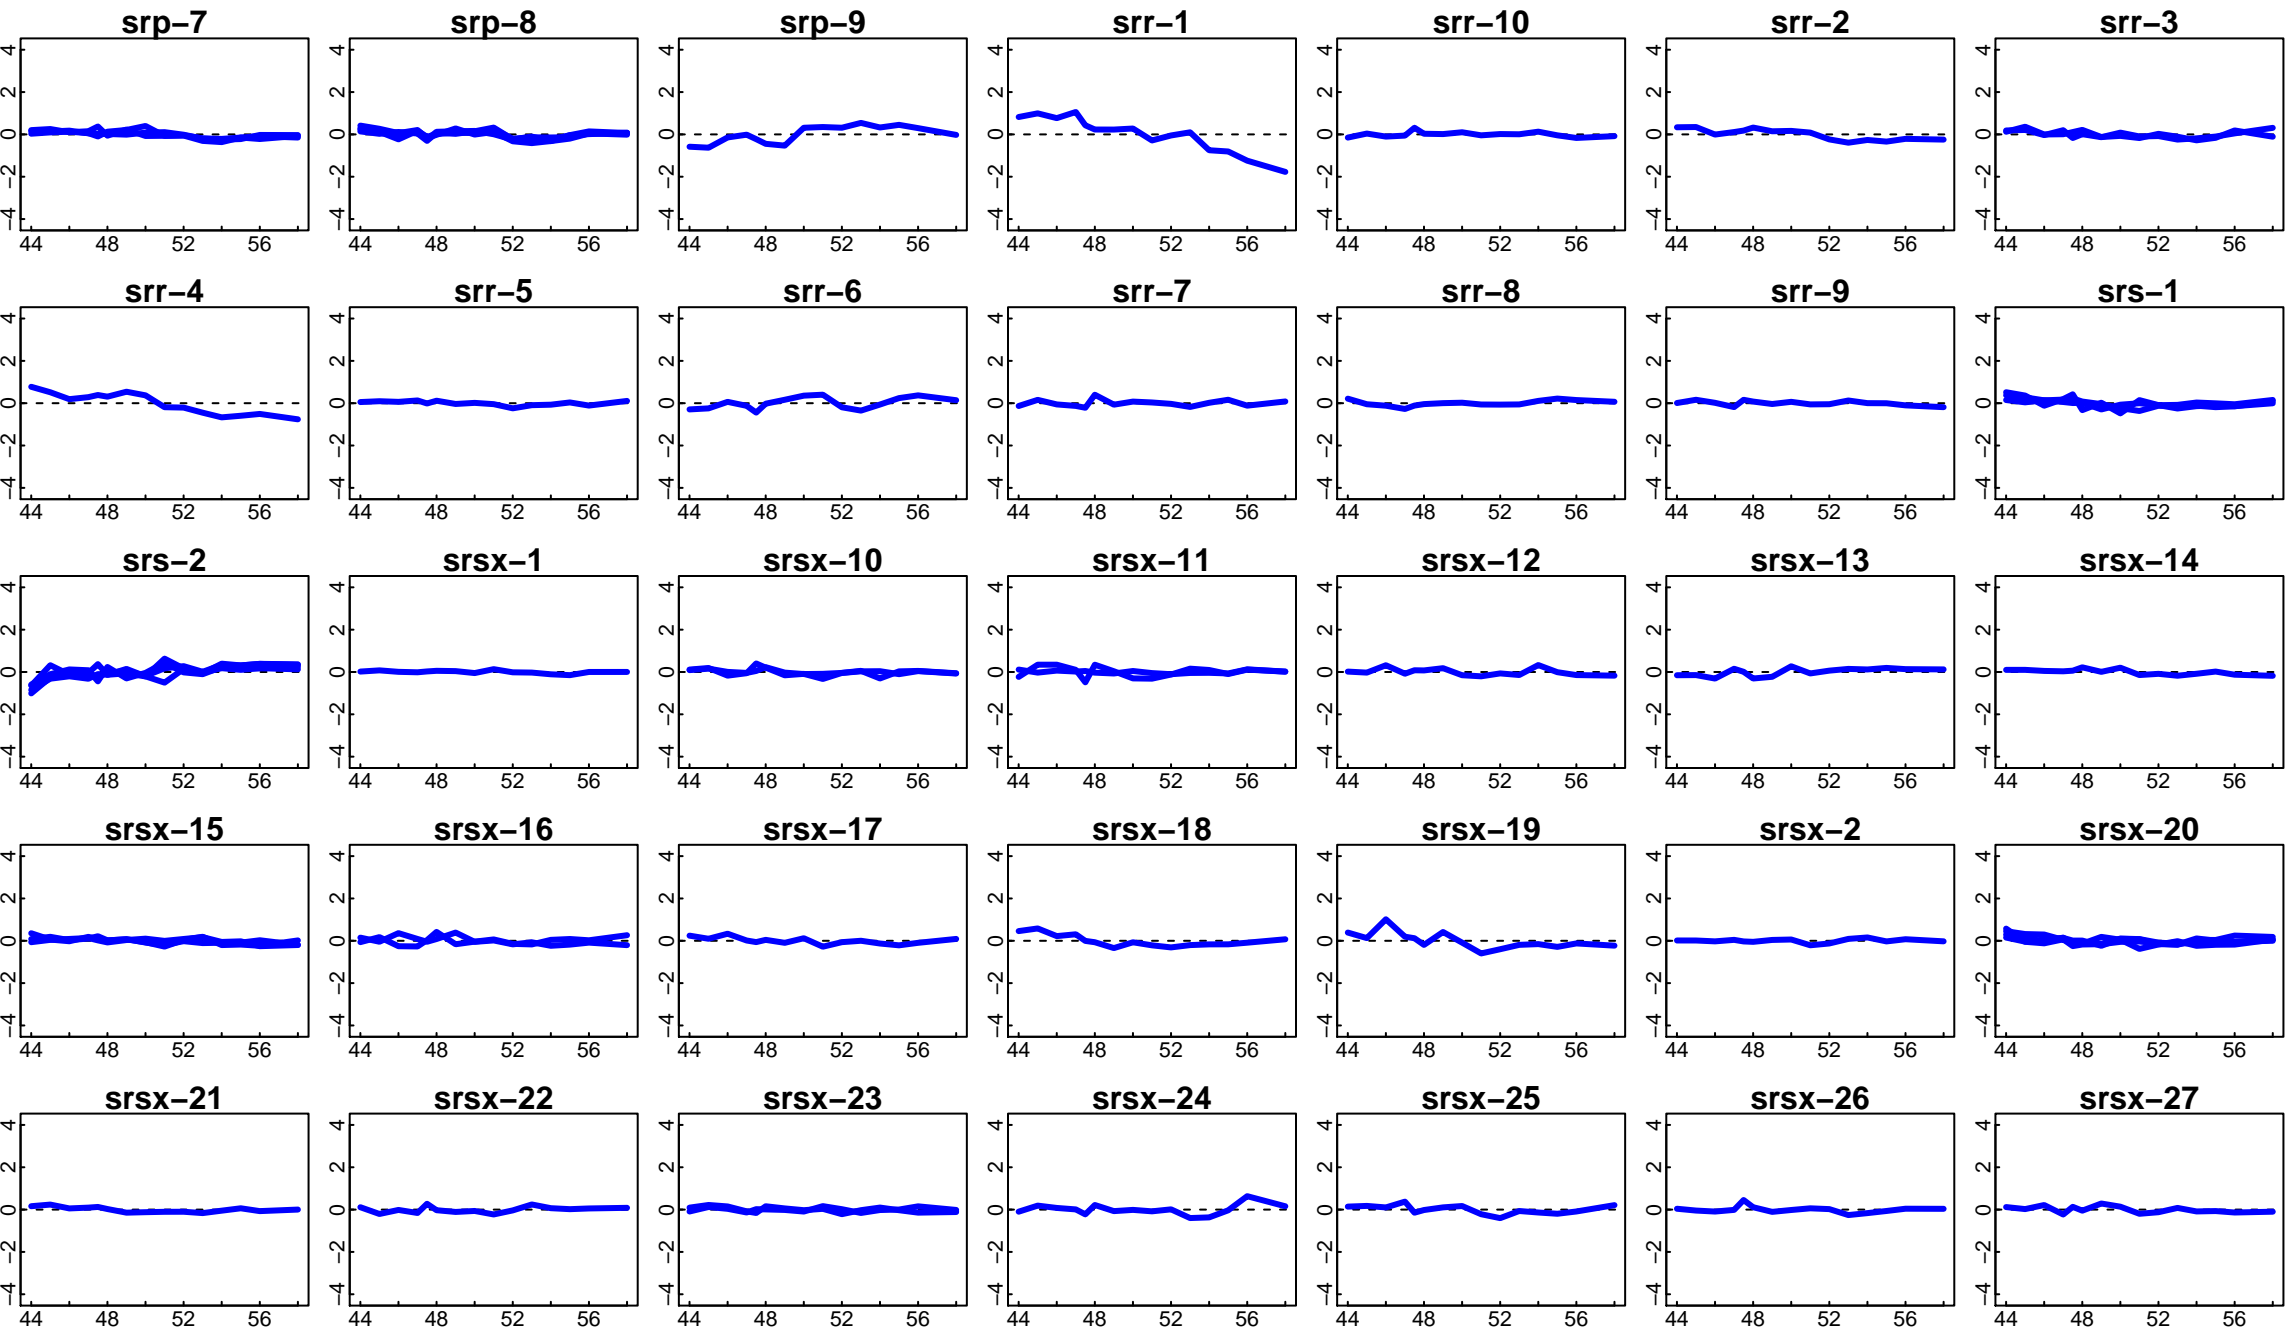

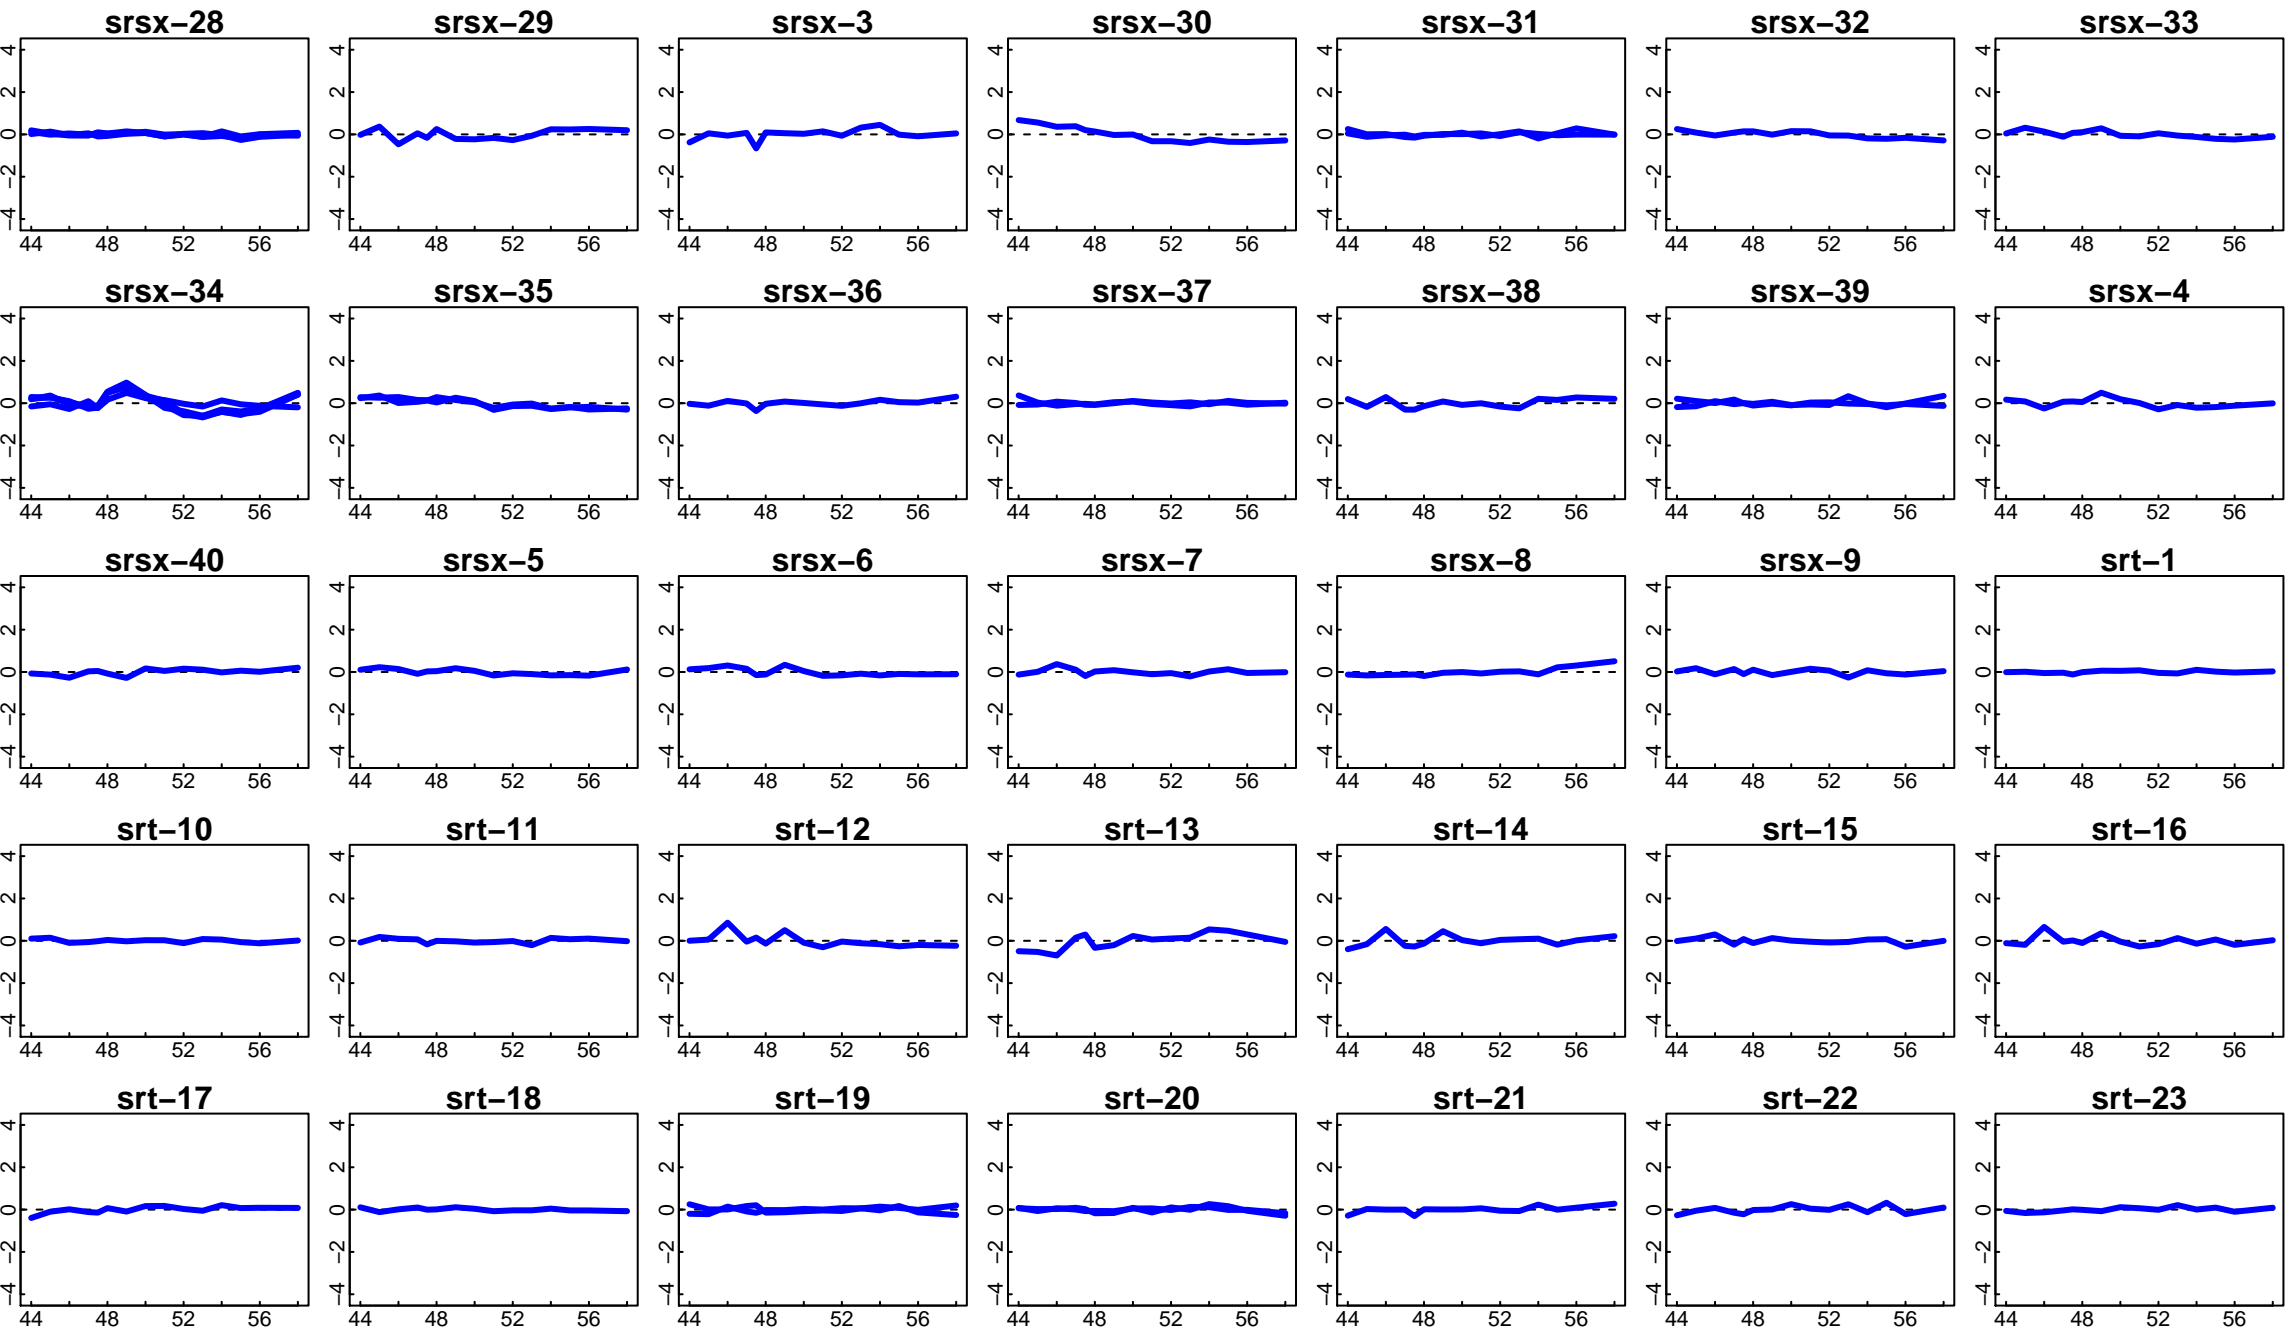

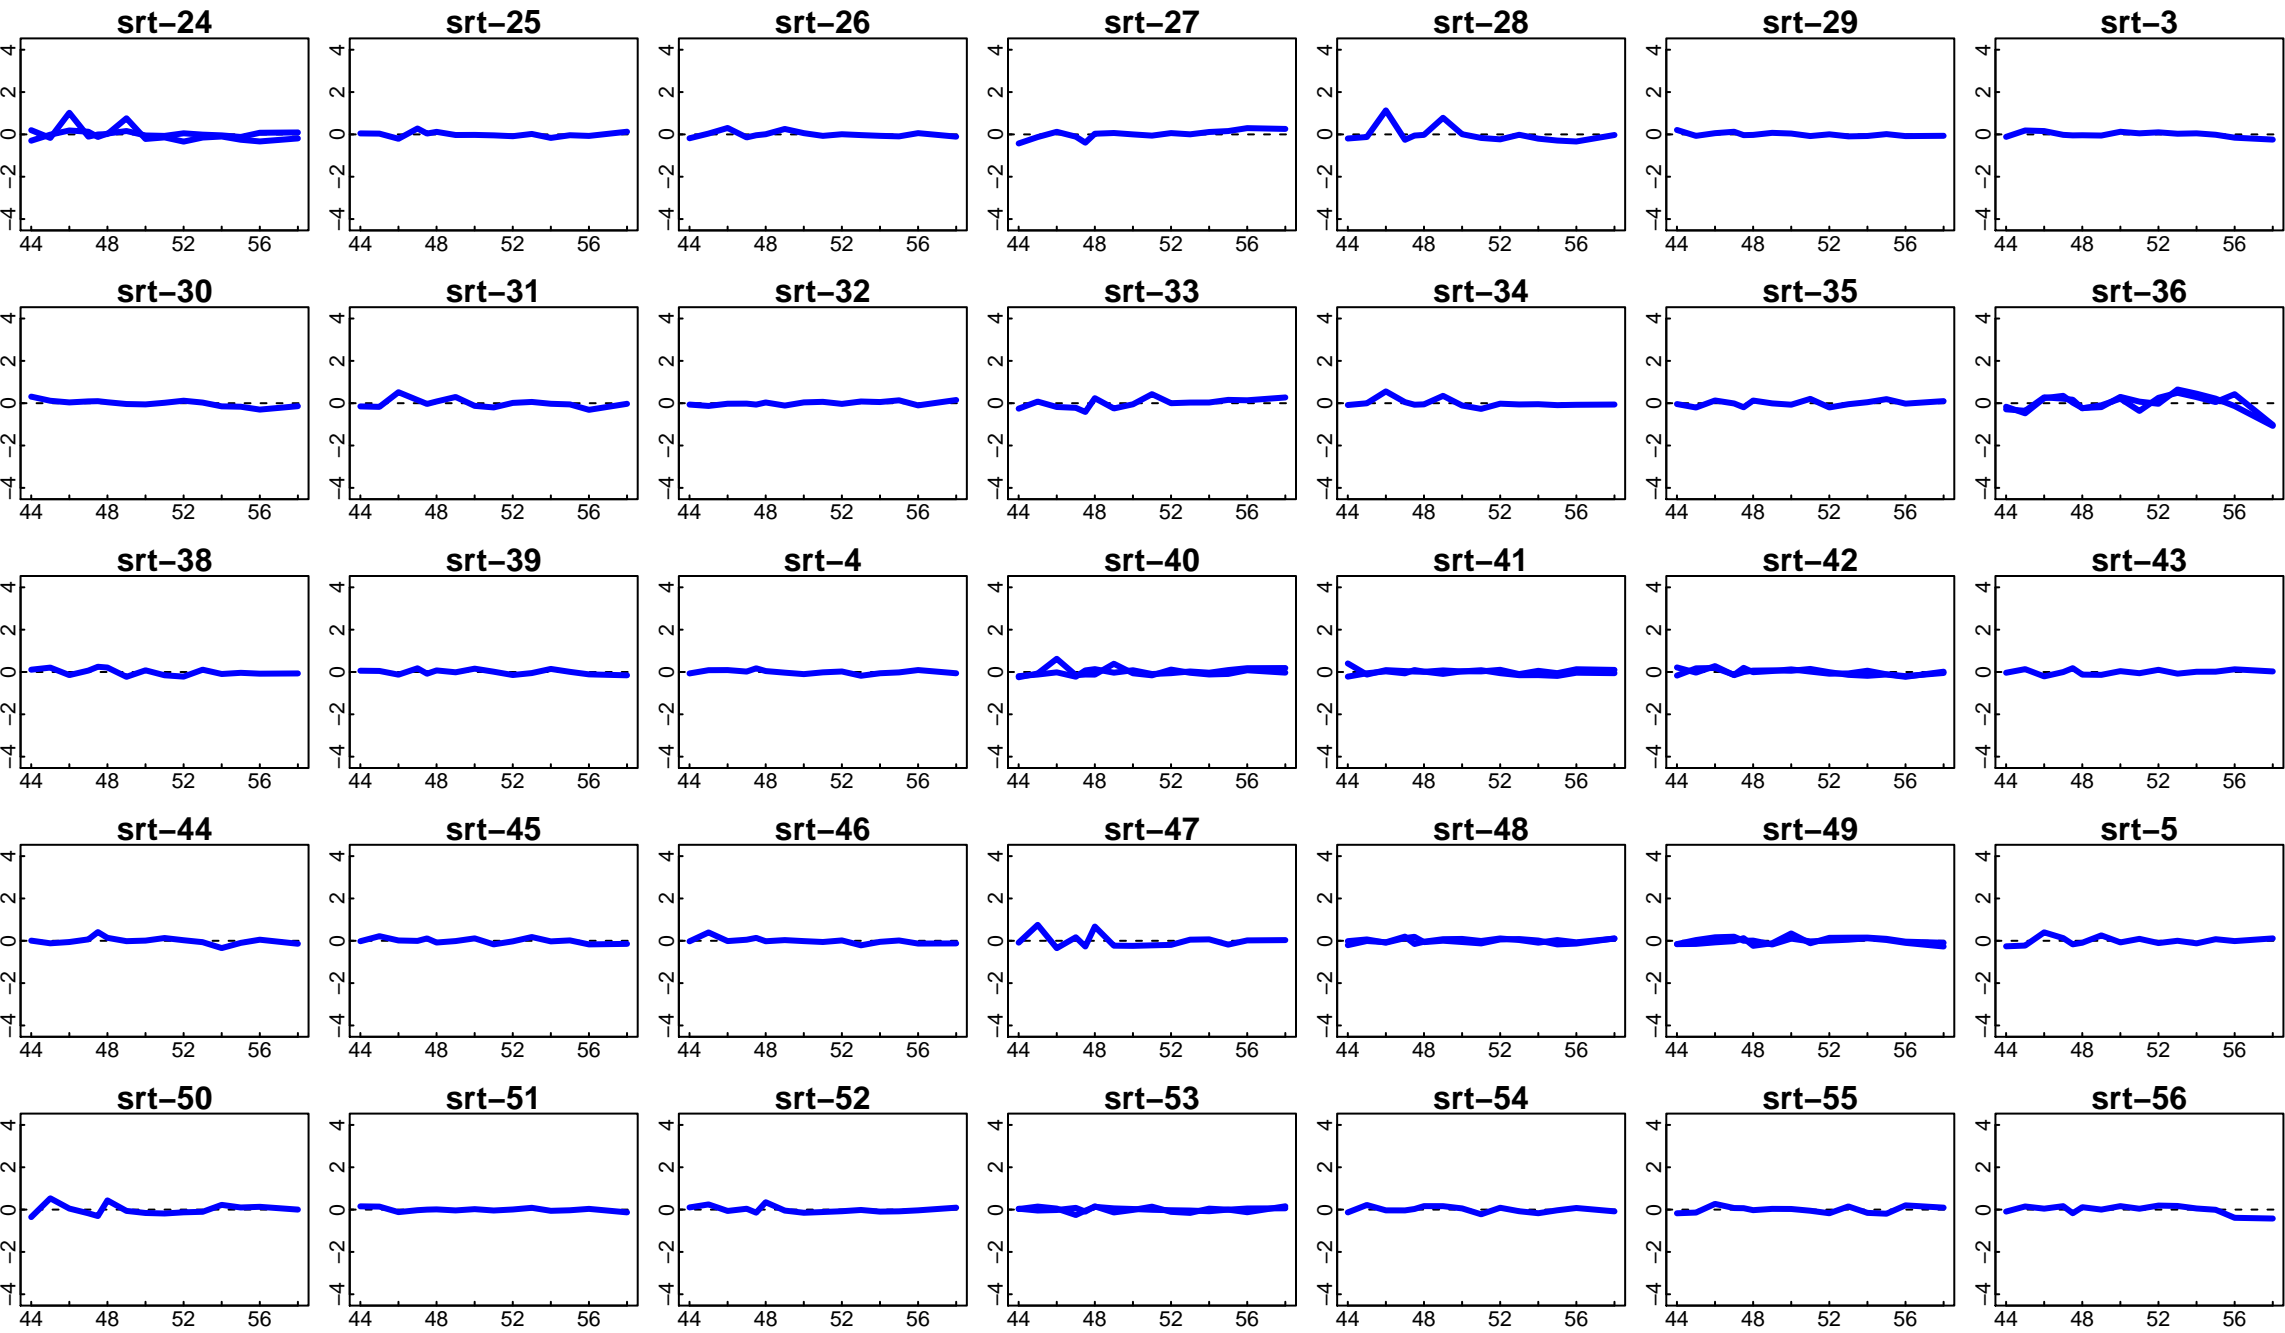

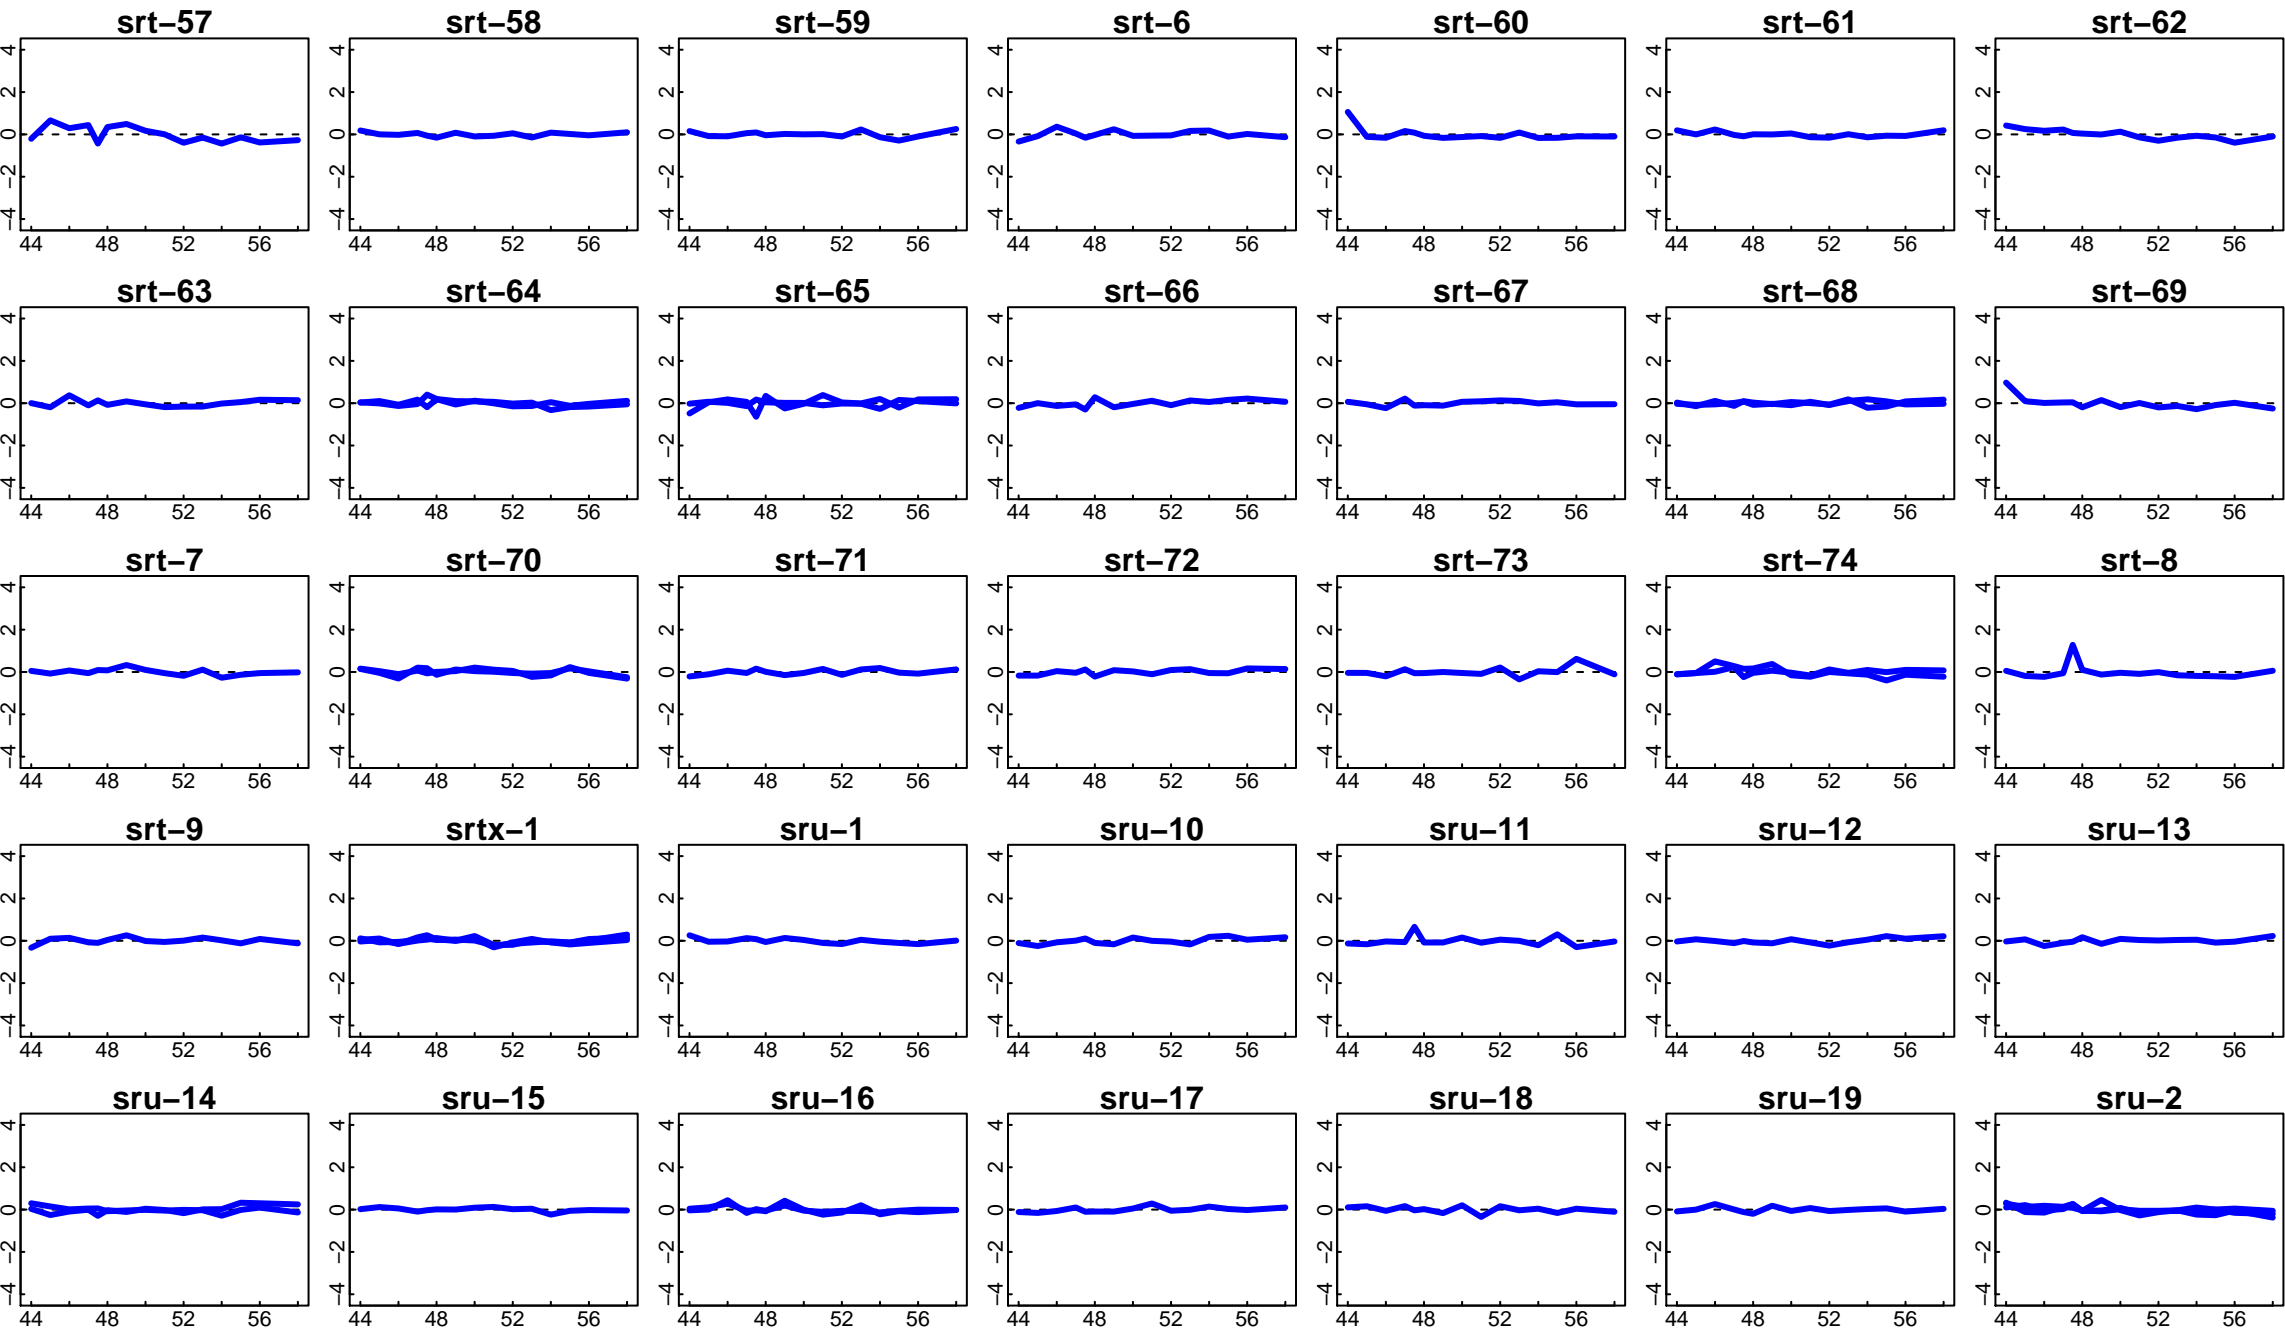

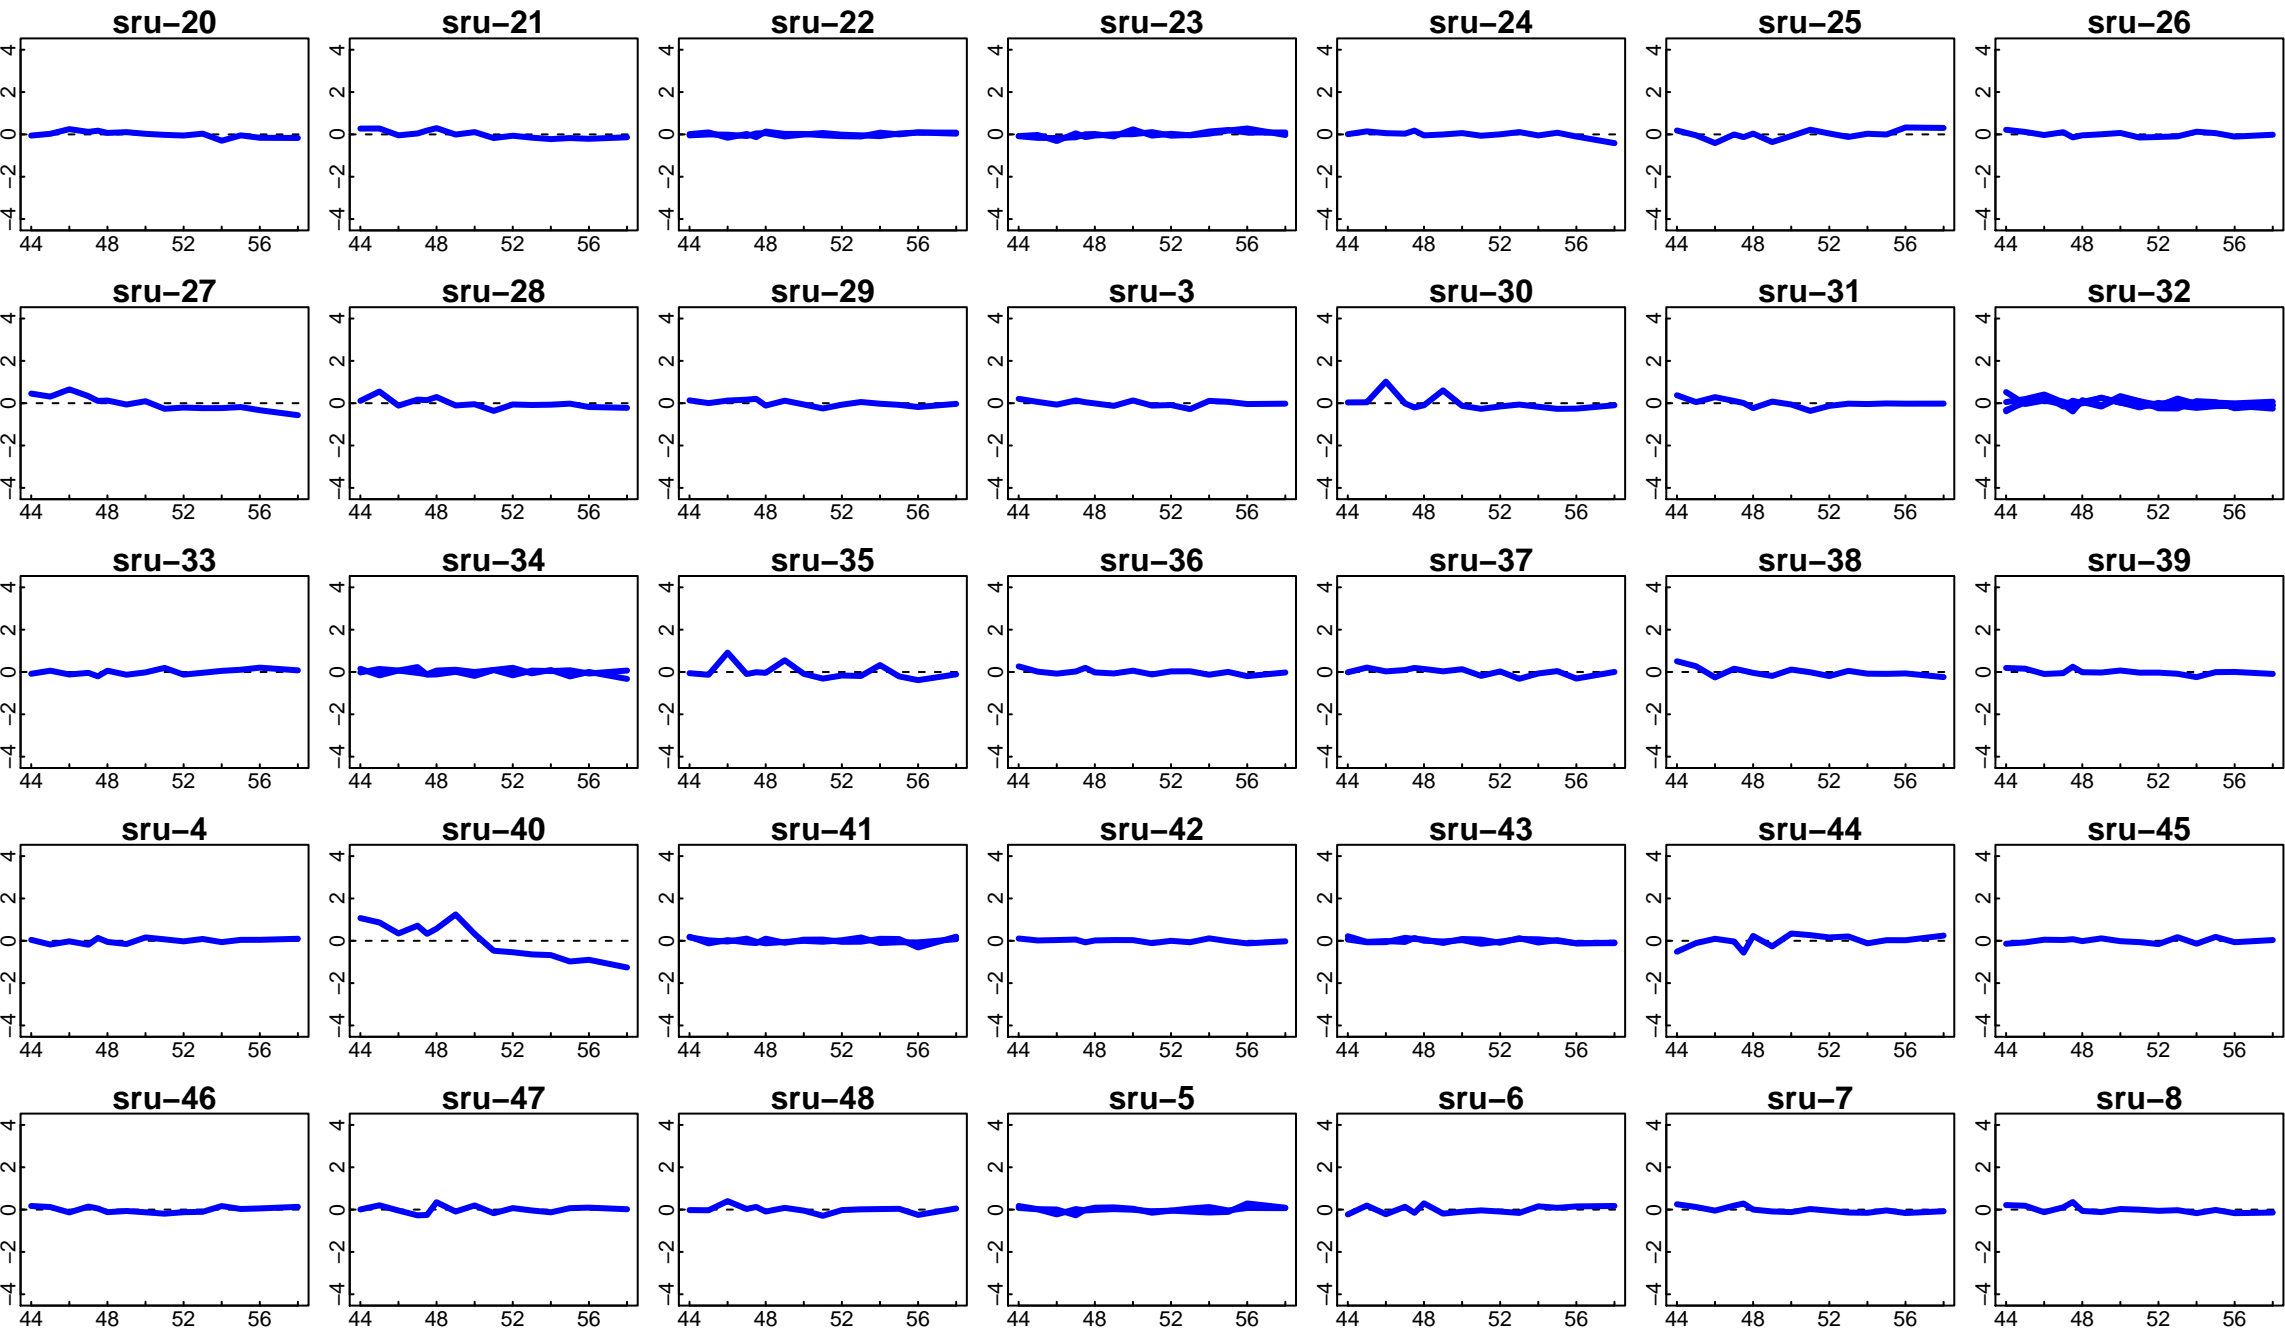



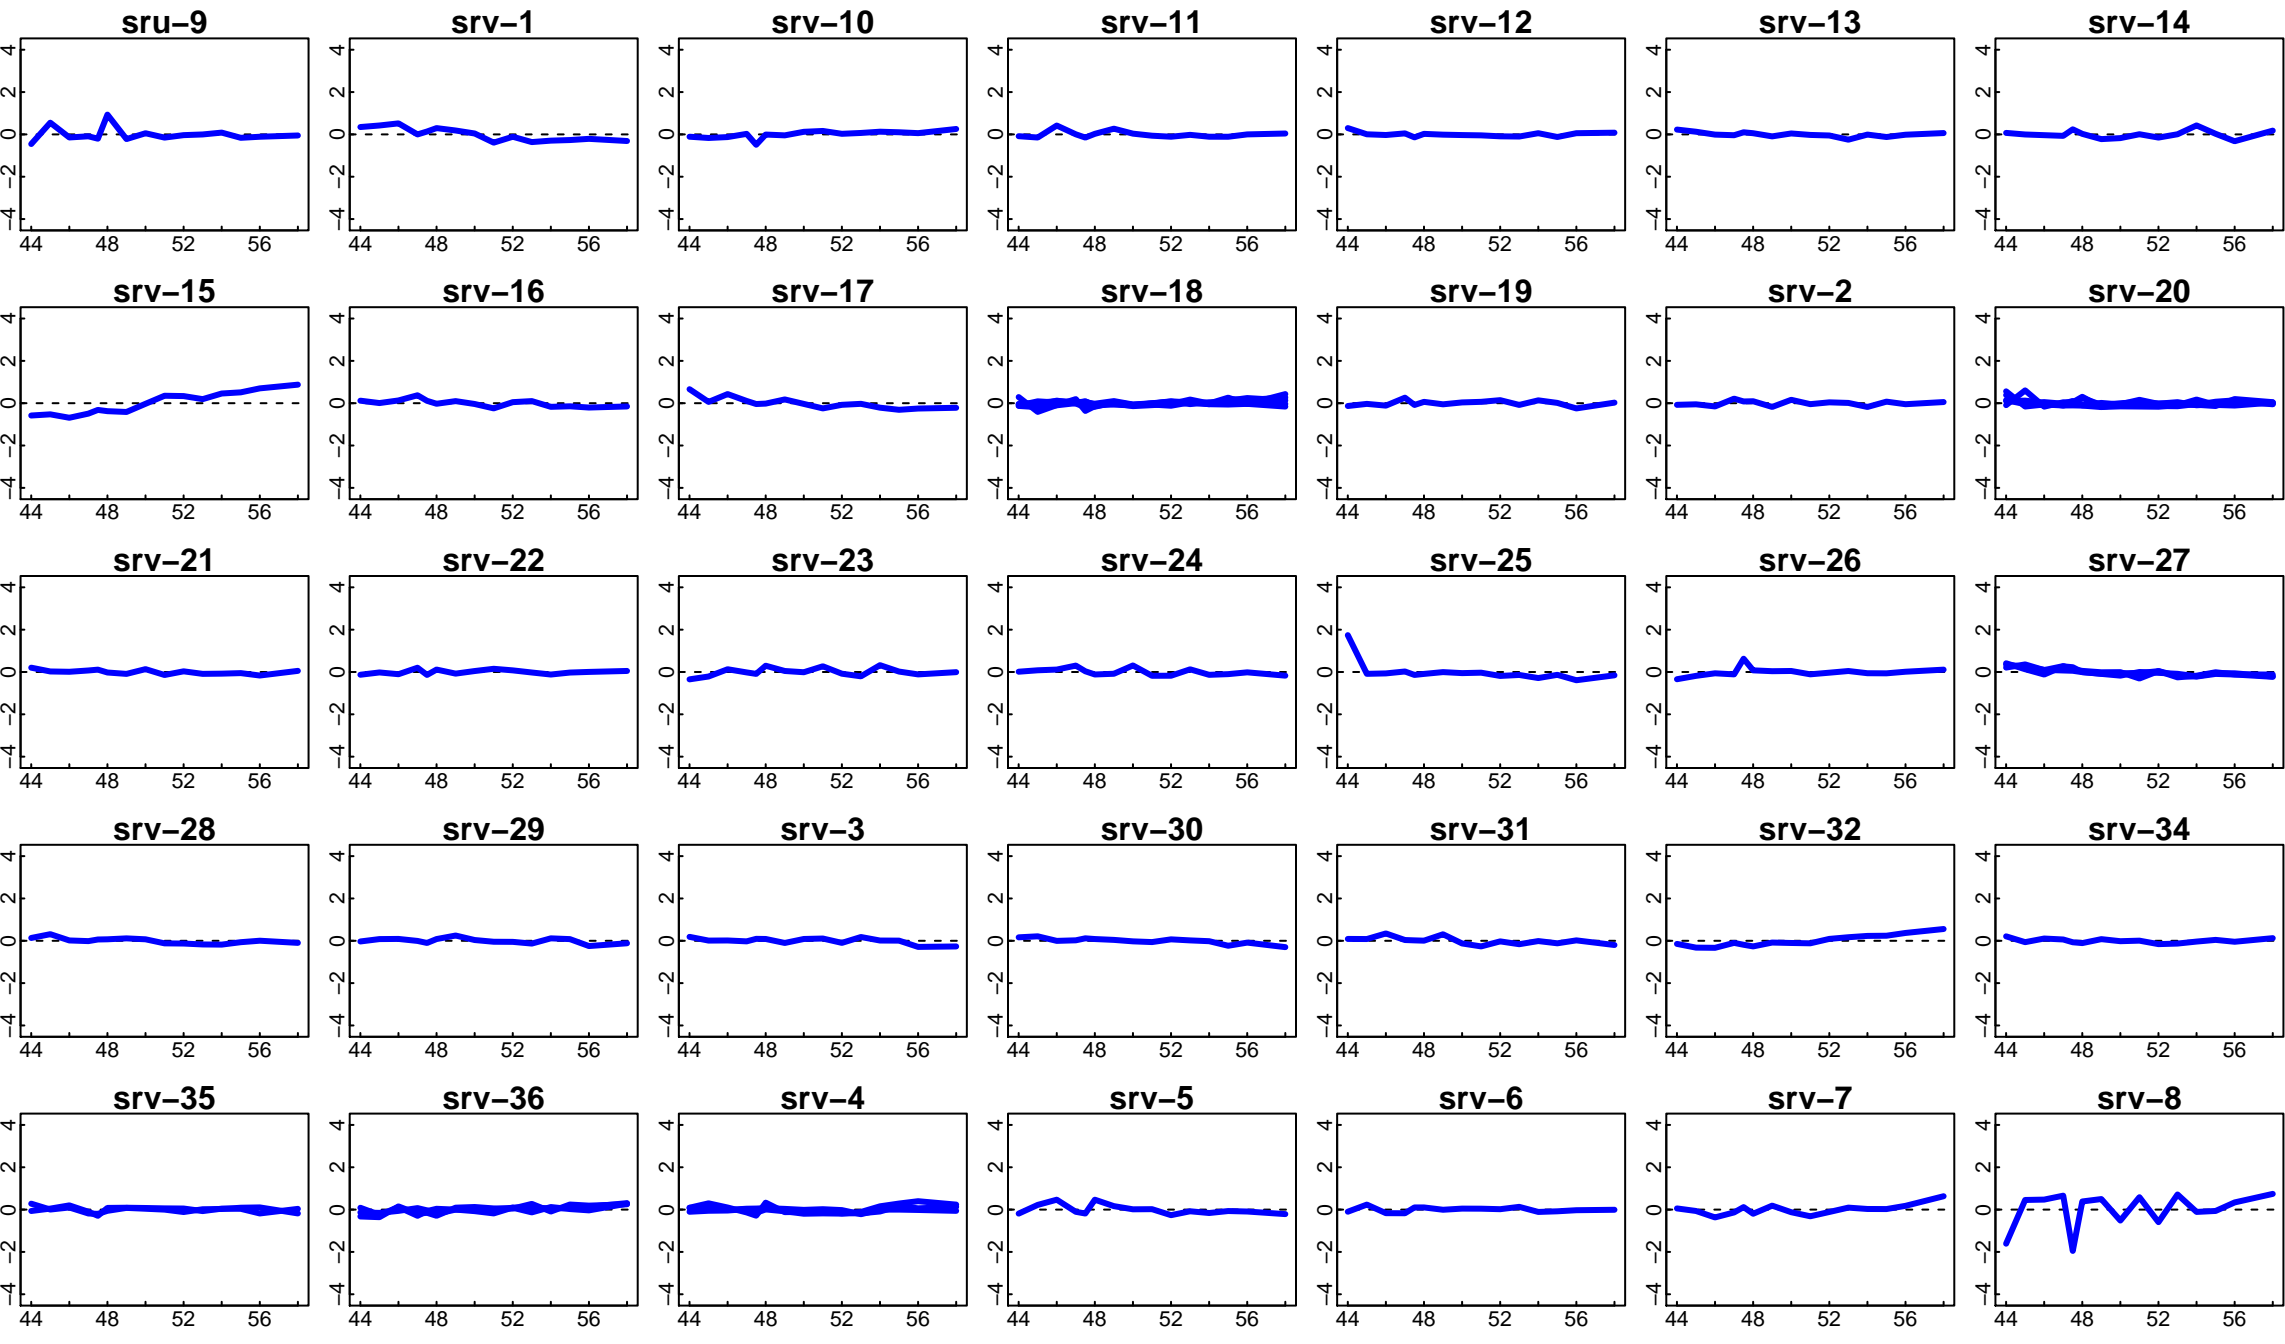

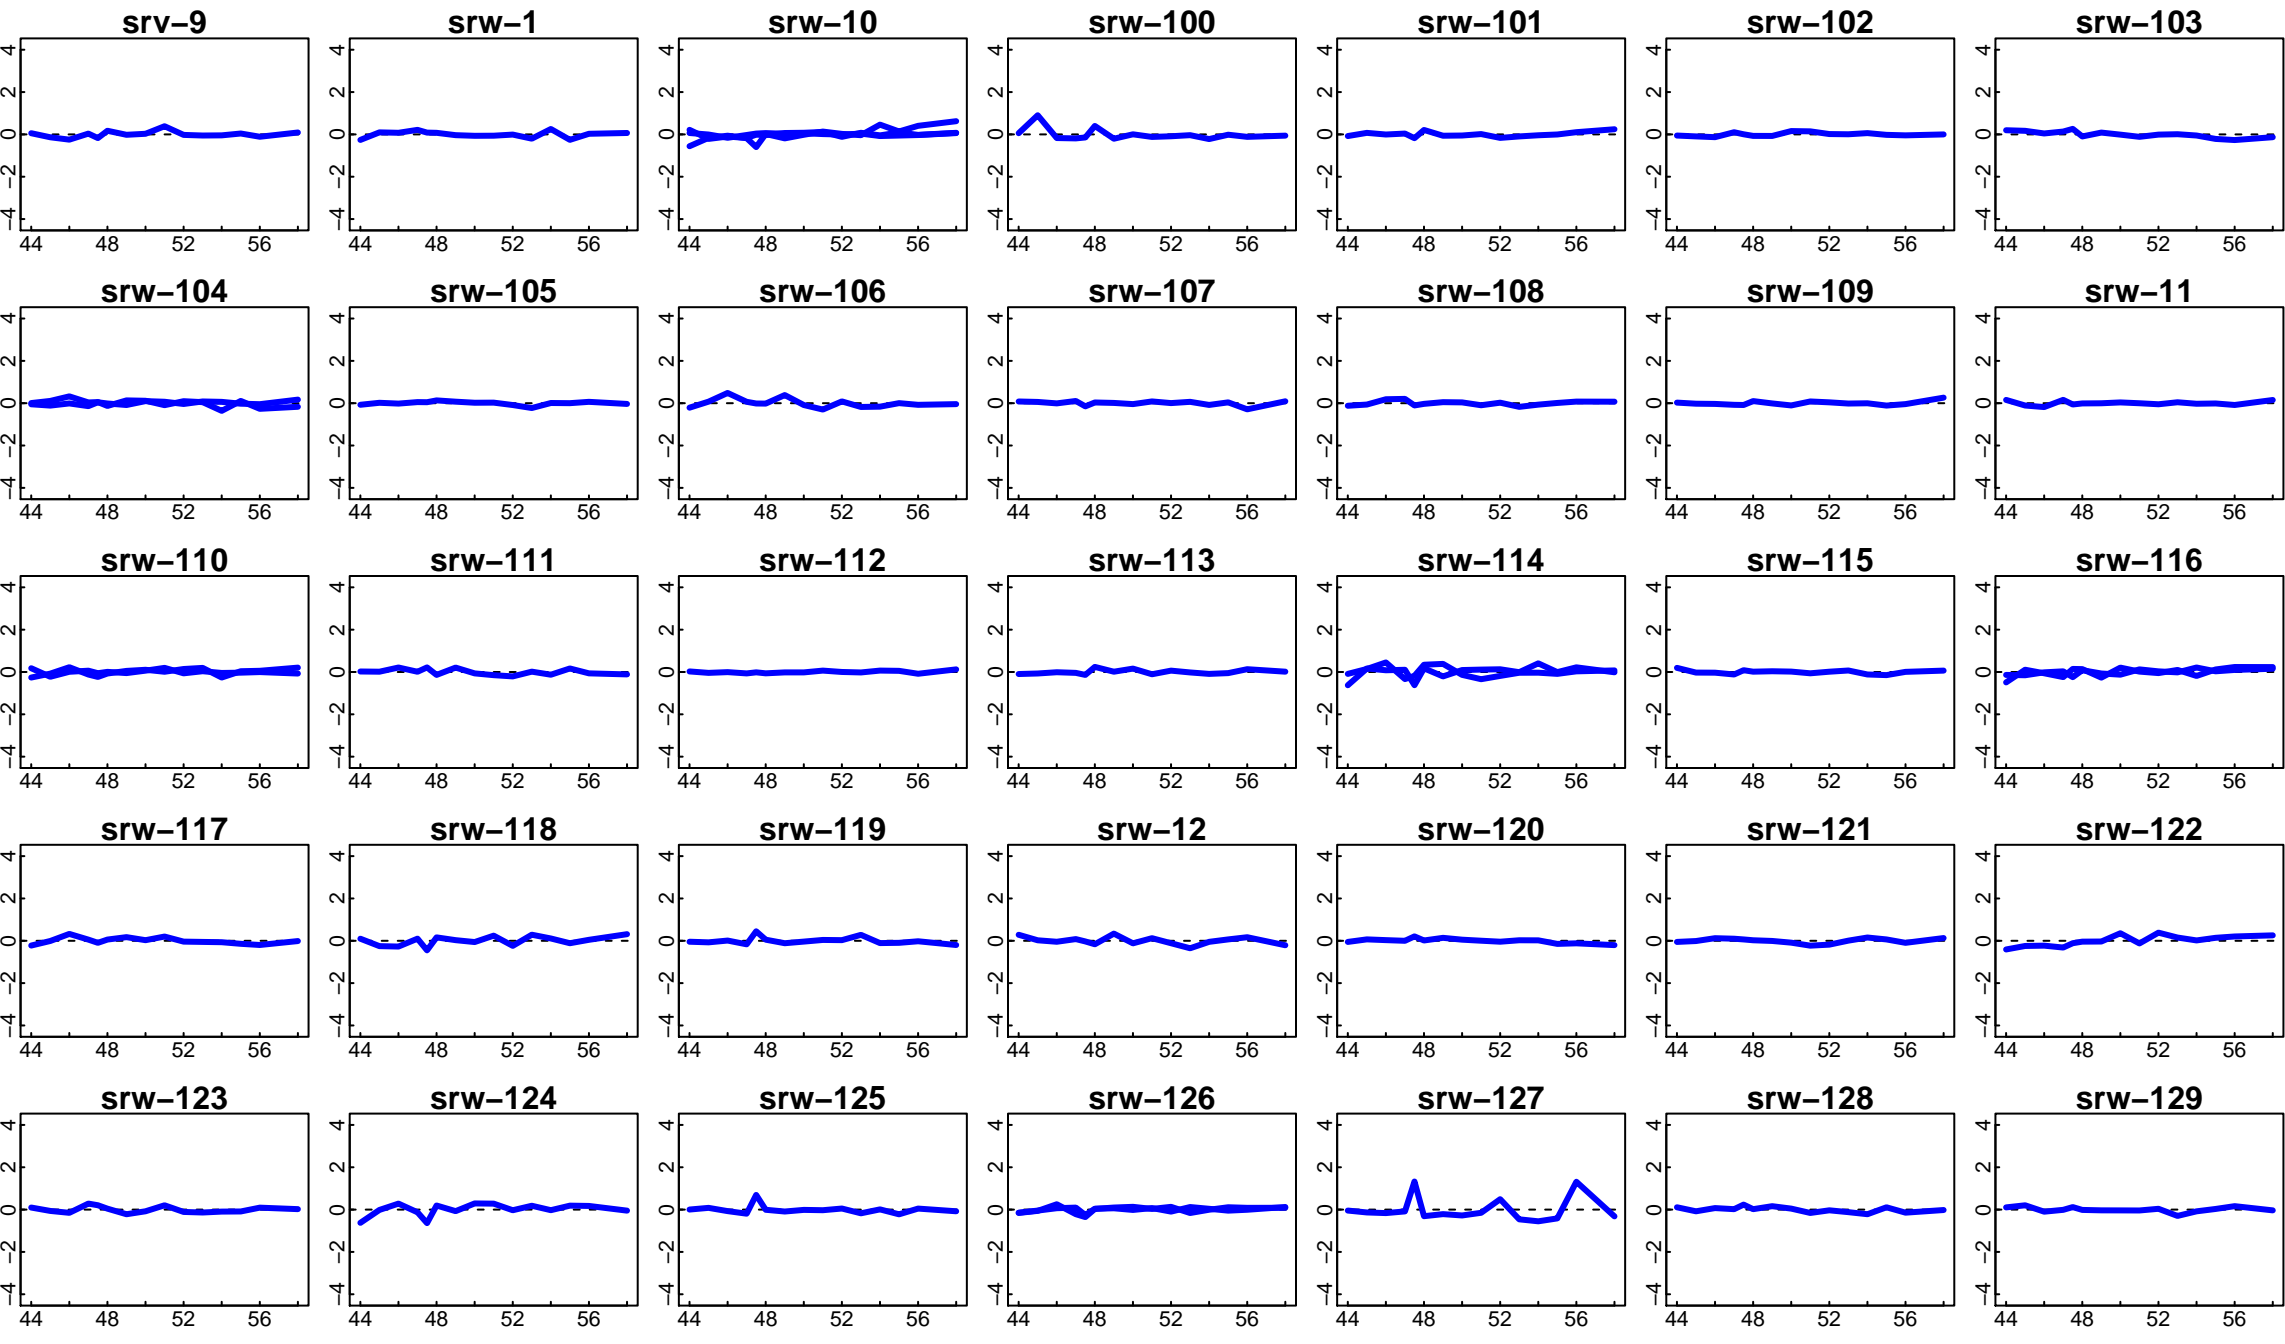

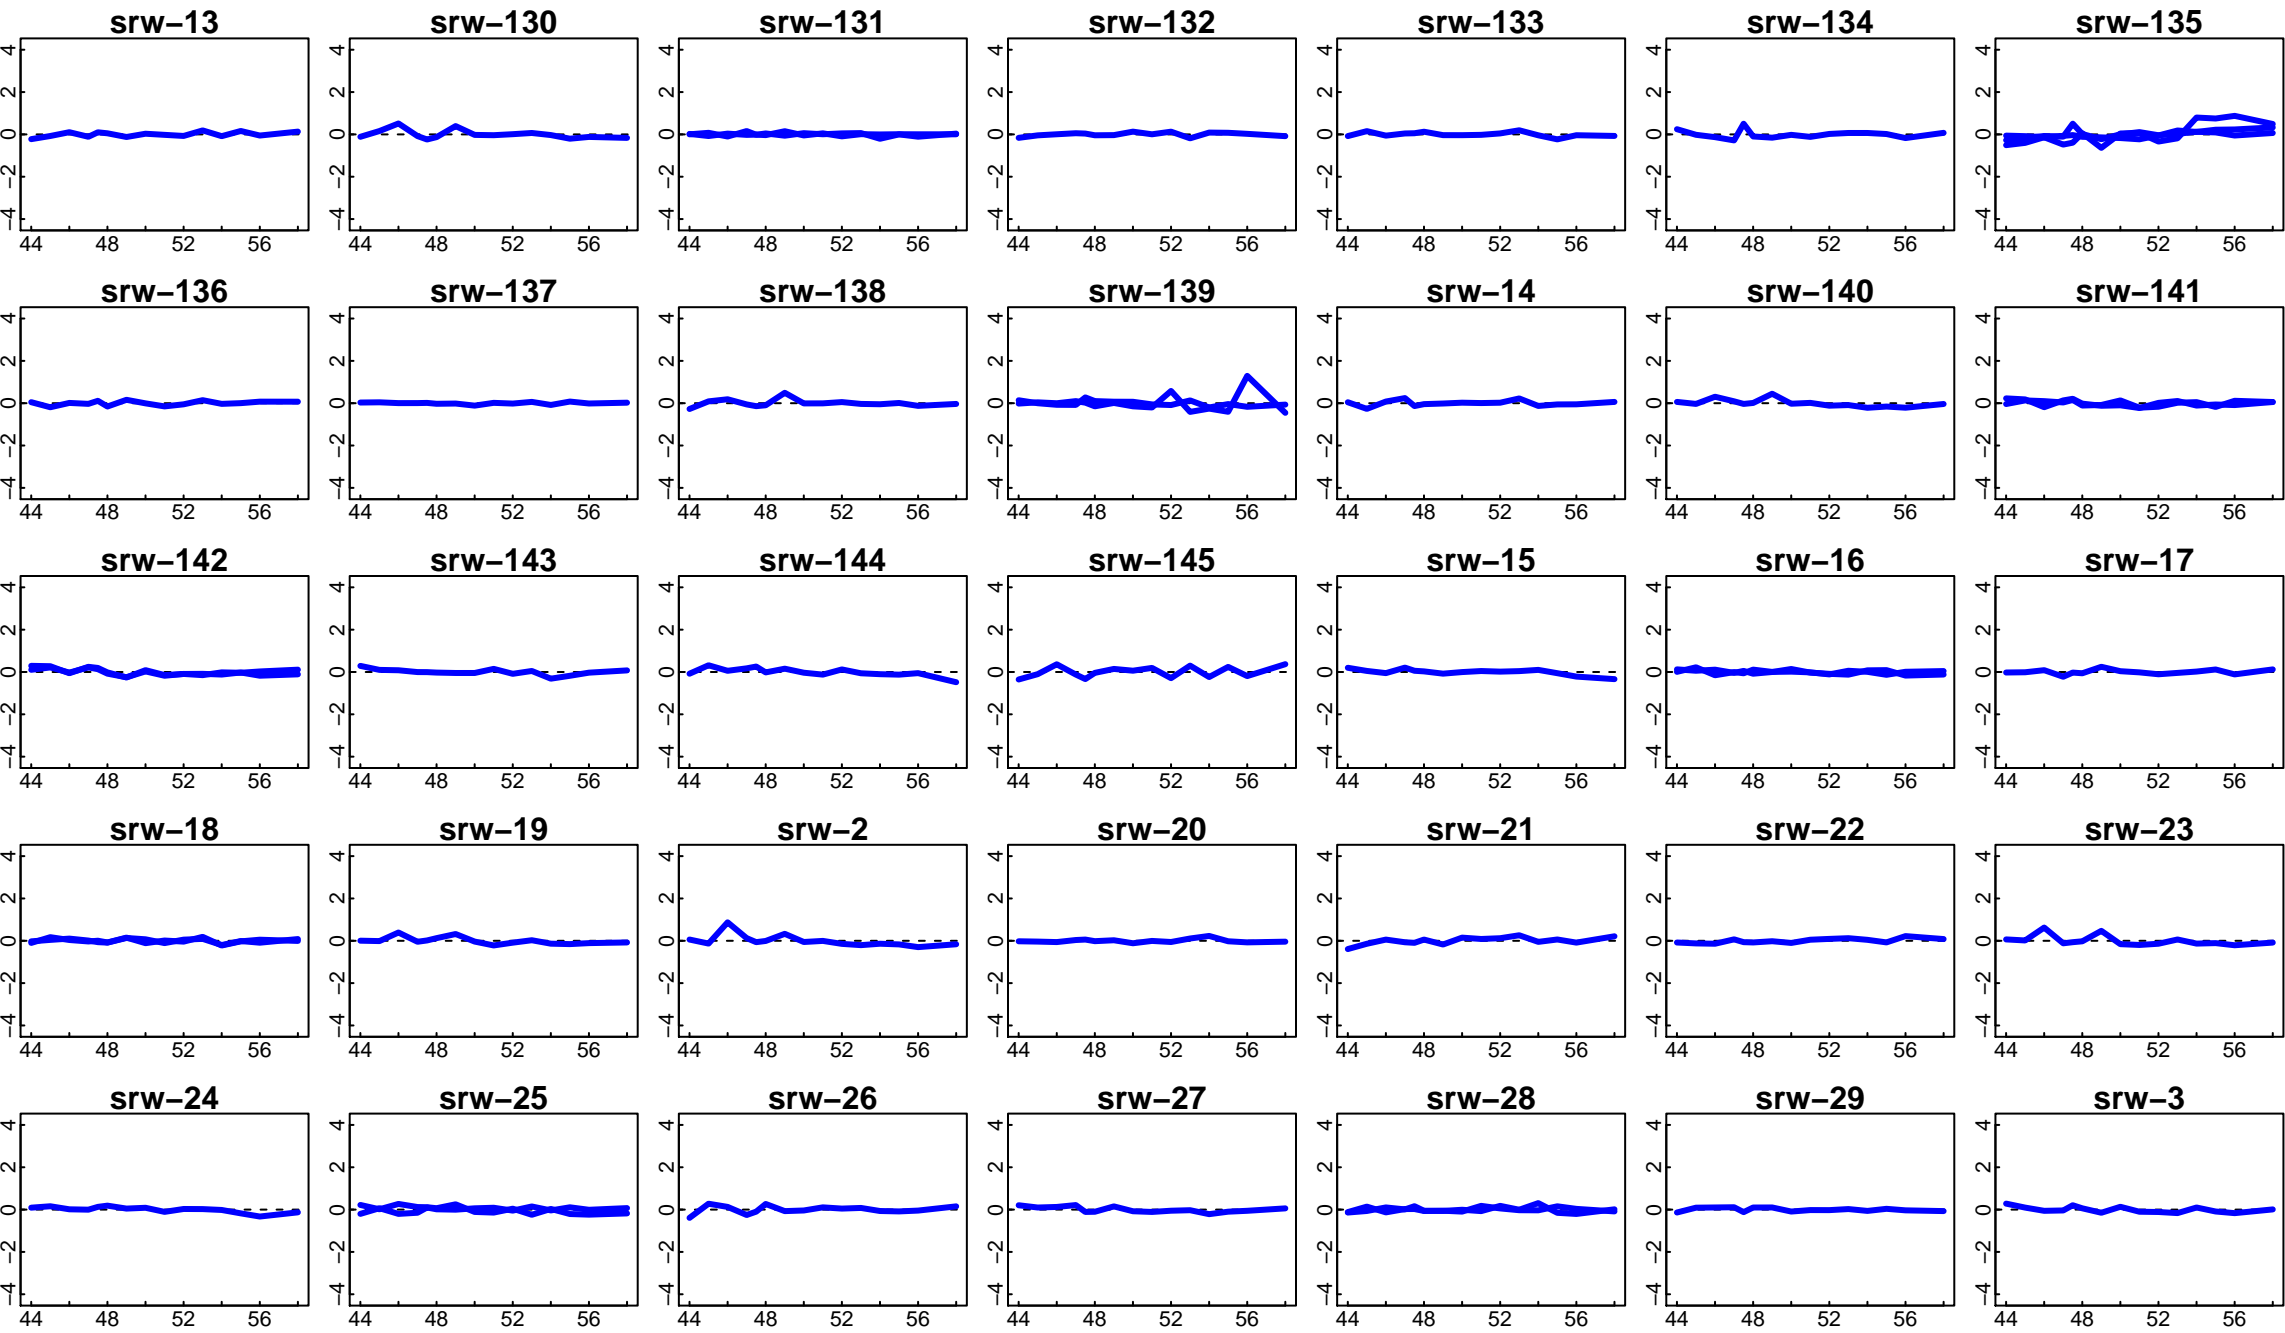

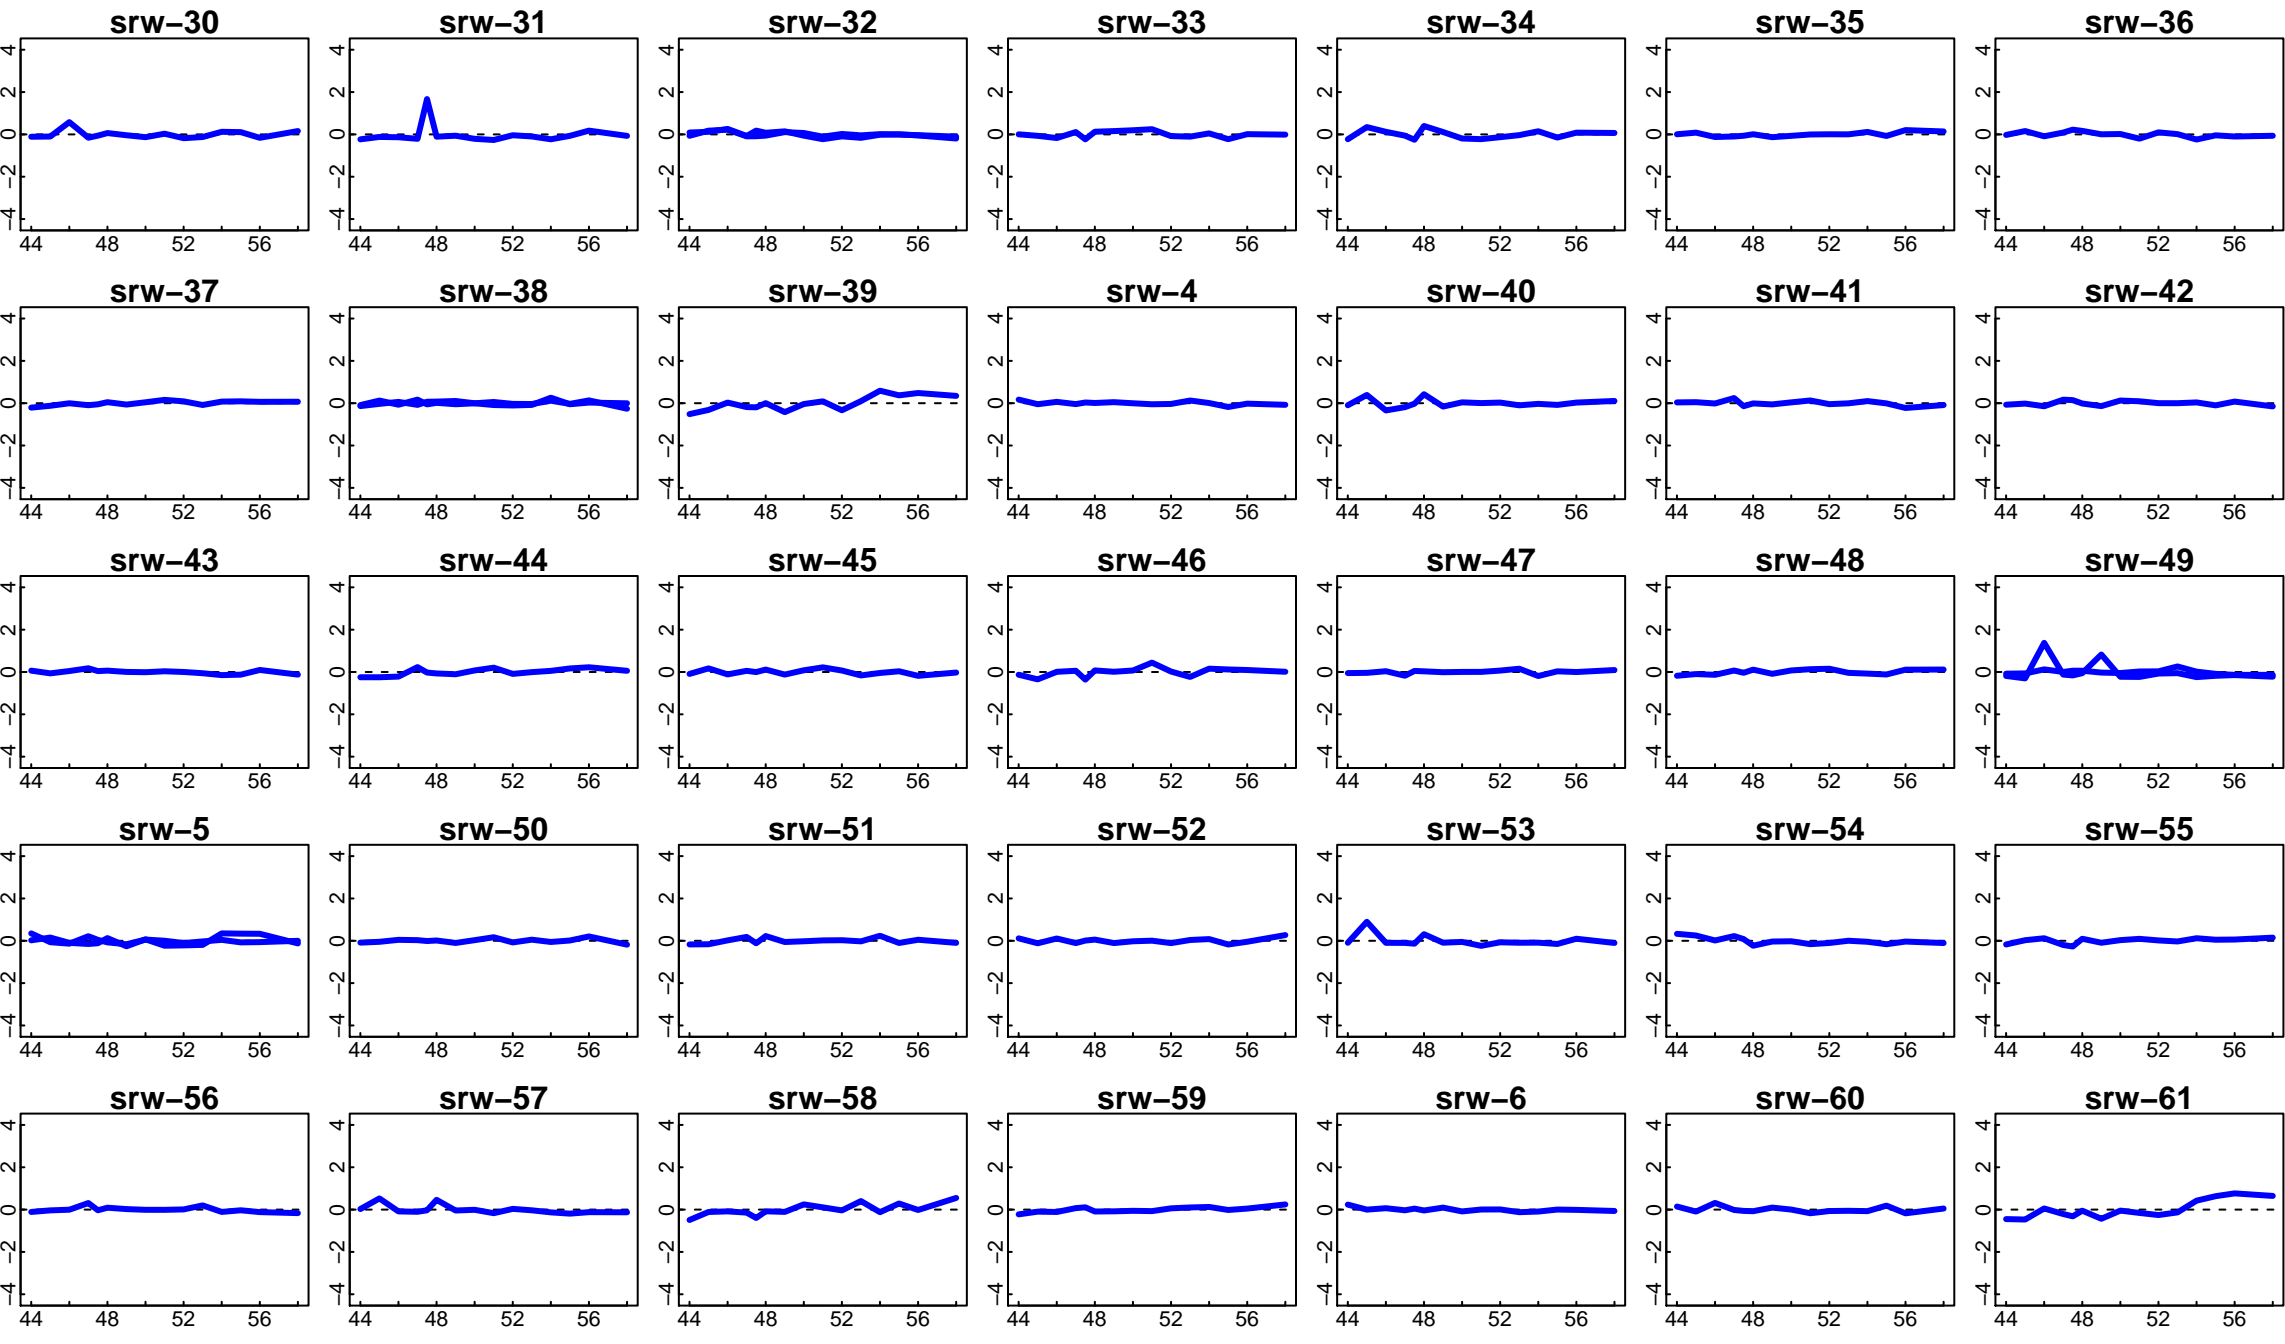

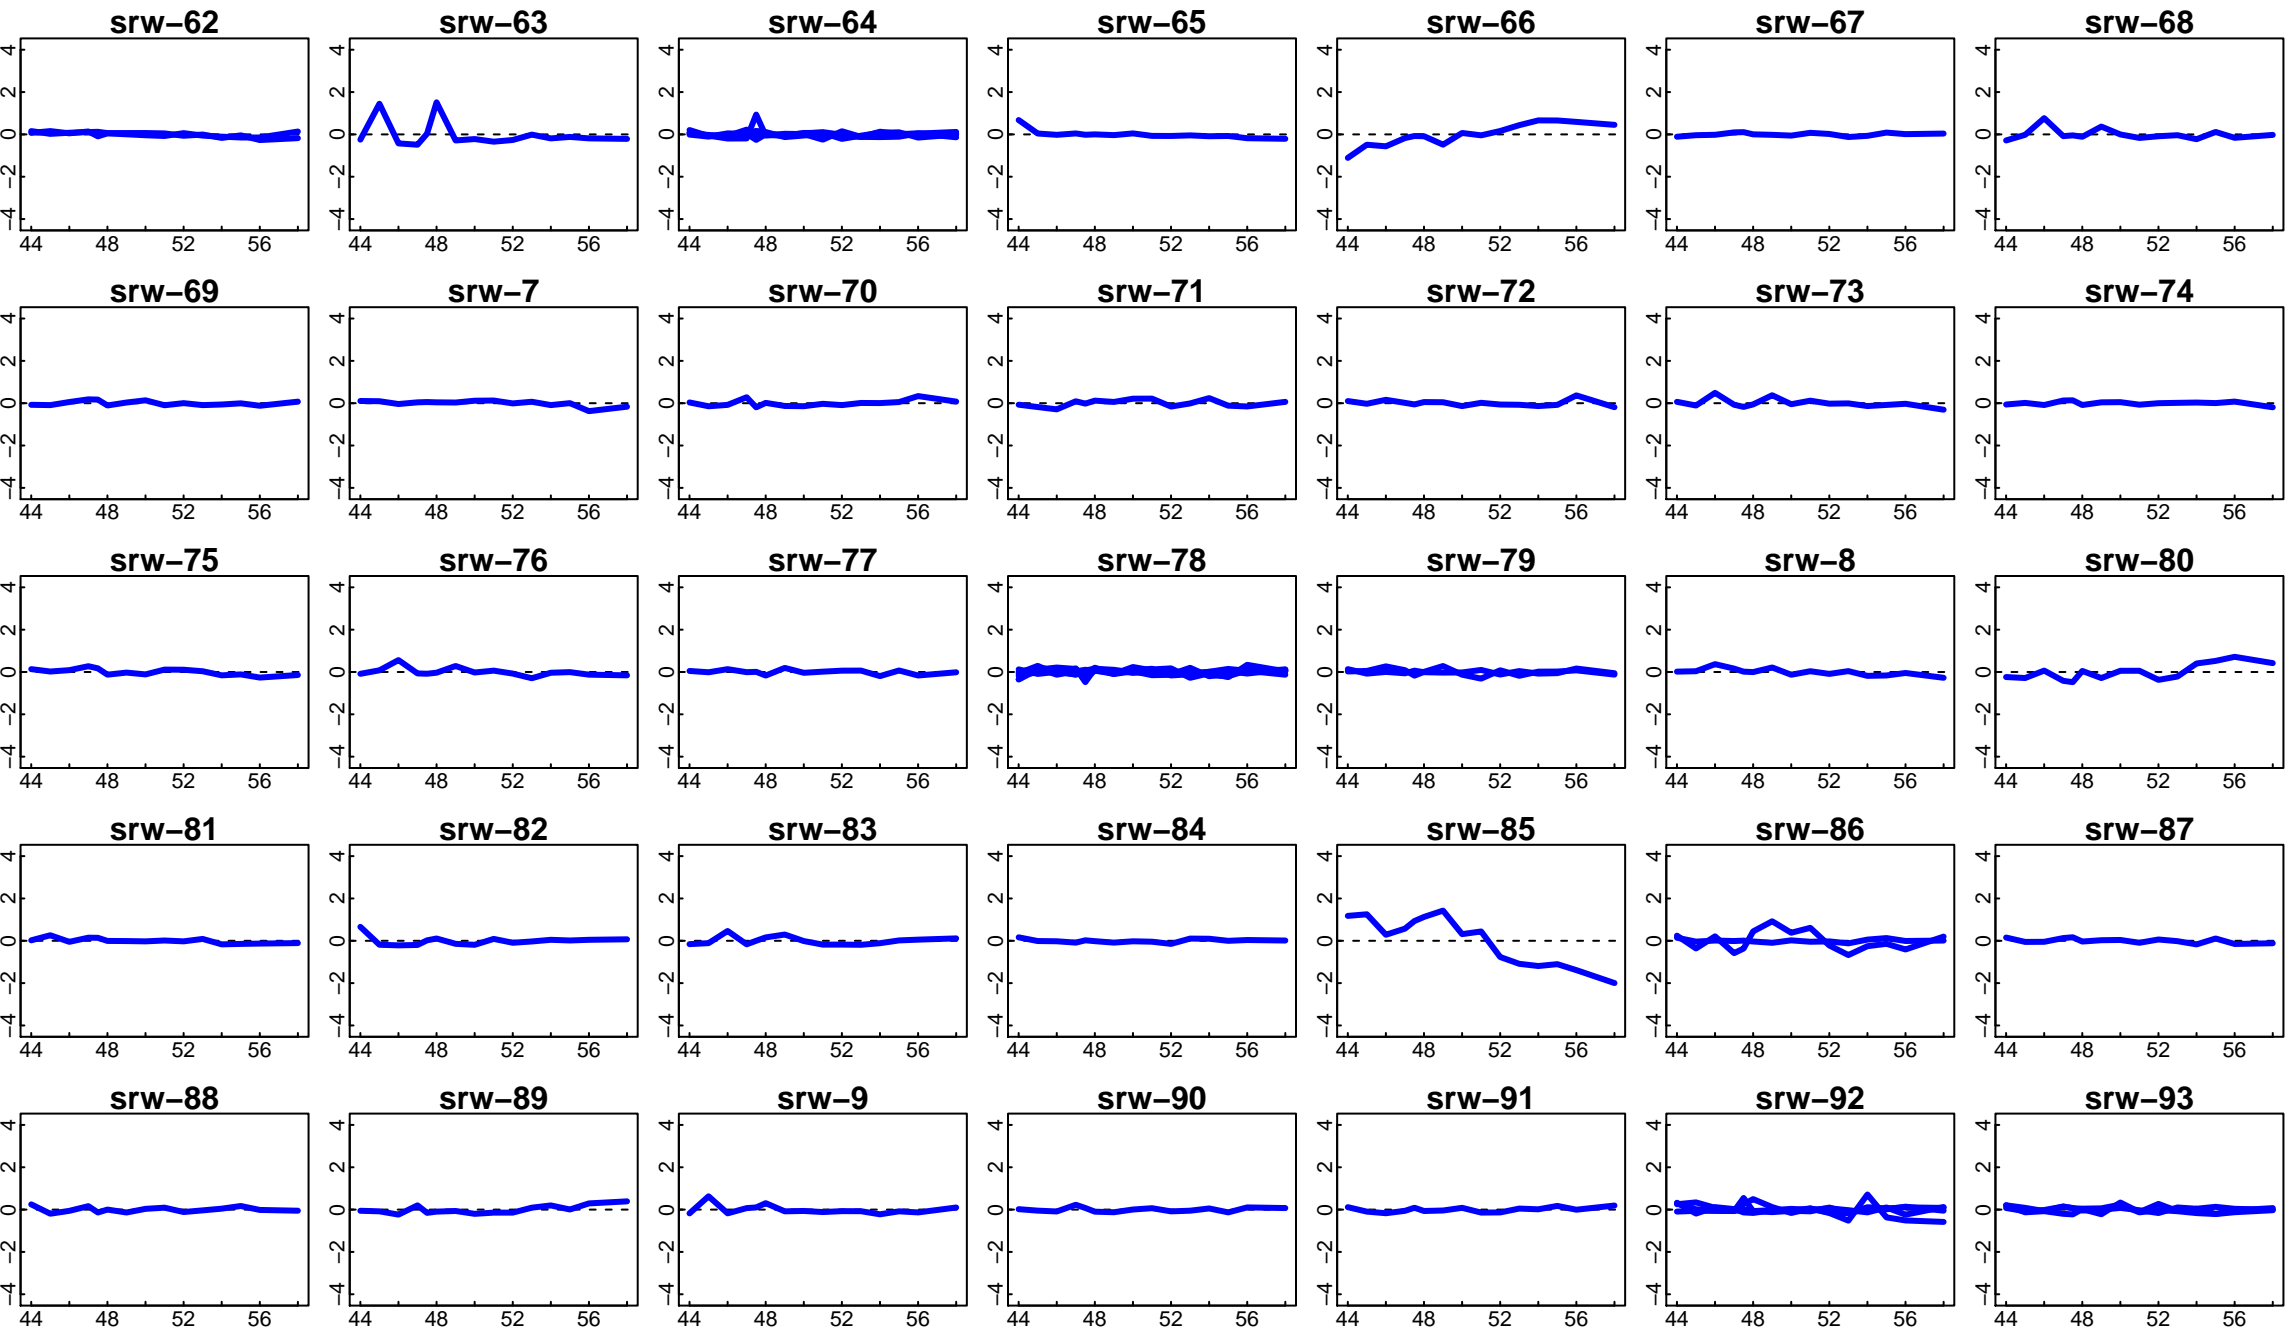

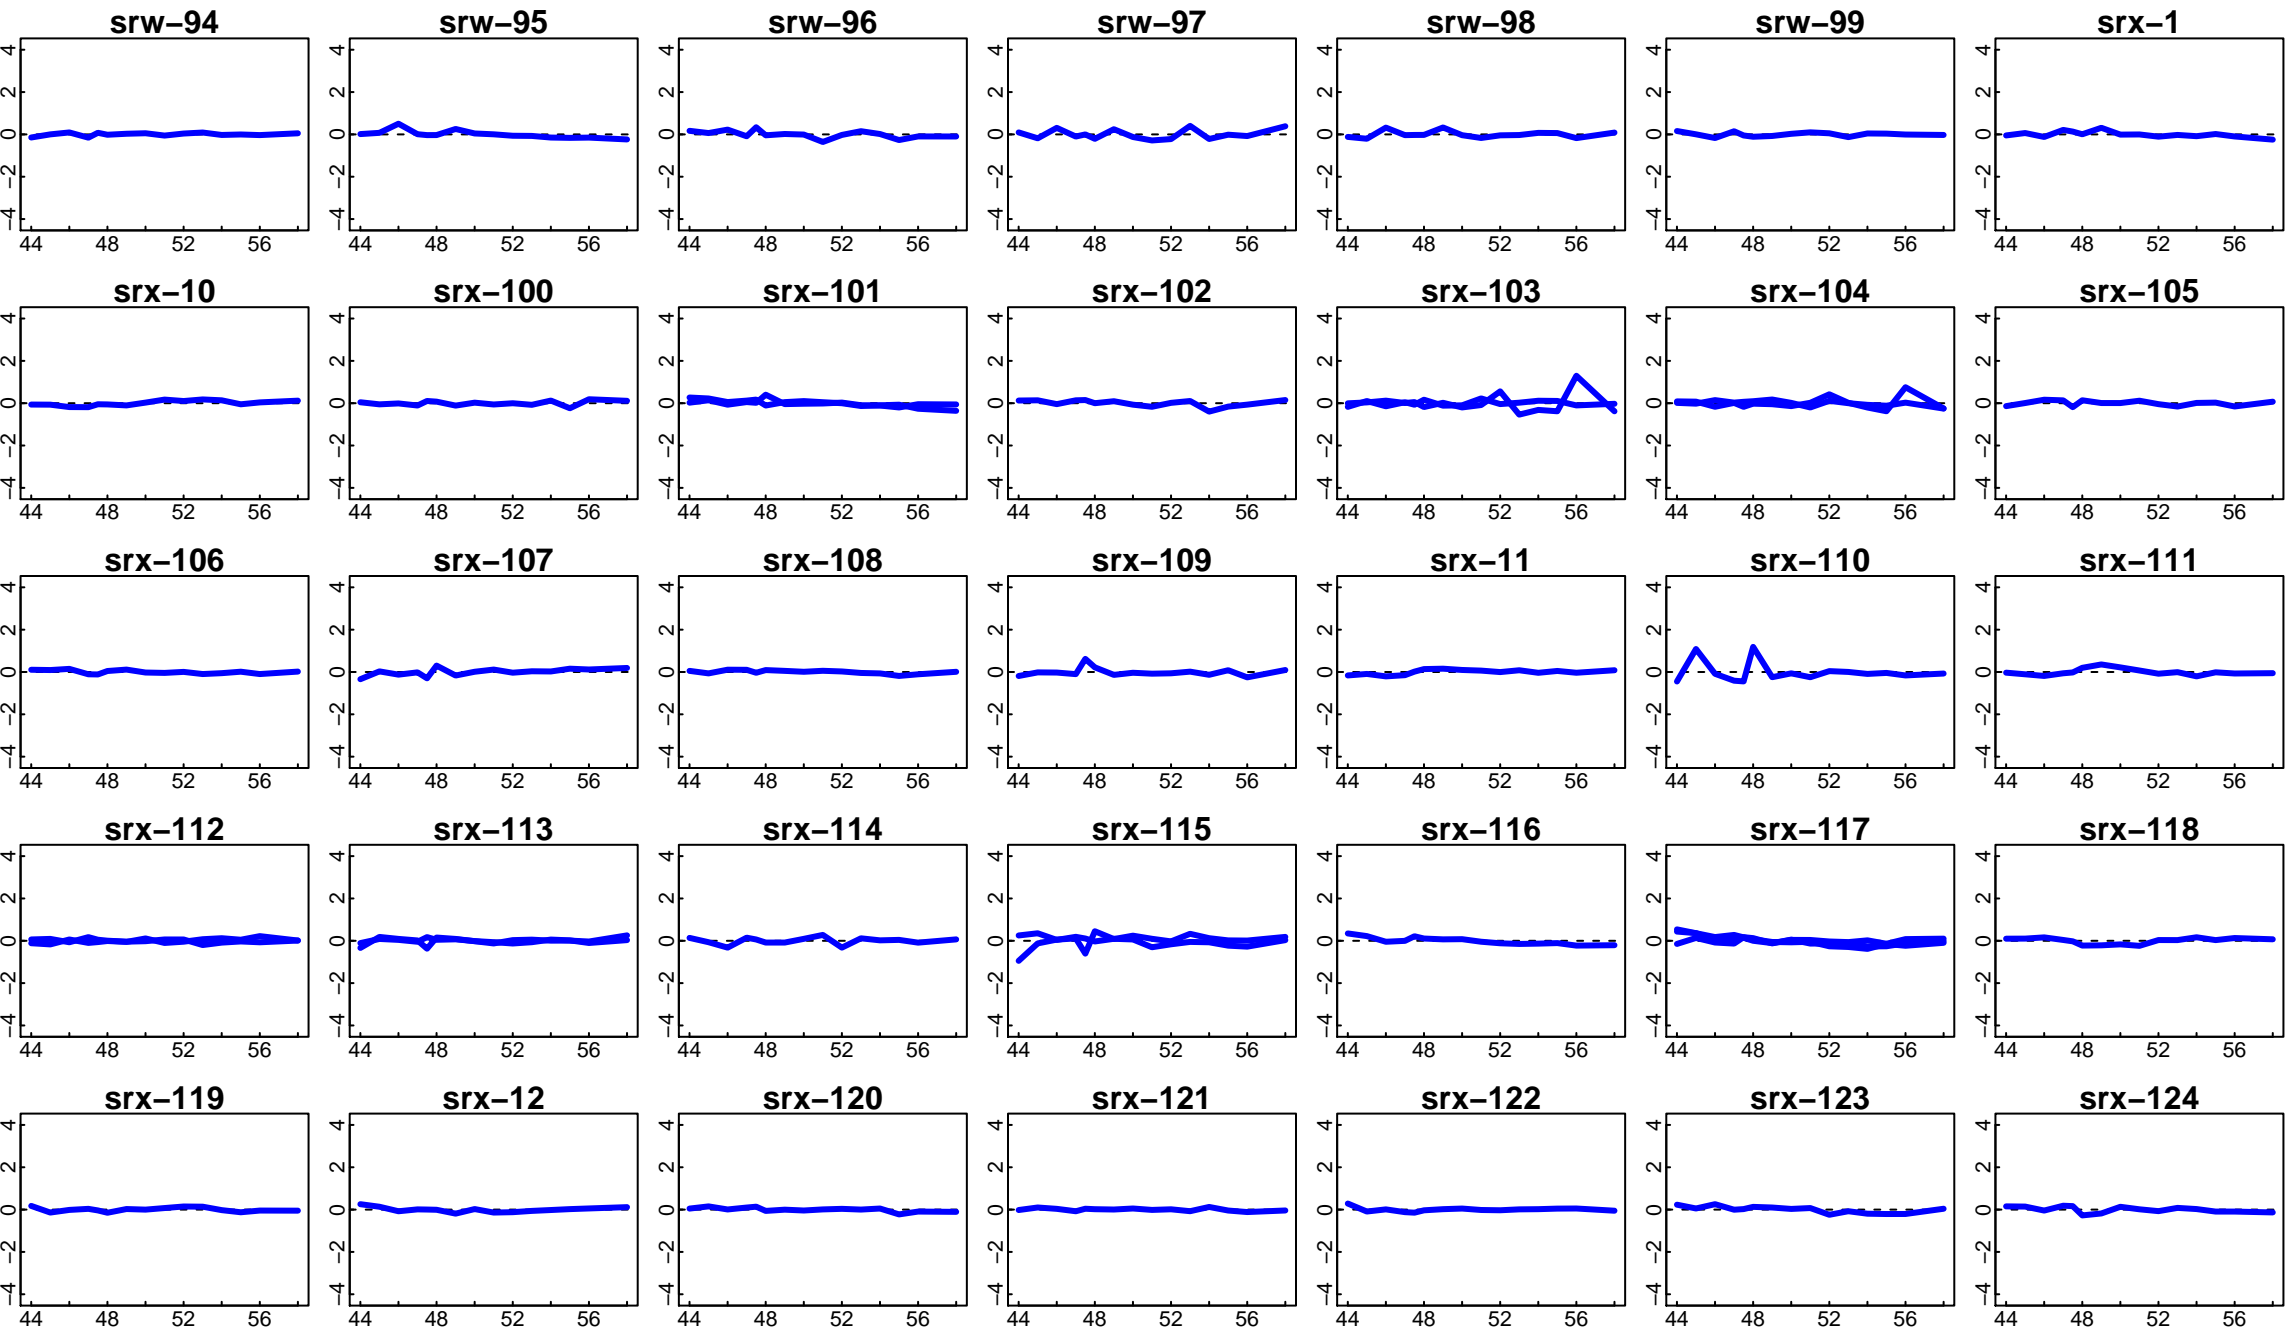

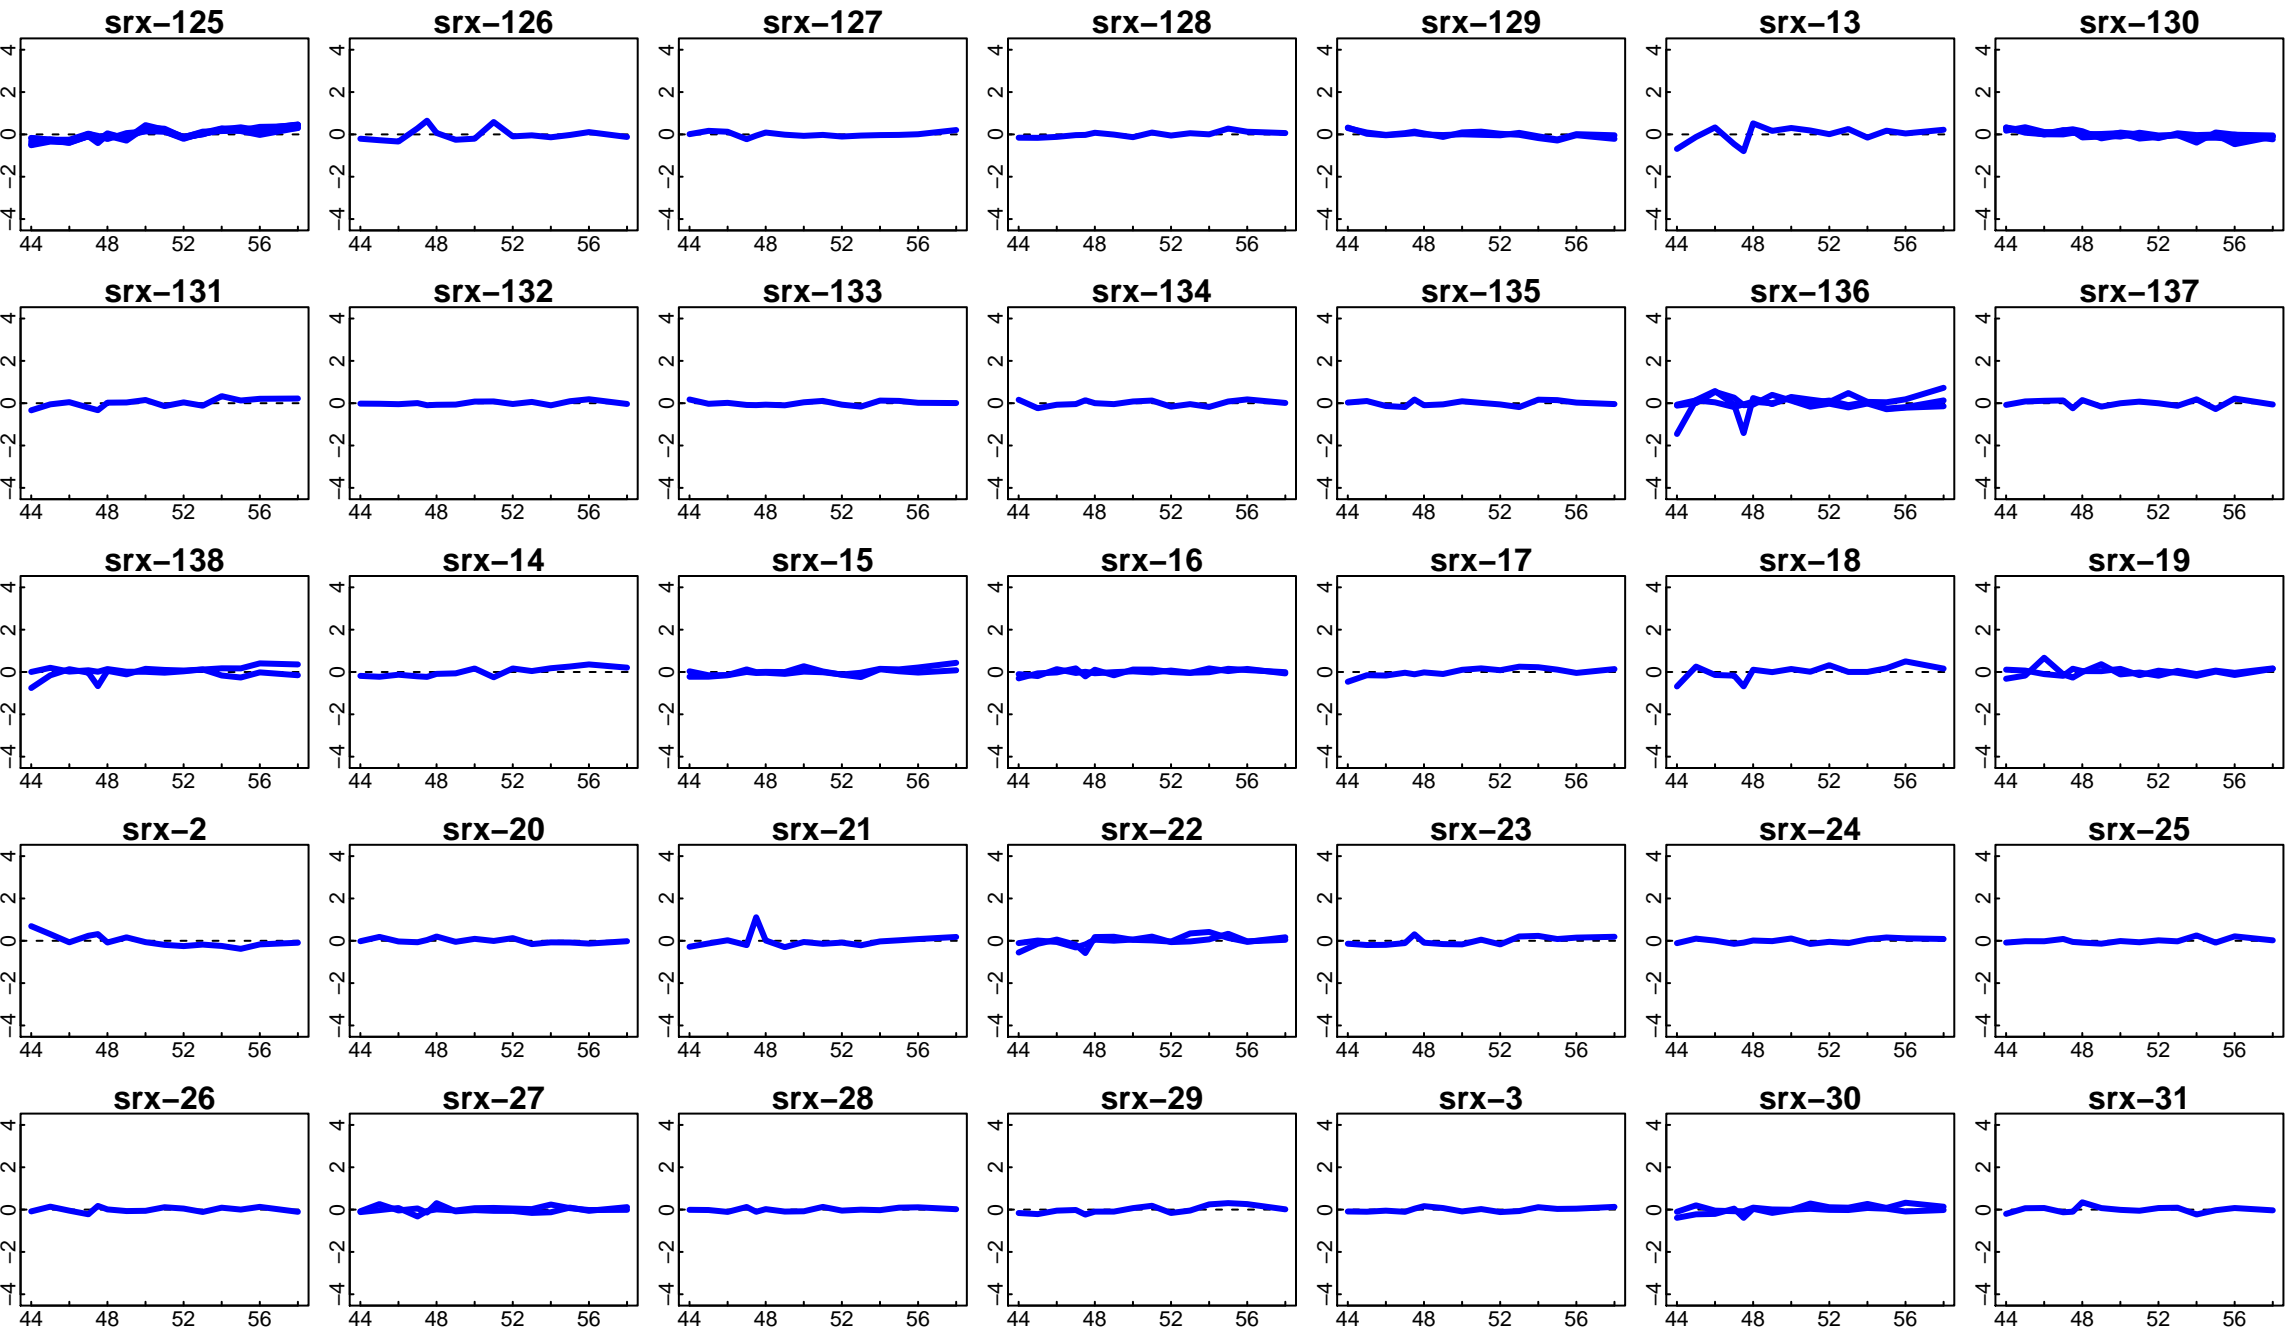

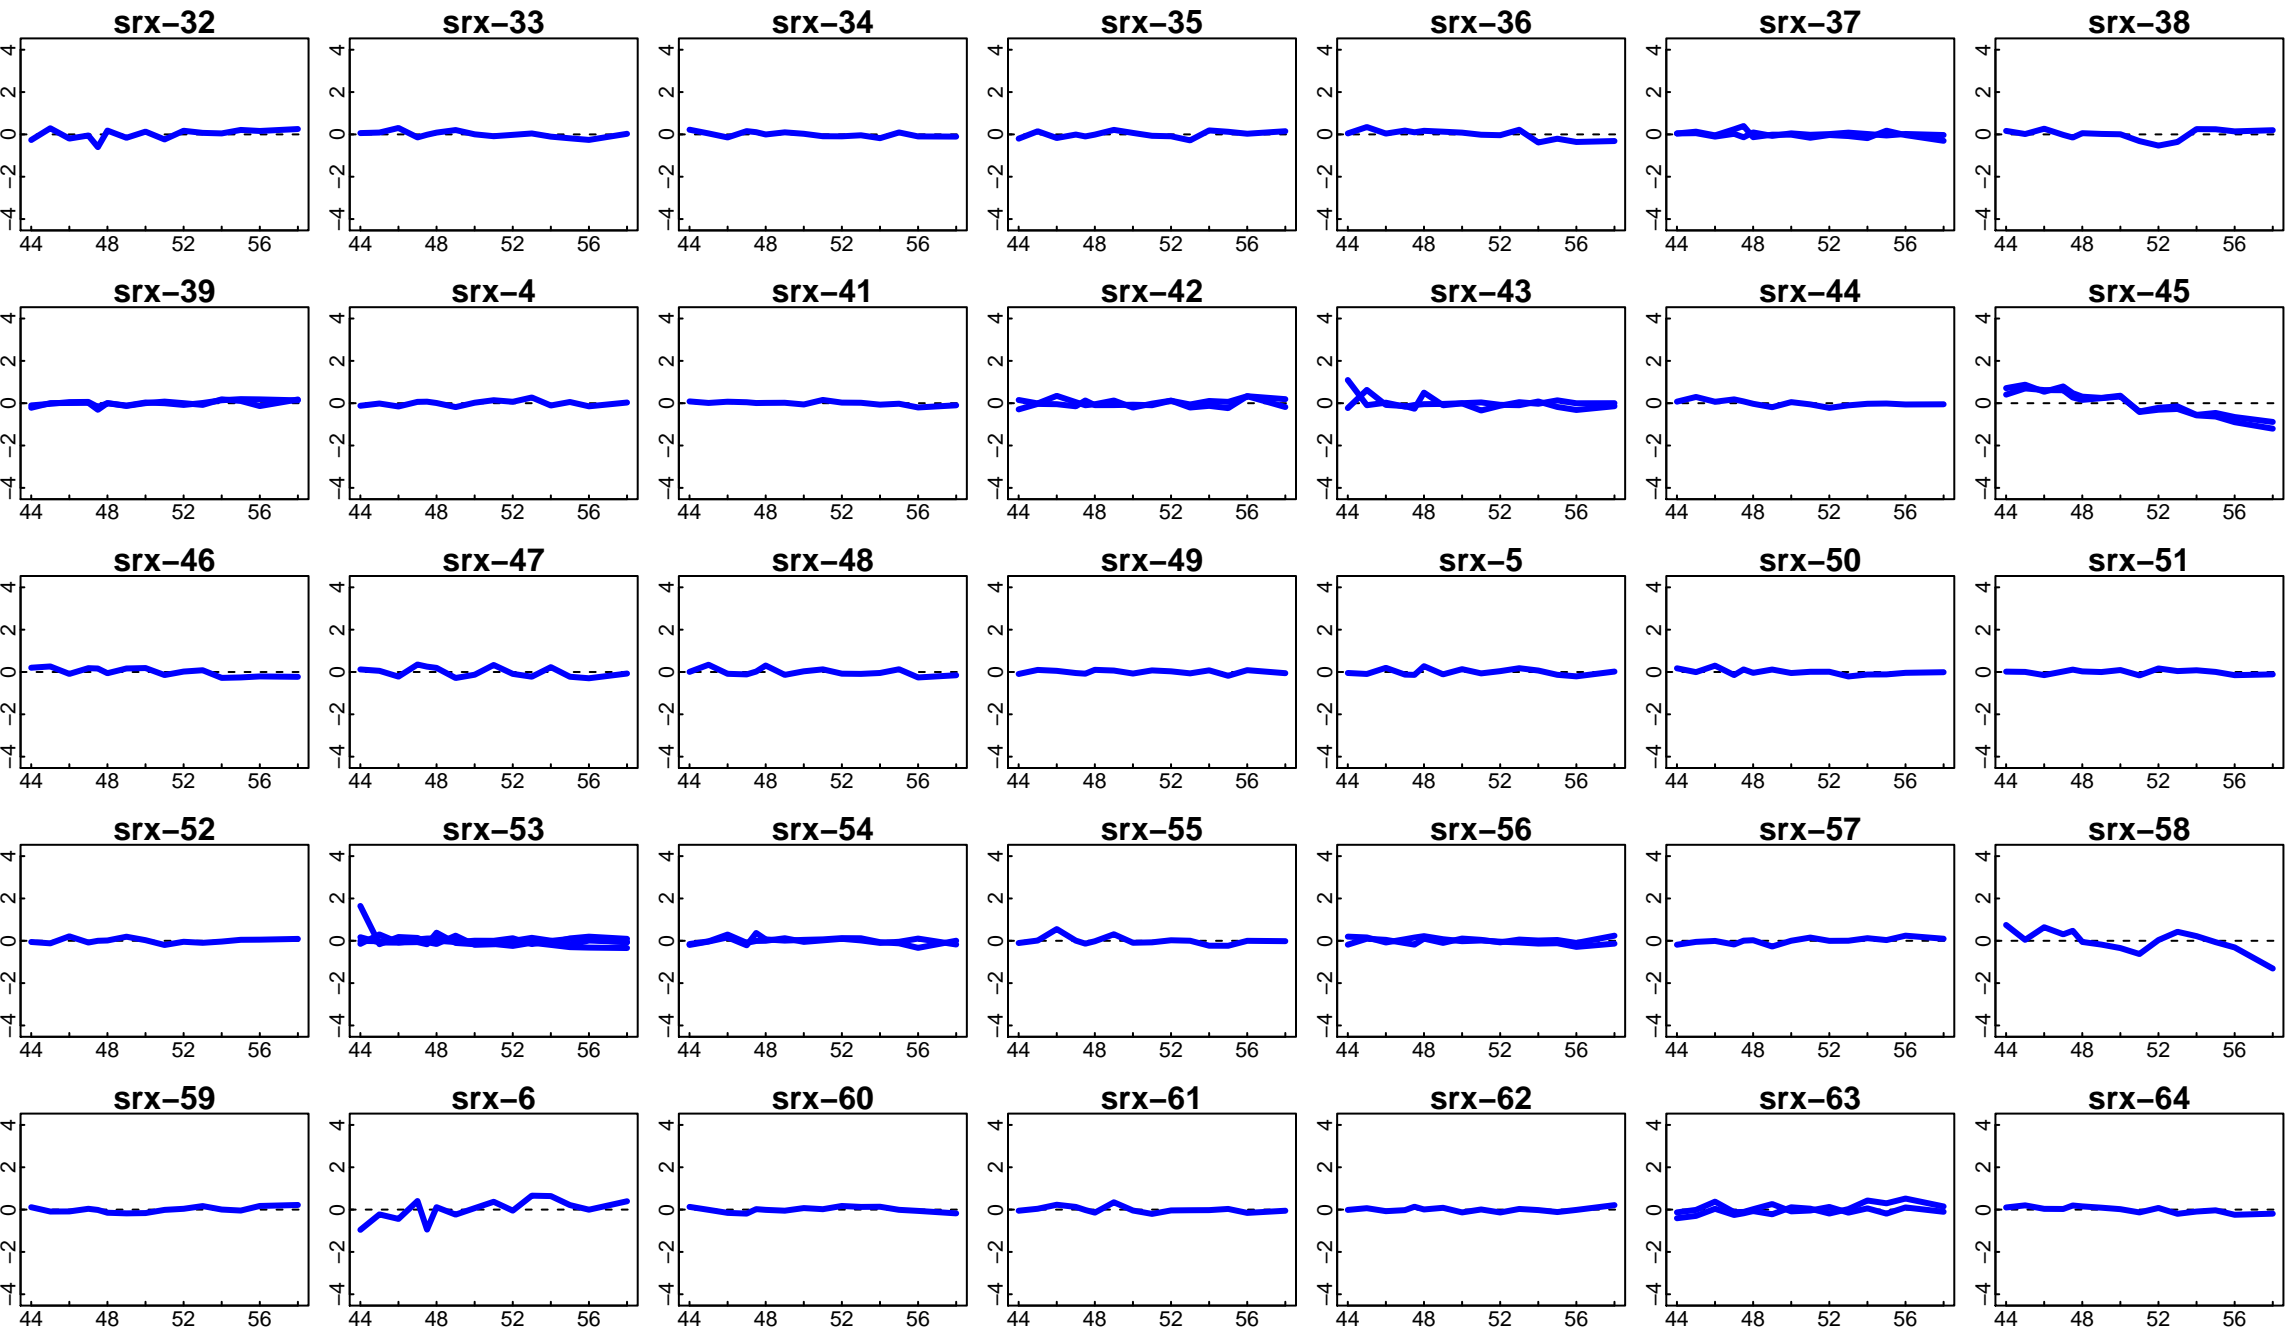



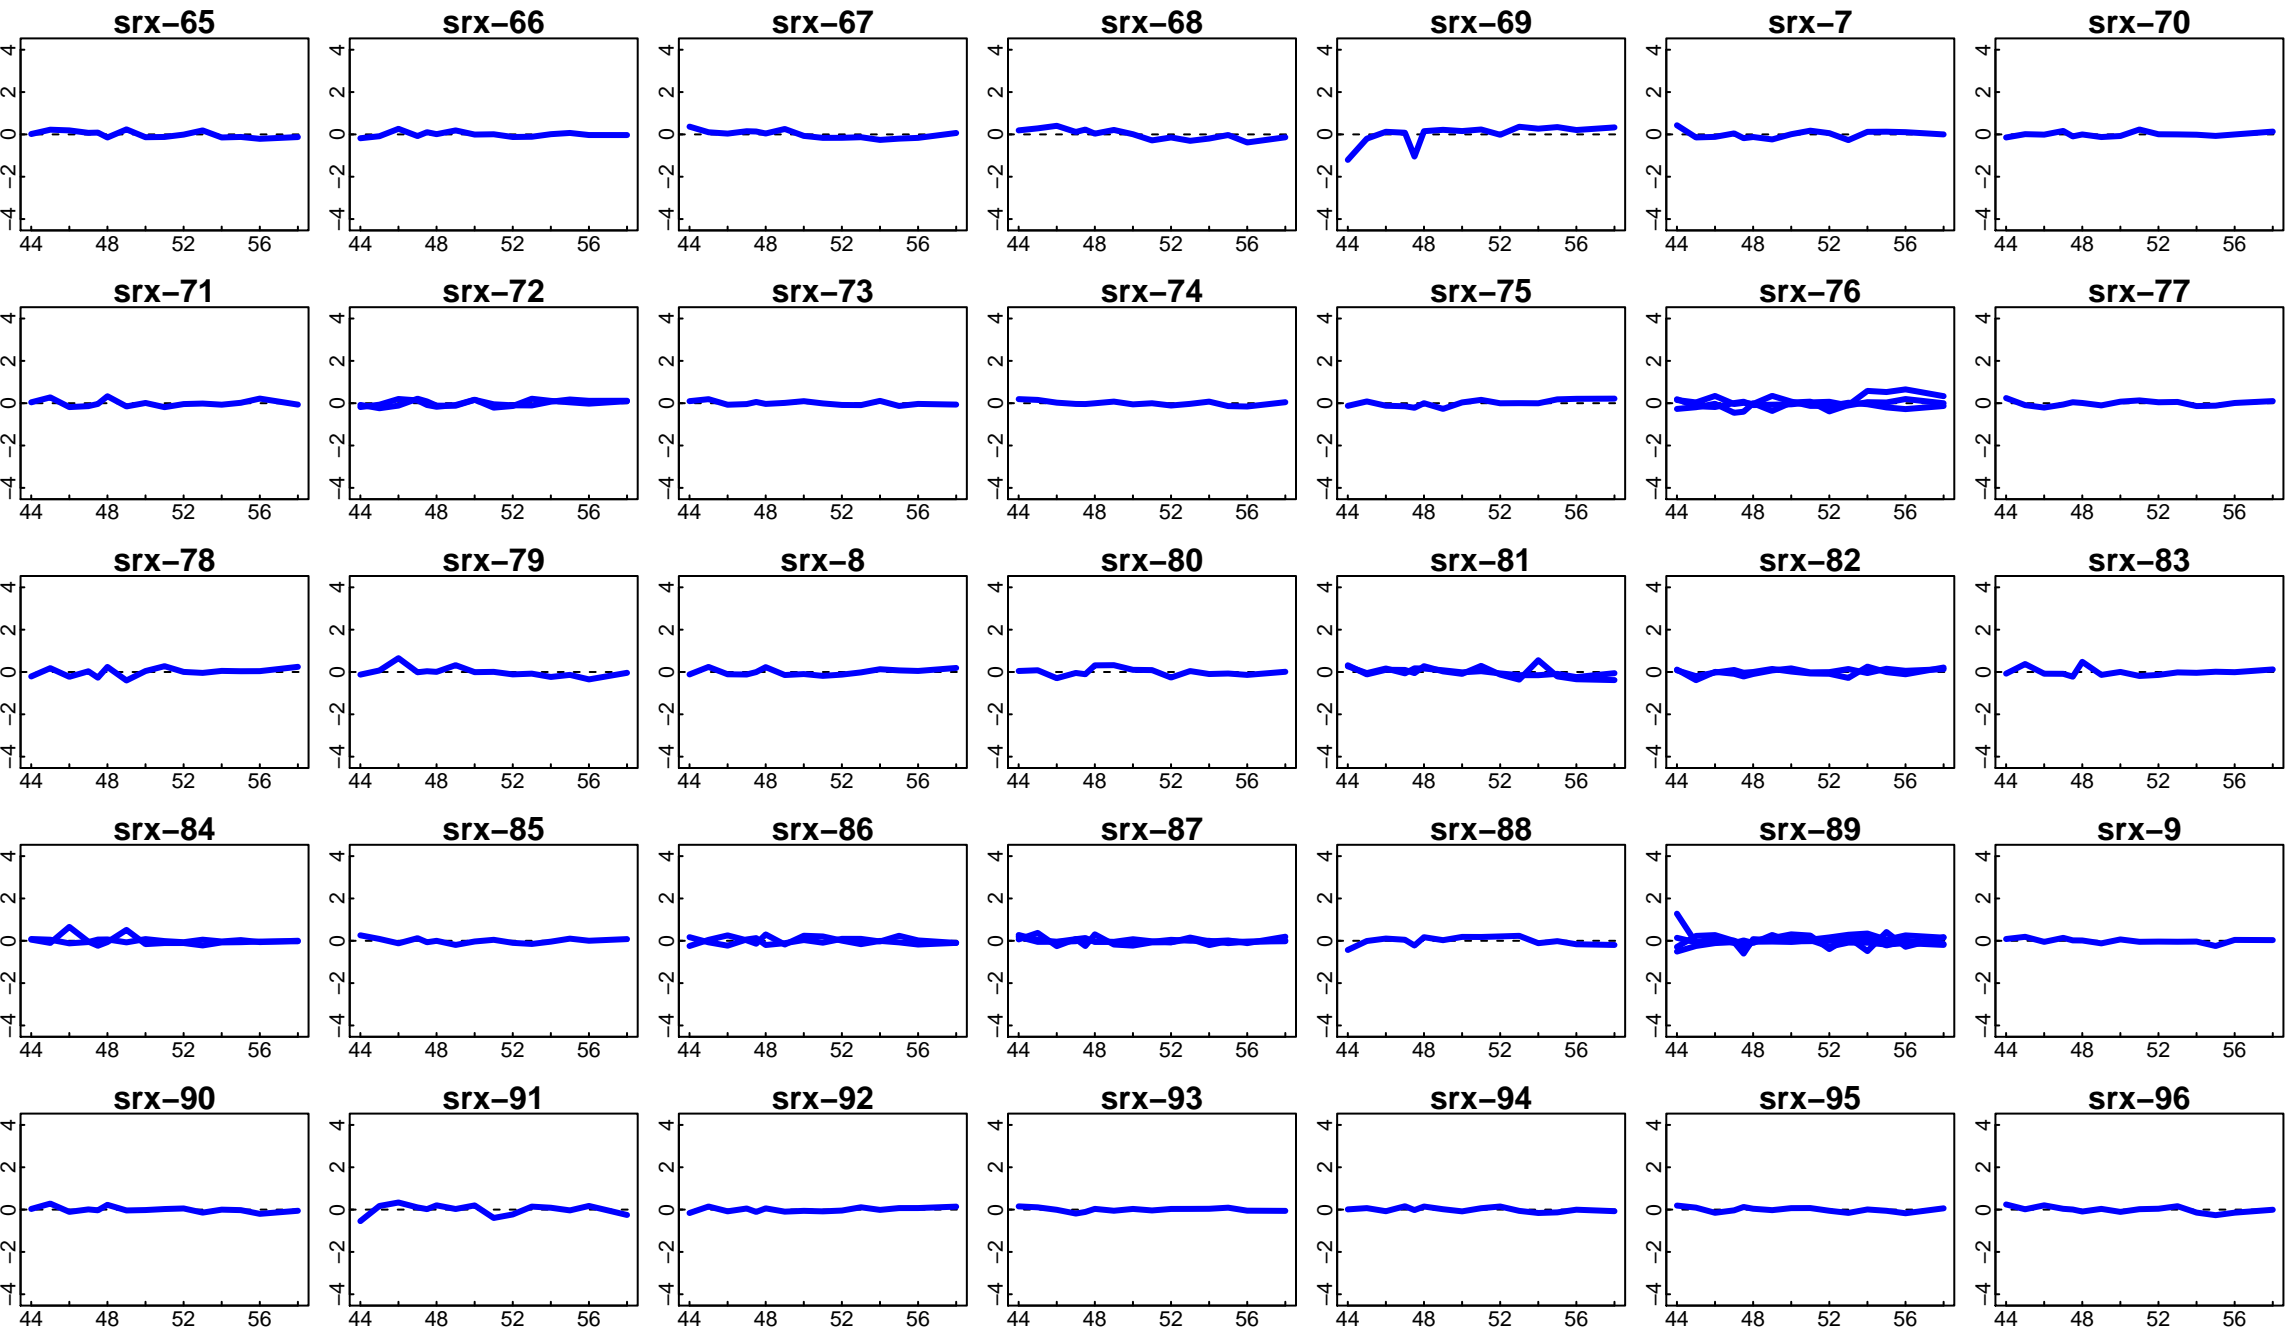

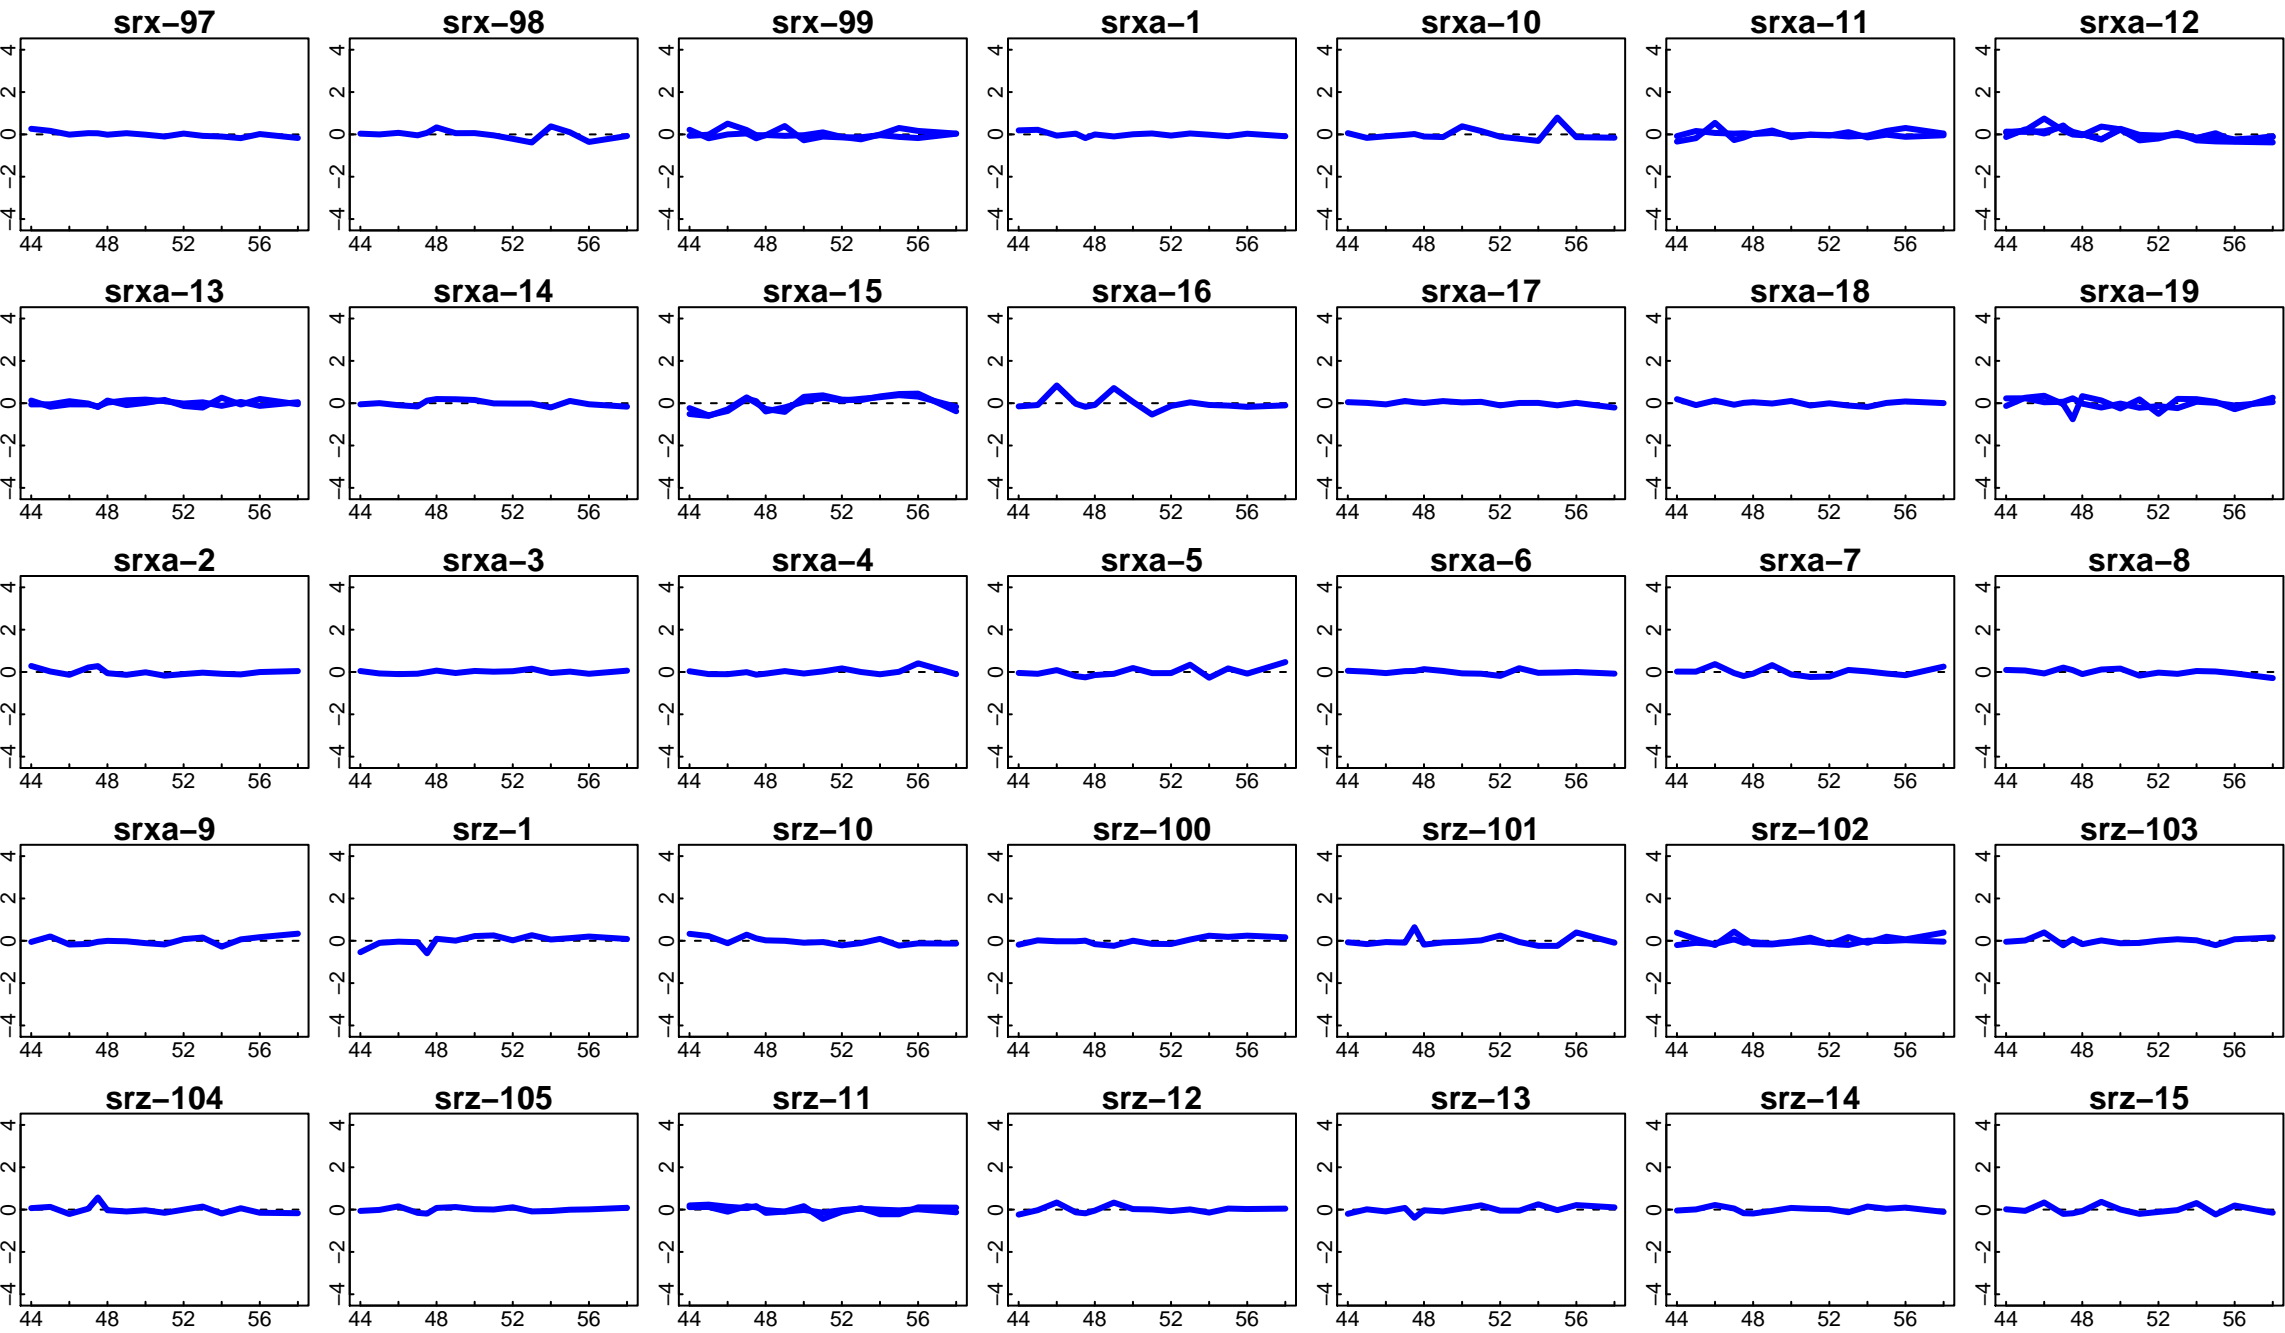

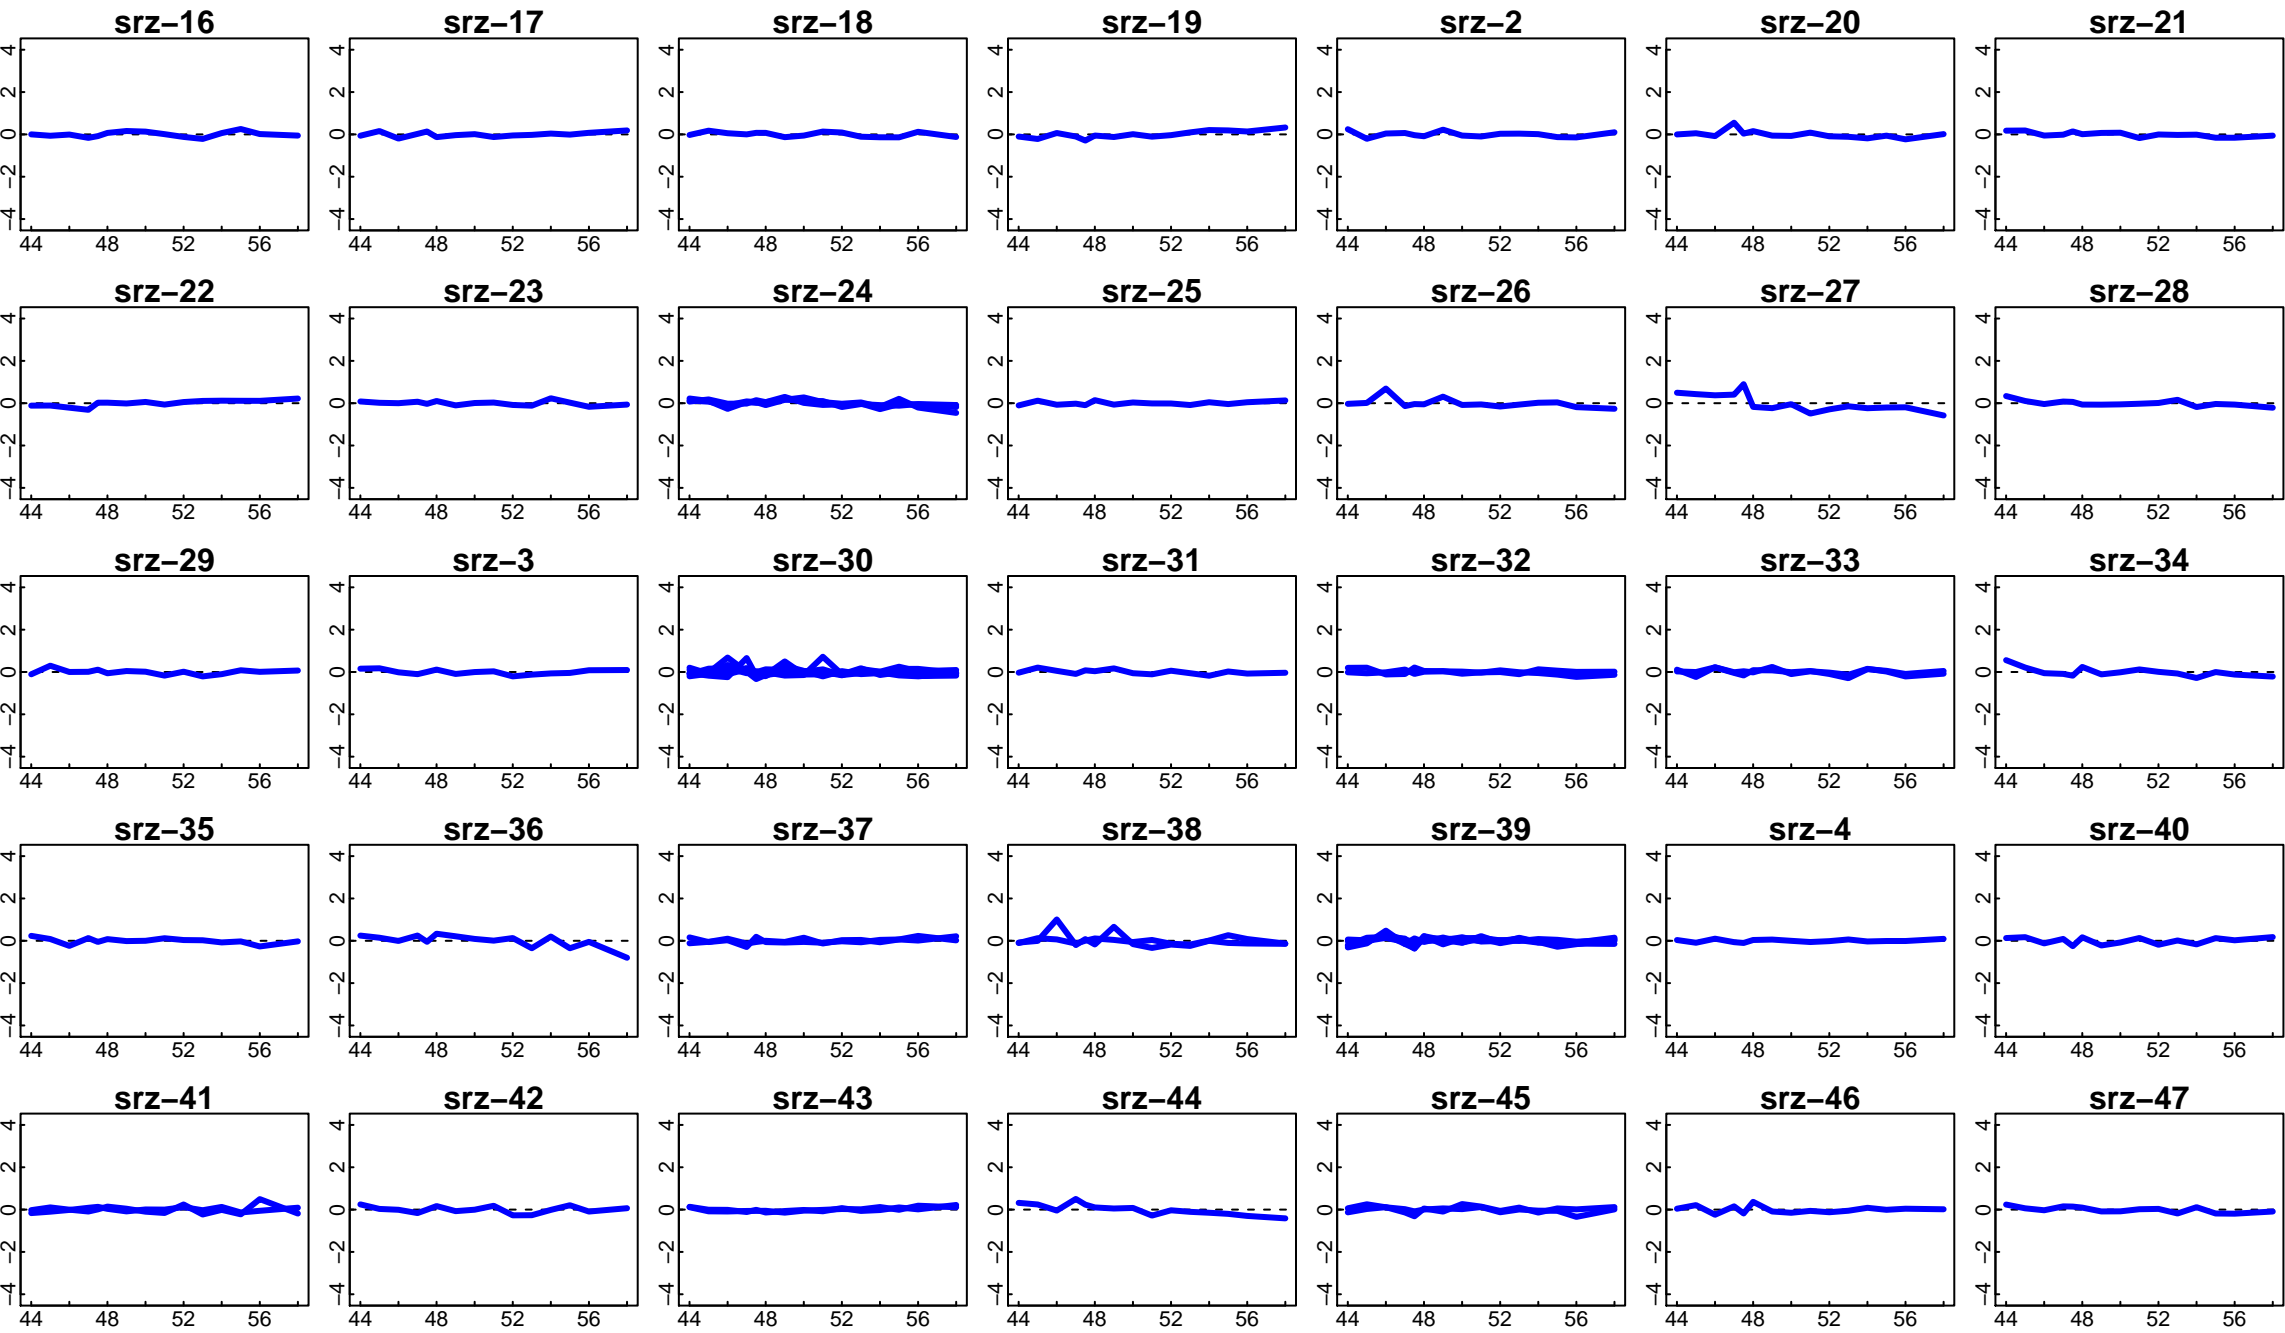

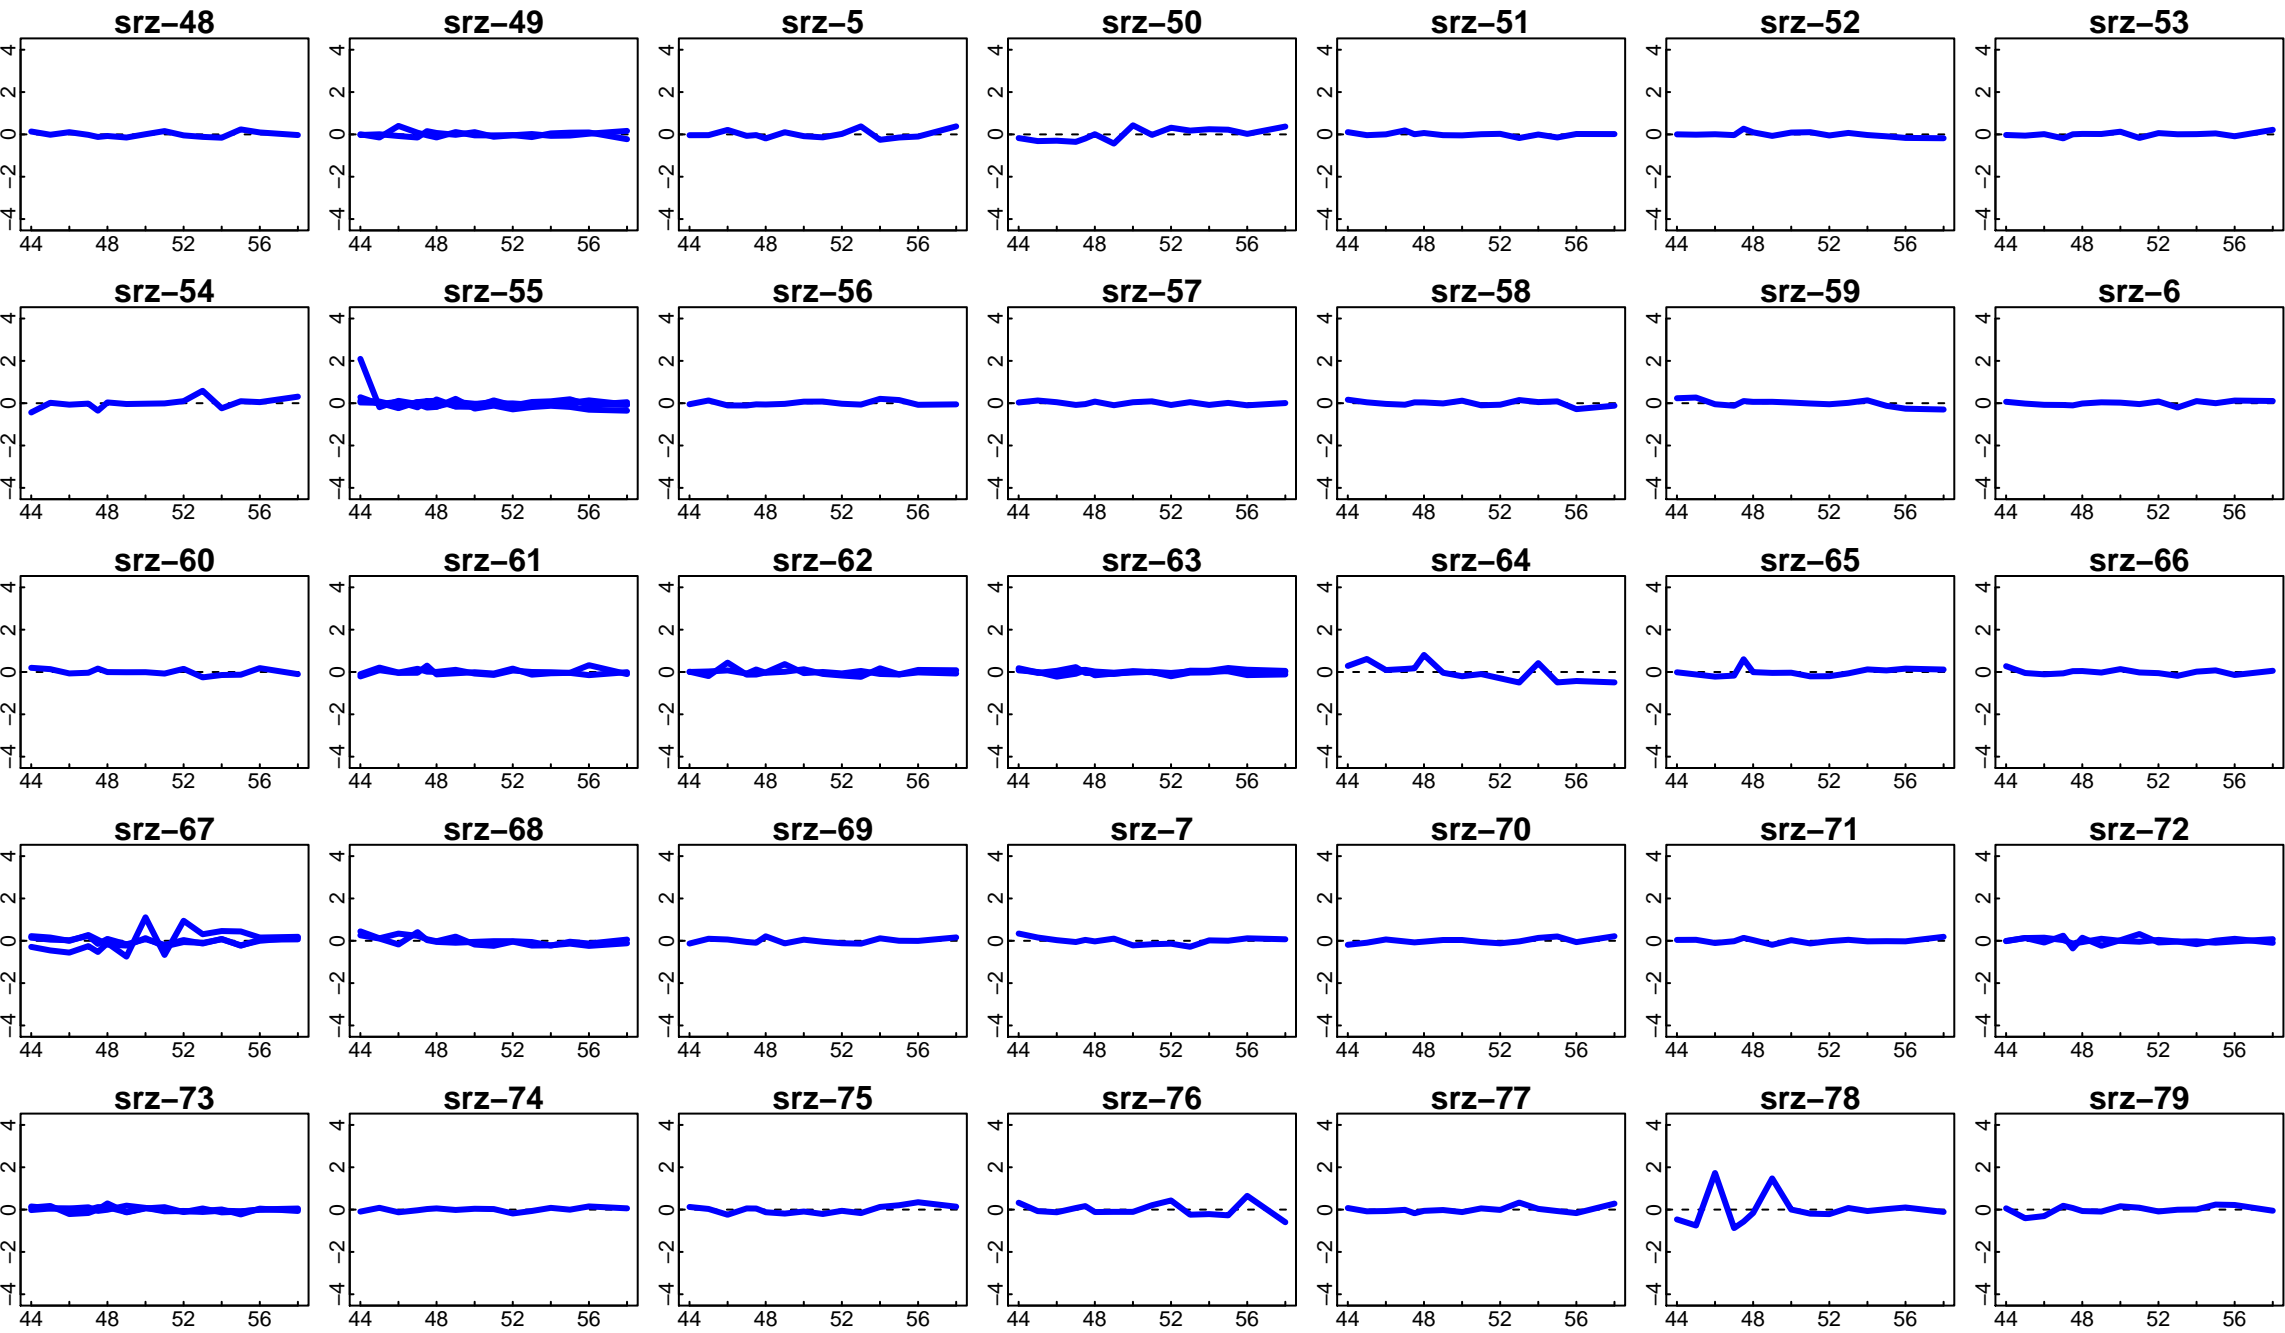

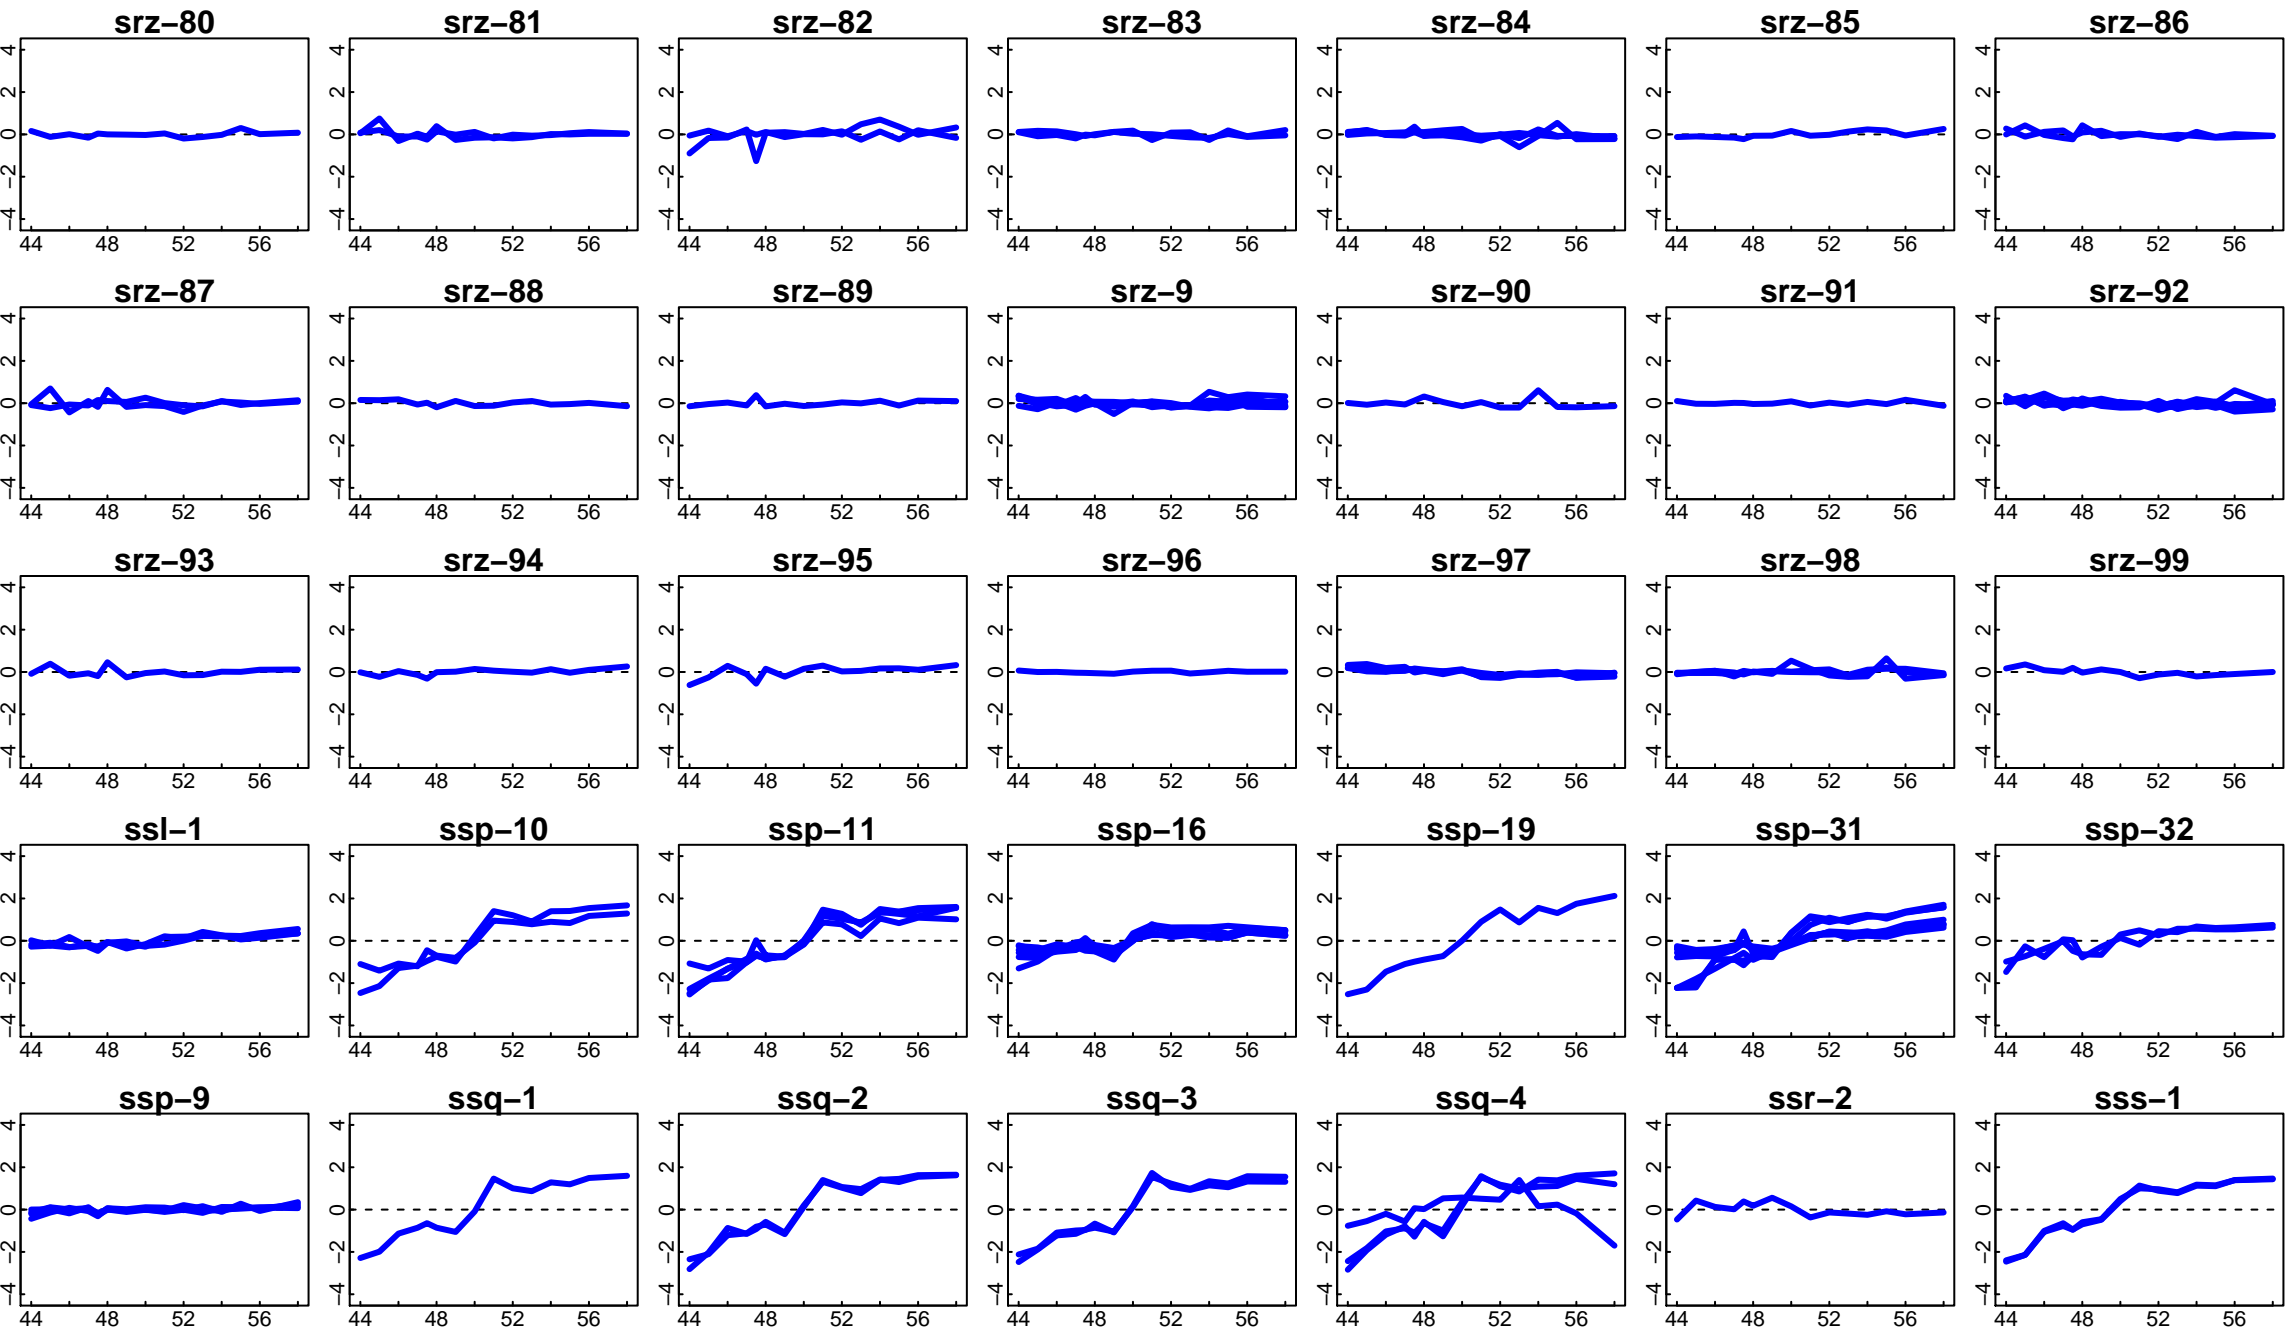

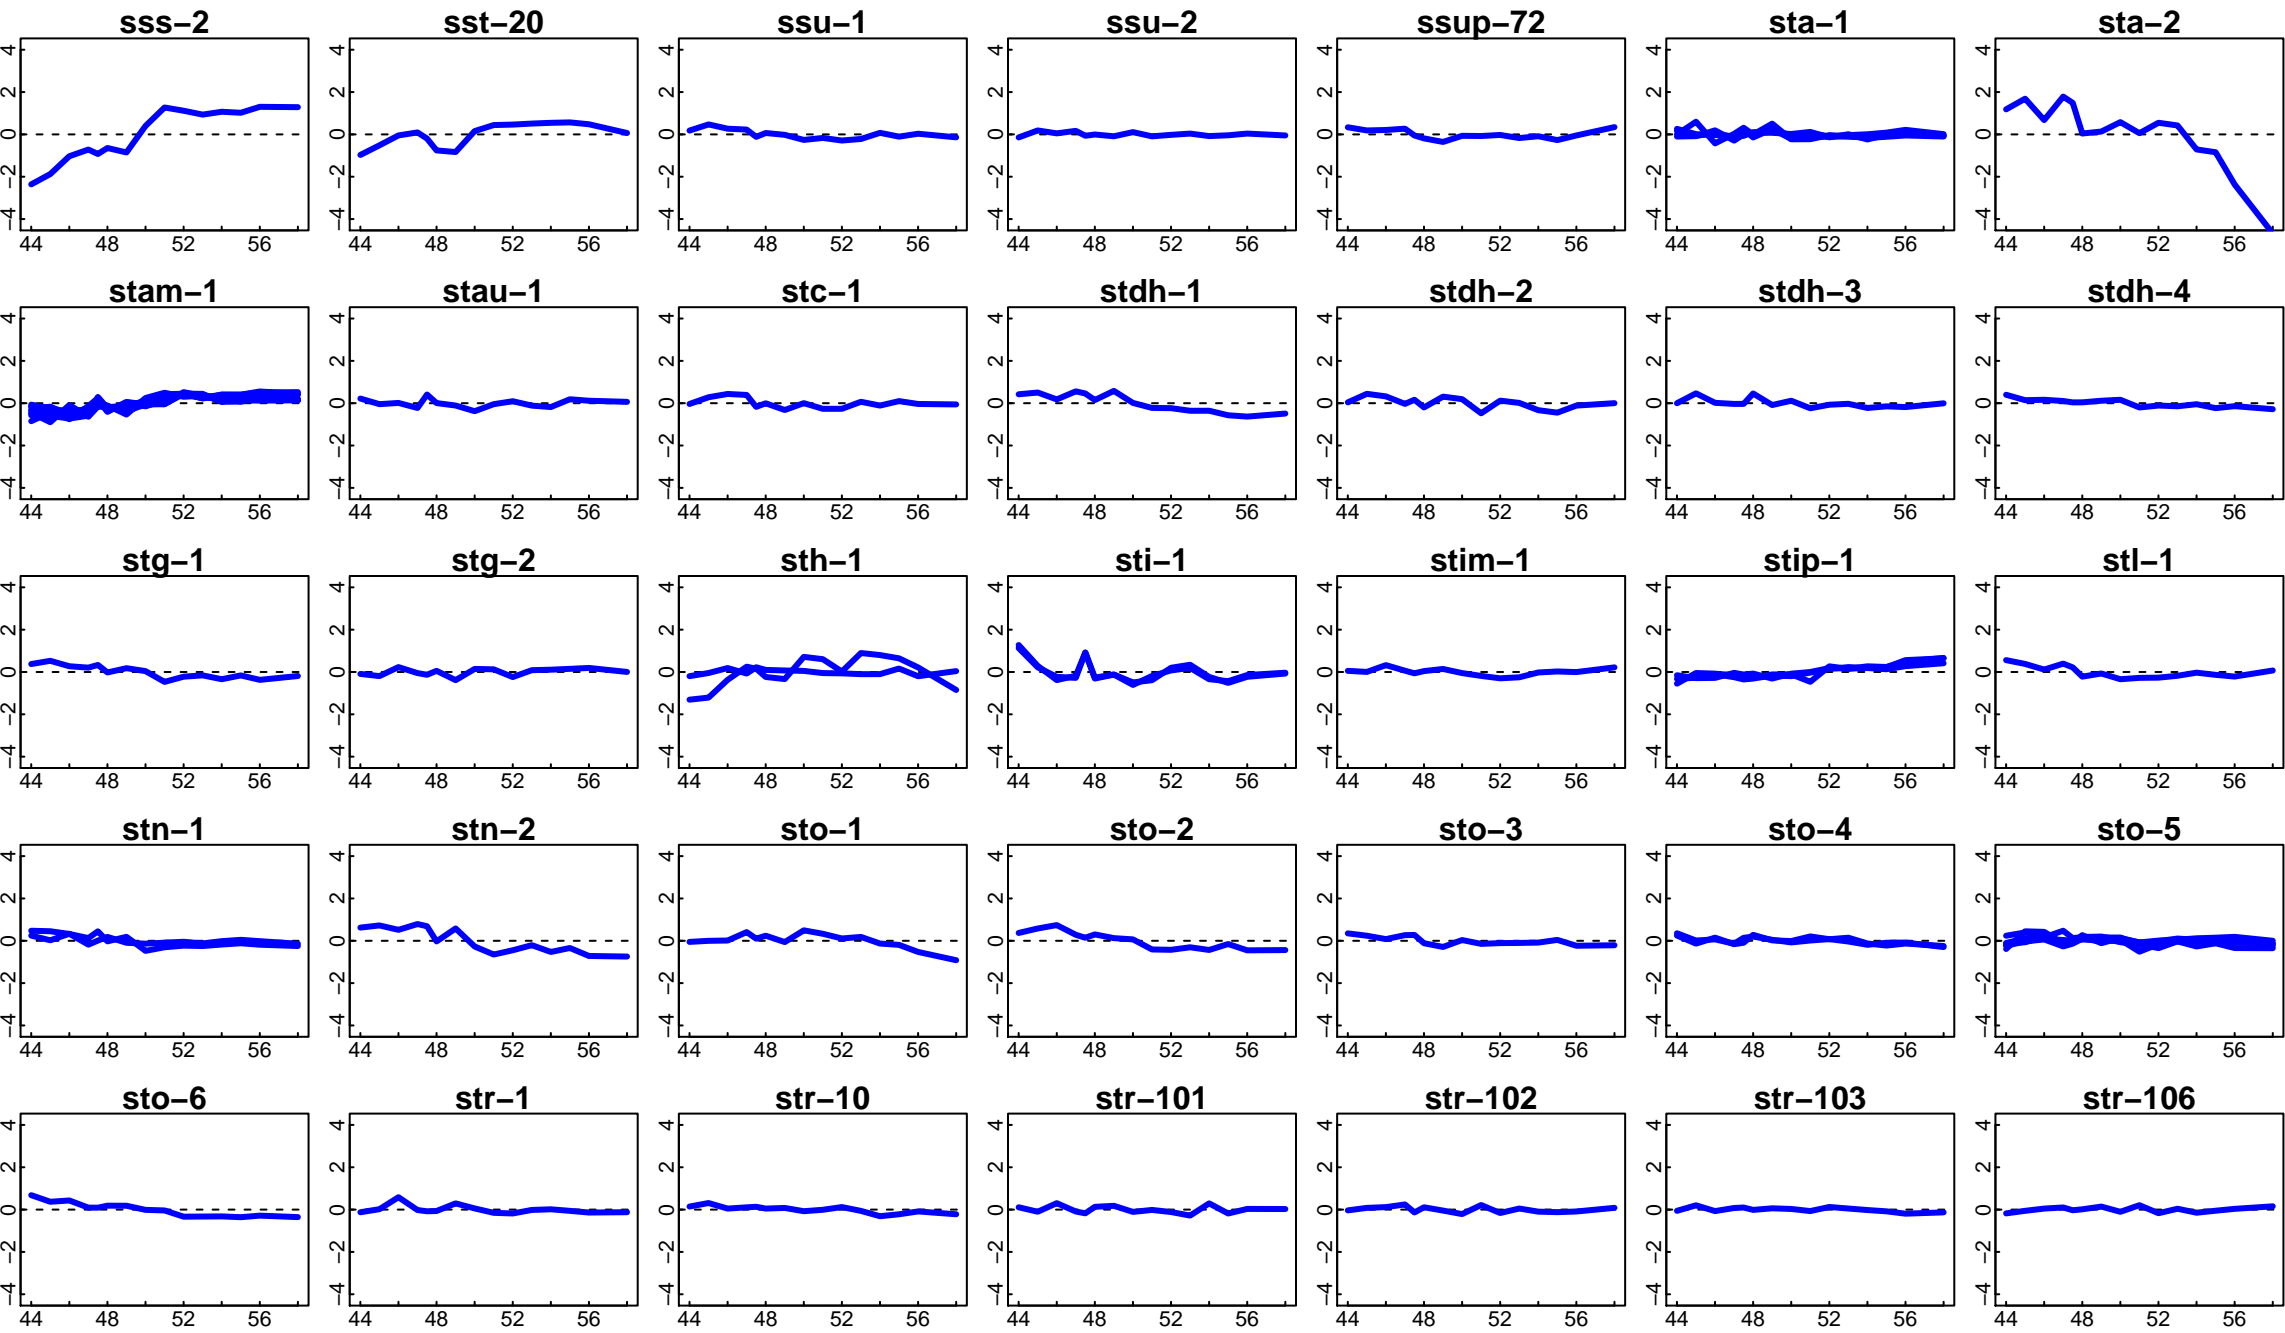

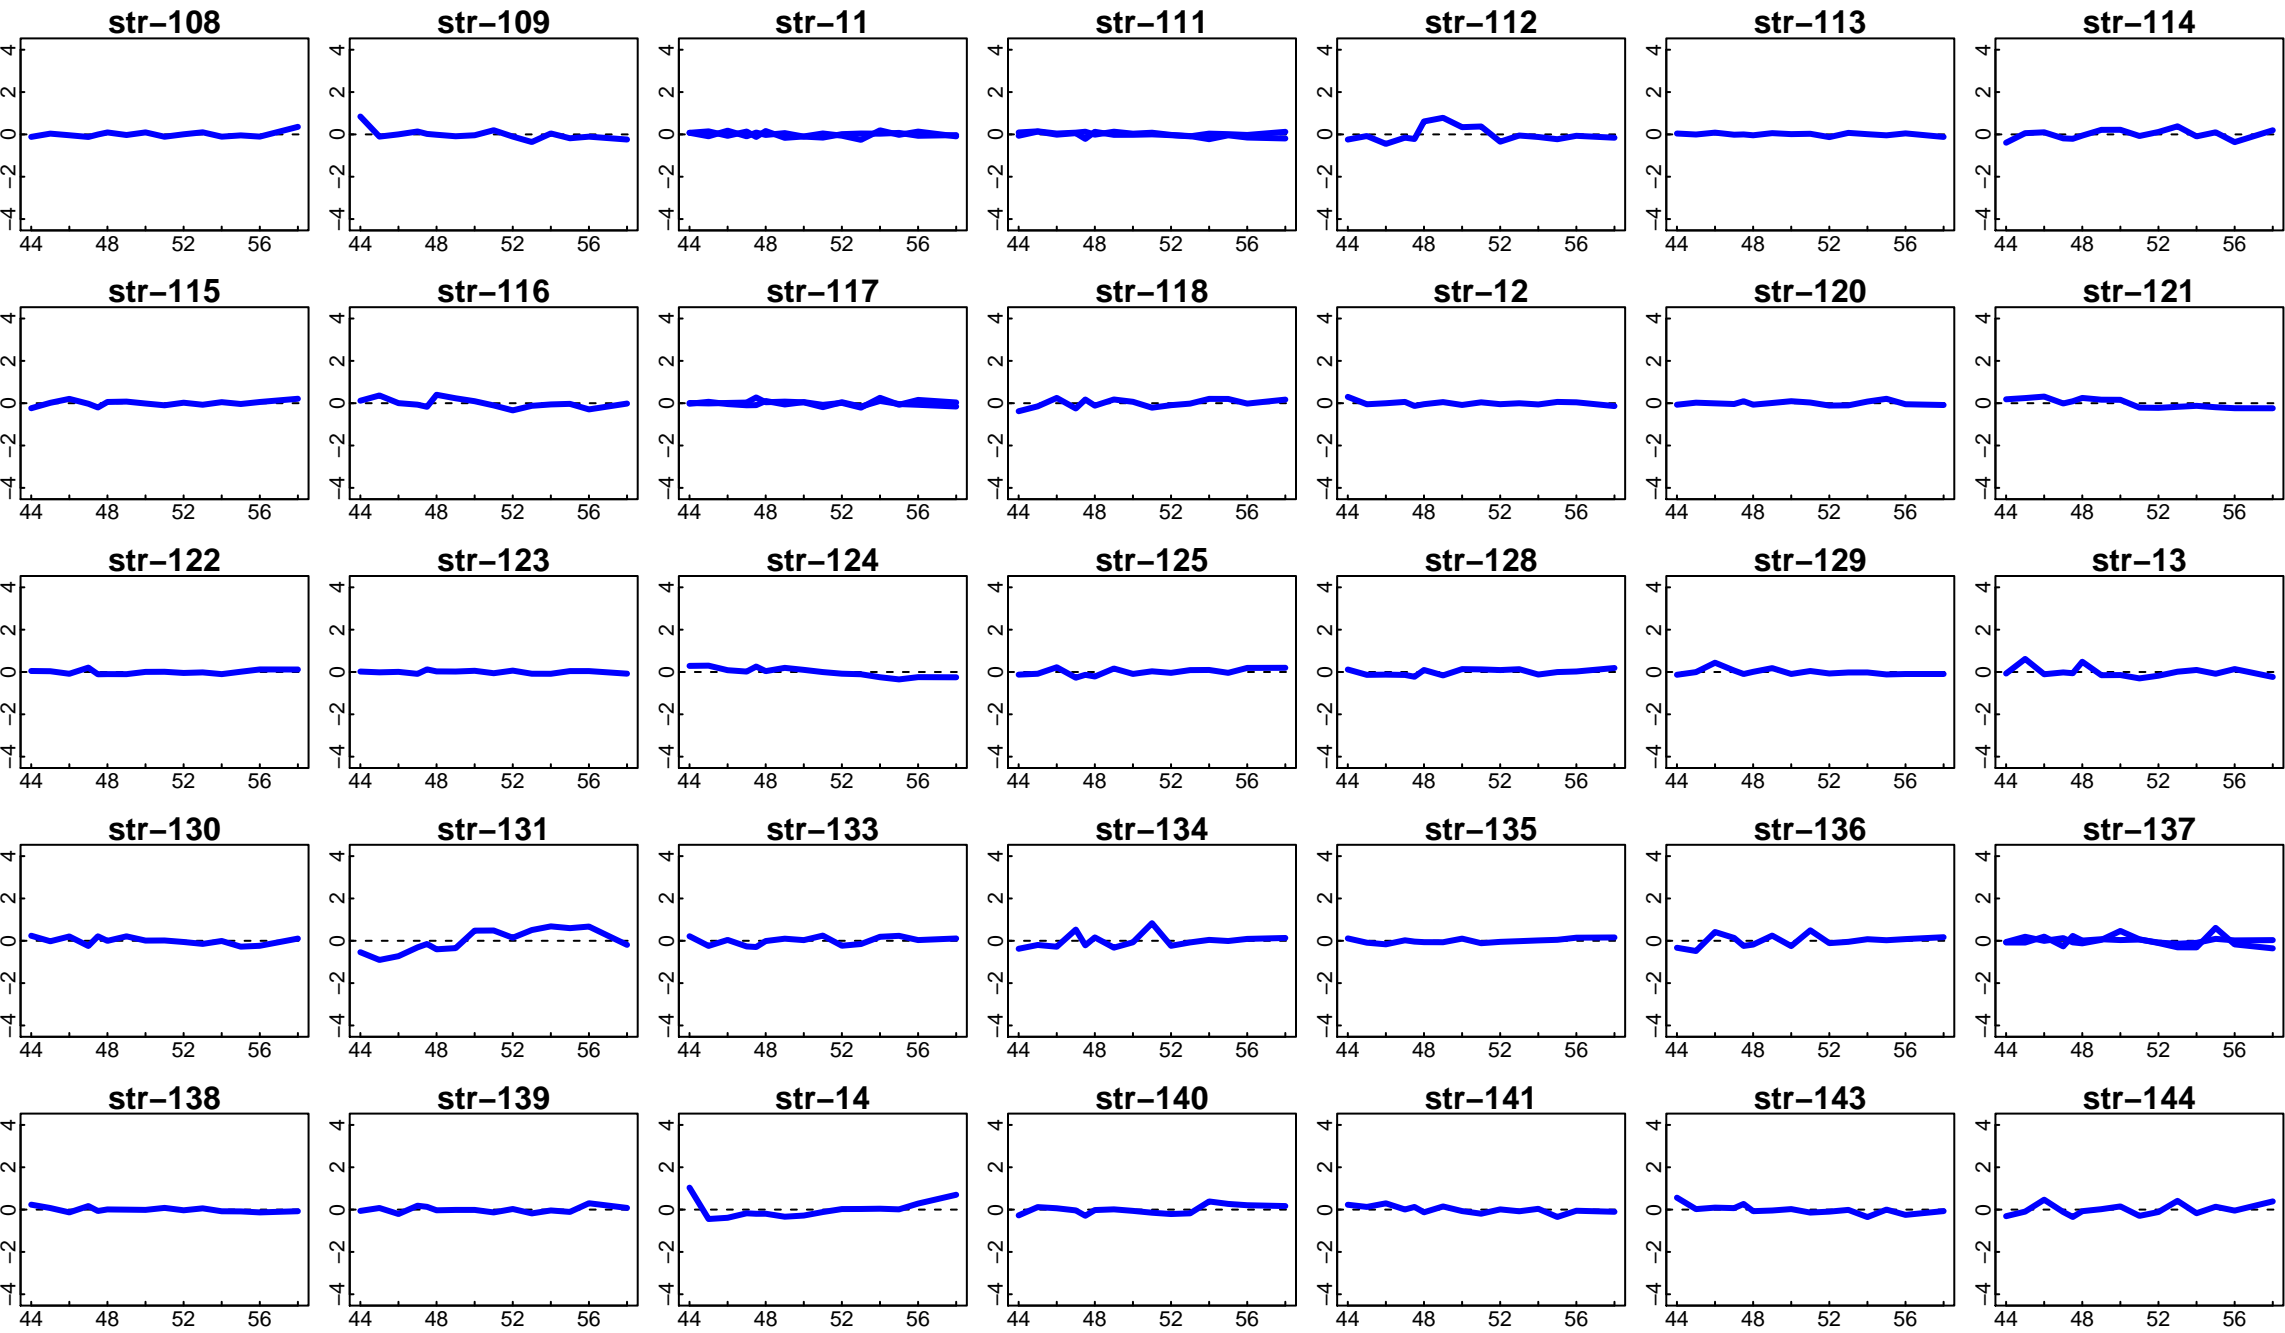

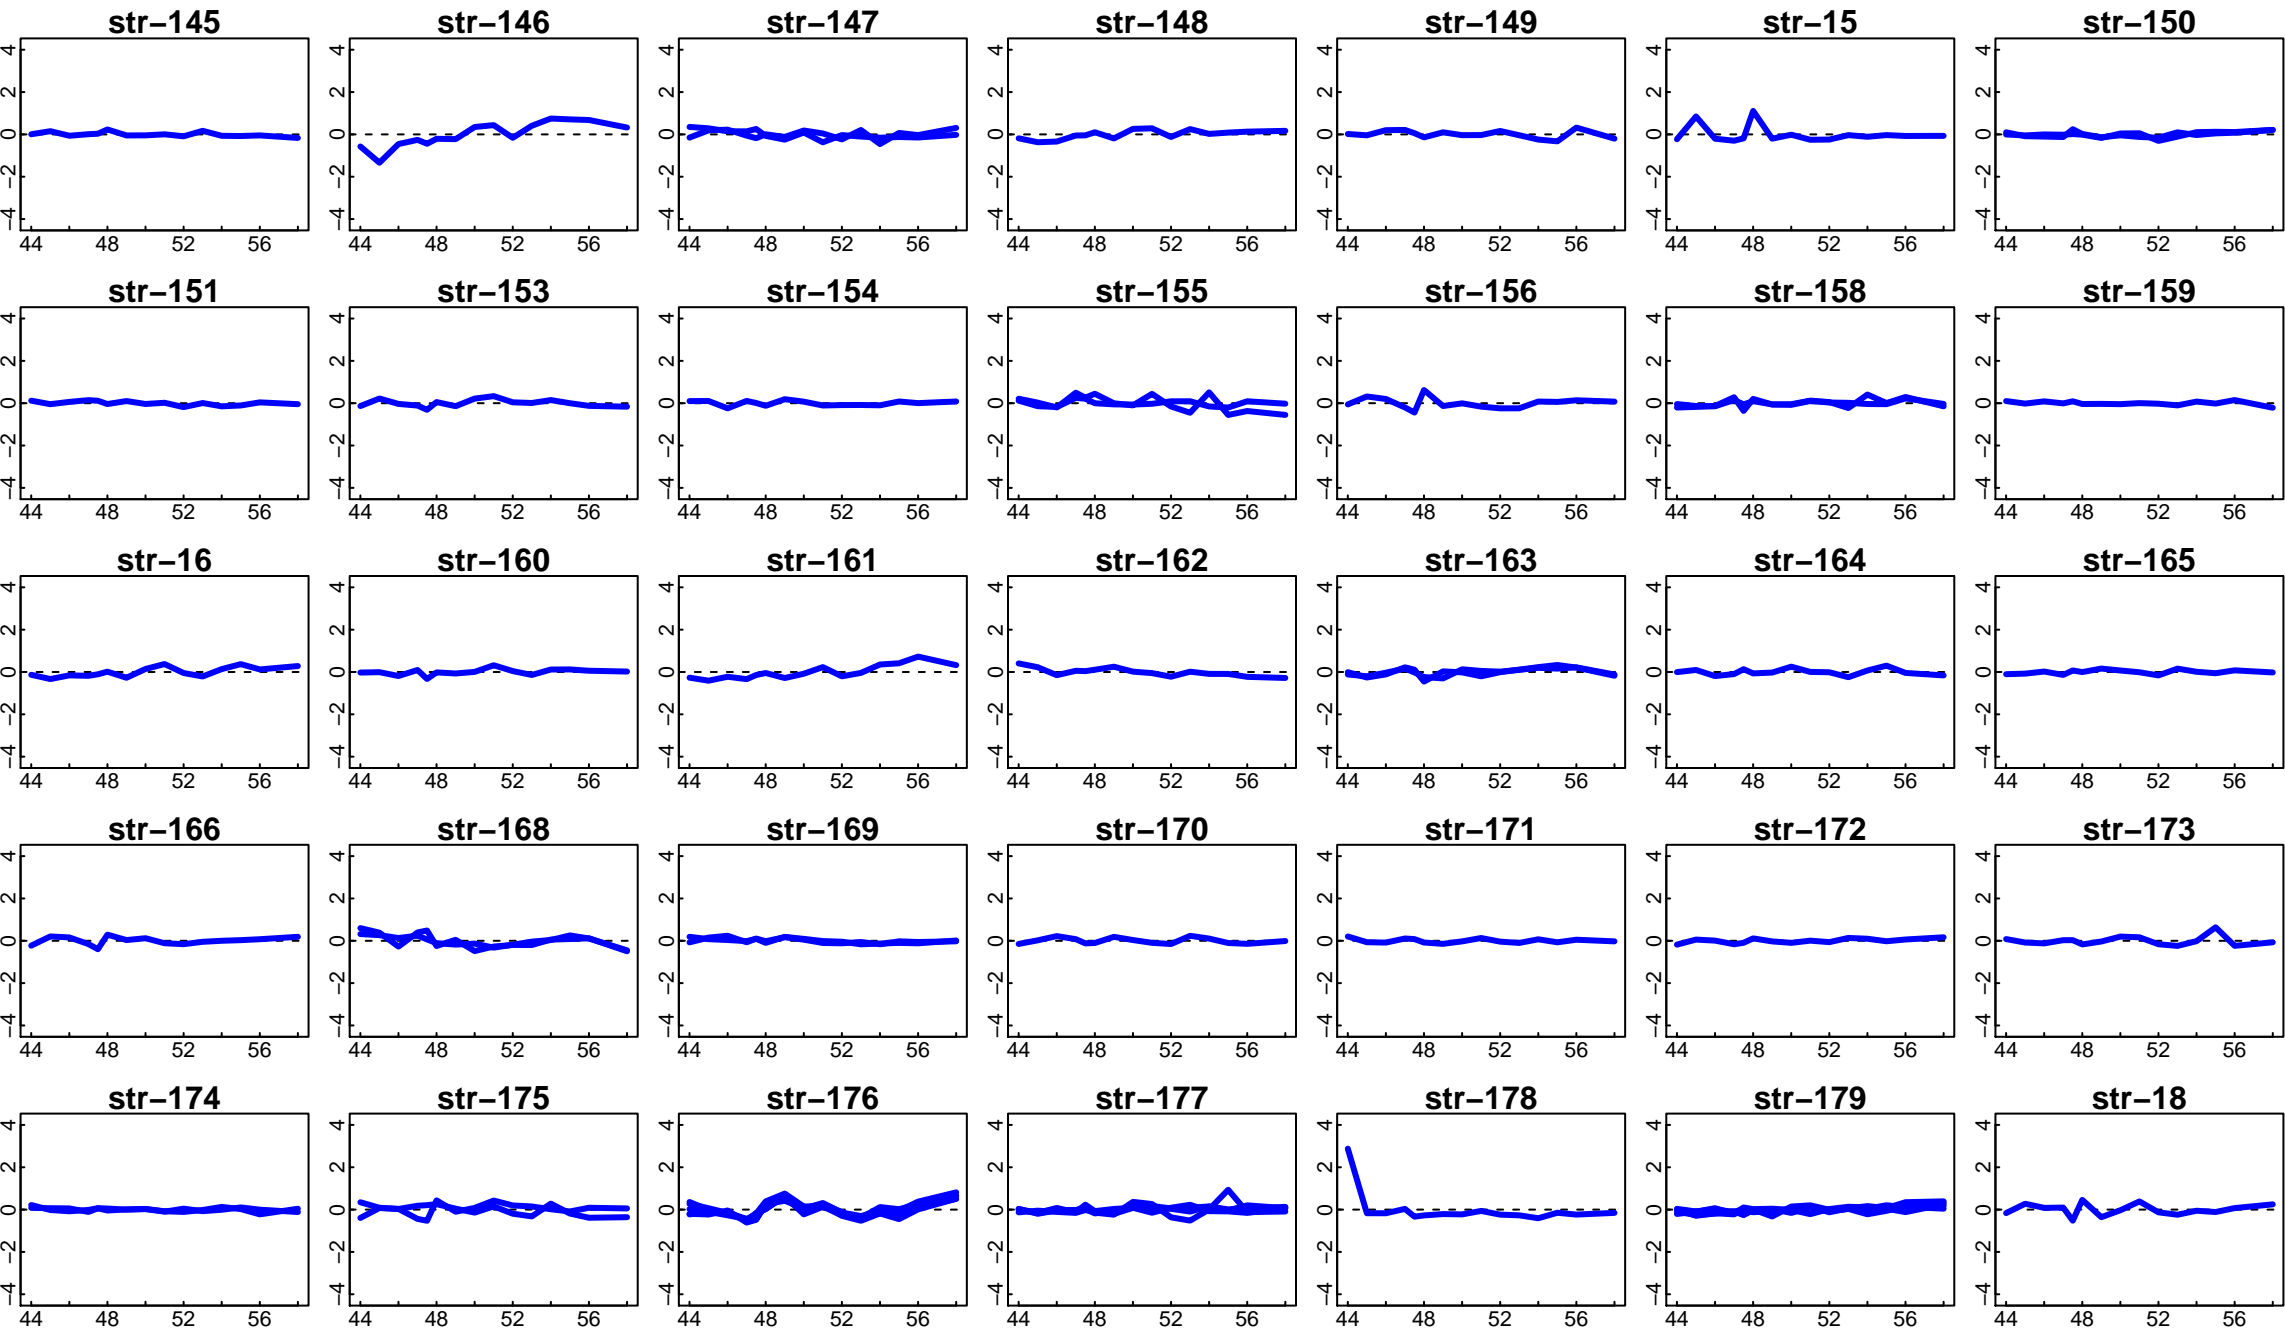



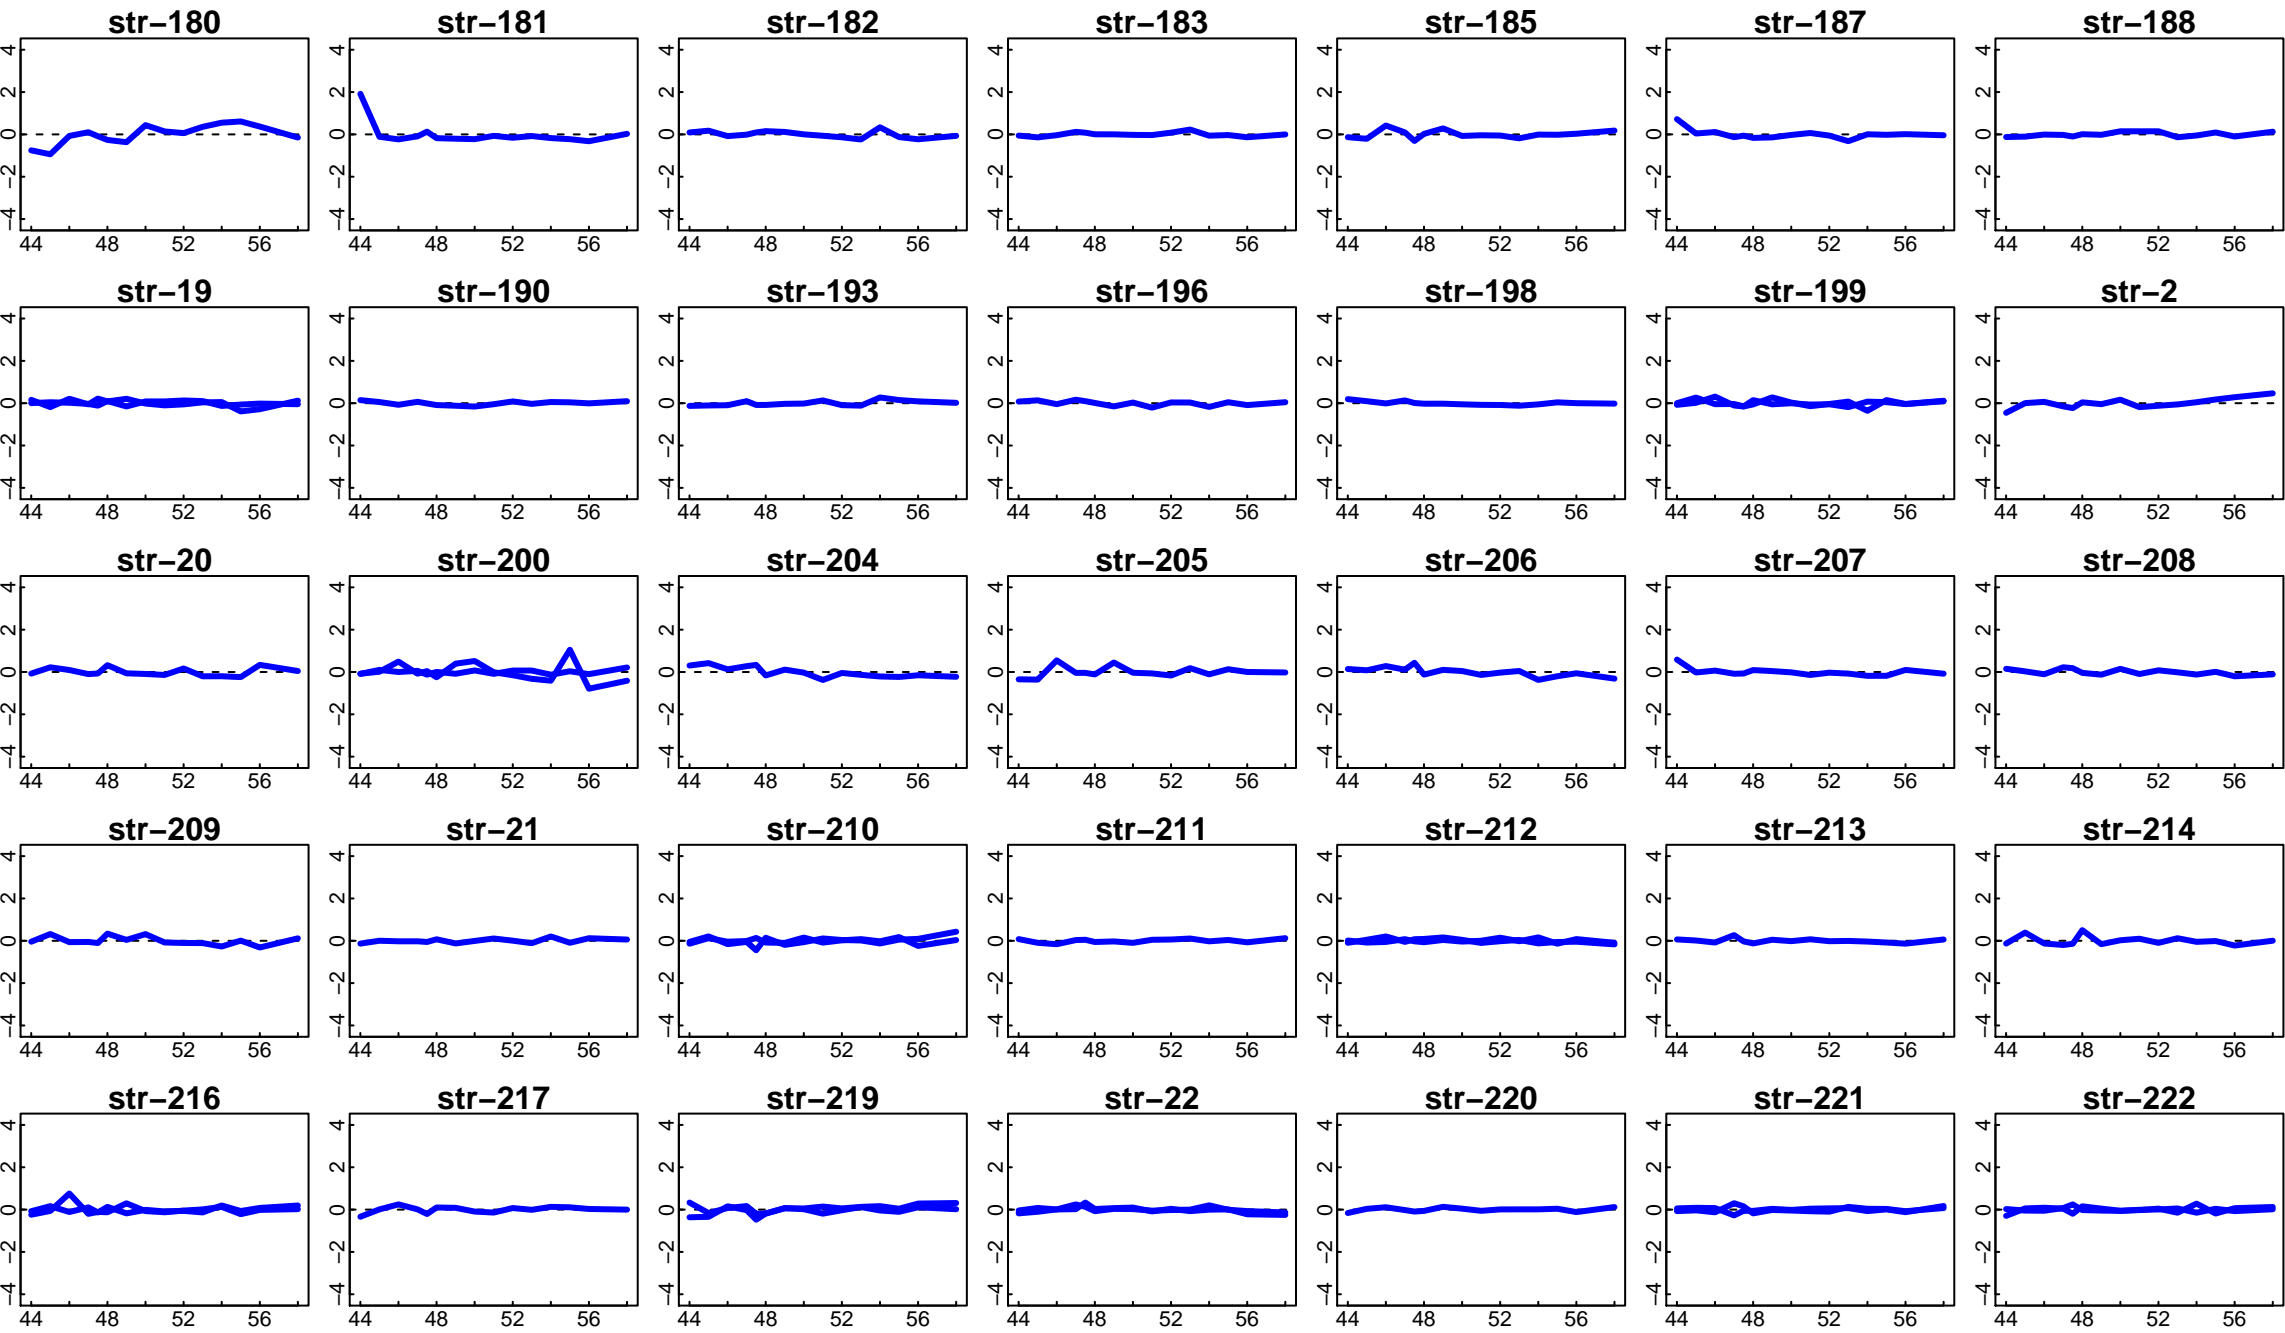

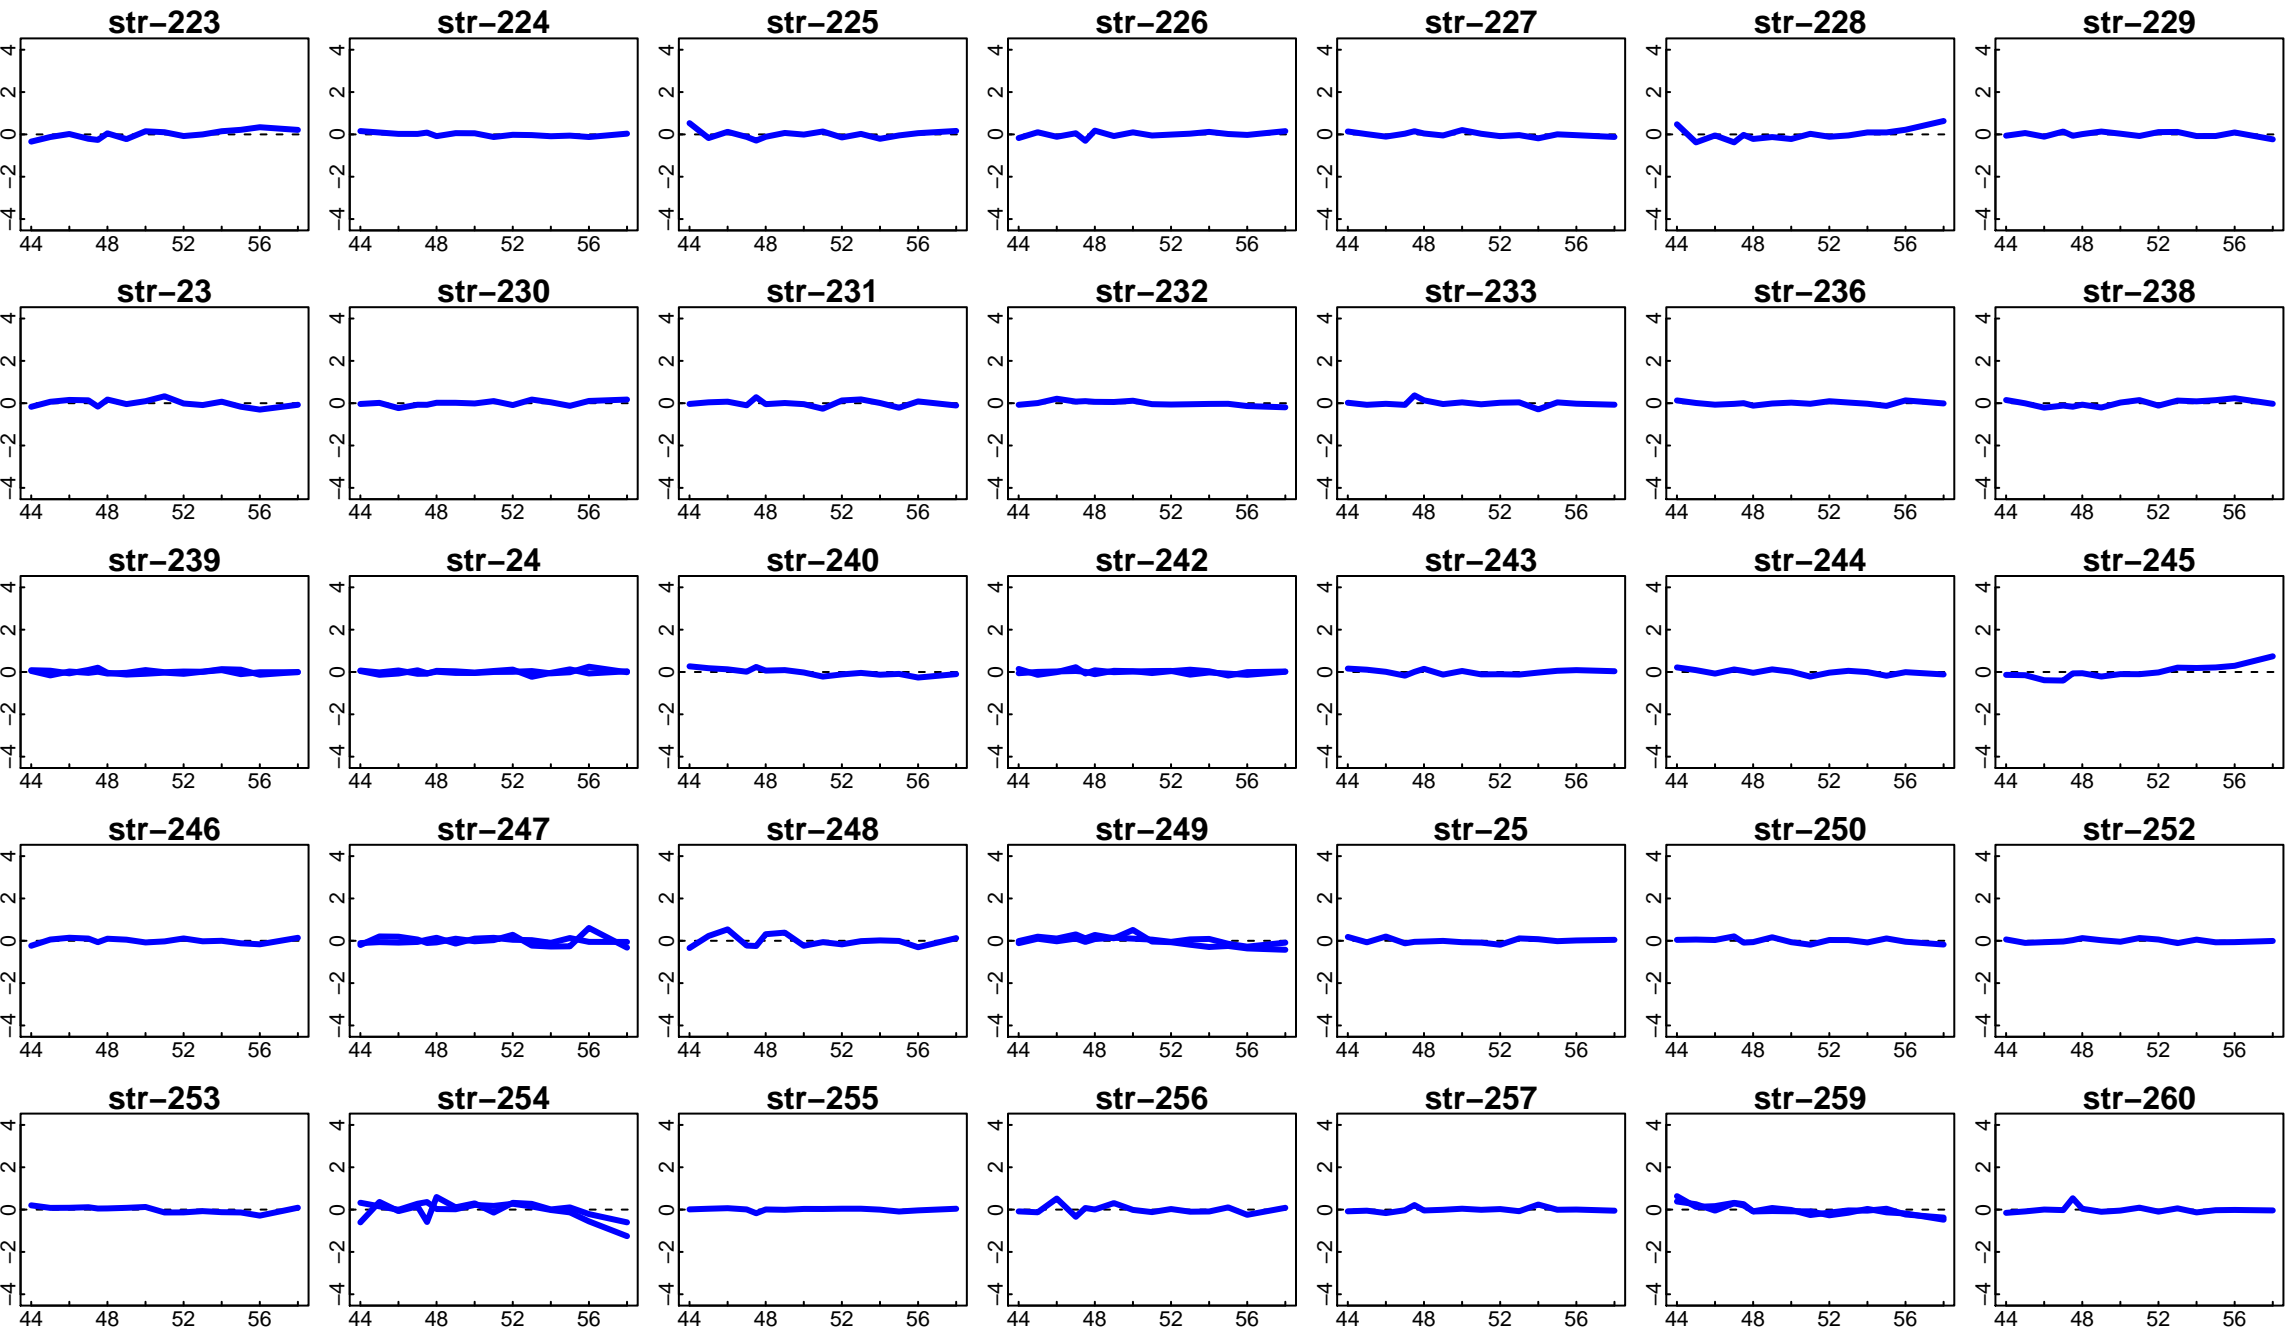

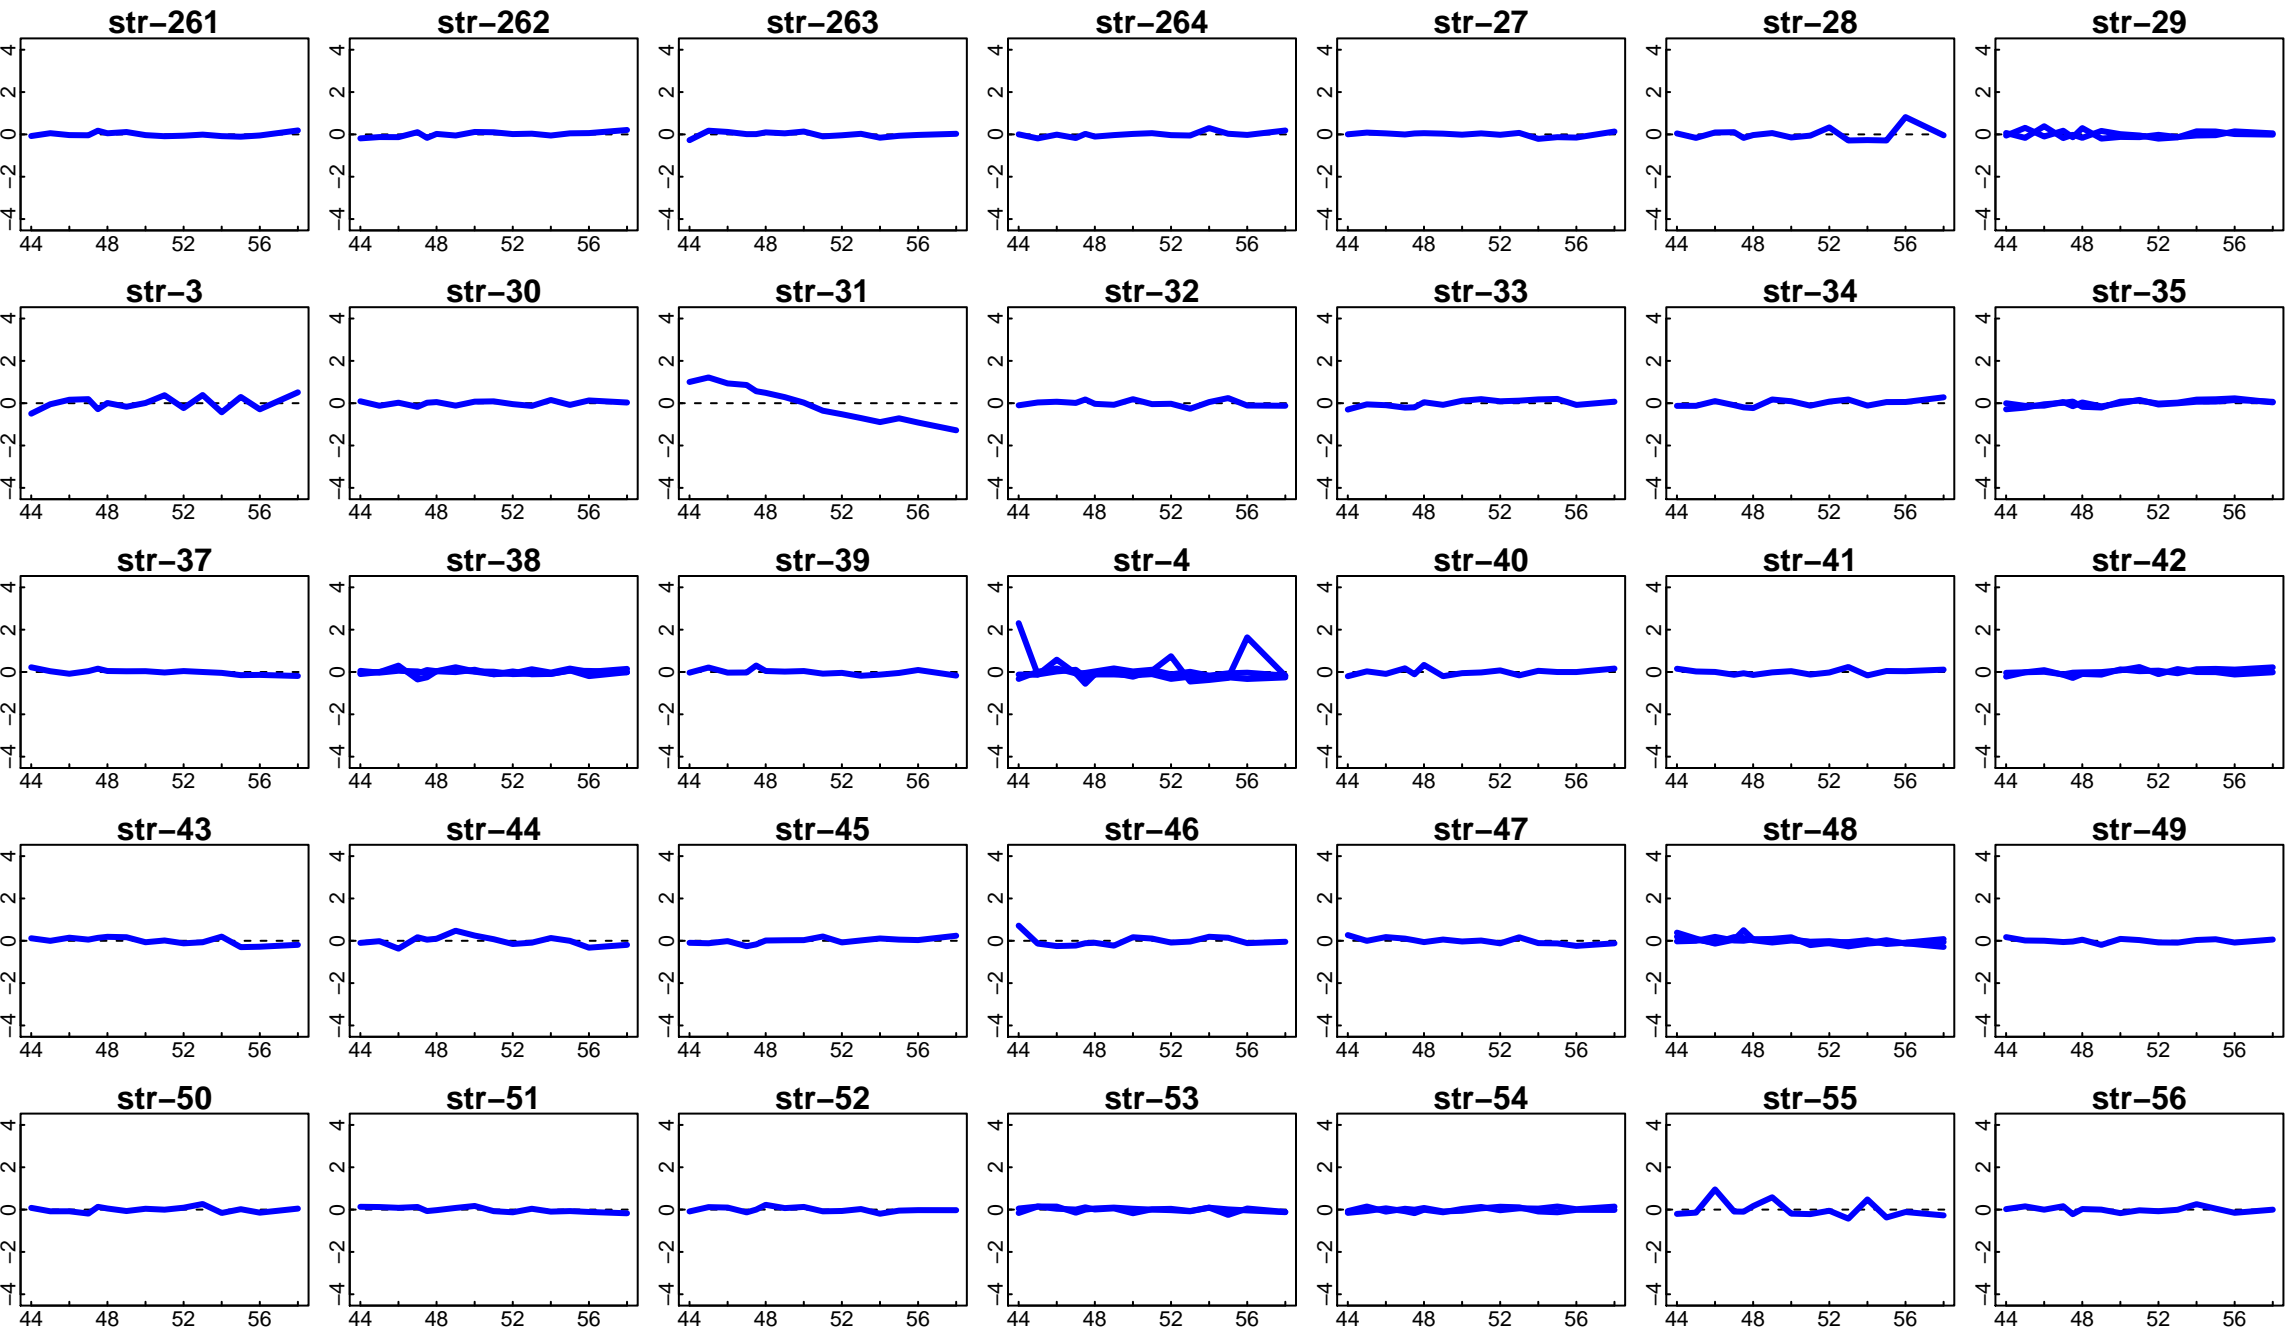

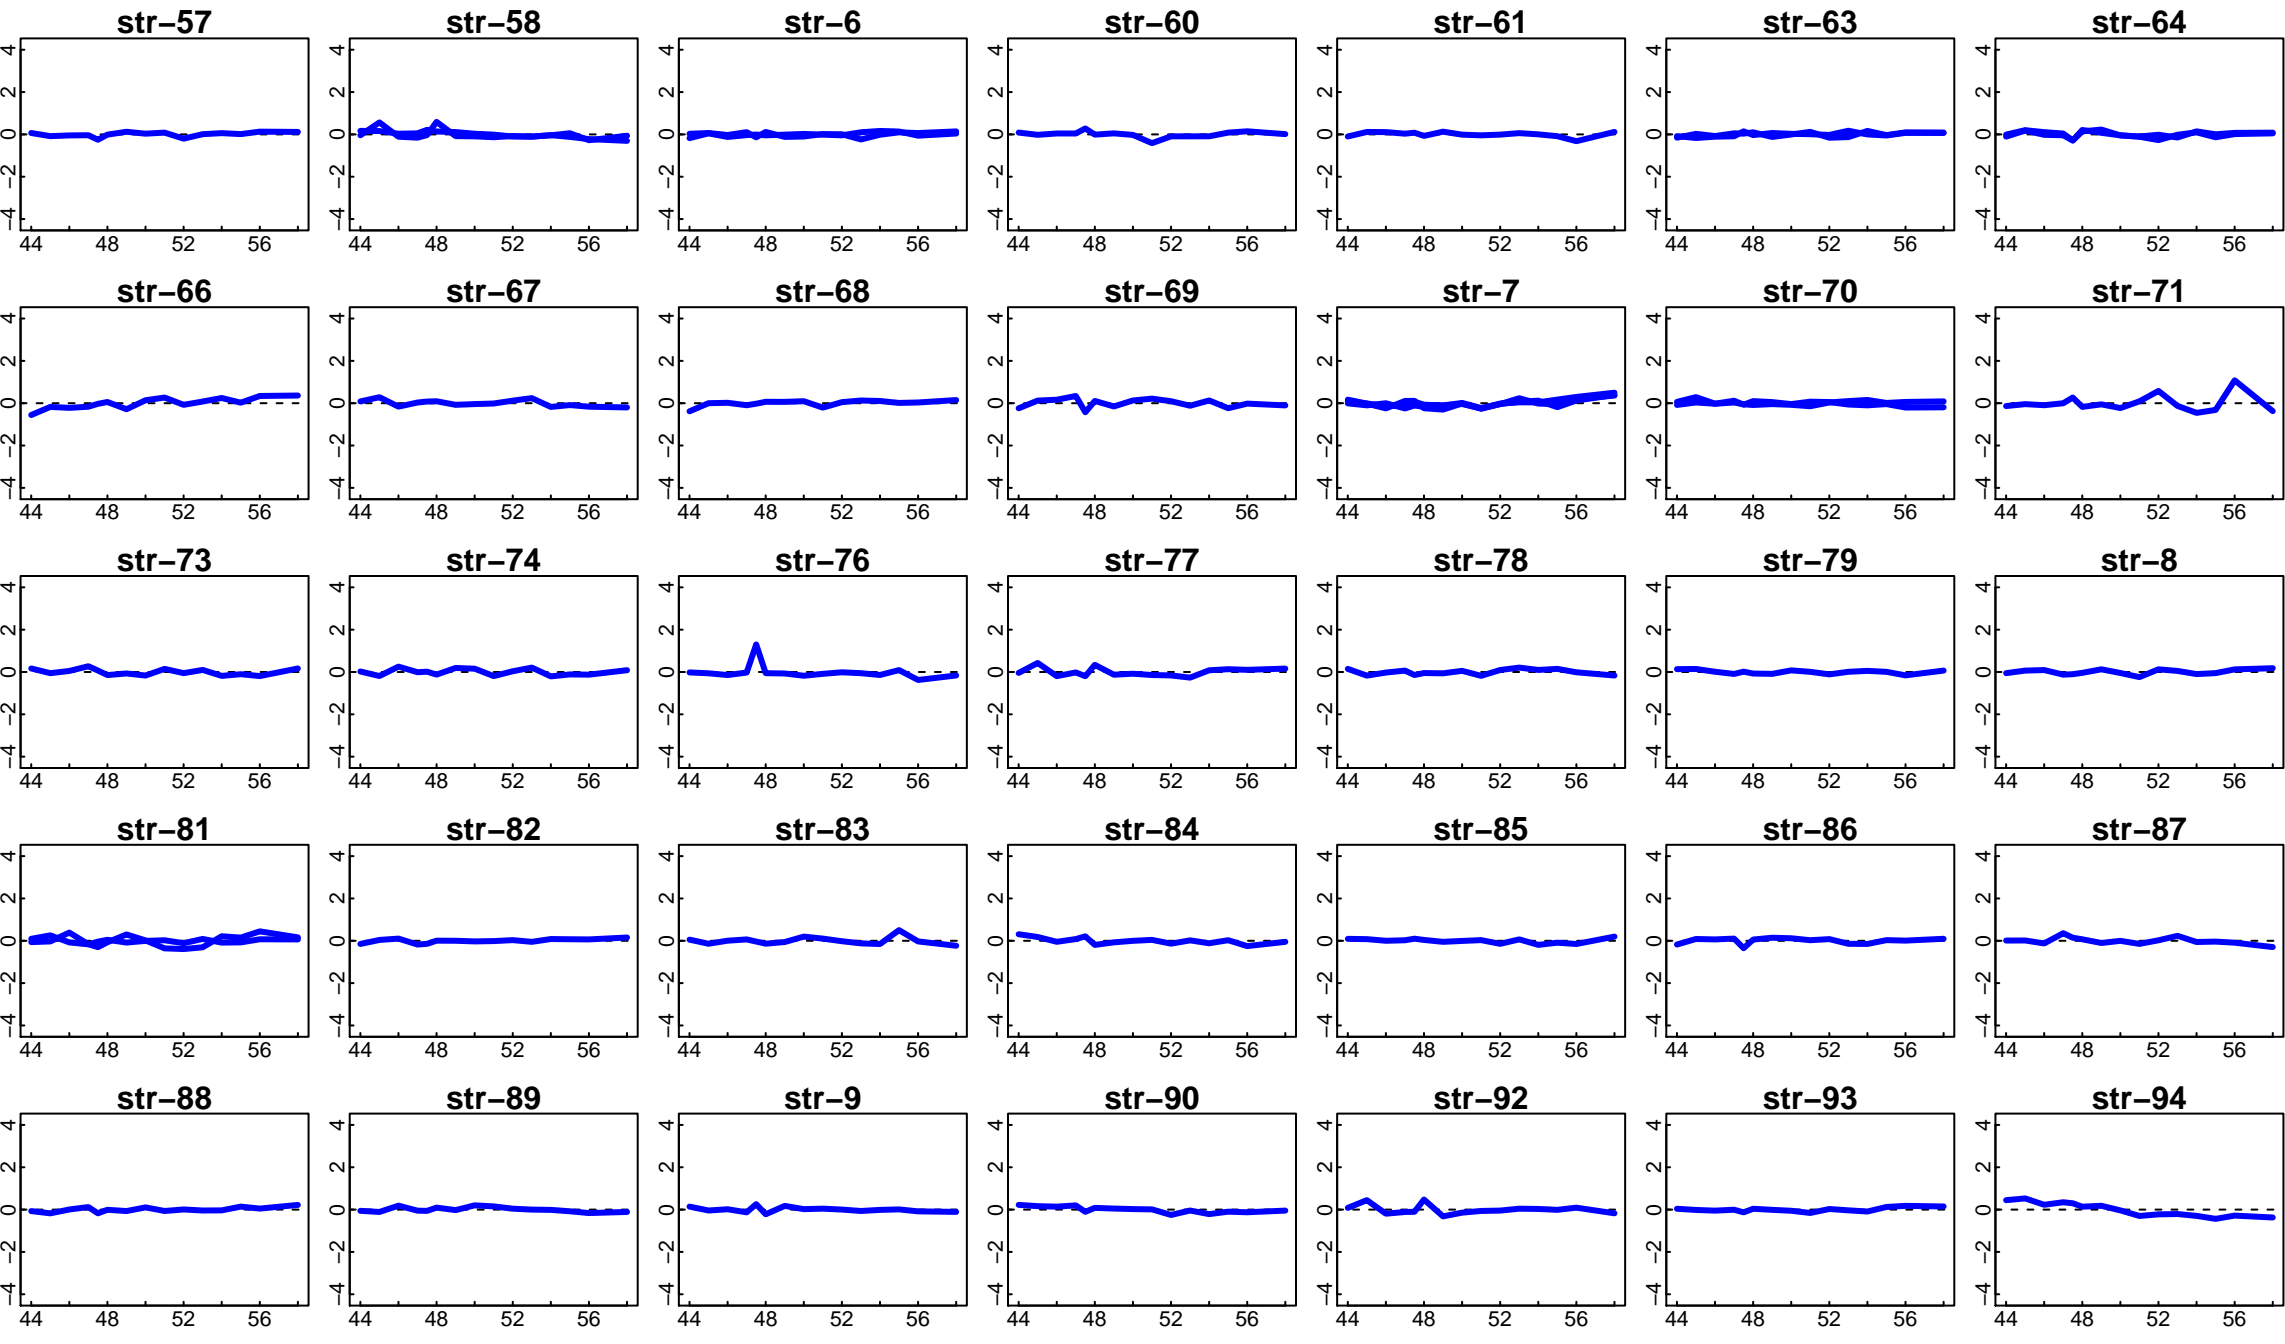

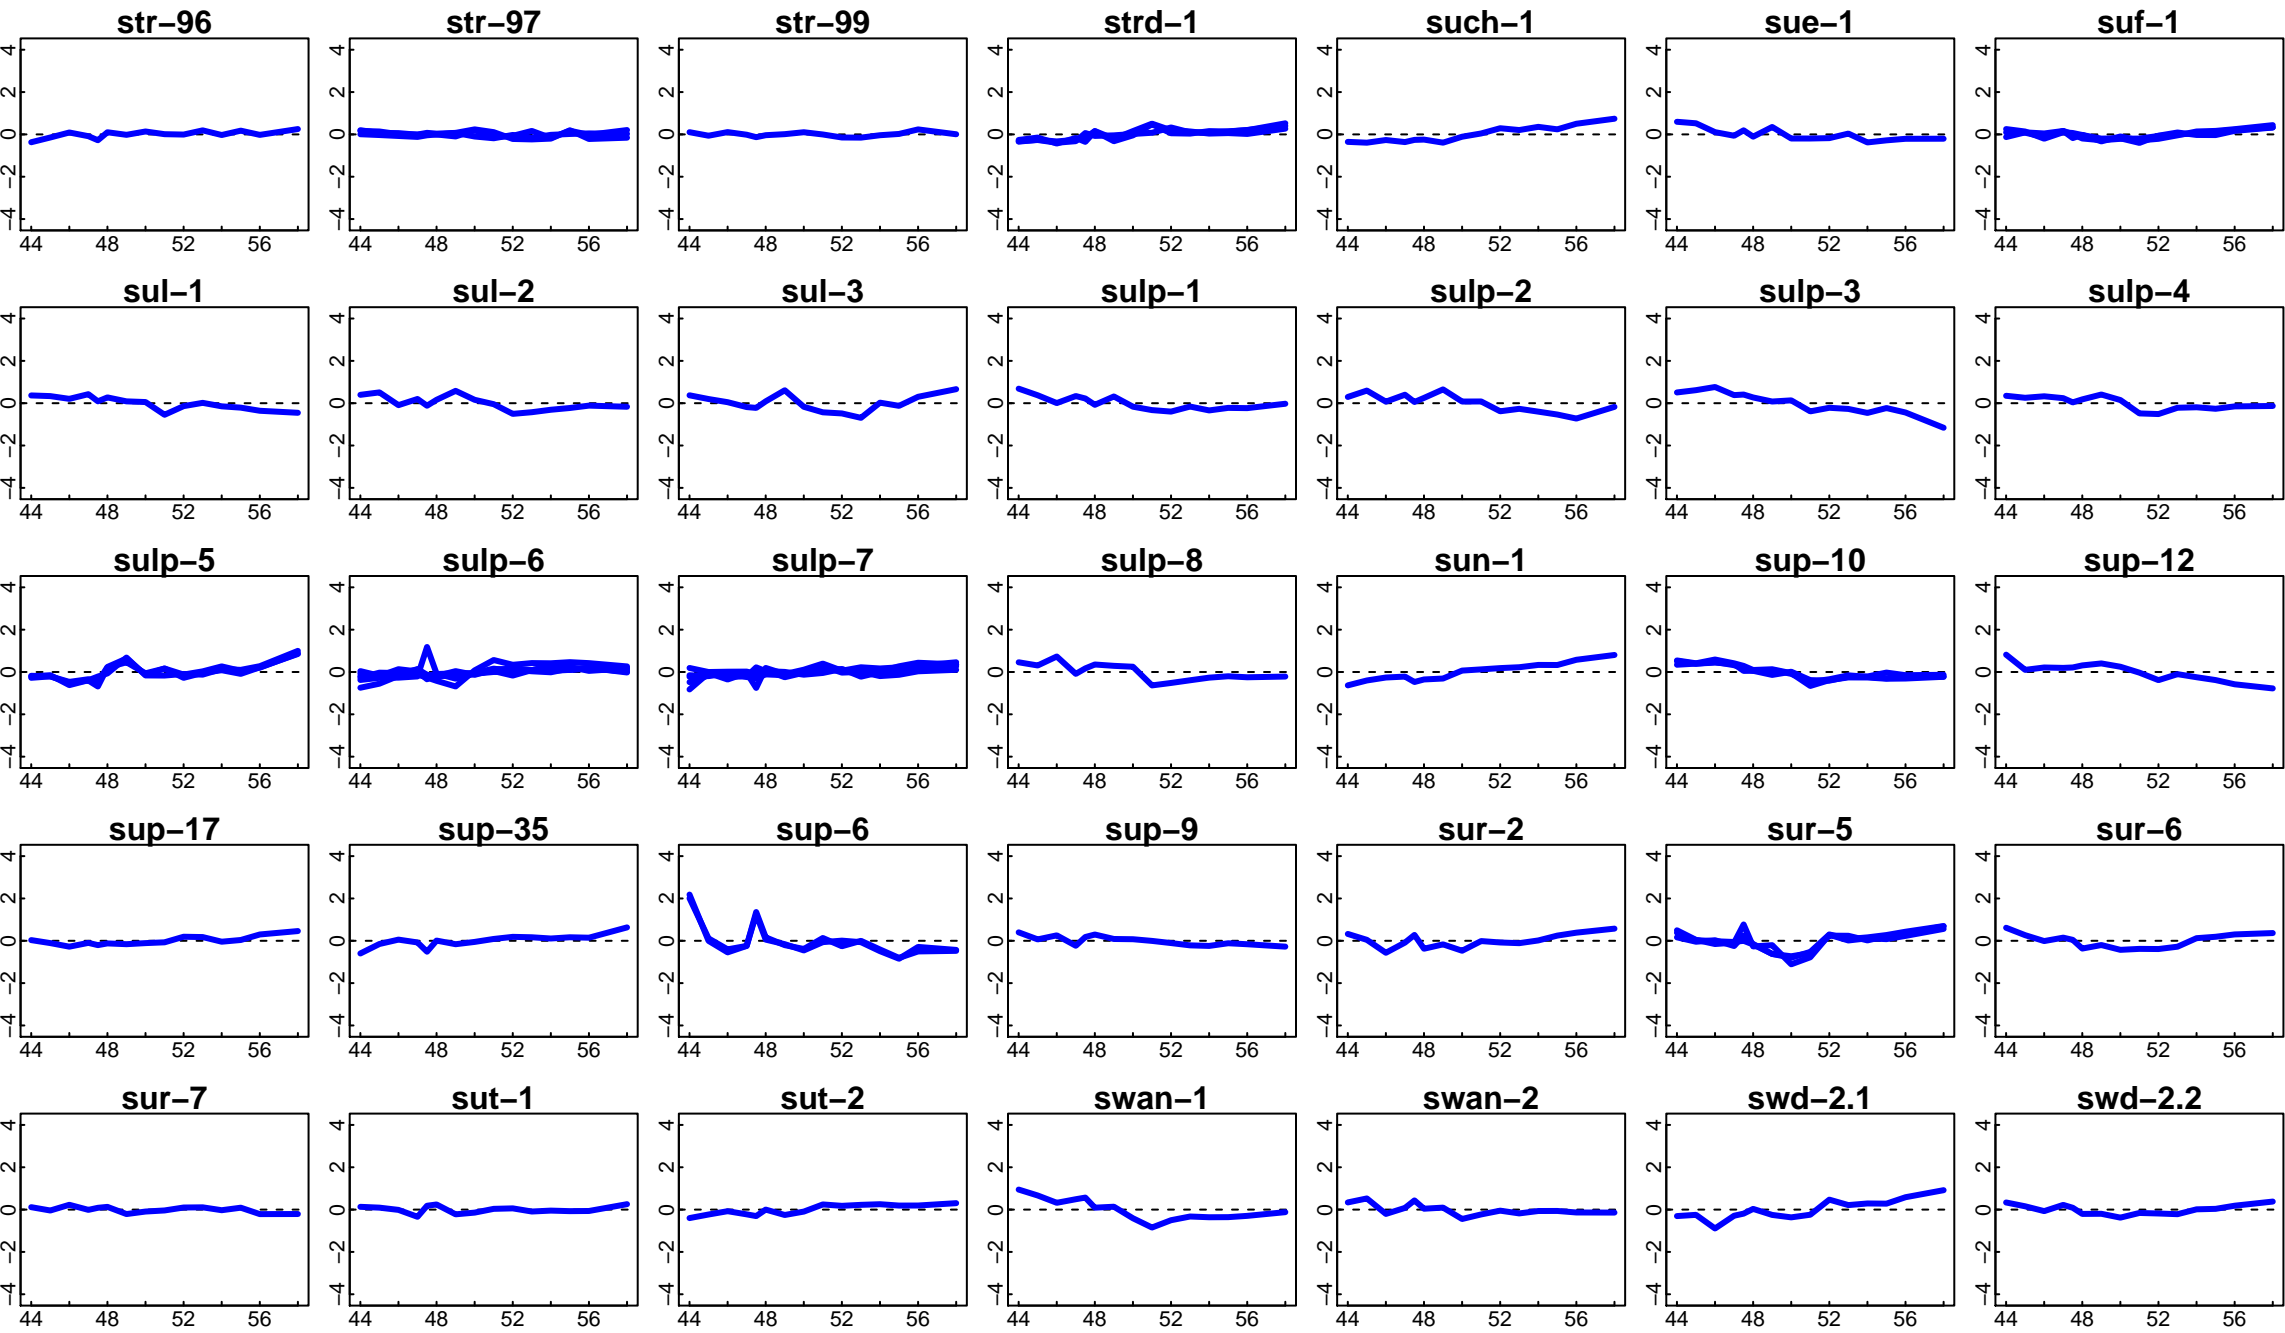

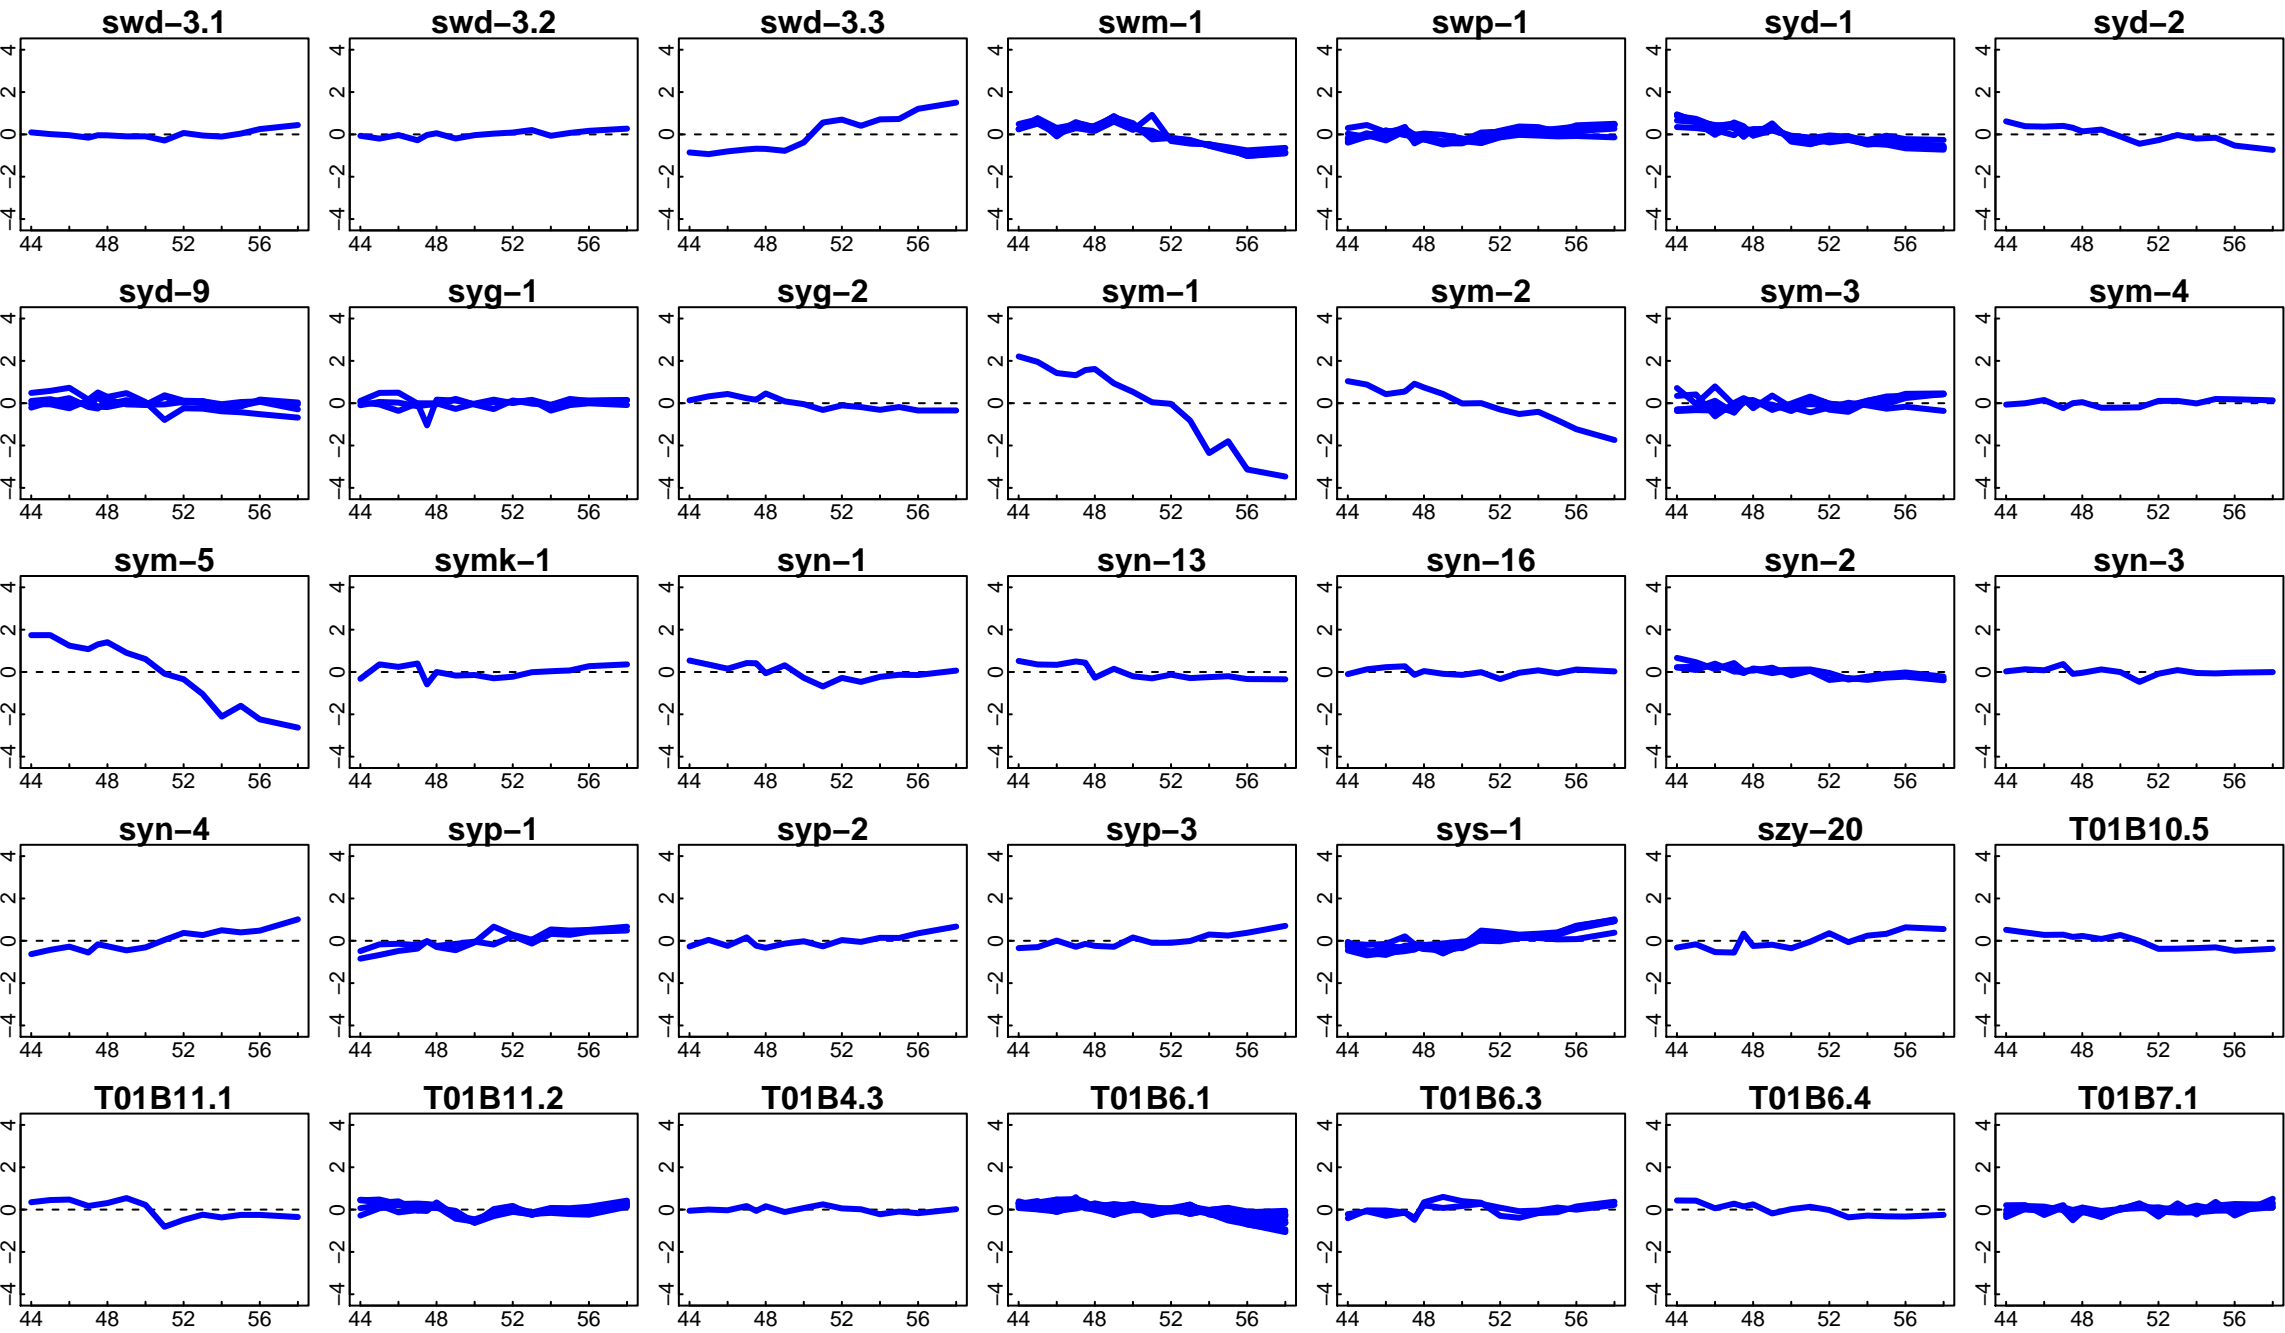

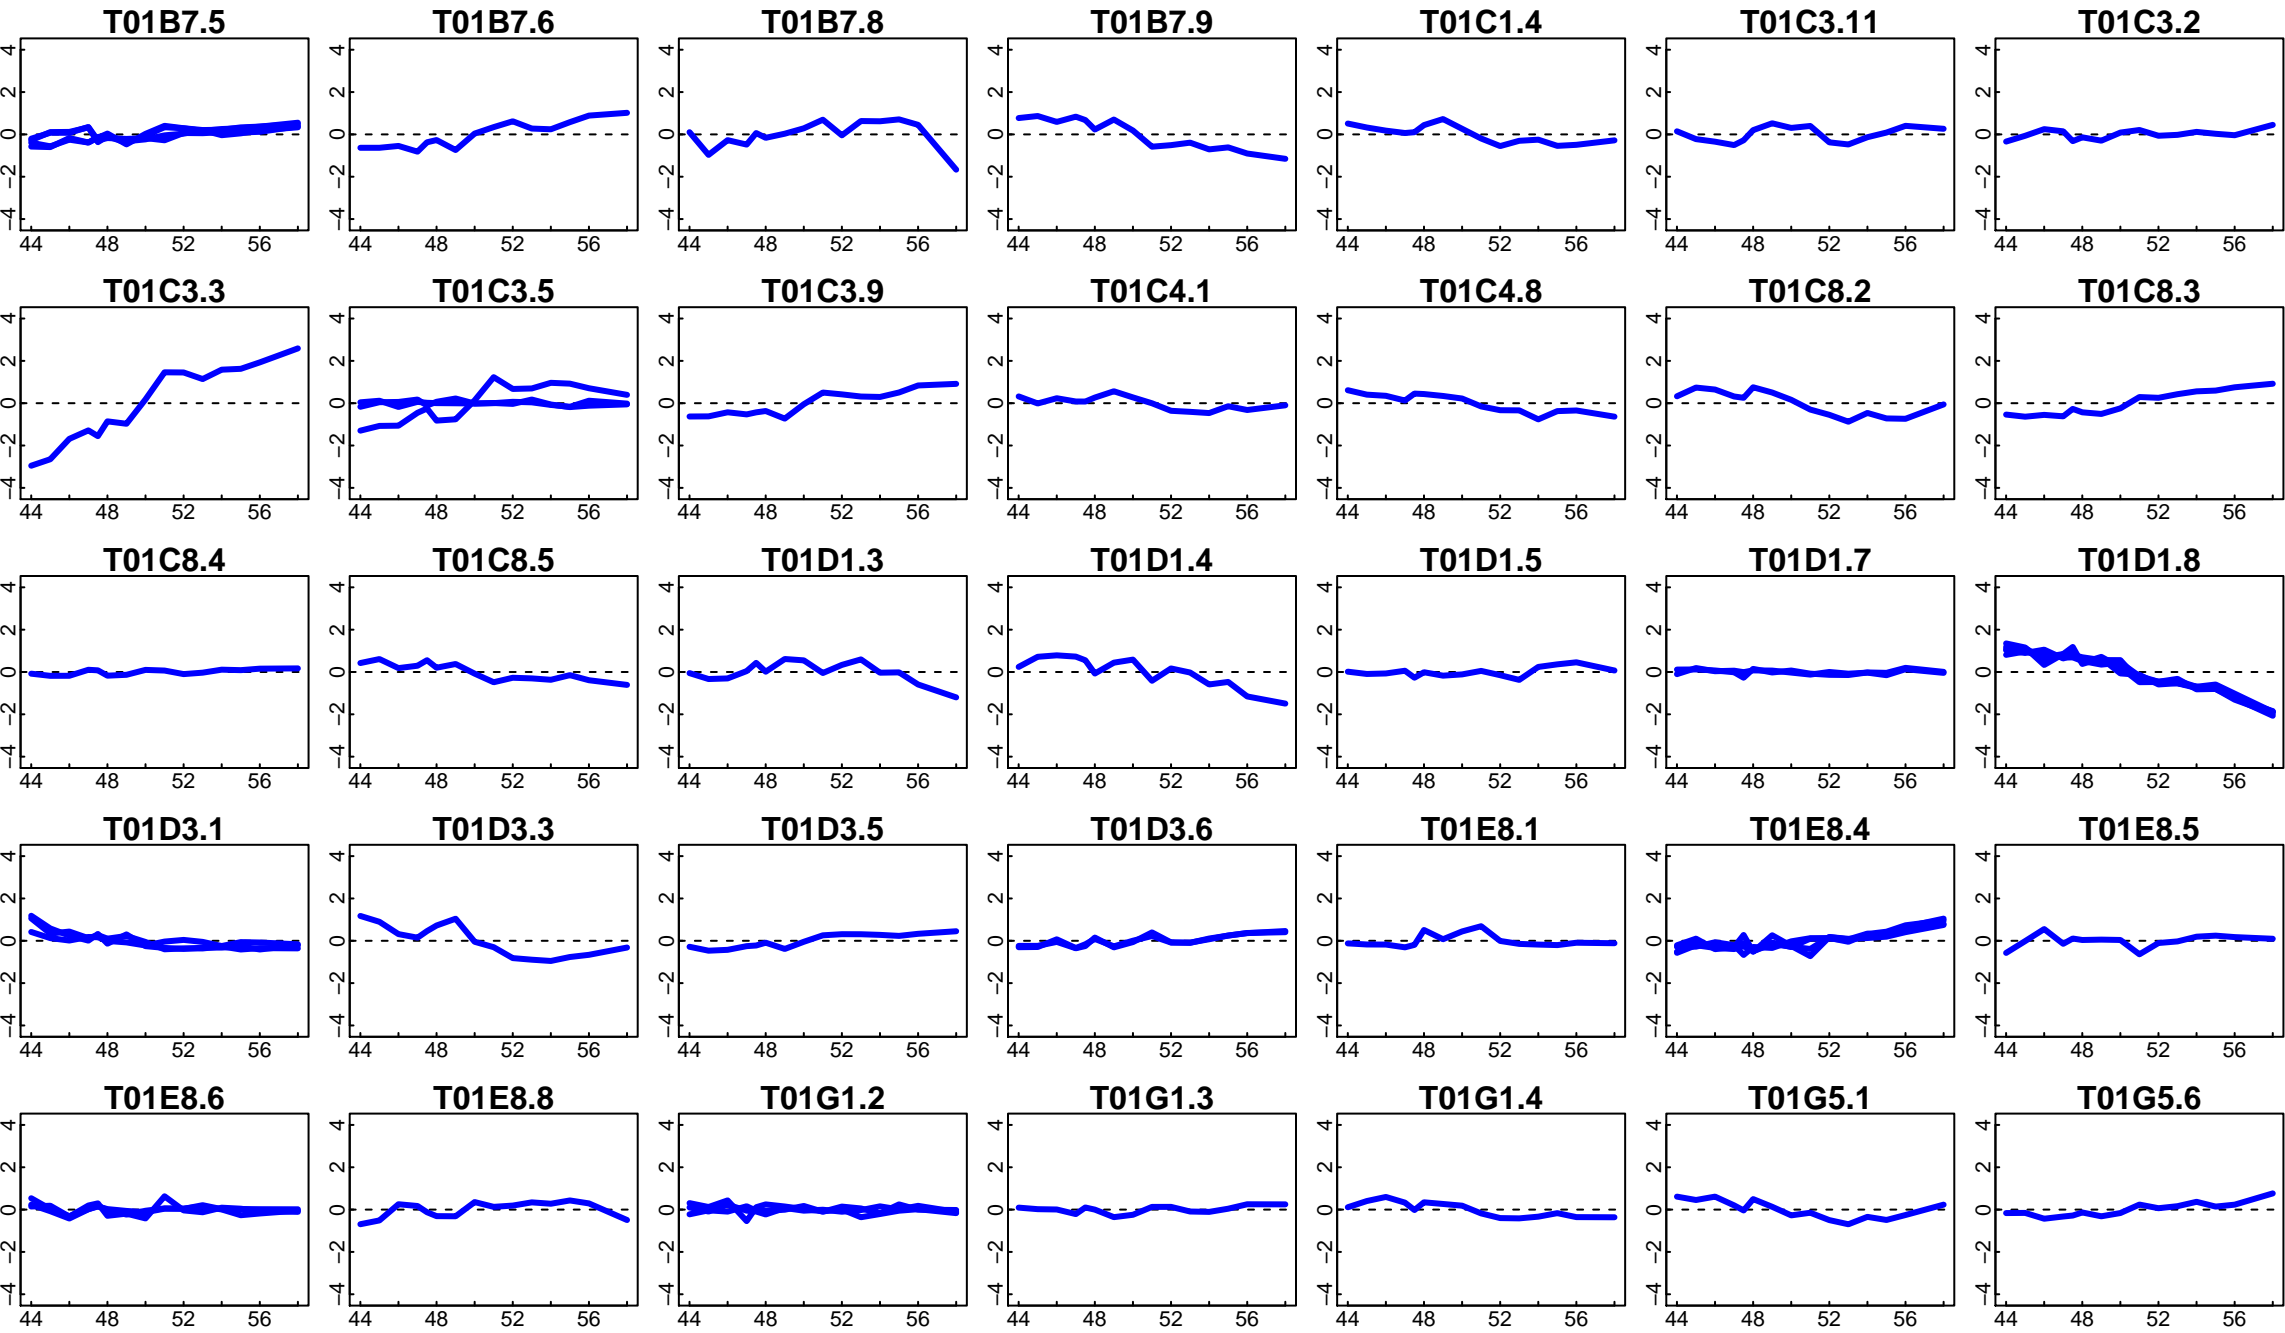

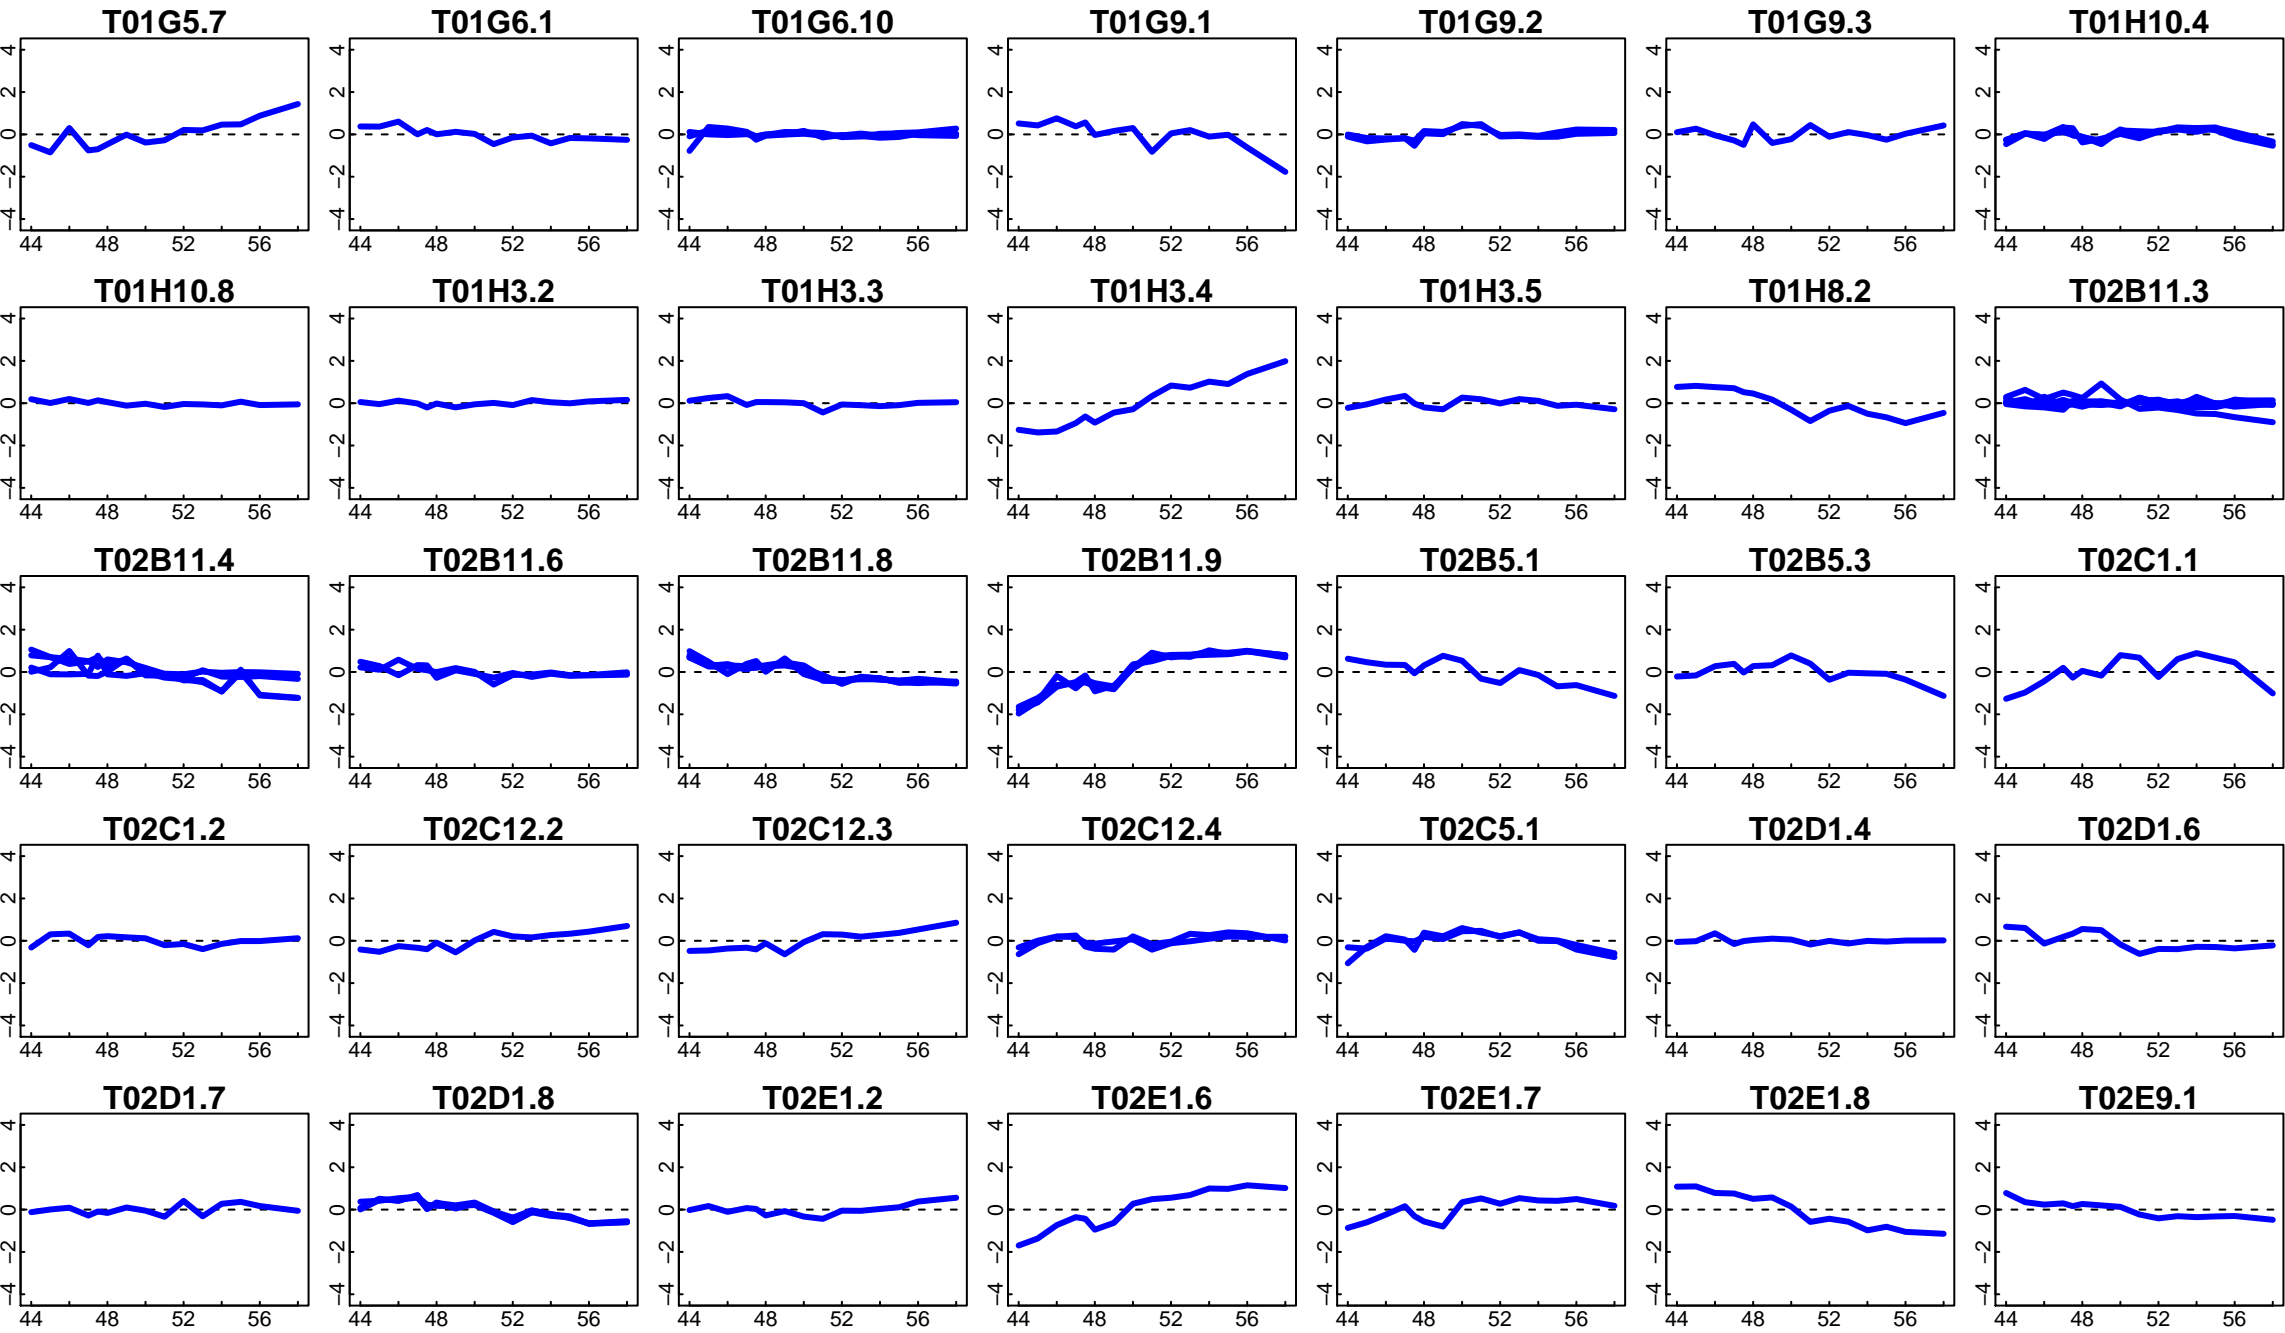



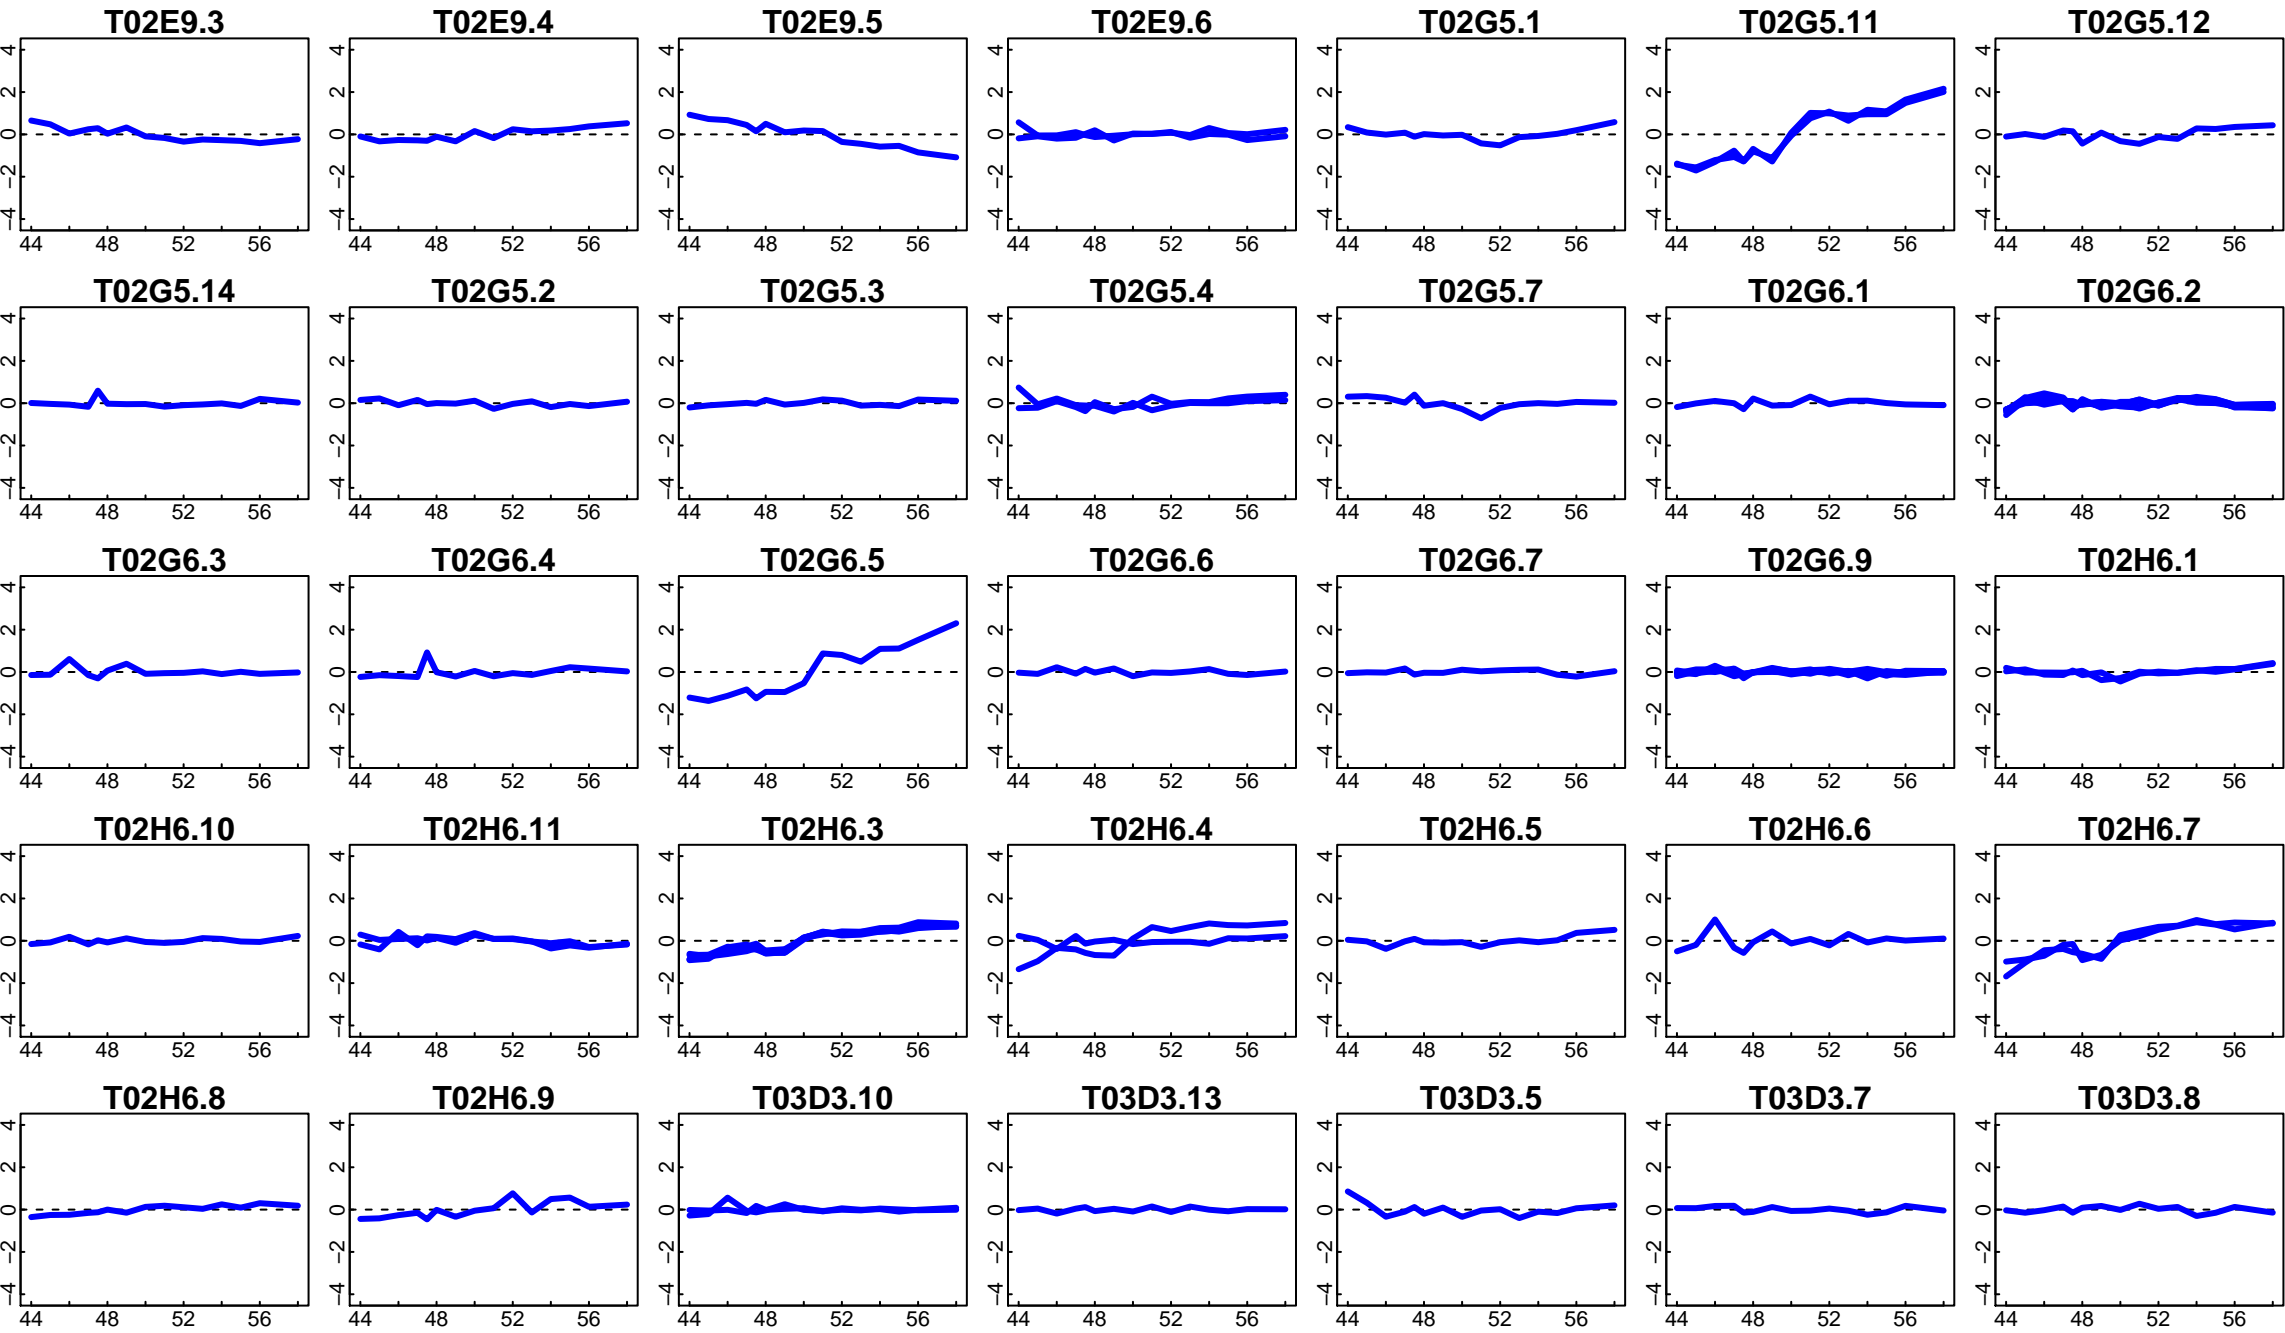

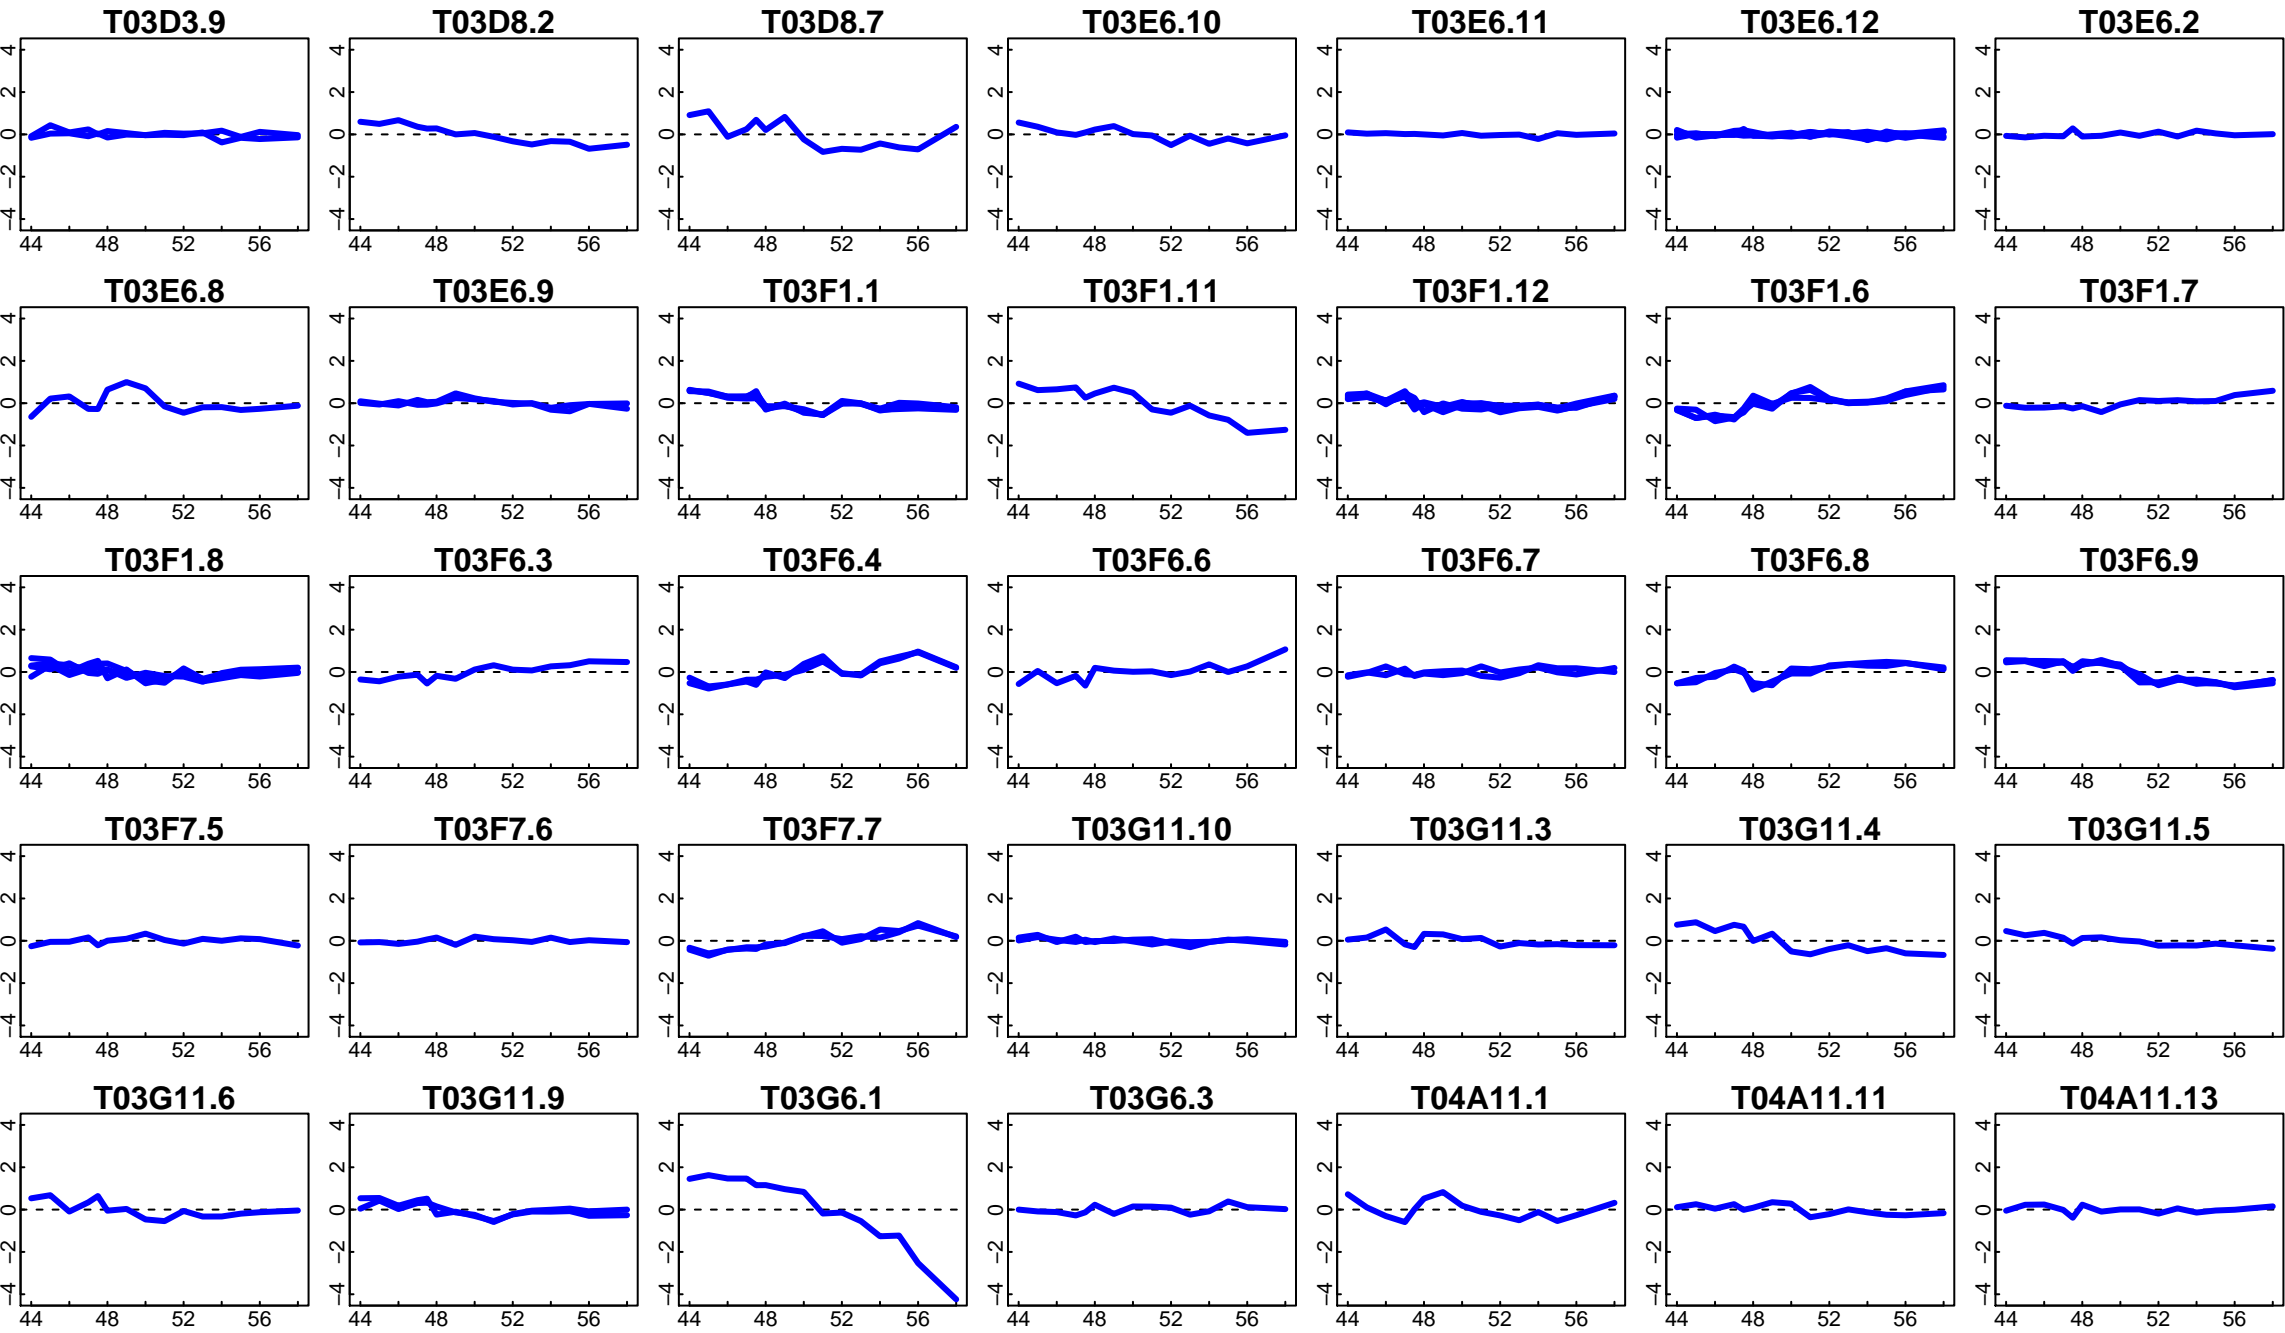

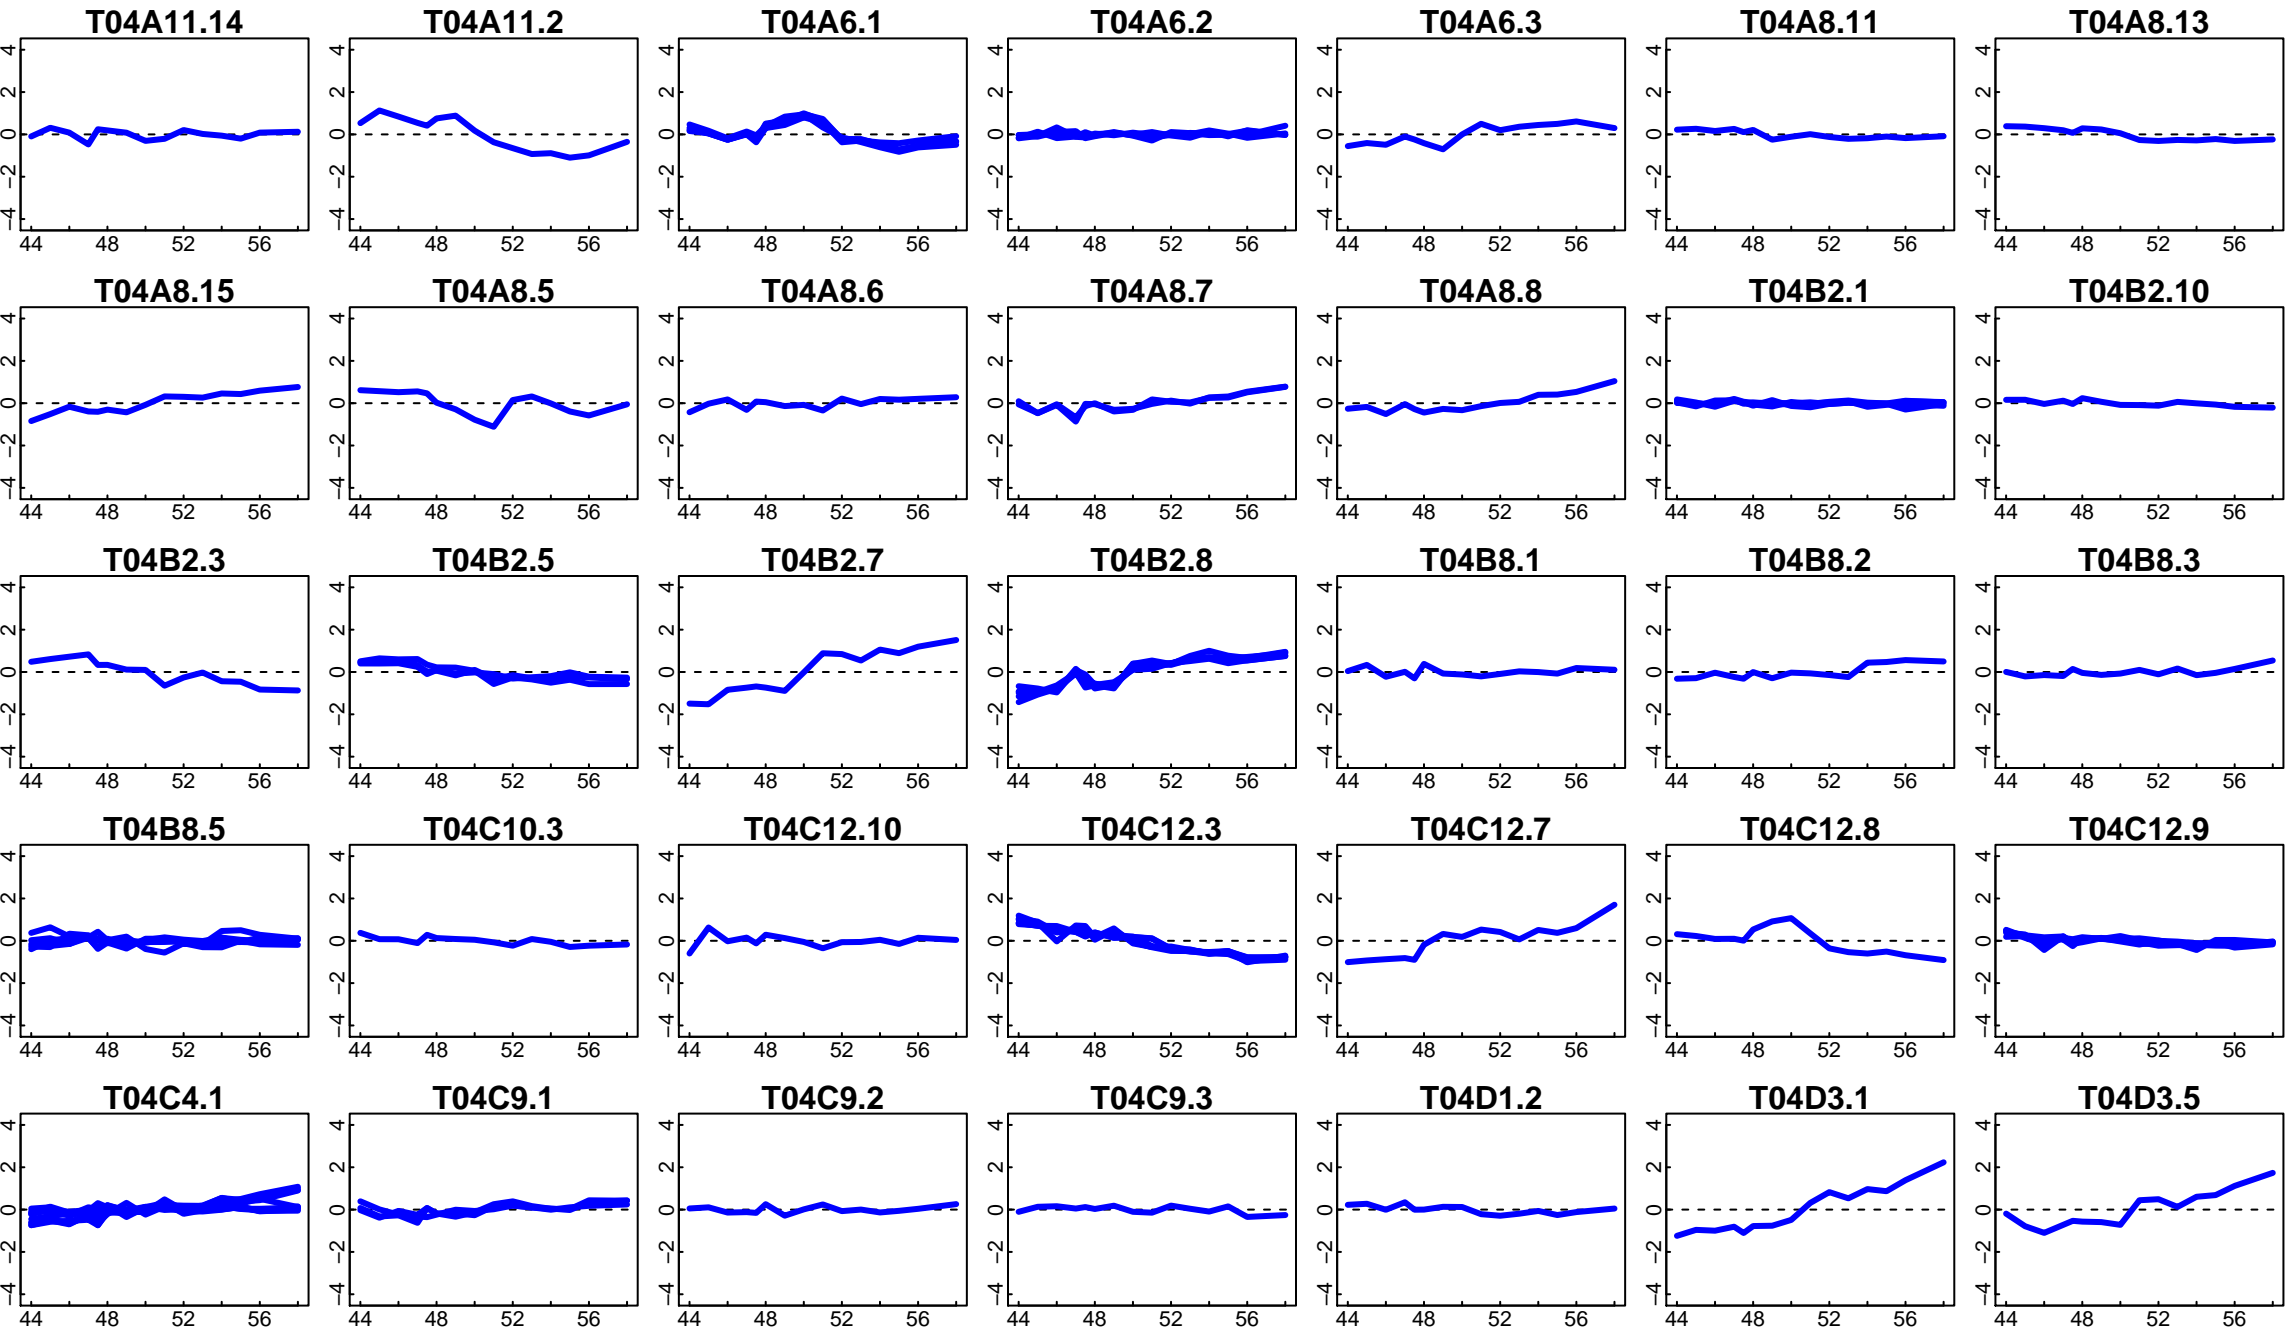

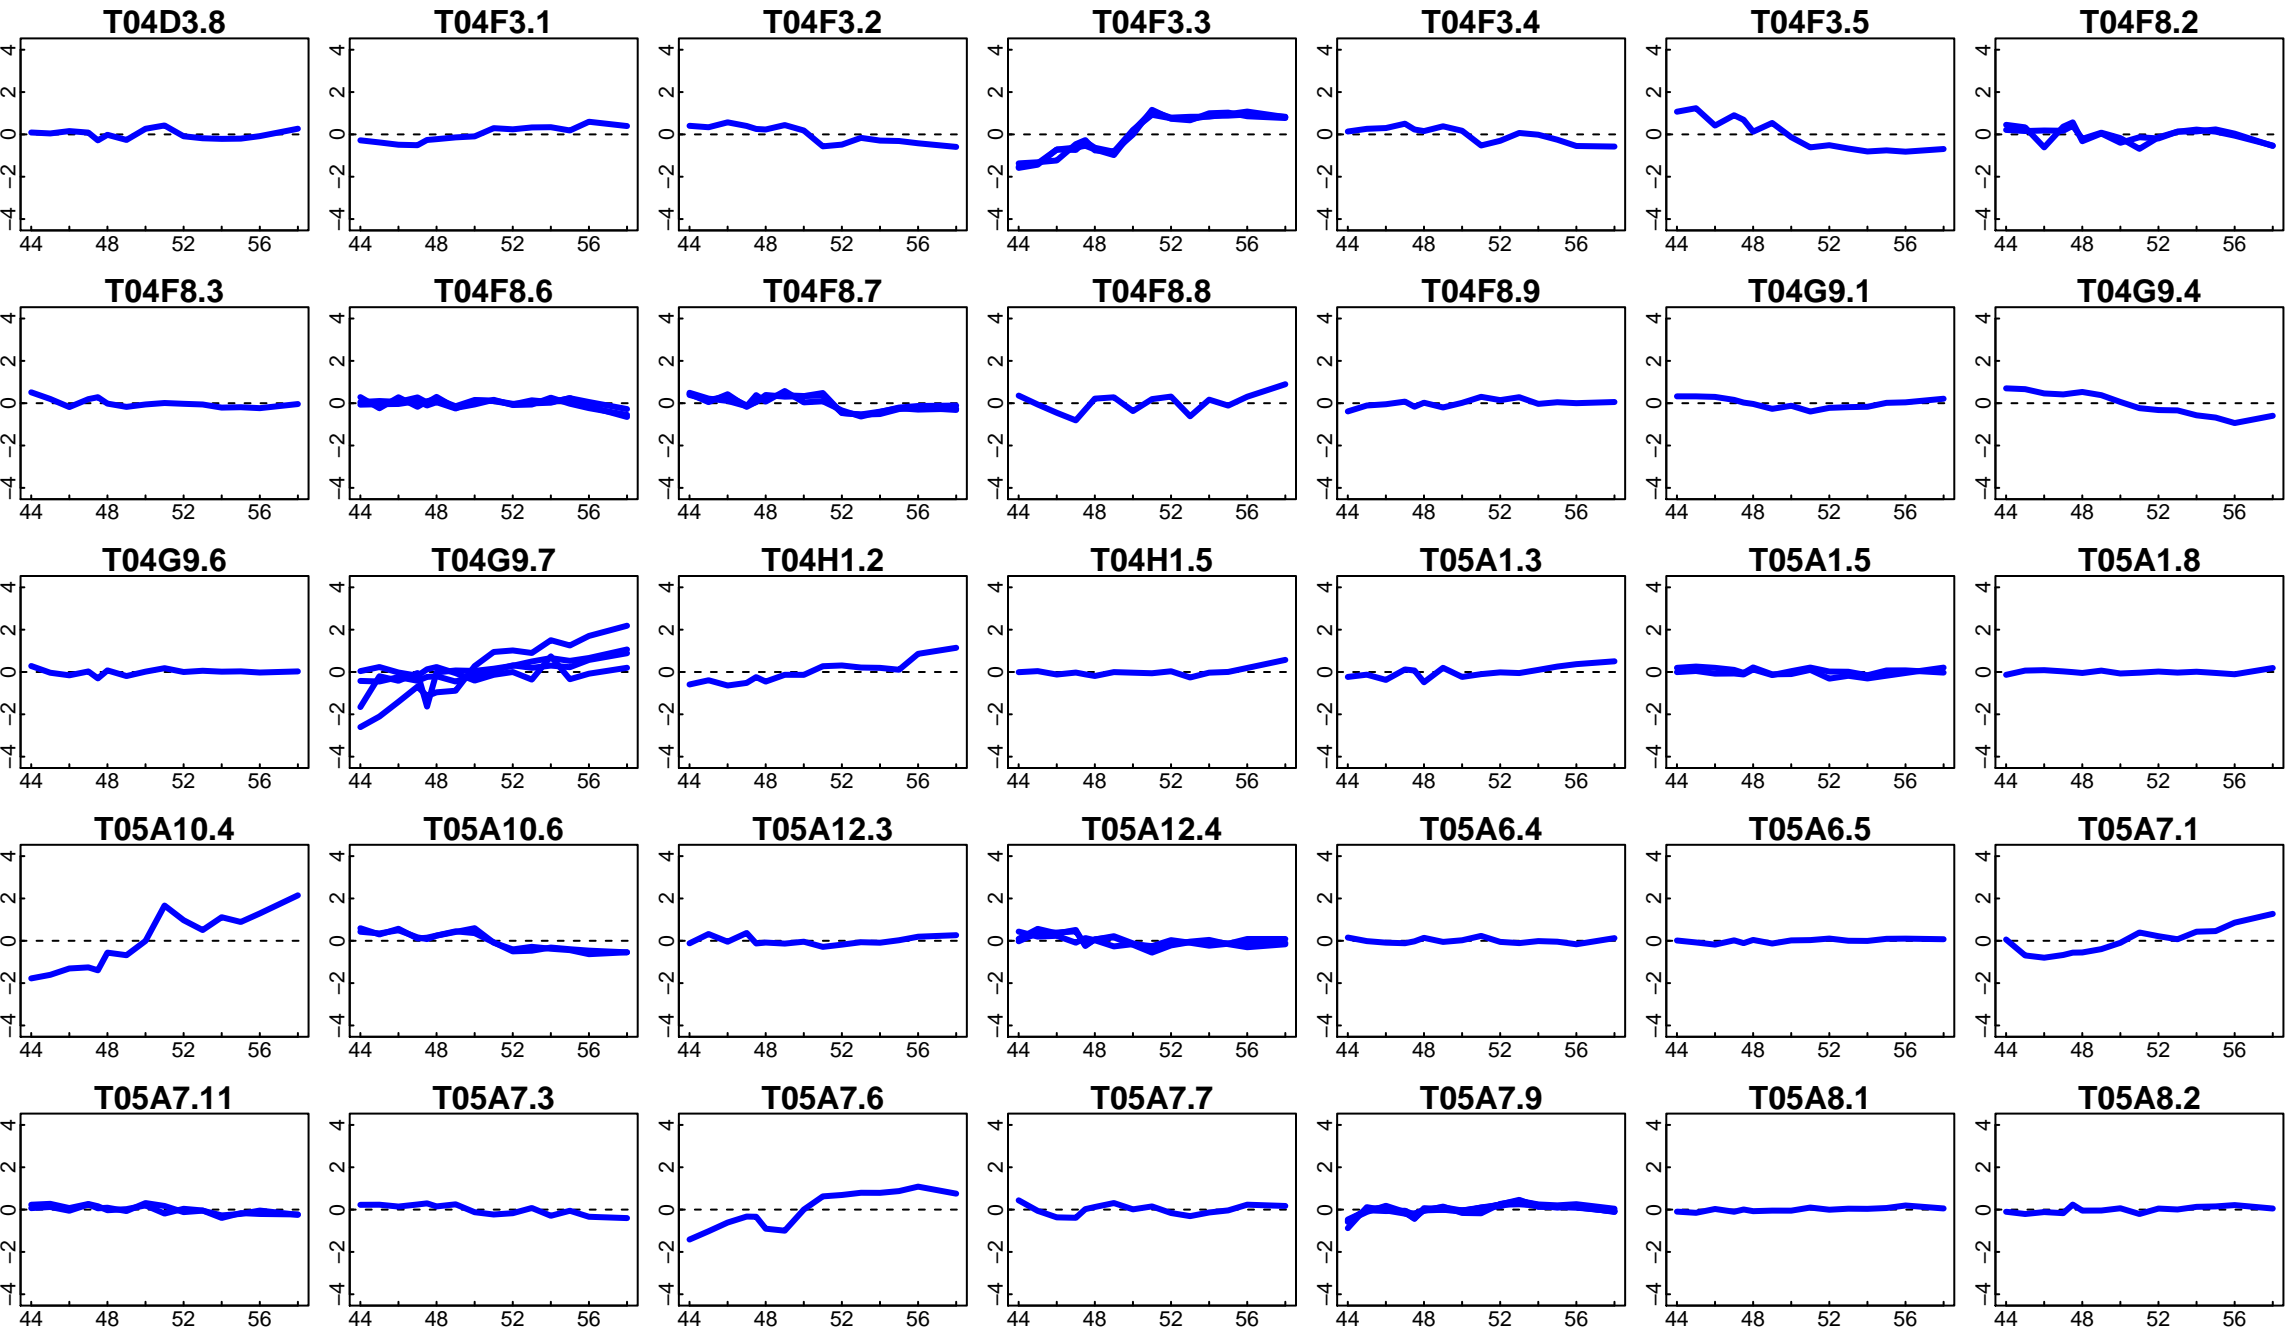

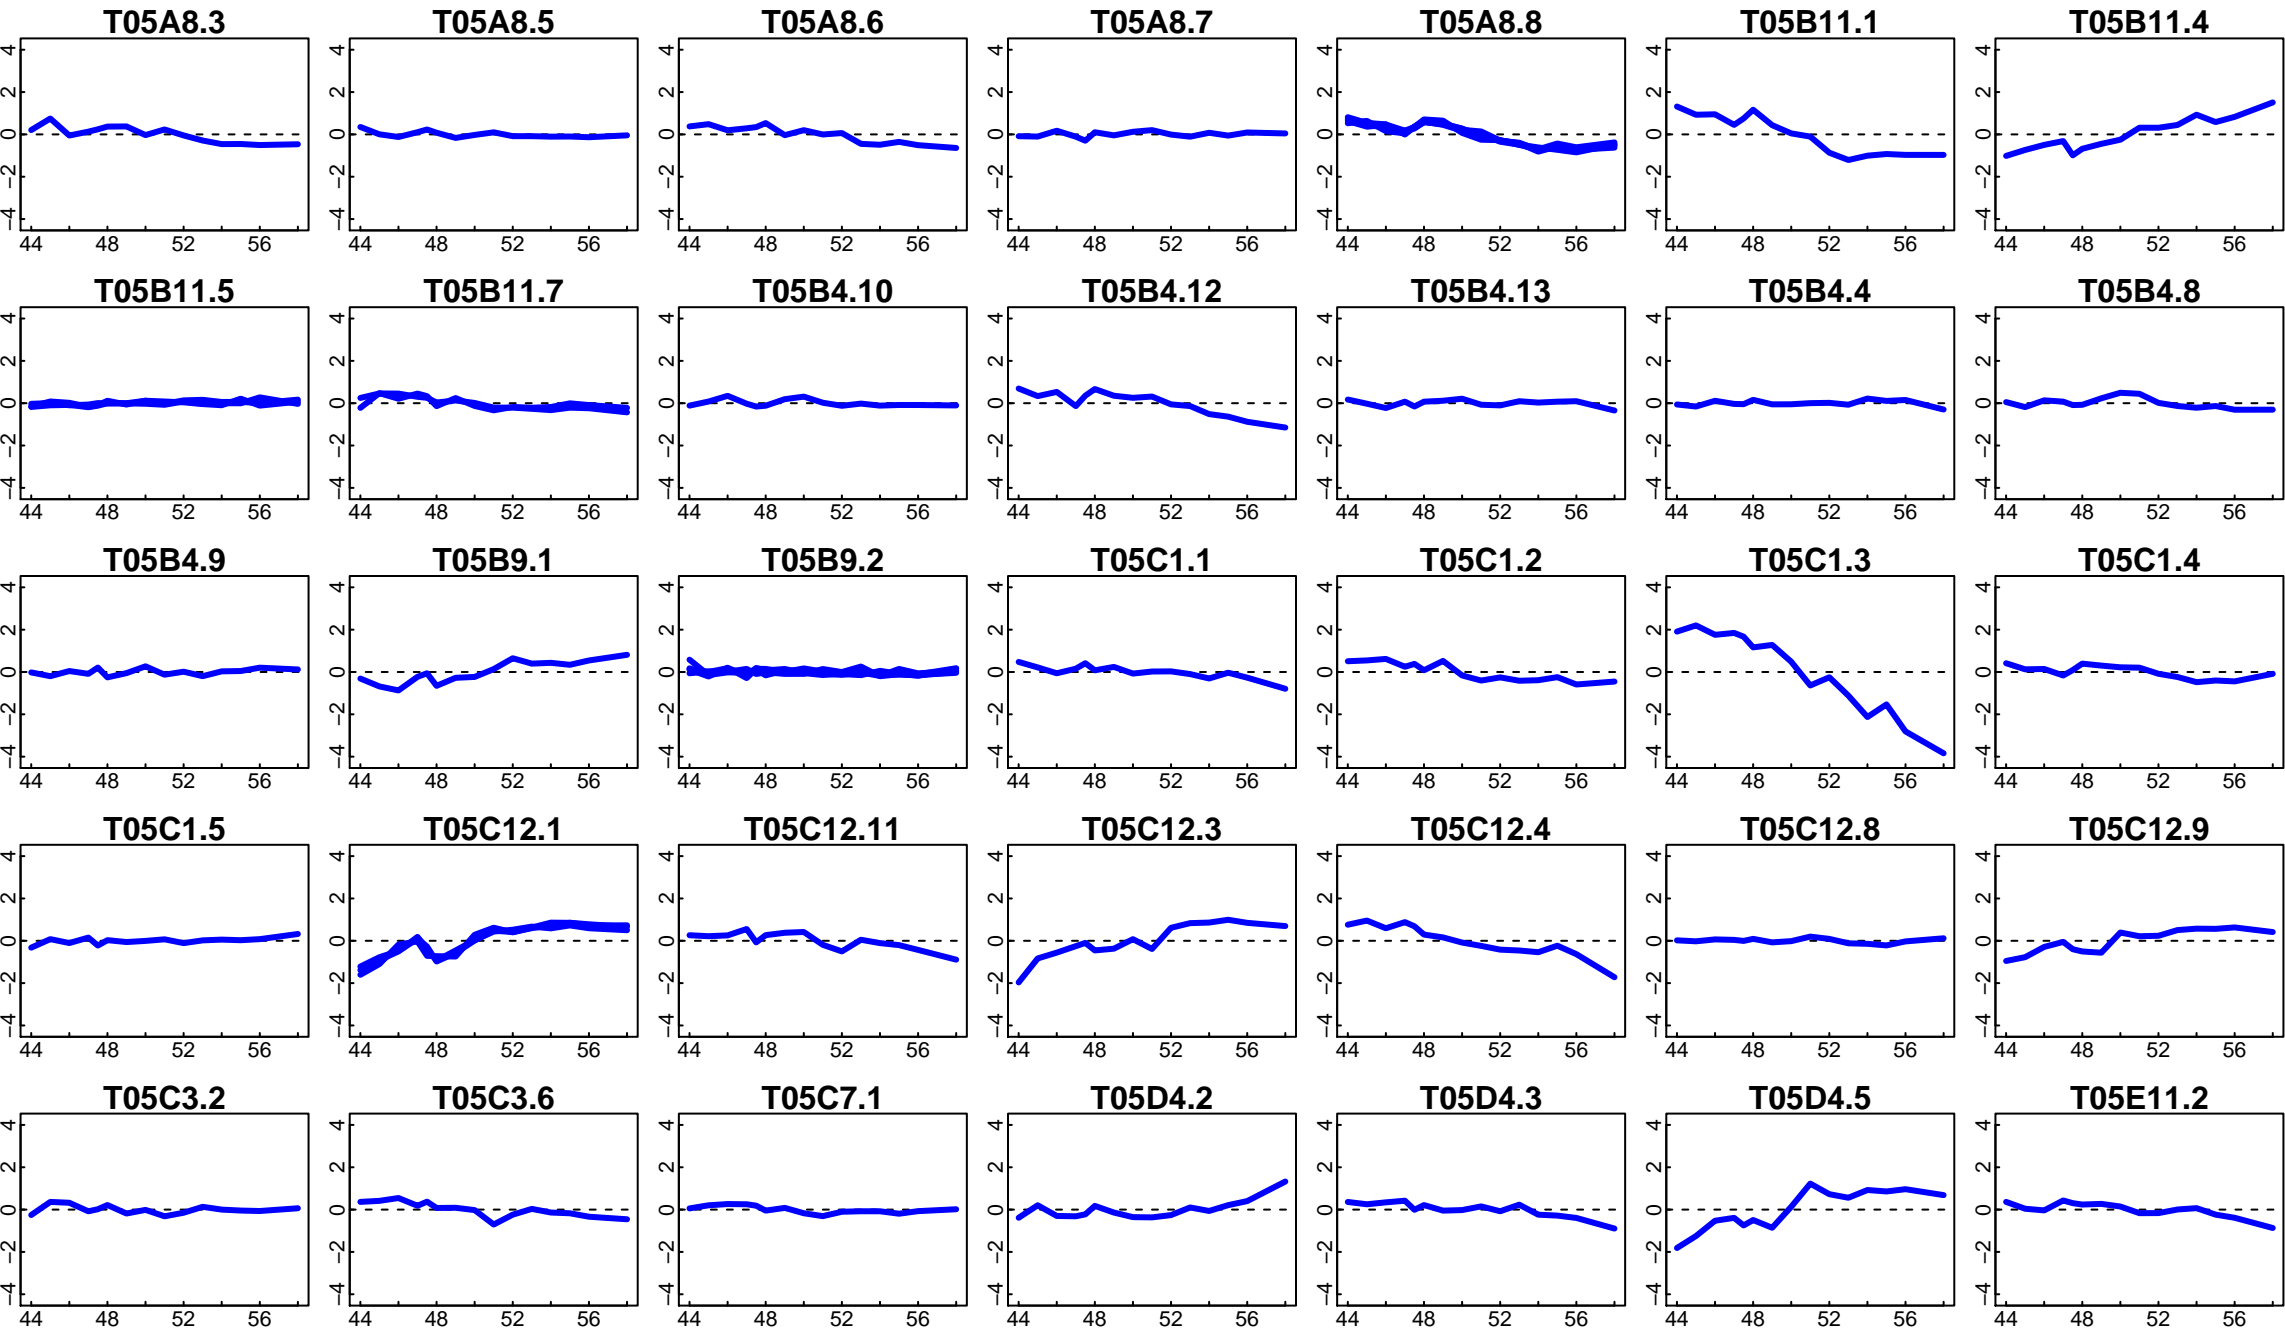

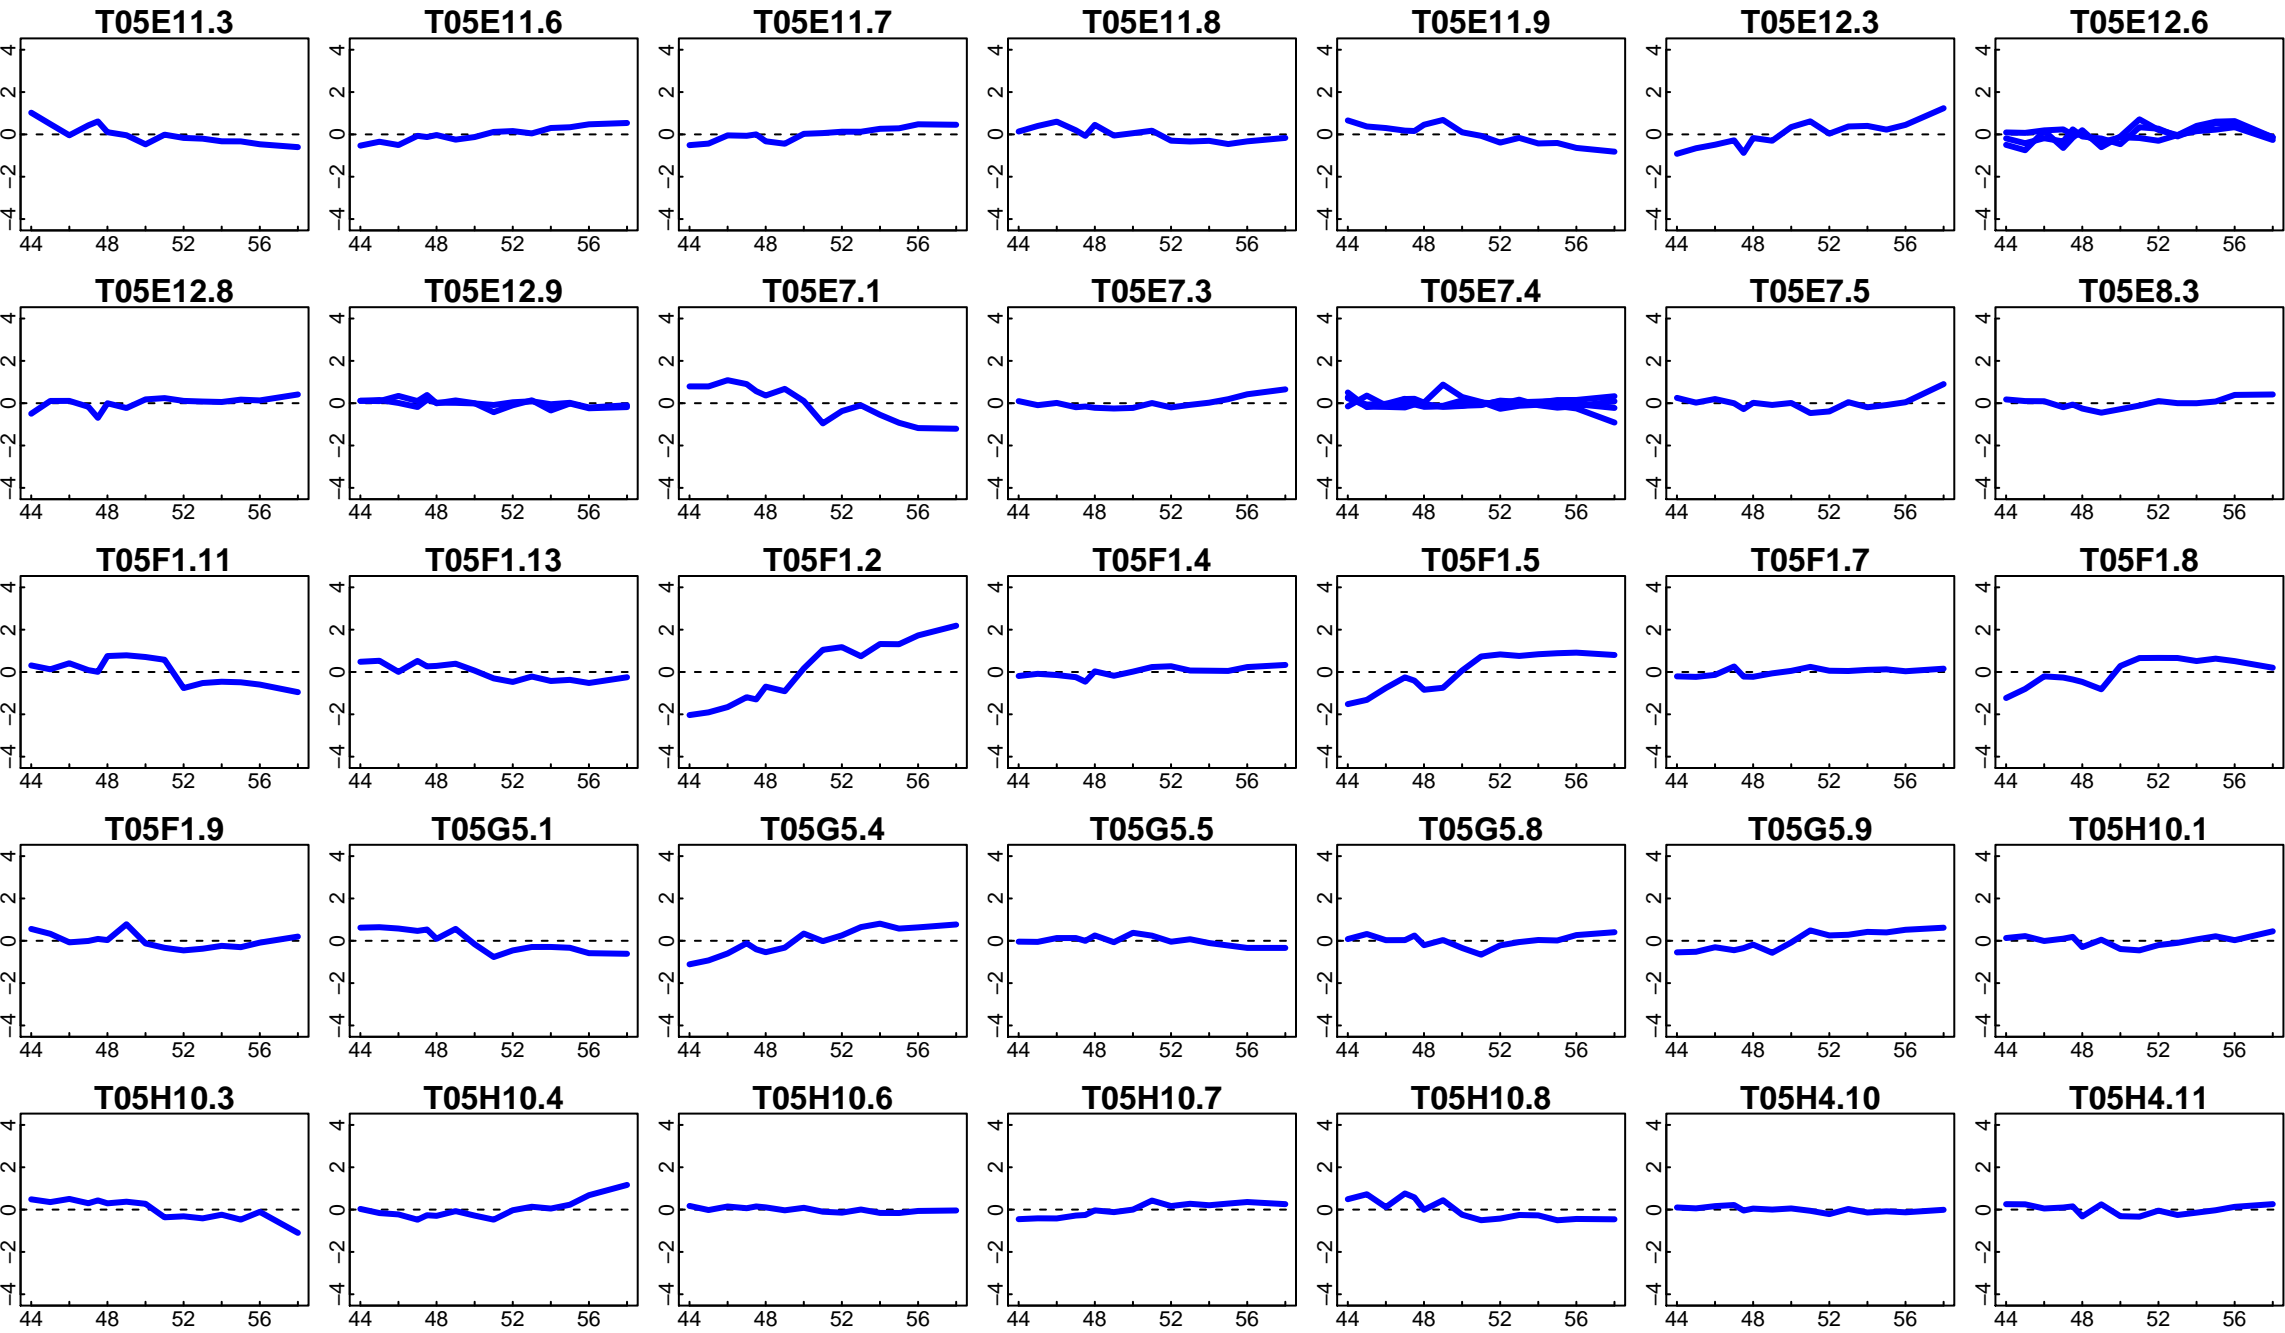

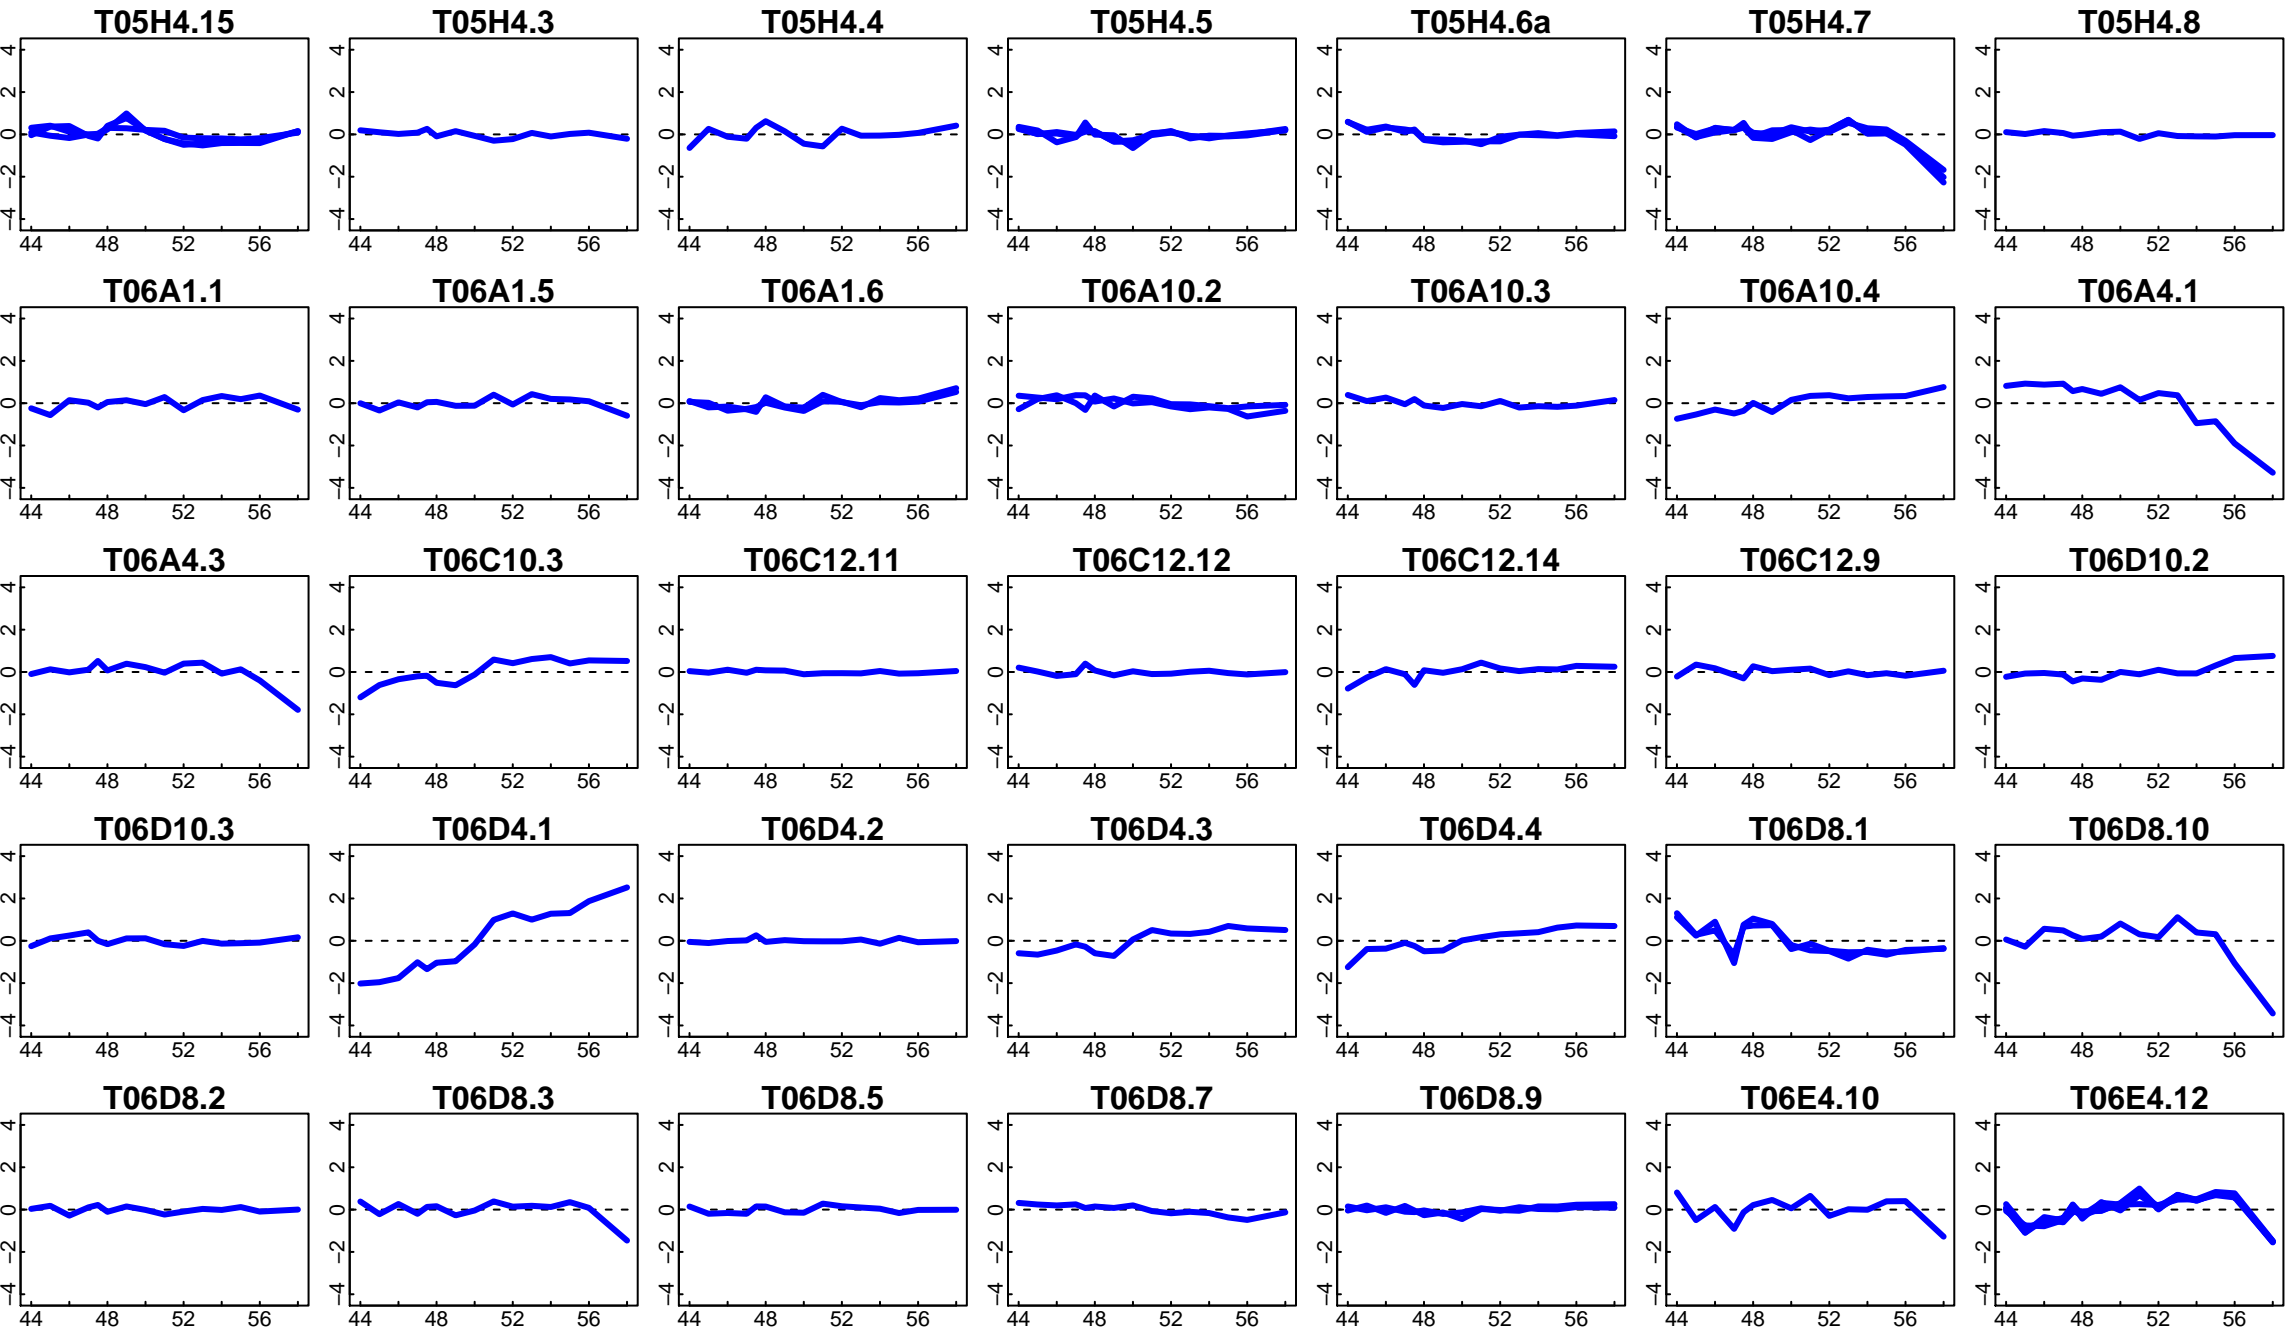

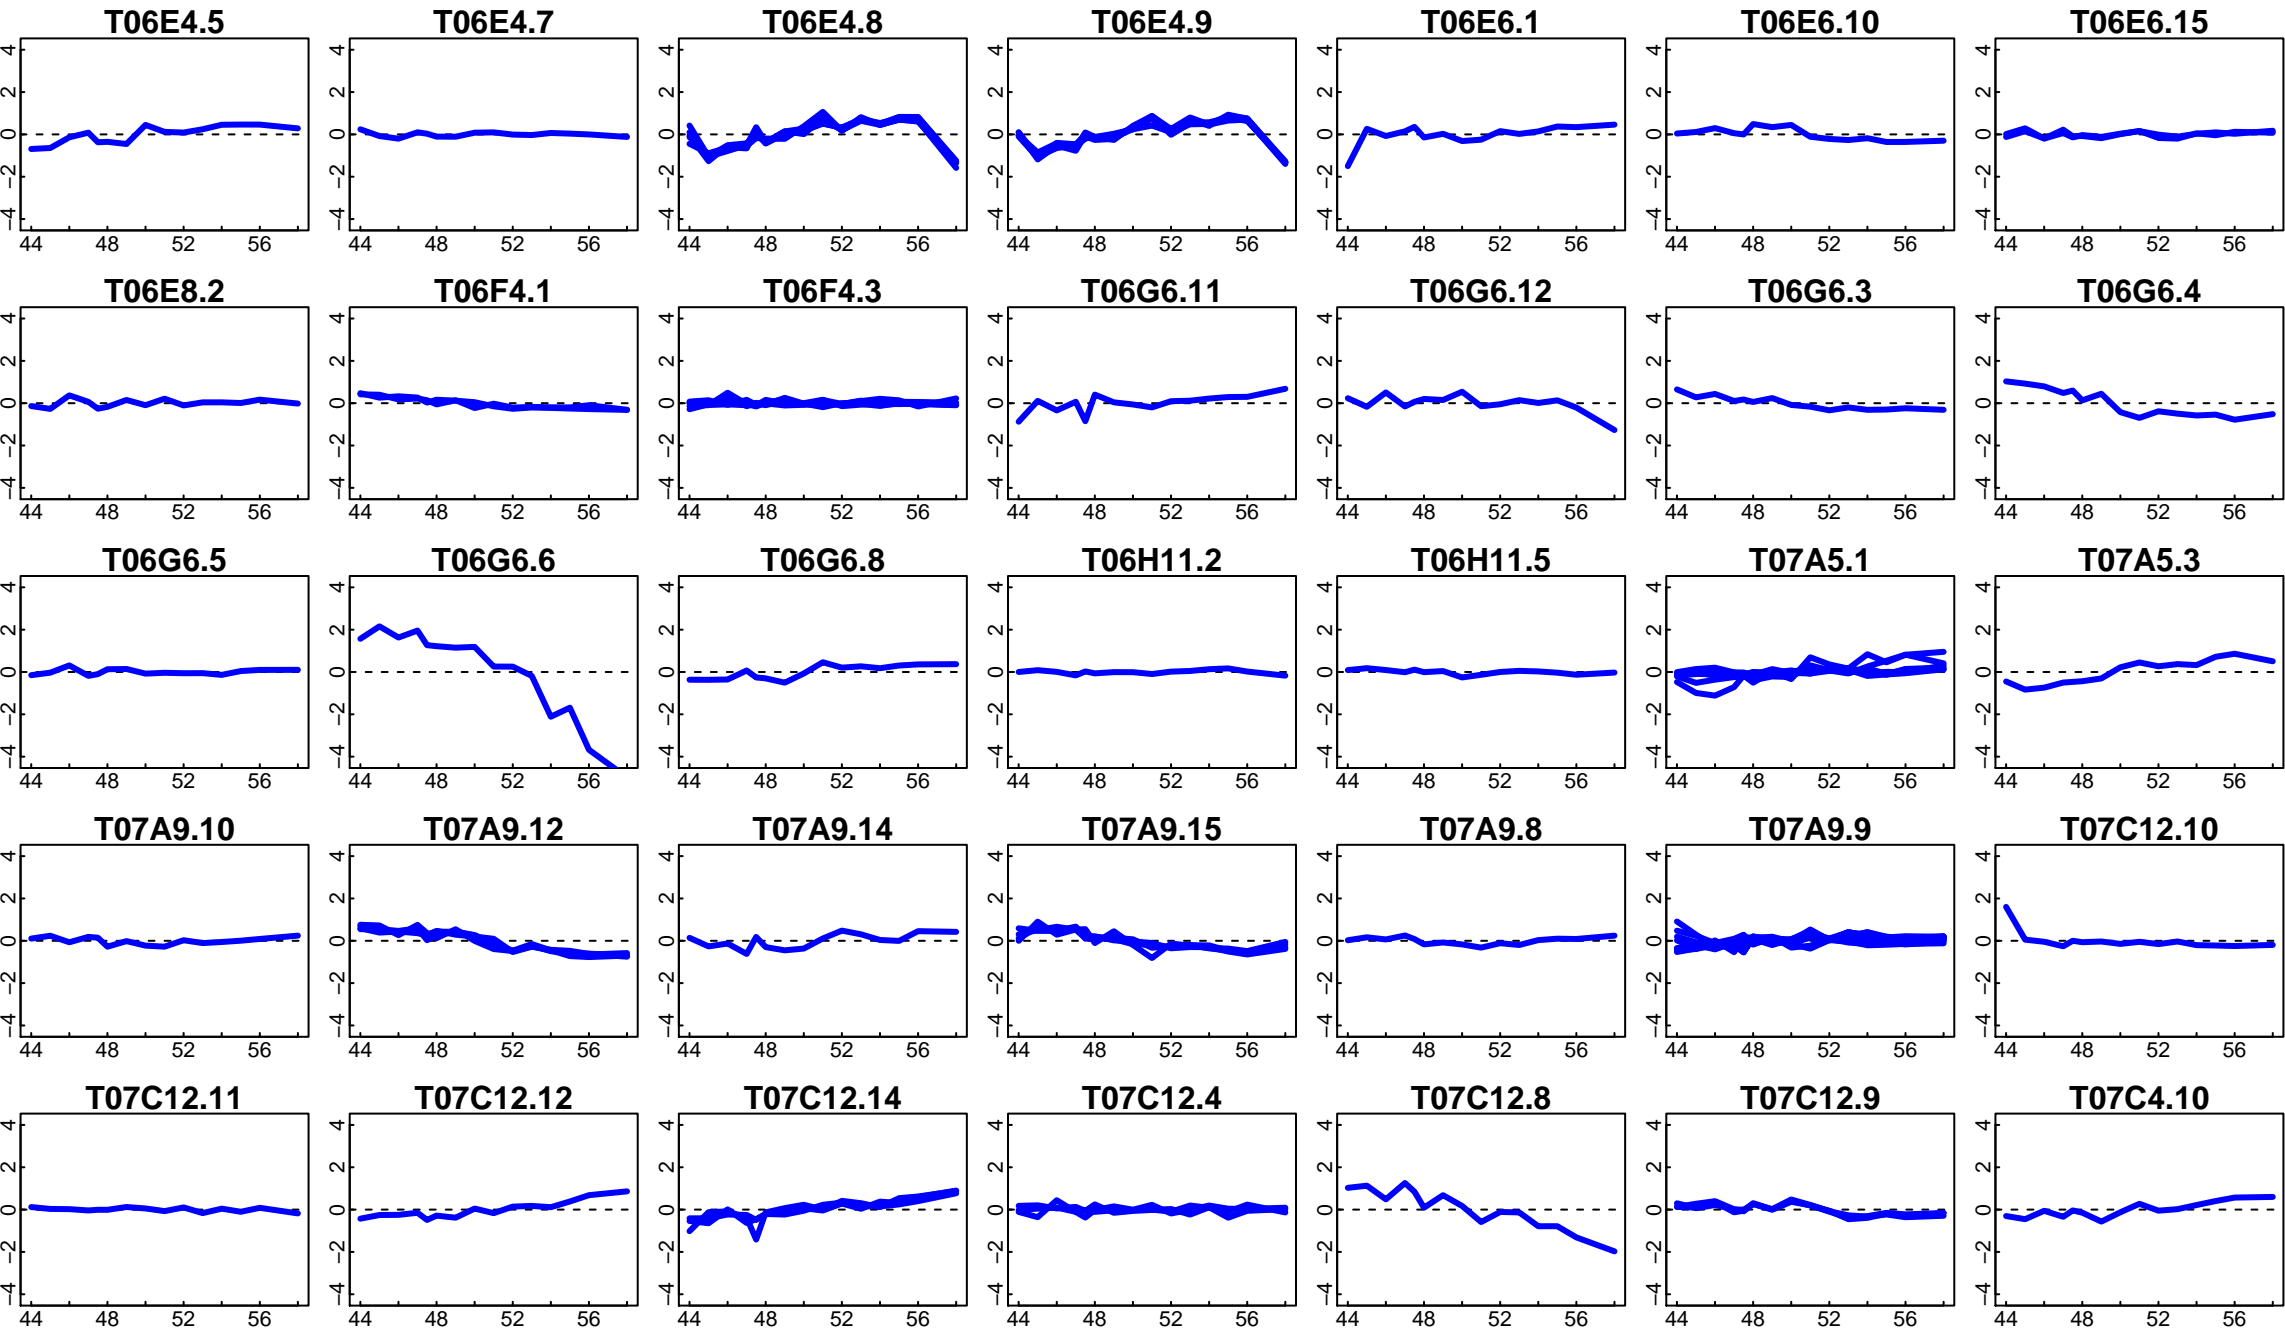



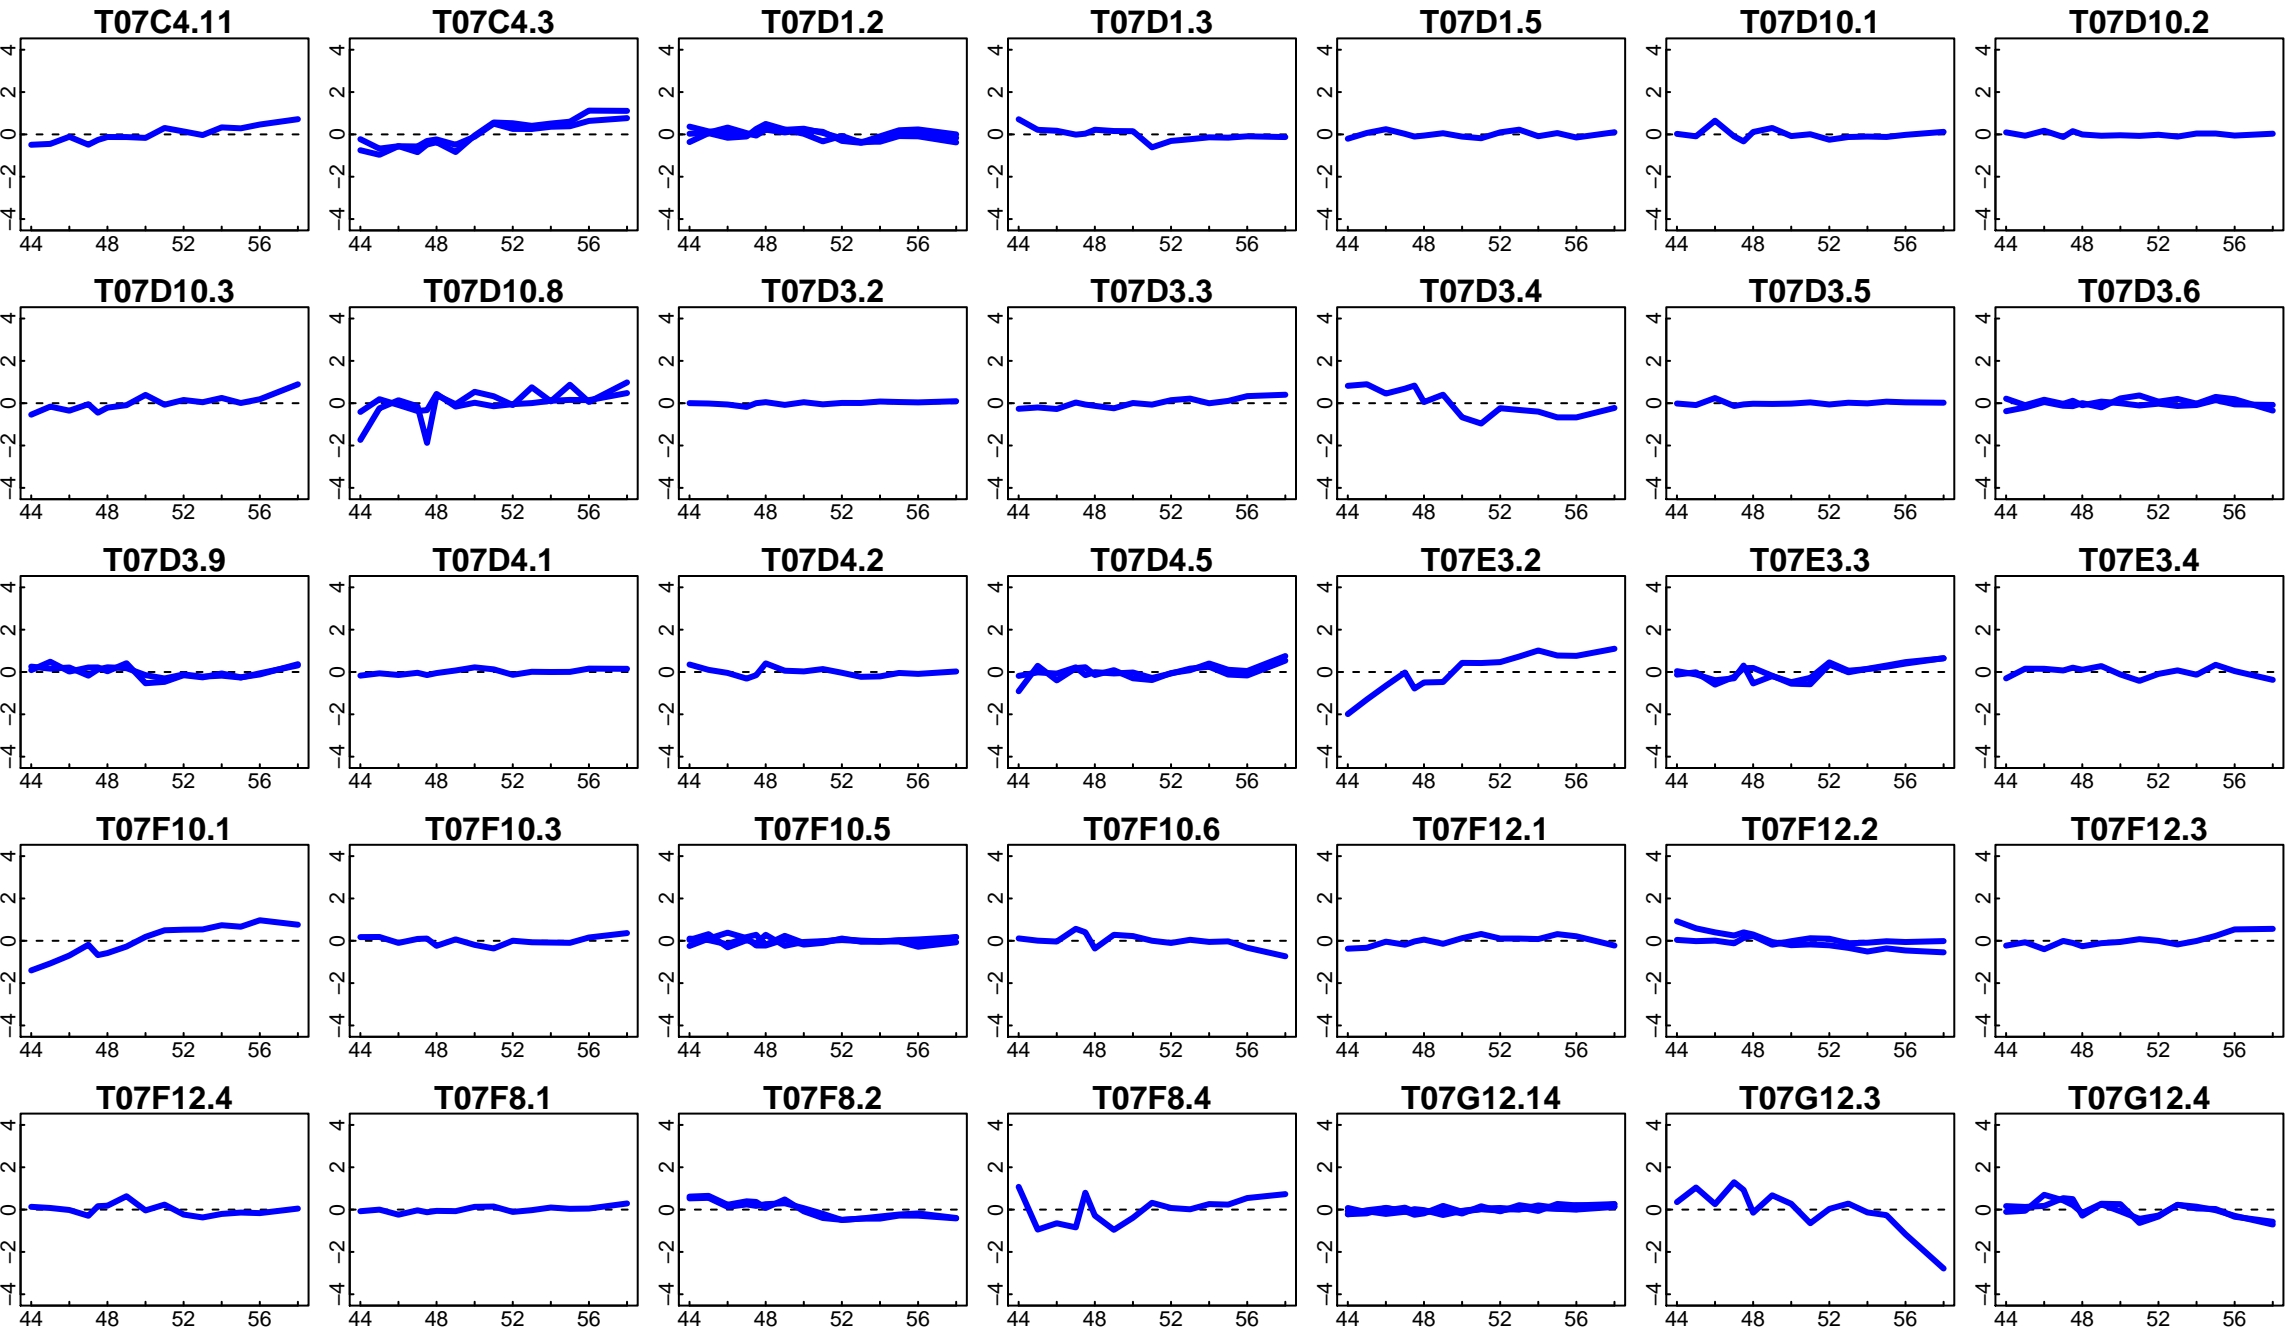

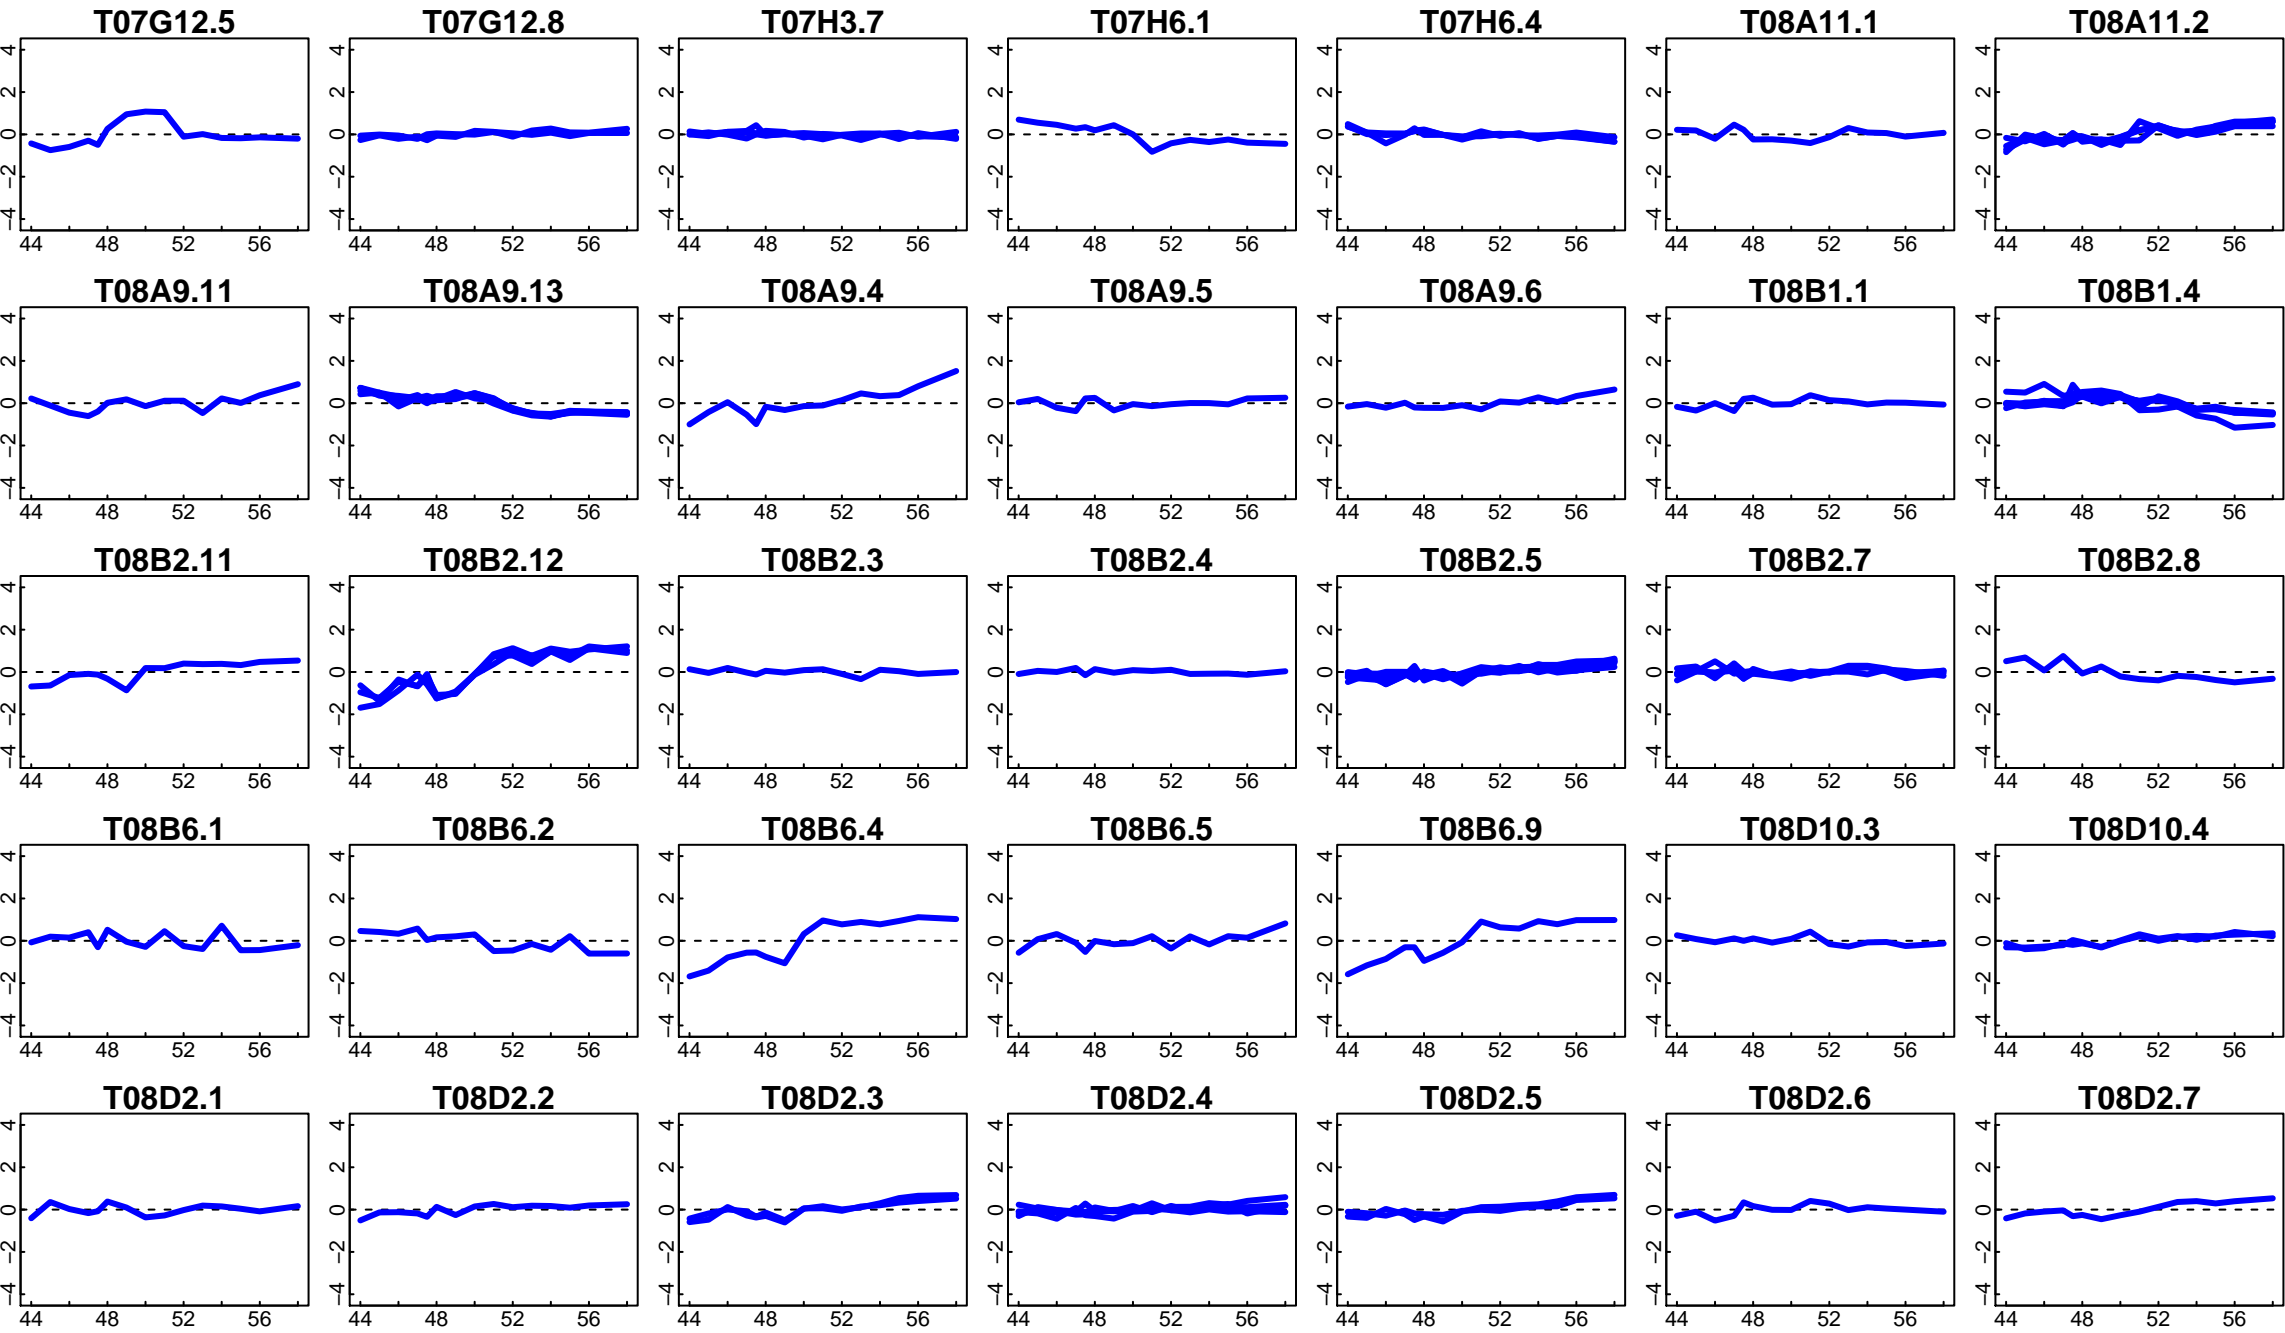

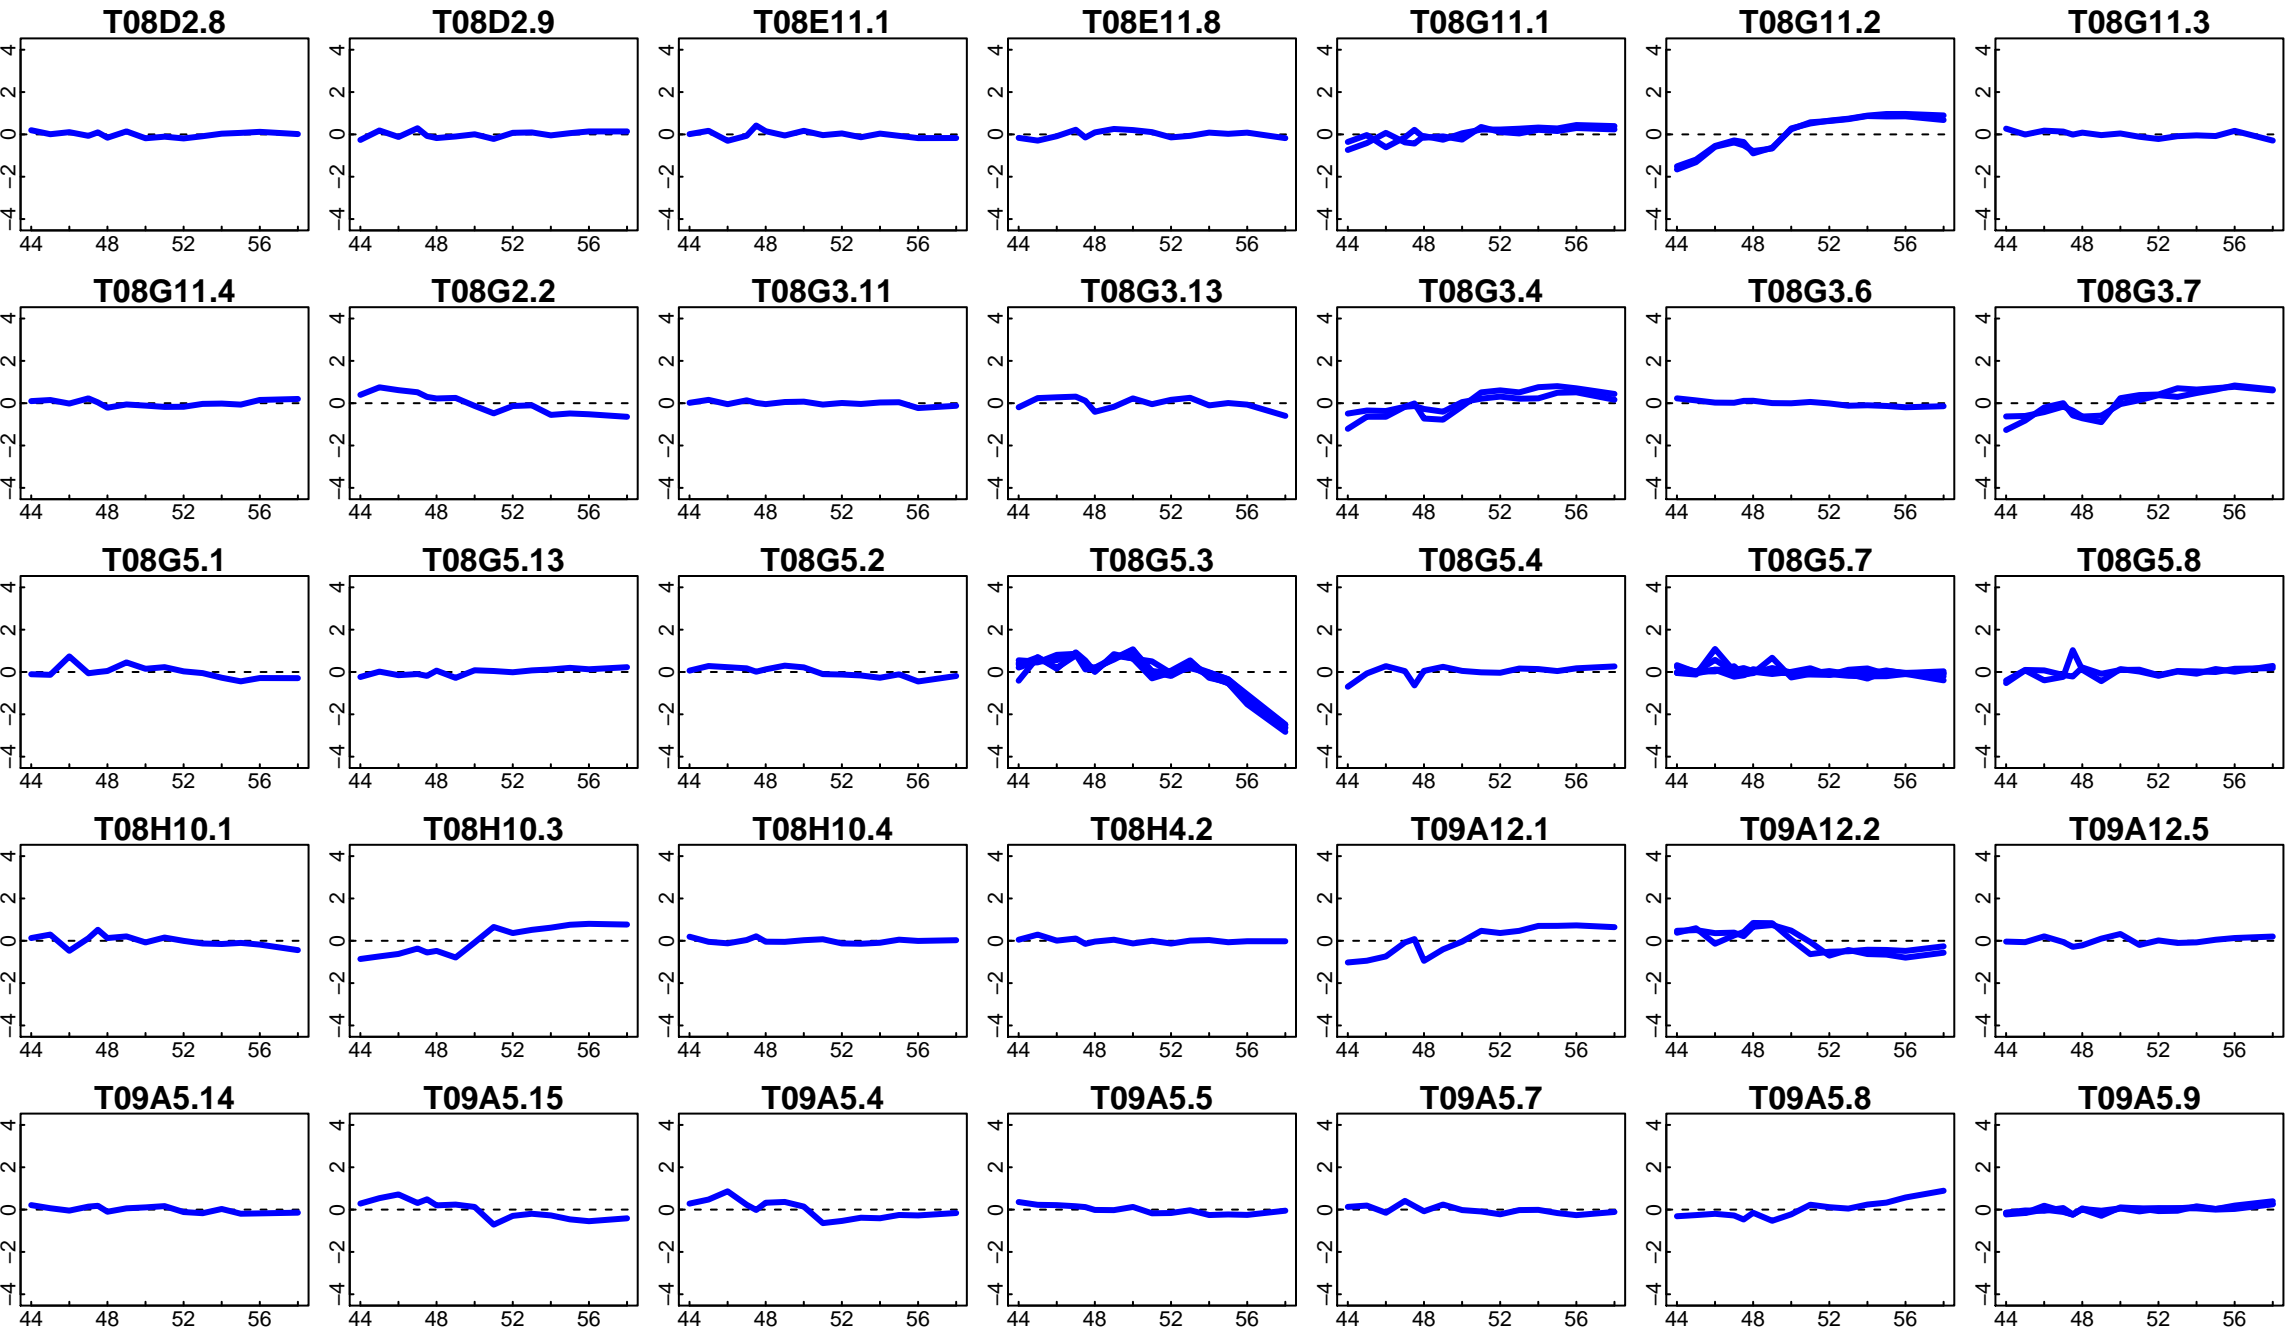

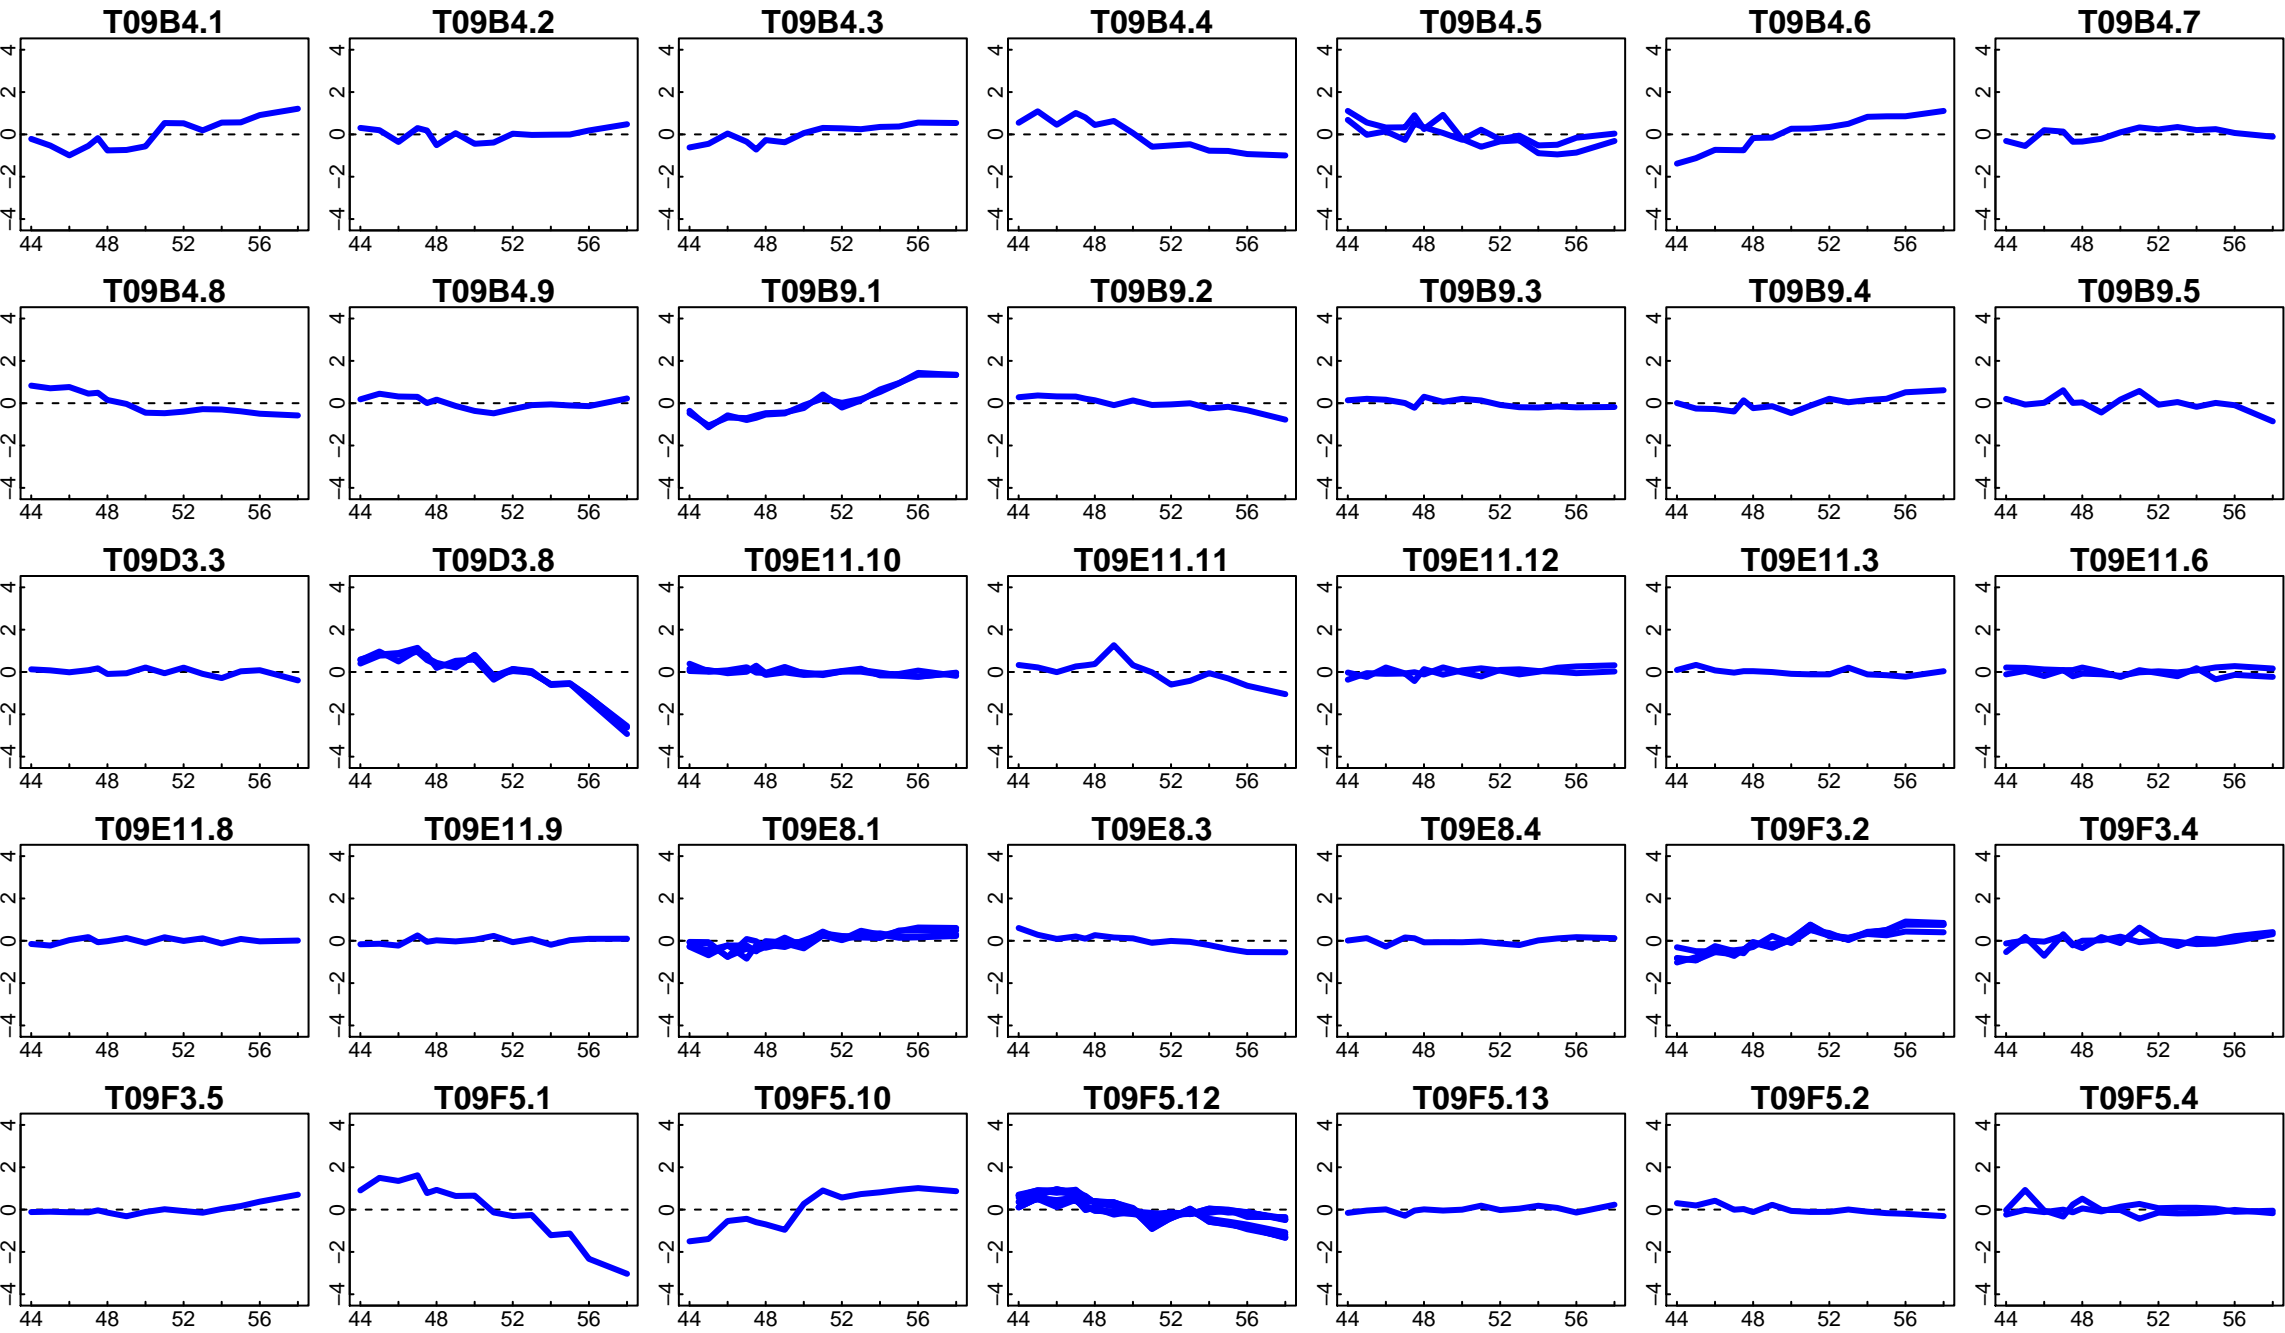

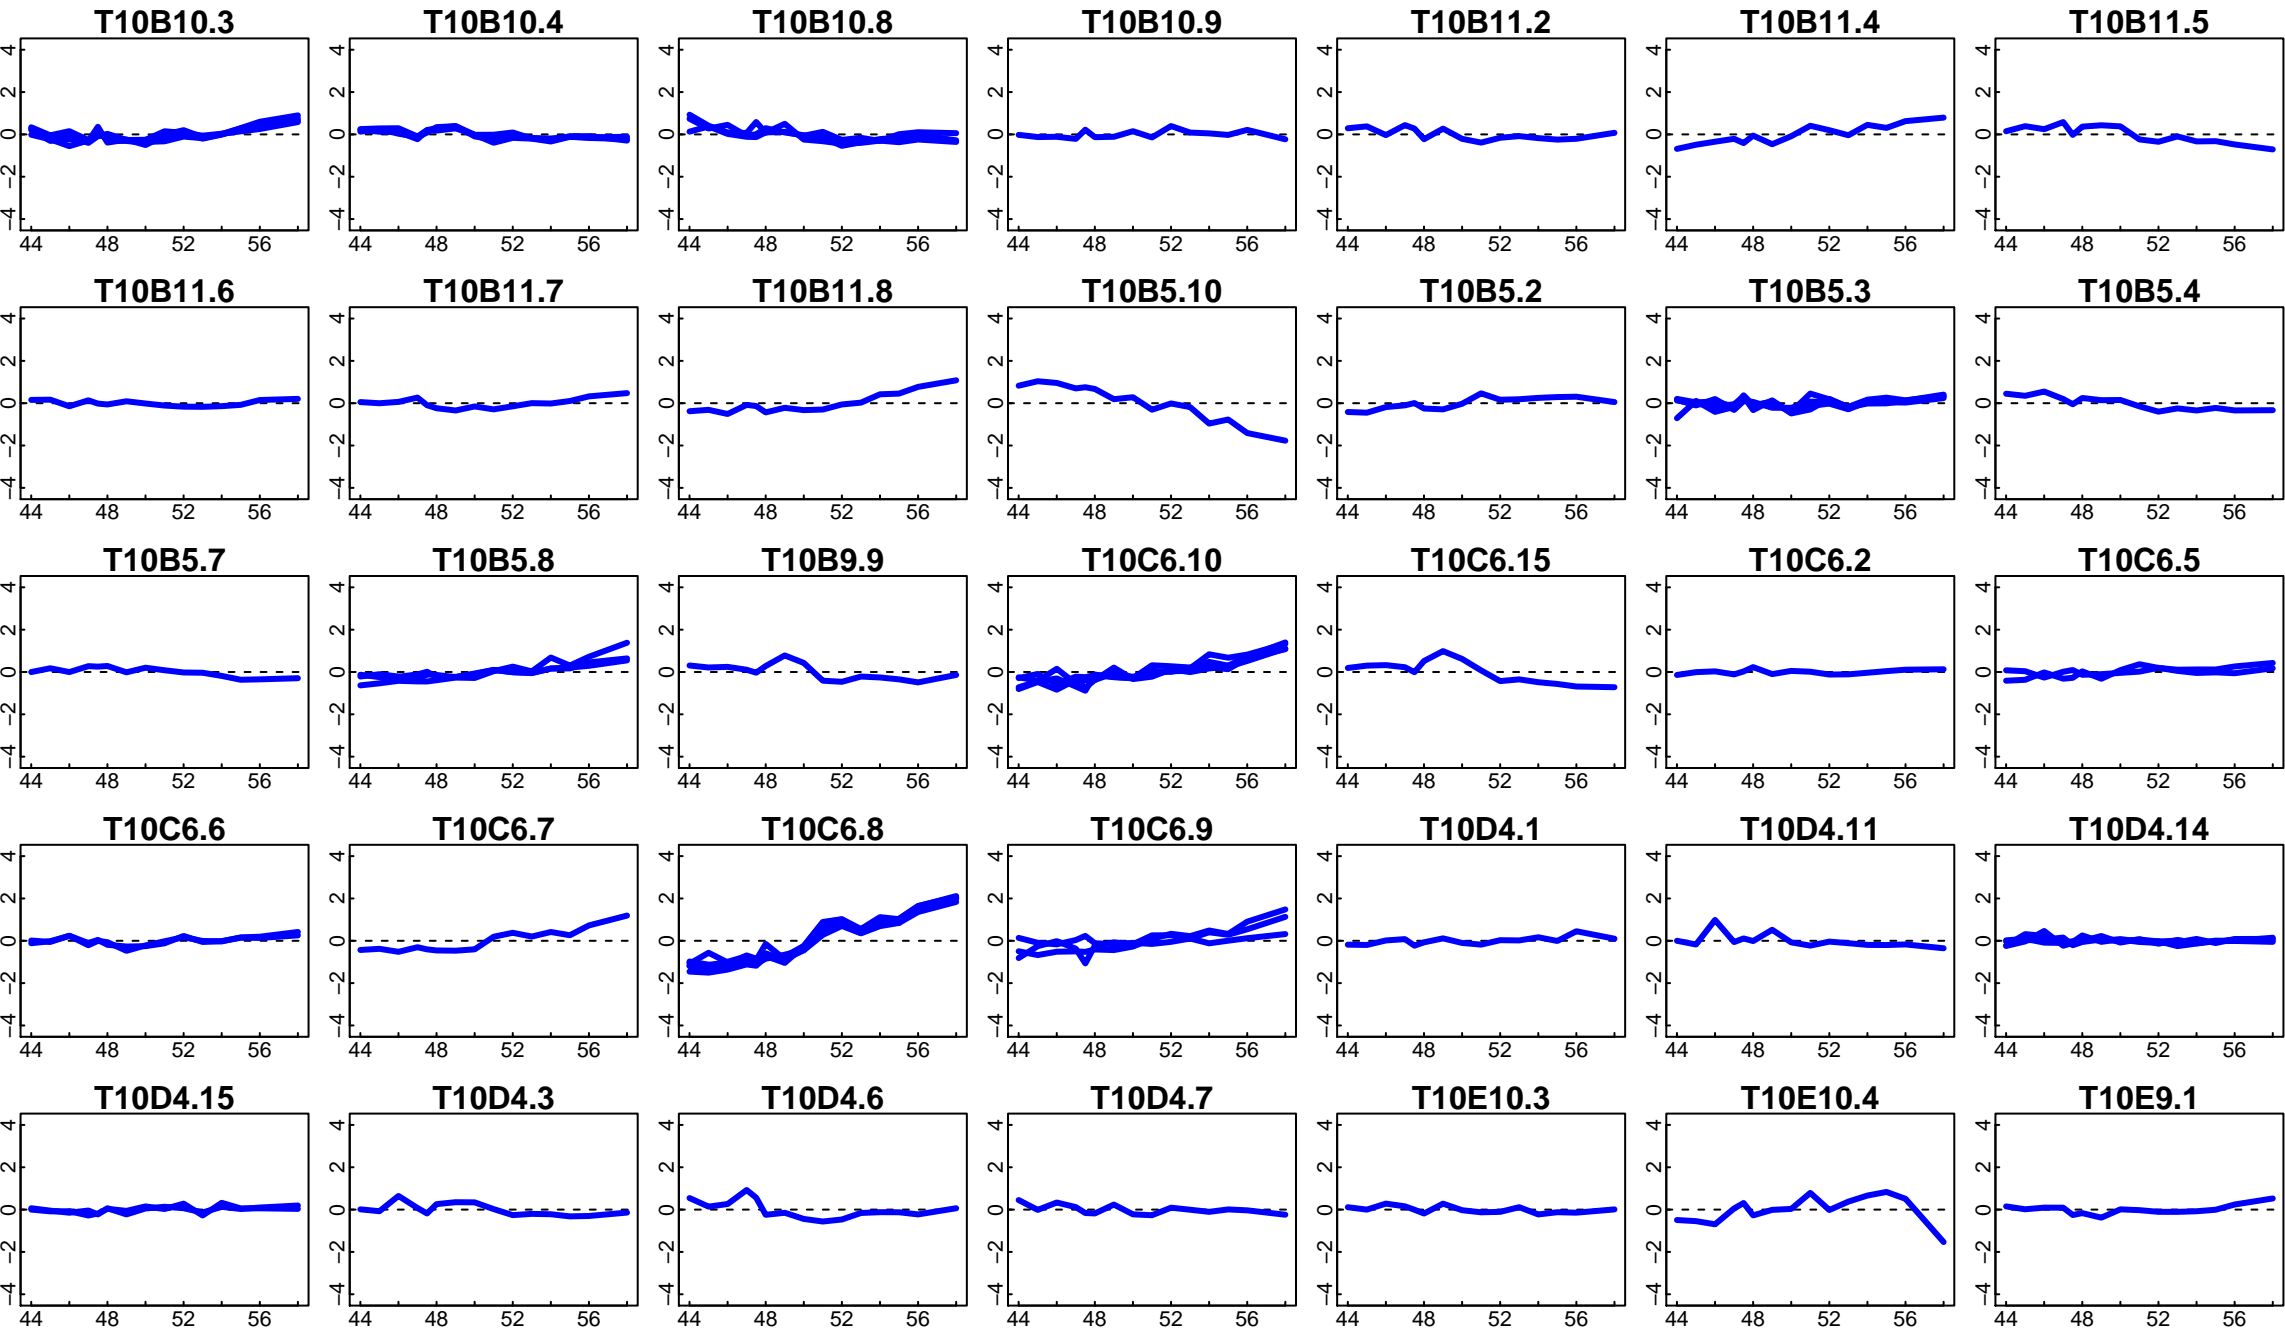

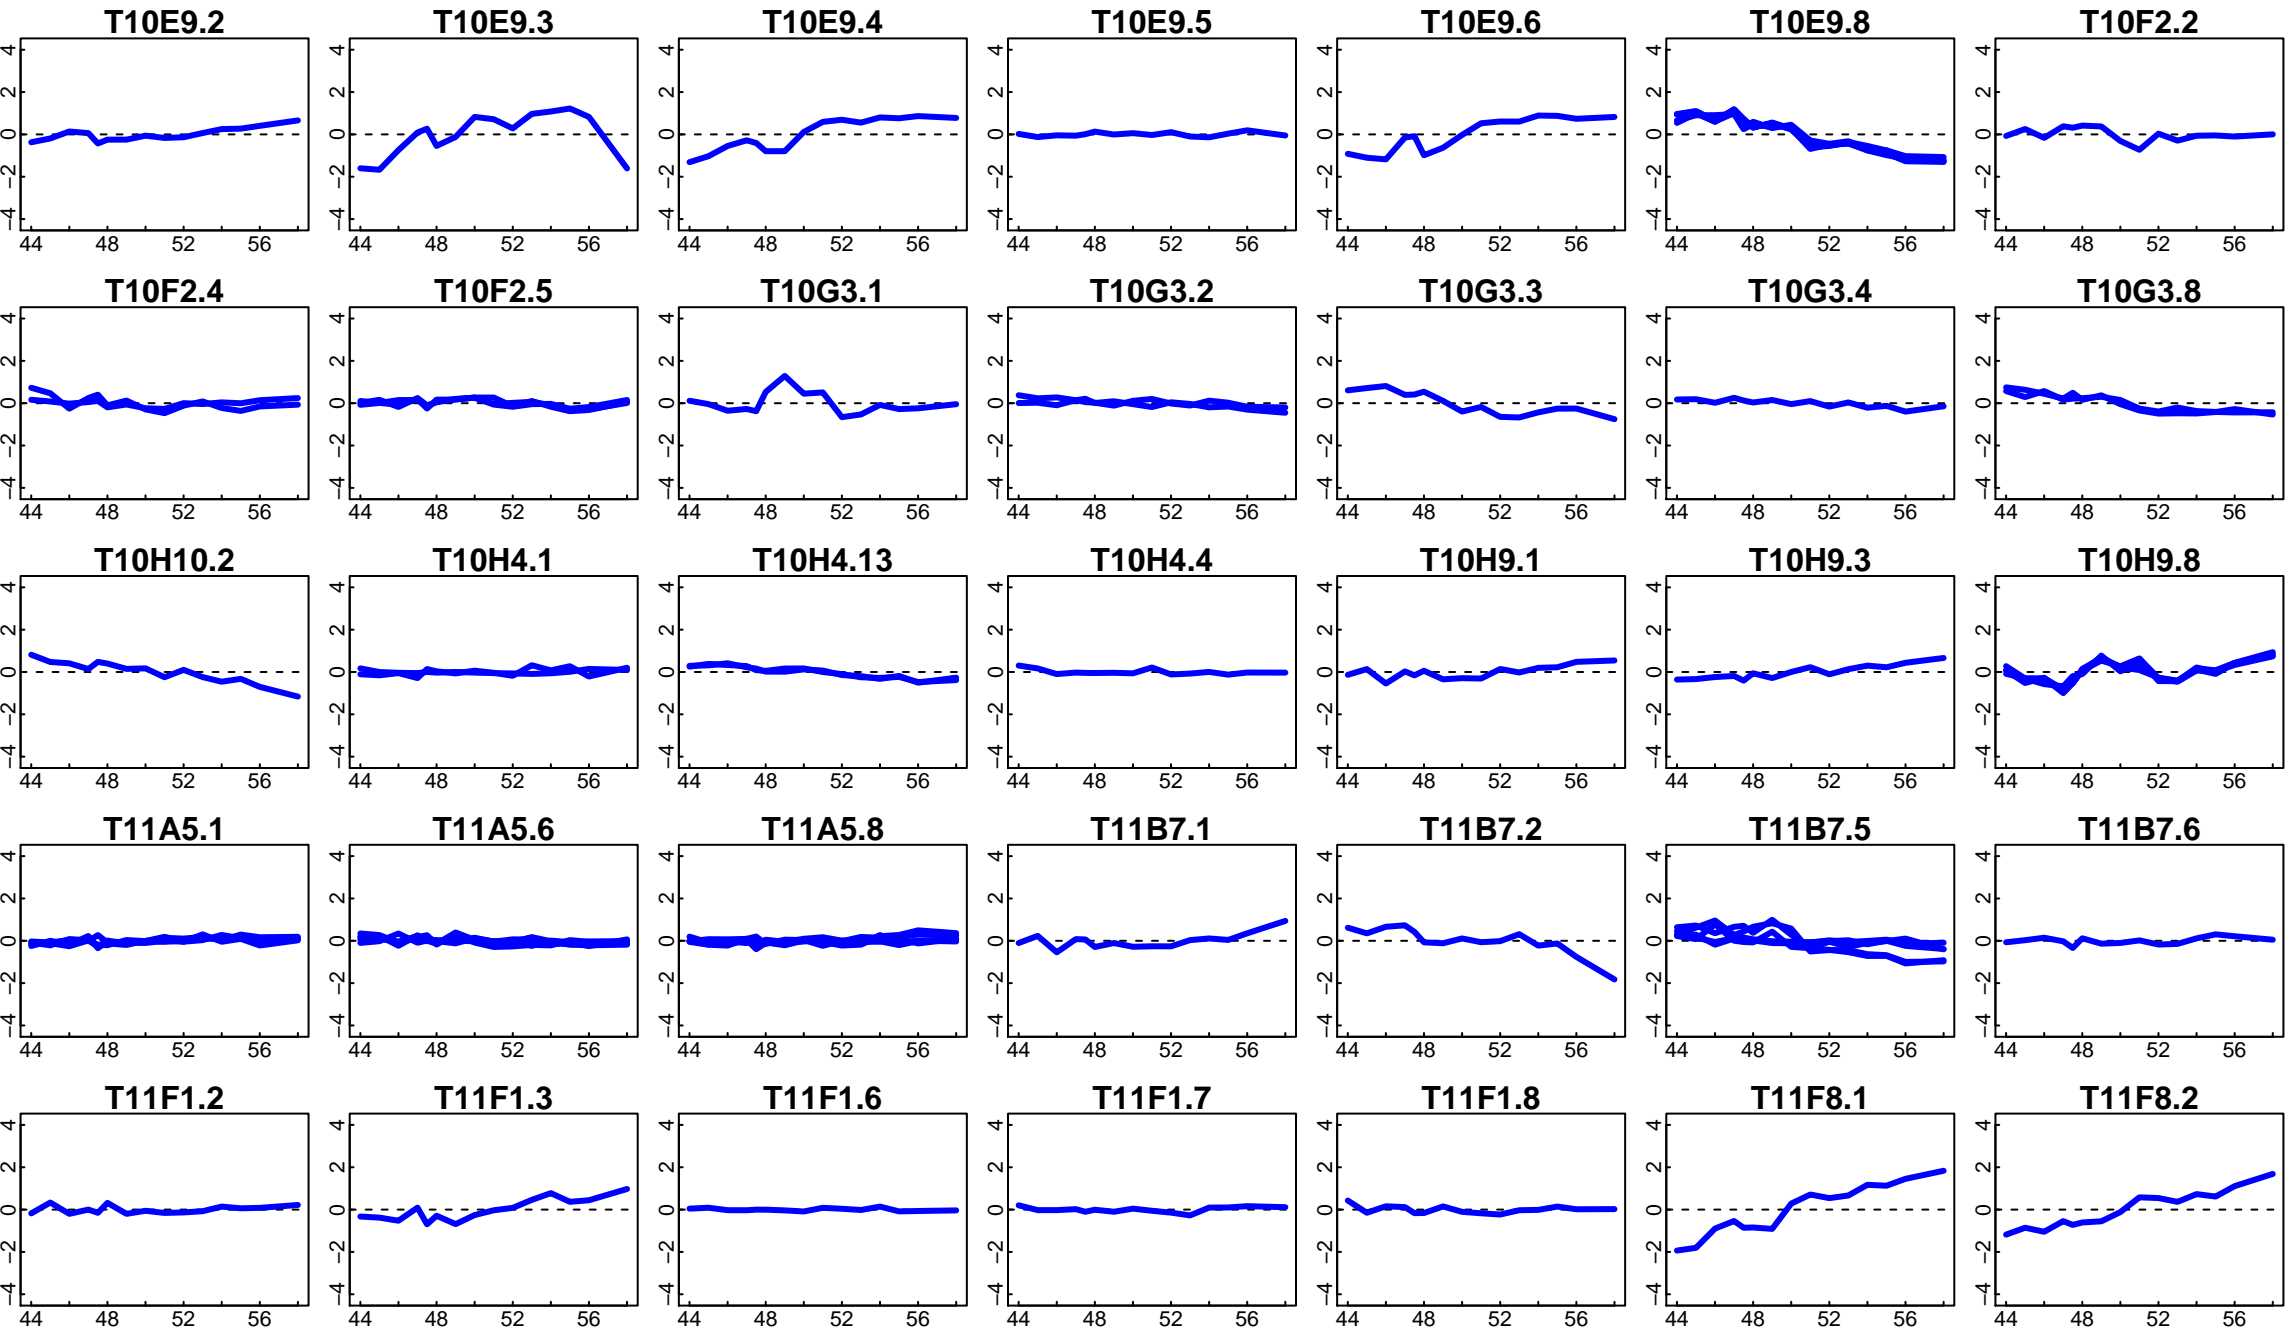

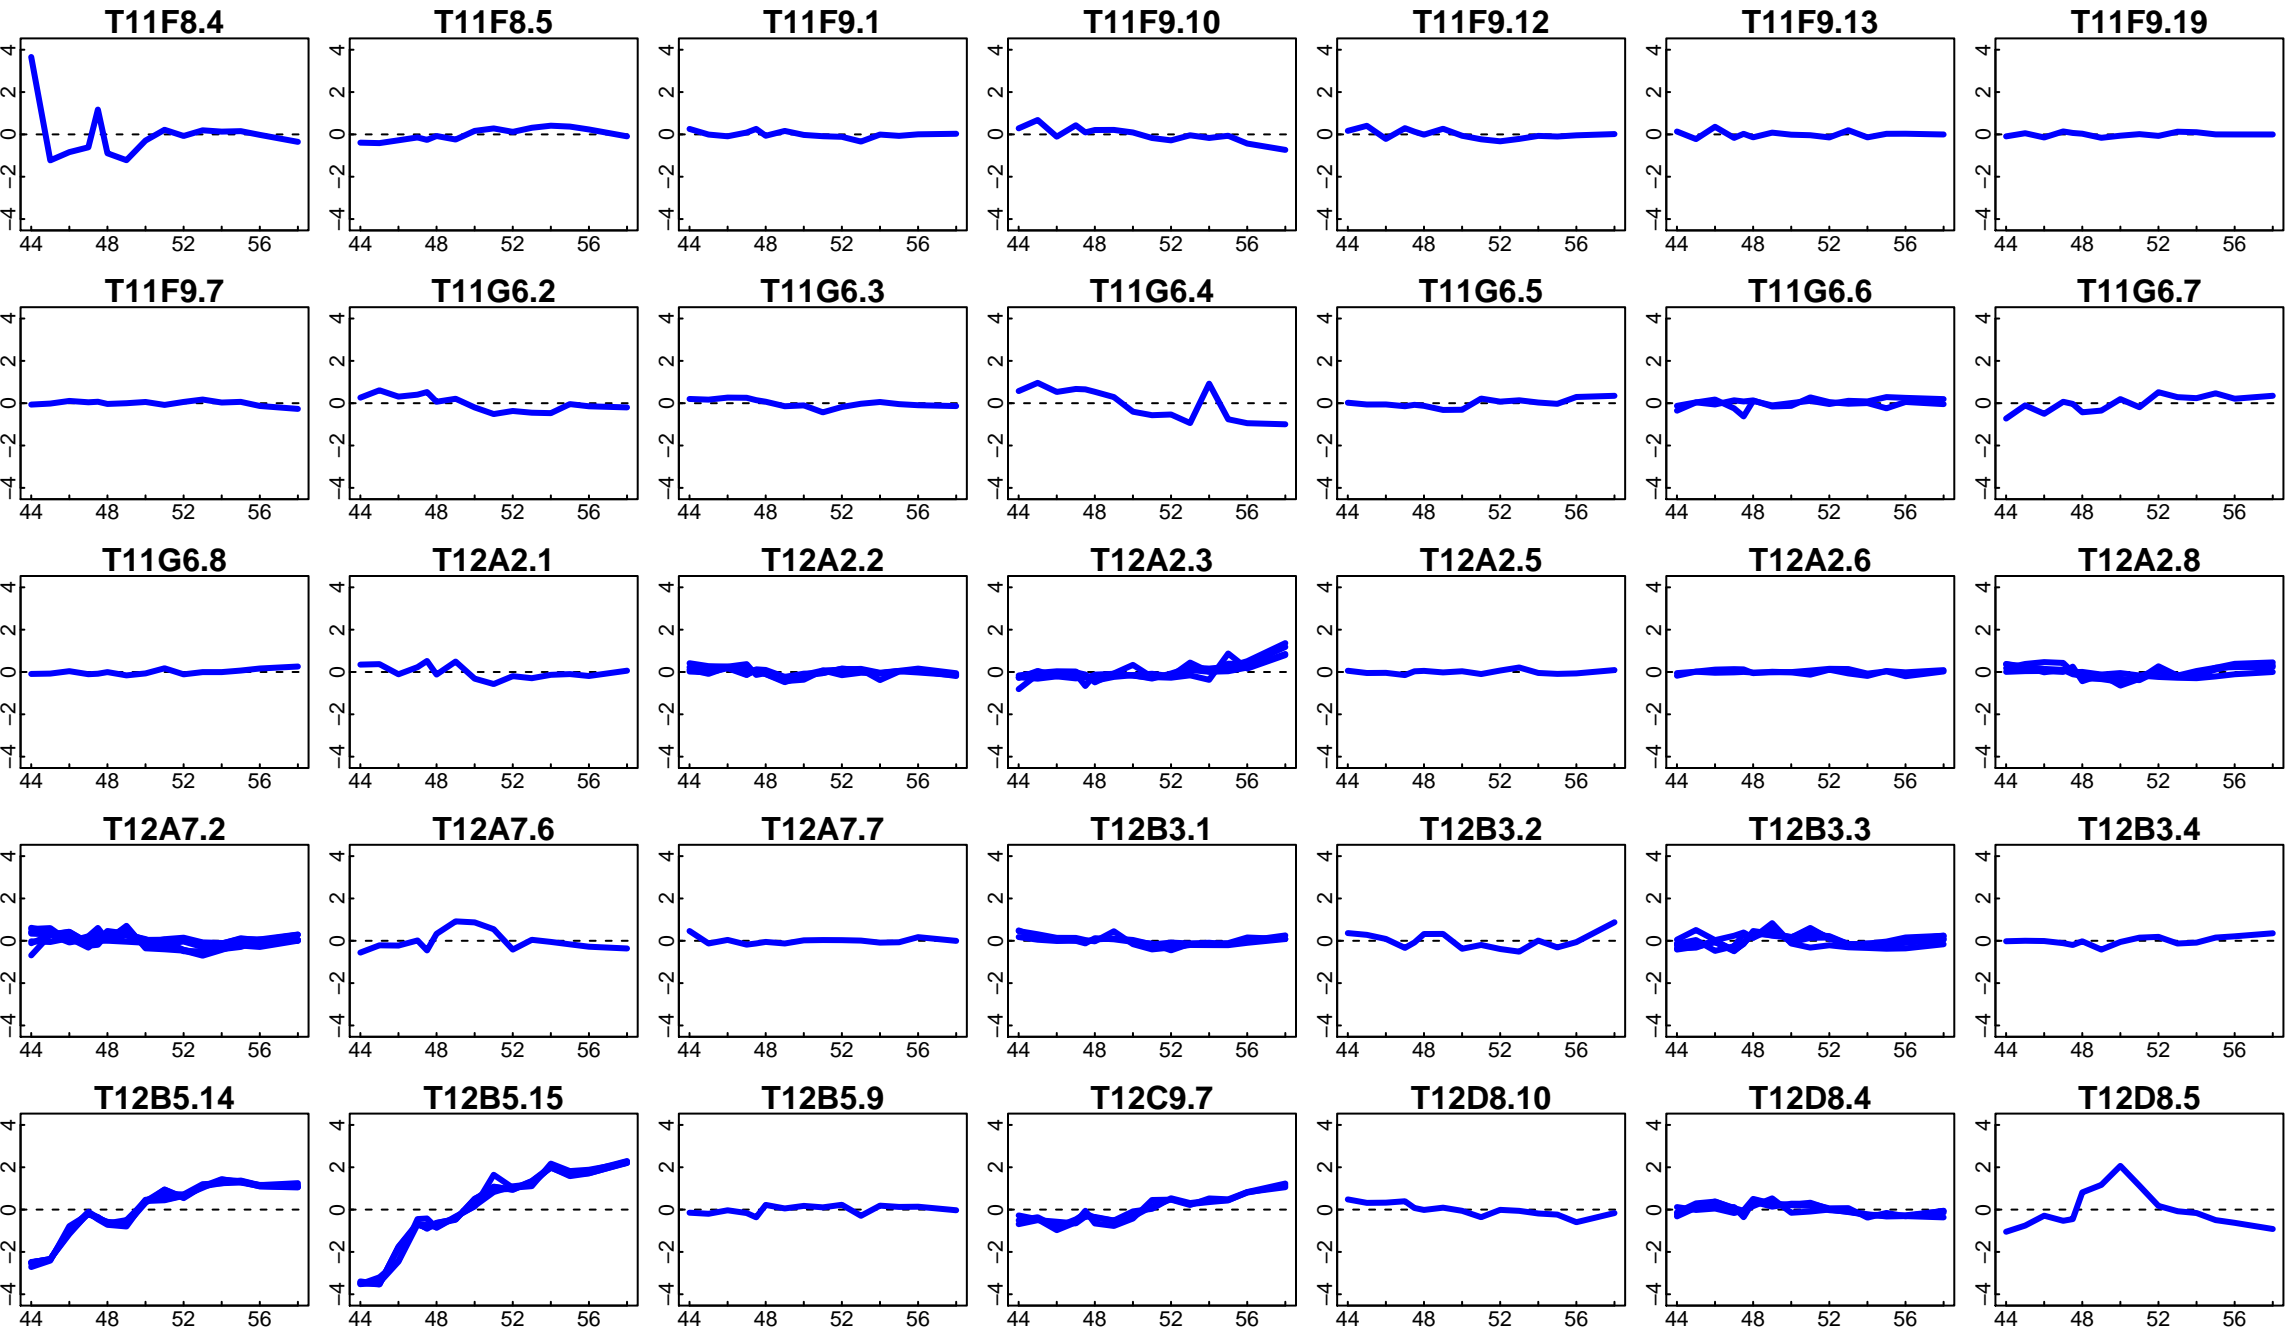

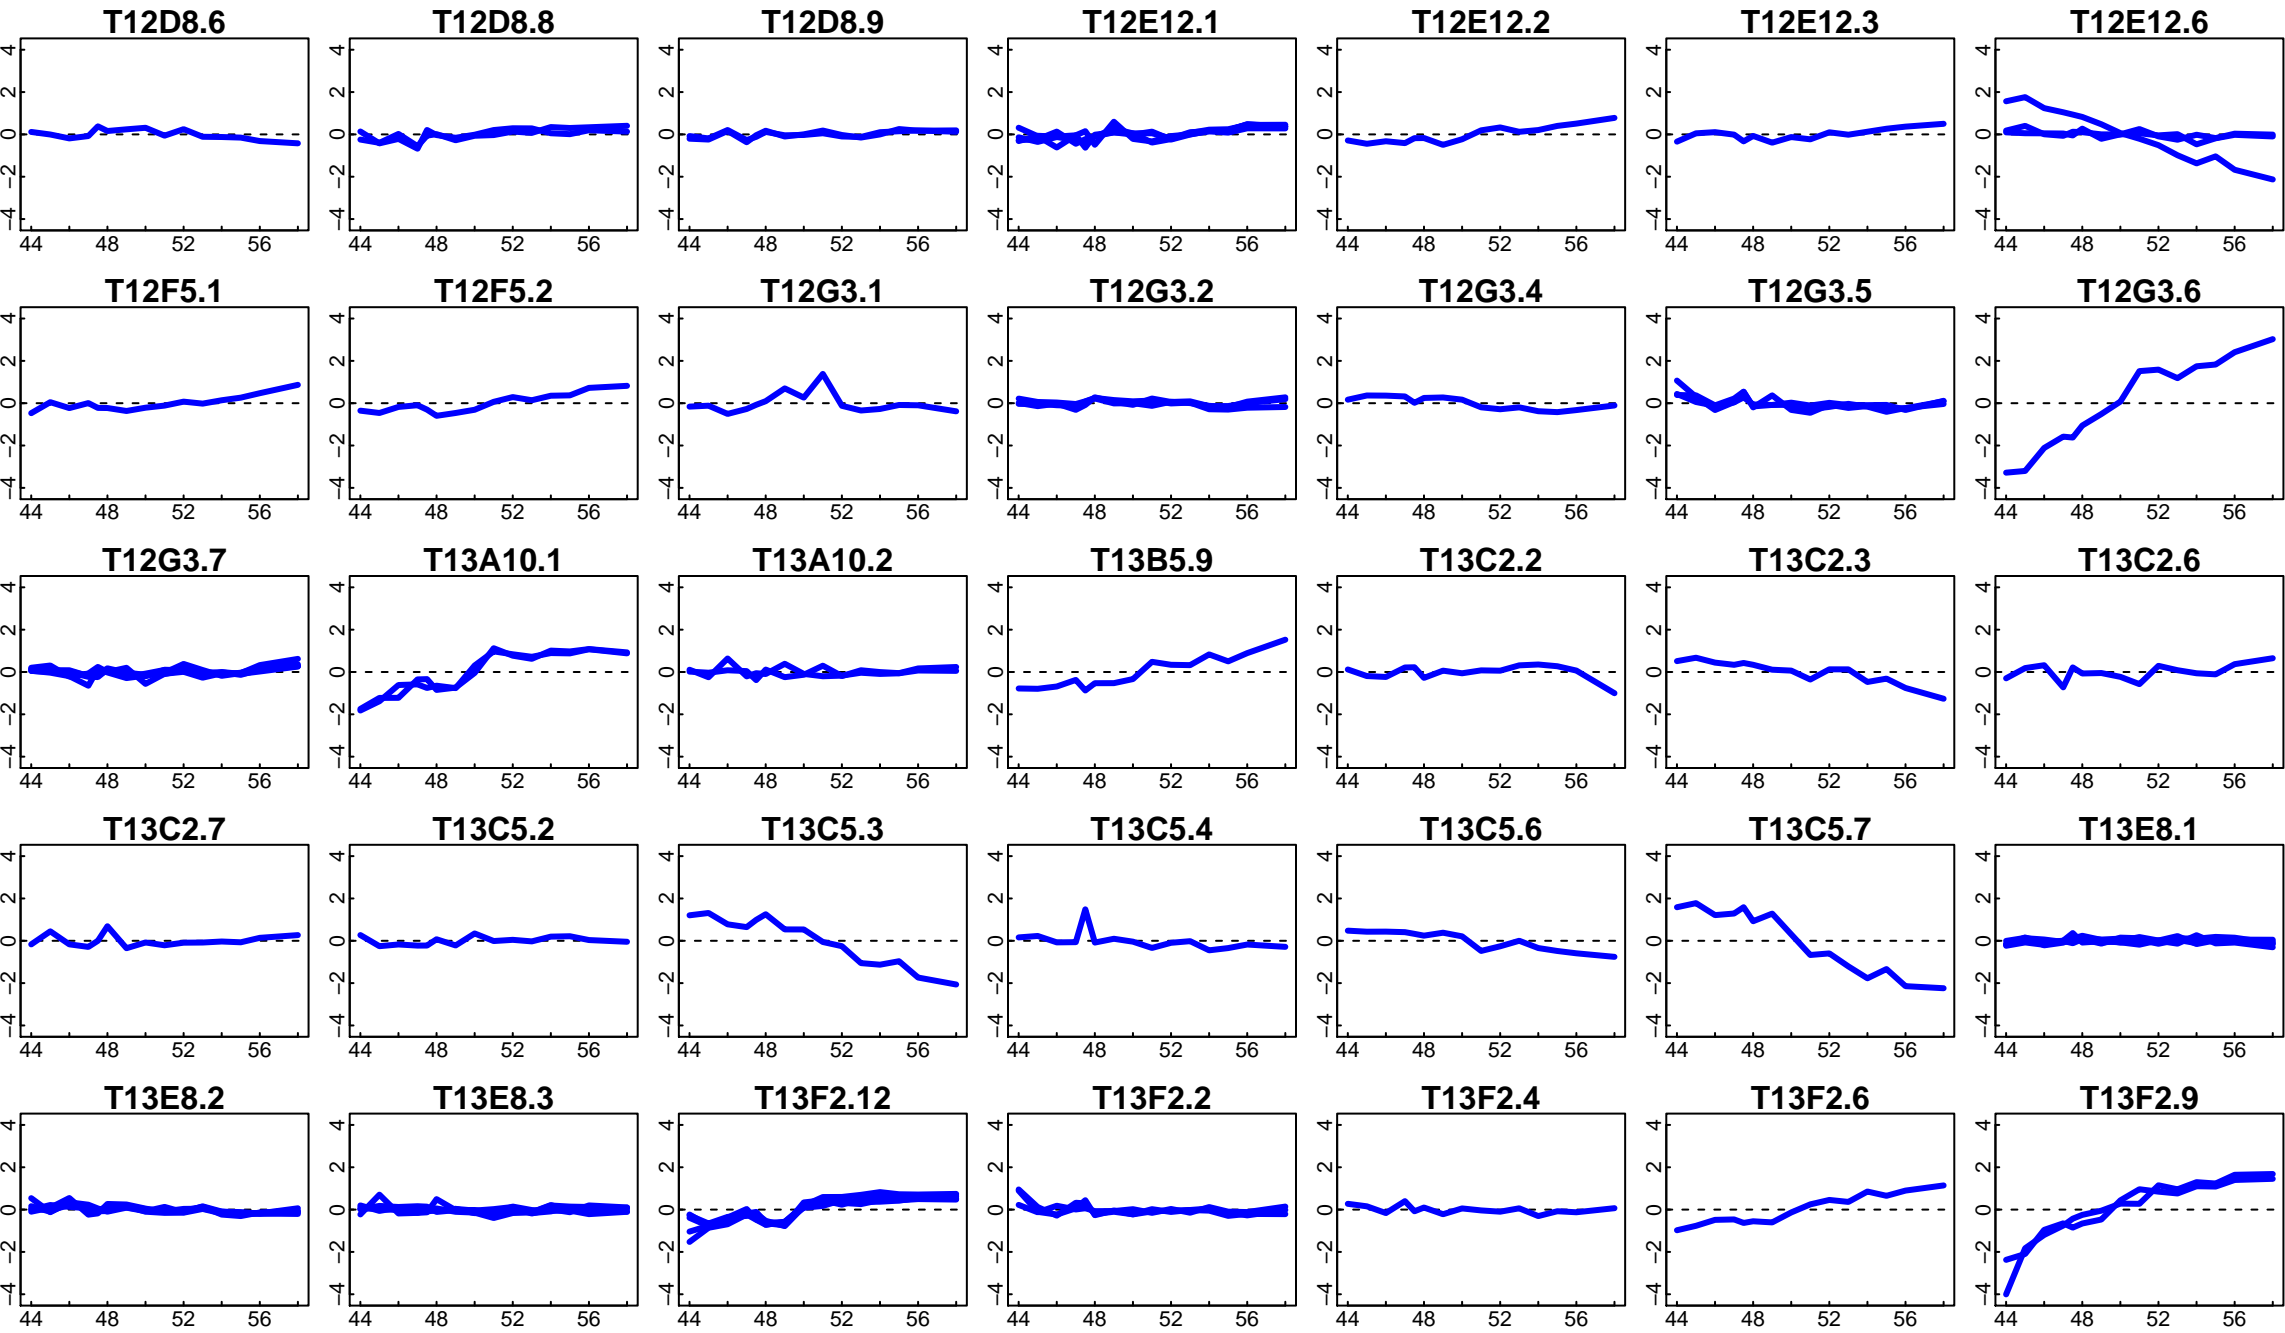



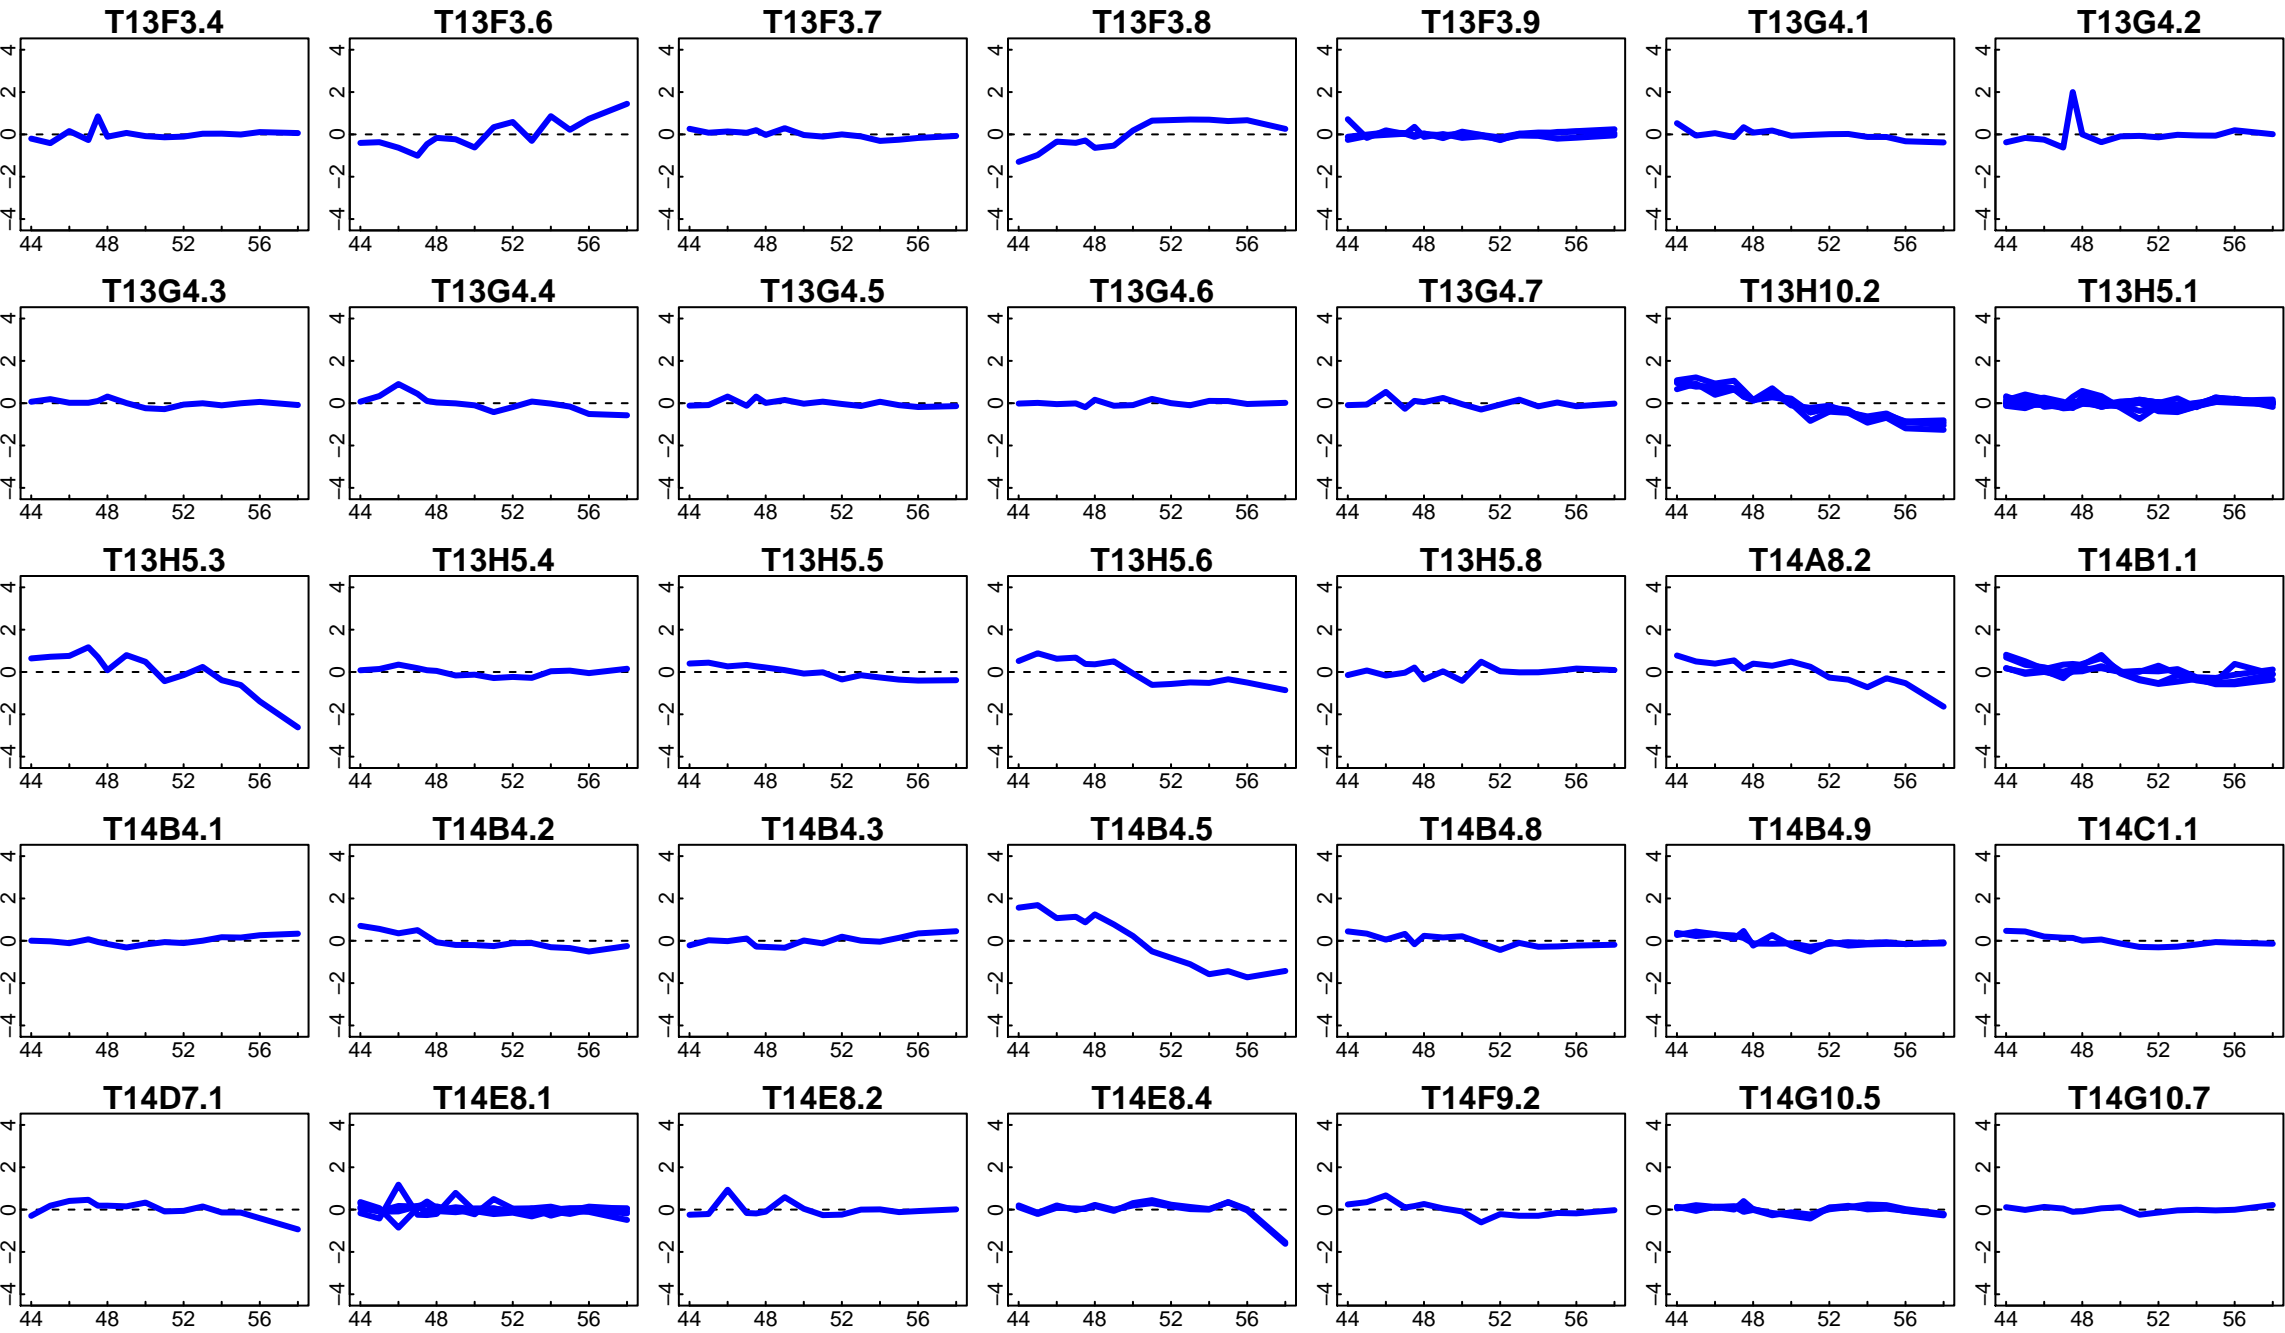

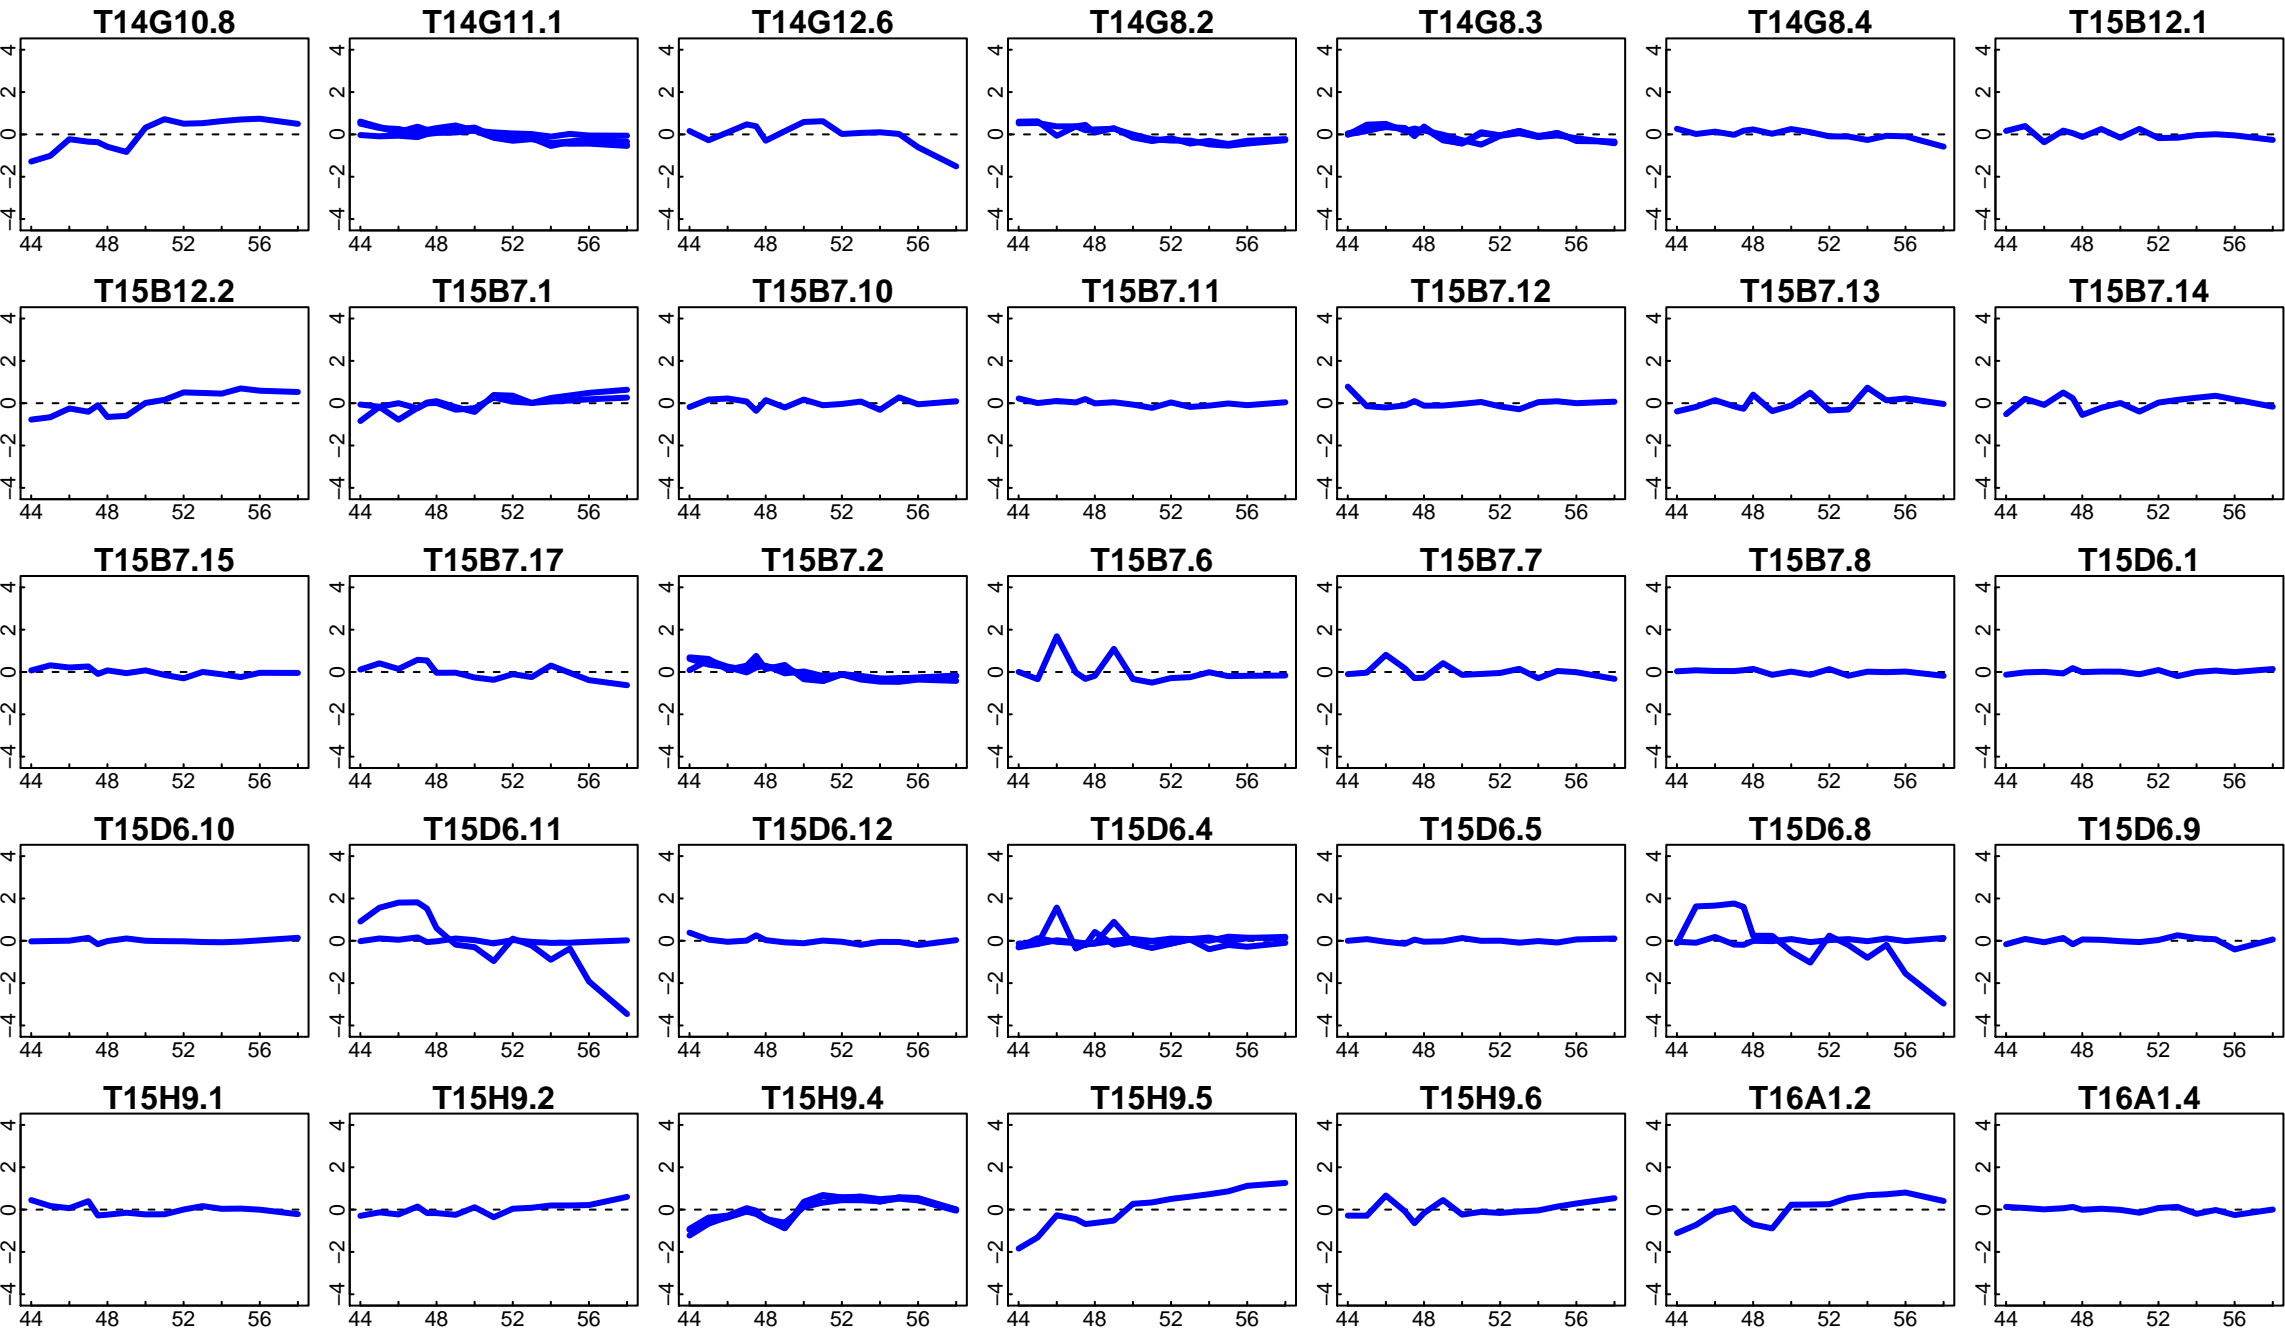

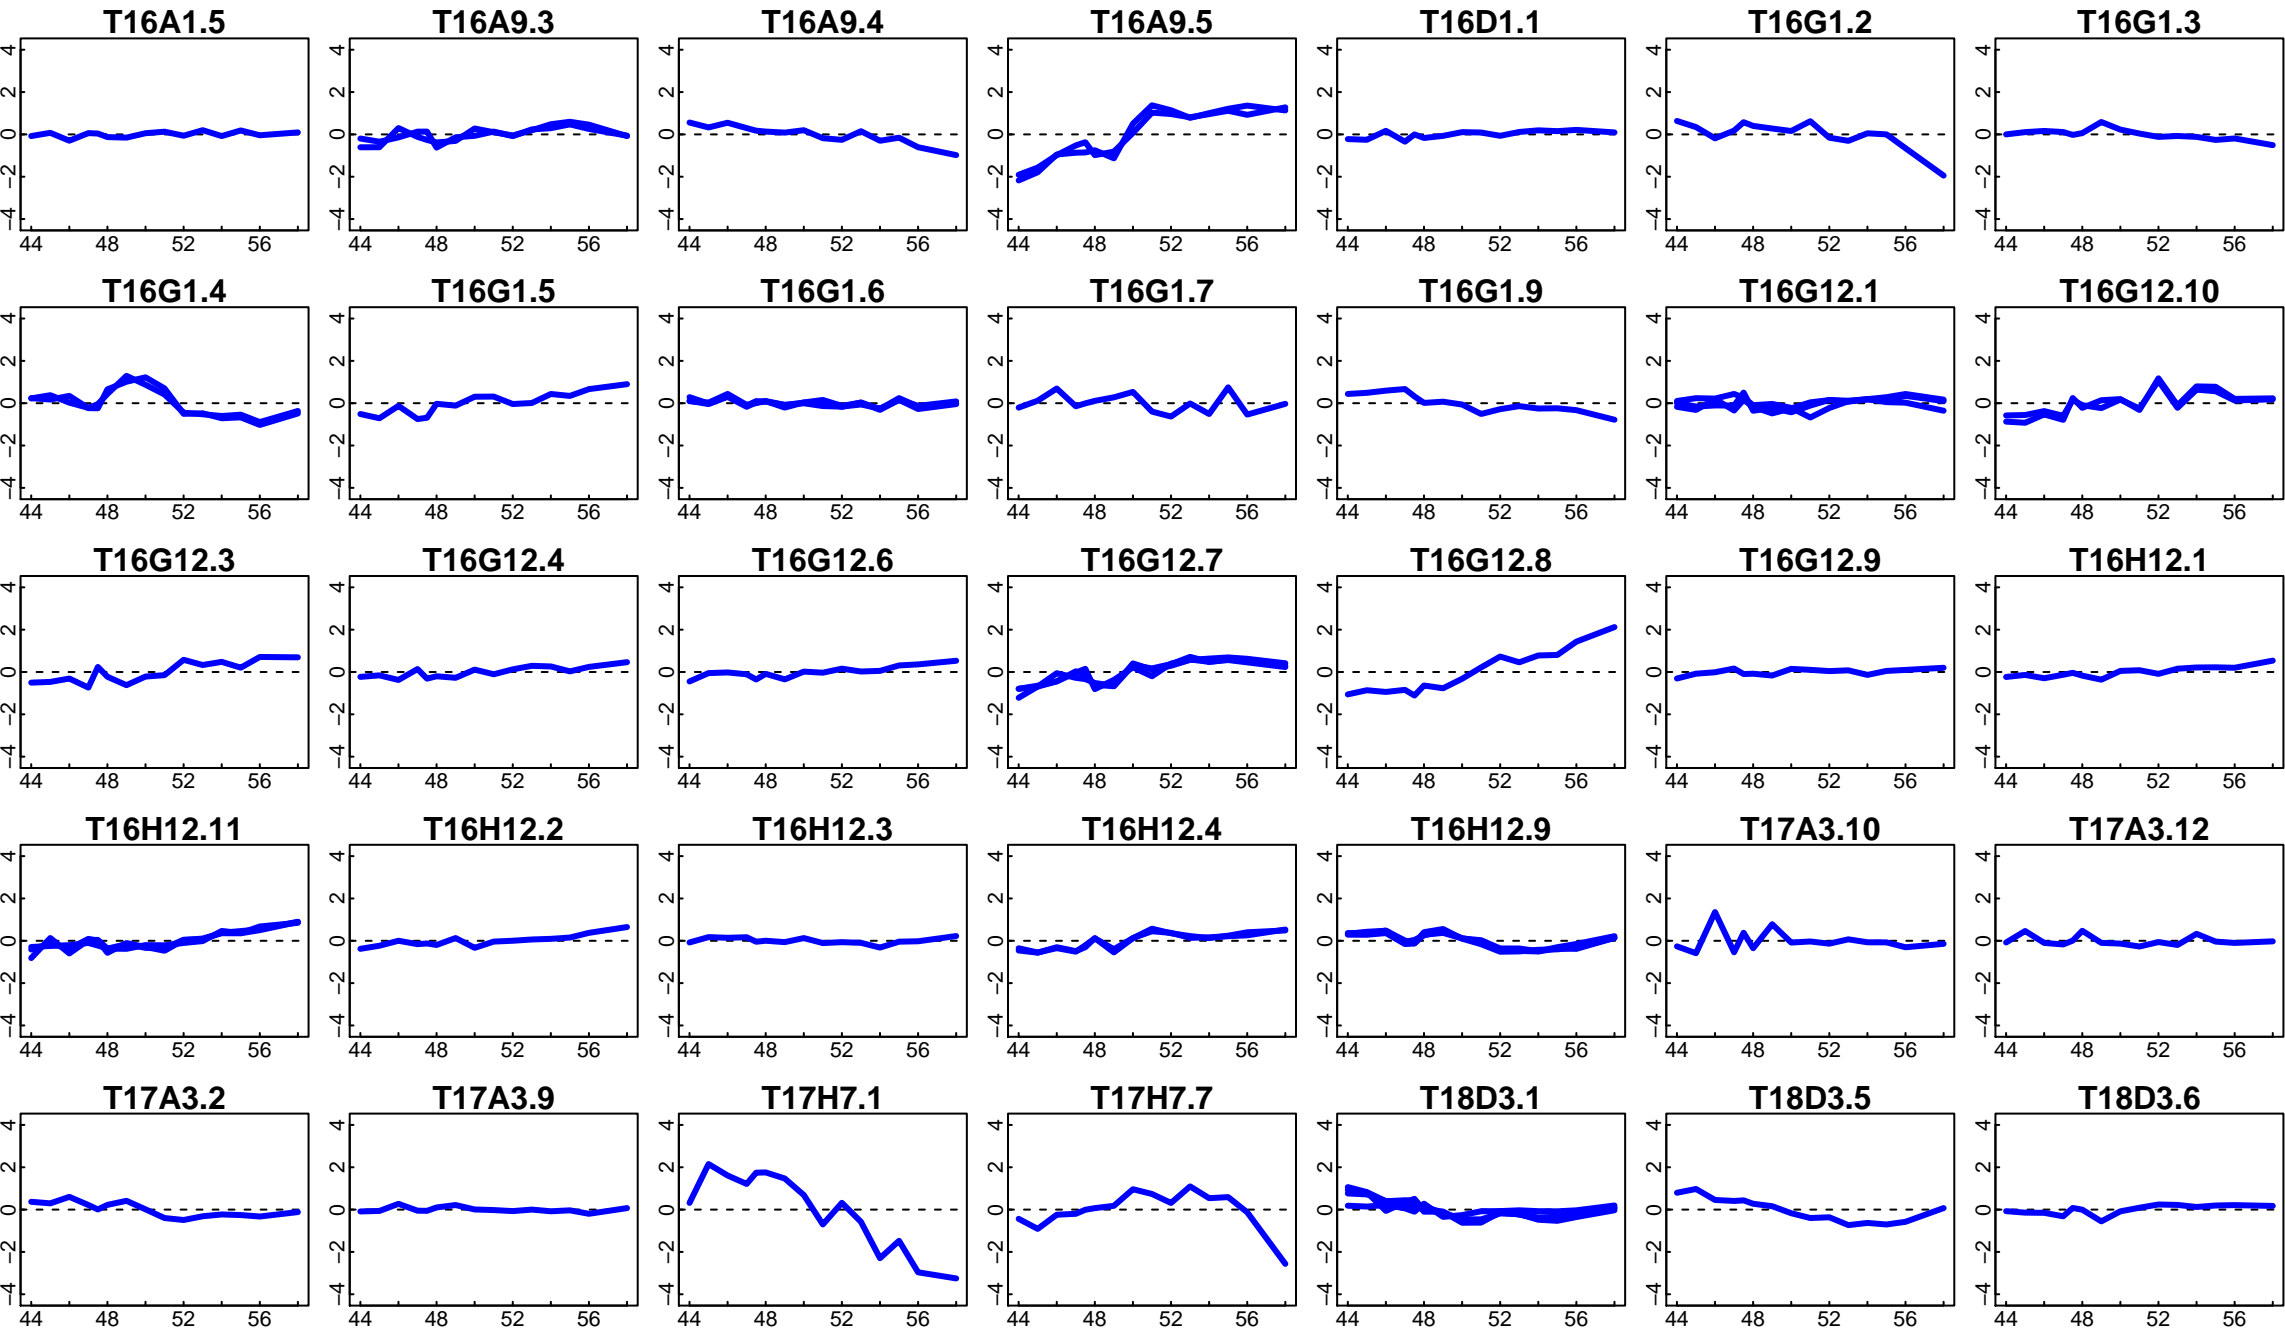

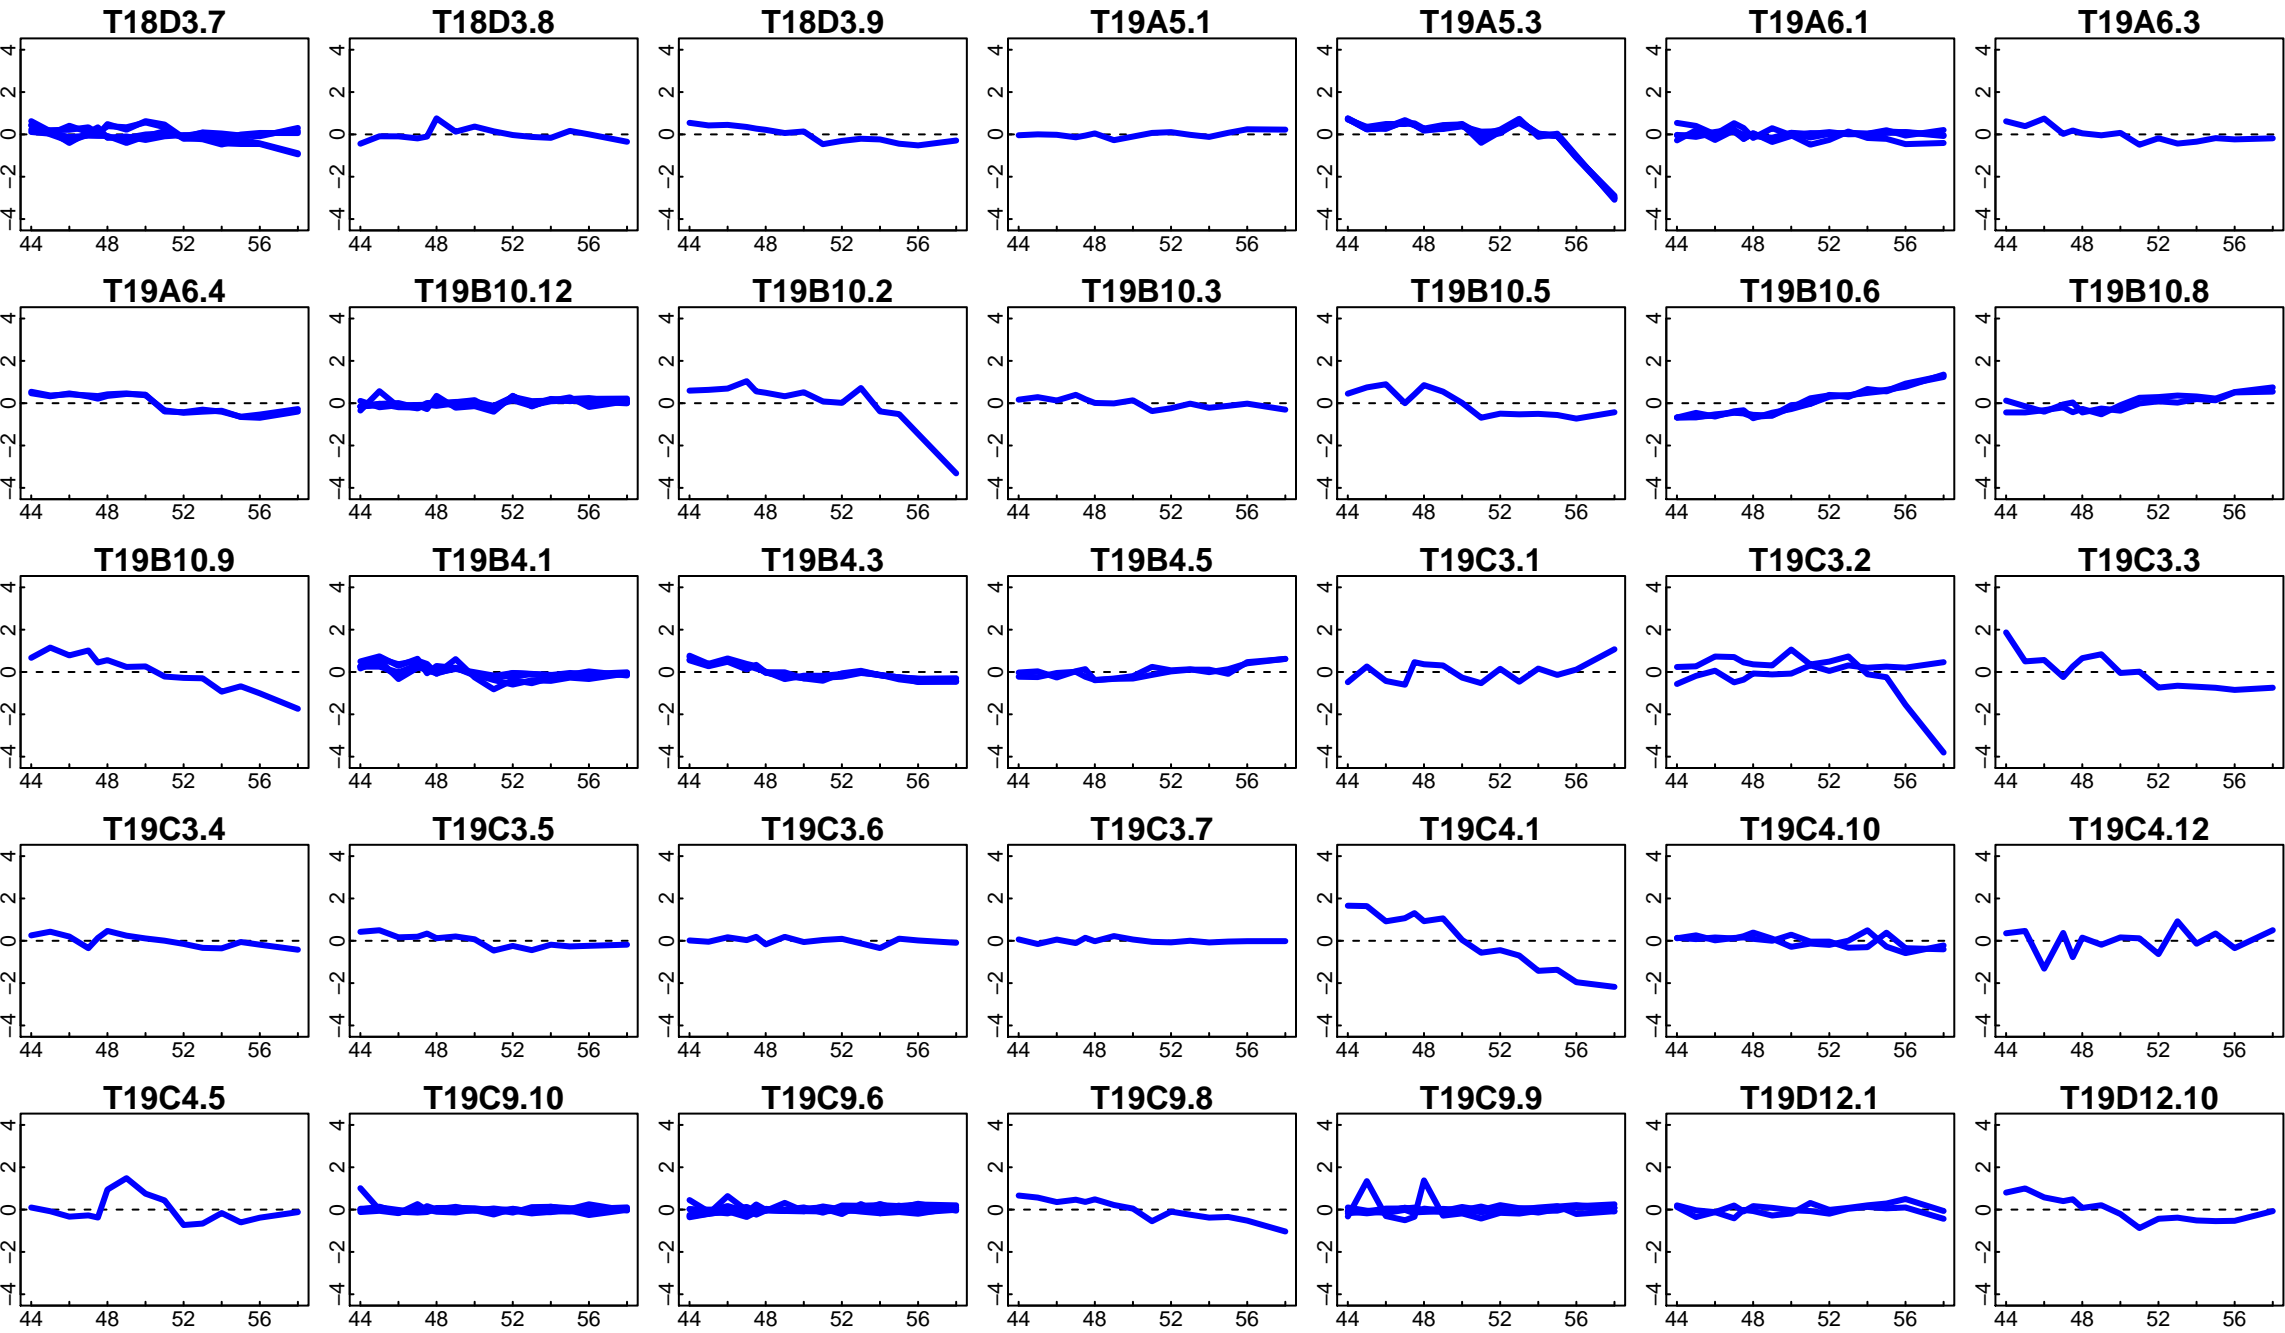

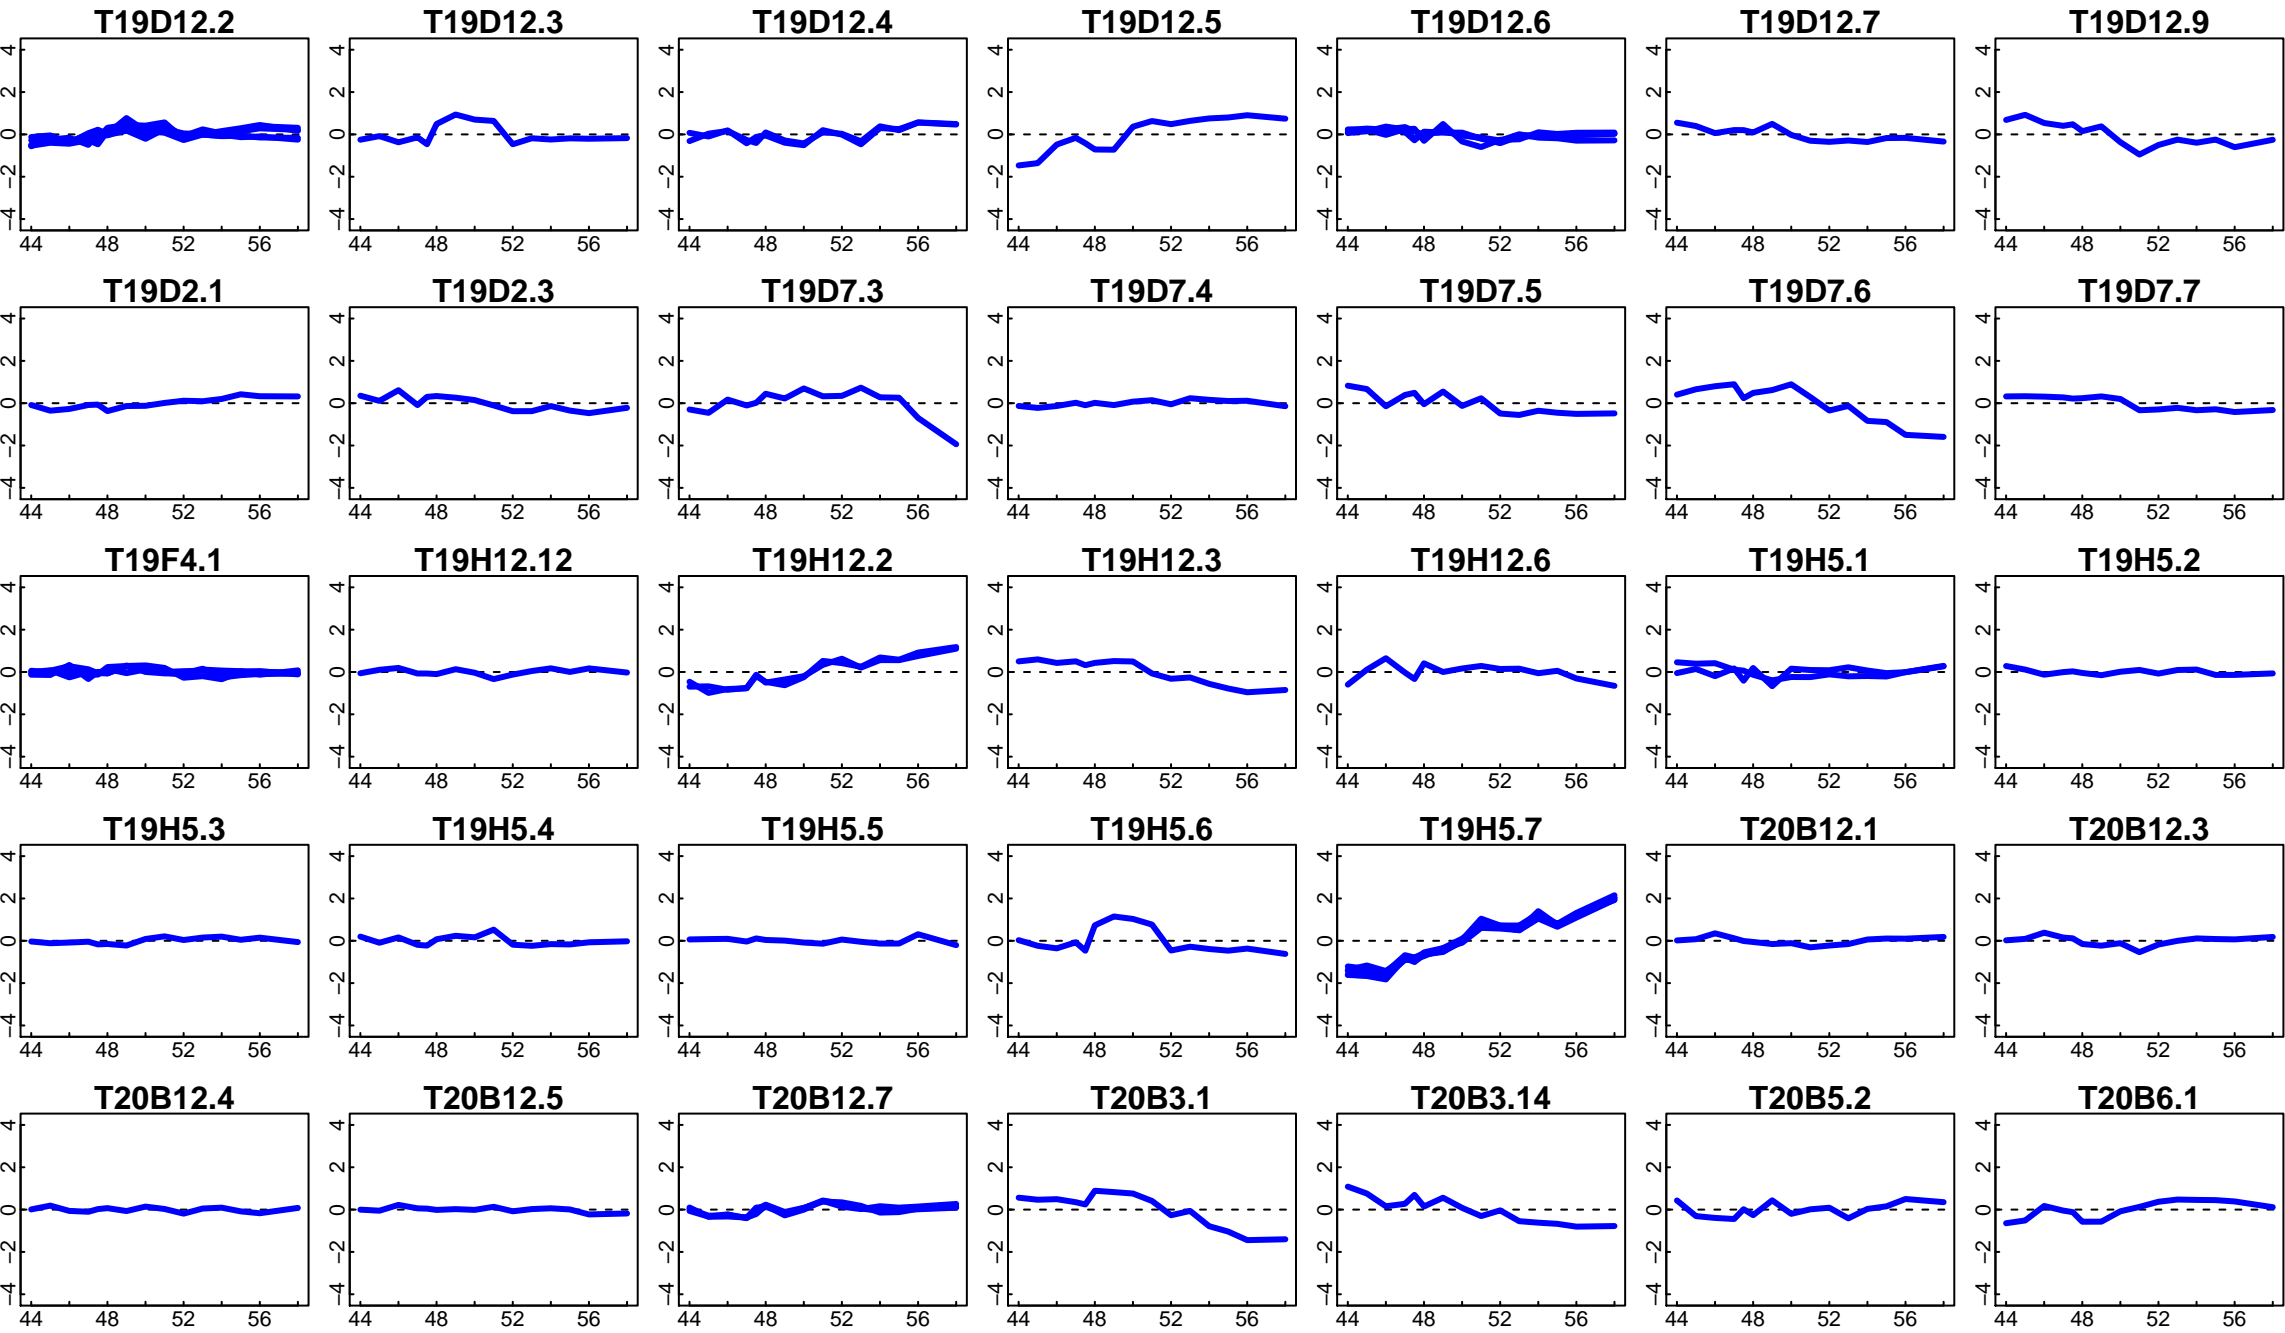

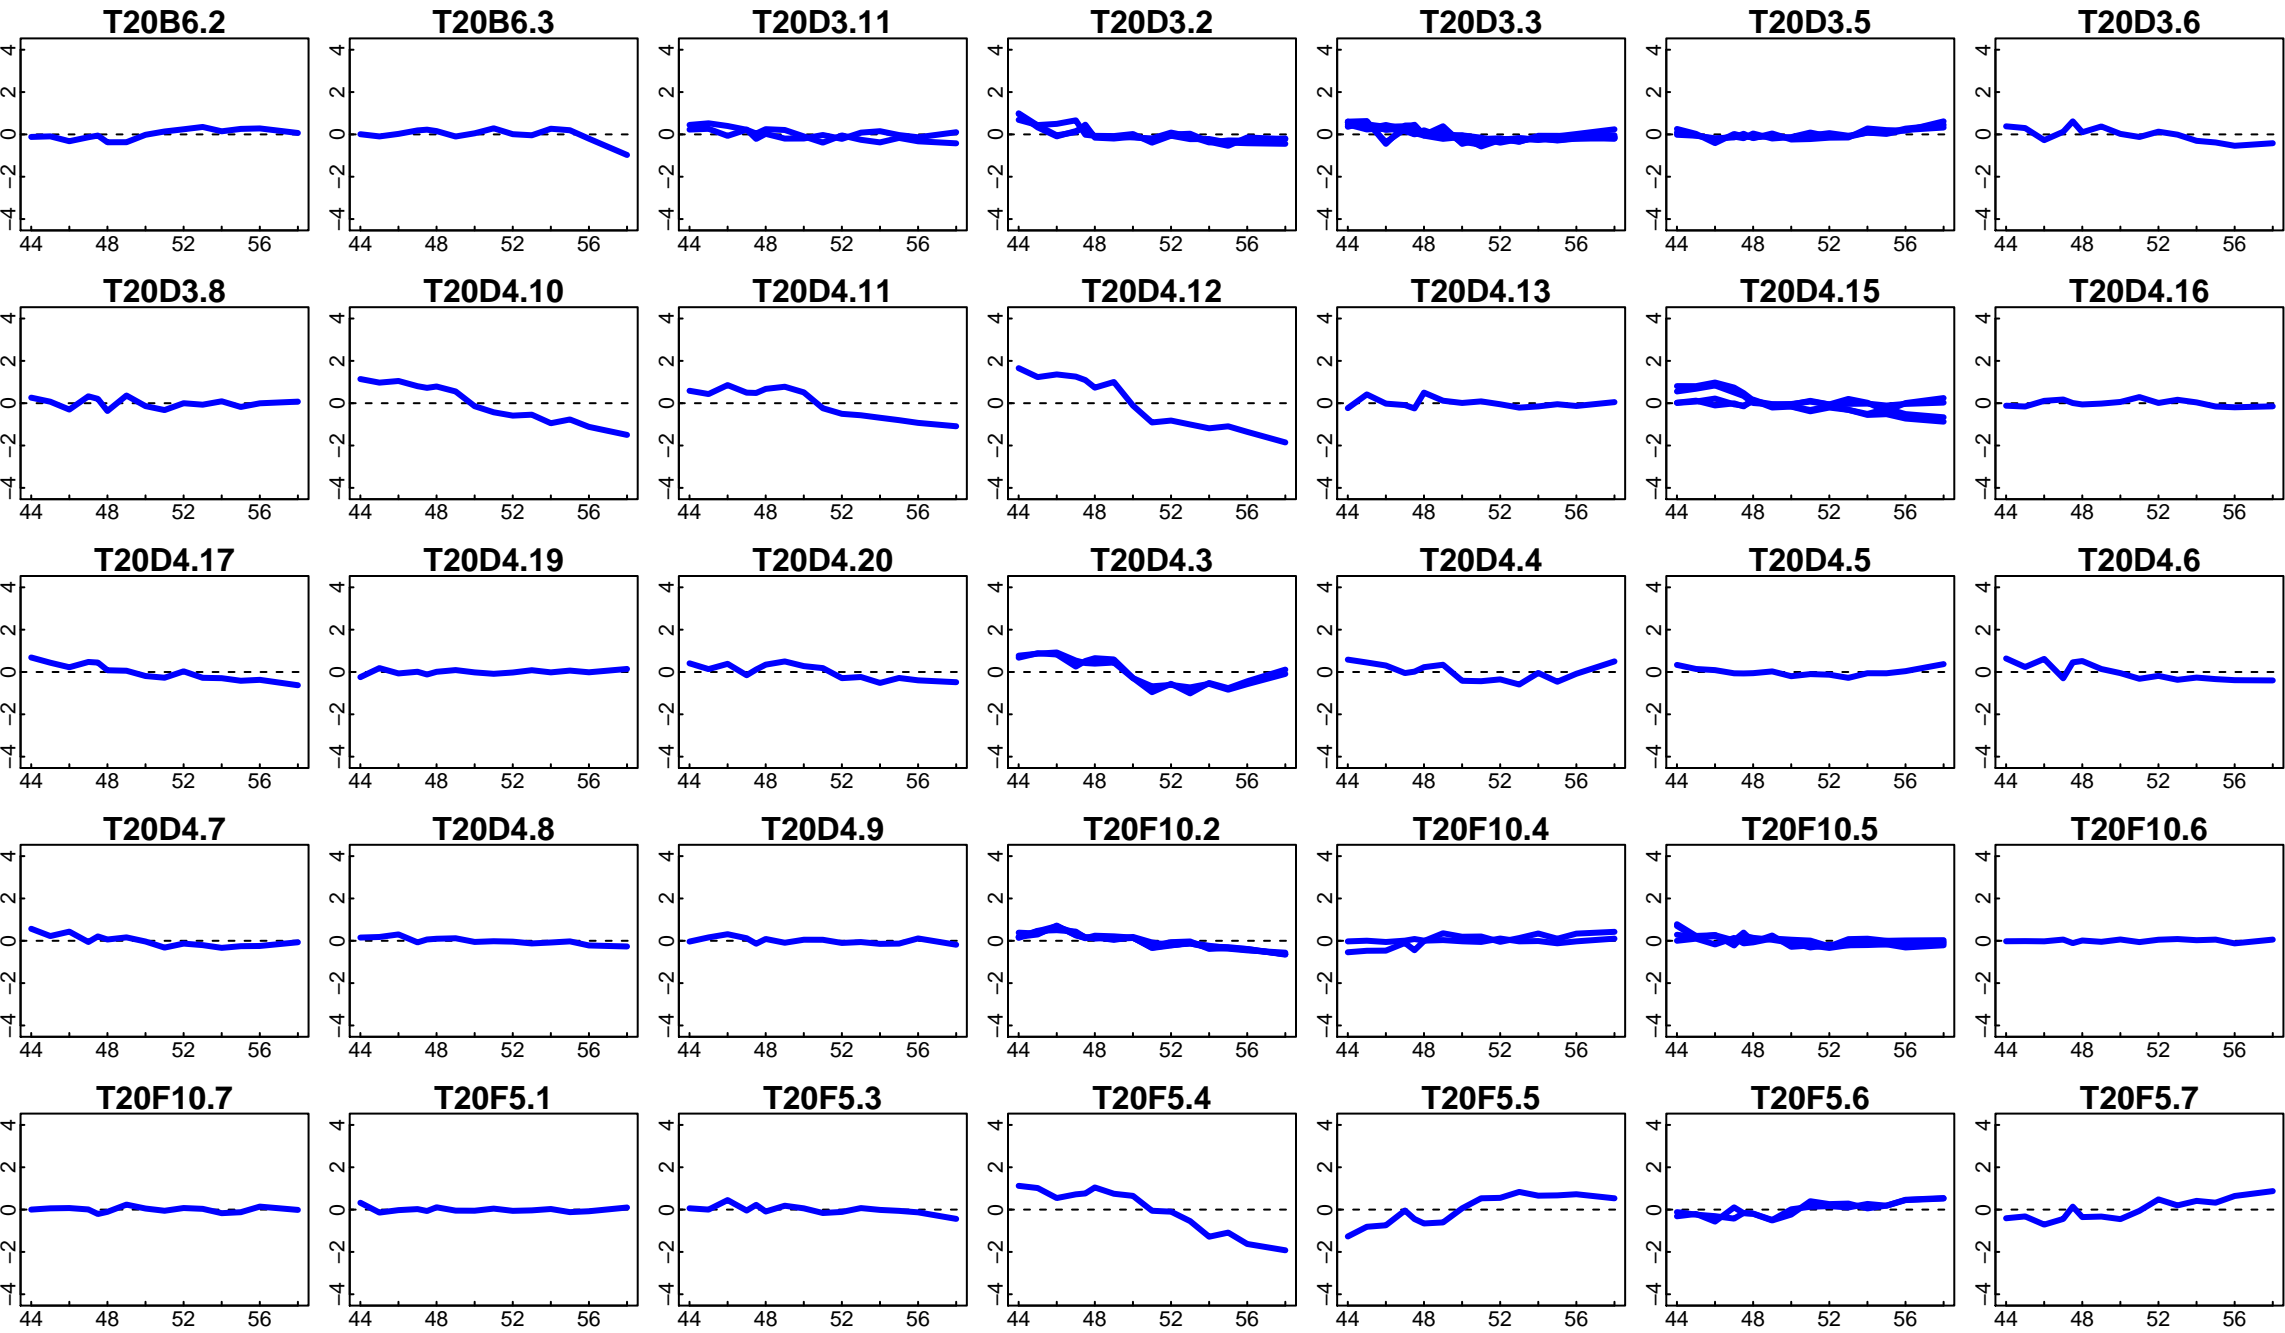

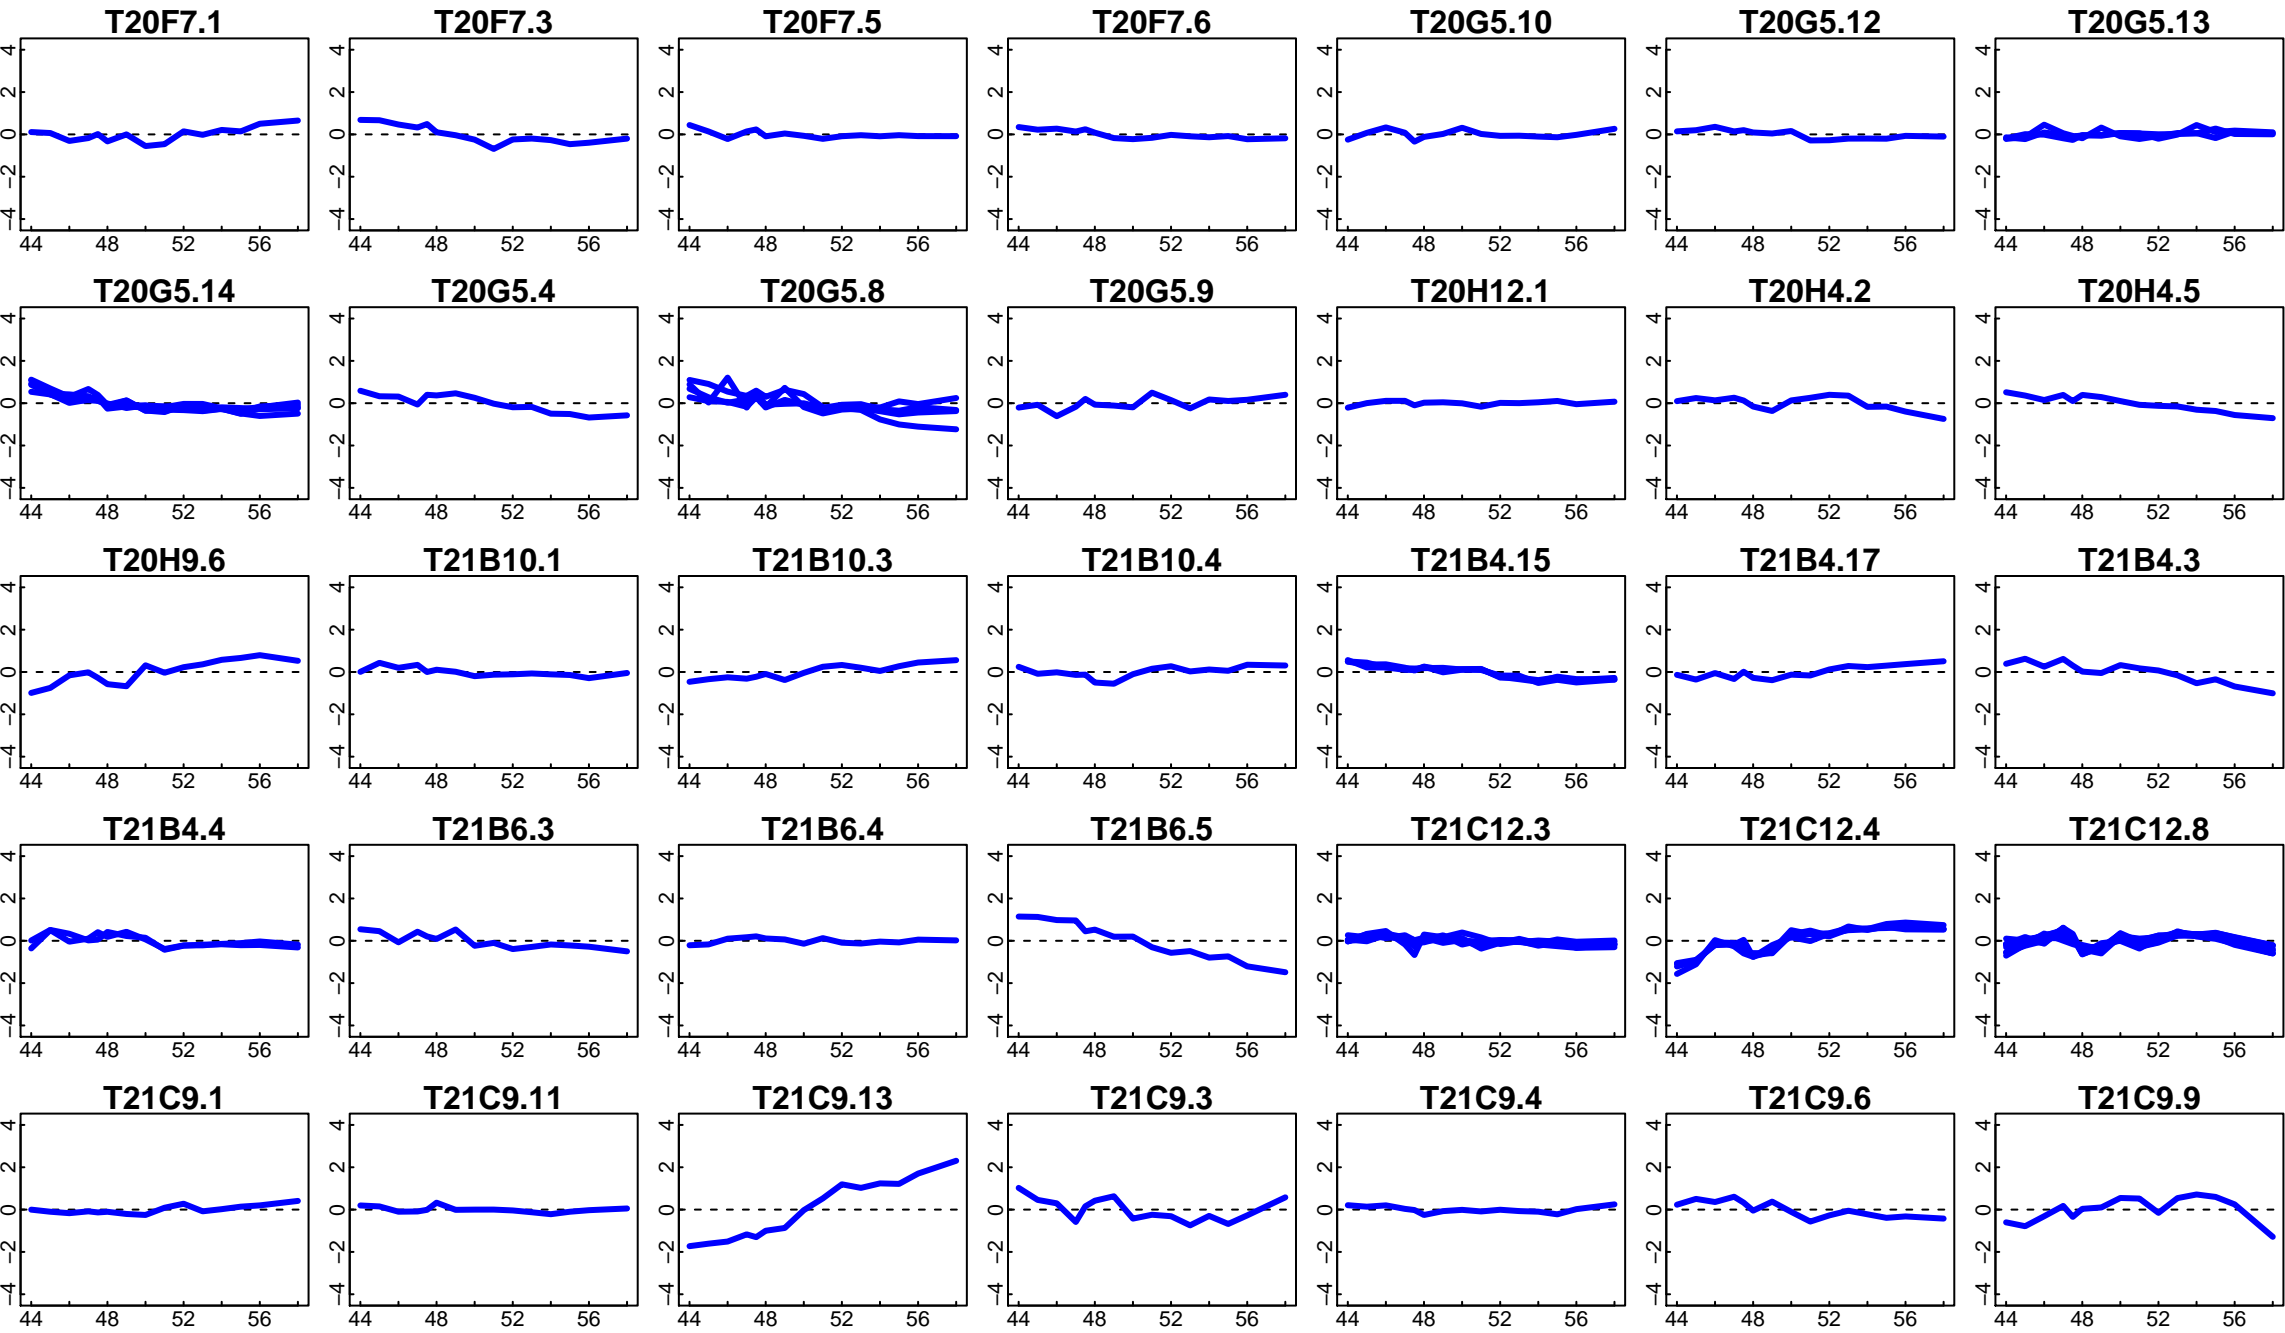

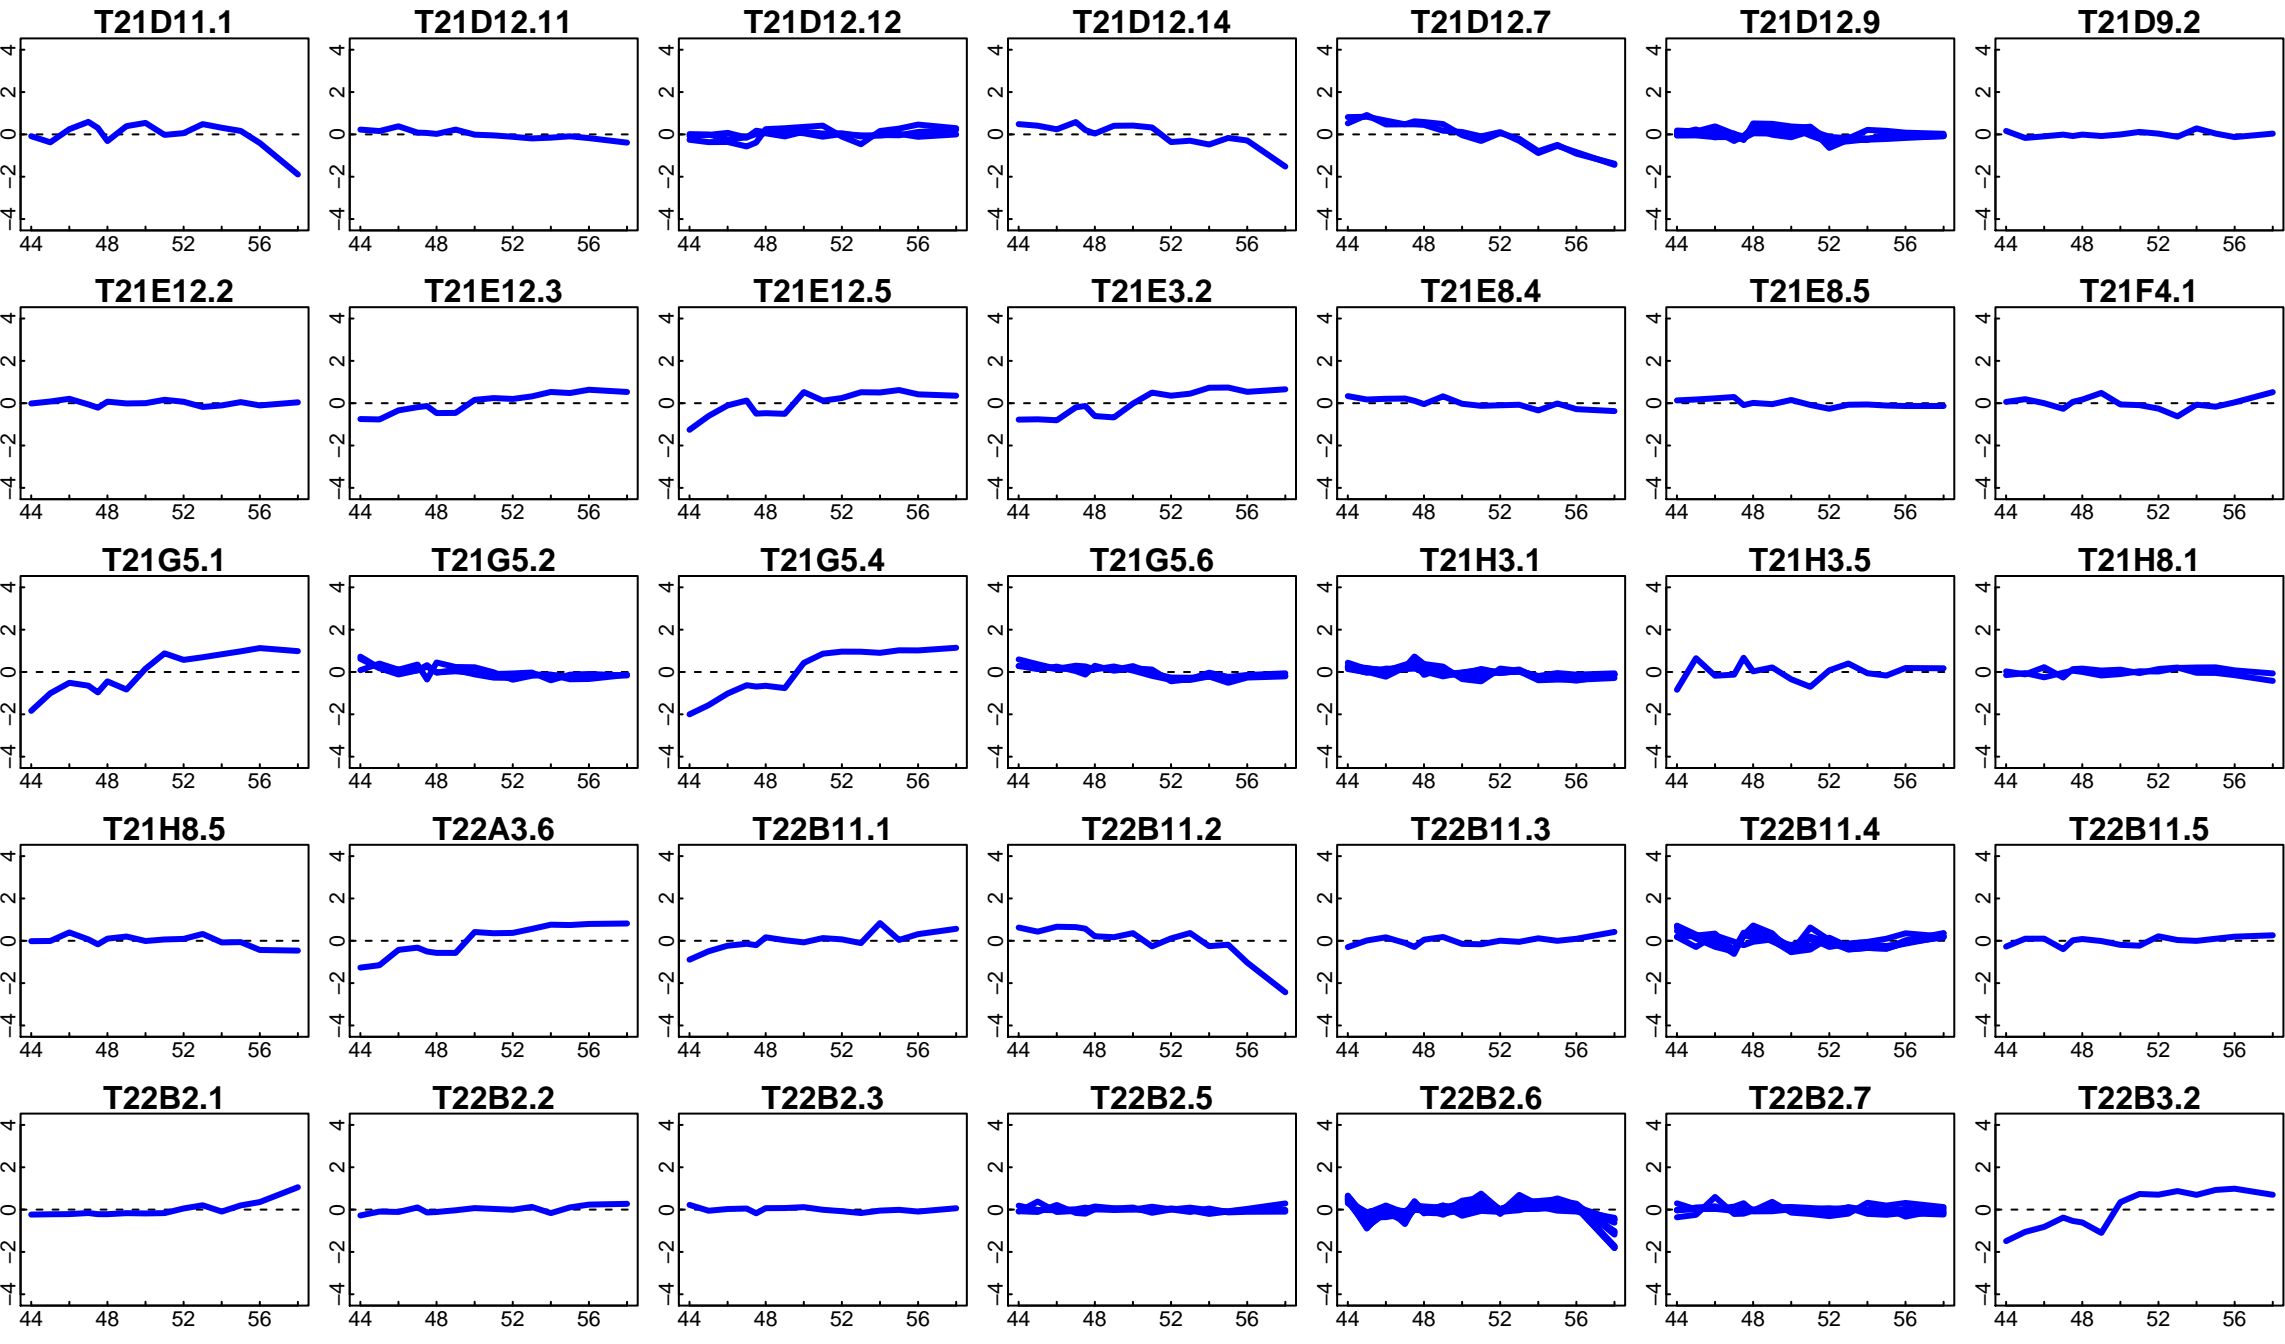



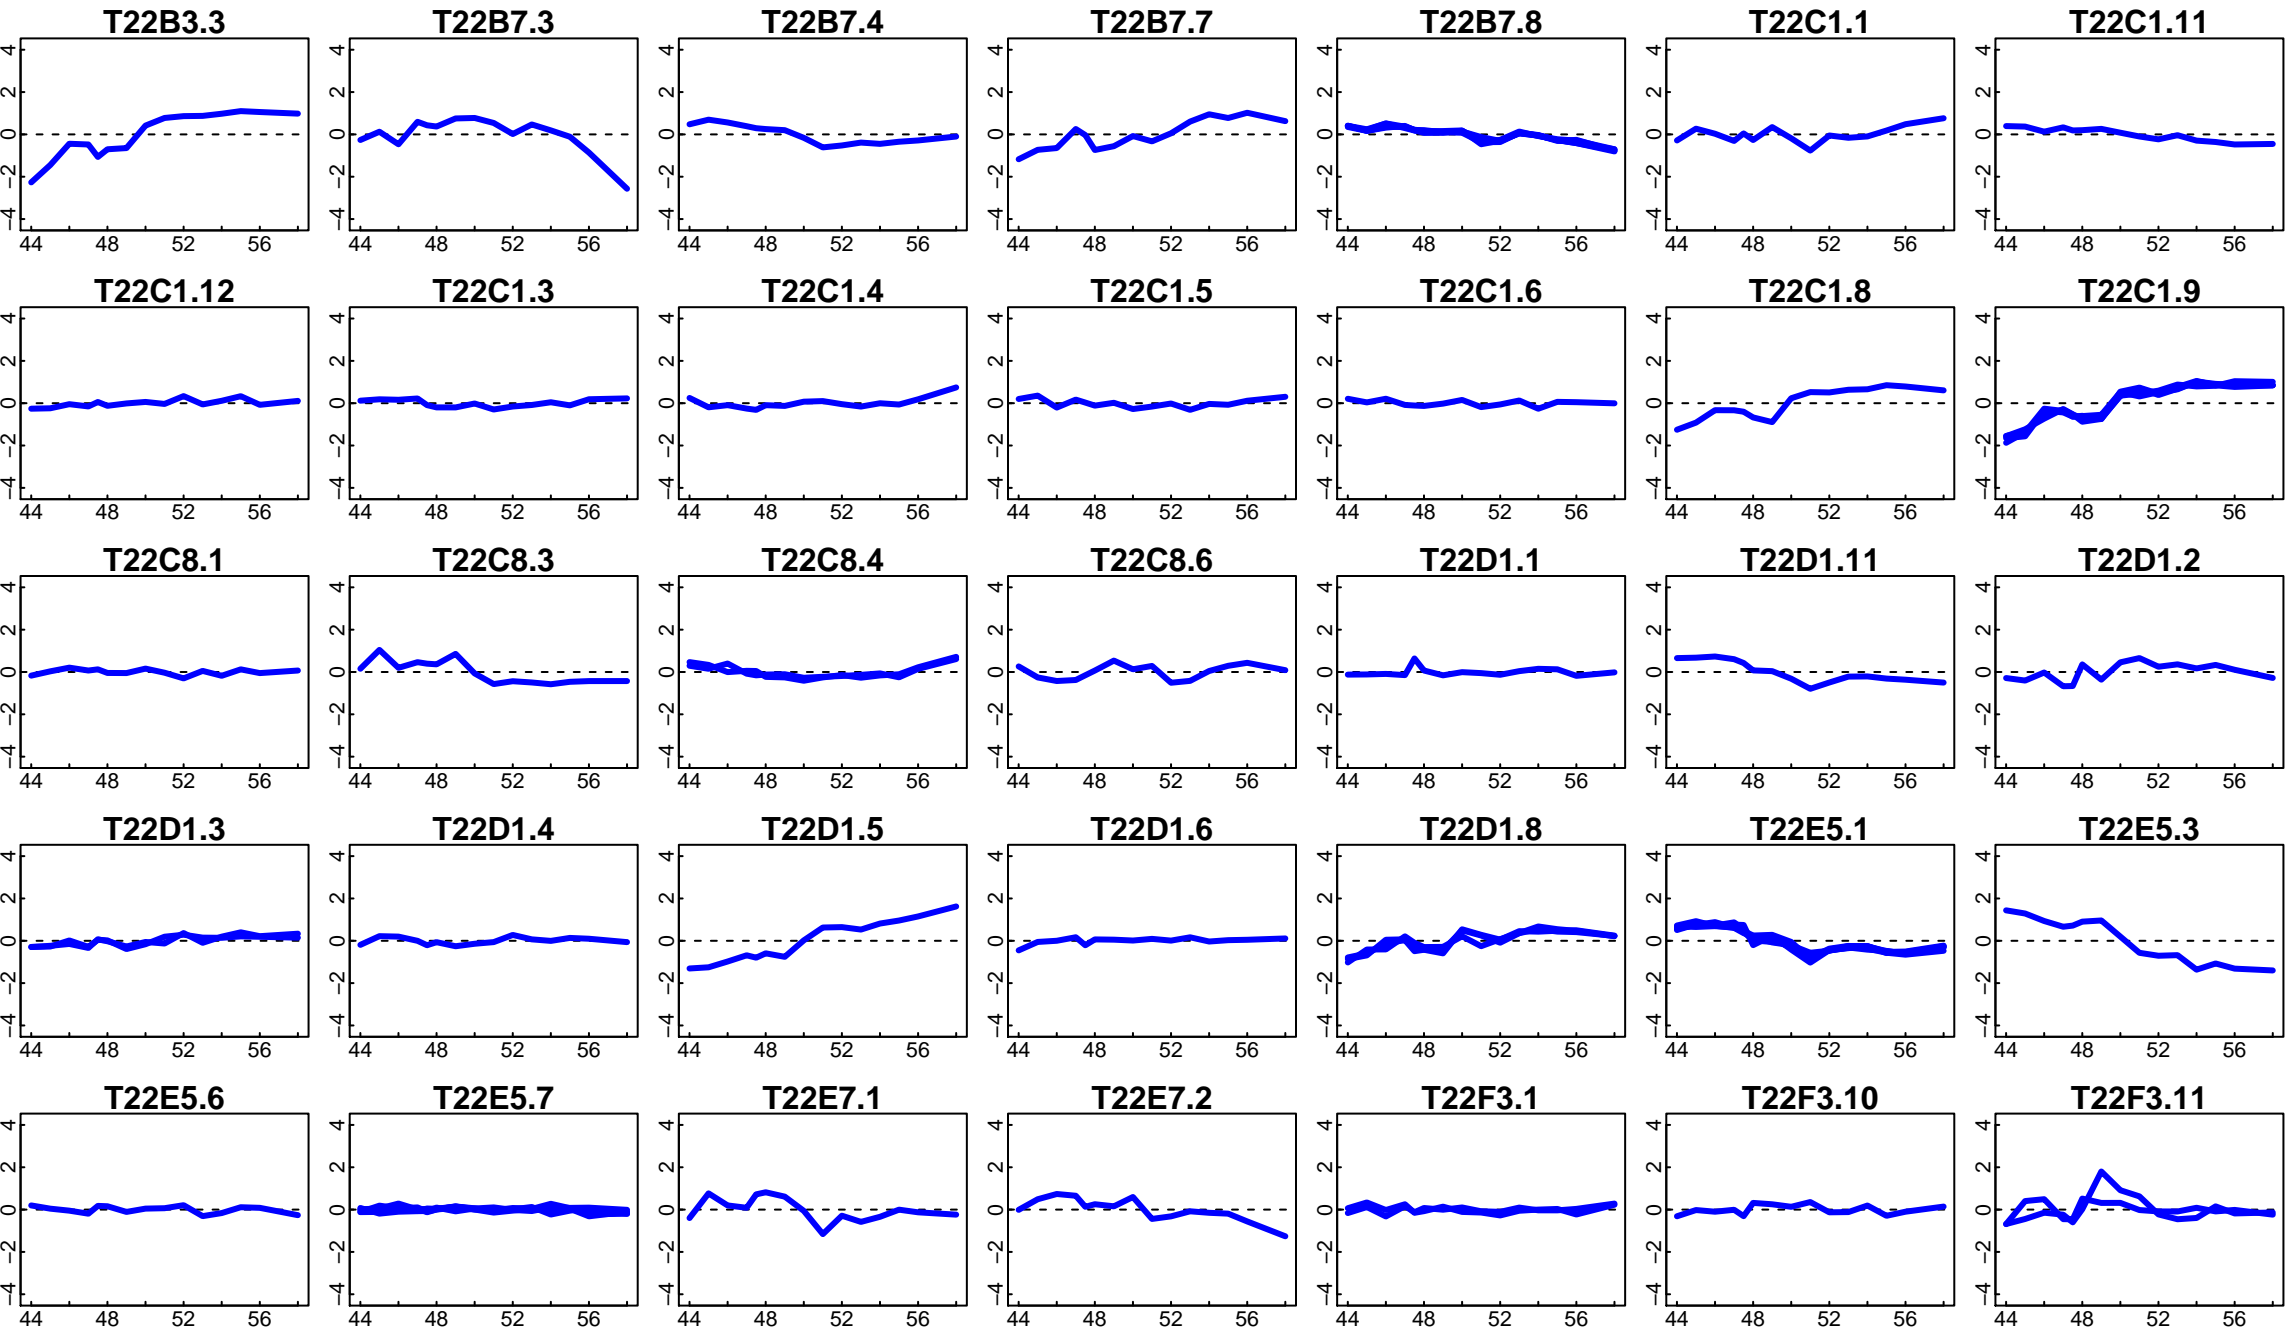

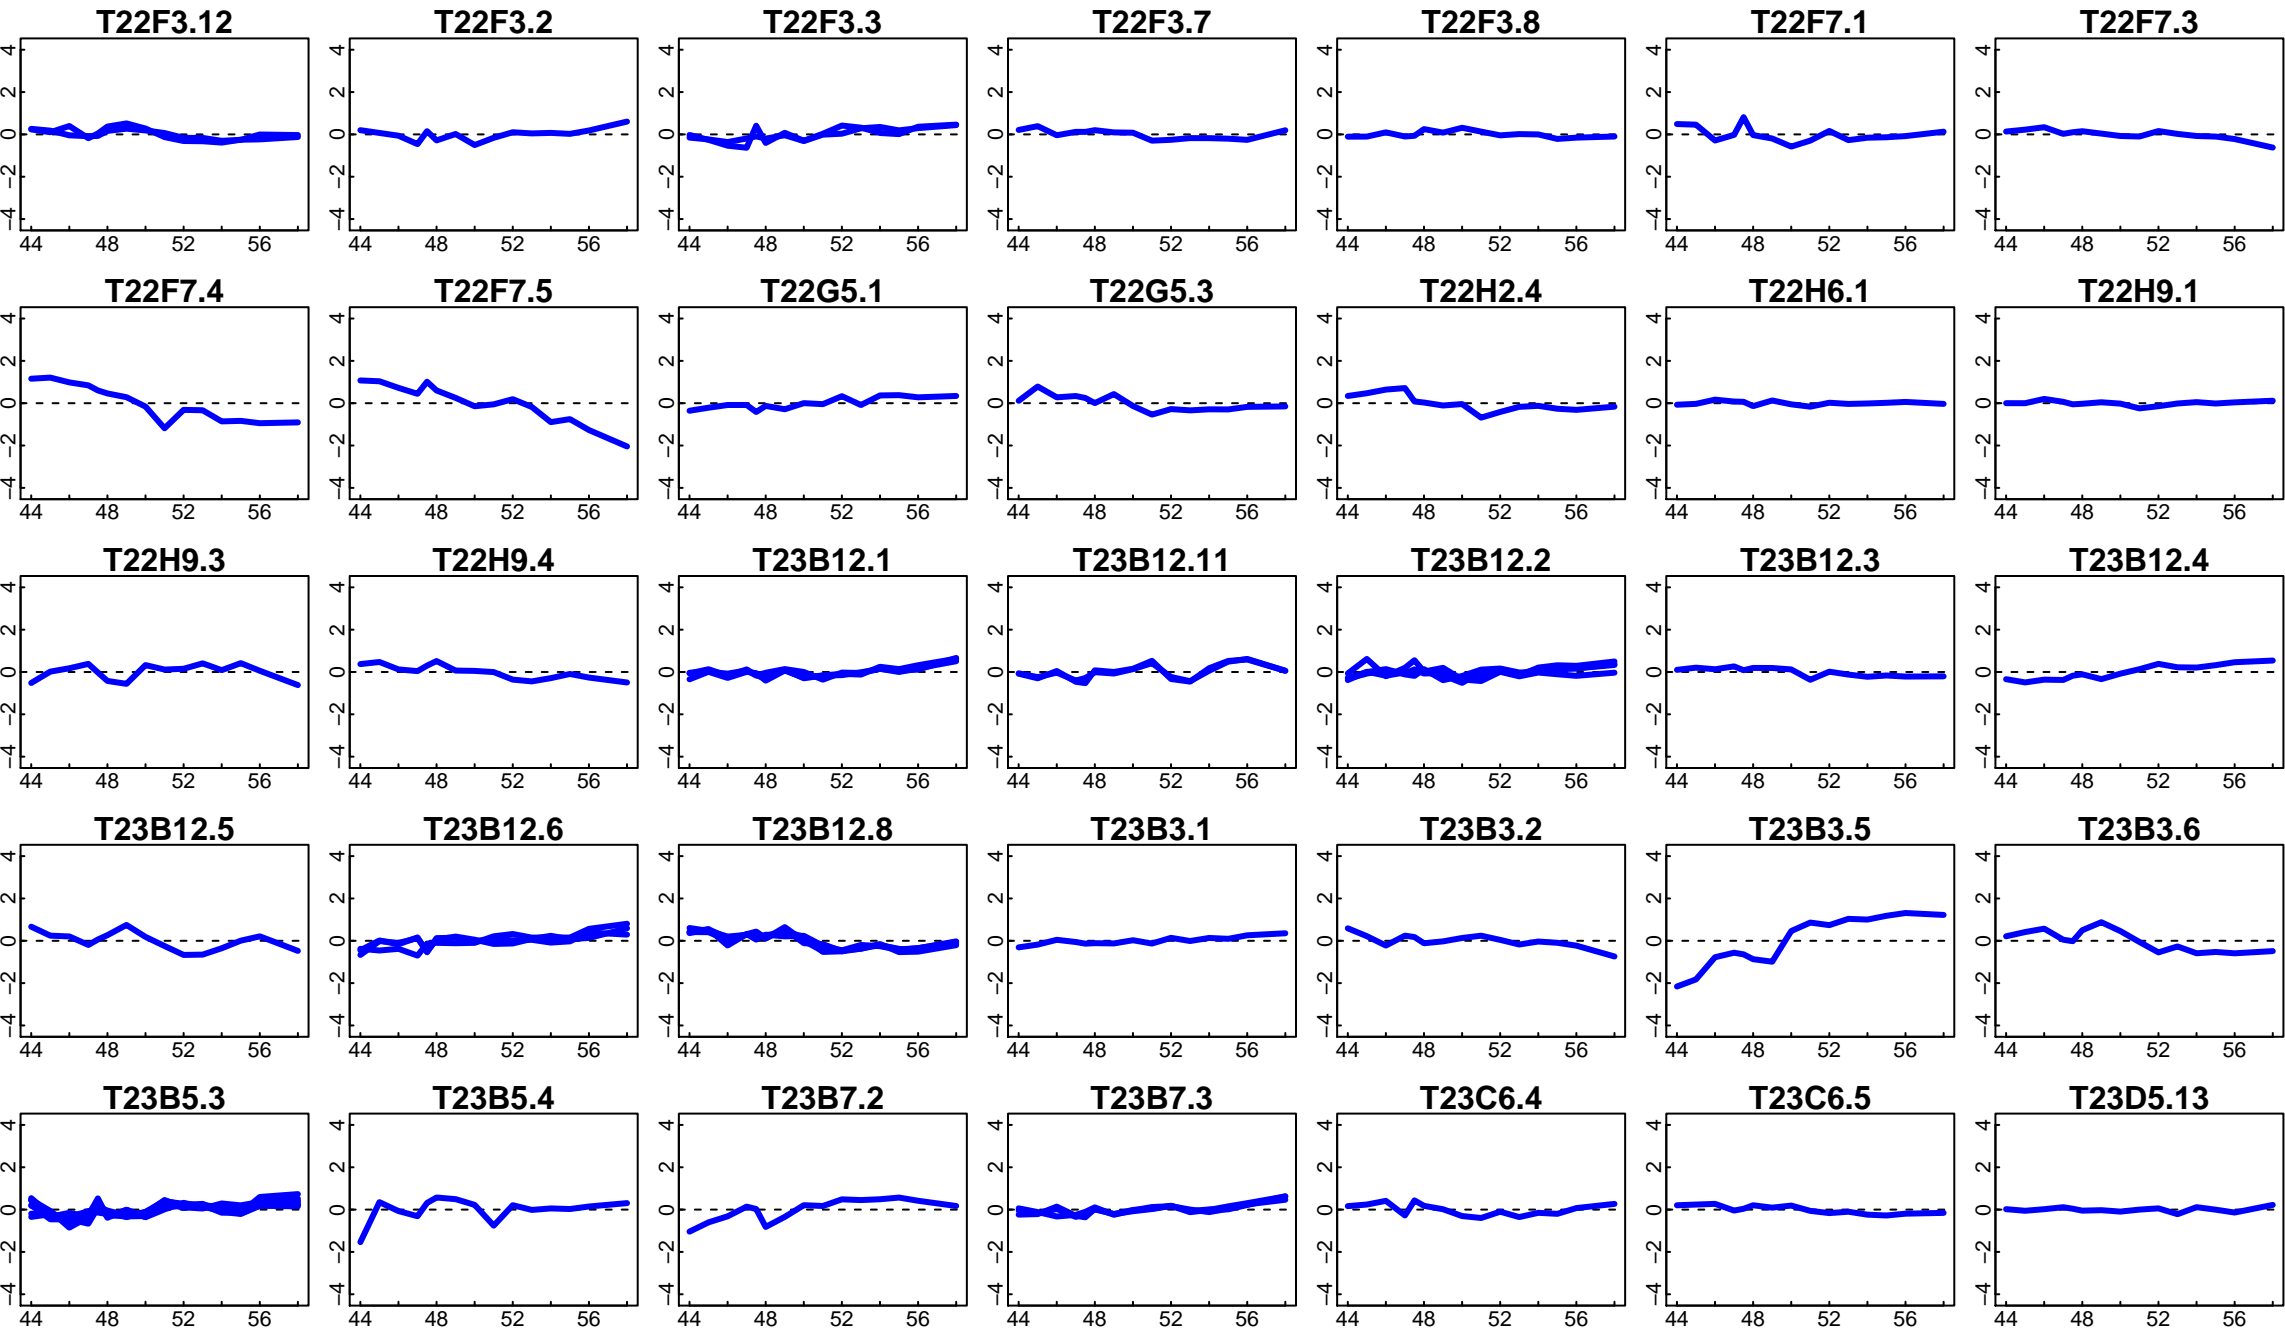

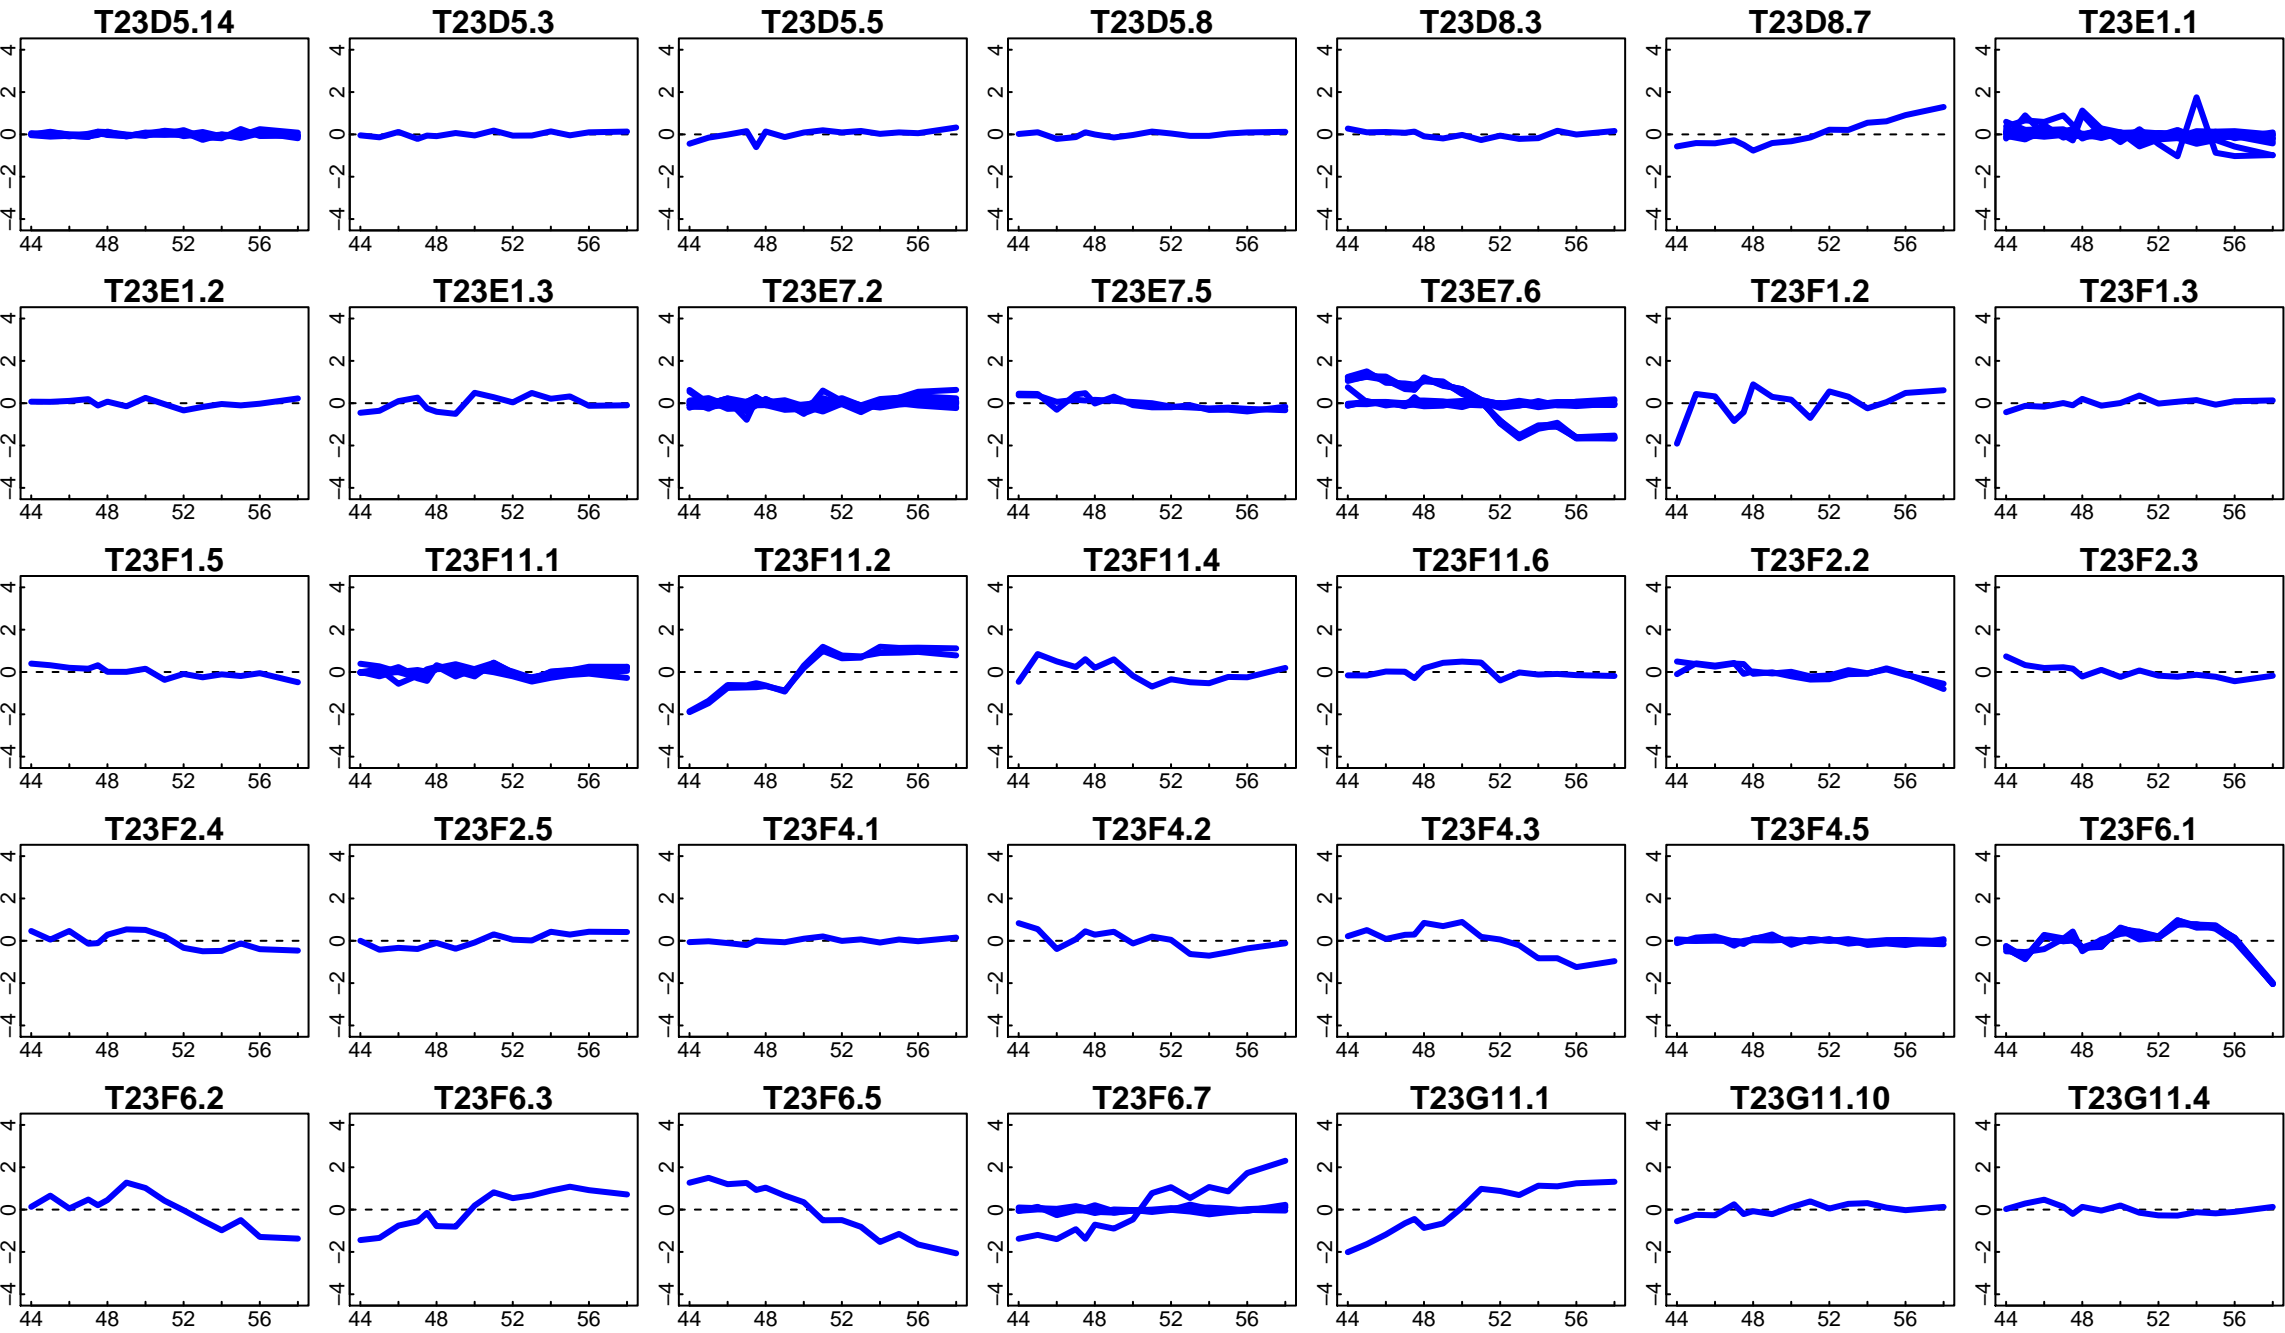

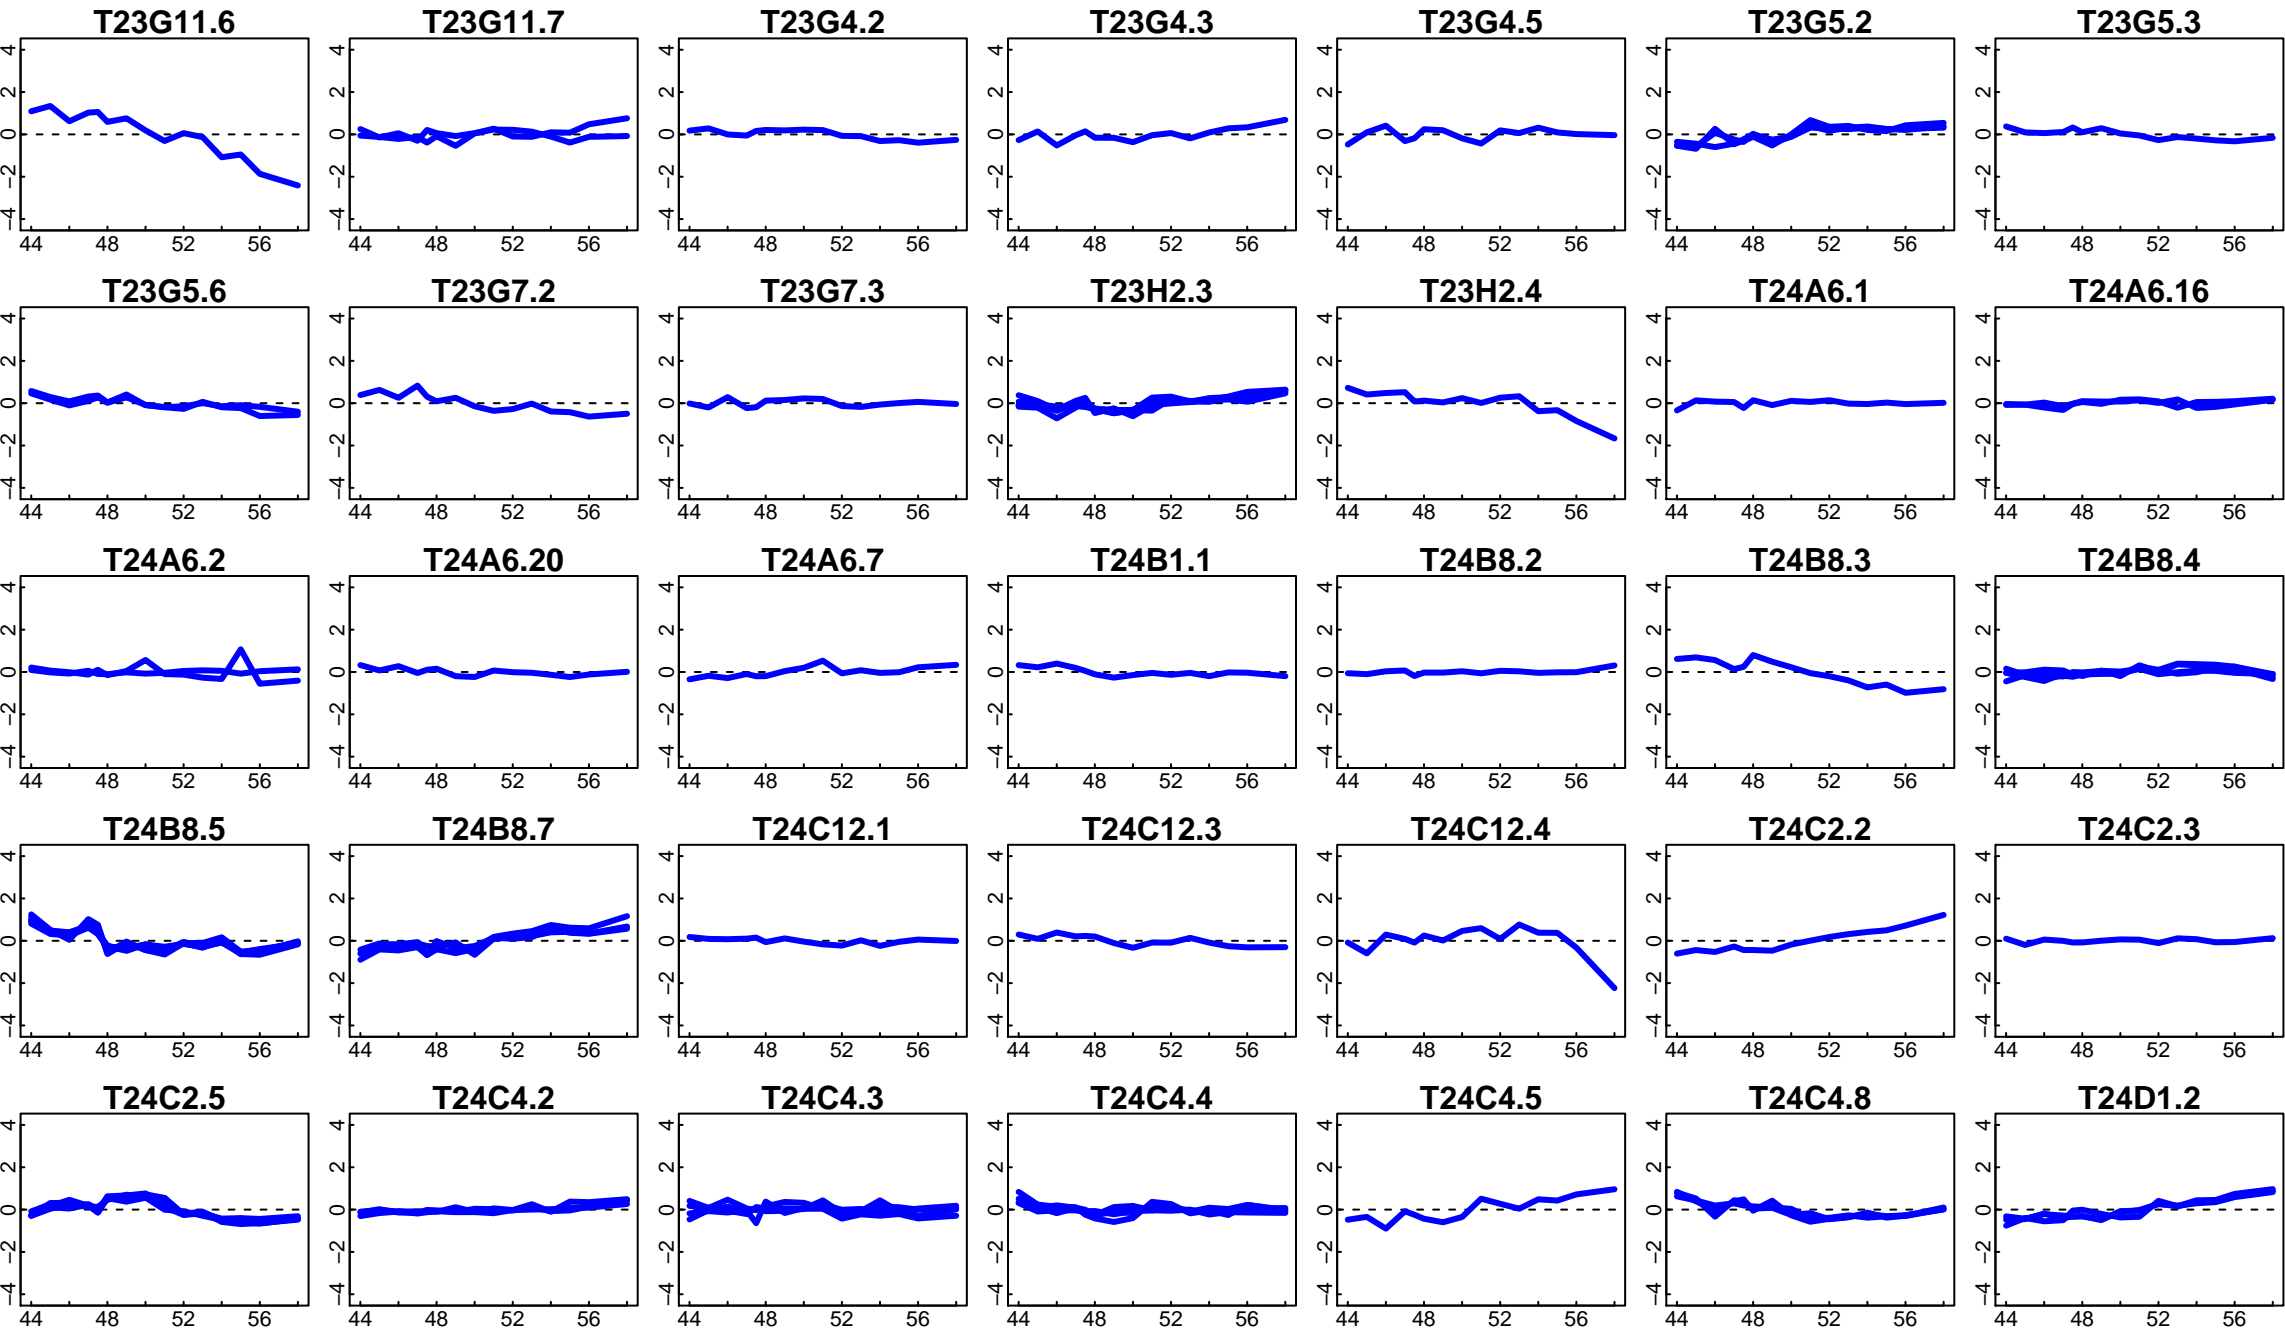

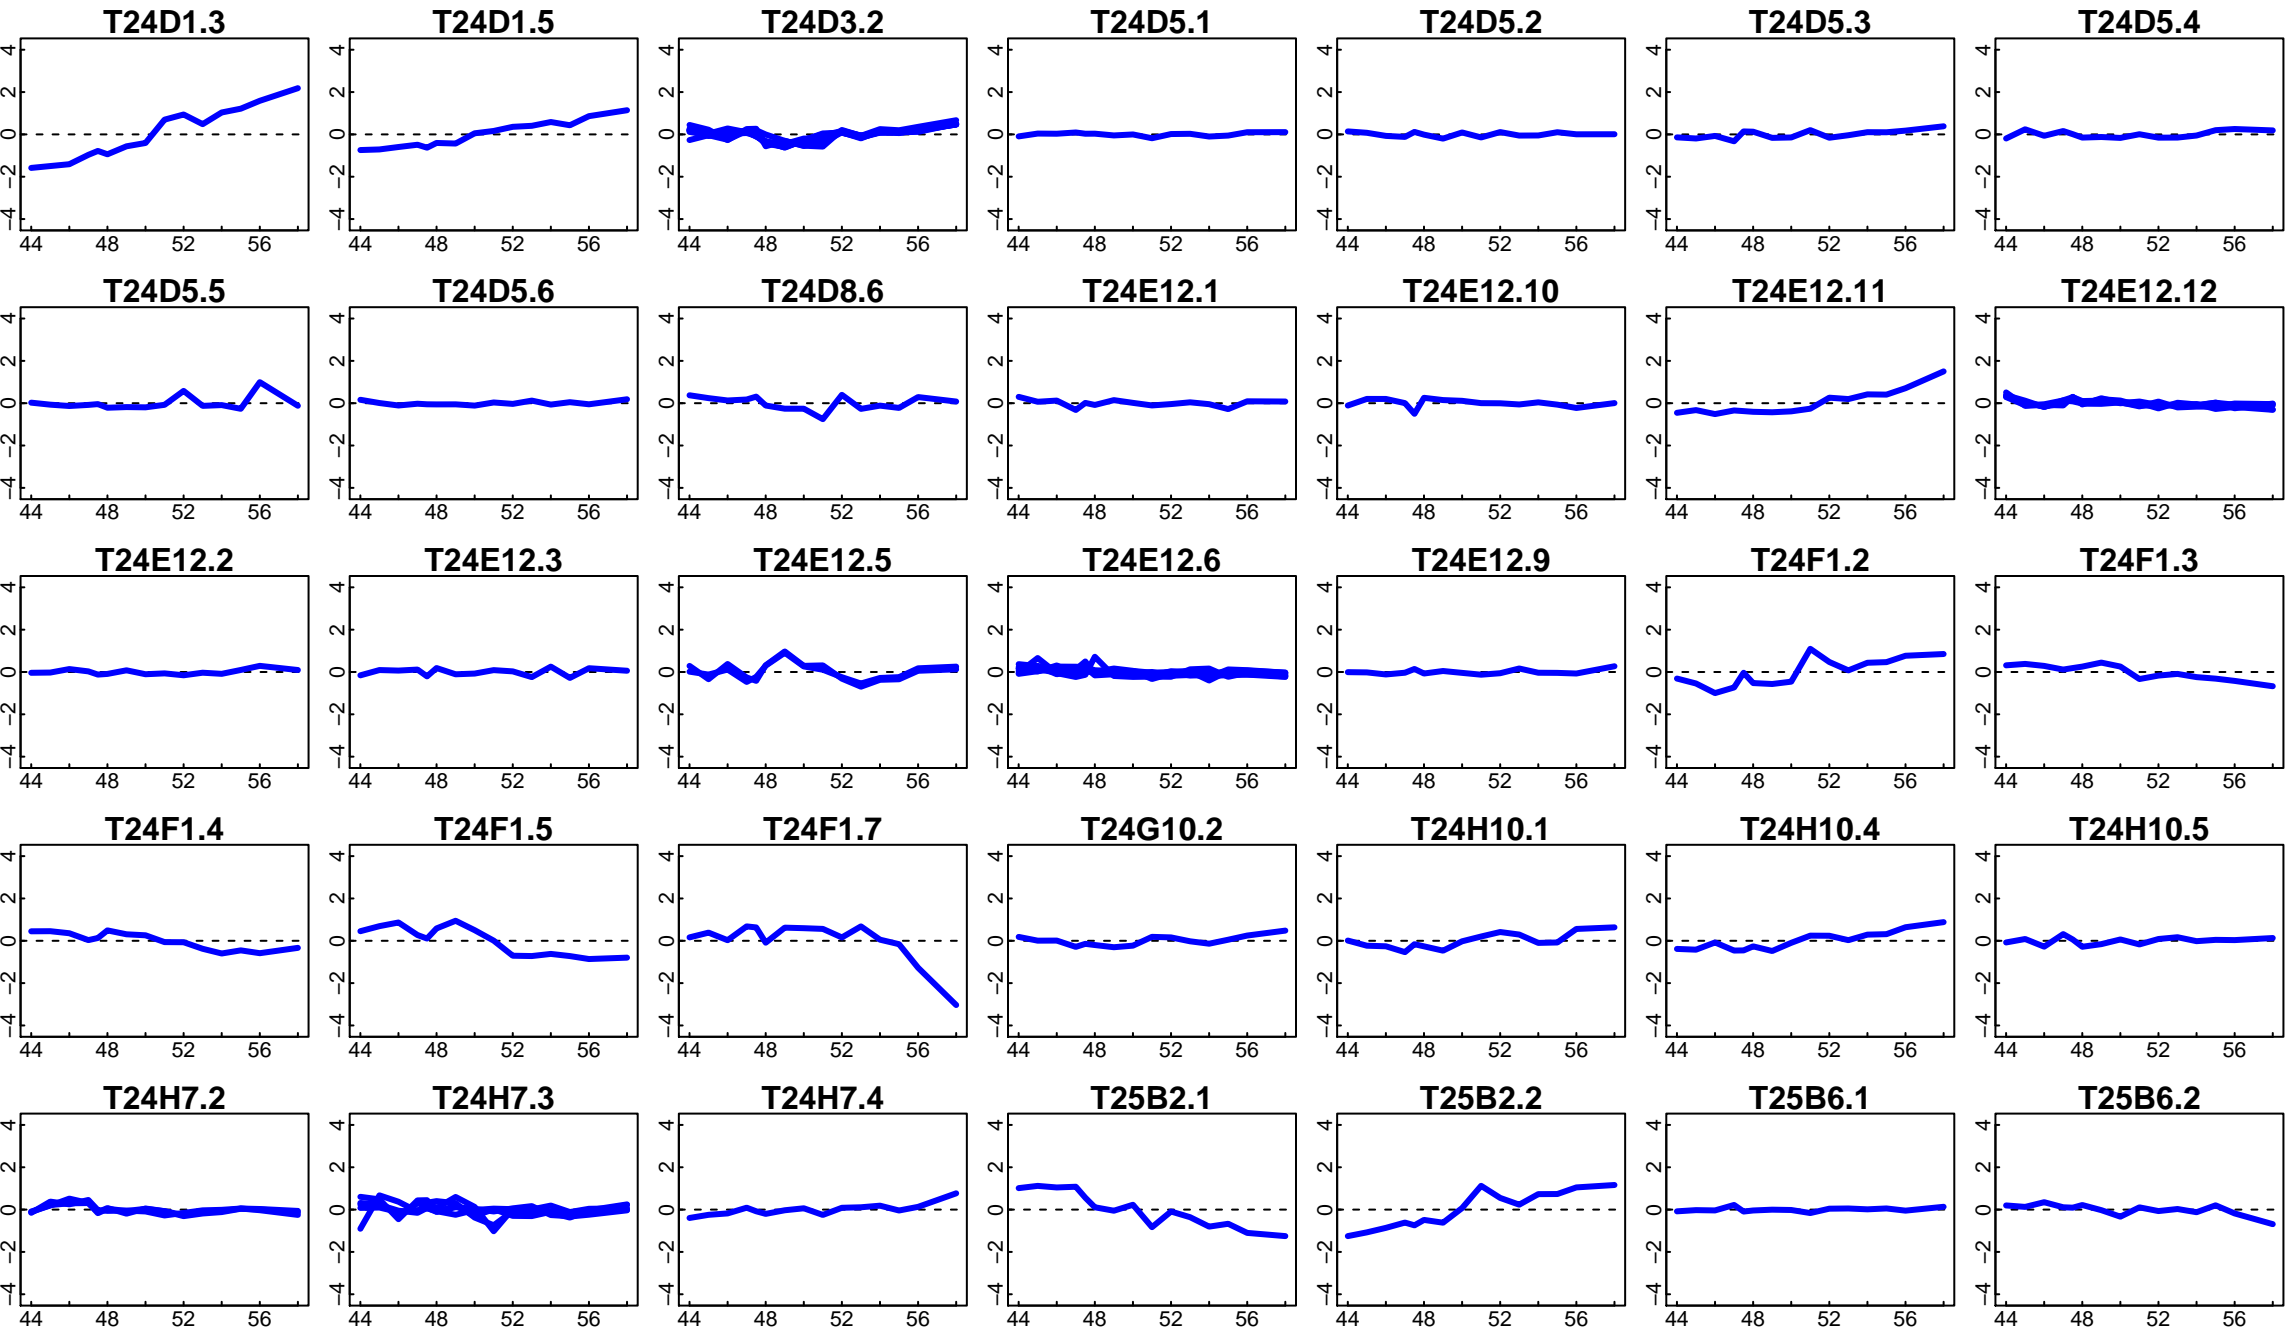

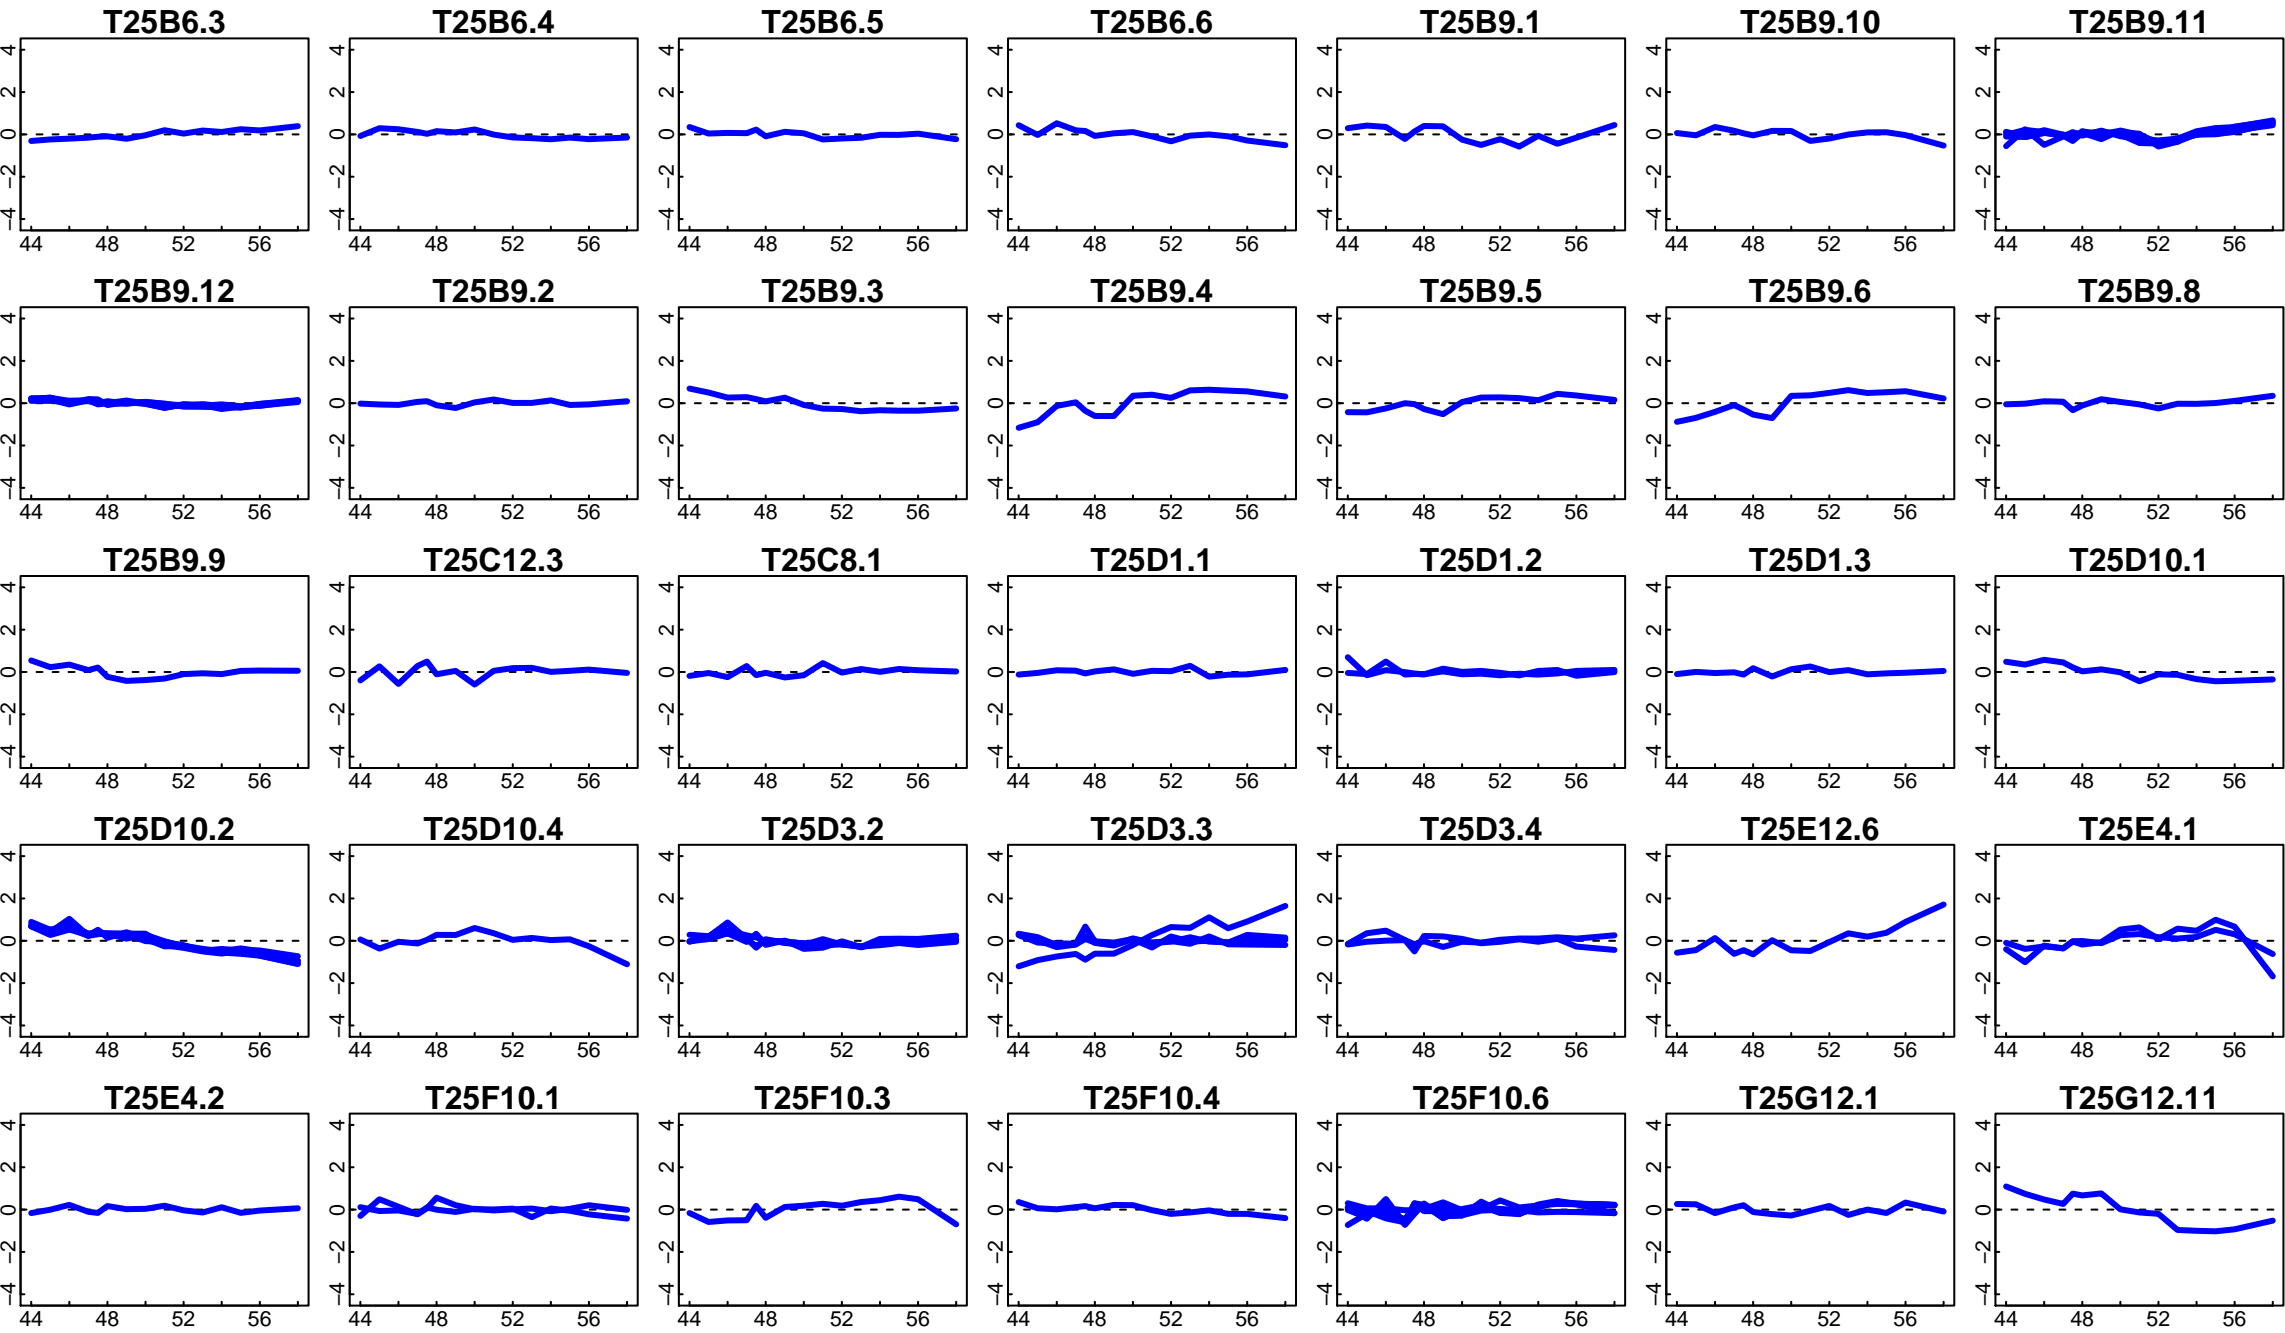

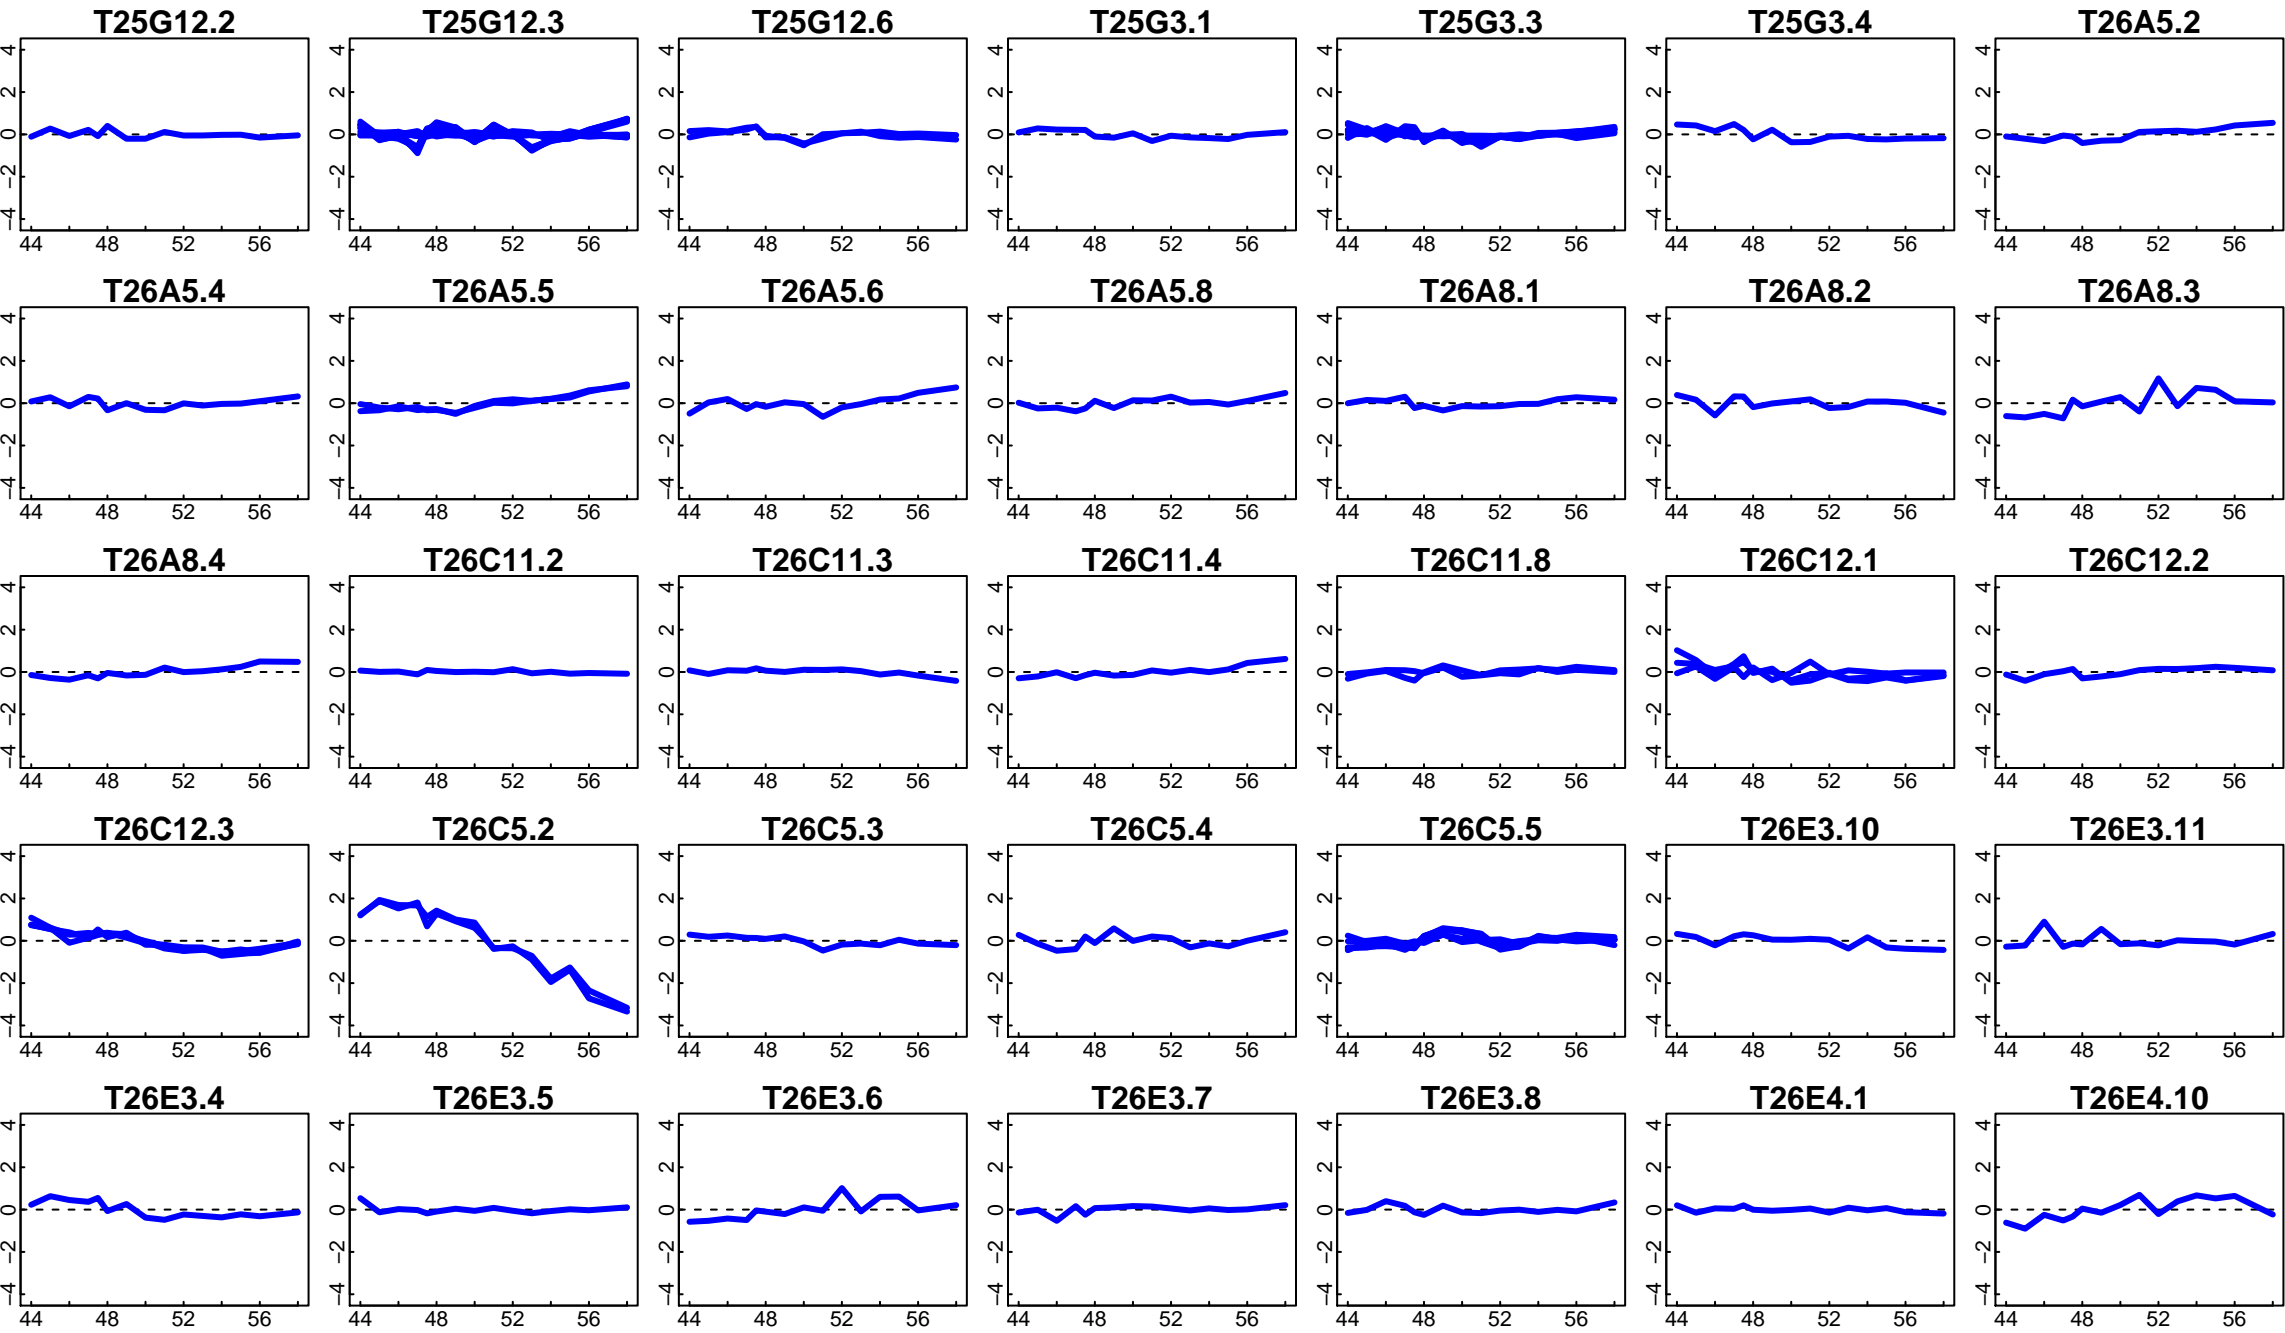

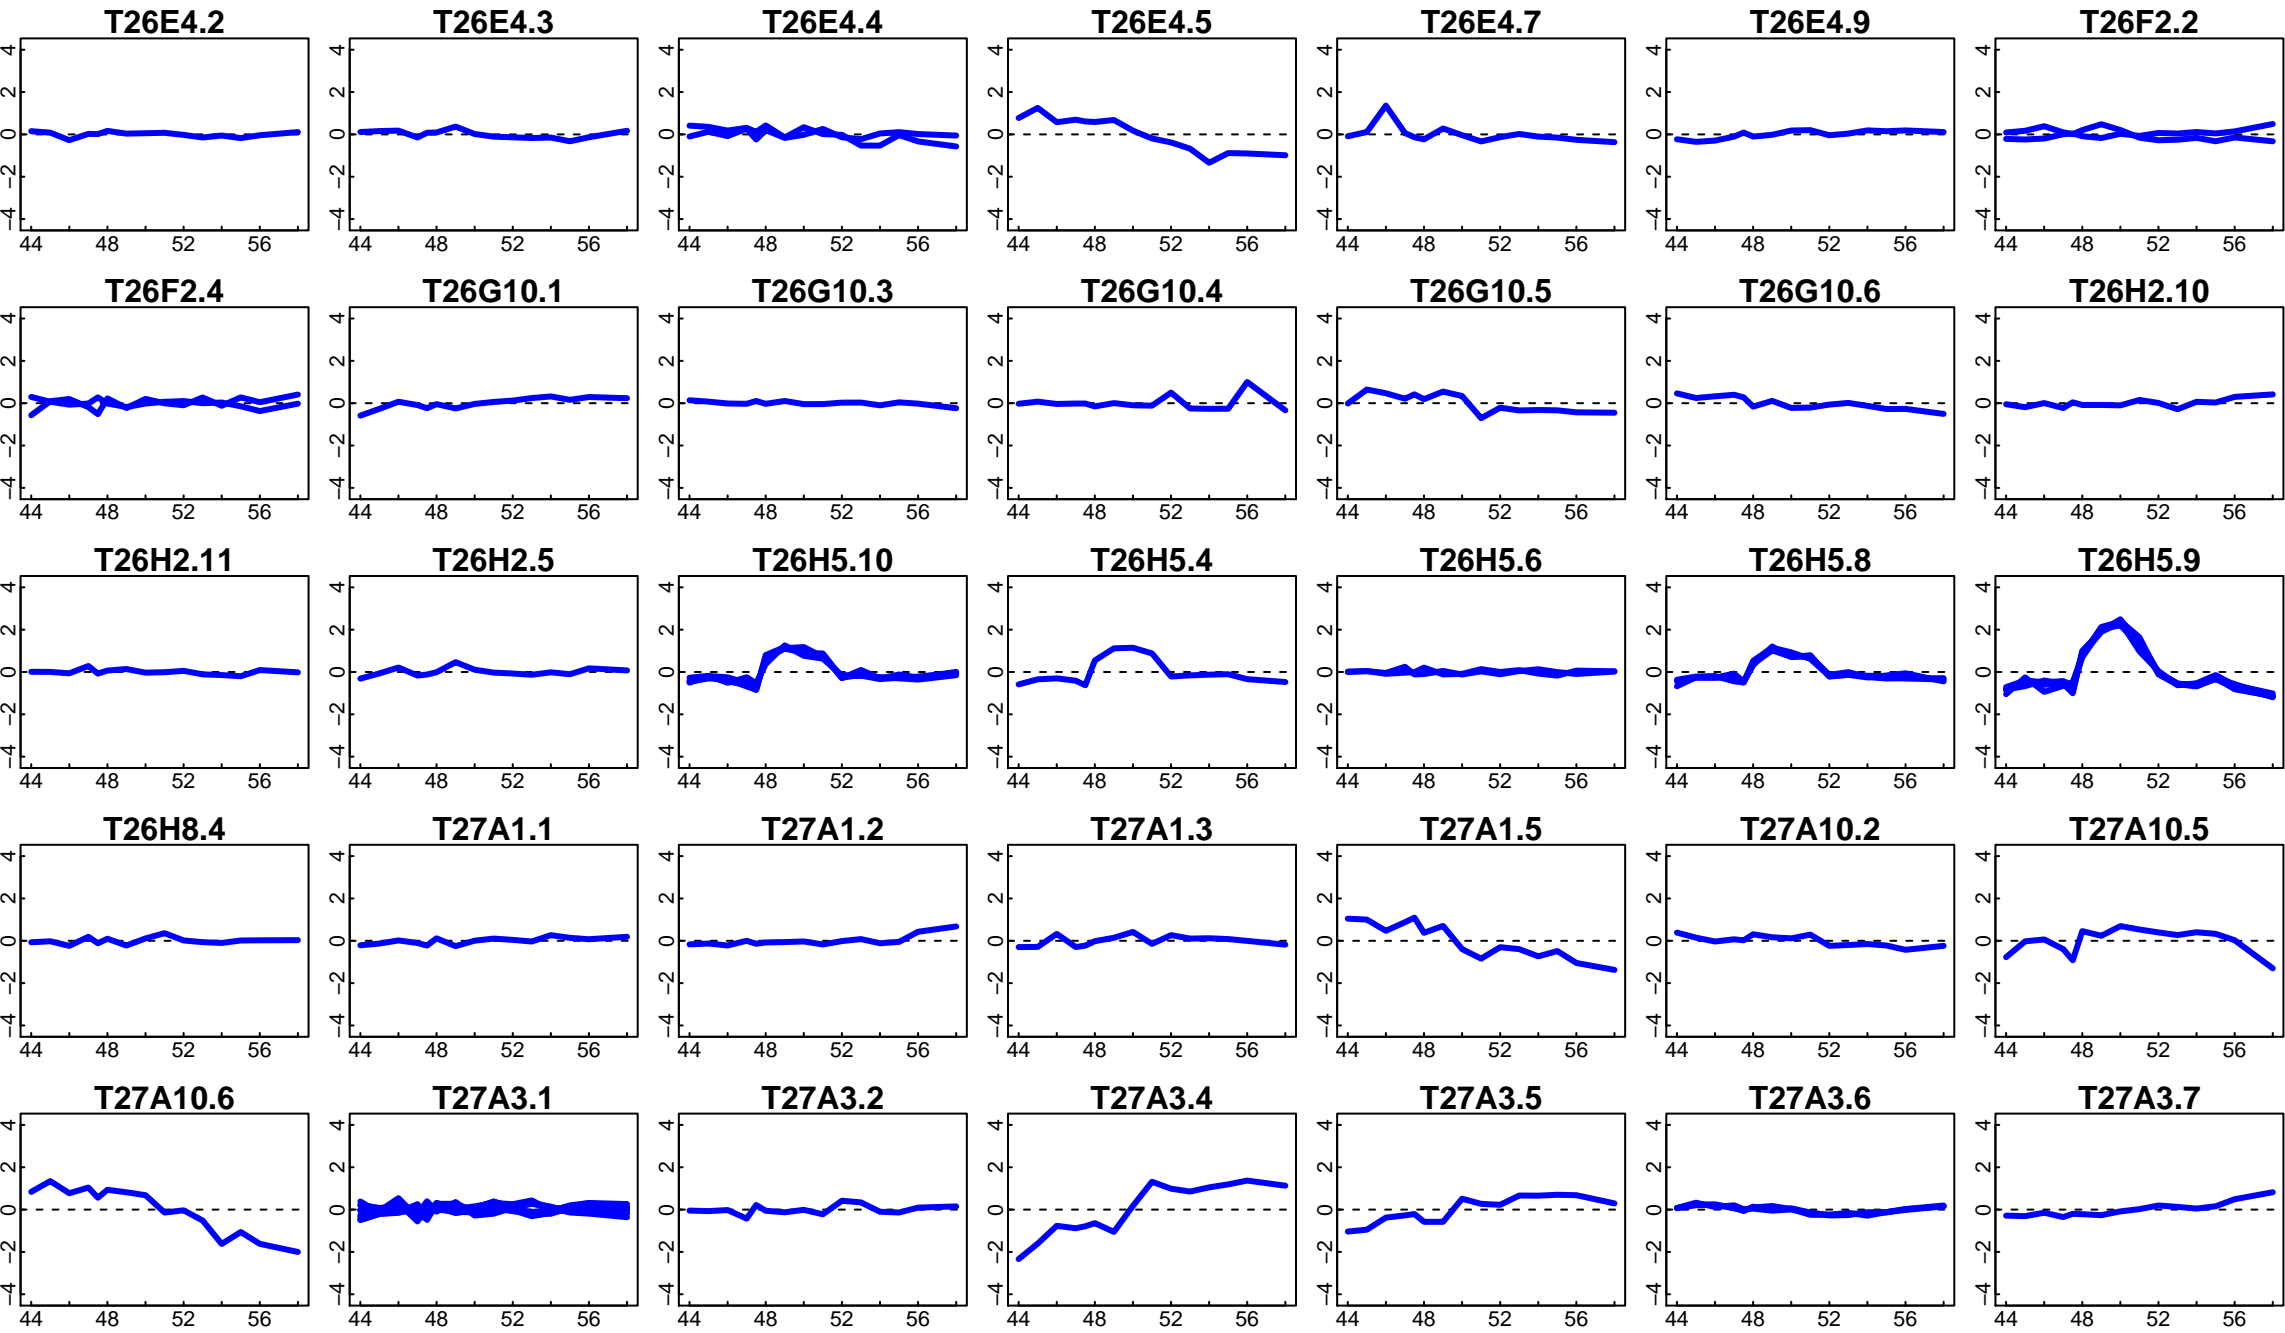



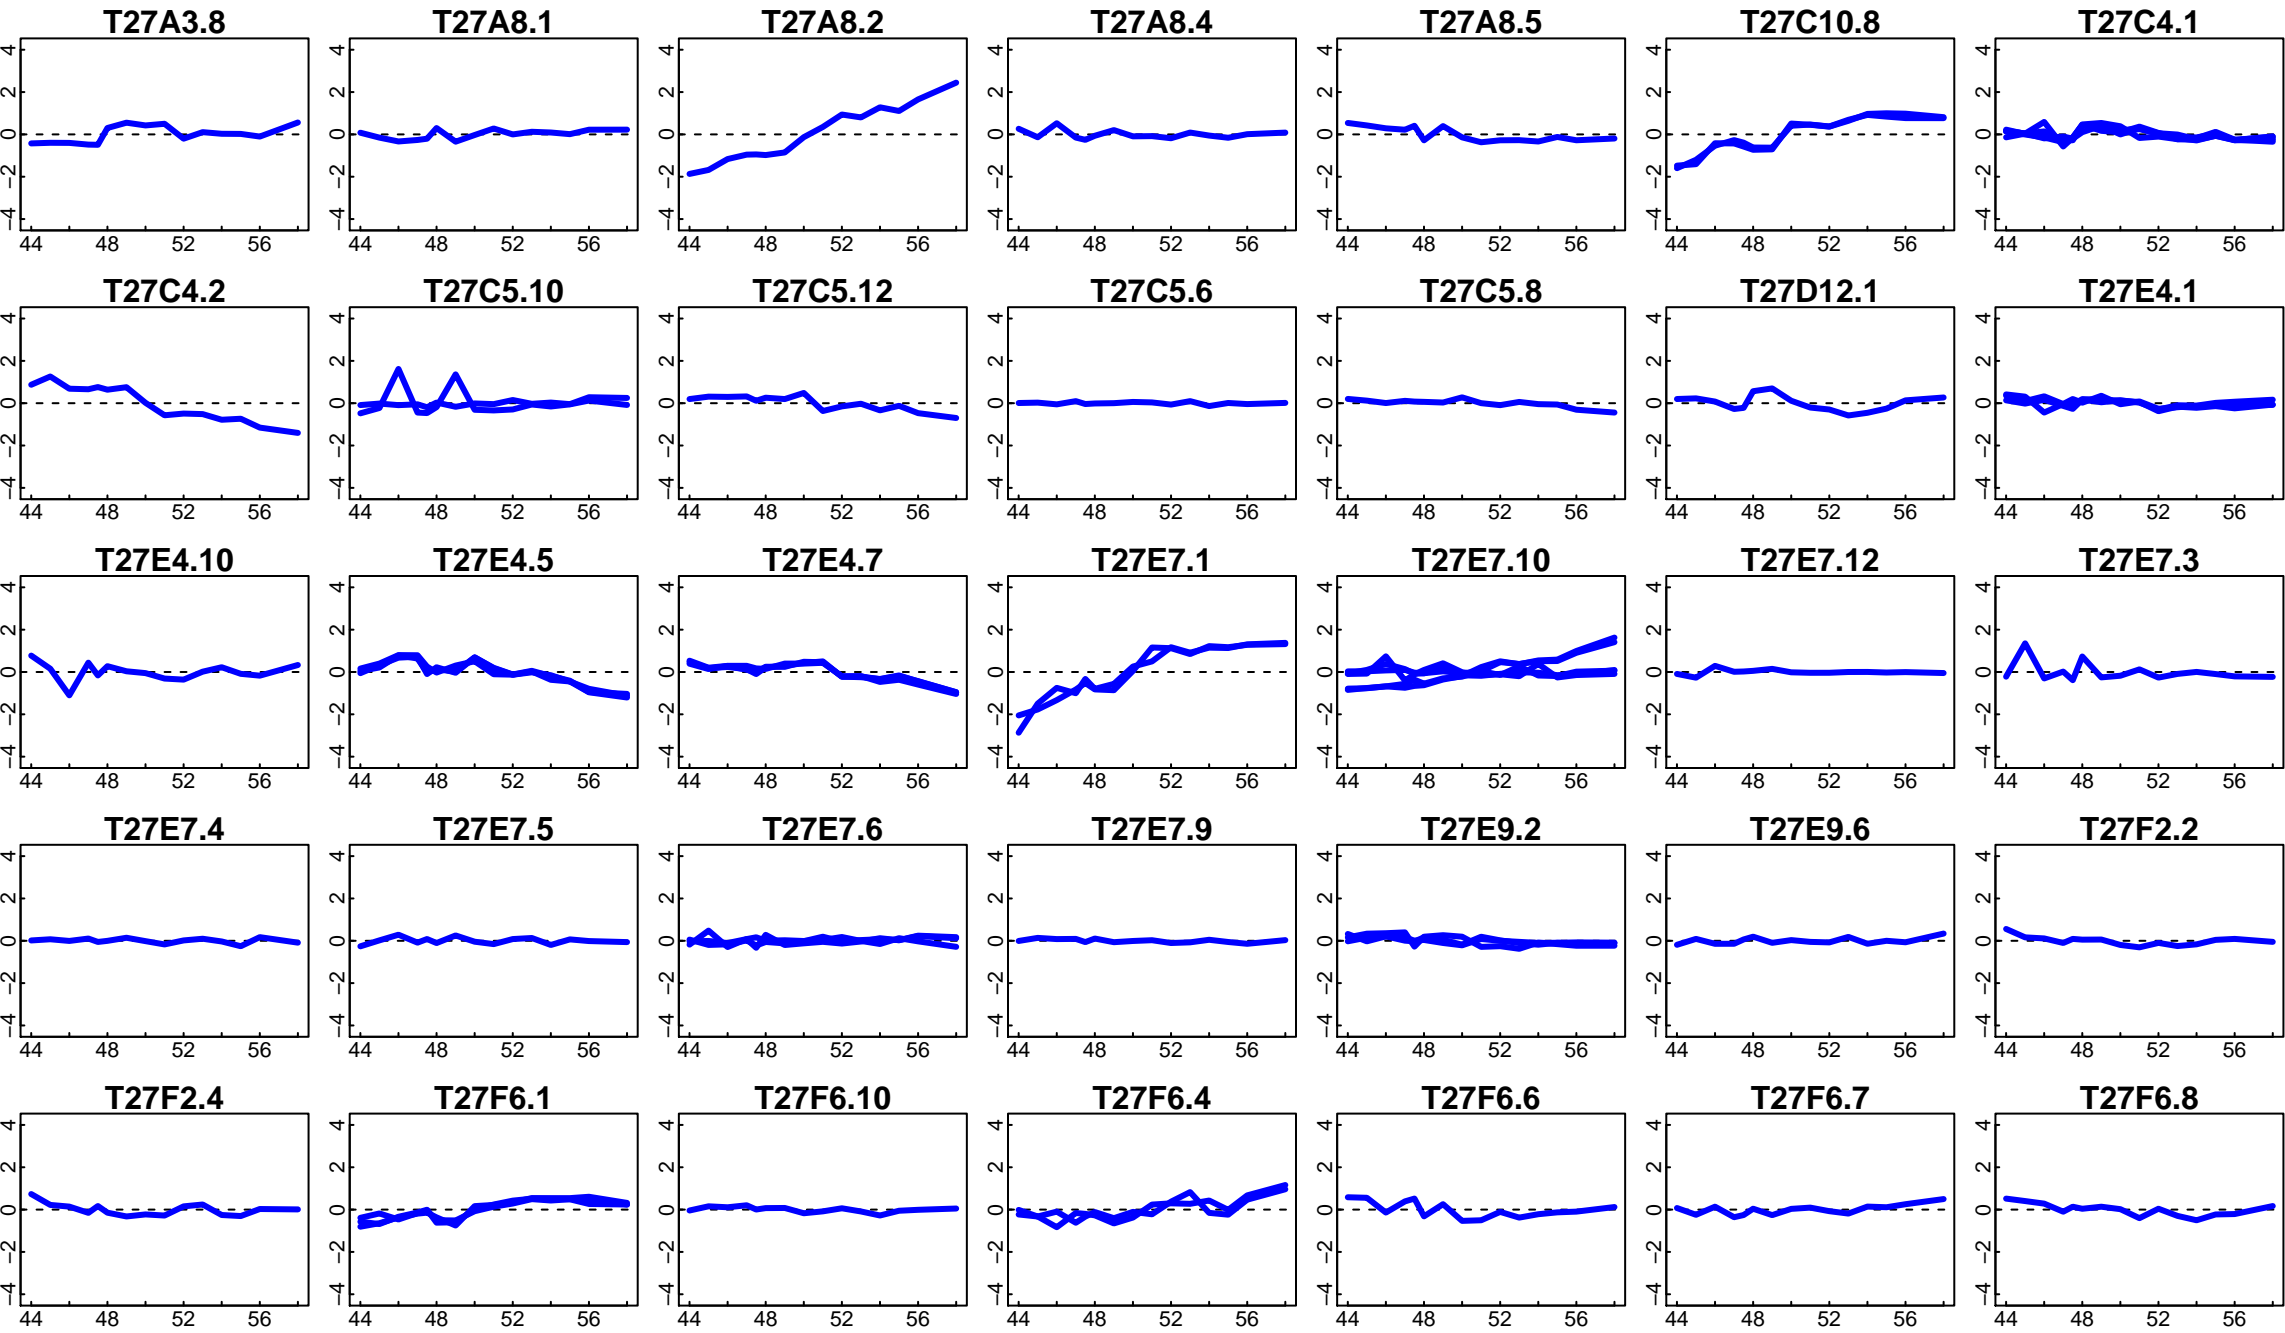

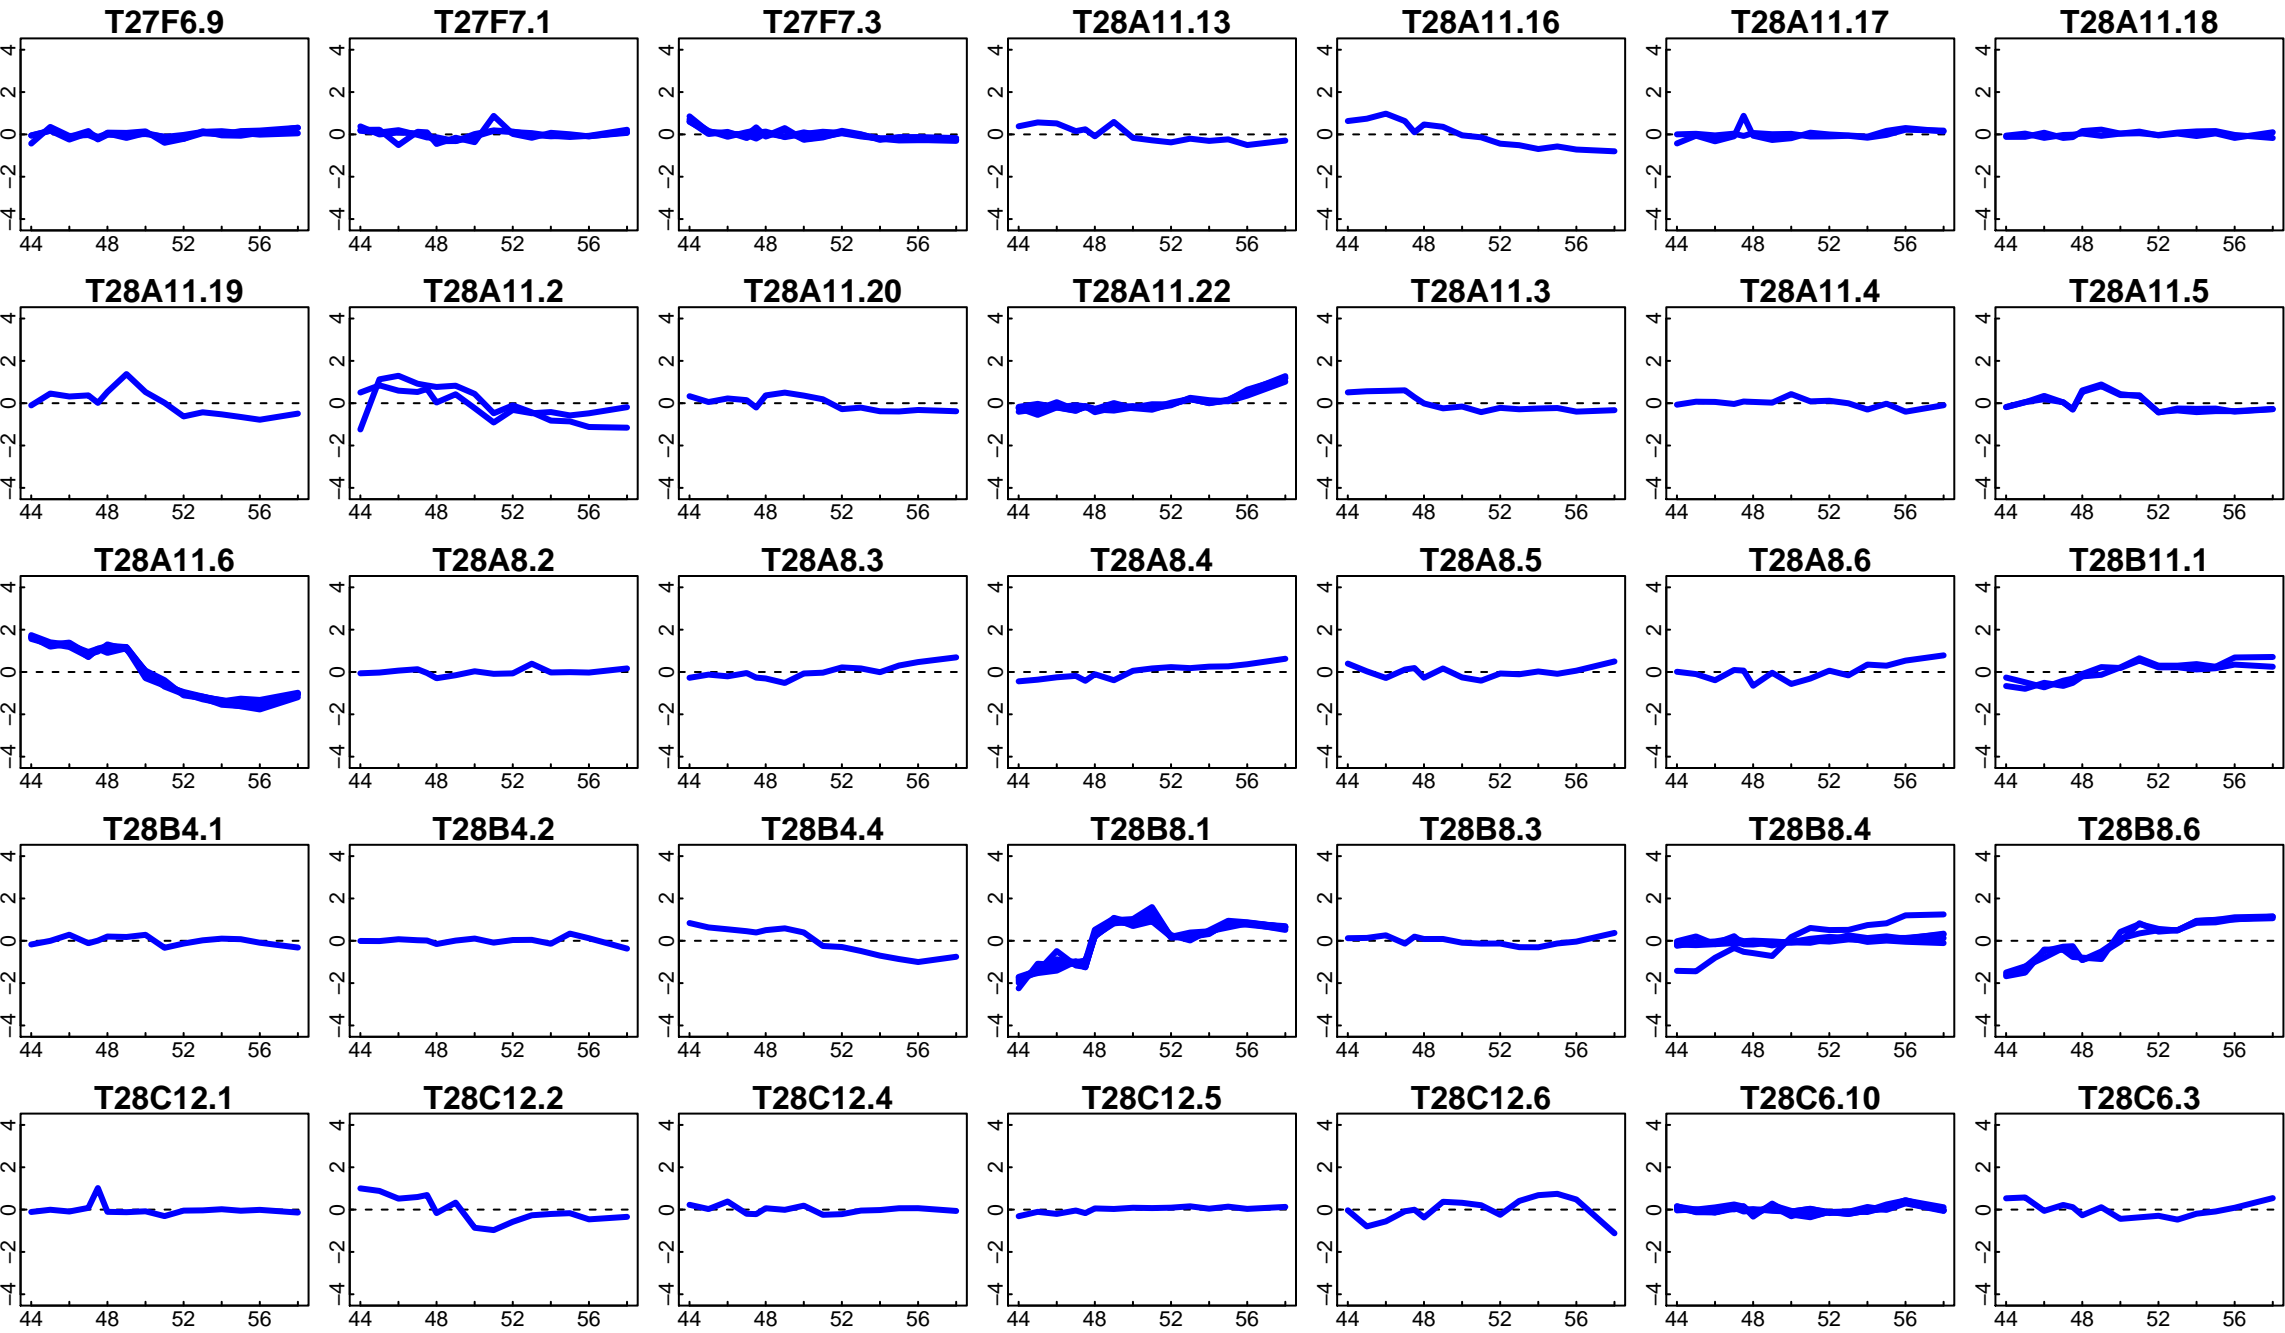

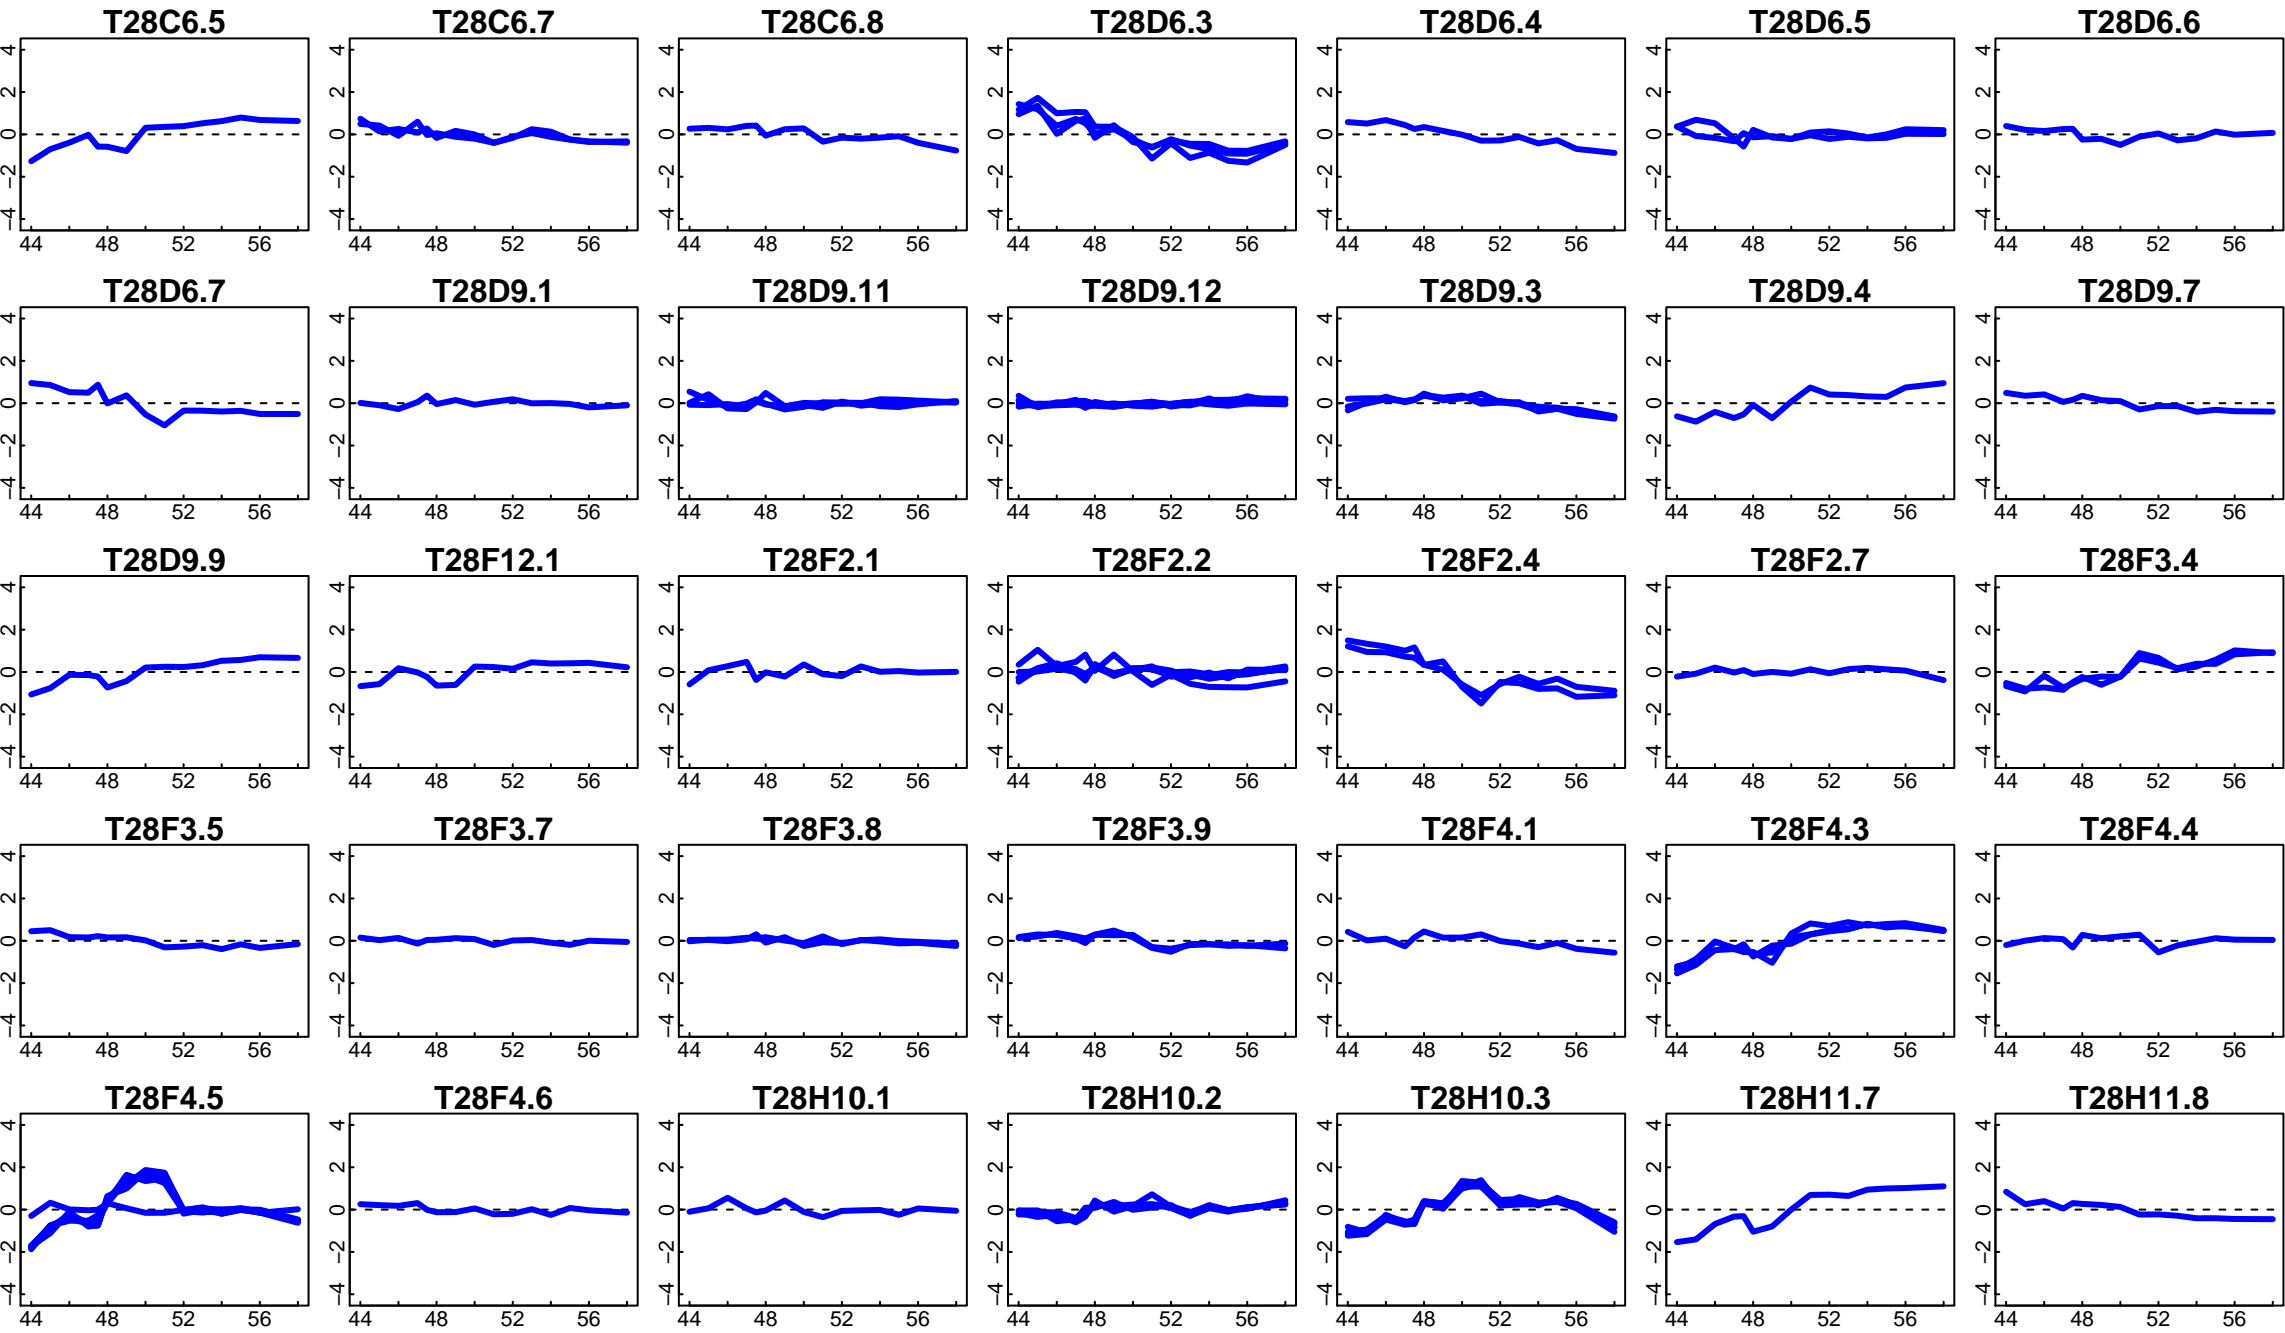

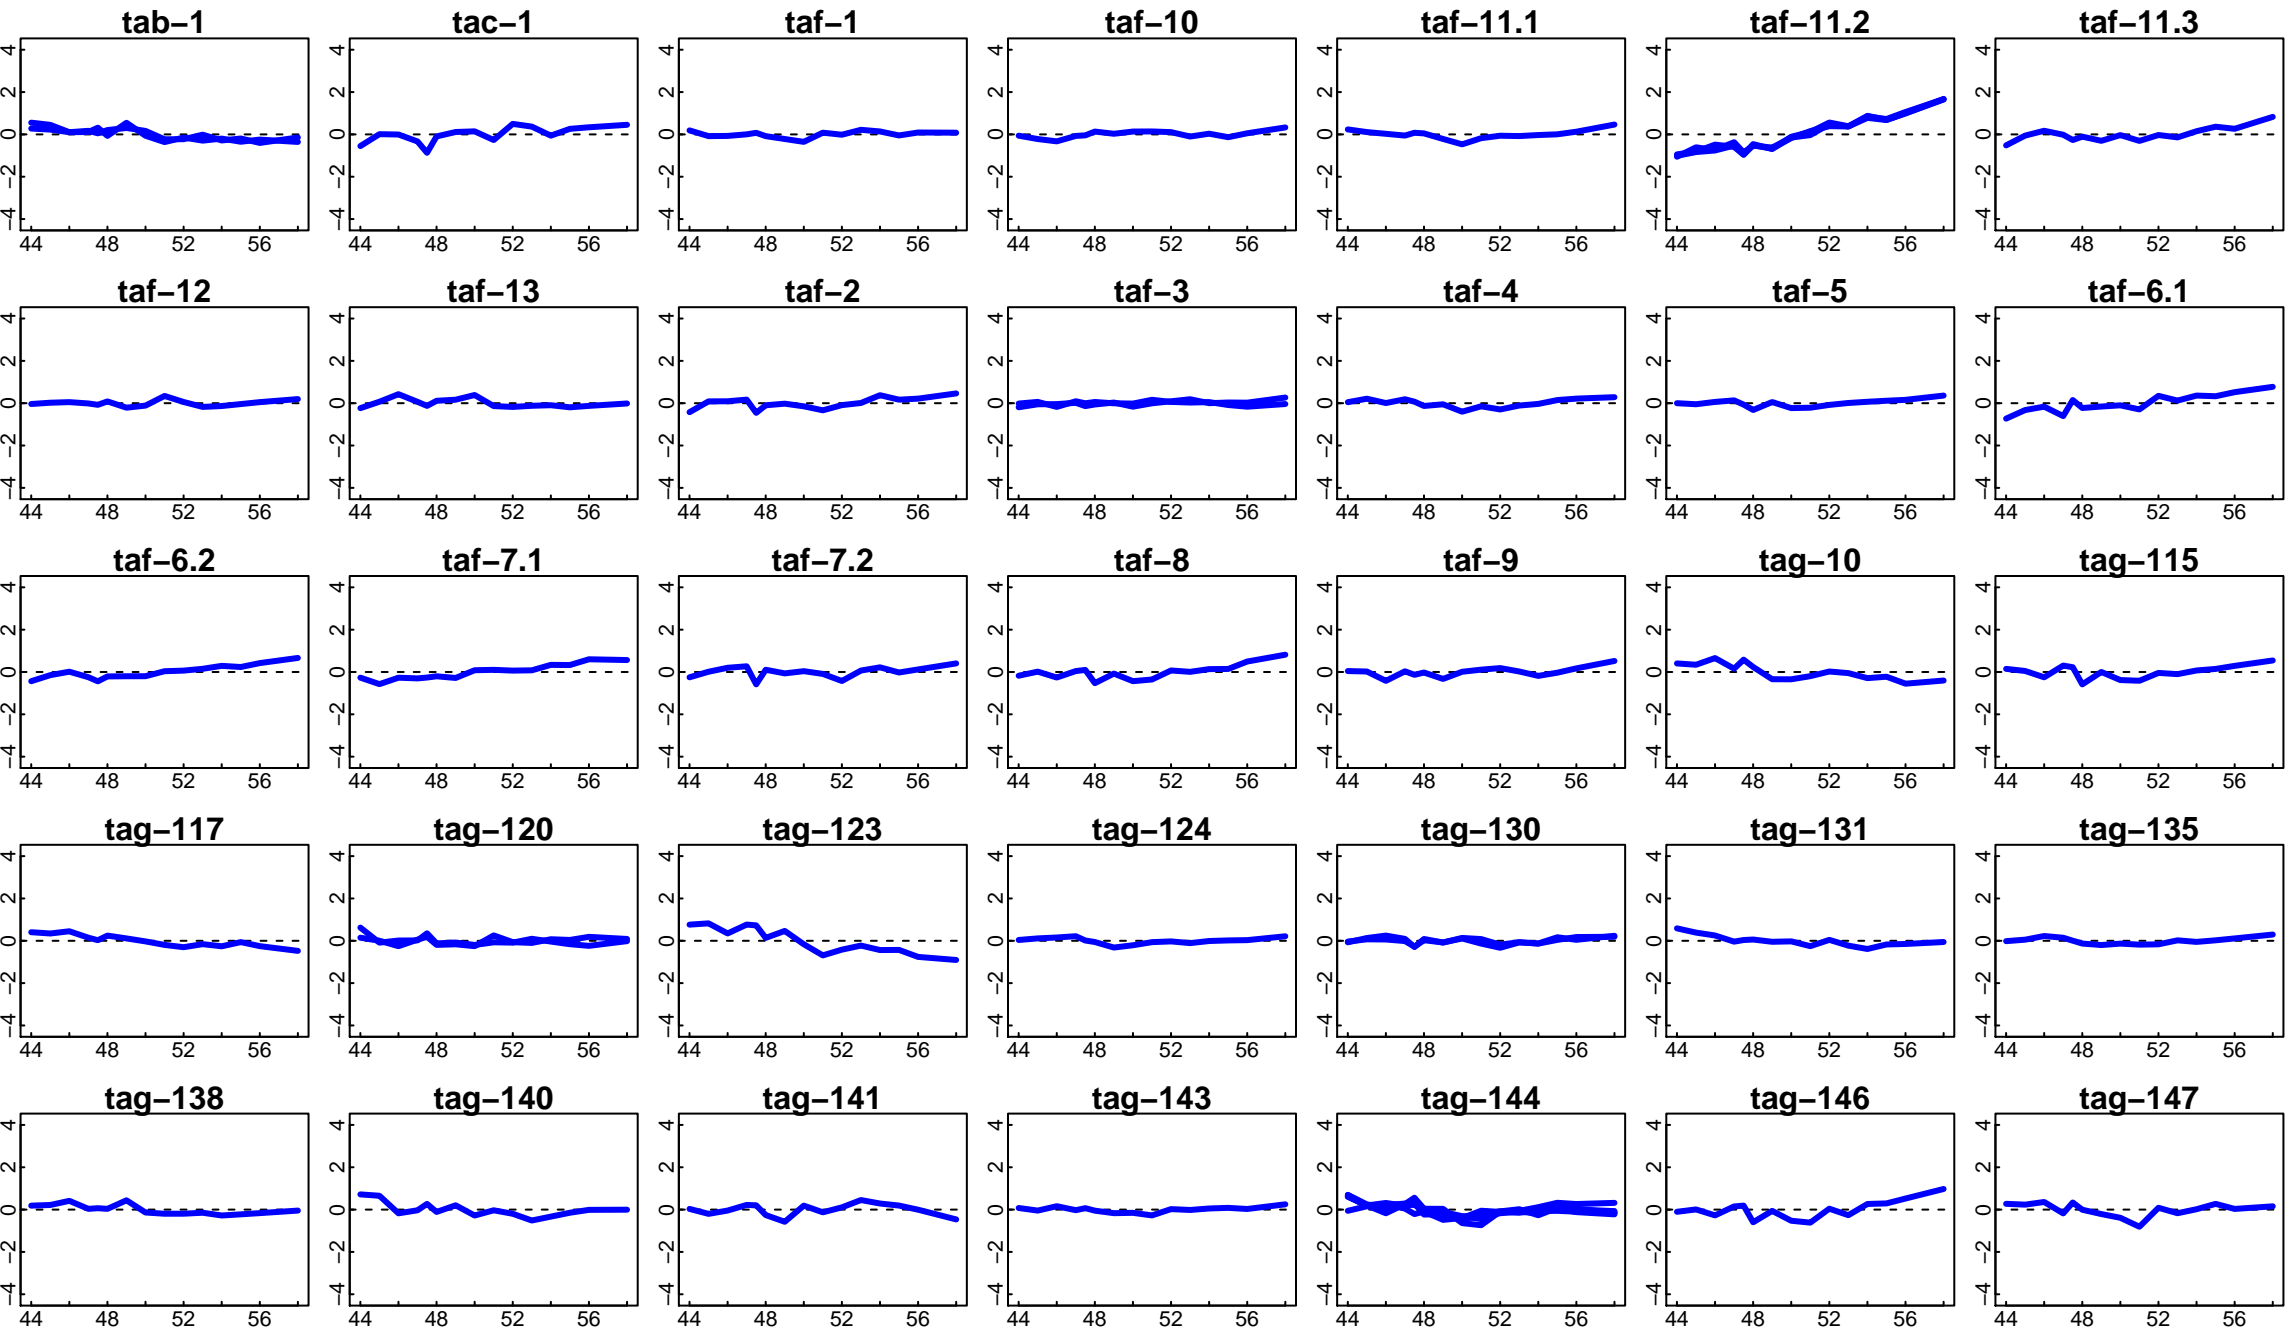

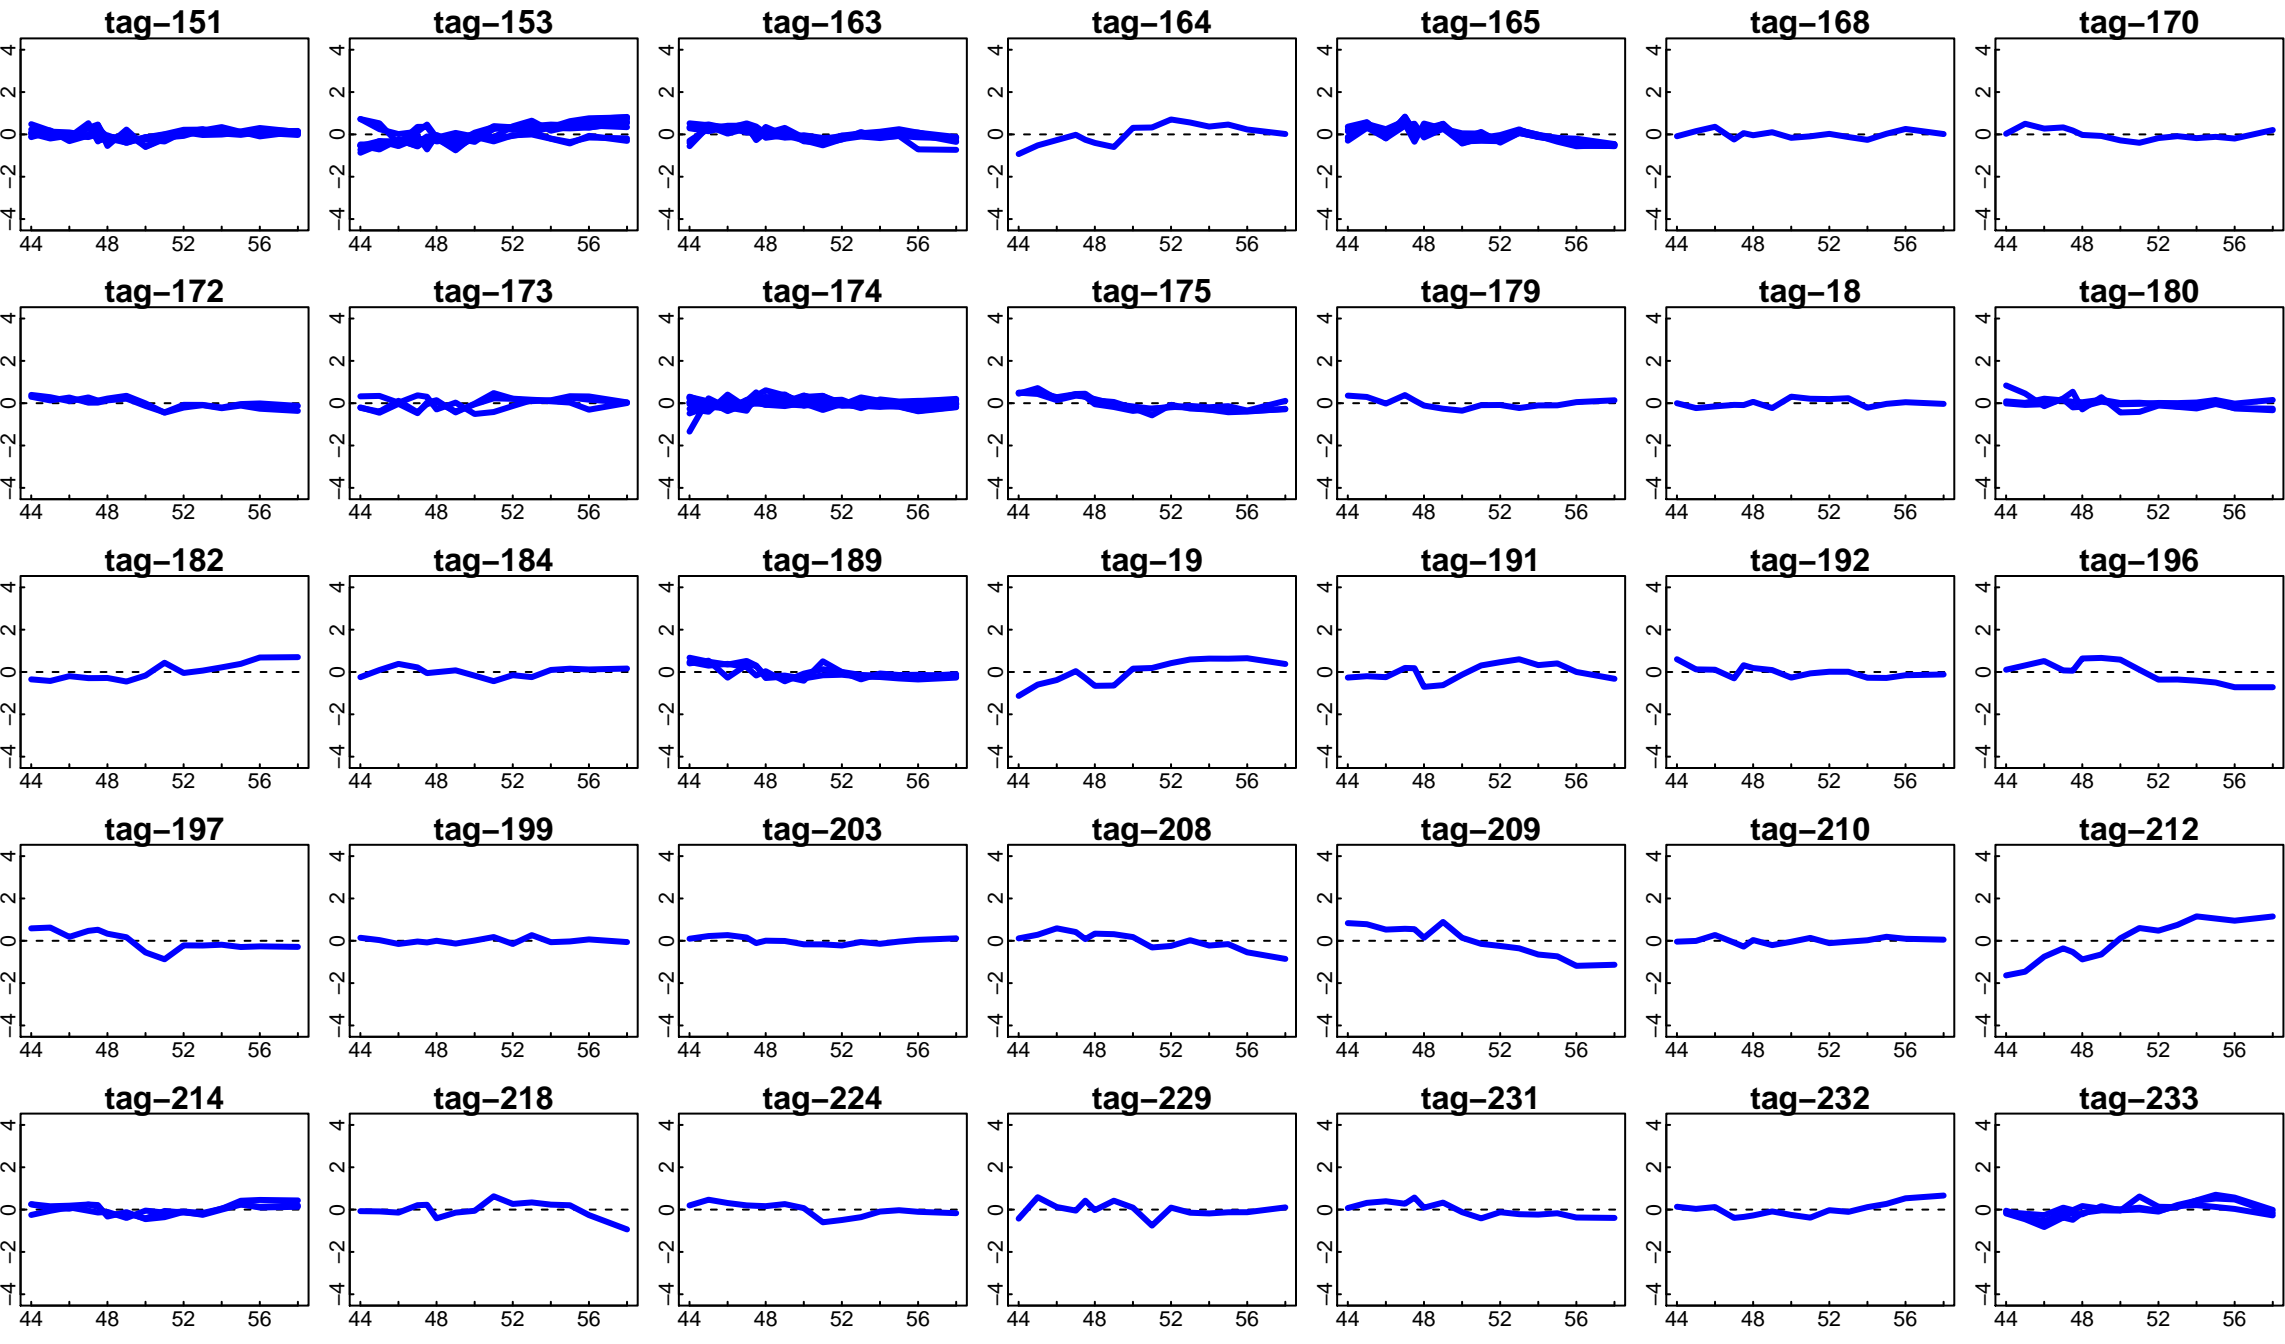

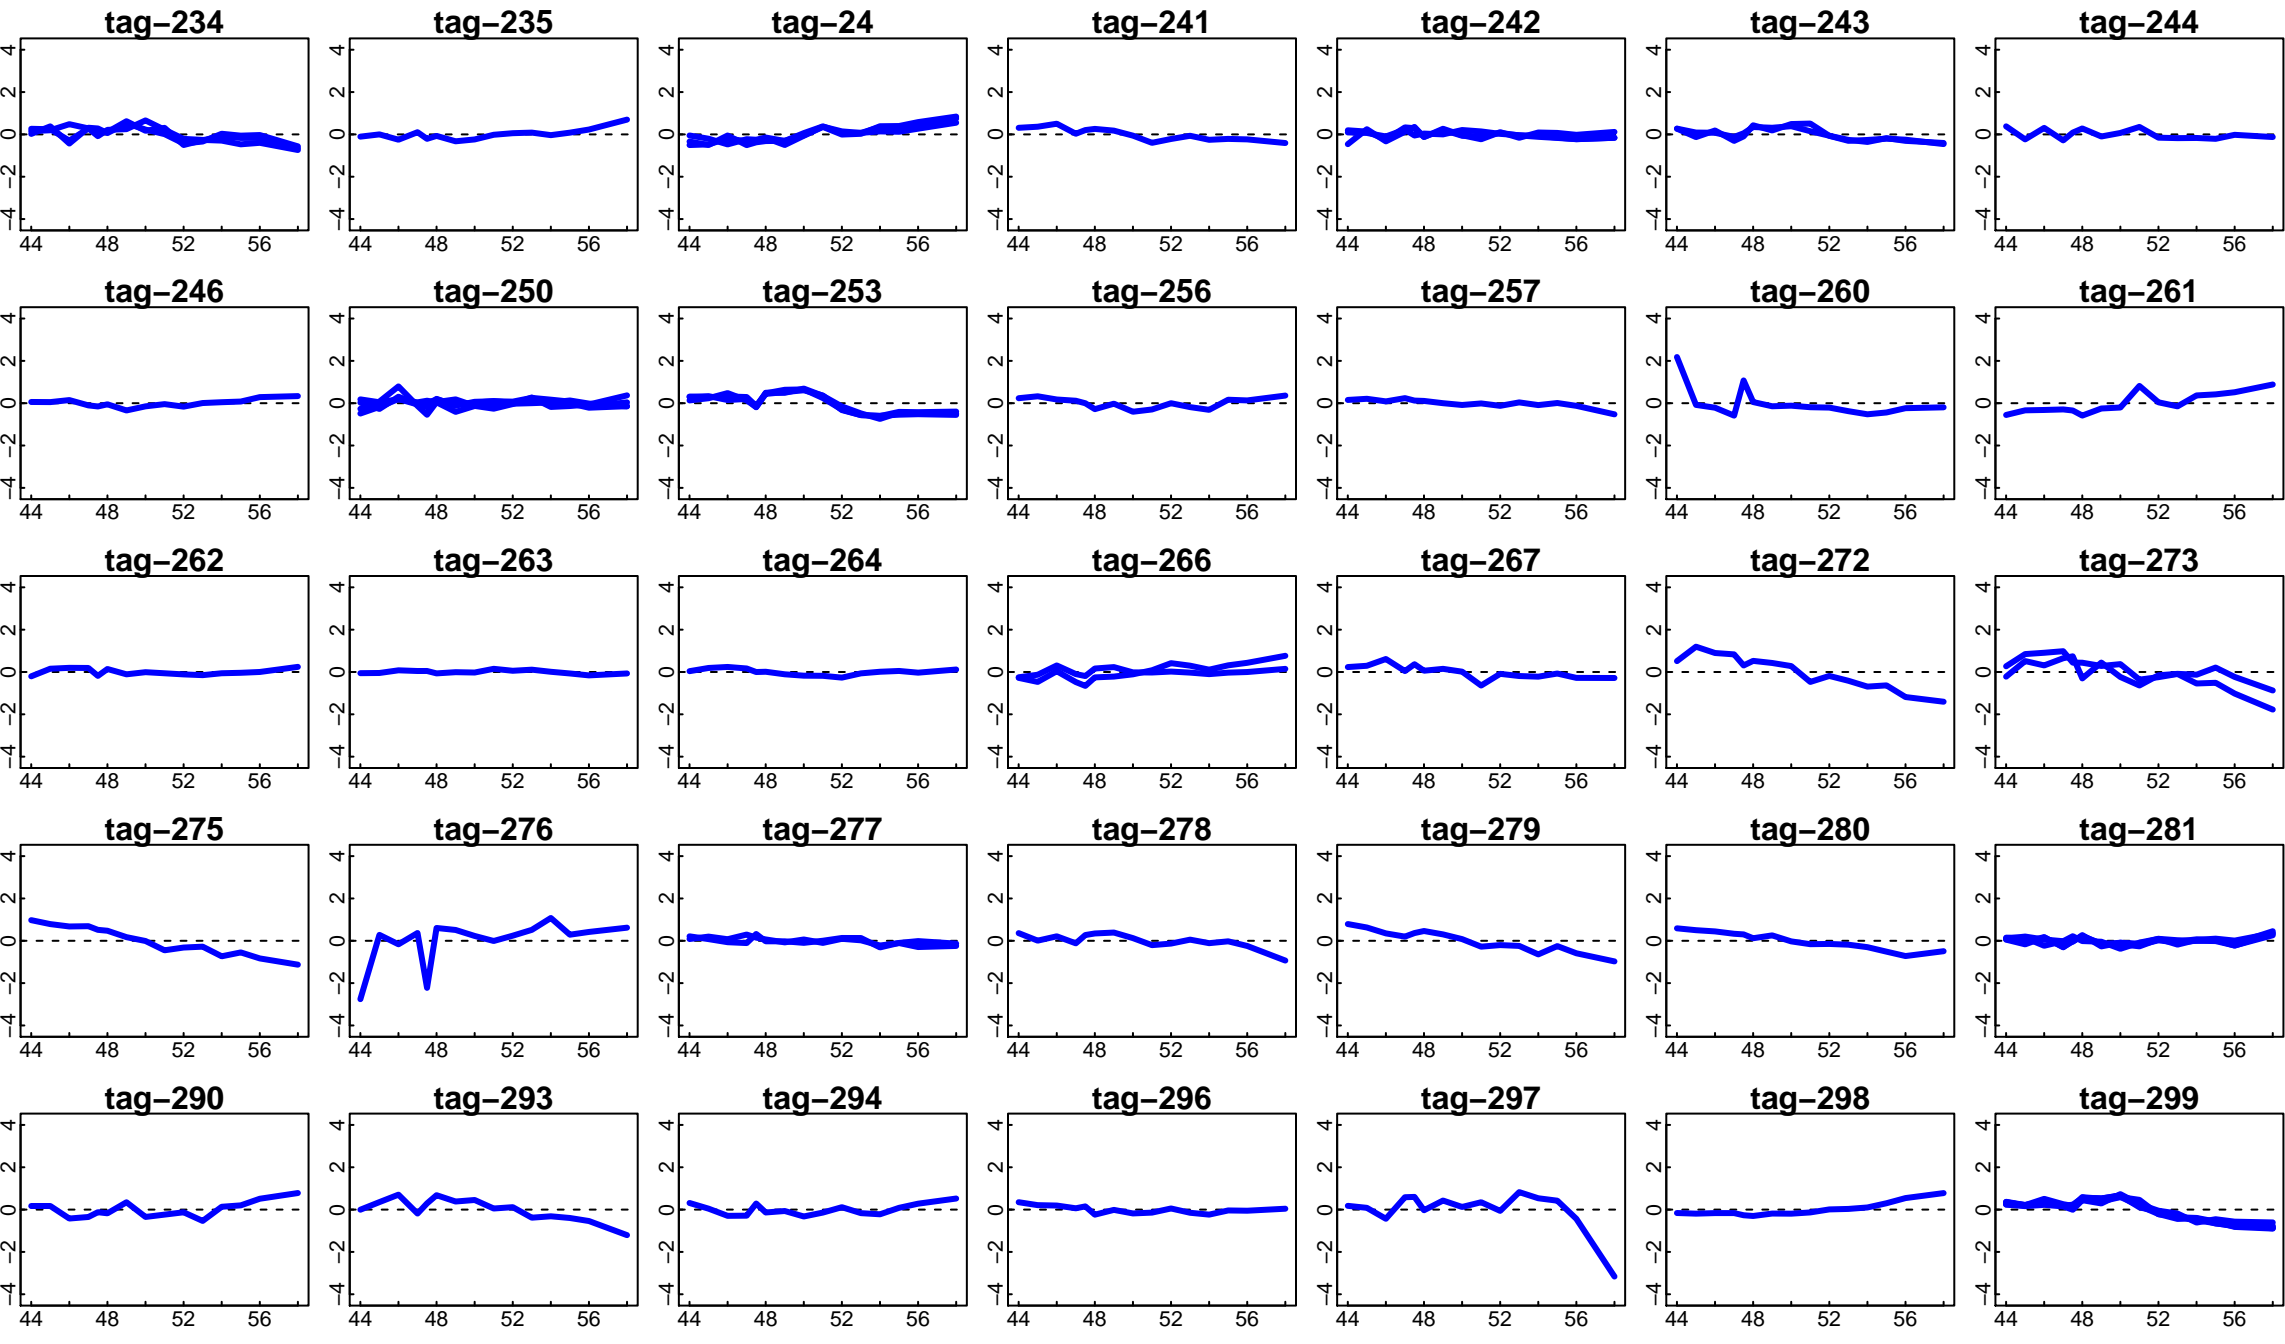

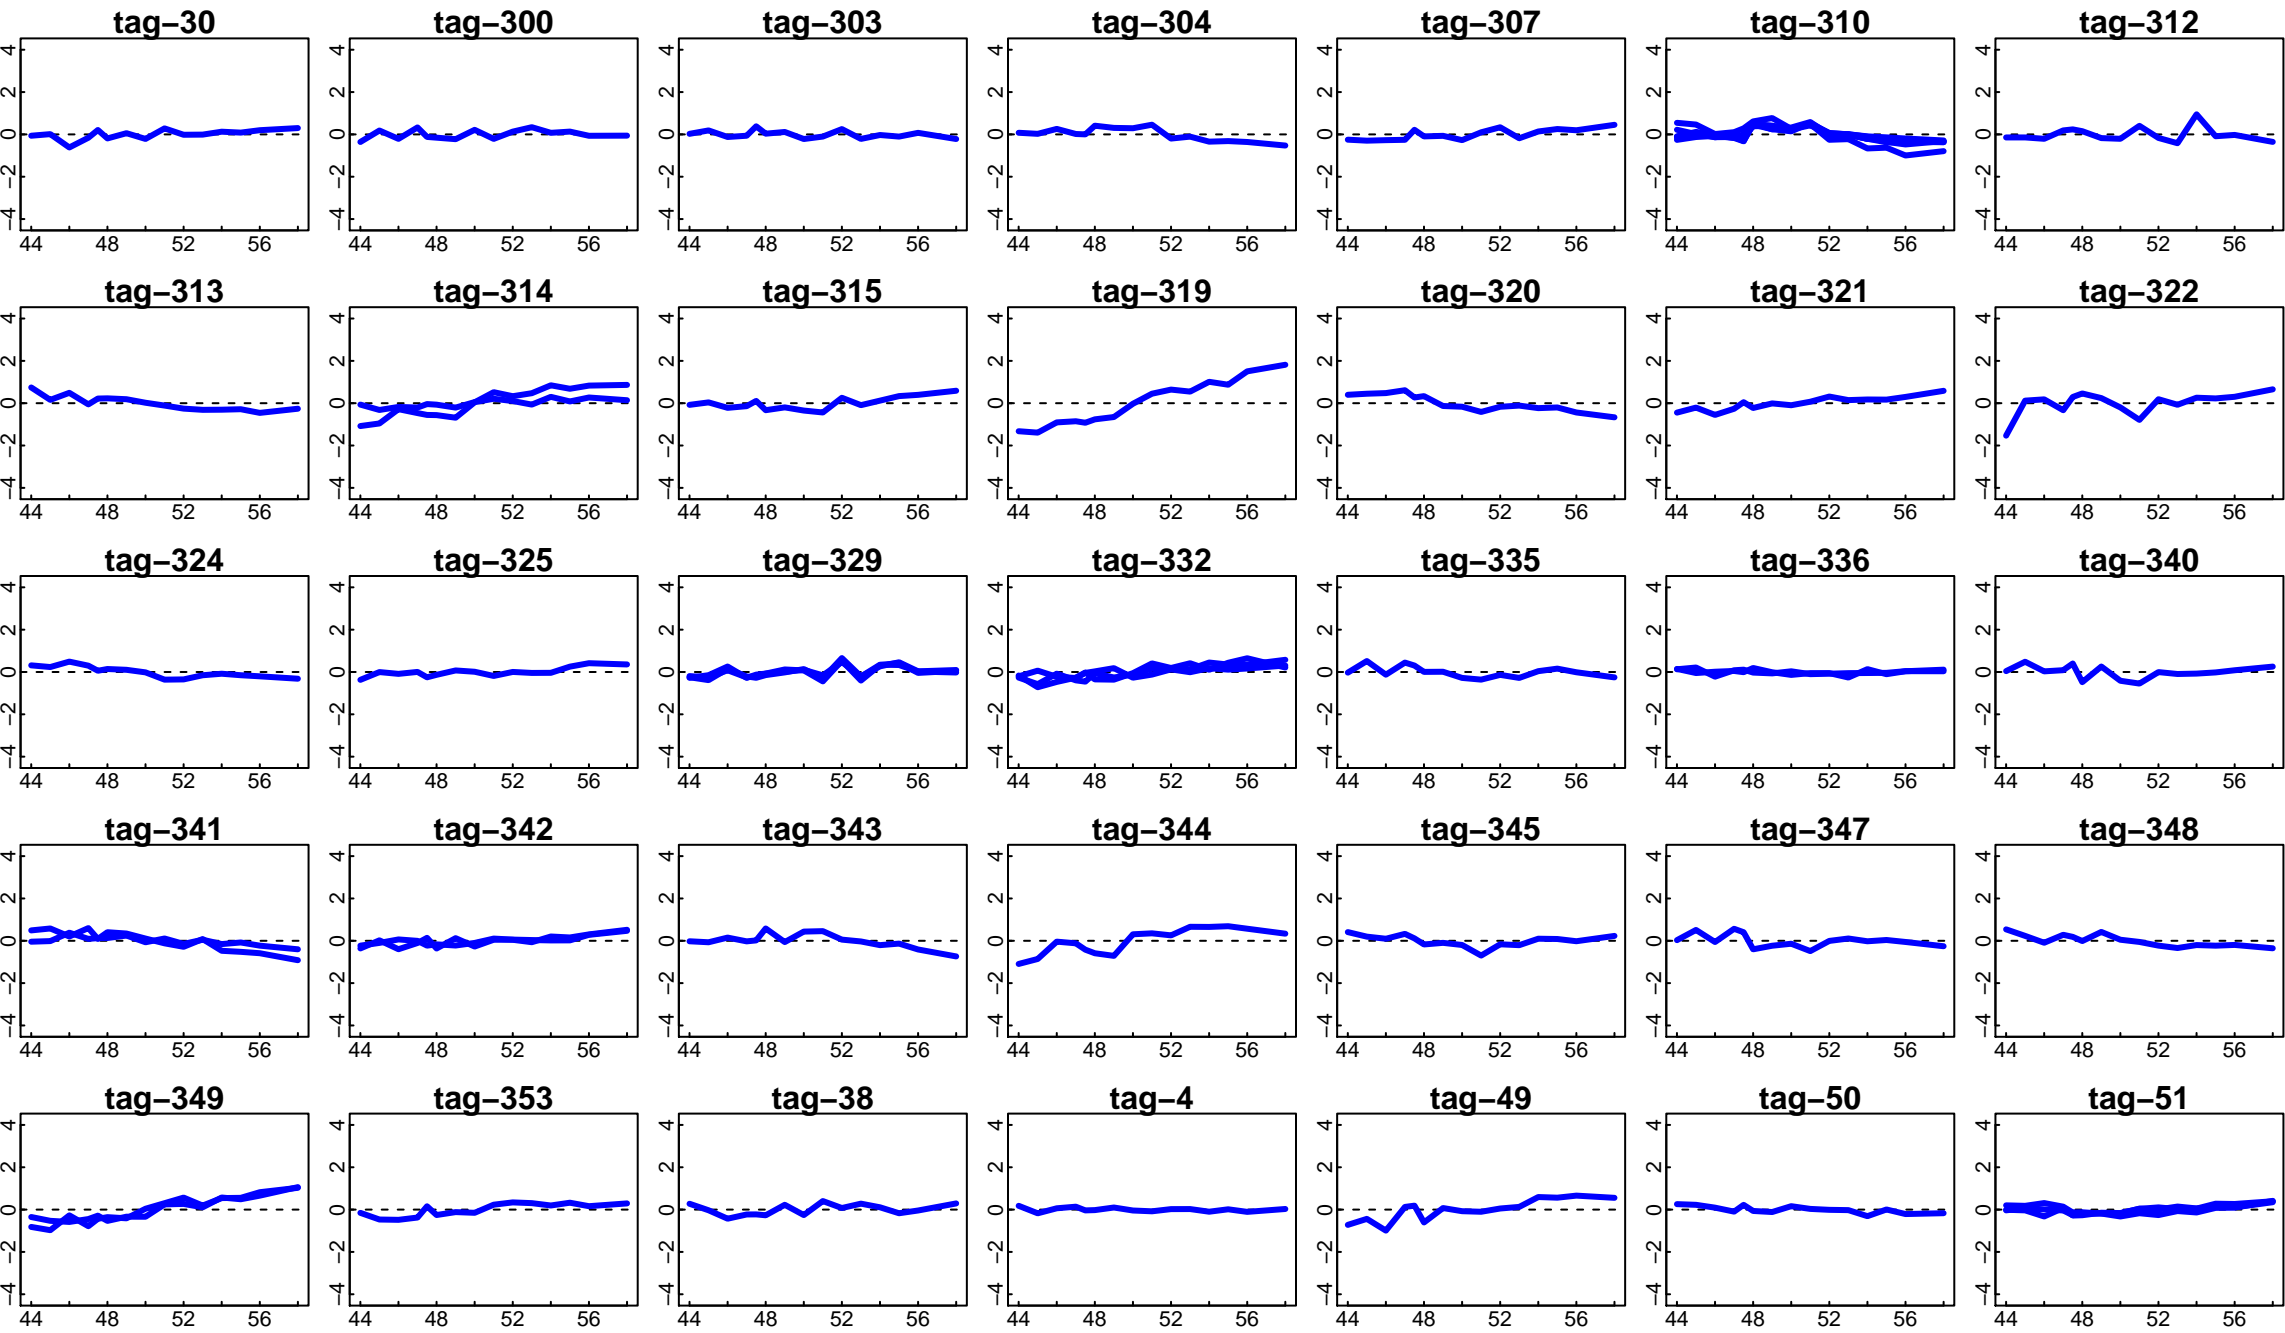

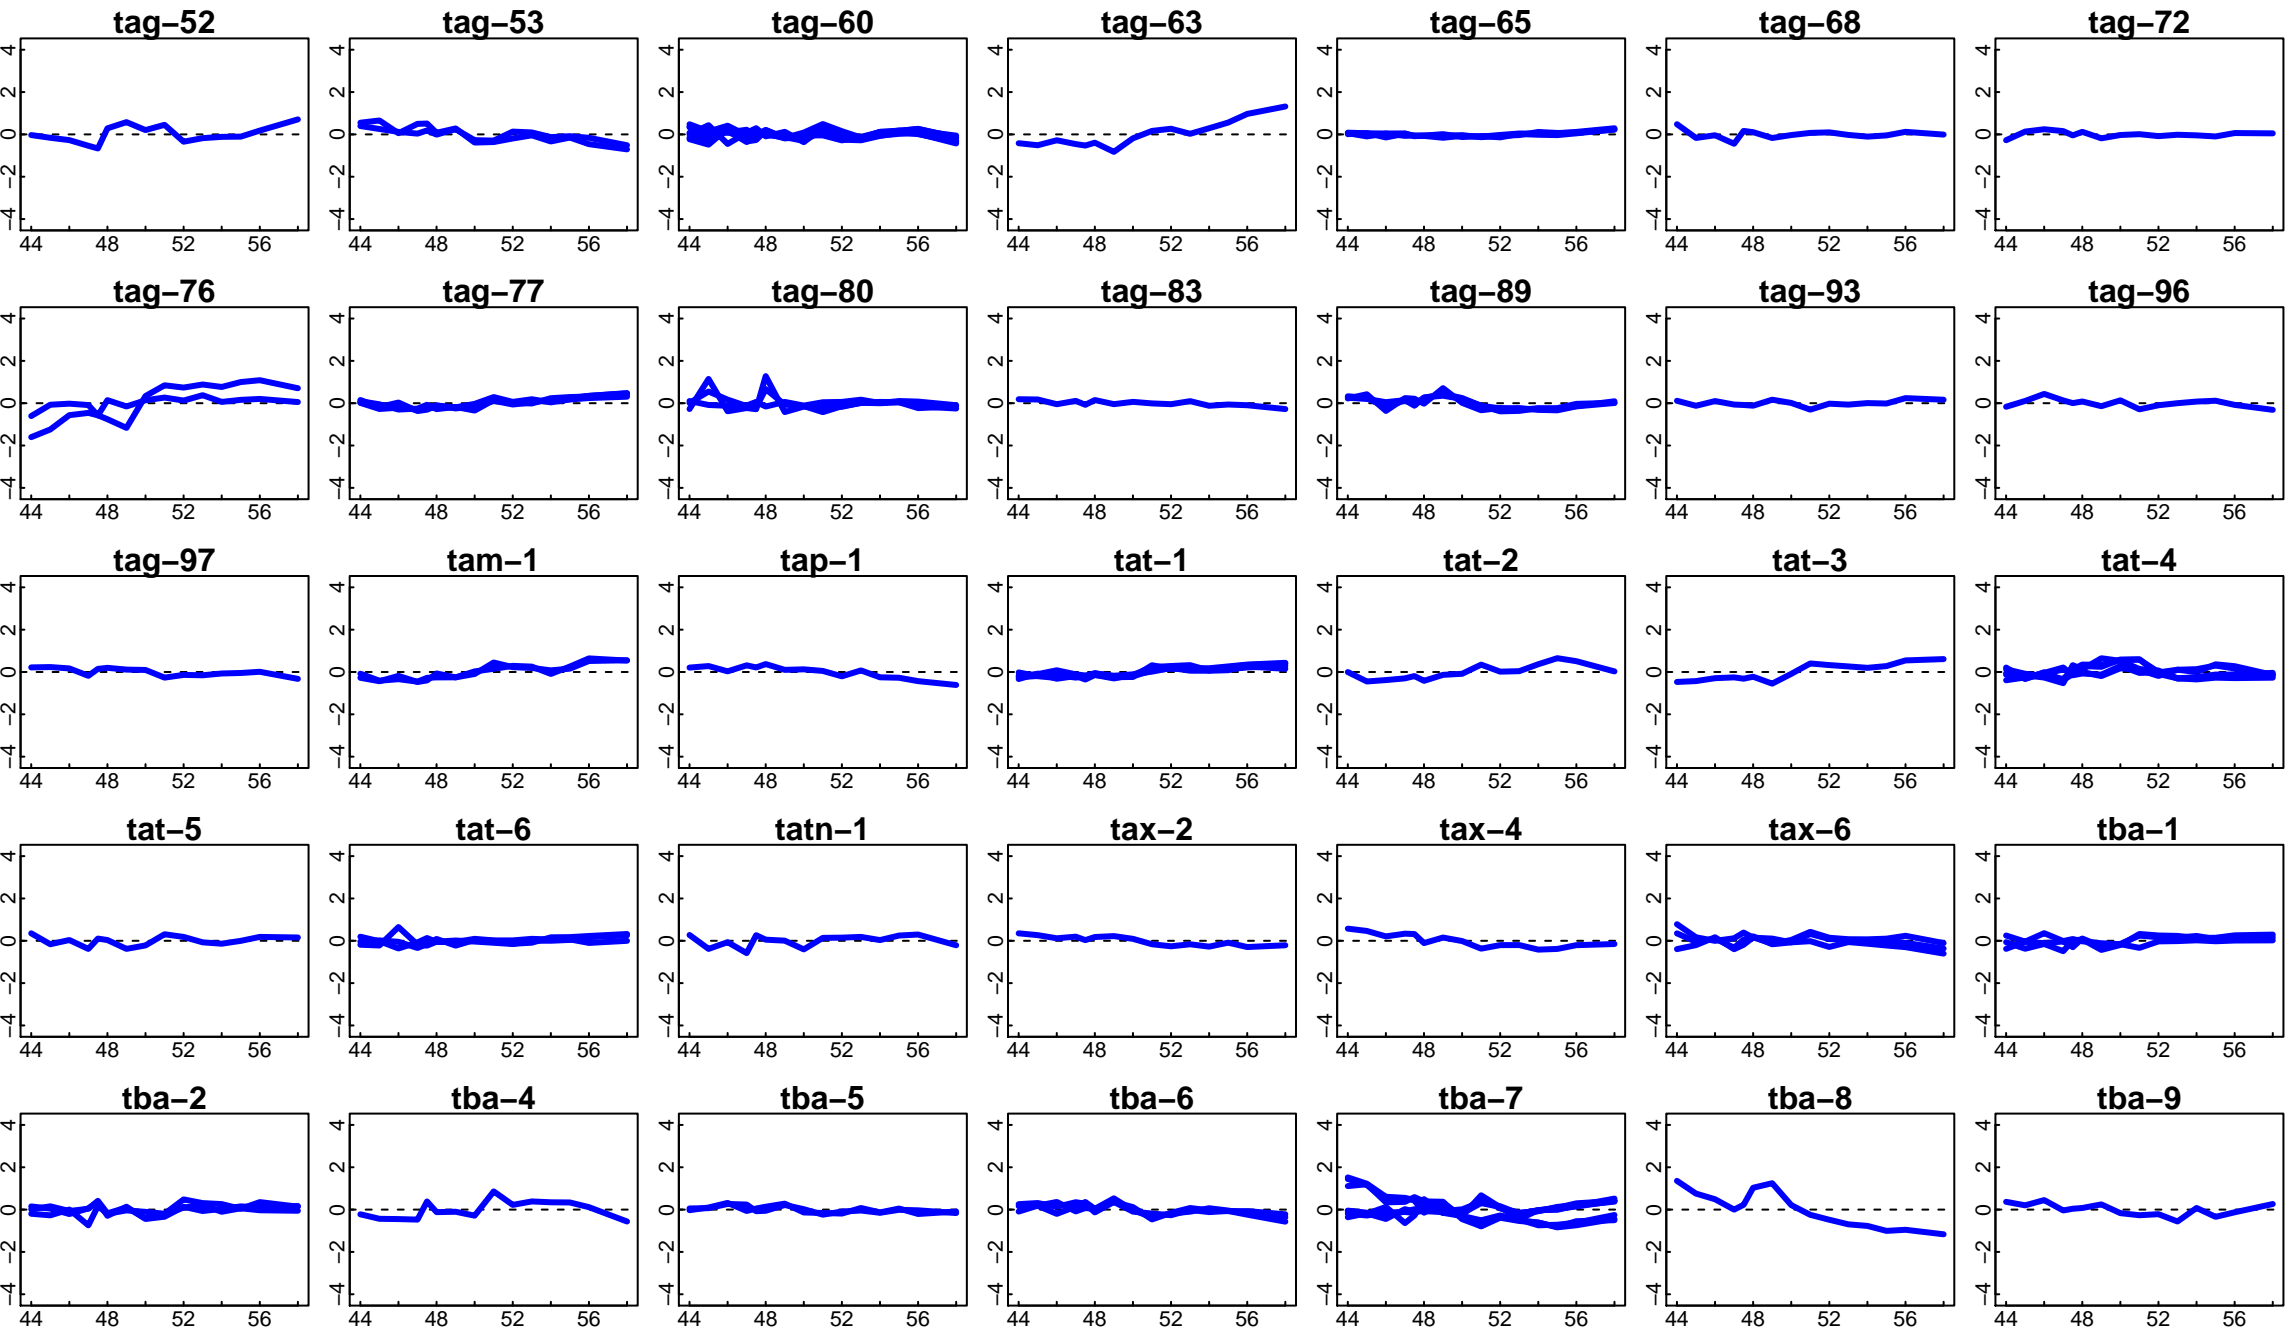



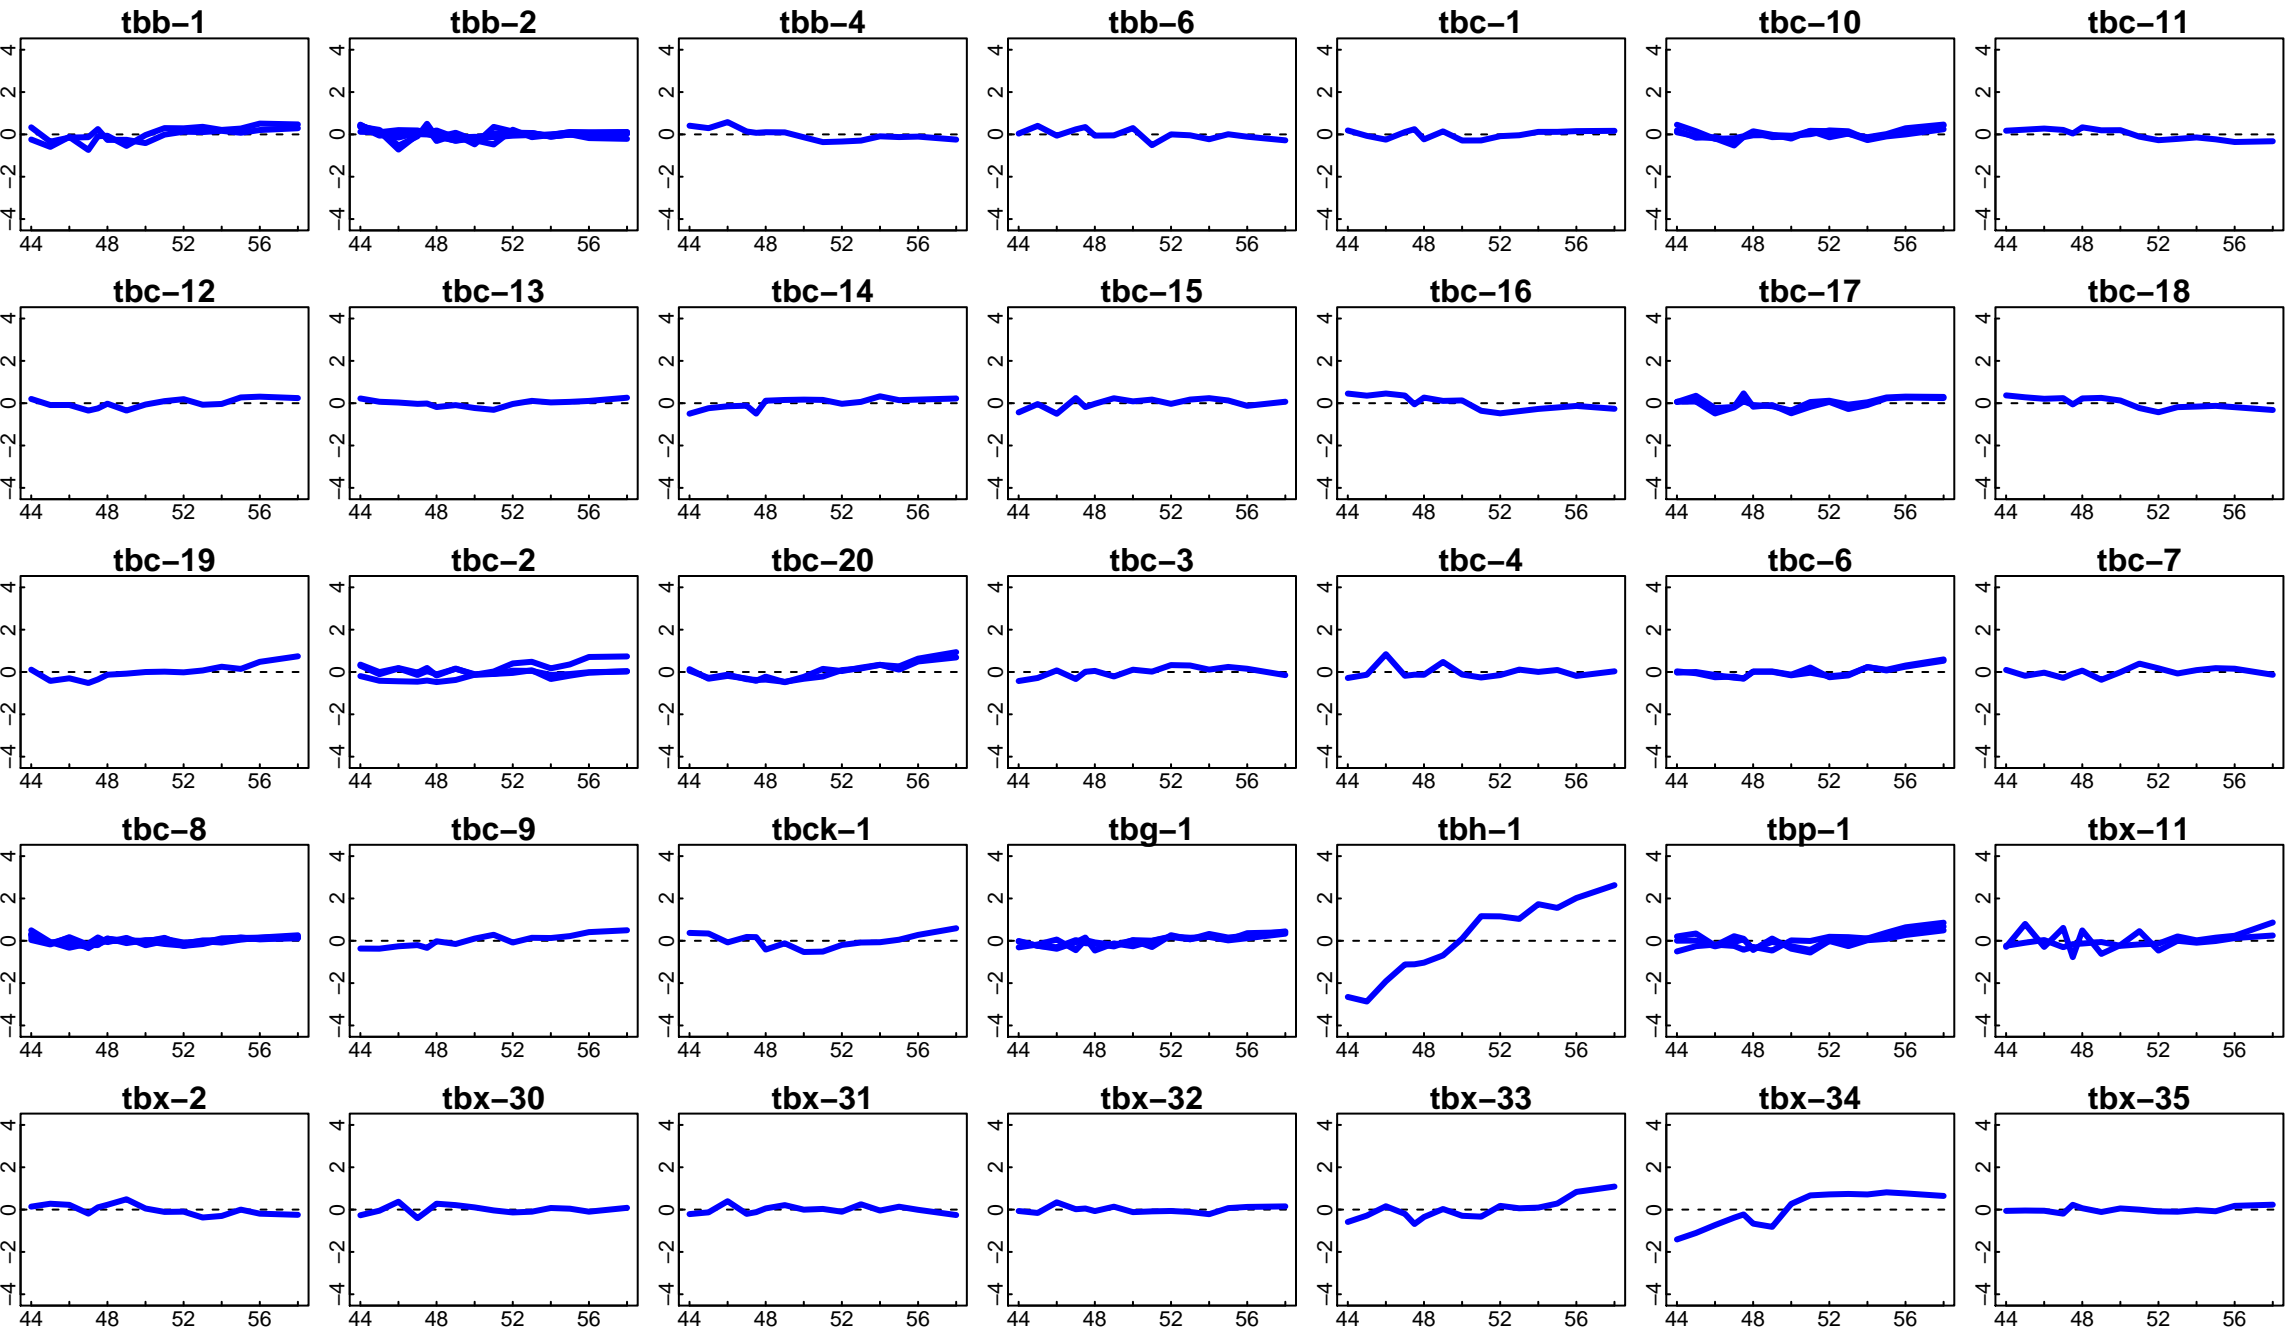

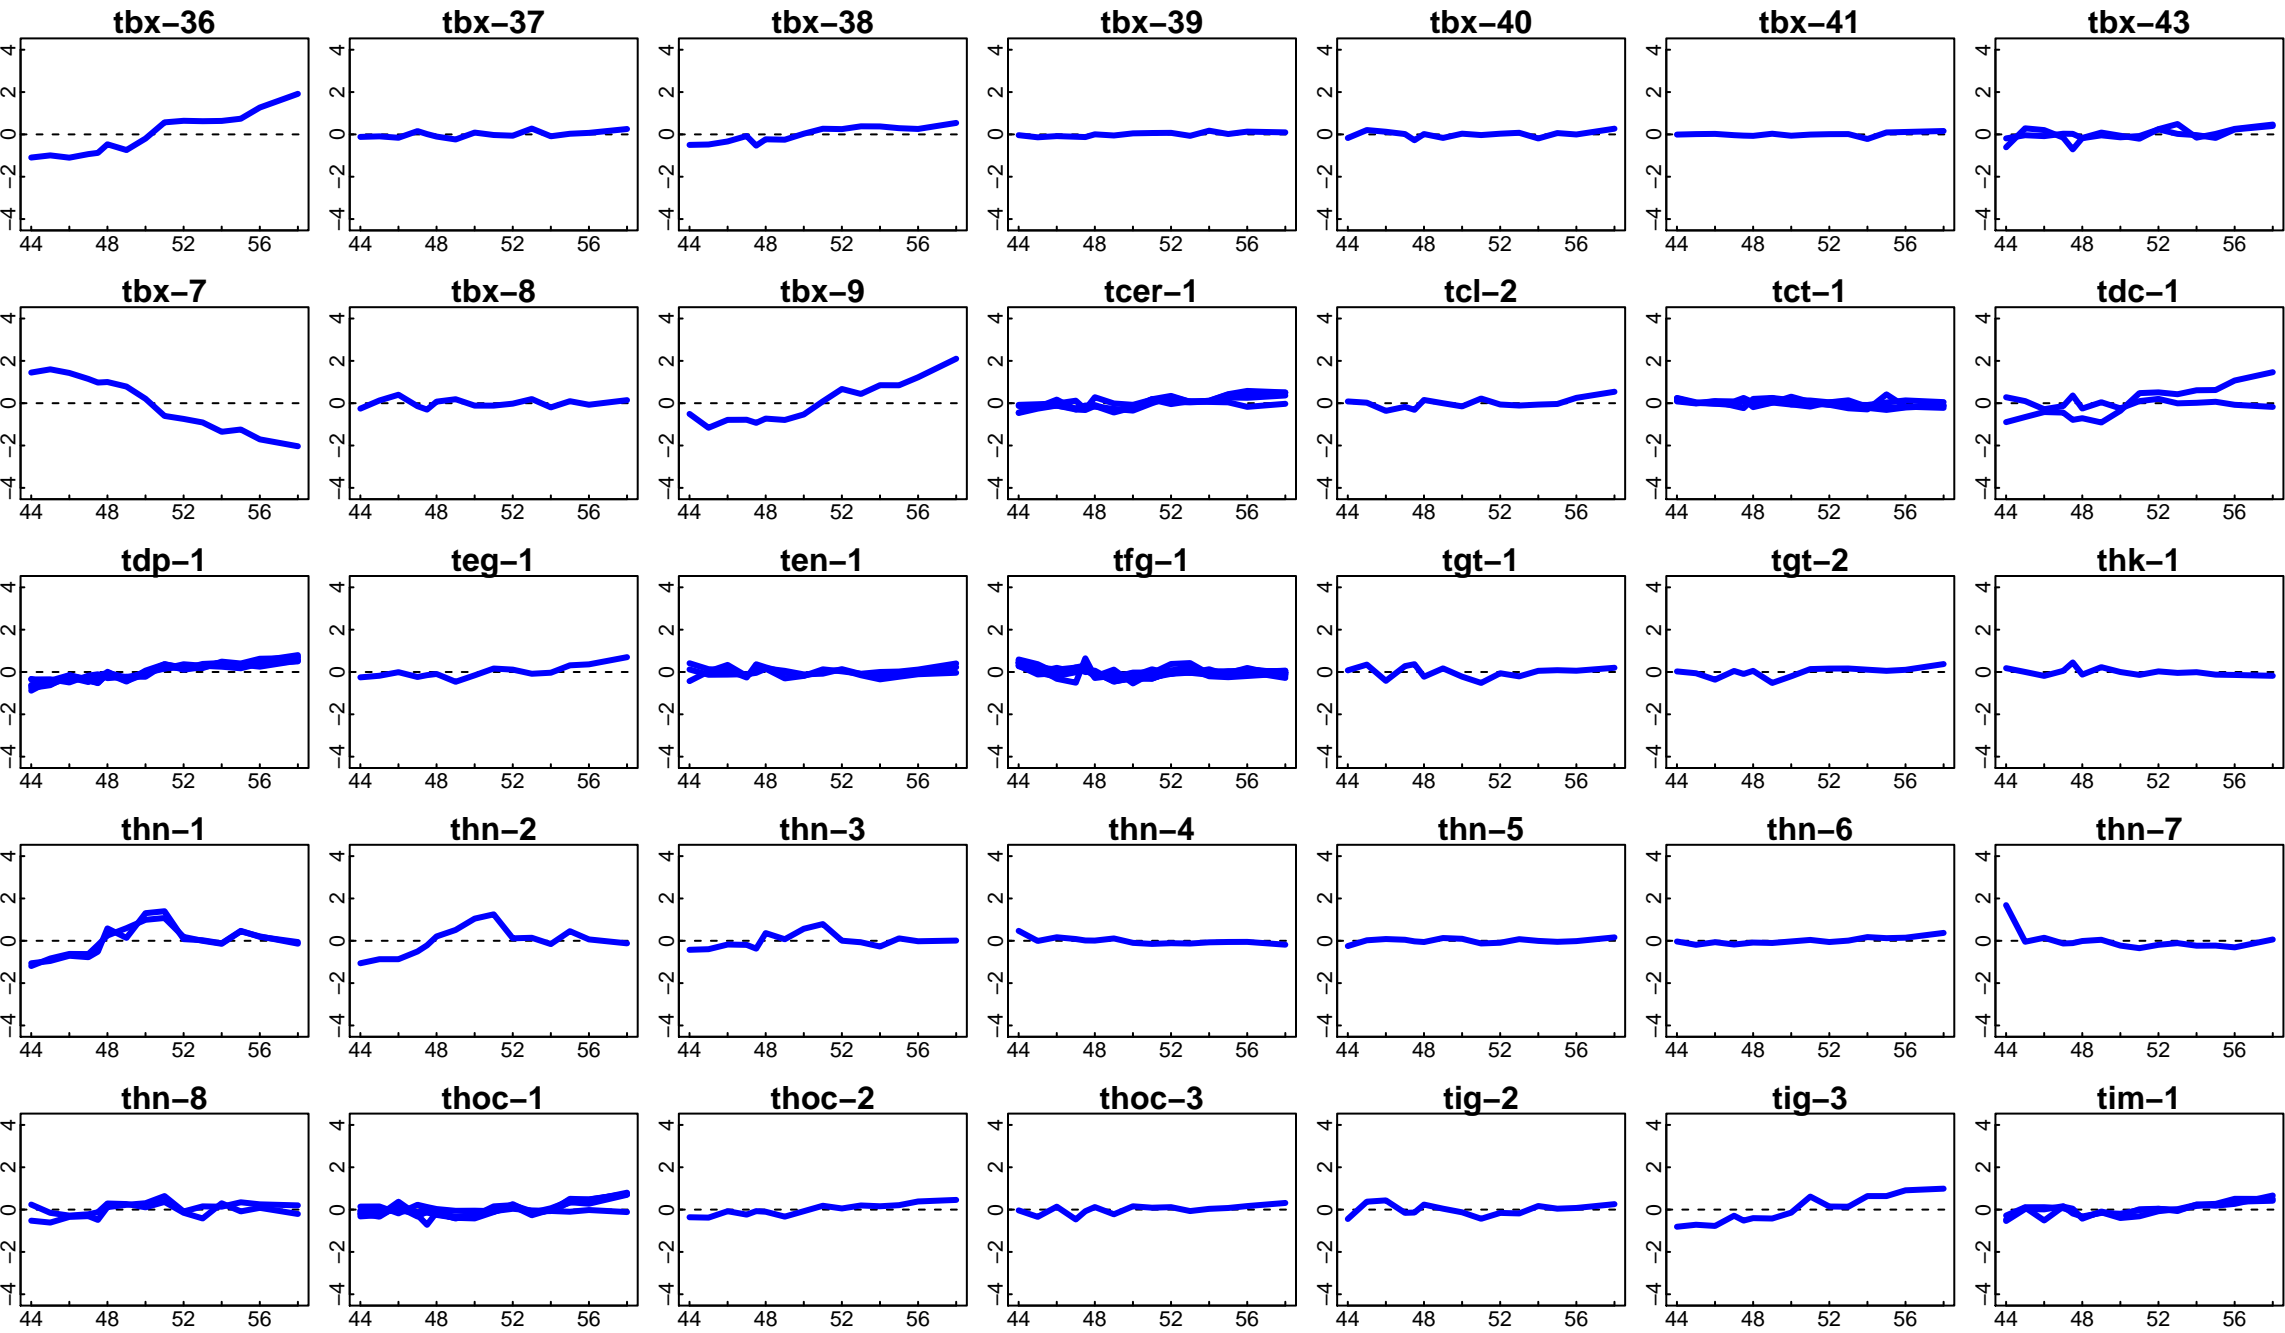

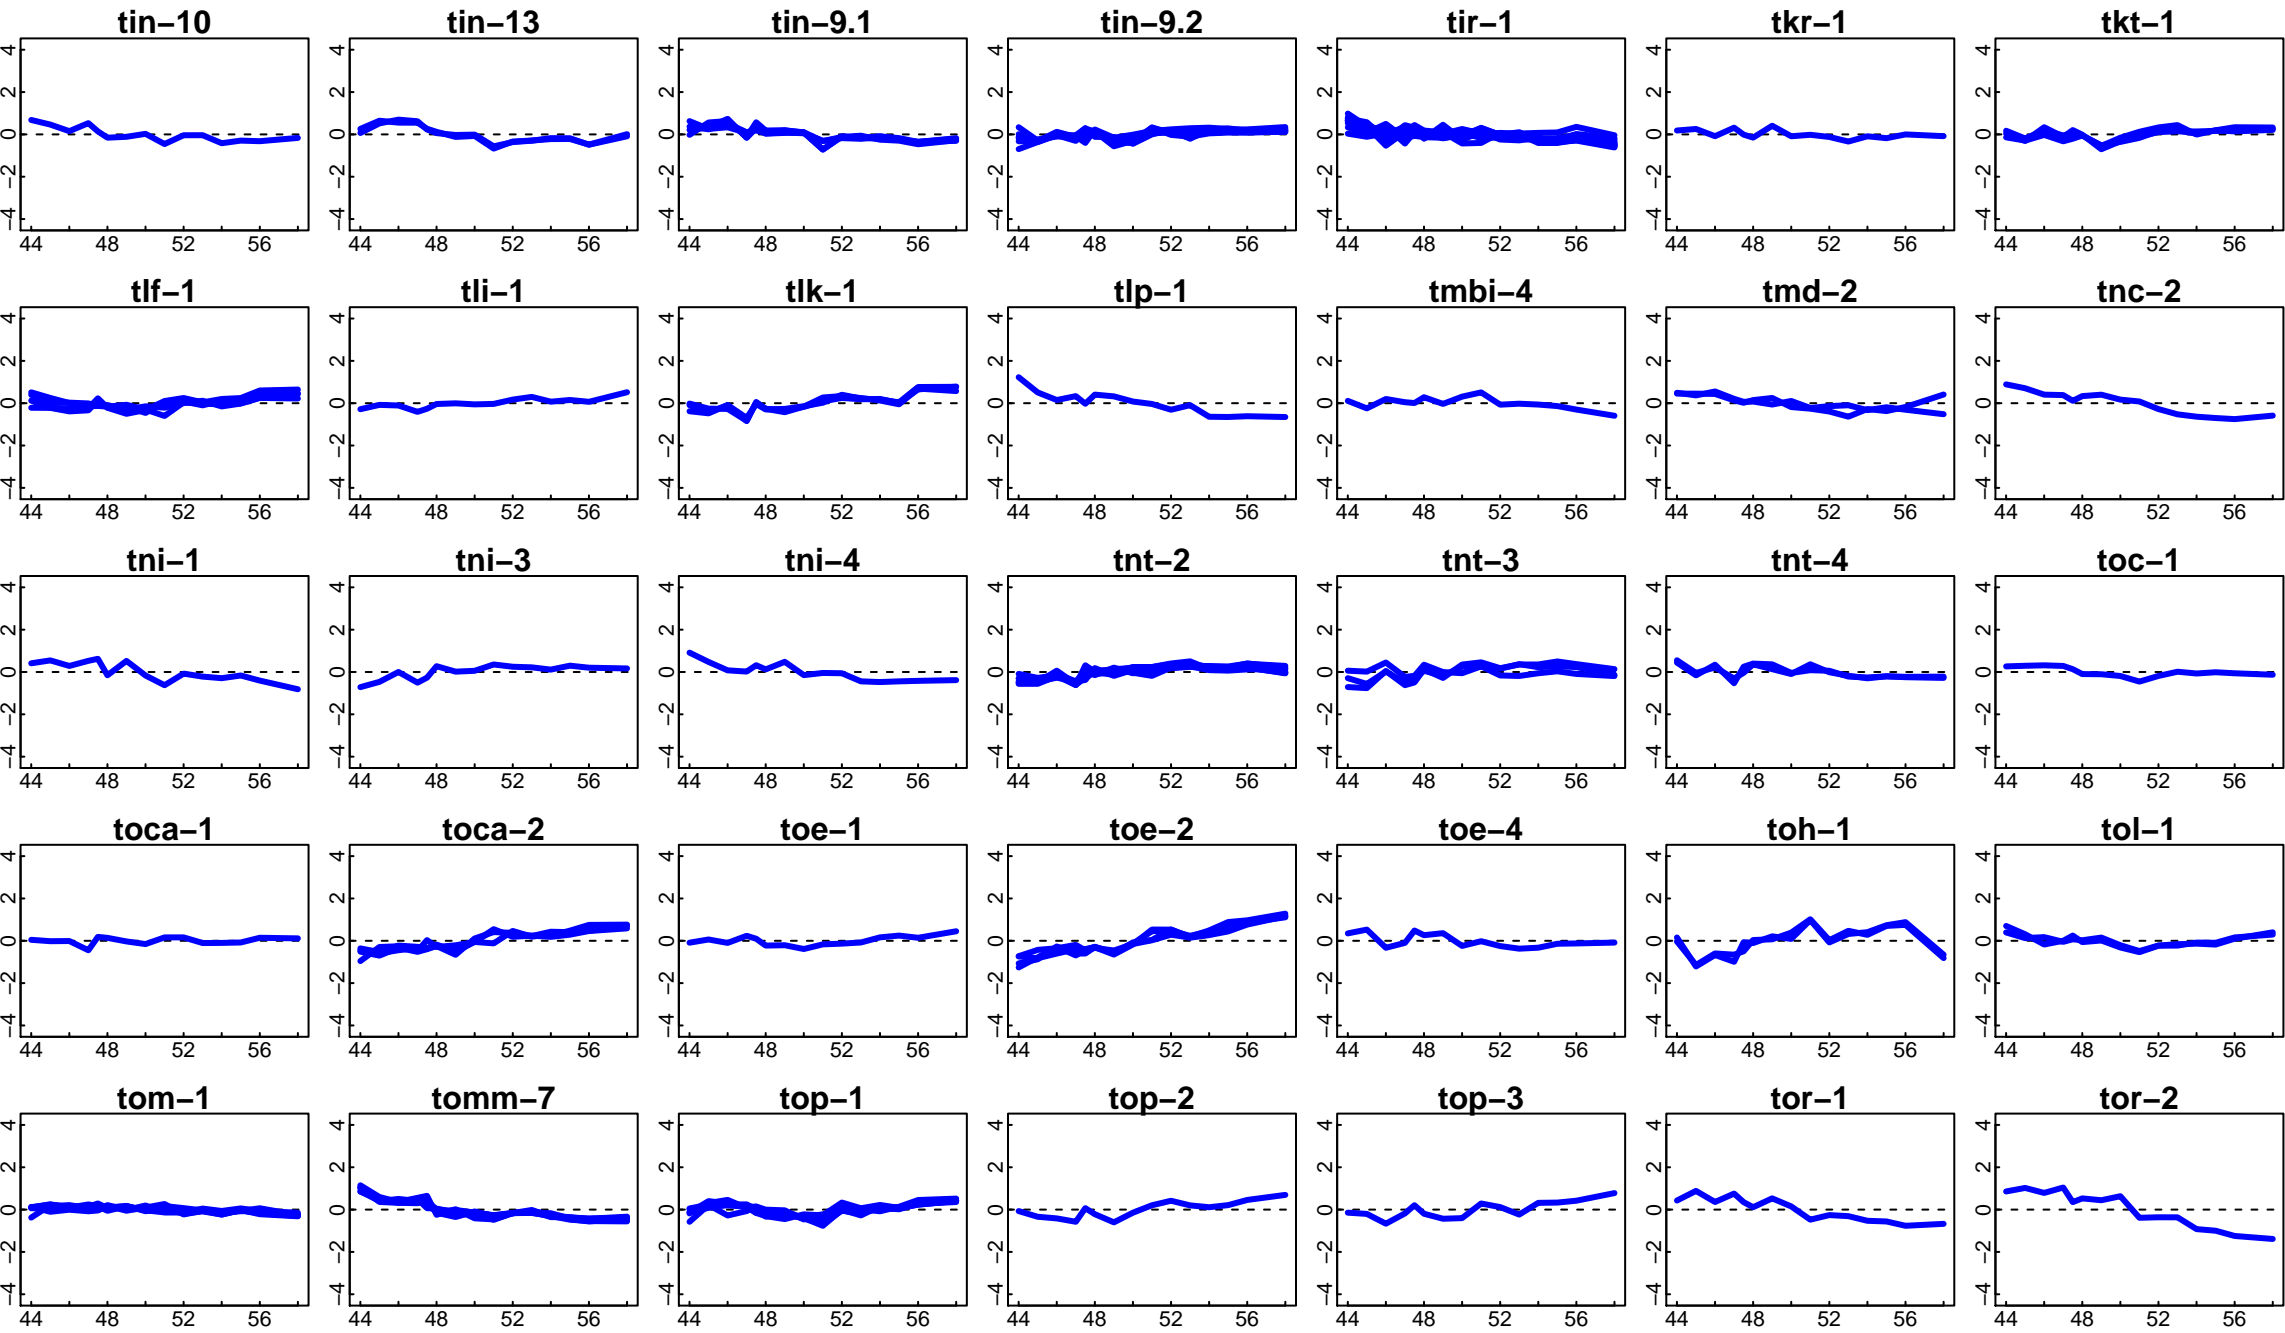

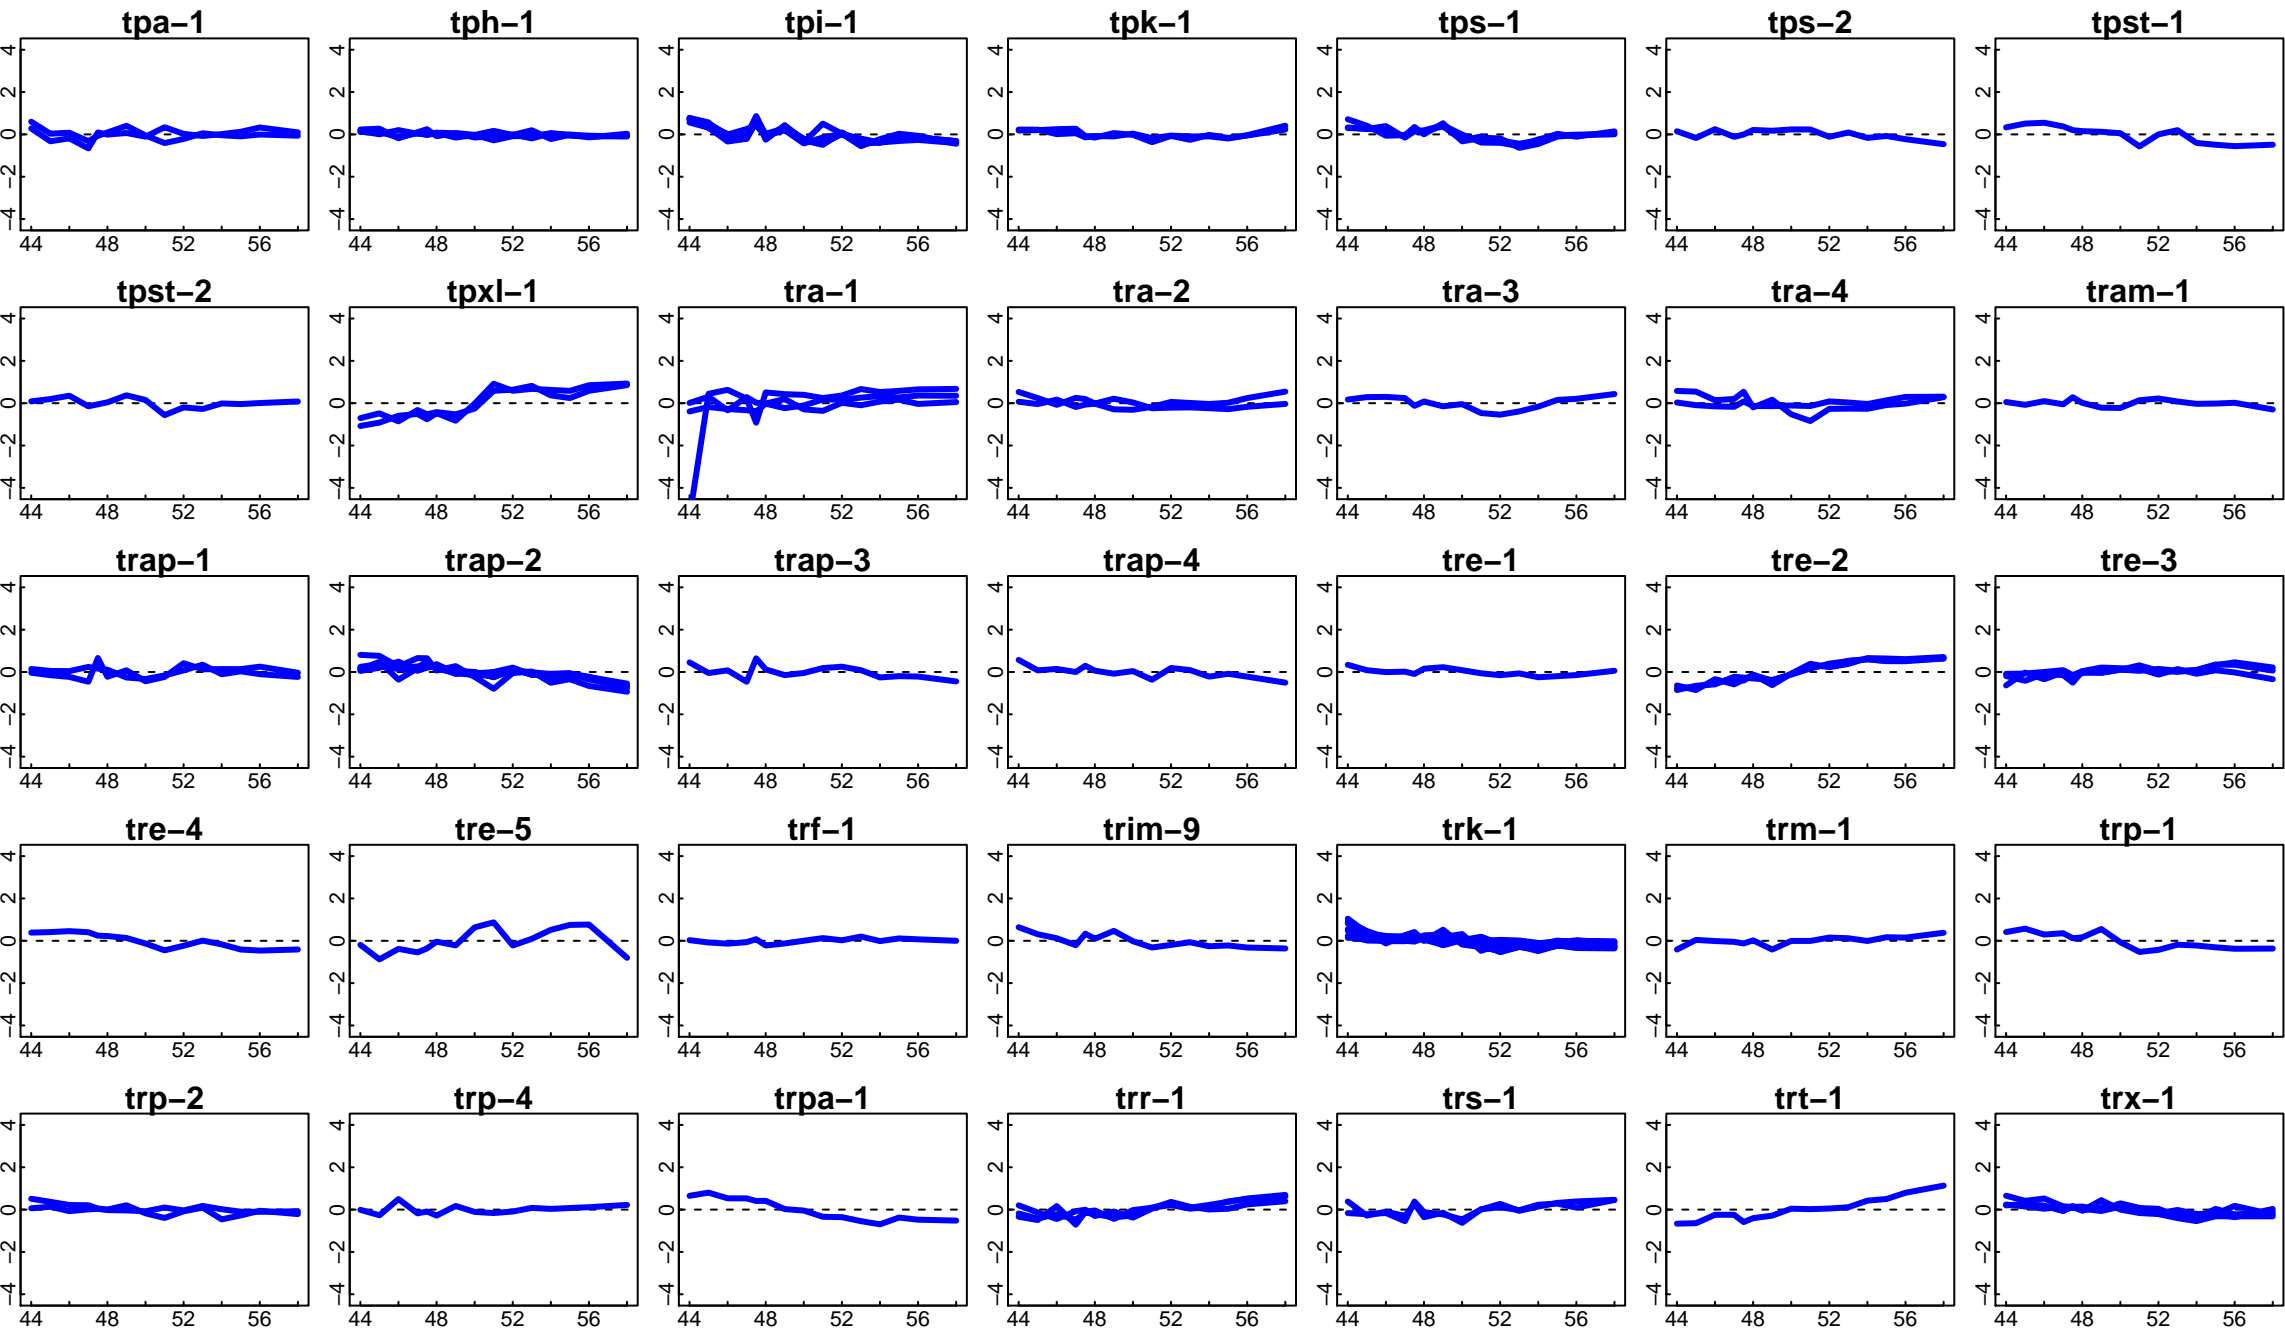

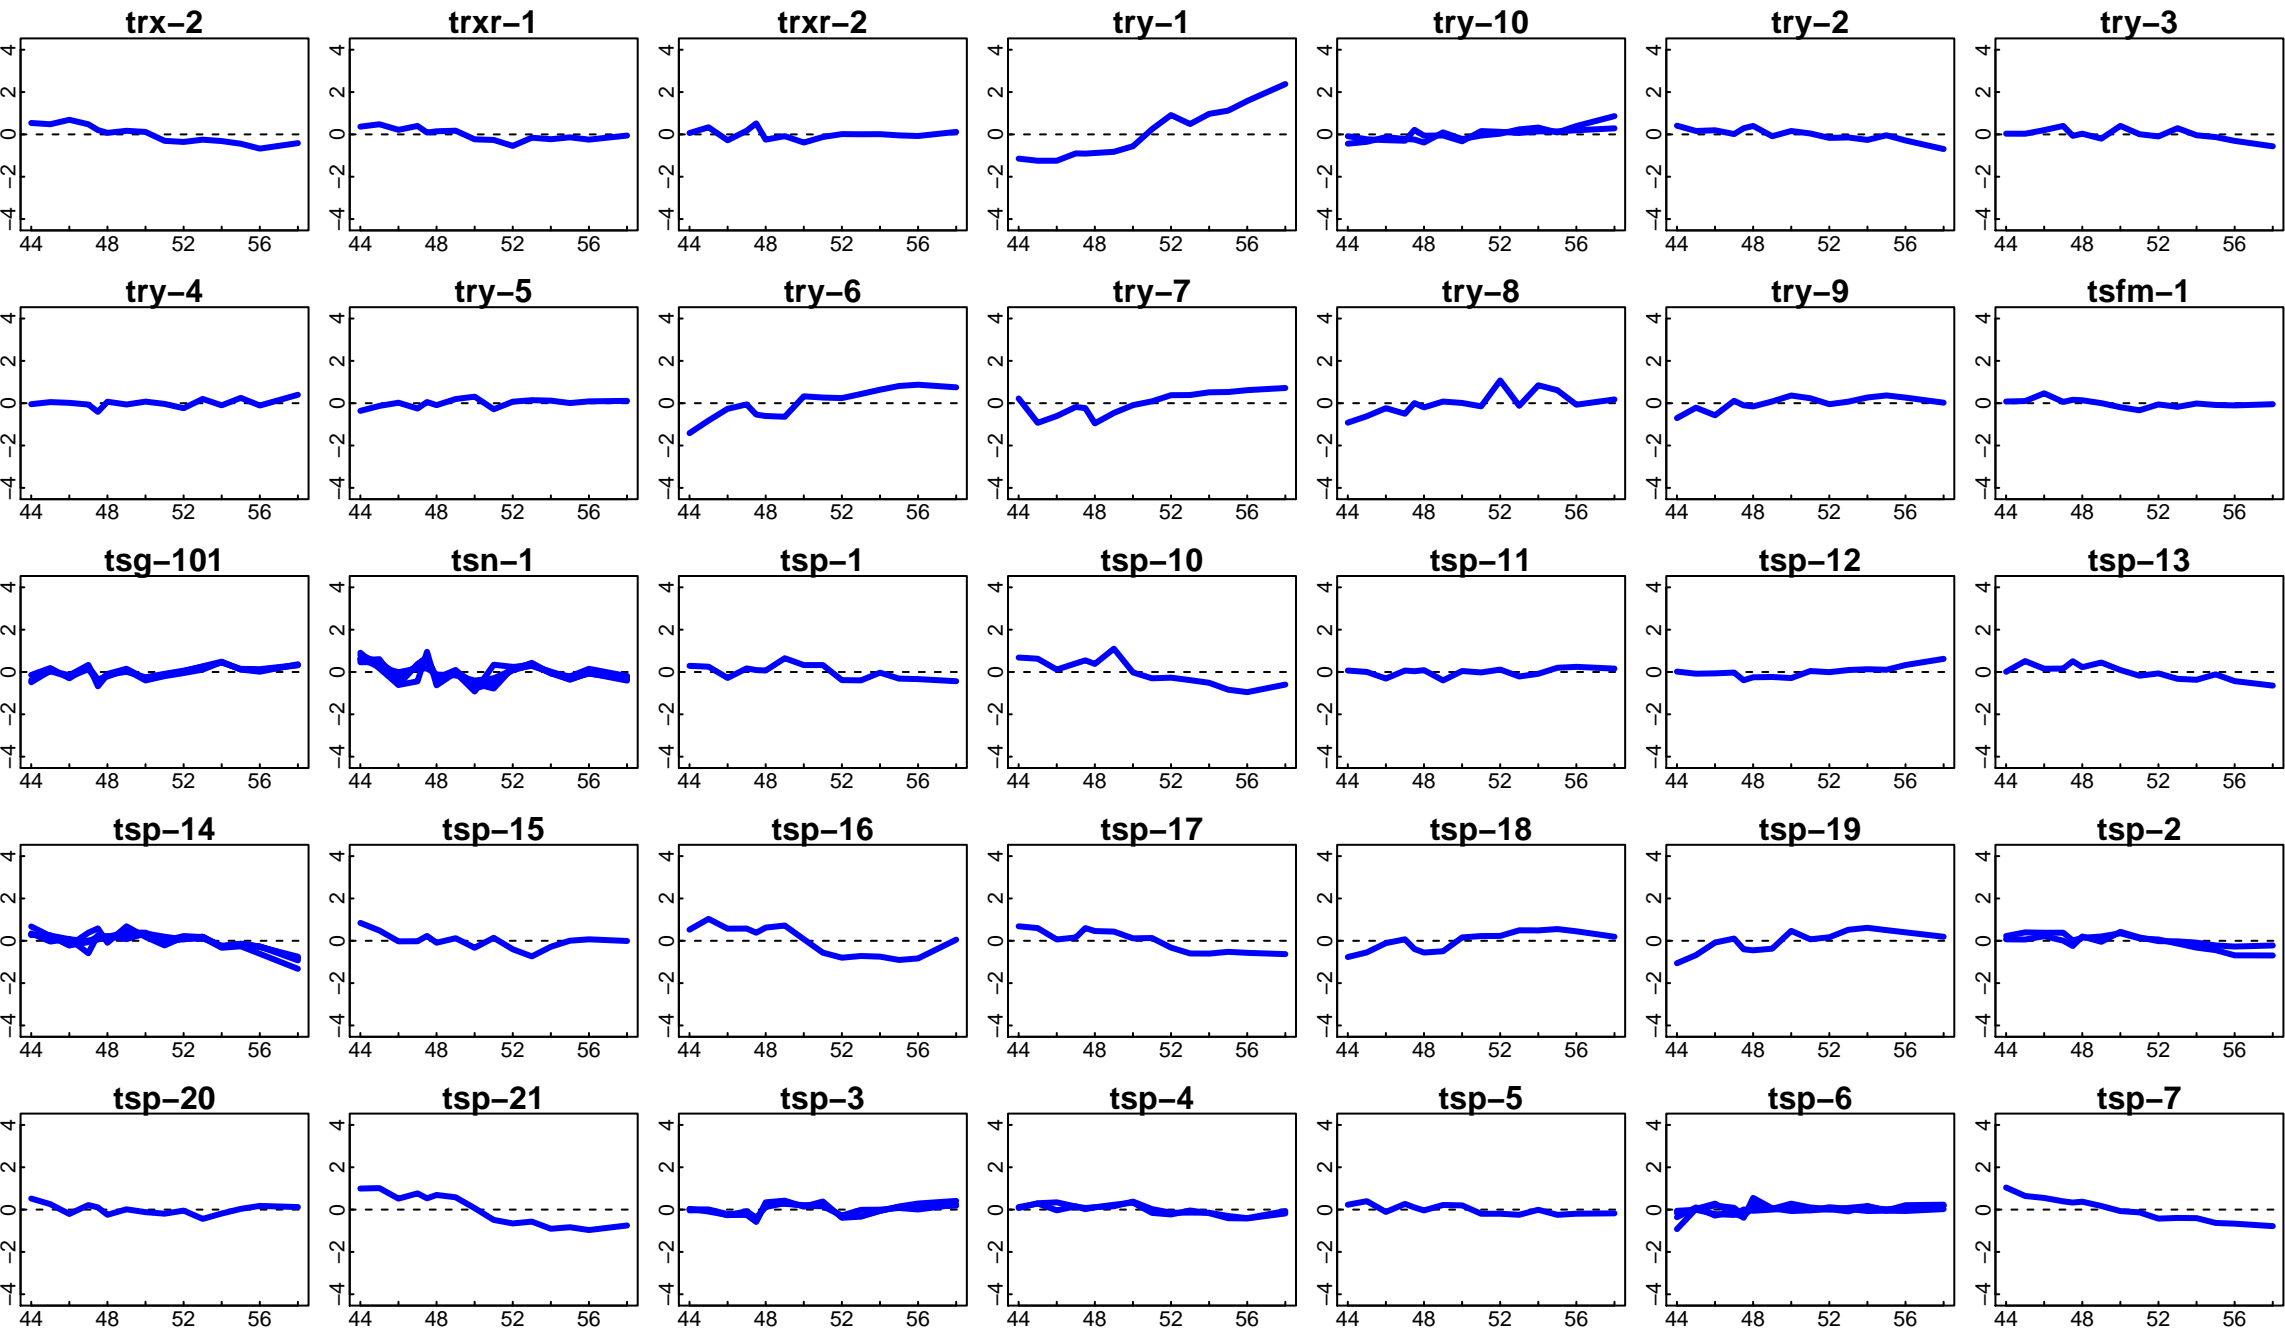

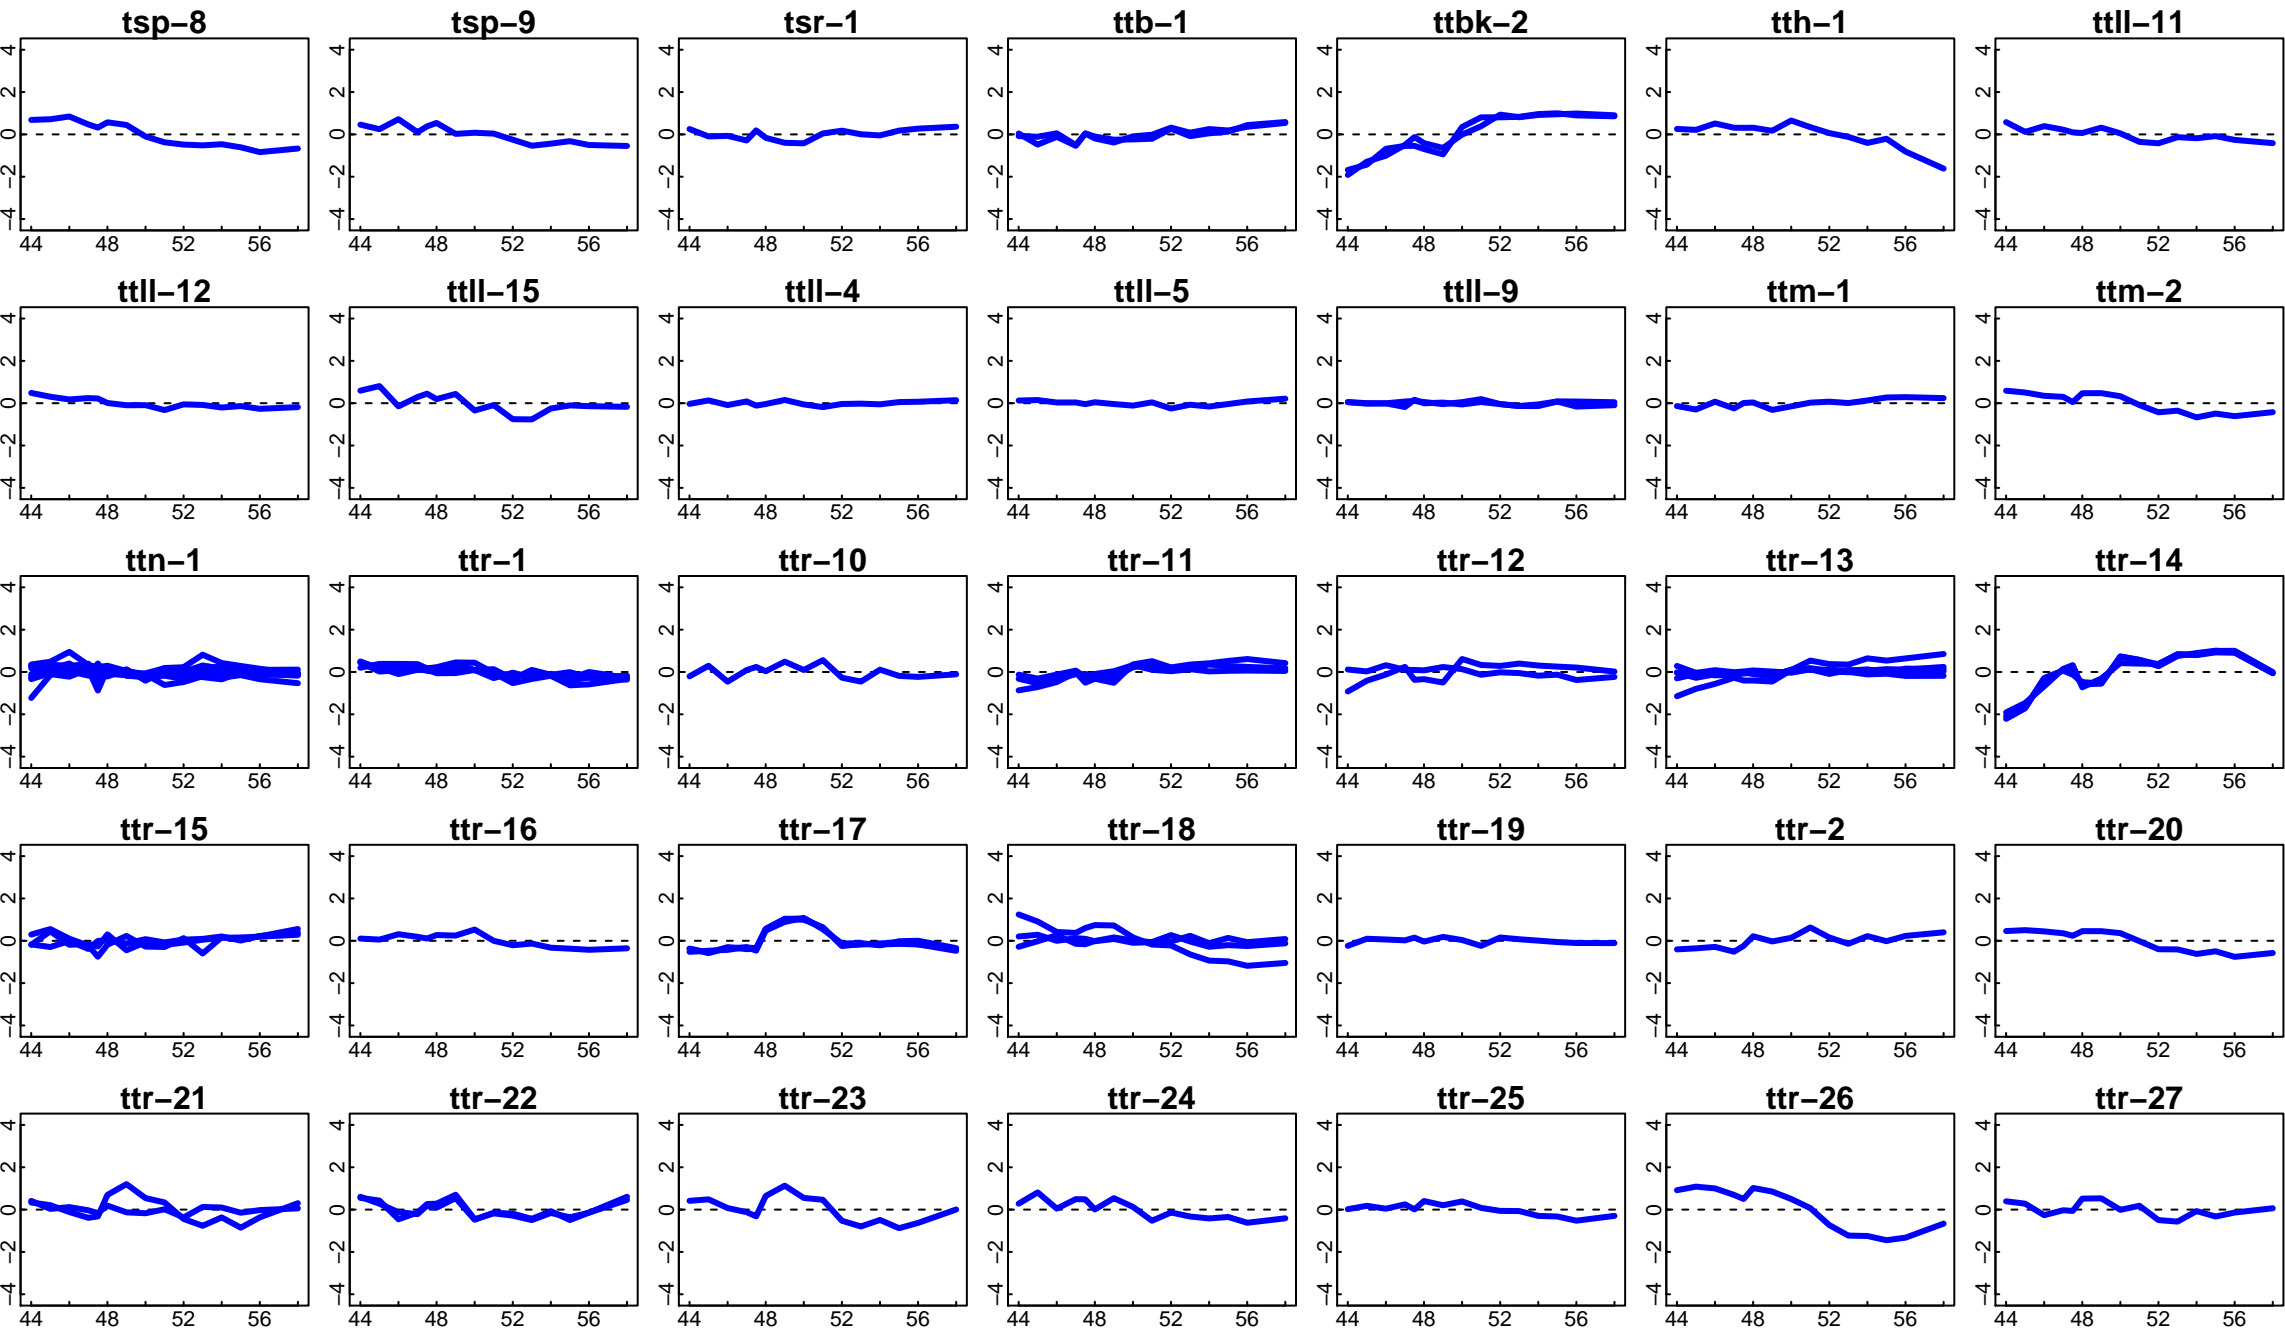

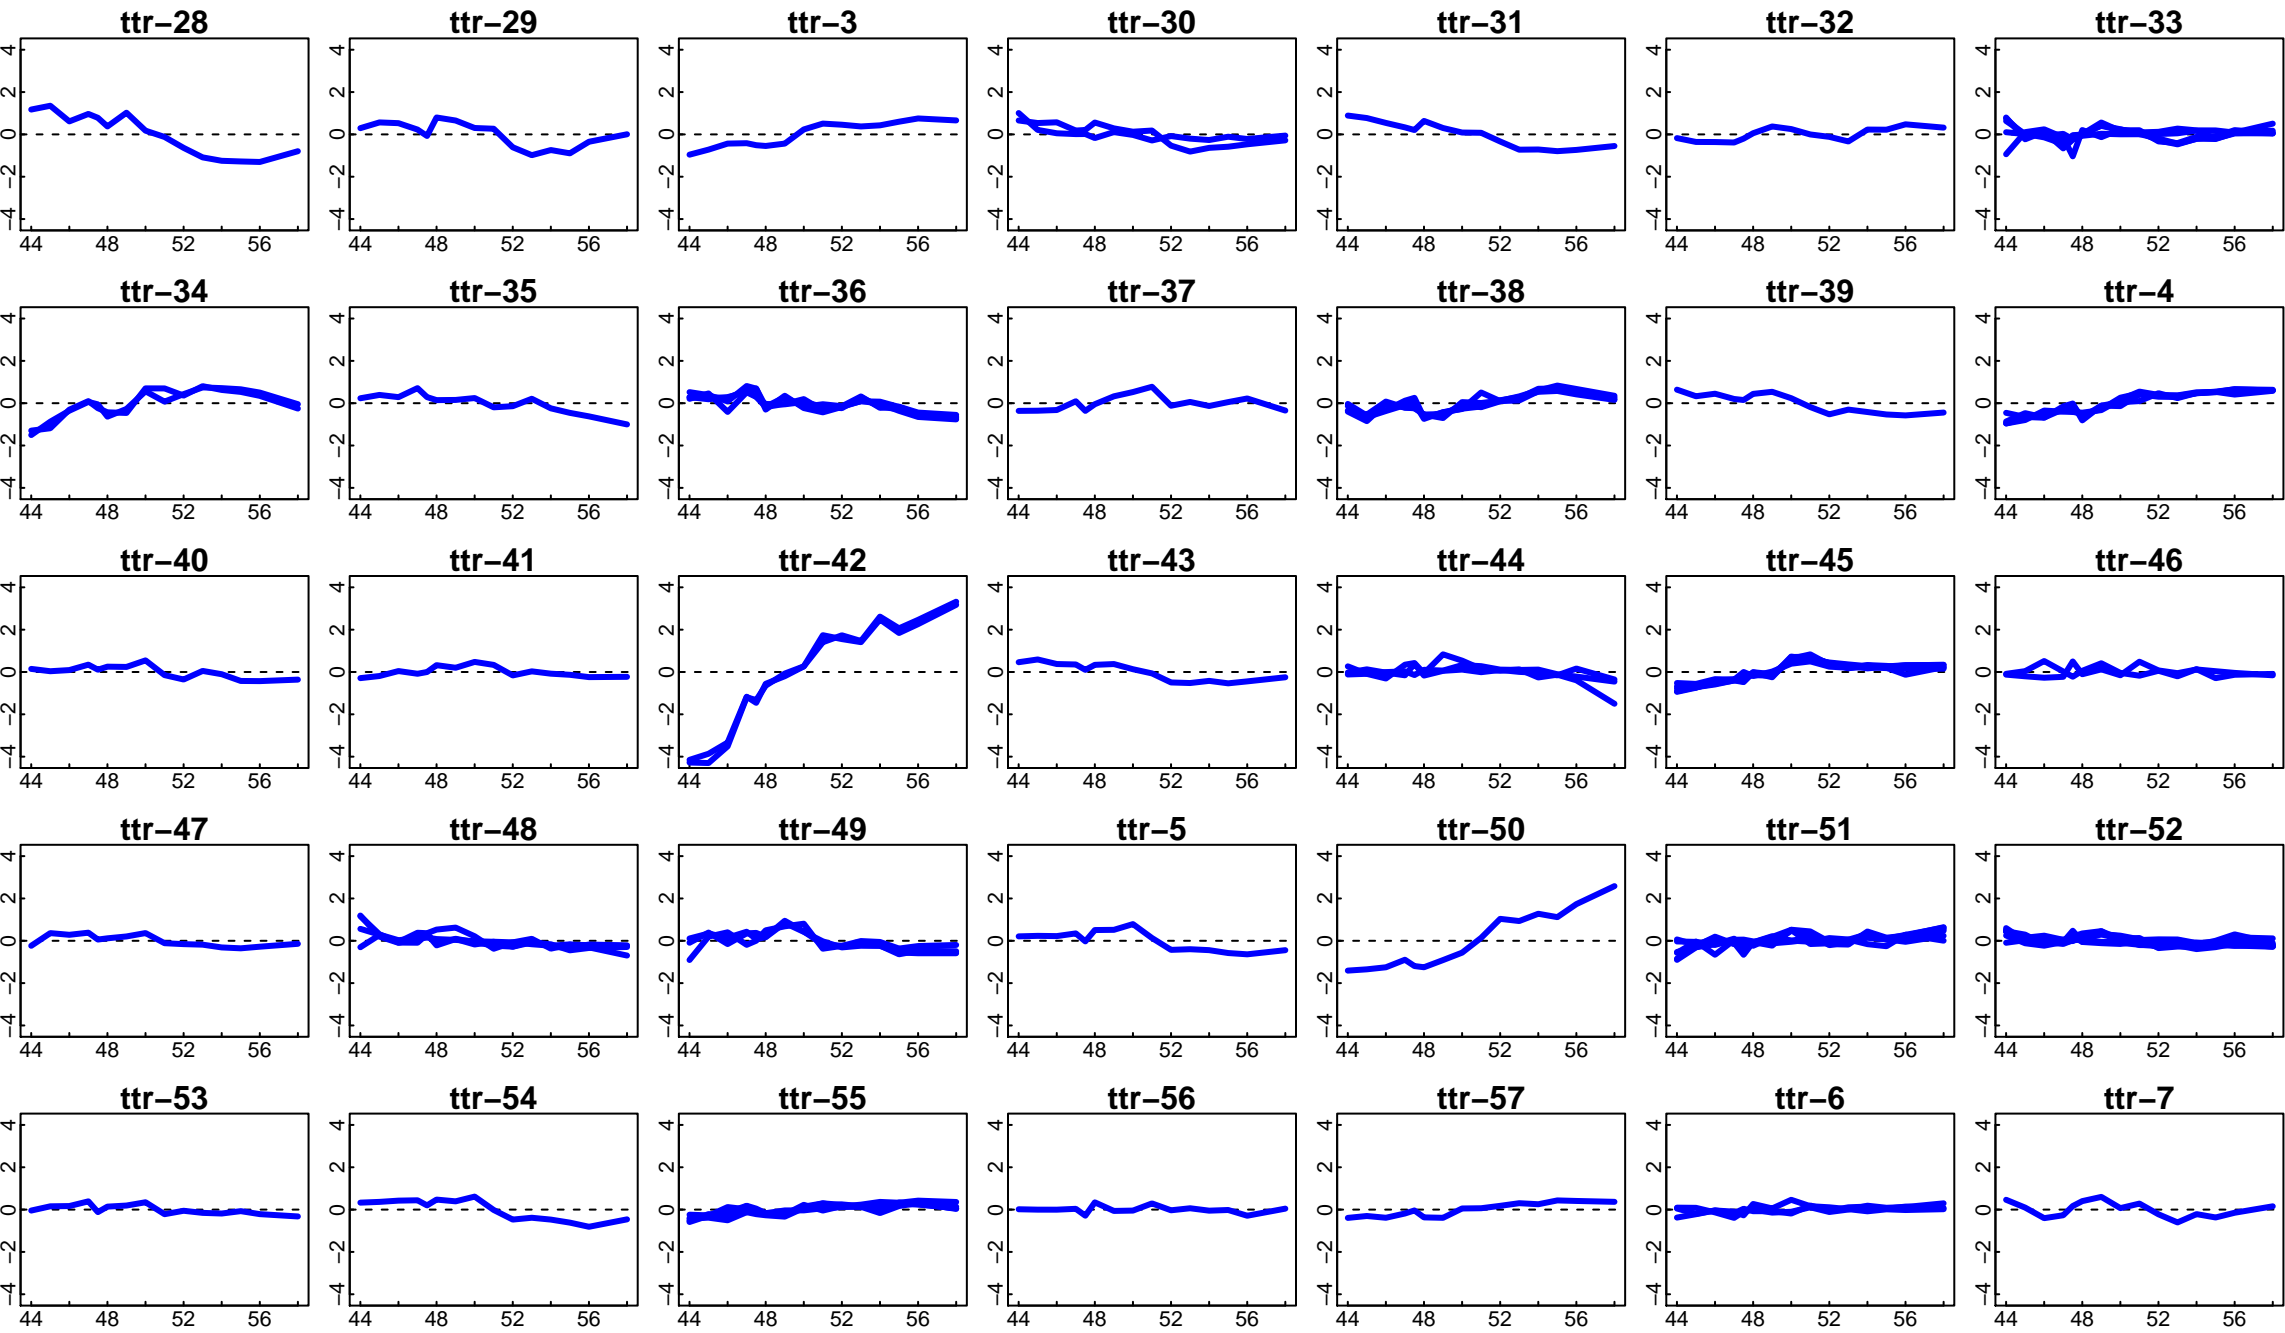

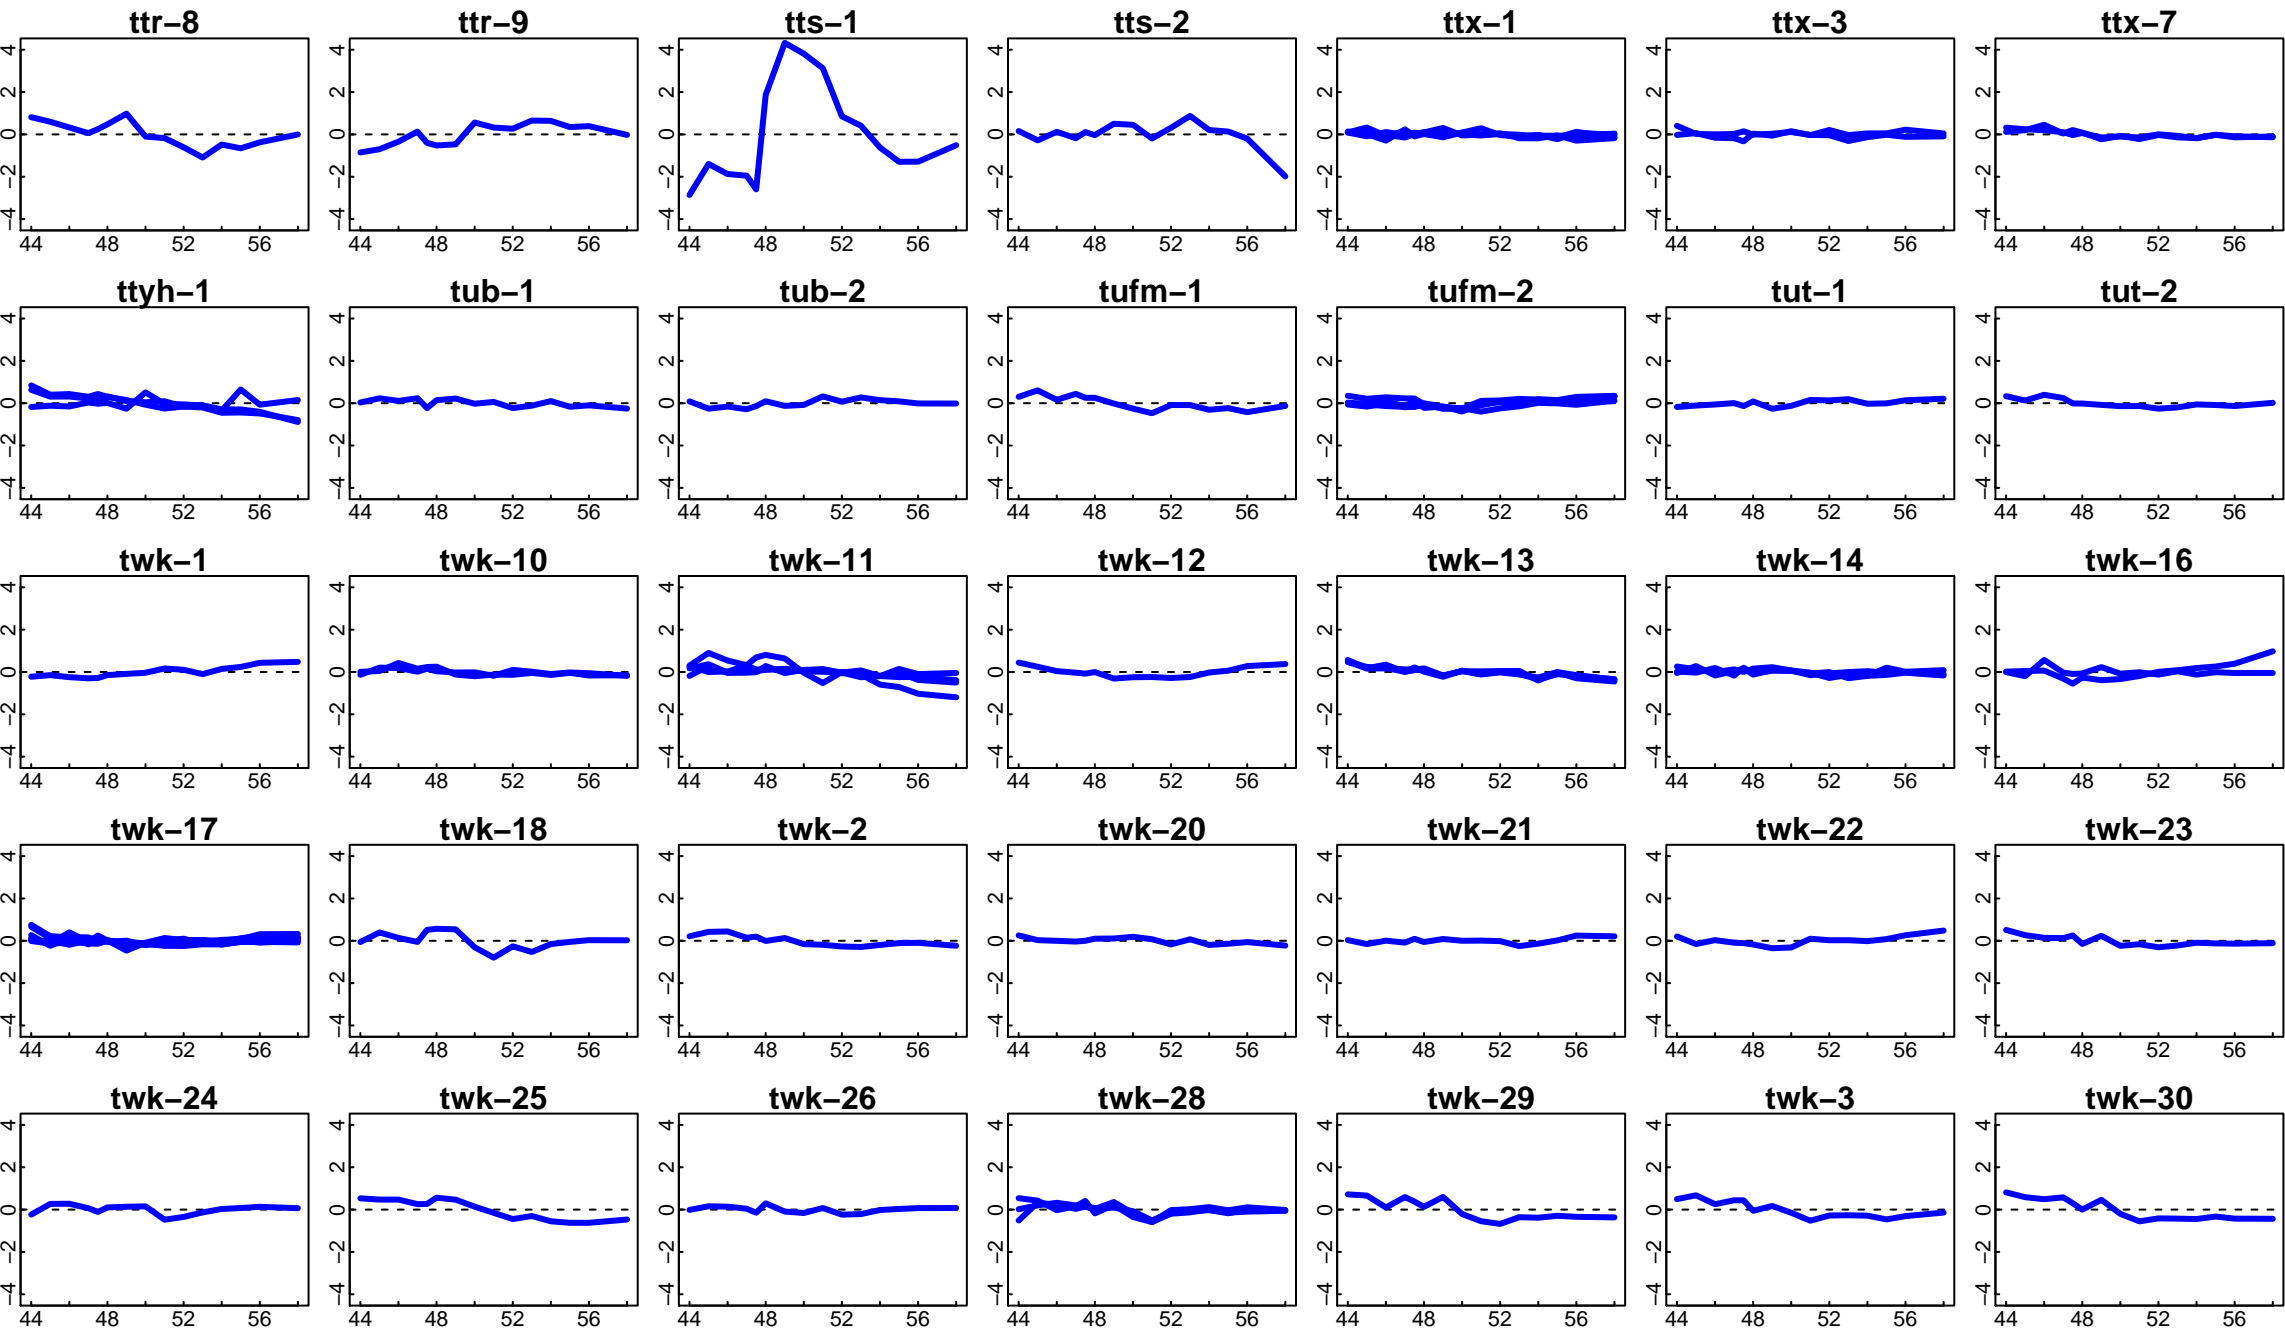



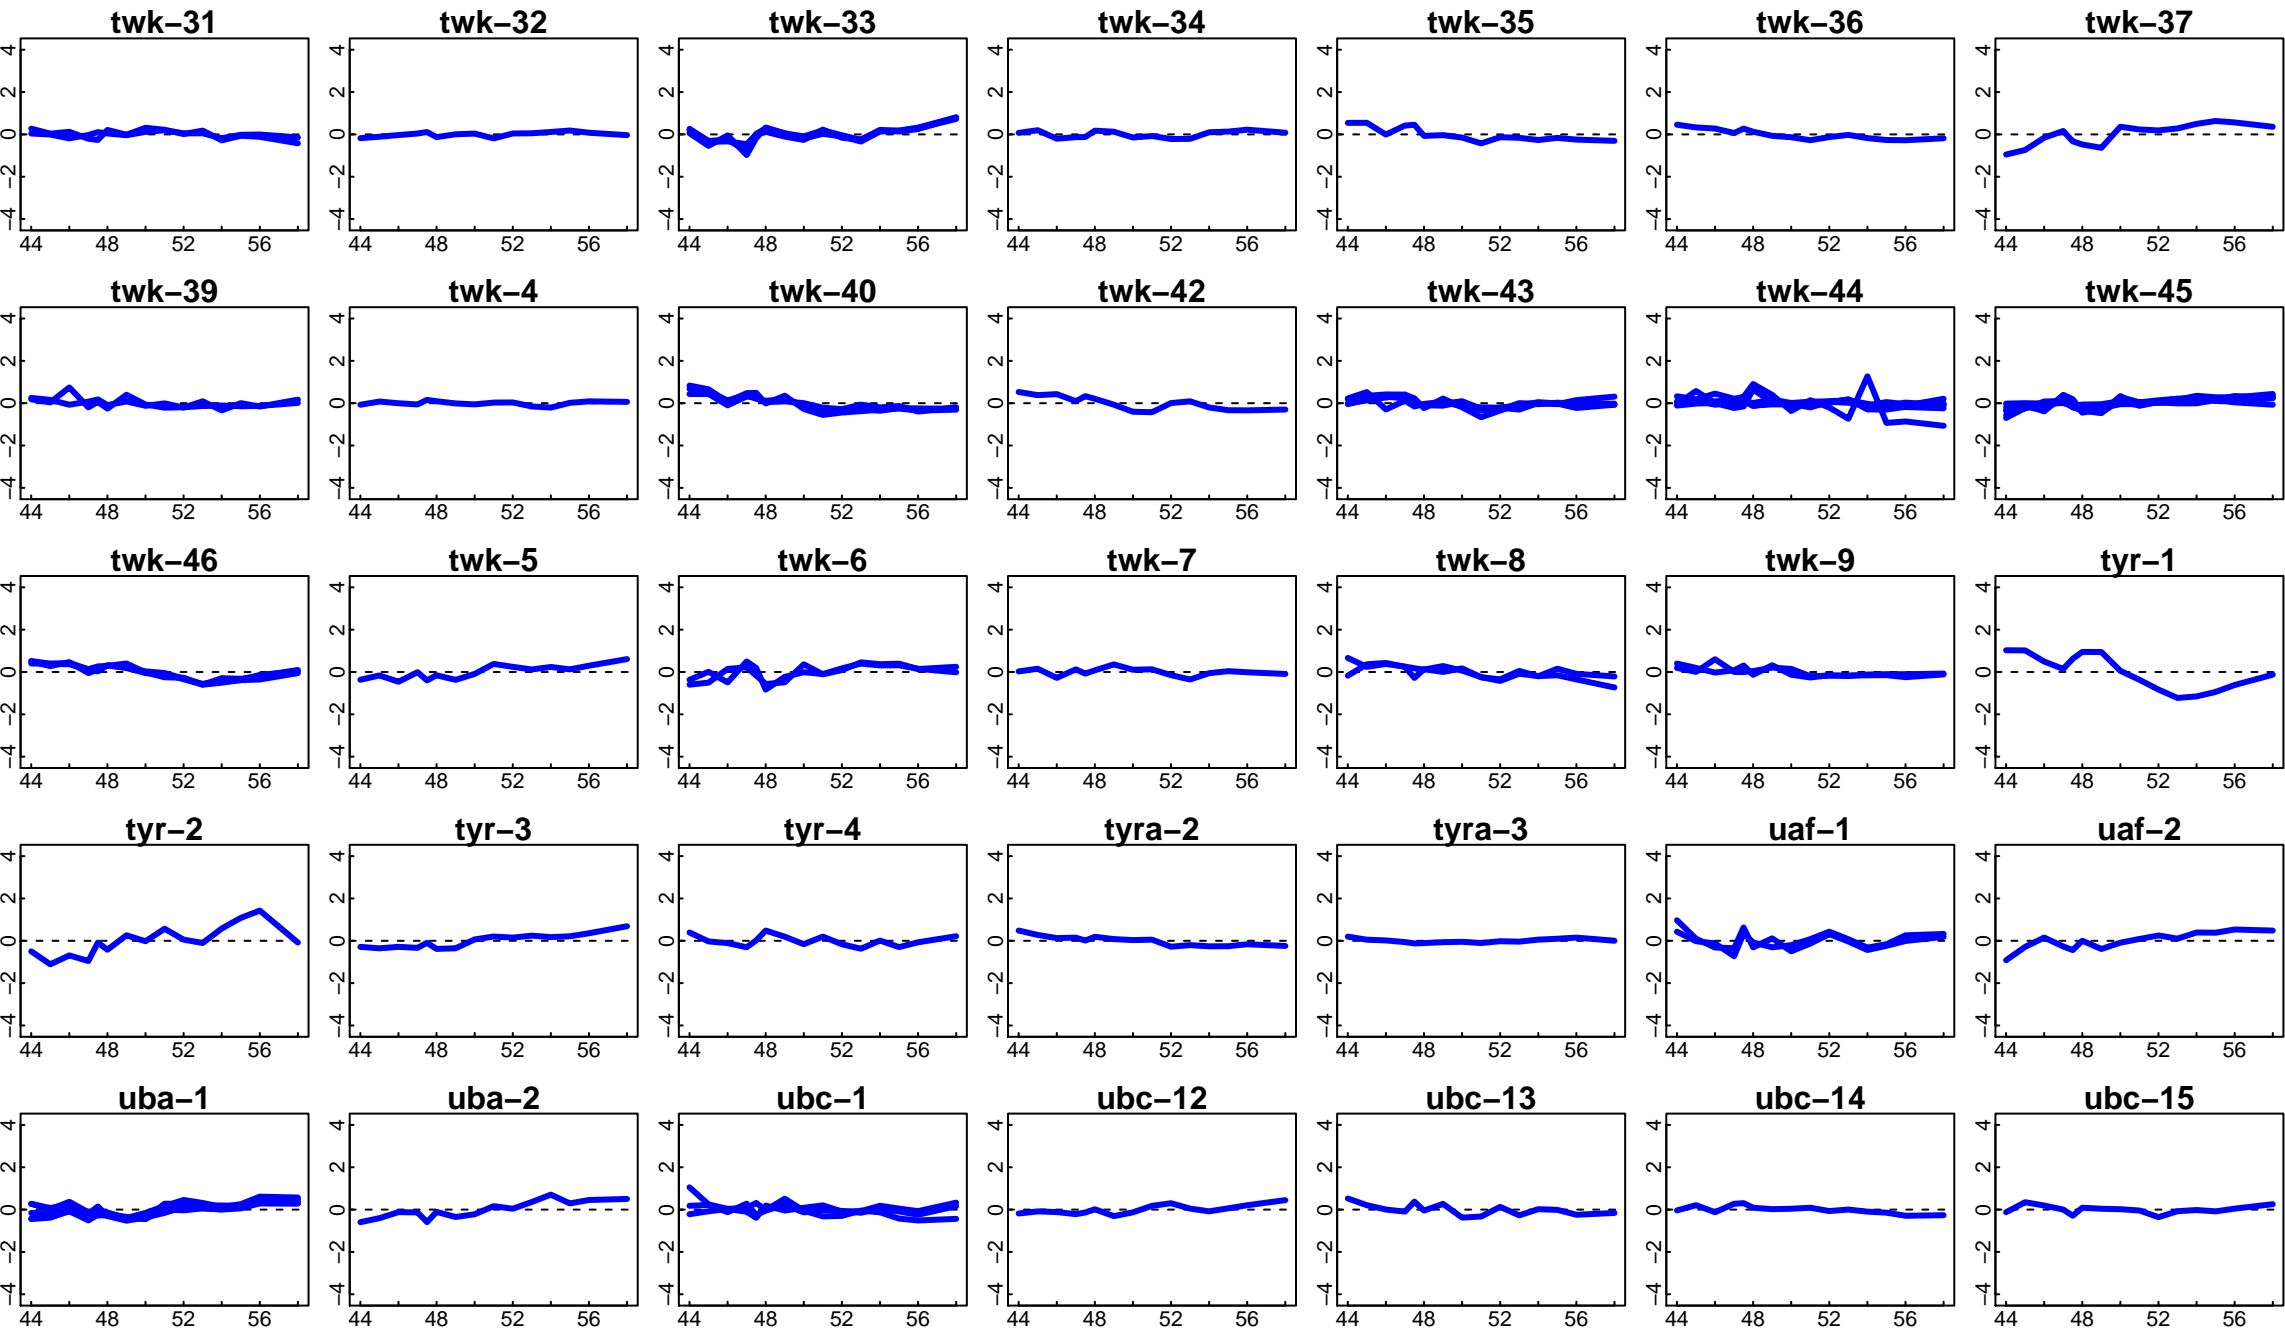

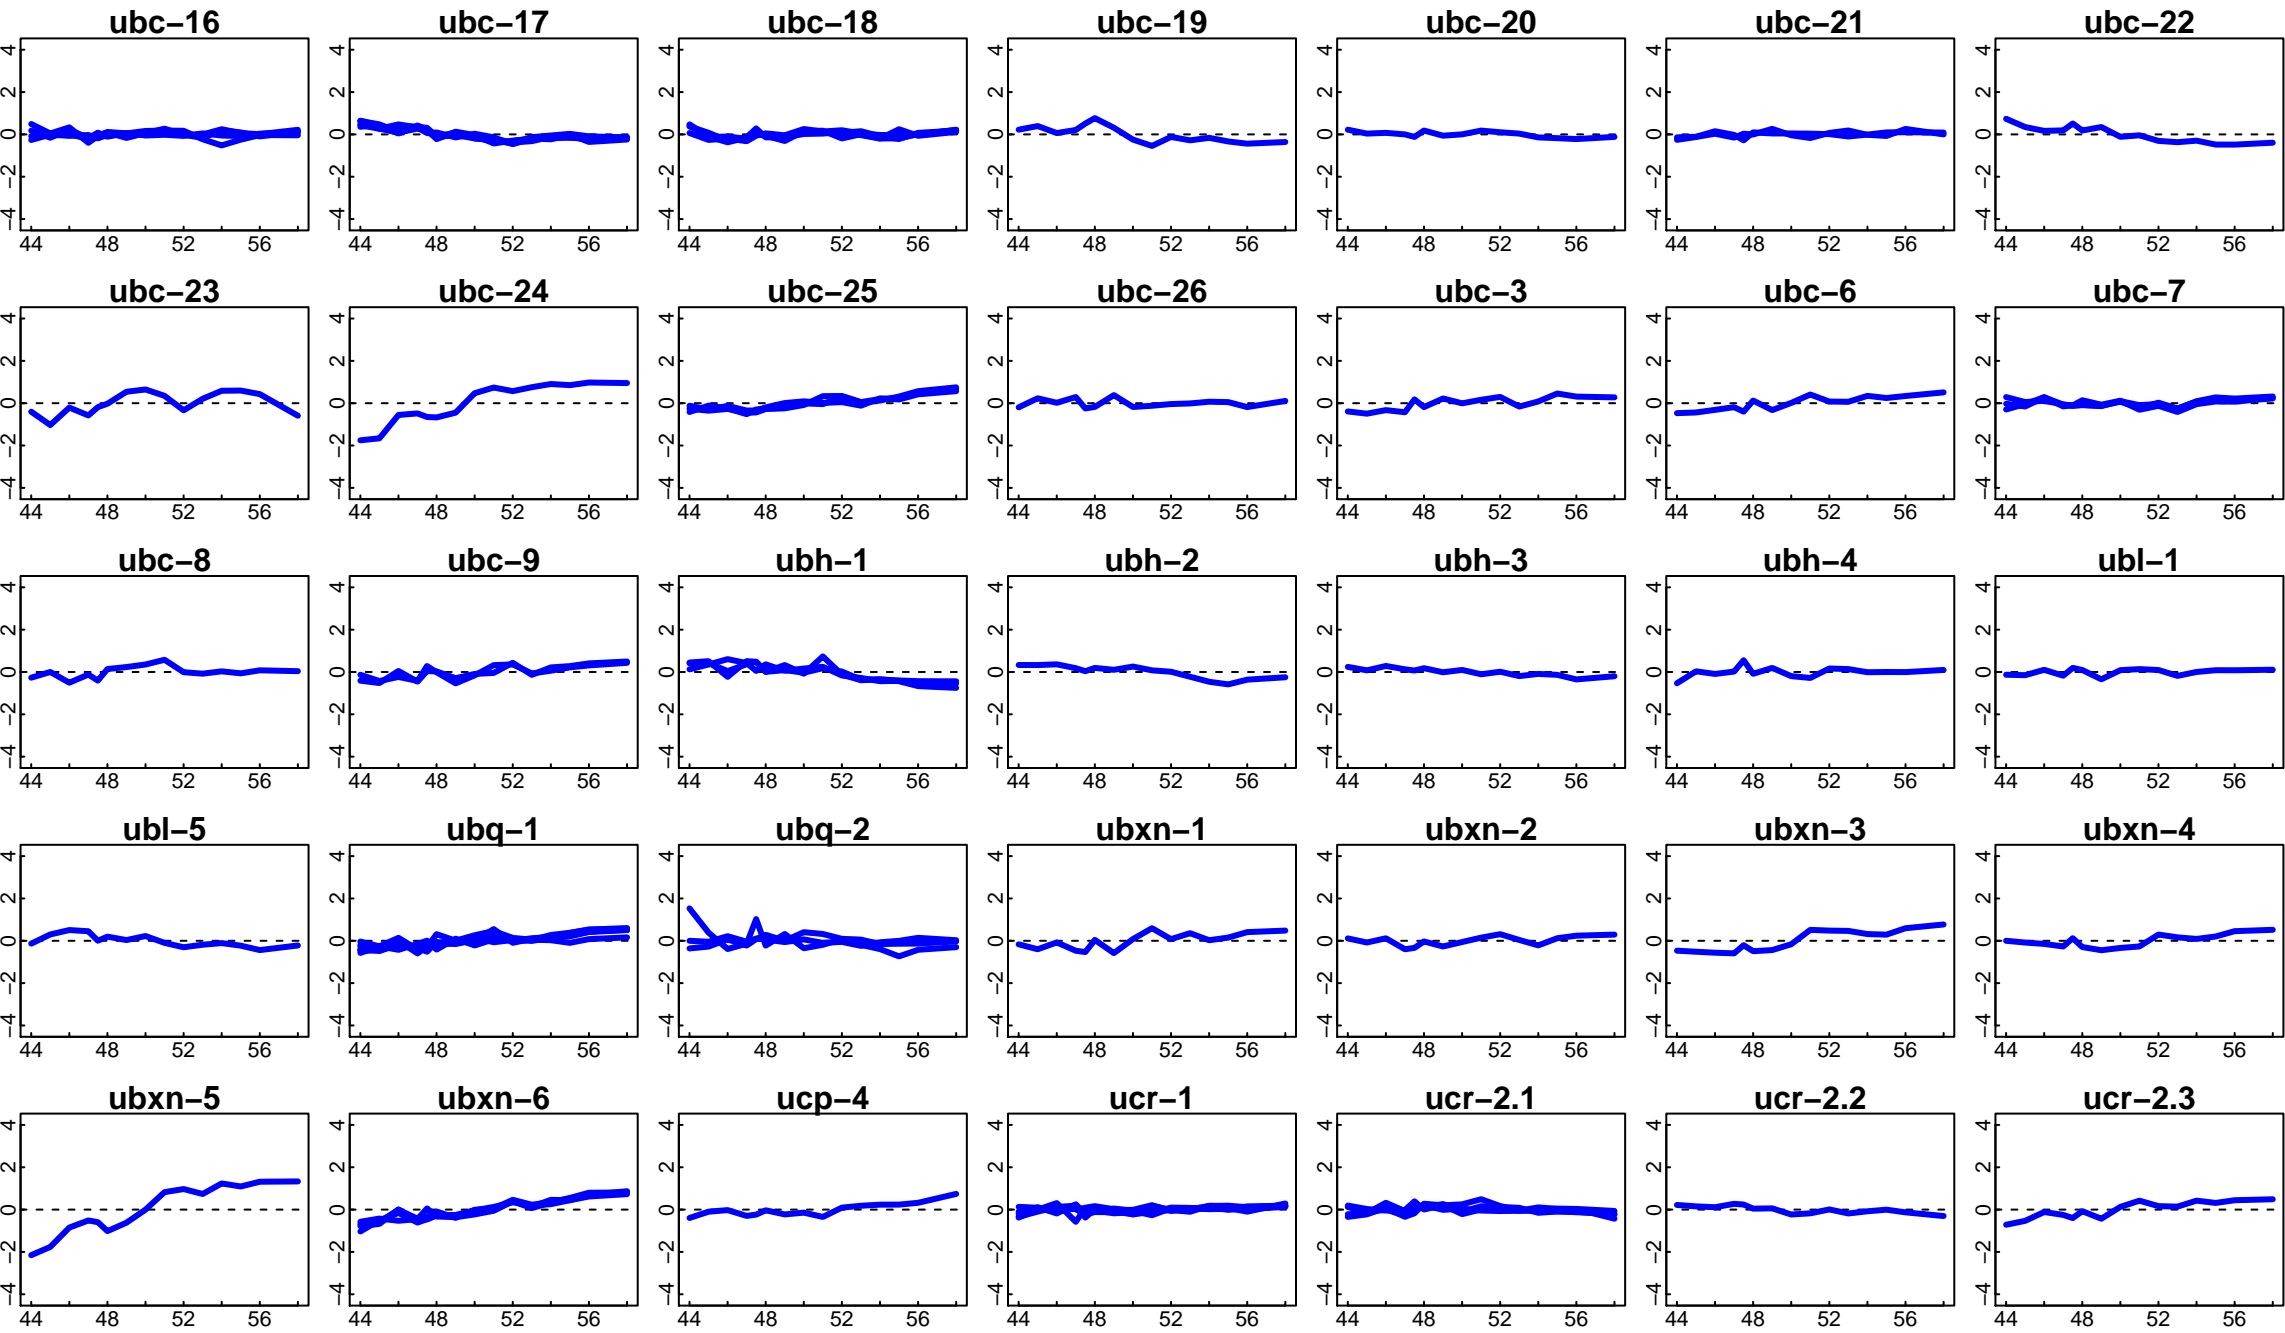

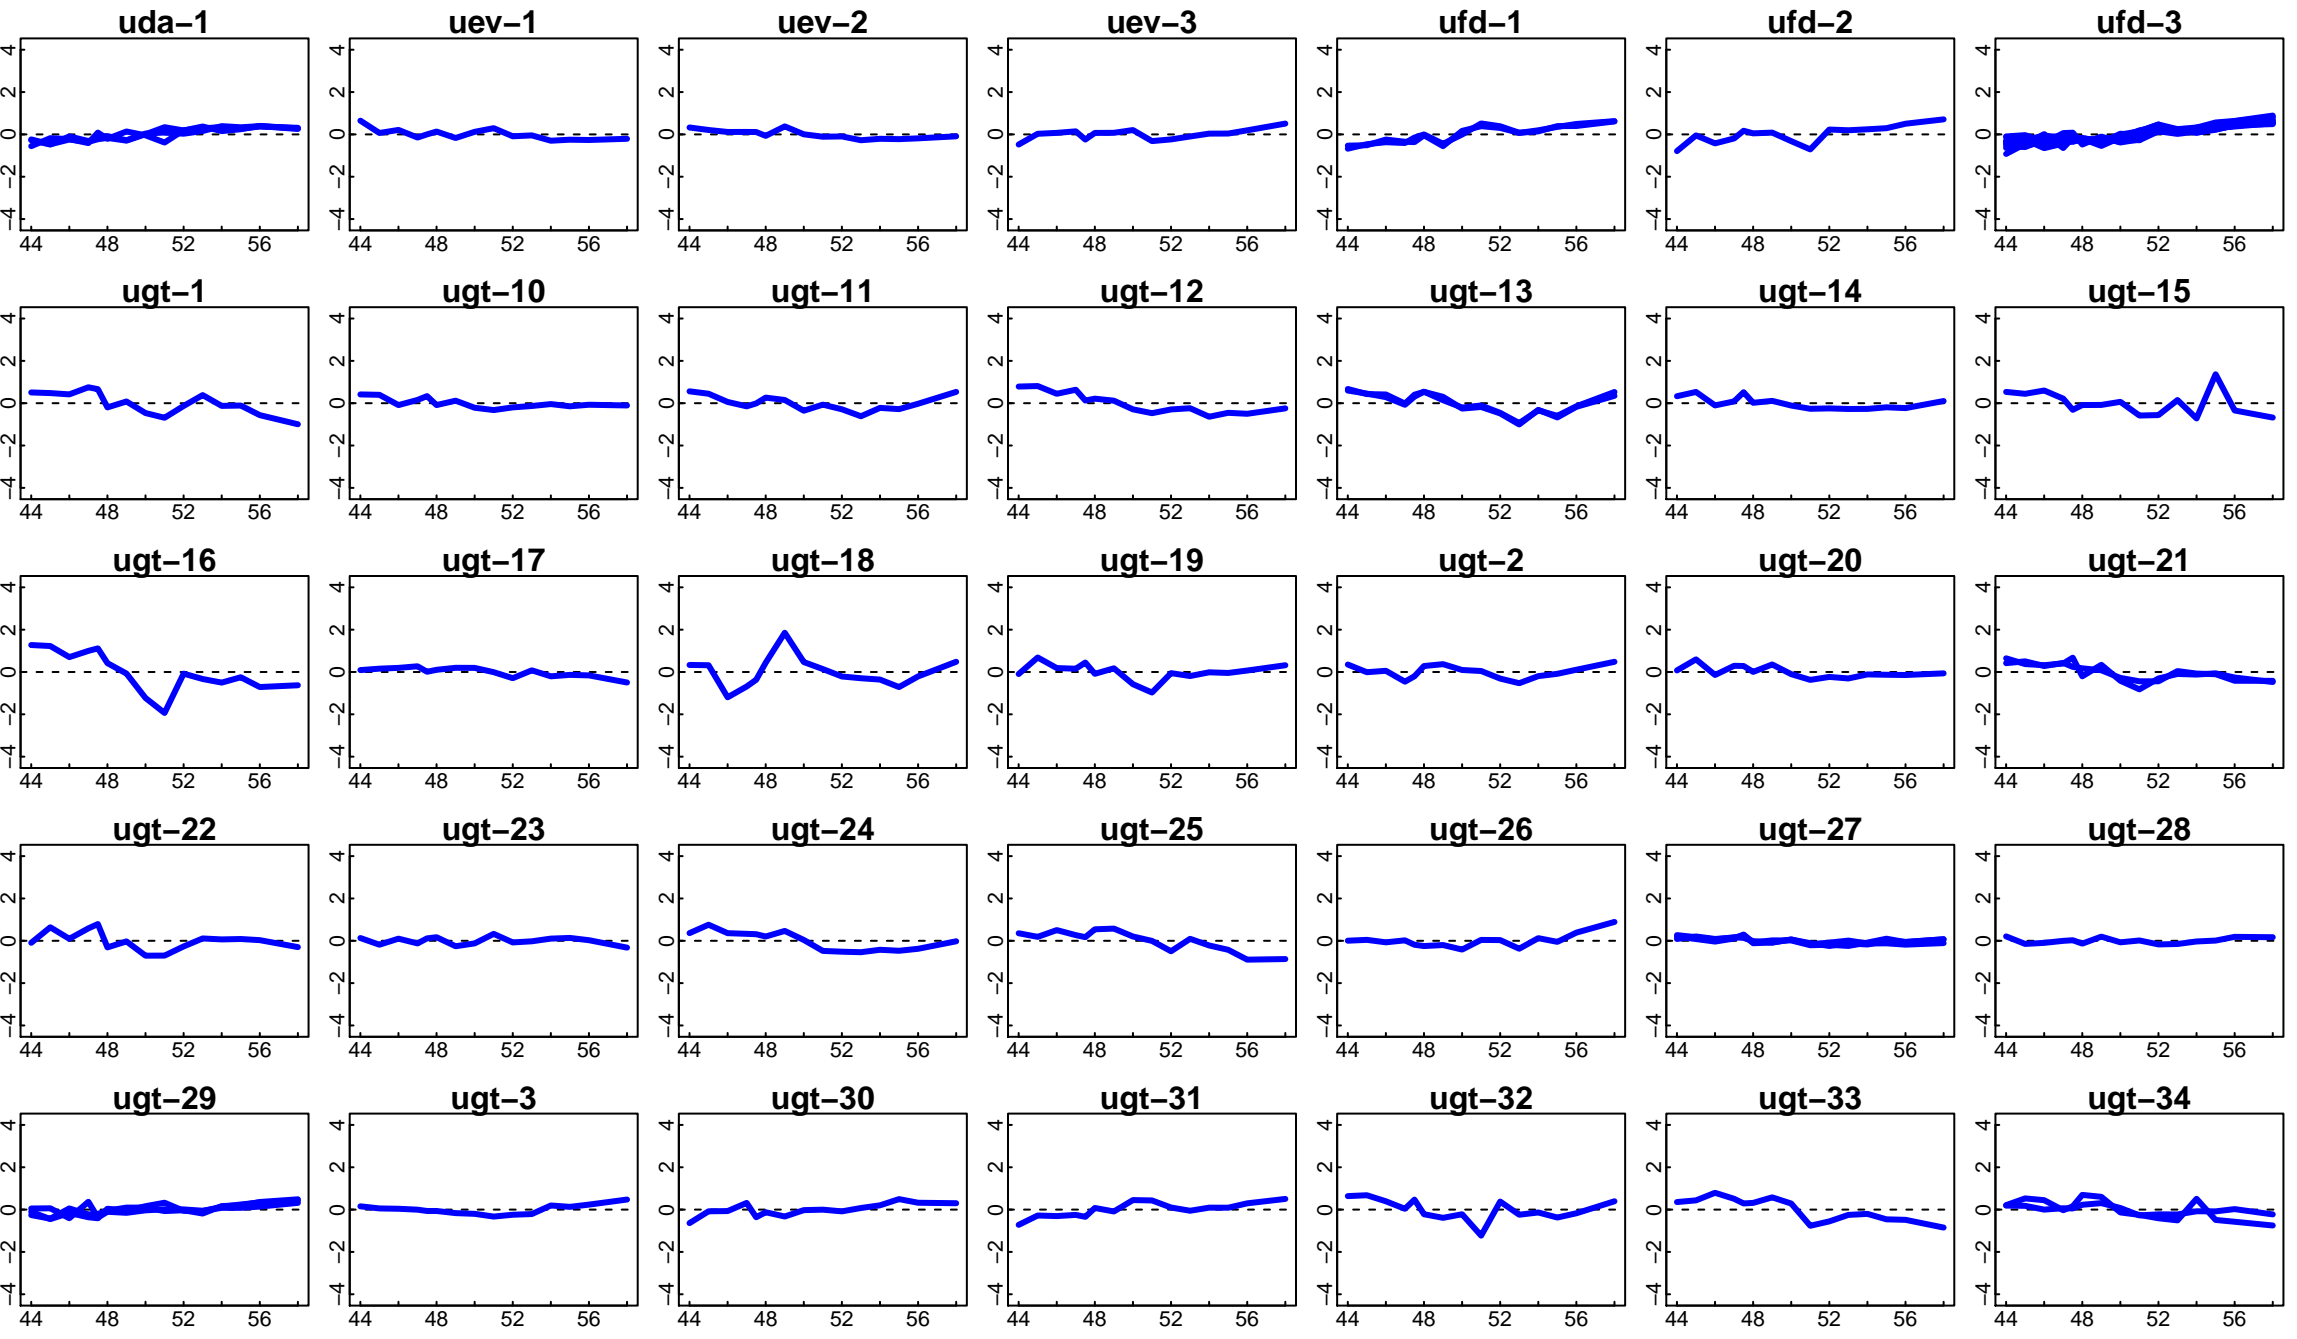

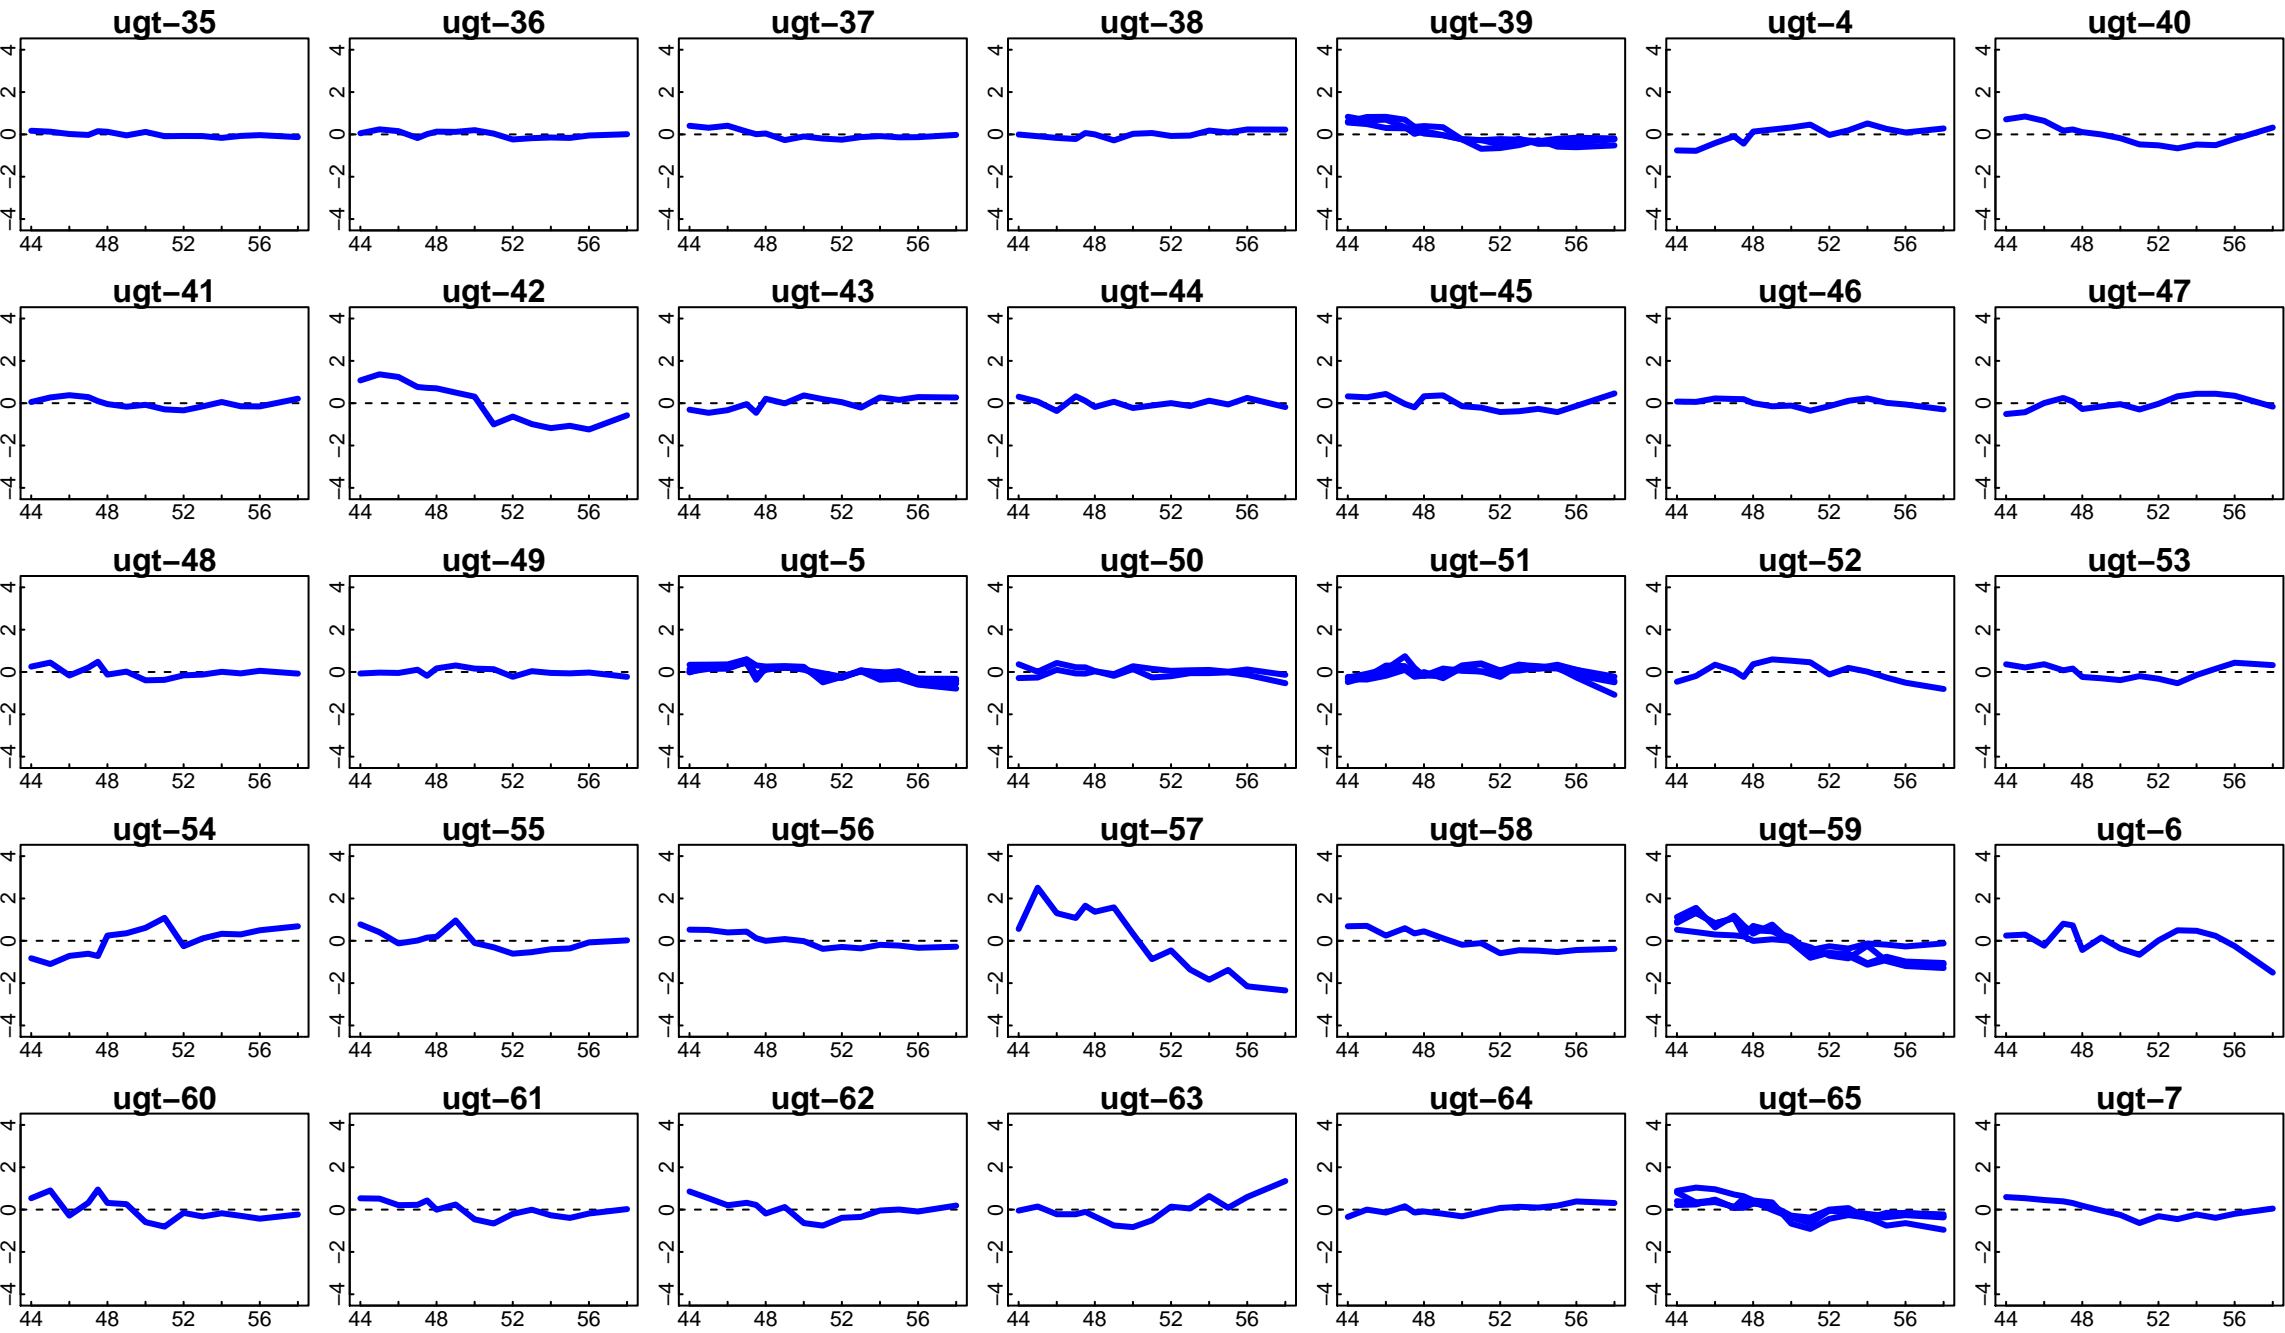

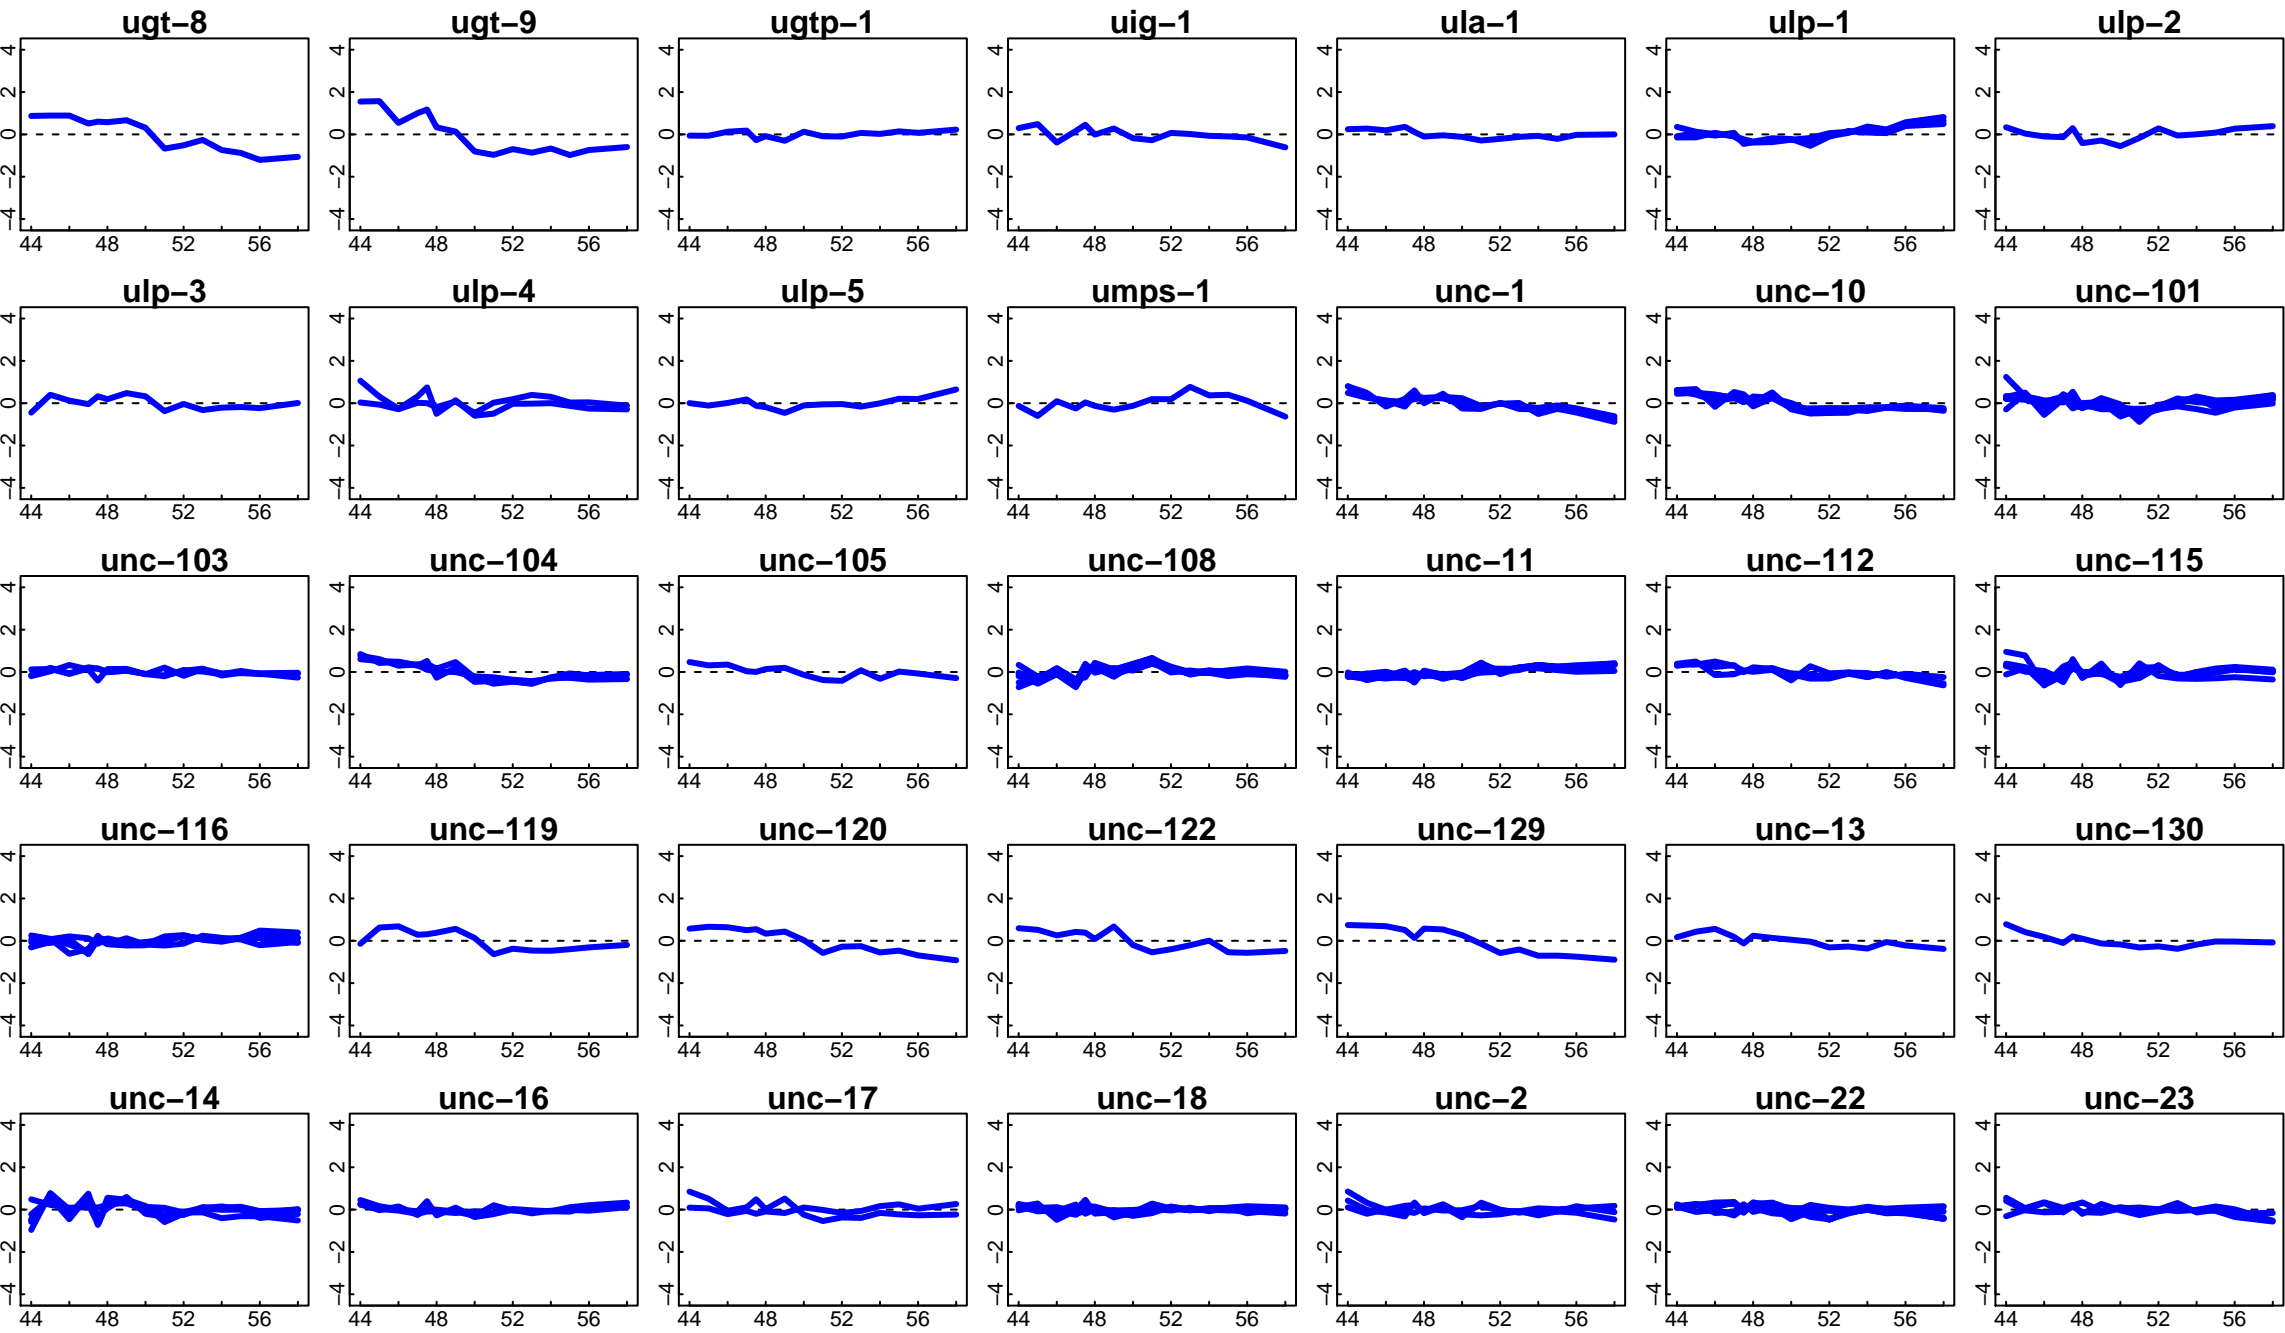

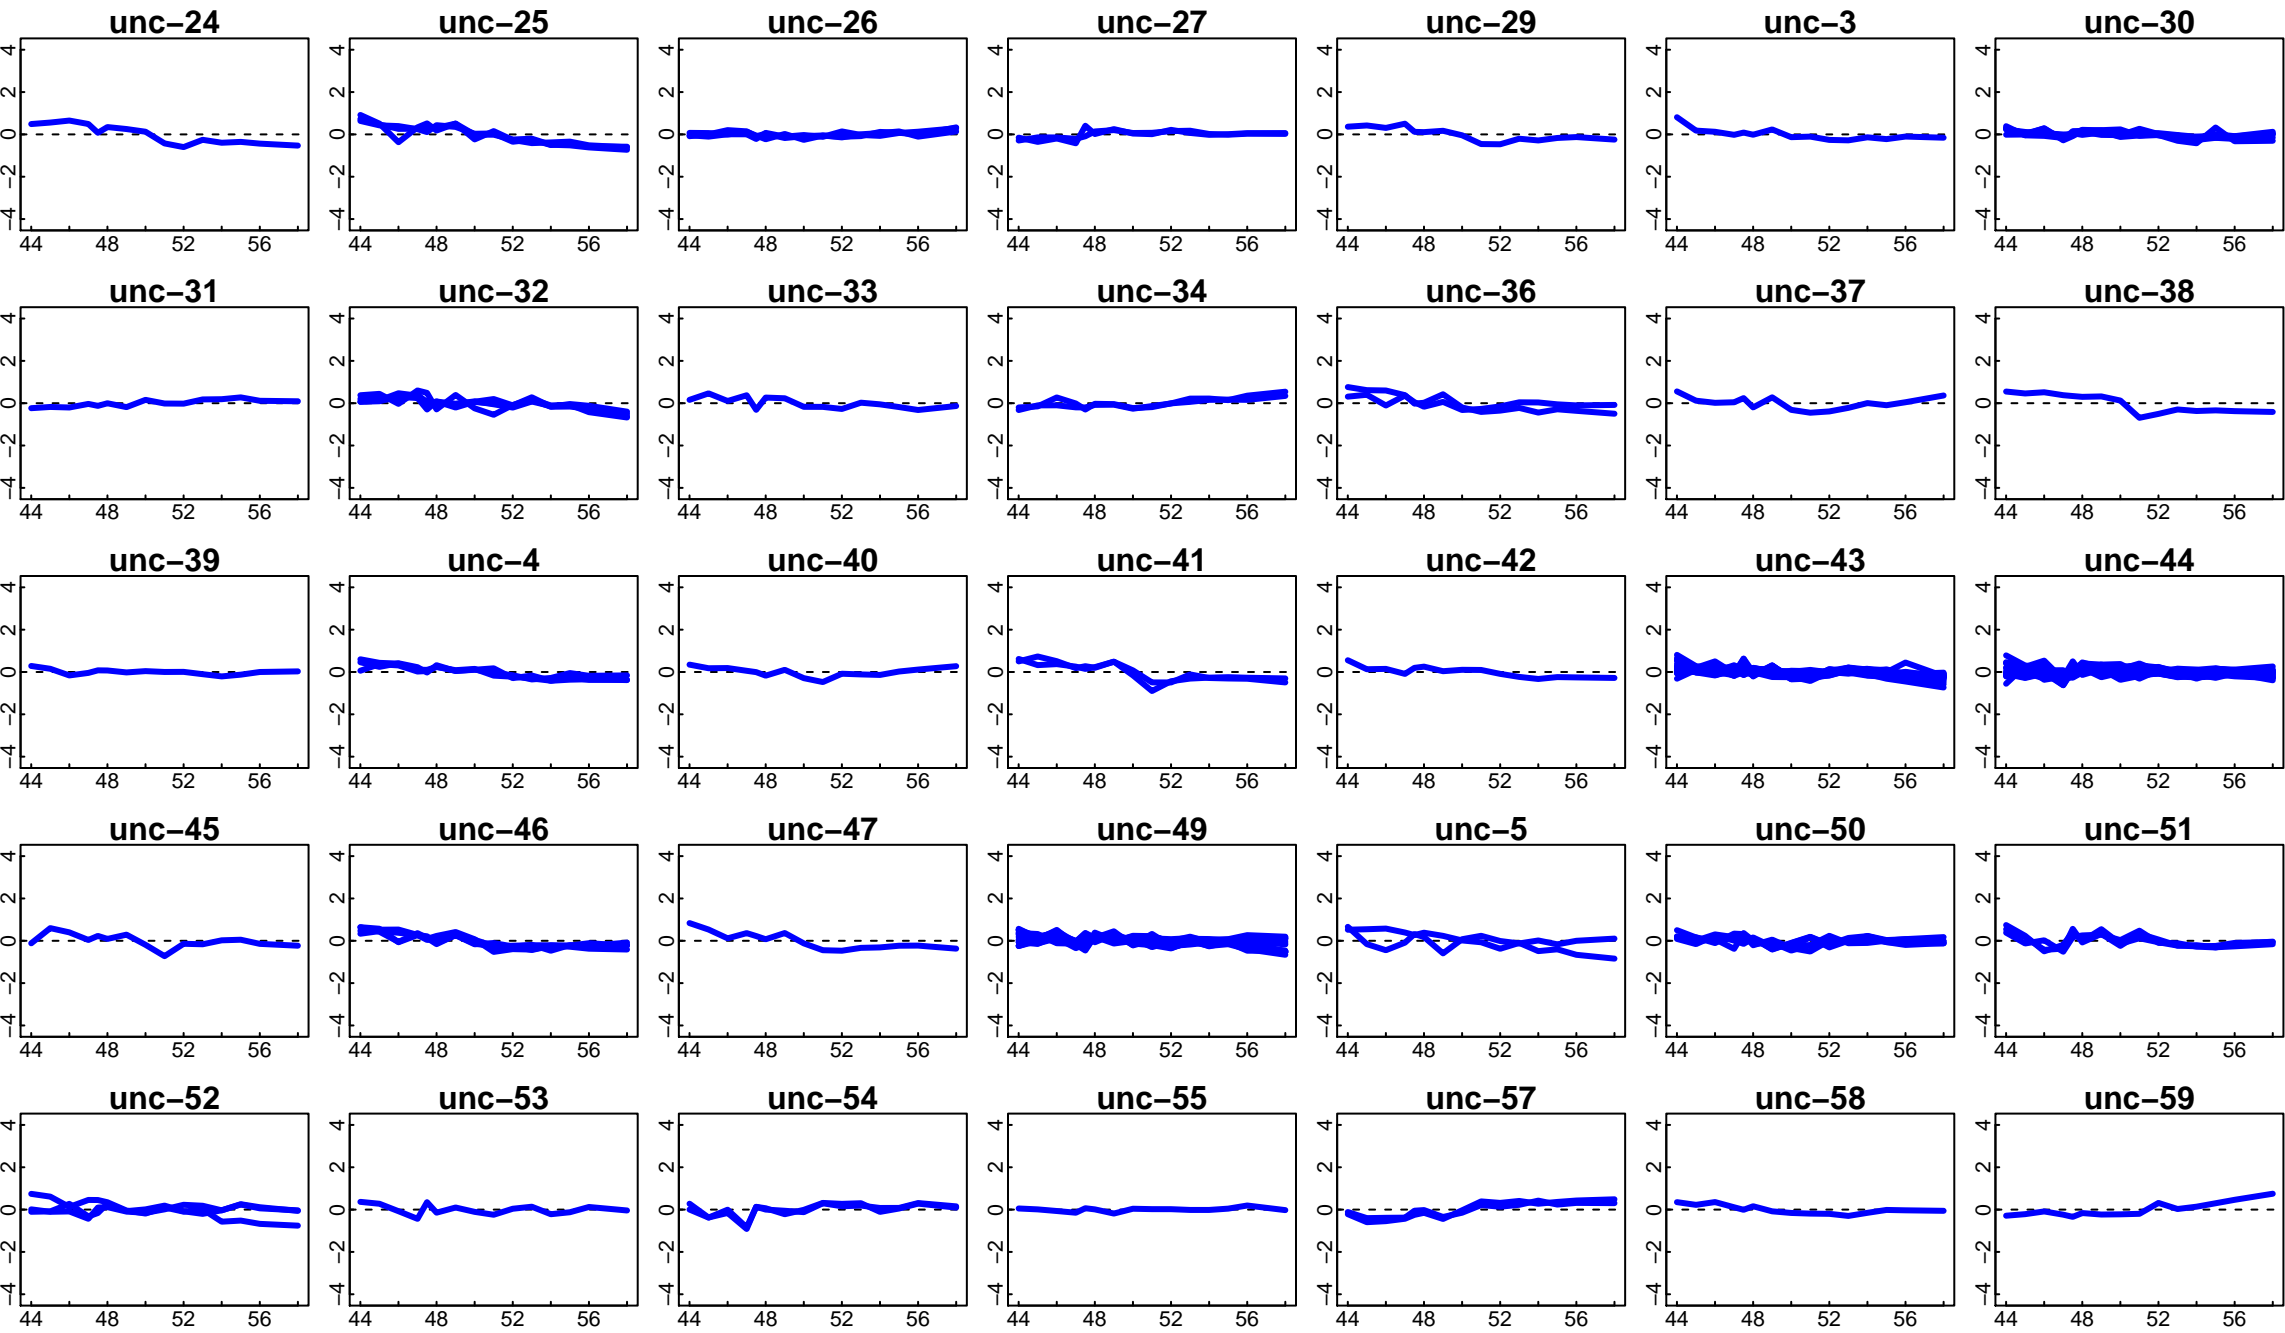

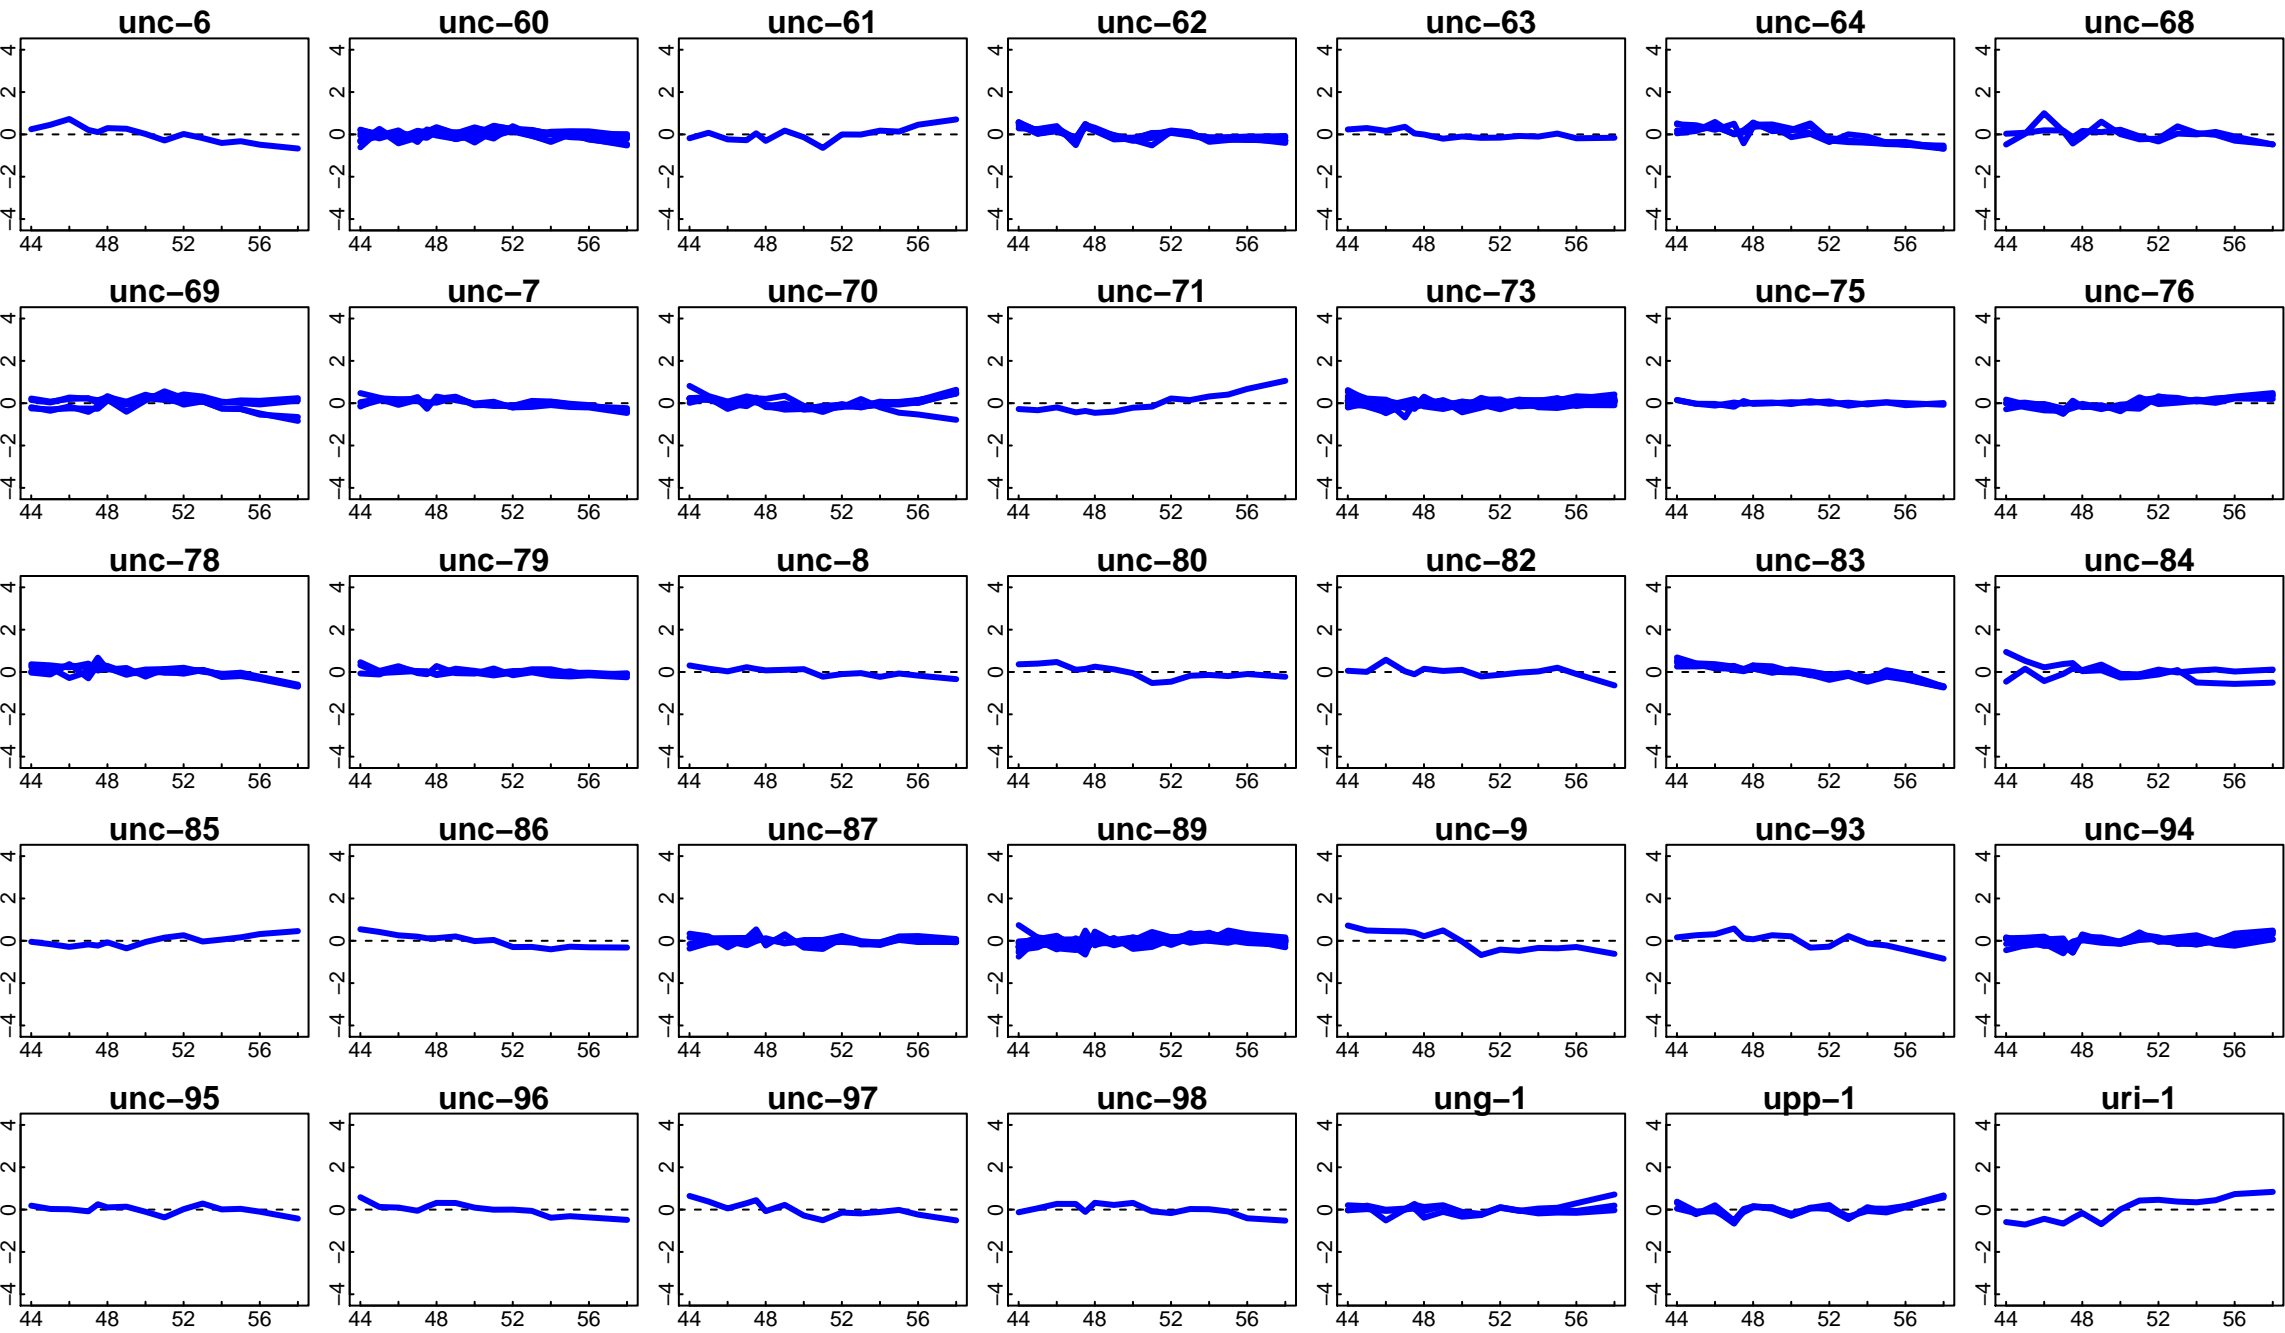

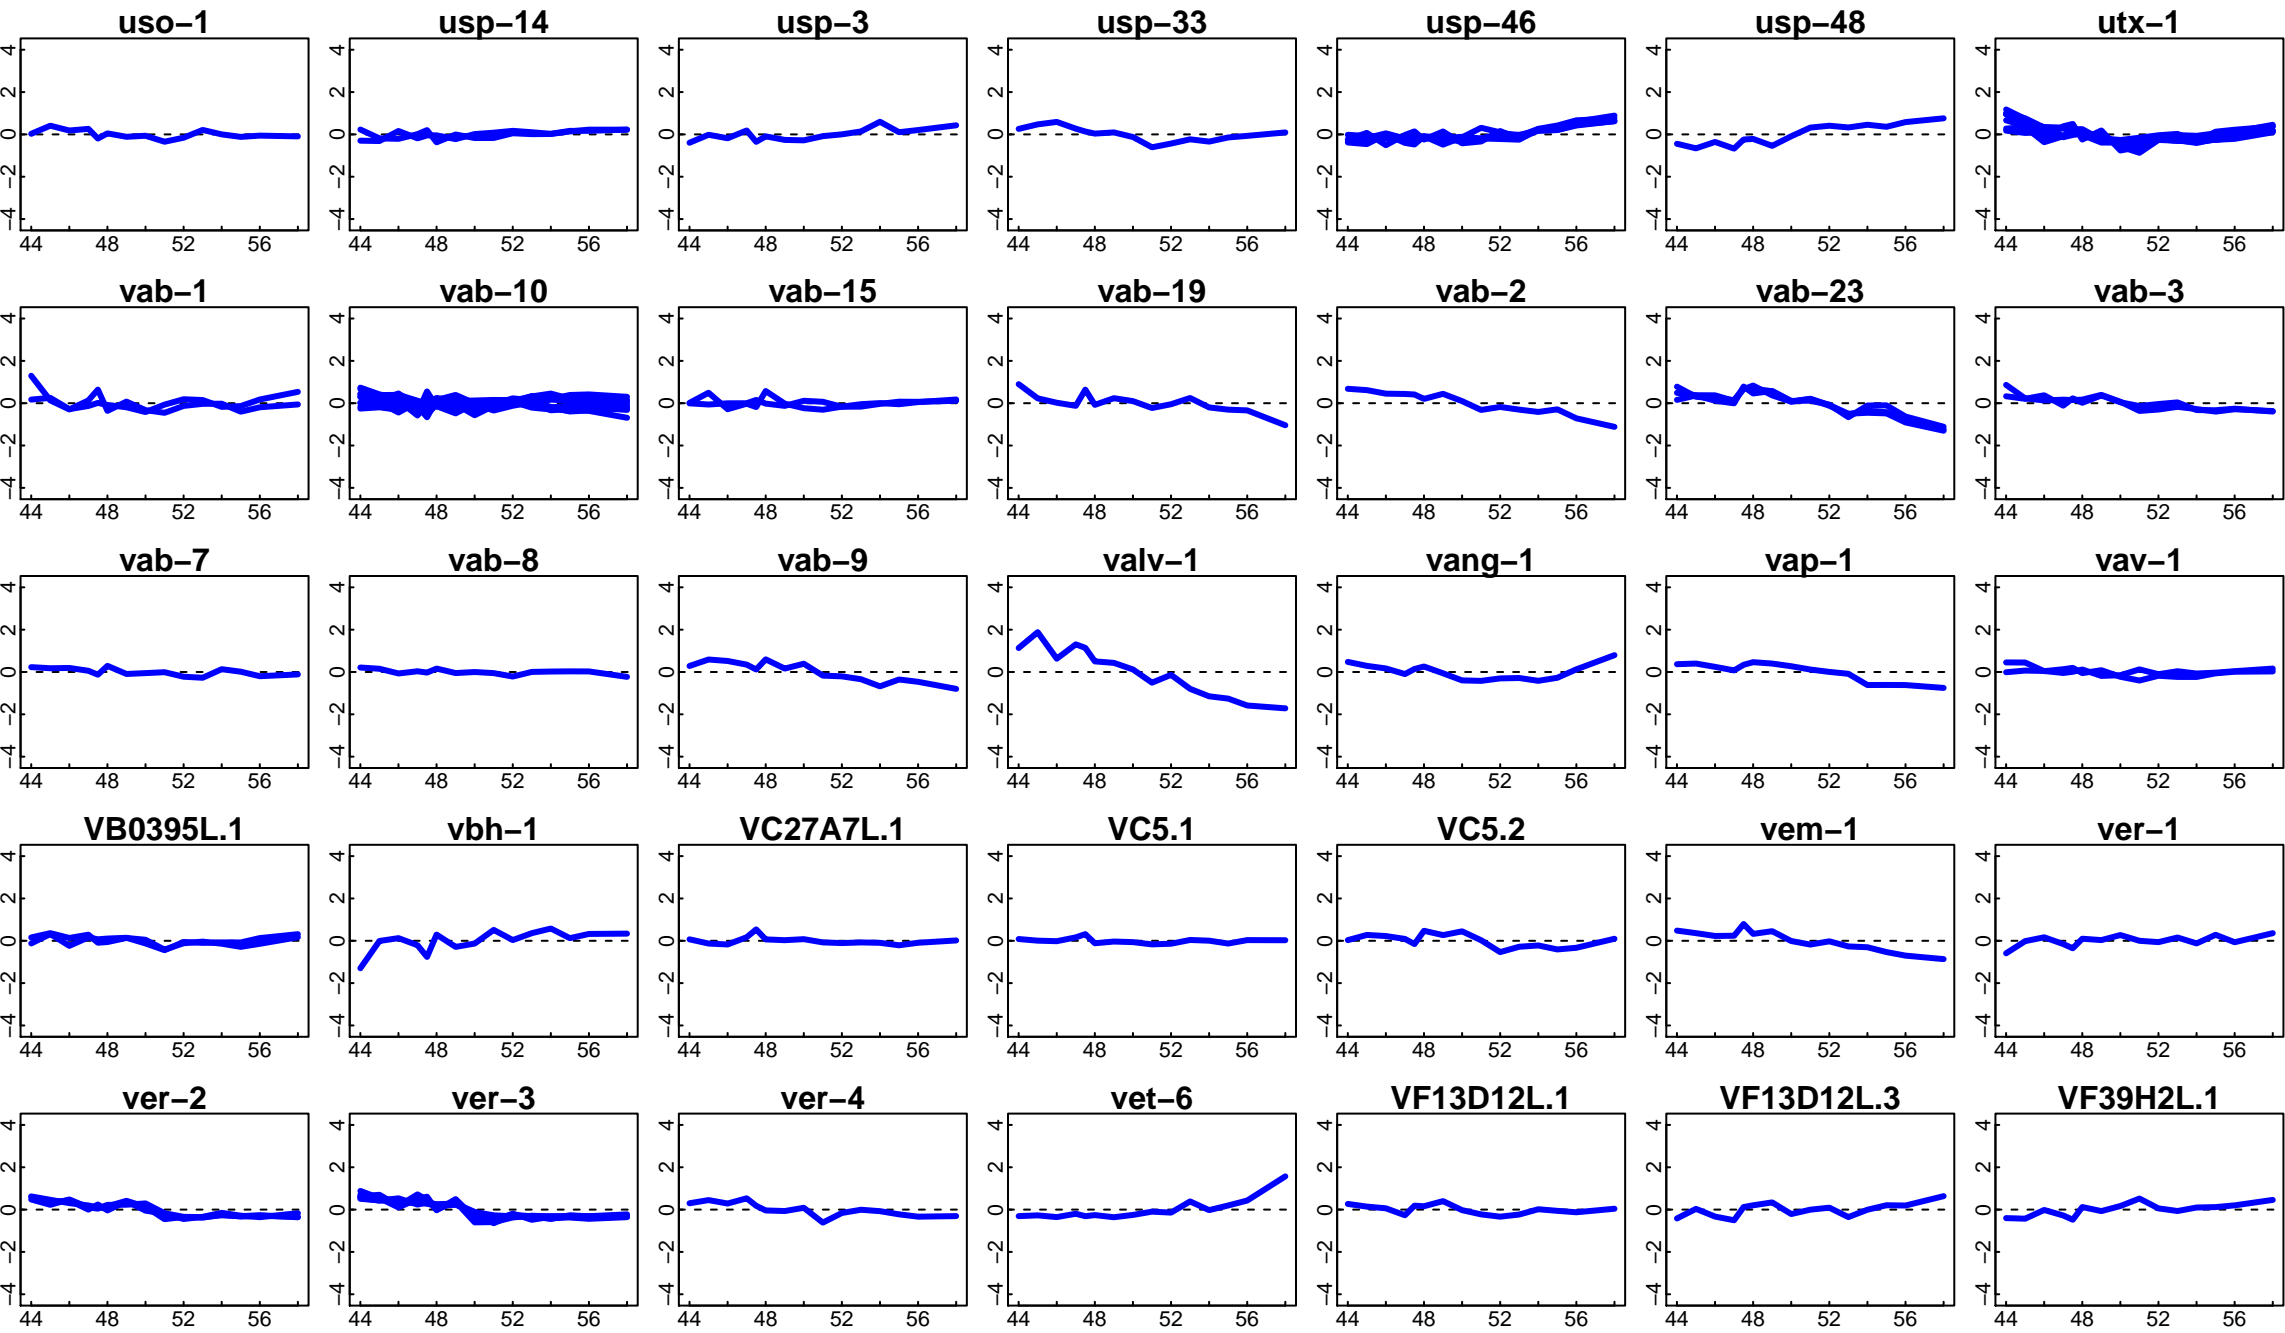



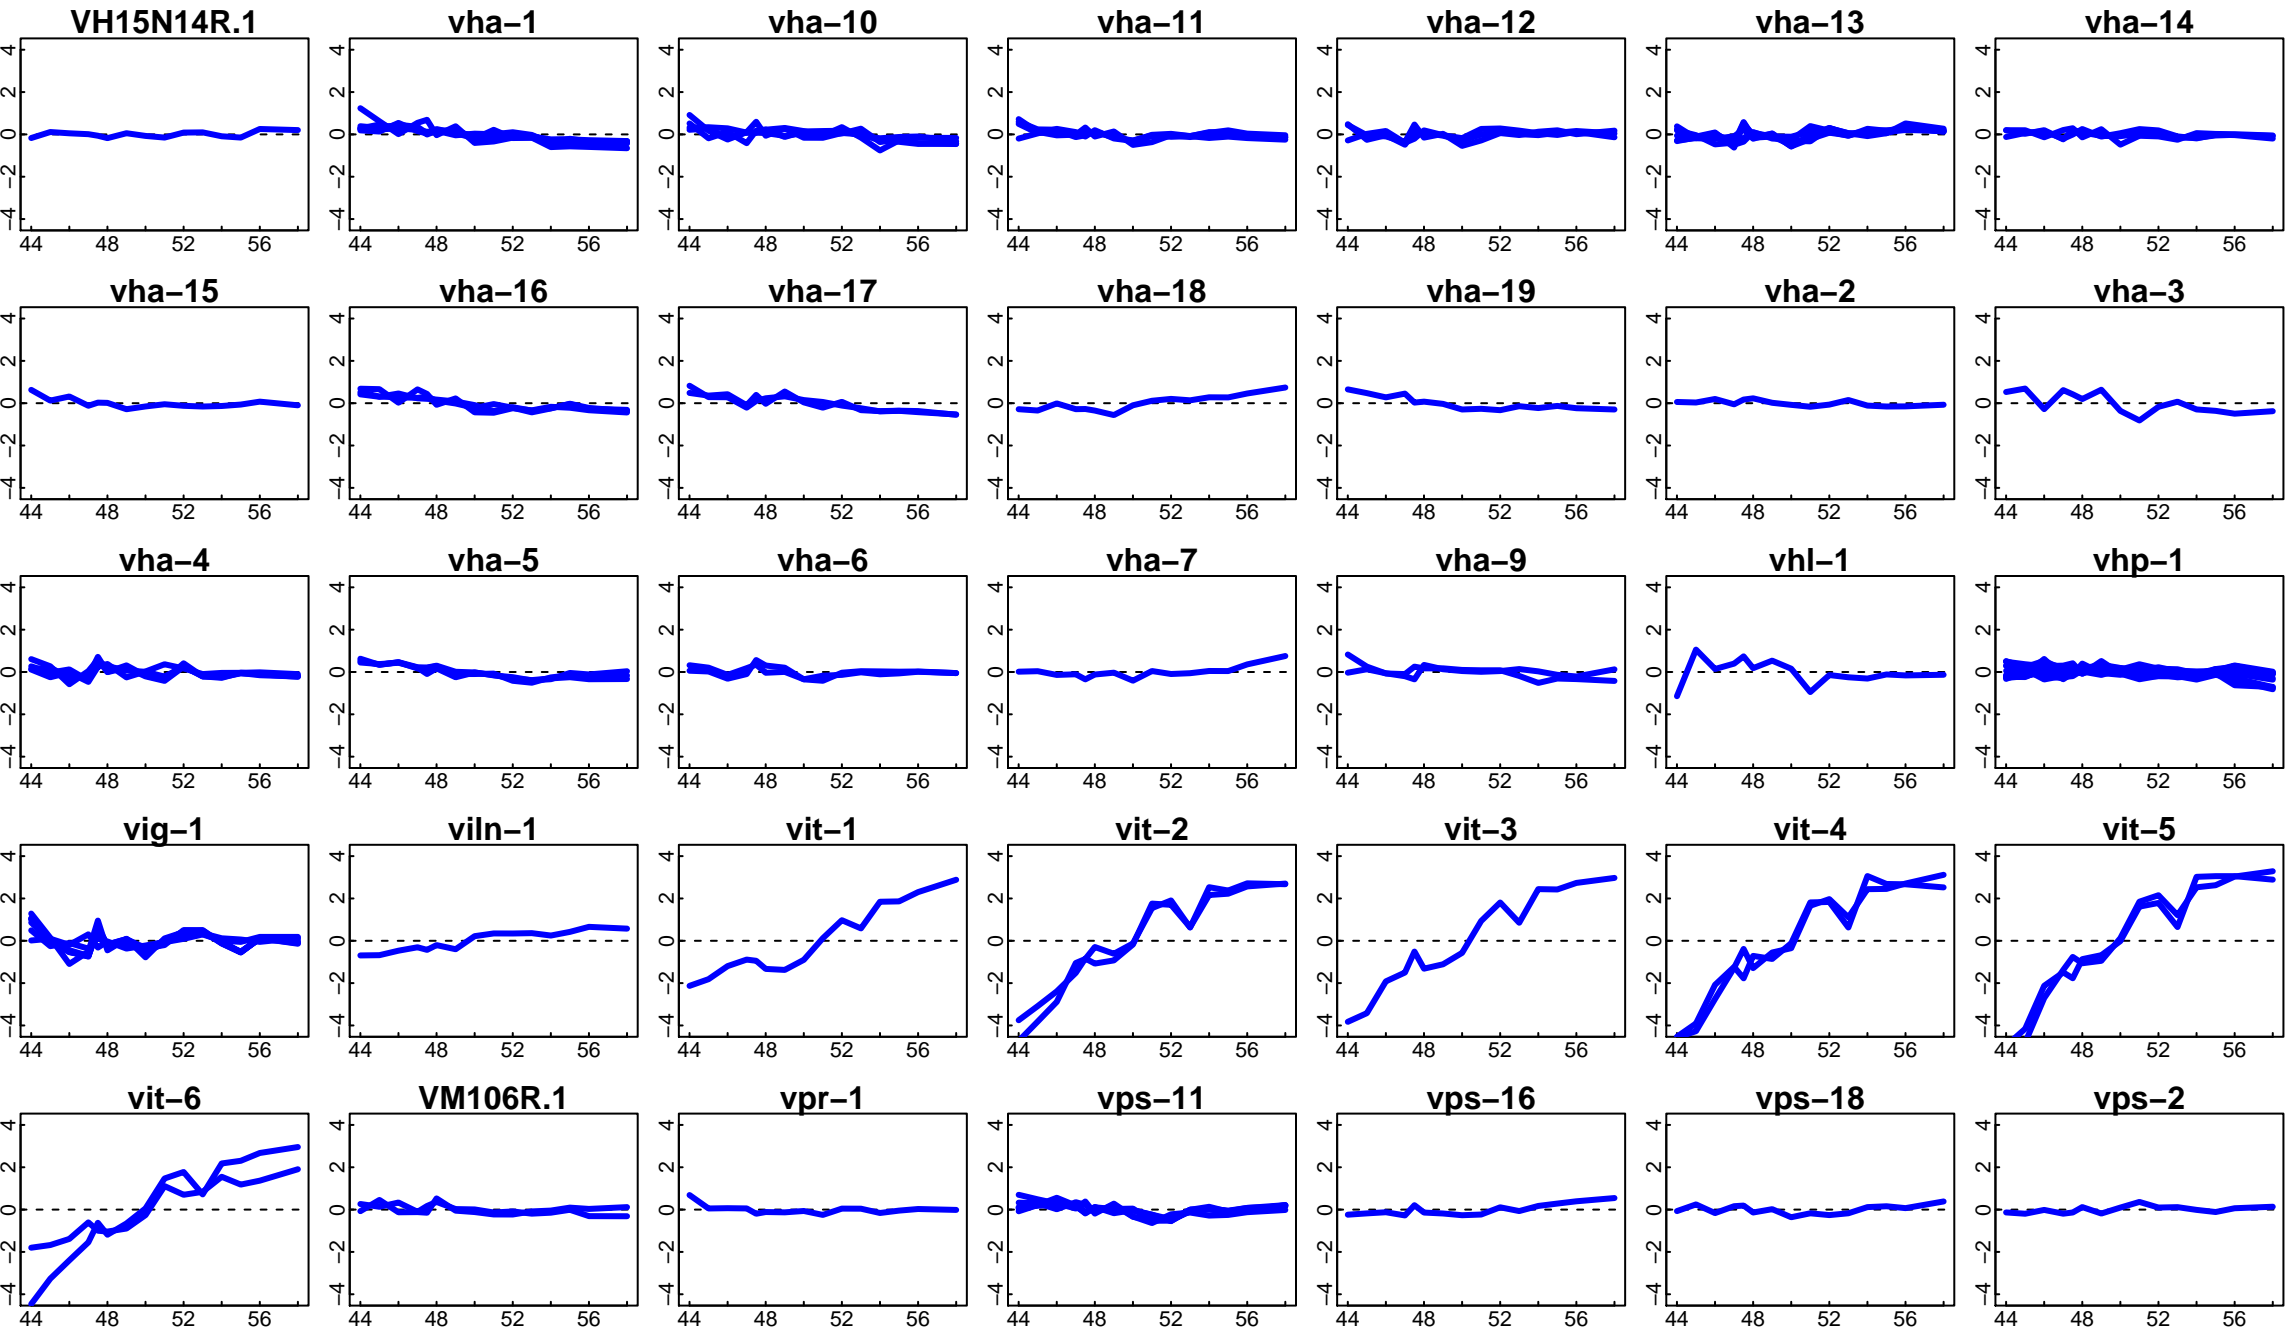

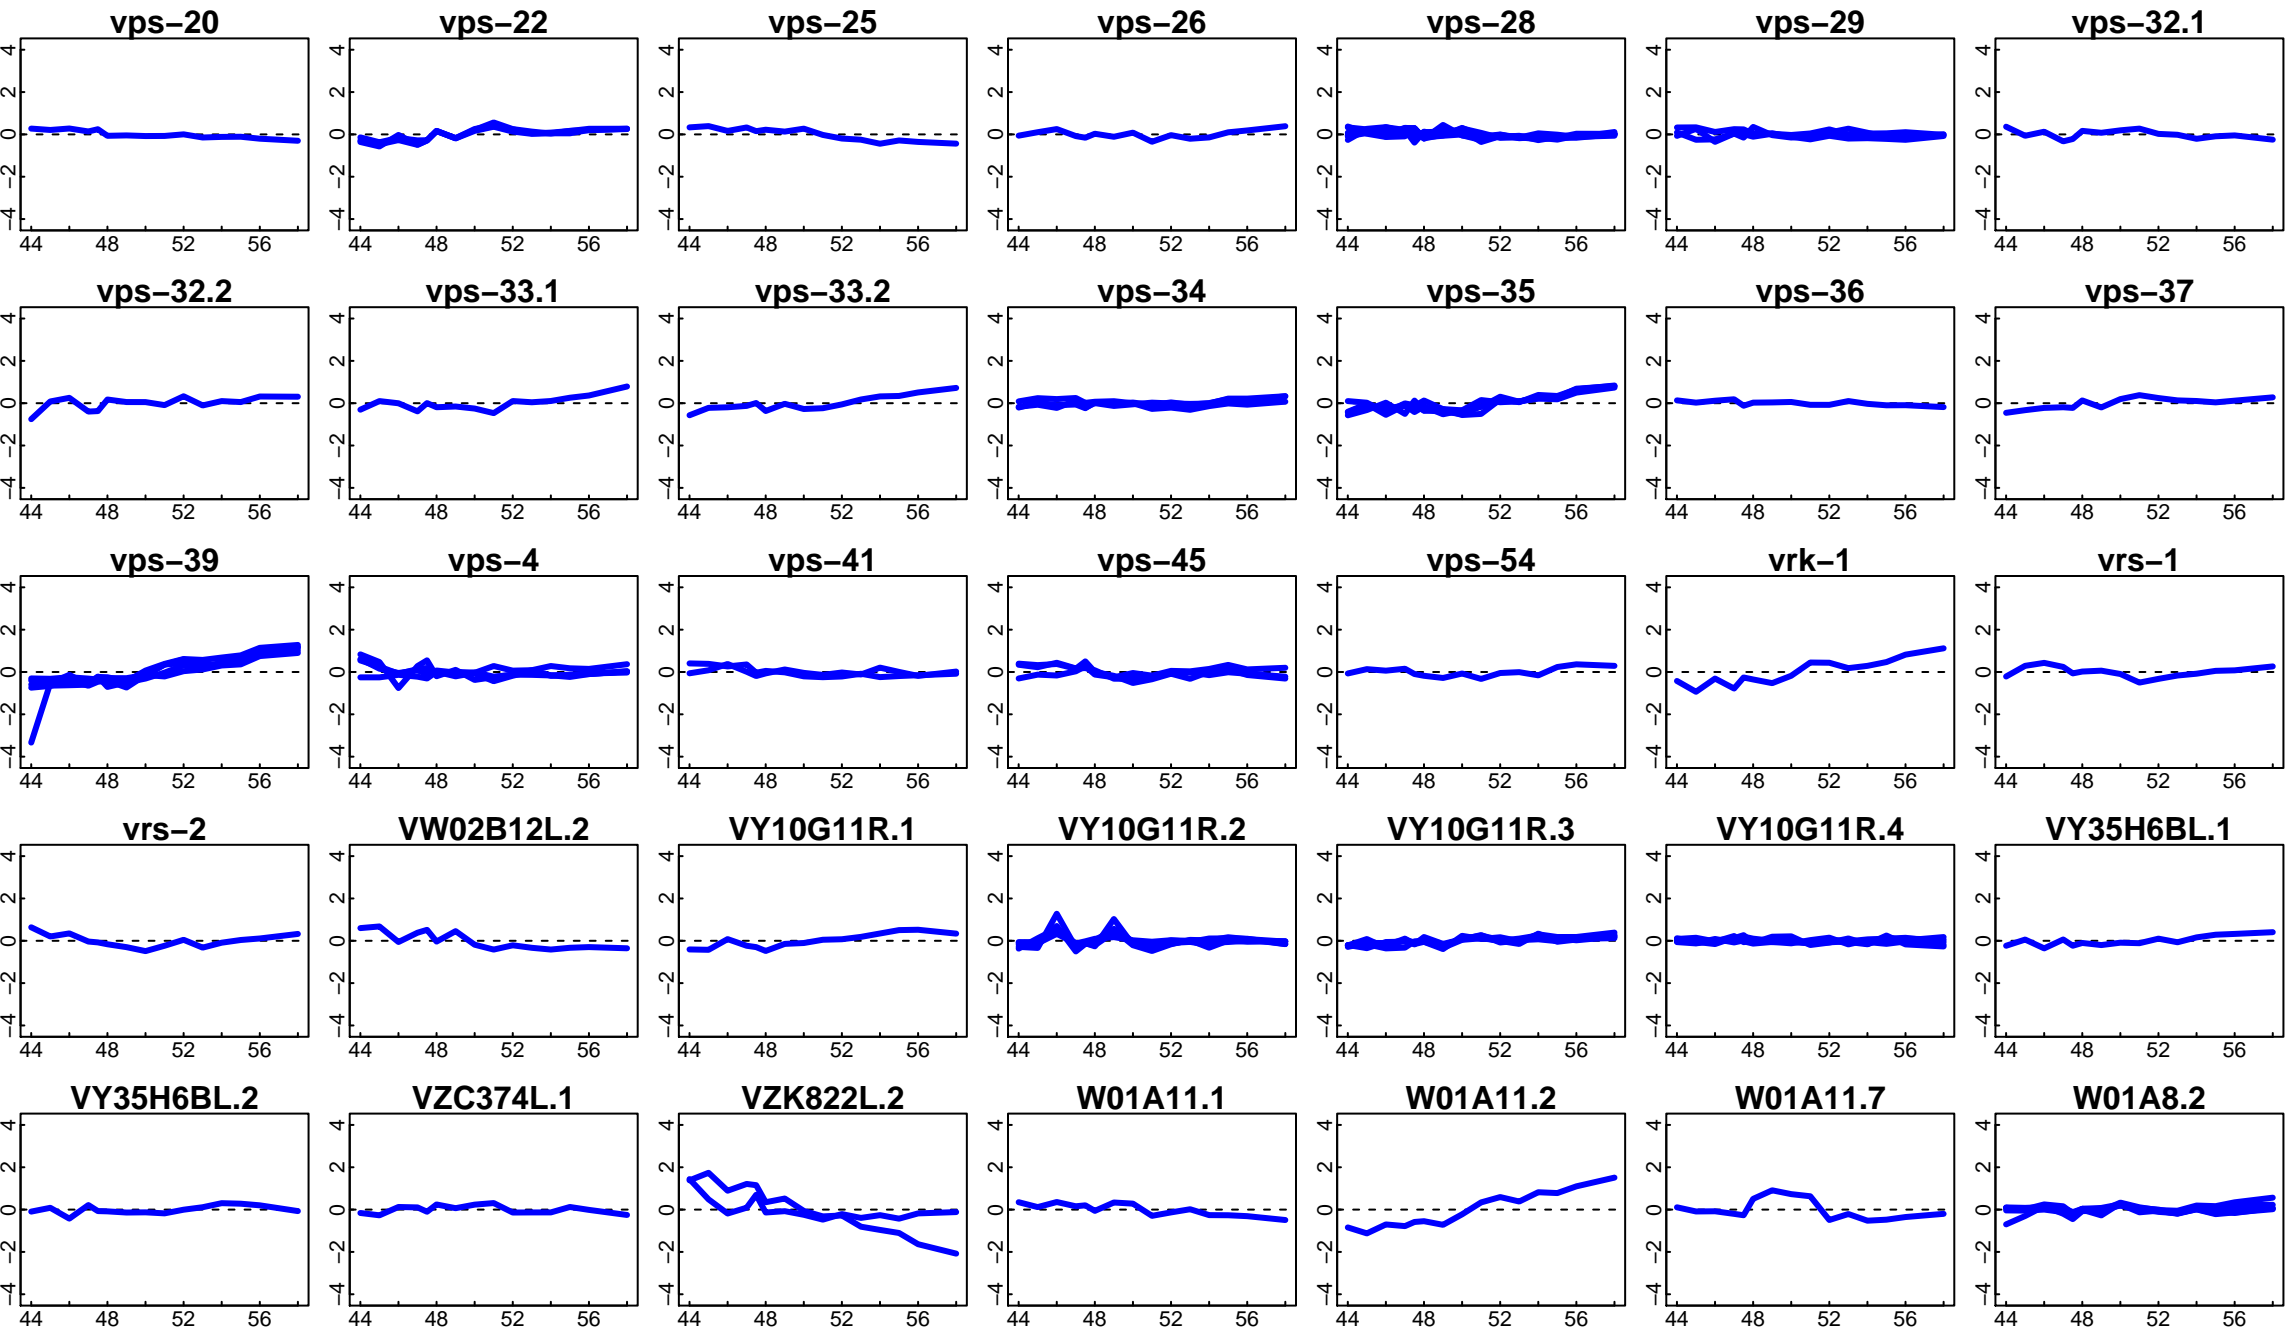

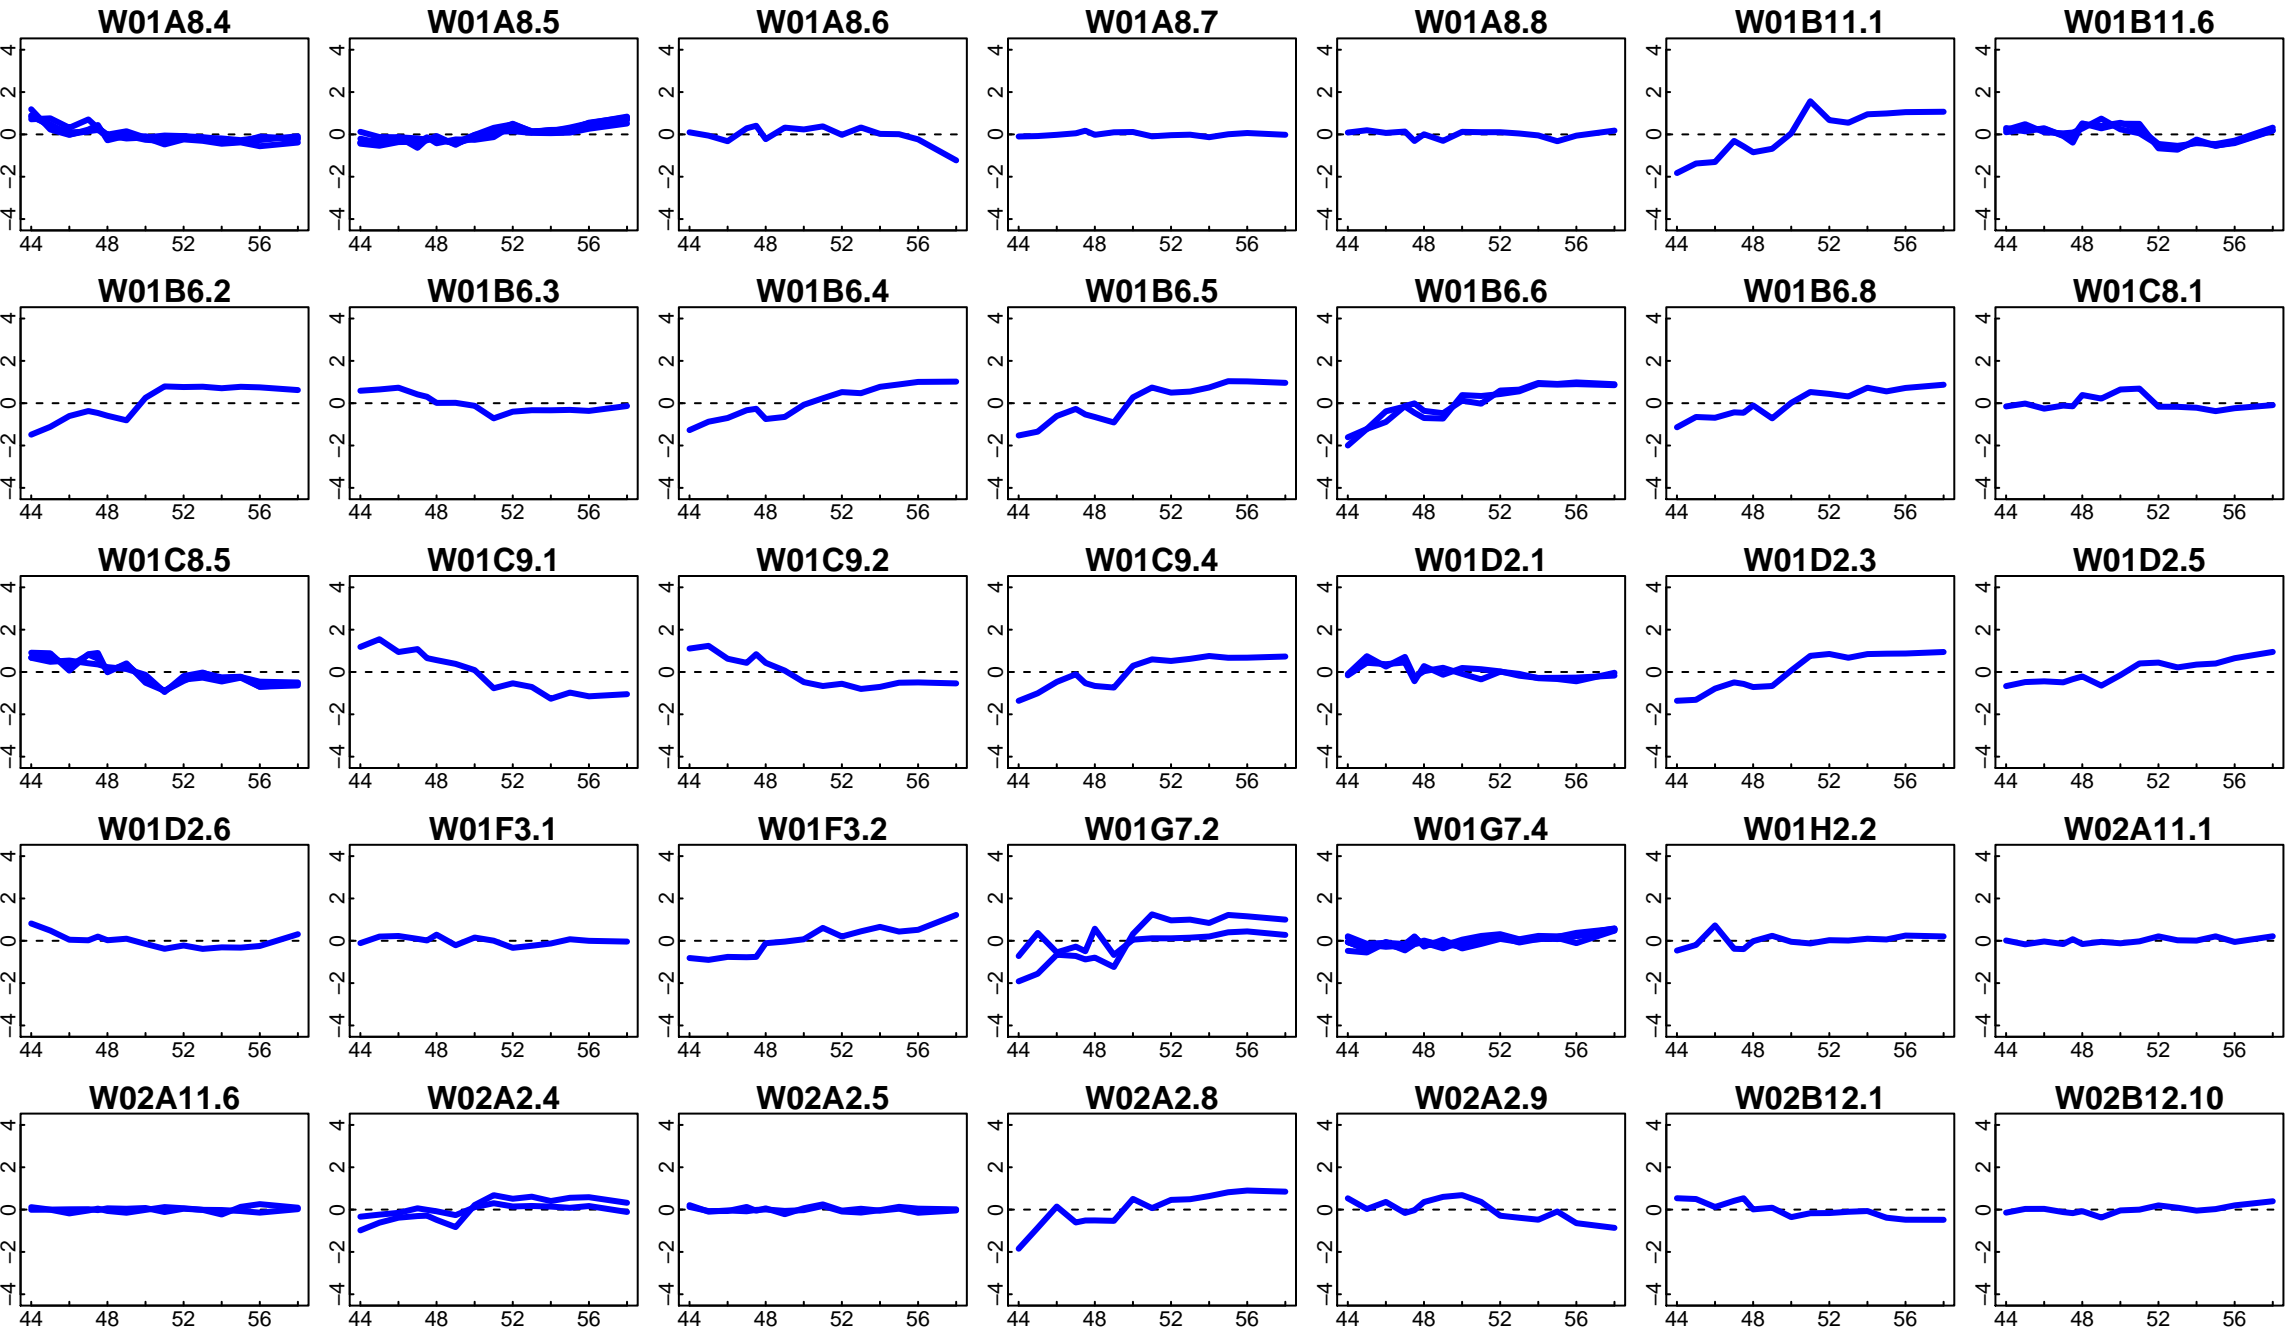

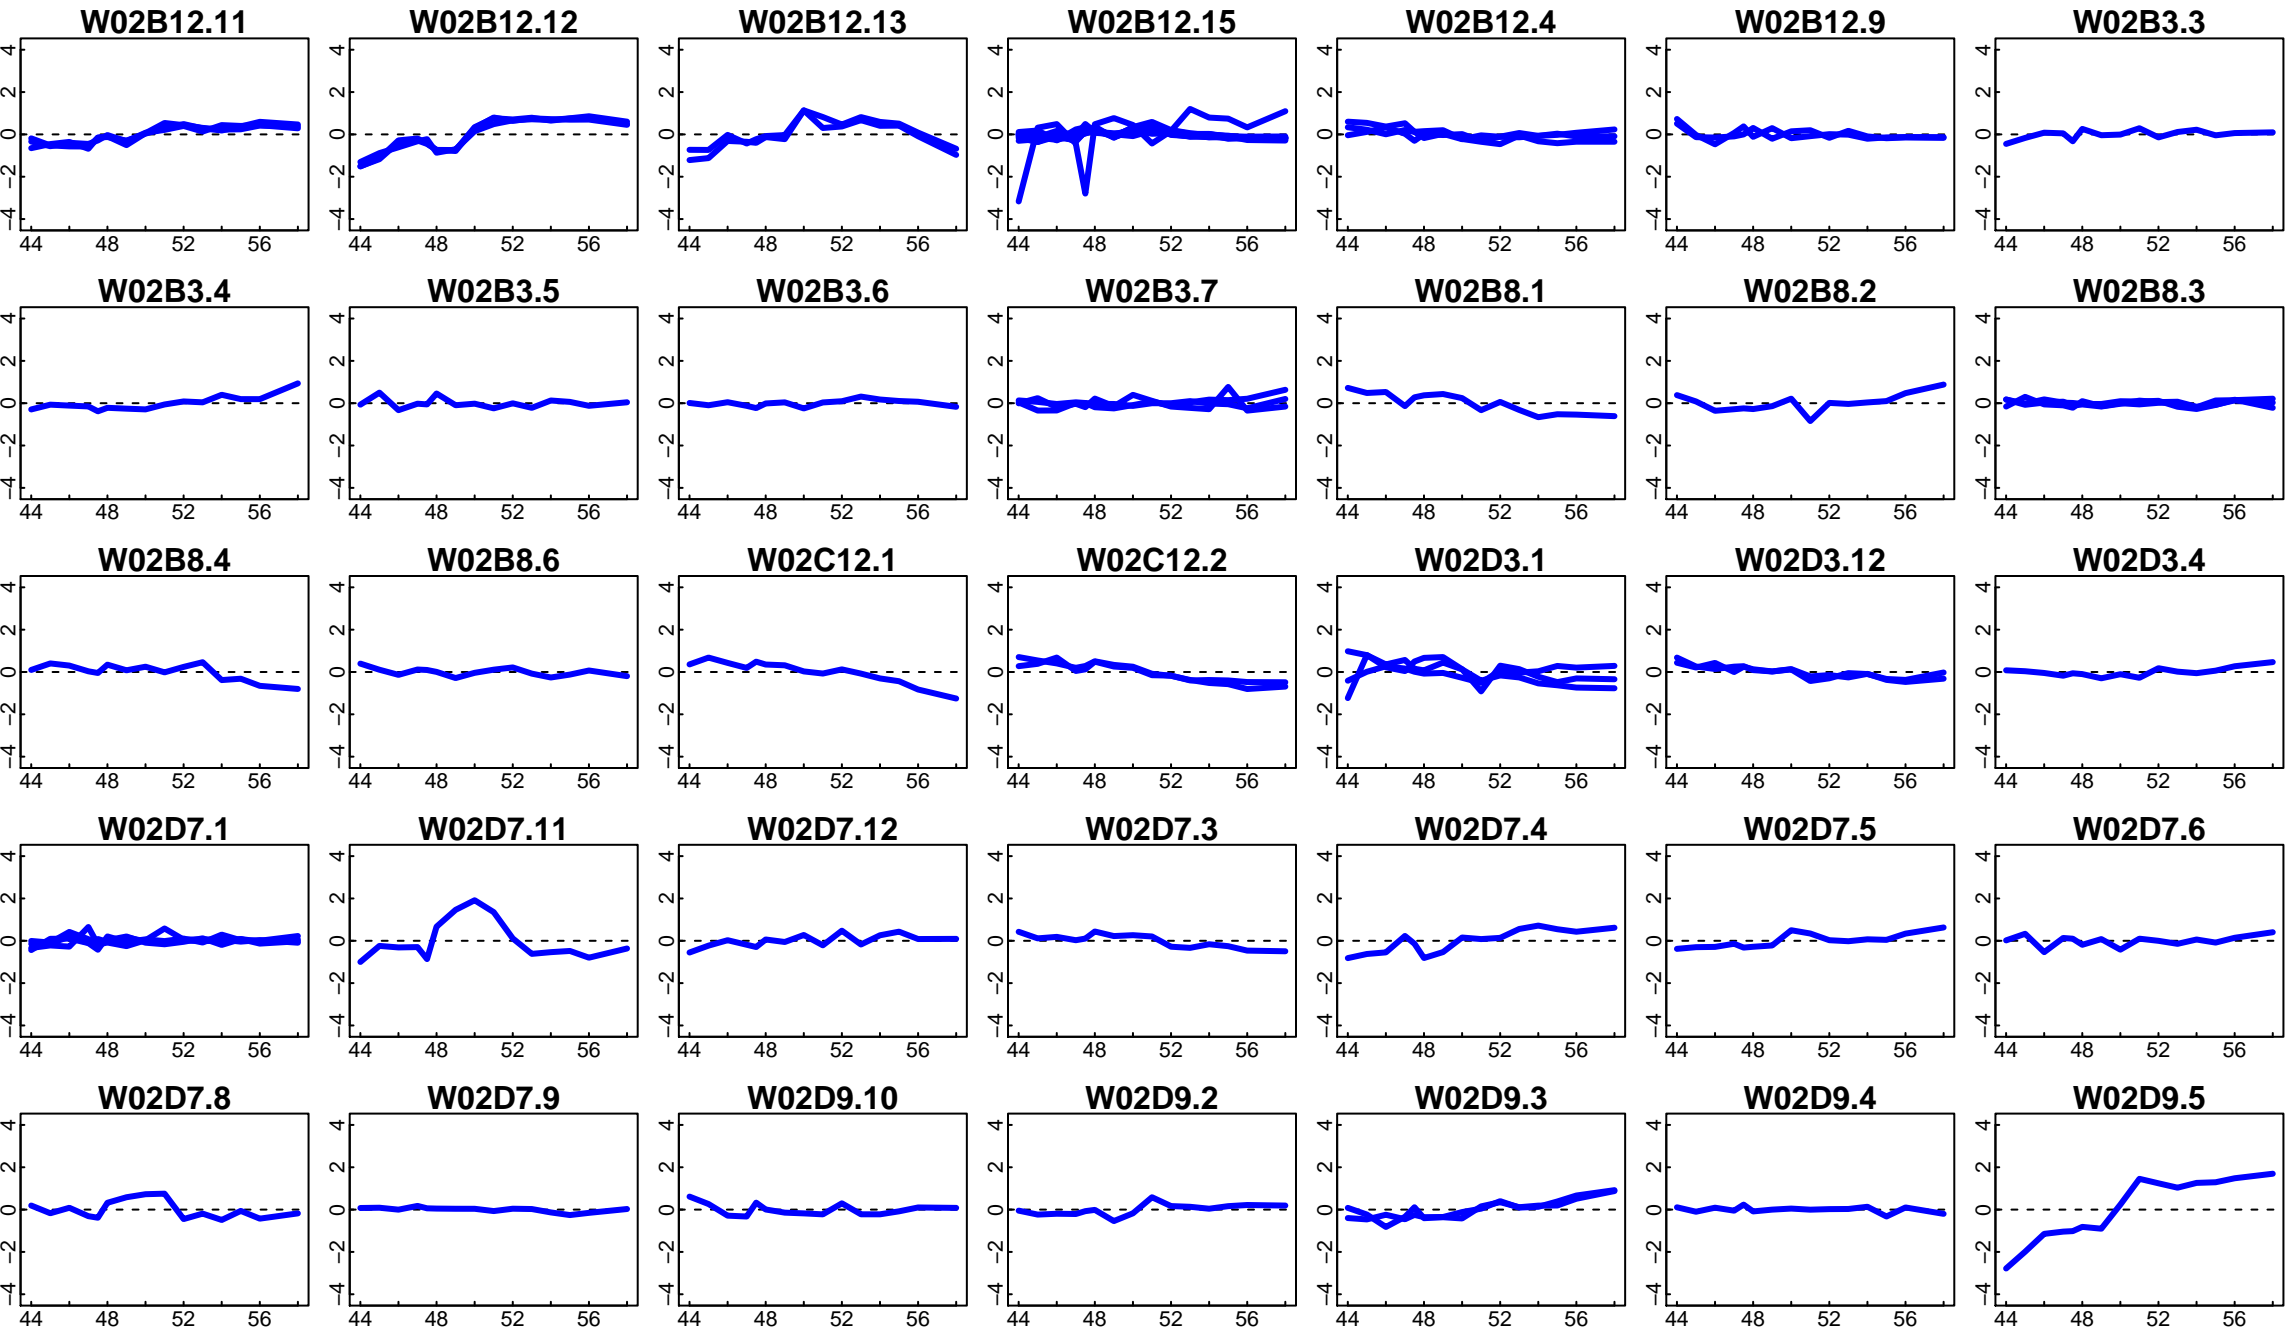

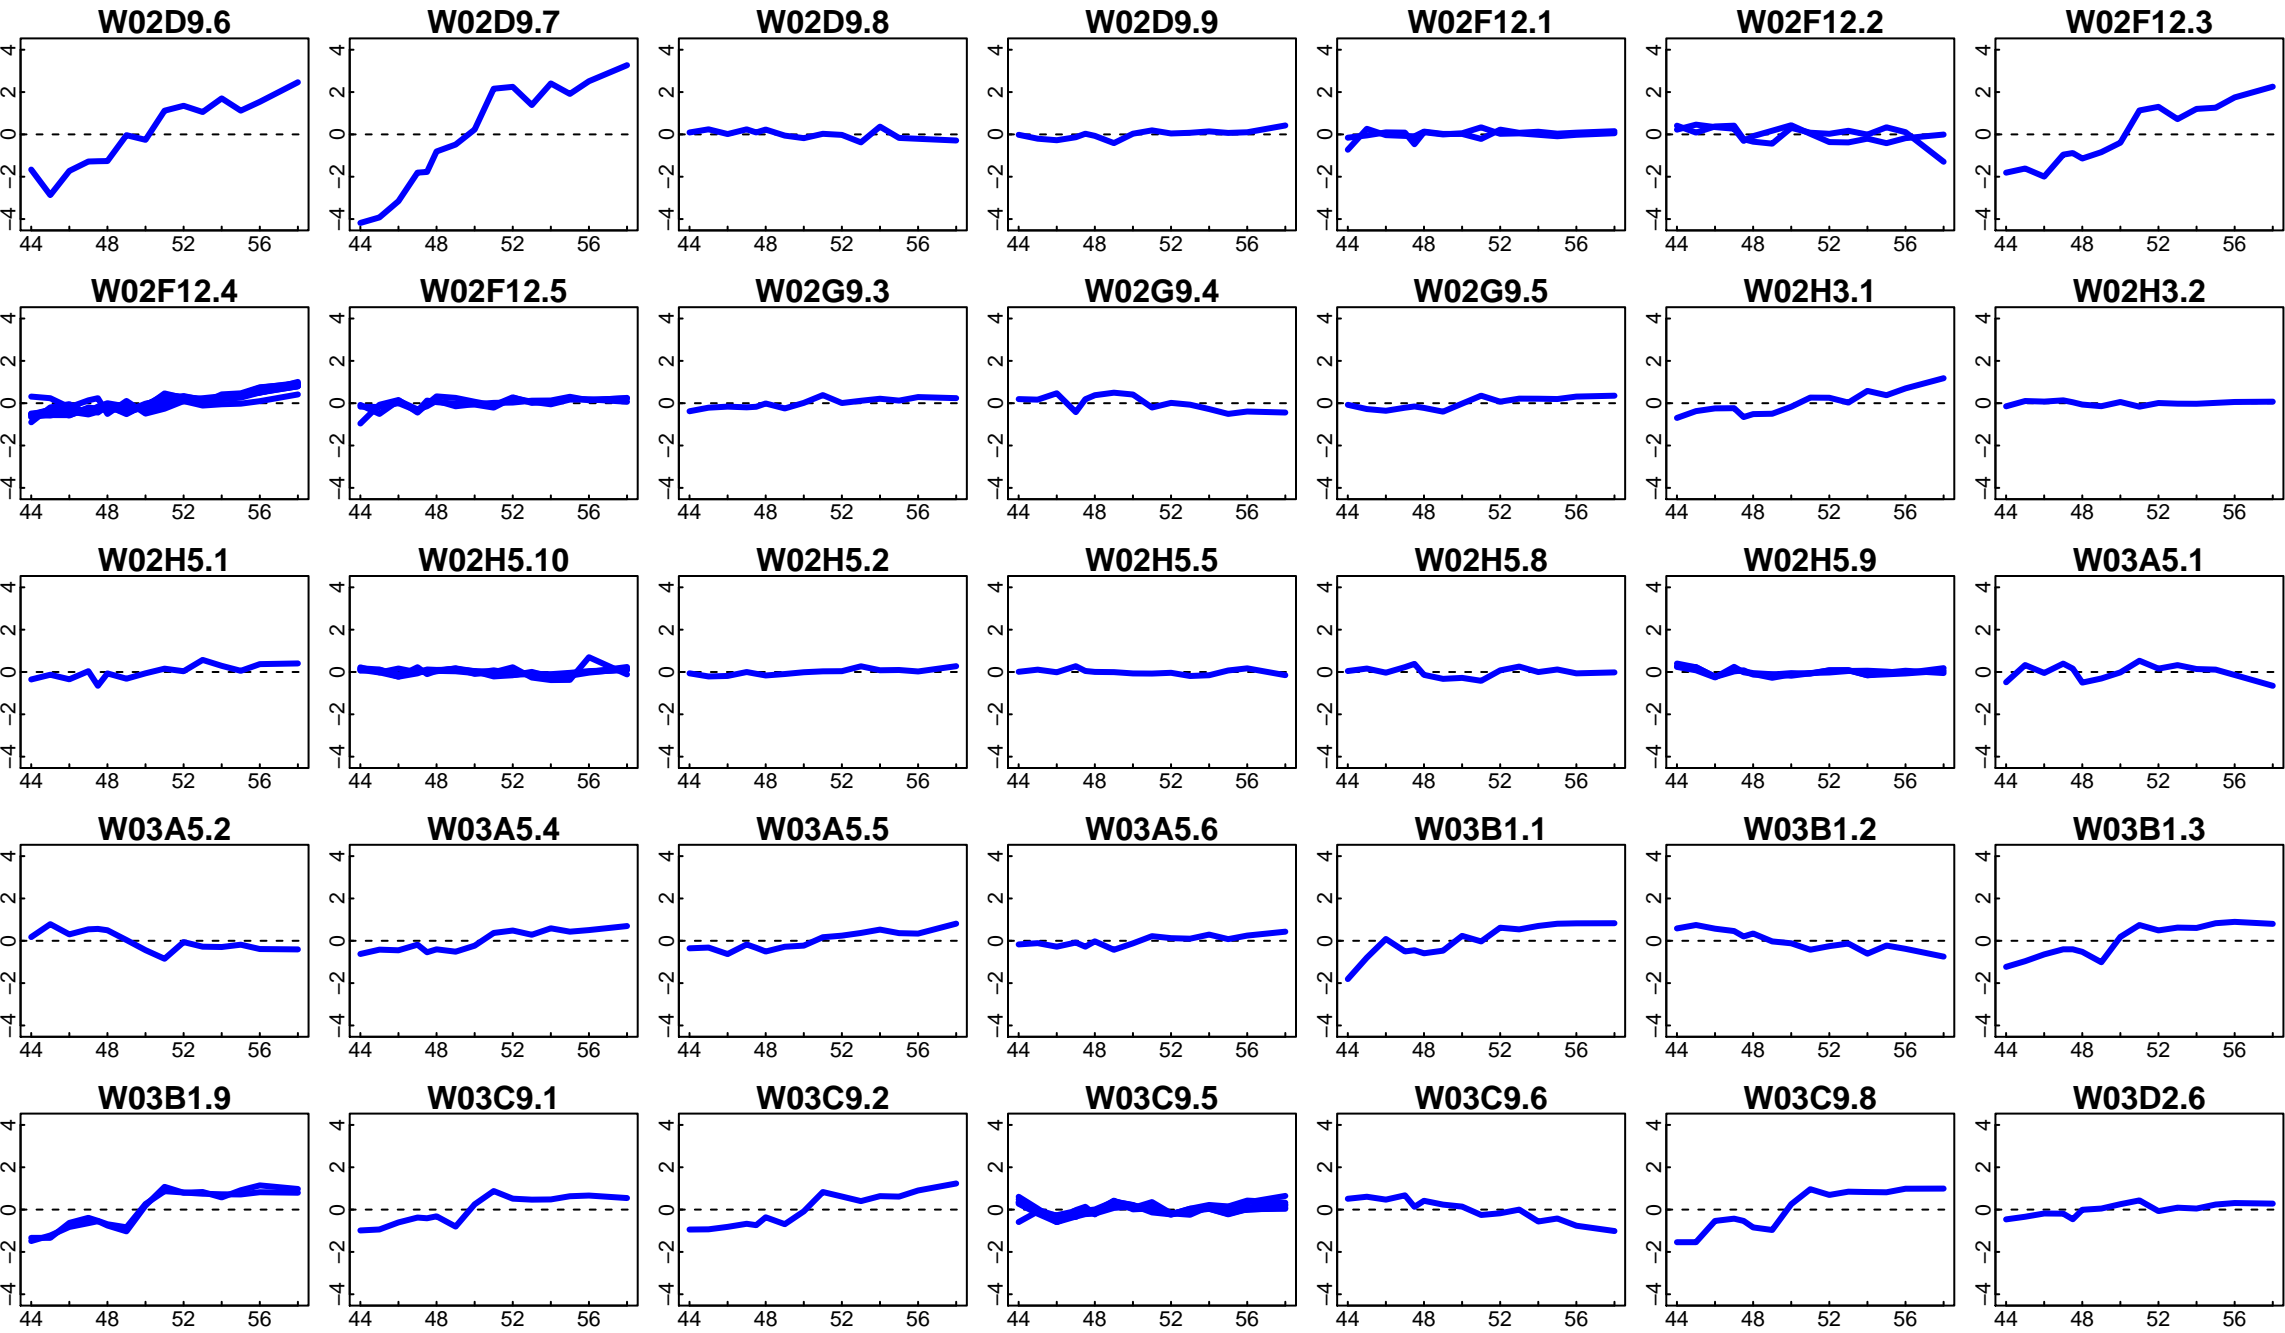

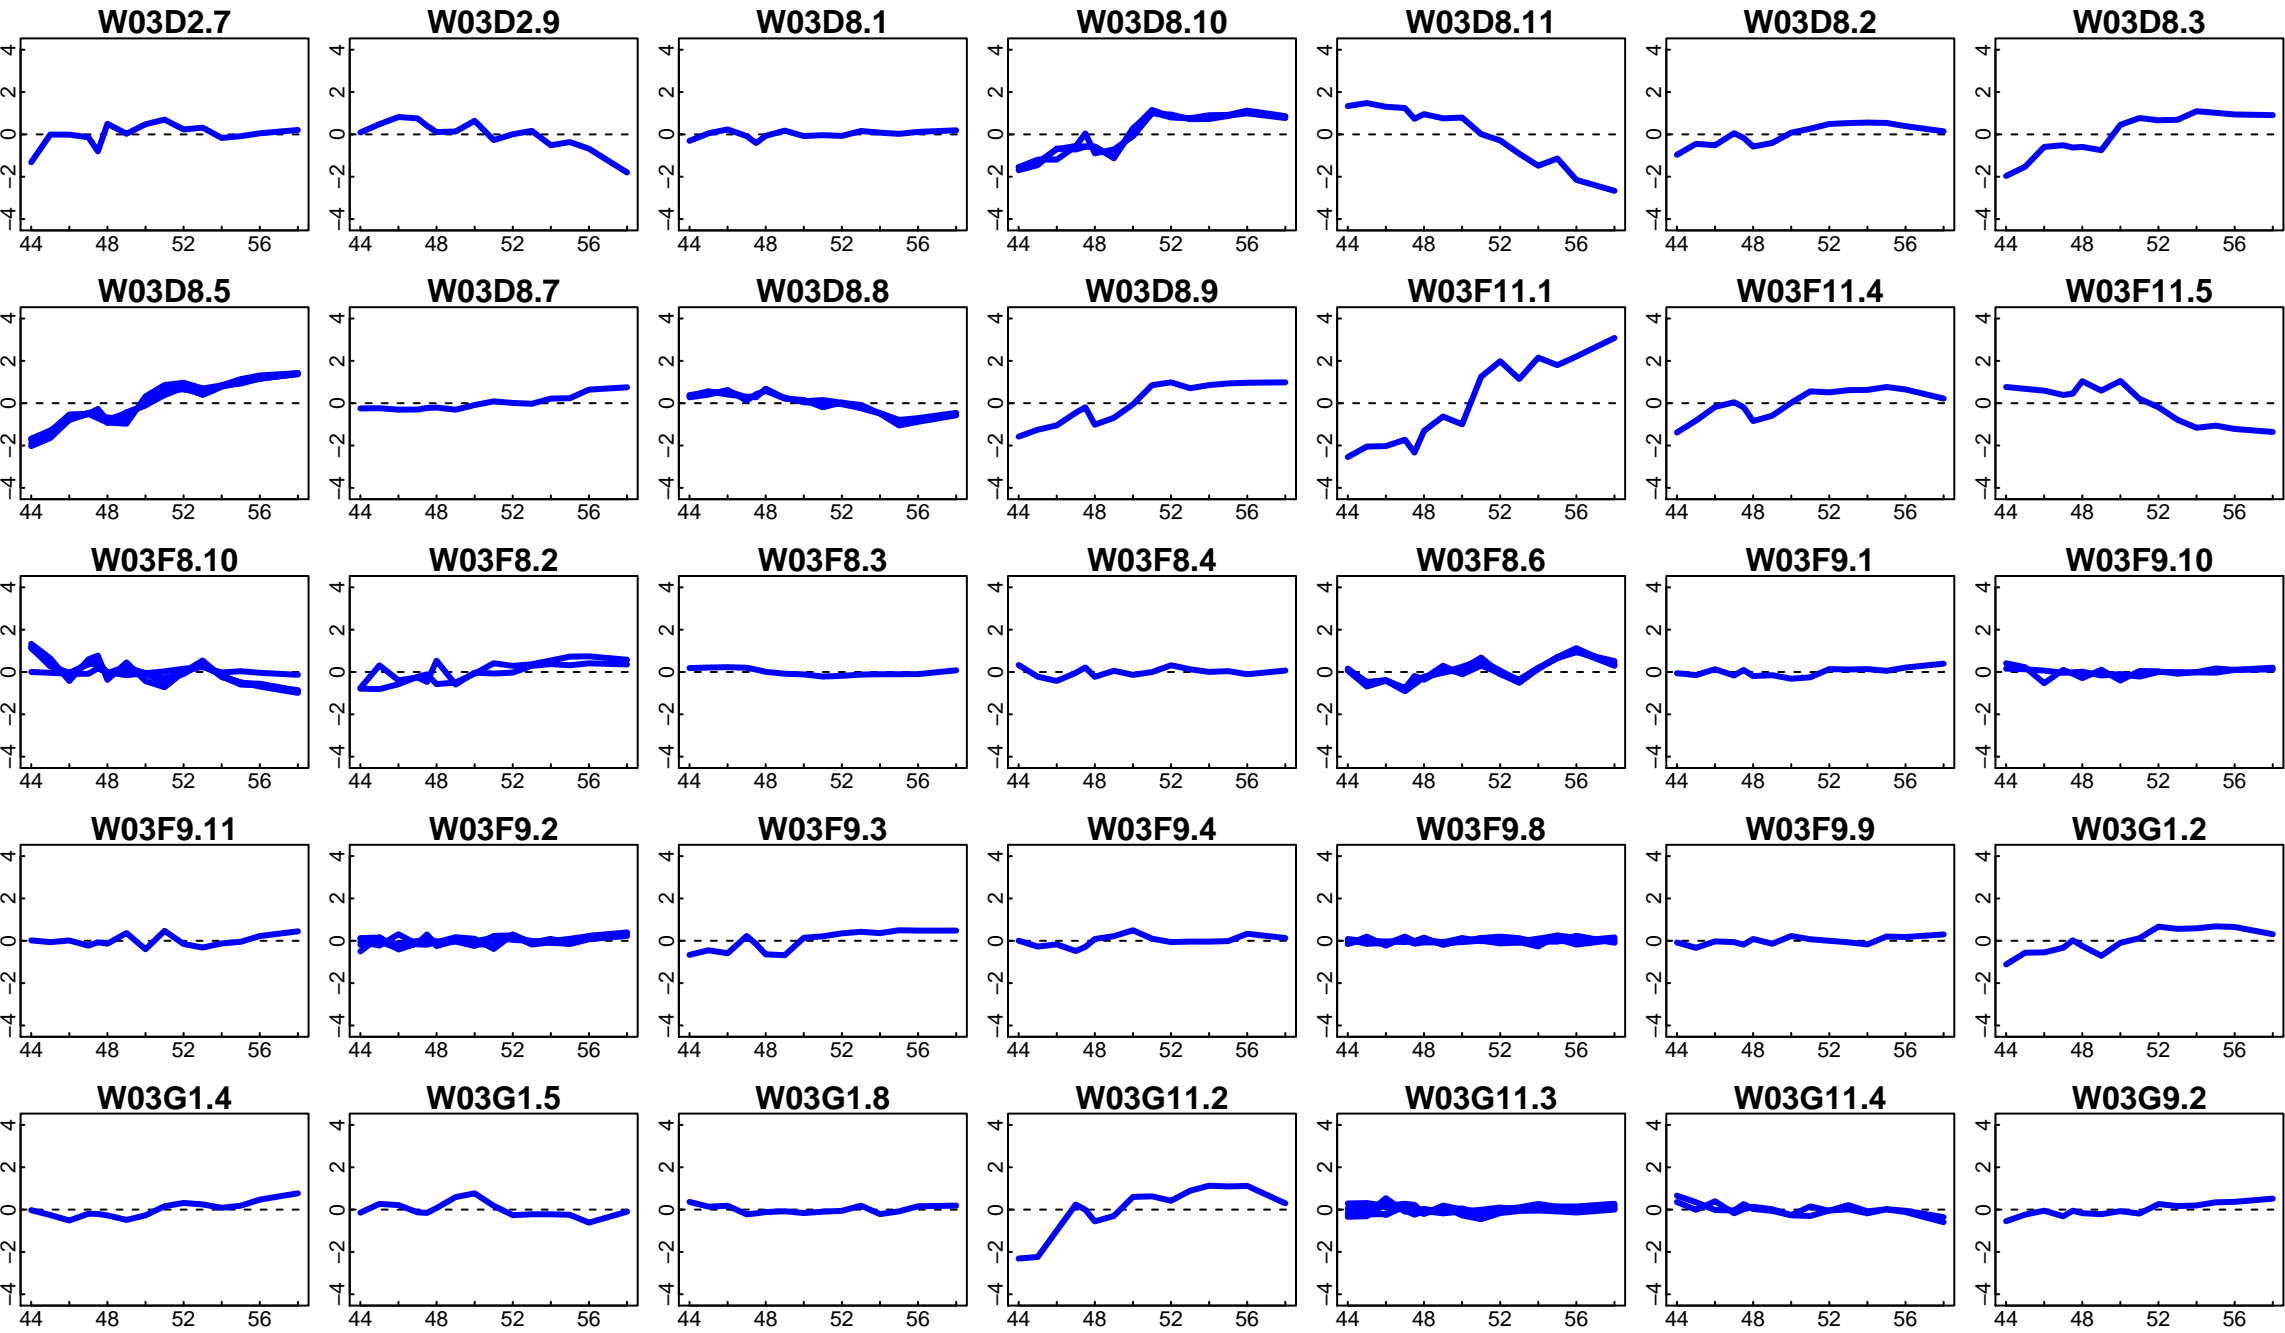

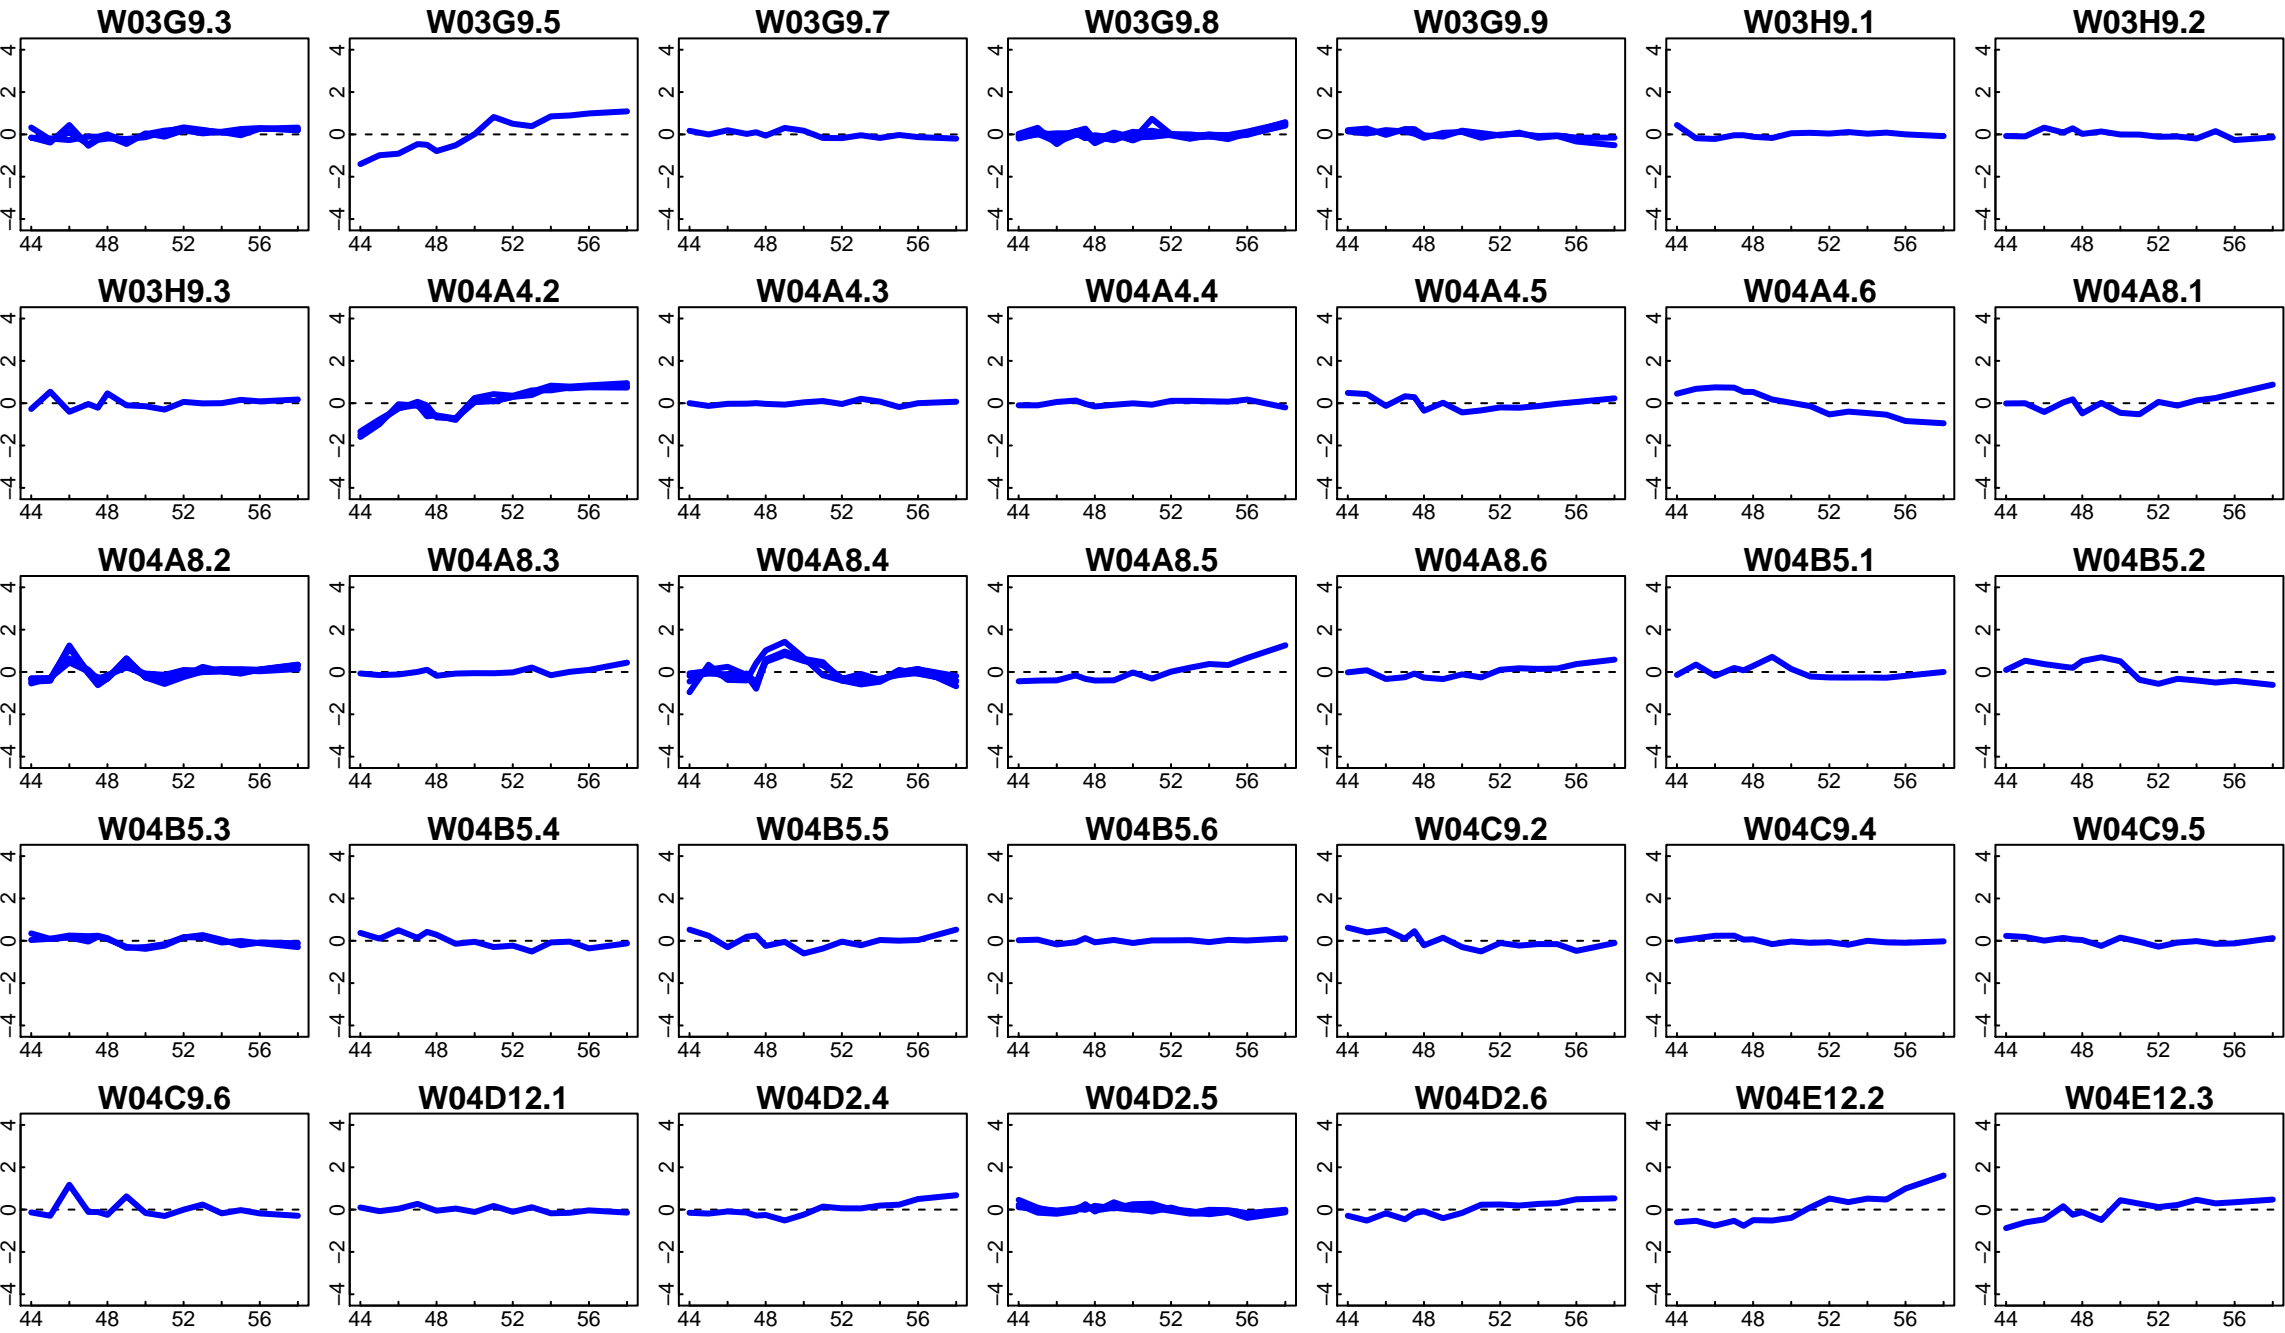

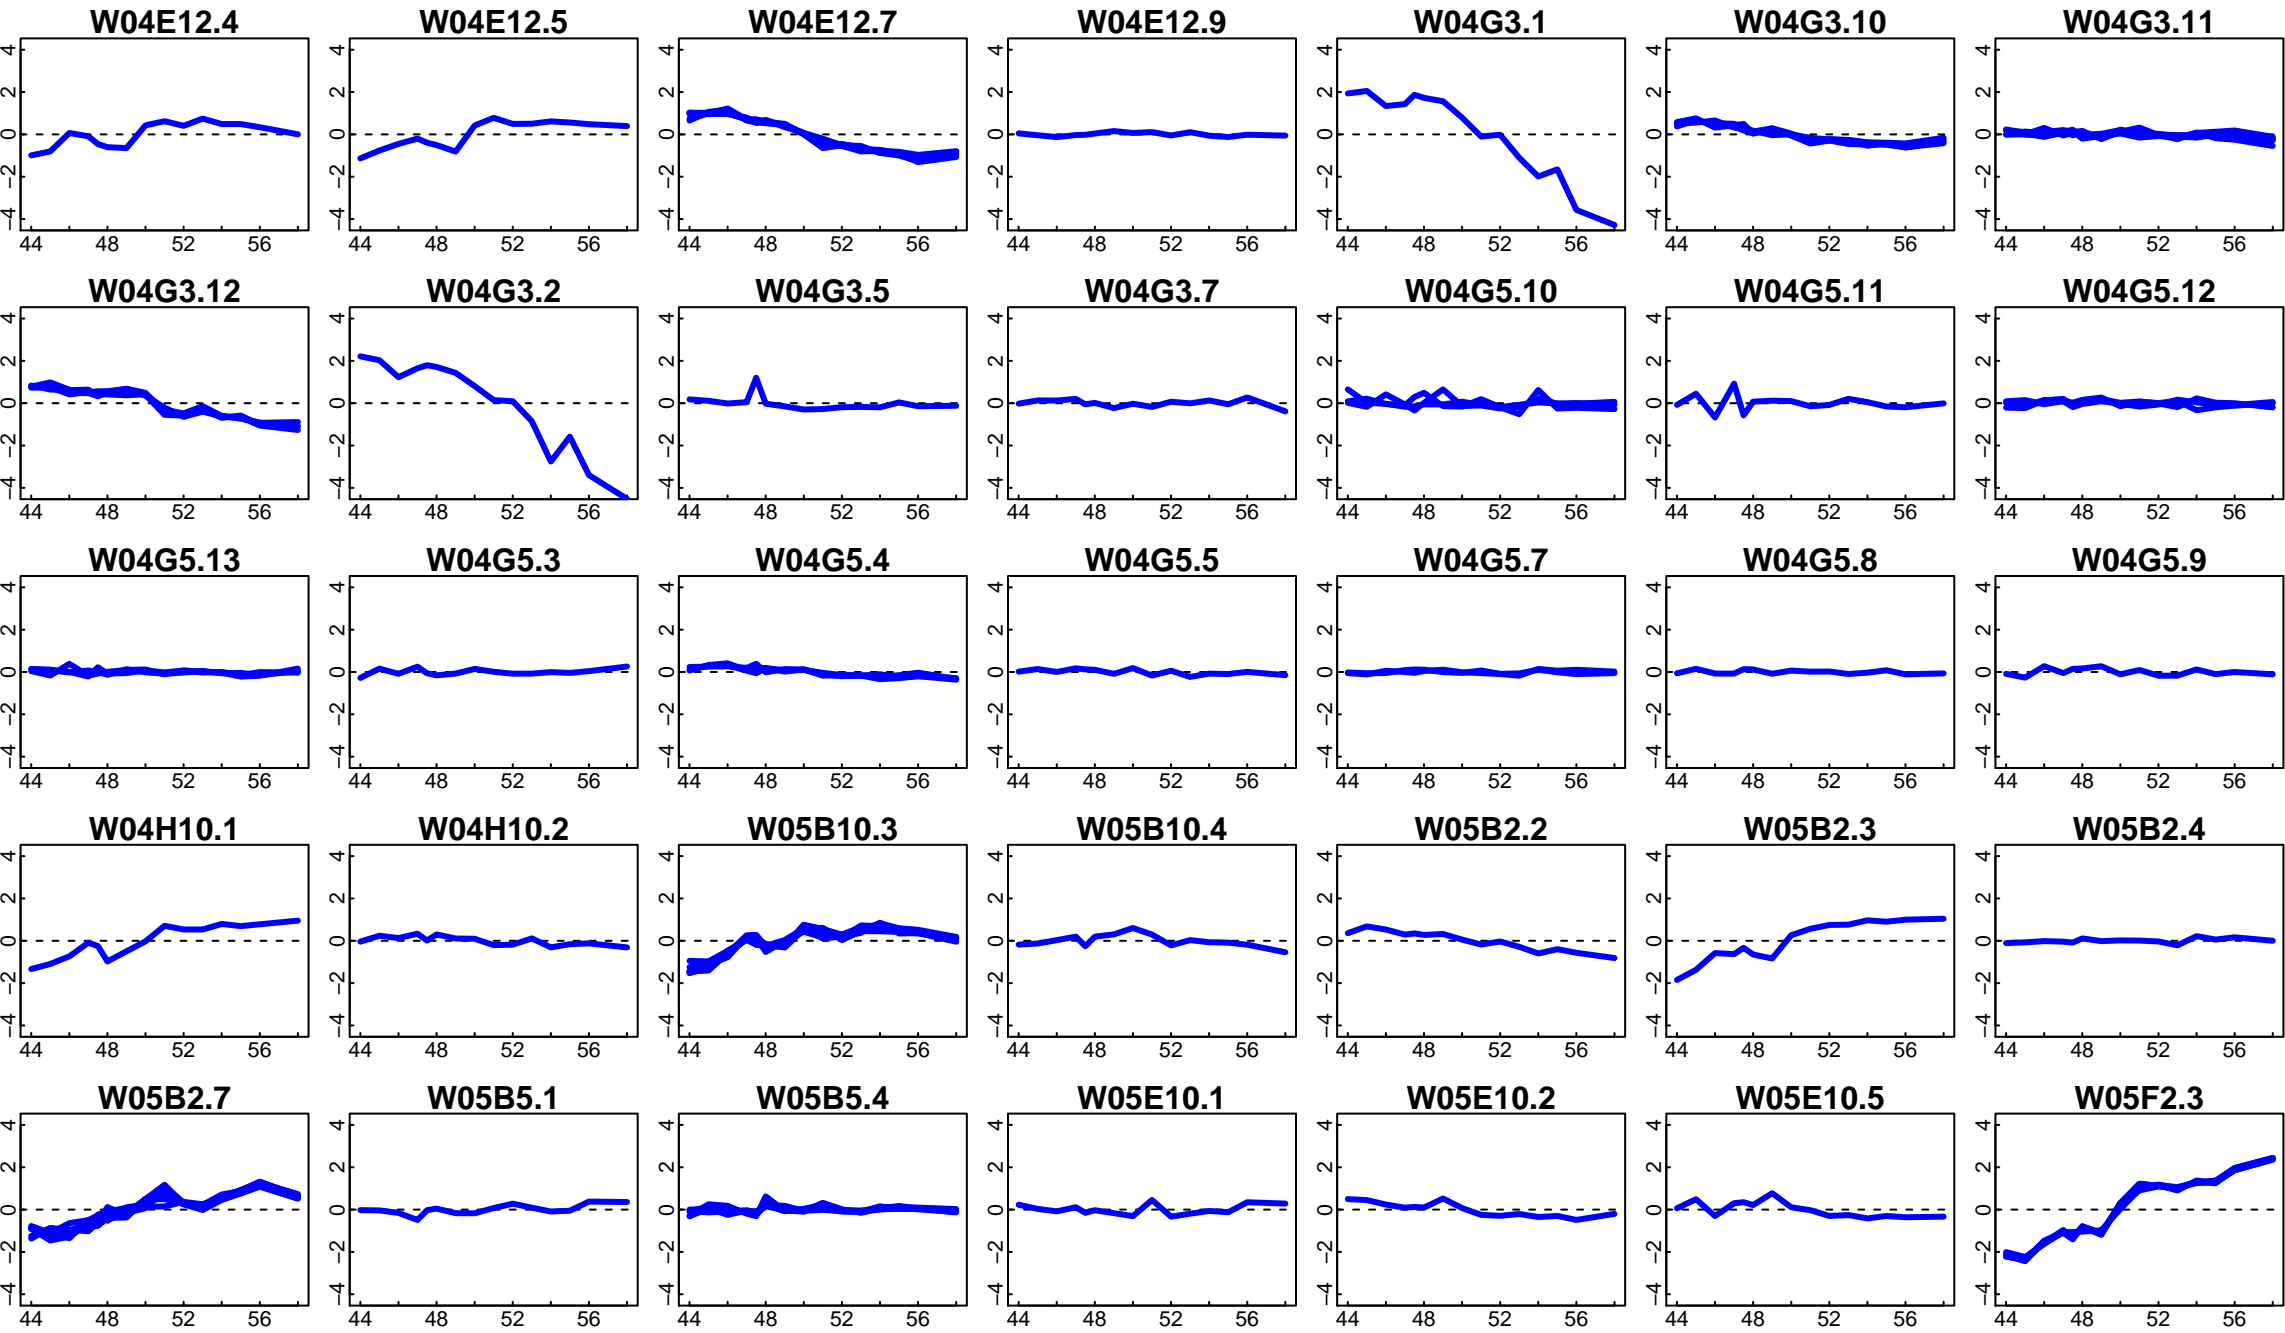



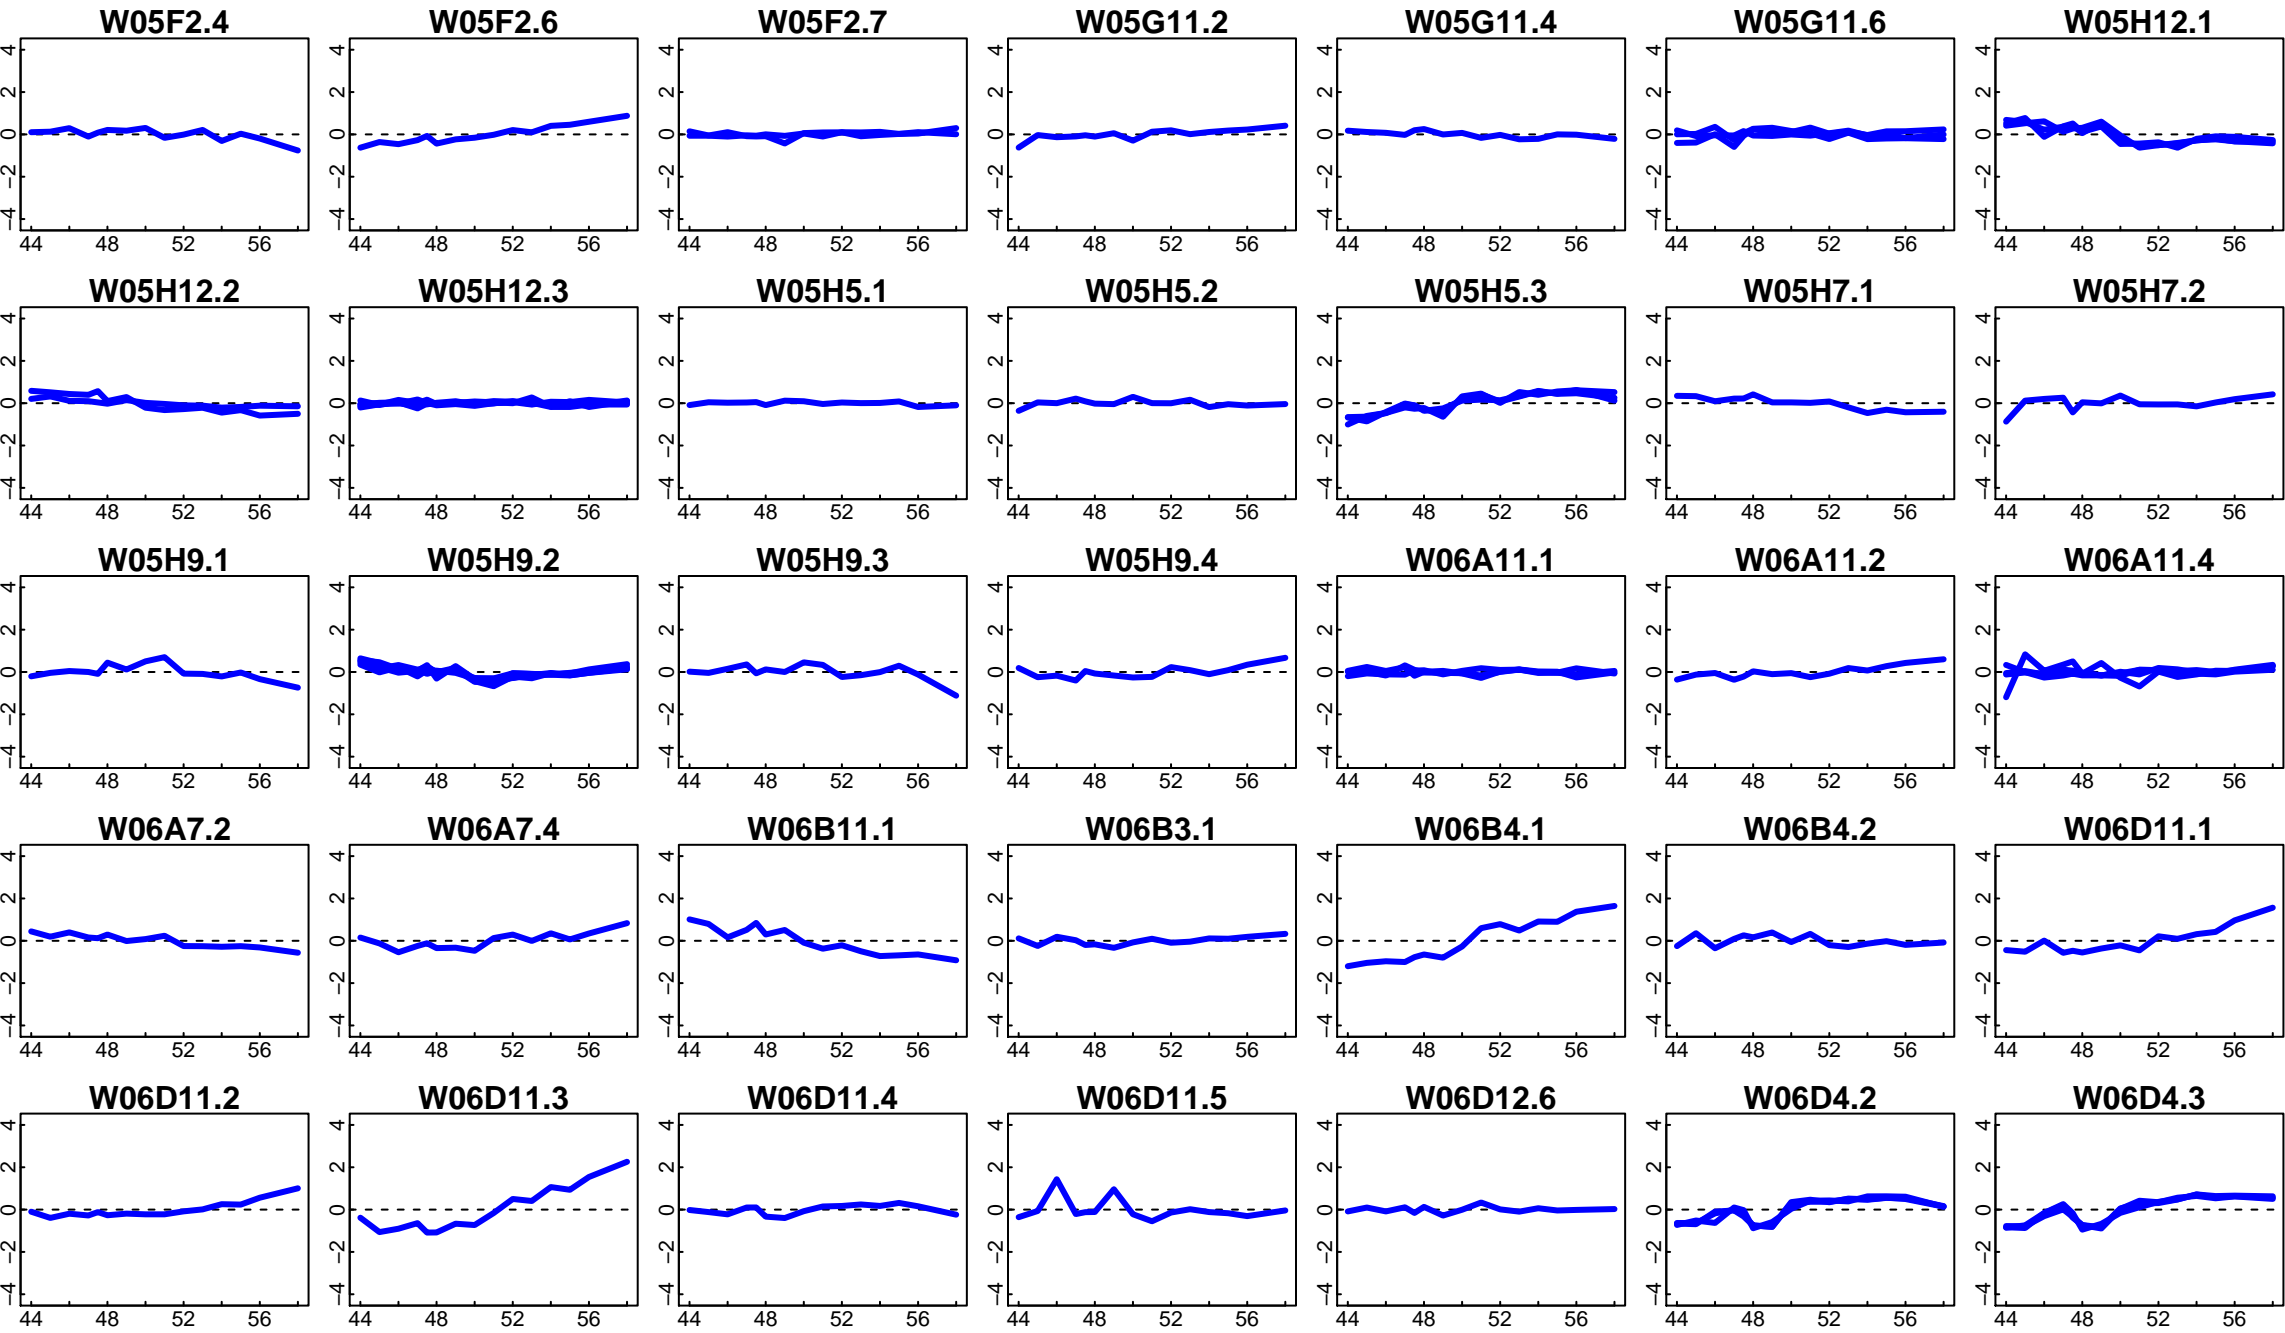

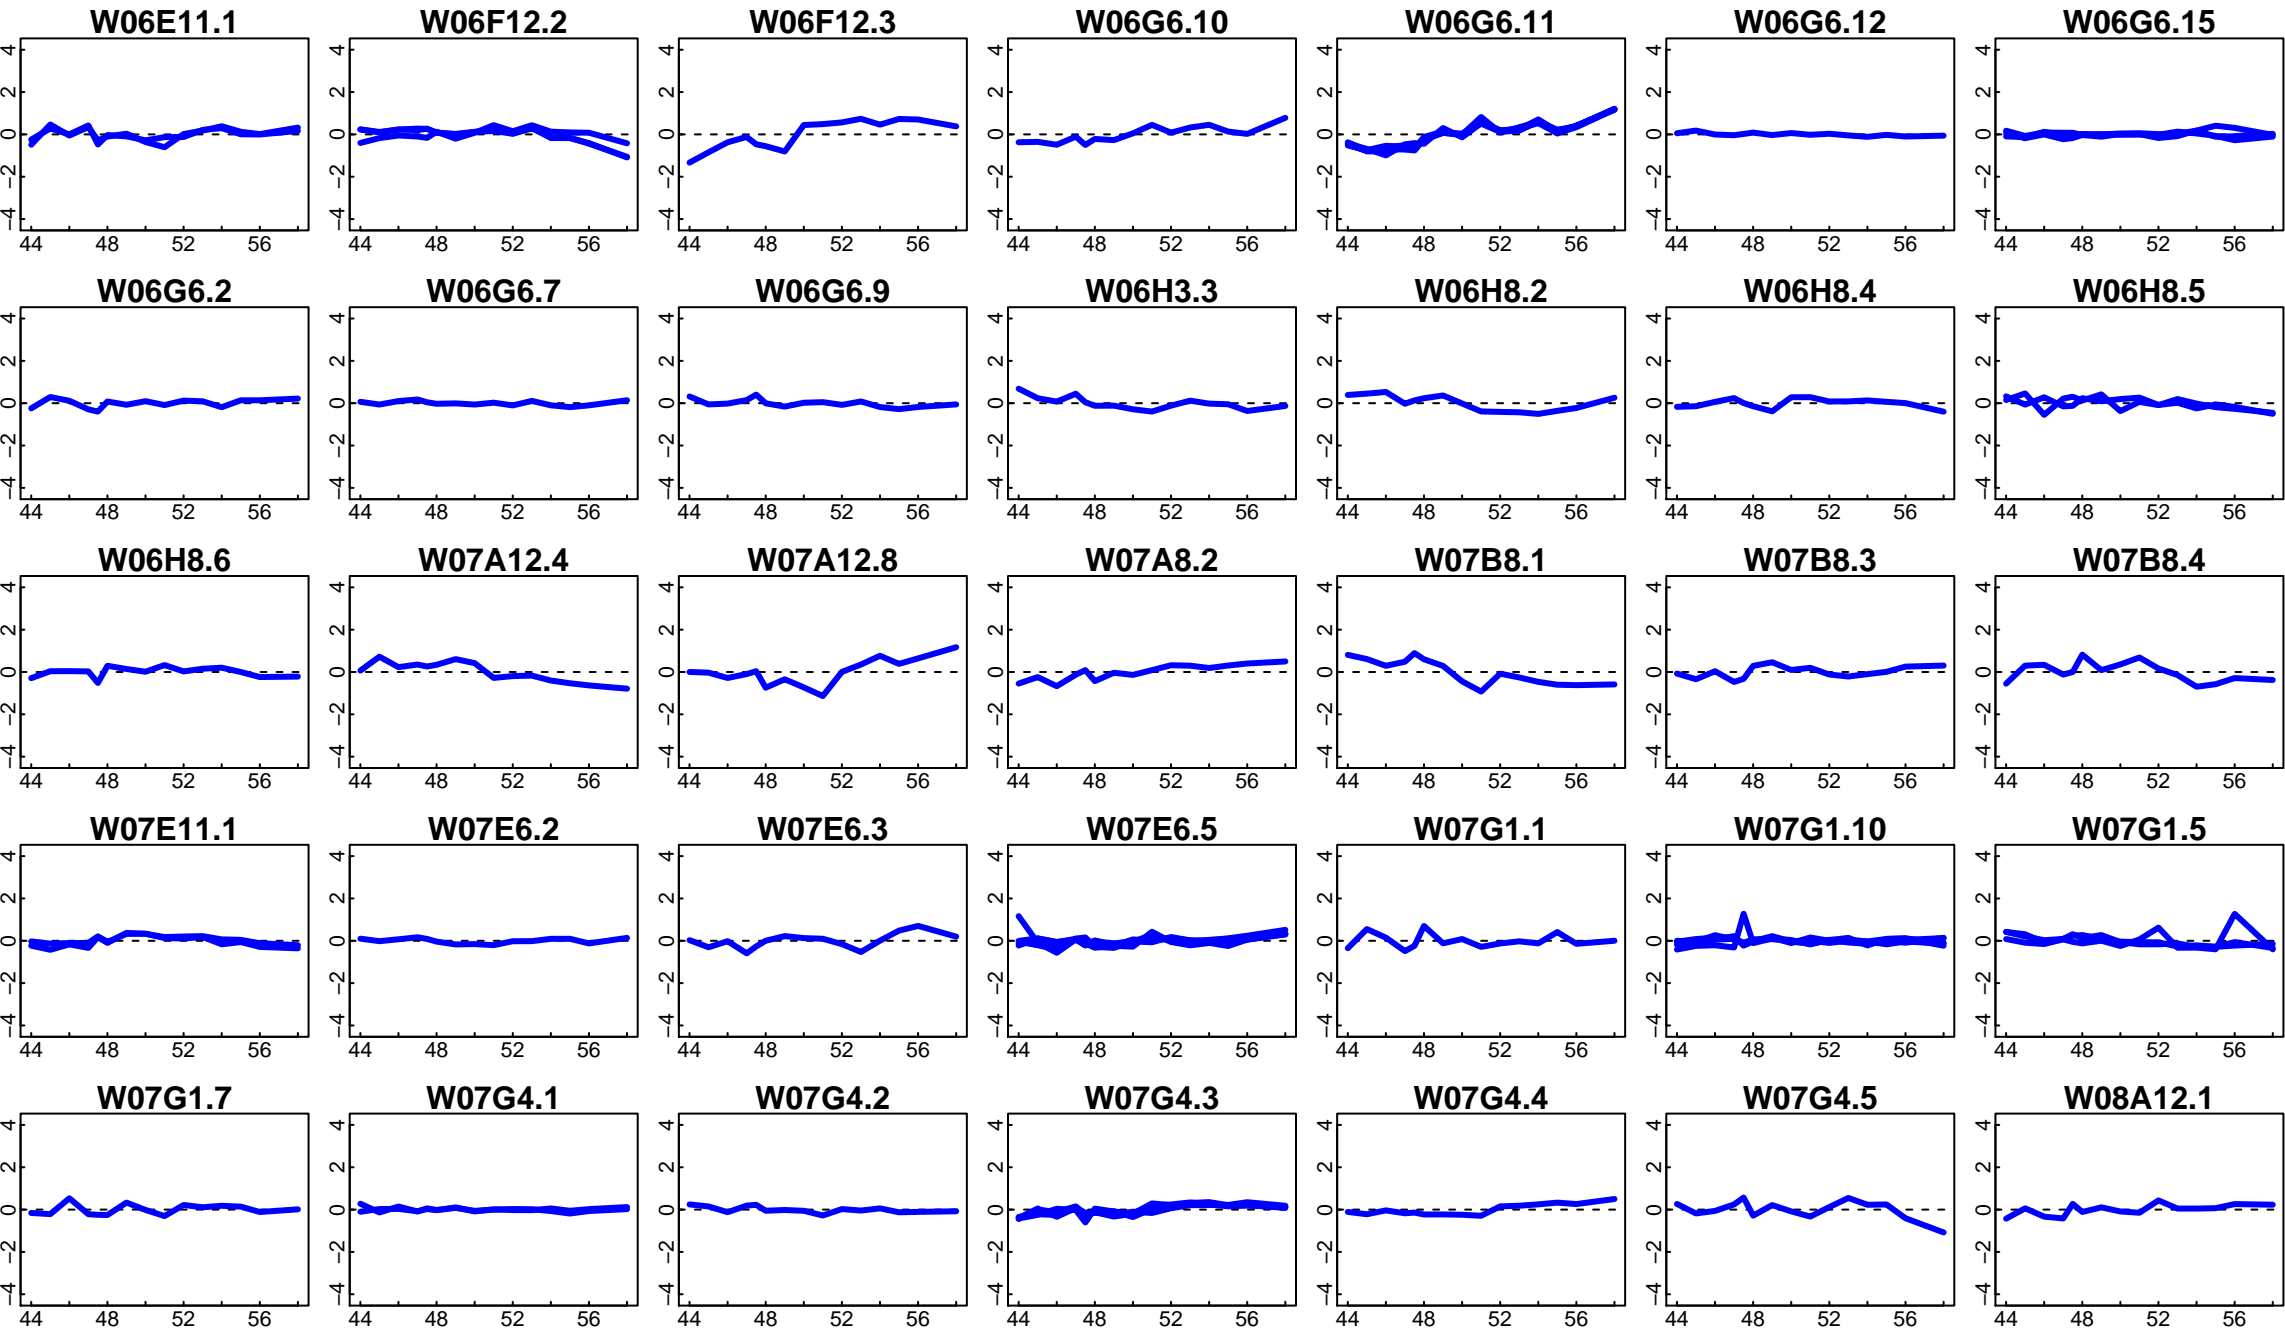

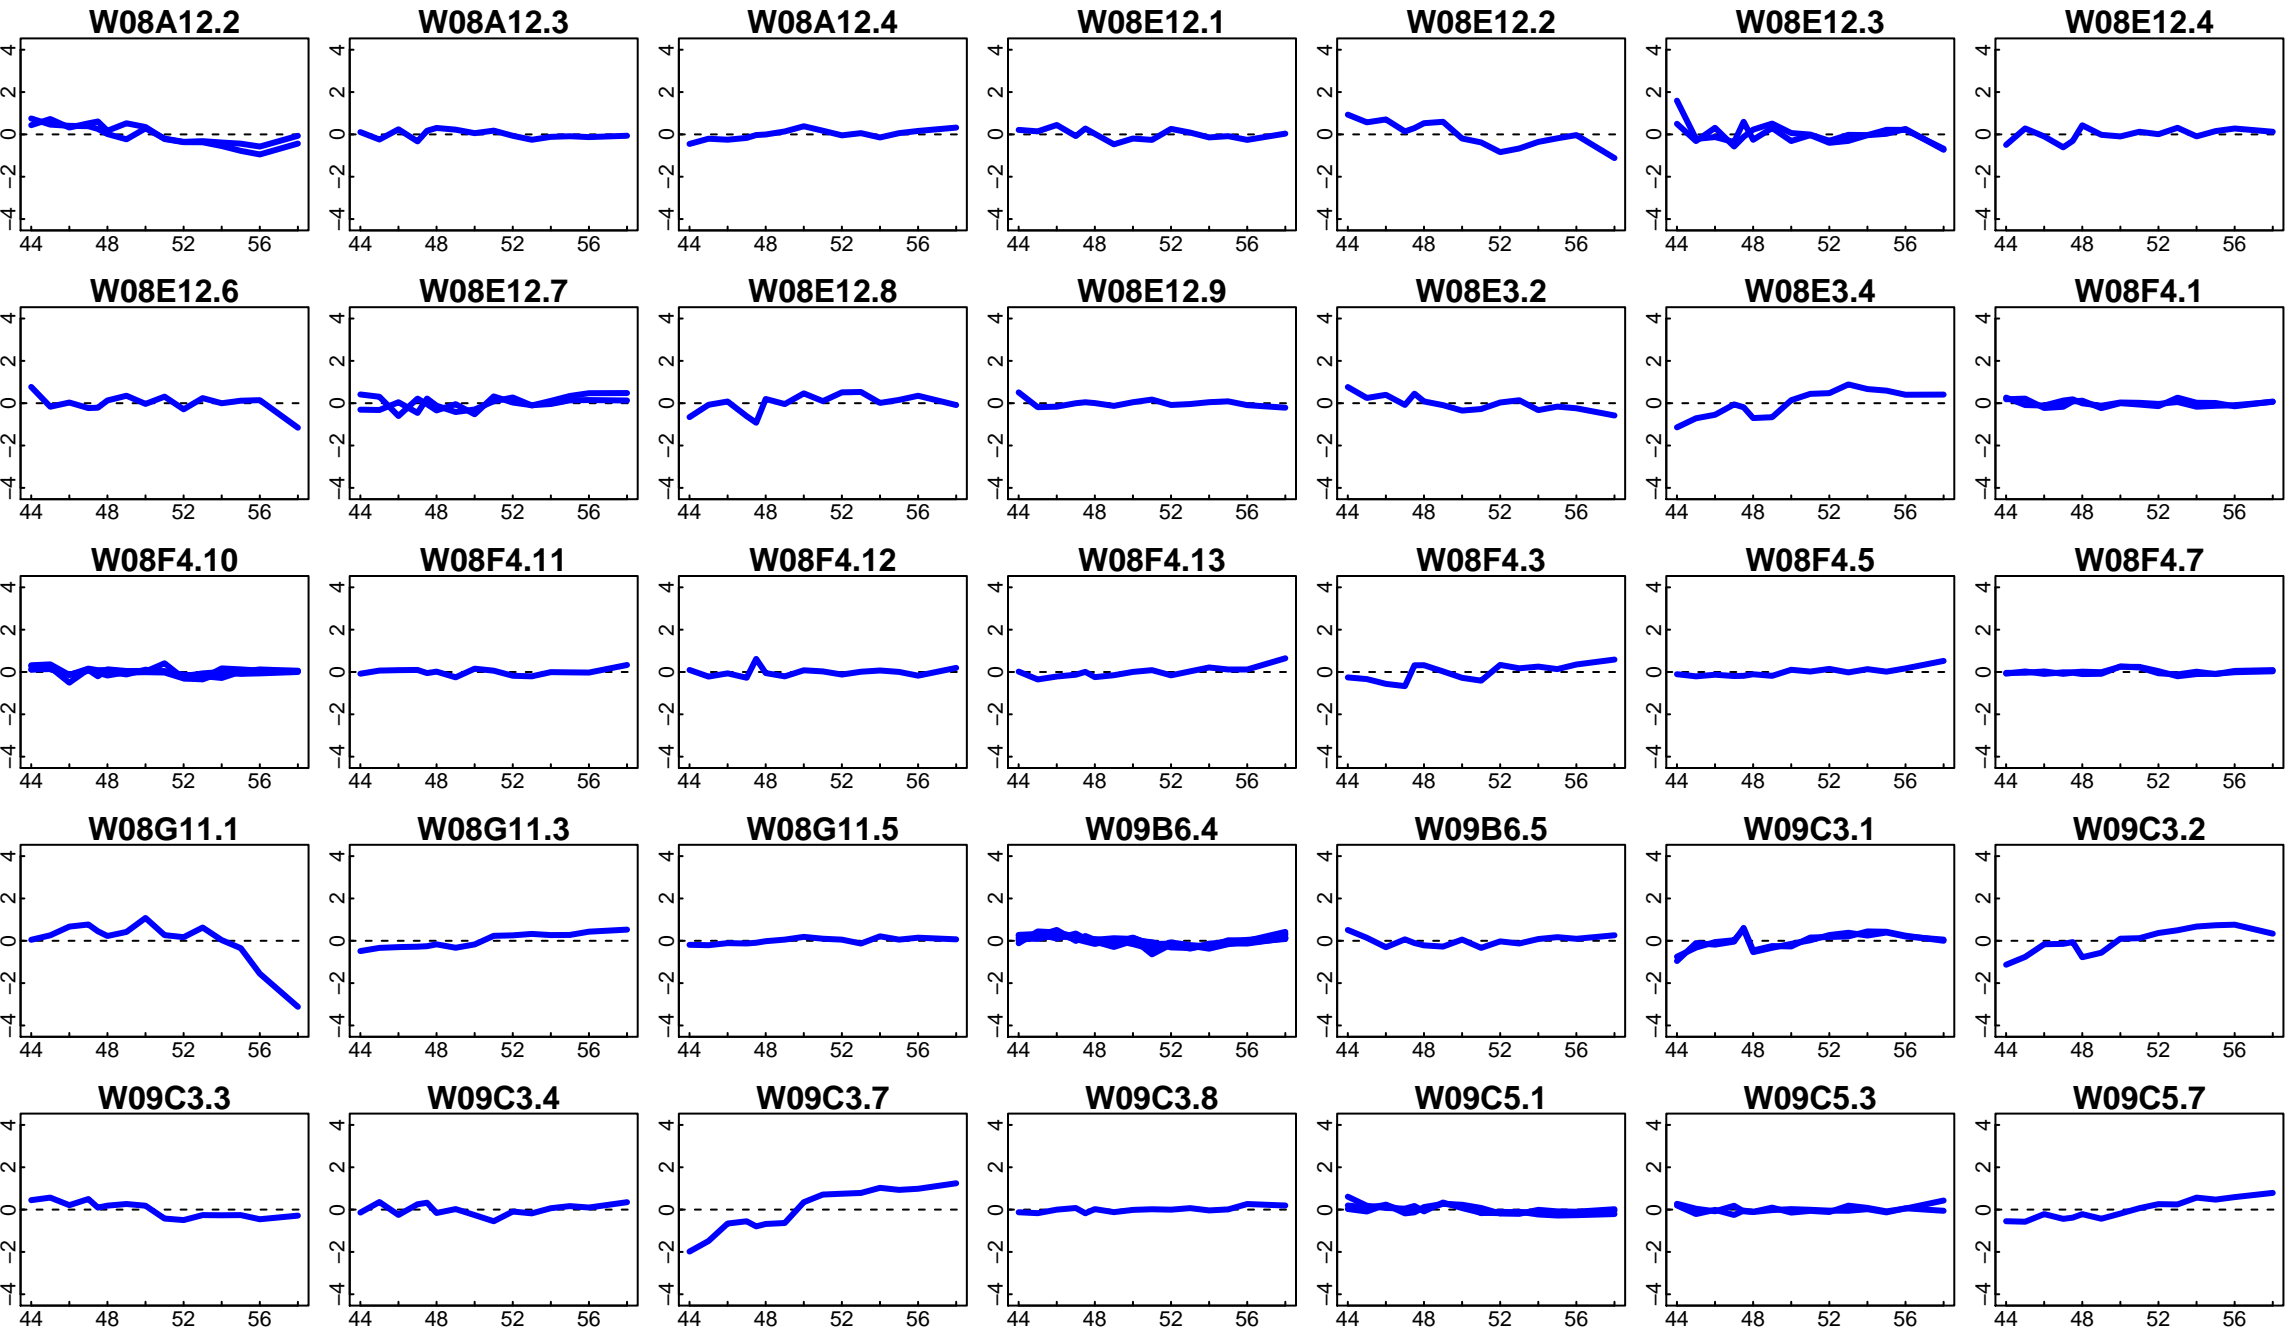

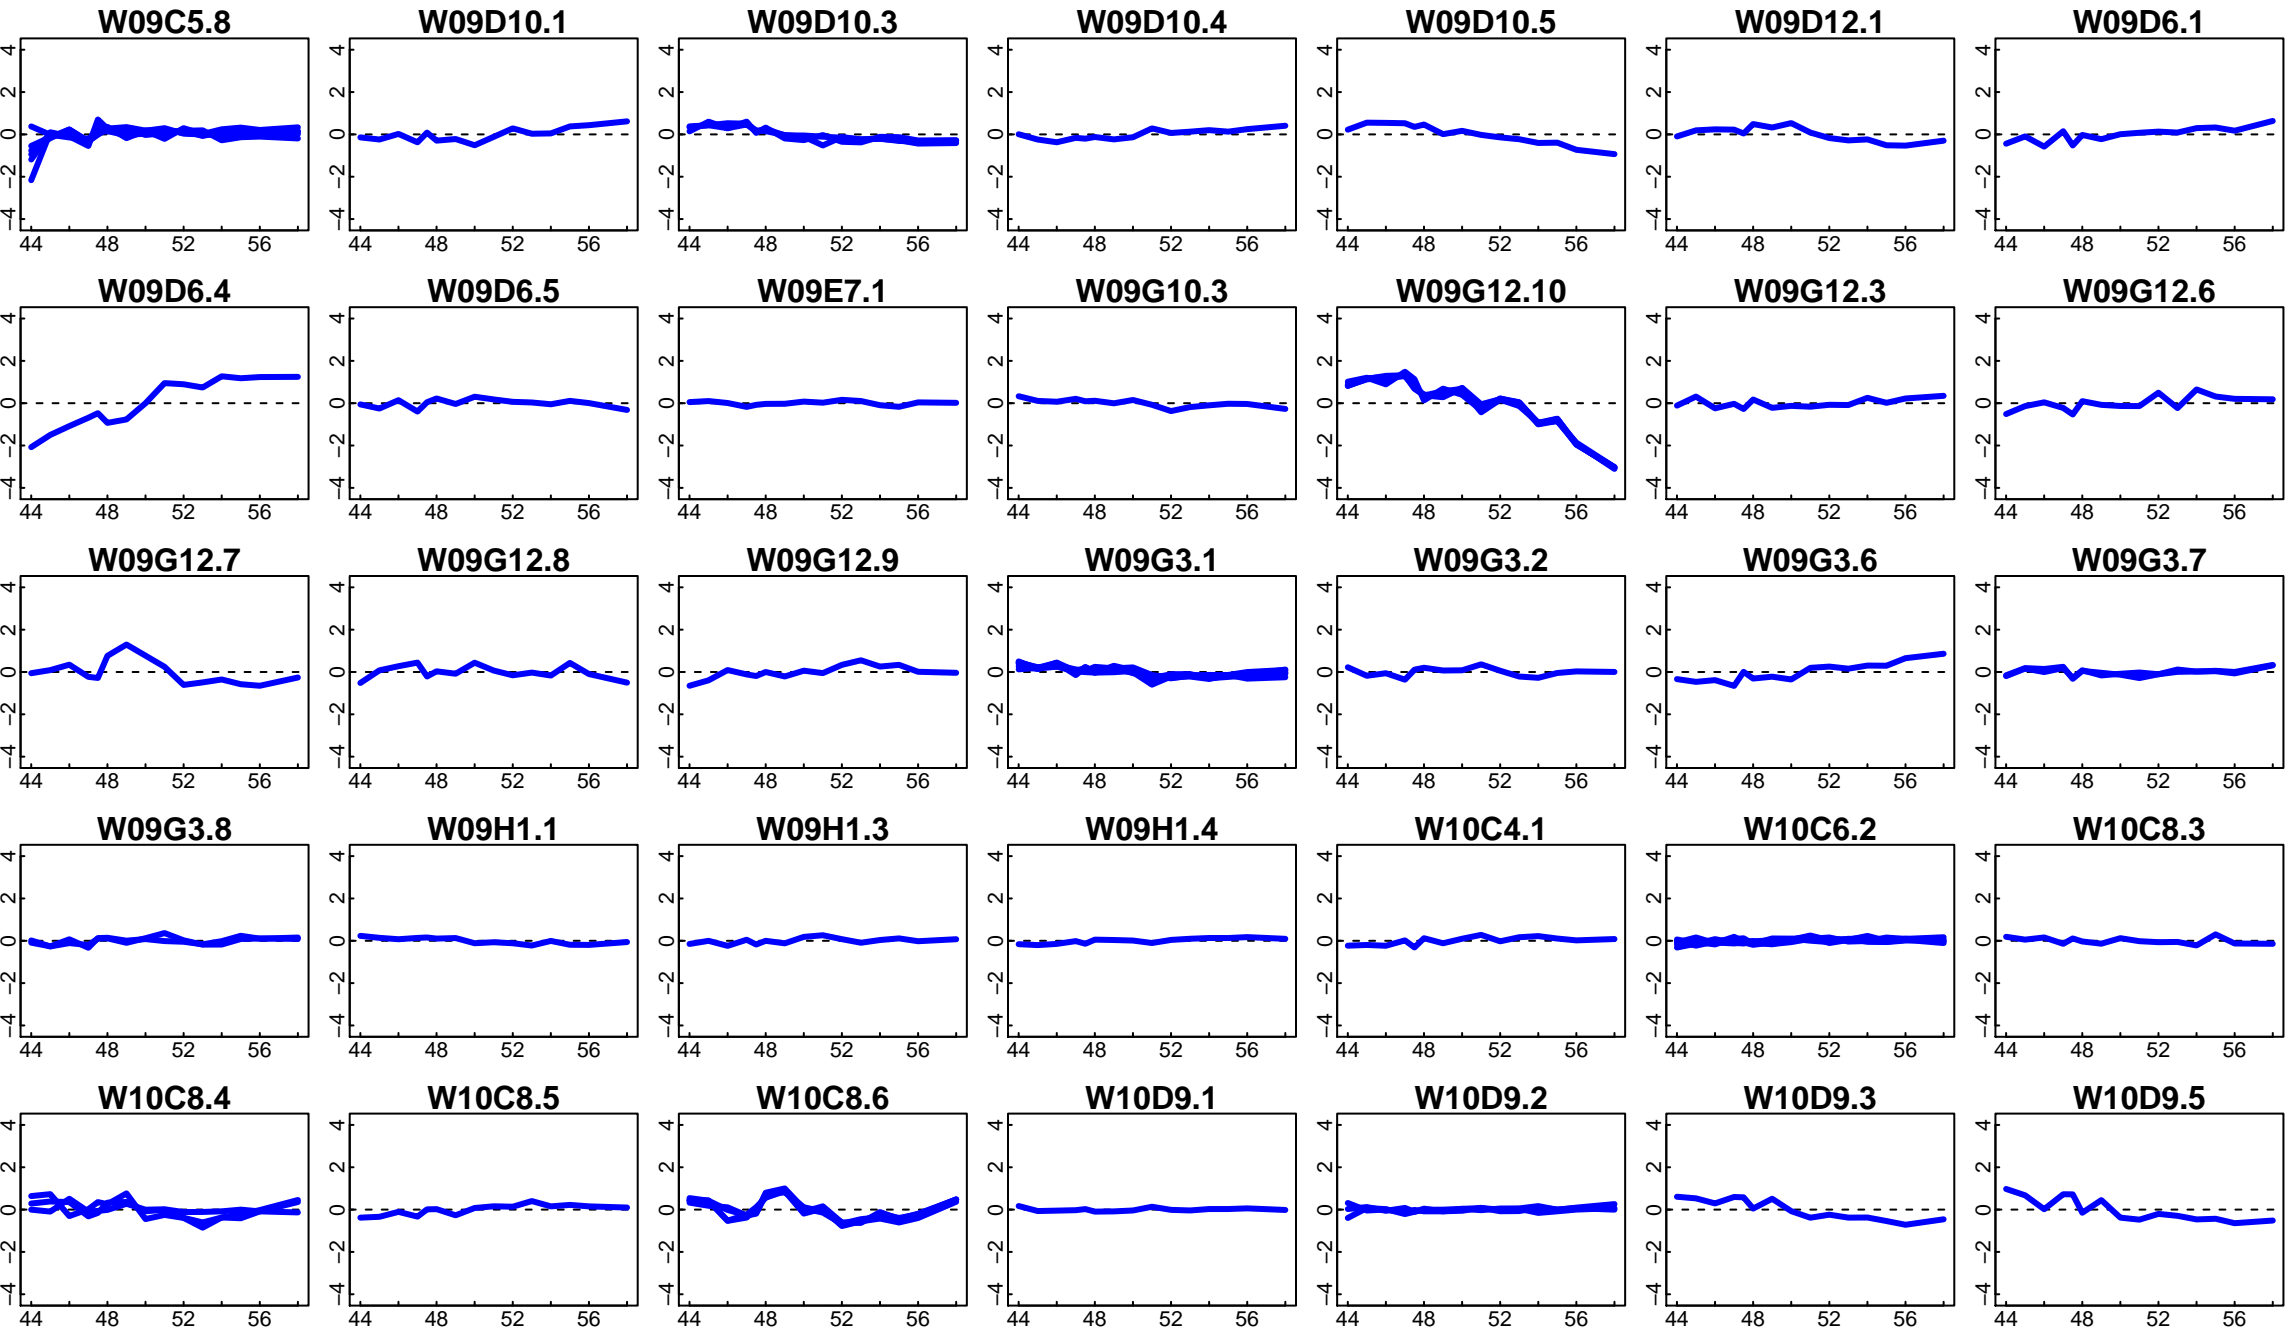

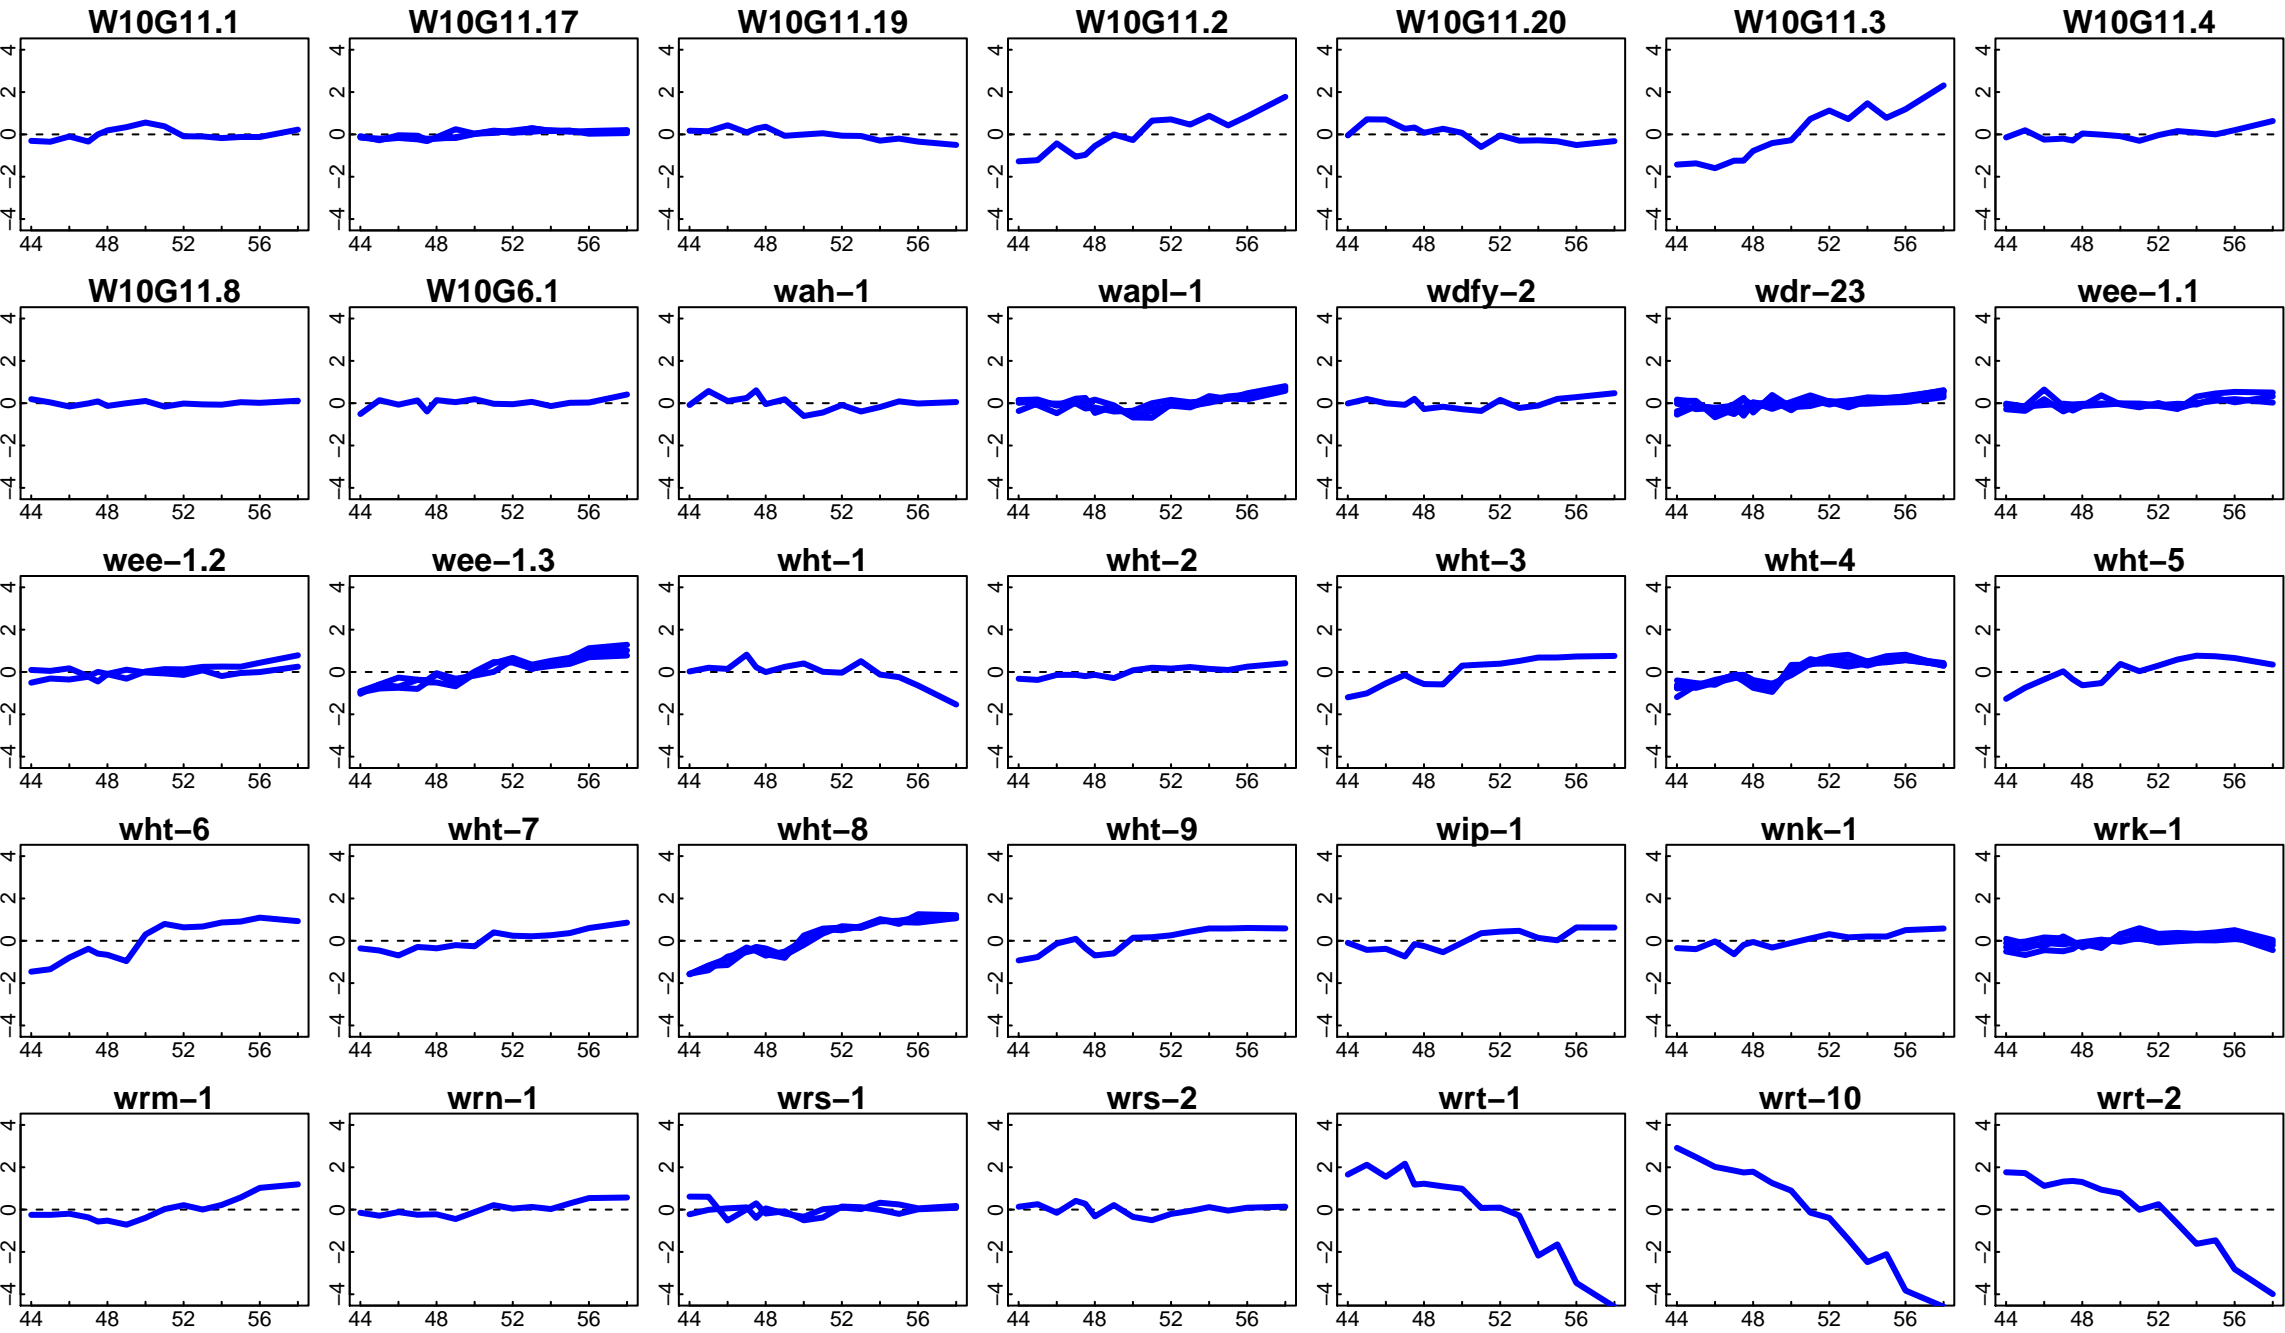

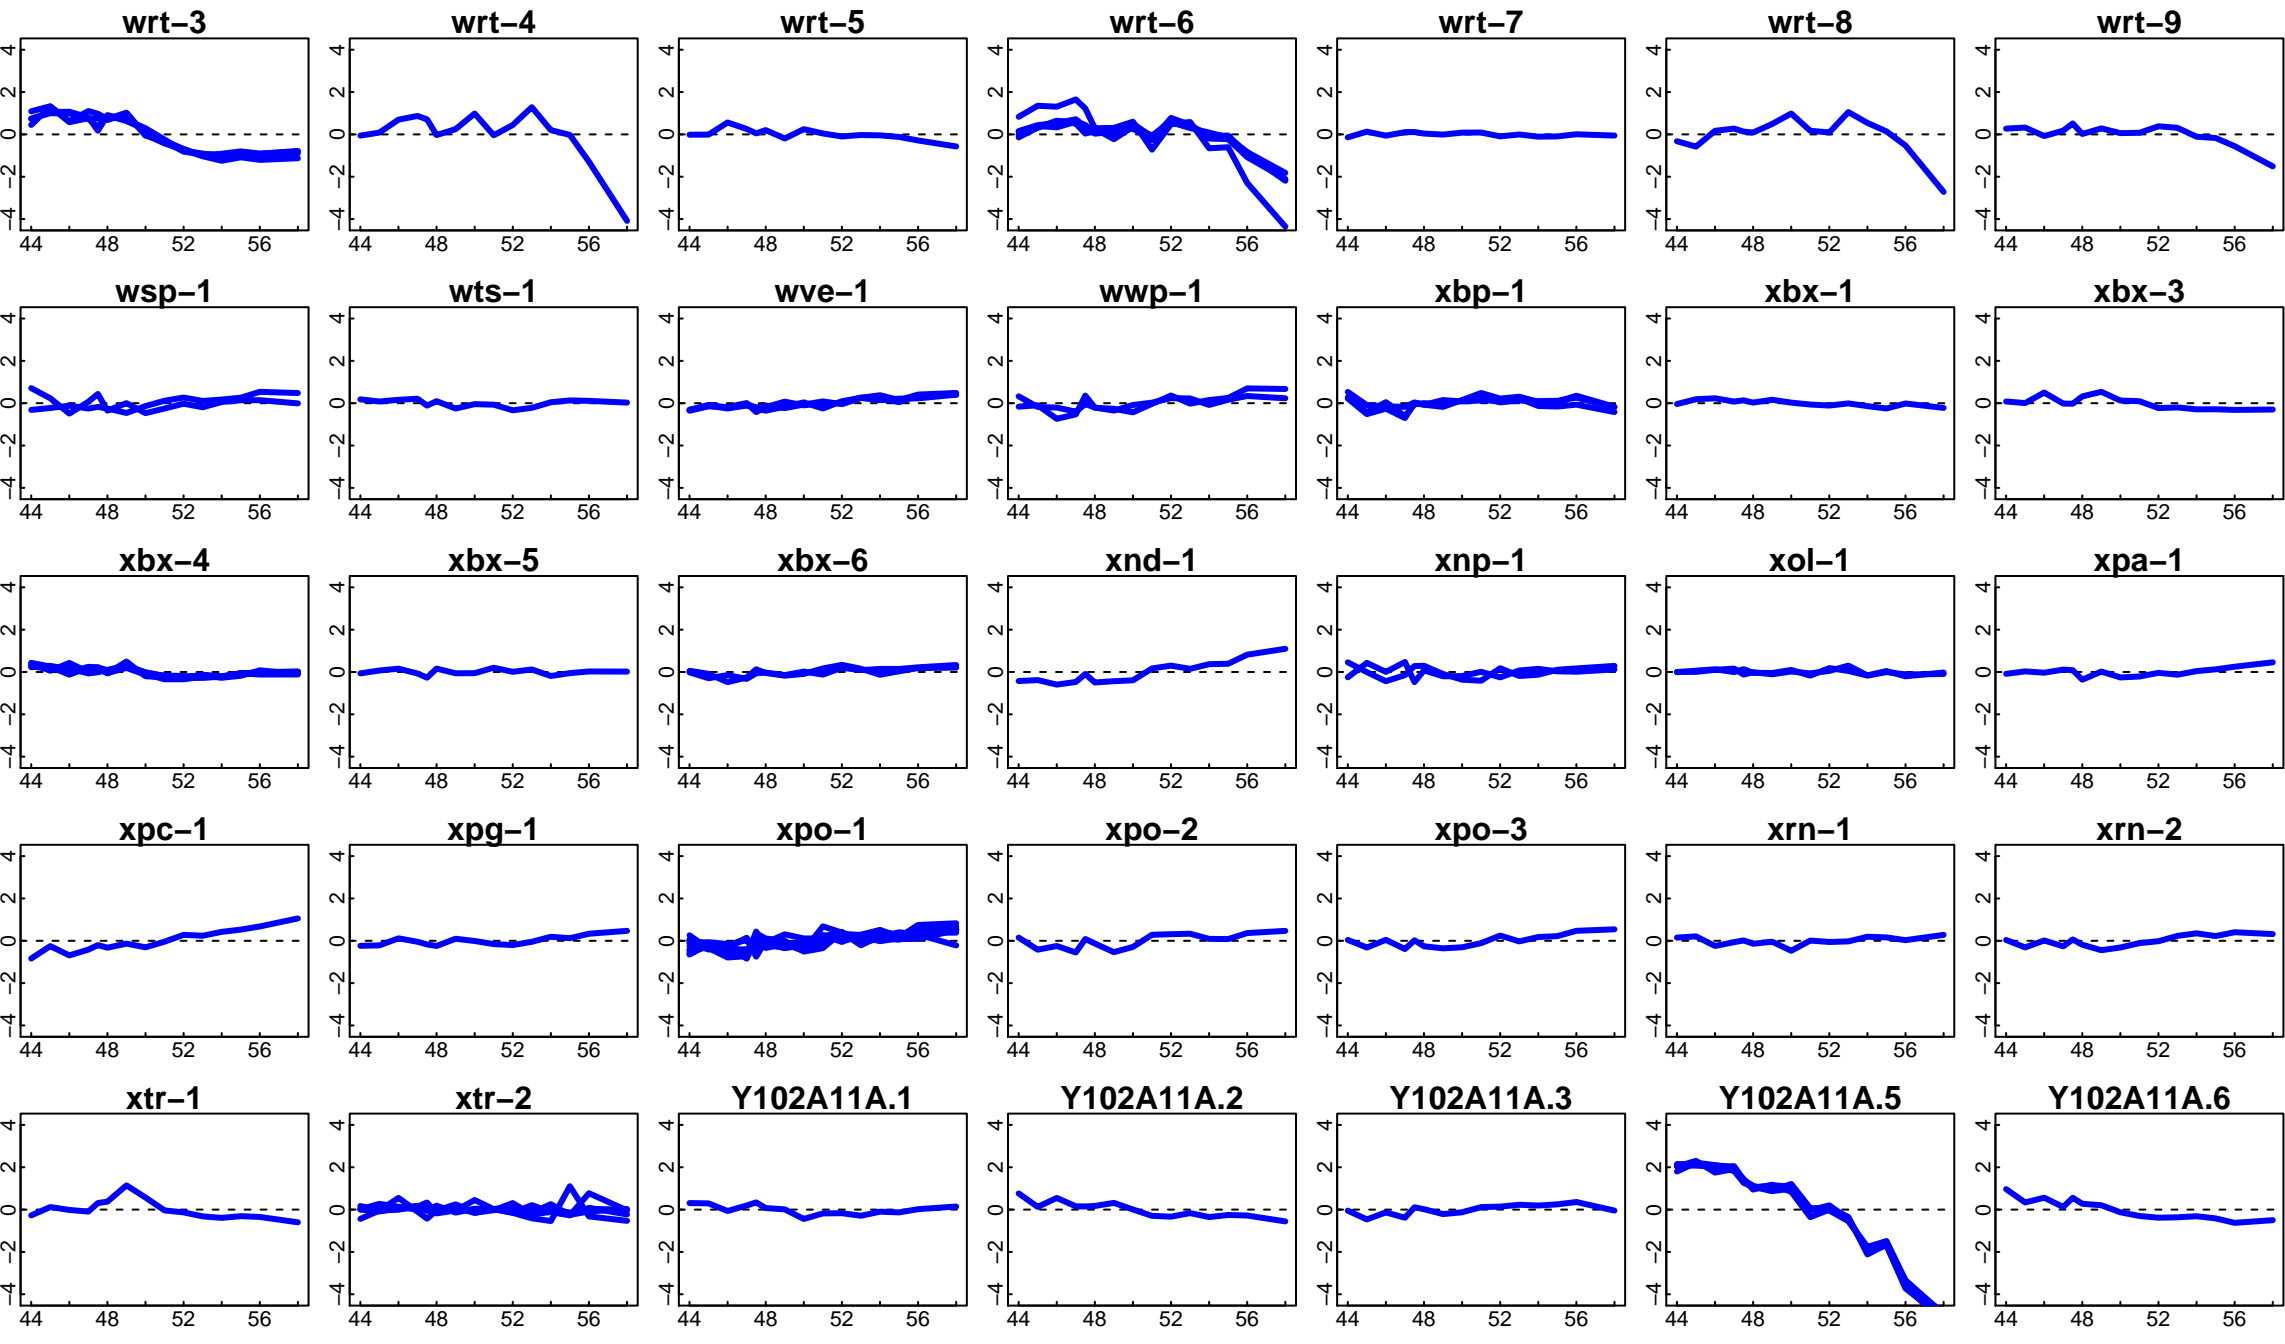

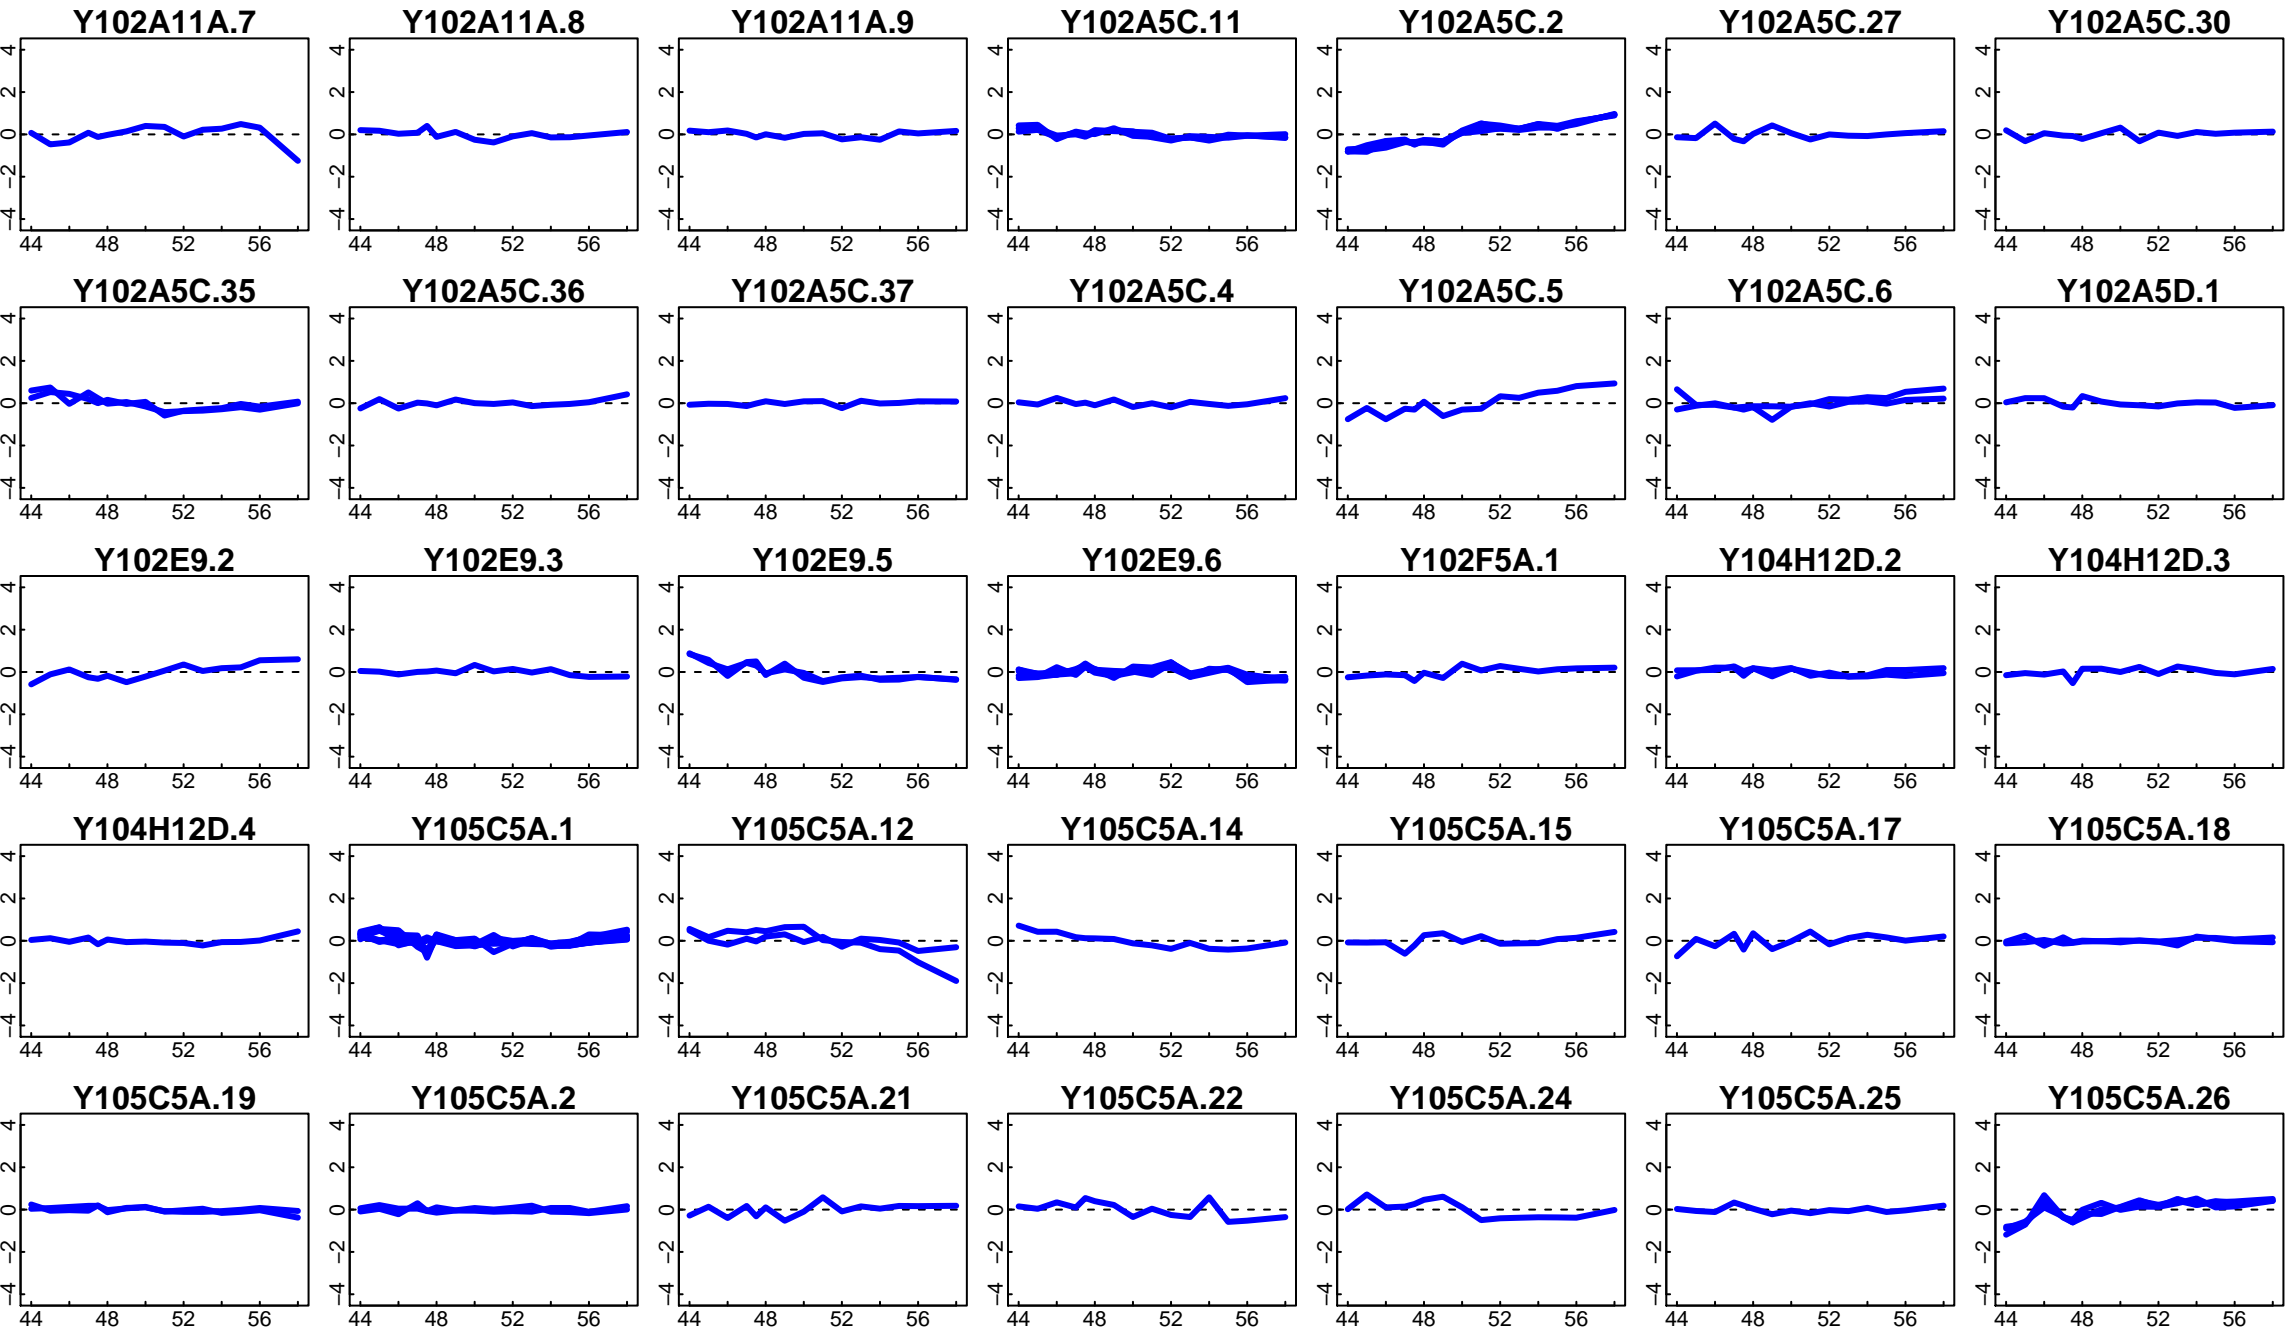

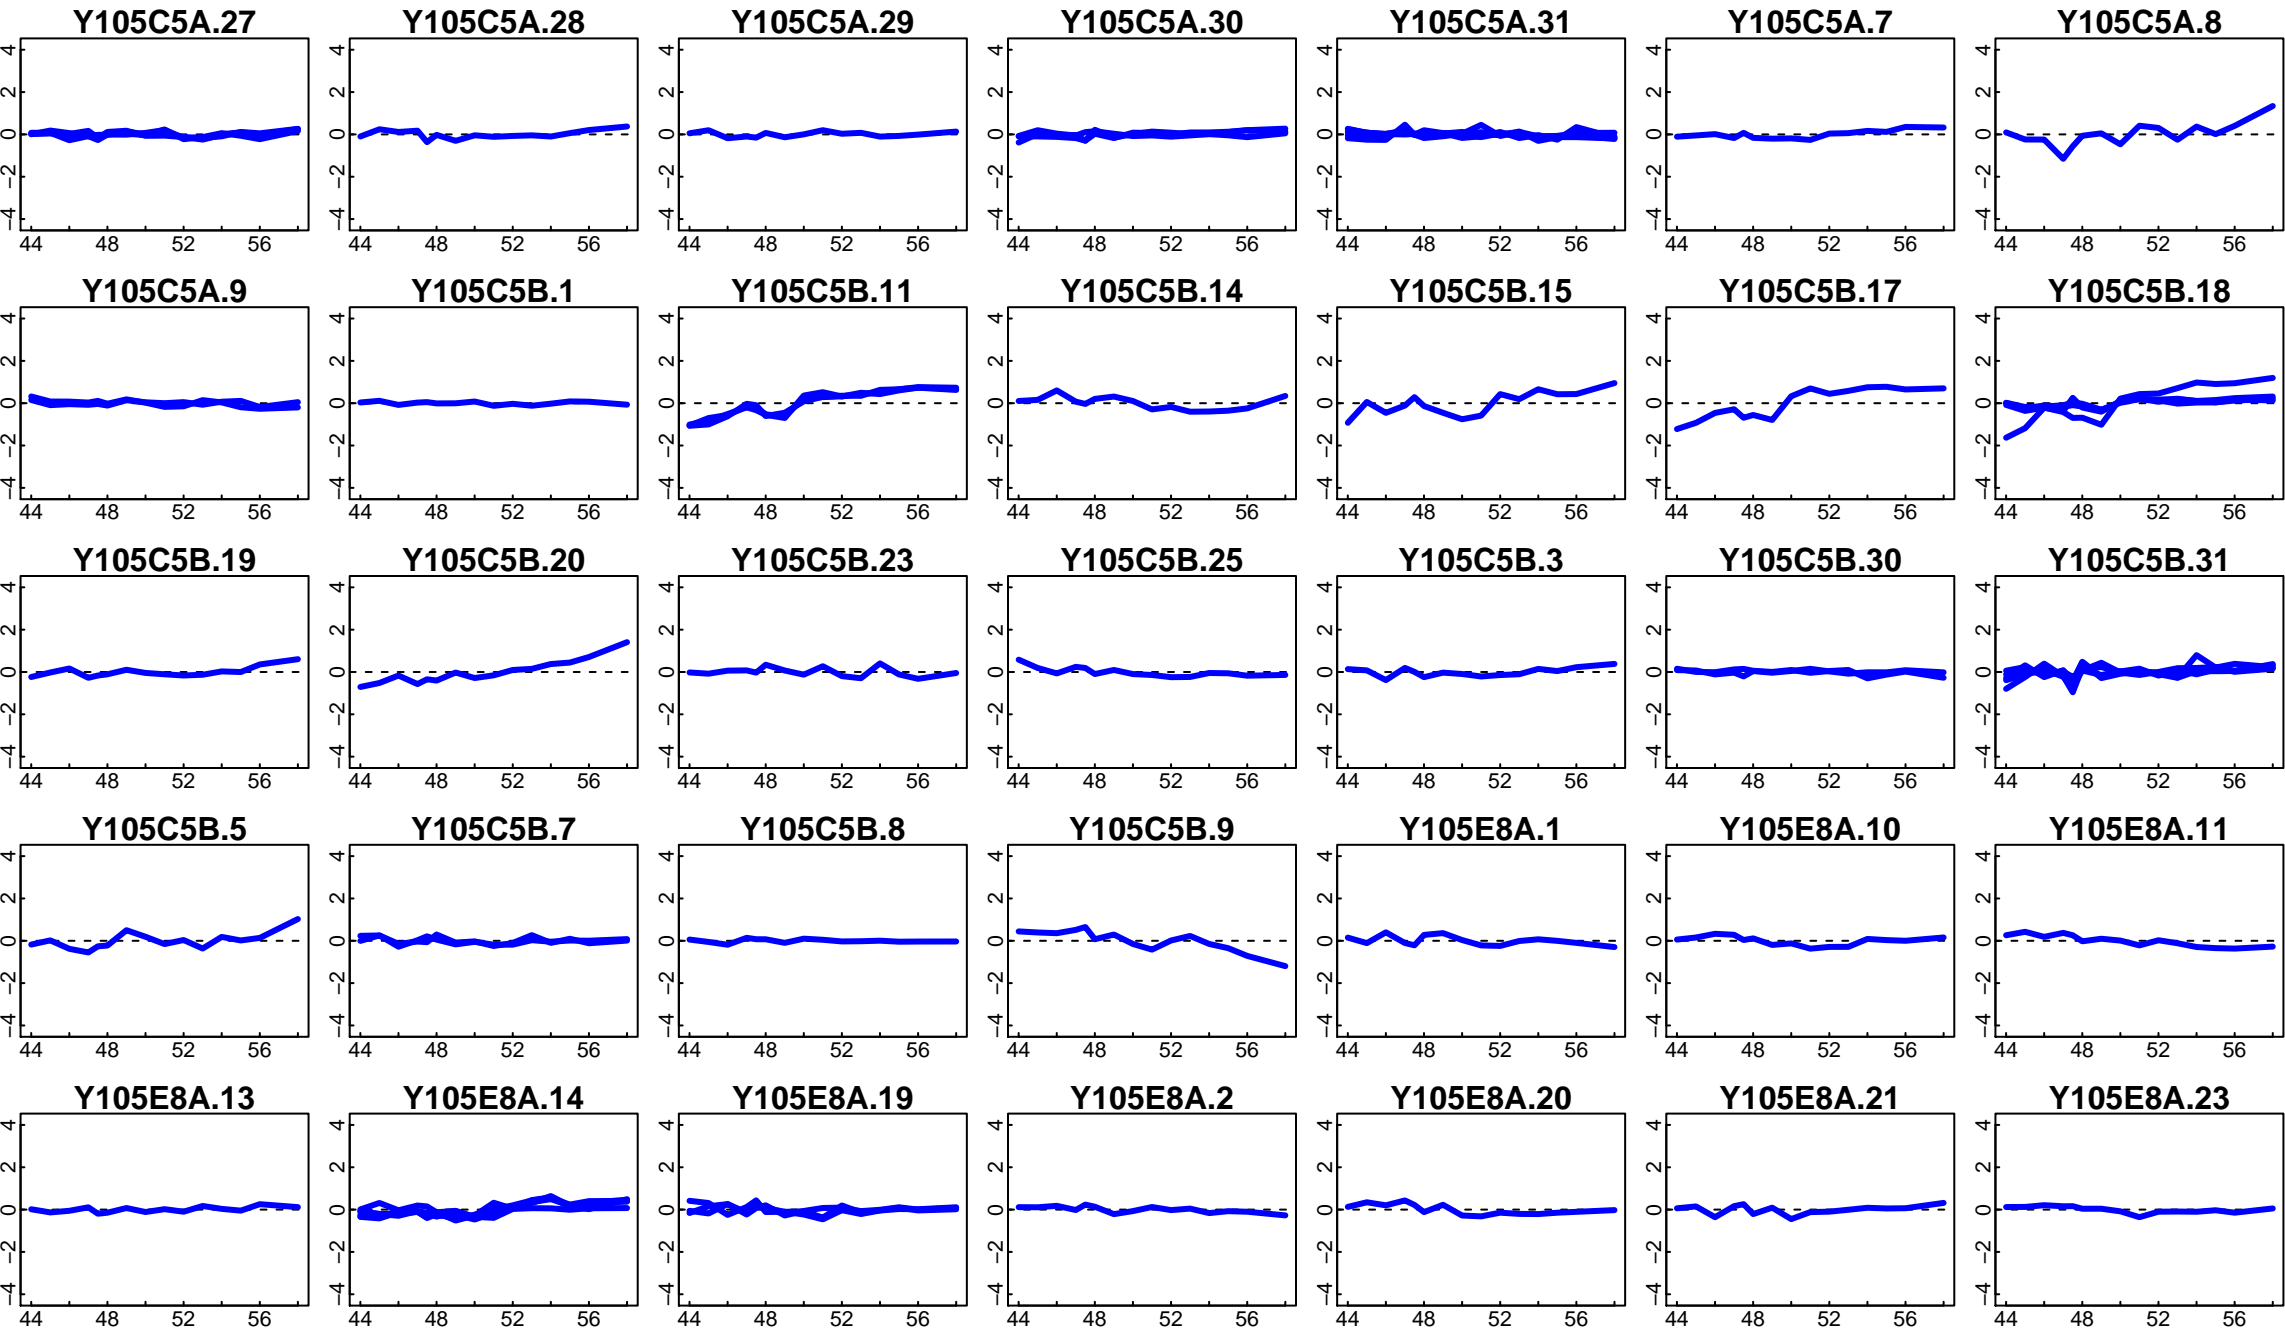



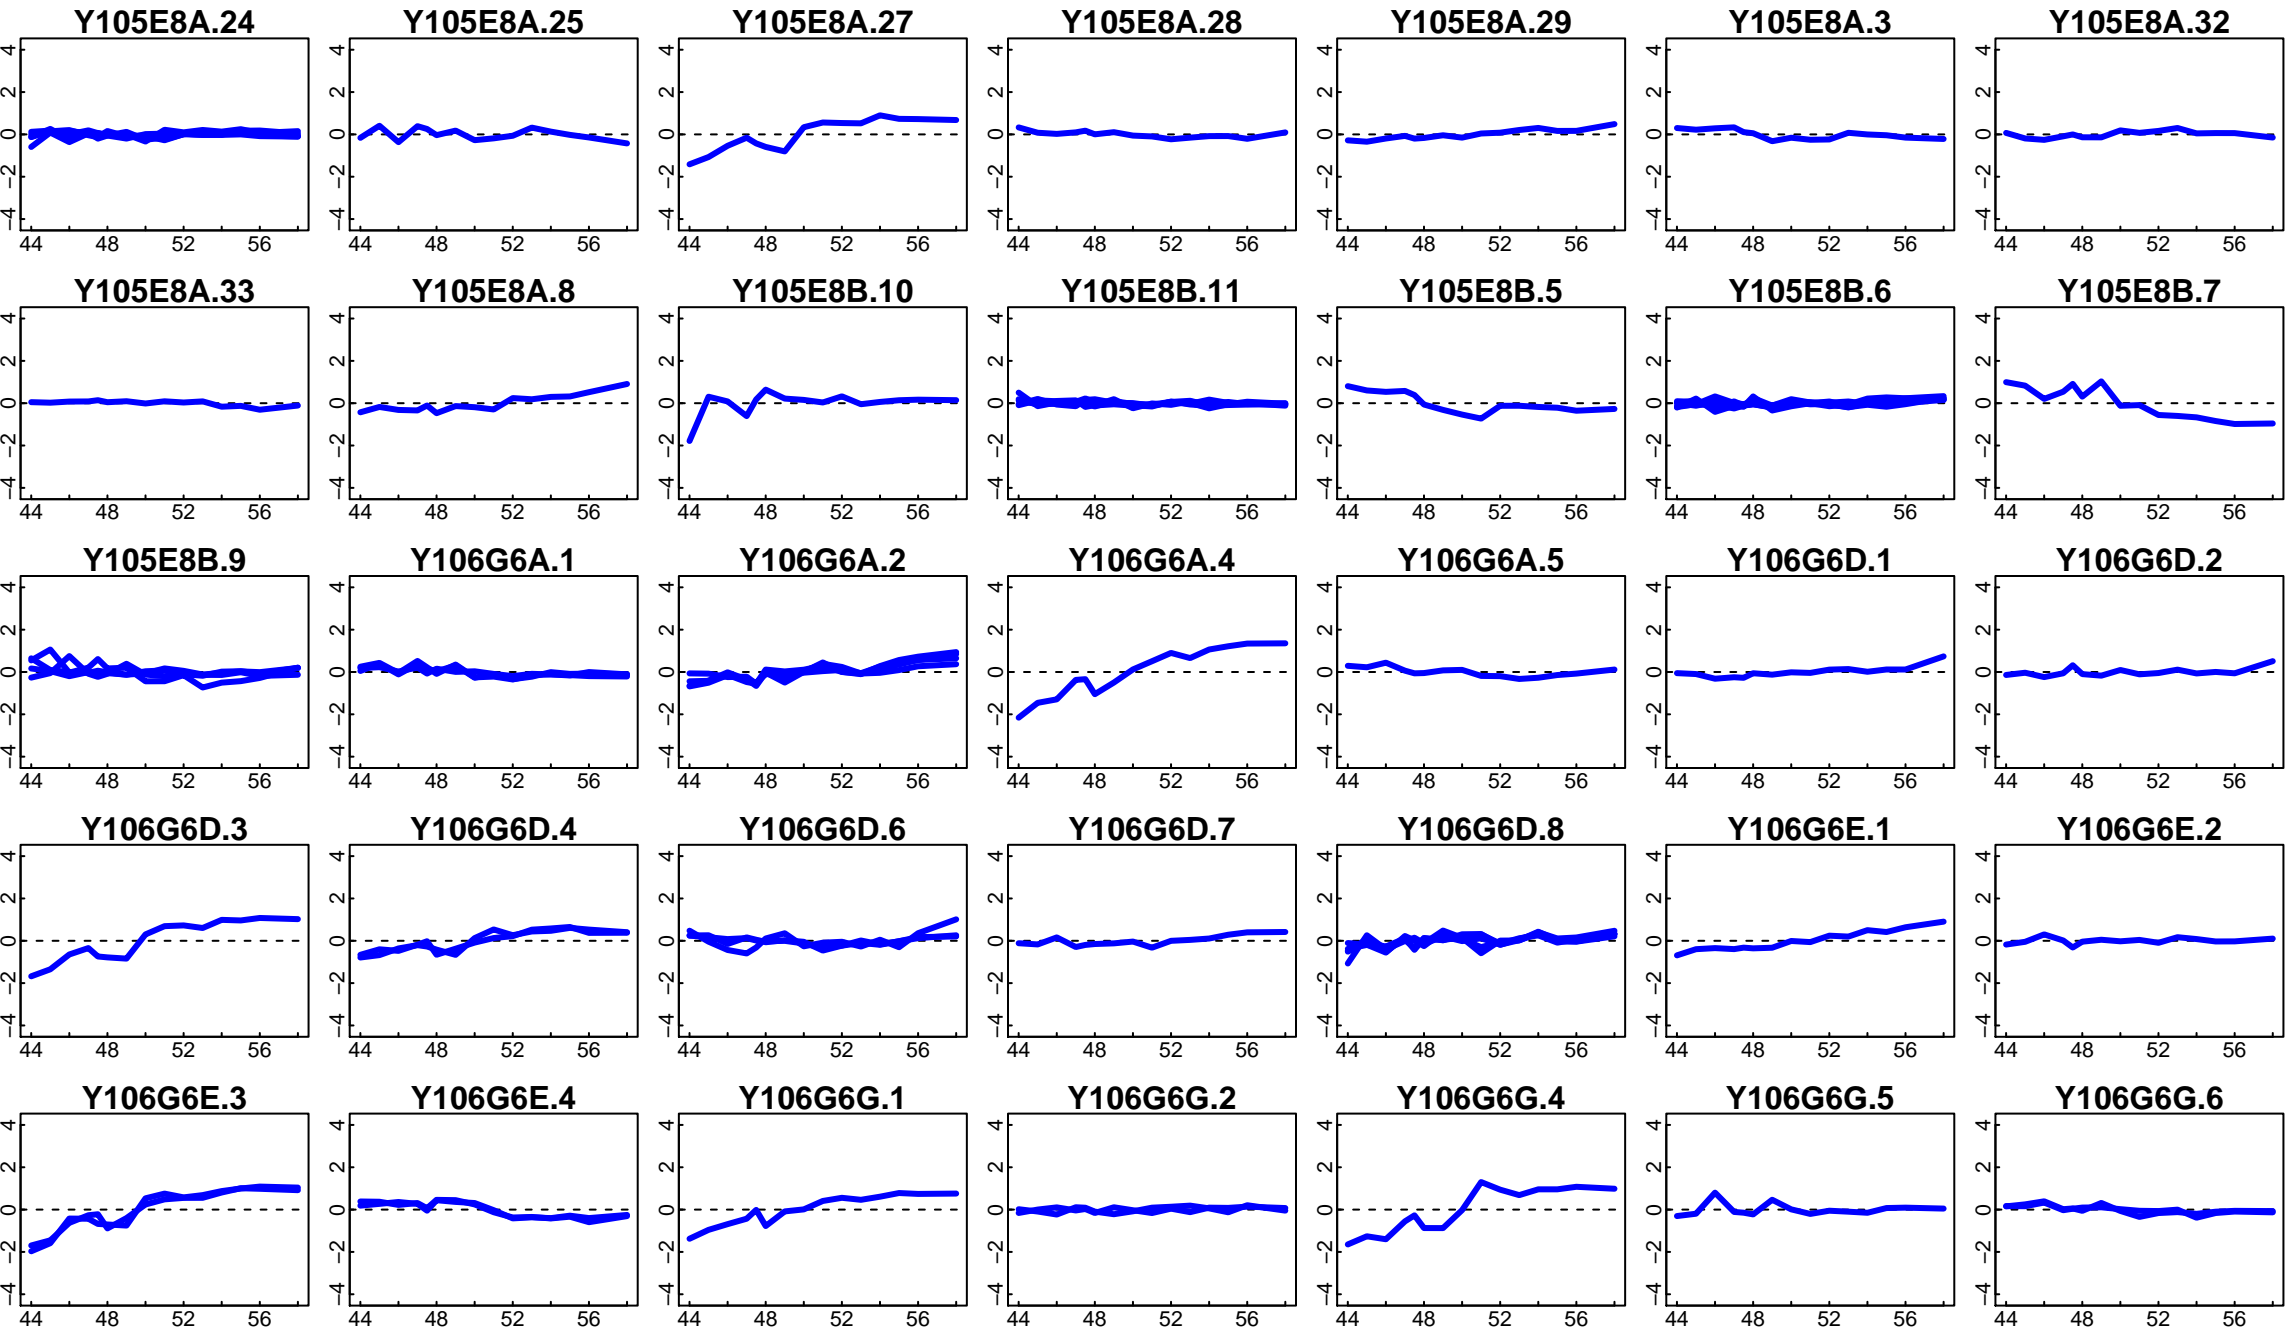

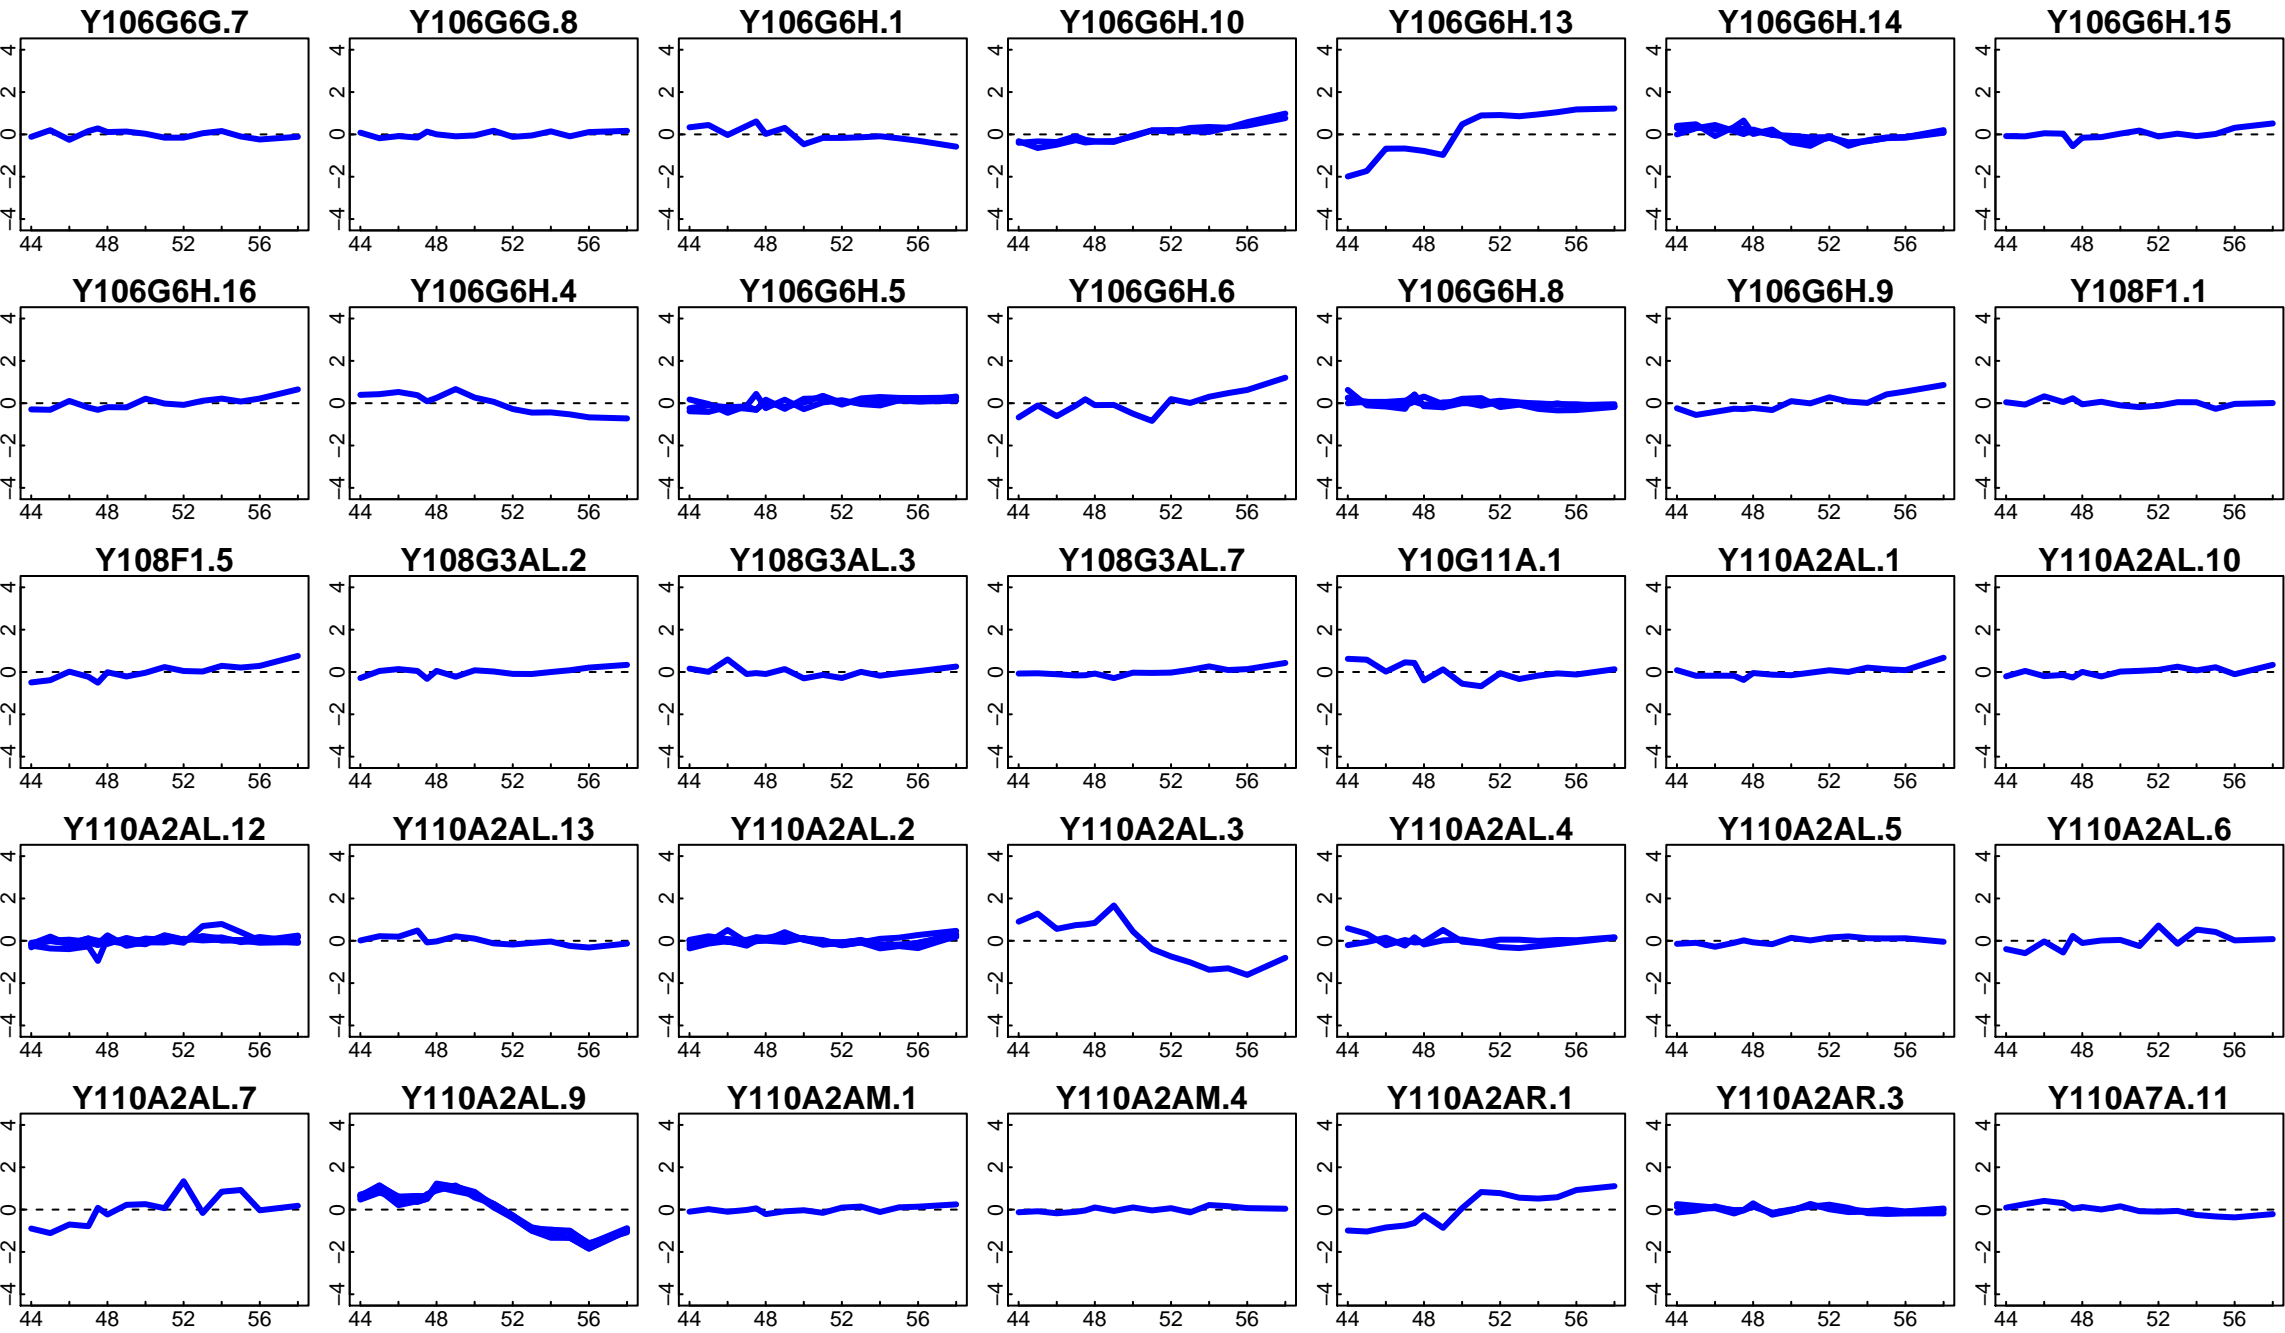

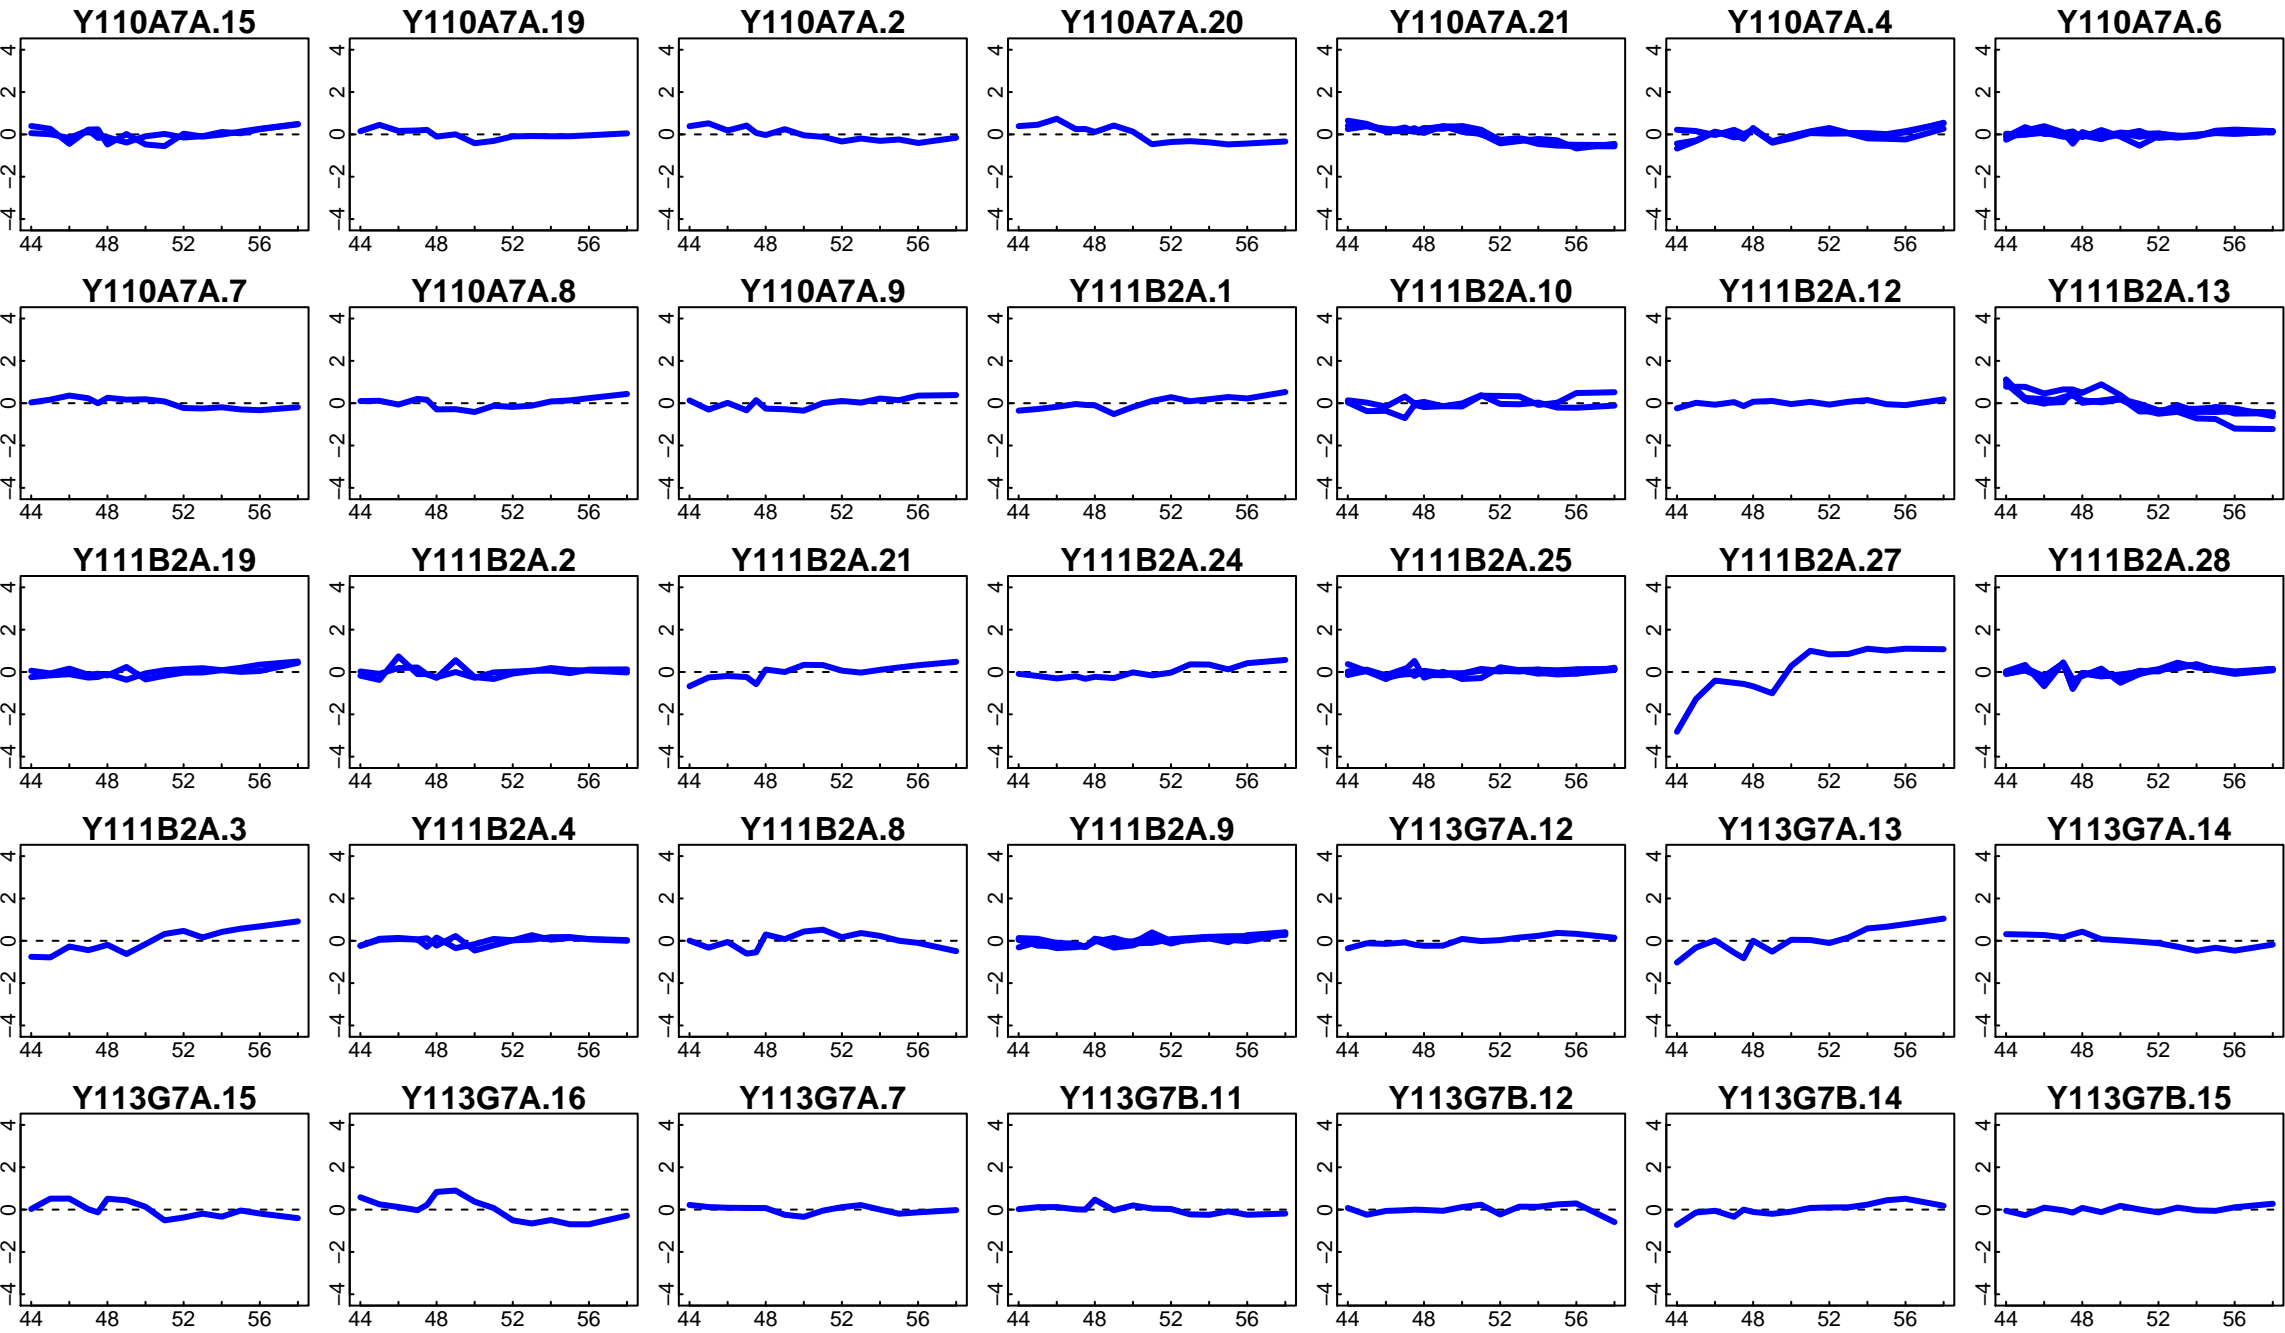

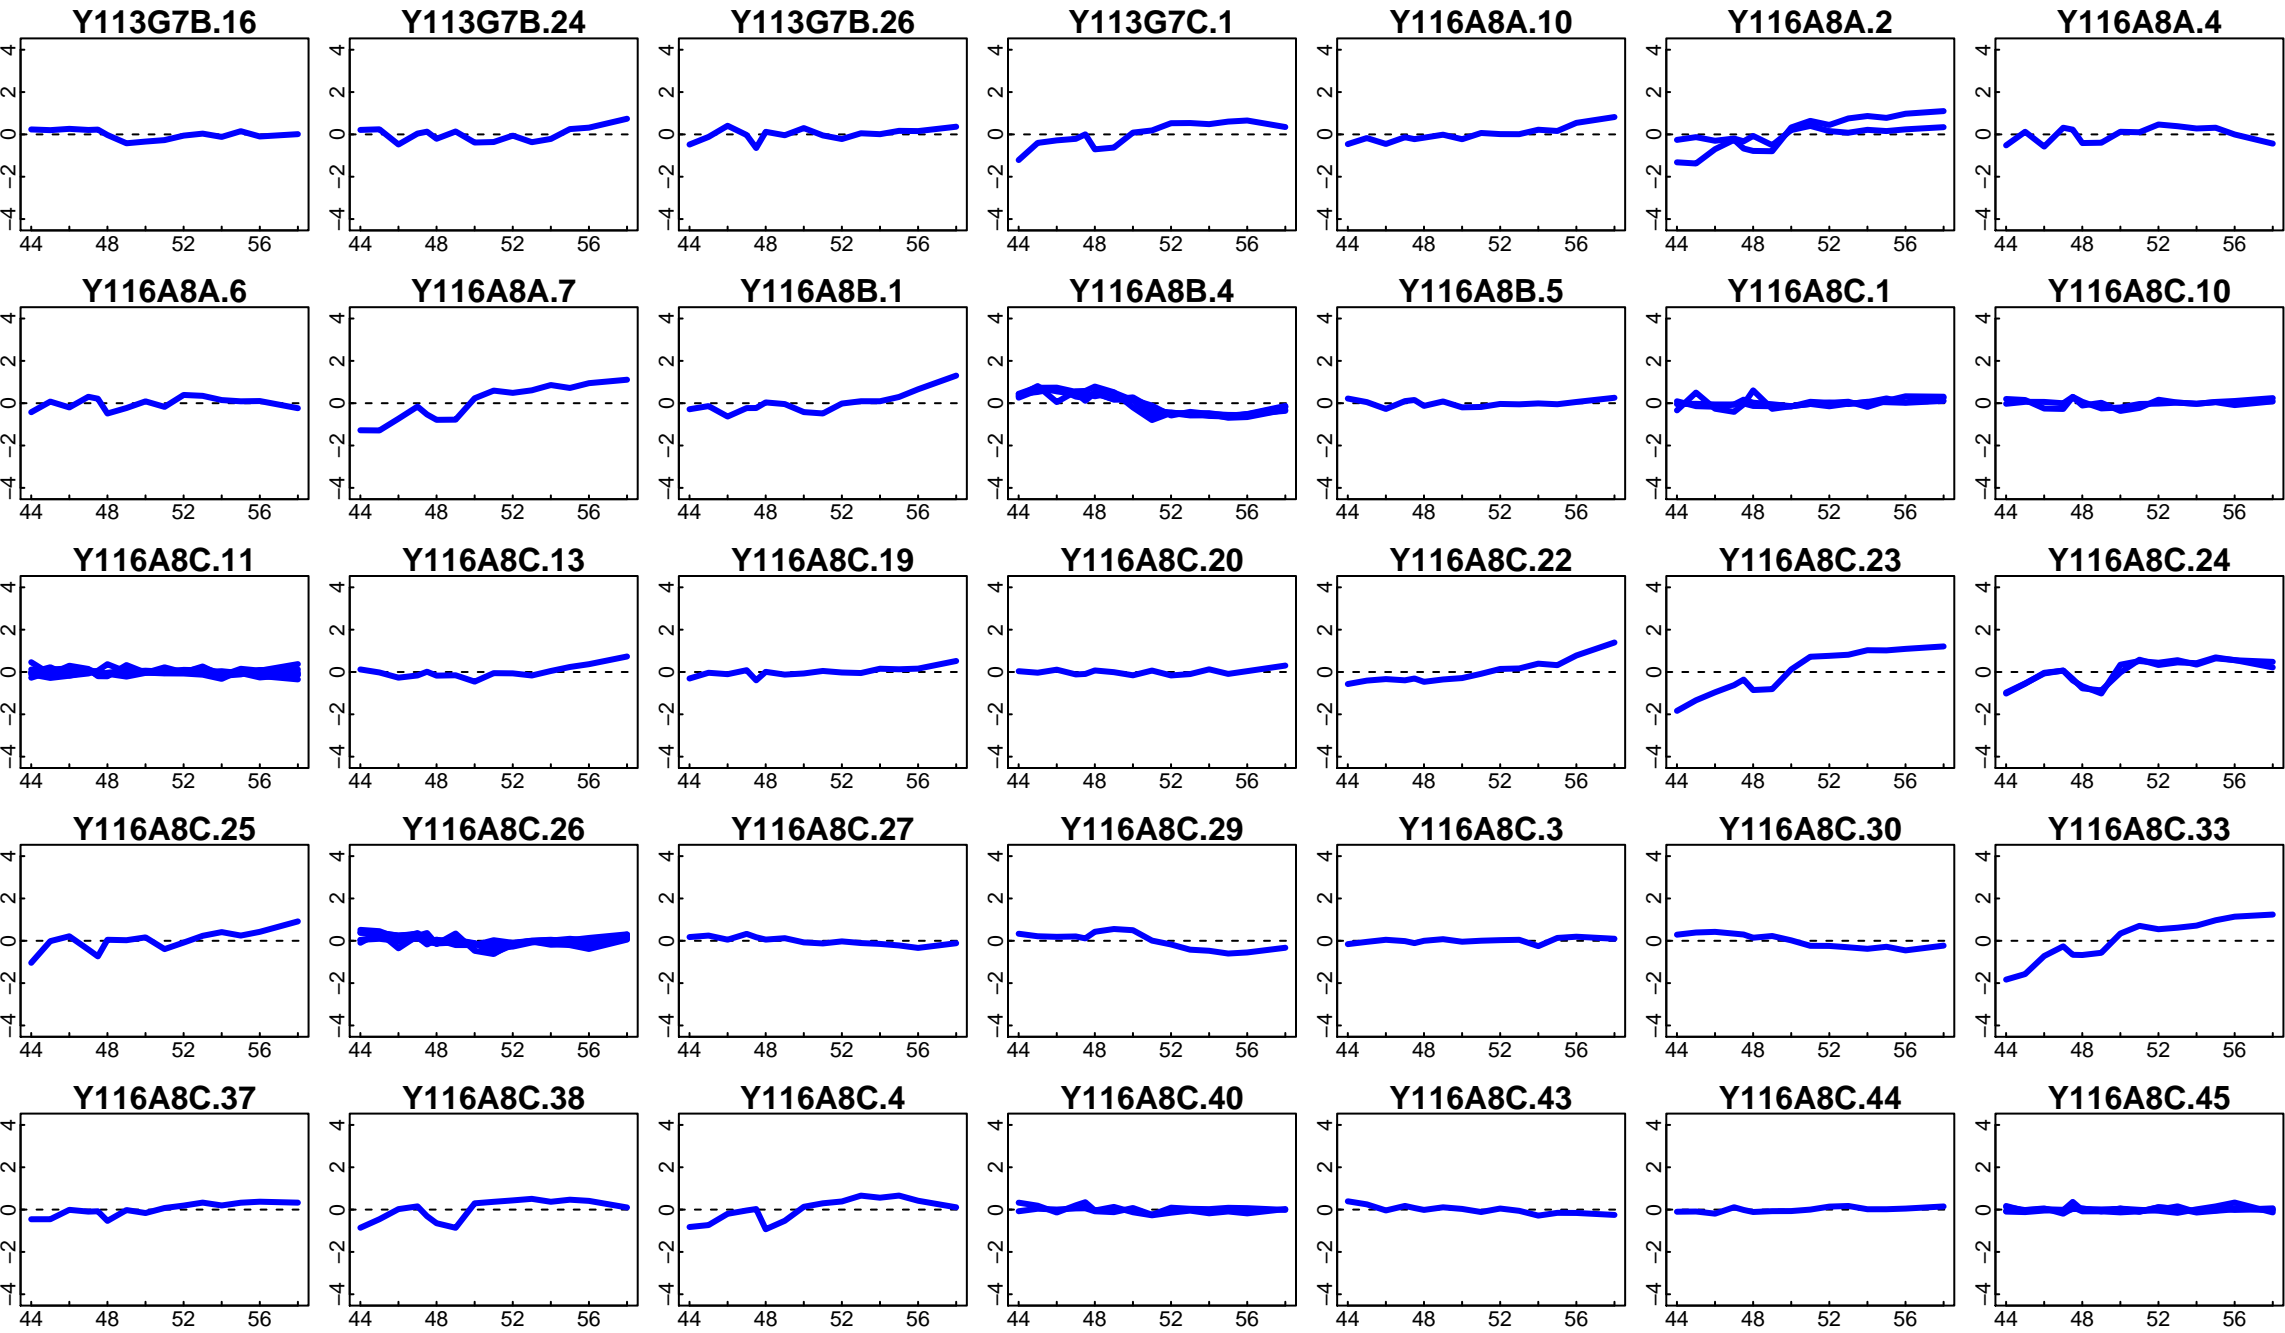

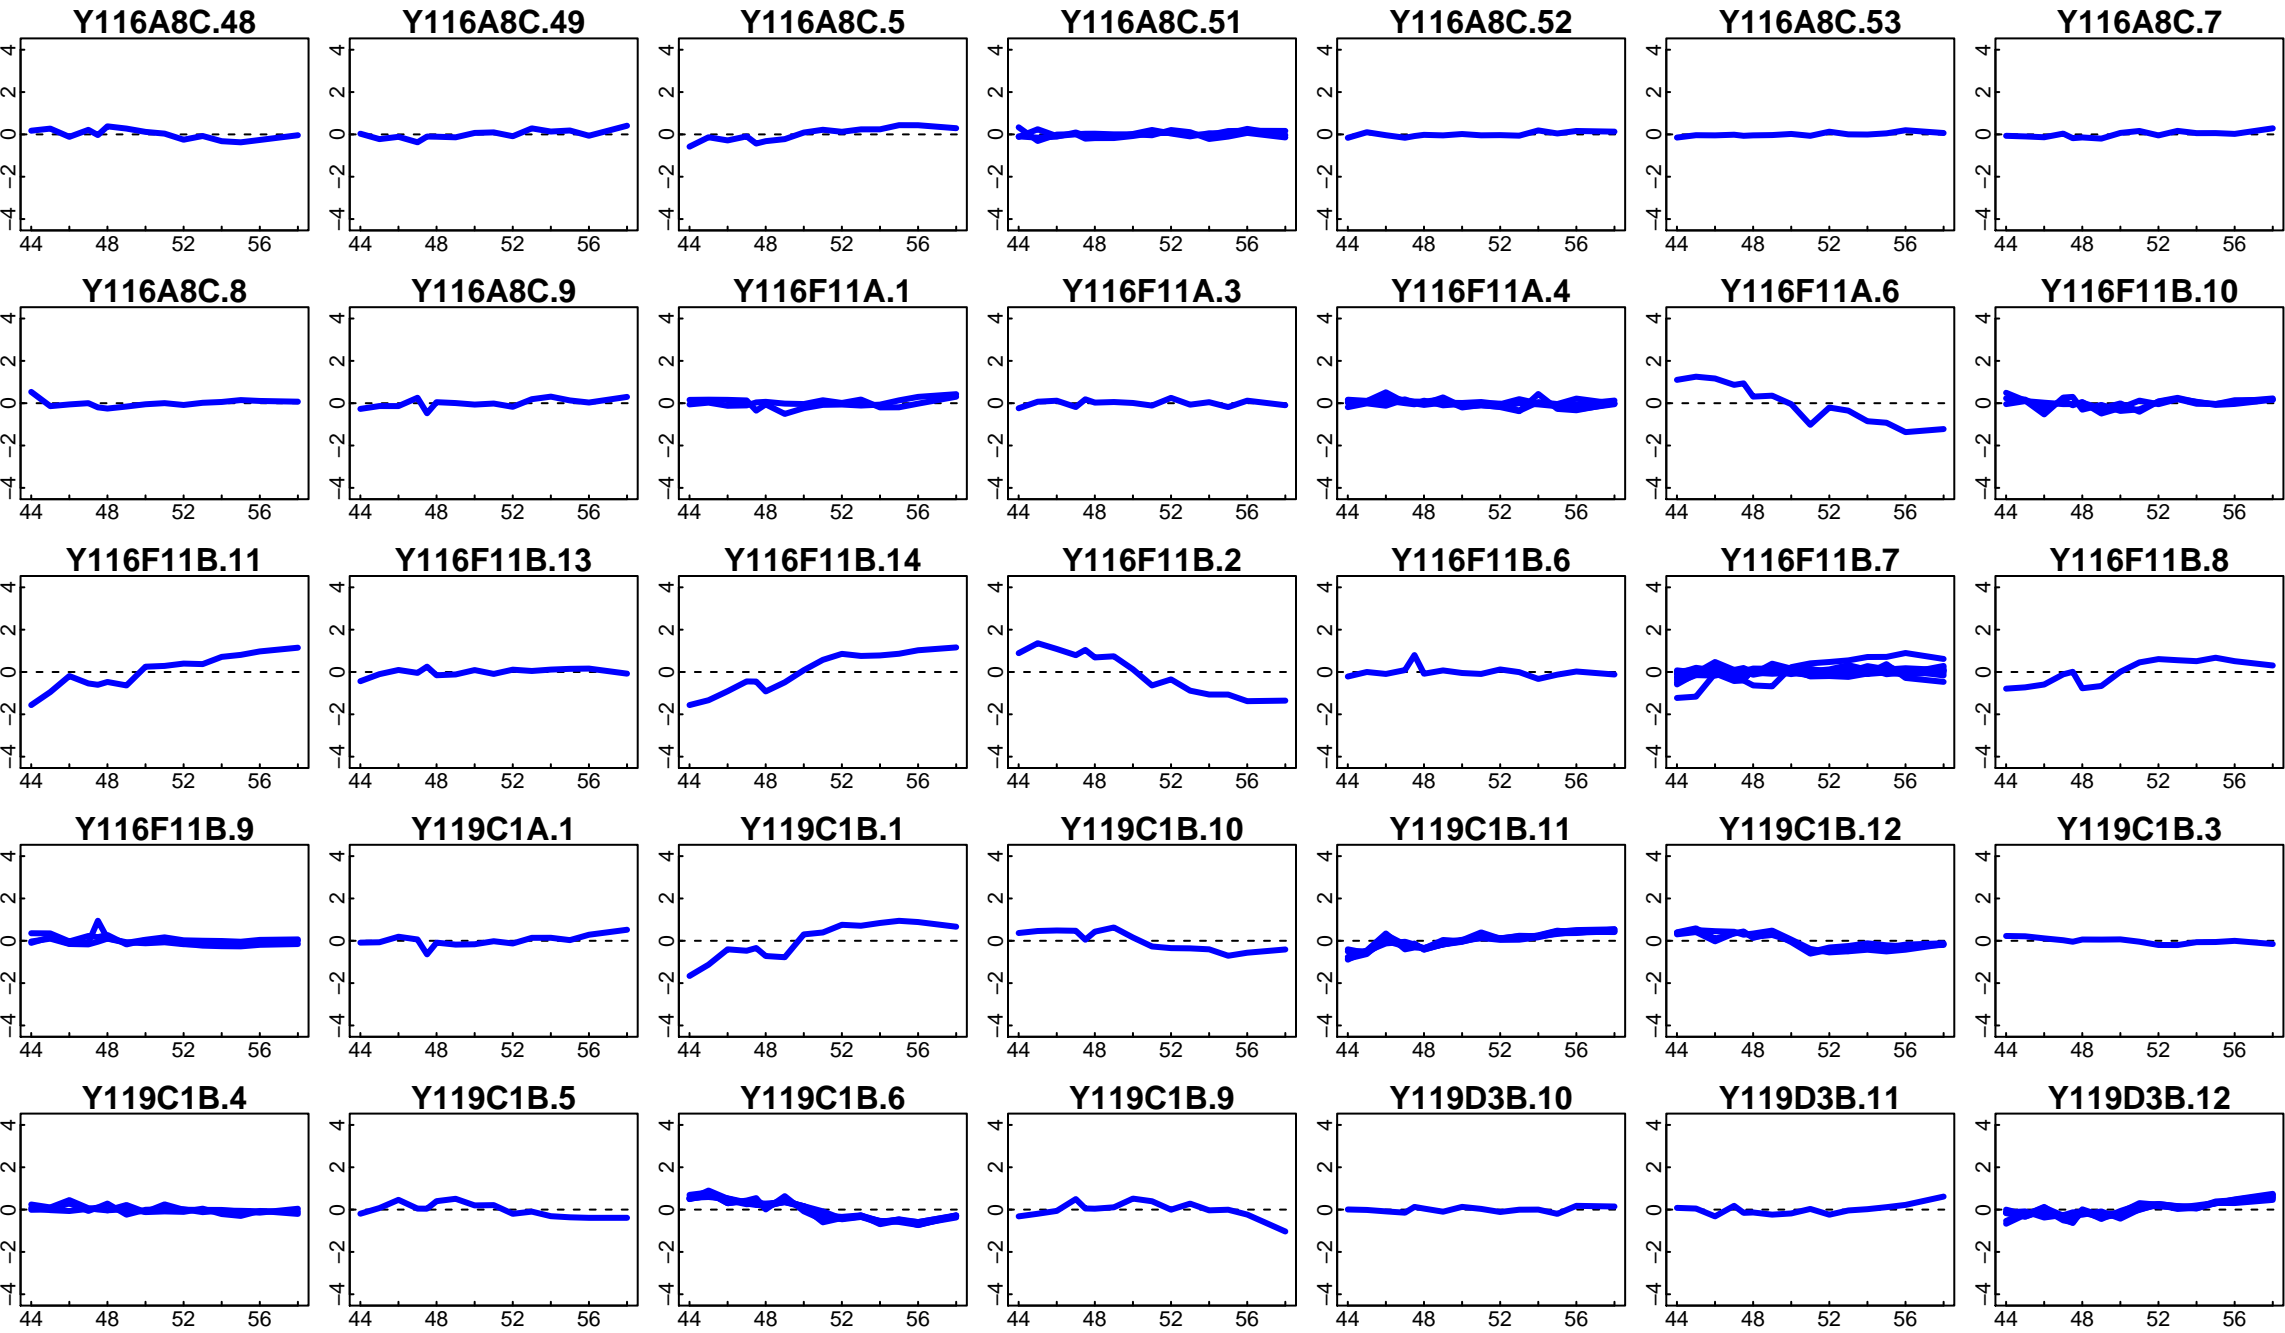

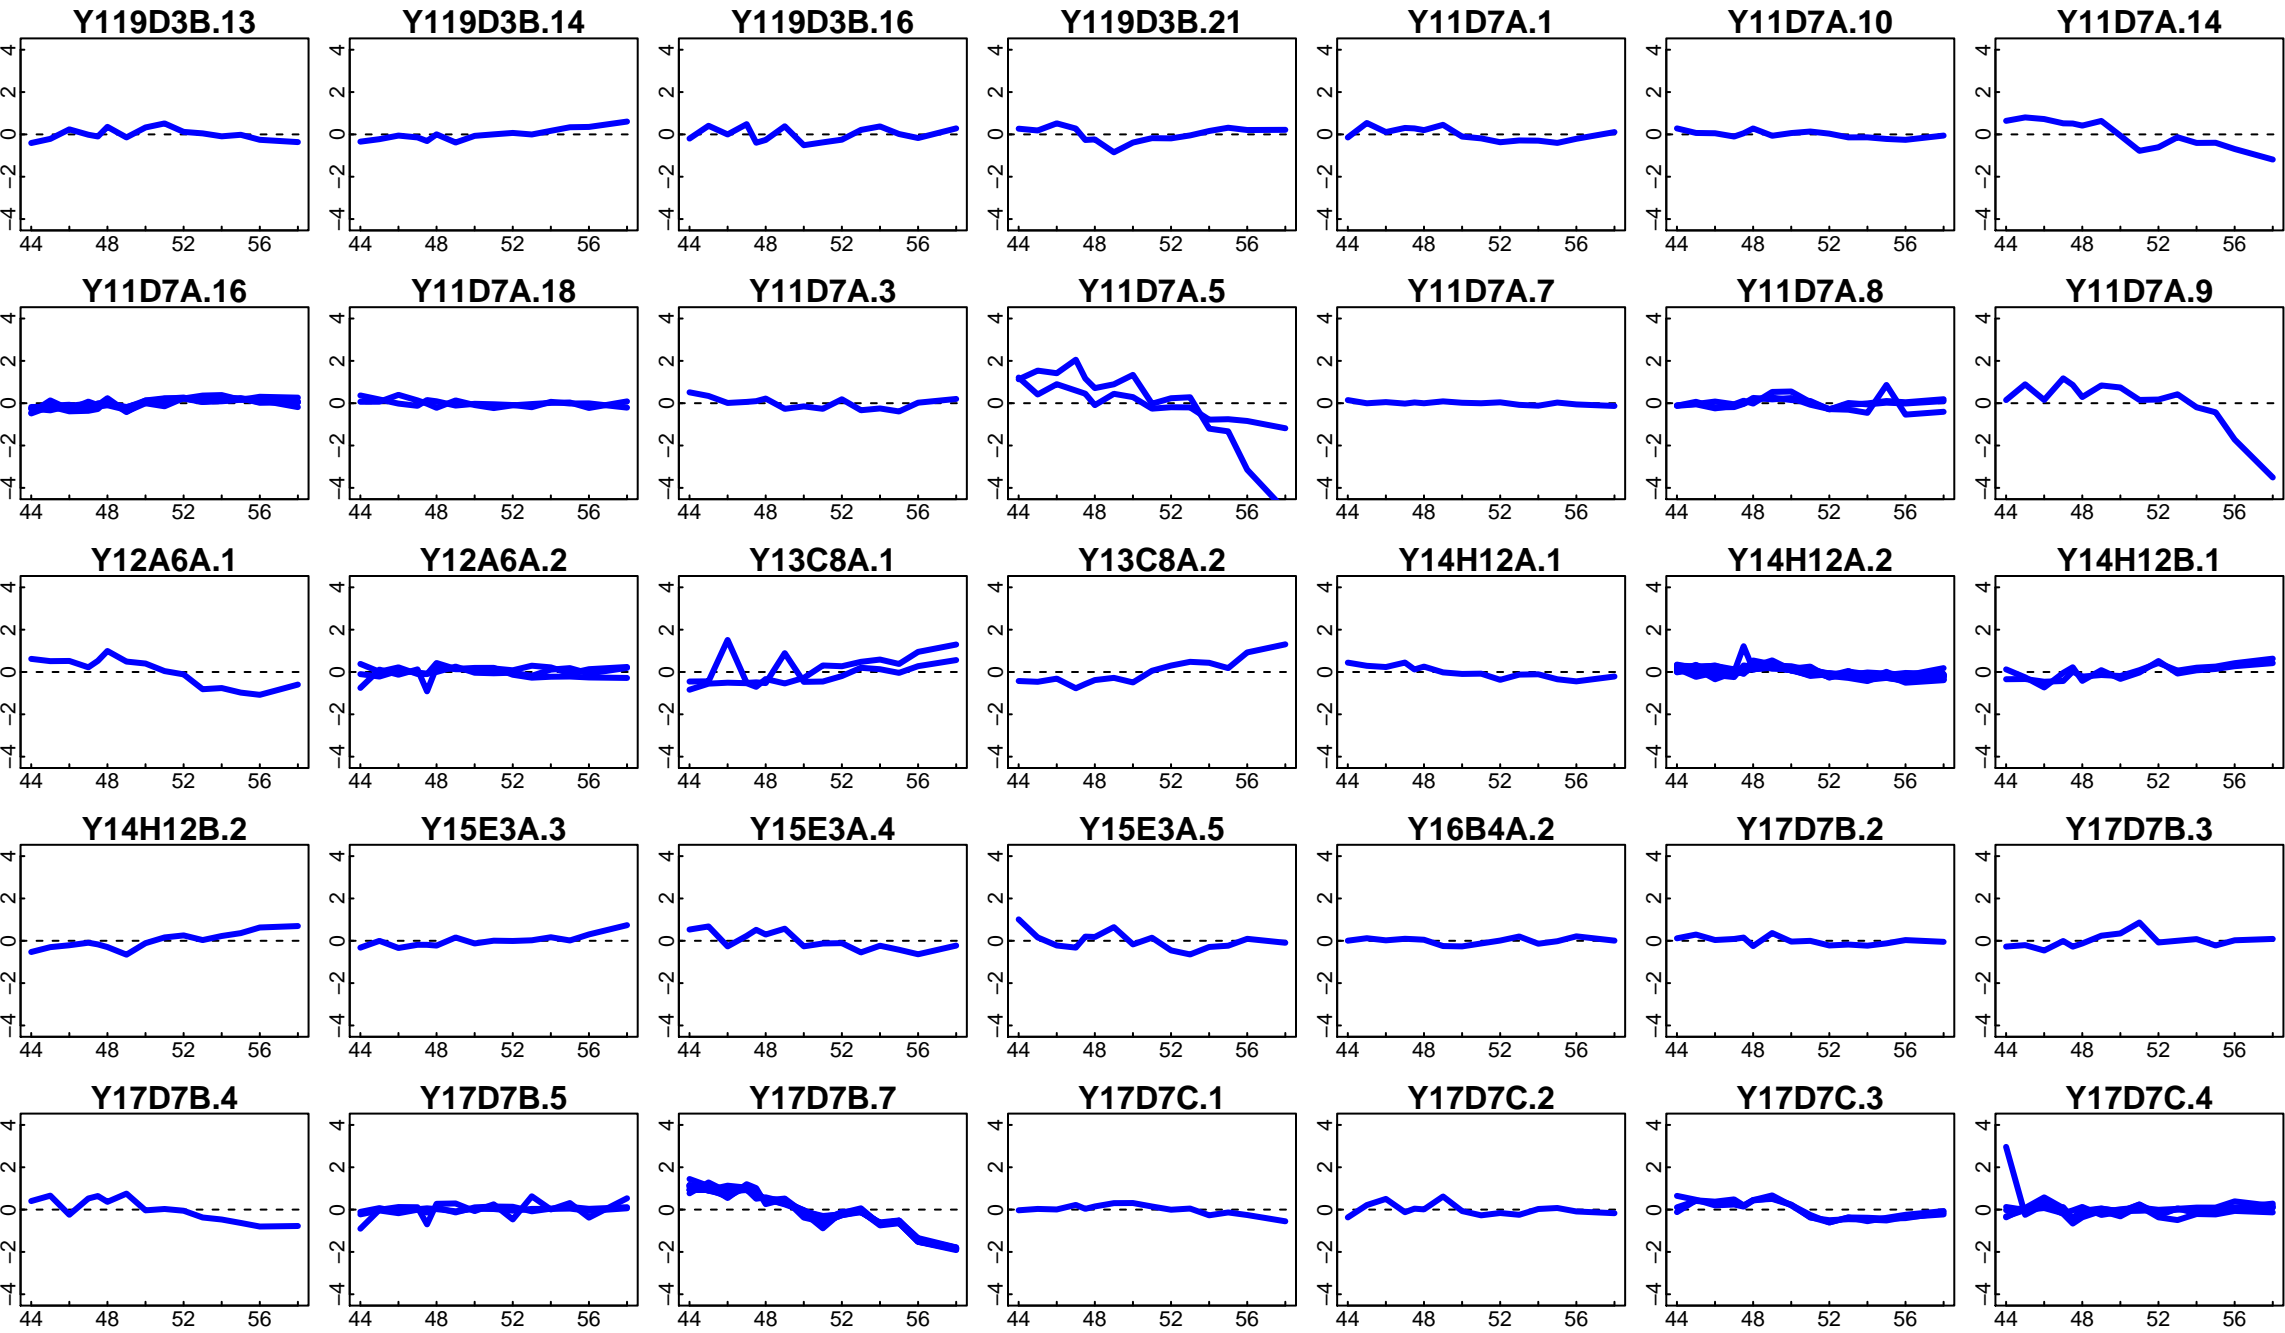

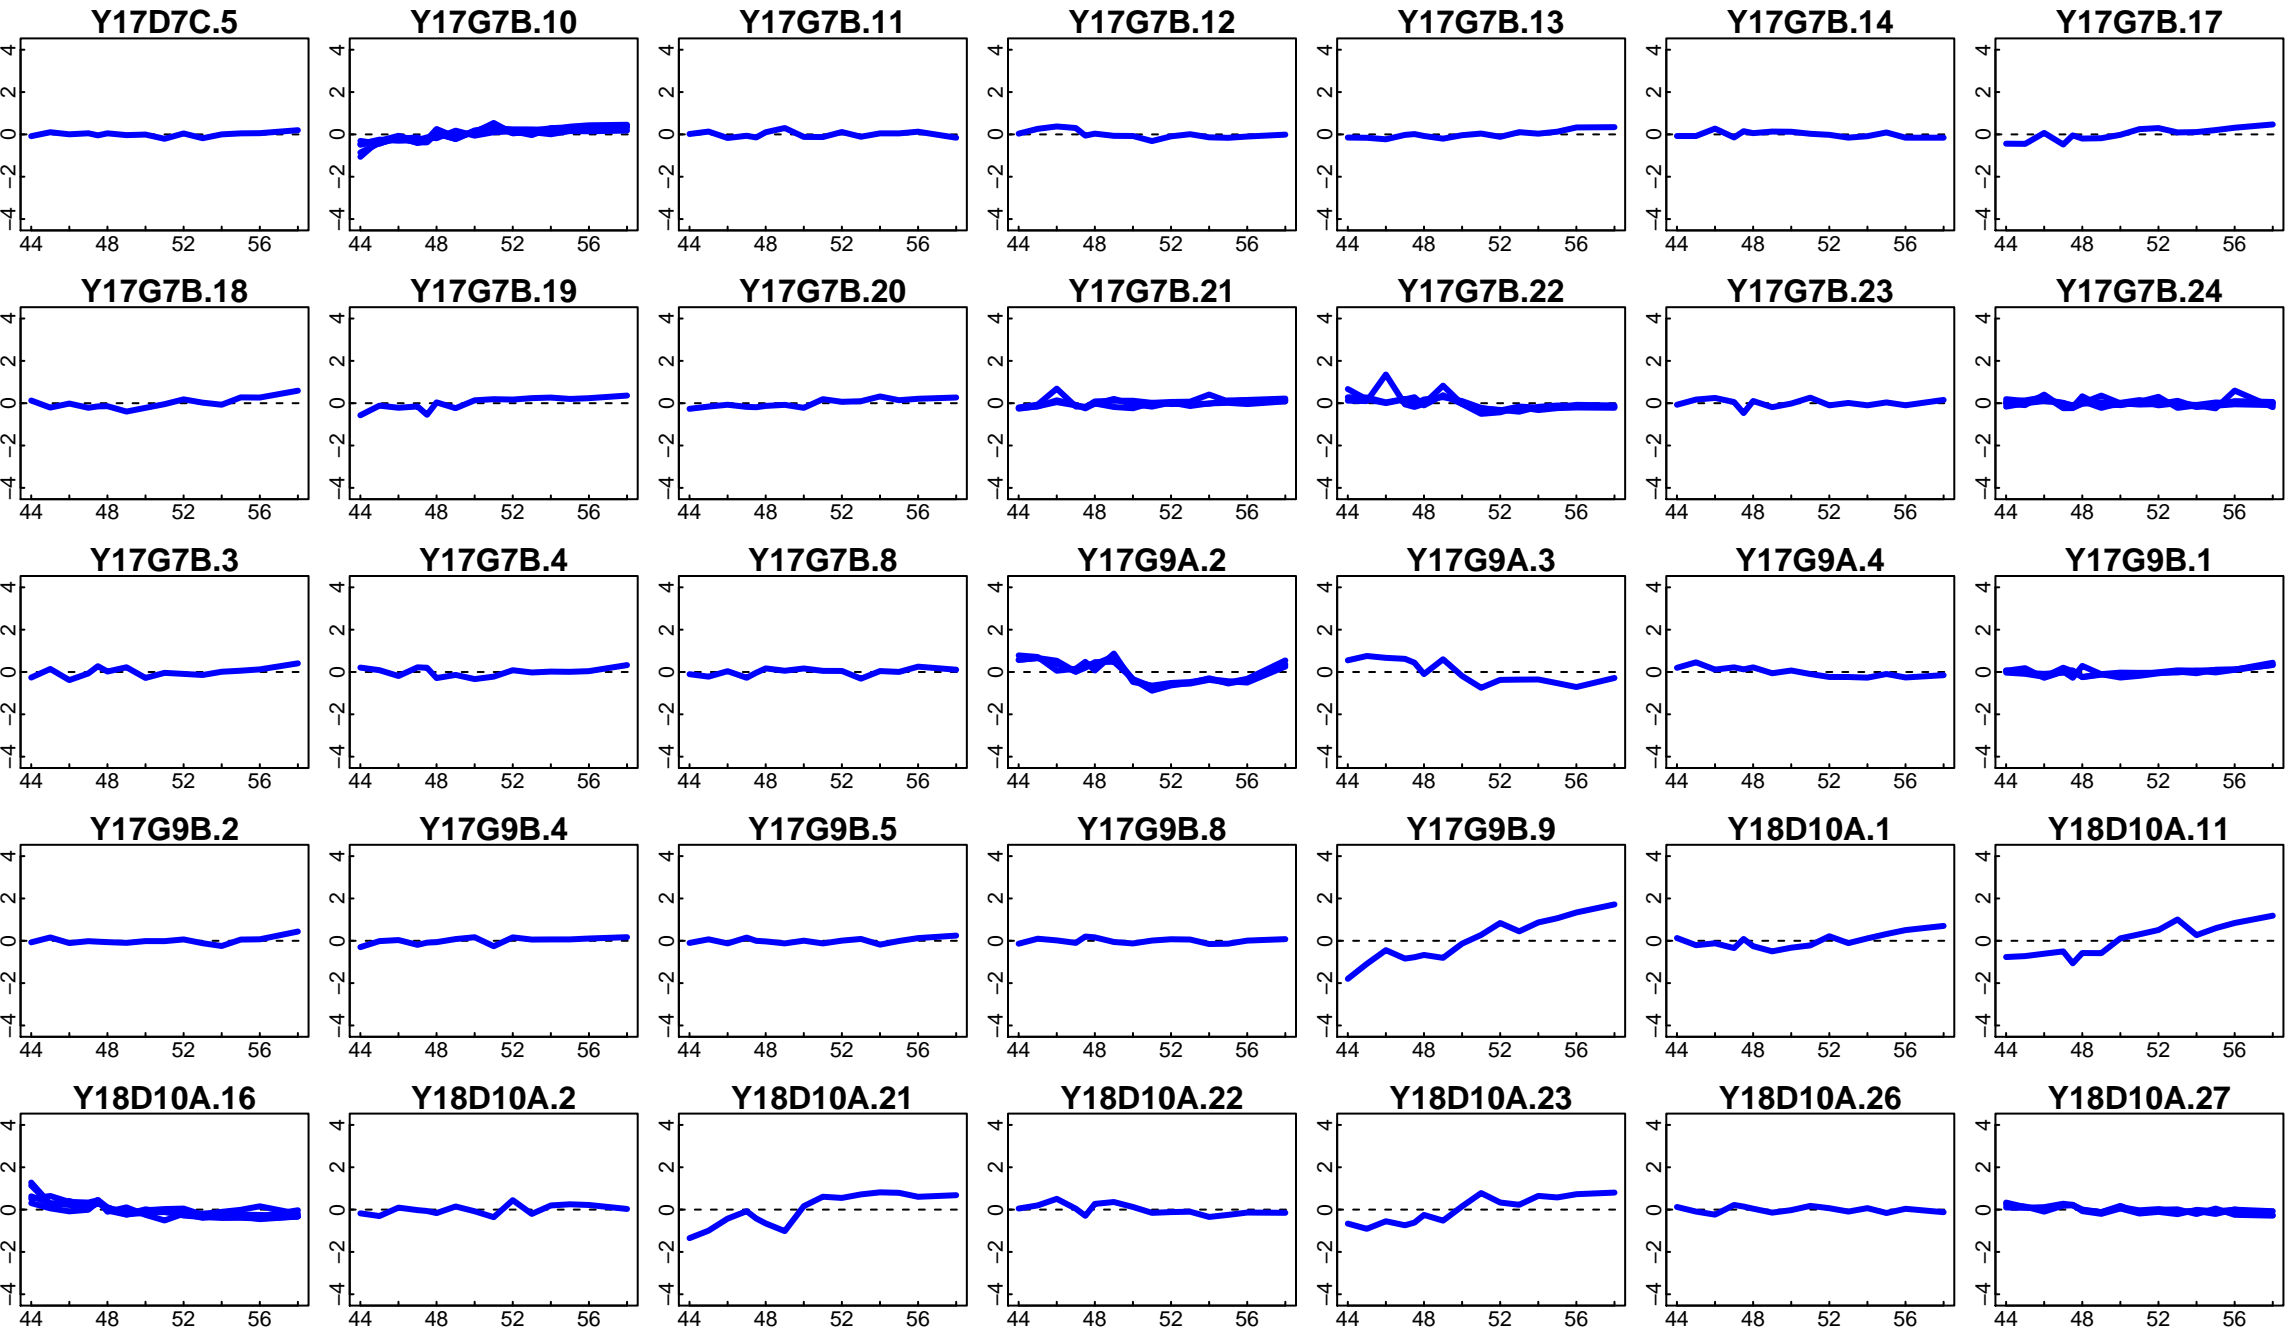

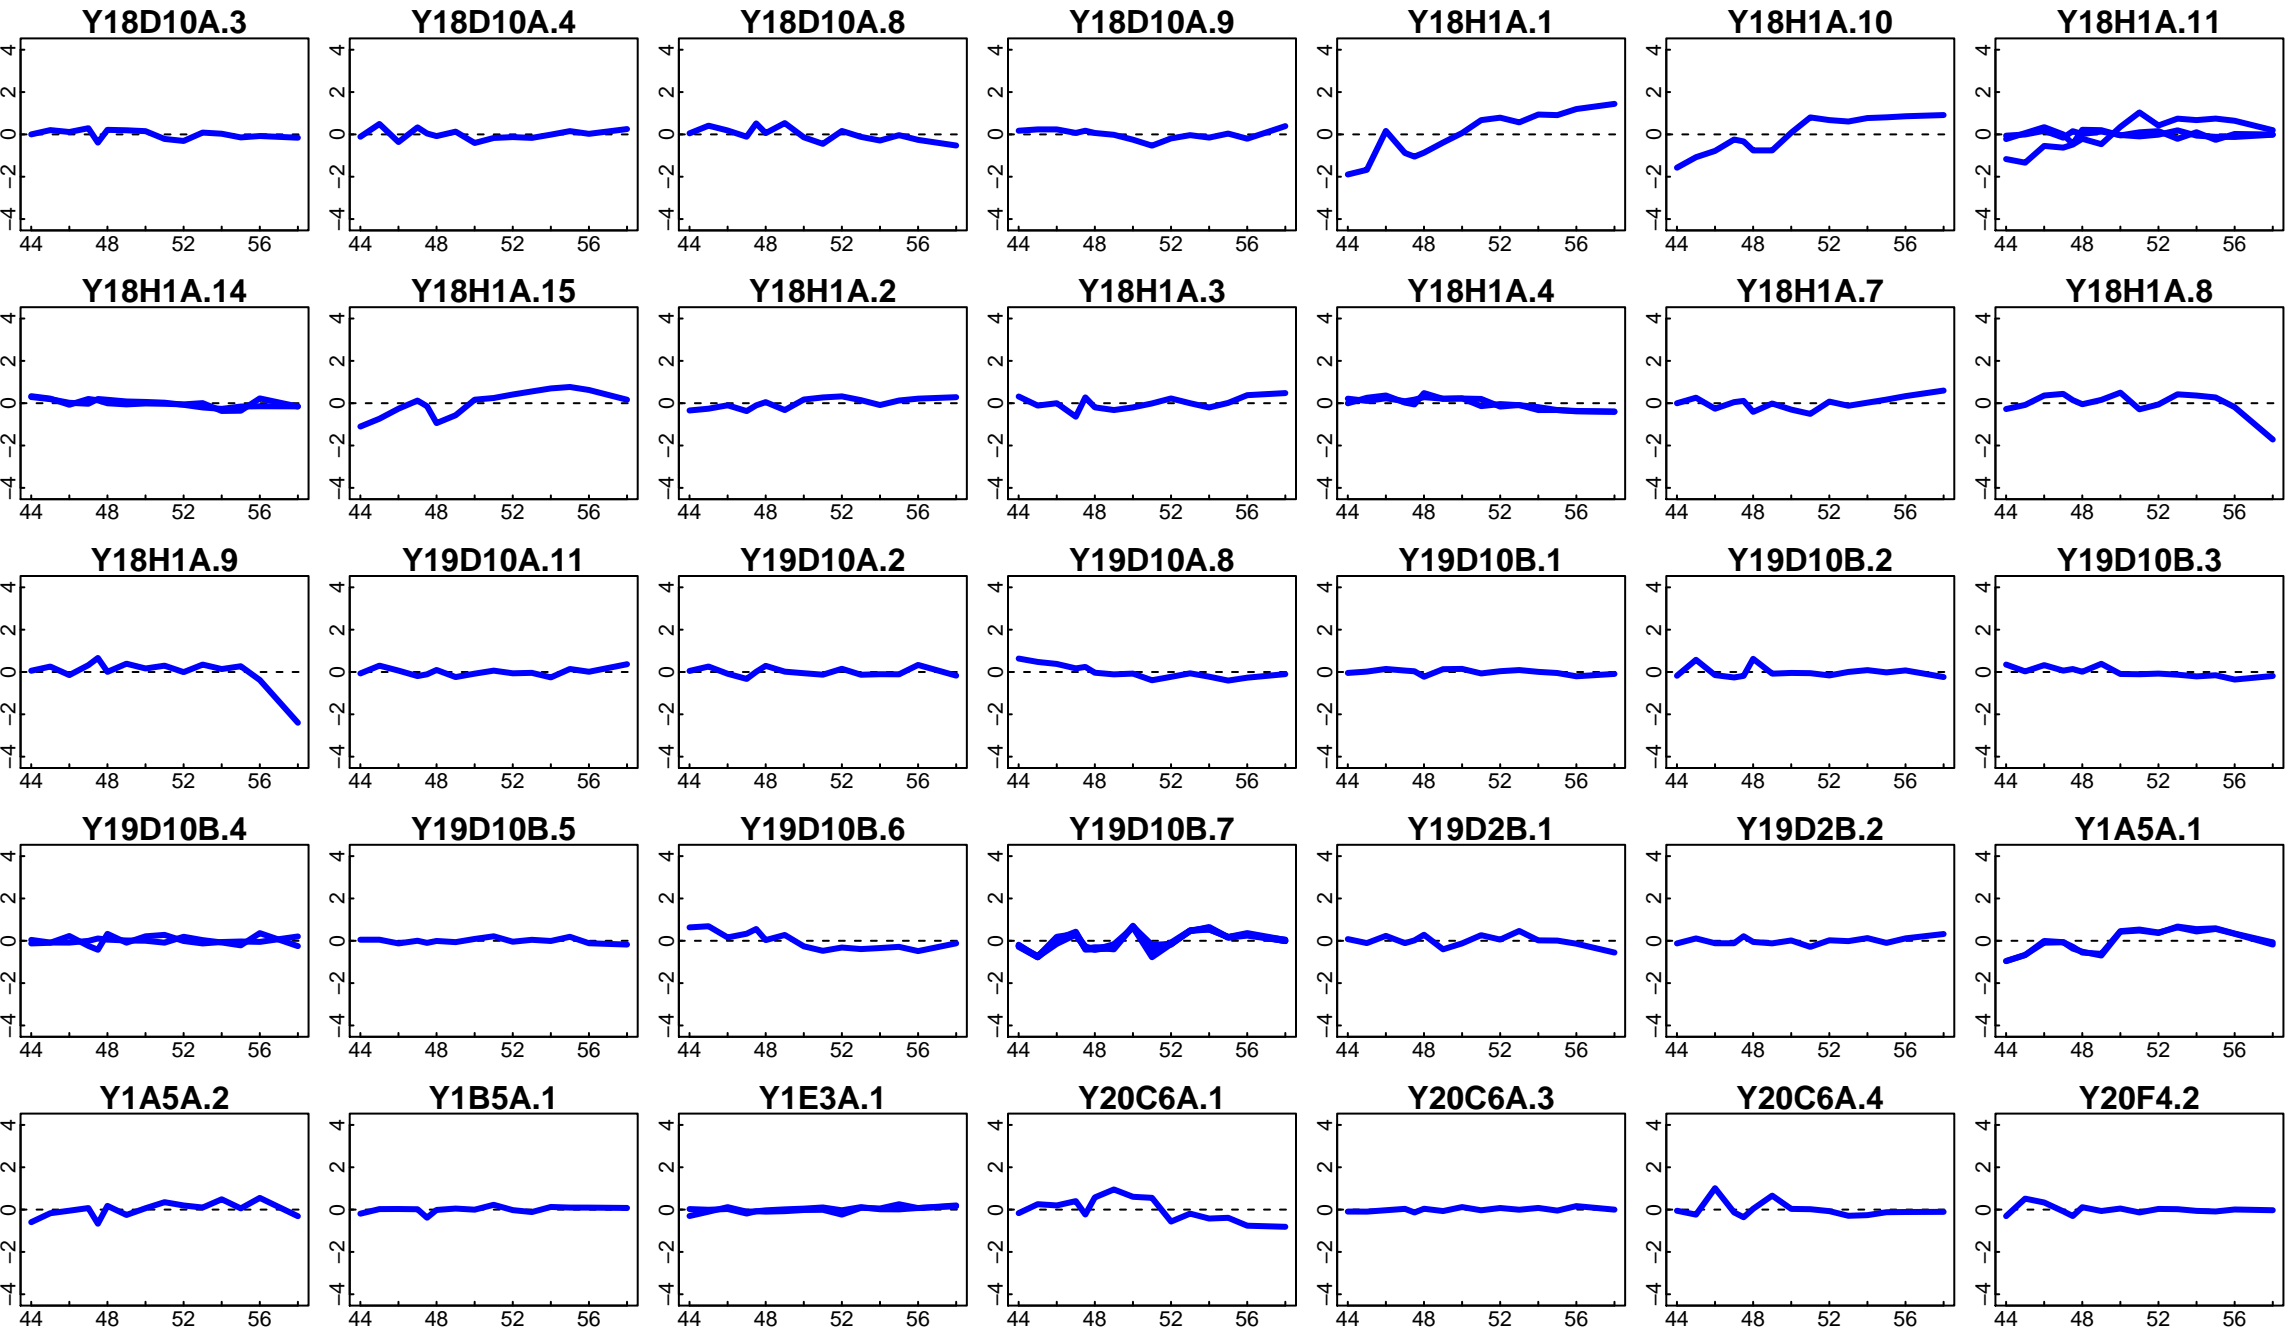



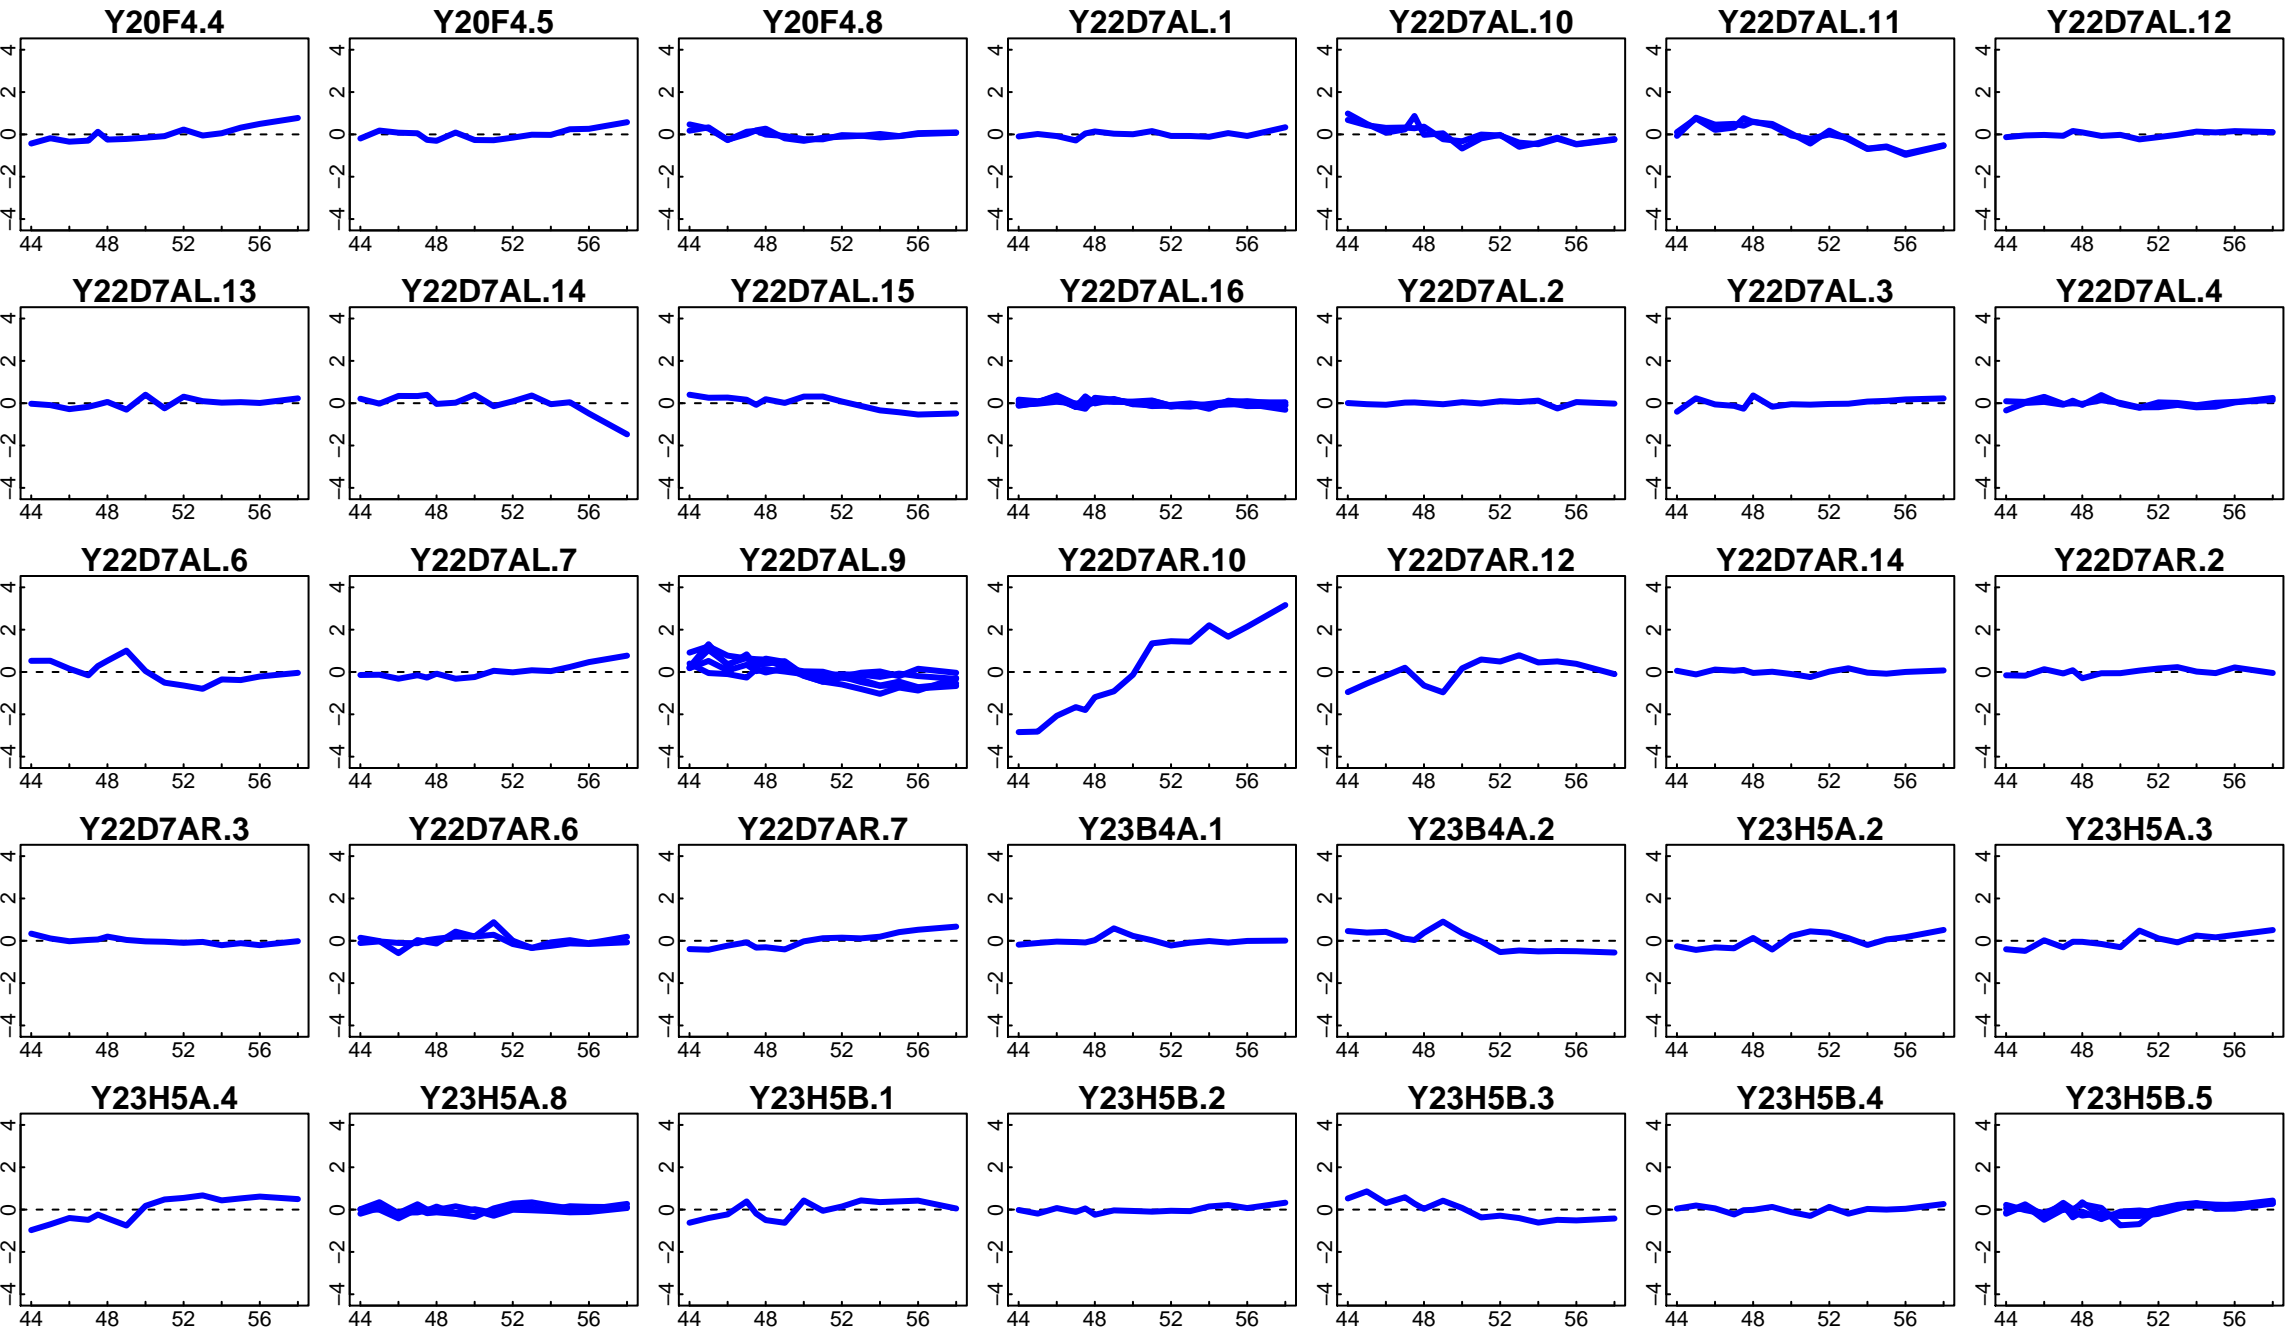

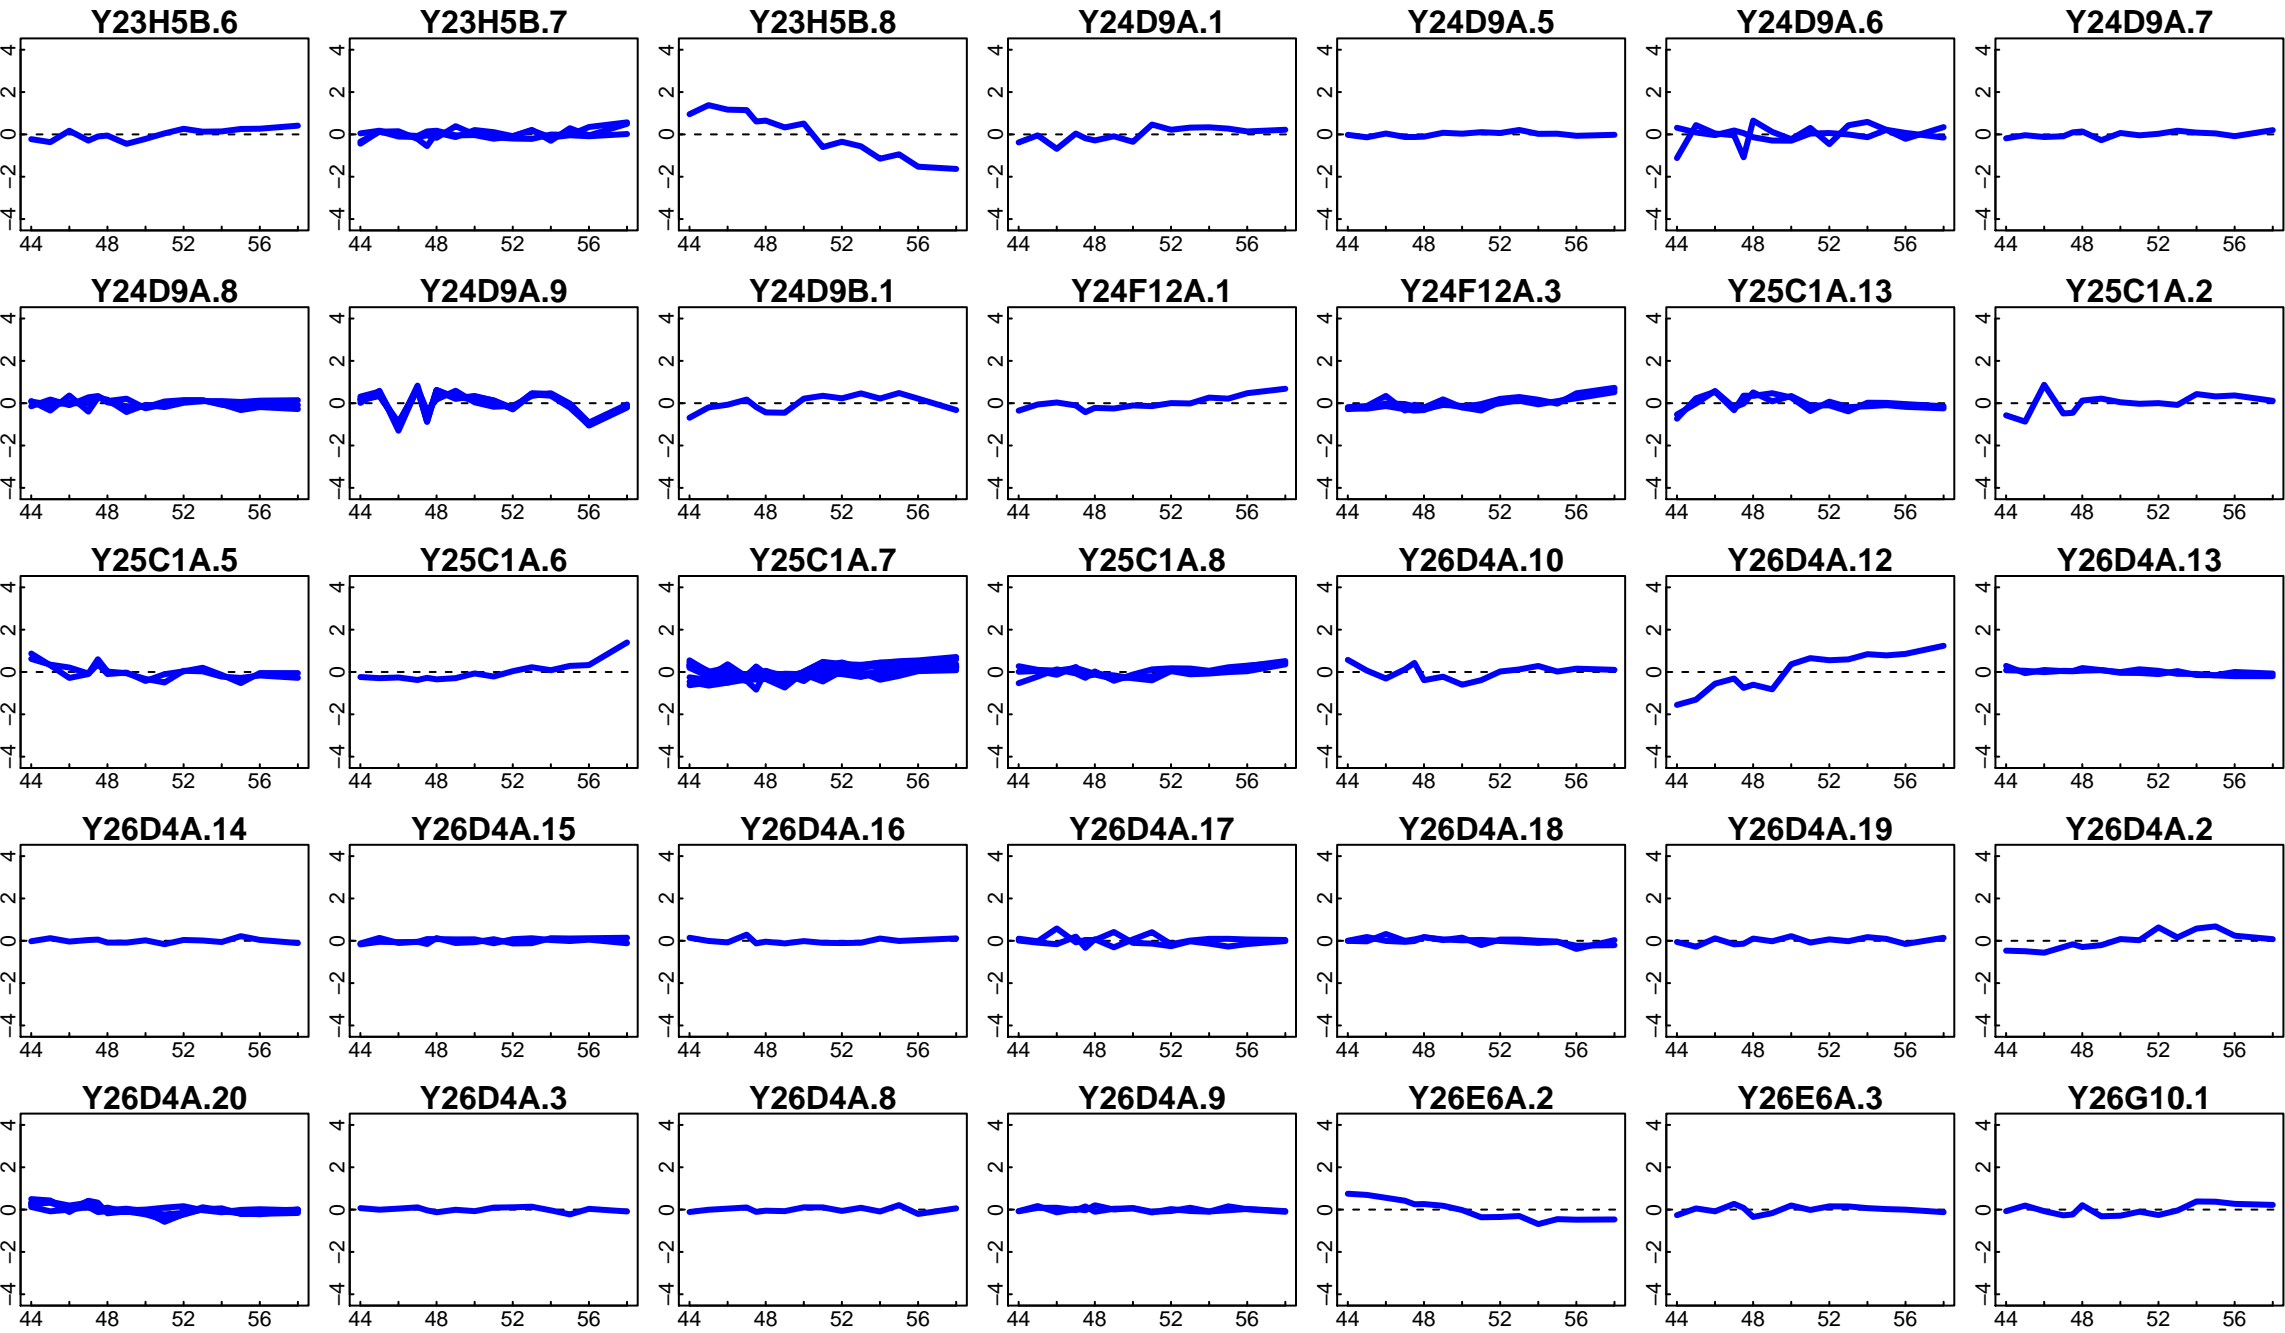

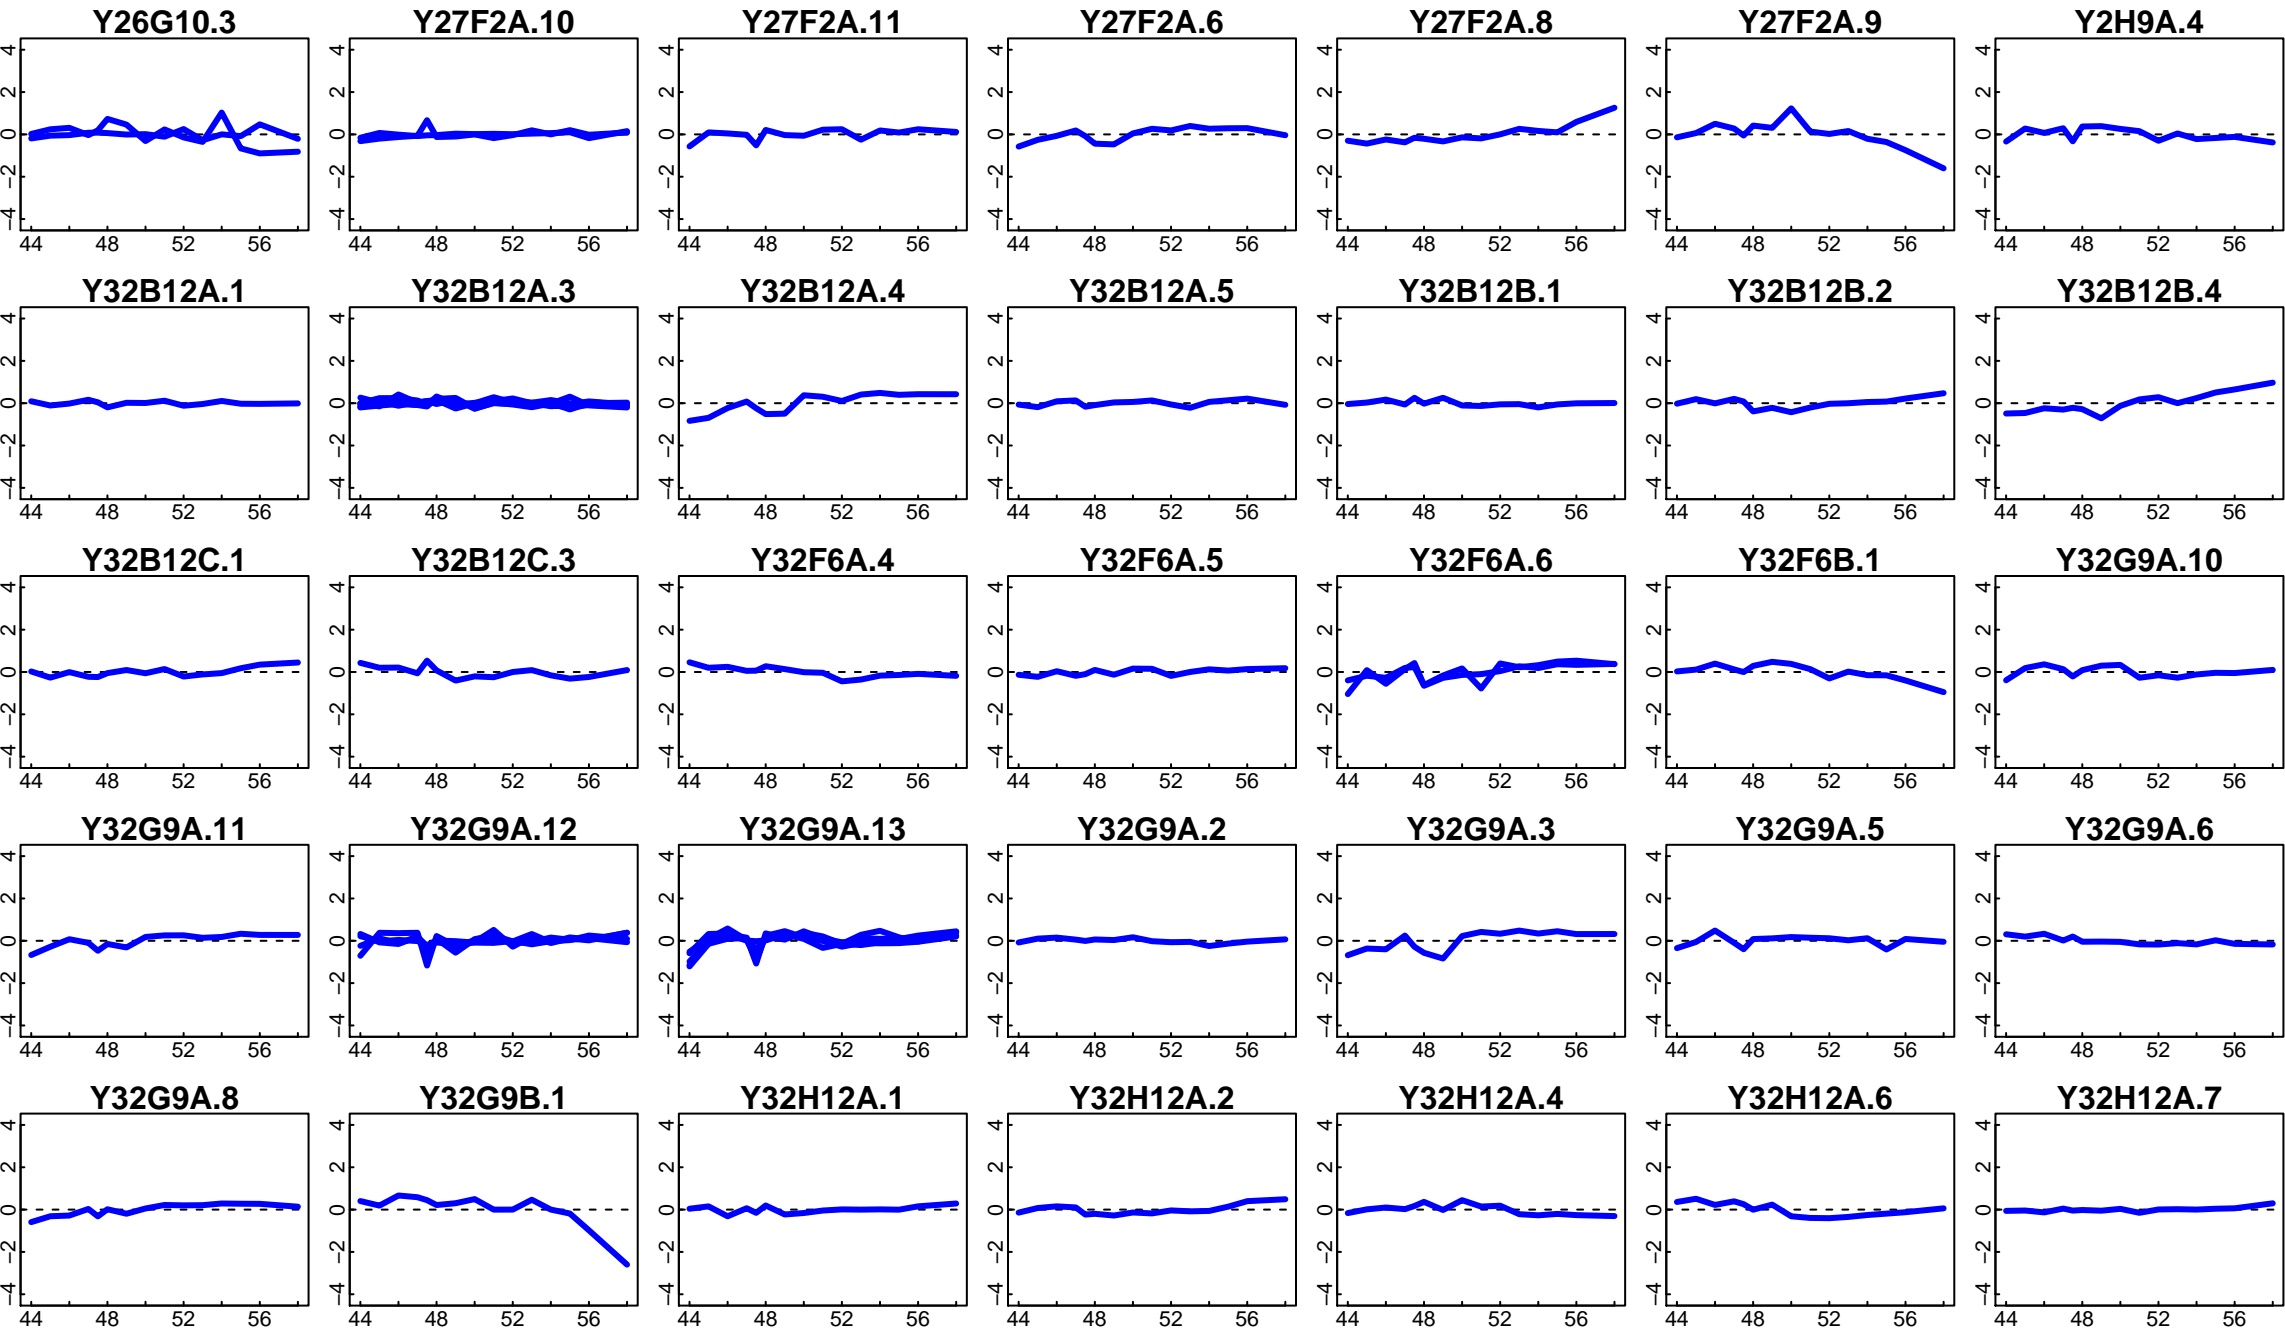

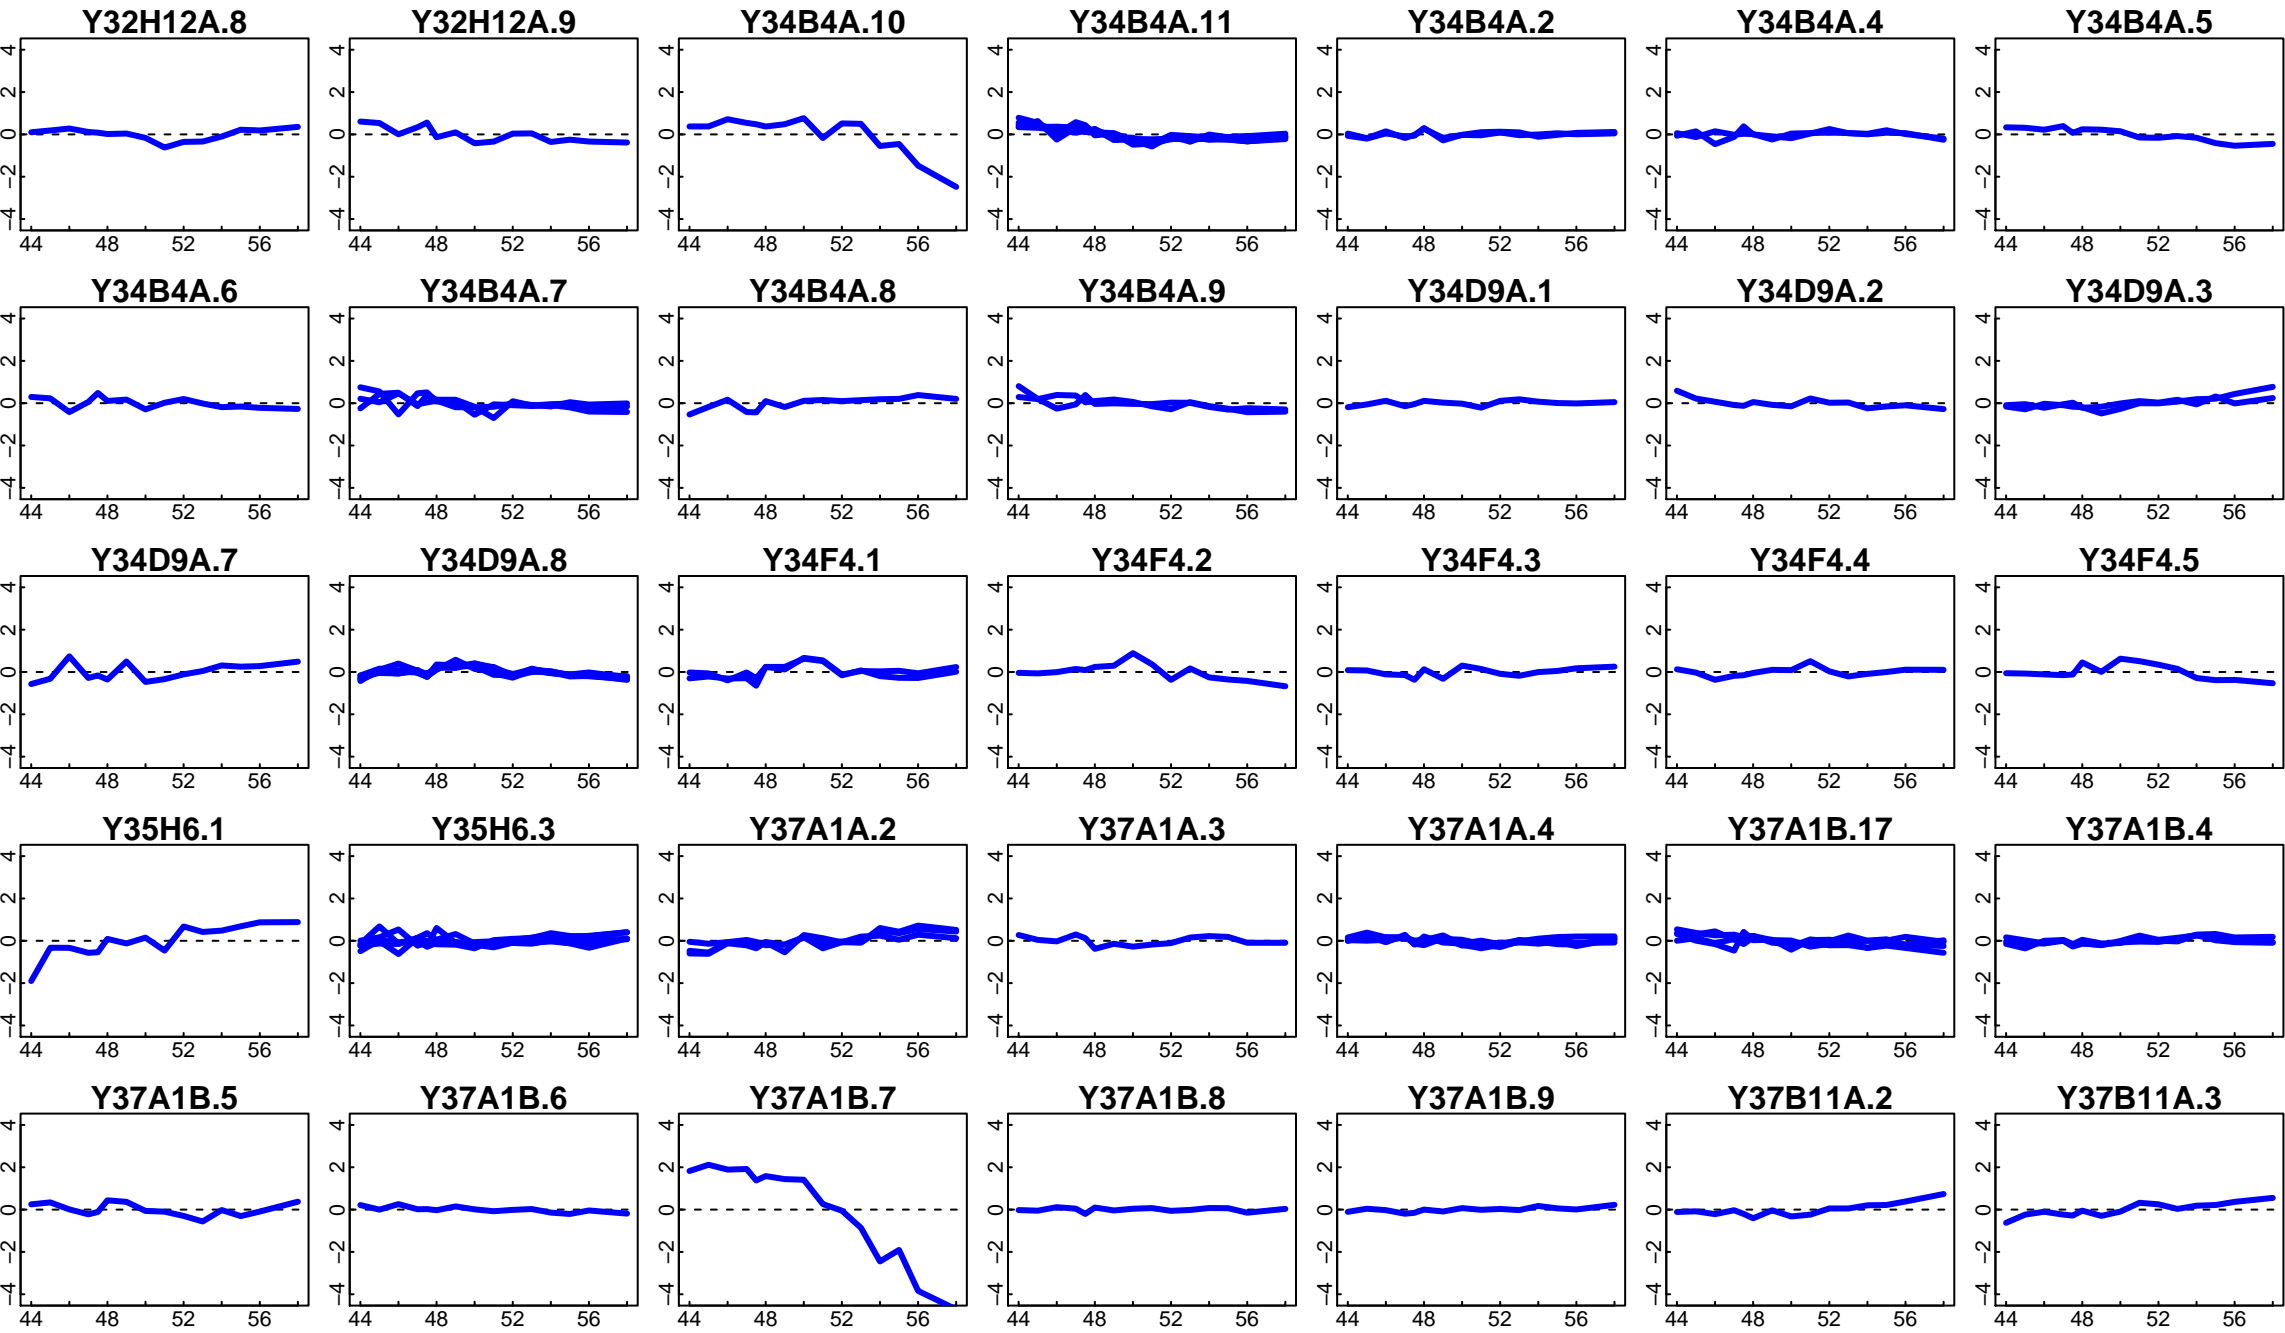

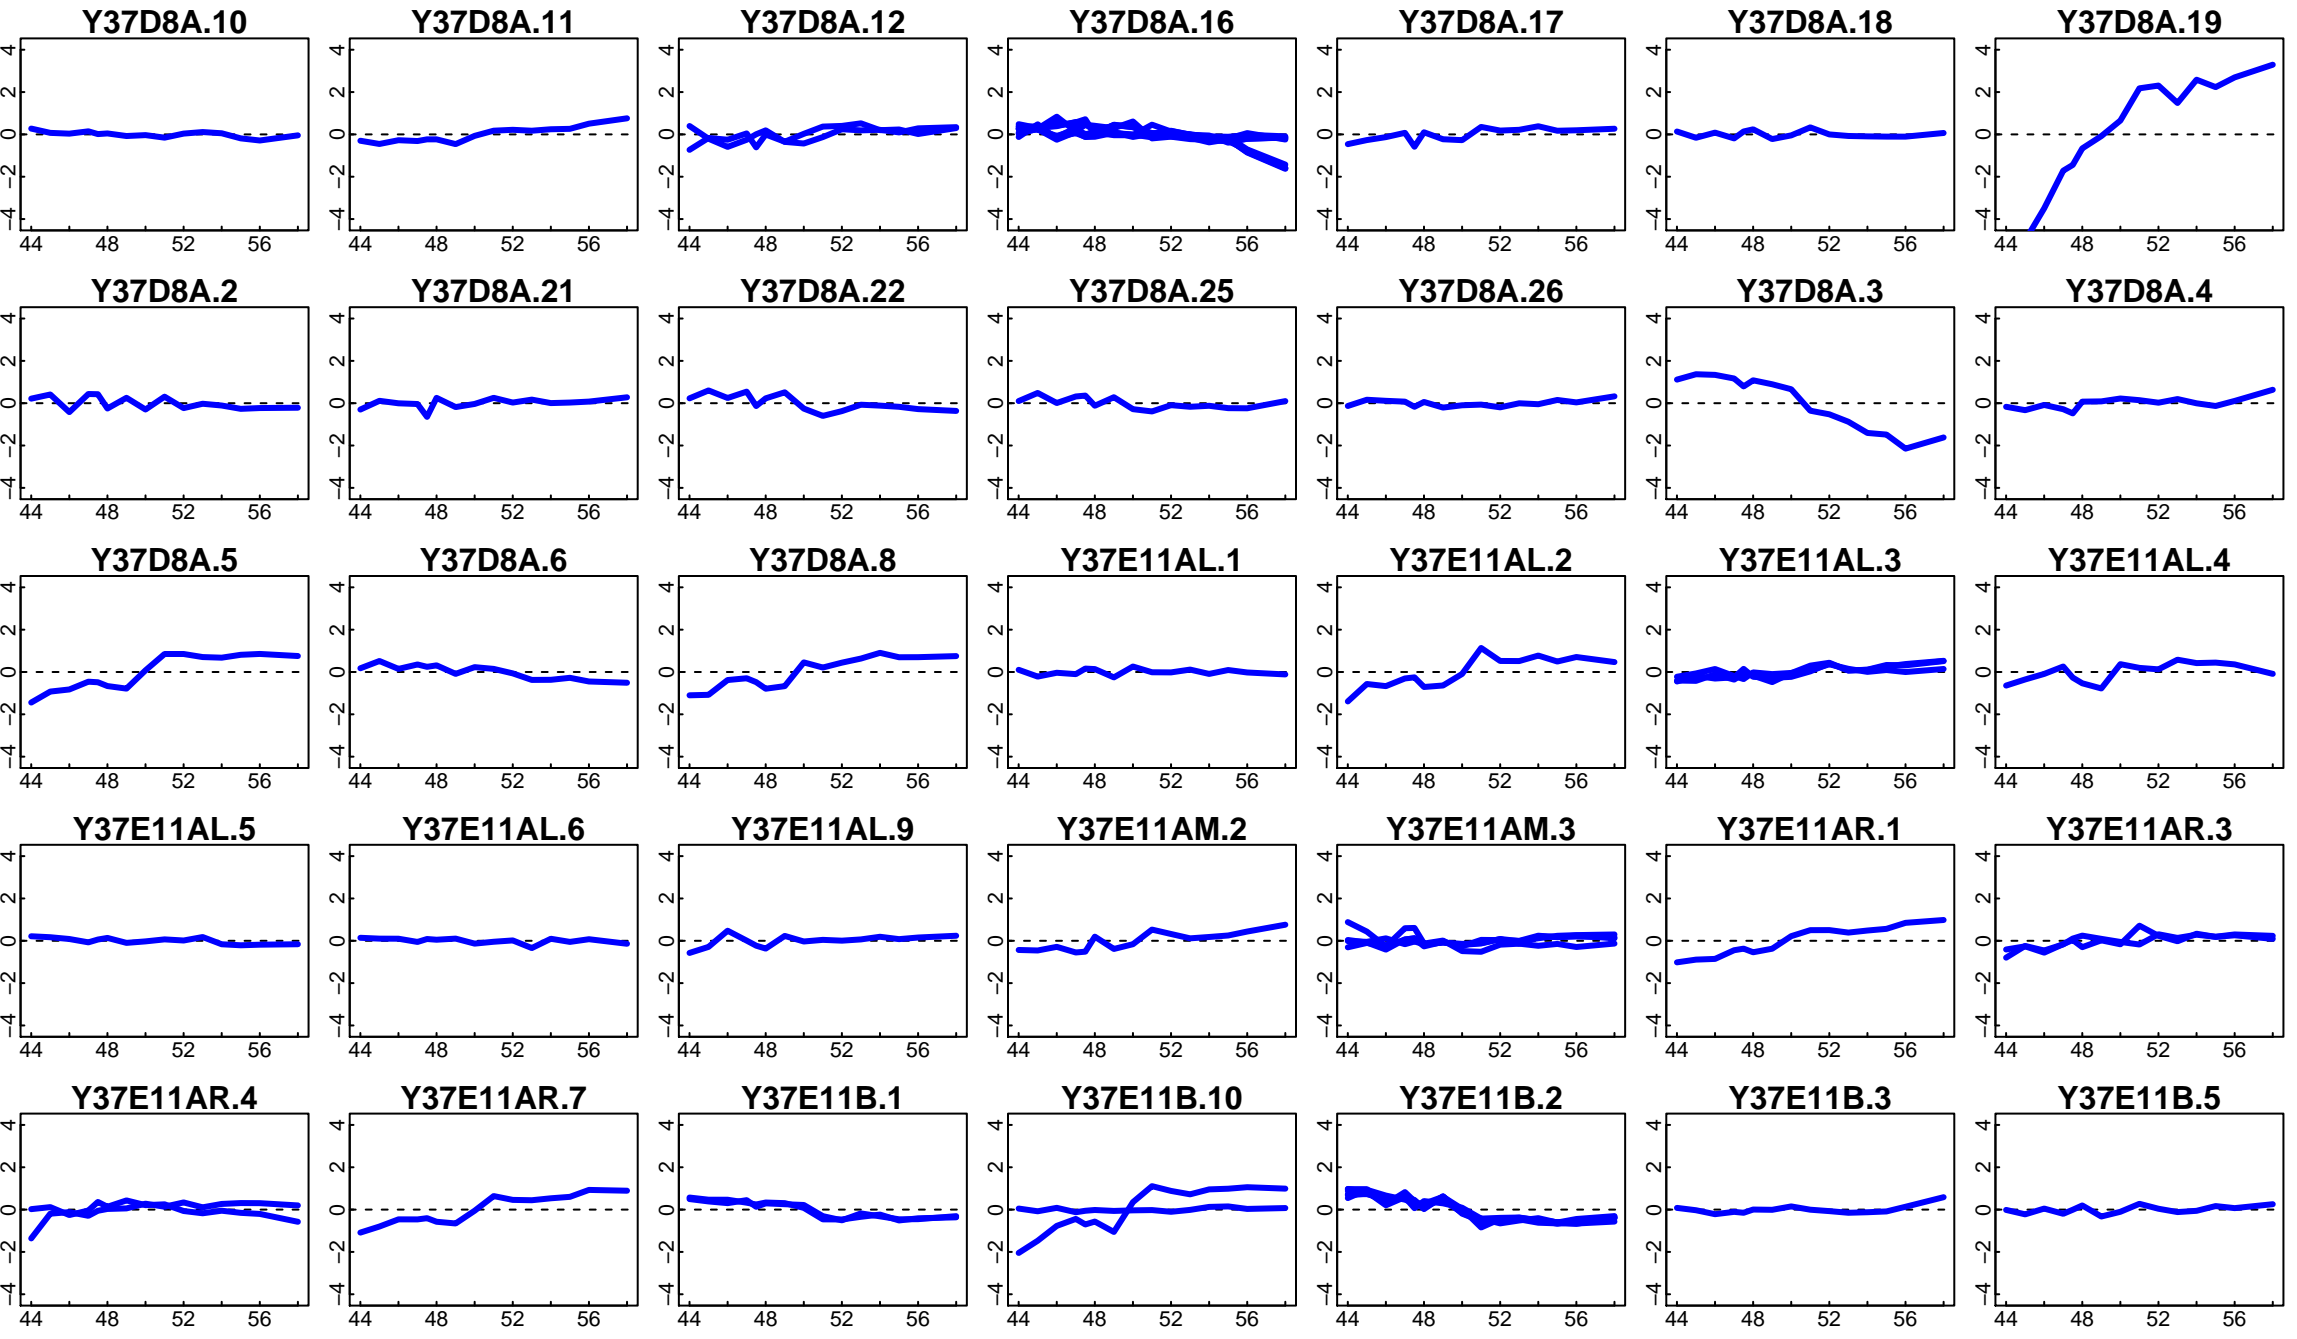

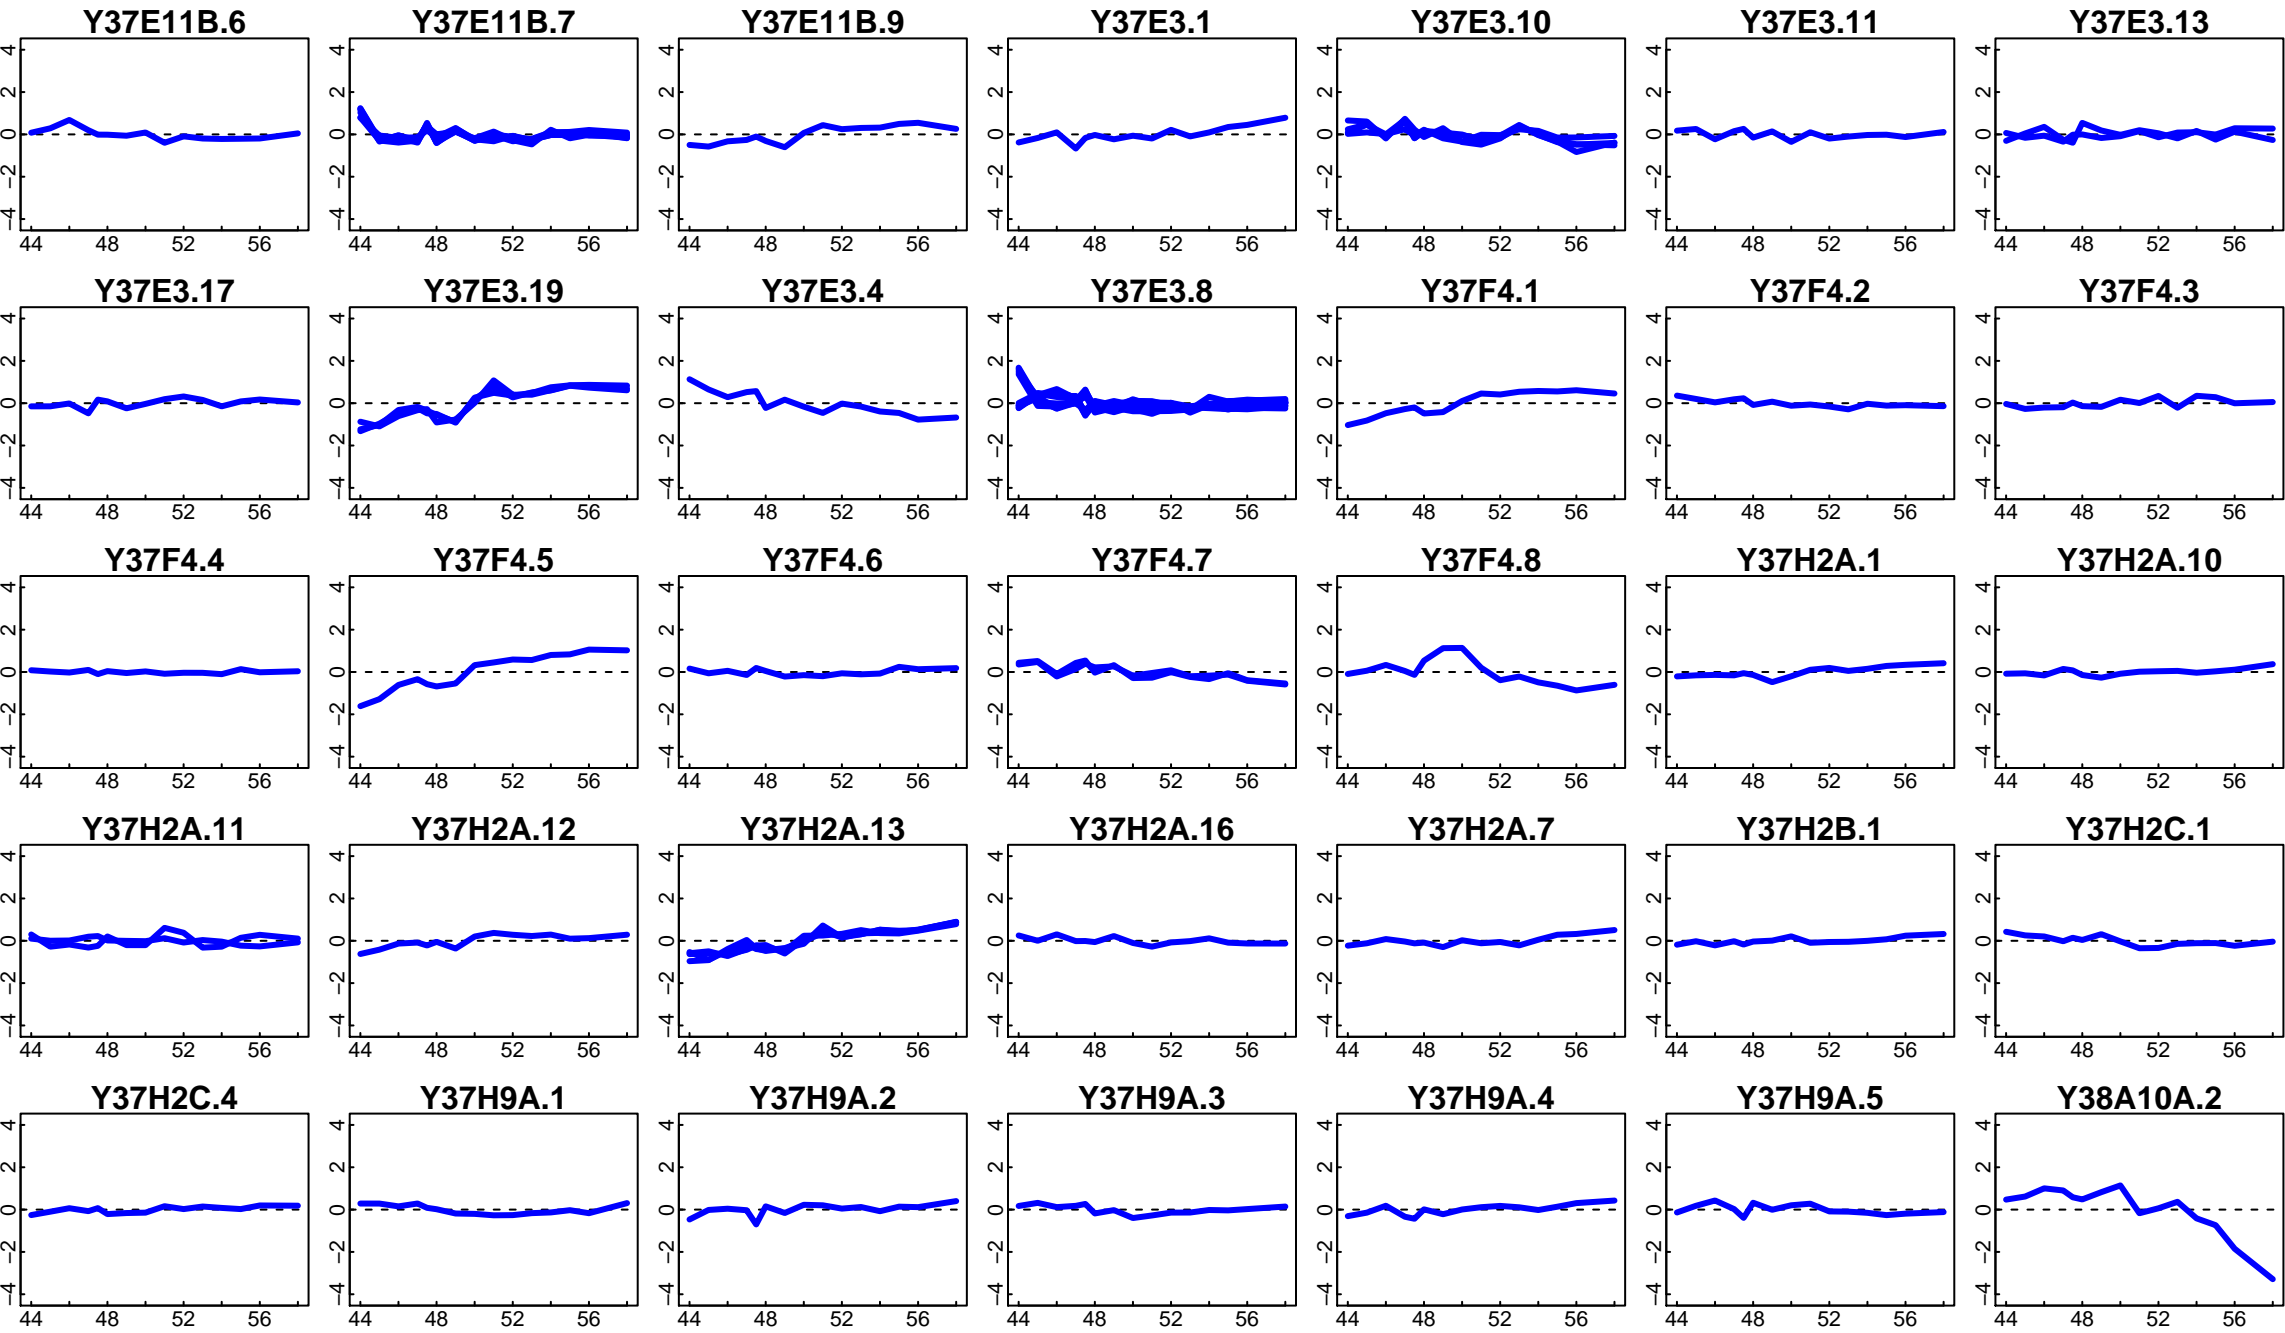

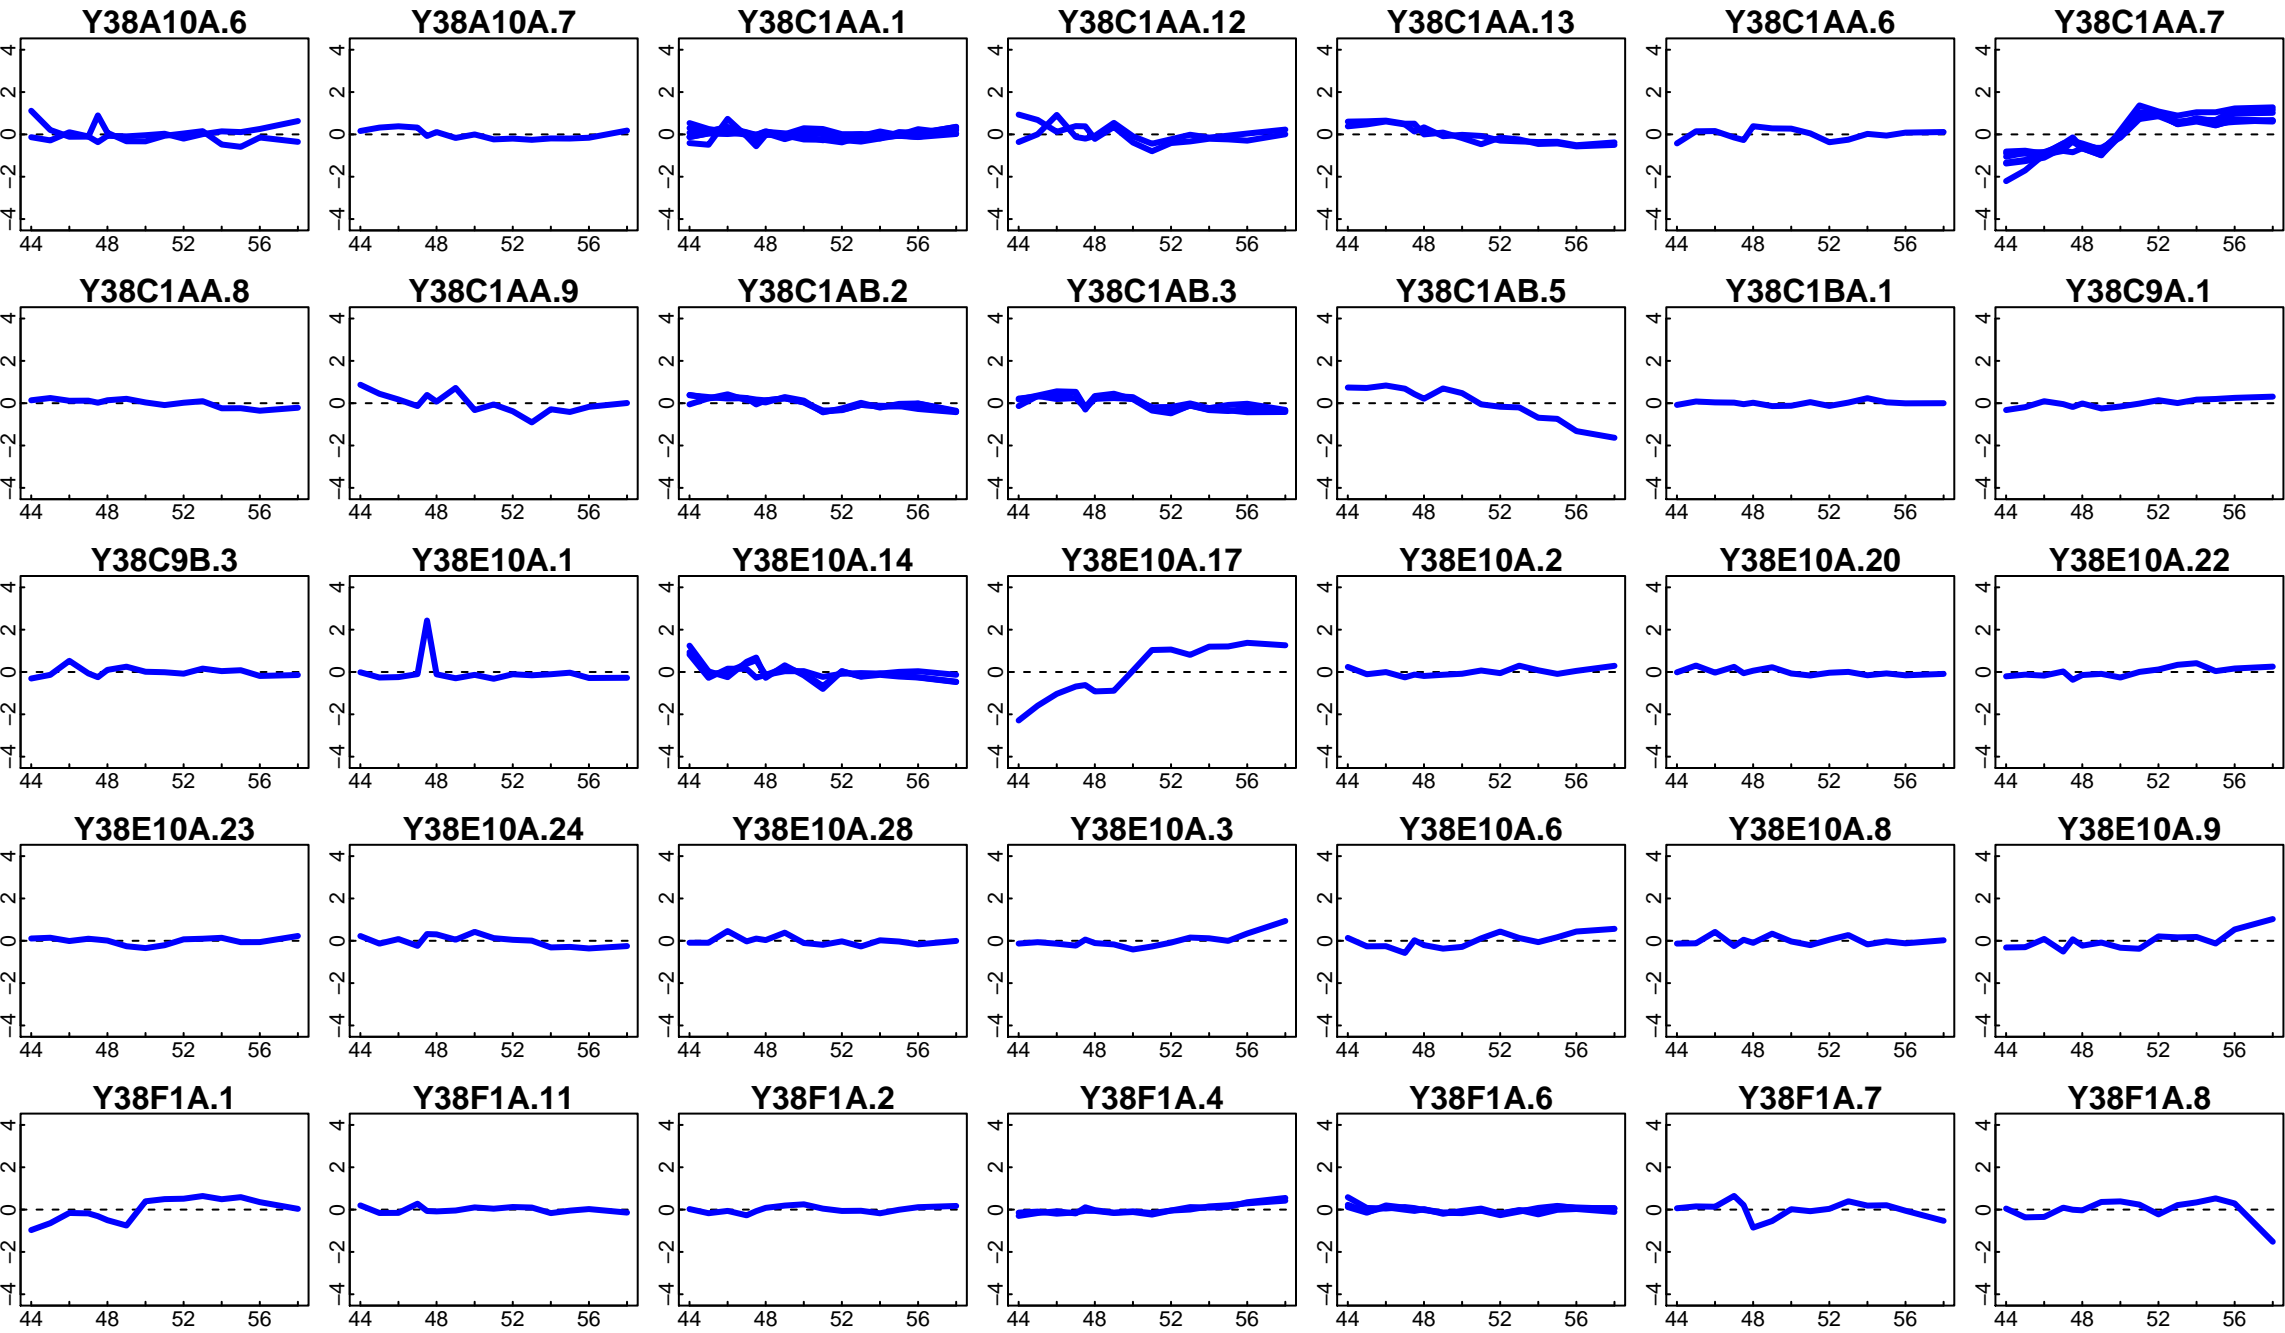

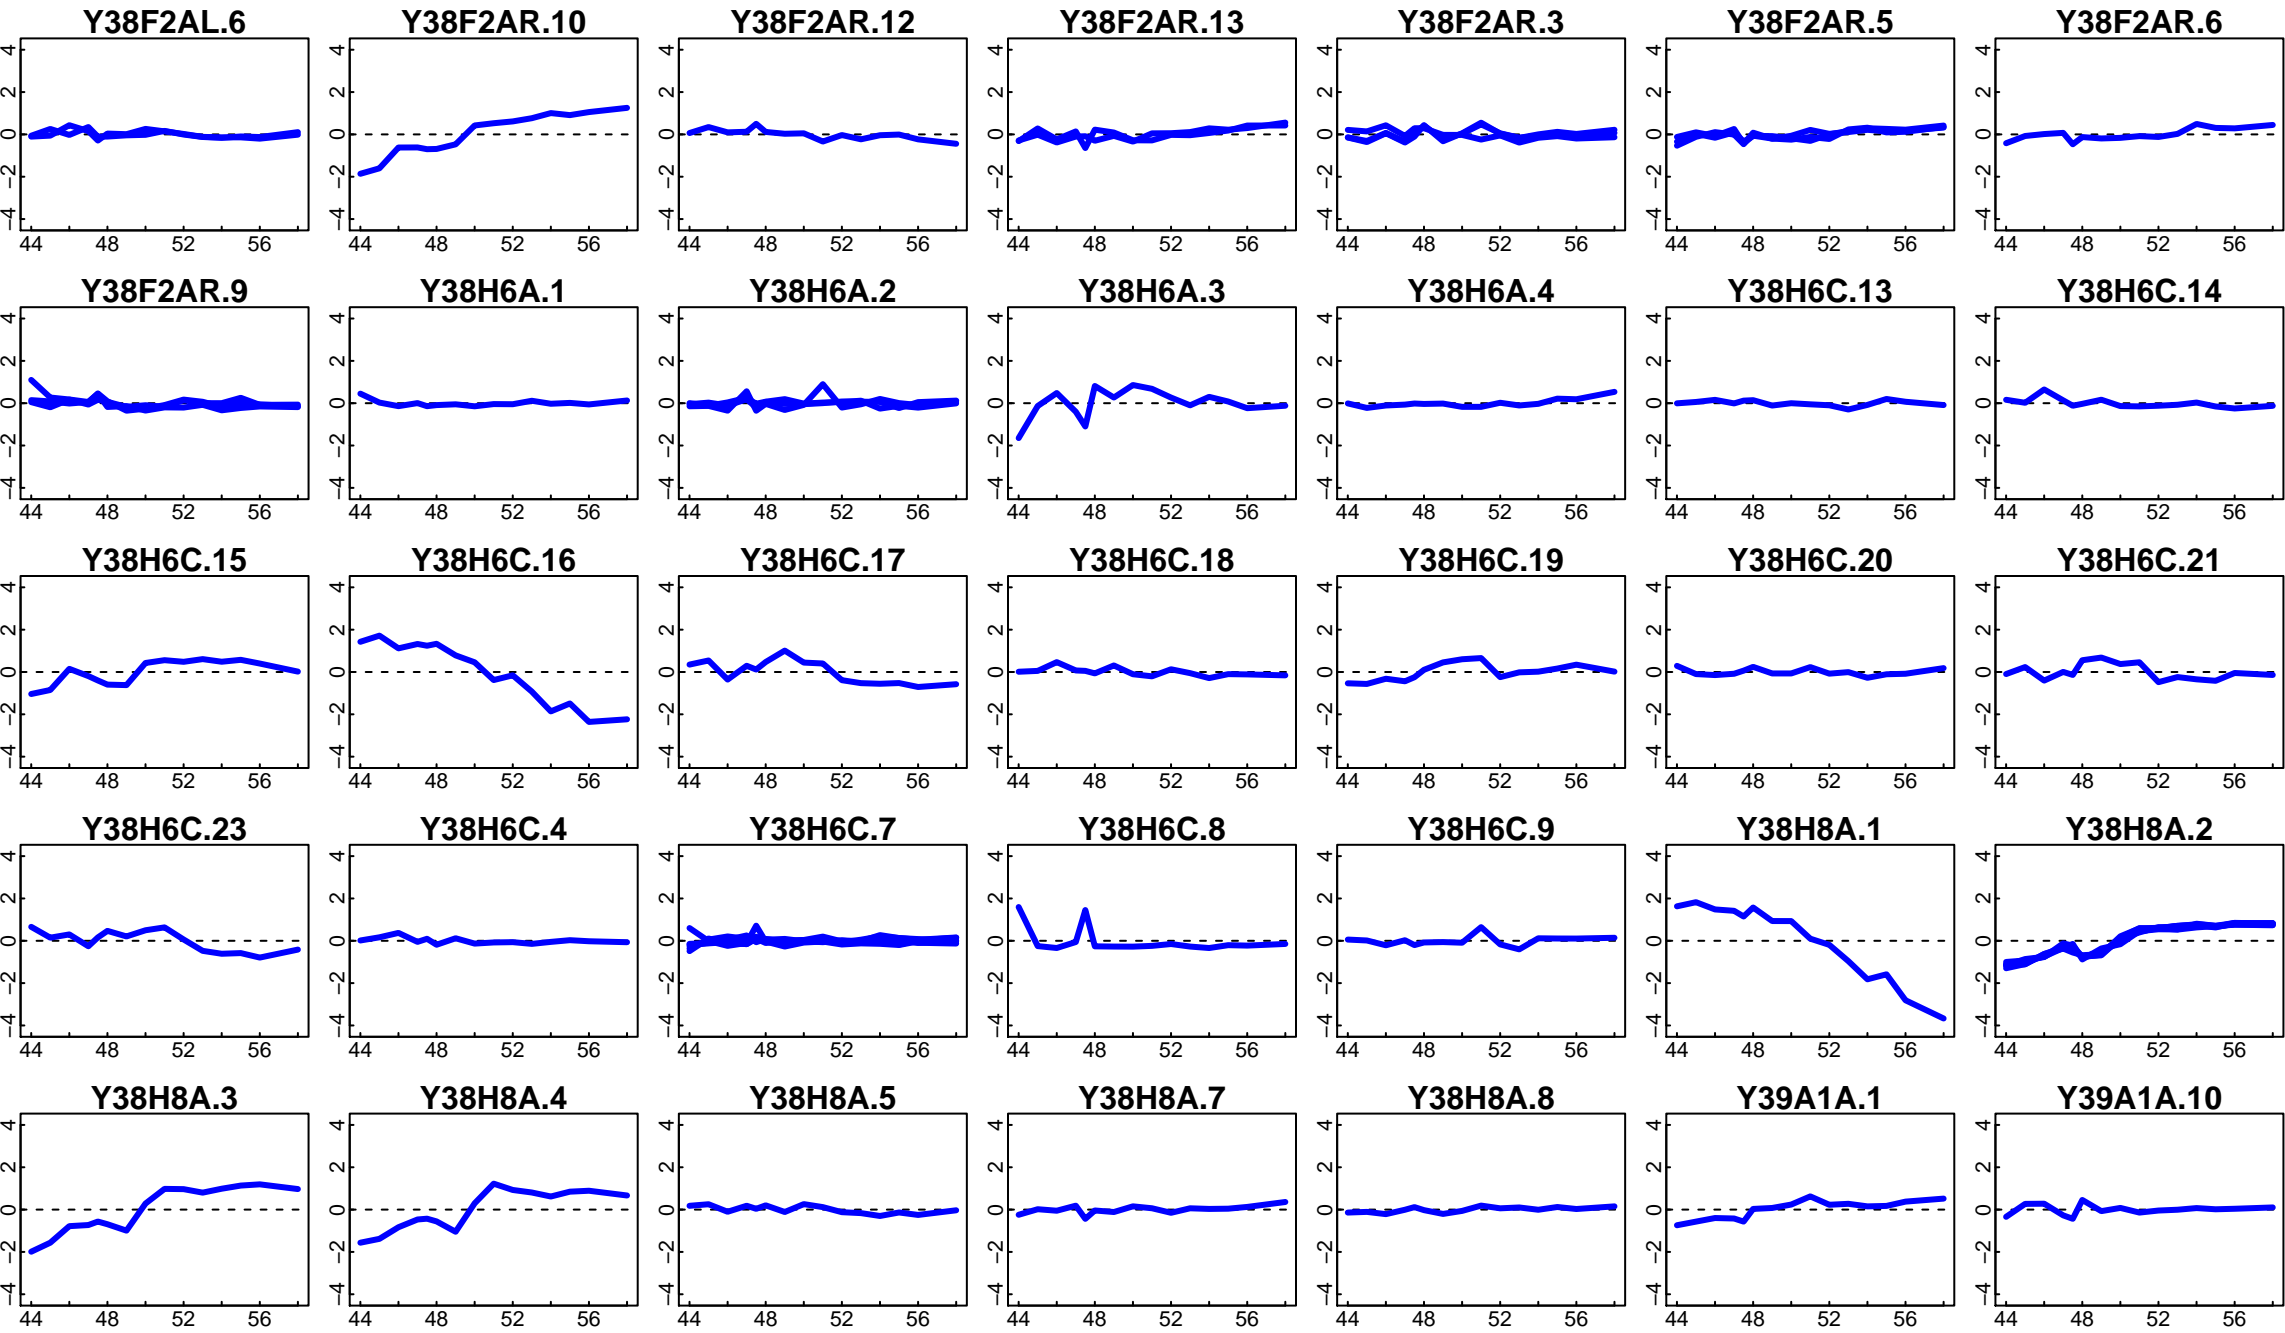



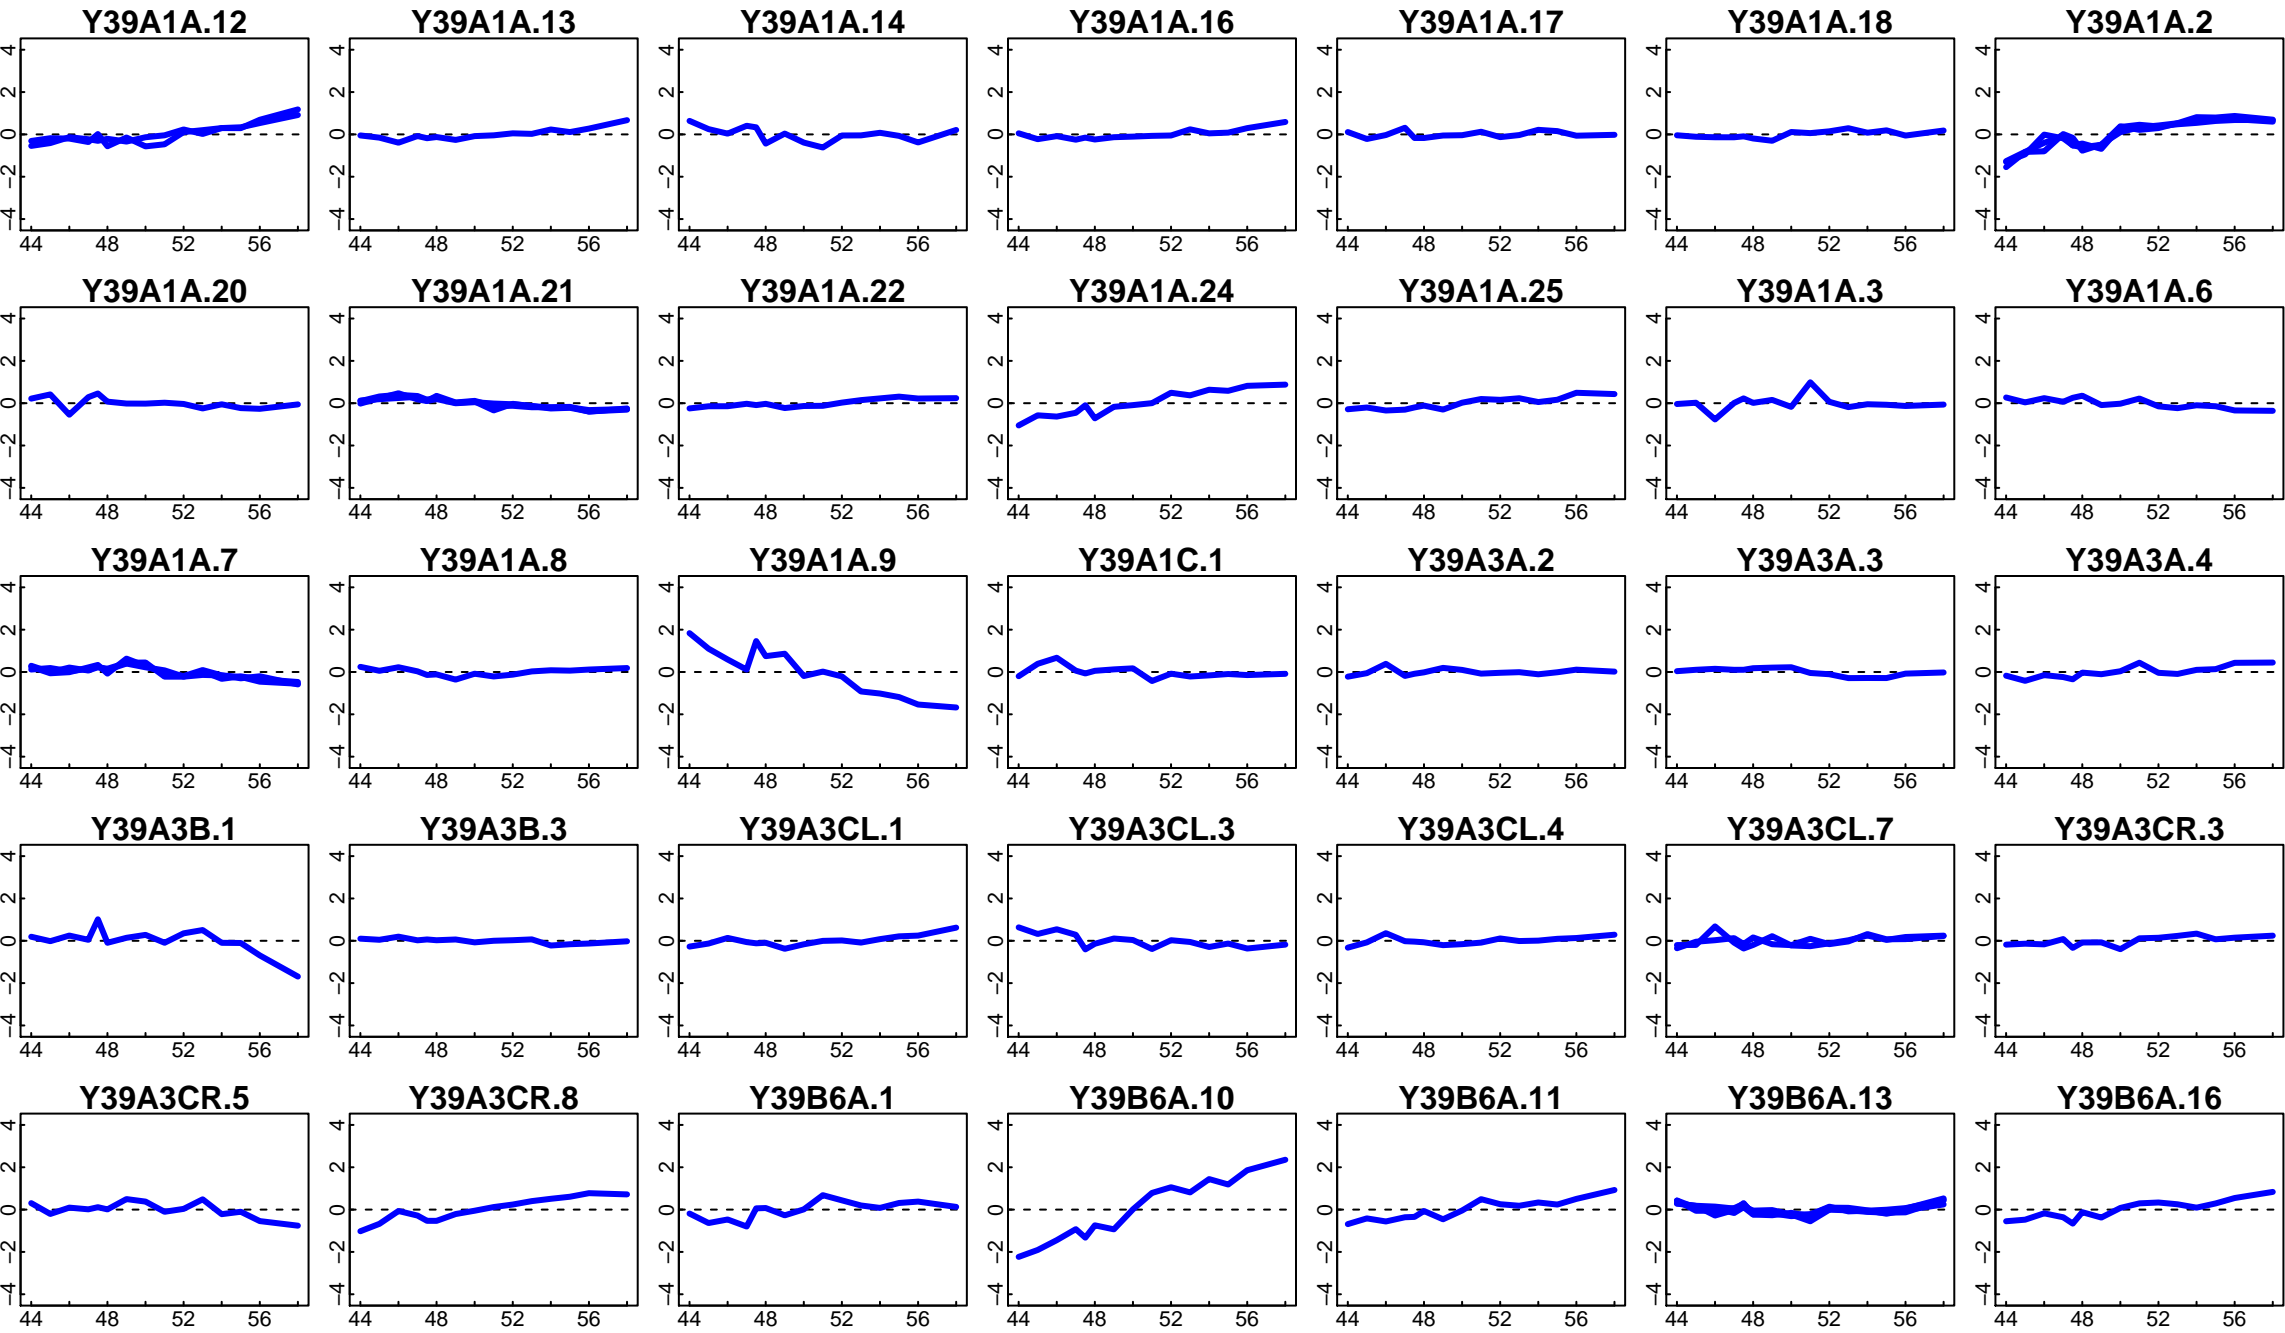

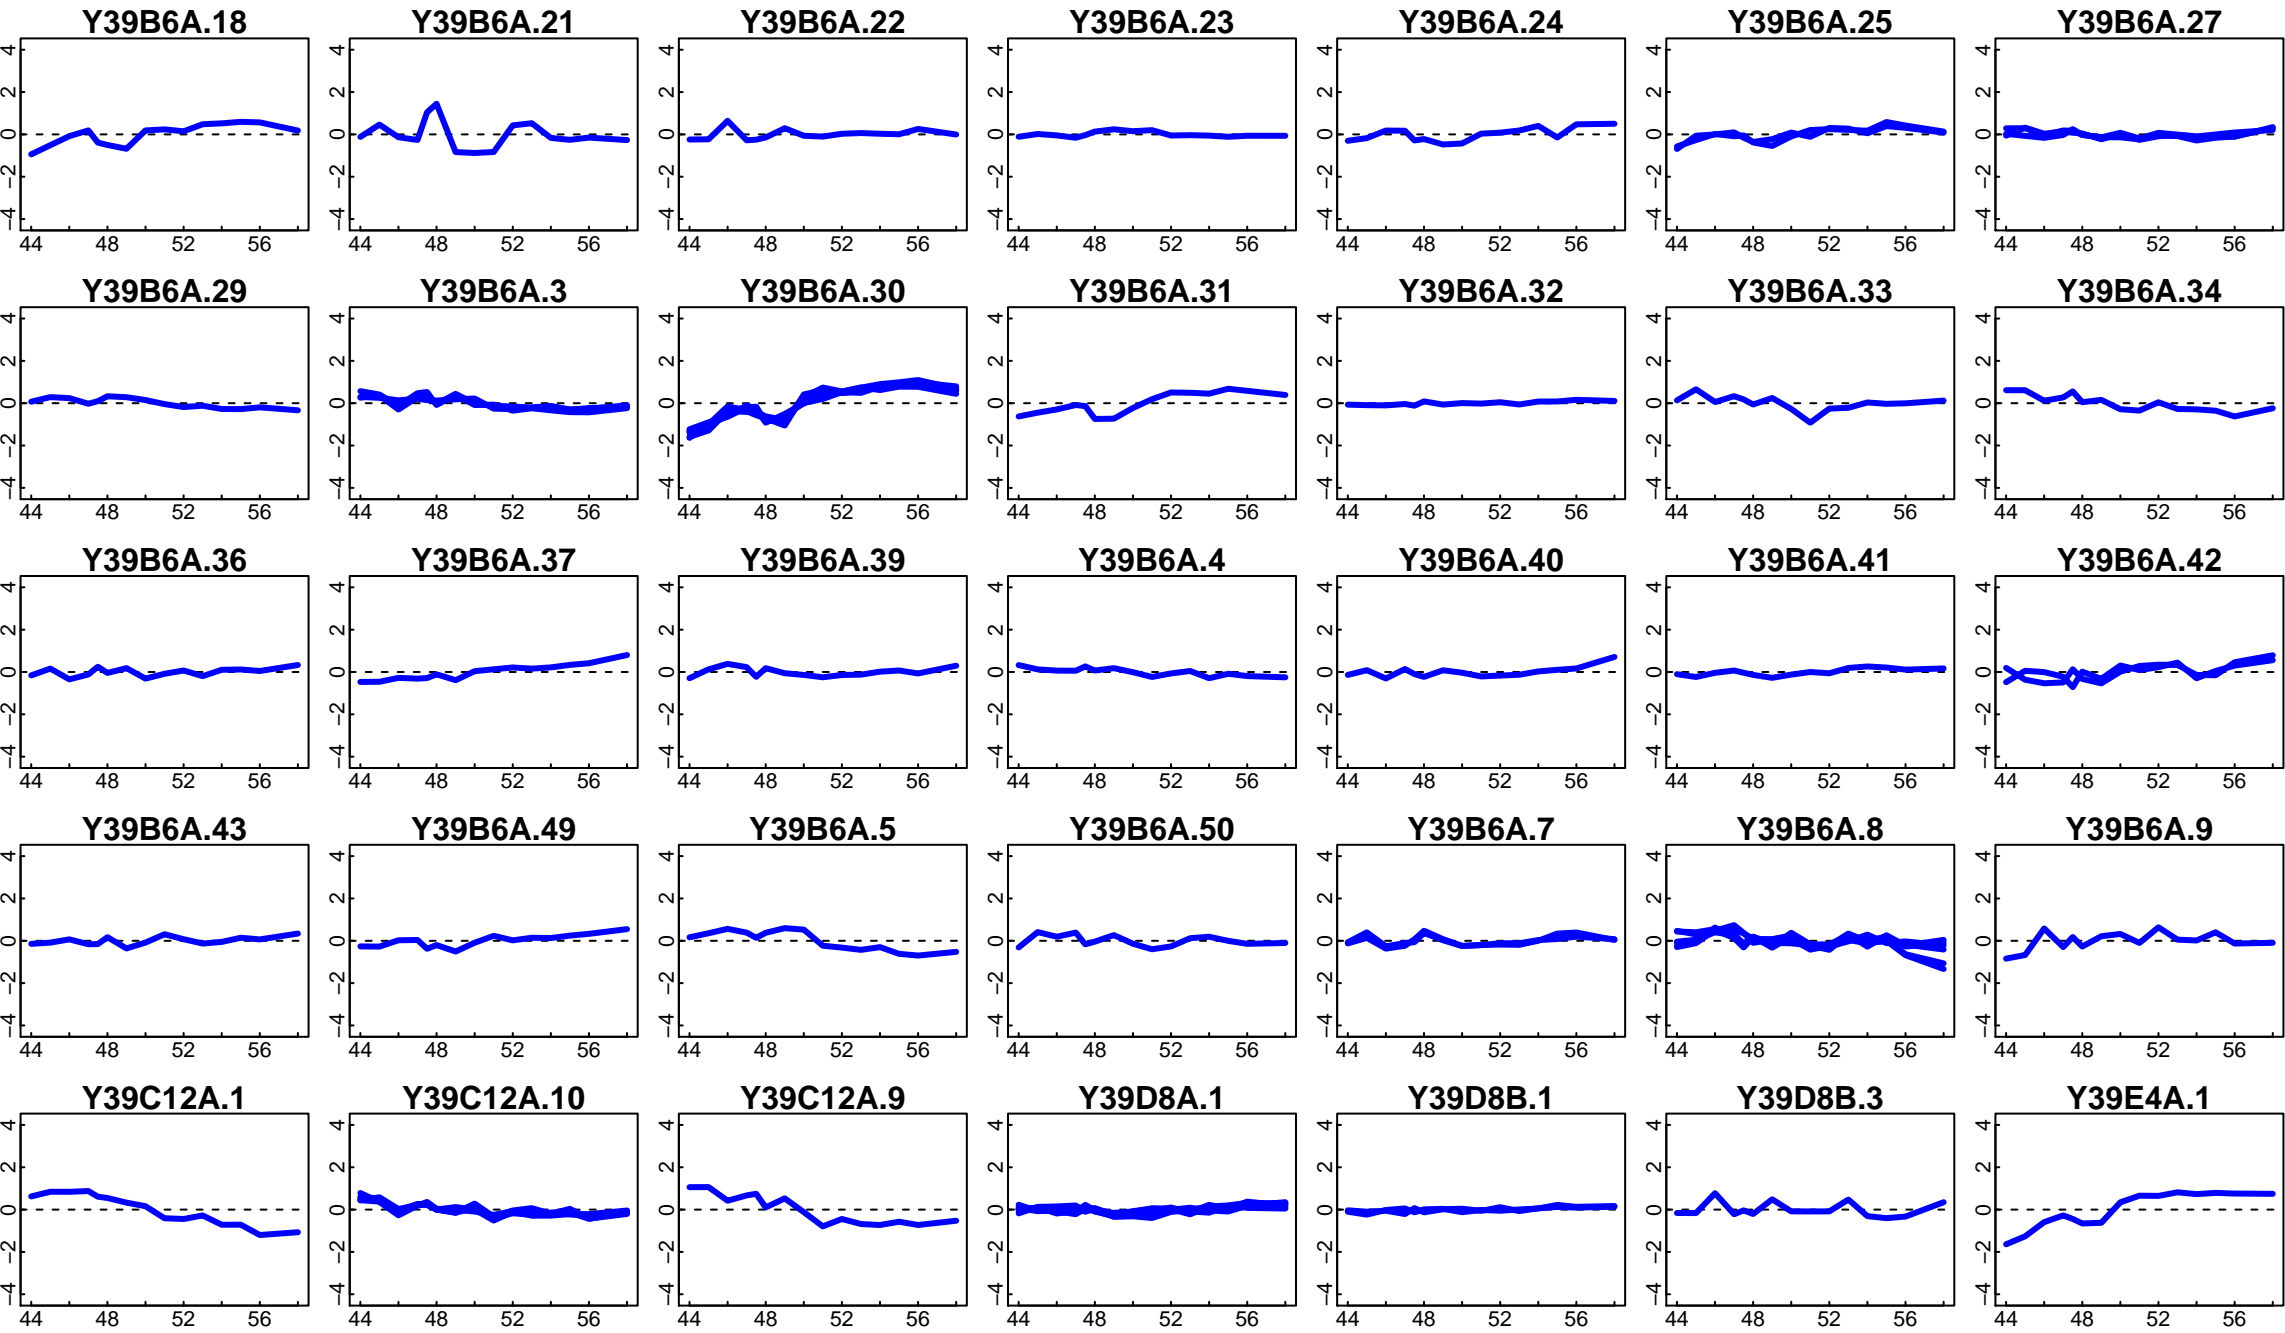

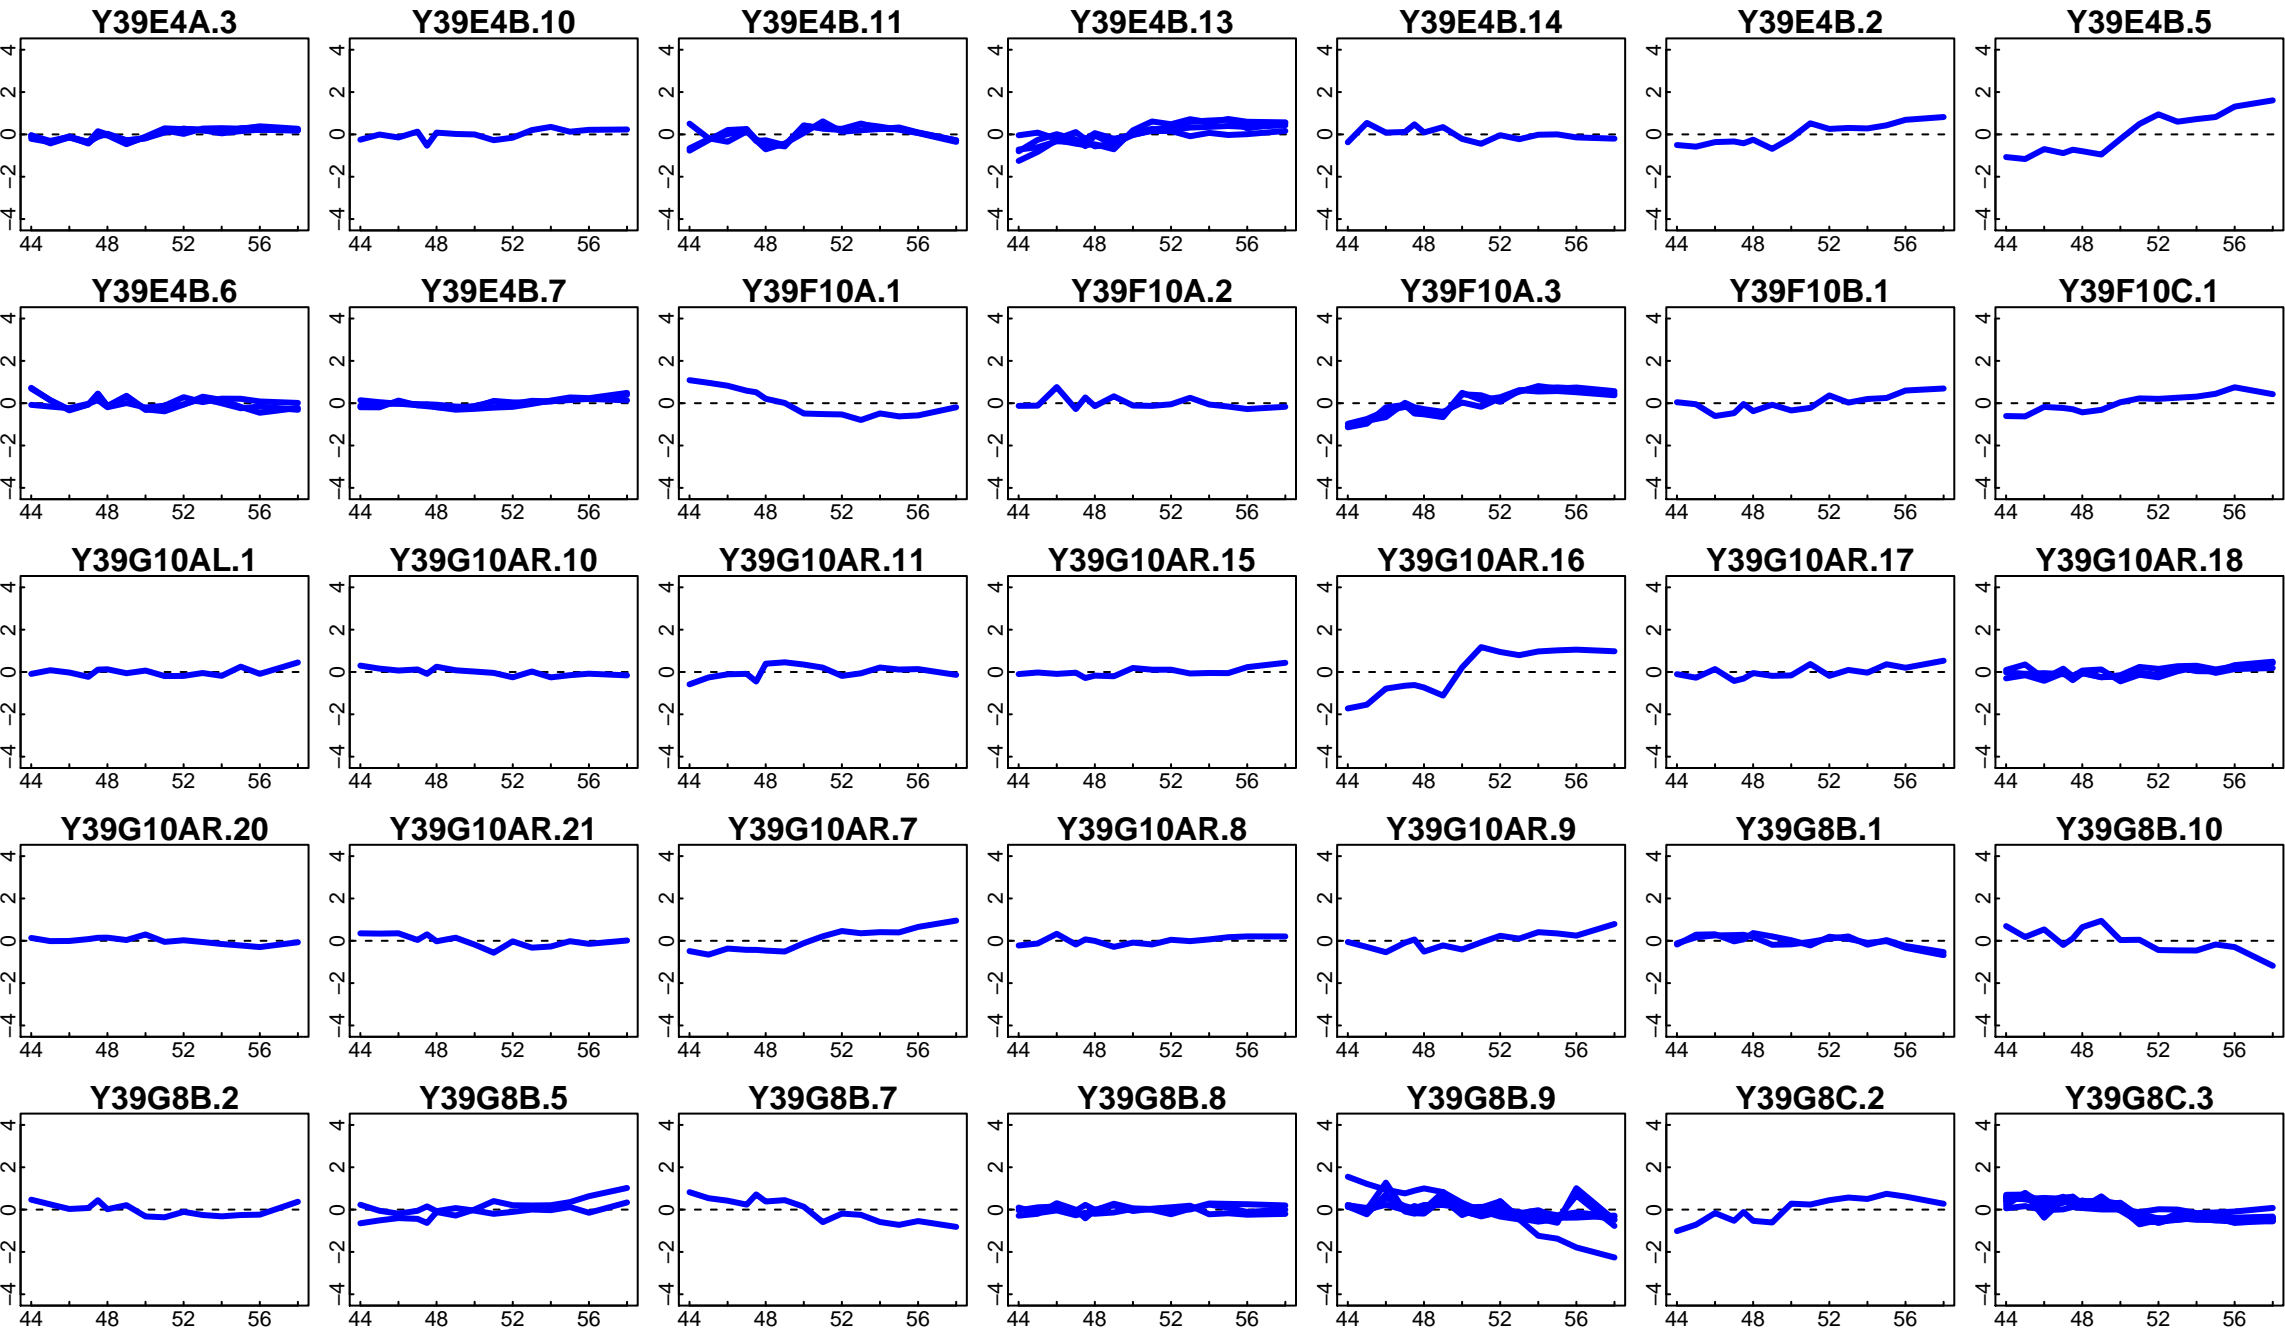

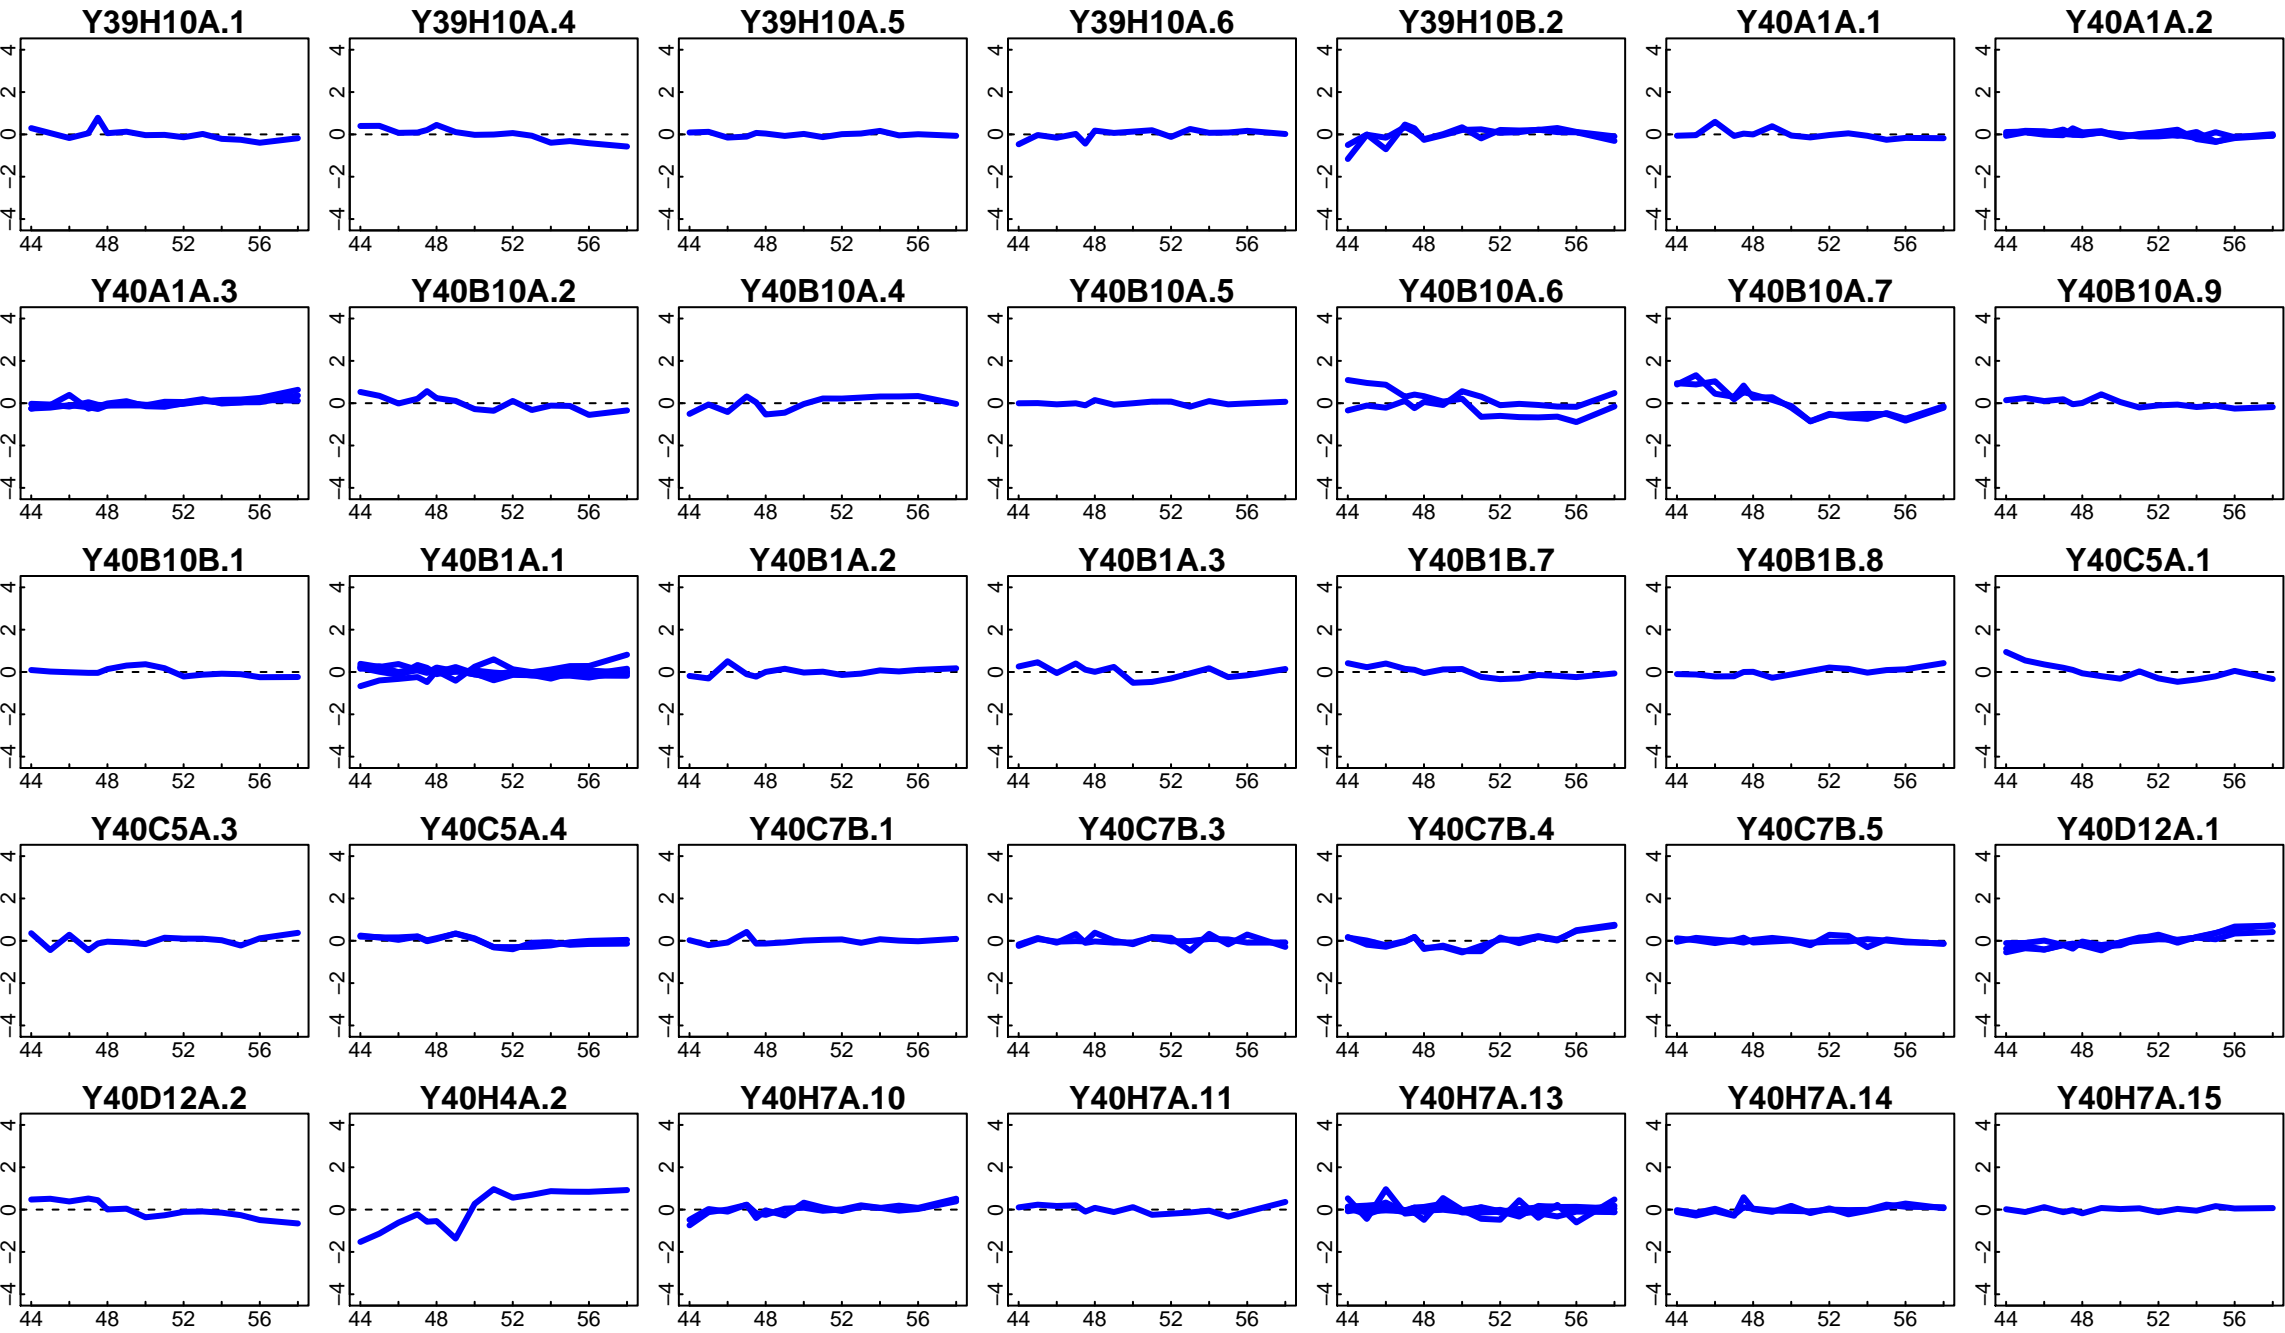

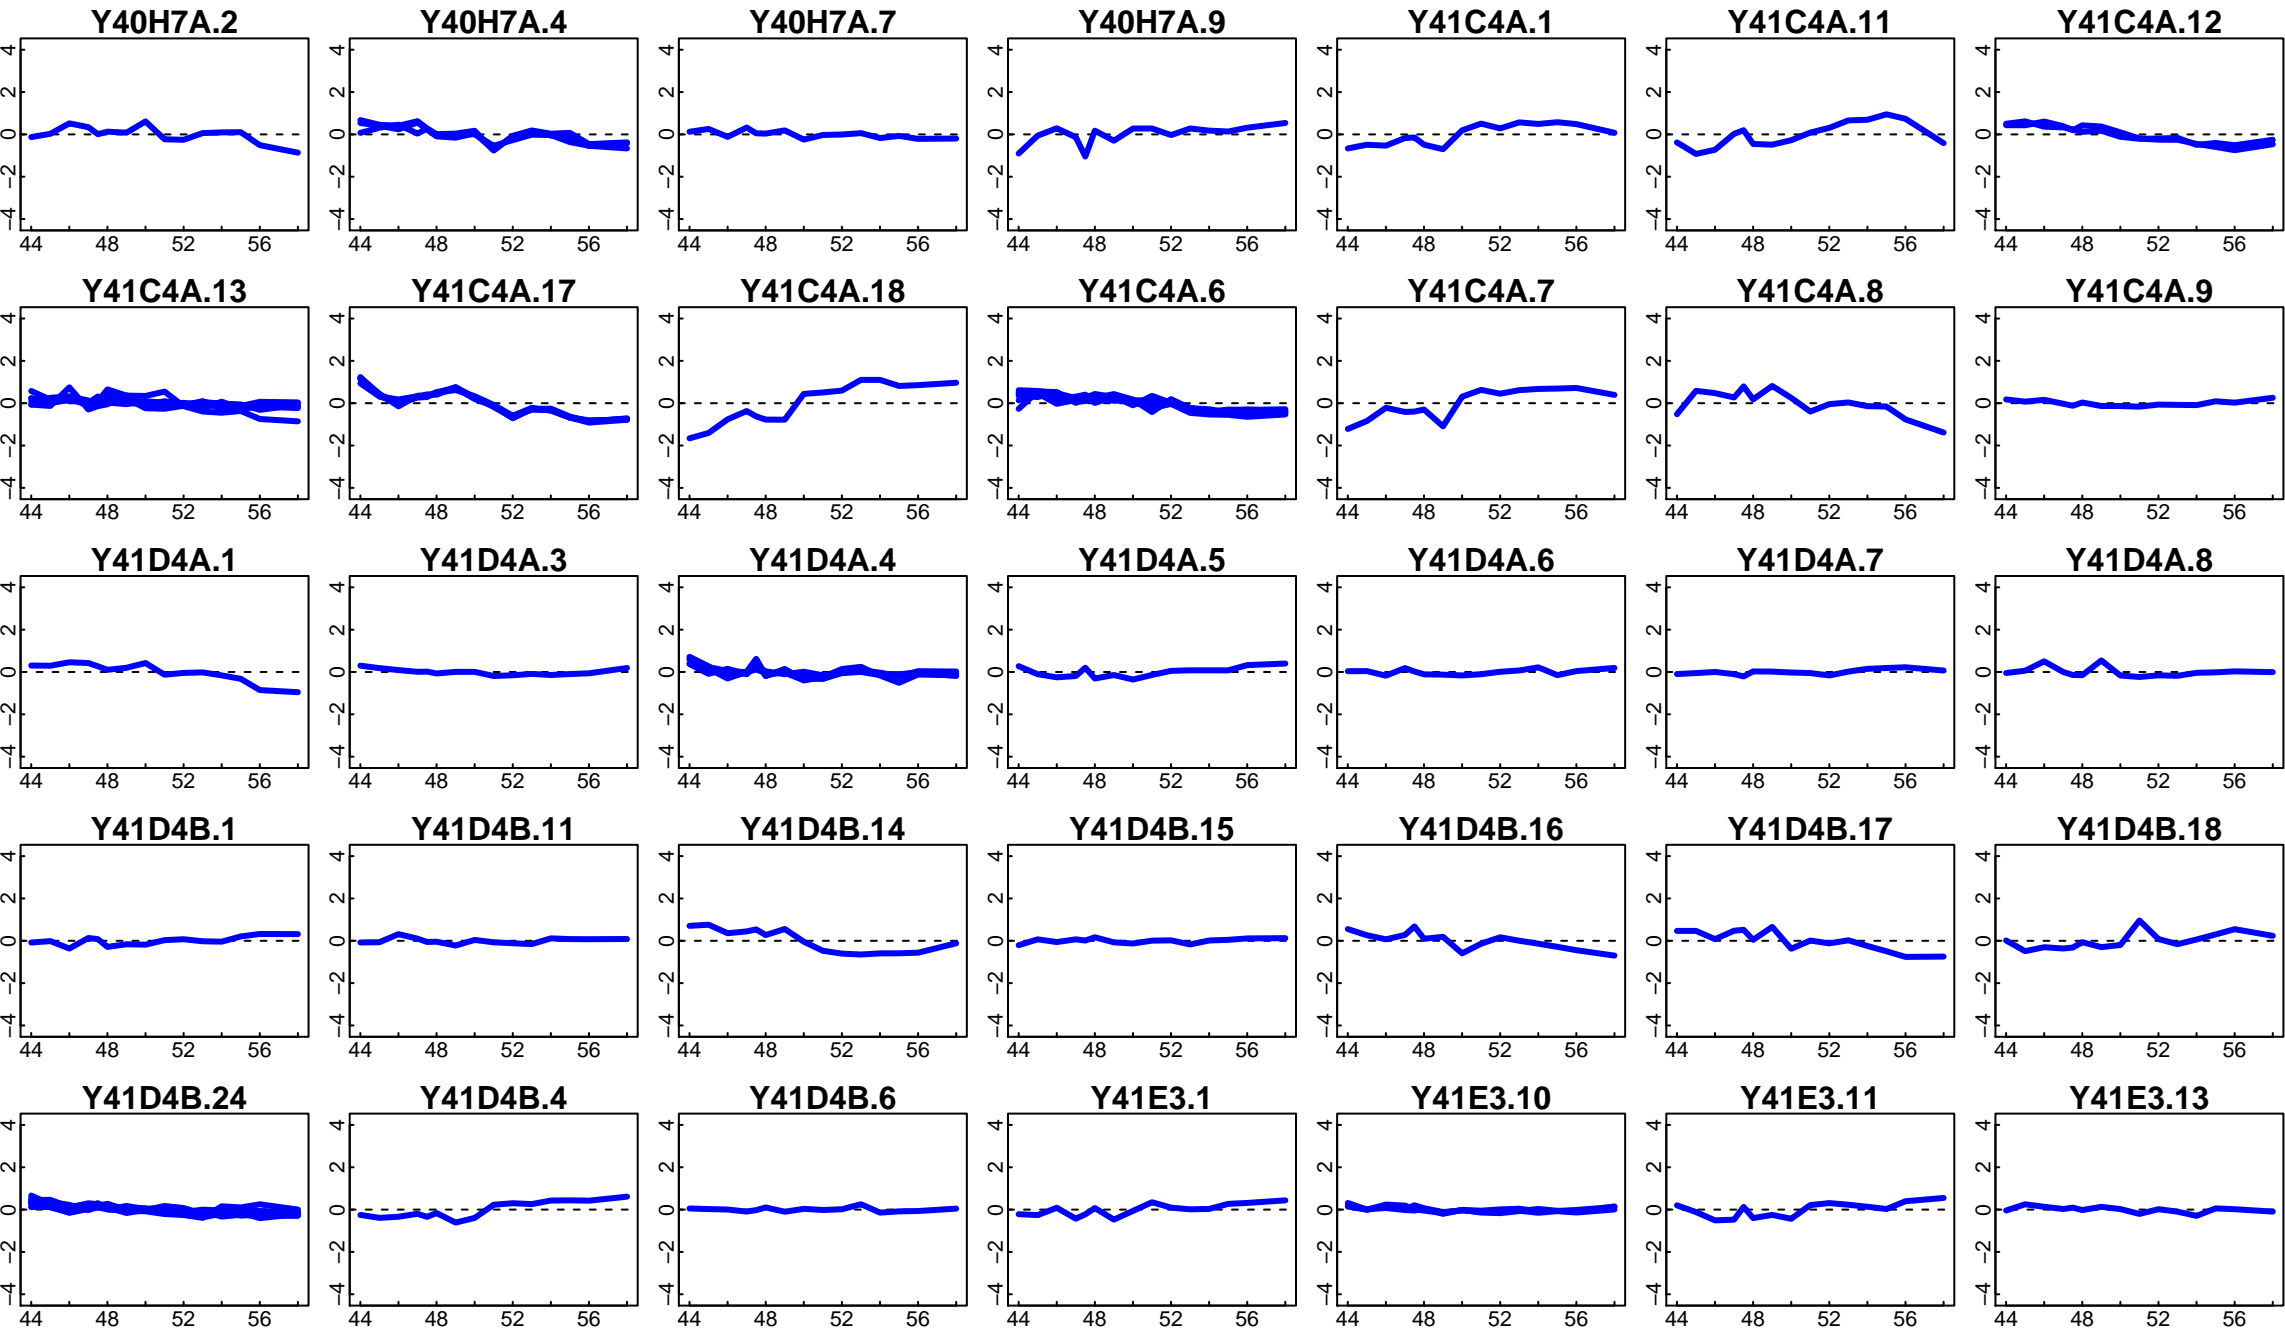

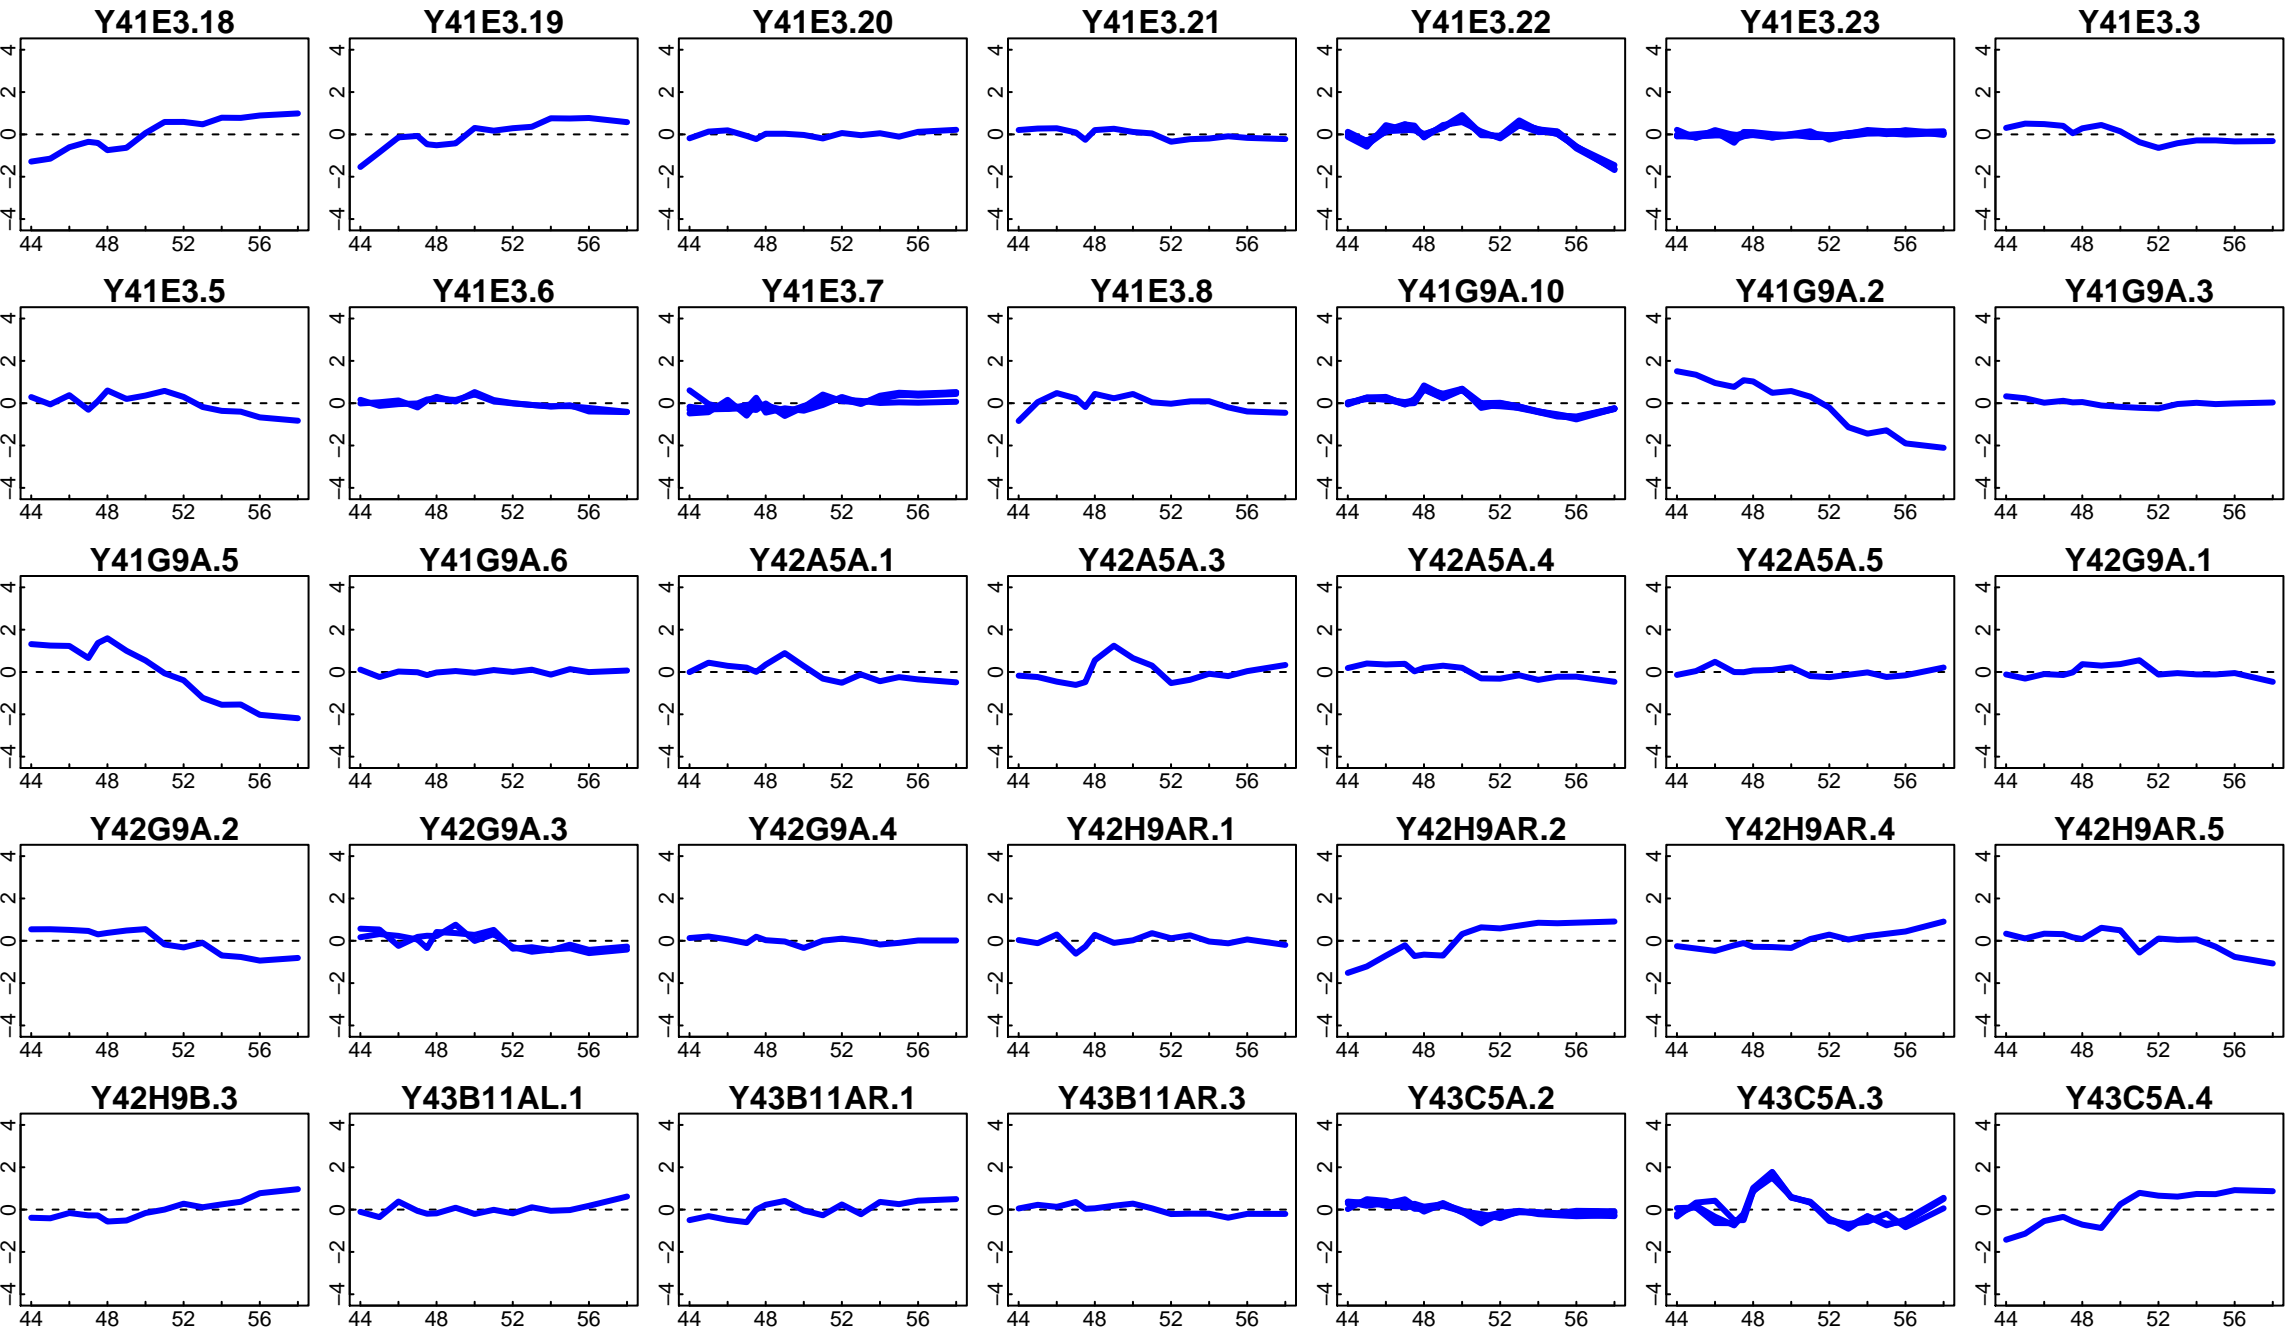

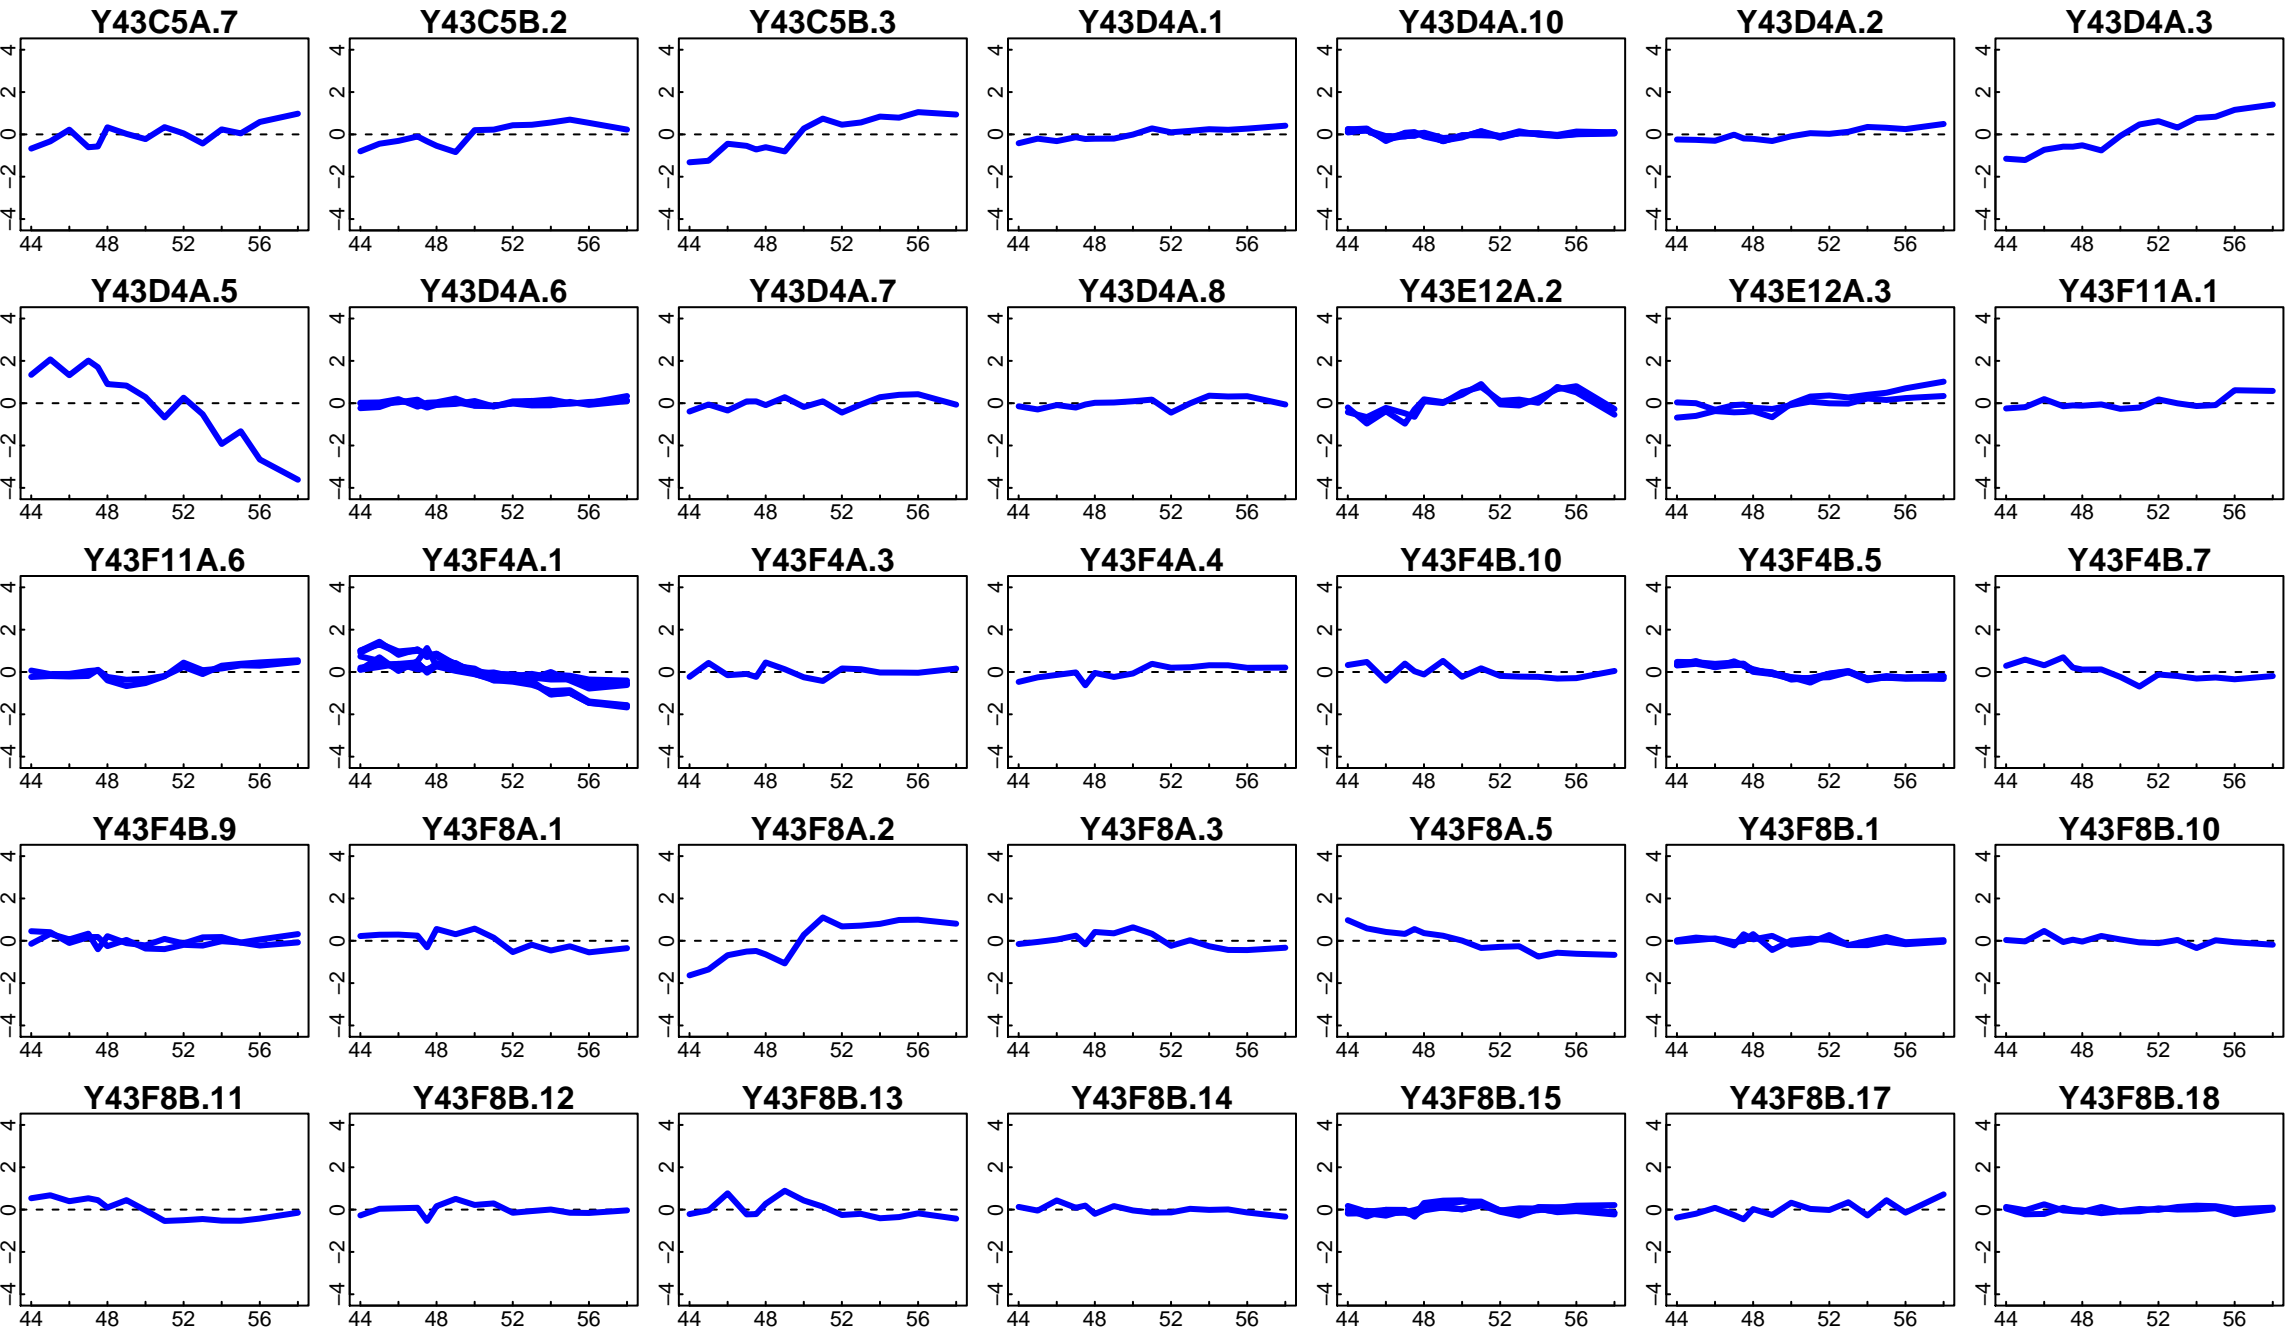

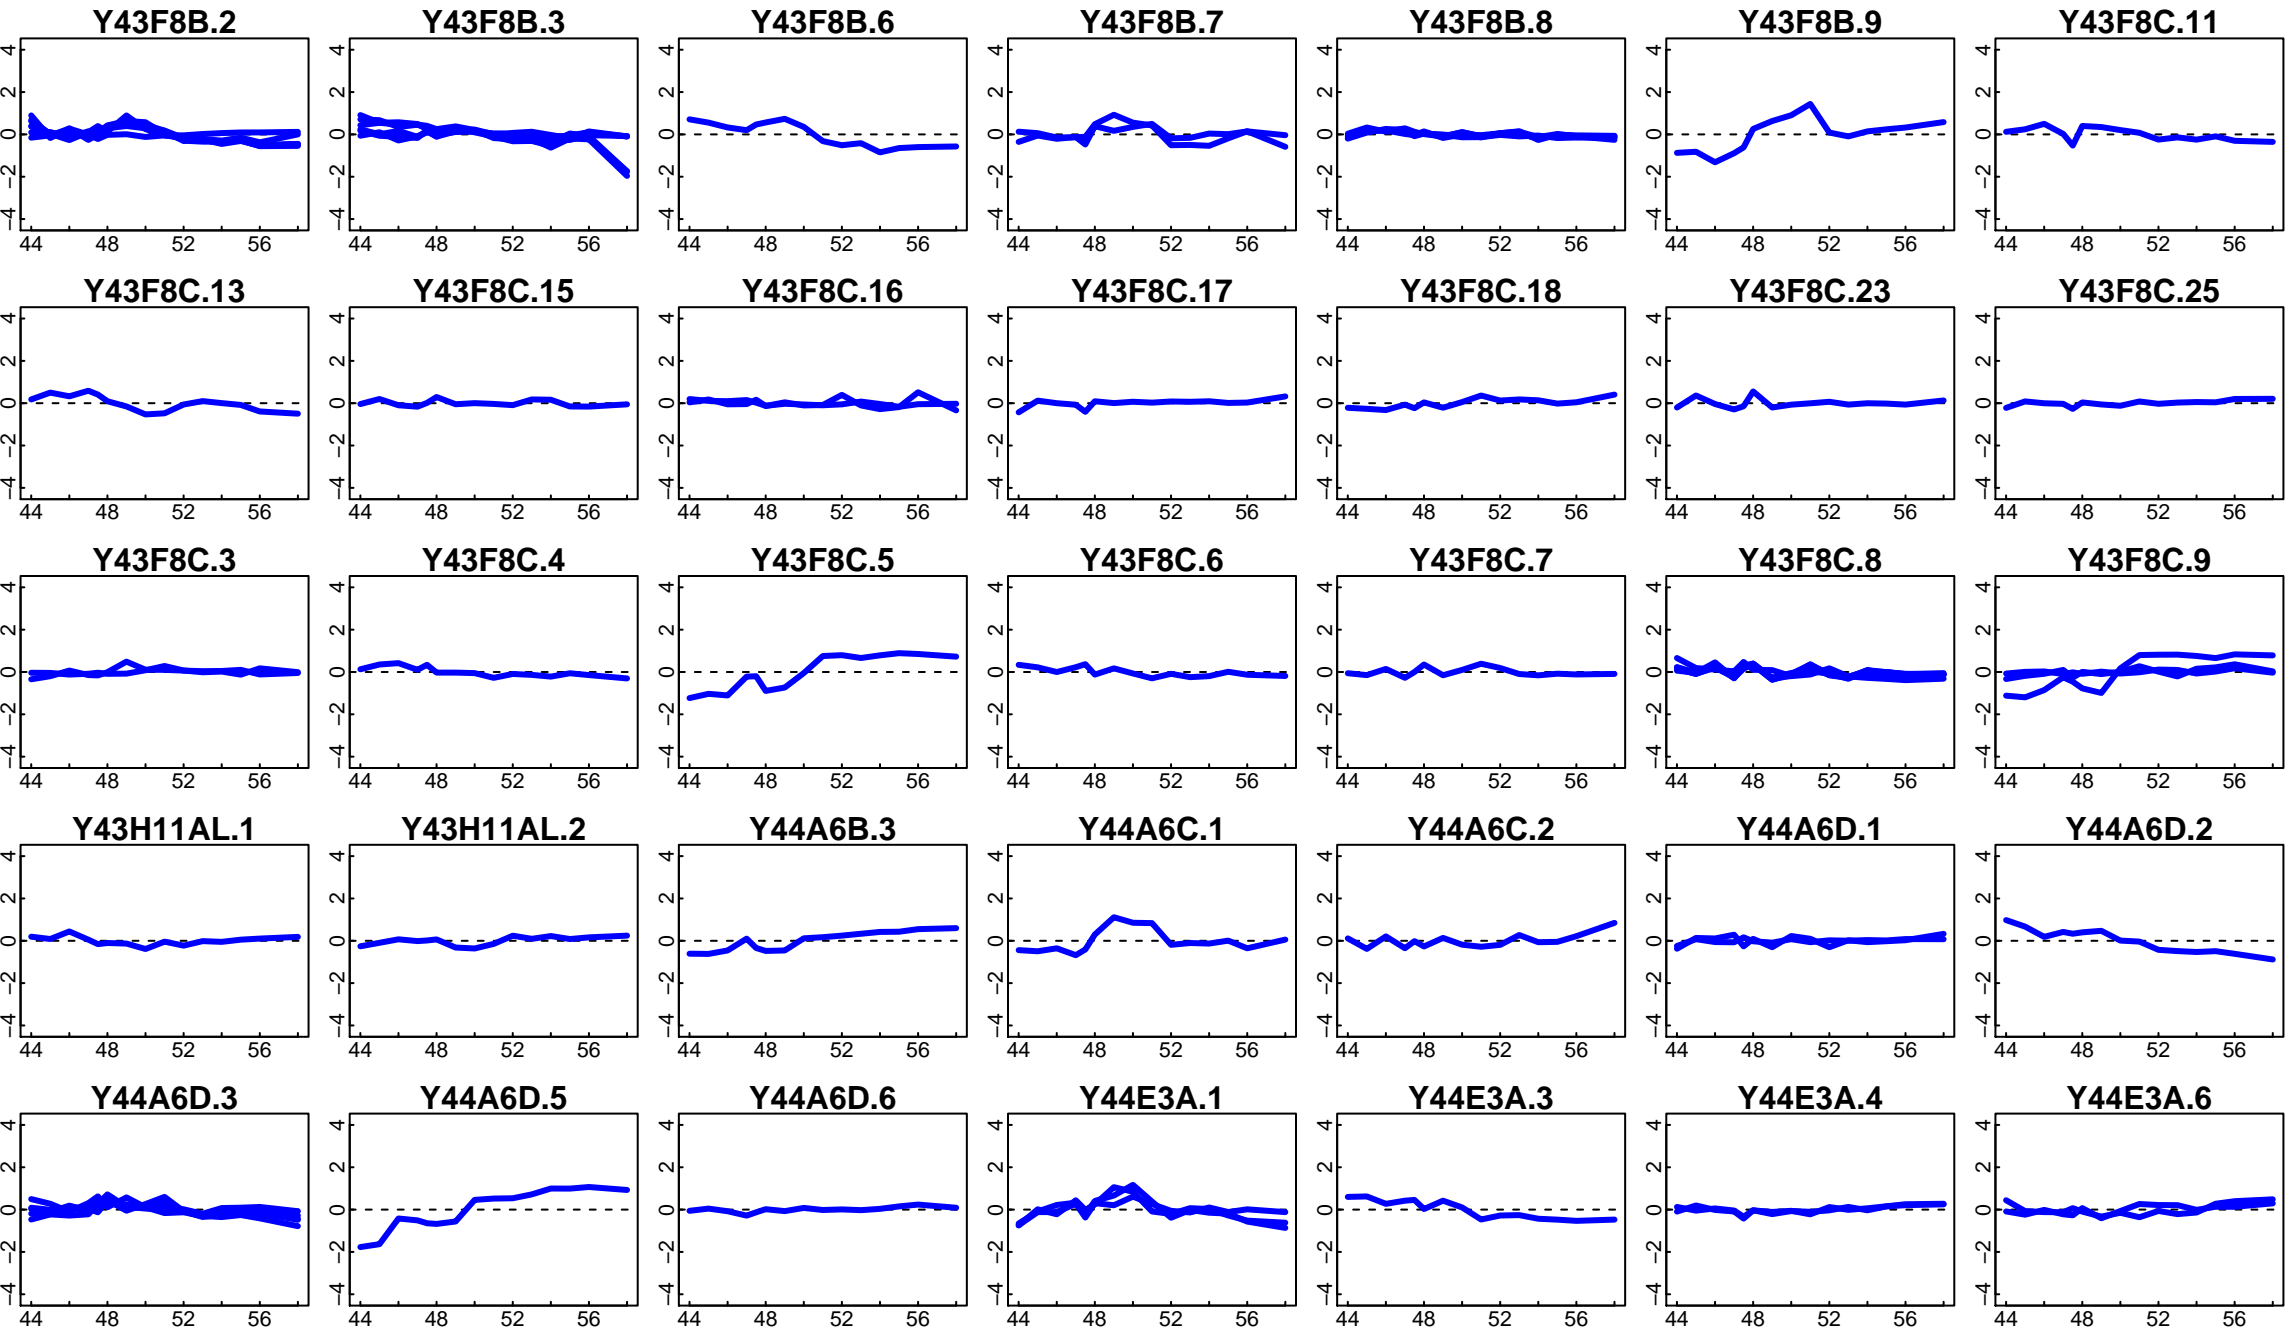



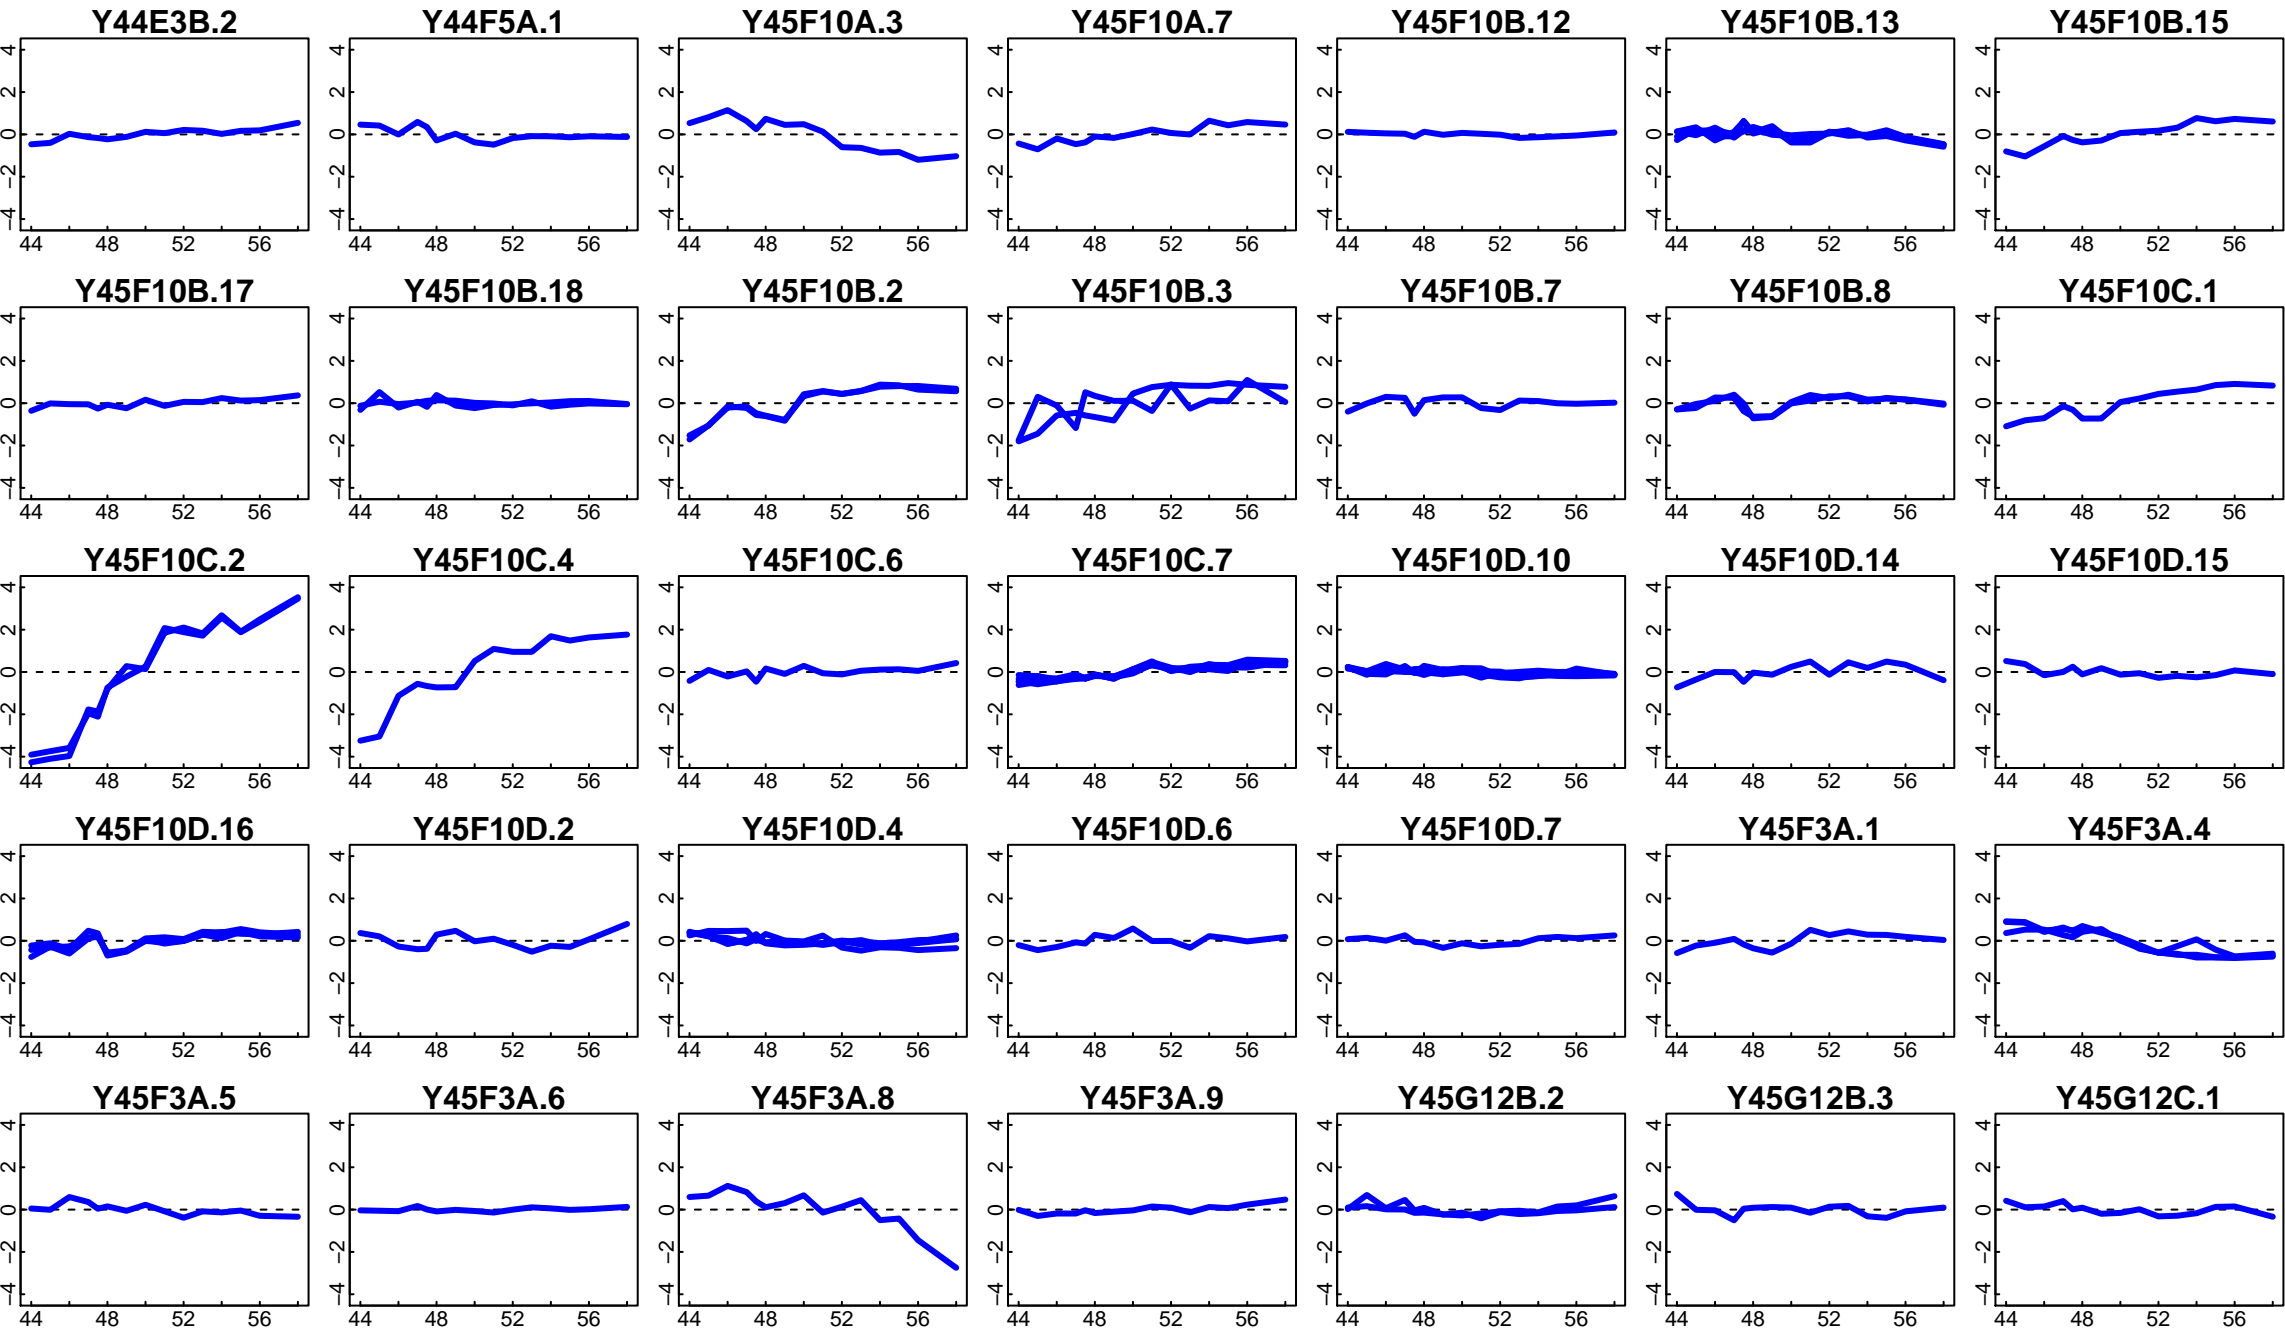

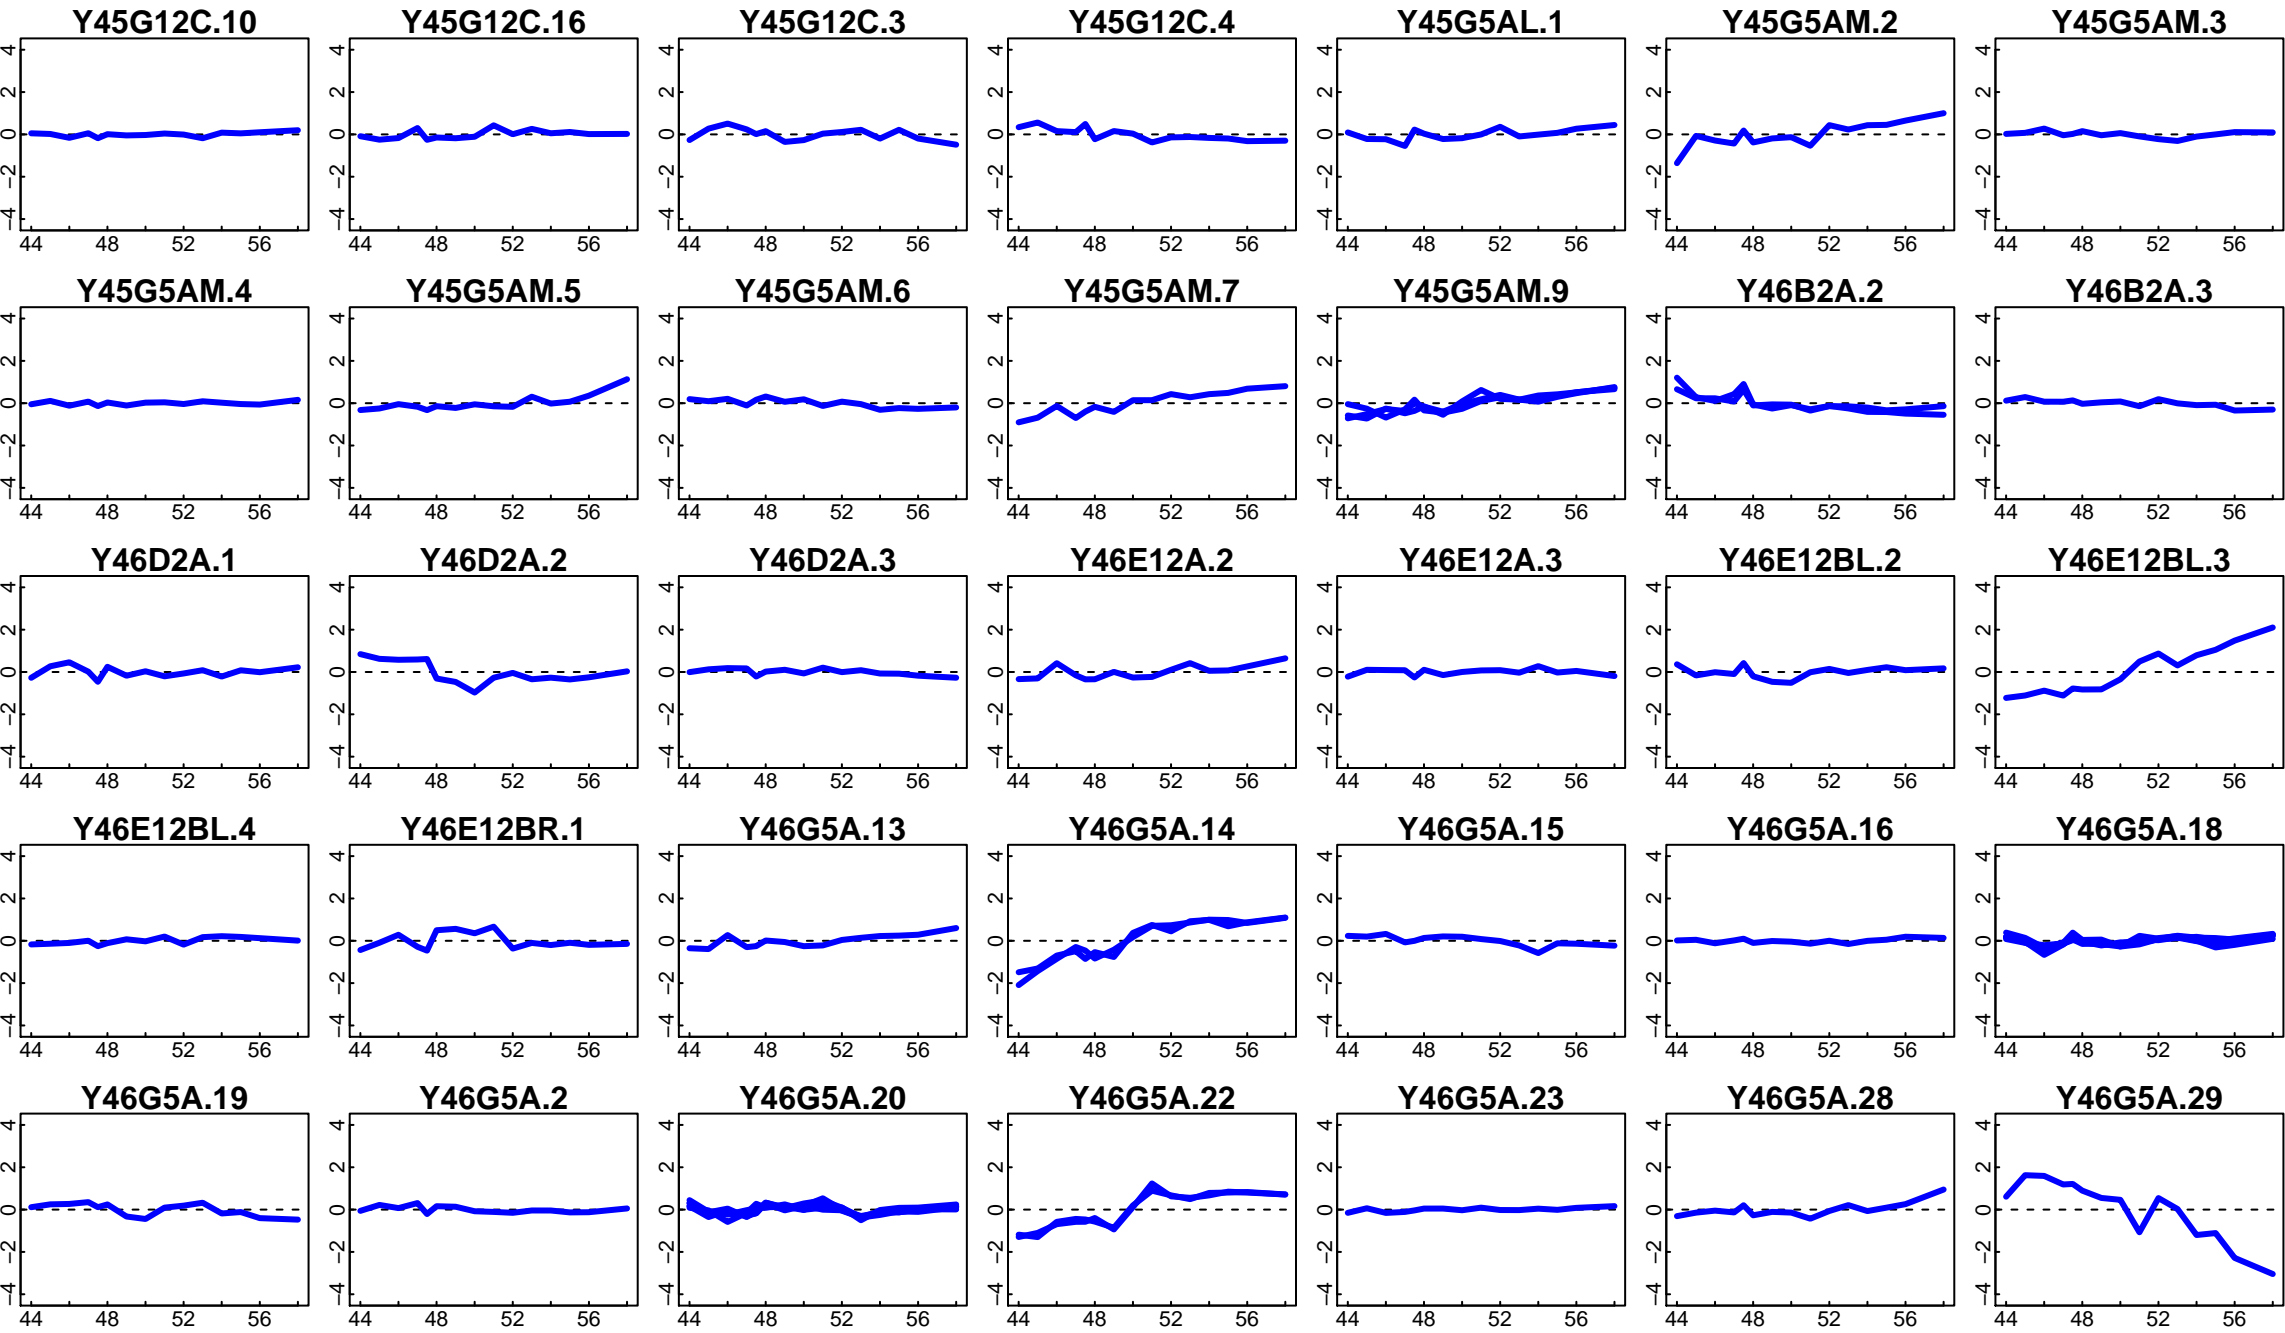

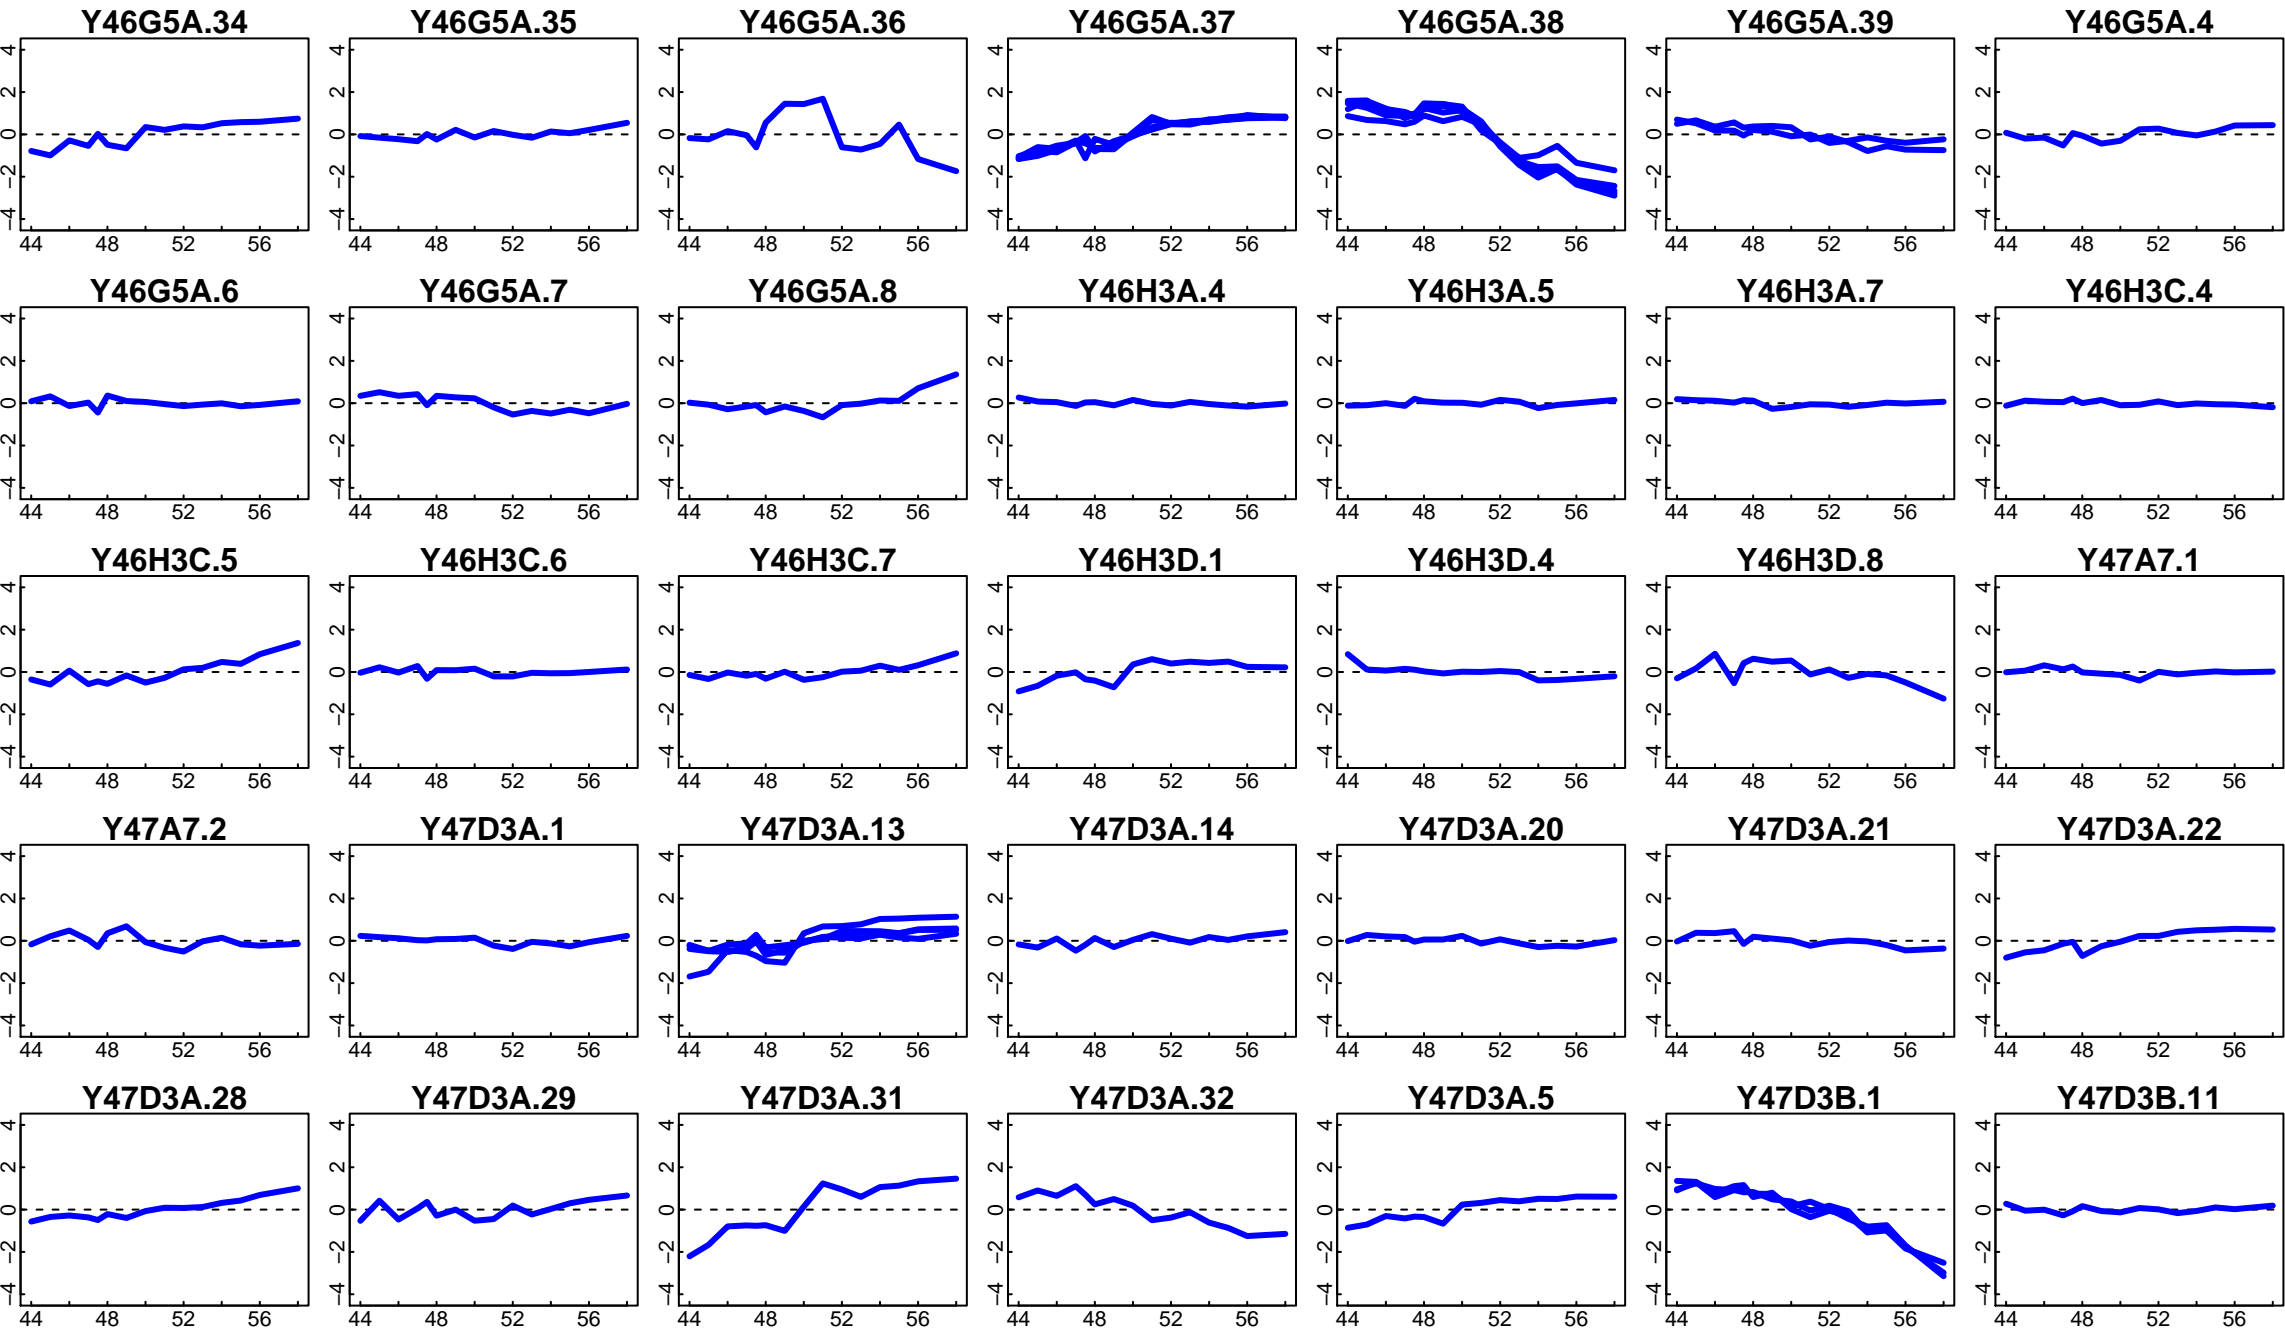

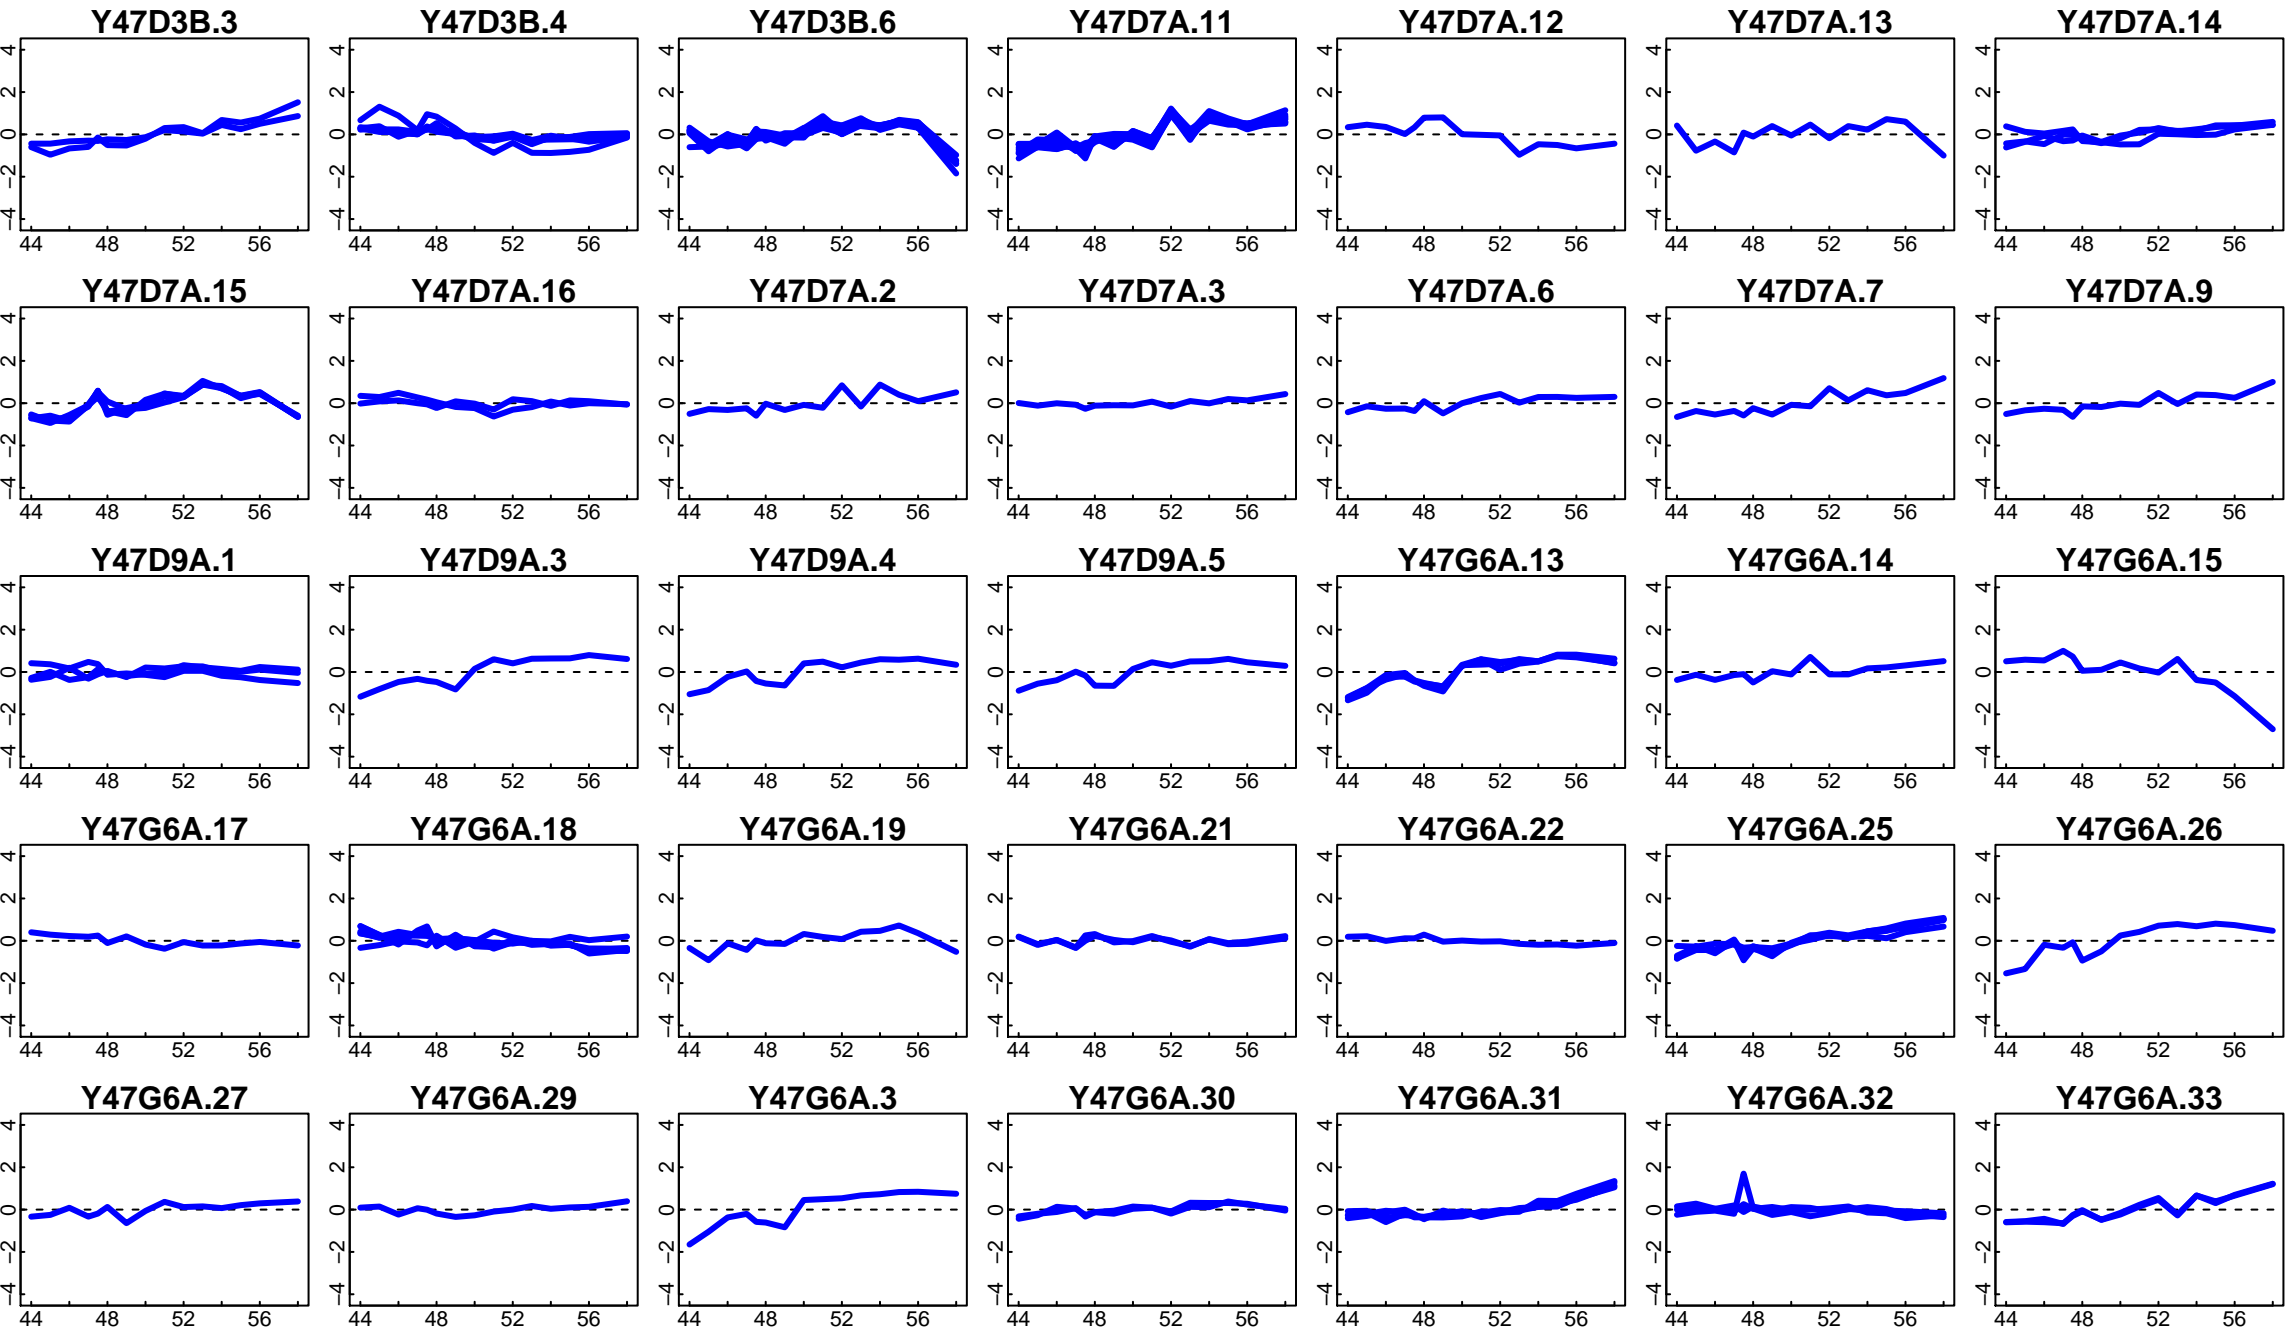

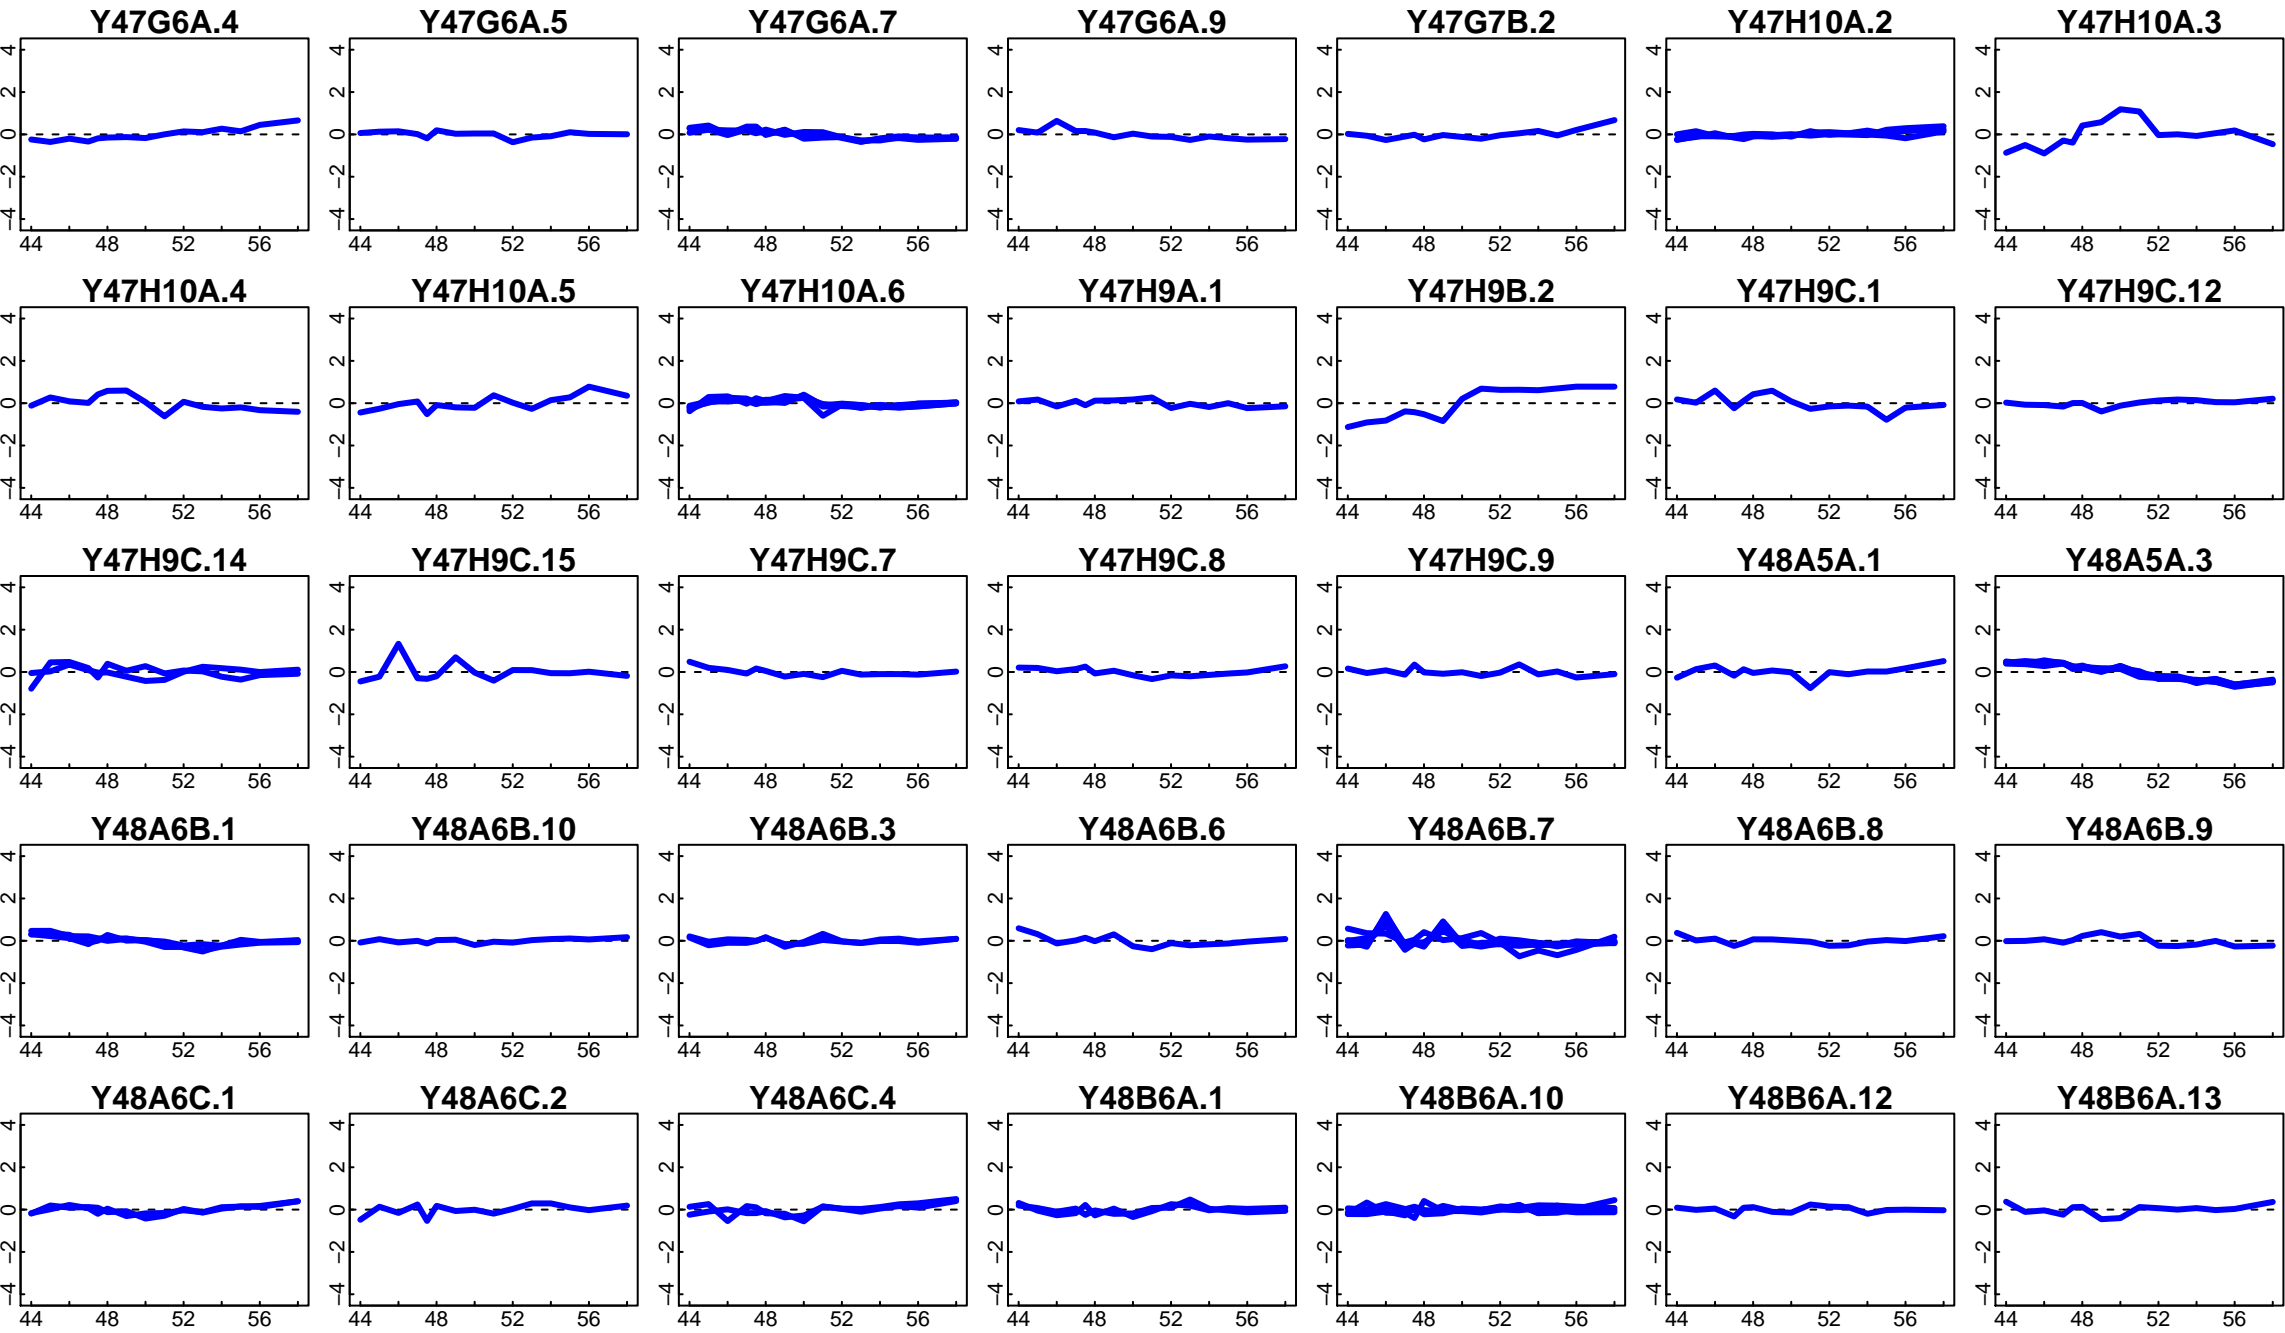

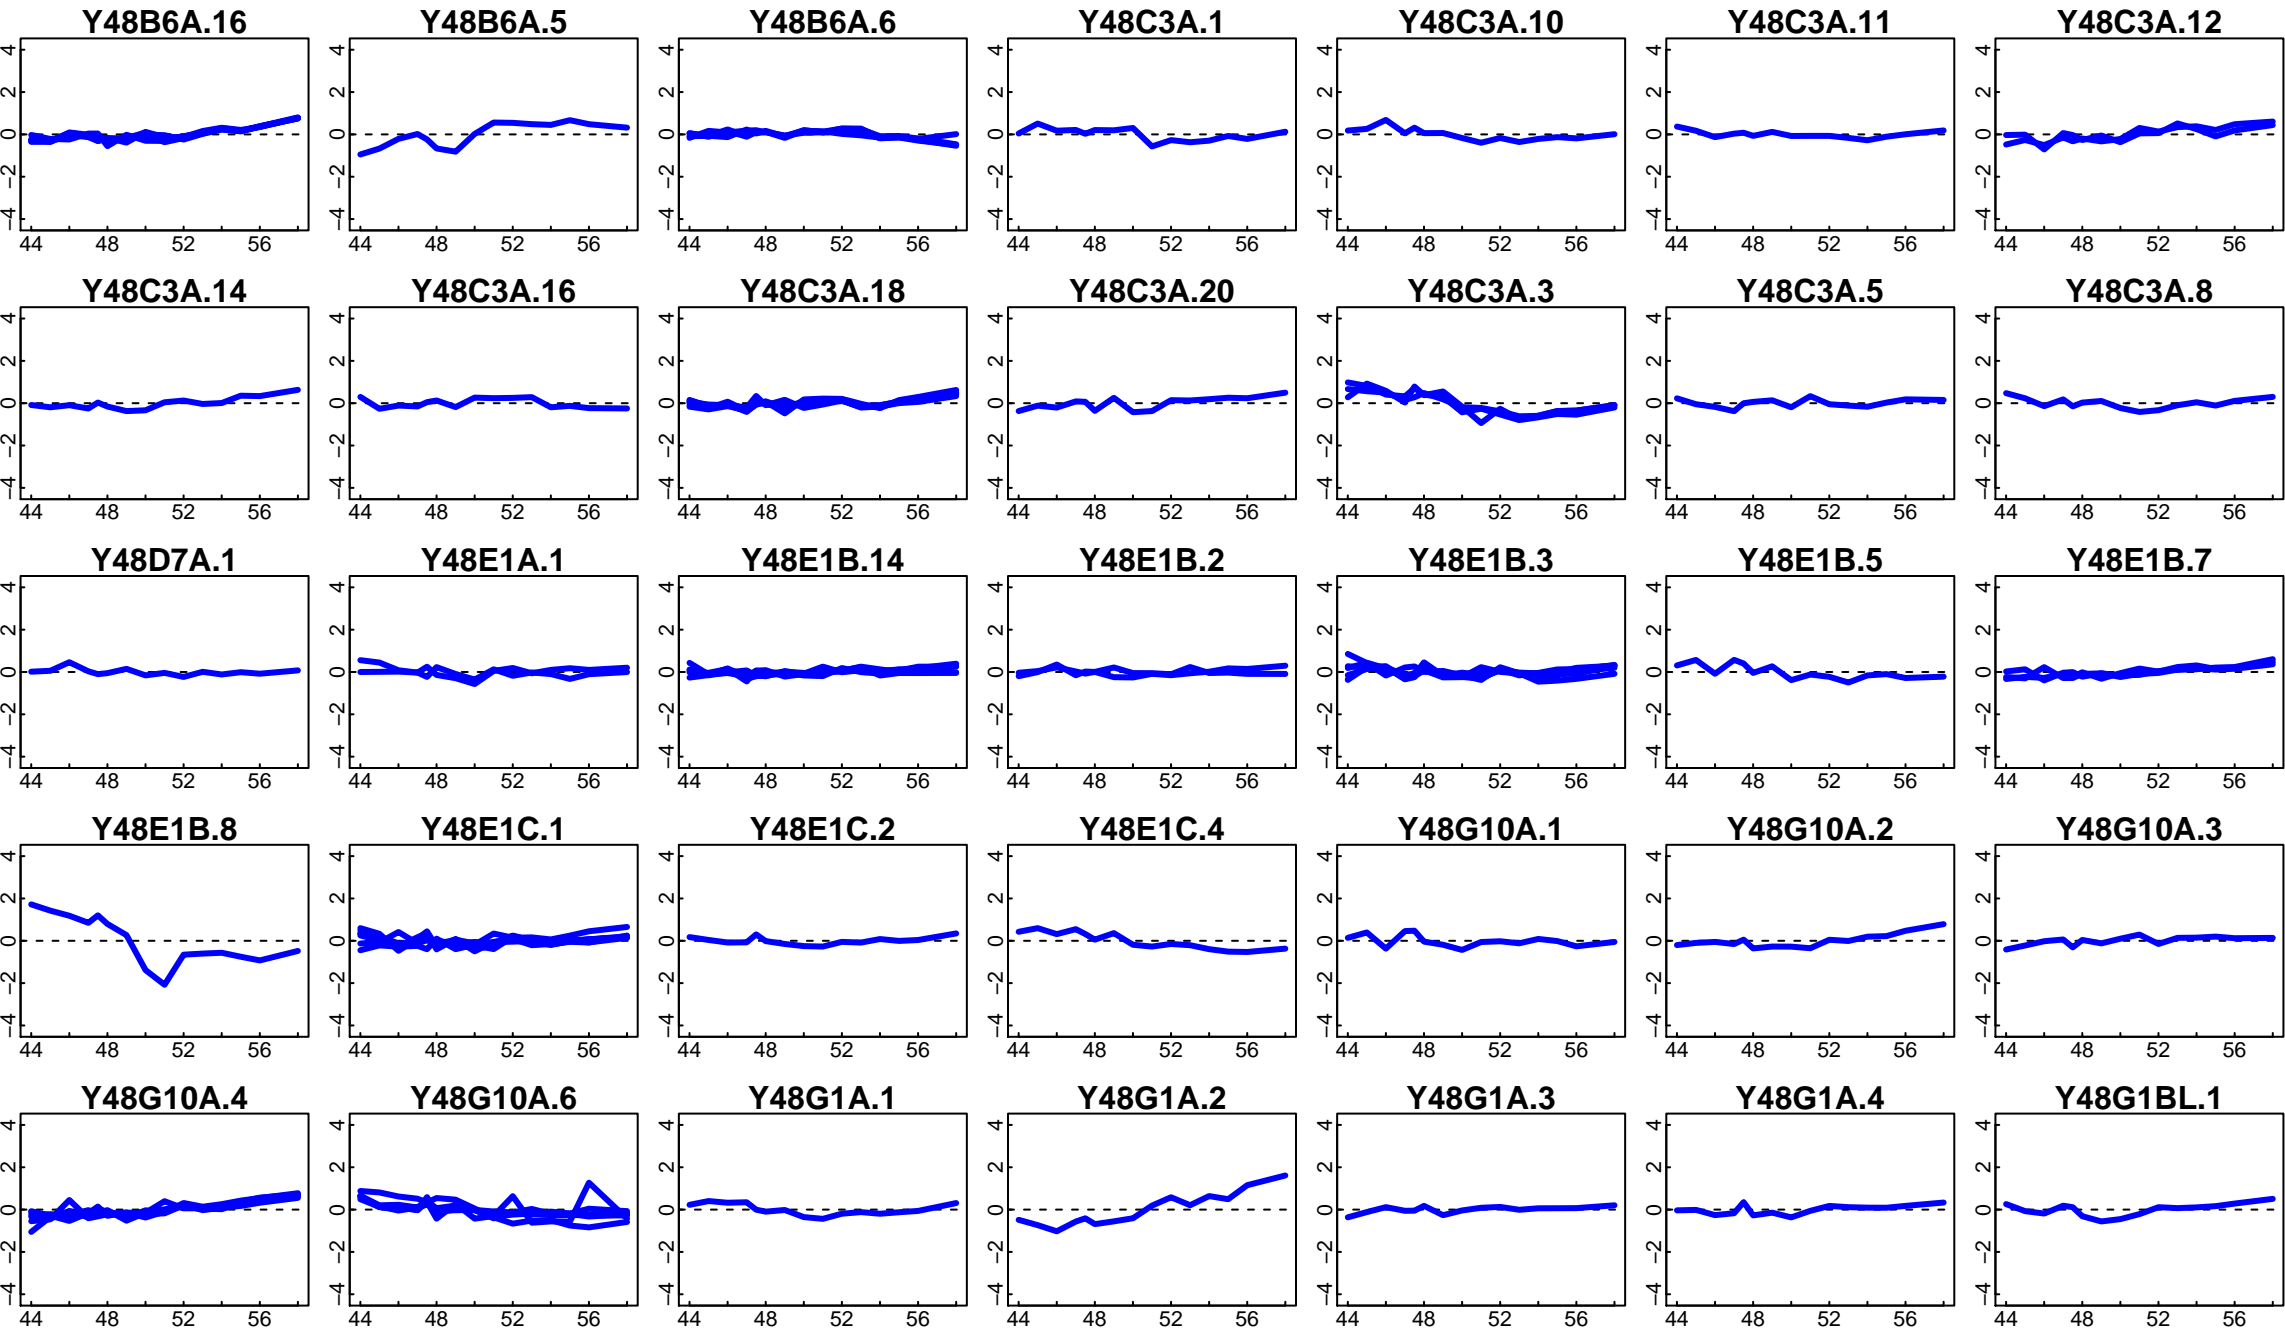

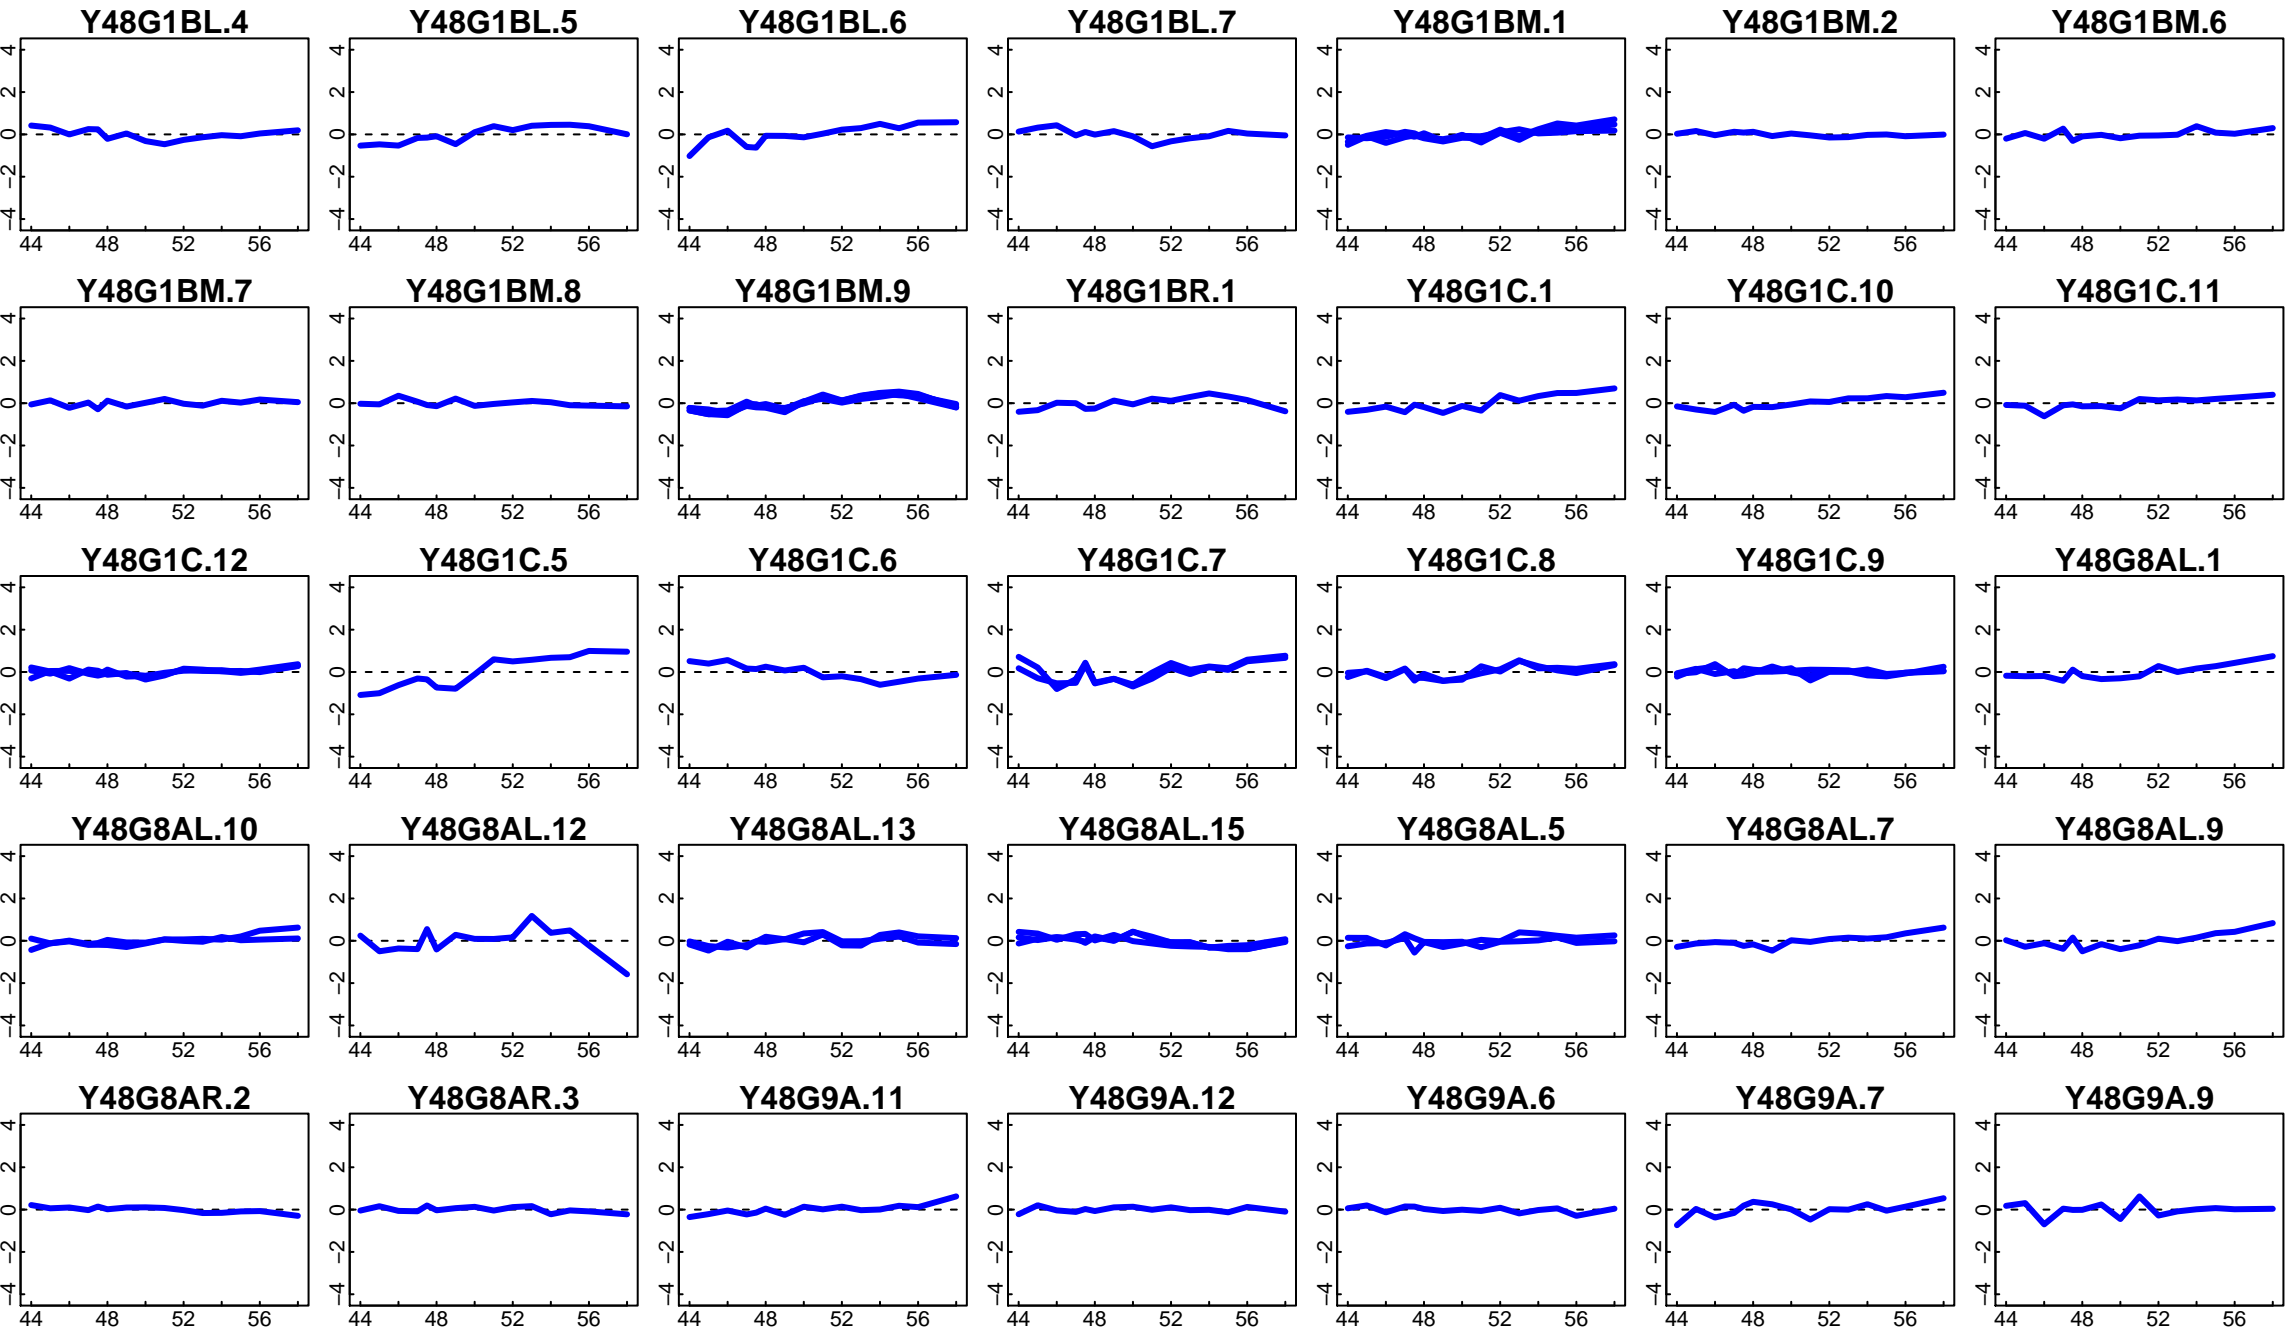

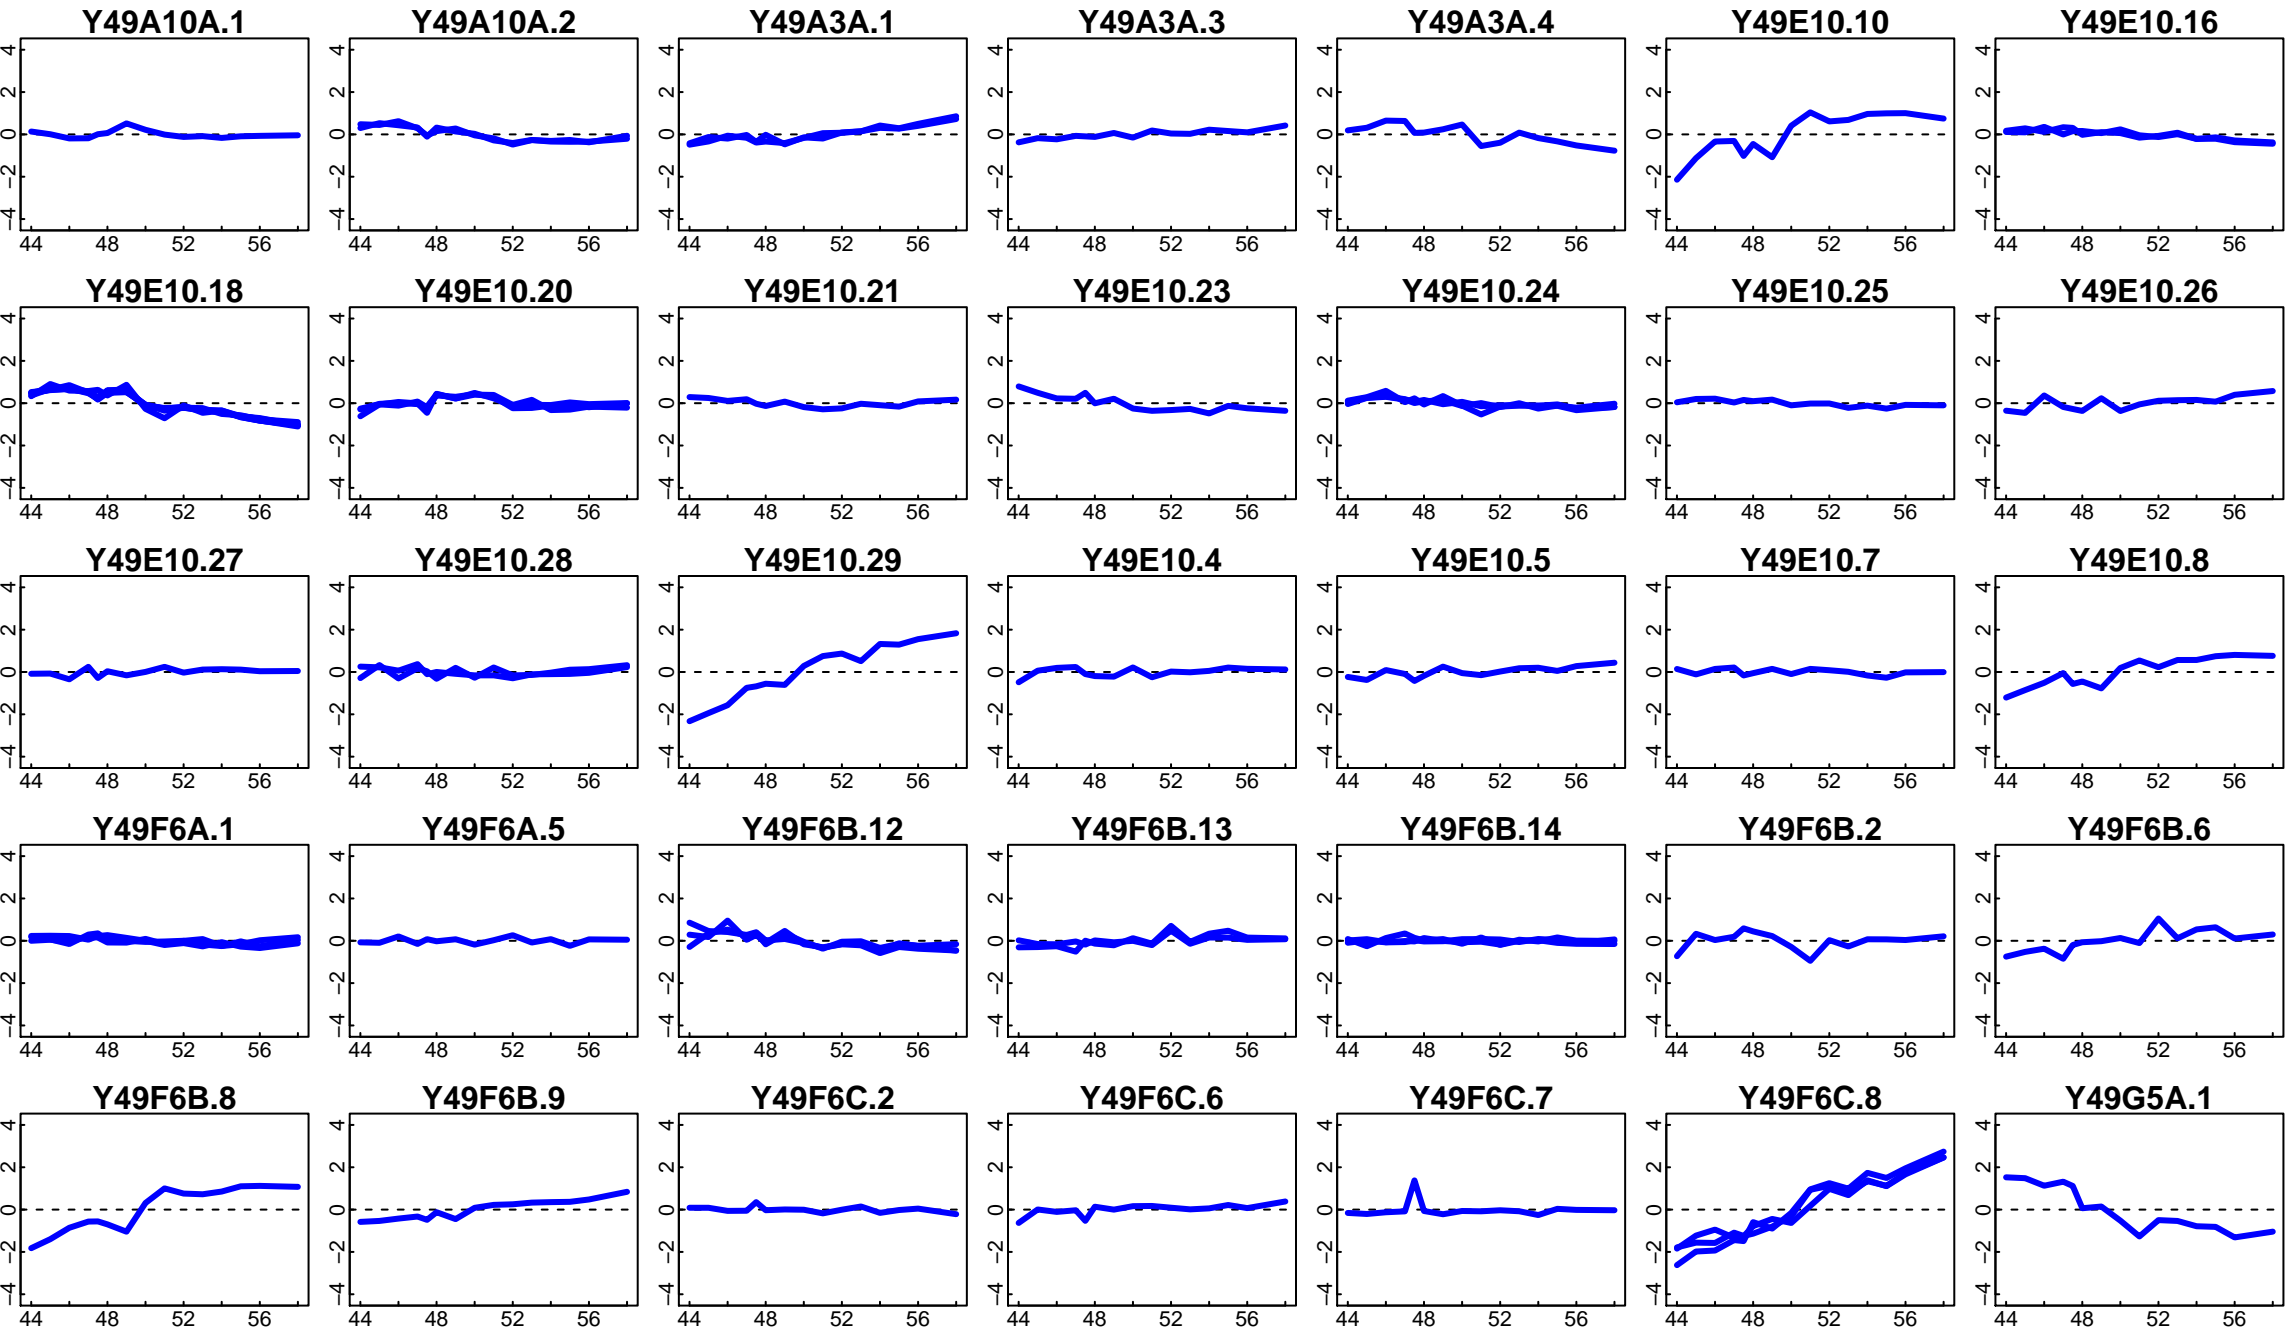



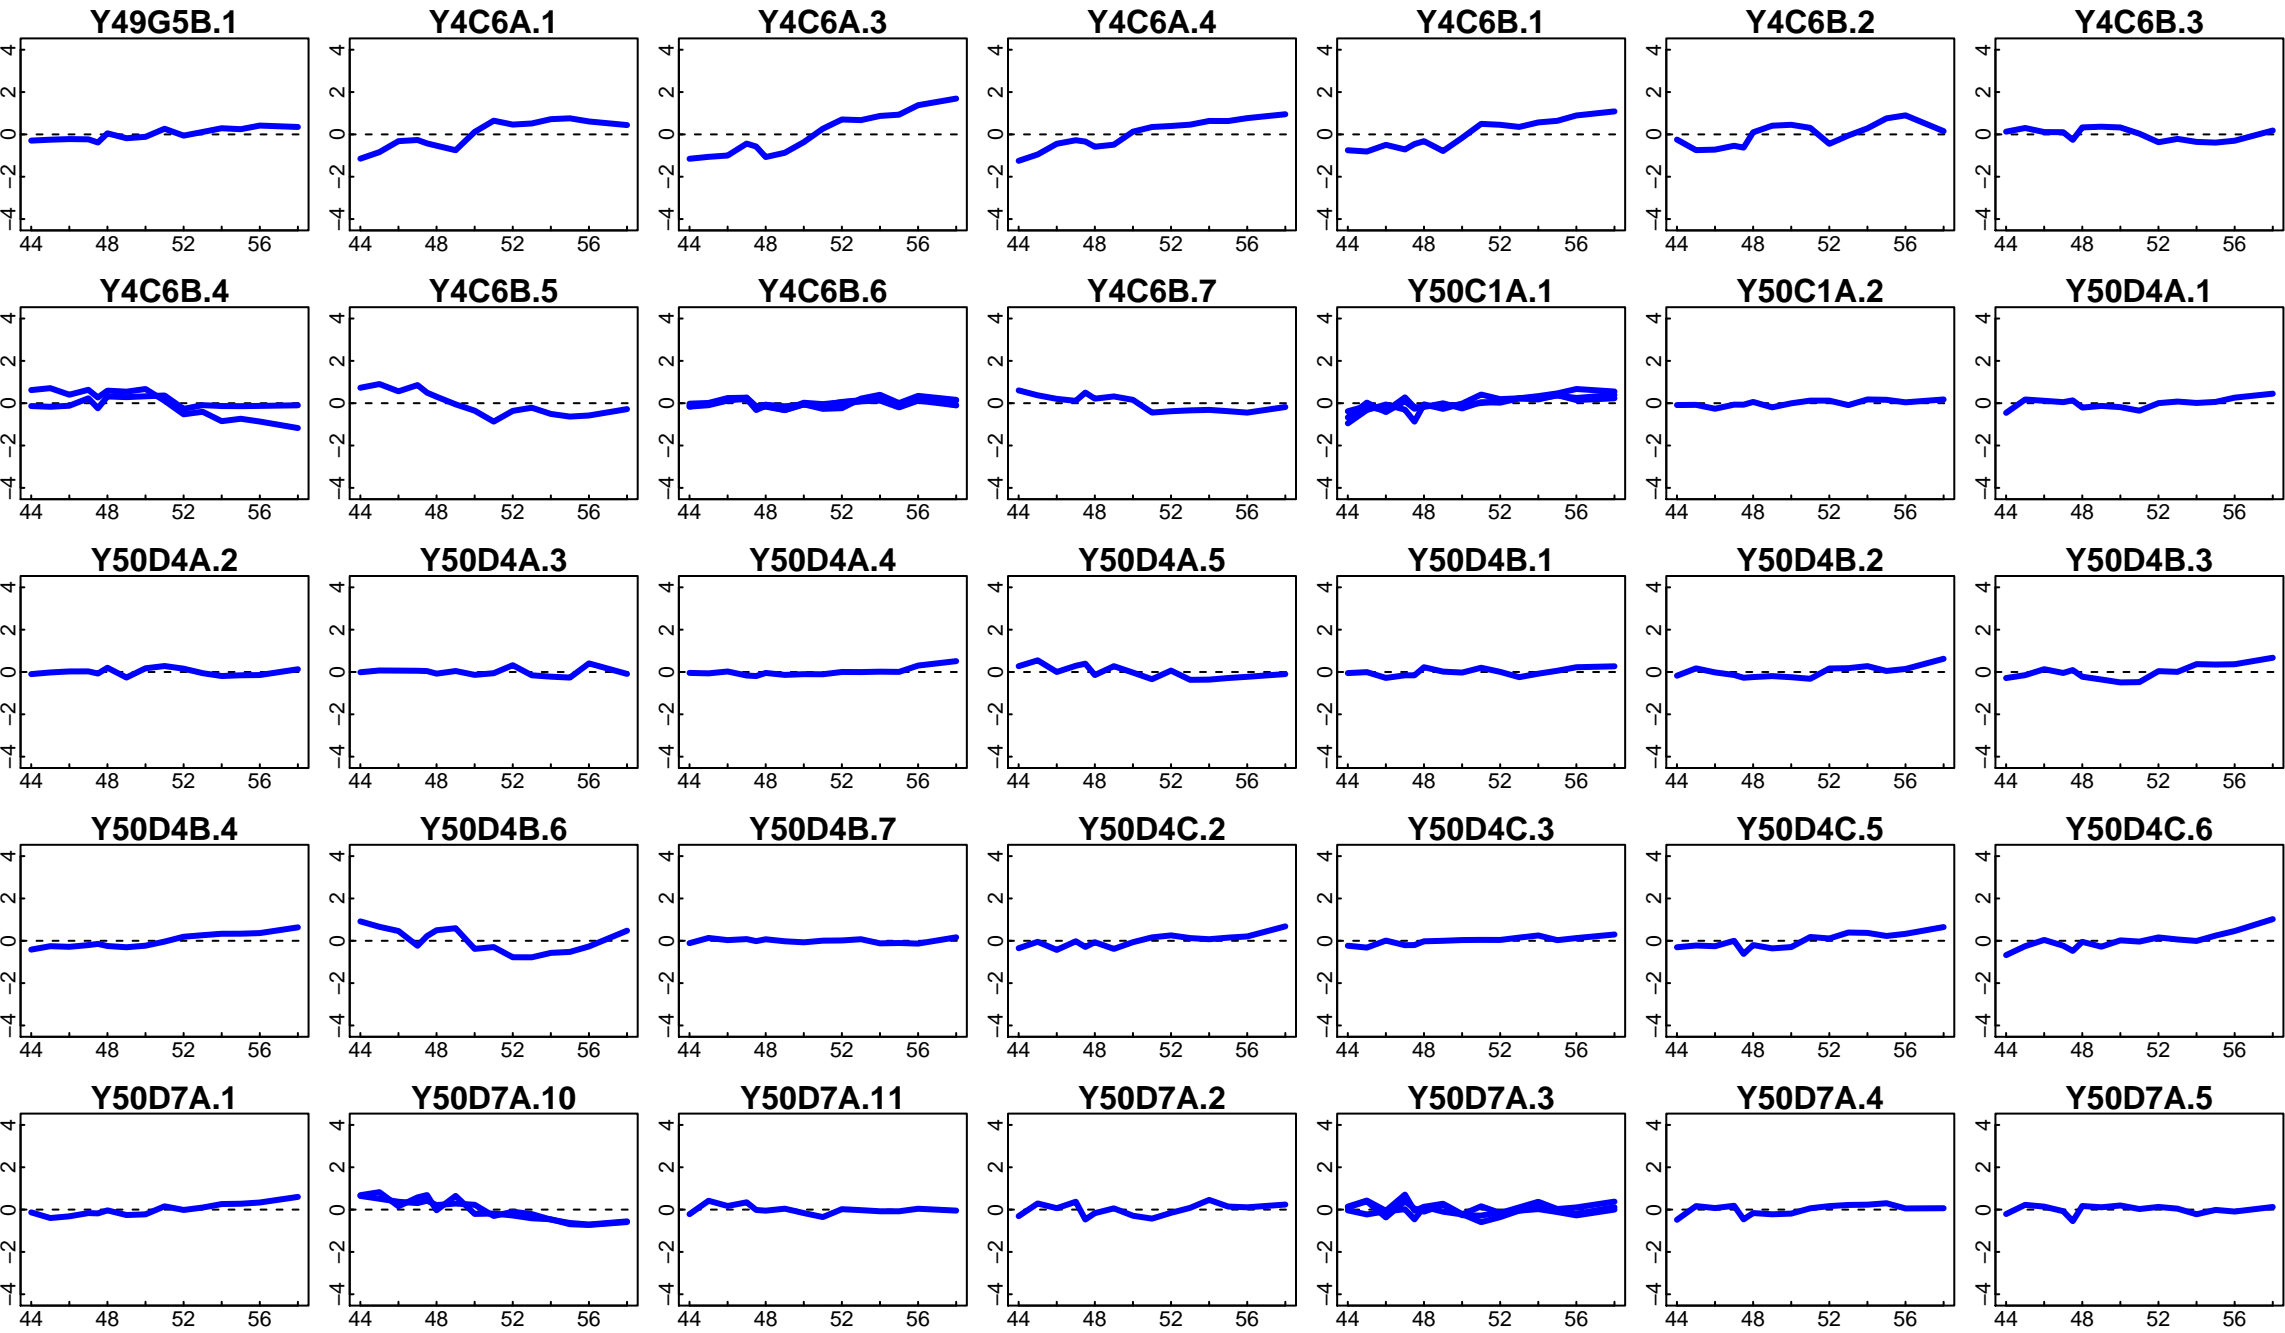

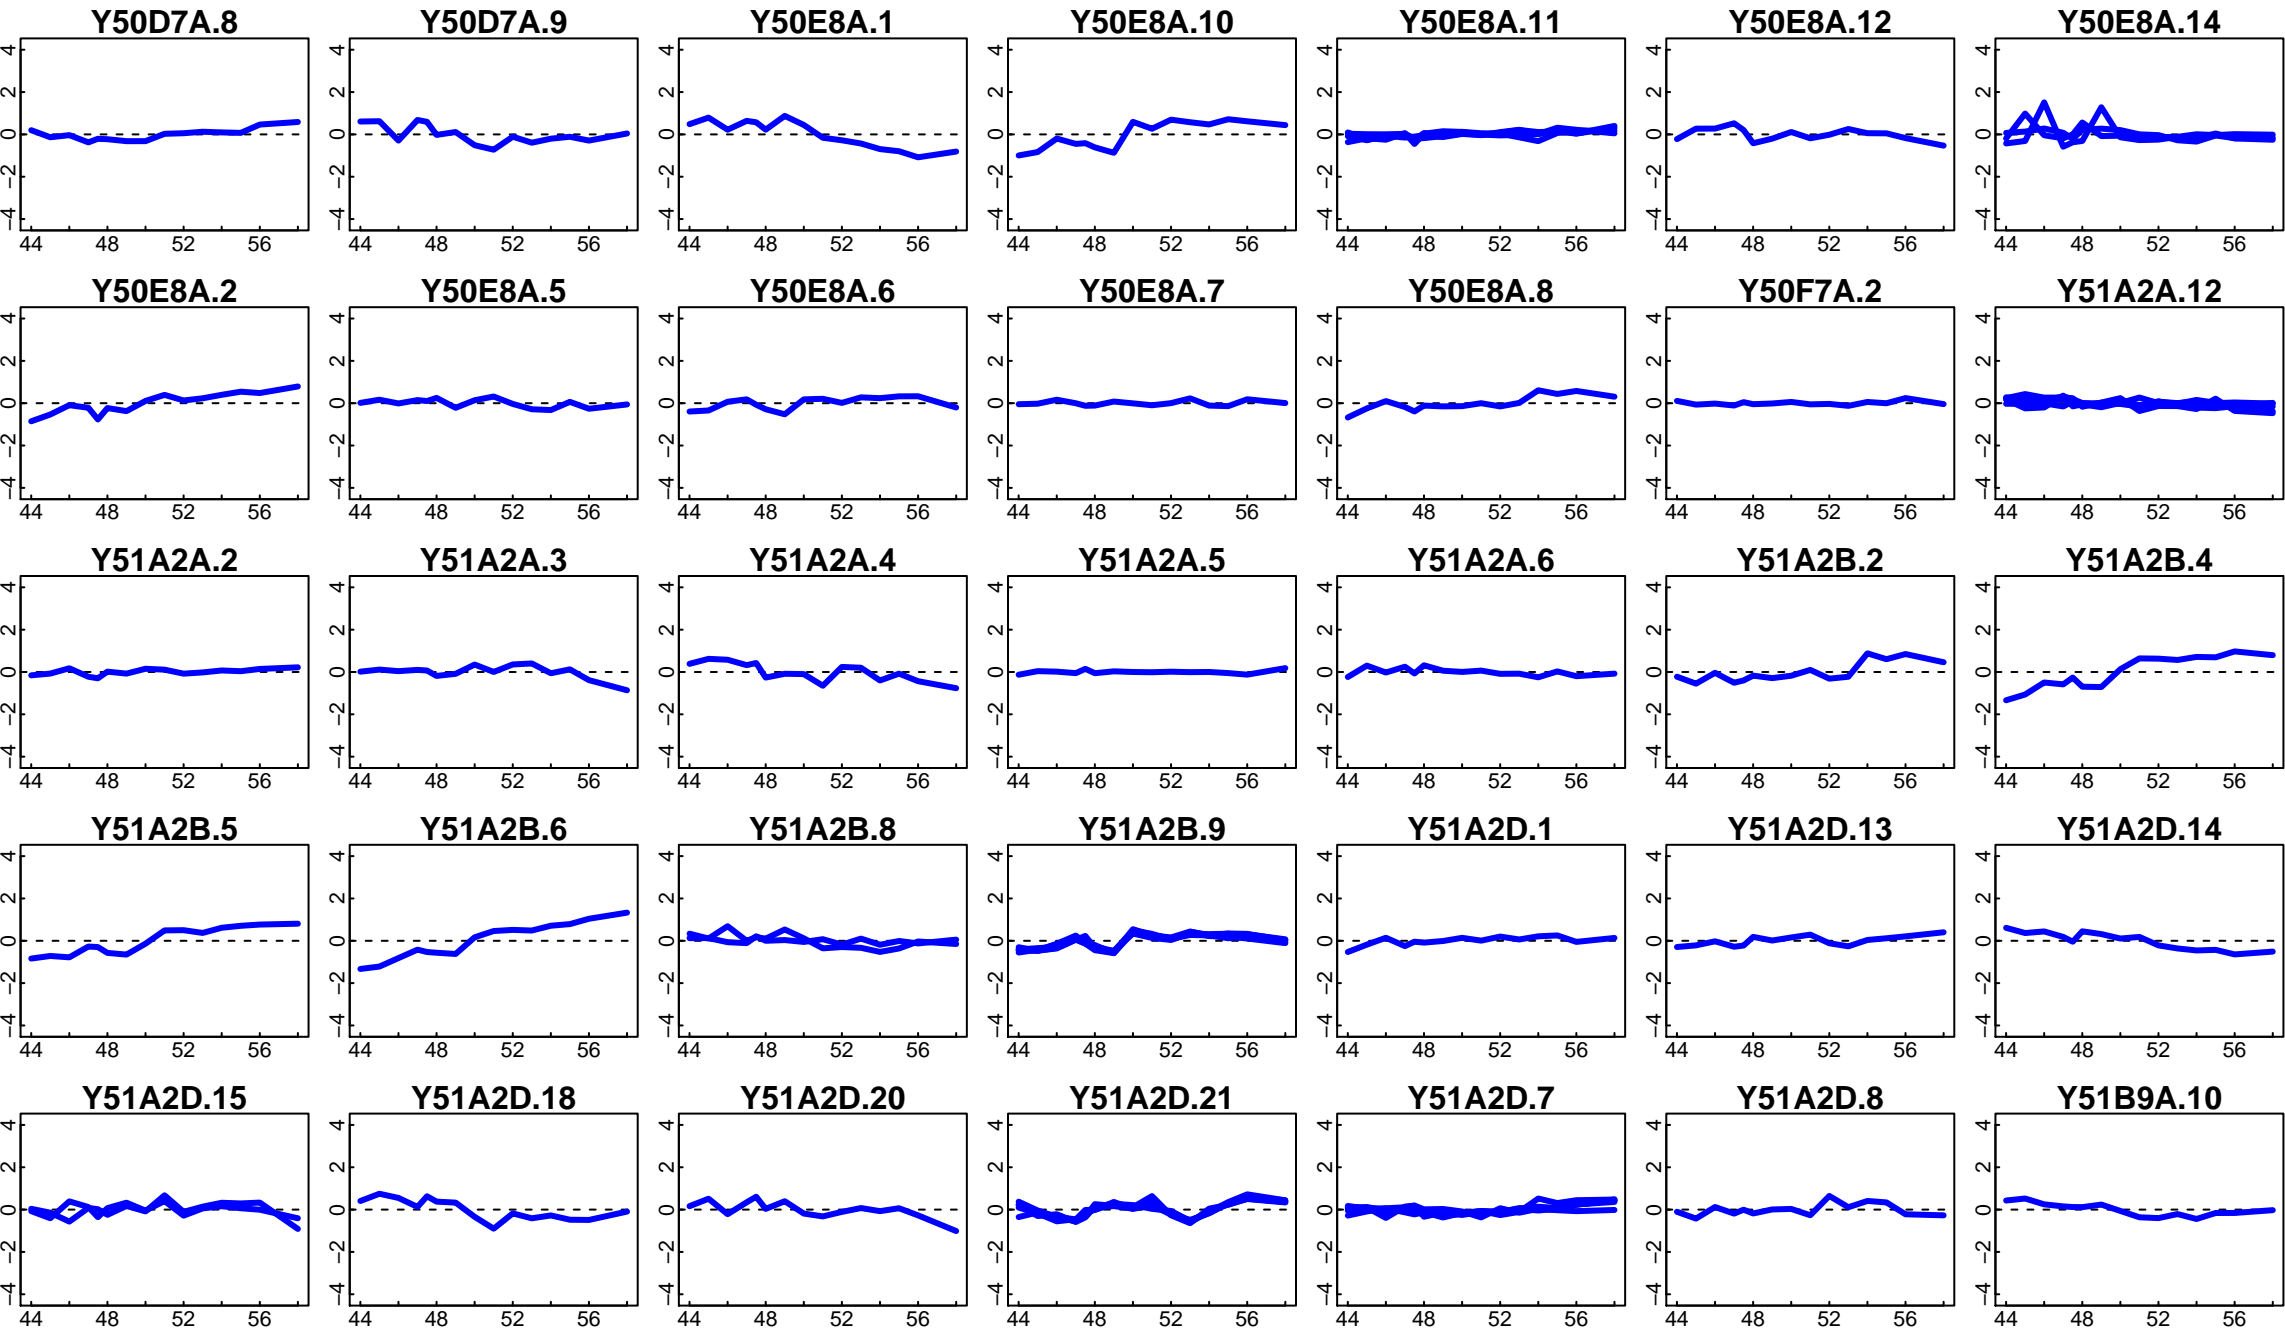

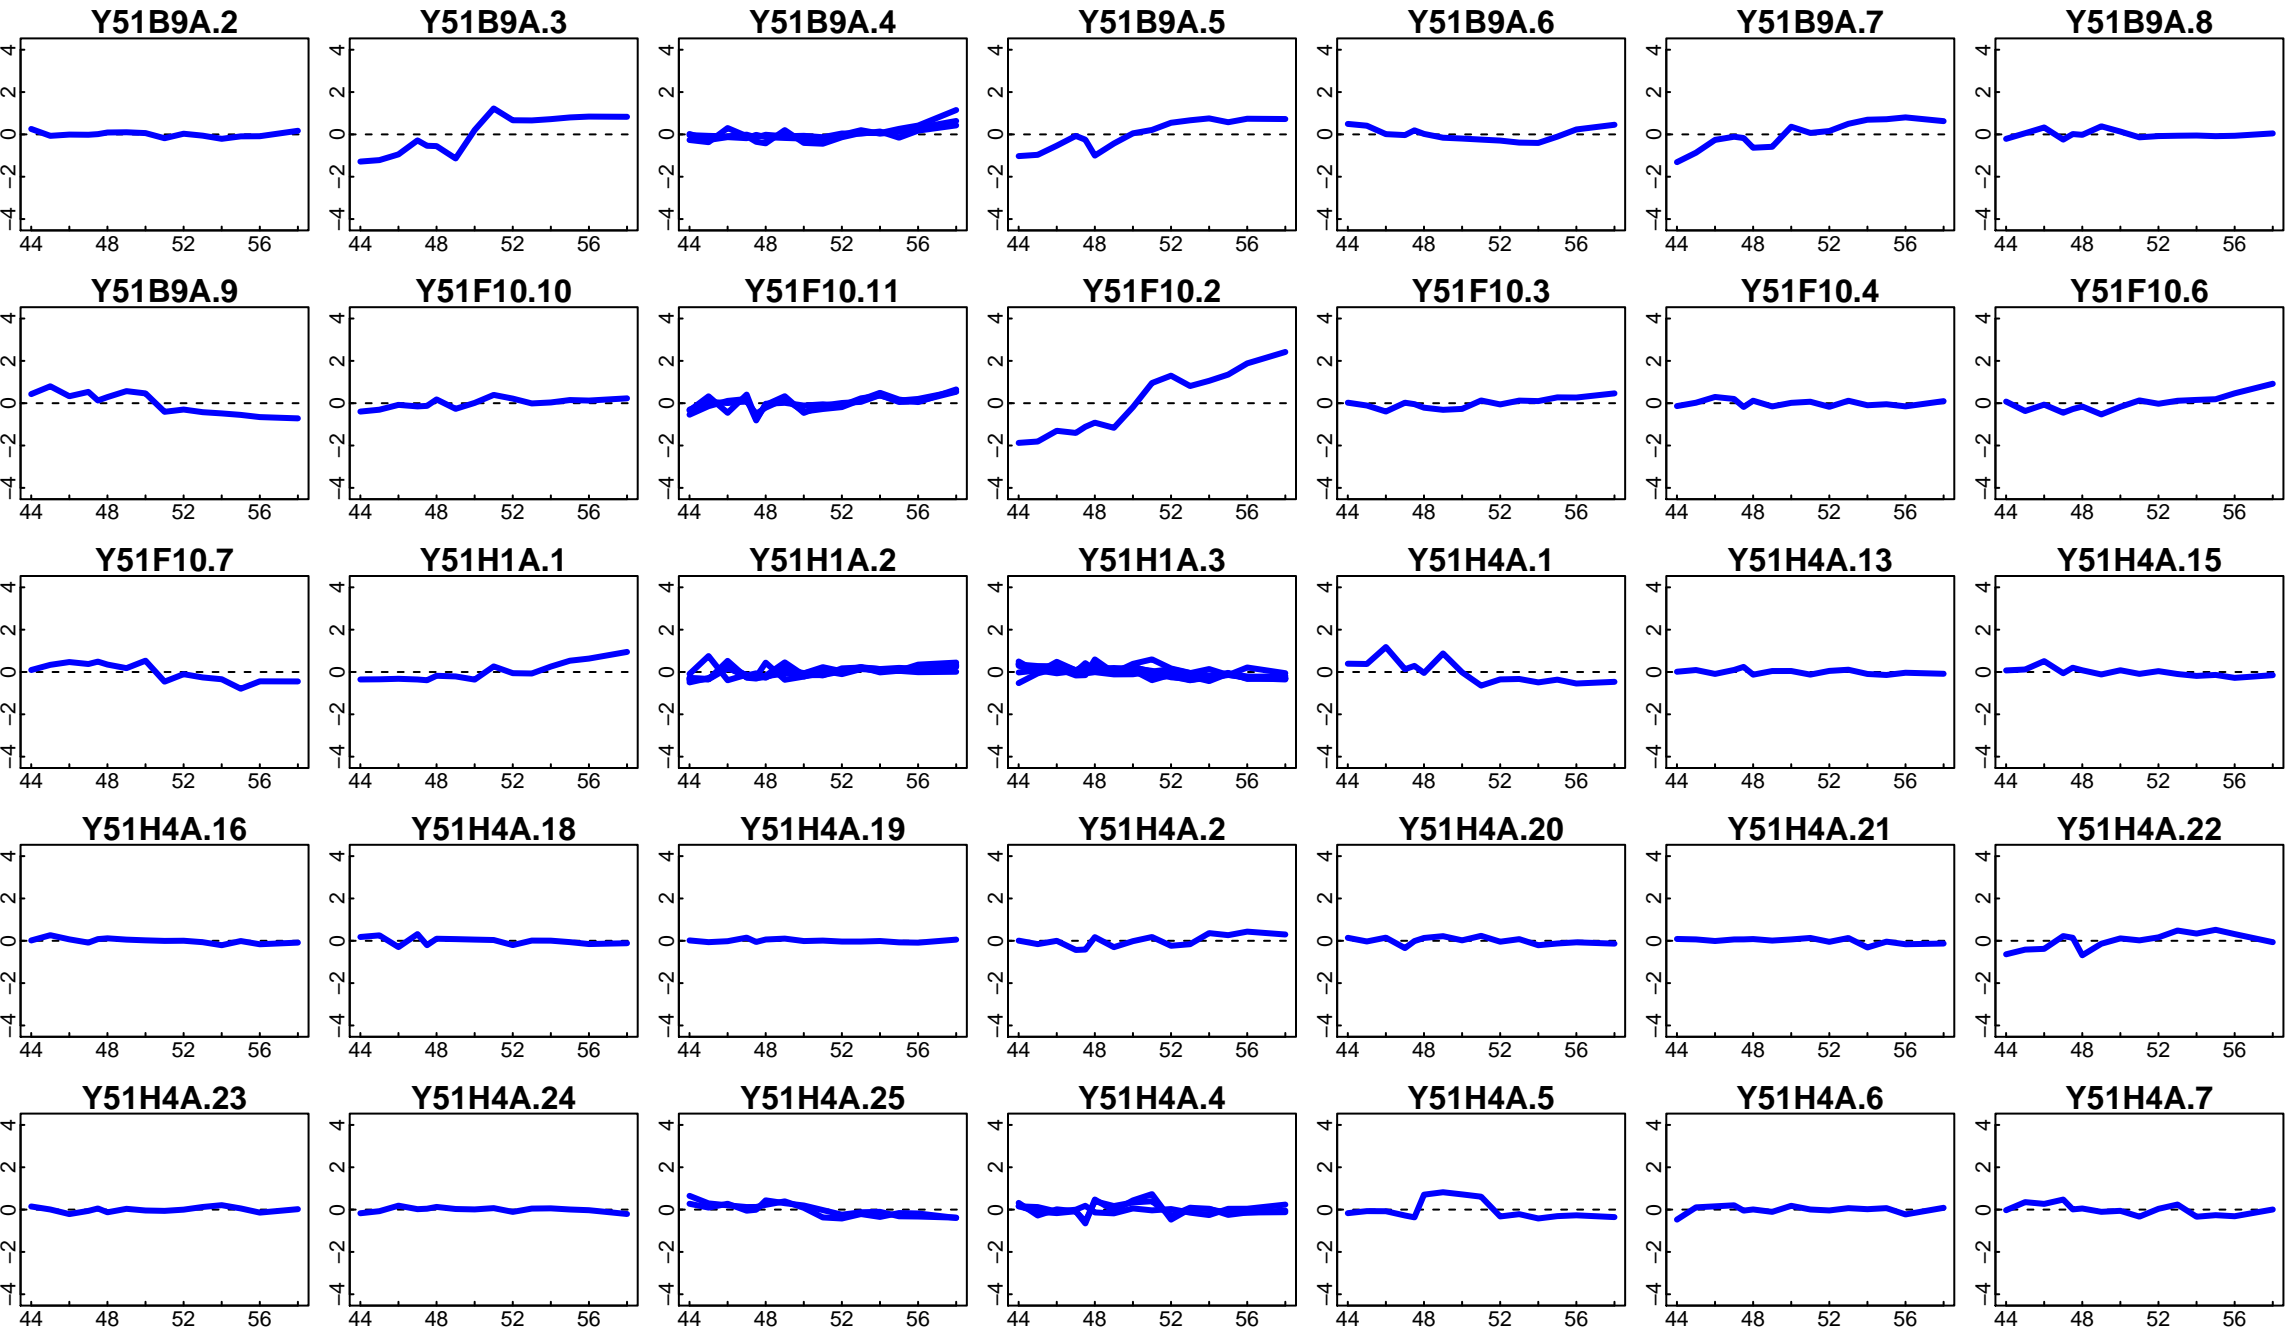

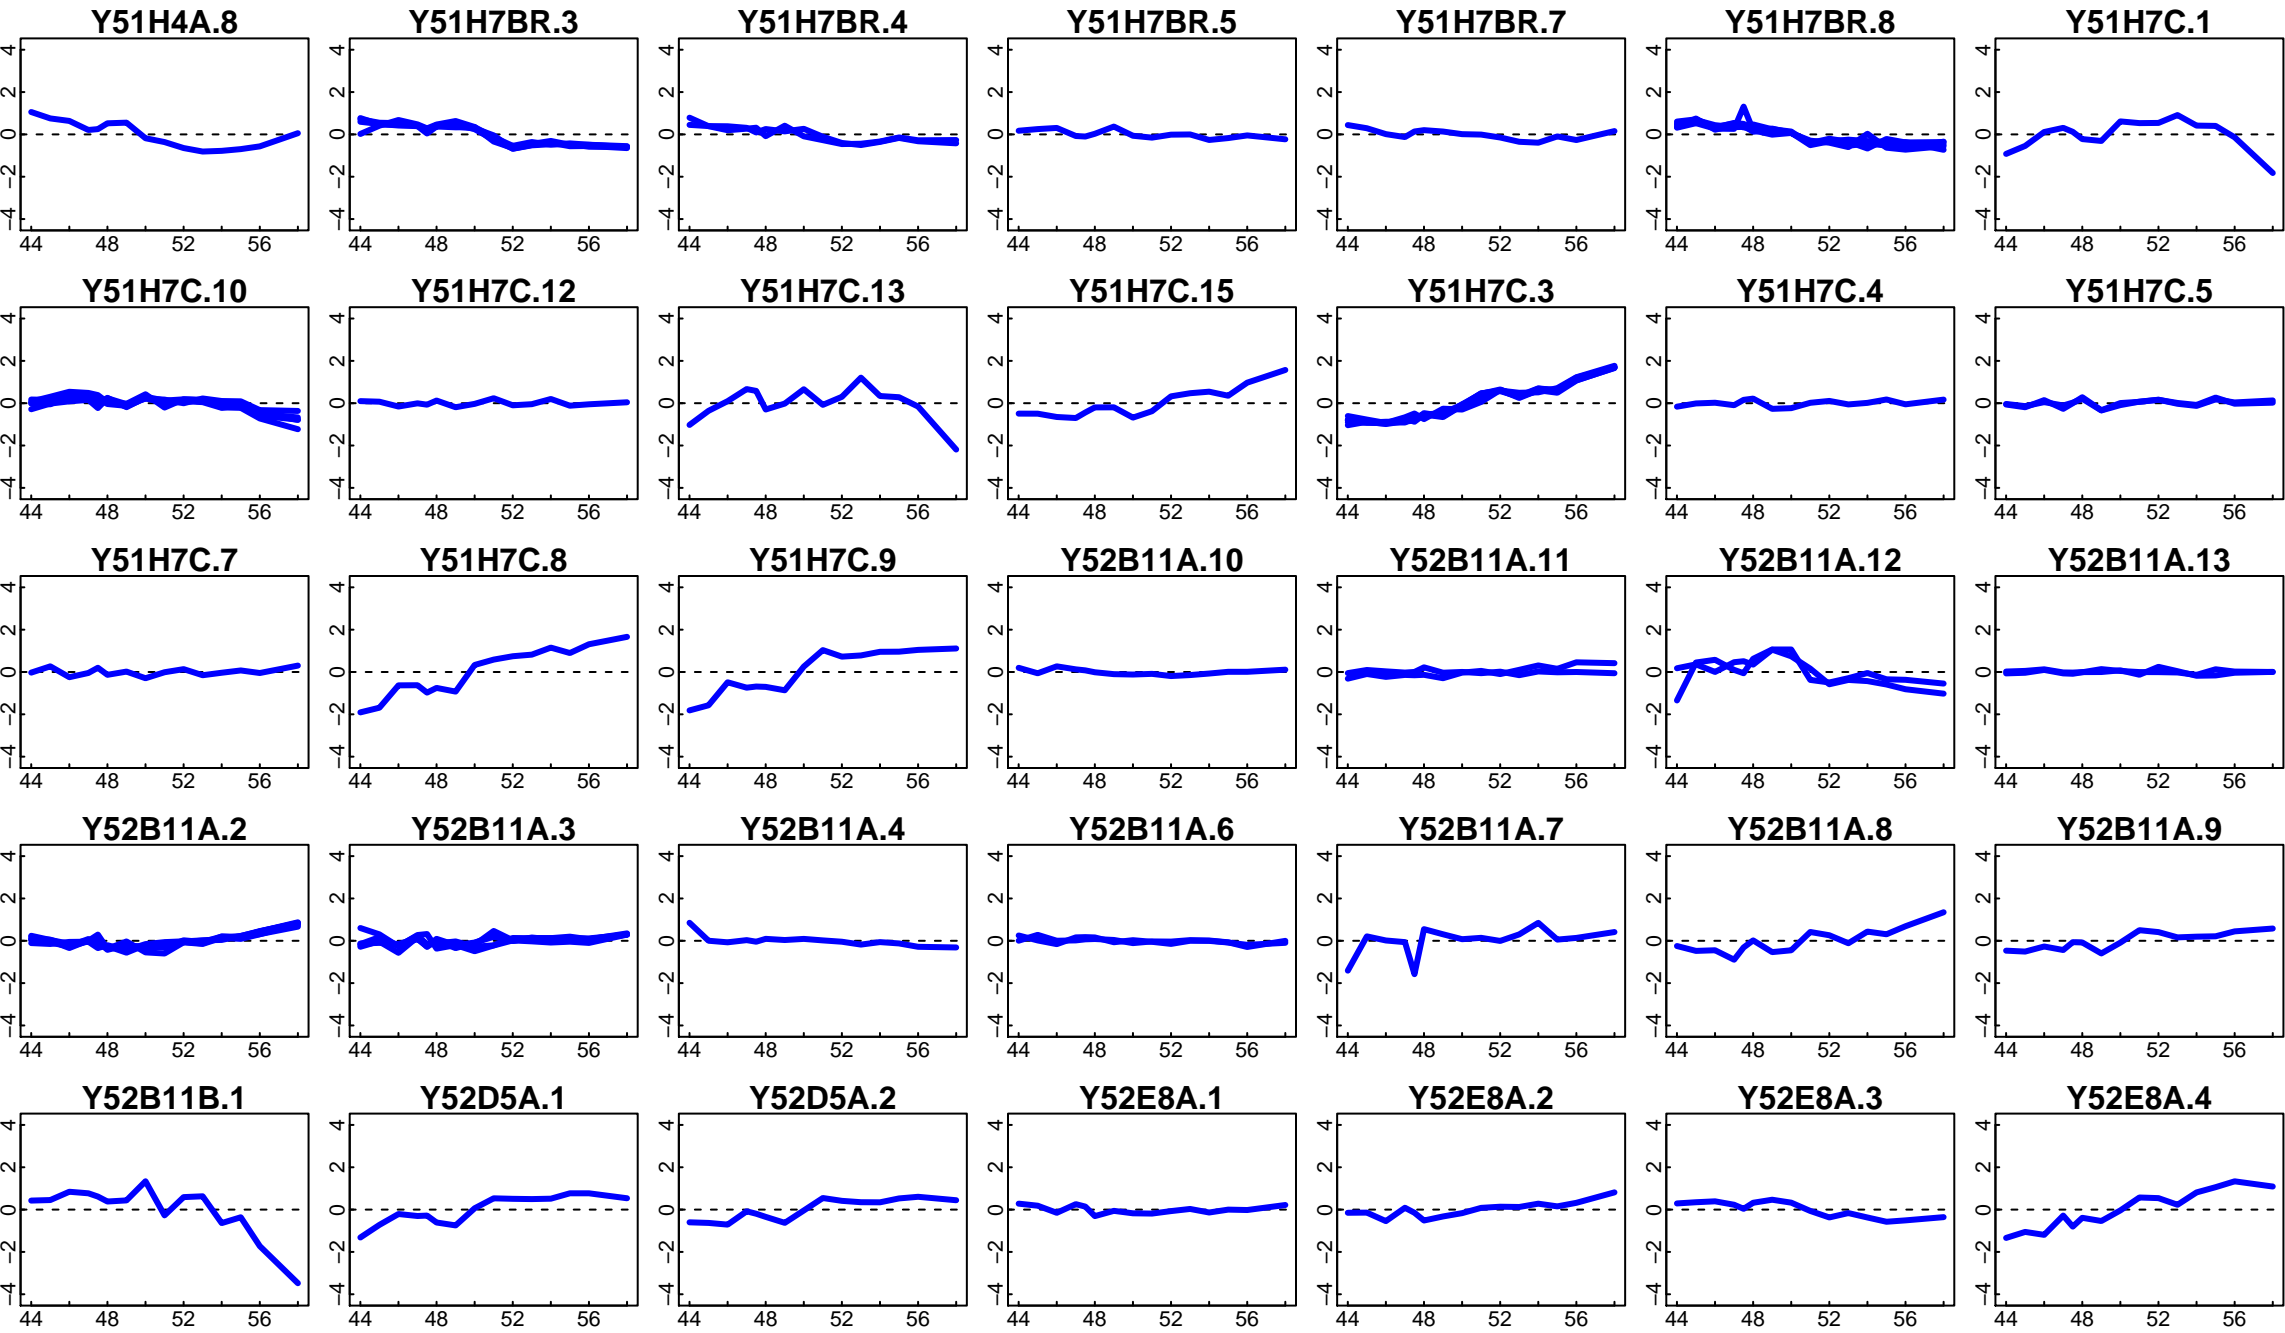

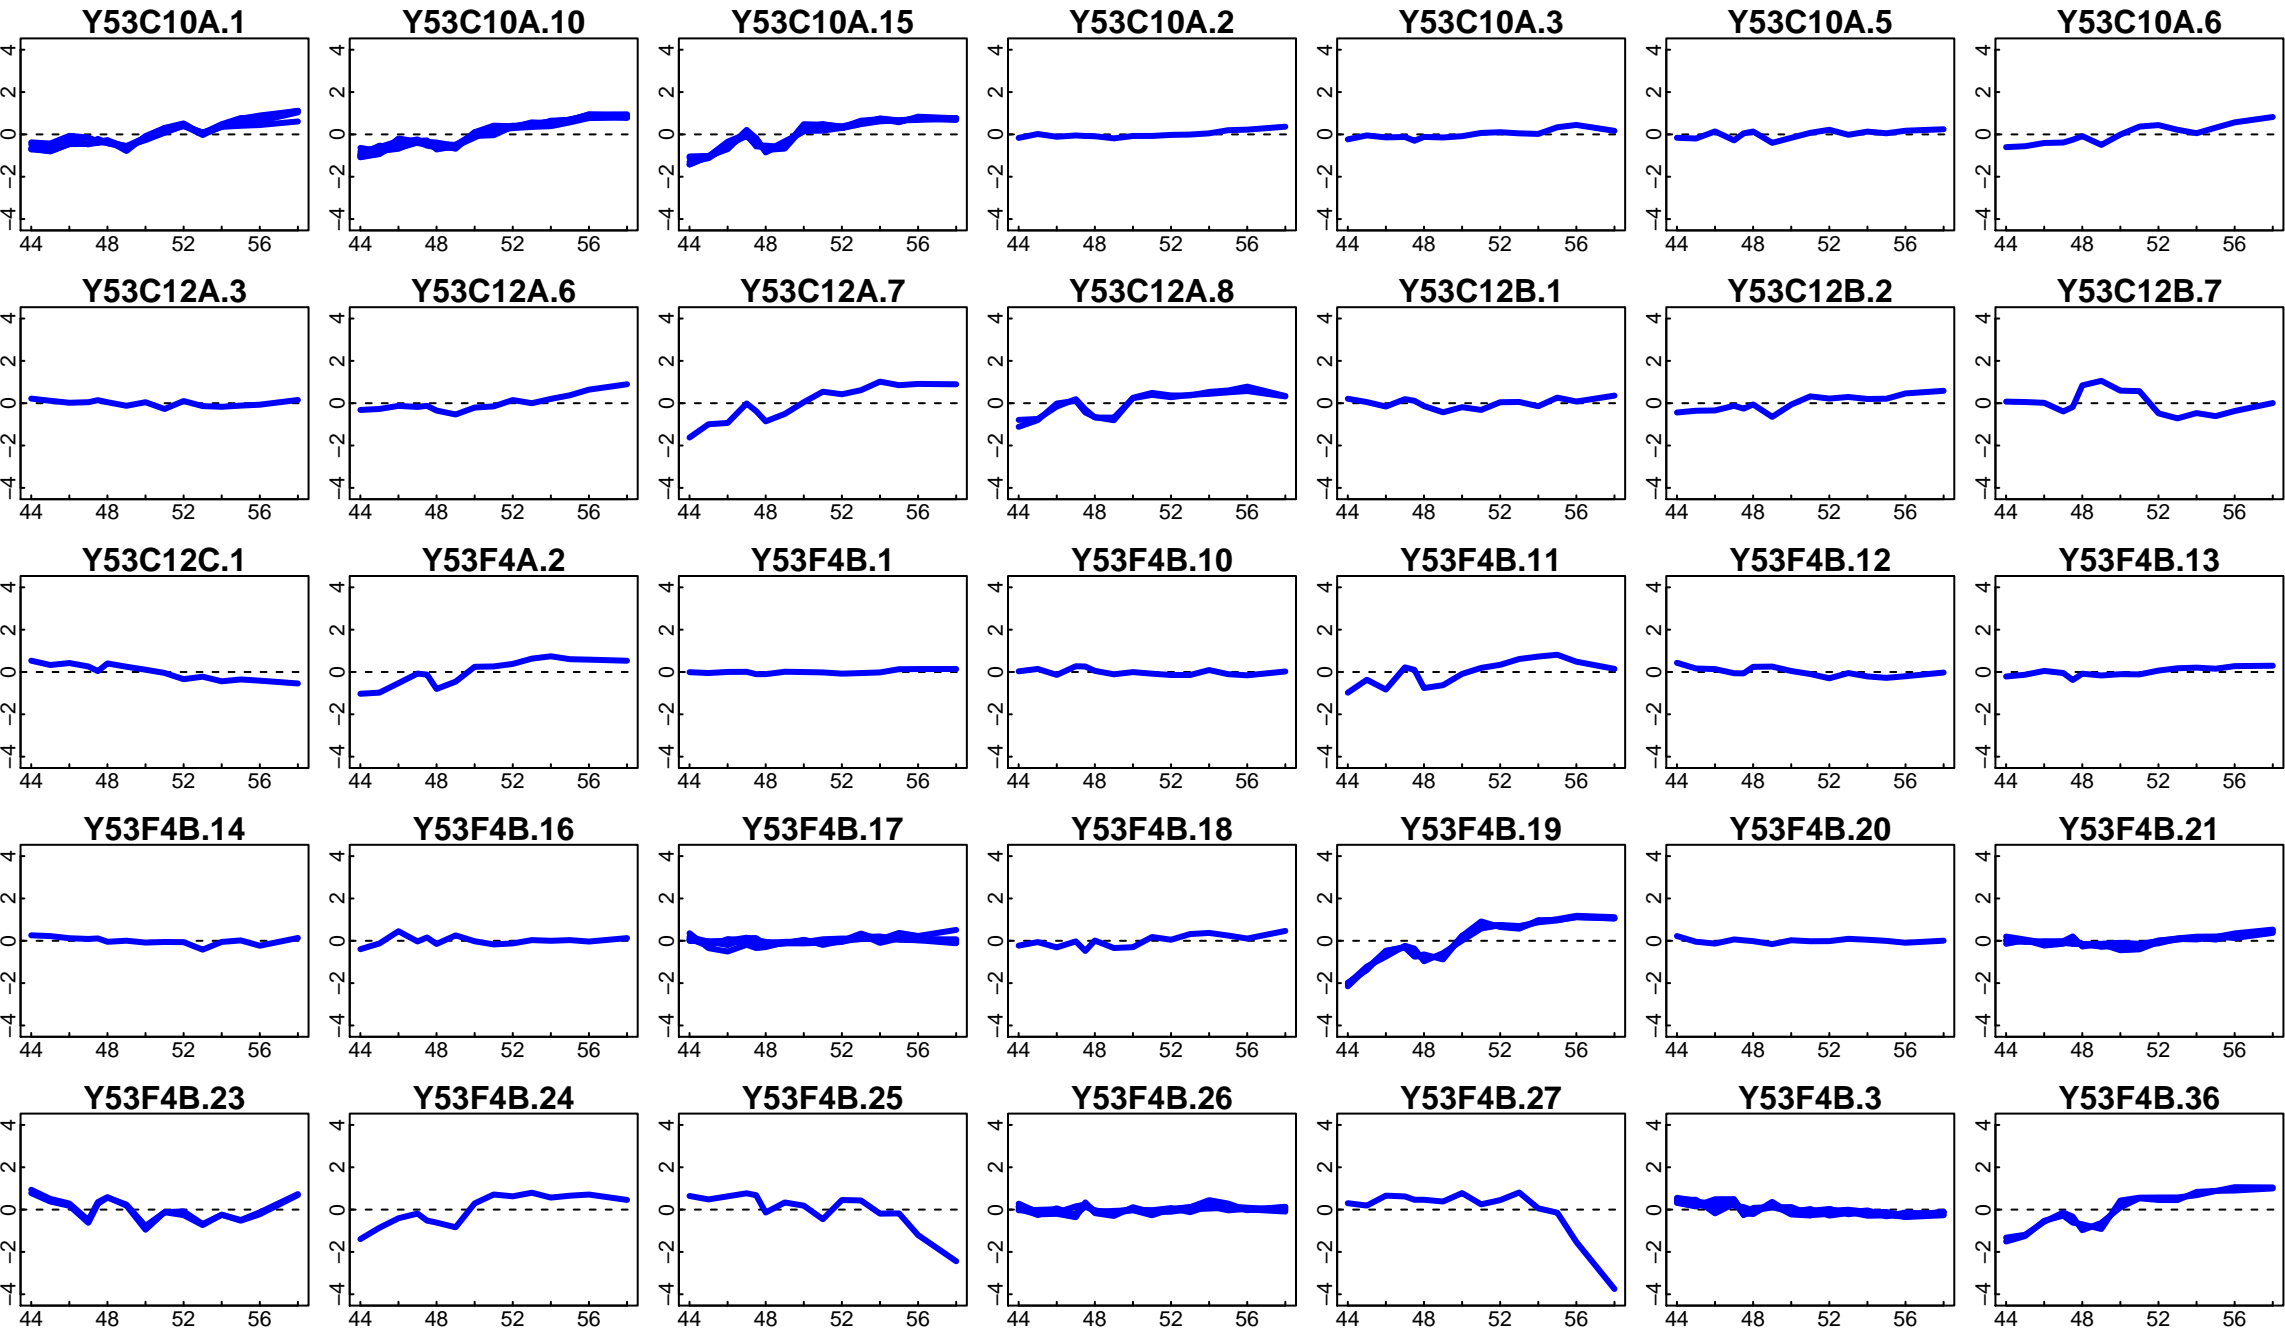

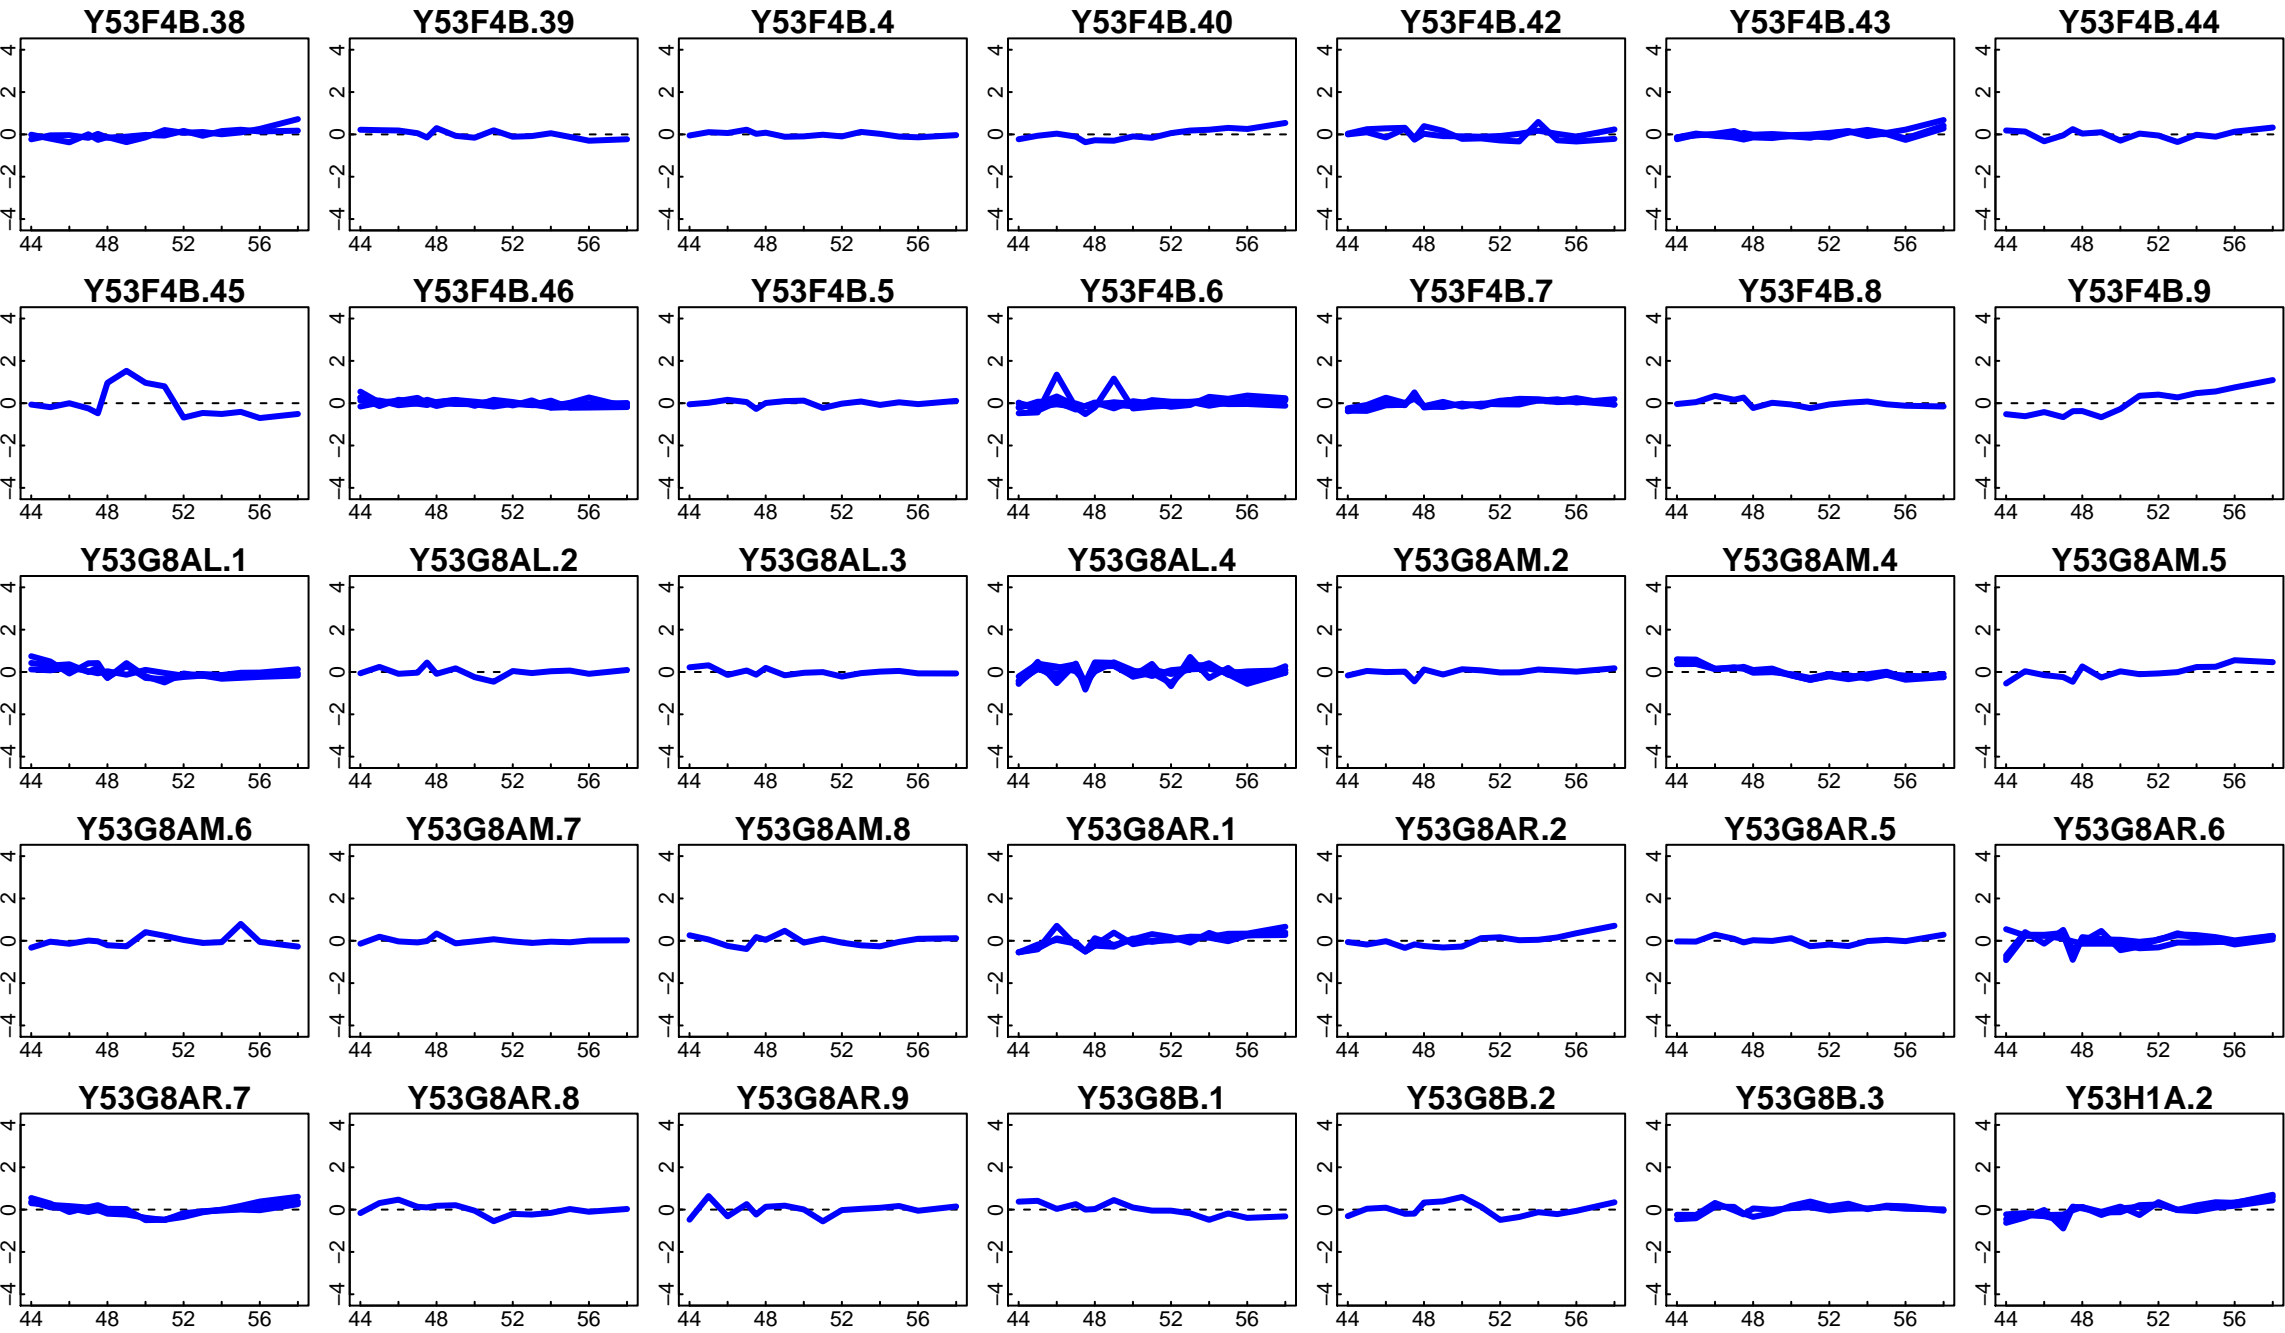

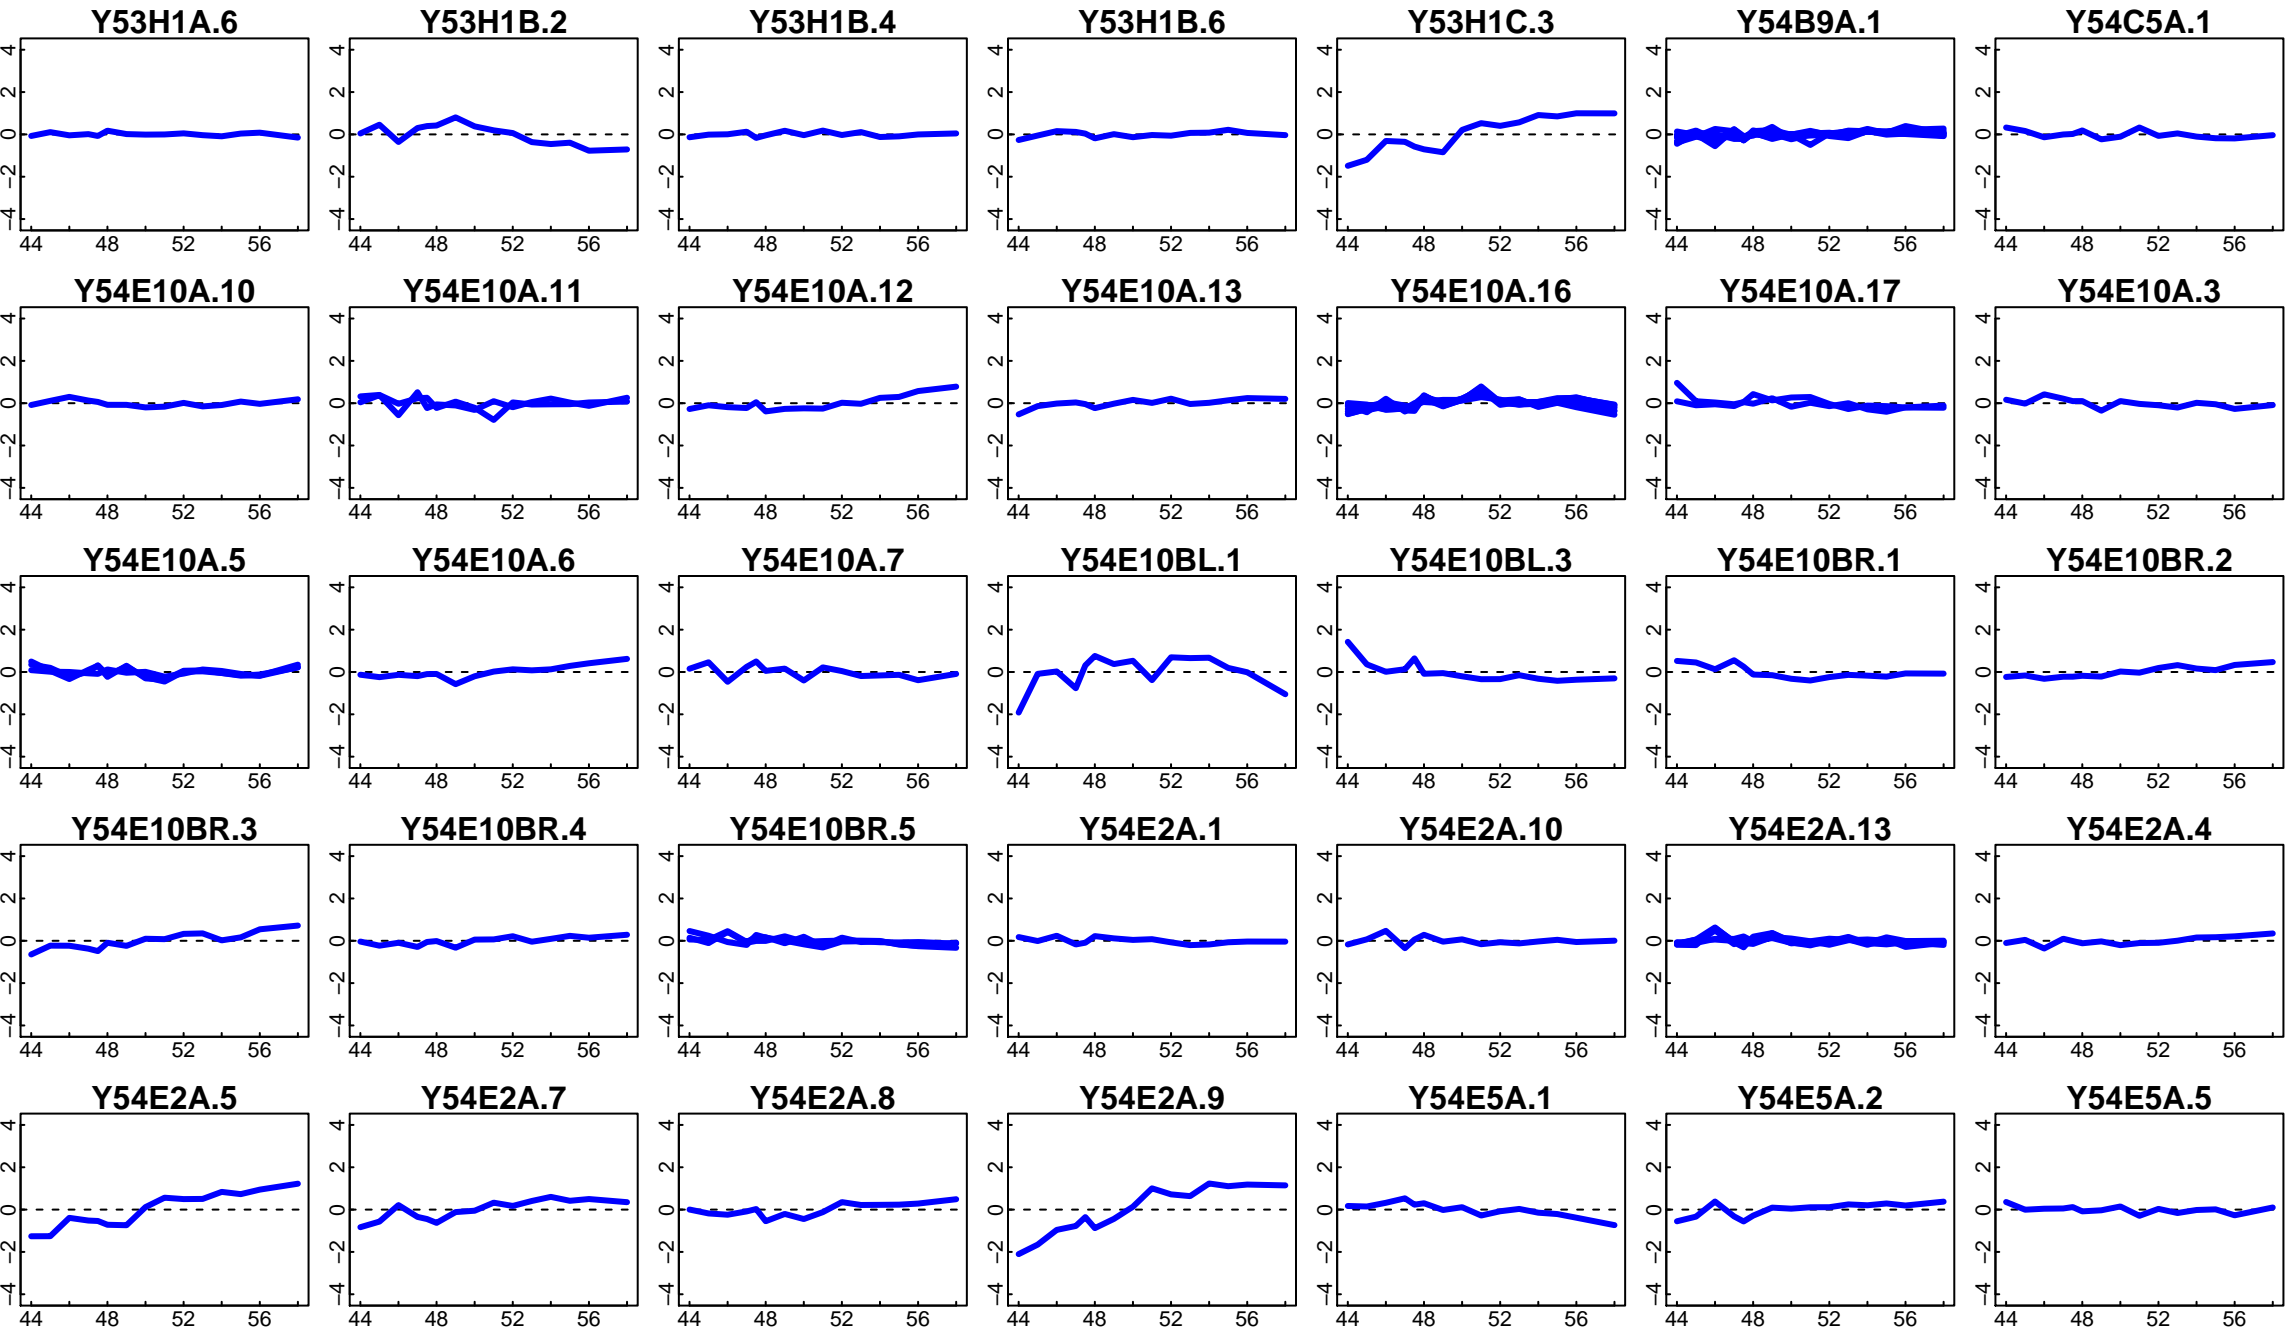

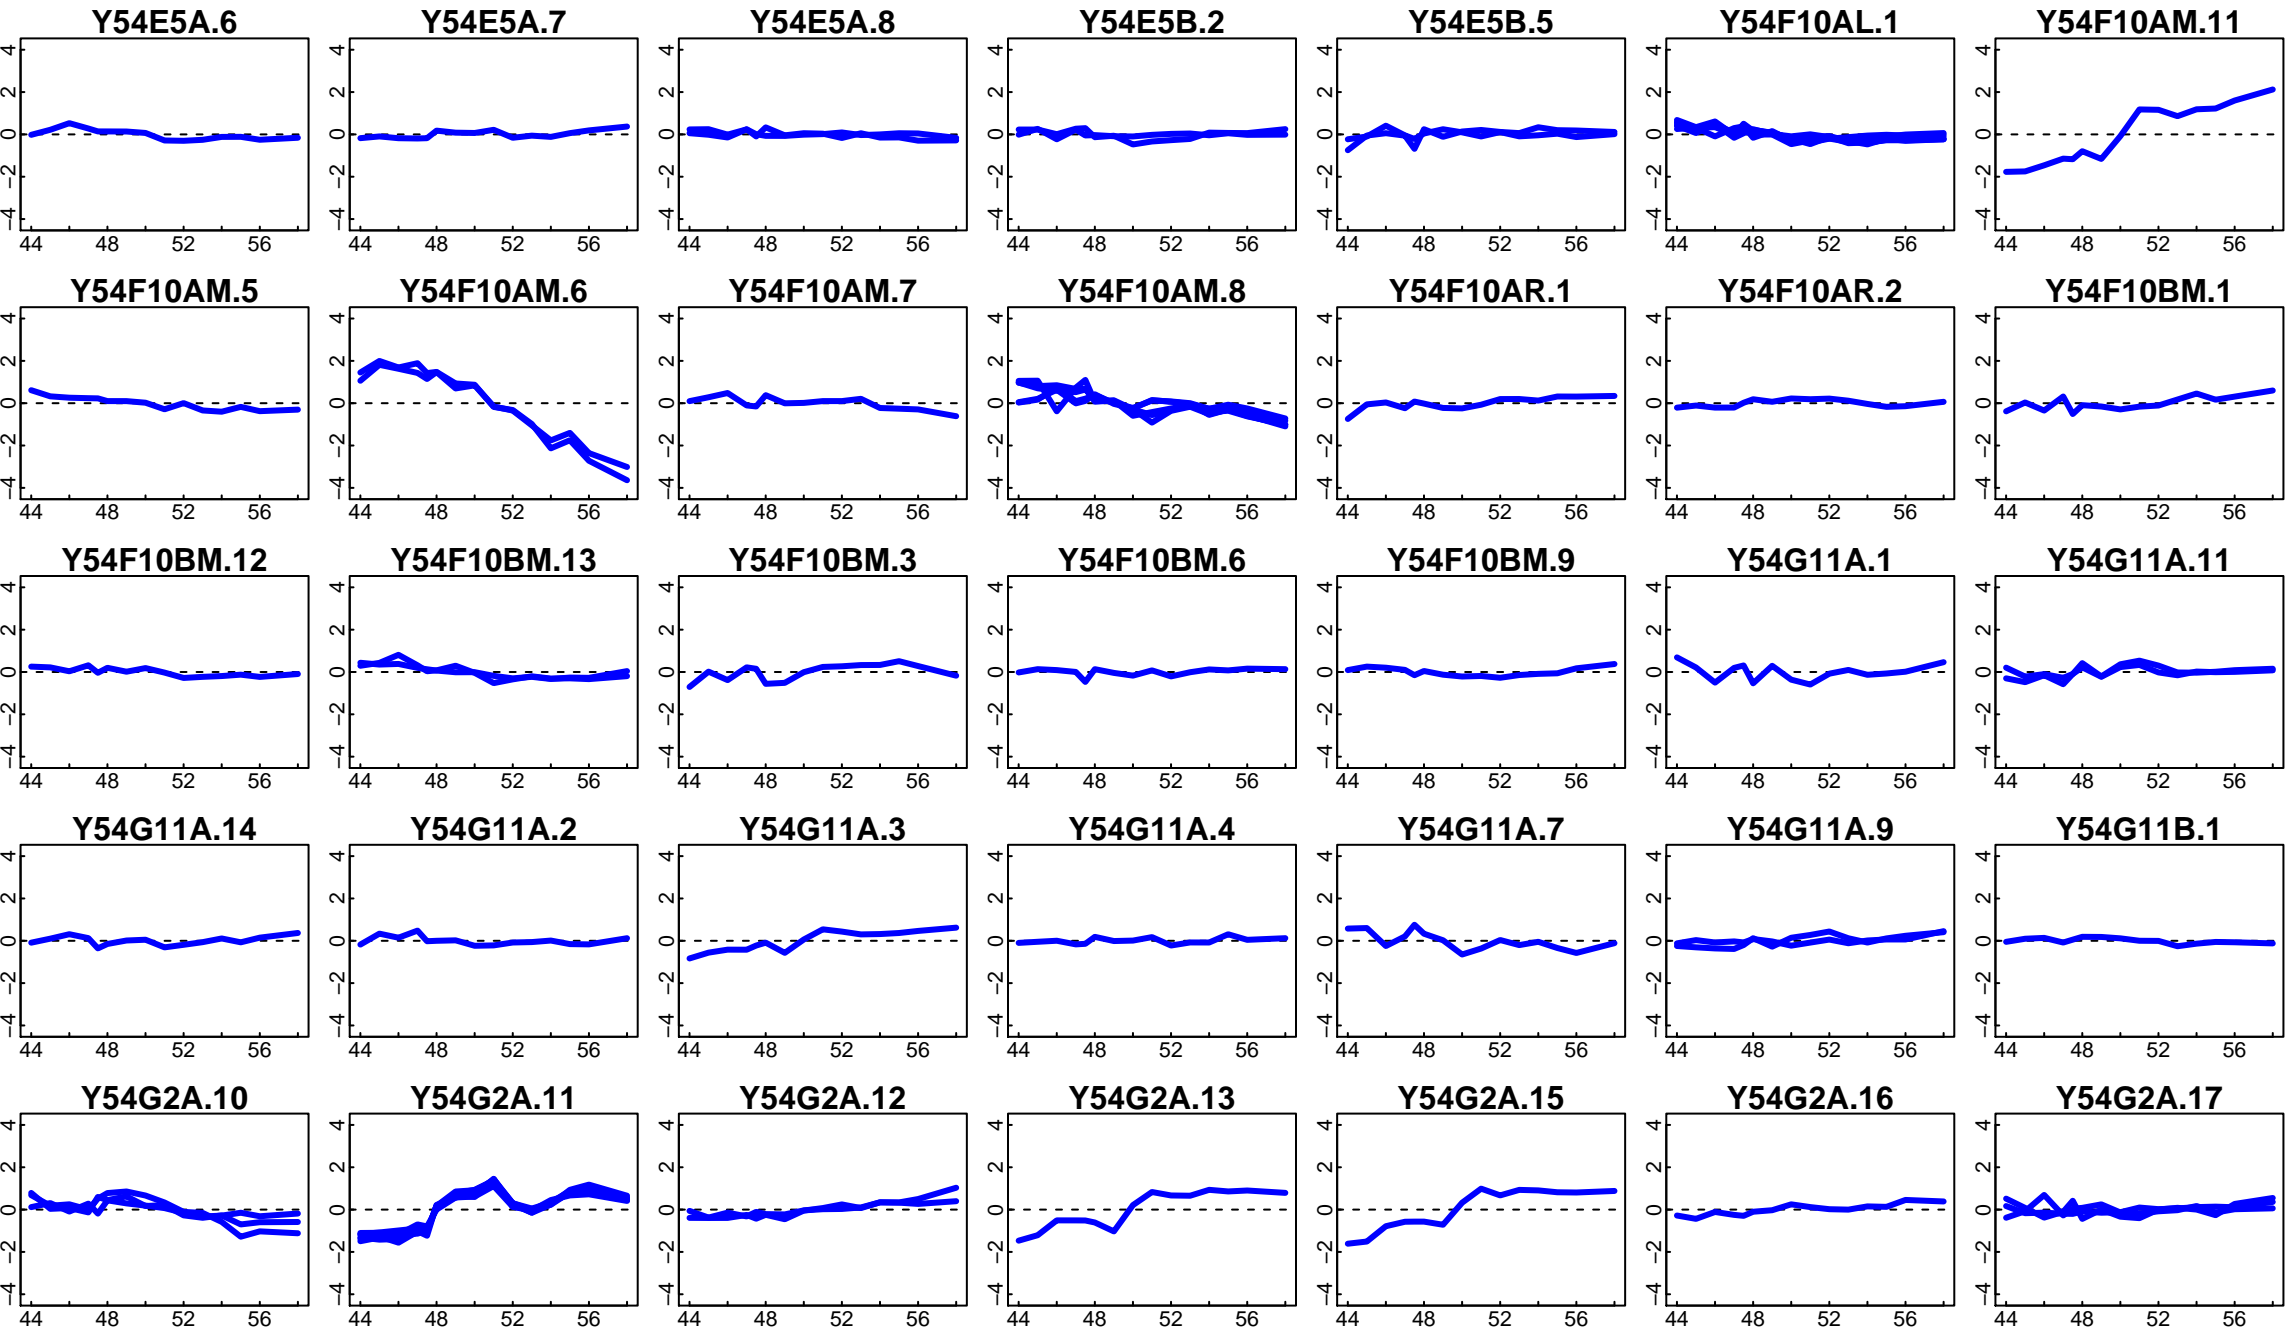



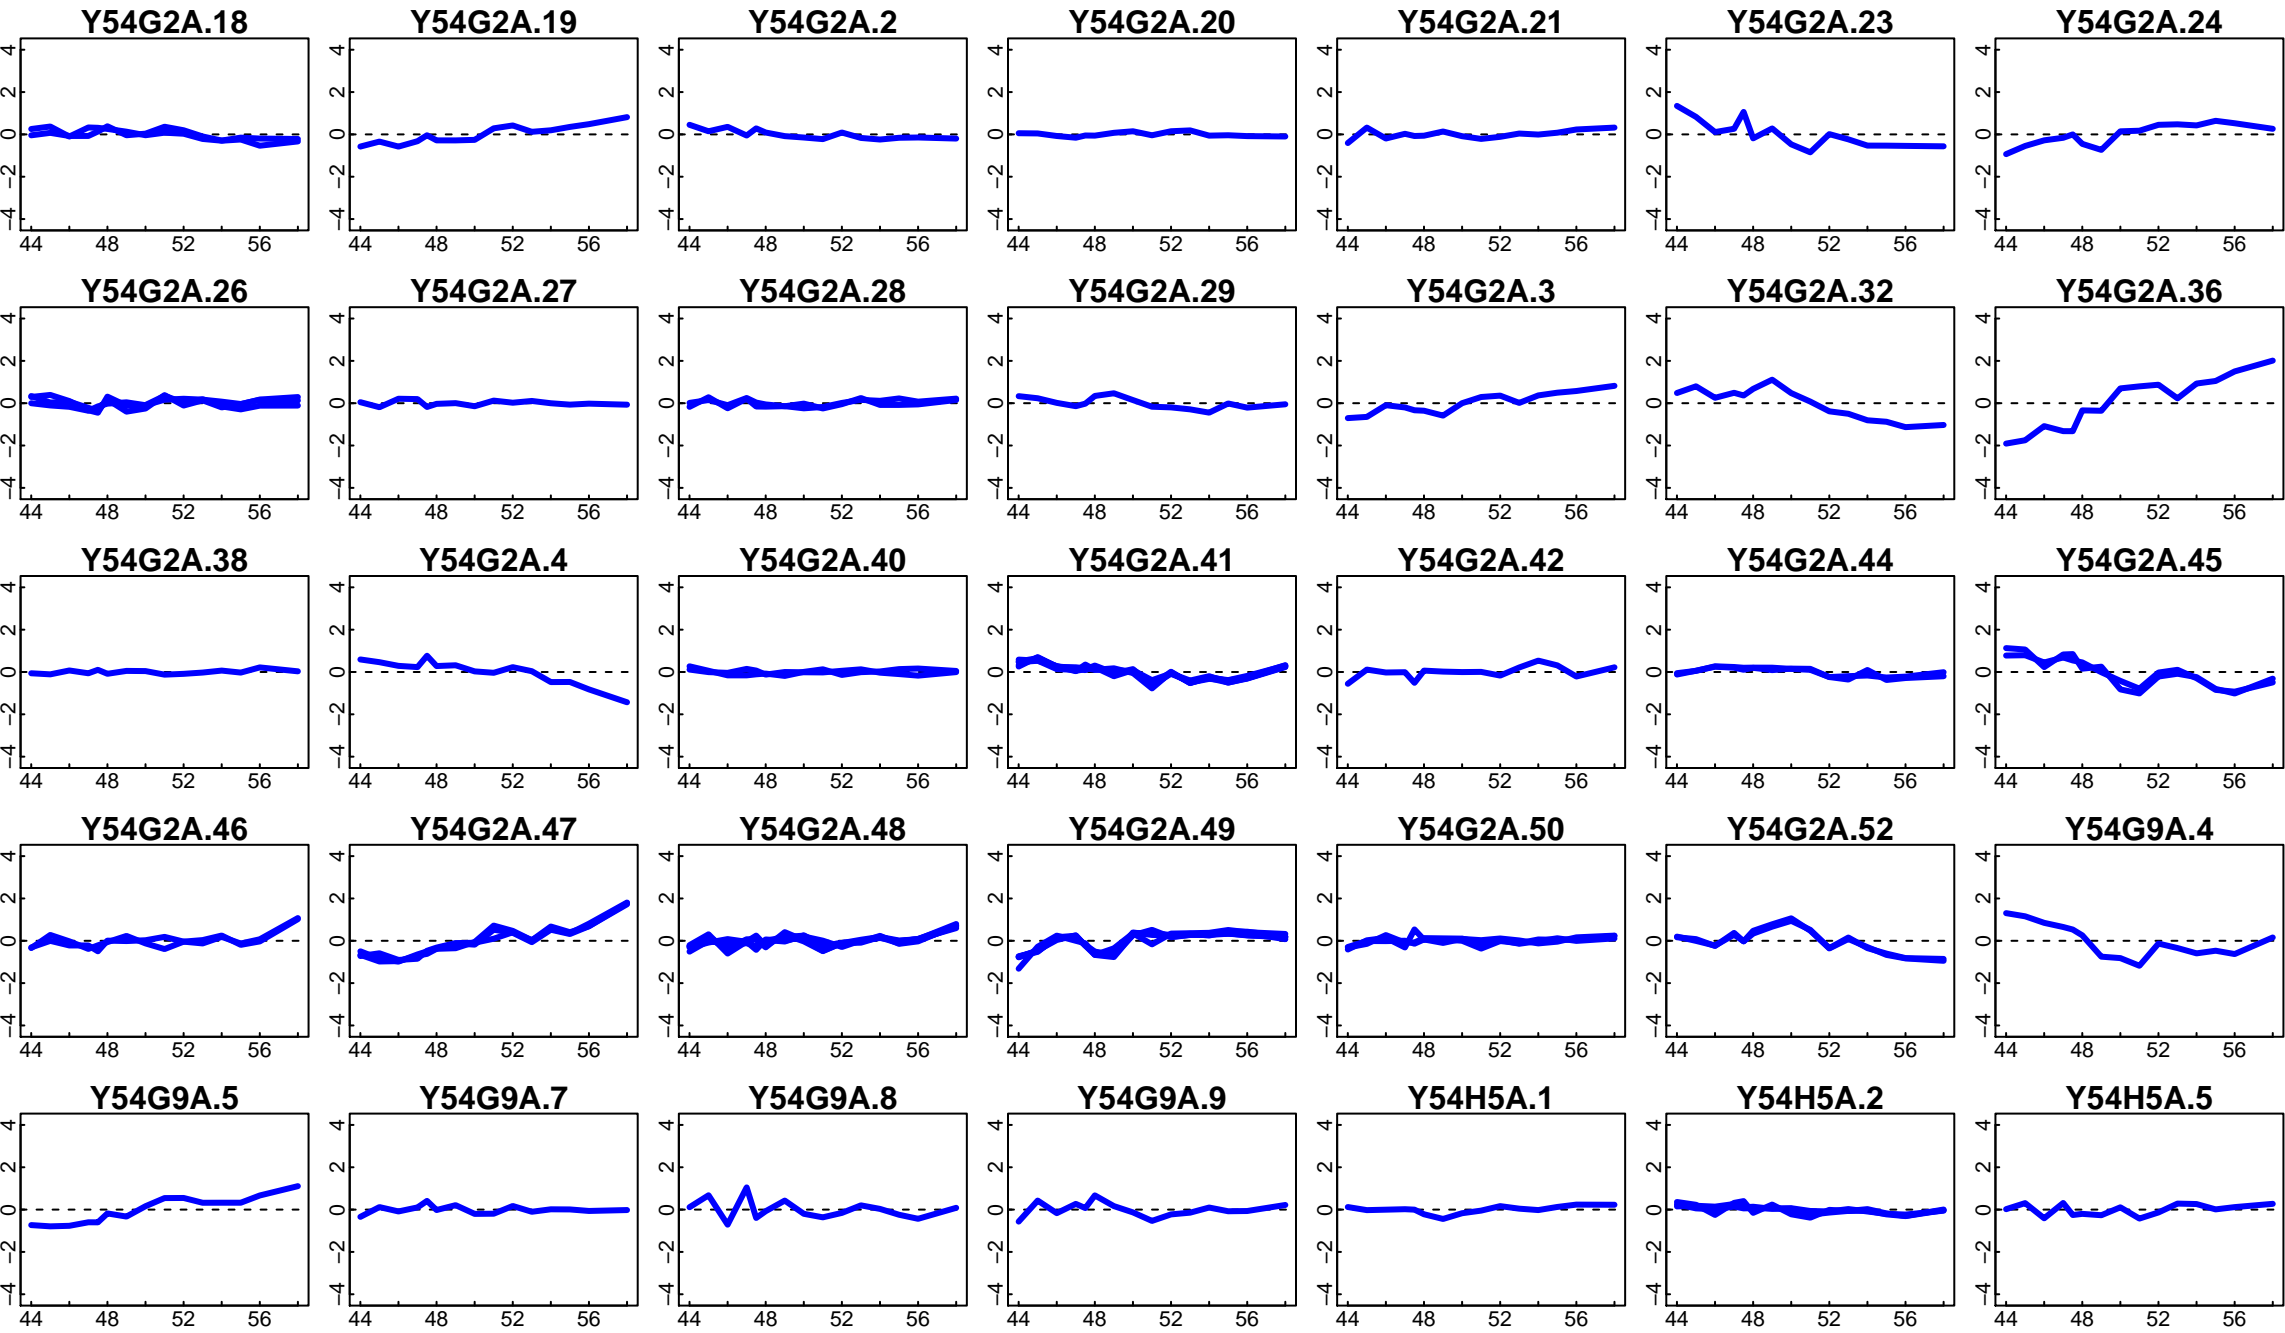

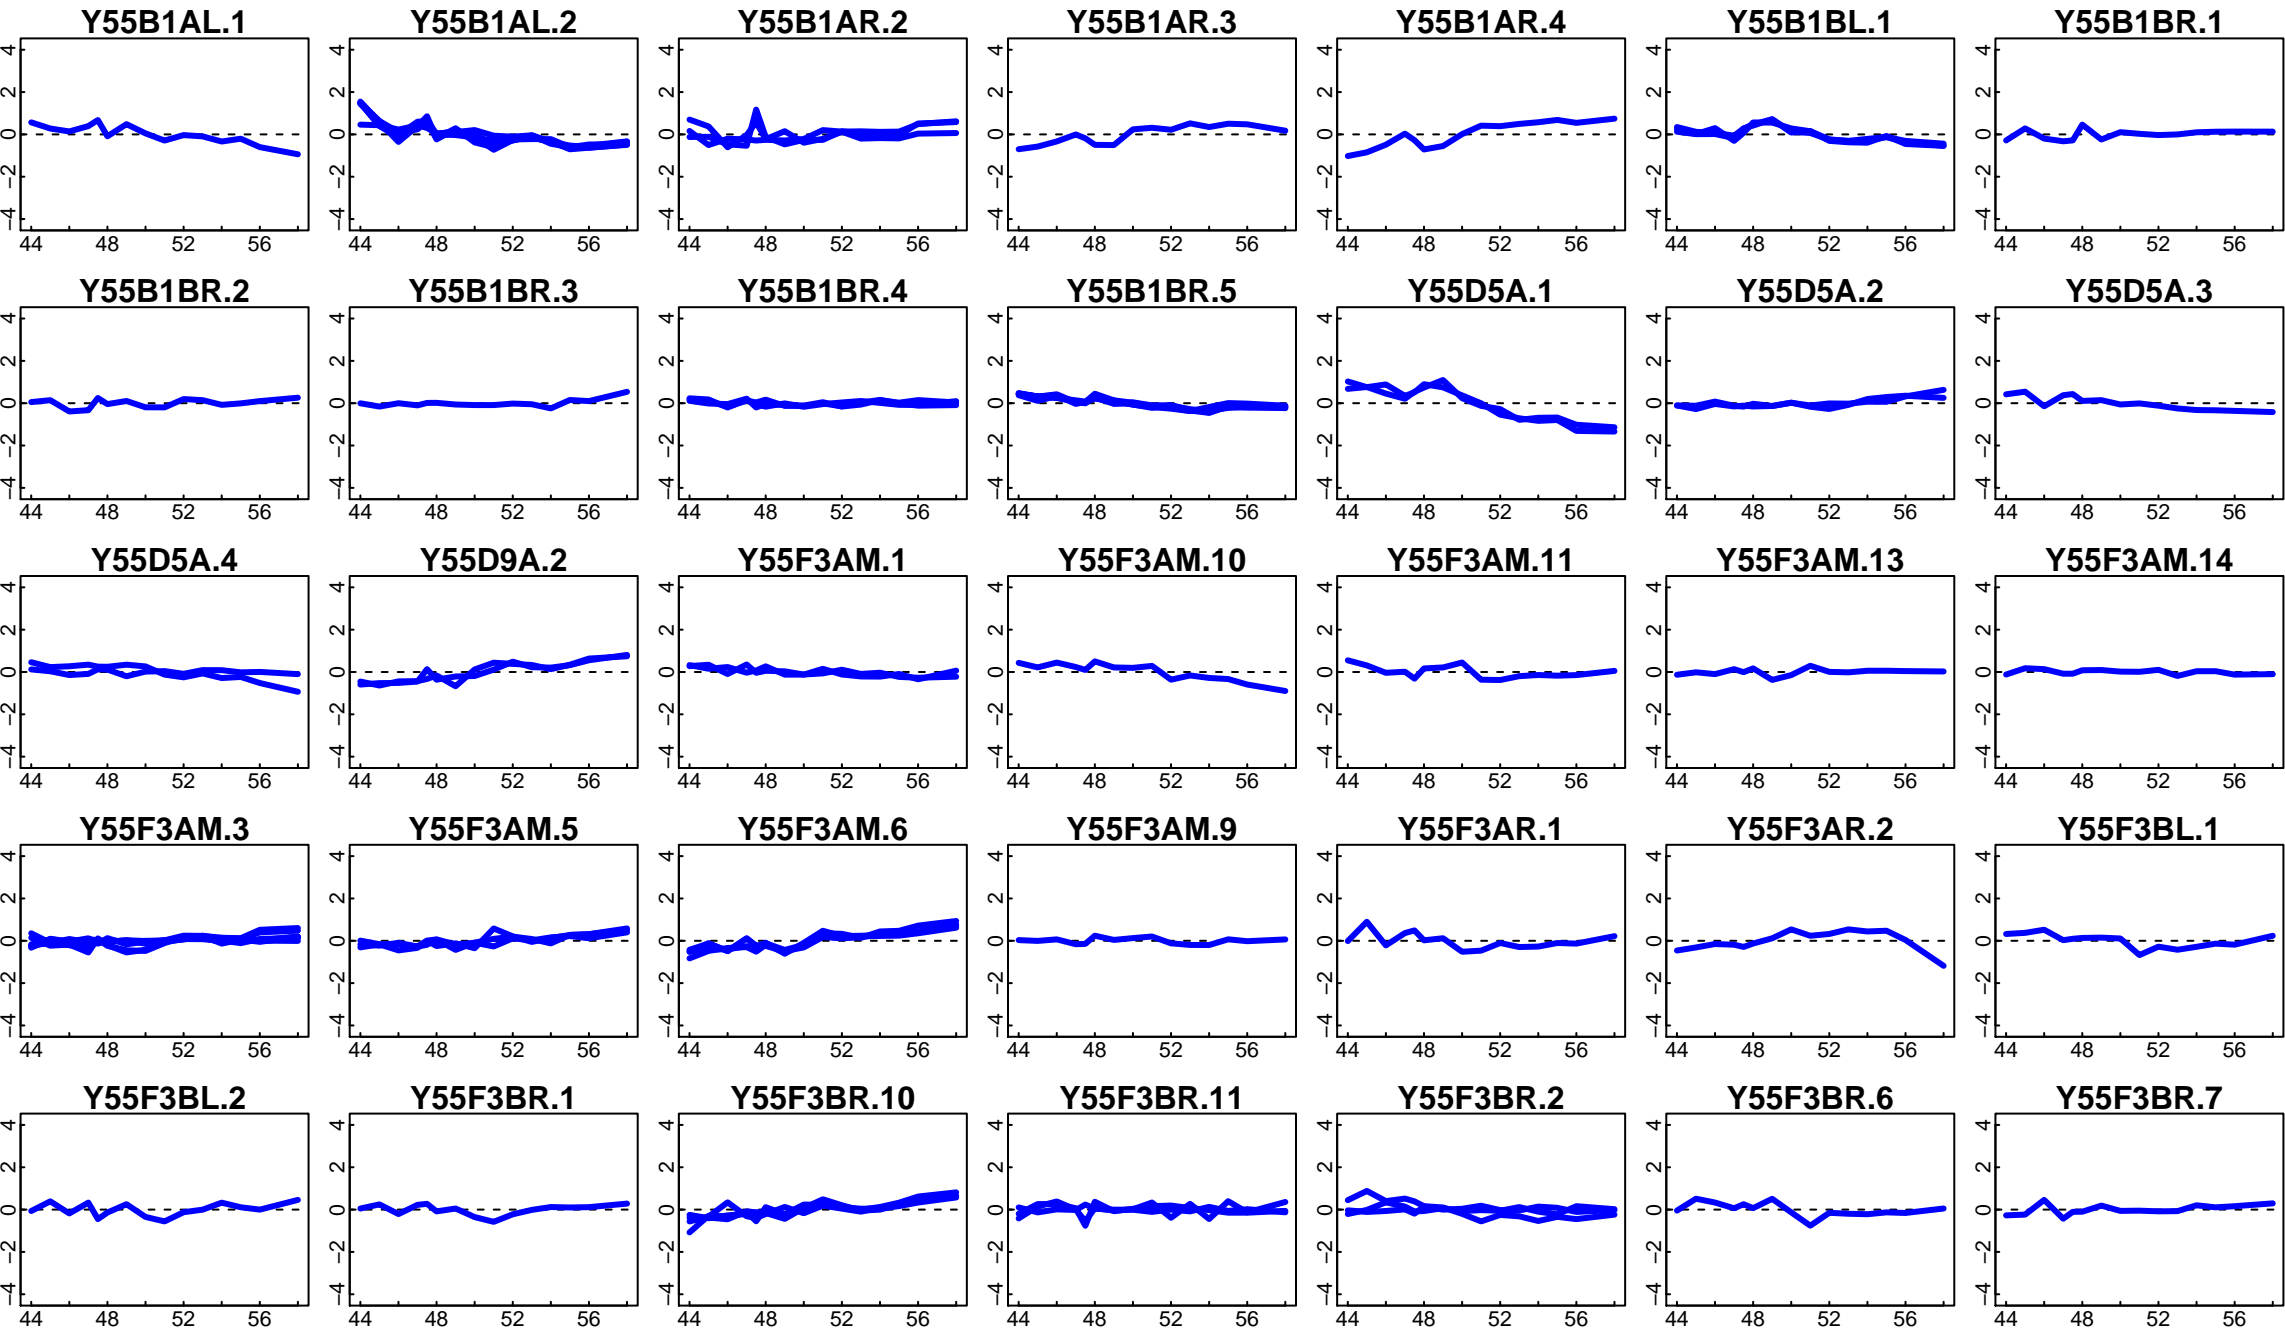

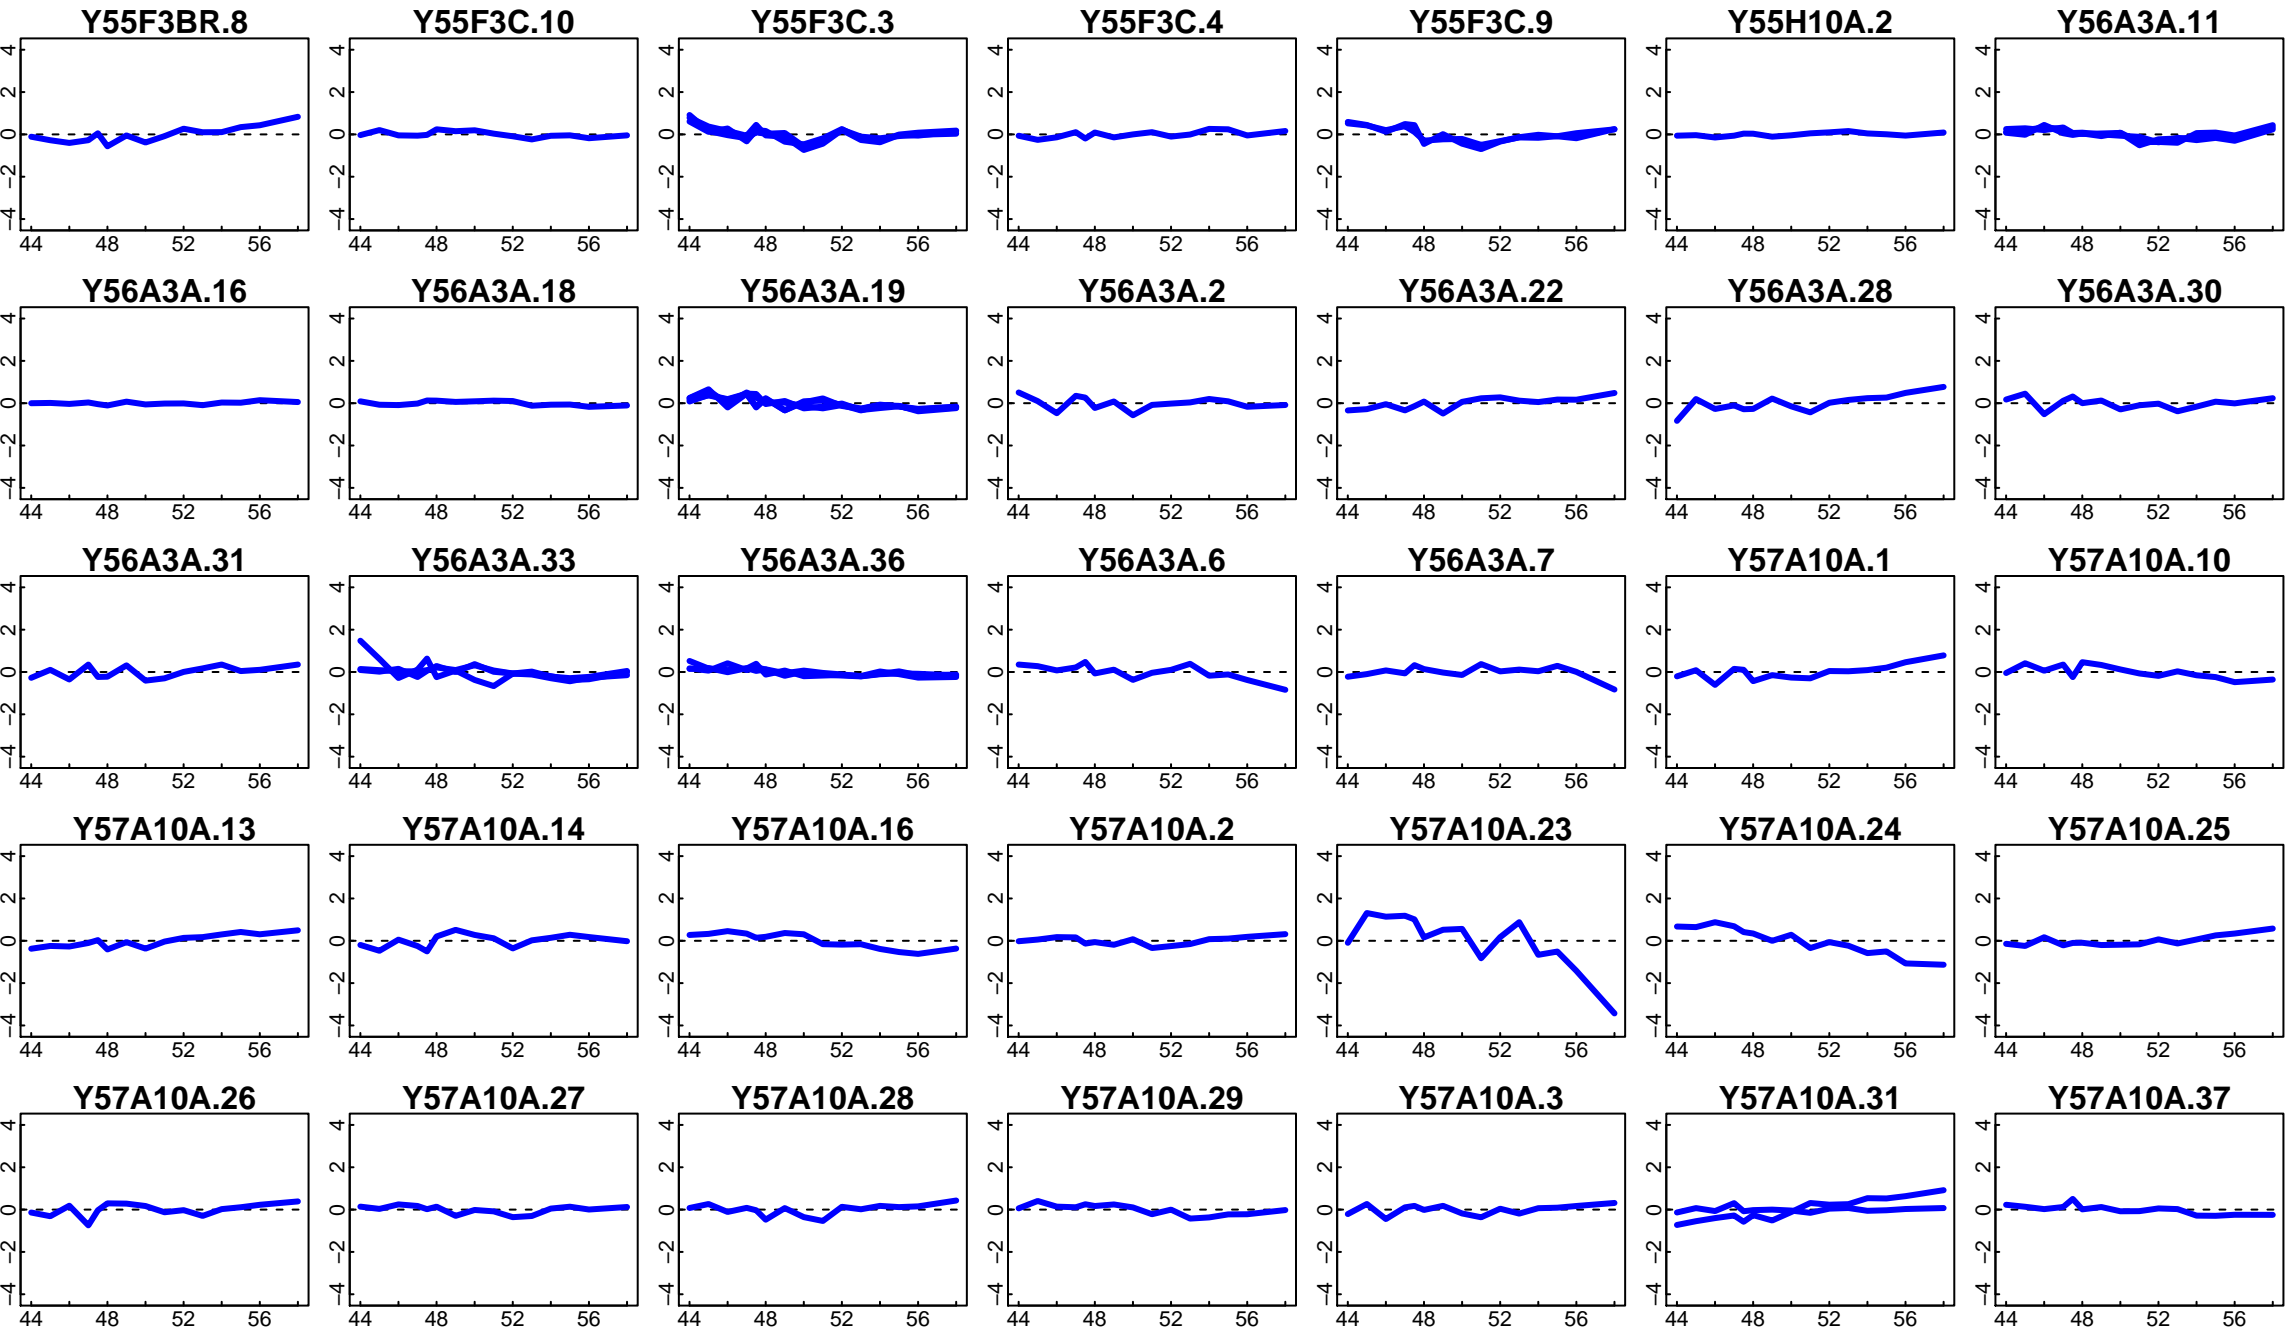

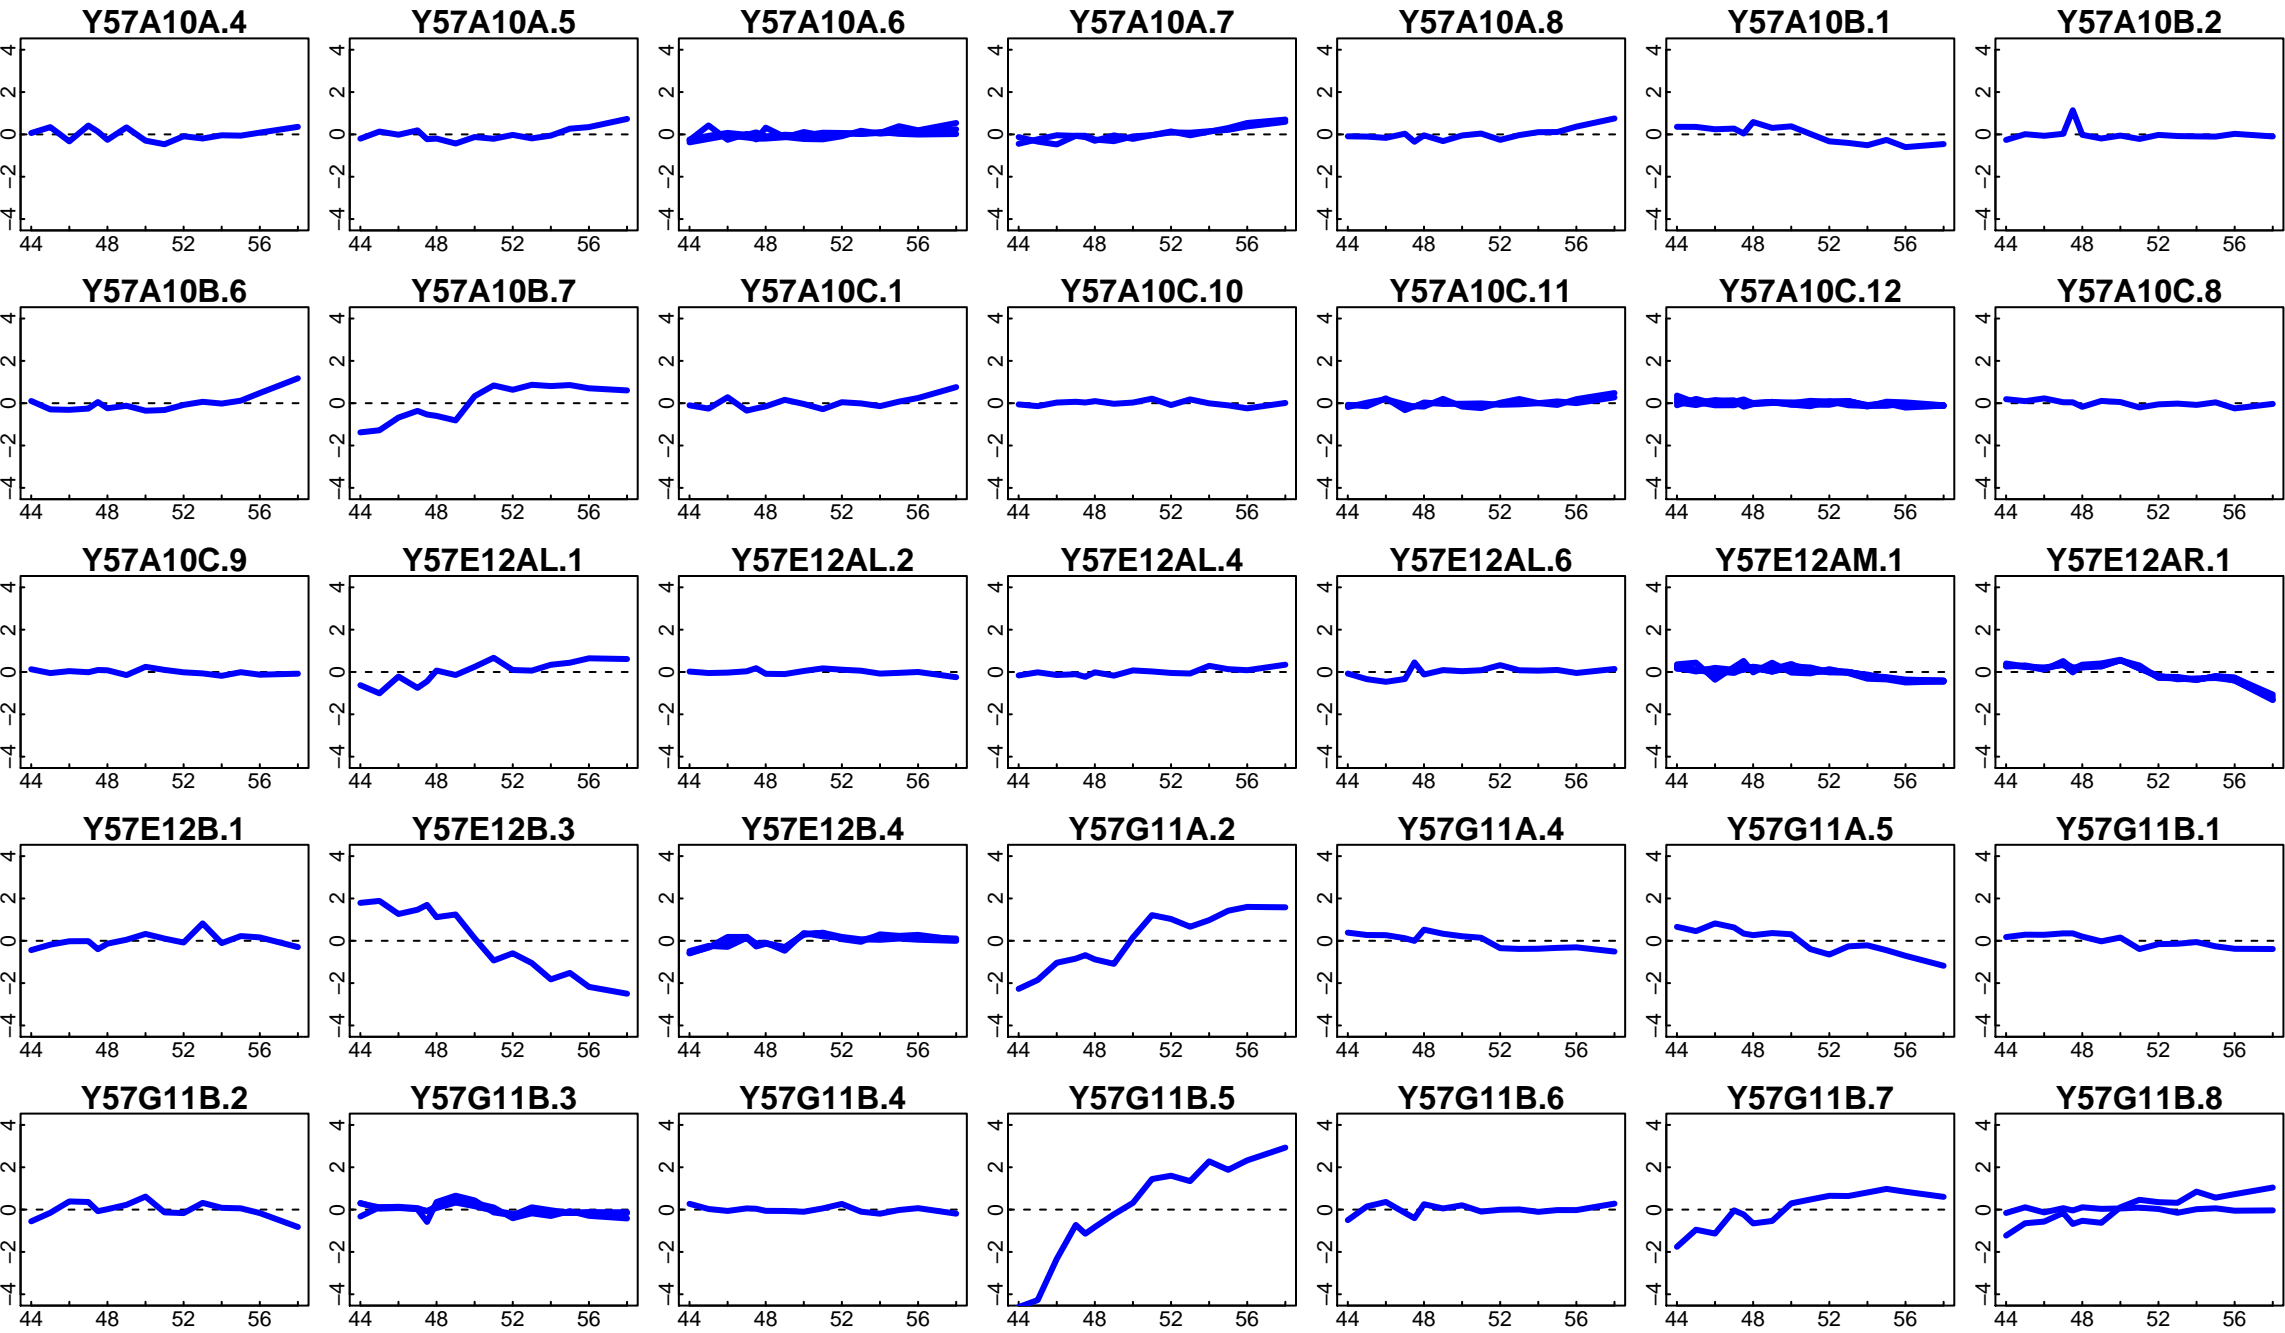

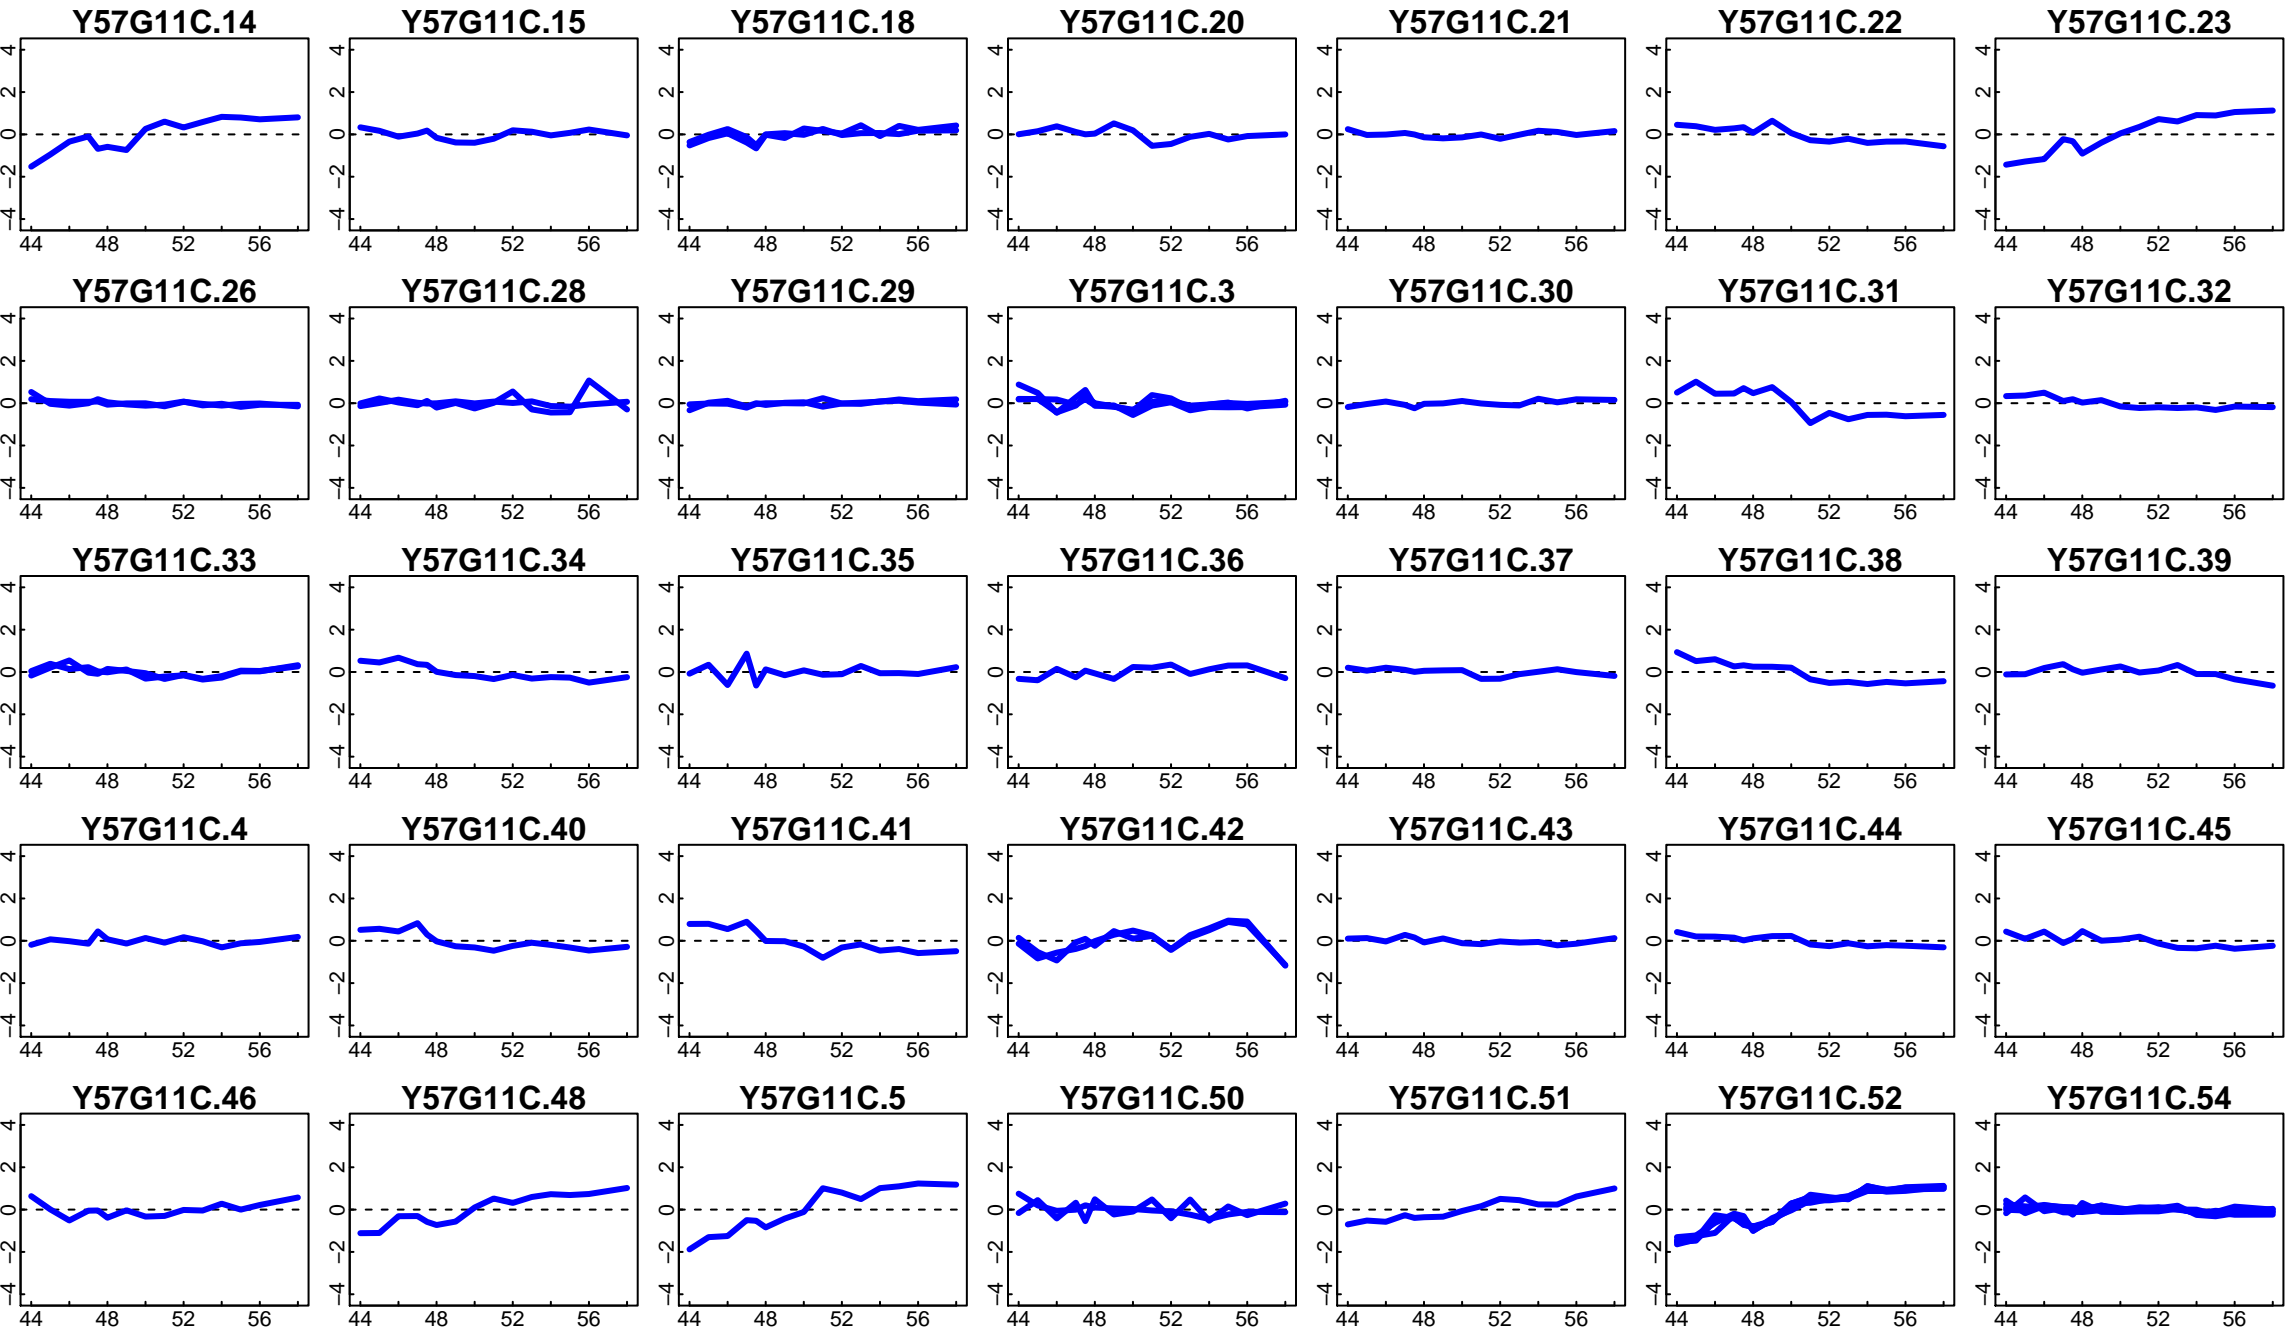

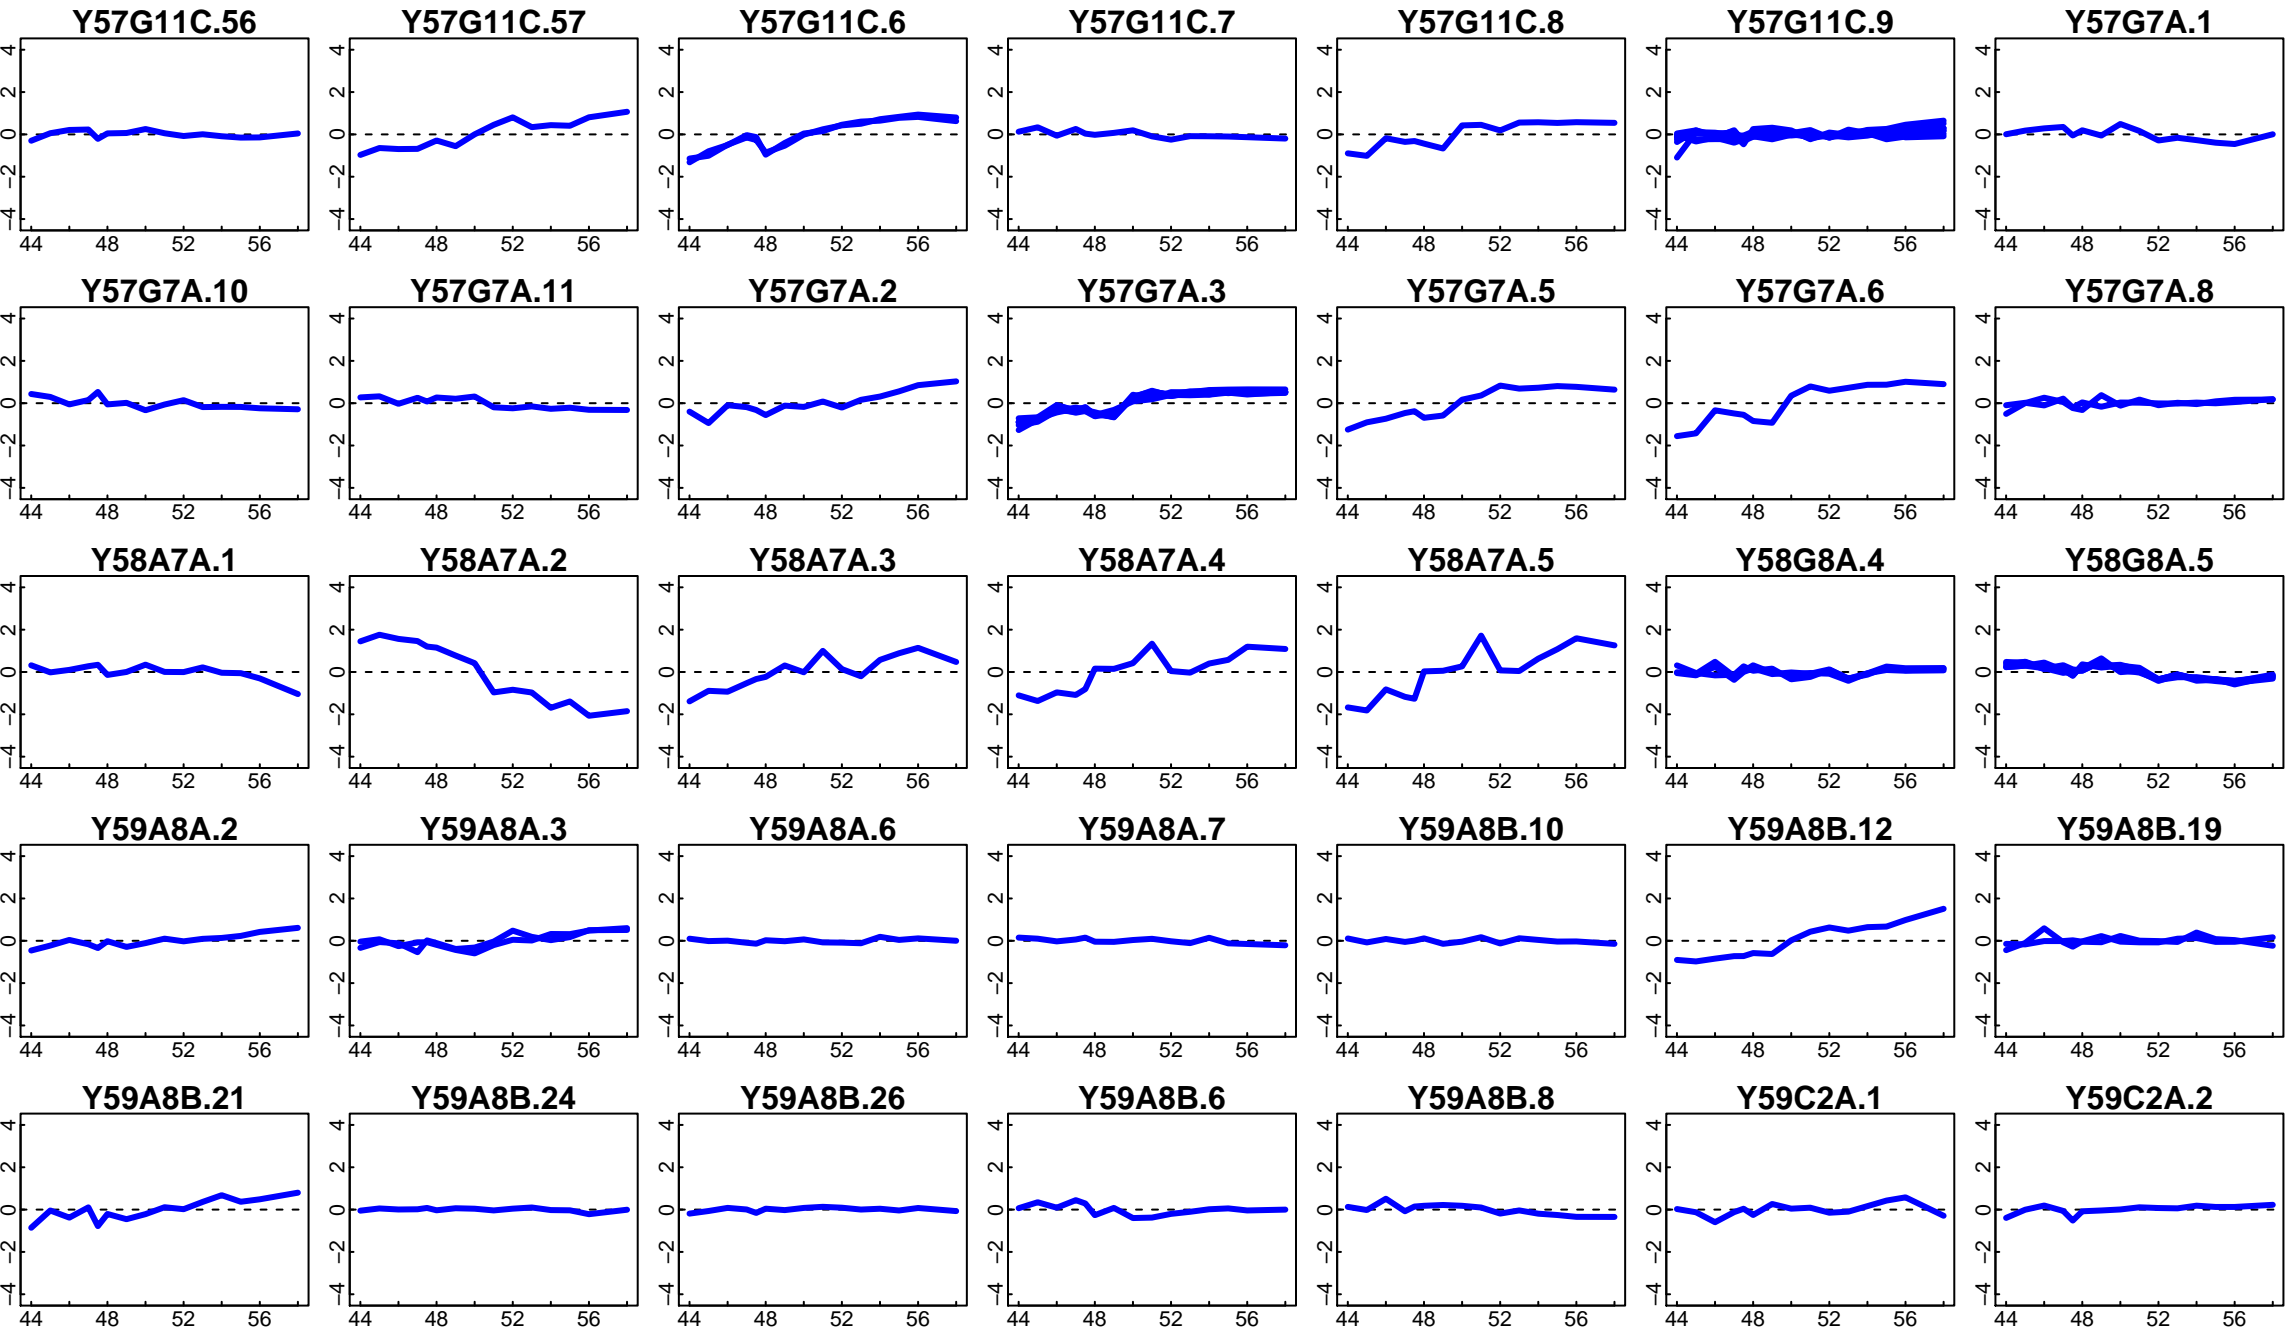

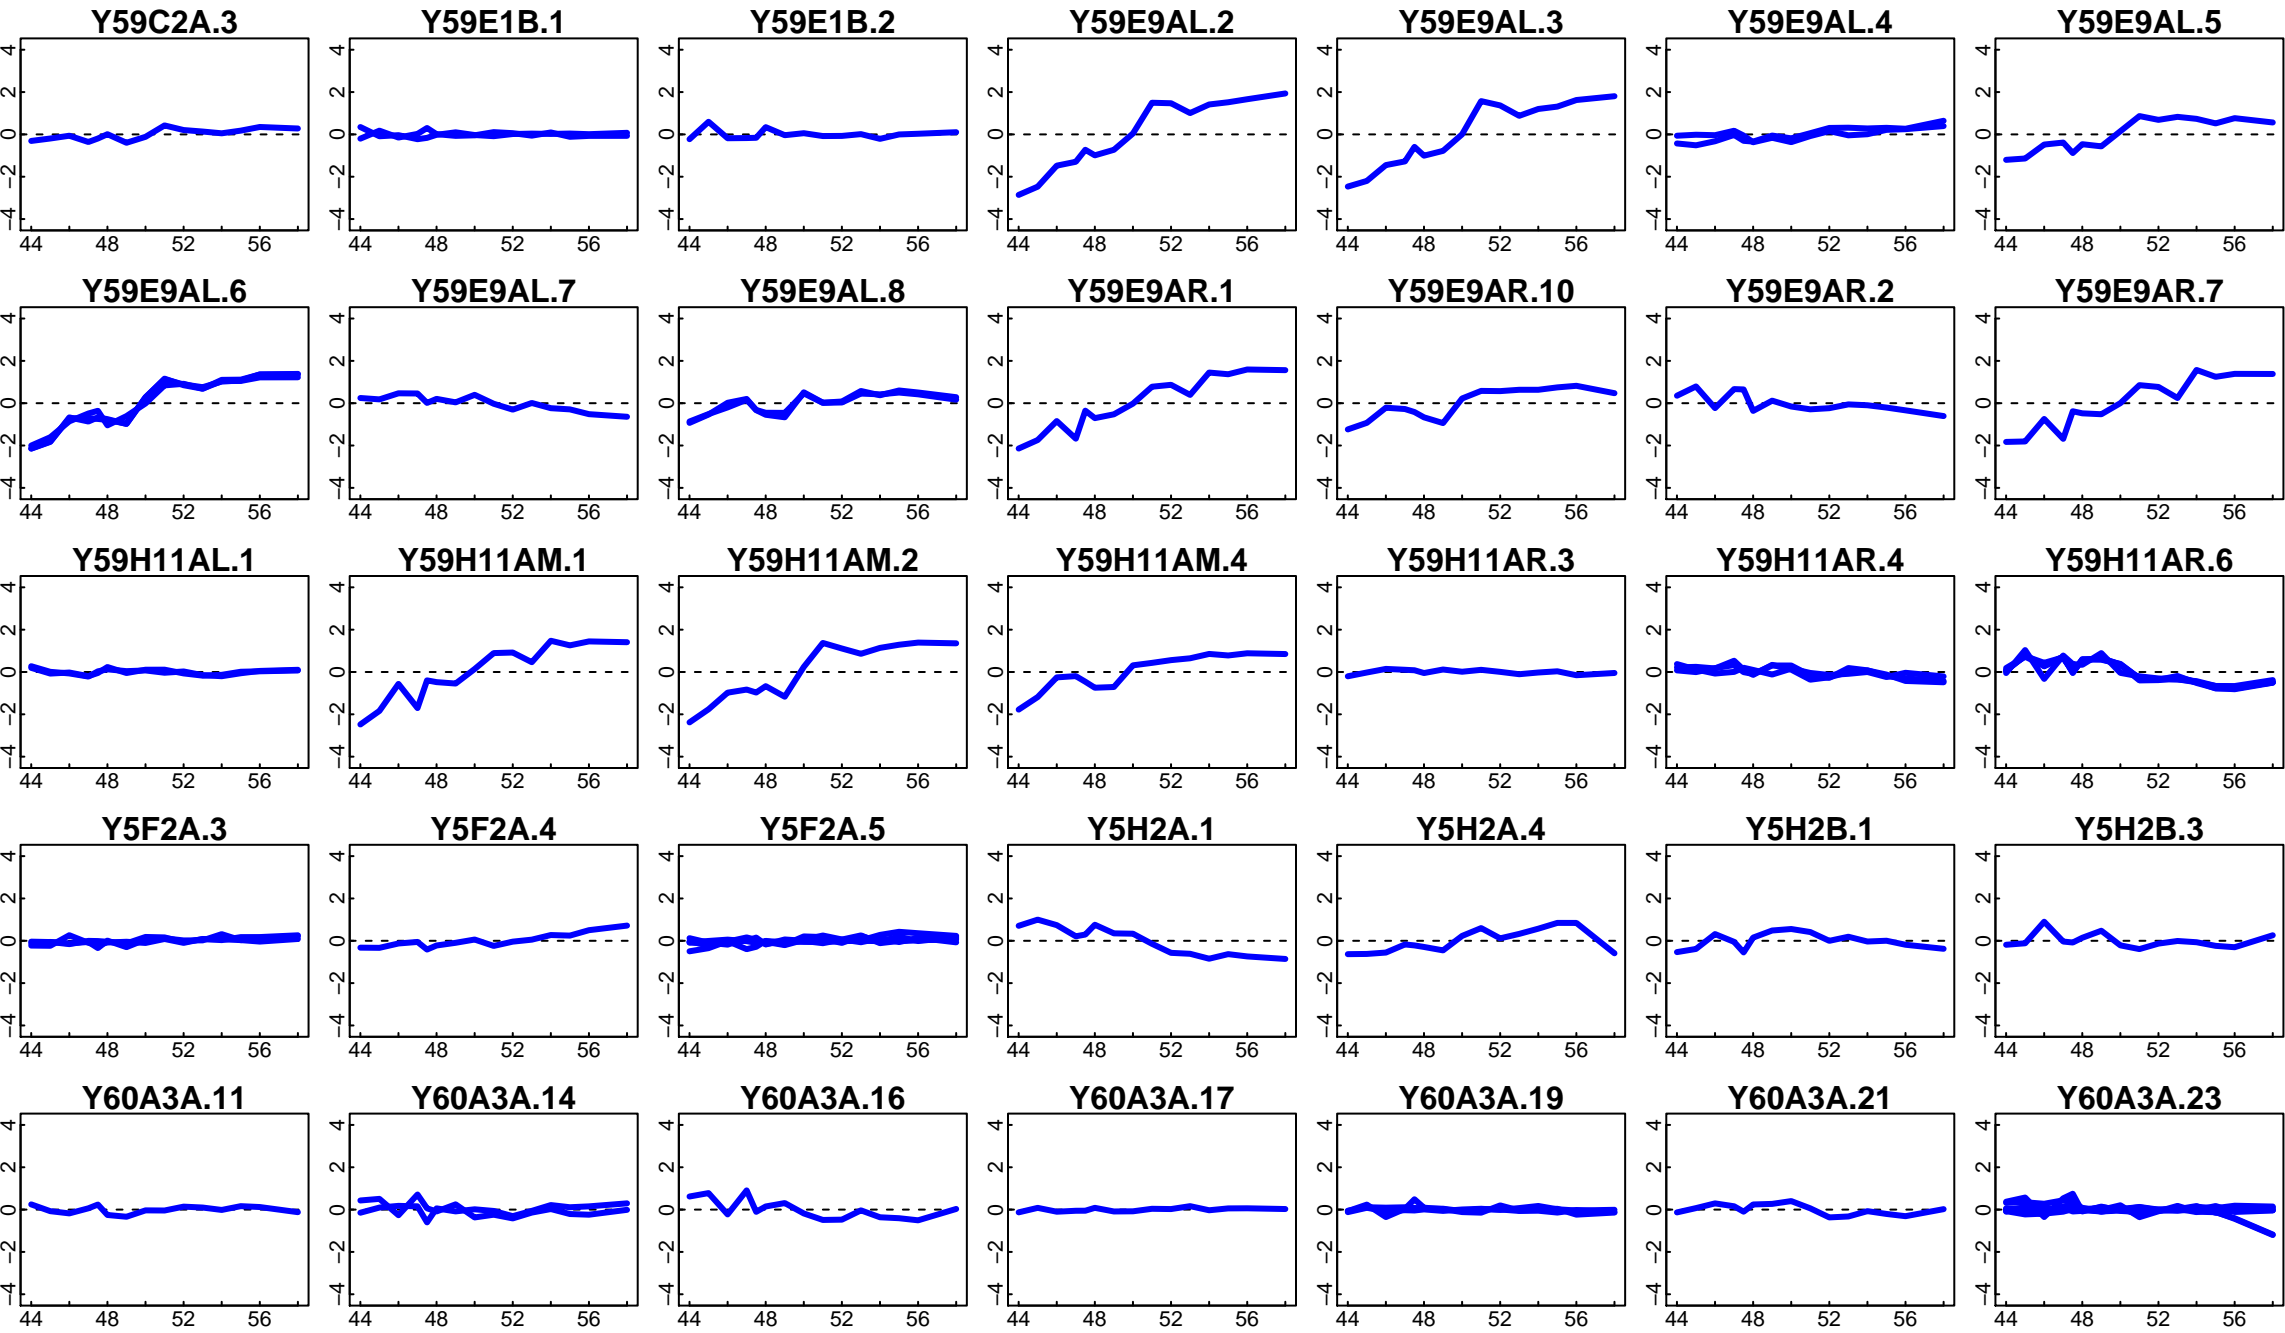

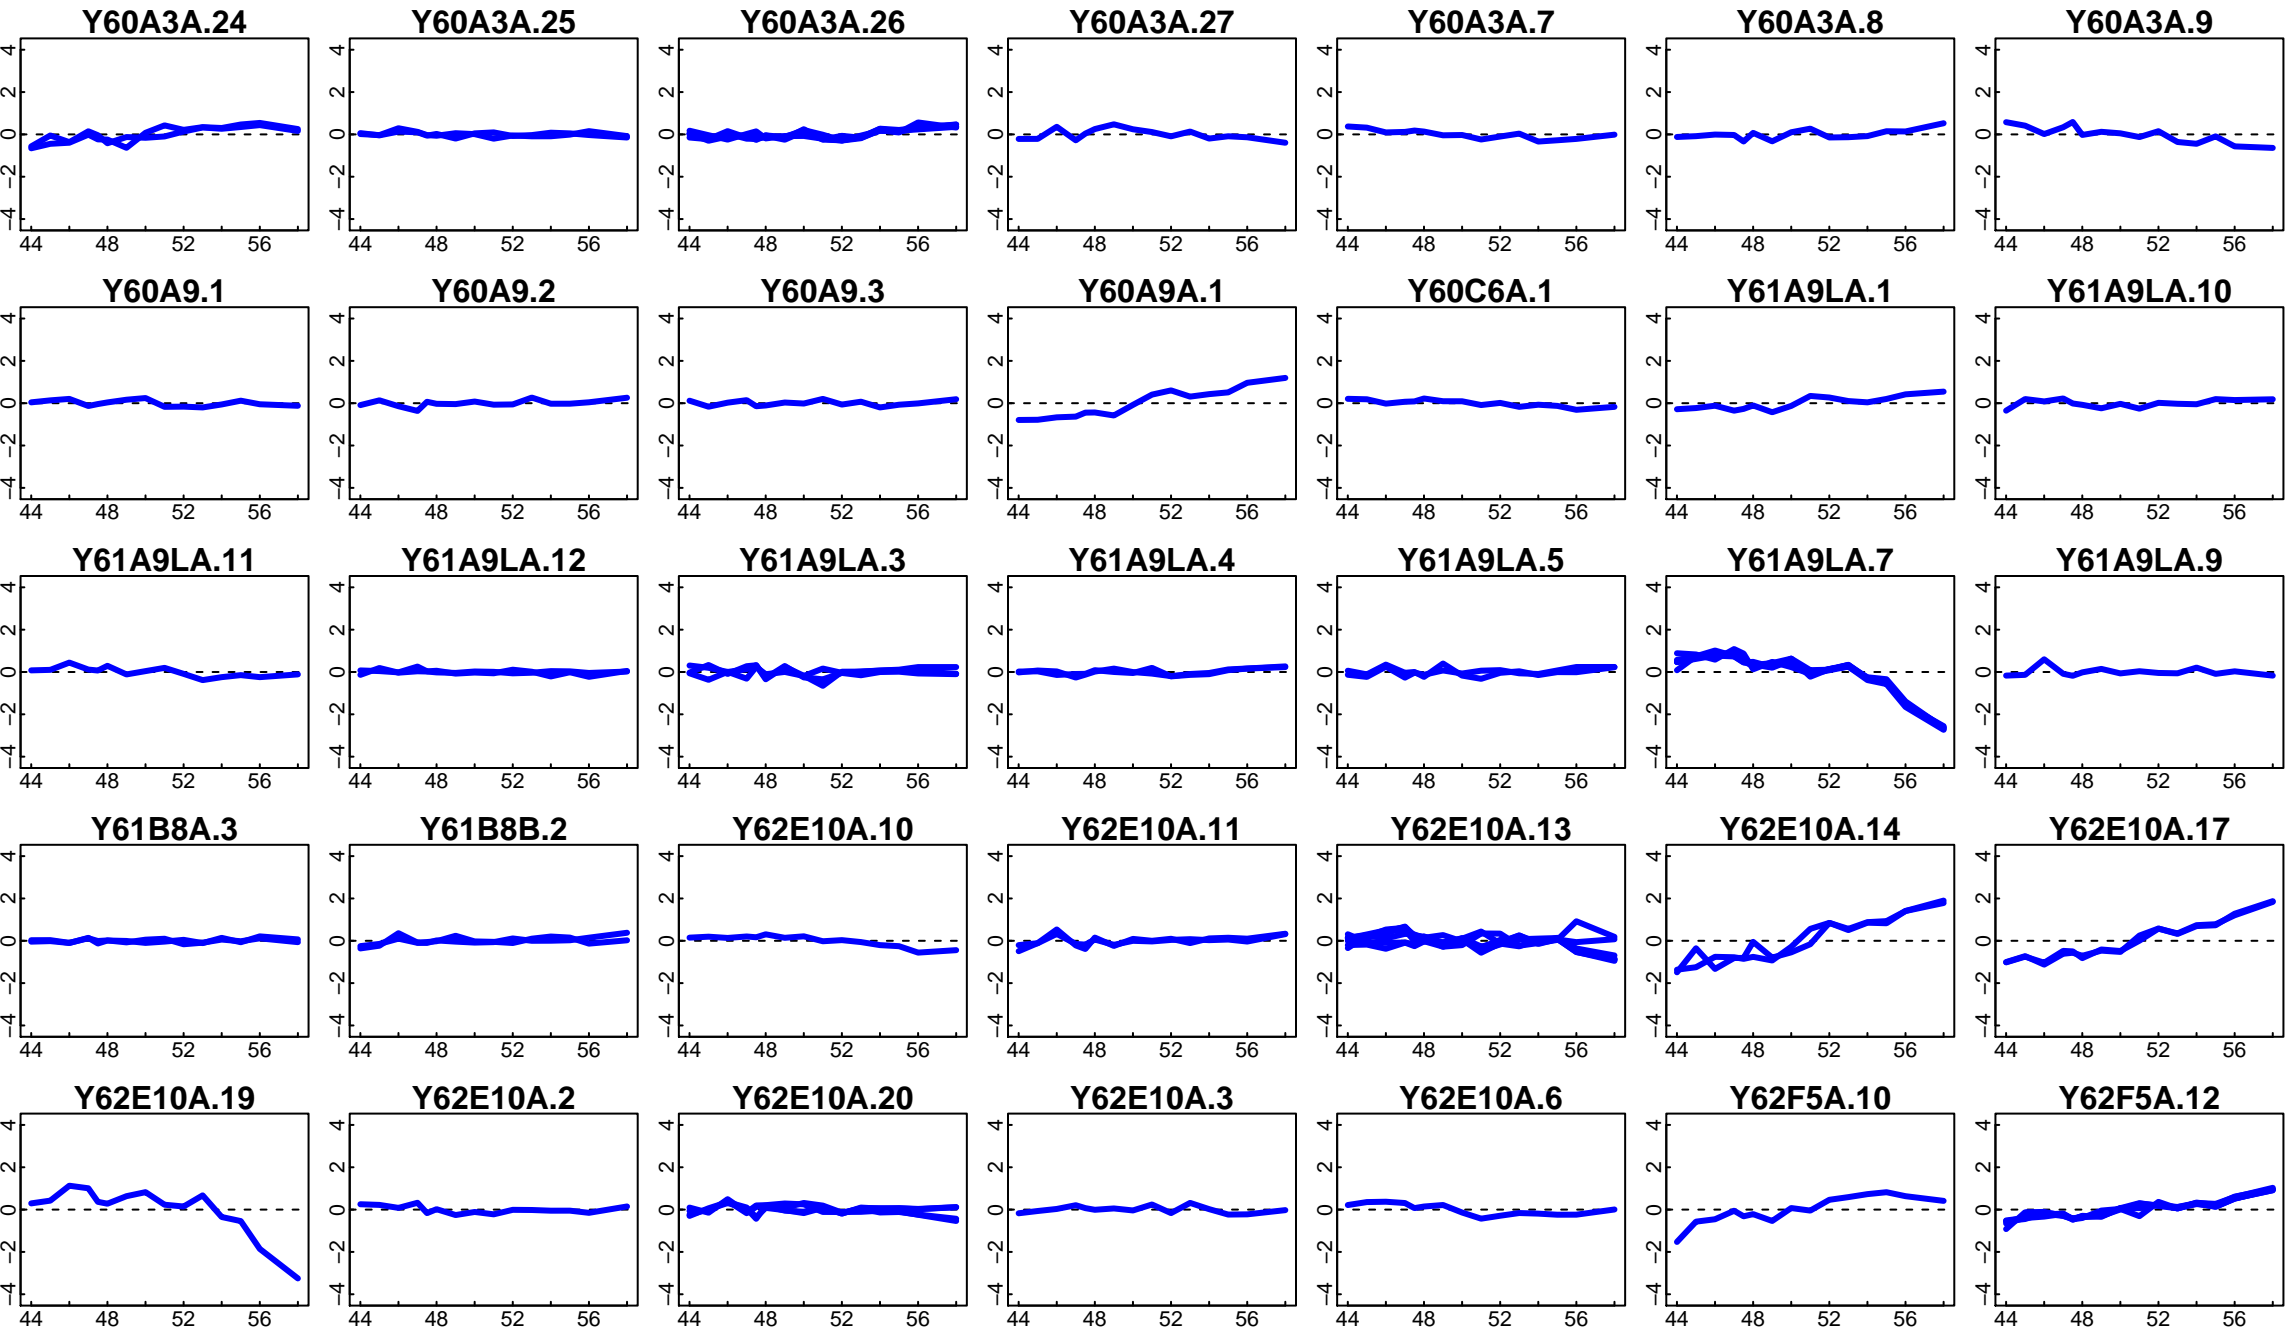



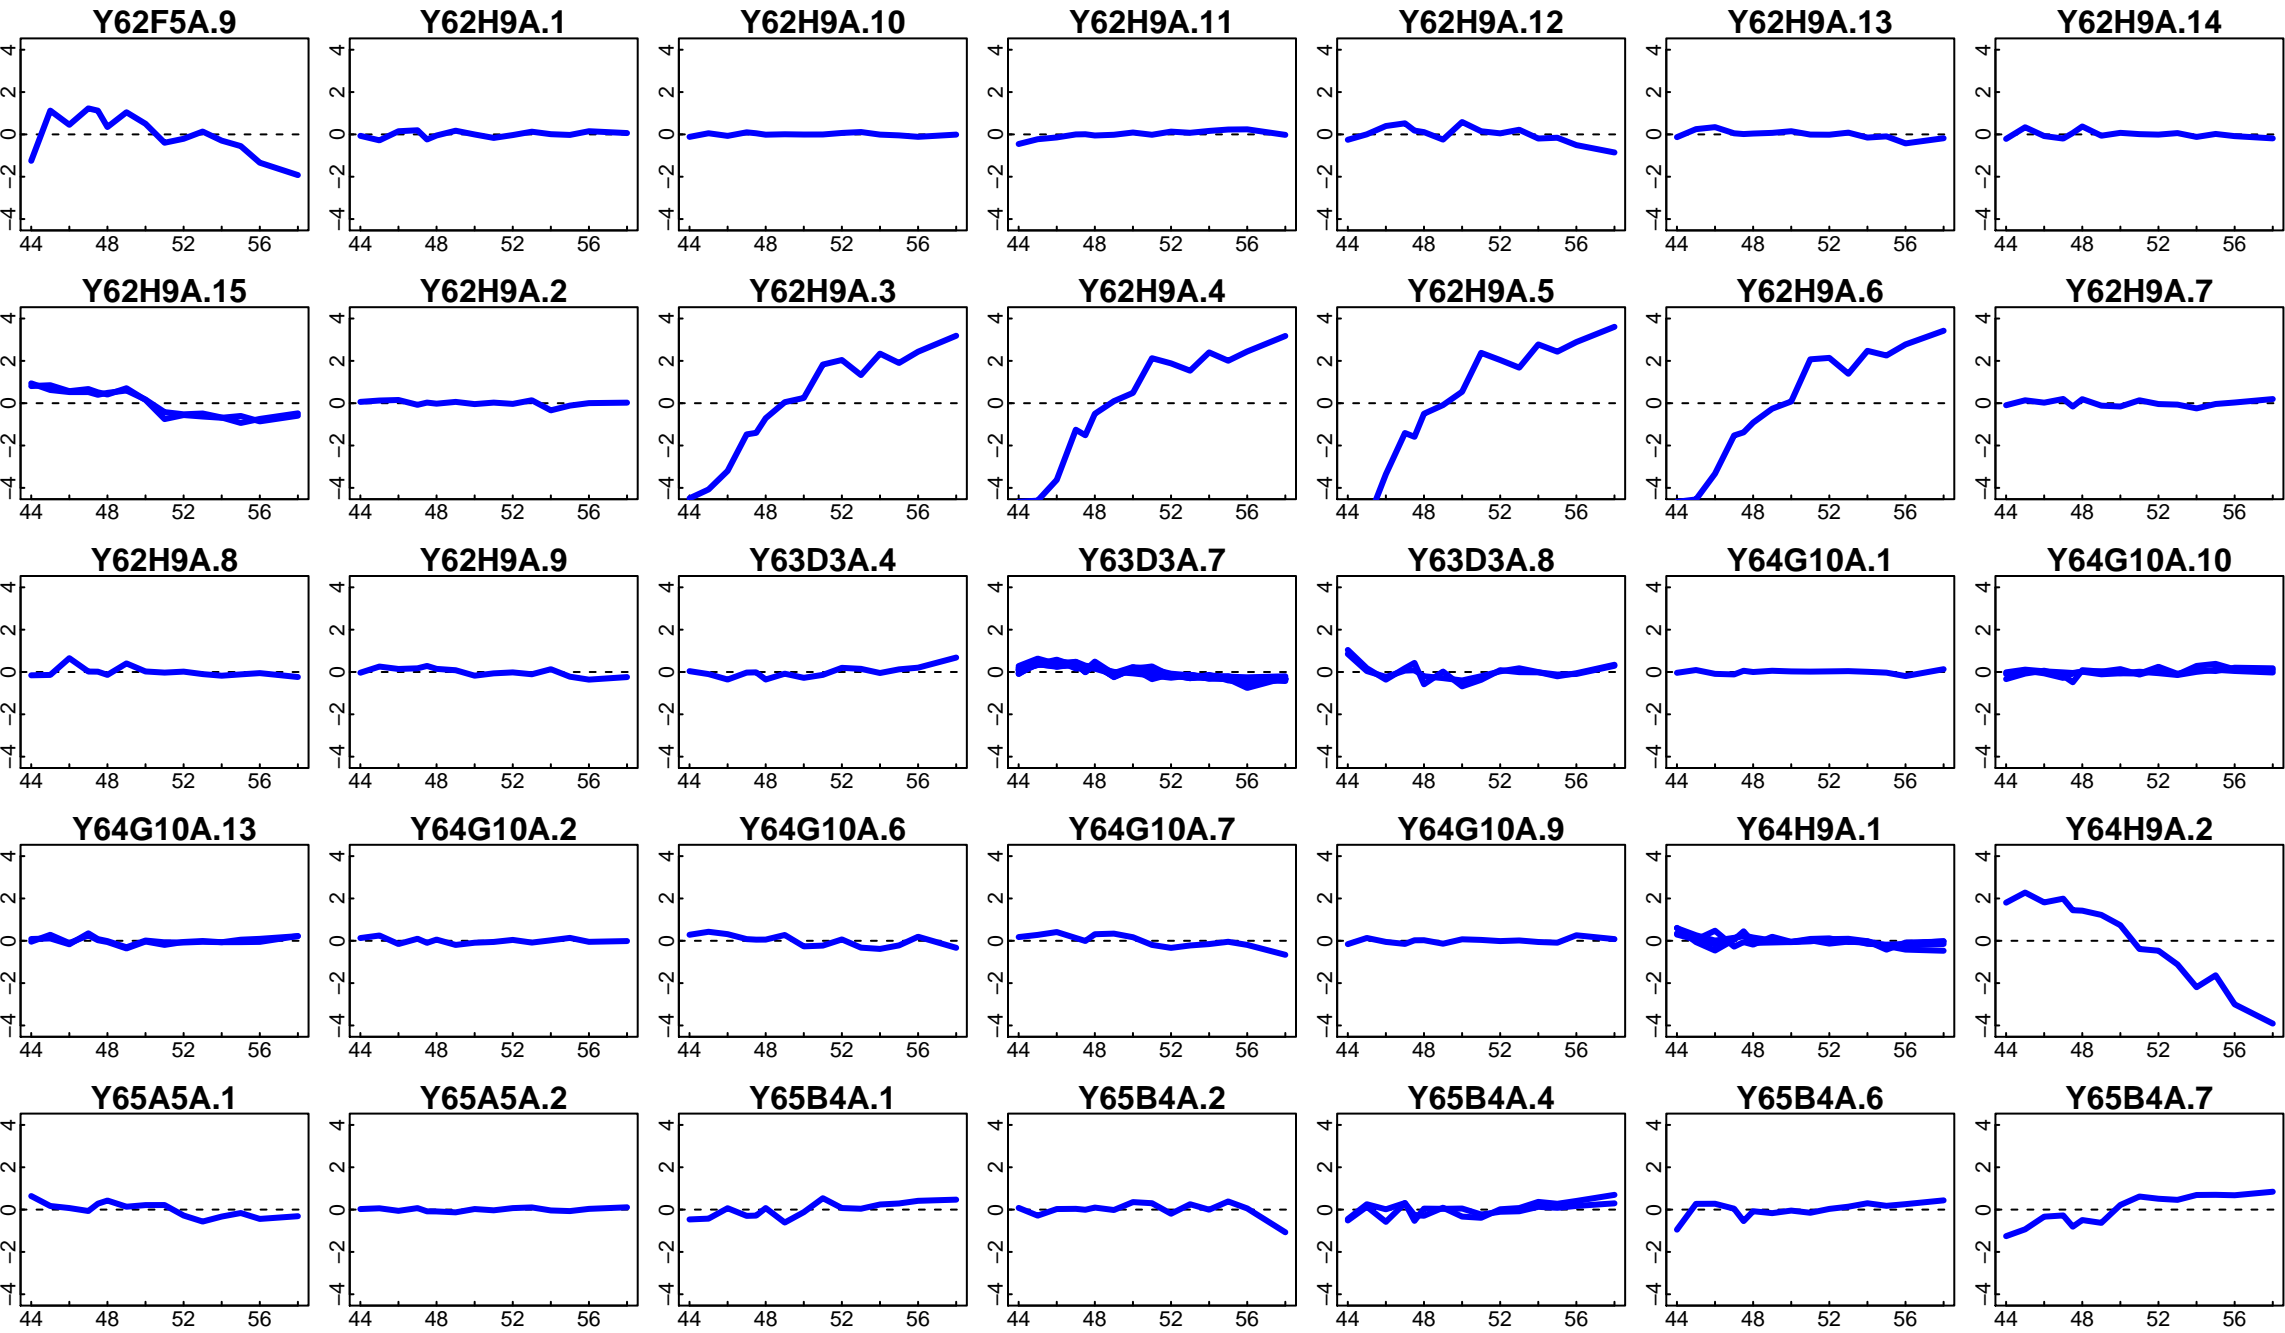

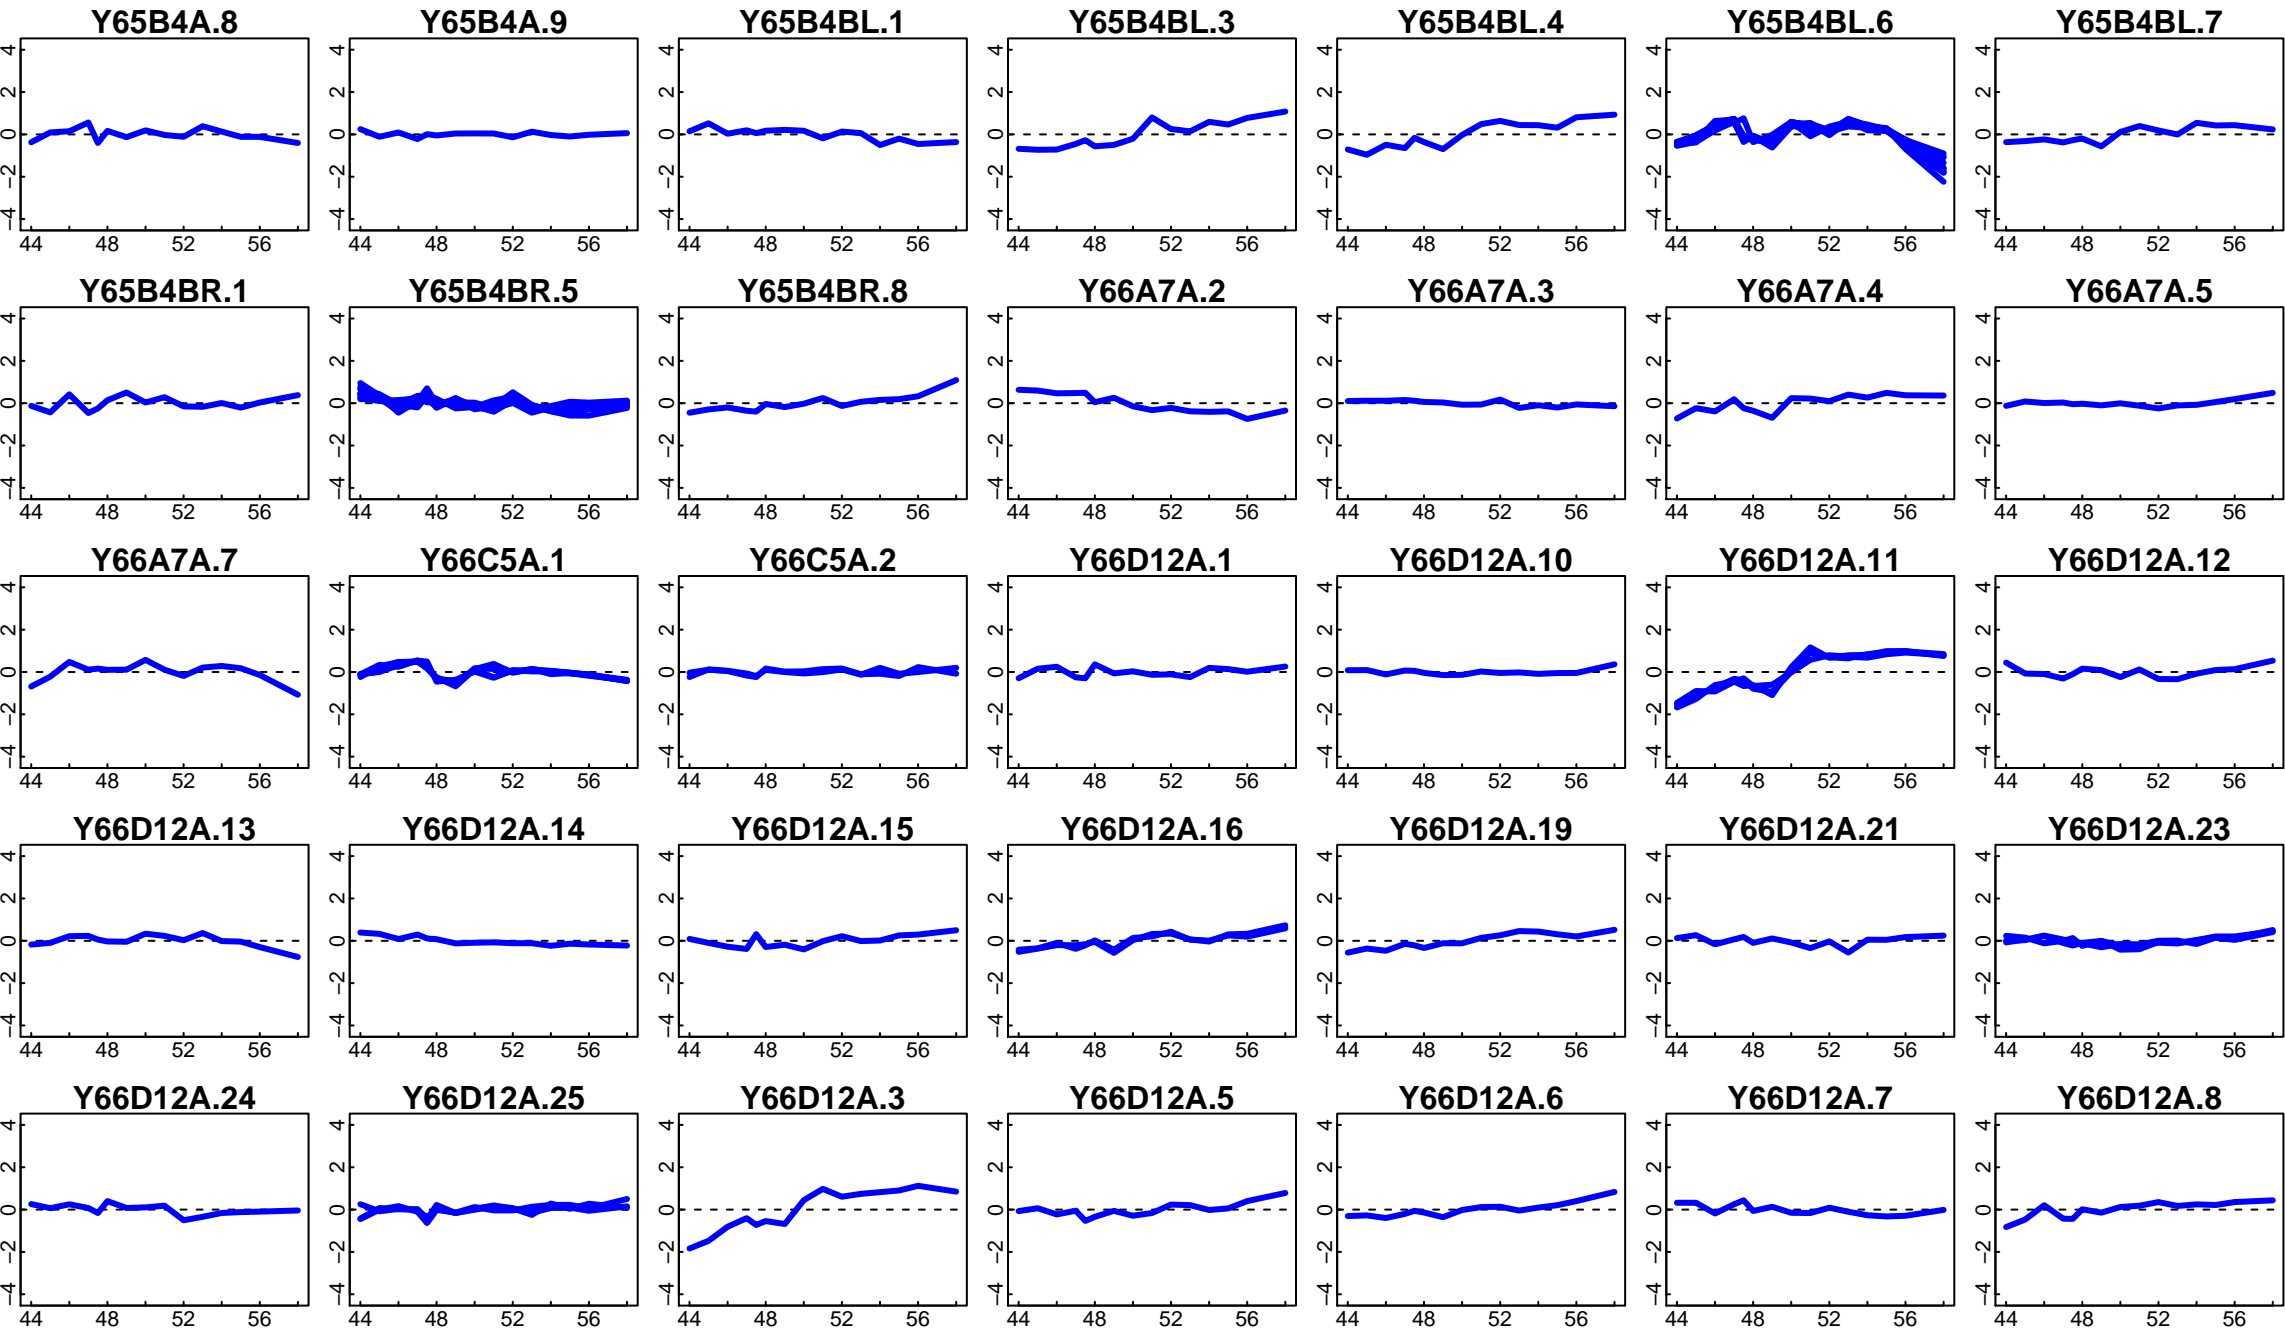

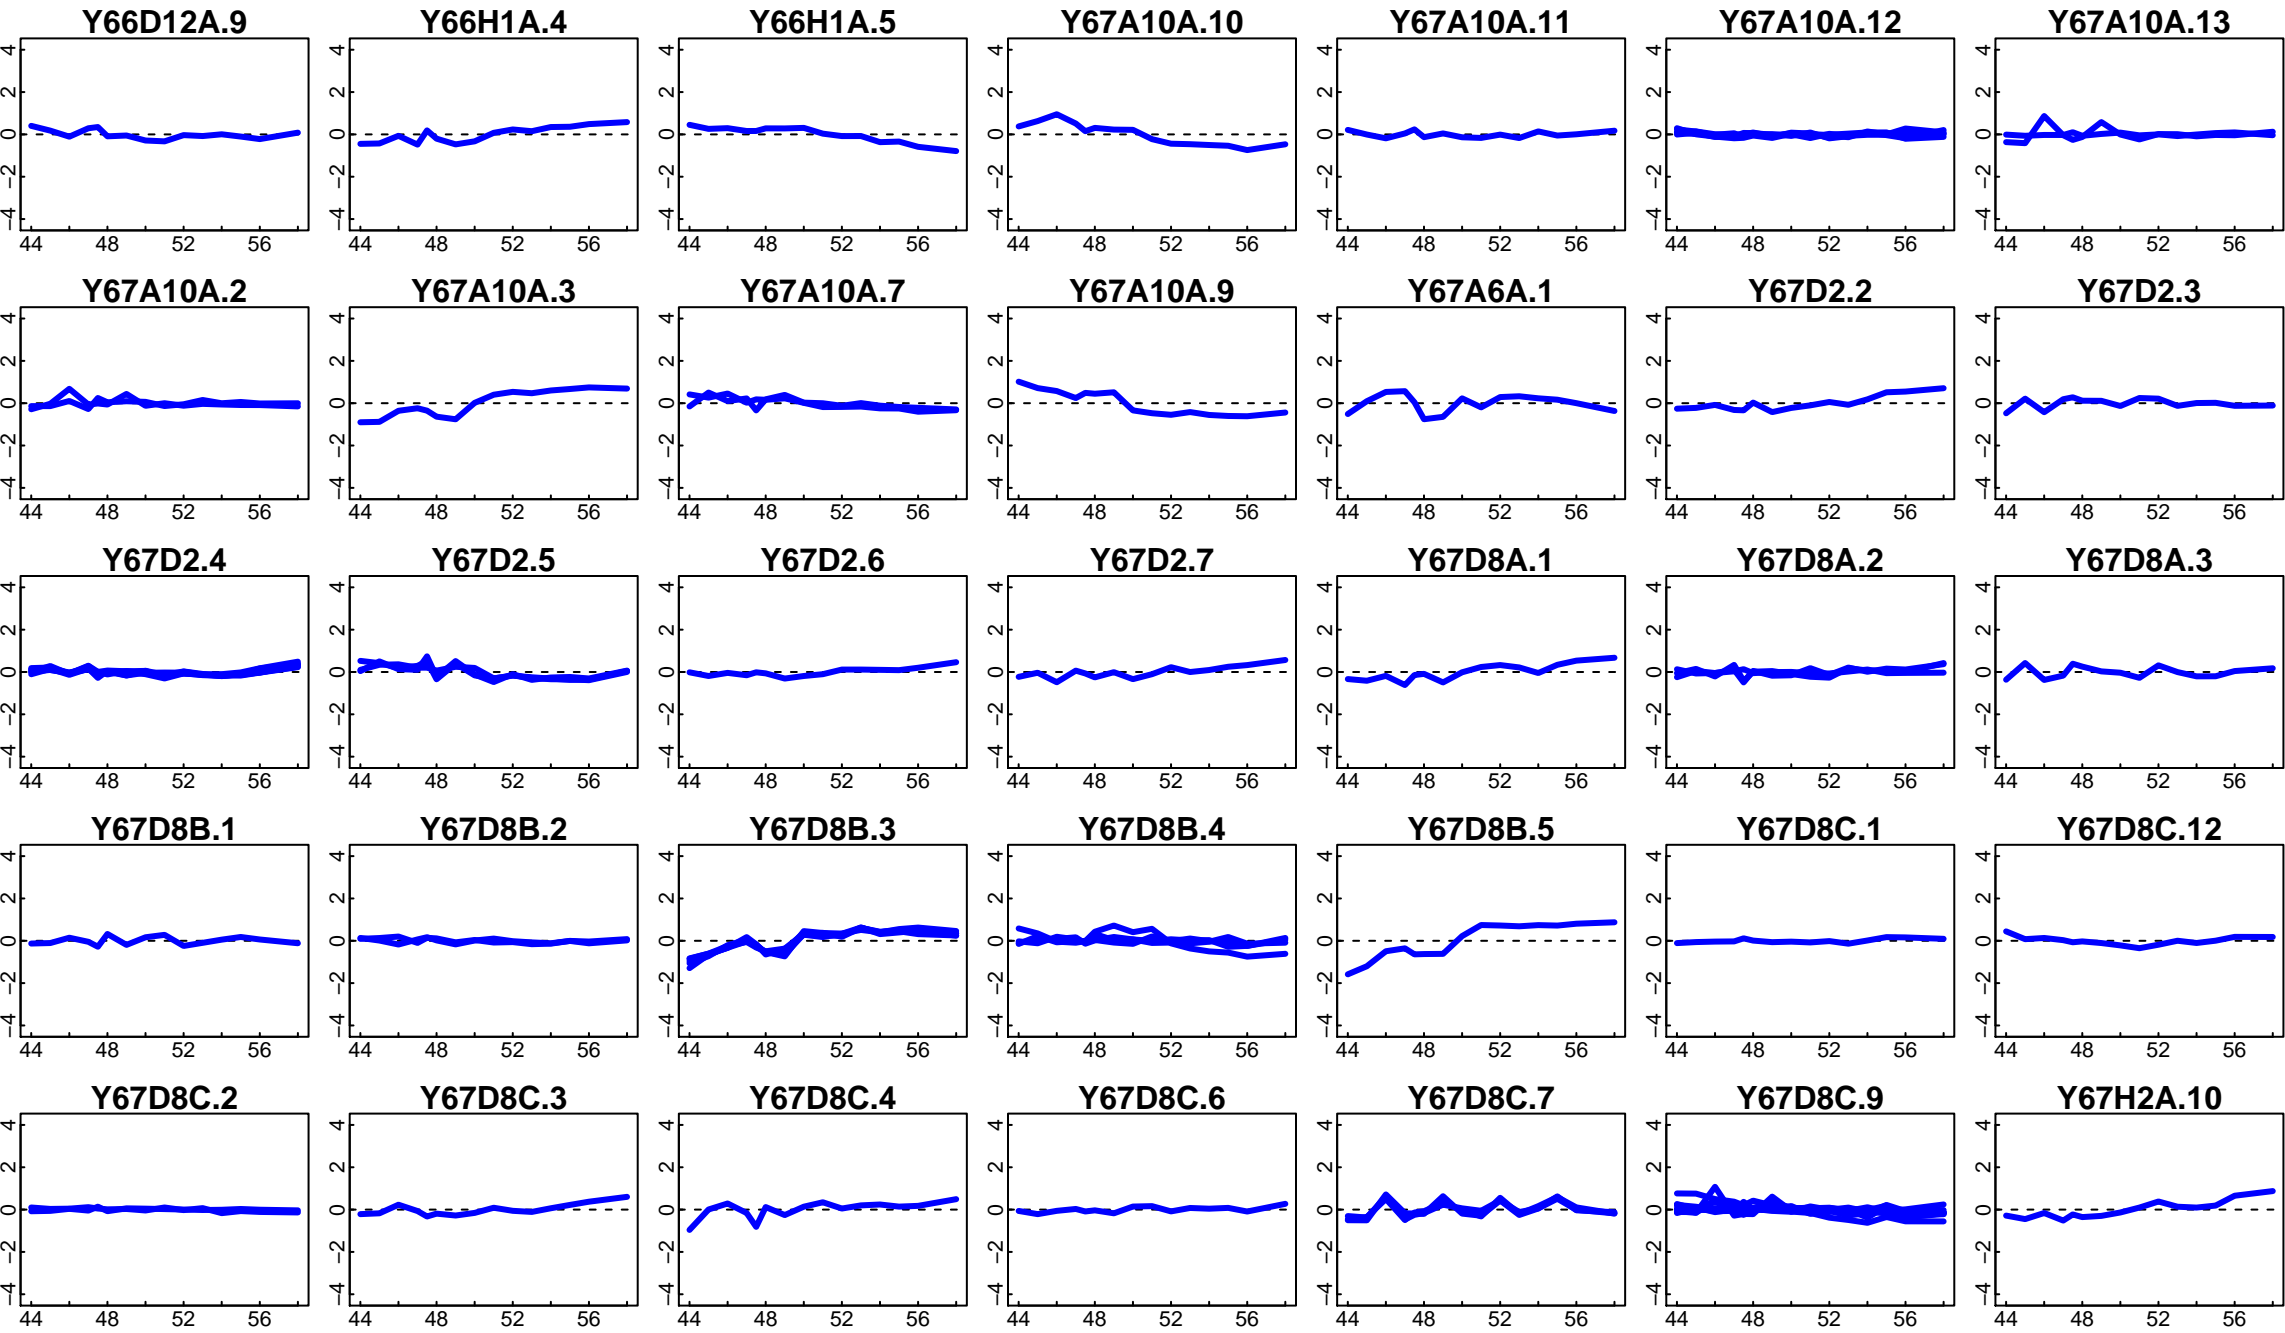

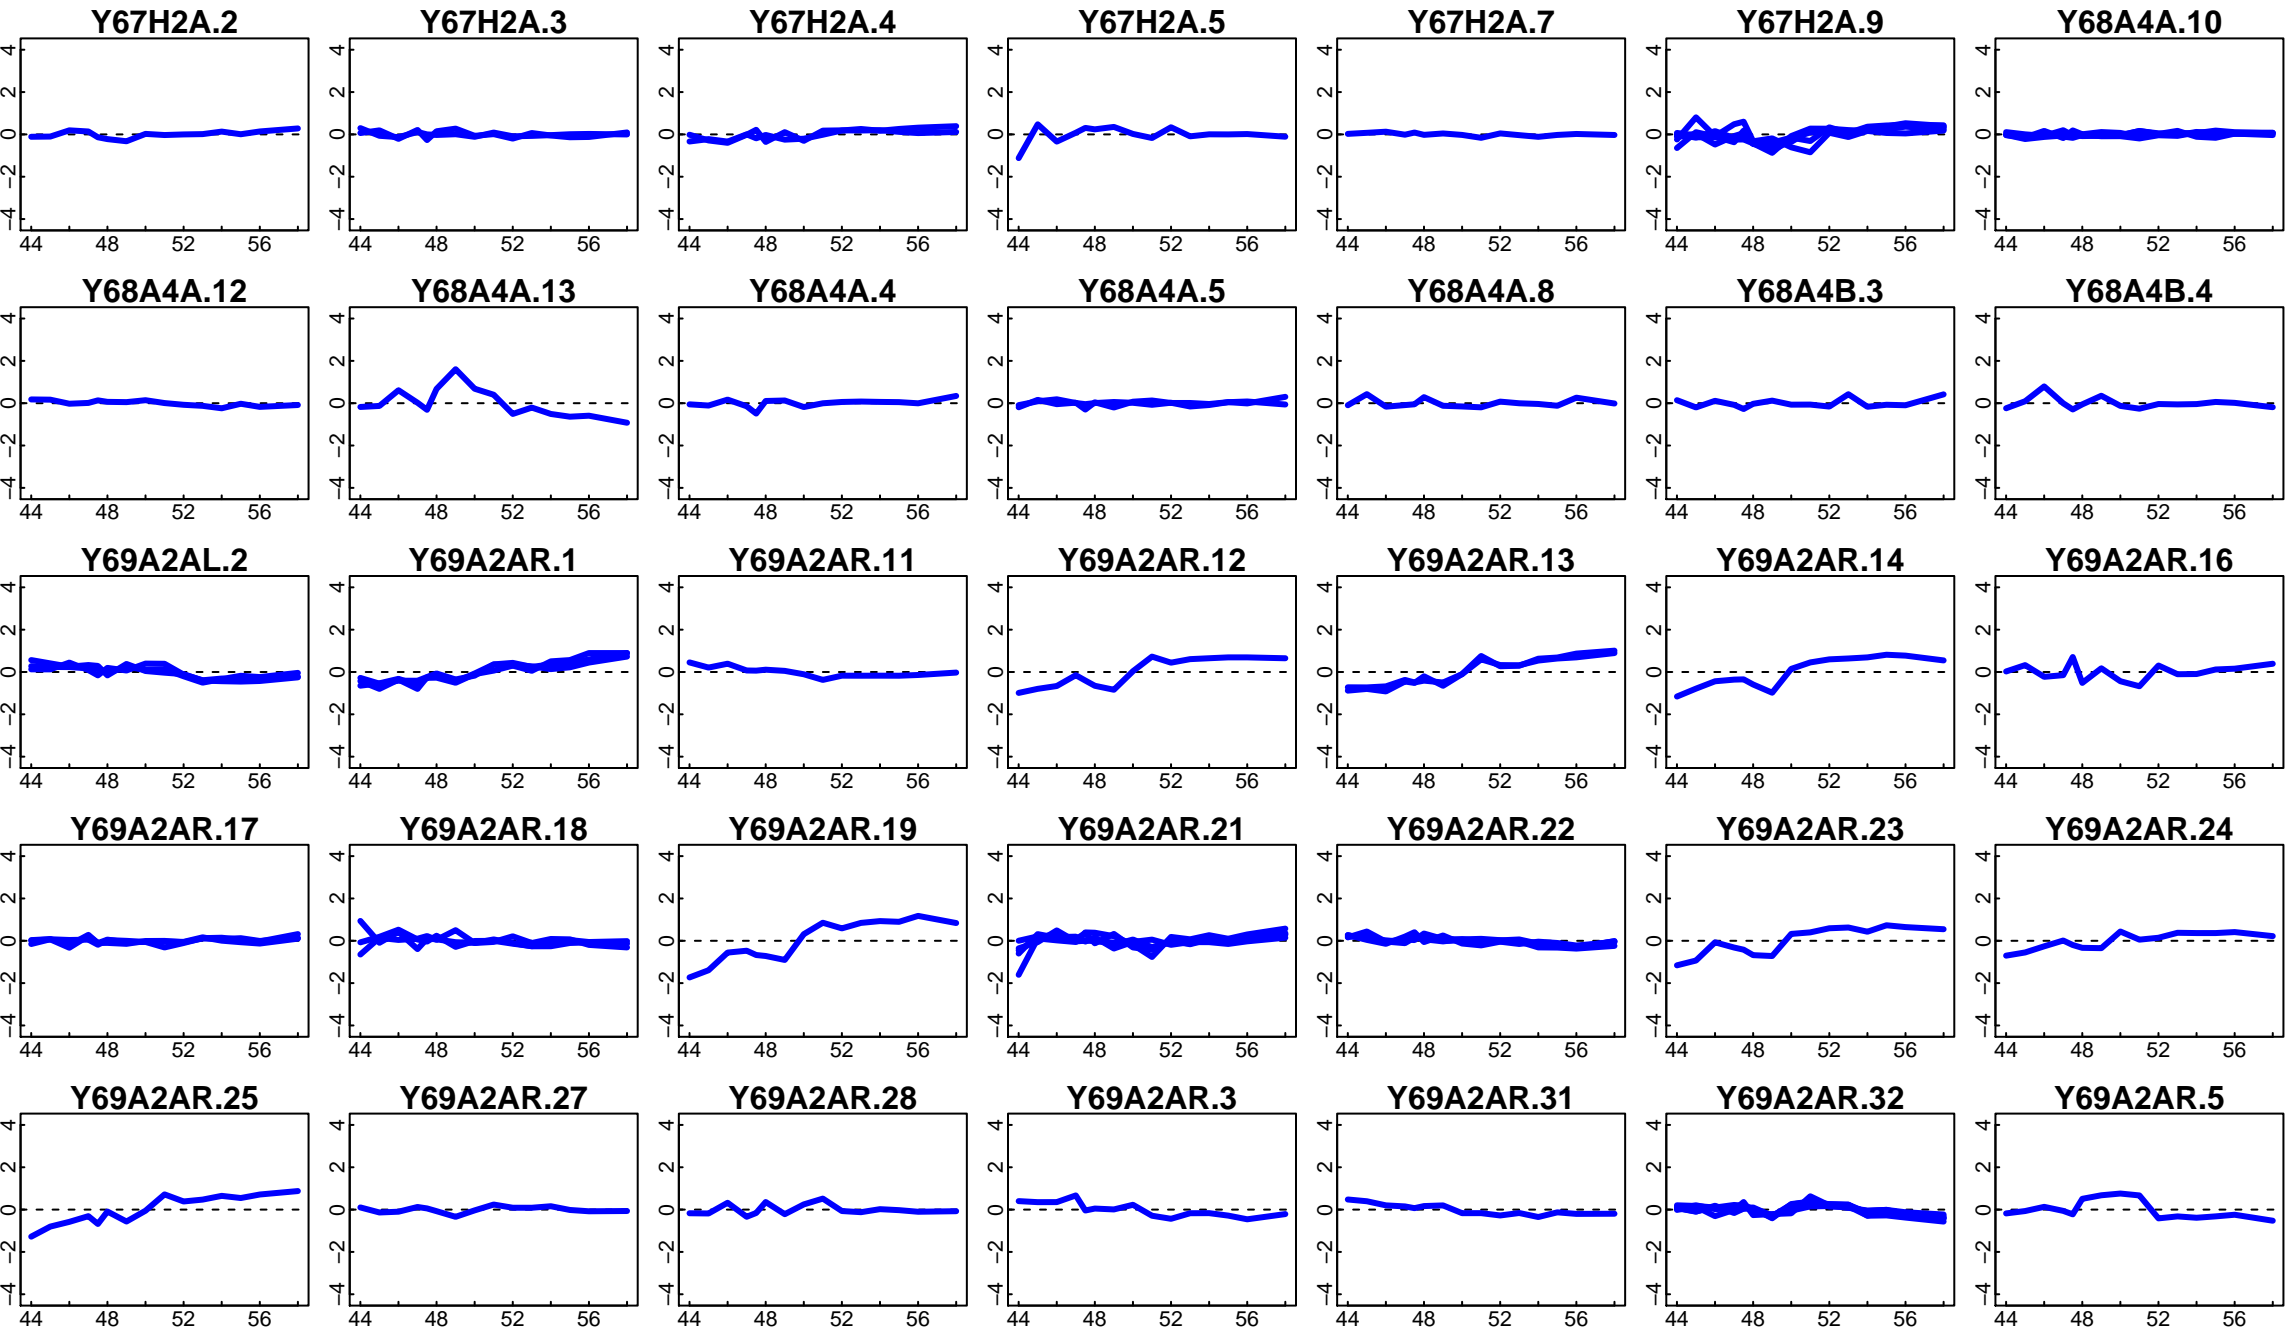

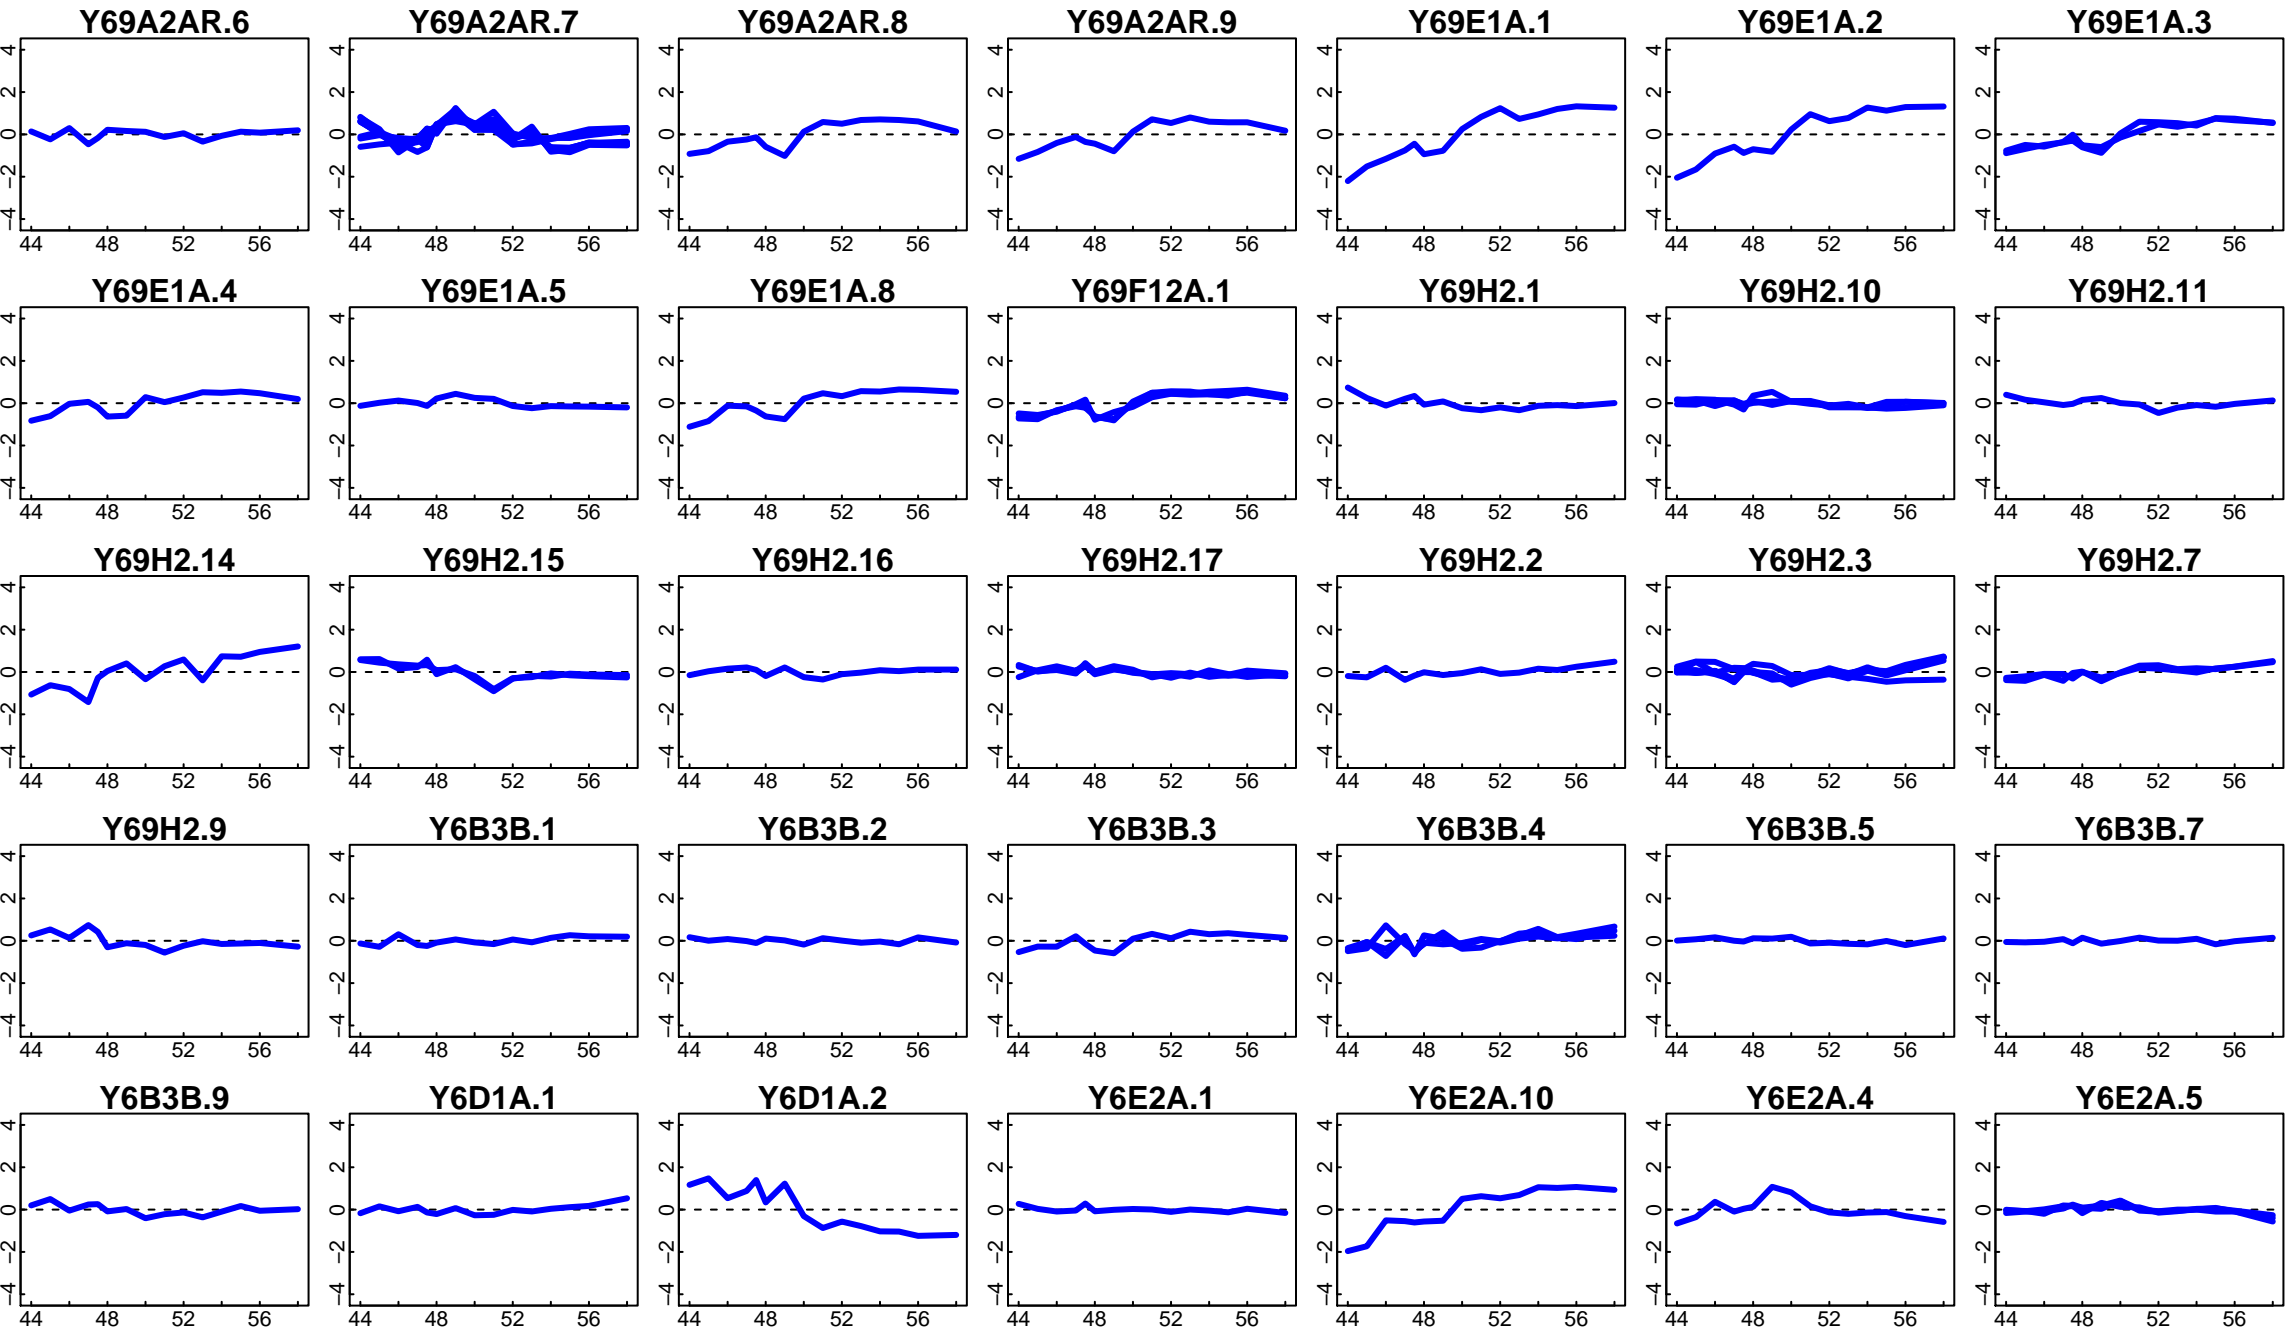

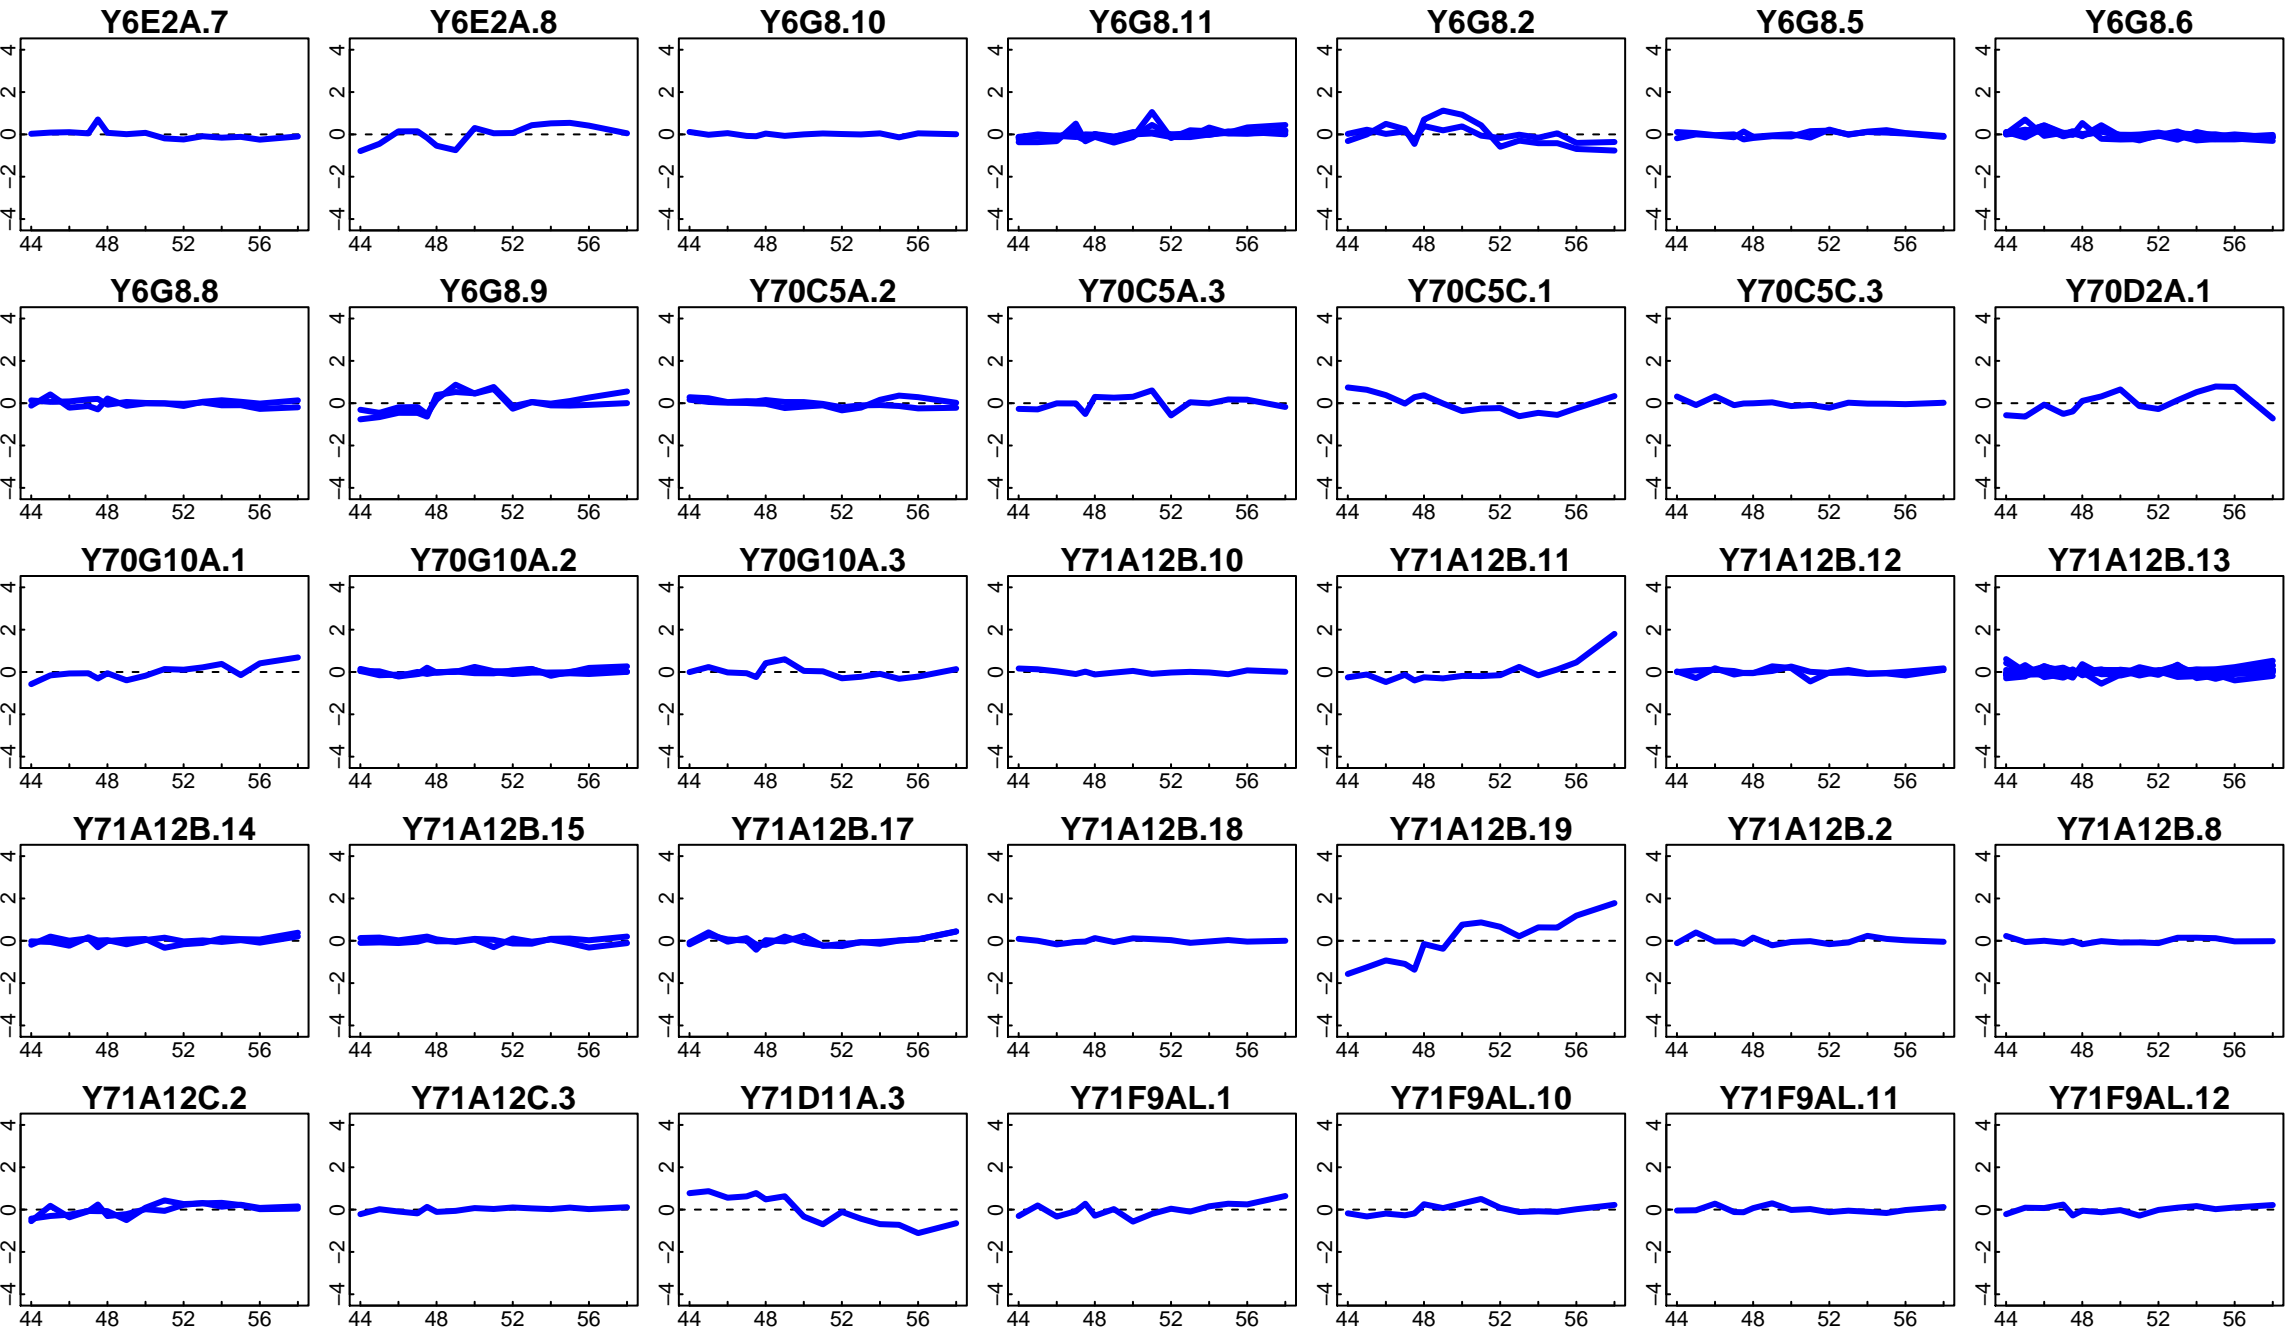

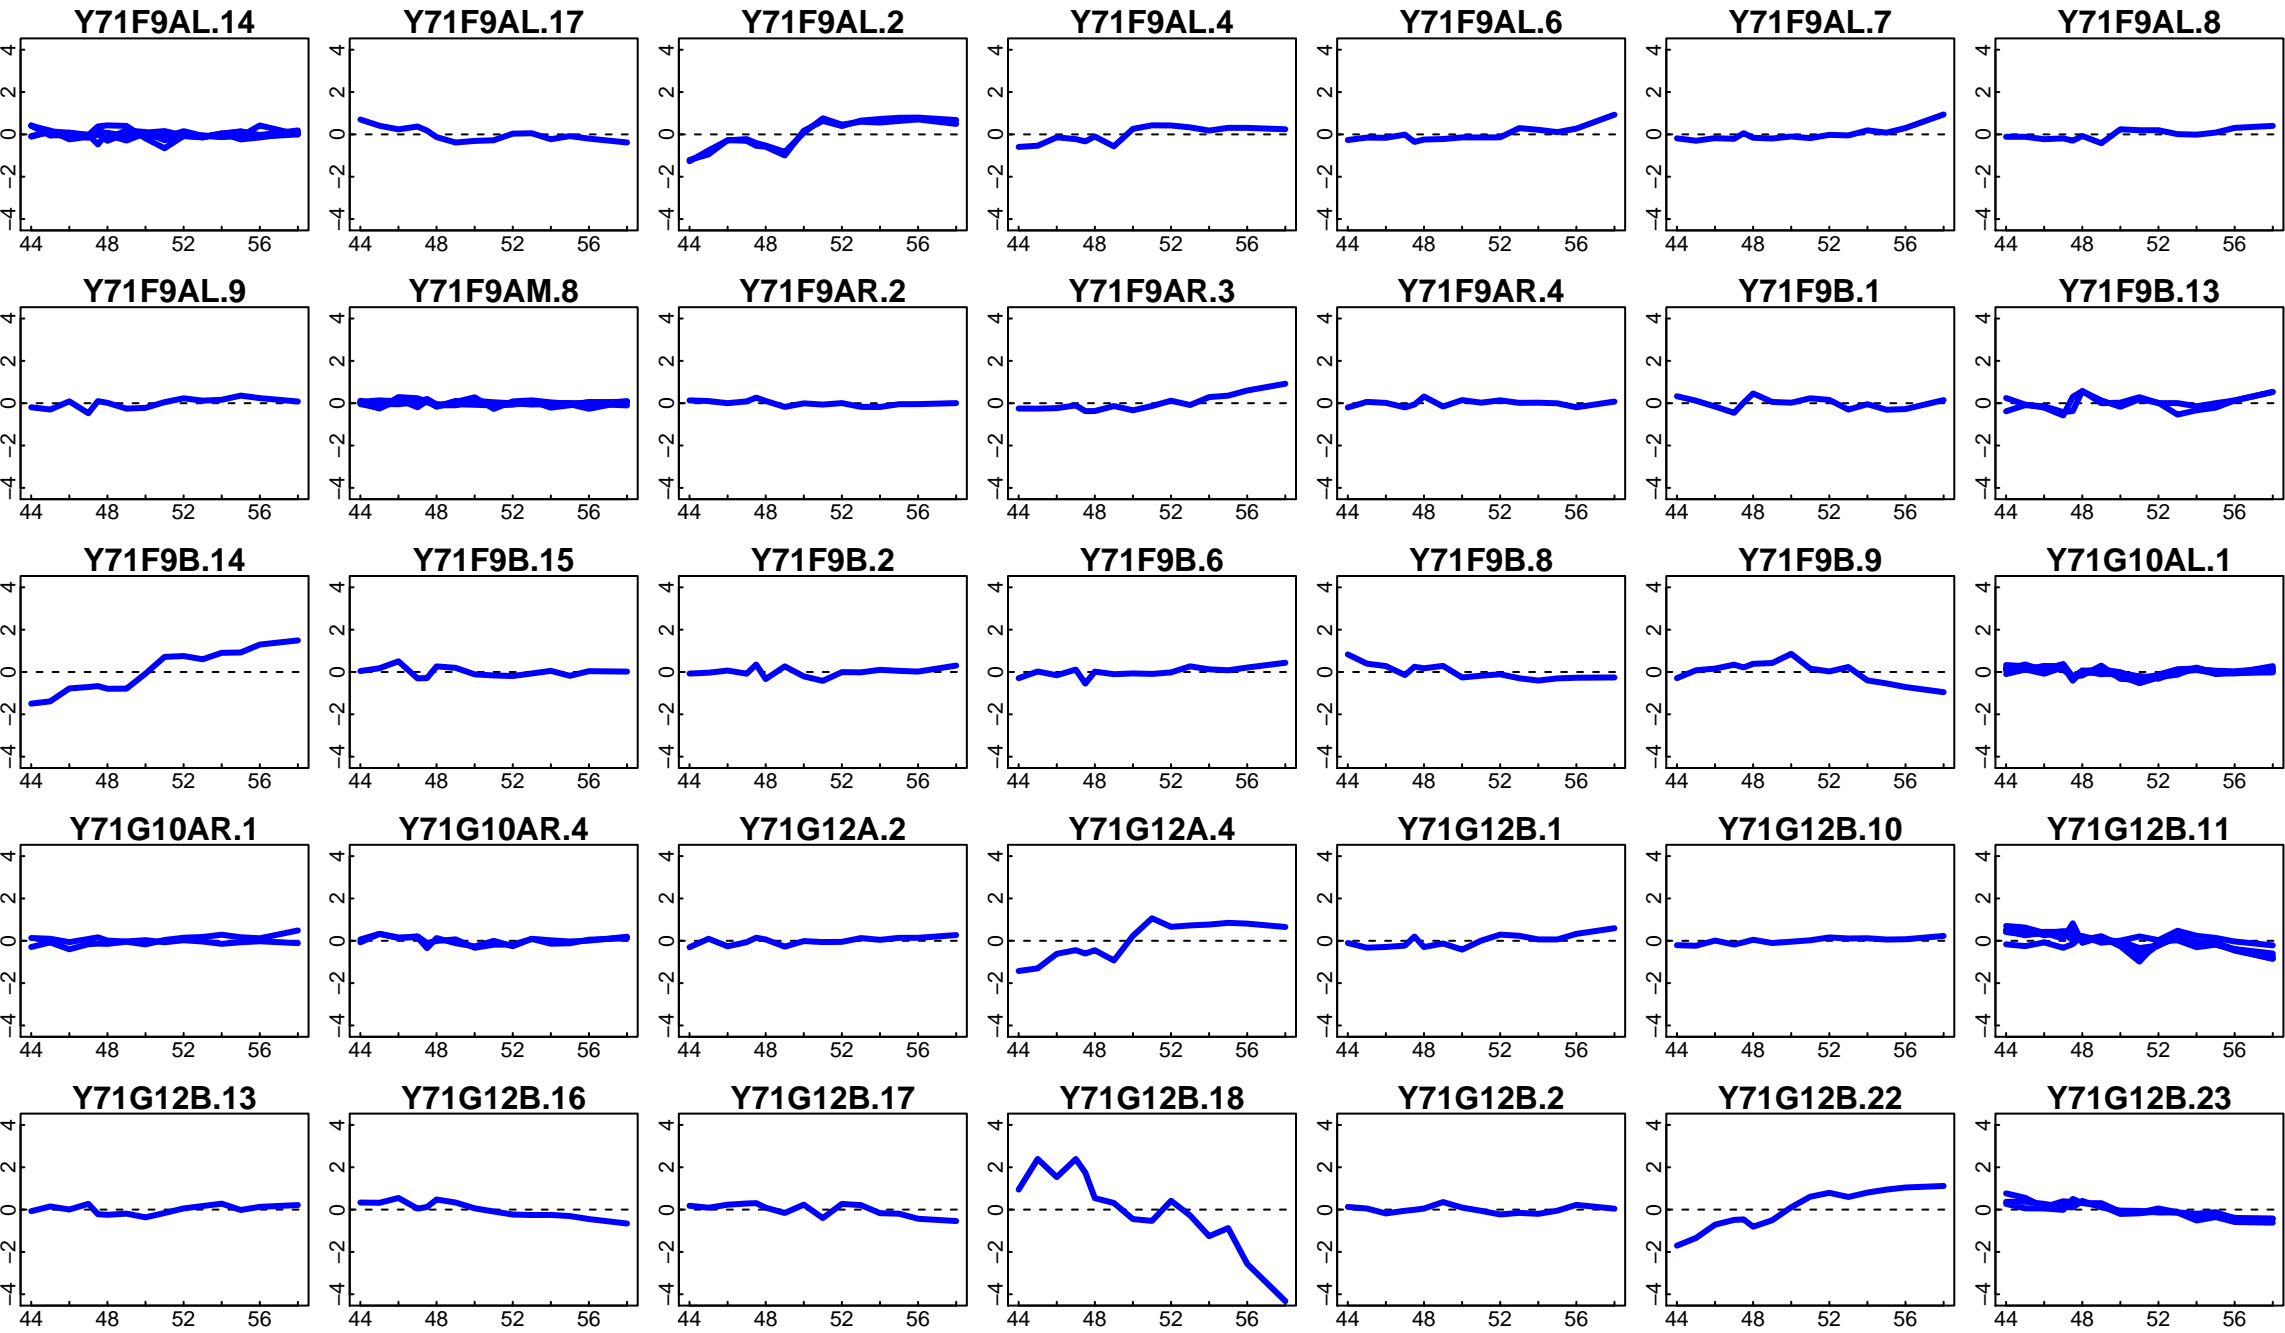

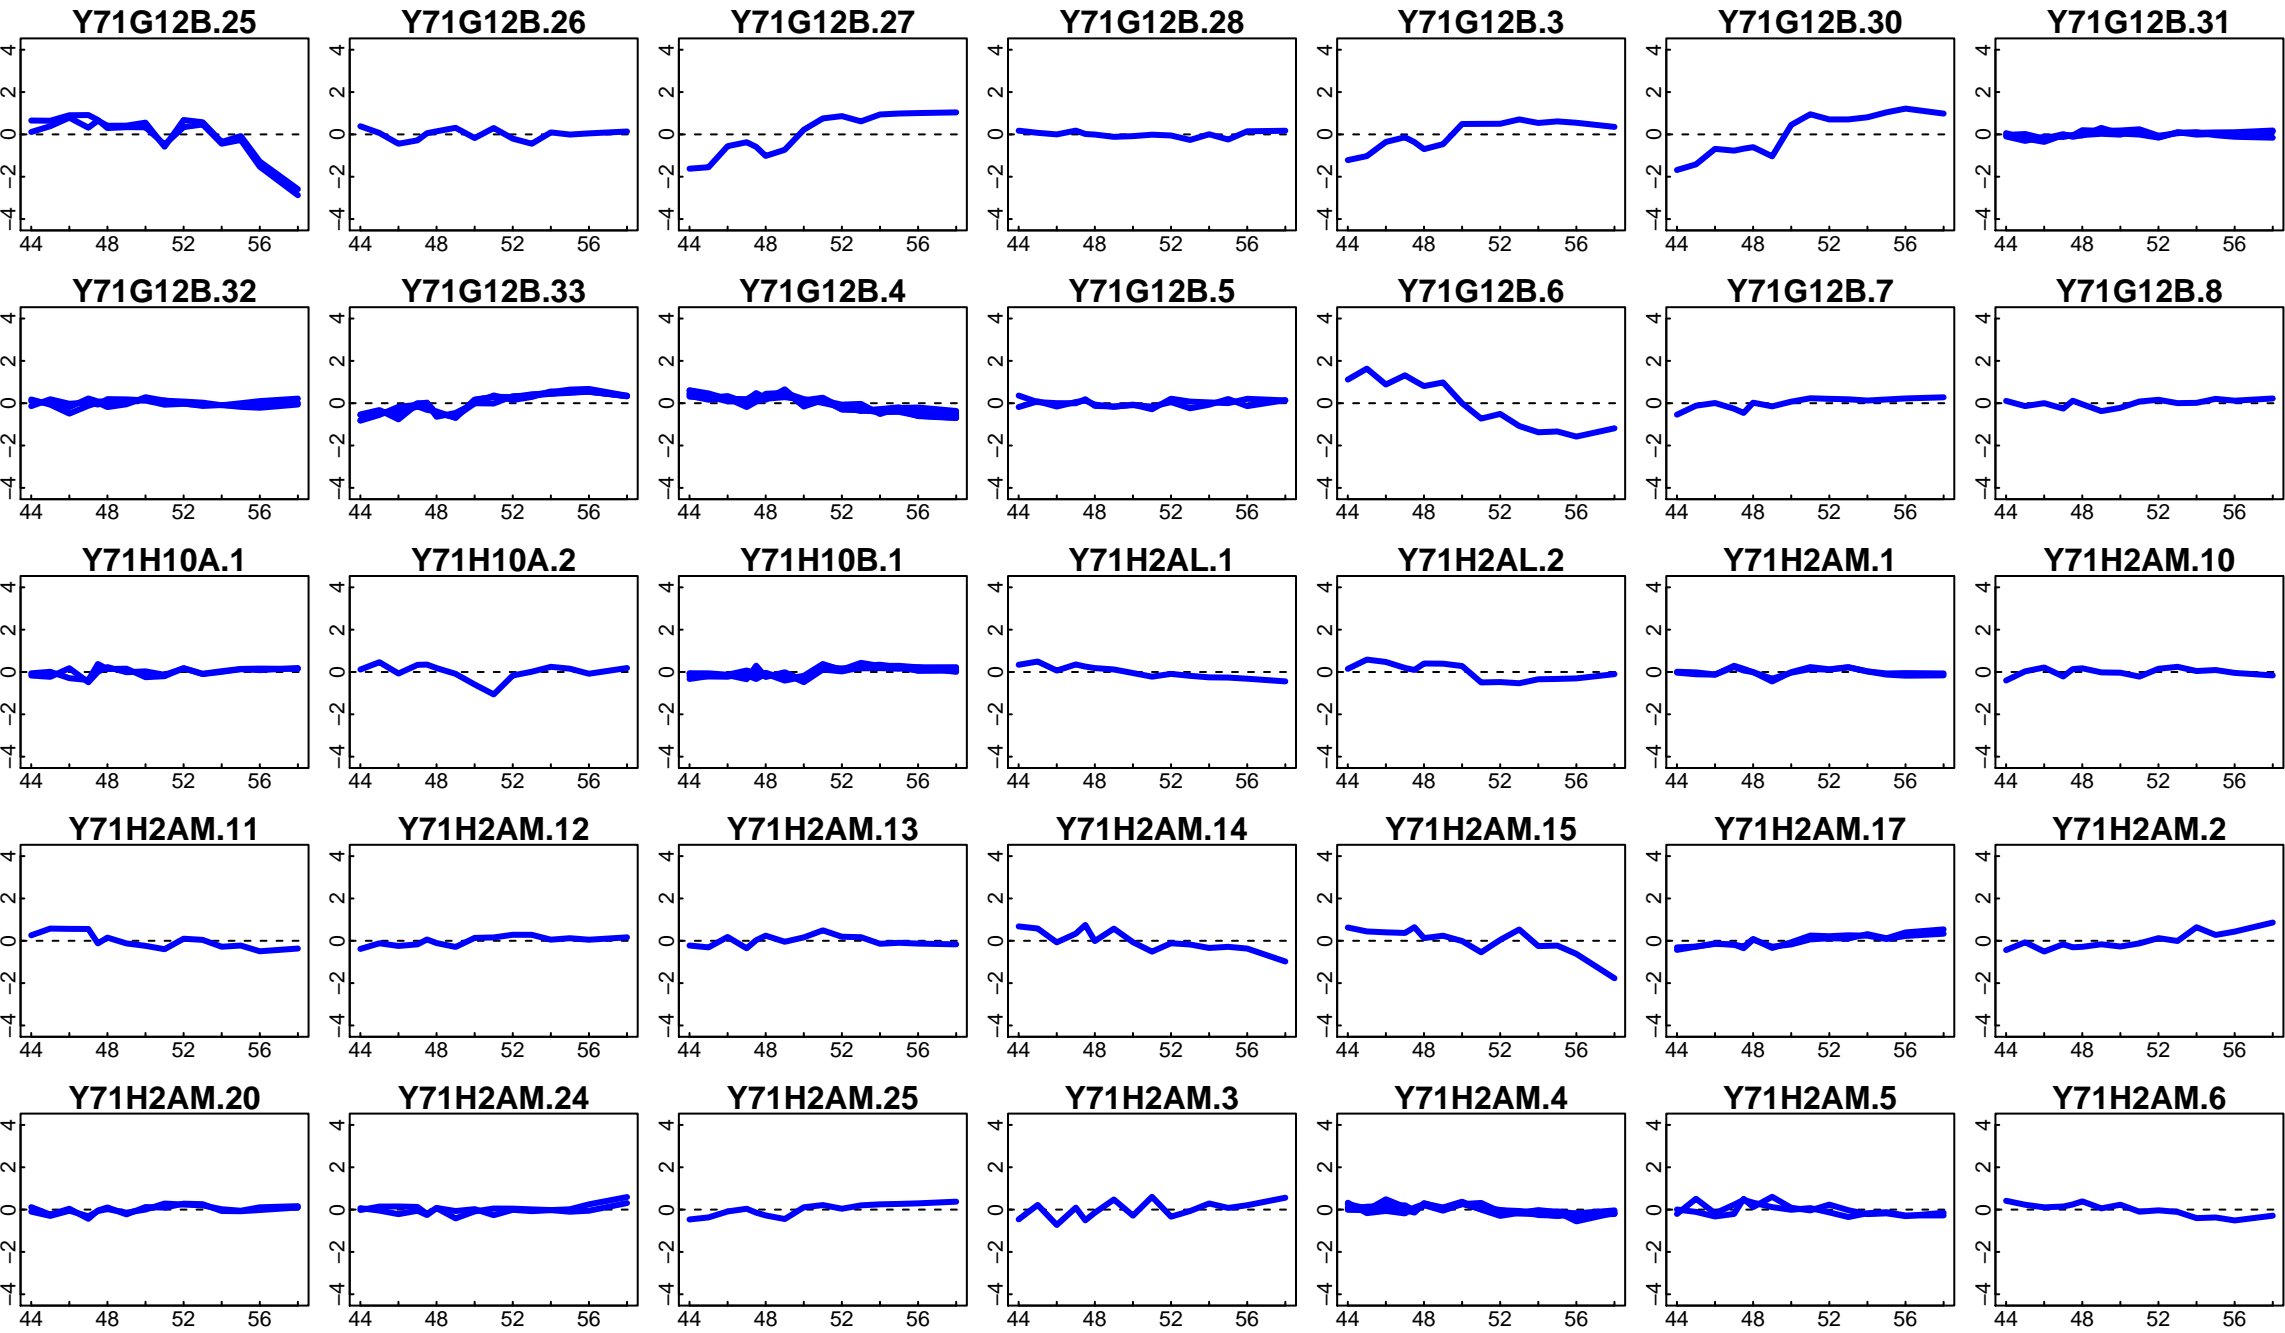



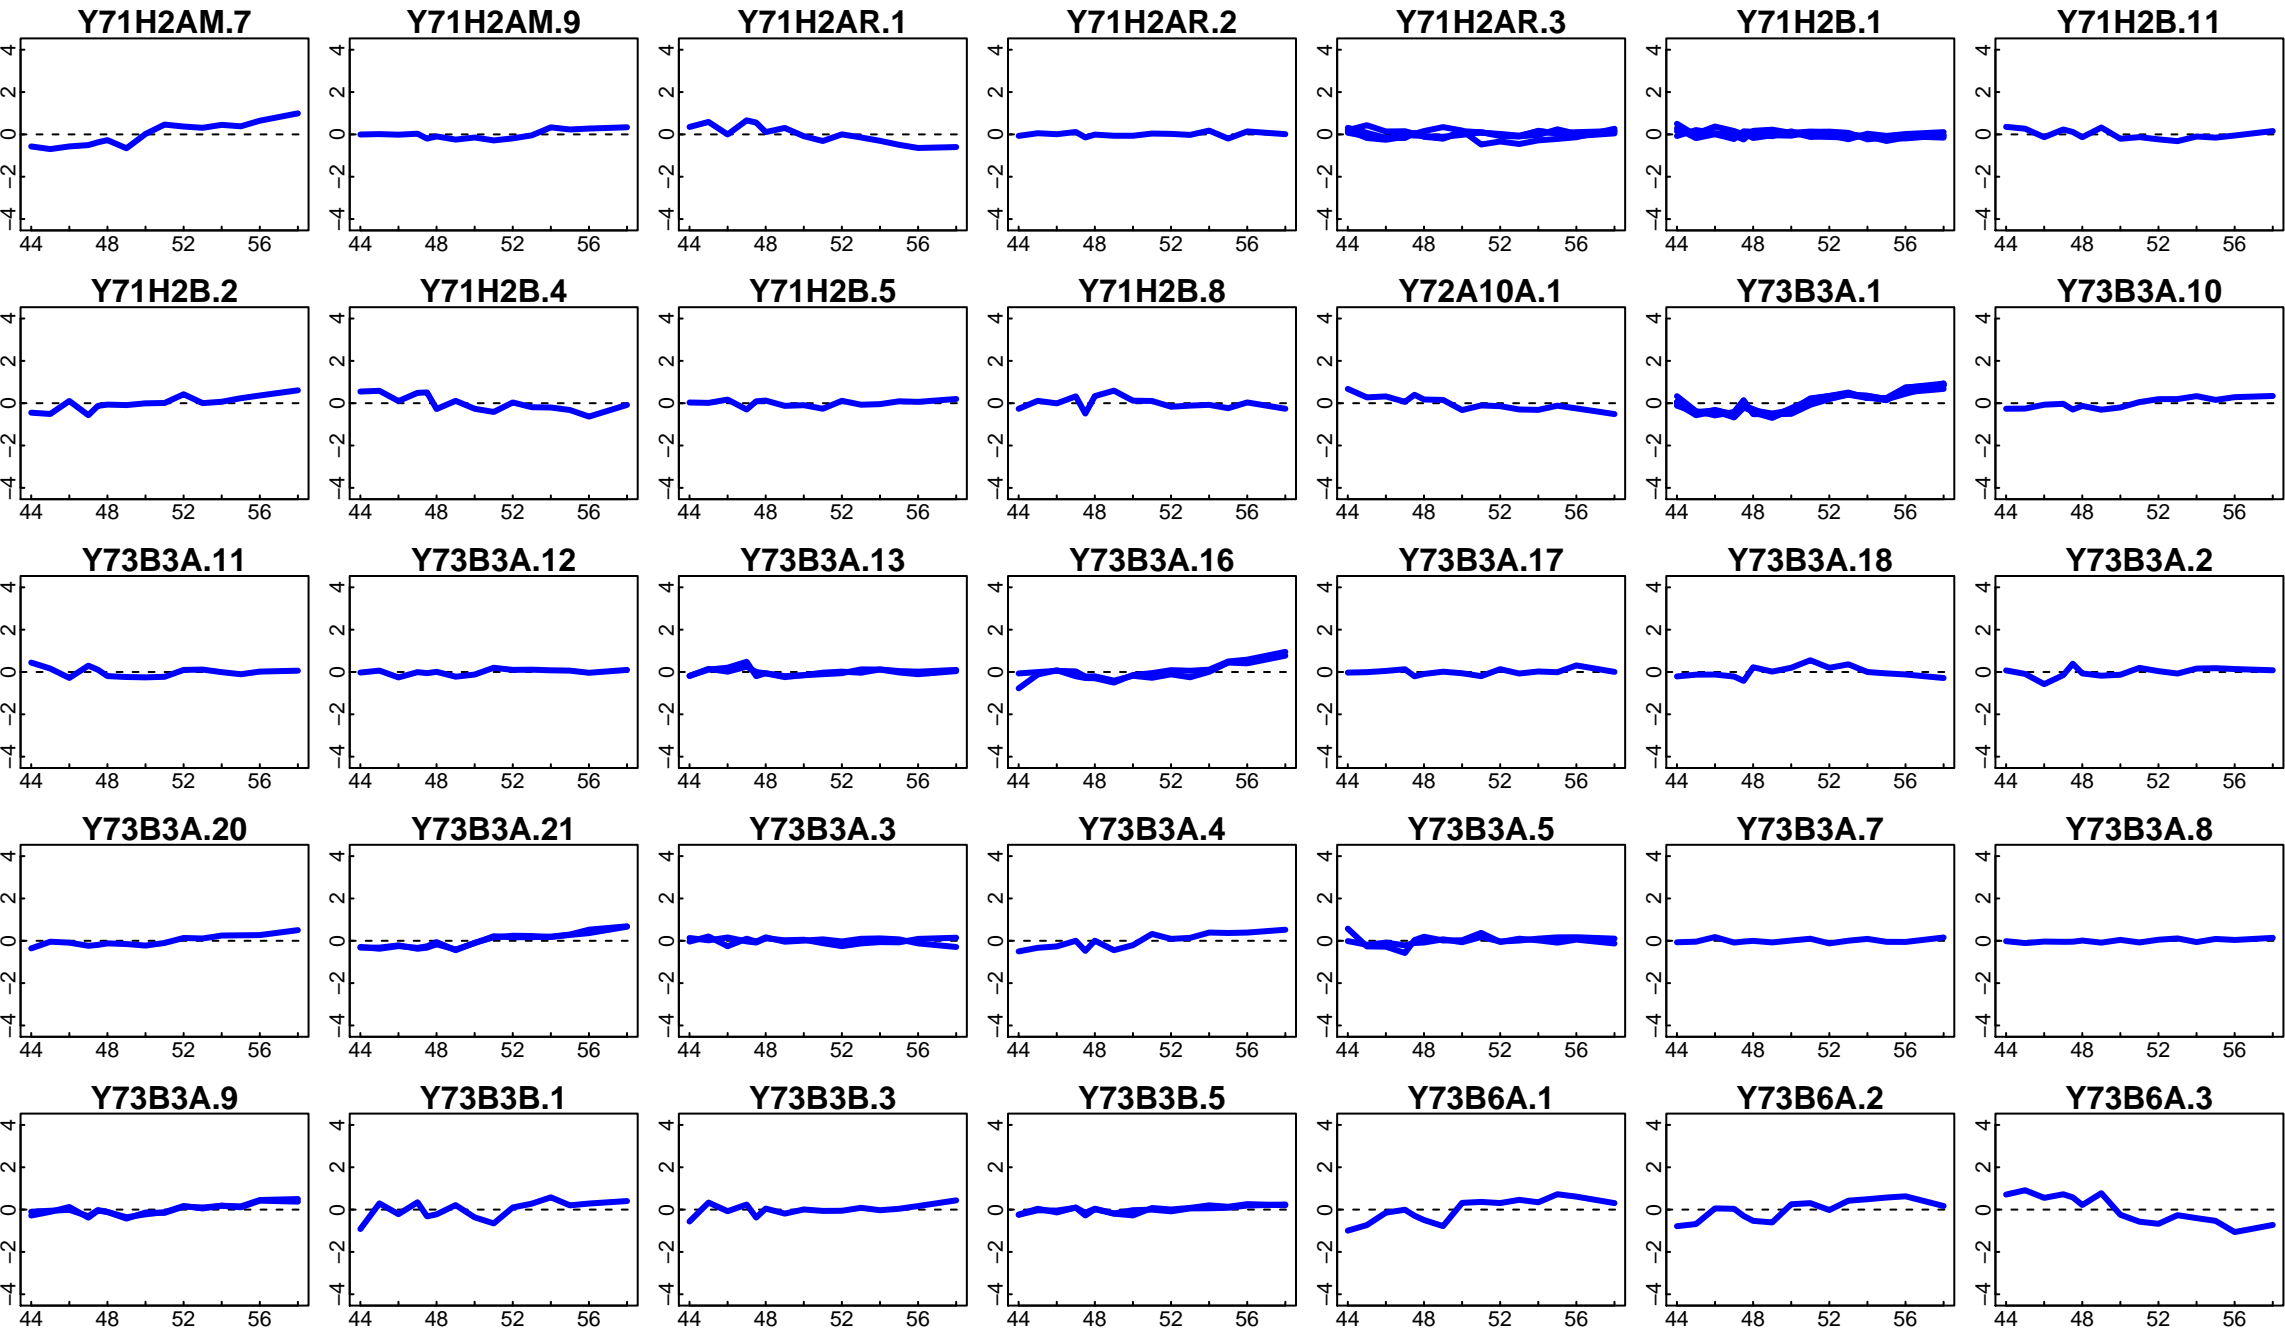

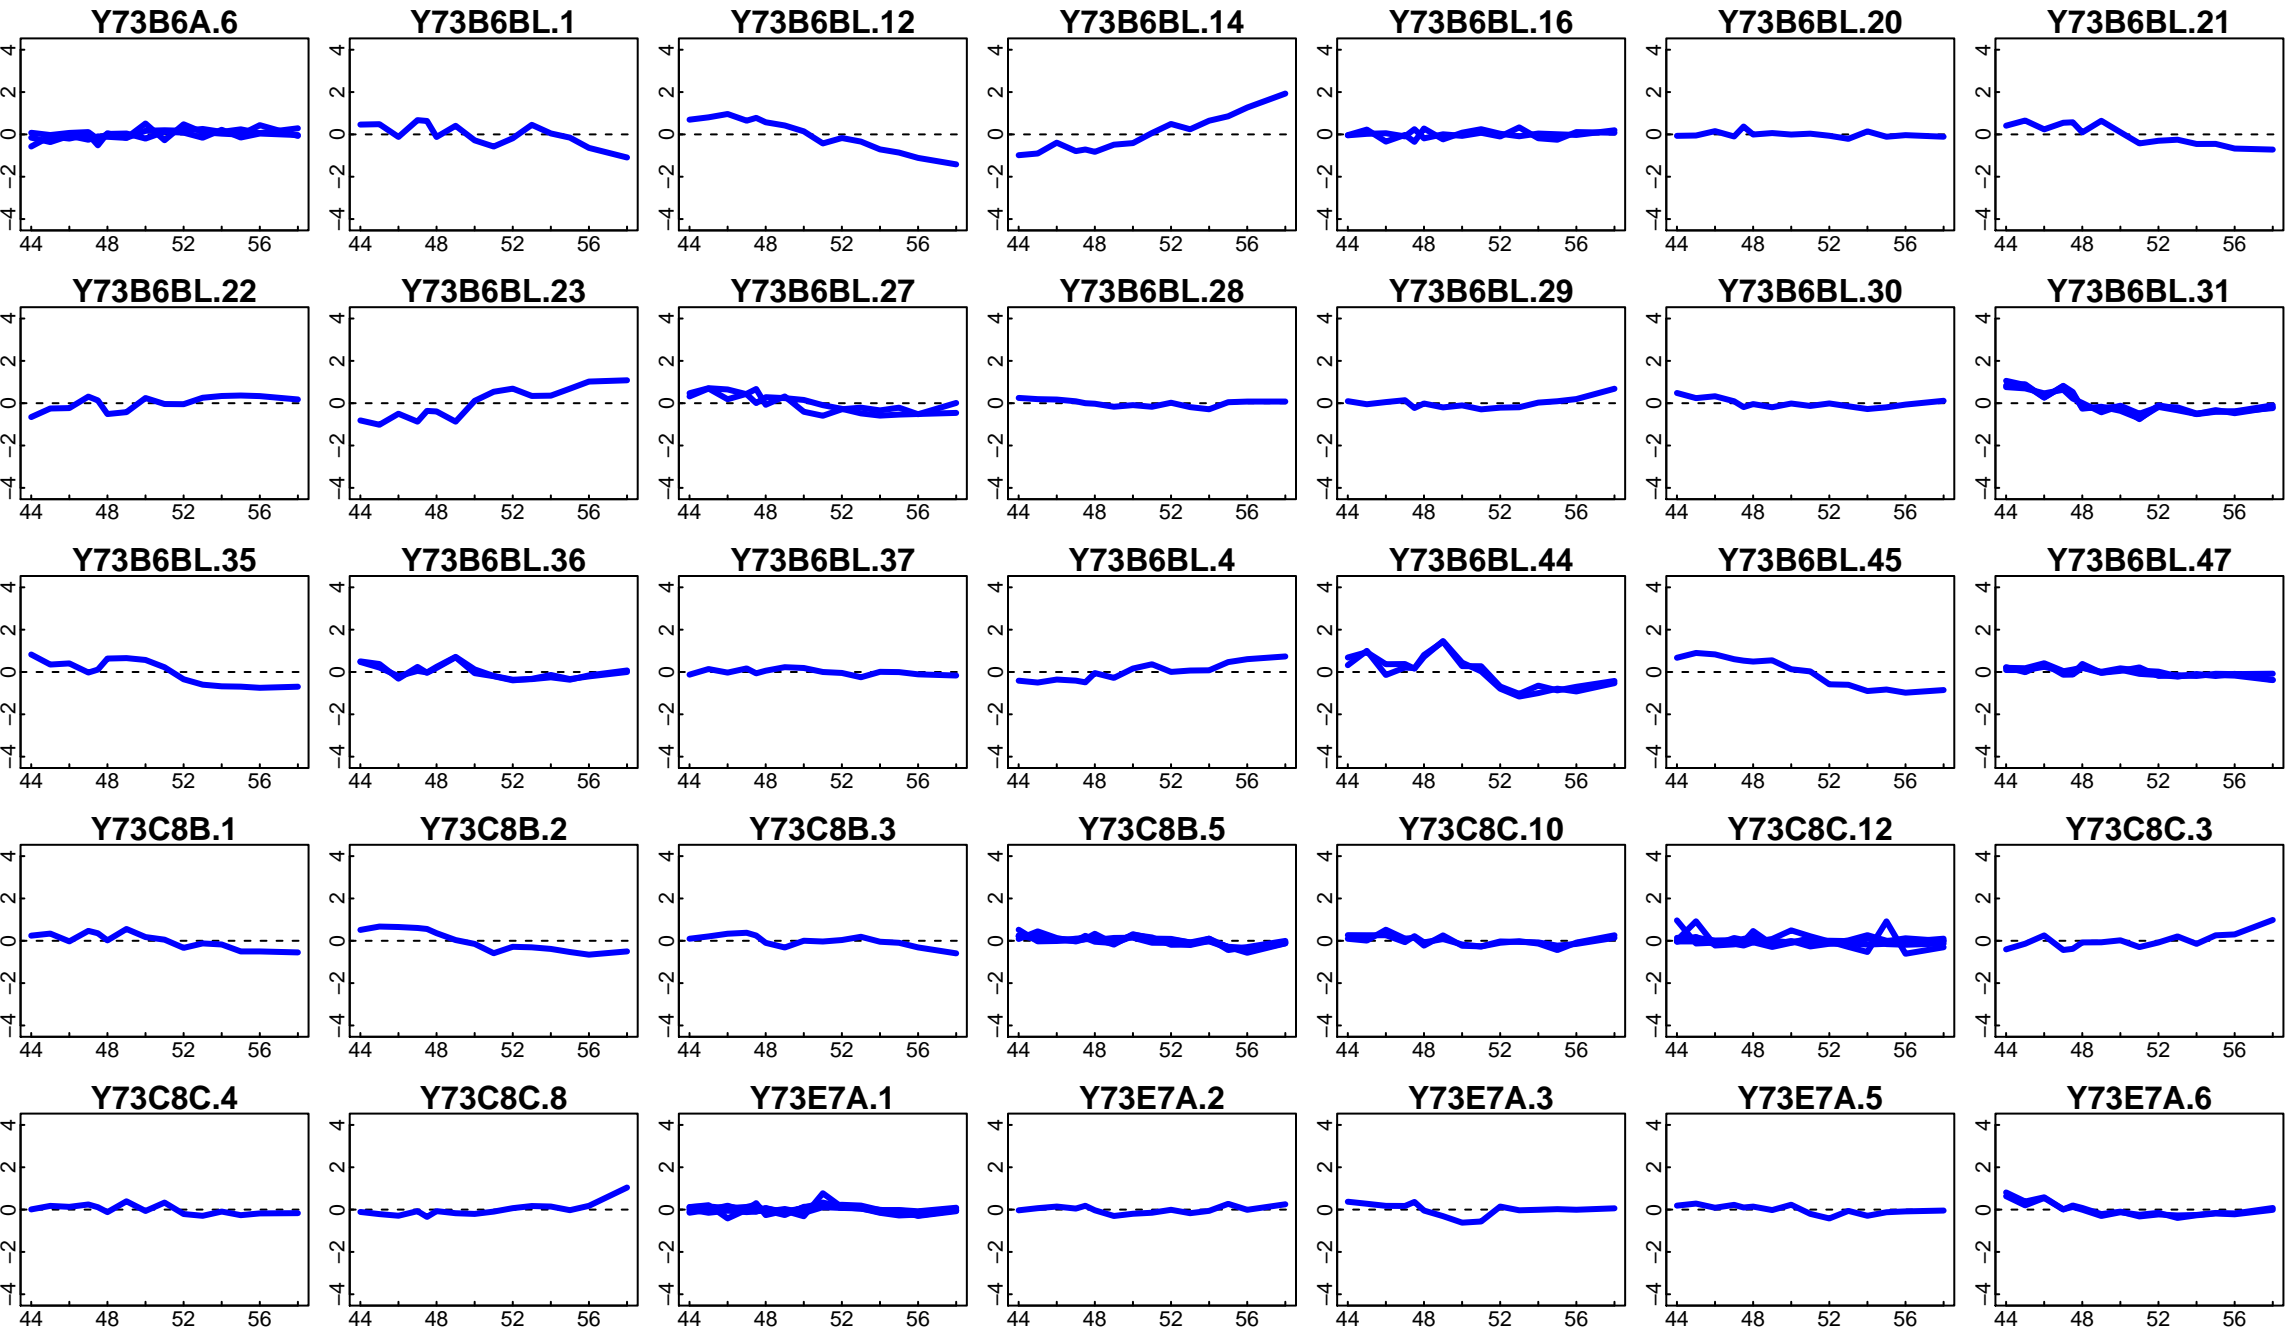

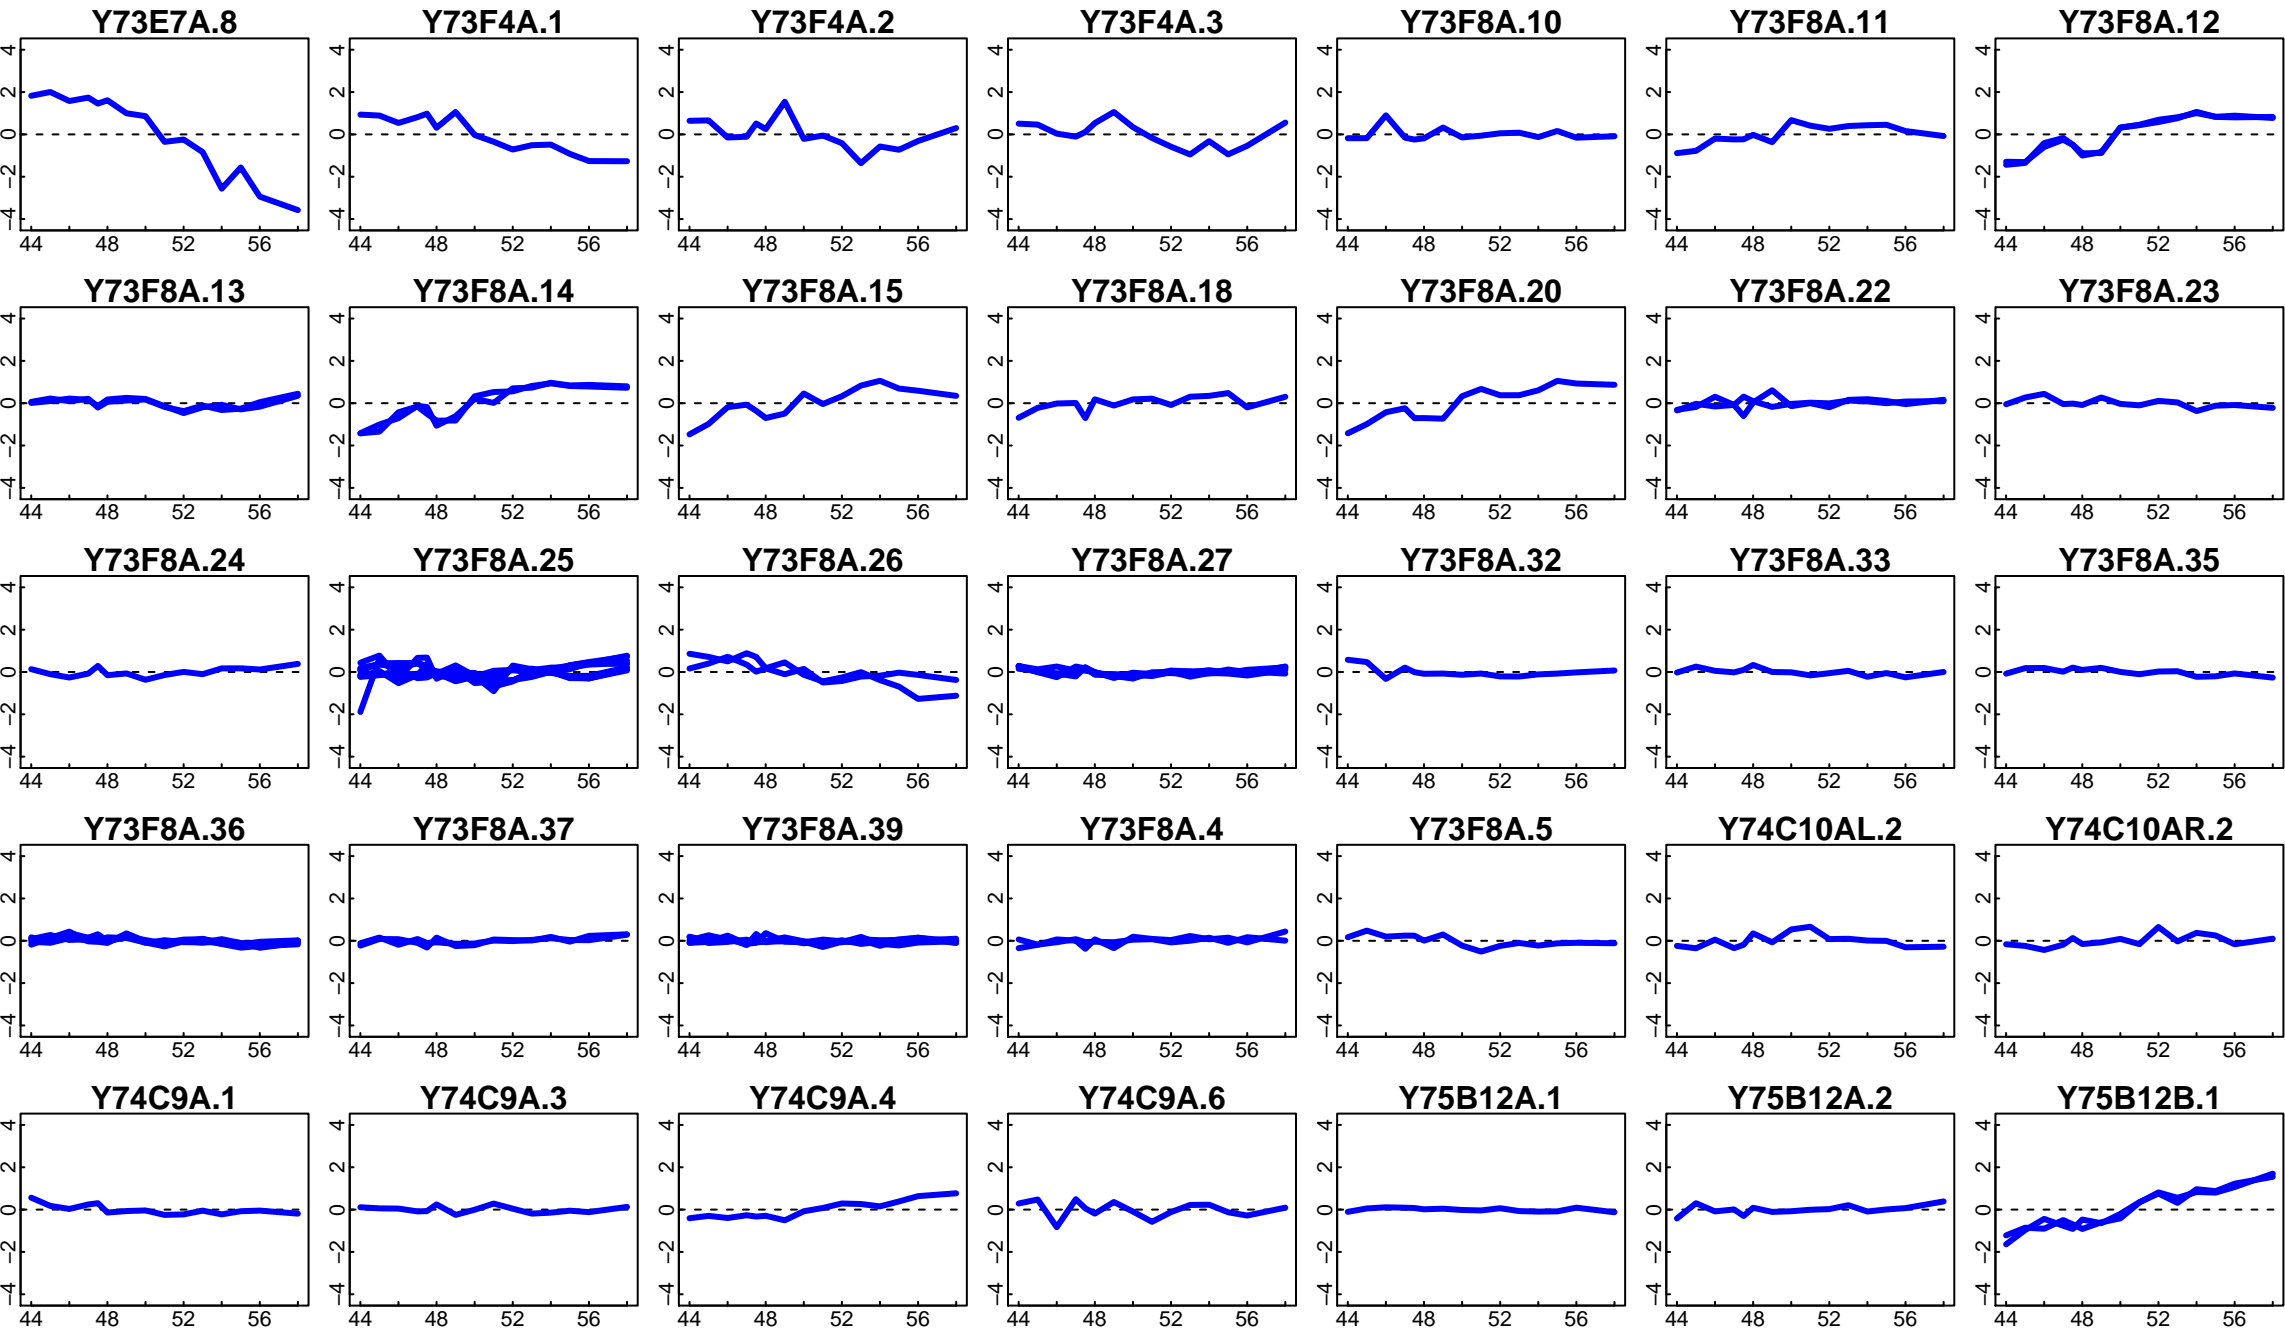

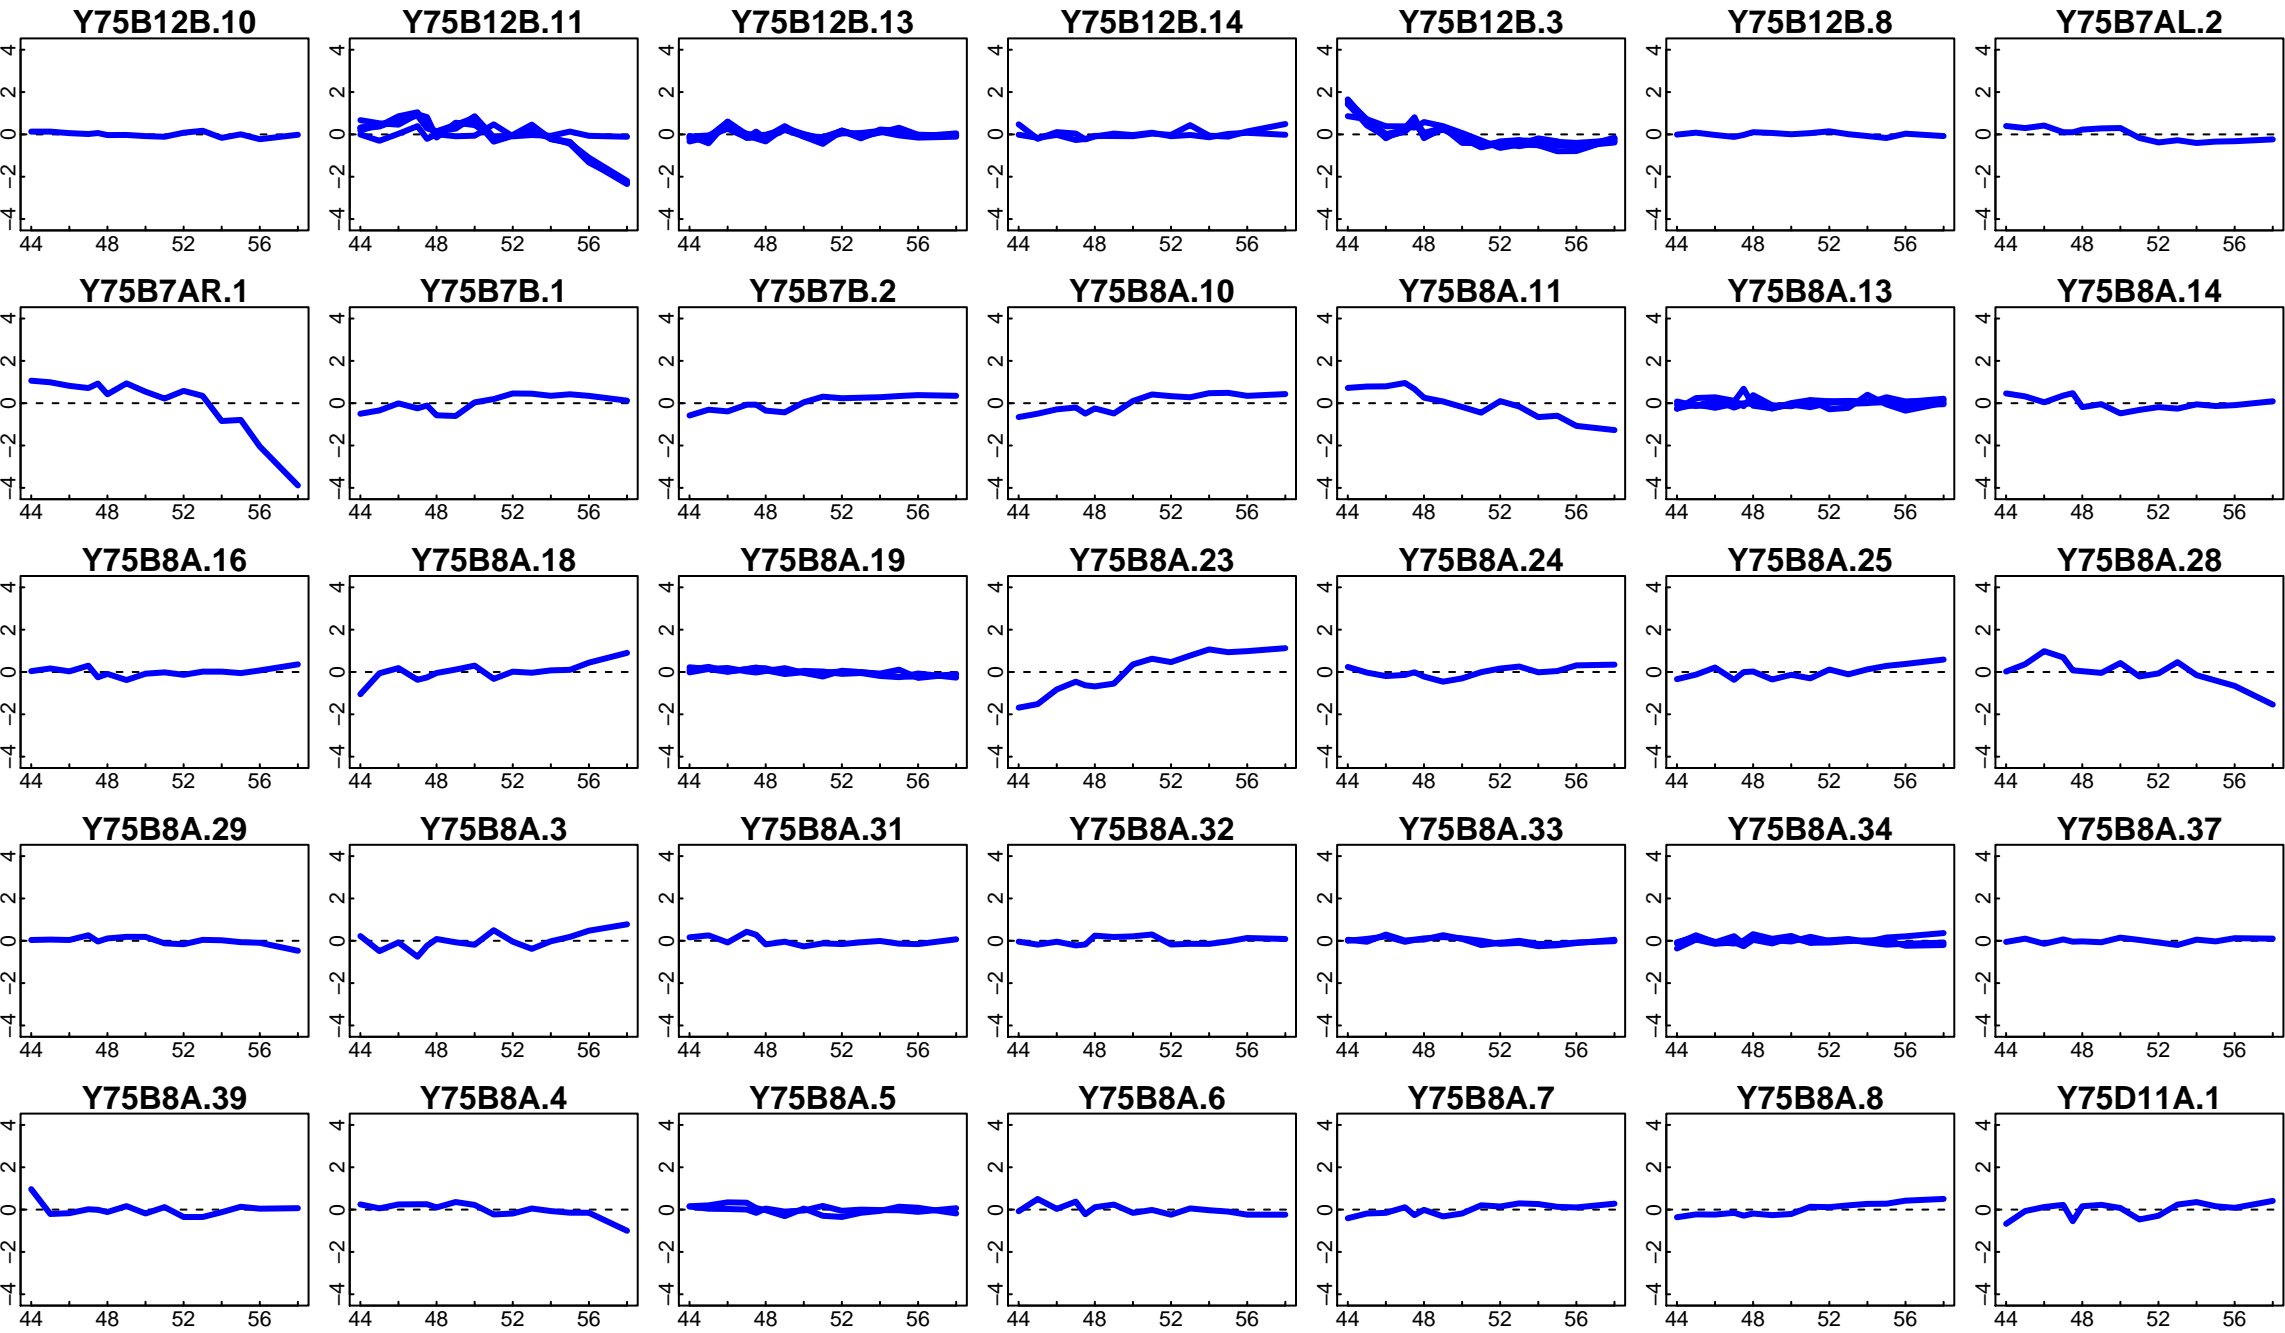

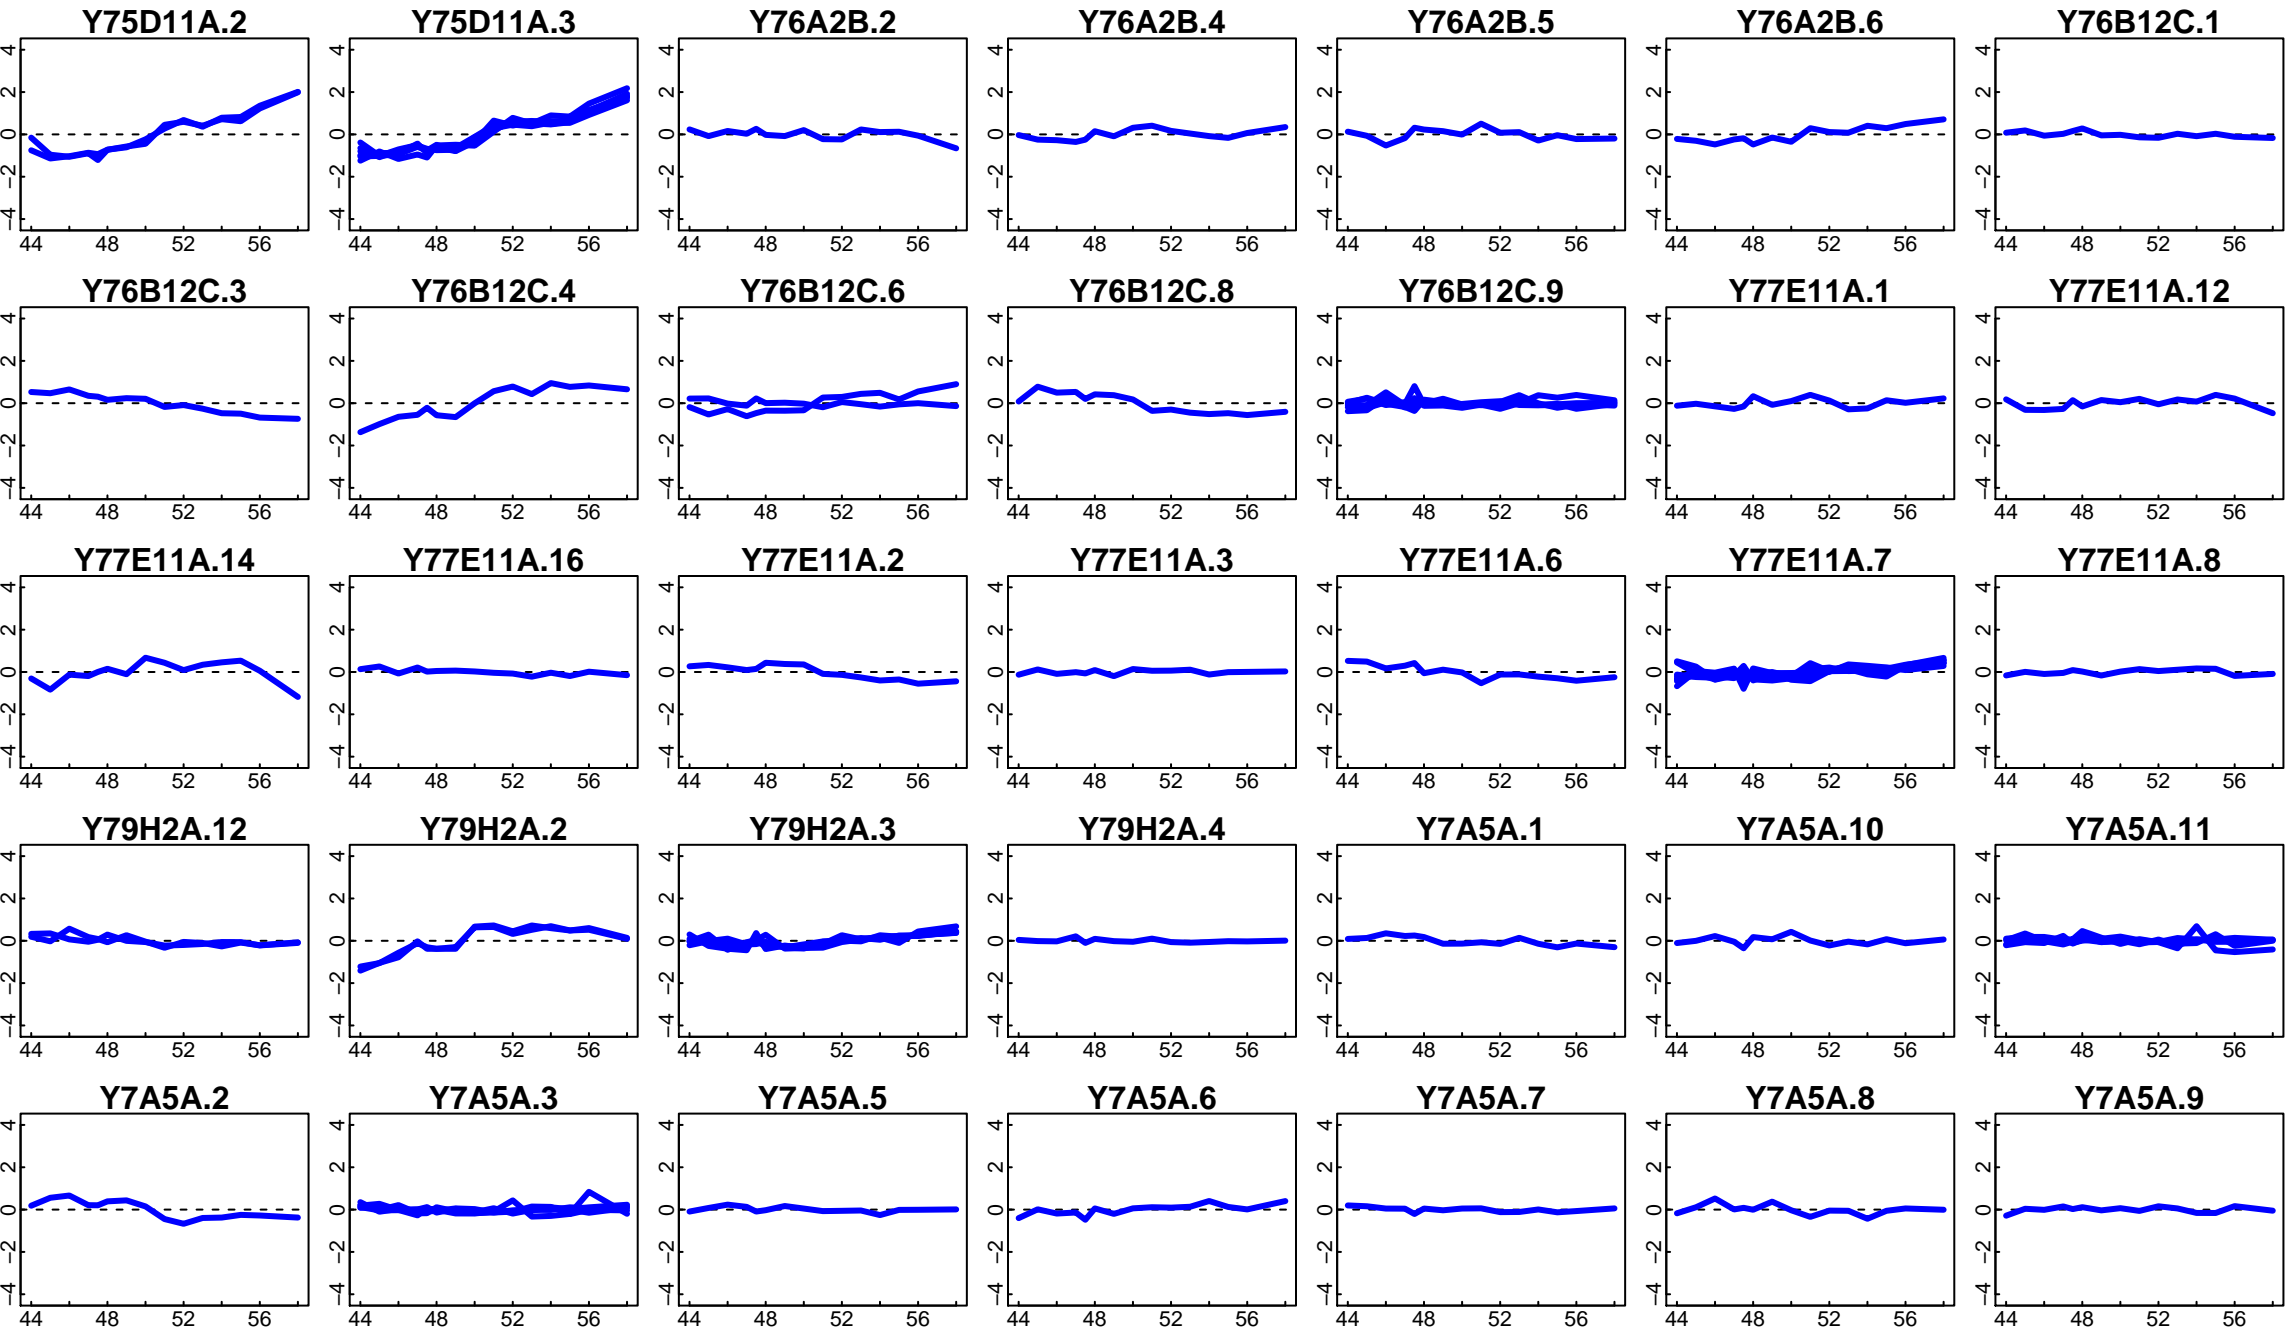

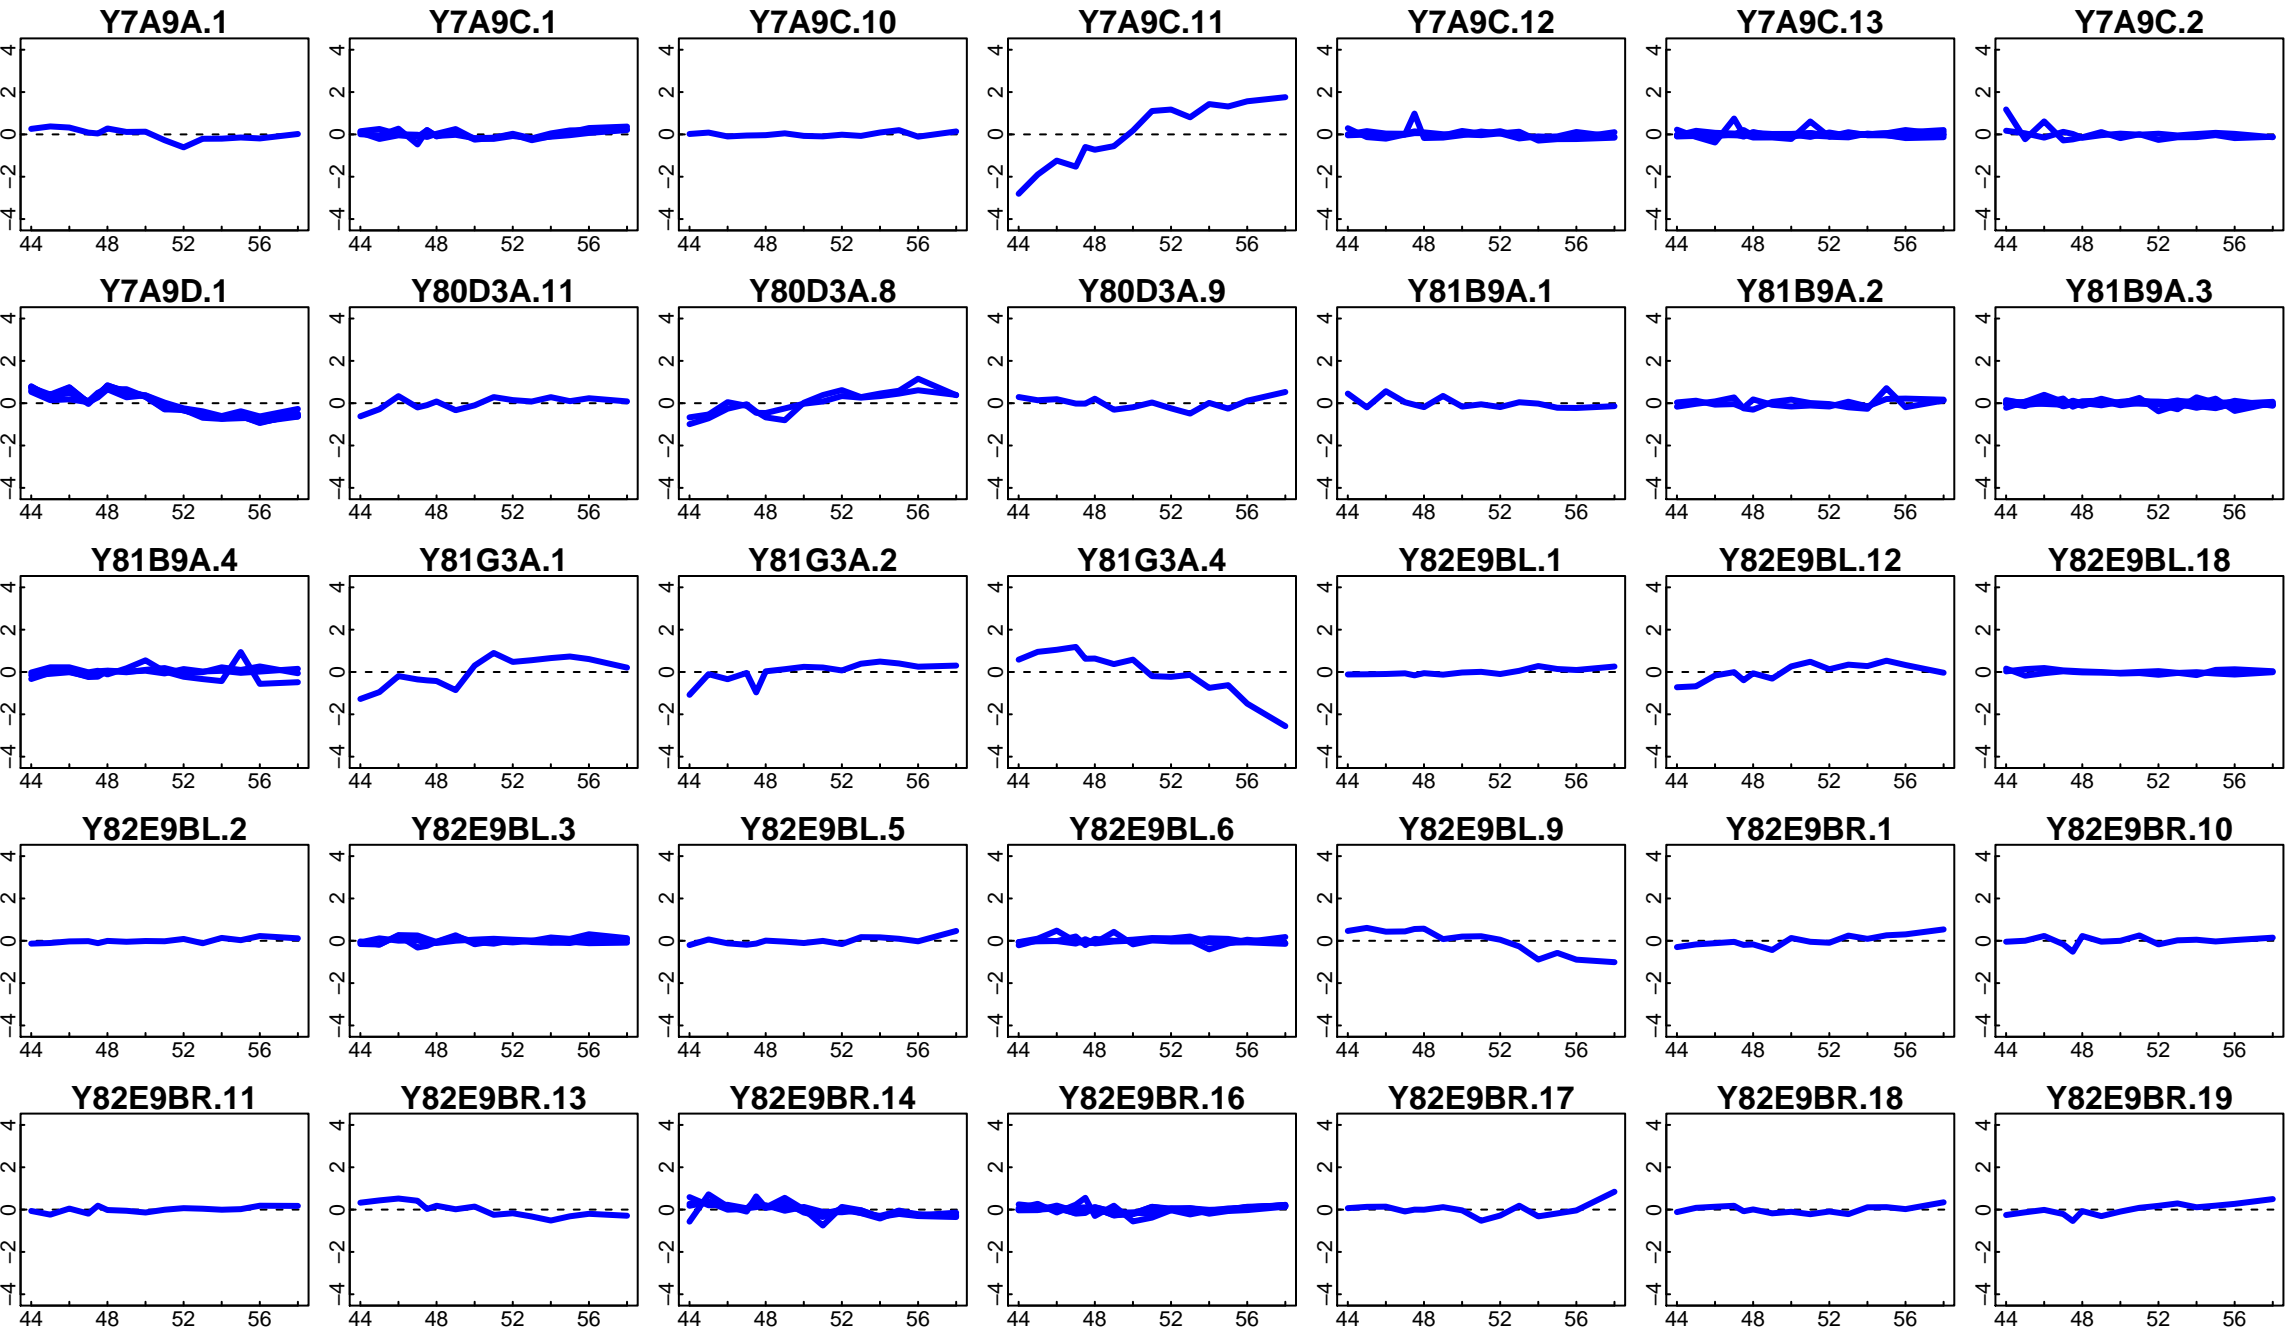

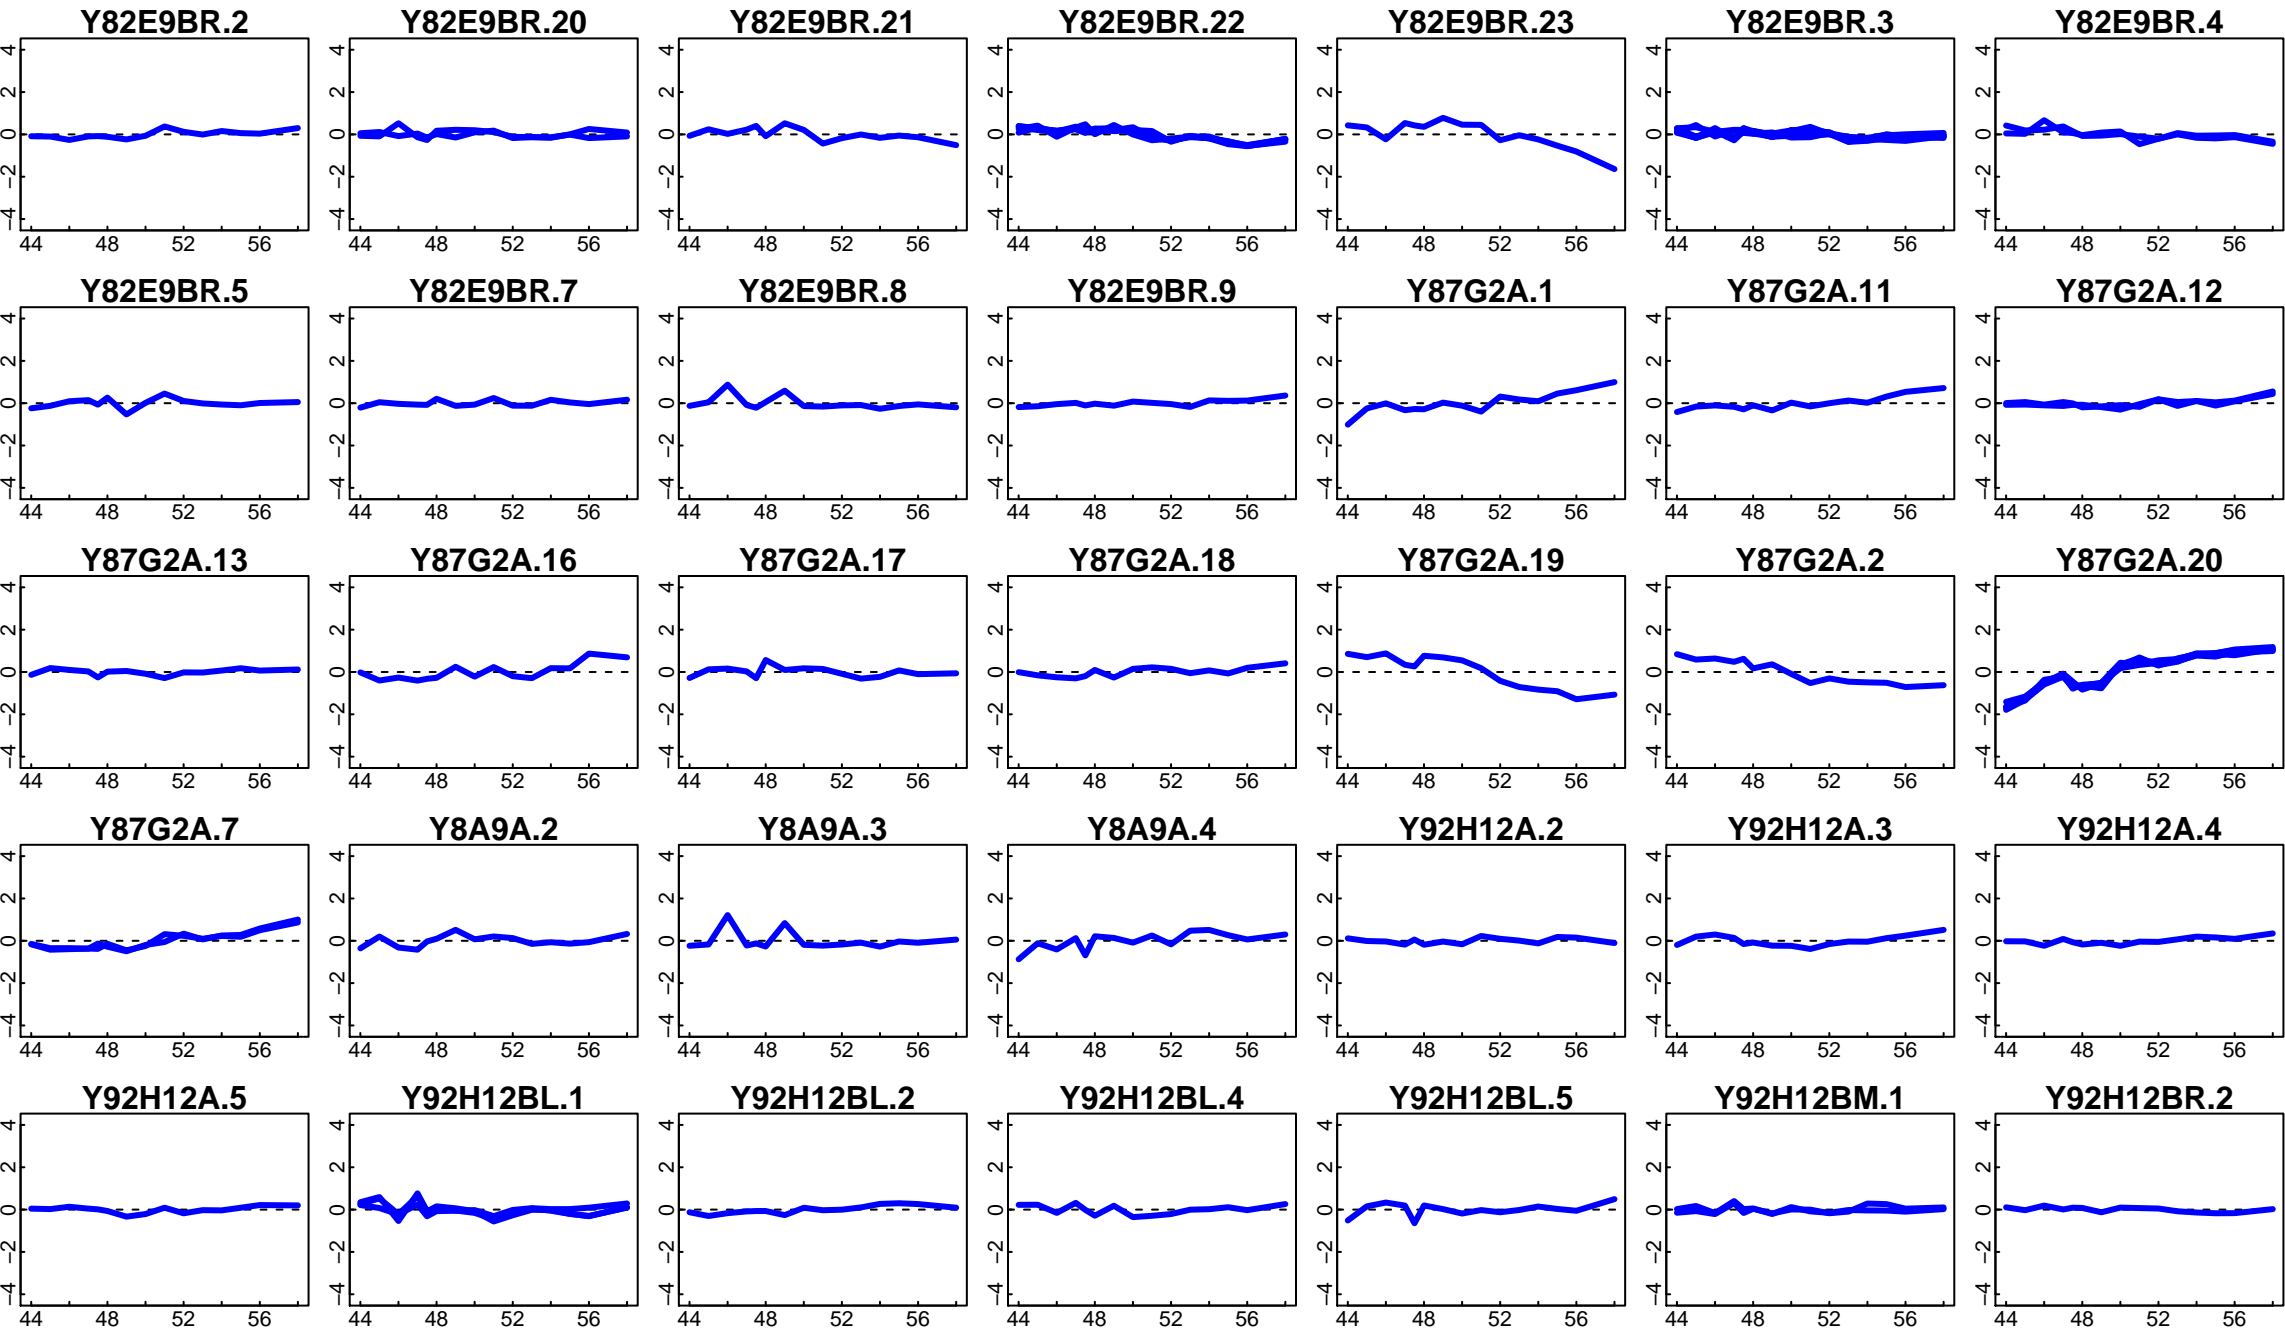

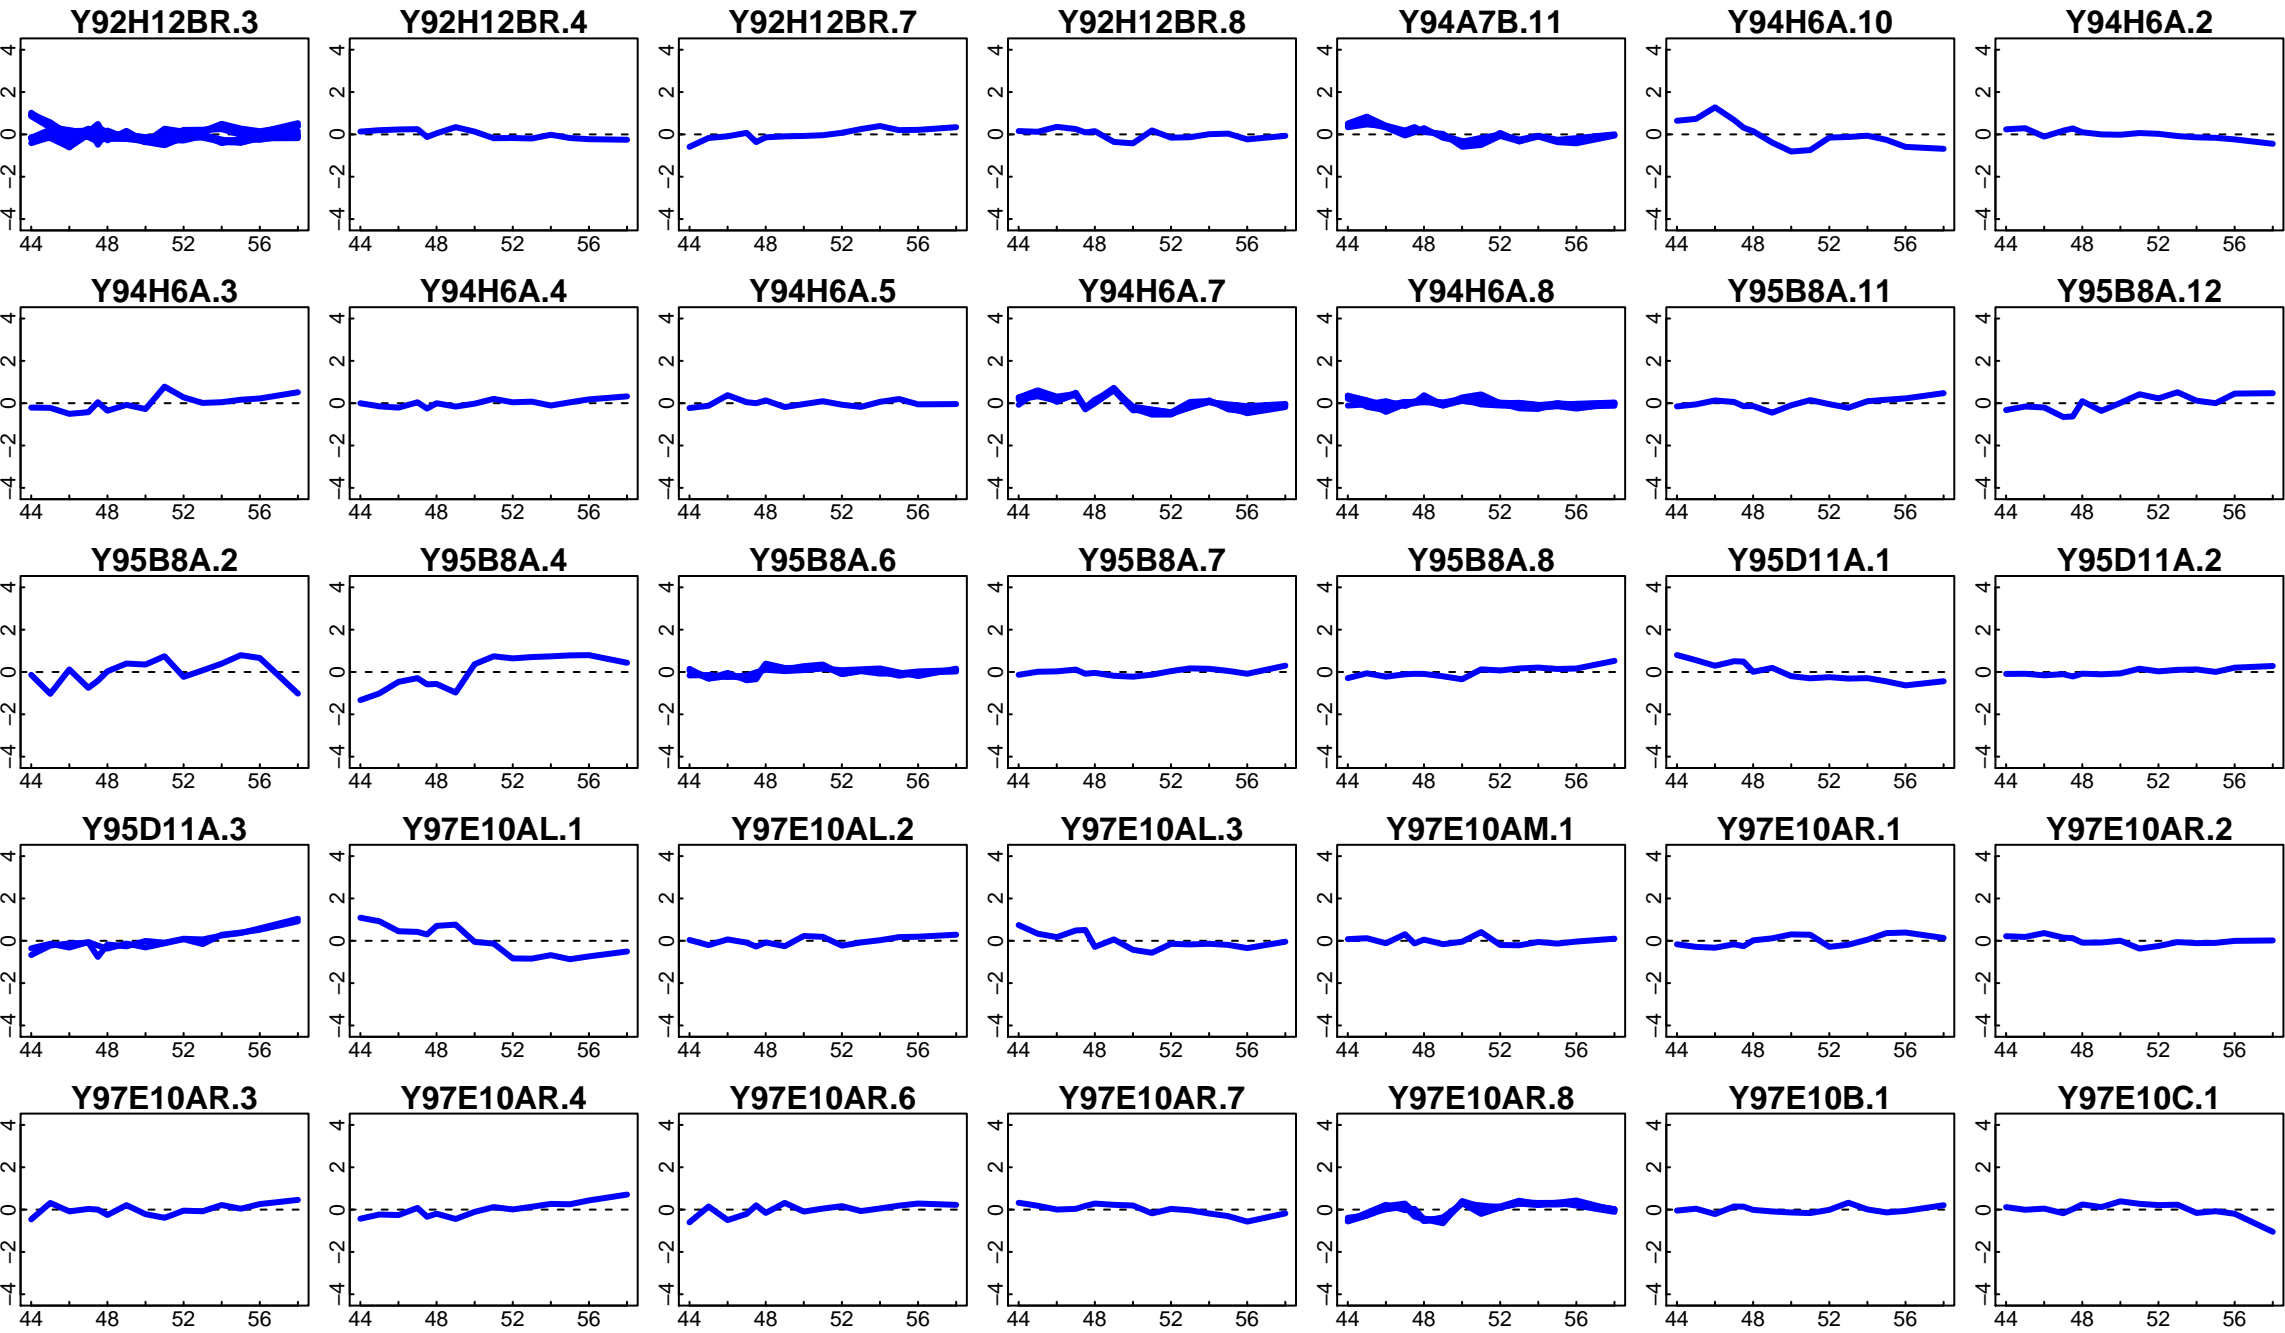



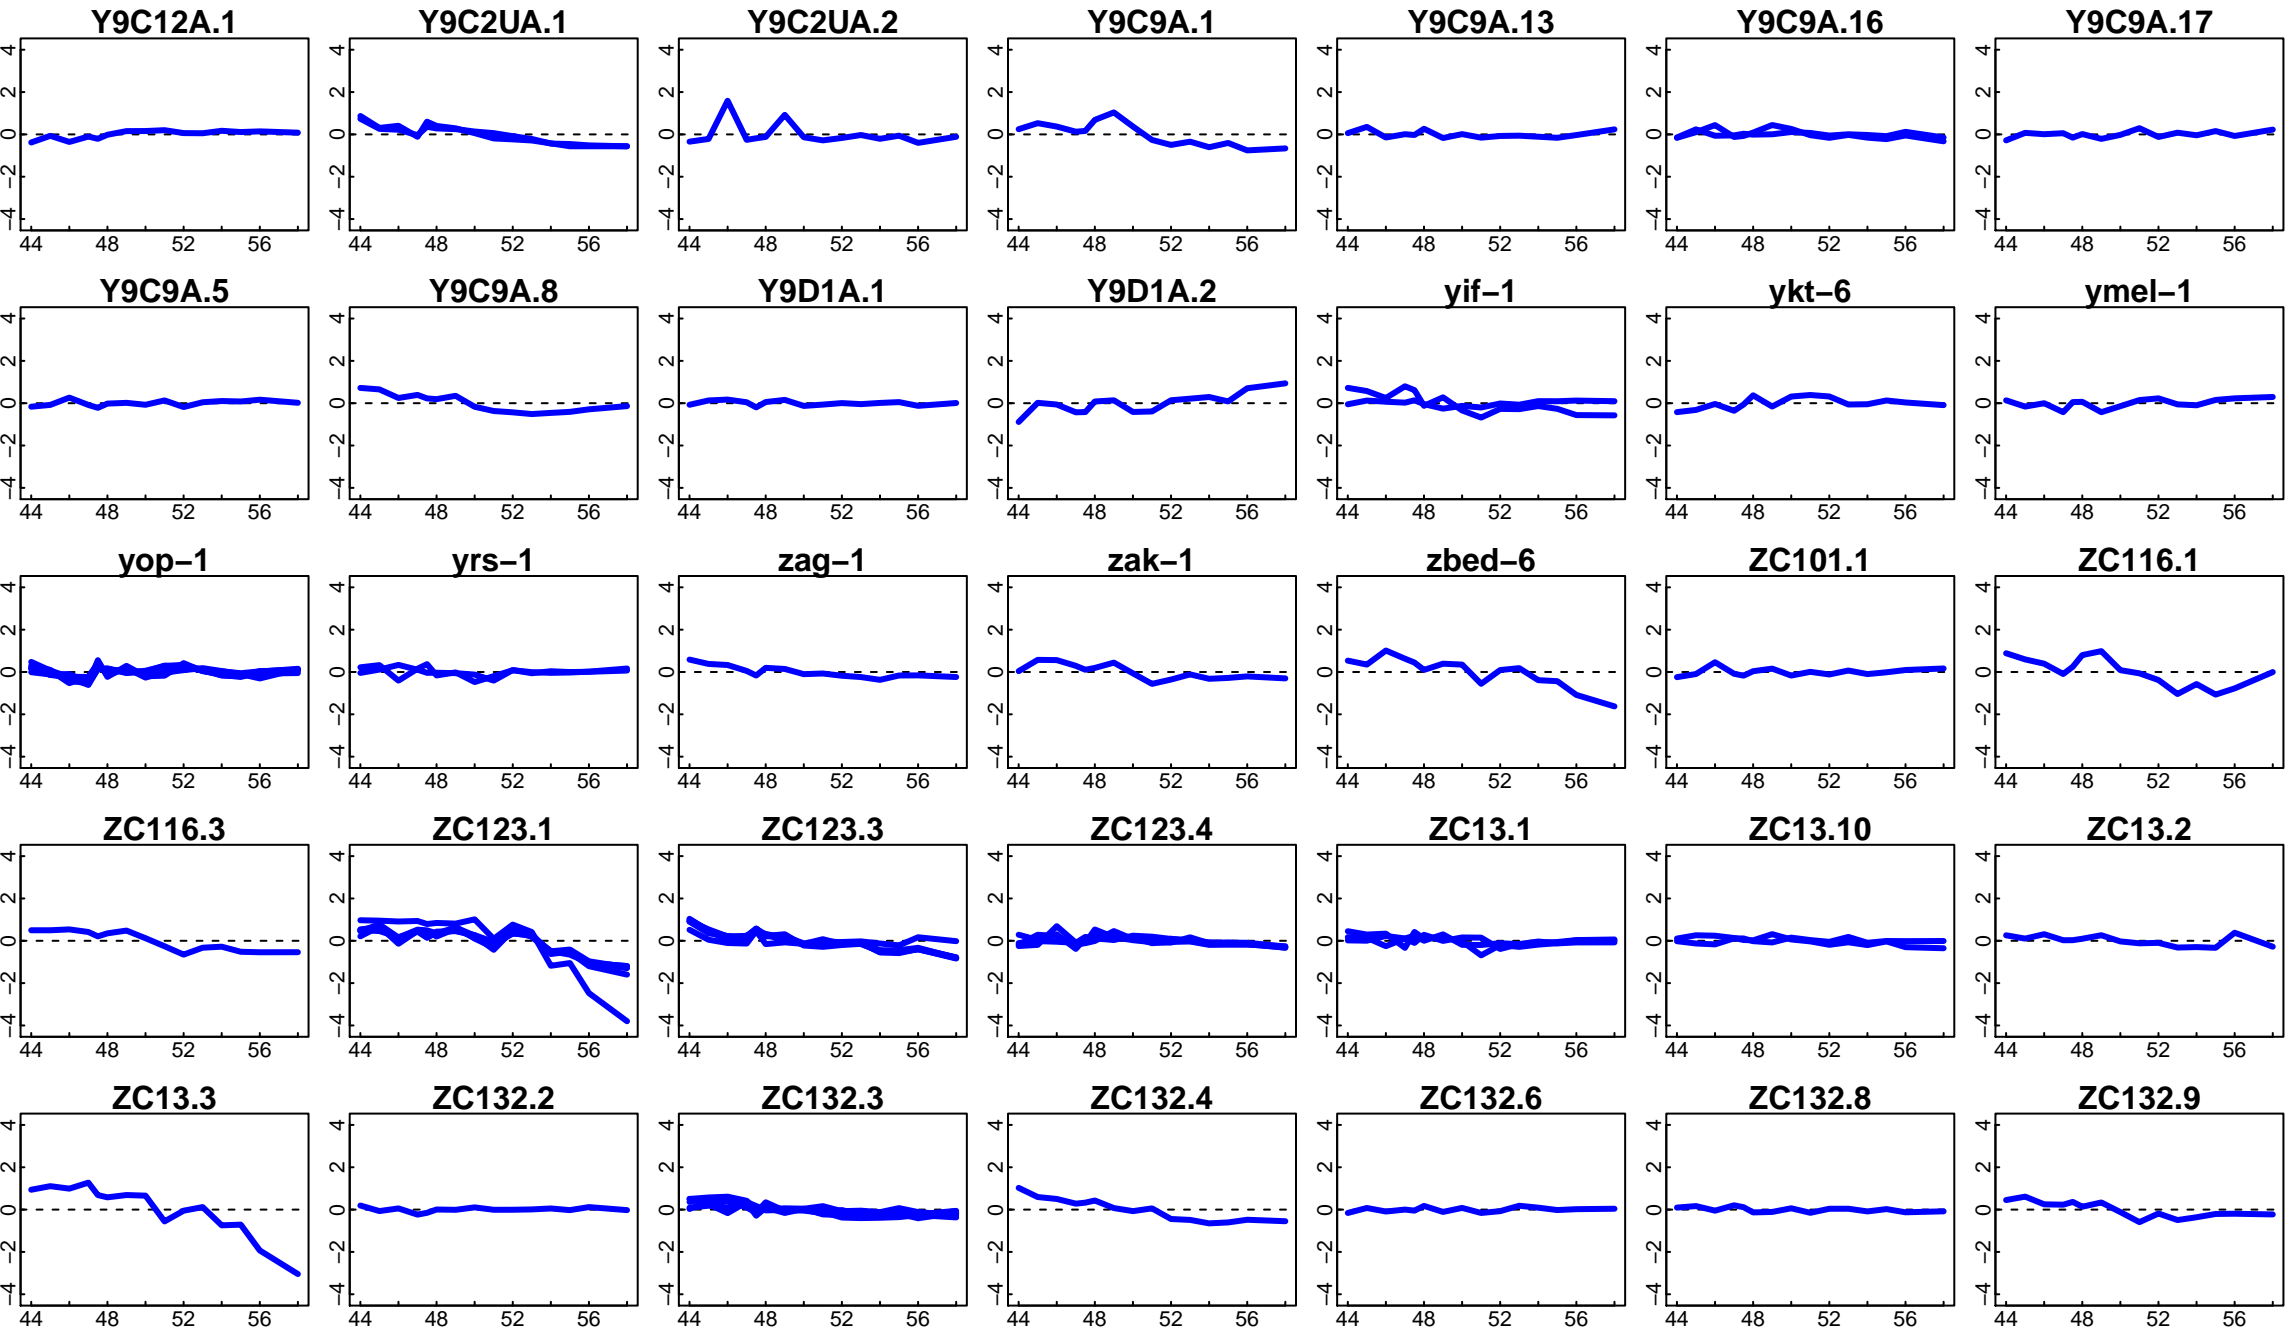

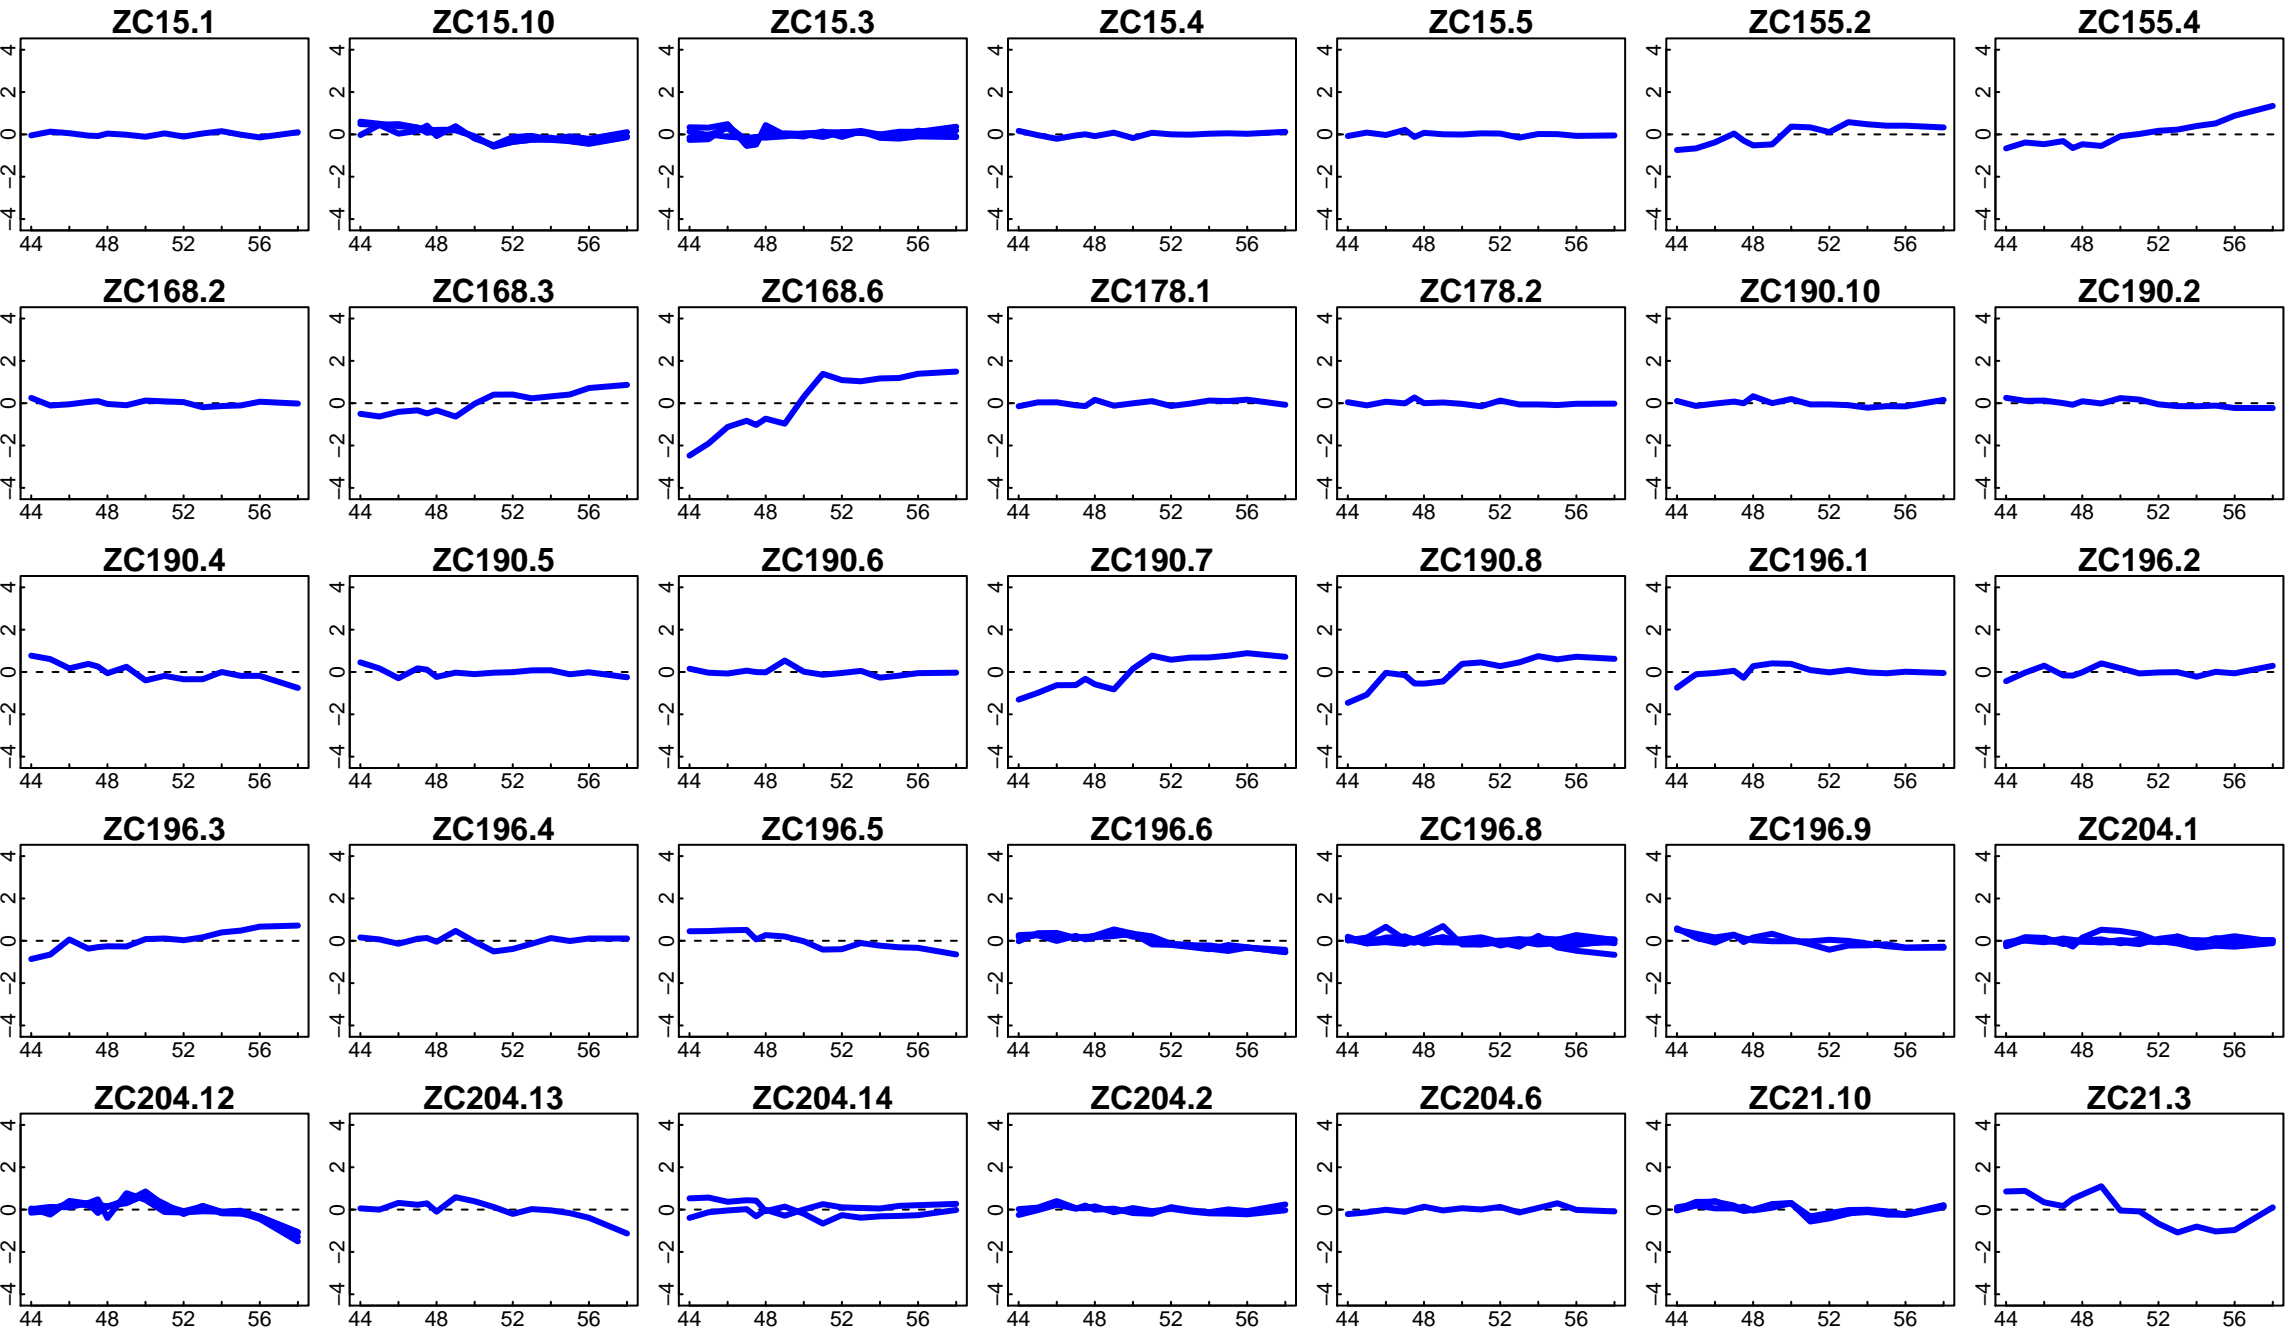

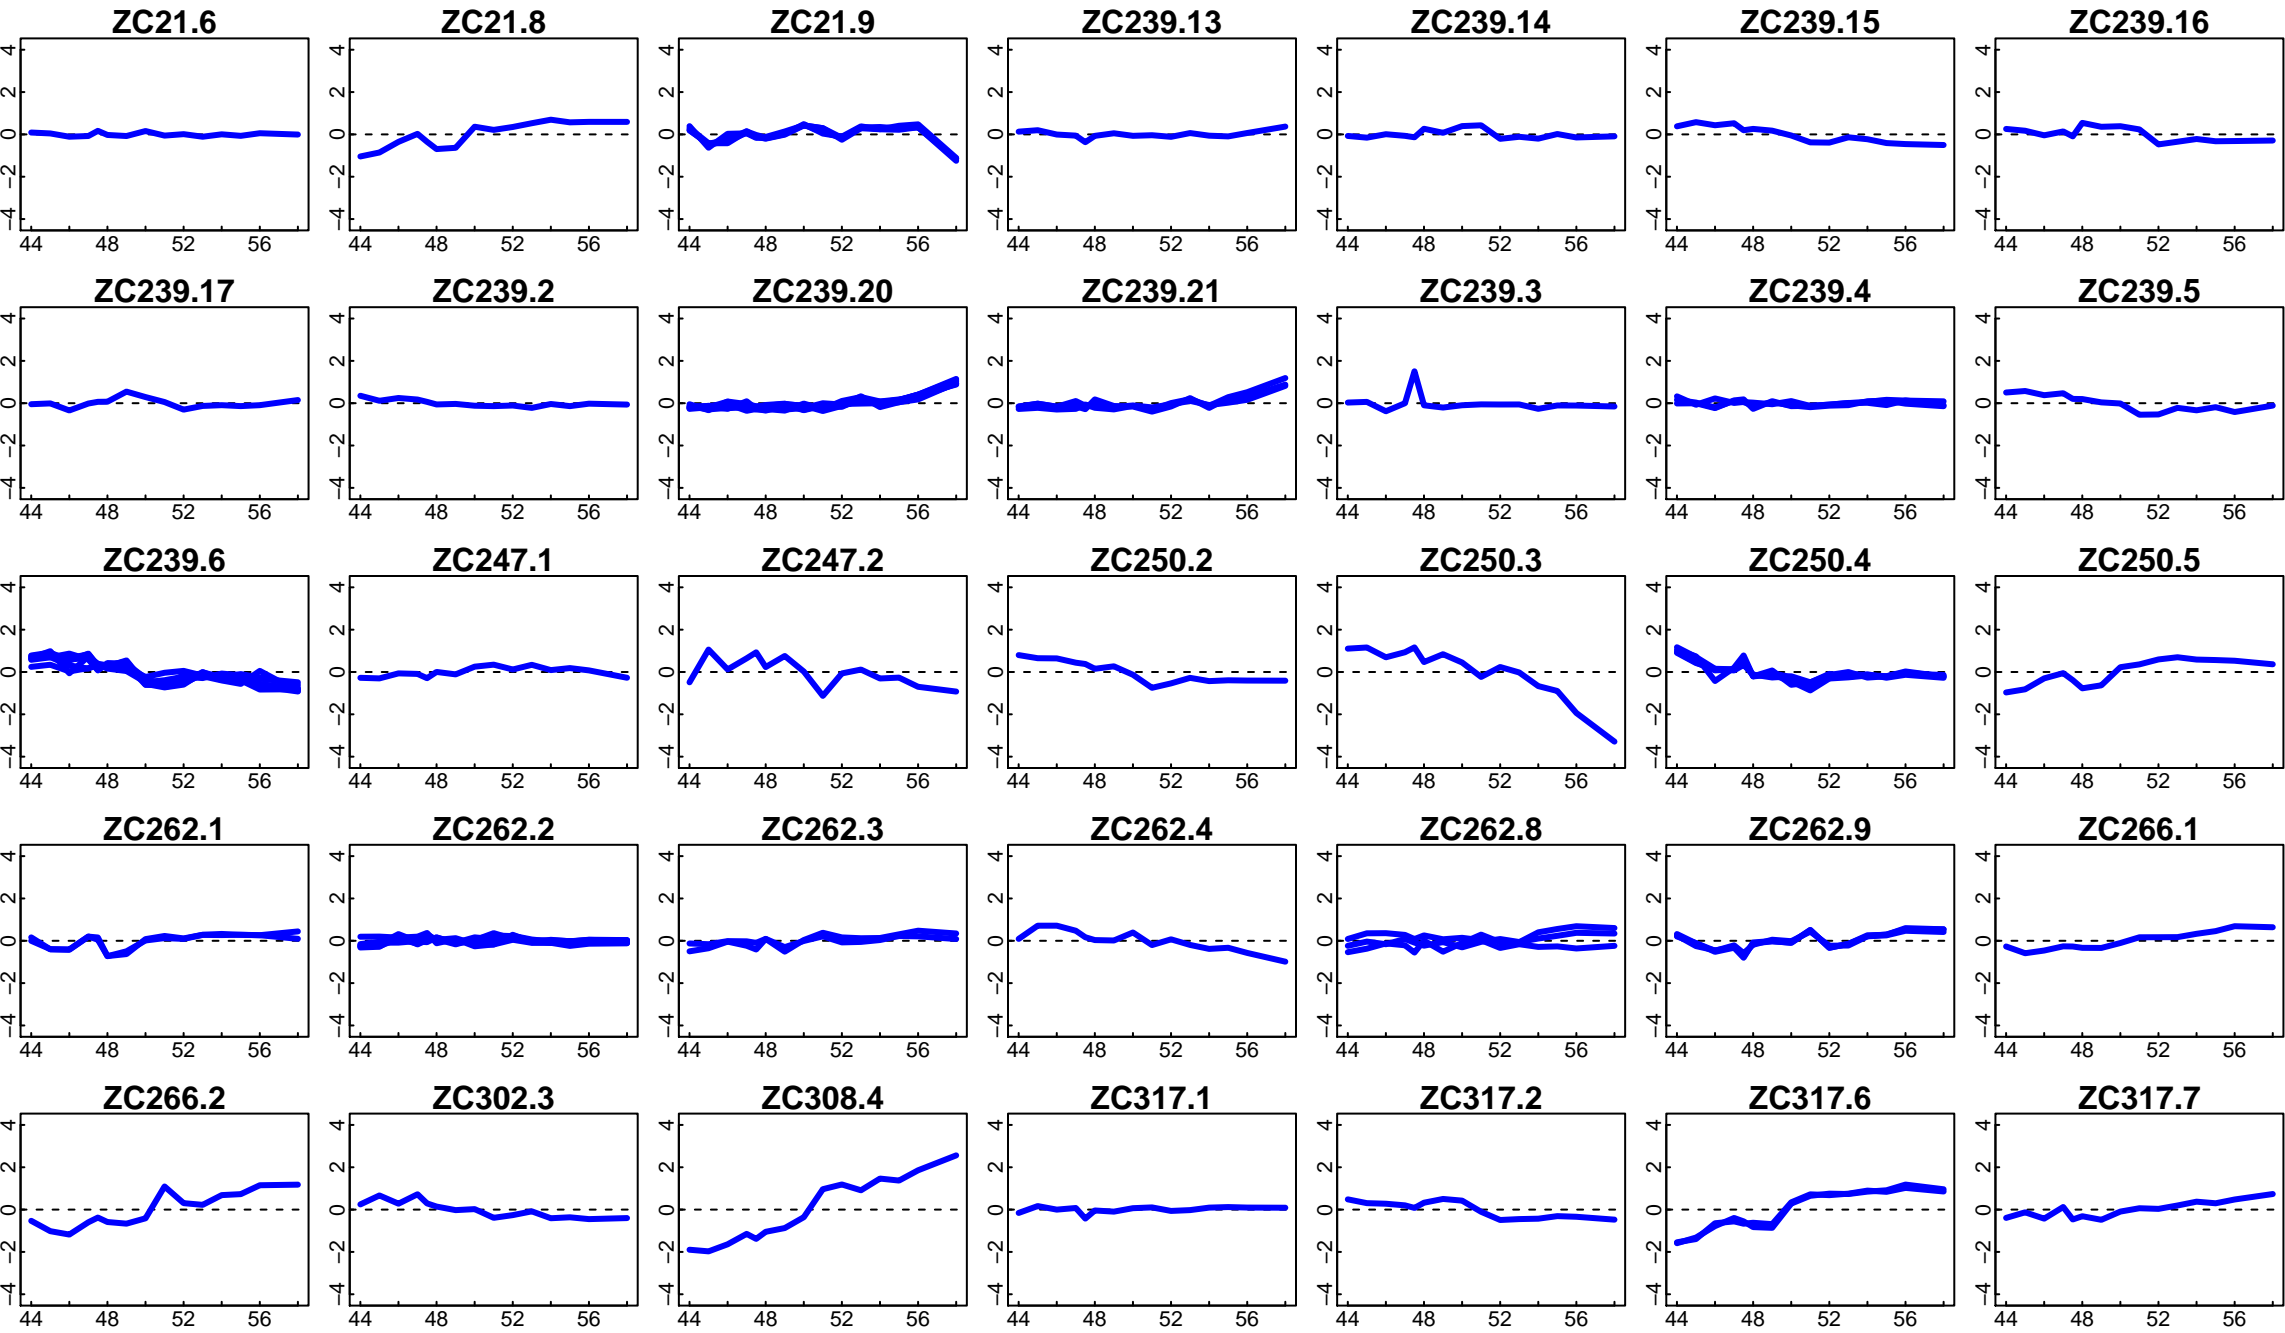

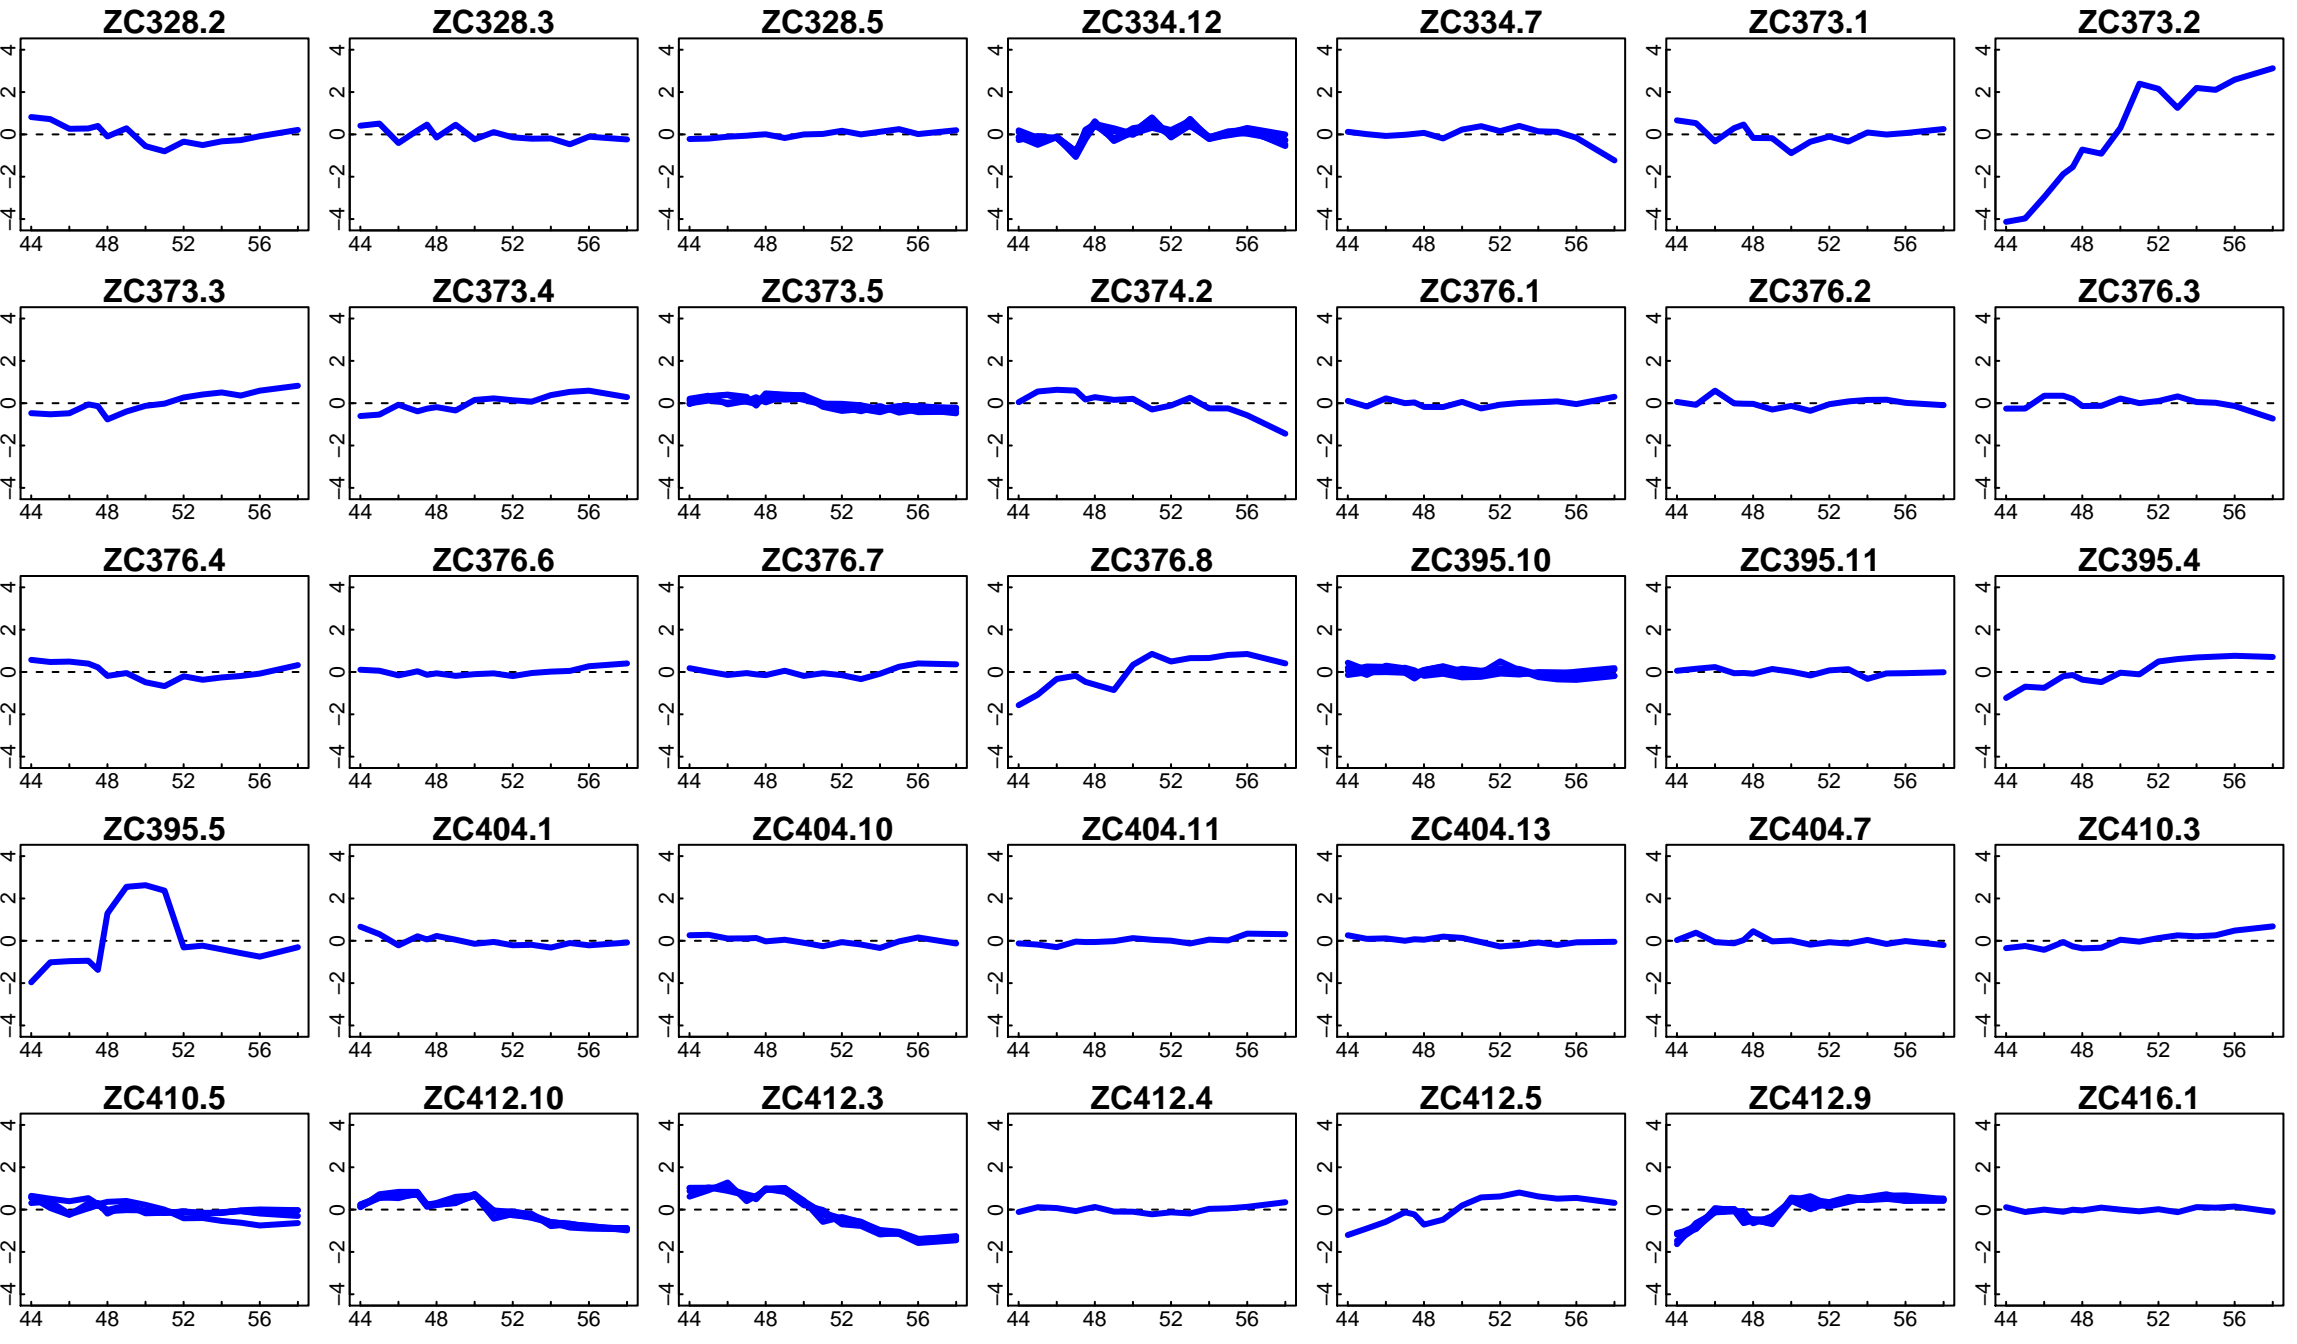

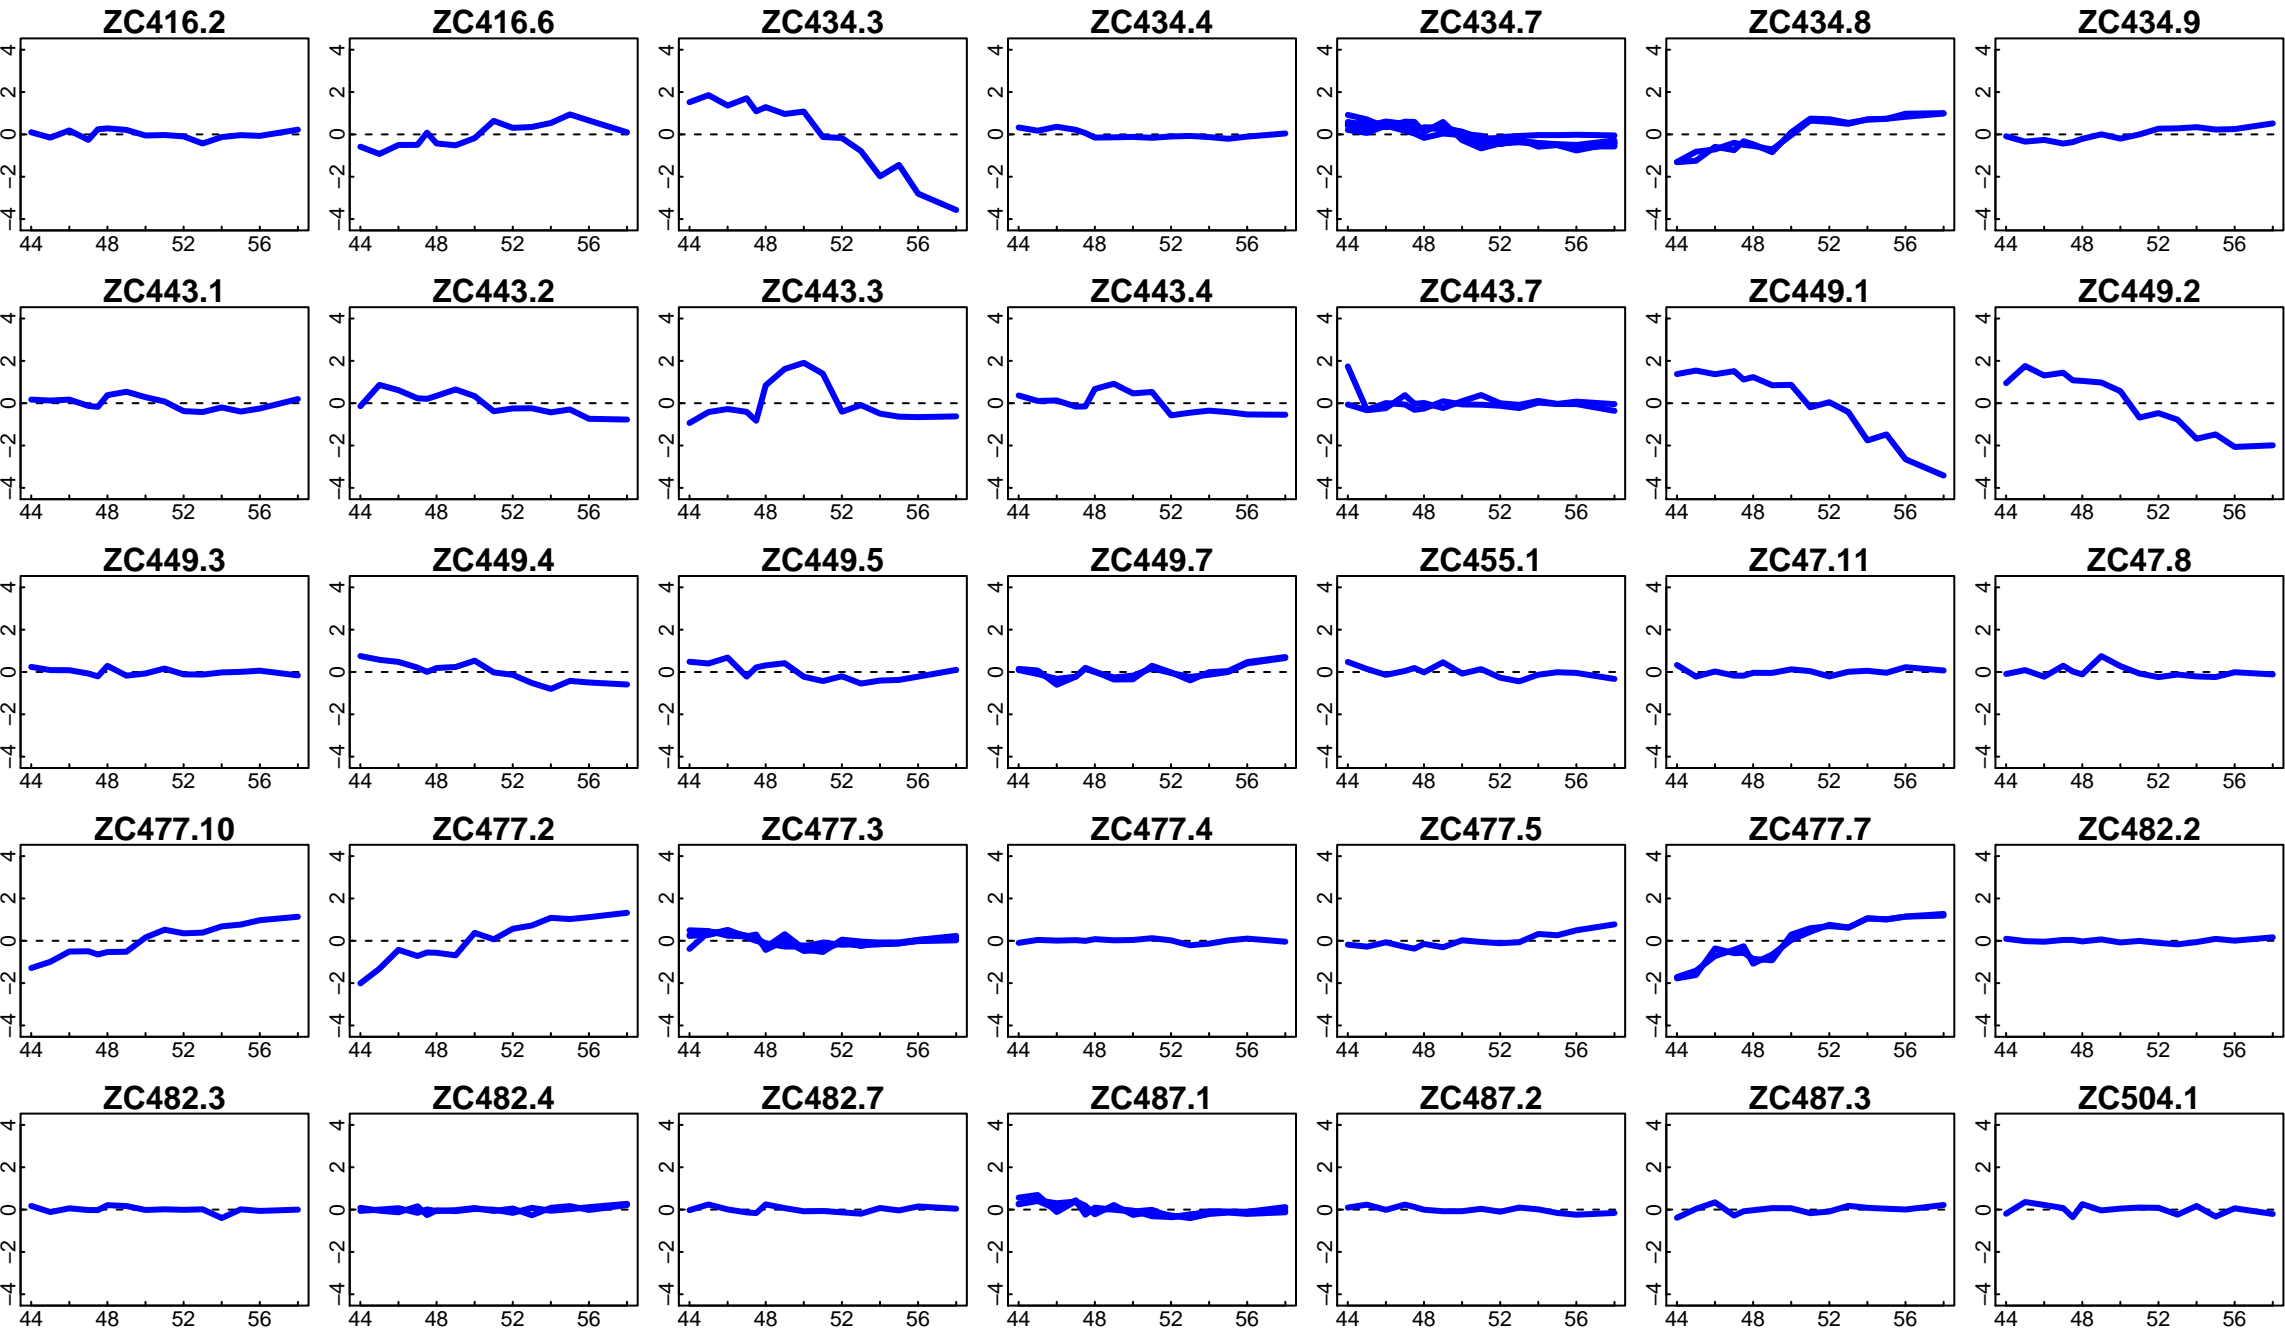

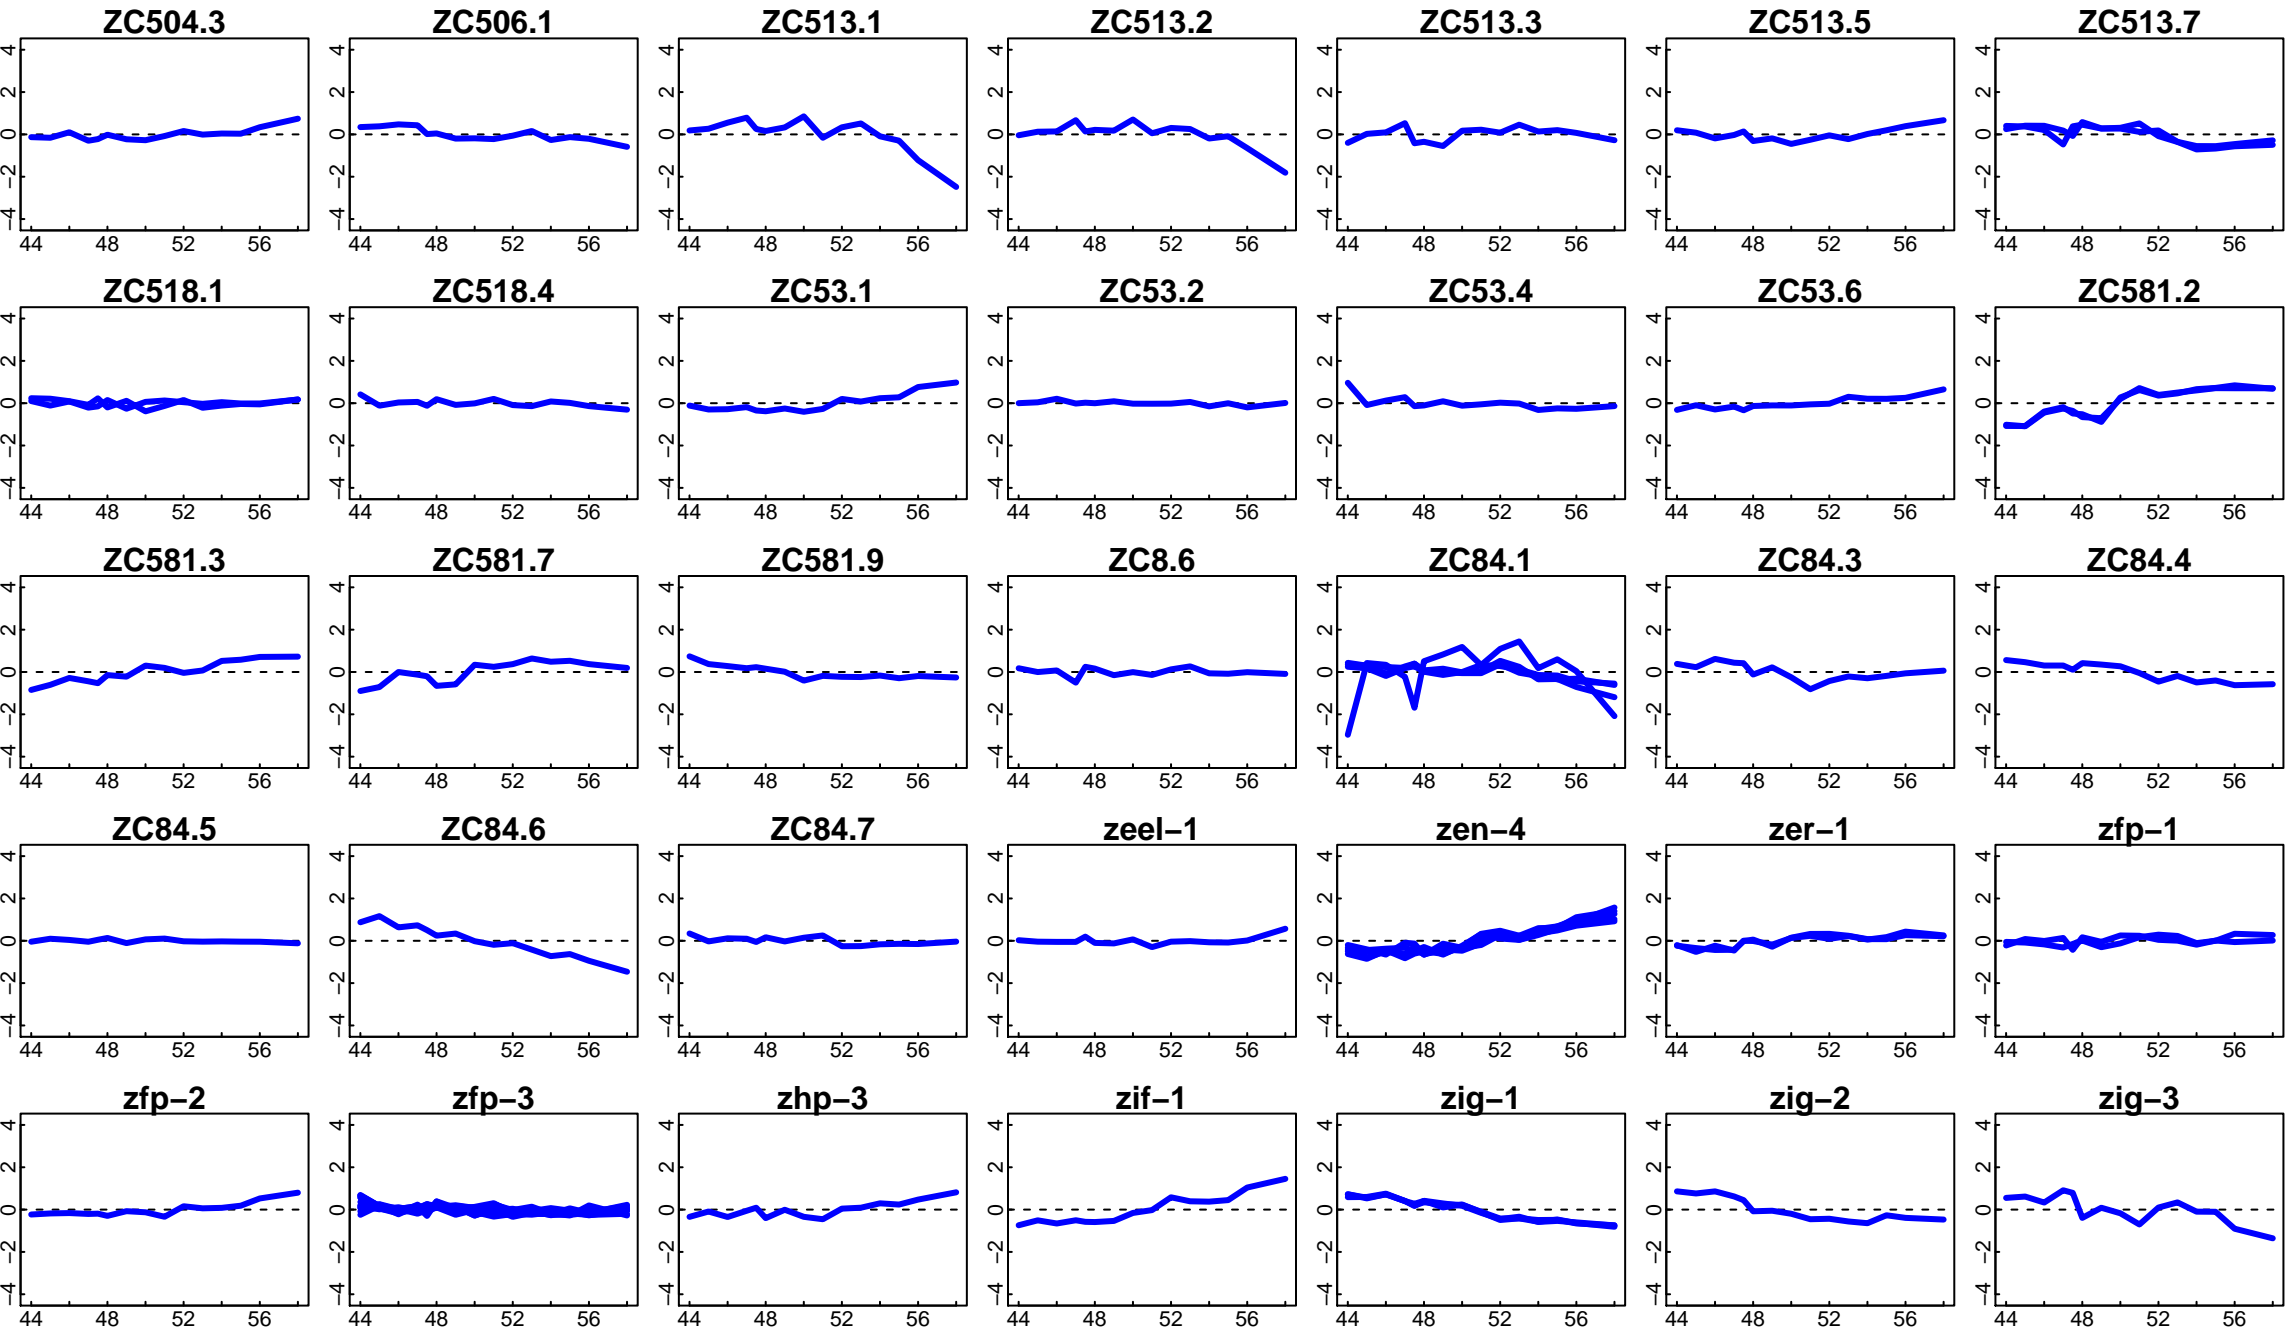

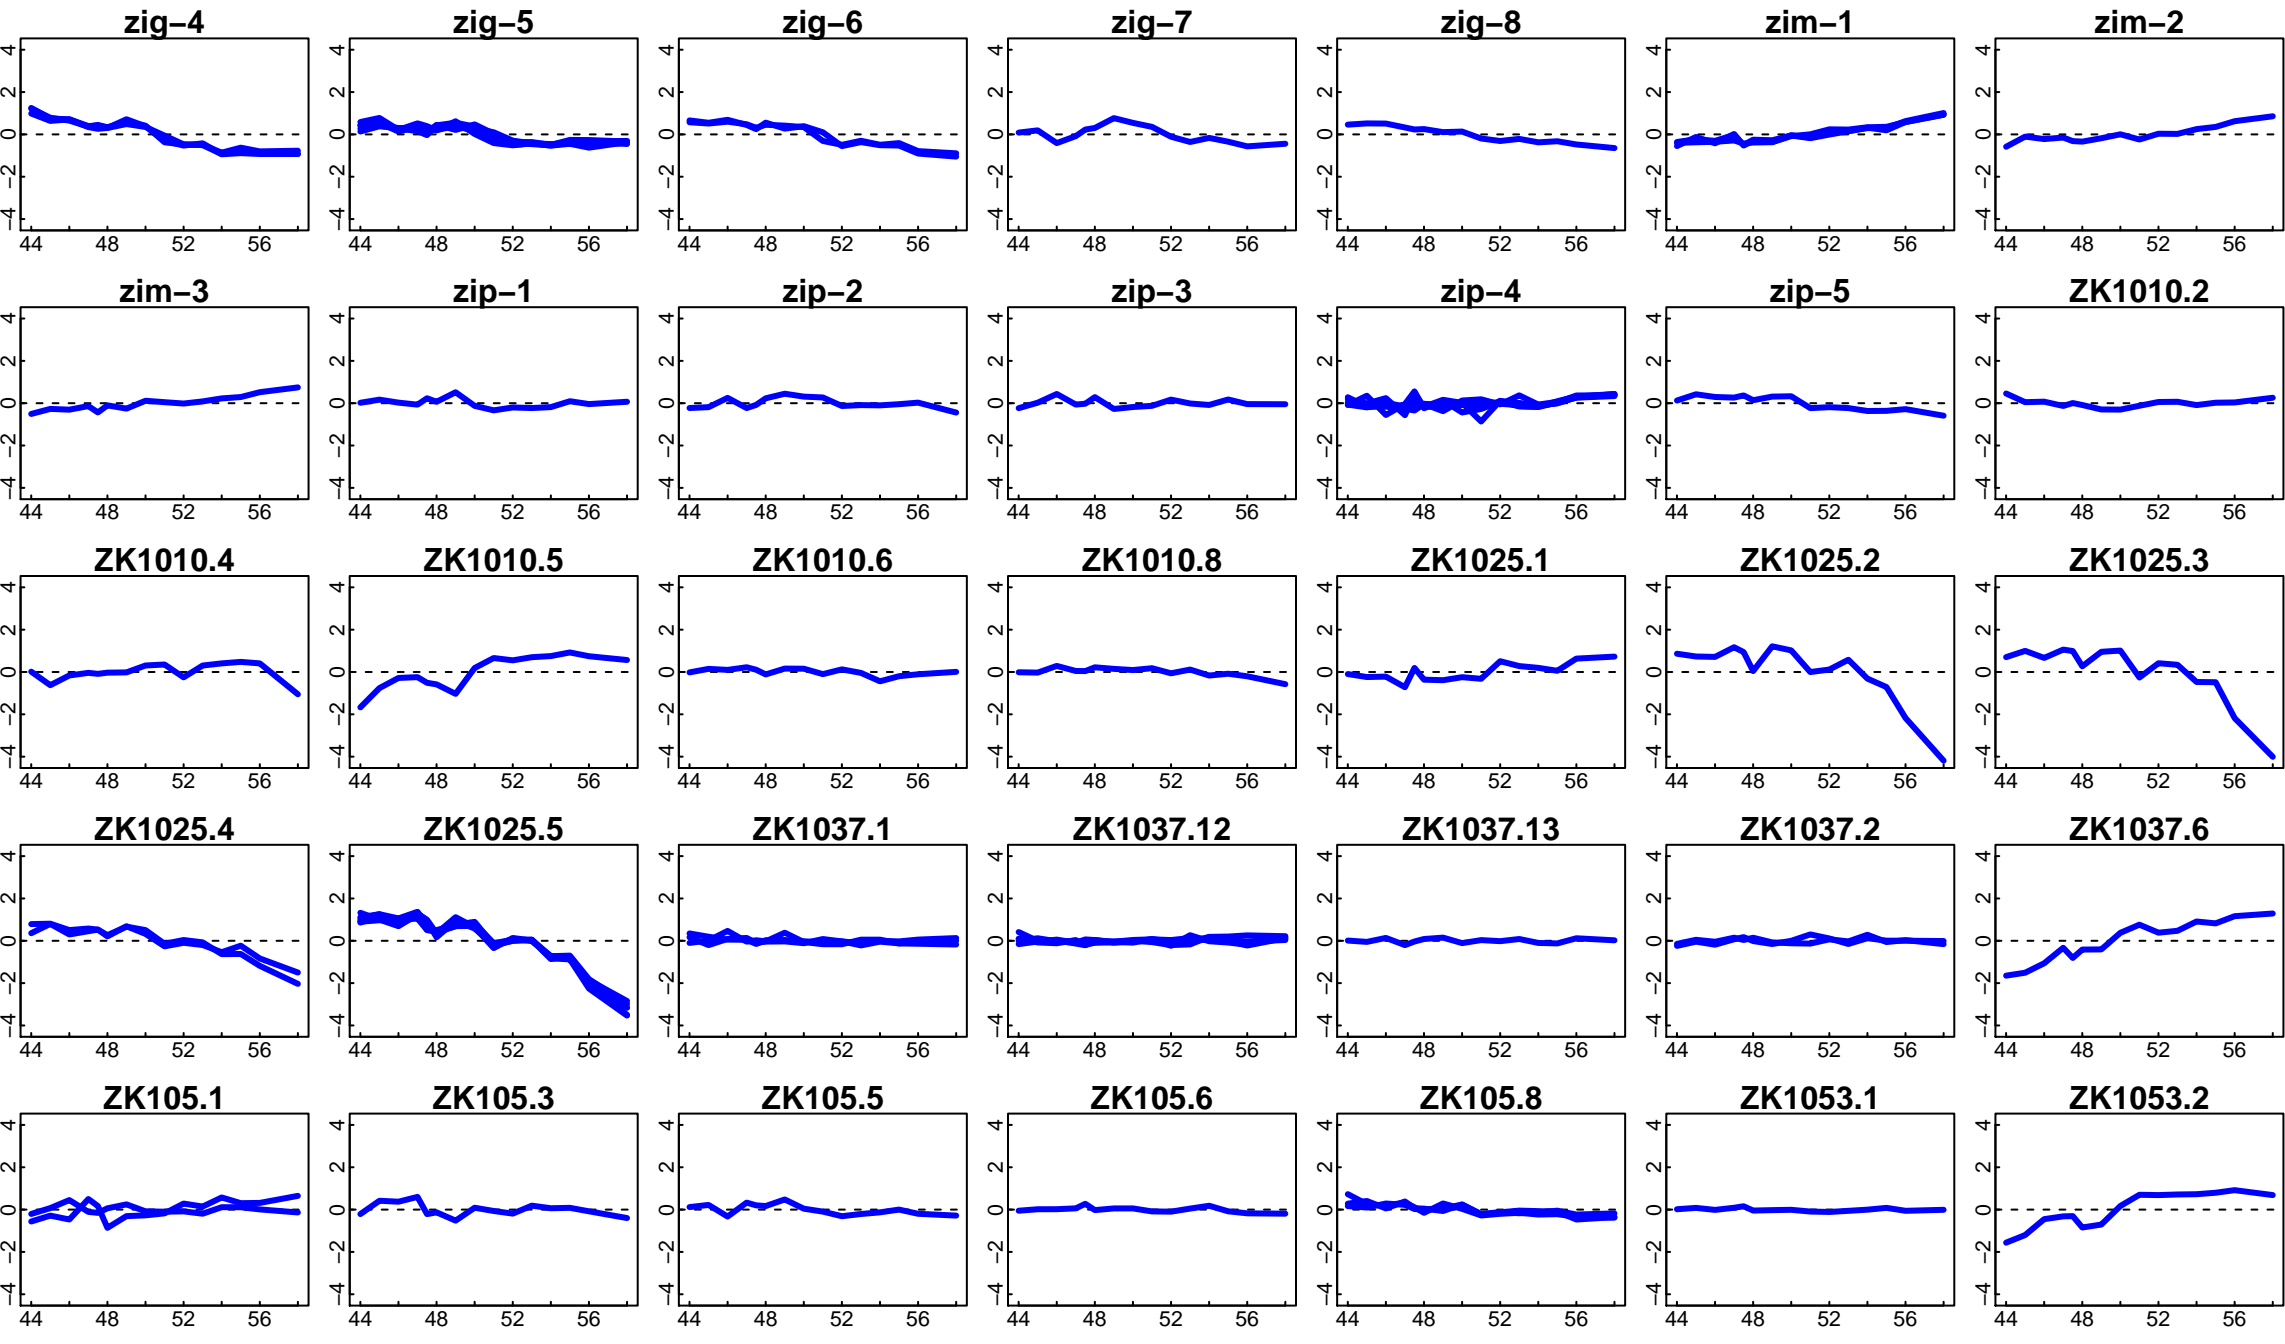

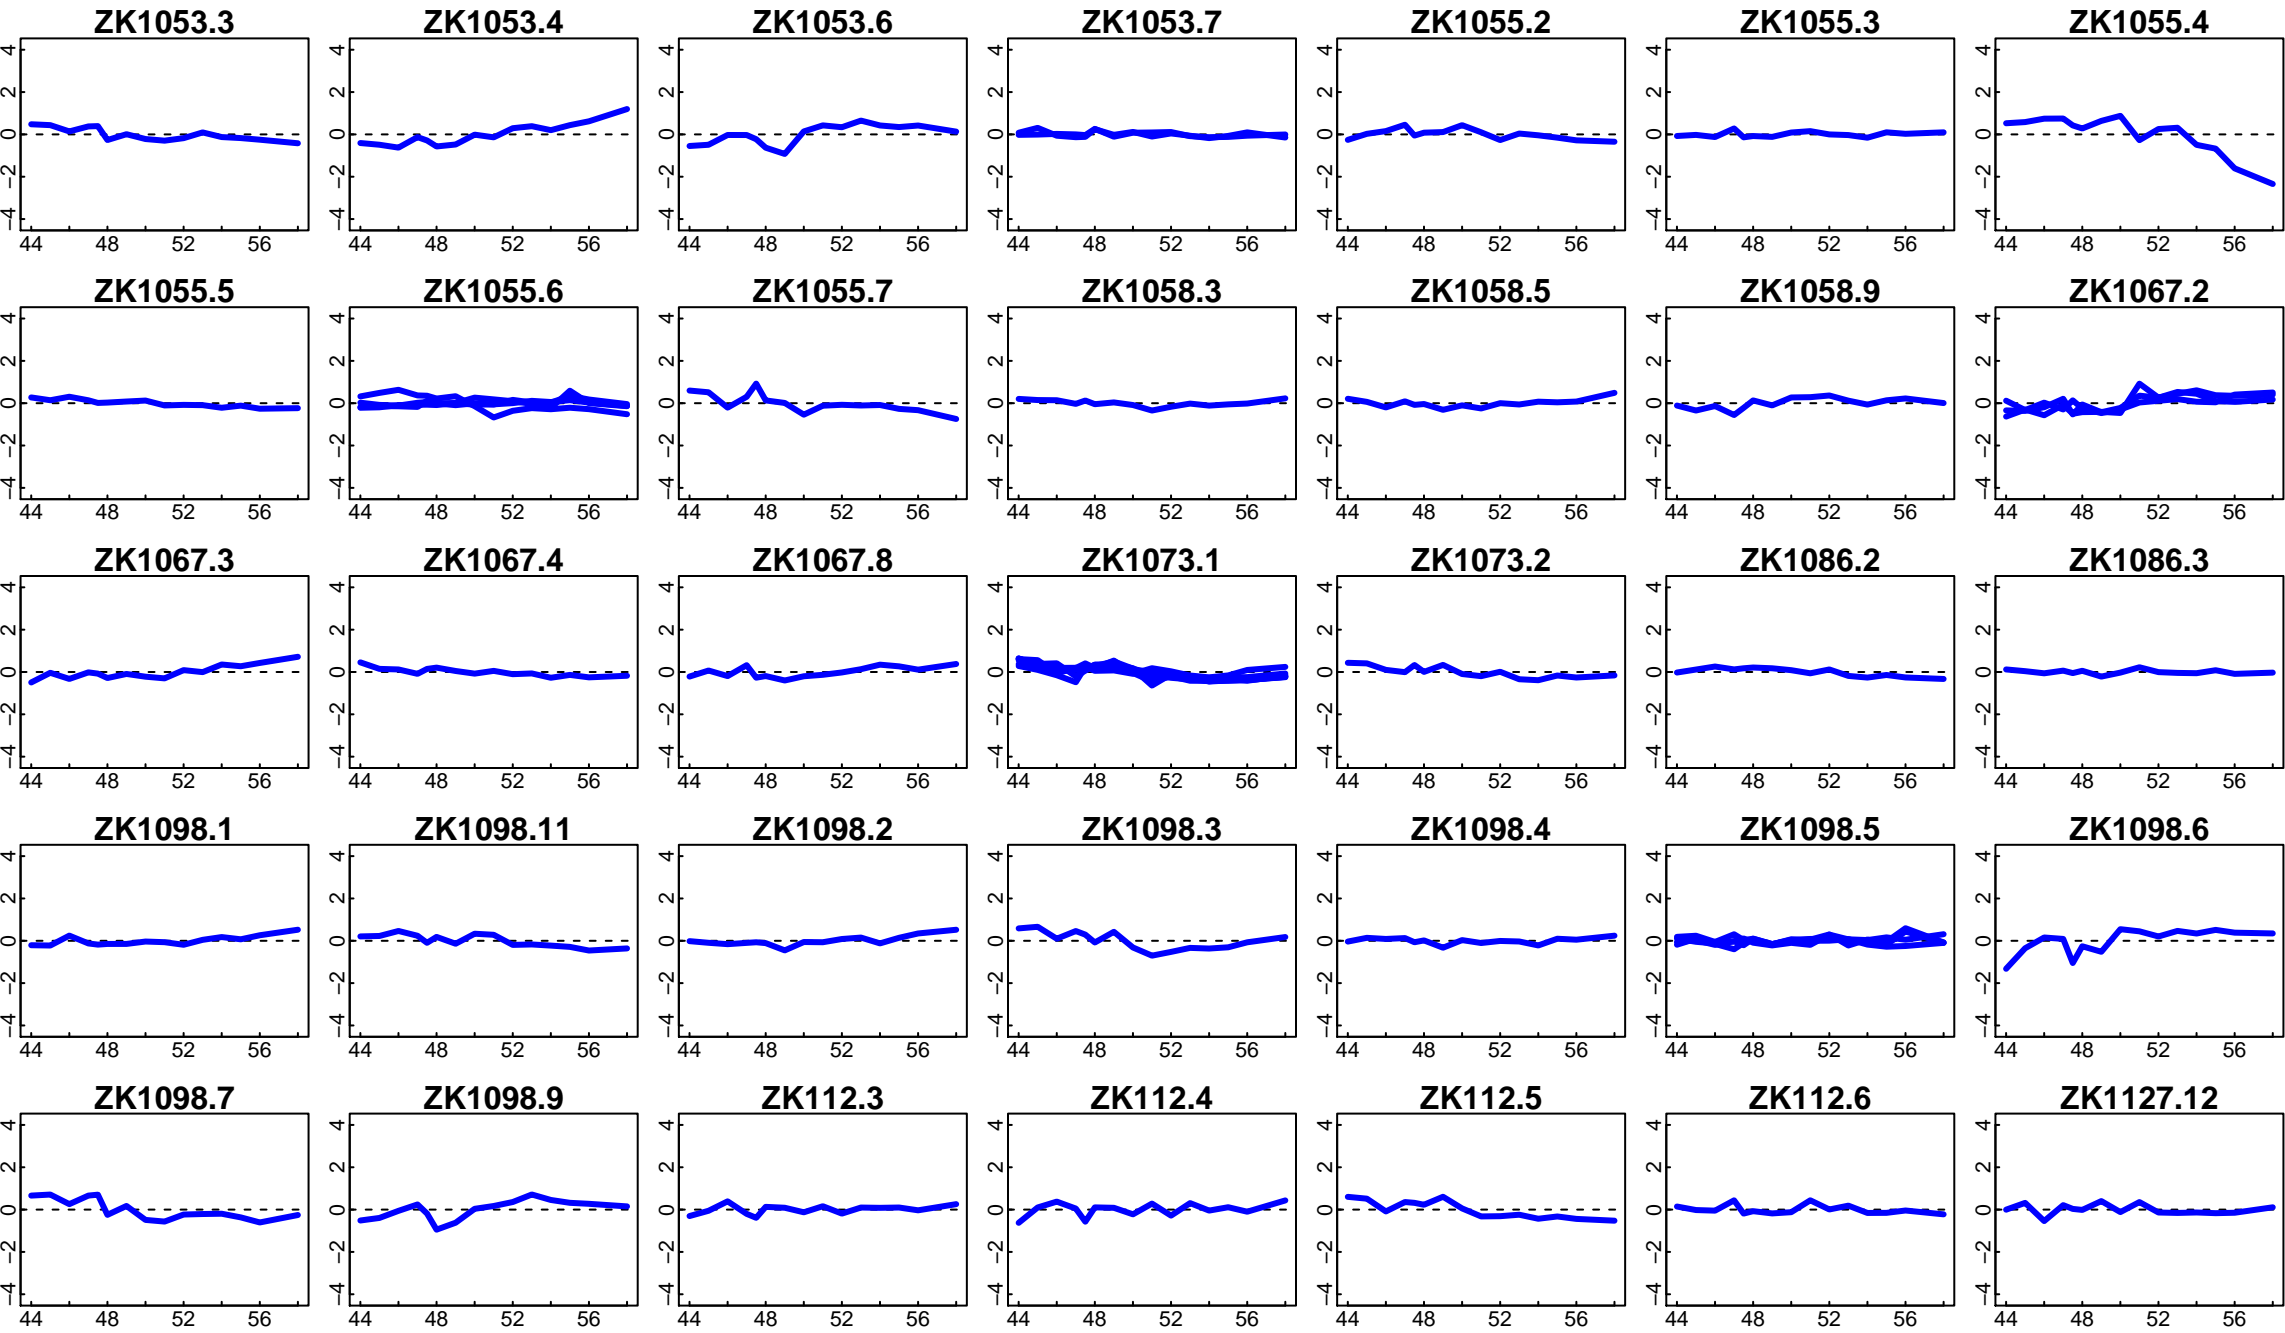



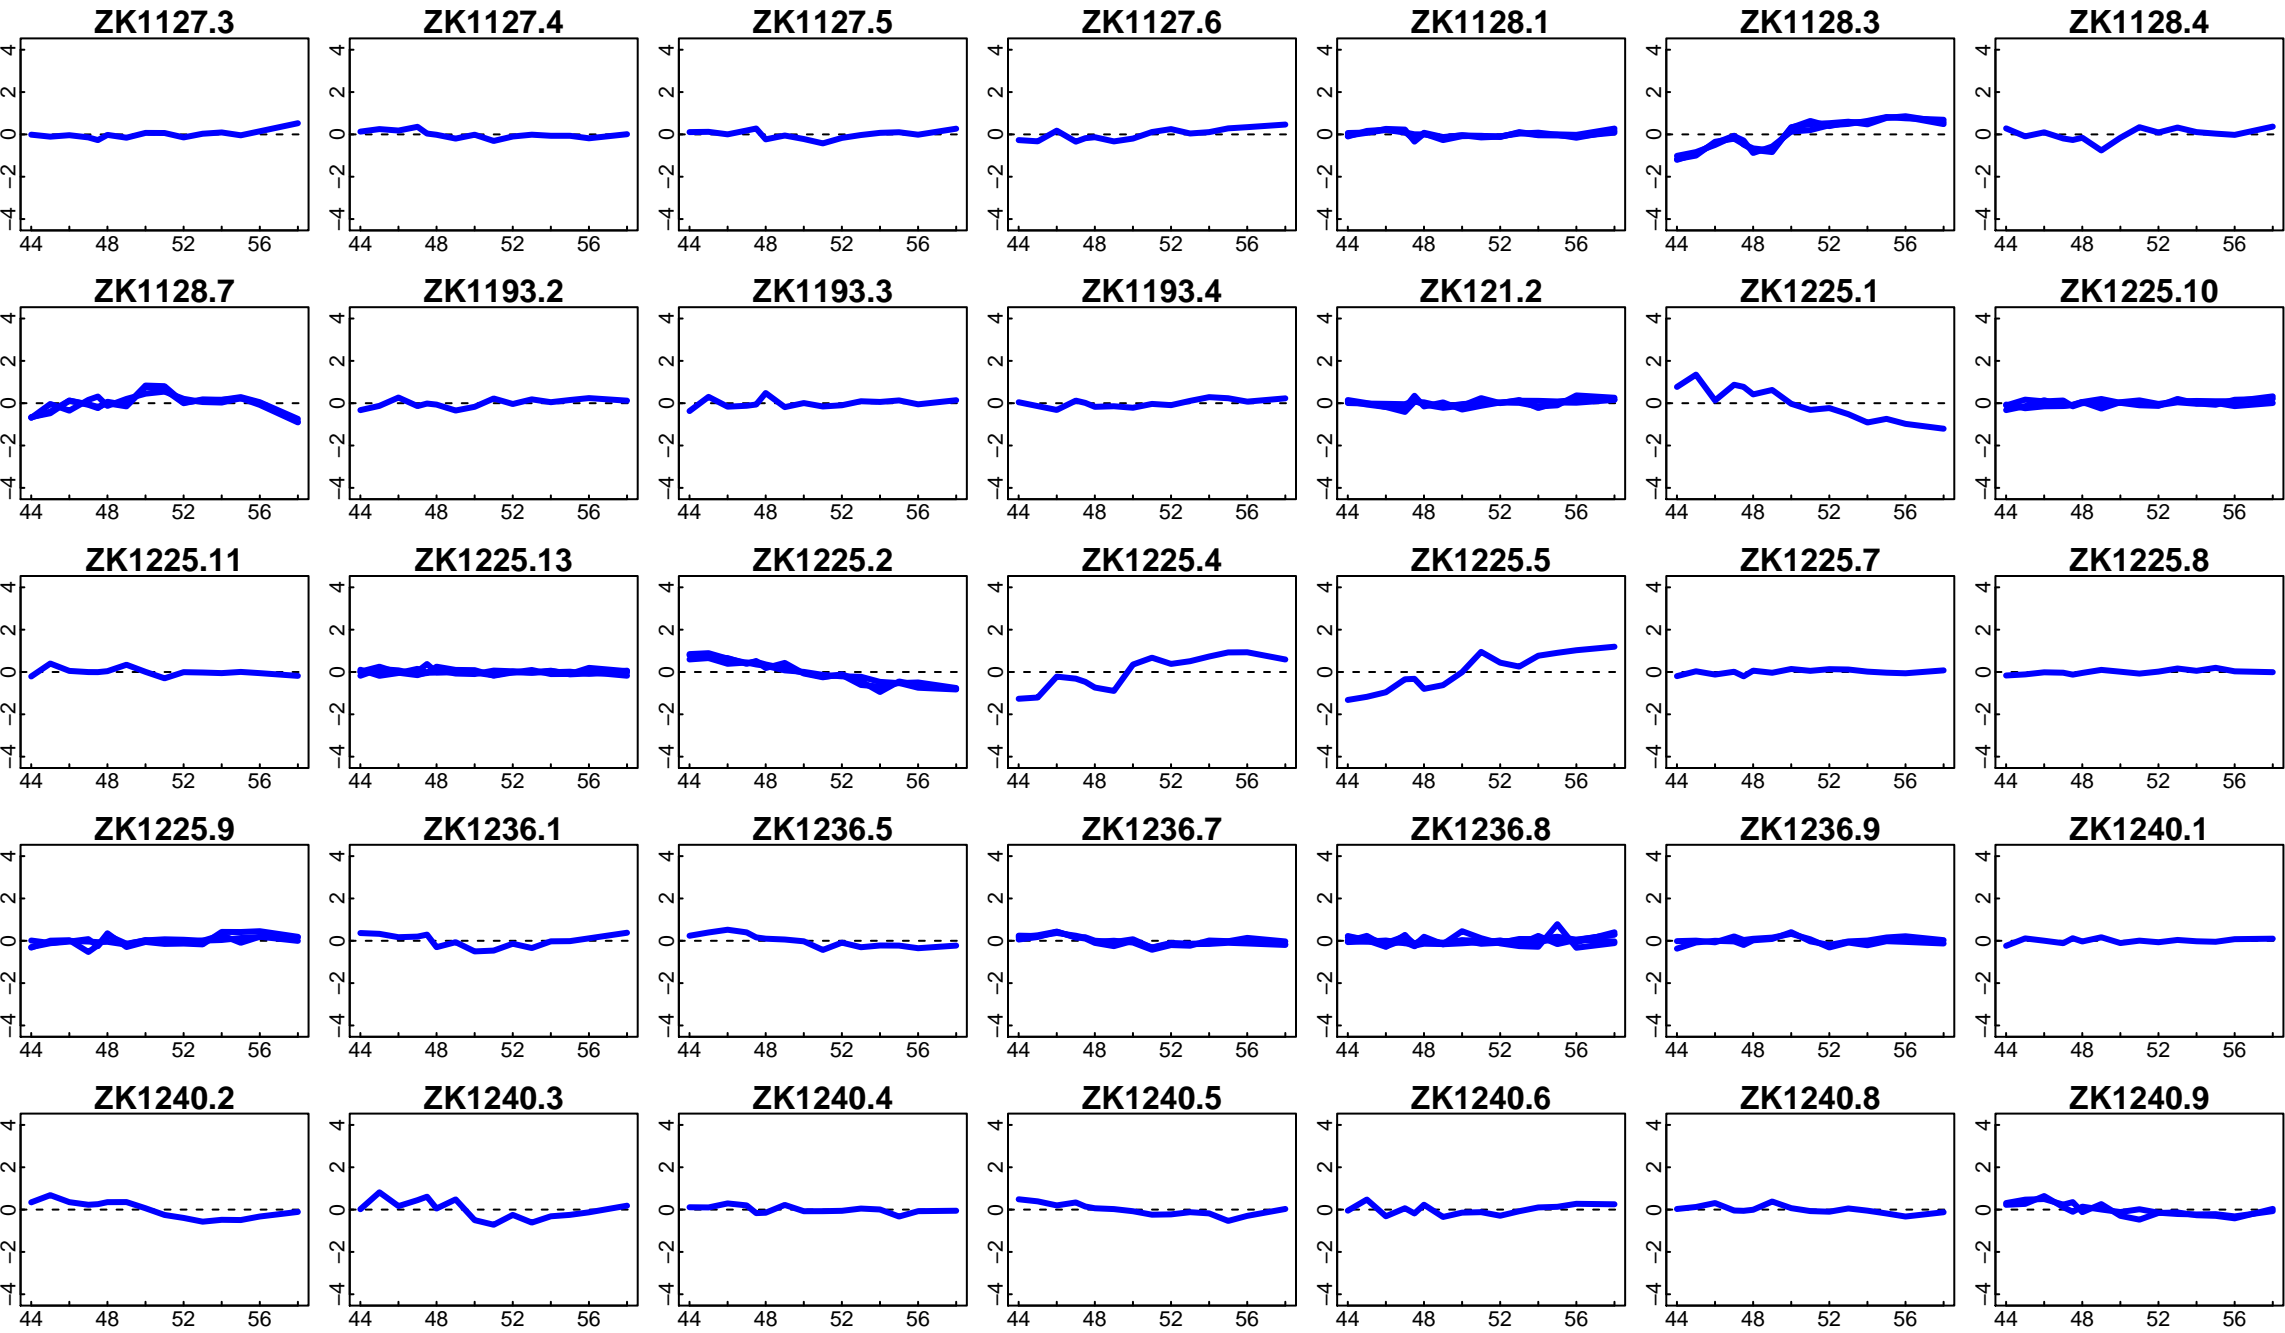

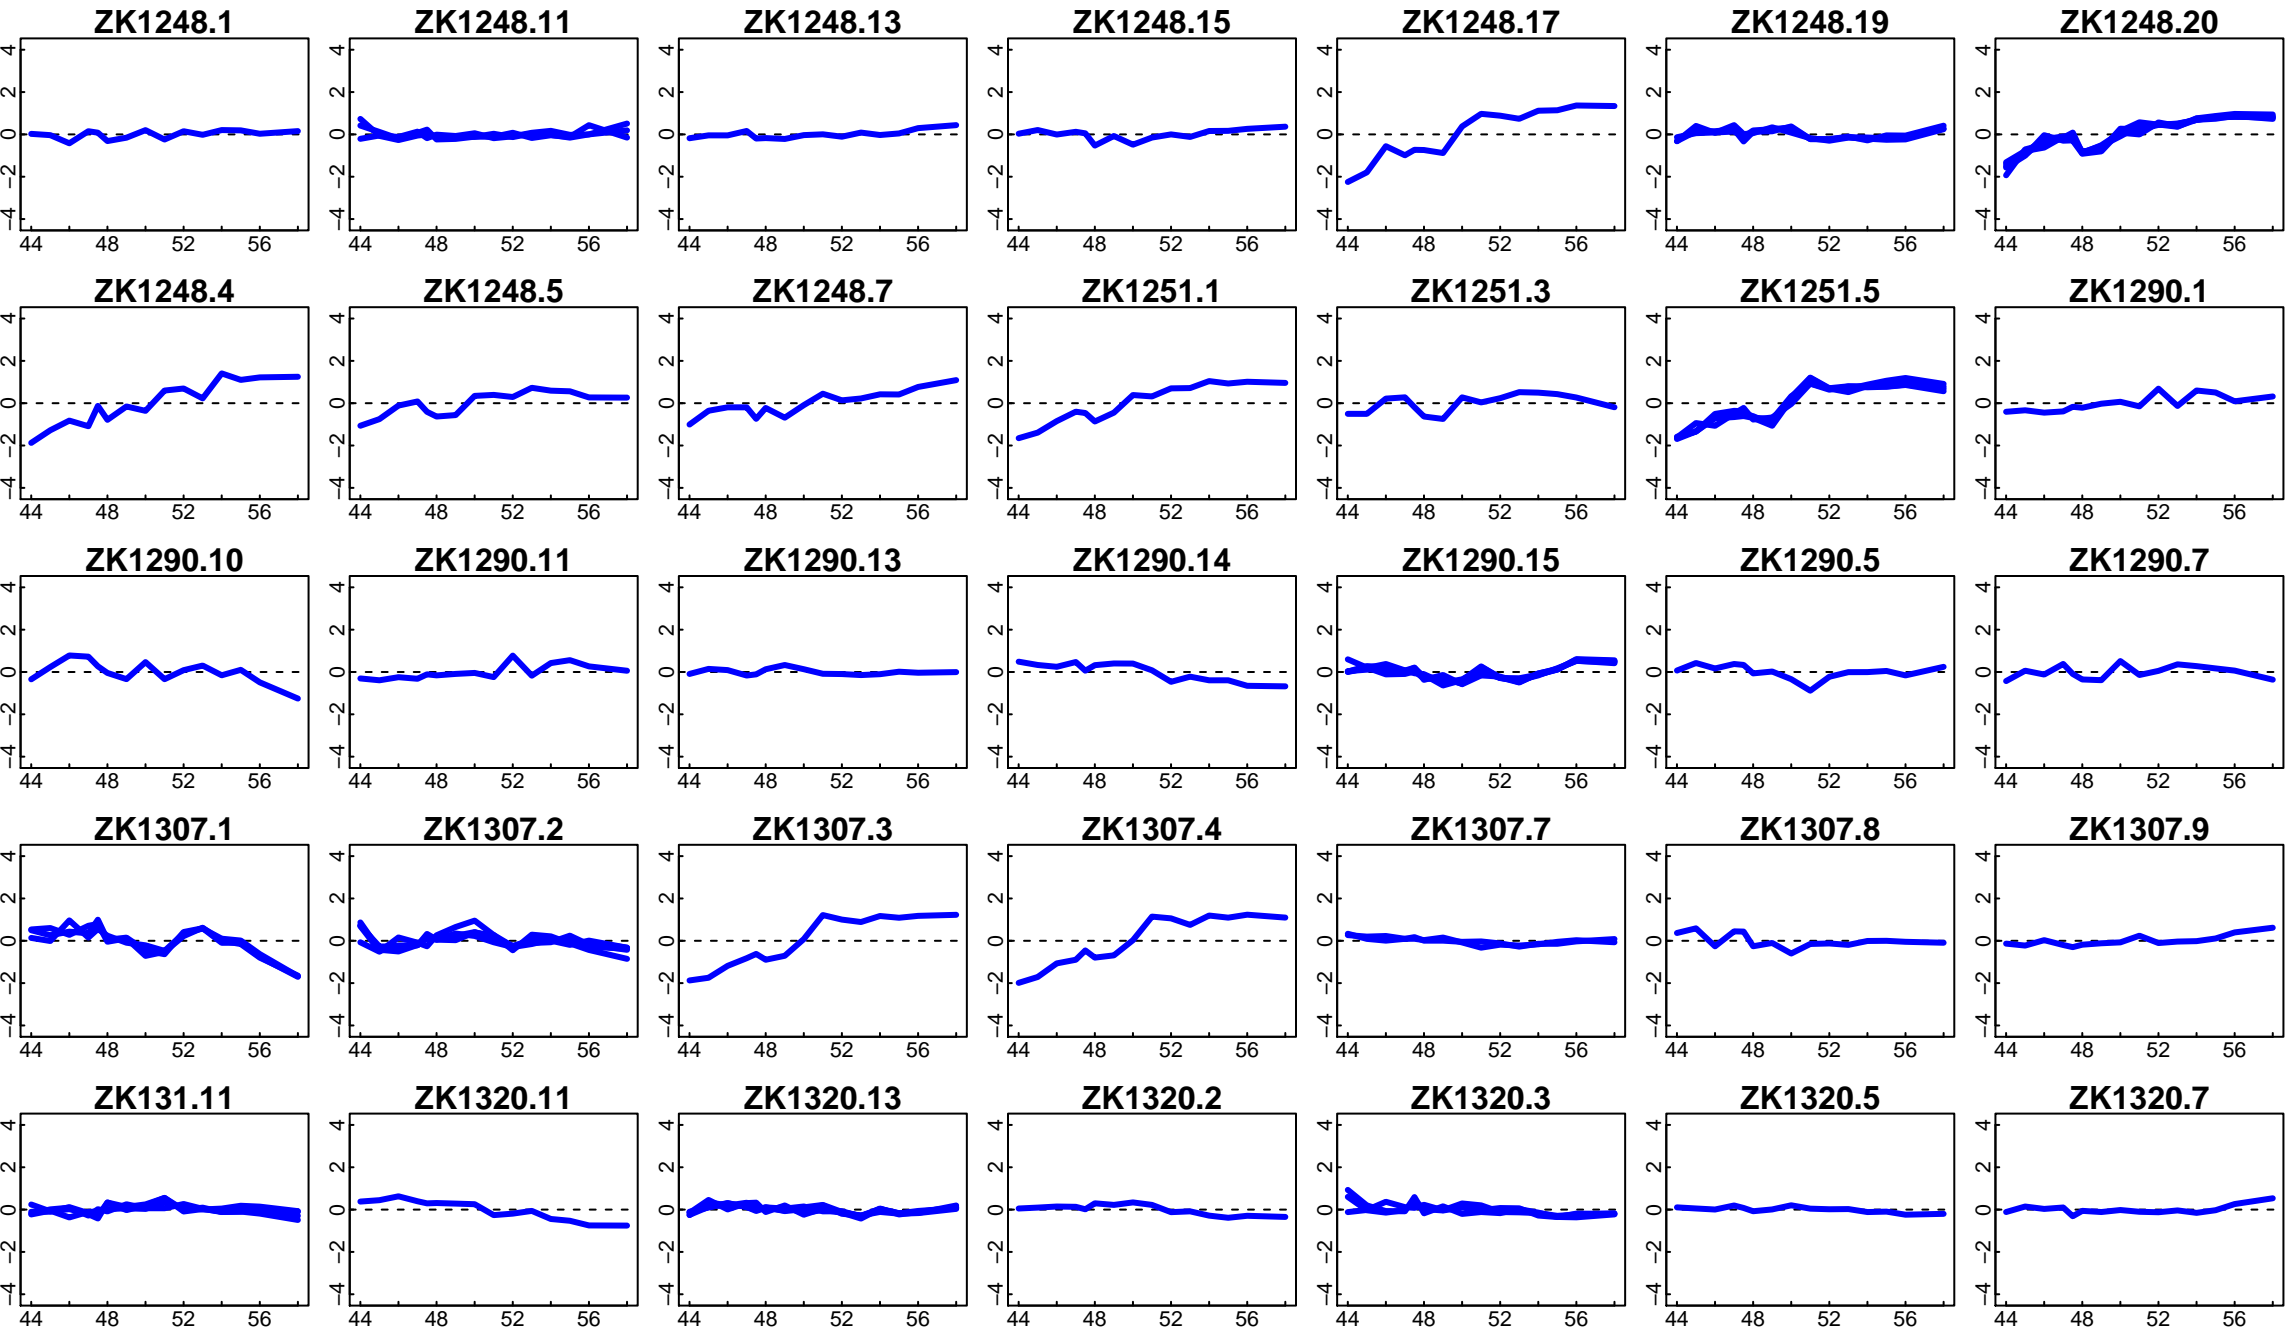

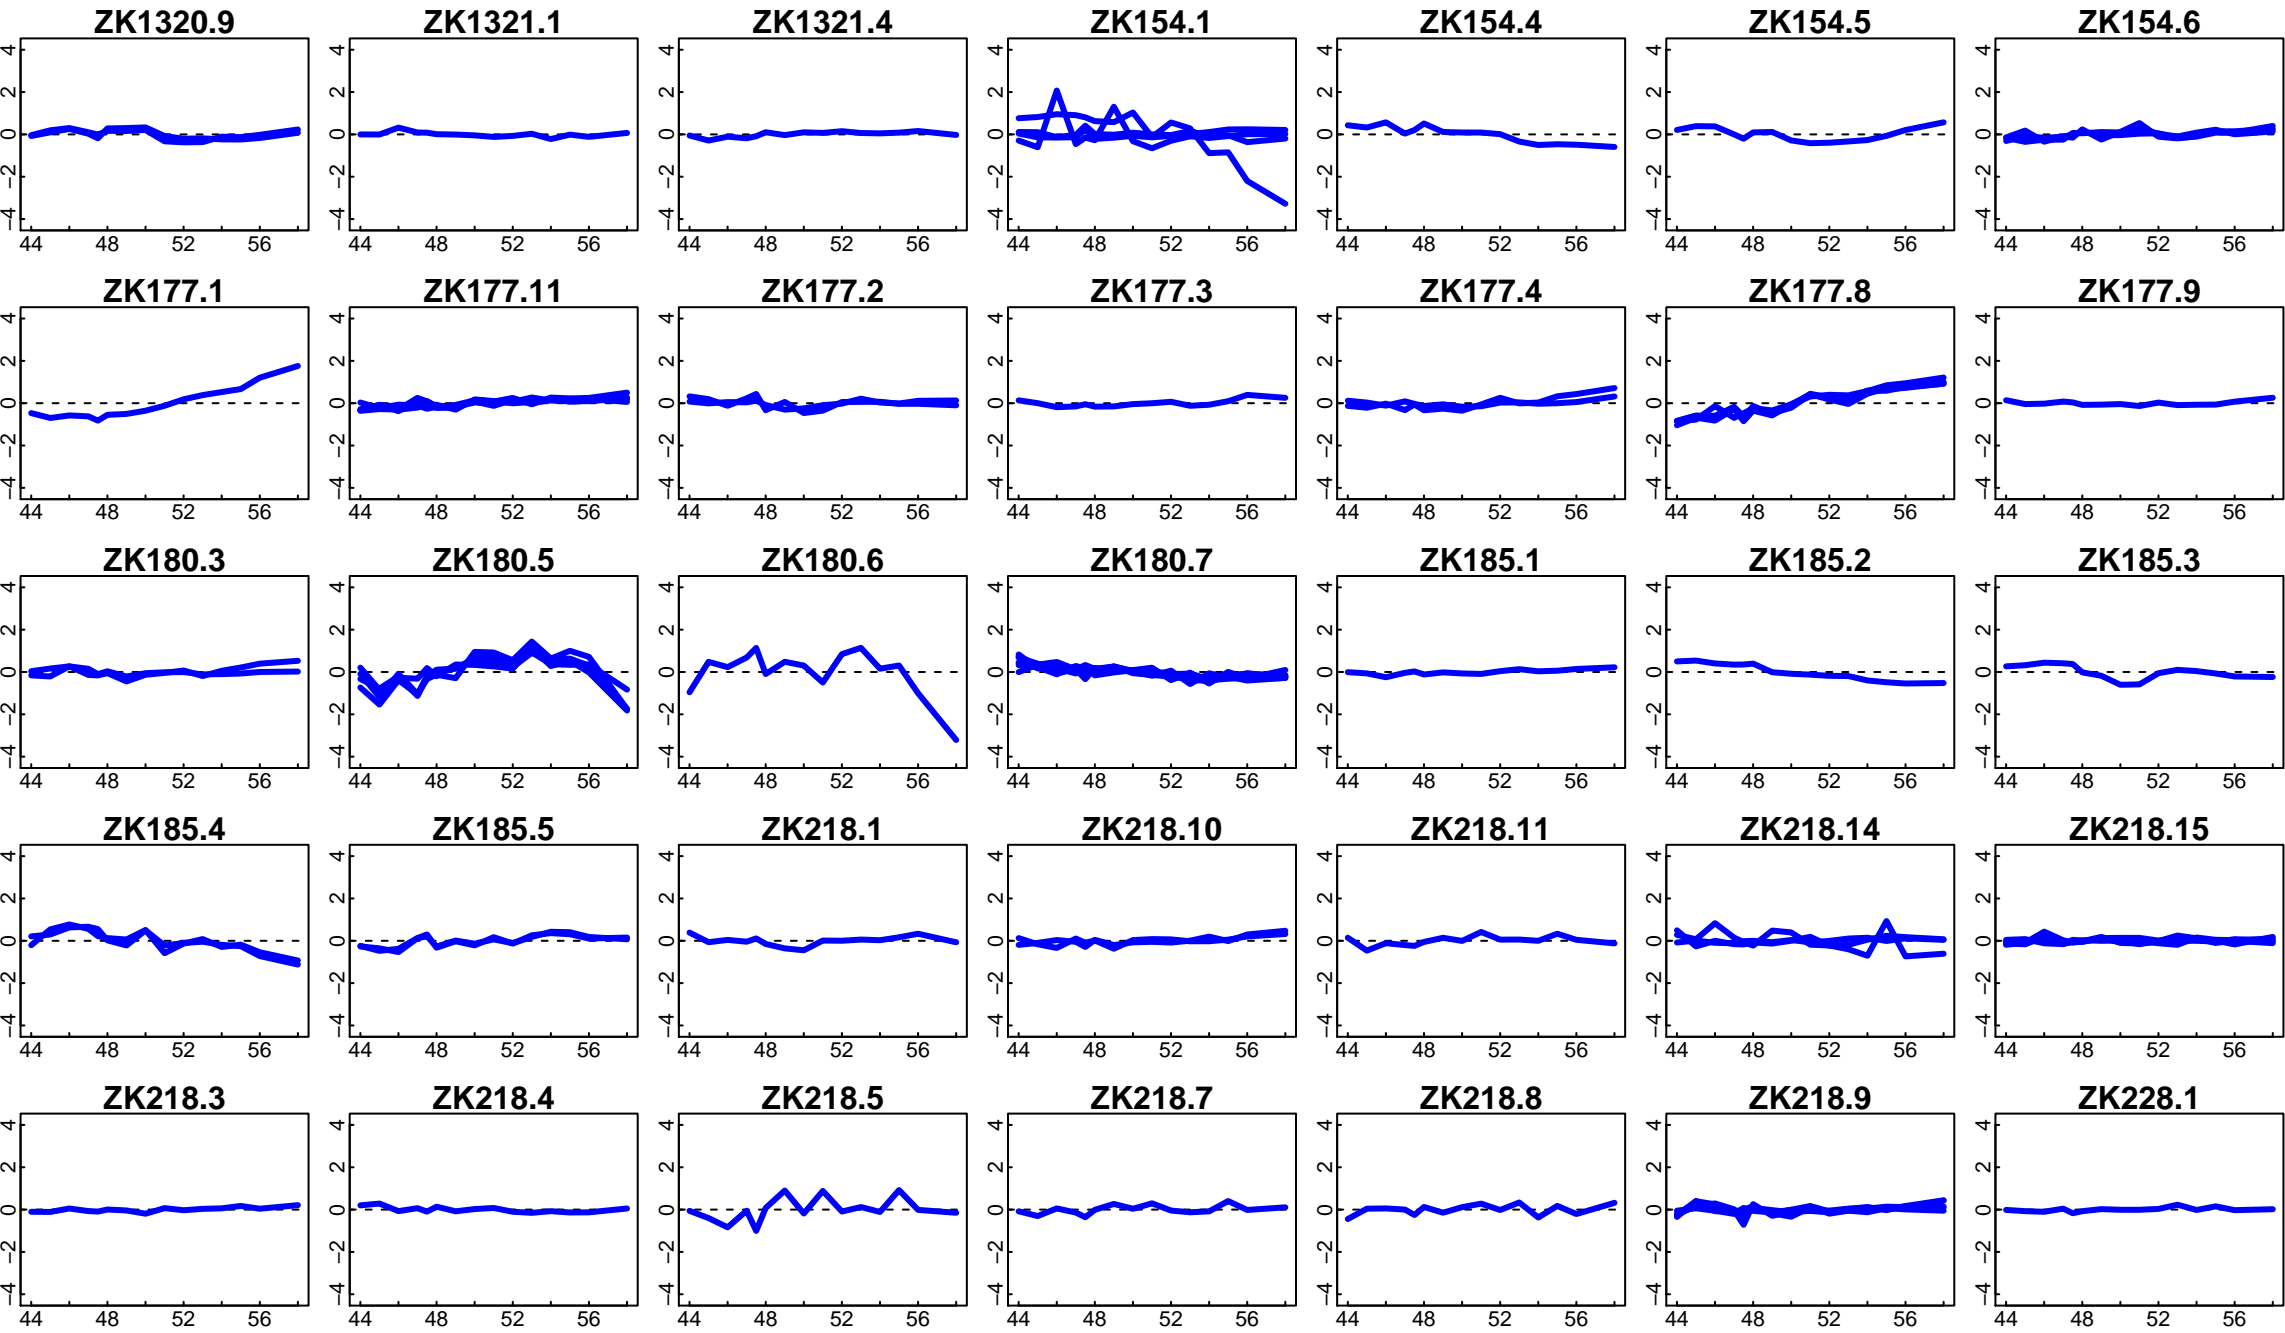

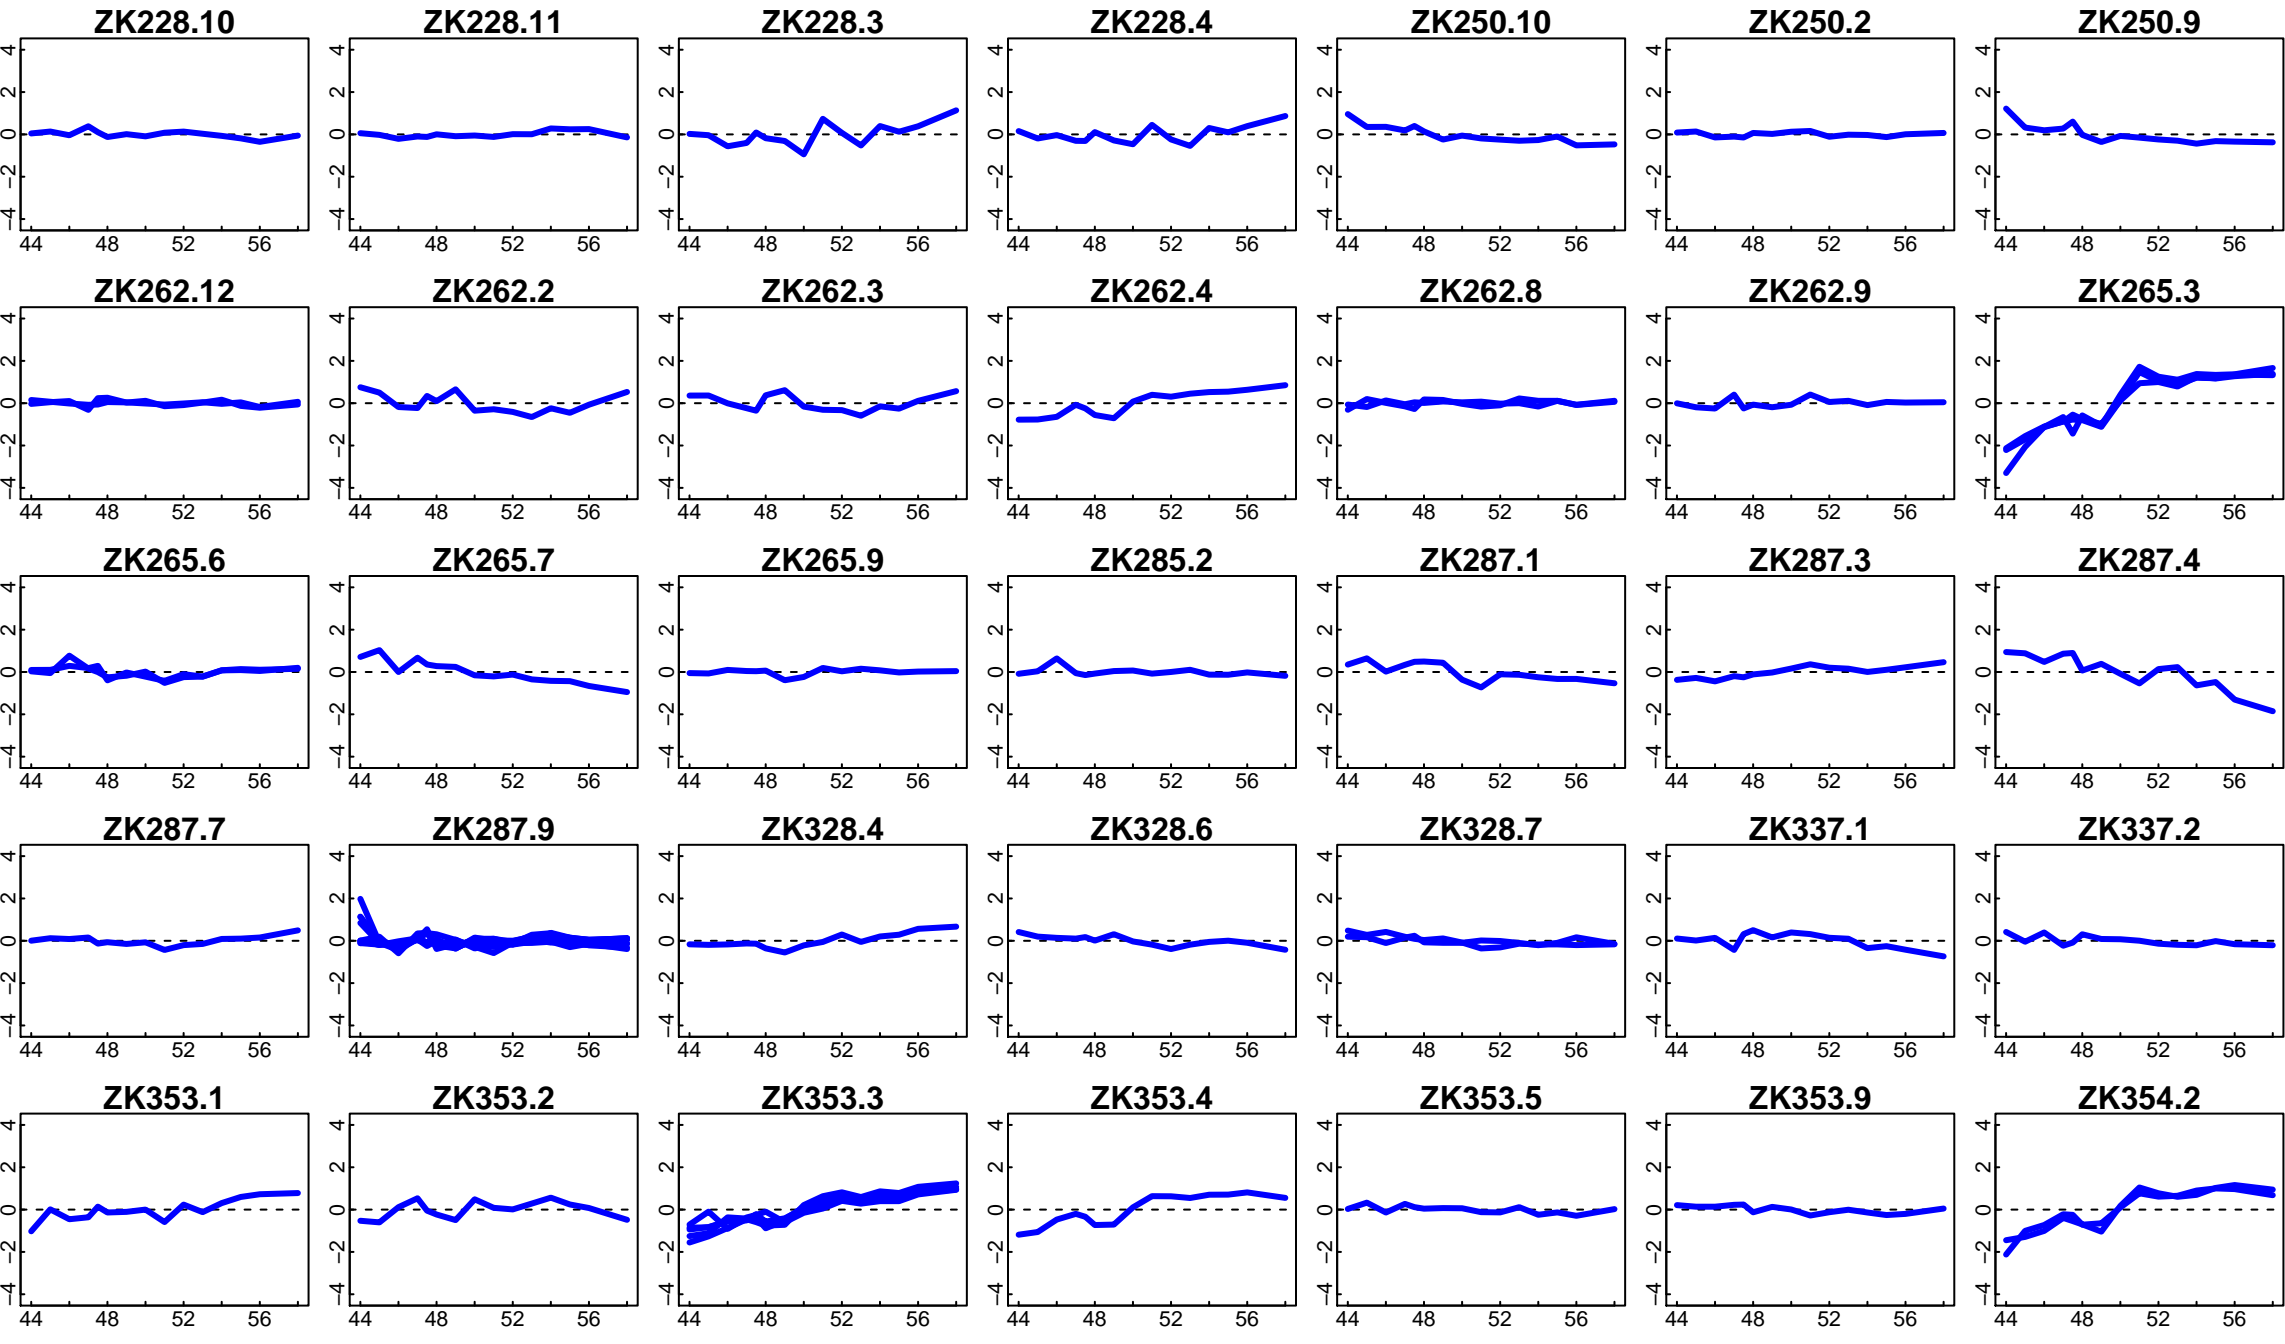

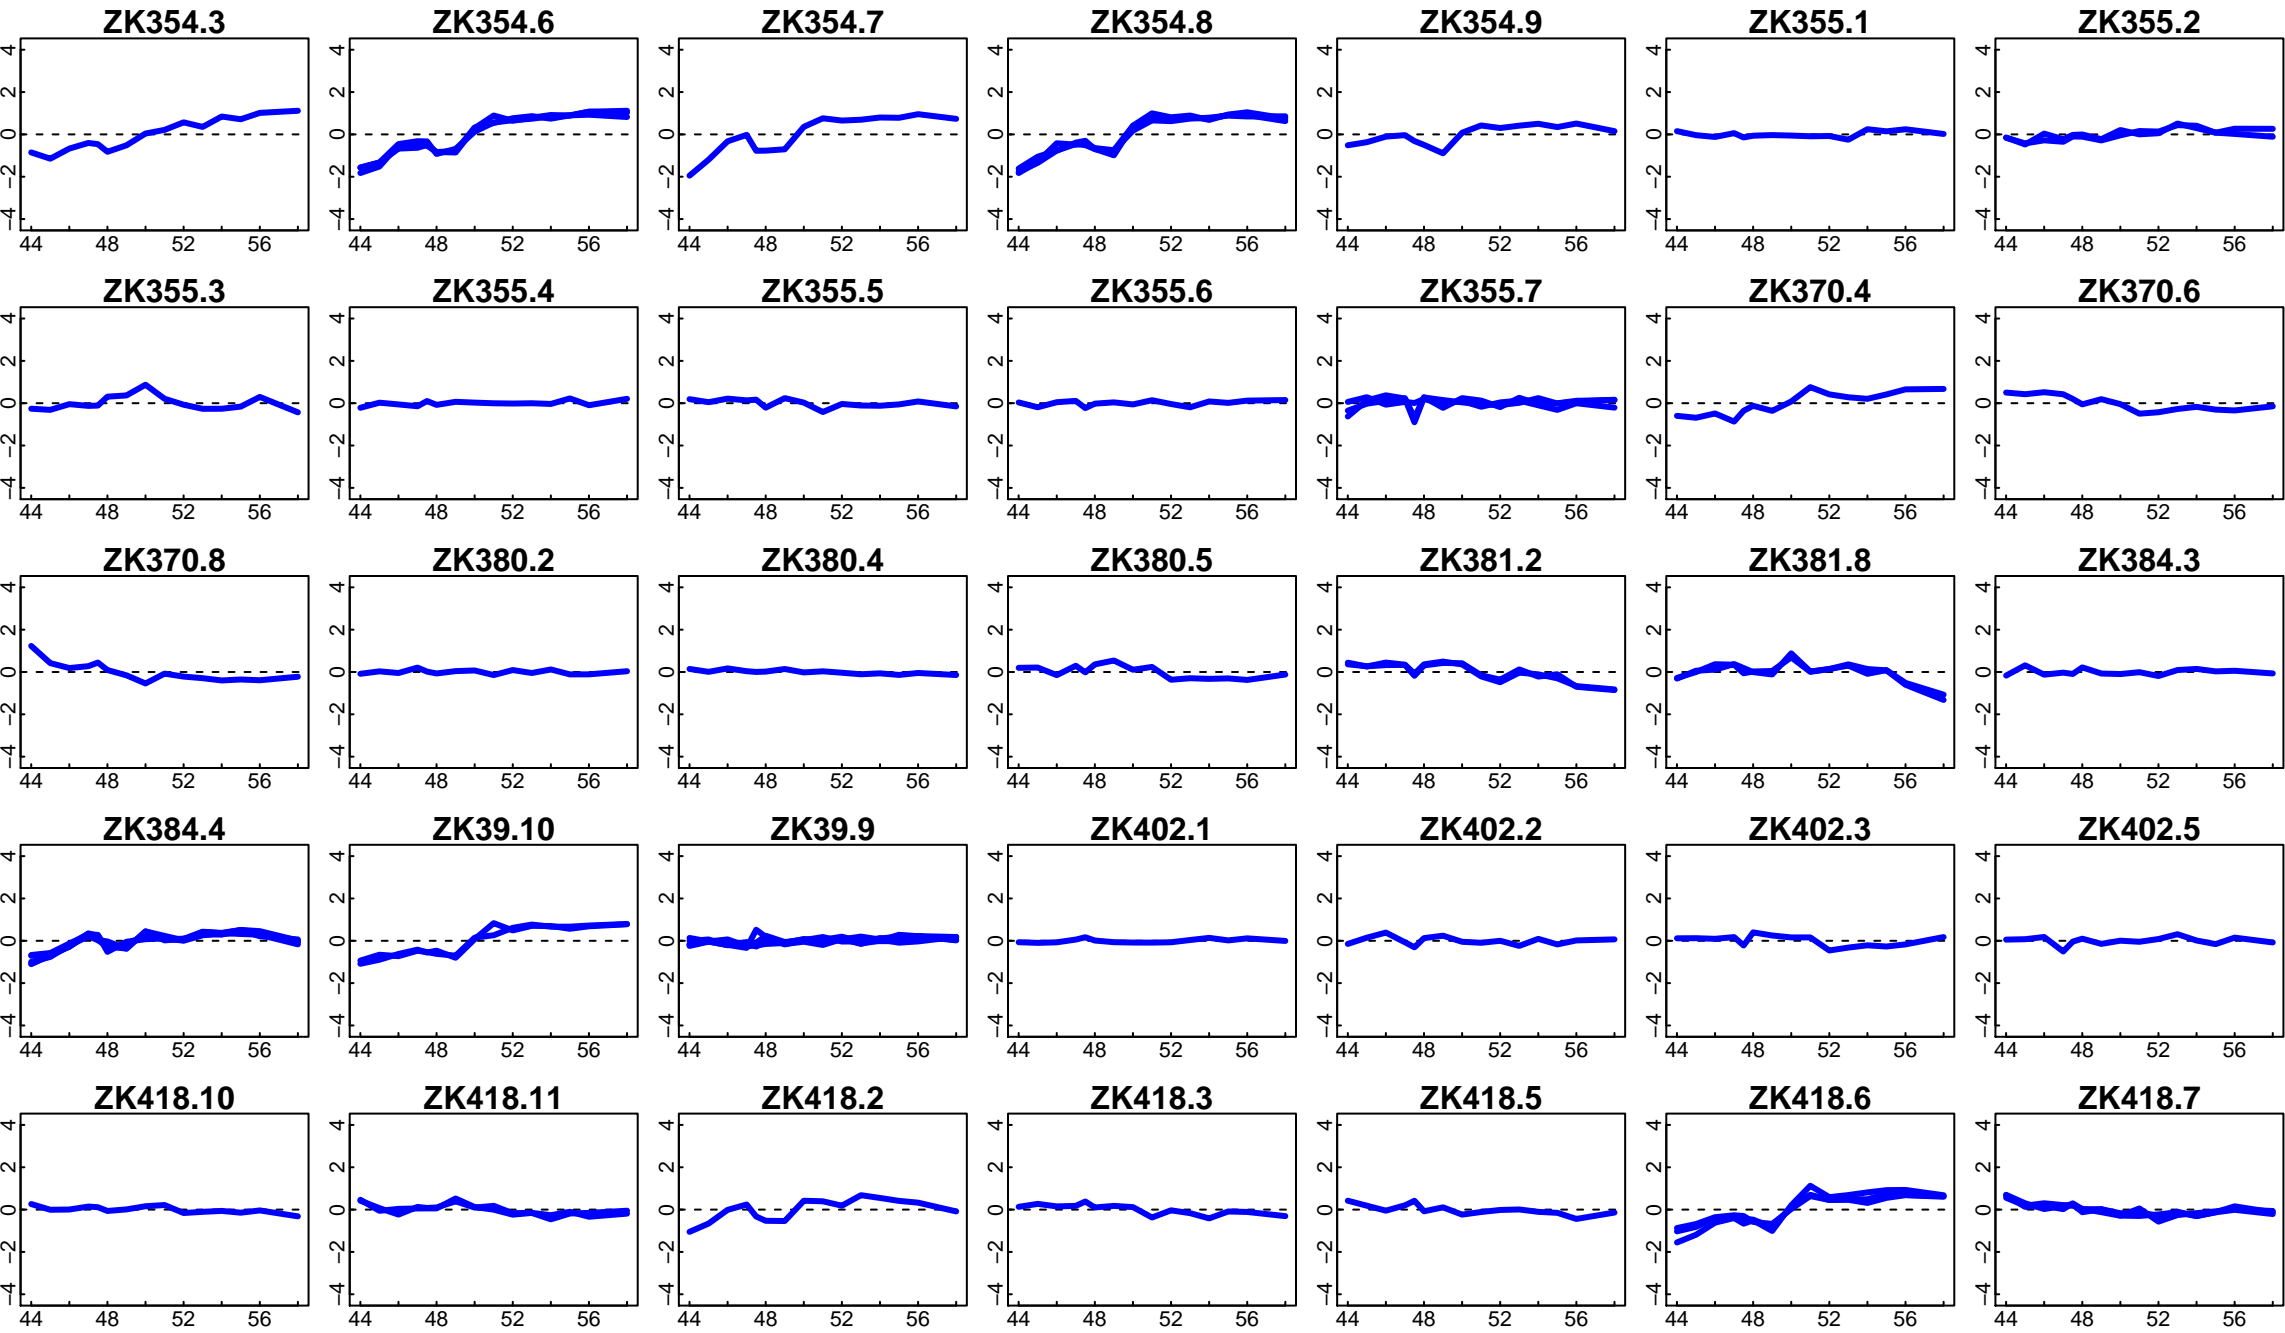

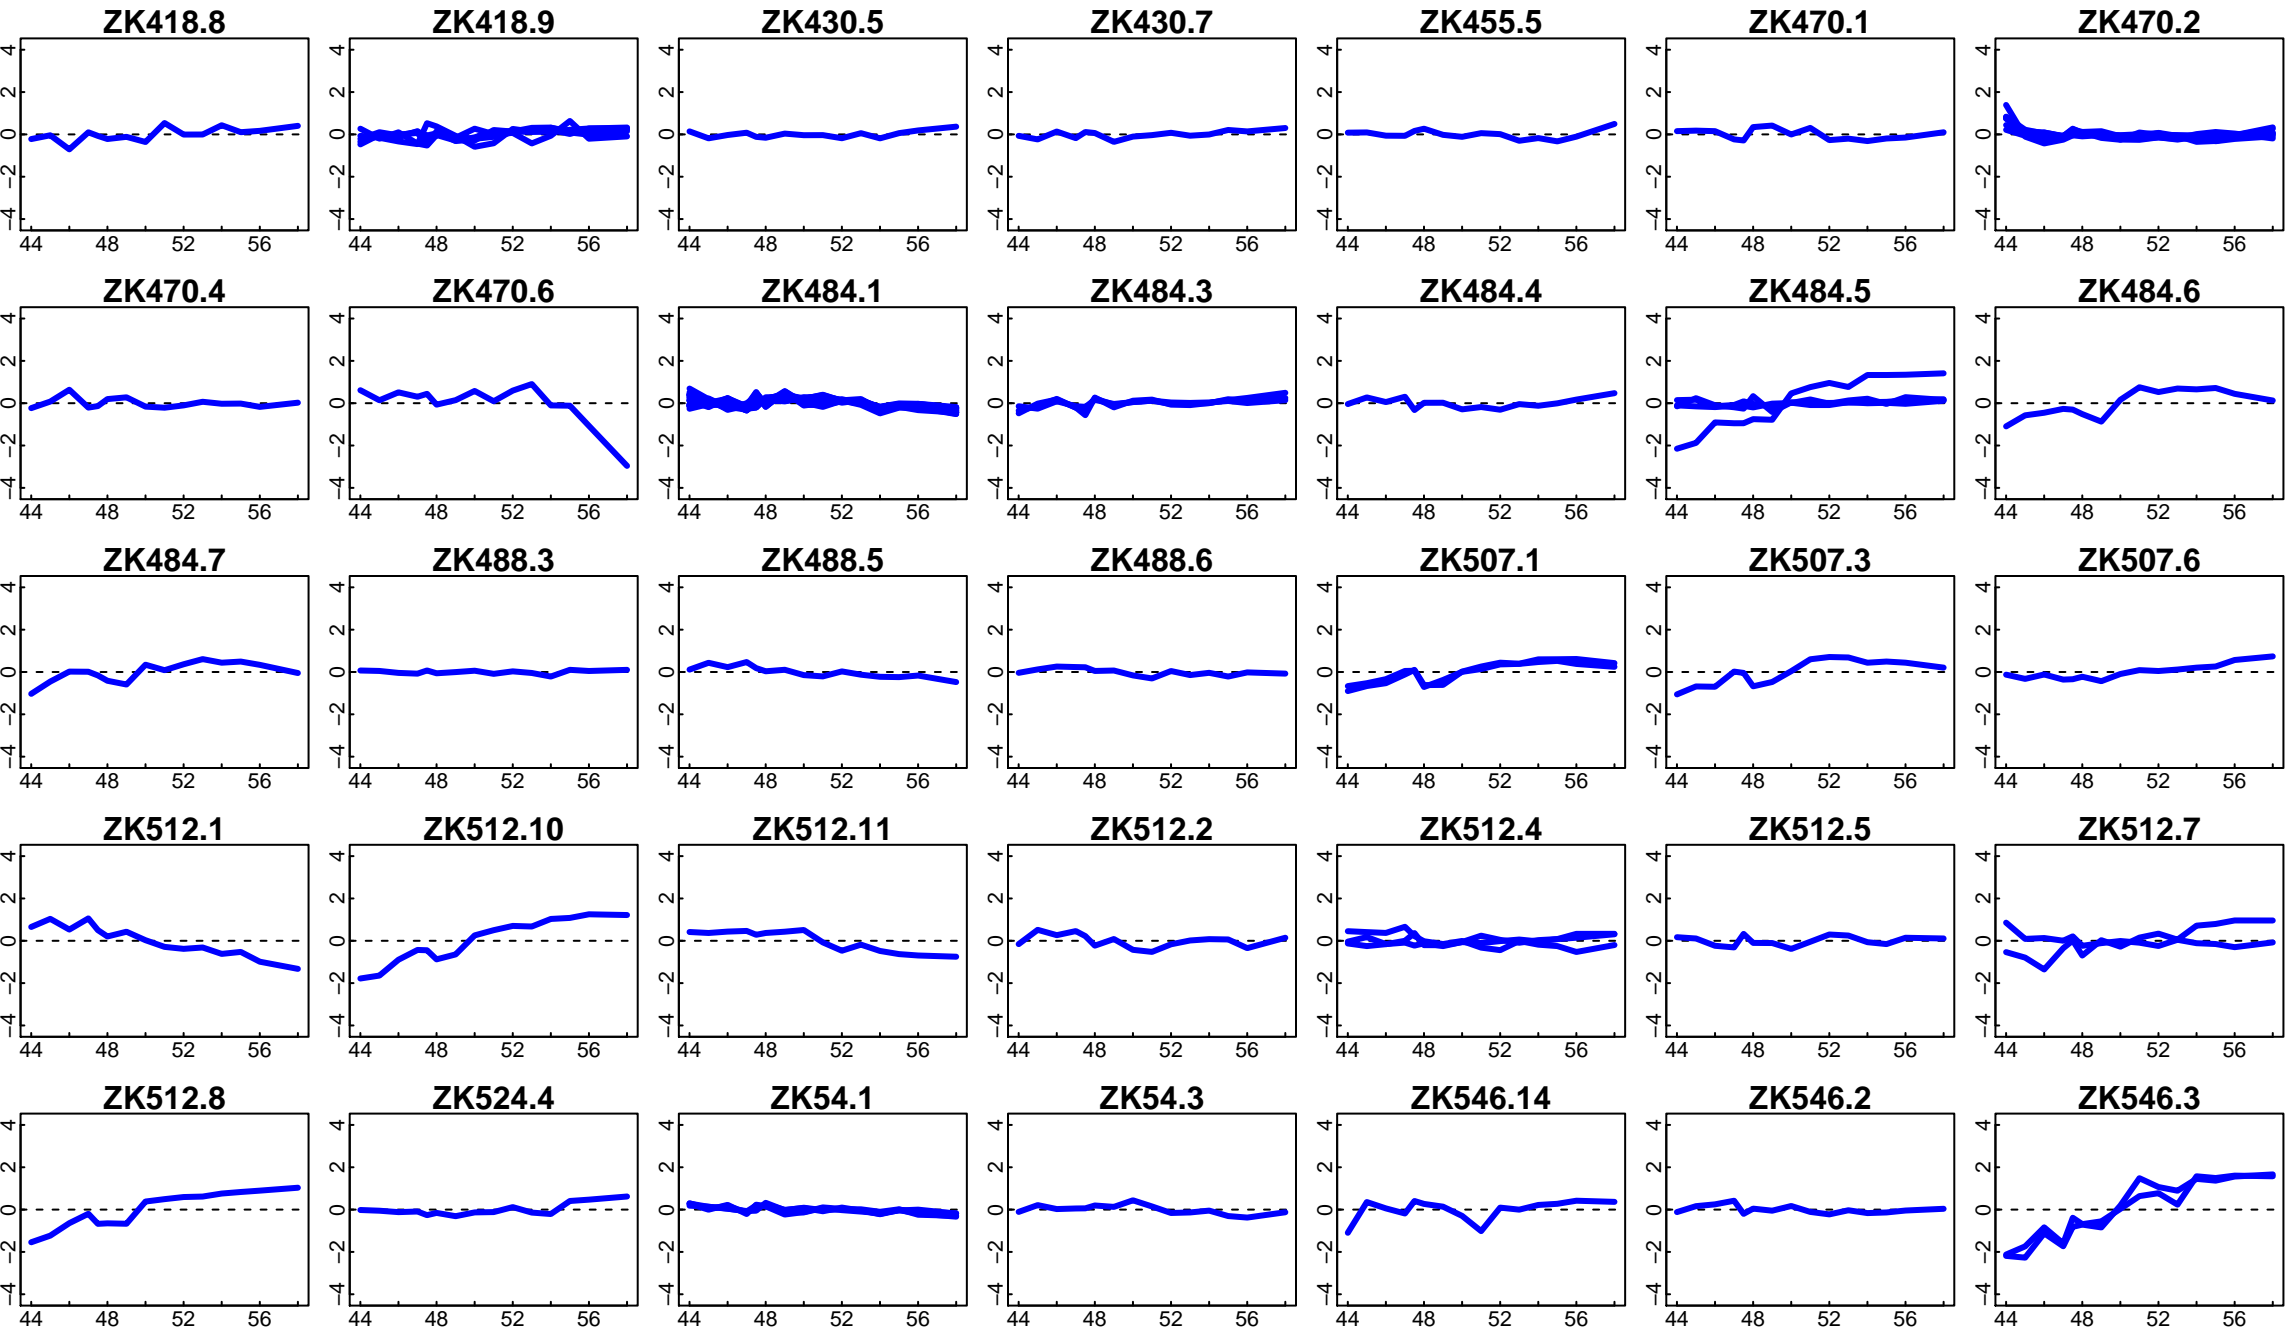

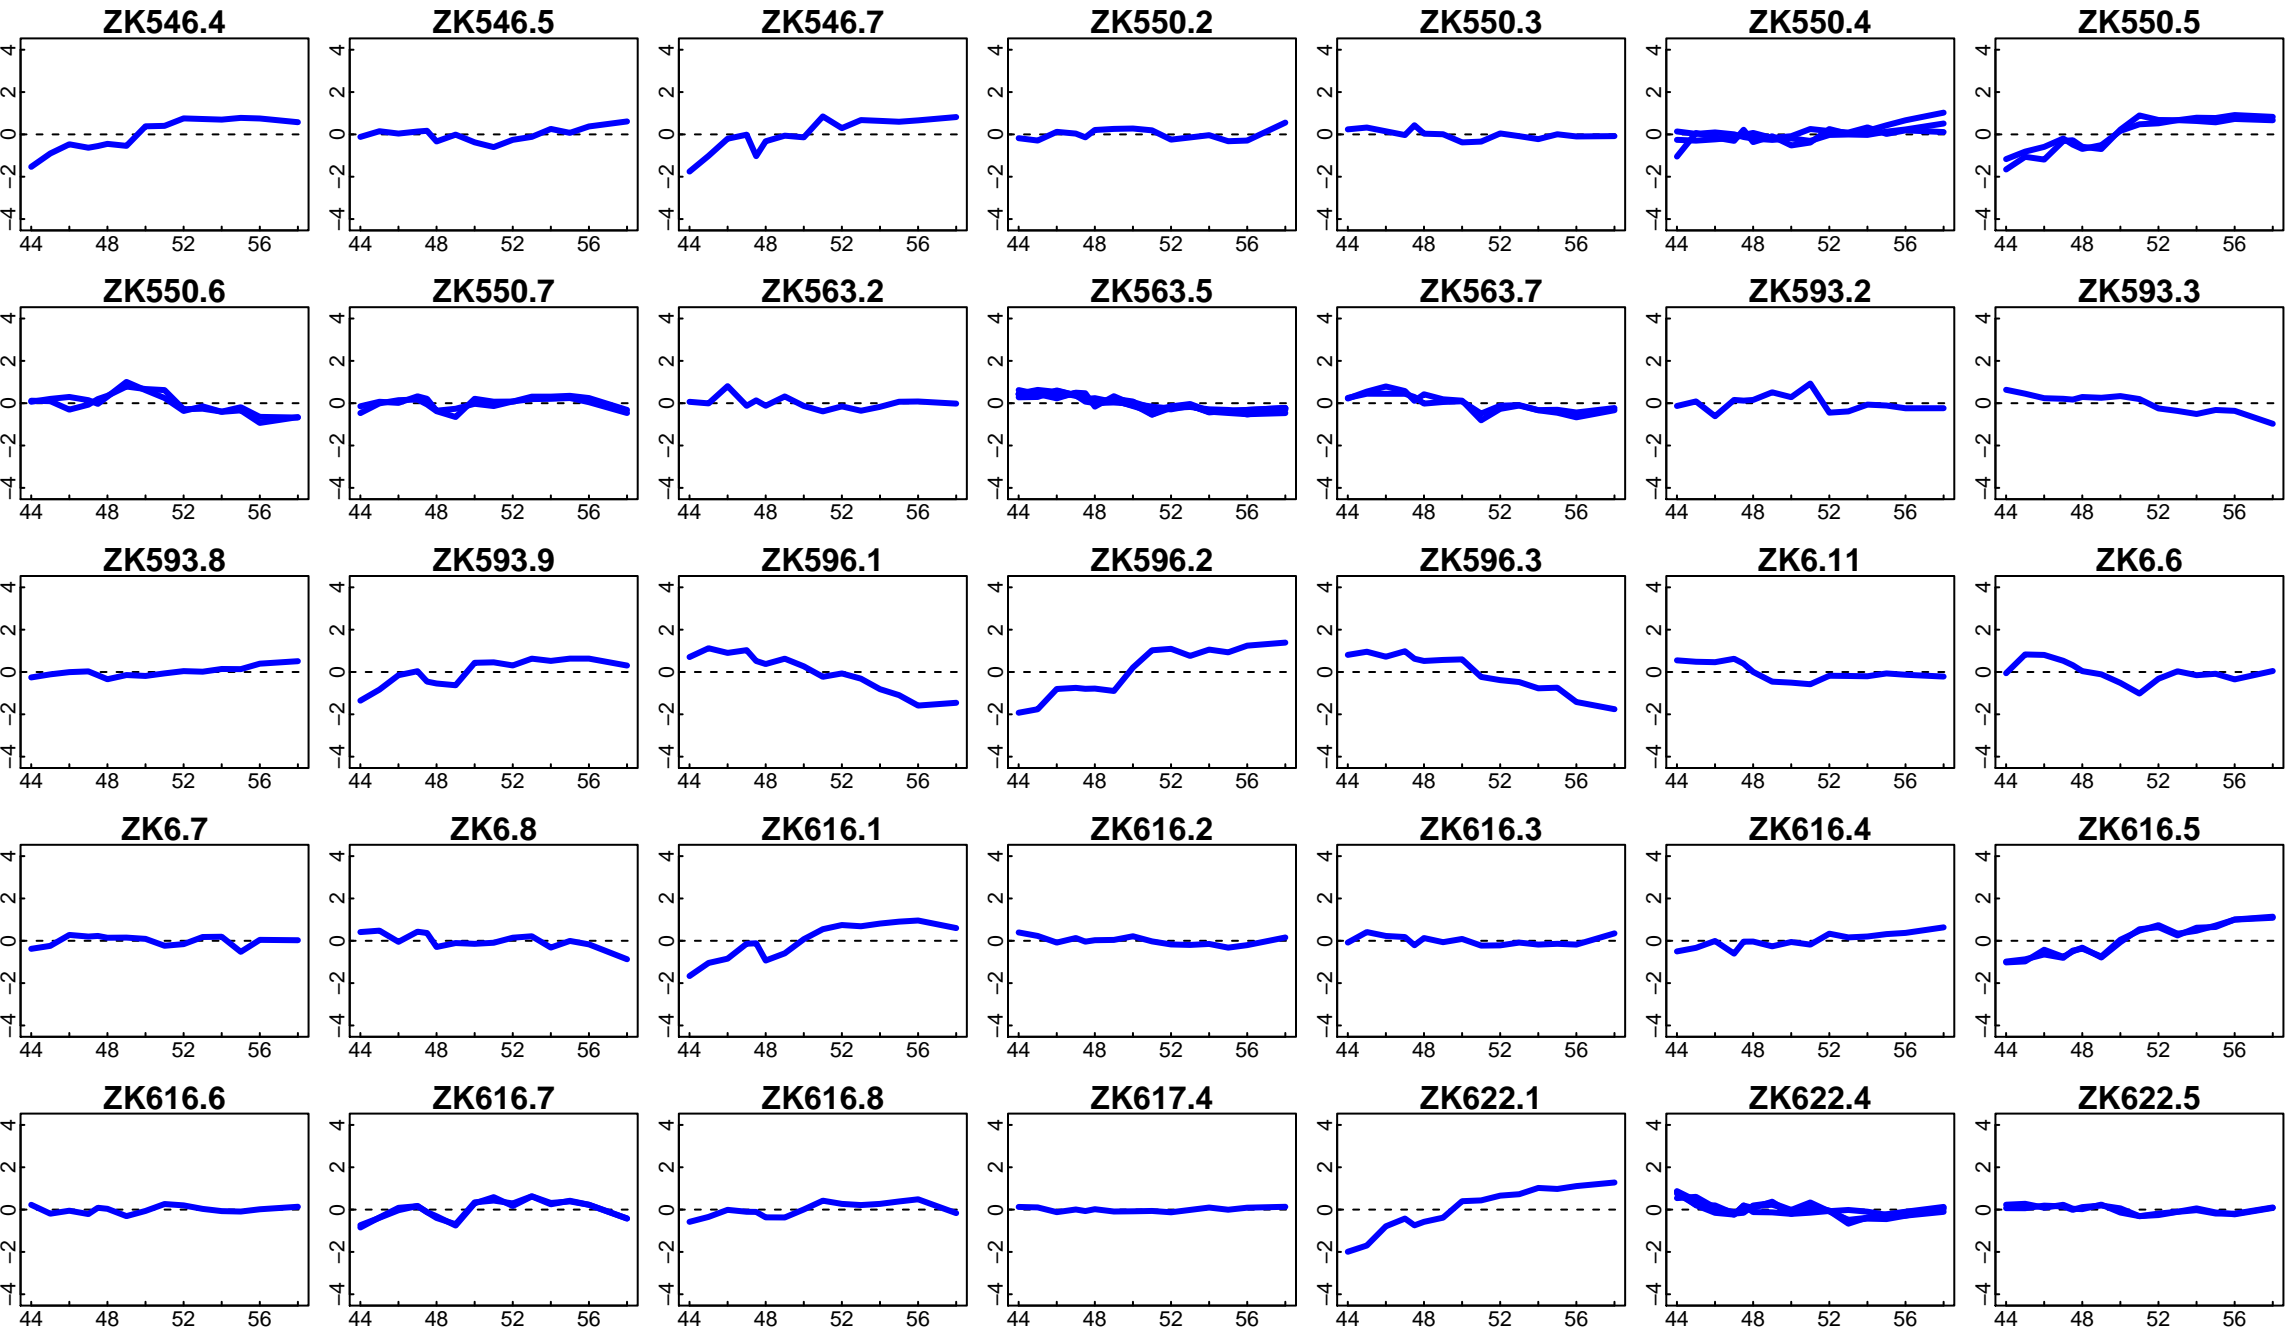

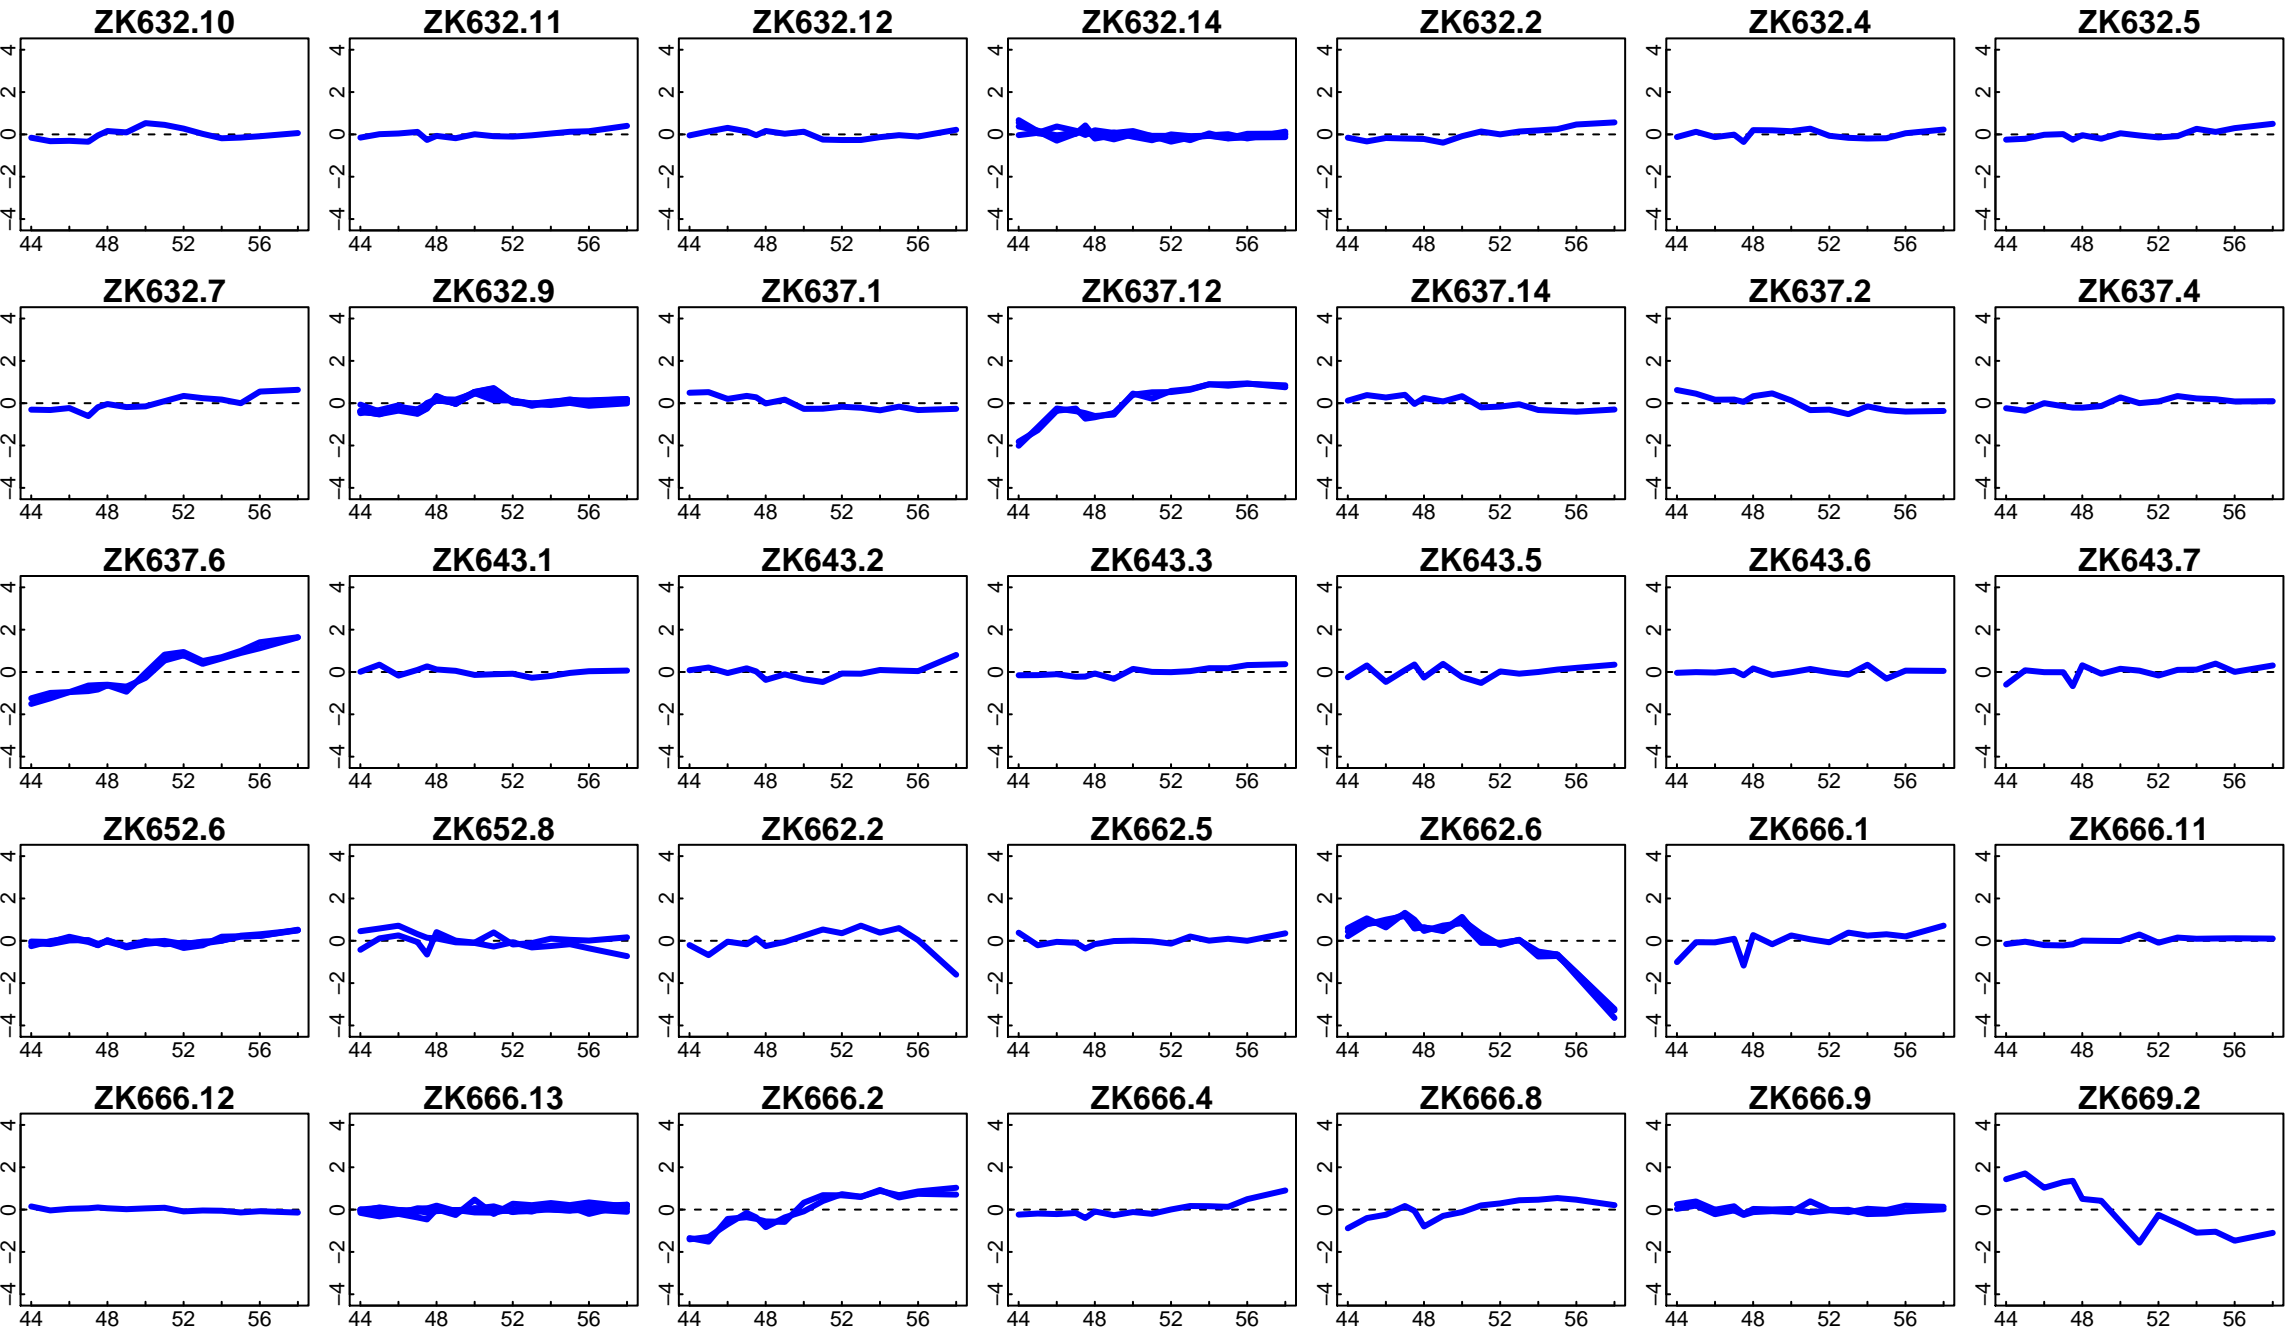



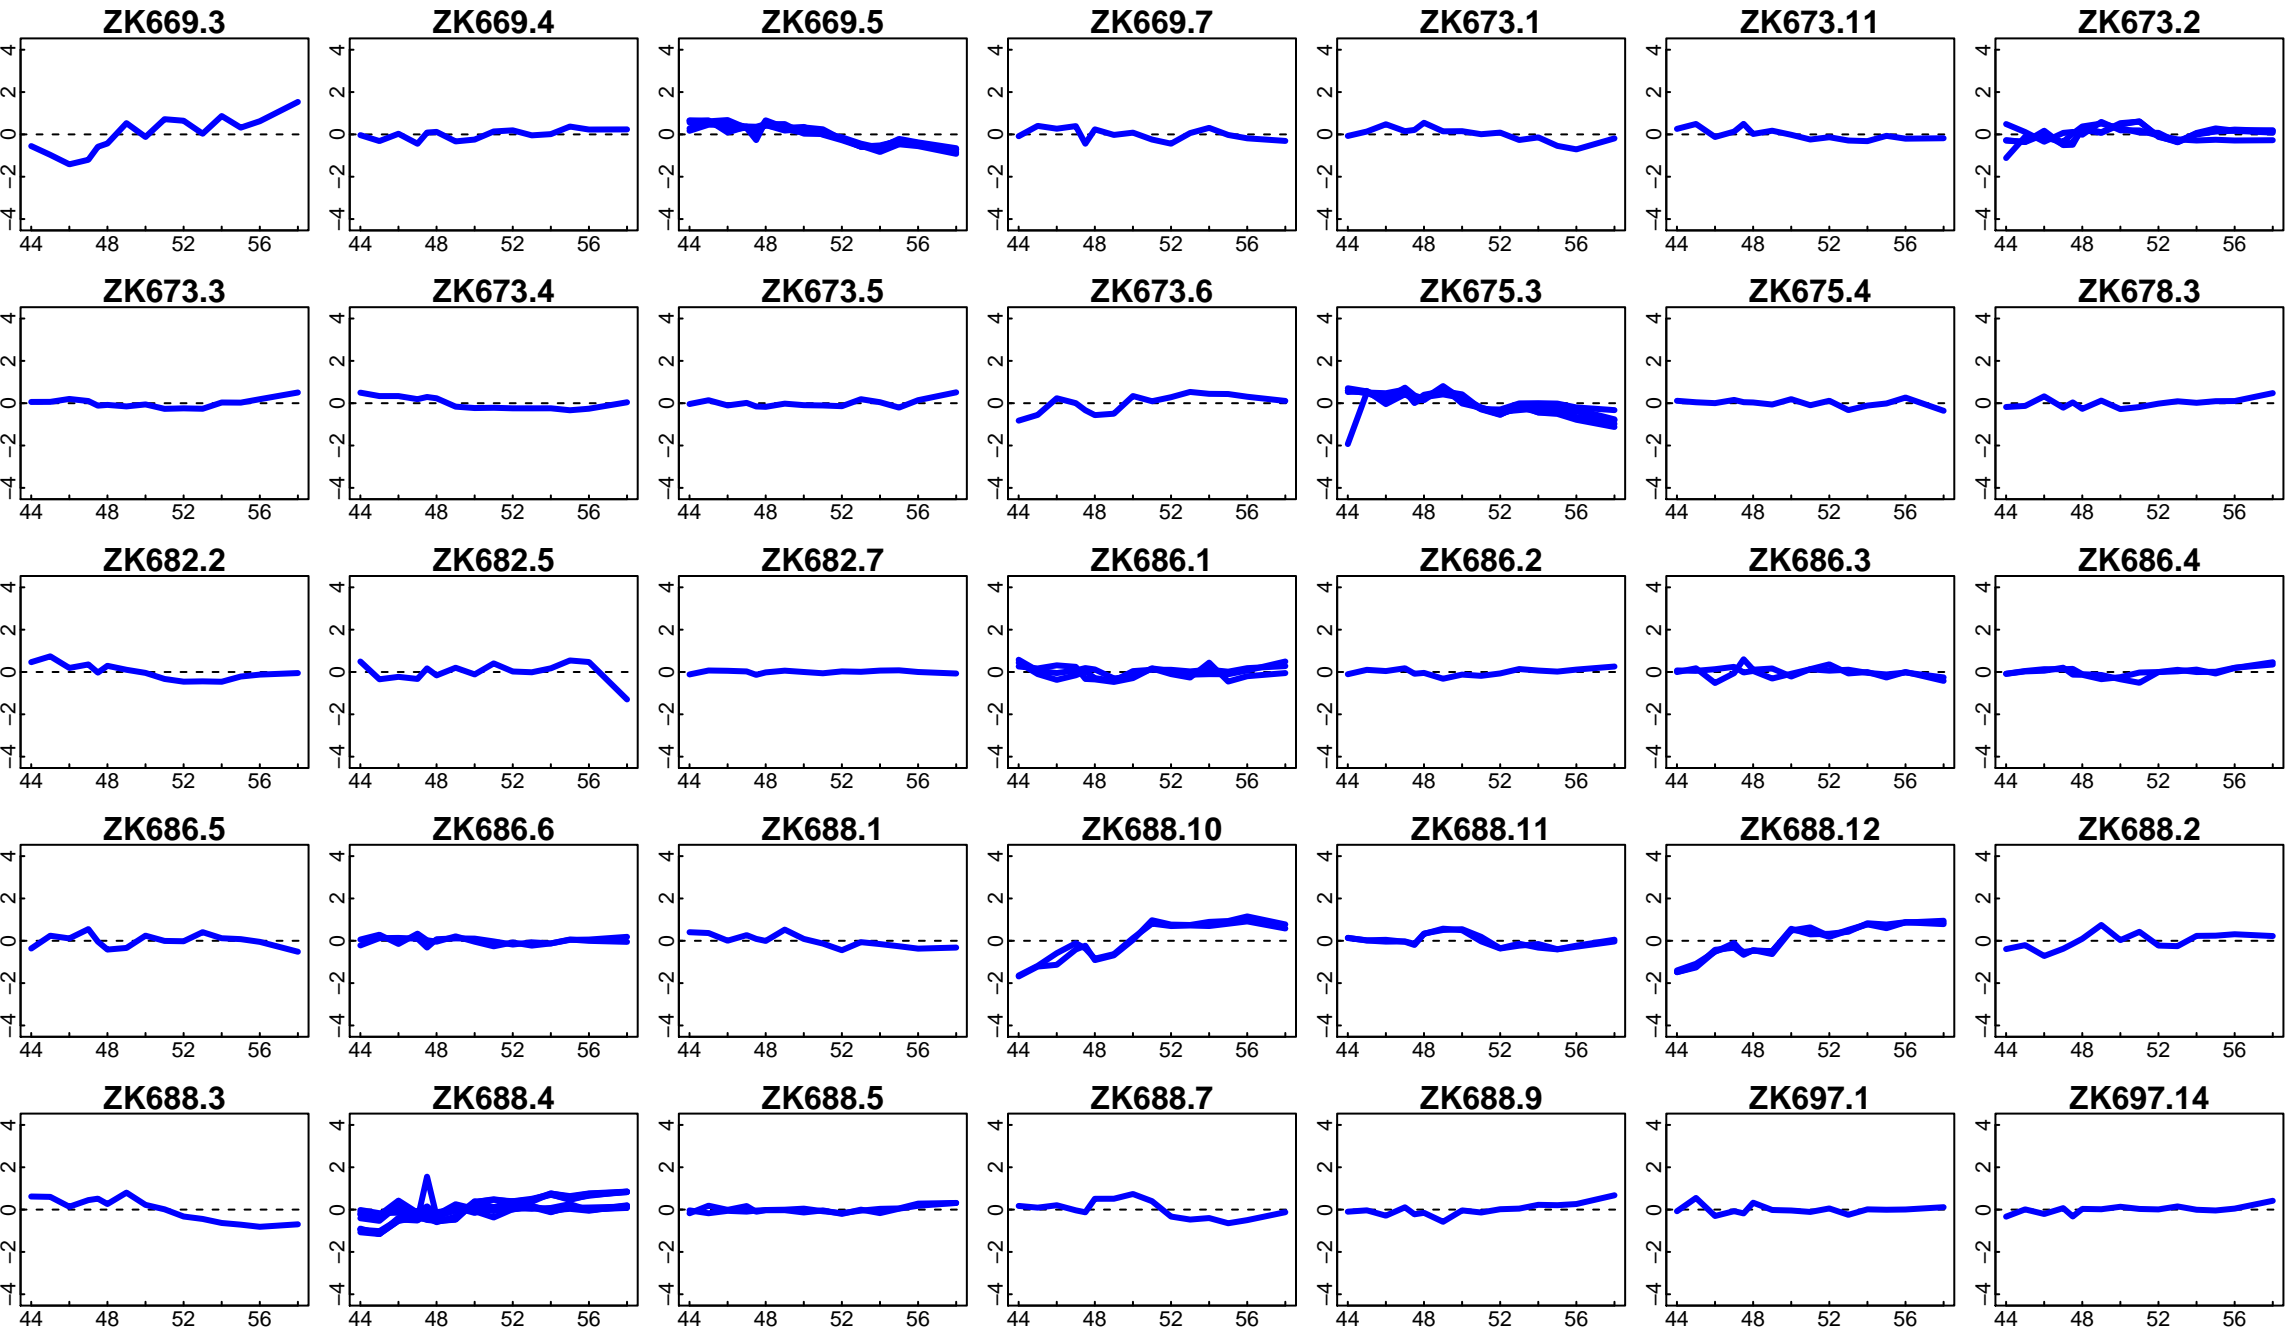

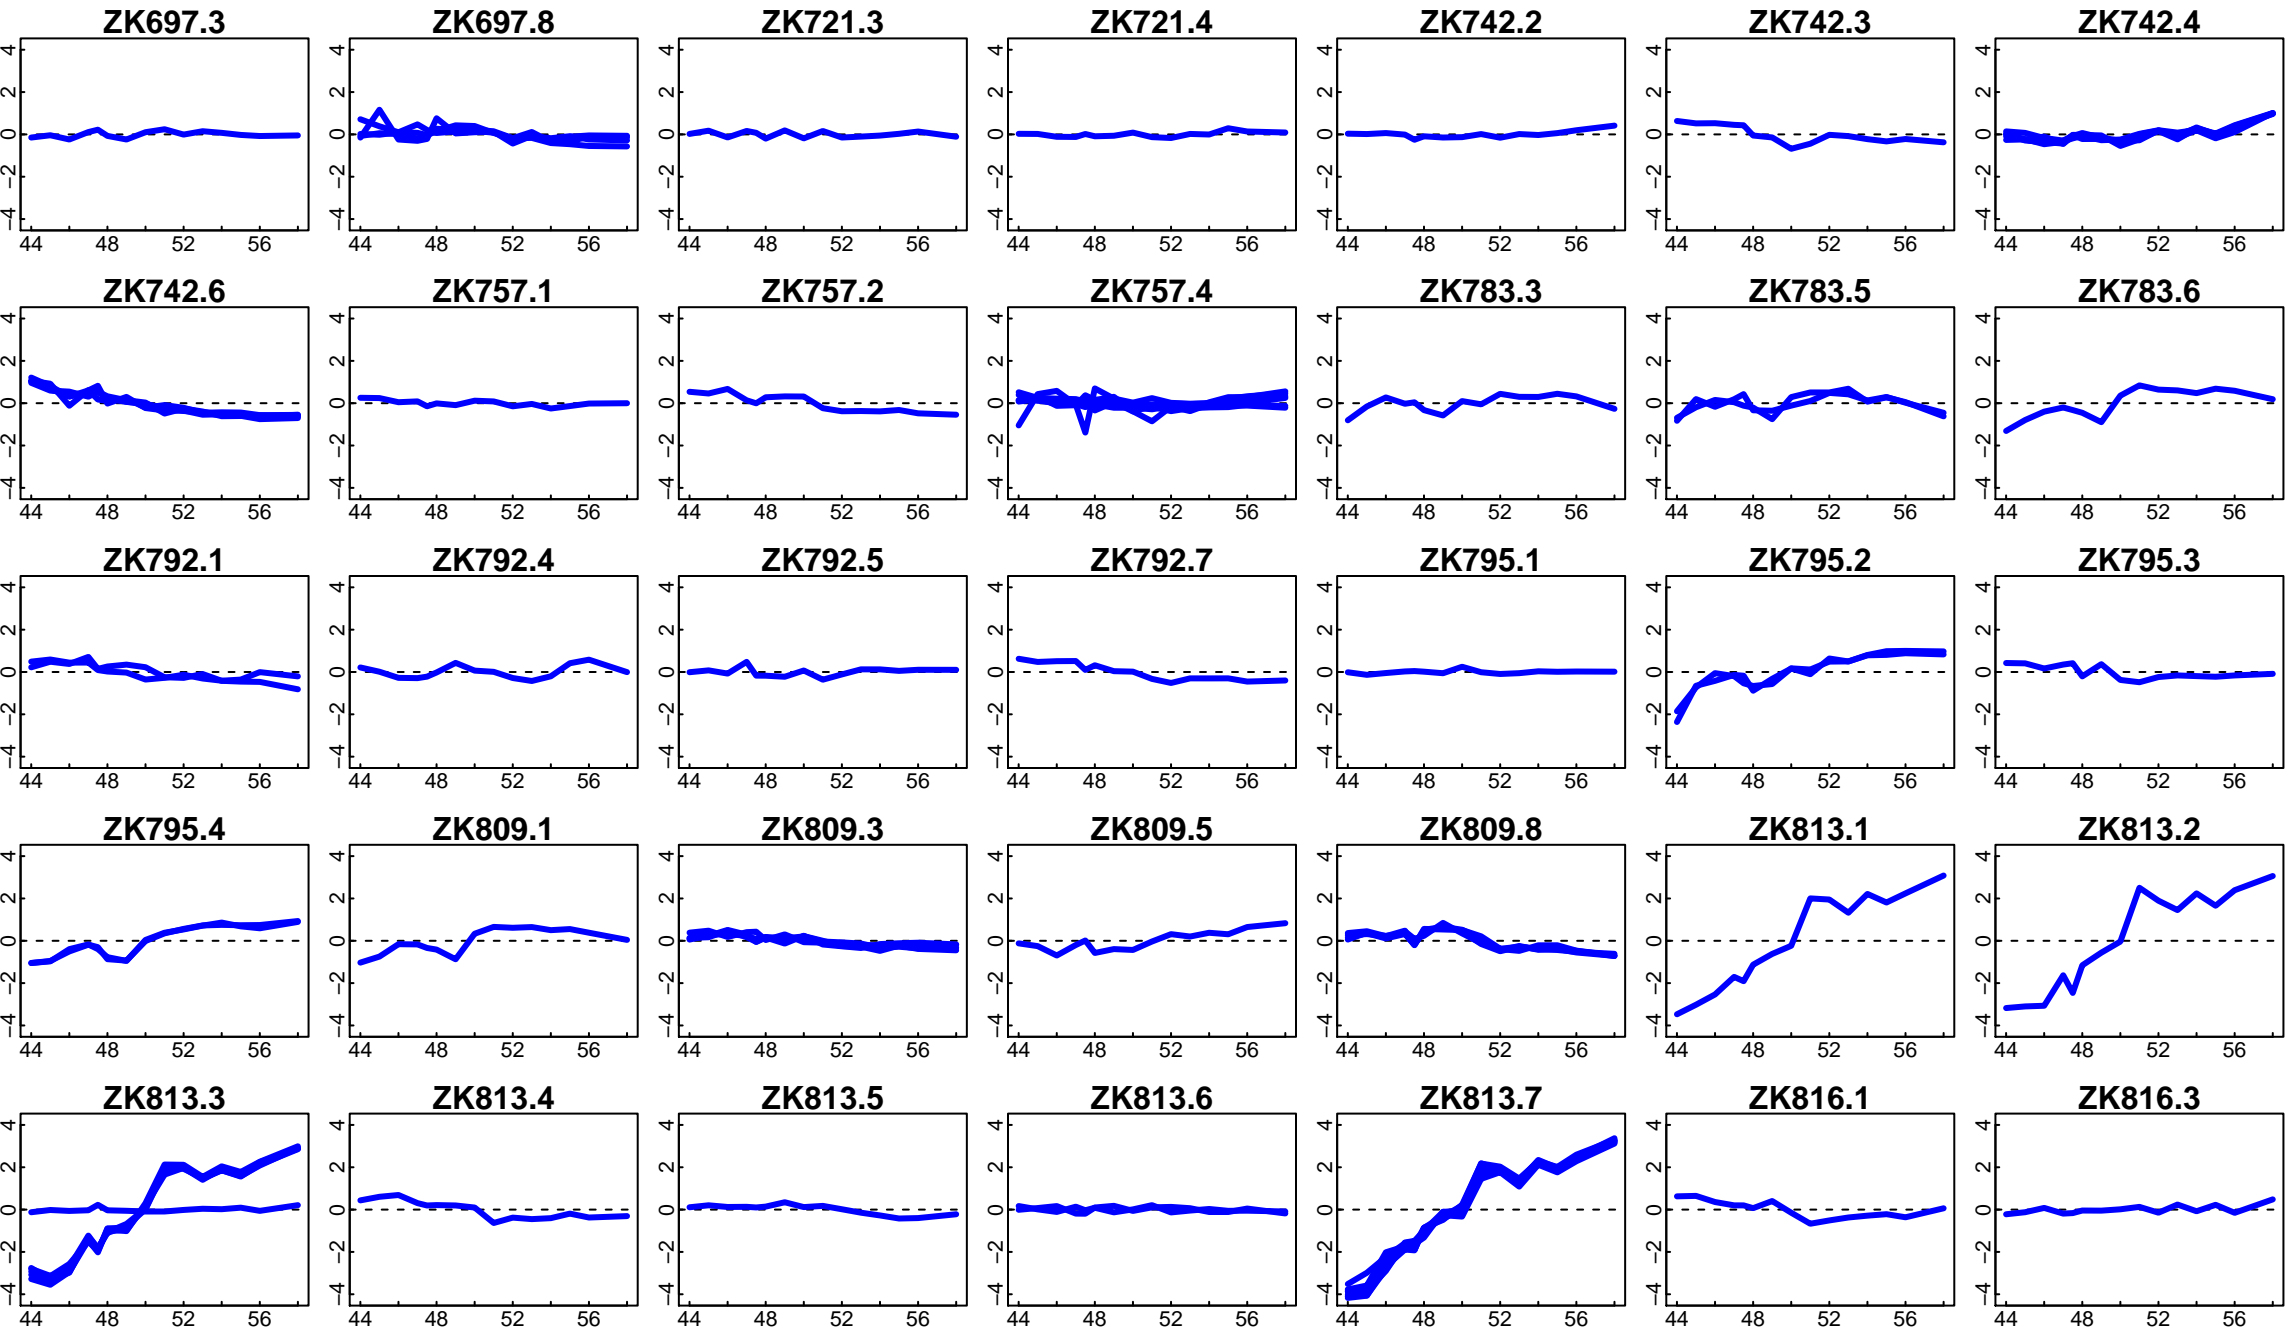

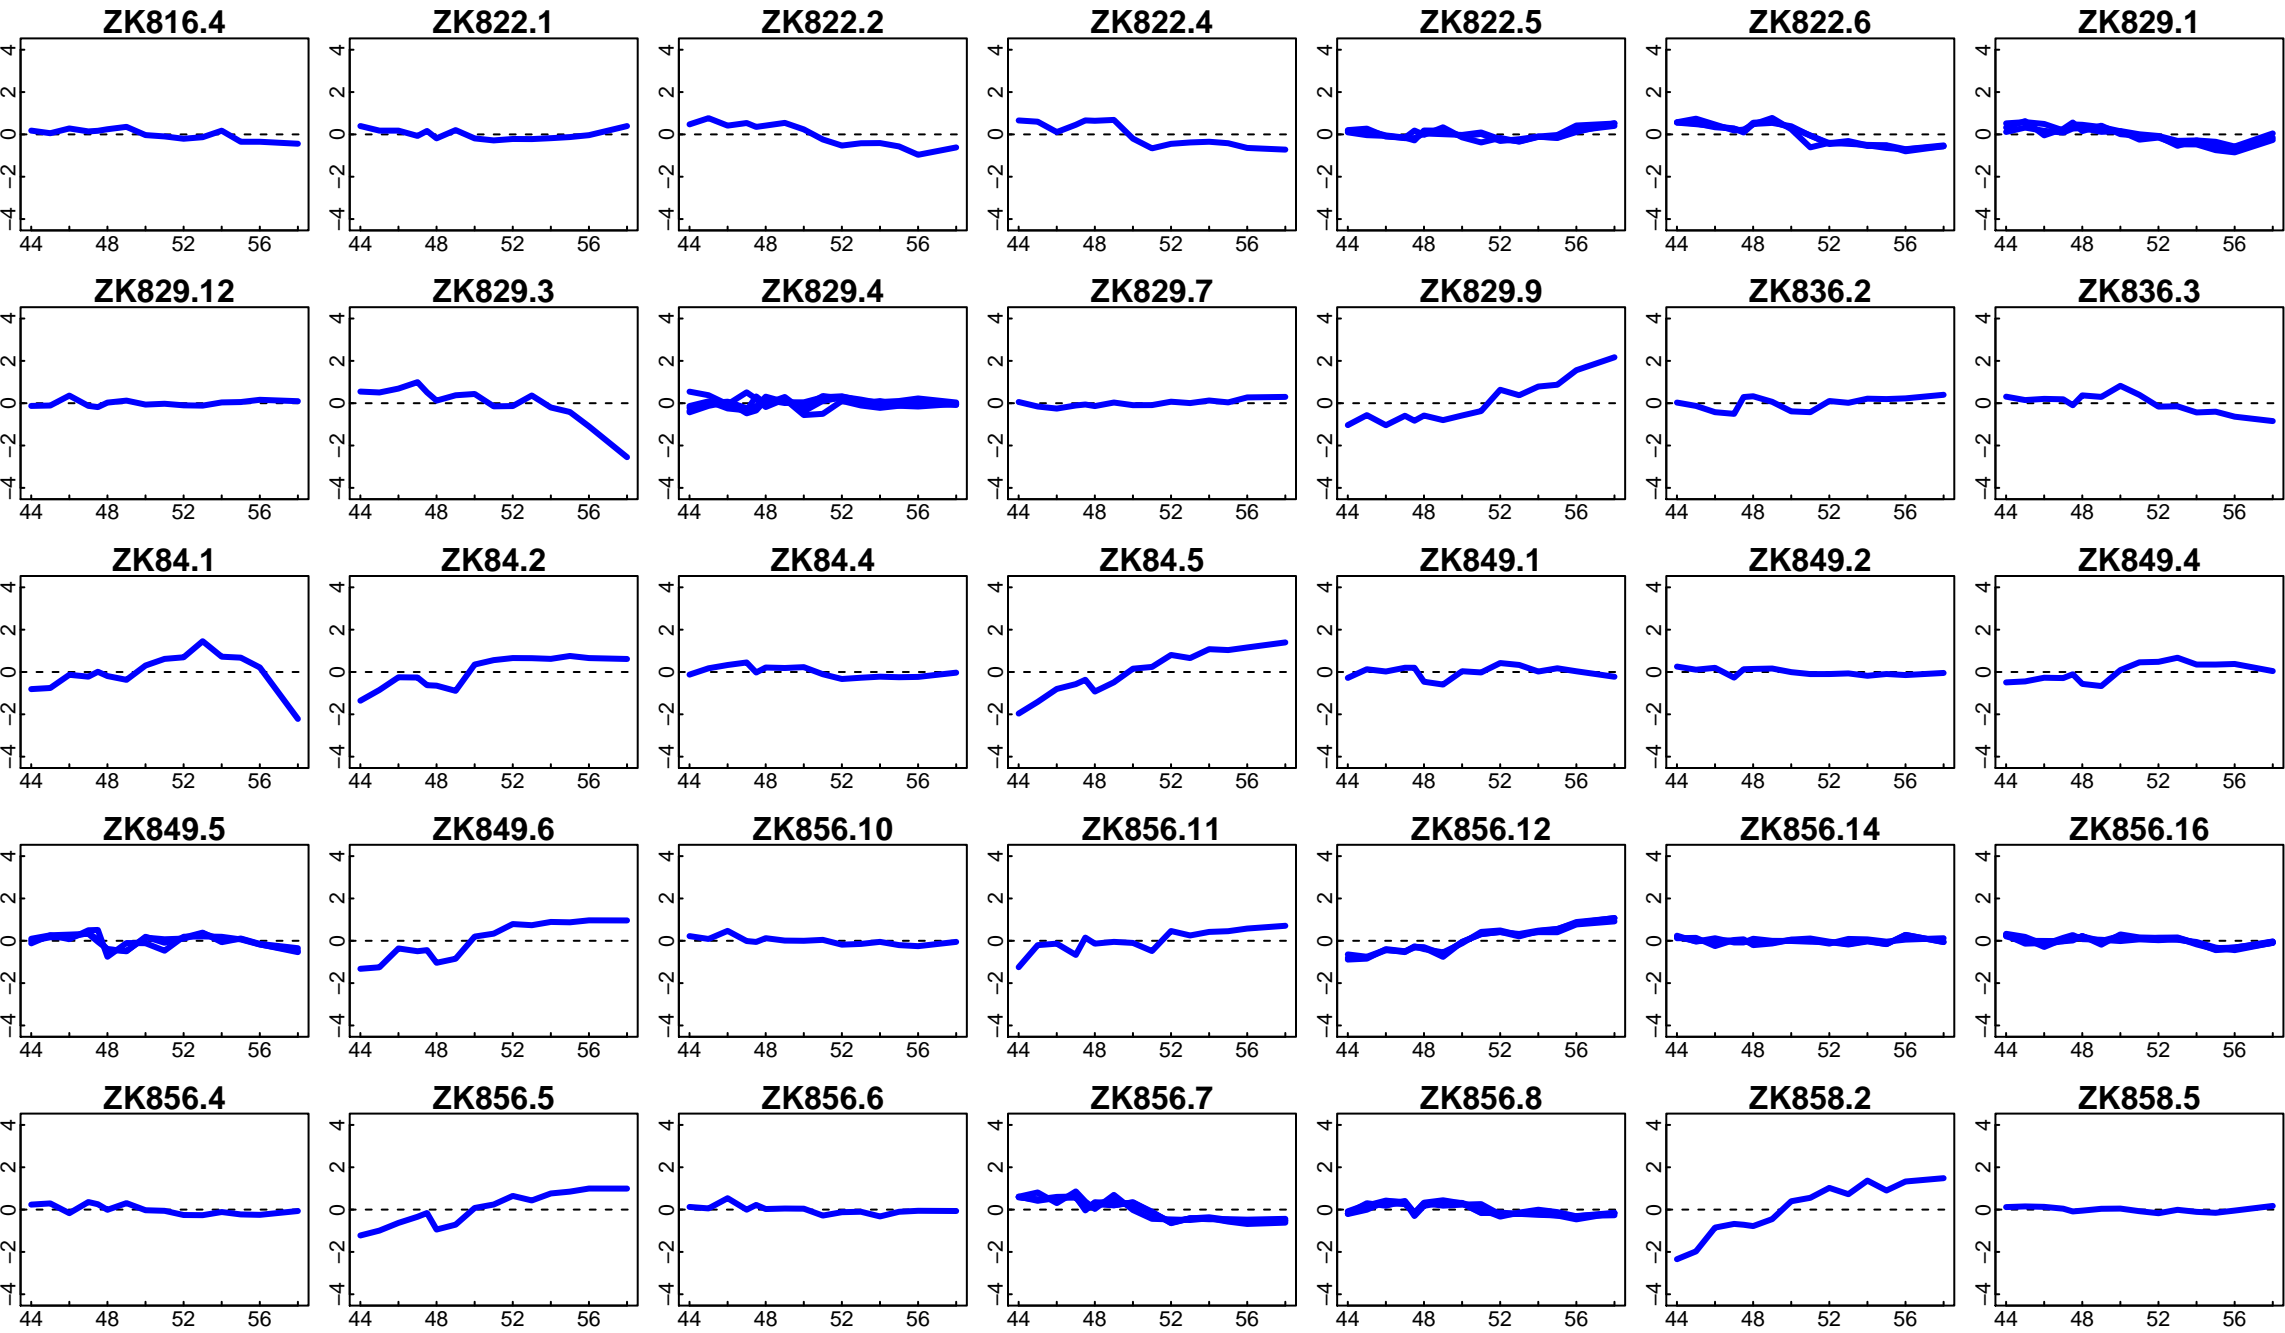

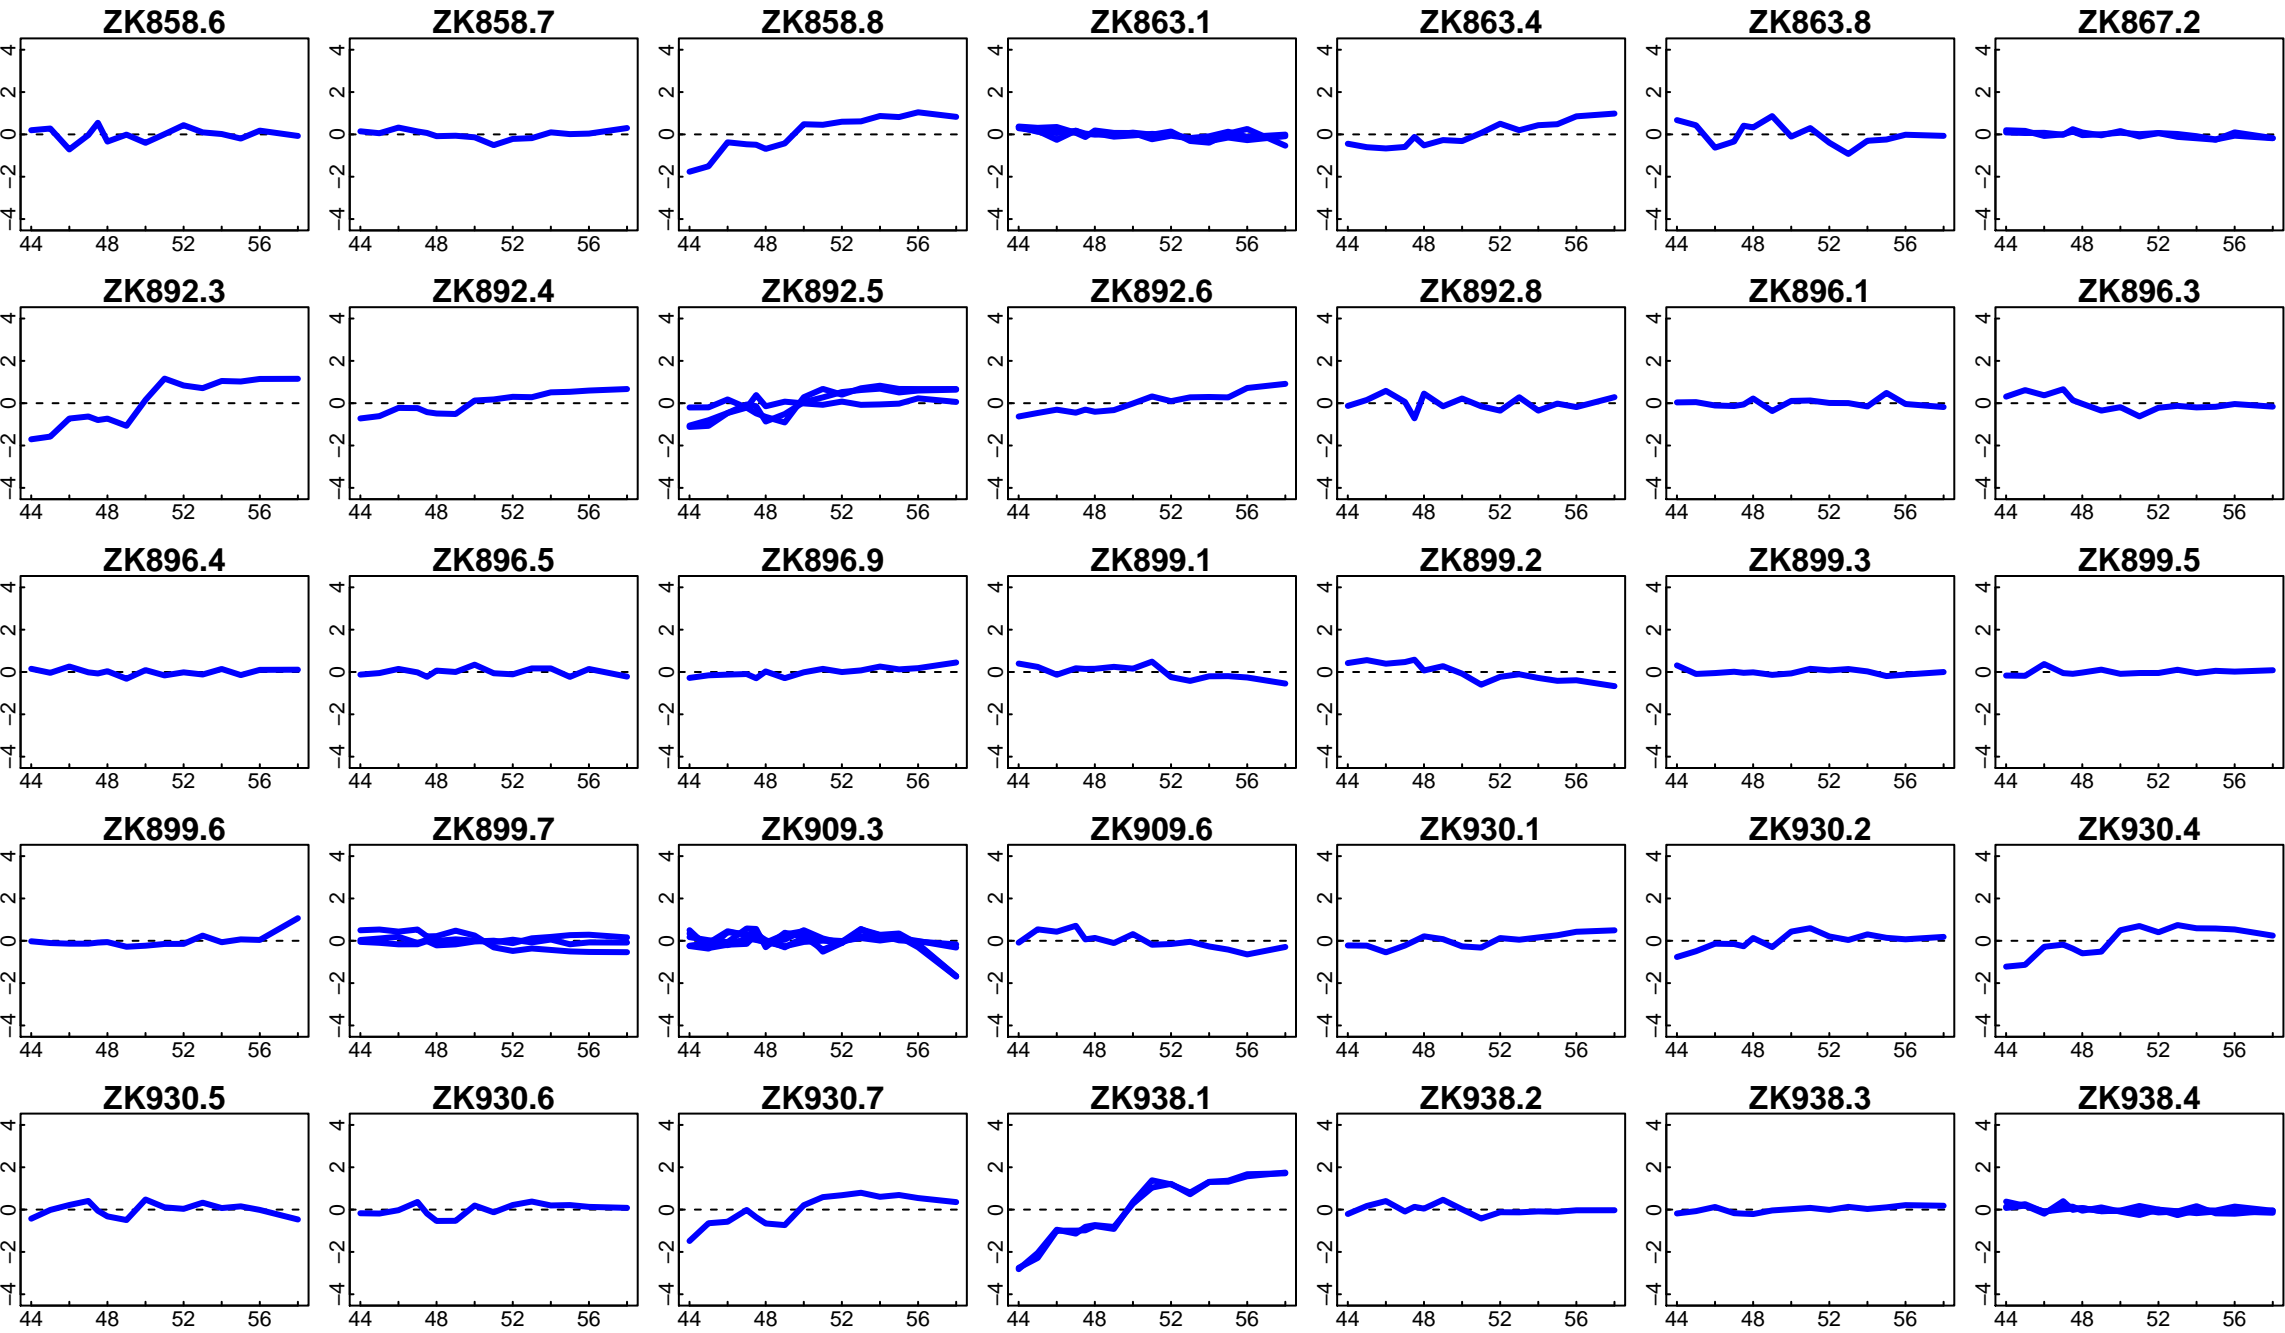

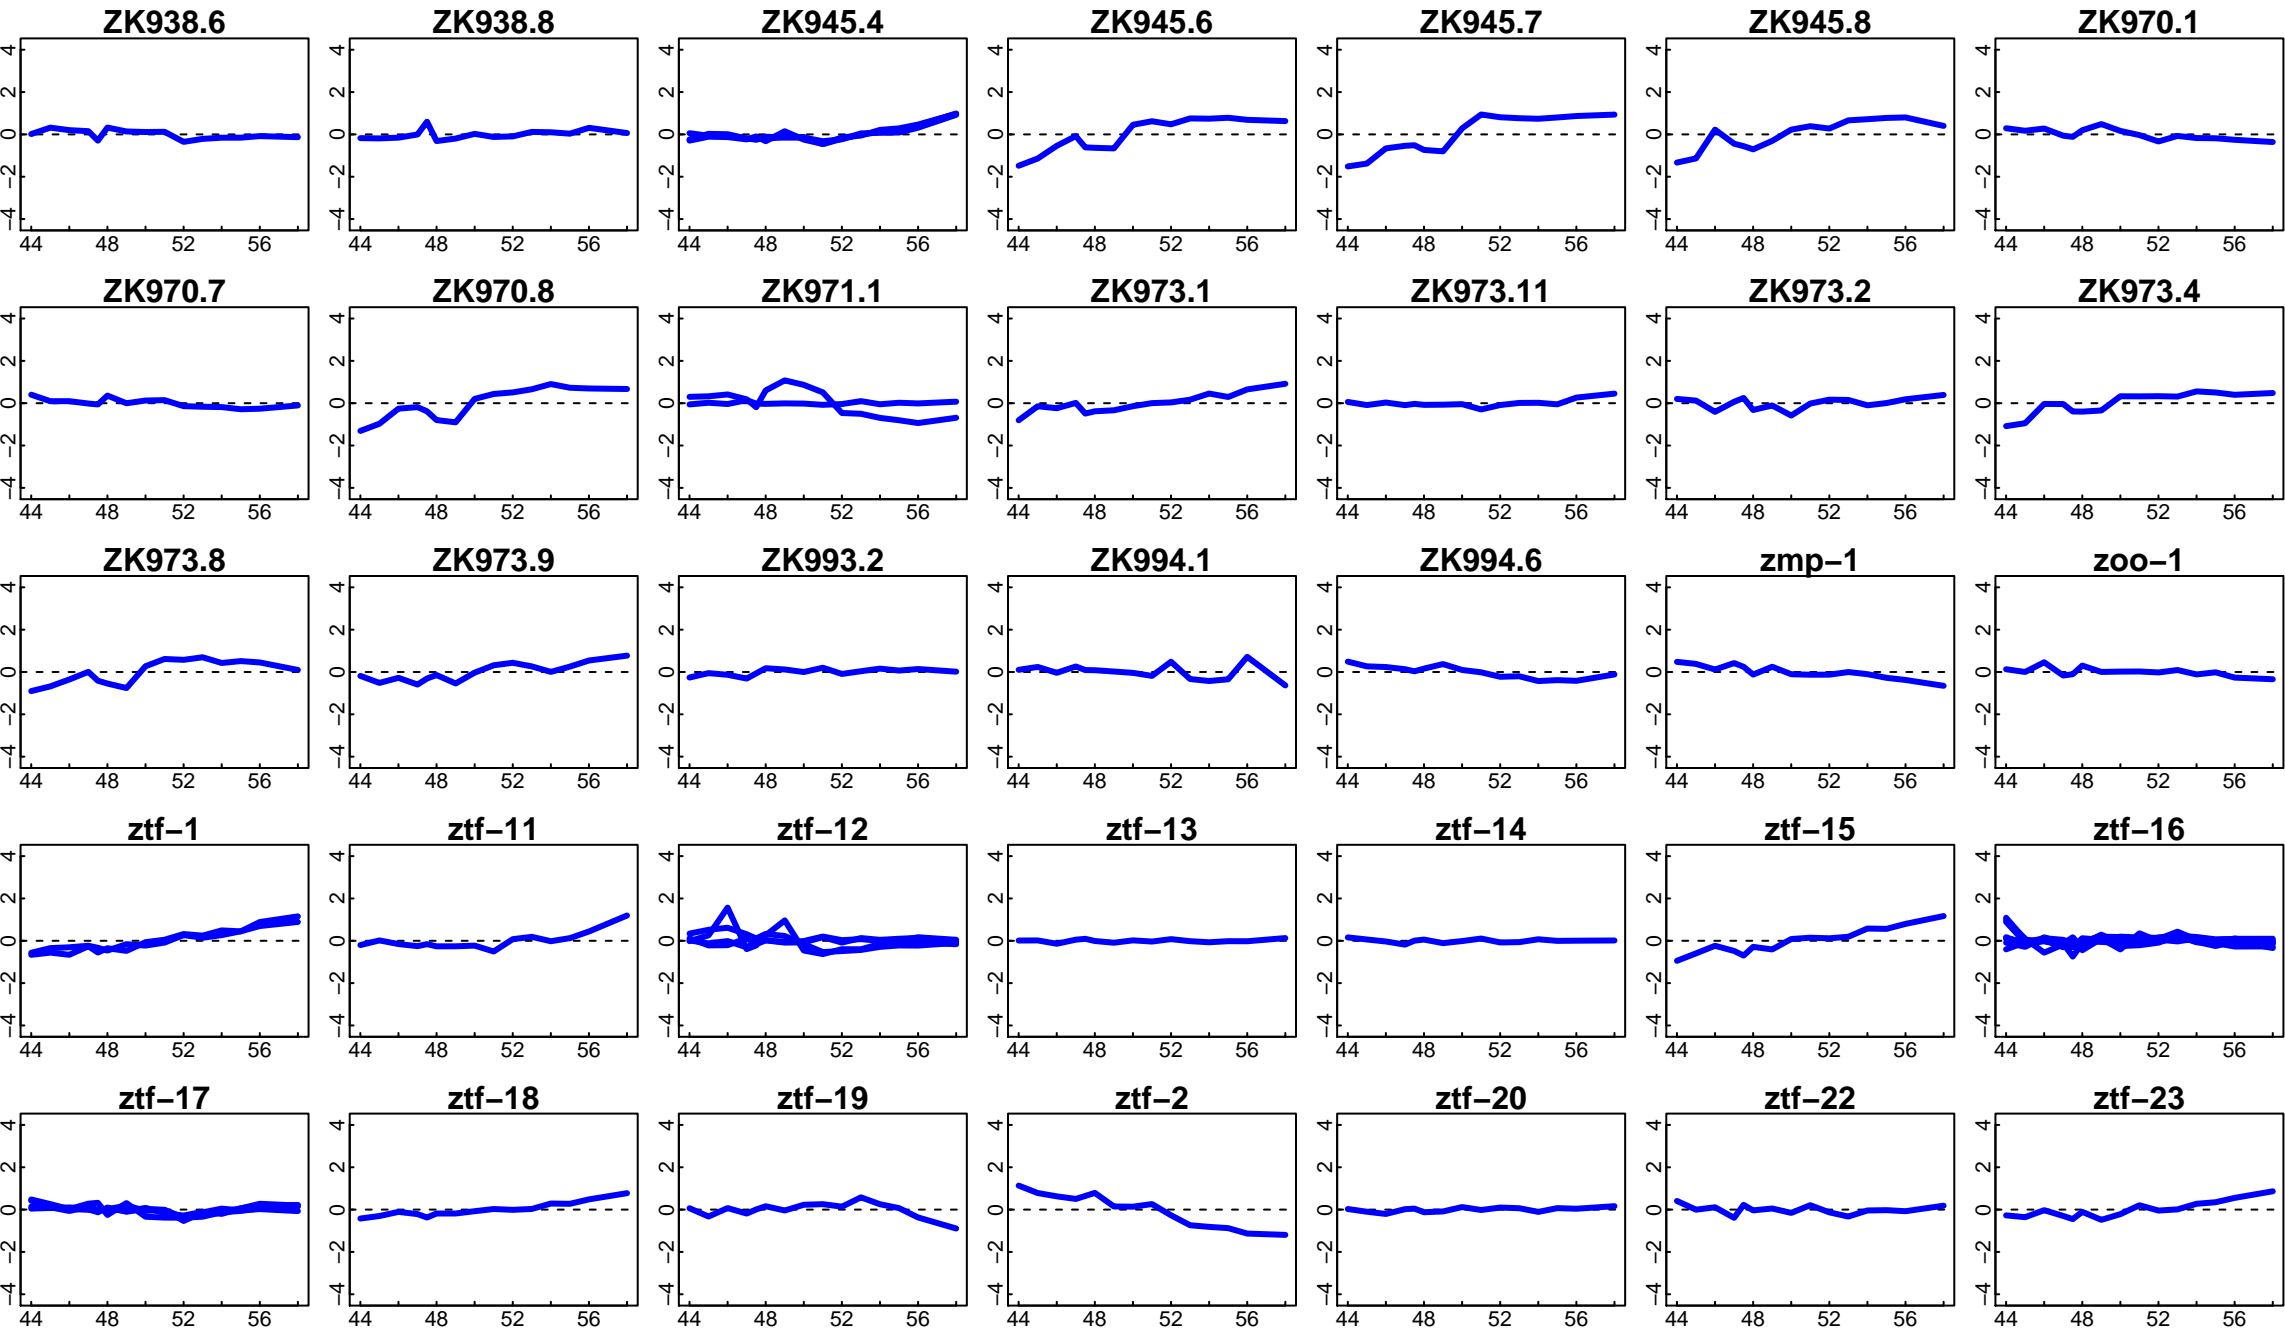

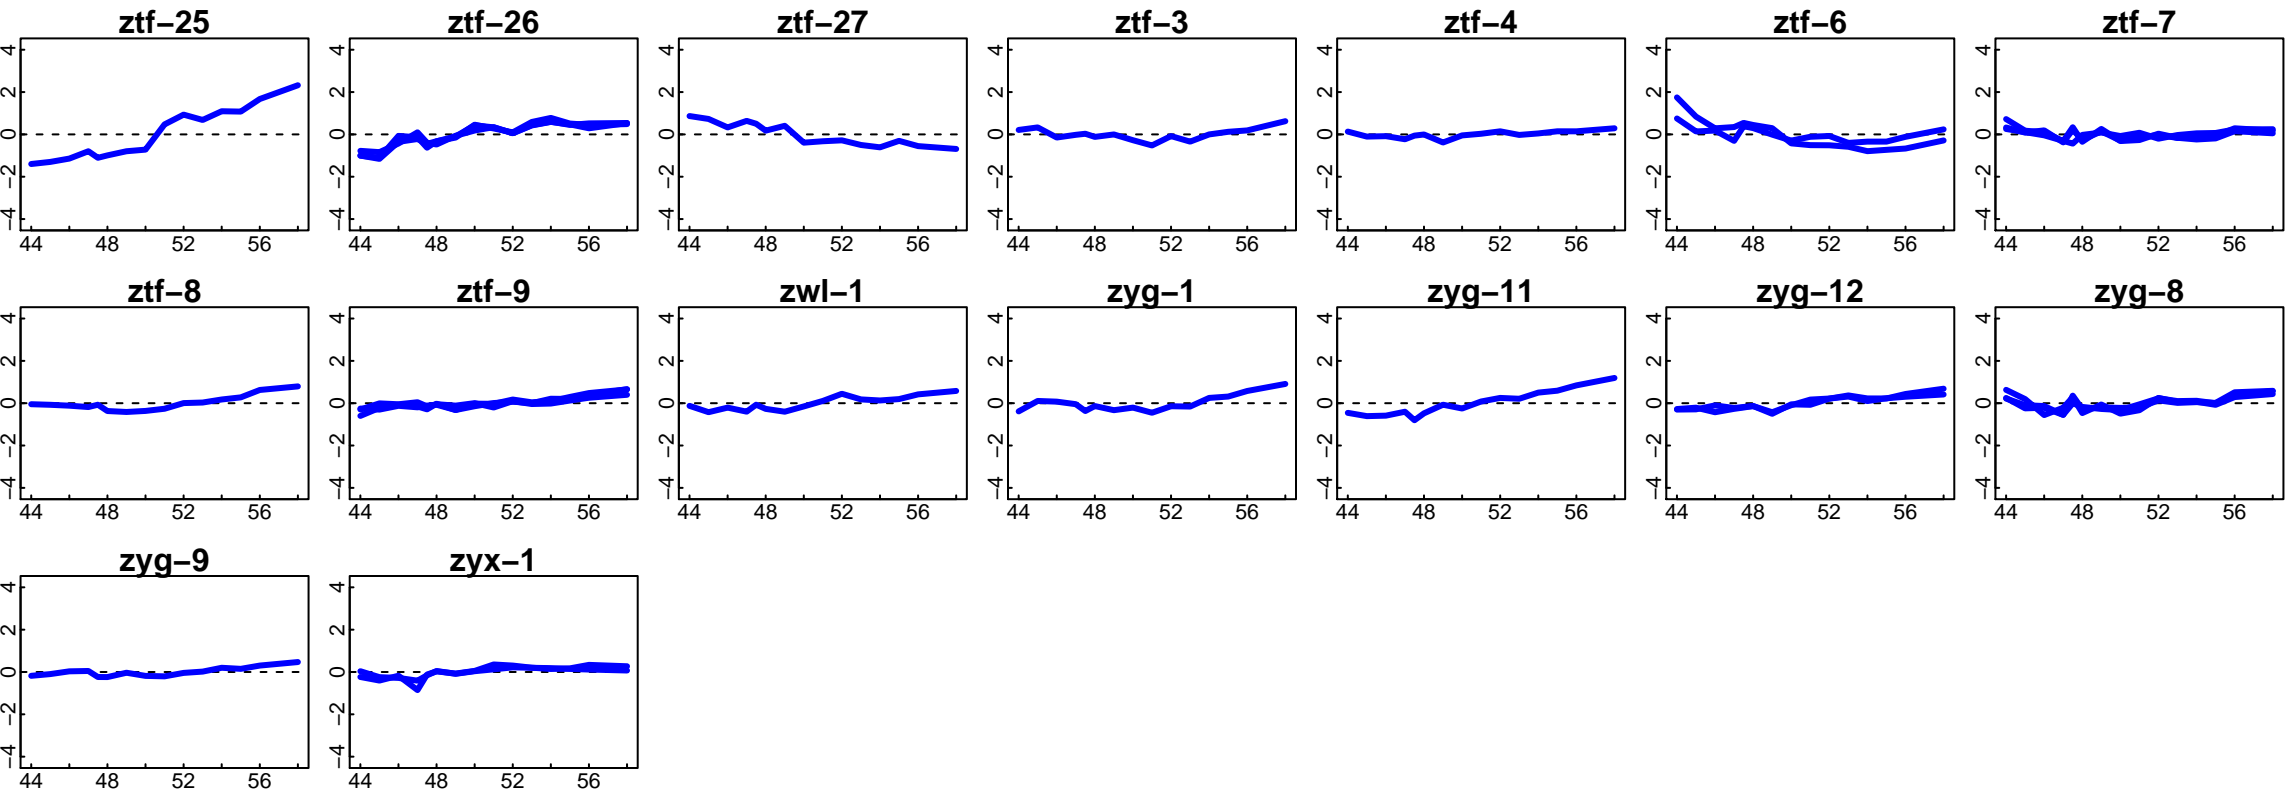

**Supplementary file D | Dynamic gene expression patterns of all the GO-annotation terms.**

The “heatmap” function of “R” was used to cluster genes of each individual GO-term according to their expression pattern. Annotation name is shown per page as figure title. The time in hours is shown on the x-axis. Gene names are shown on the y-axis. The scale bar shows the log<sub>2</sub> ratio with the mean for each time-point. Blue is lower than the mean and yellow is higher than the mean.

# 1-aminocyclopropane-1-carboxylate synthase activity

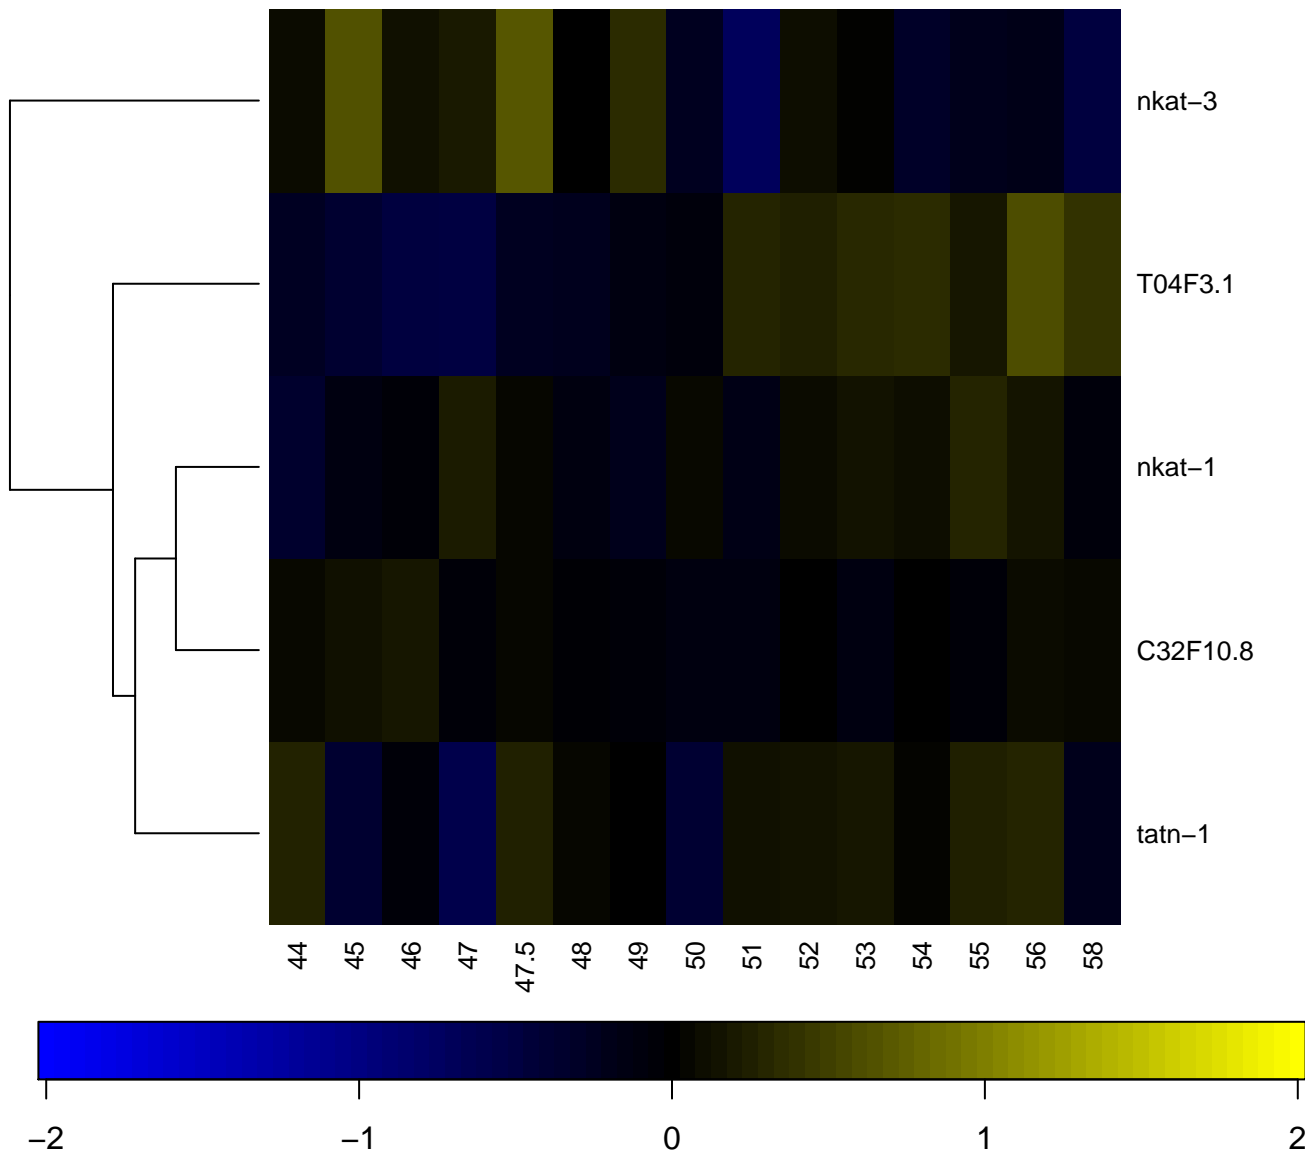







# 2,3-dihydro-2,3-dihydroxybenzoate dehydrogenase activity

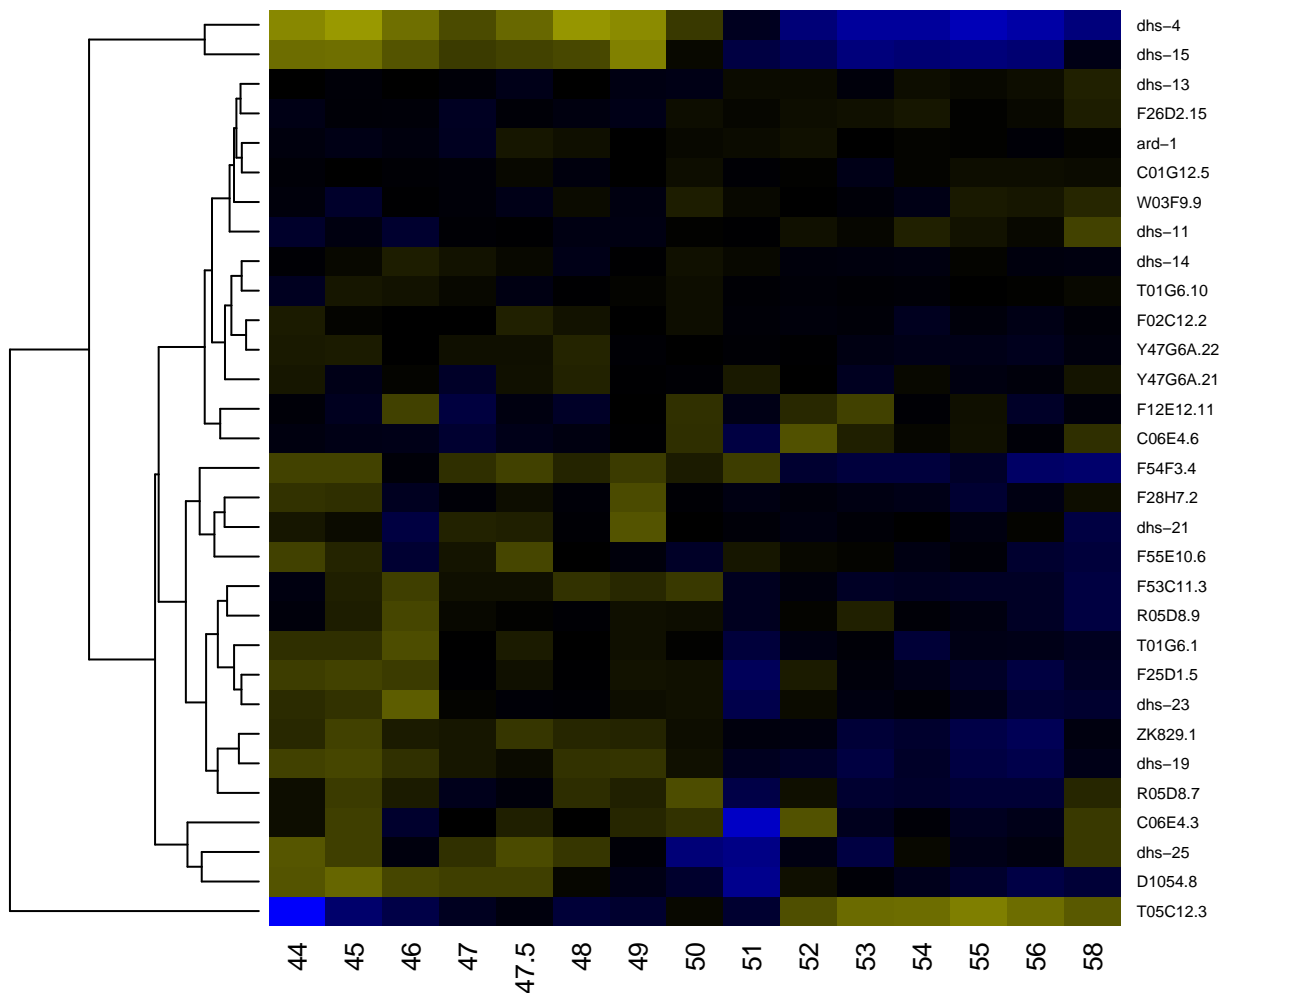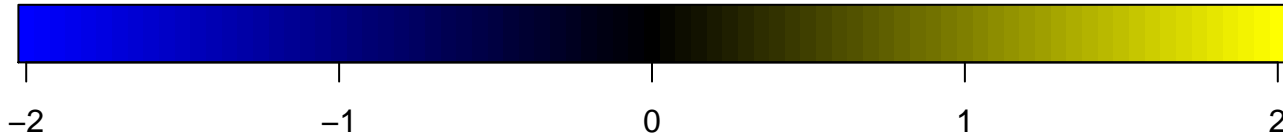









# 4 iron, 4 sulfur cluster binding

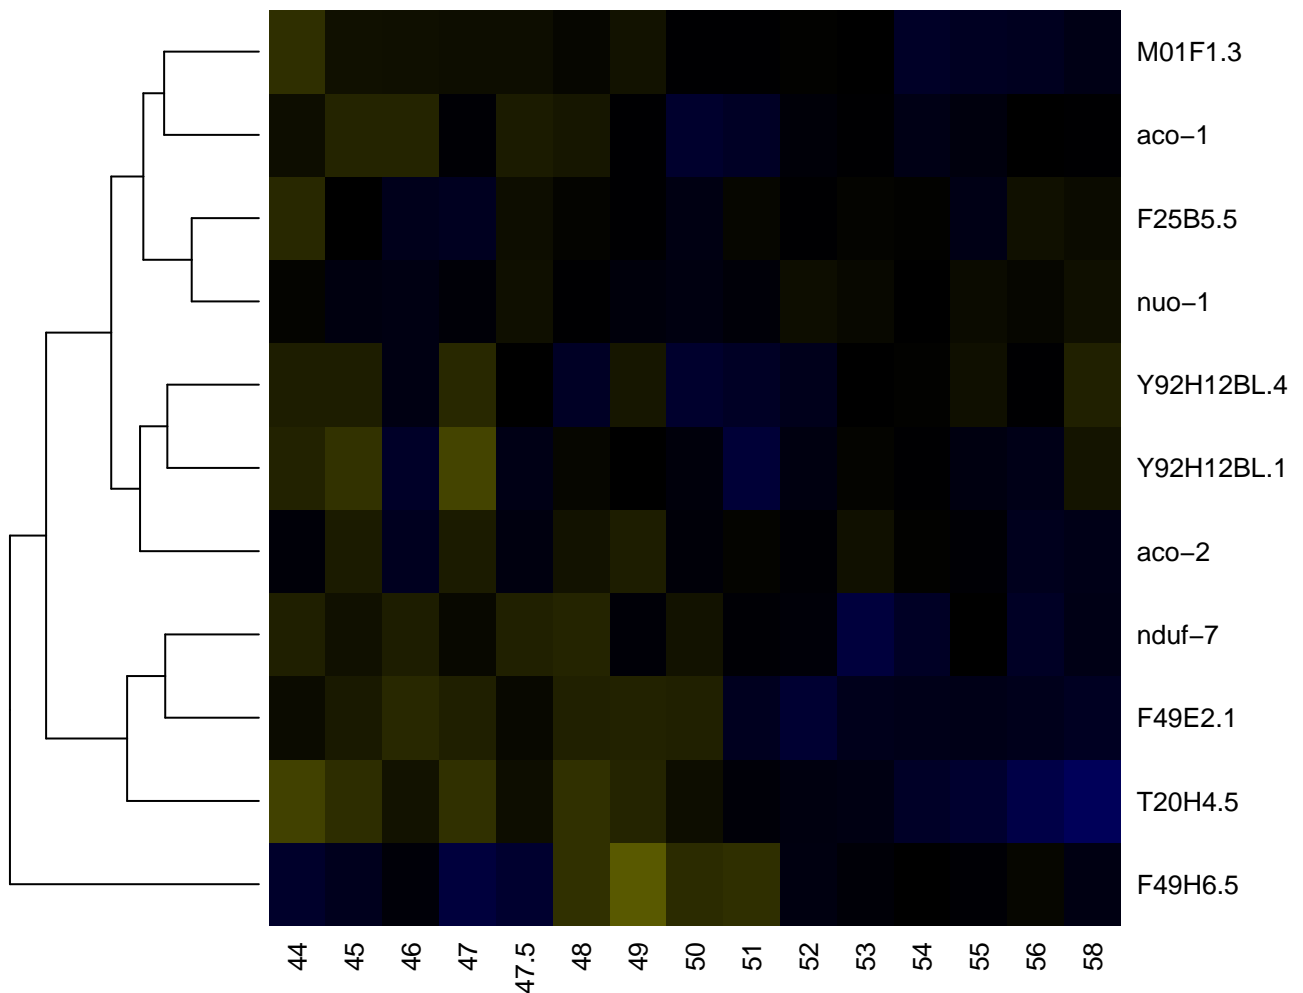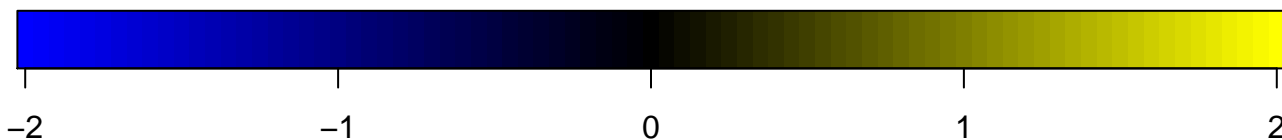







# acetylglucosaminyltransferase activity

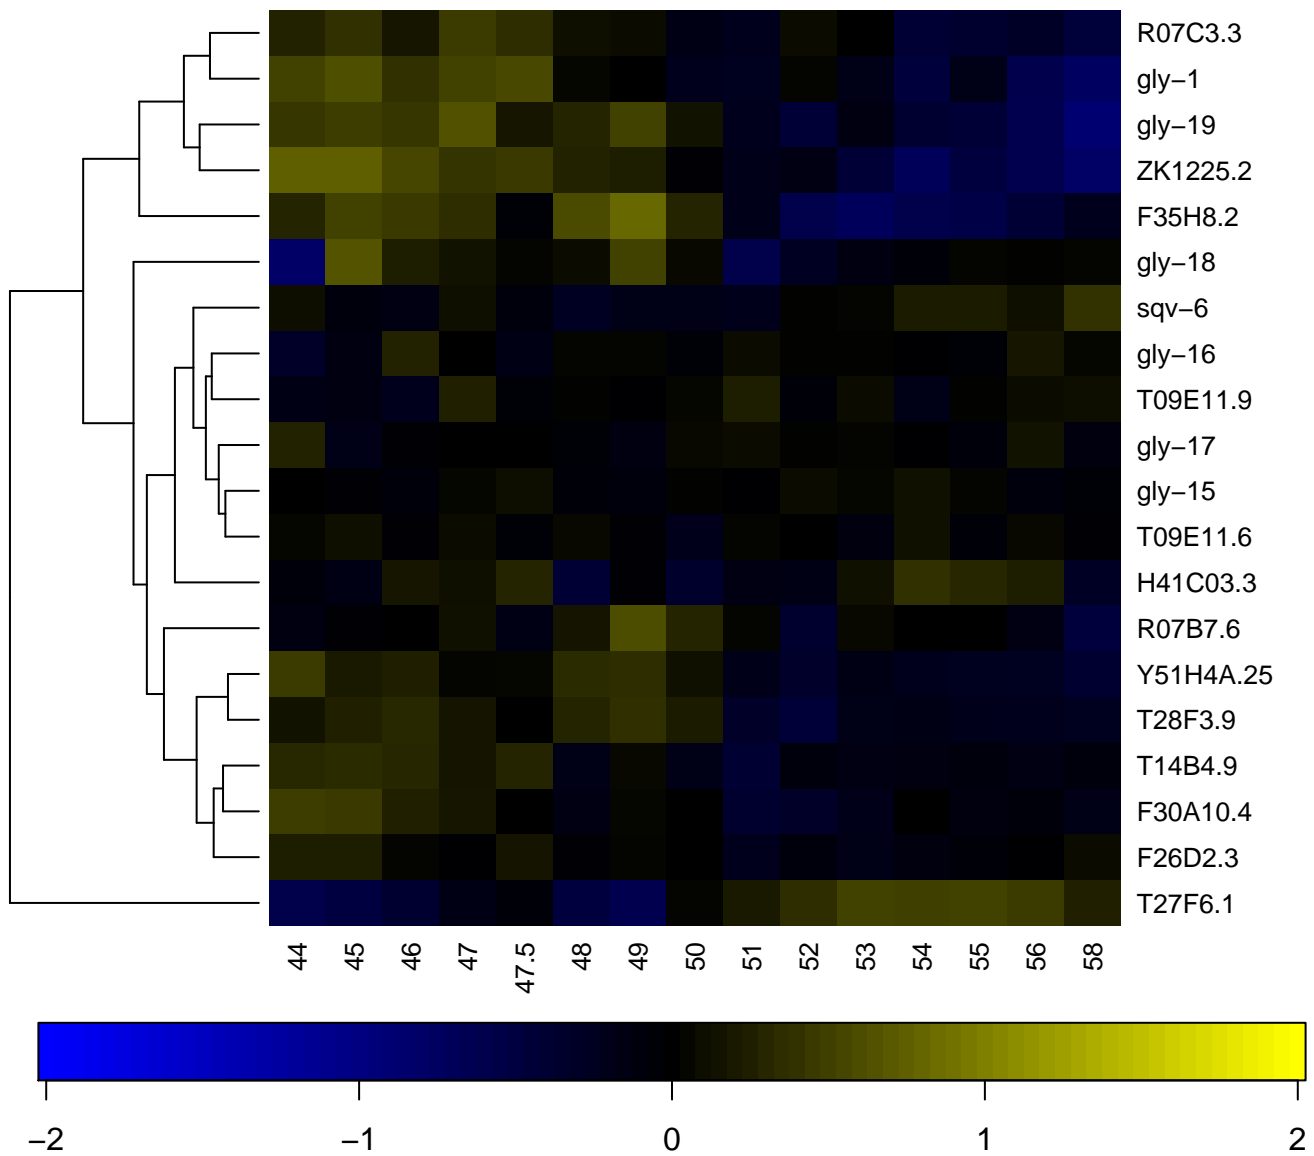

# acid-amino acid ligase activity

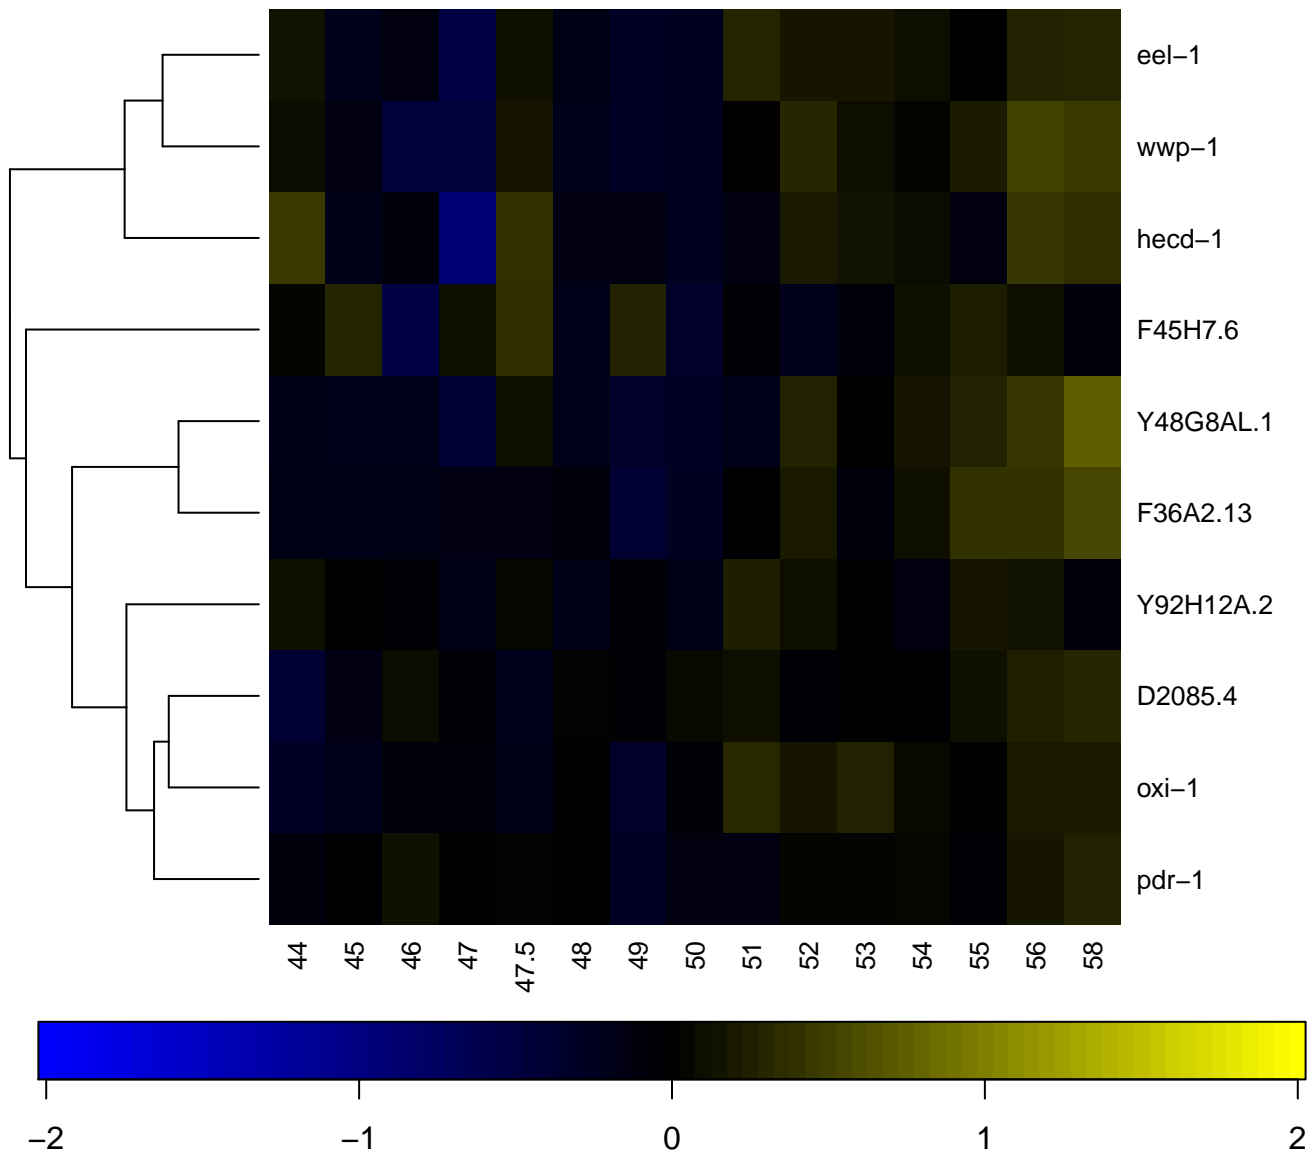

# acid phosphatase activity

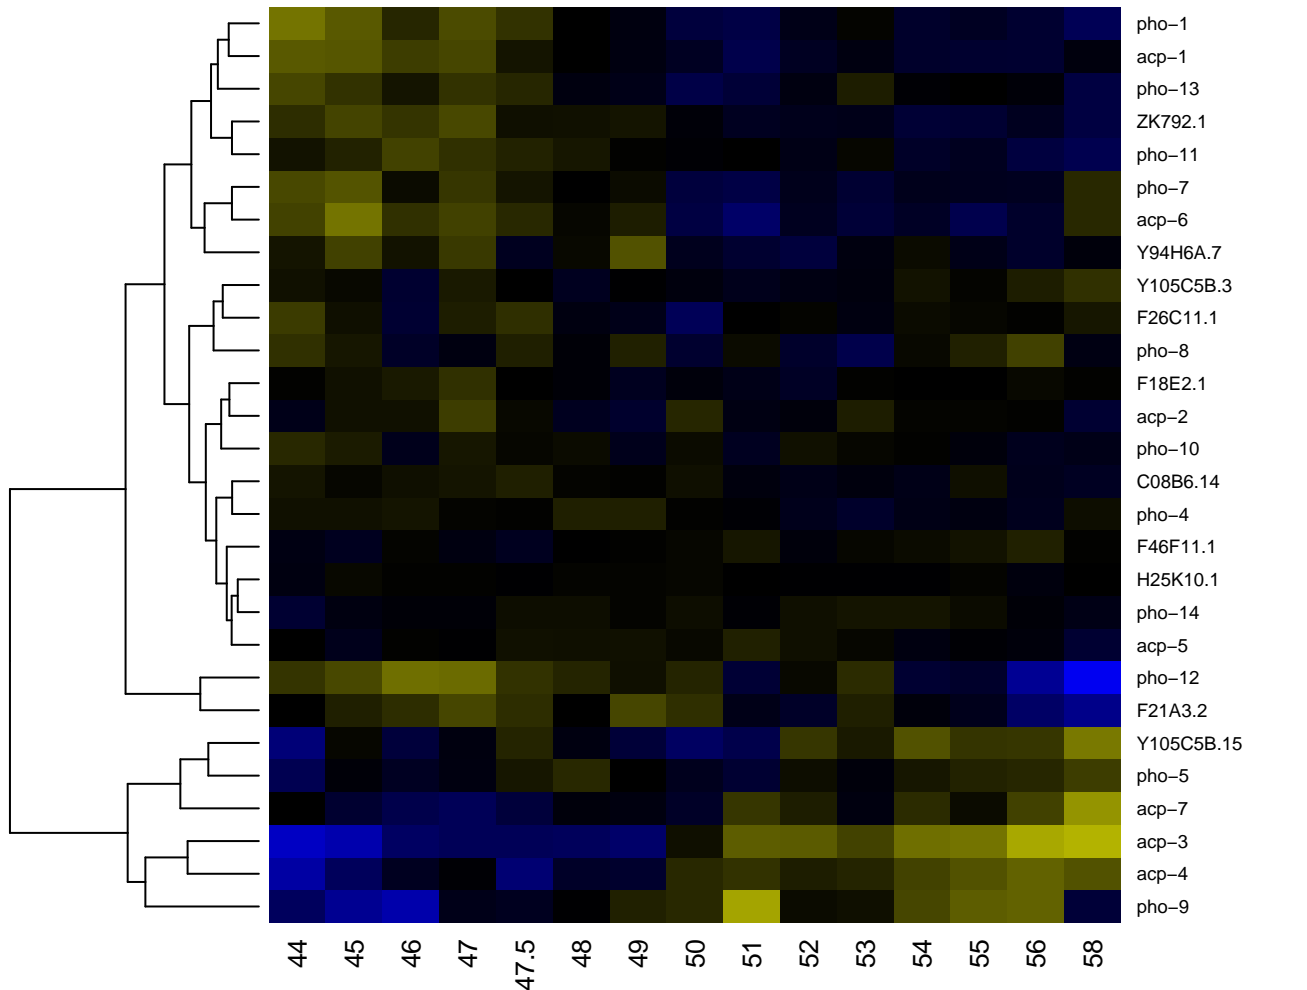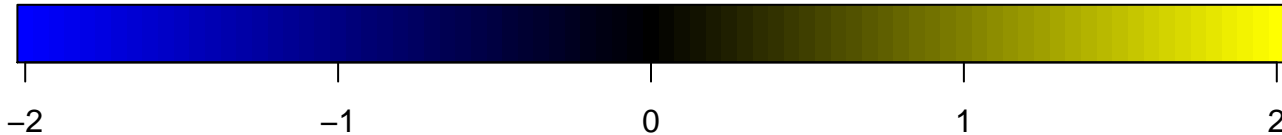

# actin binding

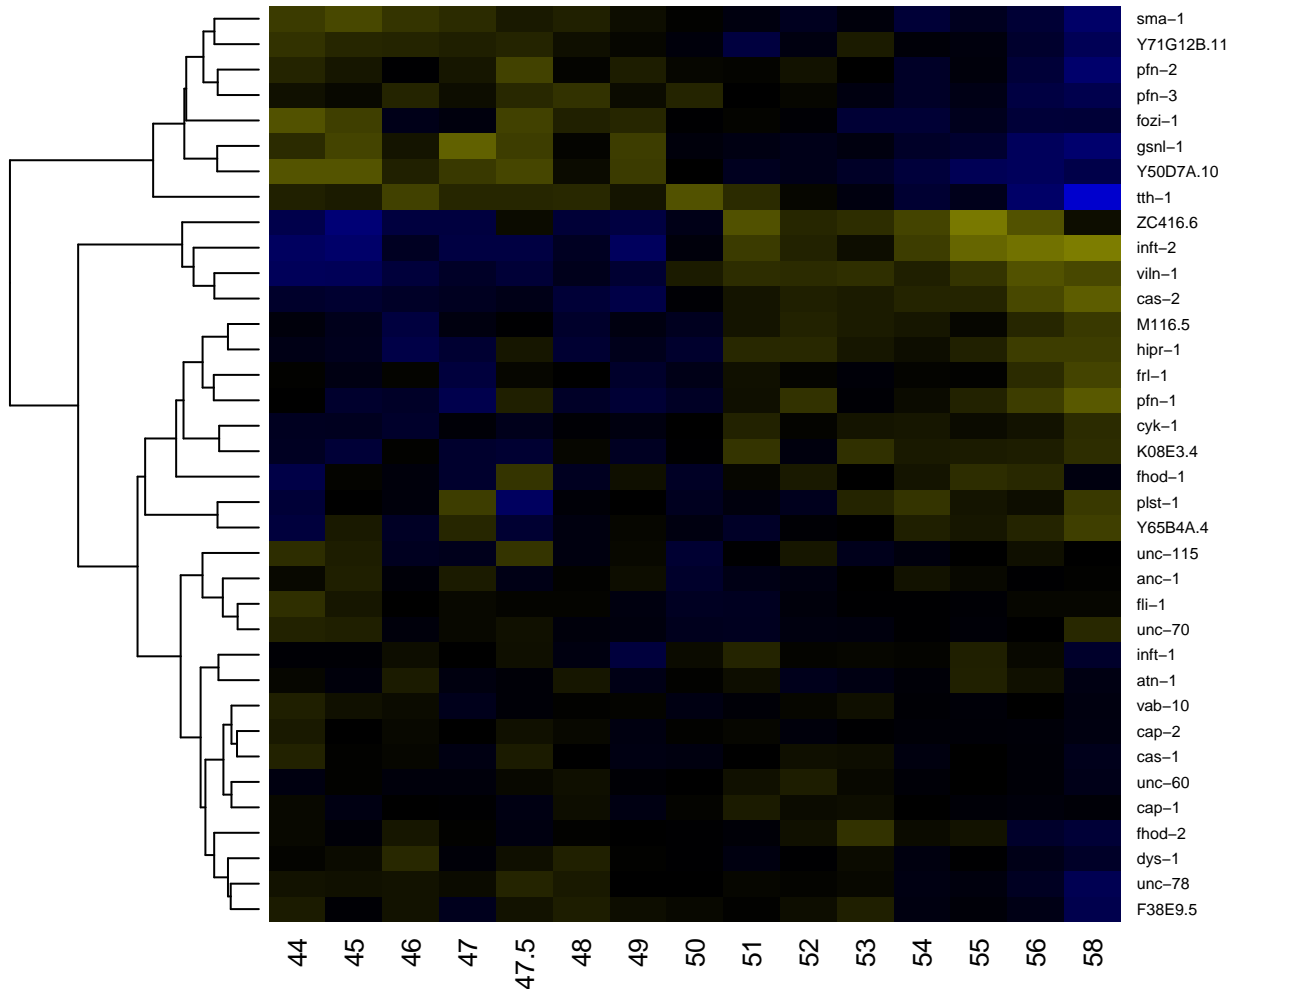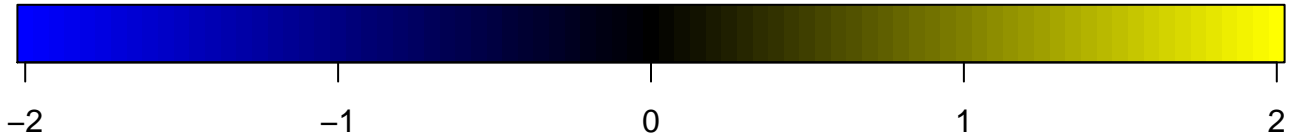













# acyl-CoA binding

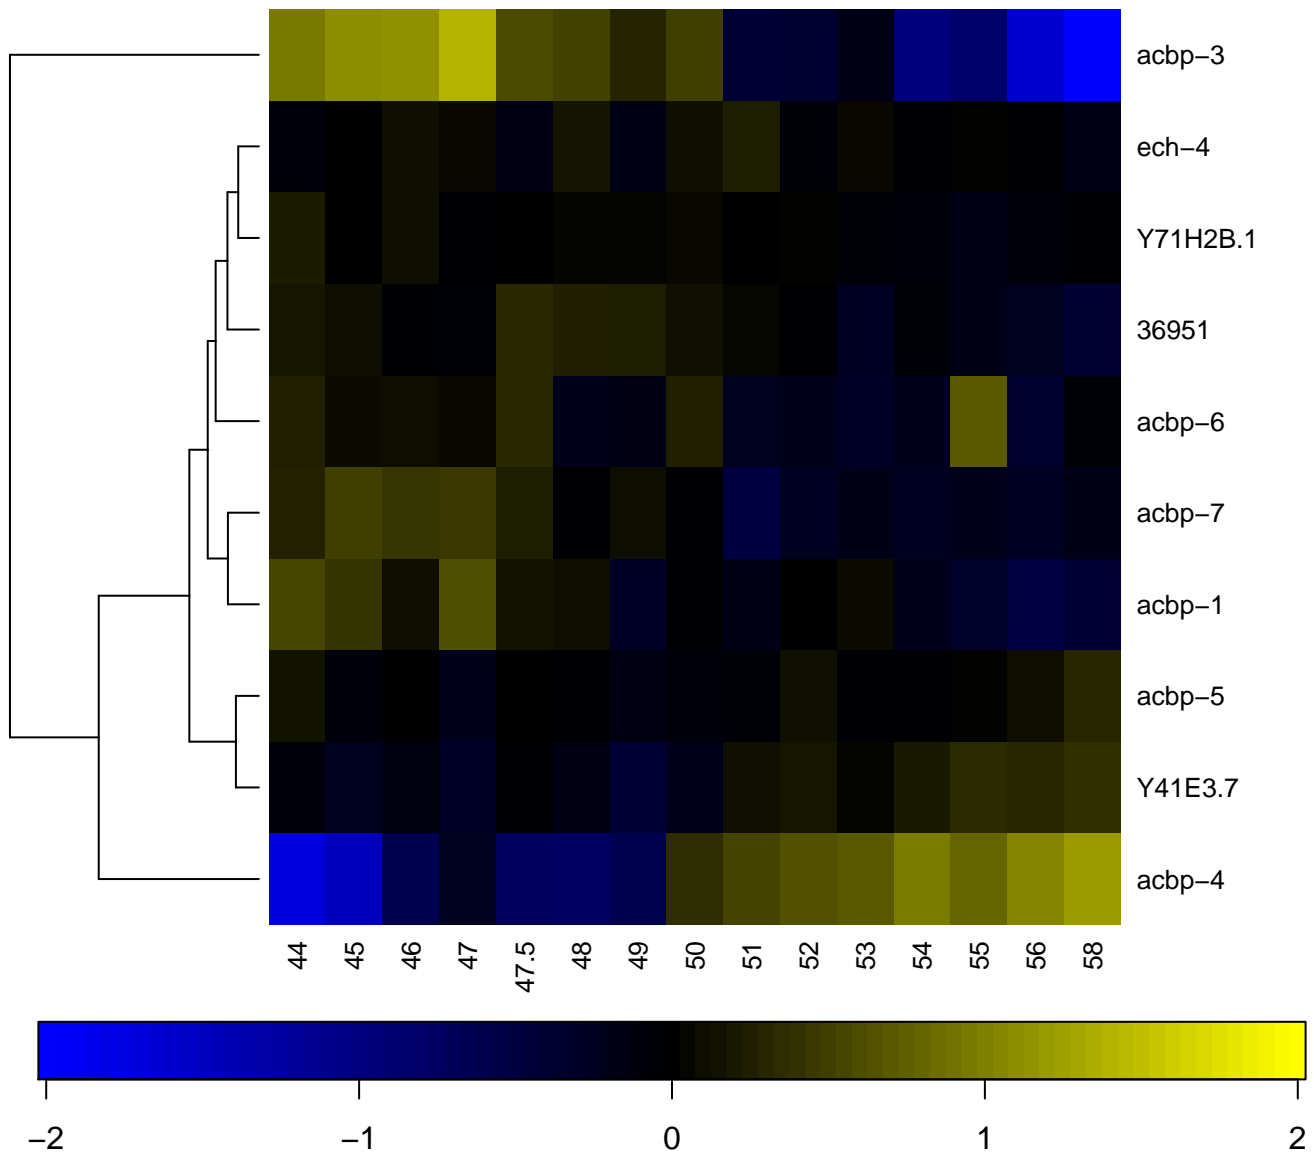

# acyl-CoA dehydrogenase activity

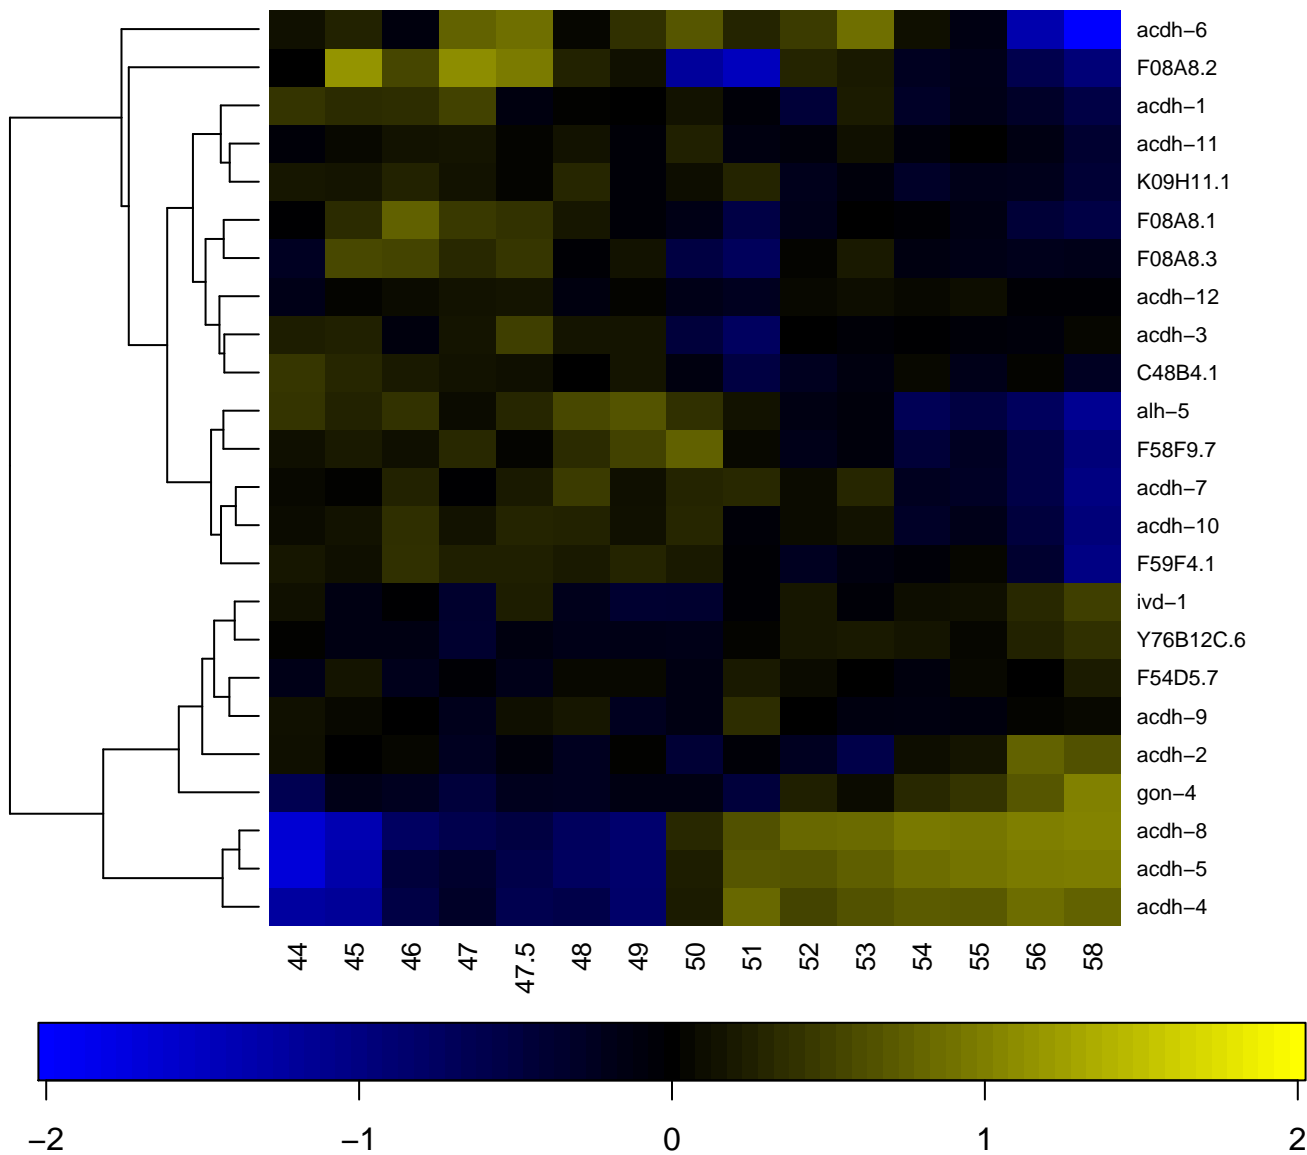



# acyl-CoA oxidase activity

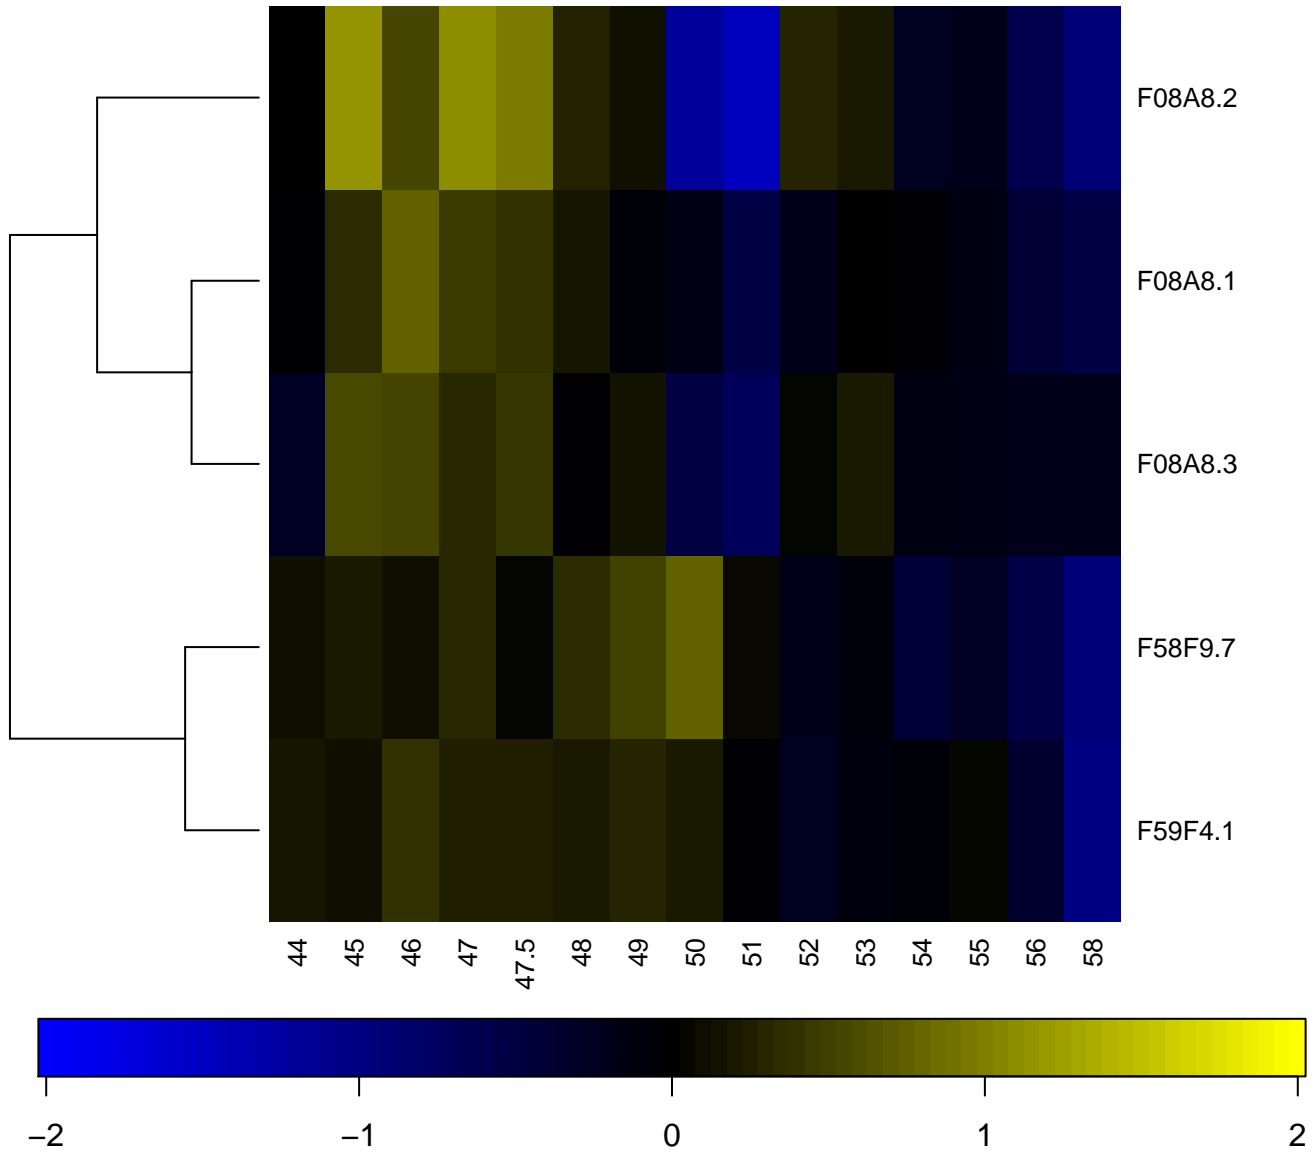





# acyltransferase activity

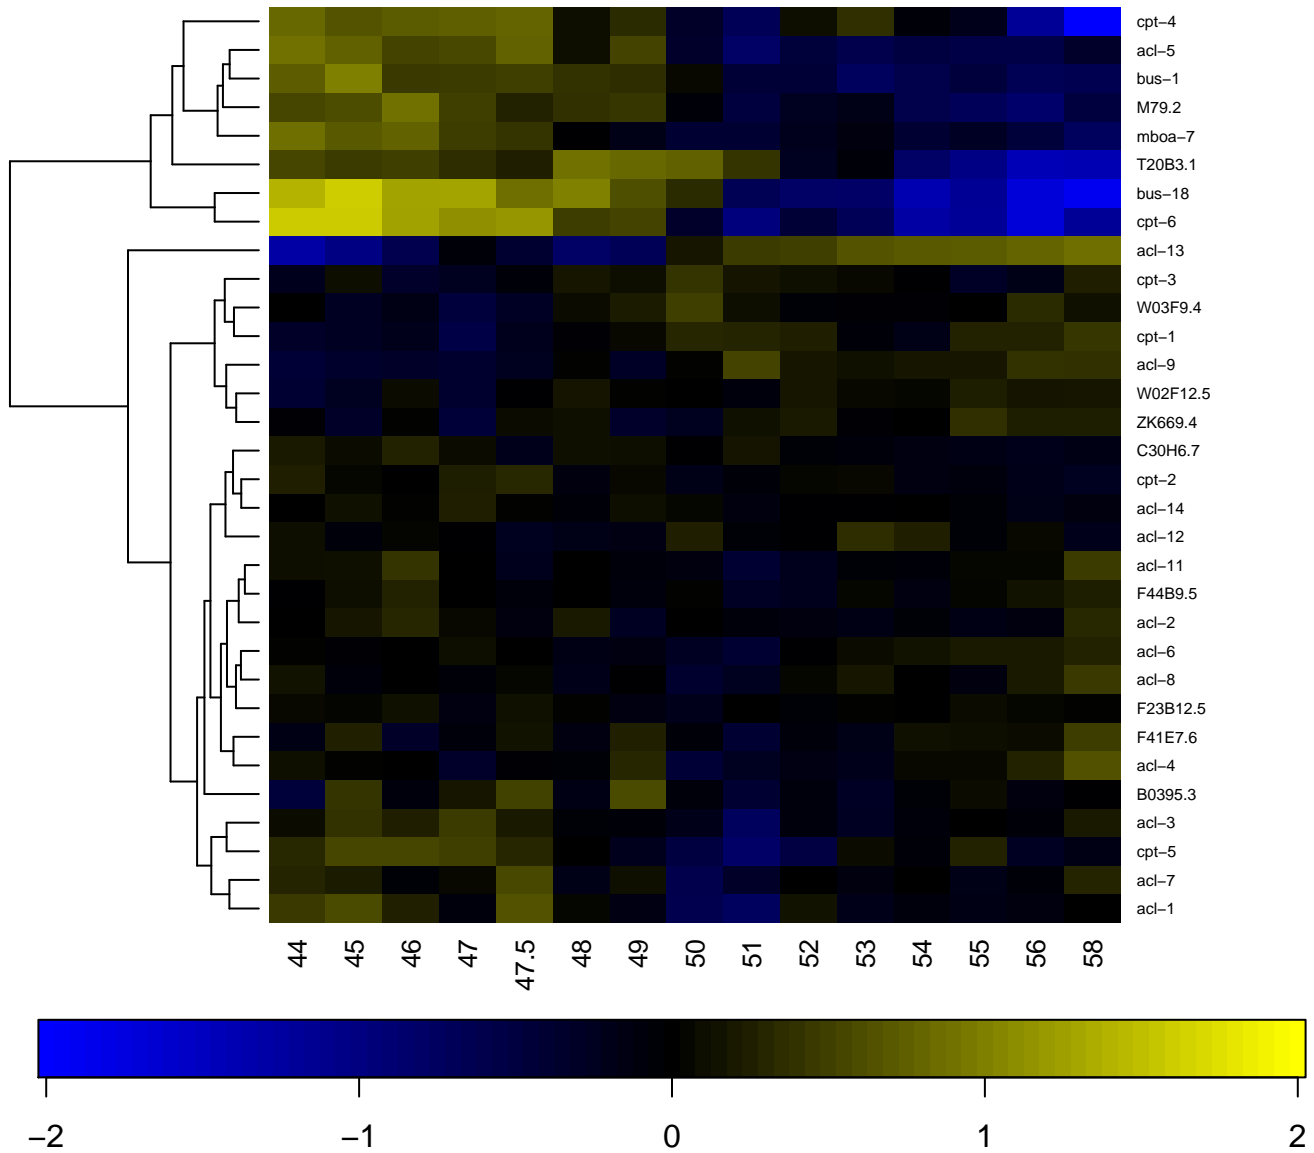

# adherens junction

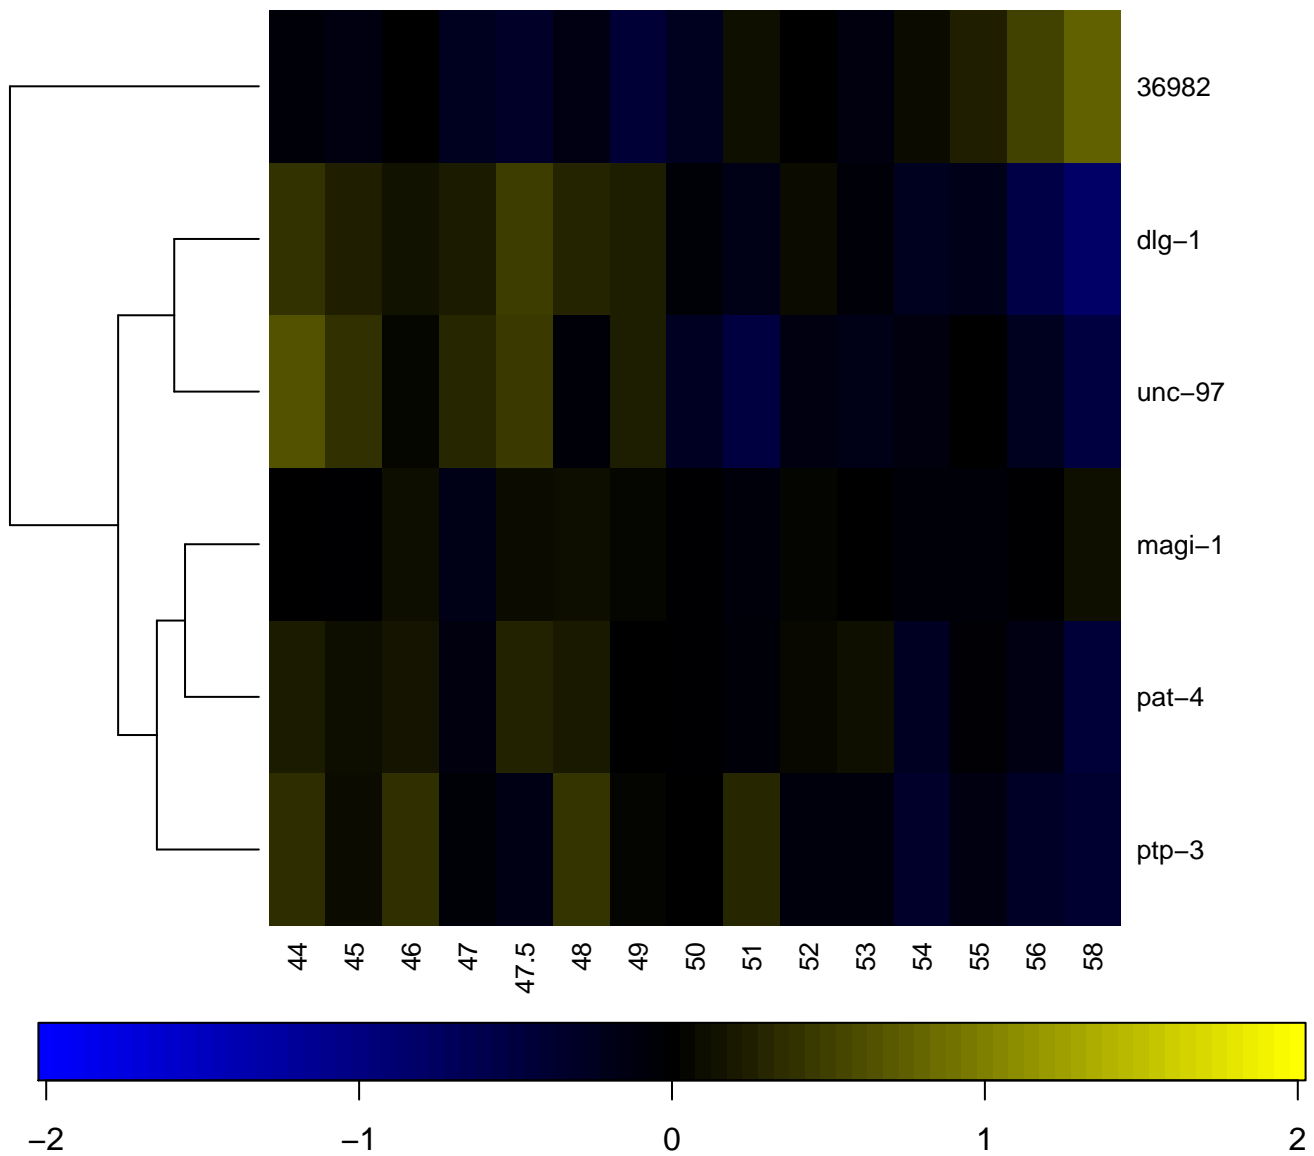

# alcohol dehydrogenase (NAD) activity

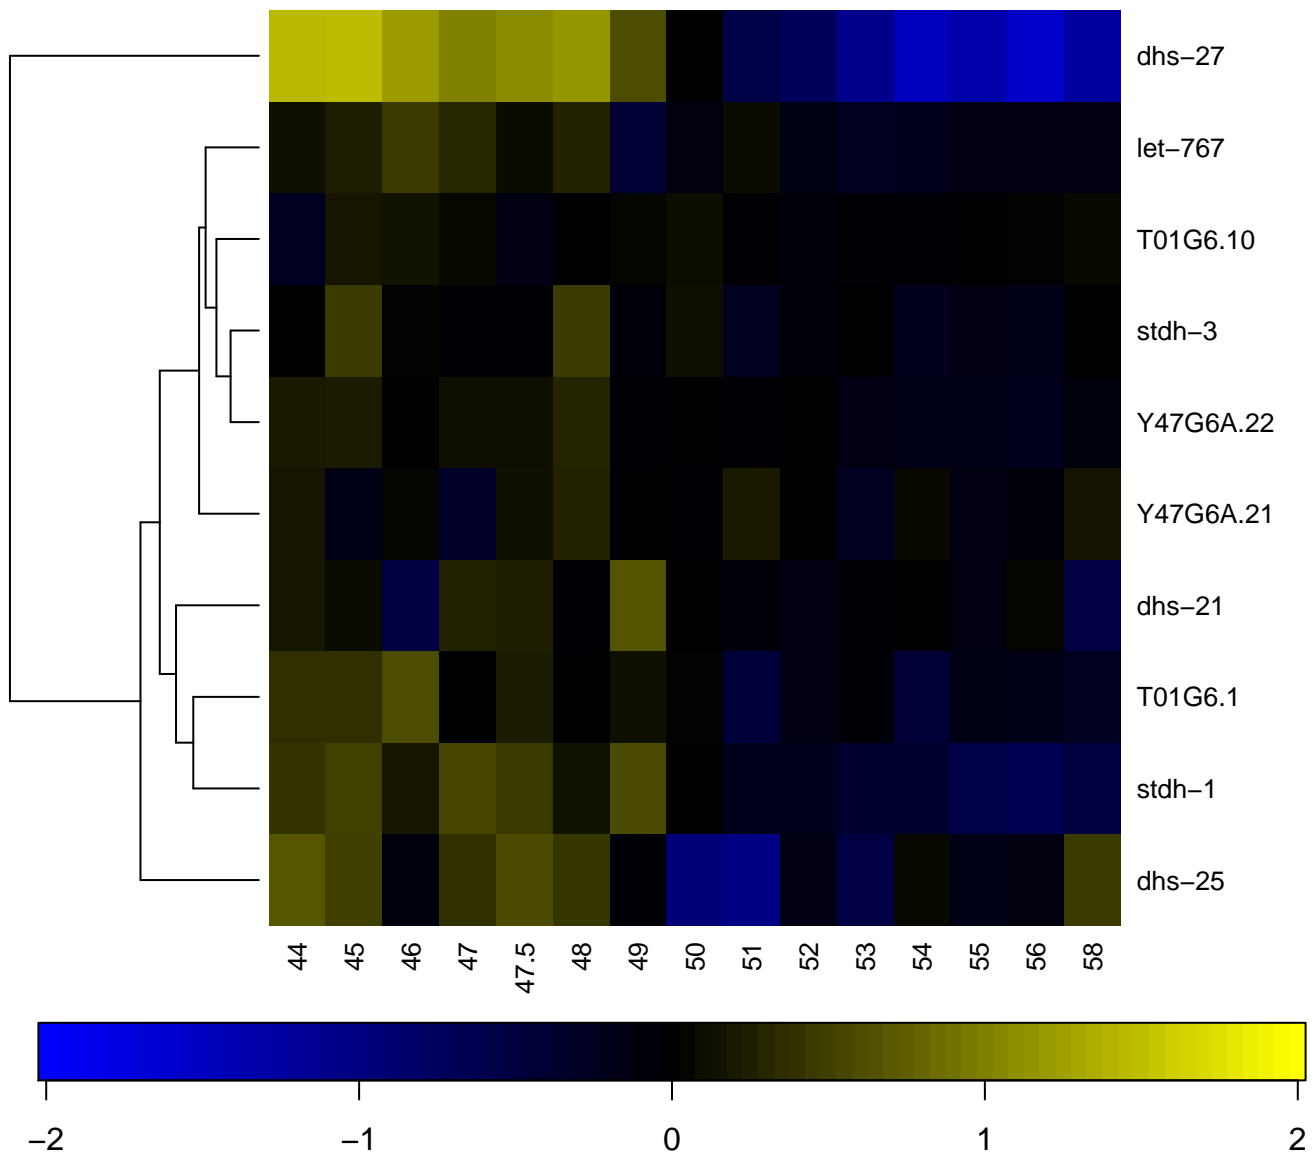







# aminoacyl-tRNA ligase activity

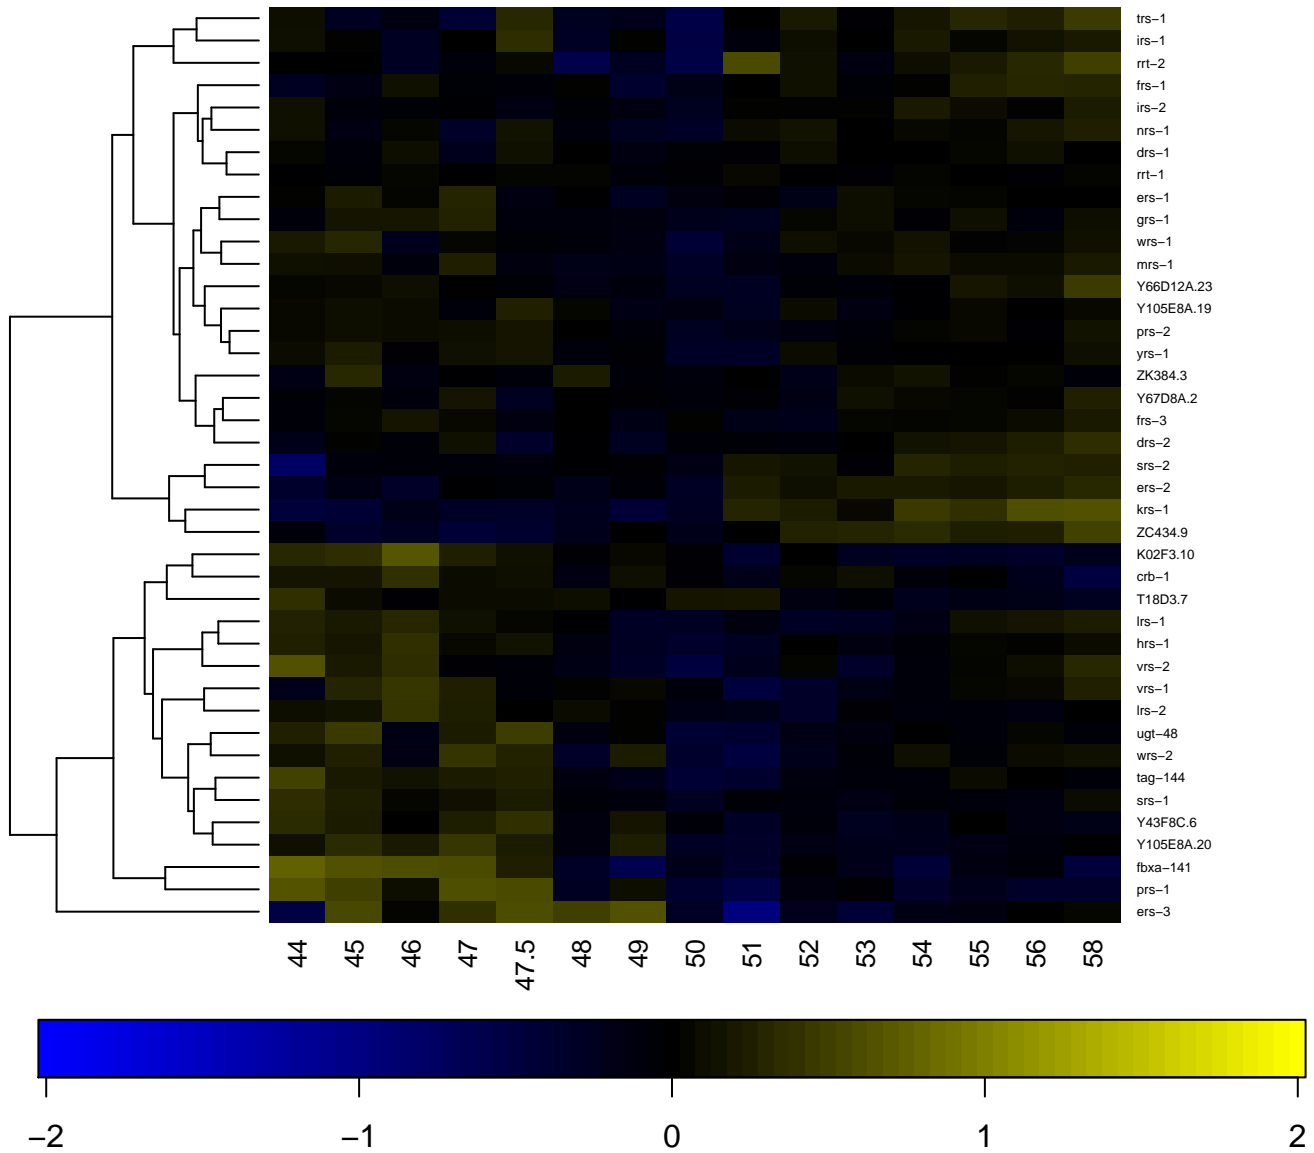





# ammonium transmembrane transporter activity

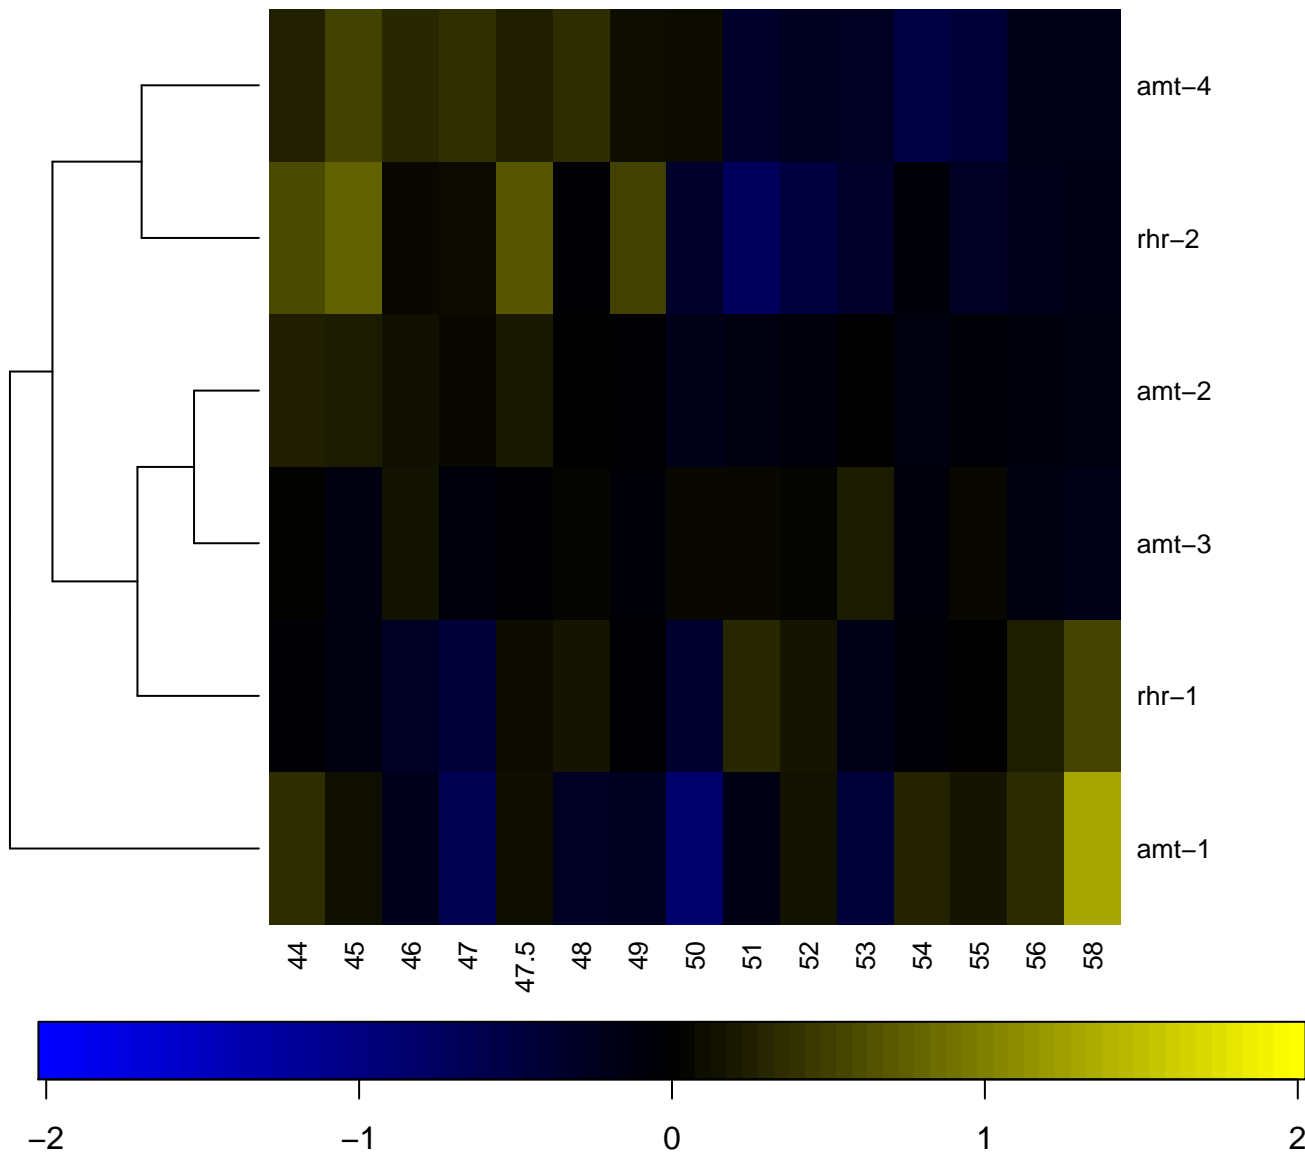





# antioxidant activity

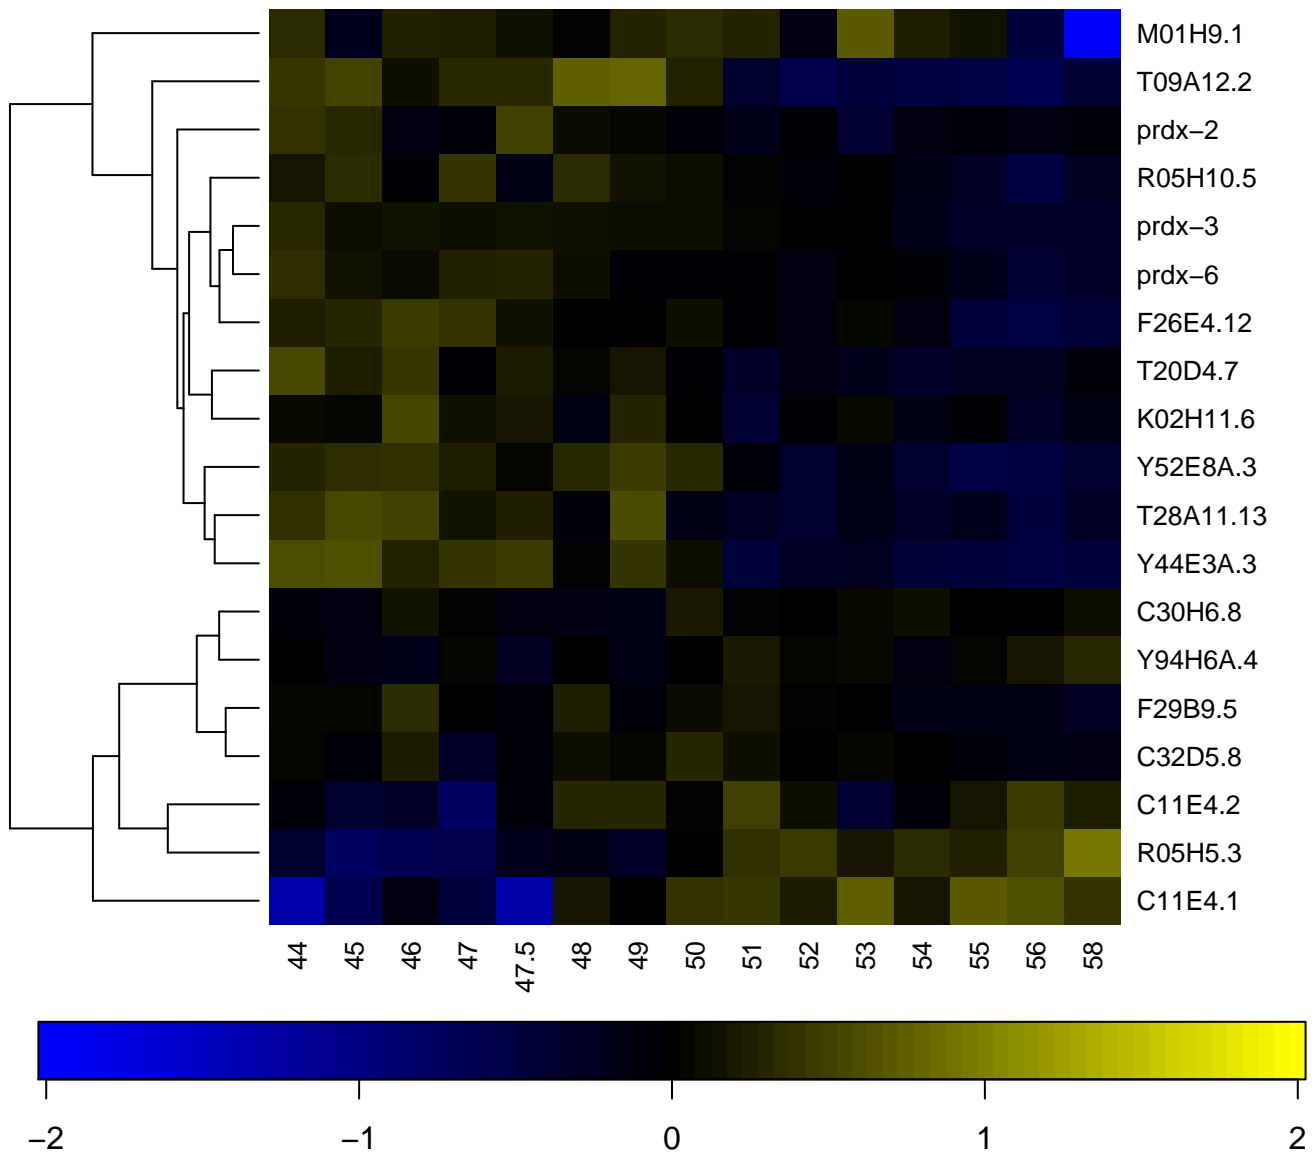



# apical plasma membrane

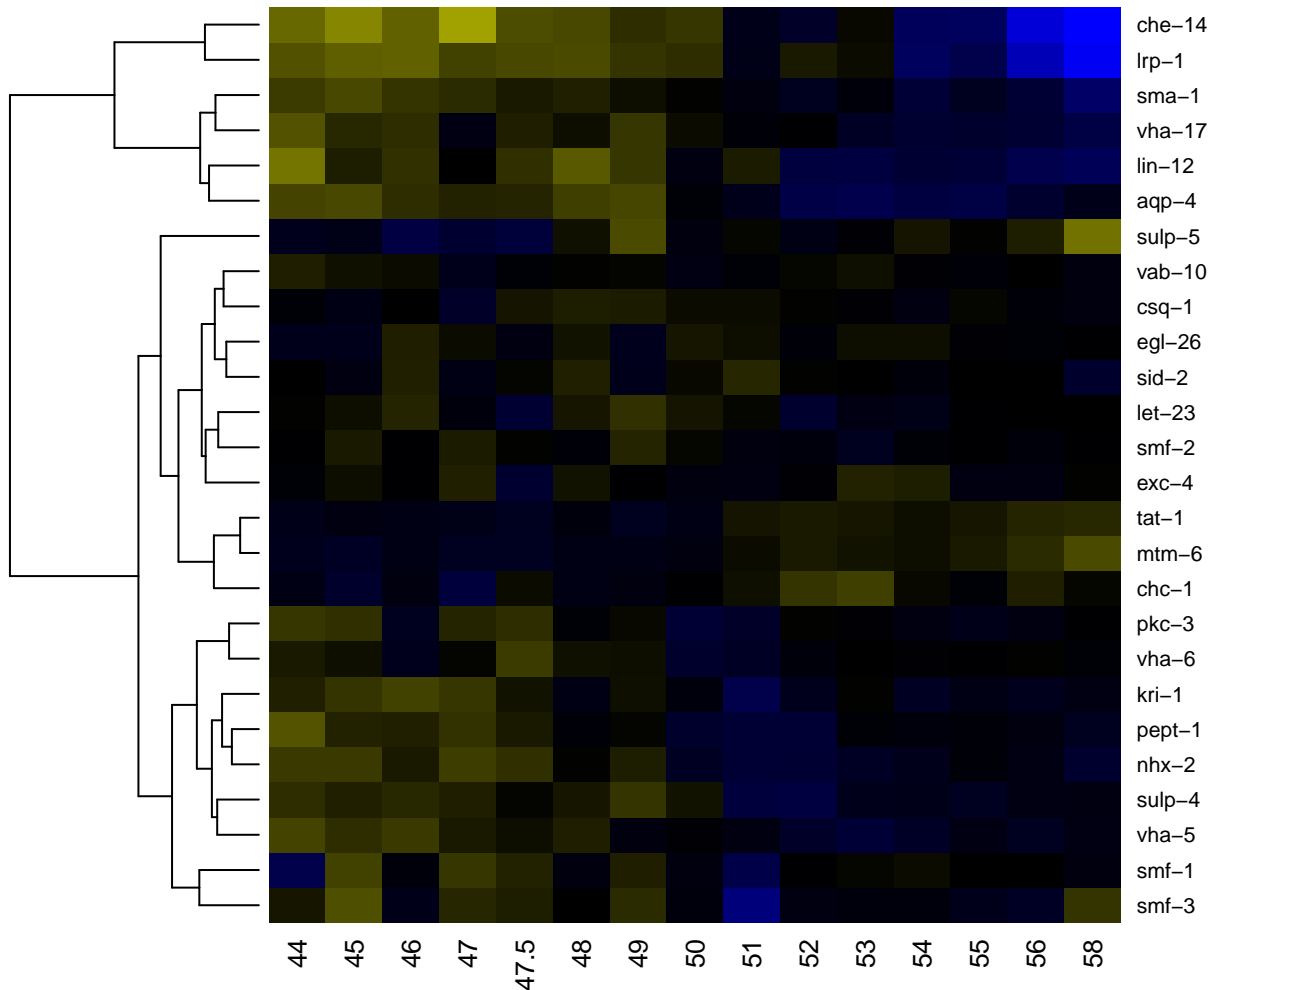

# apoptosis

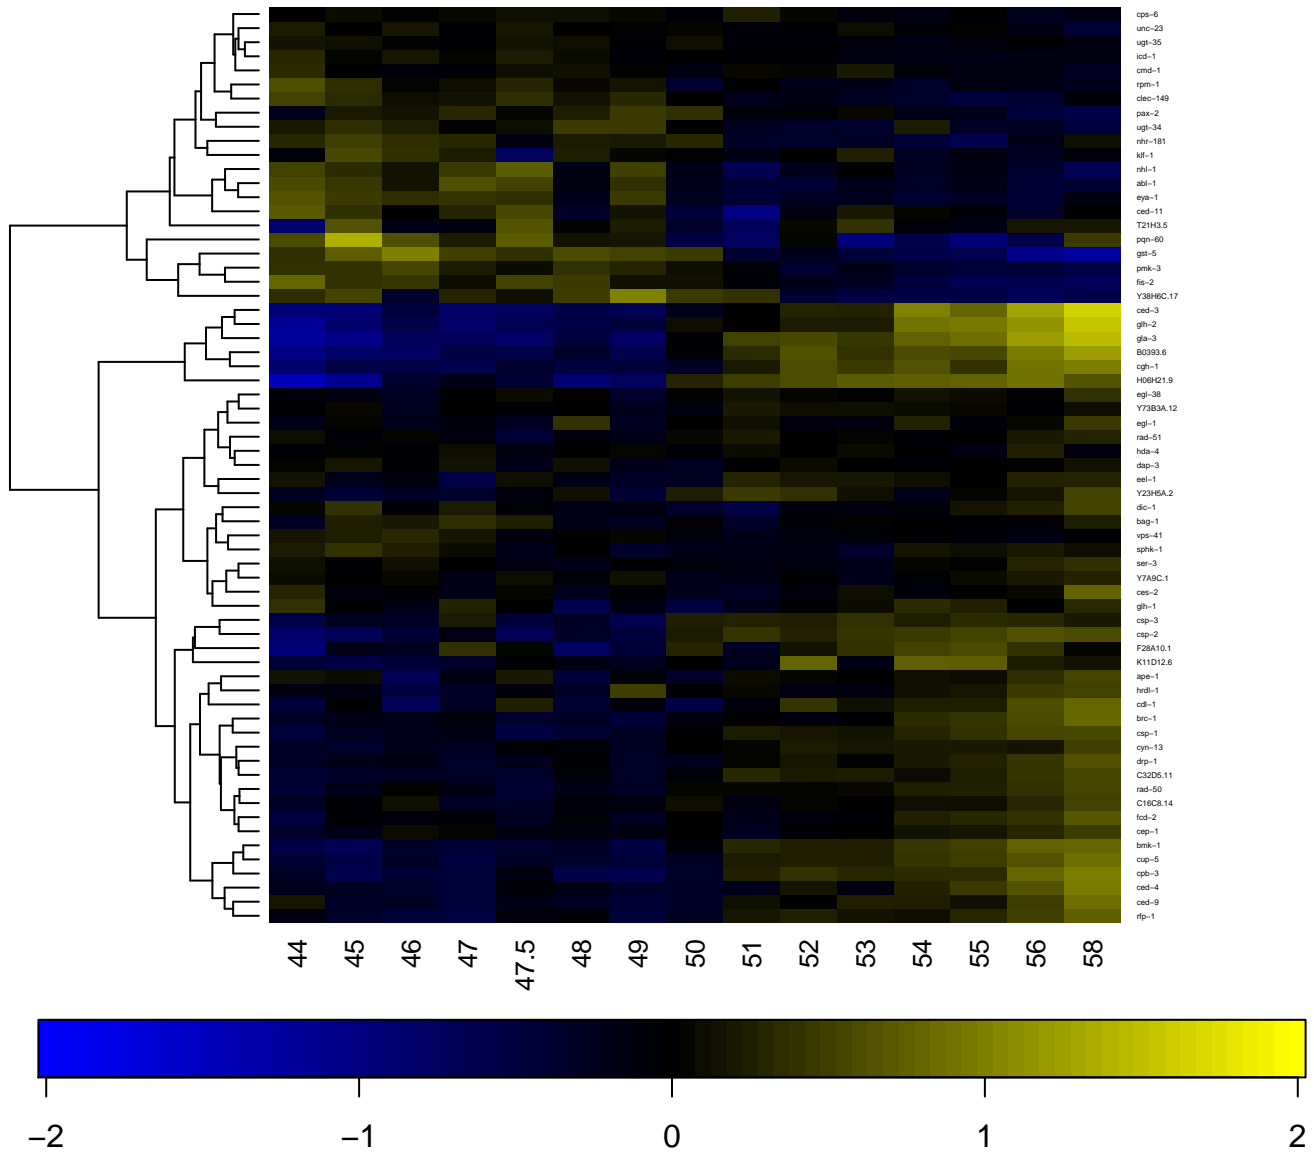

# apoptotic cell clearance

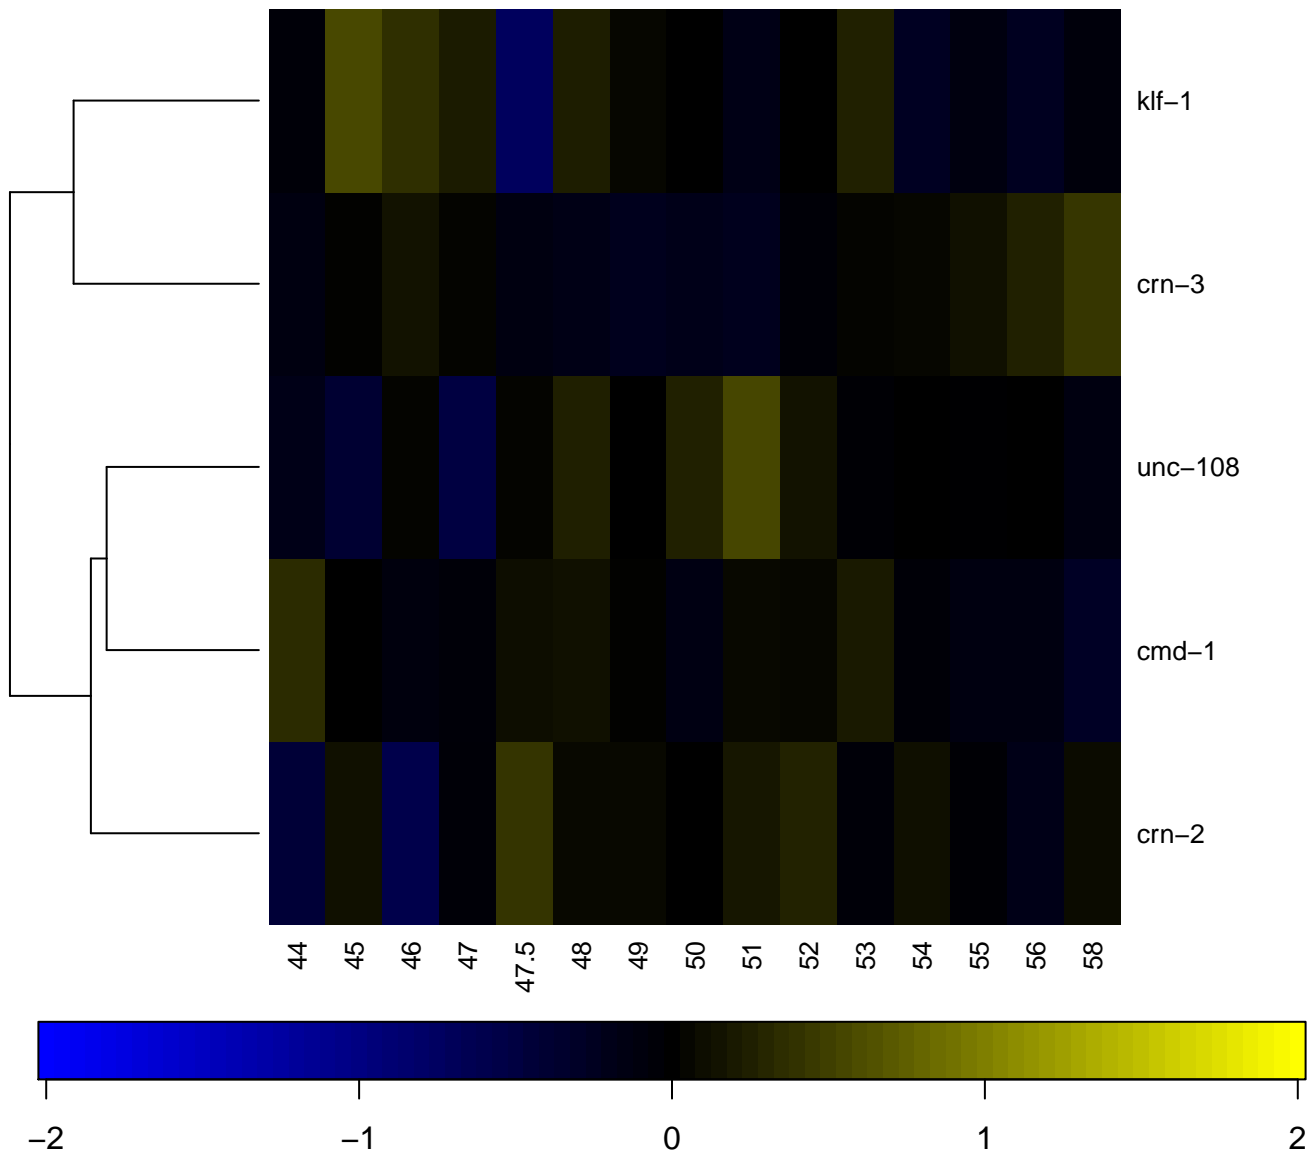





# ARF guanyl–nucleotide exchange factor activity

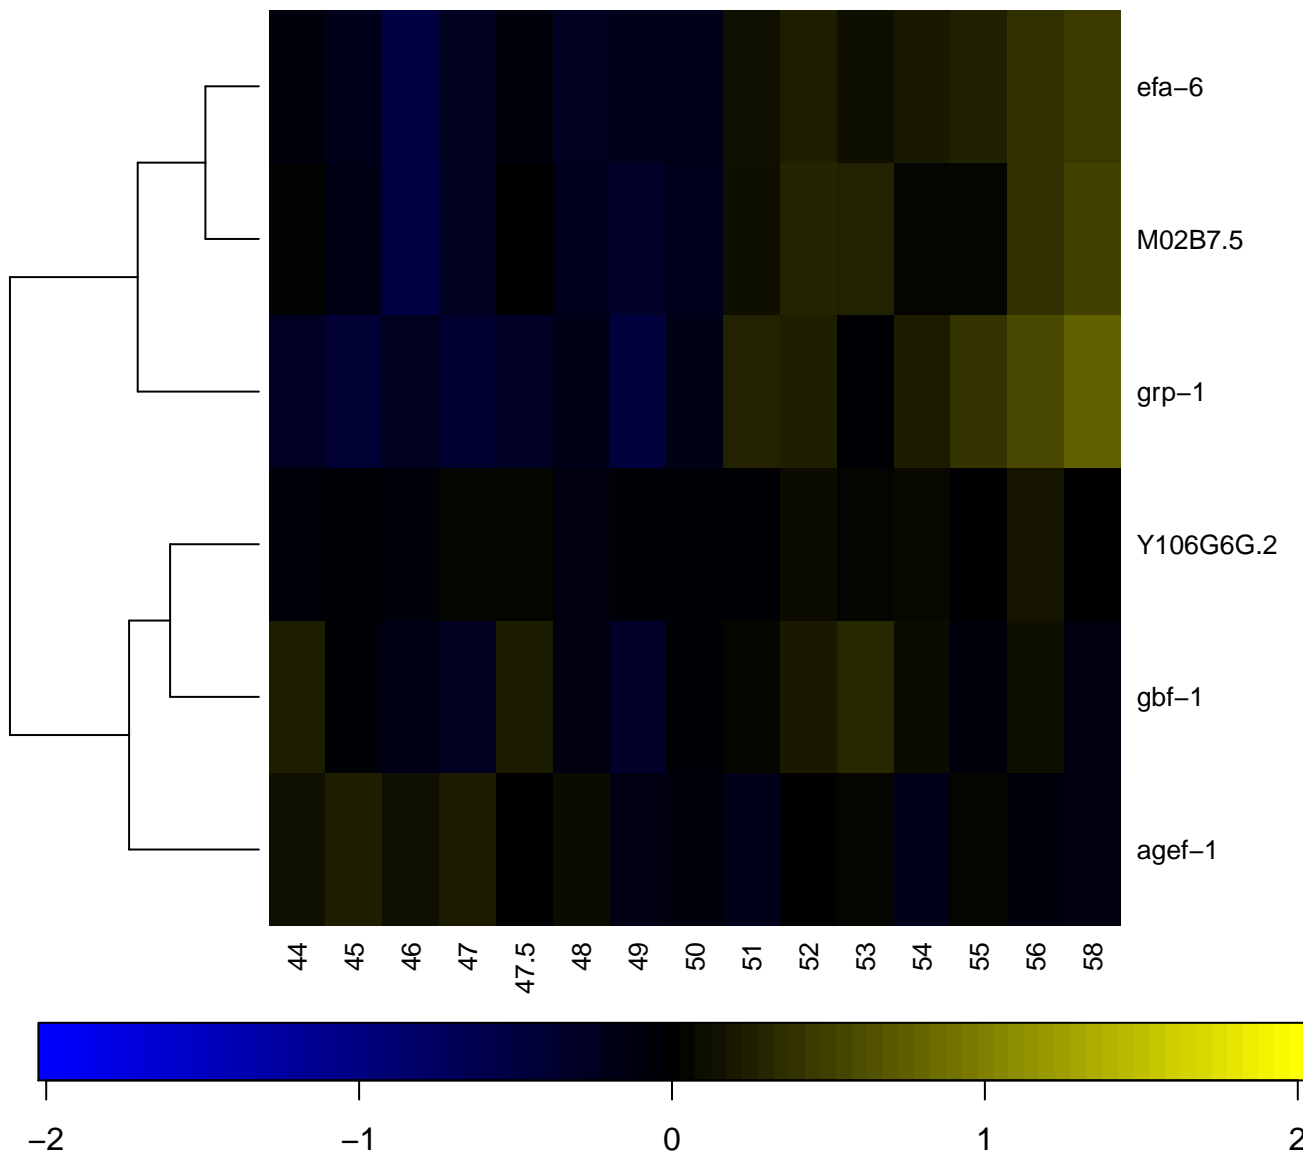









# aspartic-type endopeptidase activity

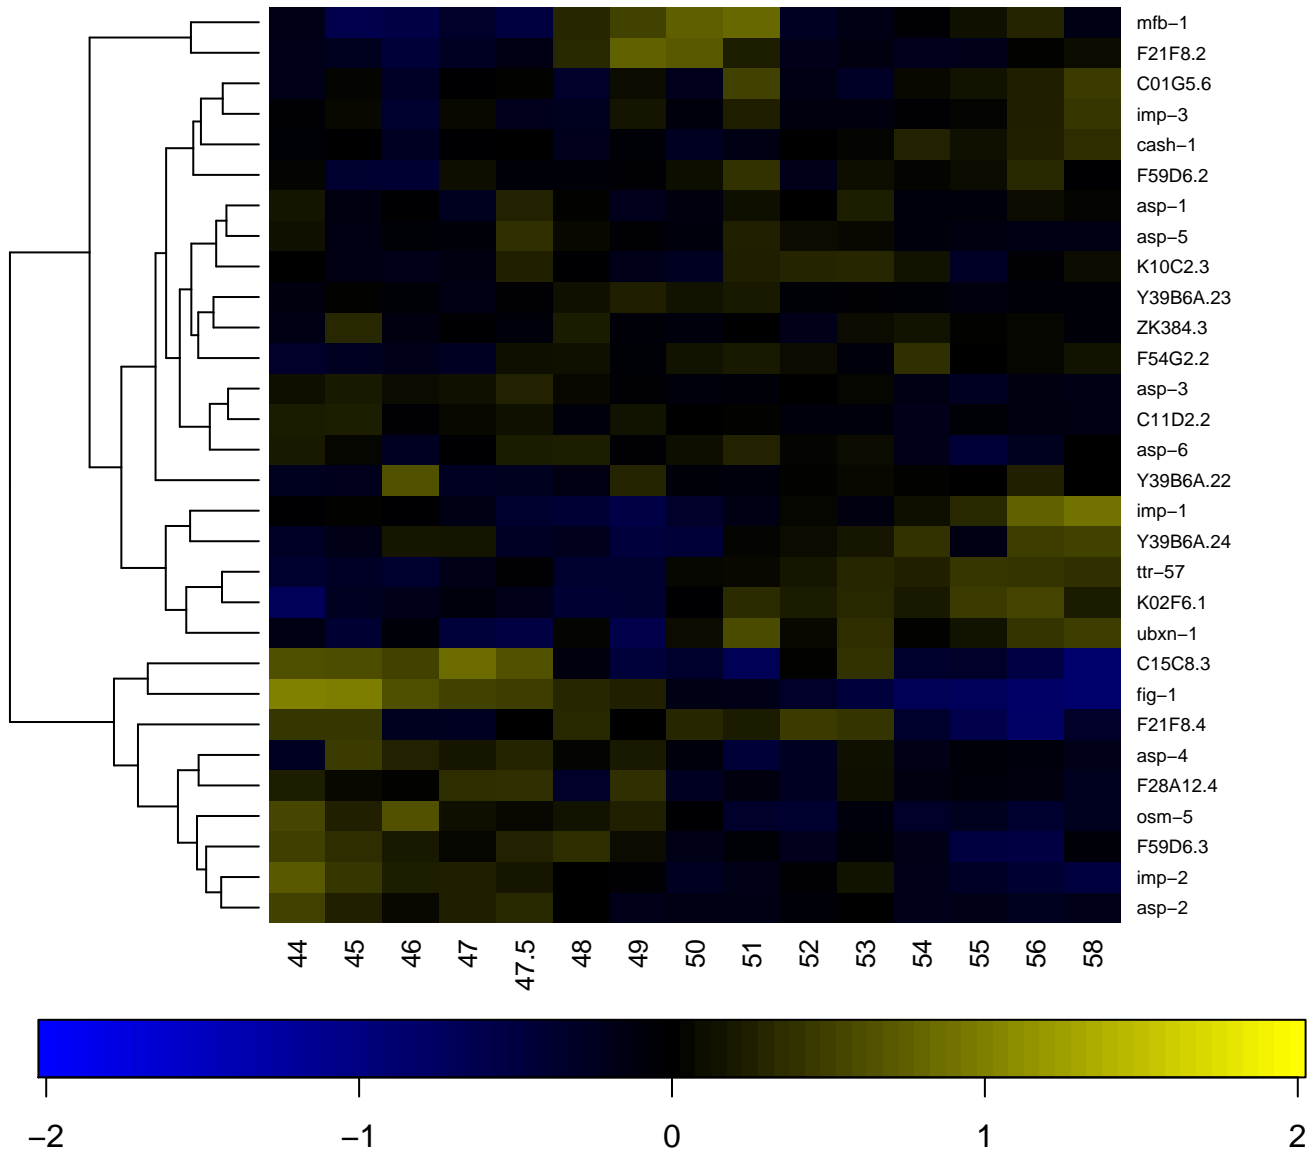













# ATP-dependent DNA helicase activity

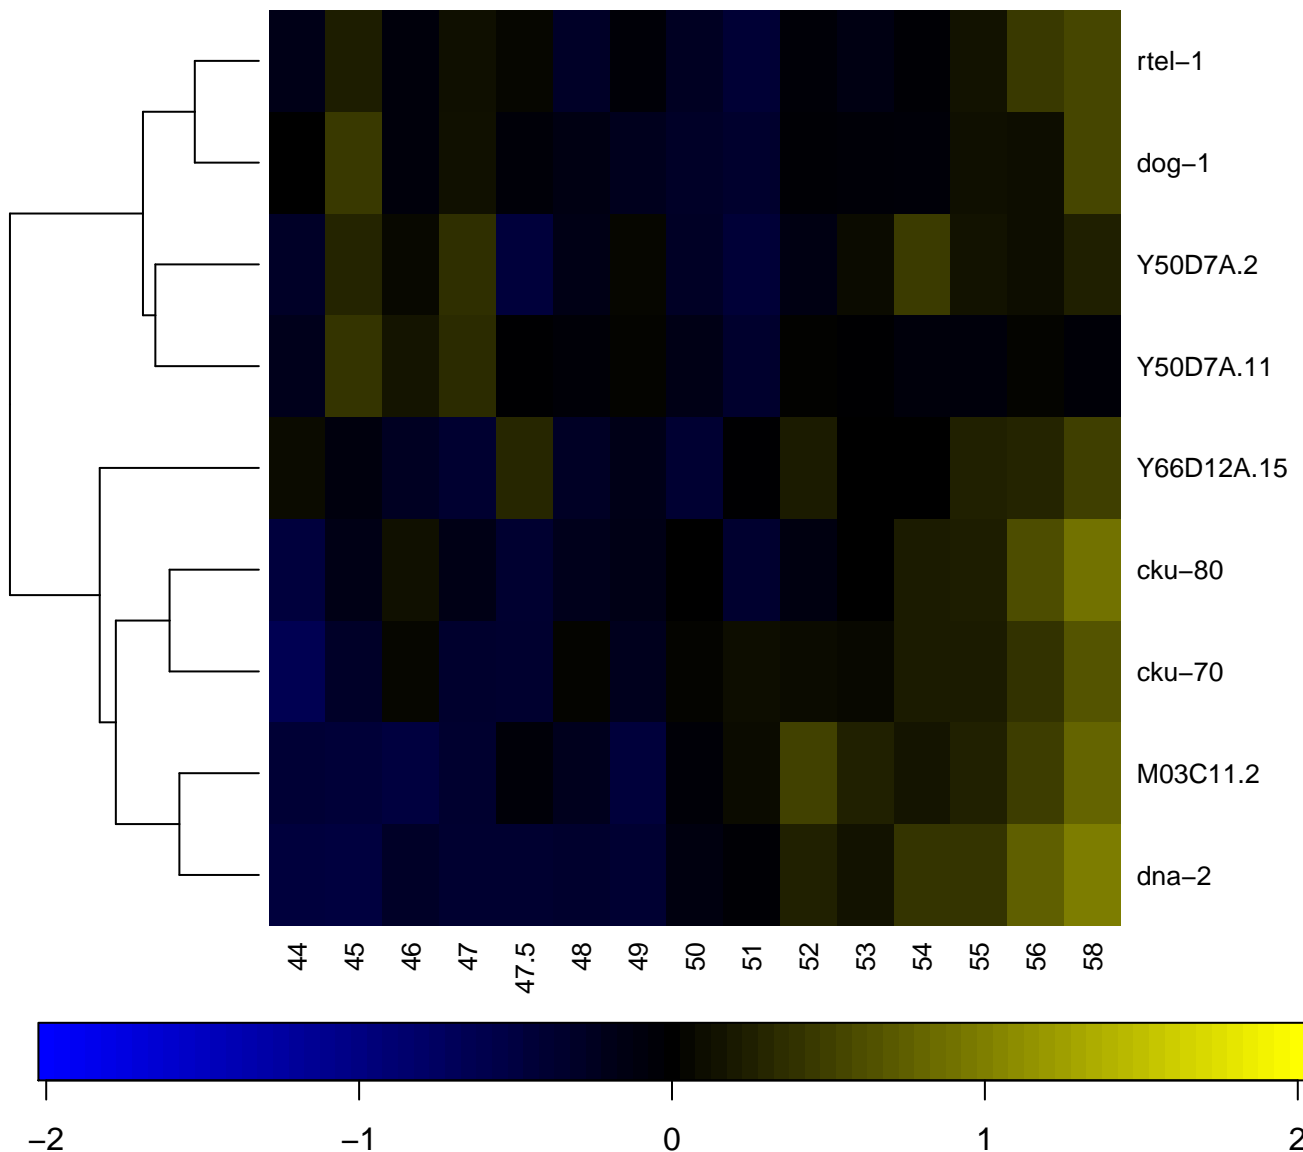

# ATP-dependent helicase activity

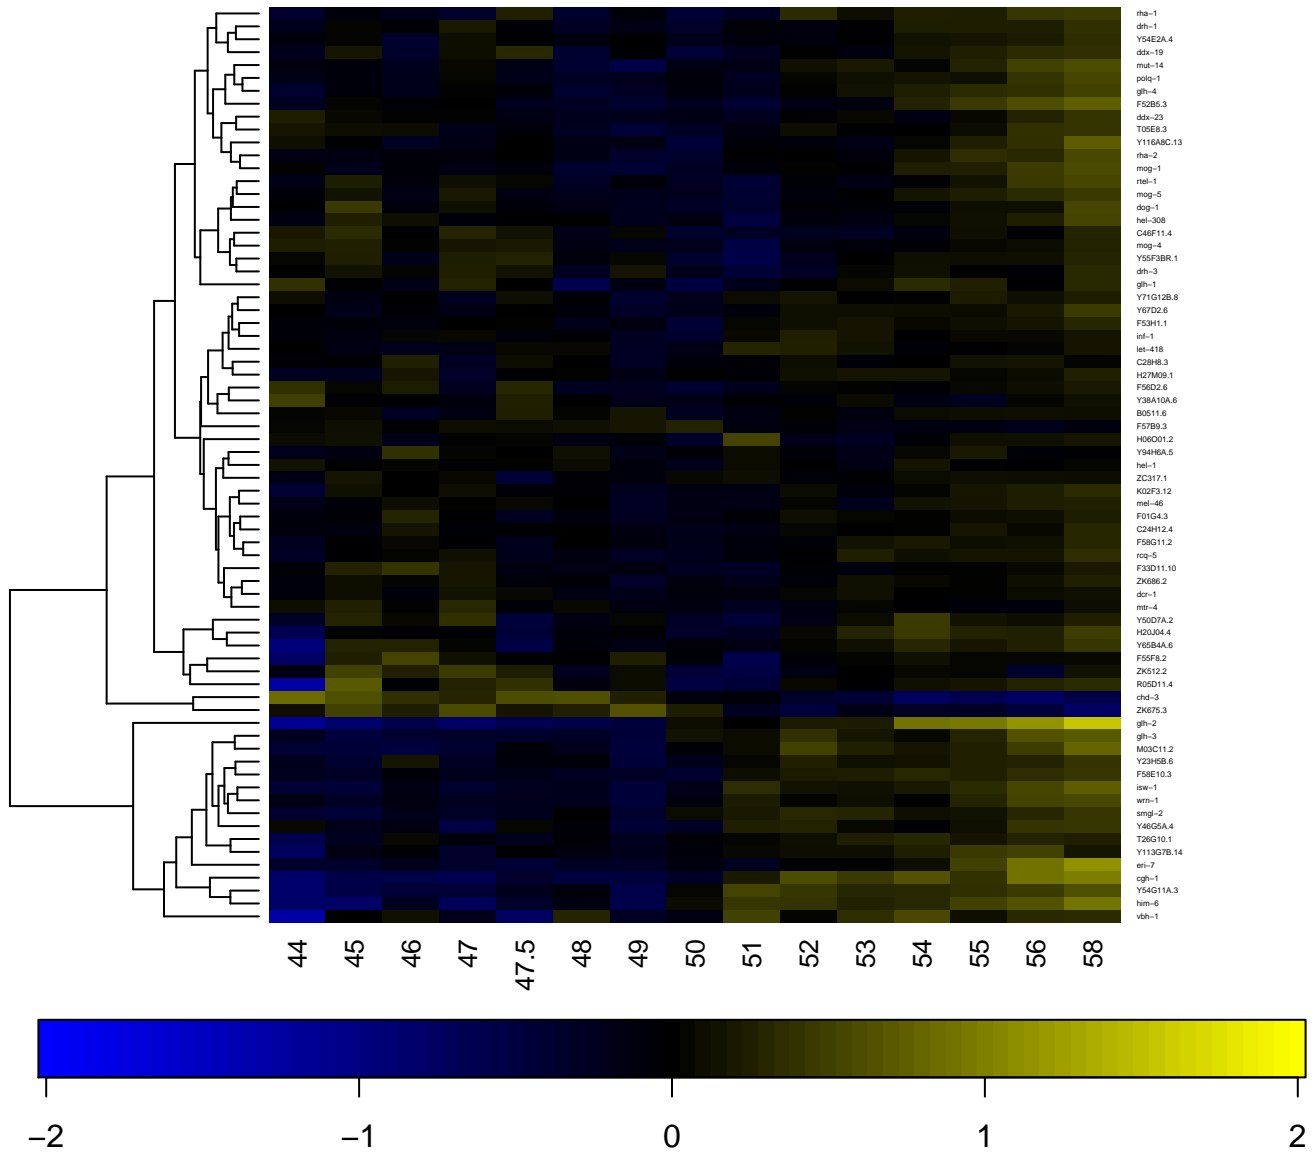



# ATP binding

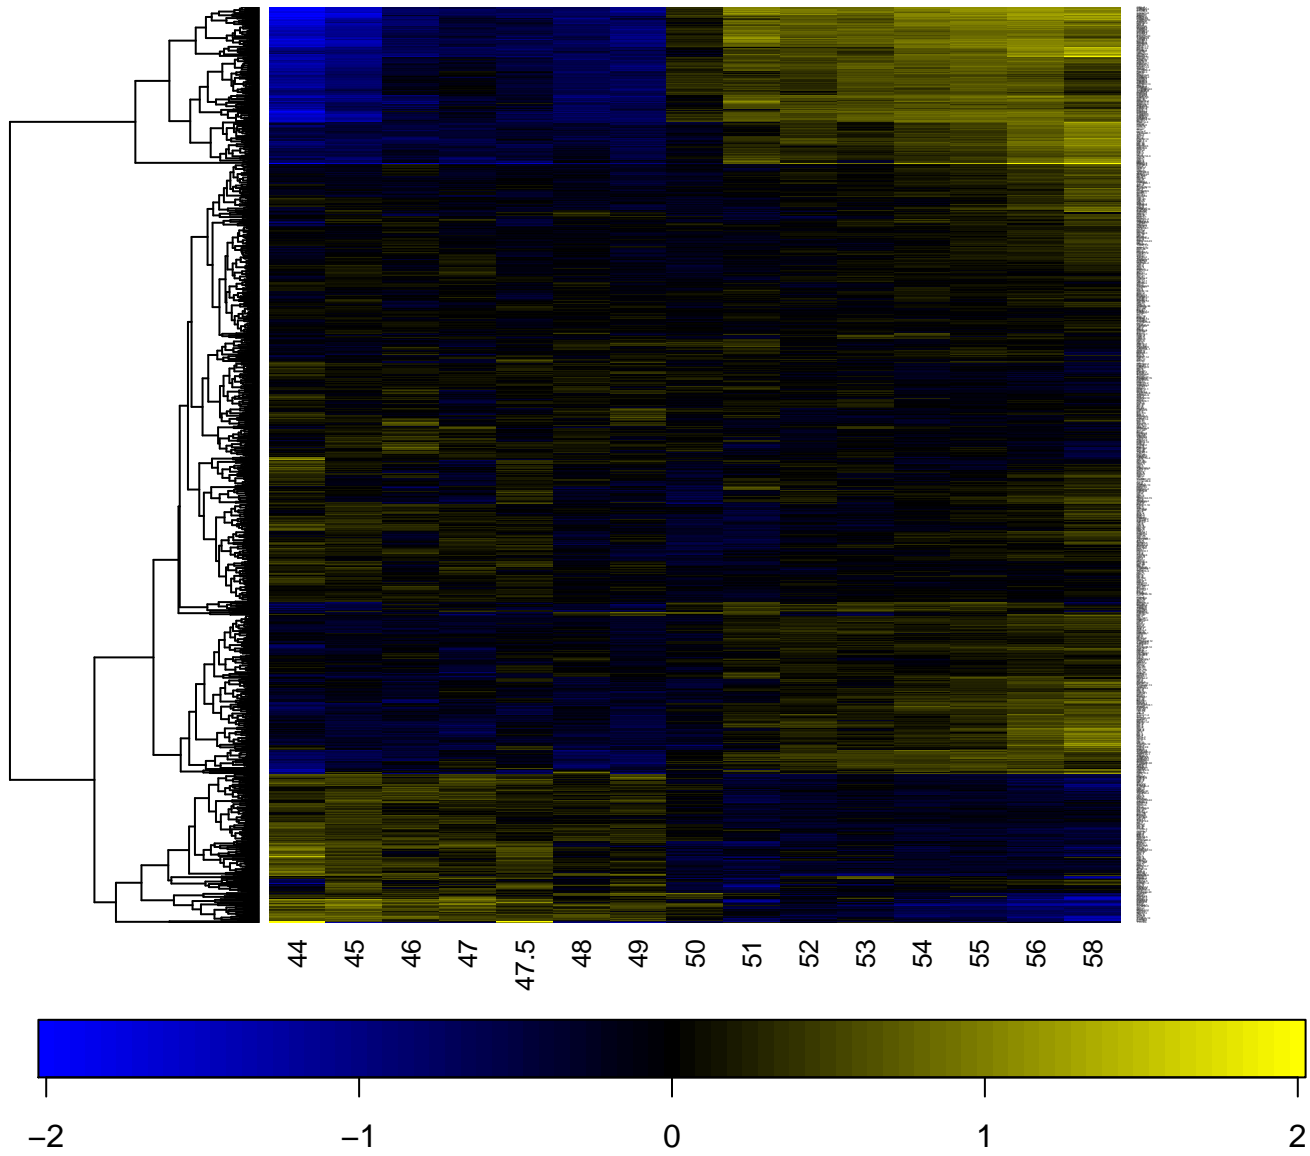



# ATP biosynthetic process

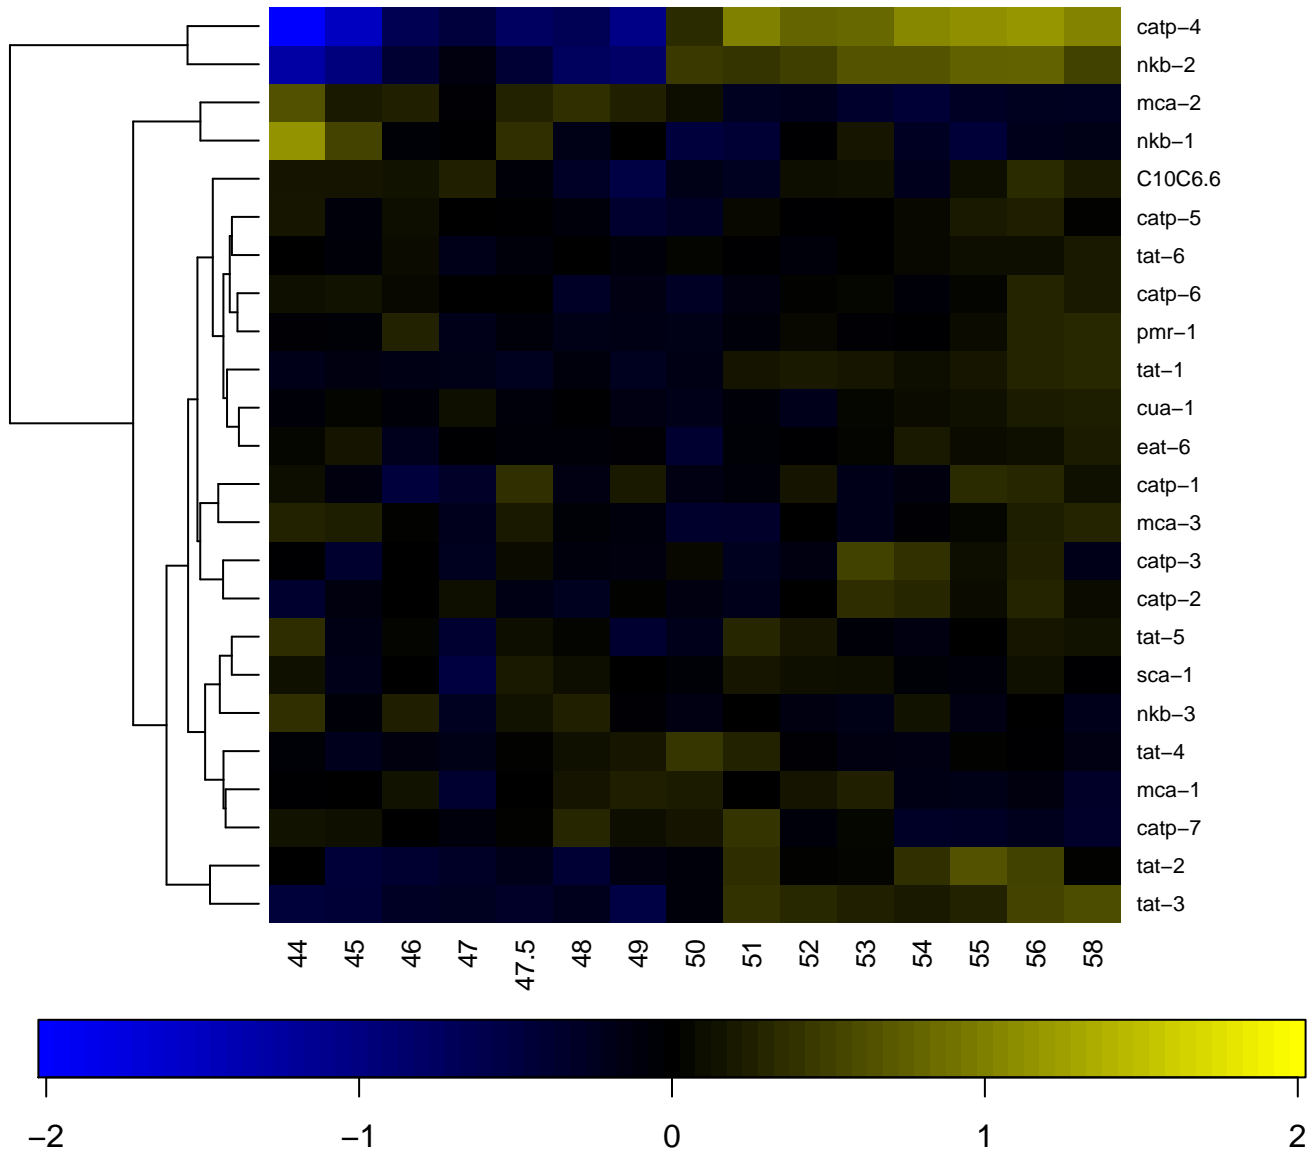

# ATP metabolic process

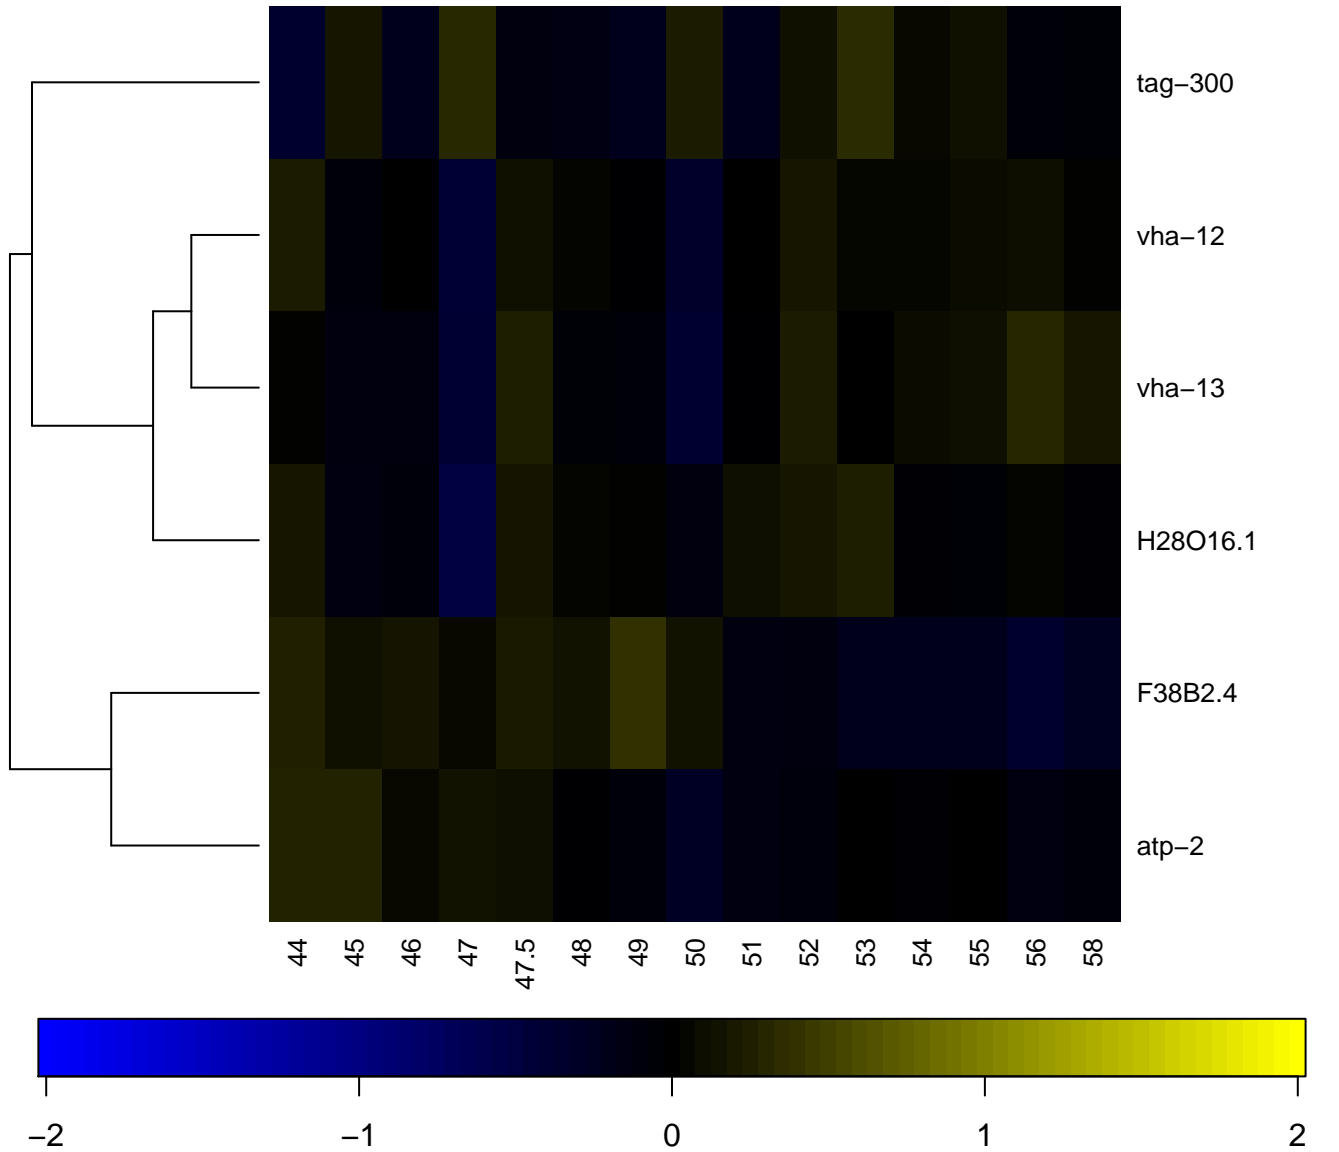

# ATP synthesis coupled proton transport

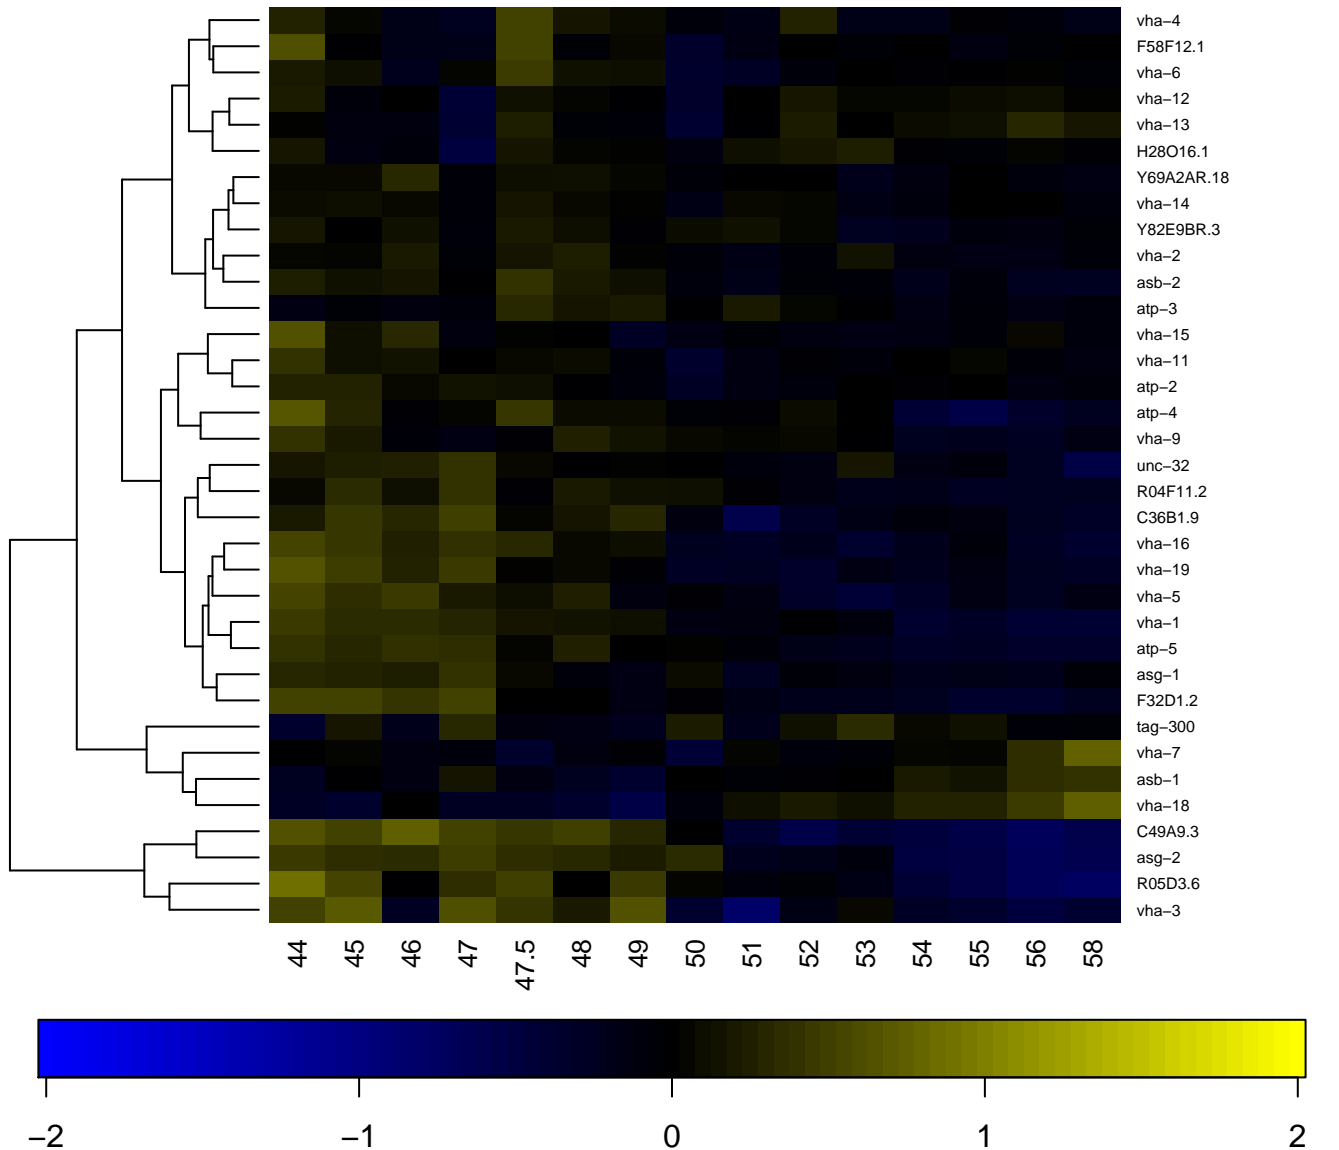

# ATPase activity

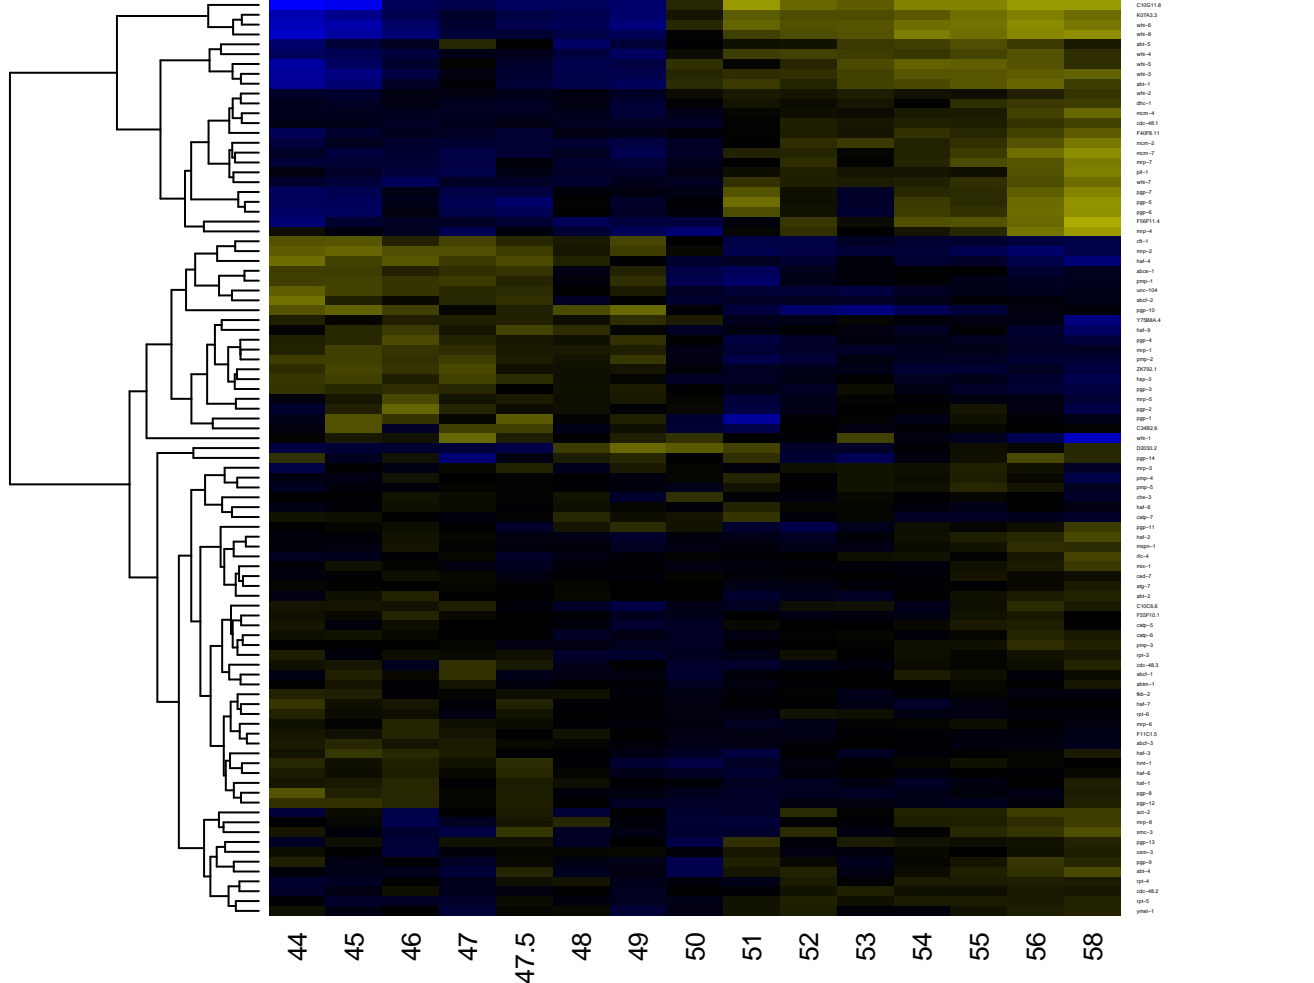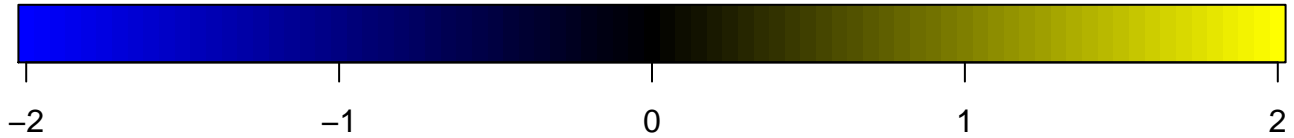

, coupled to transmembrane movement of ions, phosphoryl

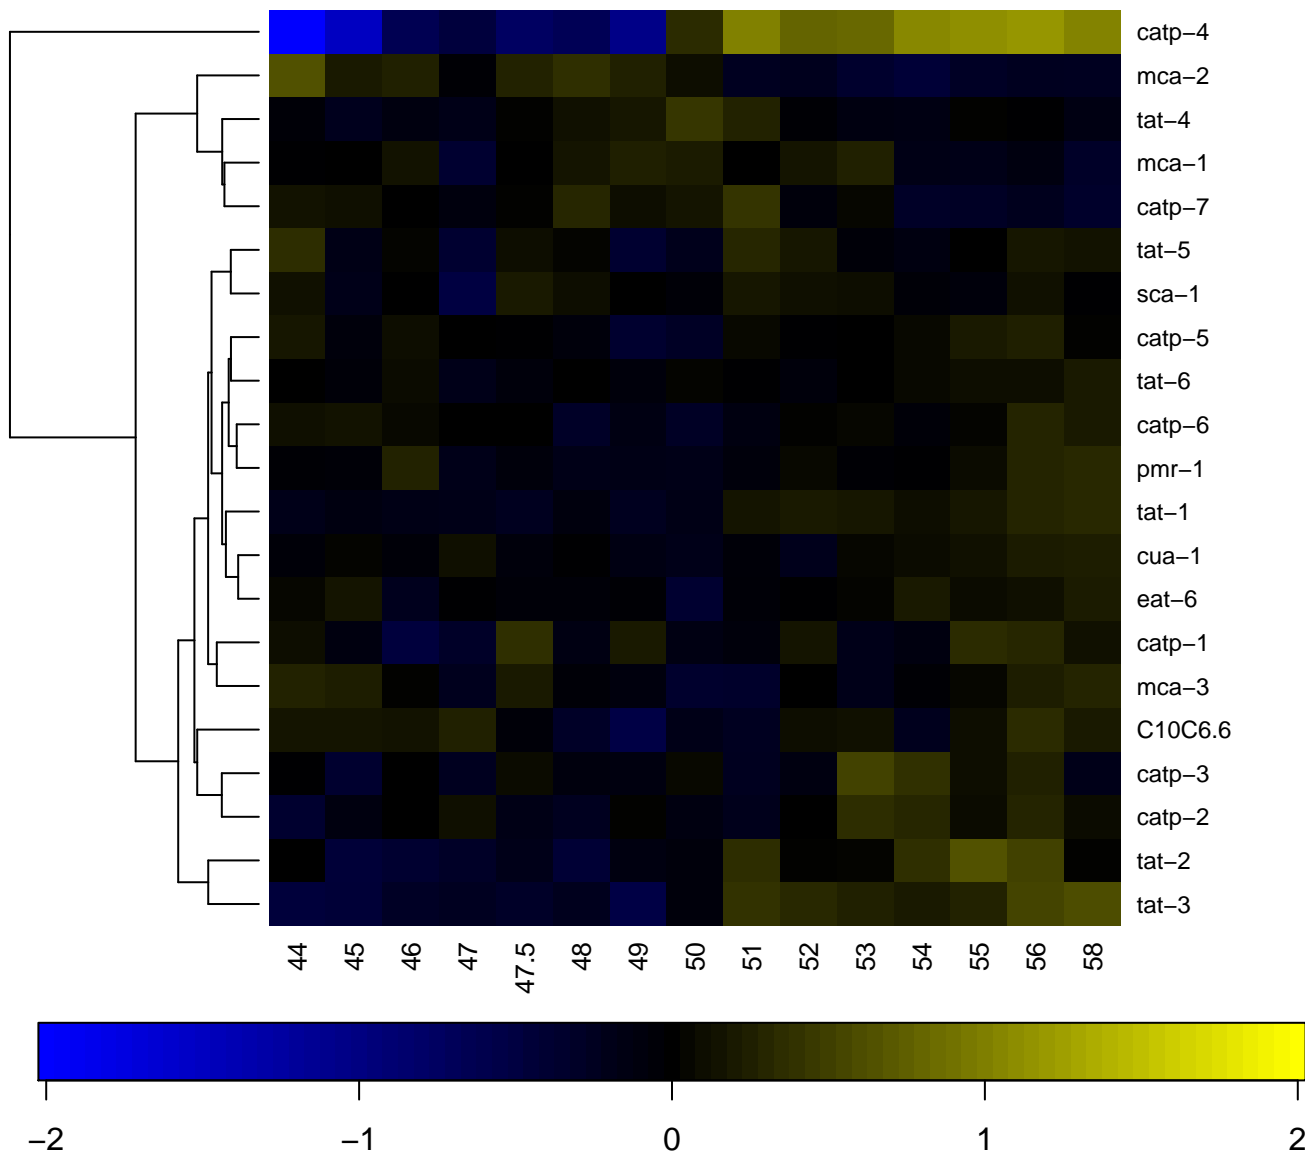





# axon

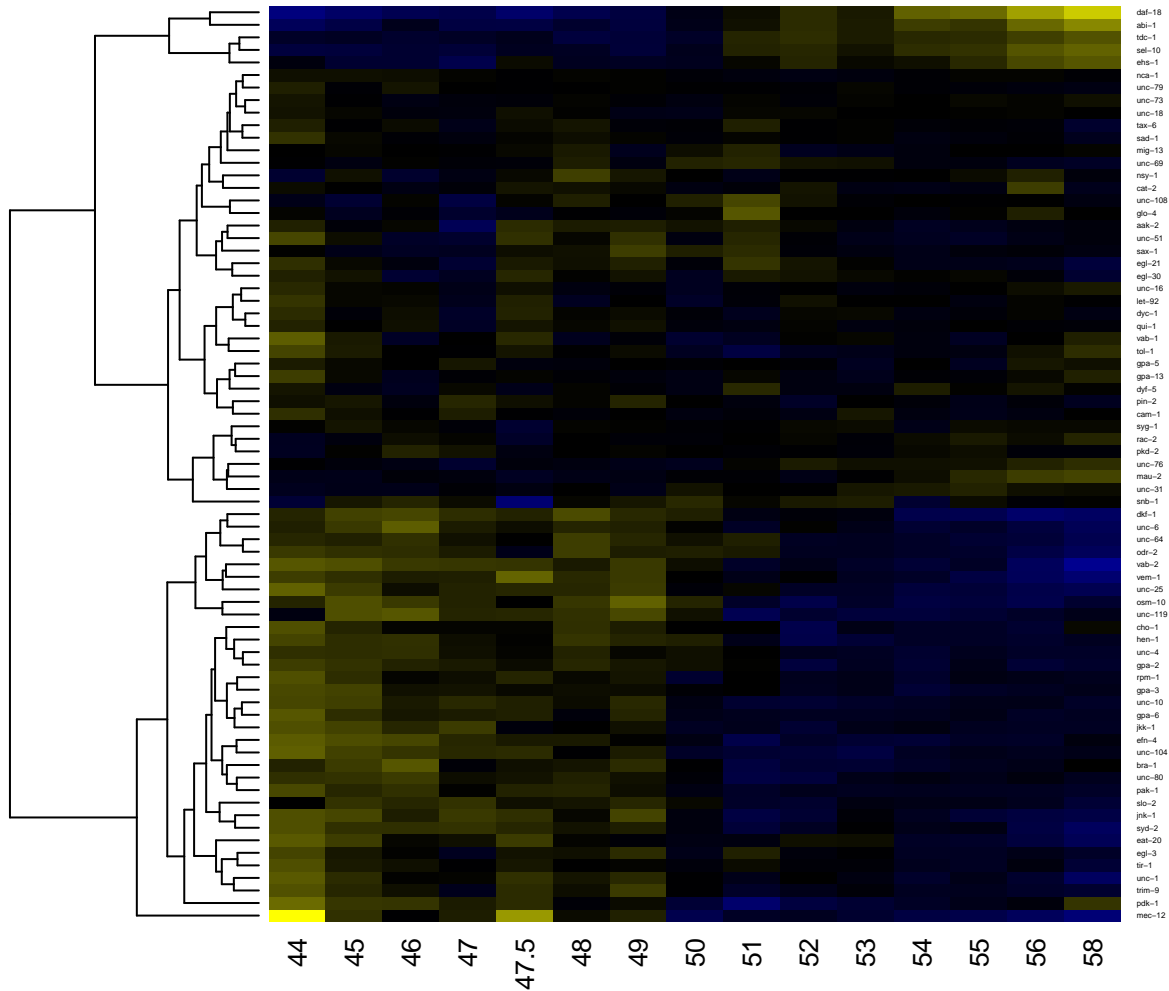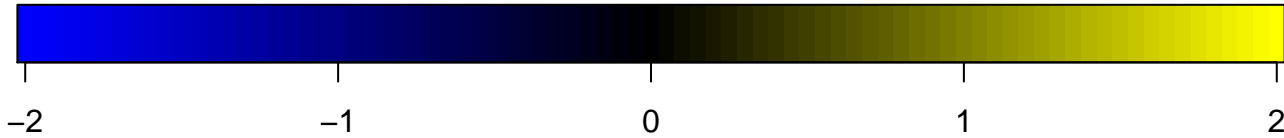



# axon extension

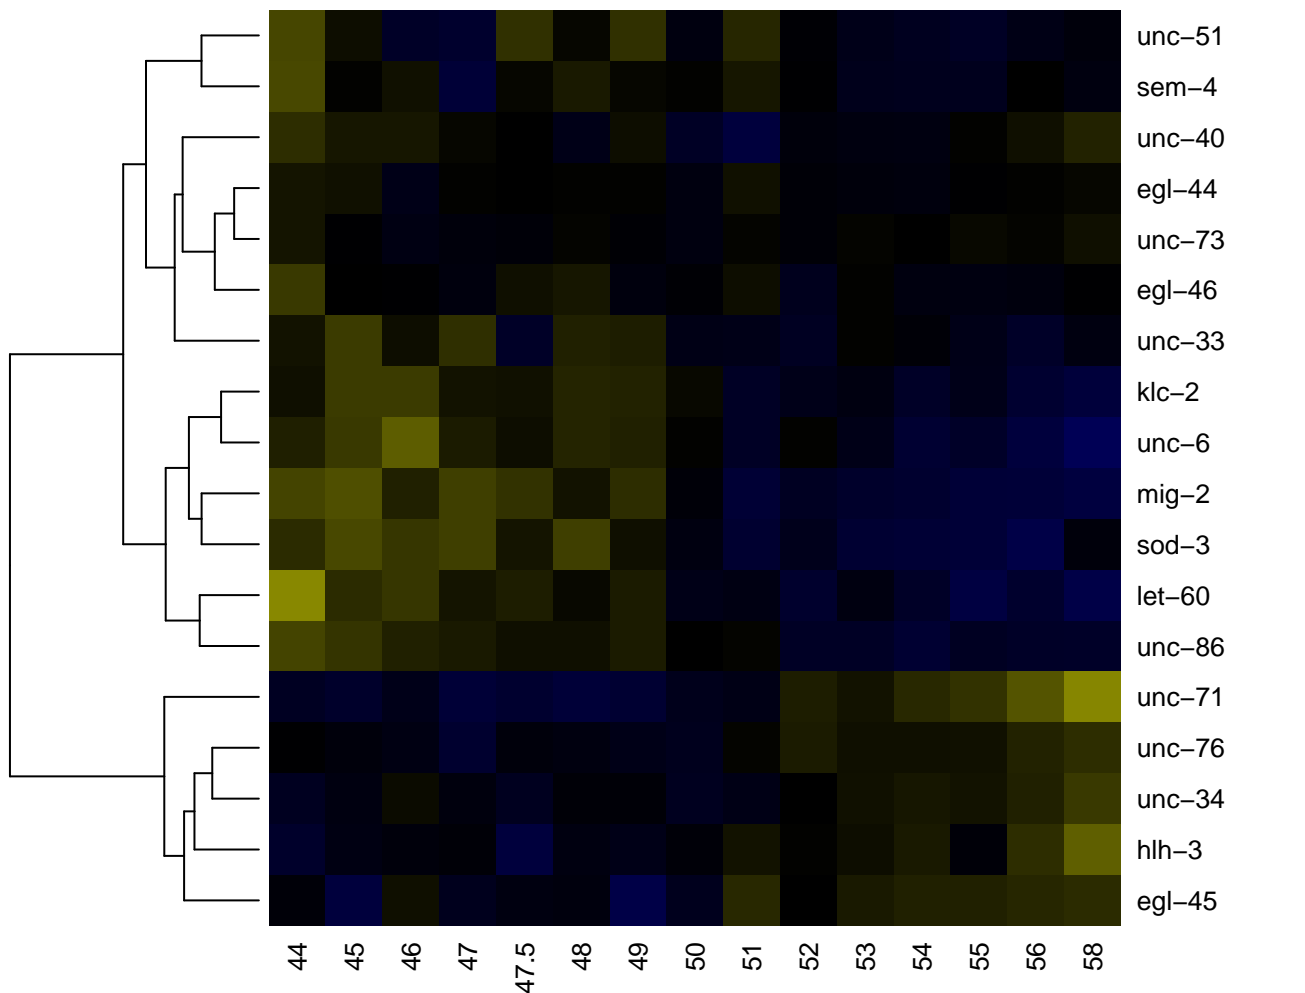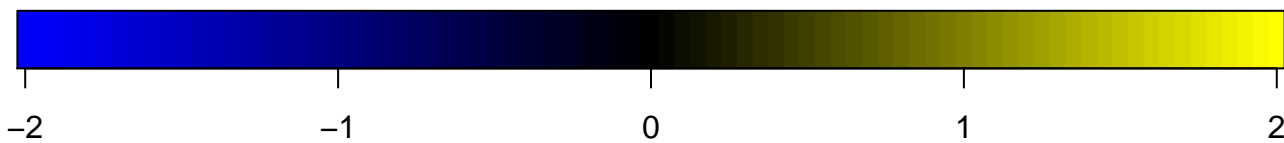

# axon extension involved in axon guidance

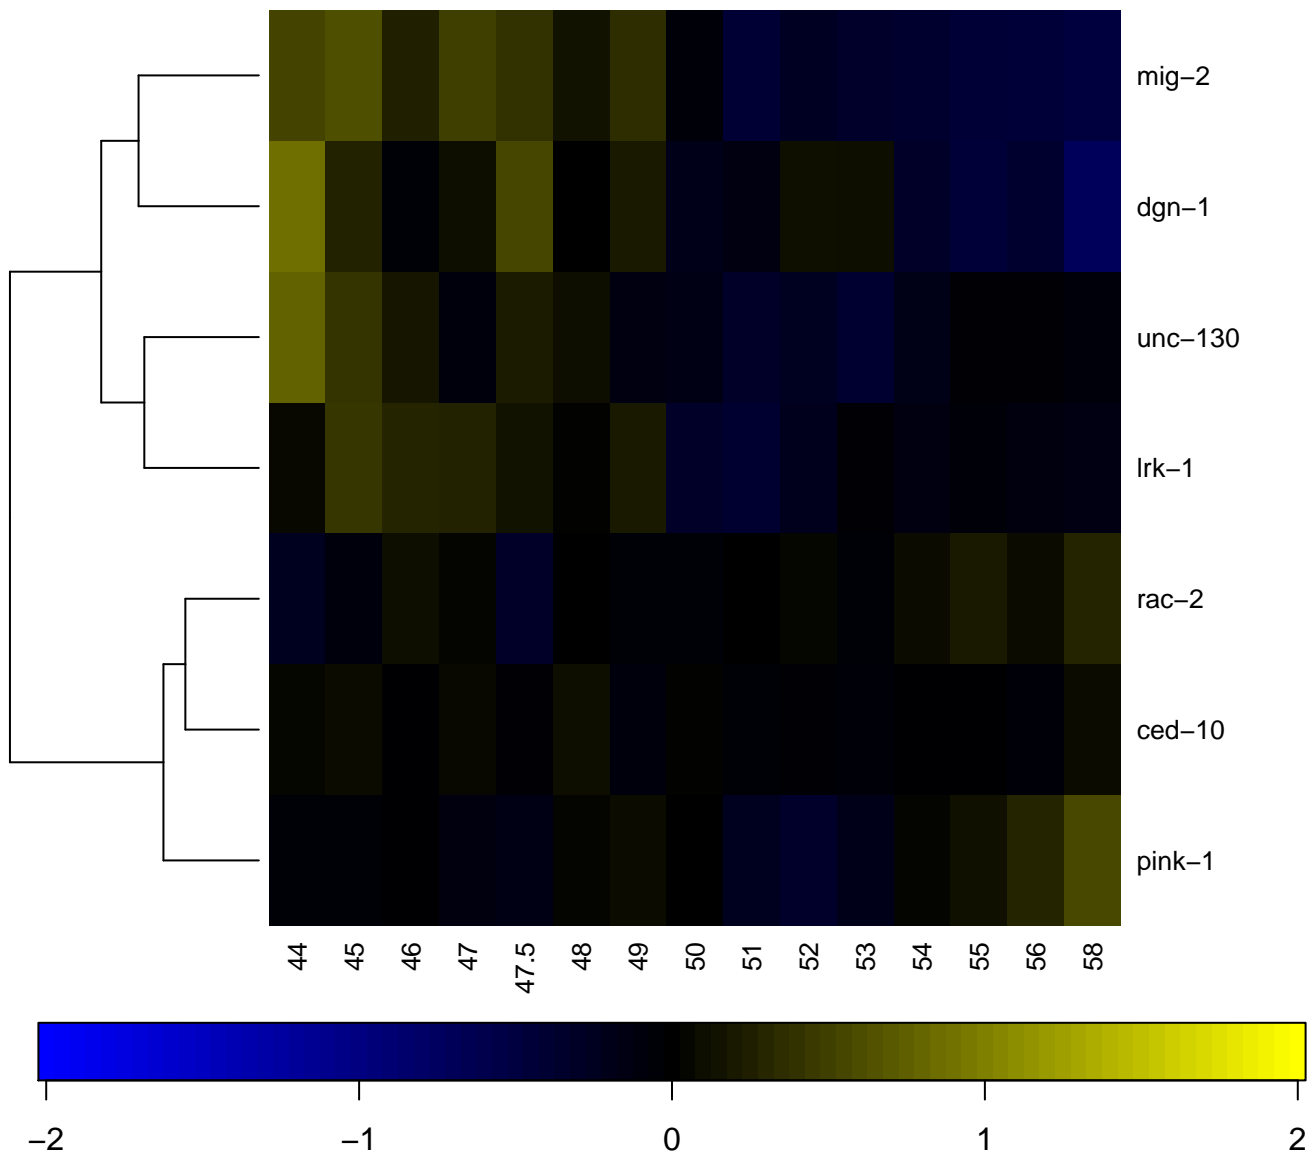

# axon guidance

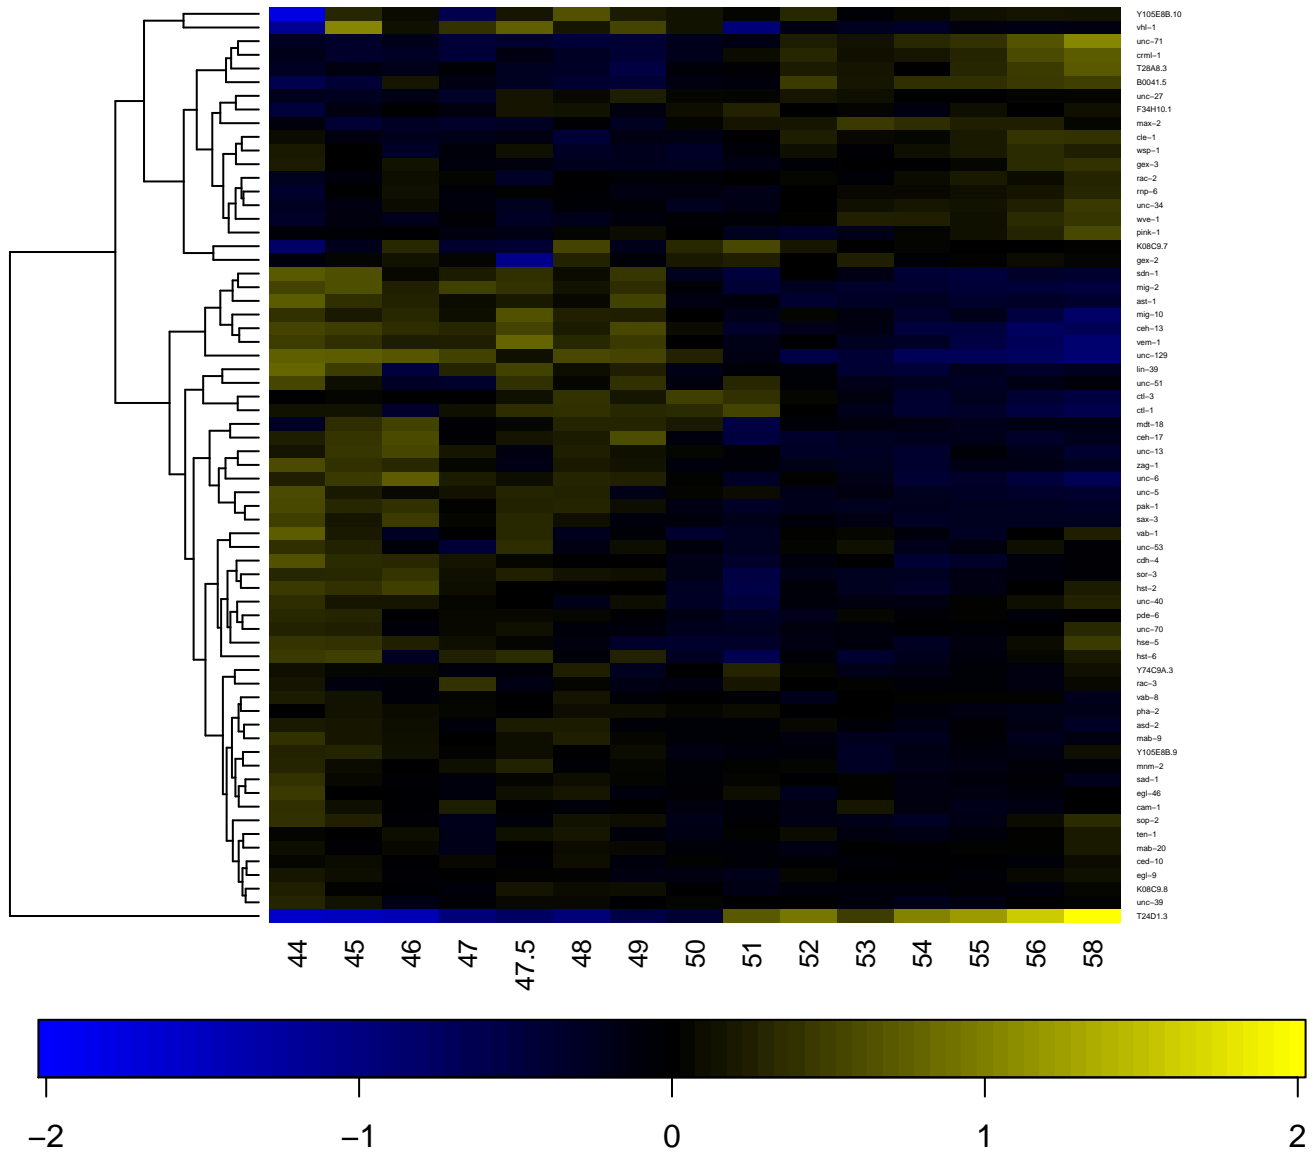

# axonal fasciculation

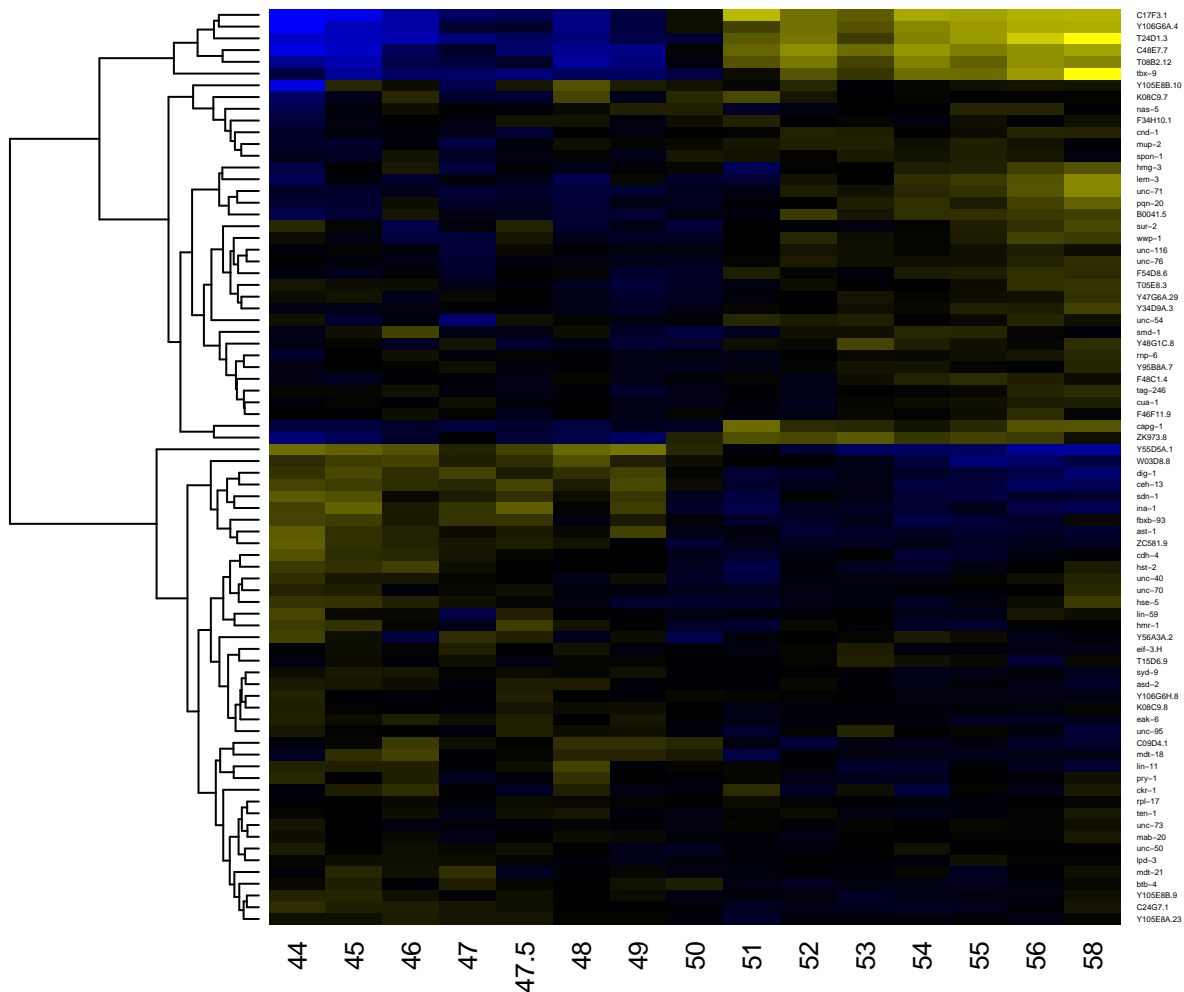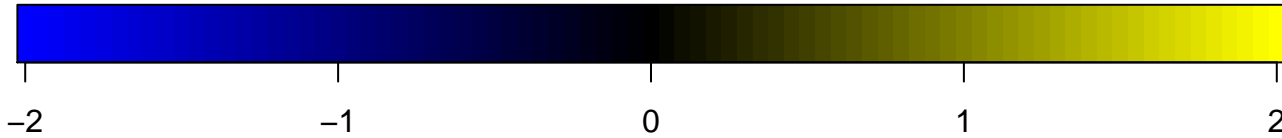

# axonogenesis

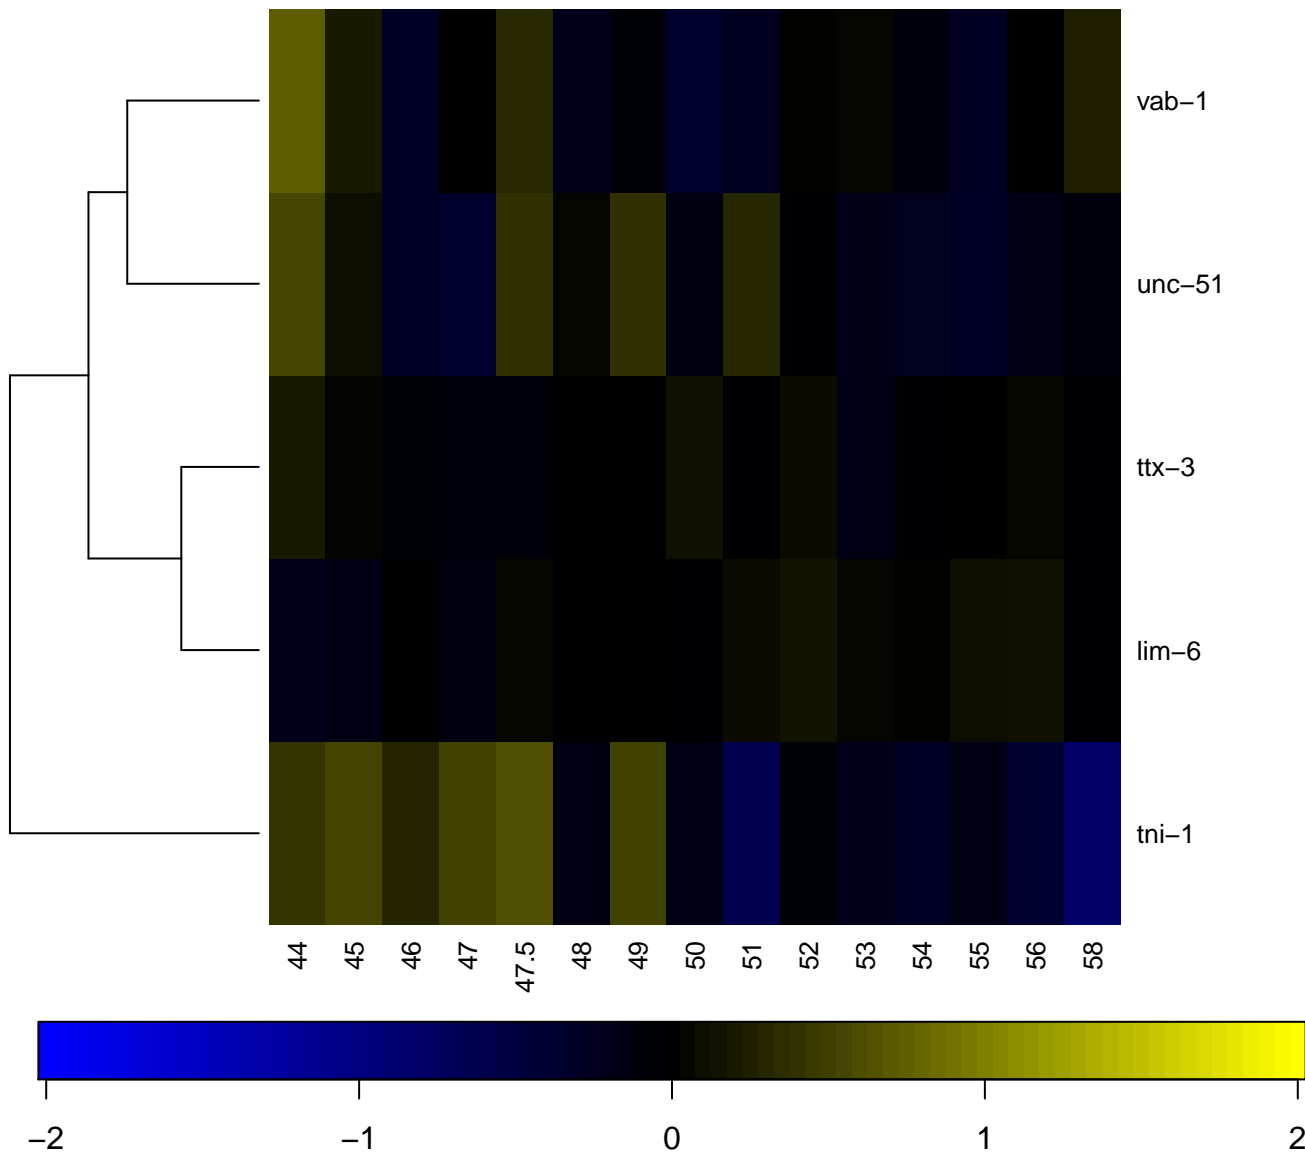

# basement membrane

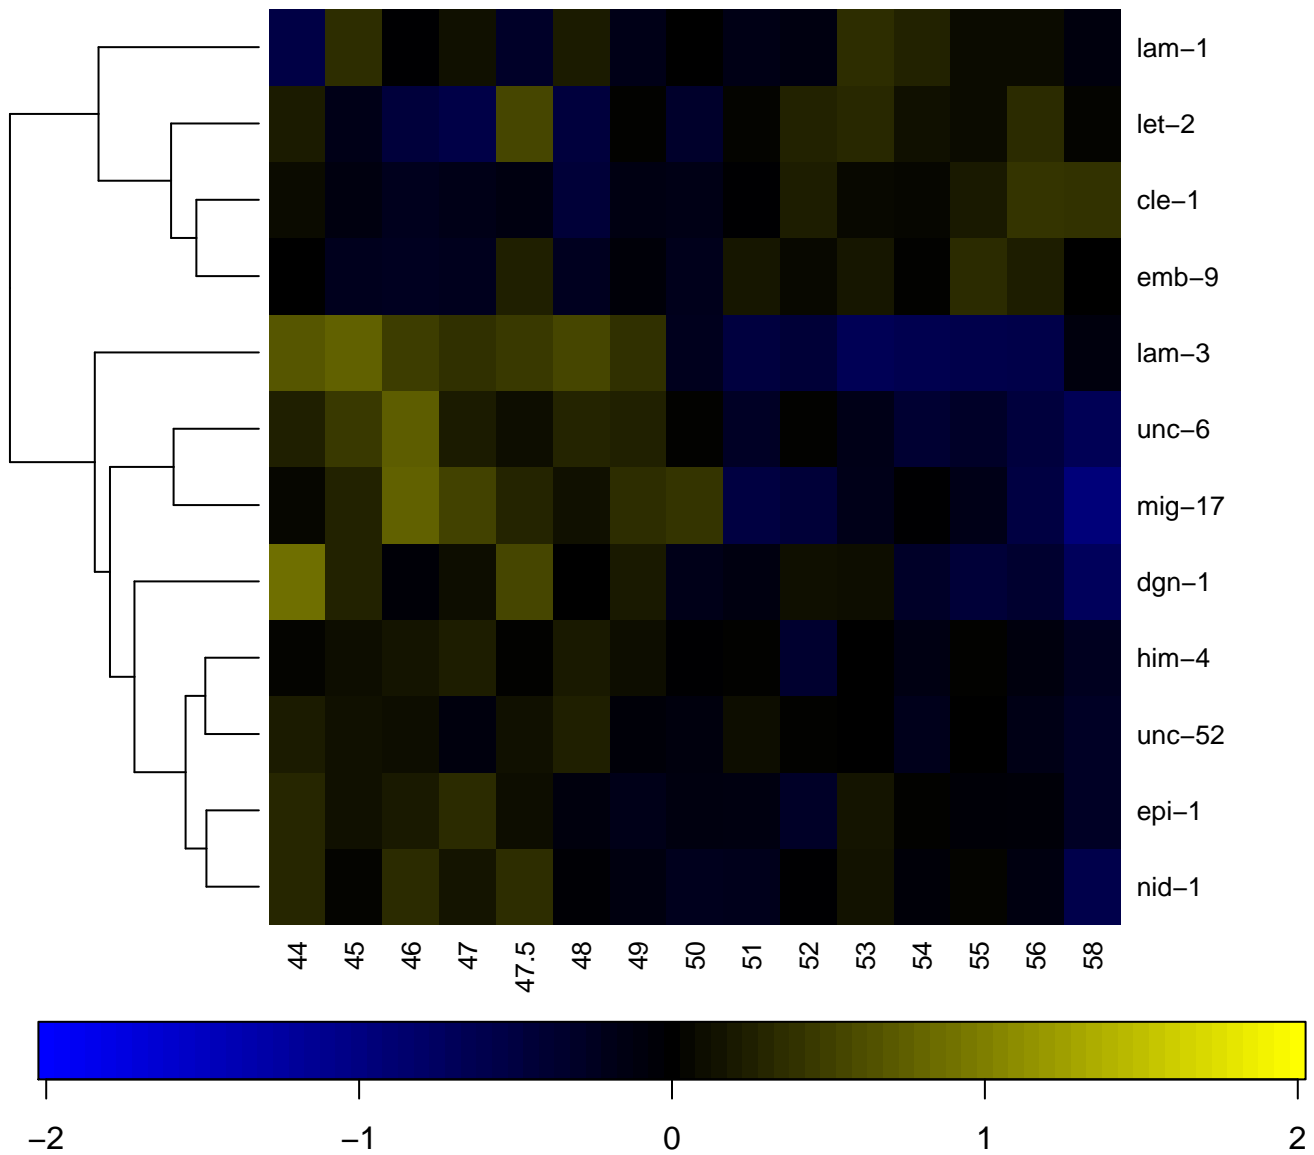

# basolateral plasma membrane

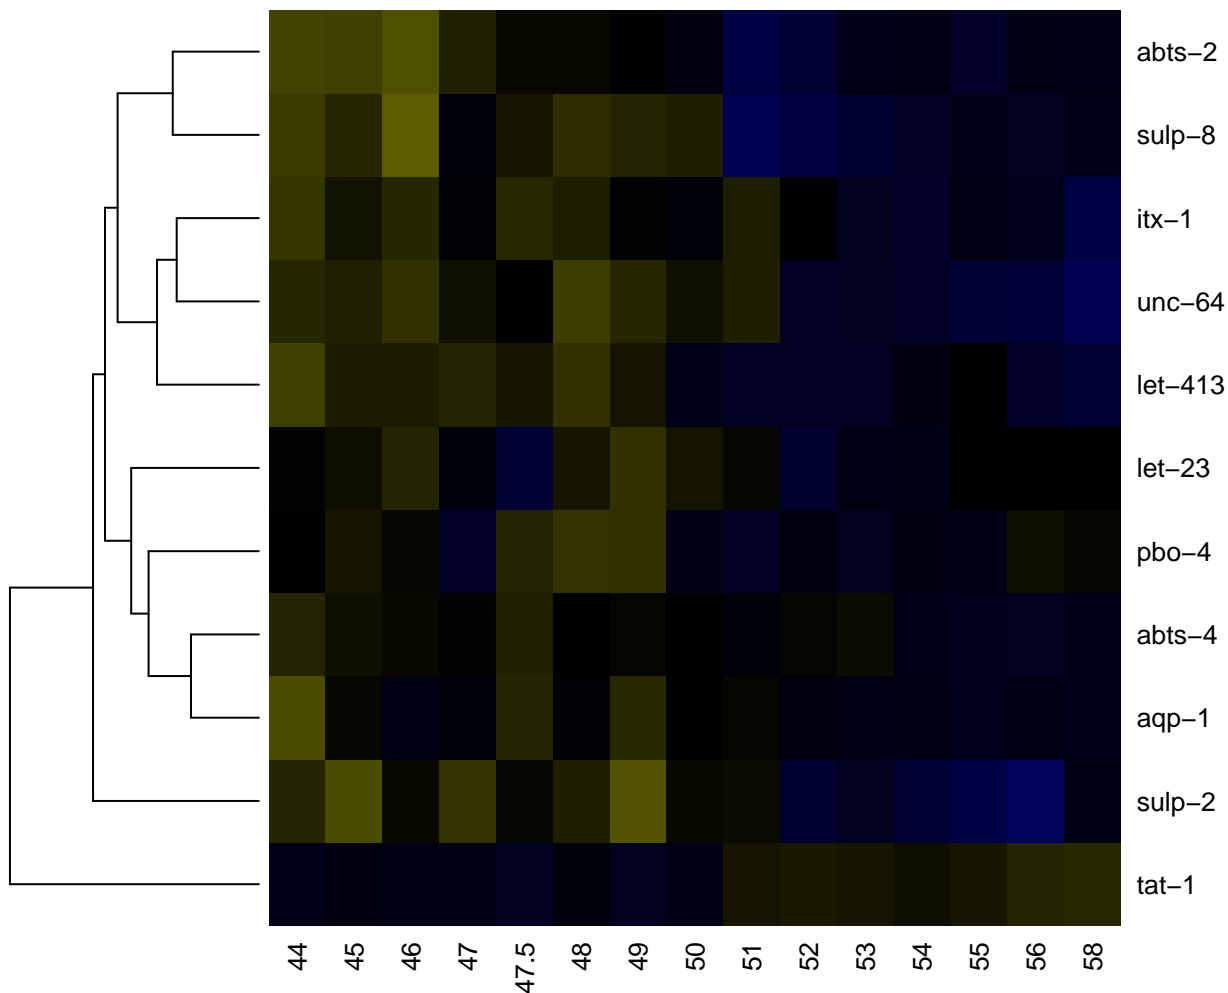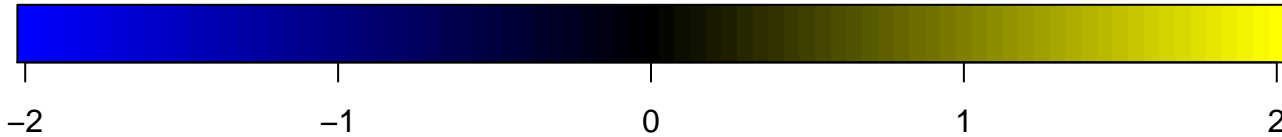





# binding

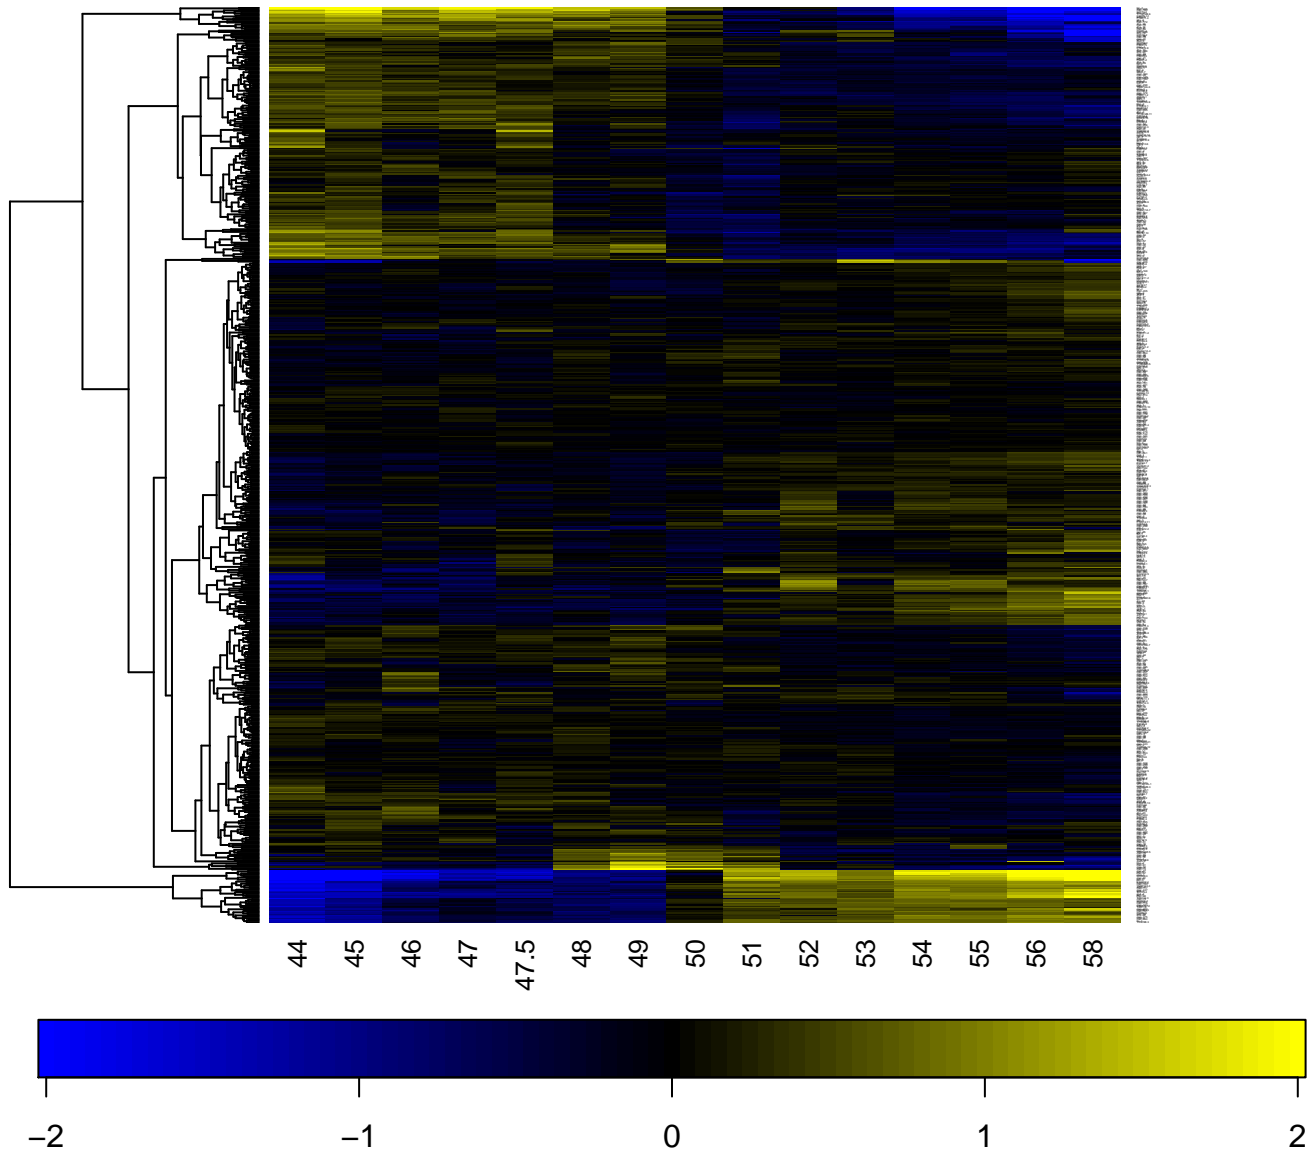

# biosynthetic process

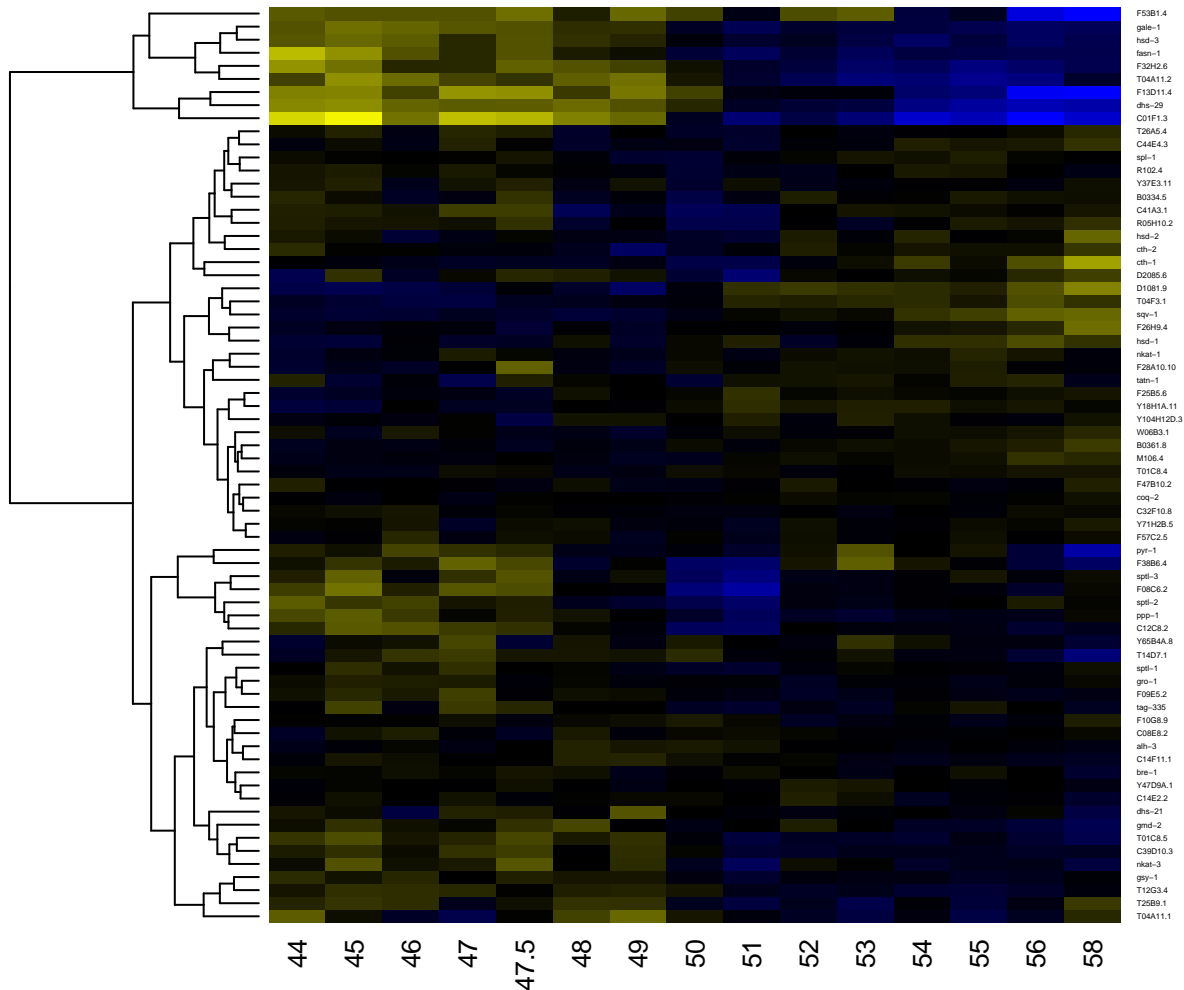

# body morphogenesis

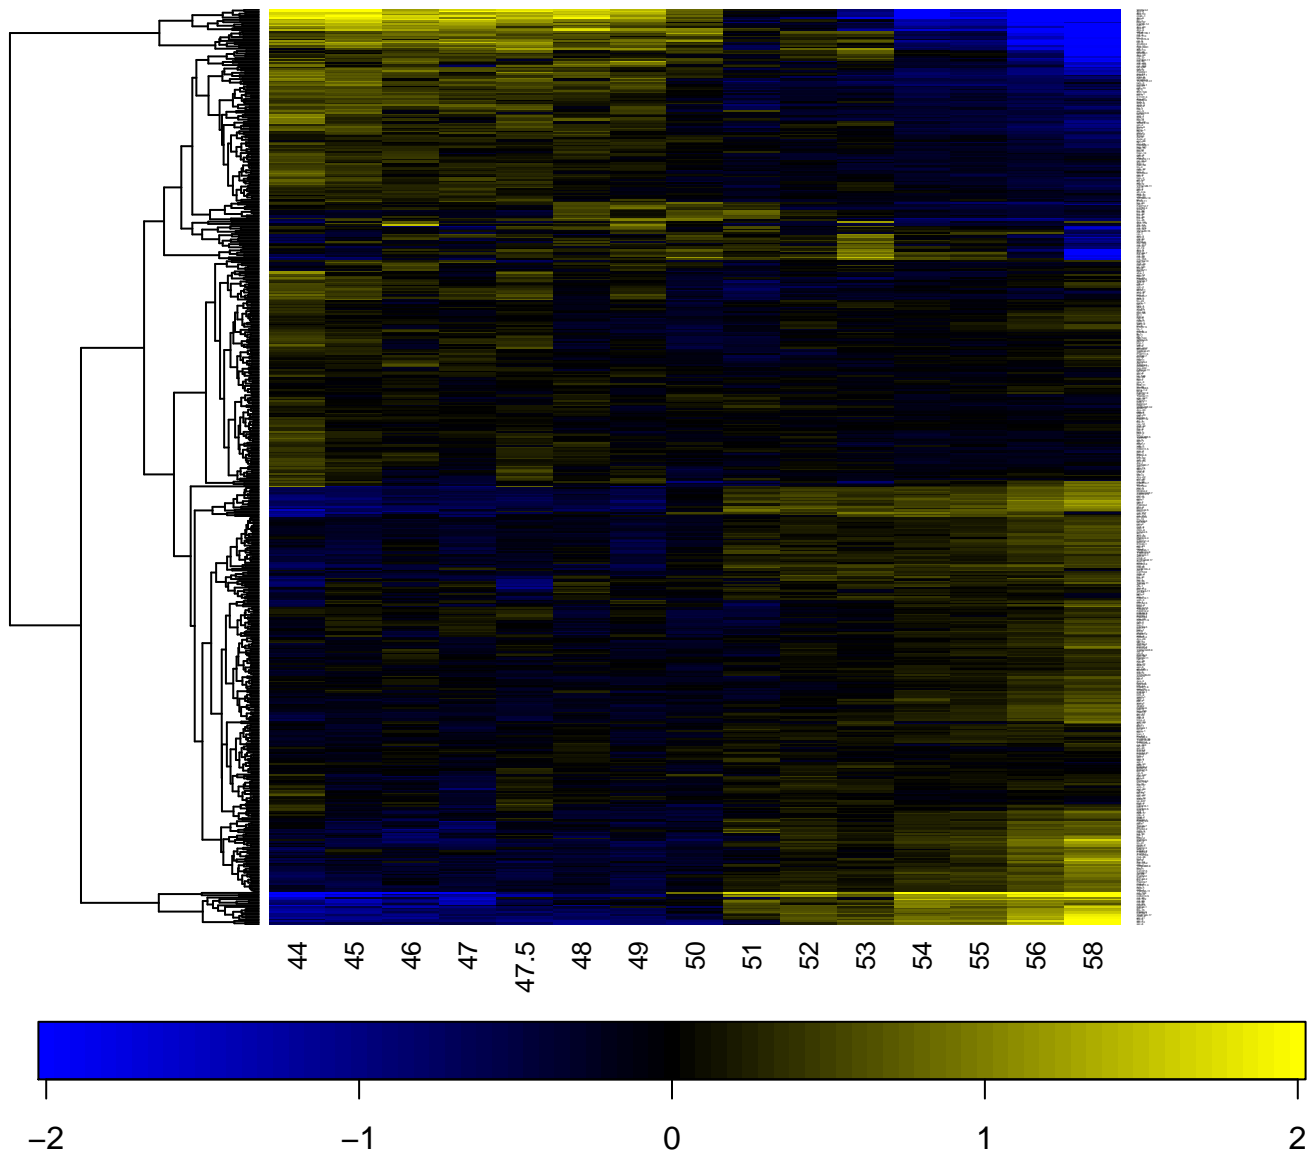



# calcium-dependent cysteine-type endopeptidase activity

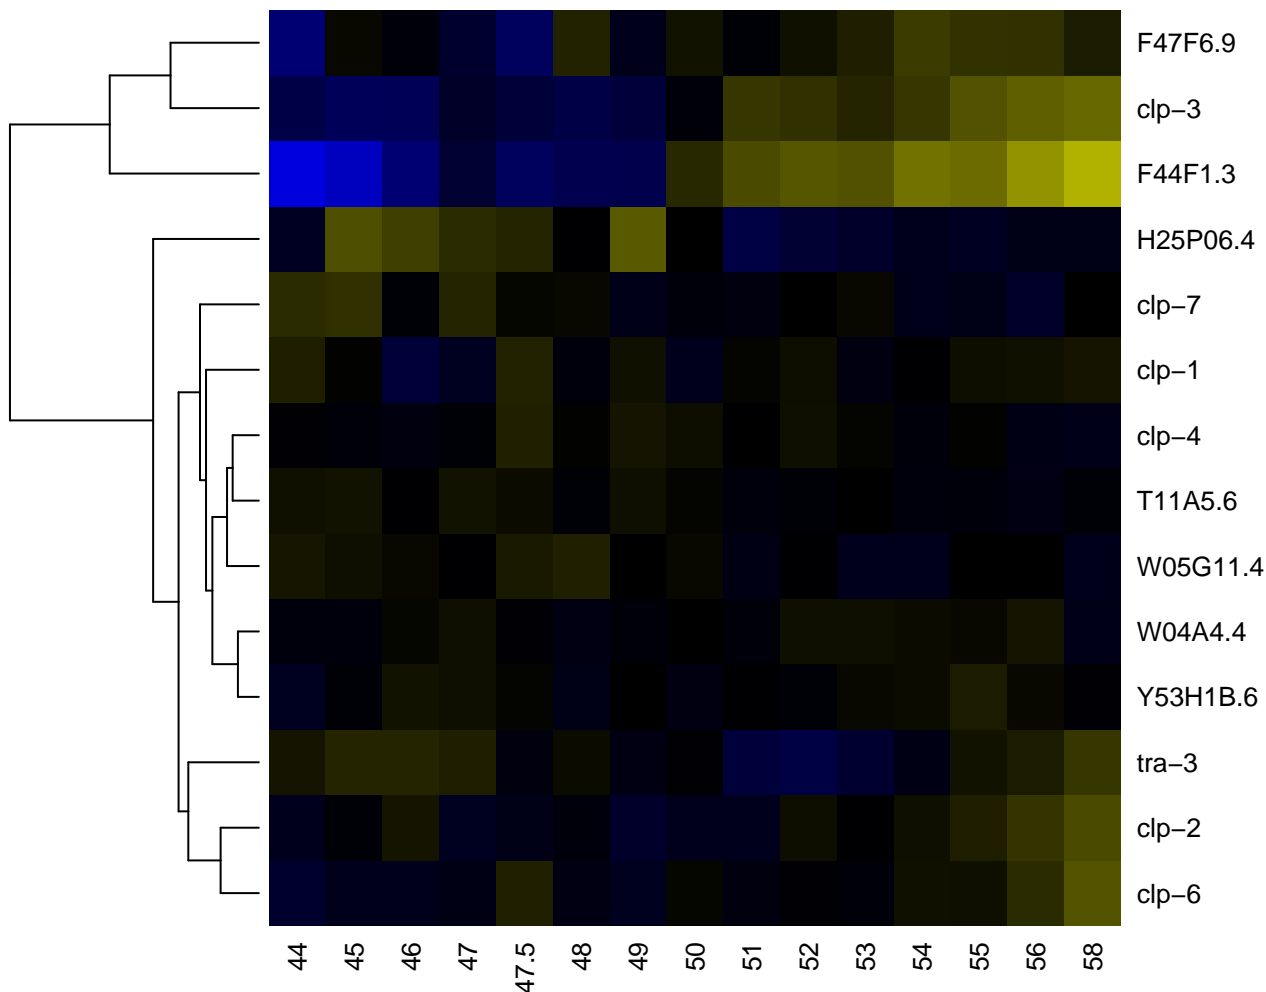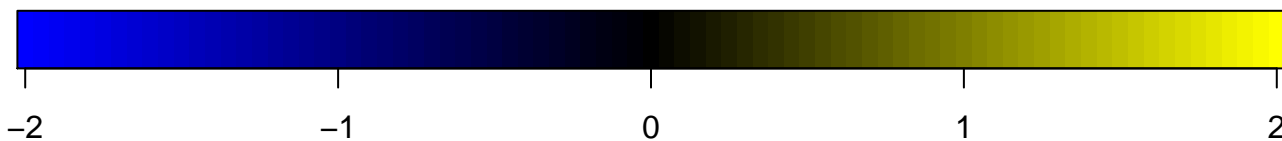

# calcium-transporting ATPase activity

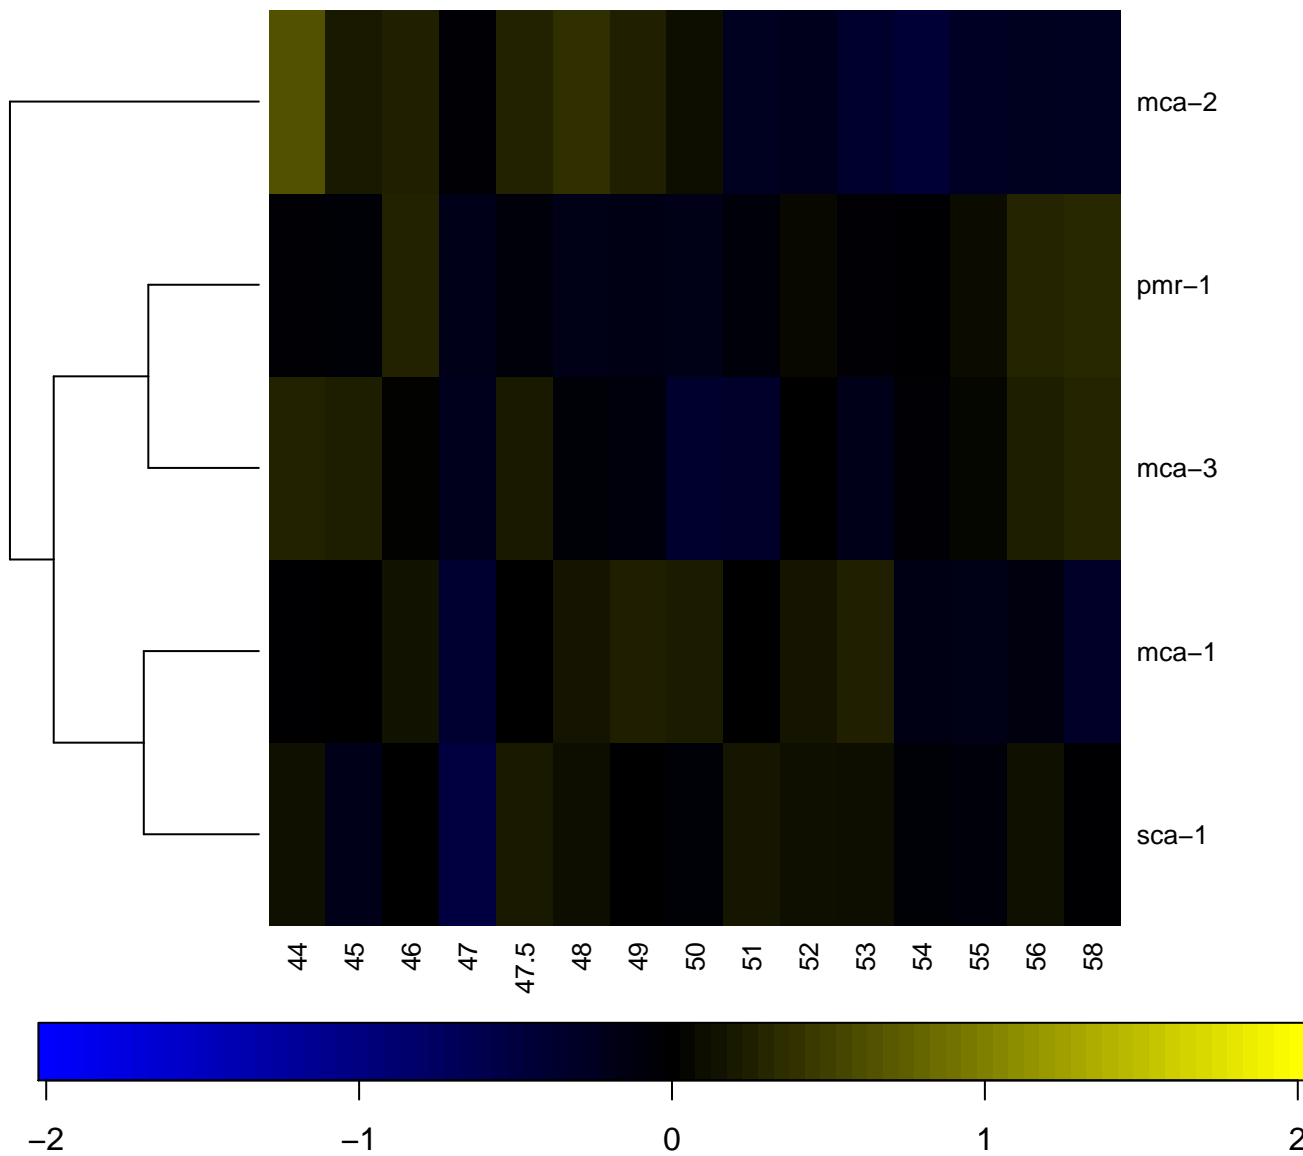

# calcium channel activity

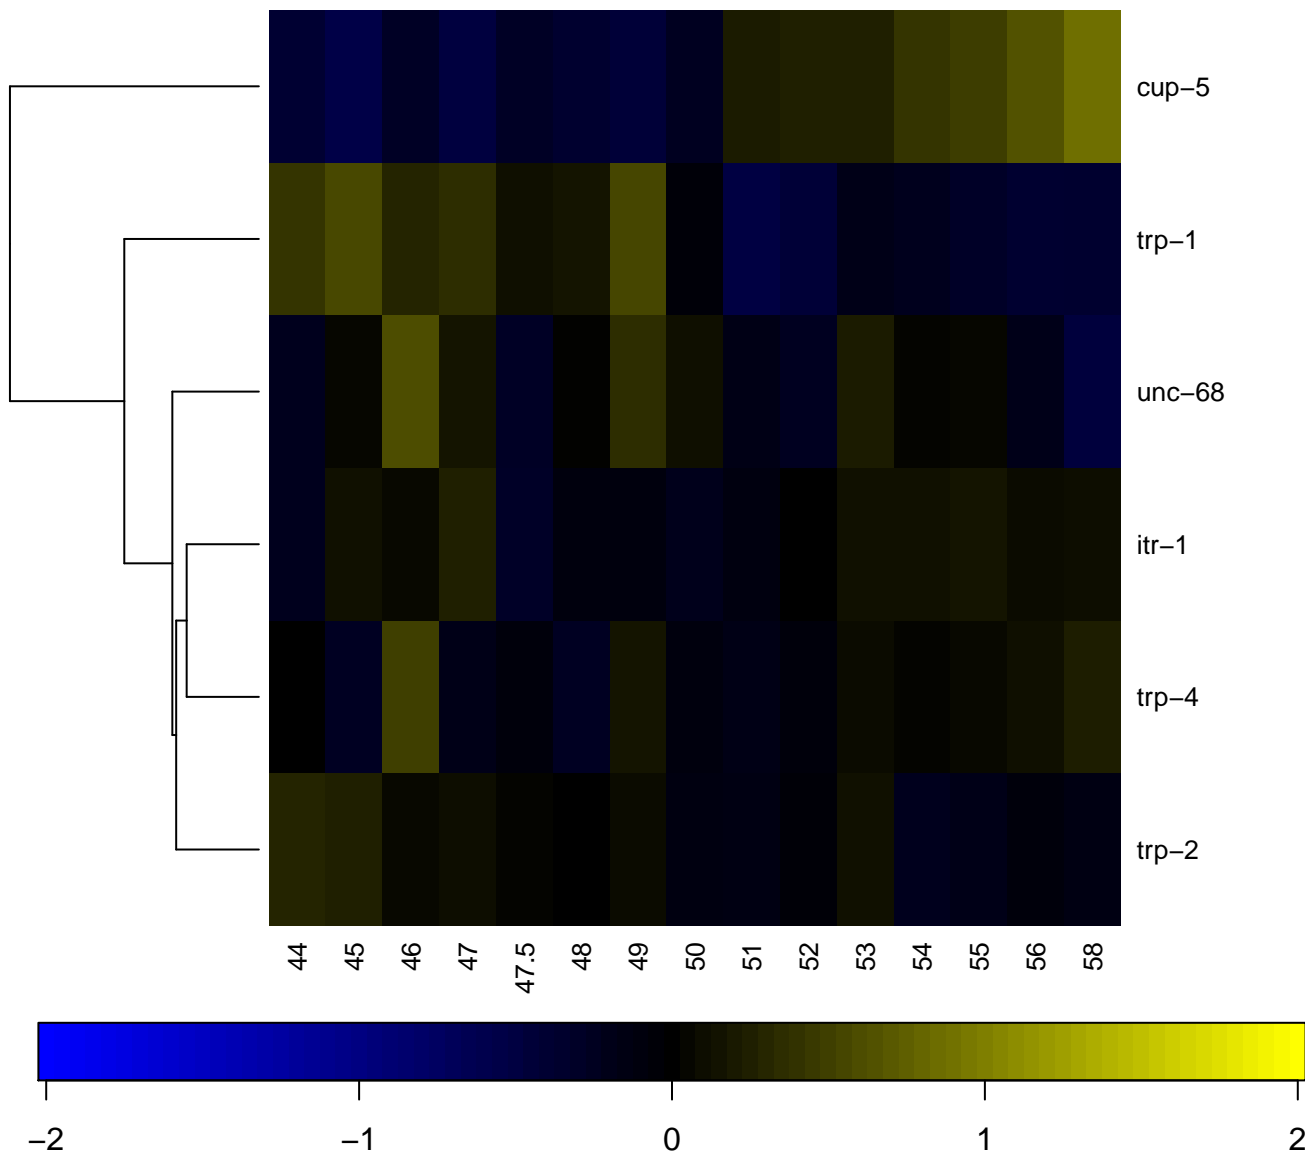

# calcium ion binding

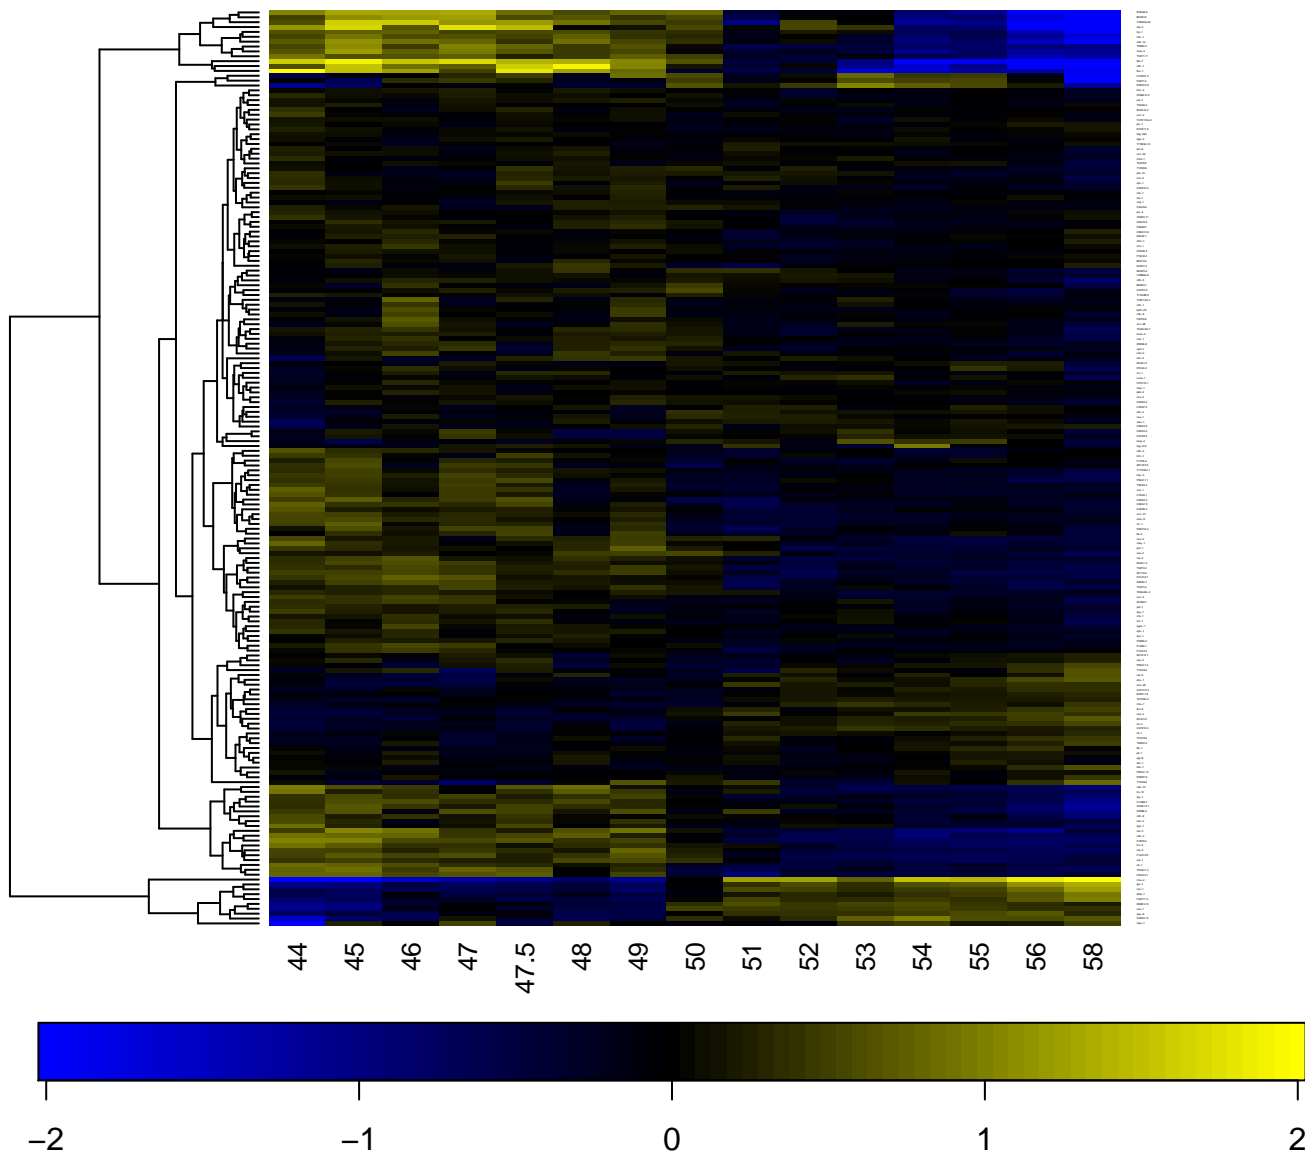



# calcium ion transport

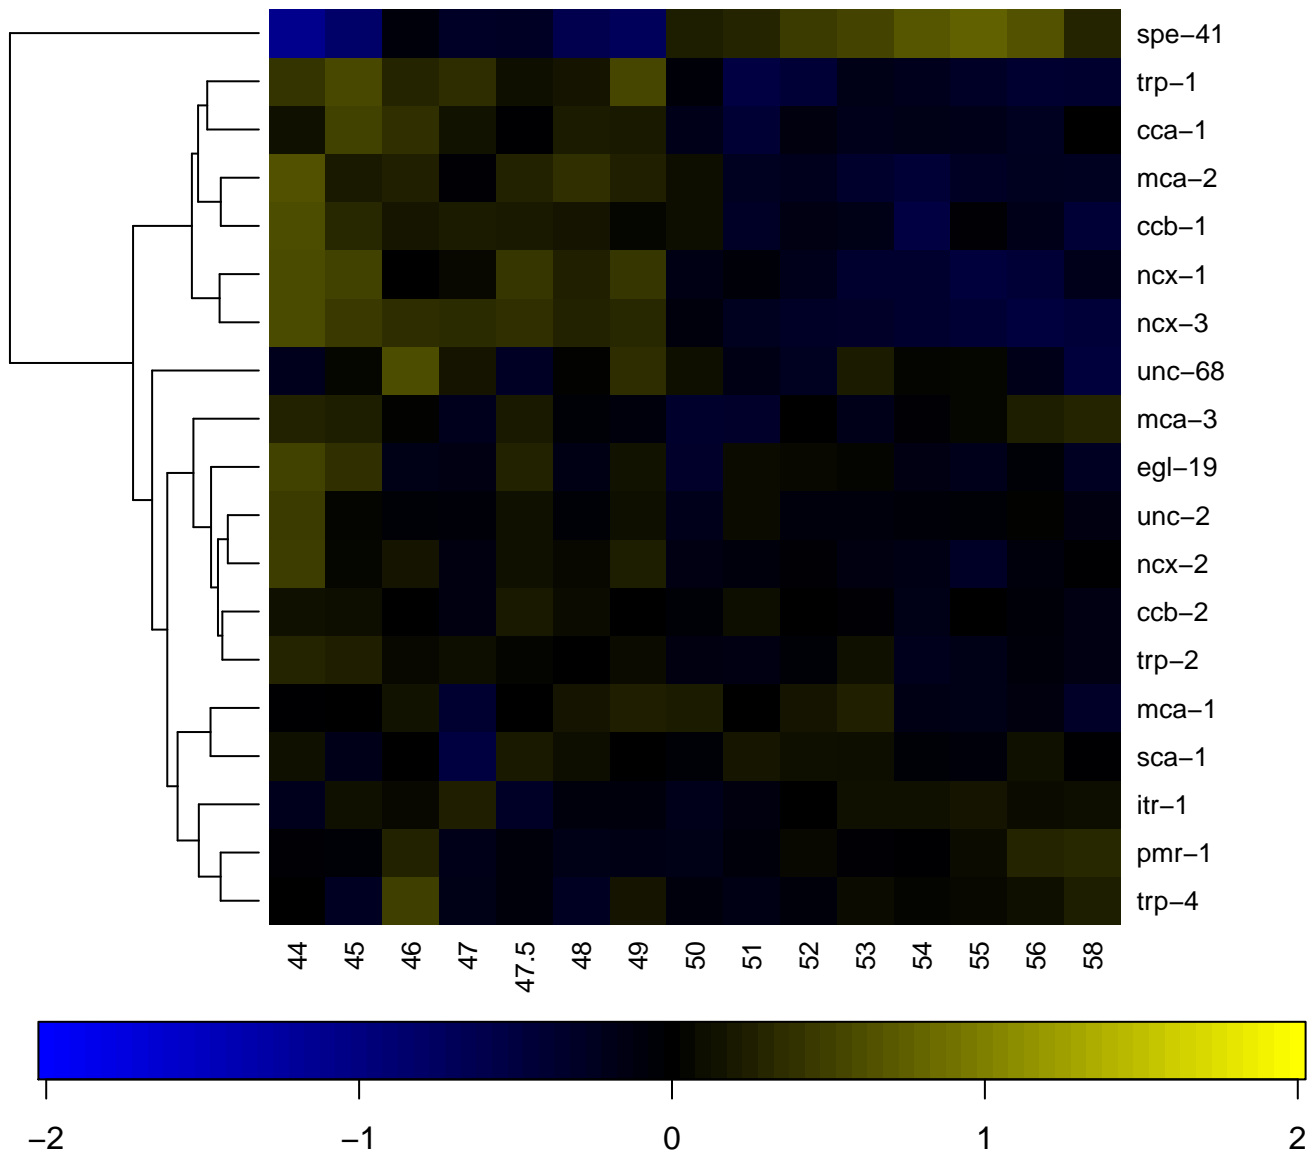

# calmodulin binding

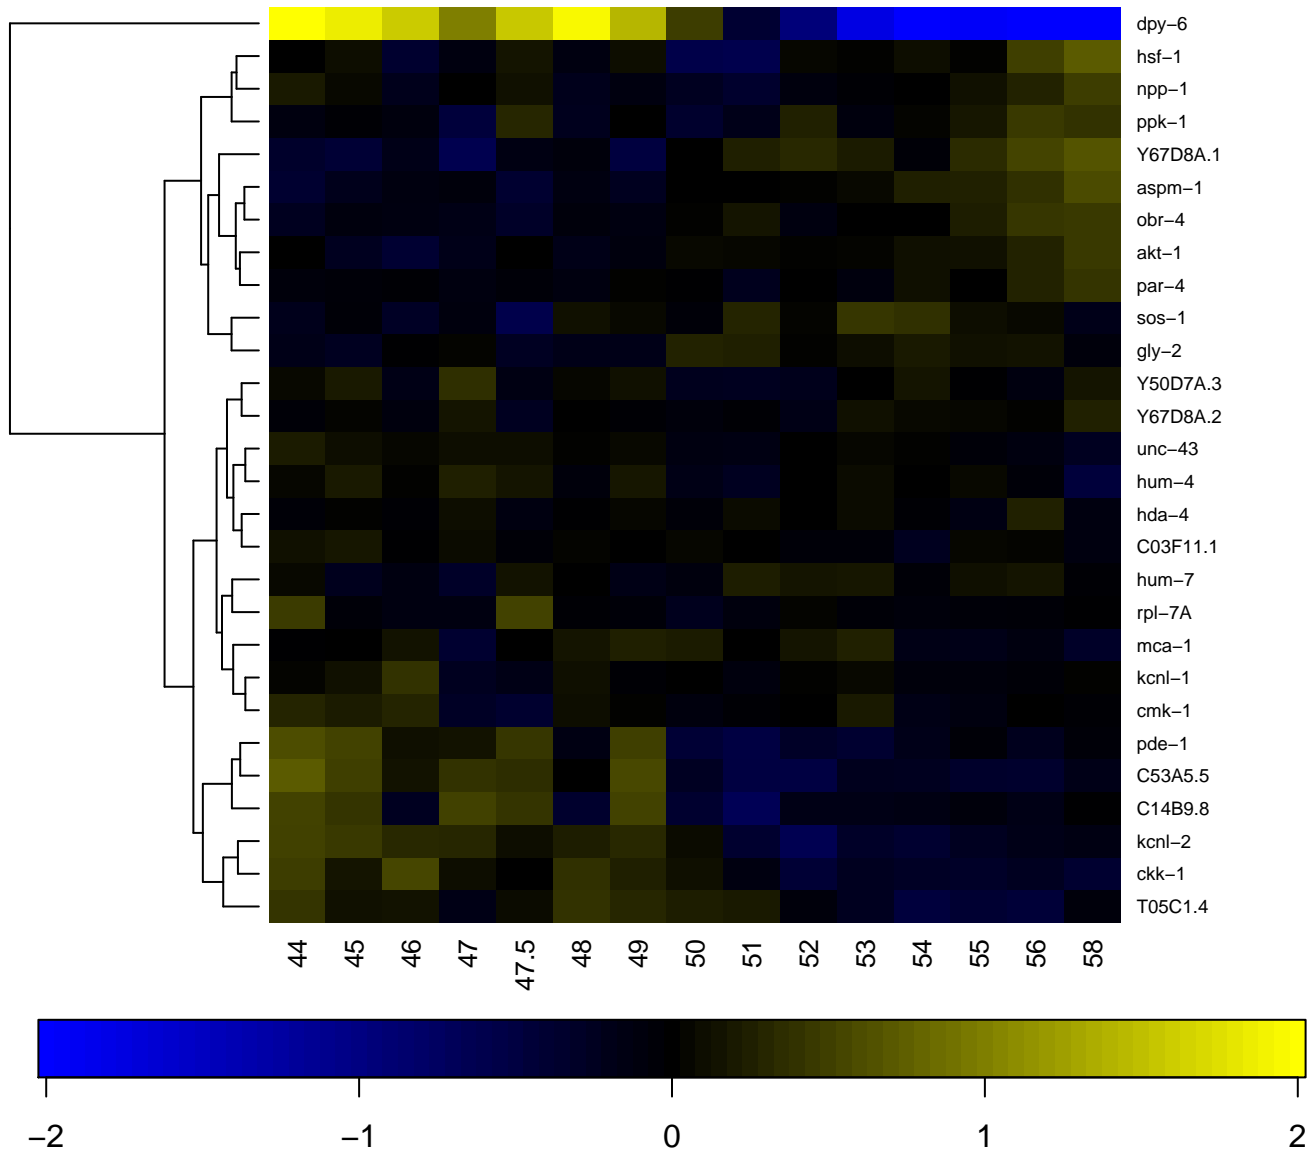

# carbohydrate binding

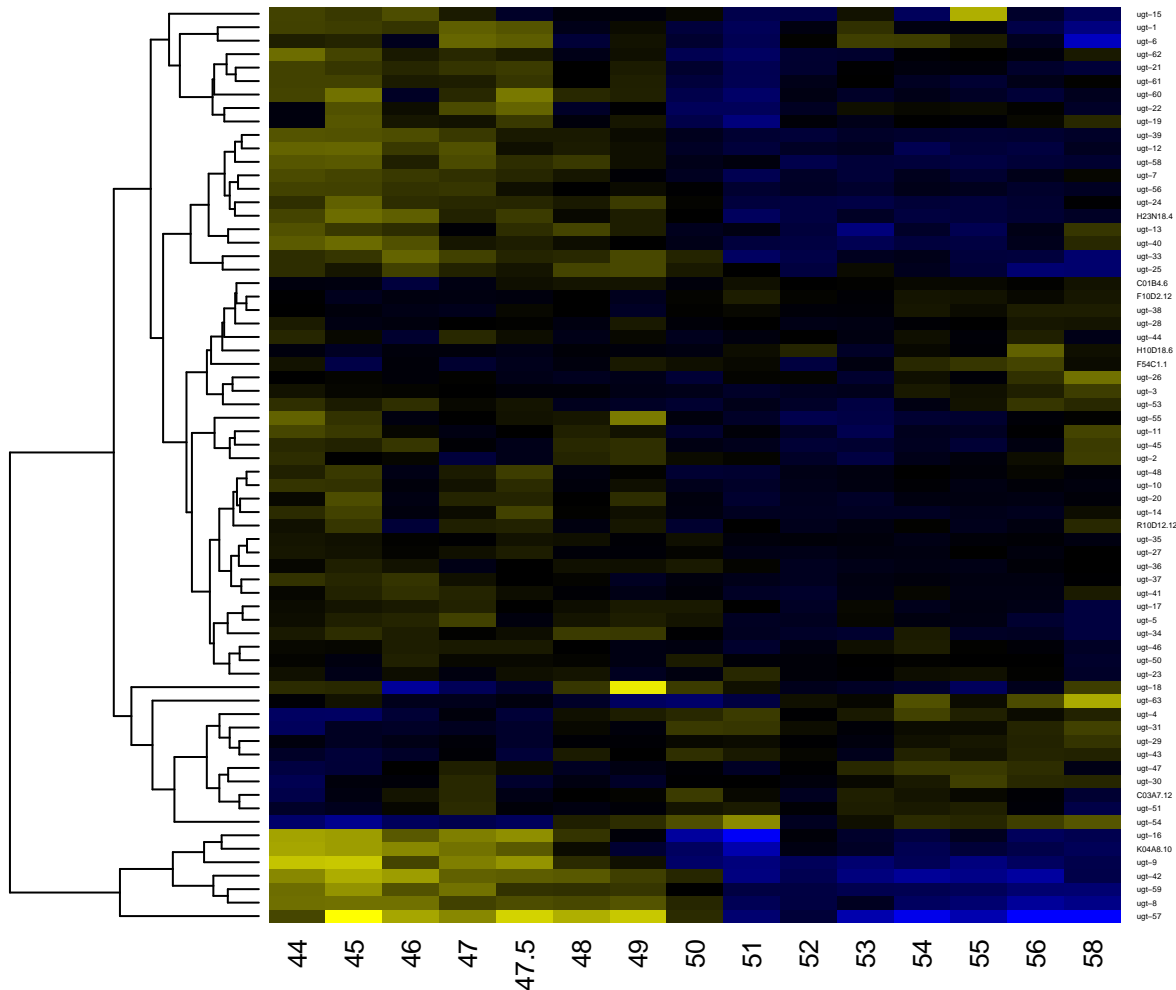

# carbohydrate biosynthetic process

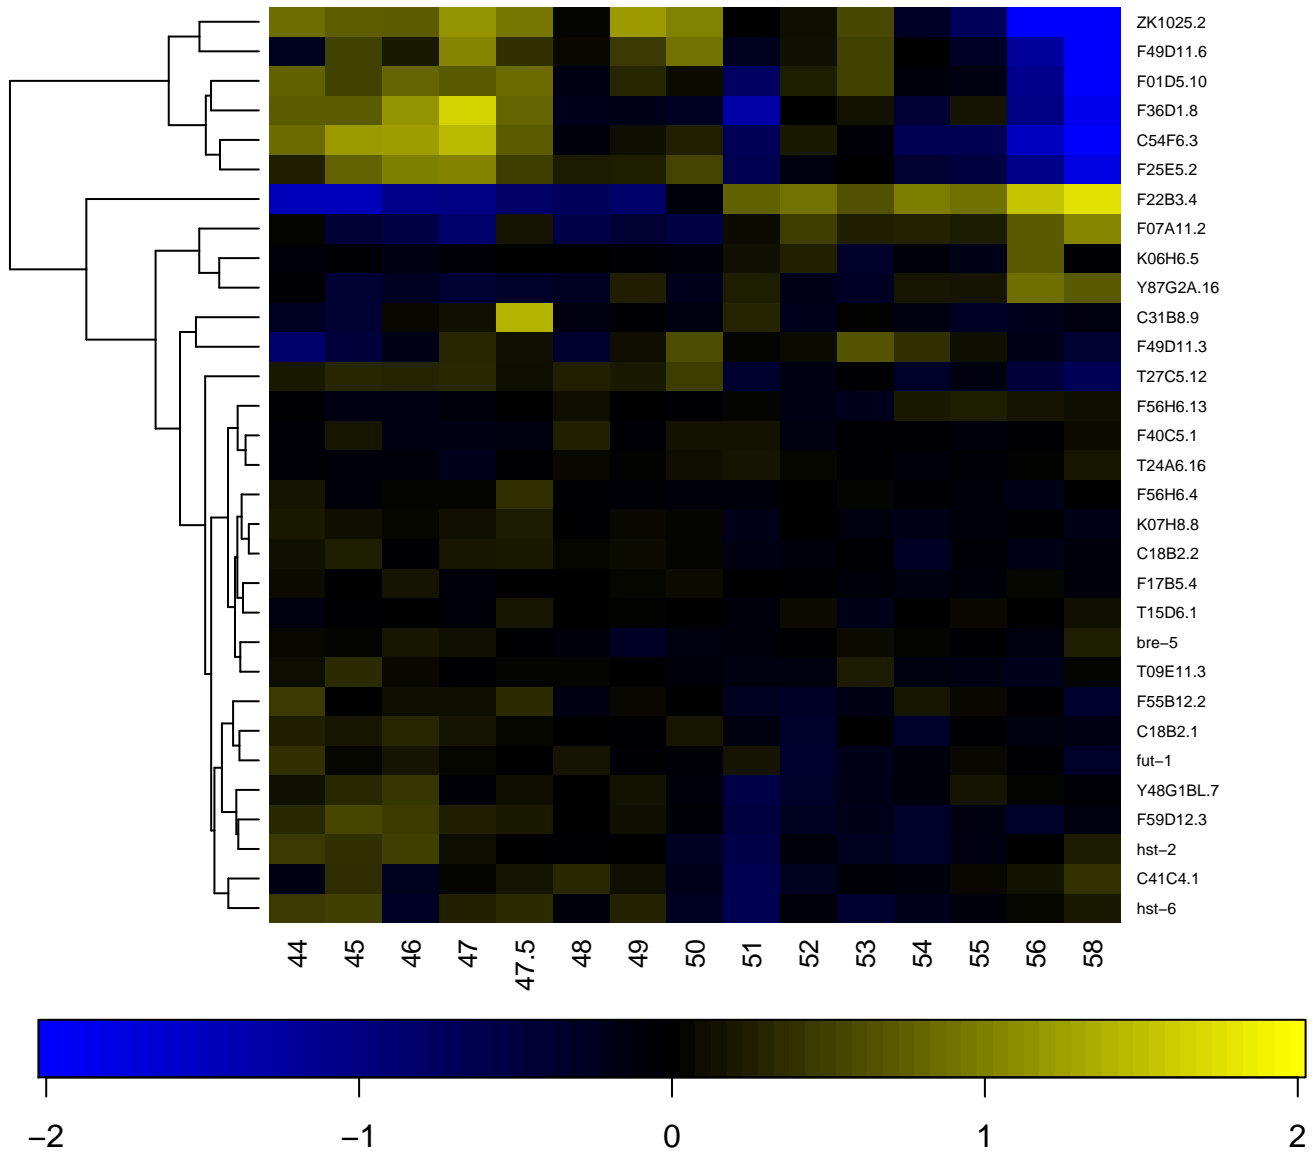

# carbohydrate metabolic process

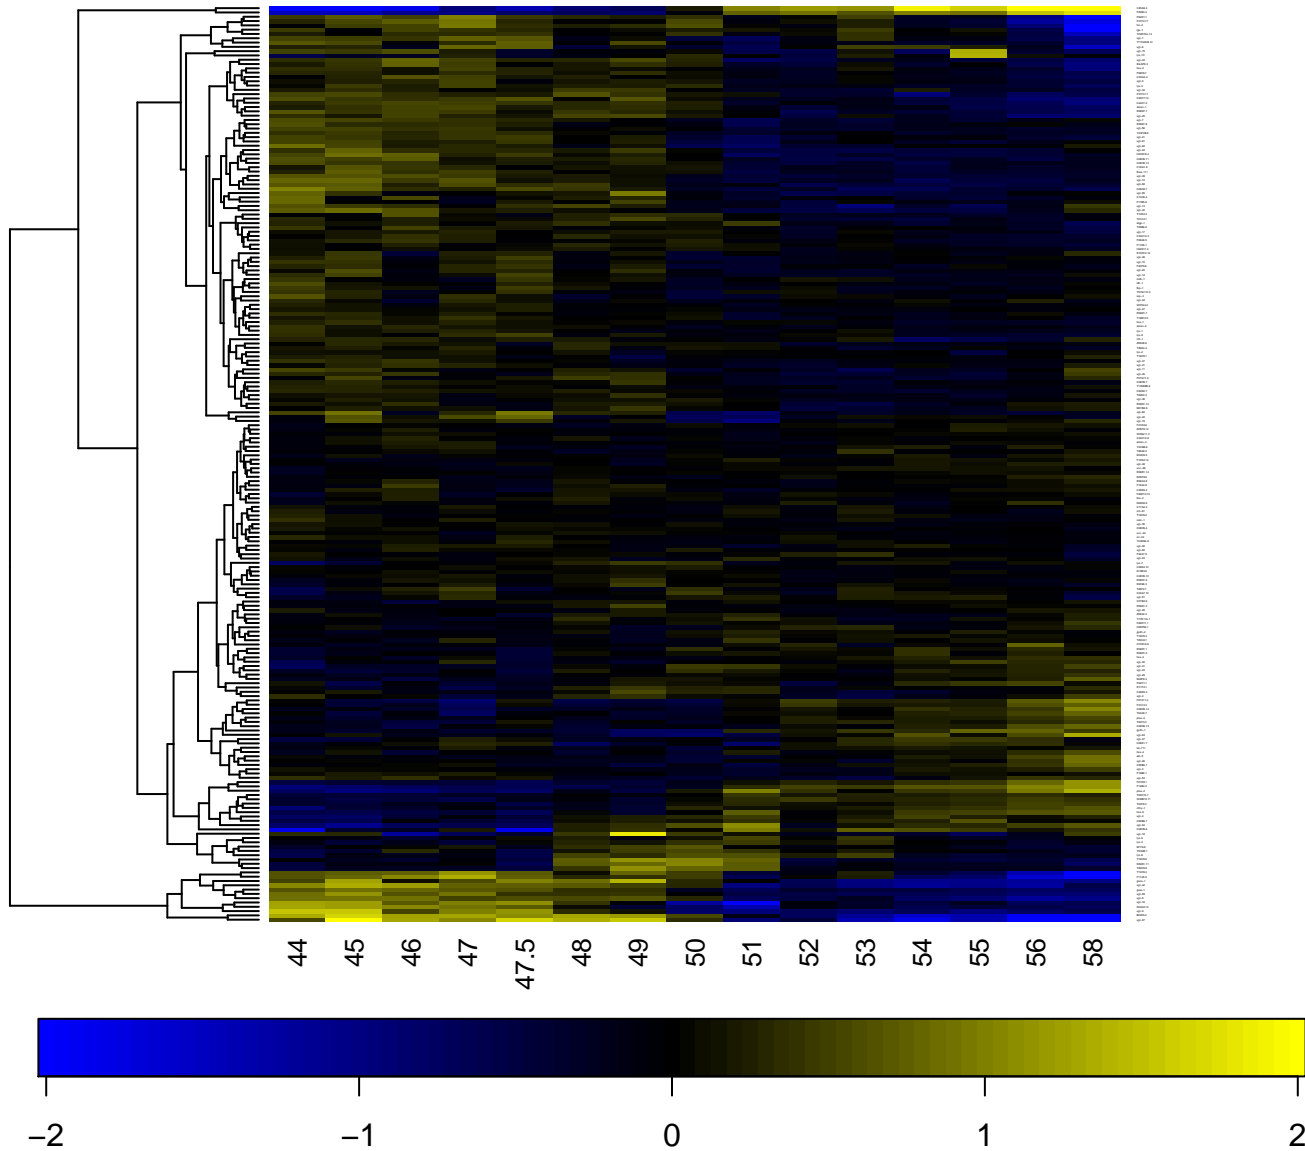

# carbohydrate transport

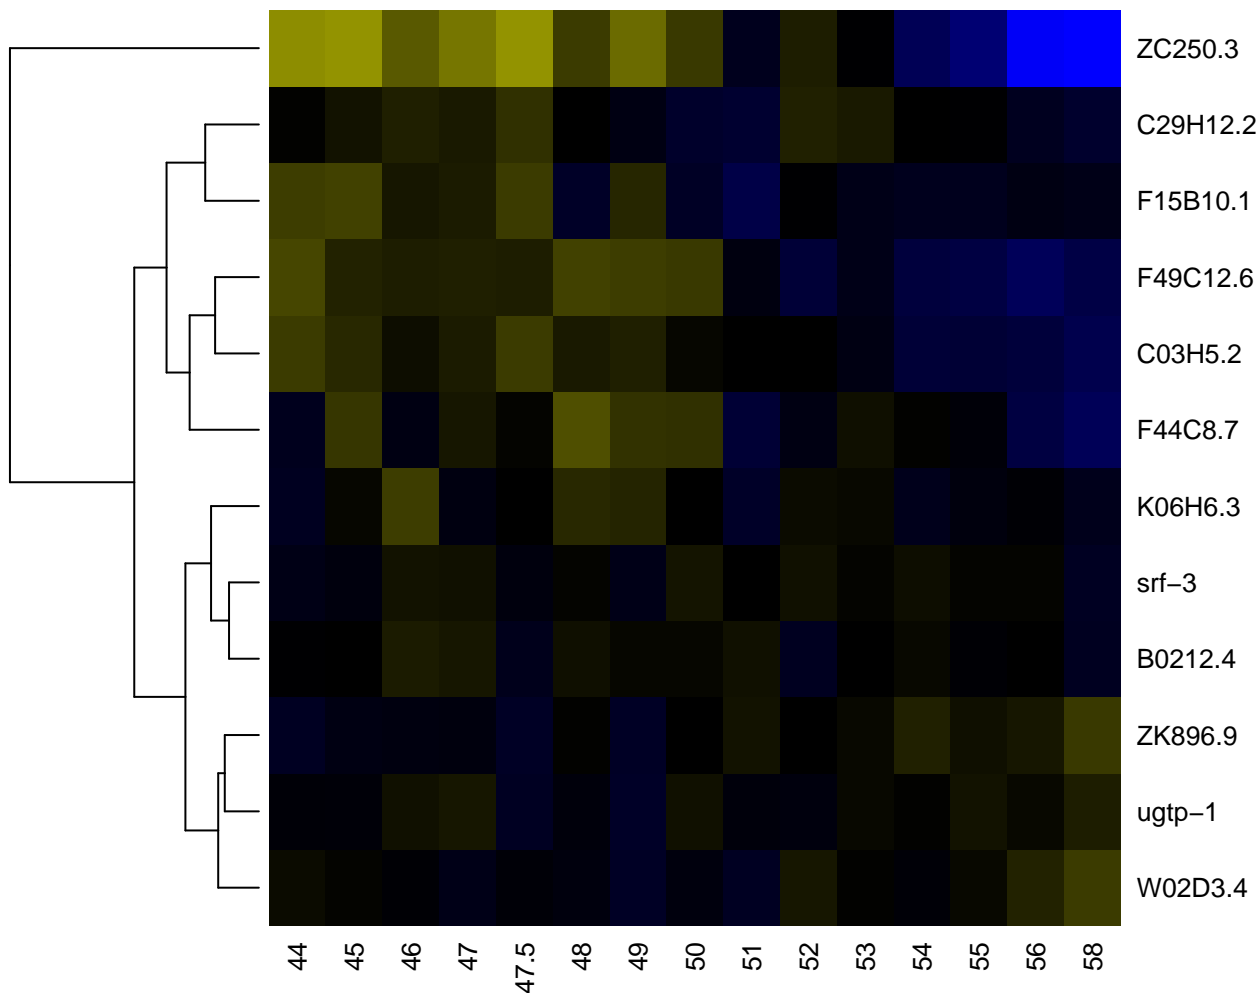







# carboxy-lyase activity

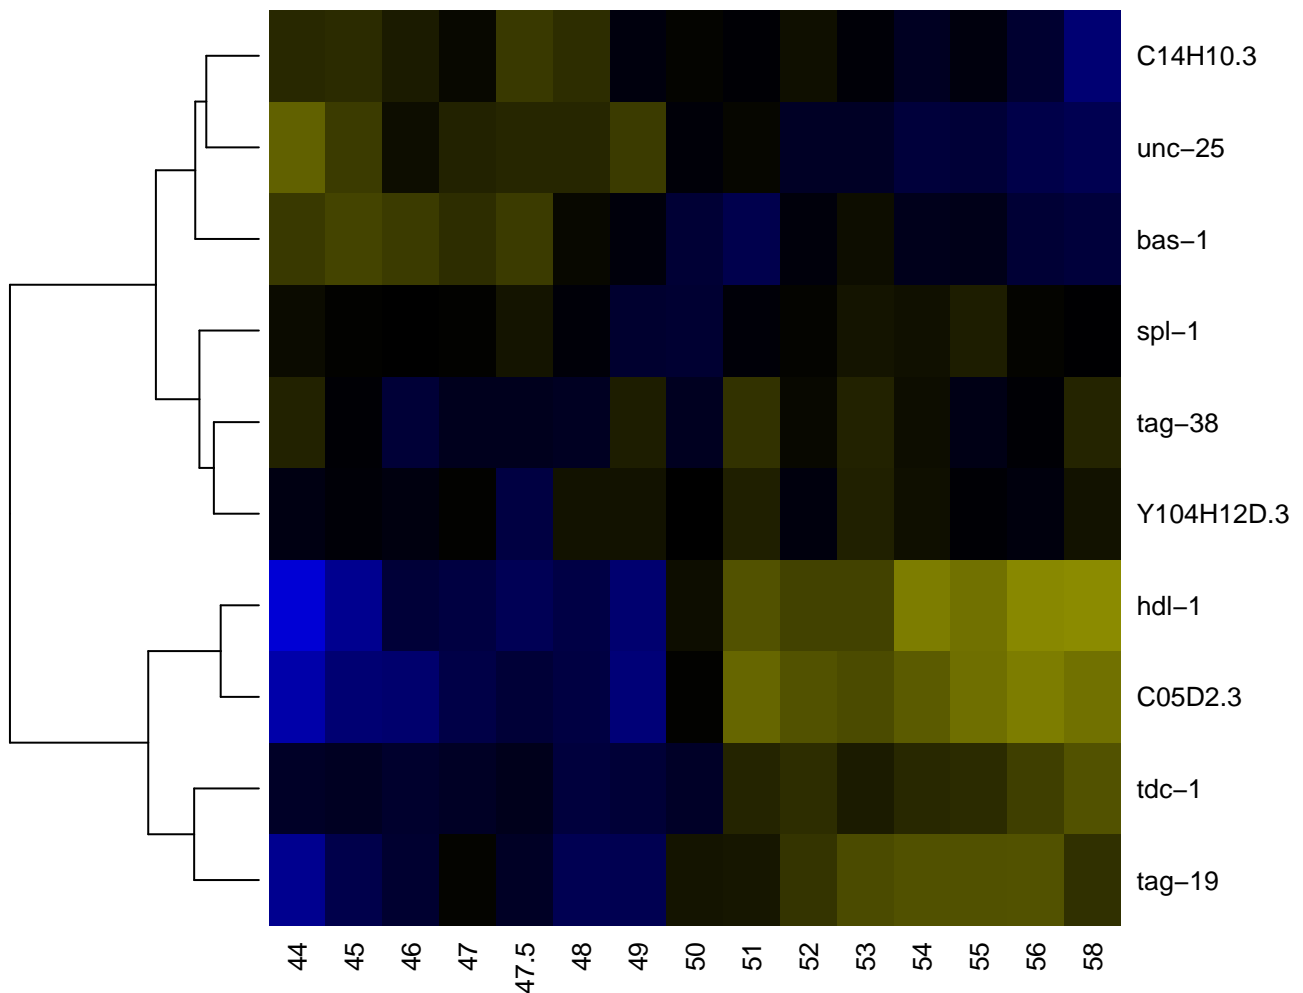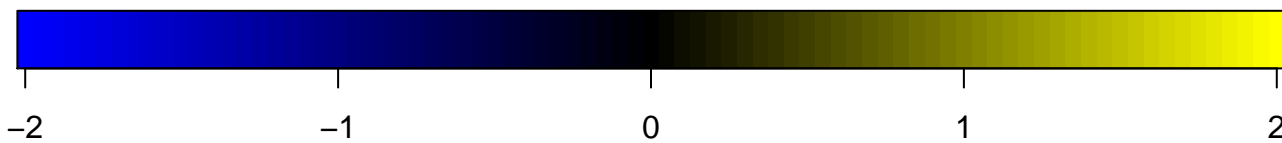

# carboxylic acid metabolic process

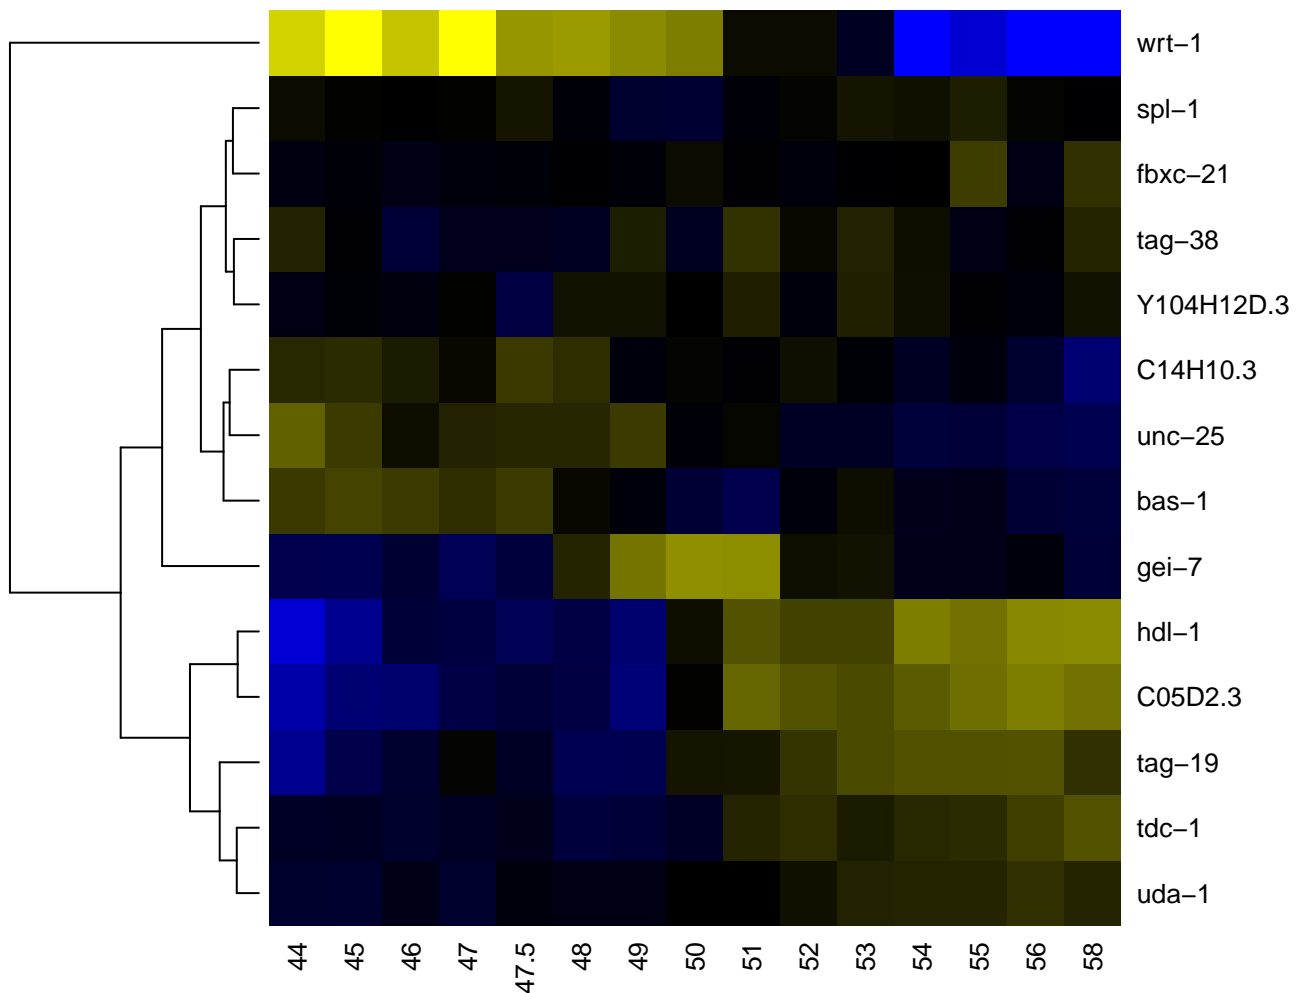



# catalytic activity

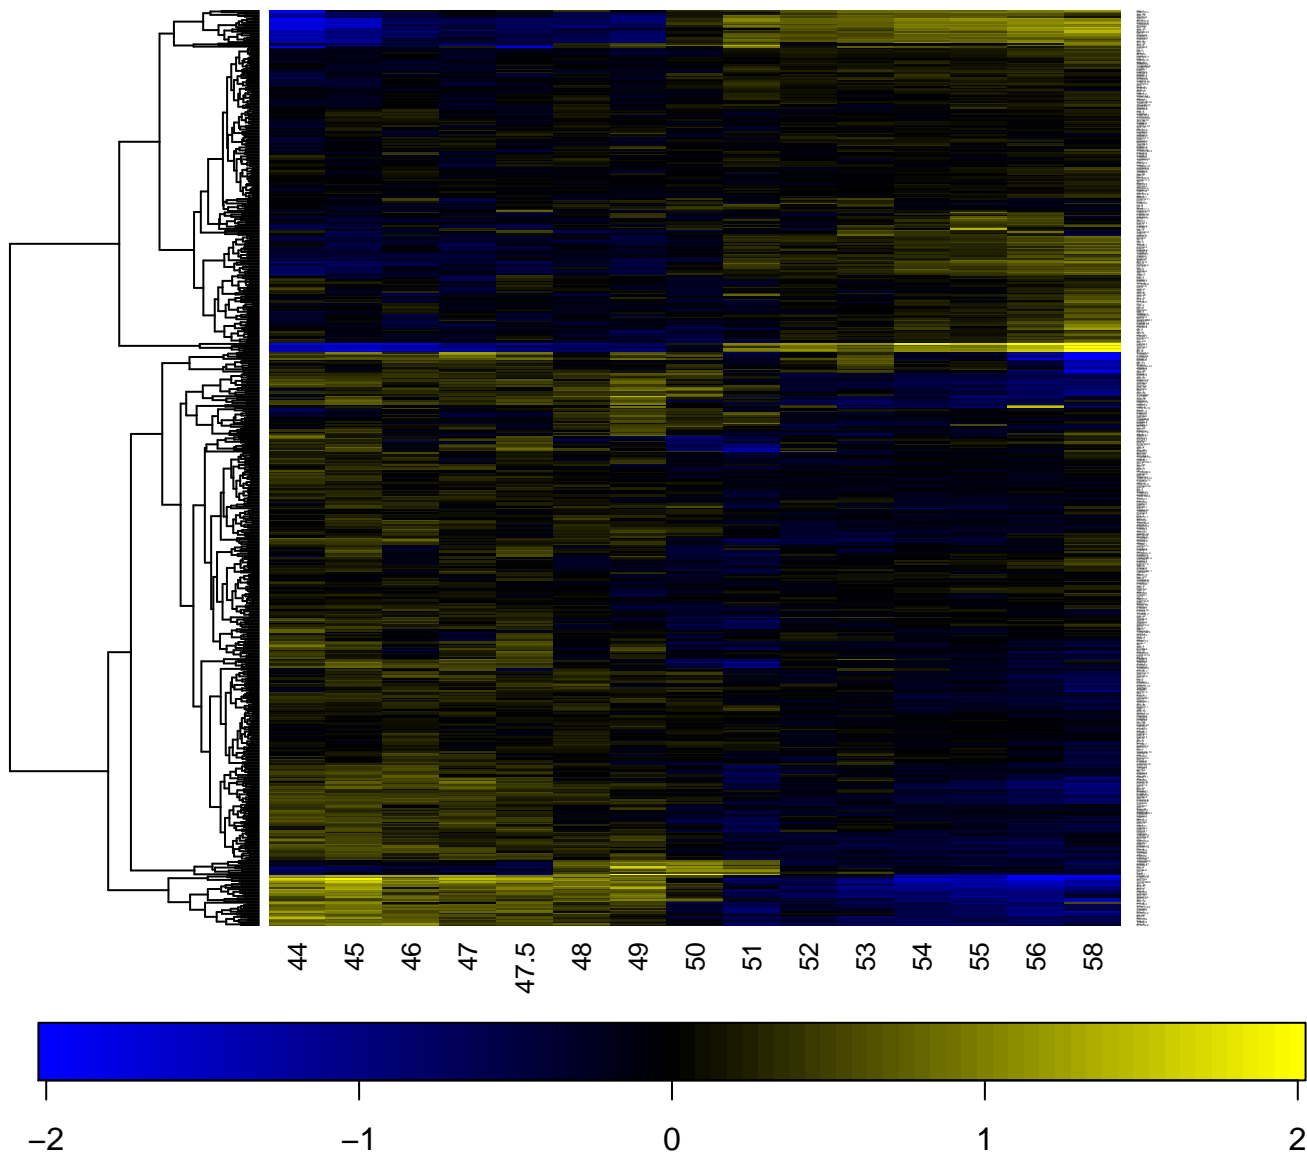

# cation binding

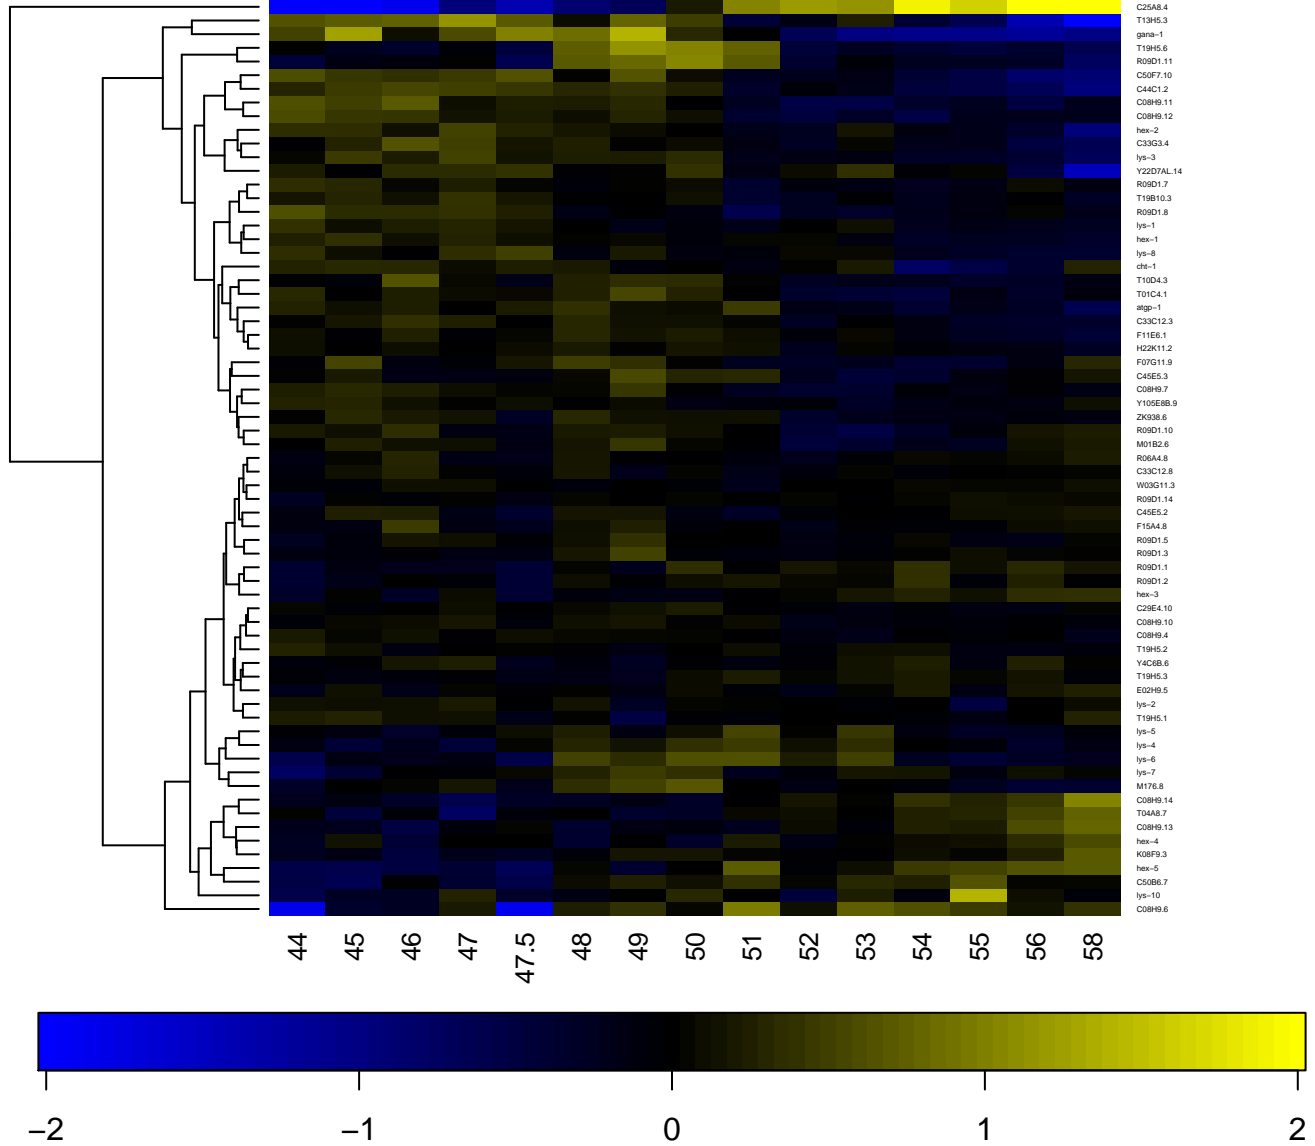



# cation transmembrane transporter activity

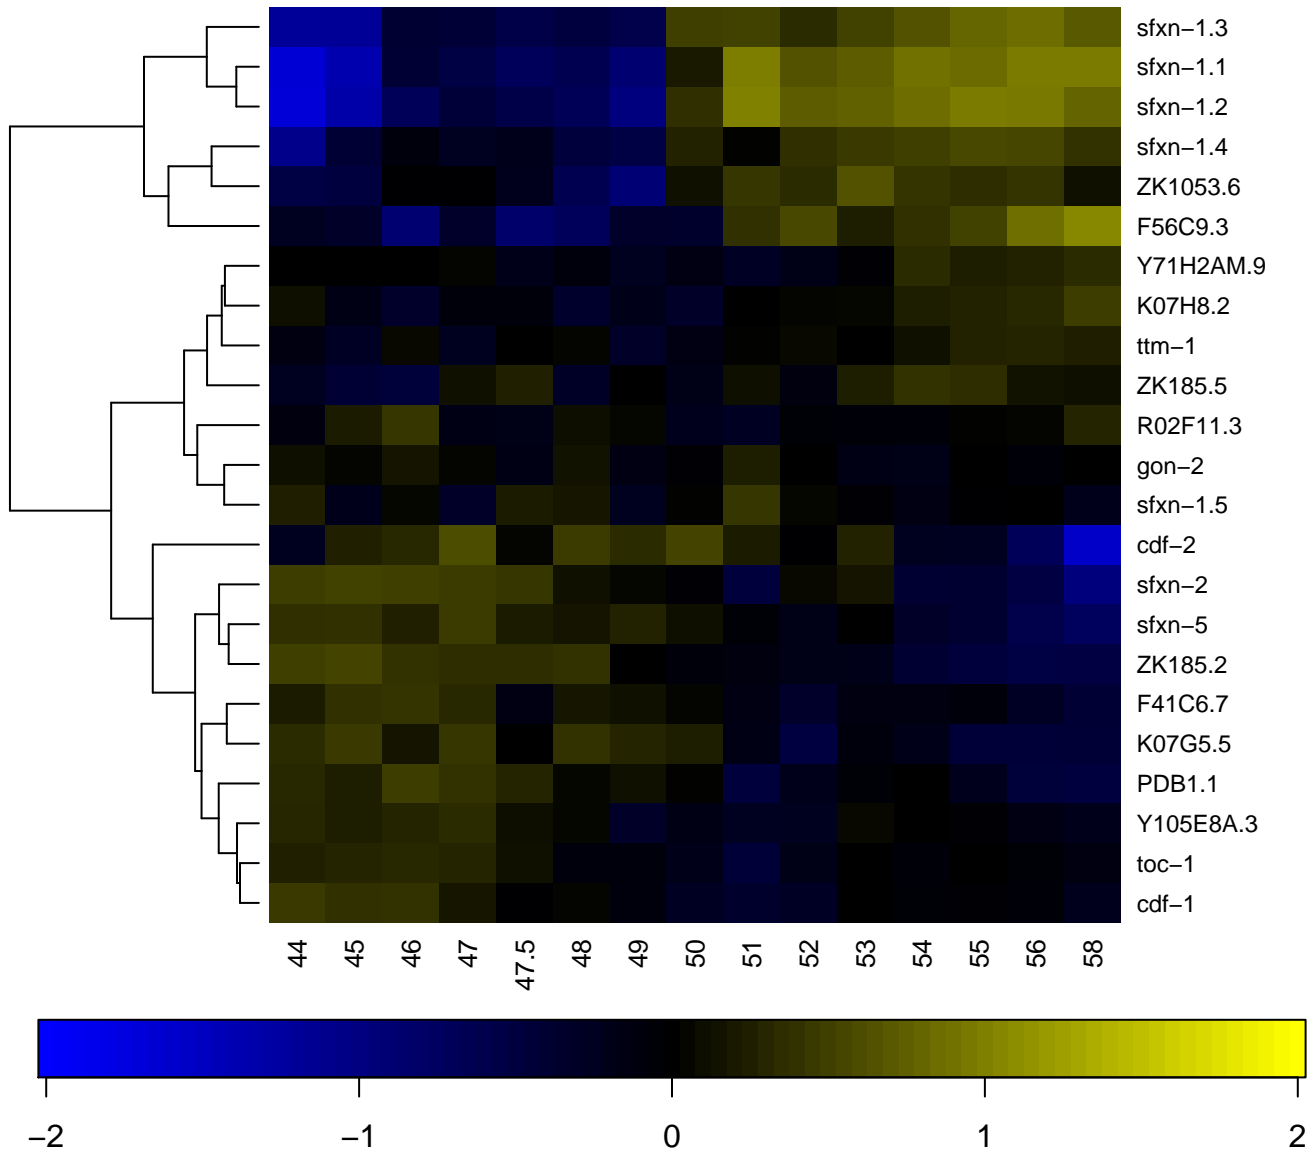

# cation transport

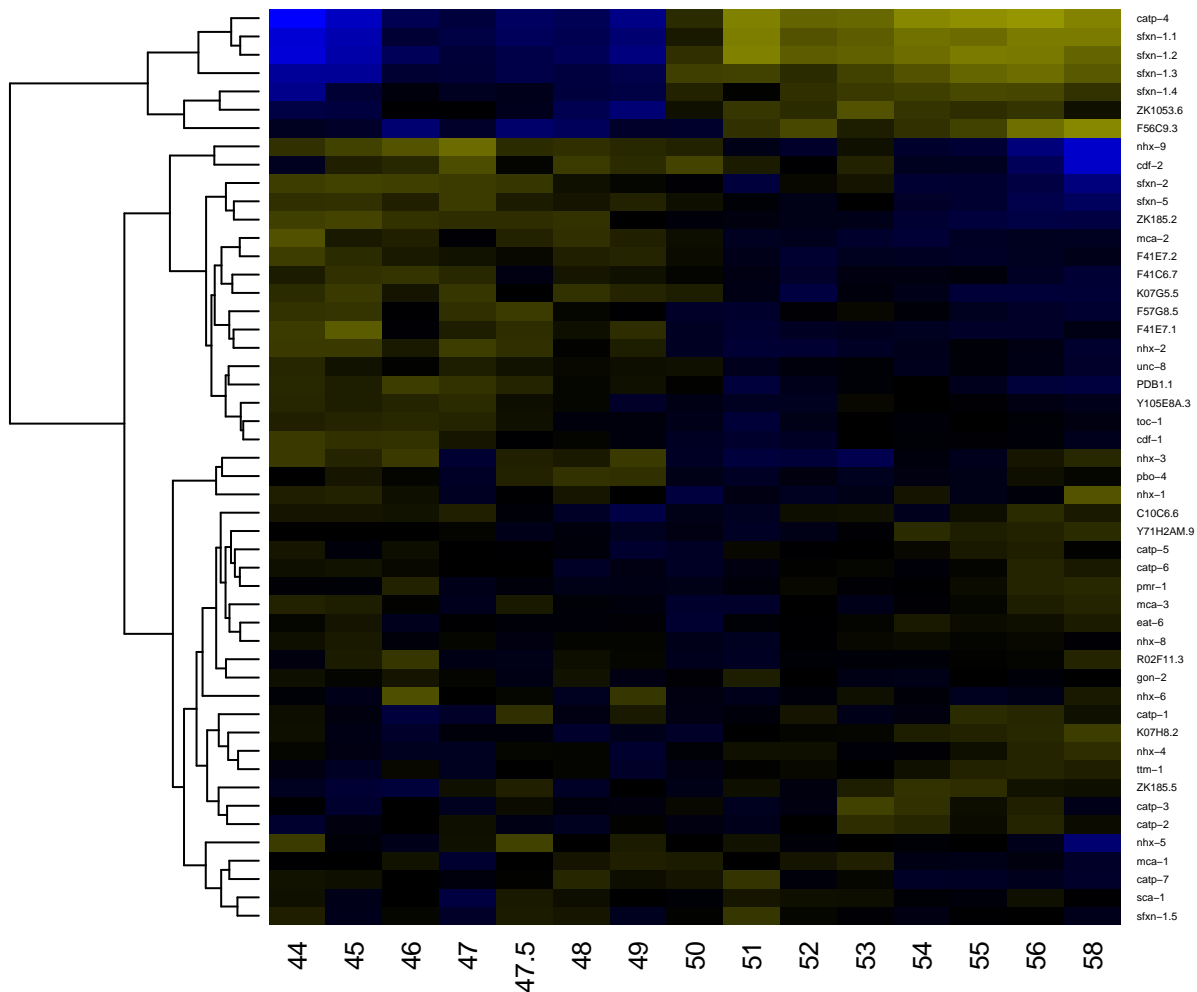



# cell

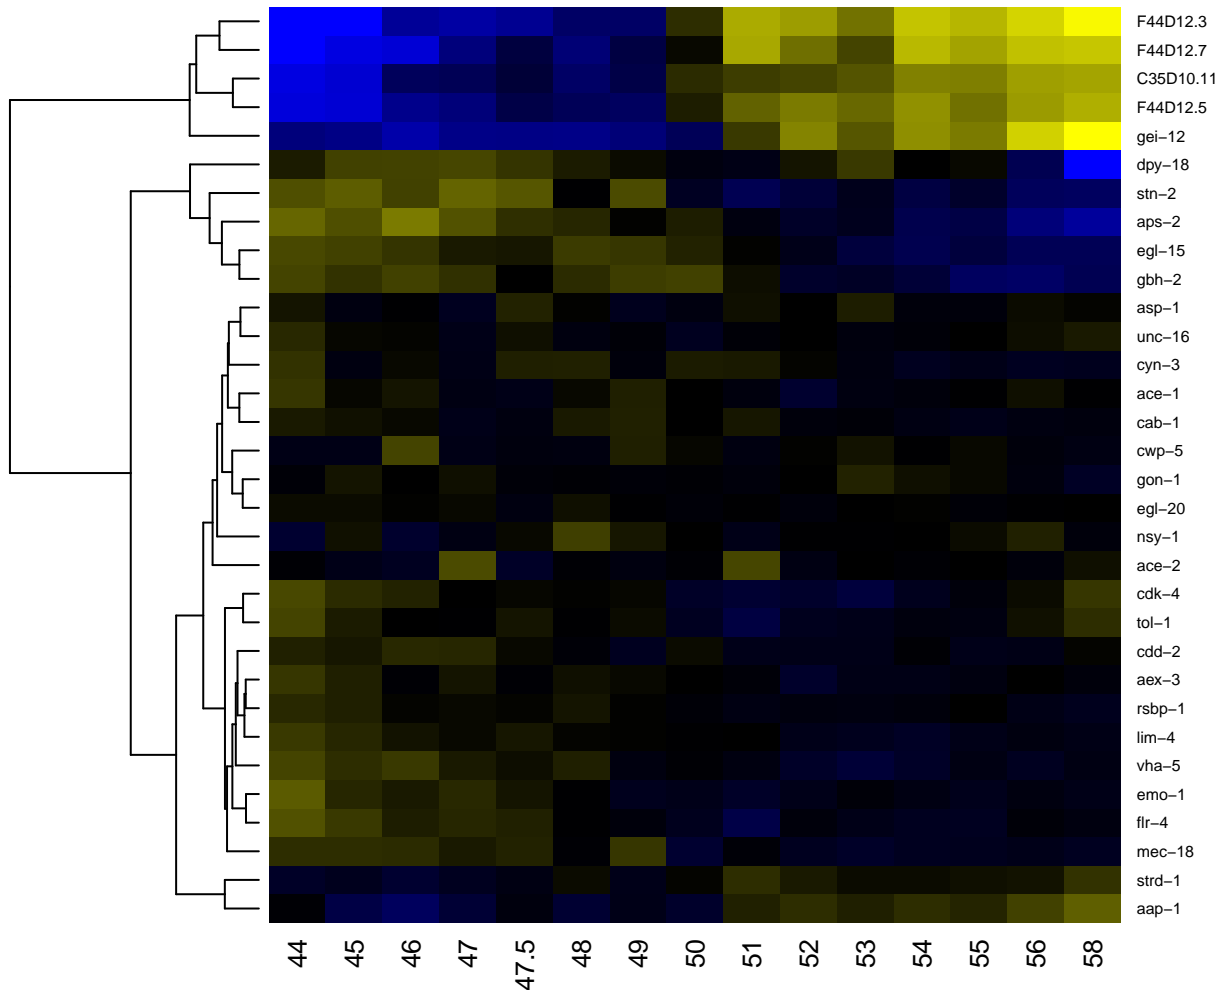





# cell-matrix adhesion

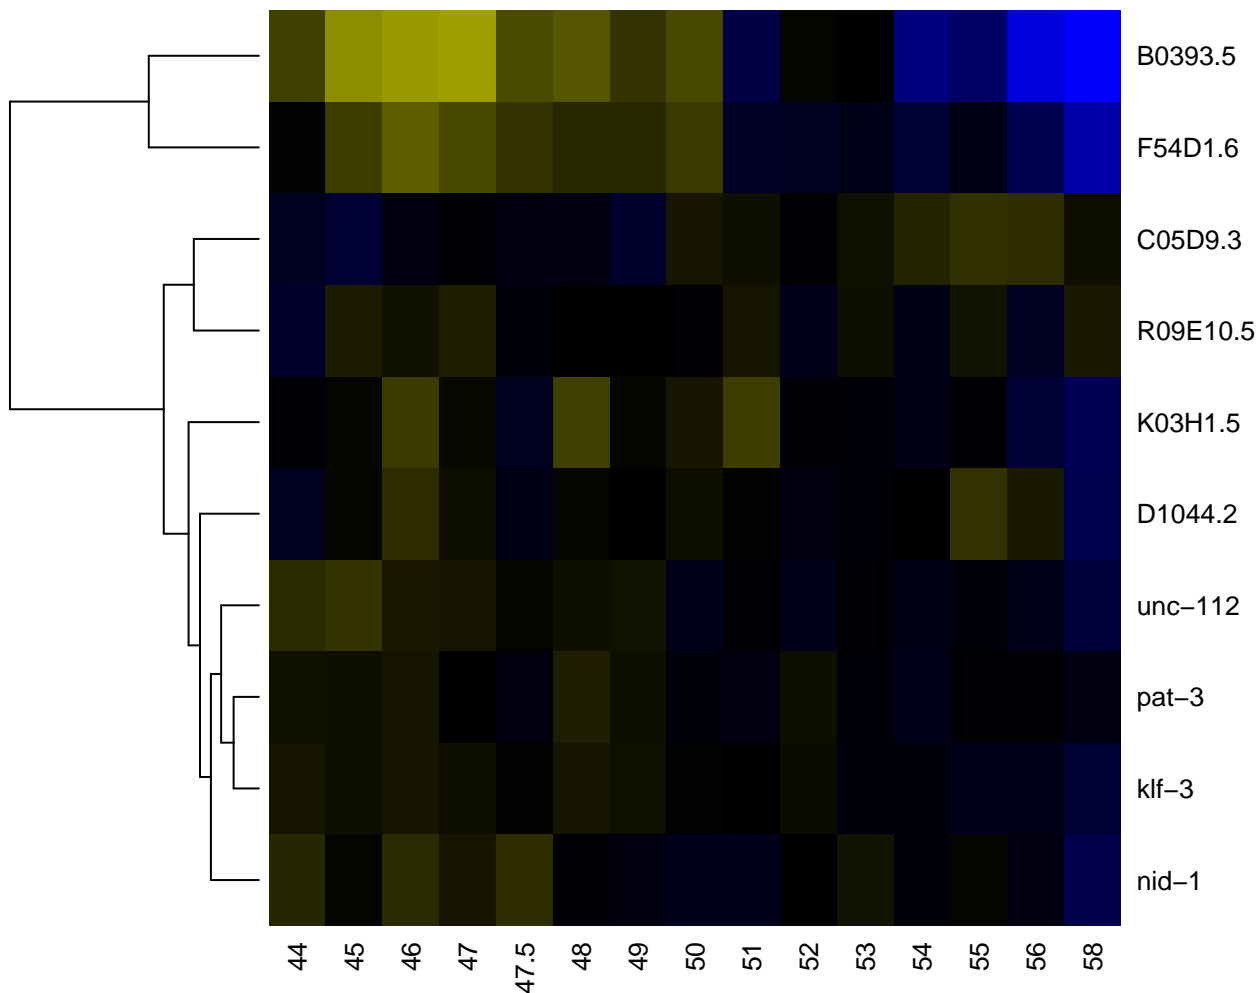

# cell adhesion

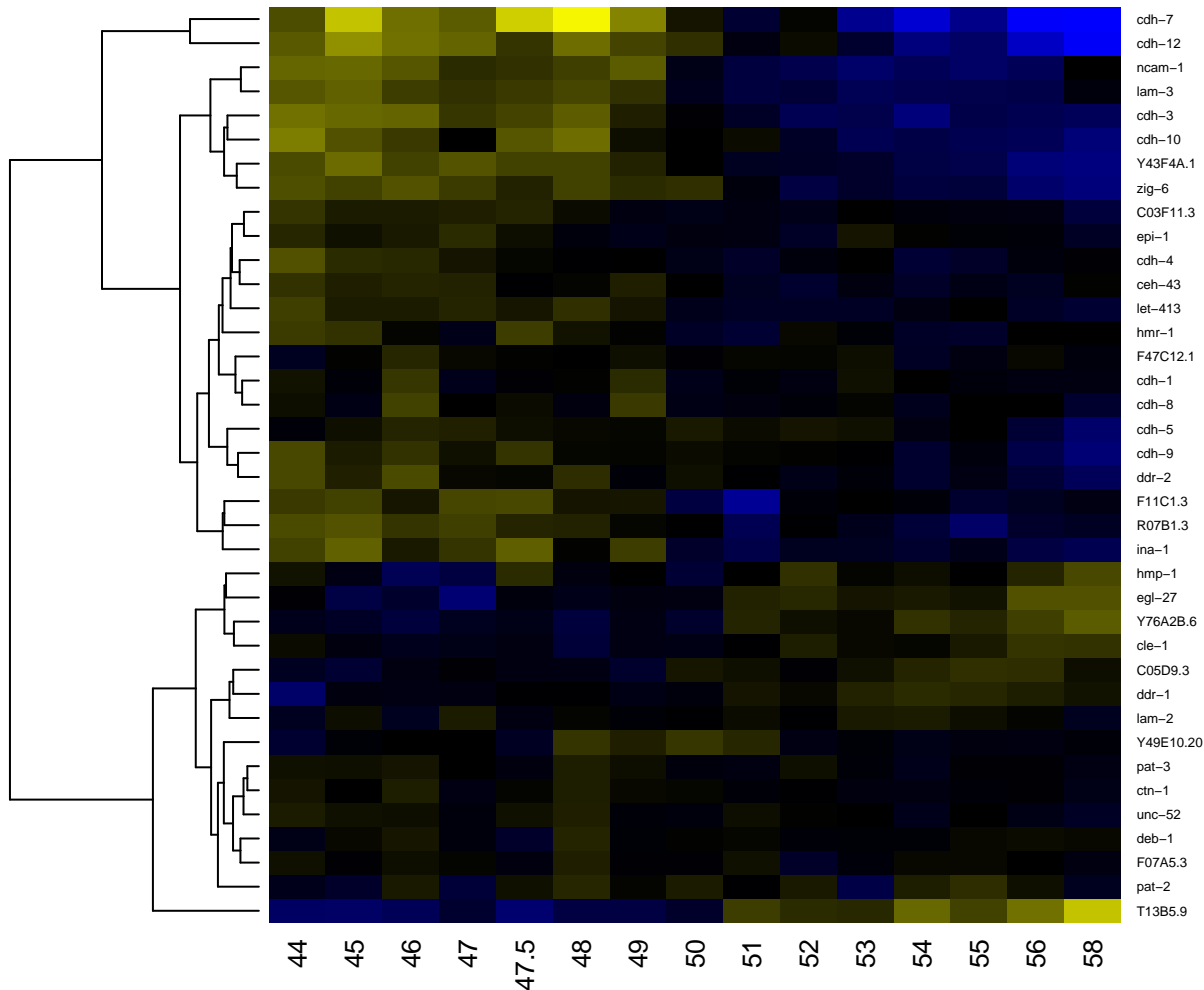

# cell communication

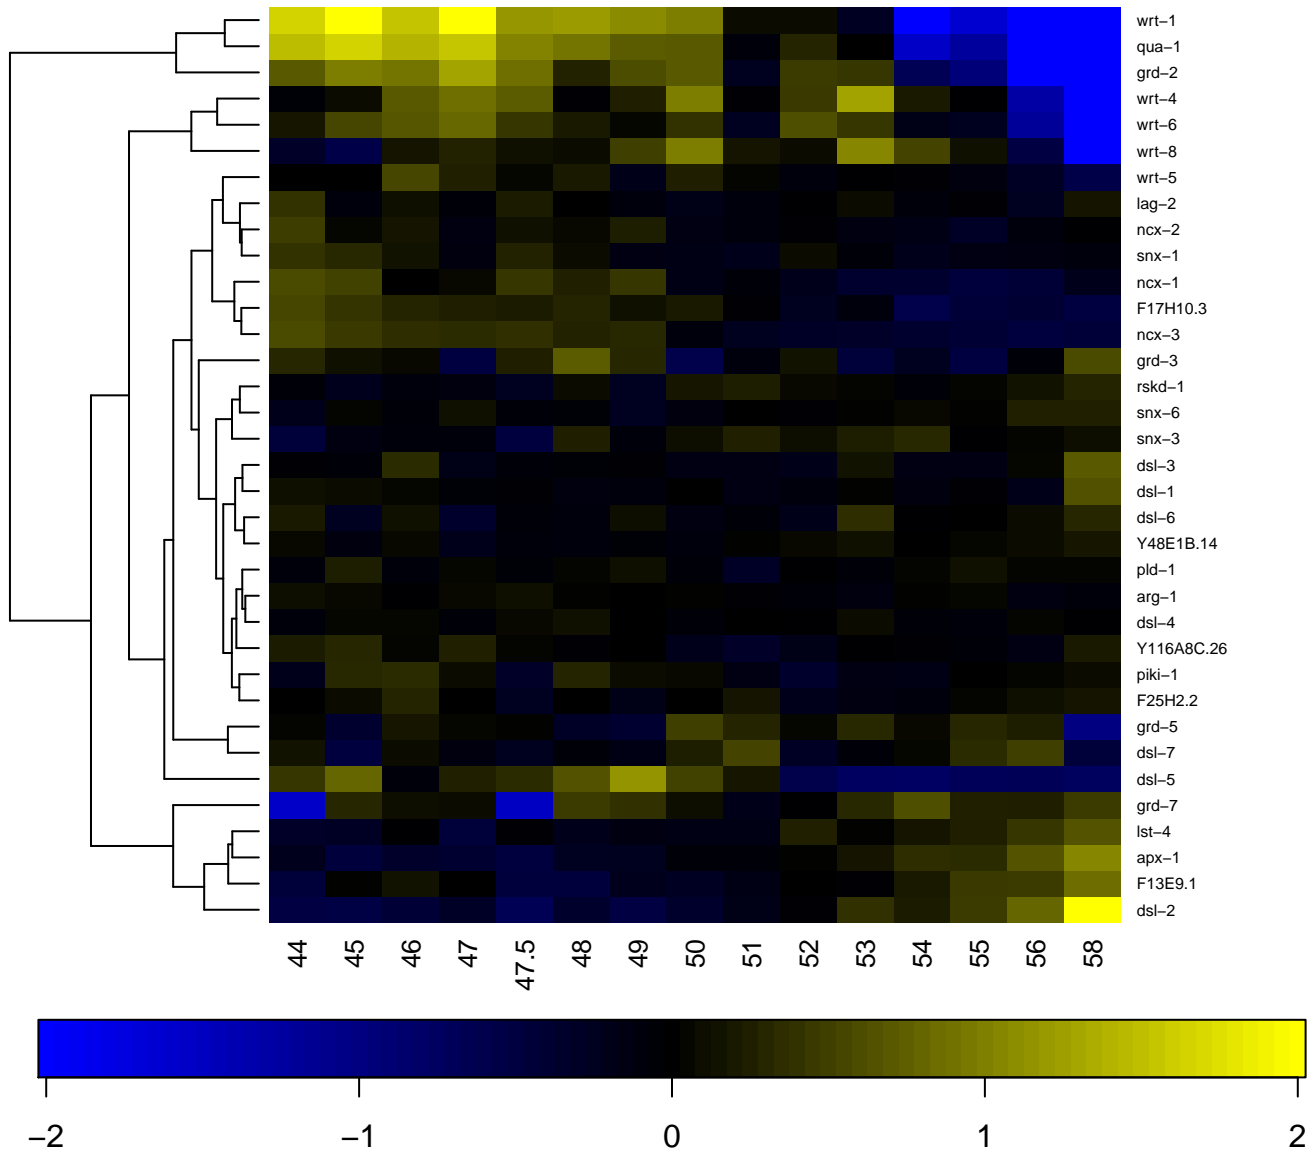

# cell cortex

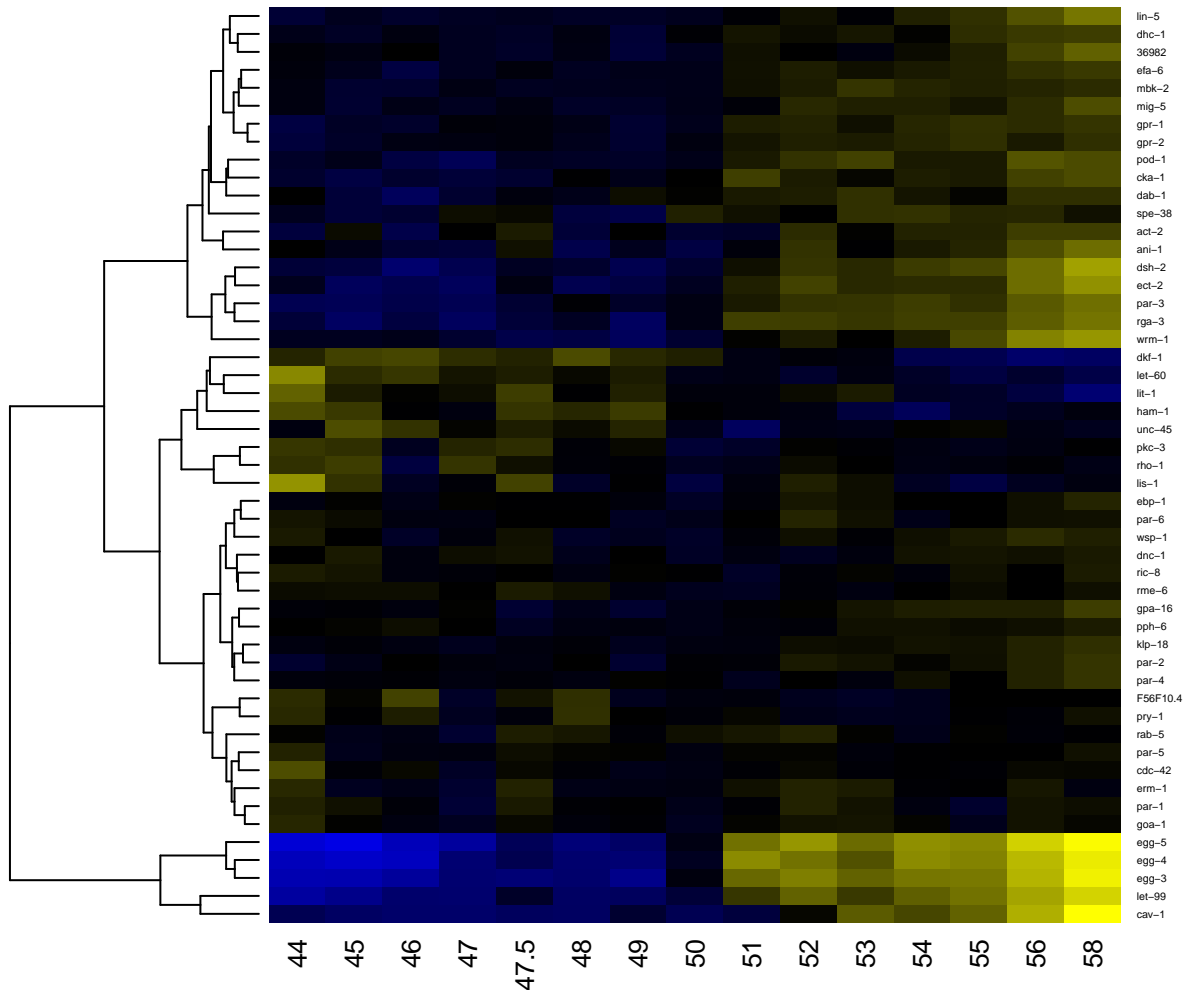

# cell cycle

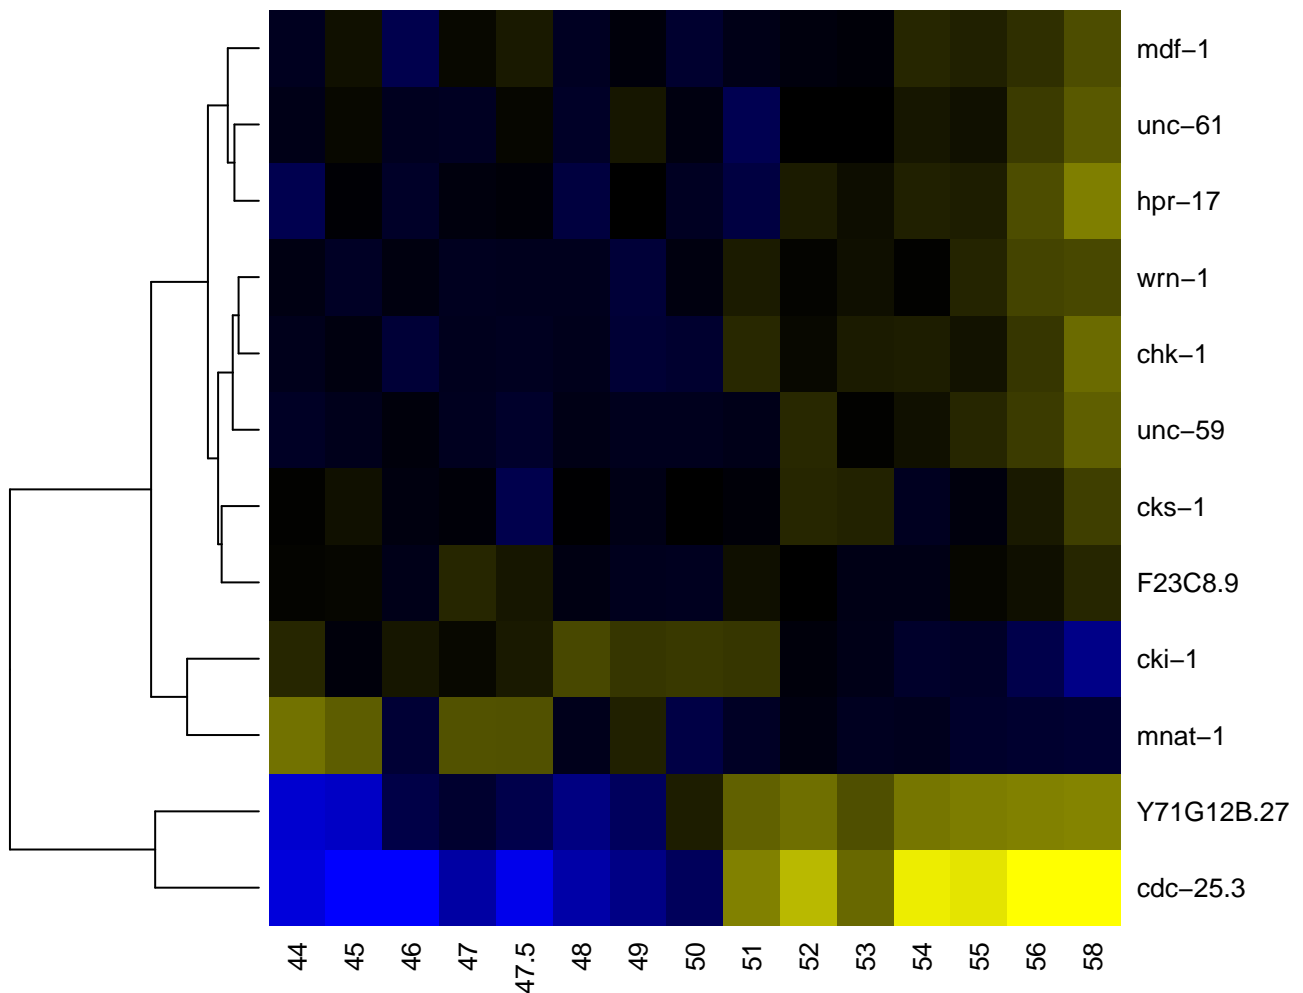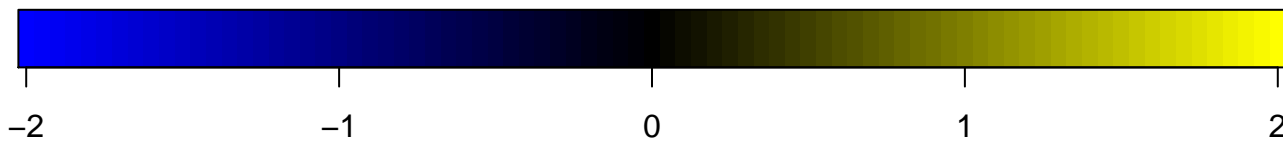





# cell death

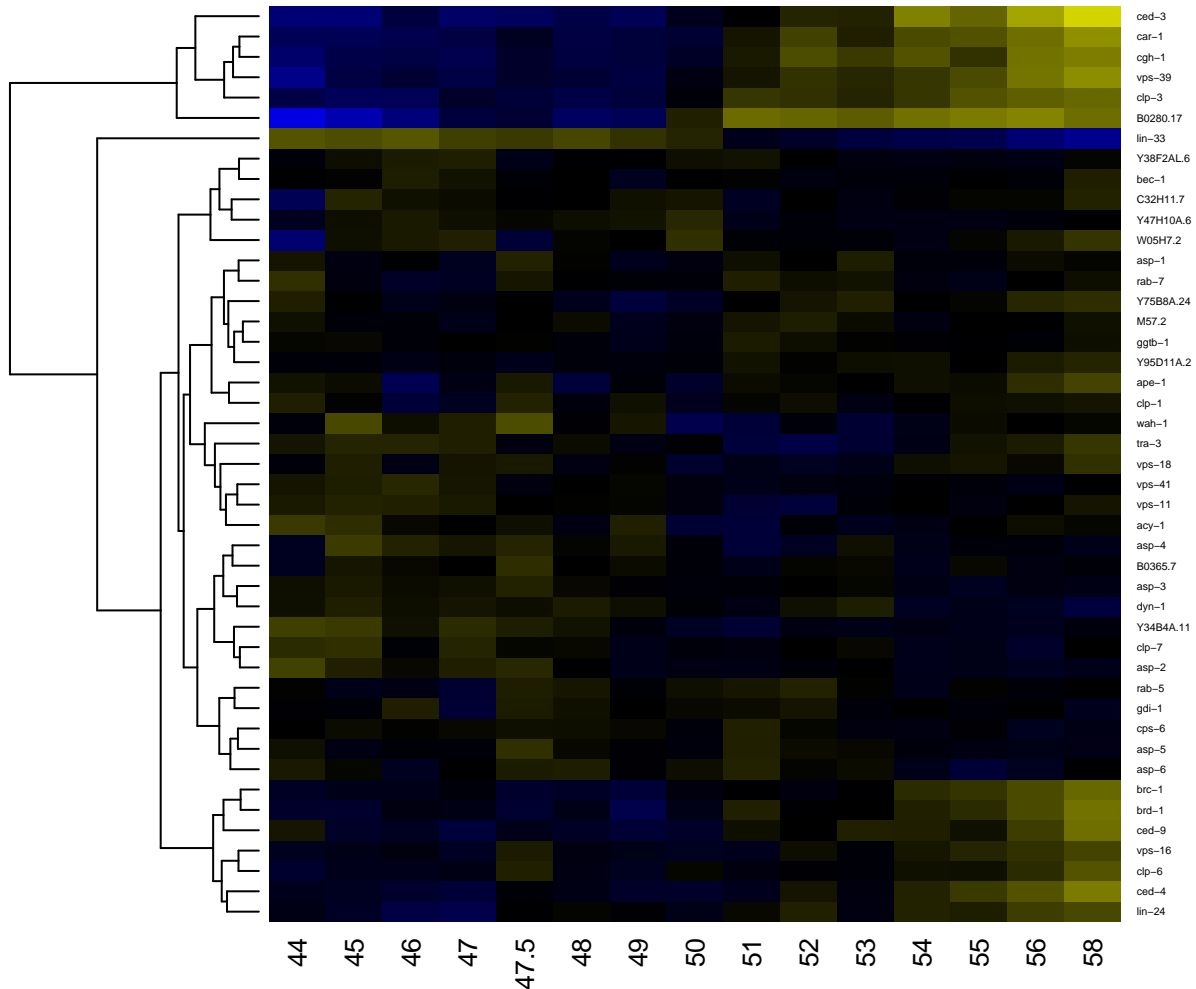



# cell division

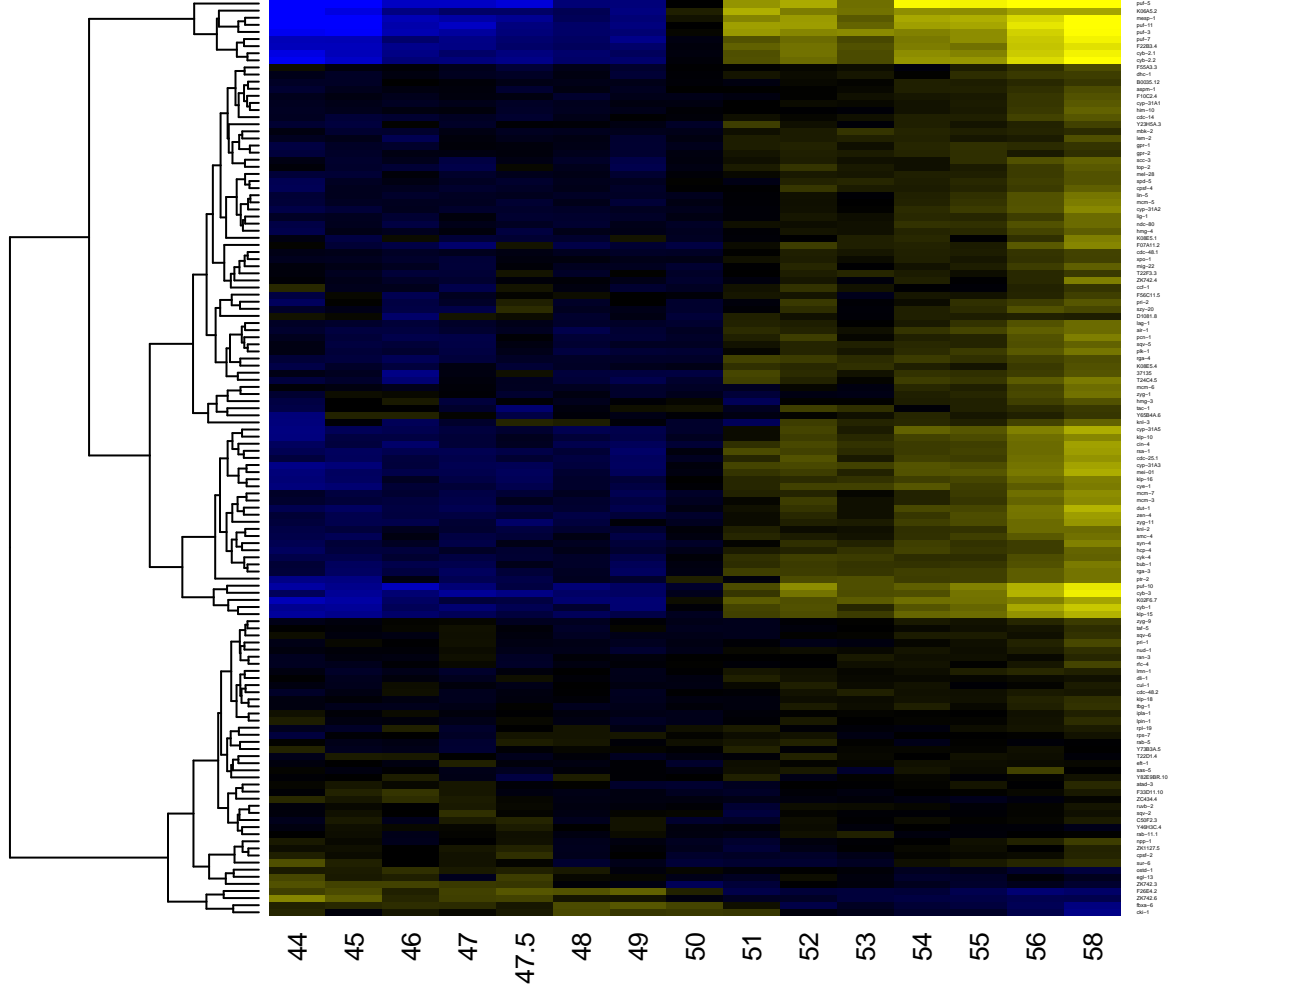





# cell fate specification

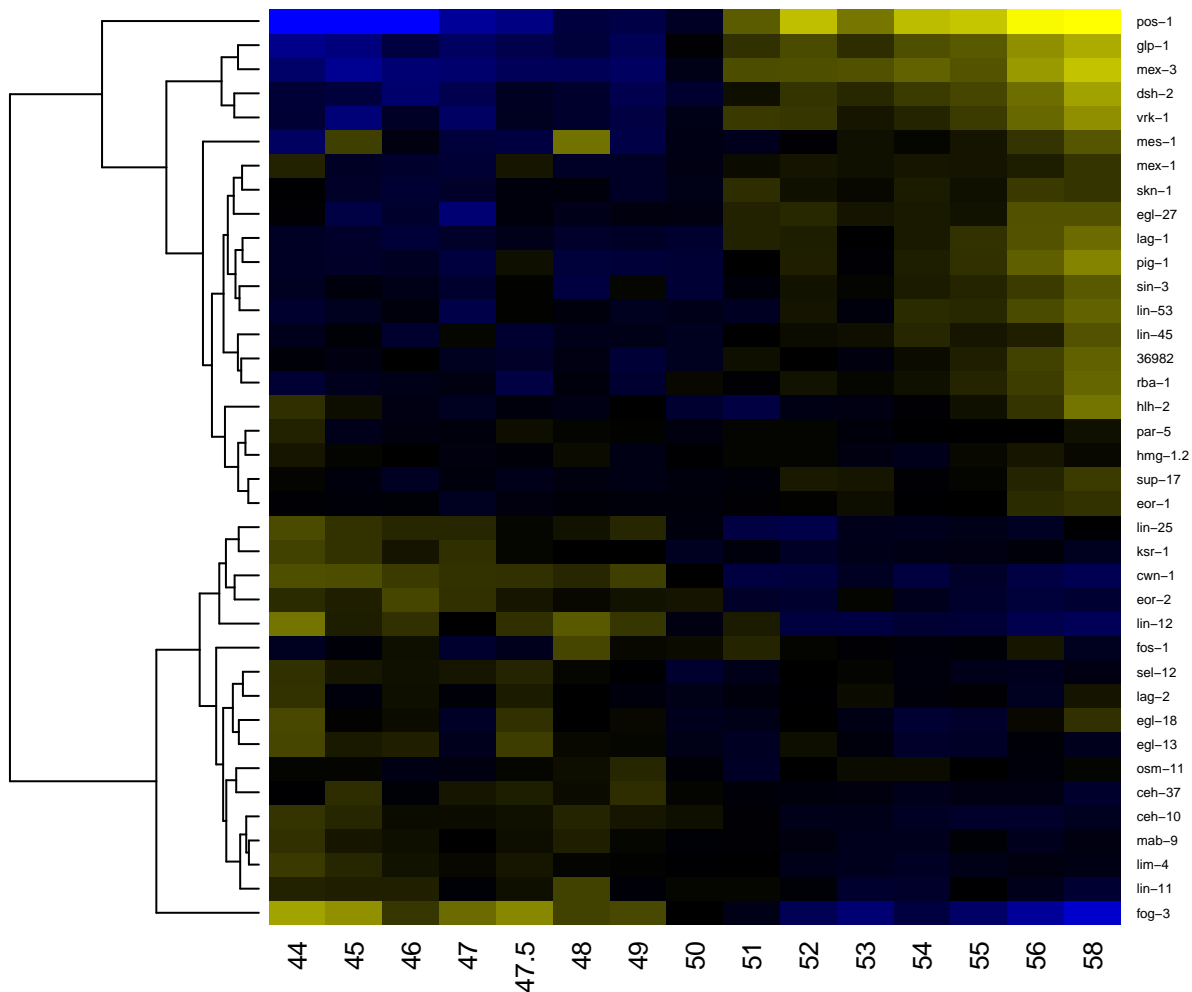

# cell junction

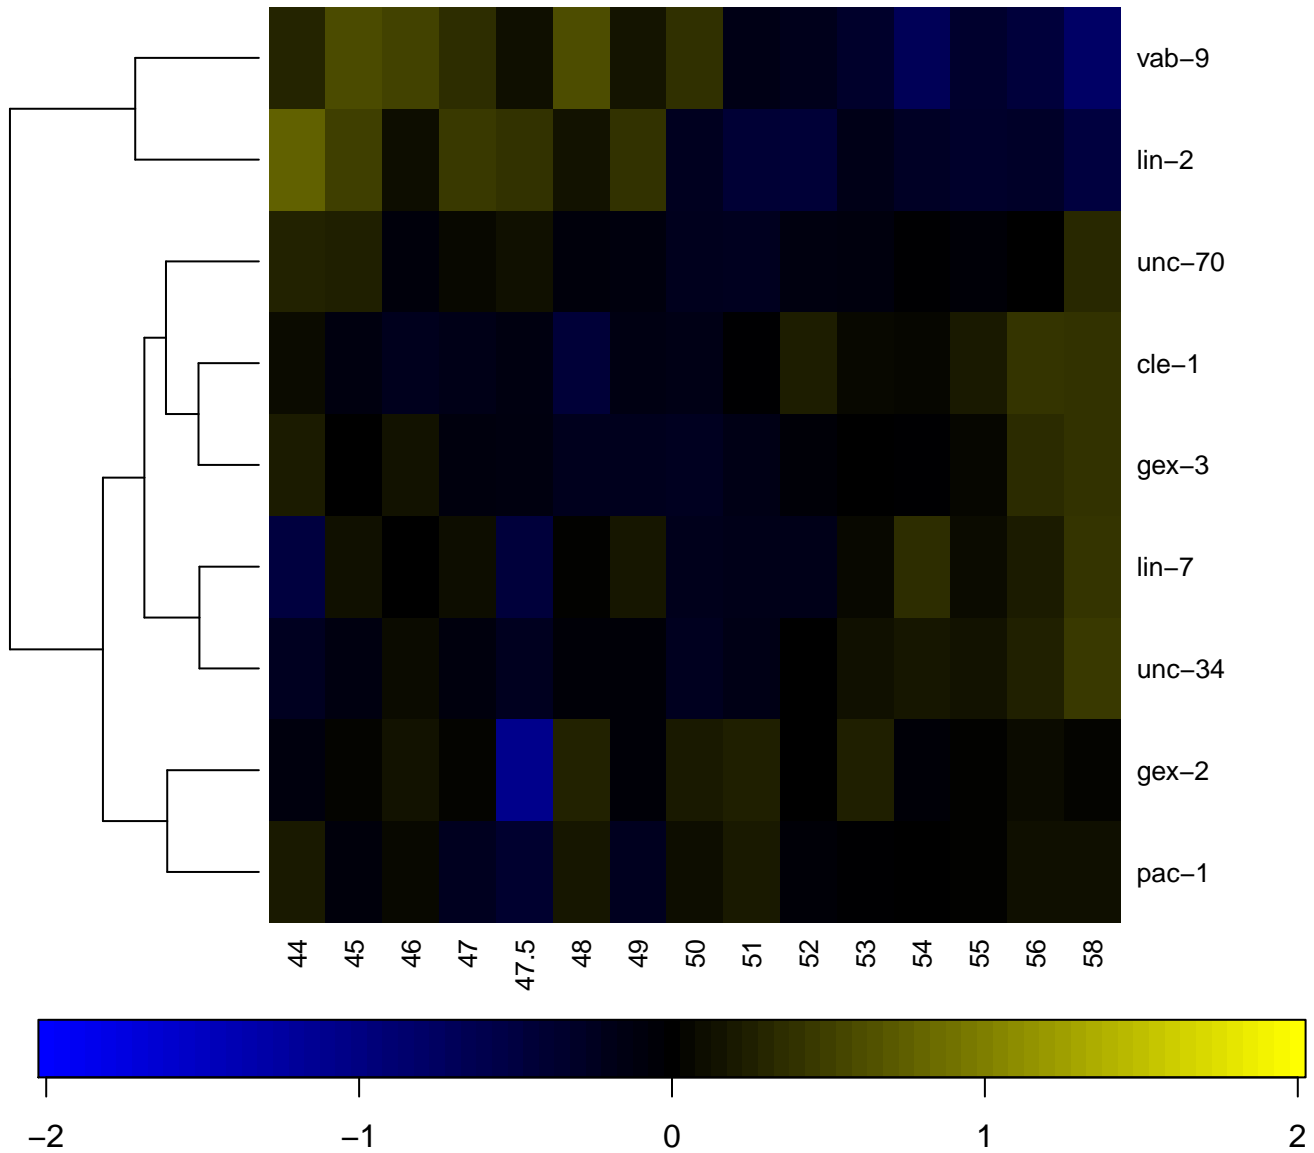



# cell migration

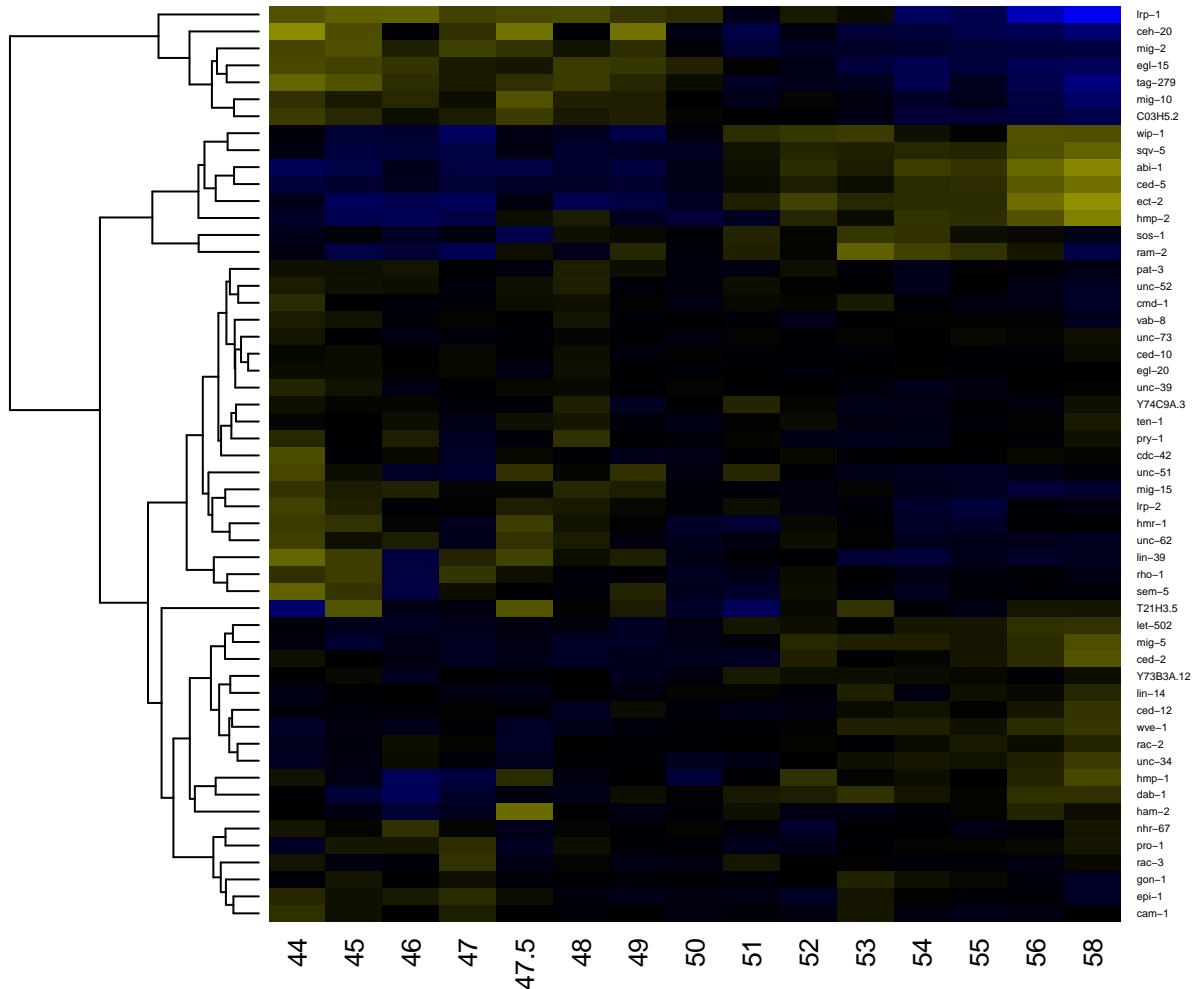





# cell proliferation

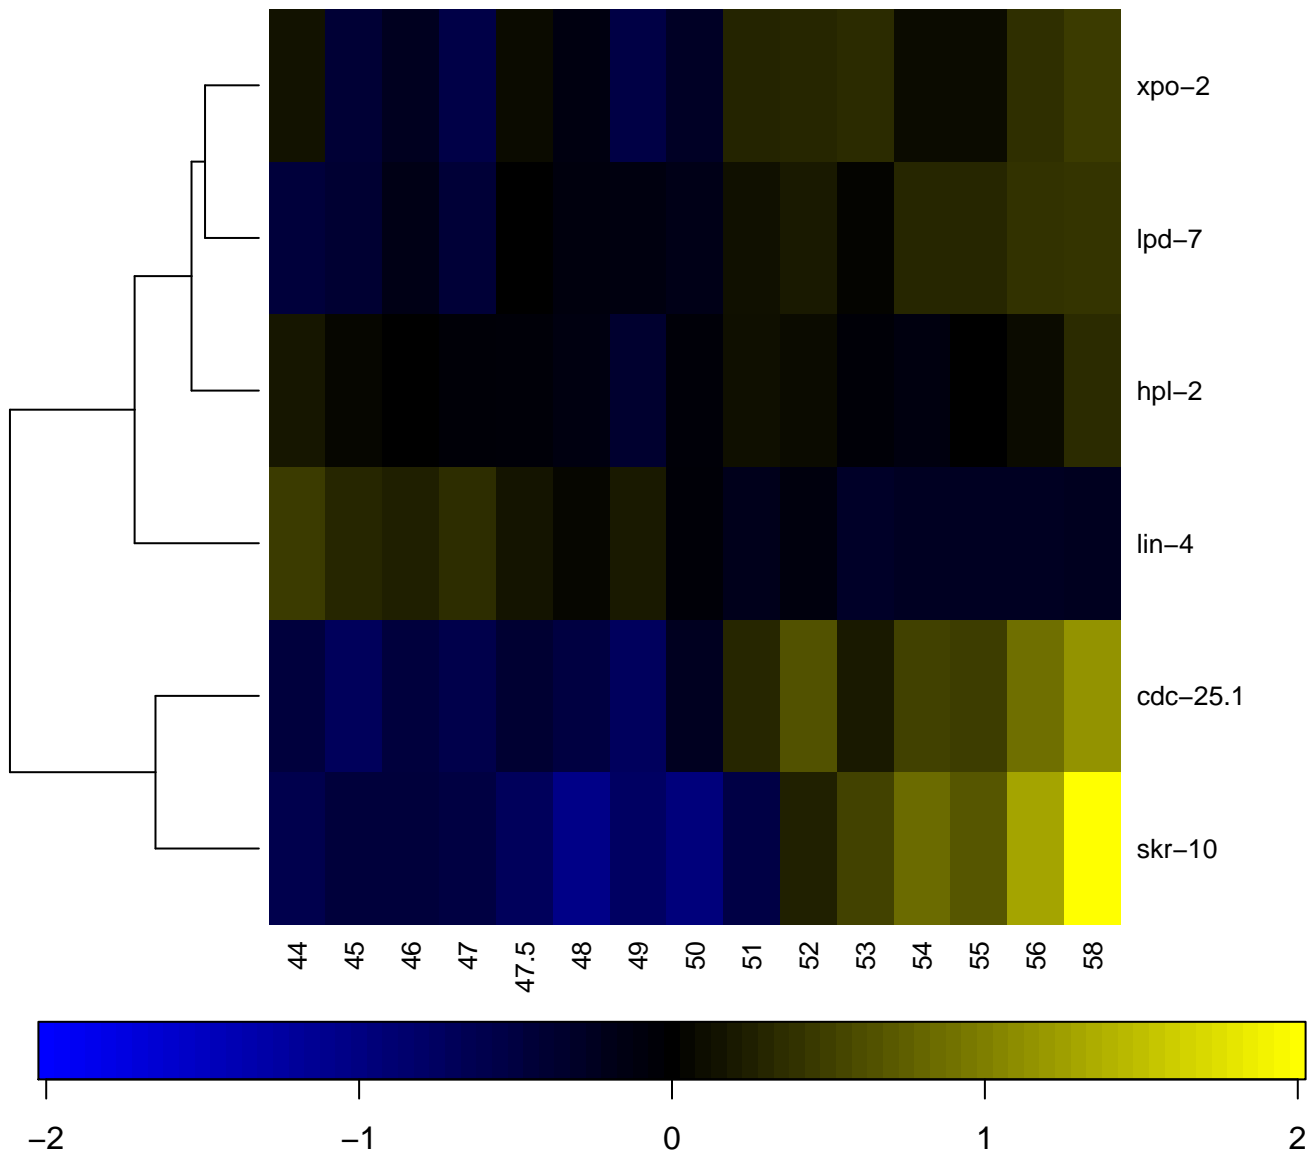

# cell redox homeostasis

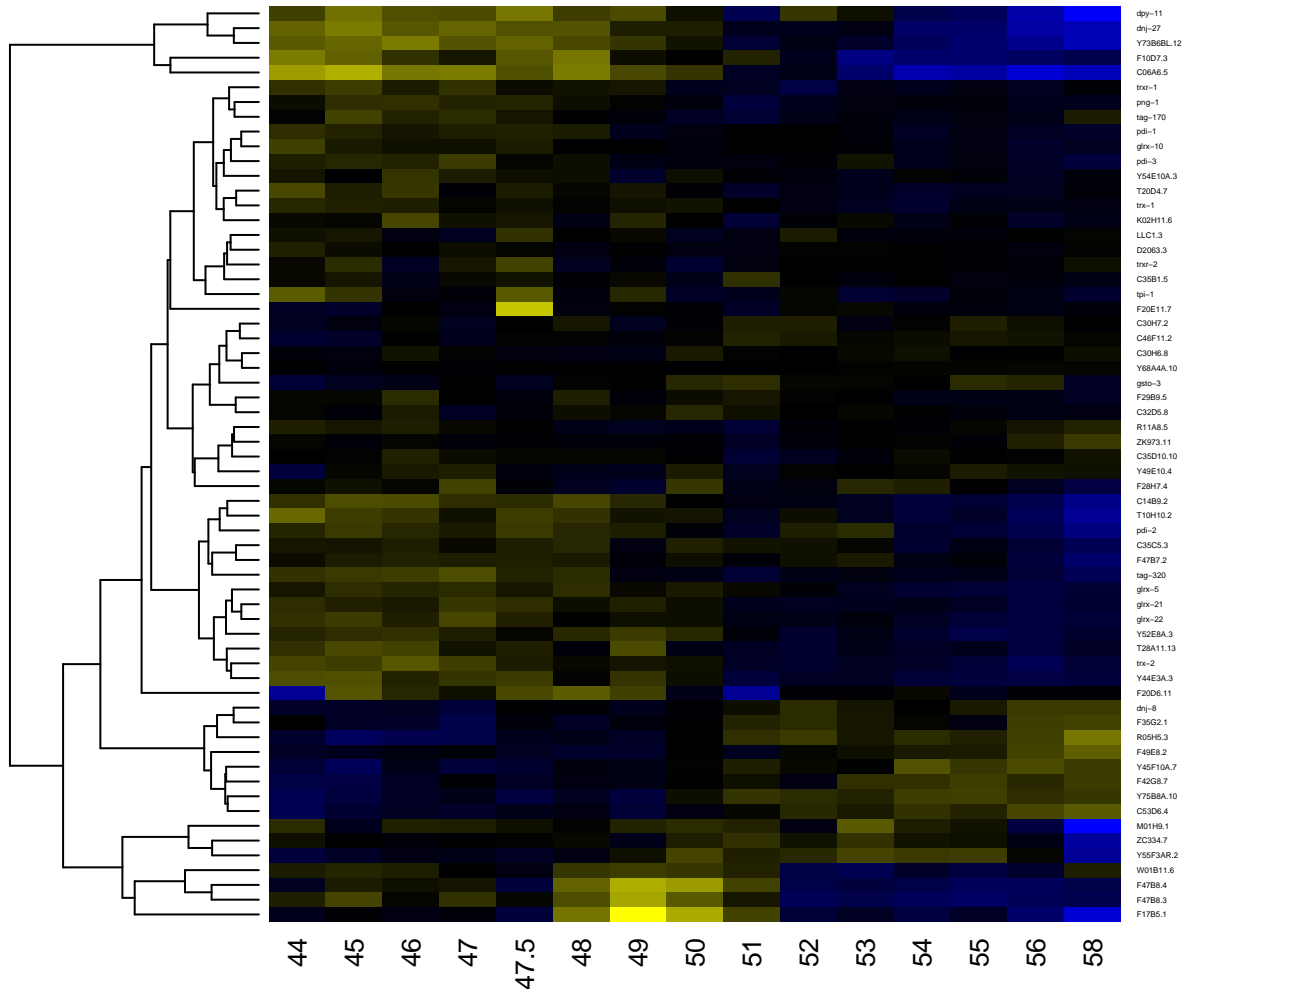

# cell soma

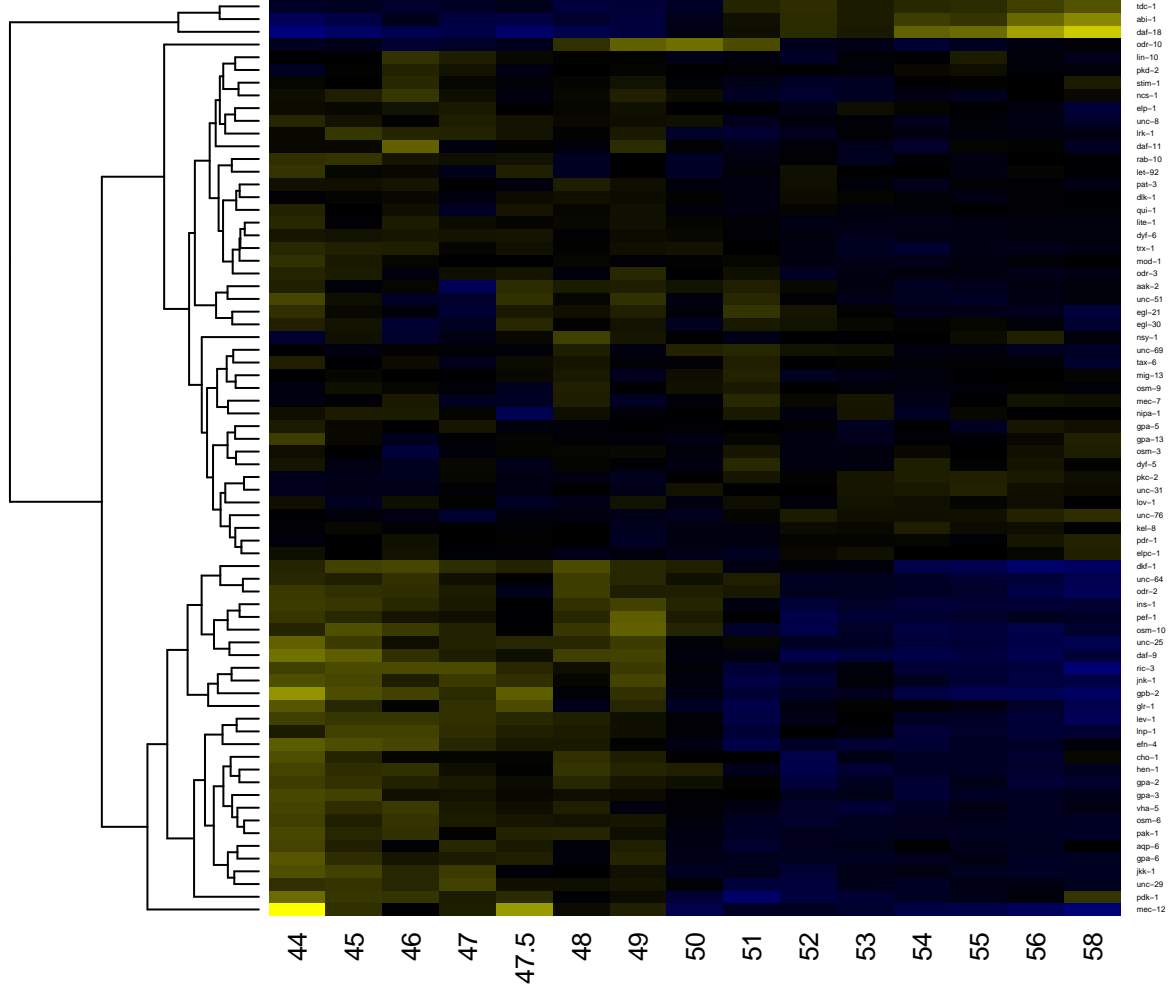

# cell surface

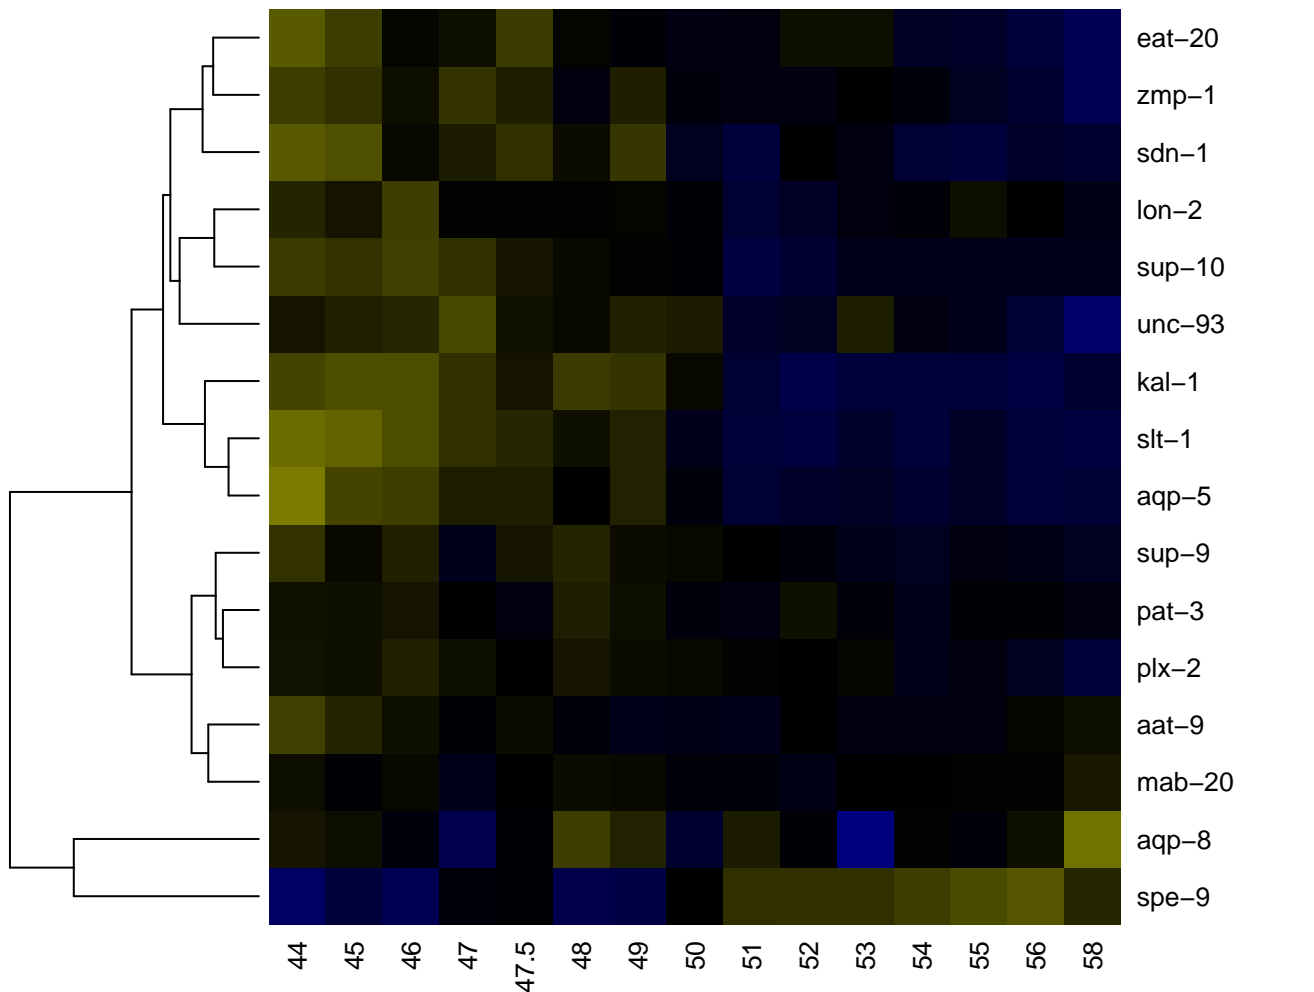







# cellular amino acid and derivative metabolic process

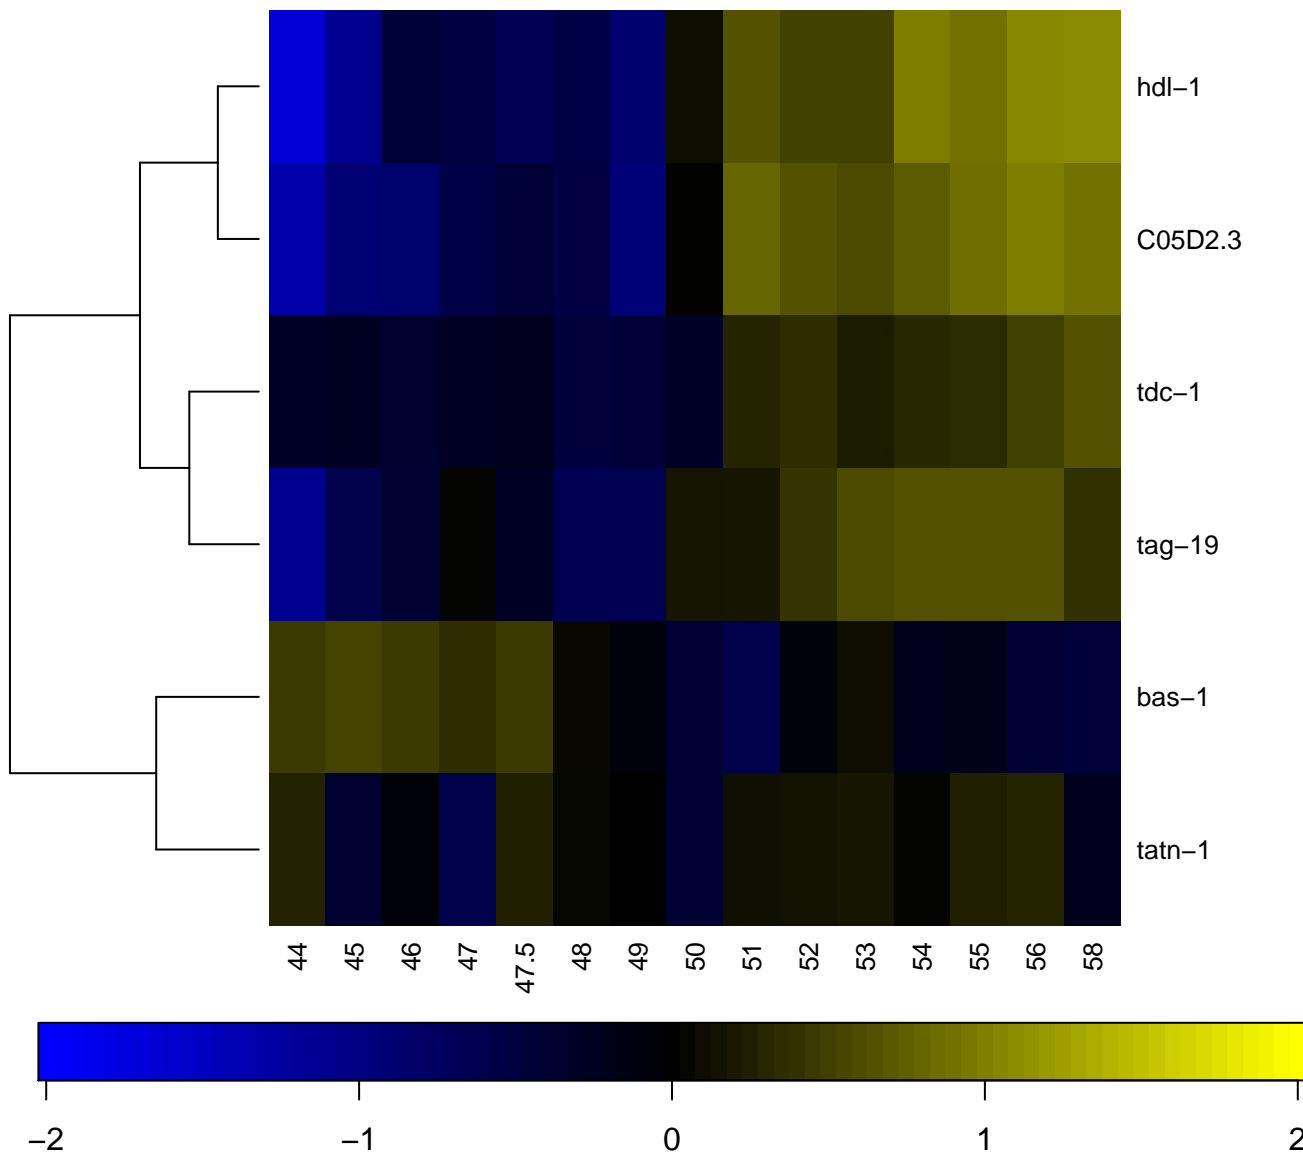

# cellular amino acid metabolic process

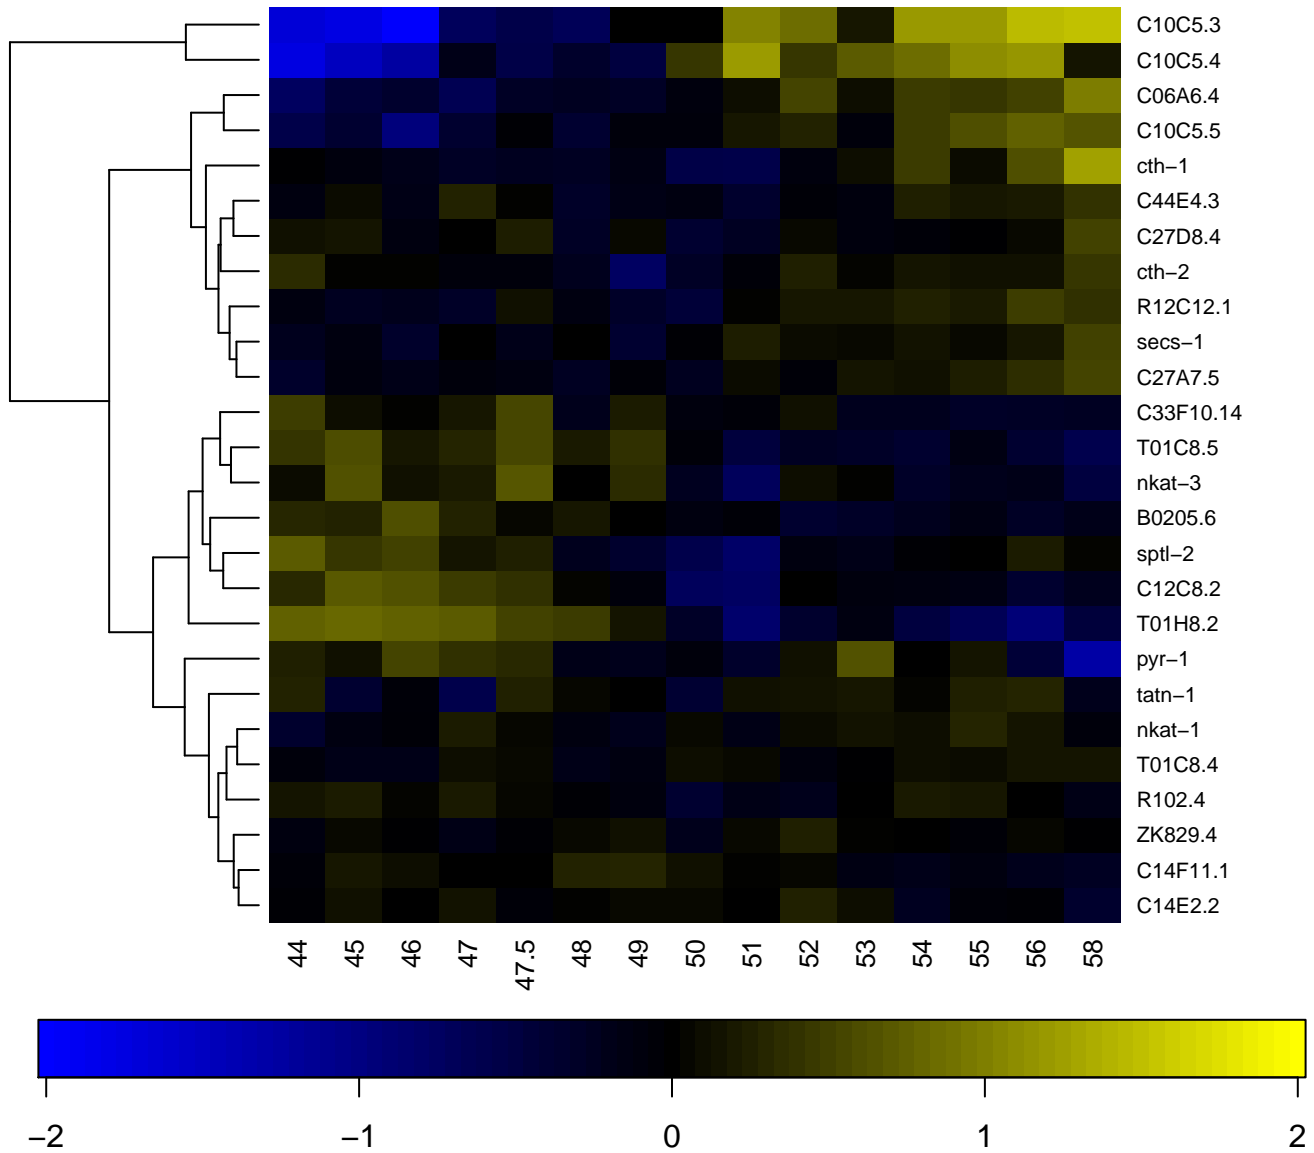

# cellular calcium ion homeostasis

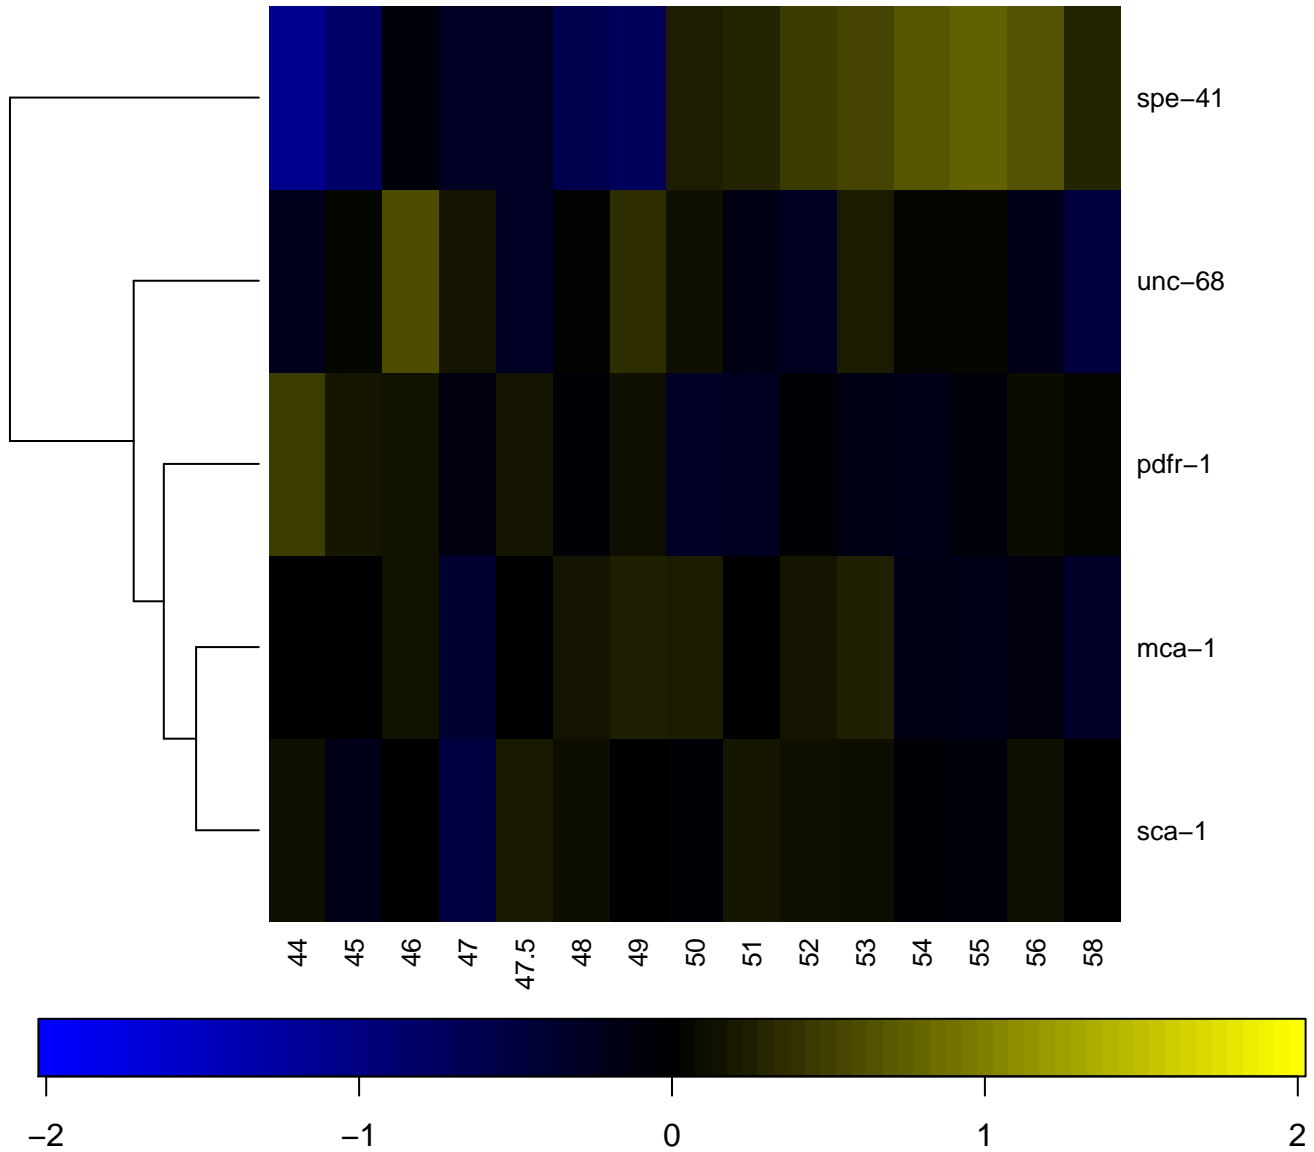











# cellular response to DNA damage stimulus

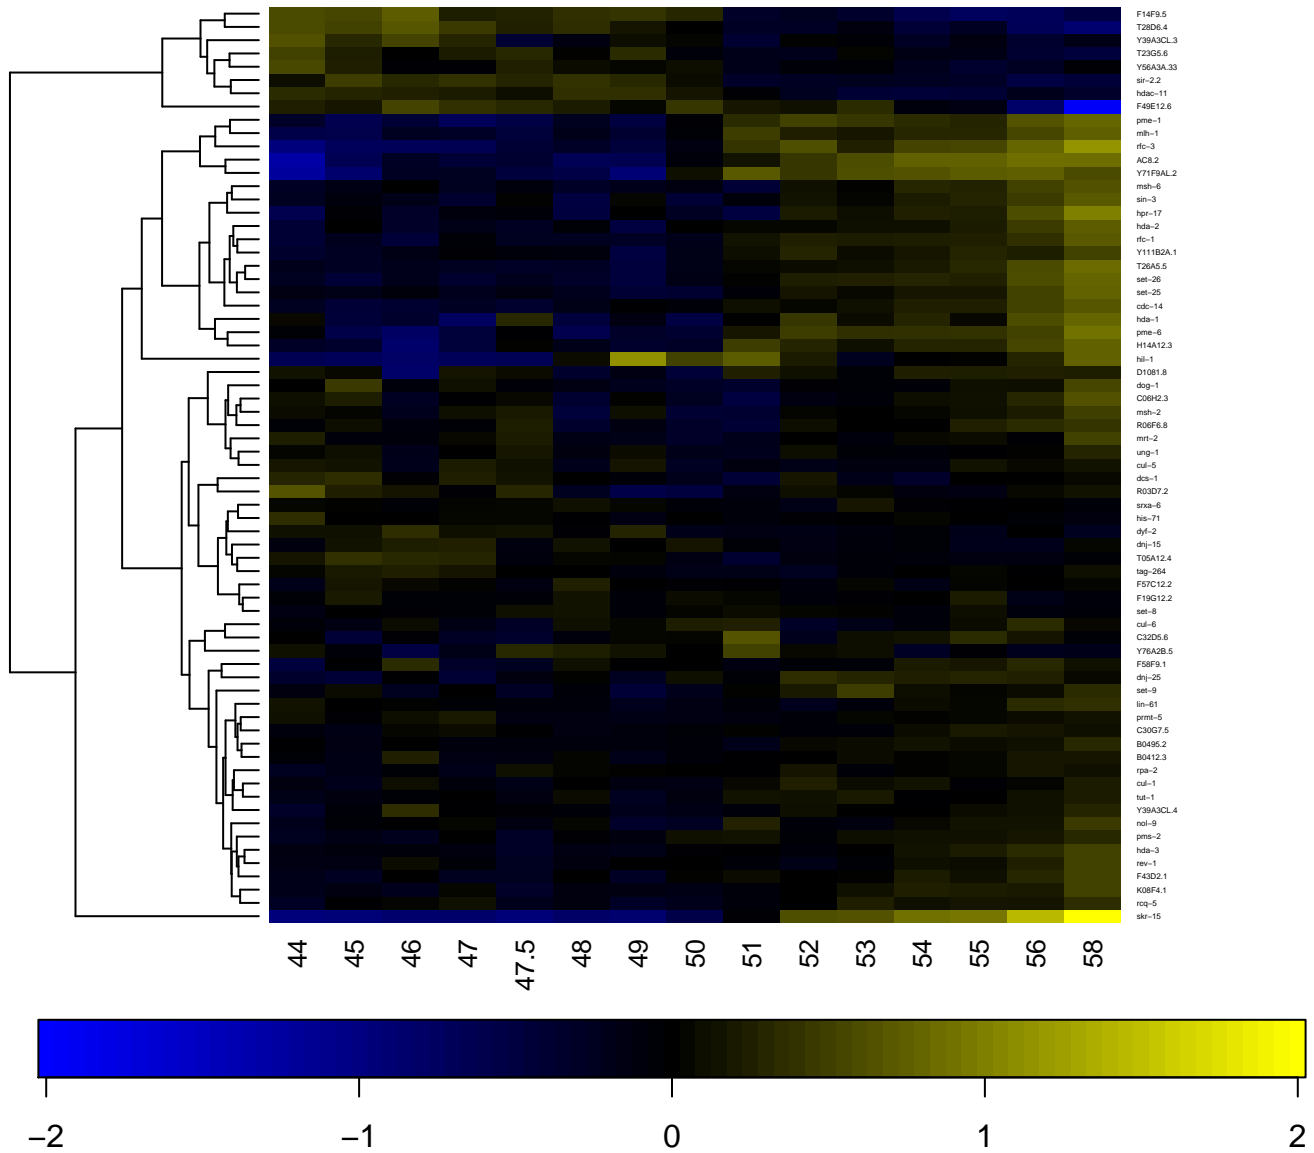



# cellular\_component

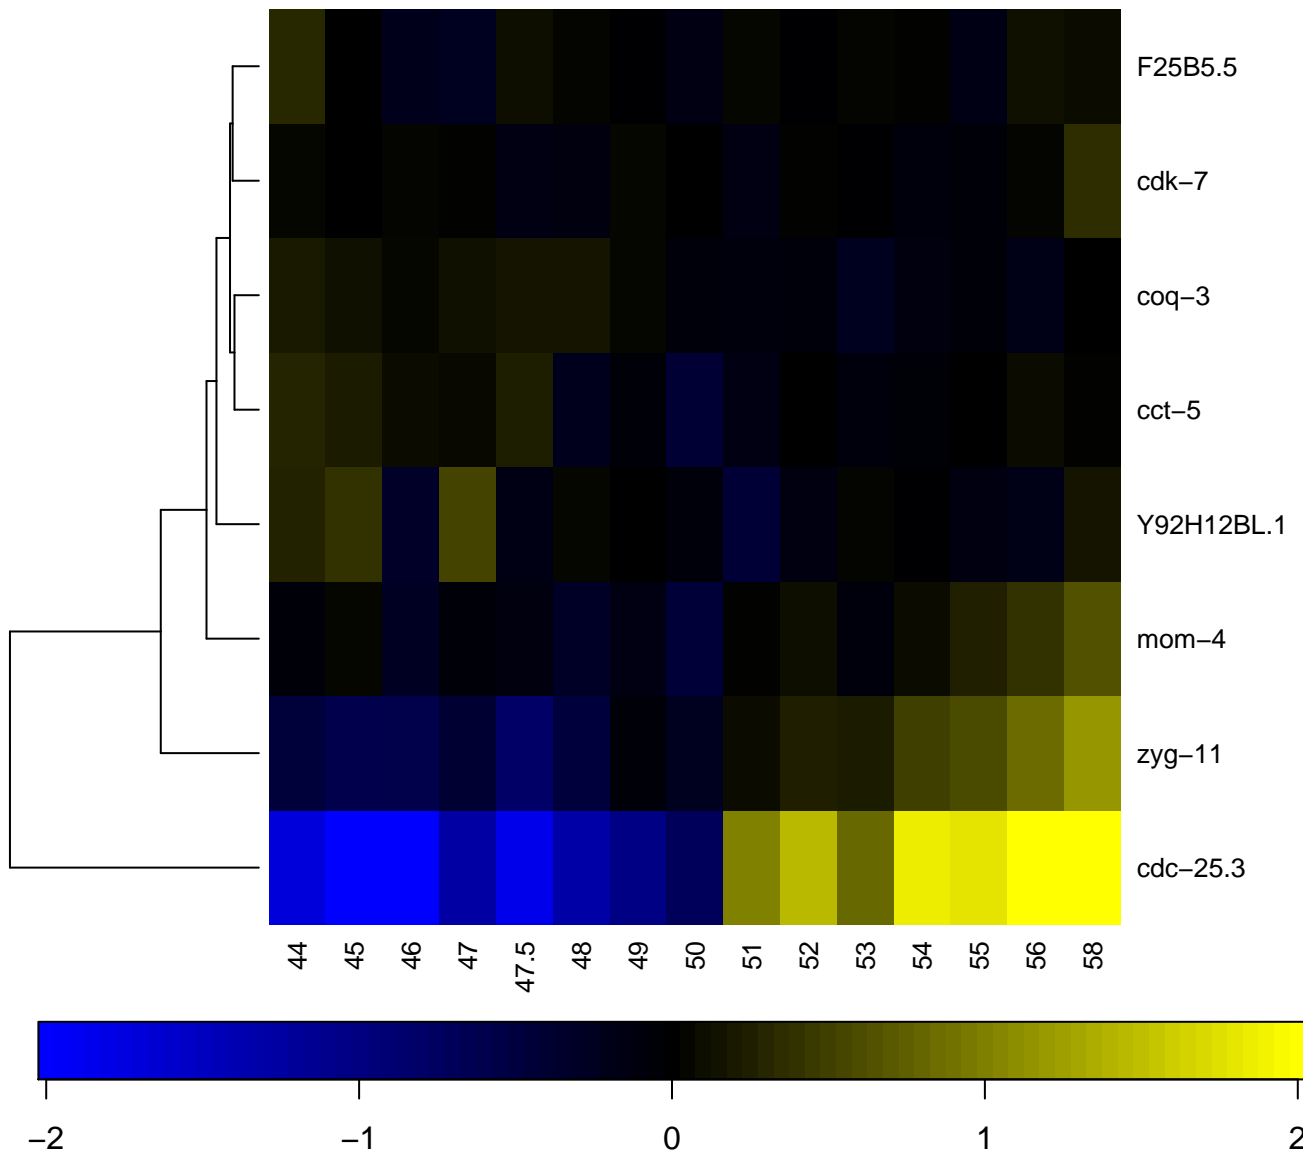



# centrosome

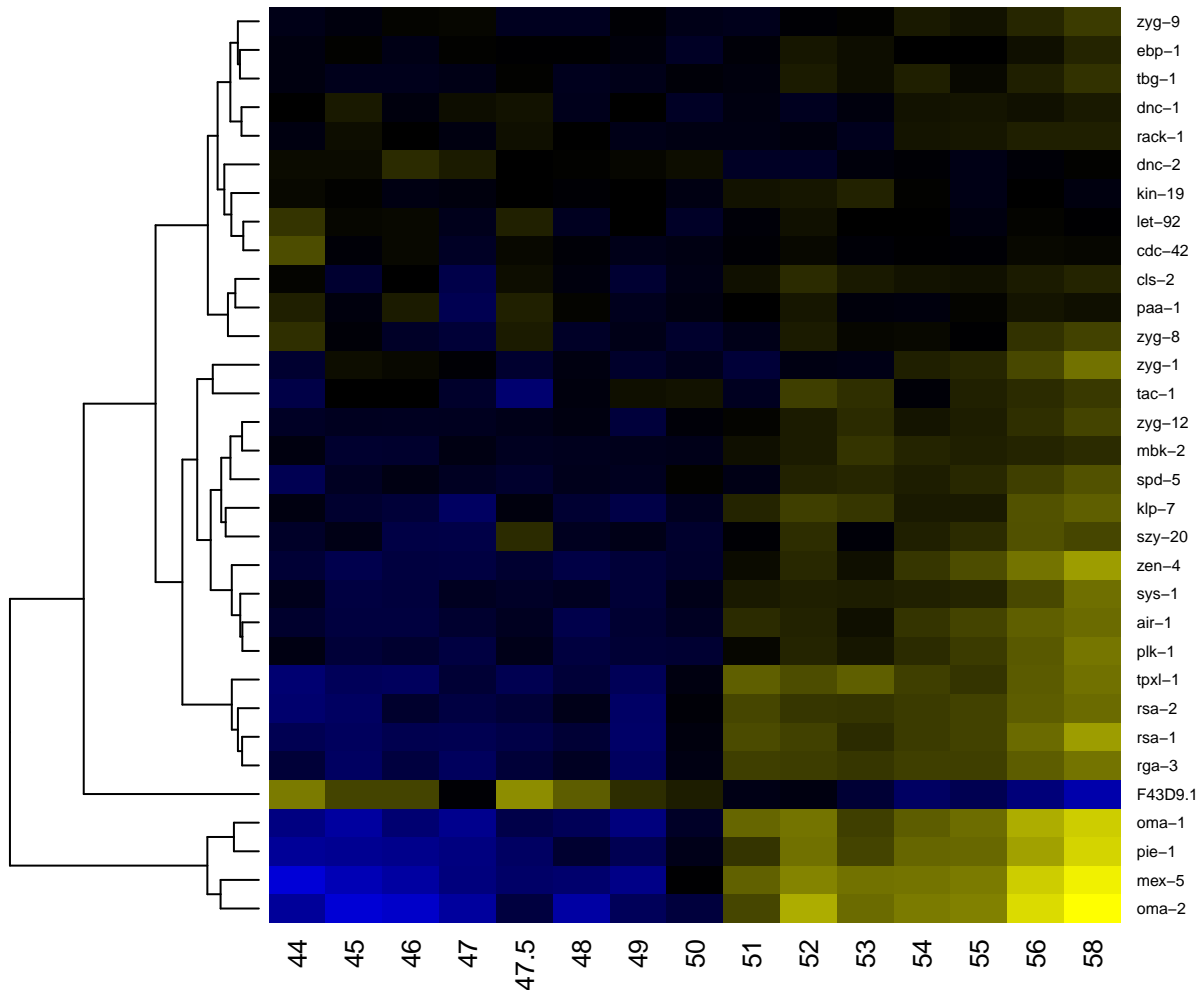









# chemotaxis

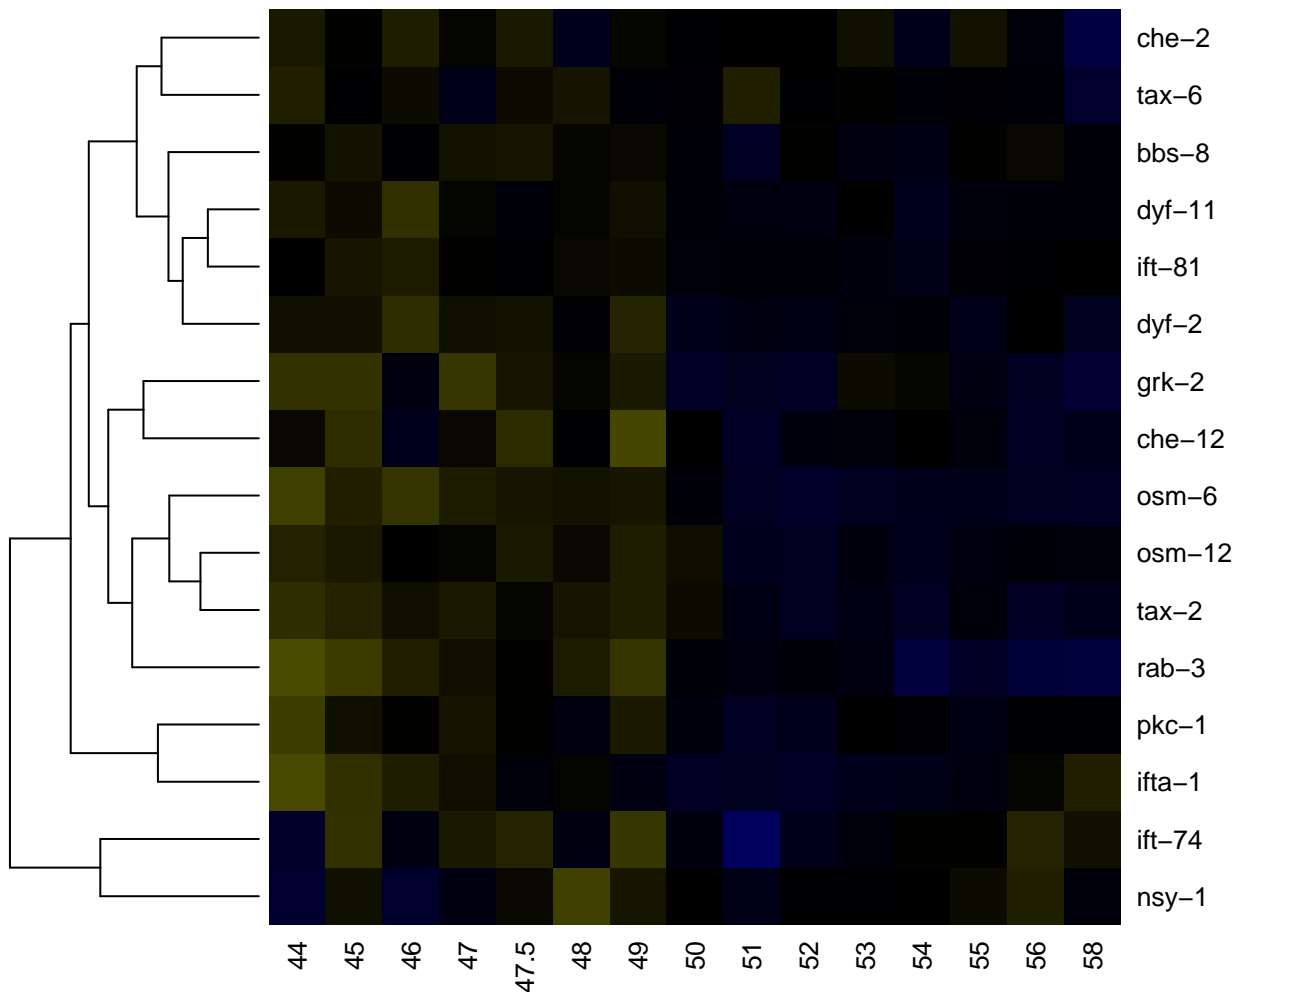

# chitin binding

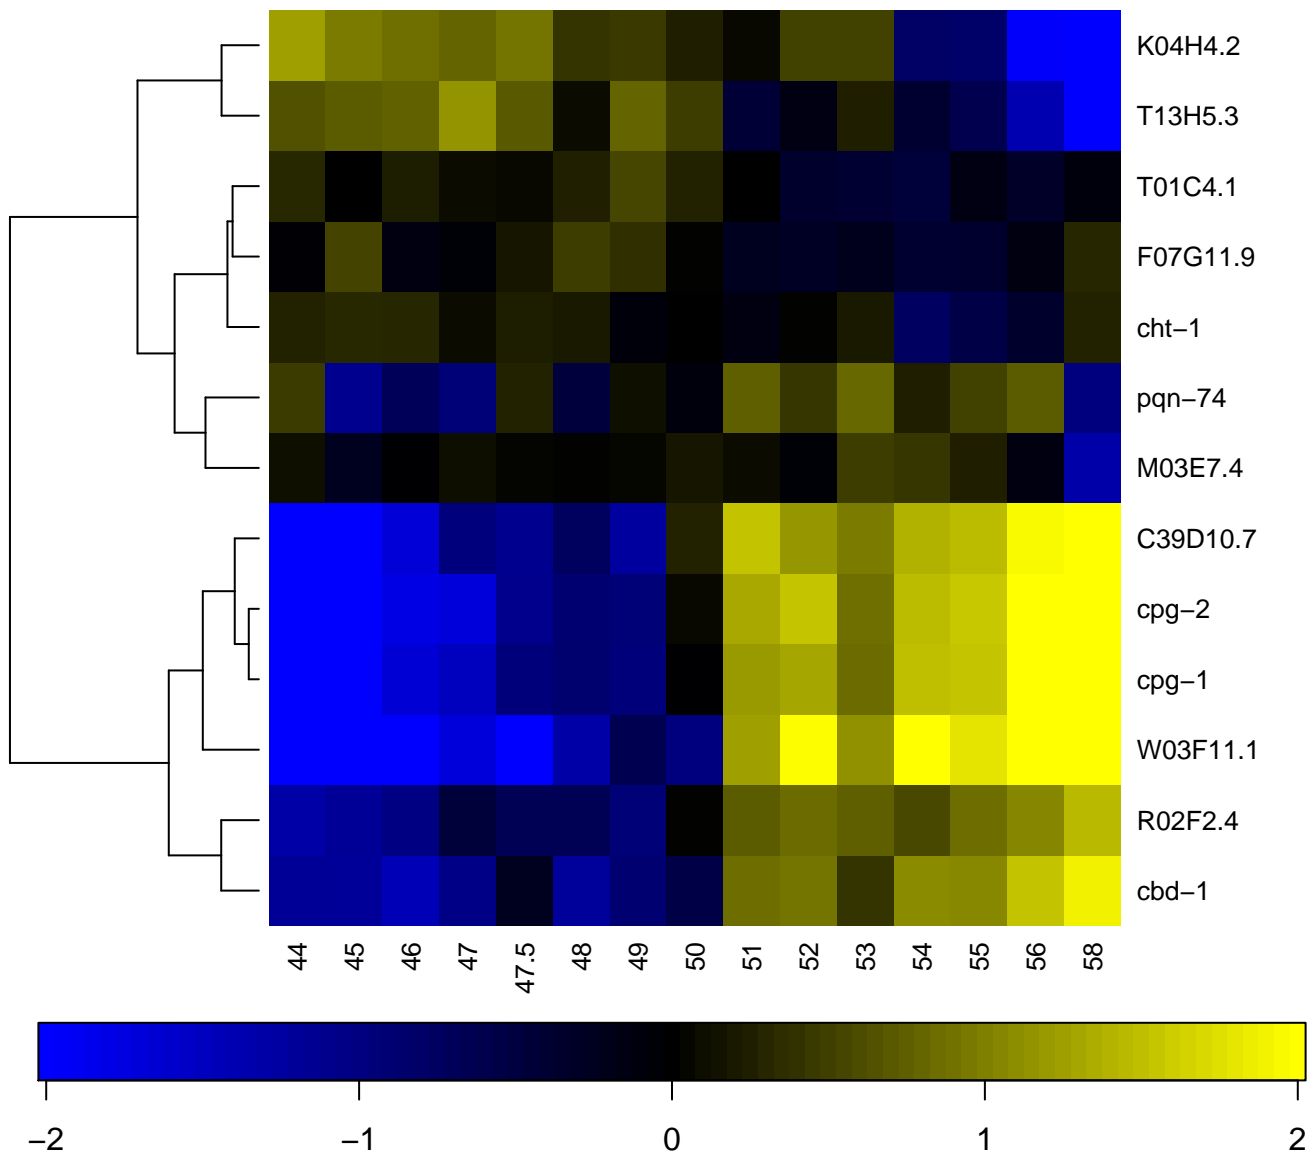

# chitin catabolic process

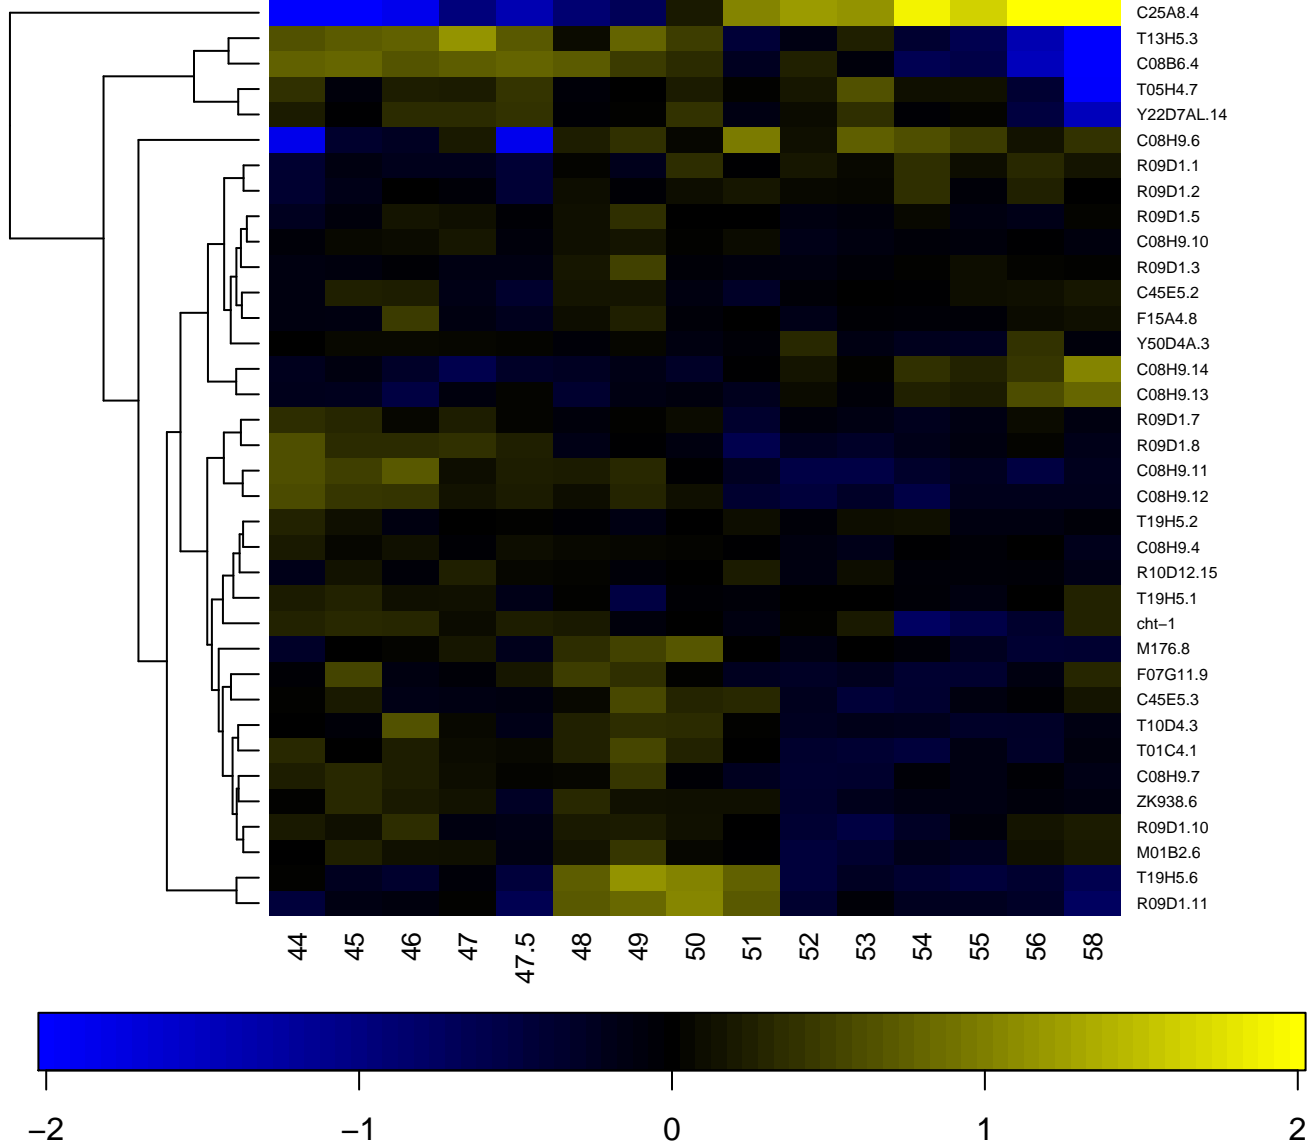

# chitin metabolic process

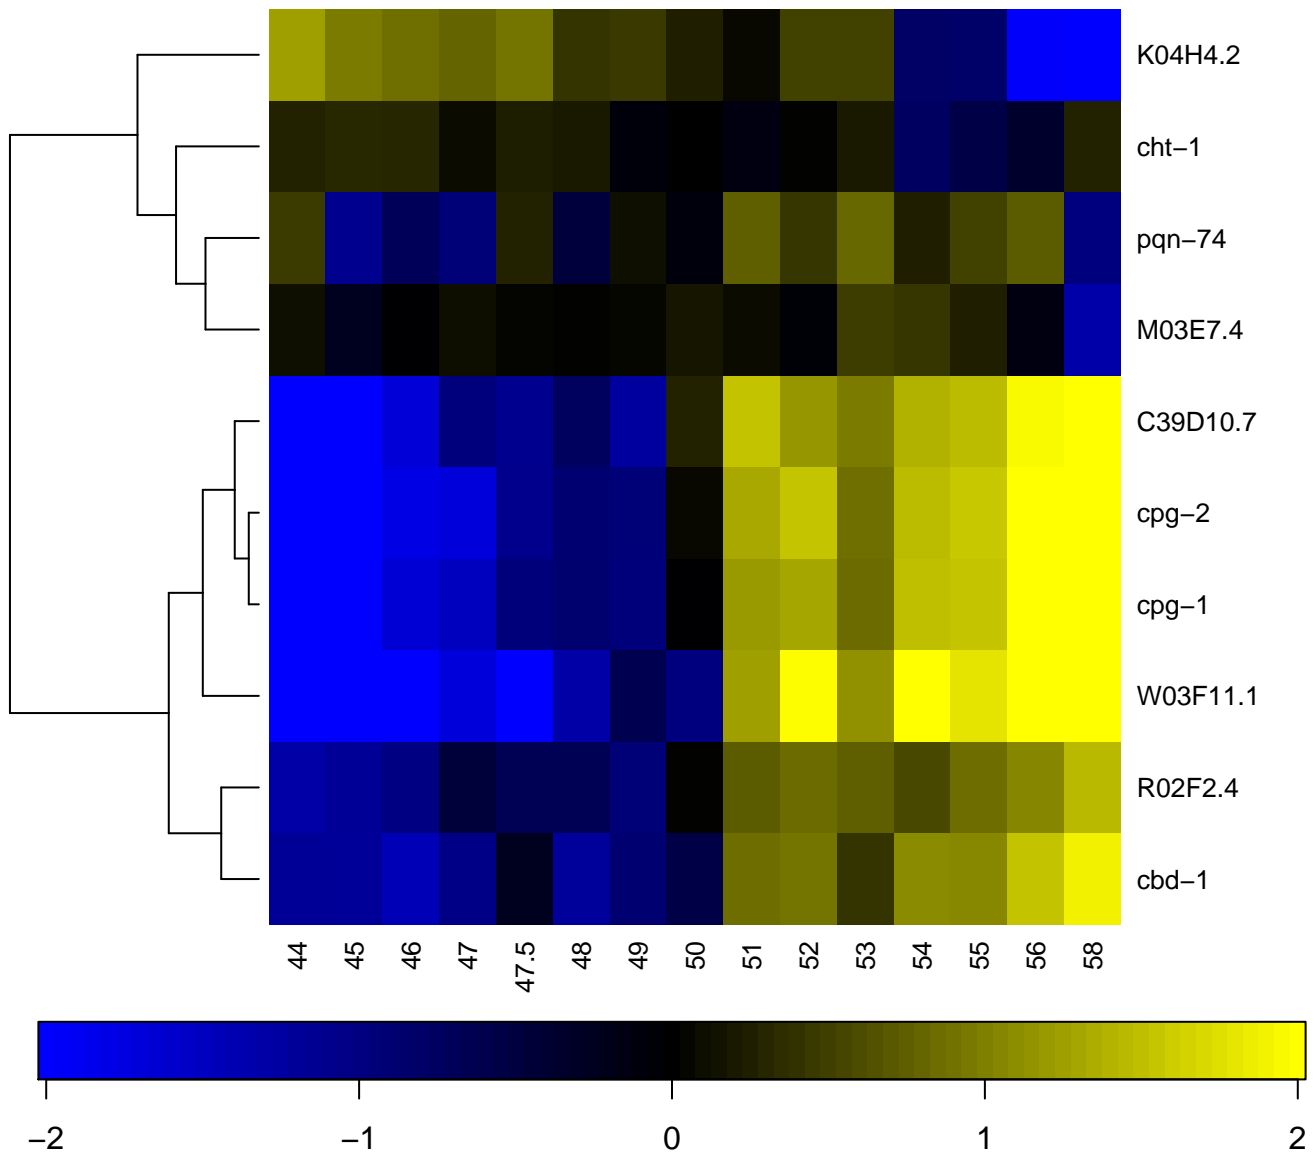

# chitinase activity

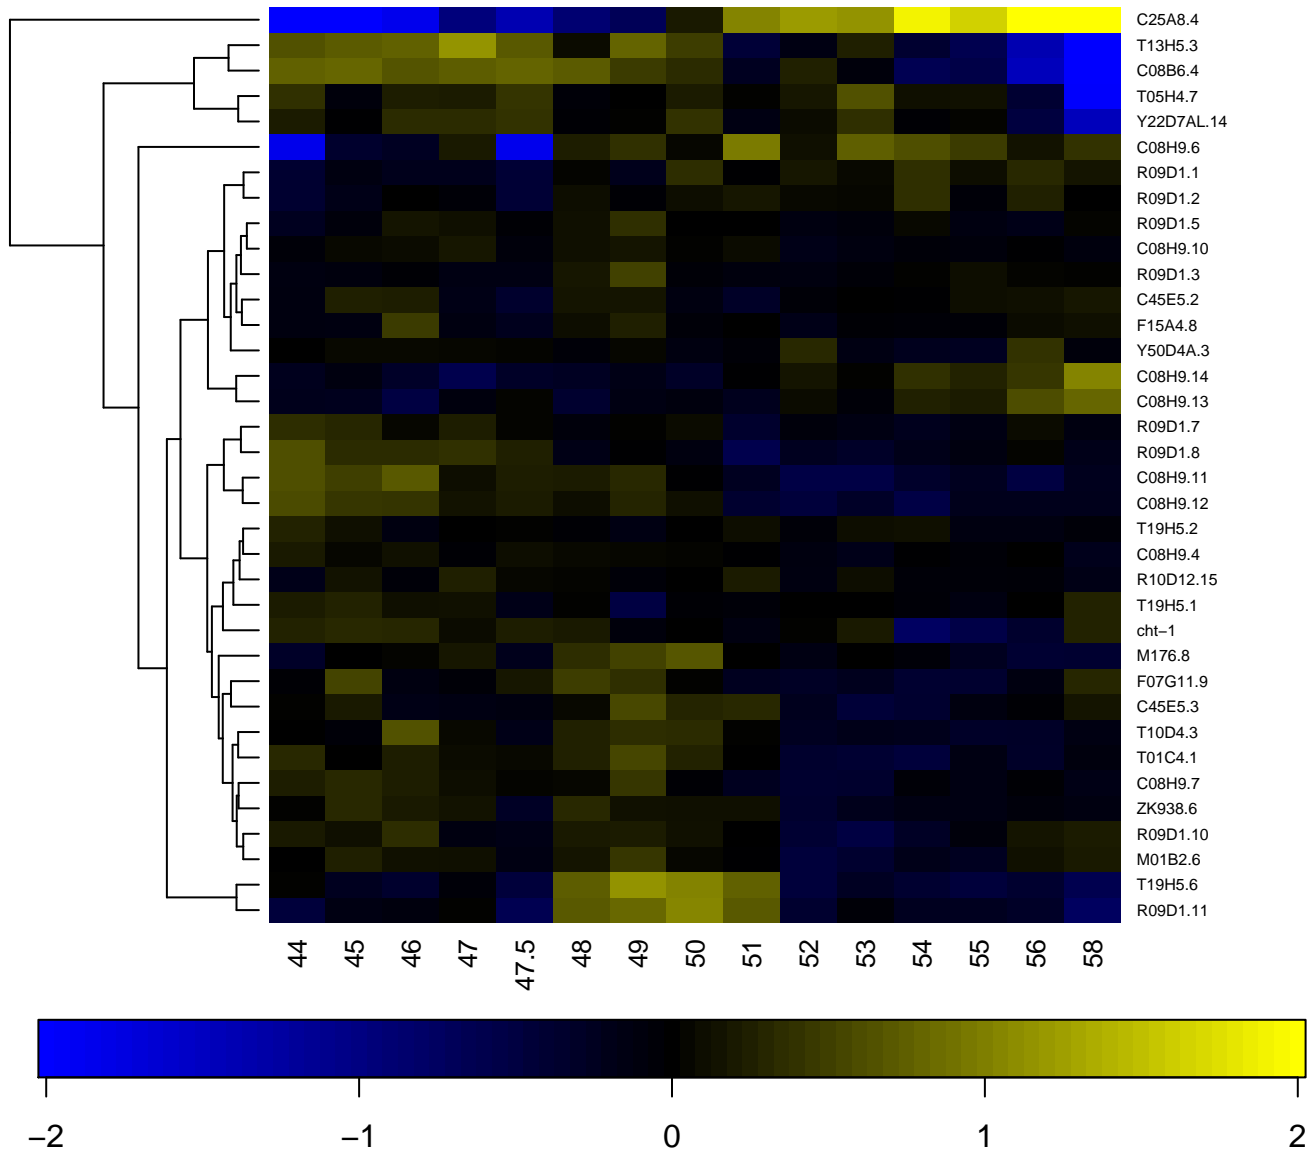



# chromatin

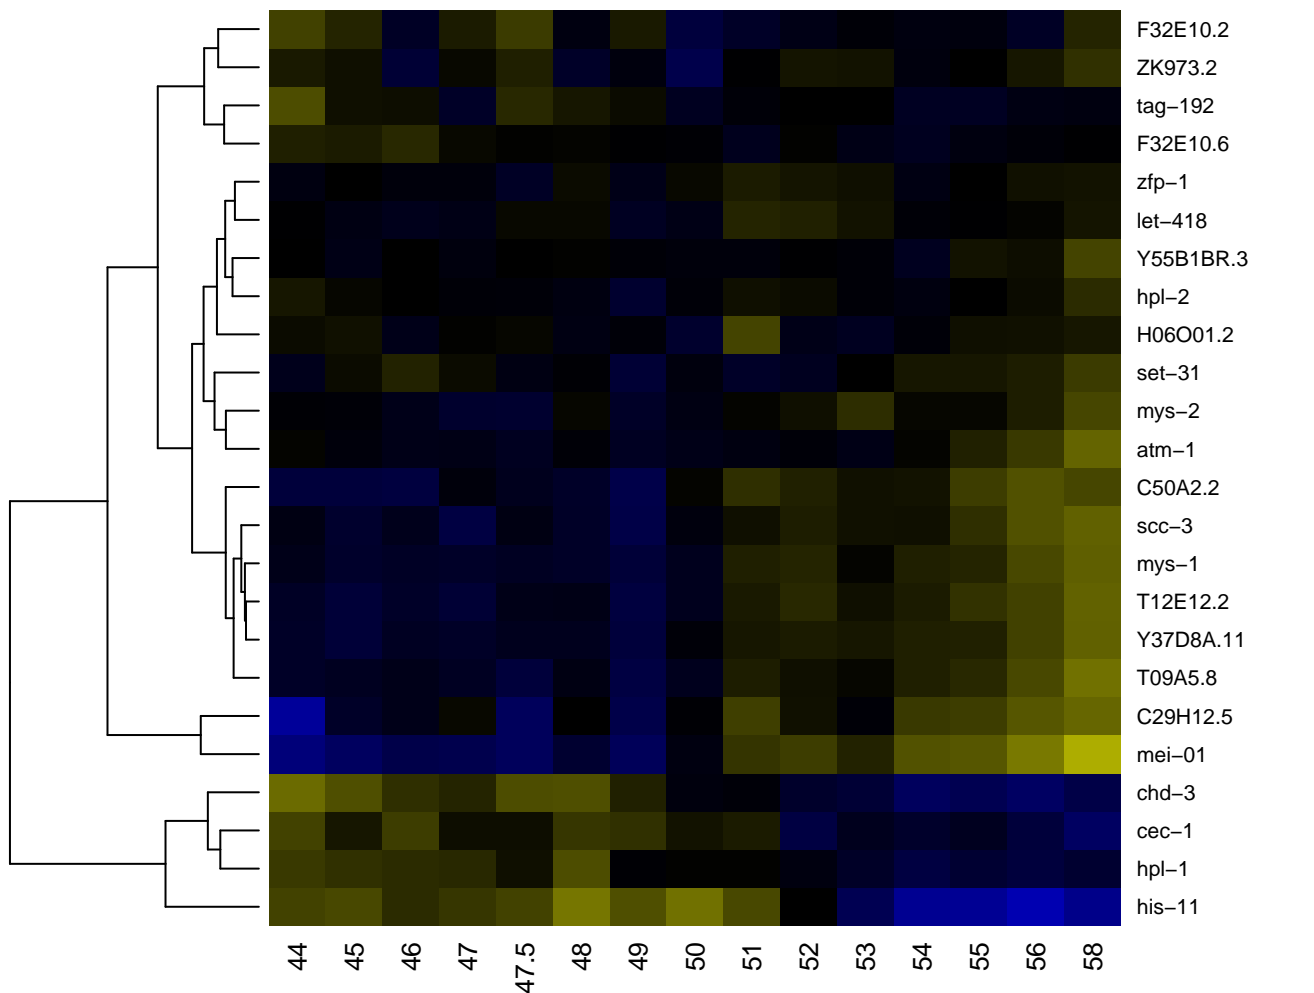

# chromatin assembly or disassembly

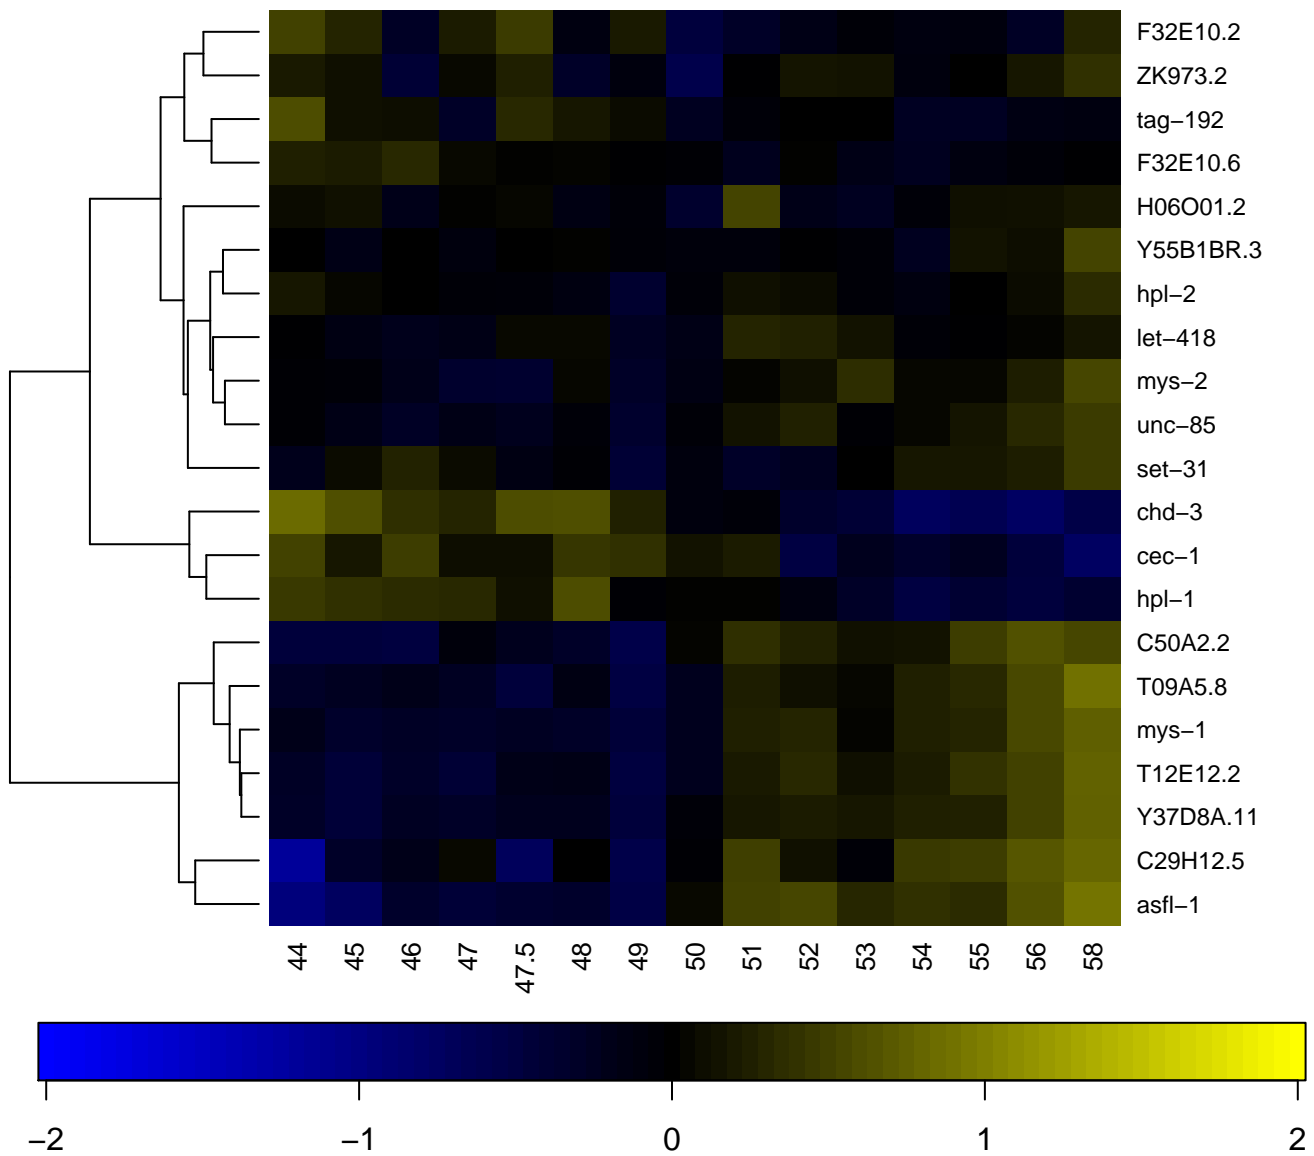



# chromatin binding

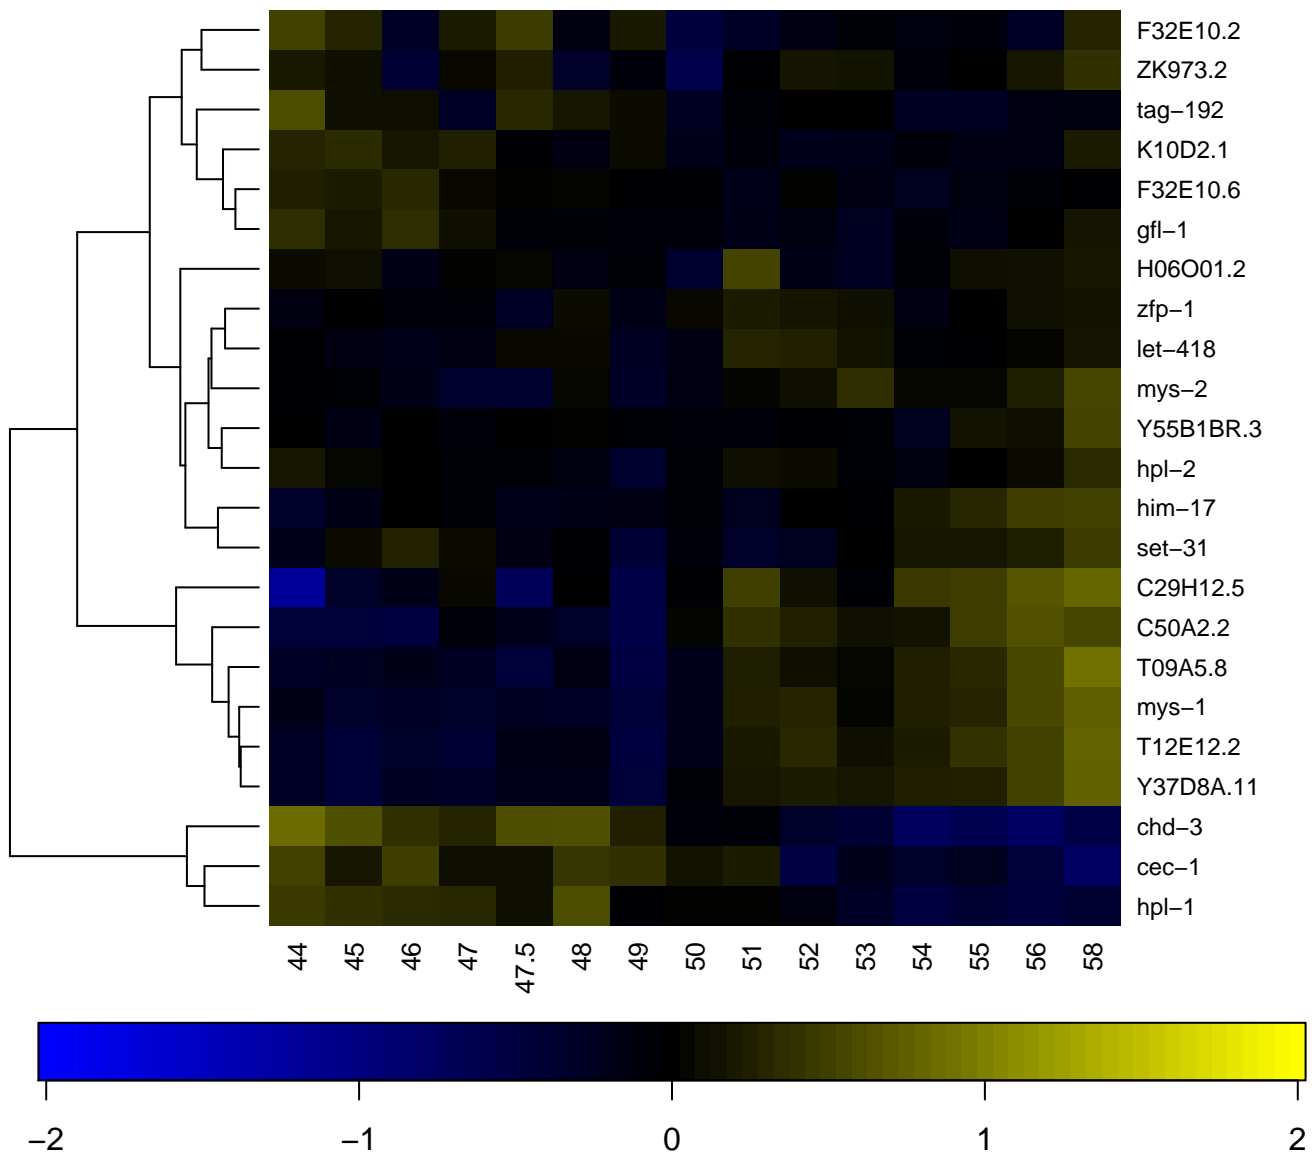



# chromosome

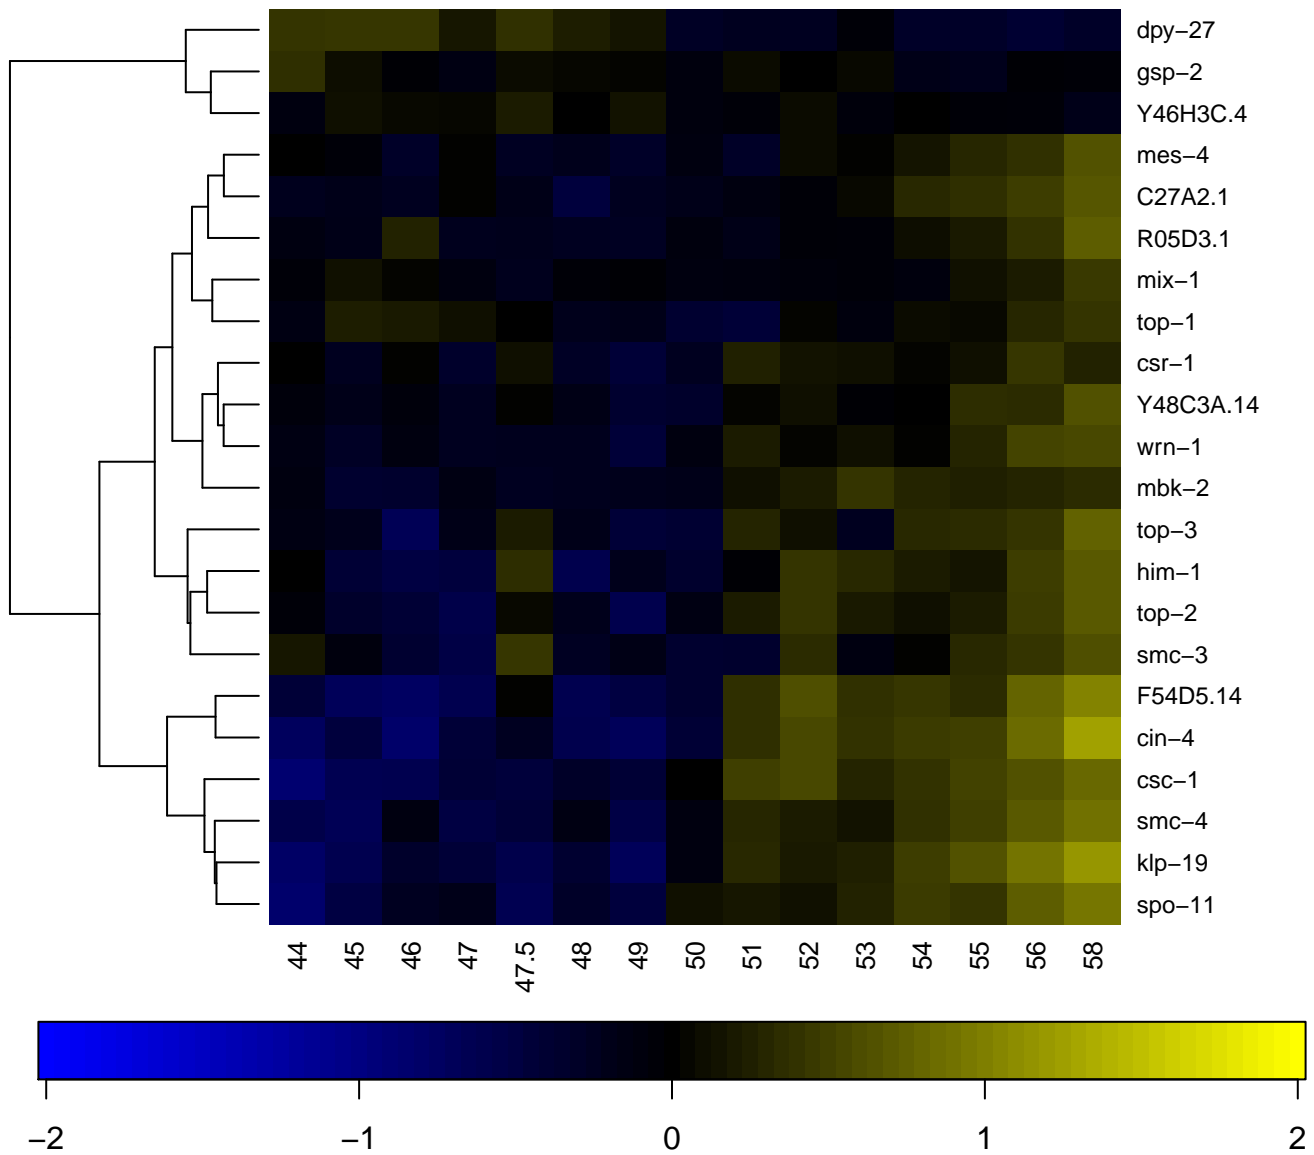





# chromosome, centromeric region

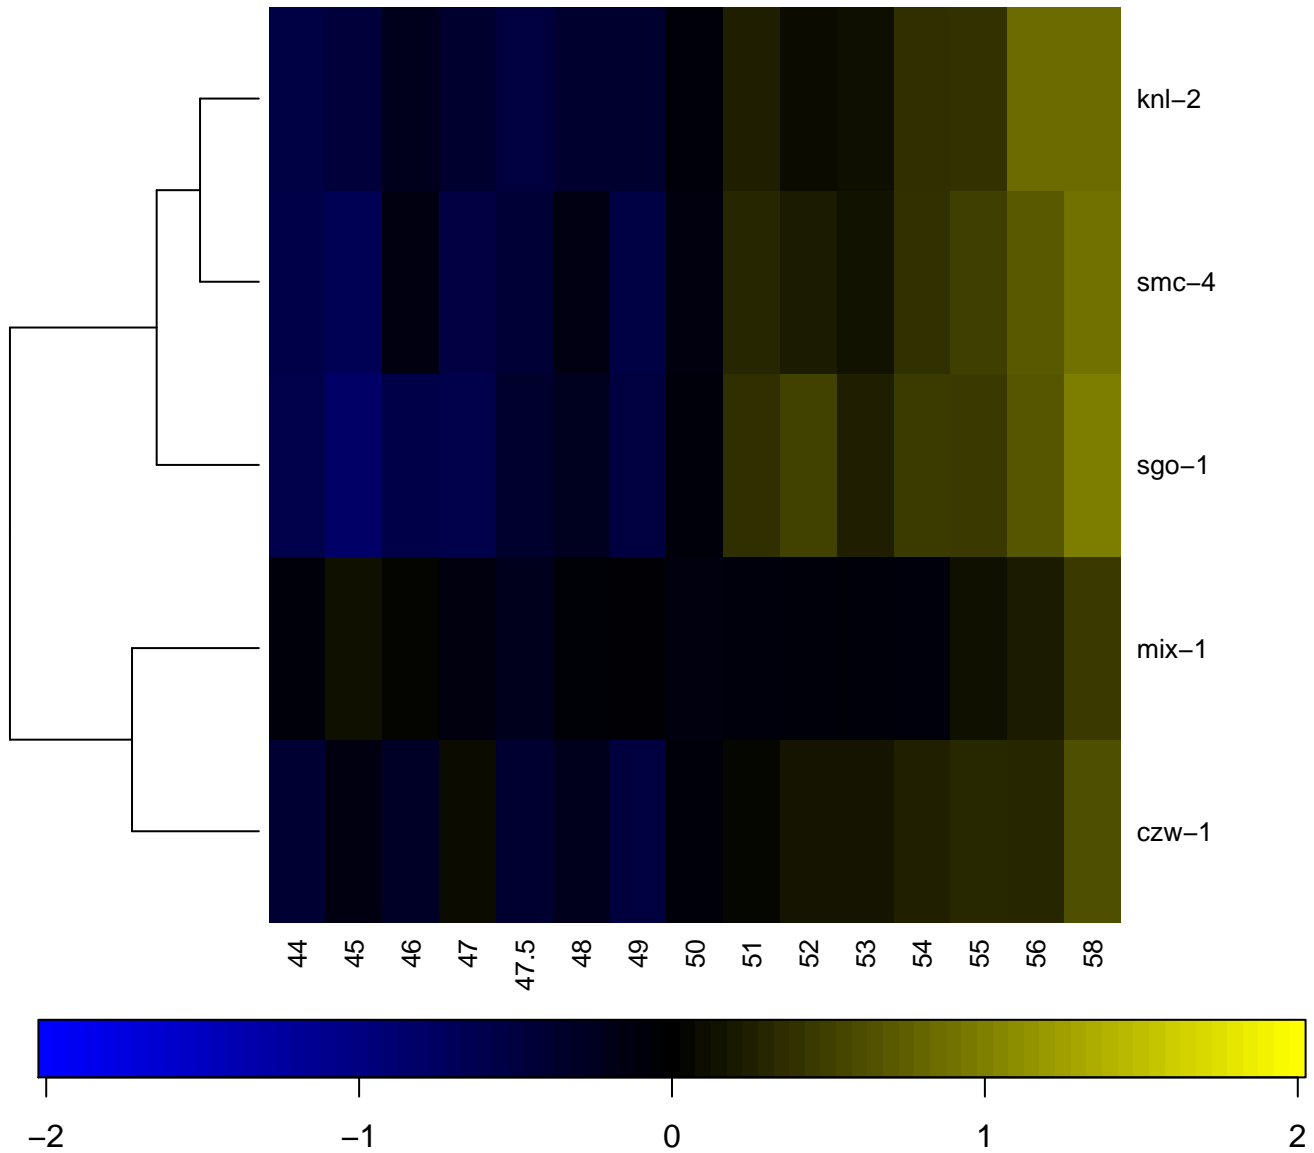

# cilium

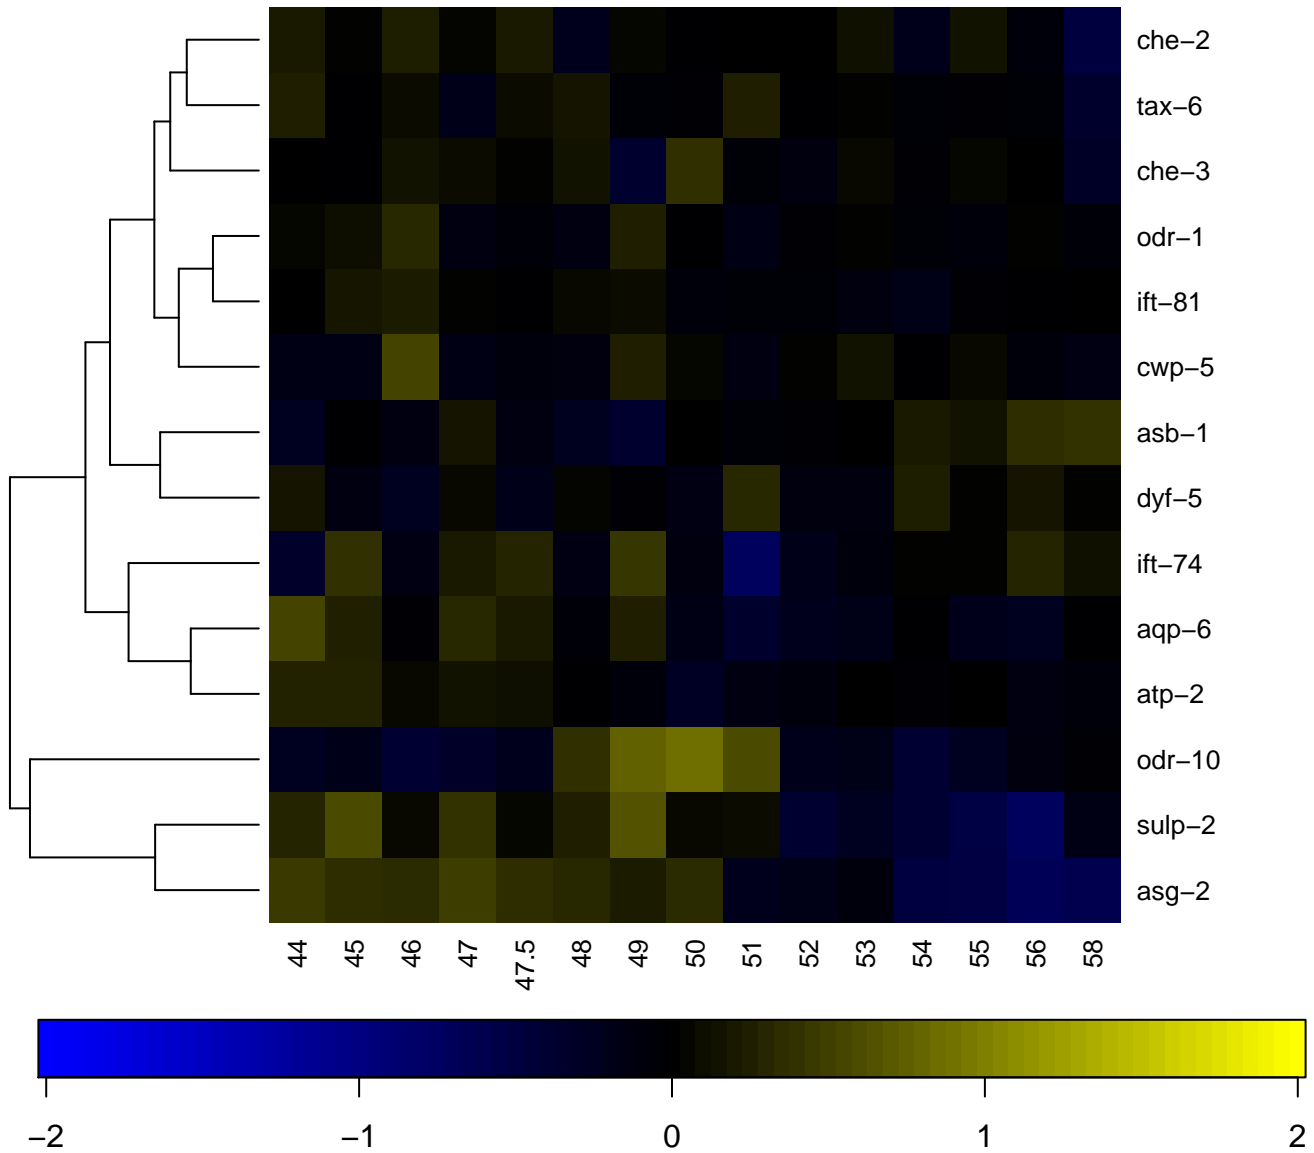







# cis-Golgi network

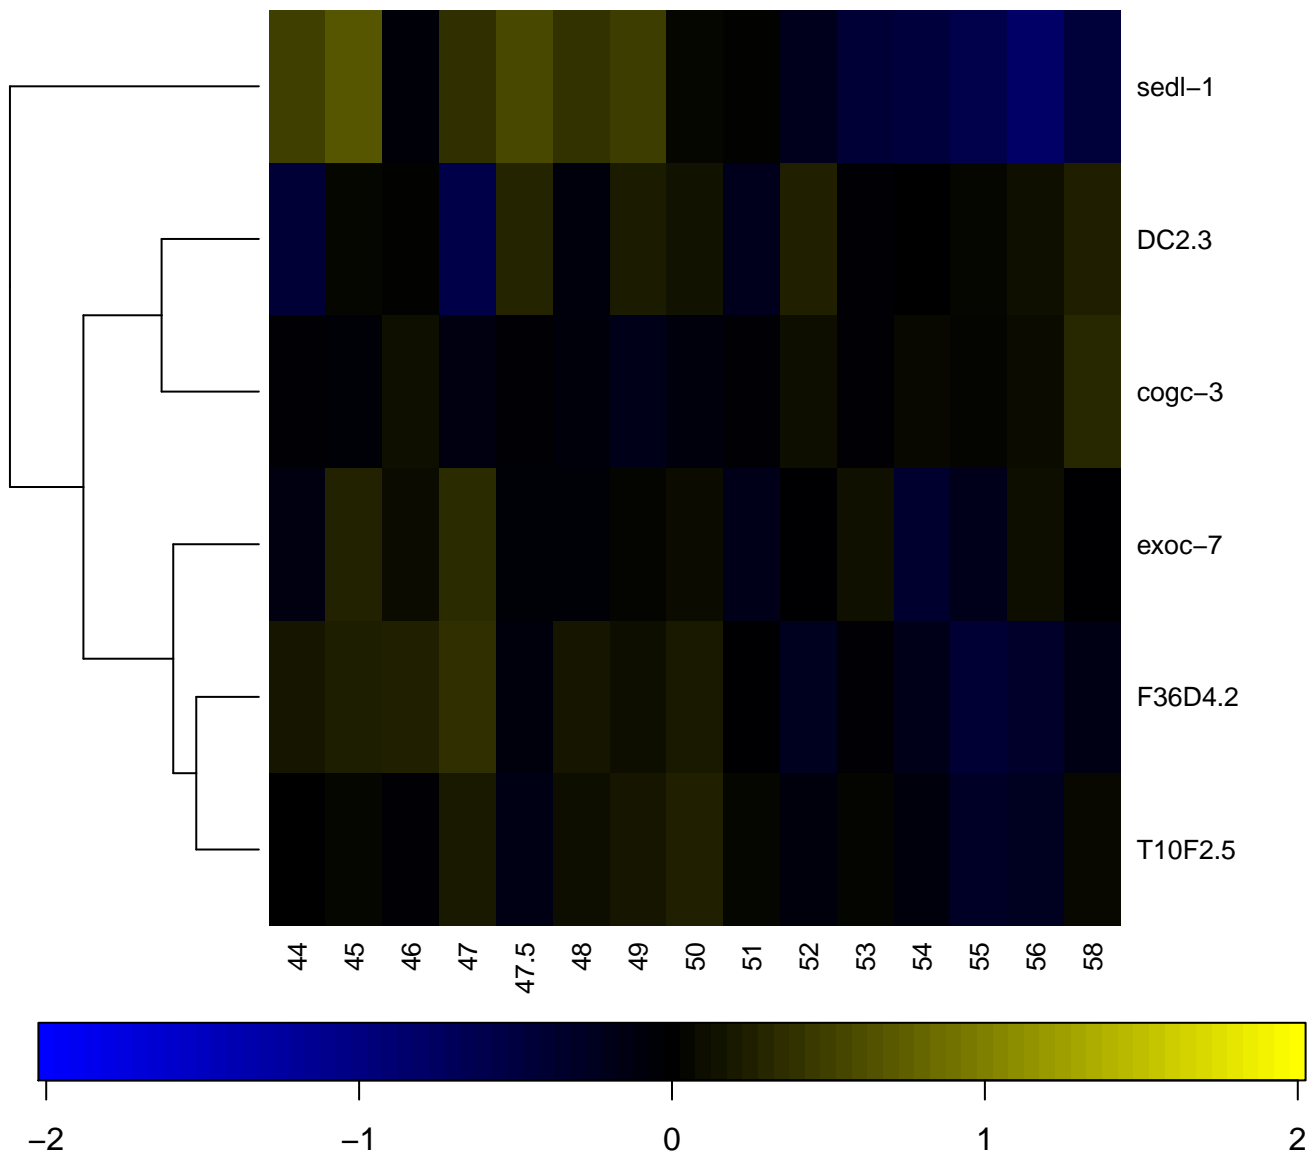





# coenzyme binding

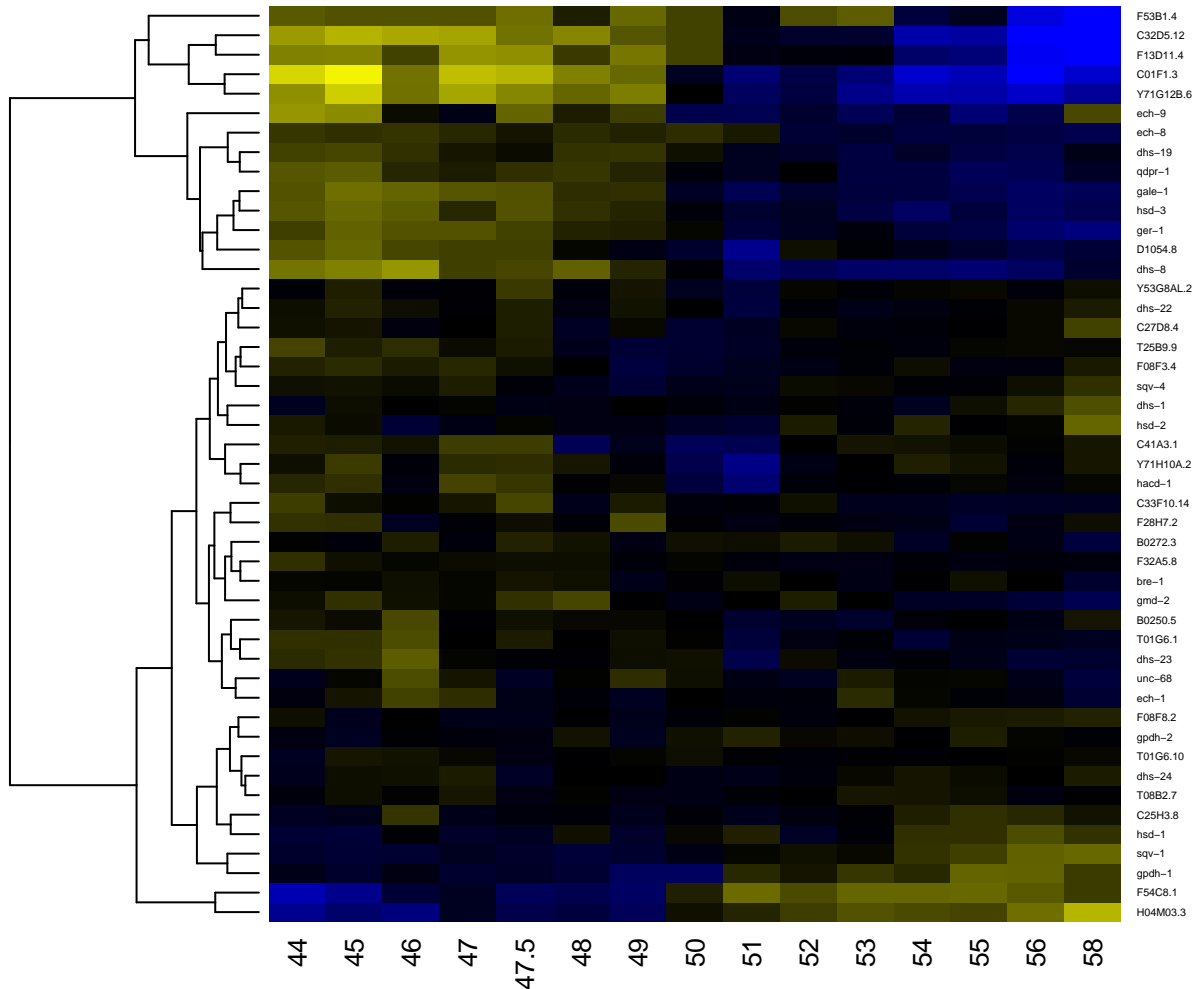

# cofactor binding

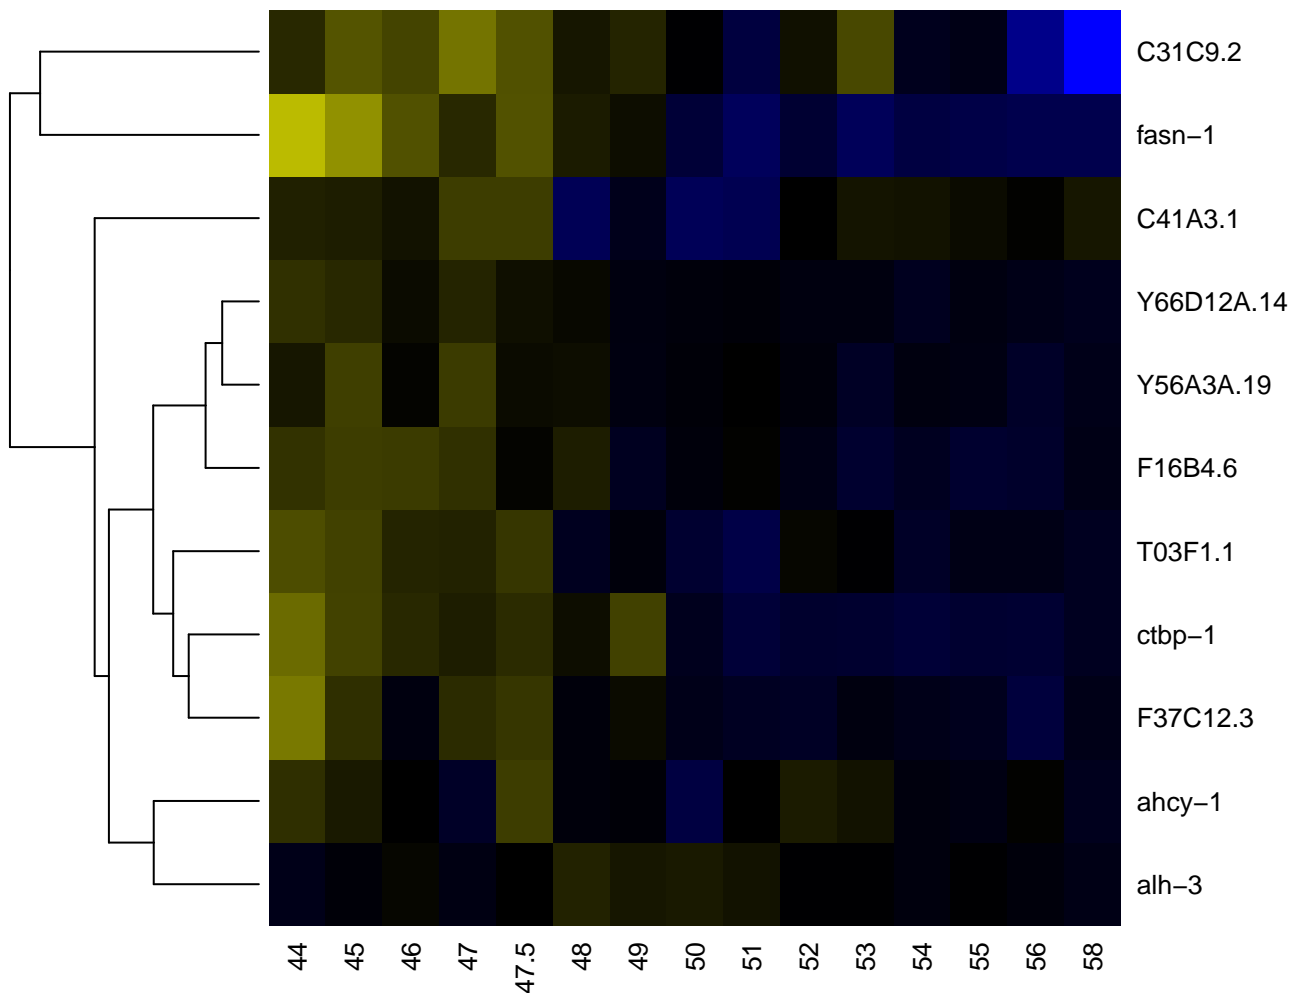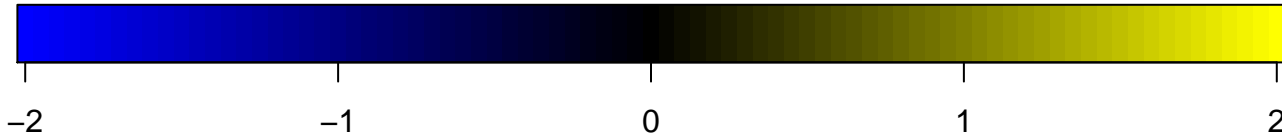

# collagen and cuticulin-based cuticle development

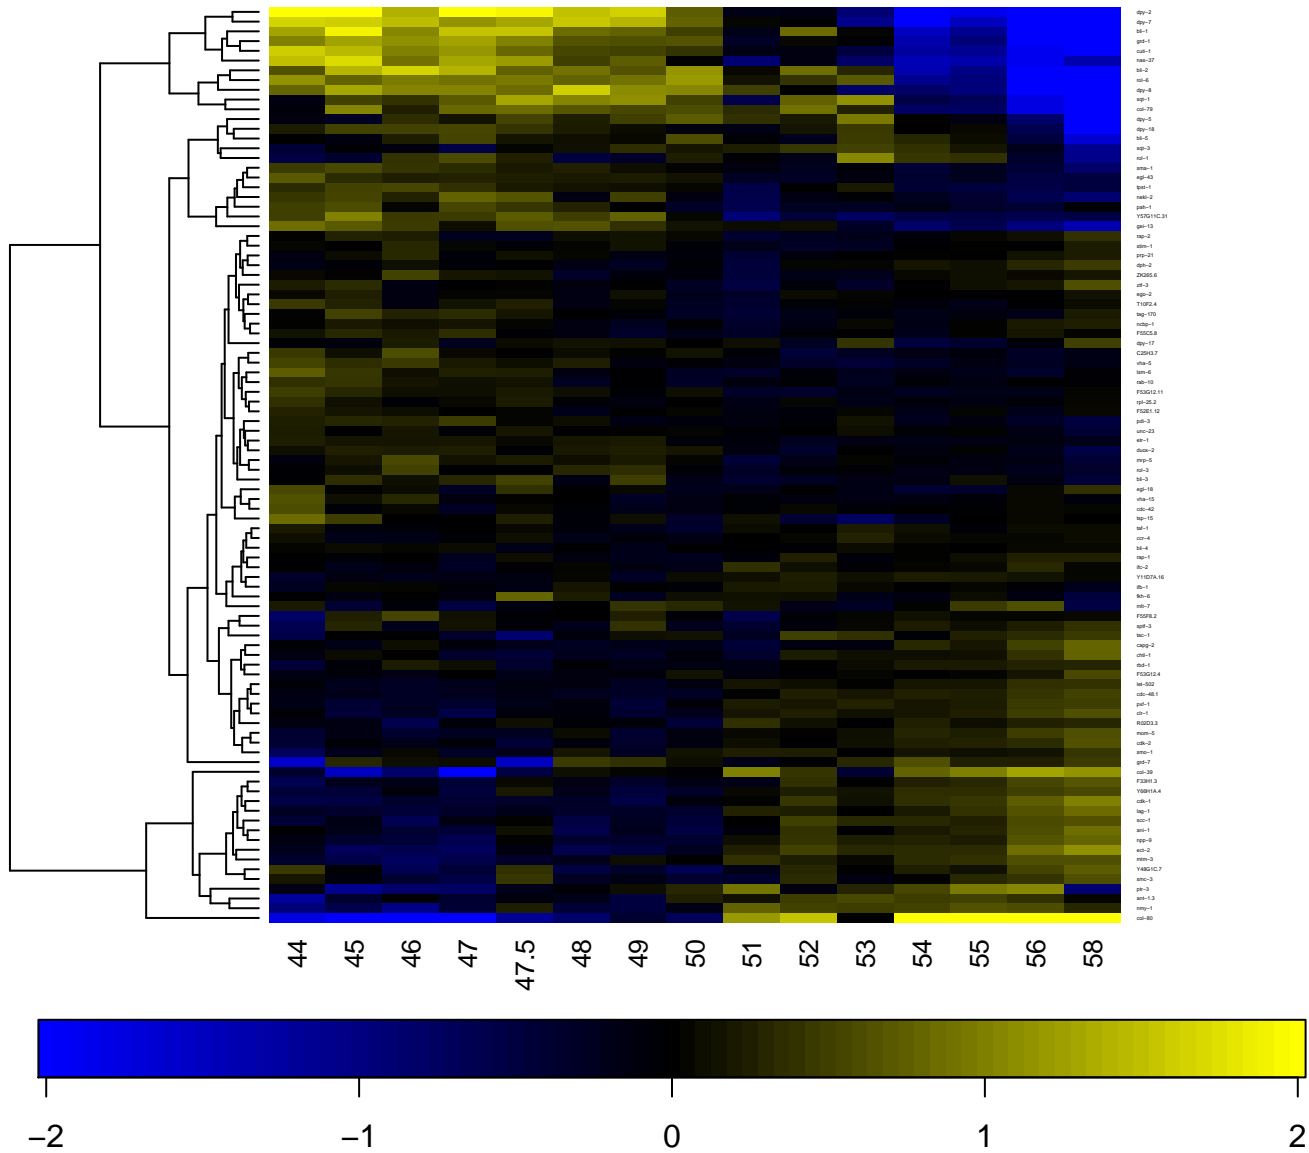

# Collagen and cuticulin-based cuticle development during molting

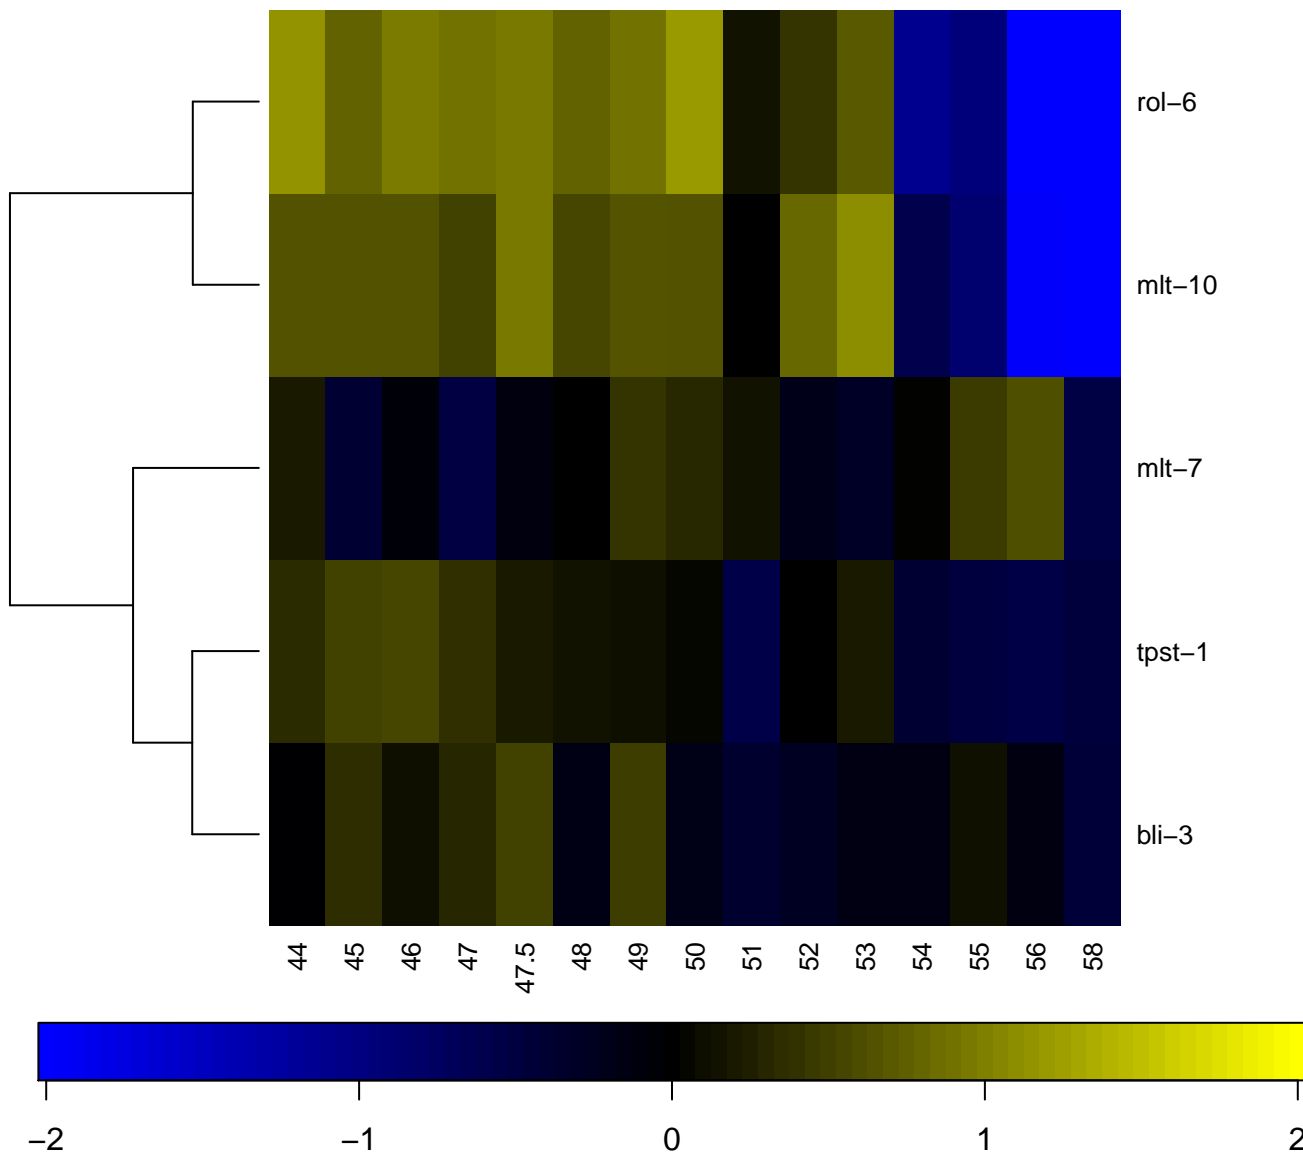







# condensed nuclear chromosome

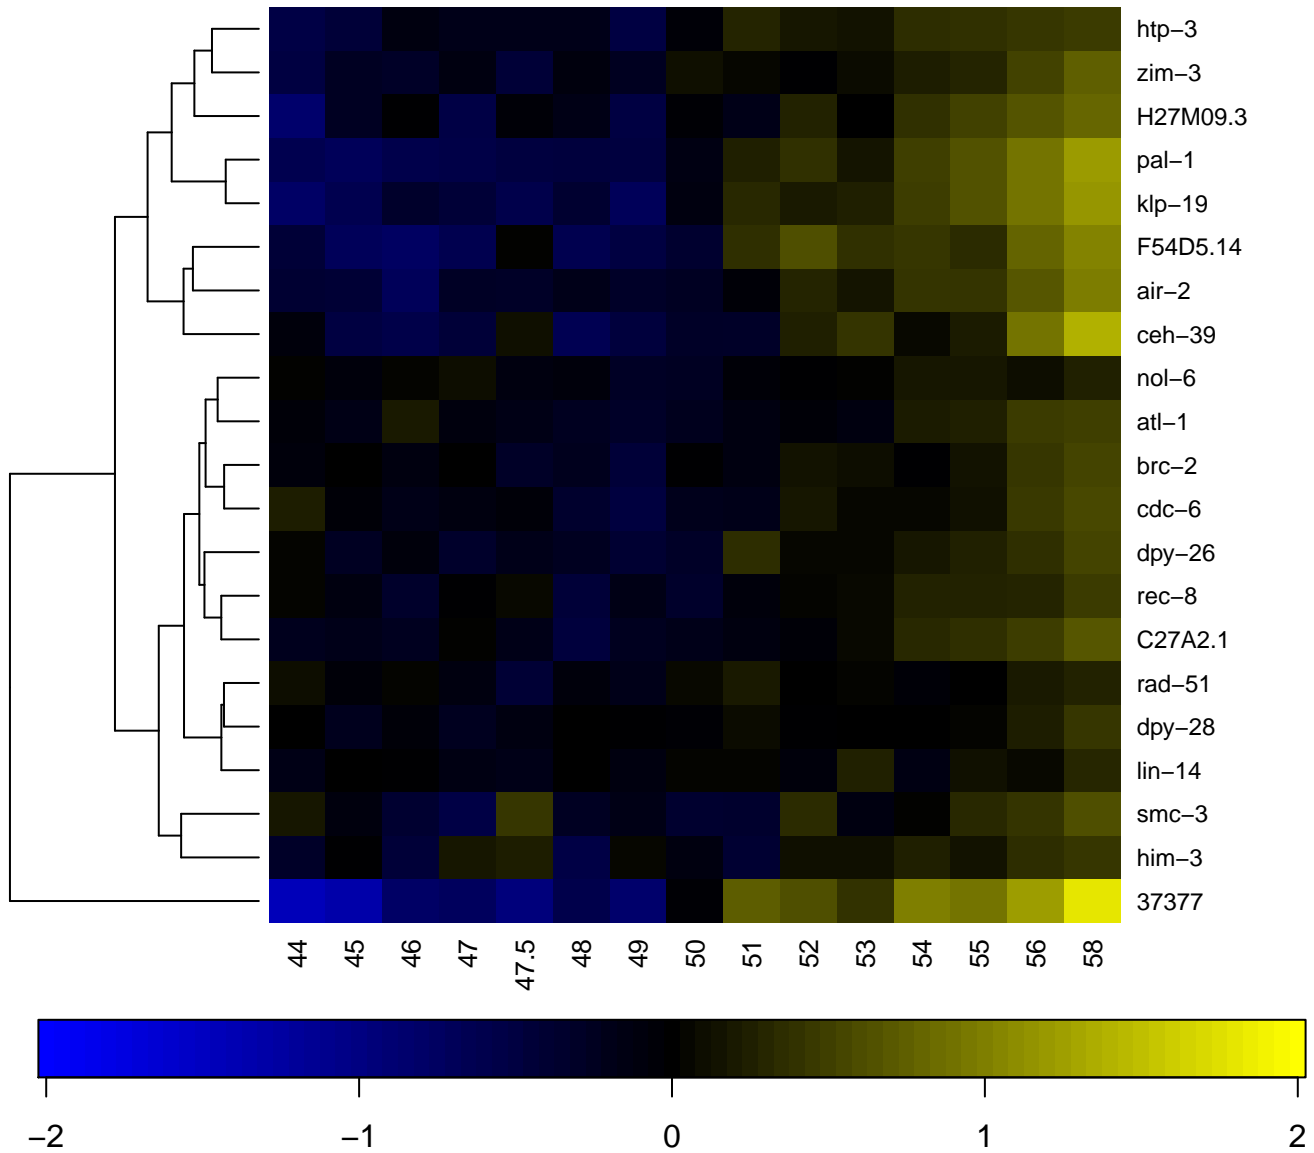





# copper ion transport

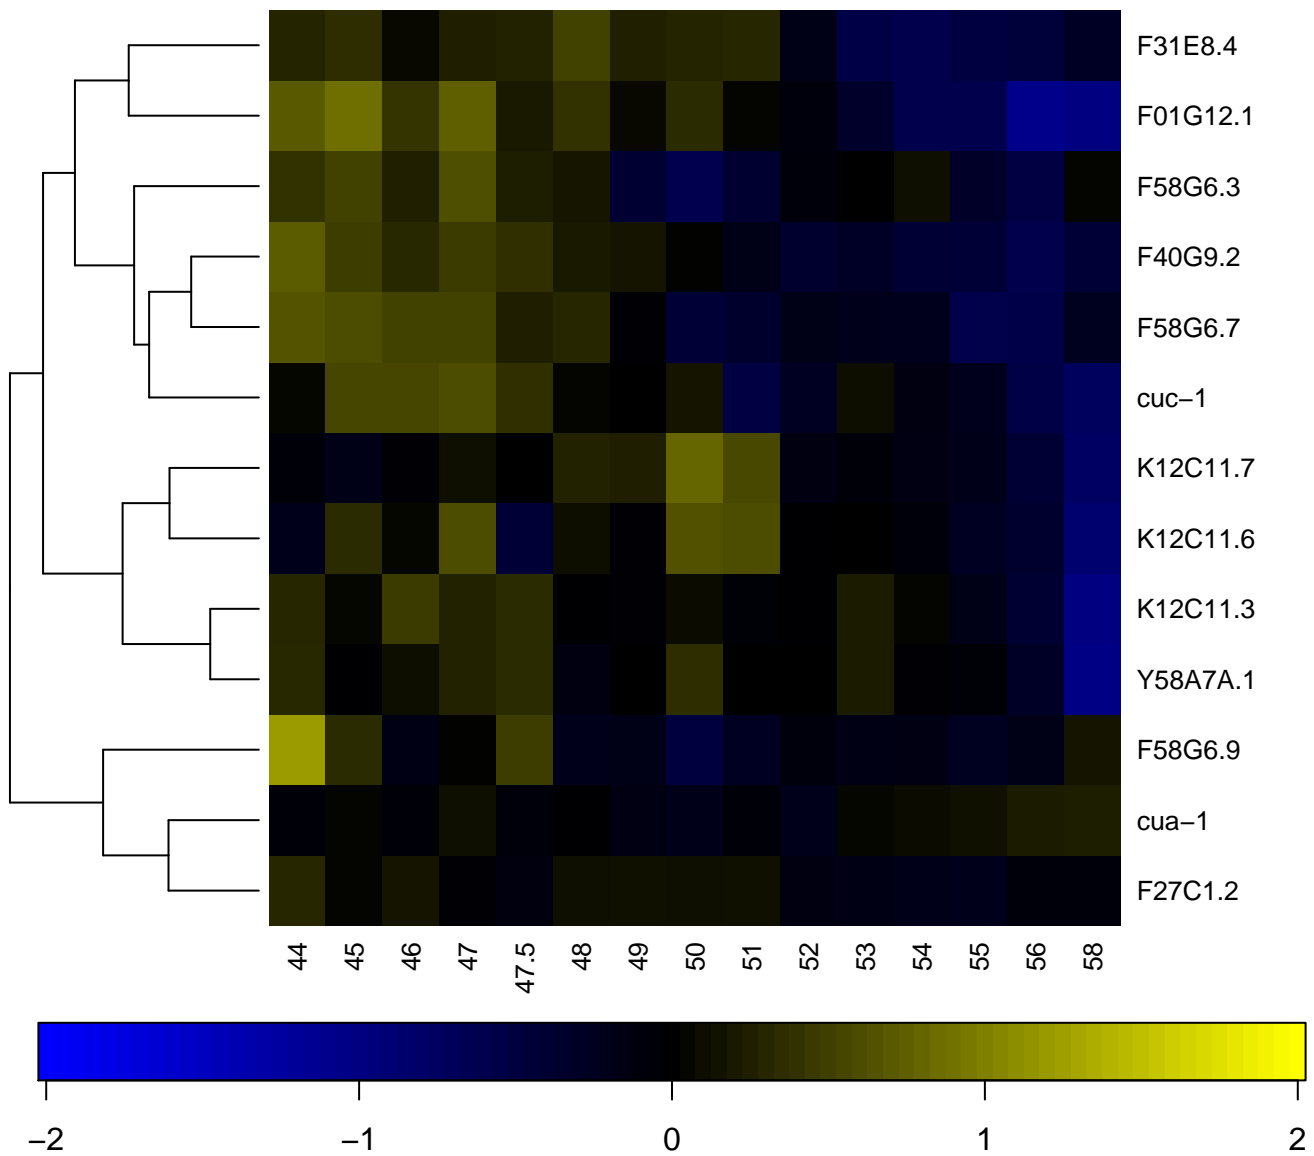

# cullin-RING ubiquitin ligase complex

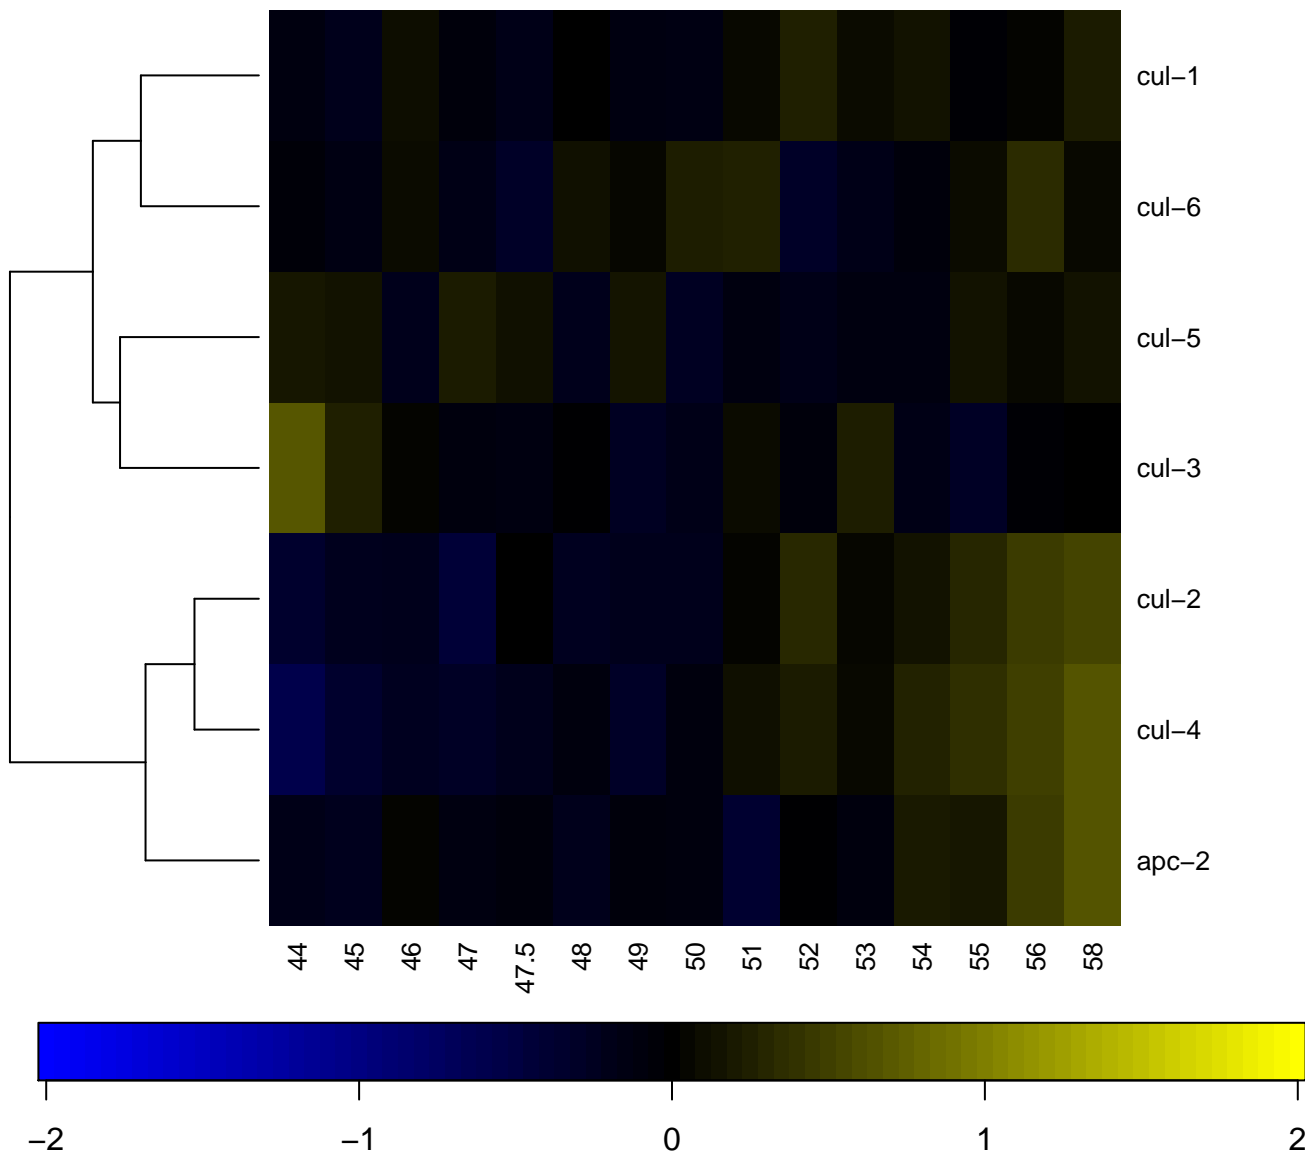

# cyclic nucleotide biosynthetic process

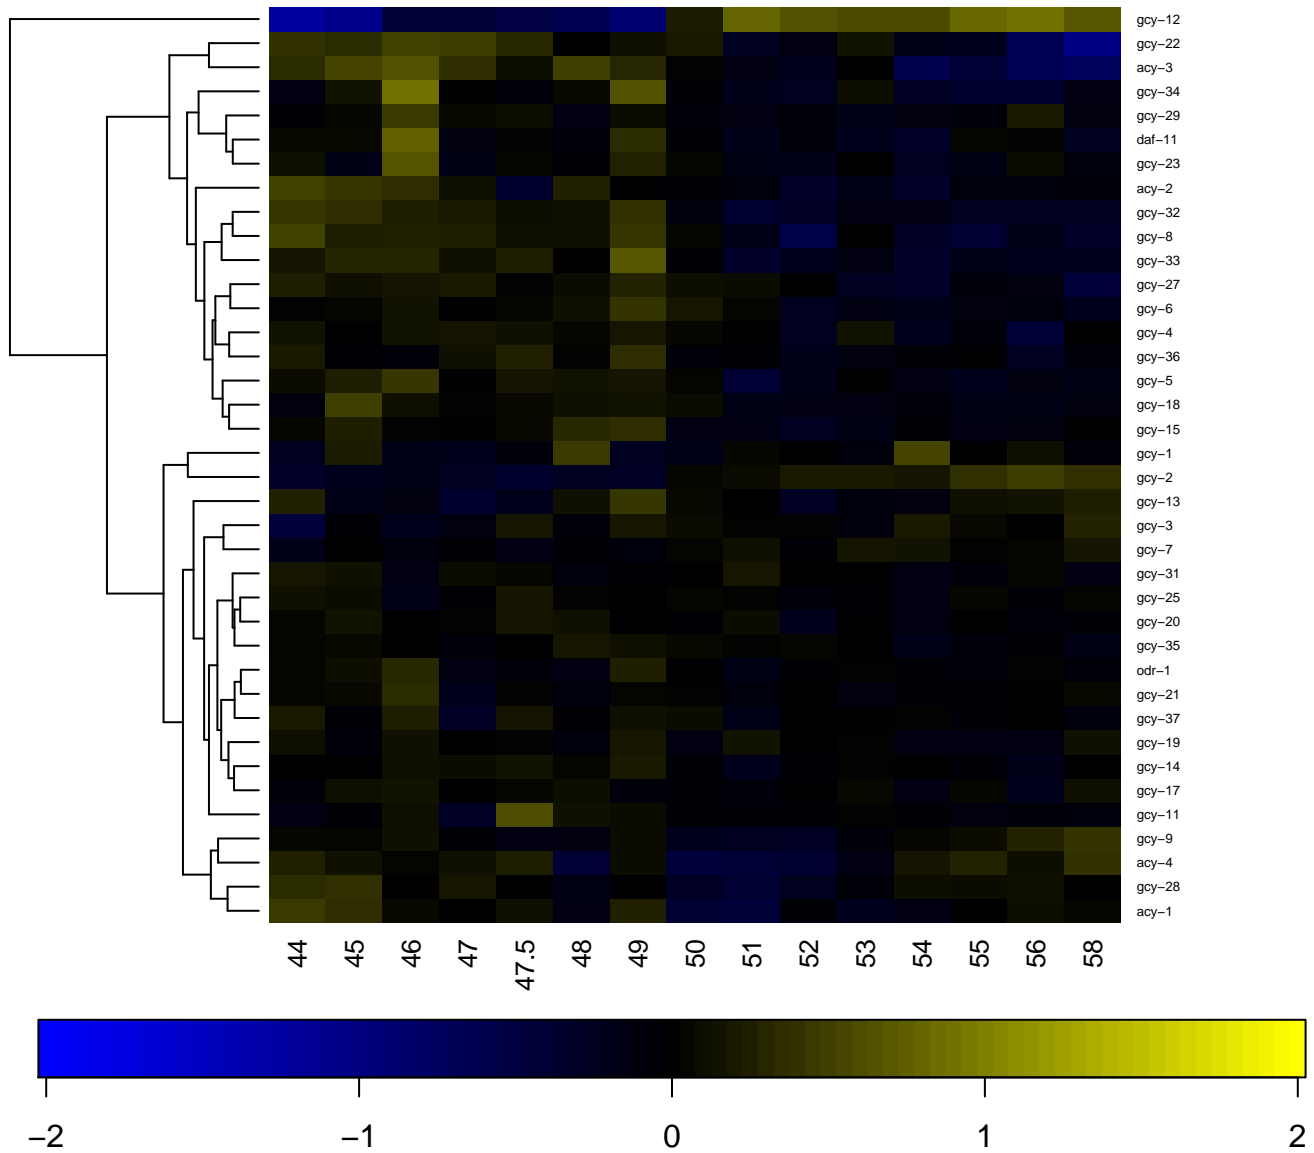



# cysteine-tRNA ligase activity

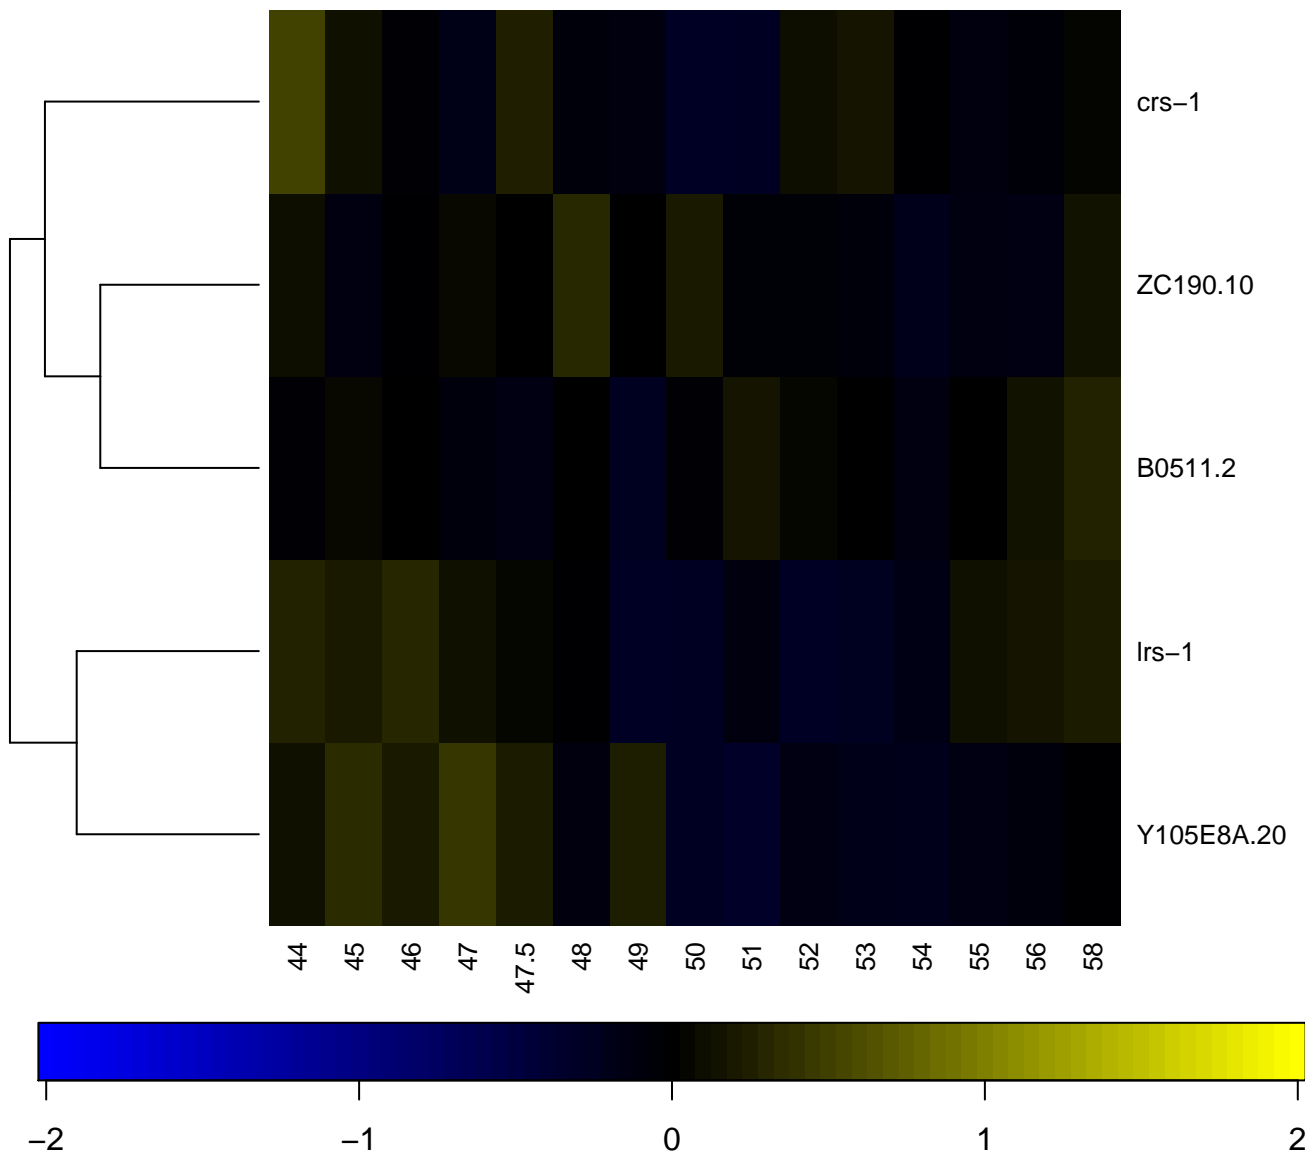

# cysteine-type endopeptidase activity

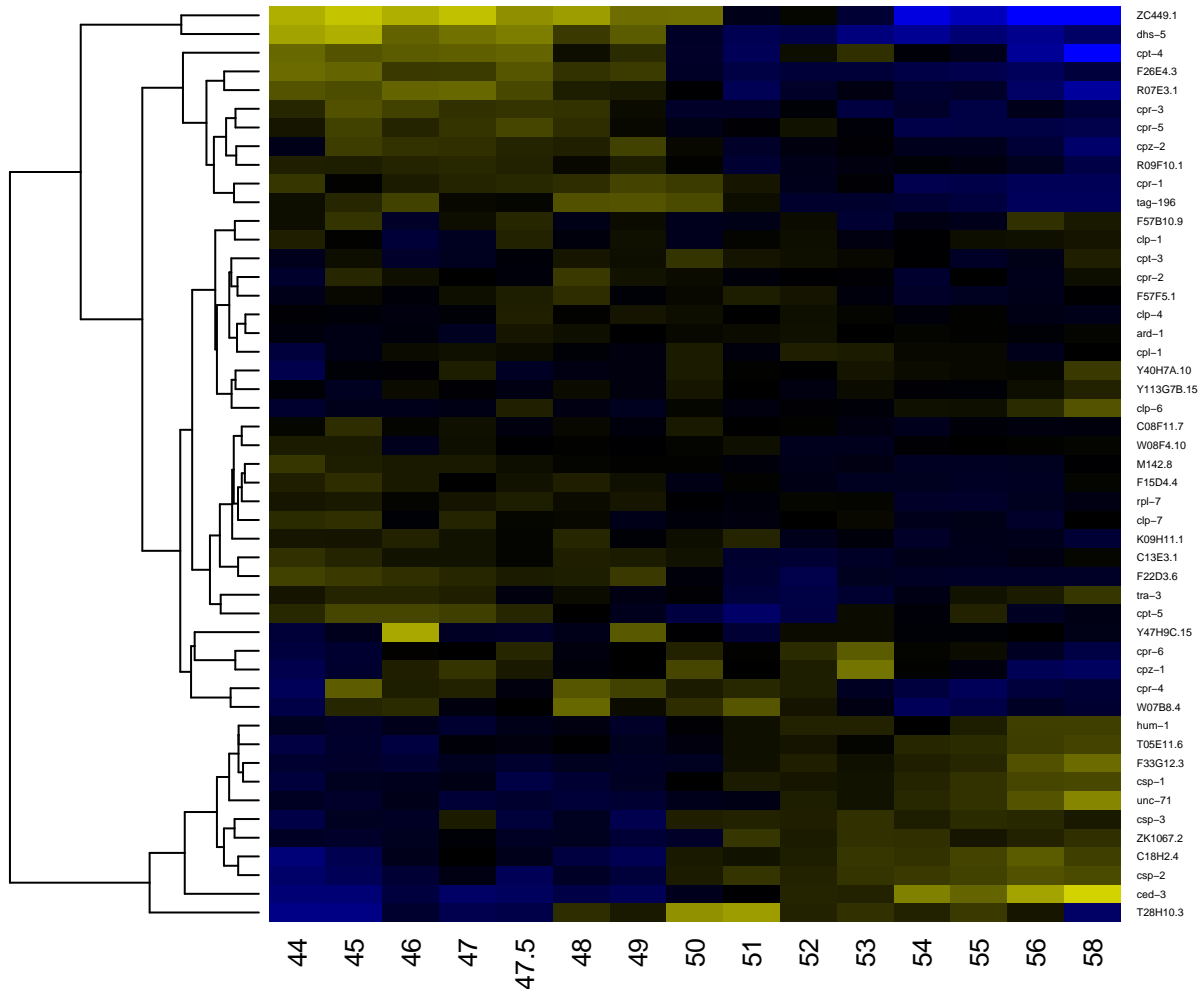

# cysteine-type peptidase activity

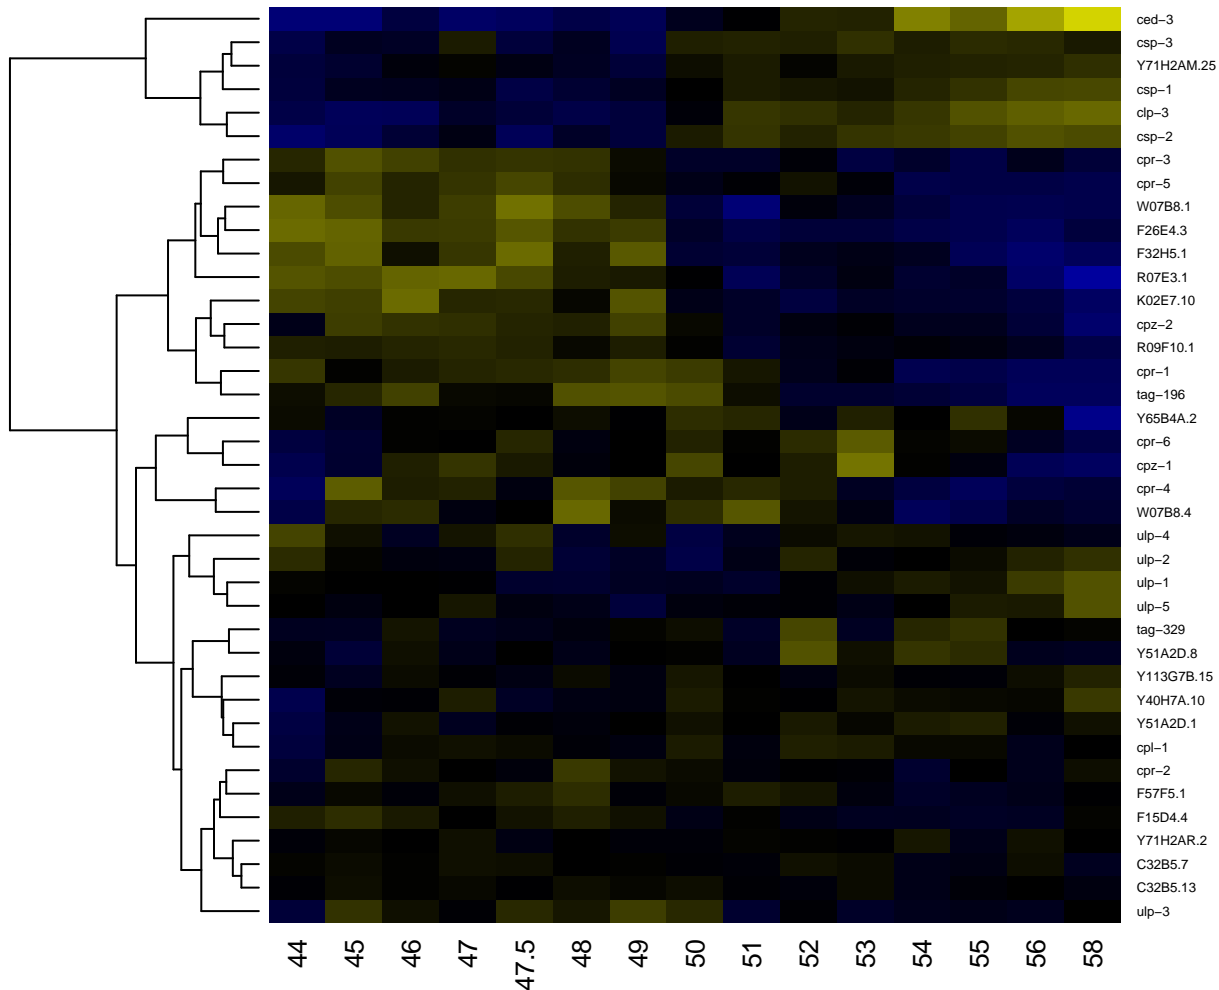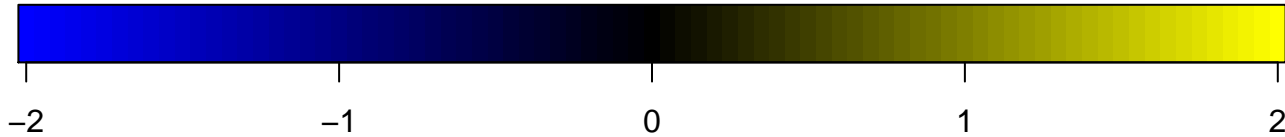

# cysteinyI-tRNA aminoacylation

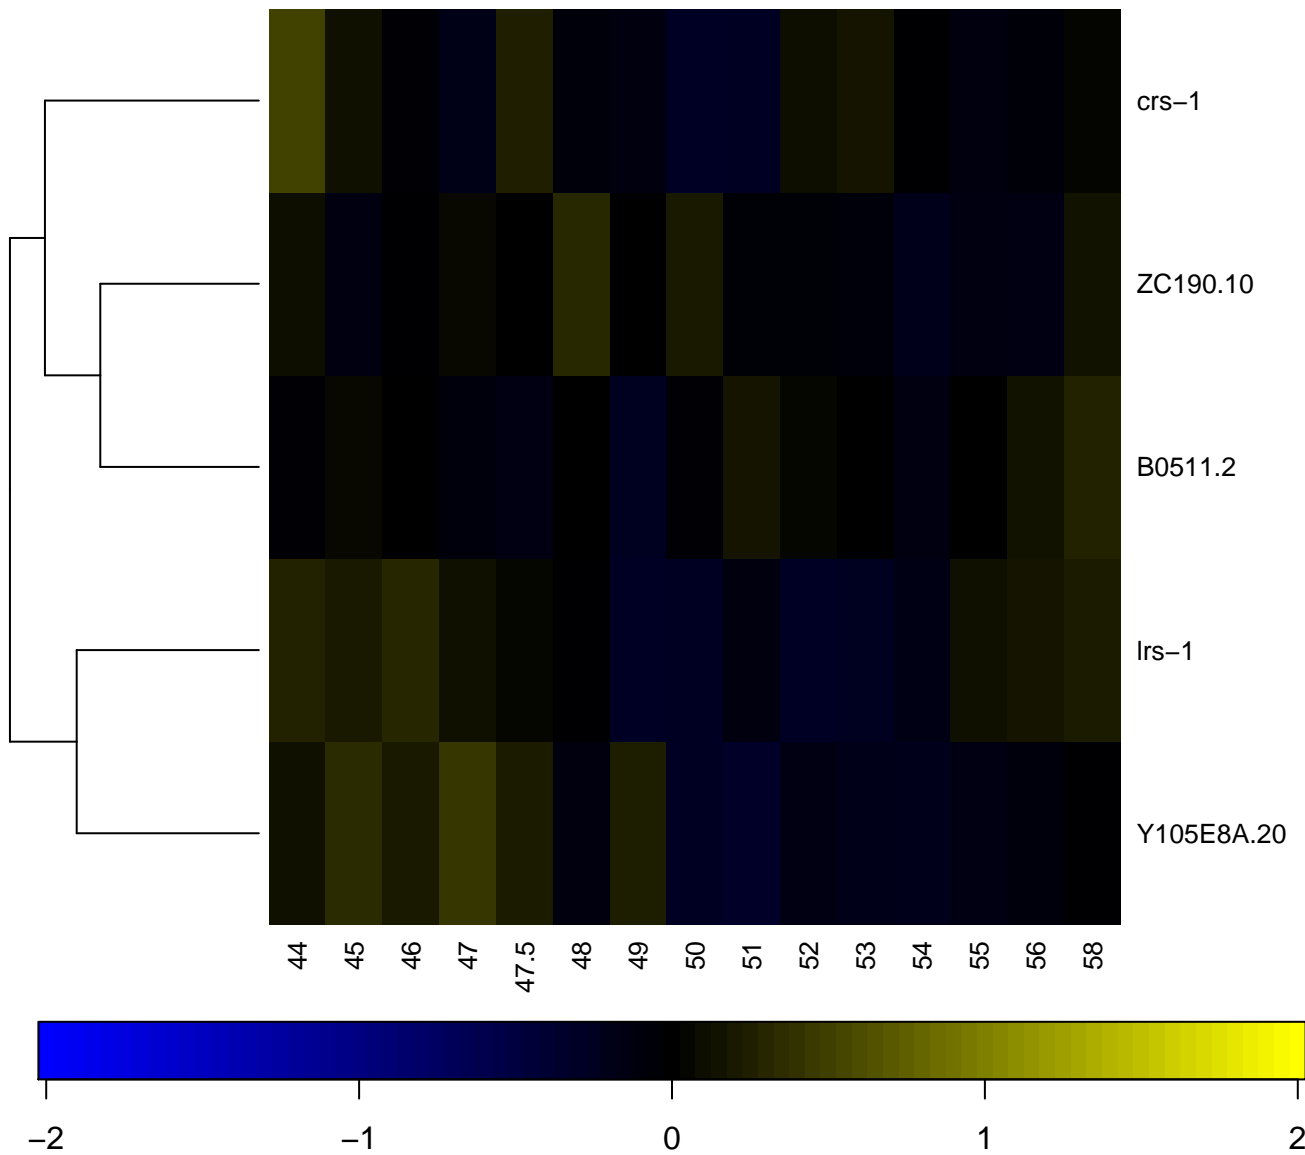



# cytokines

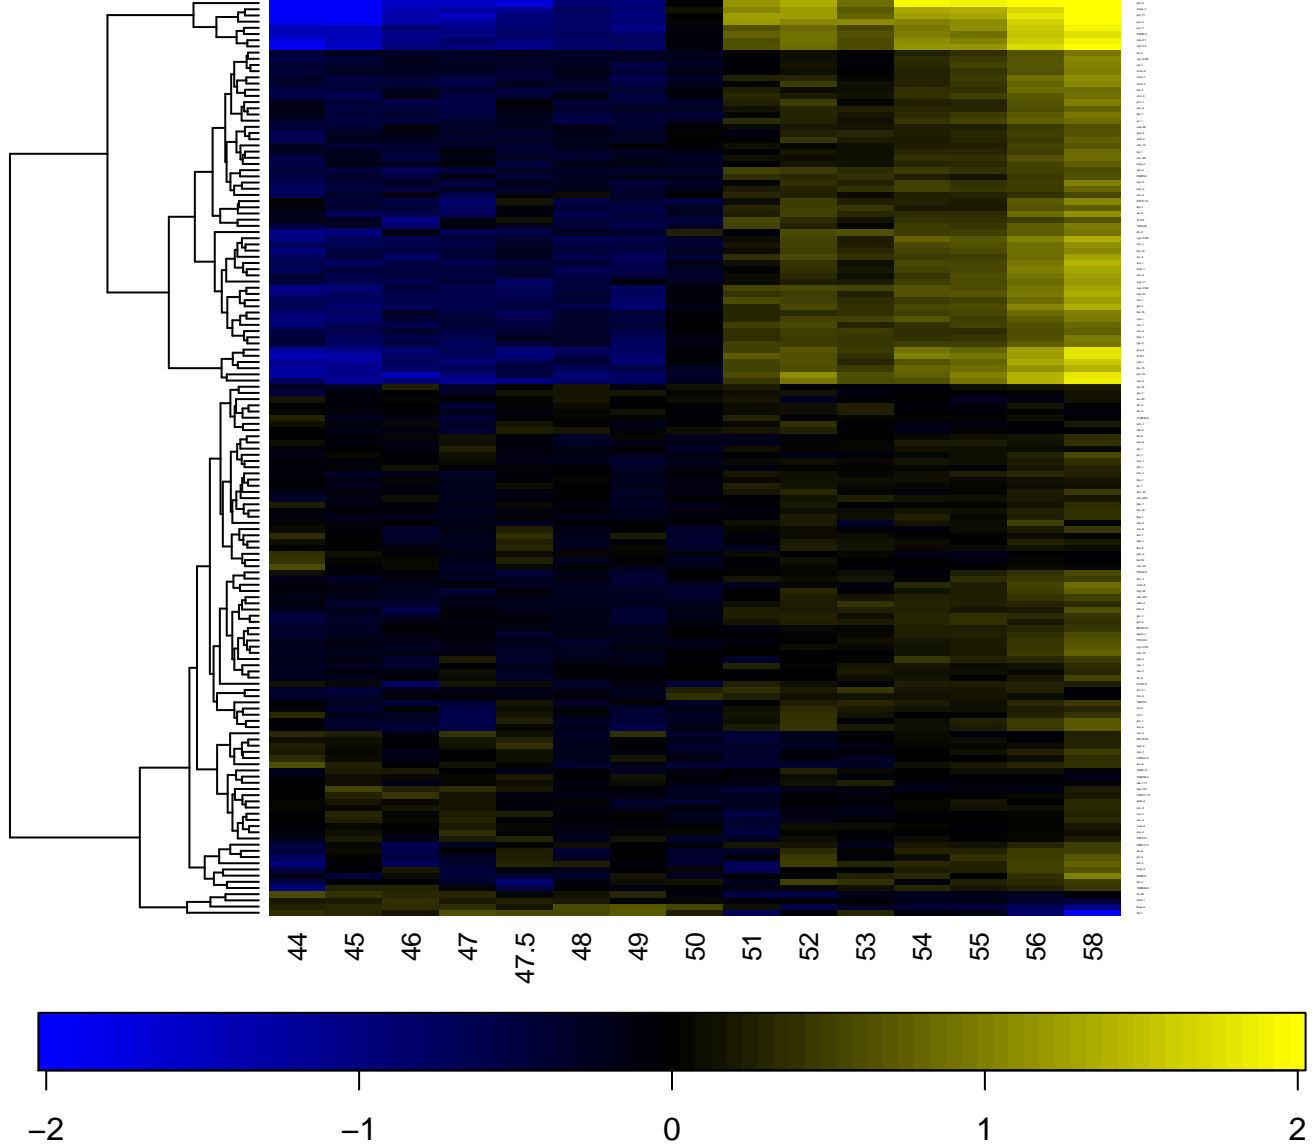



# cytoplasm

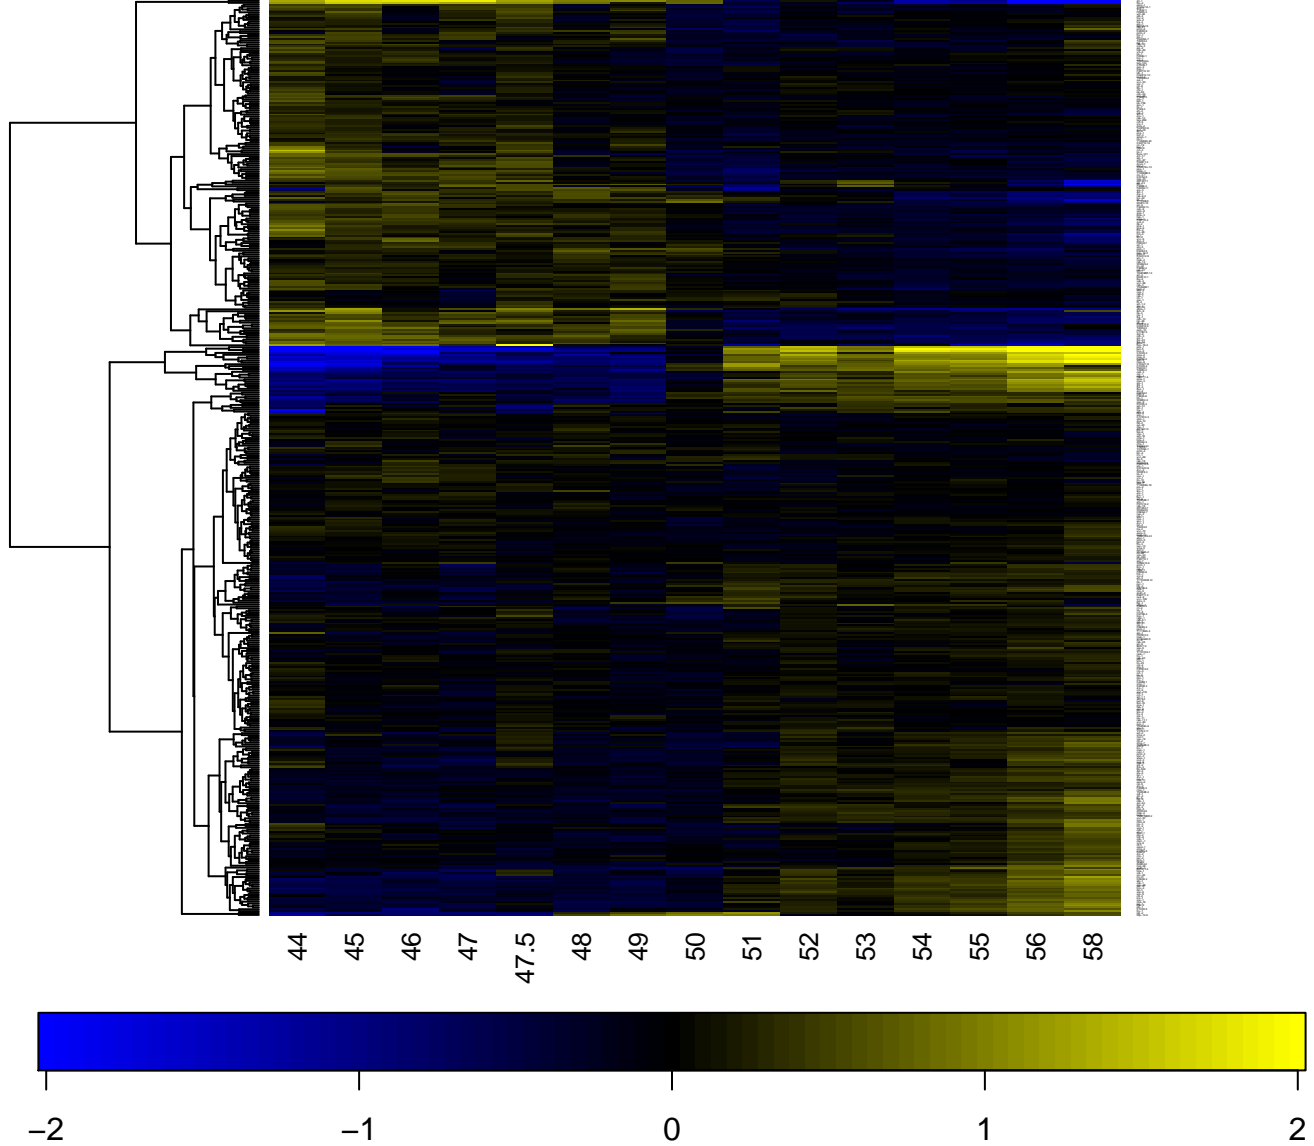



# cytoplasmic mRNA processing body

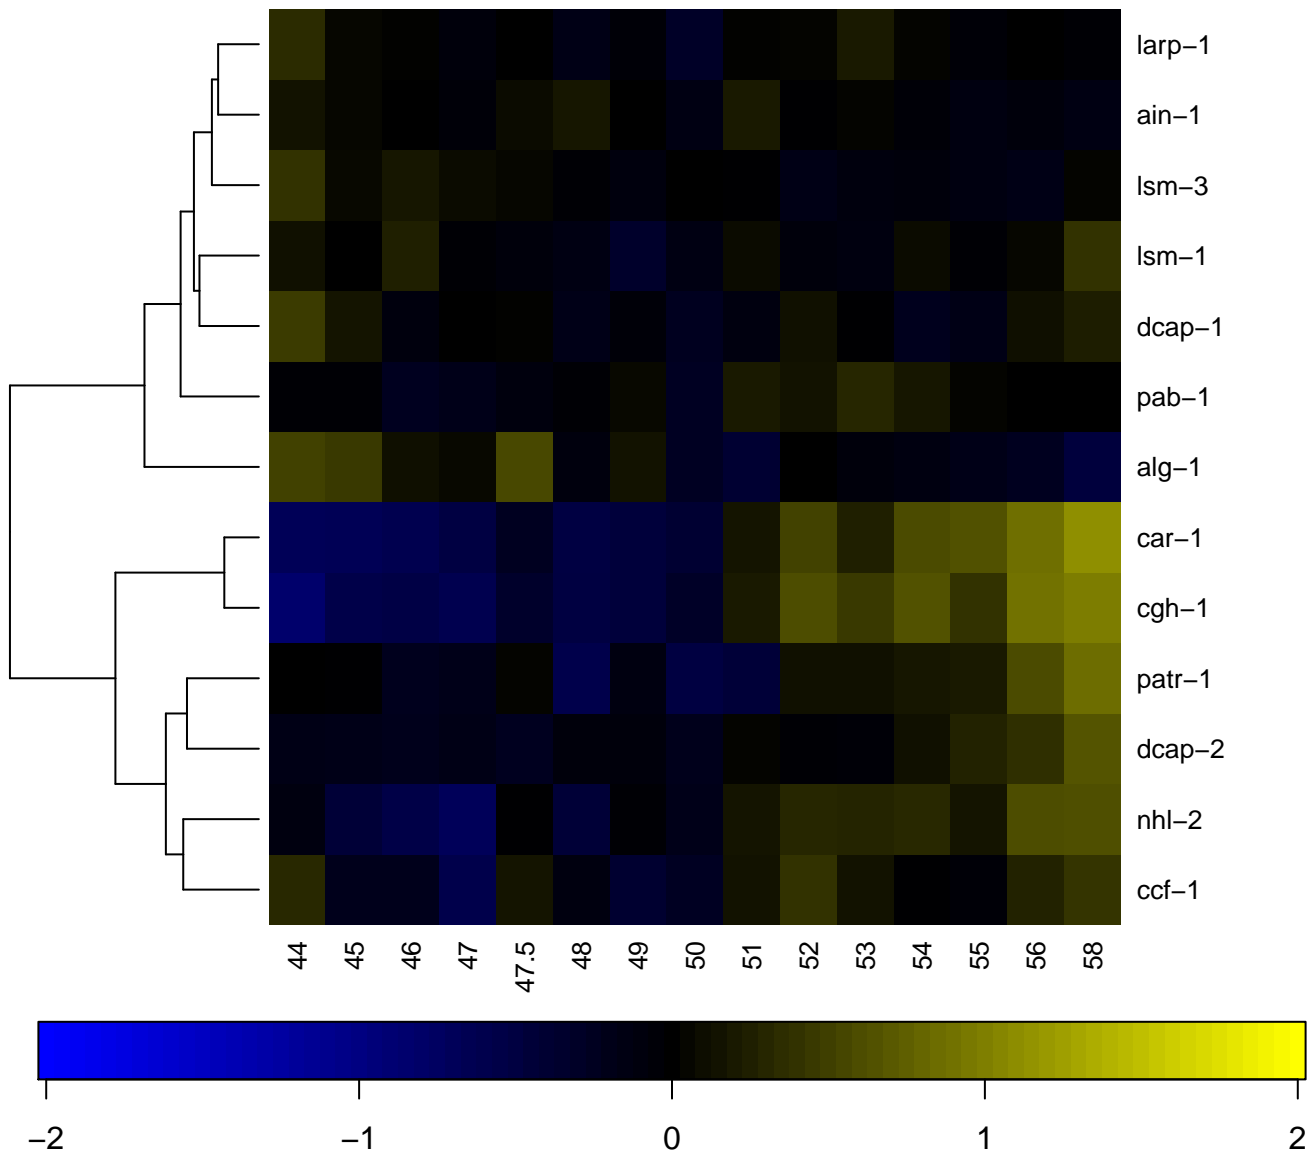

# cytoplasmic vesicle

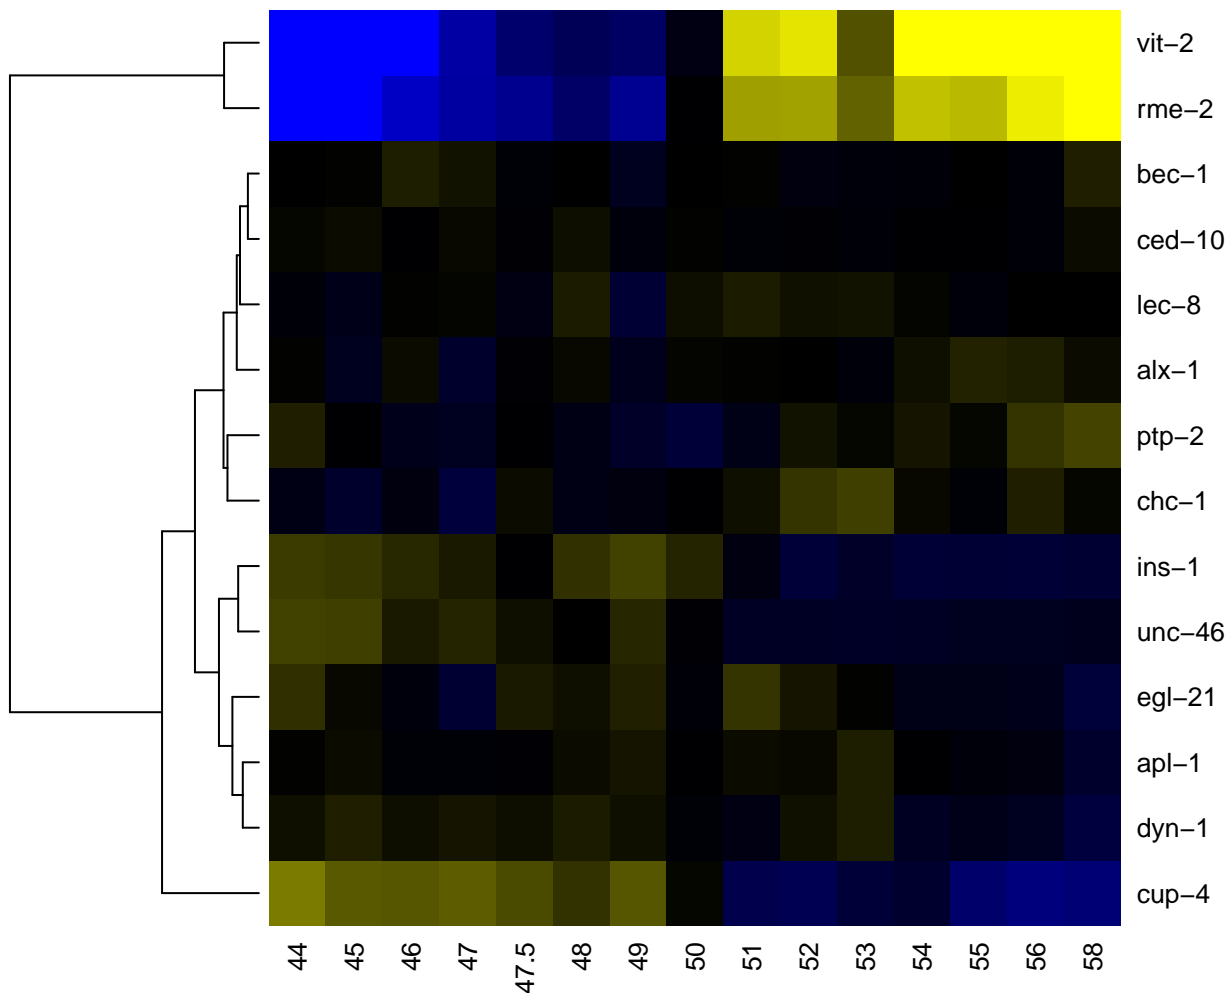

# cytoskeletal protein binding

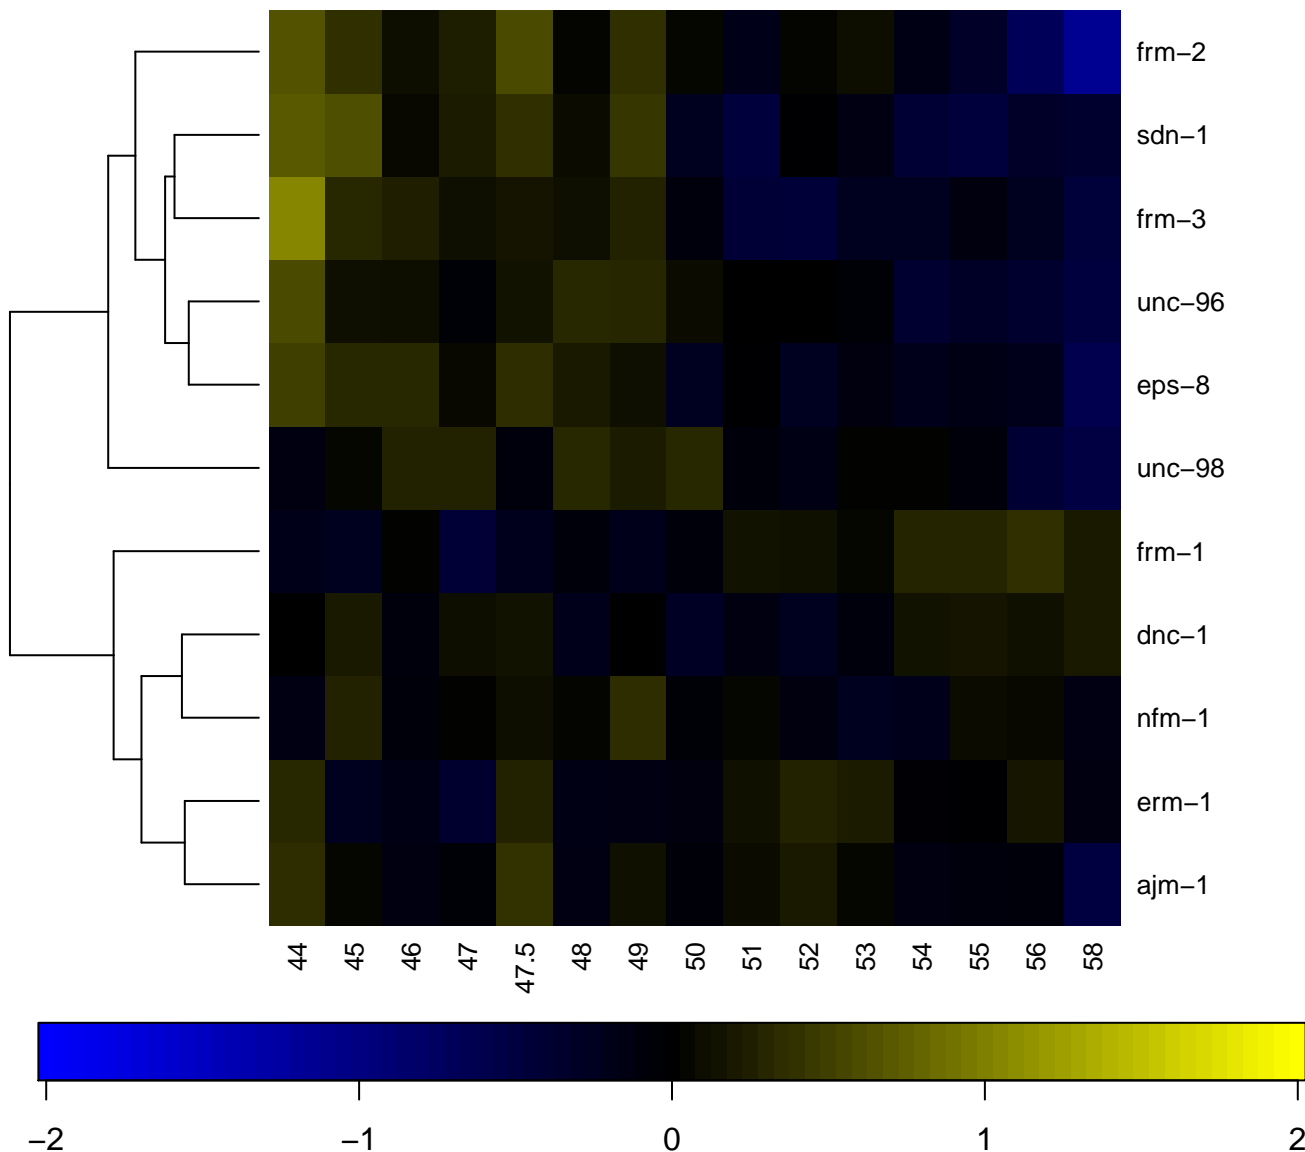

# cytoskeleton

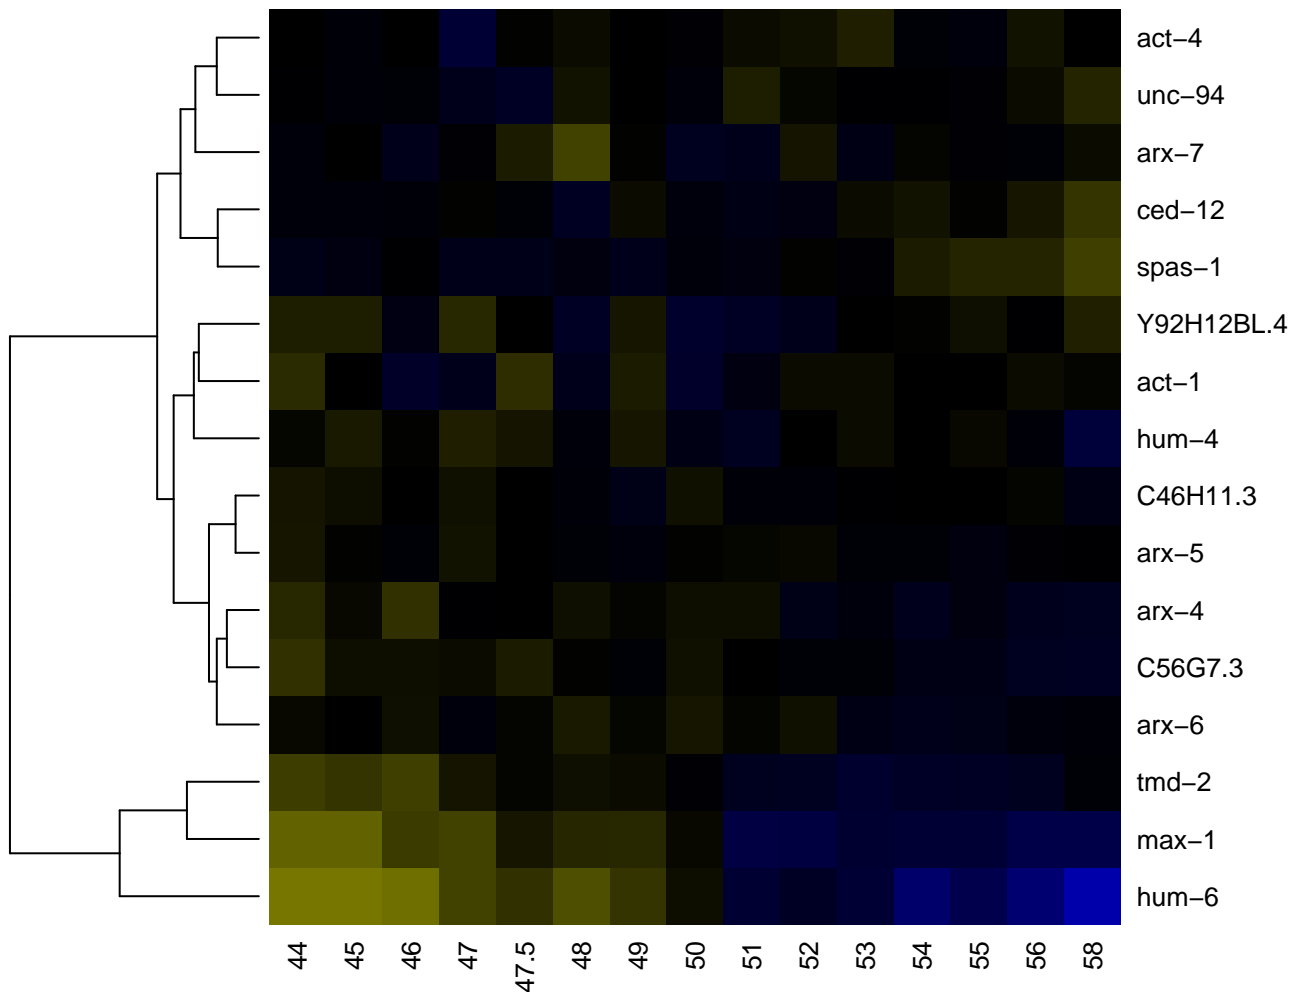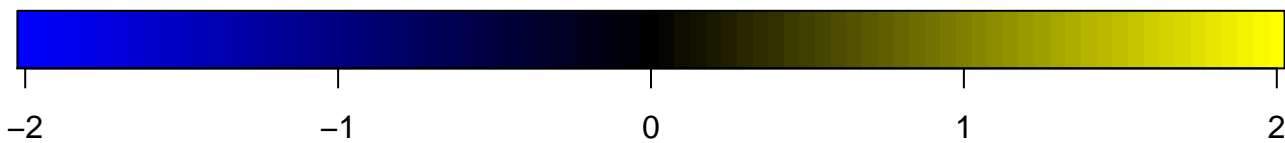



# cytosol

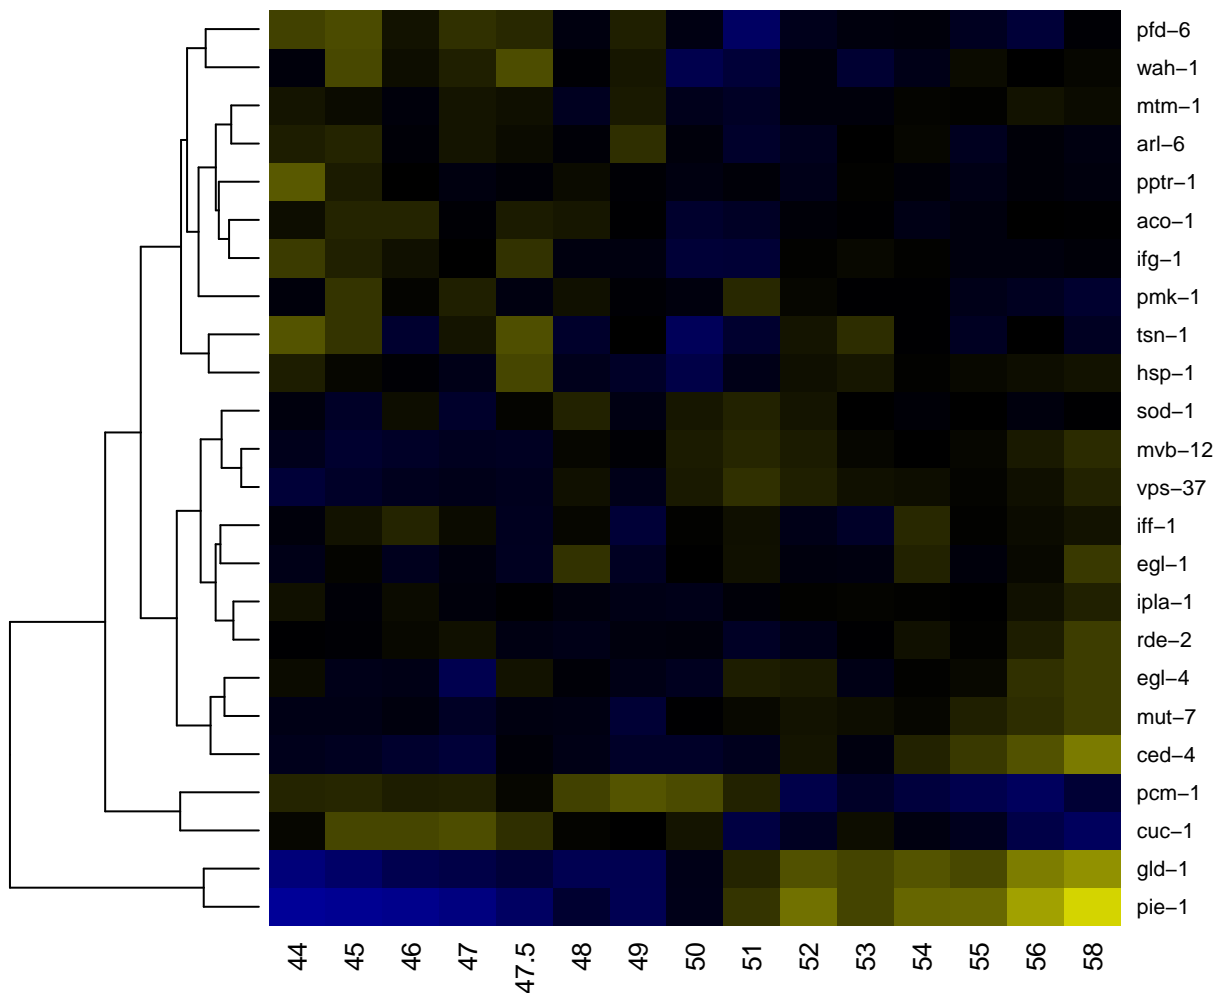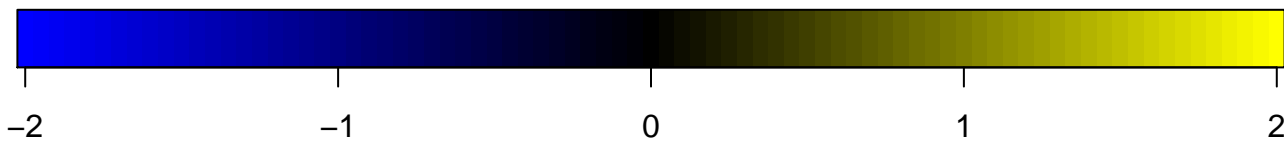



# damaged DNA binding

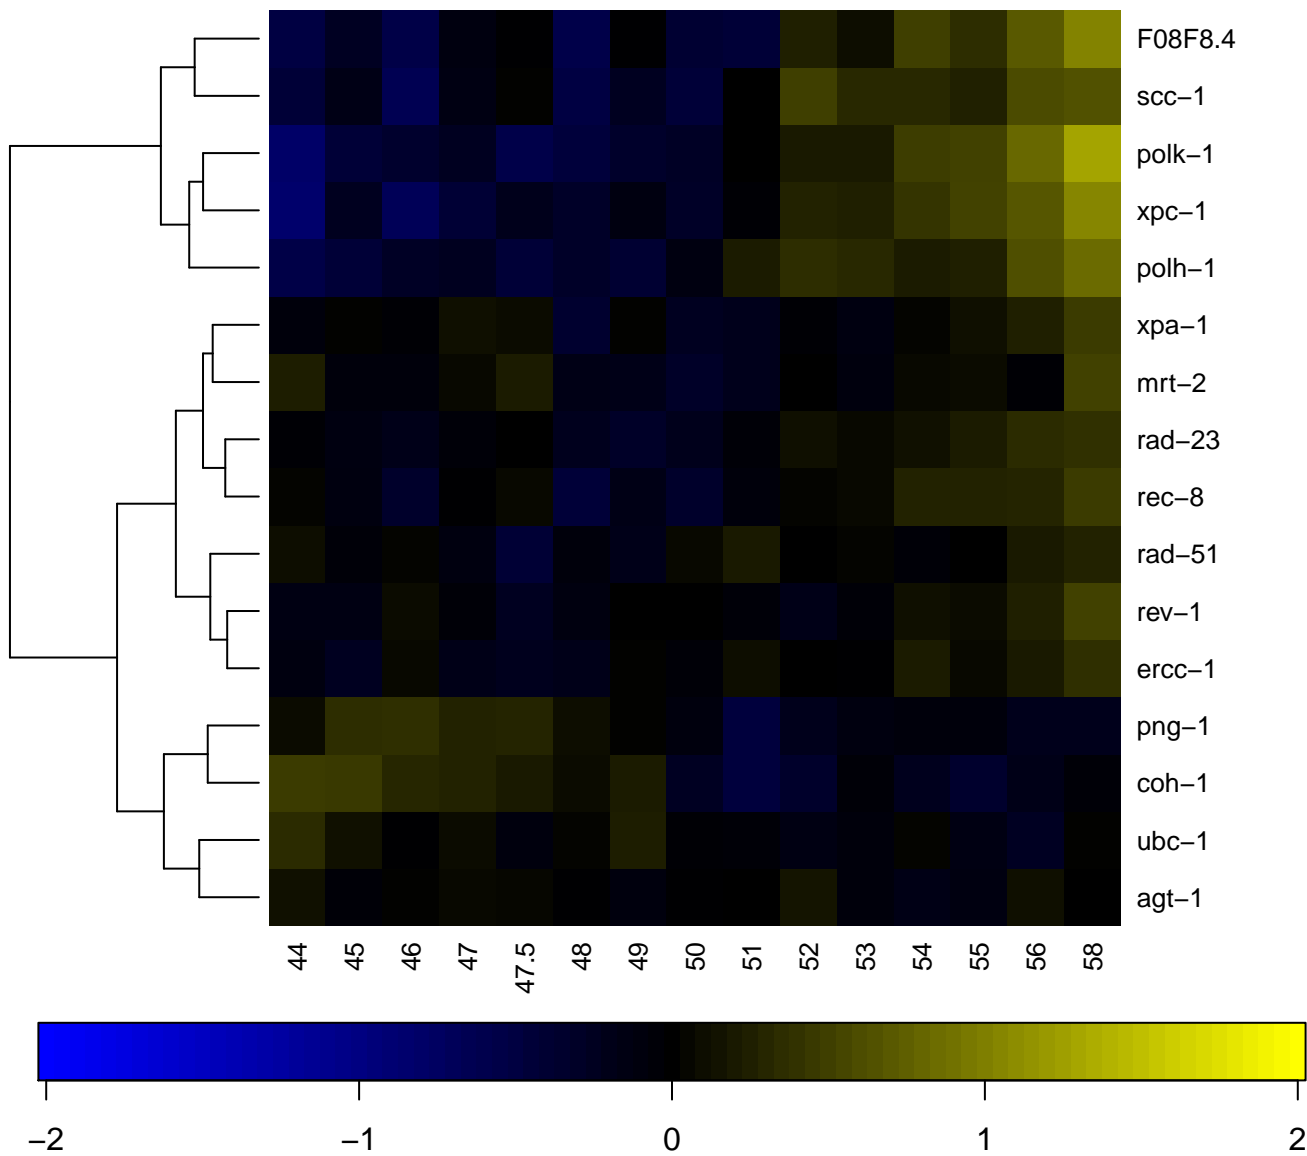



# dauer entry

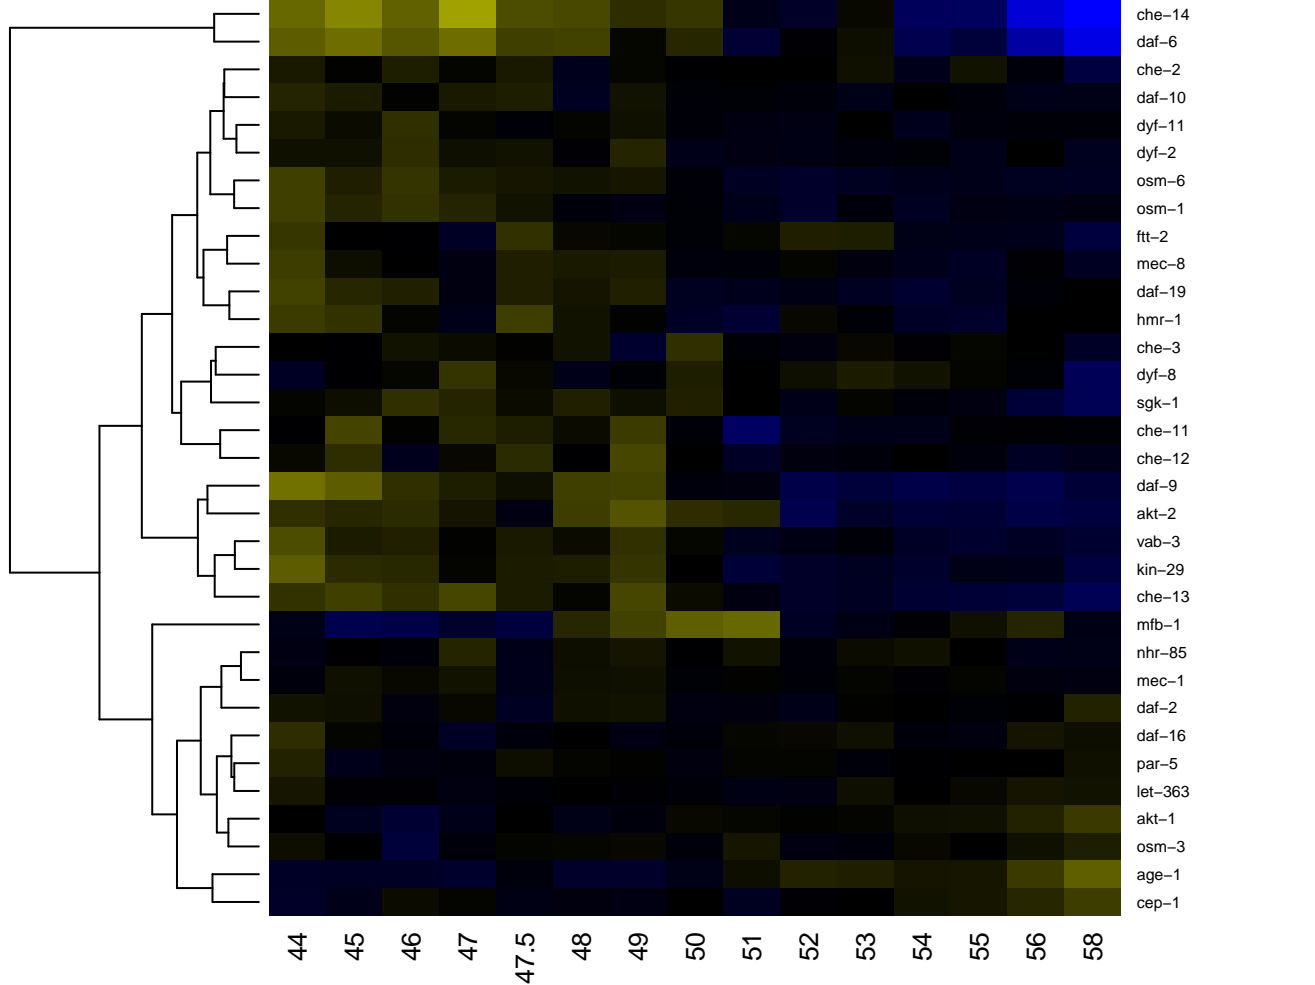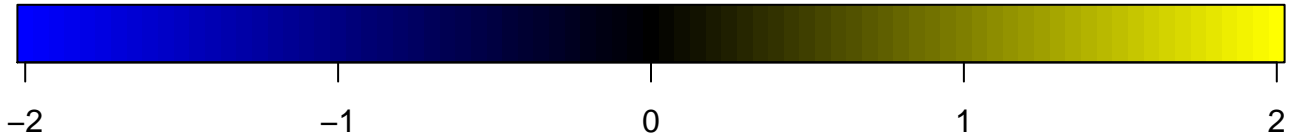



# dauer larval development

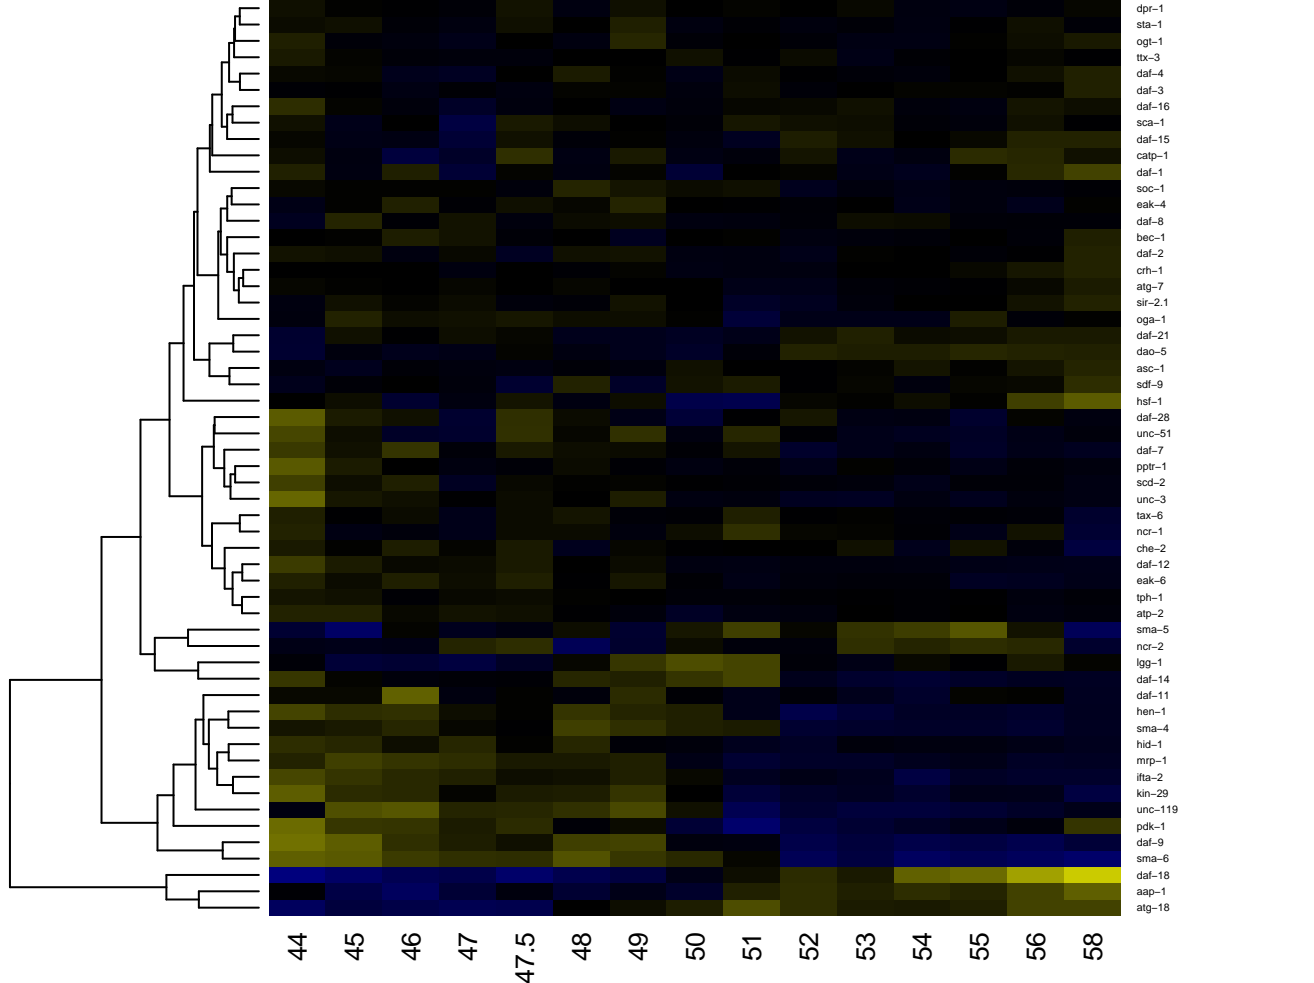



# defecation

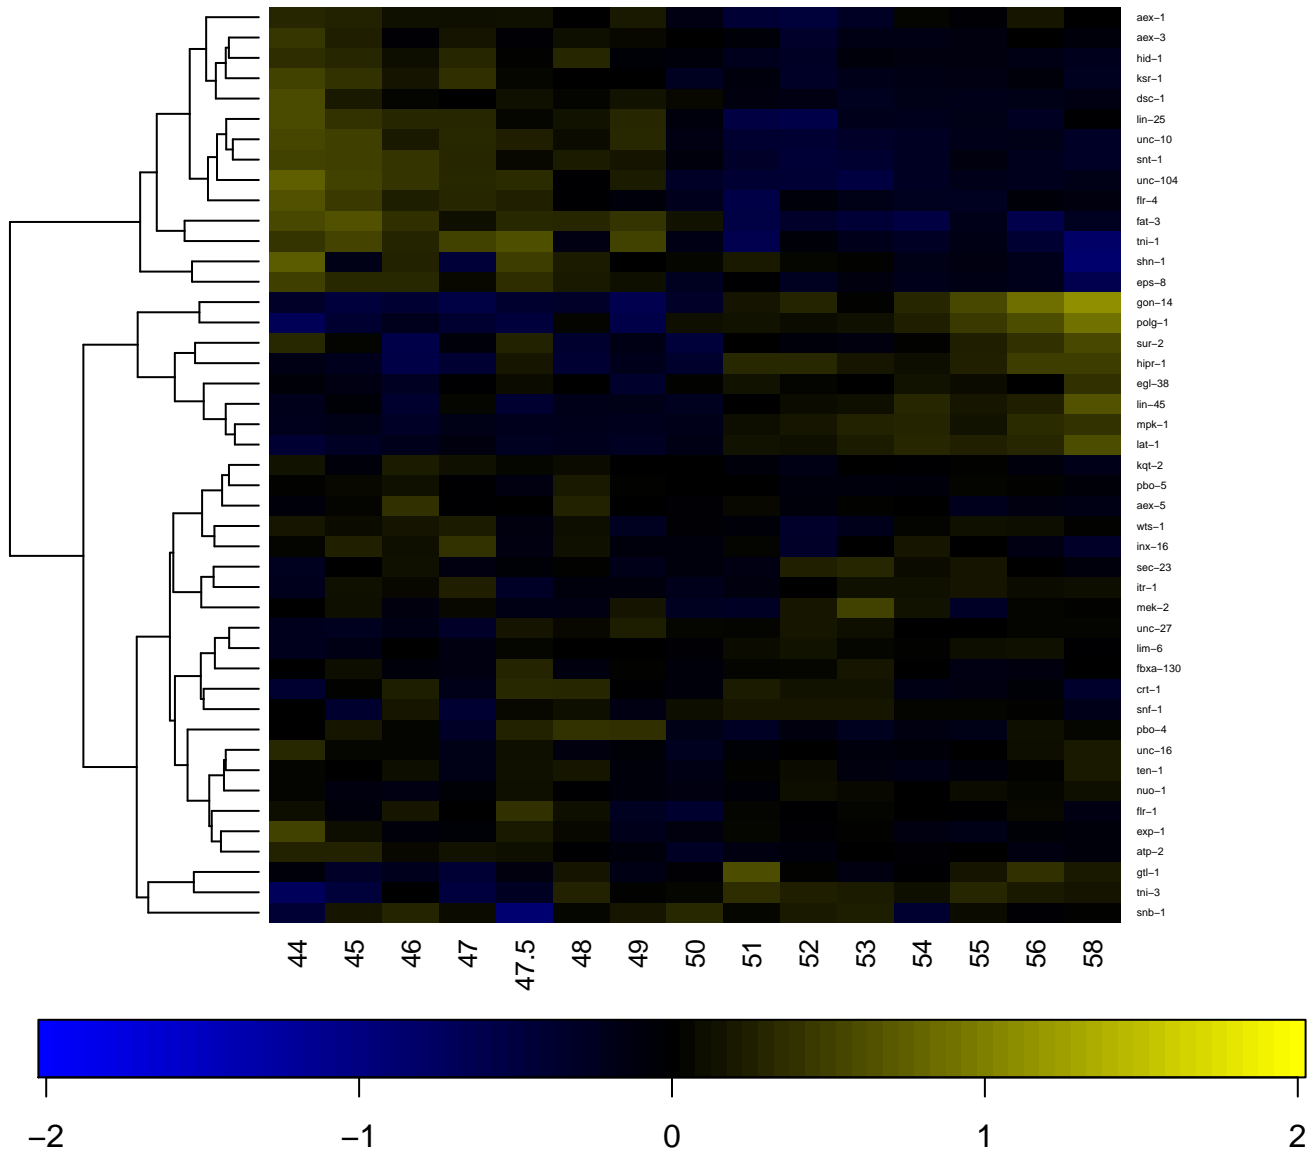

# defense response

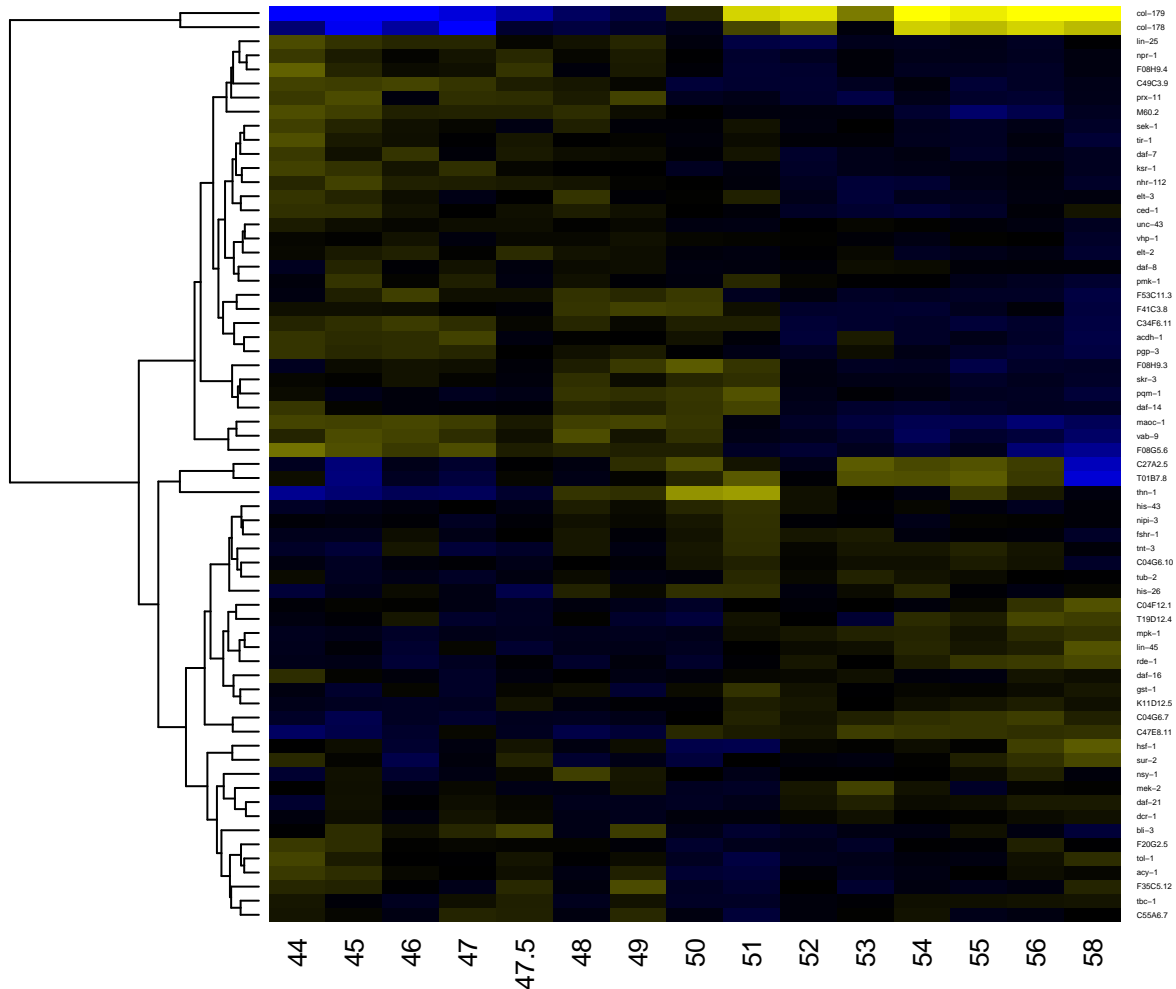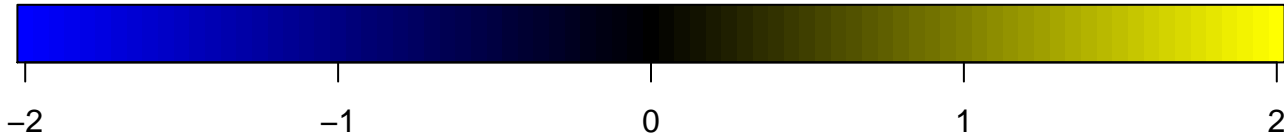

# defense response to fungus

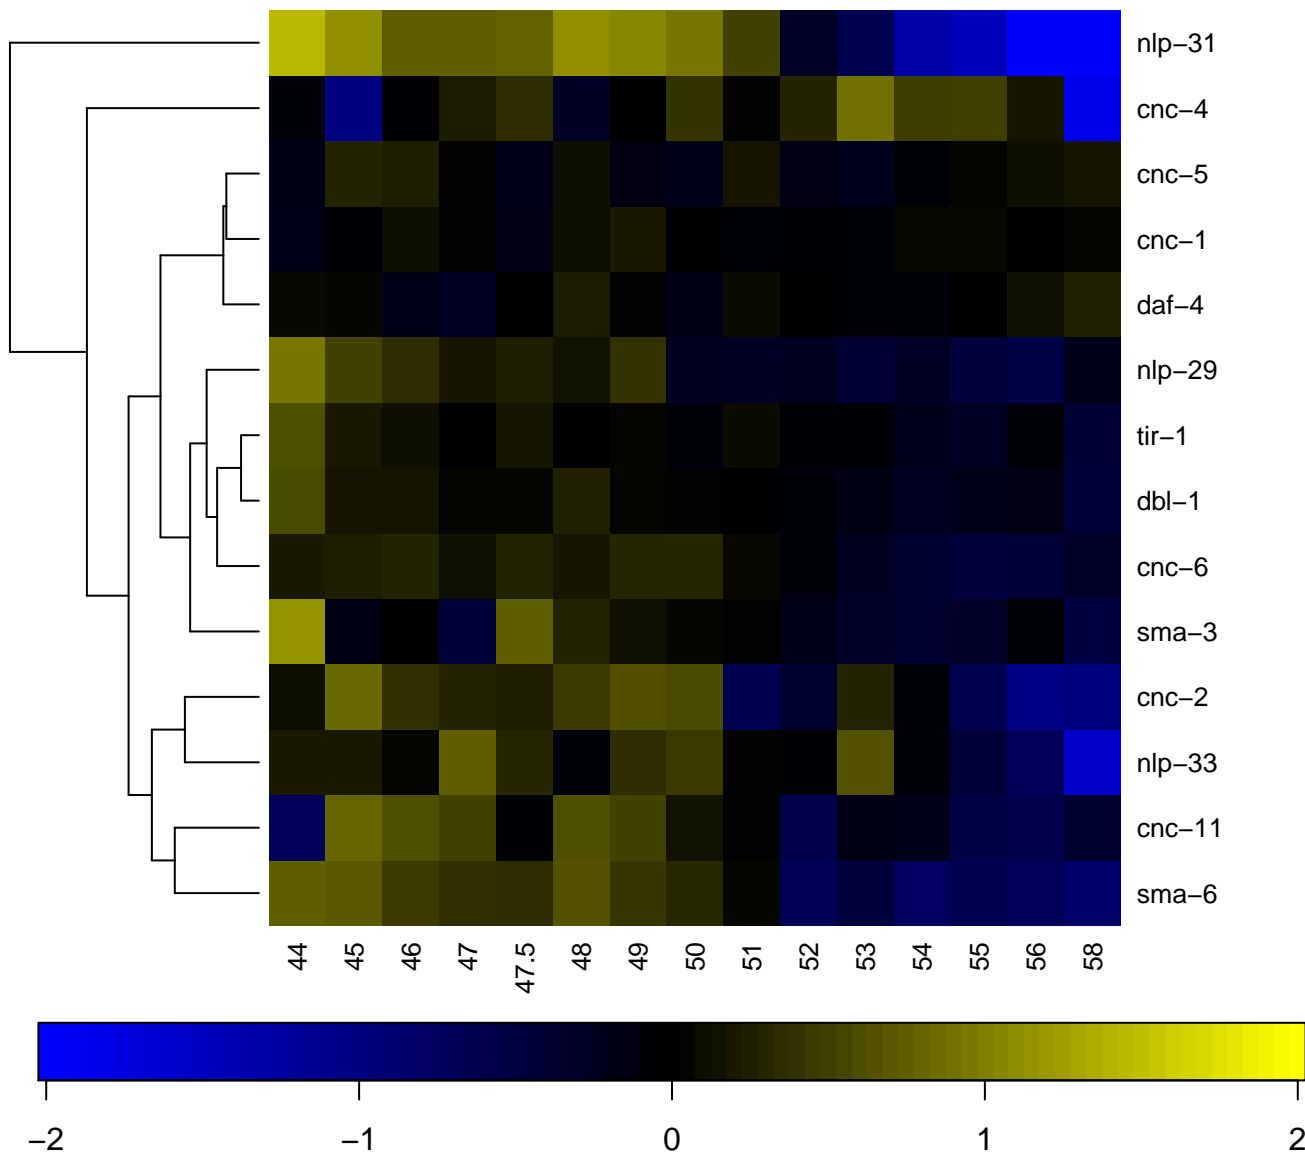









# dephosphorylation

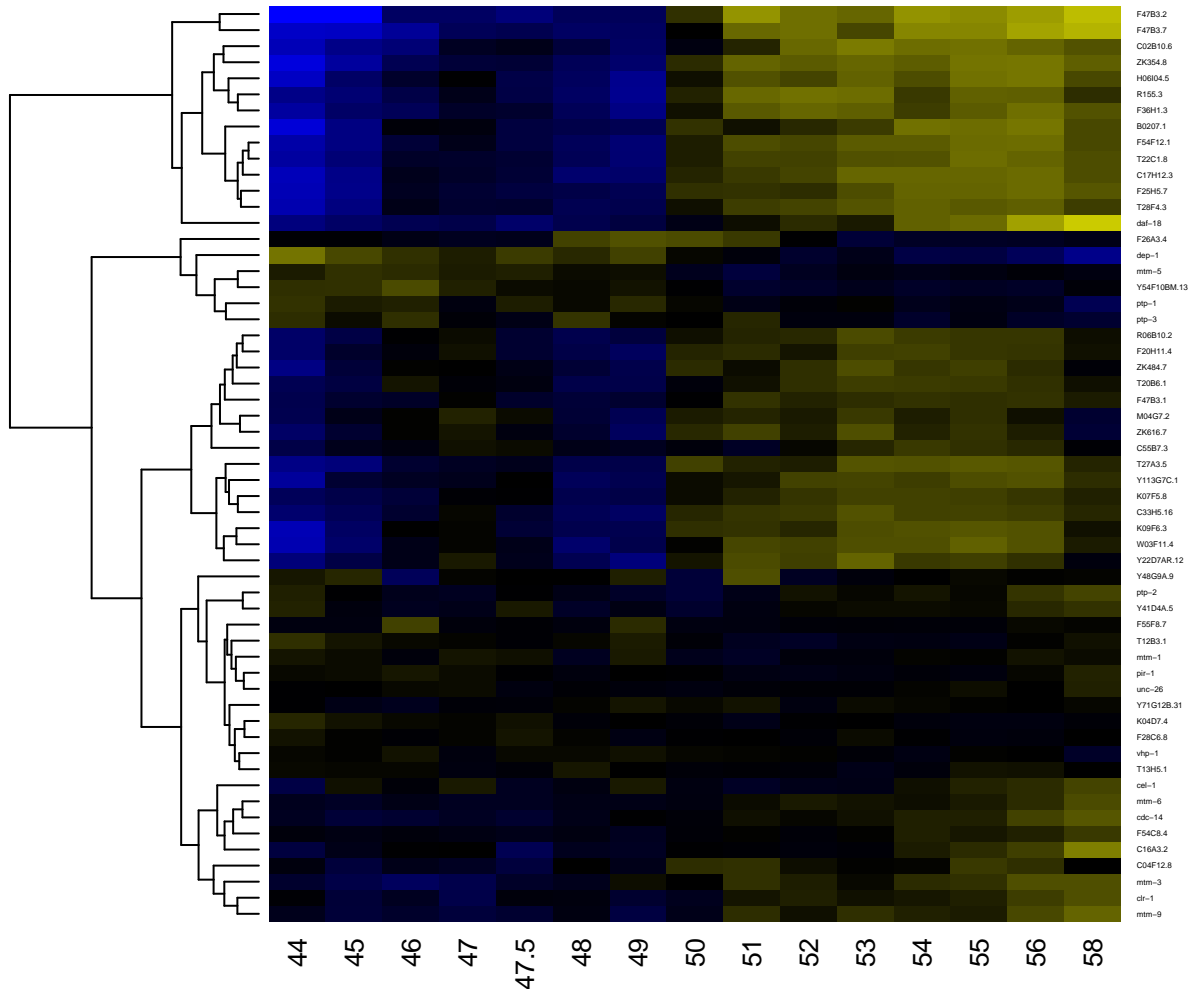

# determination of adult life span

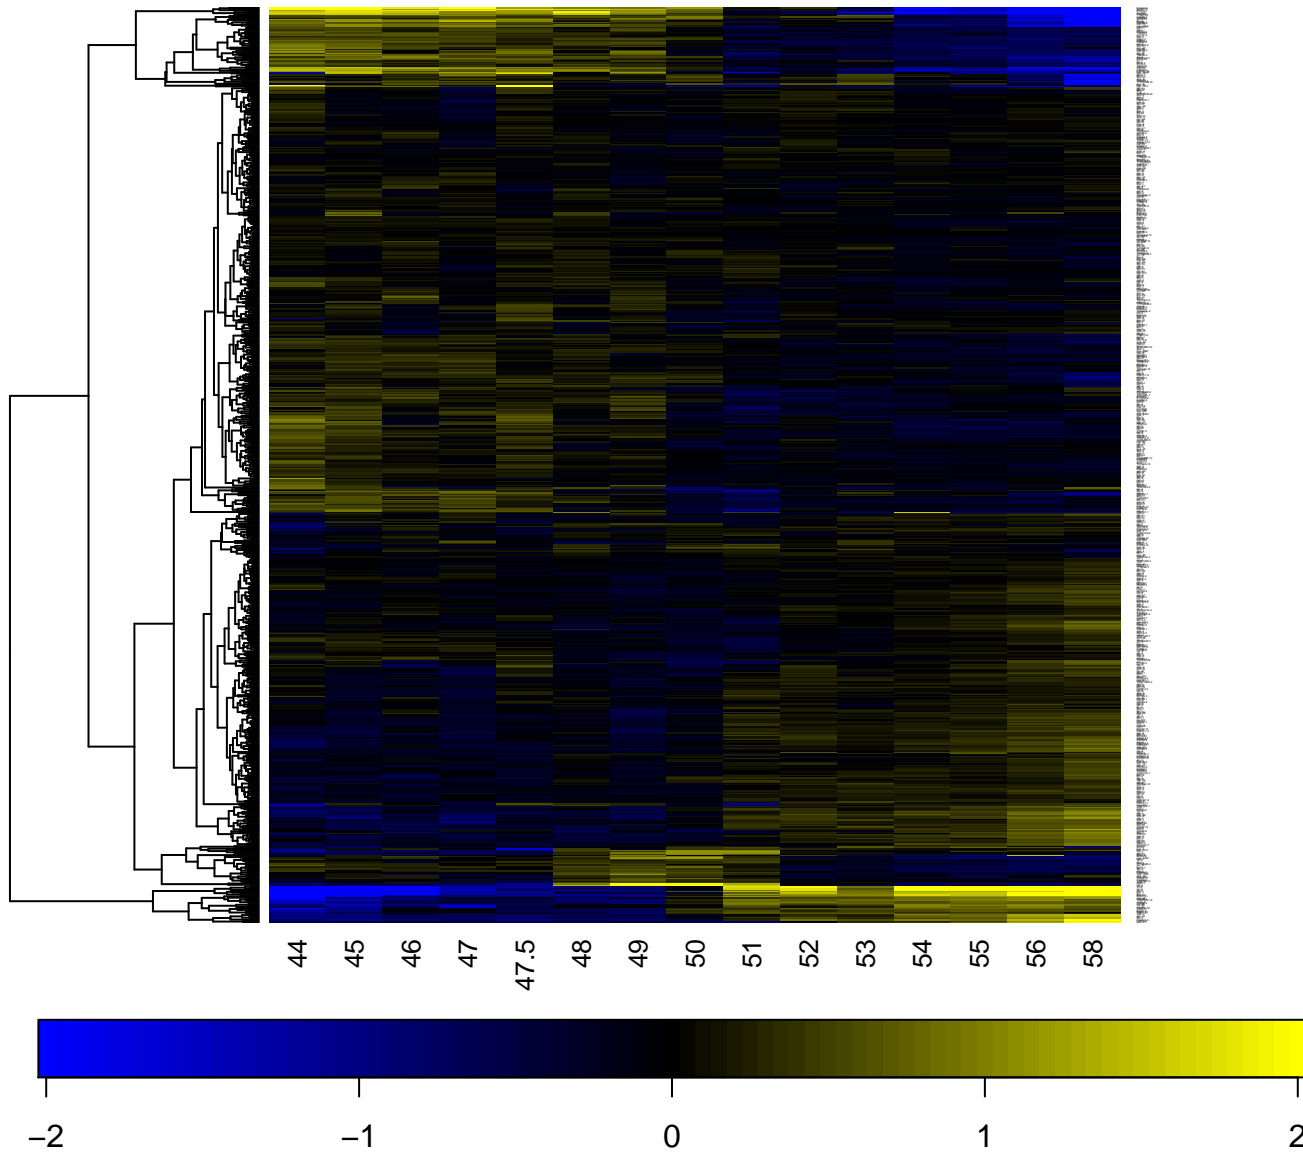



# developmental process

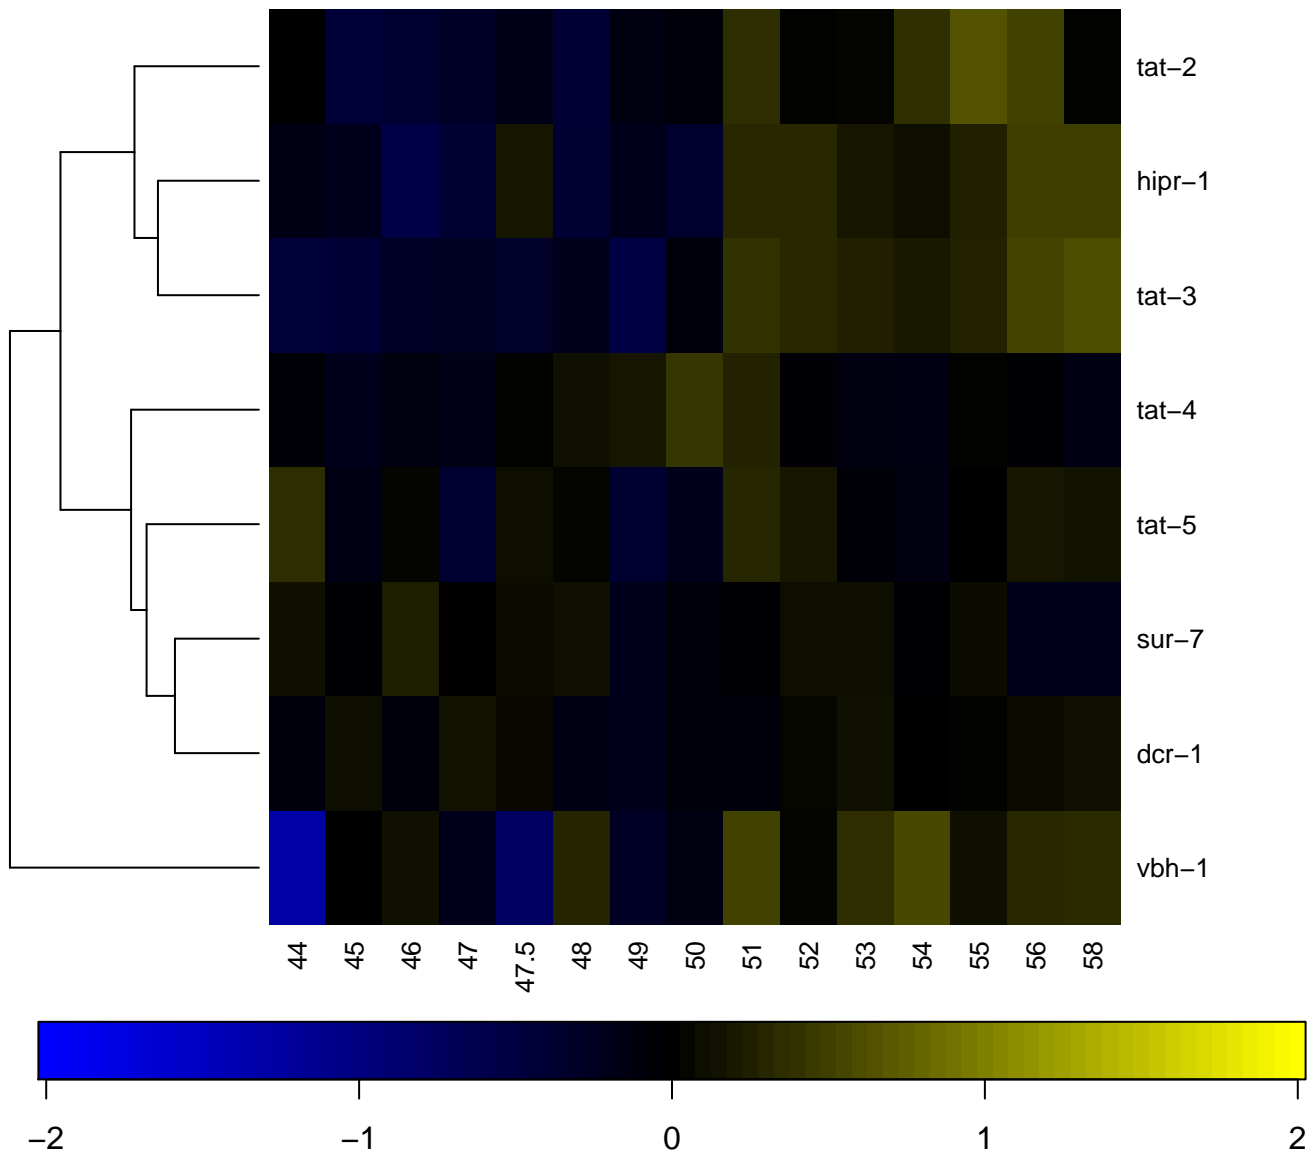



# dicarboxylic acid transport

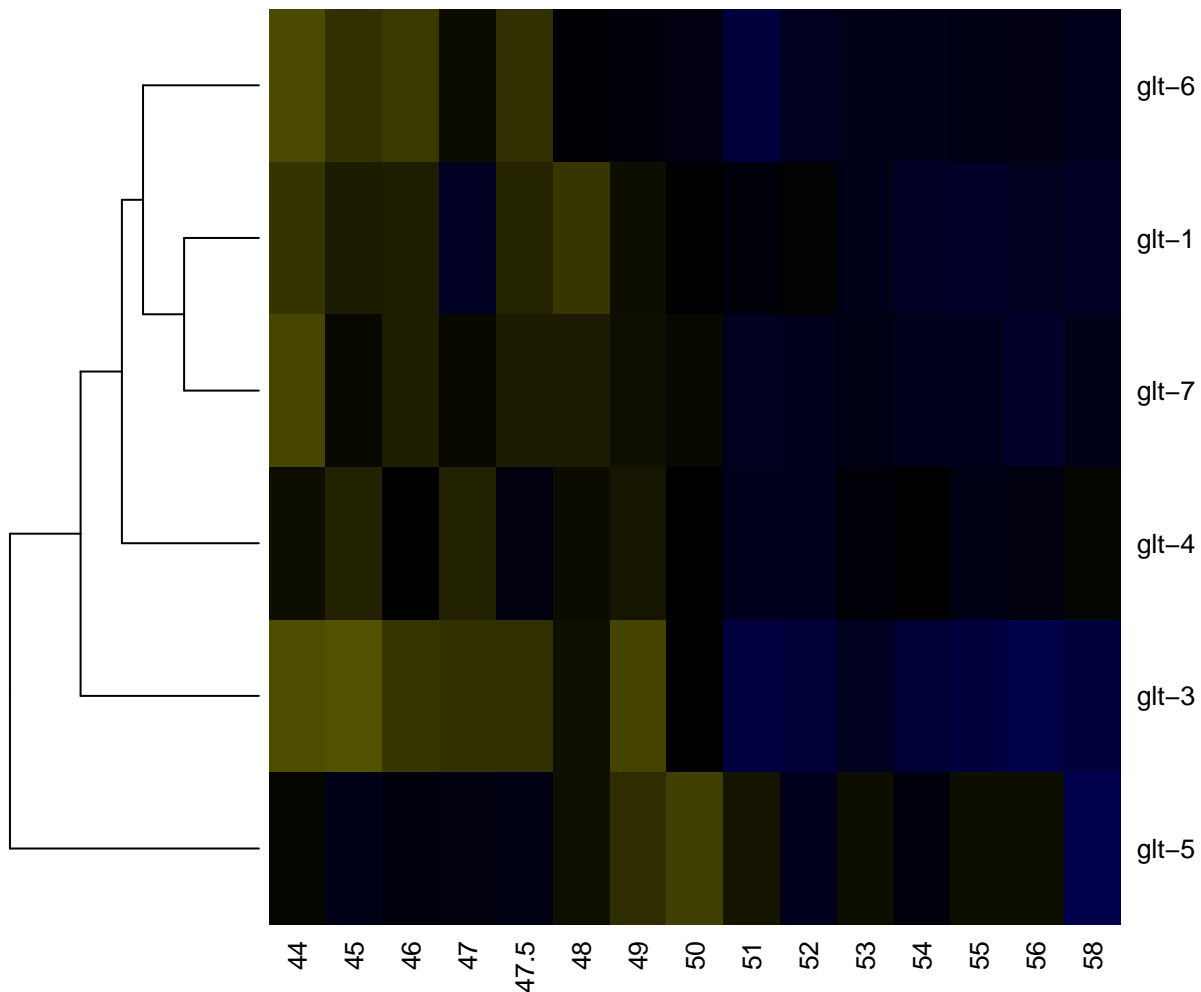



# DNA-directed DNA polymerase activity

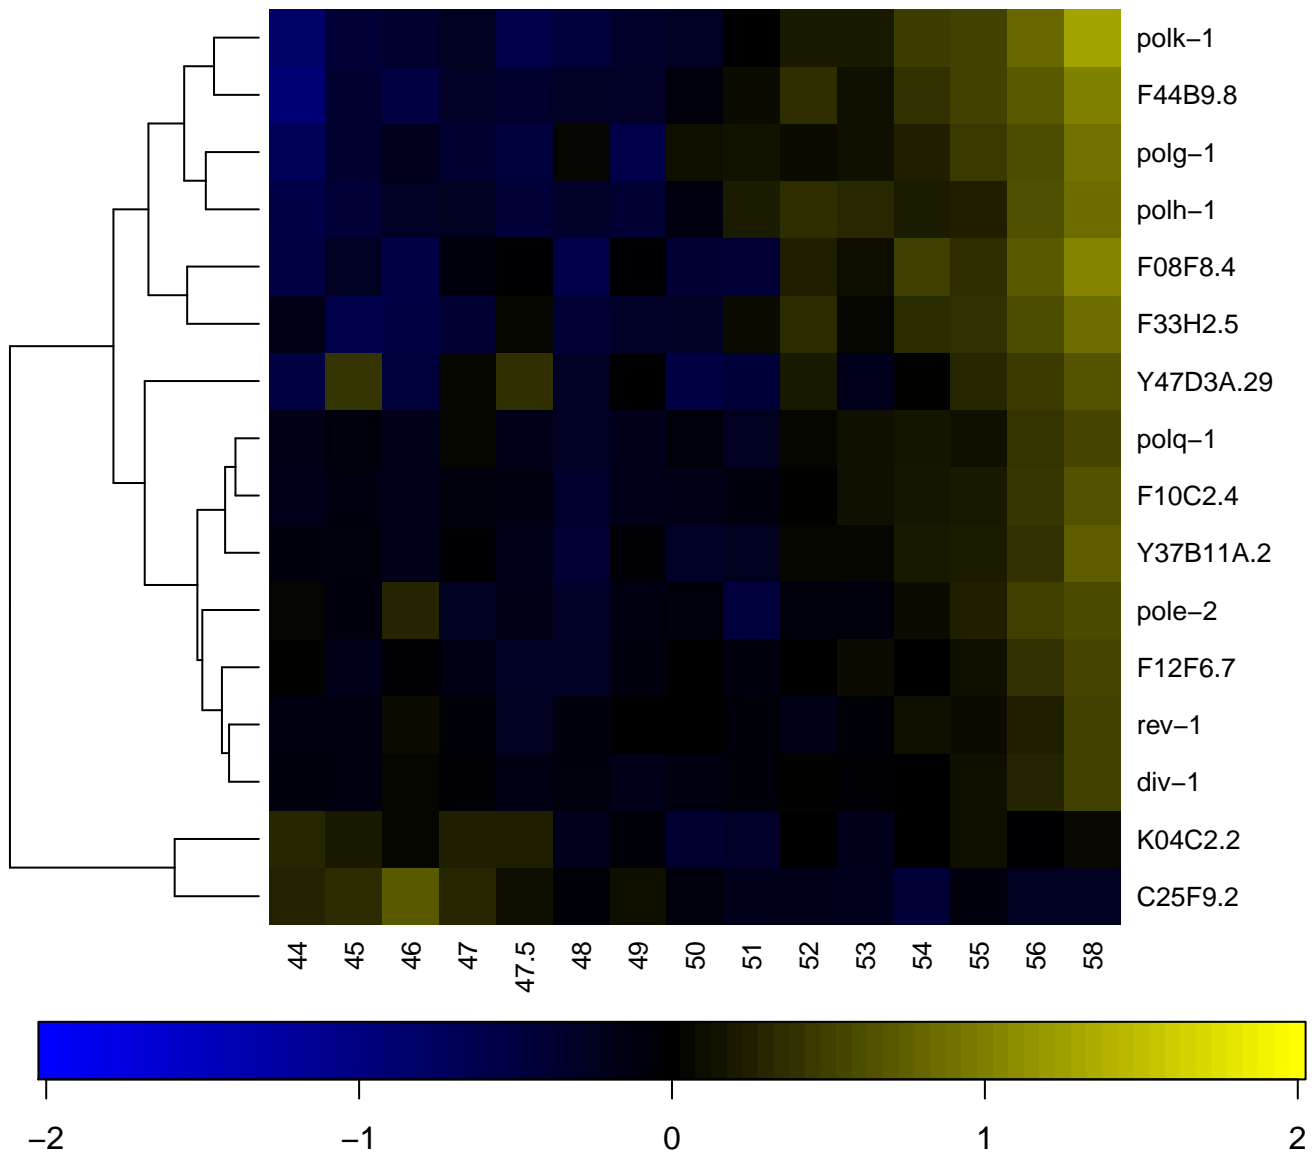

# DNA-directed RNA polymerase activity

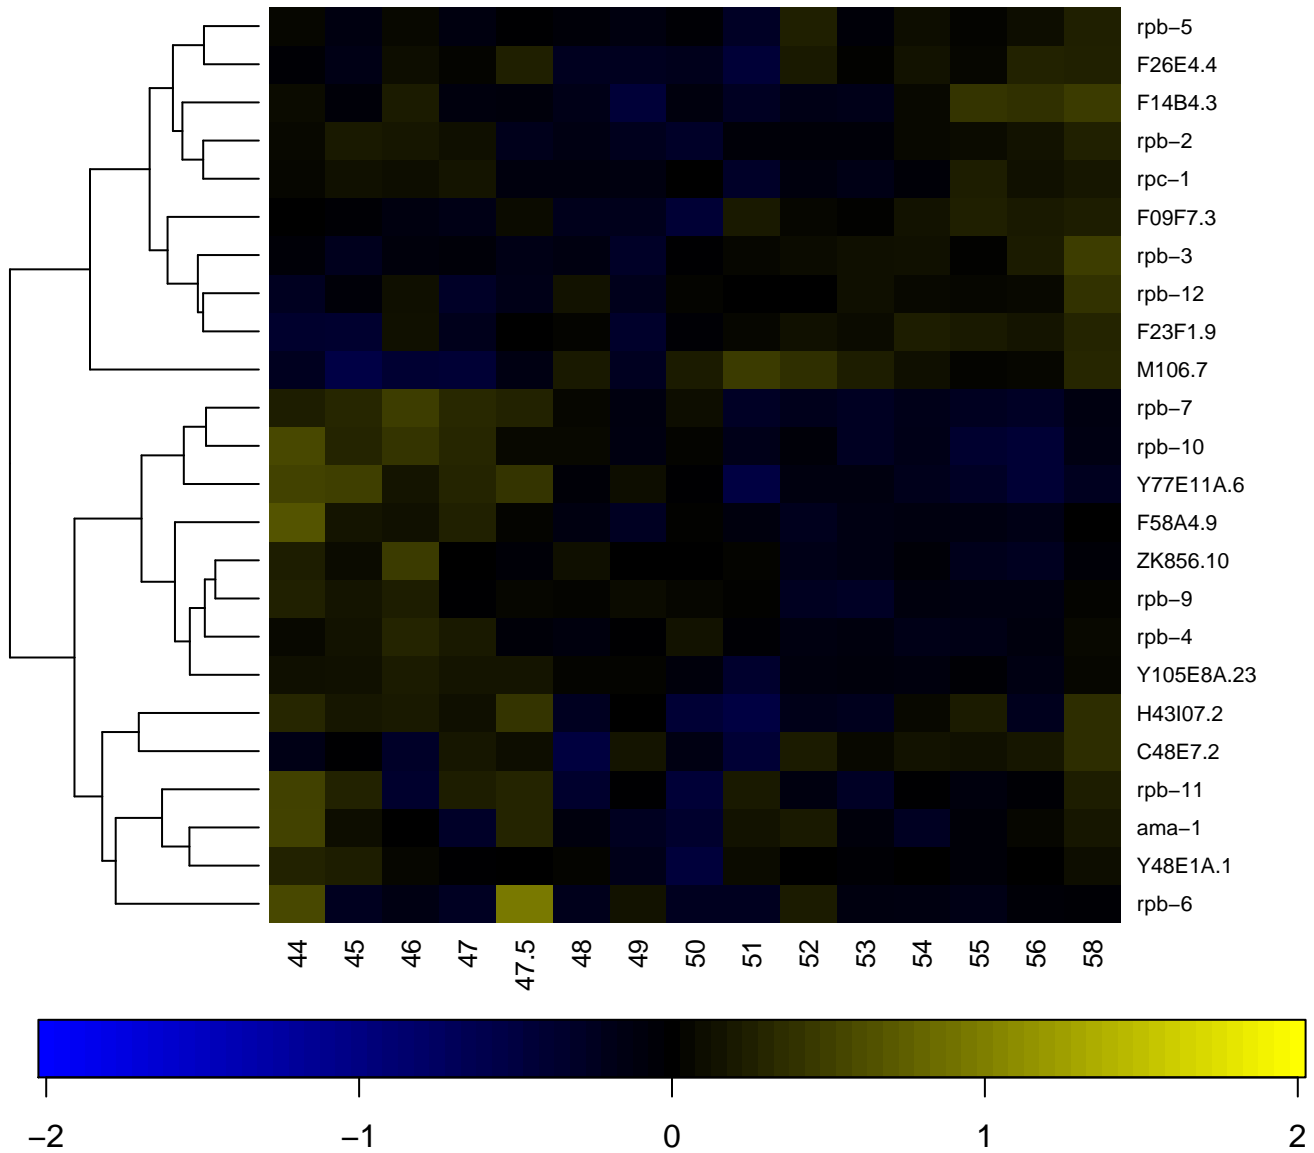

# DNA binding

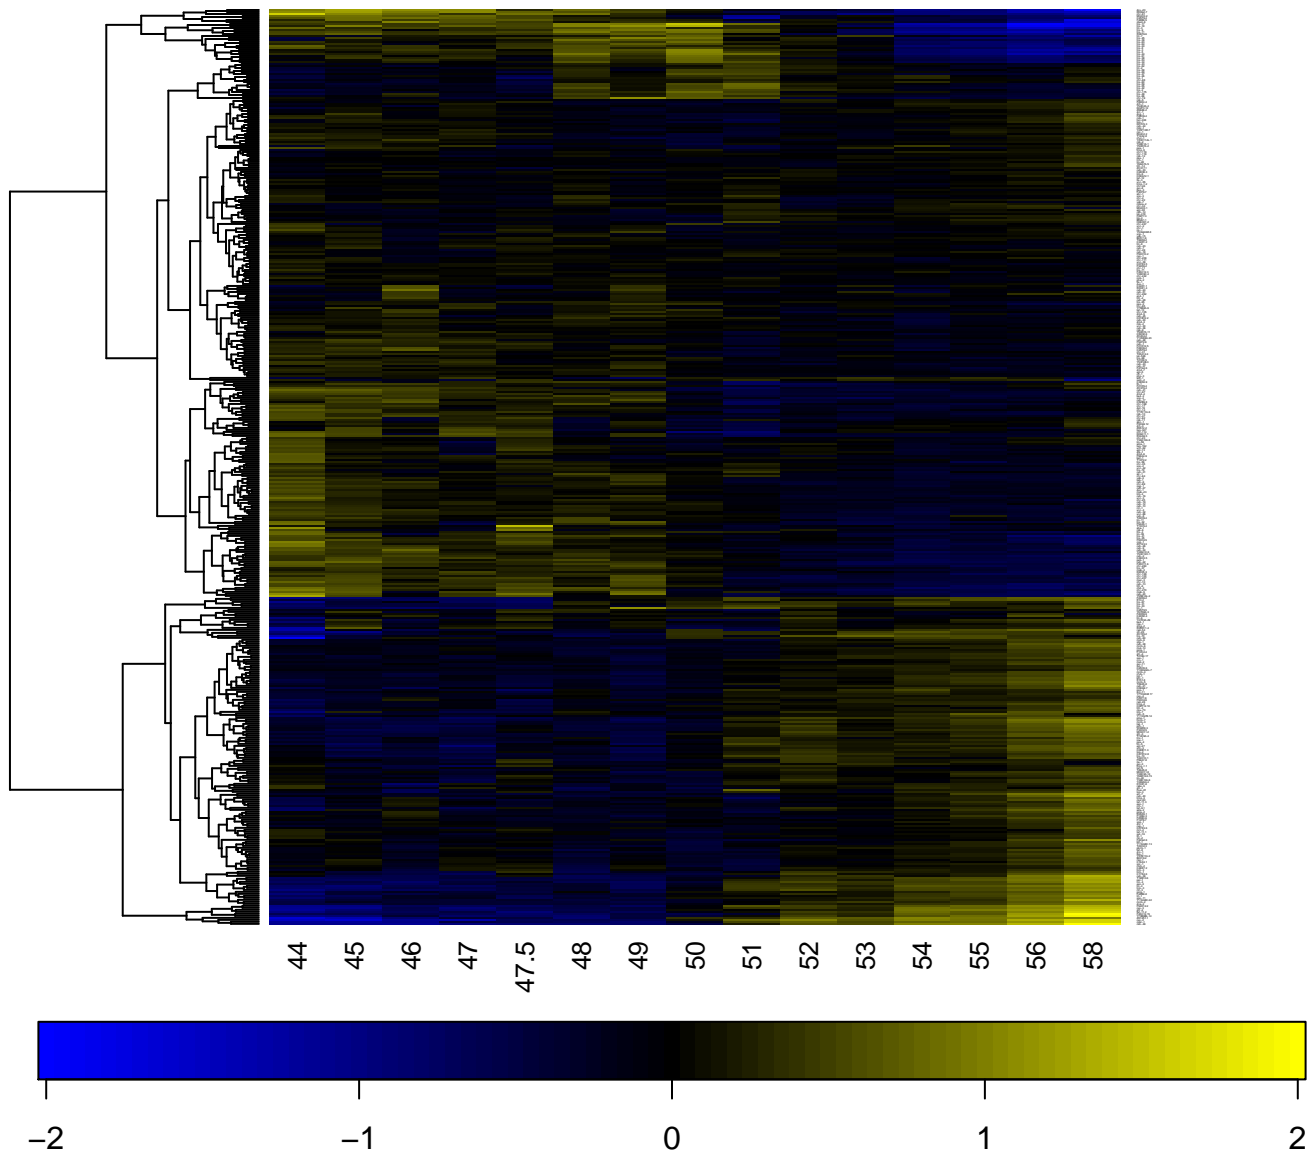



# DNA damage checkpoint

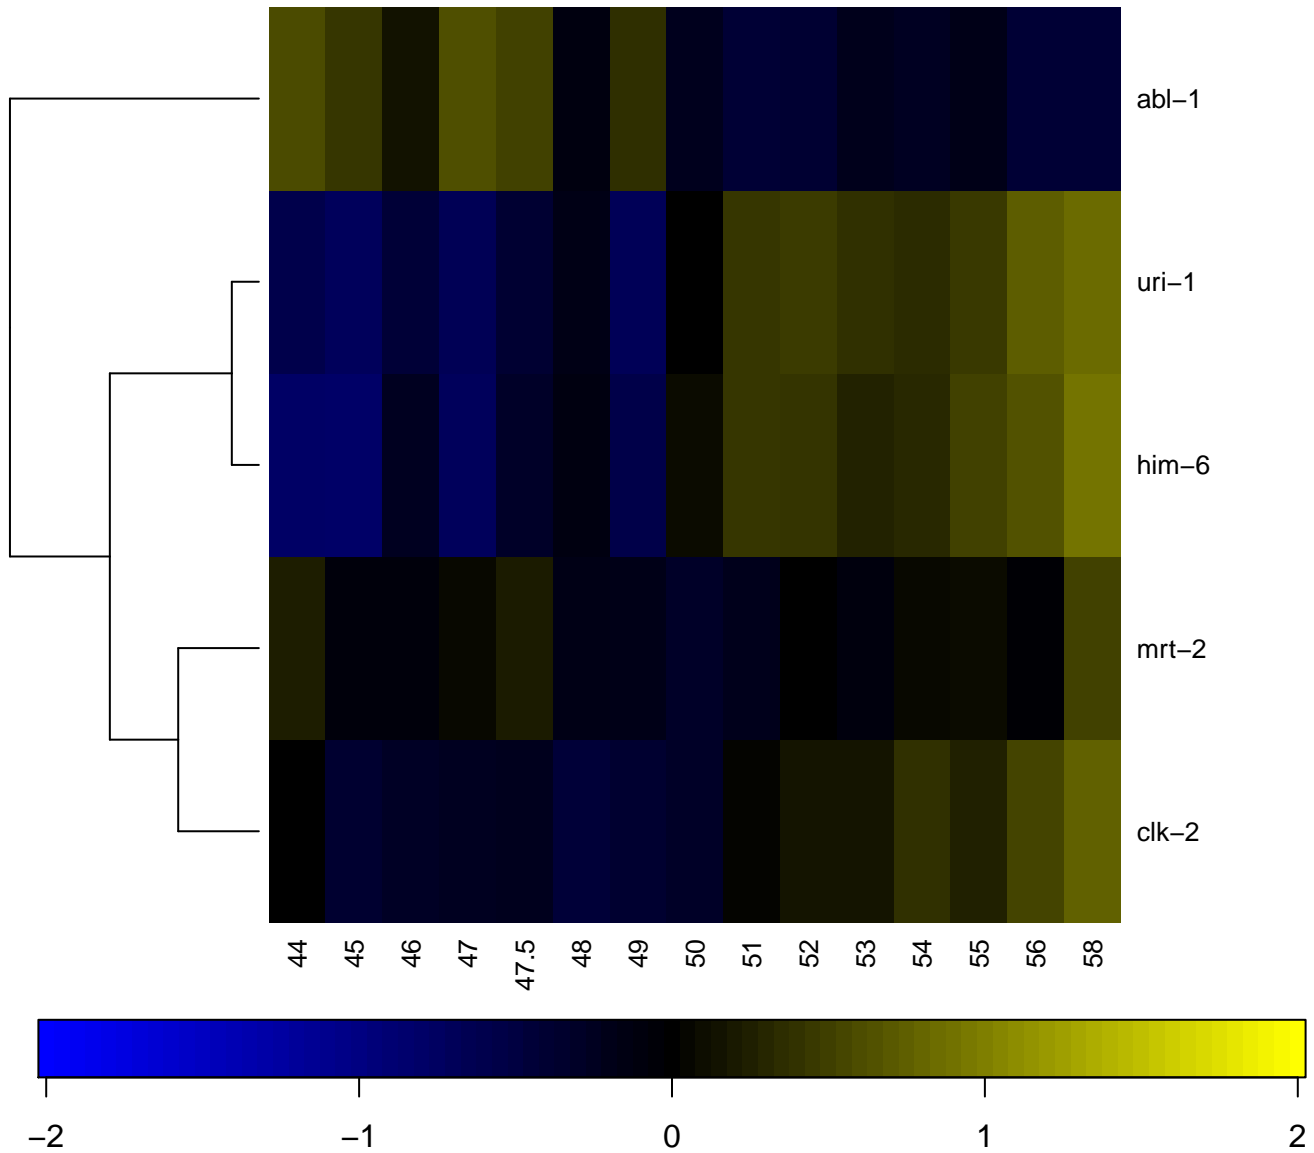





# DNA ligase (ATP) activity

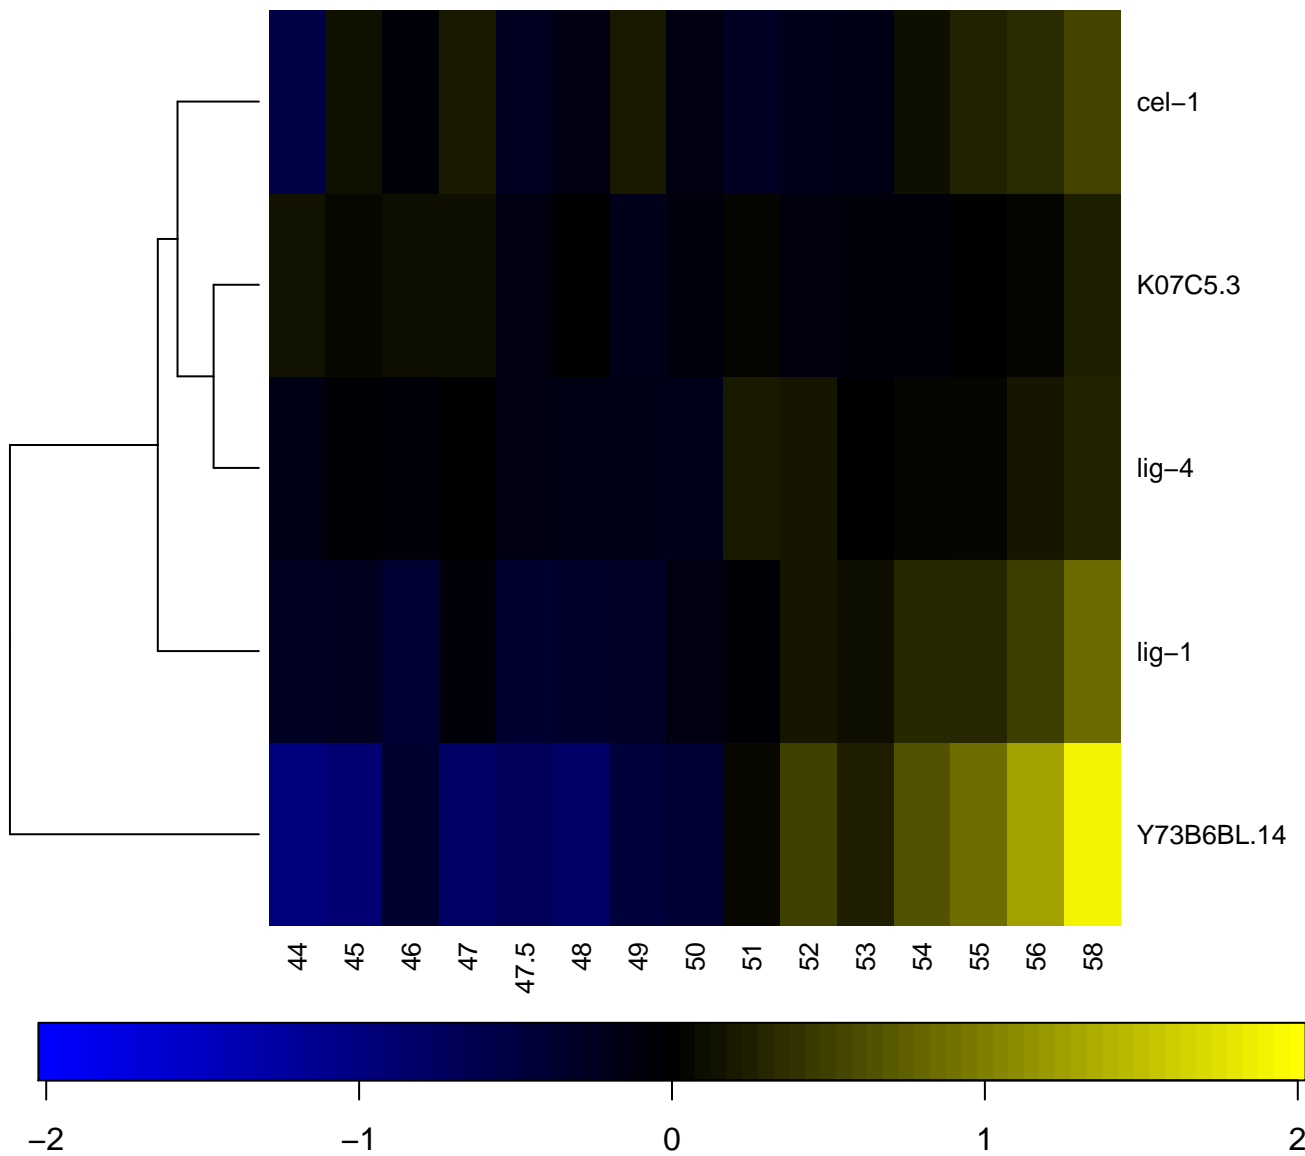







# DNA recombination

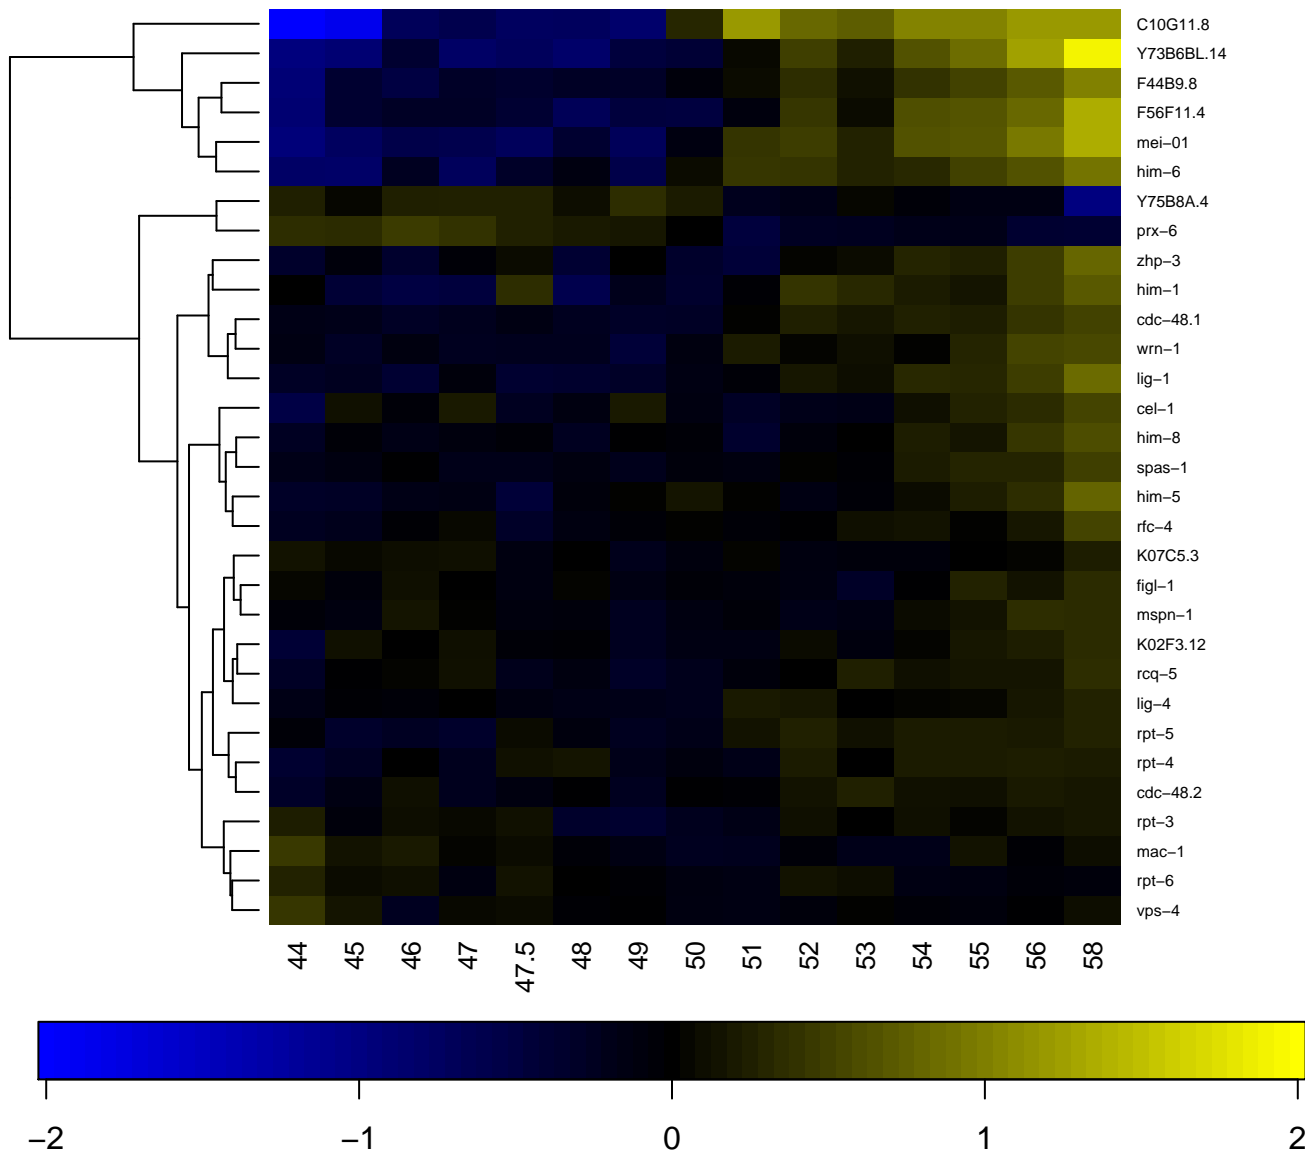

# DNA repair

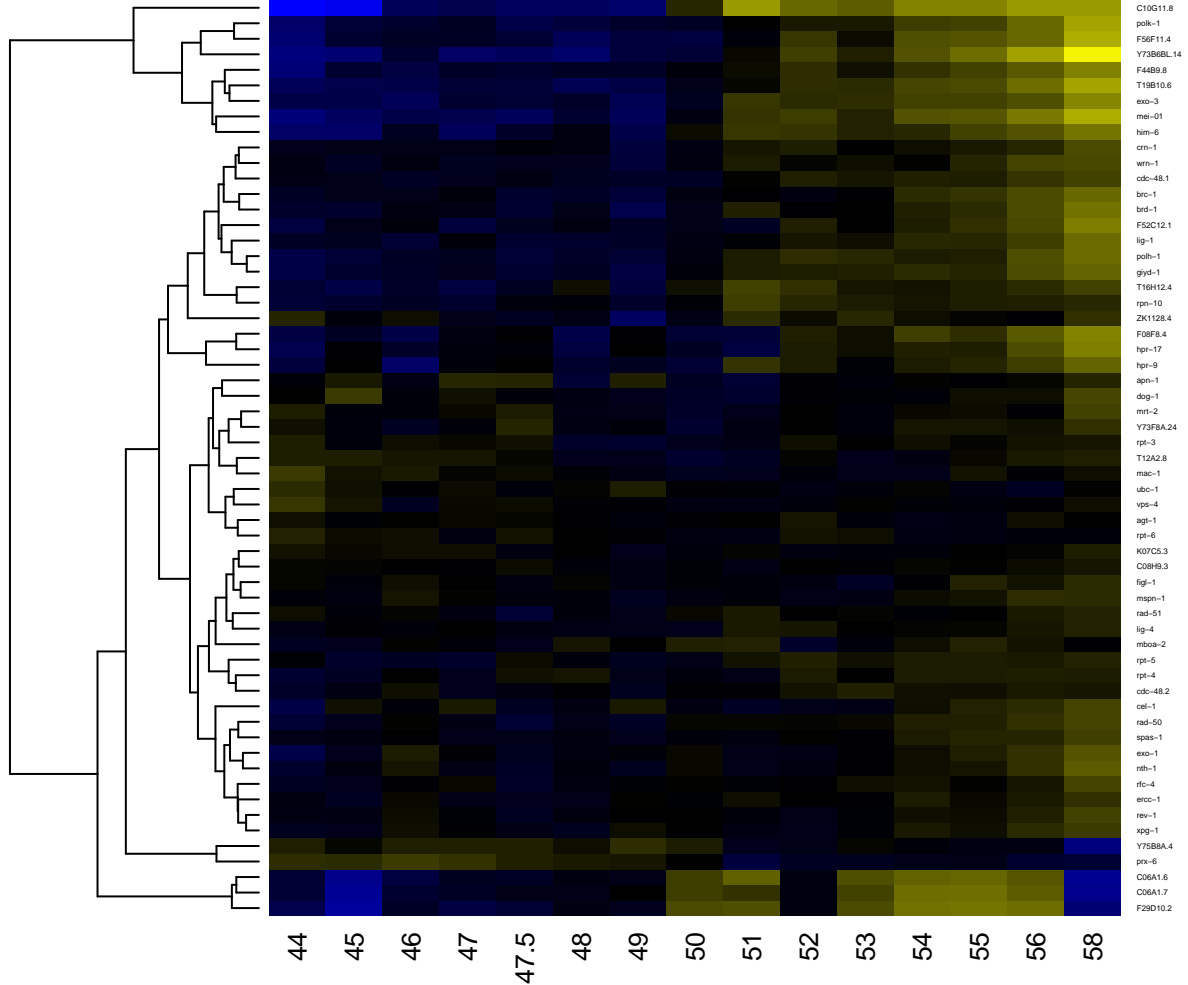

# DNA replication

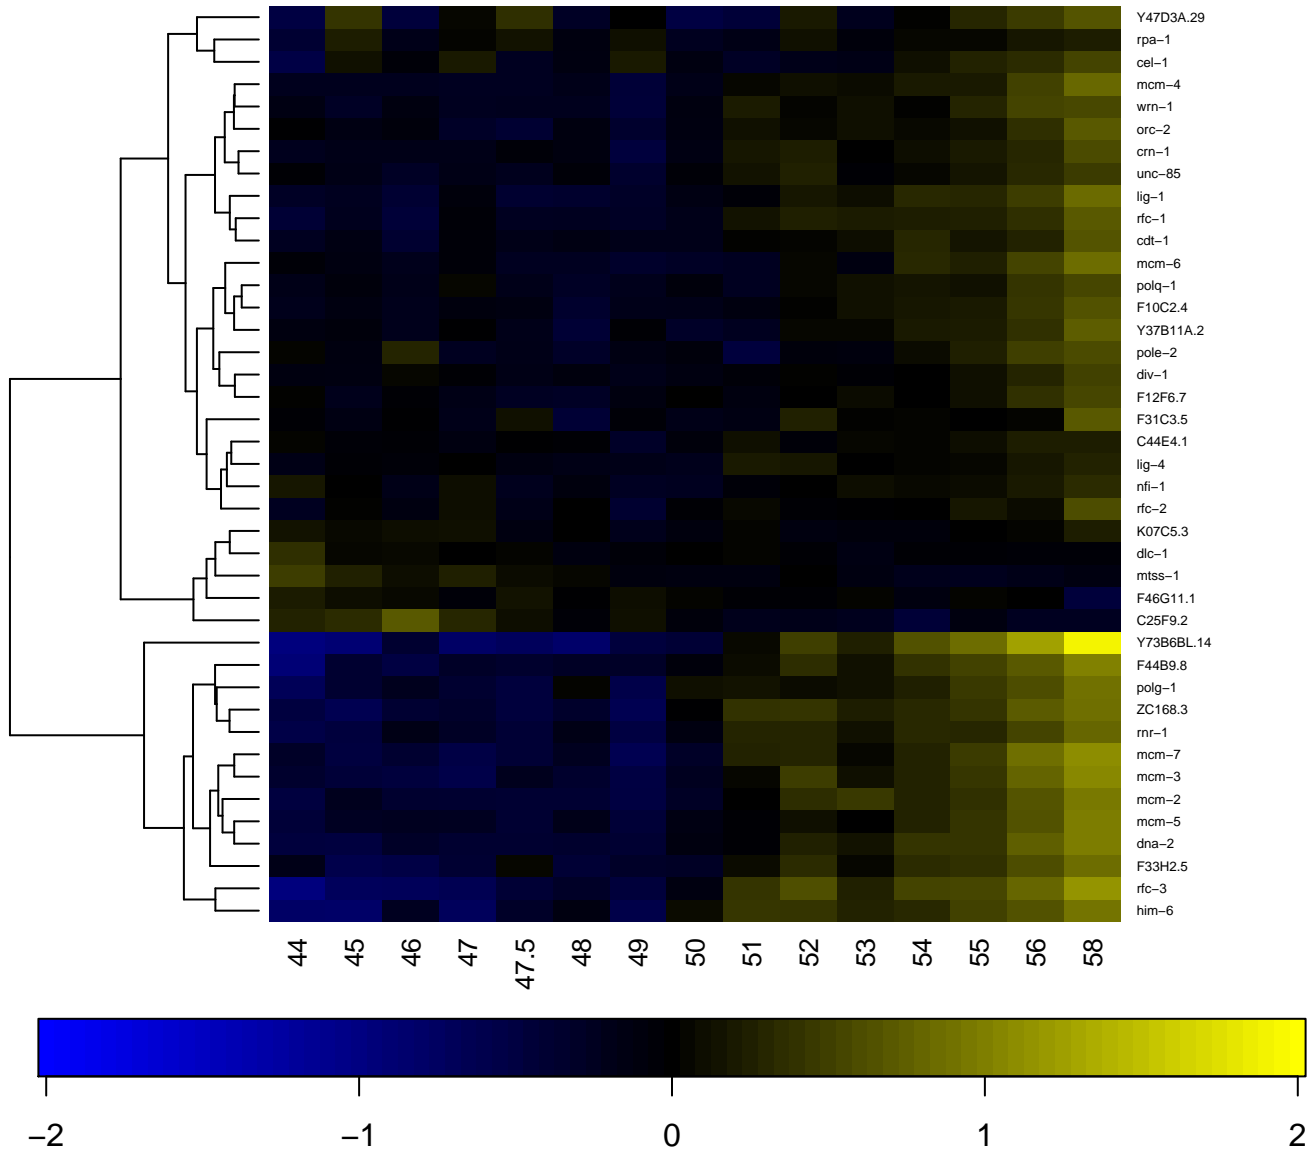









# dopamine beta-monooxygenase activity

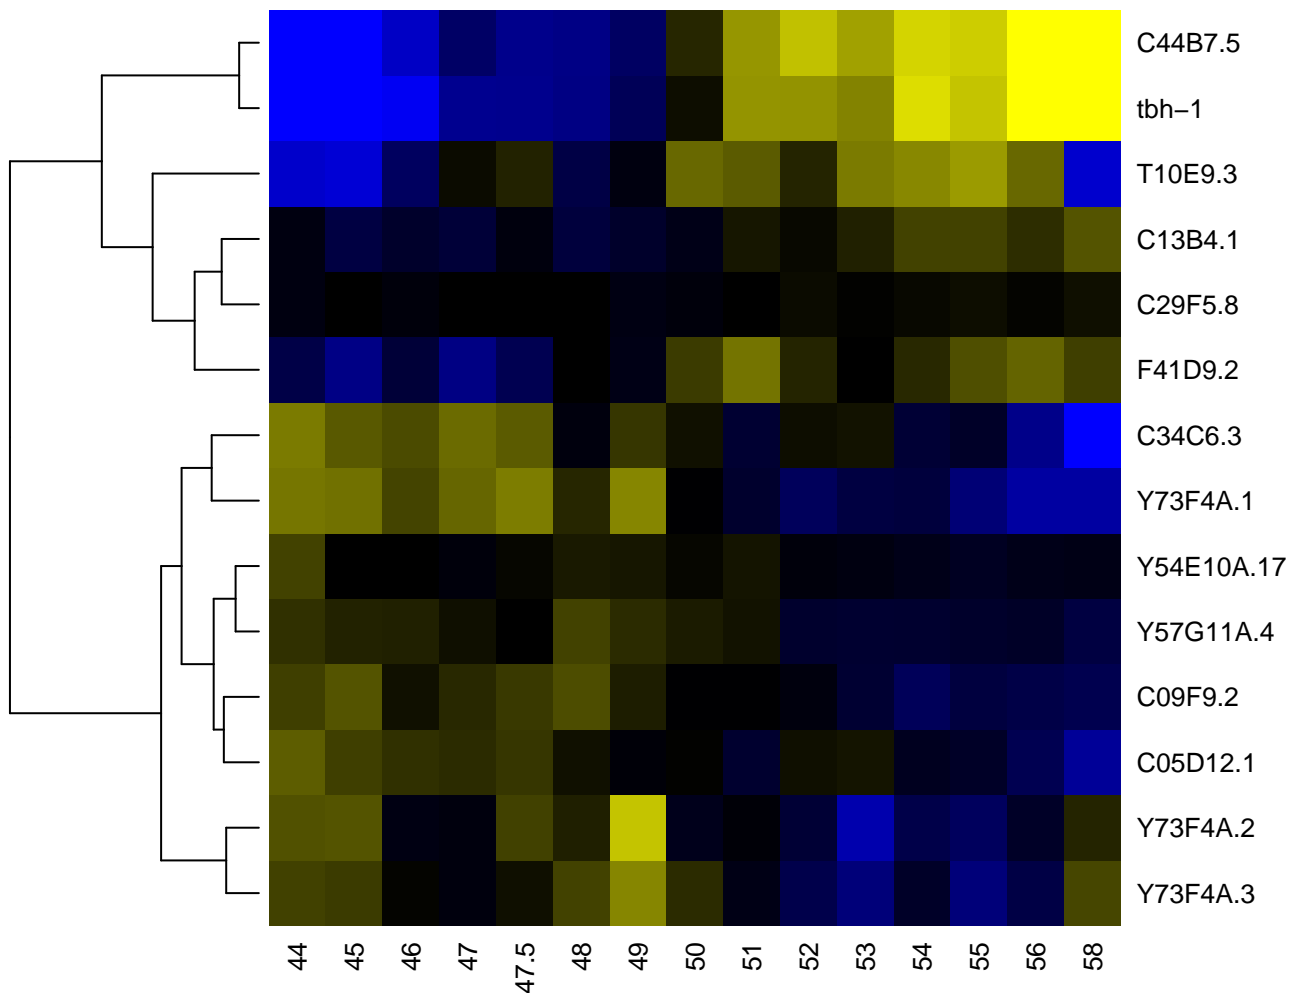

-2

-1

0

1

2





















# electron carrier activity

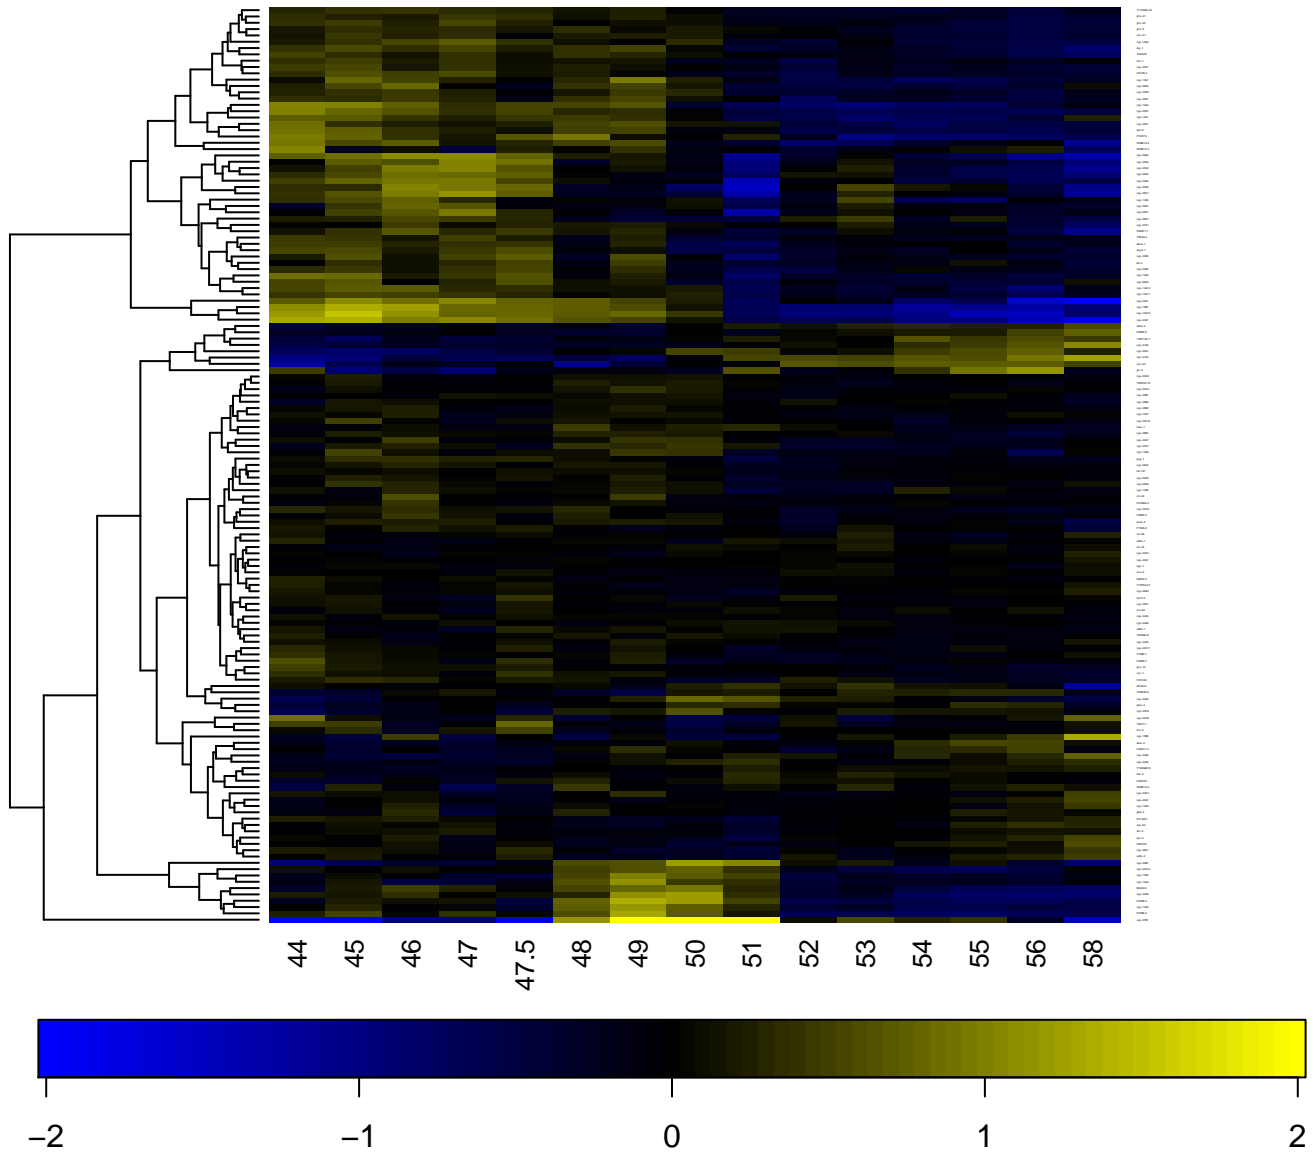



# embryonic development

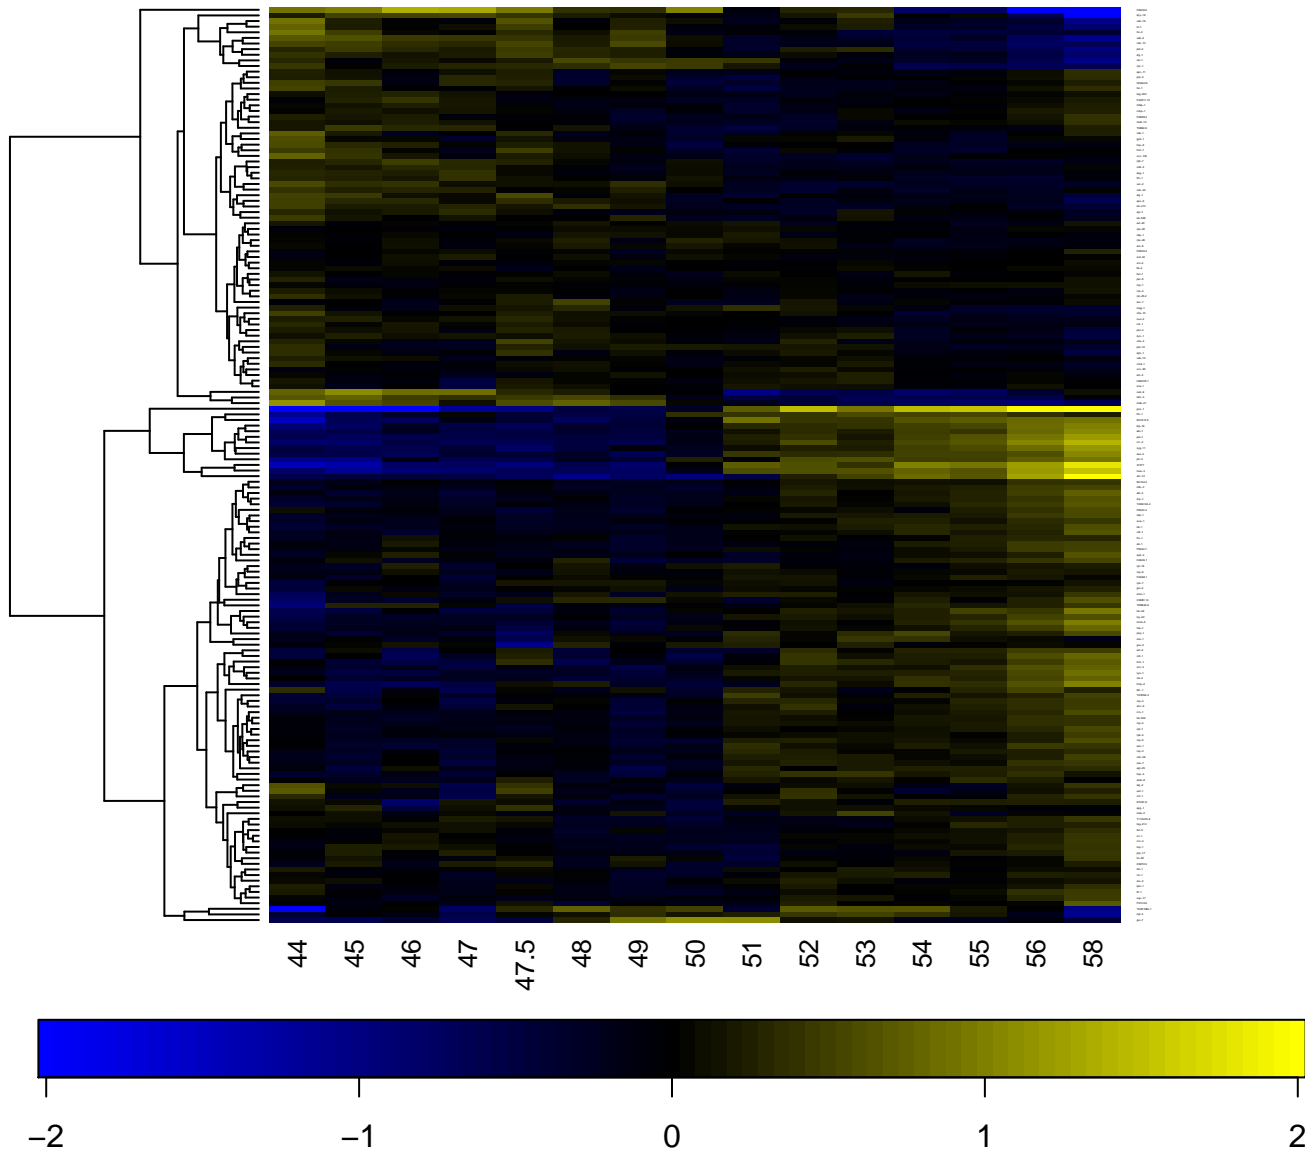

# embryonic development ending in birth or egg hatching

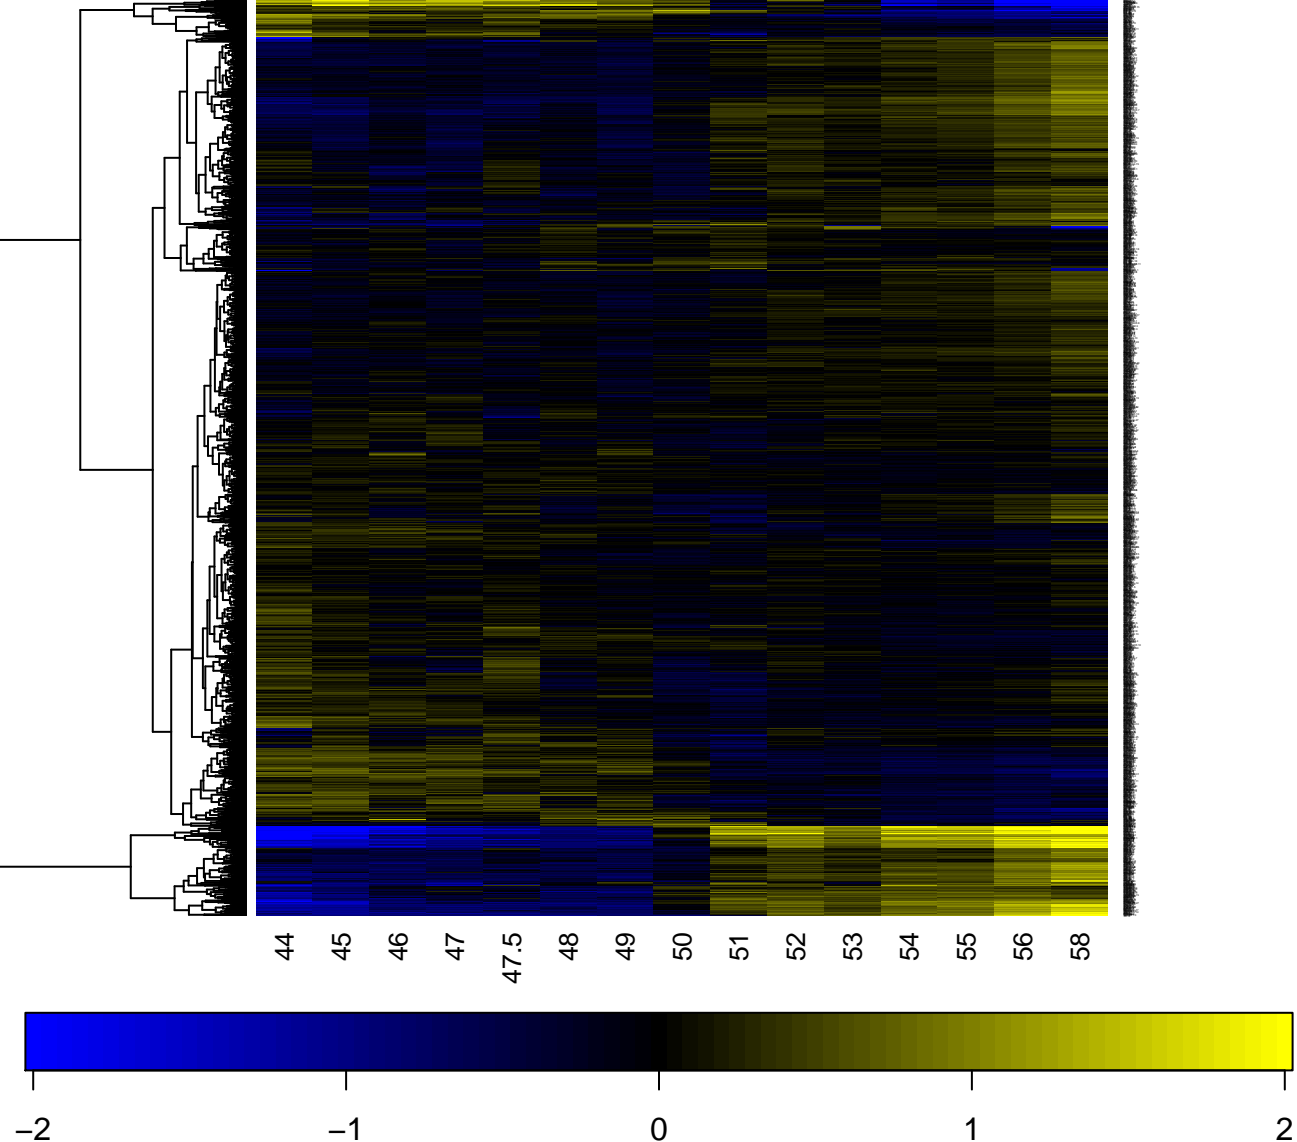

# embryonic digestive tract morphogenesis

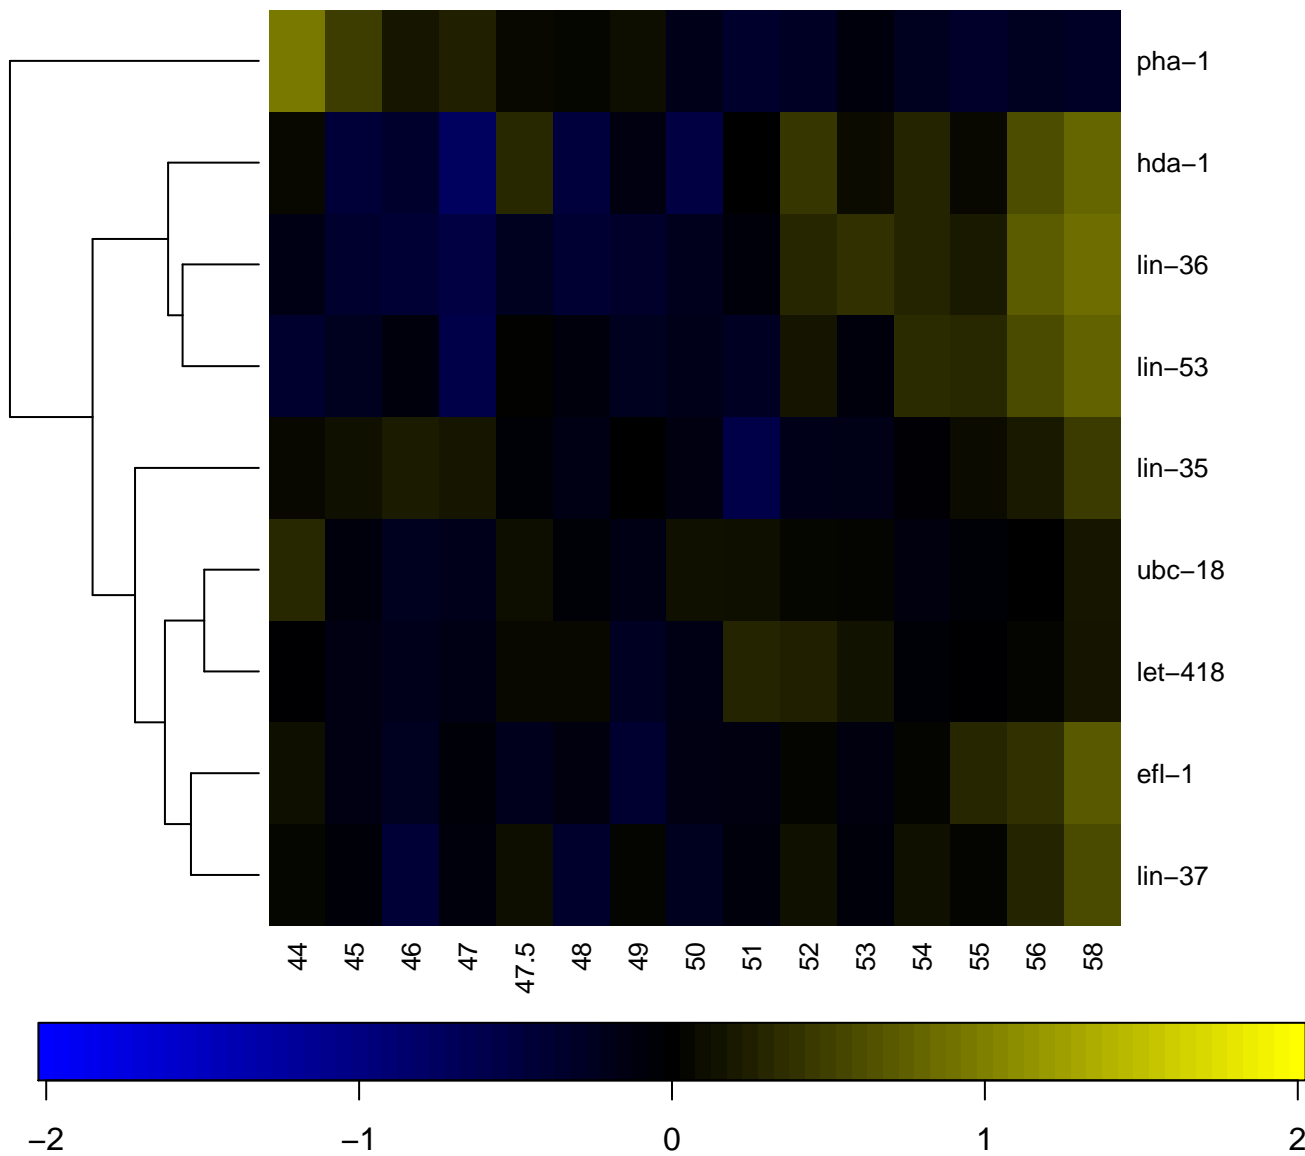

# embryonic morphogenesis

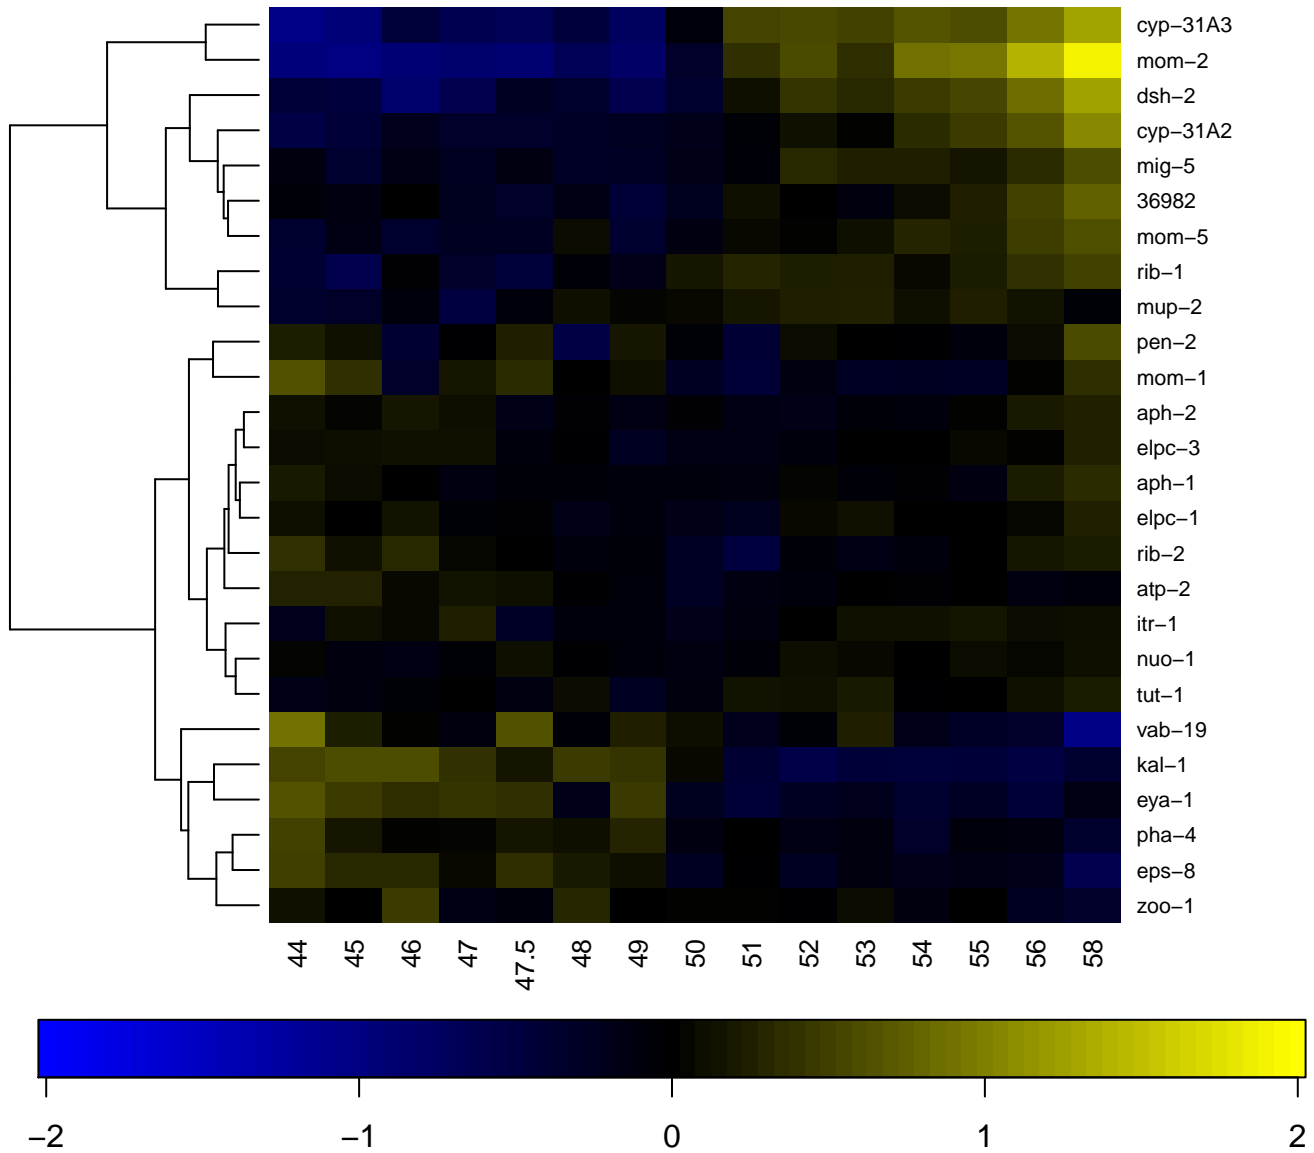



# embryonic pattern specification

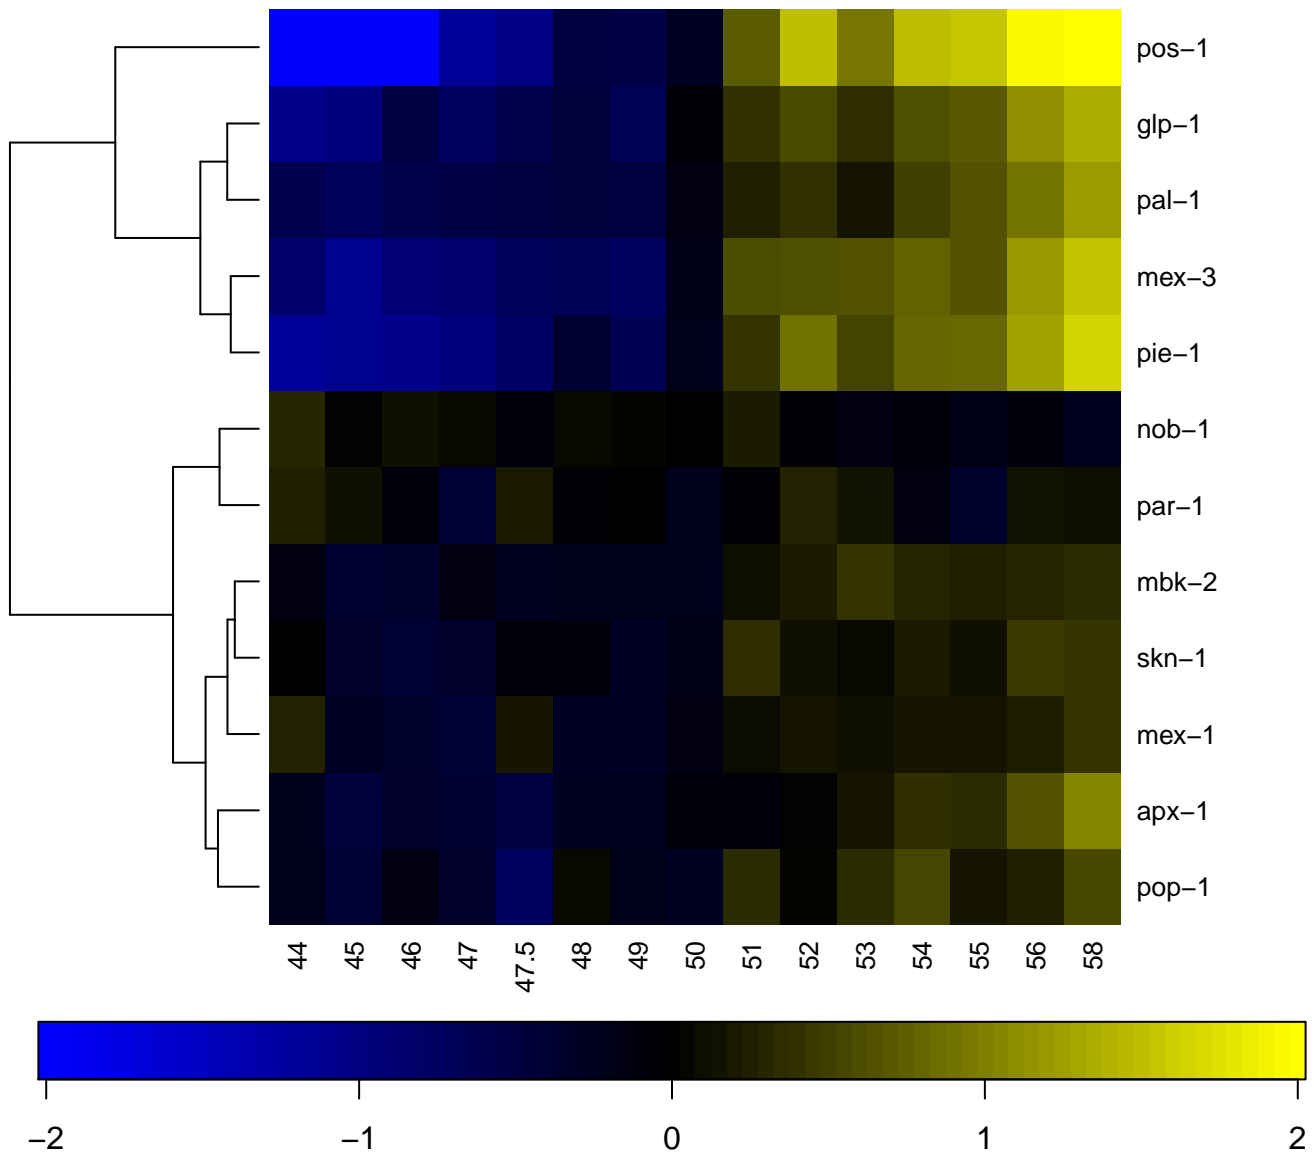



# endocytic vesicle

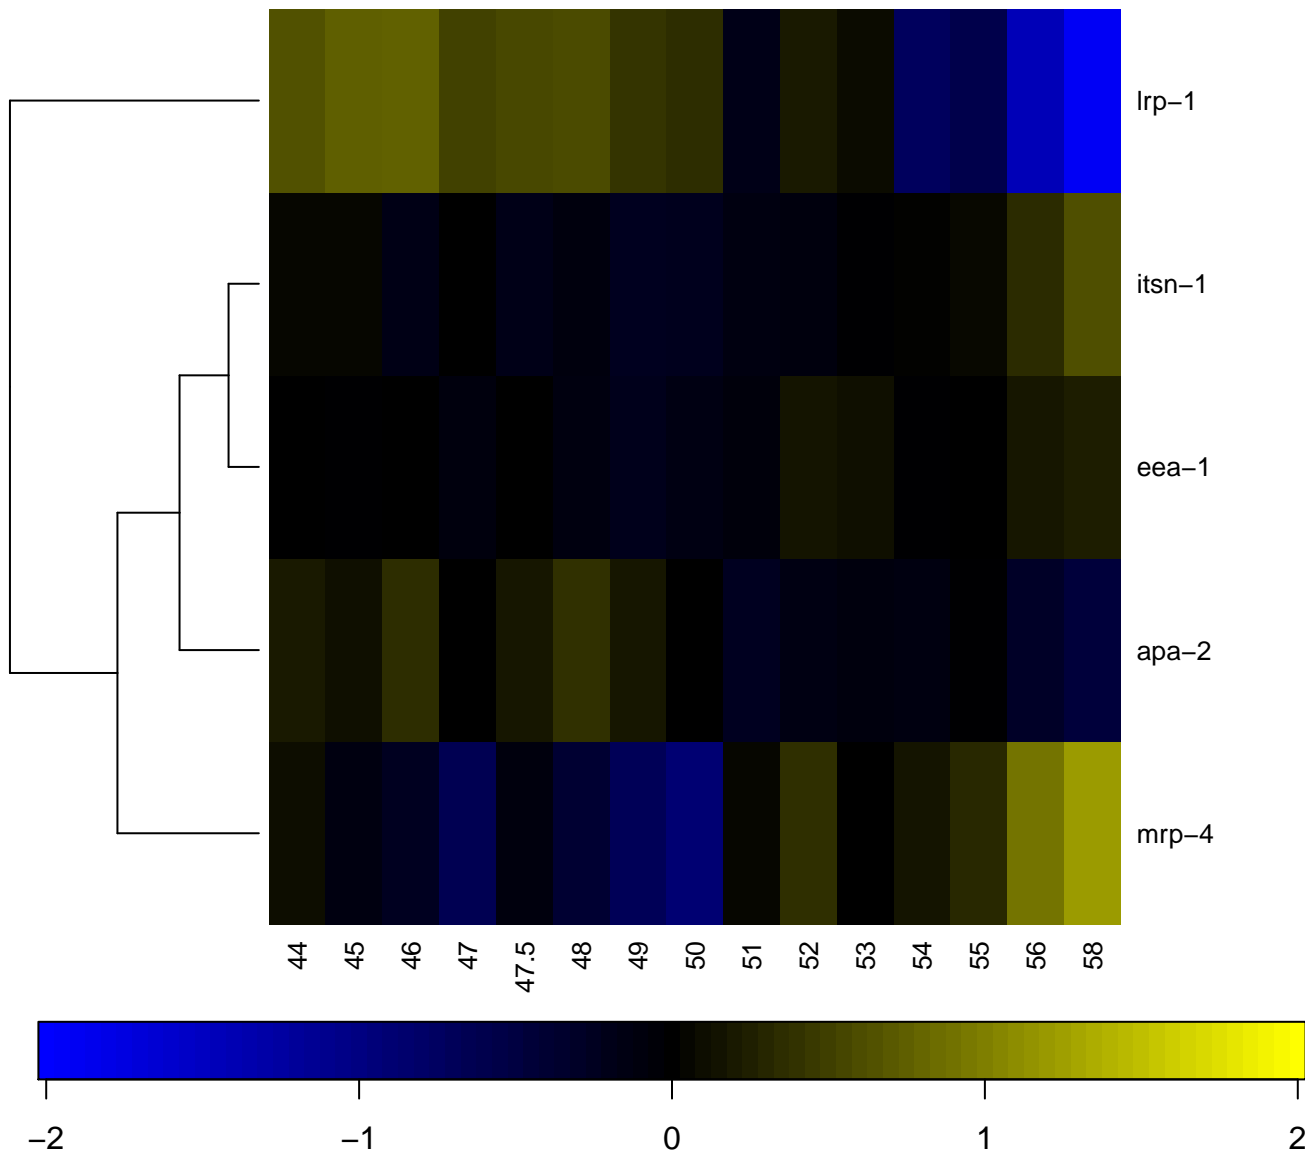

# endocytosis

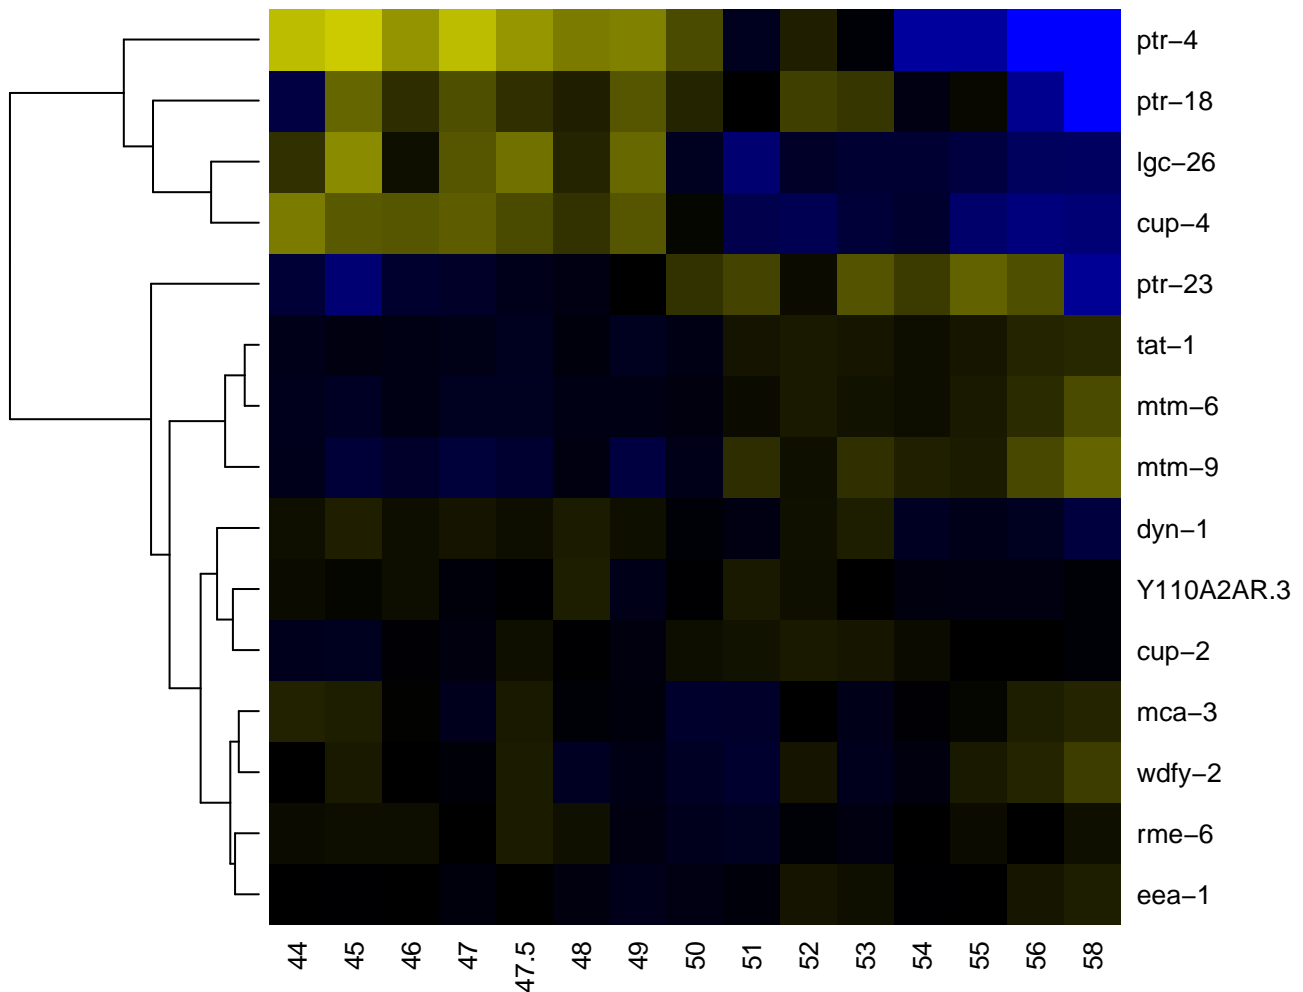





# endonuclease activity

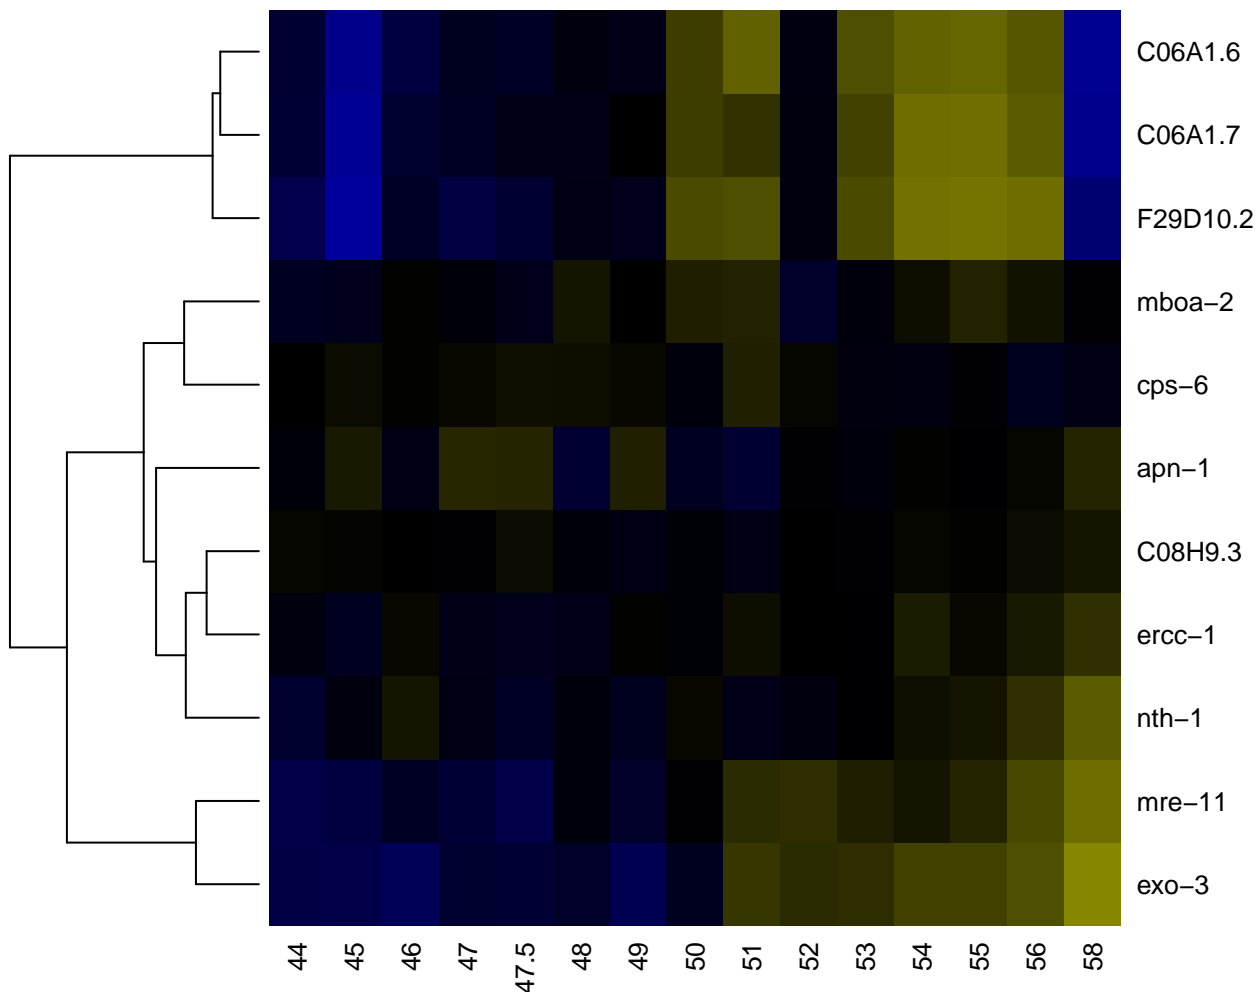





# endoplasmic reticulum

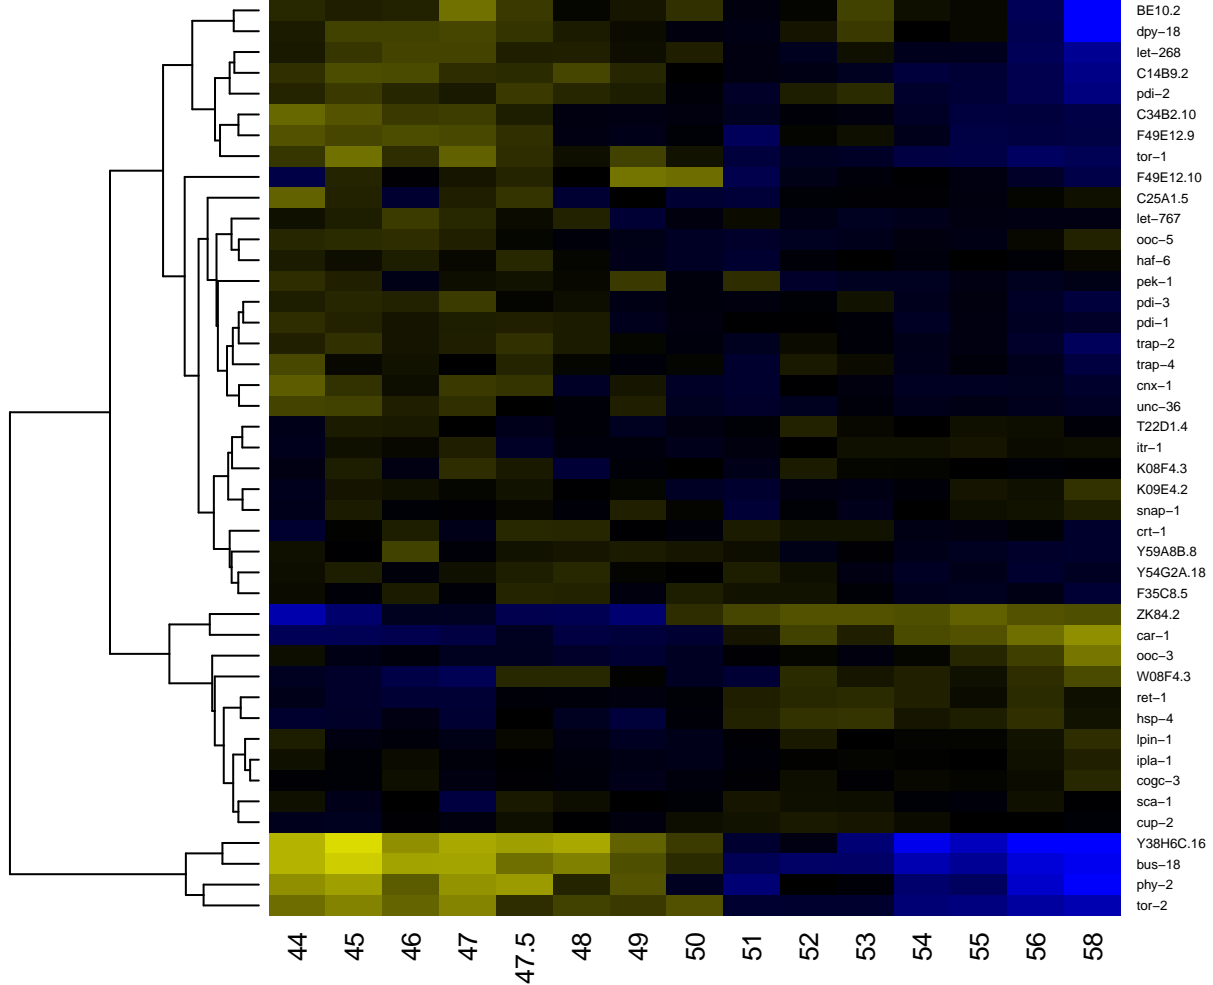

# endoplasmic reticulum membrane

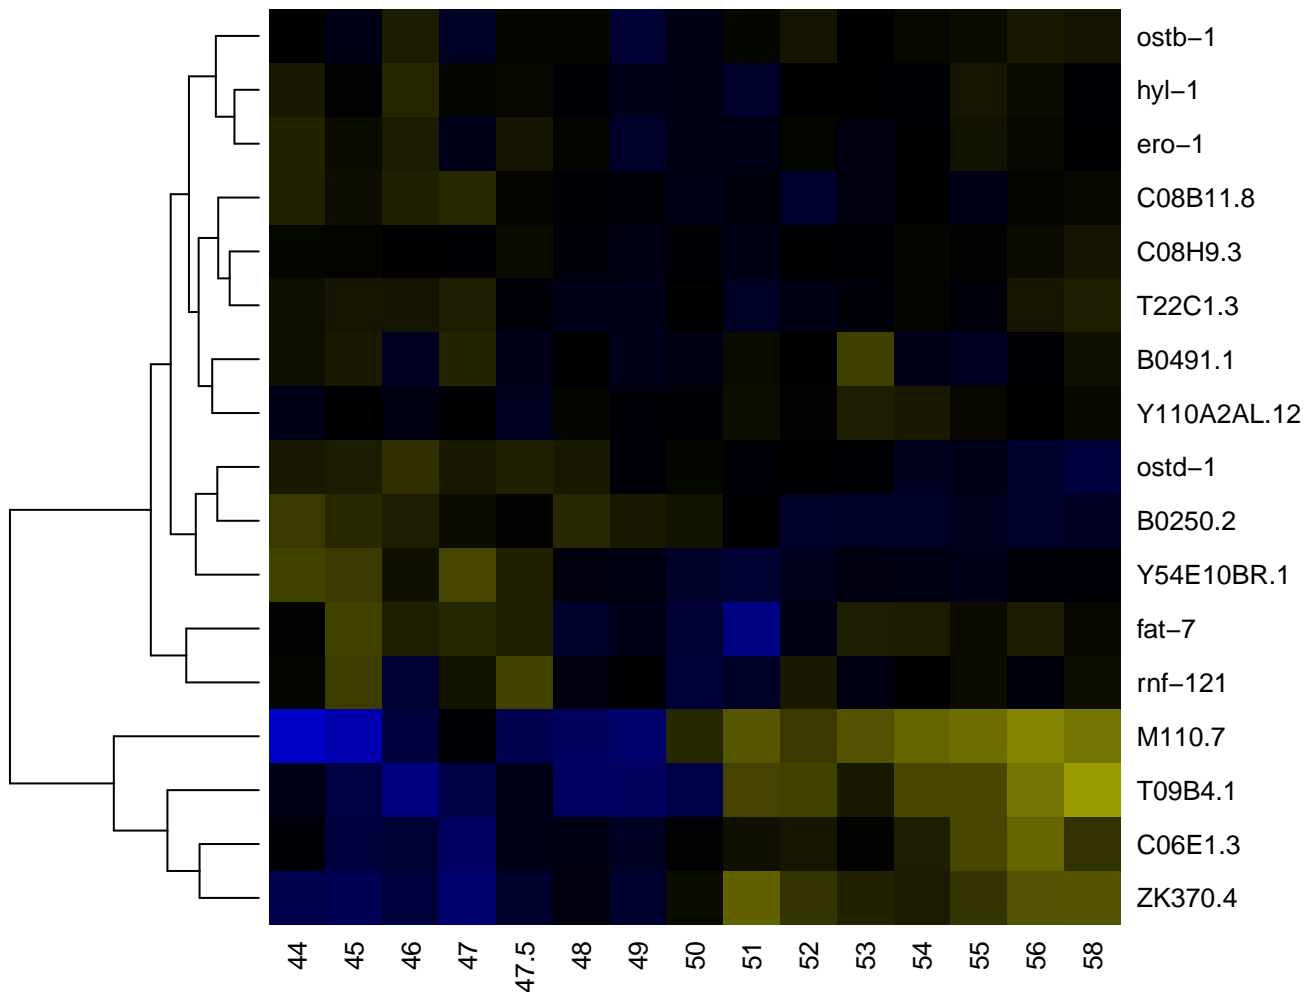

# endoplasmic reticulum unfolded protein response

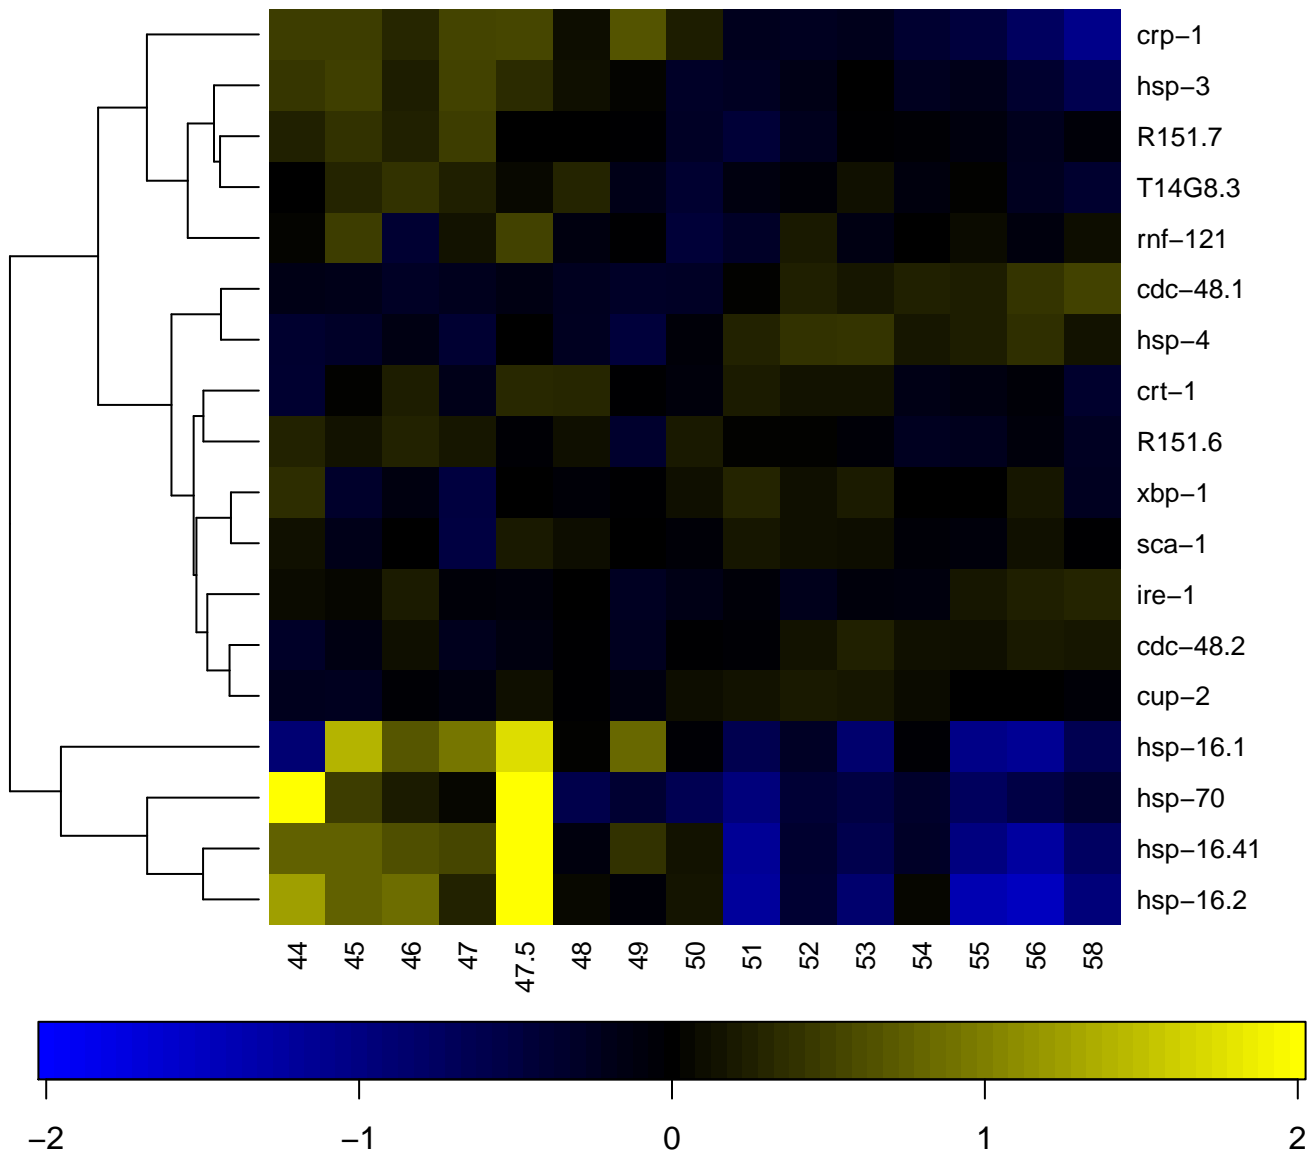





# engulfment of apoptotic cell

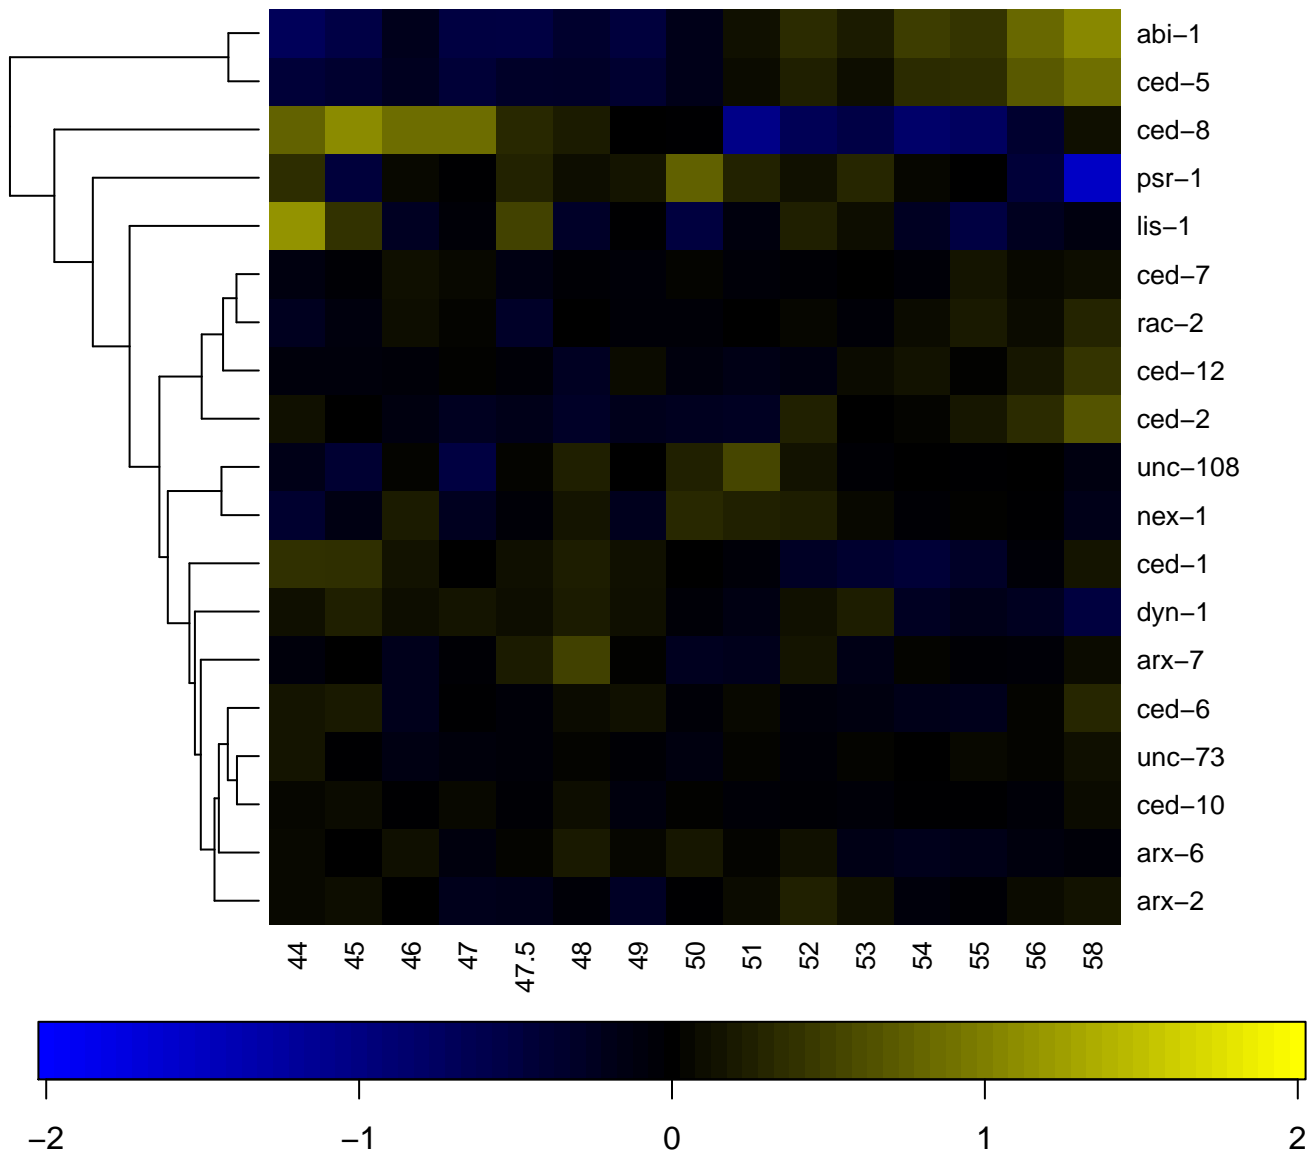

# enterobactin biosynthetic process

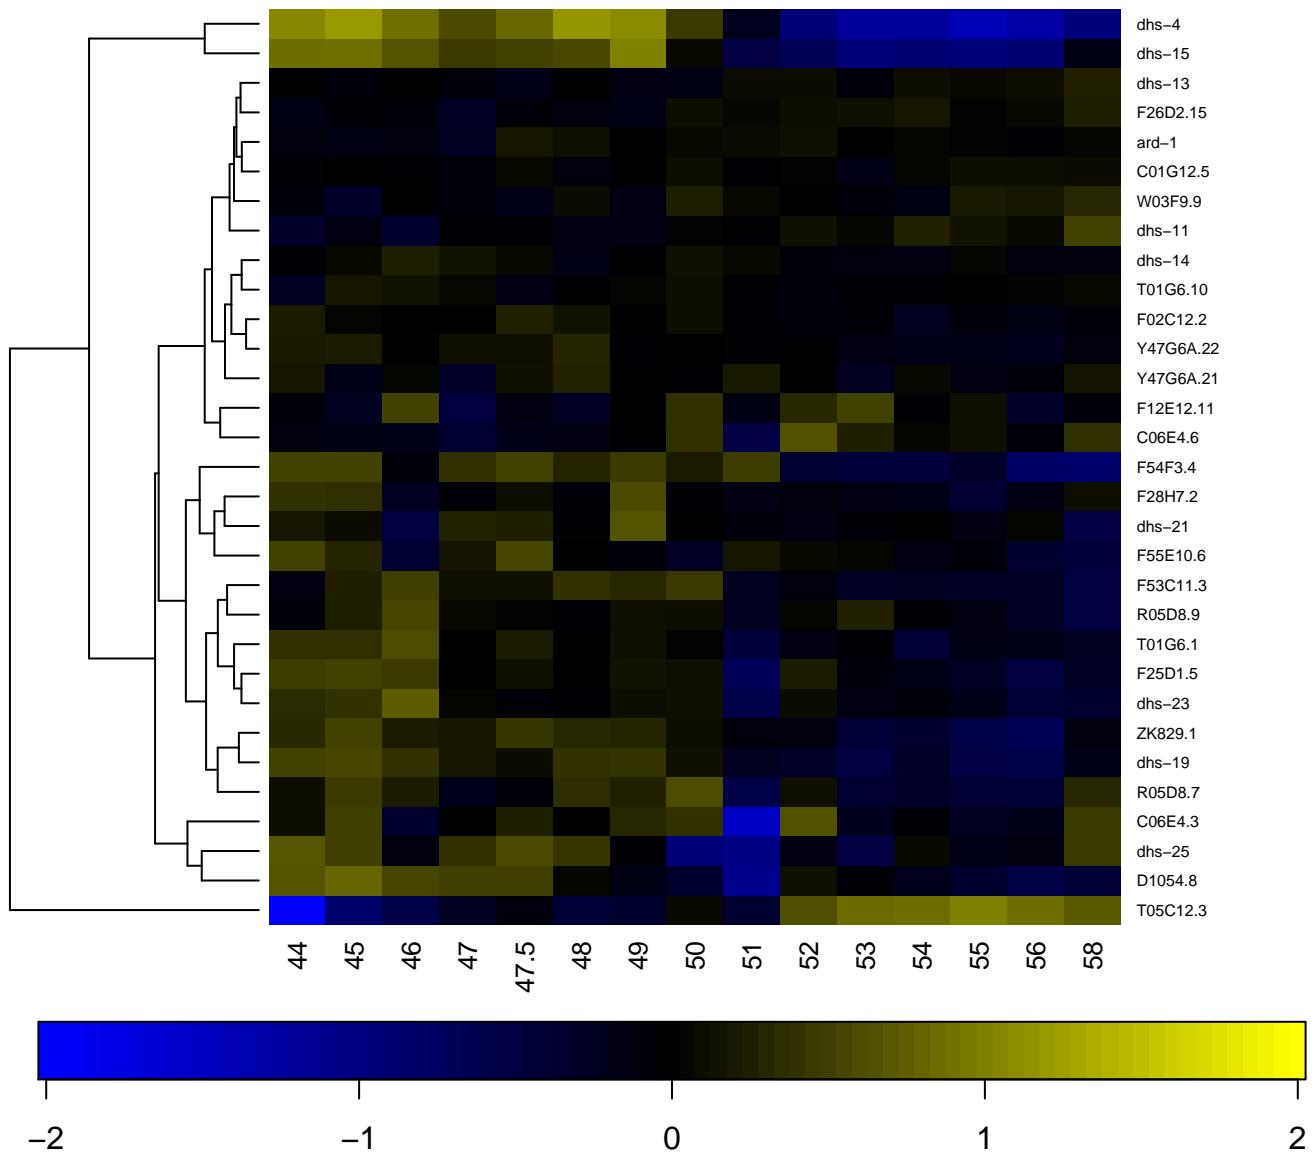







# epidermis morphogenesis

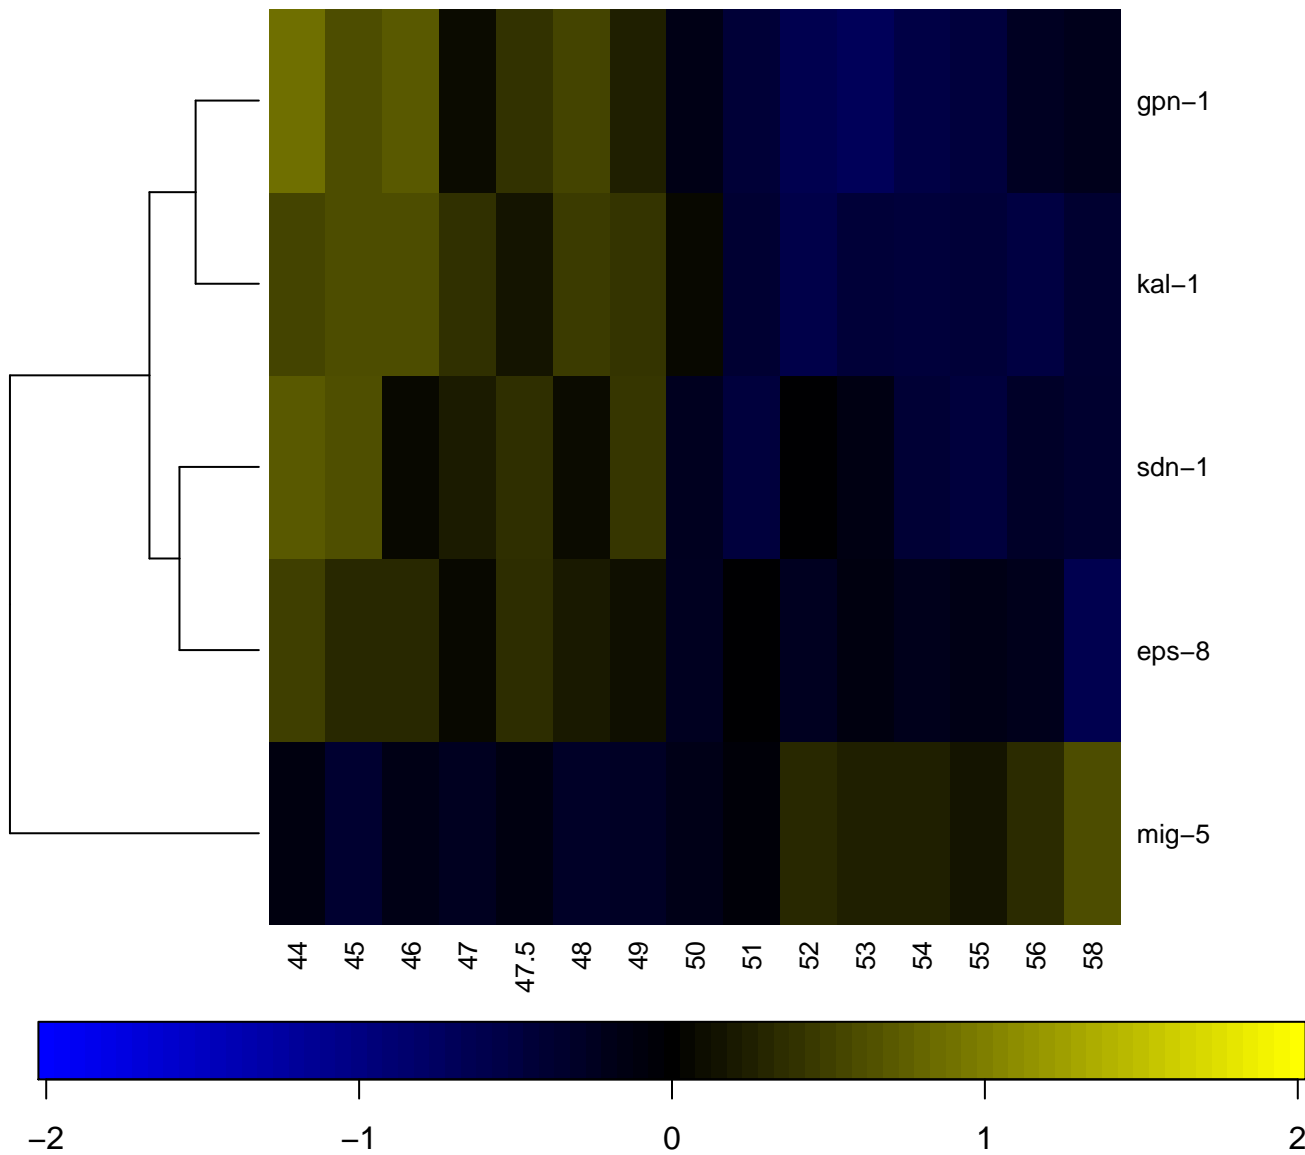

# epithelial cell development

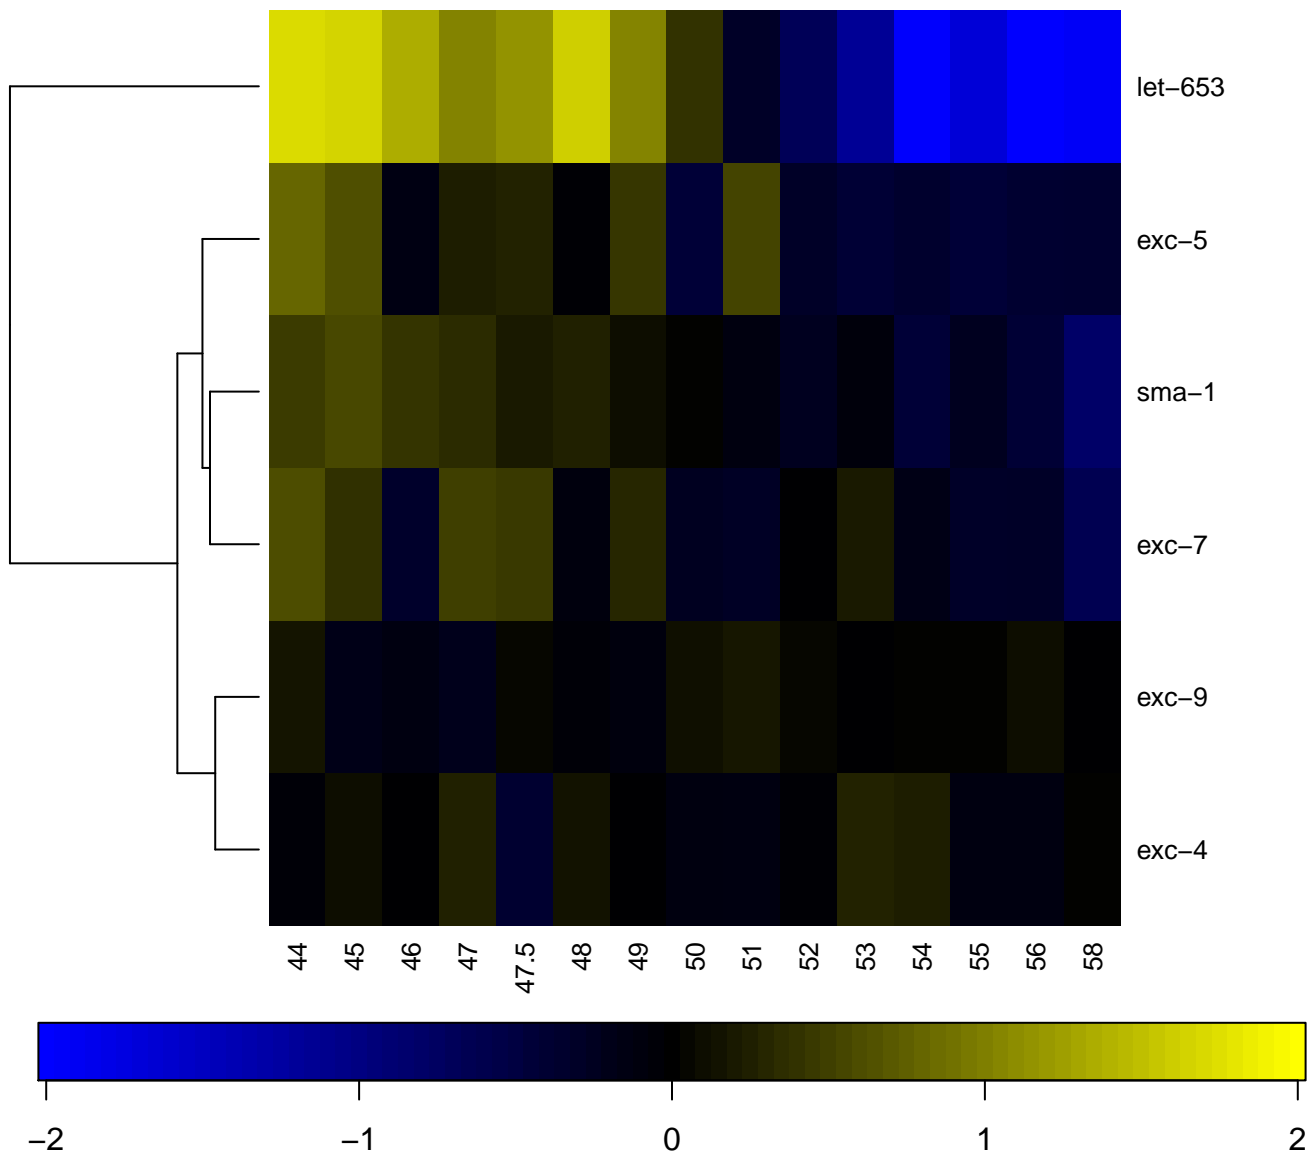

# epithelial cell migration

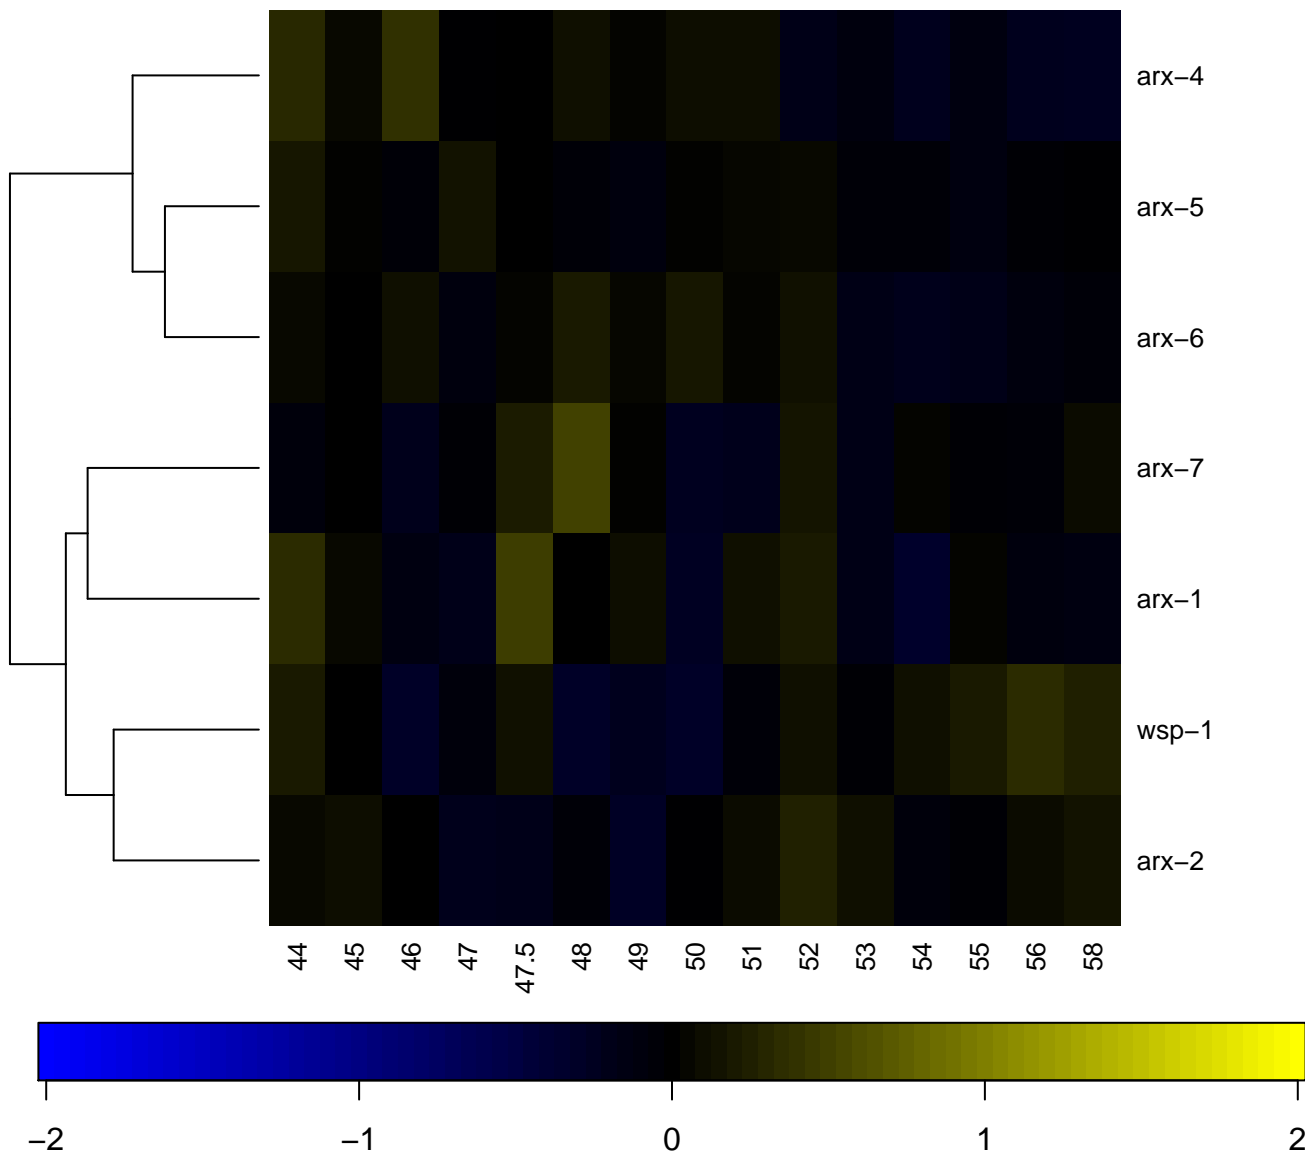













# establishment of mitotic spindle orientation

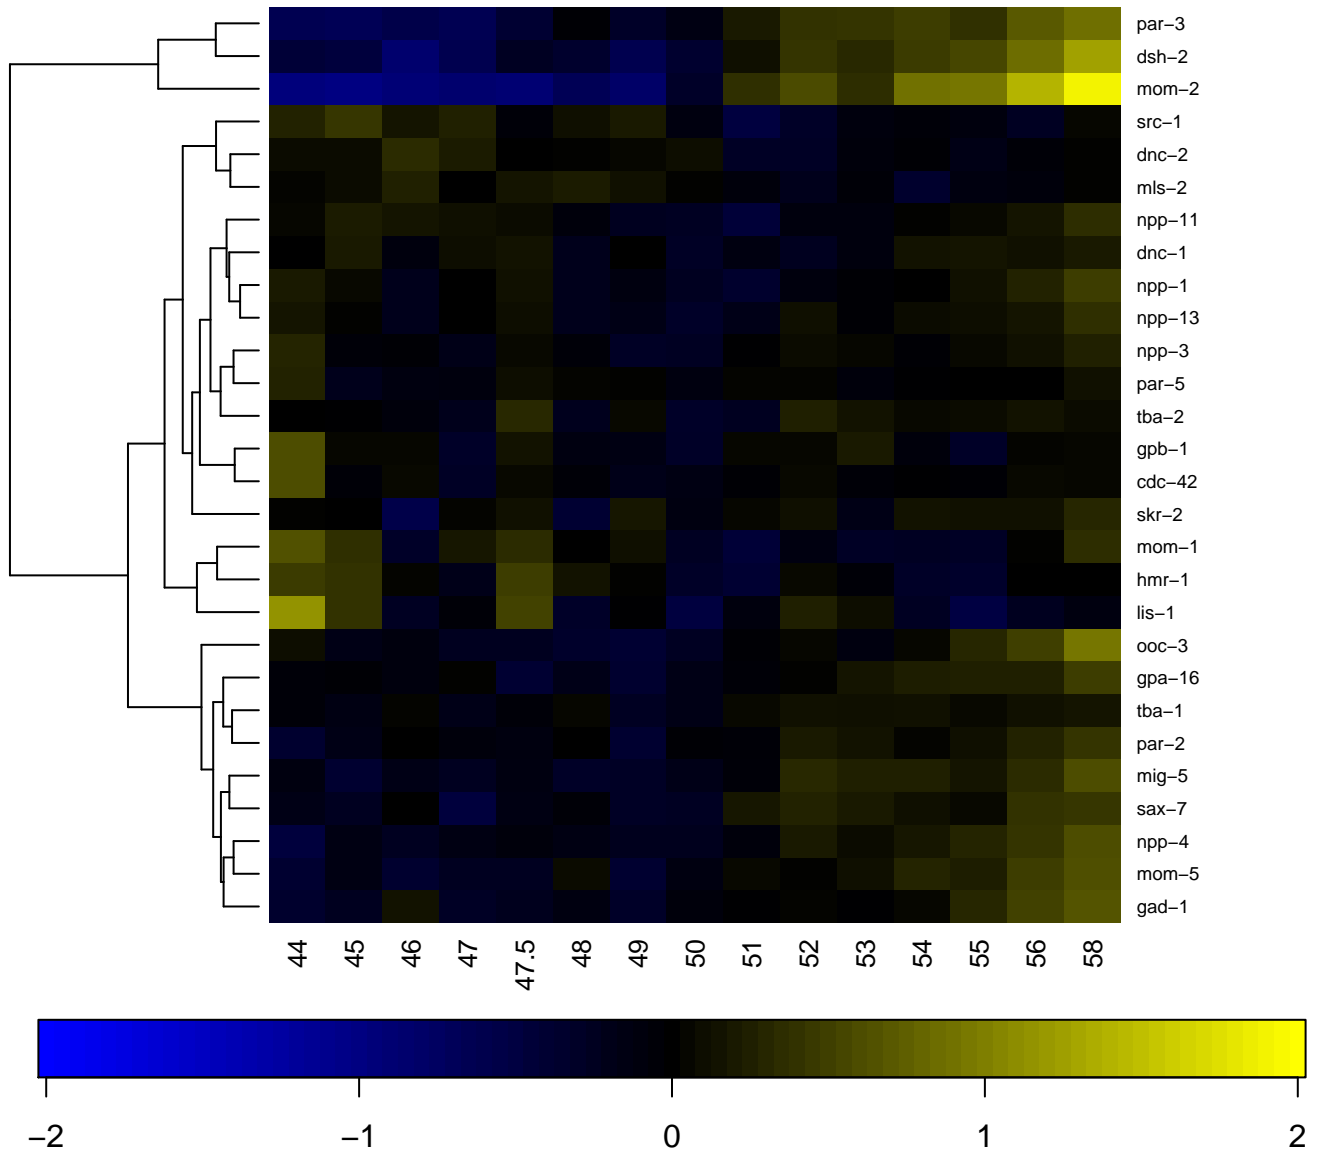



# exonuclease activity

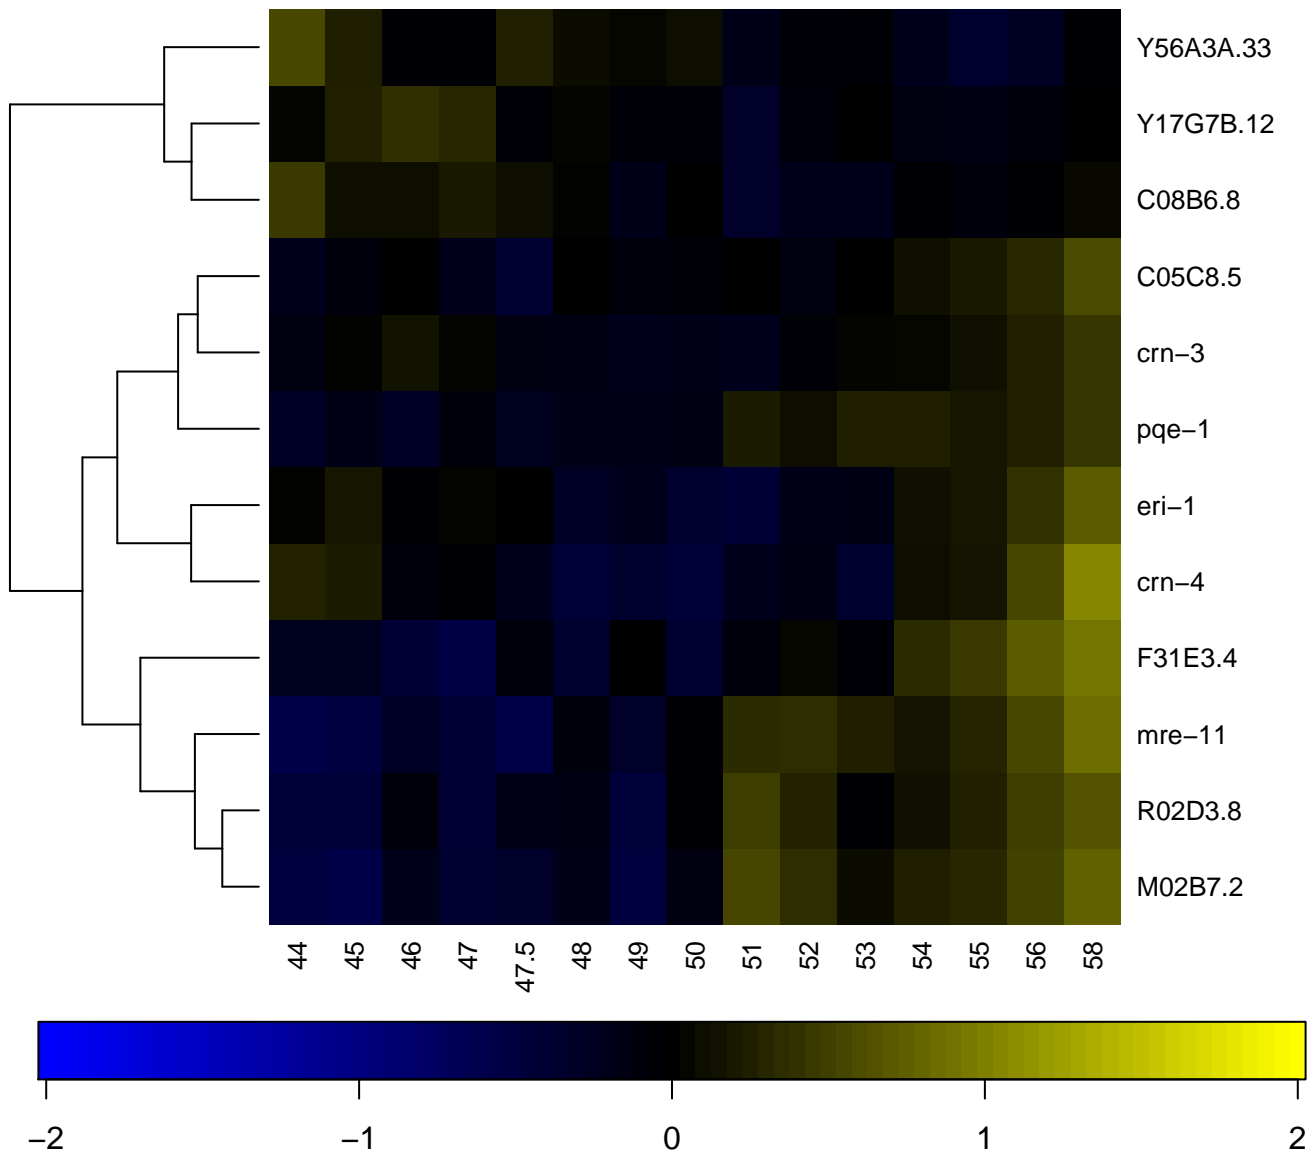

# extracellular-glutamate-gated ion channel activity

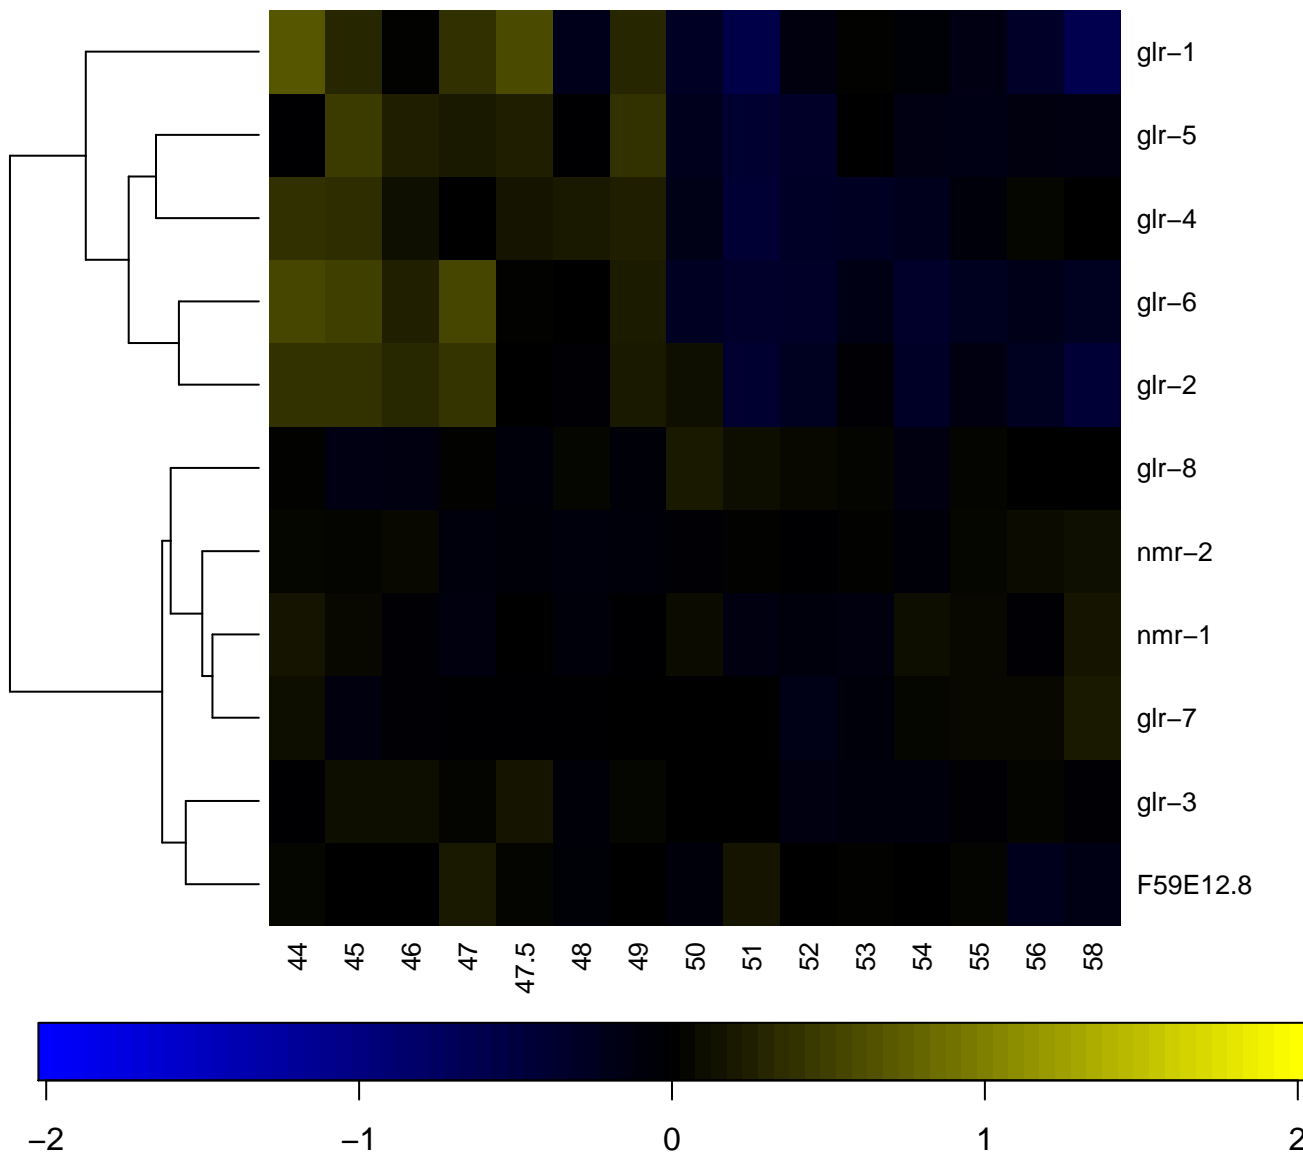











# extracellular region

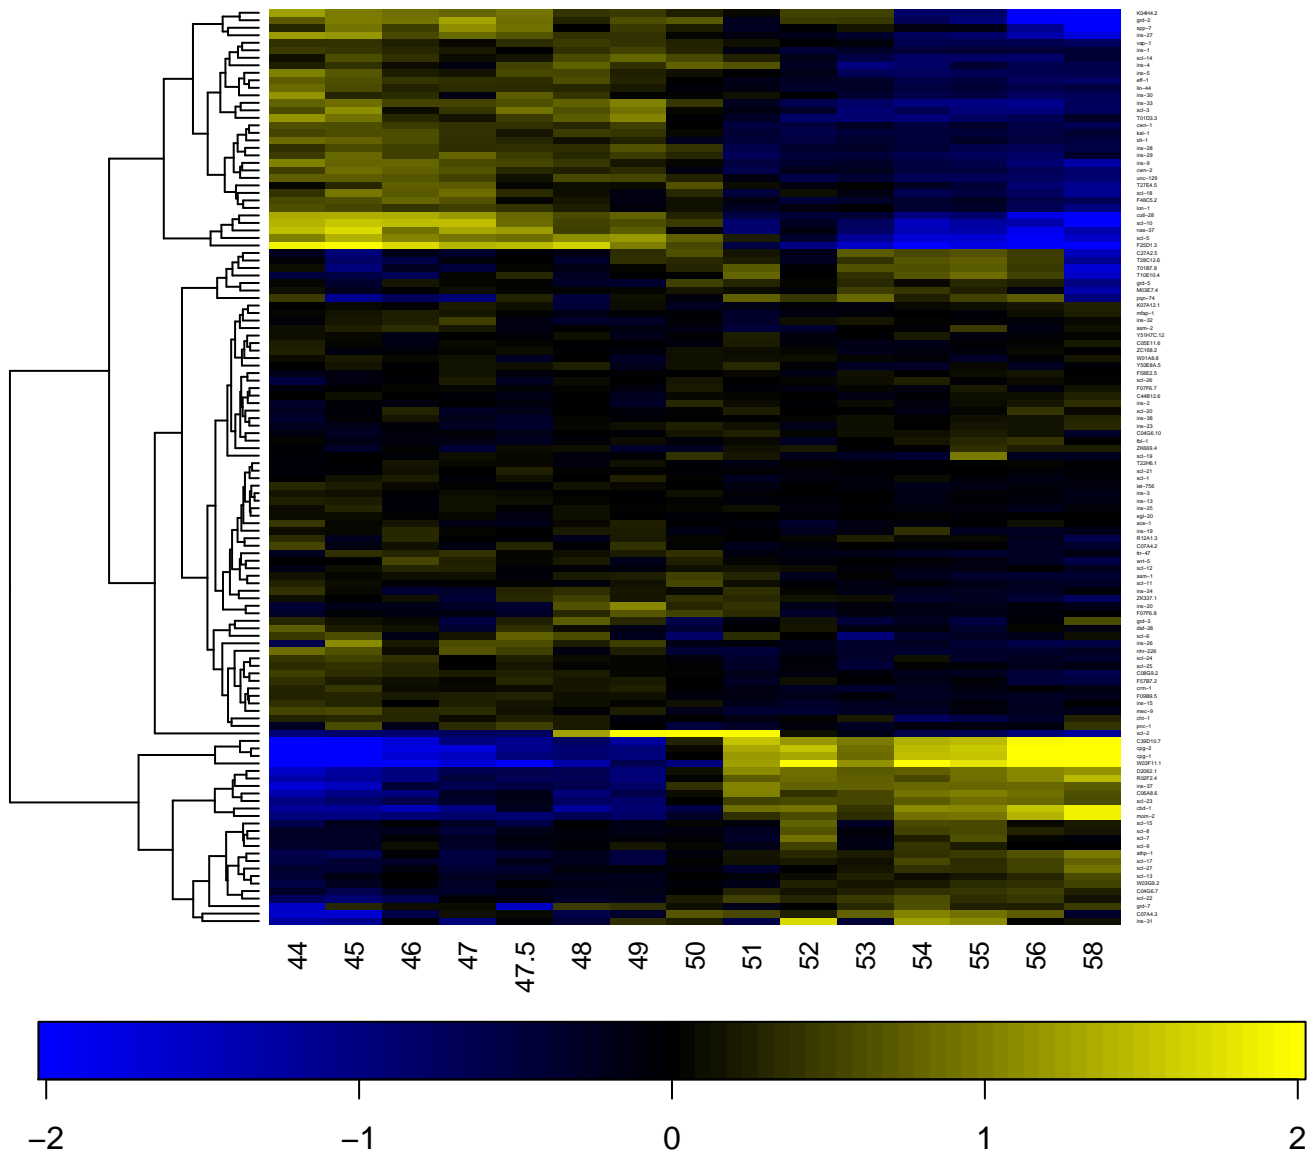

# extracellular space

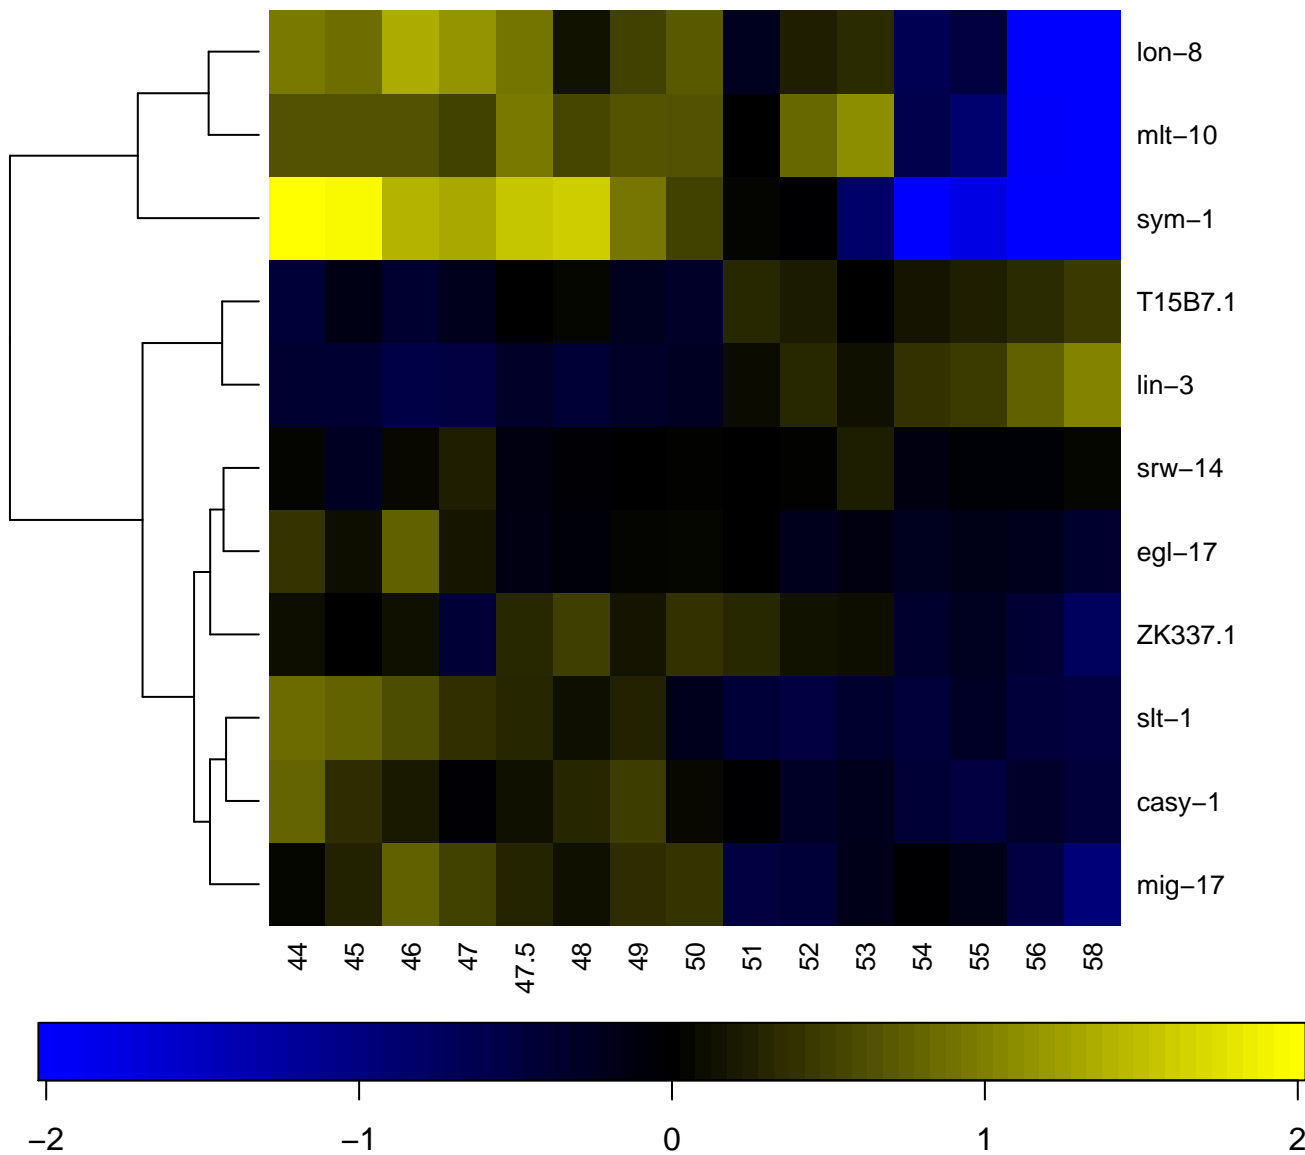



# FAD binding

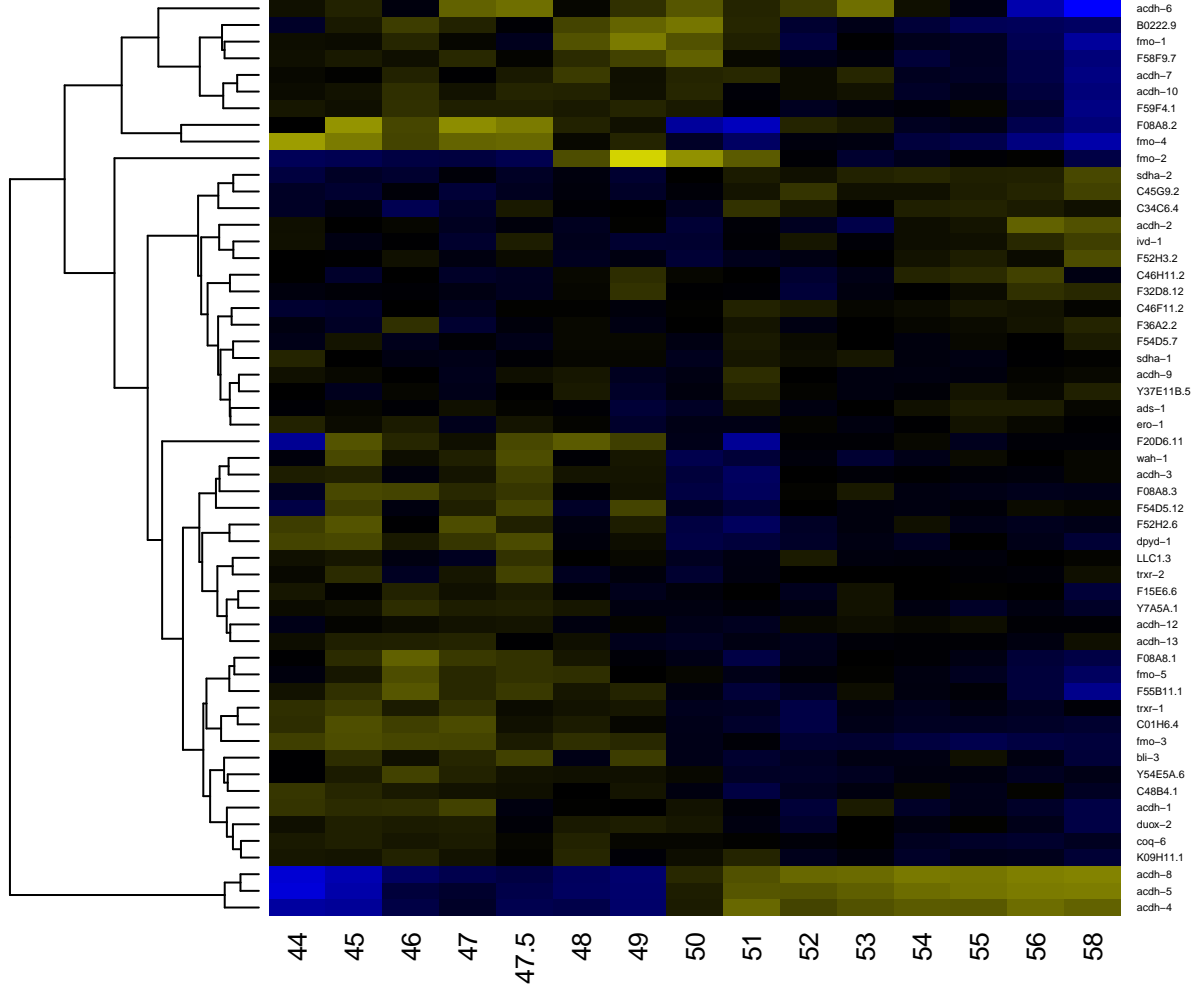

# fatty acid beta-oxidation

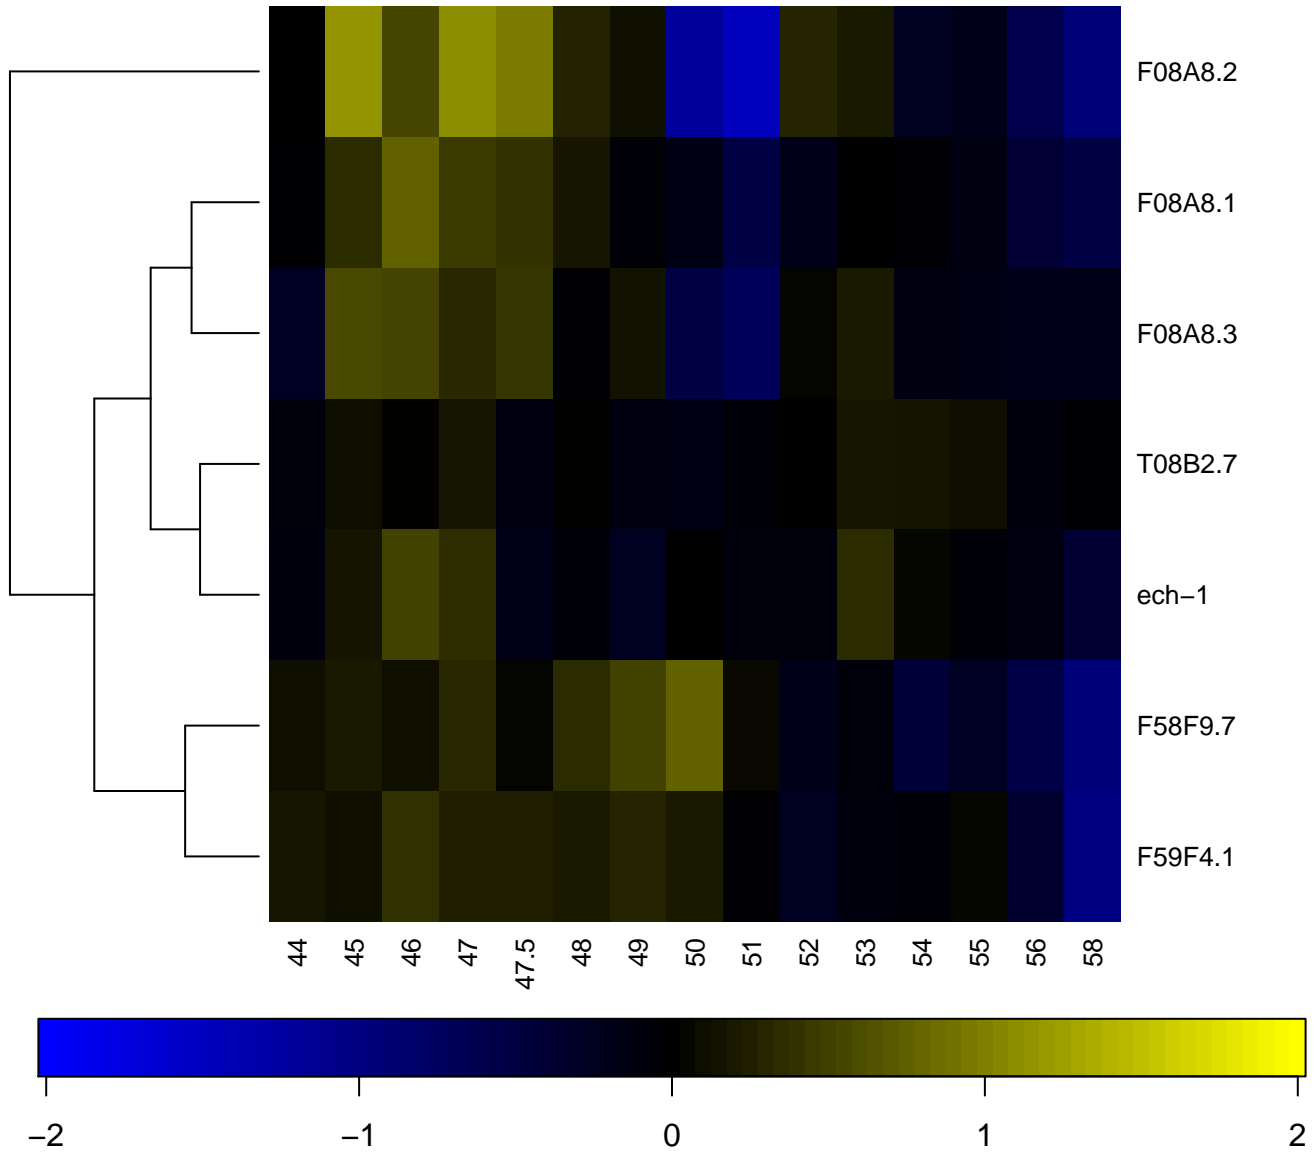



# fatty acid metabolic process

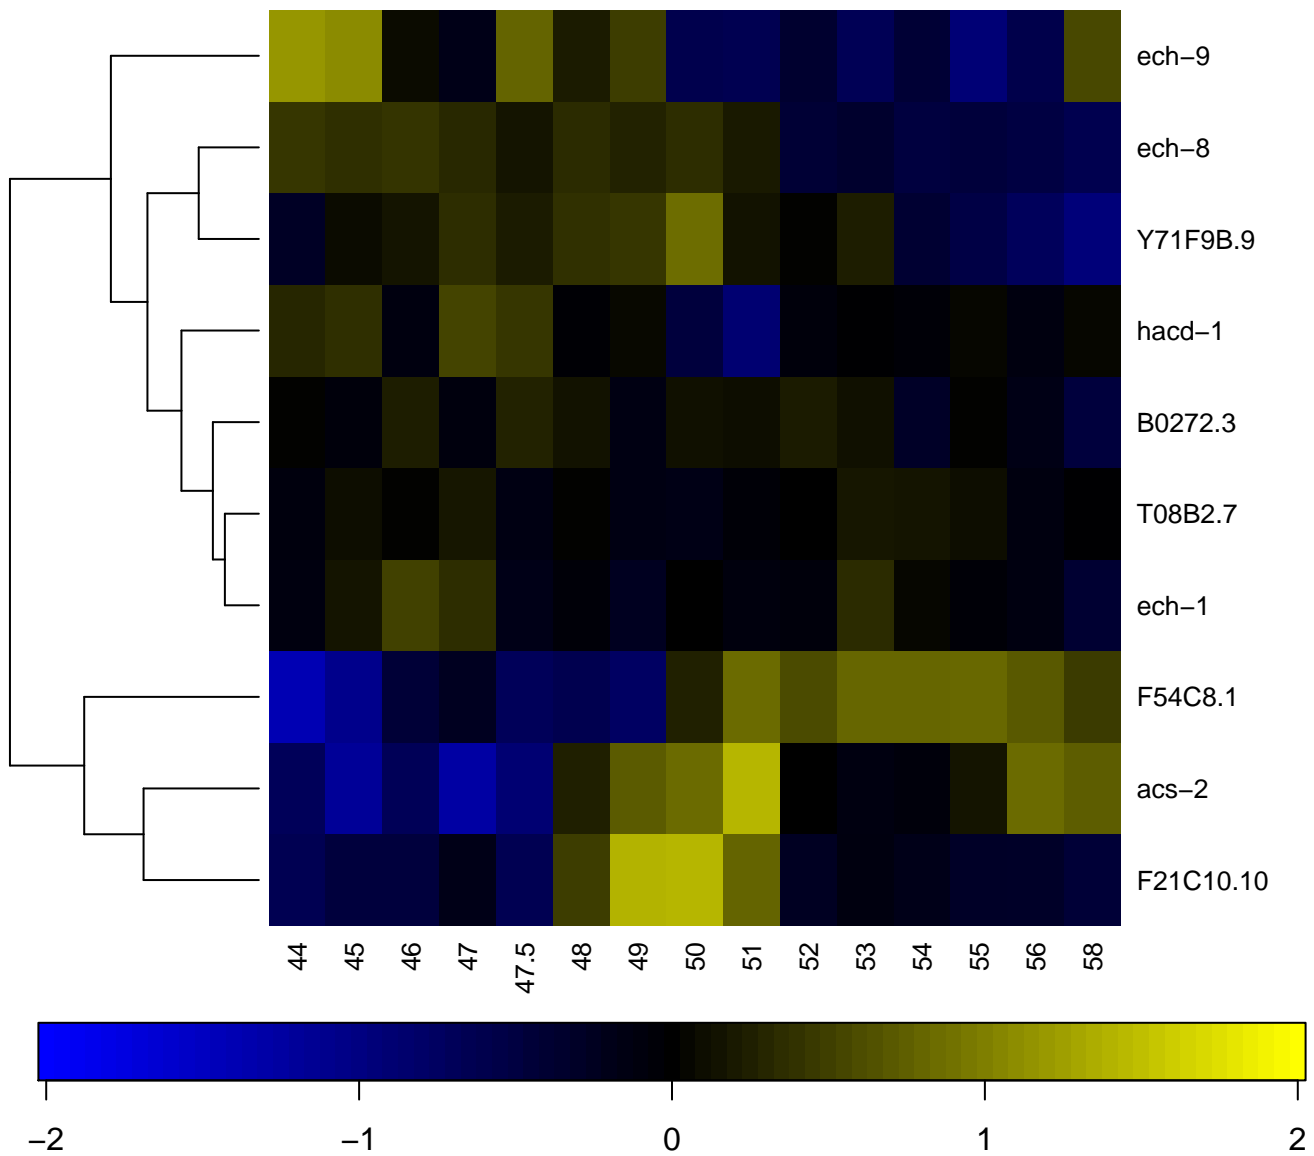





# feminization of hermaphroditic germ-line

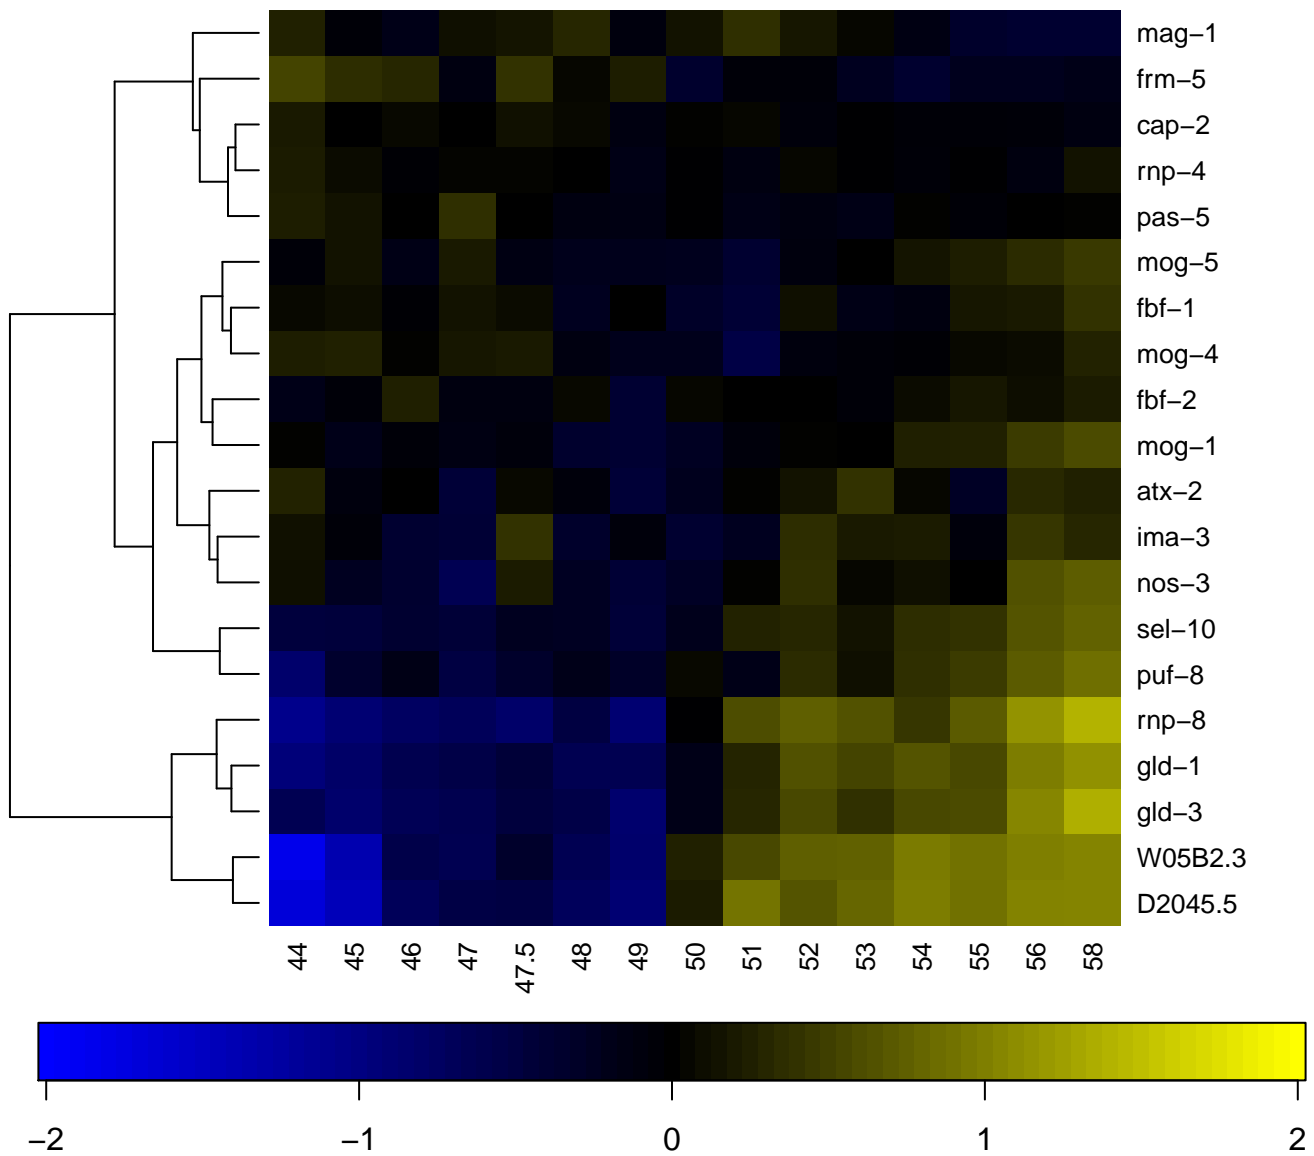

# ferrous iron transmembrane transporter activity

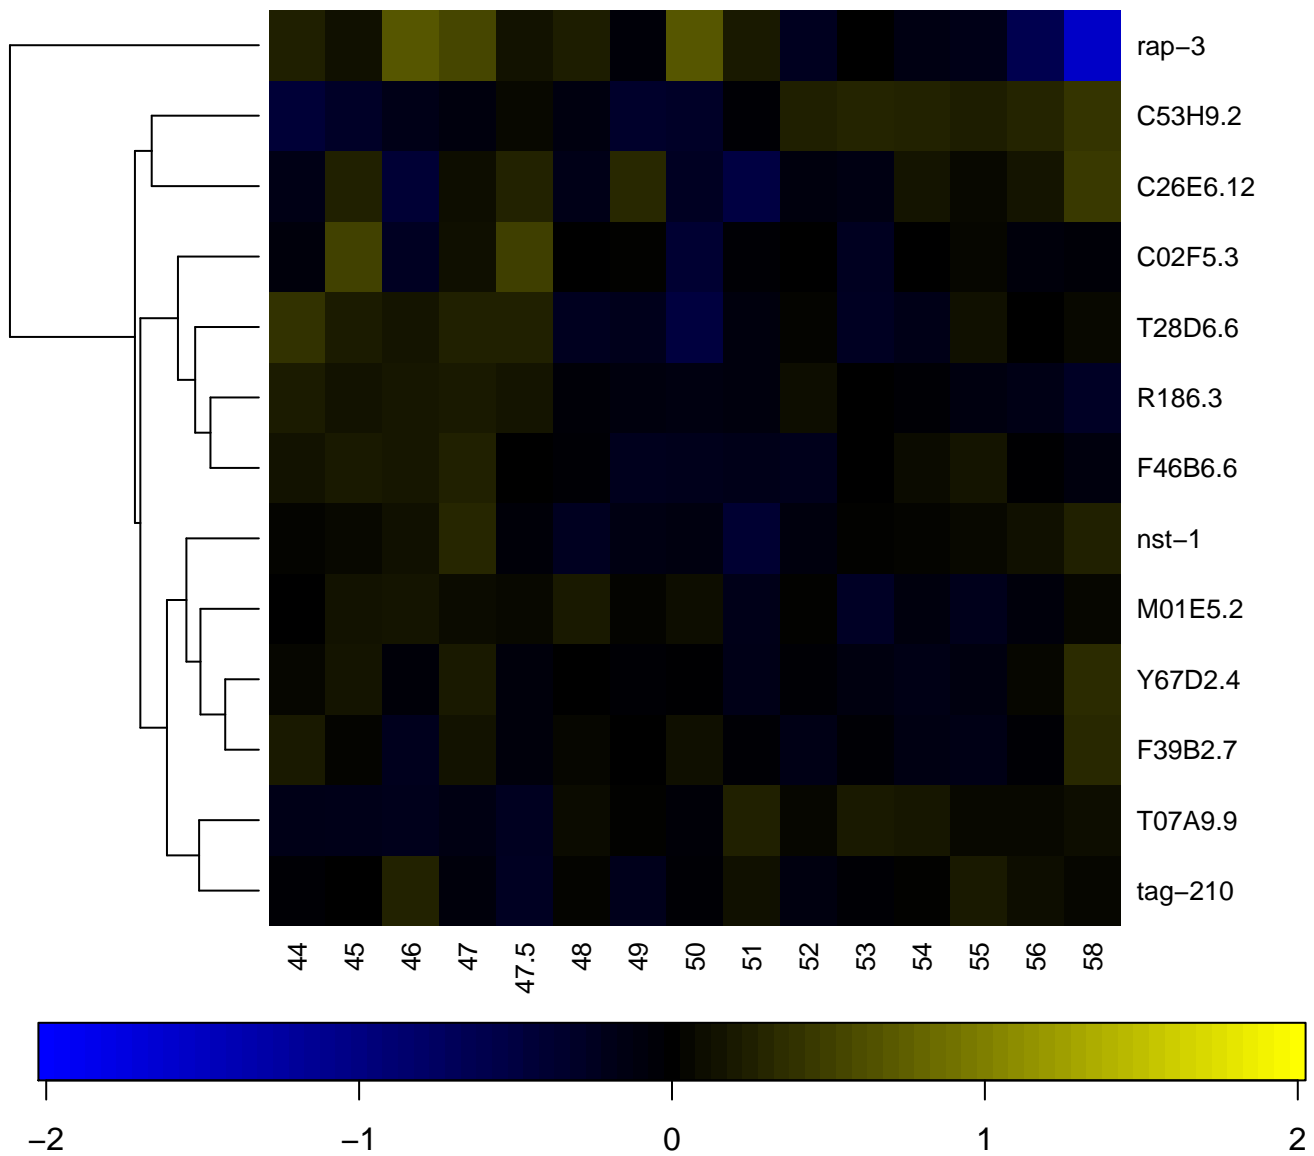

# ferrous iron transport



# flavin-containing monooxygenase activity

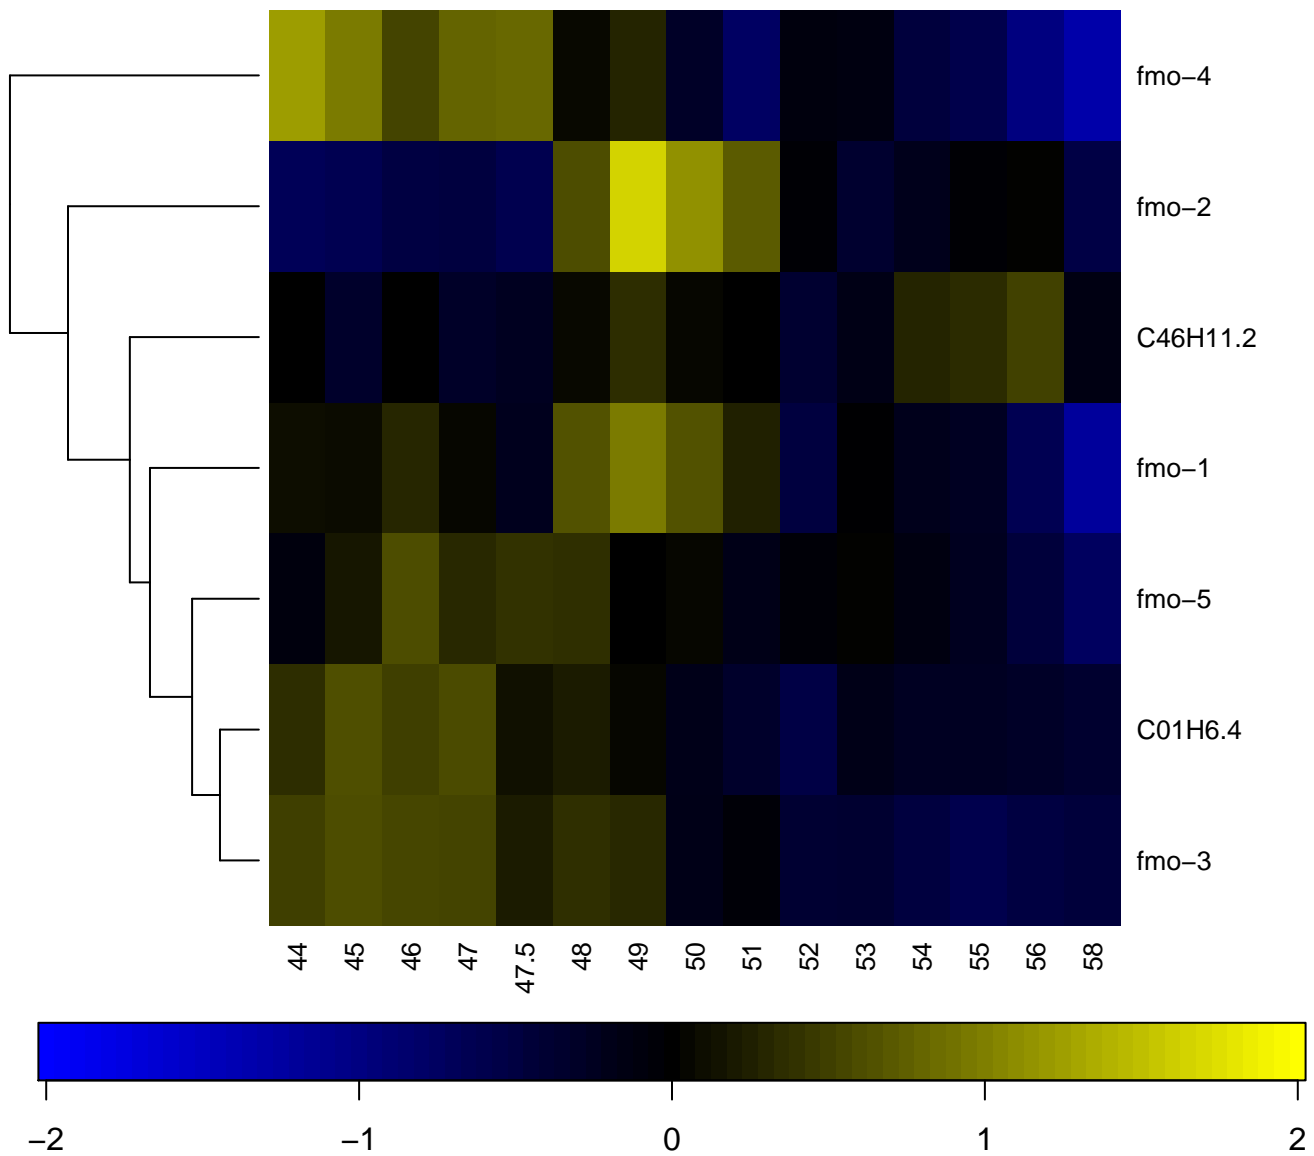



# folic acid and derivative biosynthetic process

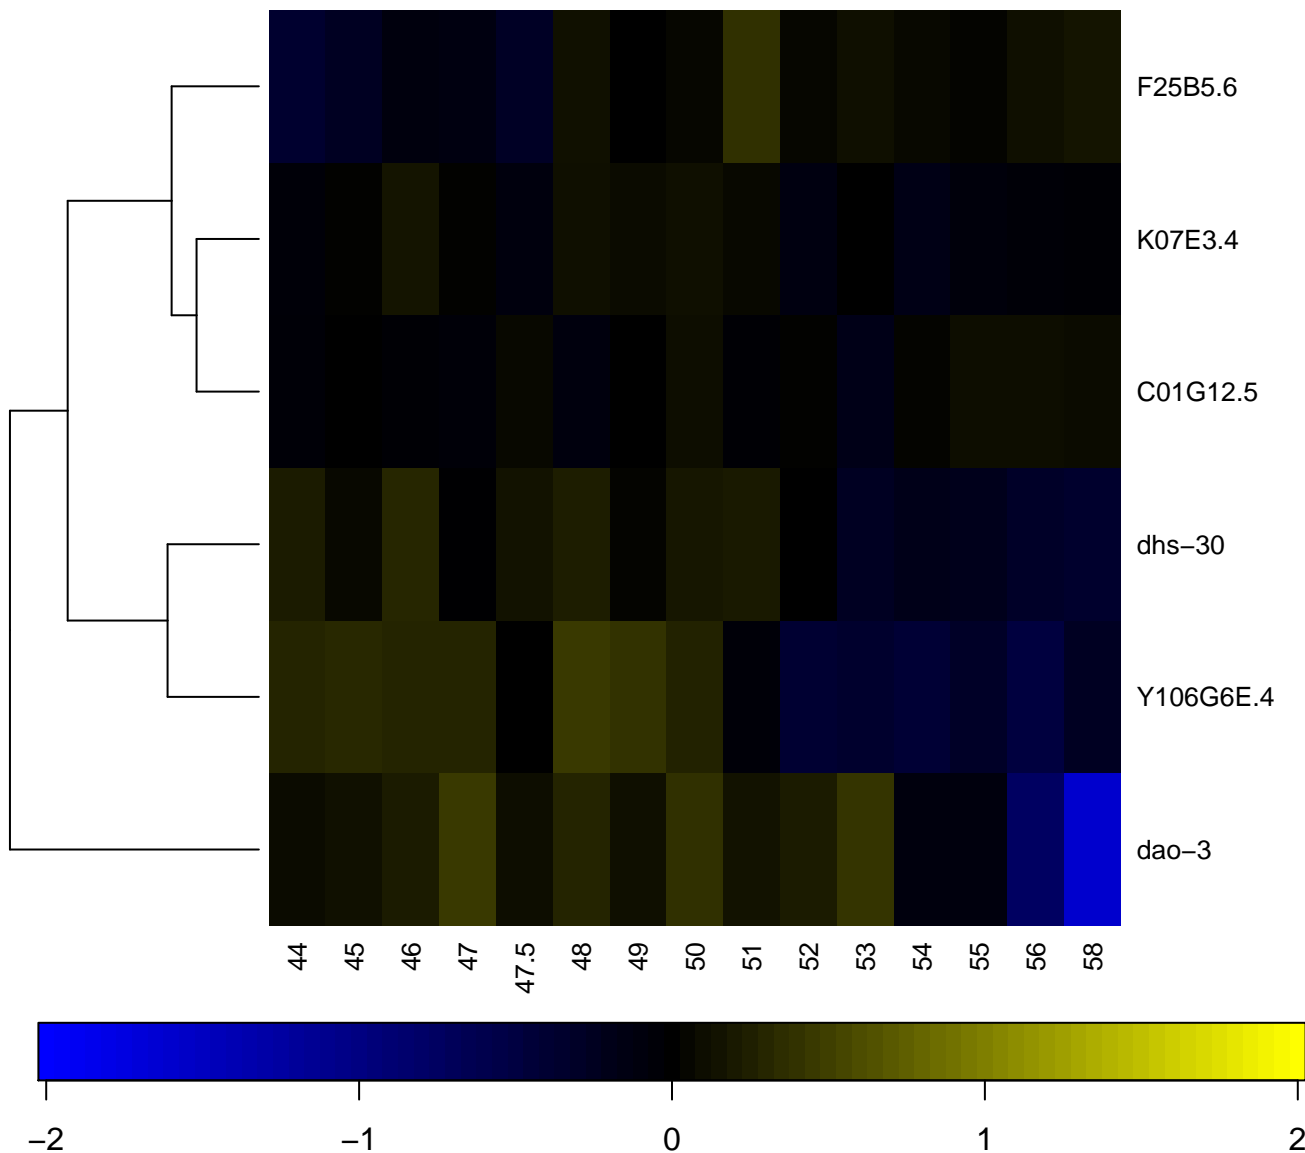











# G-protein coupled receptor protein signaling pathway

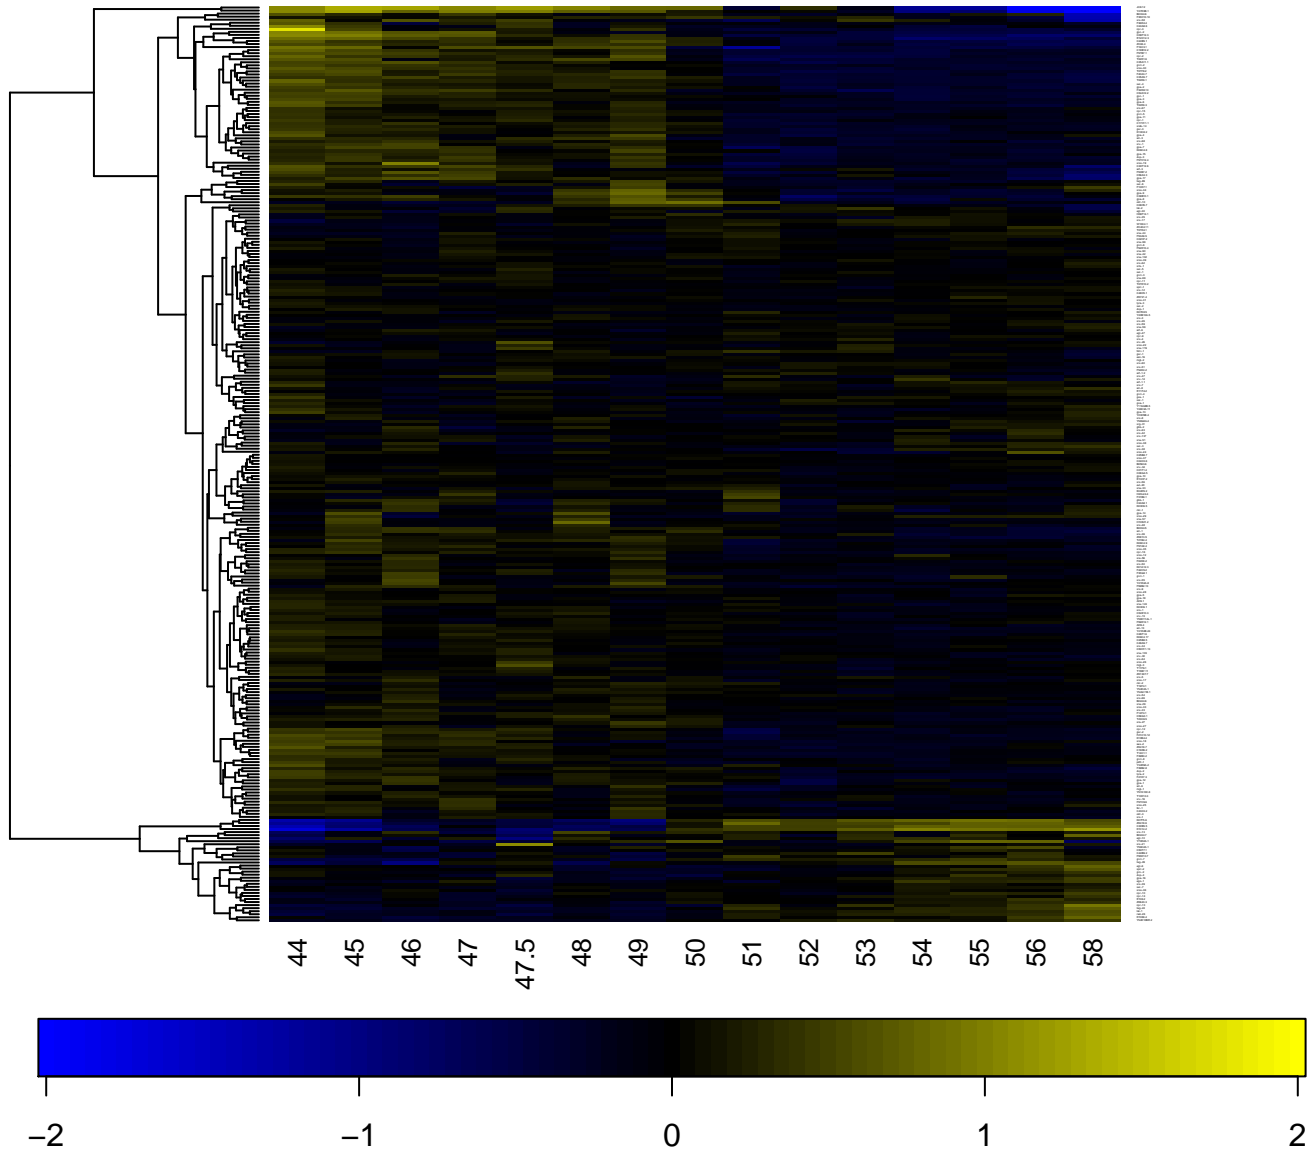

# galactoside 2-alpha-L-fucosyltransferase activity

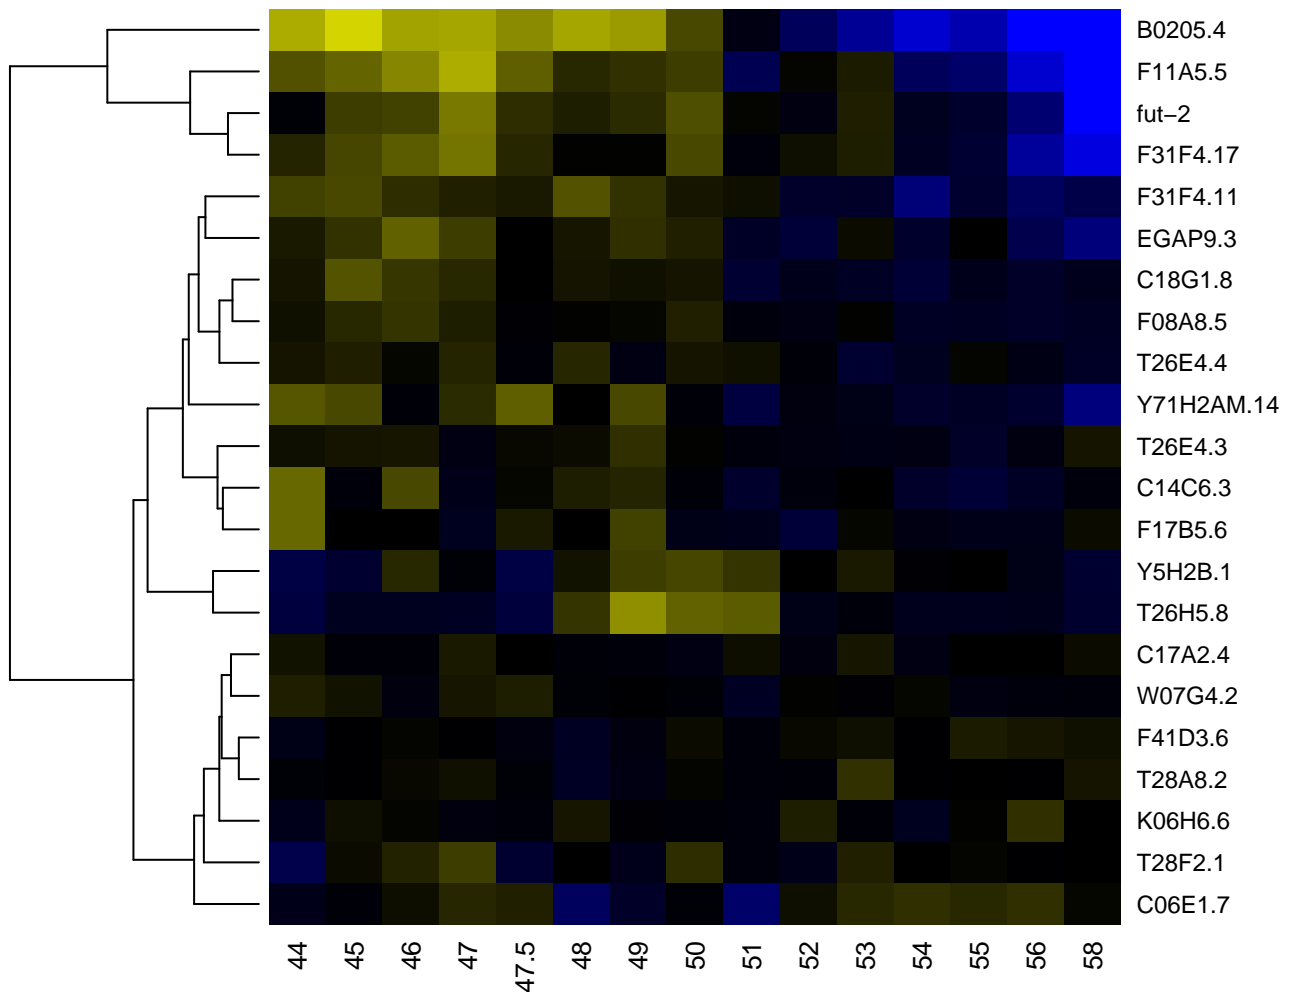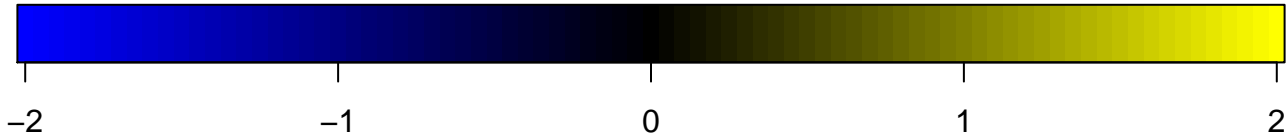

# sylgalactosylxylosylprotein 3-beta-glucuronosyltransferase

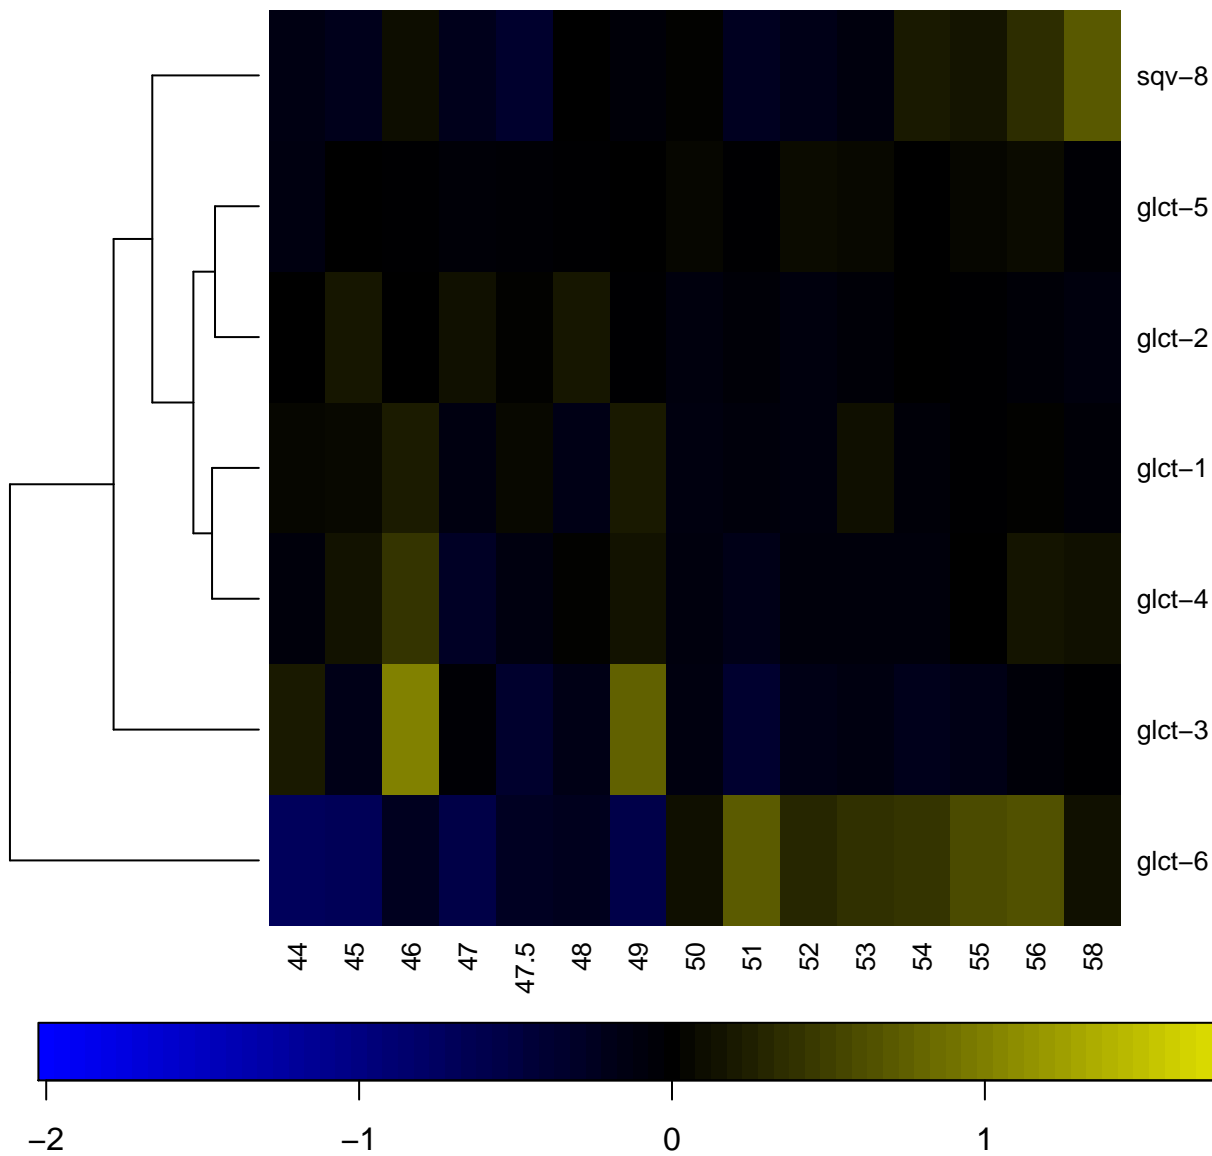



# gamete generation

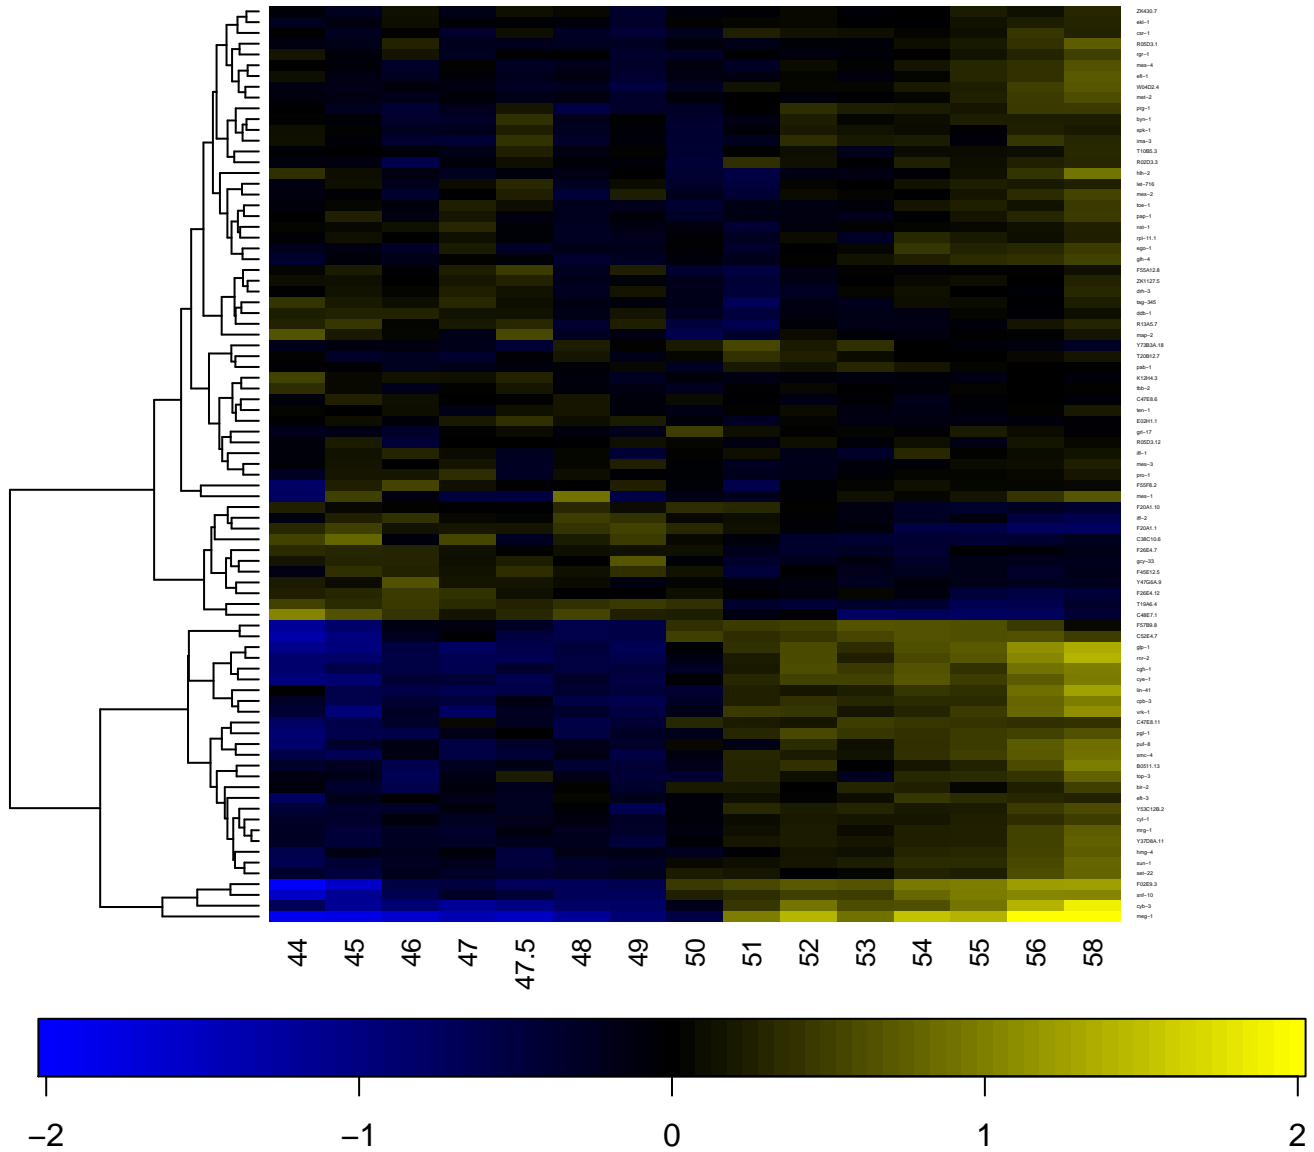







# gastrulation

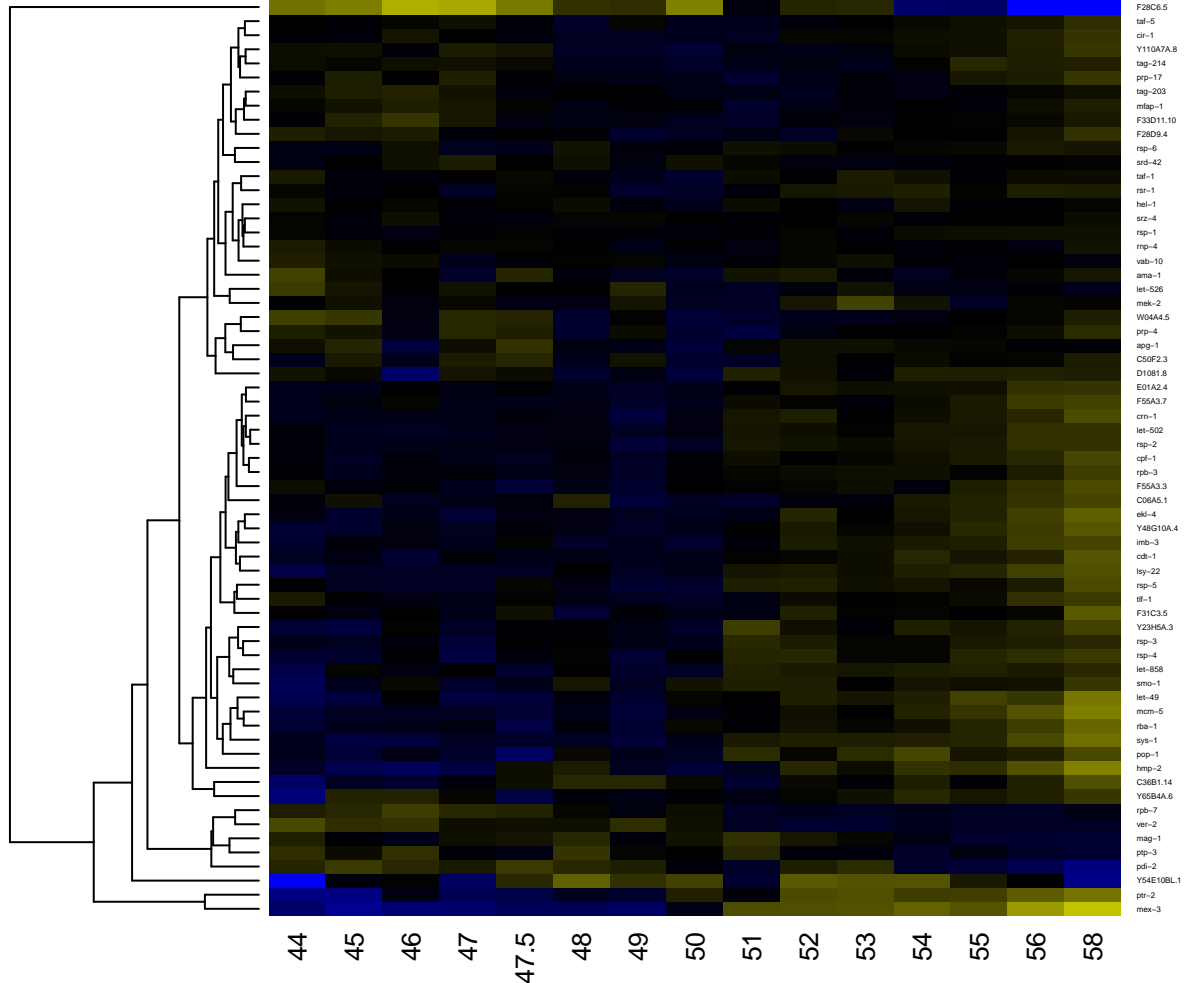

-2

-1

0

1

2

# gastrulation with mouth forming first

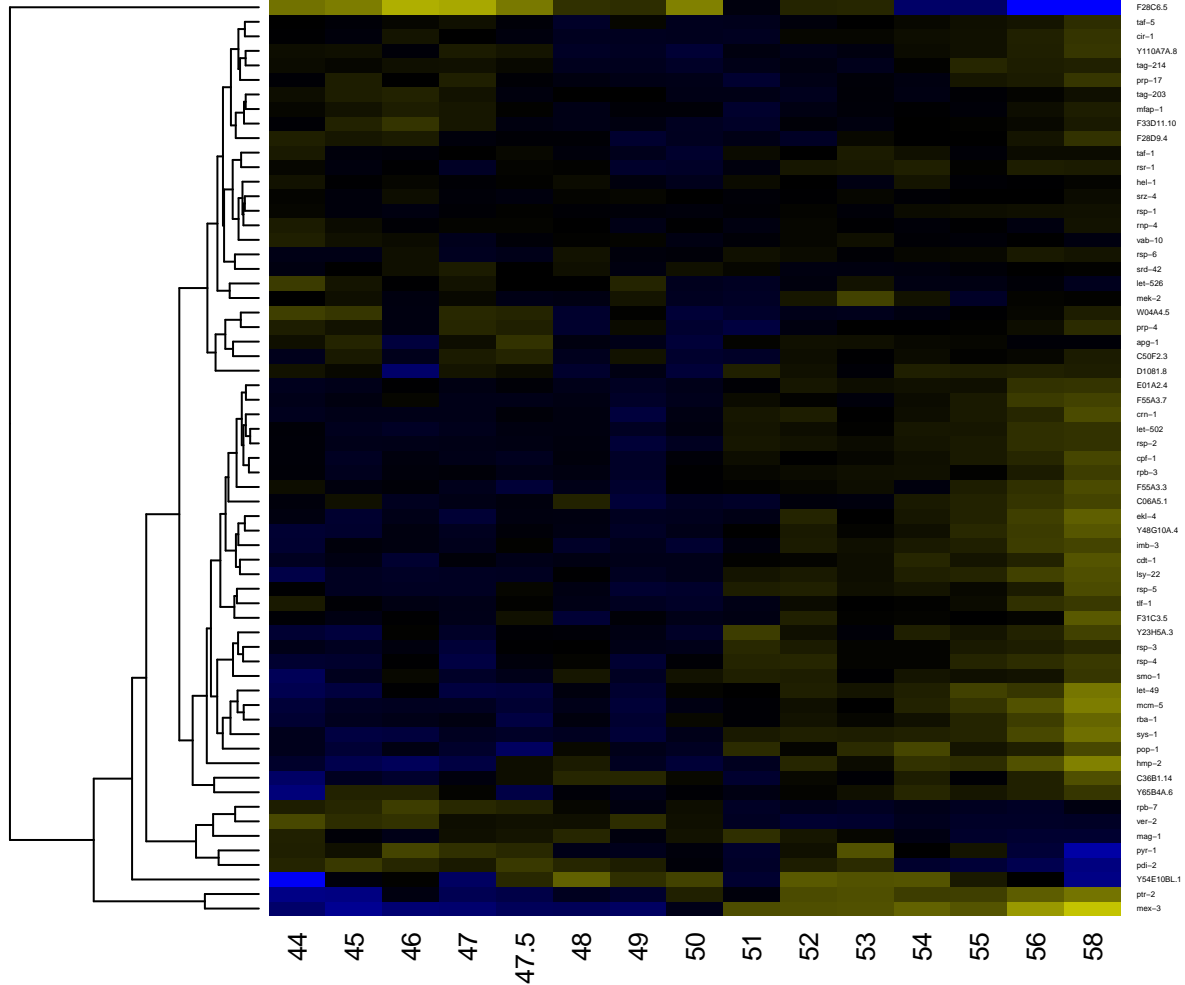





# germ cell development

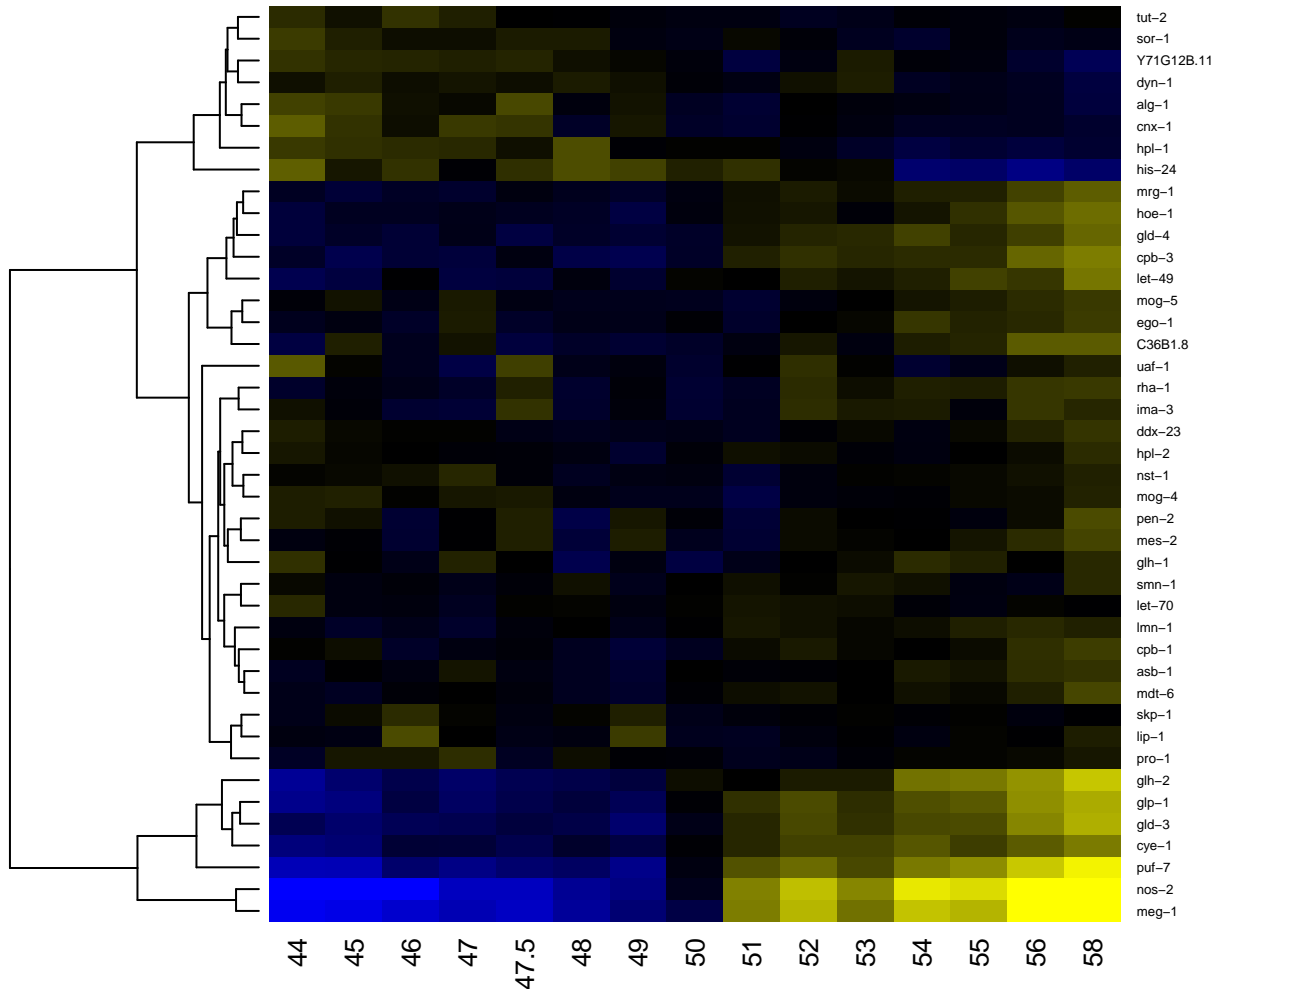





# germline cell cycle switching, mitotic to meiotic cell cycle

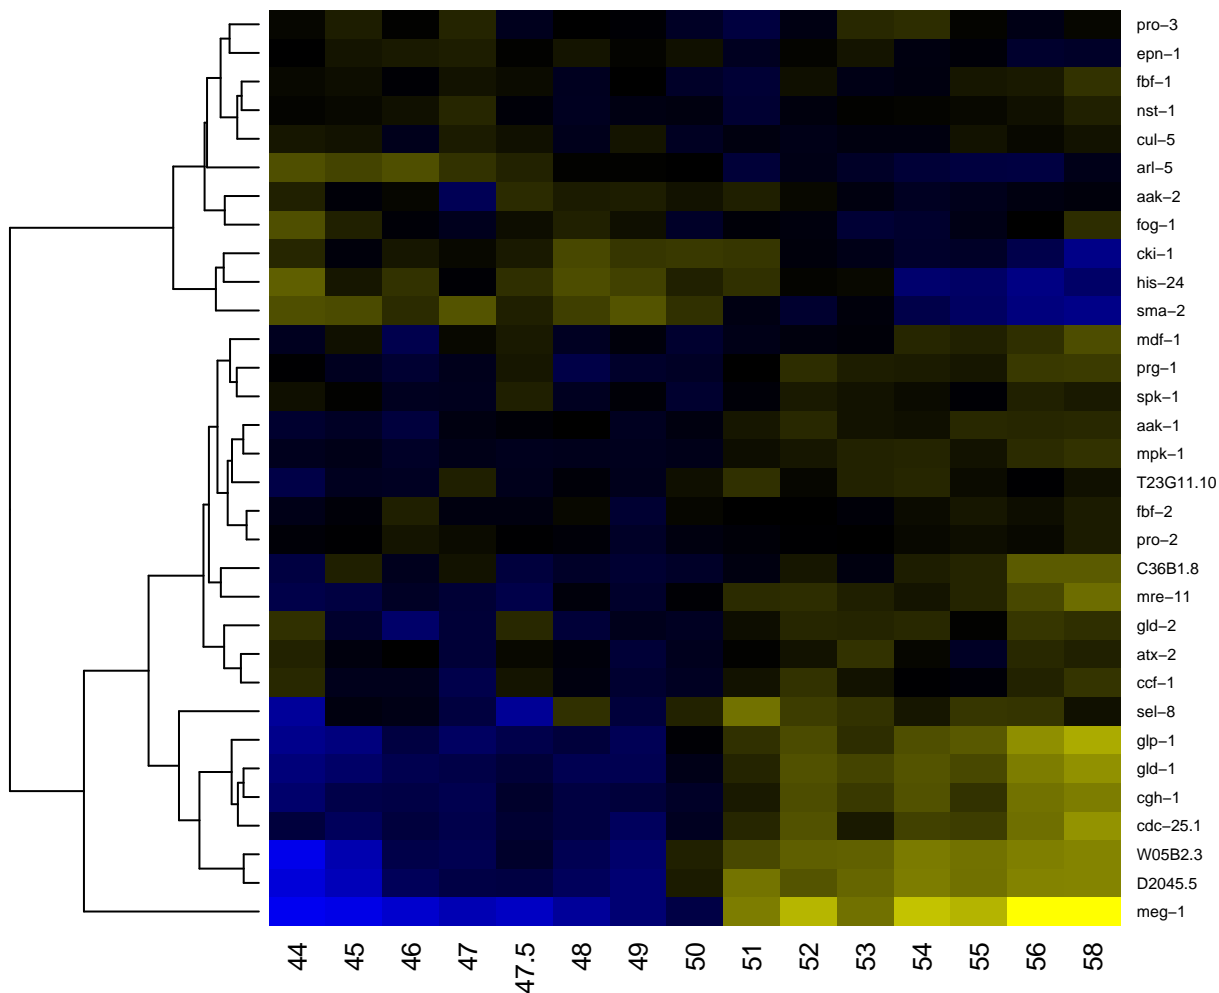

-2

-1

0

1

2

# gluconeogenesis

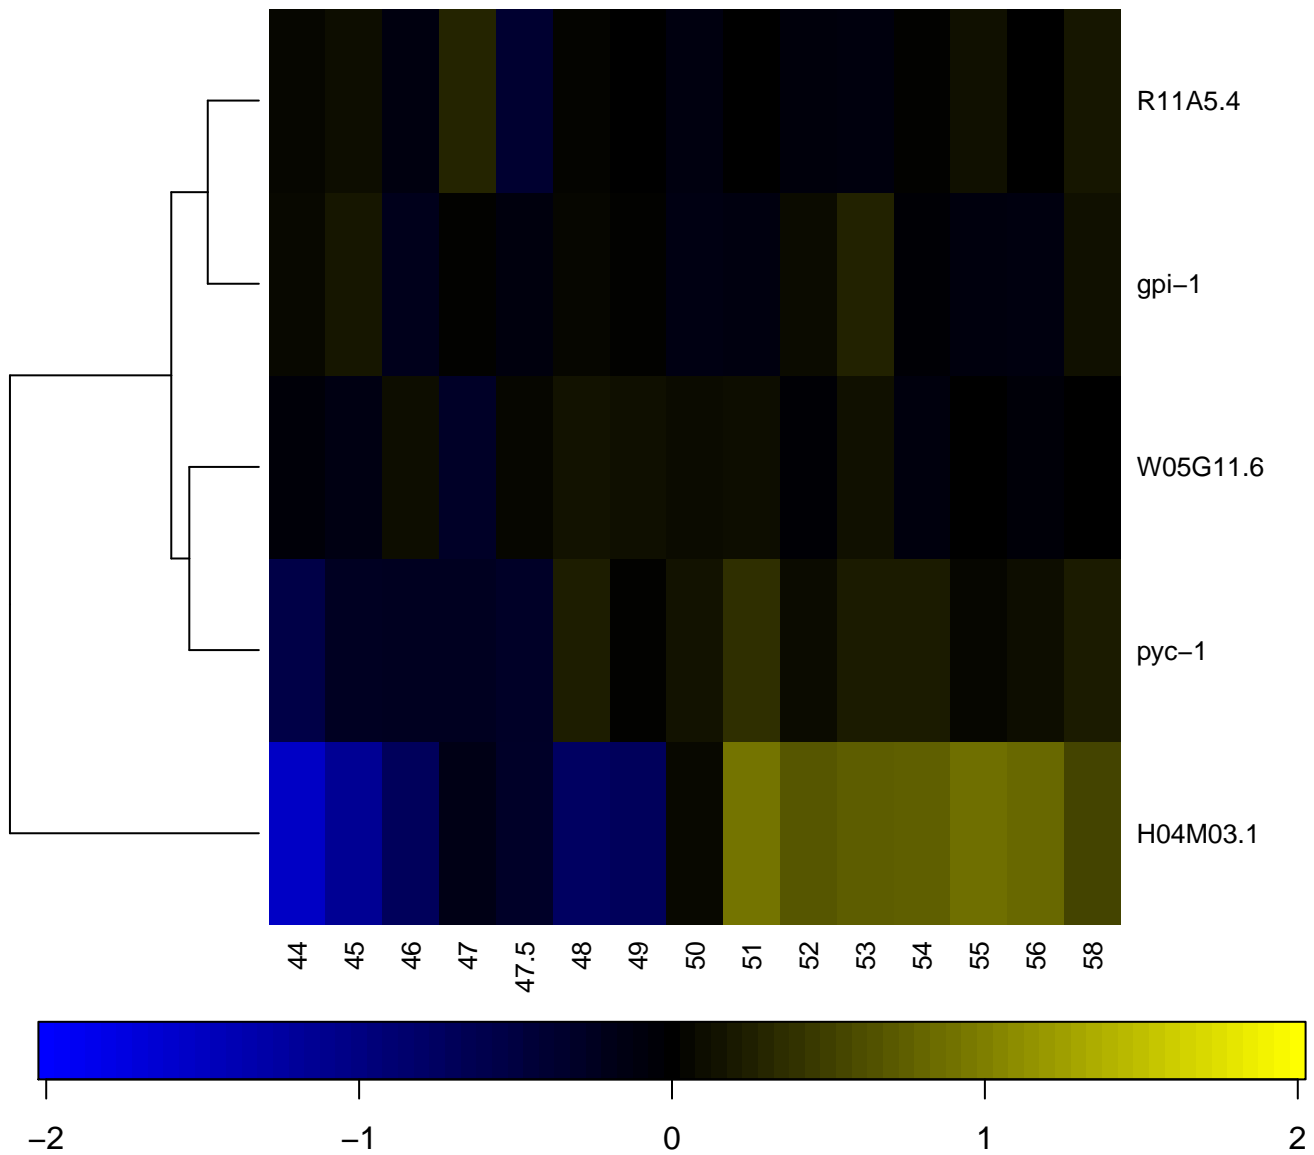

# glucosylceramidase activity

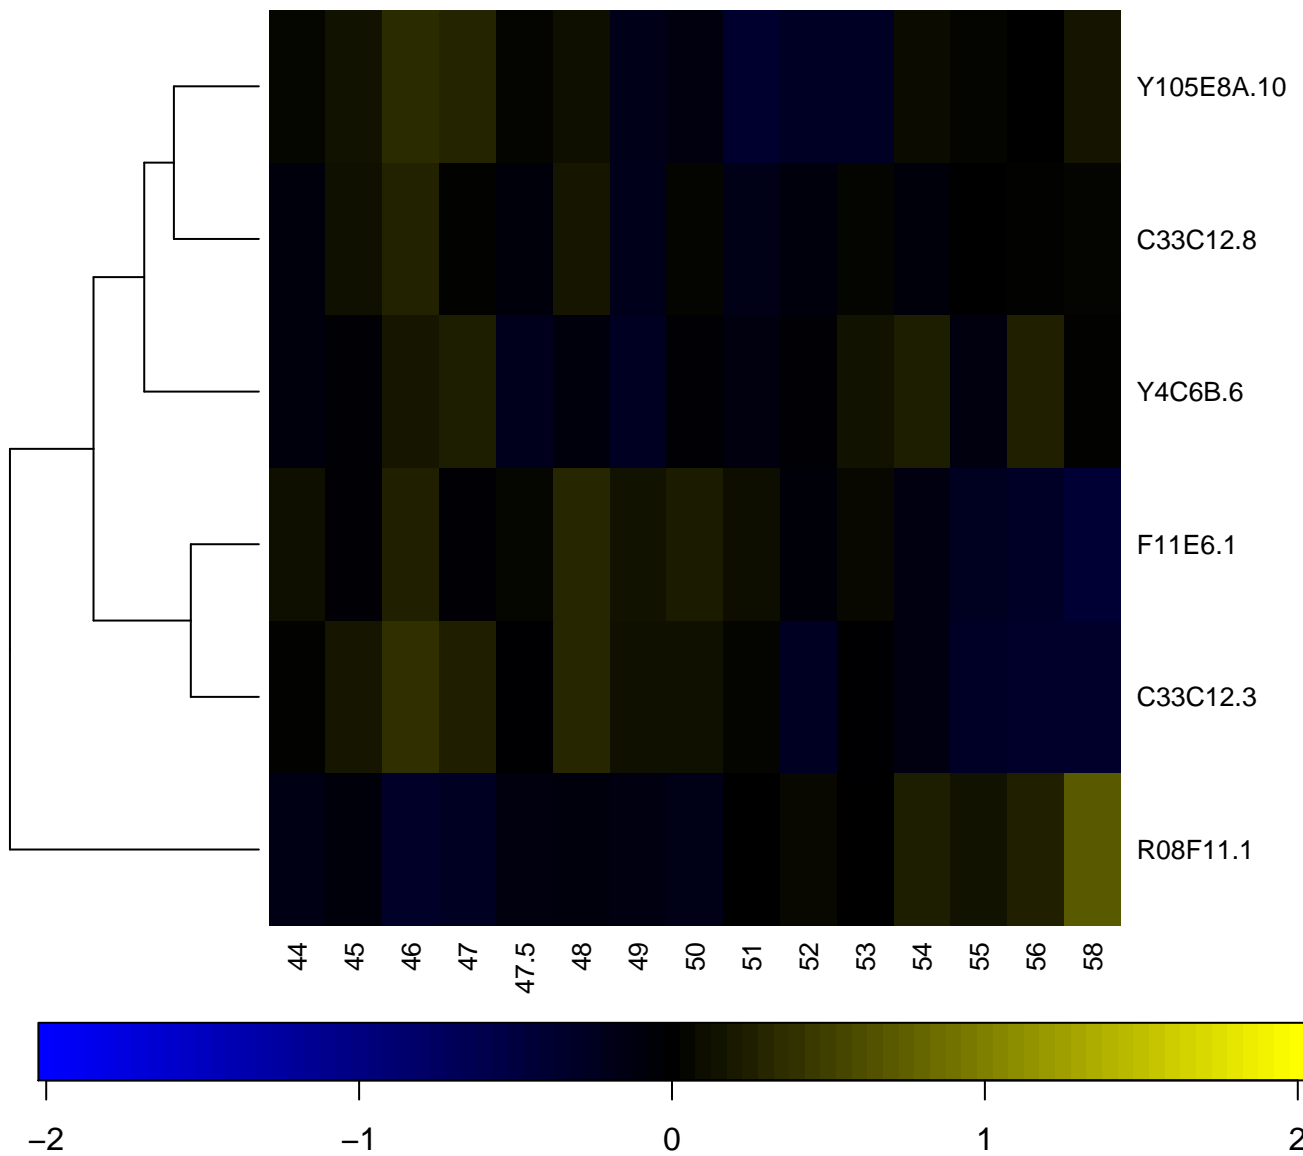

# glutamate-ammonia ligase activity

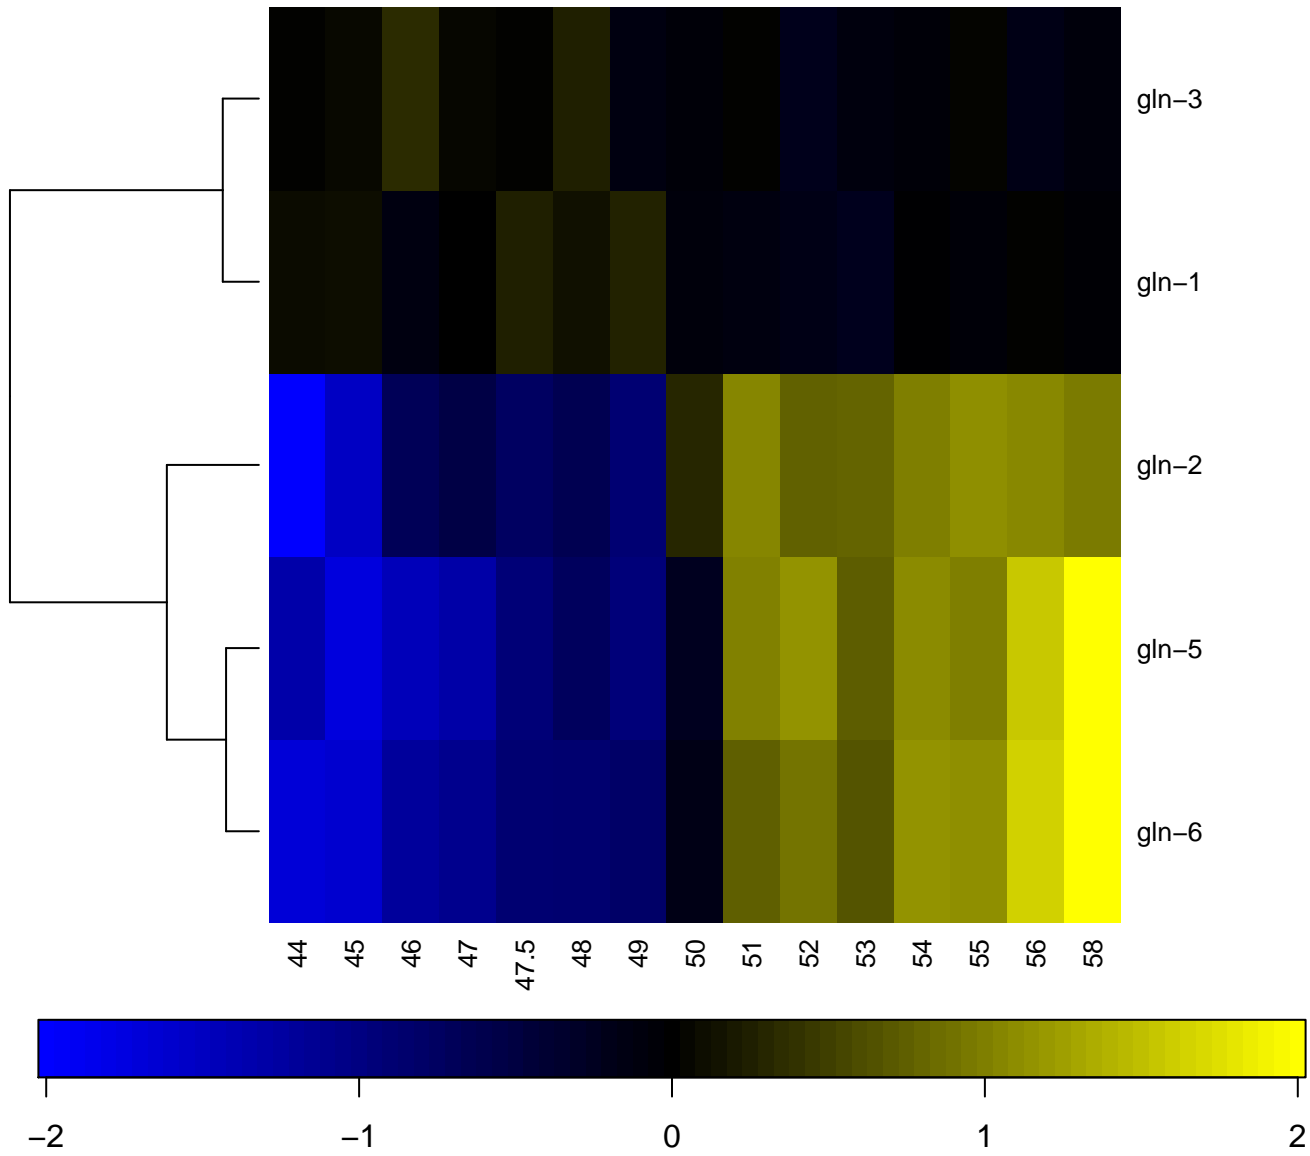

# glutamine biosynthetic process

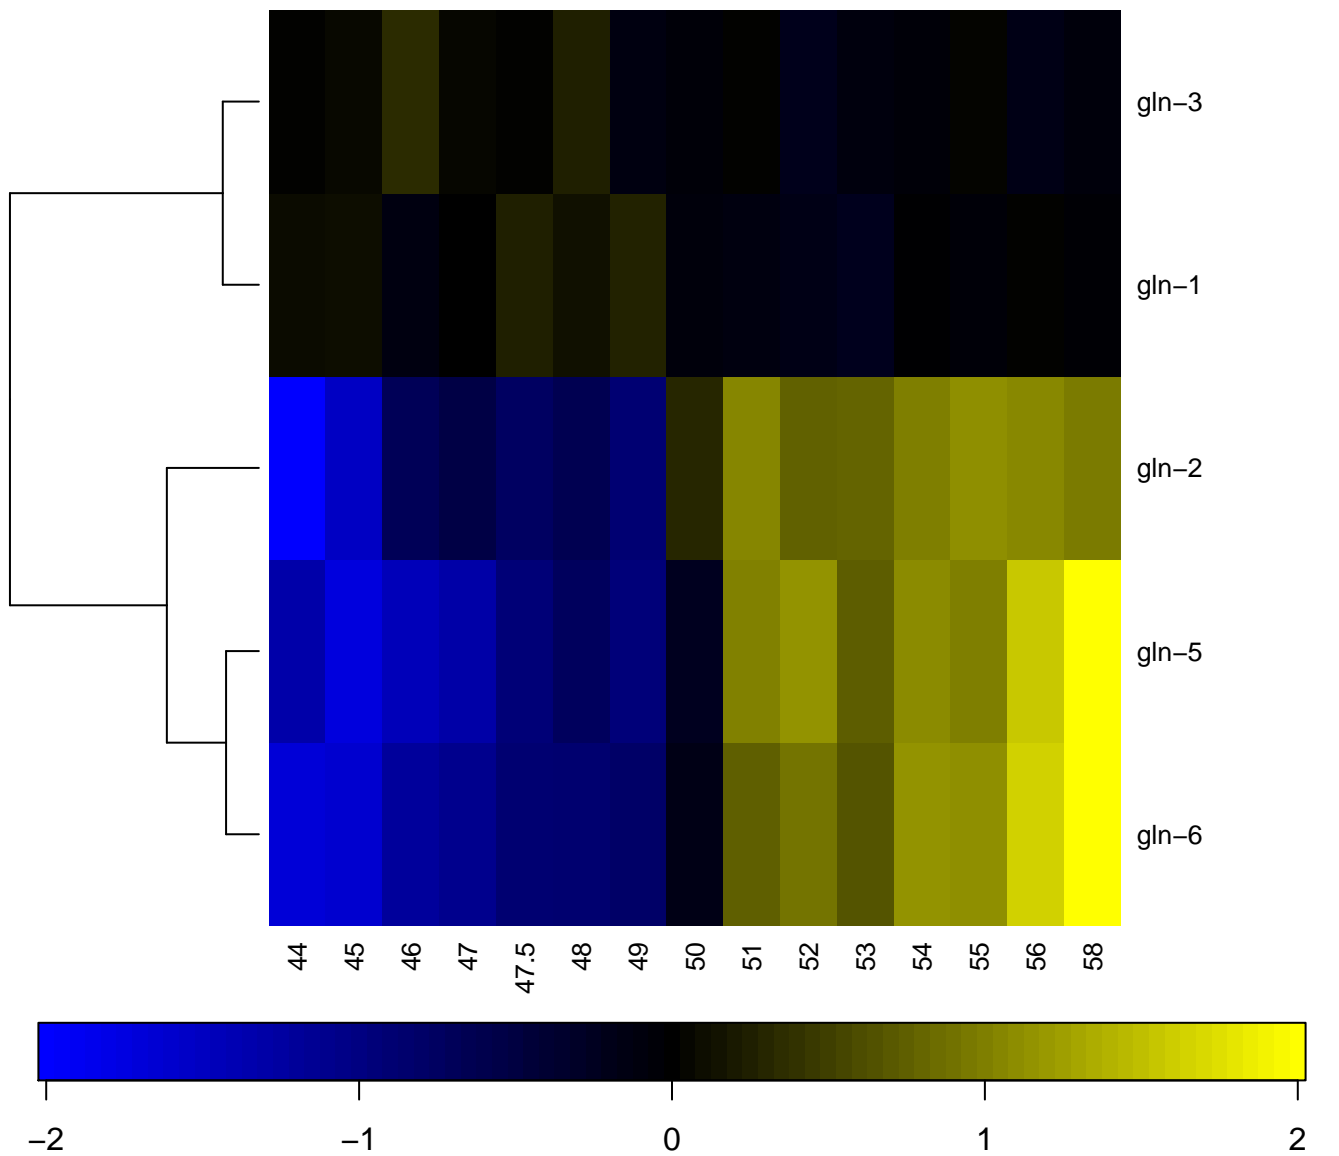

# glutamine metabolic process

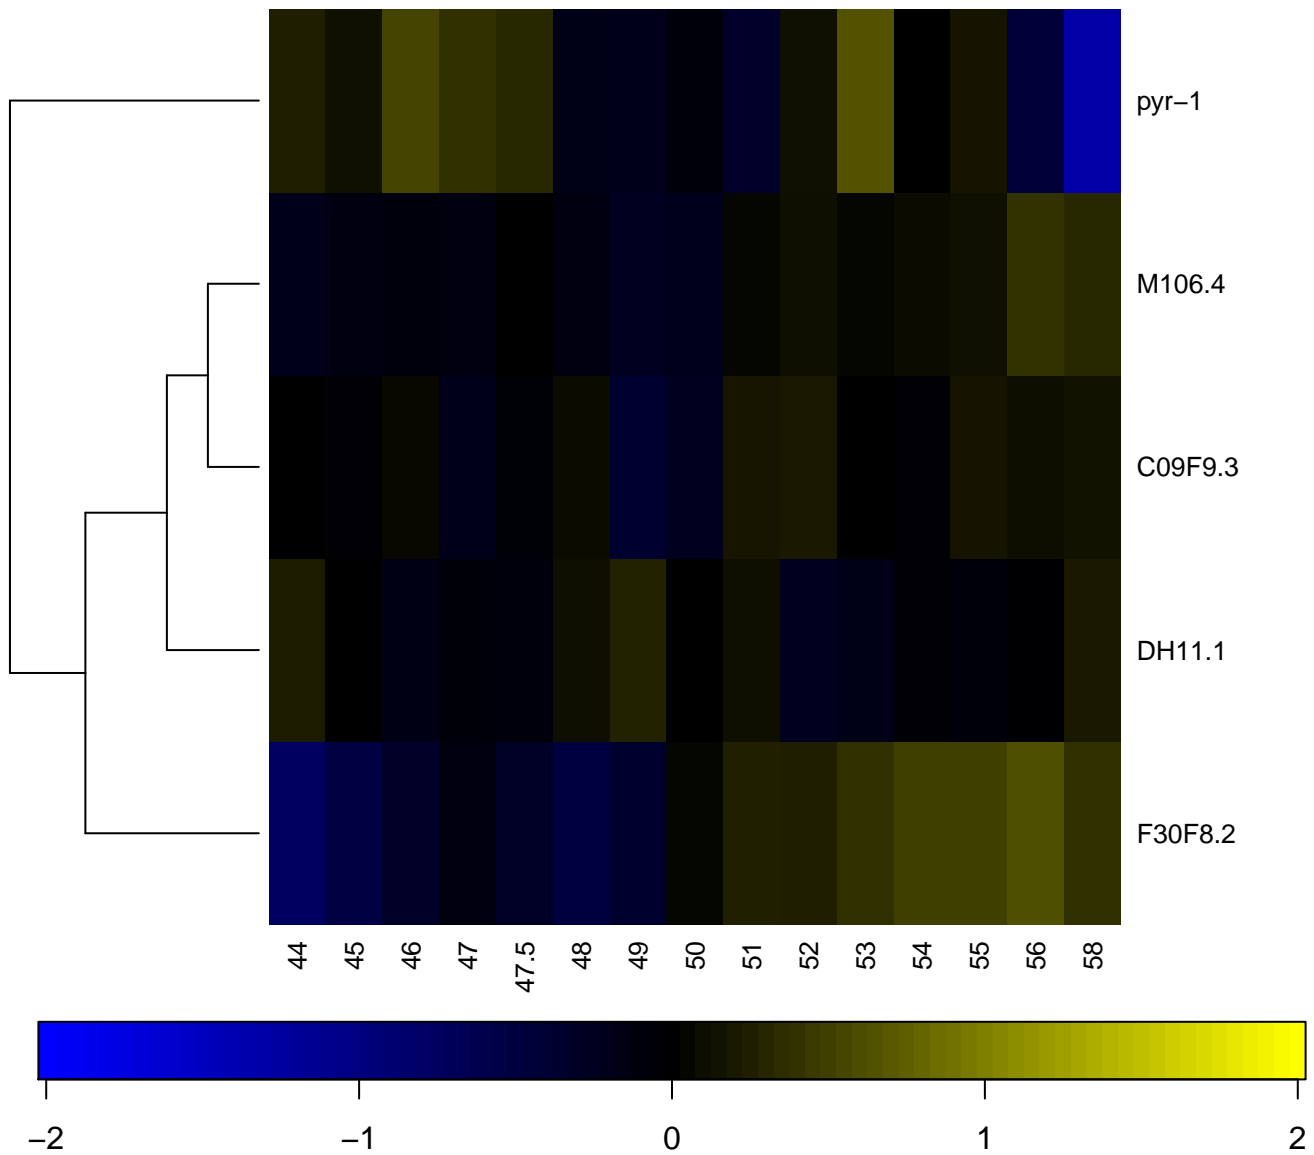

# glutathione peroxidase activity

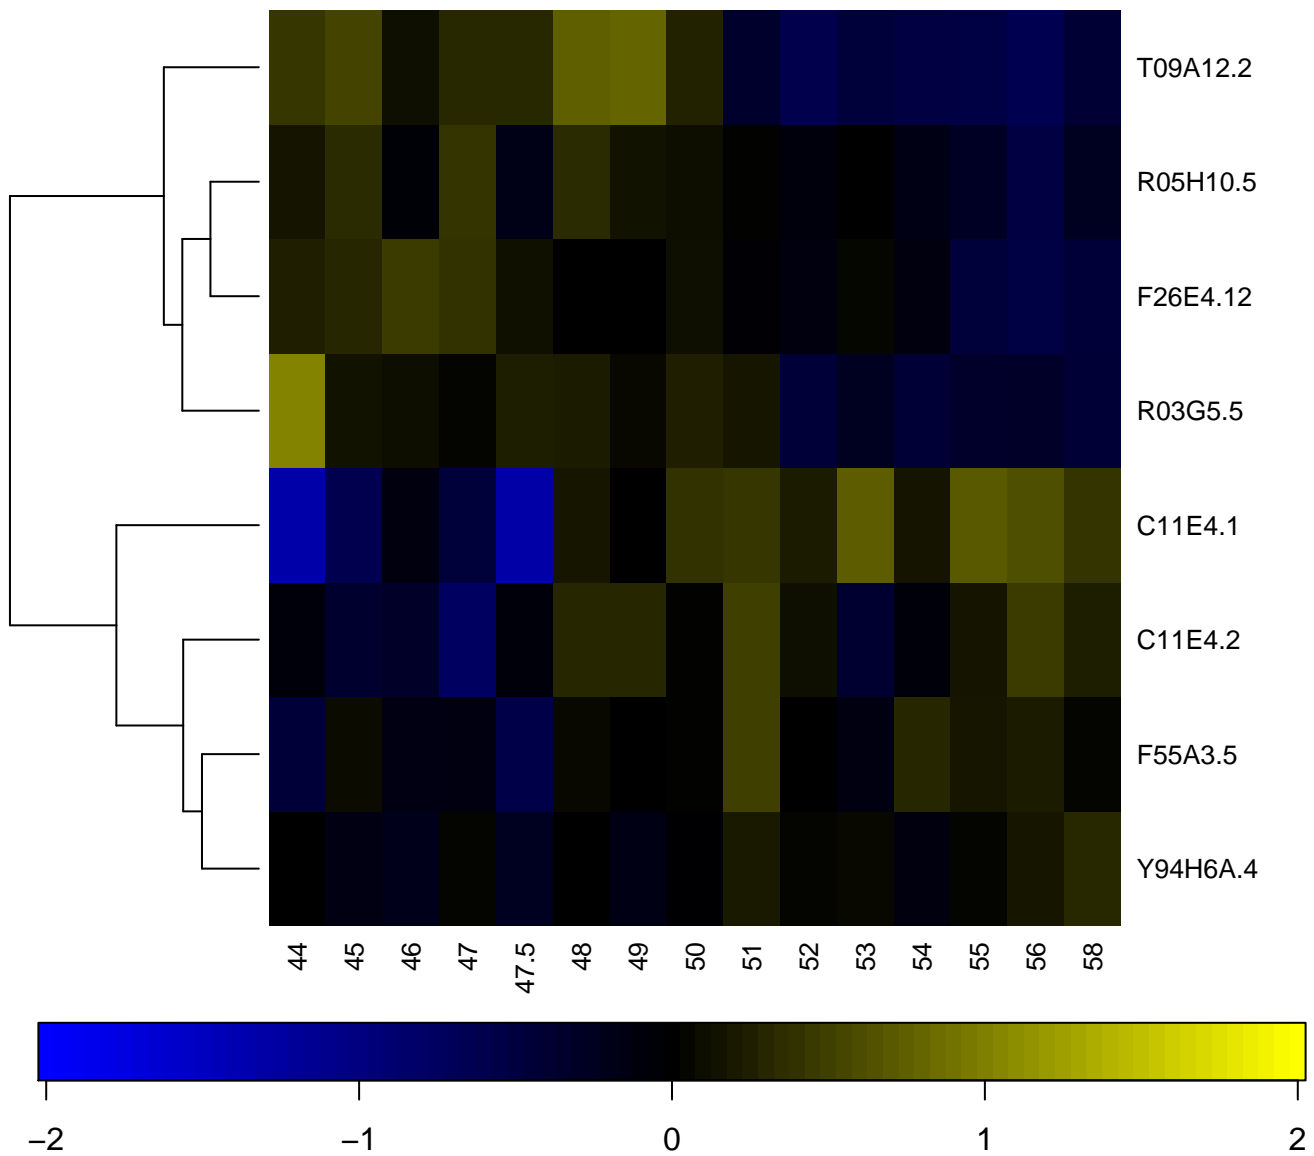

# glutathione transferase activity

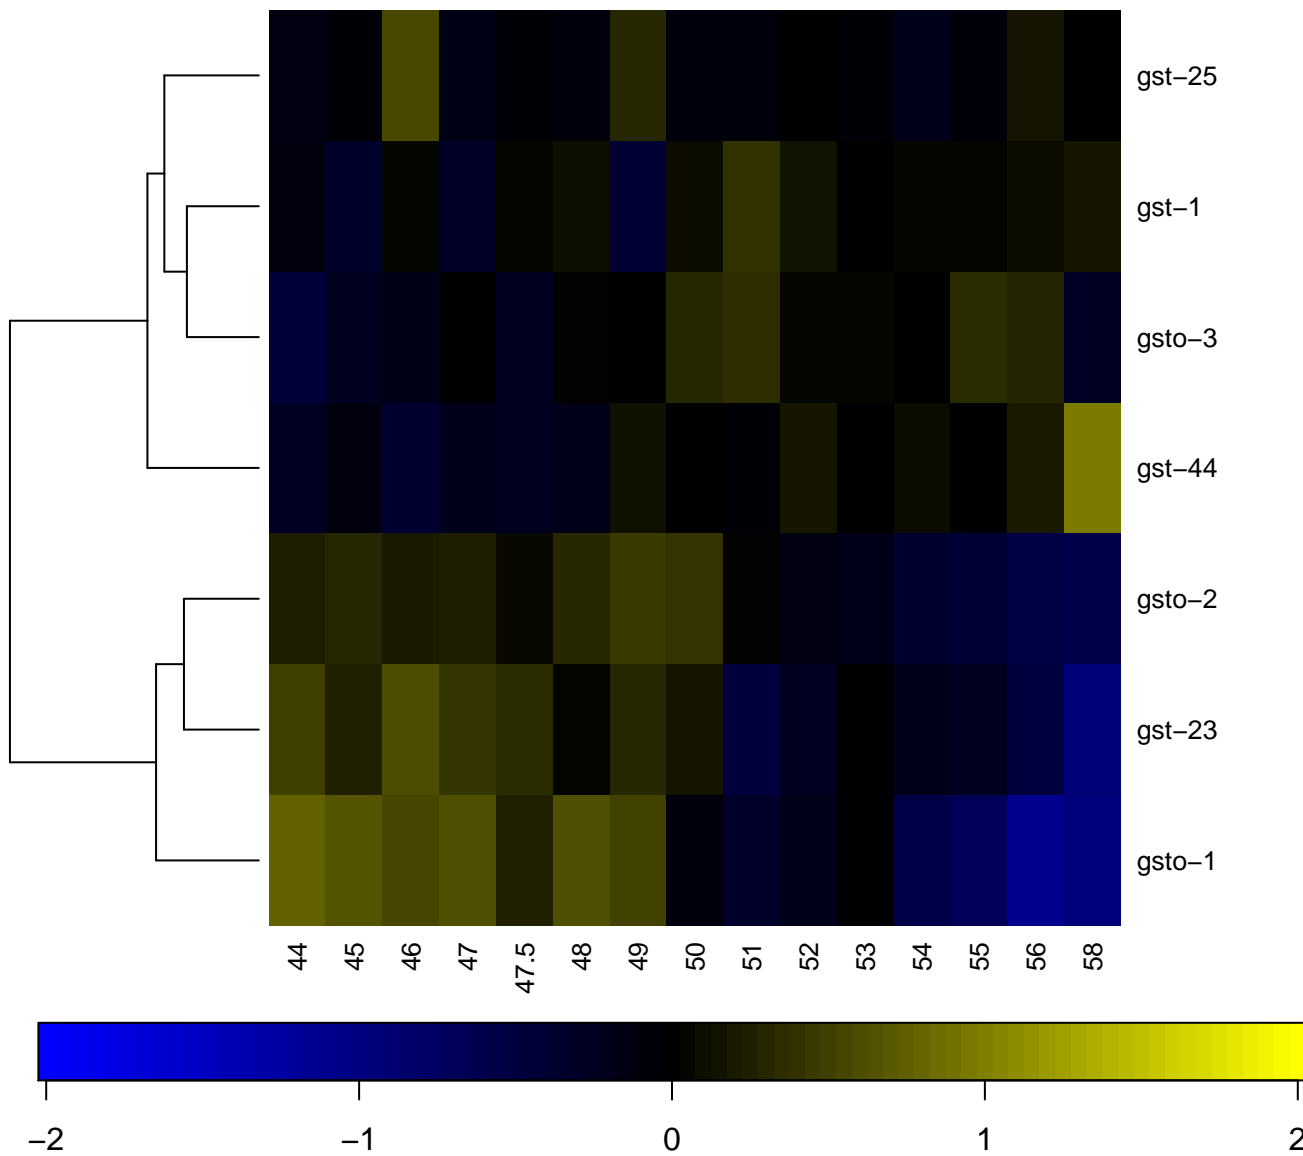



# glycerol-3-phosphate catabolic process

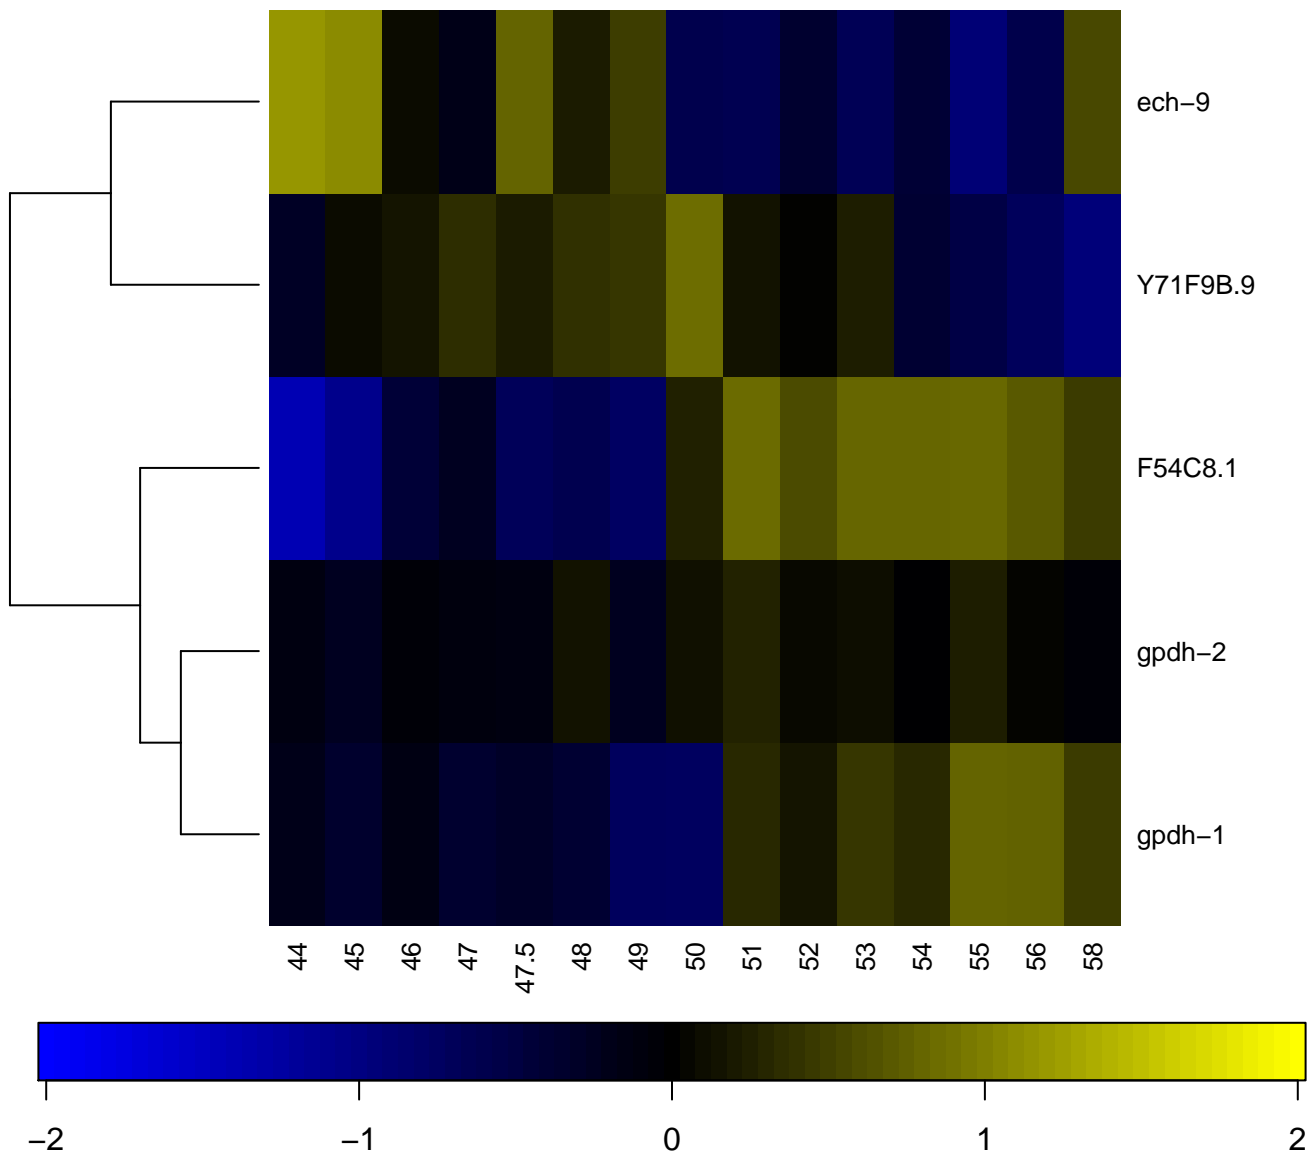

# glycerol-3-phosphate metabolic process

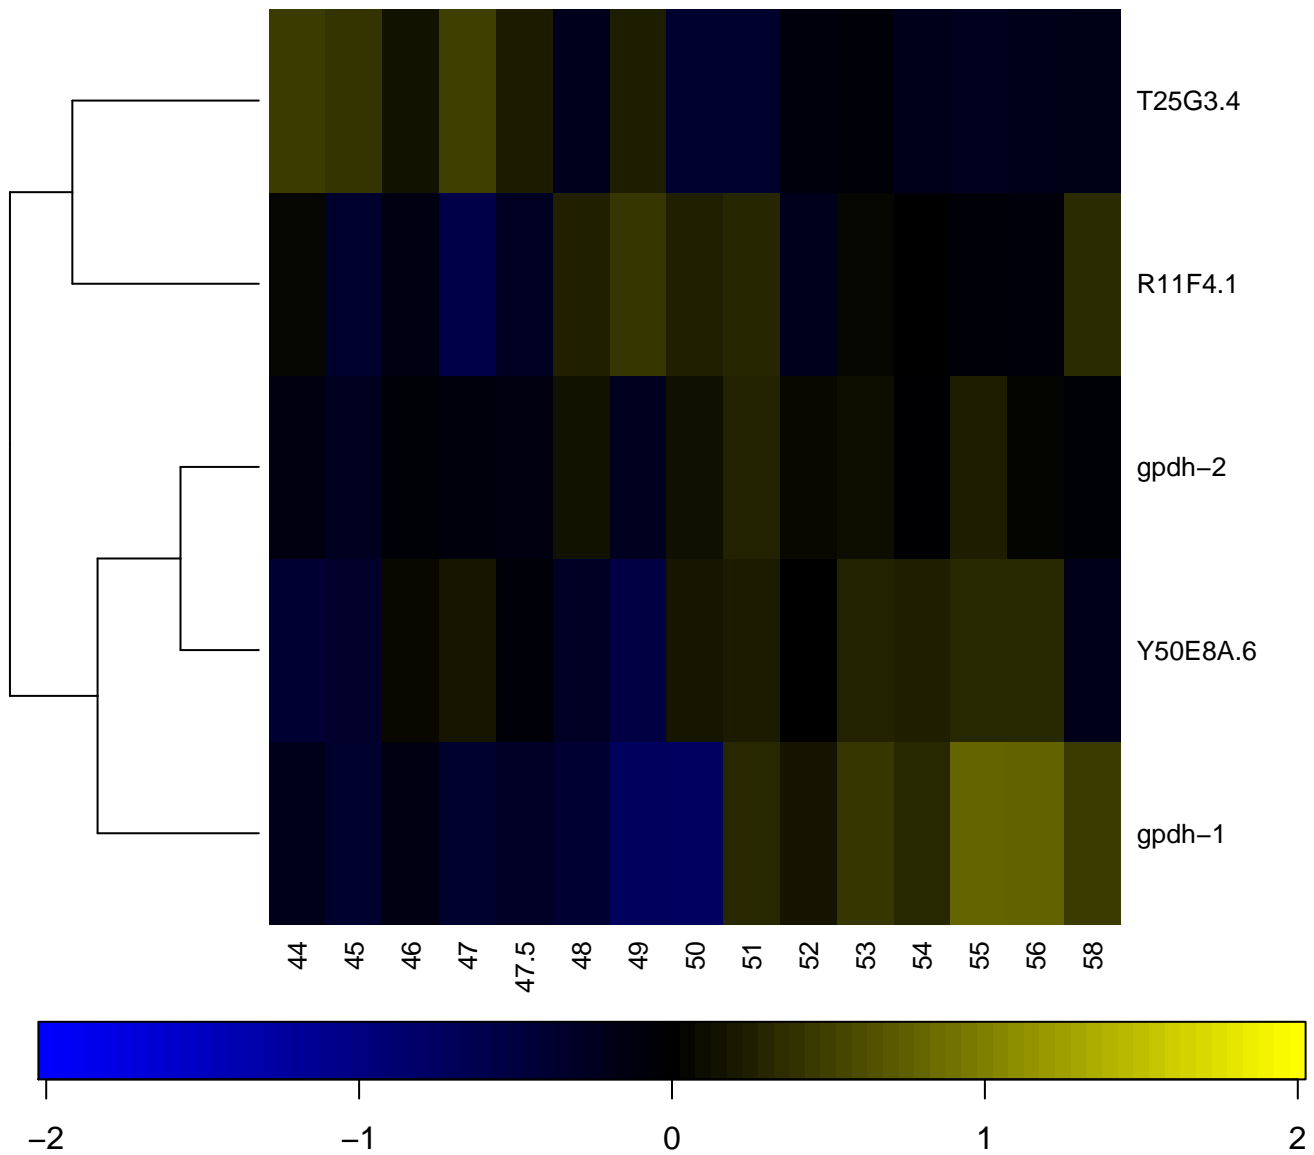









# glycolysis

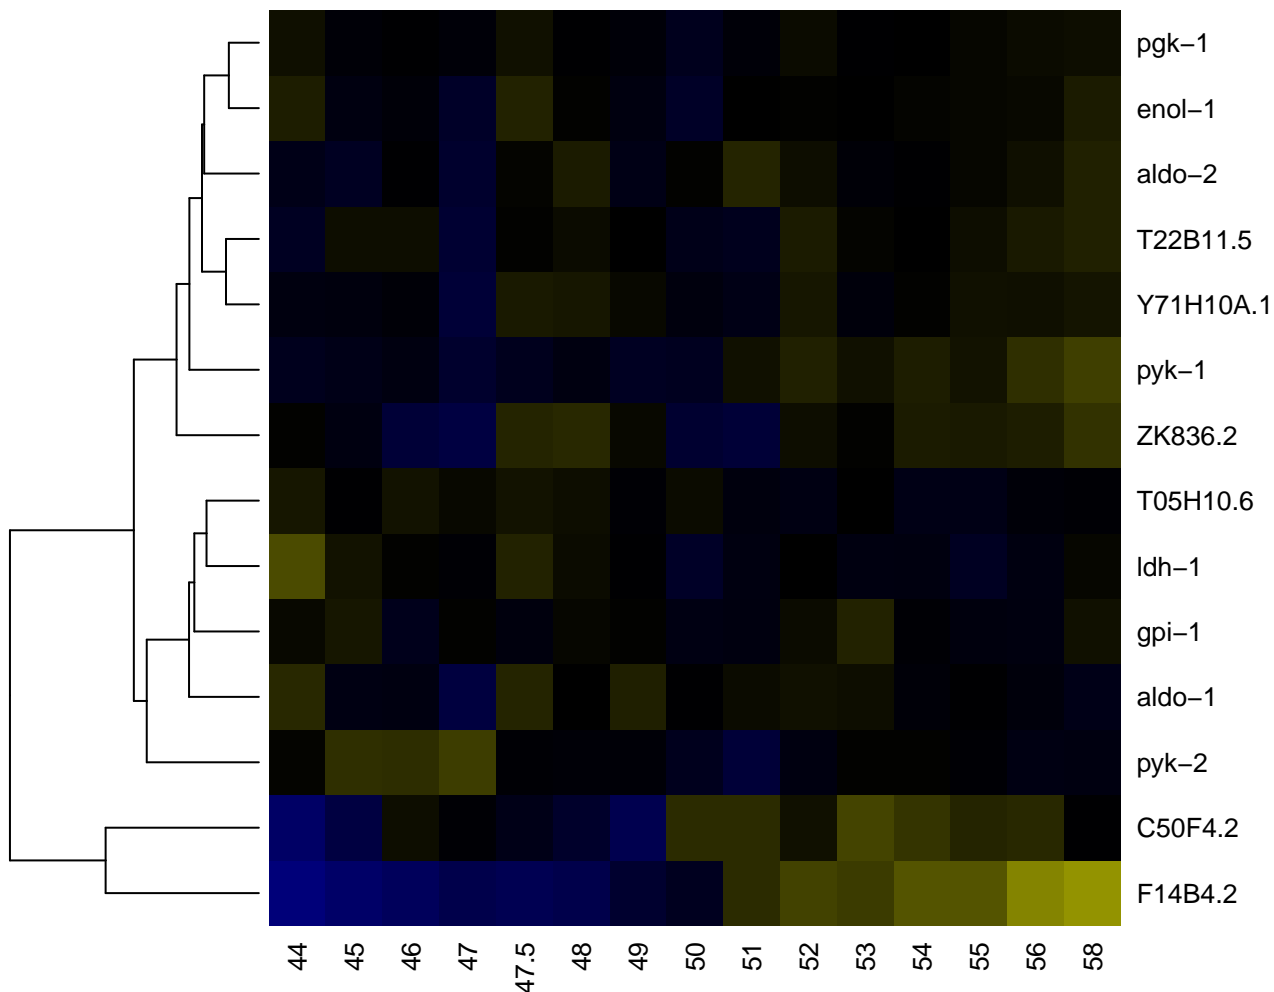





# Golgi apparatus

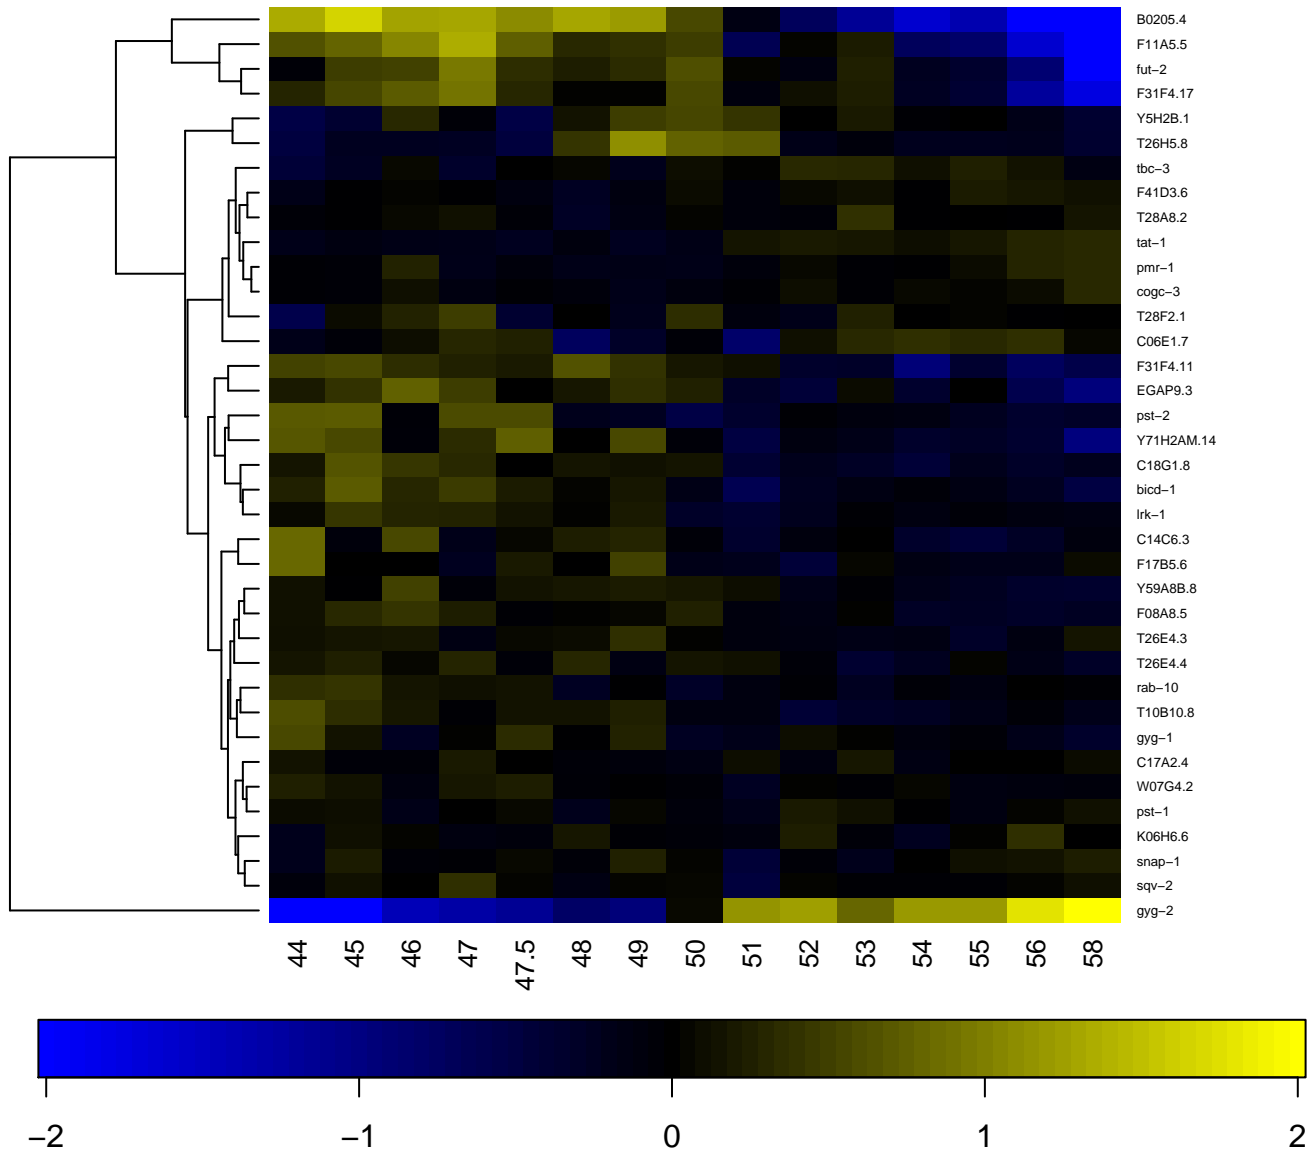

# Golgi membrane

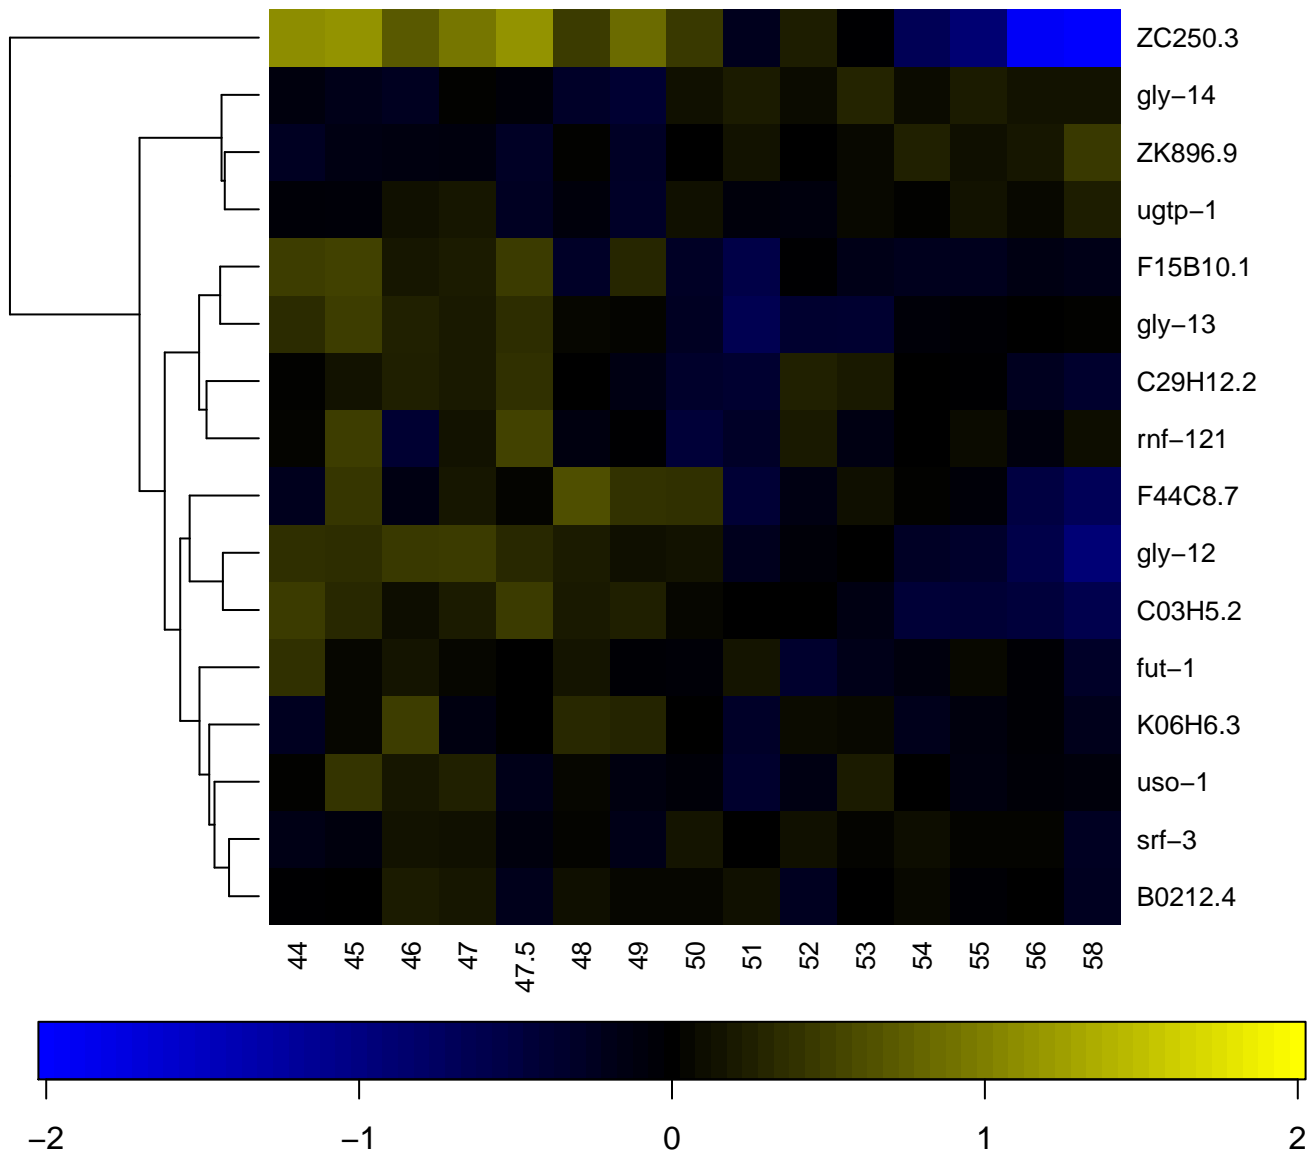

# gonad development

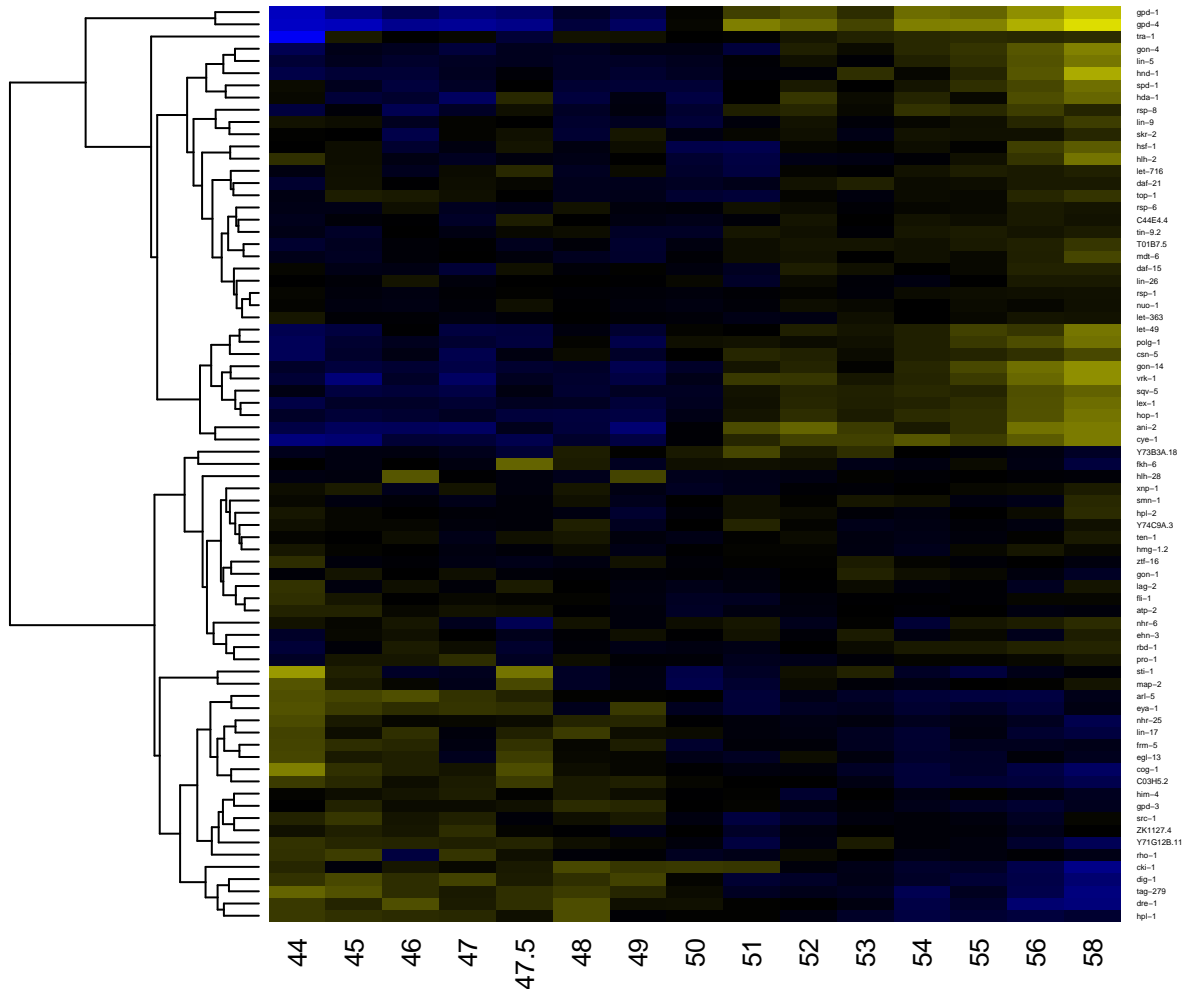

# gonad morphogenesis

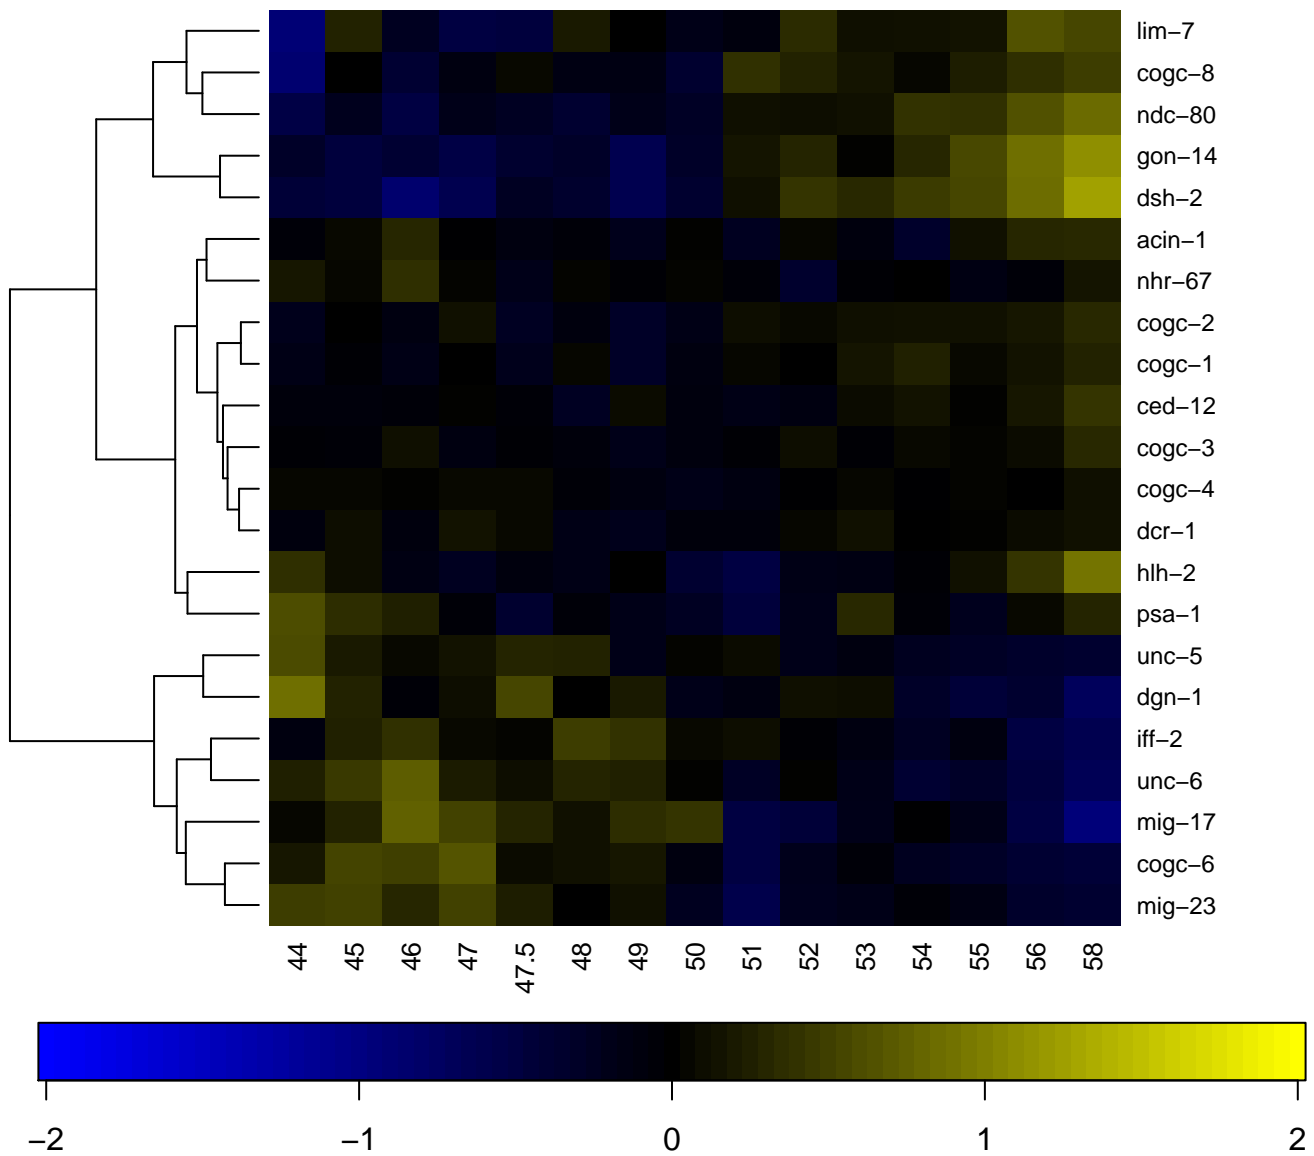

# GPI anchor biosynthetic process

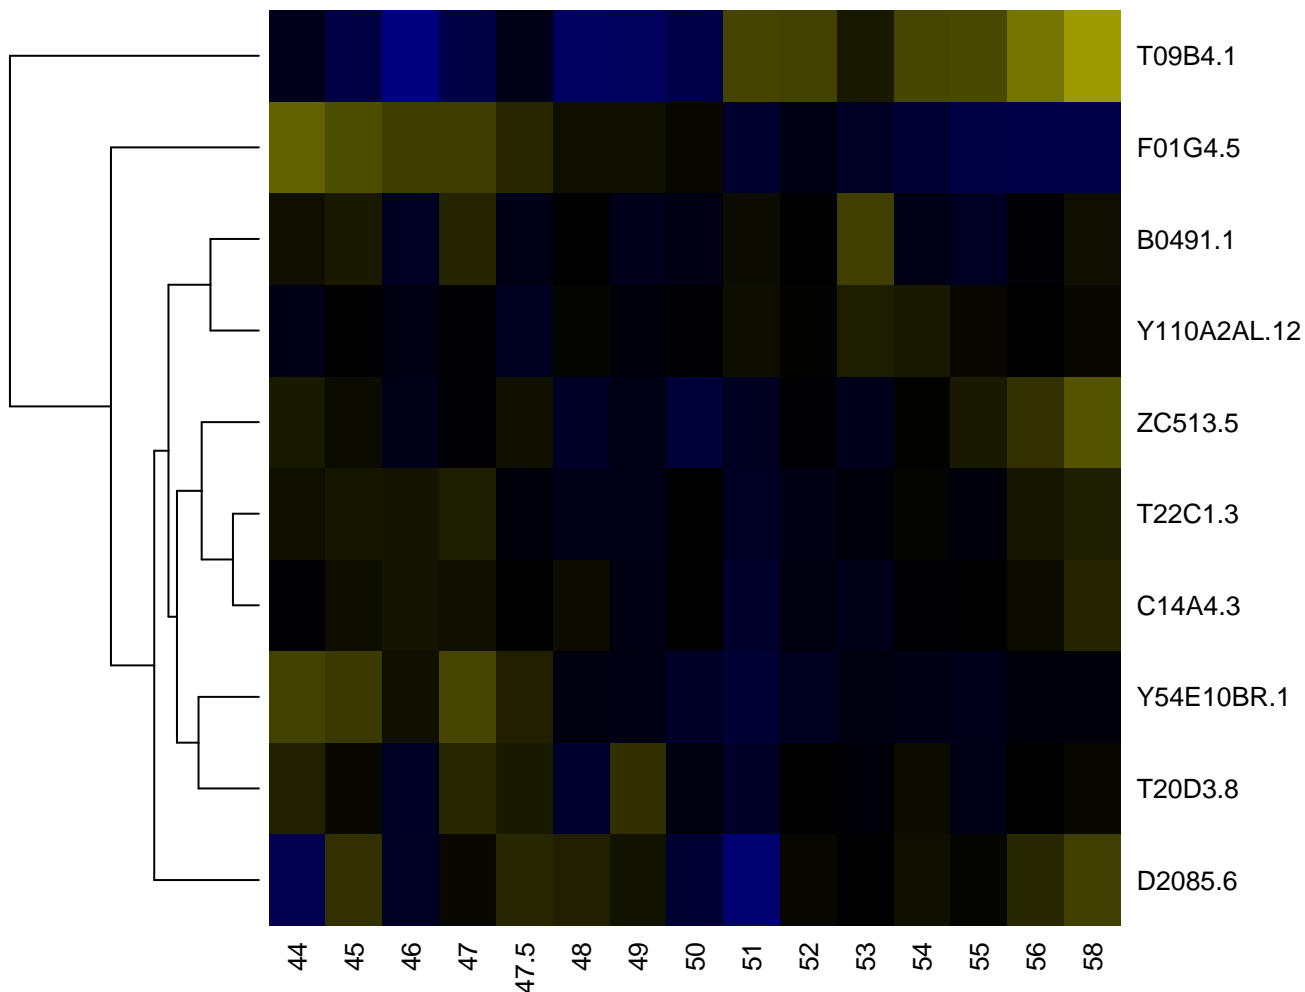

# GPI anchor metabolic process

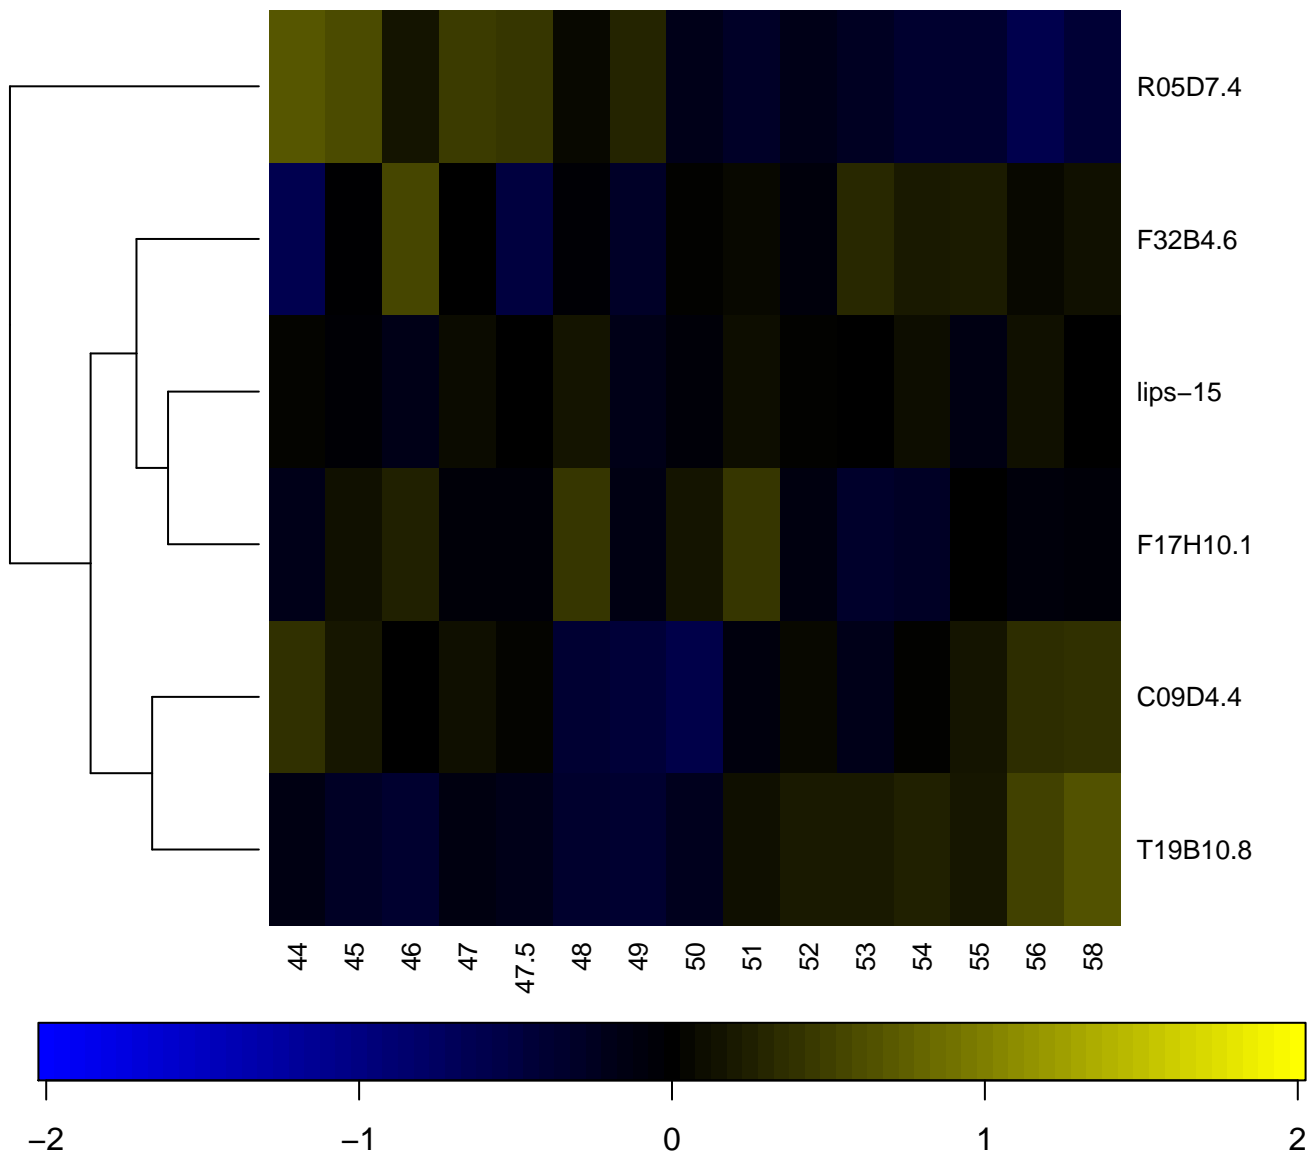

# growth

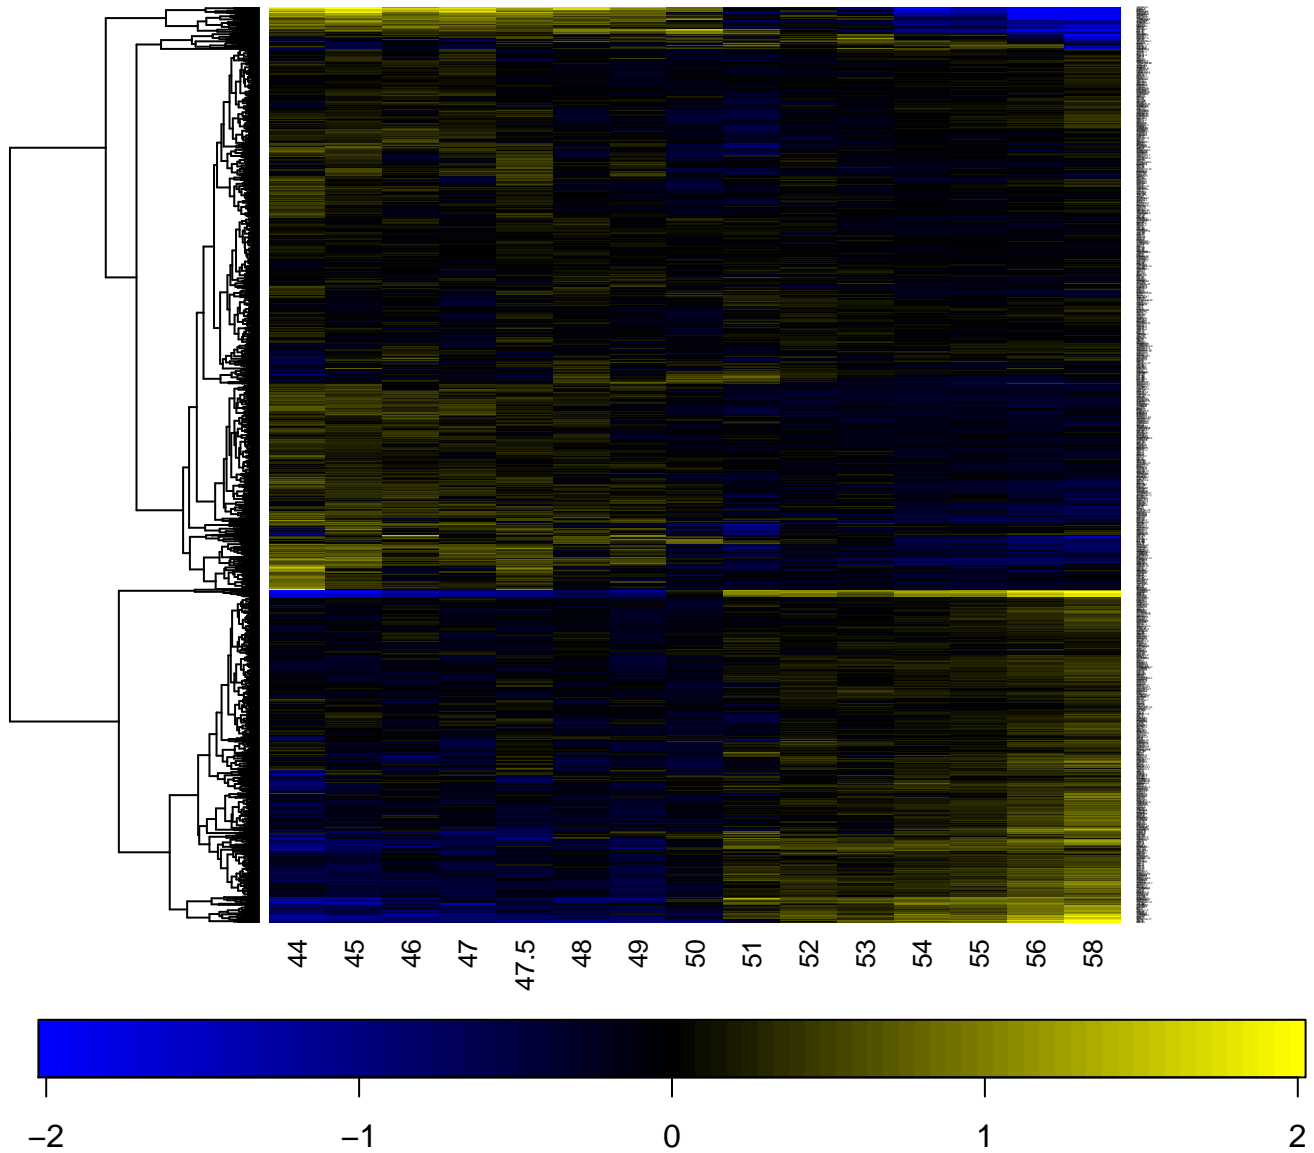





# GTP binding

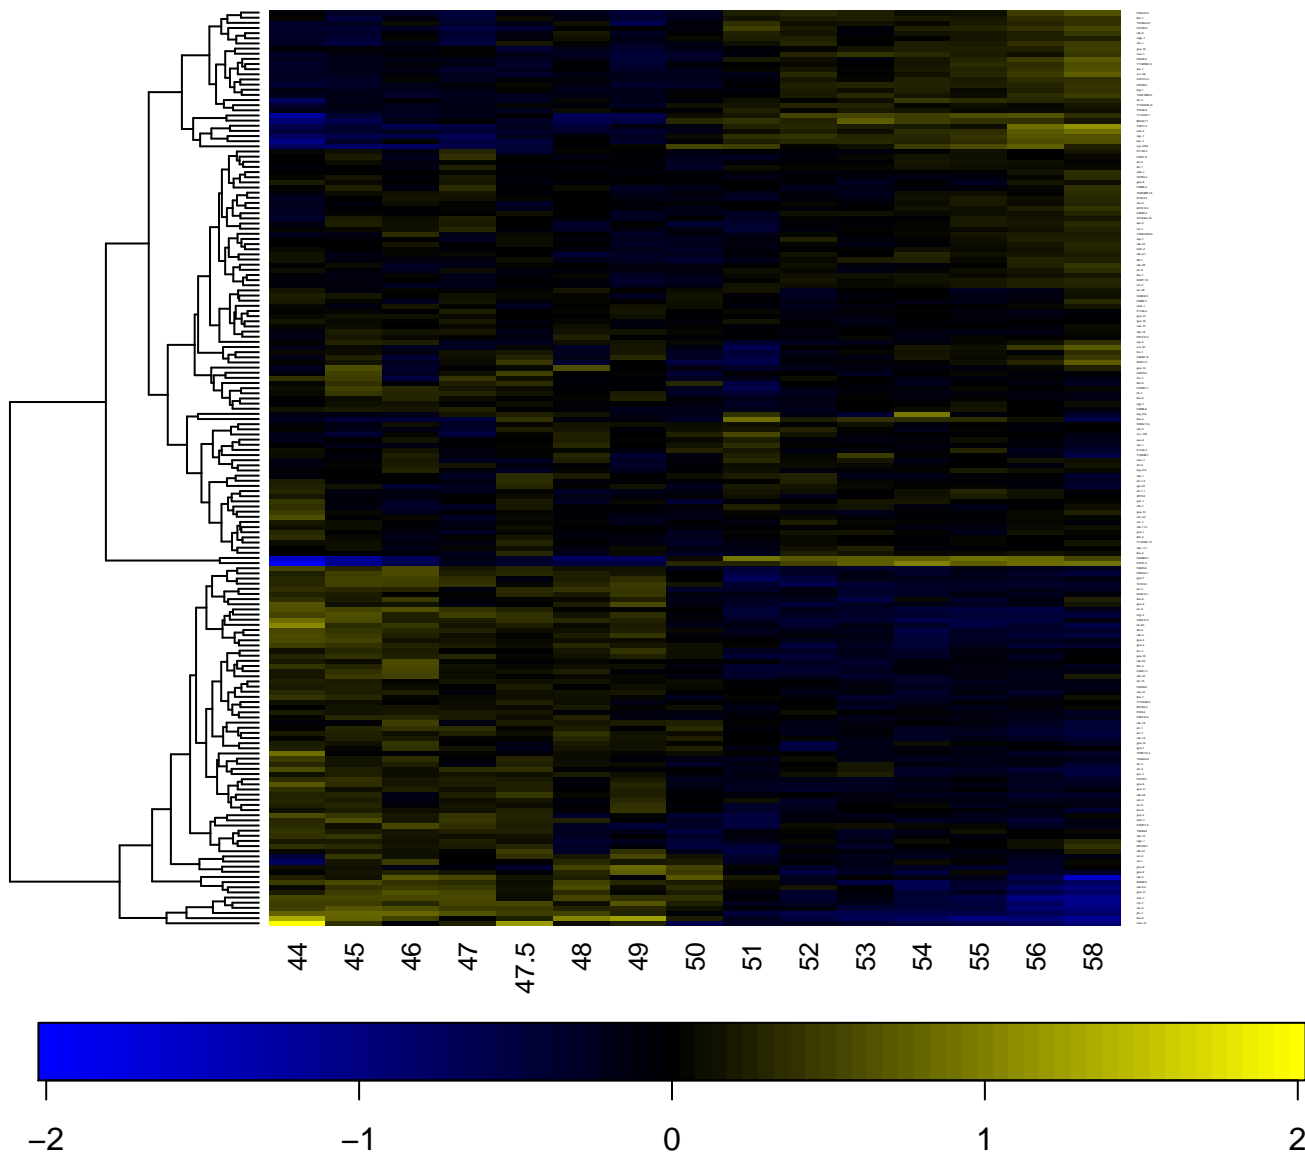







# guanyl nucleotide binding

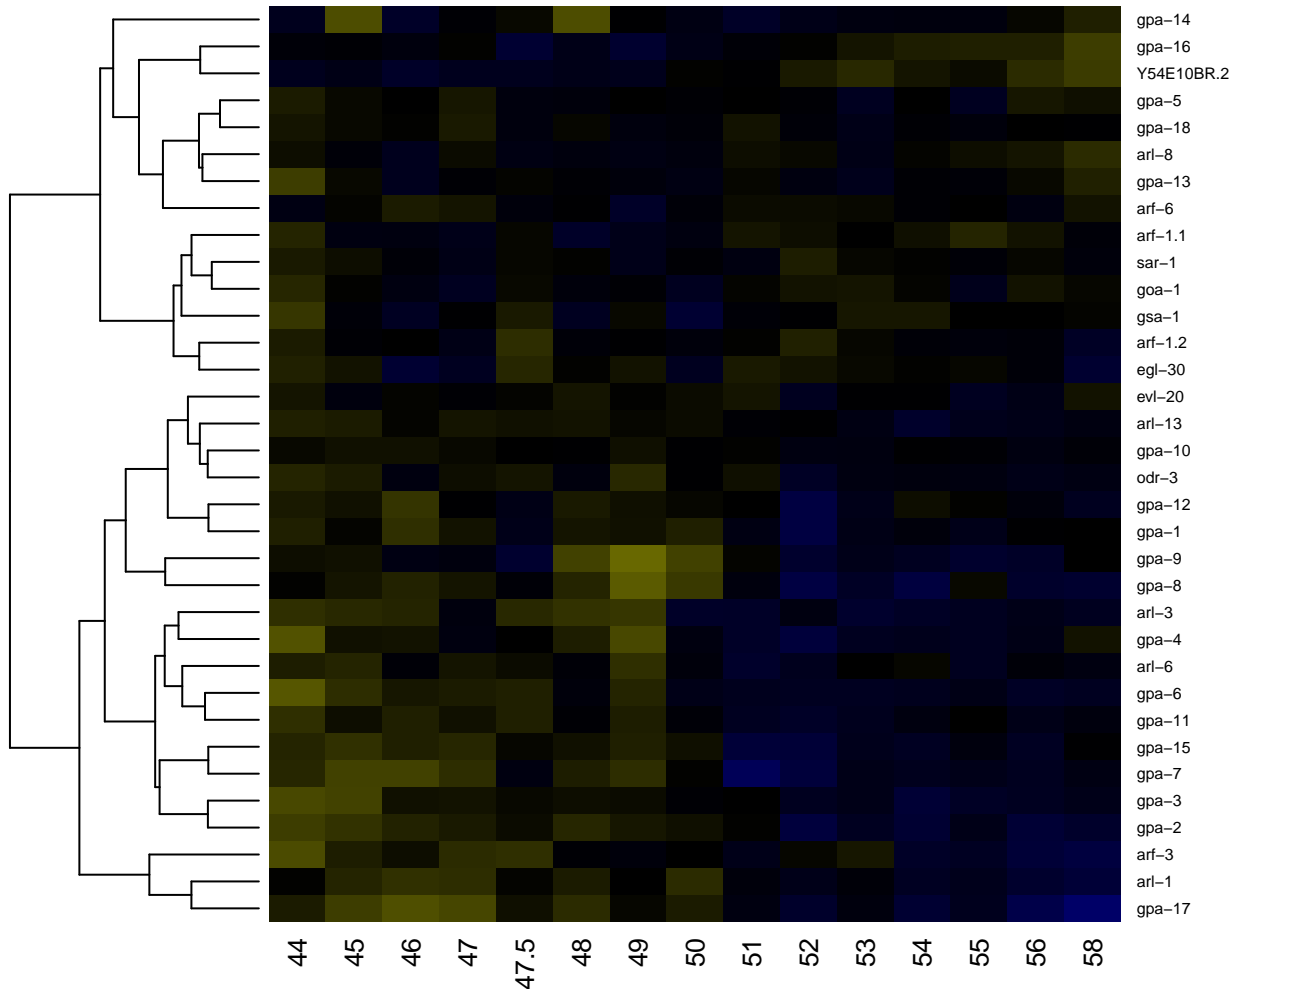





# hatching

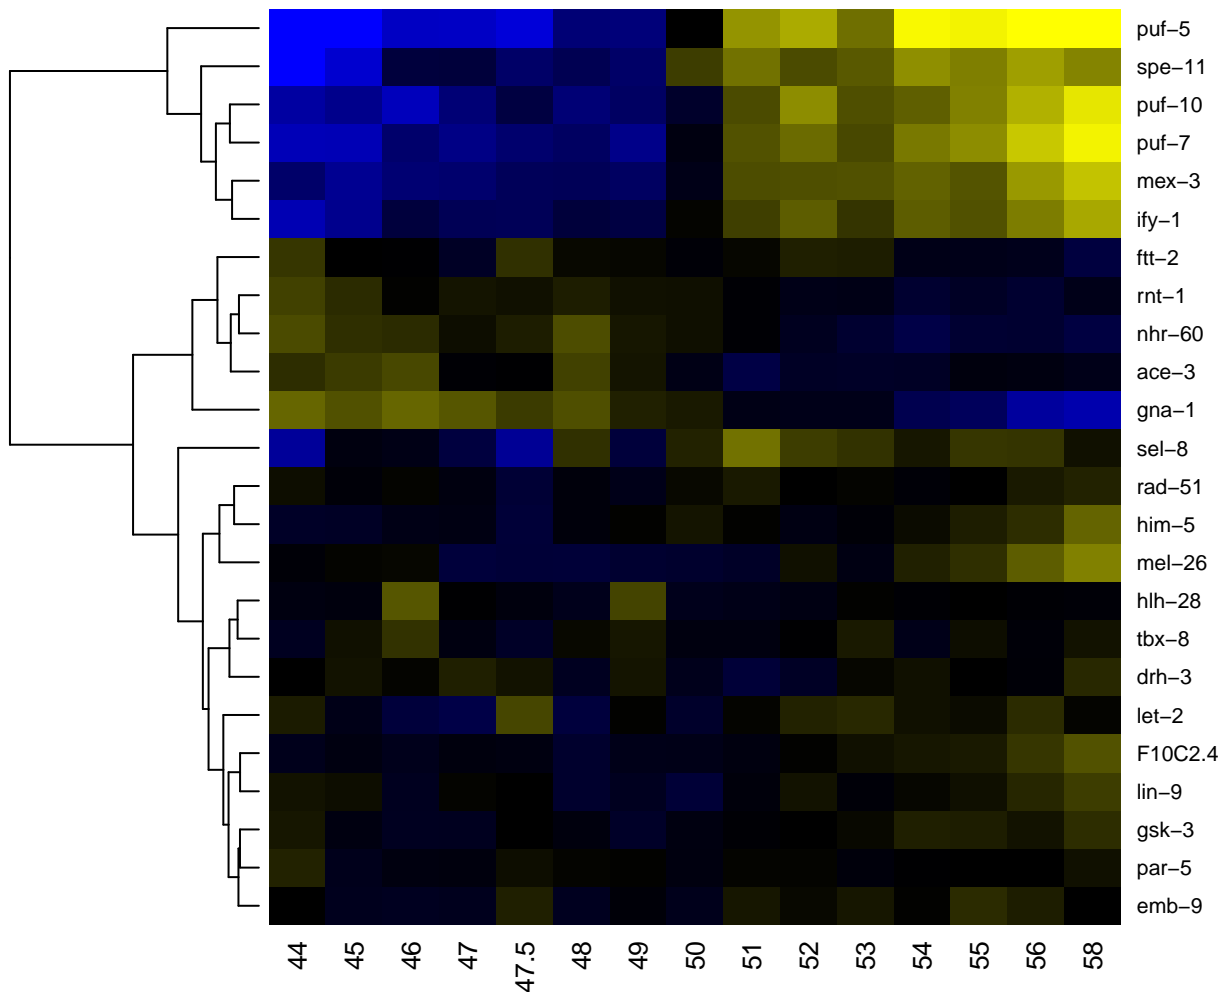



# heat shock protein binding

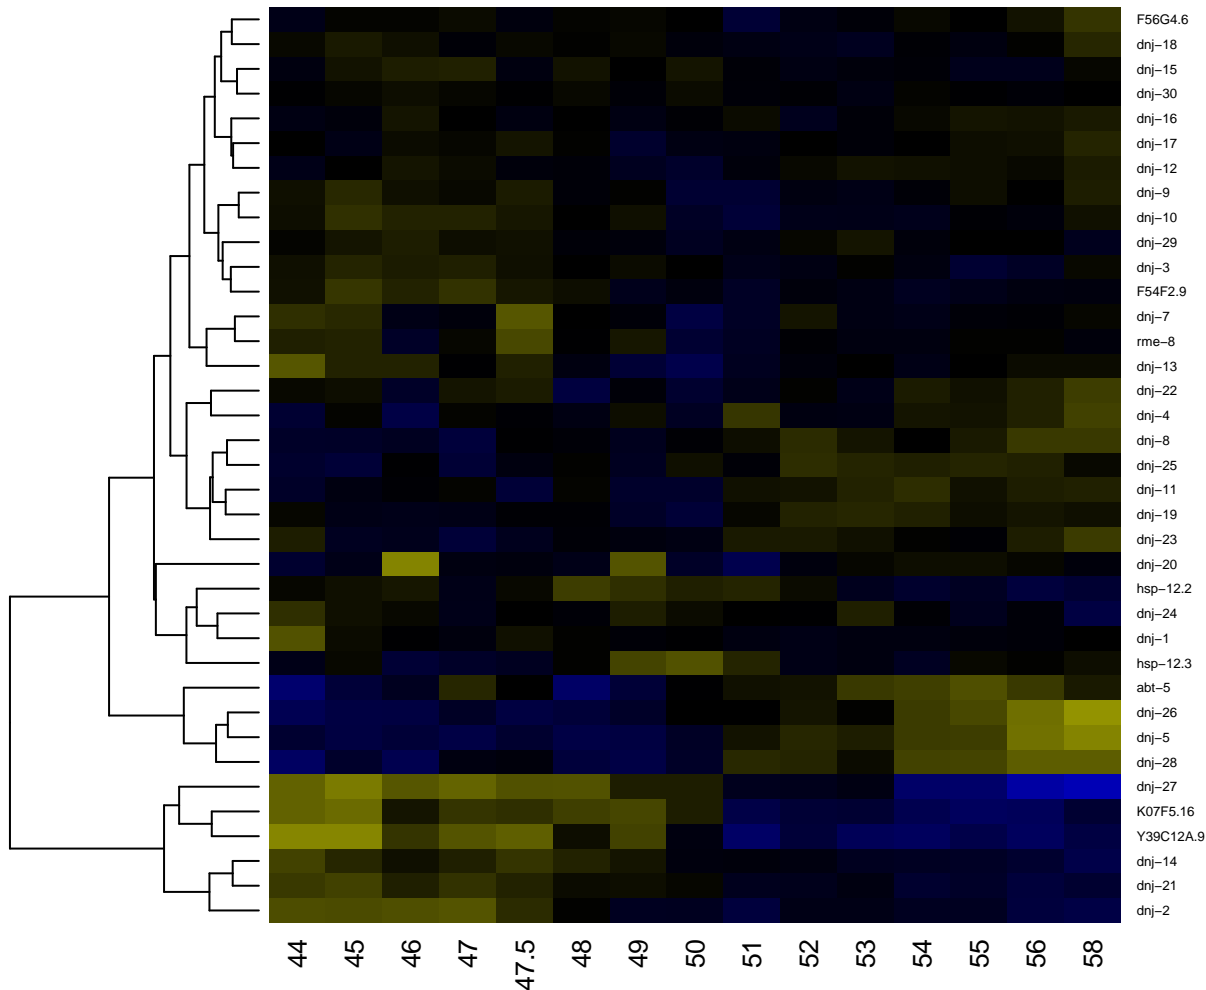

# hedgehog receptor activity

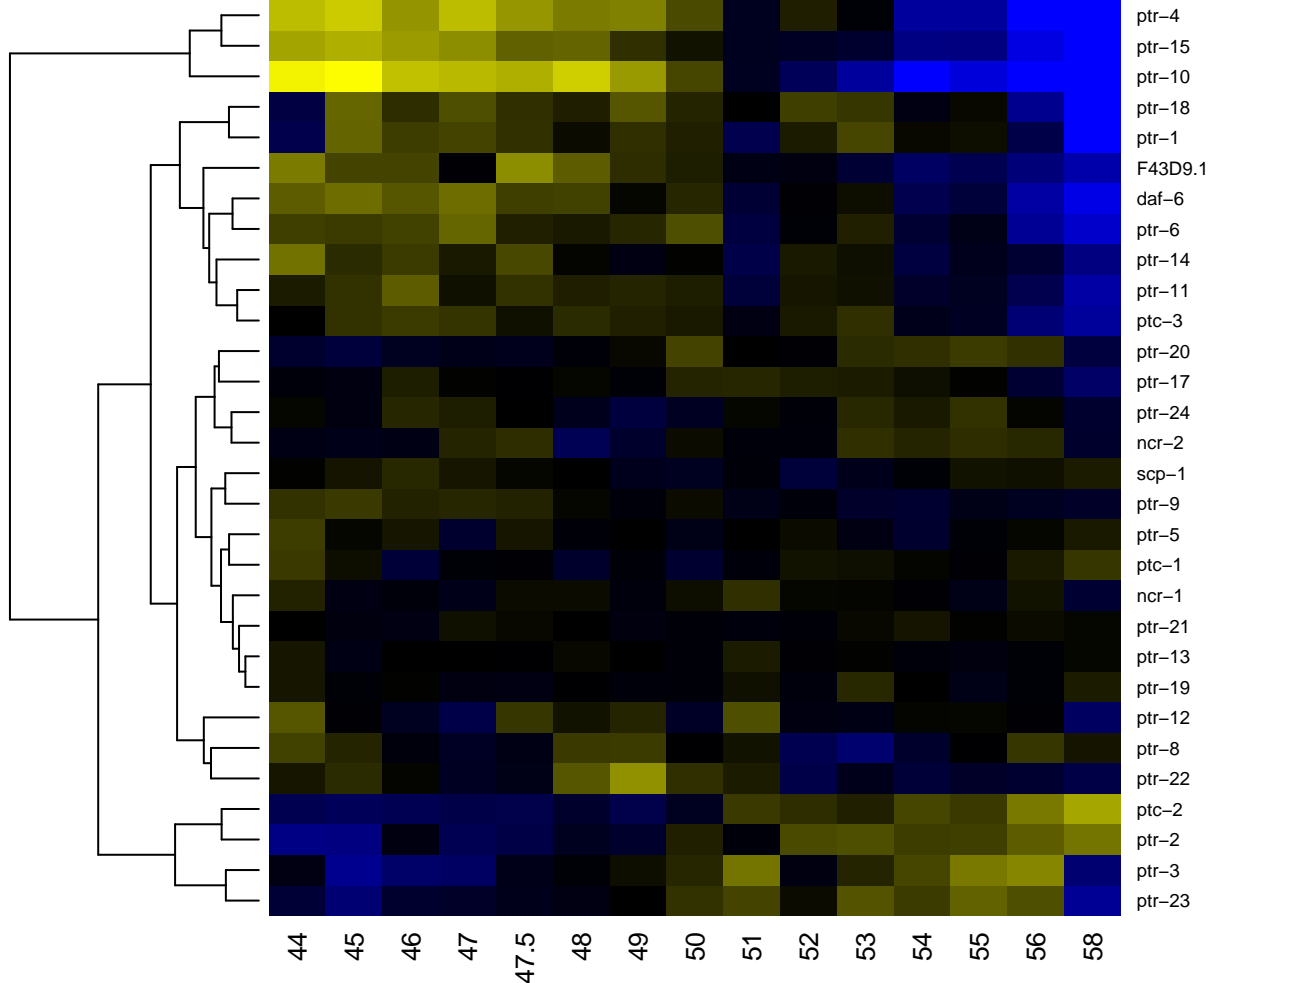

-2

-1

0

1

2

# helicase activity

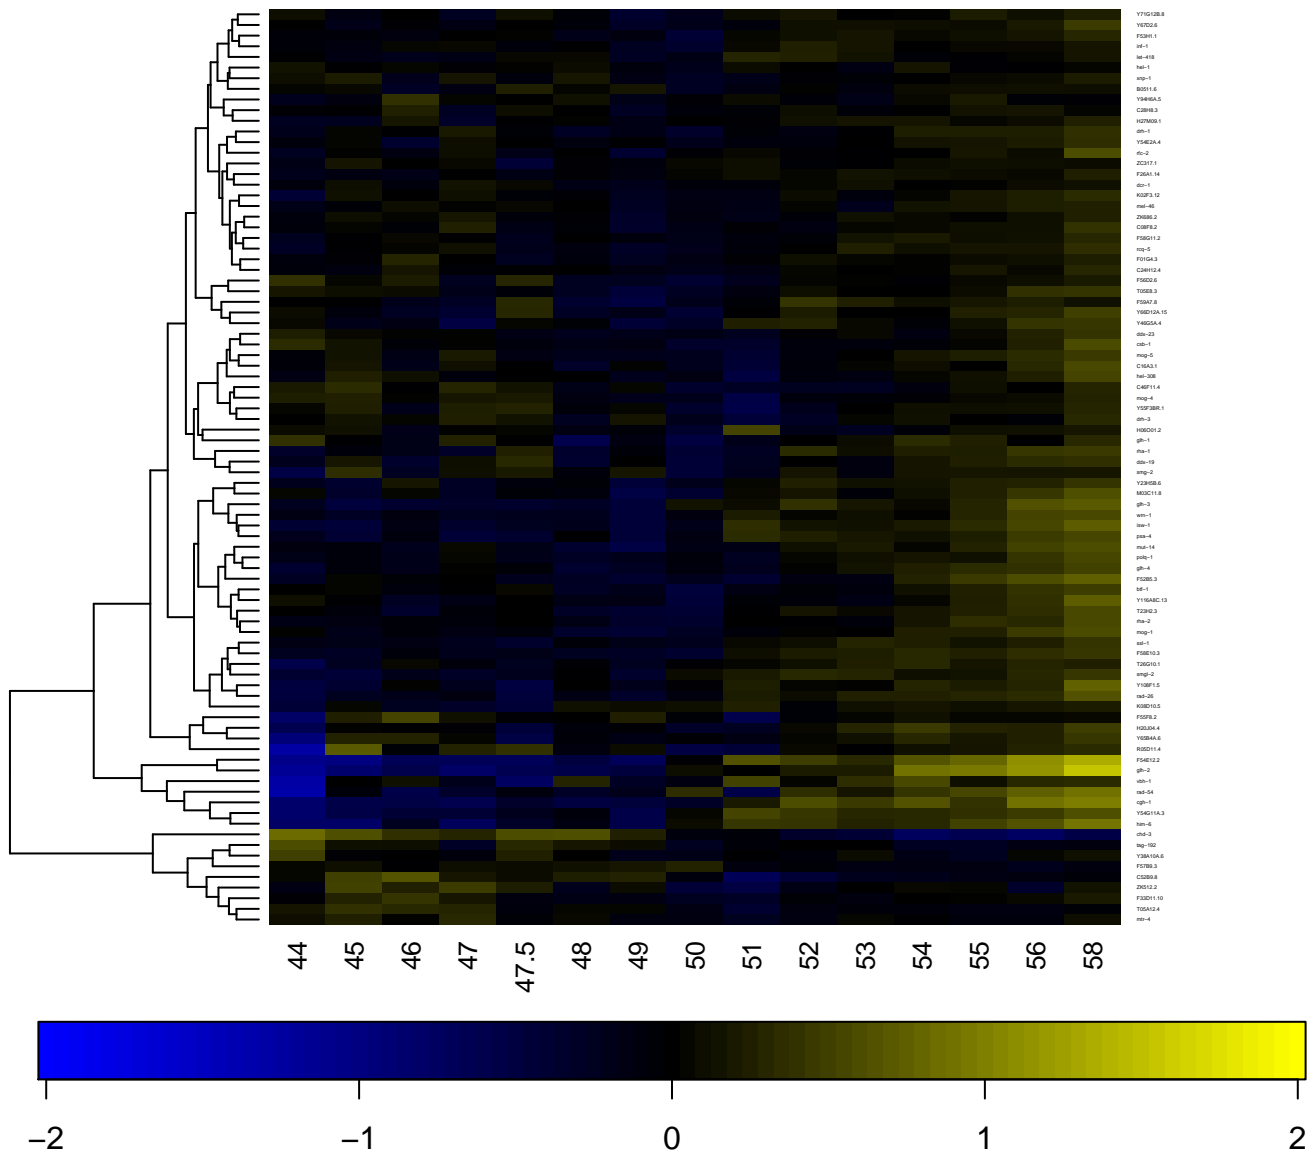

# heme binding

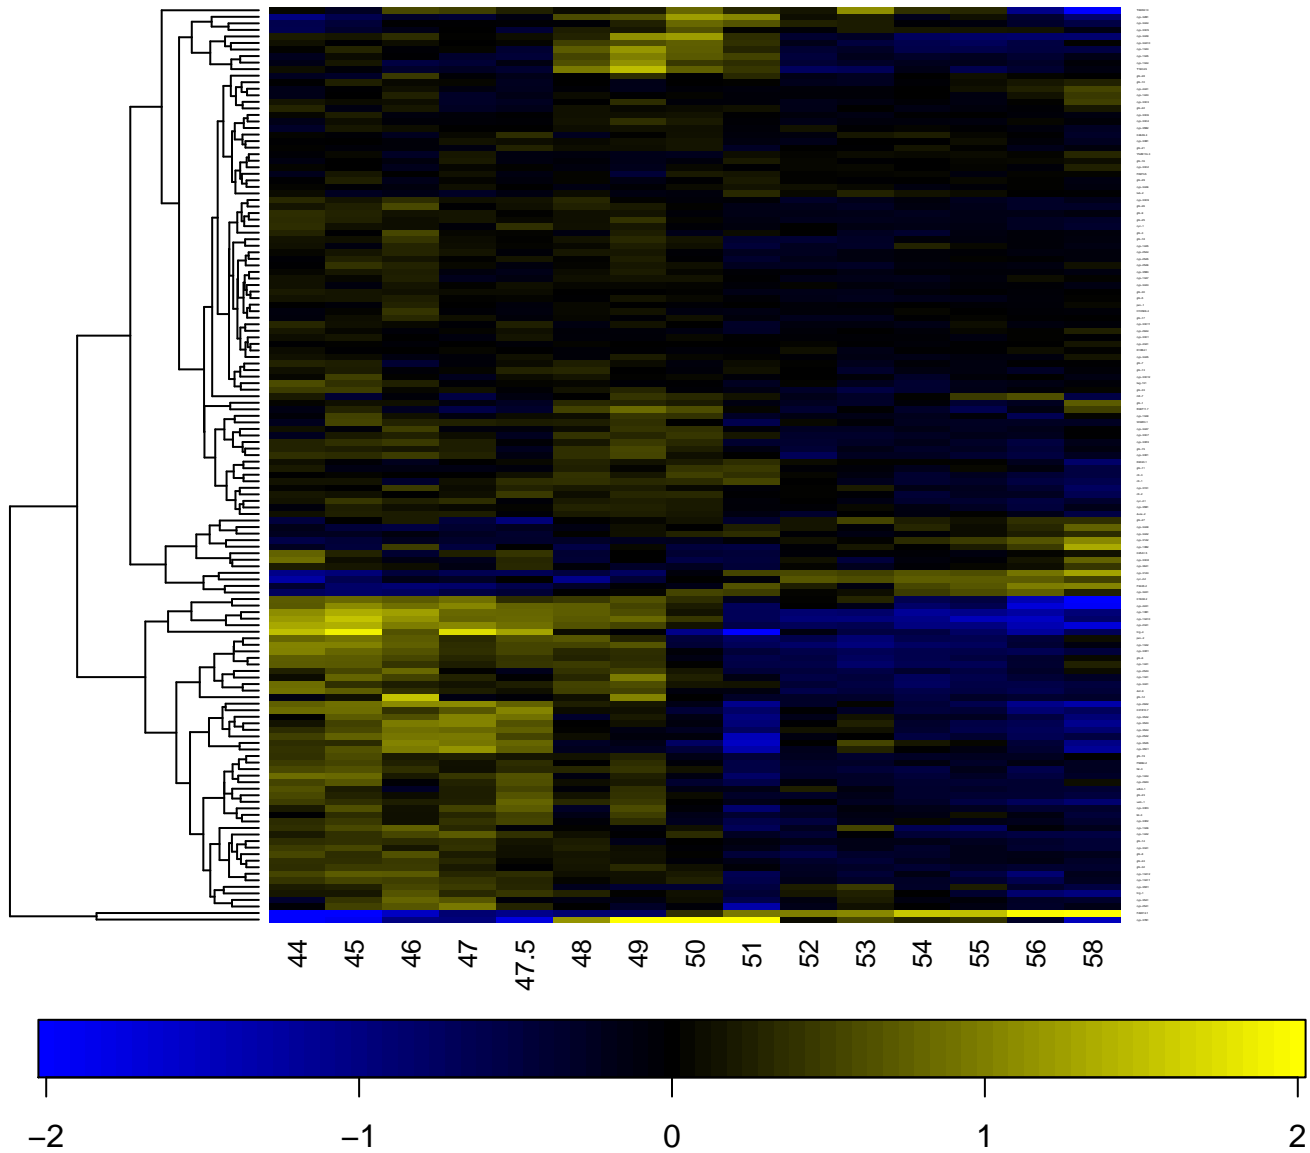

# hermaphrodite genitalia development

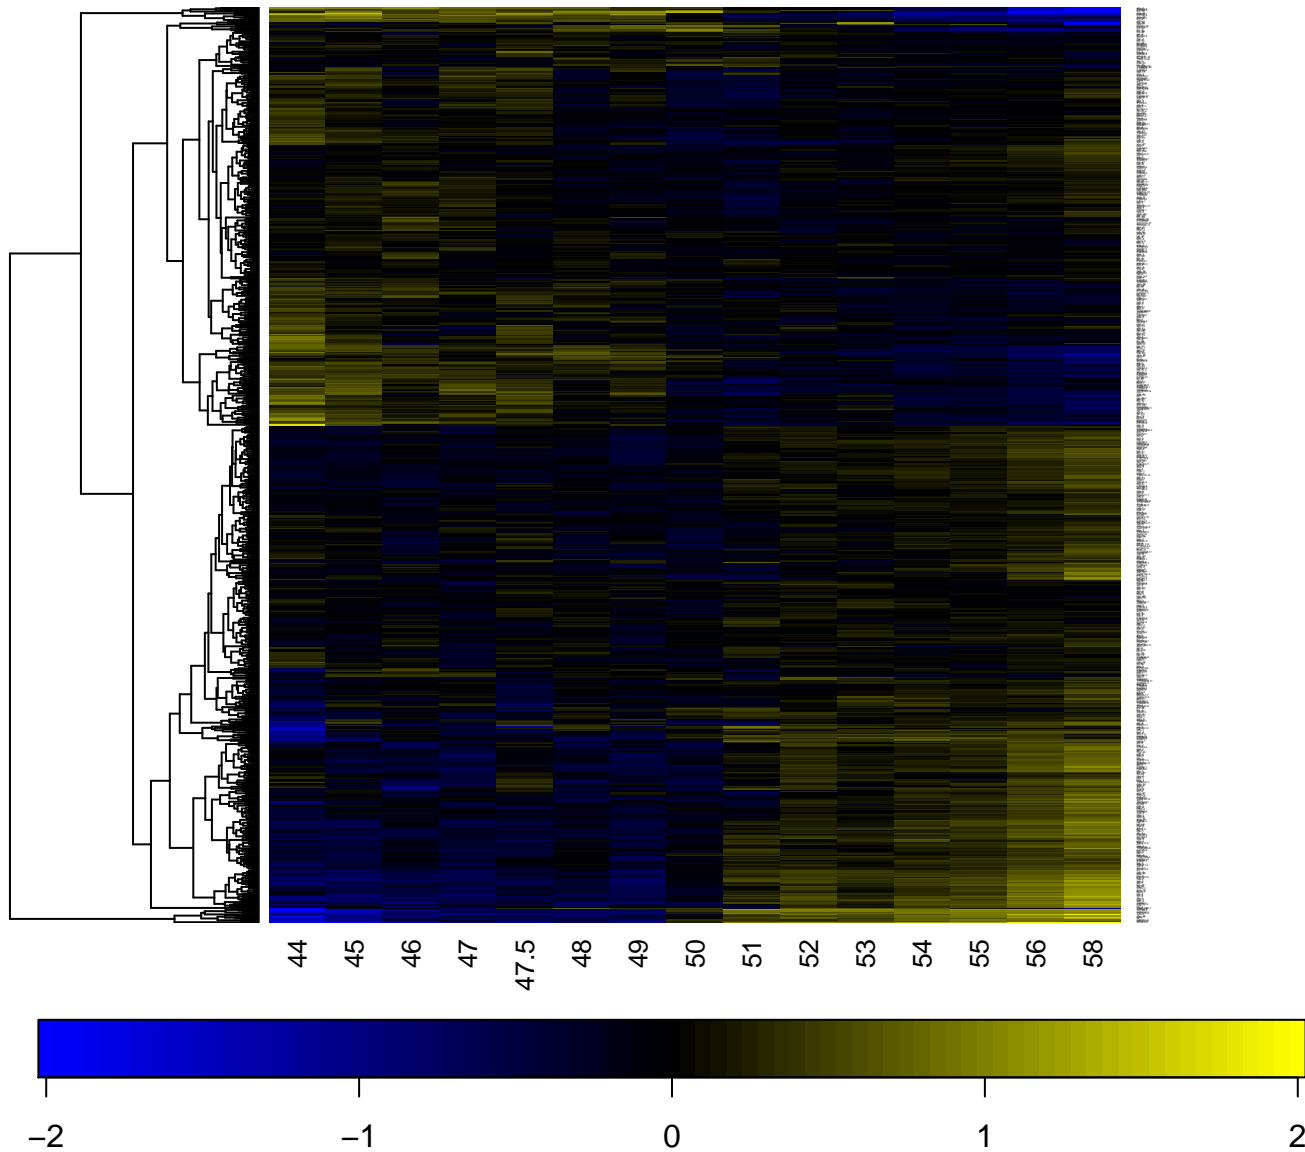





# histidine catabolic process

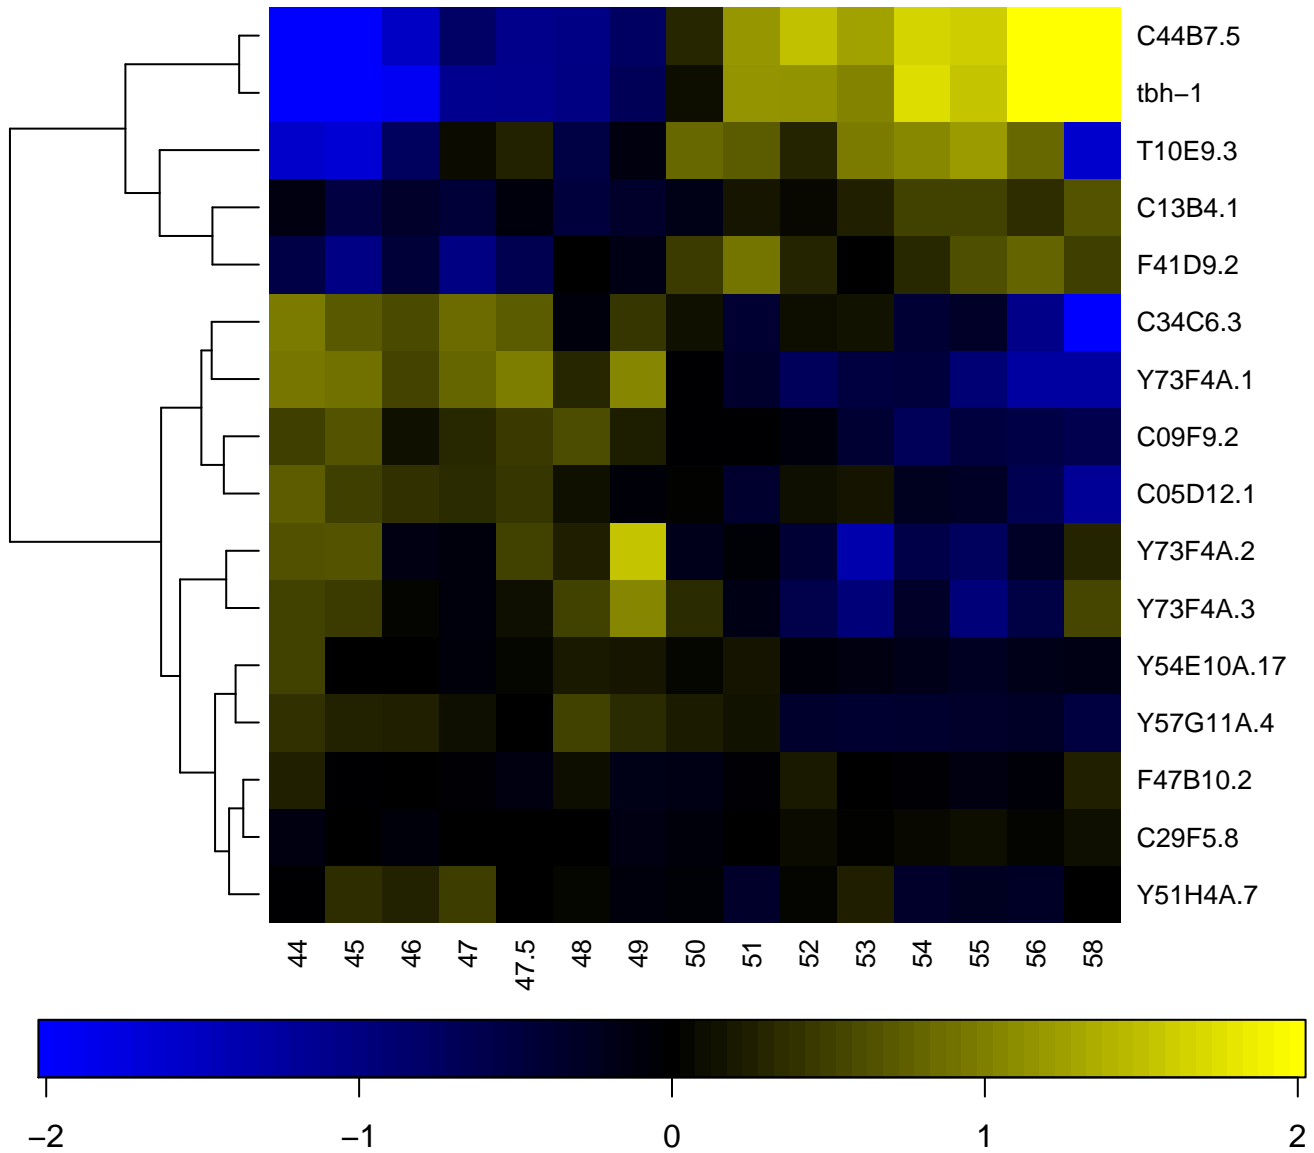



# histone-lysine N-methyltransferase activity

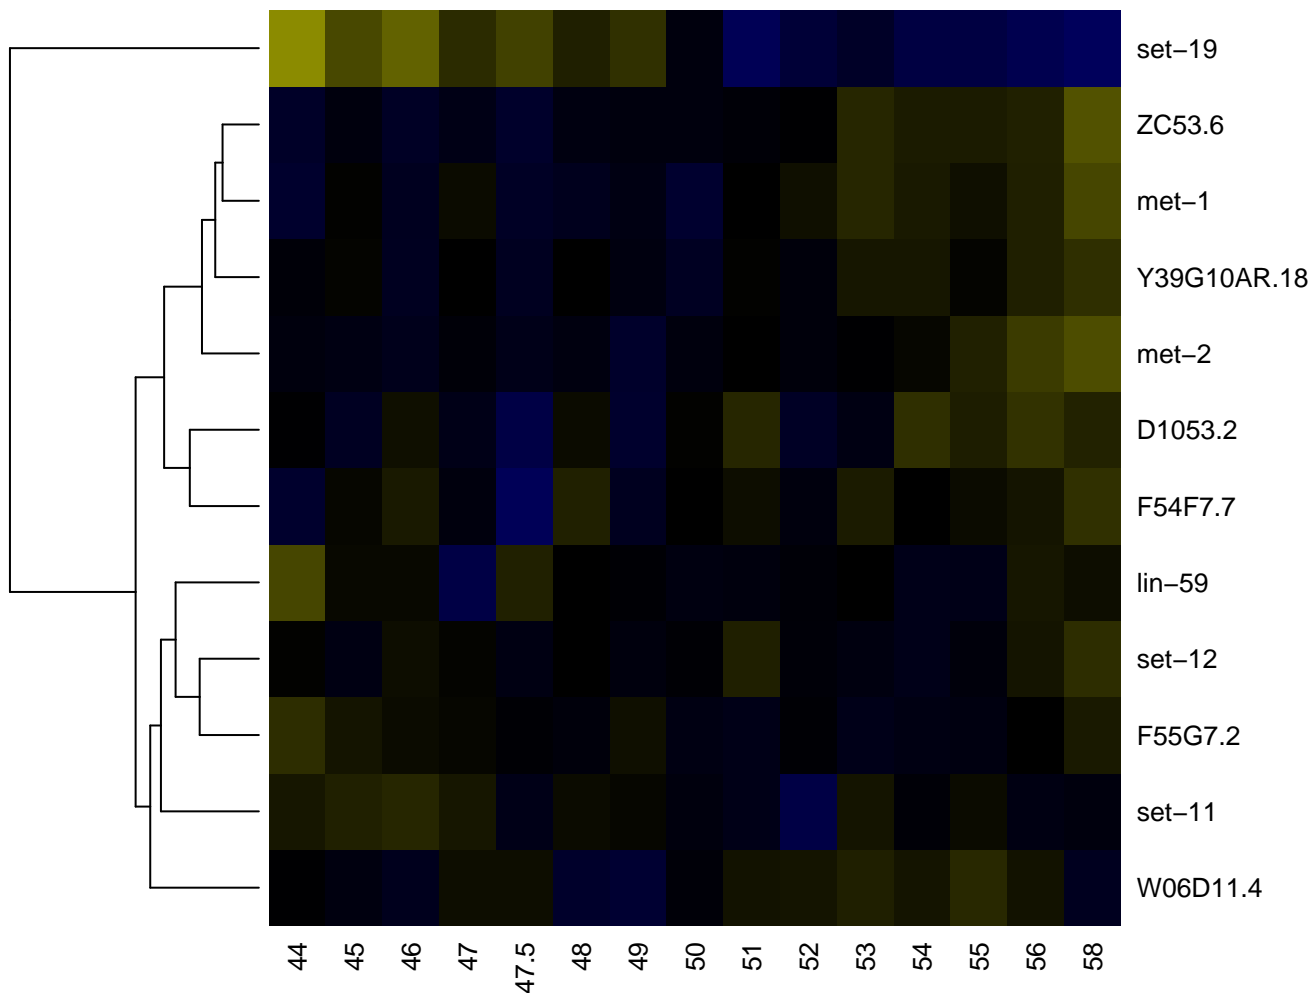



# histone deacetylase activity

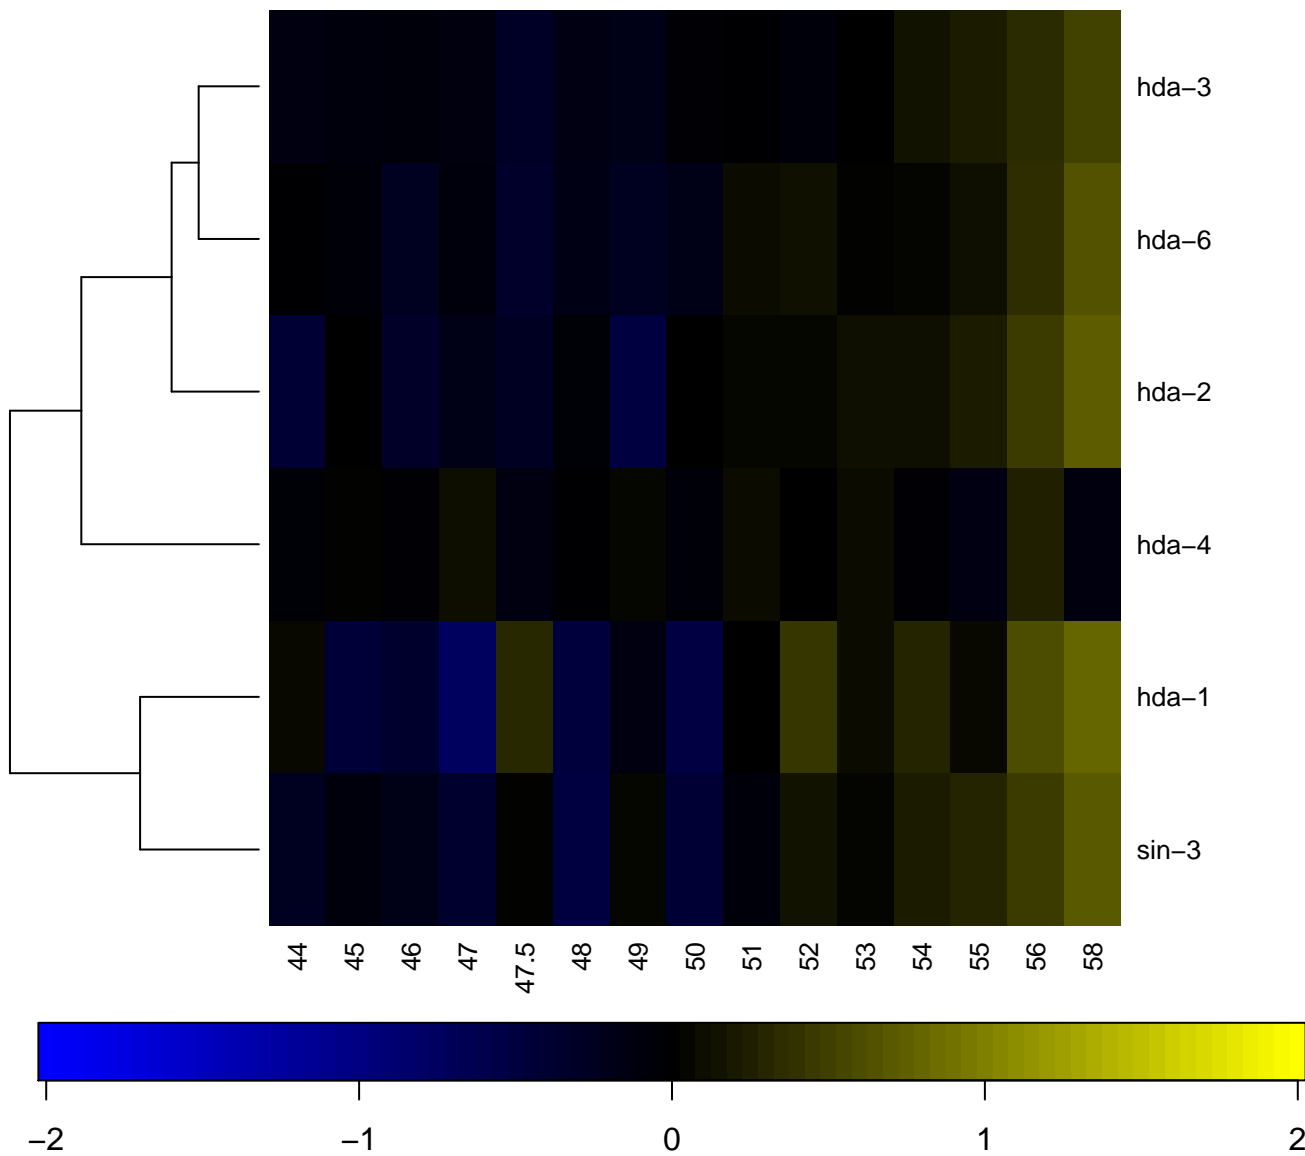



# histone deacetylation

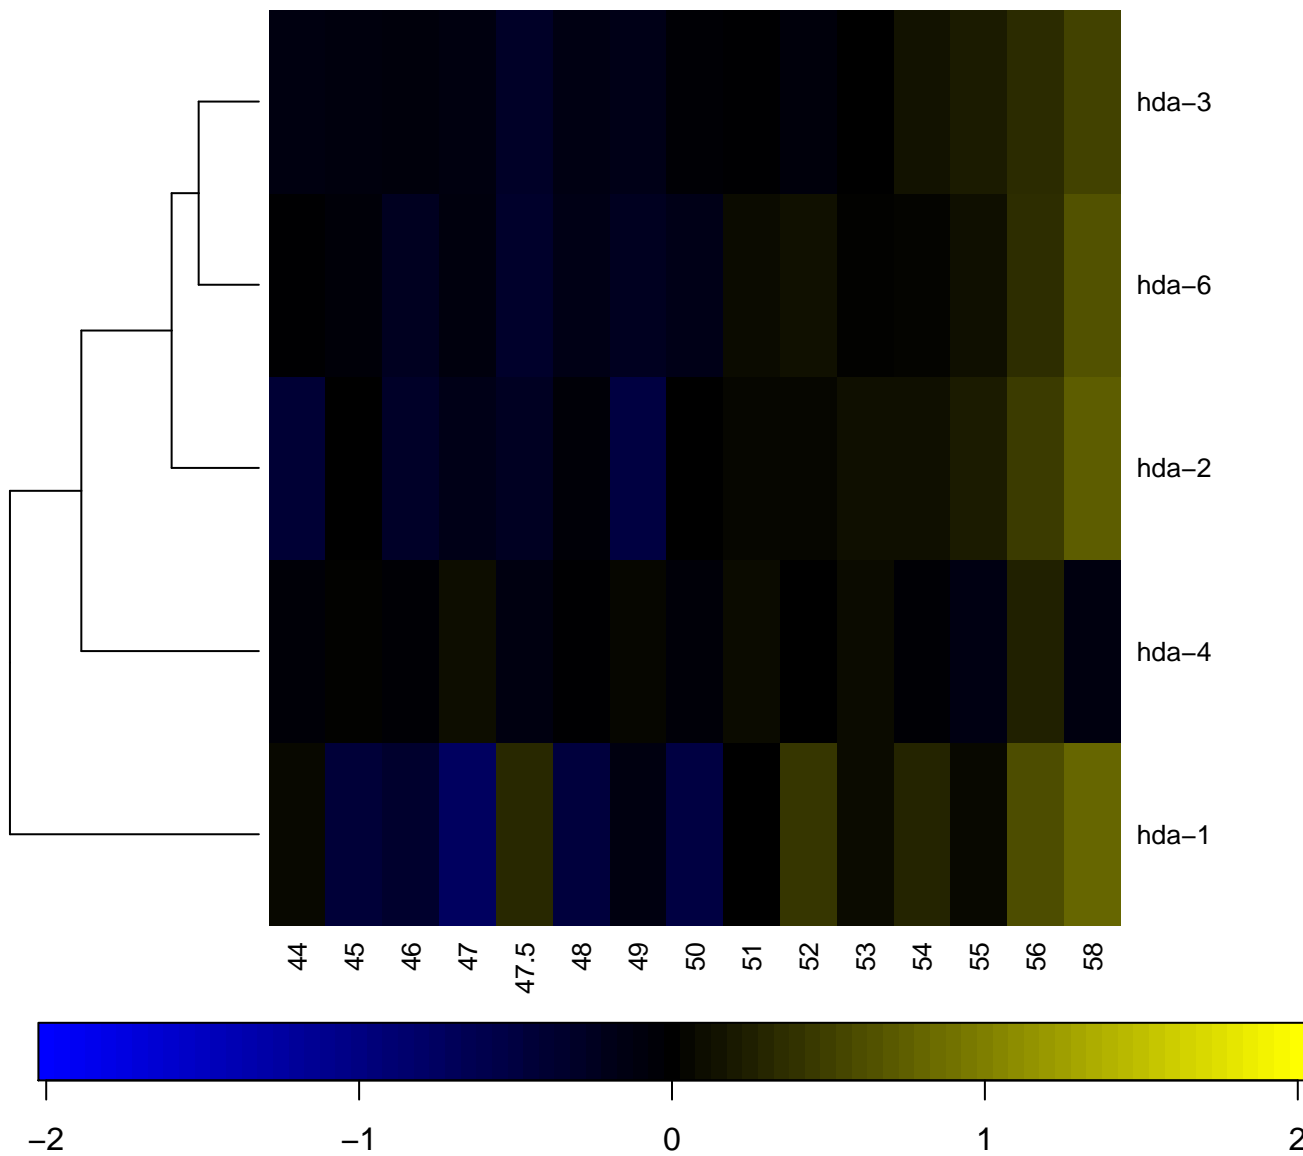

# homophilic cell adhesion

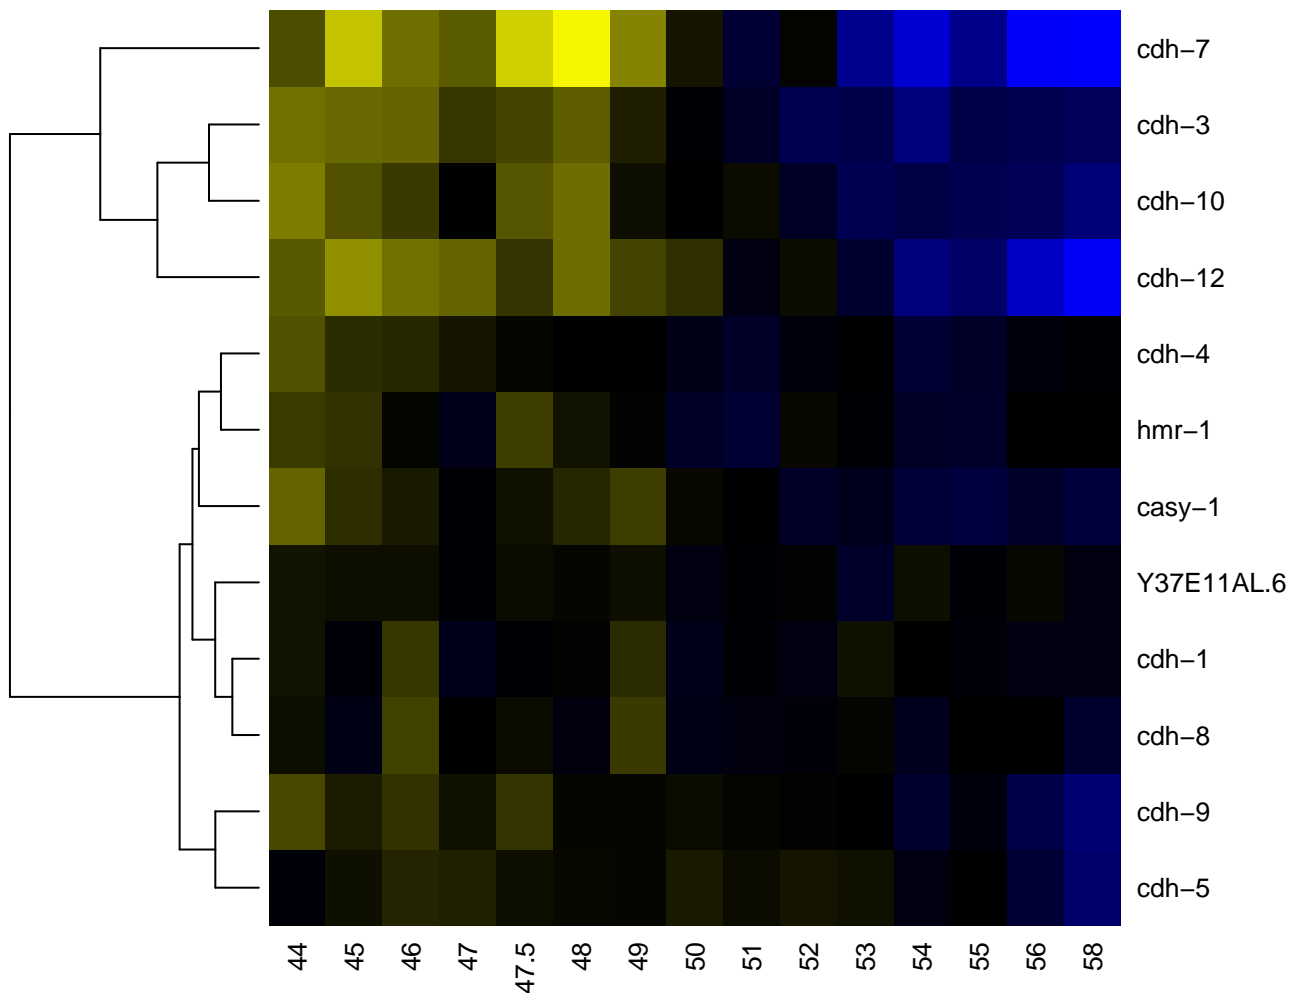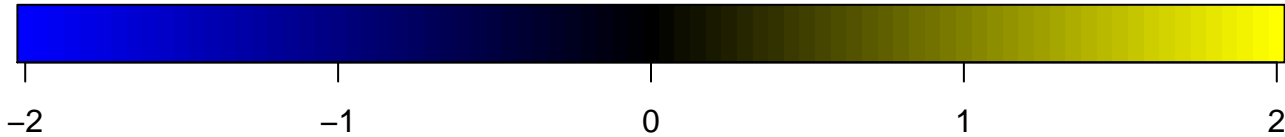

# hormone activity

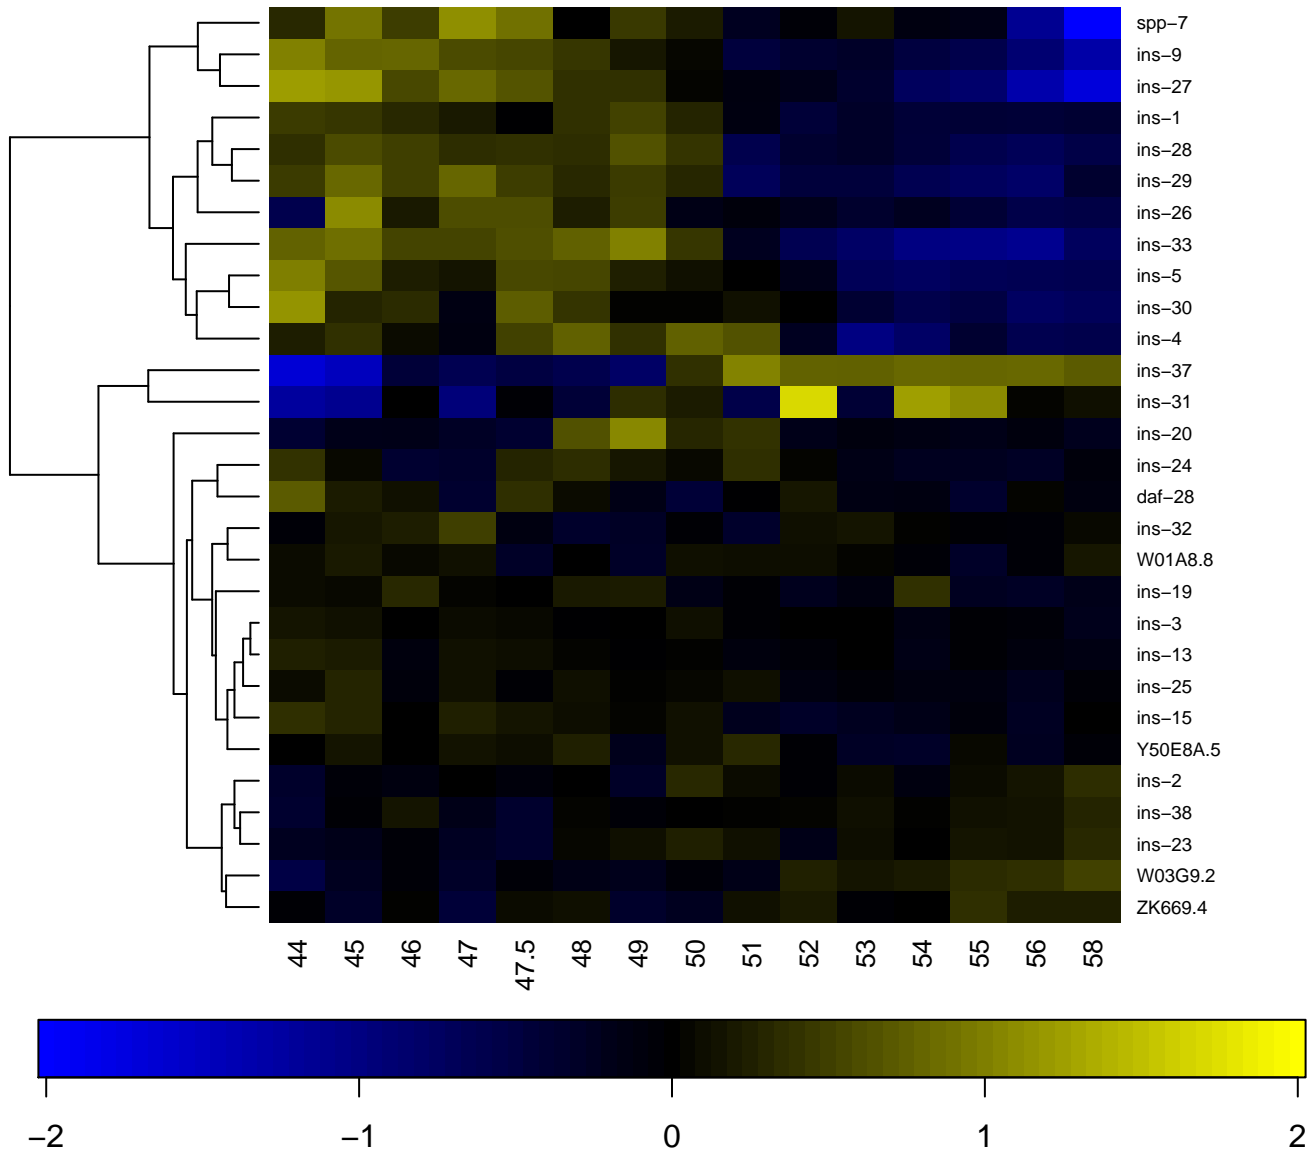

# hydrogen ion transmembrane transporter activity

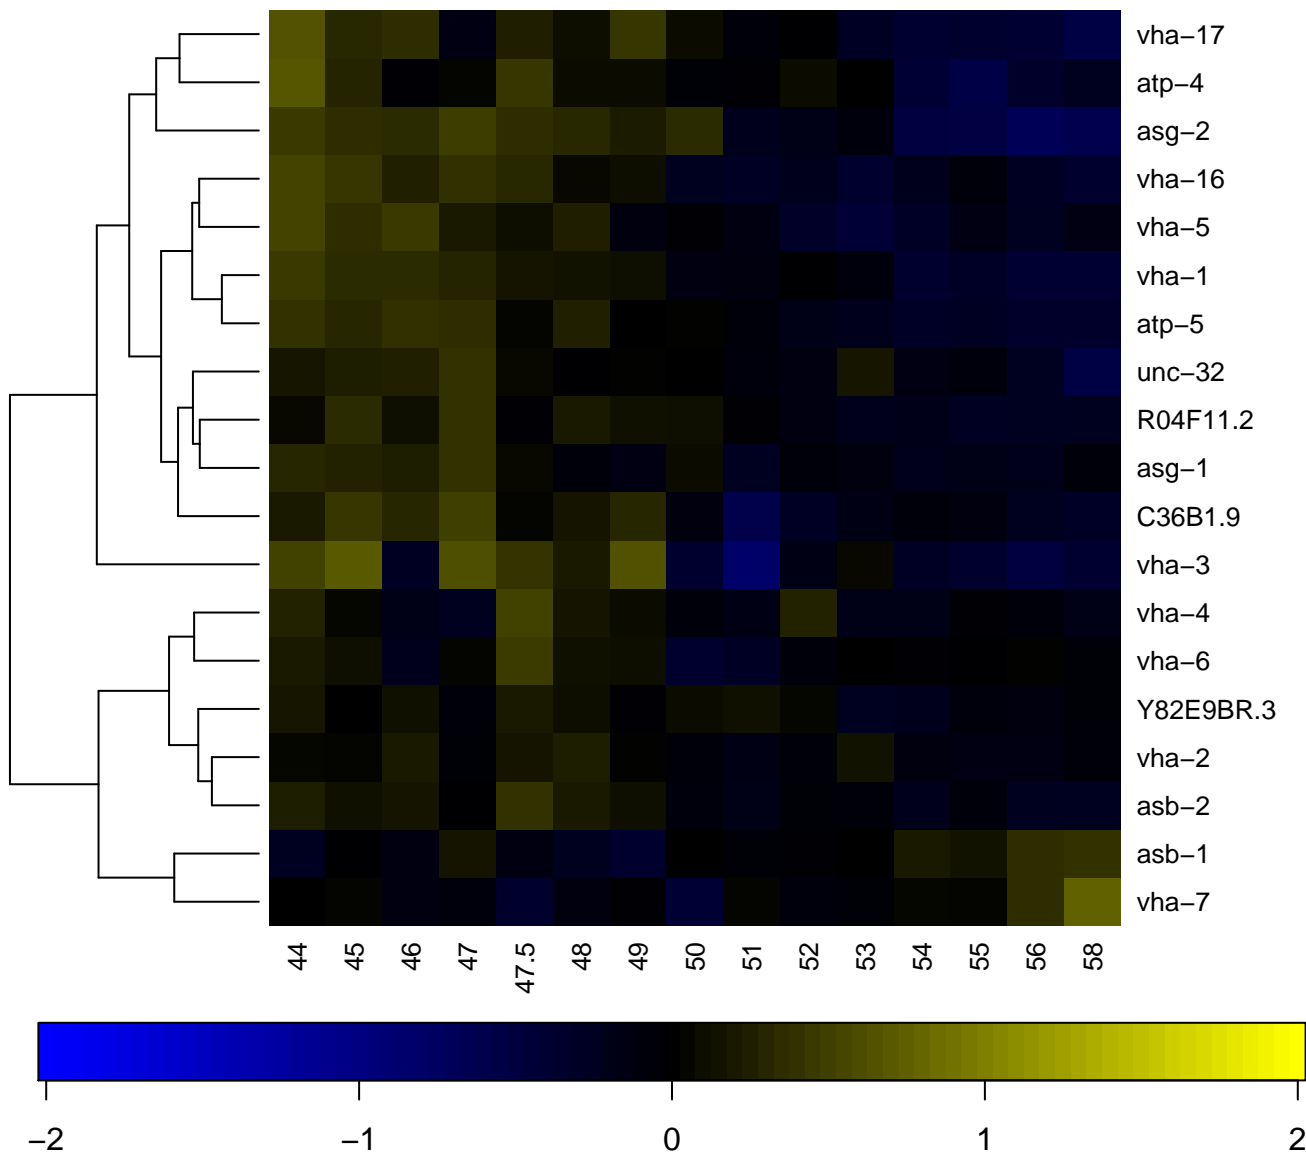



# Proton ion transporting ATP synthase activity, rotational mec

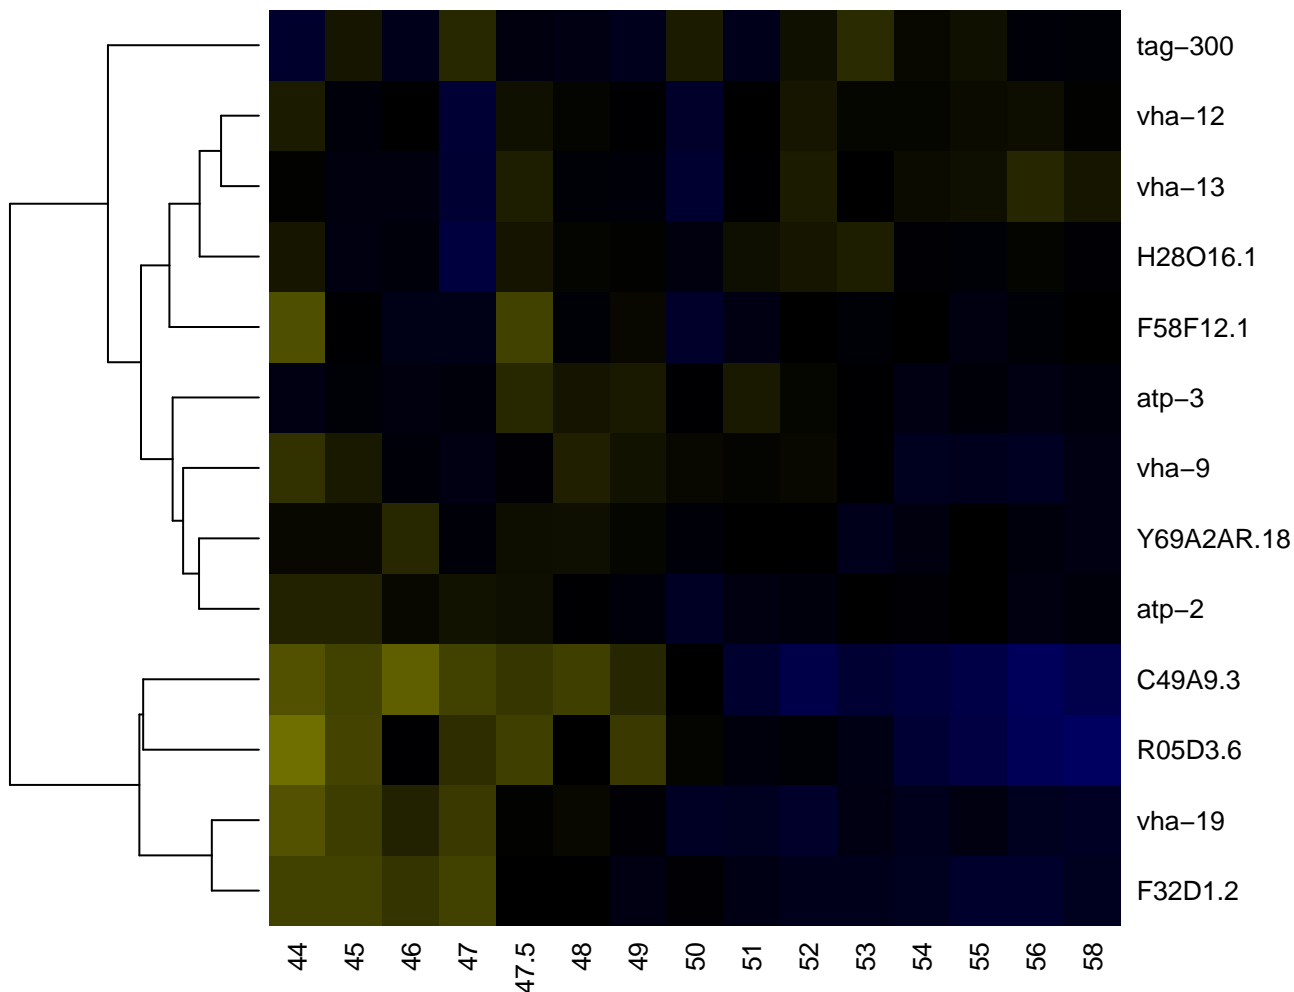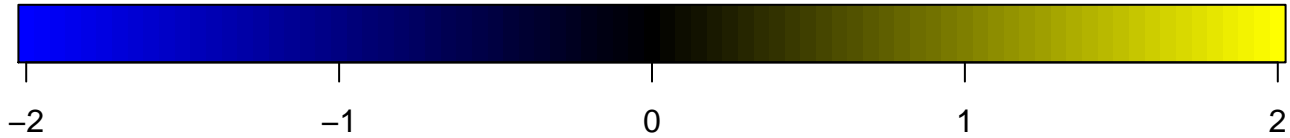

# hydrolase activity

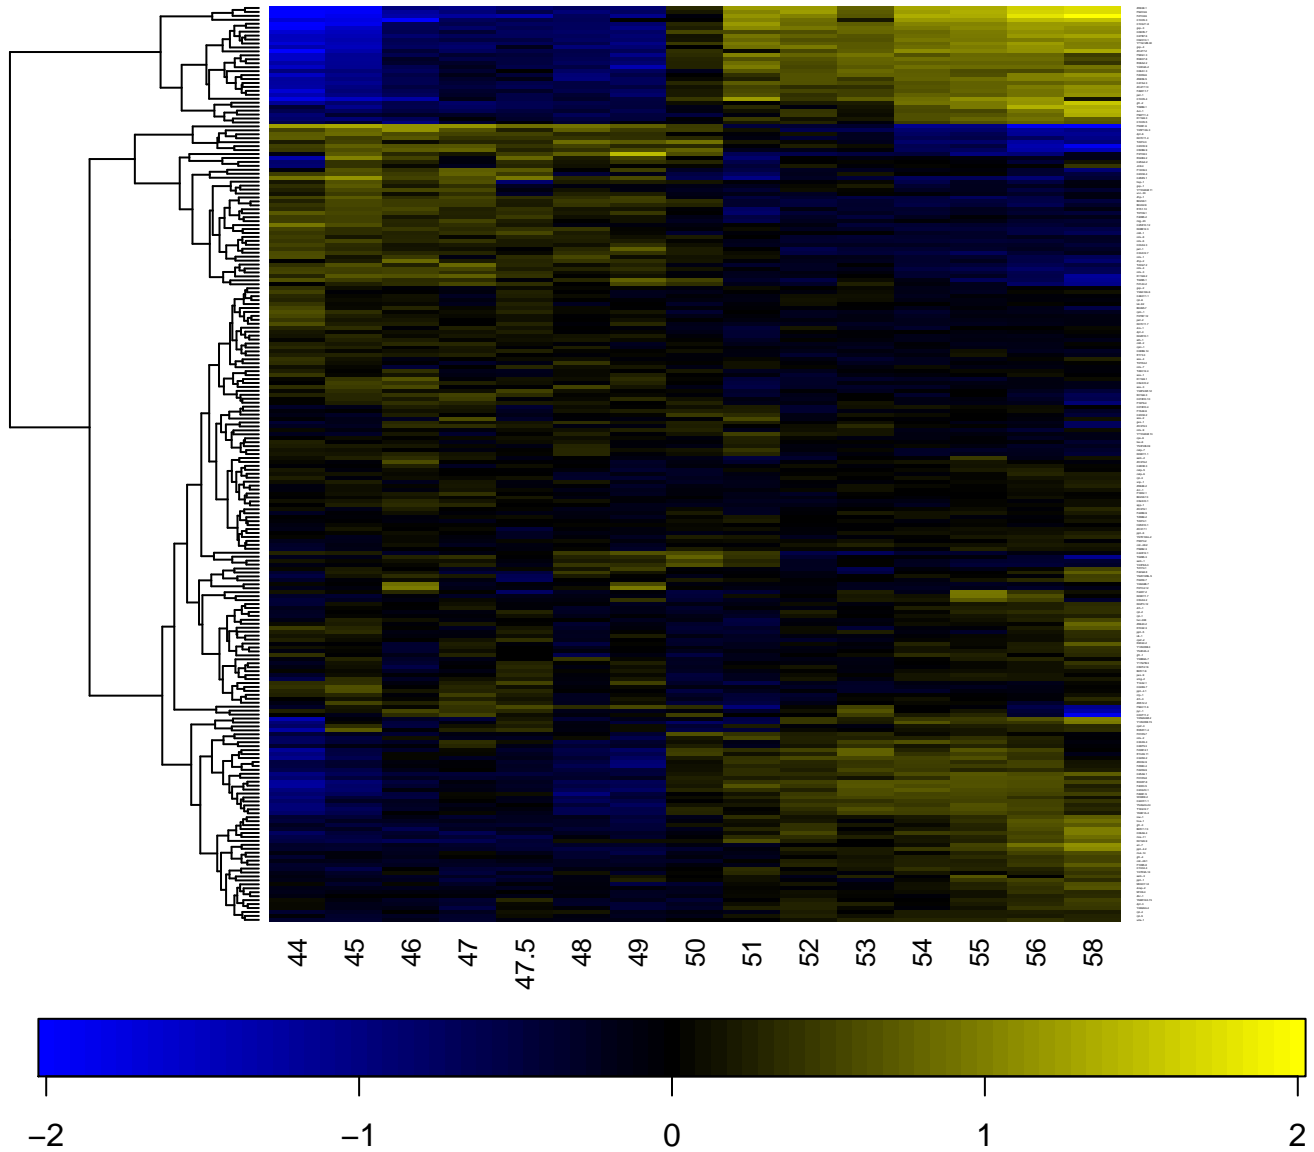

# acting on acid anhydrides, catalyzing transmembrane move

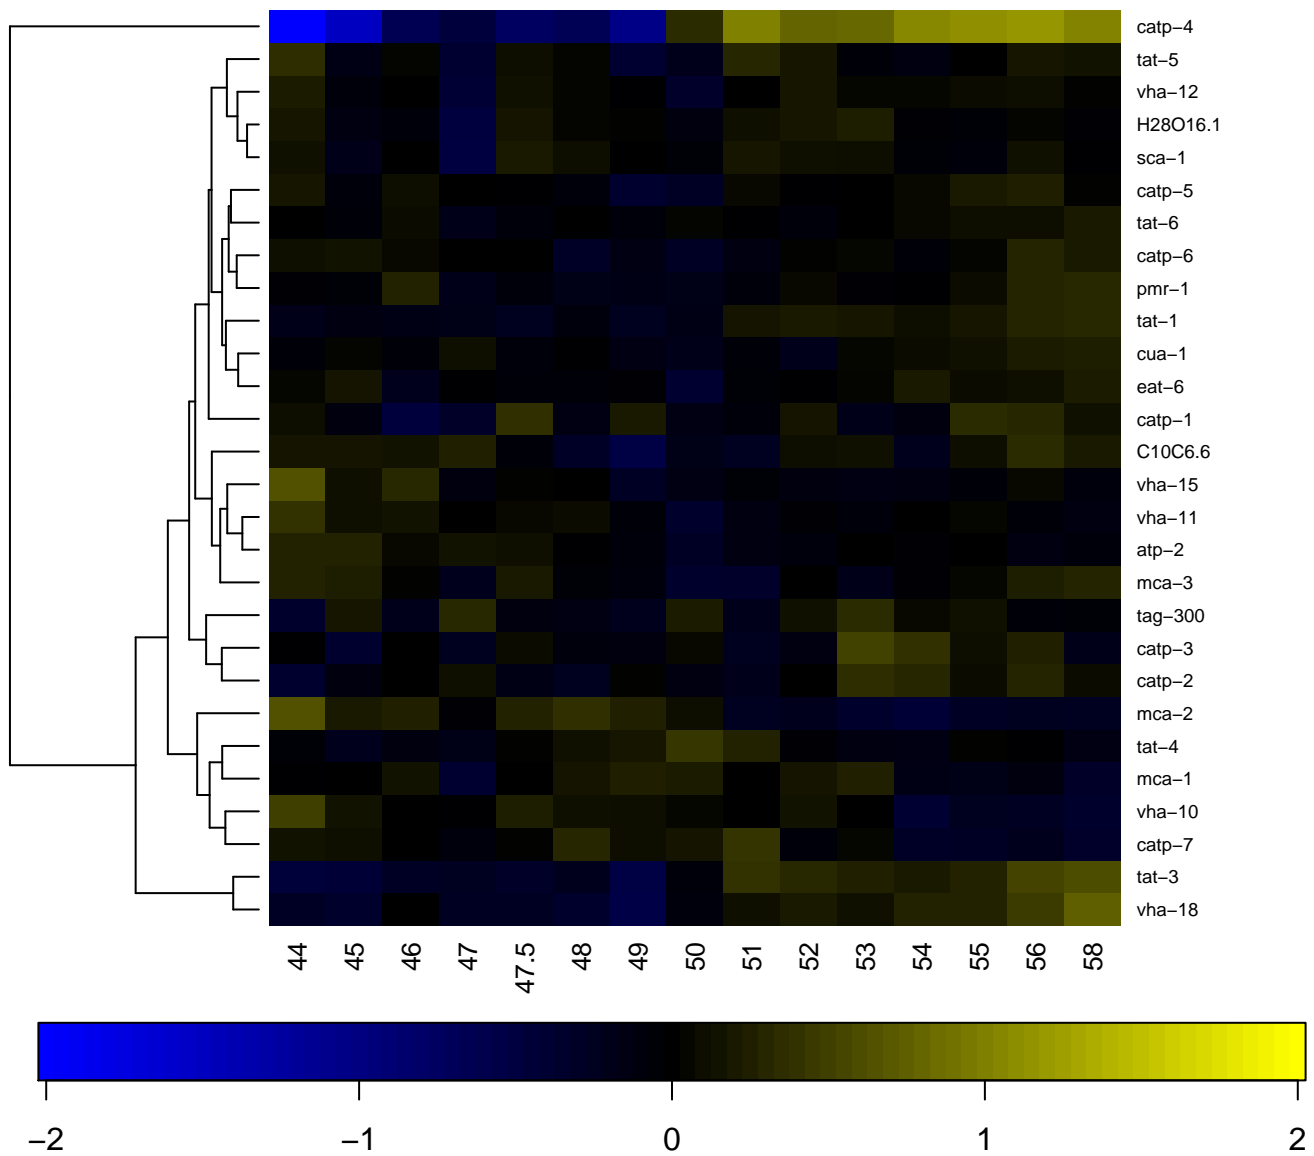

# activity, acting on acid anhydrides, in phosphorus-containing

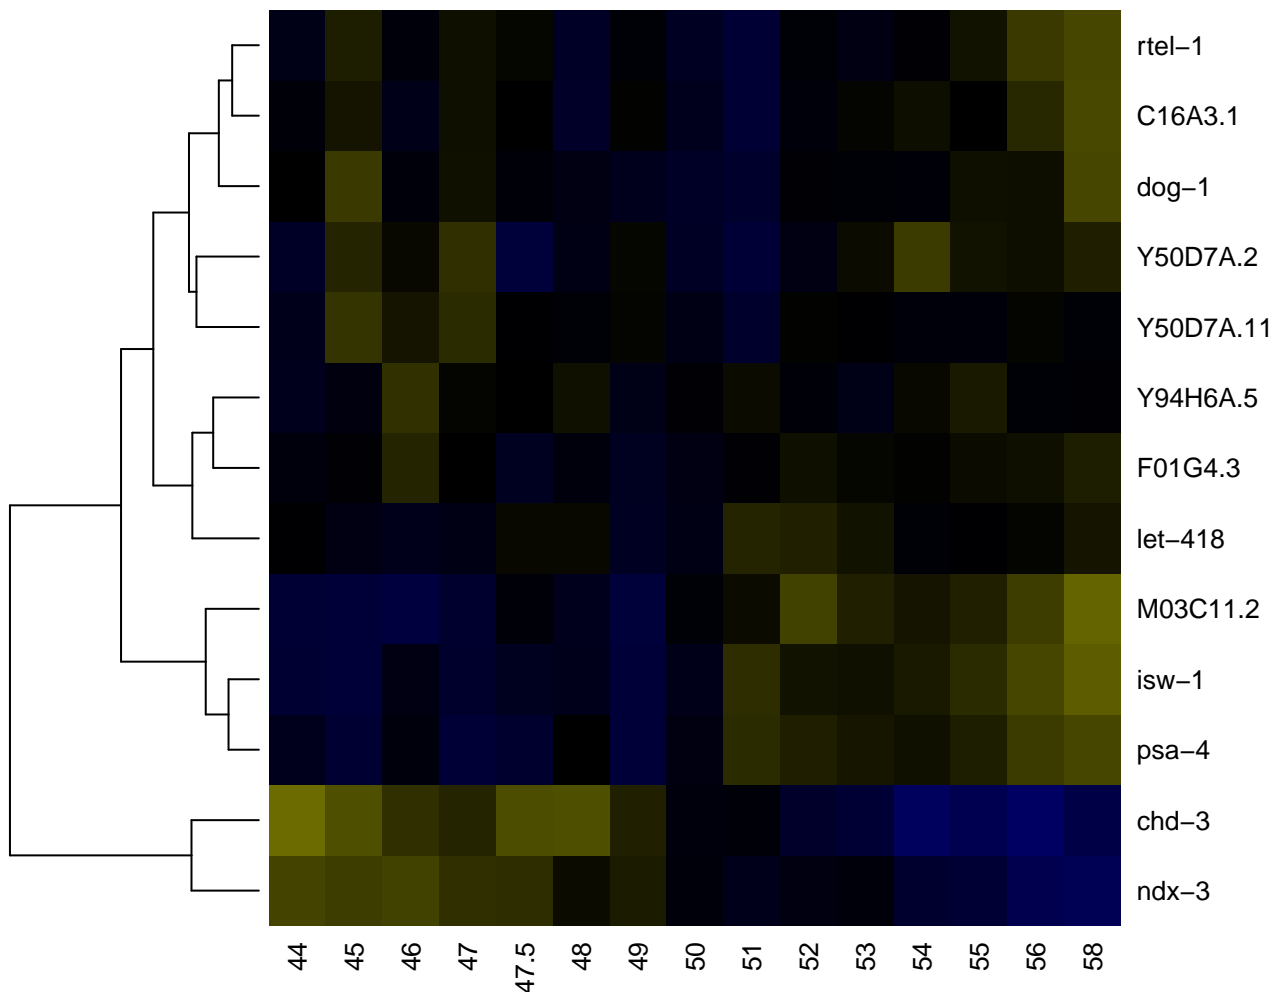



activity, acting on carbon–nitrogen (but not peptide) bonds, in

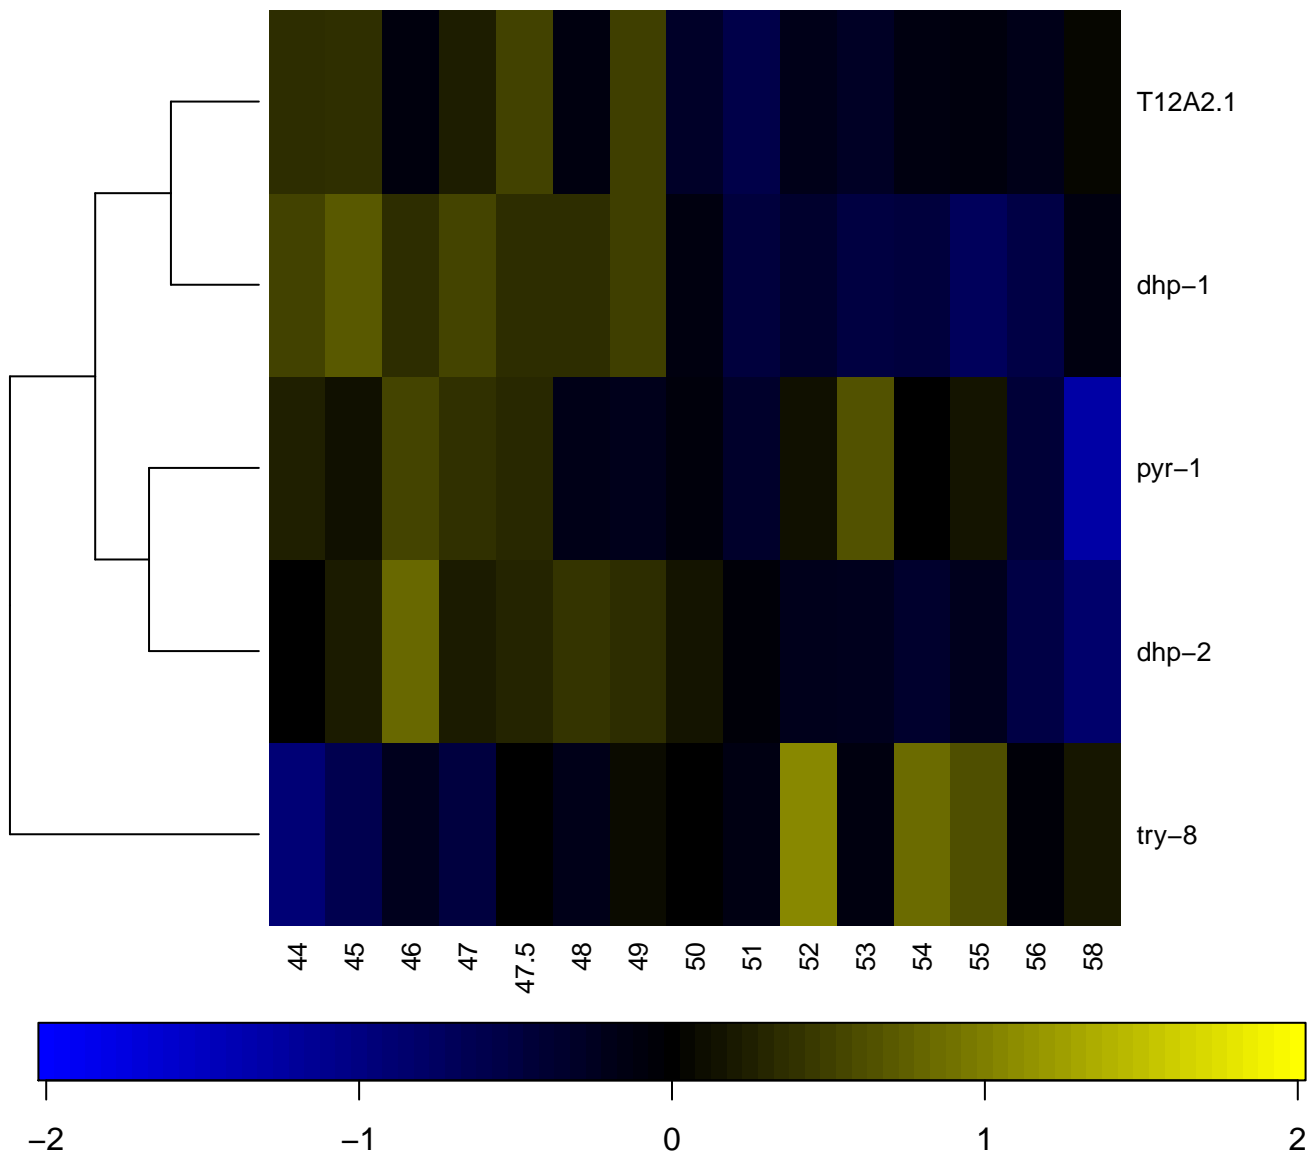



# hydrolase activity, acting on ester bonds

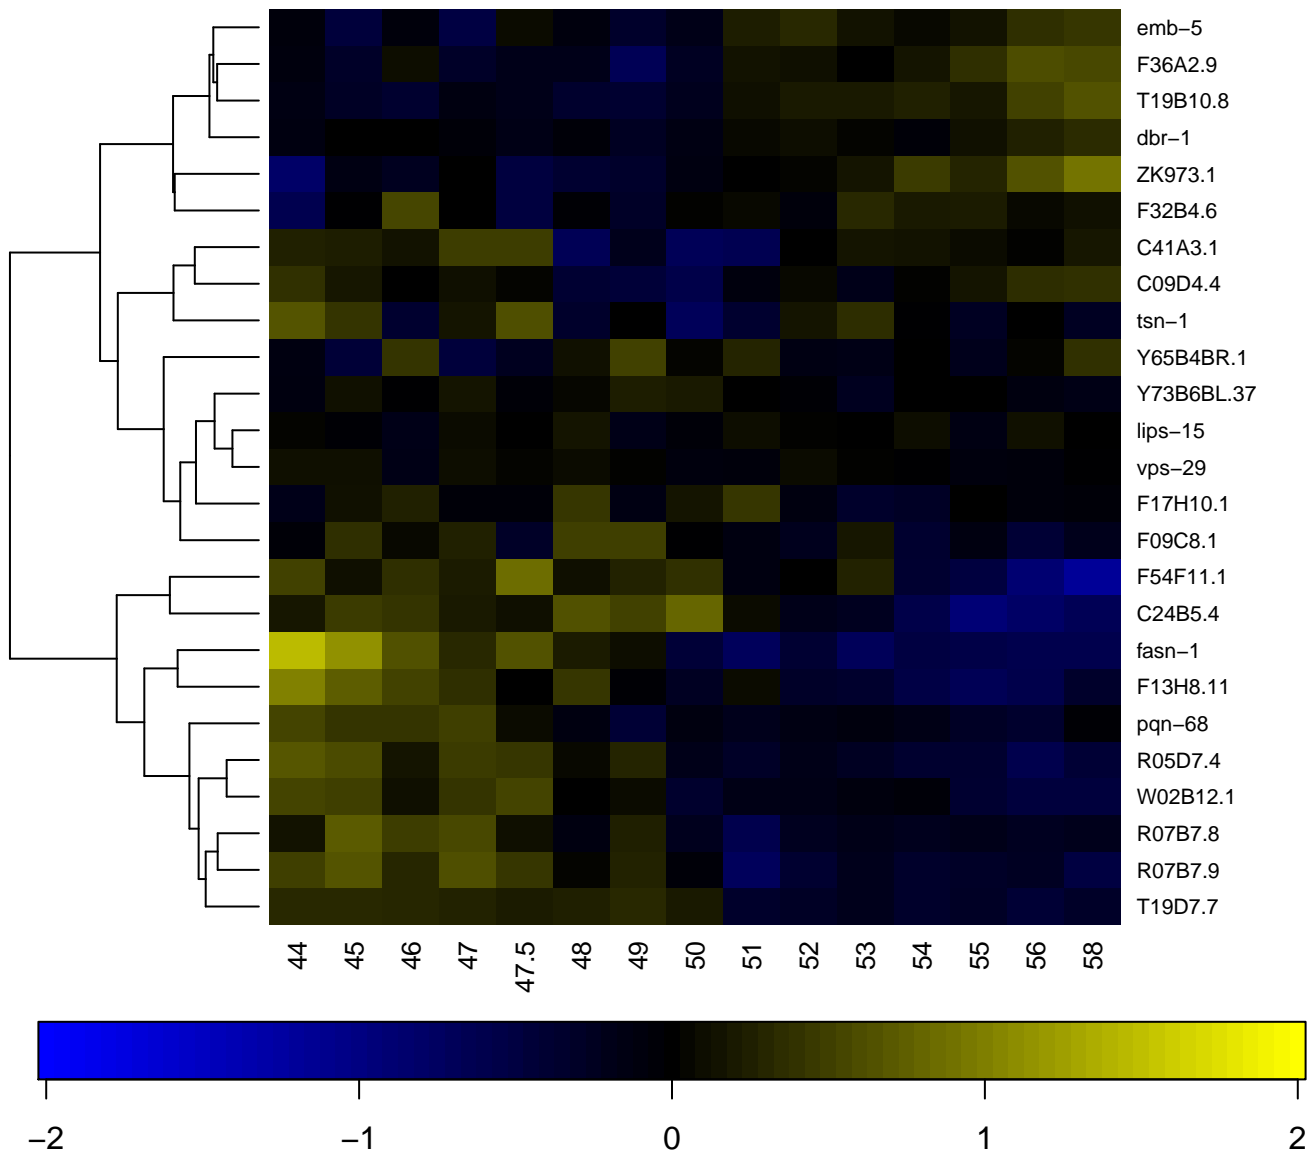



# hydrolase activity, hydrolyzing O-glycosyl compounds

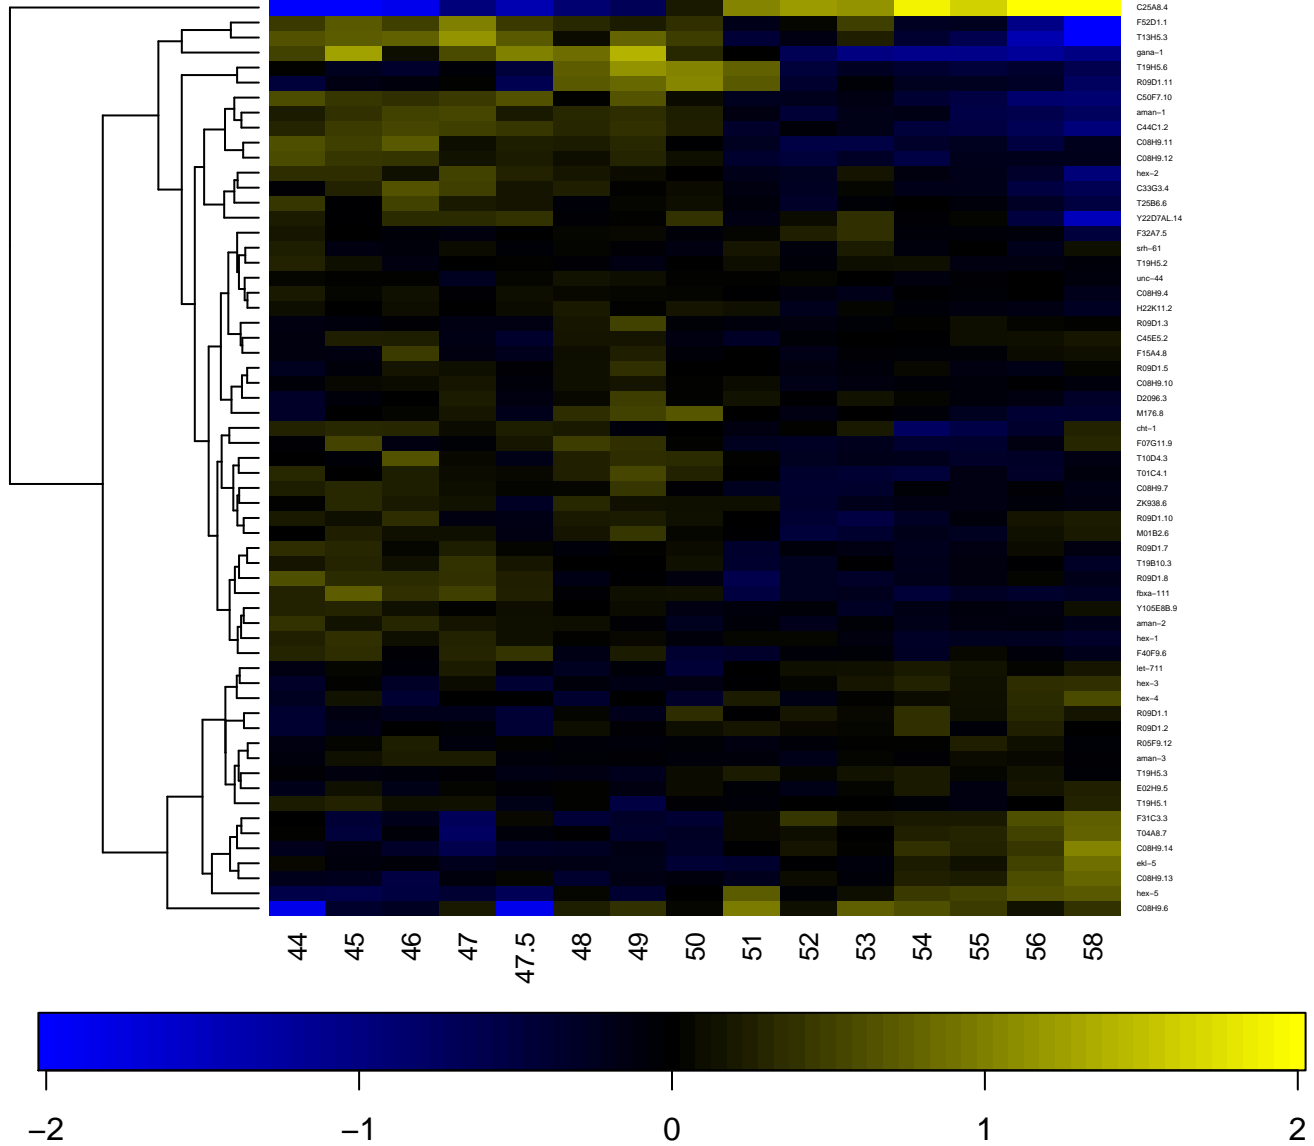

# hyperosmotic response

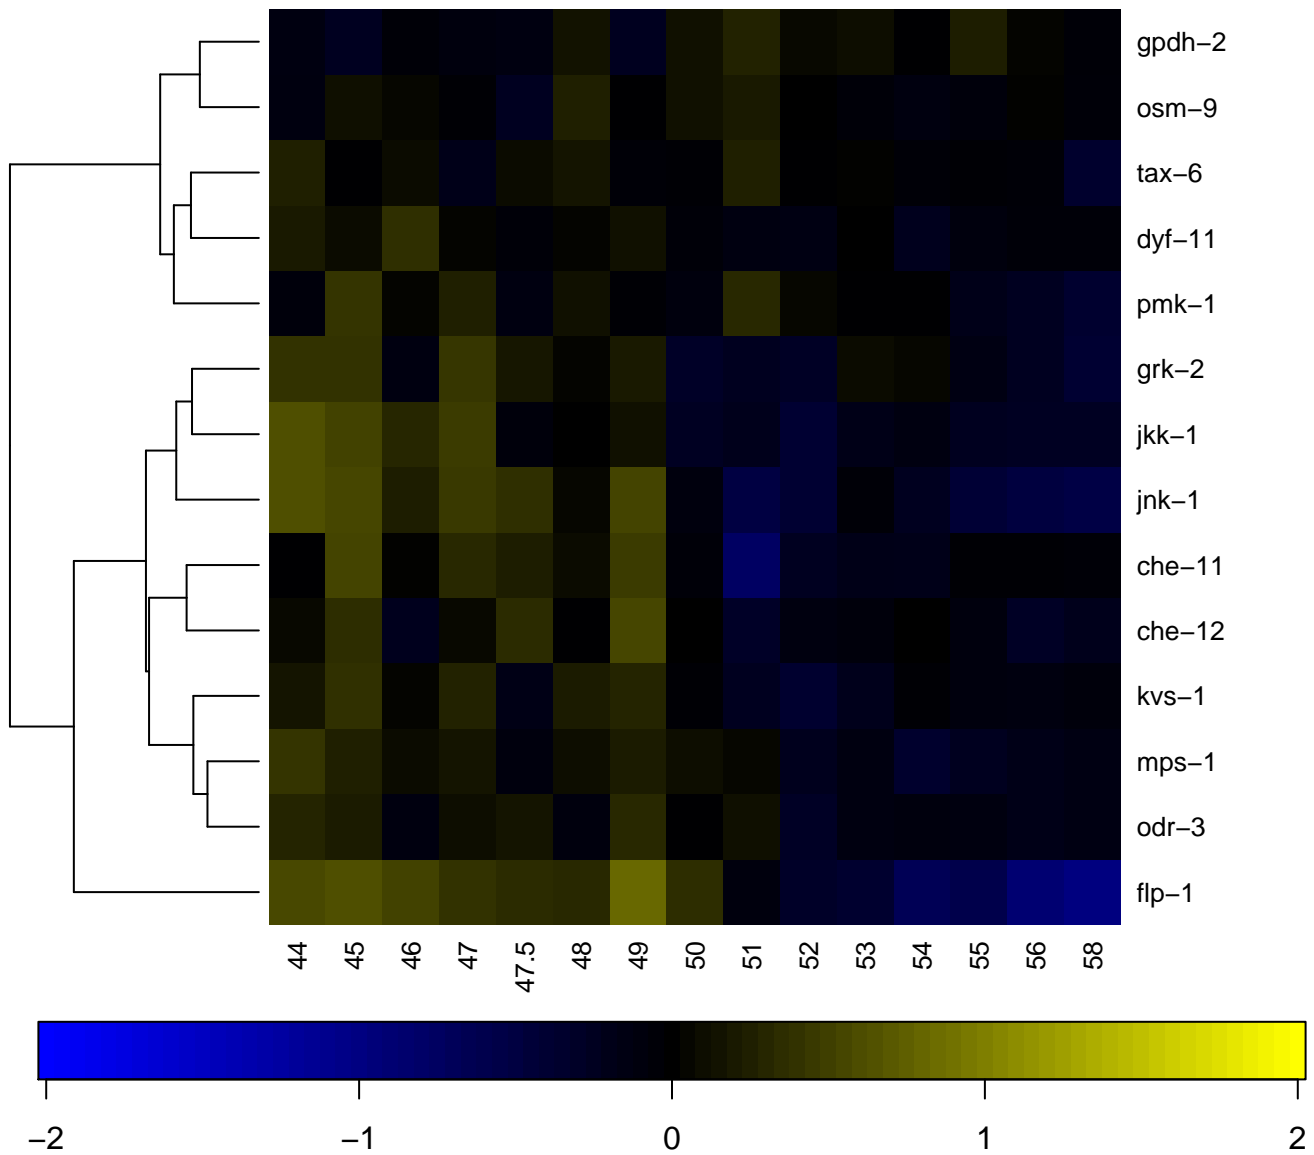



# inductive cell migration

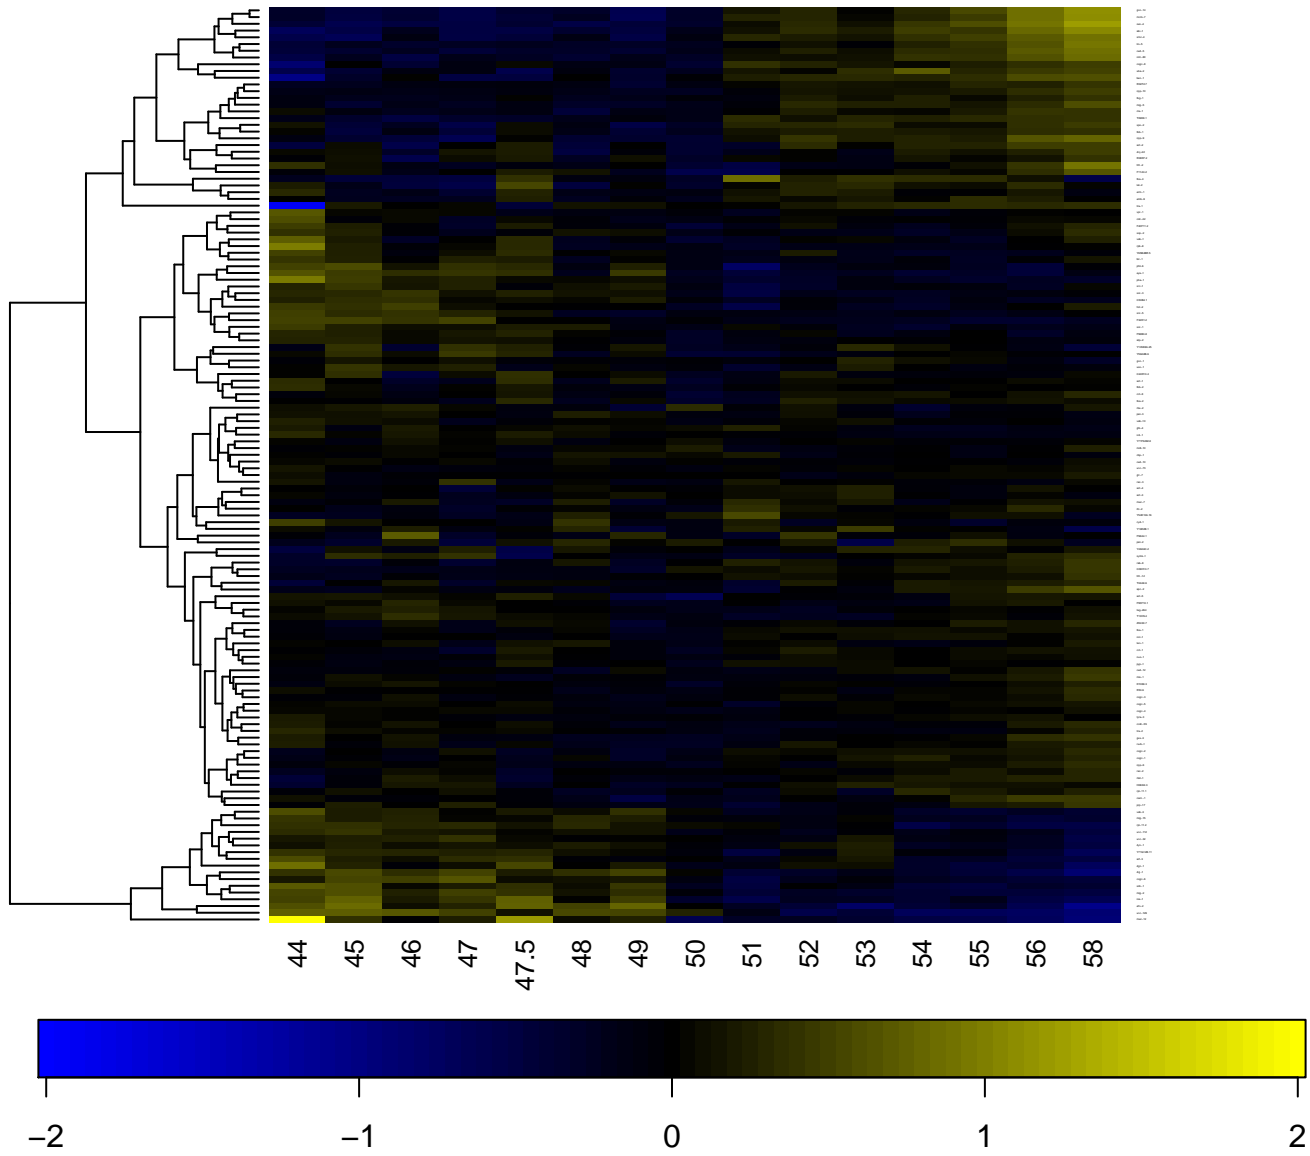

# innate immune response

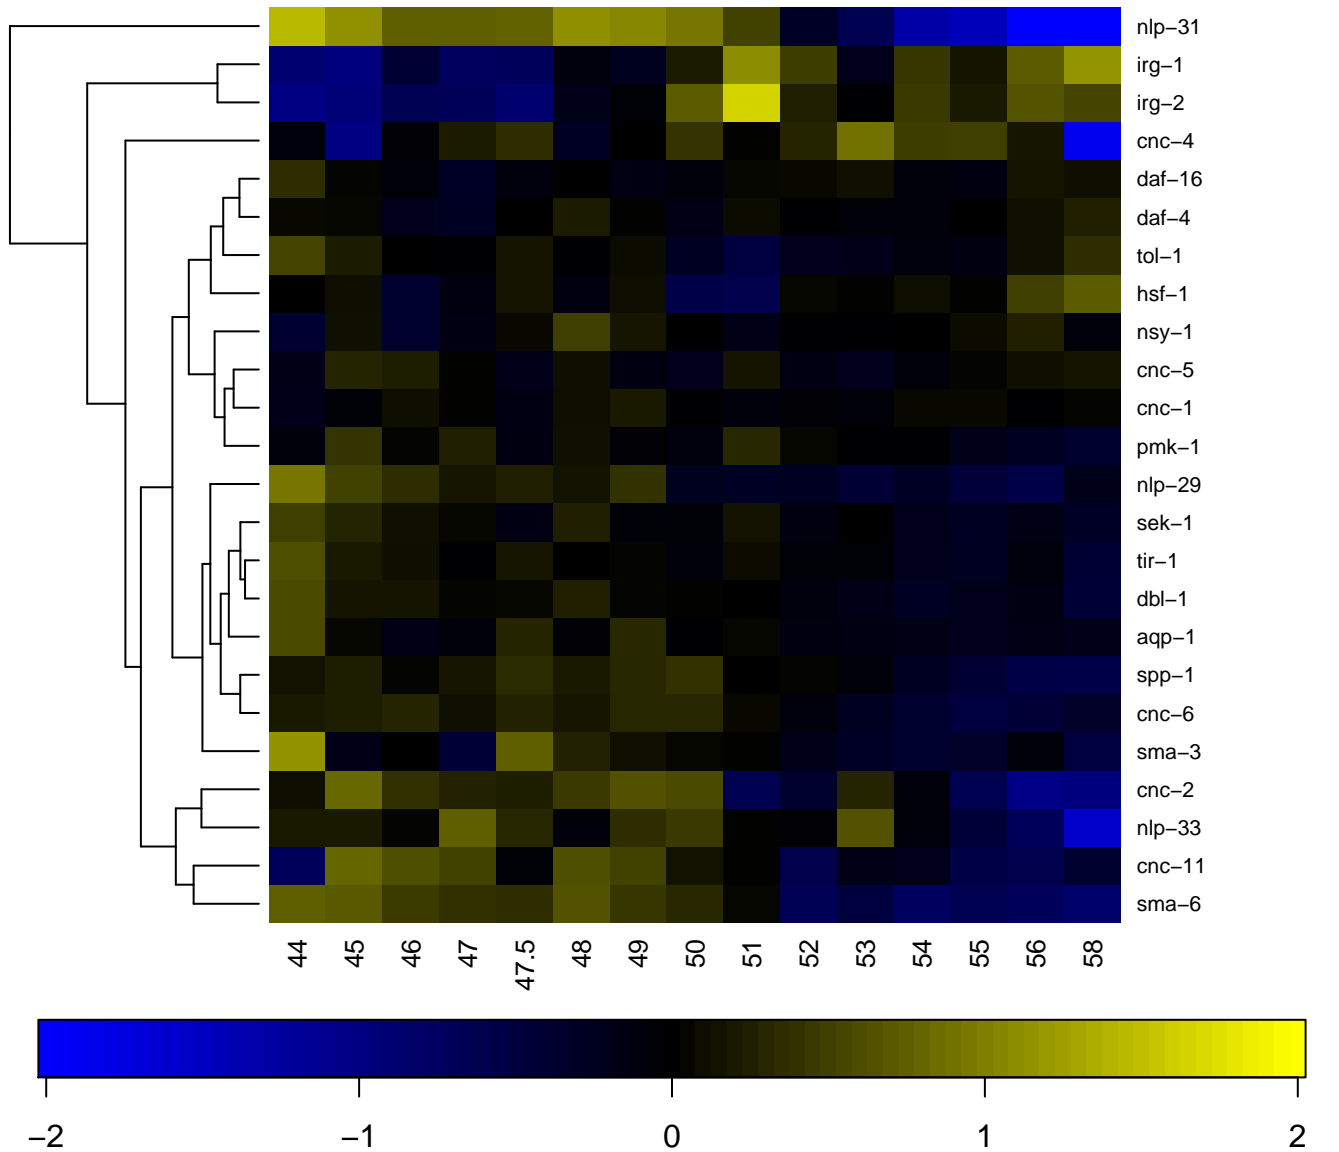



# inorganic phosphate transmembrane transporter activity

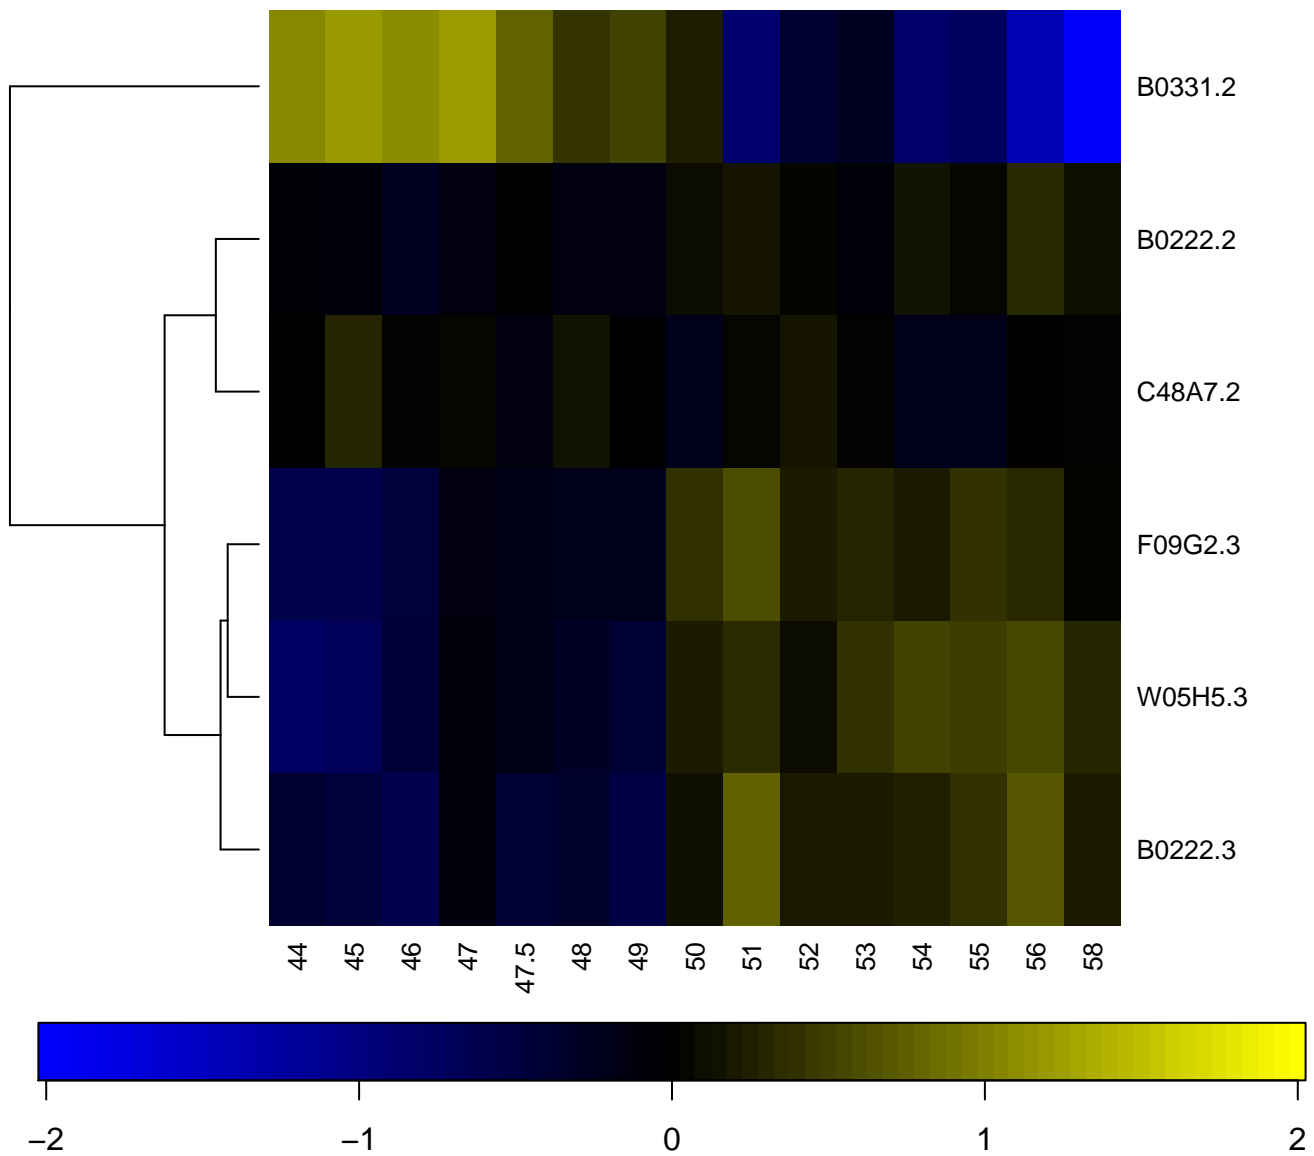















# integral to plasma membrane

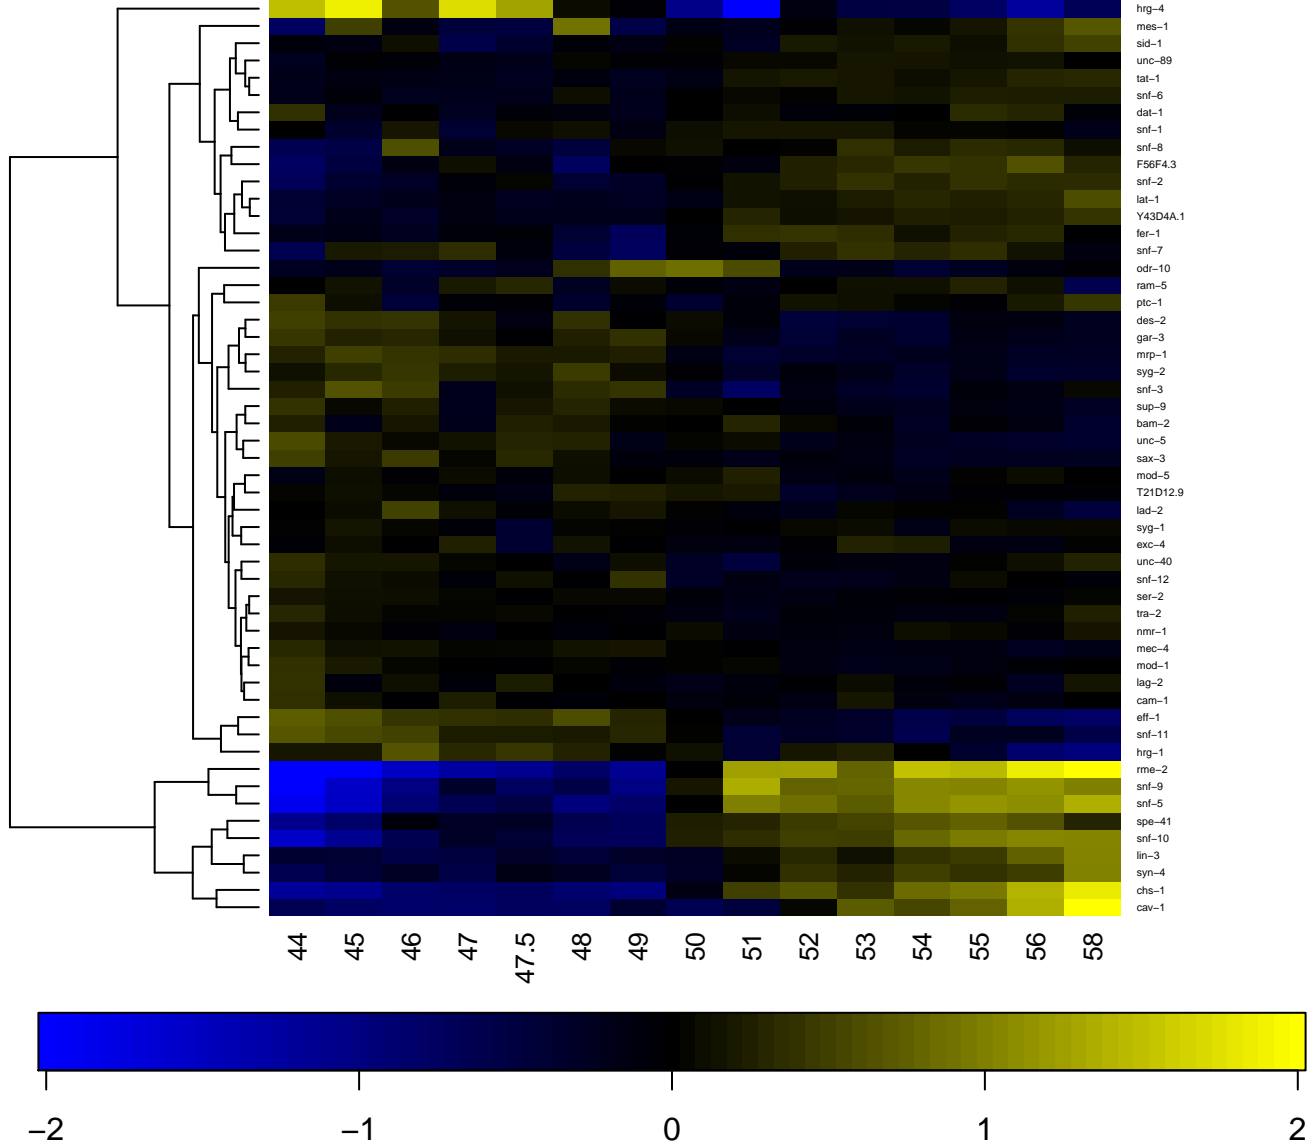







# internal side of plasma membrane

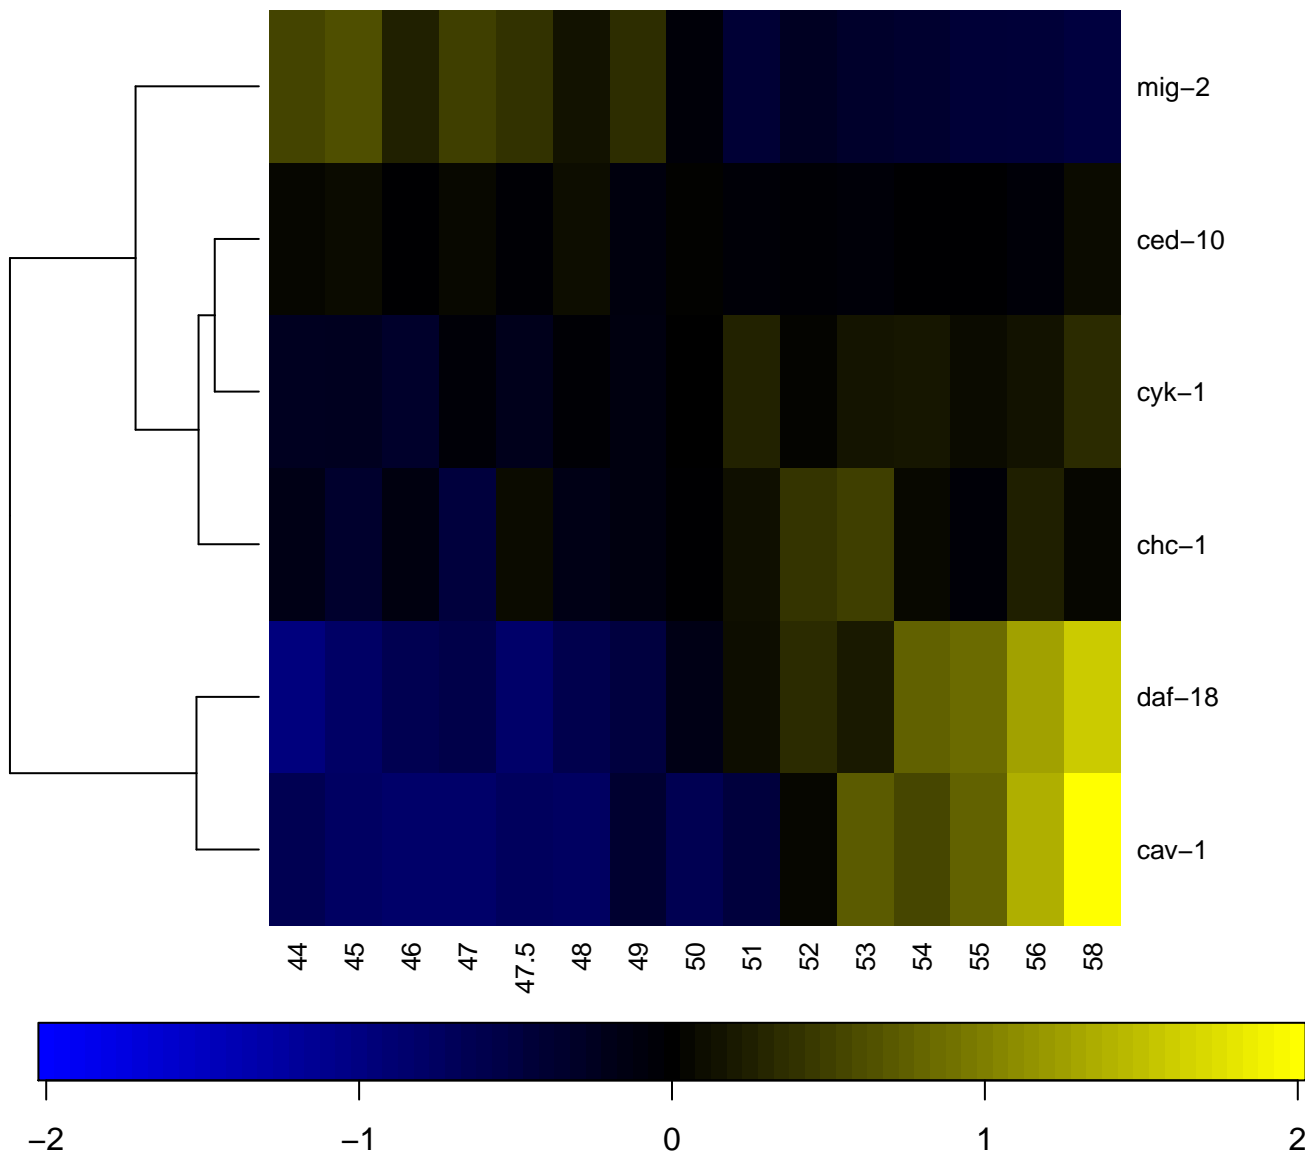

# intracellular

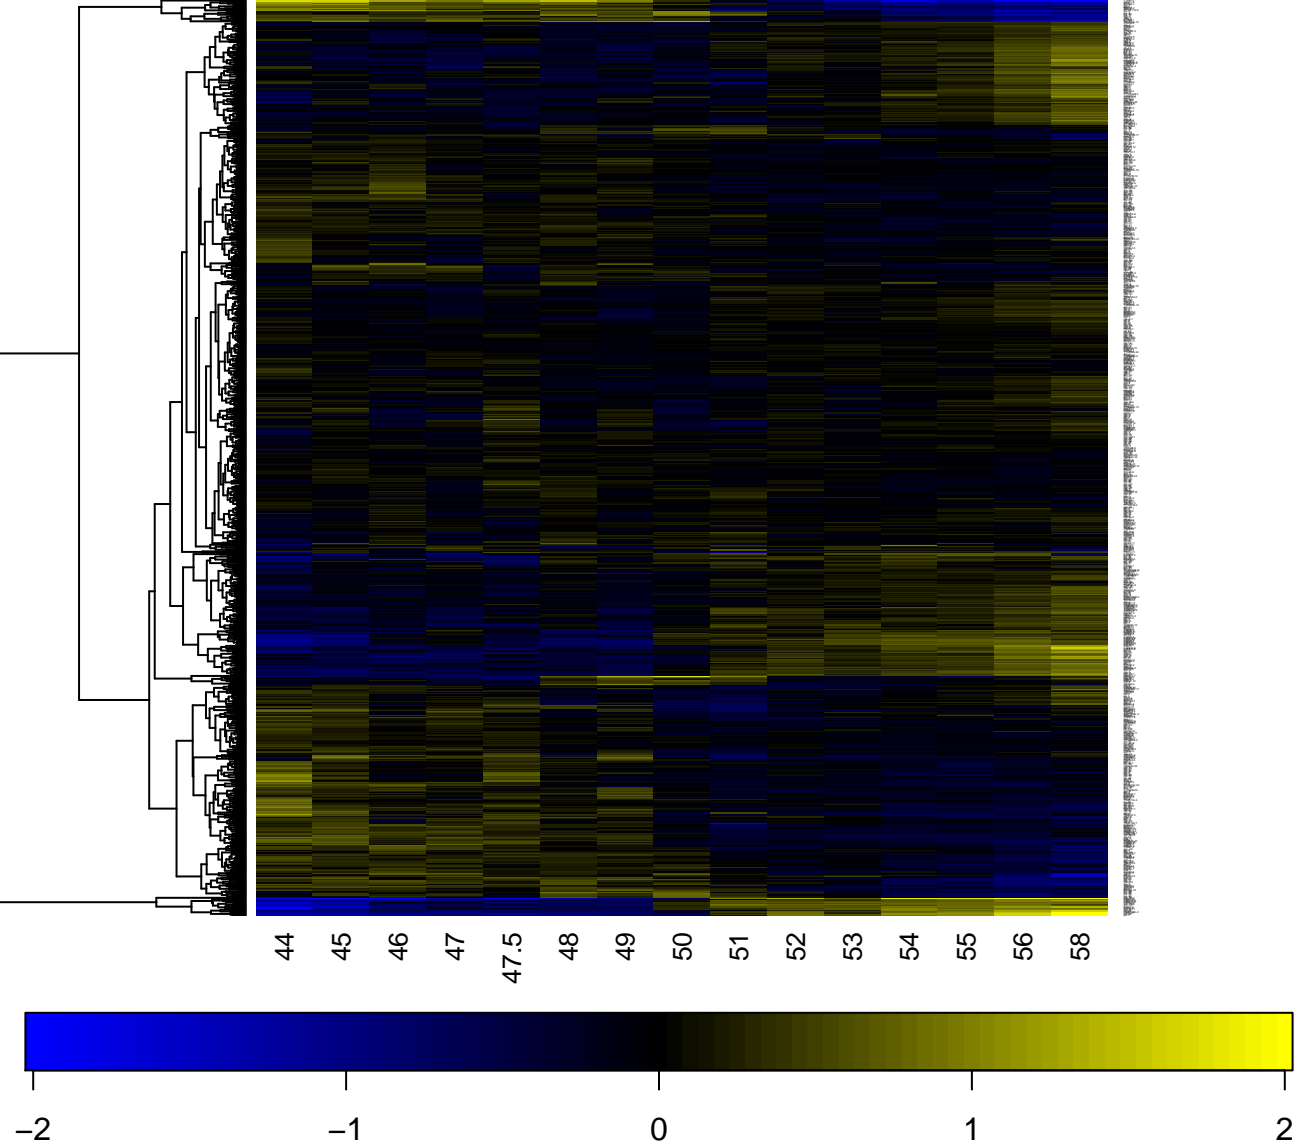





# intracellular protein transport

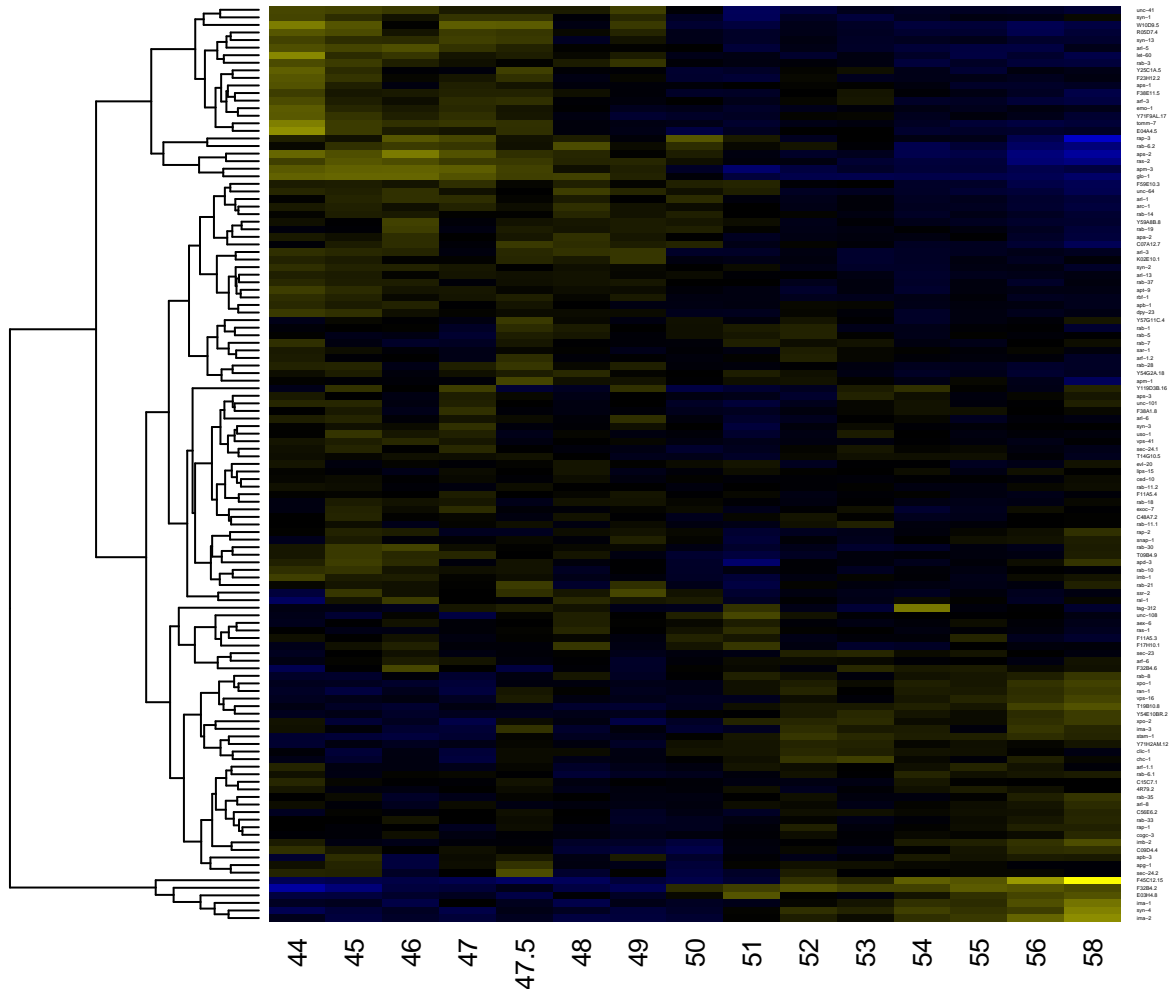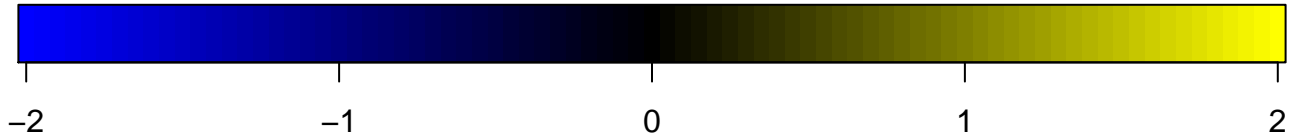

# intraflagellar transport

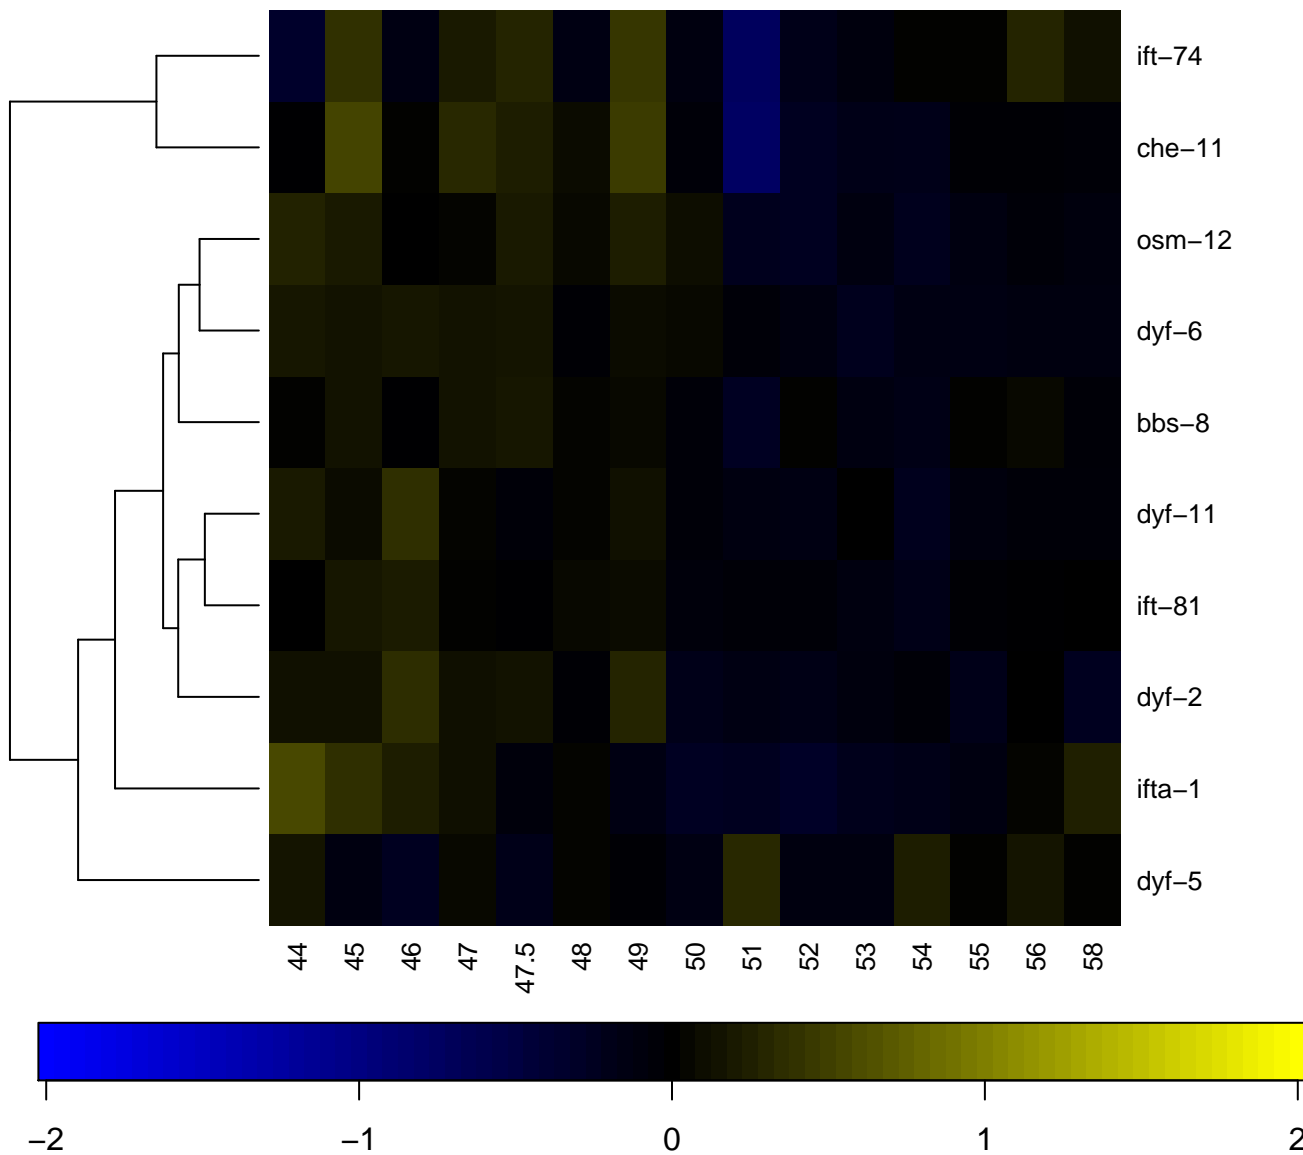







# ion transport

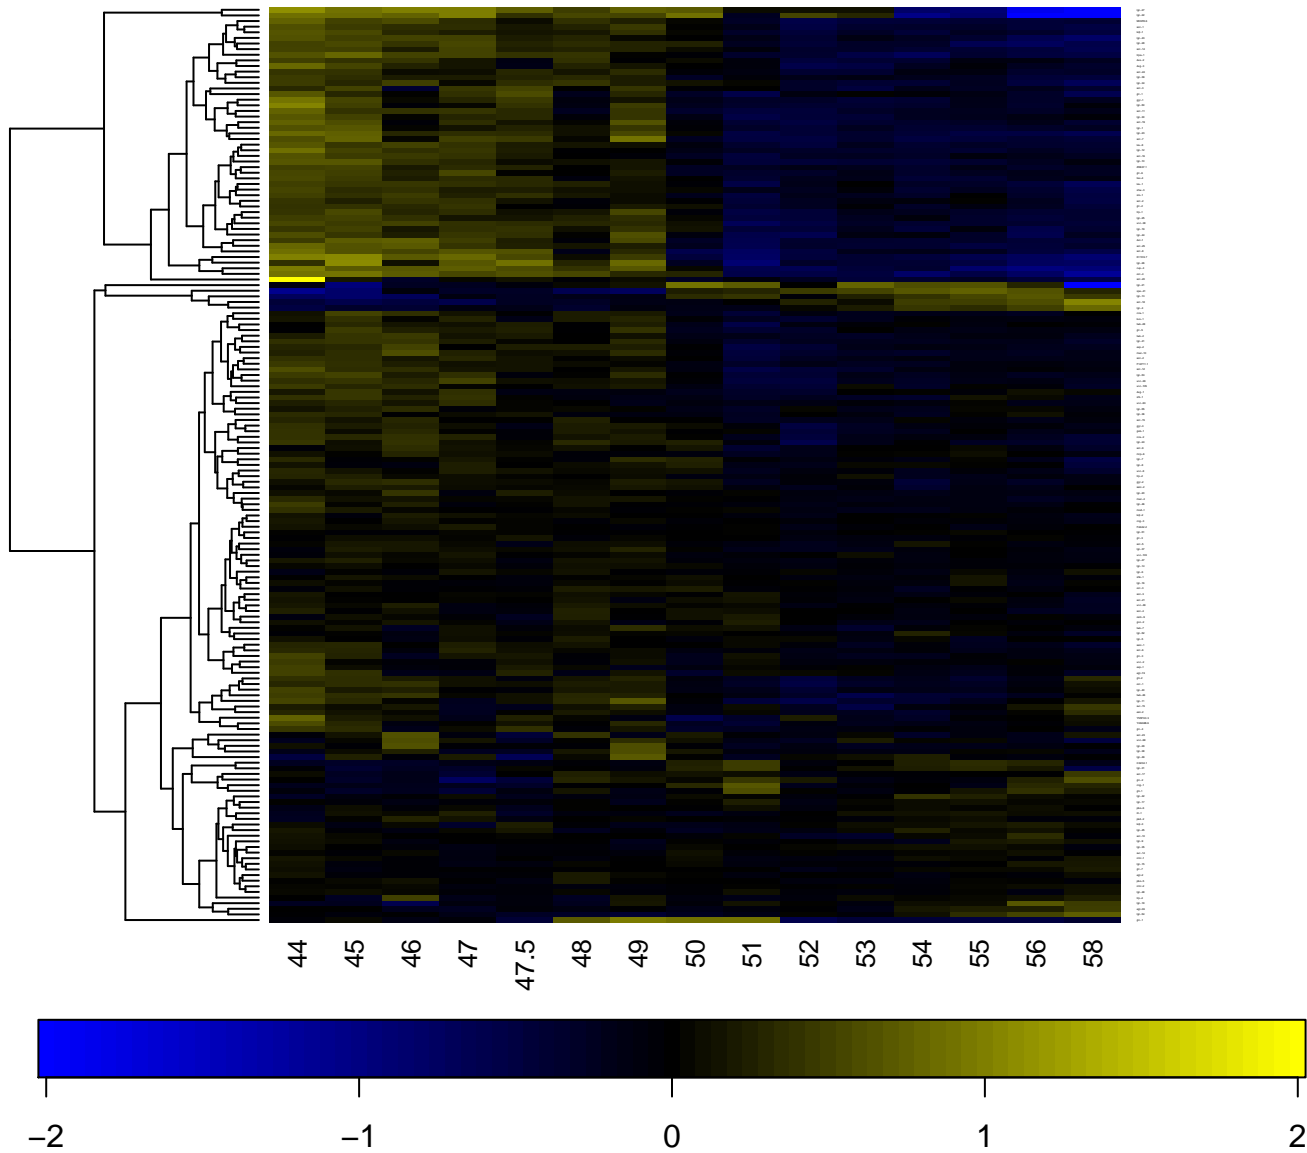

# ionotropic glutamate receptor activity

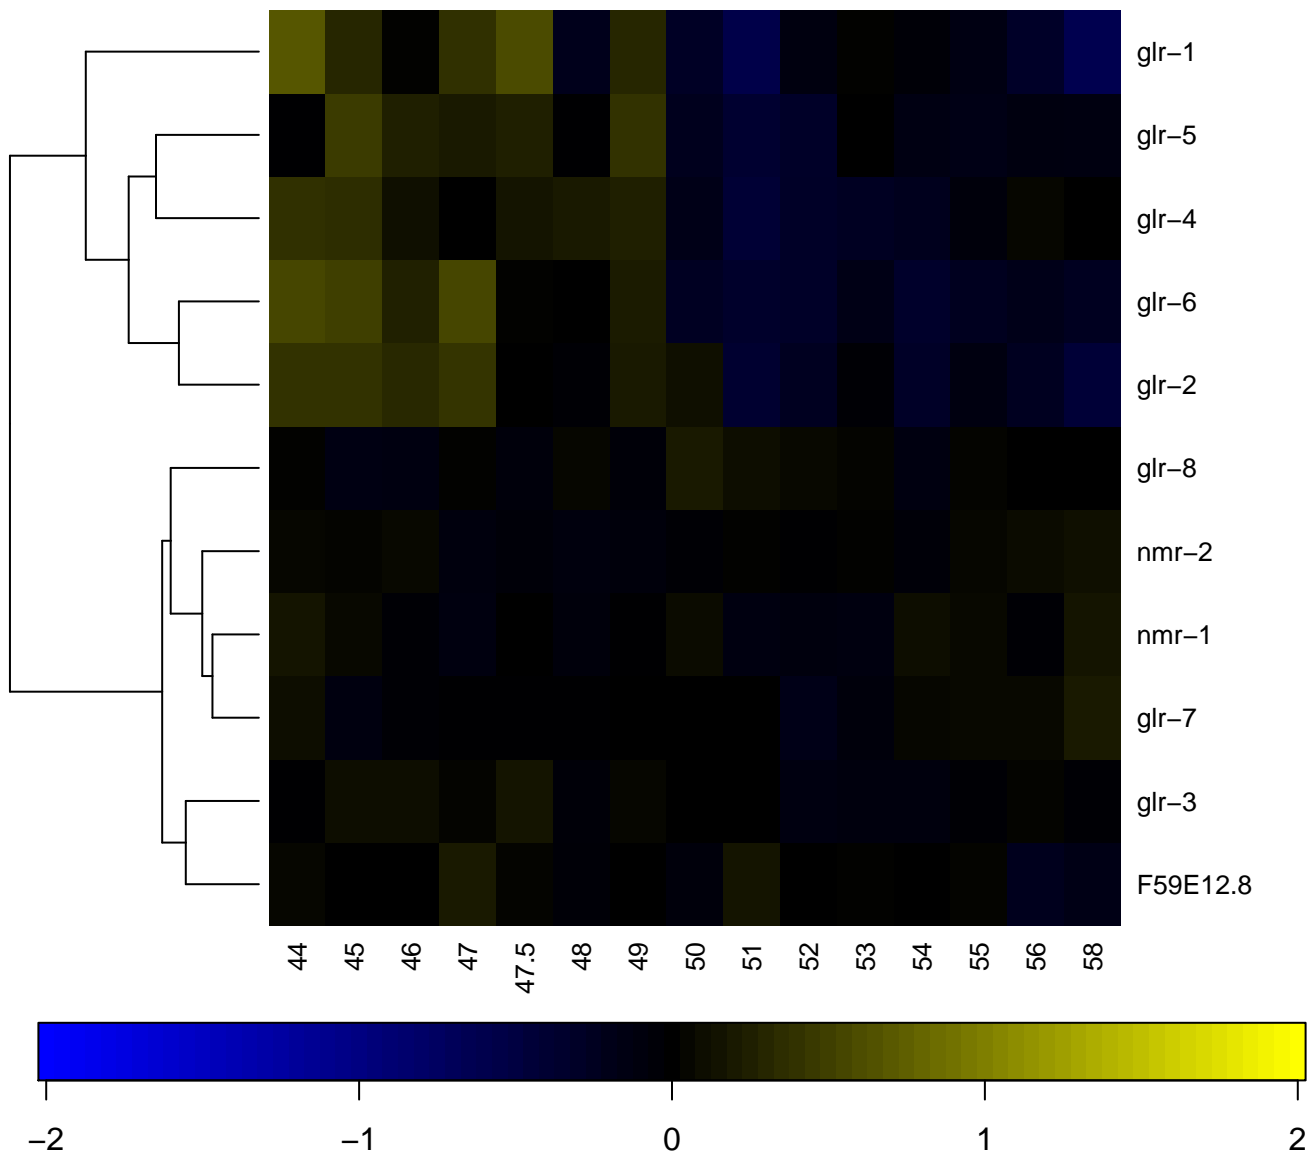



# iron-sulfur cluster binding

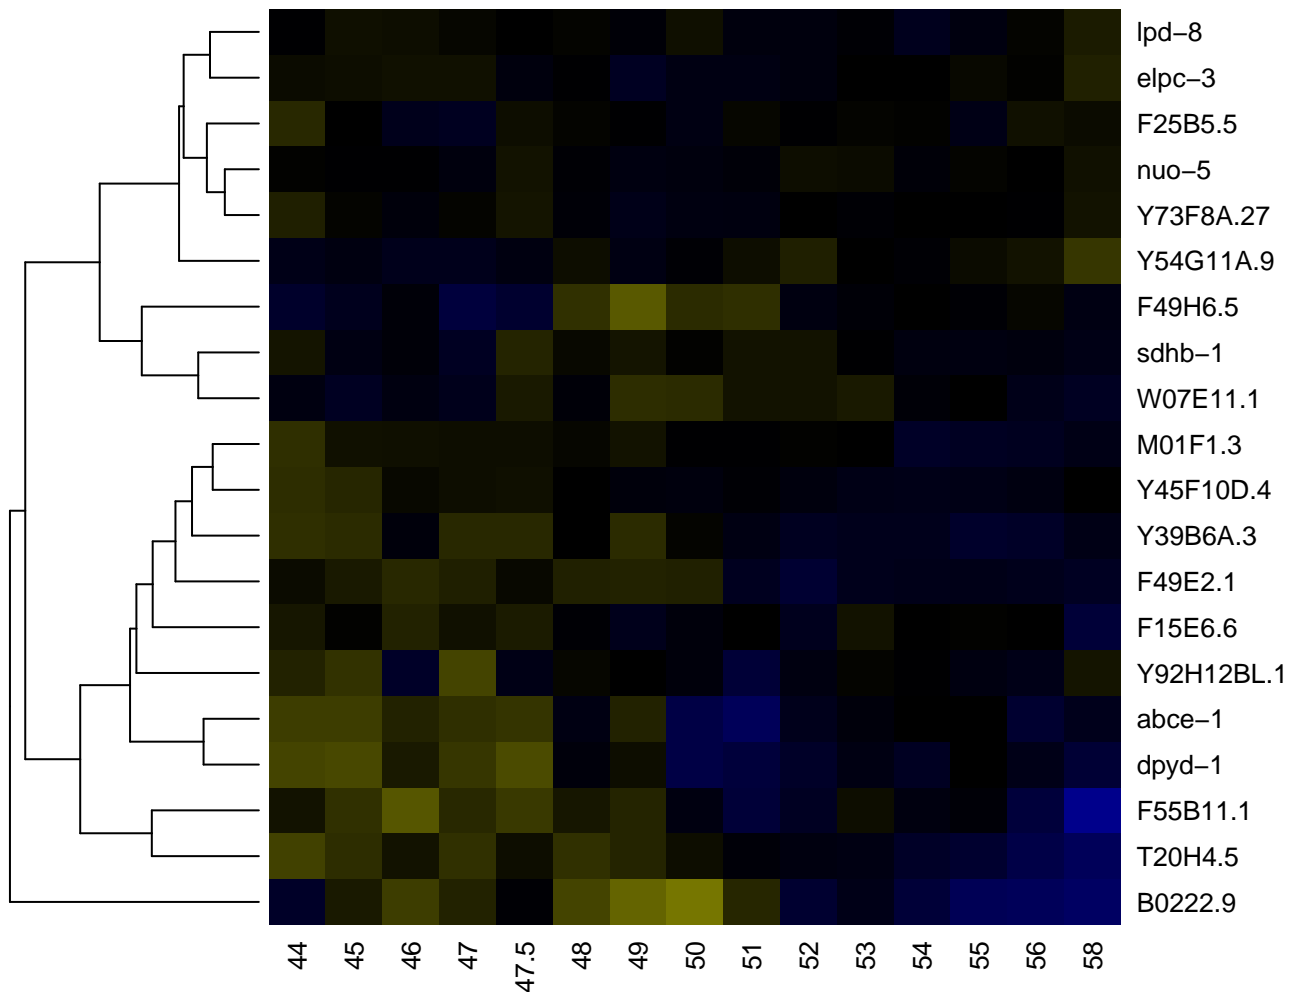

# iron ion binding

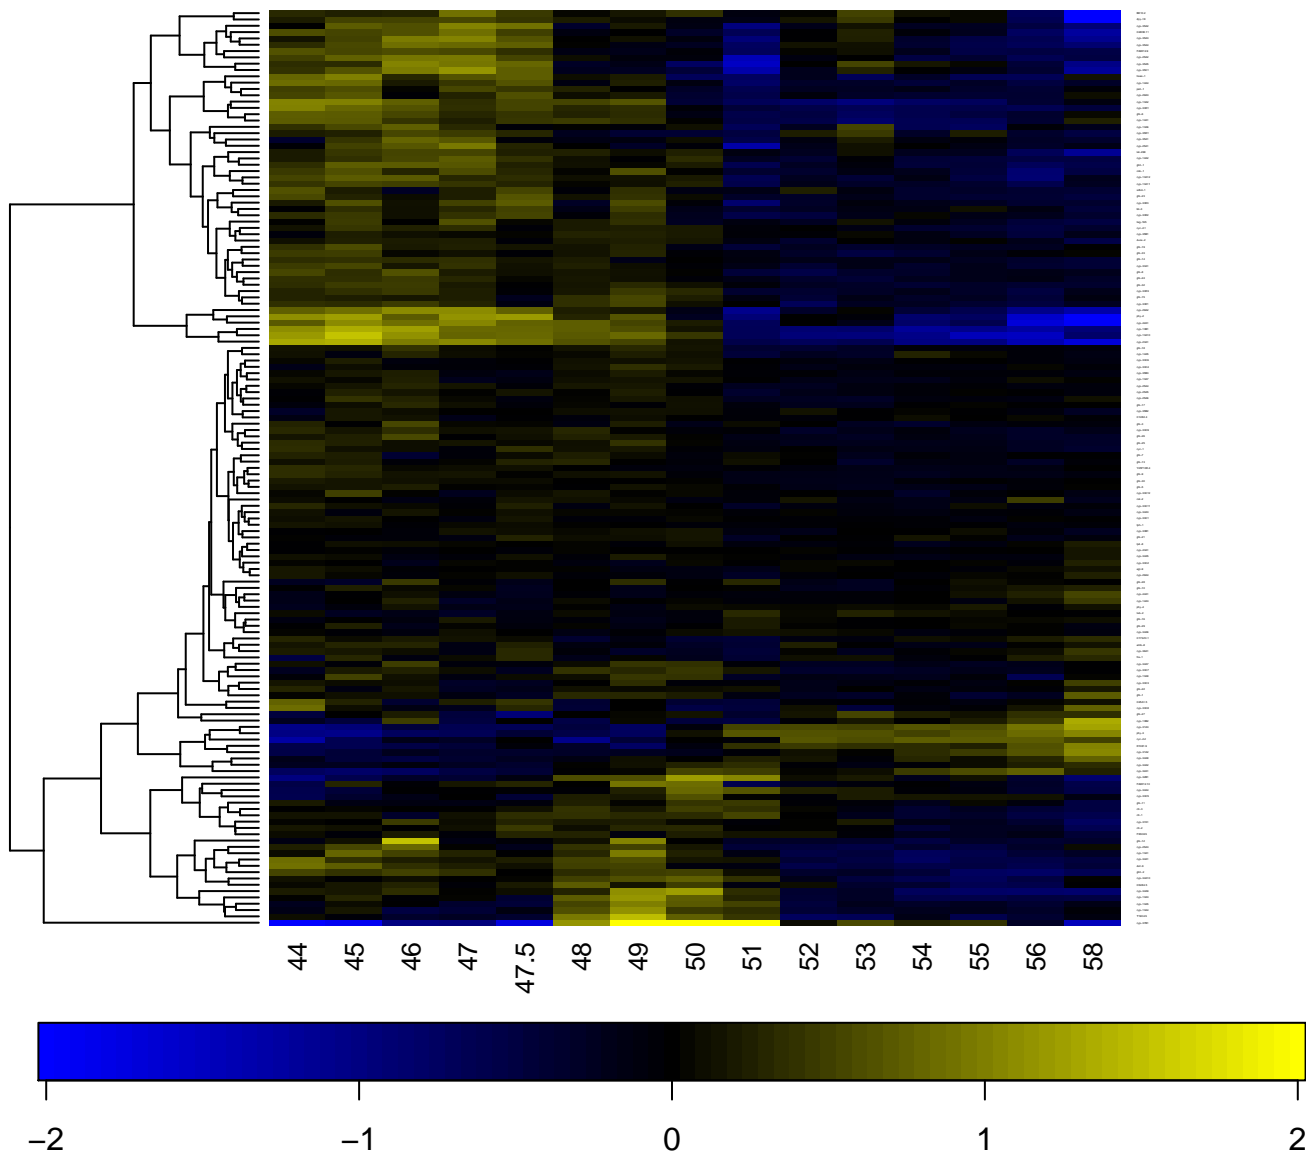

# isomerase activity

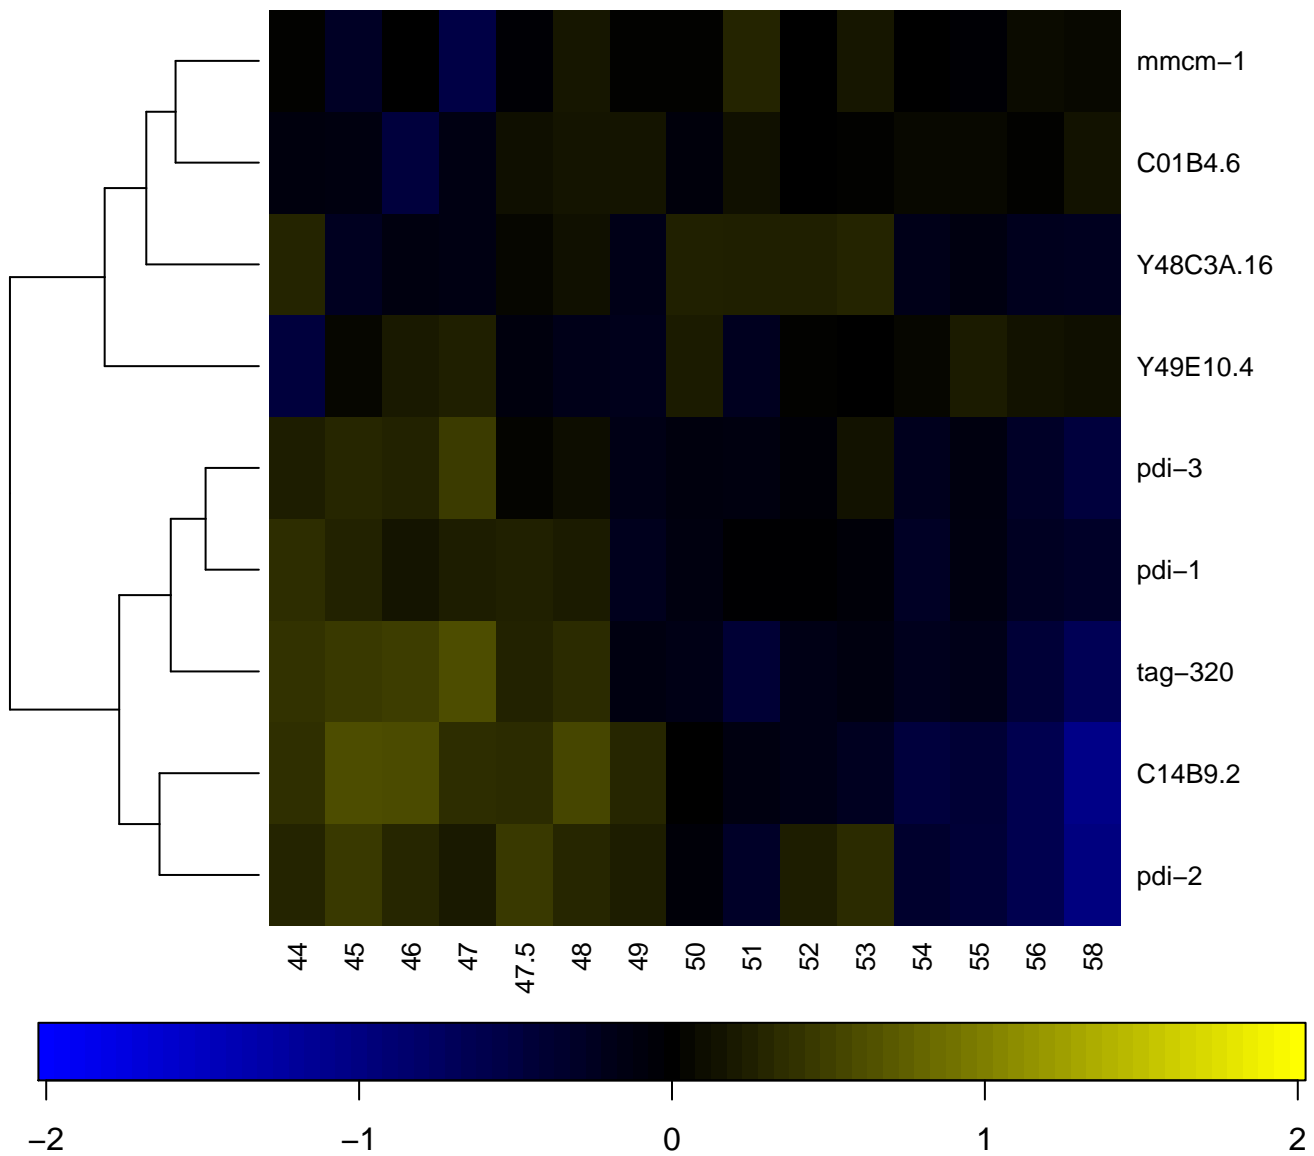



# kinase activity

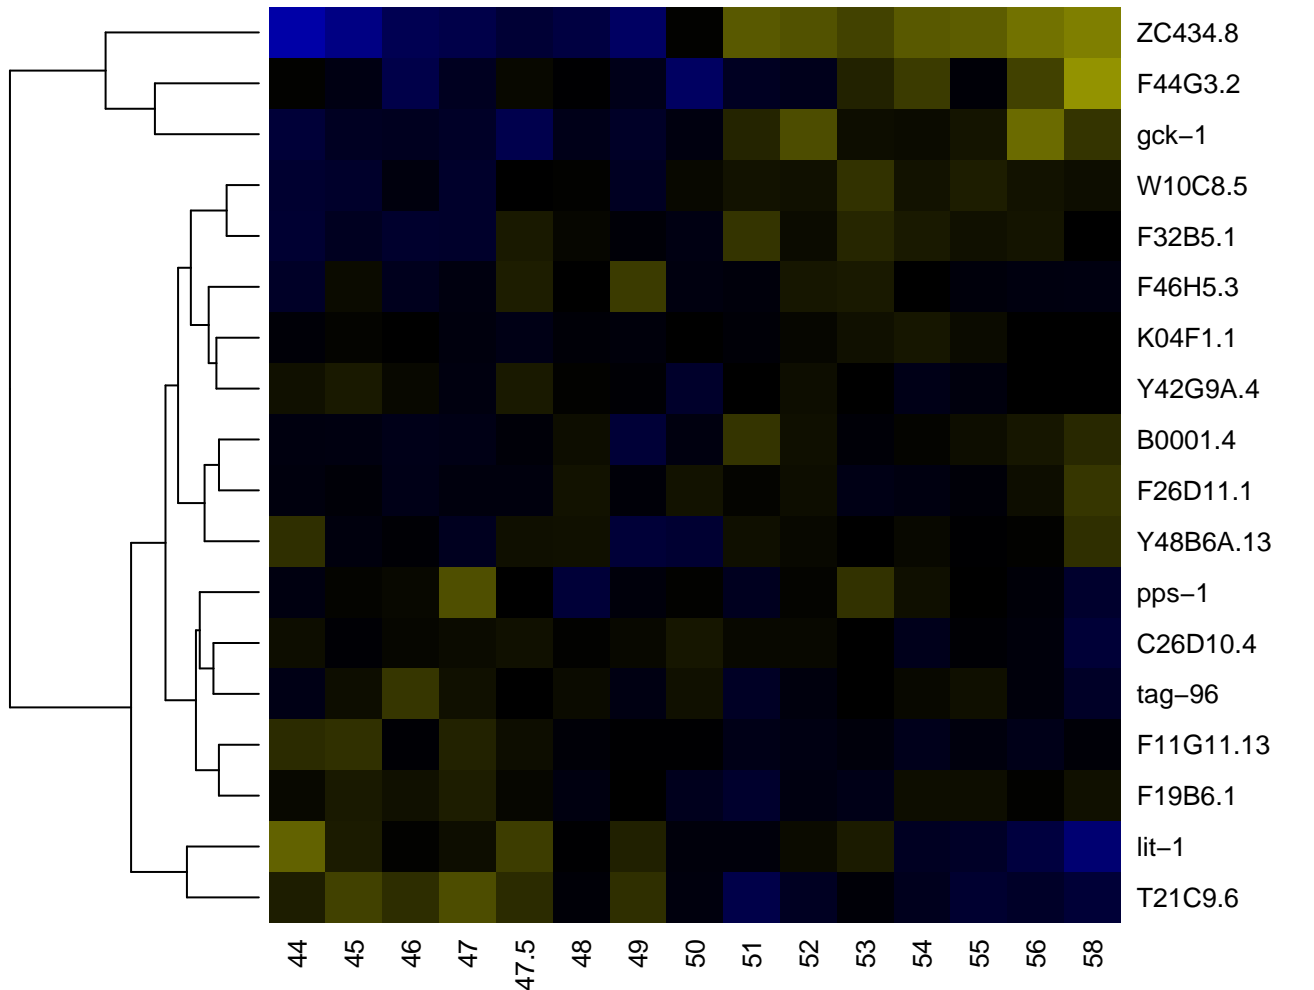



# kinetochore

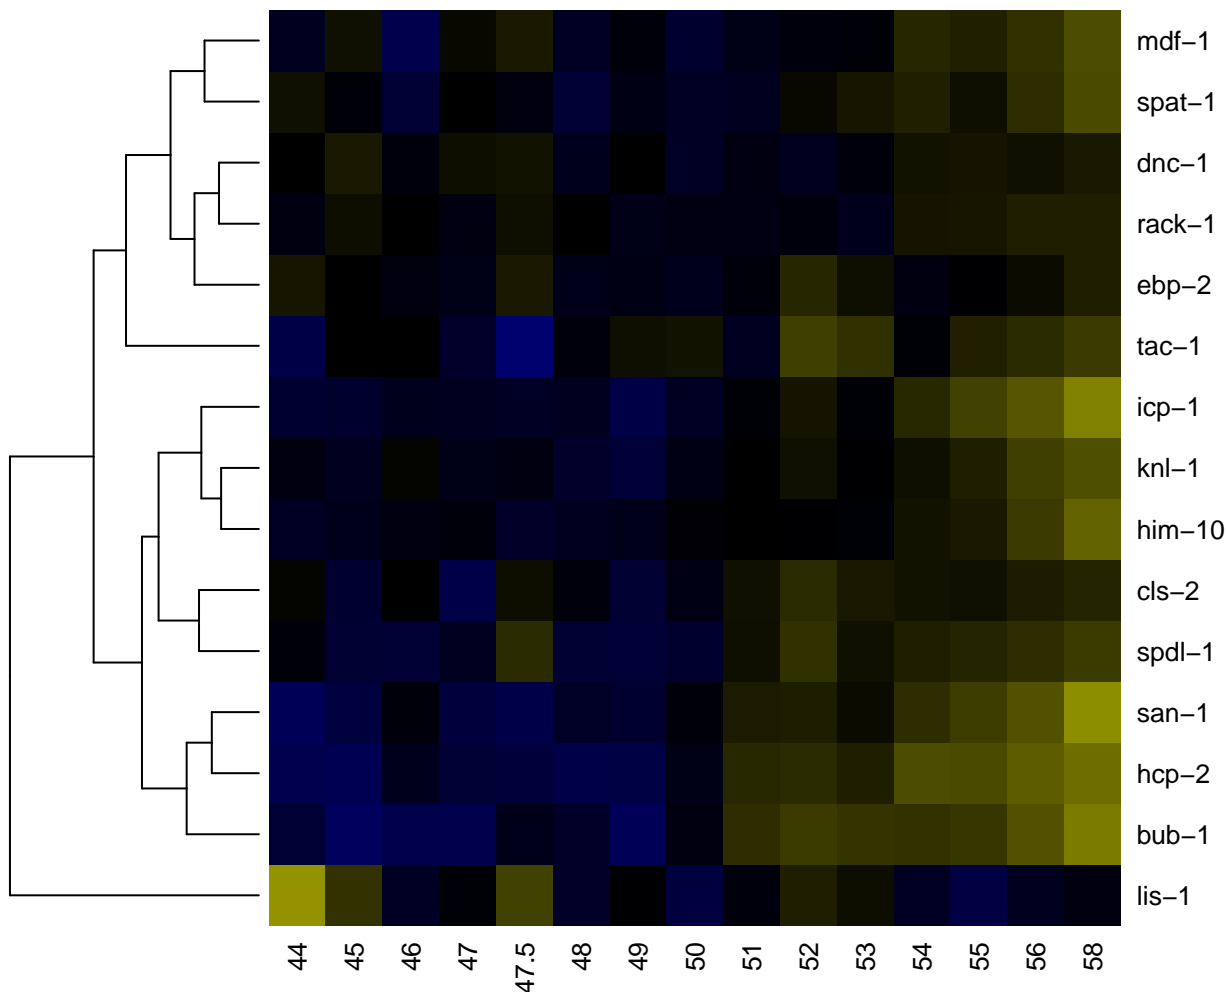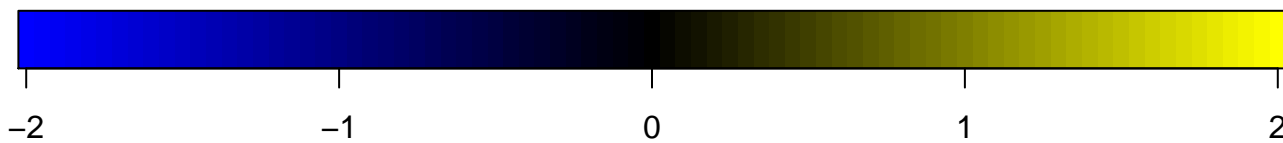





# ligand-dependent nuclear receptor activity

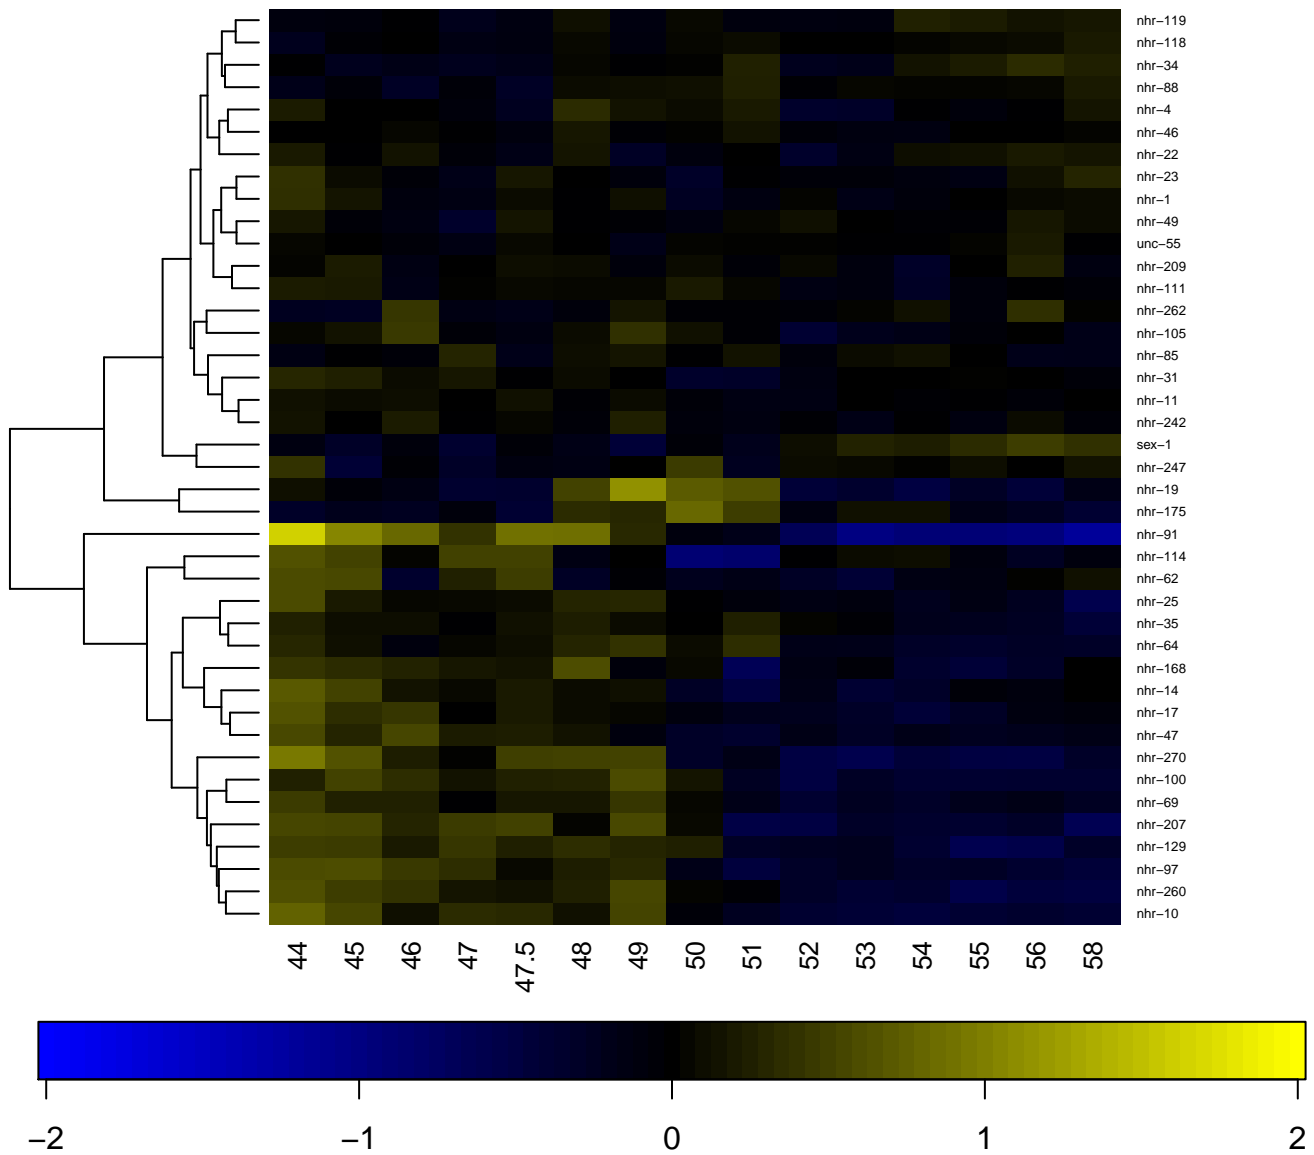





# lipid binding

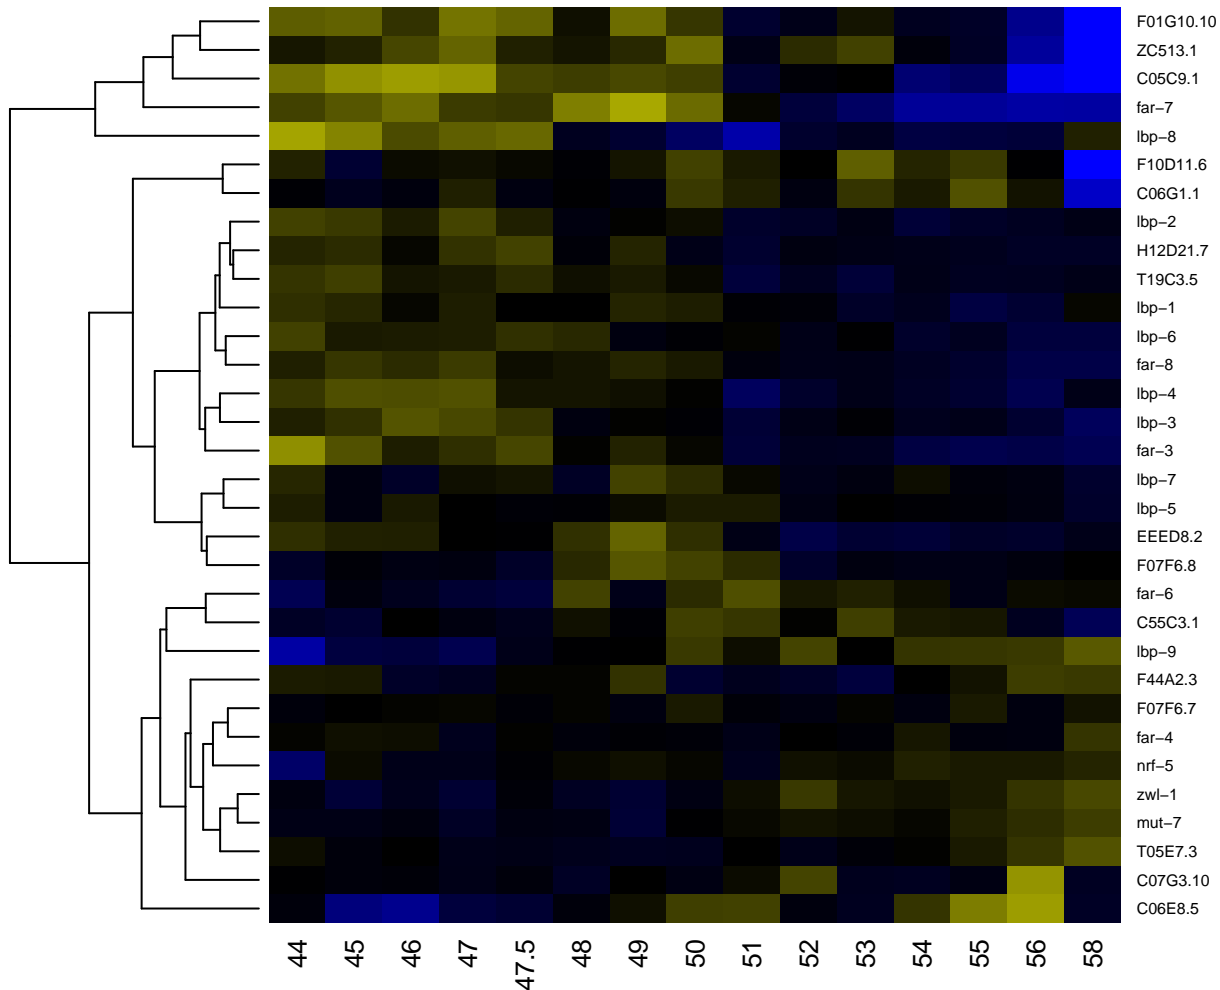





# lipid catabolic process

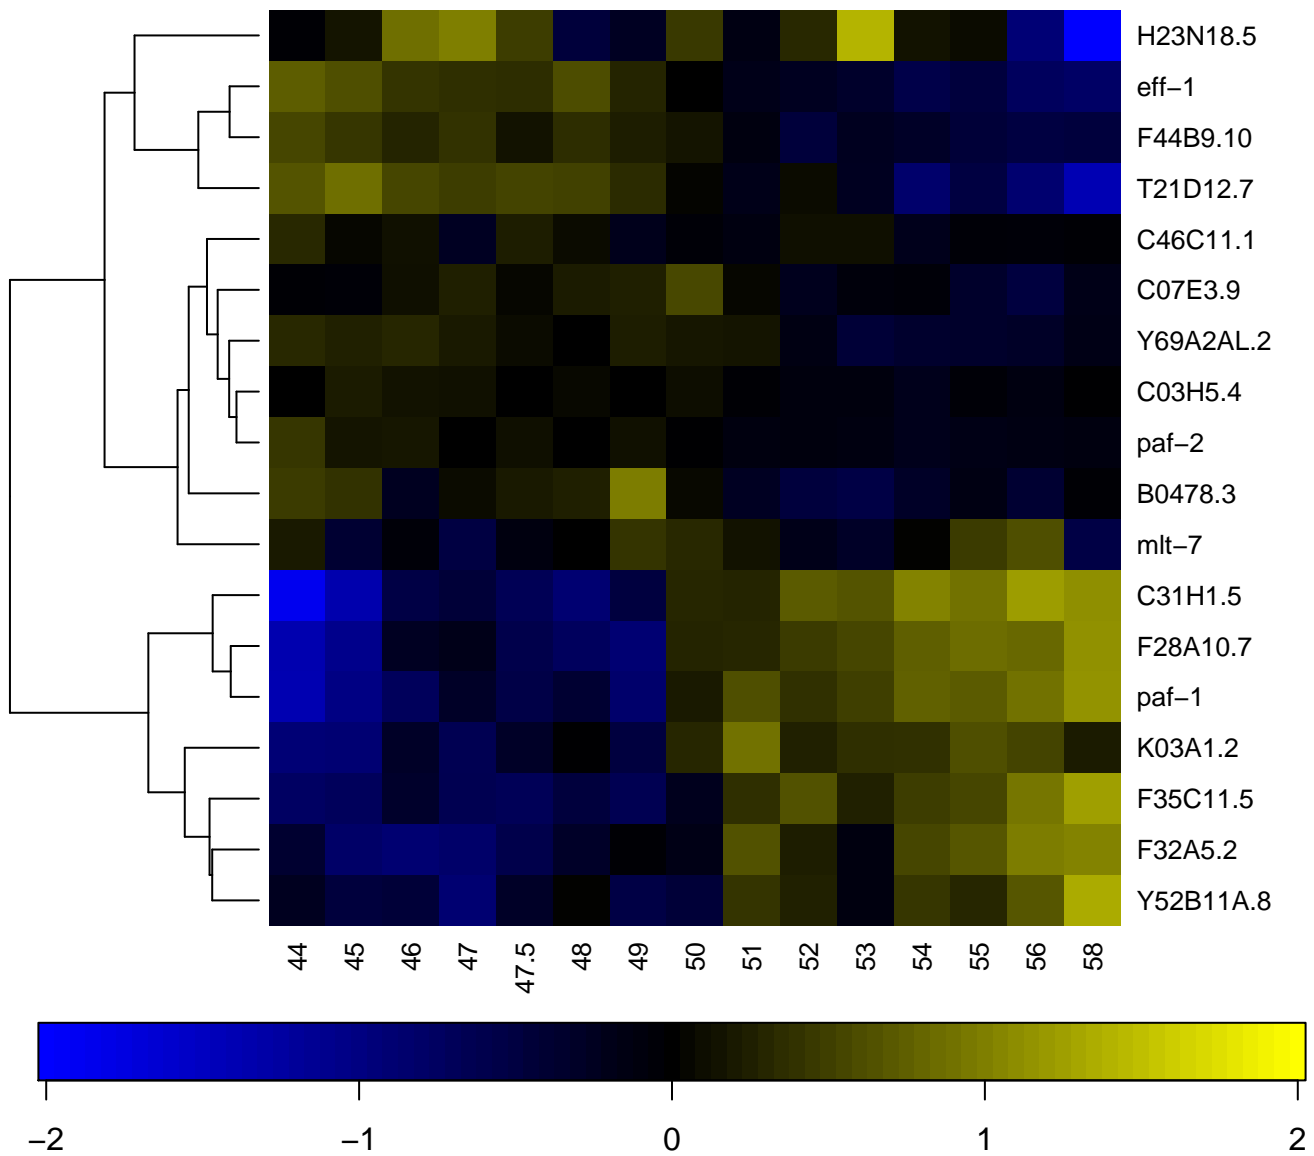

# lipid glycosylation

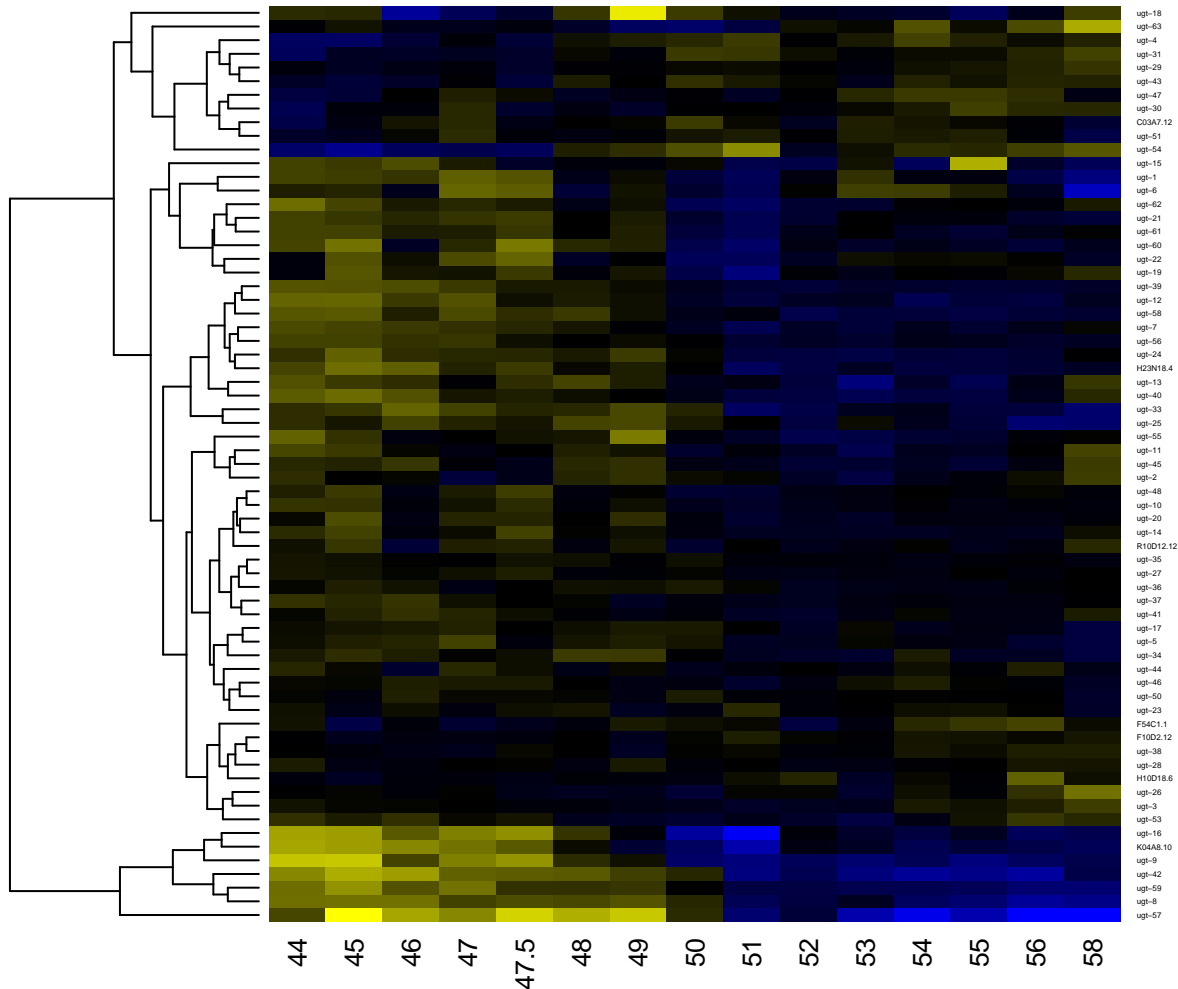

-2

-1

0

1

2

# lipid metabolic process

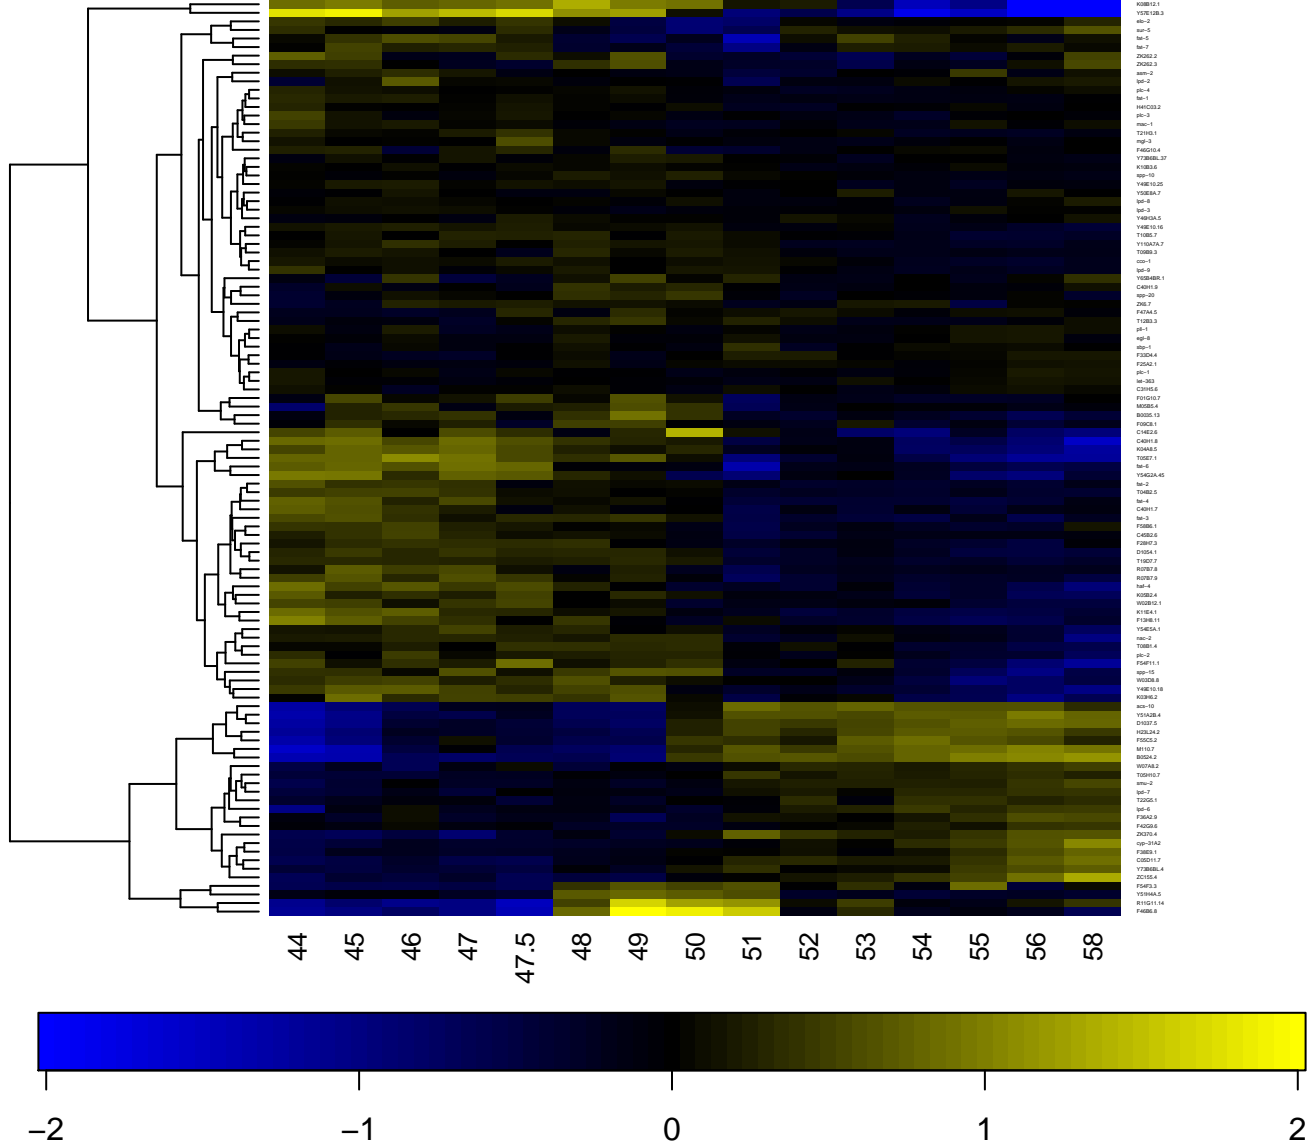

# lipid storage

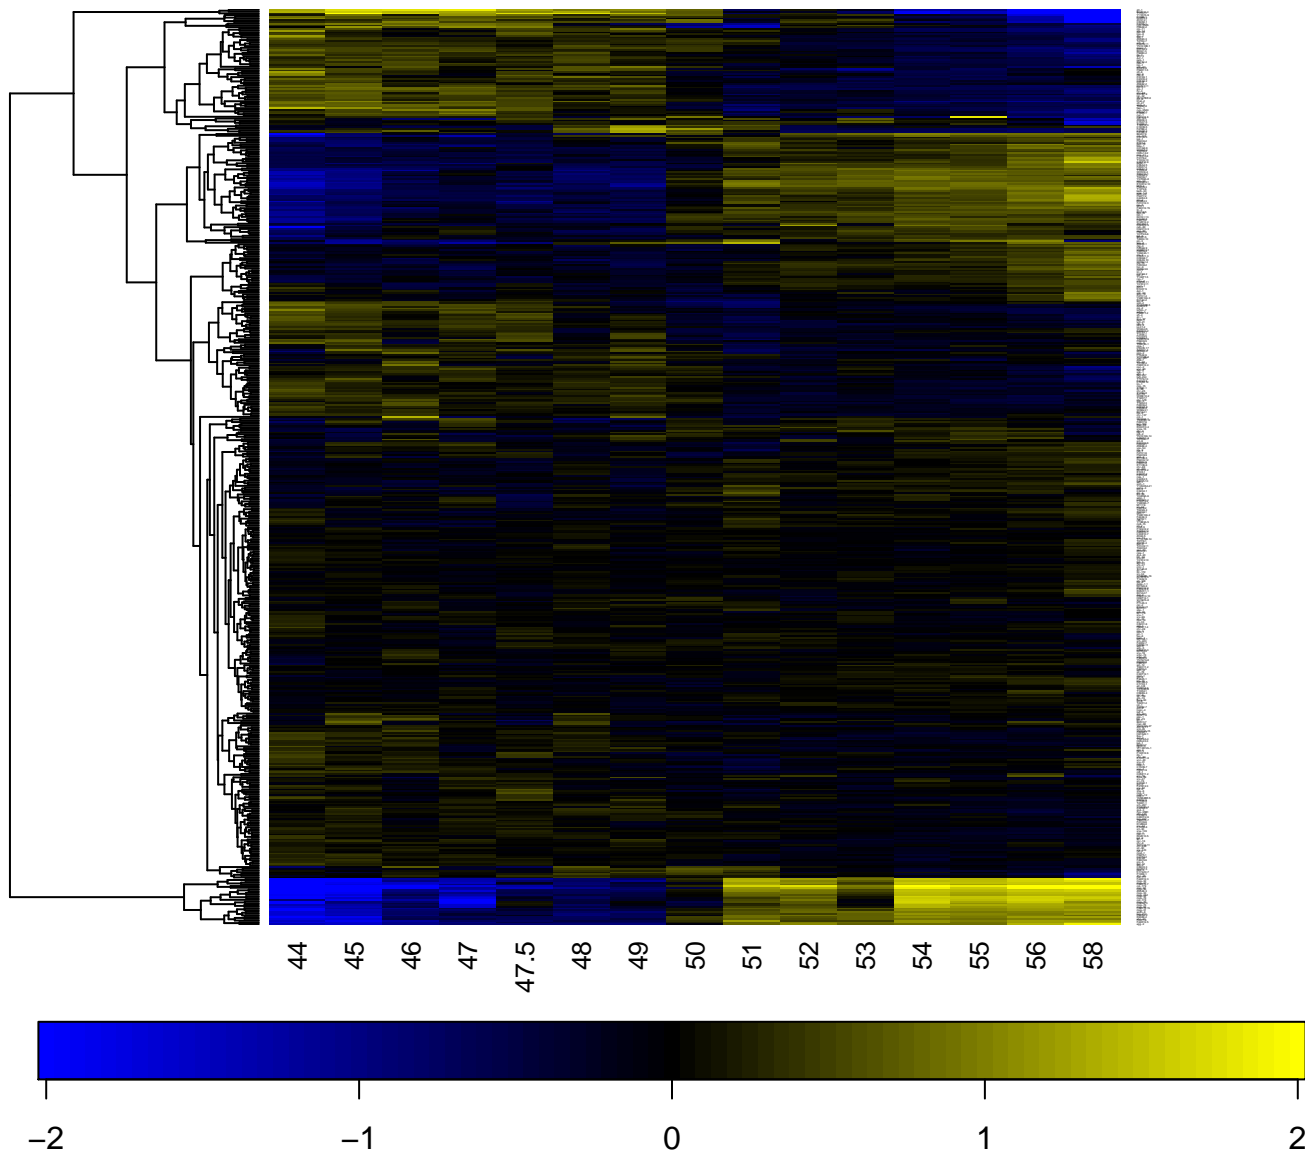



# lipid transporter activity

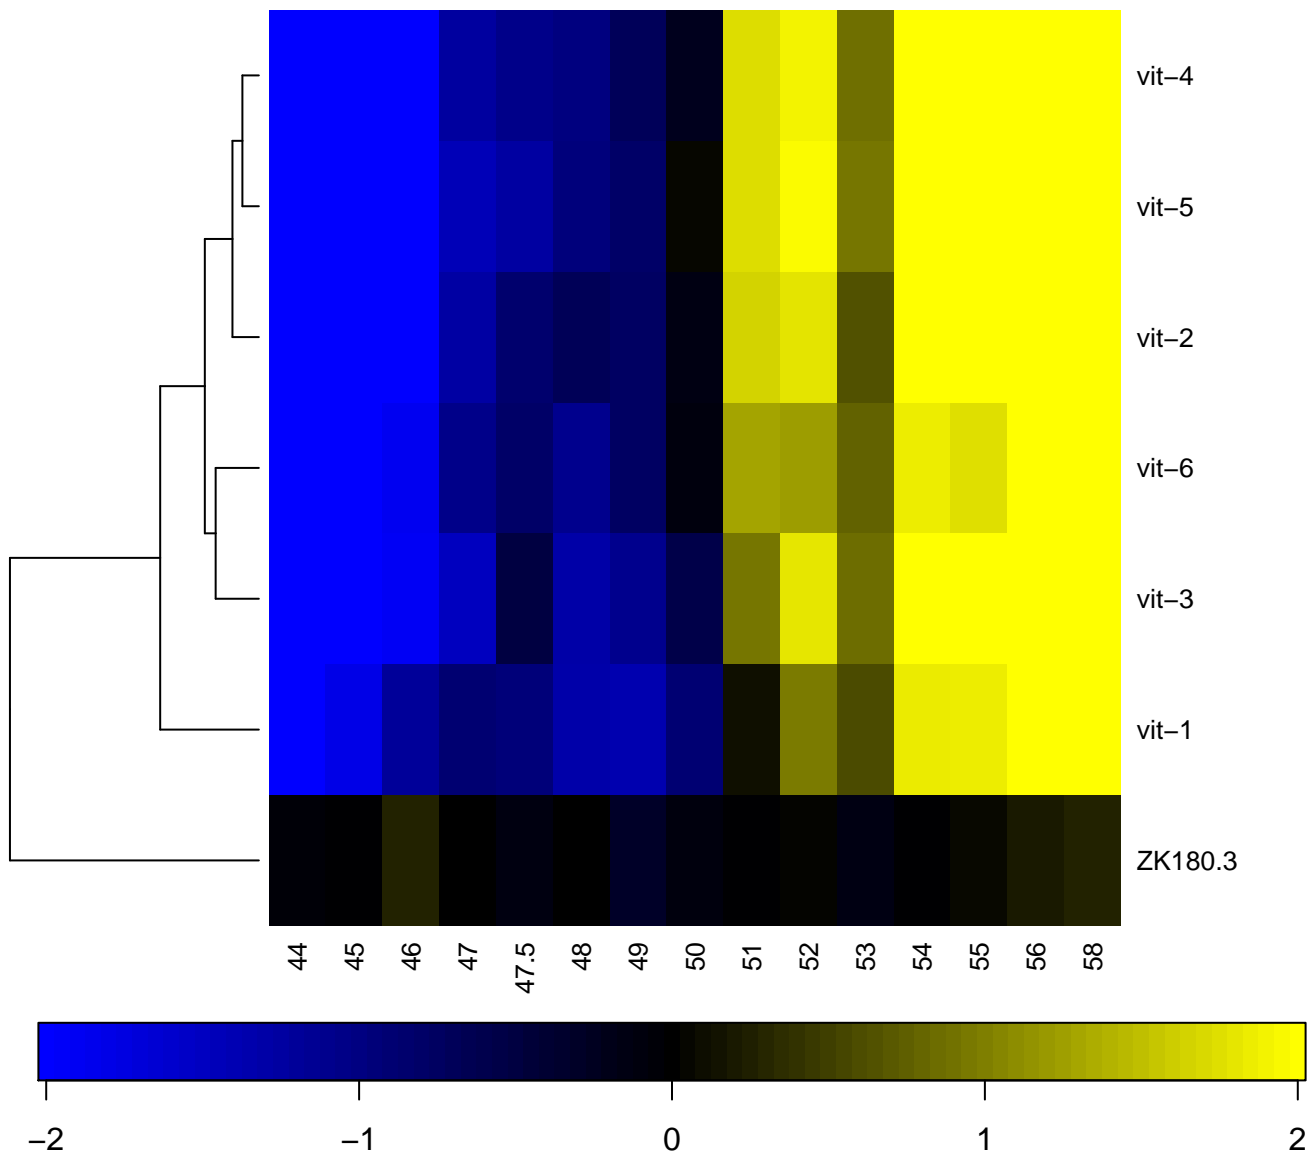



# locomotion

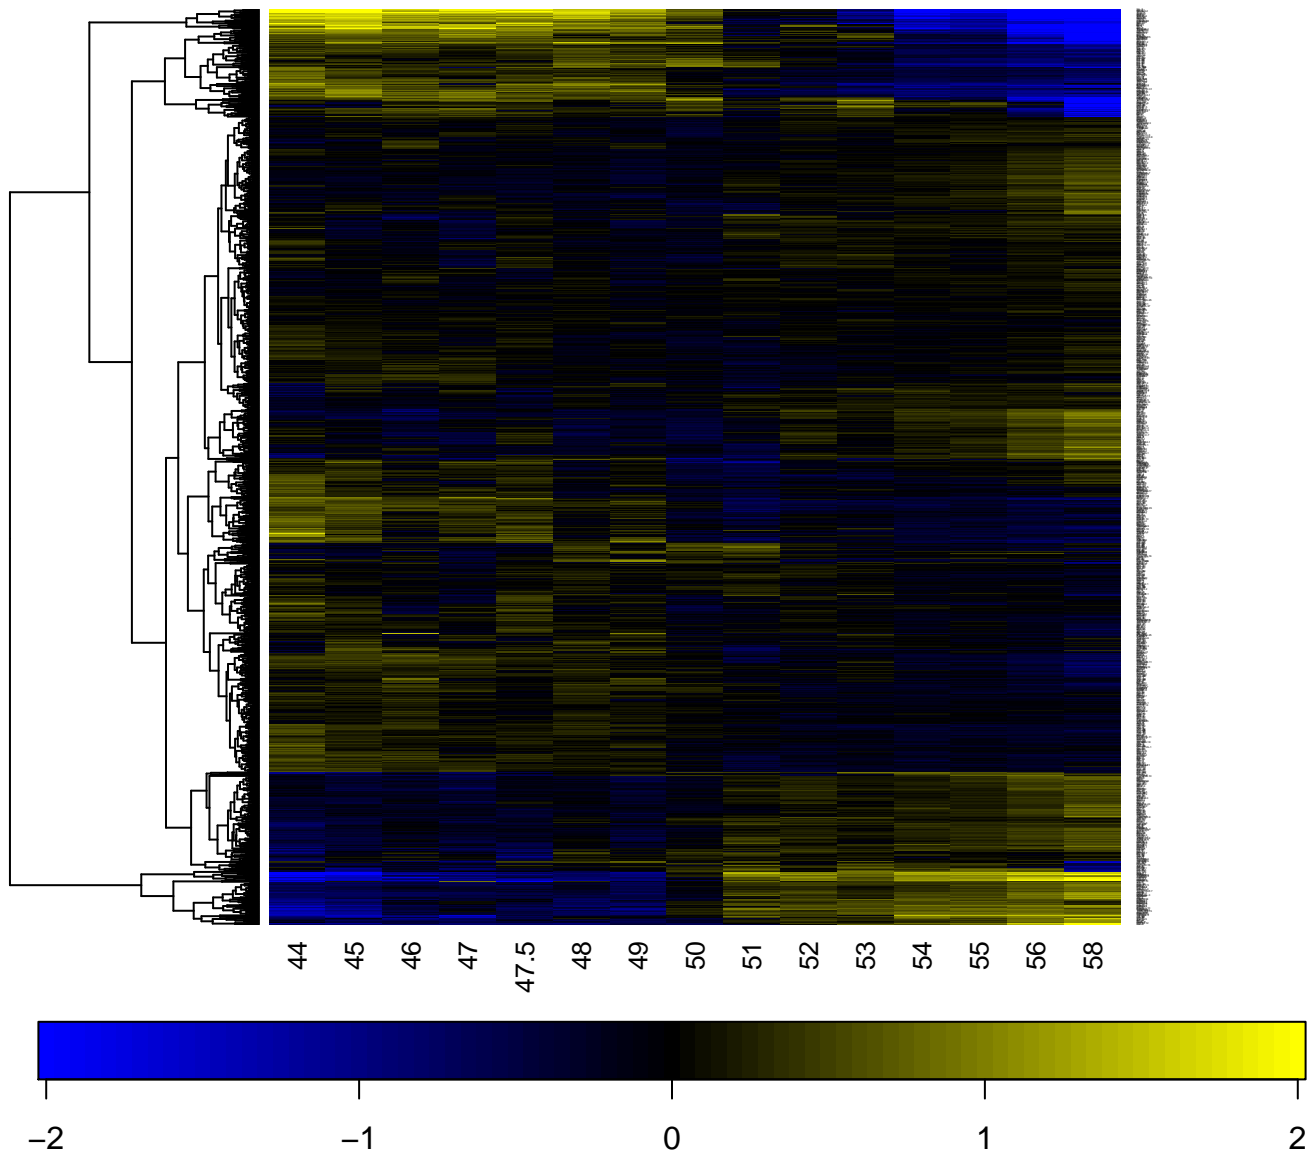





# locomotory behavior

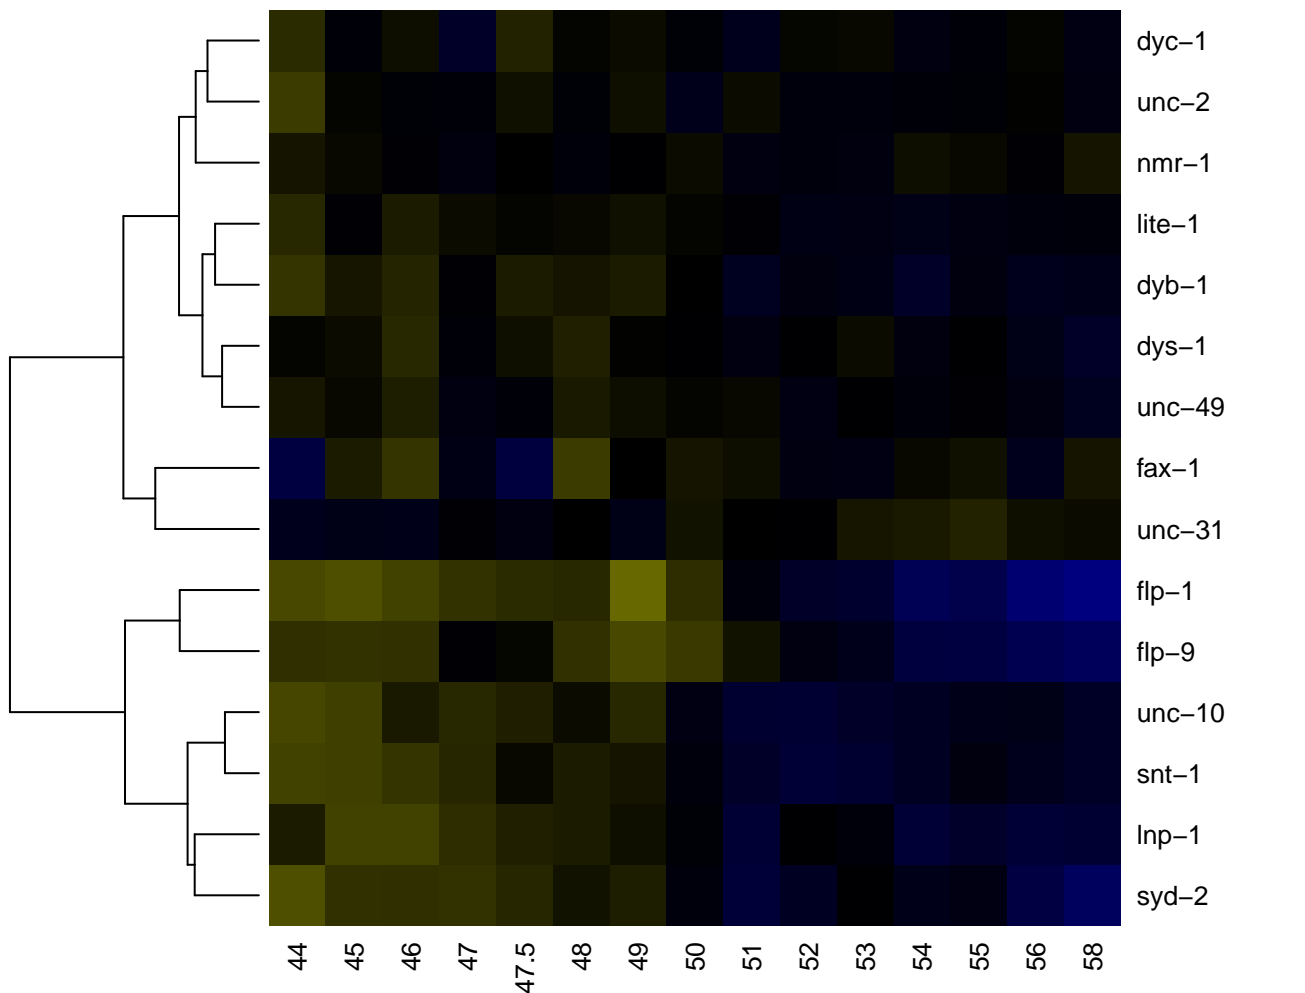

-2

-1

0

1

2

# lyase activity

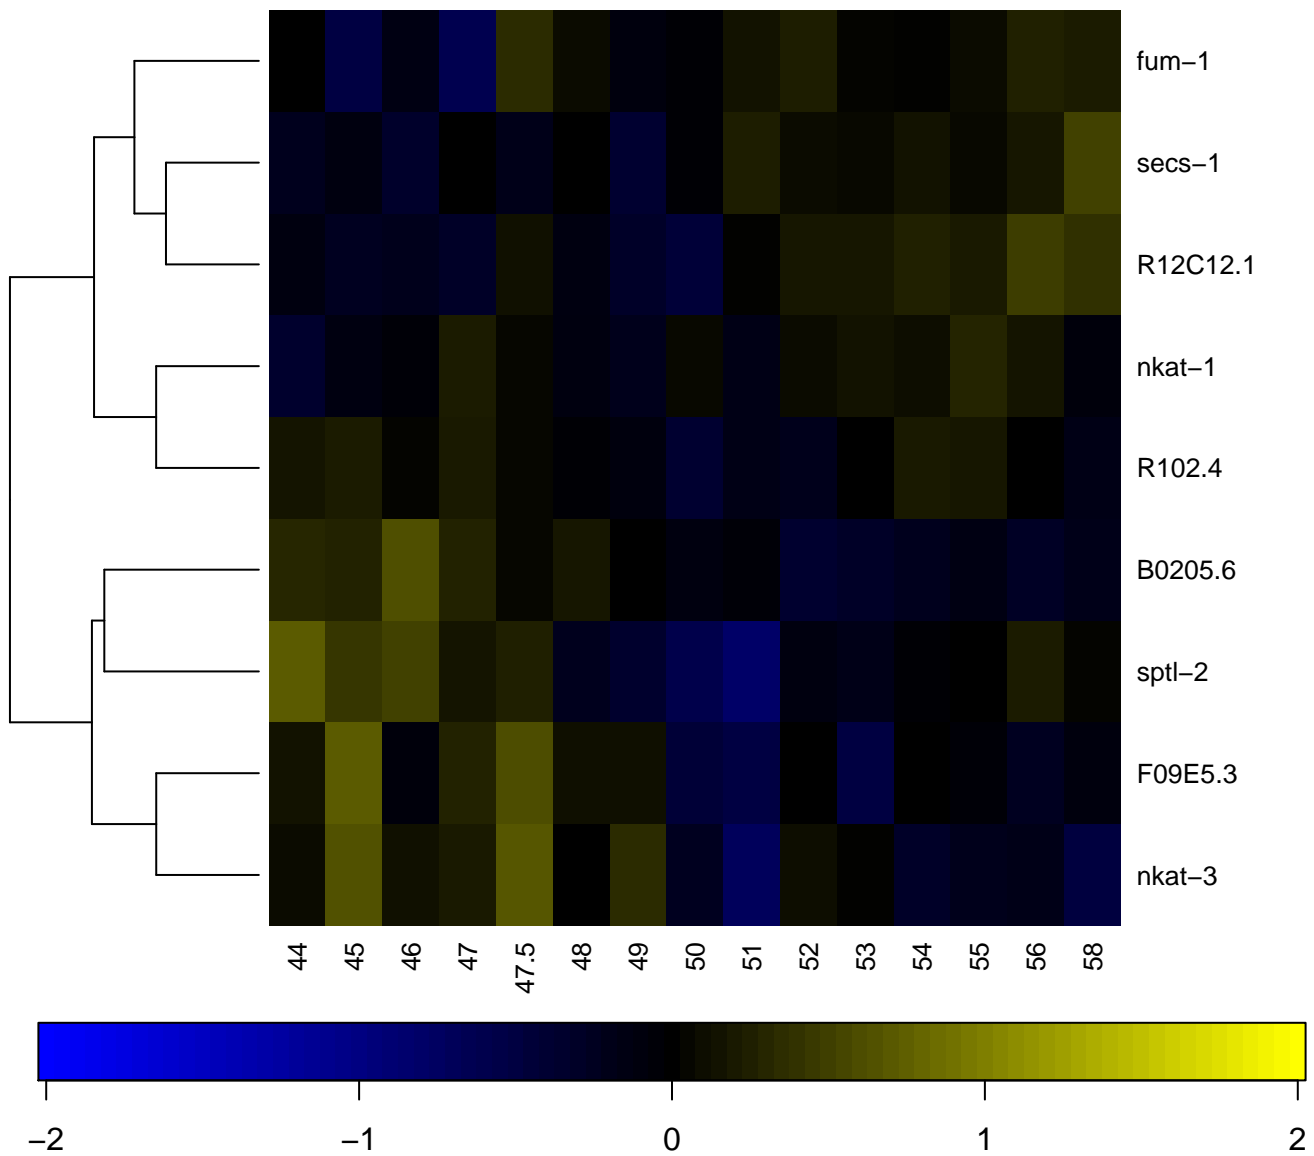

# lysosomal membrane

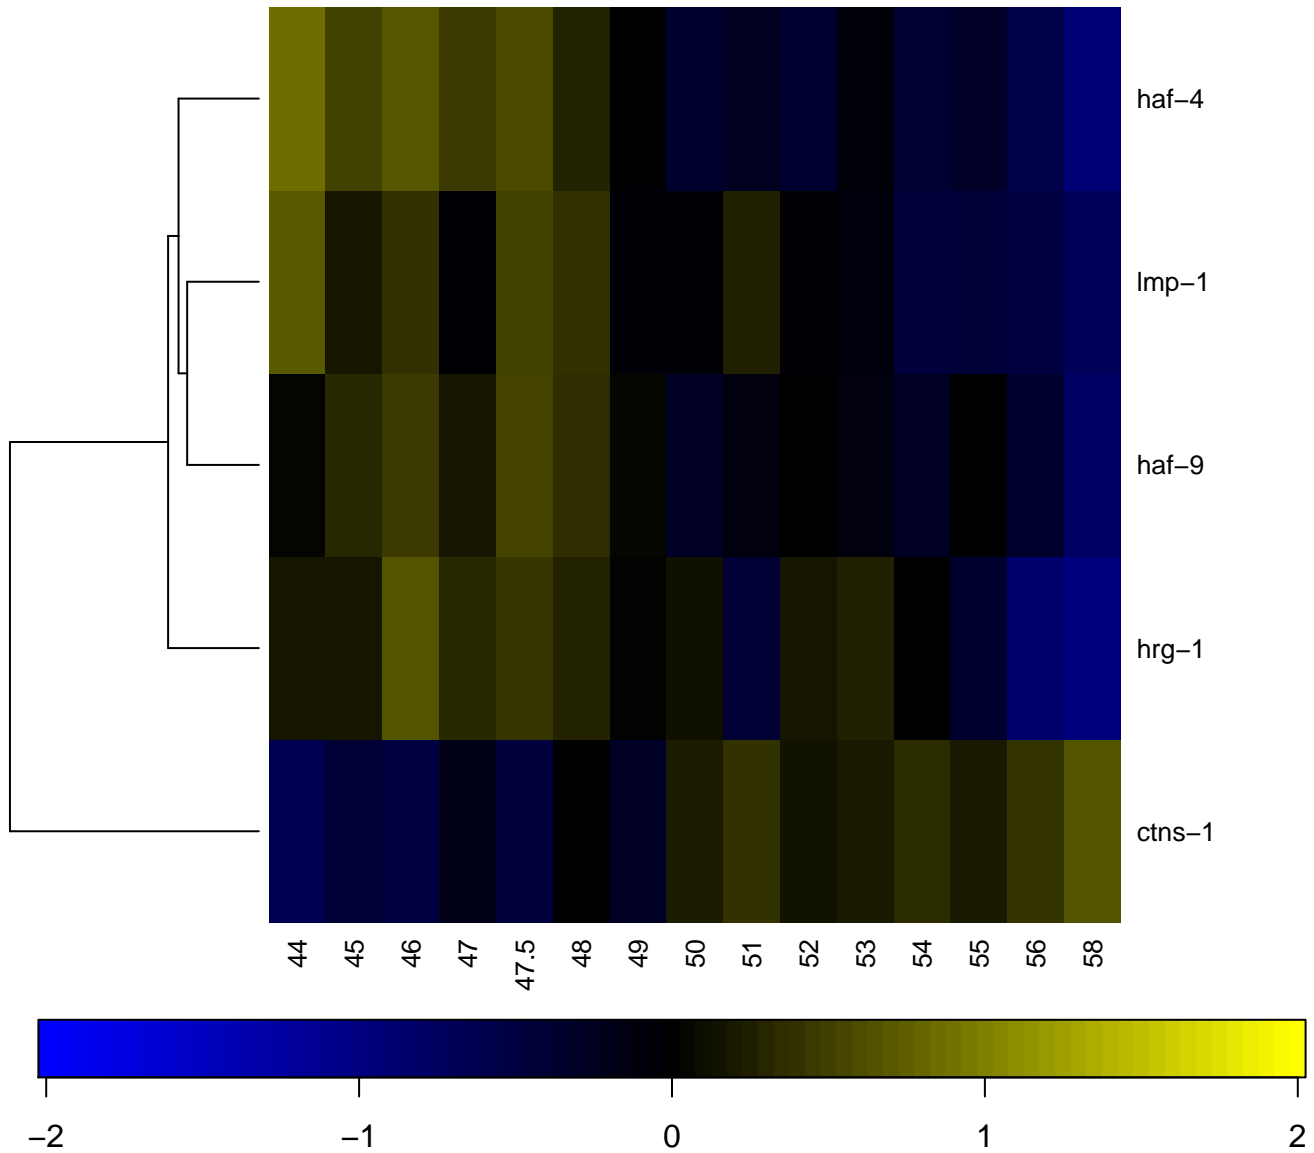

# lysosome

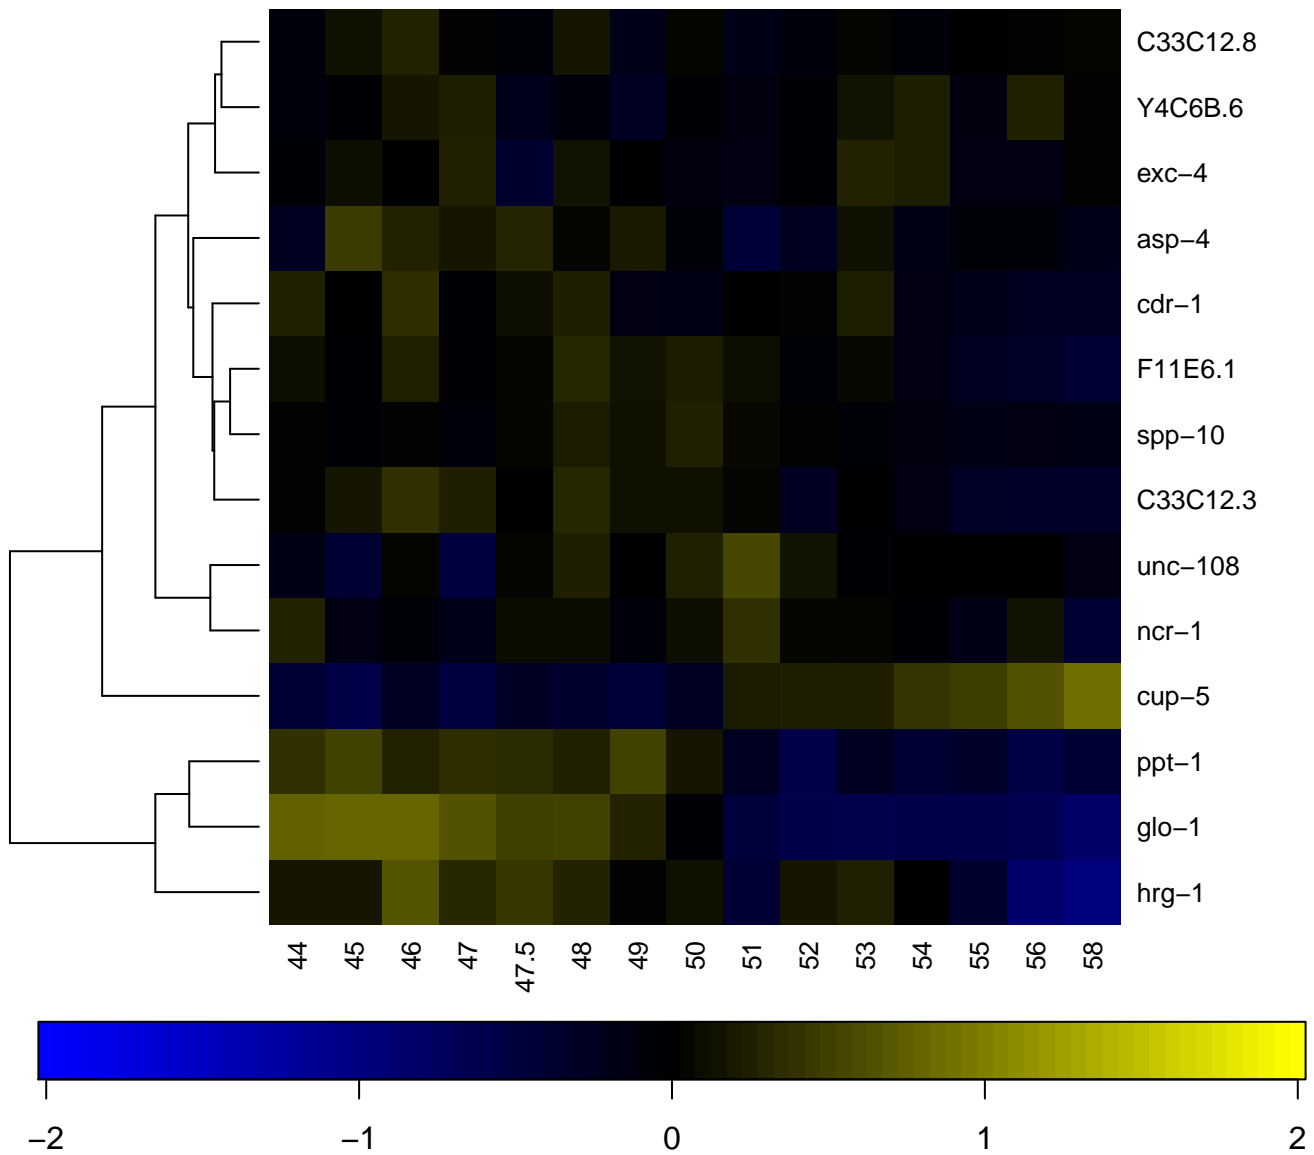





# M band

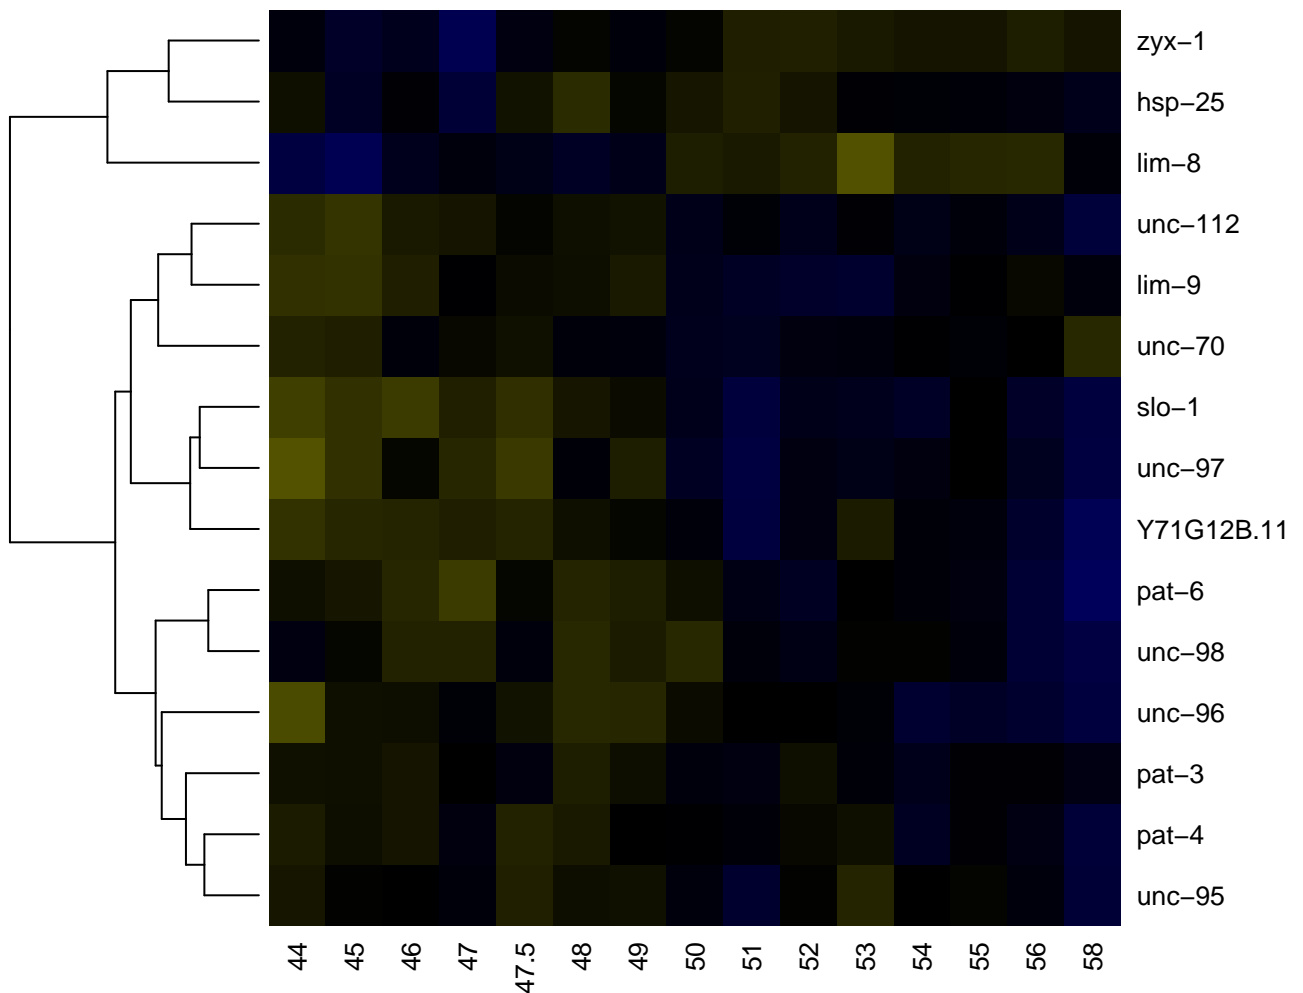







# magnesium ion binding

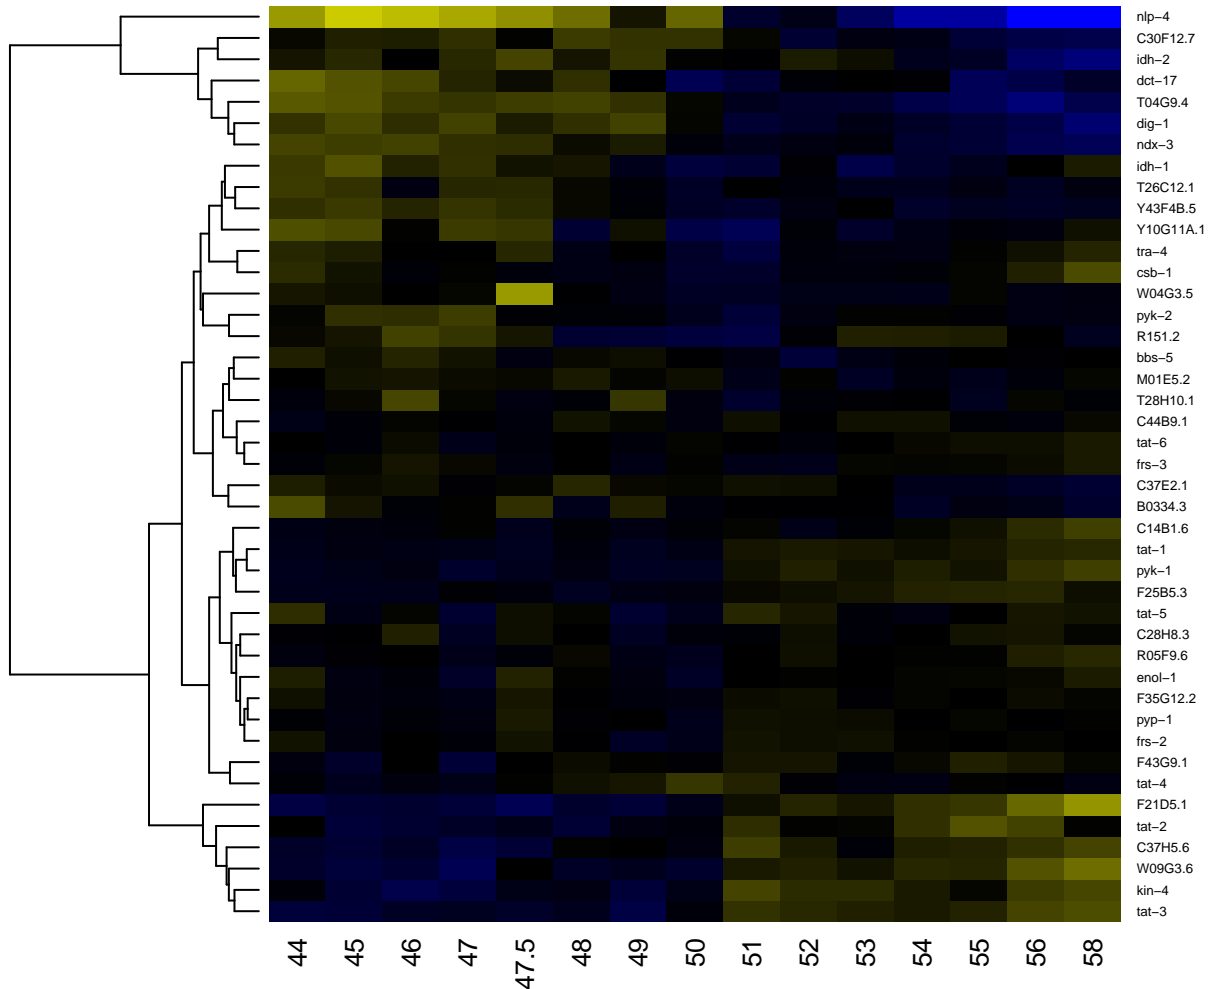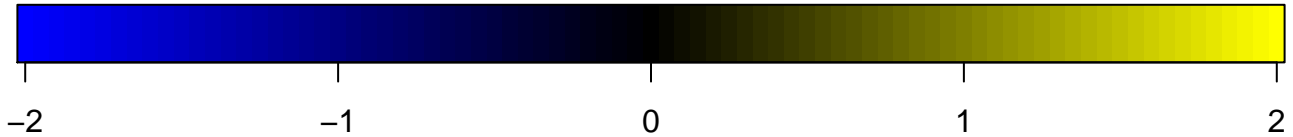



# male mating behavior

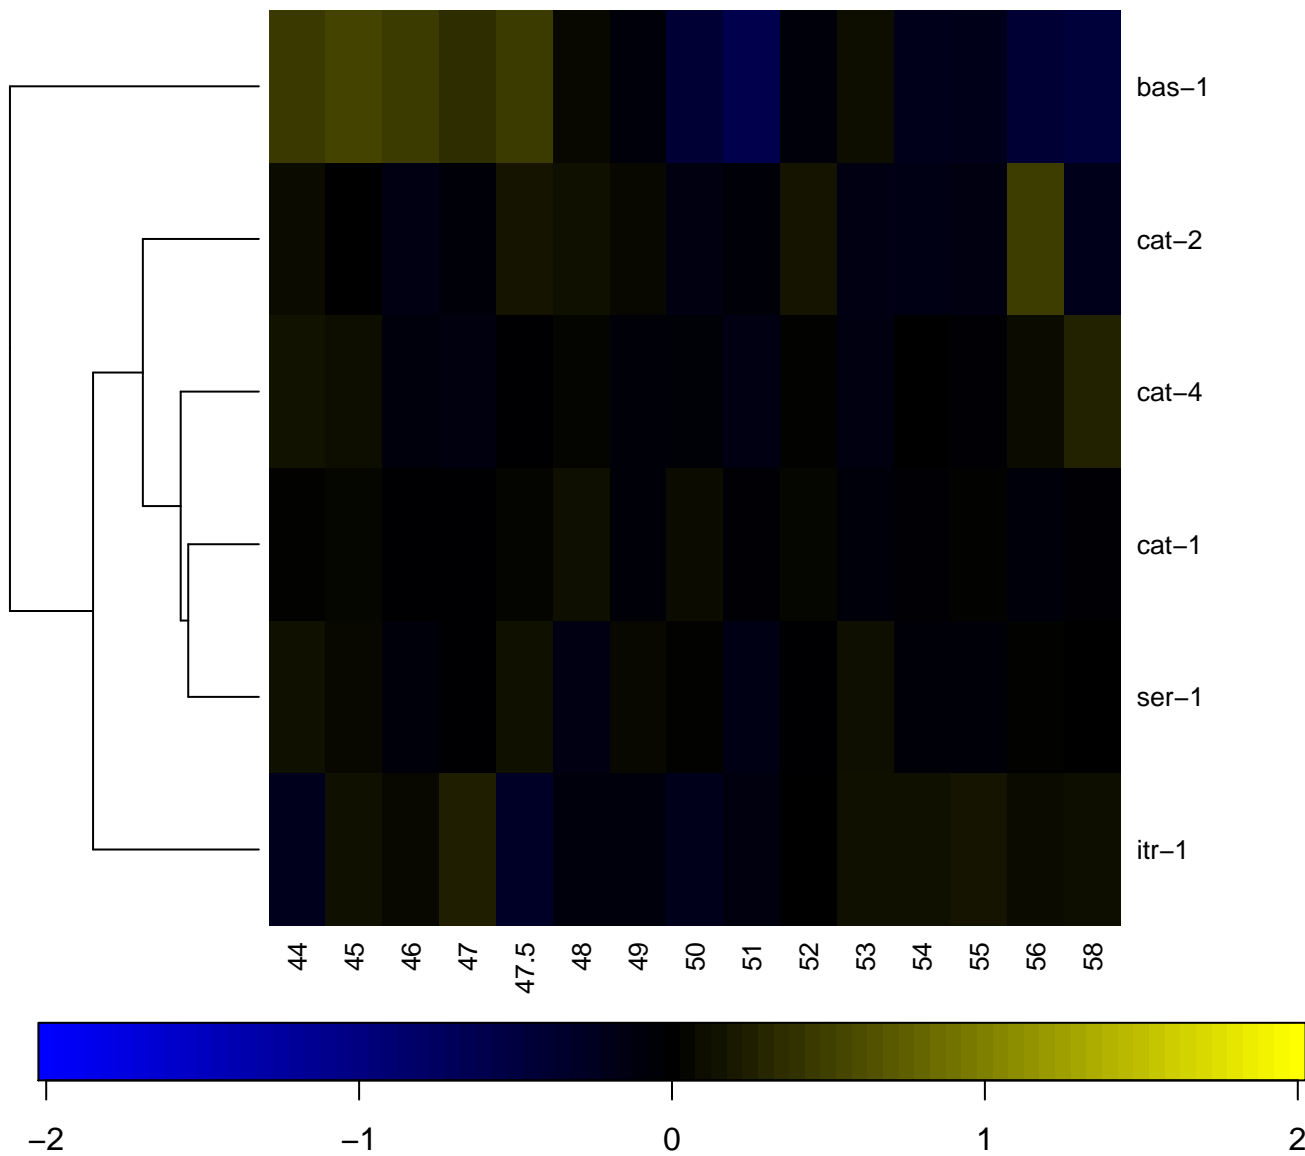

# manganese ion binding

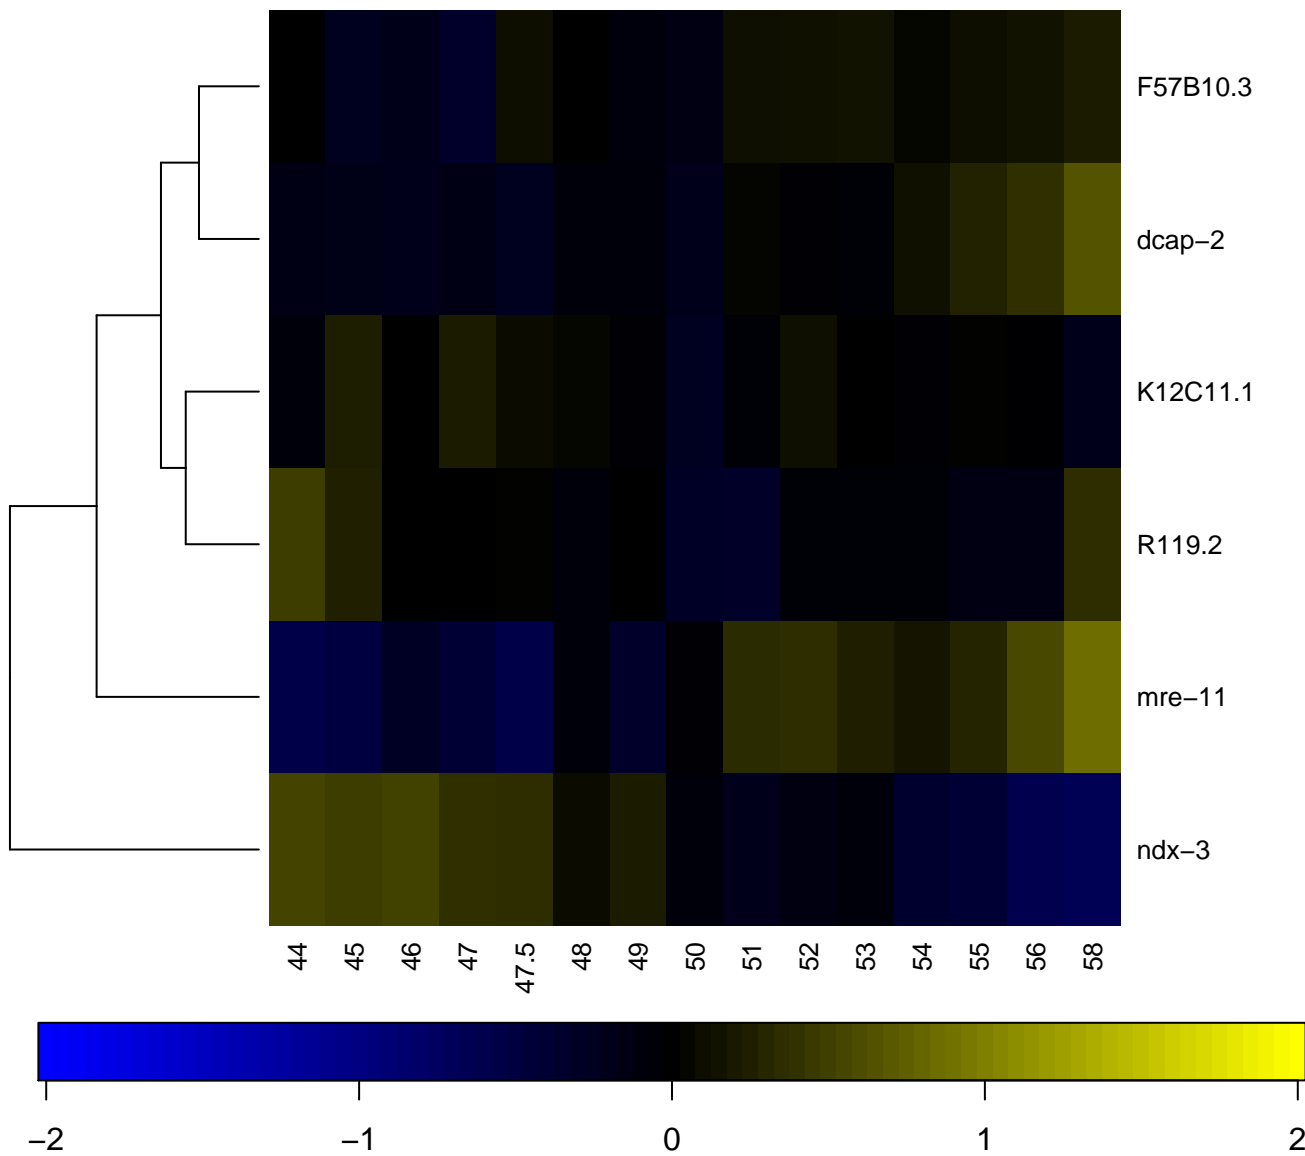



# MAP kinase activity

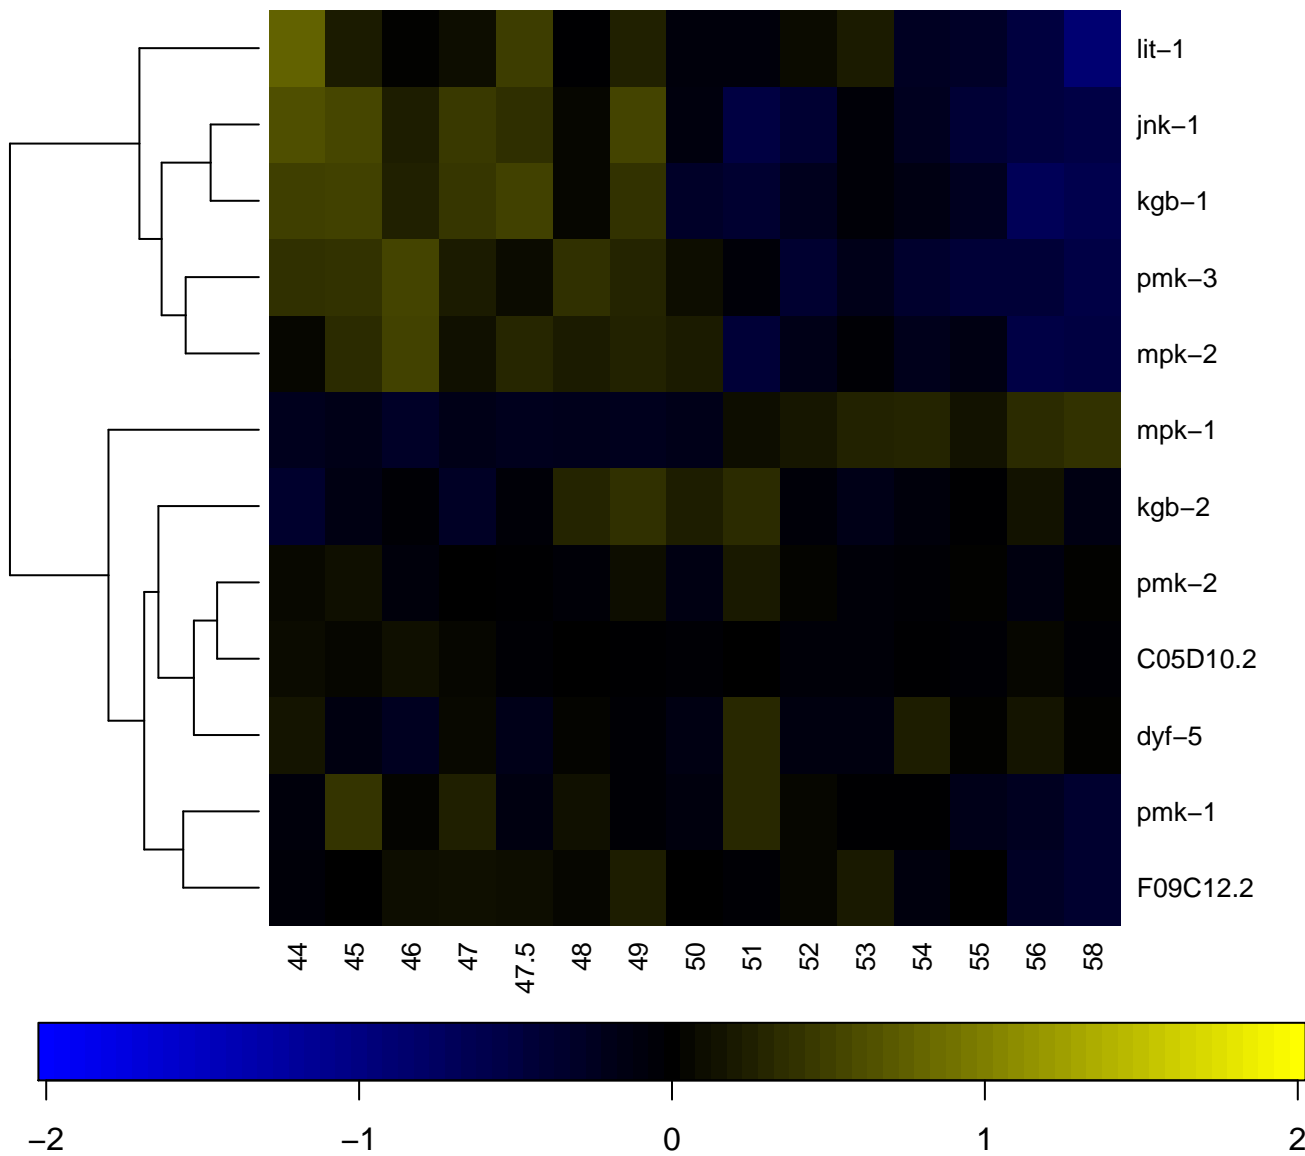



# masculinization of hermaphroditic germ-line

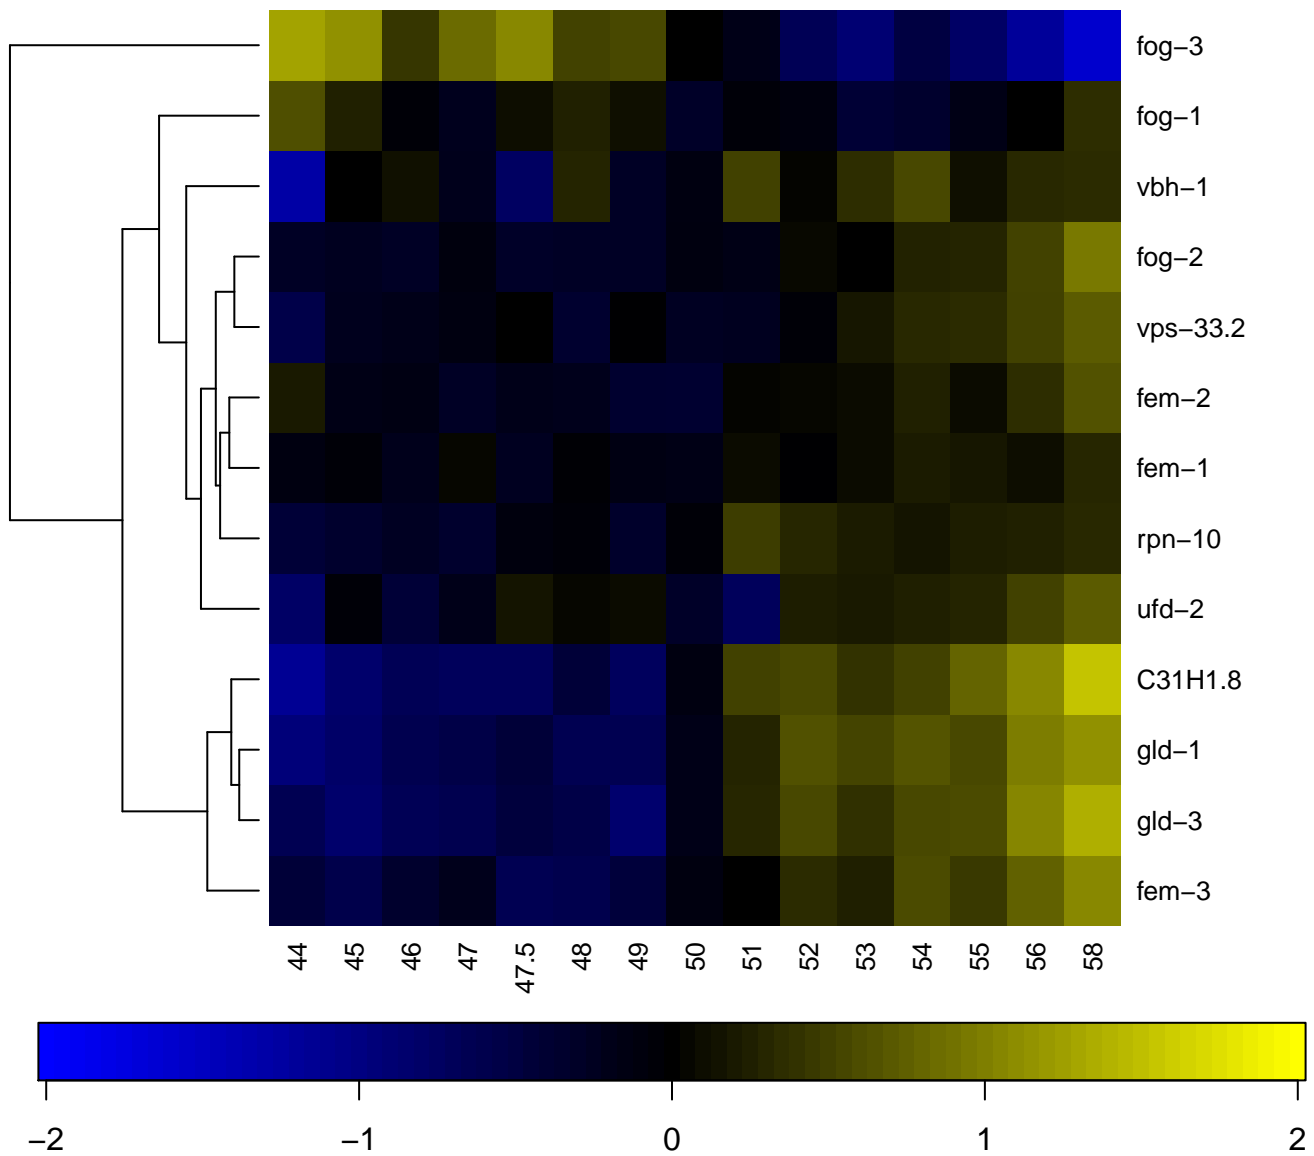





# meiosis

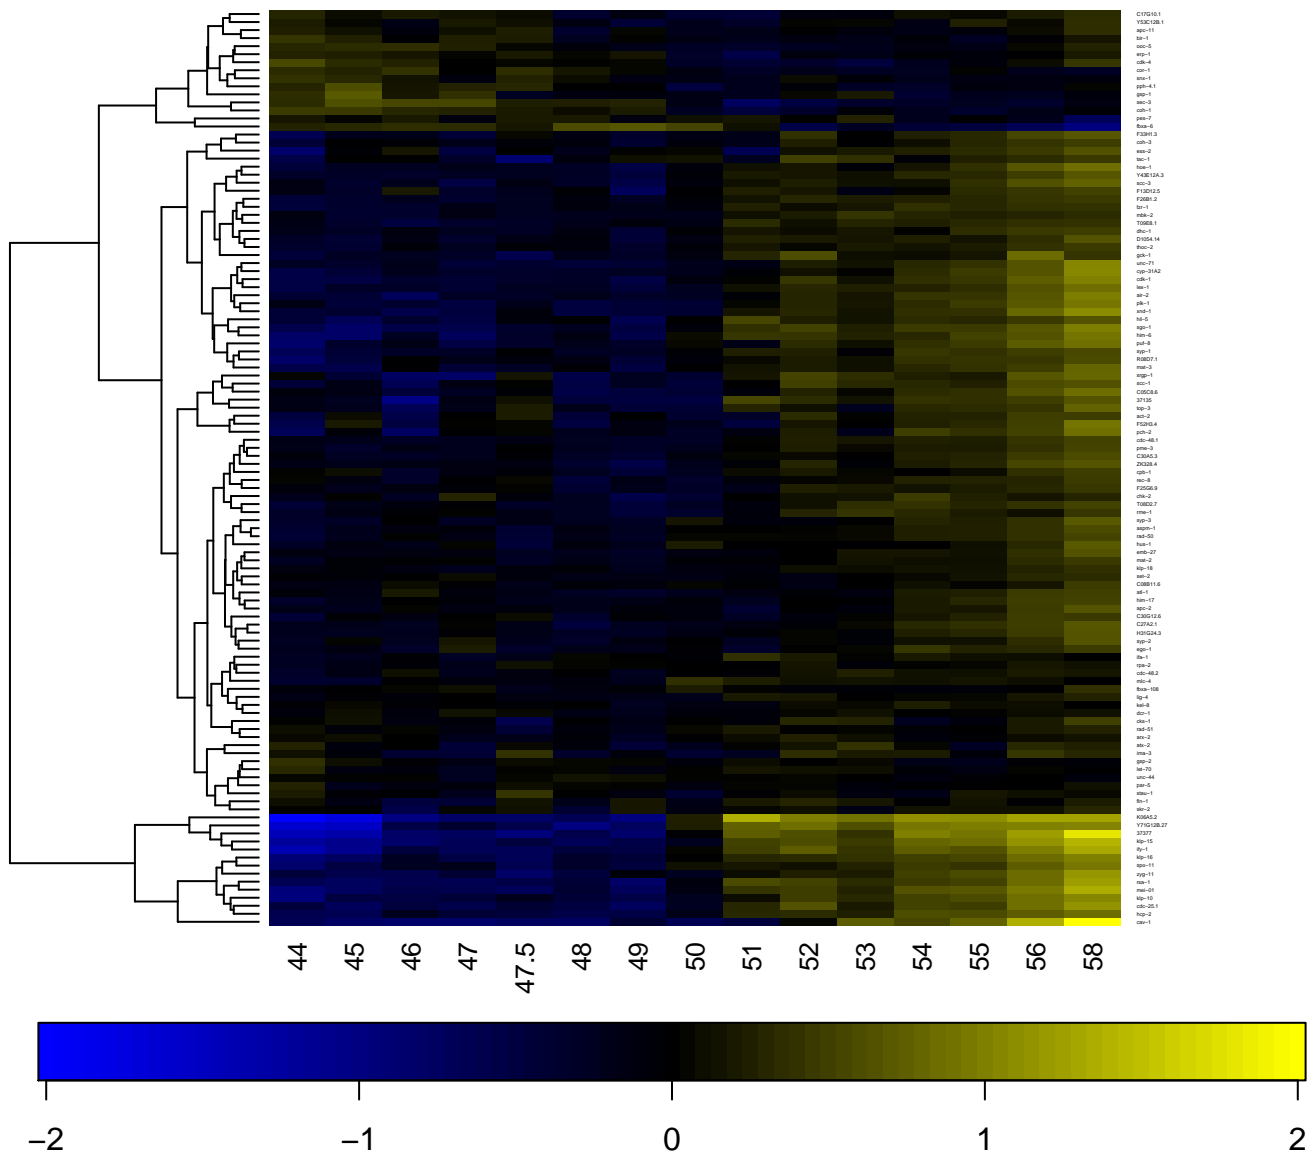

# meiotic chromosome segregation

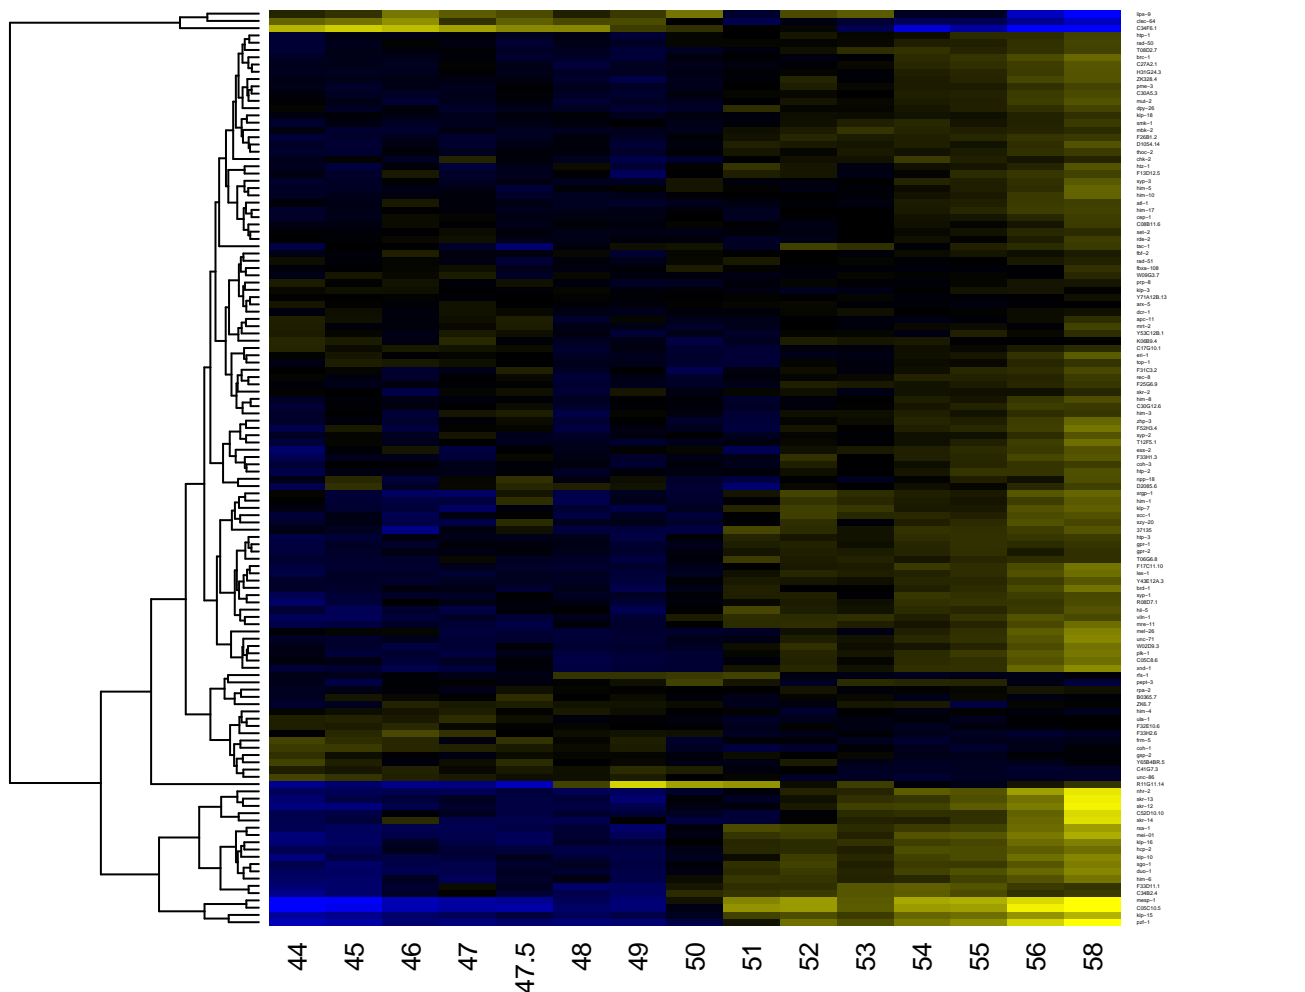

9p-9  
PAC9.4  
CAP9.1  
RAD50  
TRIO2  
SPO1  
C17orf11  
RIZ2A3  
C20orf4  
PRM2  
C16orf3  
ME1  
SPY2  
ME1  
FMR2  
FMR14  
ME2  
ME3  
SPO1  
SPO2  
SPO3  
SPO4  
SPO5  
SPO6  
SPO7  
SPO8  
SPO9  
SPO10  
SPO11  
SPO12  
SPO13  
SPO14  
SPO15  
SPO16  
SPO17  
SPO18  
SPO19  
SPO20  
SPO21  
SPO22  
SPO23  
SPO24  
SPO25  
SPO26  
SPO27  
SPO28  
SPO29  
SPO30  
SPO31  
SPO32  
SPO33  
SPO34  
SPO35  
SPO36  
SPO37  
SPO38  
SPO39  
SPO40  
SPO41  
SPO42  
SPO43  
SPO44  
SPO45  
SPO46  
SPO47  
SPO48  
SPO49  
SPO50  
SPO51  
SPO52  
SPO53  
SPO54  
SPO55  
SPO56  
SPO57  
SPO58  
SPO59  
SPO60  
SPO61  
SPO62  
SPO63  
SPO64  
SPO65  
SPO66  
SPO67  
SPO68  
SPO69  
SPO70  
SPO71  
SPO72  
SPO73  
SPO74  
SPO75  
SPO76  
SPO77  
SPO78  
SPO79  
SPO80  
SPO81  
SPO82  
SPO83  
SPO84  
SPO85  
SPO86  
SPO87  
SPO88  
SPO89  
SPO90  
SPO91  
SPO92  
SPO93  
SPO94  
SPO95  
SPO96  
SPO97  
SPO98  
SPO99  
SPO100  
SPO101  
SPO102  
SPO103  
SPO104  
SPO105  
SPO106  
SPO107  
SPO108  
SPO109  
SPO110

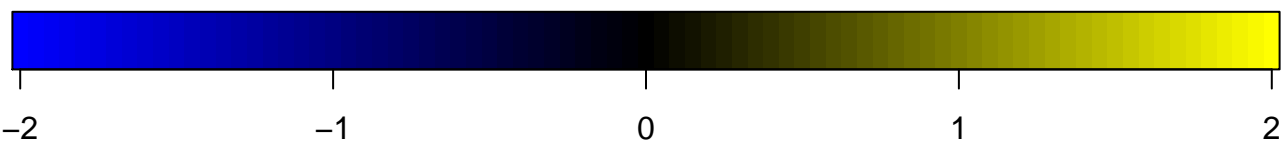



# membrane

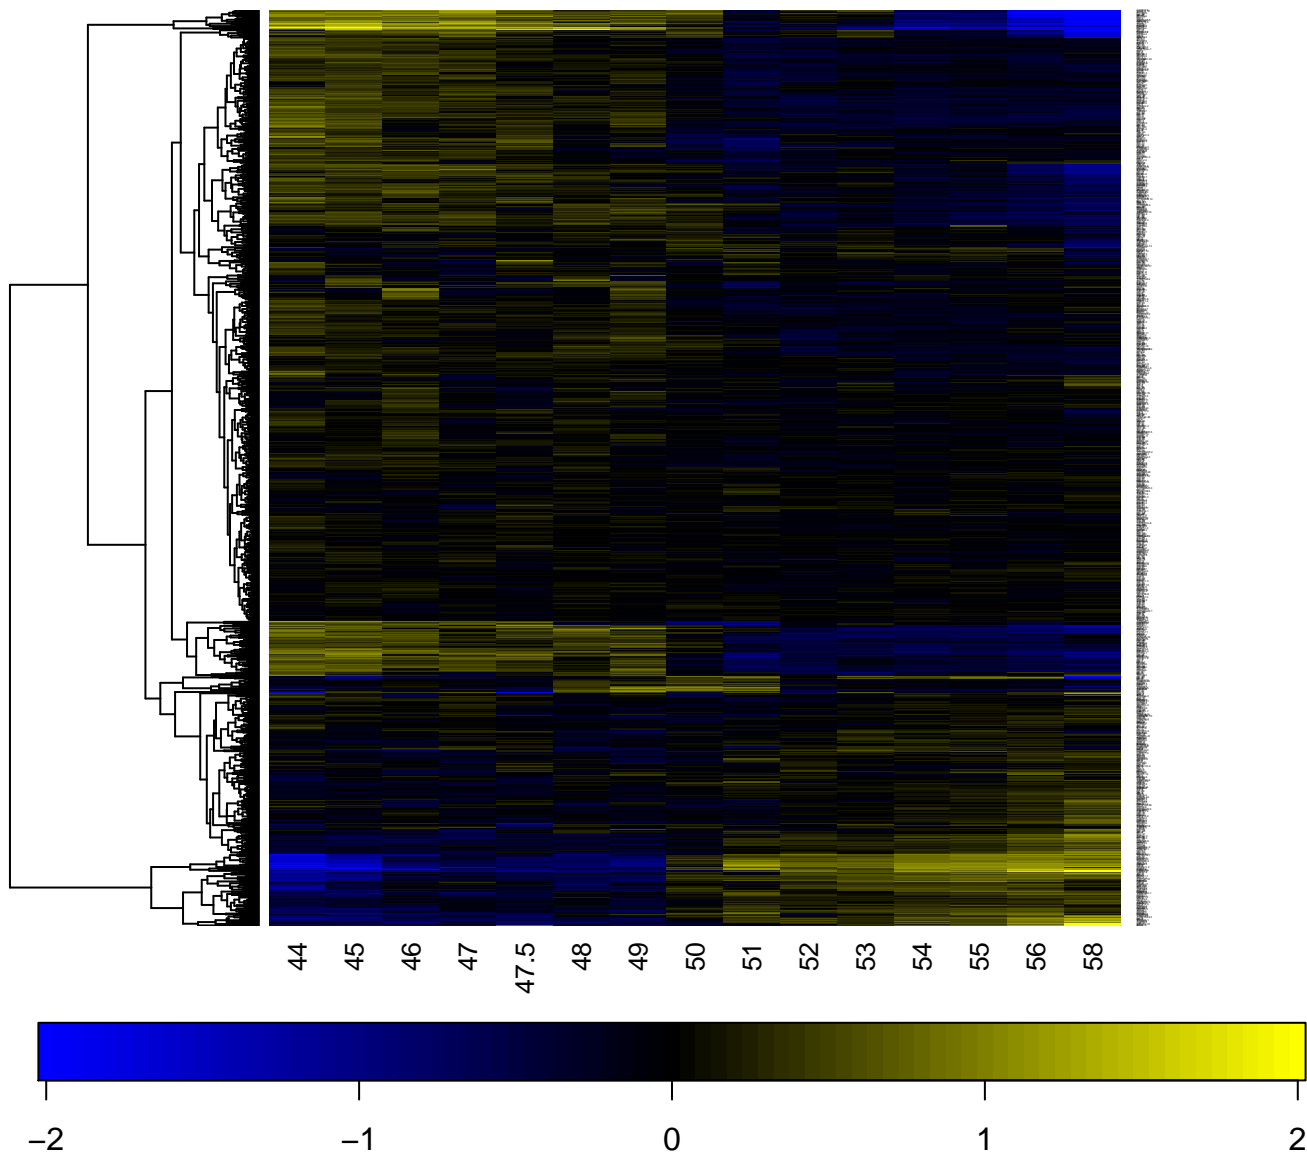

# membrane coat

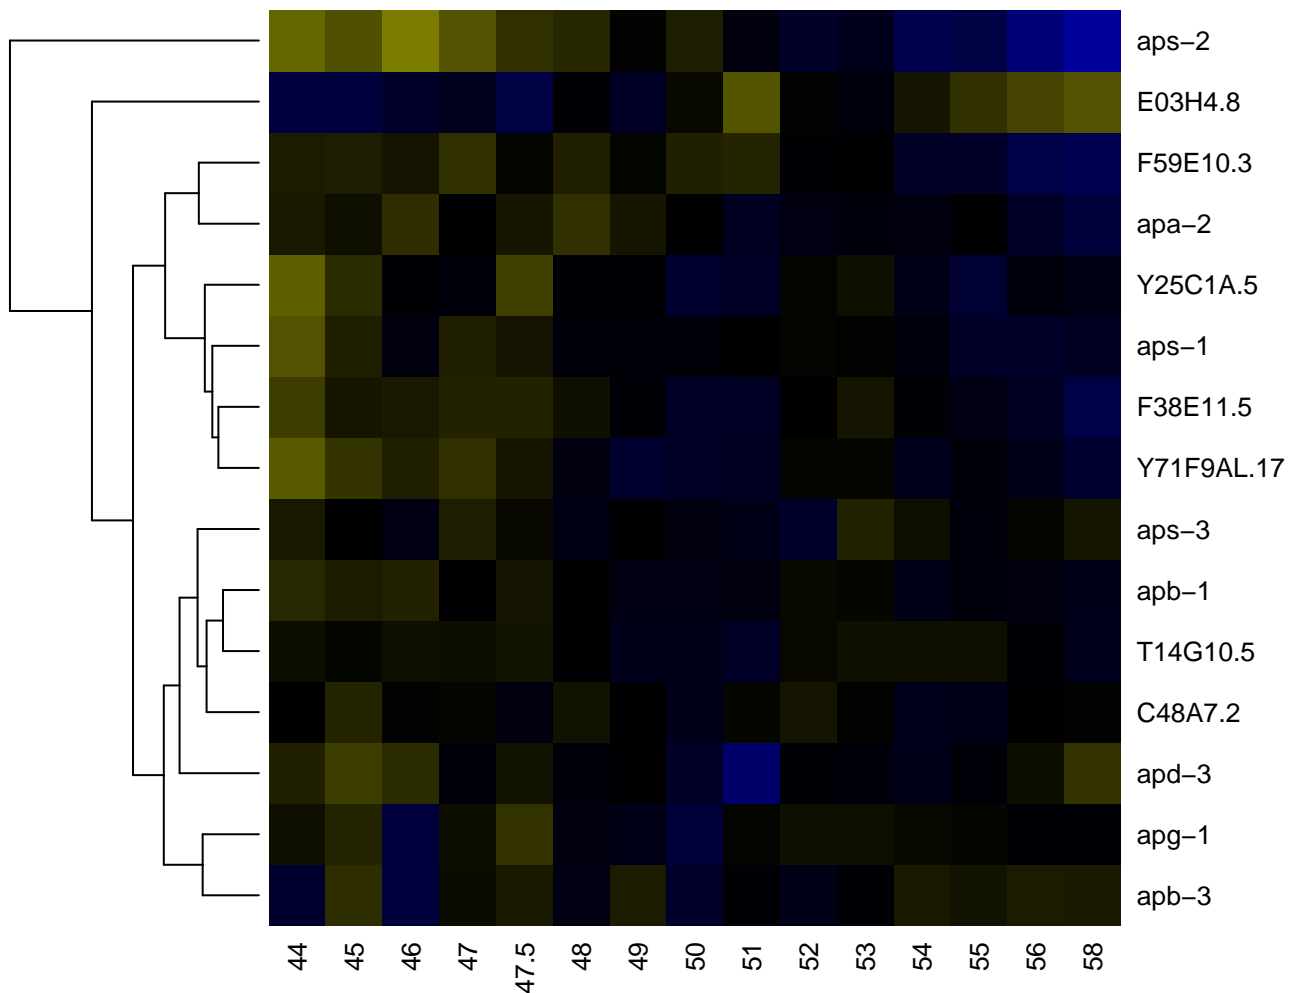



# membrane fraction

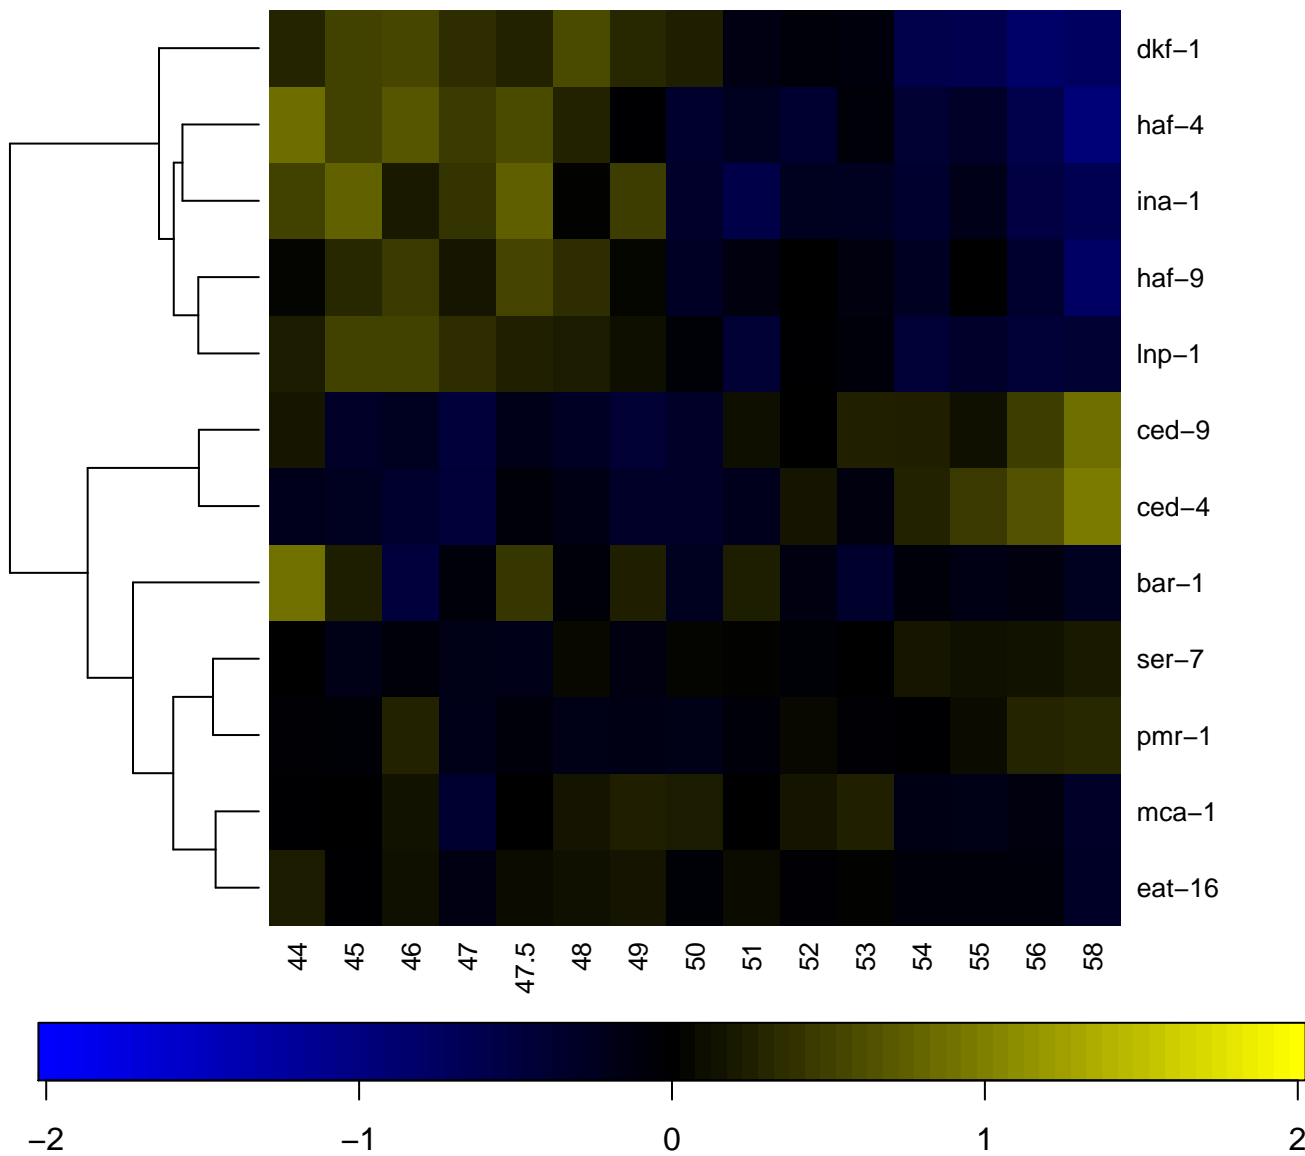



# metabolic process

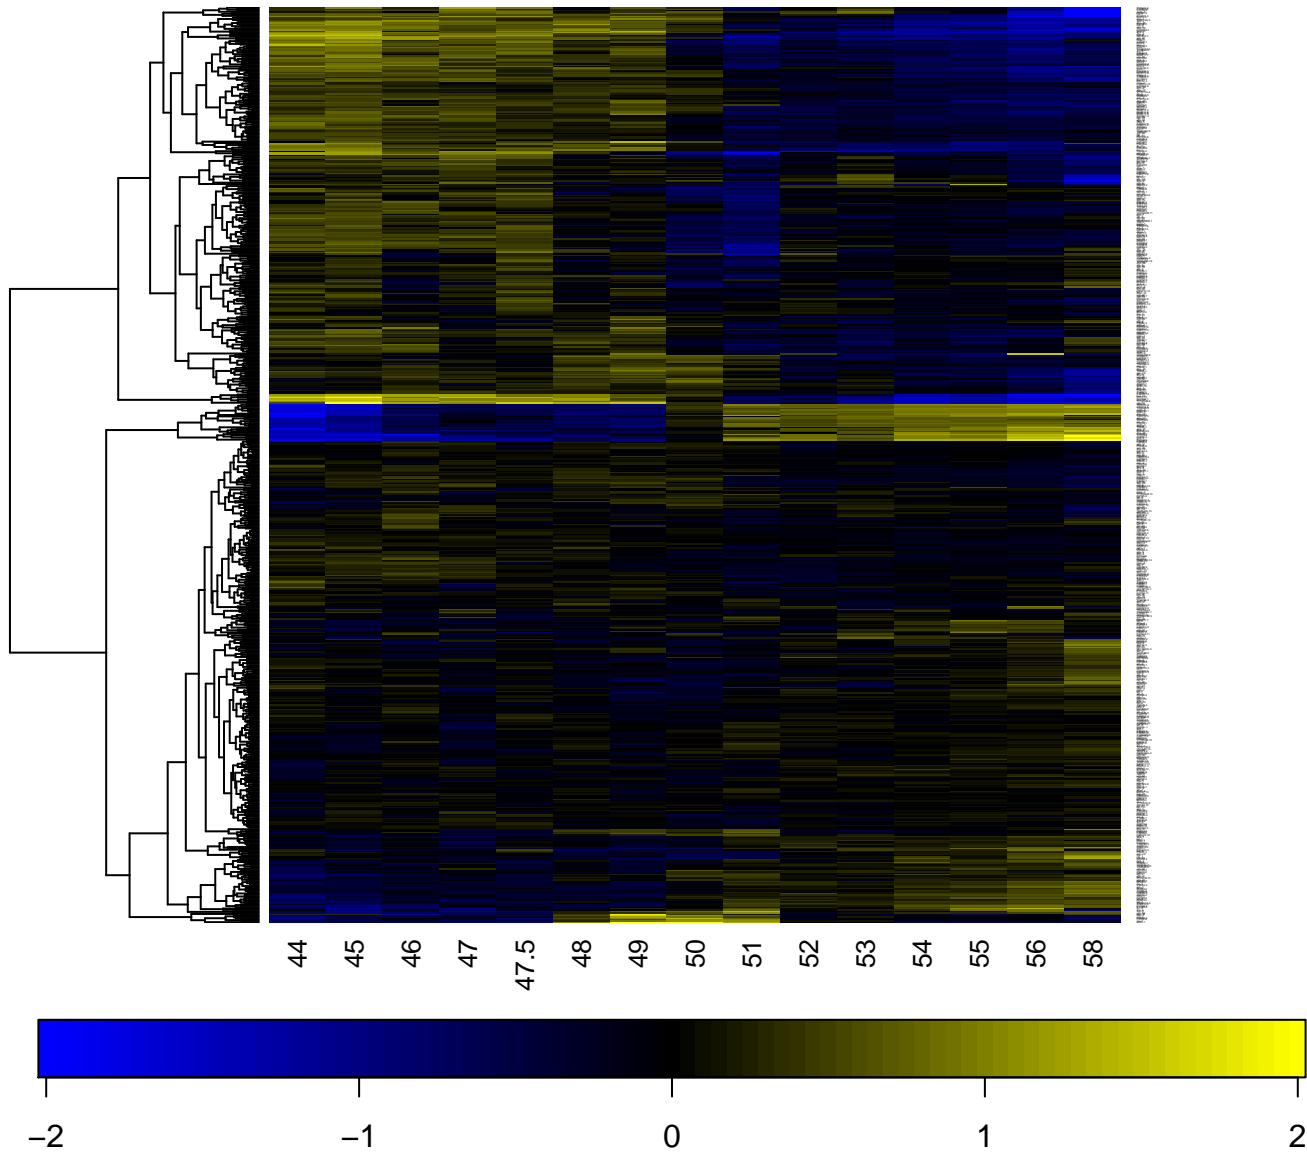

# metal ion binding

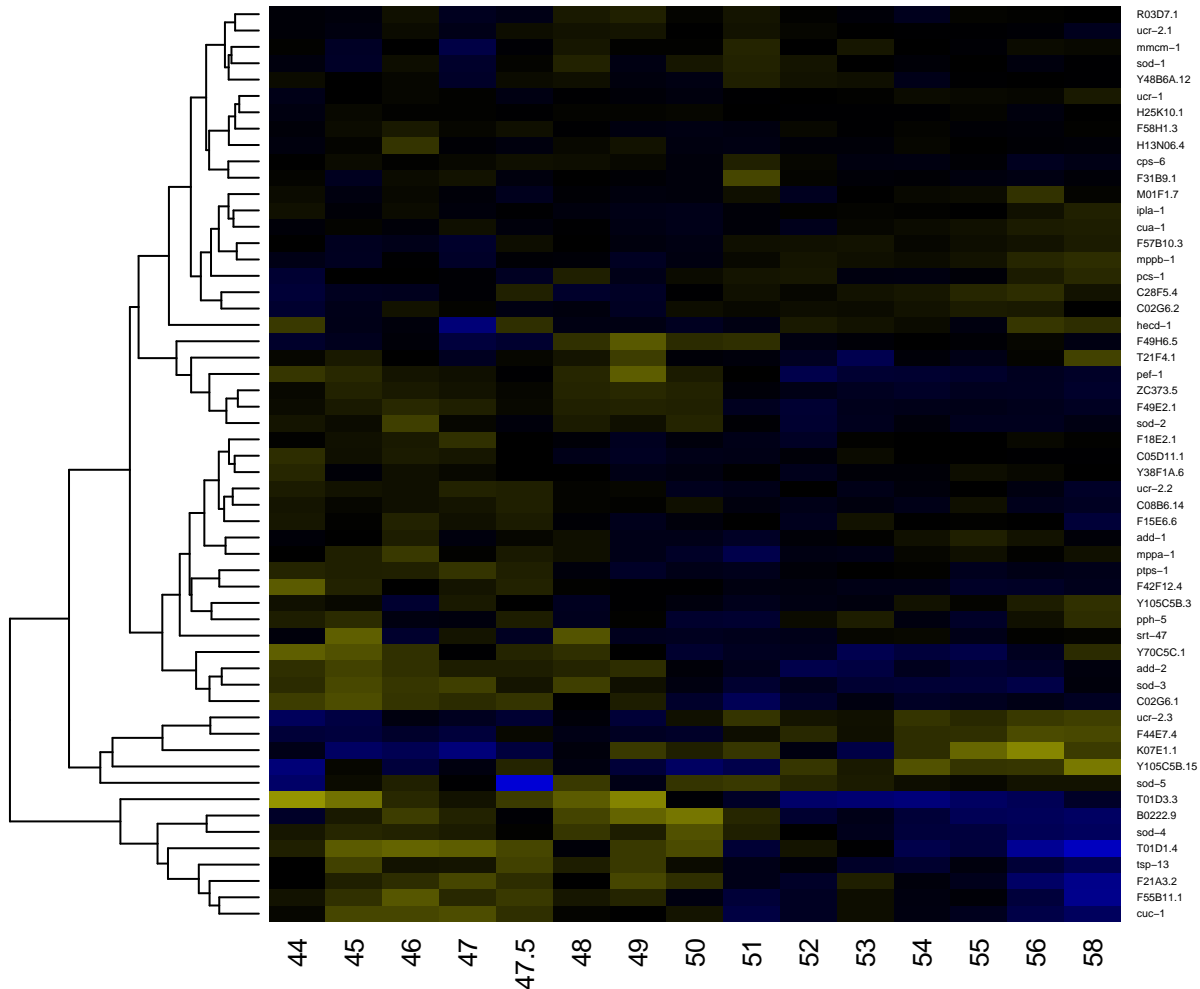











# metallopeptidase activity

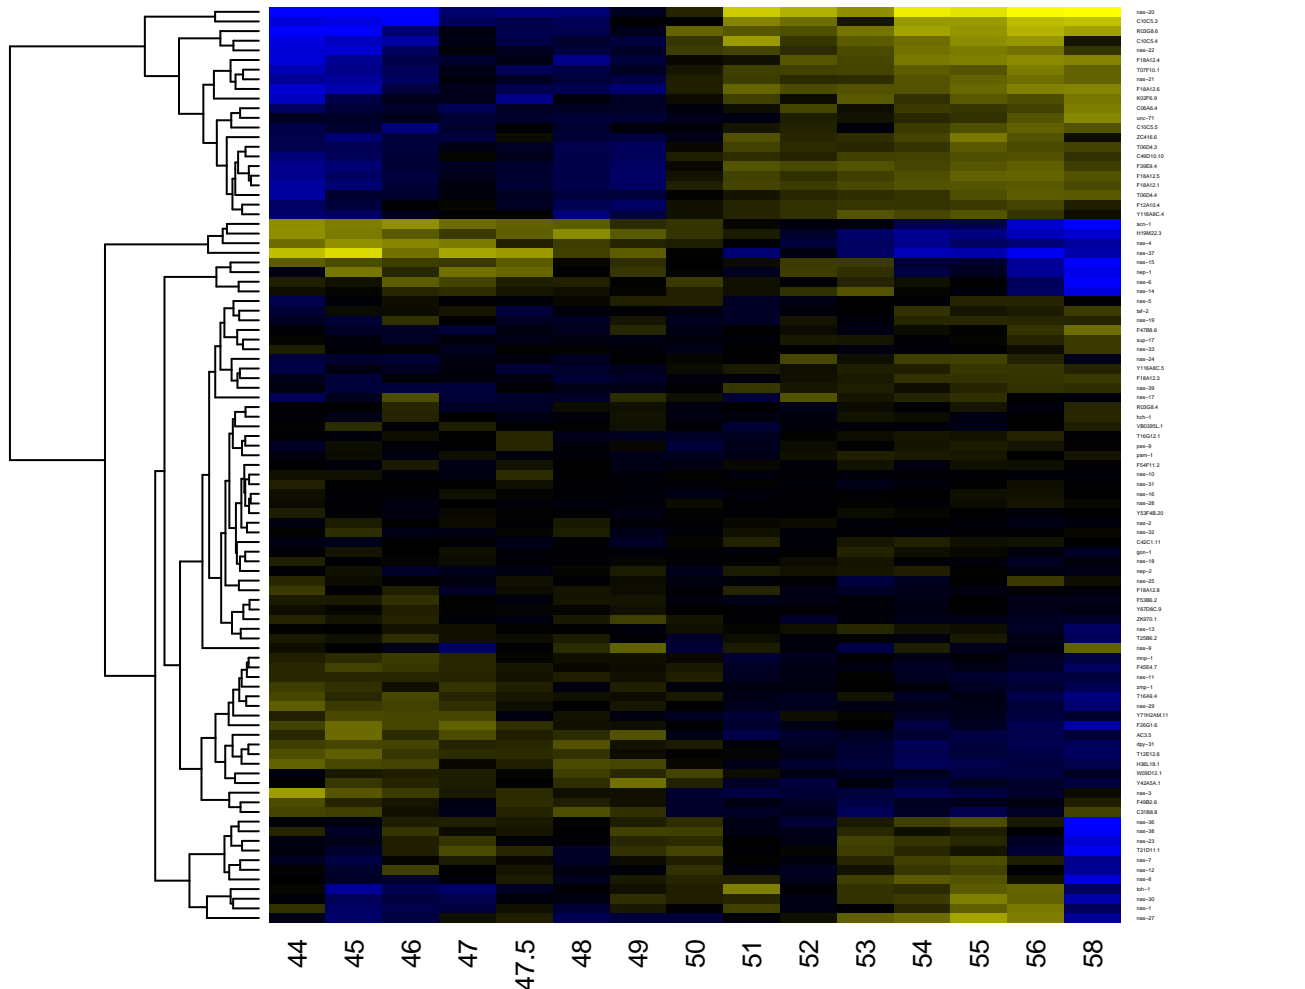

# methylation

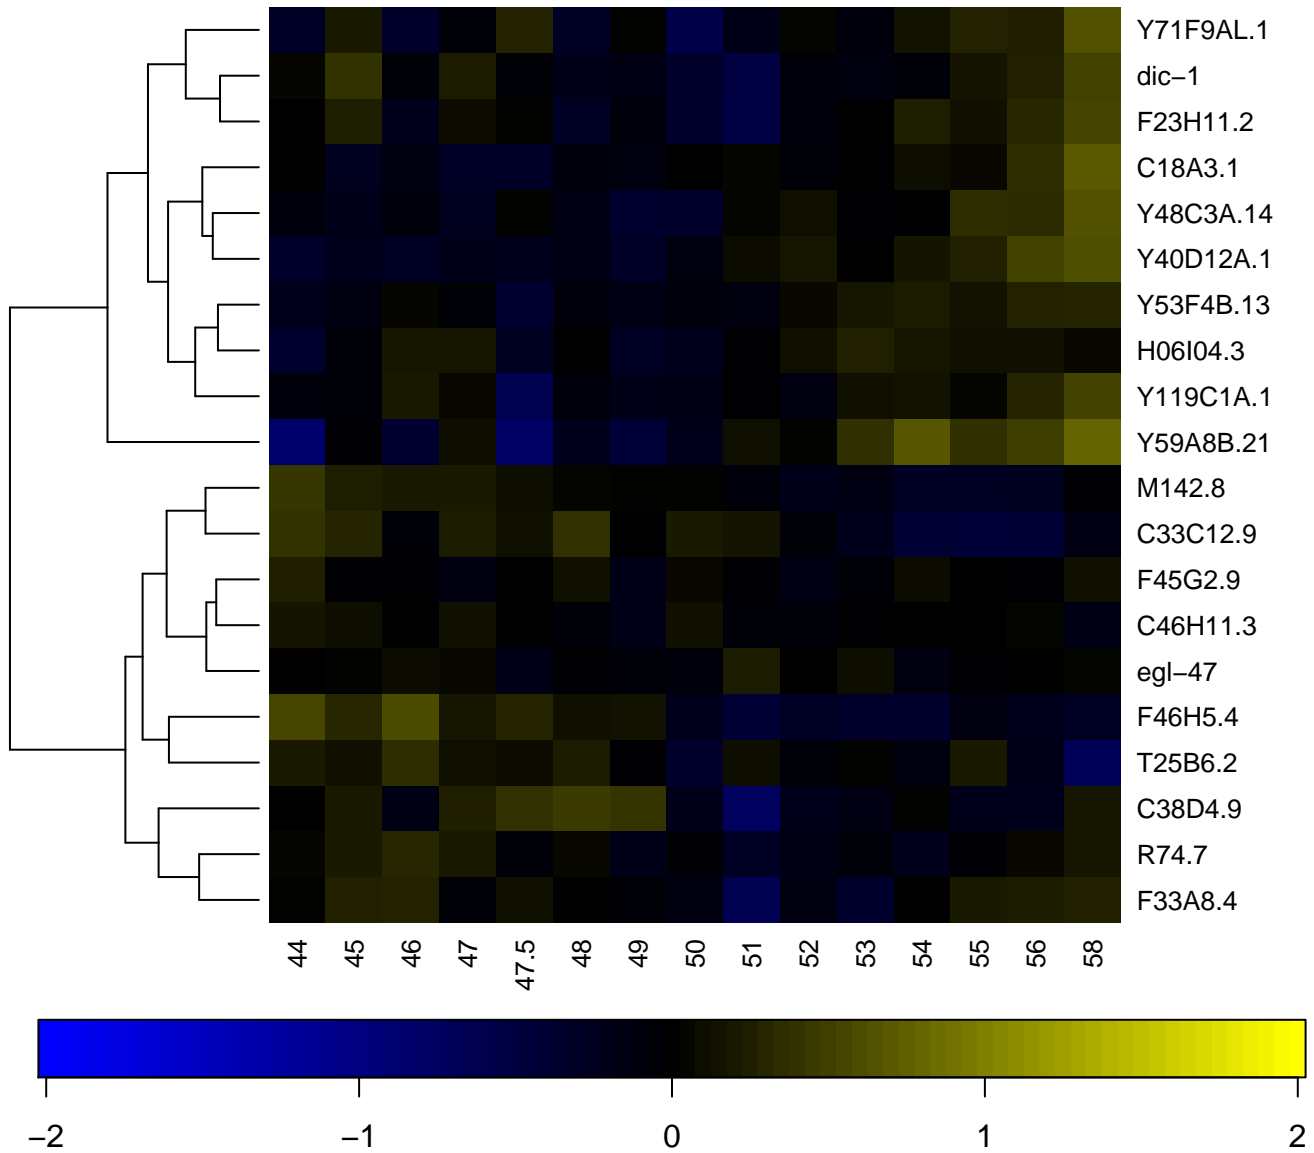

# methyltransferase activity

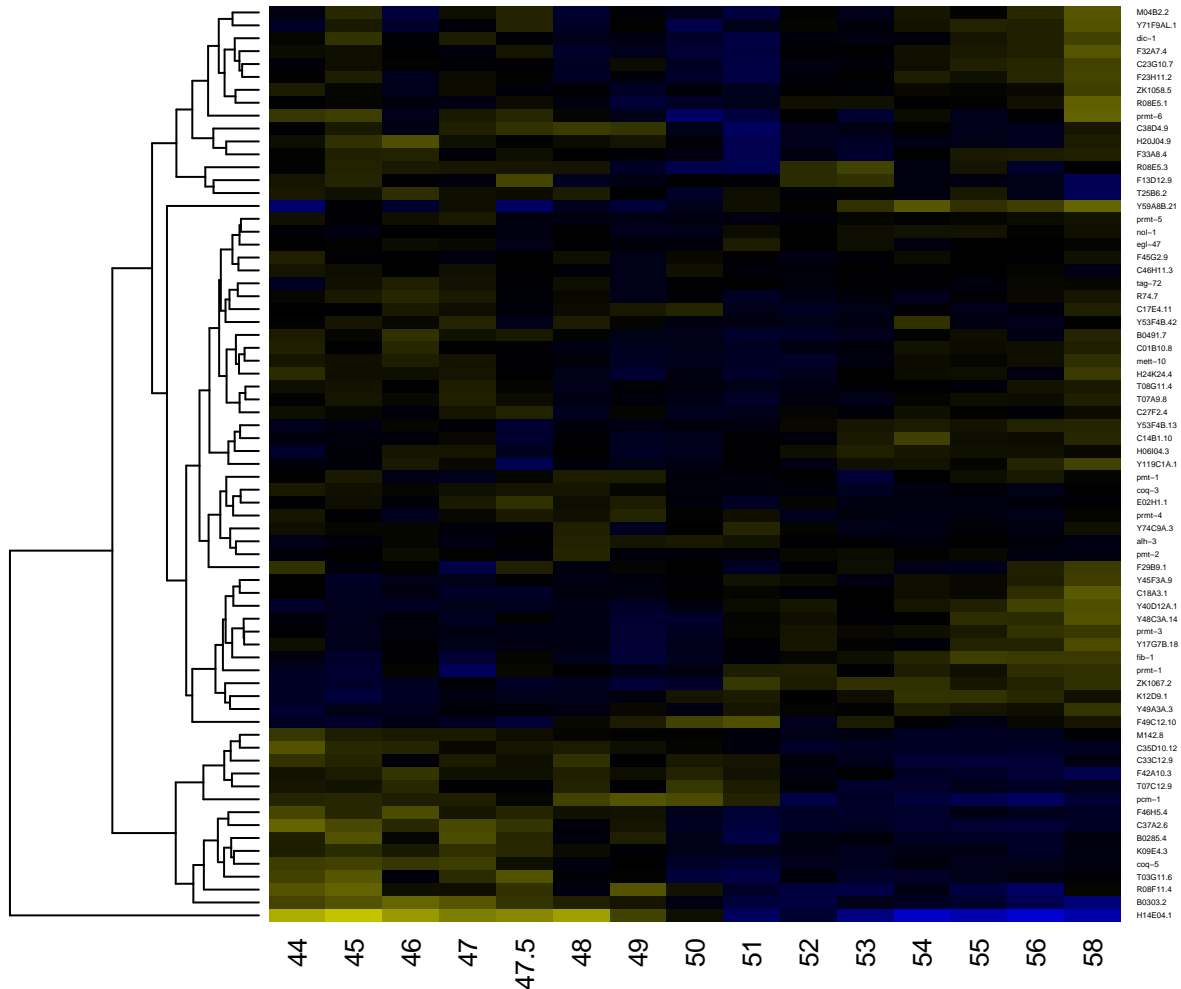

-2

-1

0

1

2

# microtubule

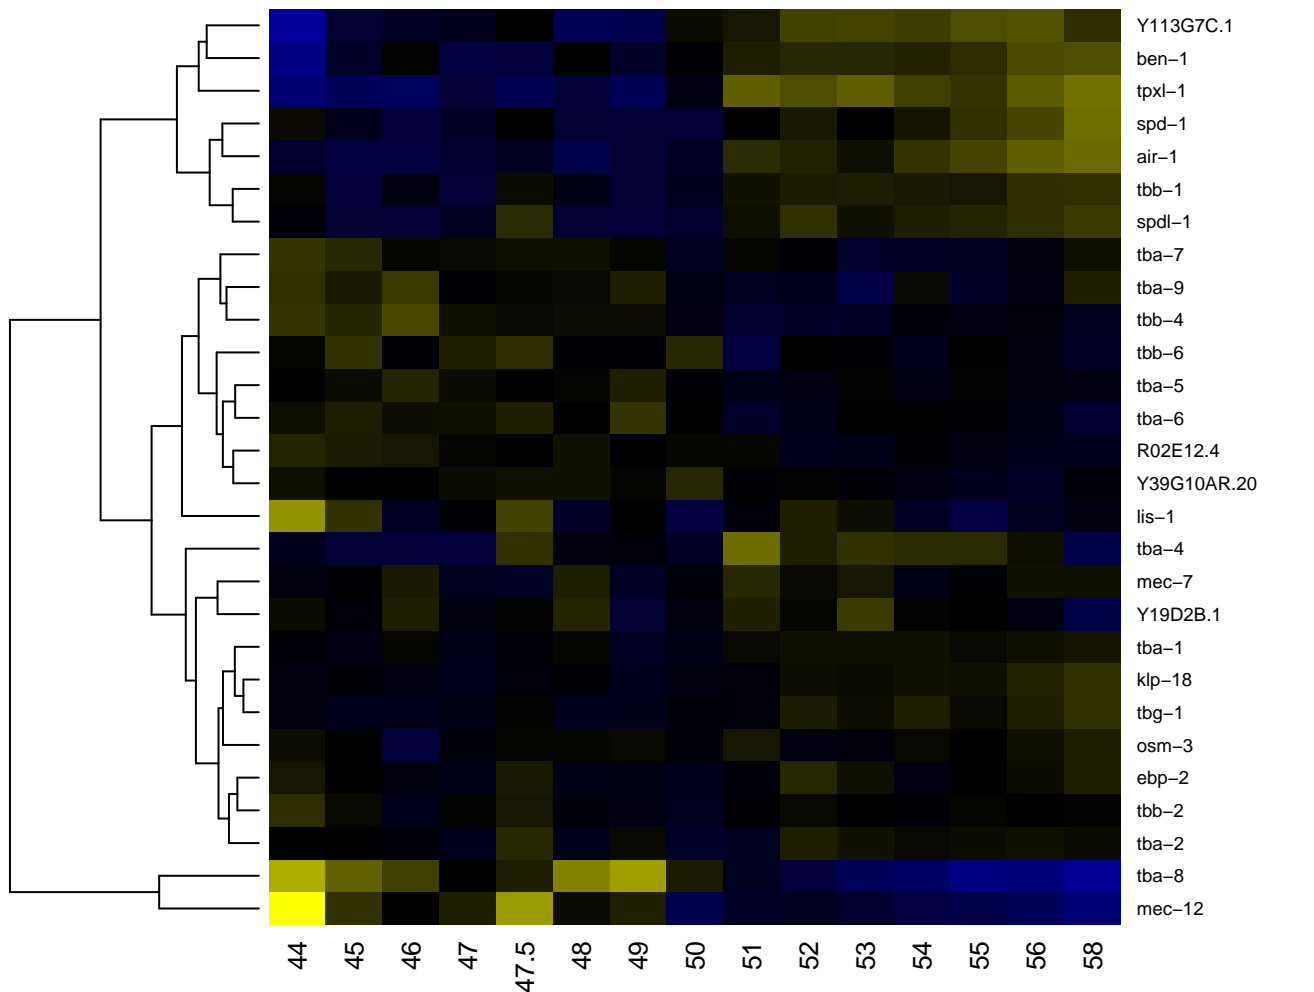

# microtubule-based movement

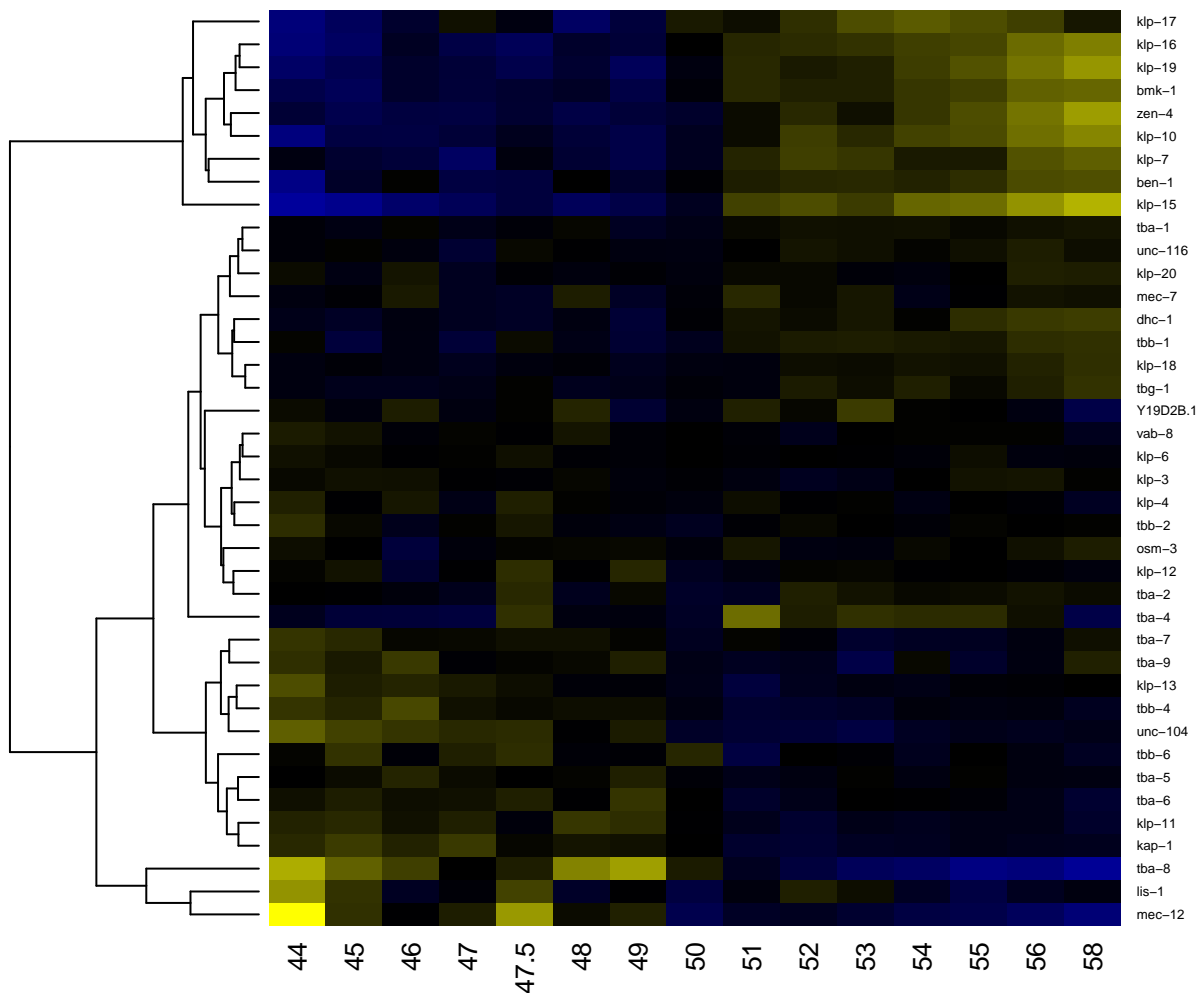

# microtubule-based process

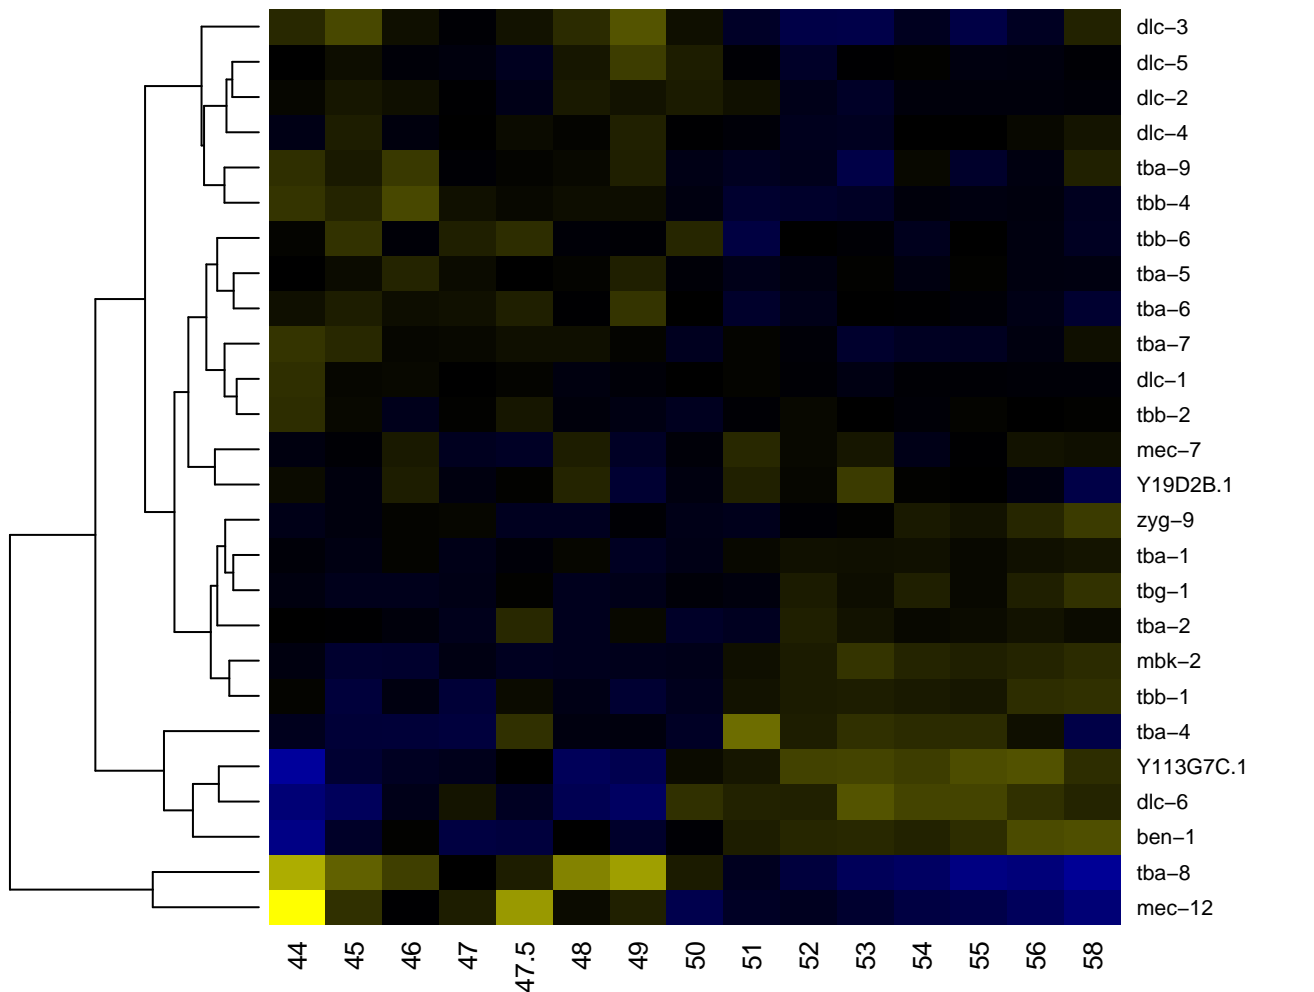

# microtubule associated complex

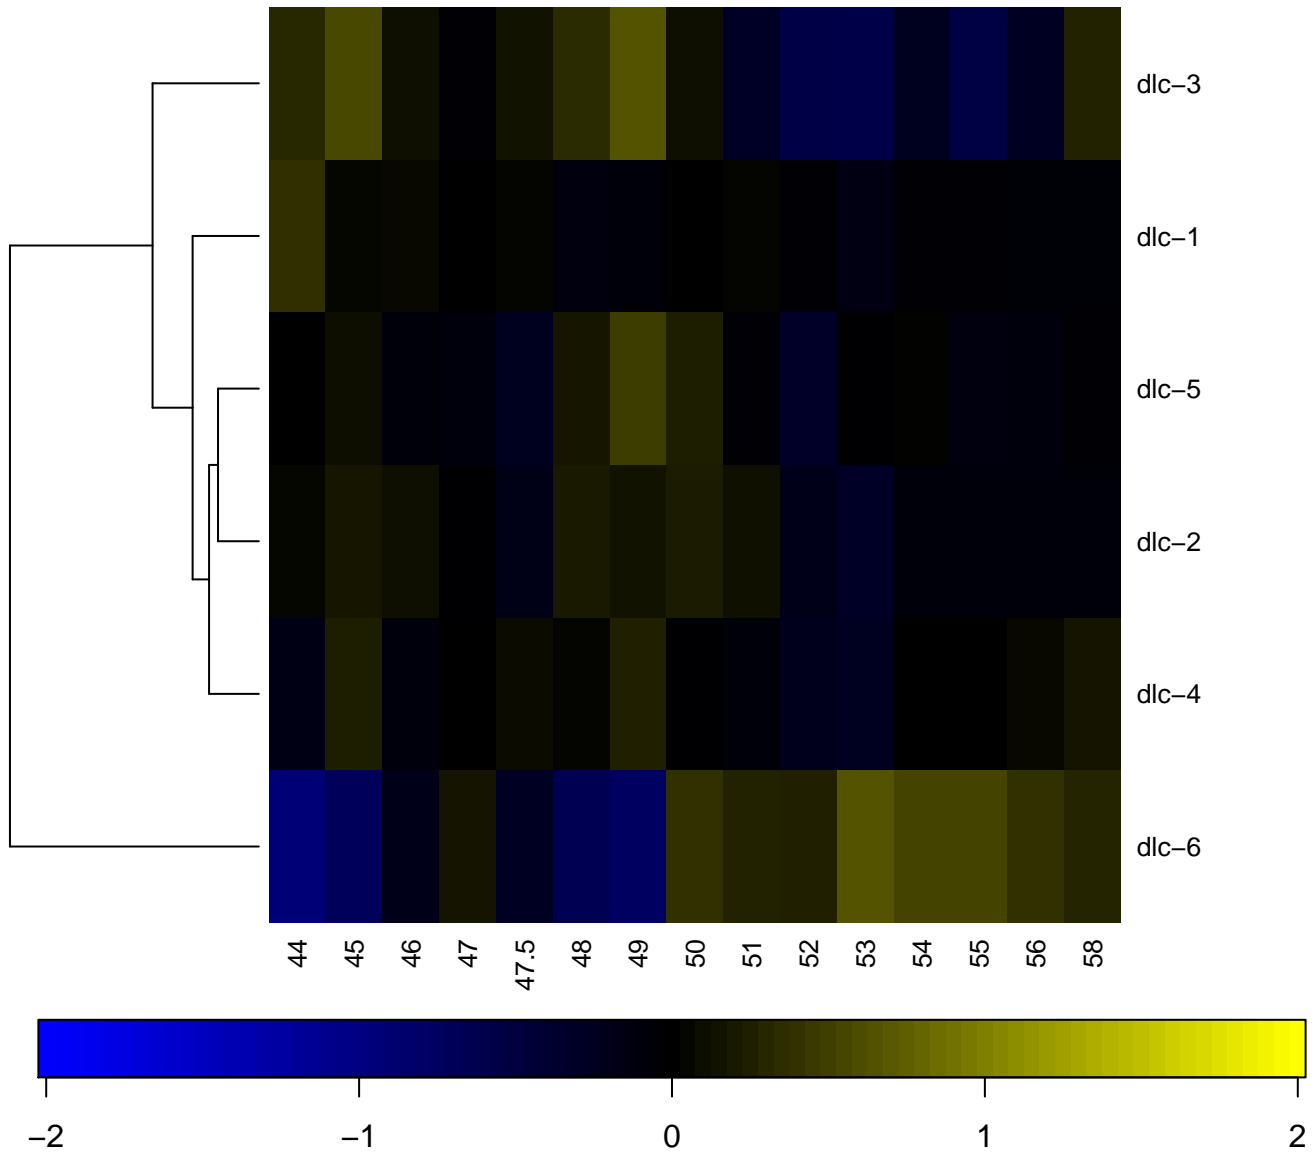







# microtubule motor activity

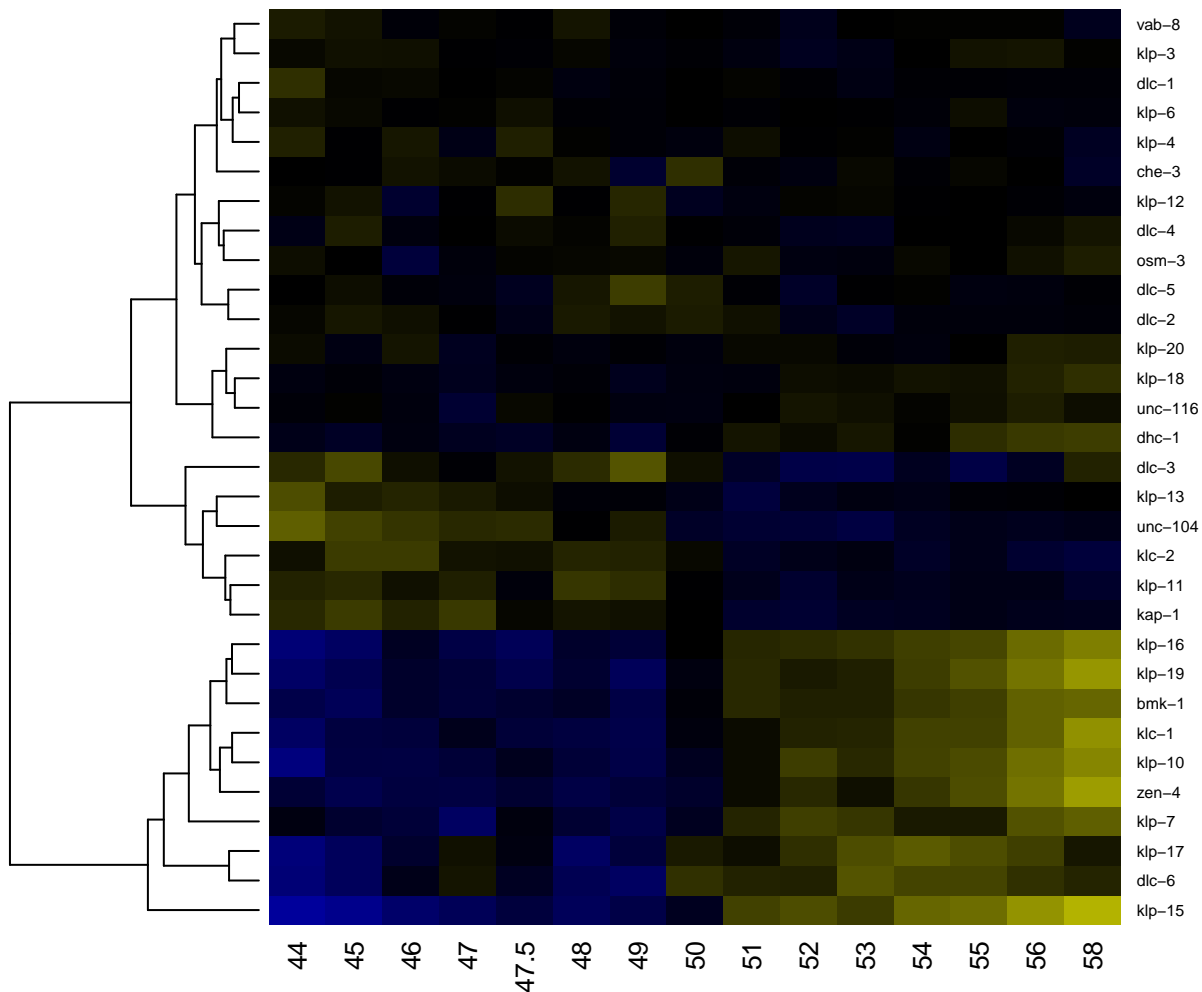

# microtubule nucleation

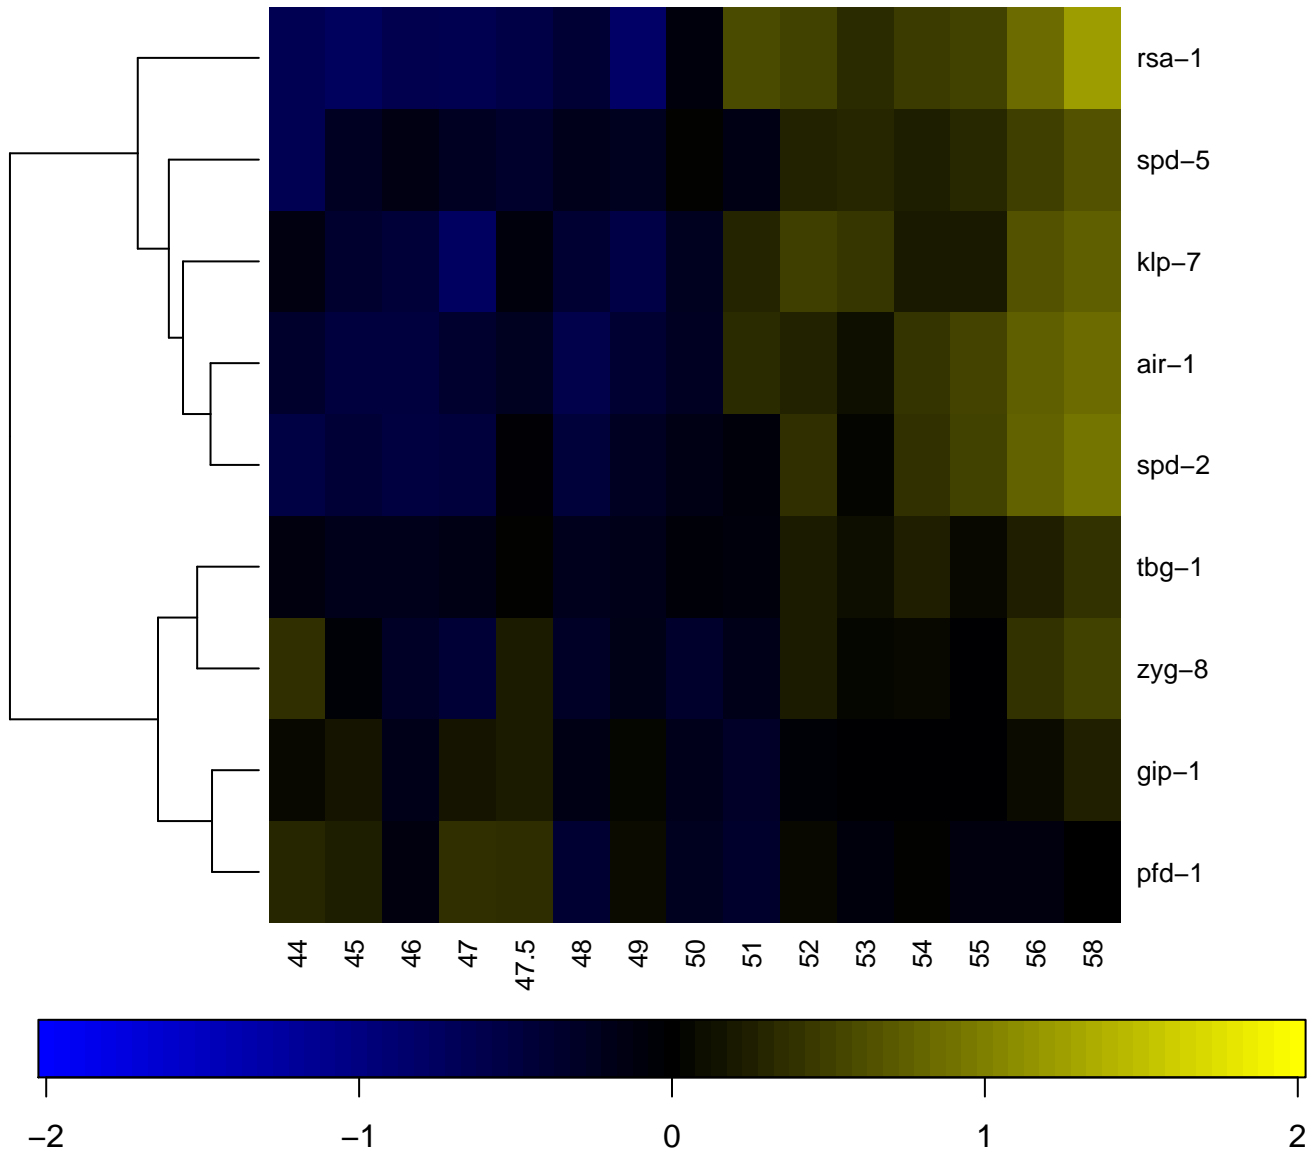



















# mitochondrion

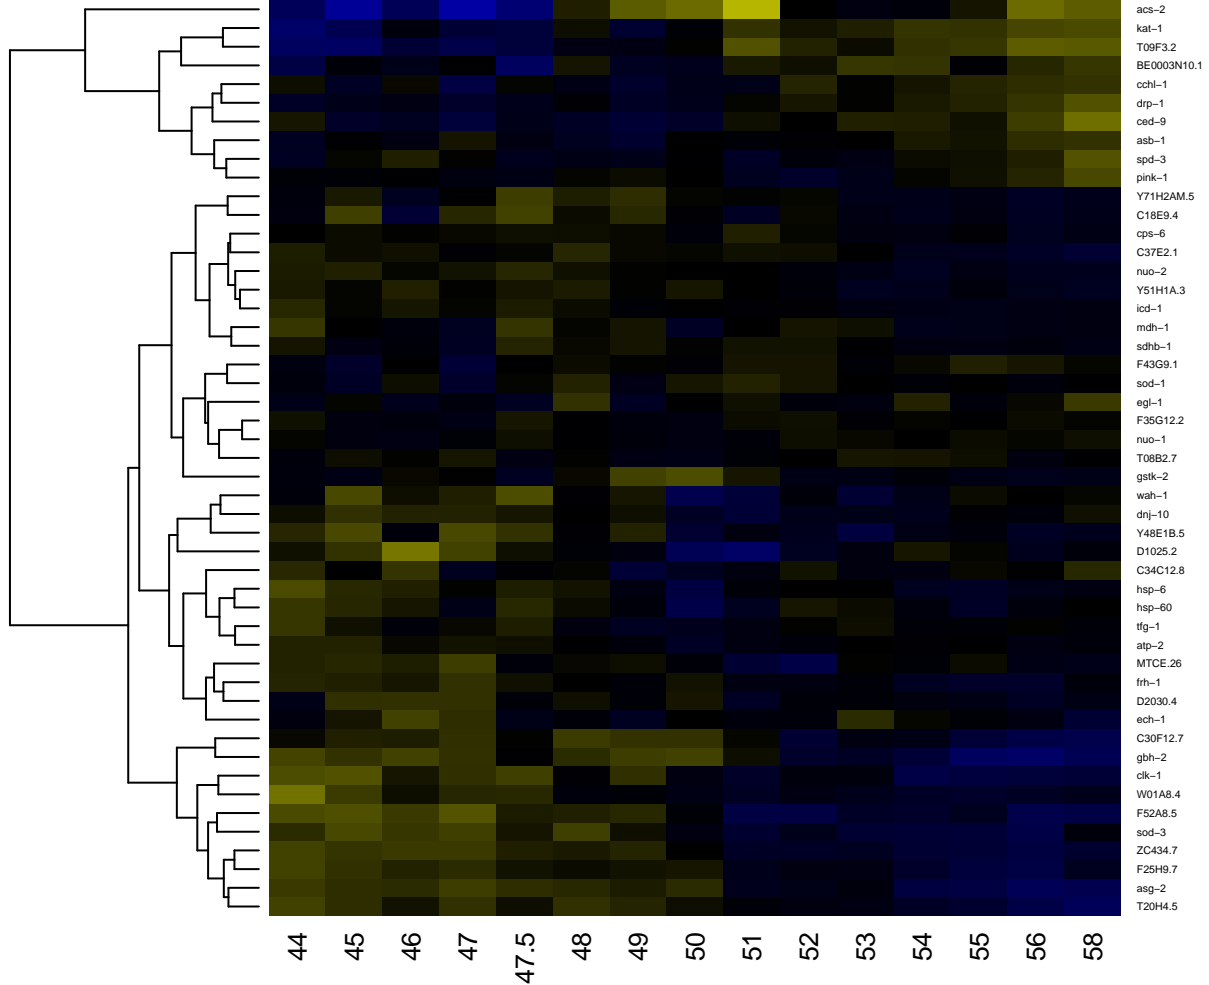



# mitosis

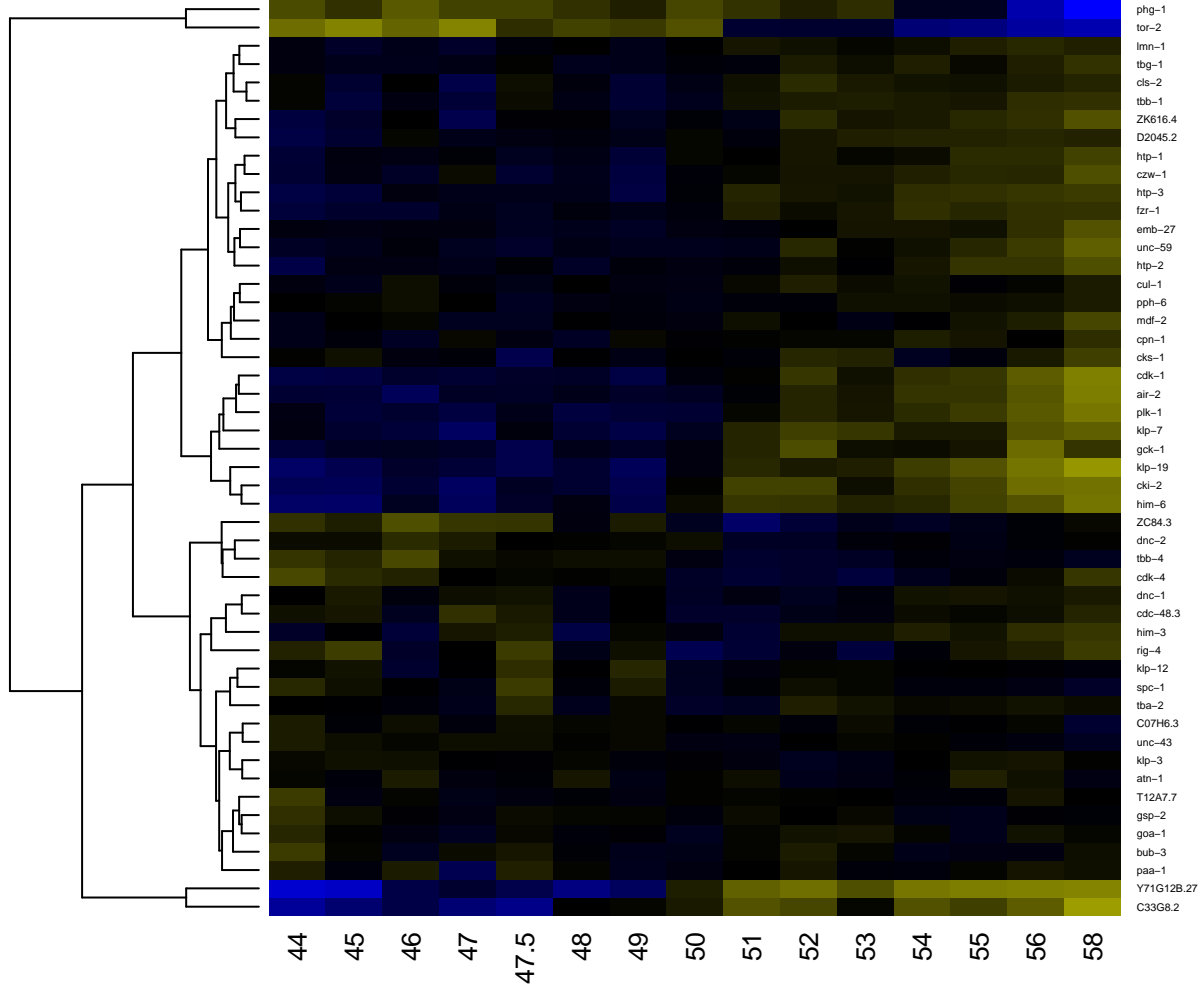



# mitotic sister chromatid segregation

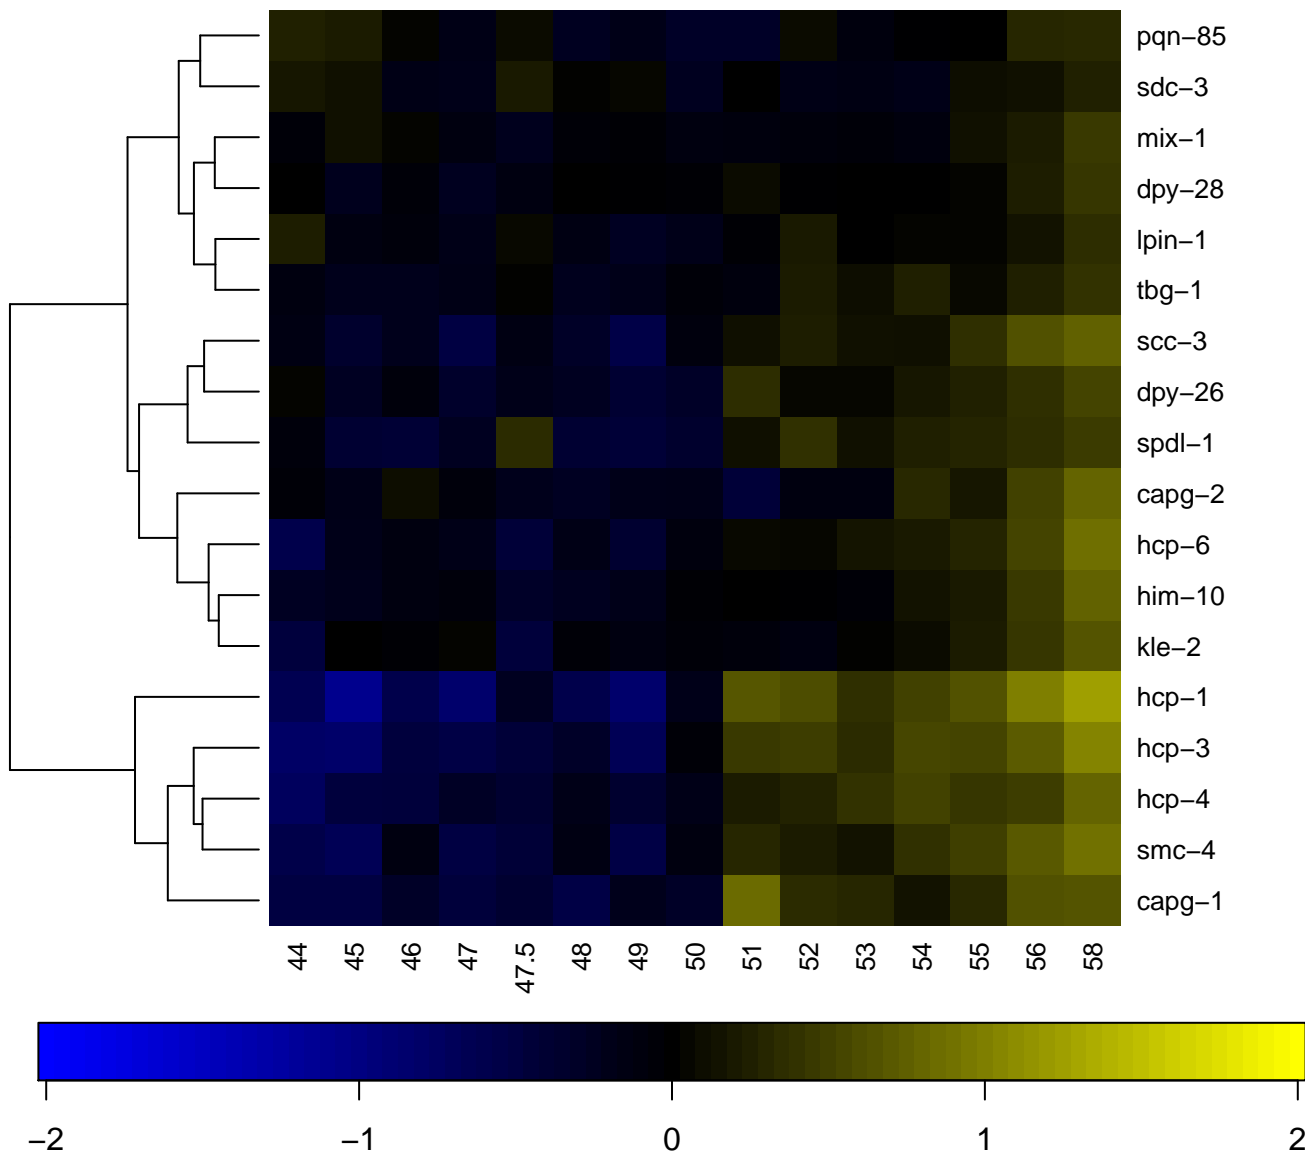



# mitotic spindle organization

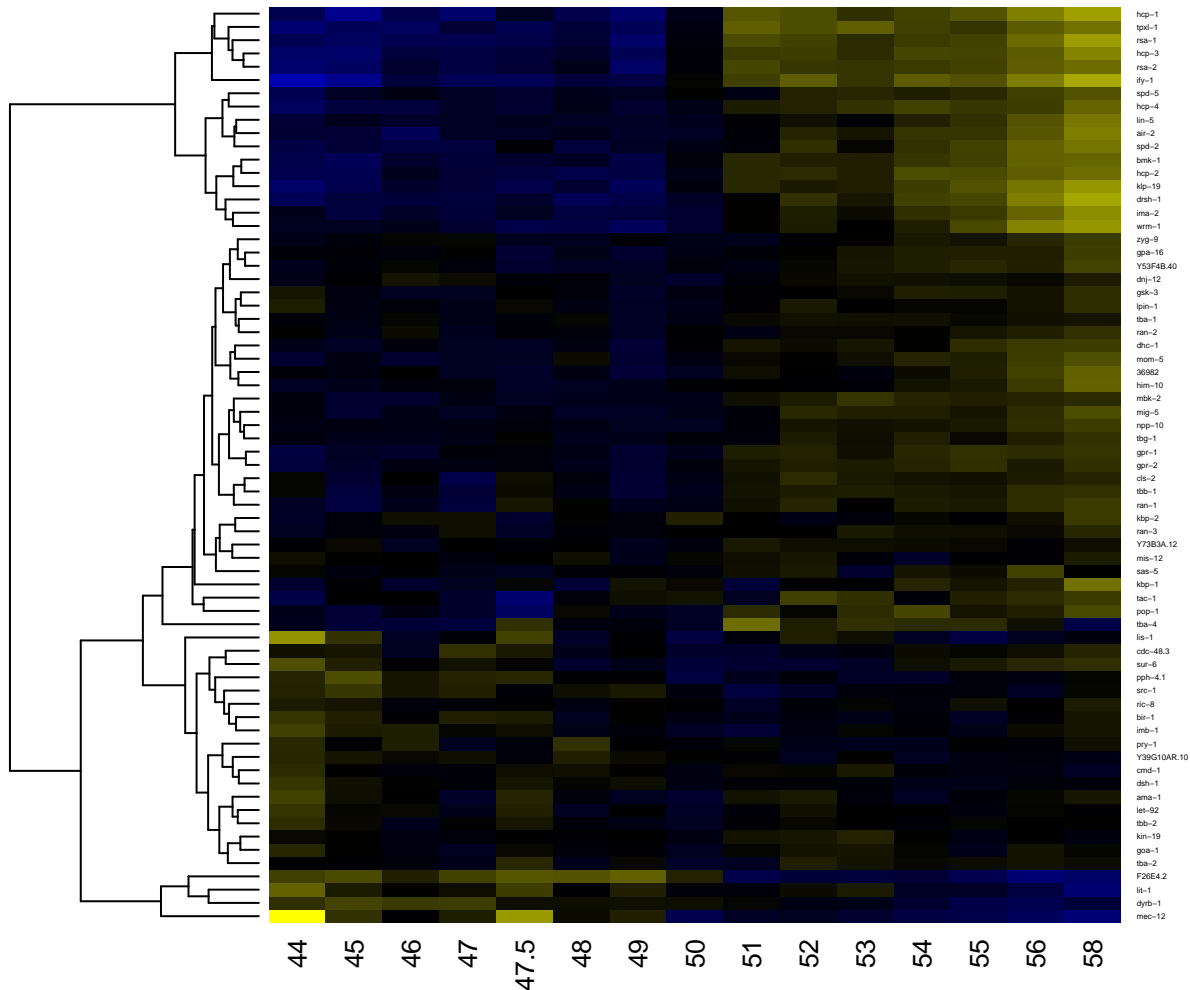

# Mo-molybdopterin cofactor biosynthetic process

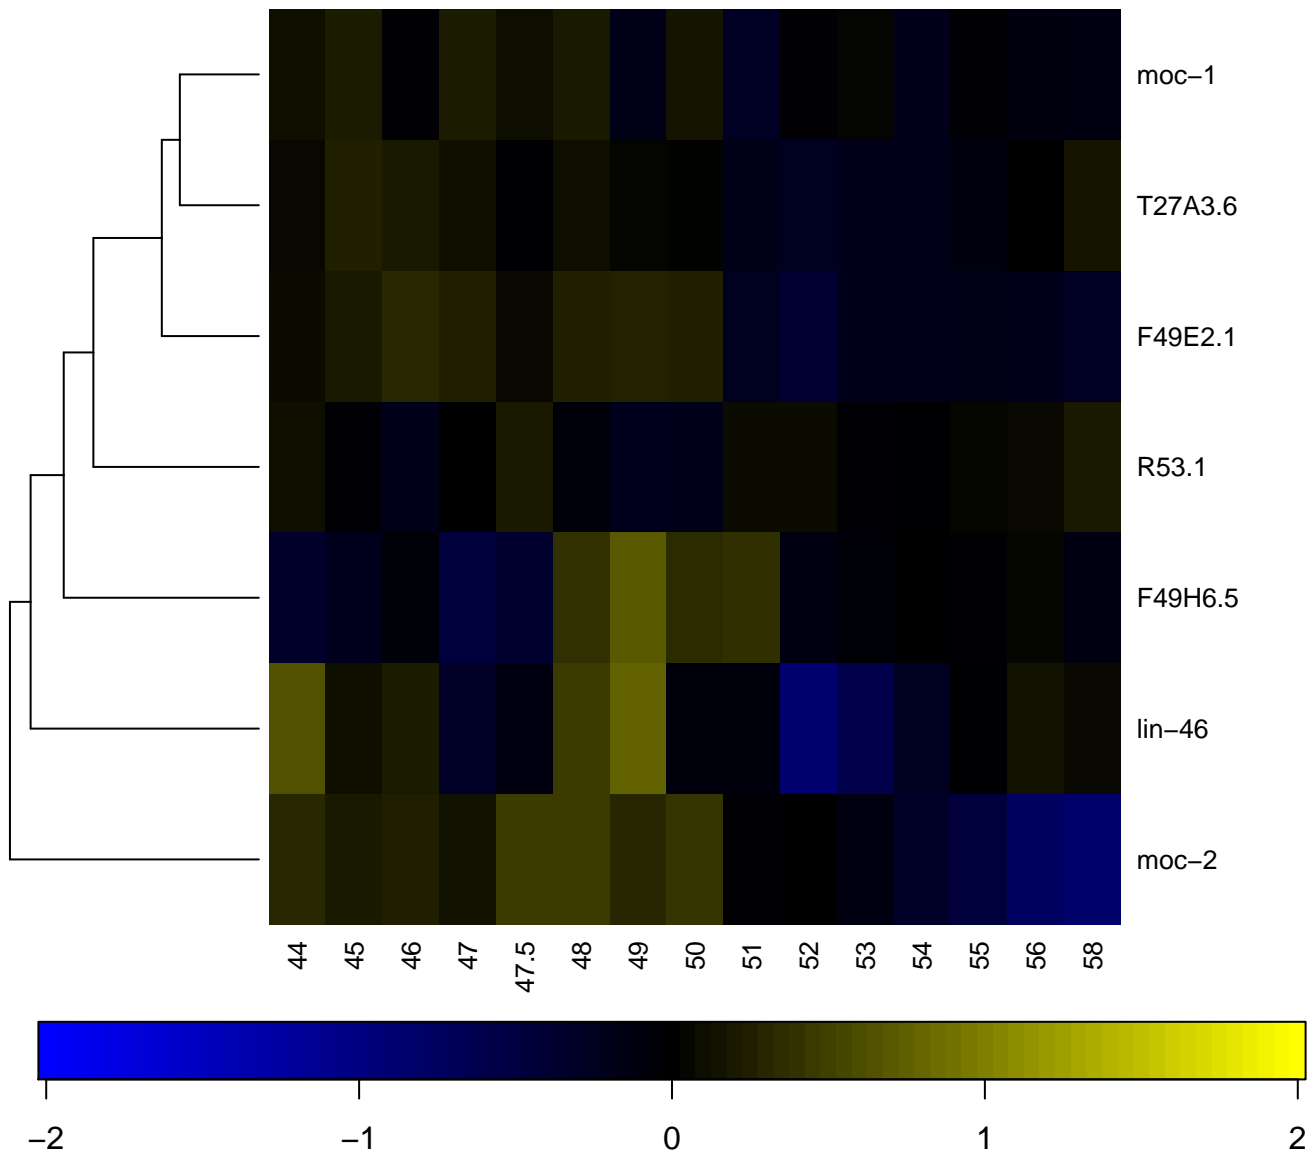



# molting cycle, collagen and cuticulin-based cuticle

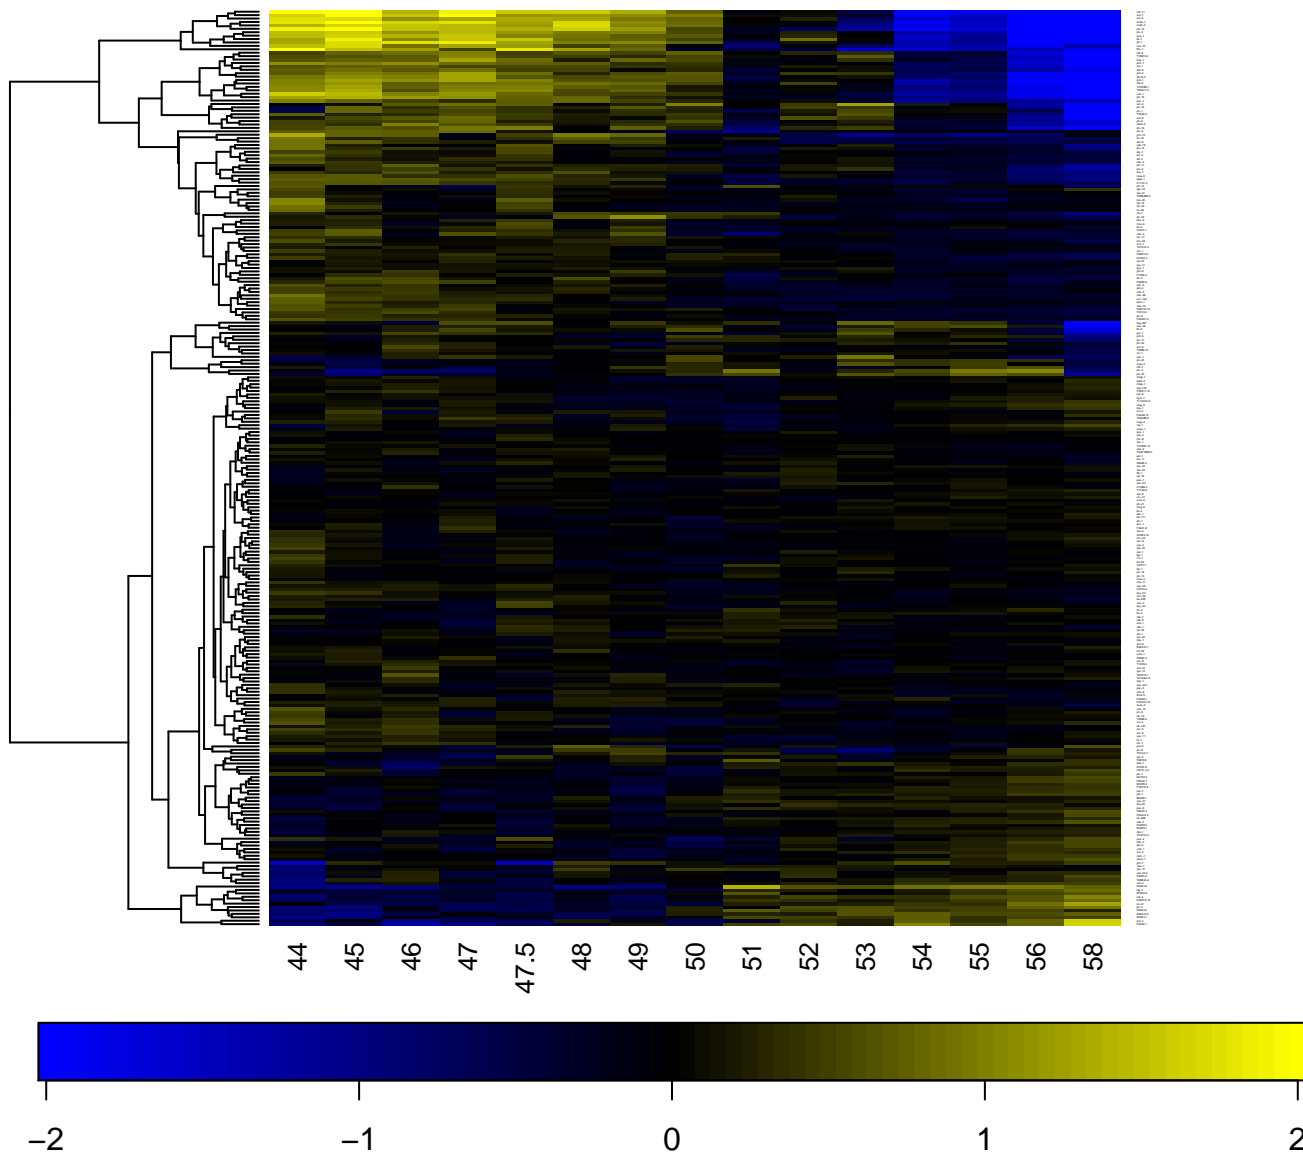



# monooxygenase activity

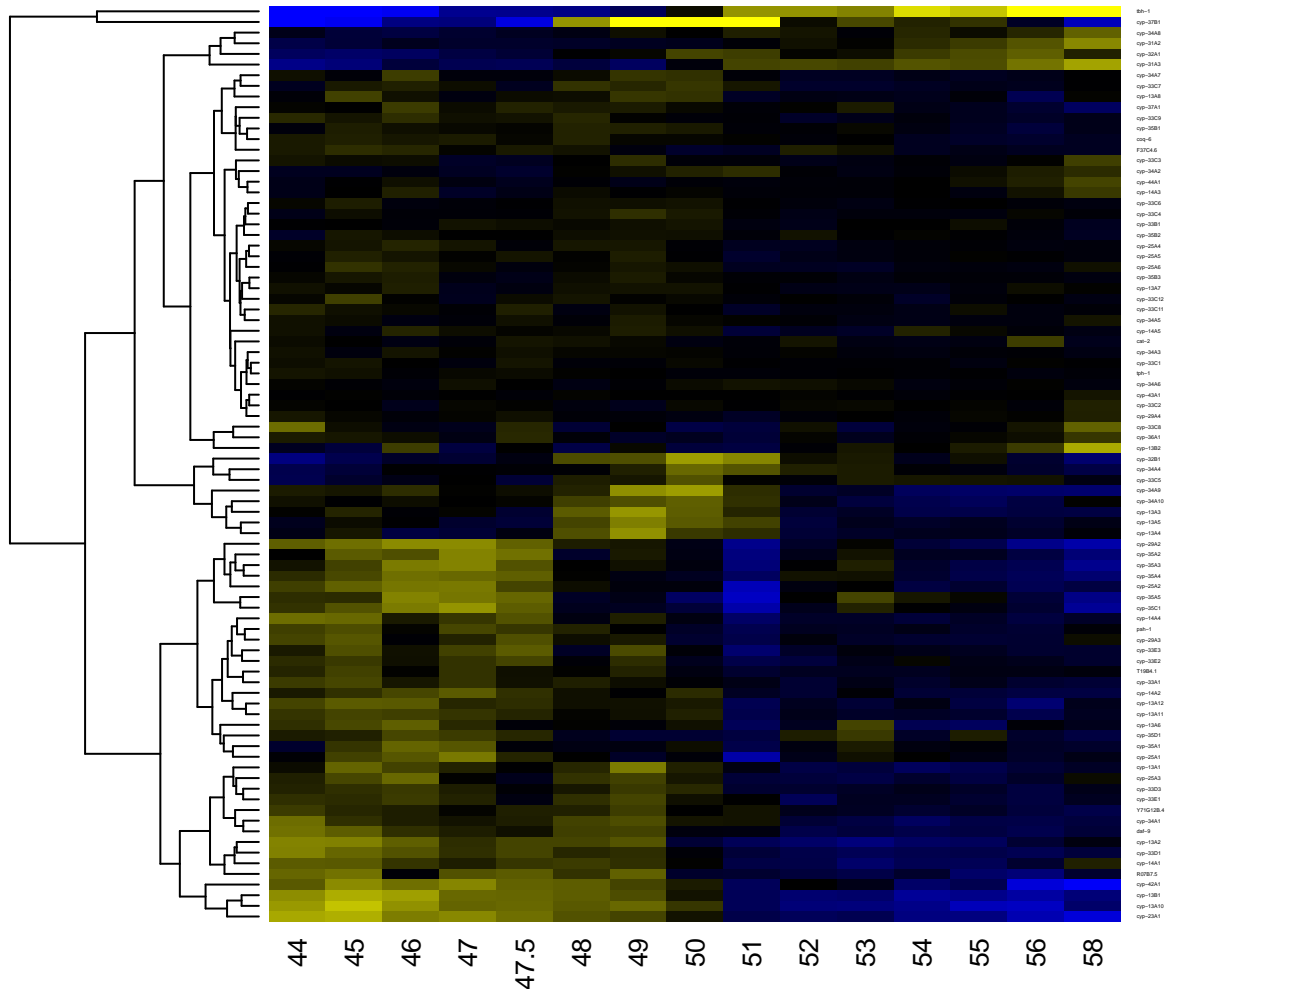

# morphogenesis of an epithelium

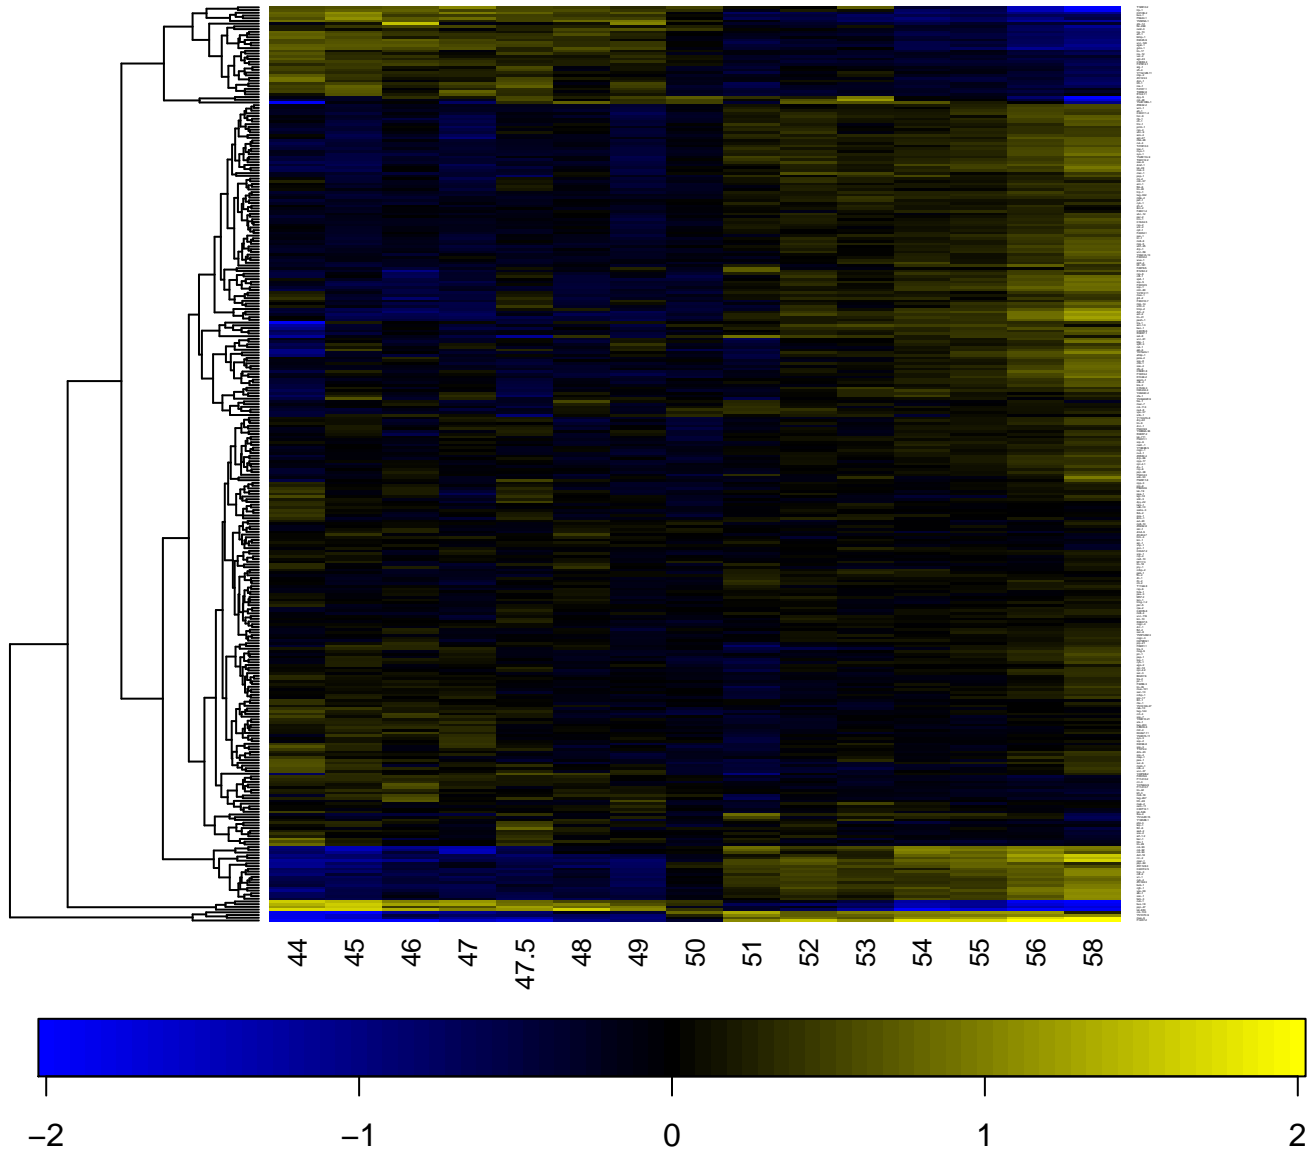





# motor activity

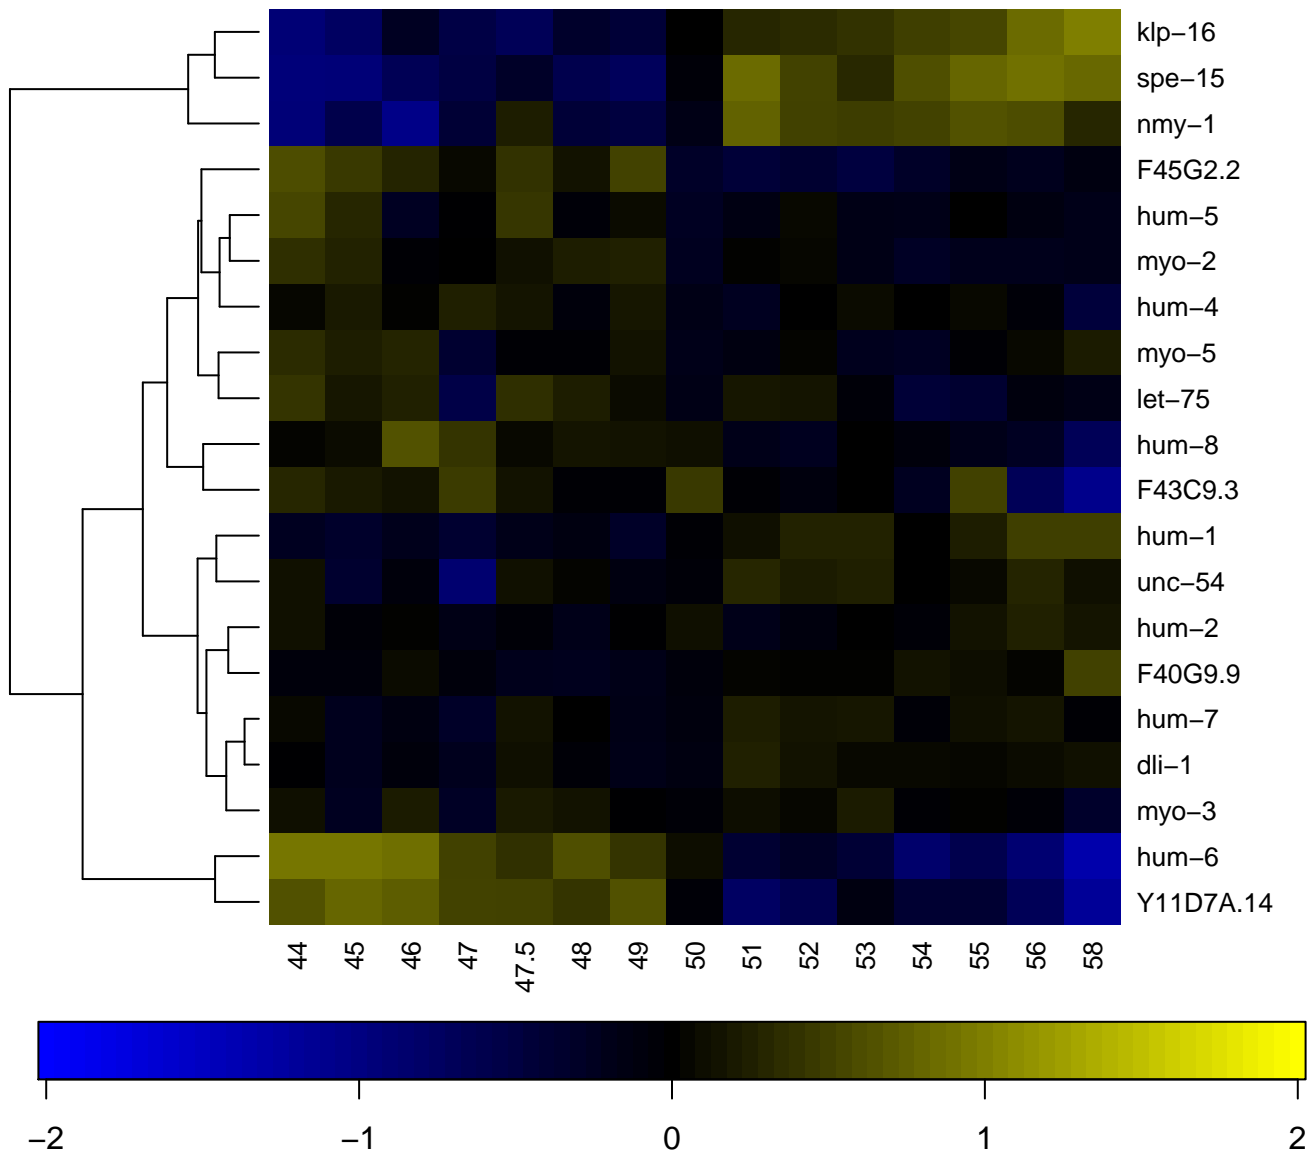



# mRNA 3'-UTR binding

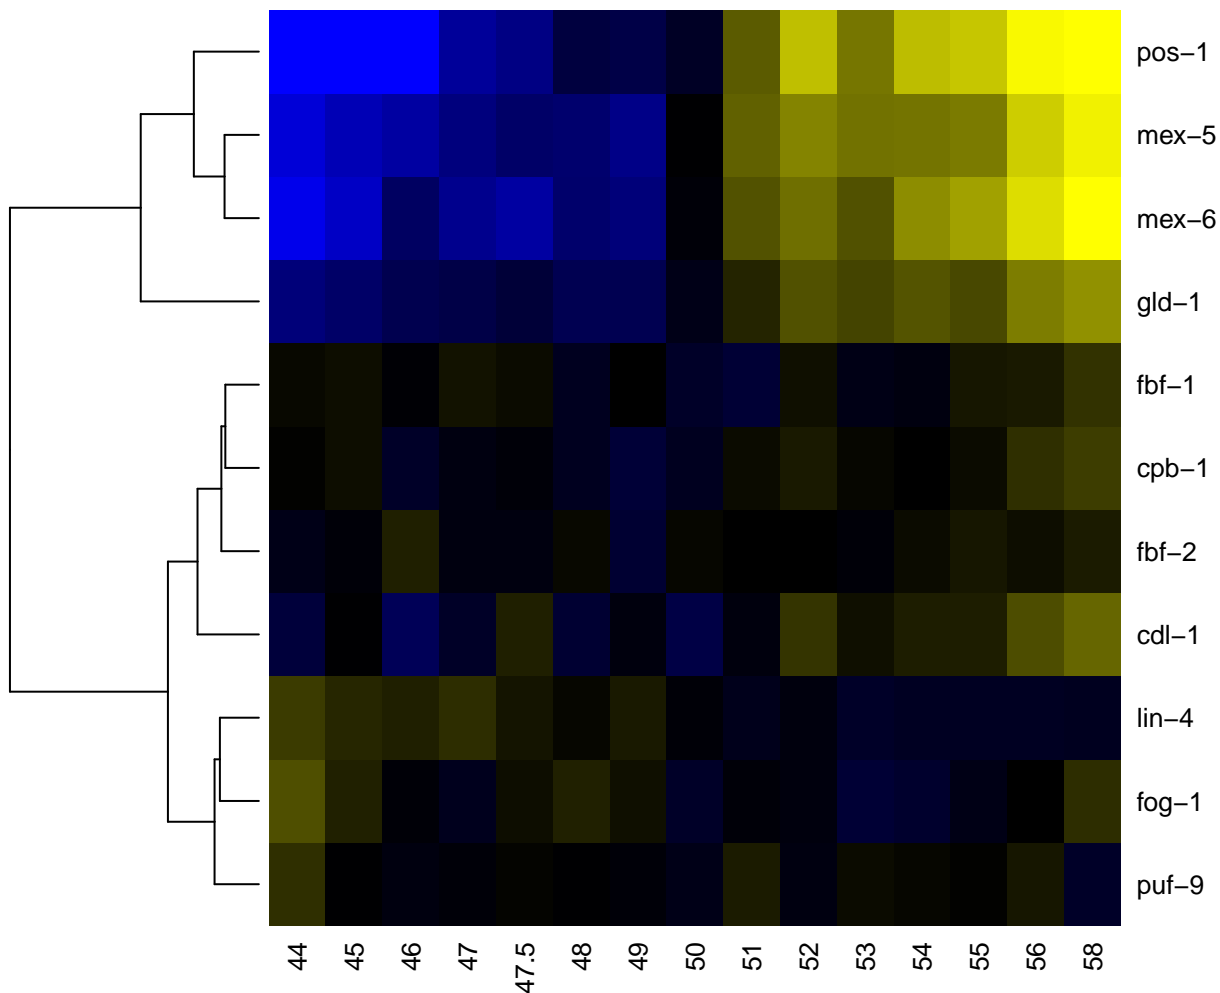





# multicellular organismal development

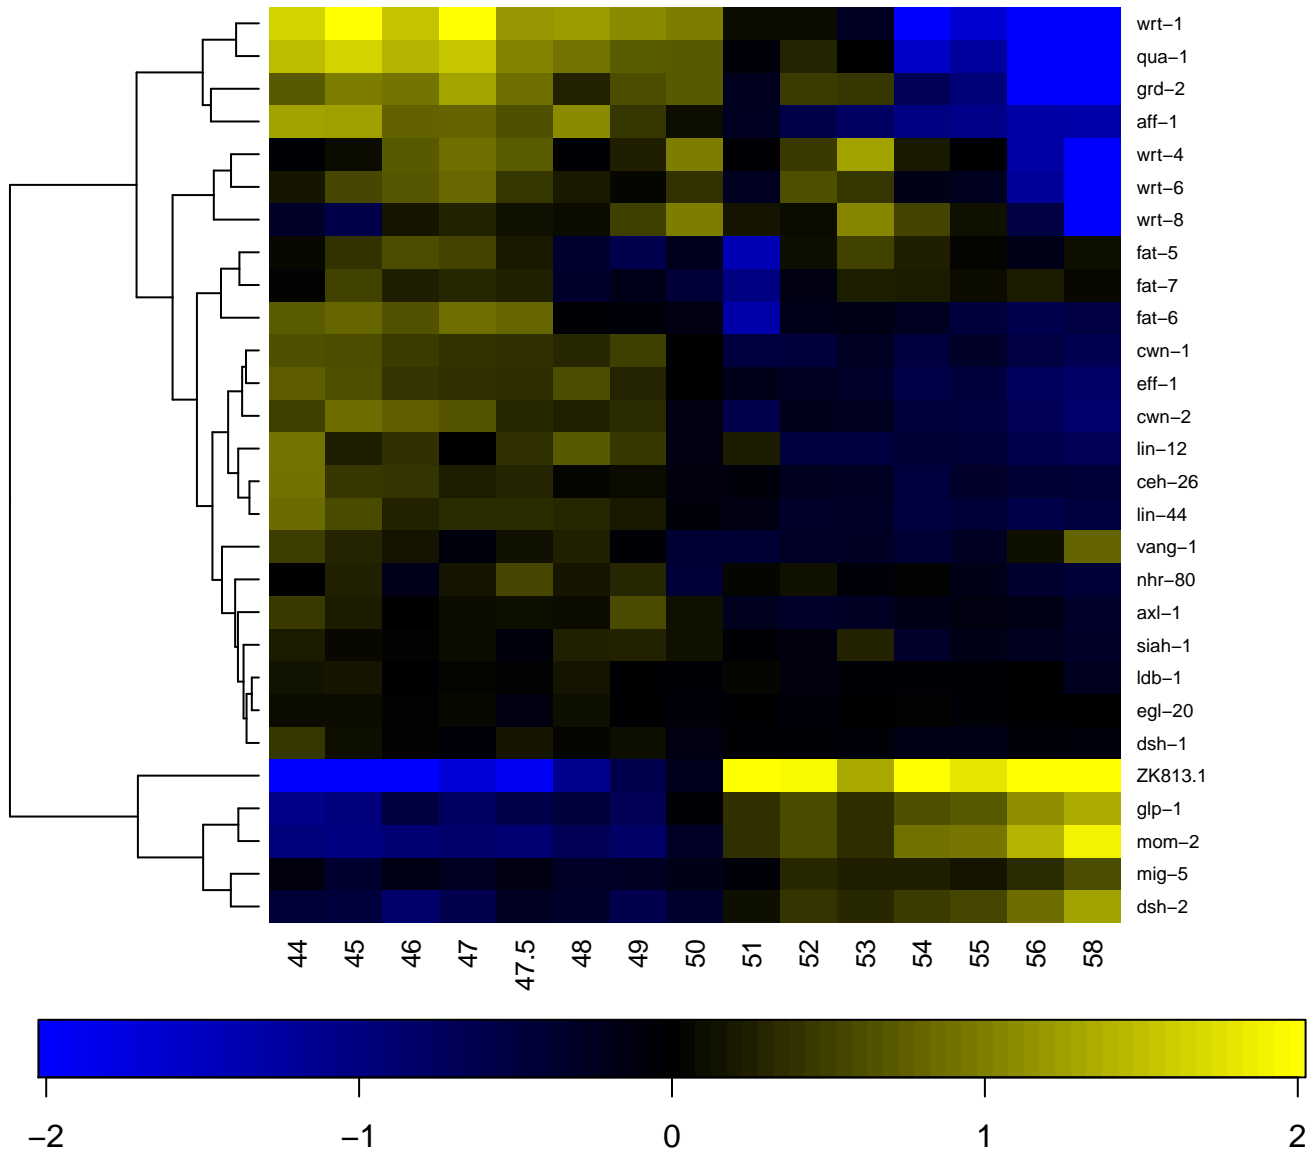



# muscle contraction

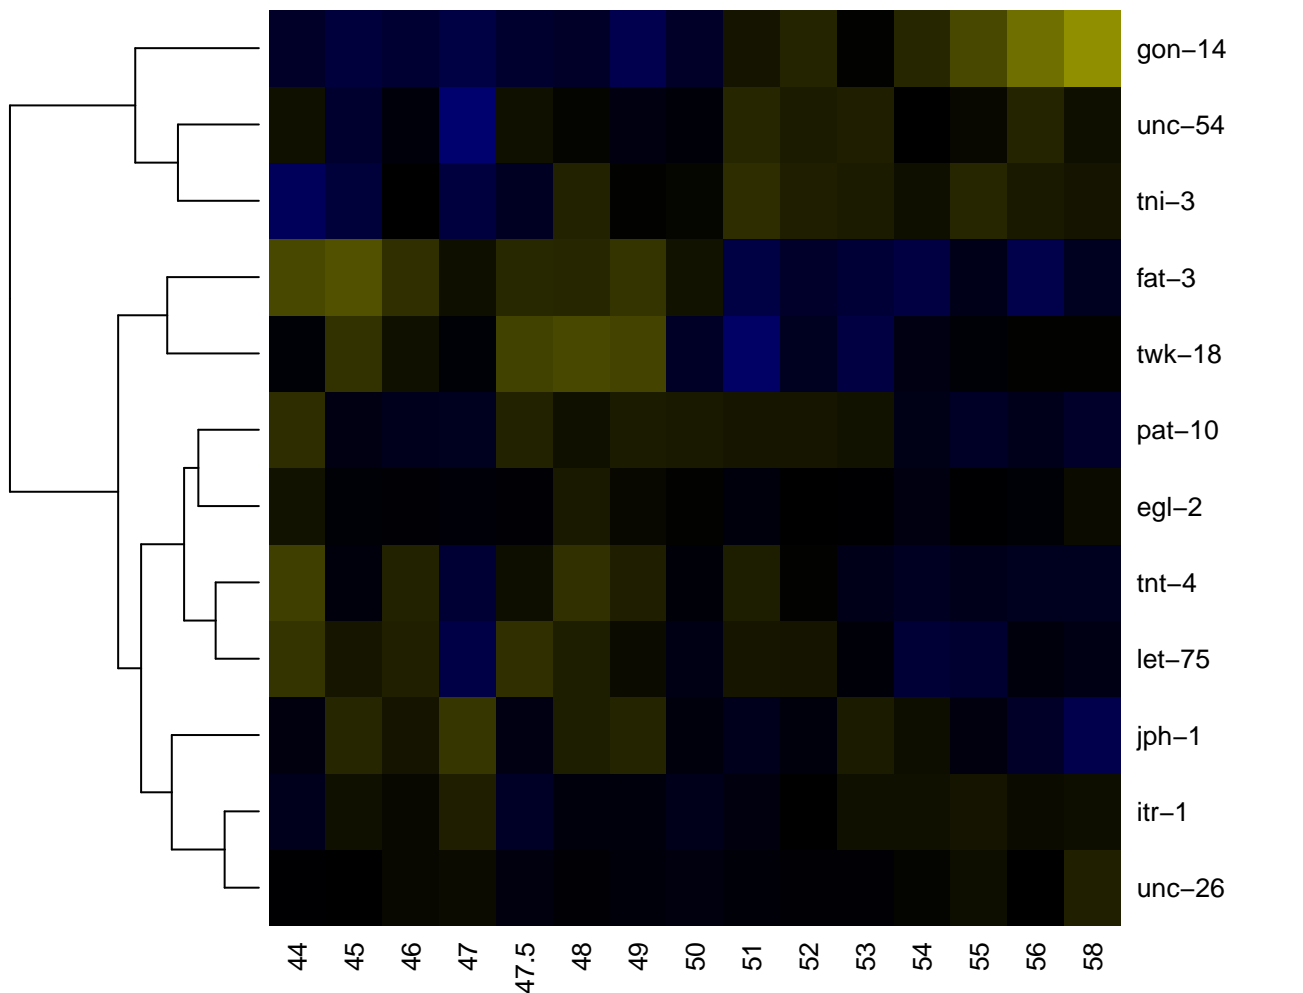





# myosin complex

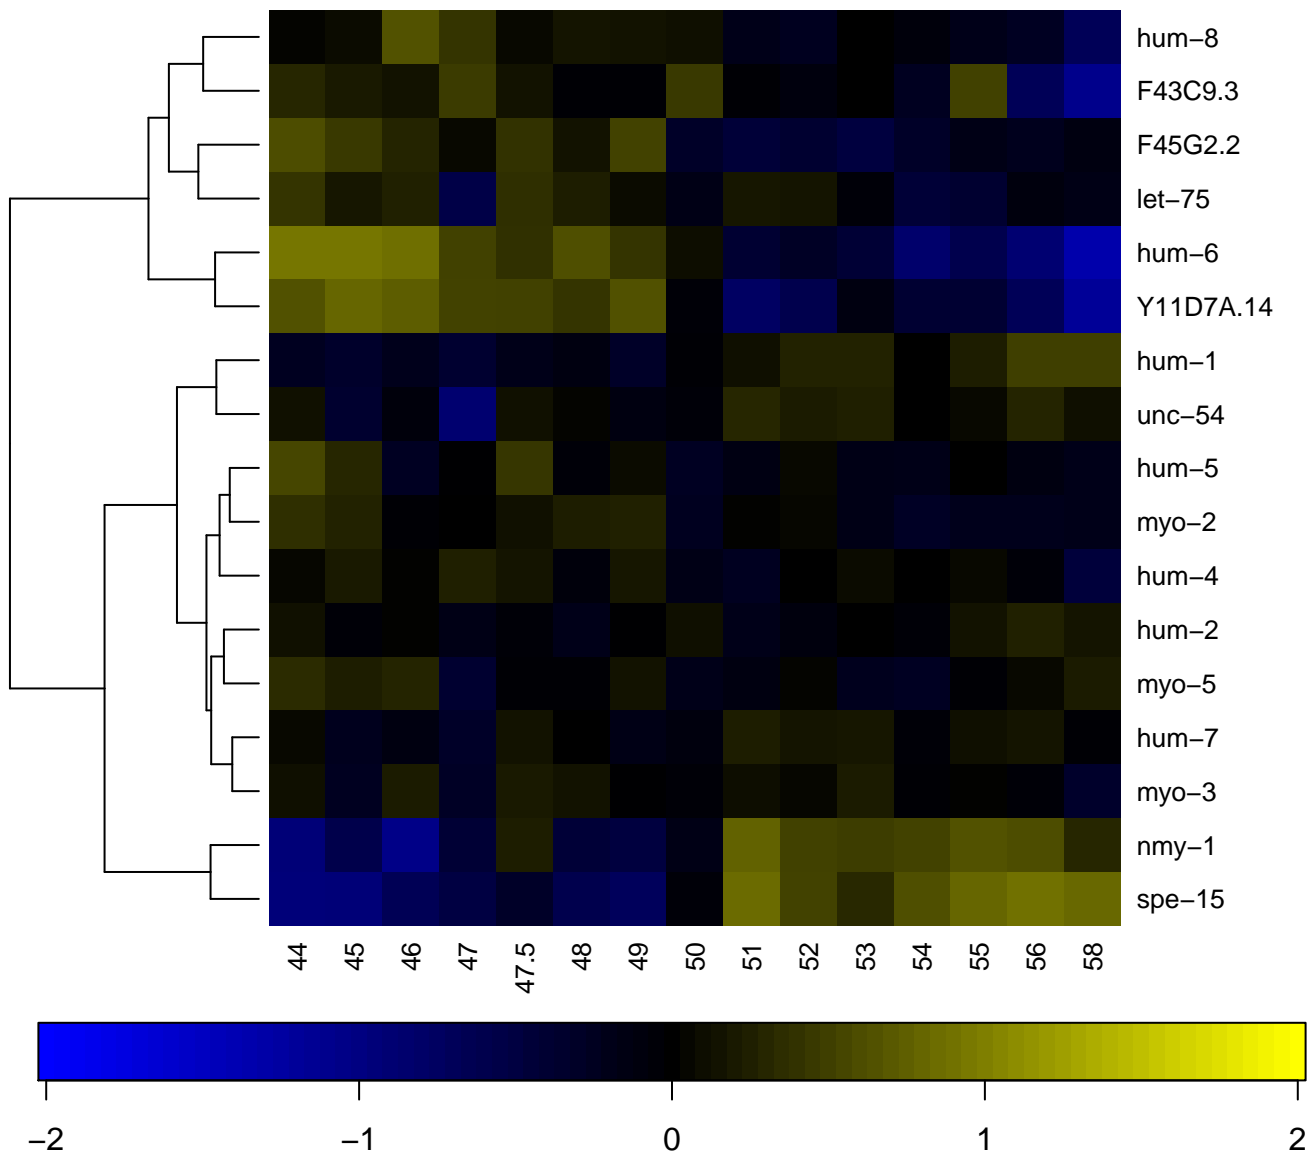

# NAD or NADH binding

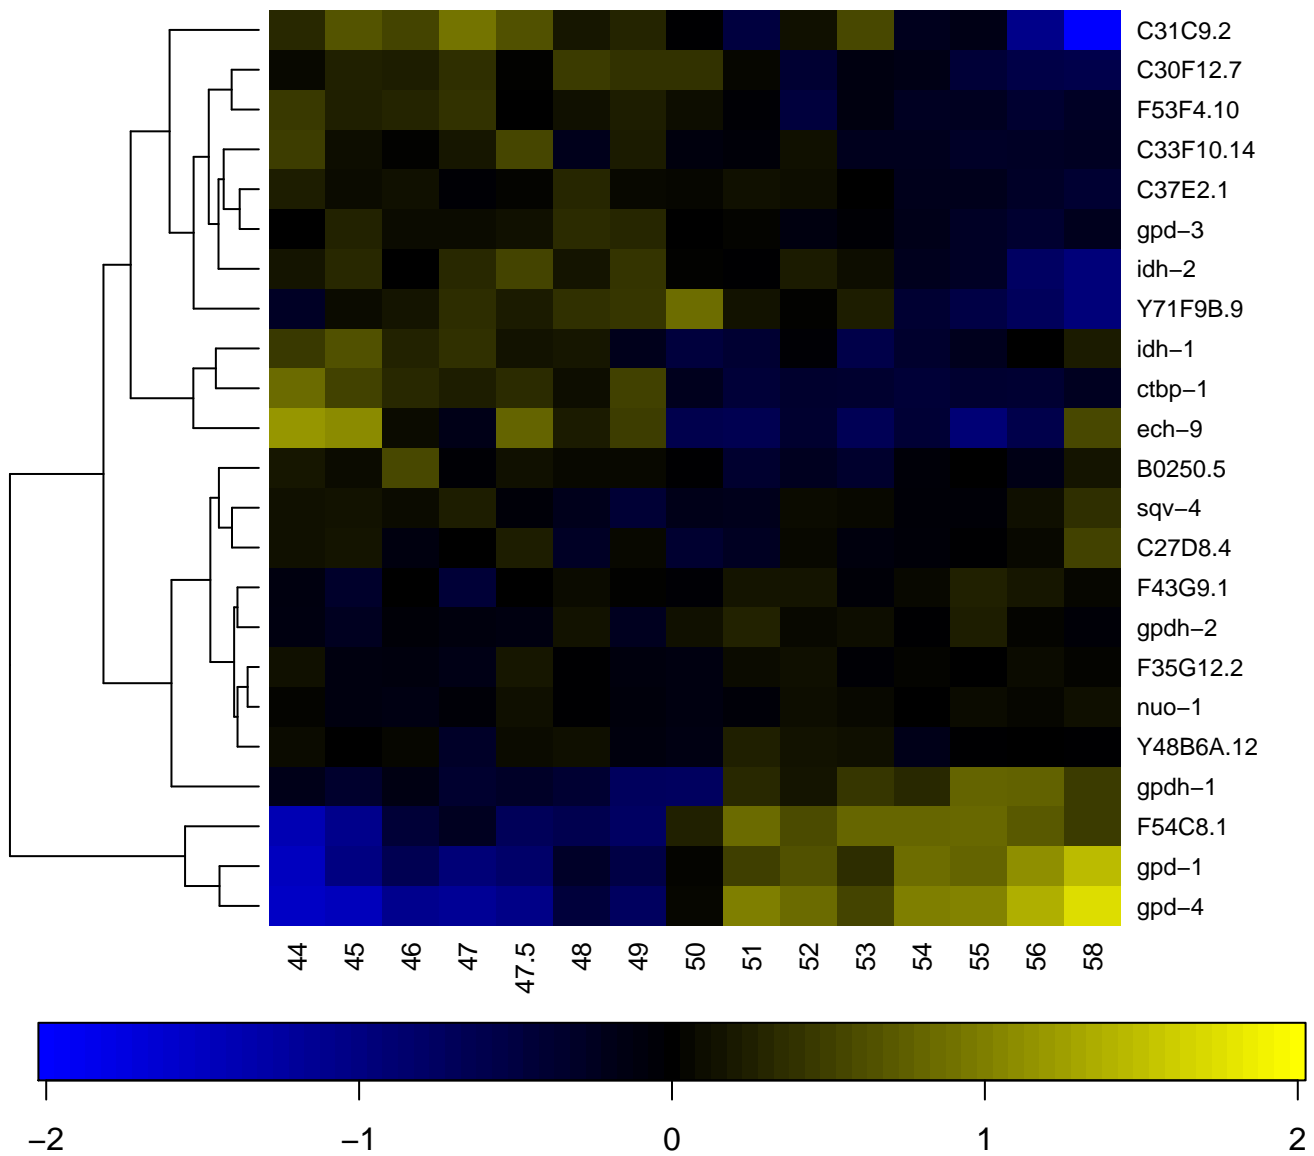

# NADH dehydrogenase (ubiquinone) activity

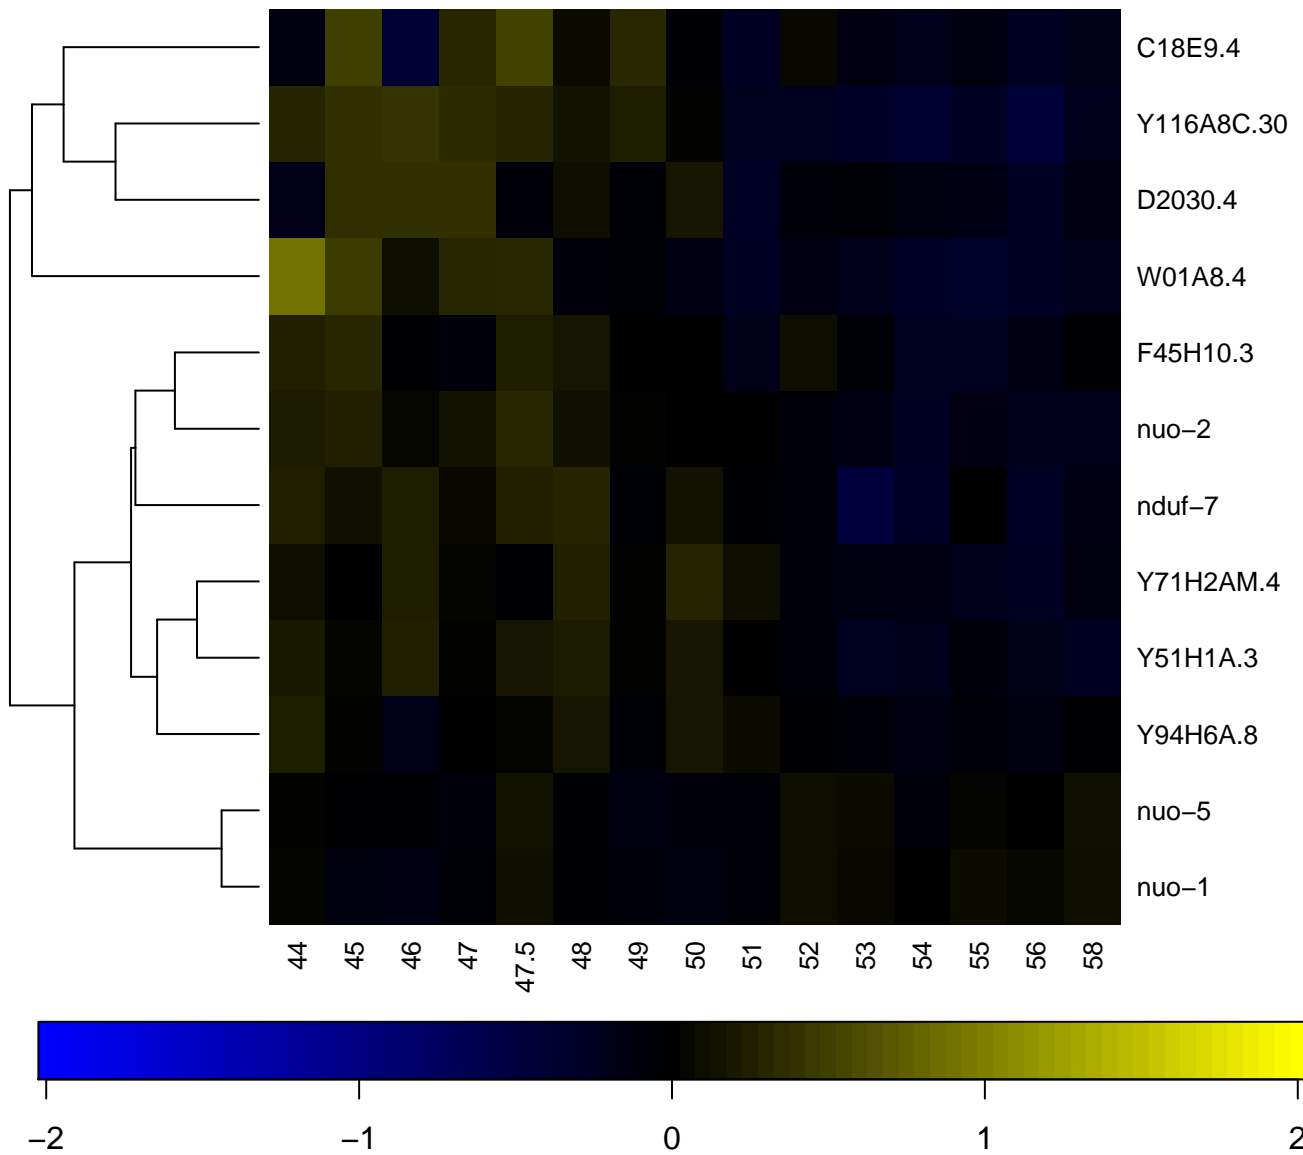





# negative regulation of apoptosis

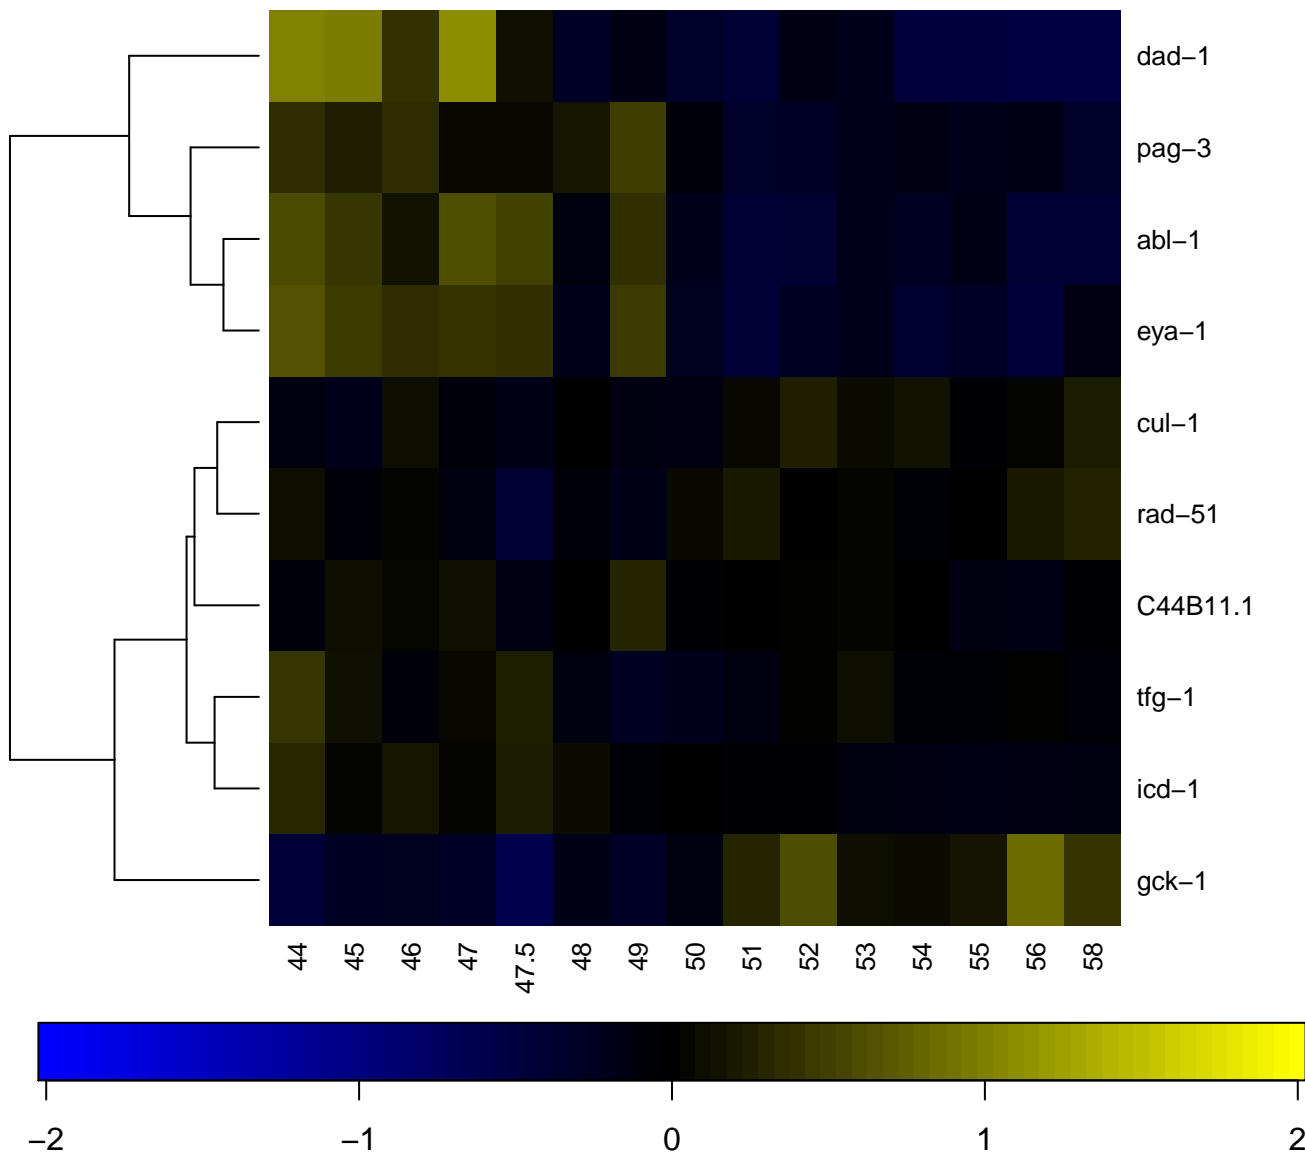





# negative regulation of multicellular organism growth

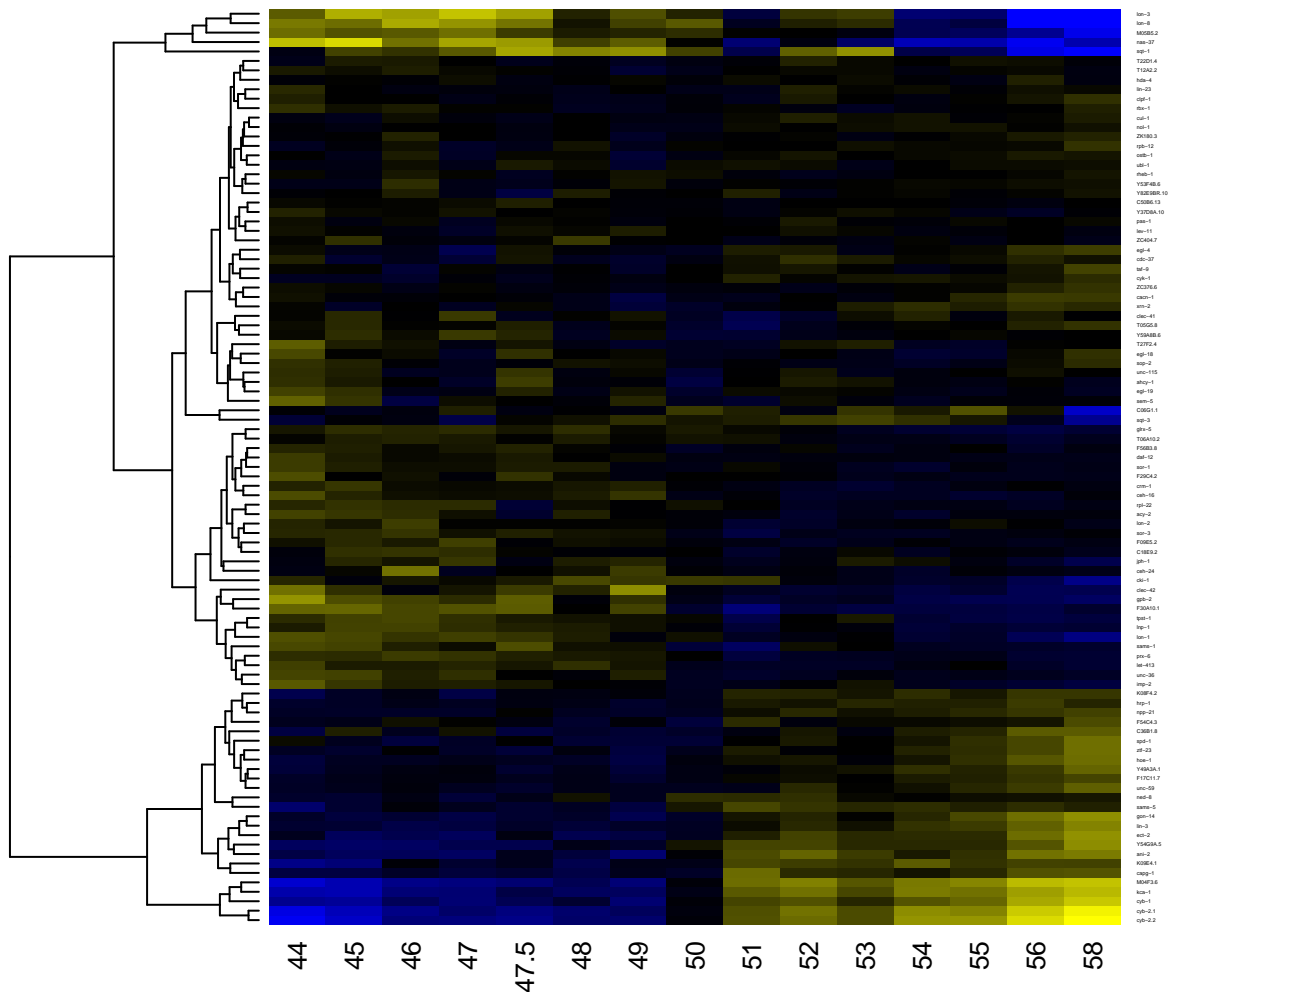





# Alternative regulation of transcription from RNA polymerase II promoter

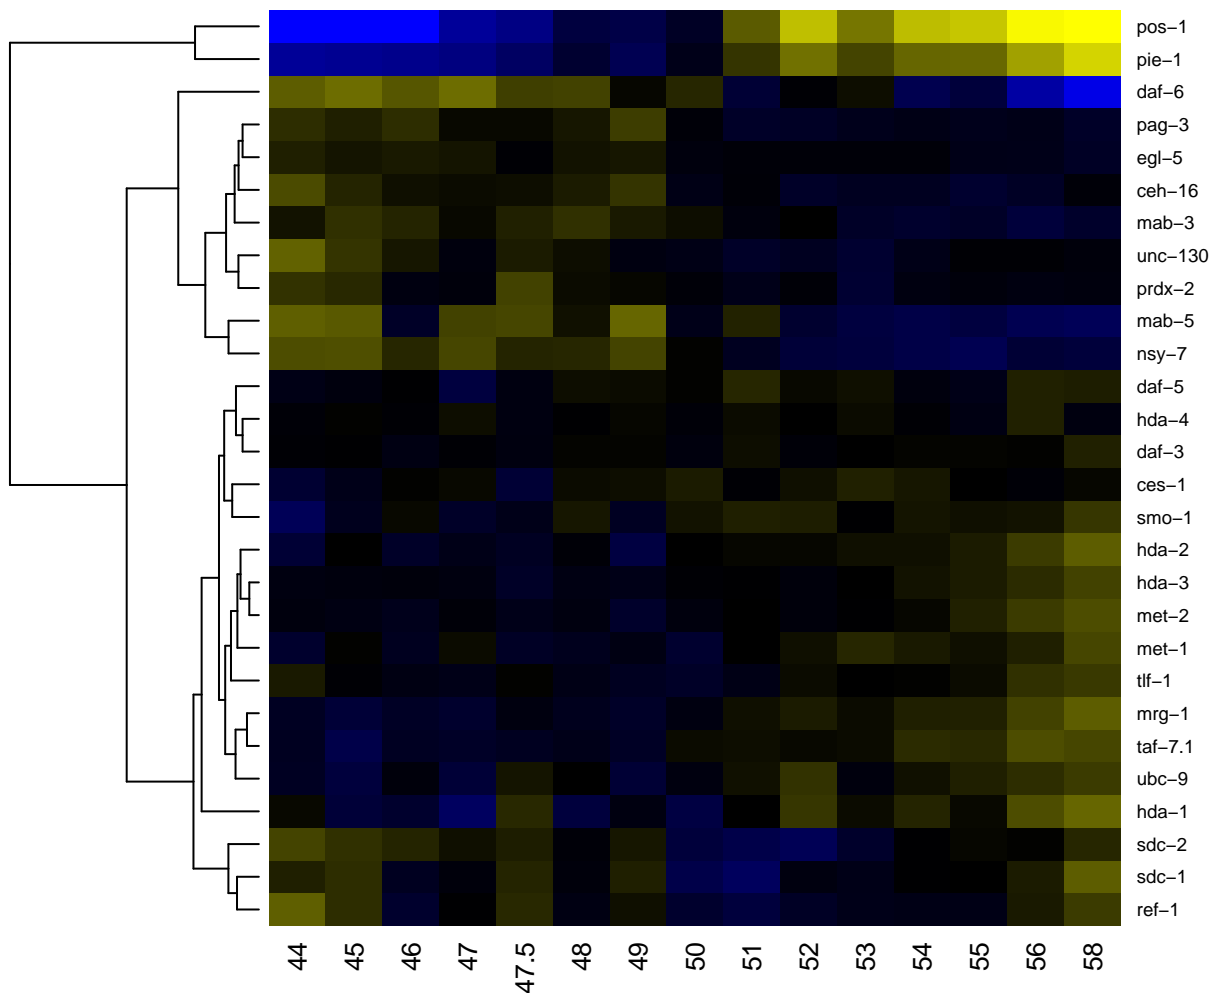





# negative regulation of vulval development

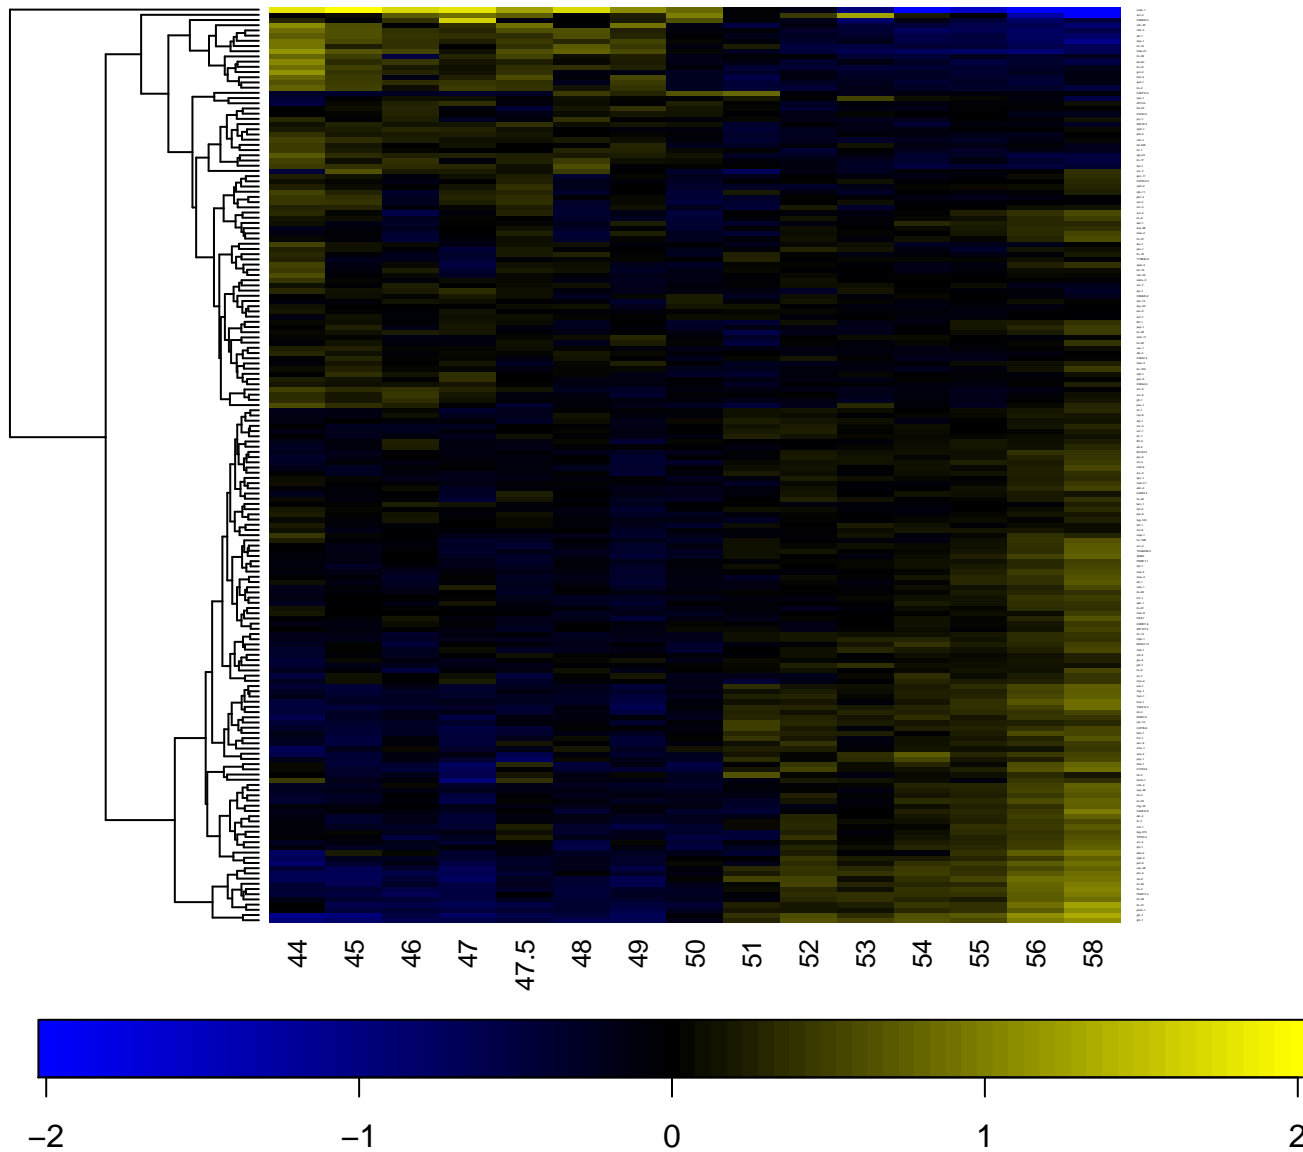

# nematode larval development

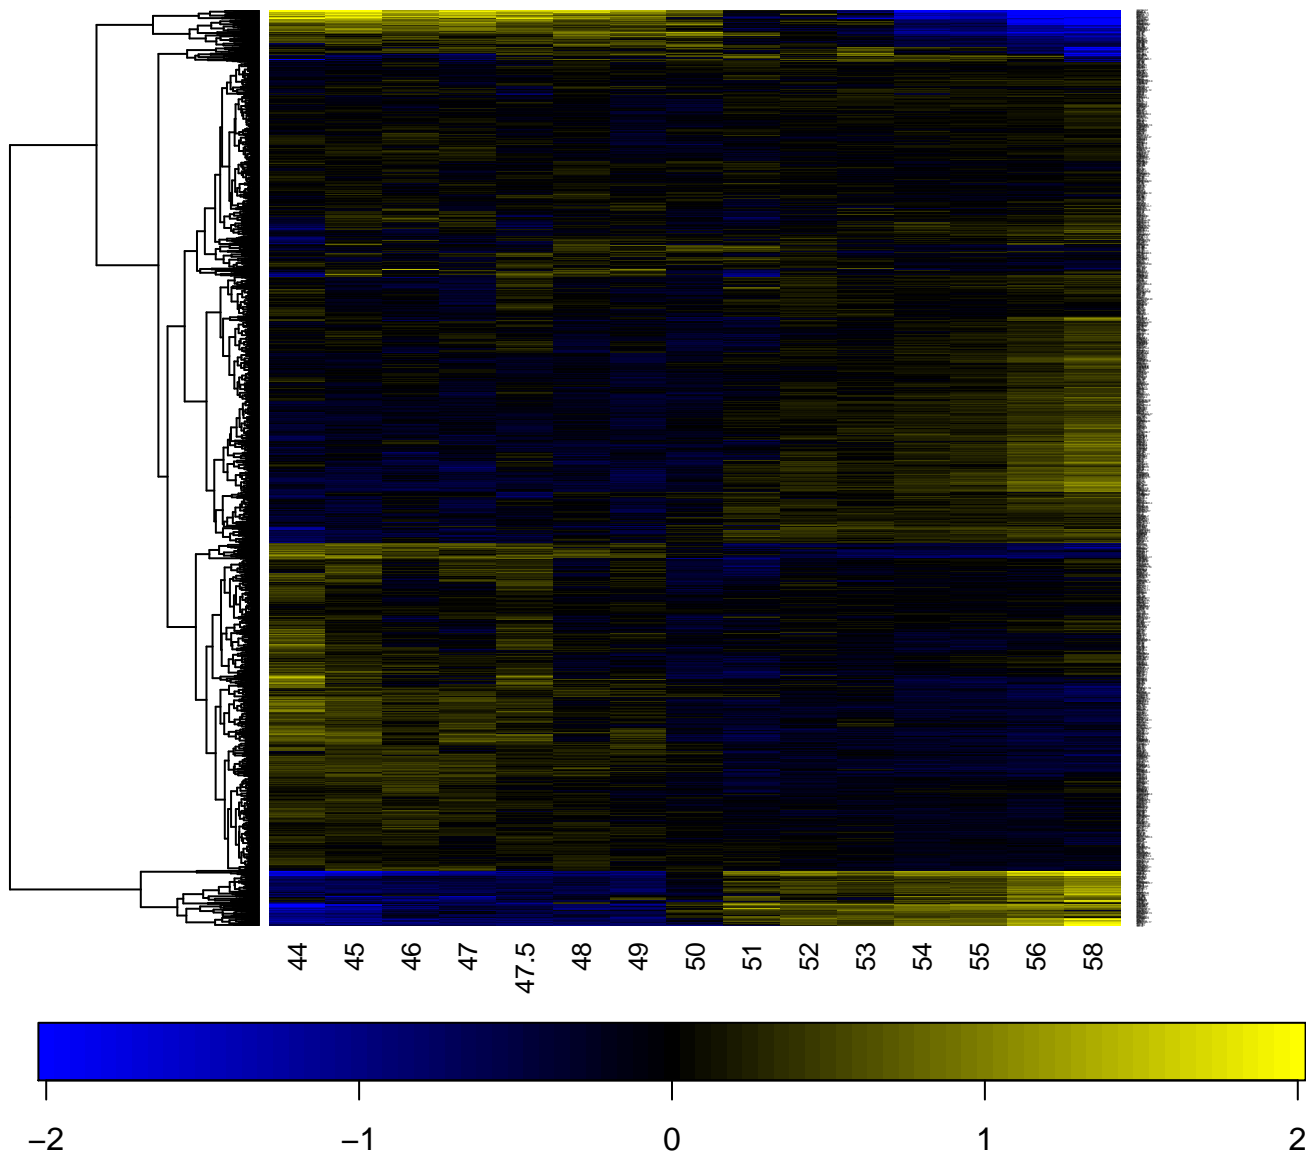







# neuromuscular synaptic transmission

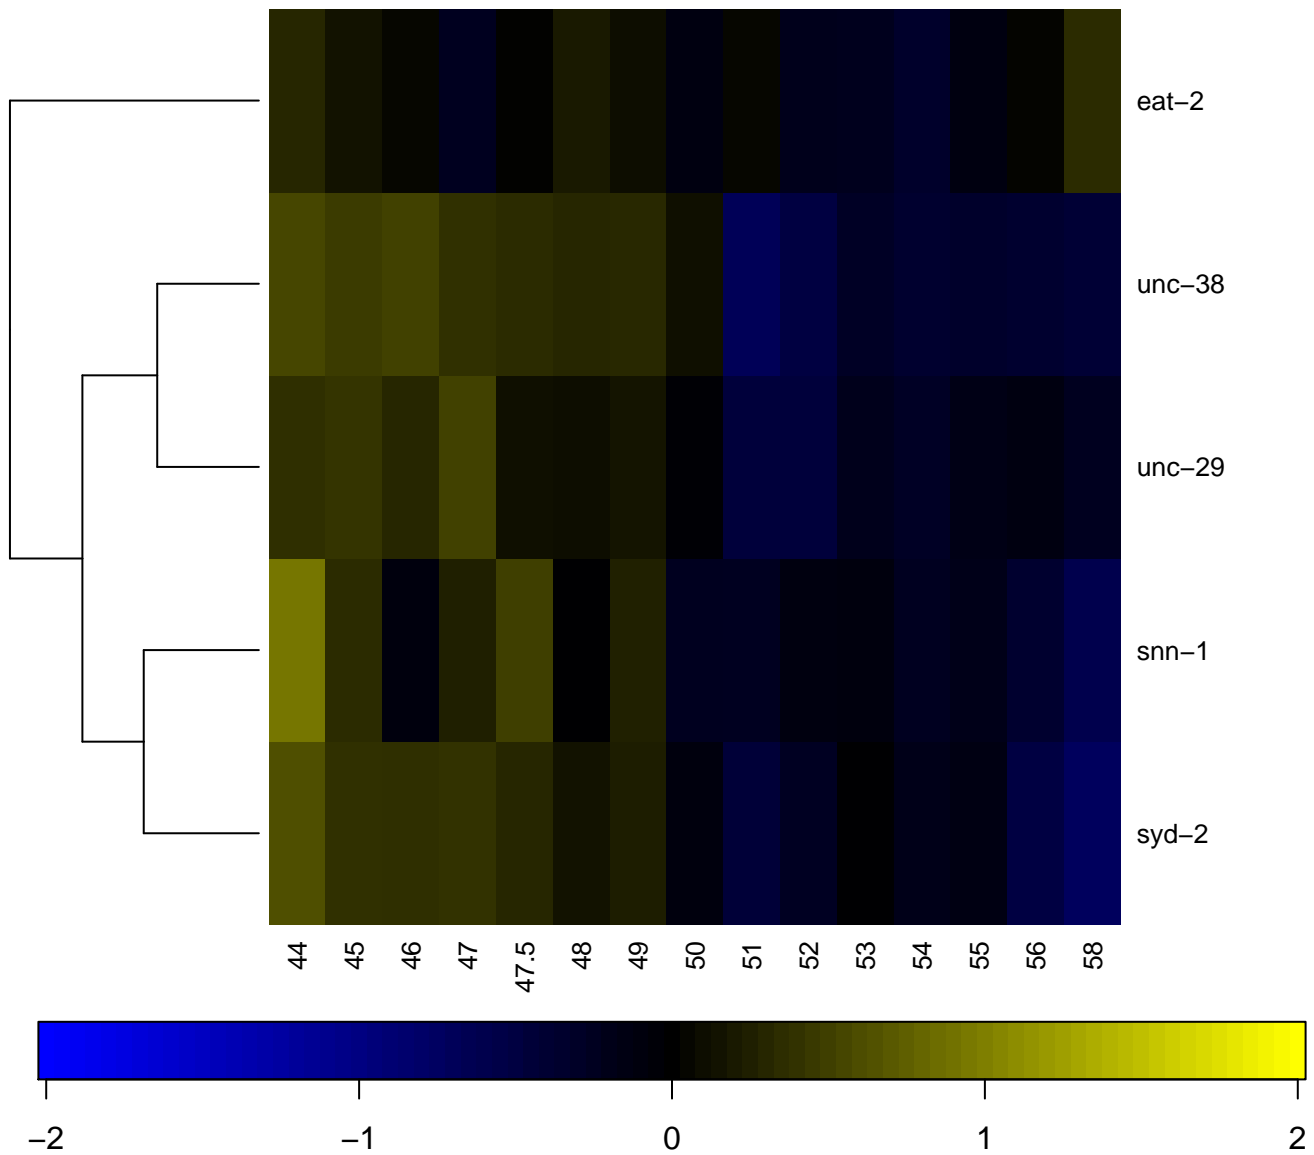

# neuron development

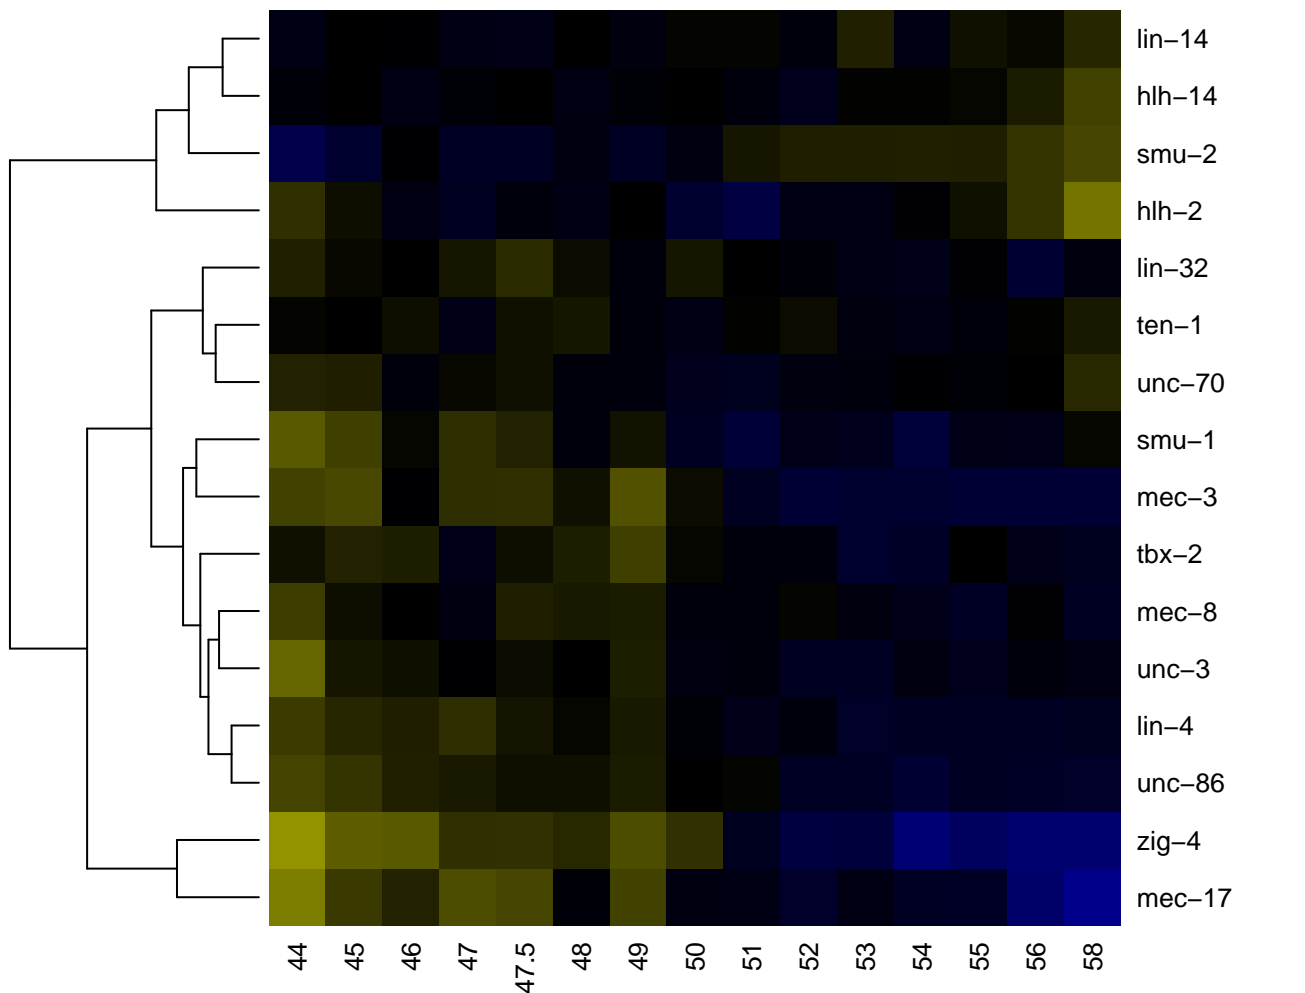





# neuron migration

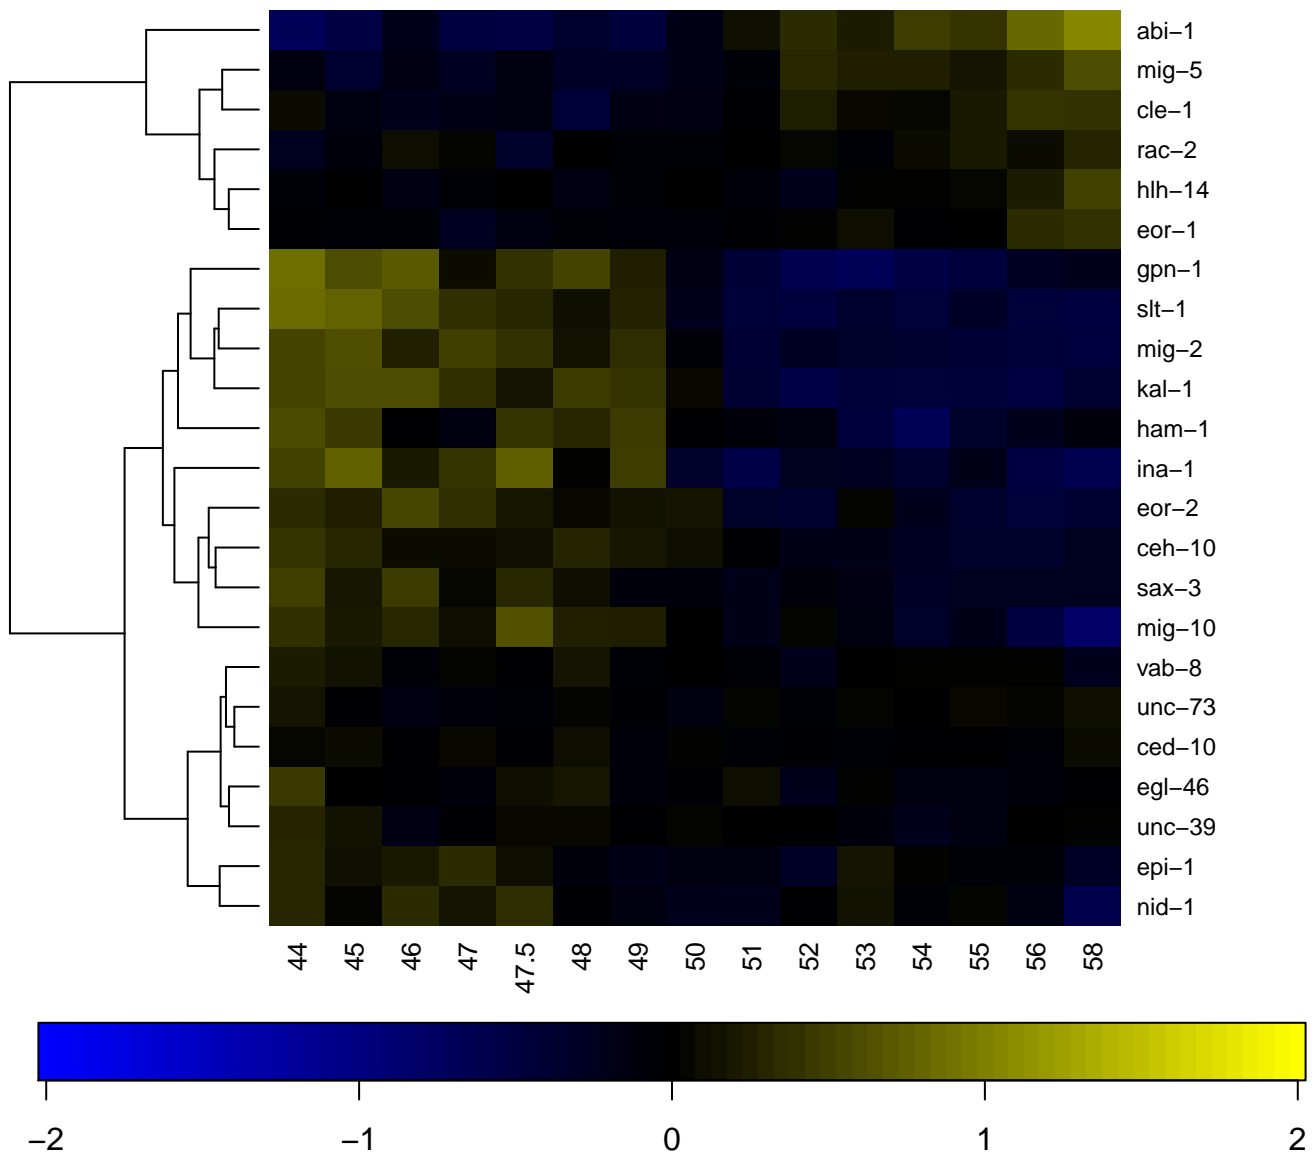

# neuron projection

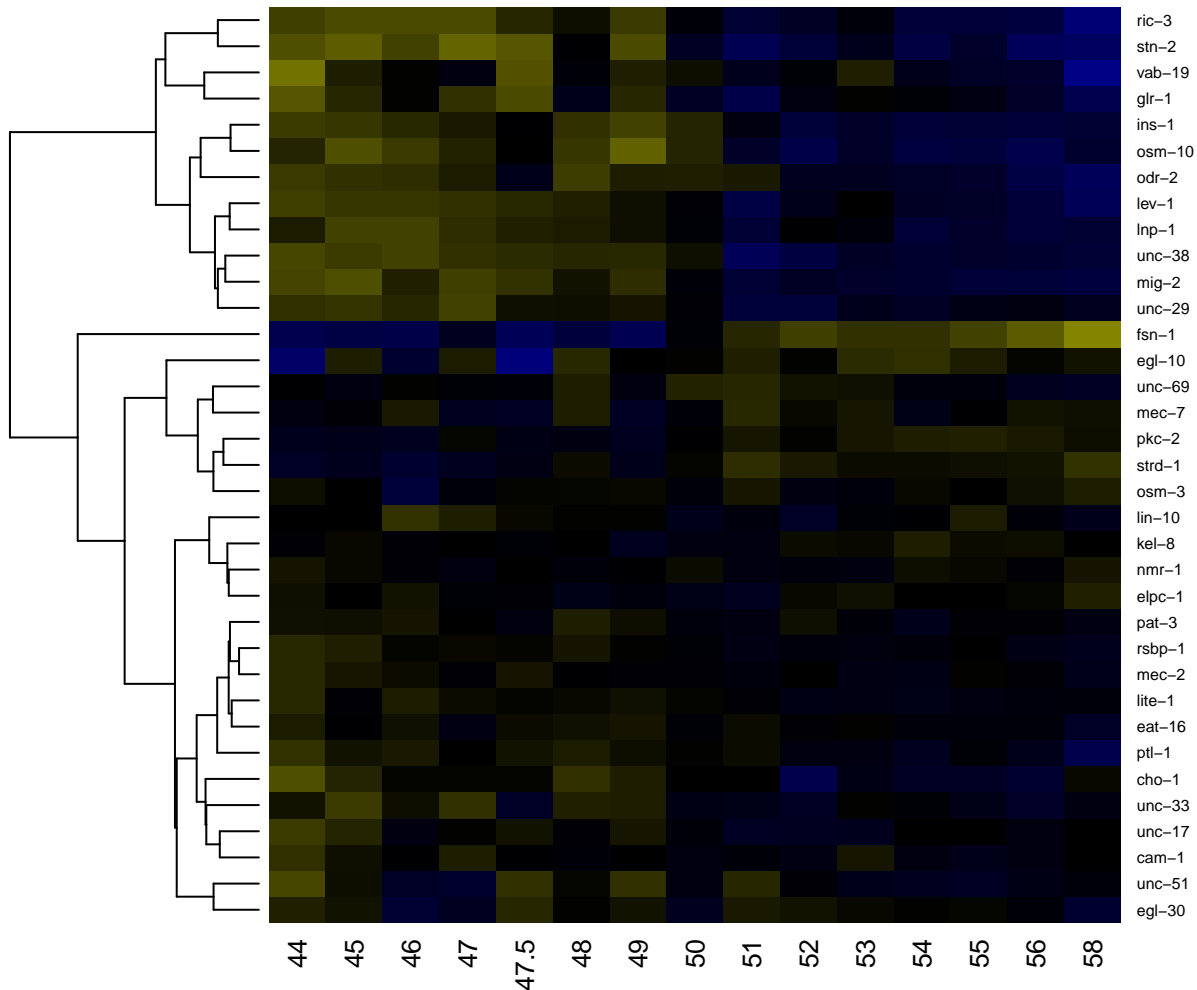





# neuropeptide signaling pathway

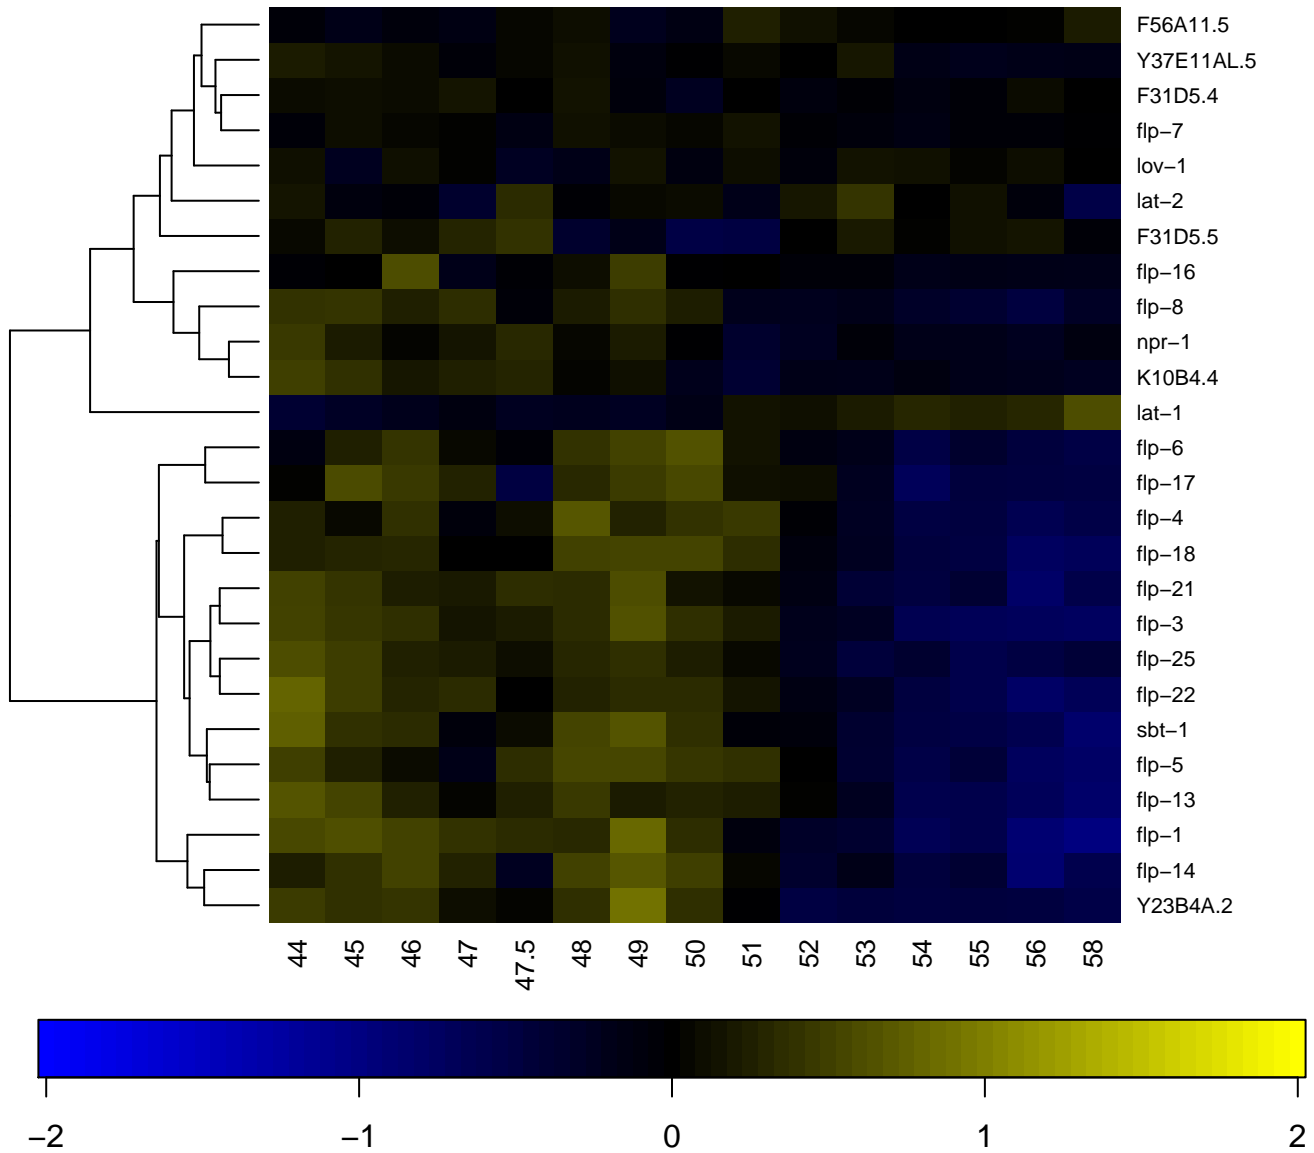



# neurotransmitter transport

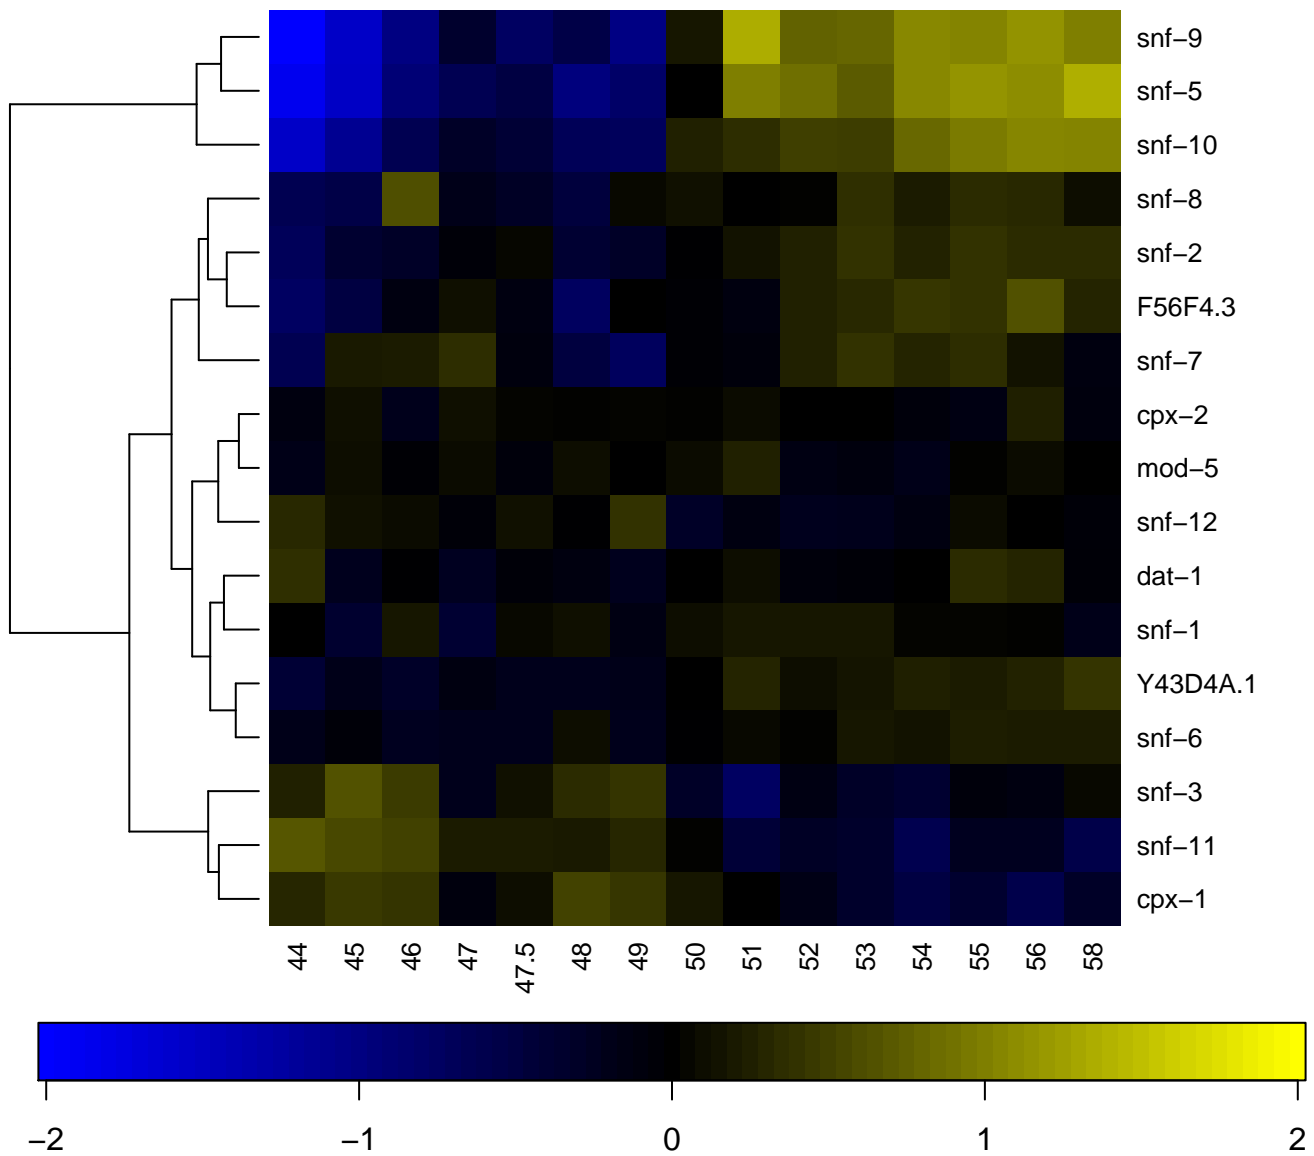

# neurotransmitter:sodium symporter activity

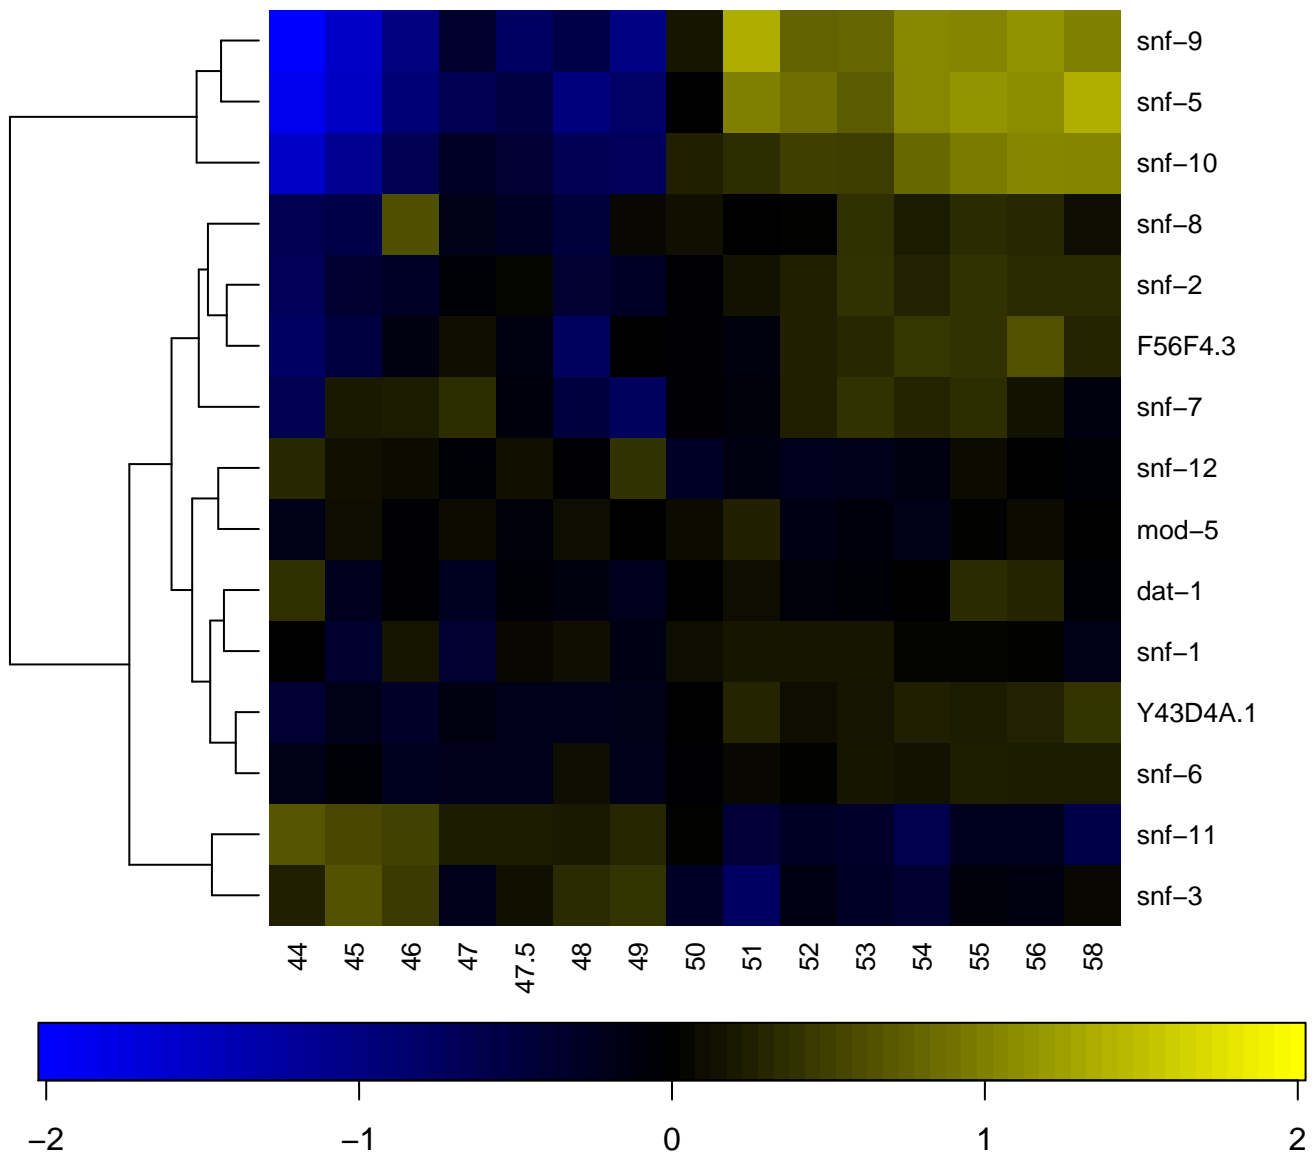



# nitrogen compound metabolic process

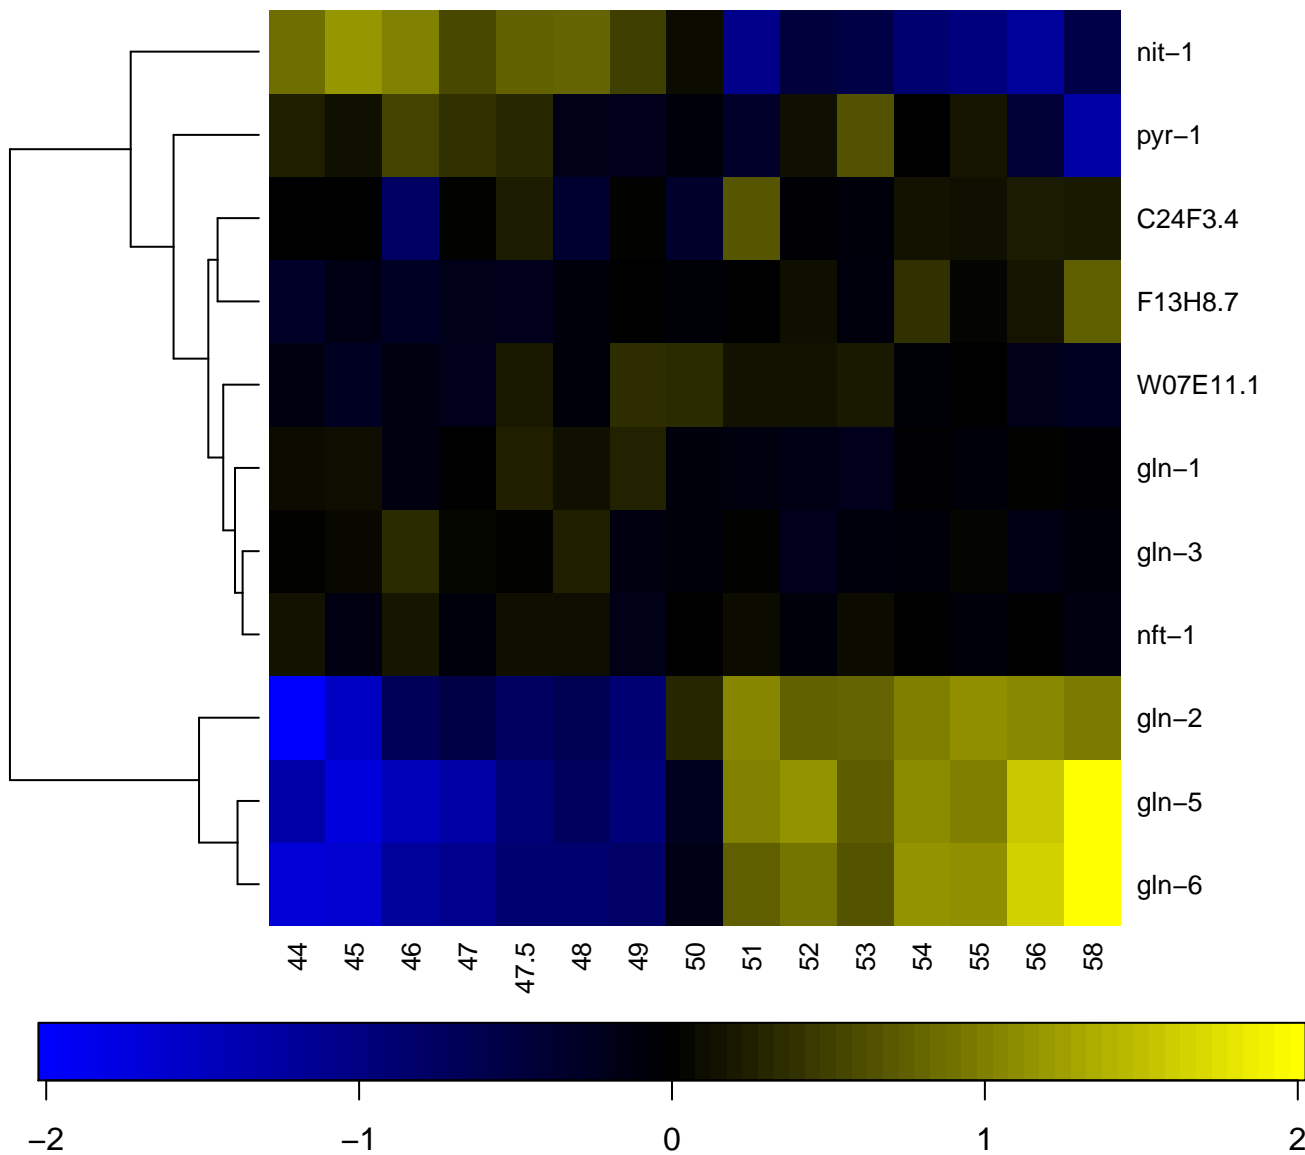







# ar-transcribed mRNA catabolic process, nonsense-mediate

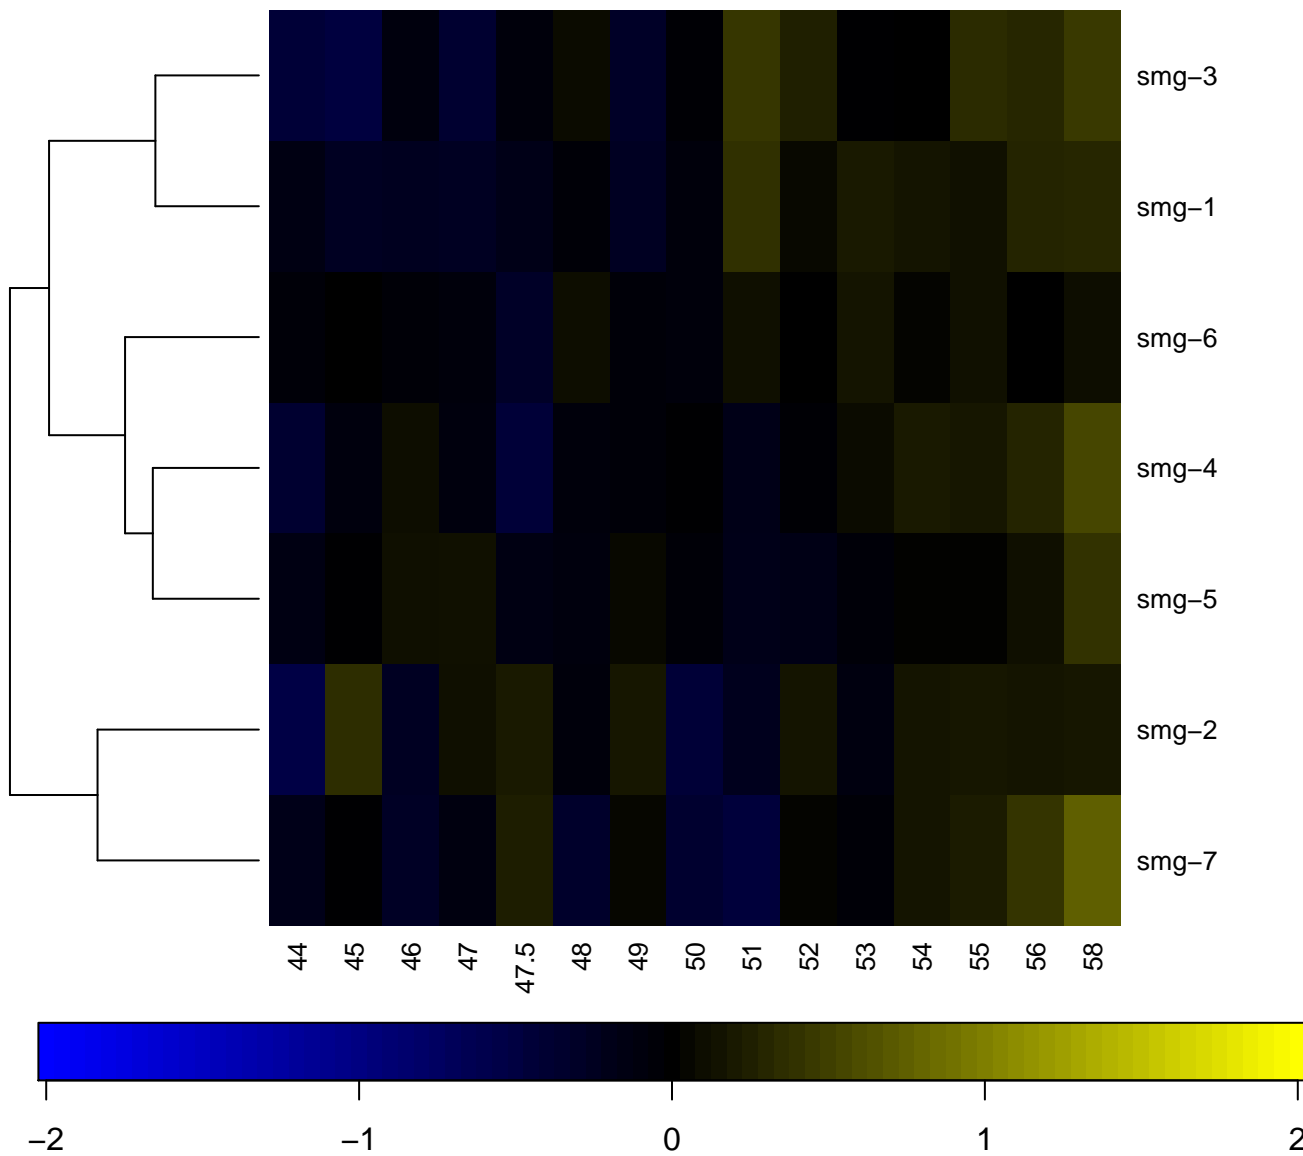

# nuclear chromatin

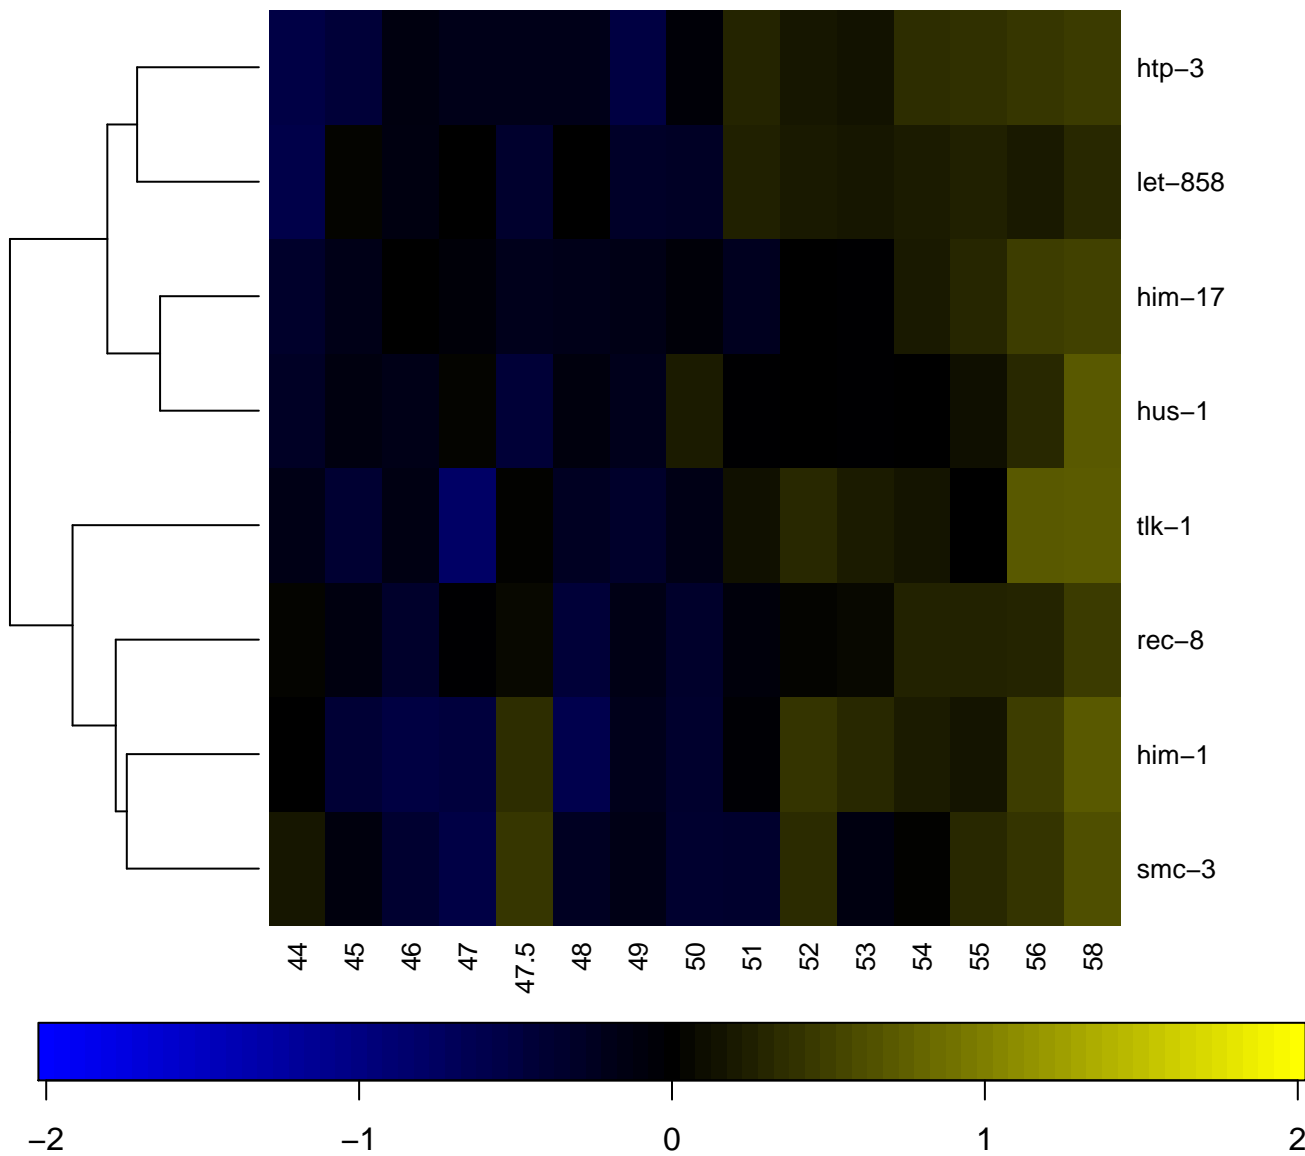



# nuclear envelope

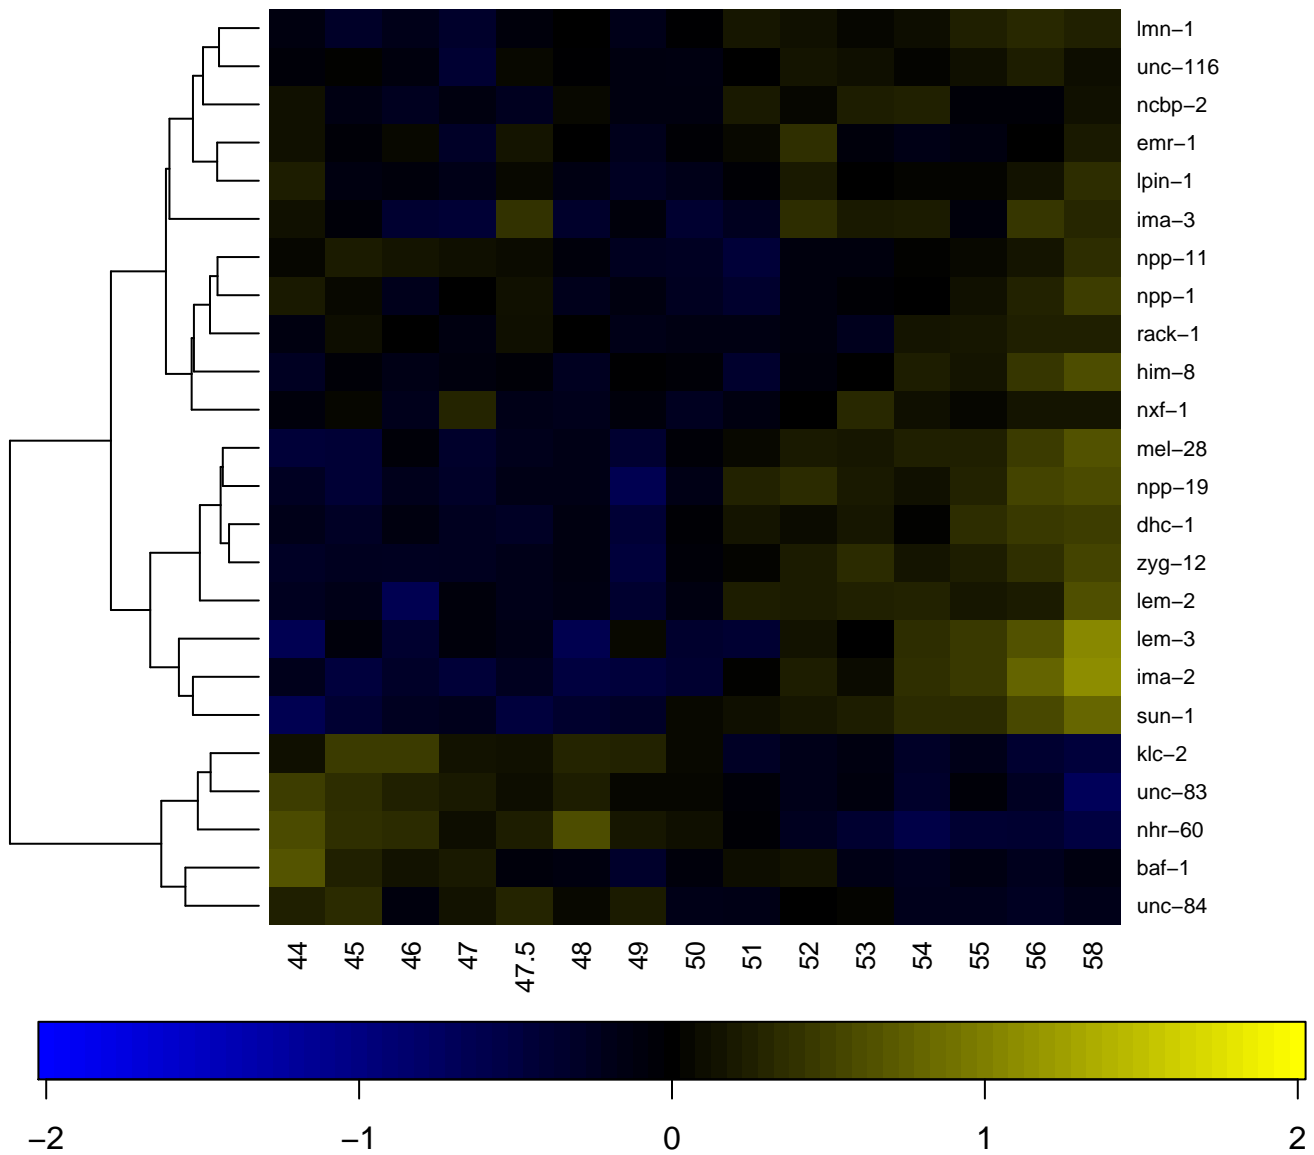

# nuclear migration

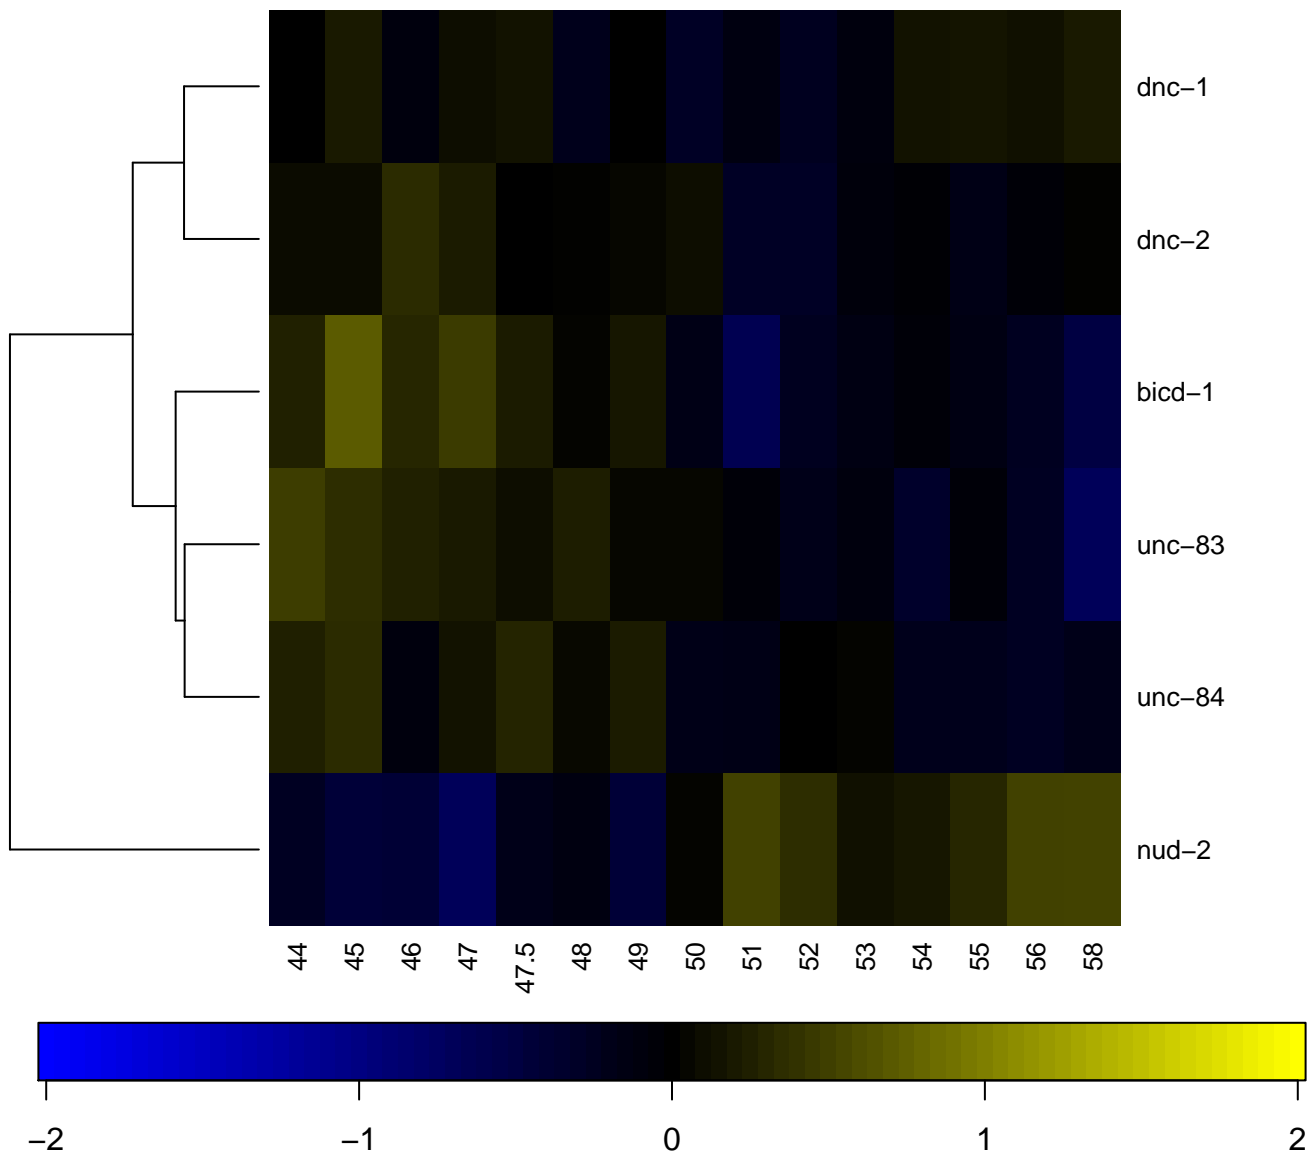



# nuclear pore

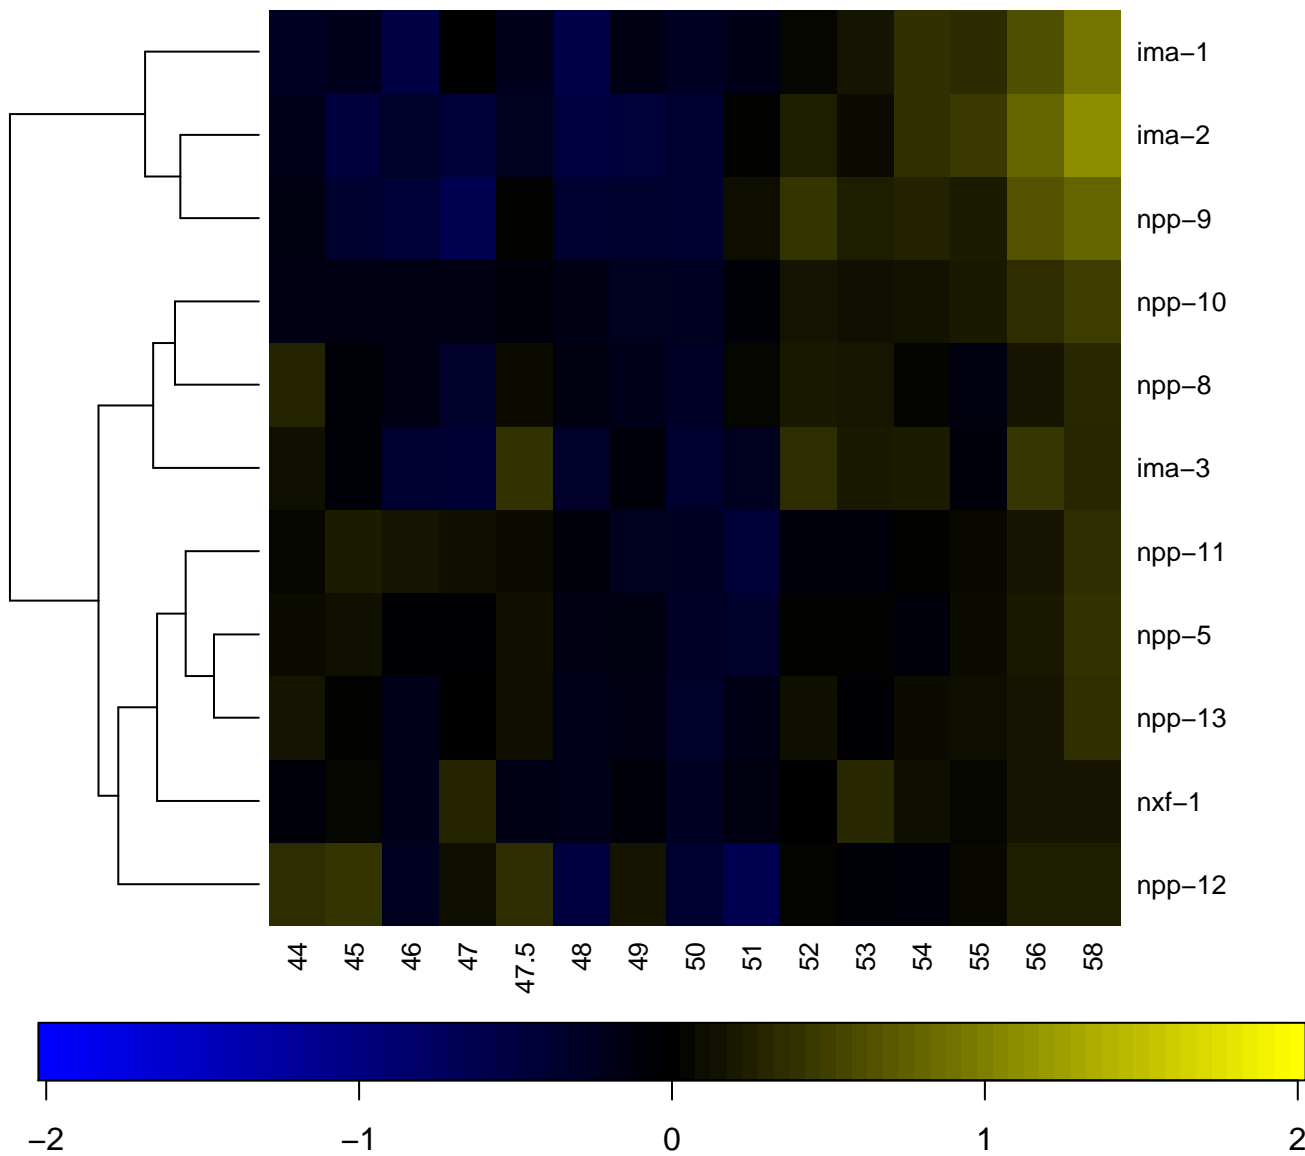







# nucleic acid binding

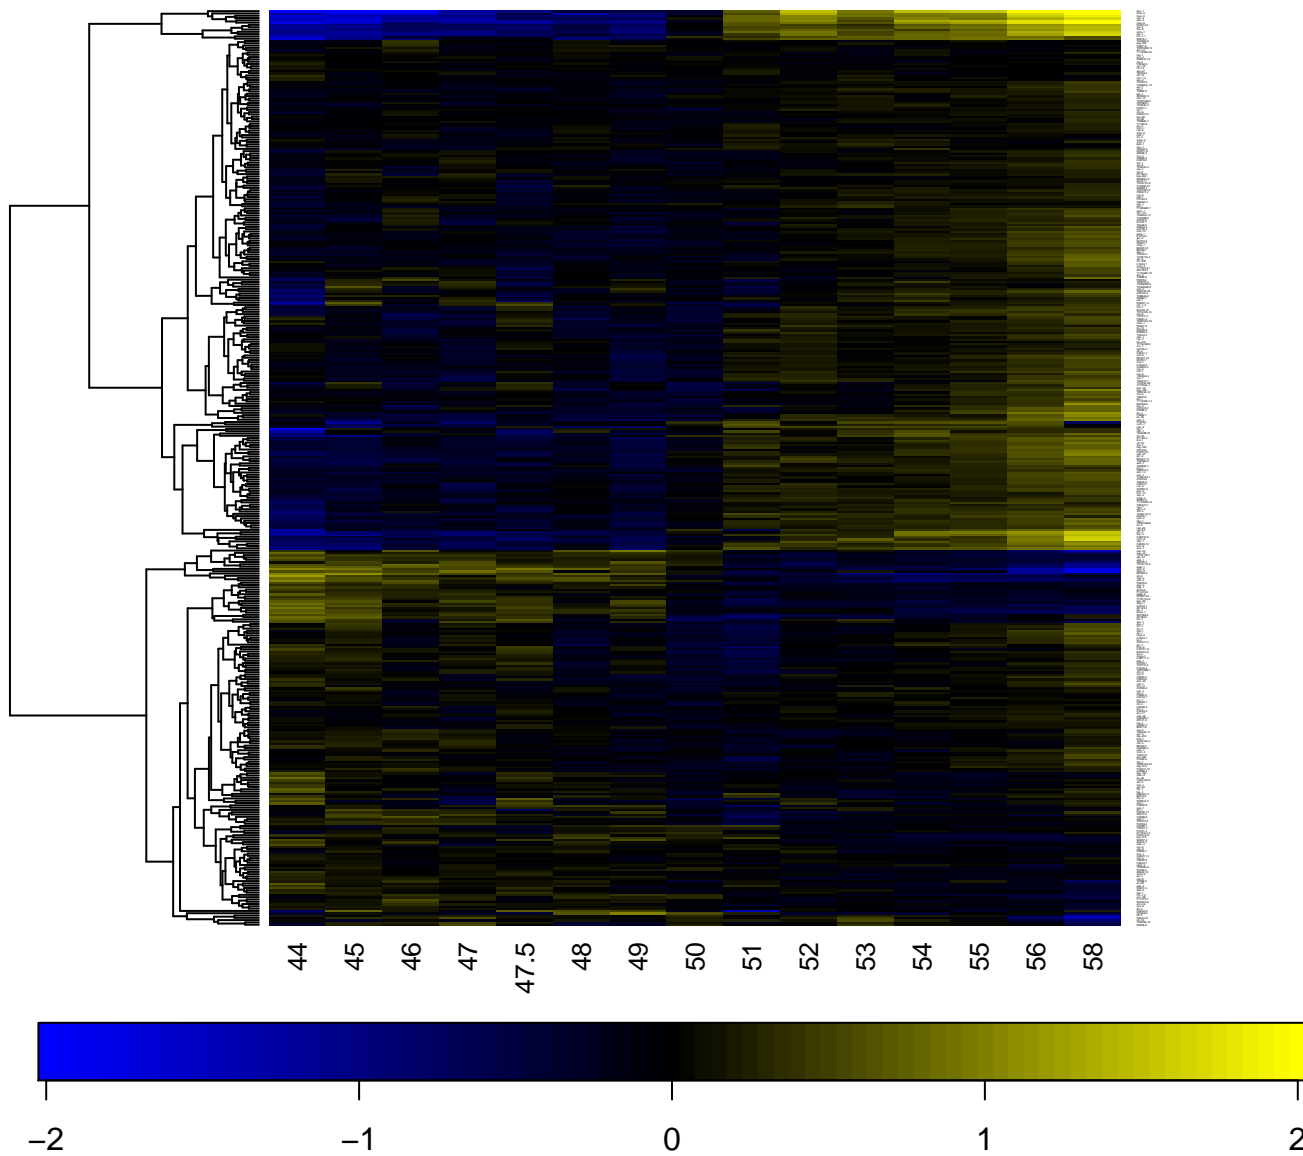

# Probase, nucleoside, nucleotide and nucleic acid metabolic p

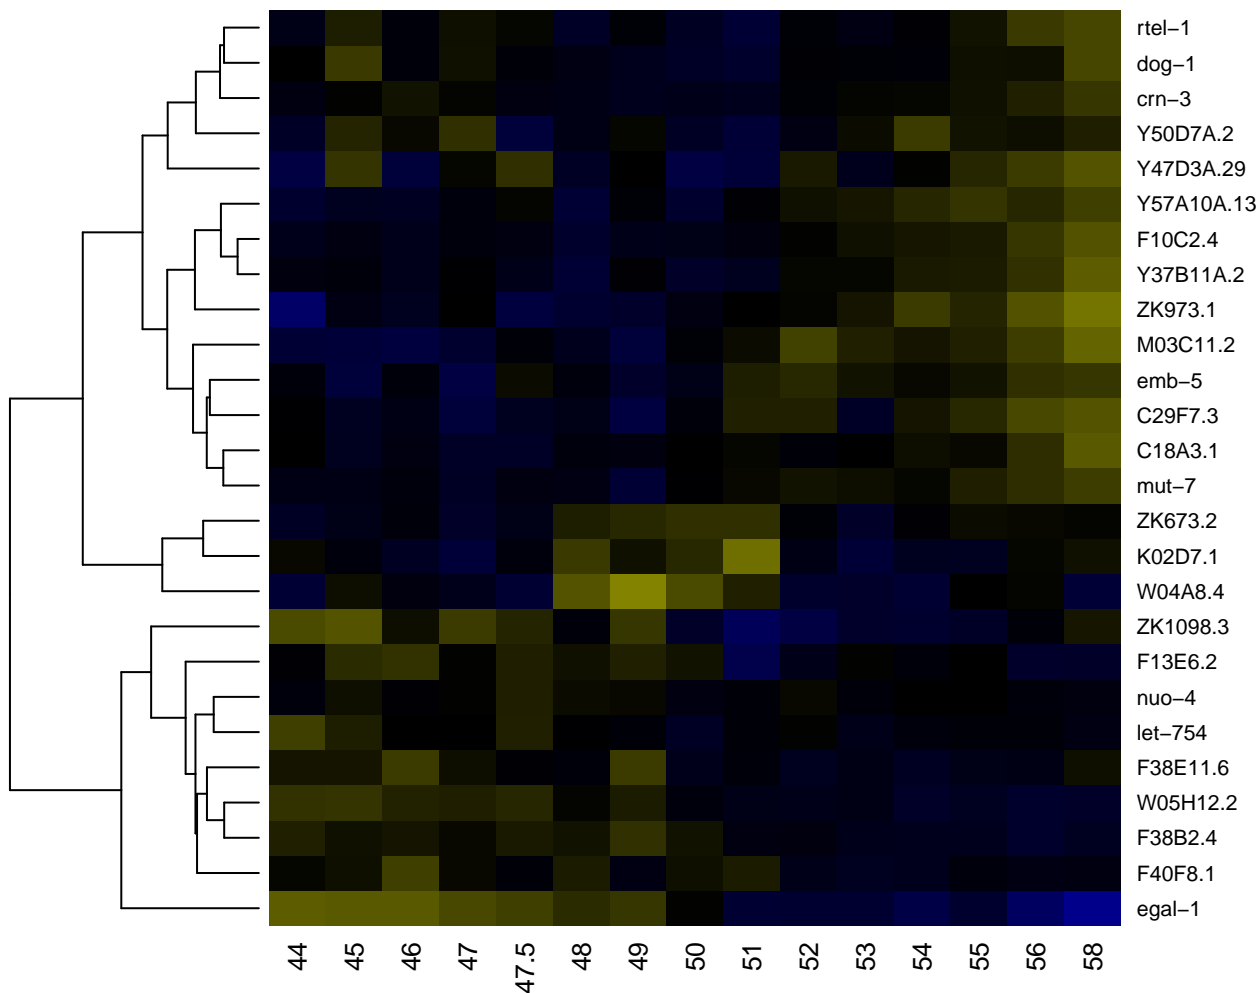

# nucleobase, nucleoside, nucleotide kinase activity

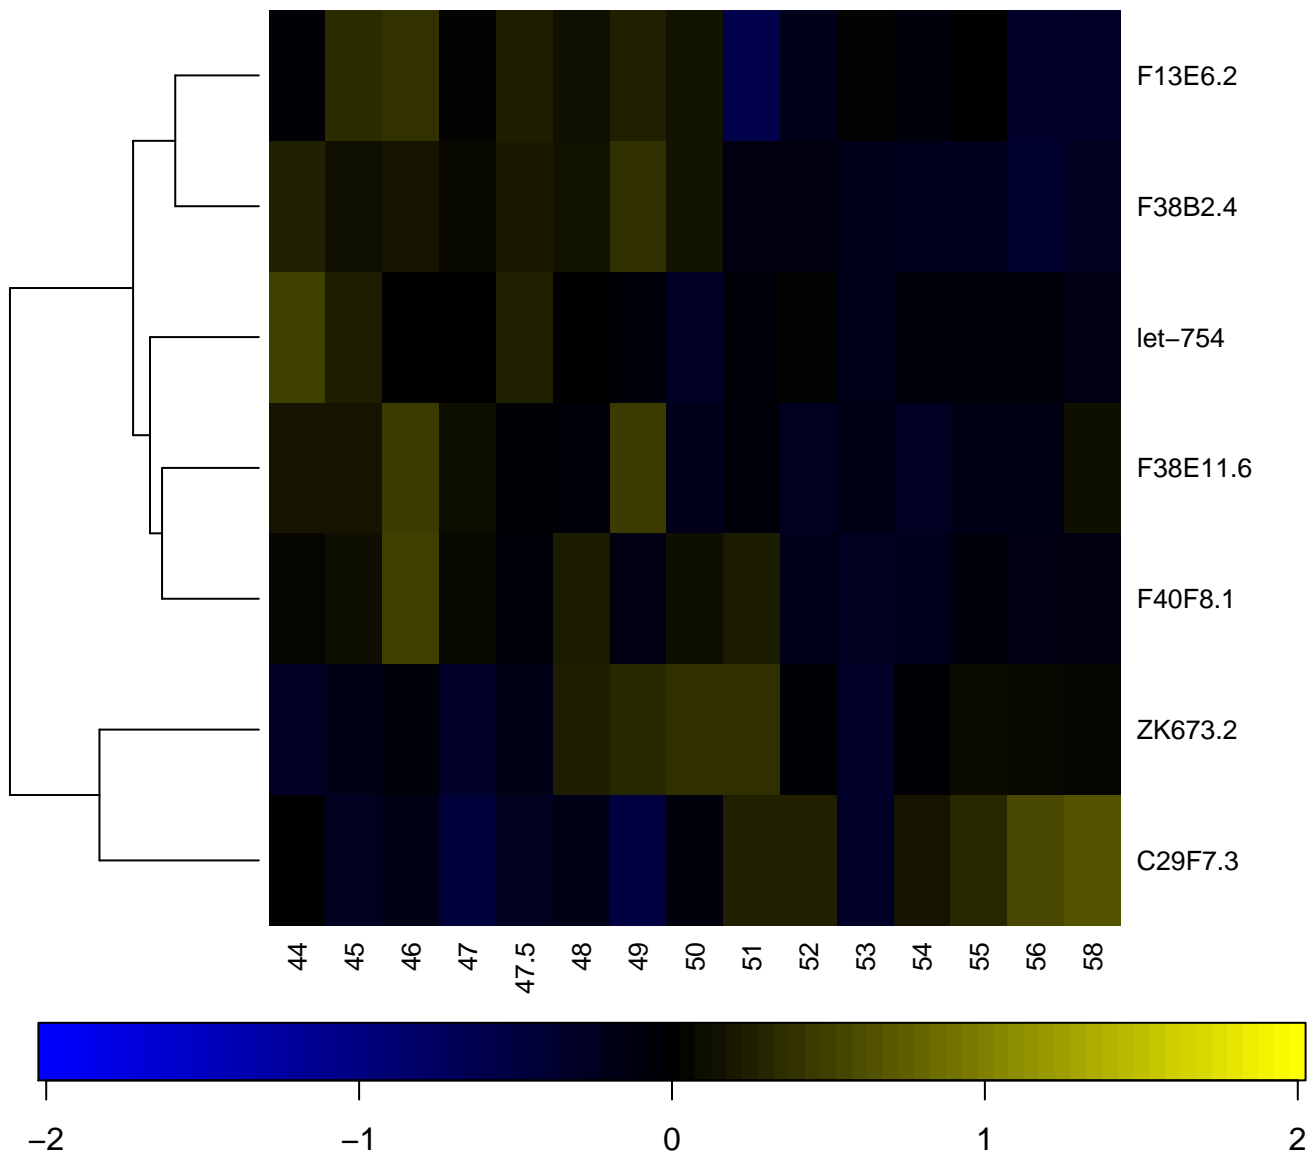

# nucleocytoplasmic transport

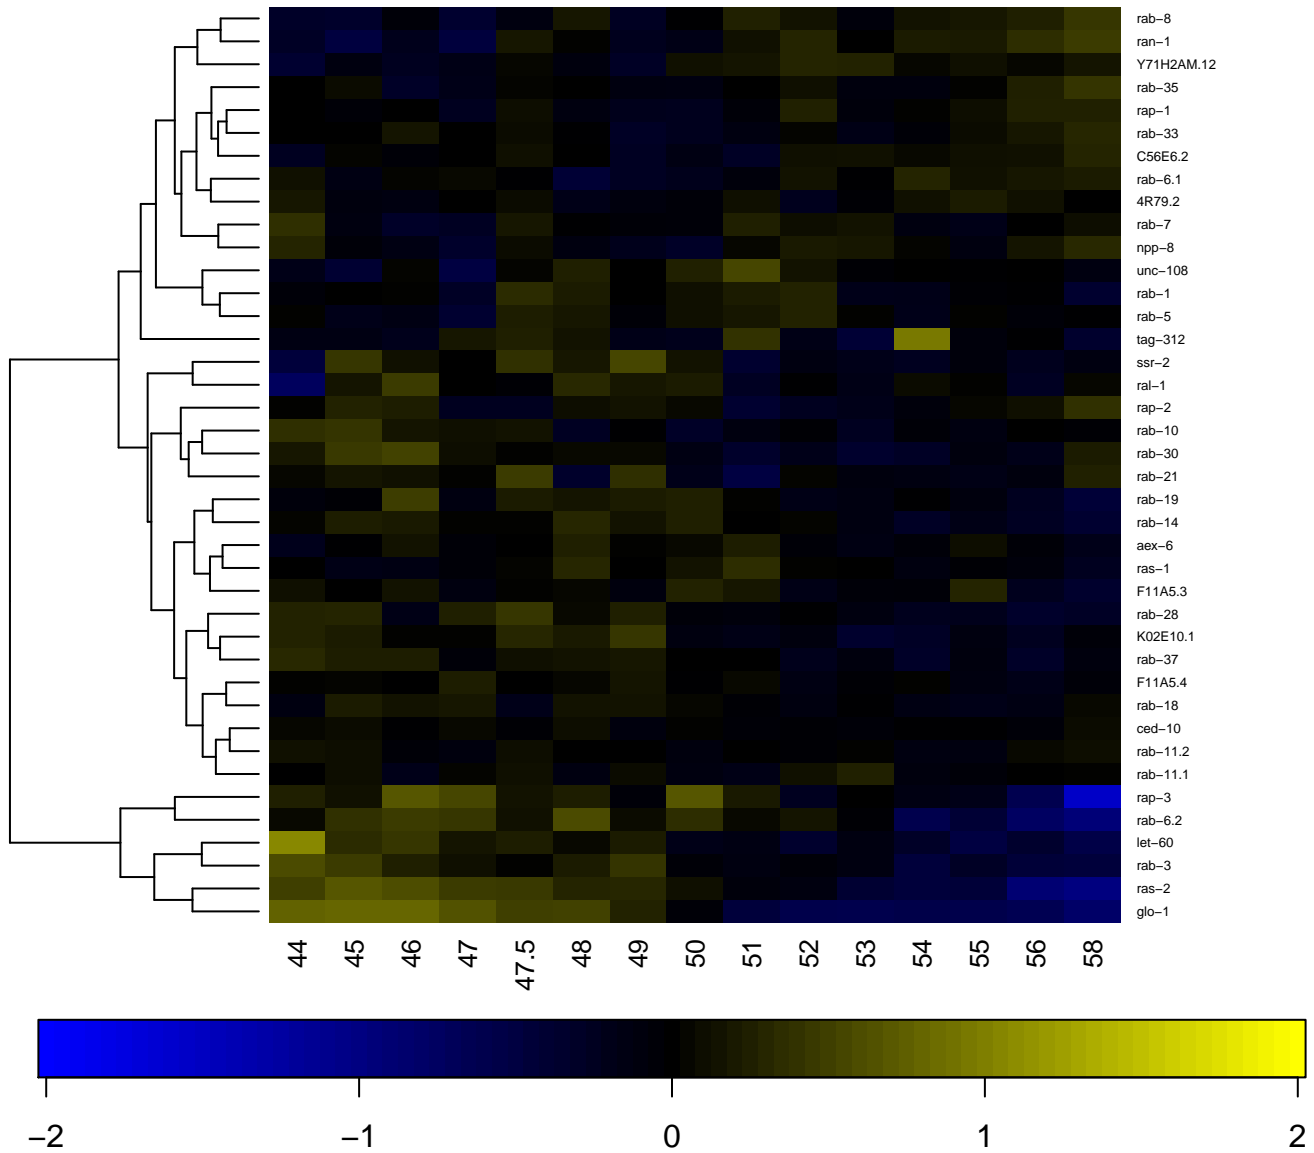



# nucleoplasm

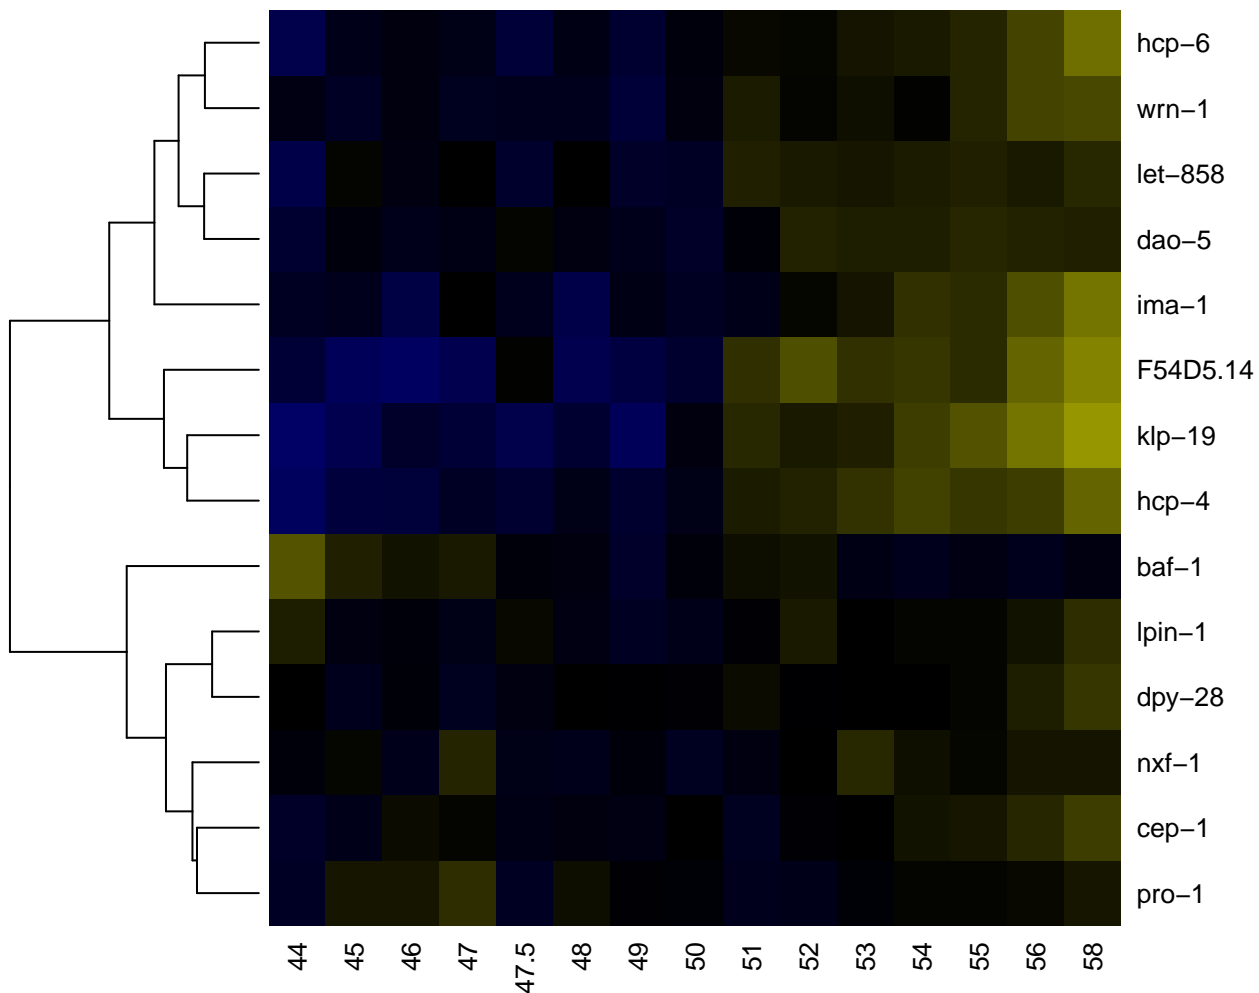





# nucleoside metabolic process

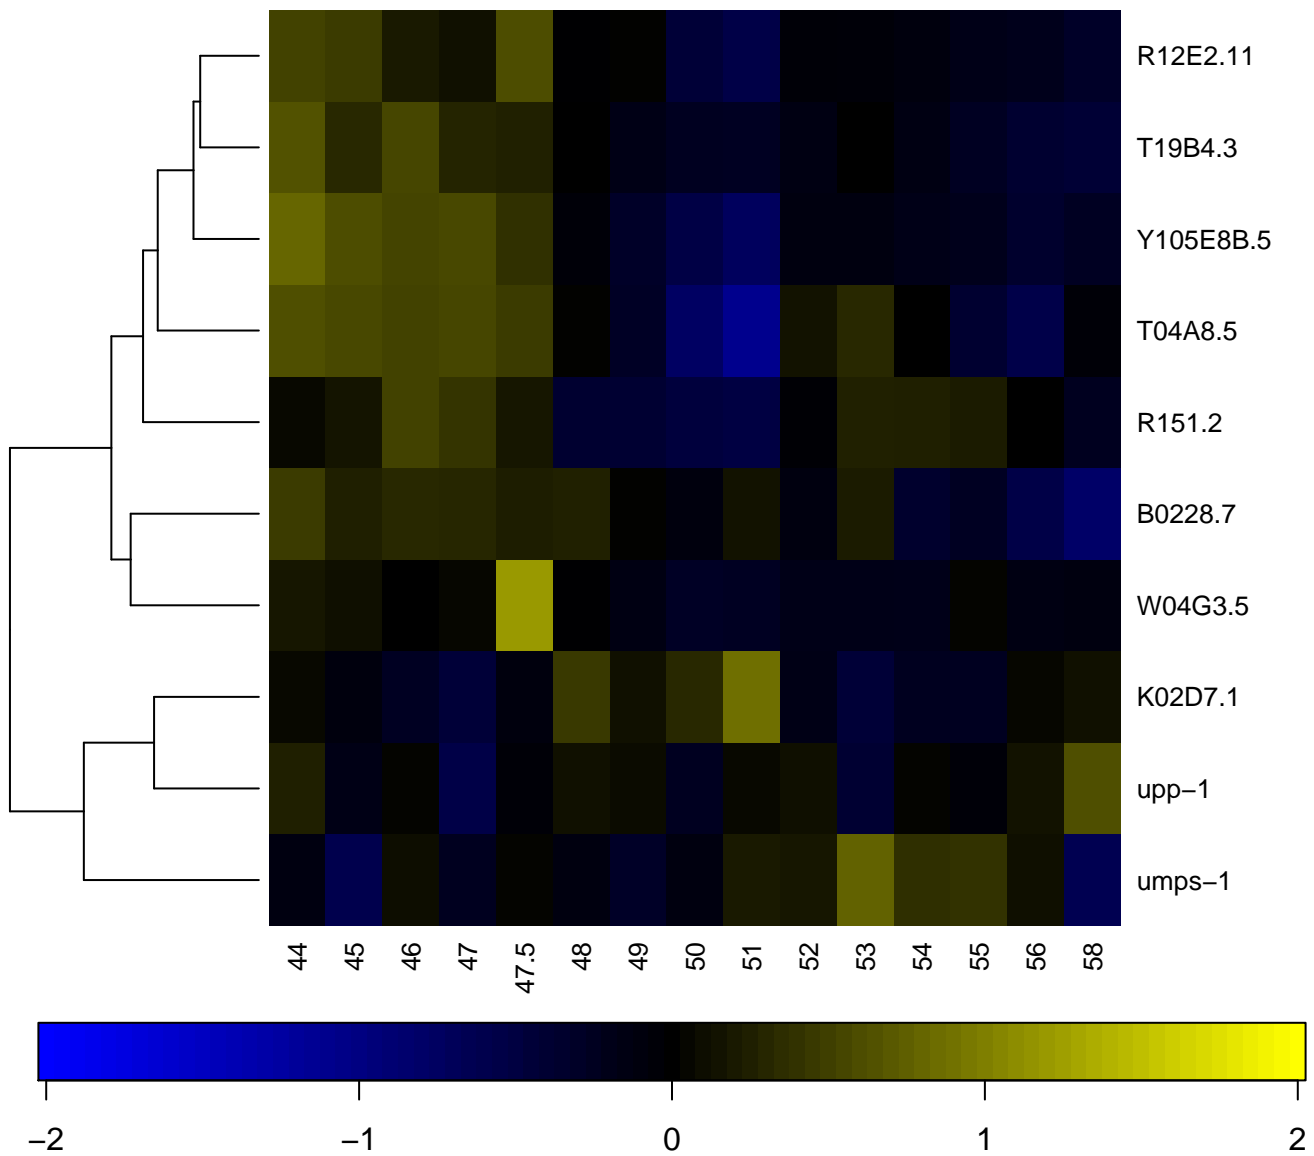

# nucleoside transmembrane transporter activity

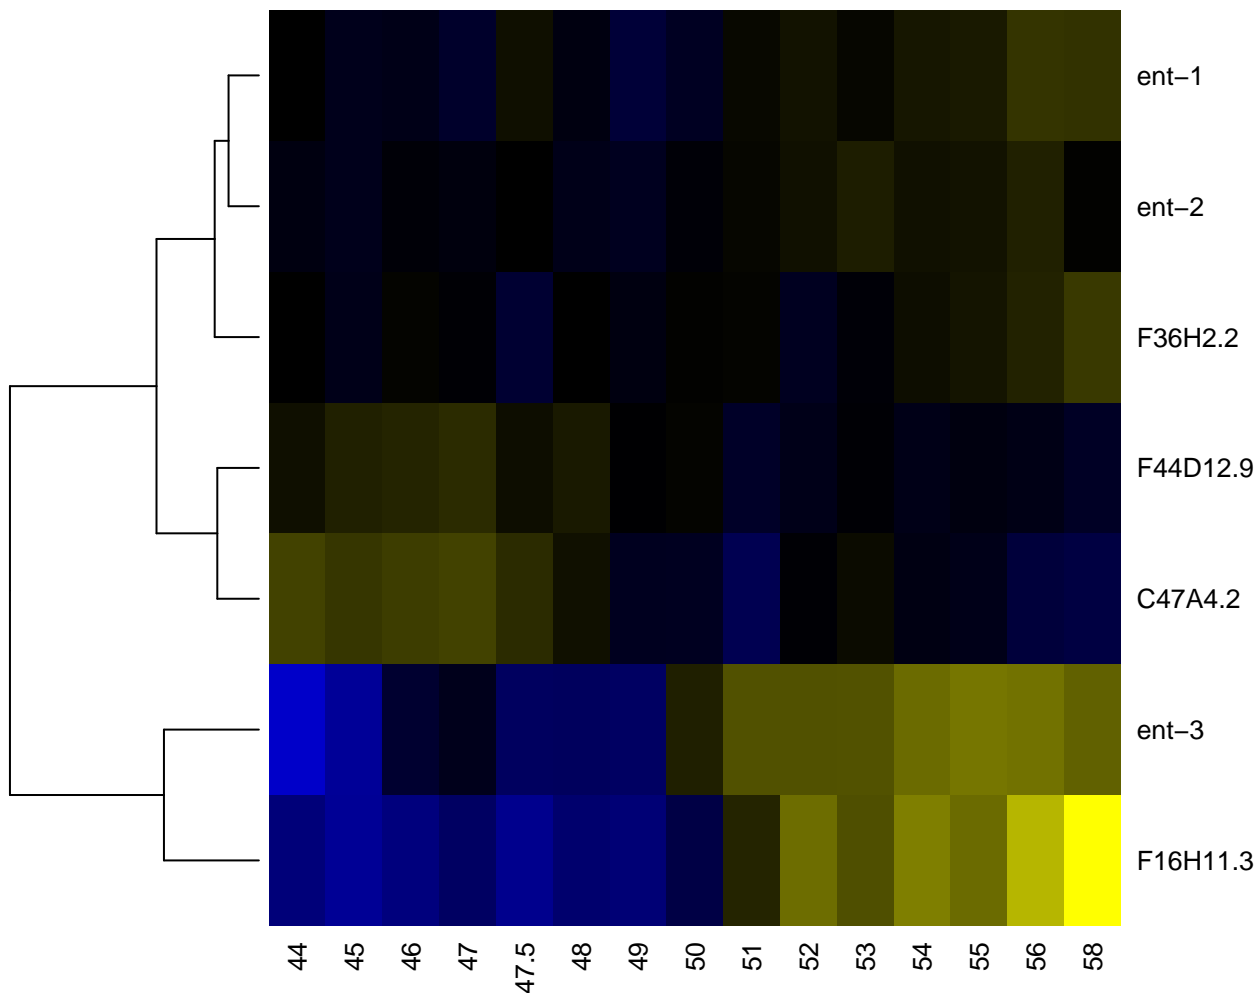

# nucleosome

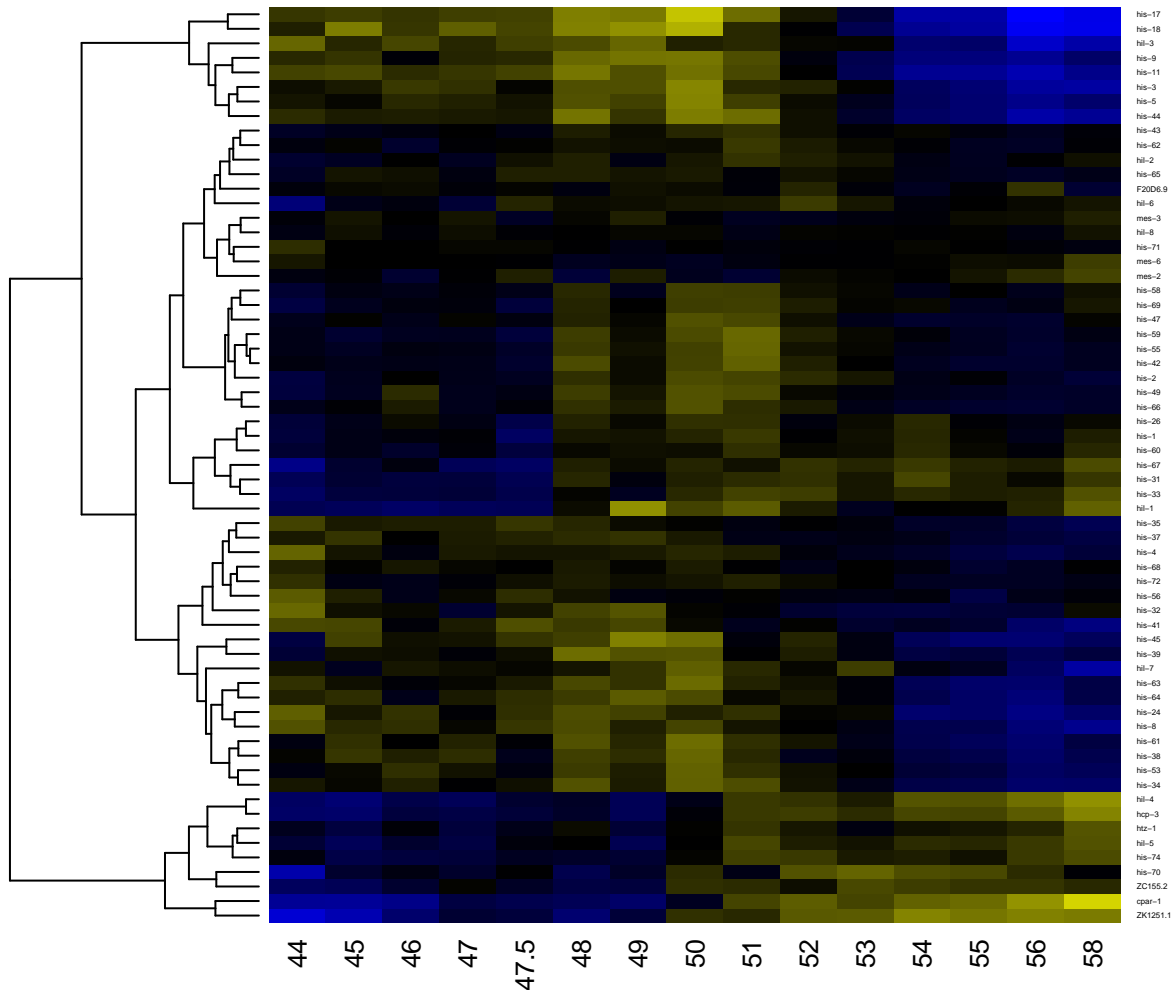

-2

-1

0

1

2

# nucleosome assembly

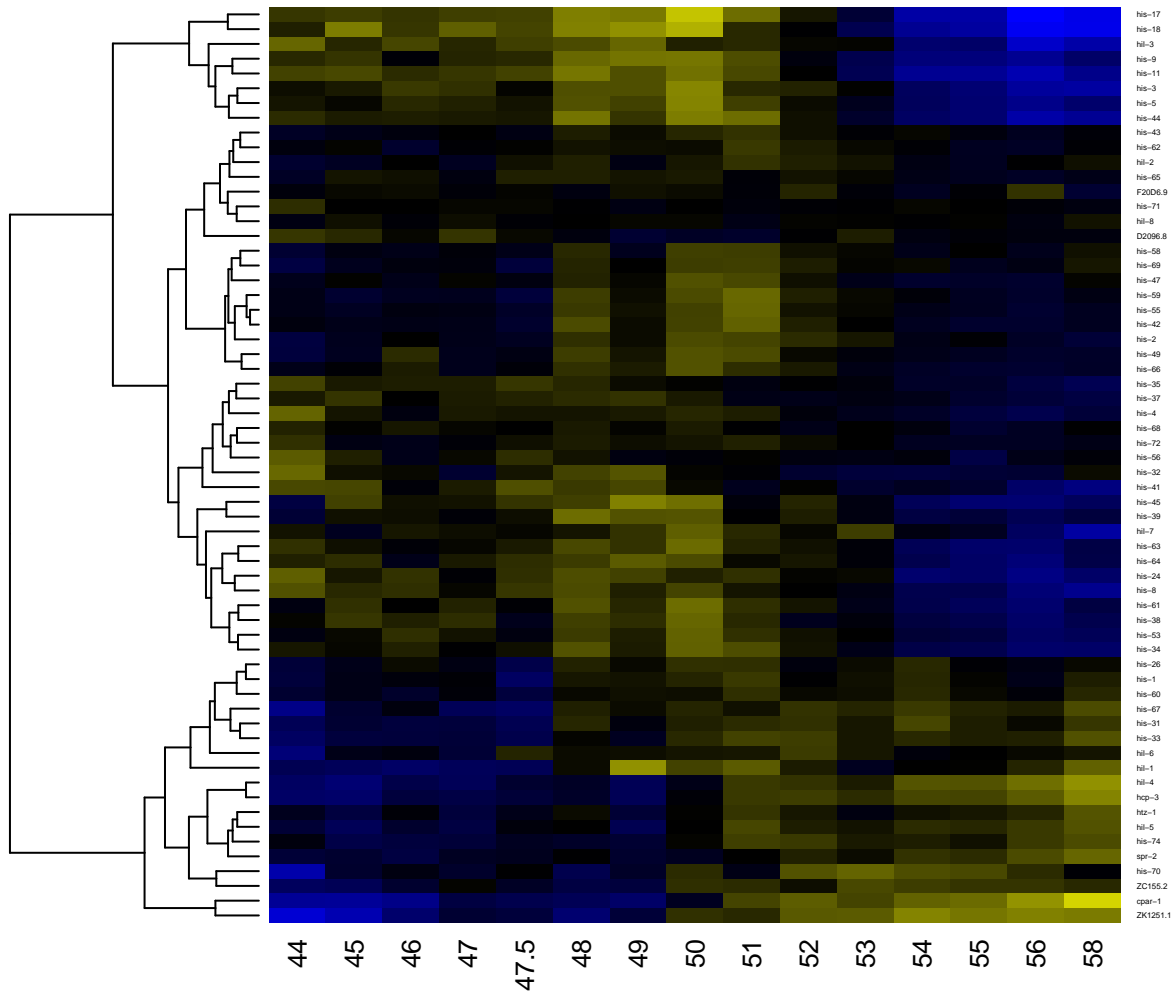



# nucleotide-sugar transmembrane transporter activity

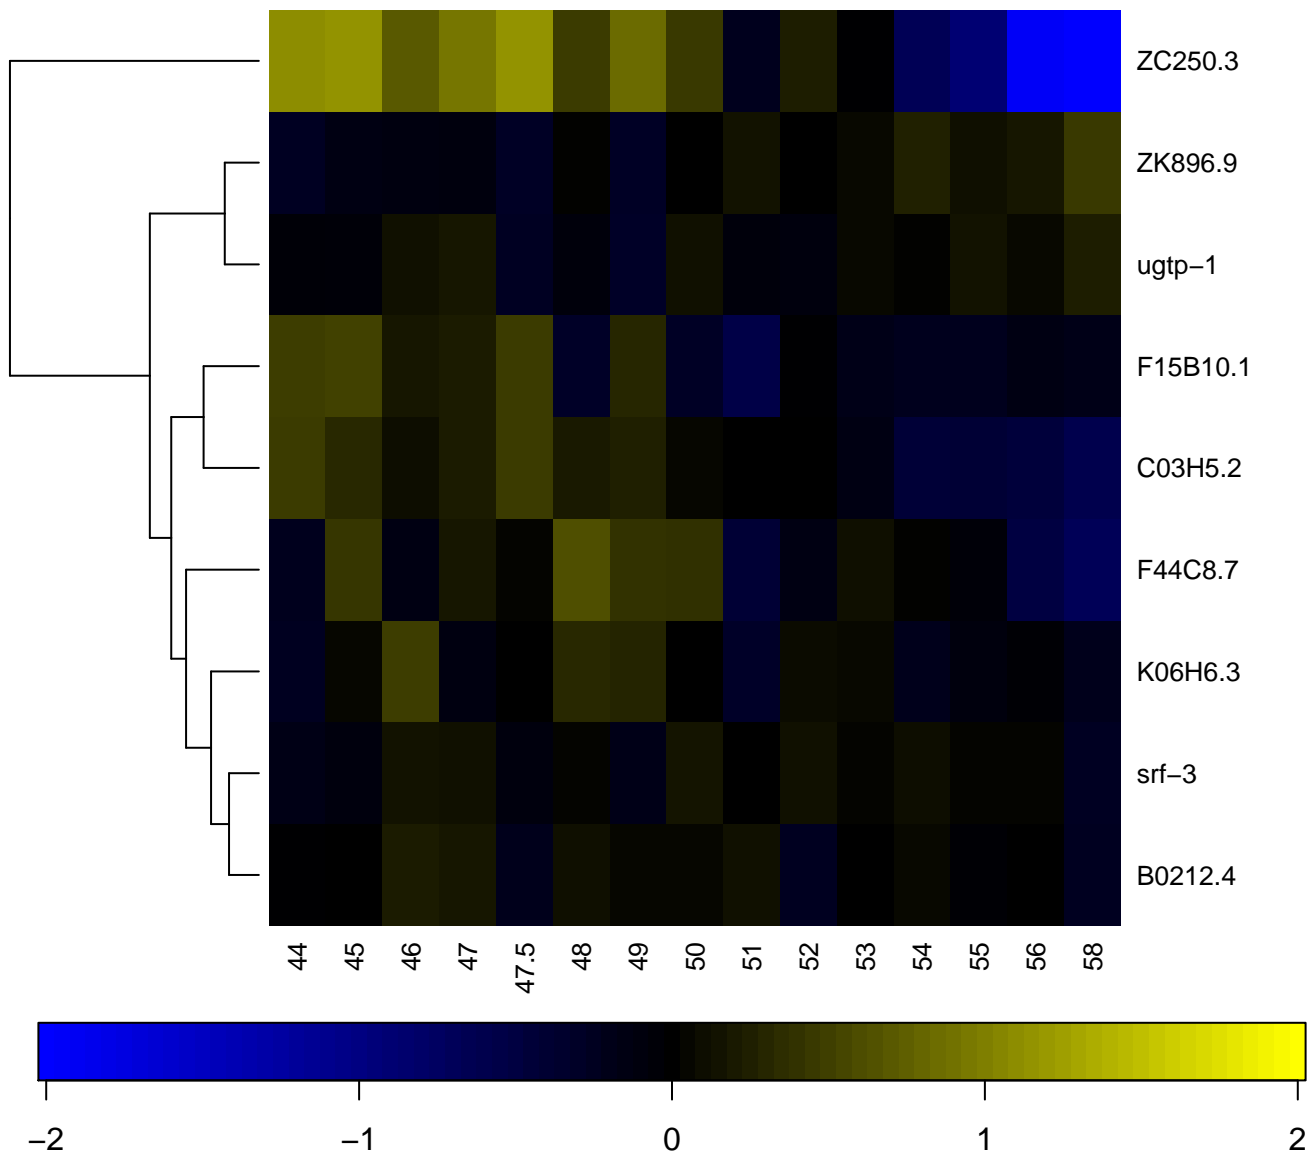

# nucleotide-sugar transport

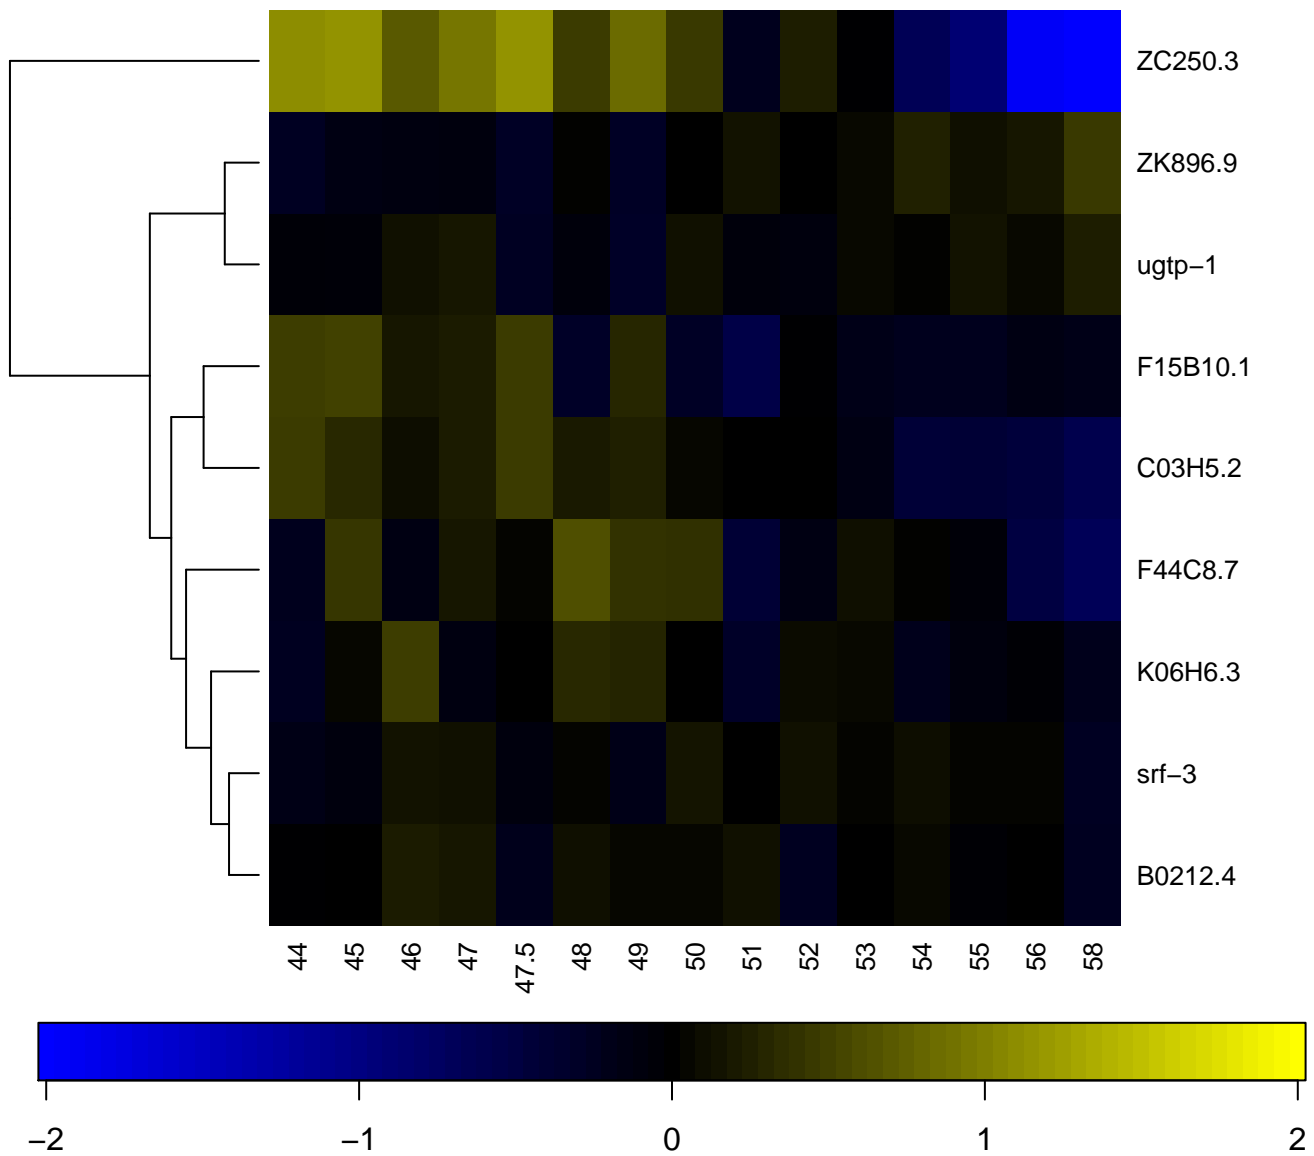



# nucleotide binding

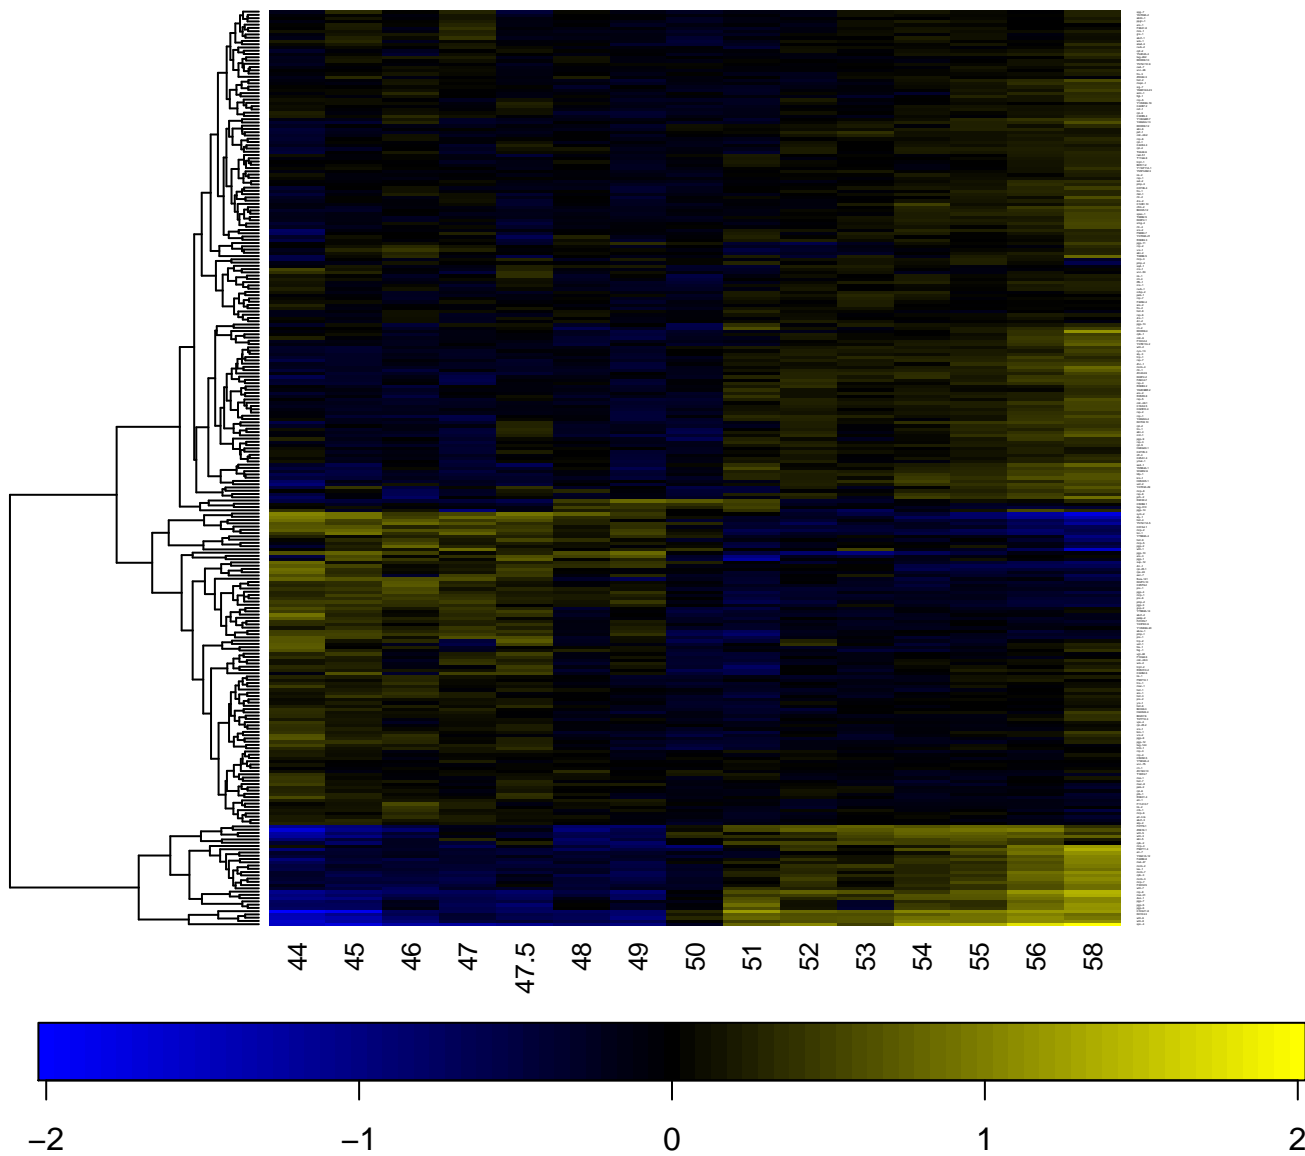

# nucleotidyltransferase activity

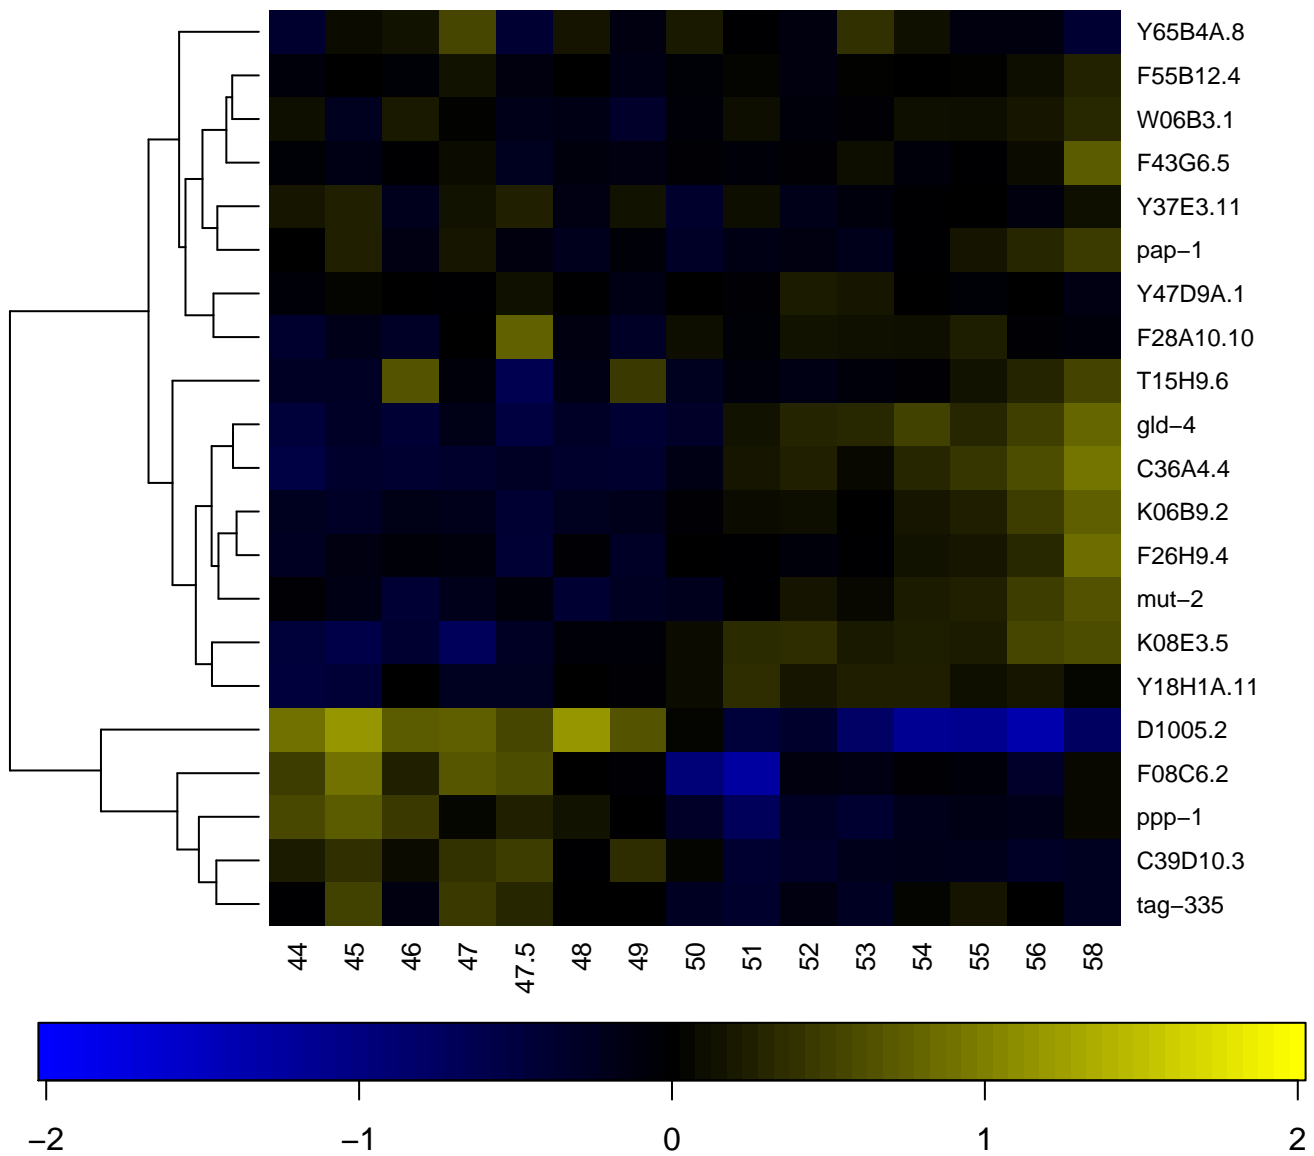

# nucleus

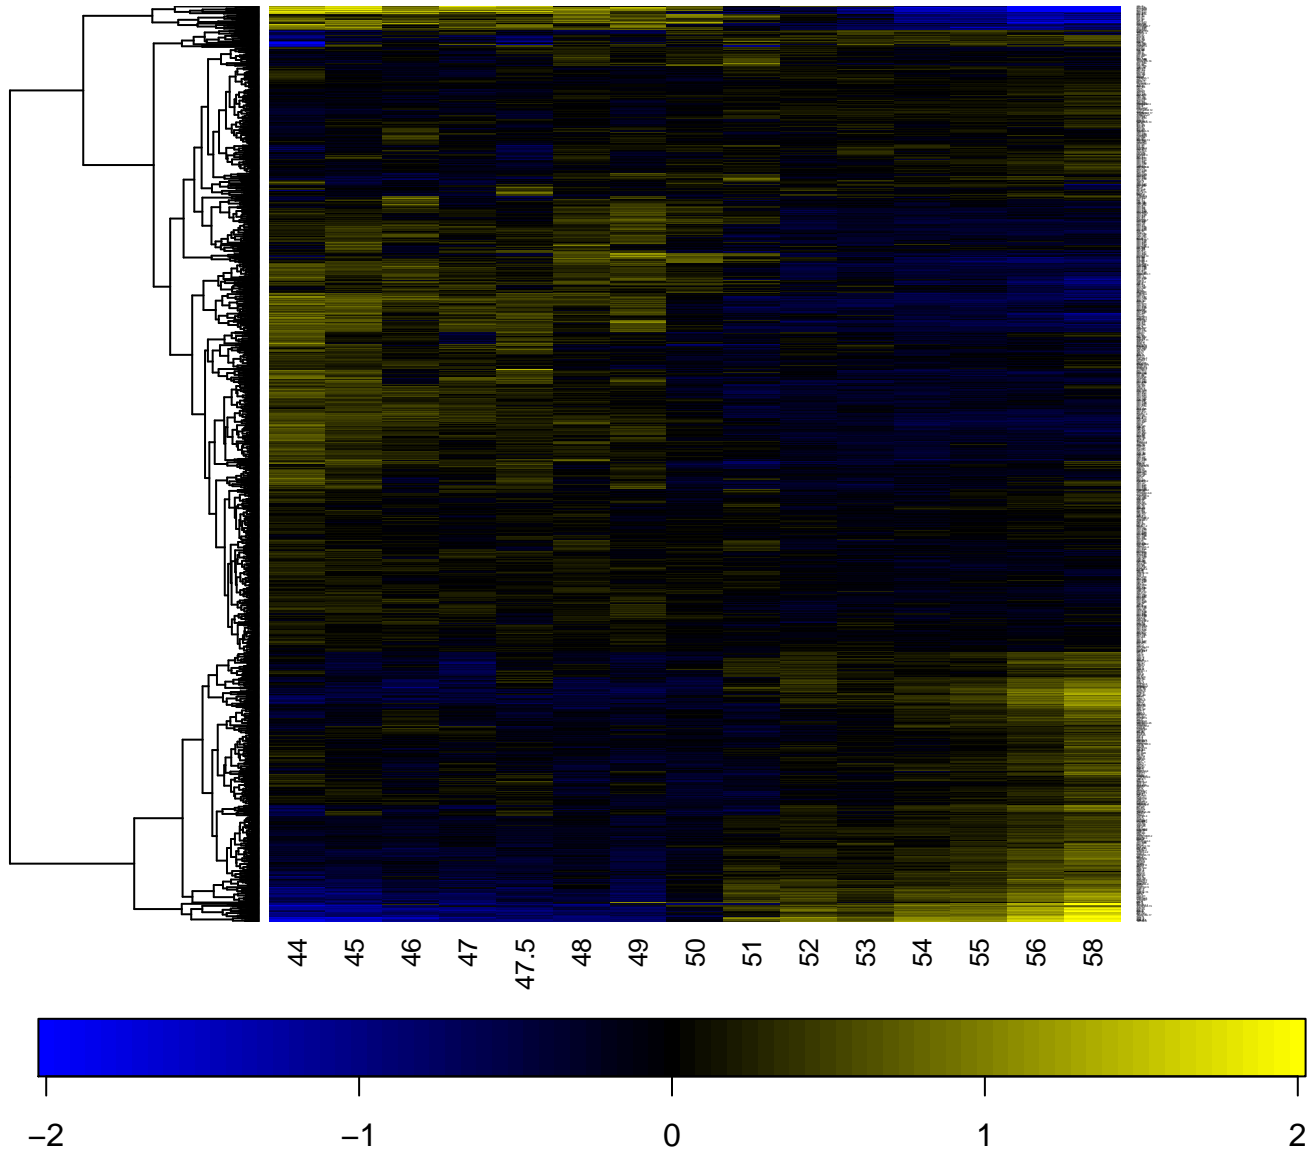

# nucleus organization

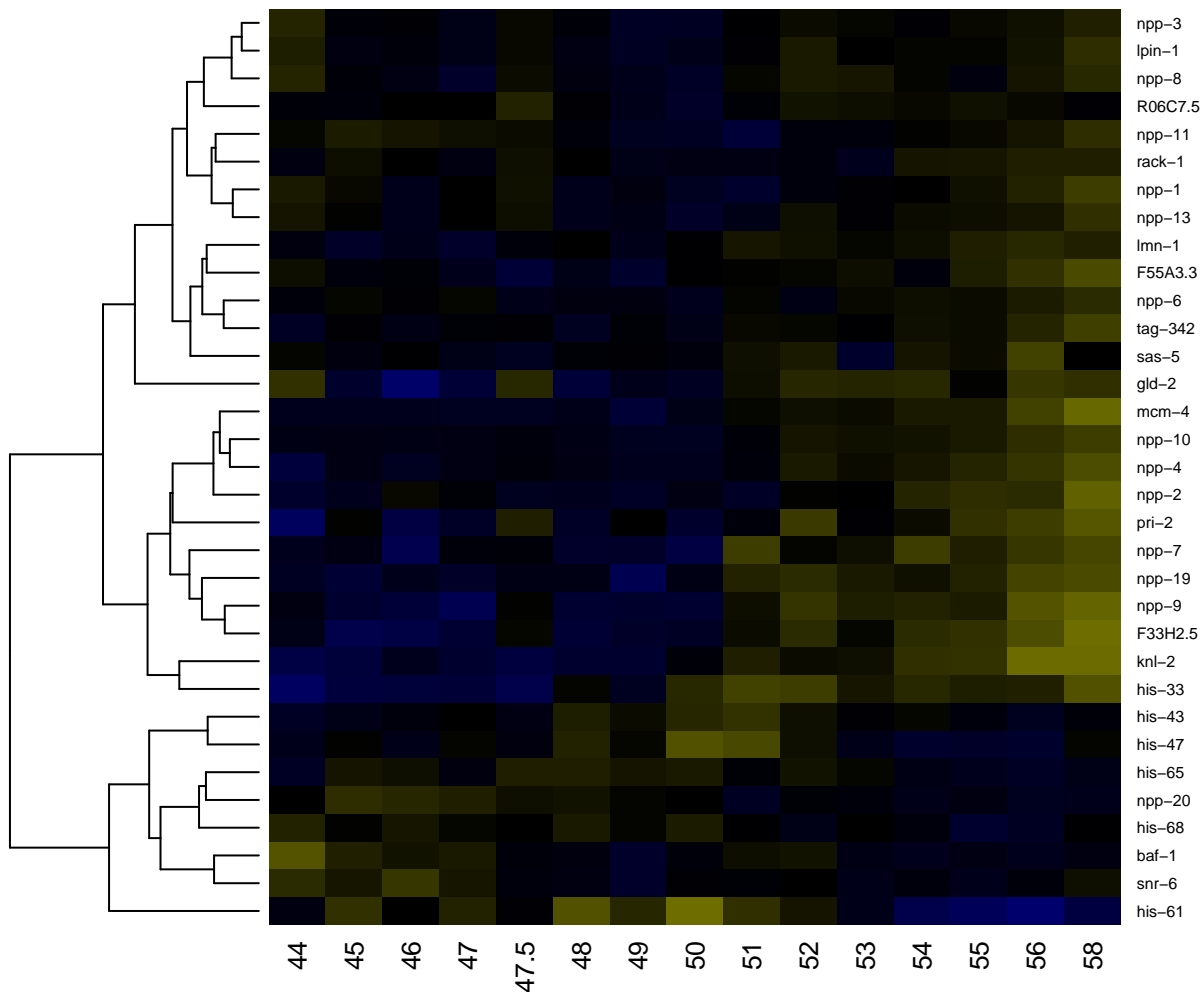





# olfactory learning

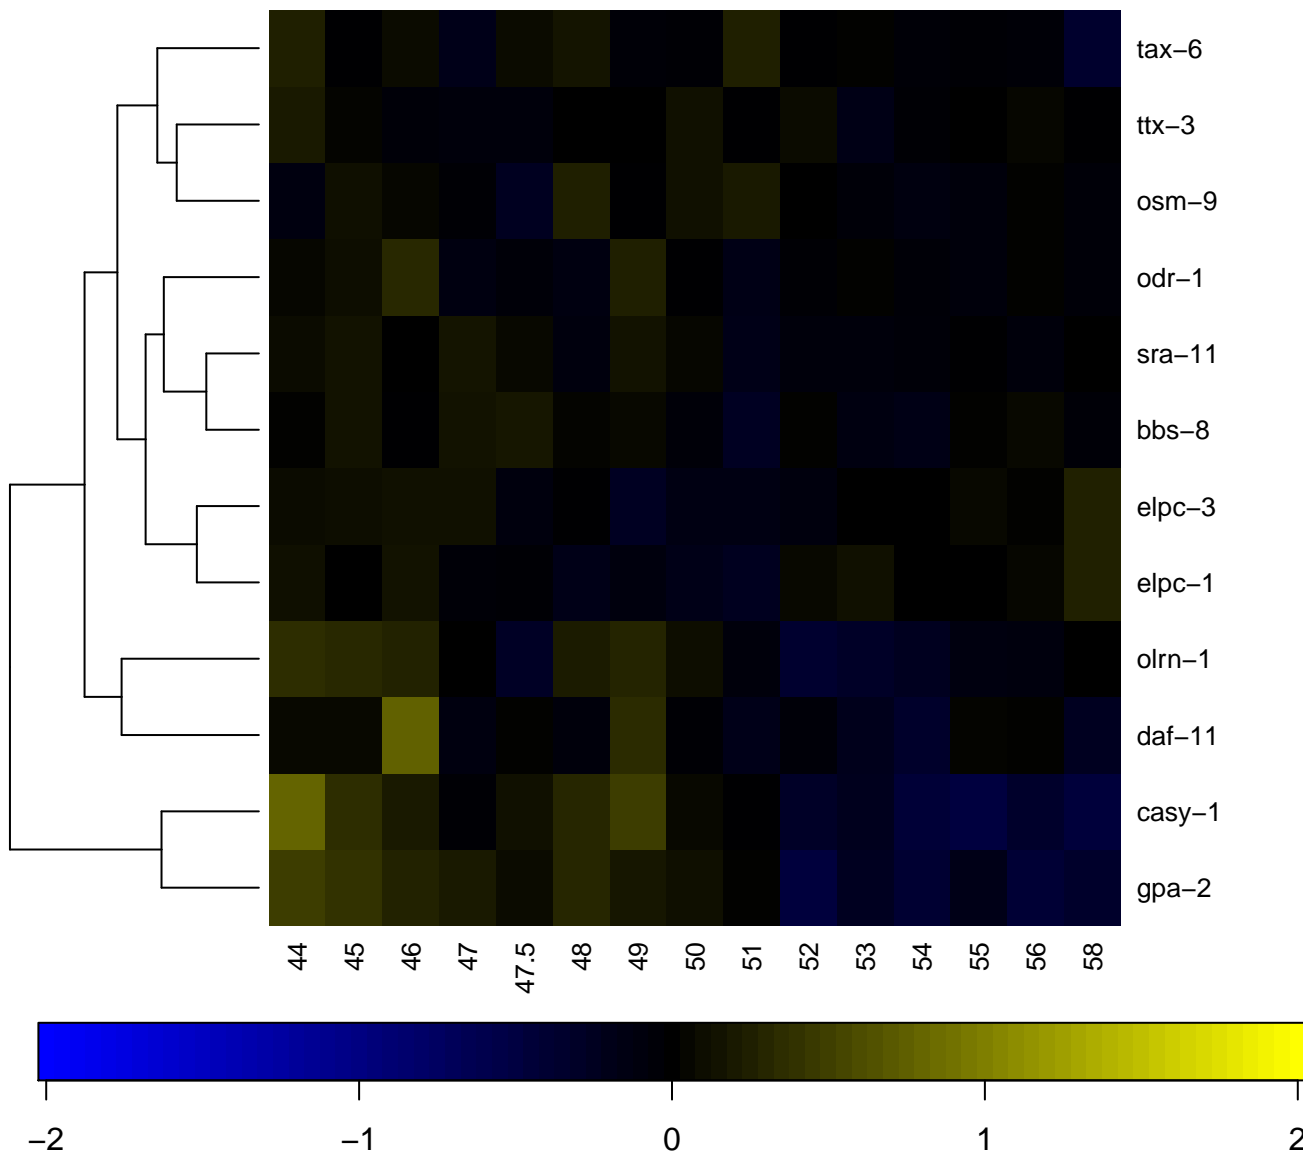





# oocyte development

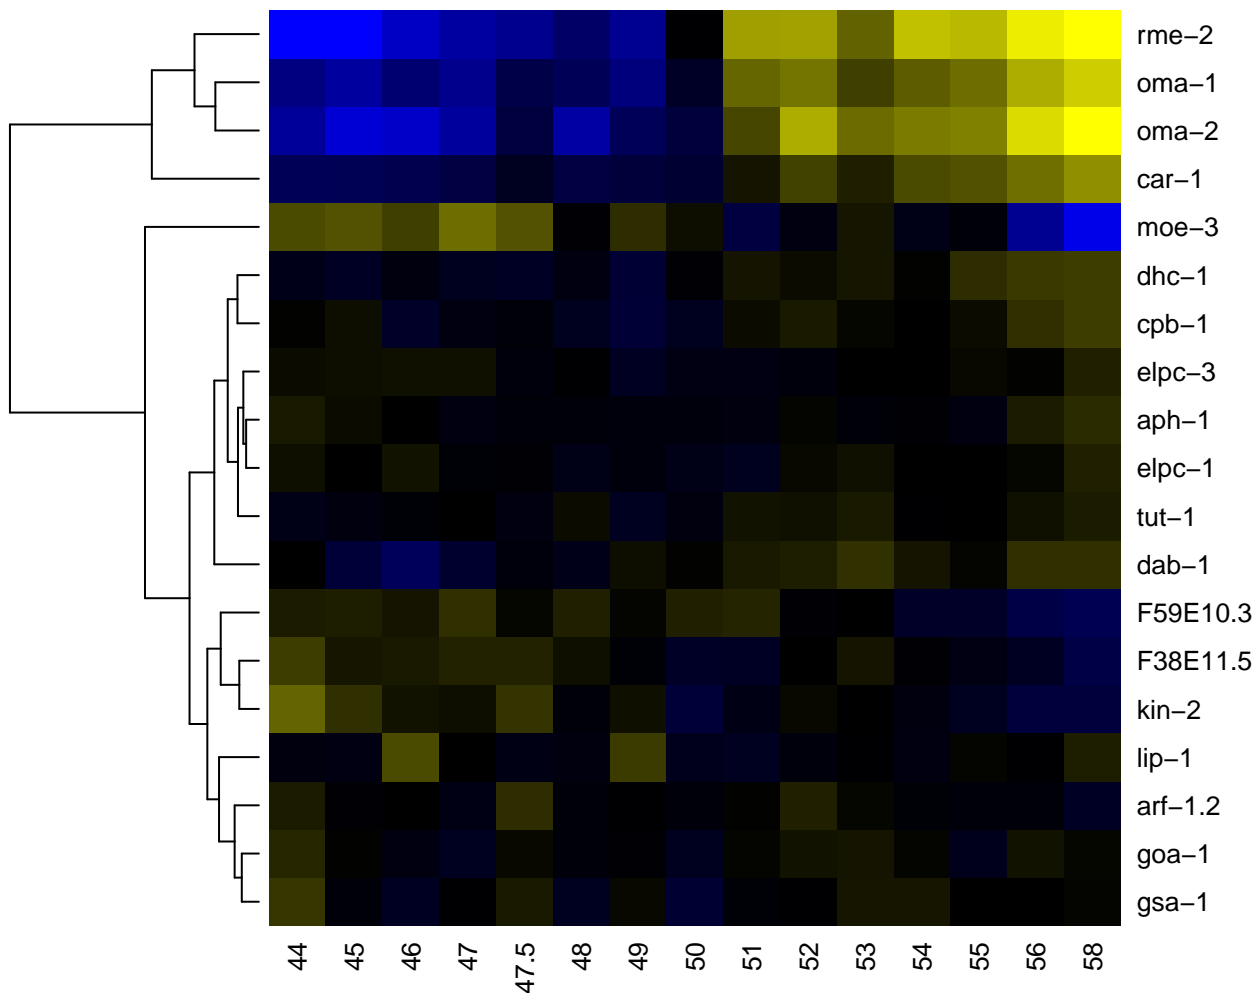

# oocyte maturation

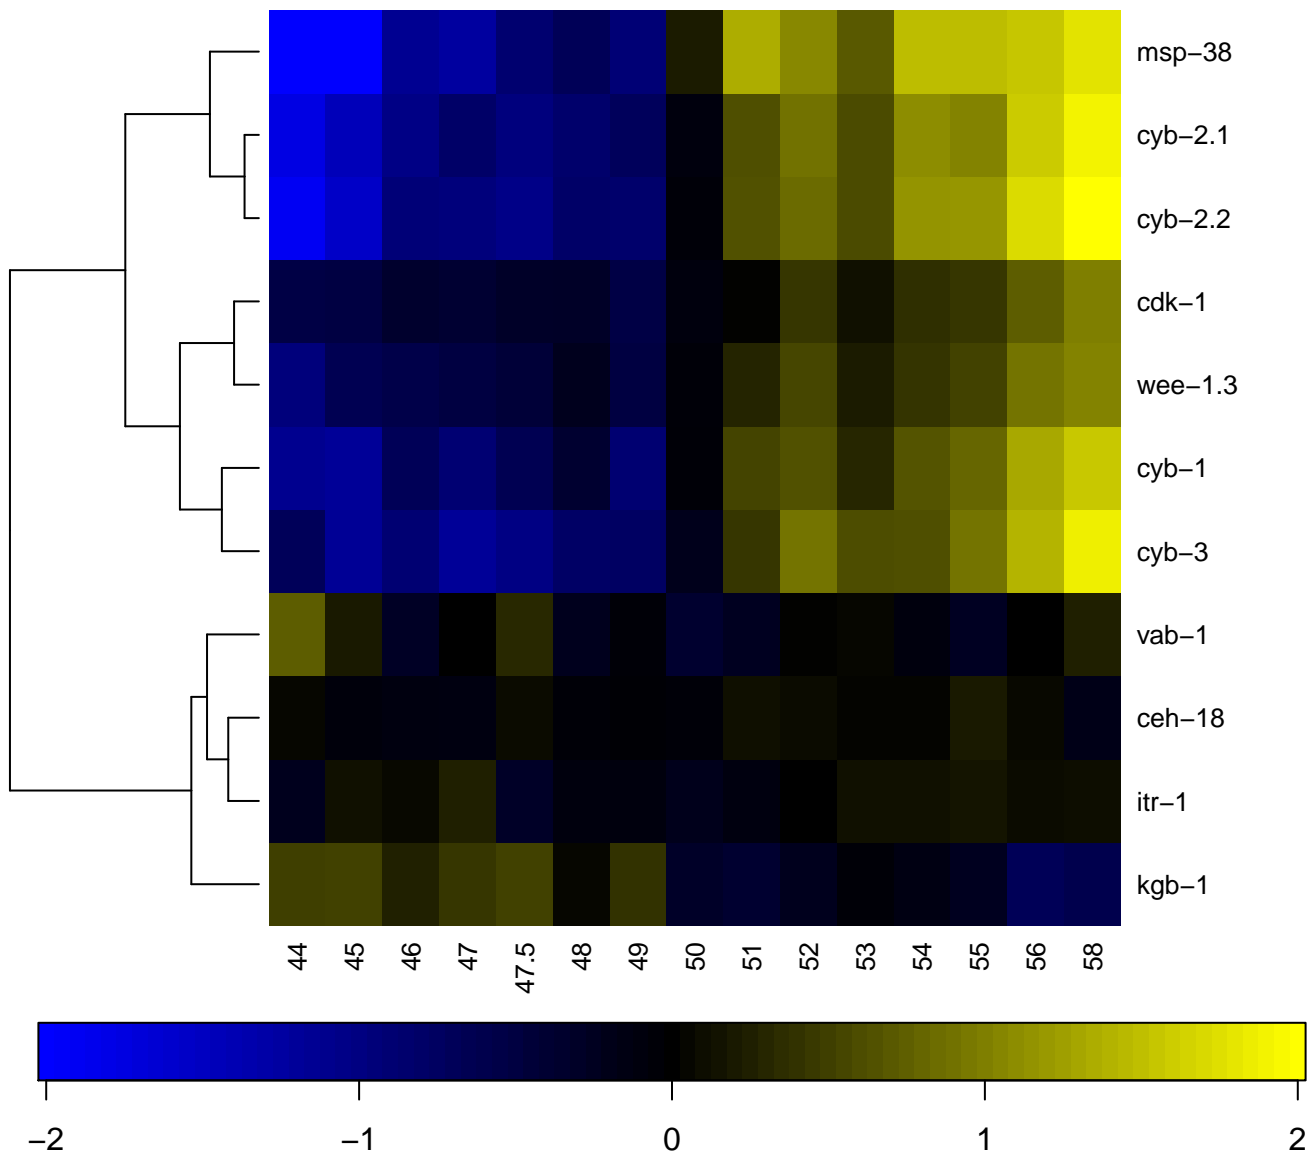

# oogenesis

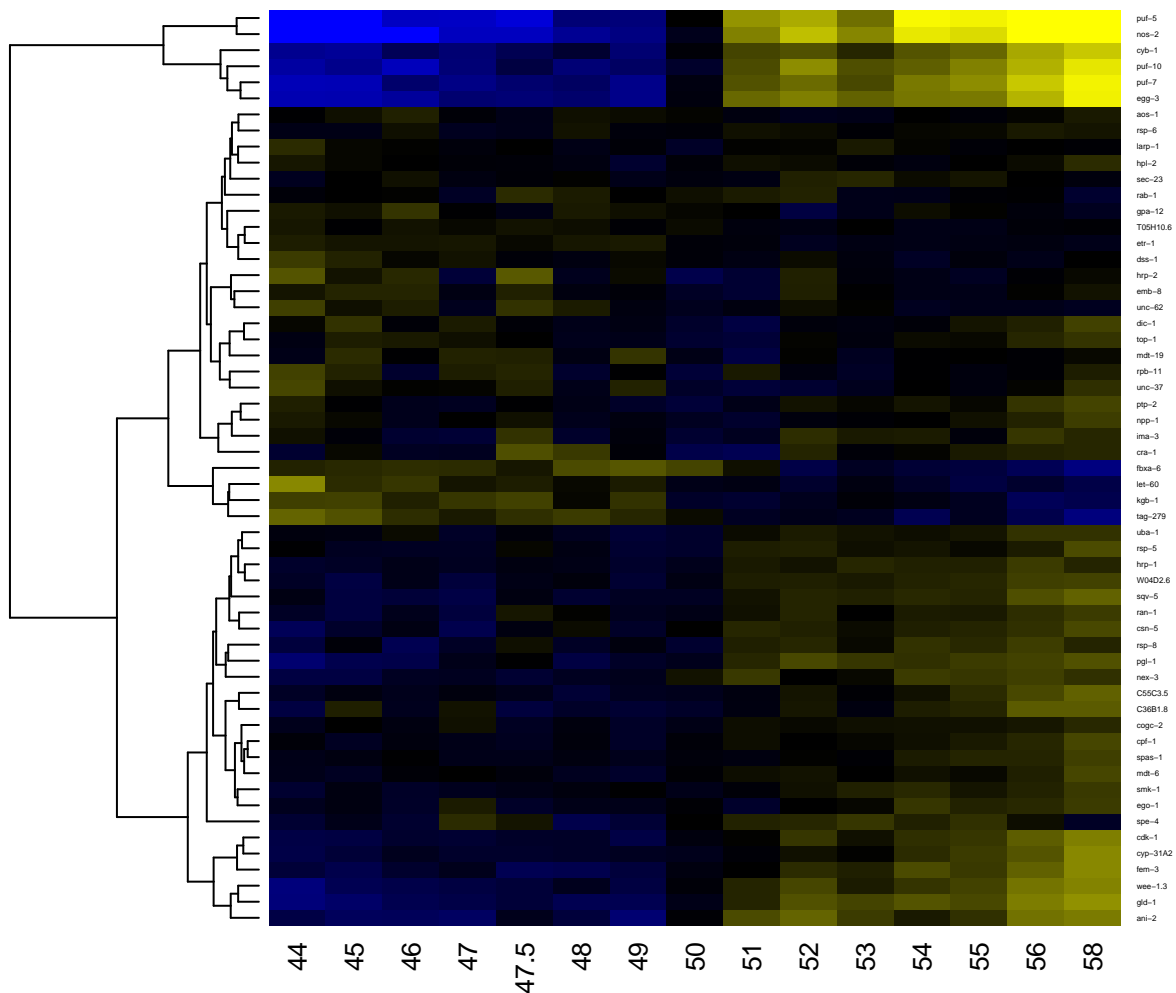



# oviposition

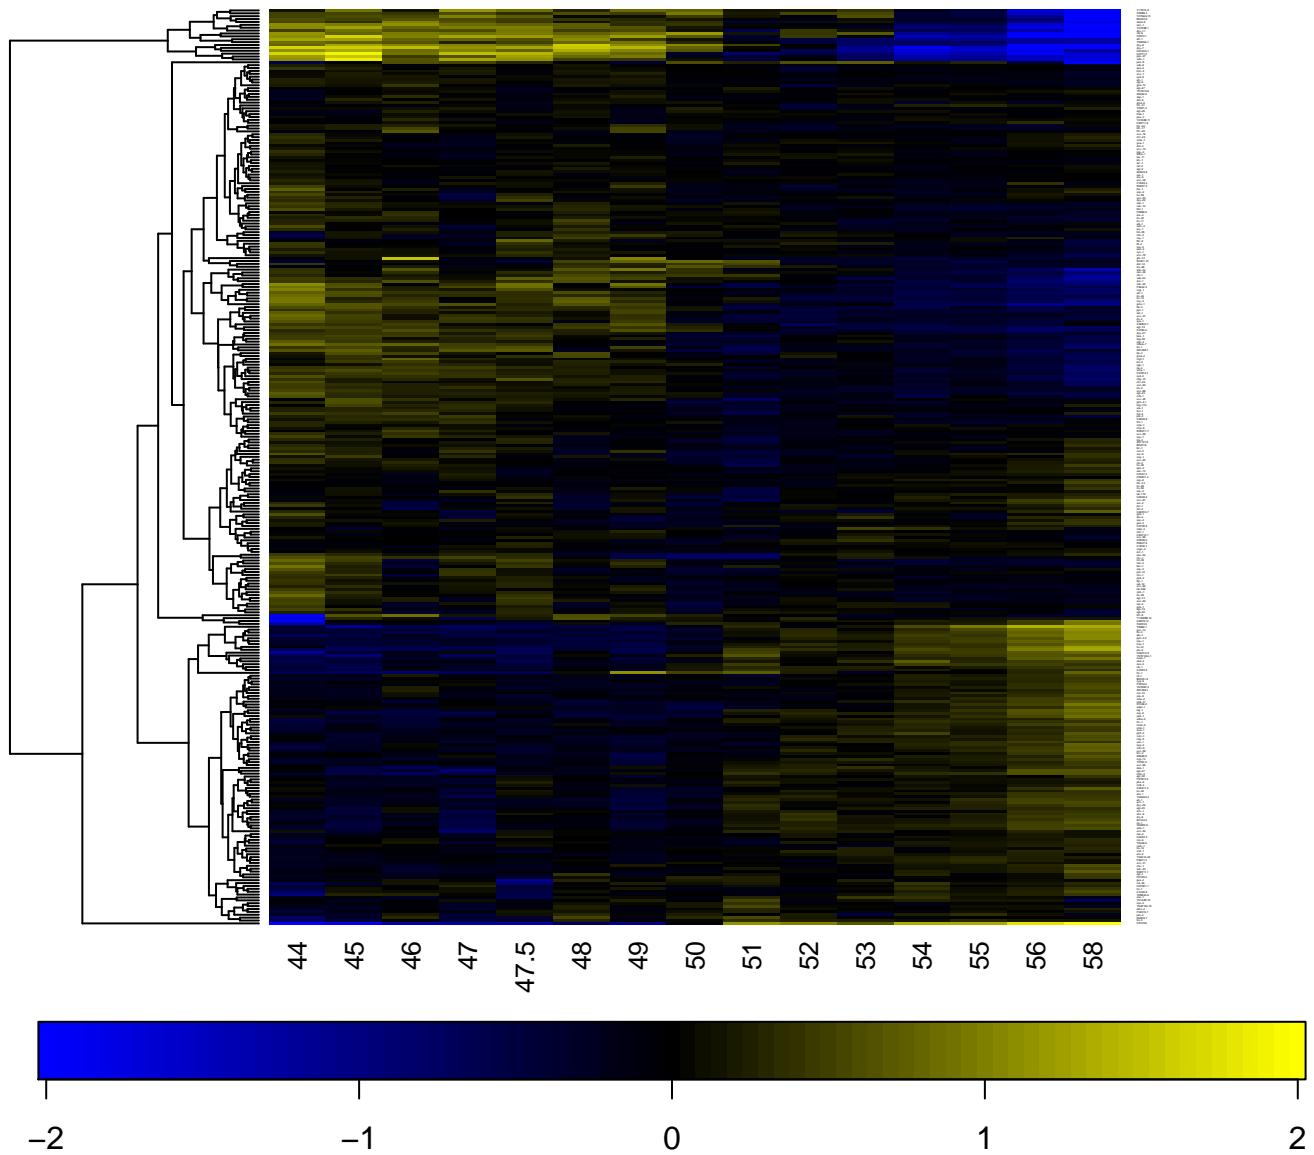

# ovulation

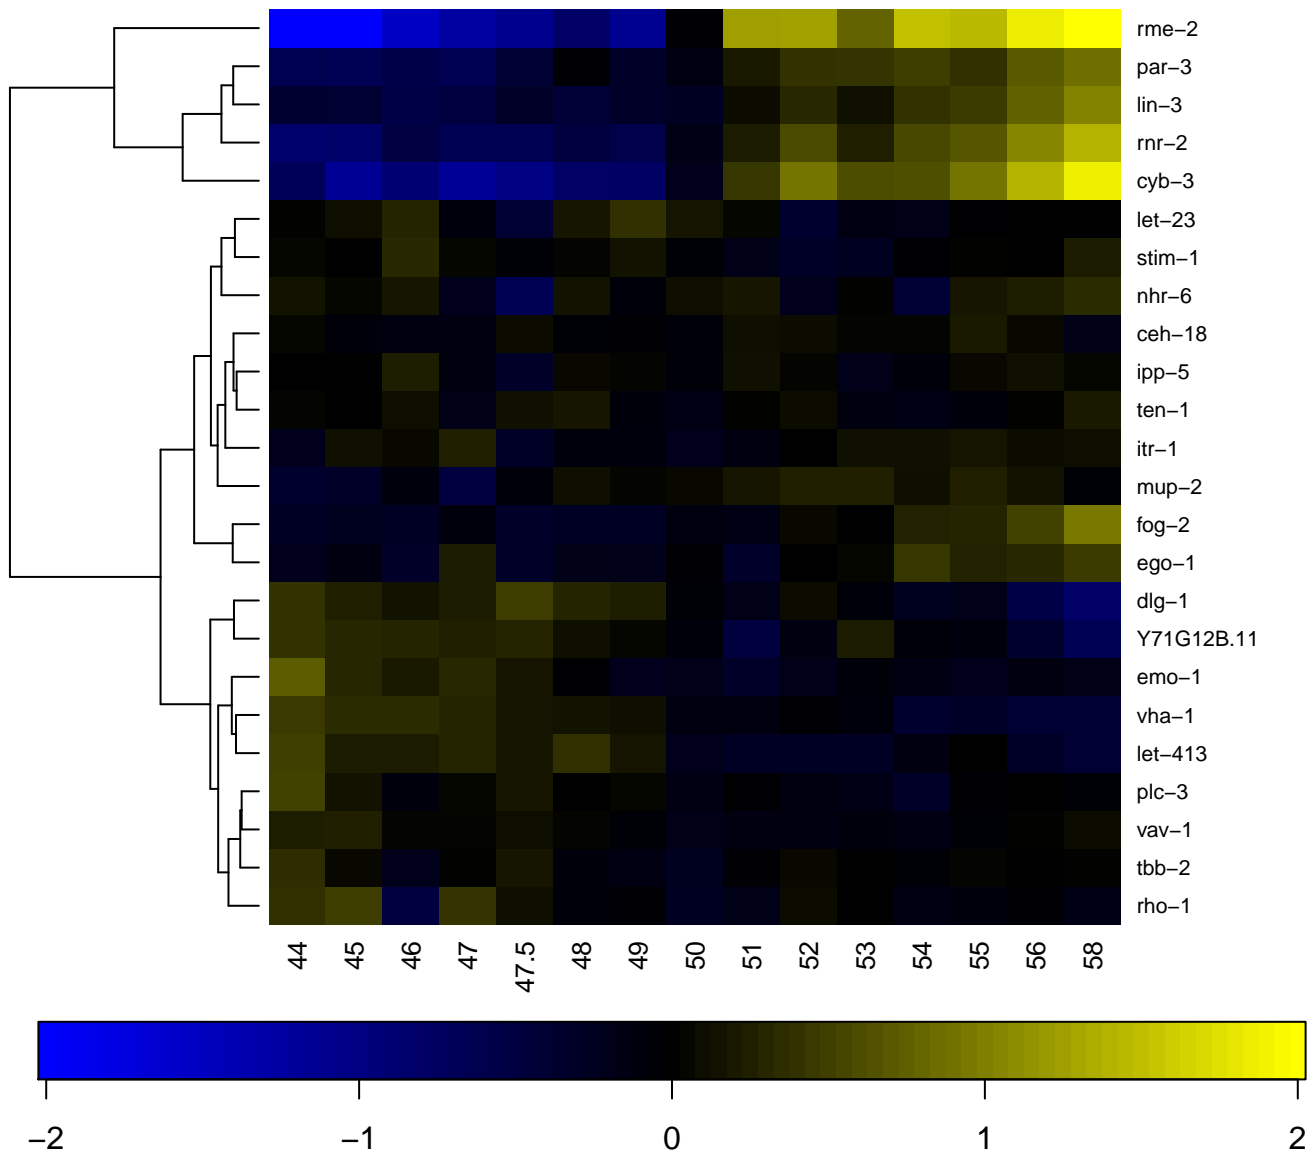

# oxidation reduction

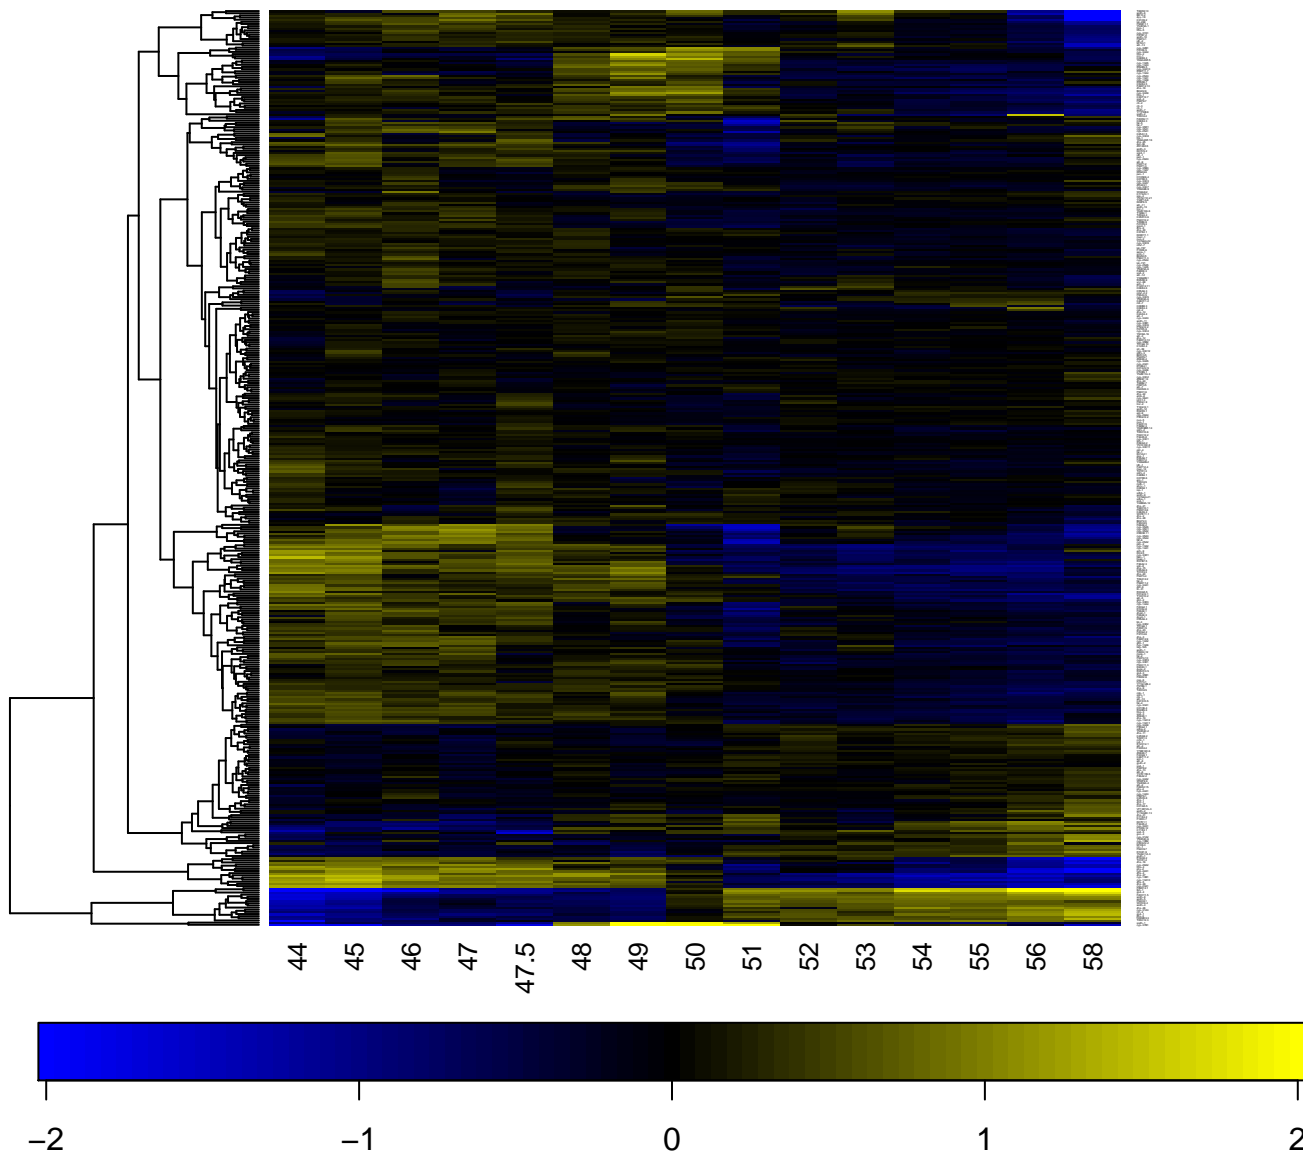

# oxidoreductase activity

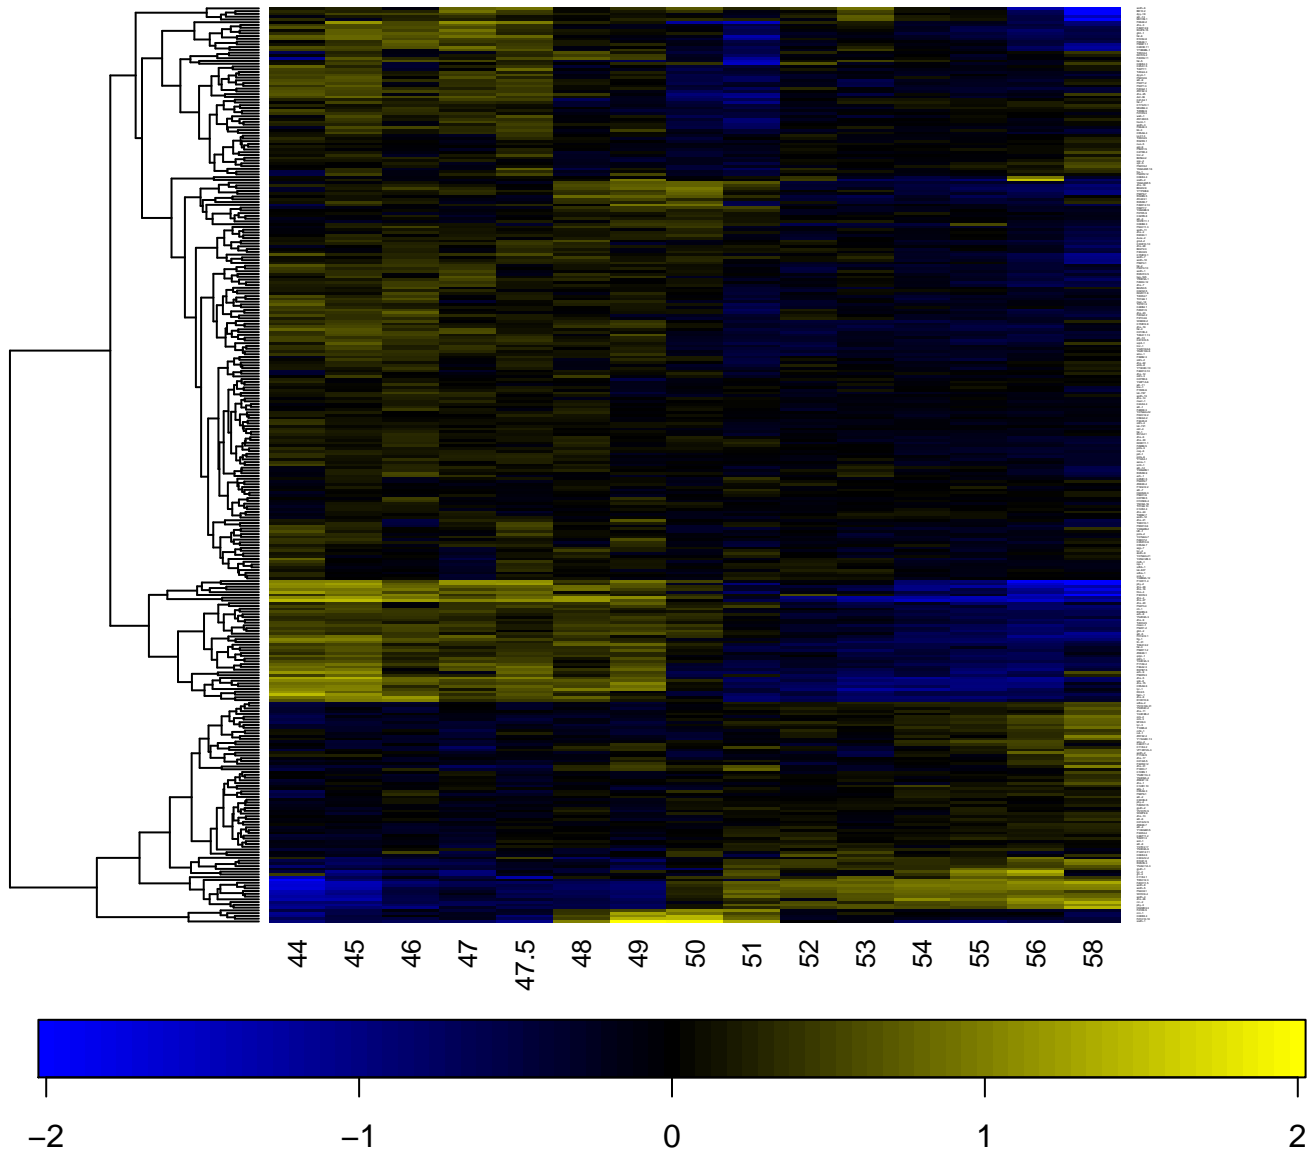





activity, acting on paired donors, with incorporation or reduction

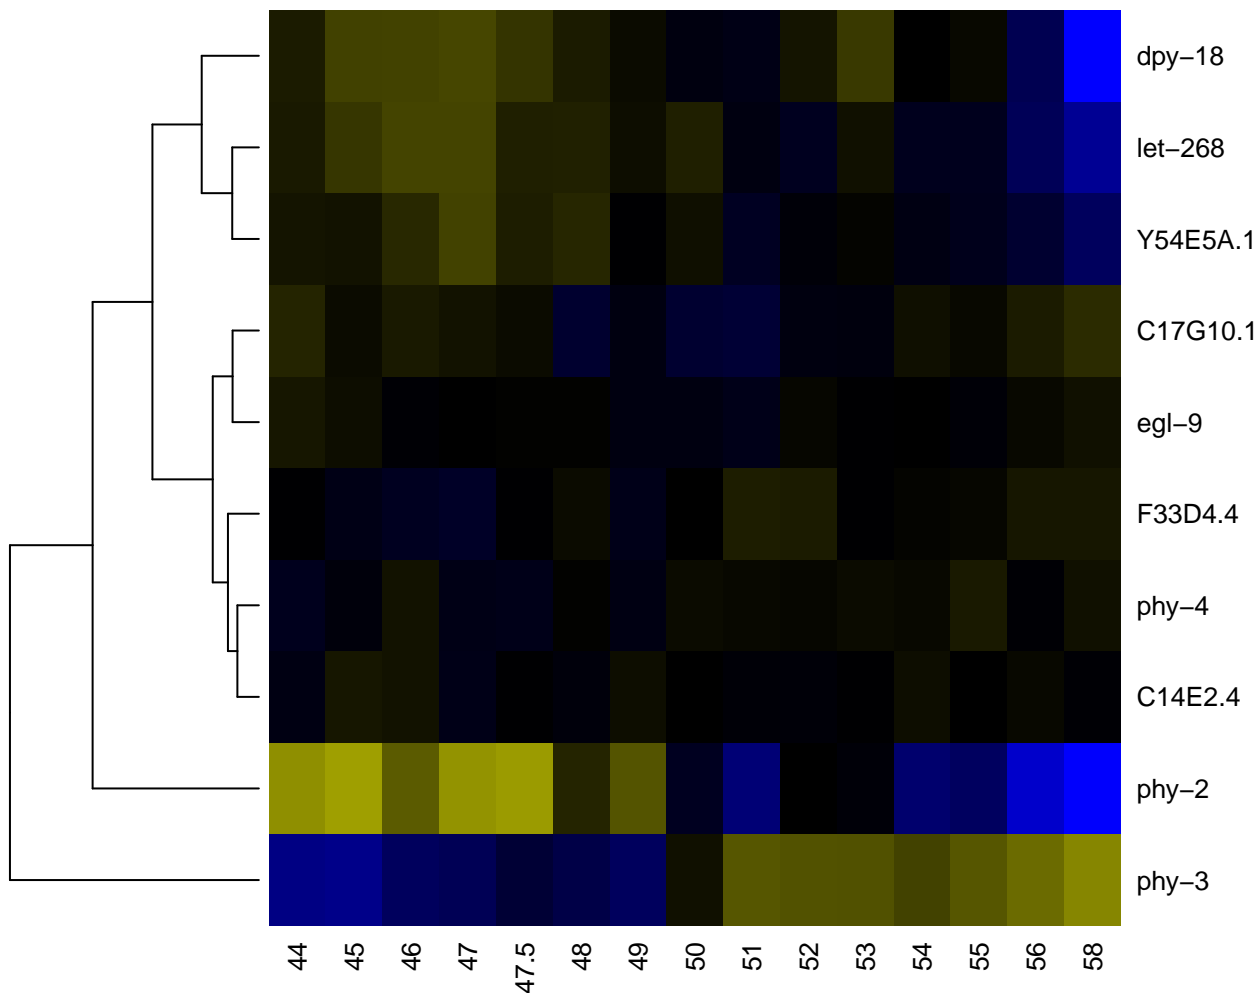



# oxidoreductase activity, acting on the CH-CH group of donc

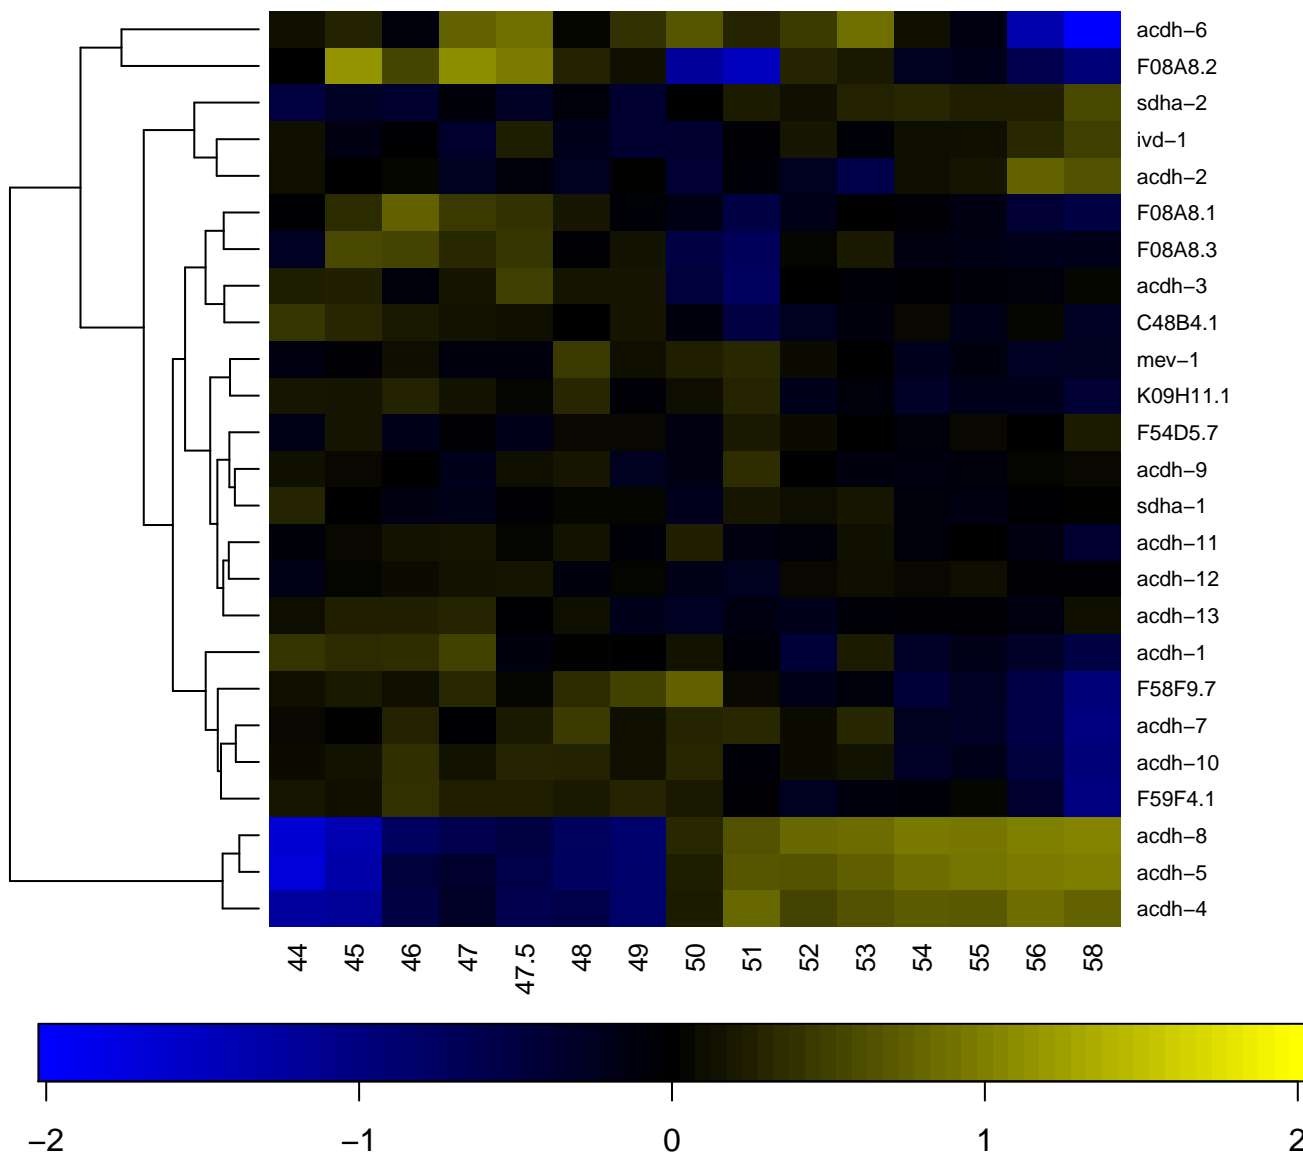

# Activity, acting on the CH-OH group of donors, NAD or NADP

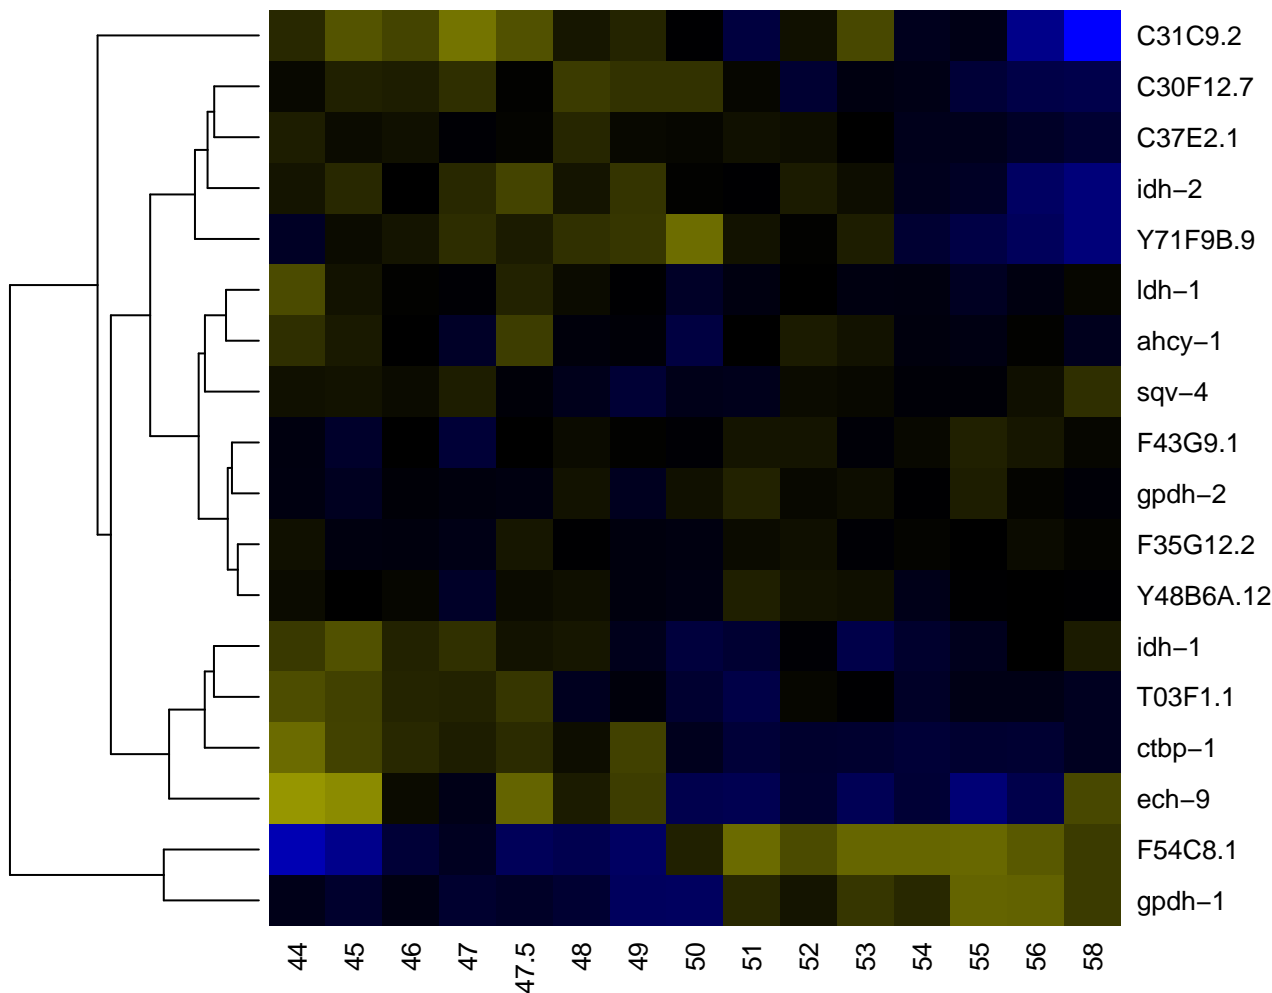

# oxygen binding

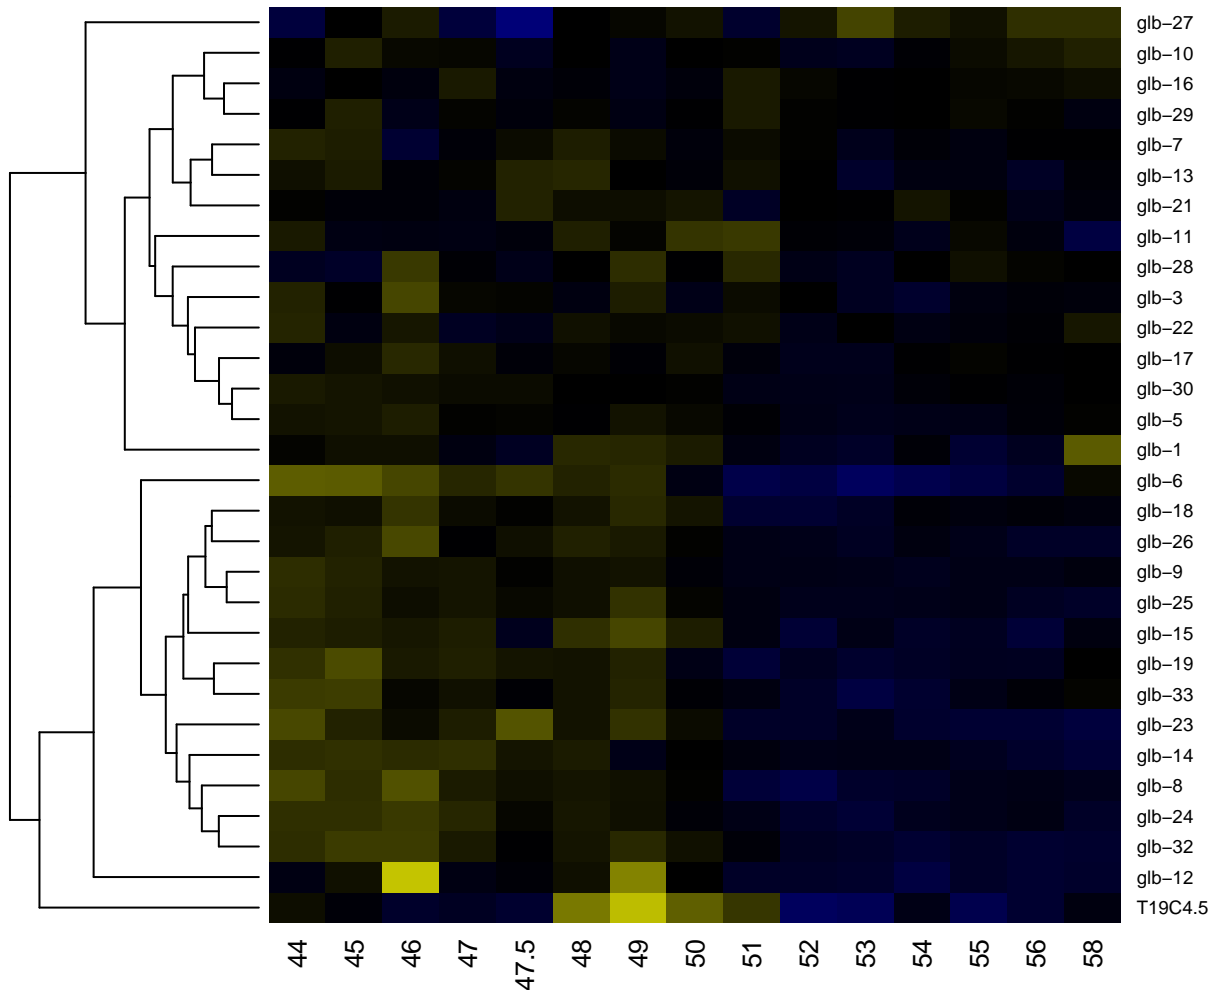

-2

-1

0

1

2

# oxygen transport



-2

-1

0

1

2





# P granule

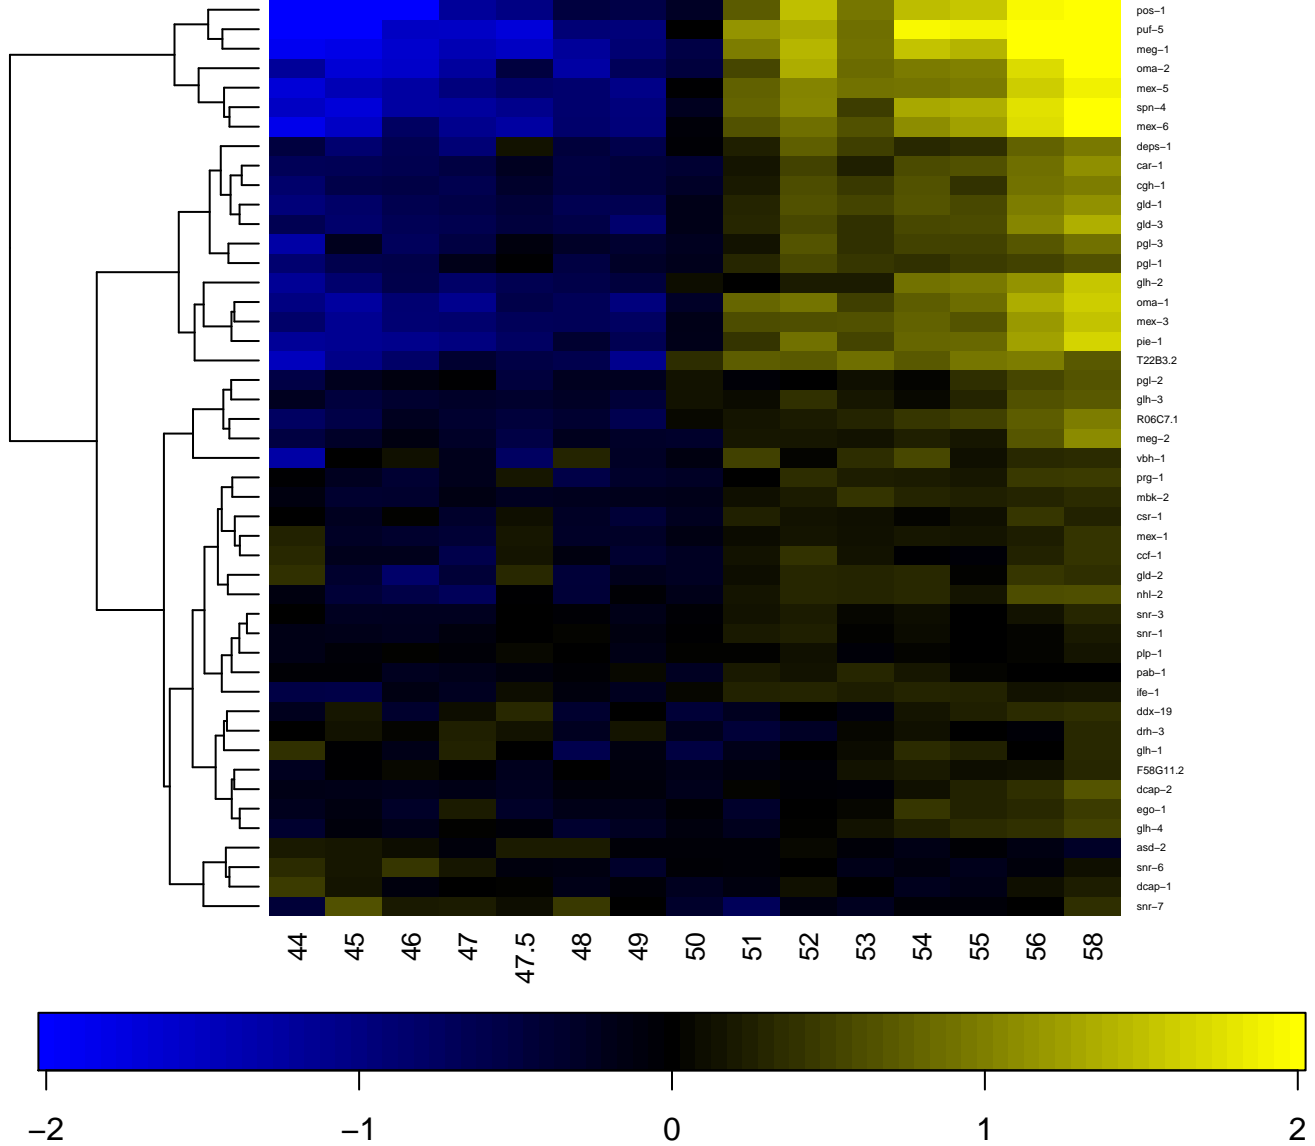

# pentose-phosphate shunt

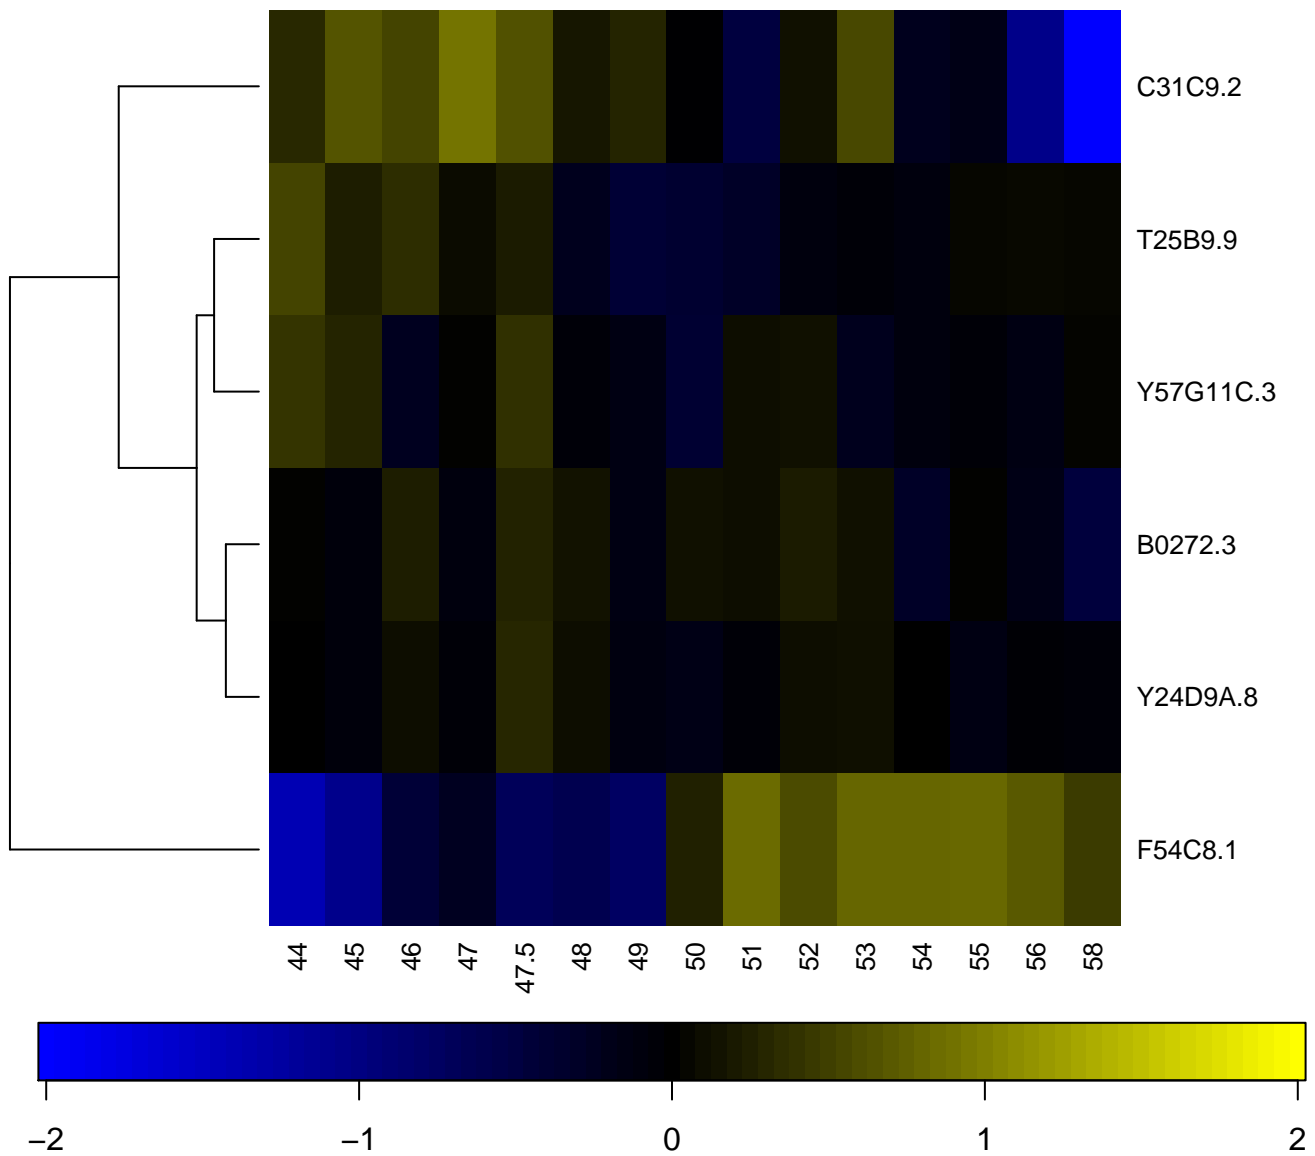







# peptidyl-prolyl cis-trans isomerase activity

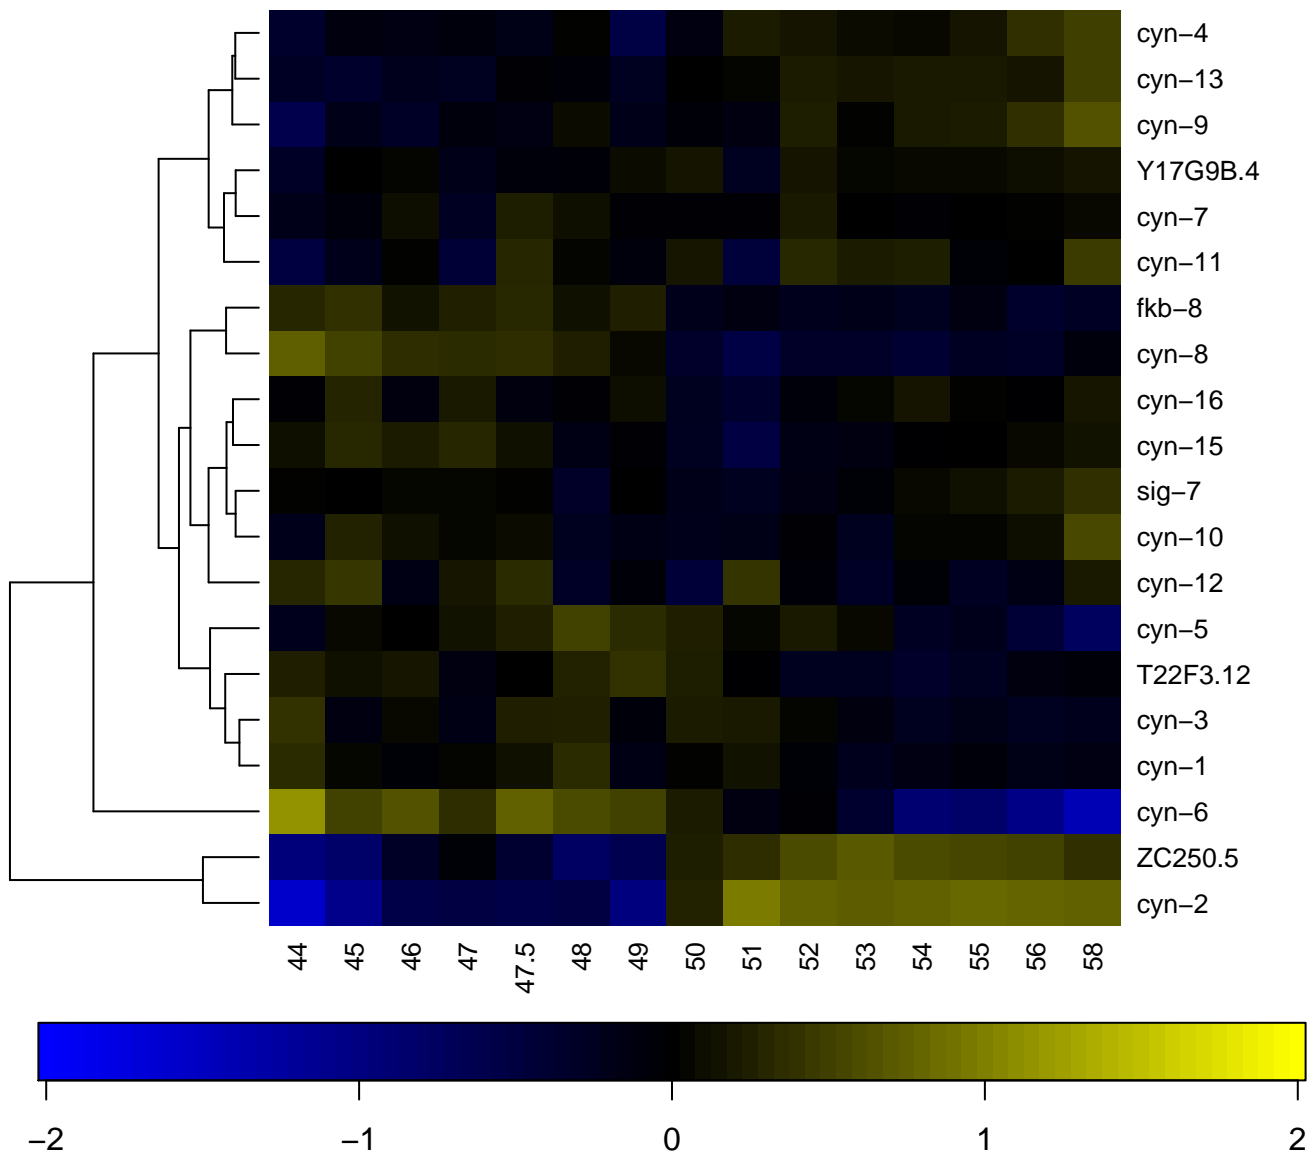



# peroxidase activity

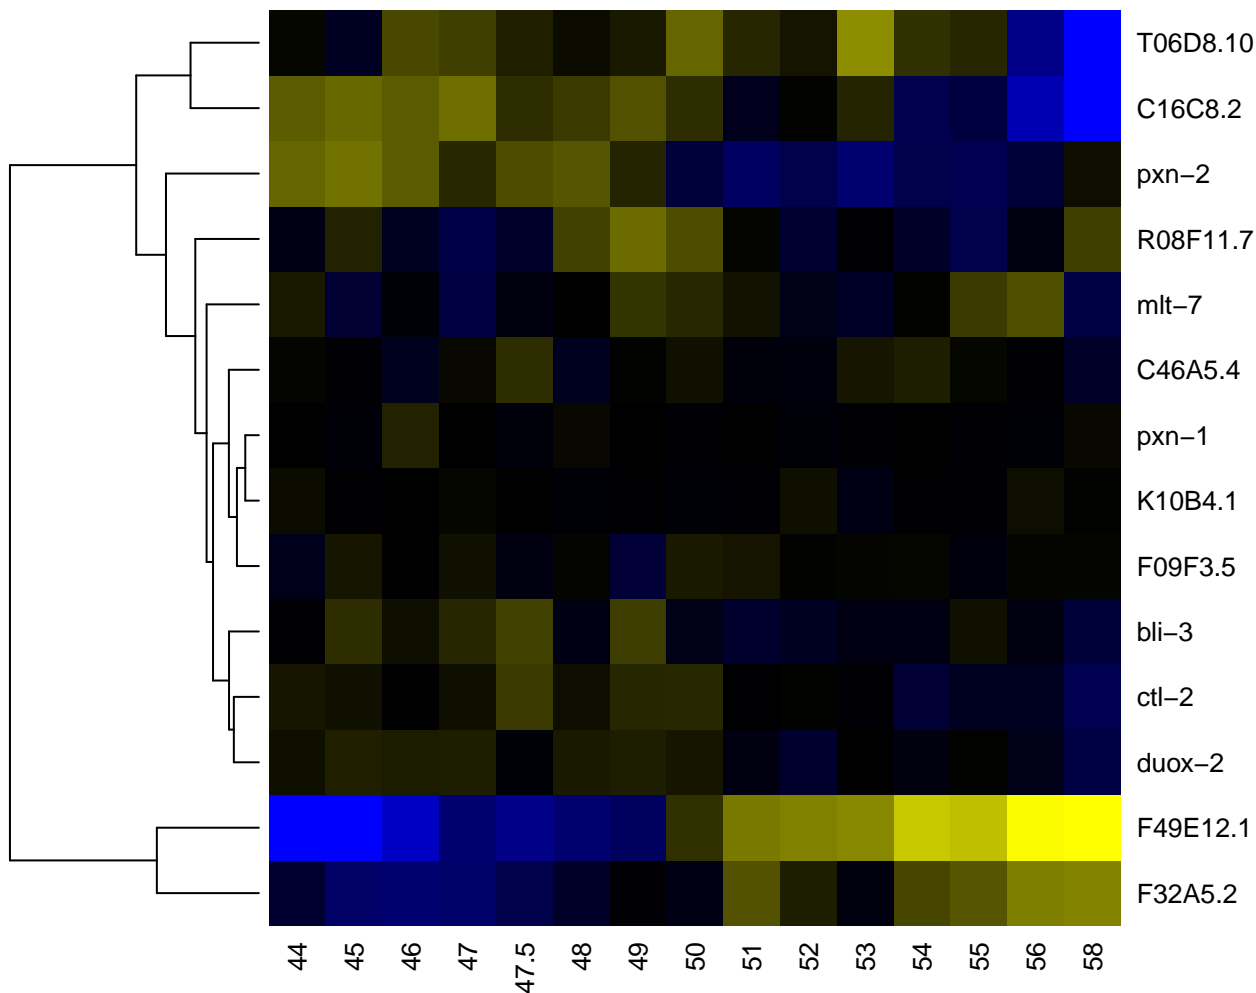

-2

-1

0

1

2



# peroxisome

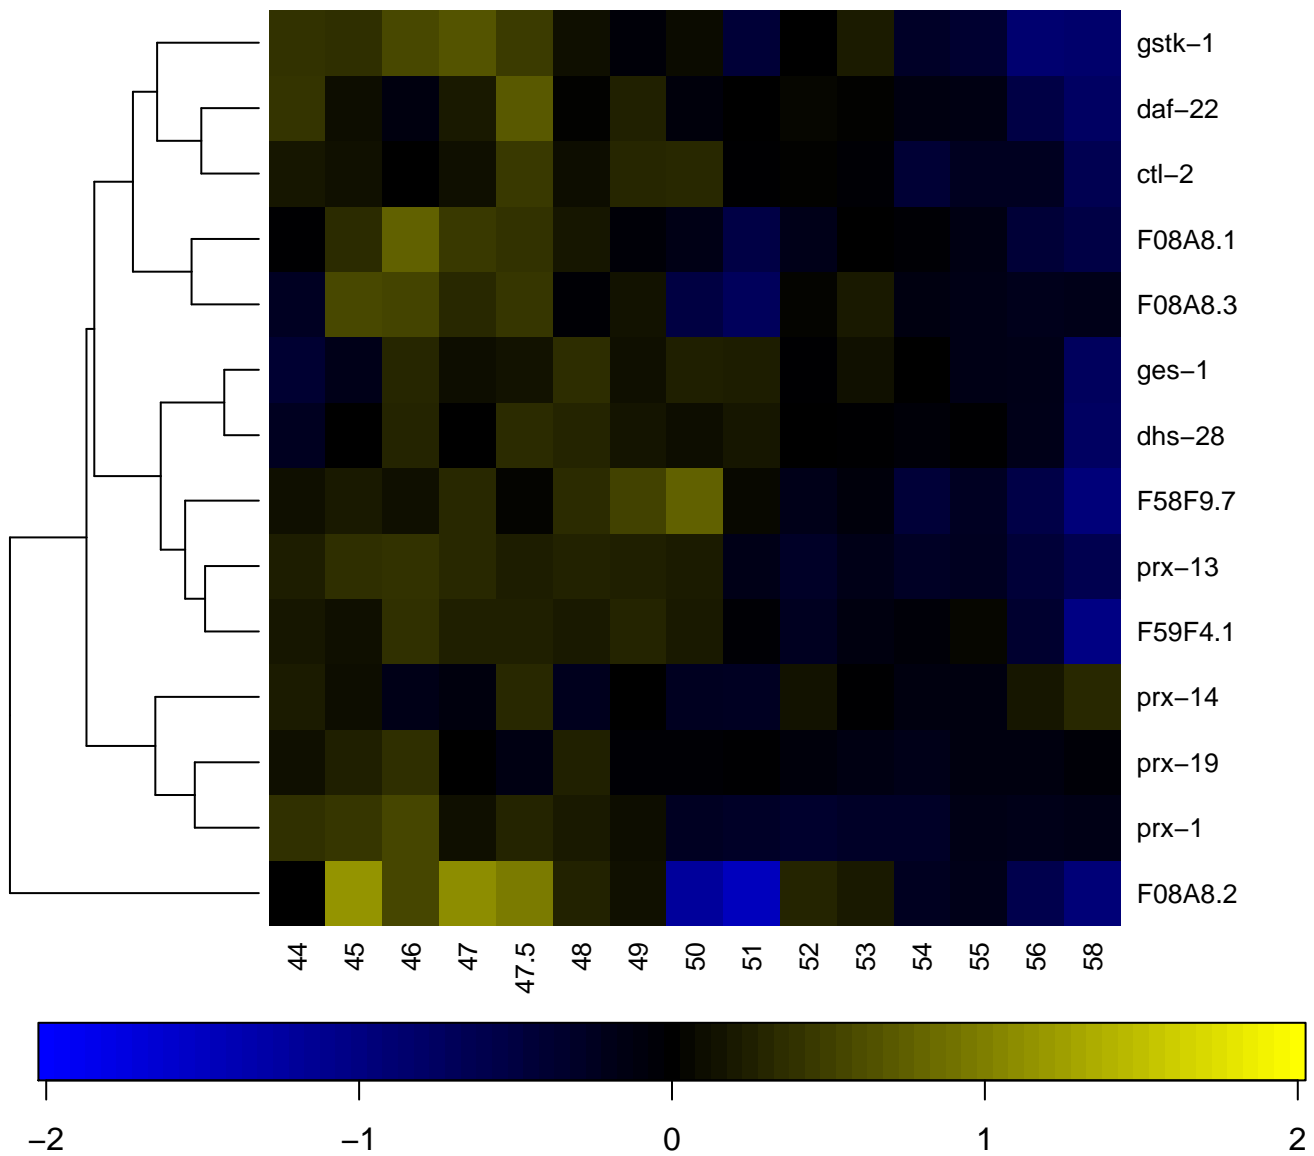



# pharyngeal muscle development

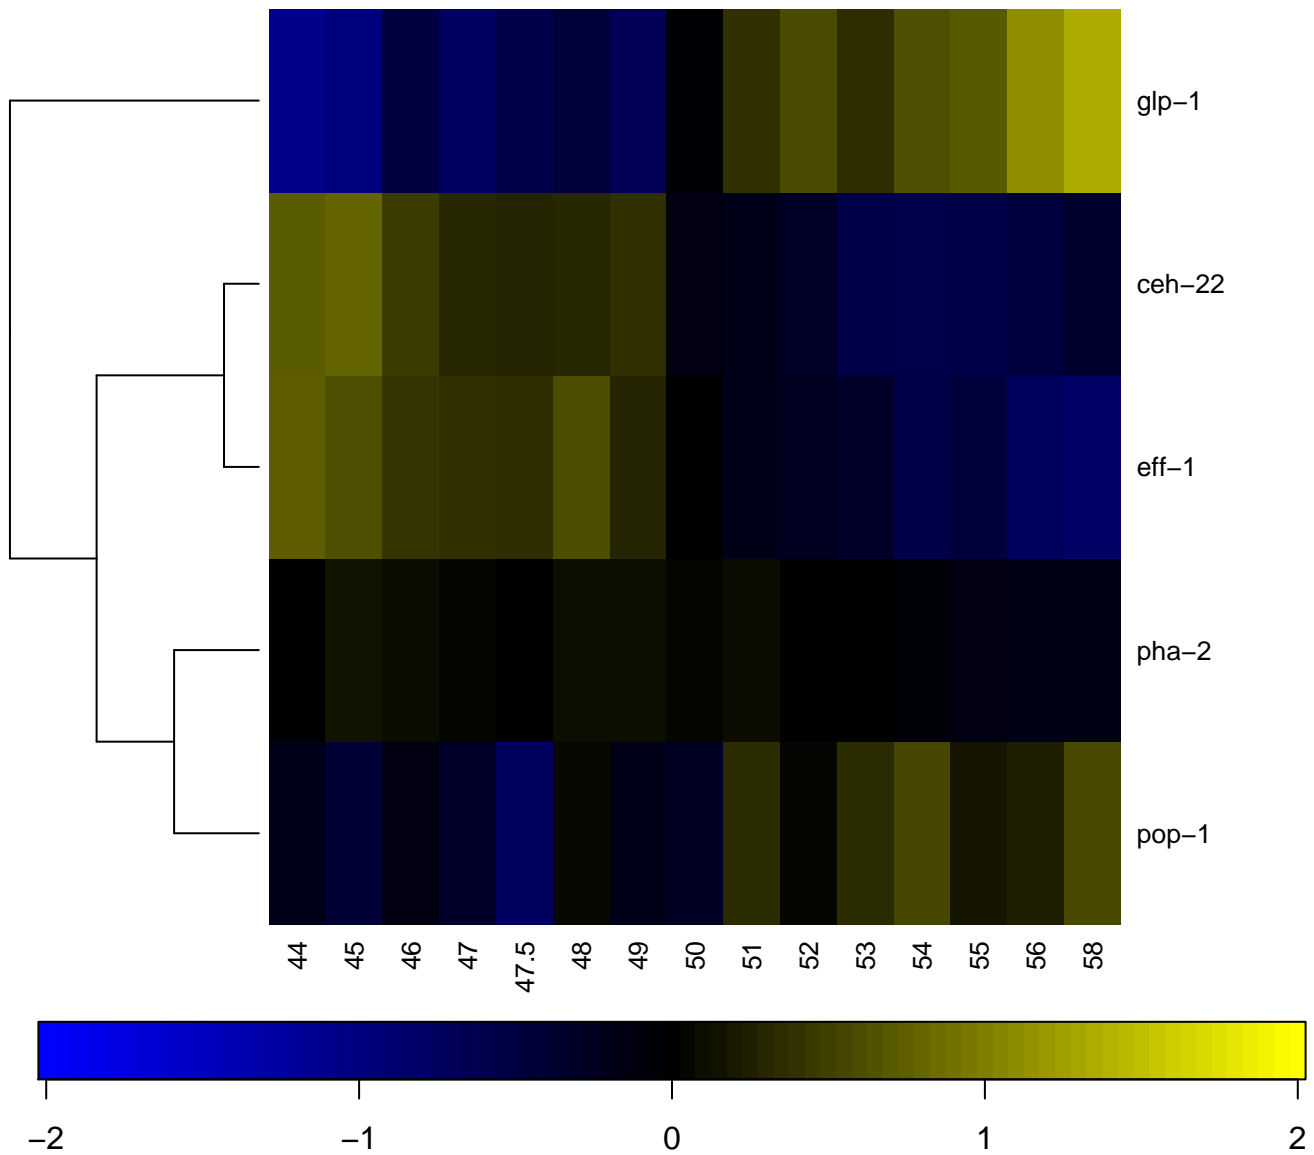

# pharyngeal pumping

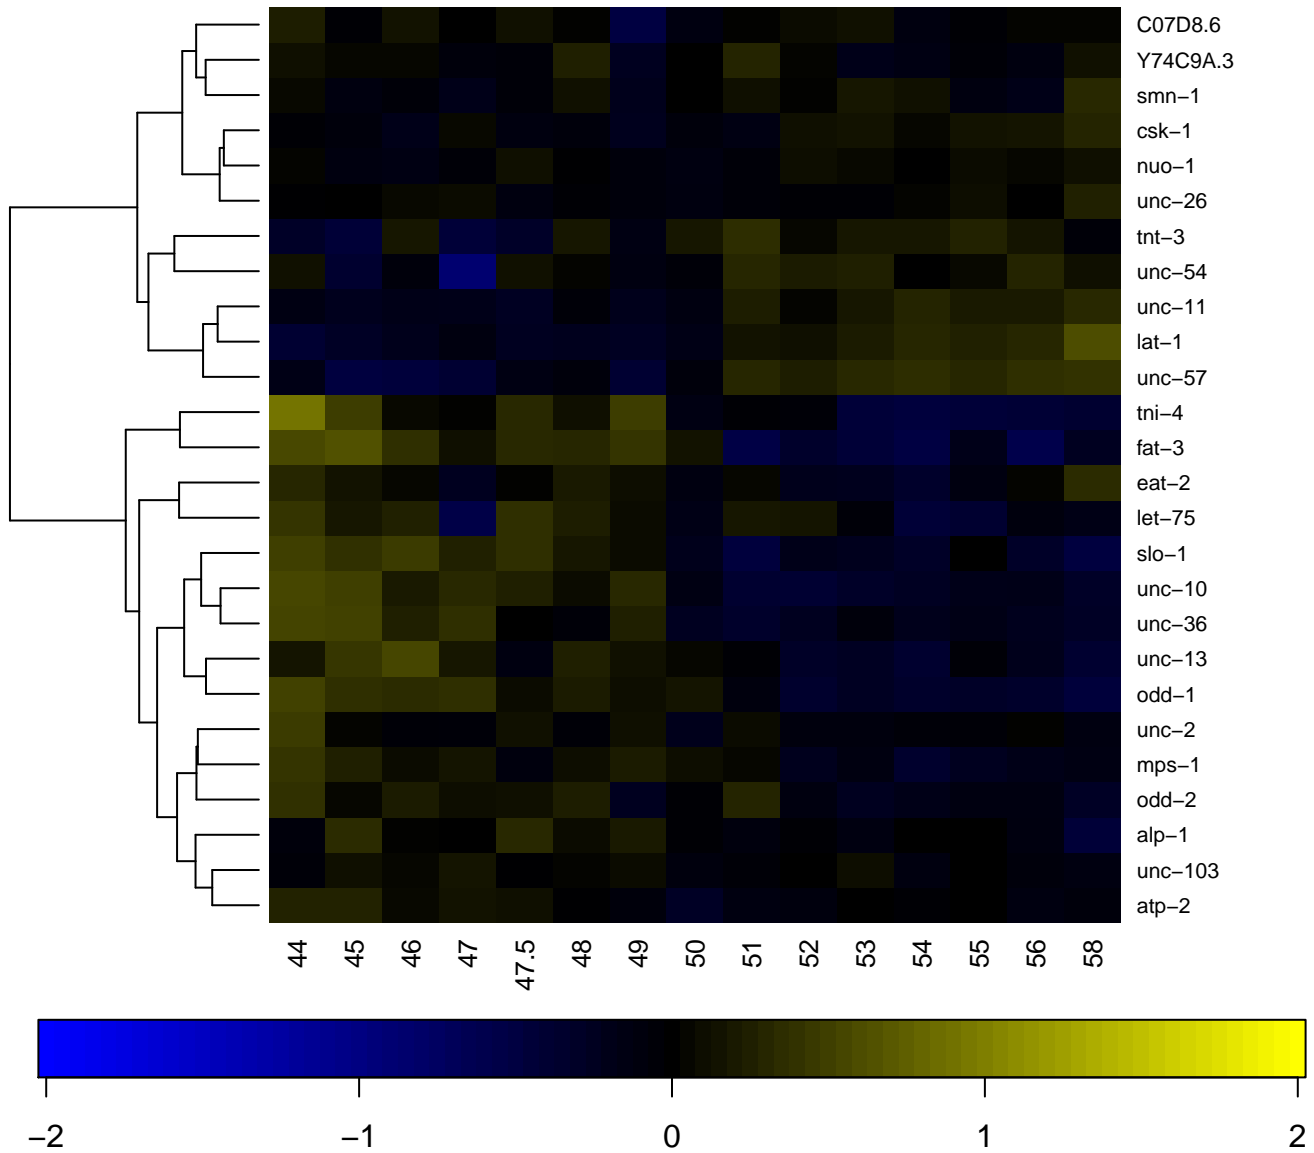

# pharynx development

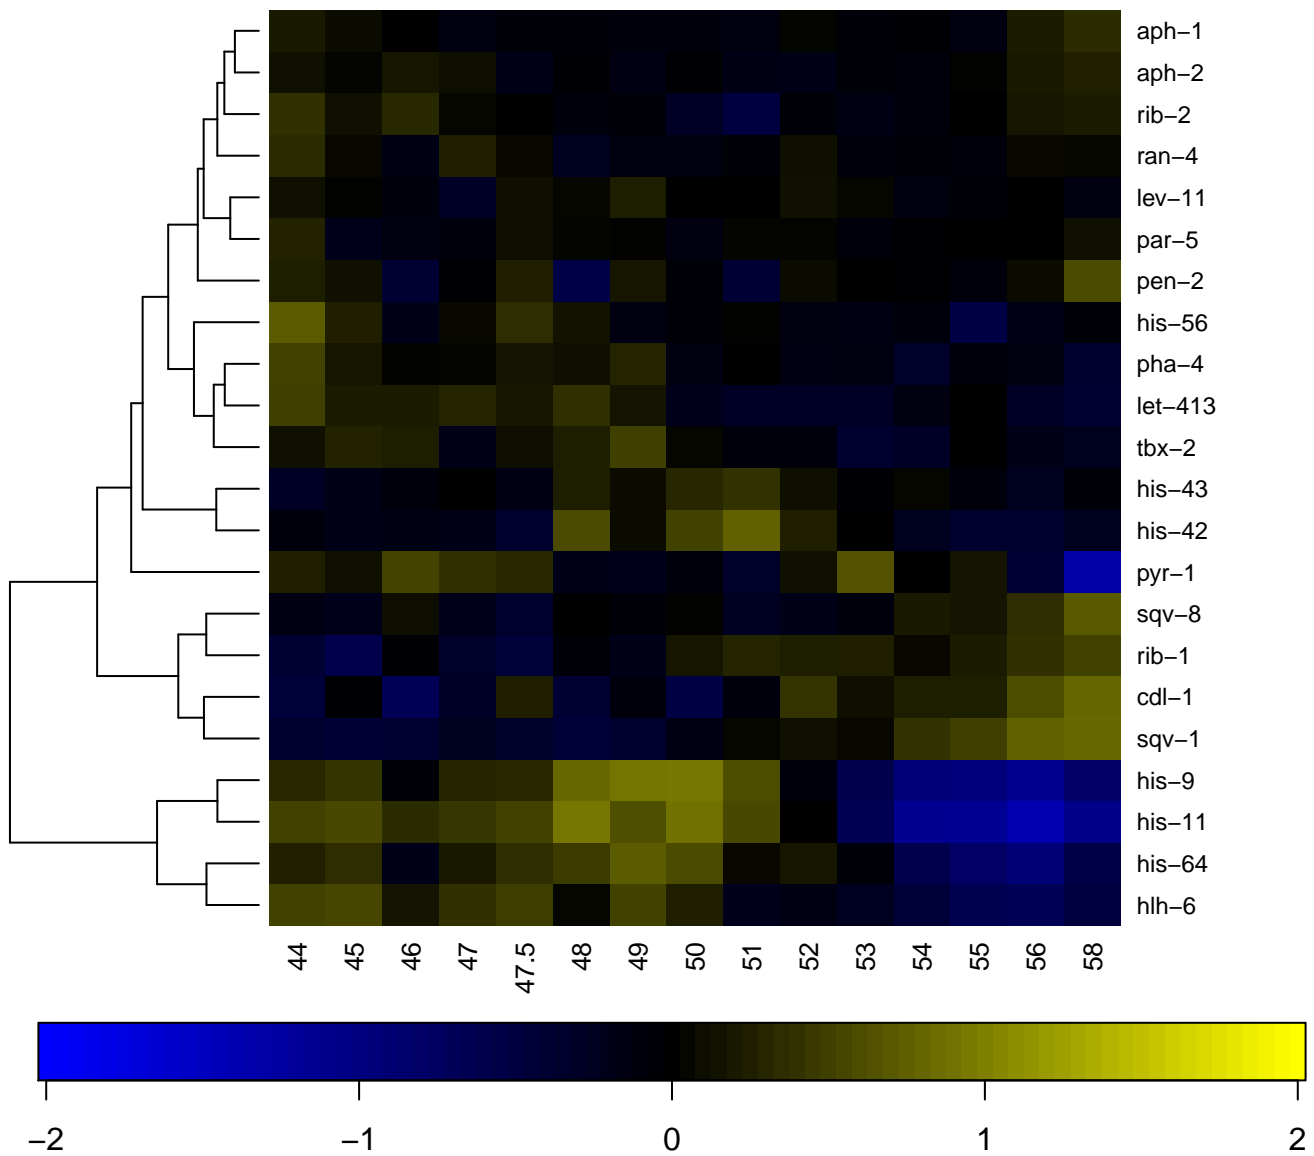

# phosphatase activity

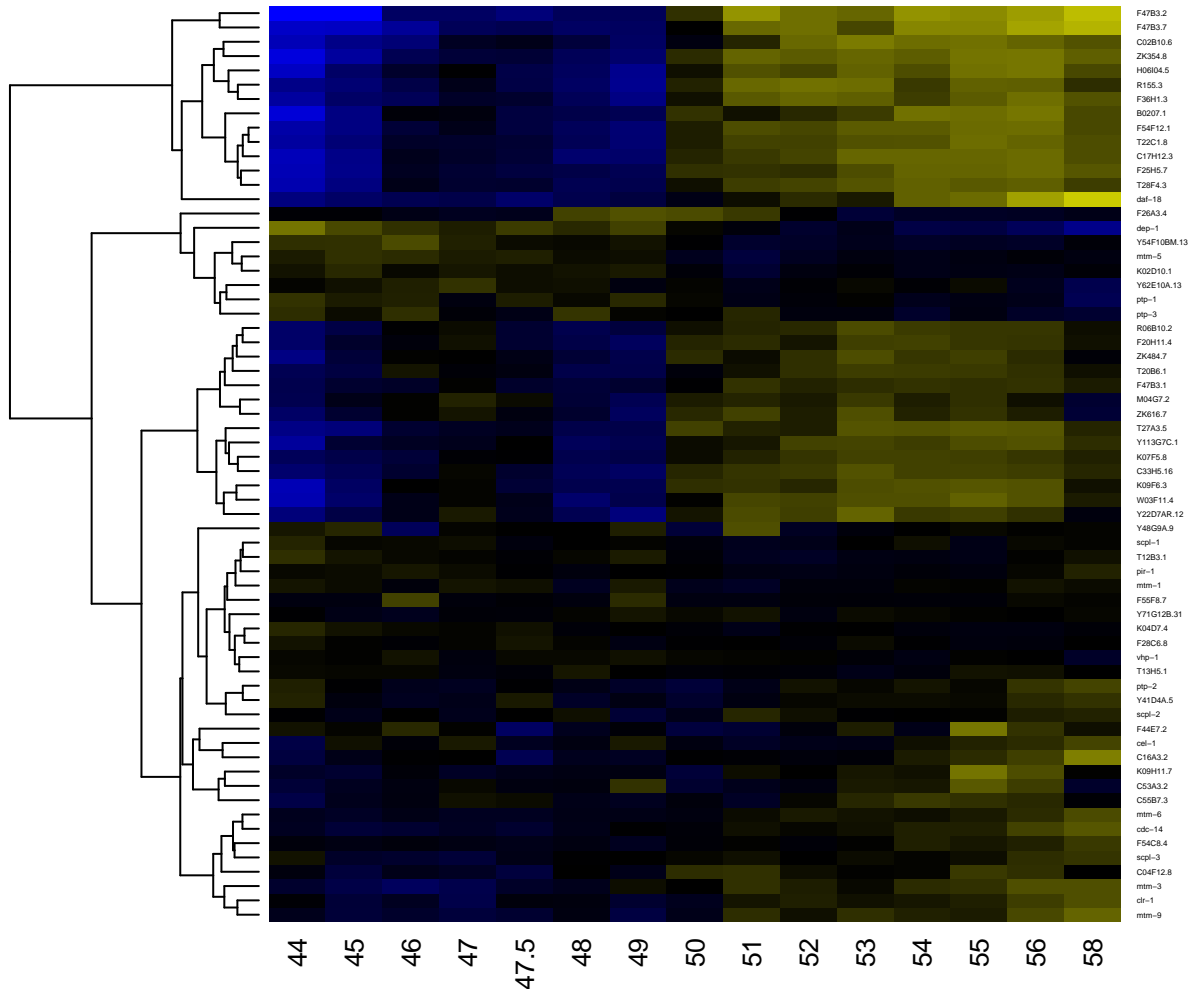

# phosphate metabolic process

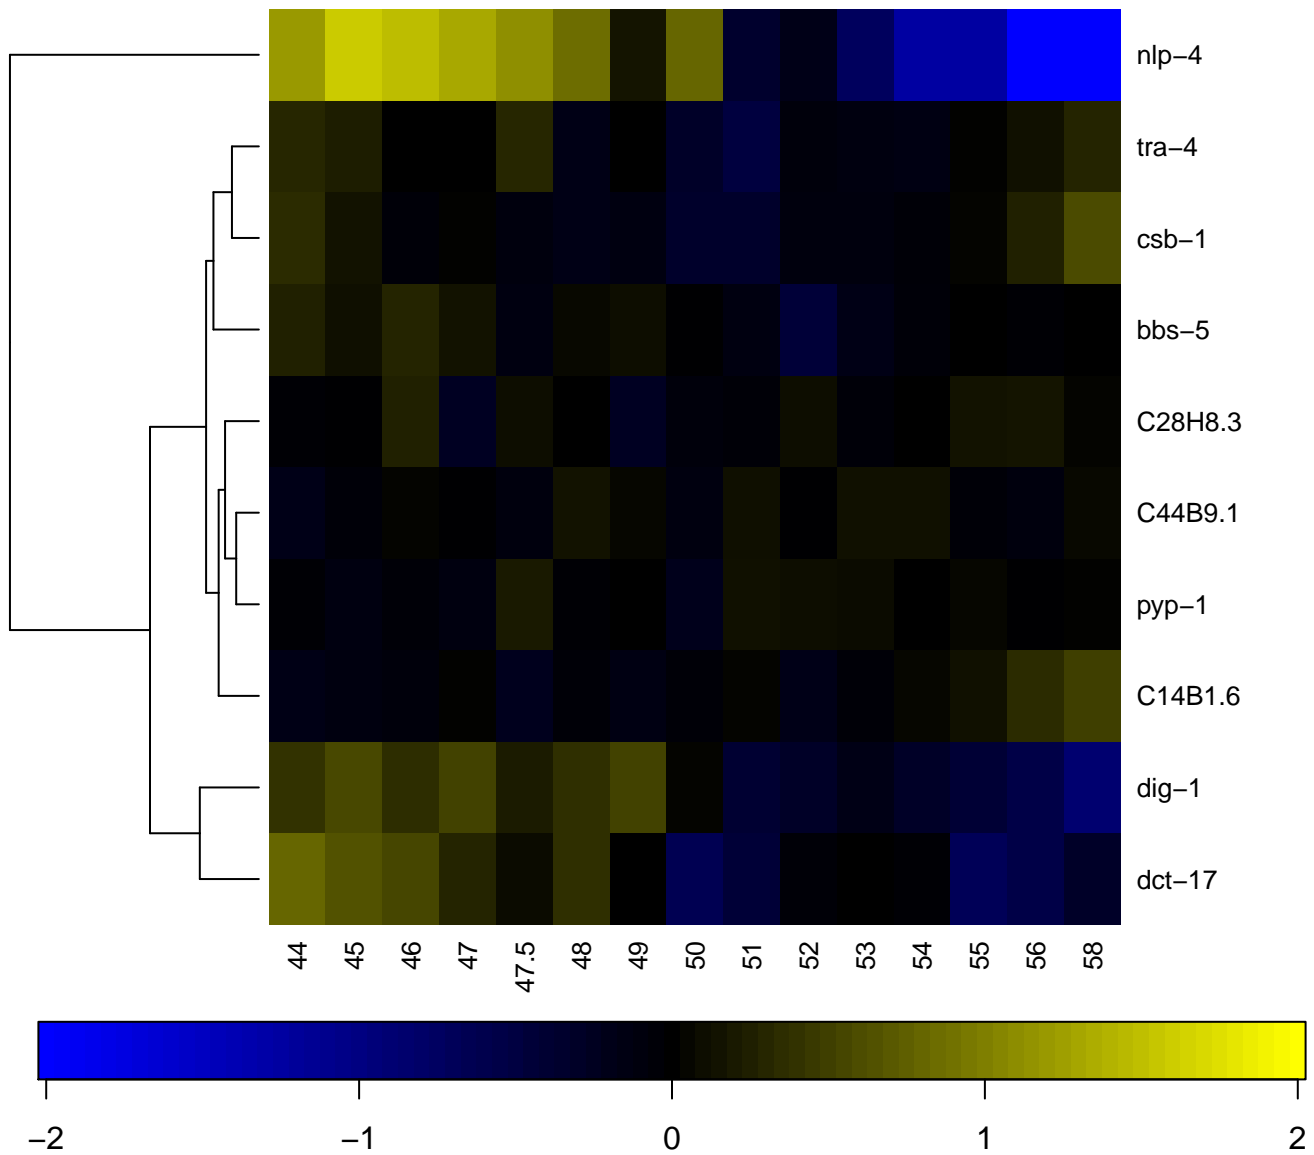







# phosphatidylinositol binding

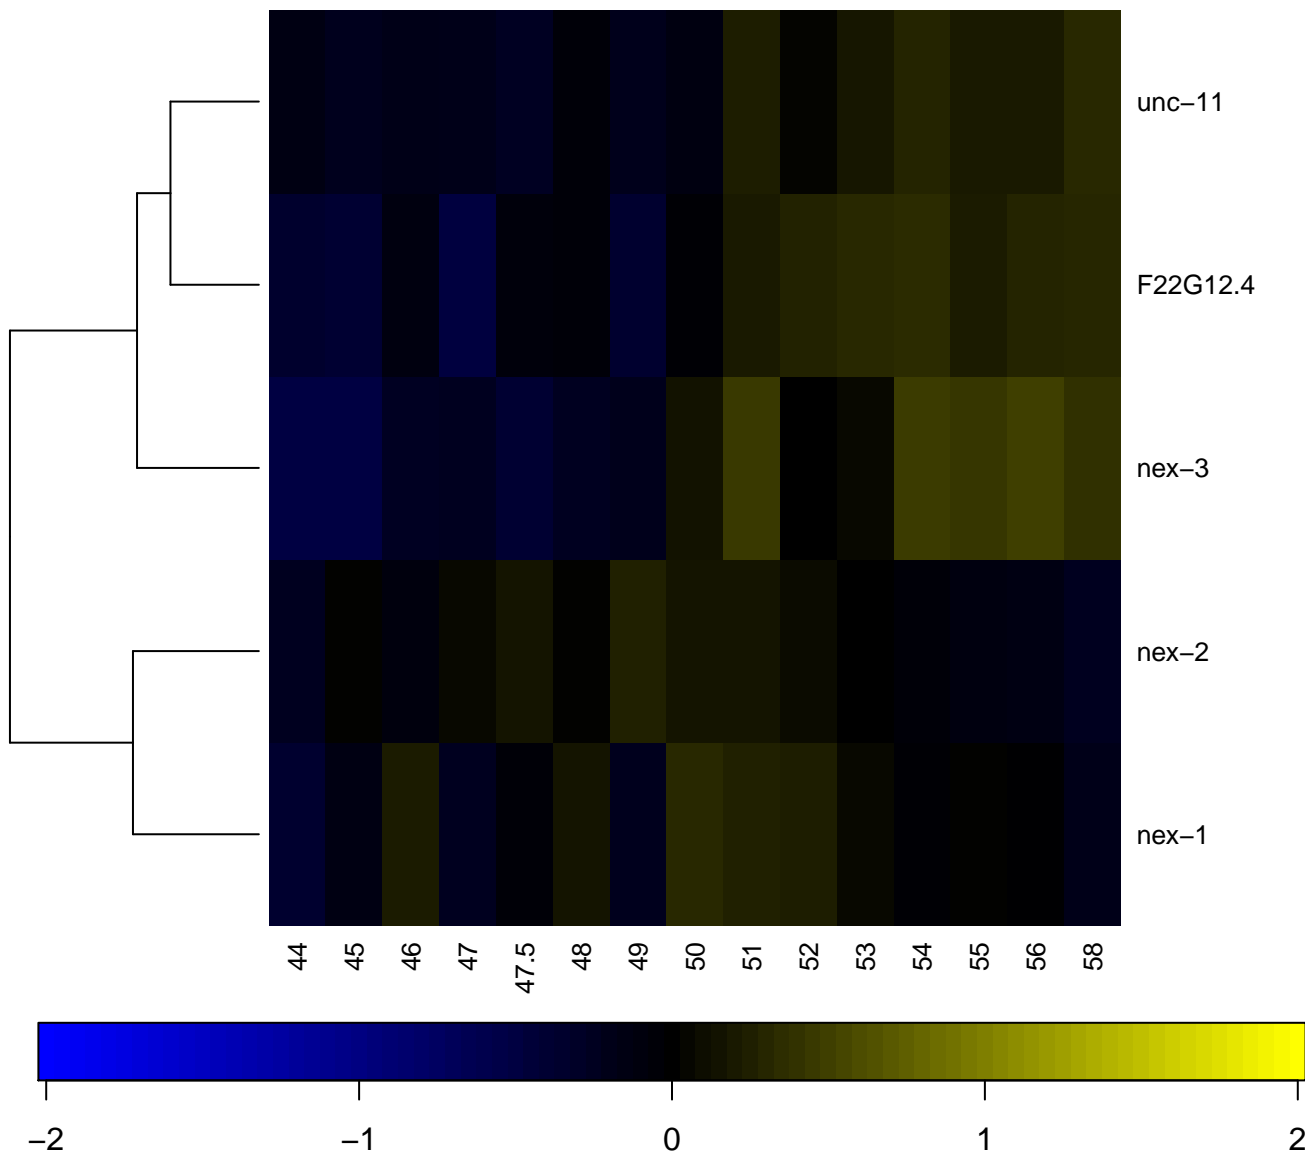



# phosphoinositide-mediated signaling

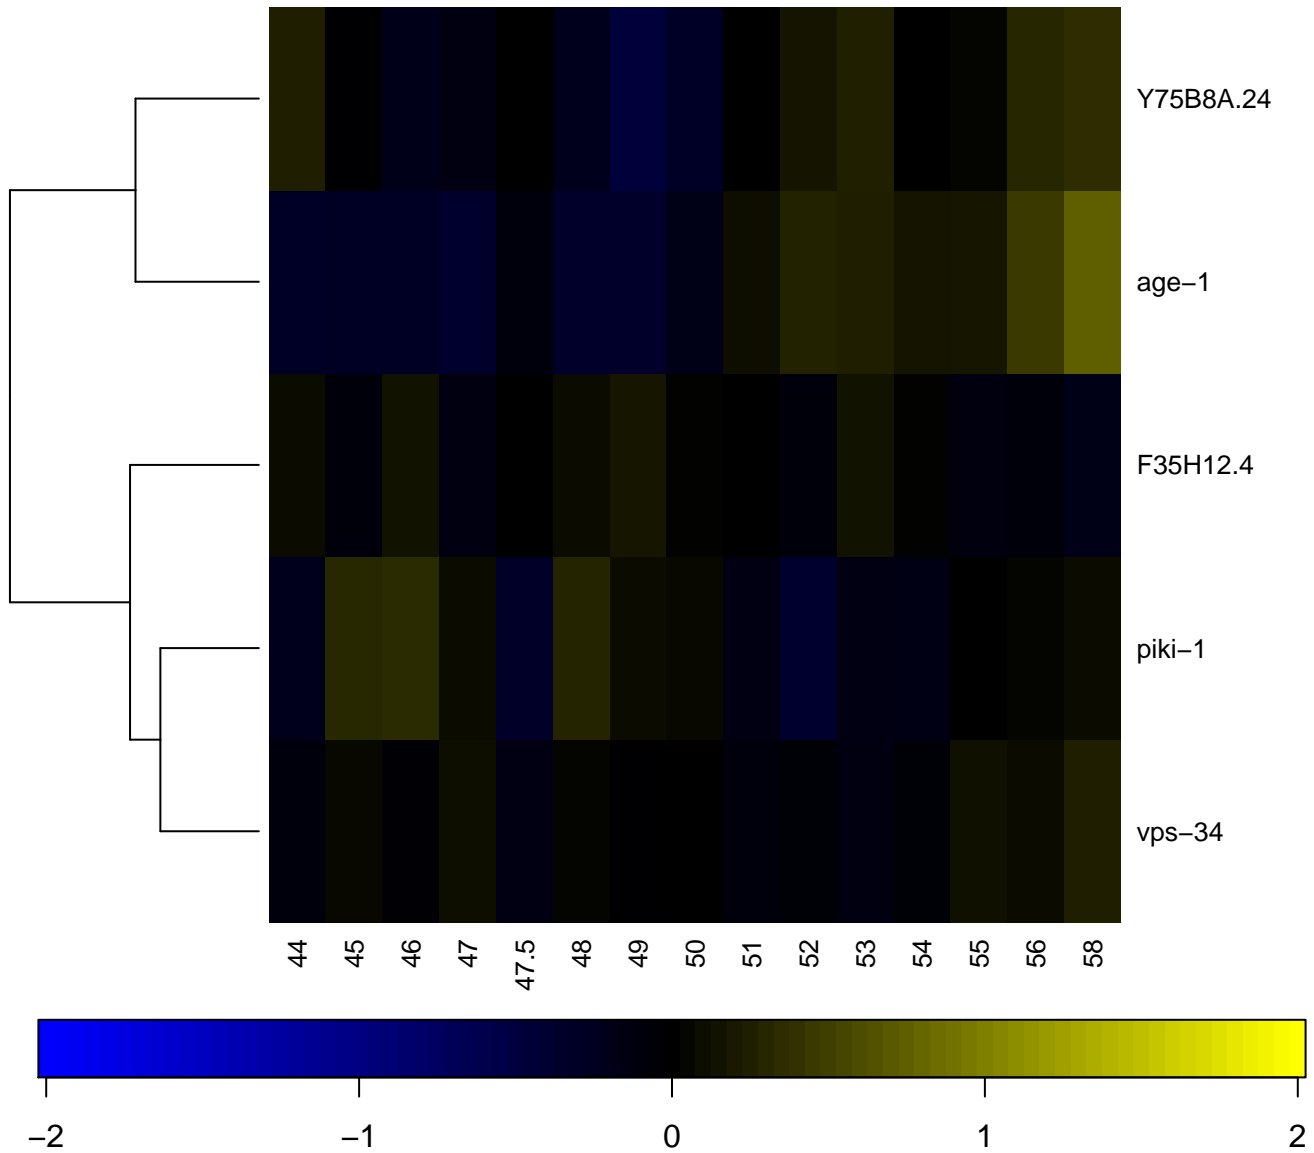



# phosphoinositide binding

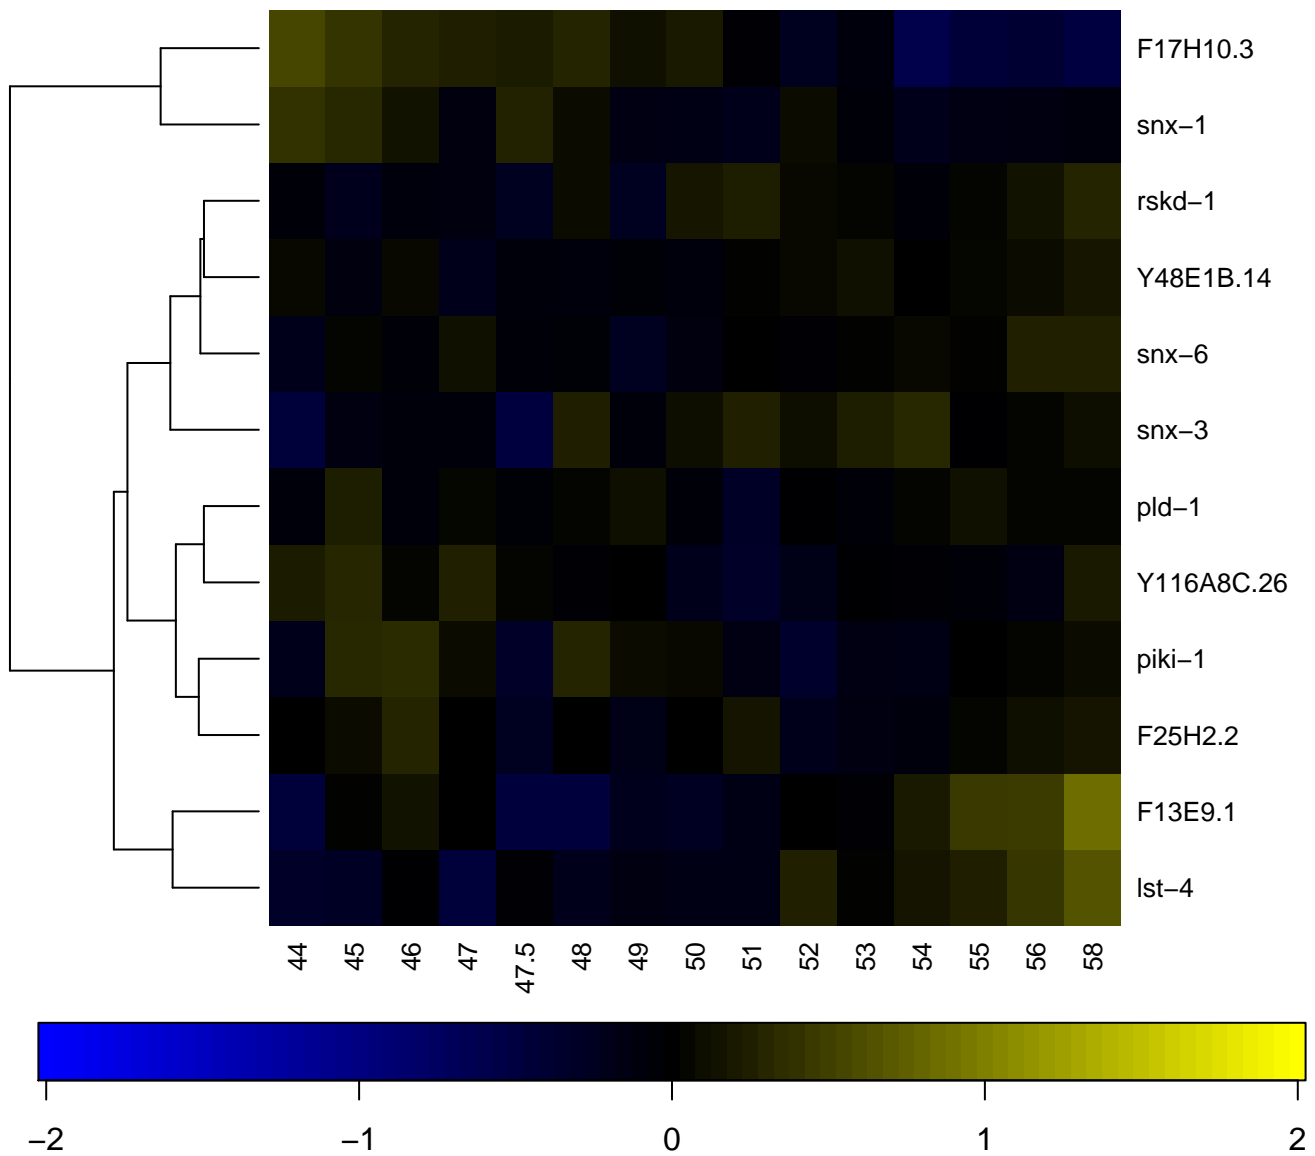







# phospholipase A2 activity

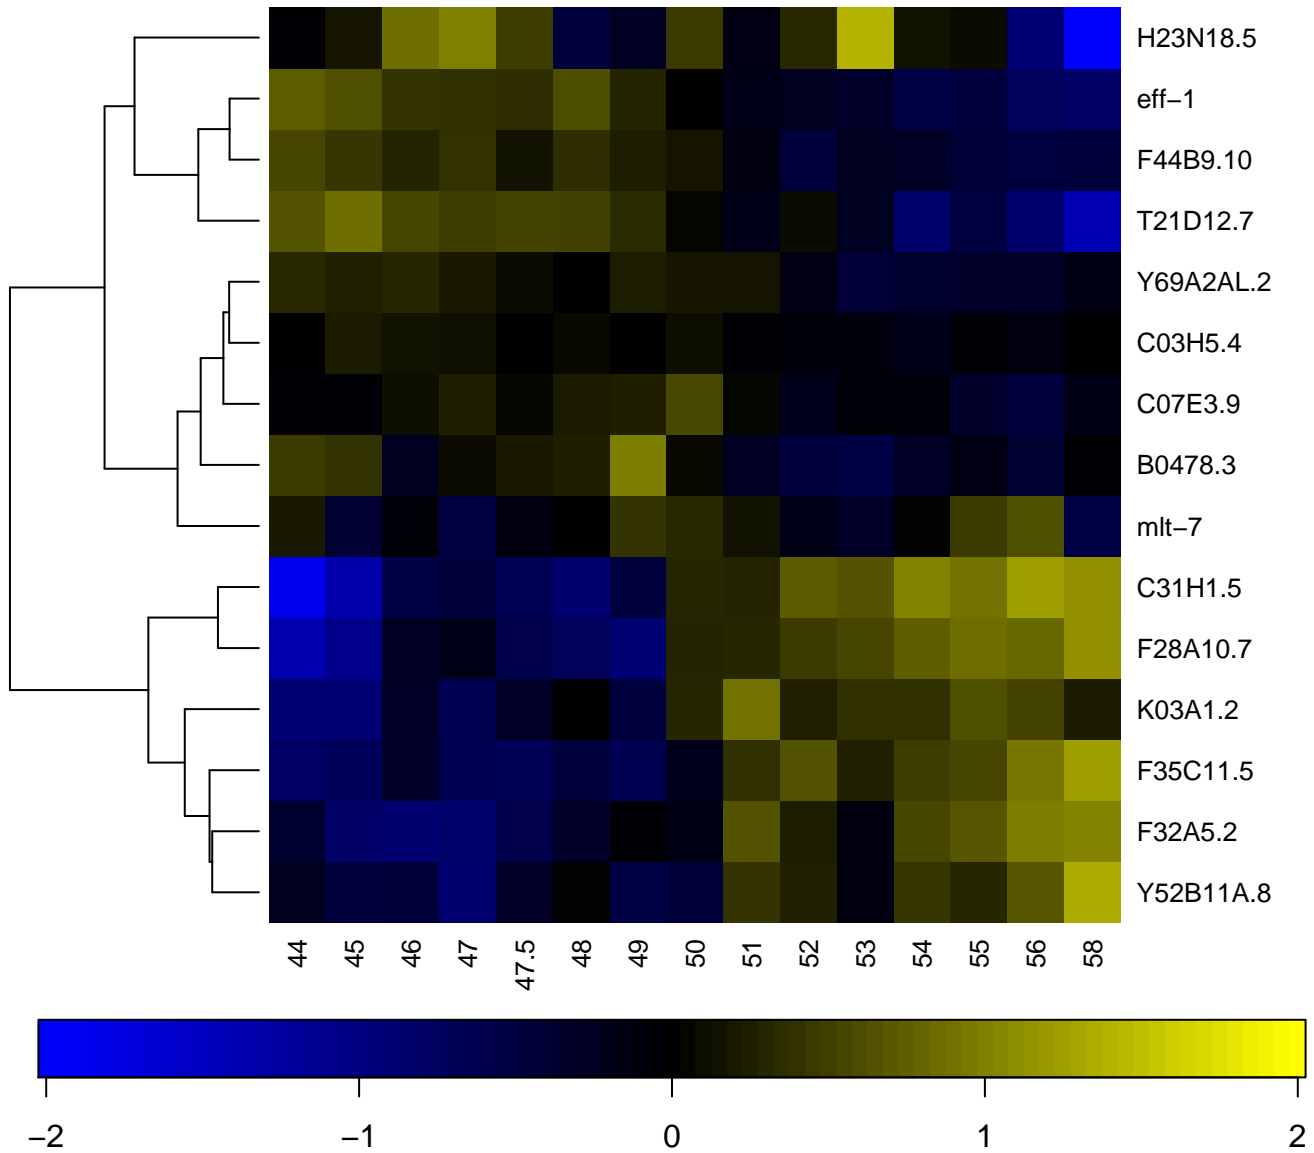







# phospholipid biosynthetic process

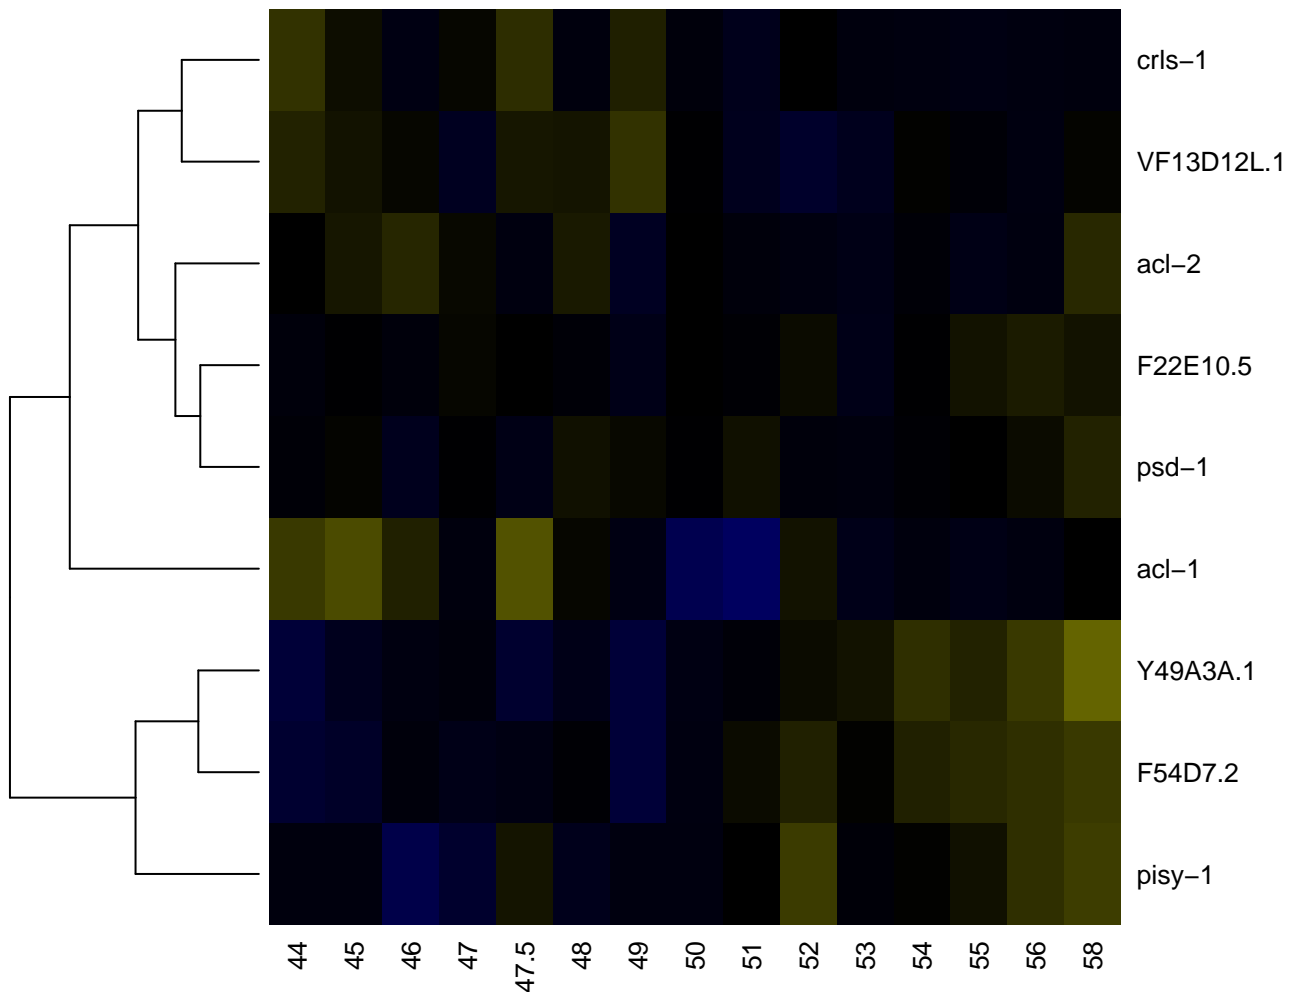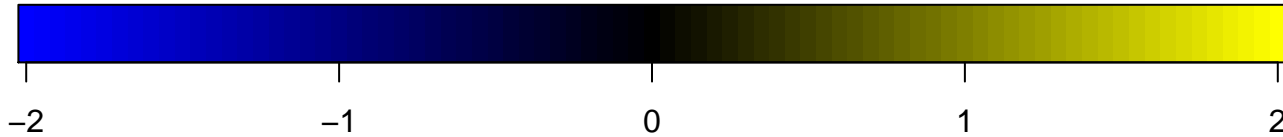

# phospholipid metabolic process



# phospholipid transport

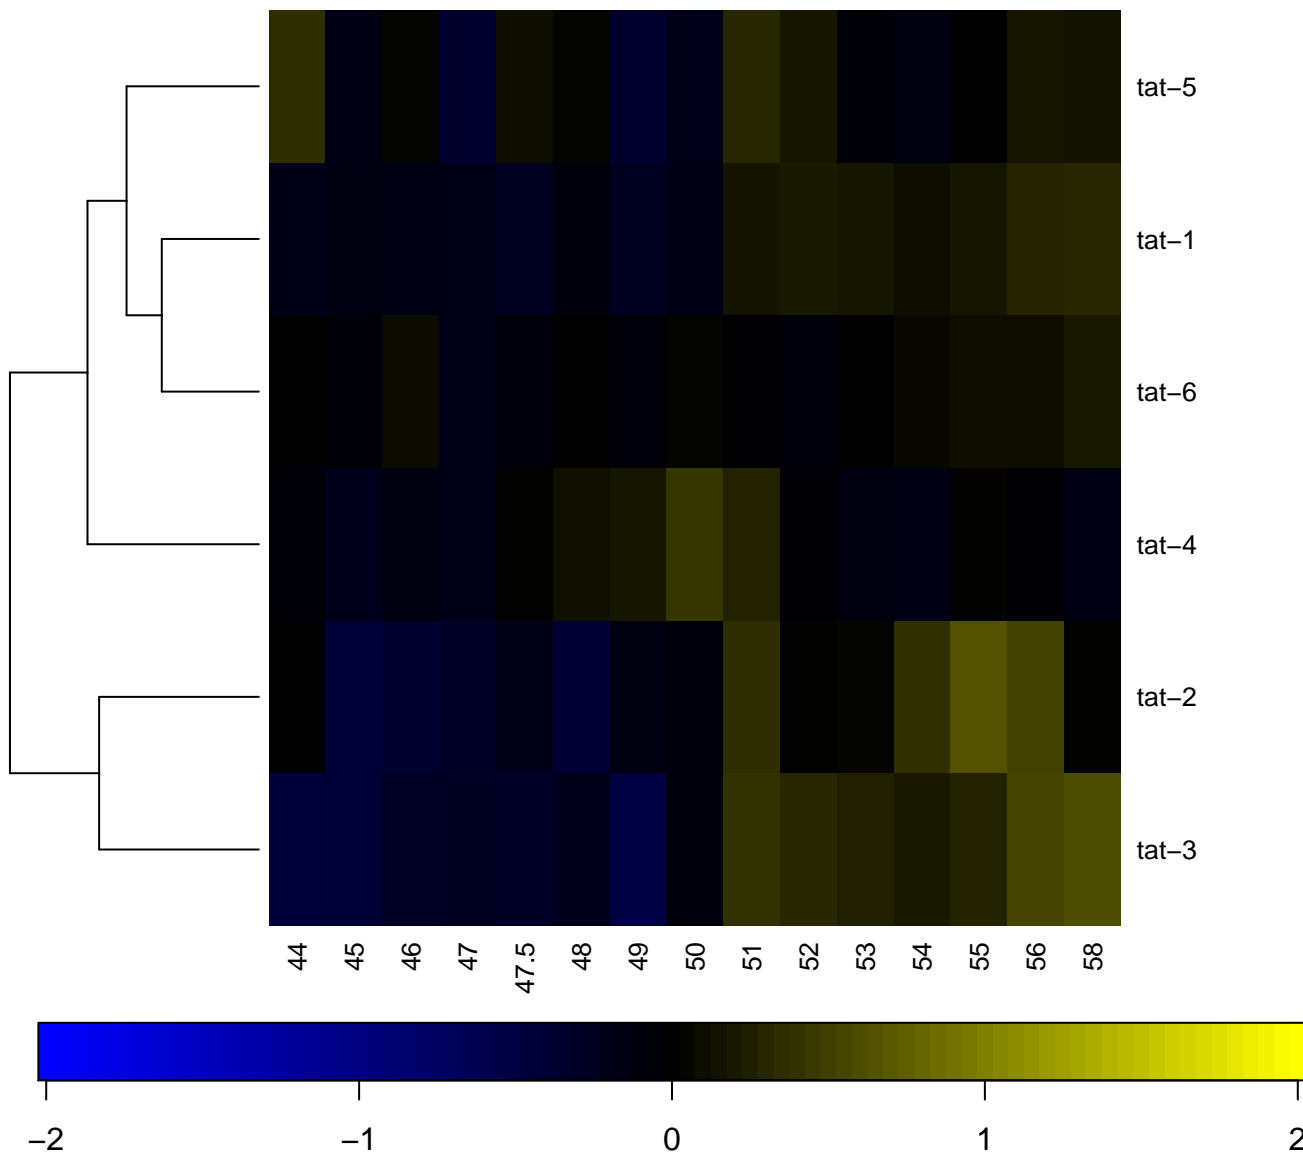

# phosphopantetheine binding

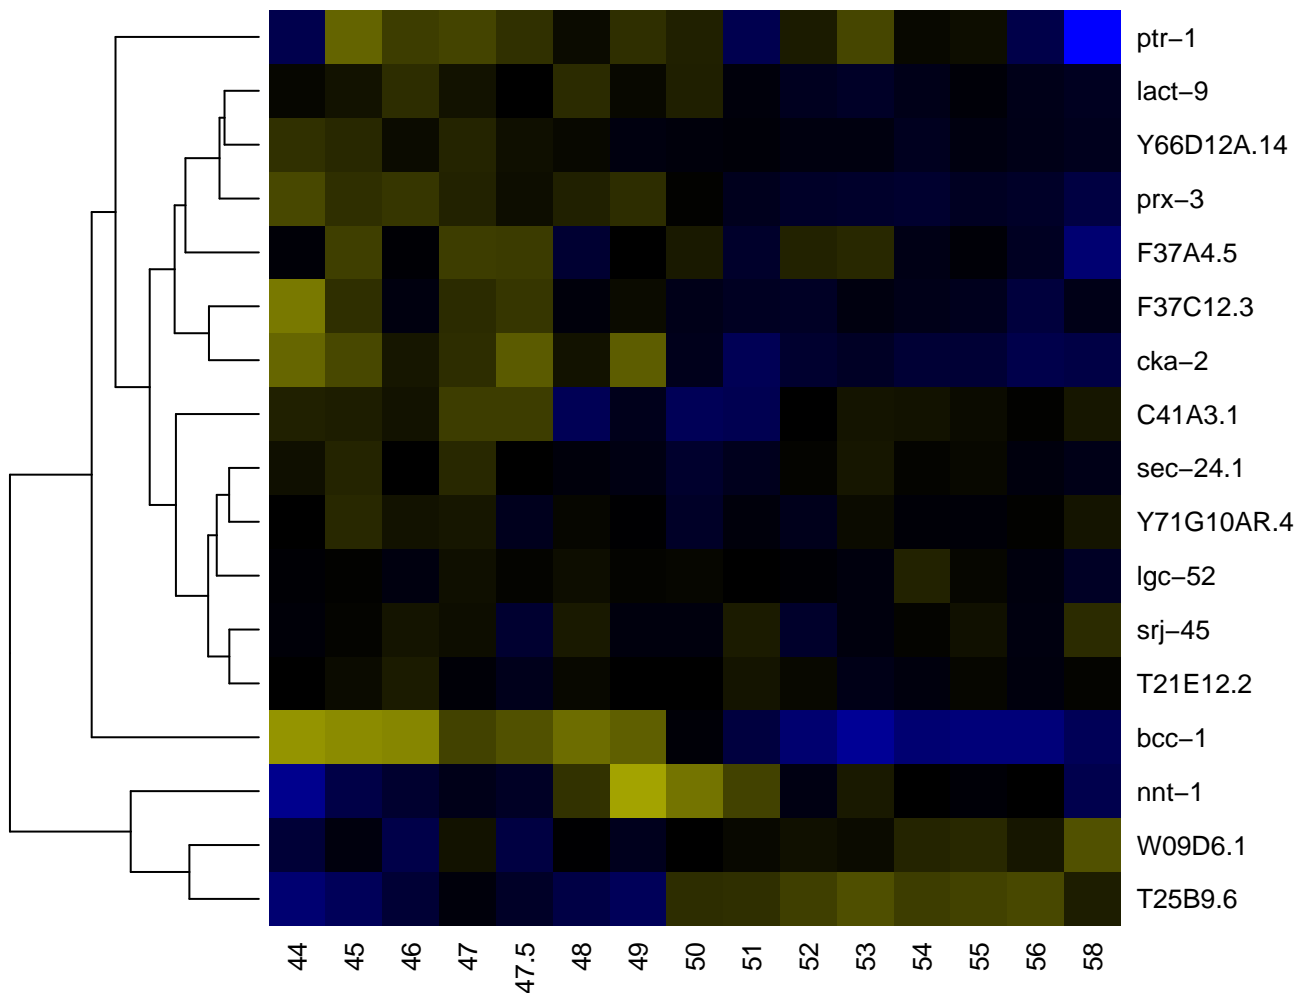





# phosphorus-oxygen lyase activity

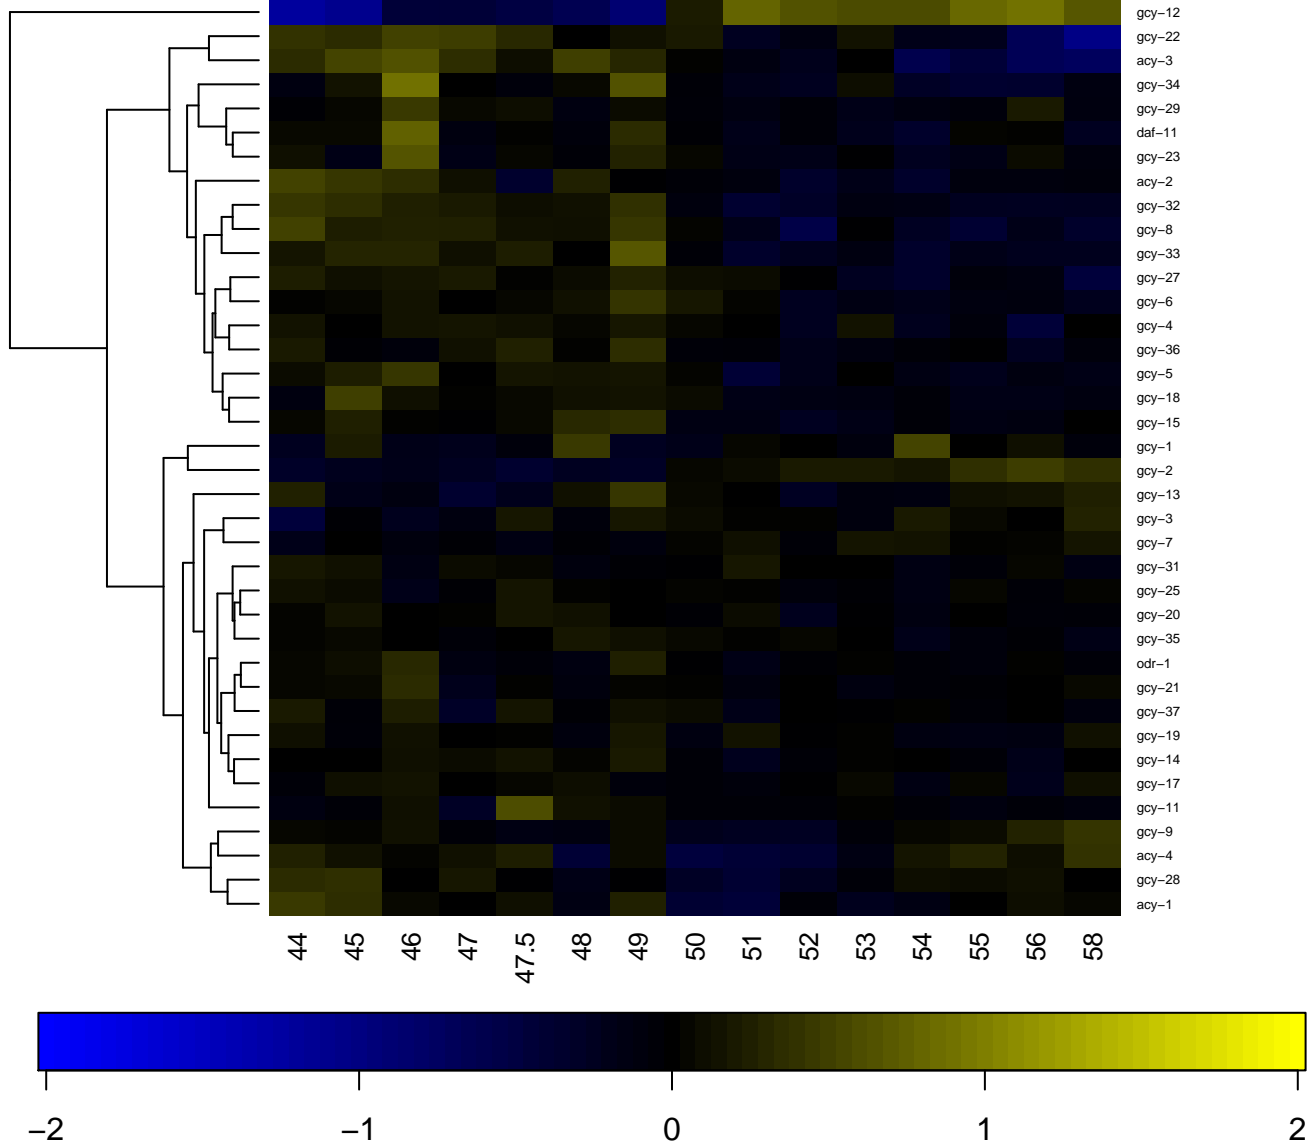



# phosphotransferase activity, alcohol group as acceptor

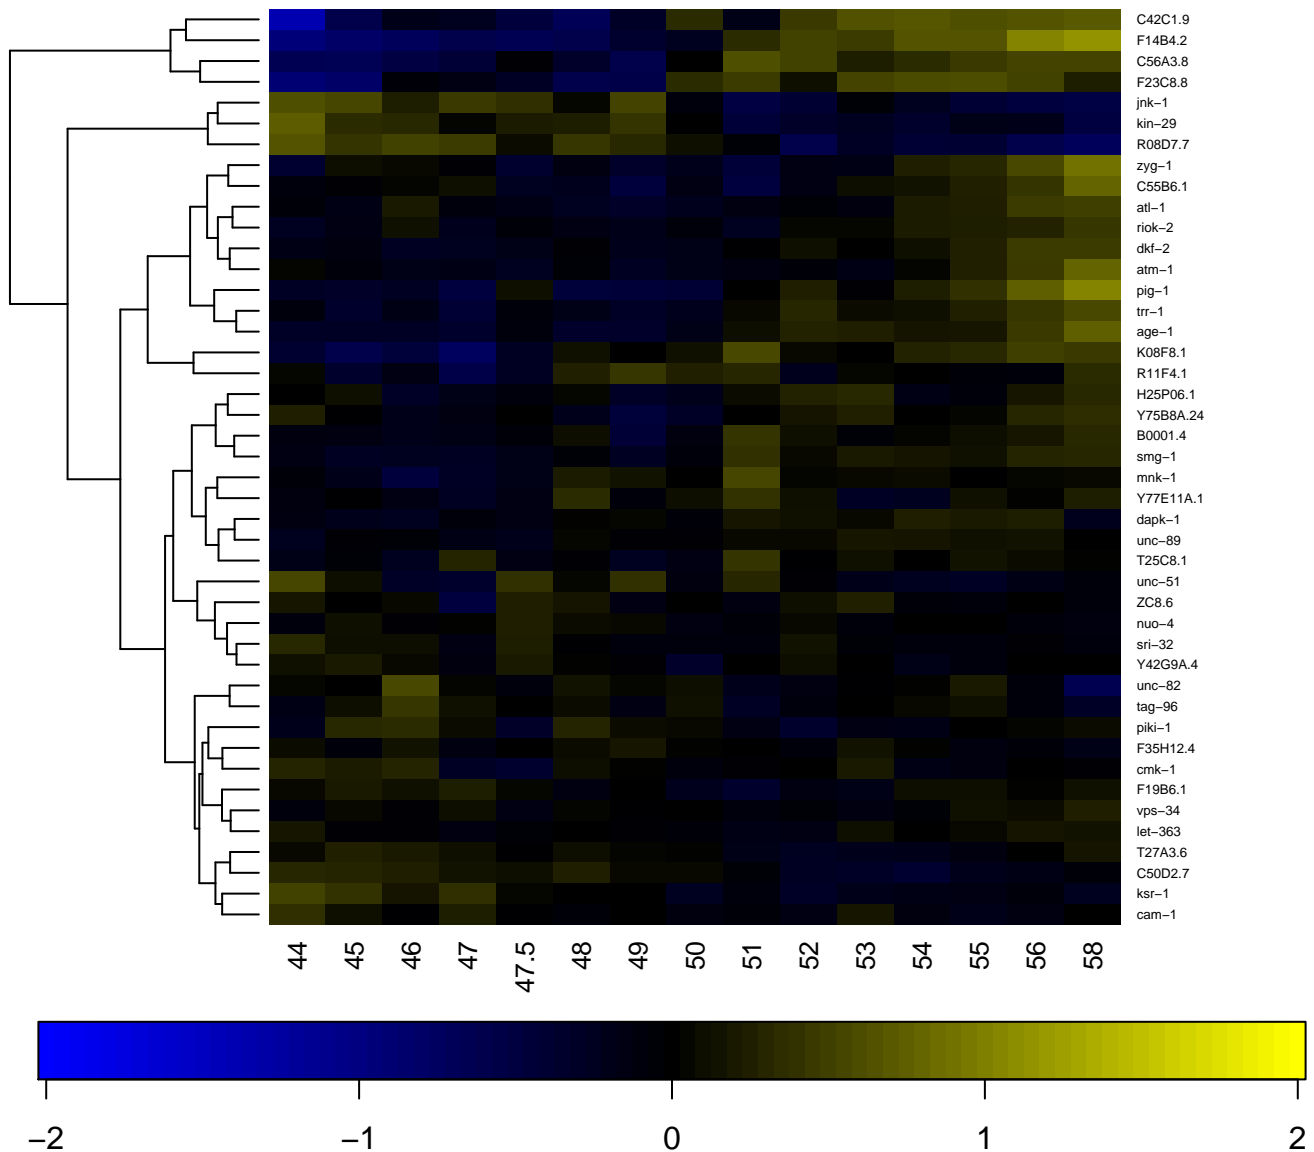

# phosphotransferase activity, for other substituted phosphate g

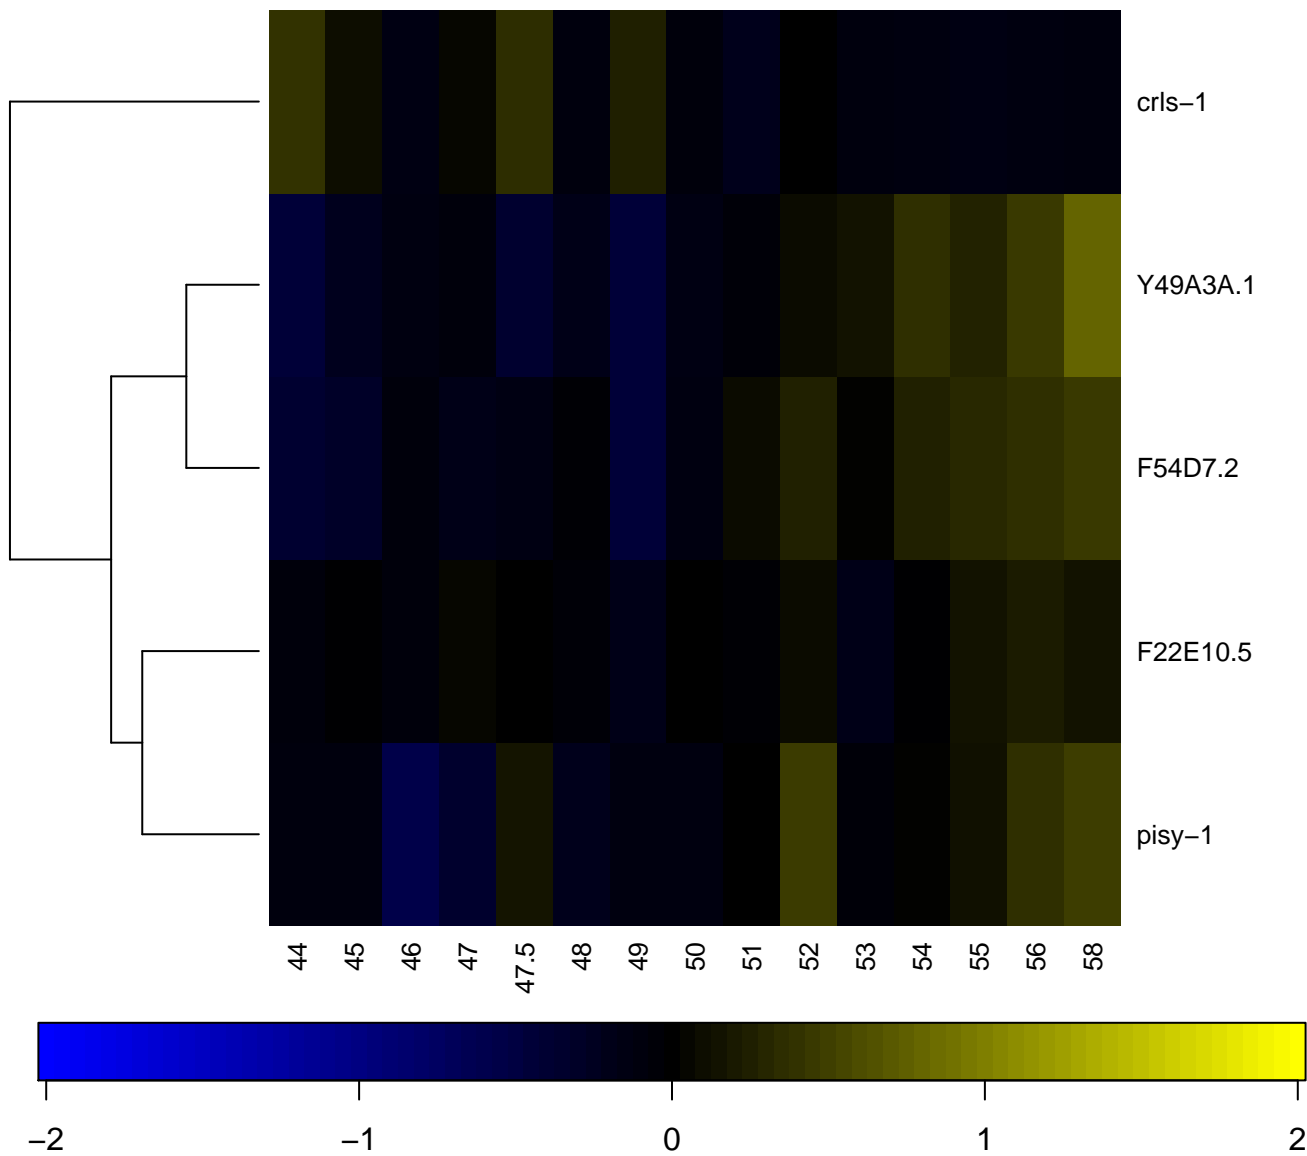

# plasma membrane

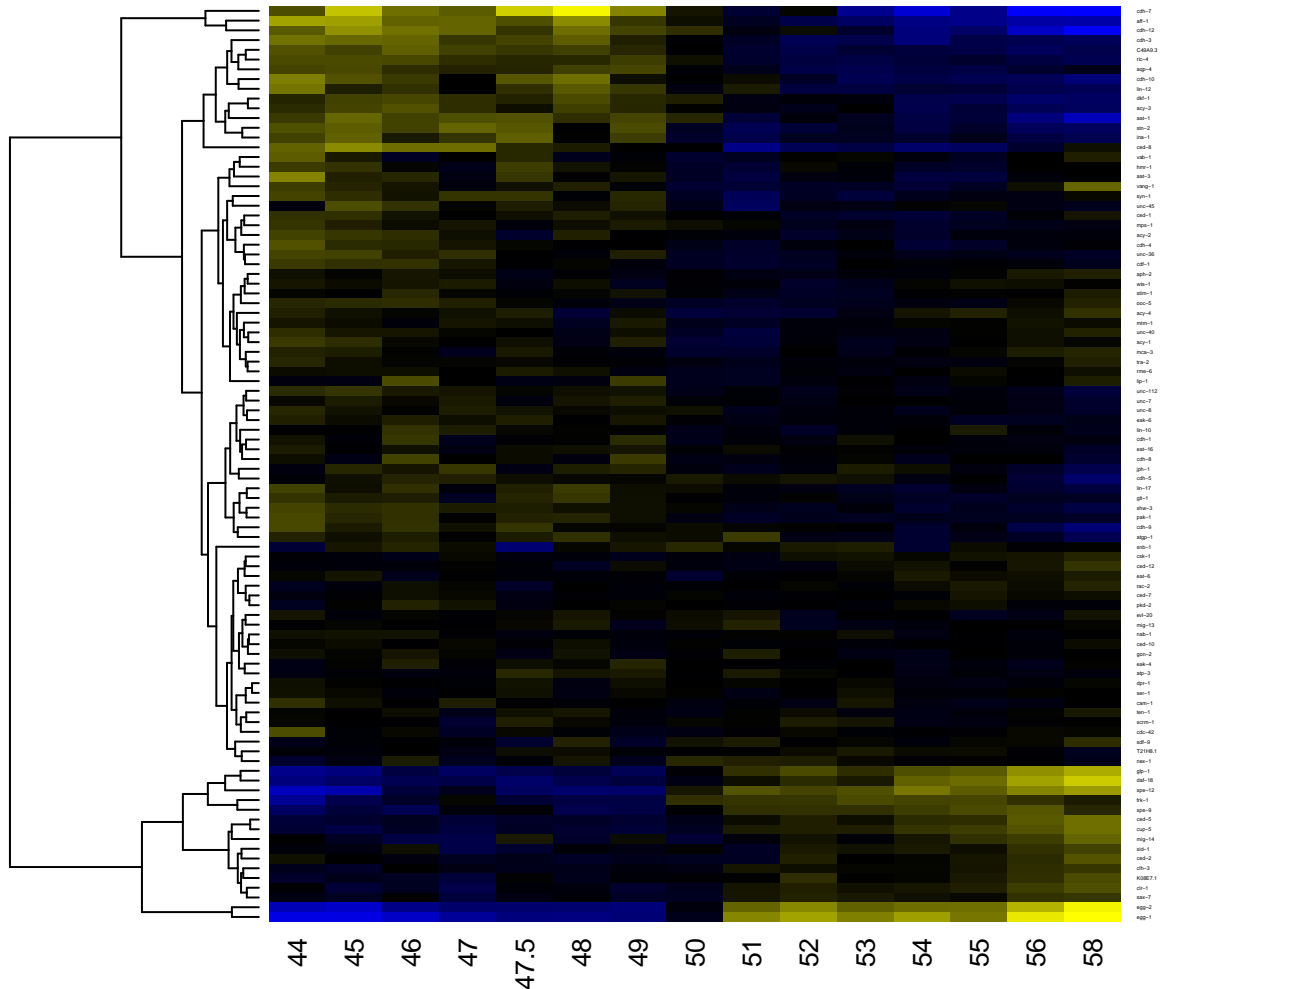



# polar body extrusion after meiotic divisions

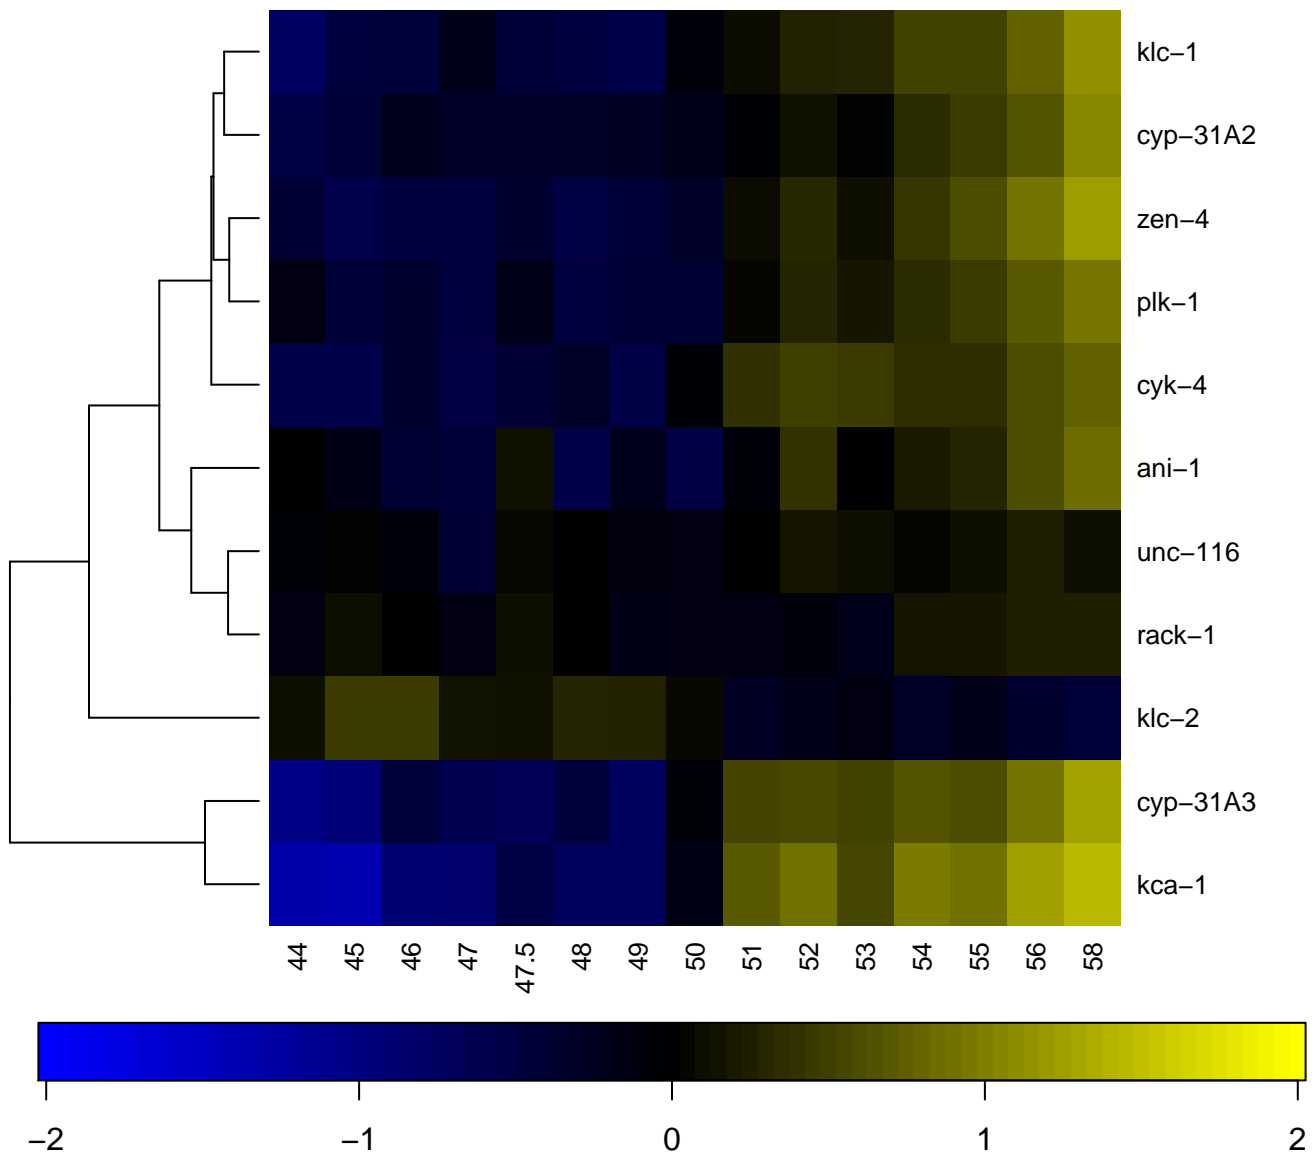



# polarity specification of anterior/posterior axis

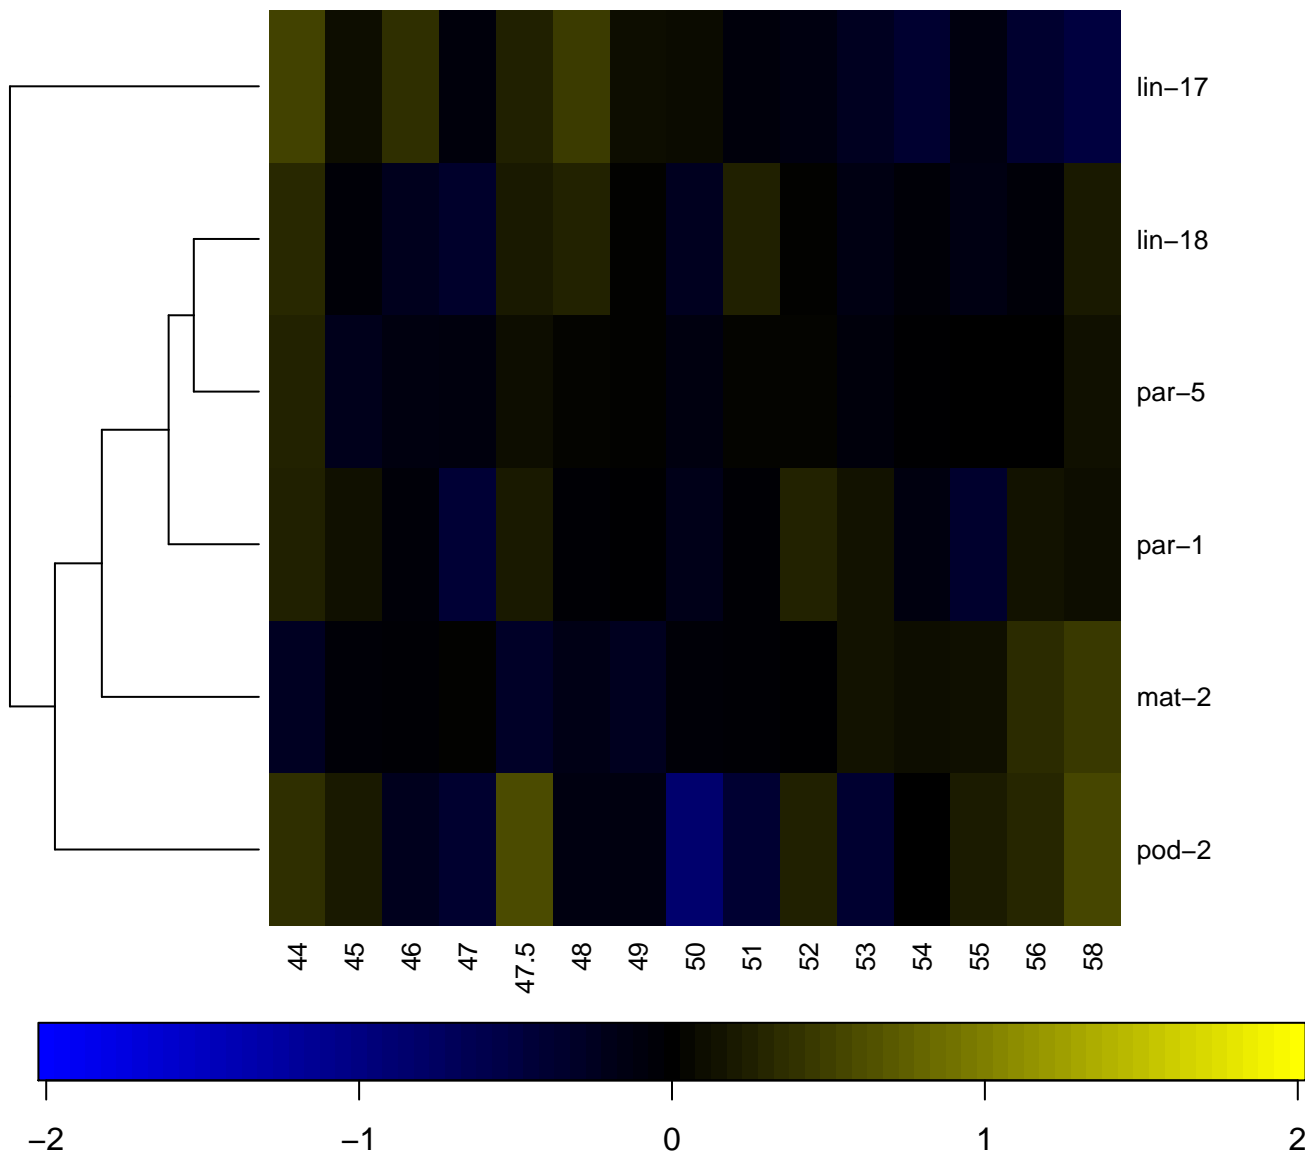

# polarity specification of proximal/distal axis

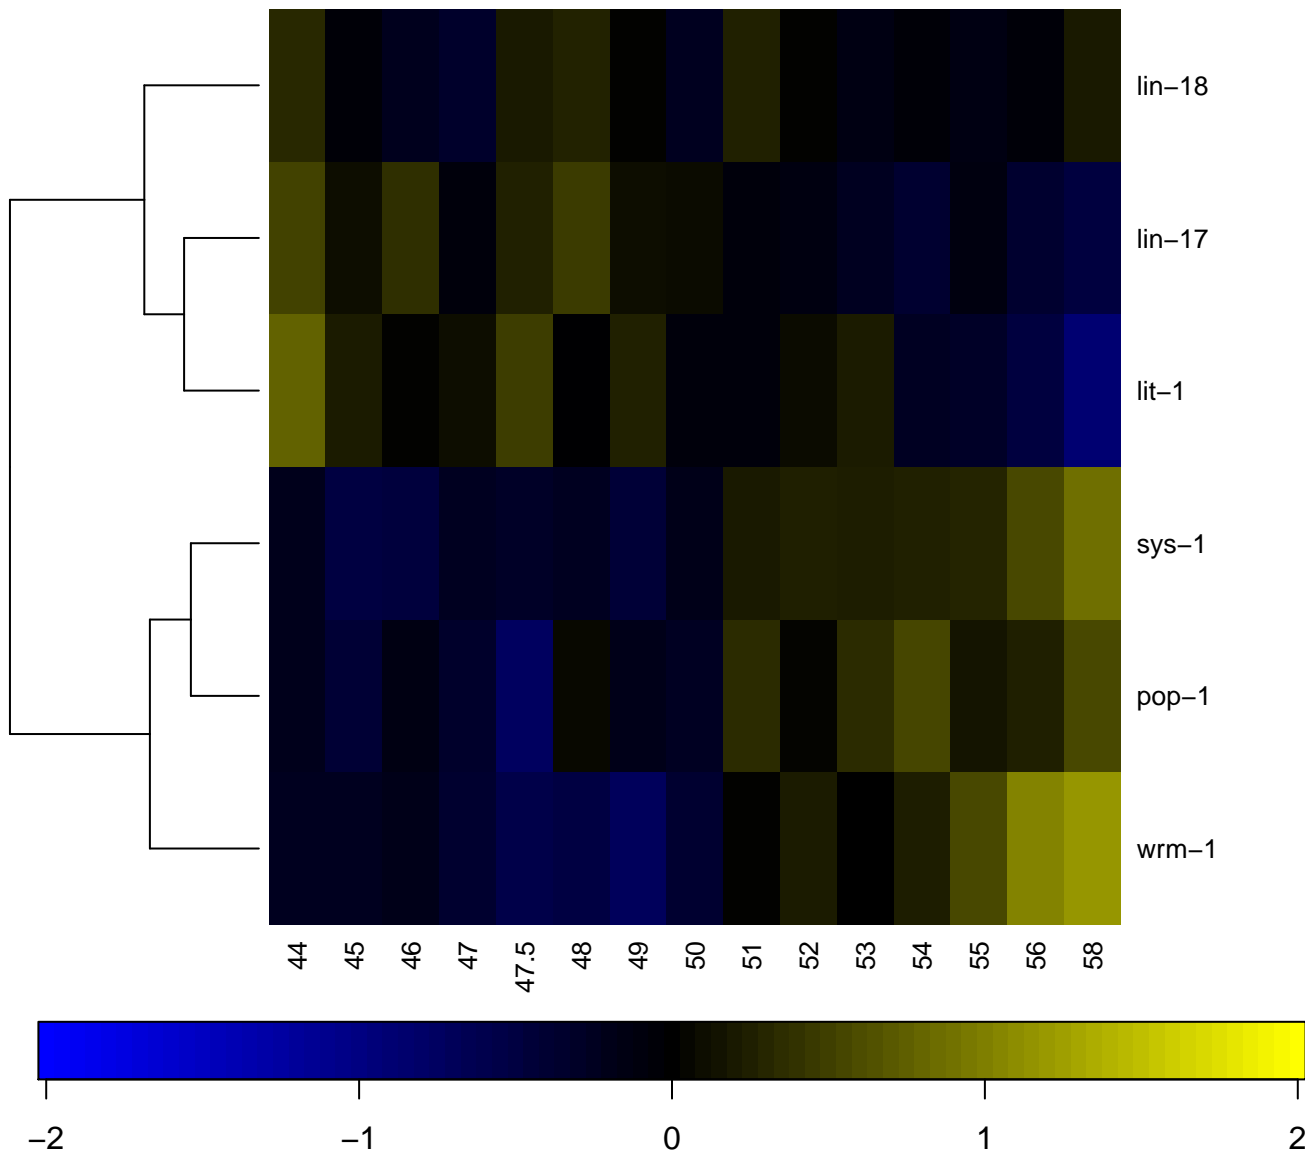







# positive regulation of embryonic development

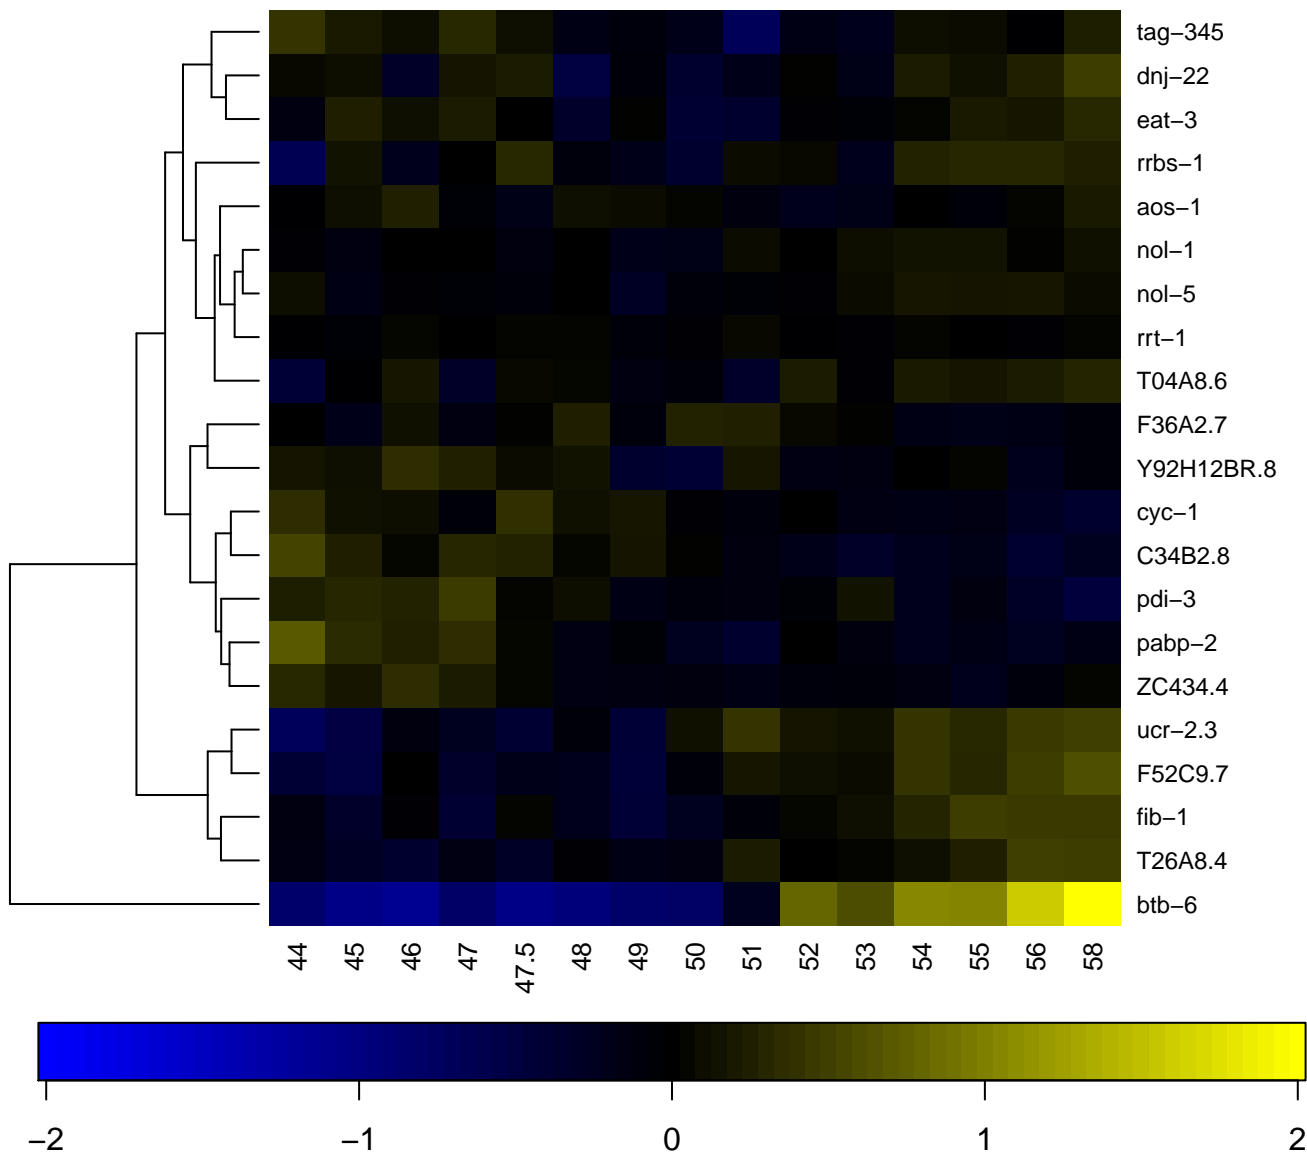

# positive regulation of growth rate

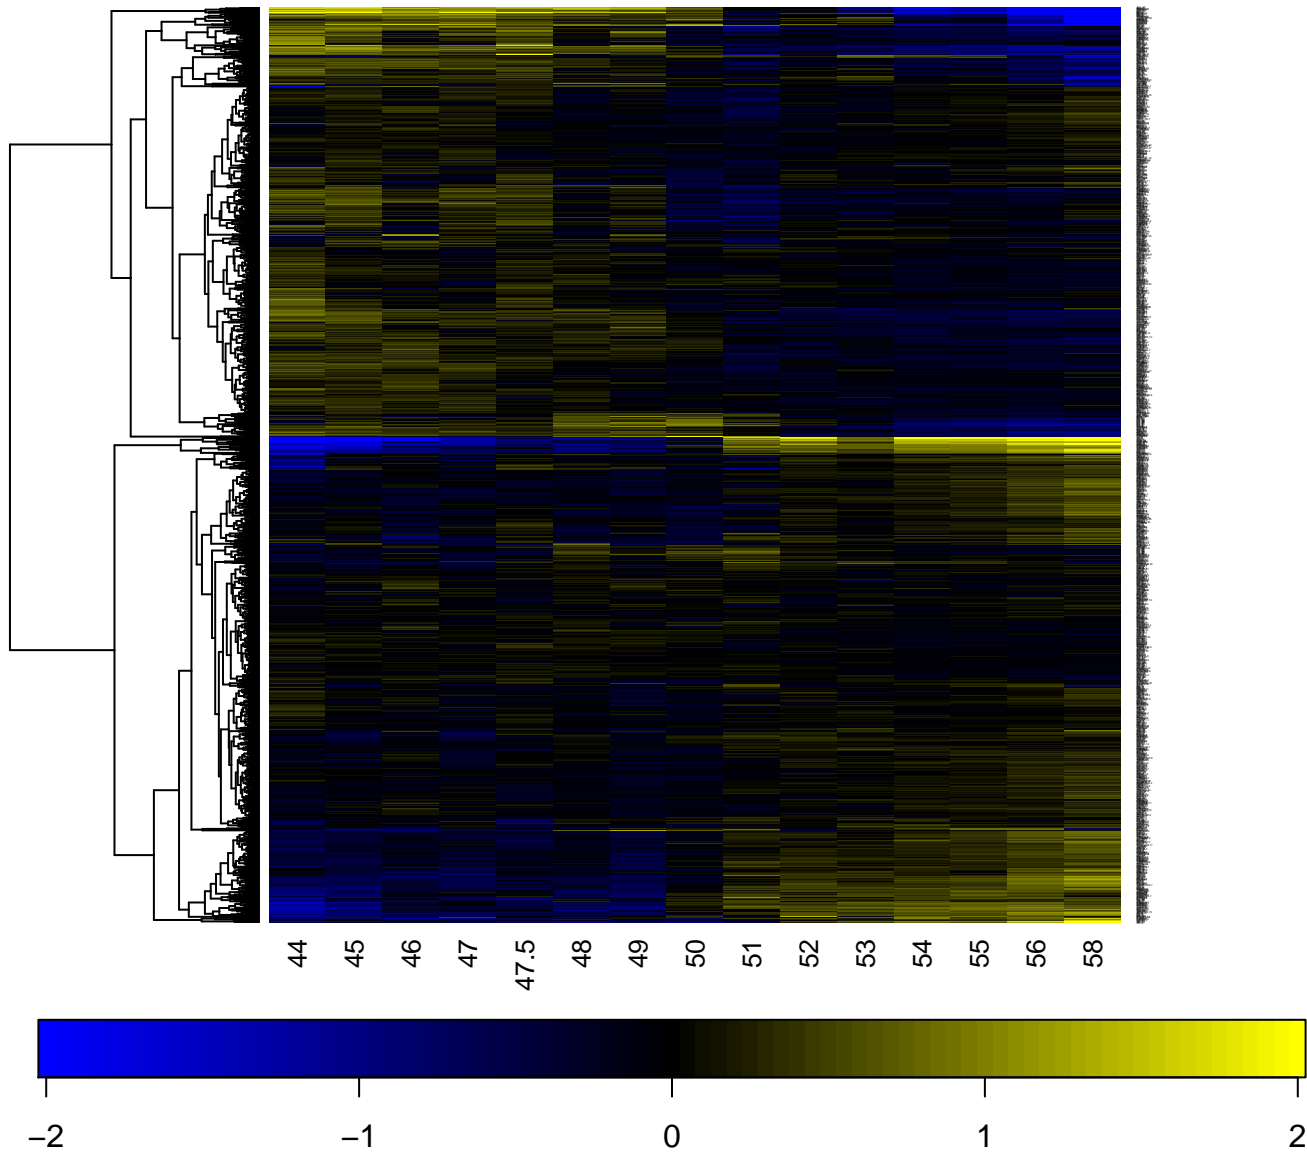

# positive regulation of locomotion

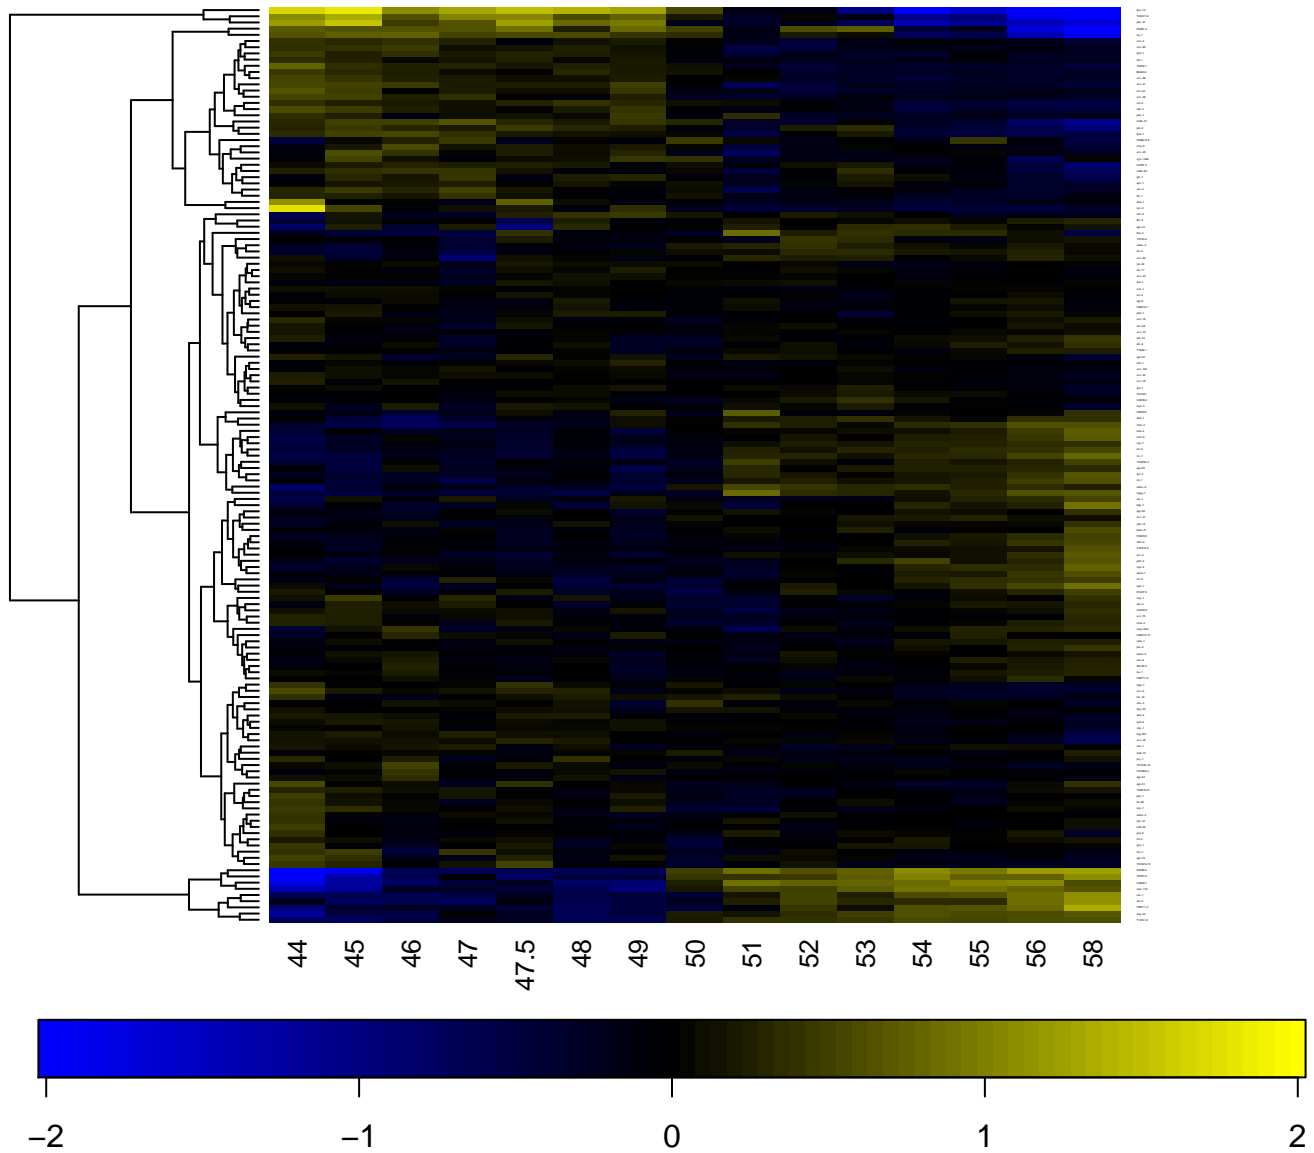



# positive regulation of multicellular organism growth

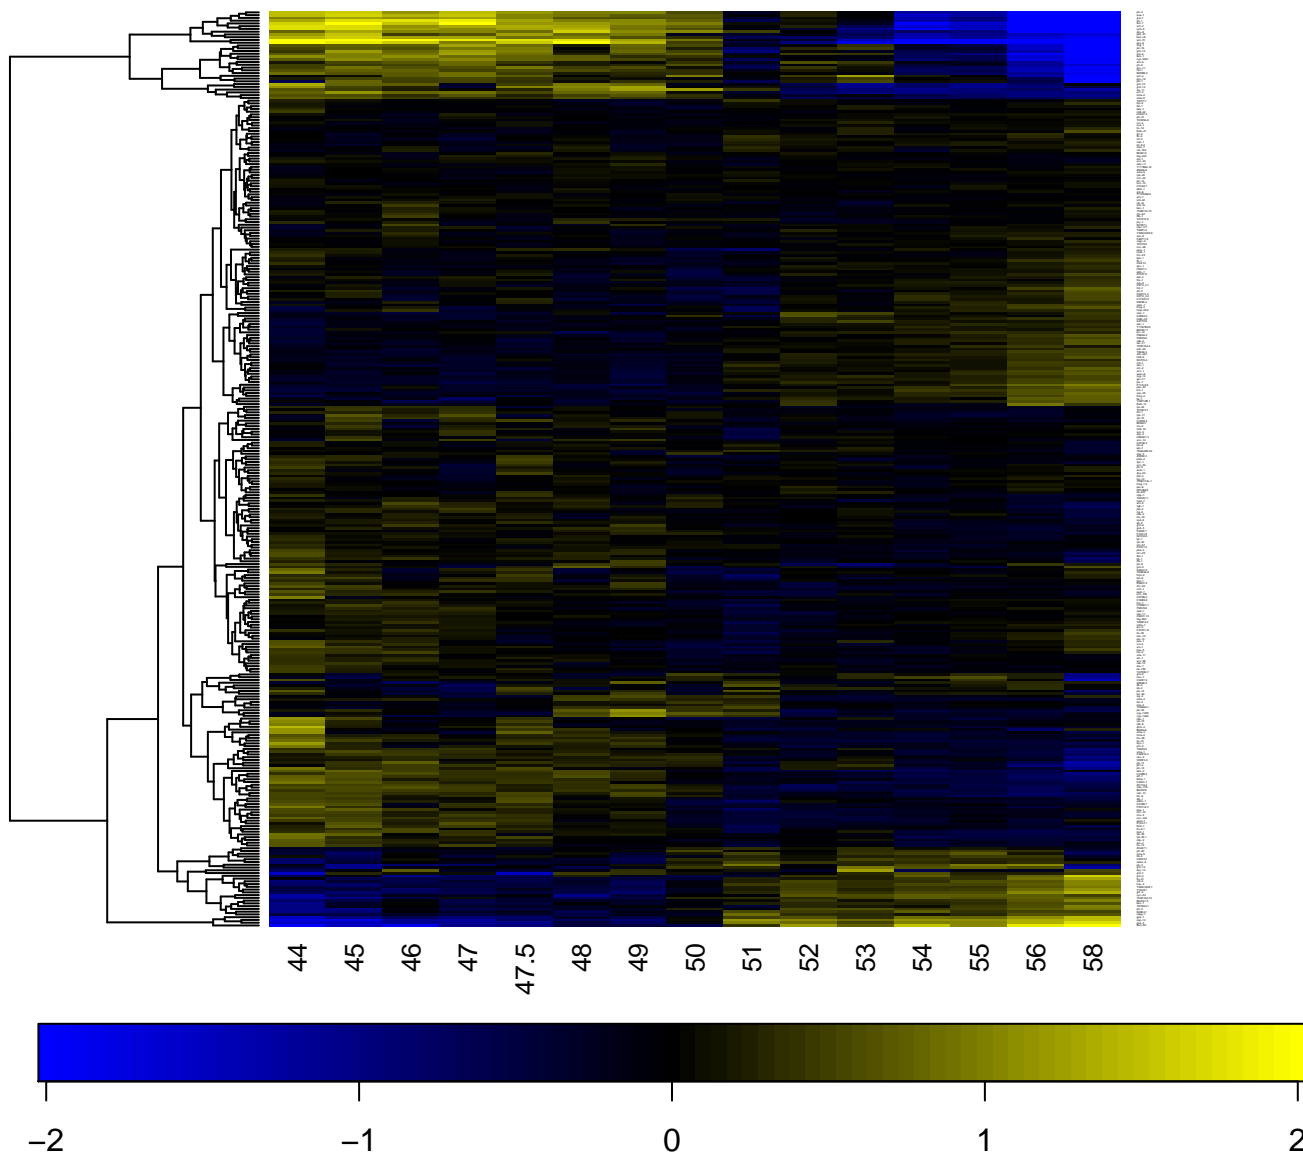









# Positive regulation of transcription from RNA polymerase II promoter

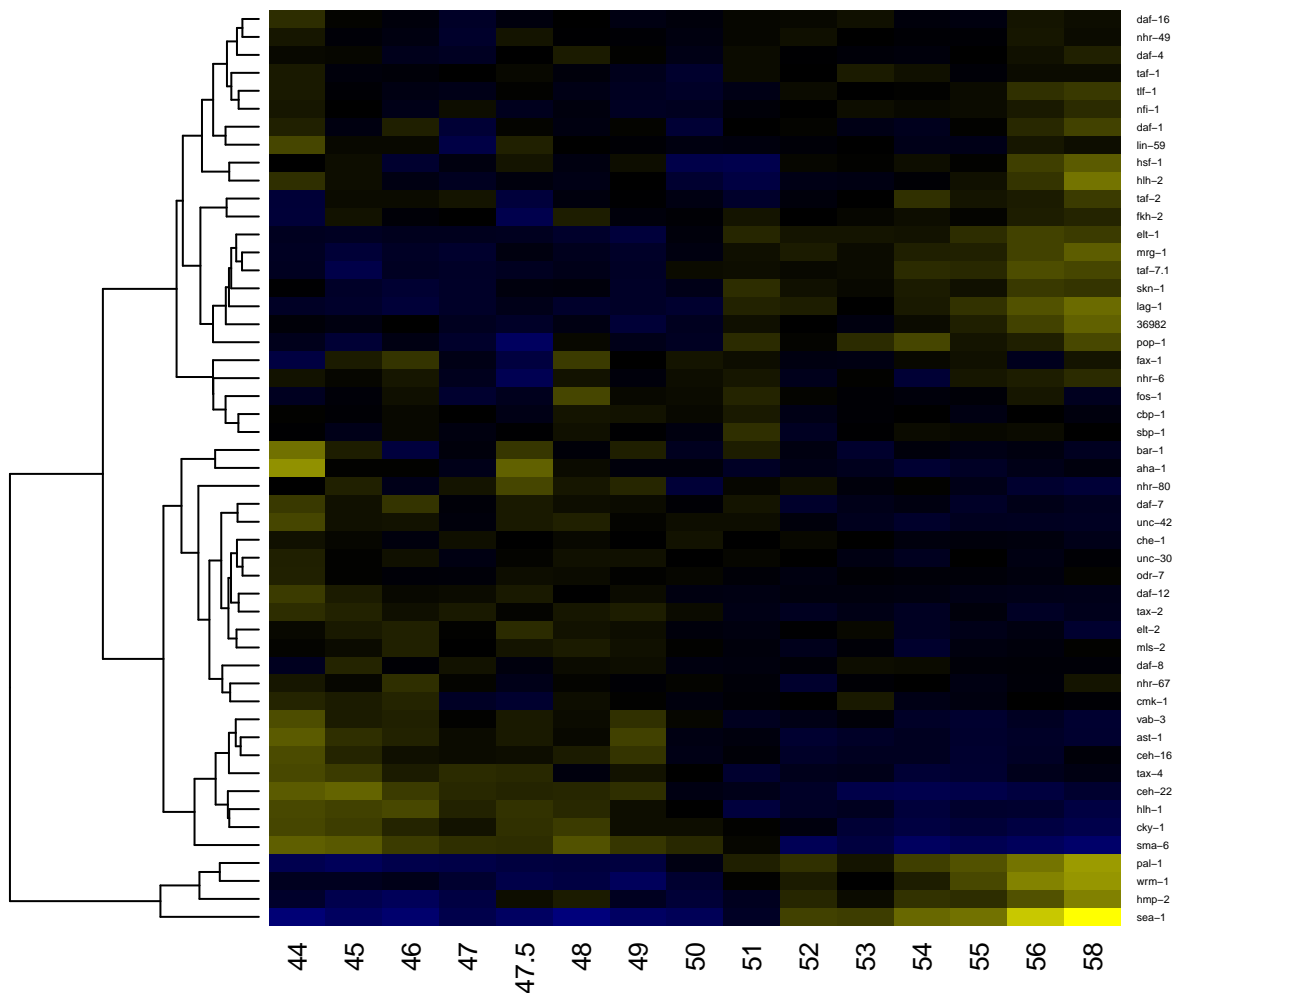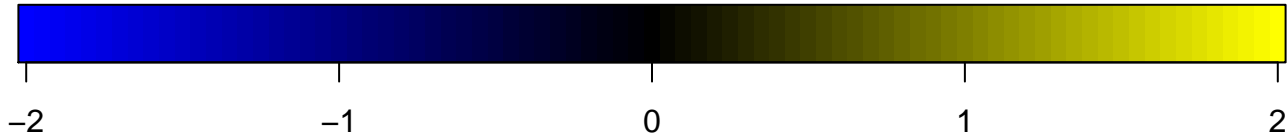



# positive regulation of vulval development

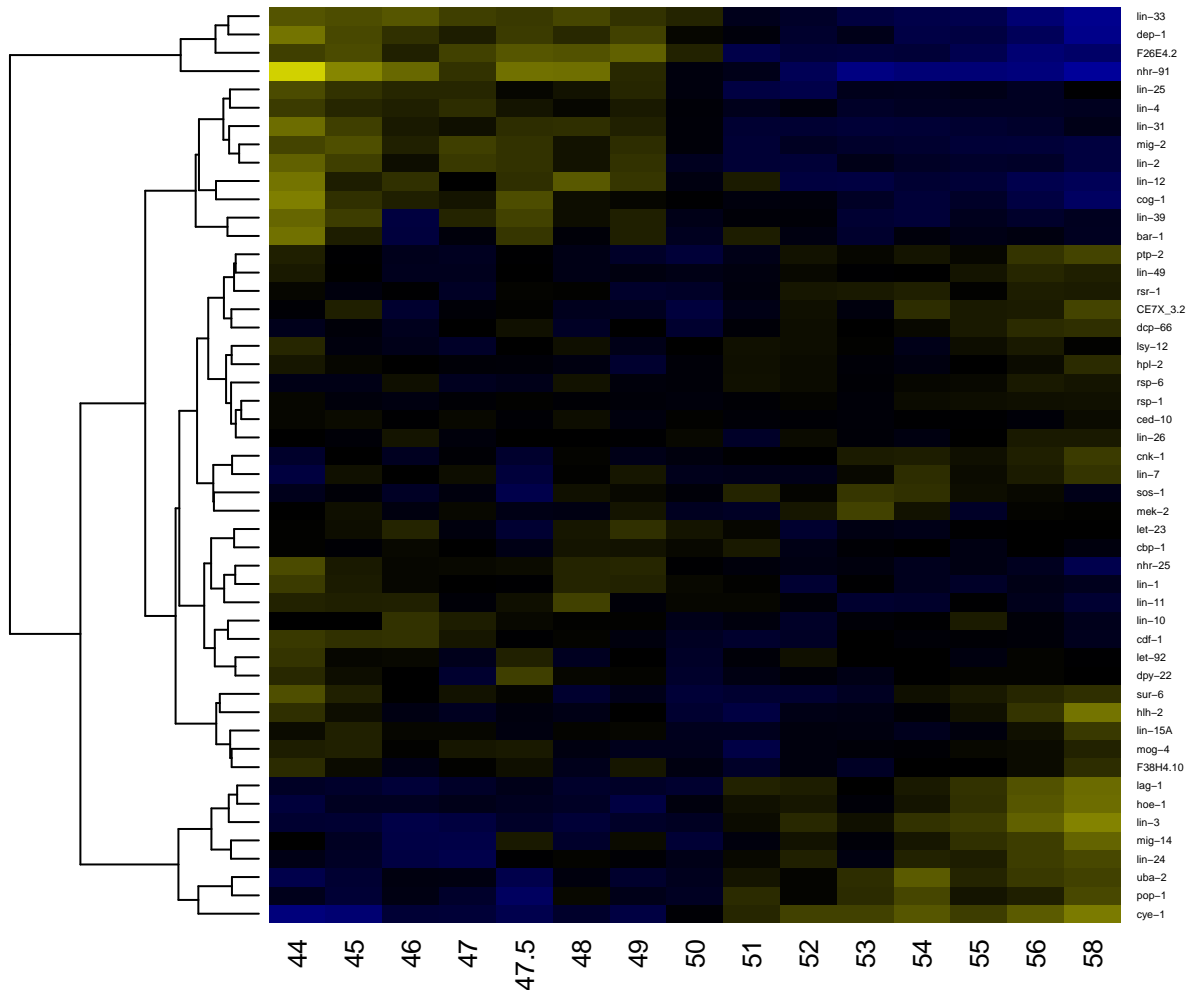



# post-embryonic body morphogenesis

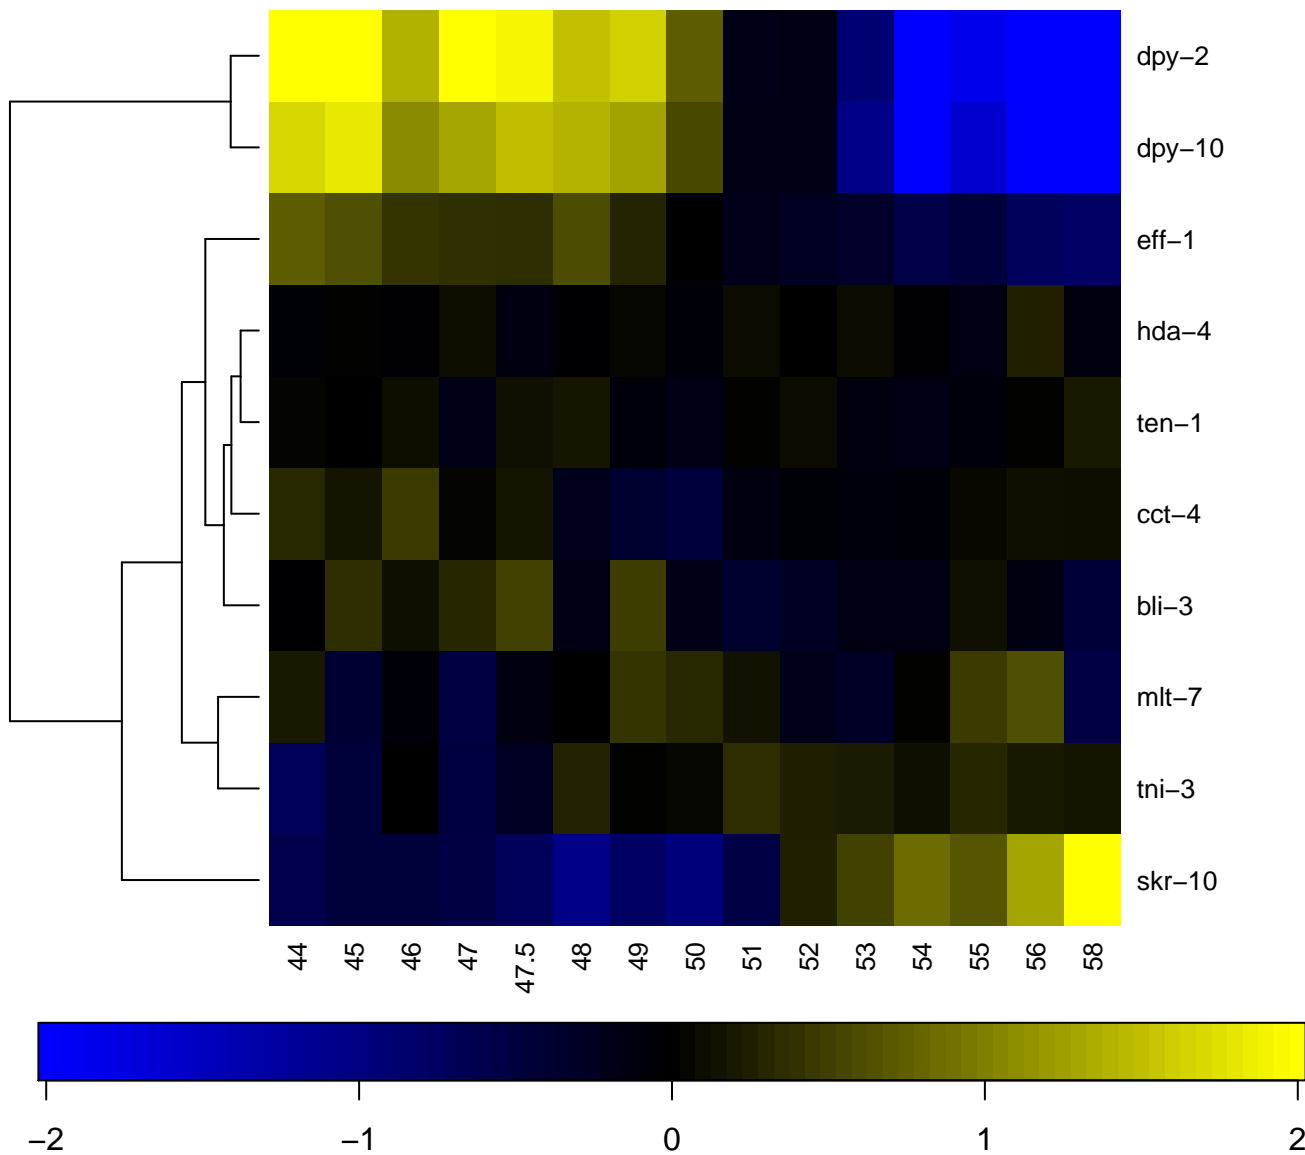







# postsynaptic membrane

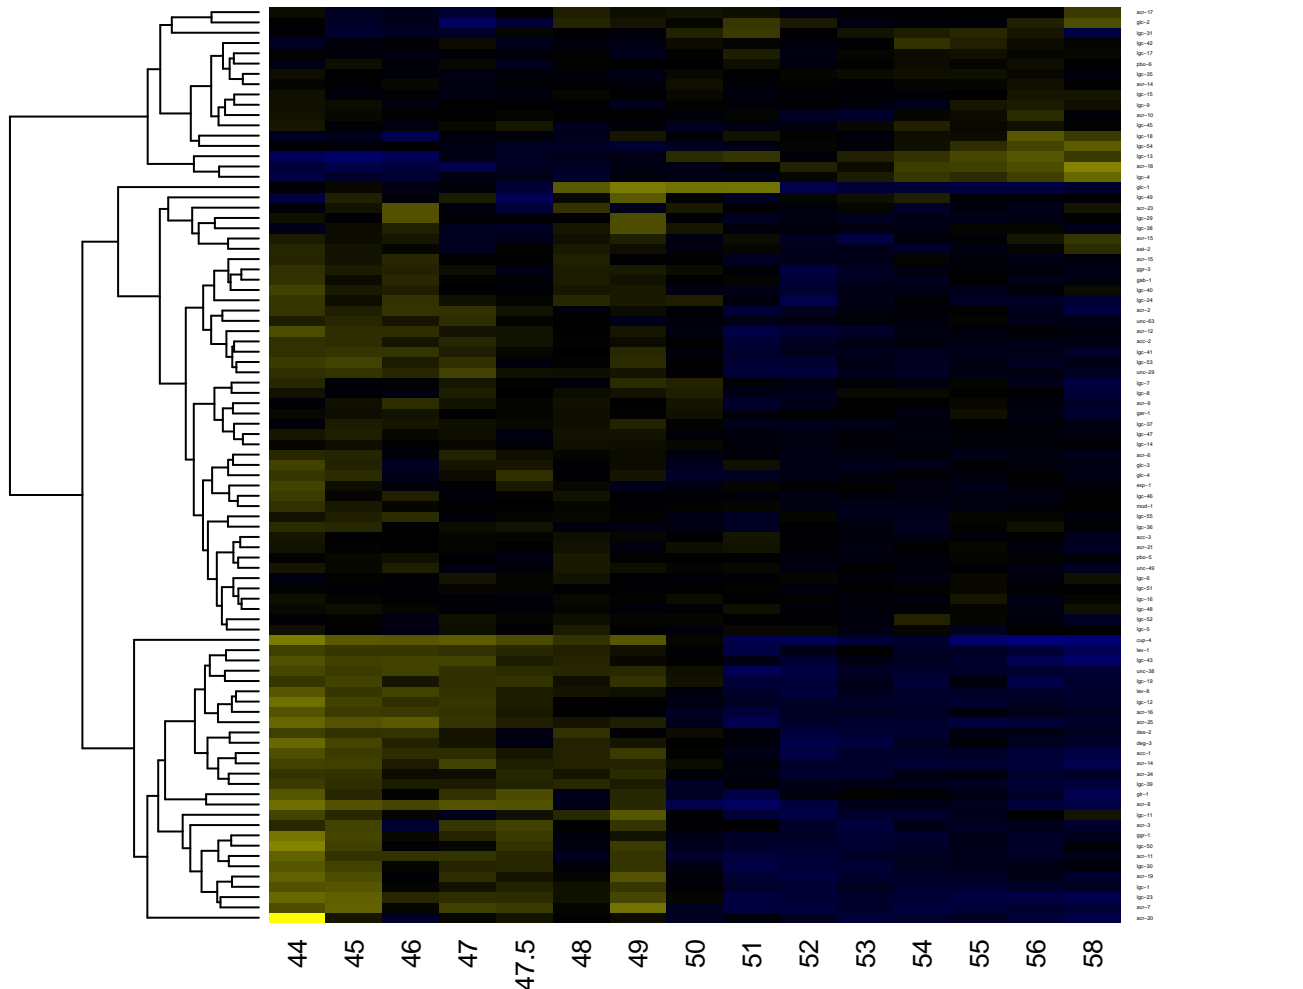

# potassium channel activity

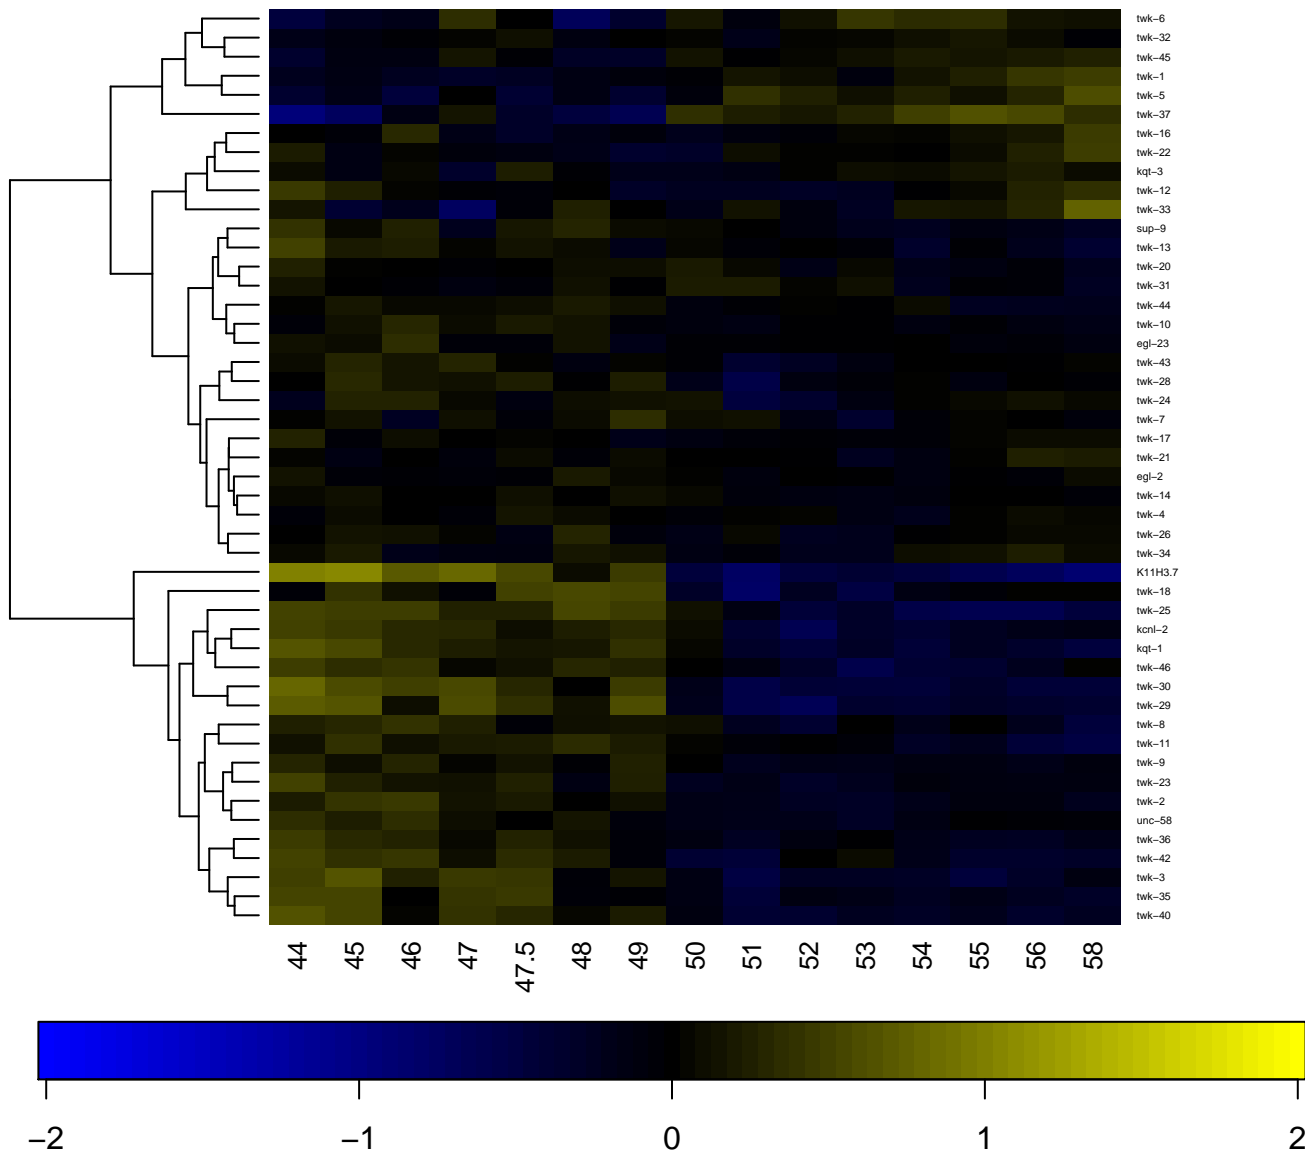

# potassium ion transport

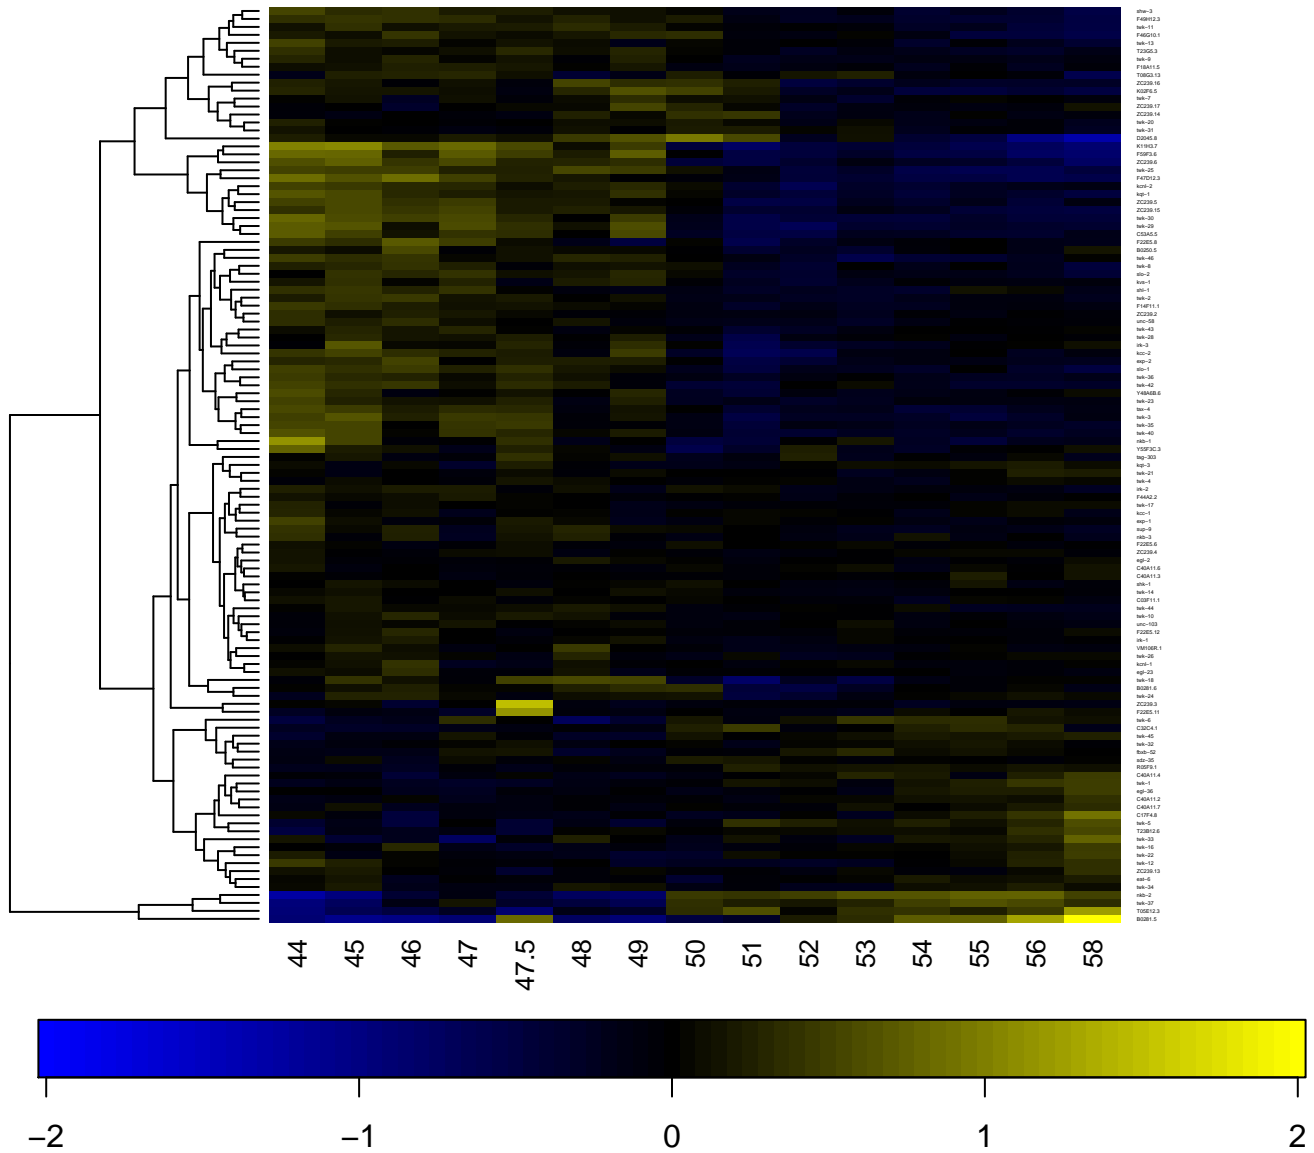







# programmed cell death

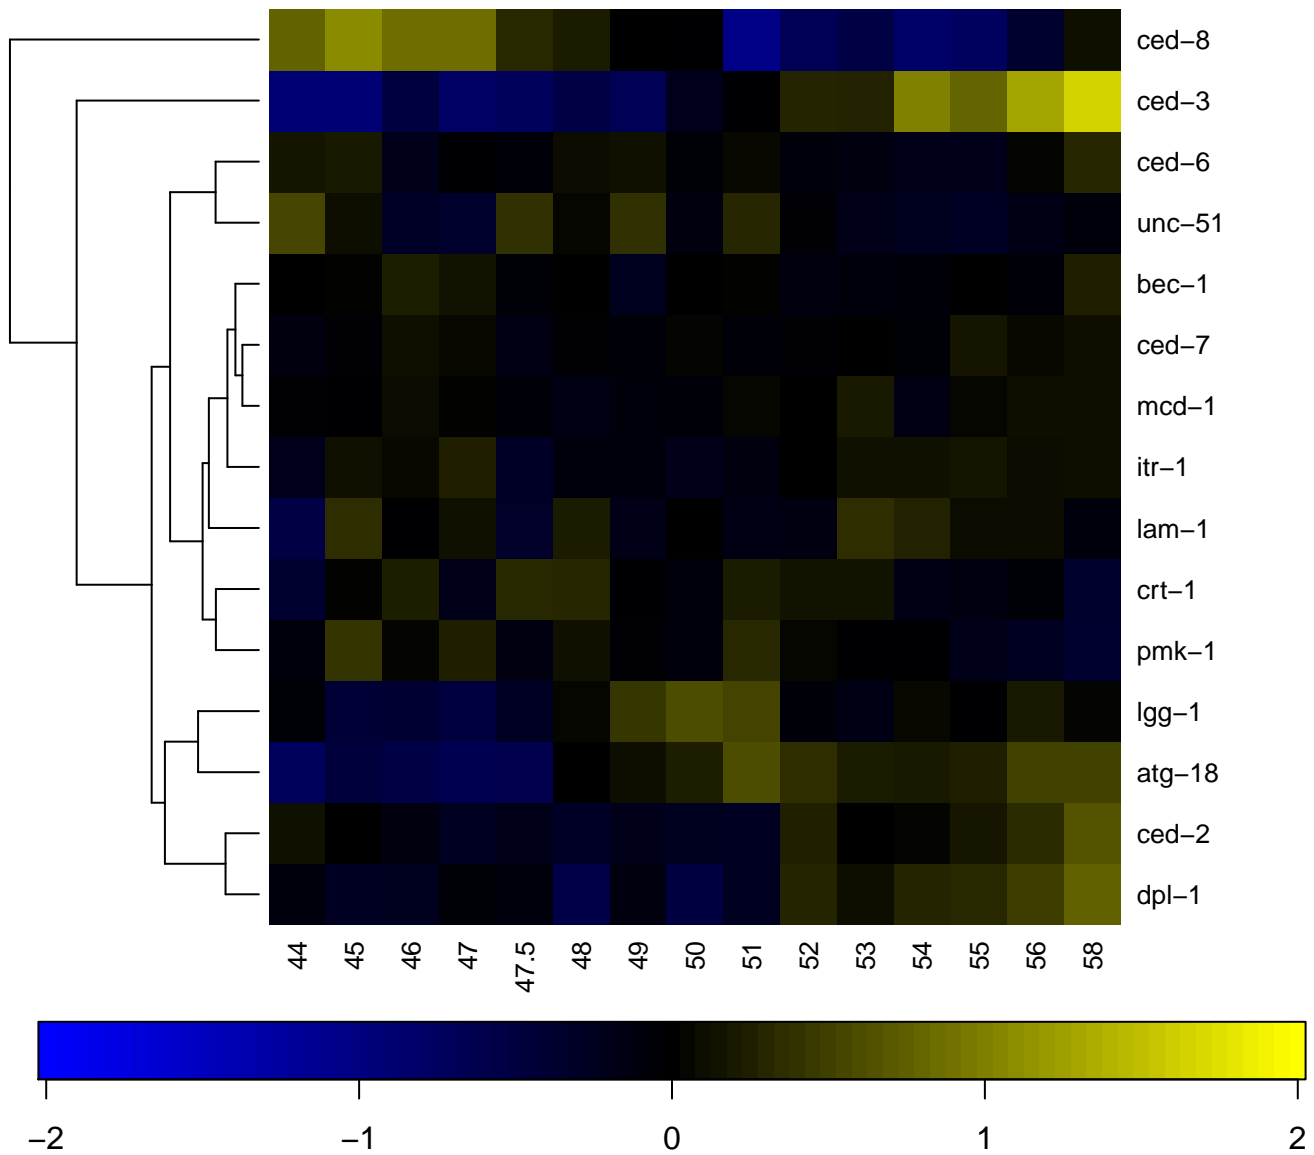

# pronuclear migration

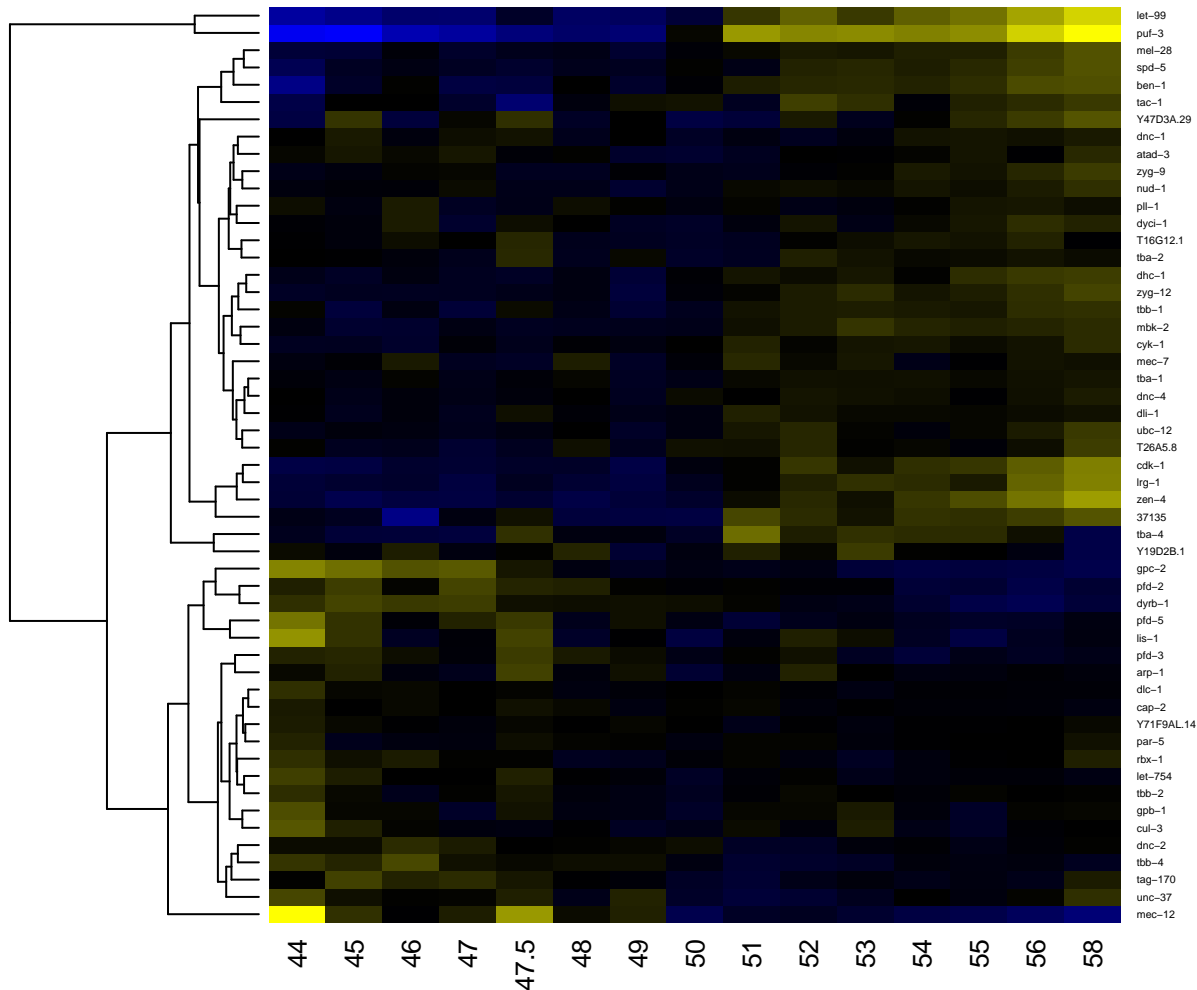





# protein

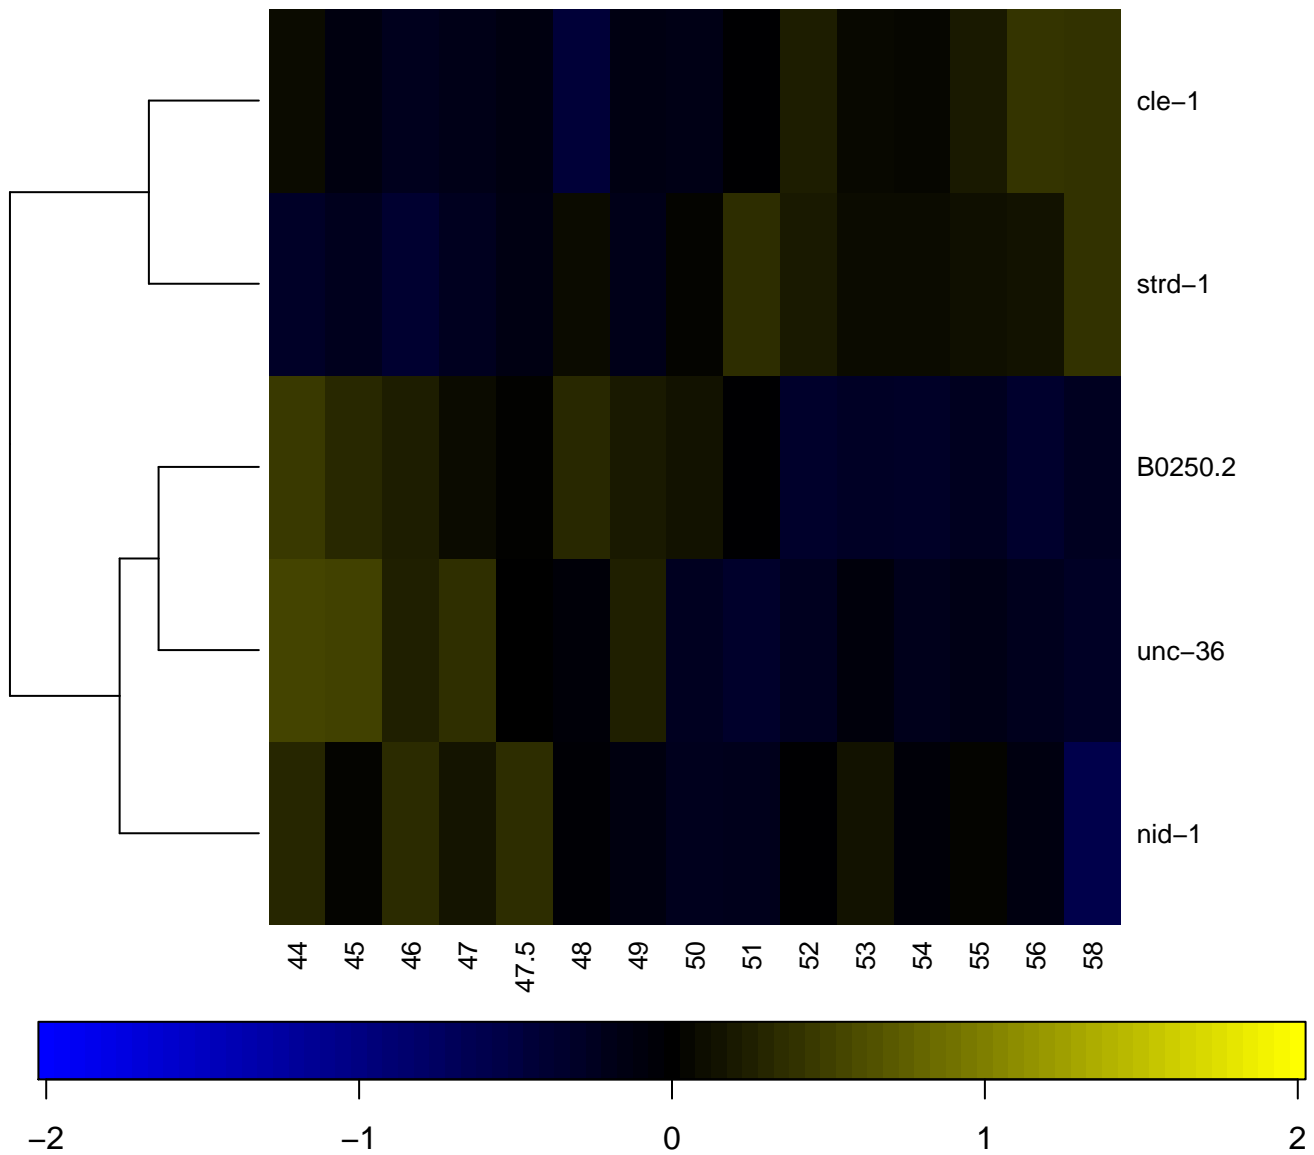

# protein amino acid autophosphorylation

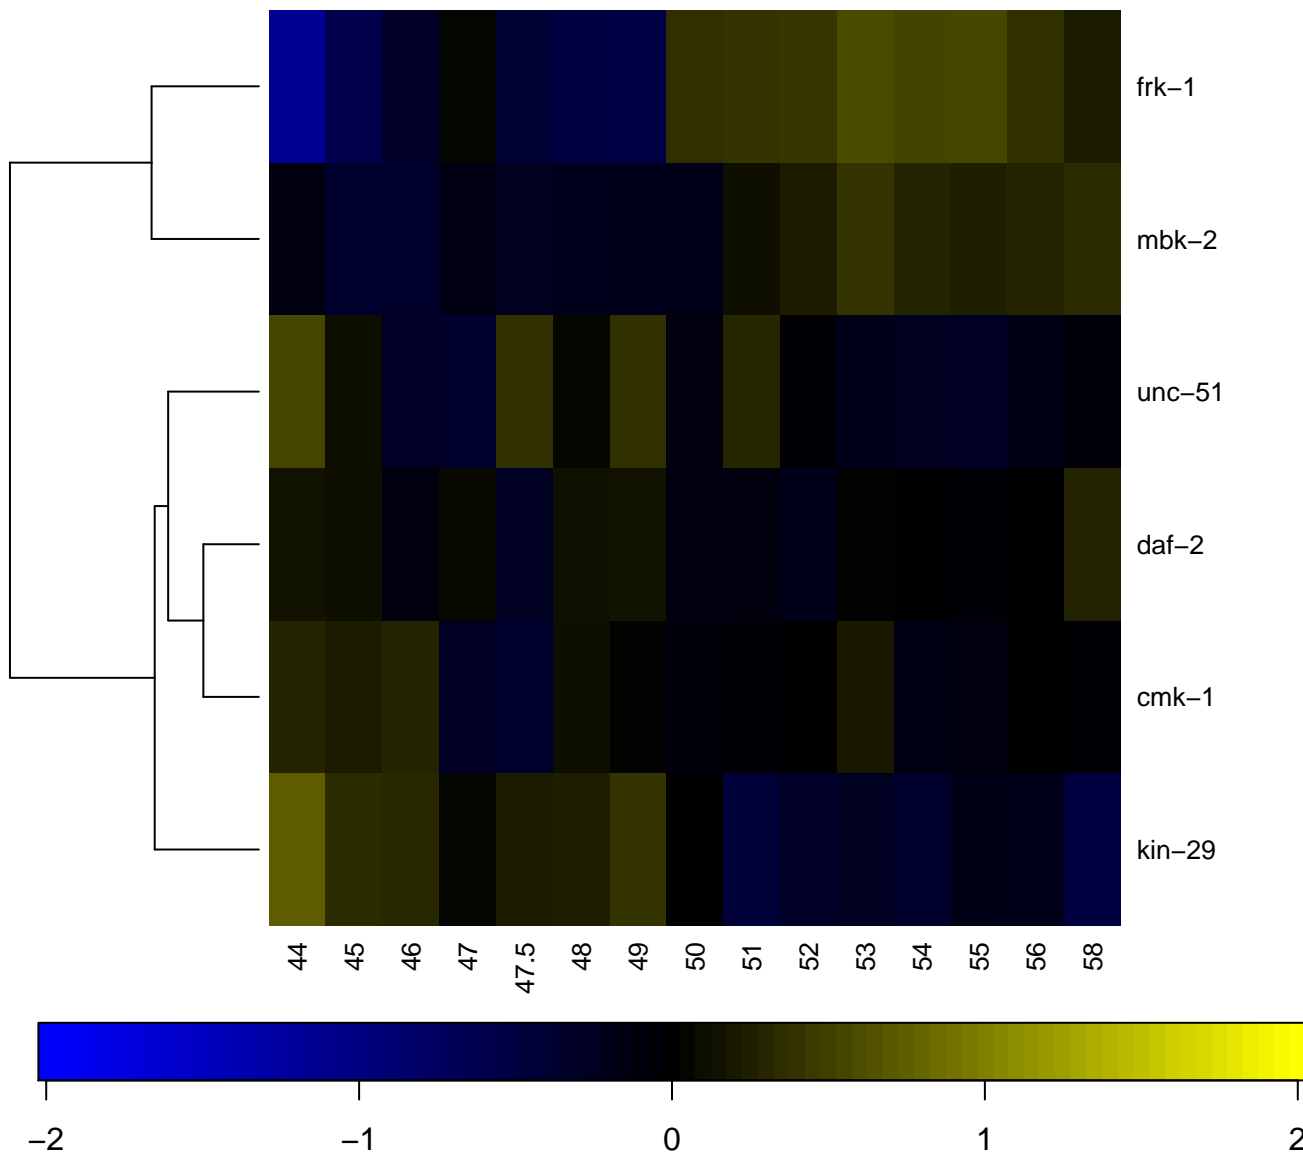





# protein amino acid glycosylation

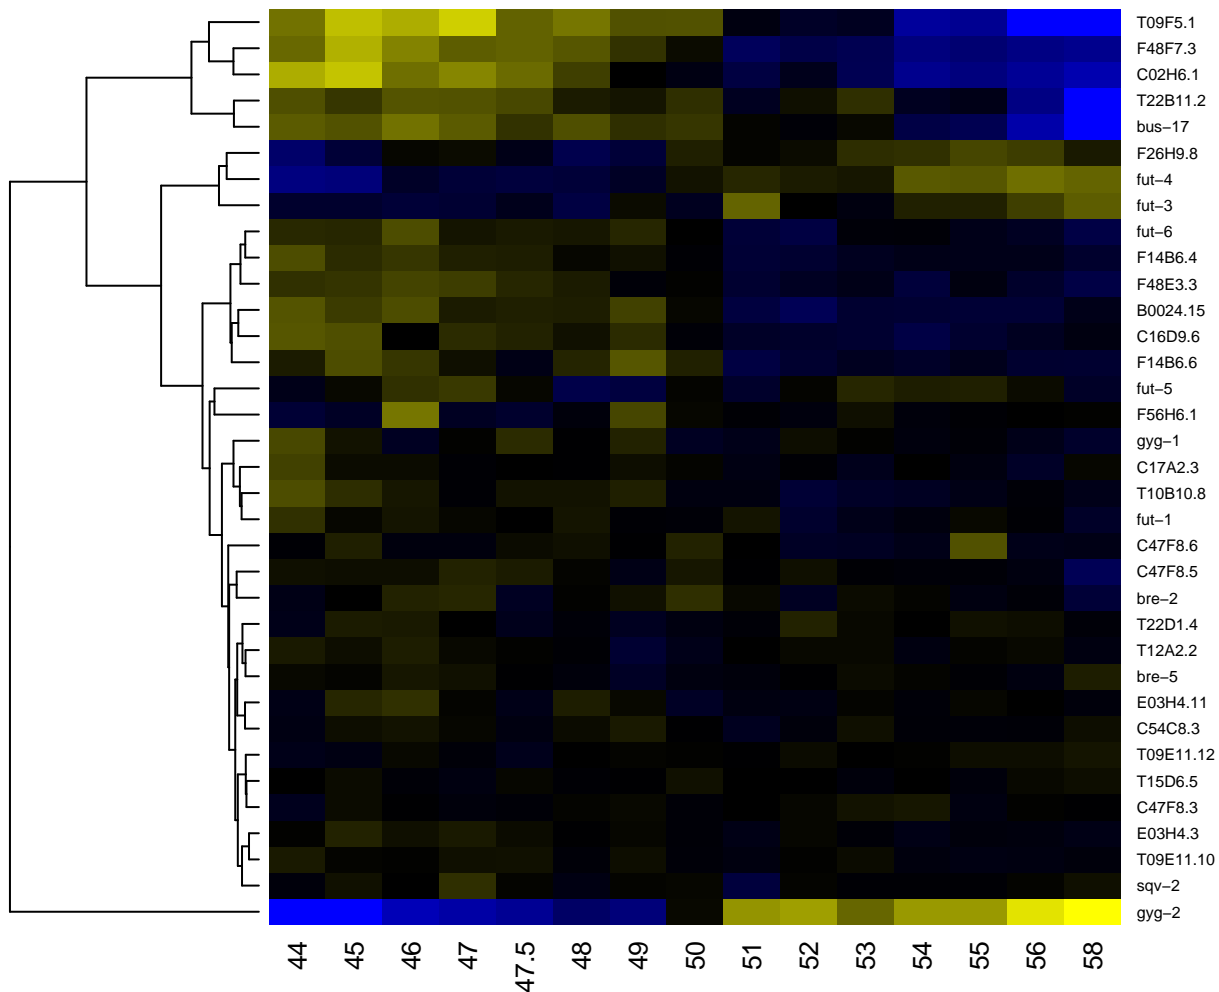

# protein amino acid methylation

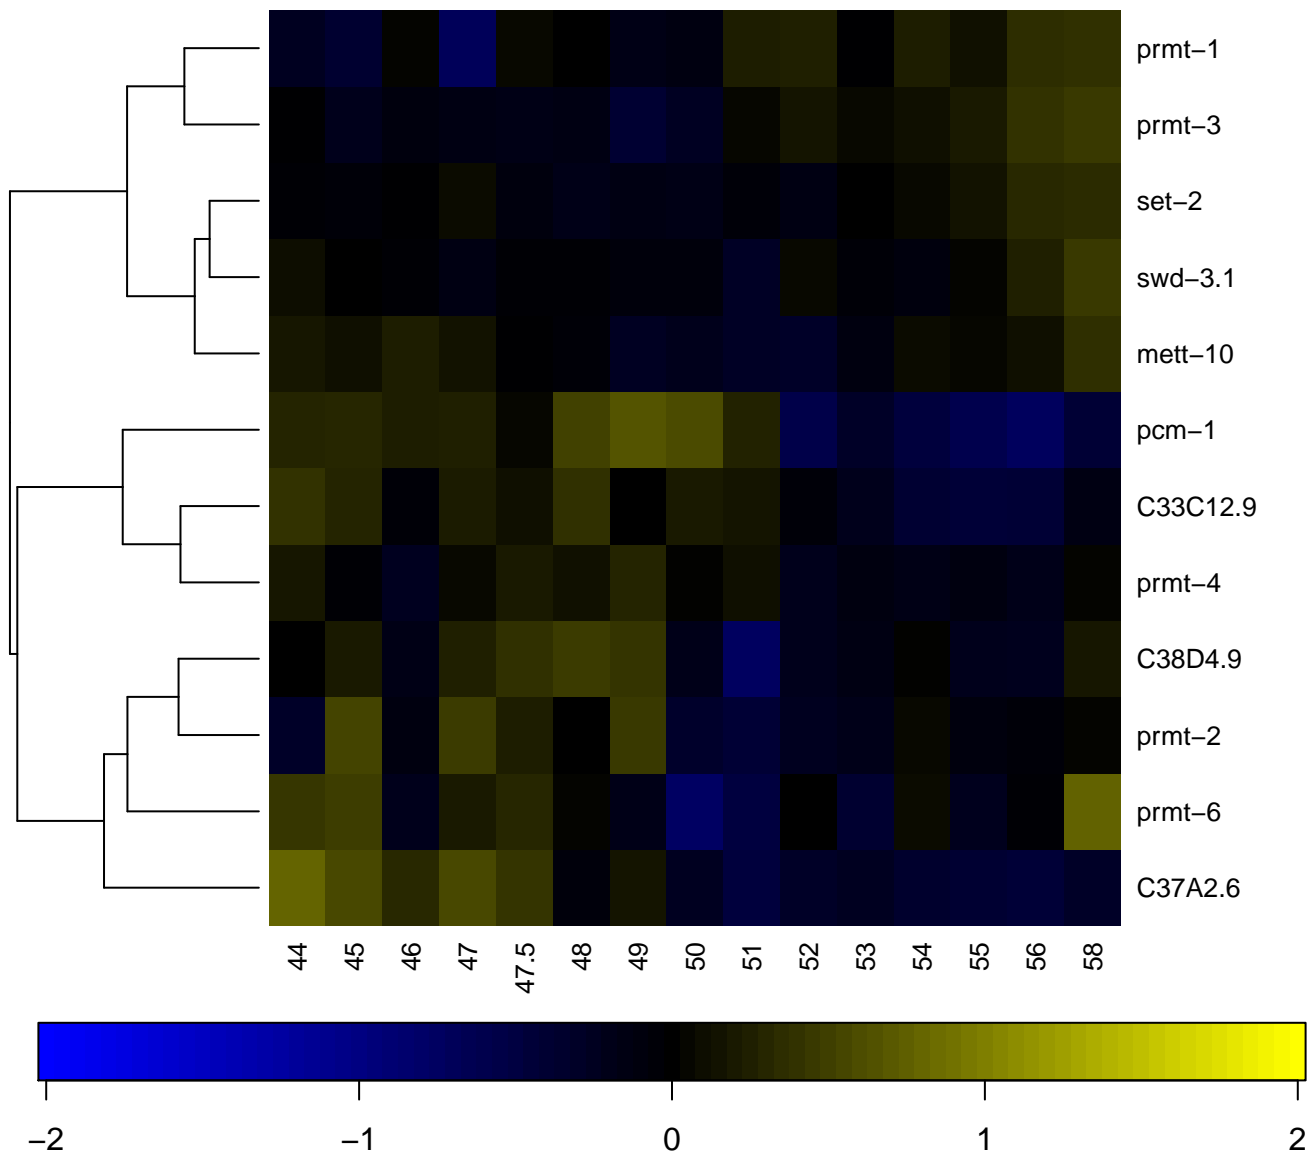

# protein amino acid phosphorylation

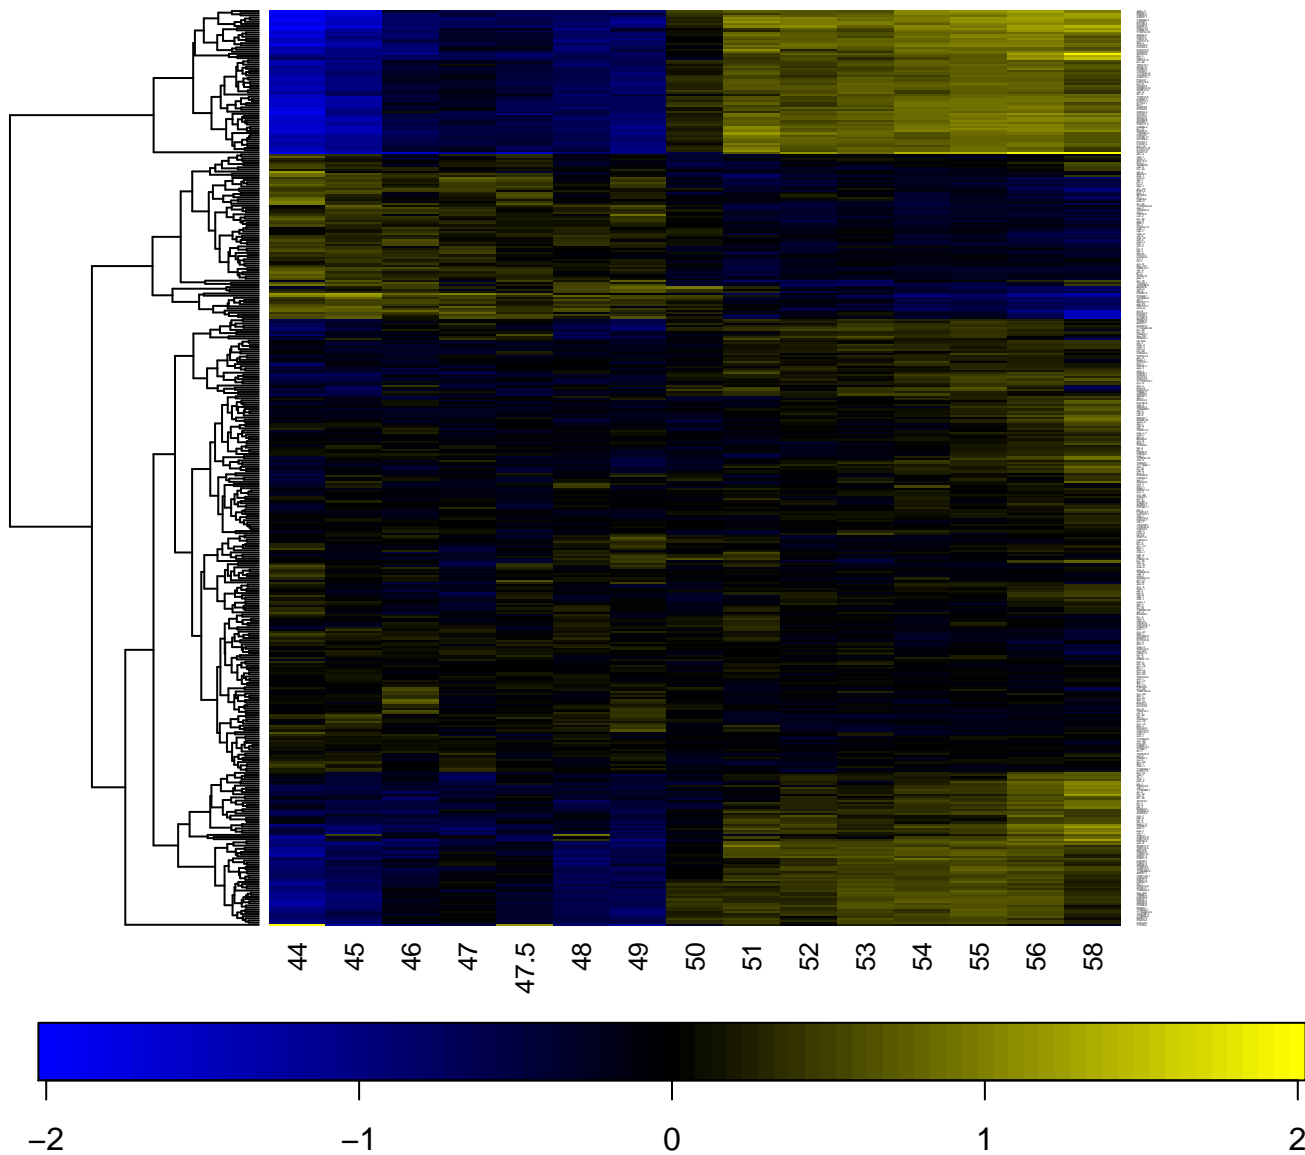

# protein binding

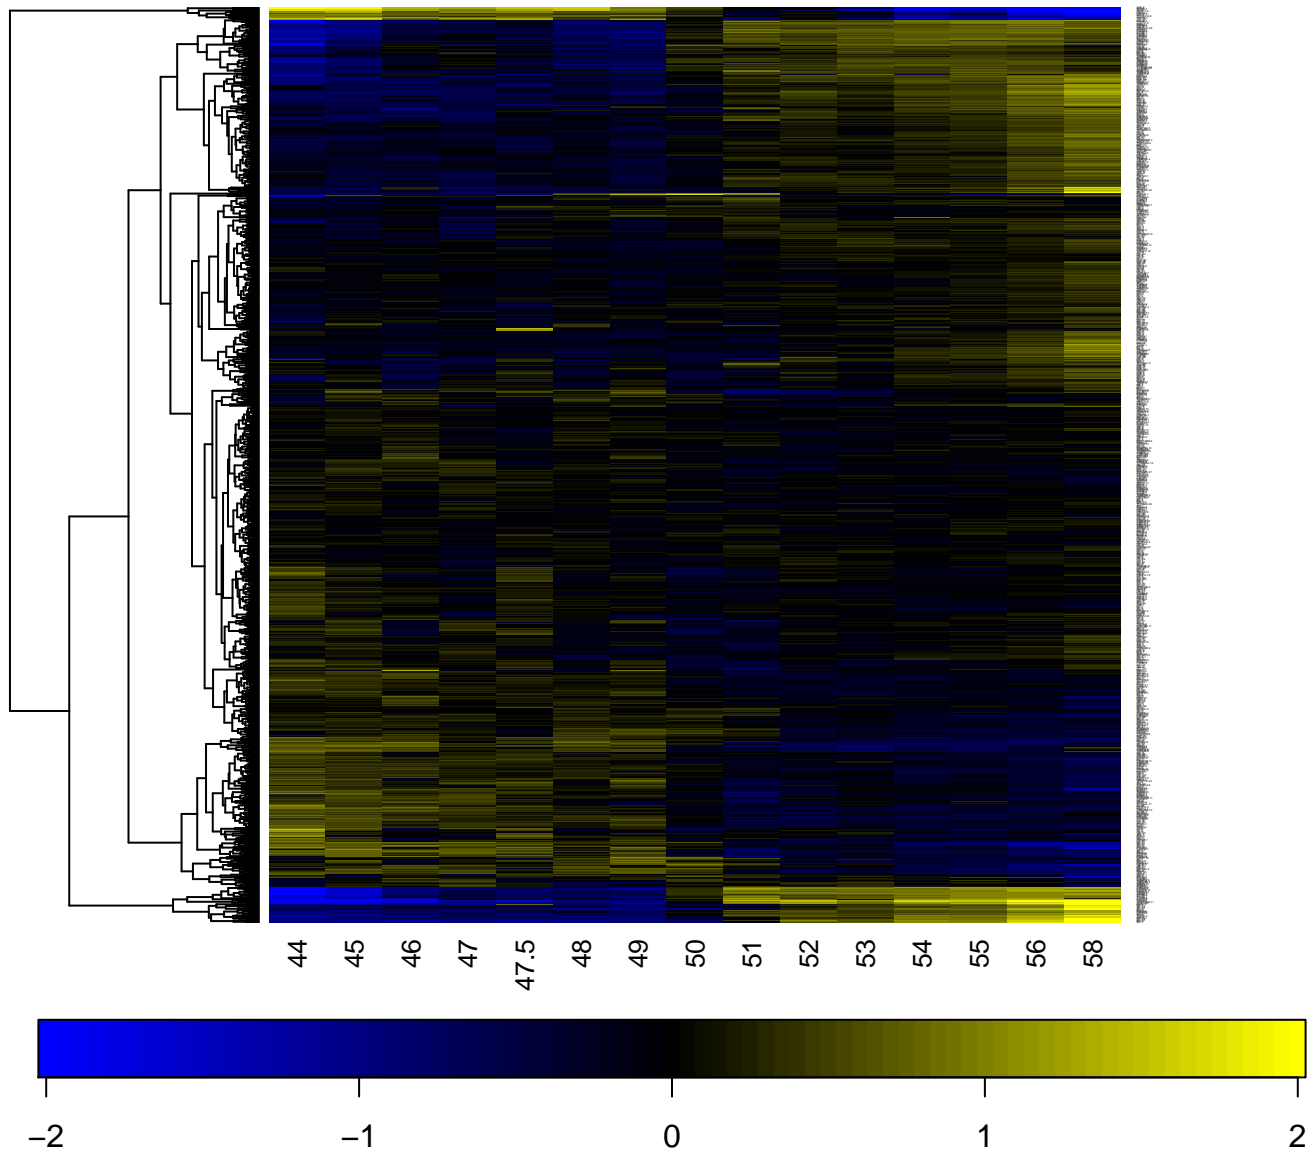





# protein catabolic process

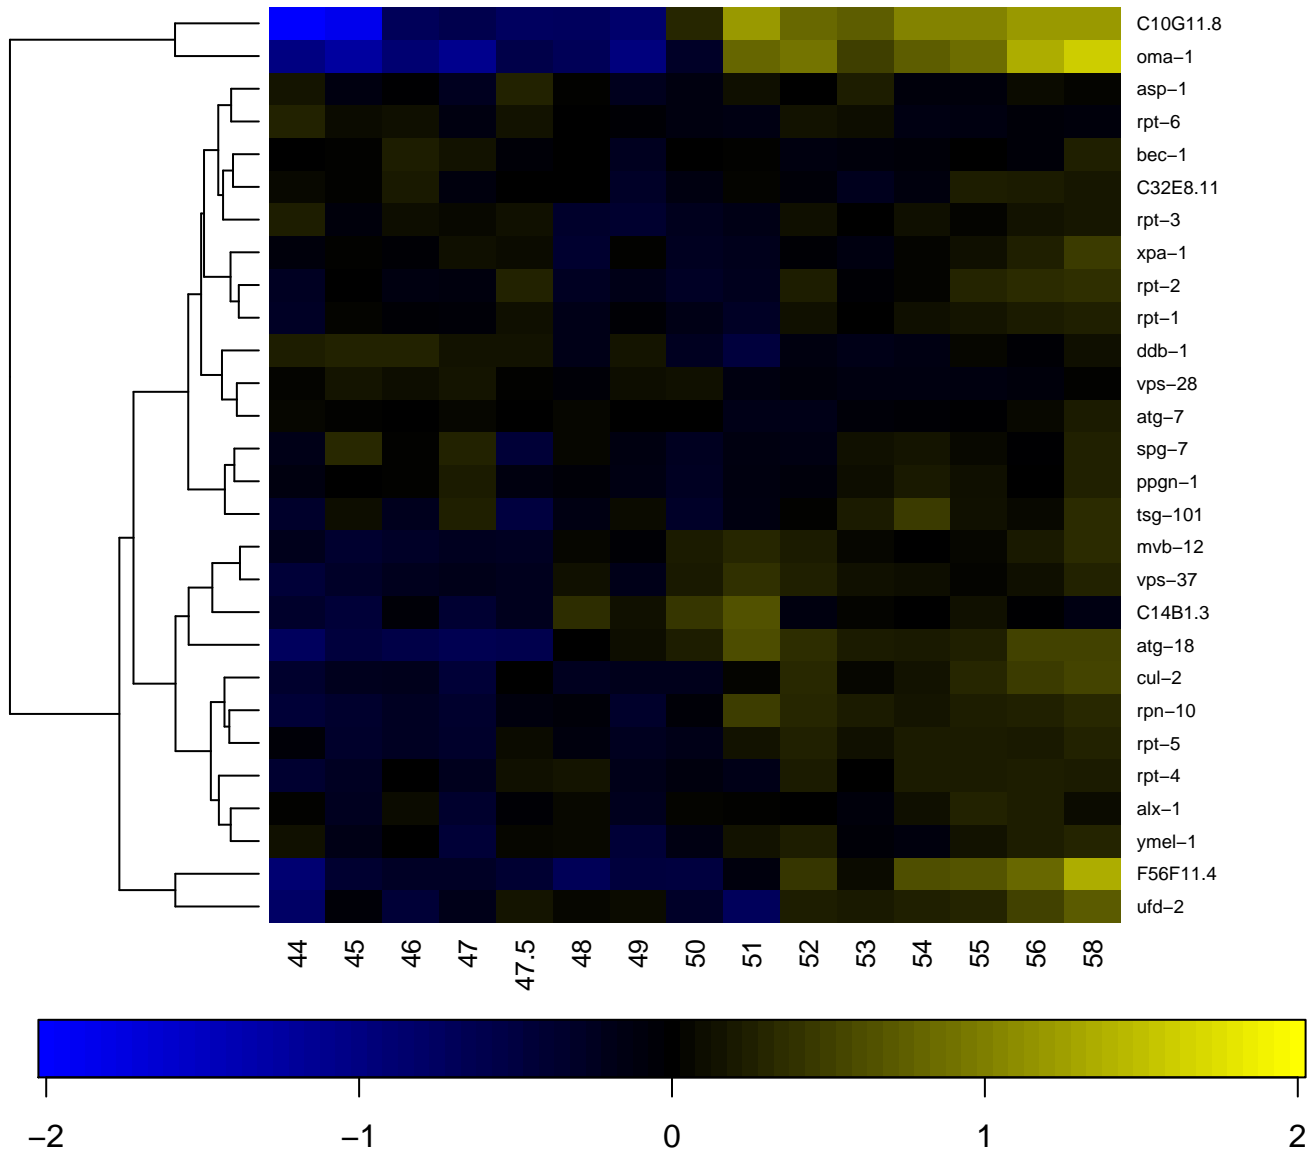

# protein complex

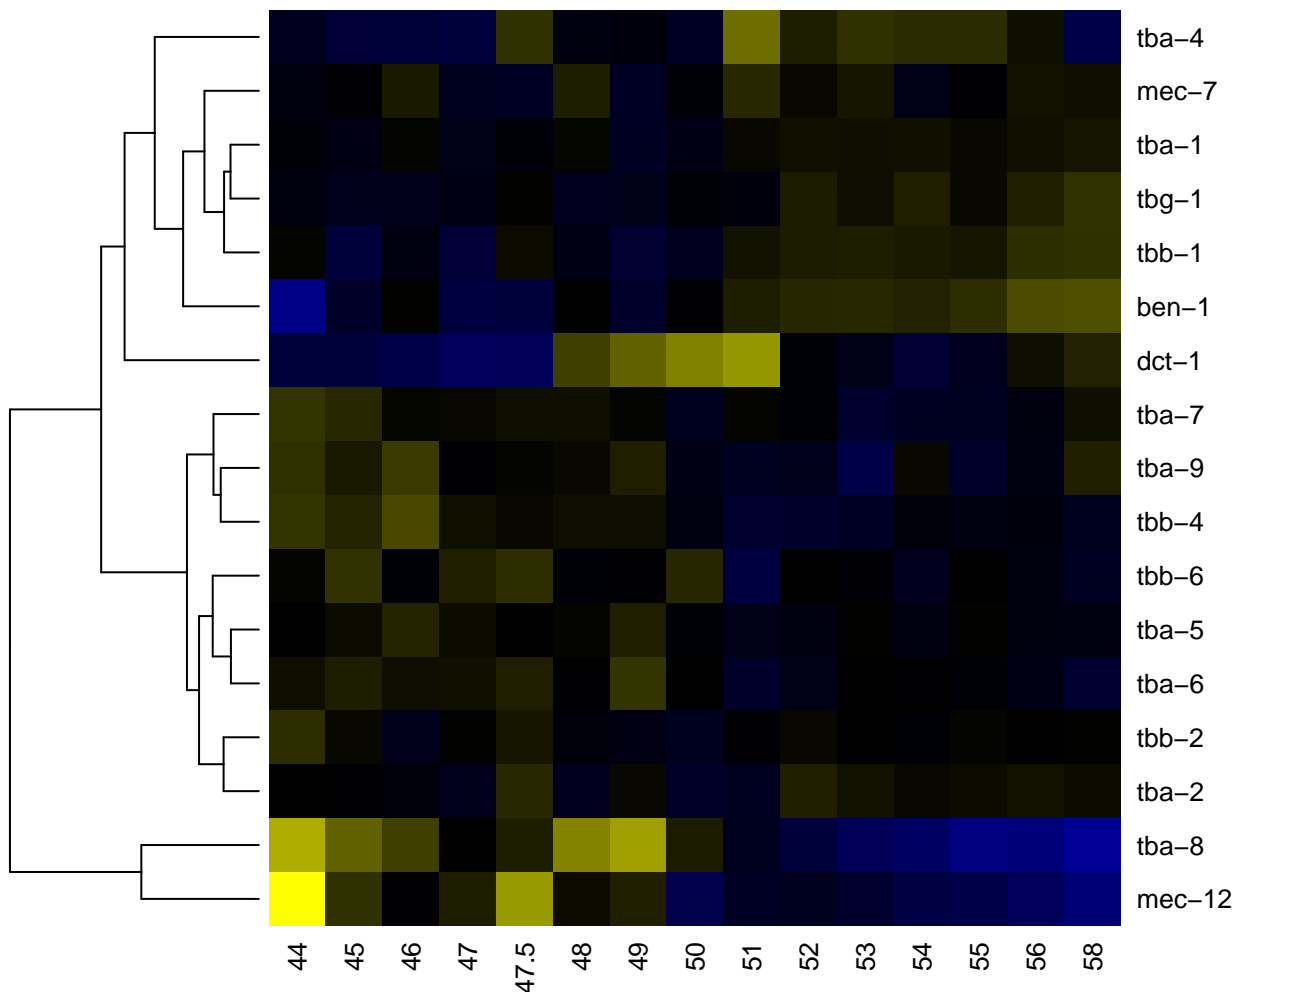



# protein dimerization activity

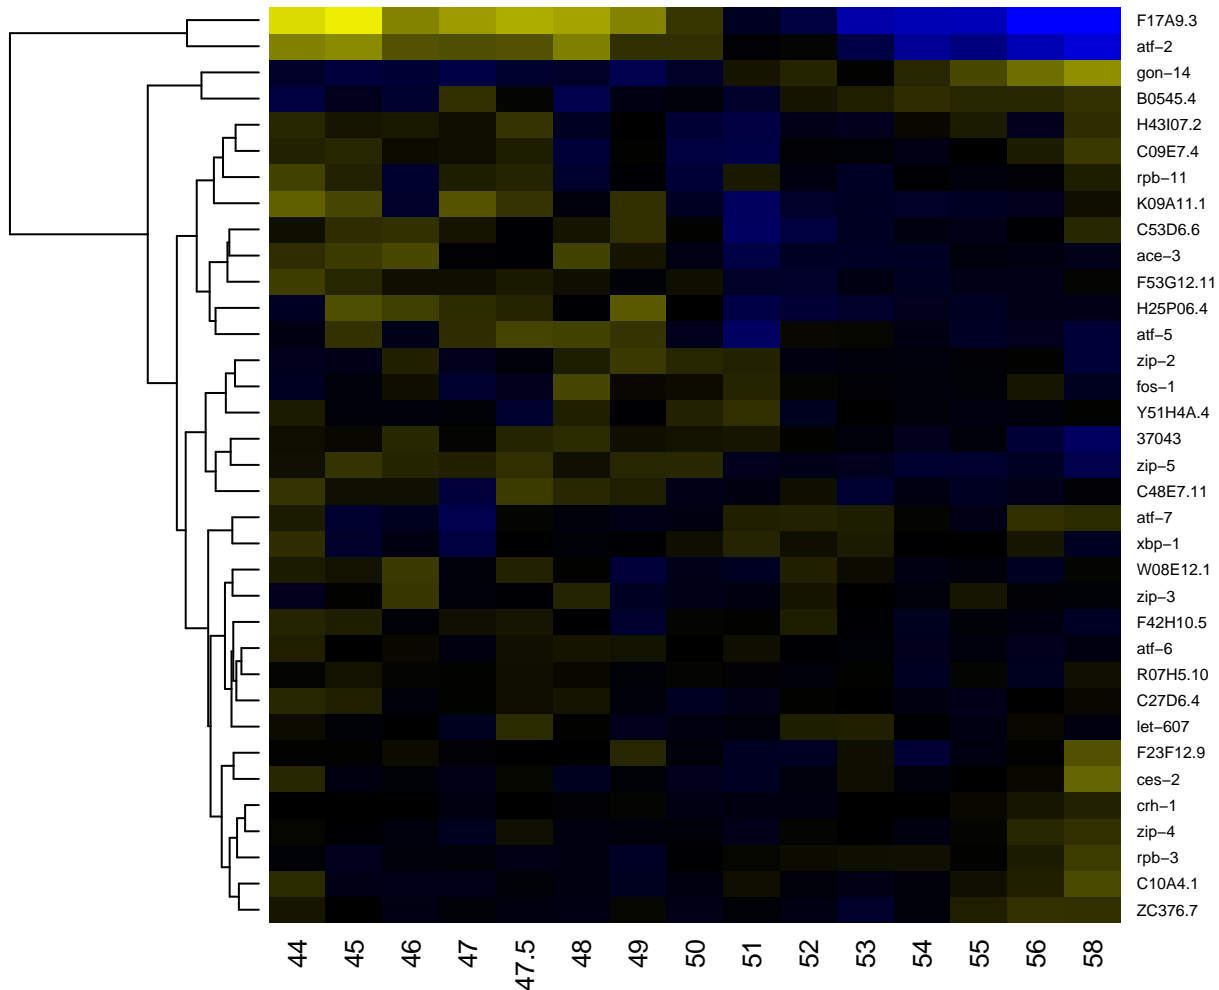



# protein domain specific binding

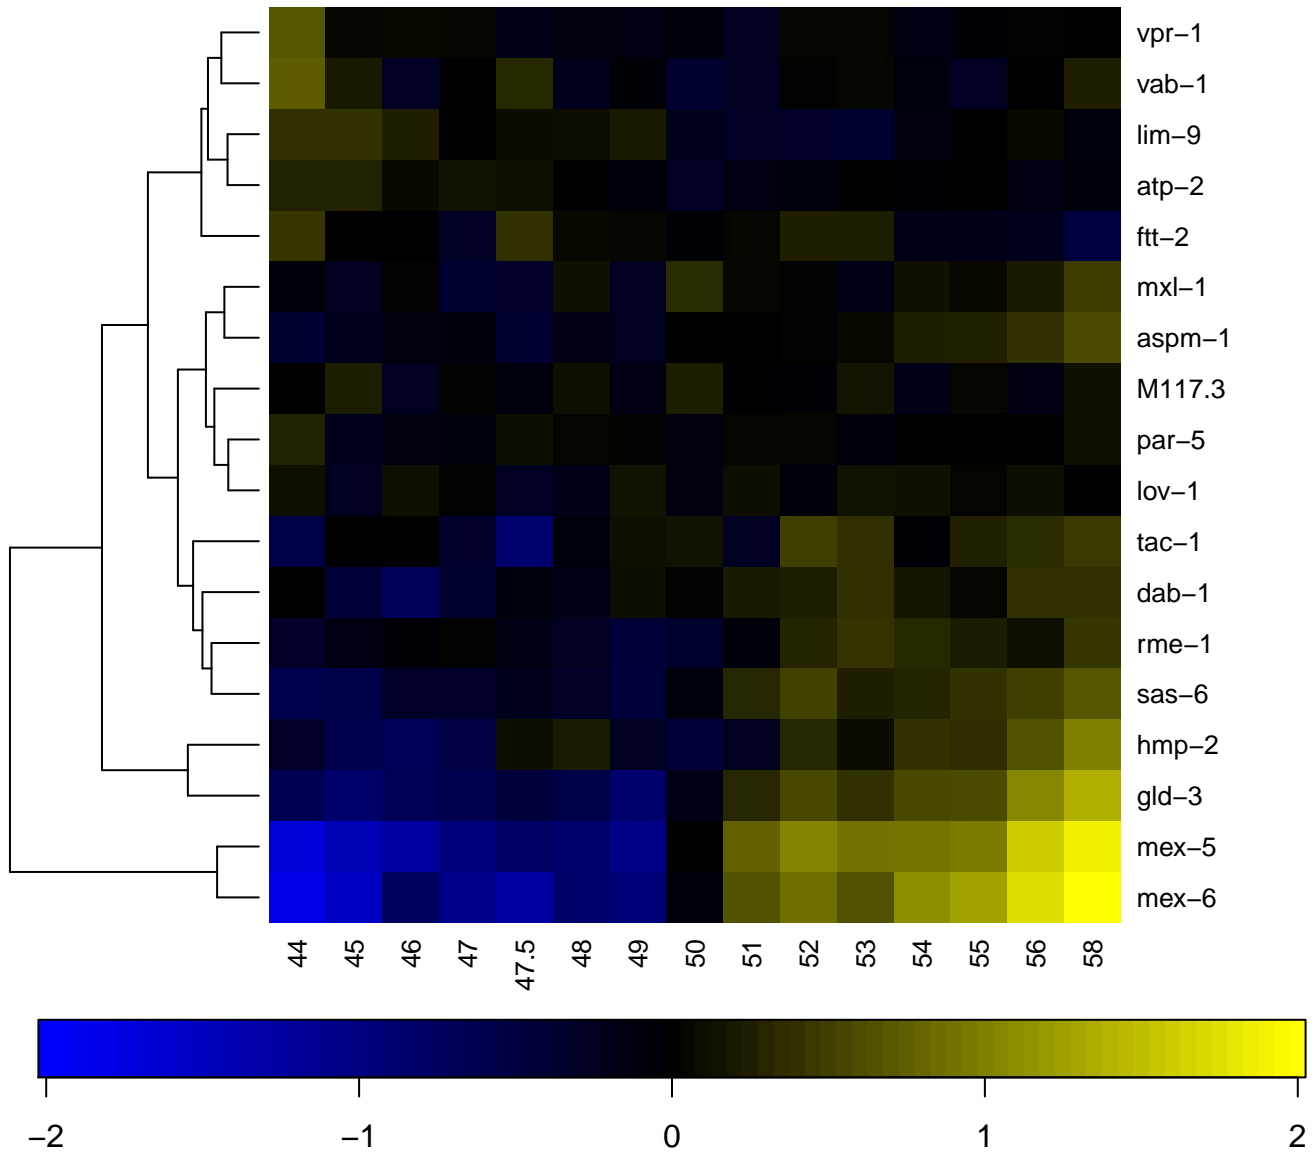

# protein folding

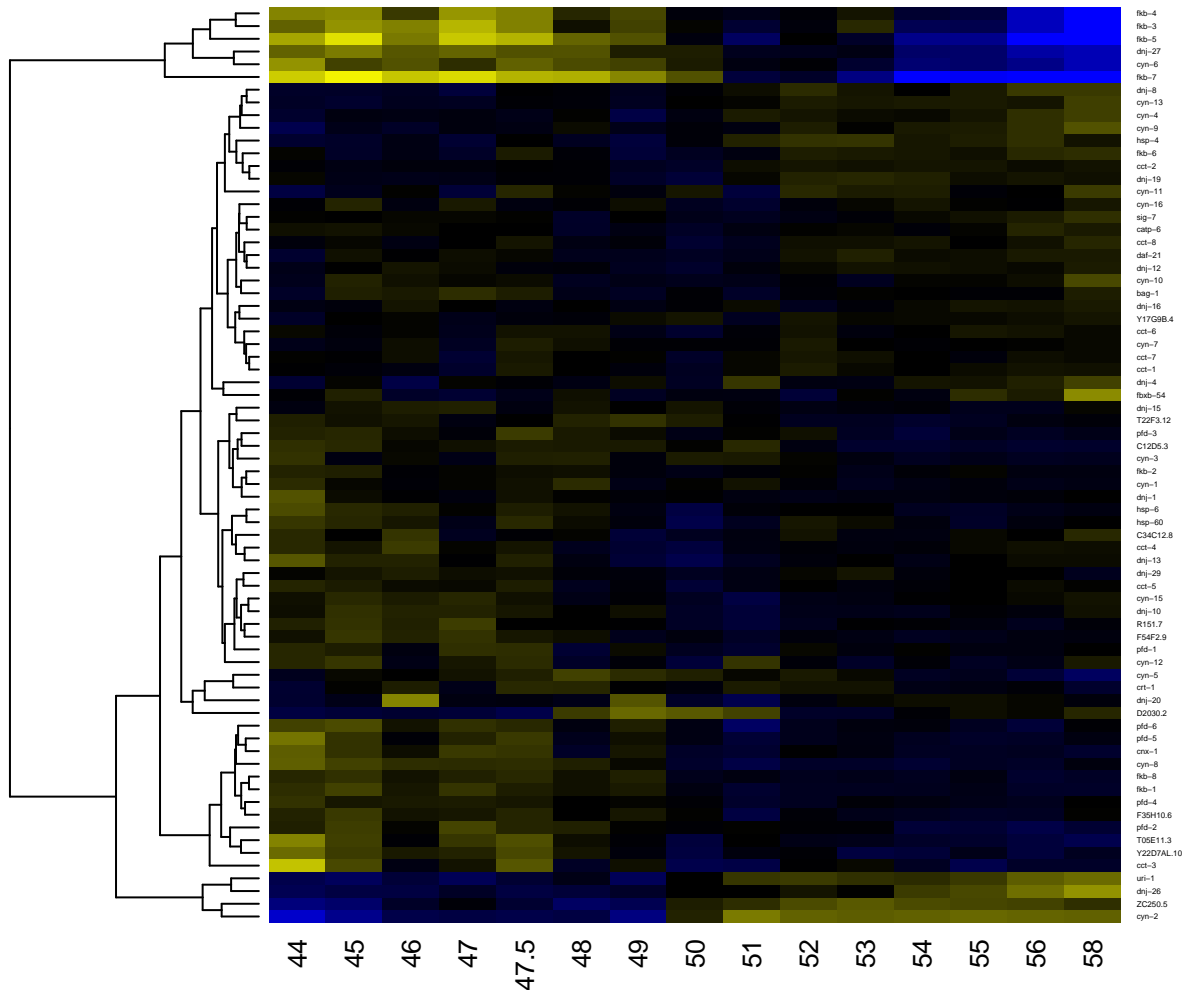

-2

-1

0

1

2



# protein homodimerization activity

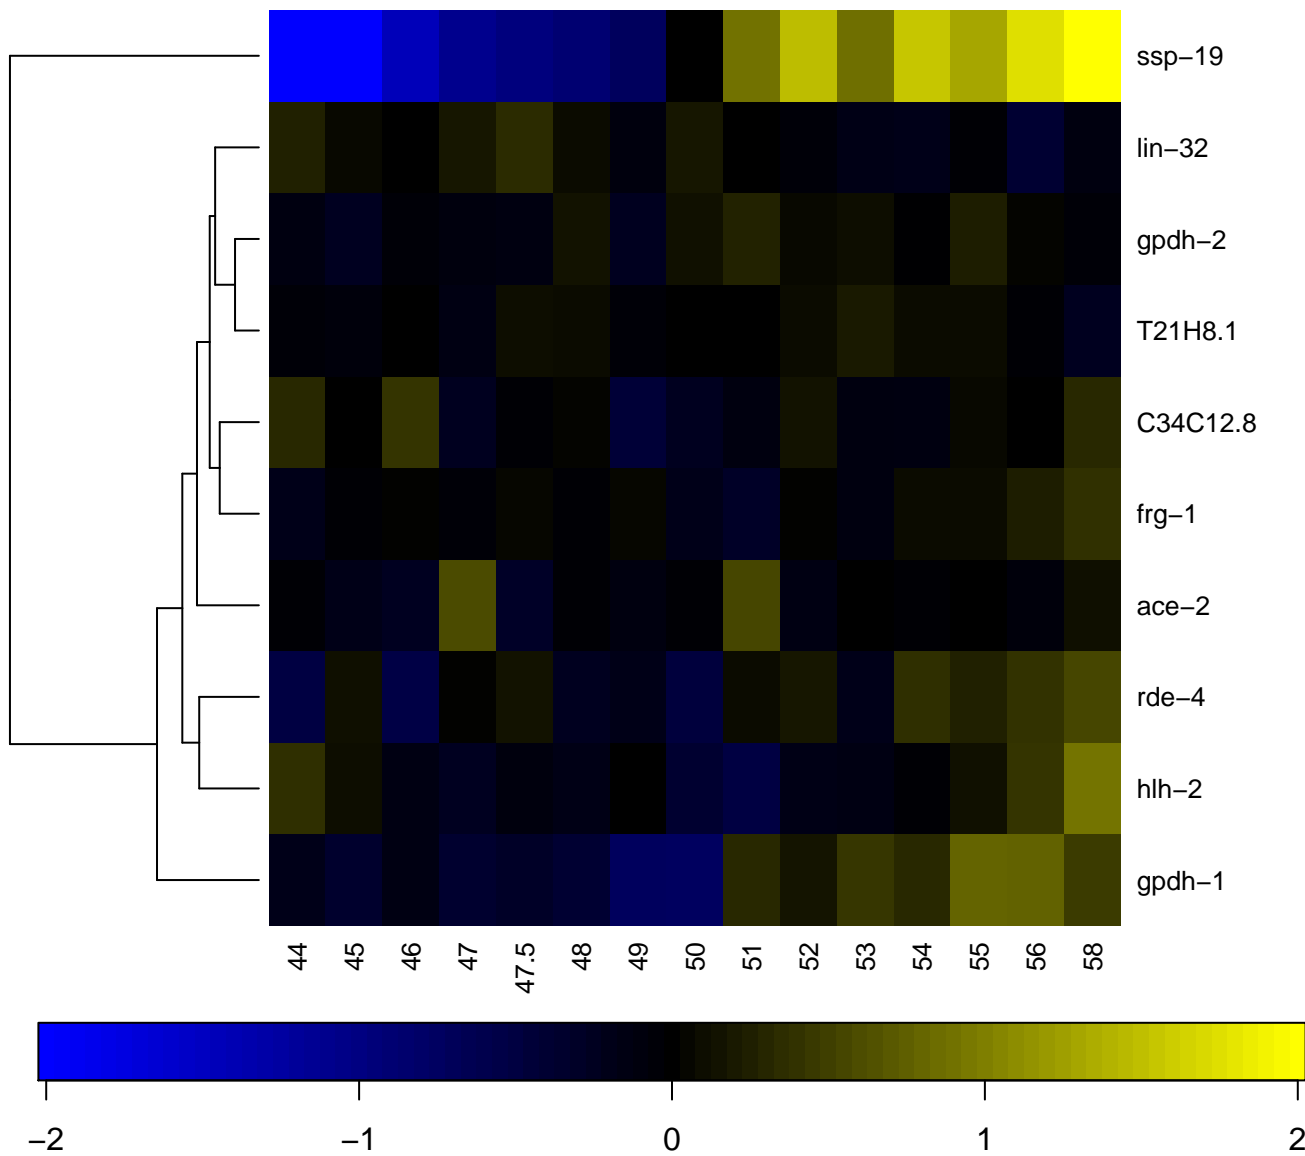

# protein kinase activity

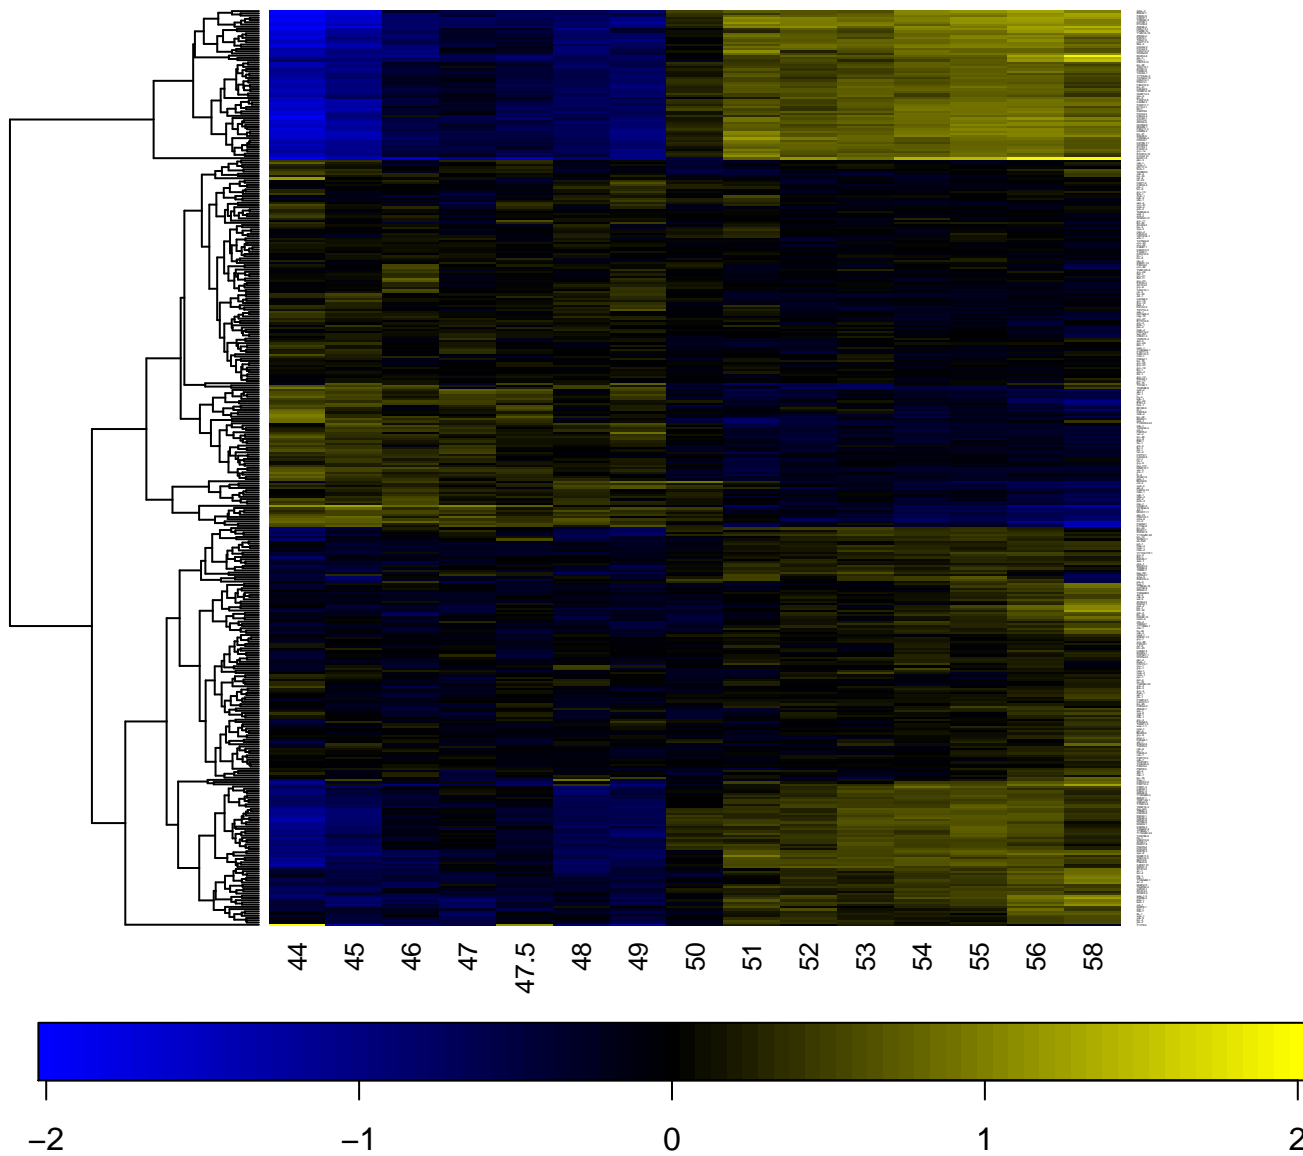

# protein kinase binding

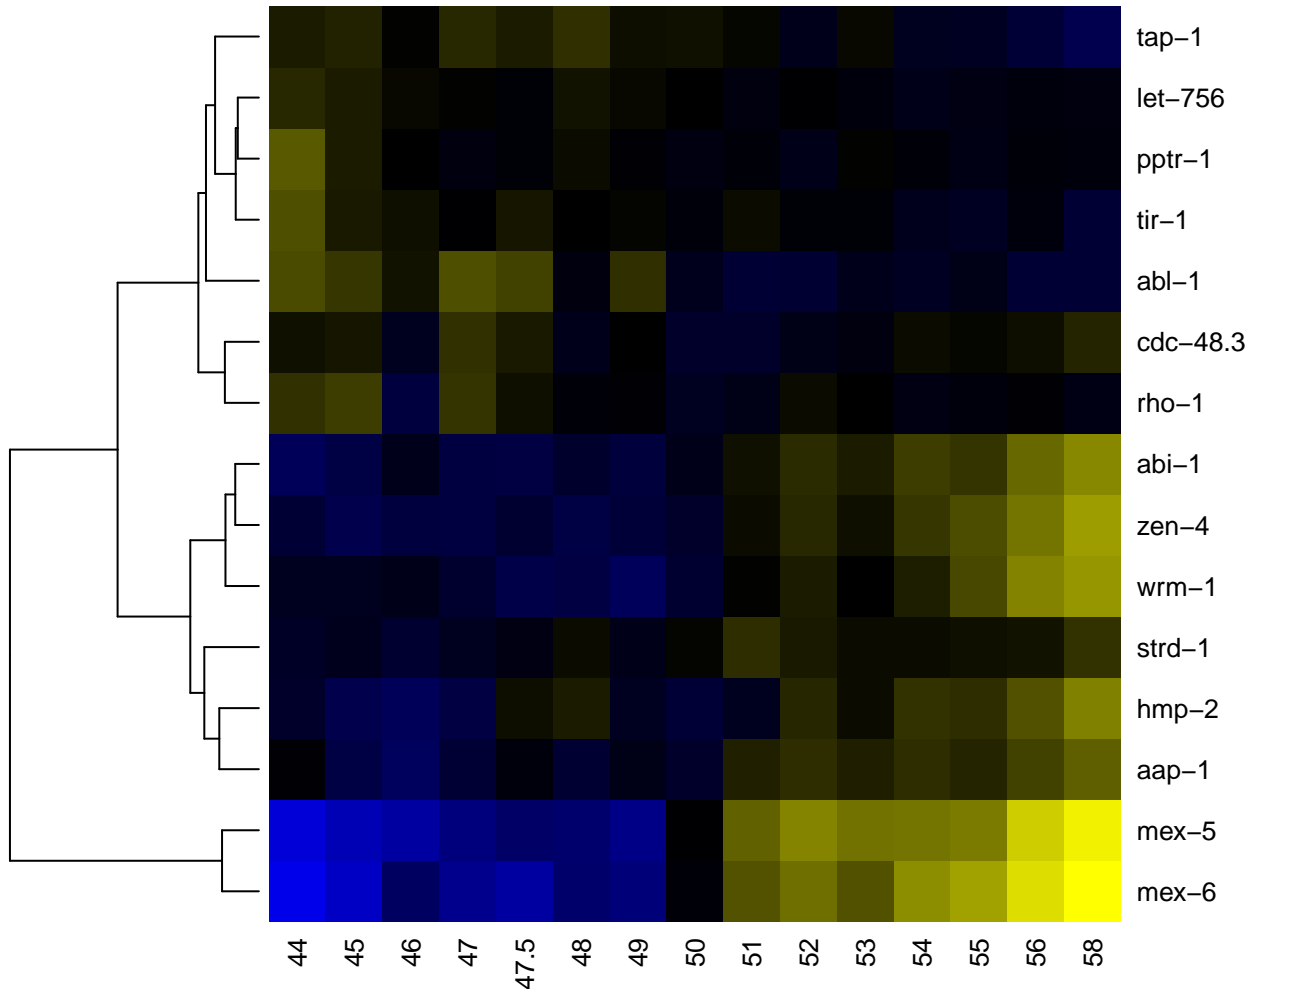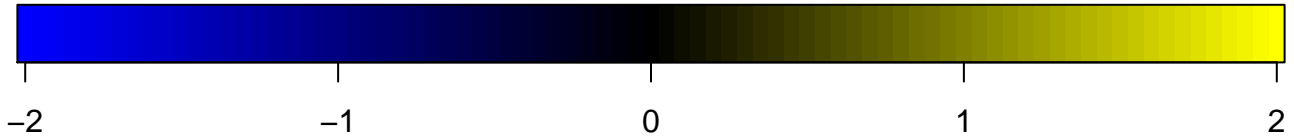





# protein localization

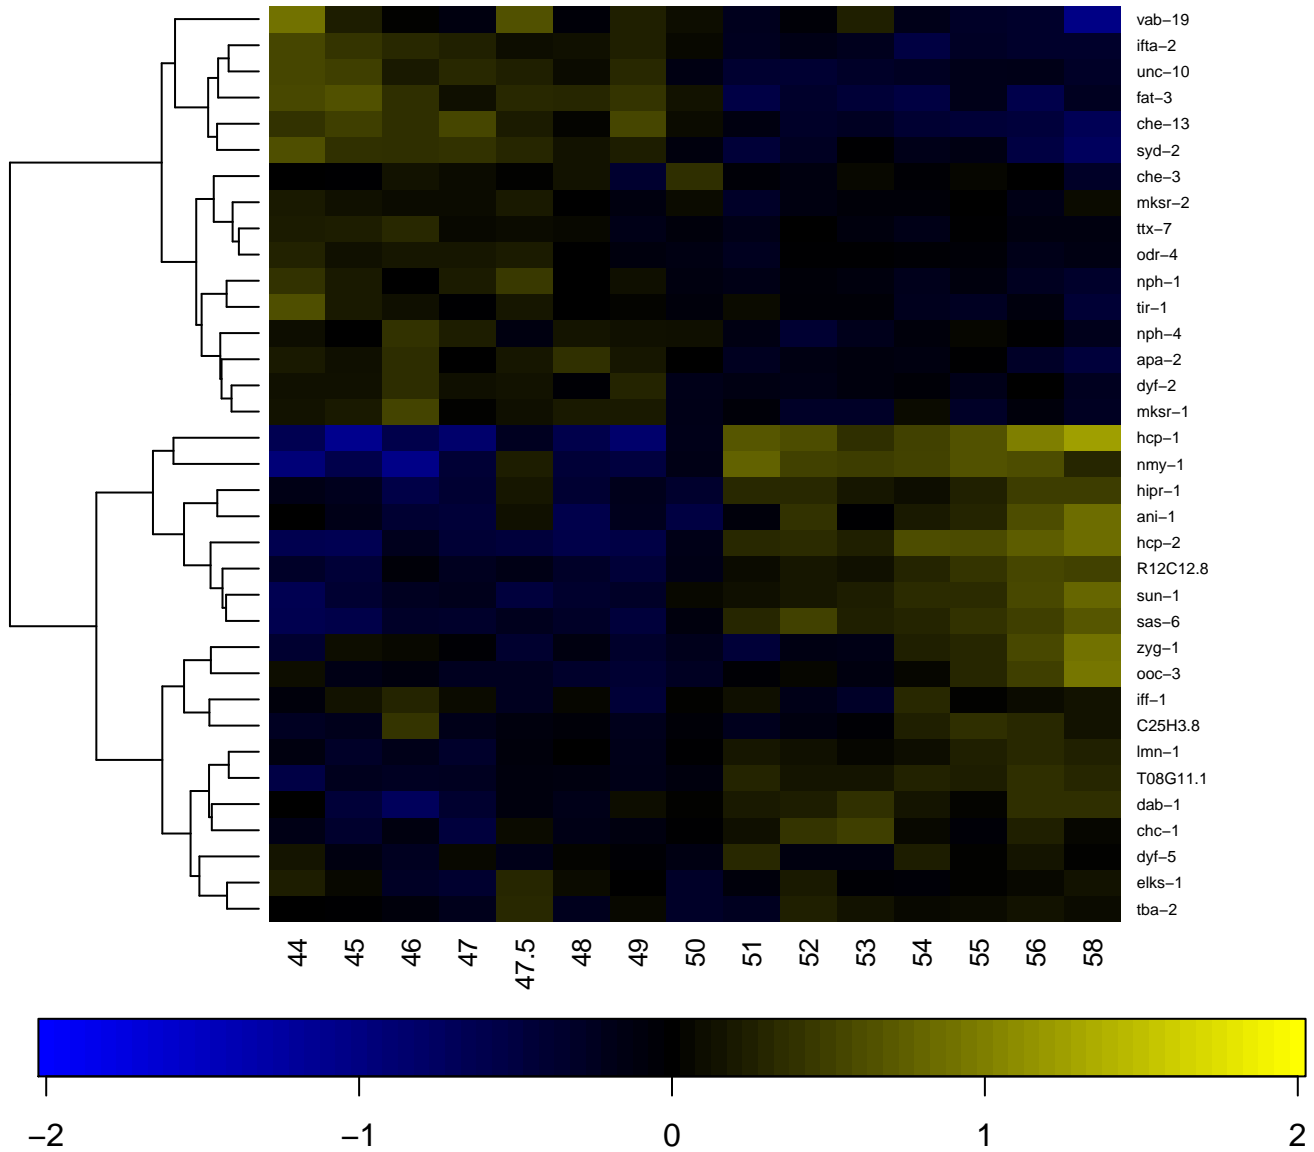

# protein localization in organelle

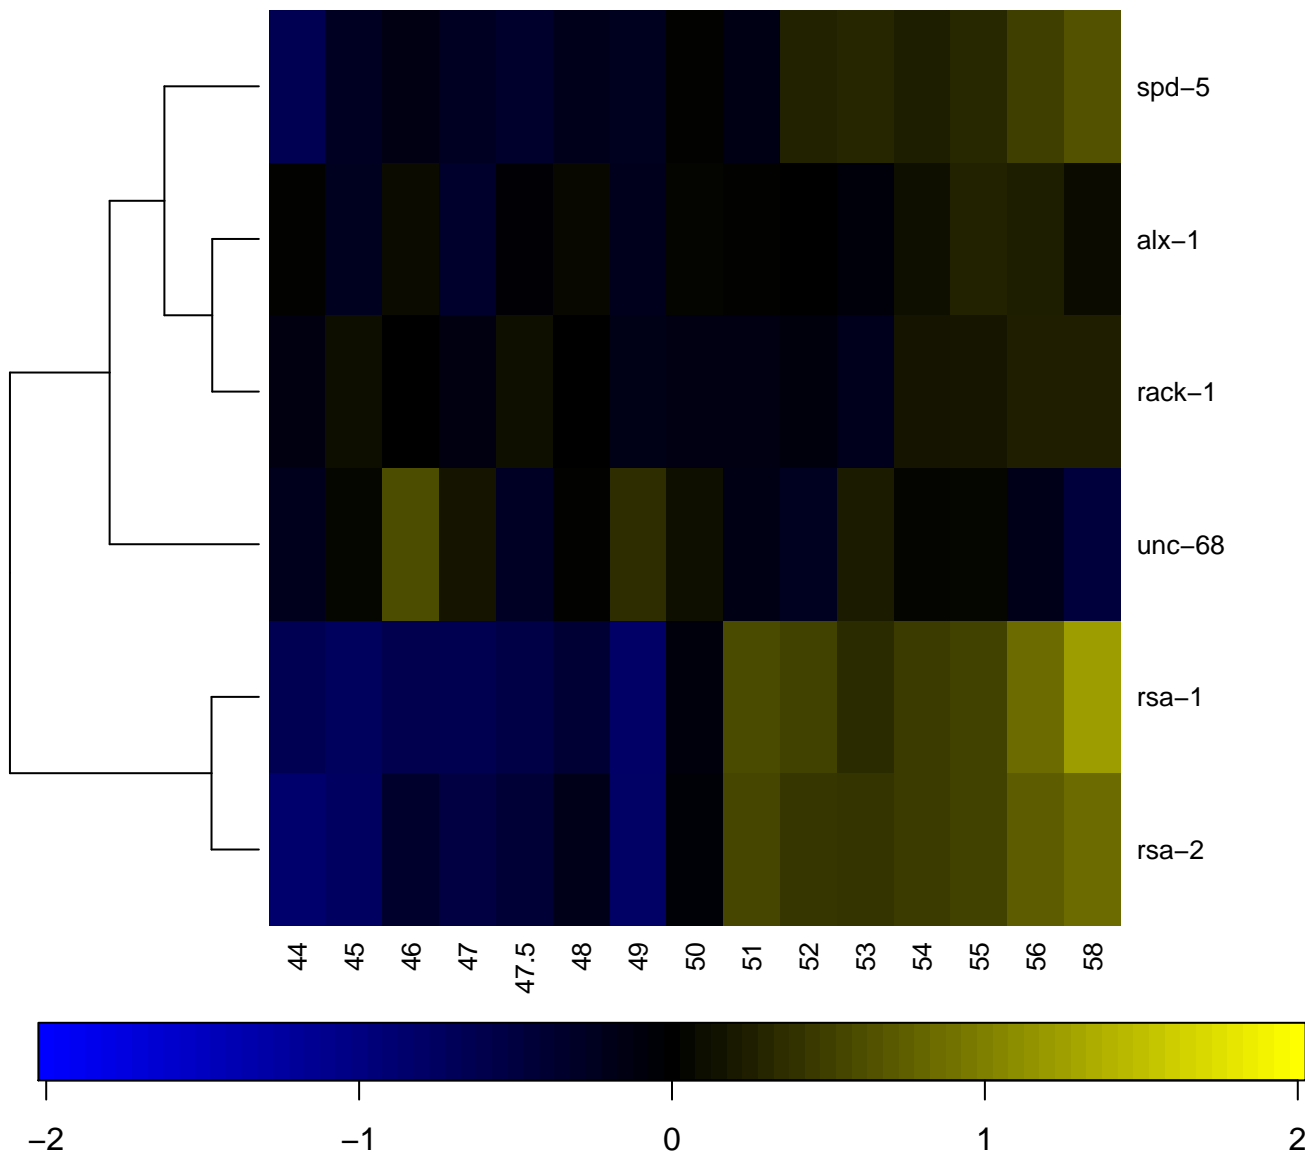

# protein methyltransferase activity

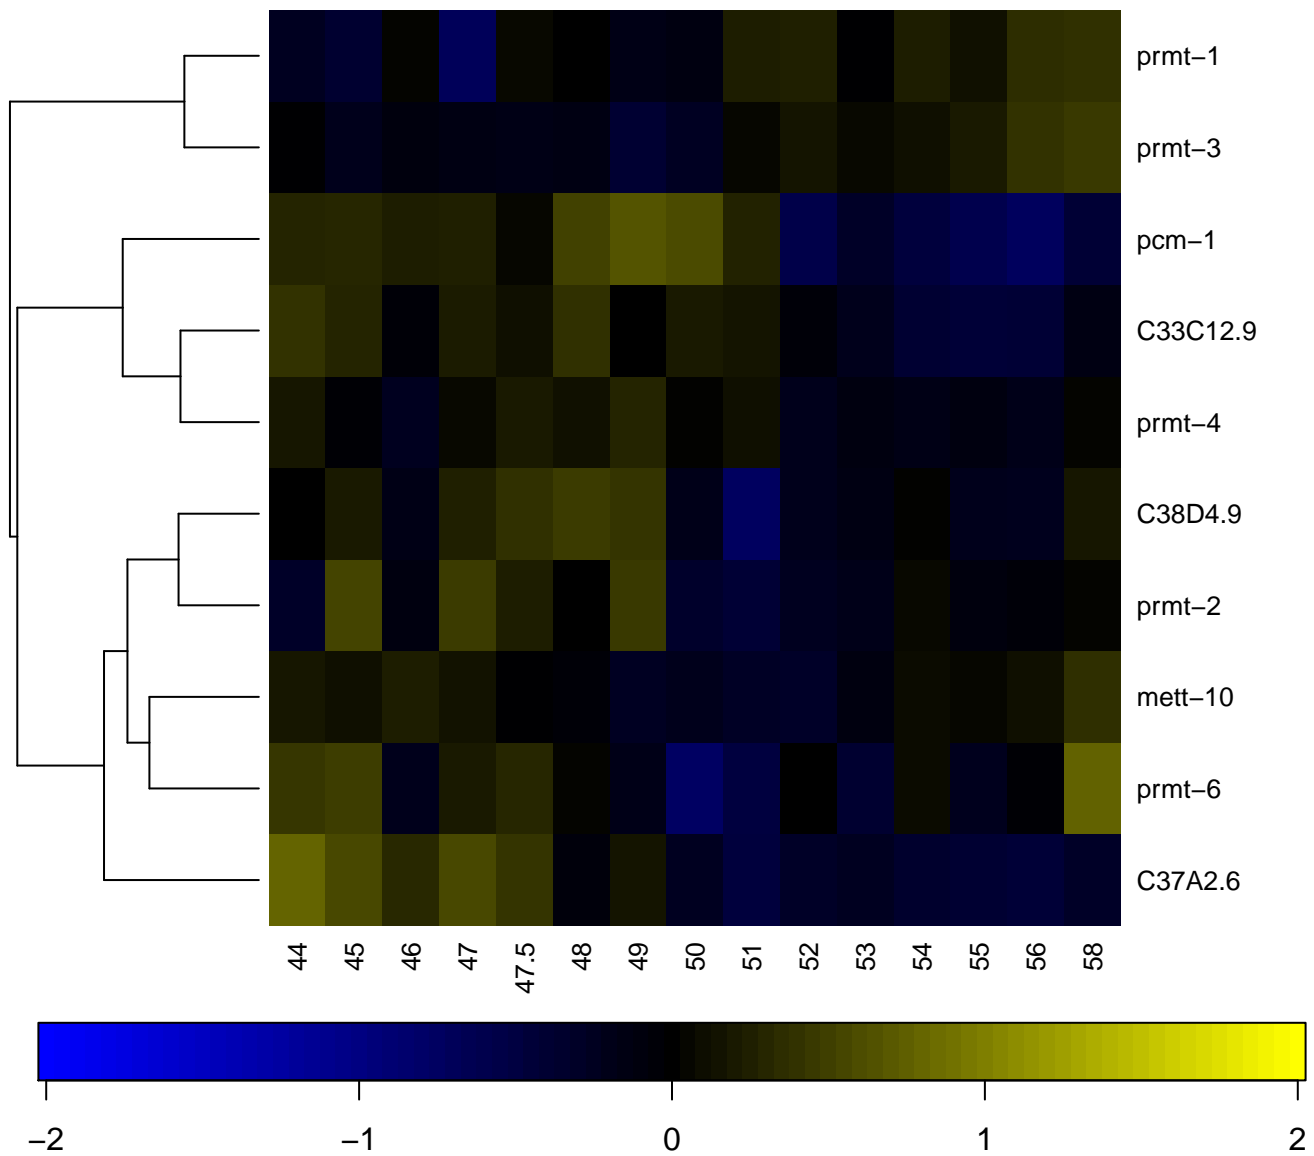

# protein modification process

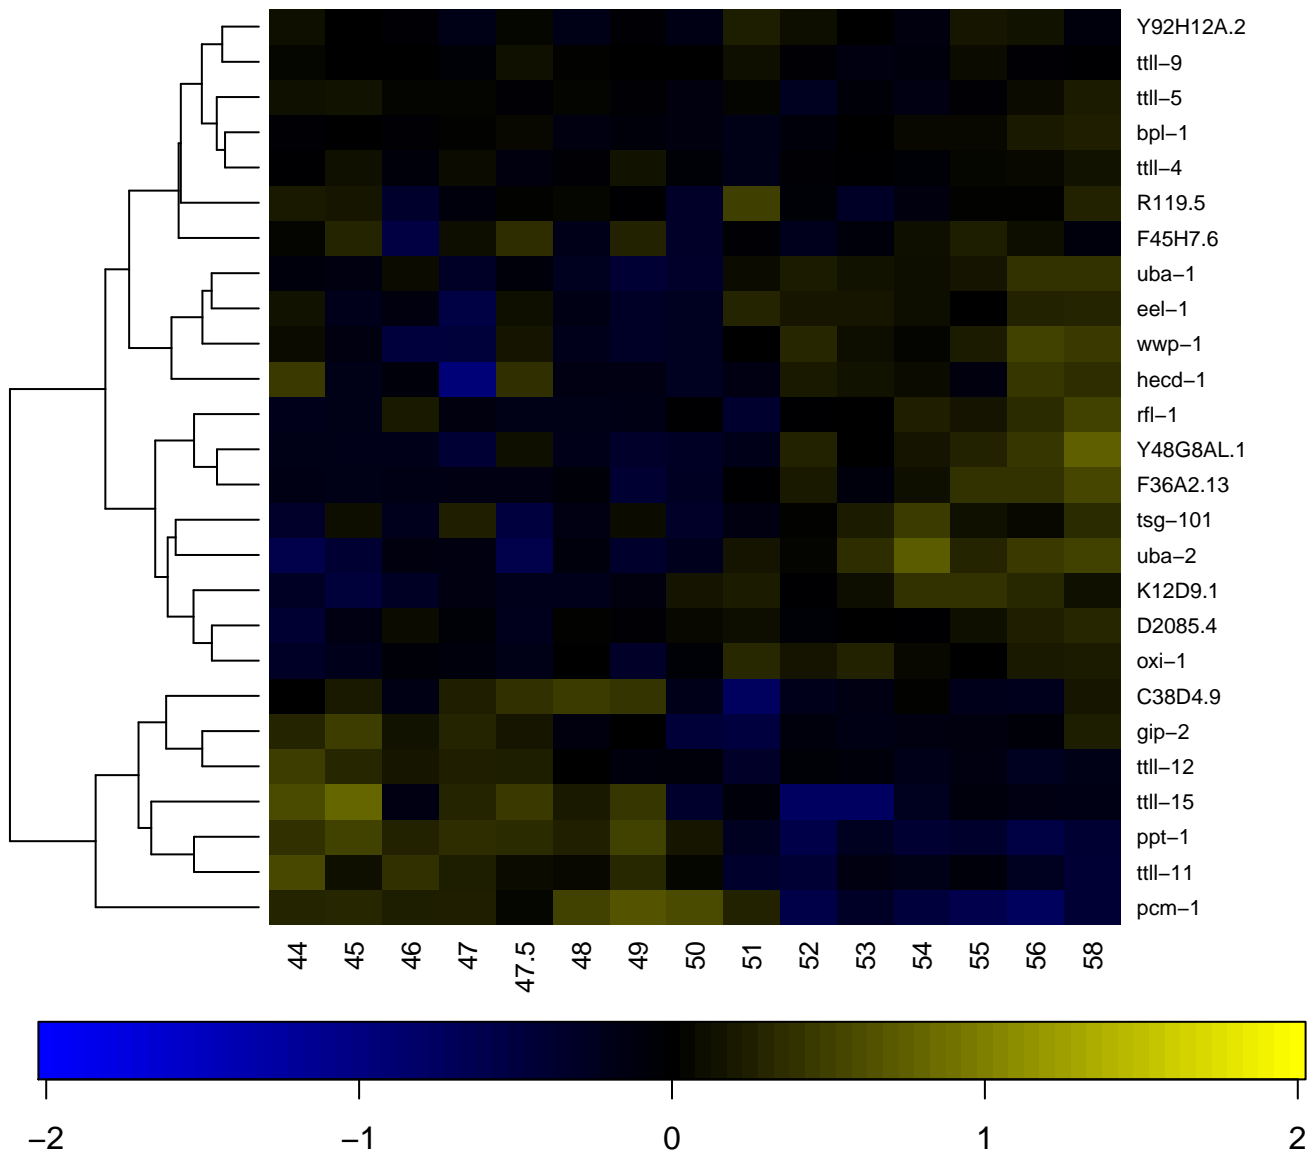



# protein polymerization

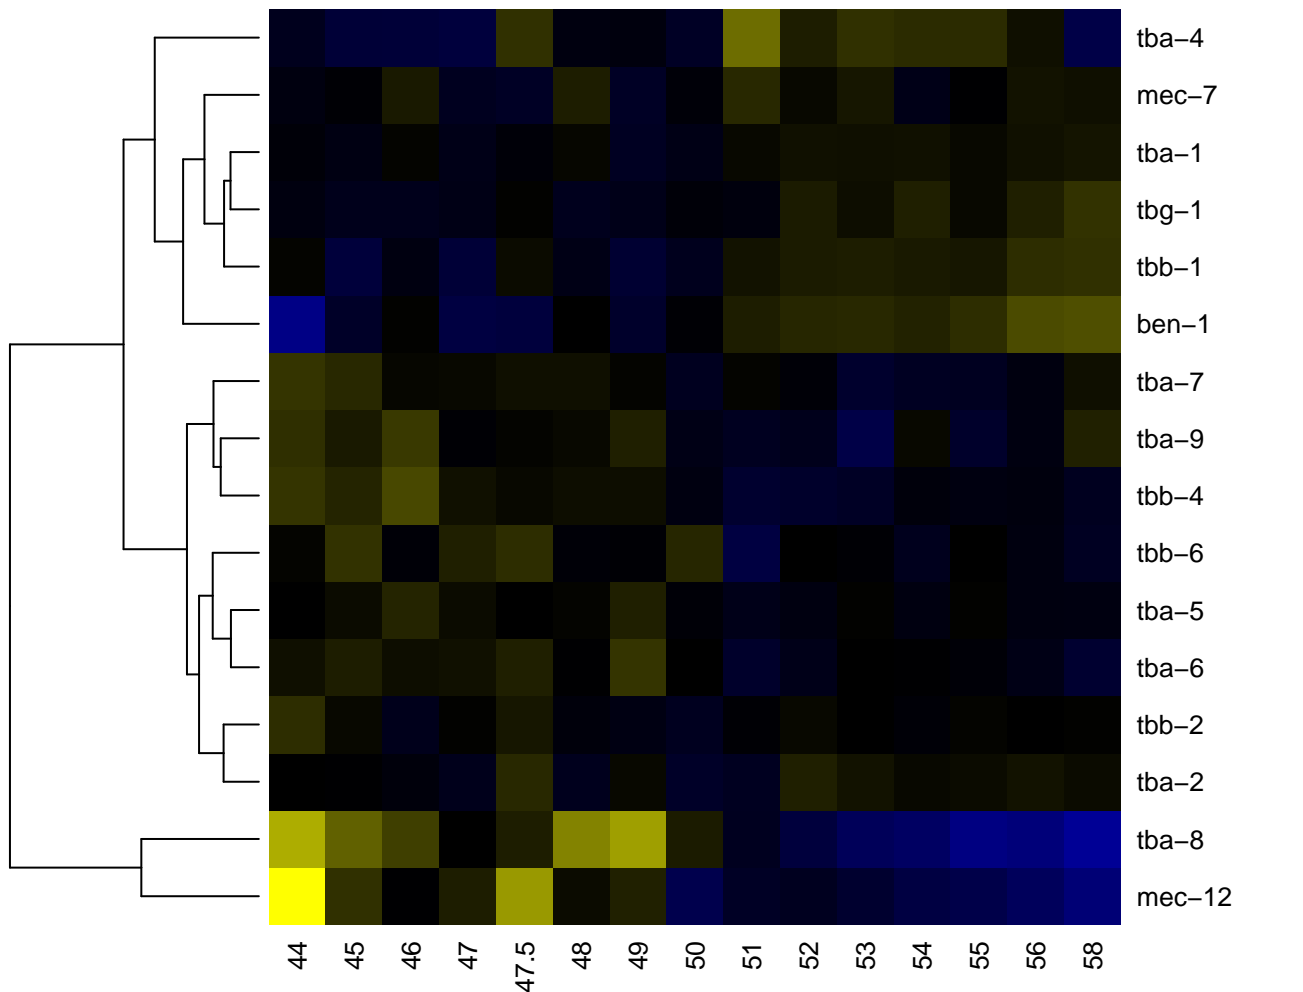

# protein refolding

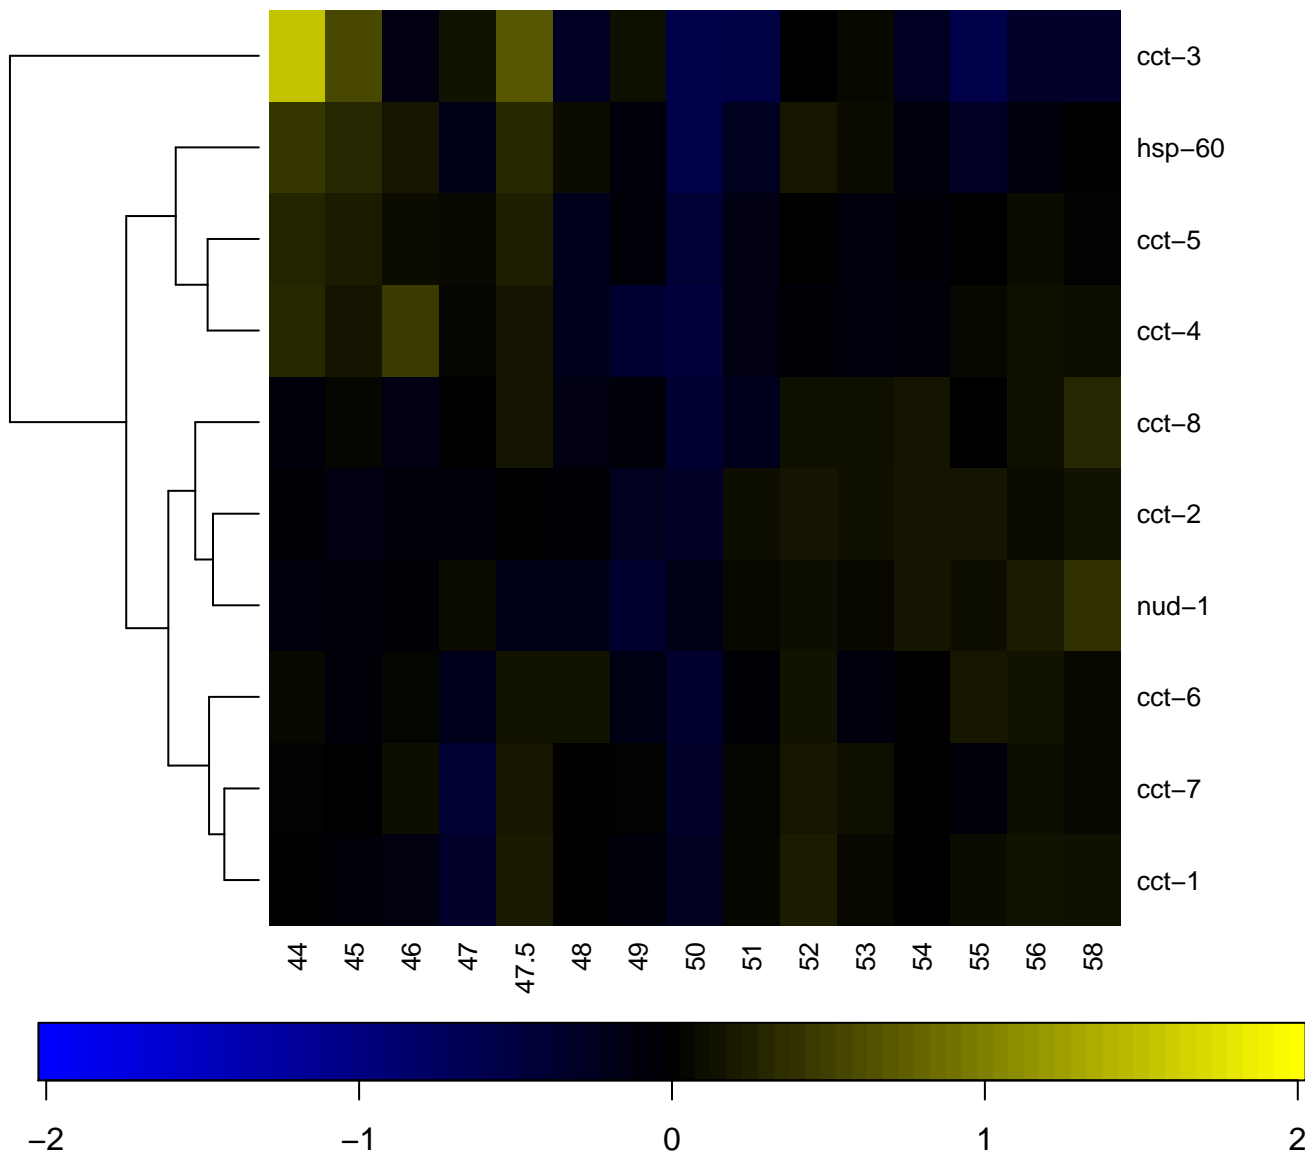







# protein serine/threonine kinase activity

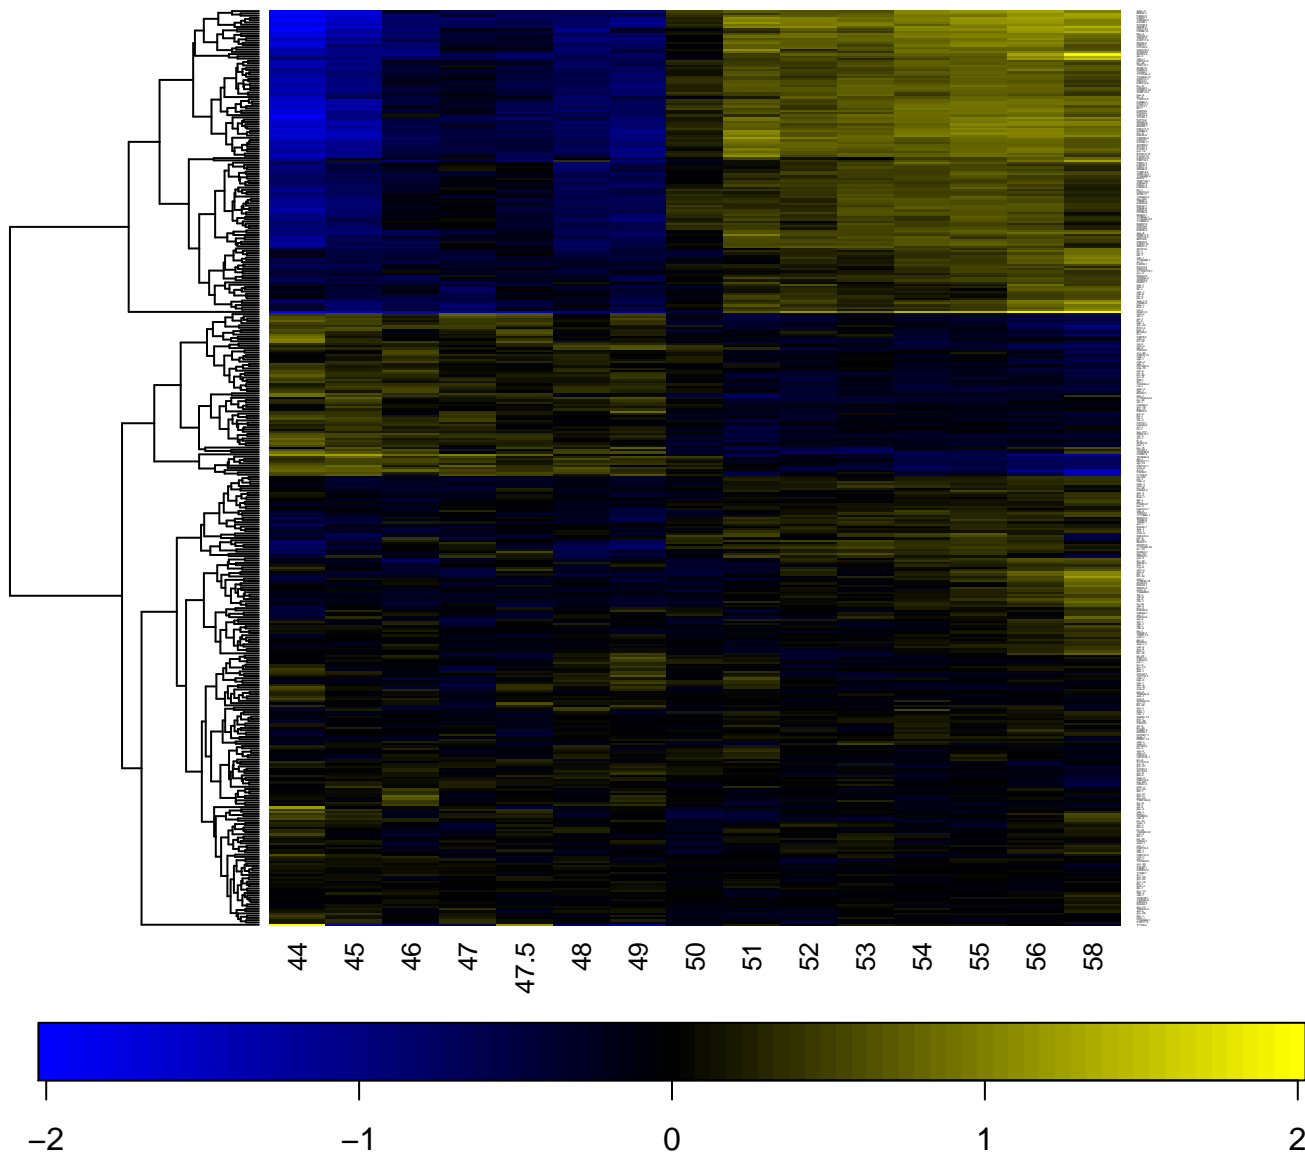

# protein serine/threonine phosphatase activity

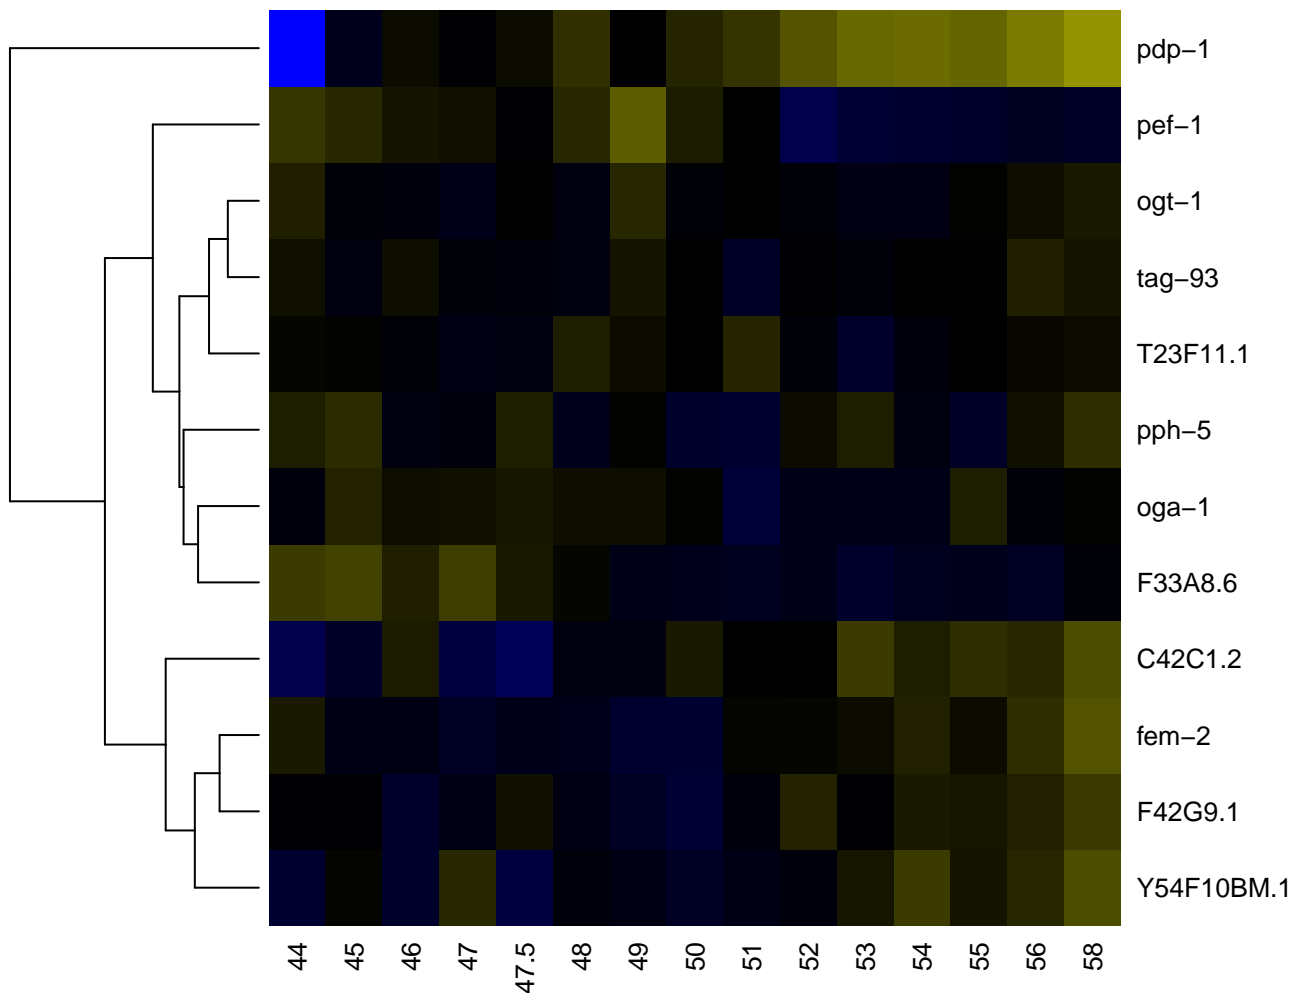





# protein transport

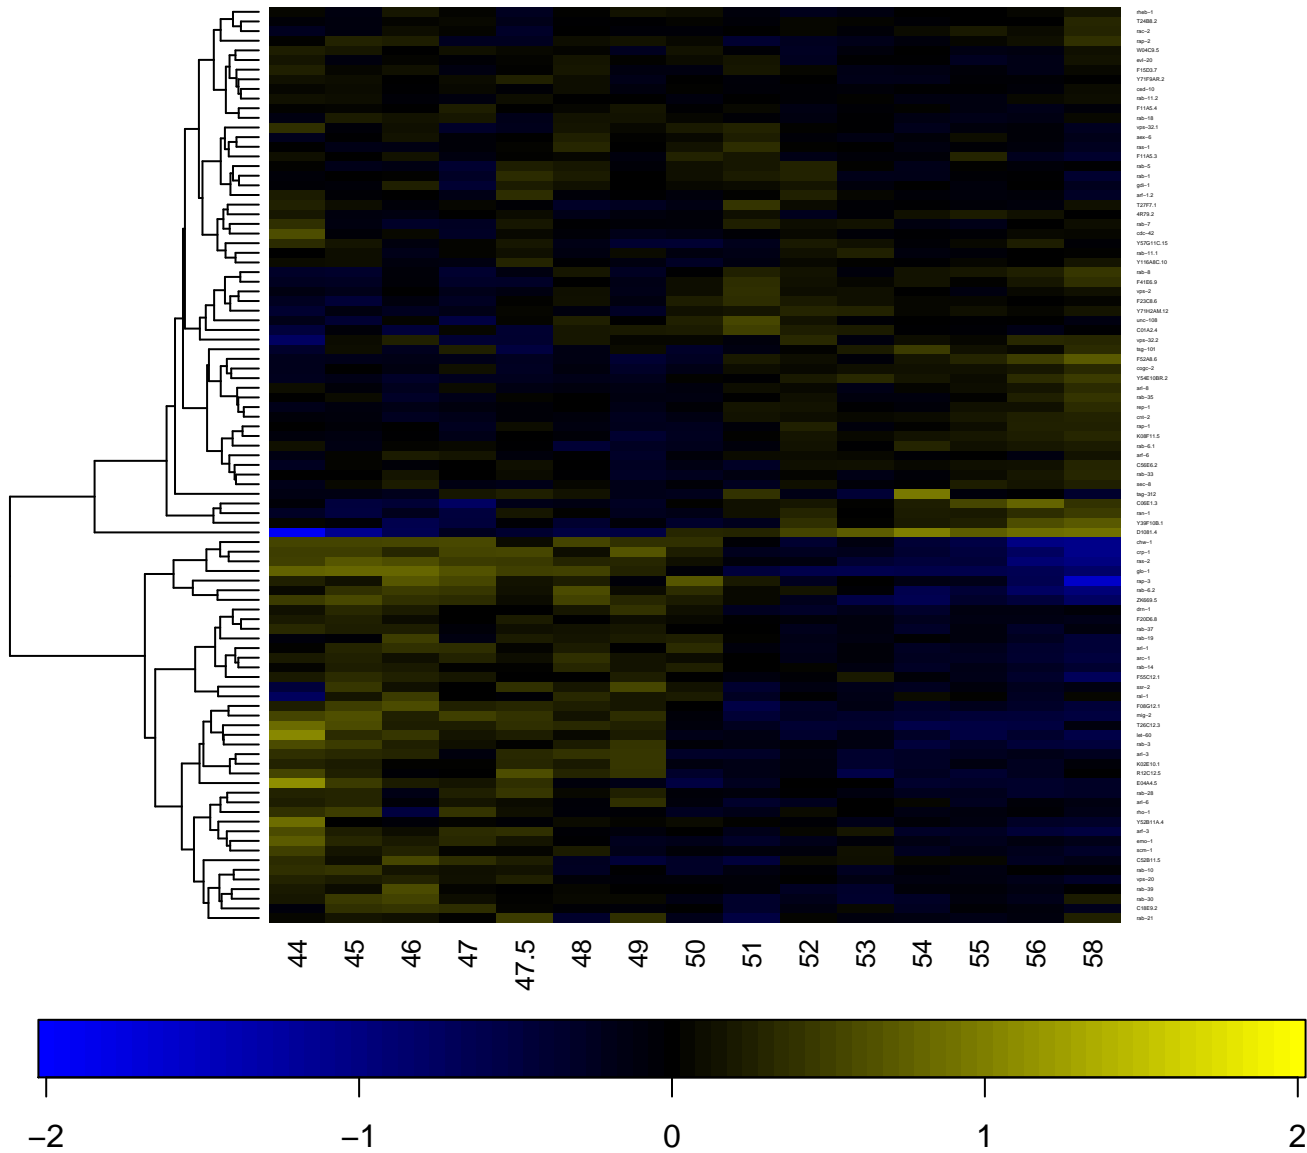

# protein transporter activity

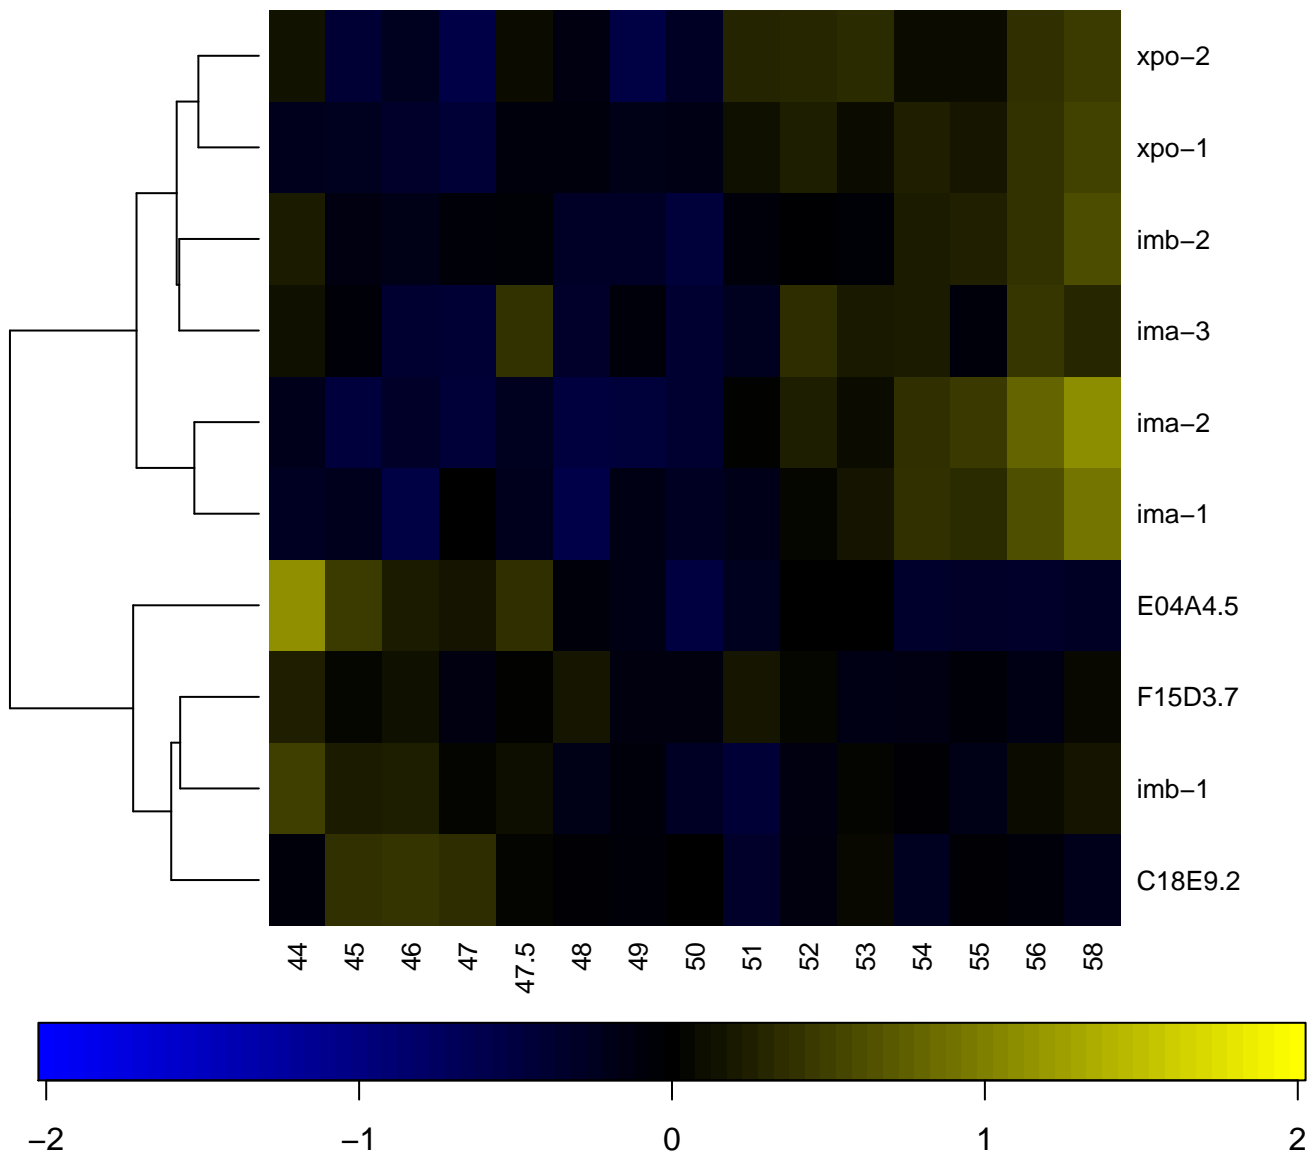



# protein tyrosine kinase activity

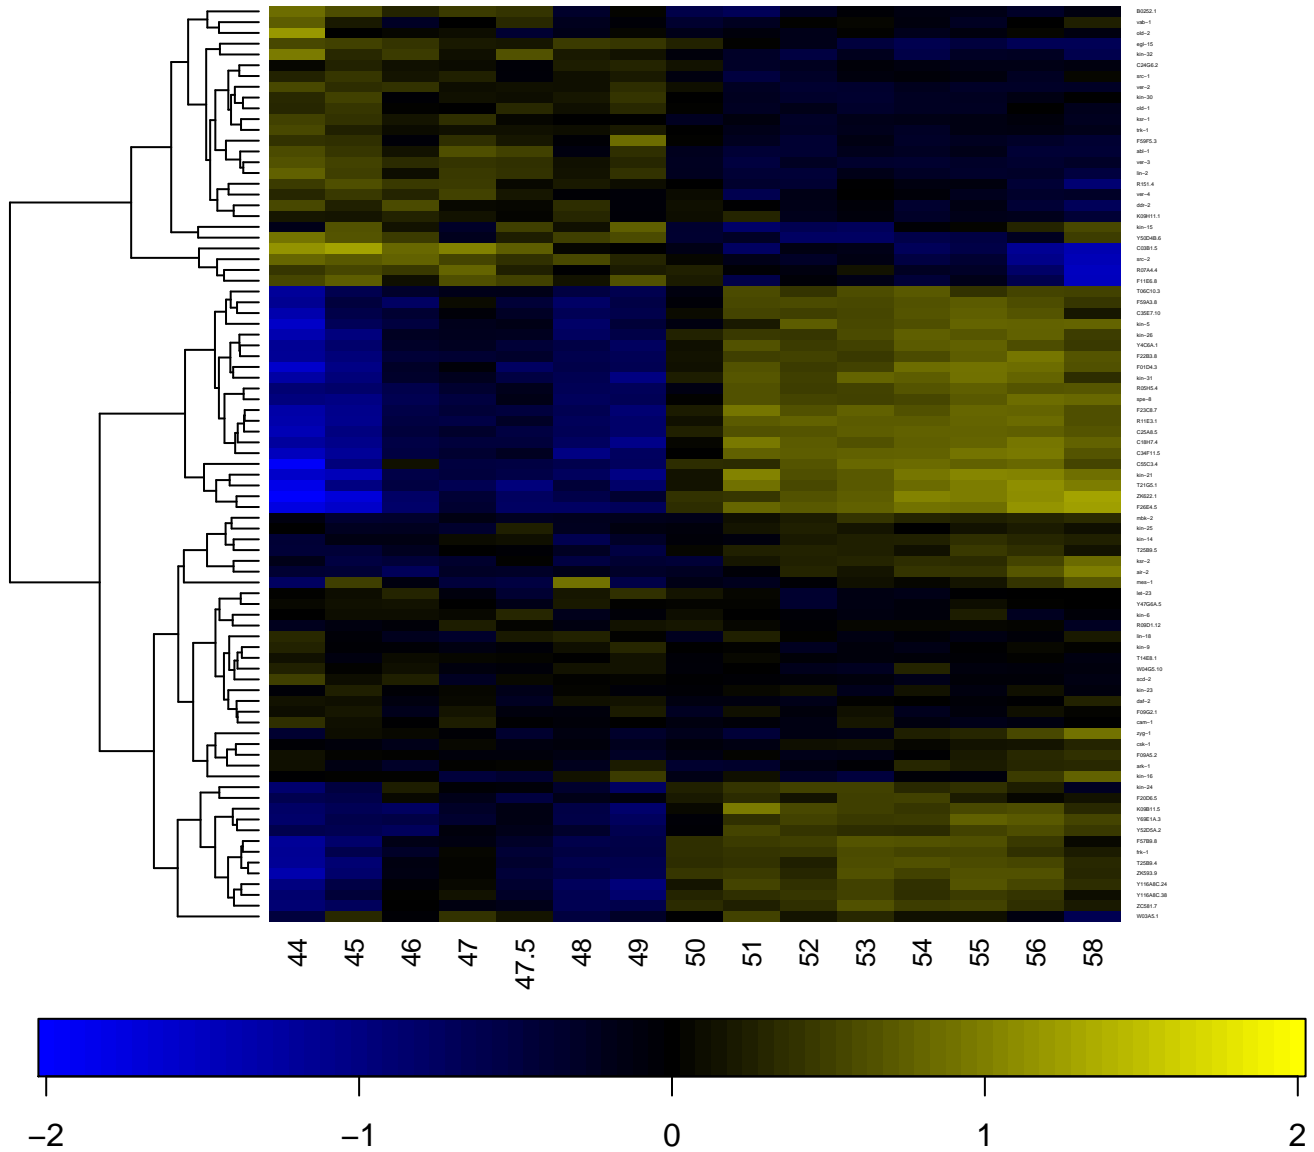

# protein tyrosine phosphatase activity

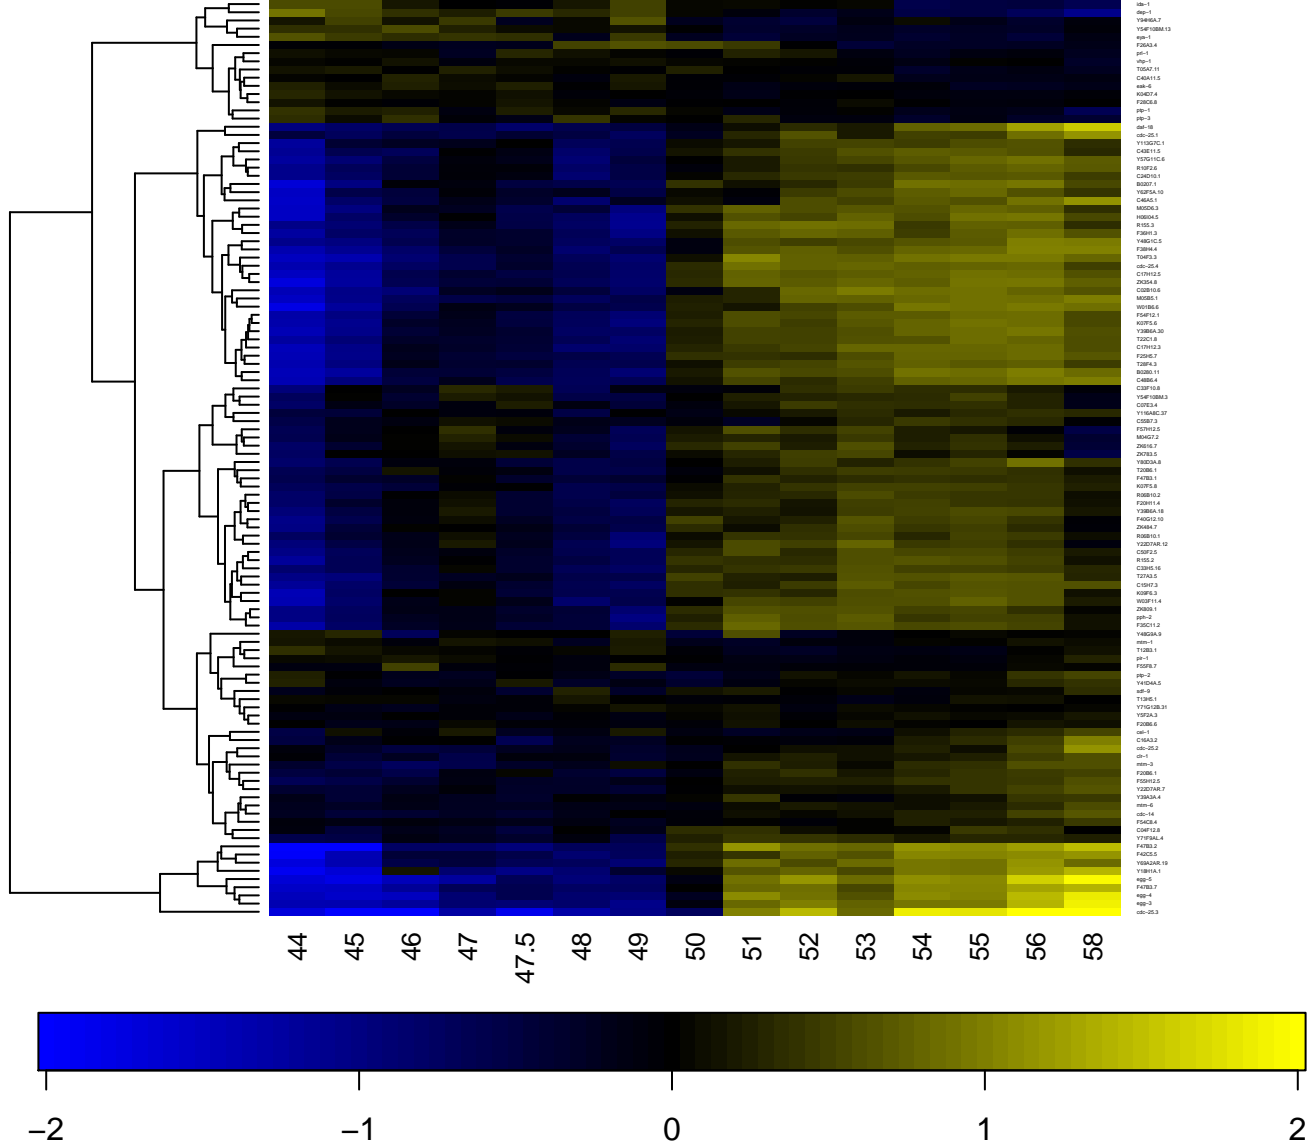

# protein tyrosine/serine/threonine phosphatase activity

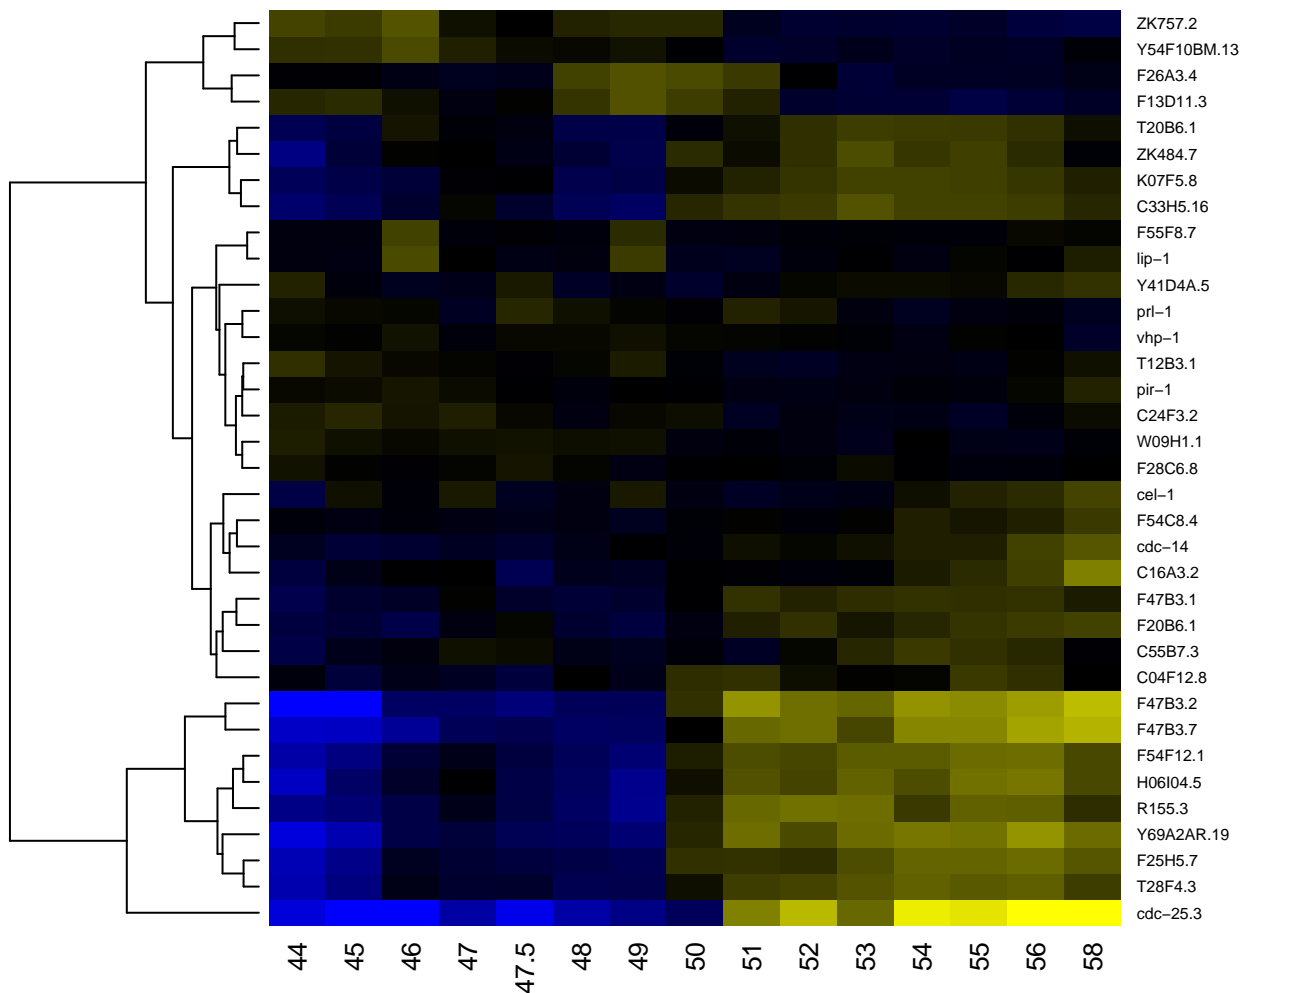



# proteinaceous extracellular matrix

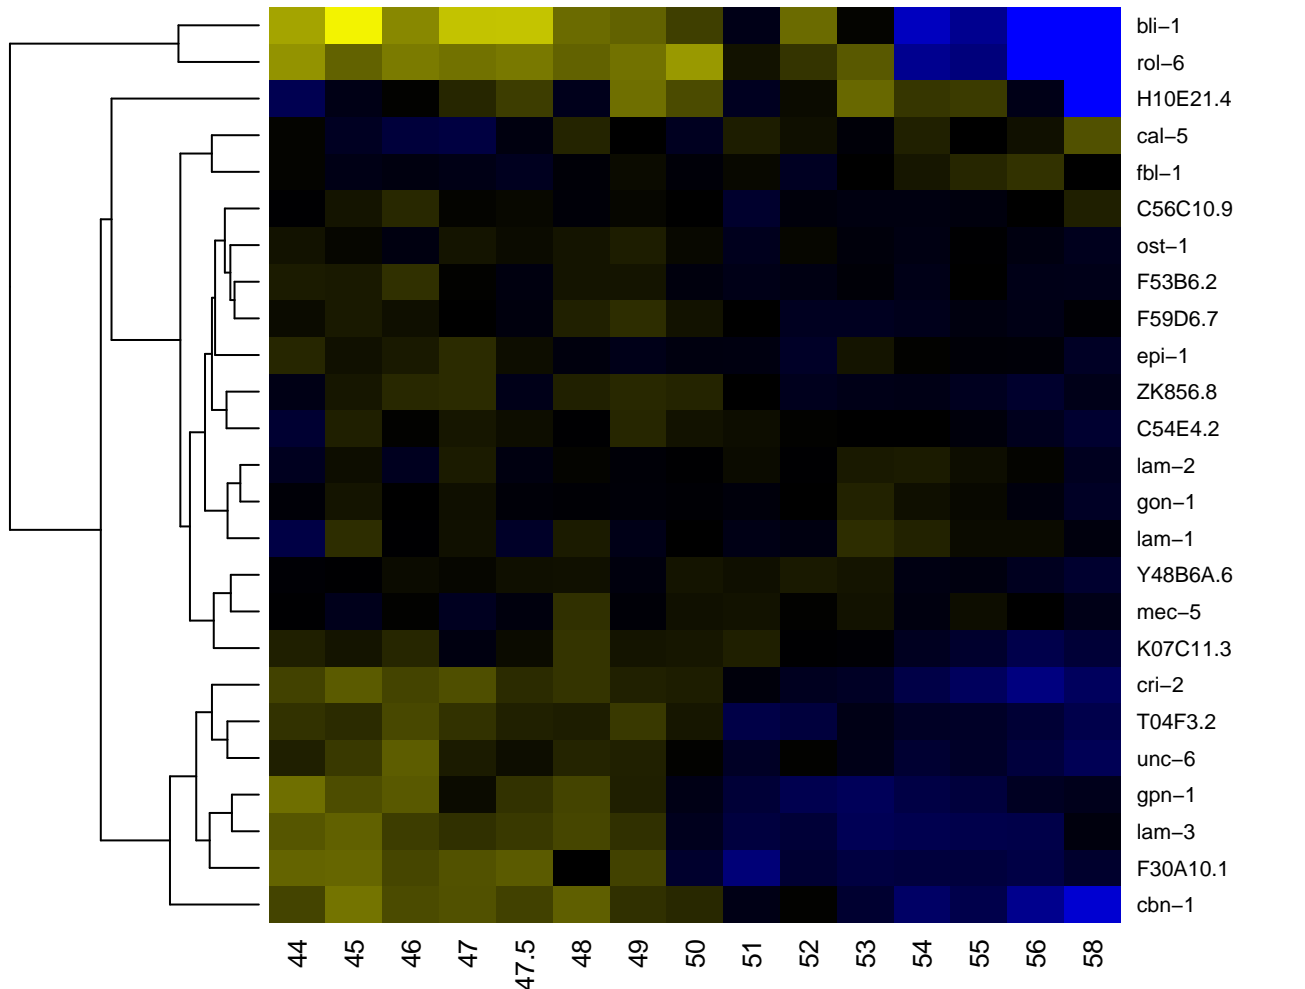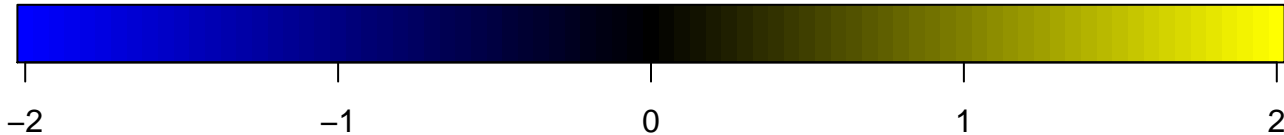

# proteolysis

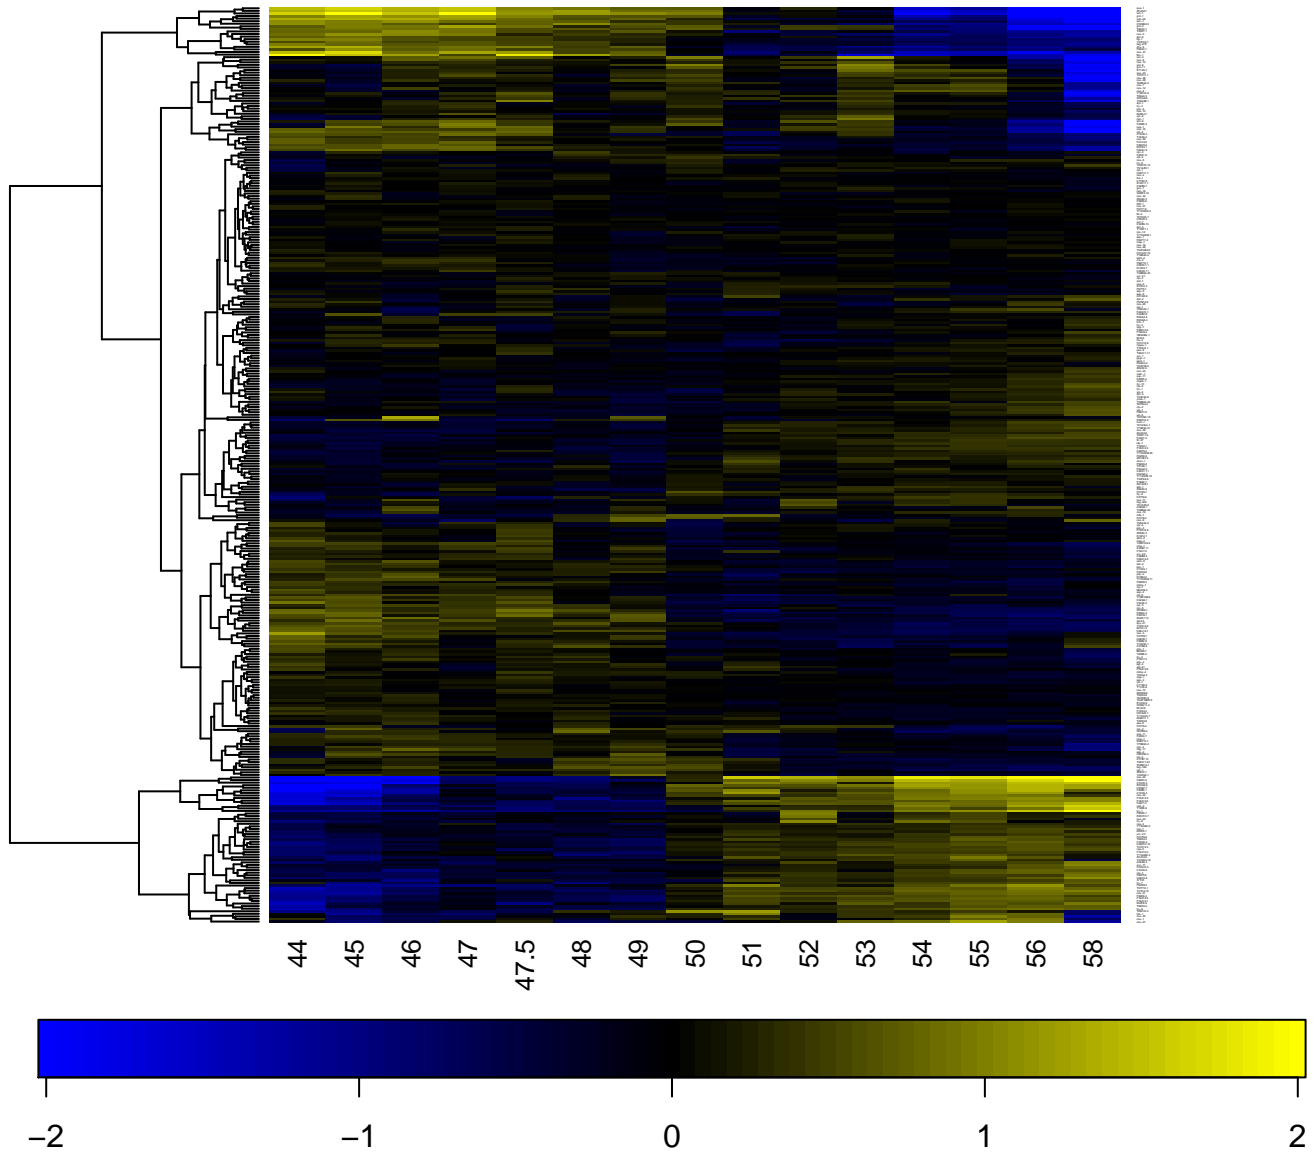

# proteolysis involved in cellular protein catabolic process

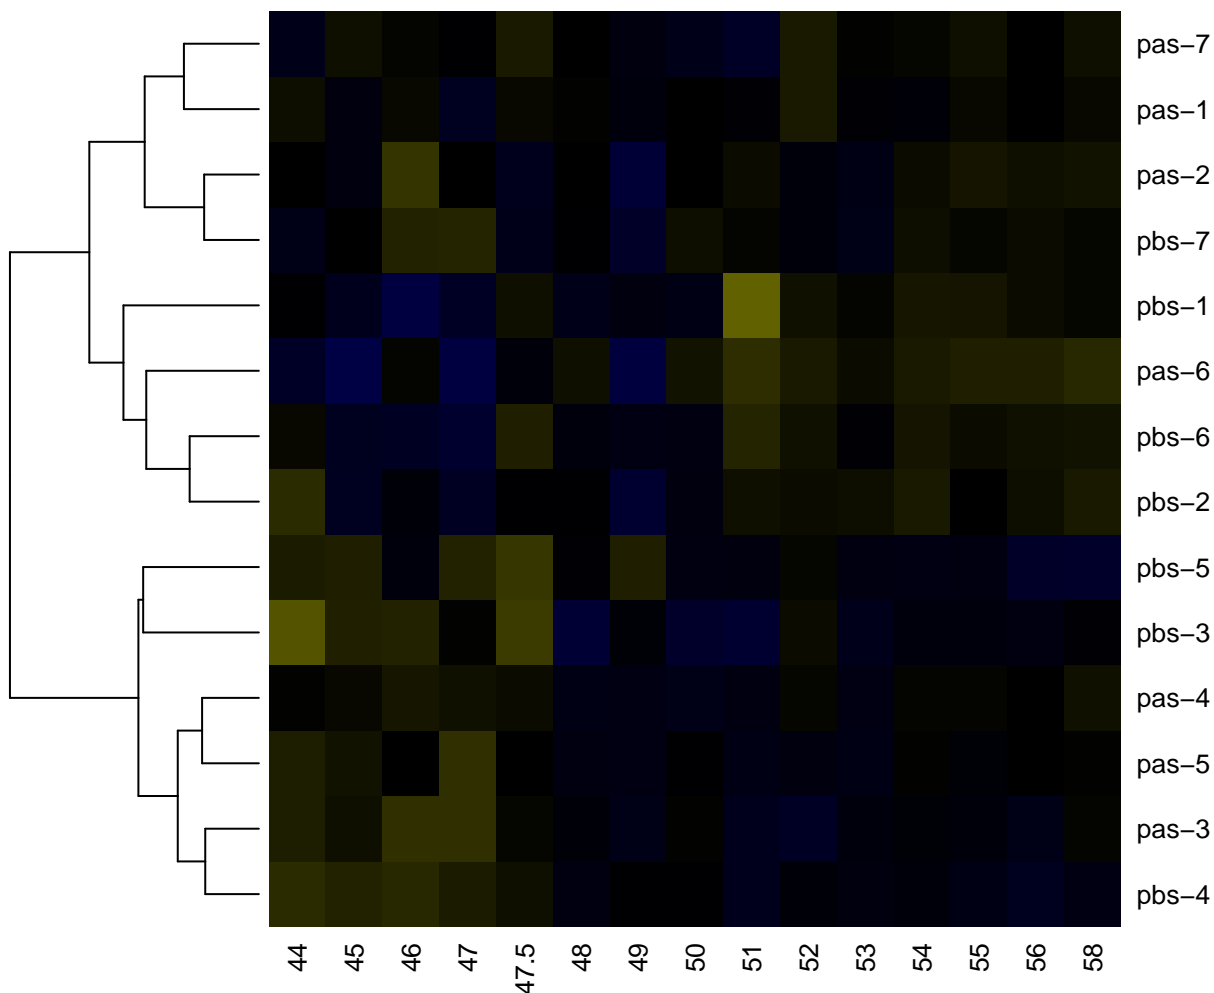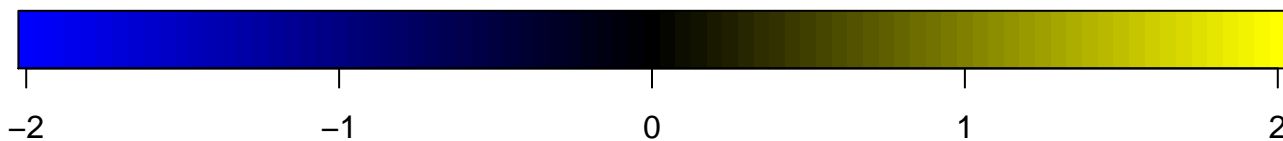





# proton-transporting ATPase activity, rotational mechanism

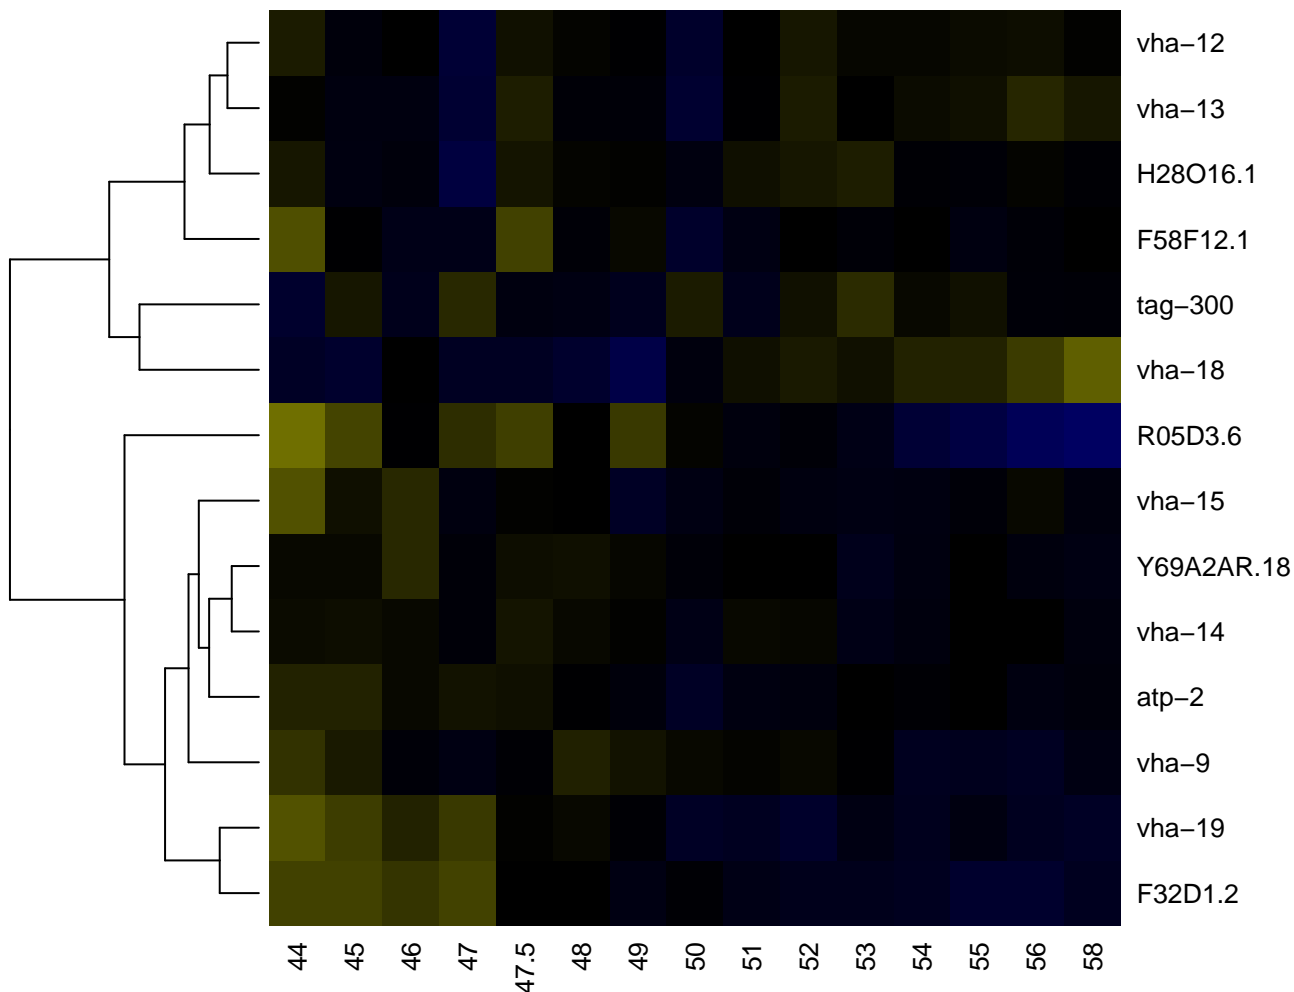











# pseudopodium

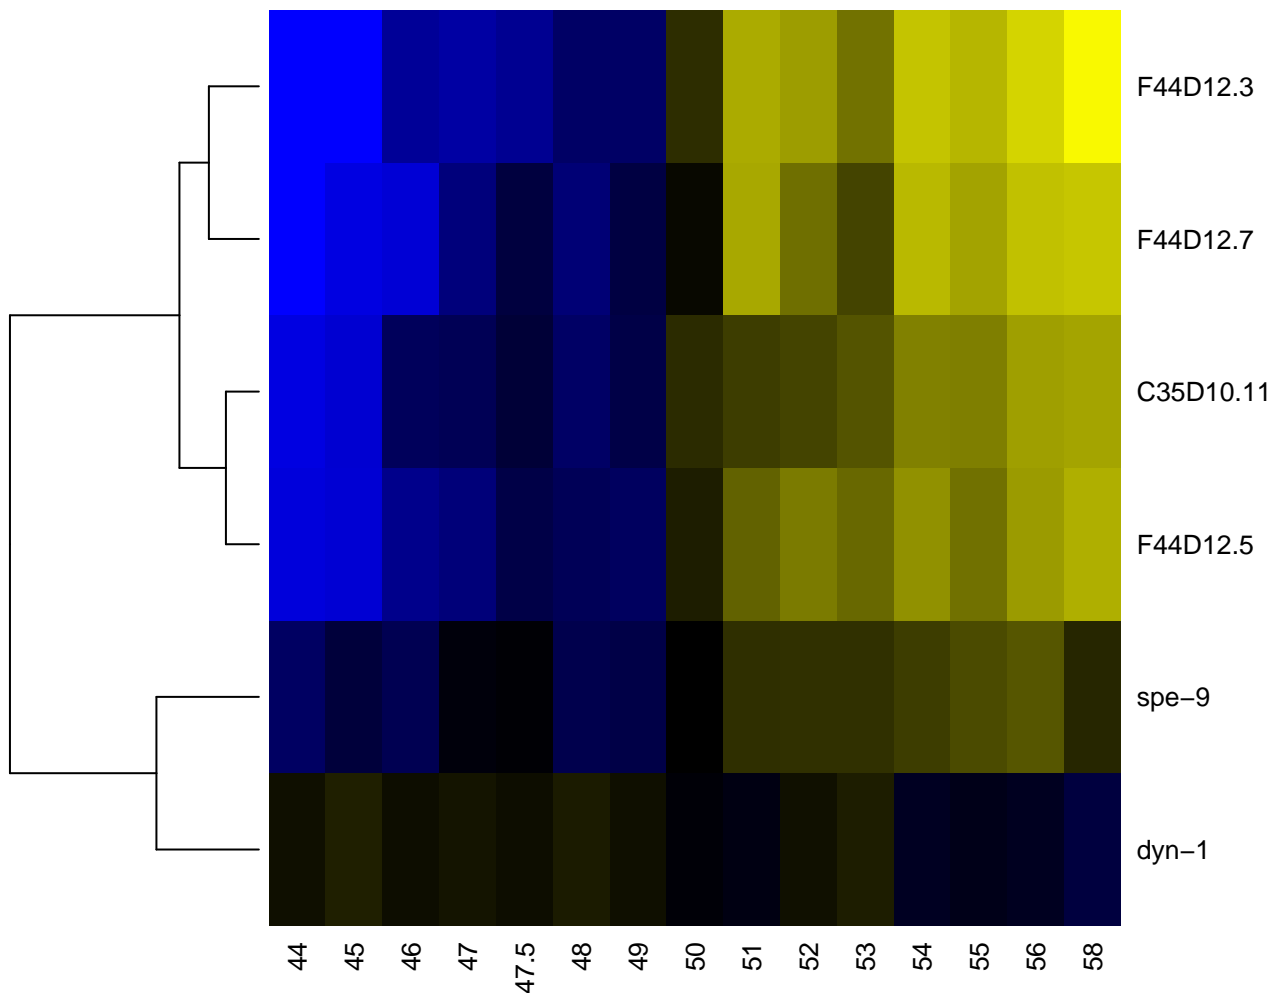

-2

-1

0

1

2

# pseudouridine synthase activity

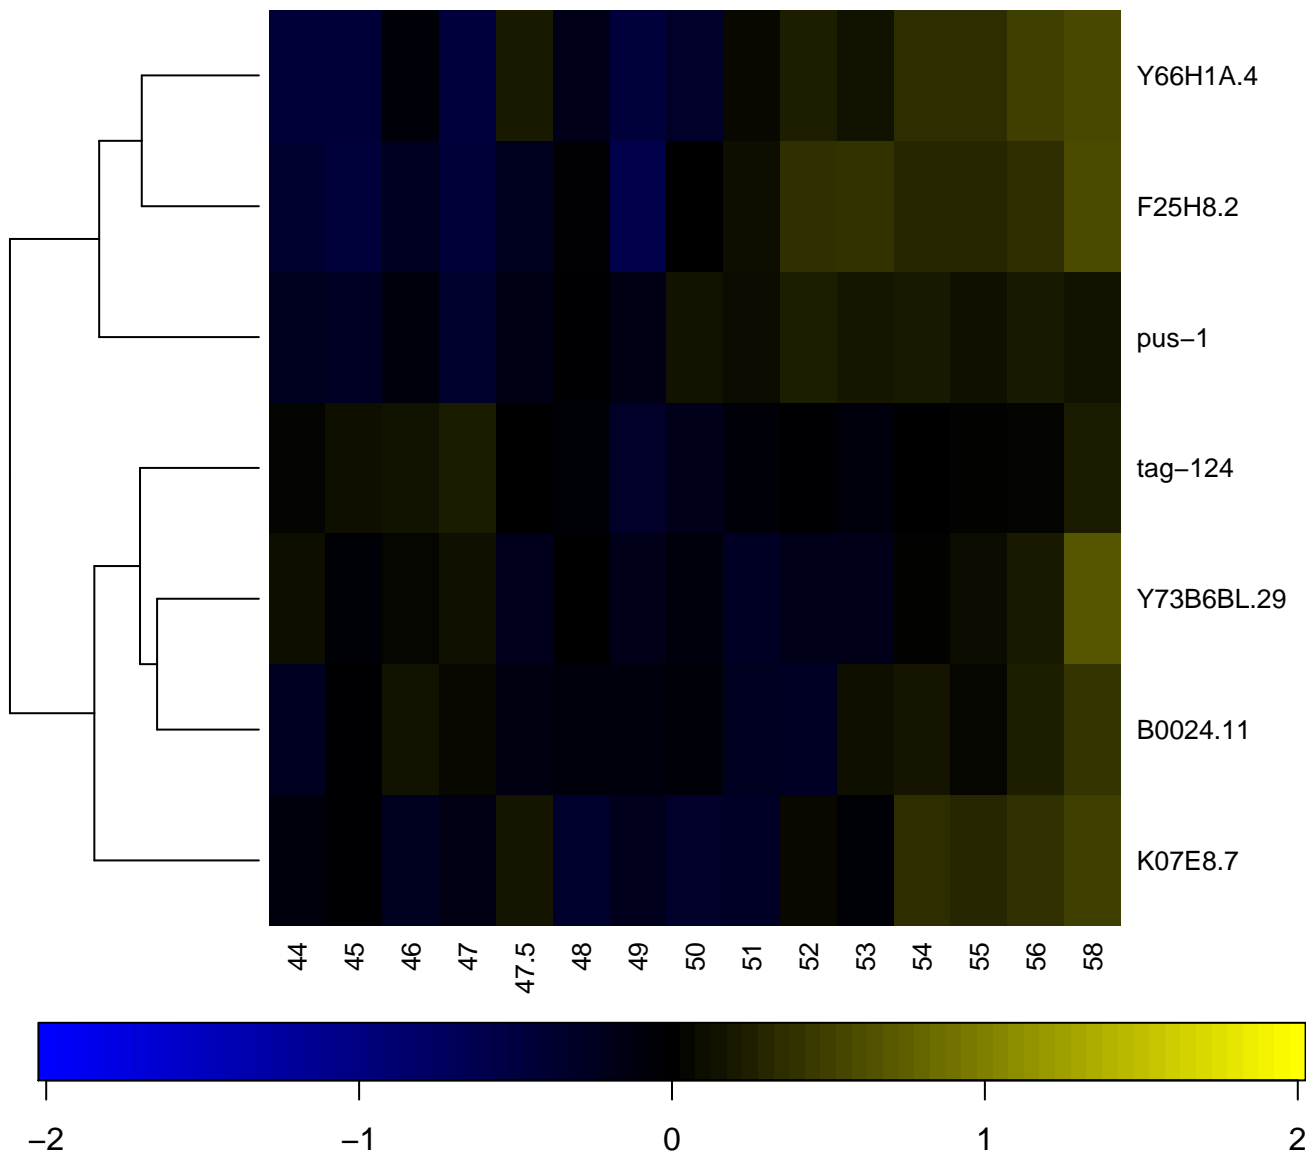





# pyridoxal phosphate binding

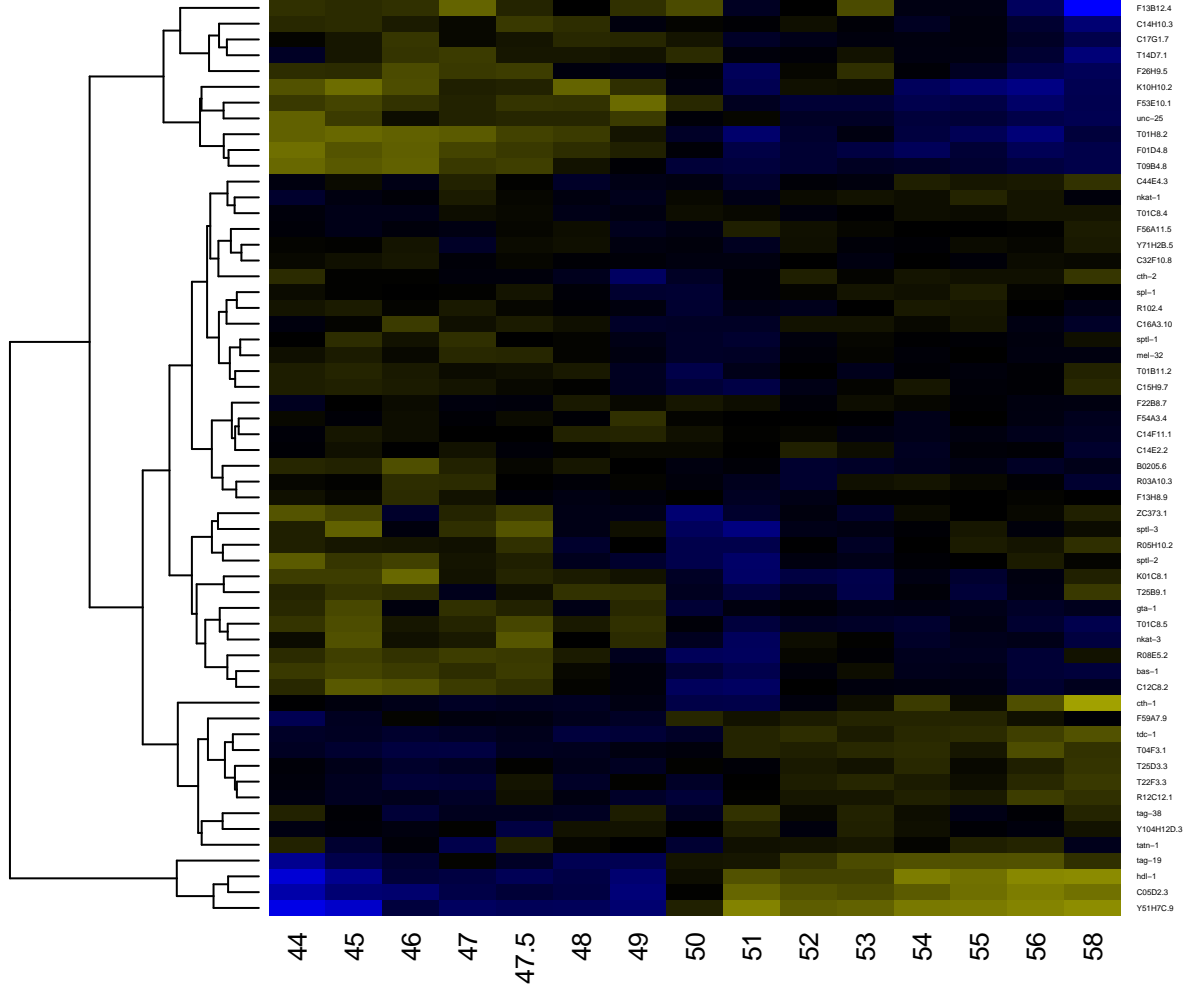

# Rab GTPase activator activity

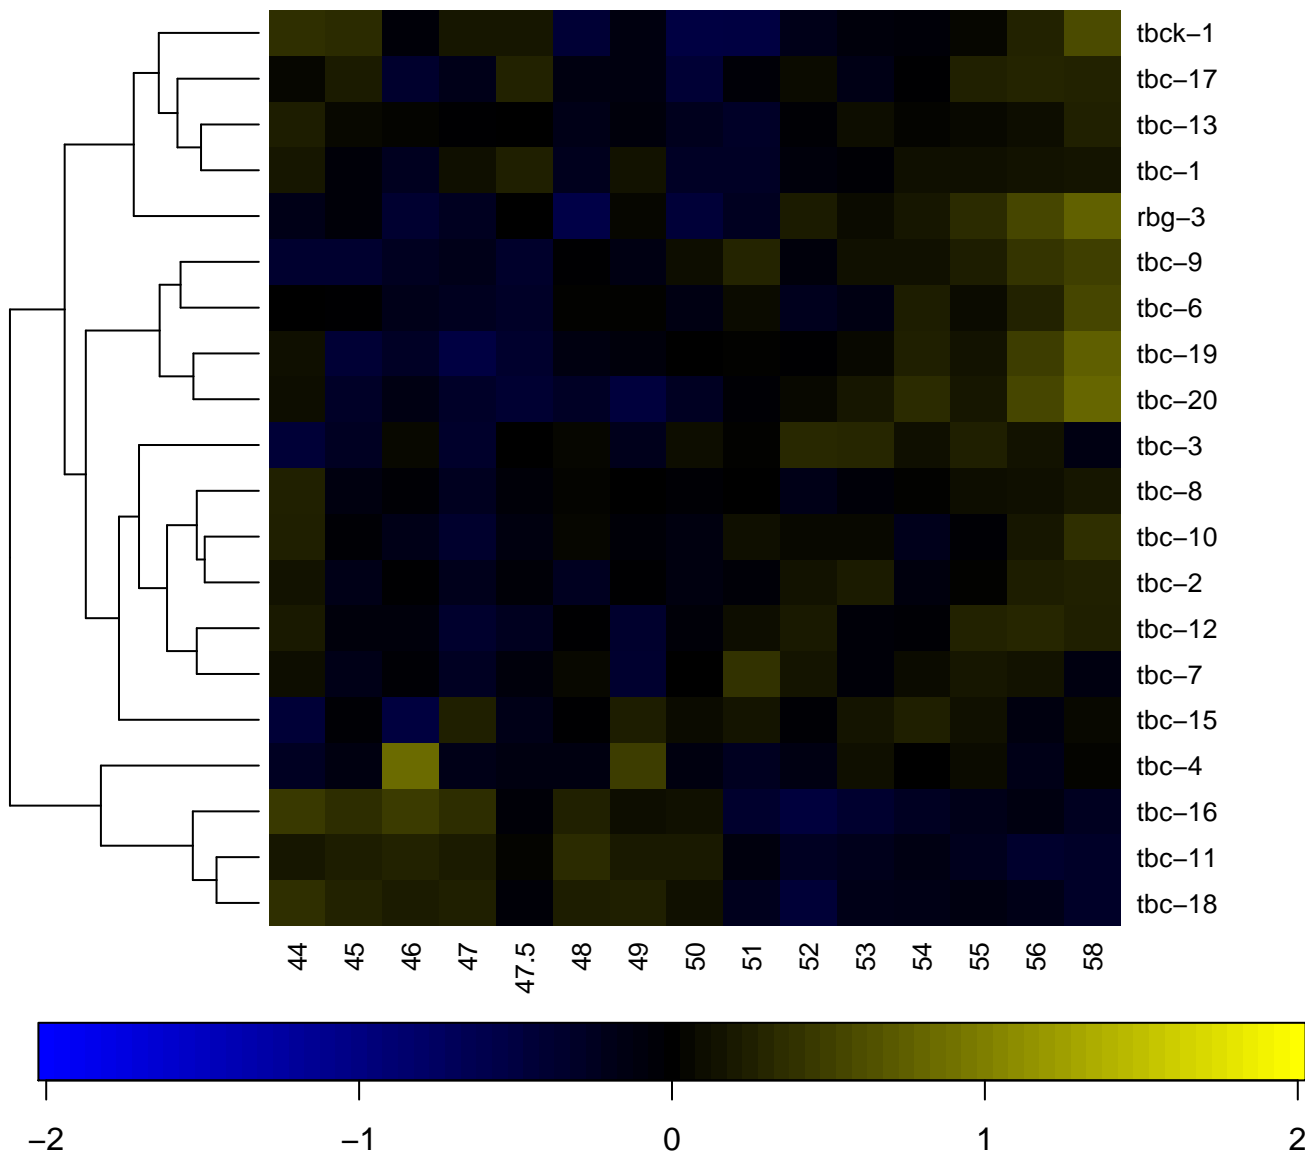

# Ras protein signal transduction

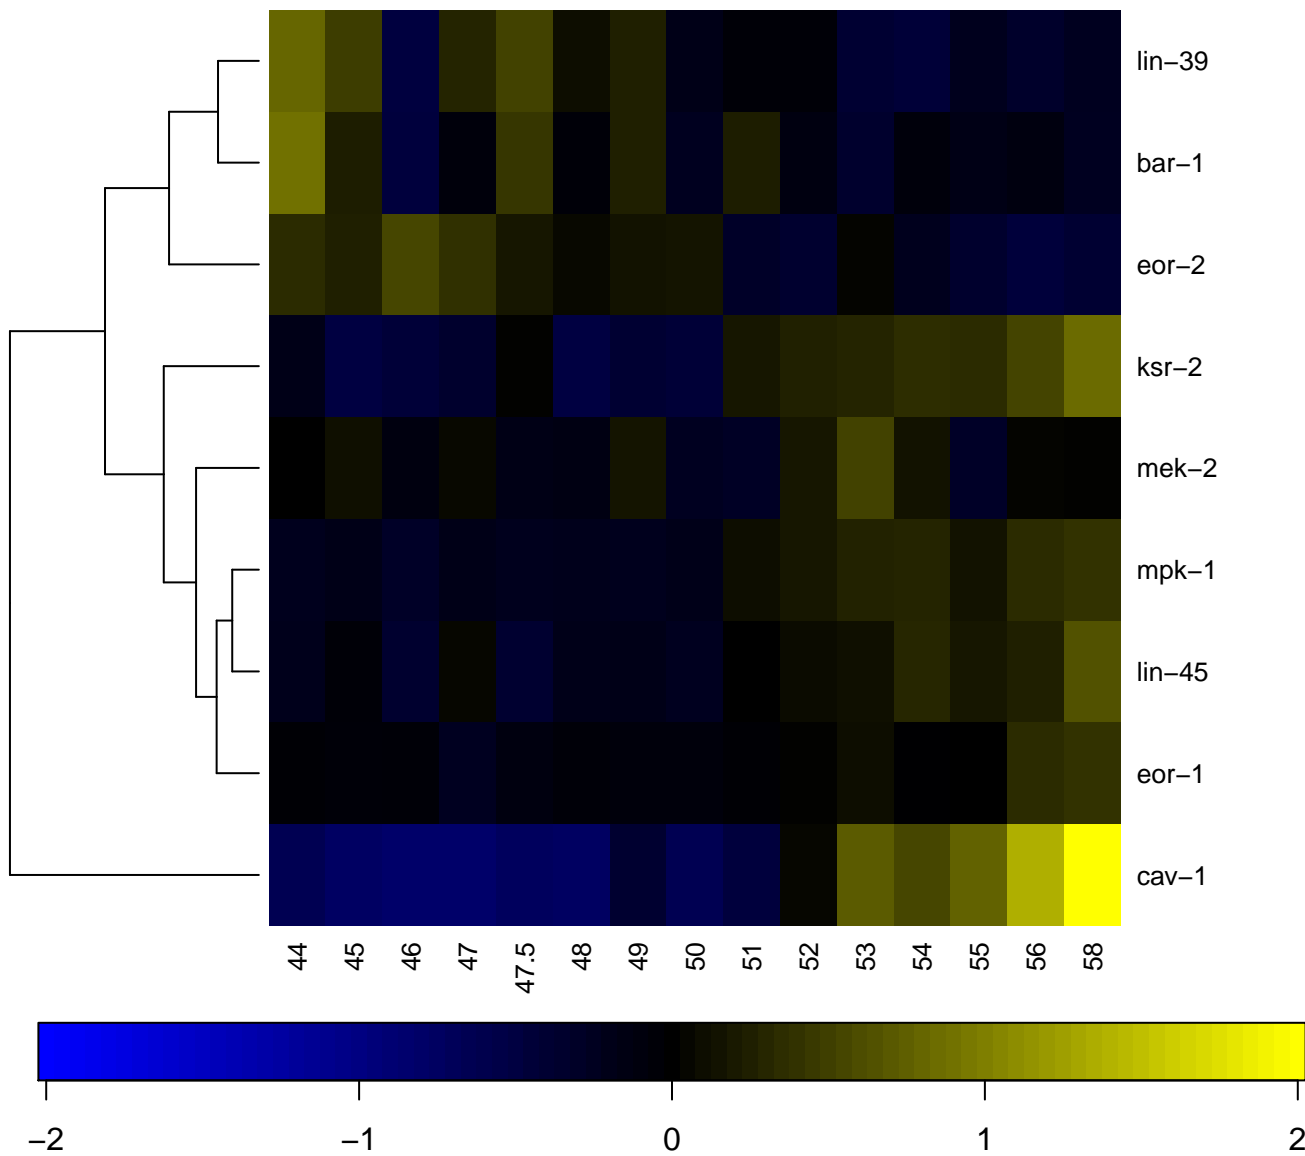

# receptor-mediated endocytosis

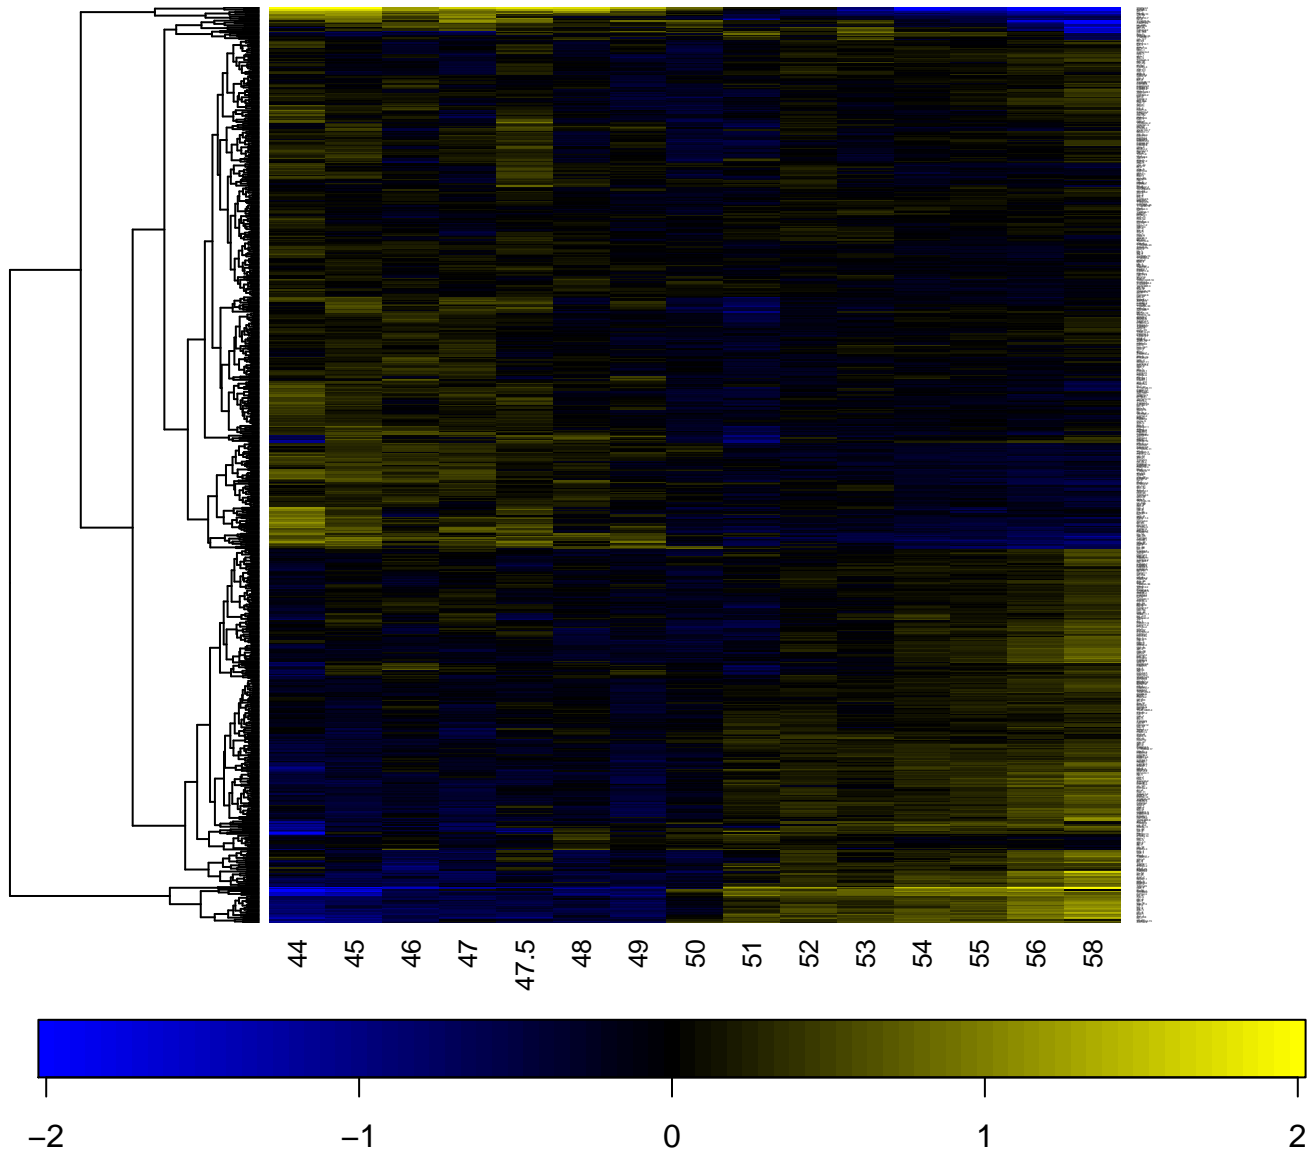

# receptor activity

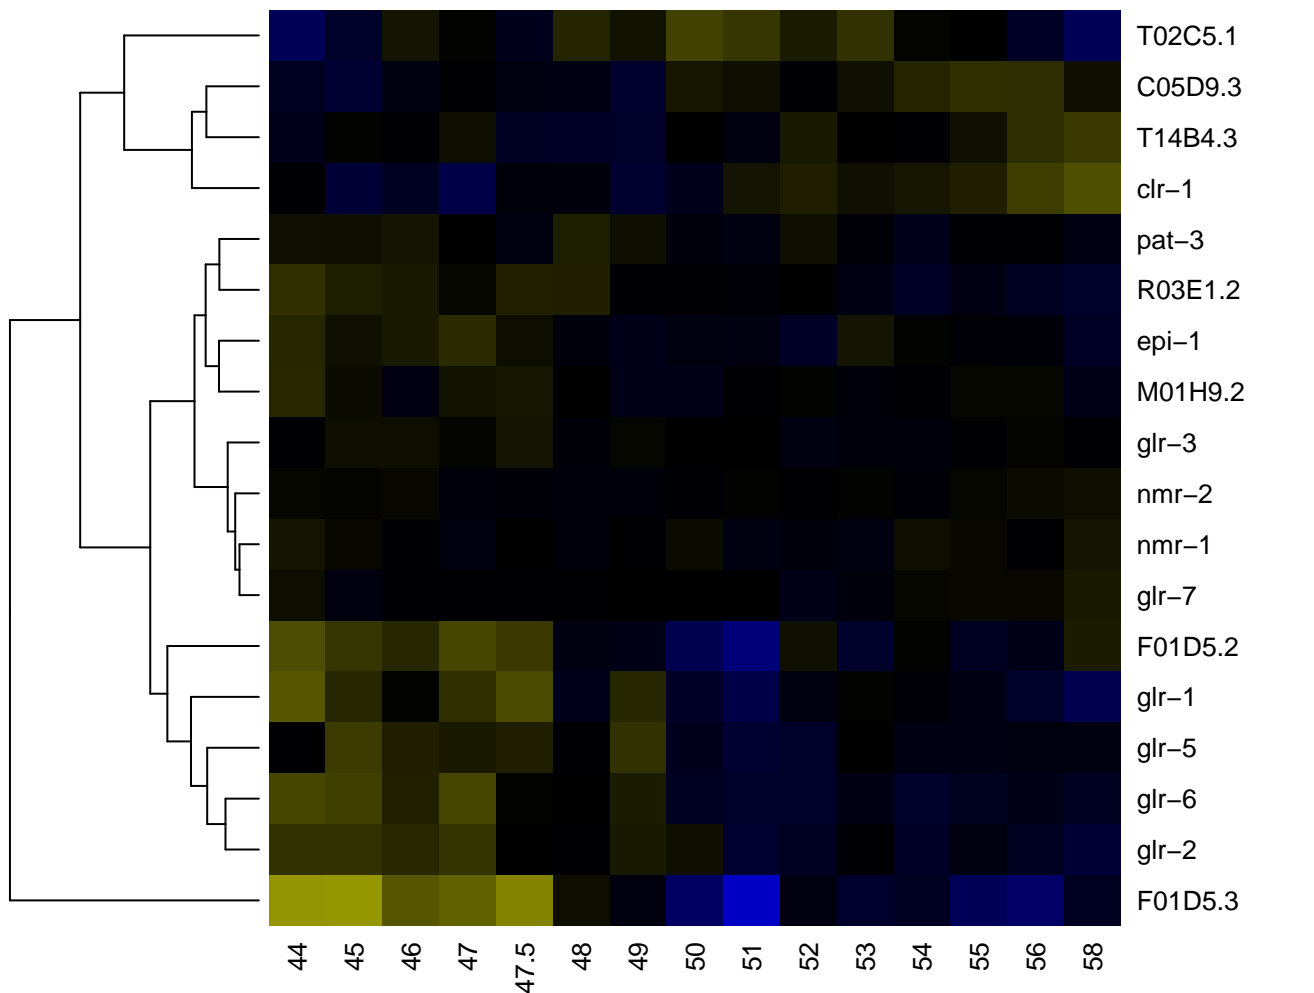

# receptor binding

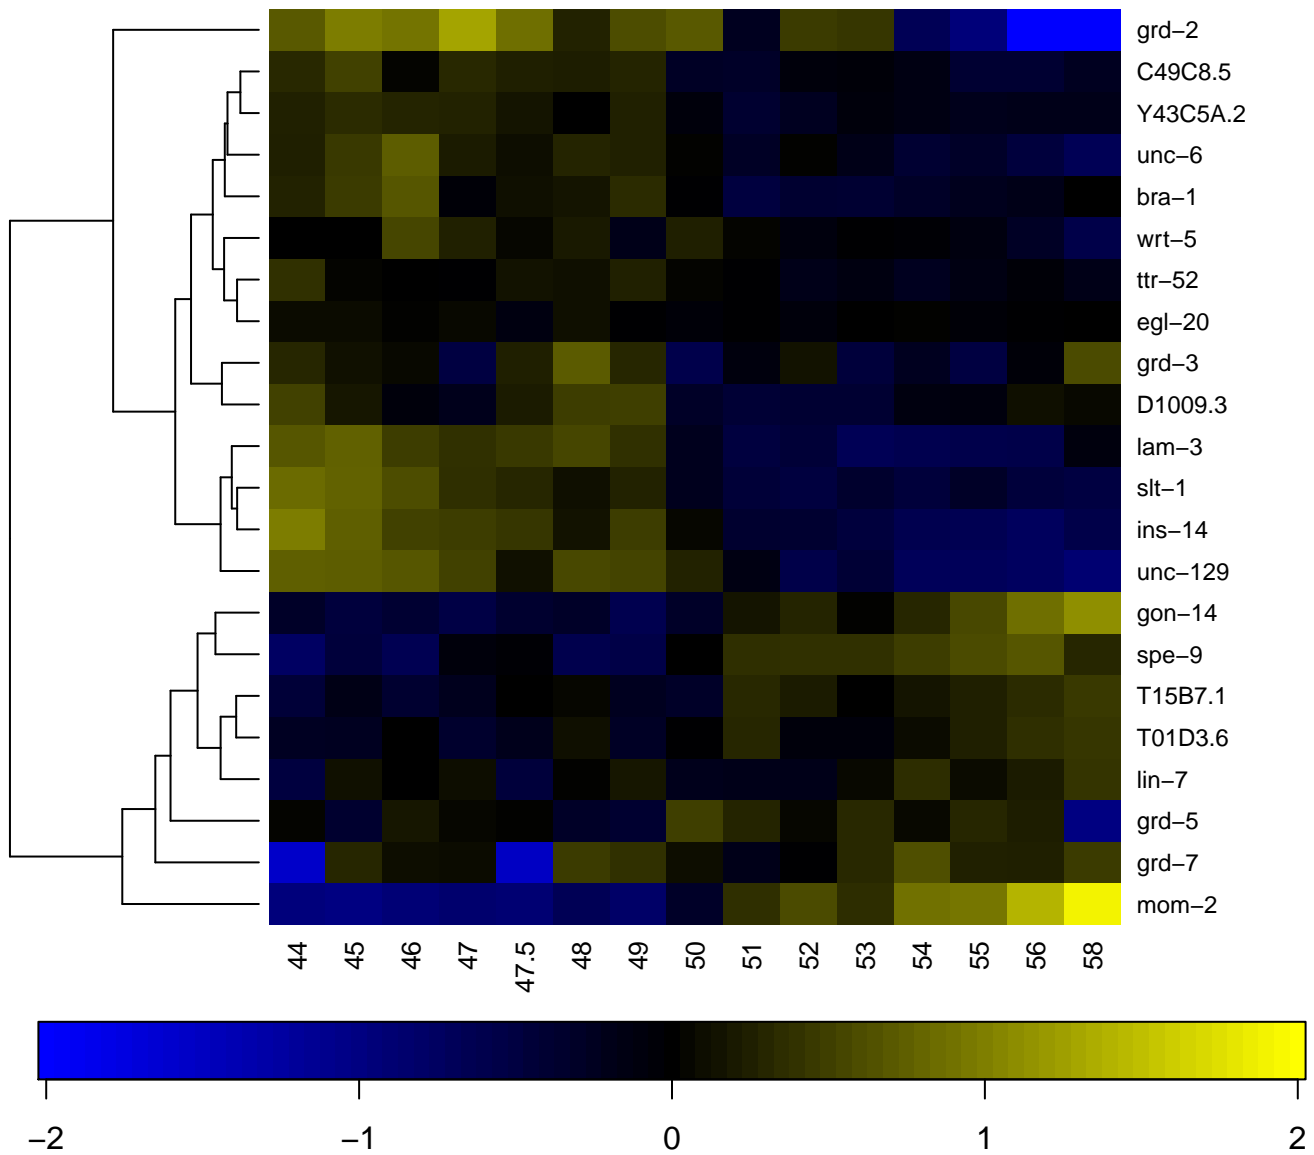

















# regulation of ARF GTPase activity

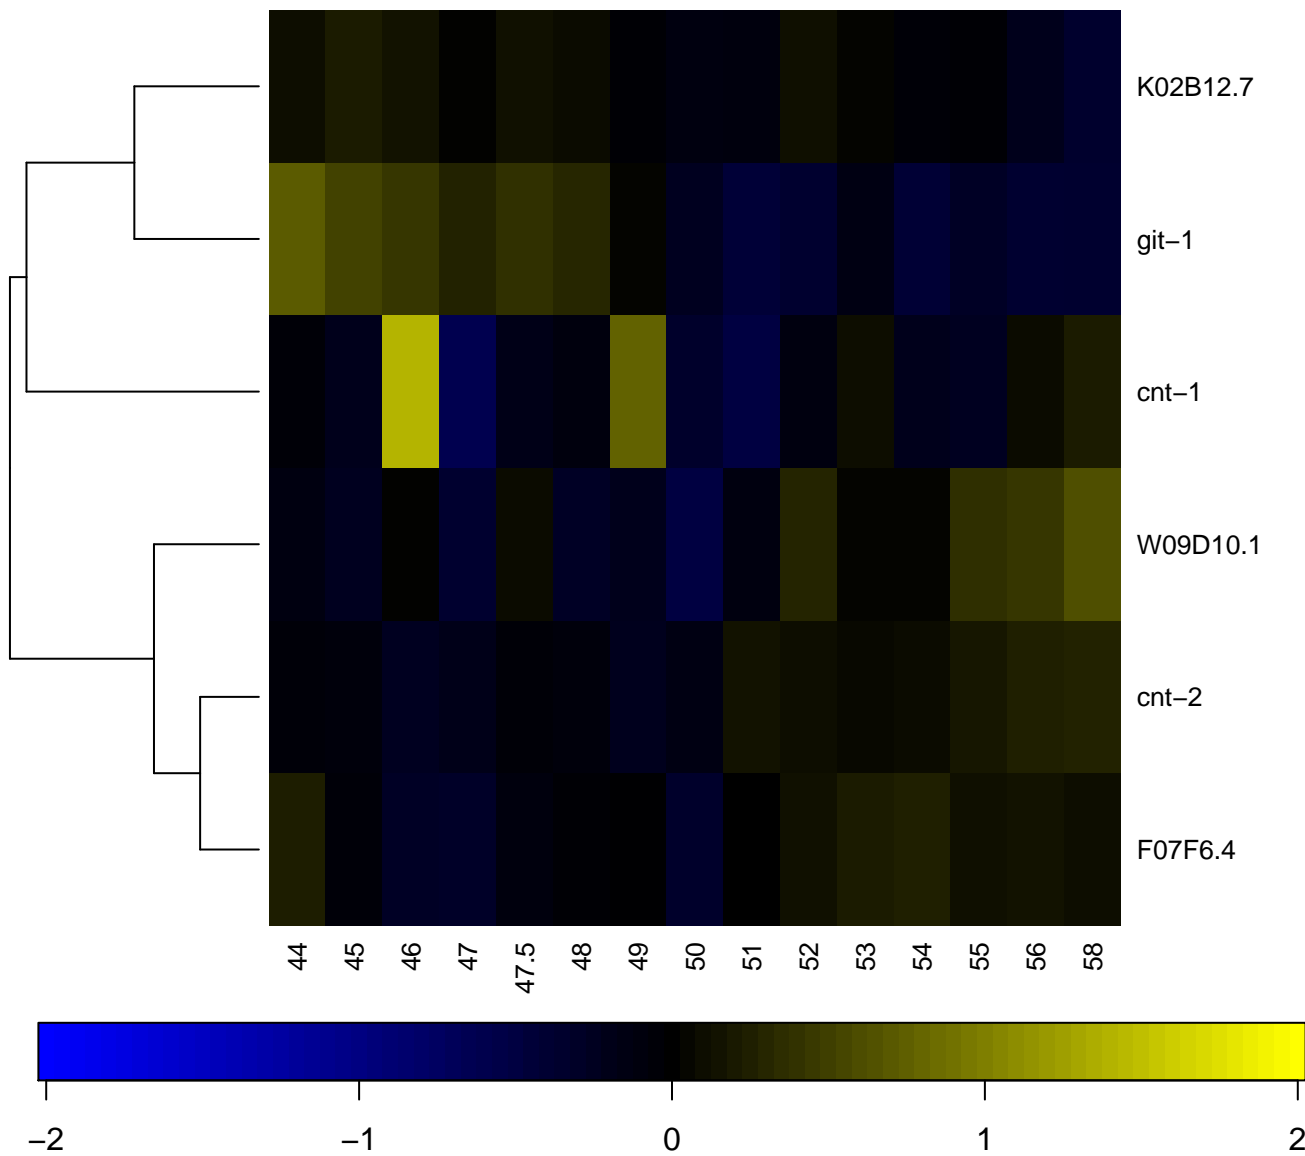













# regulation of cell fate specification

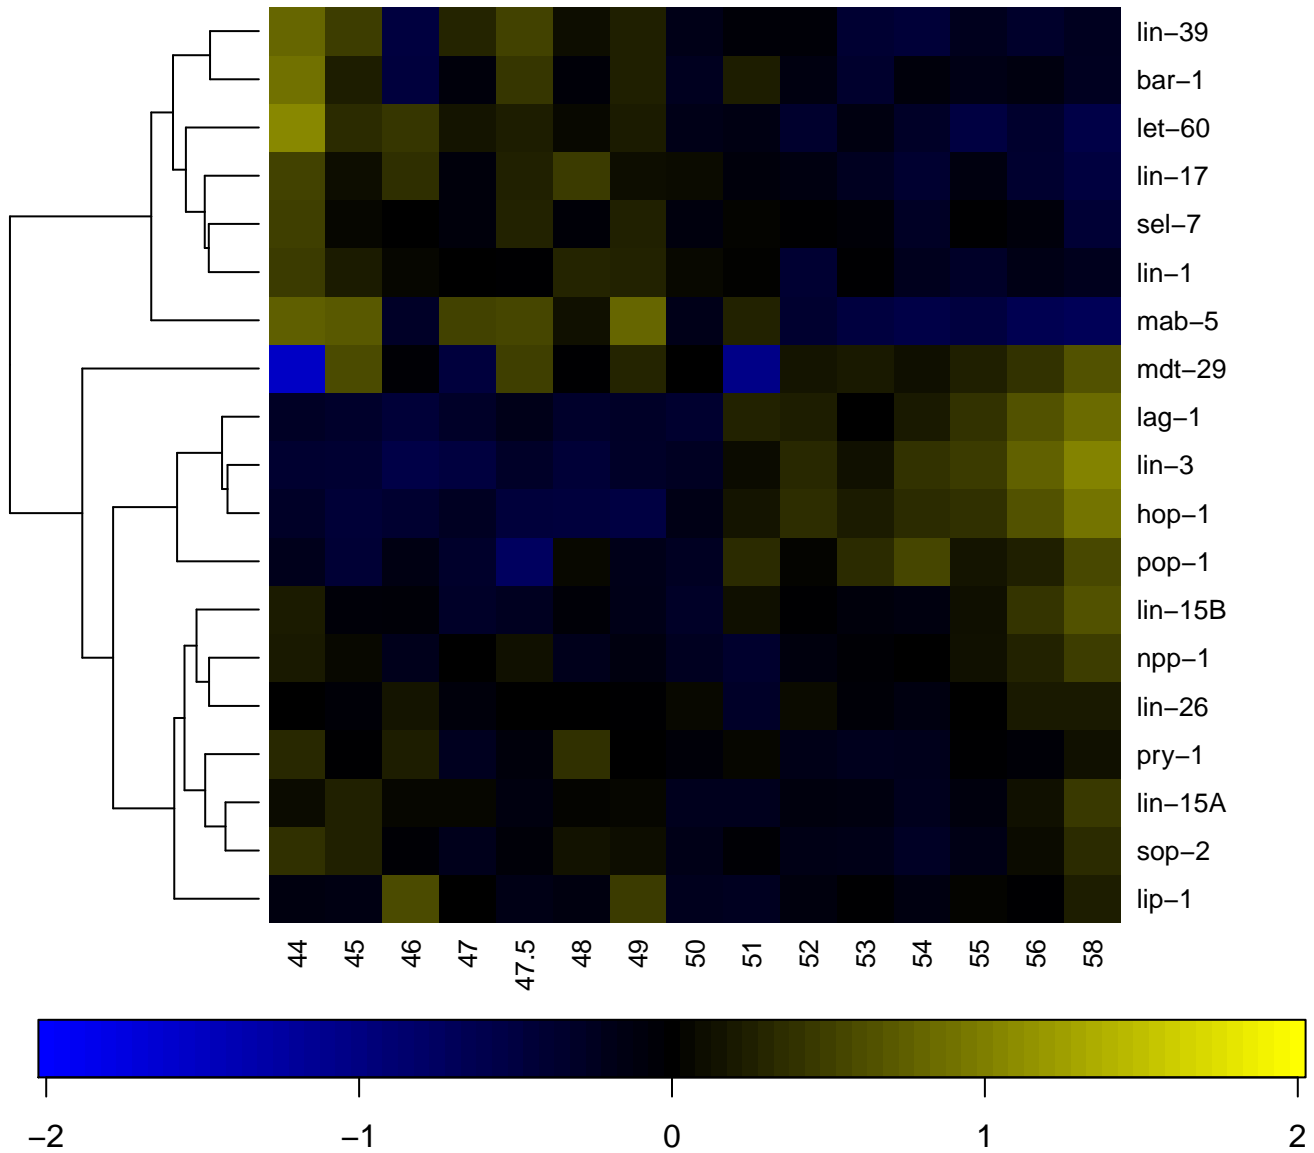

# regulation of cell migration

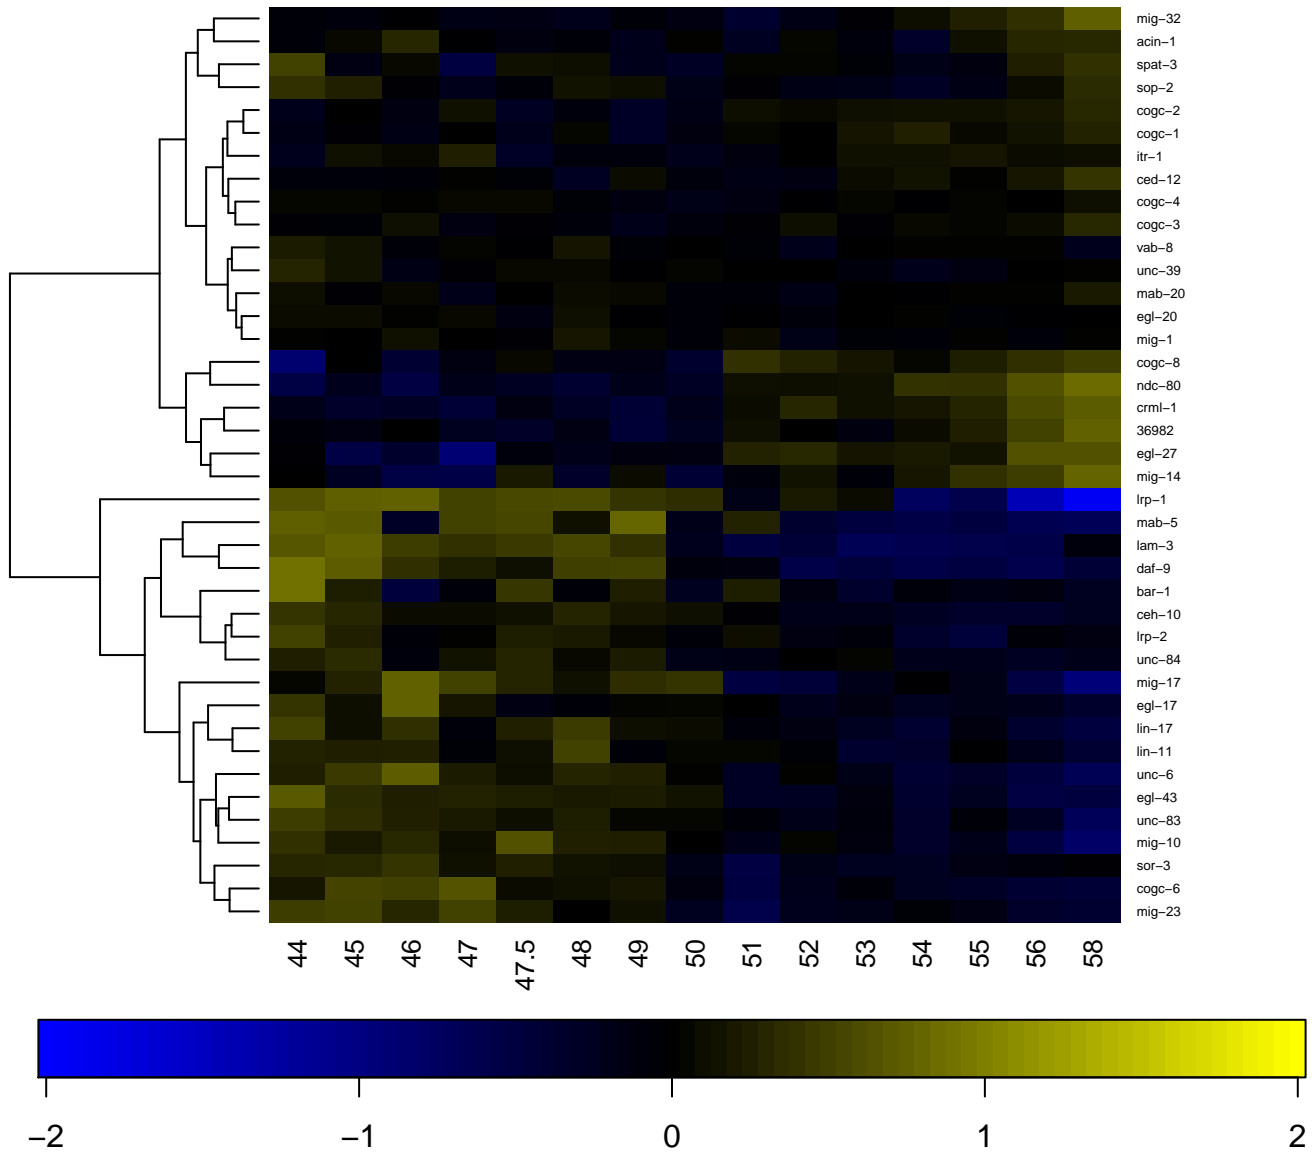

# regulation of cell projection organization

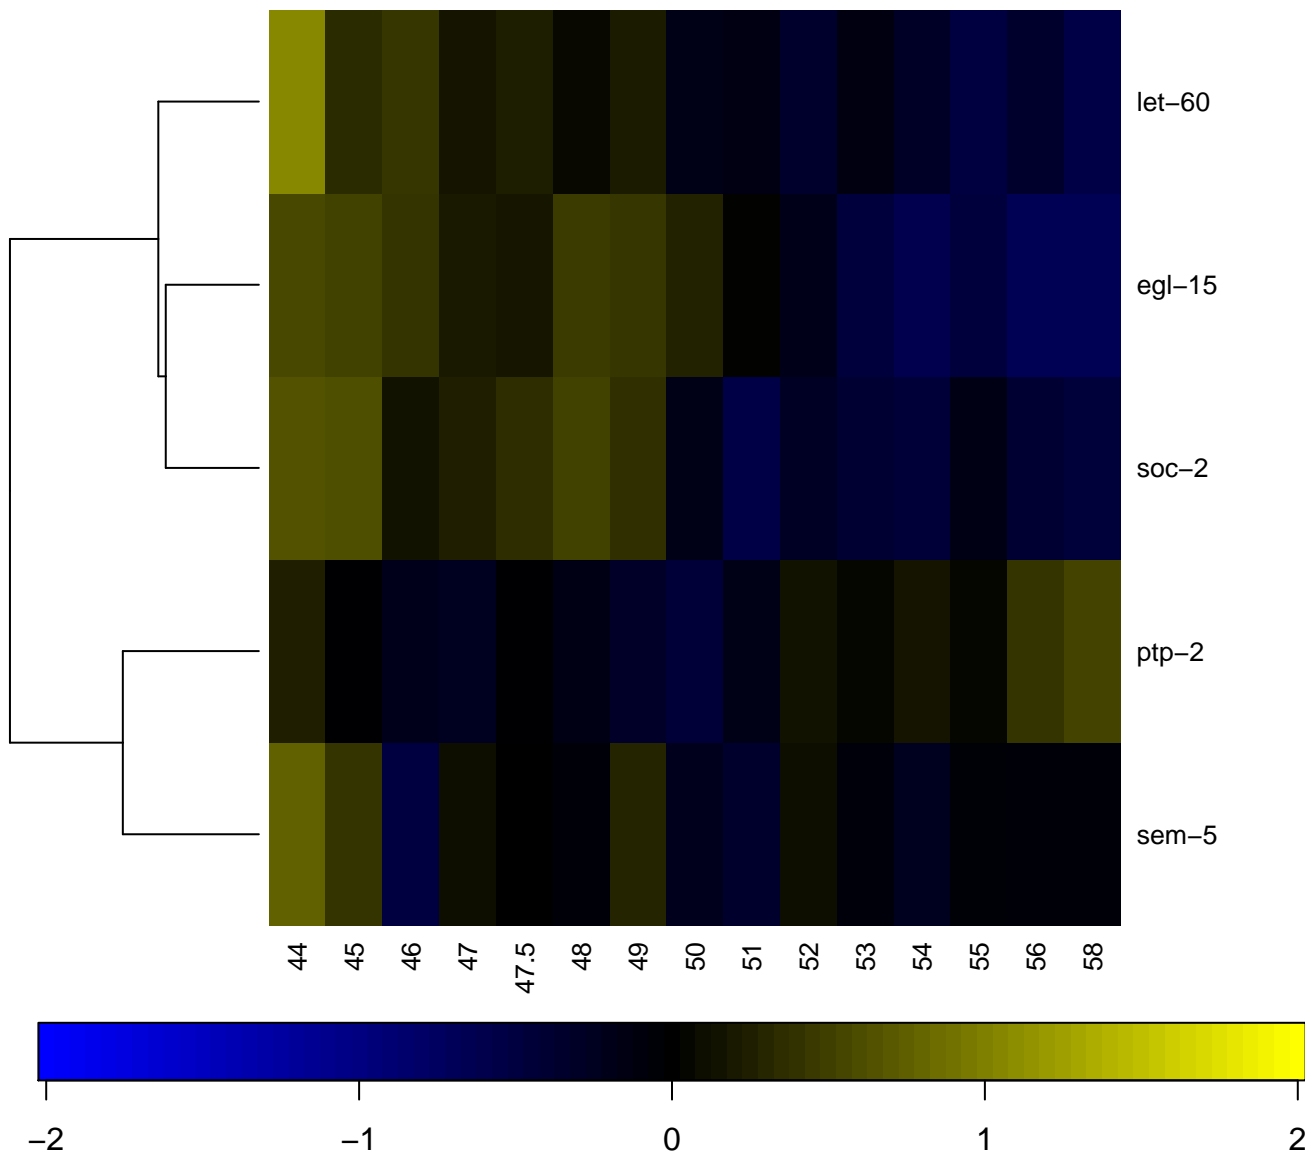

# regulation of cell proliferation

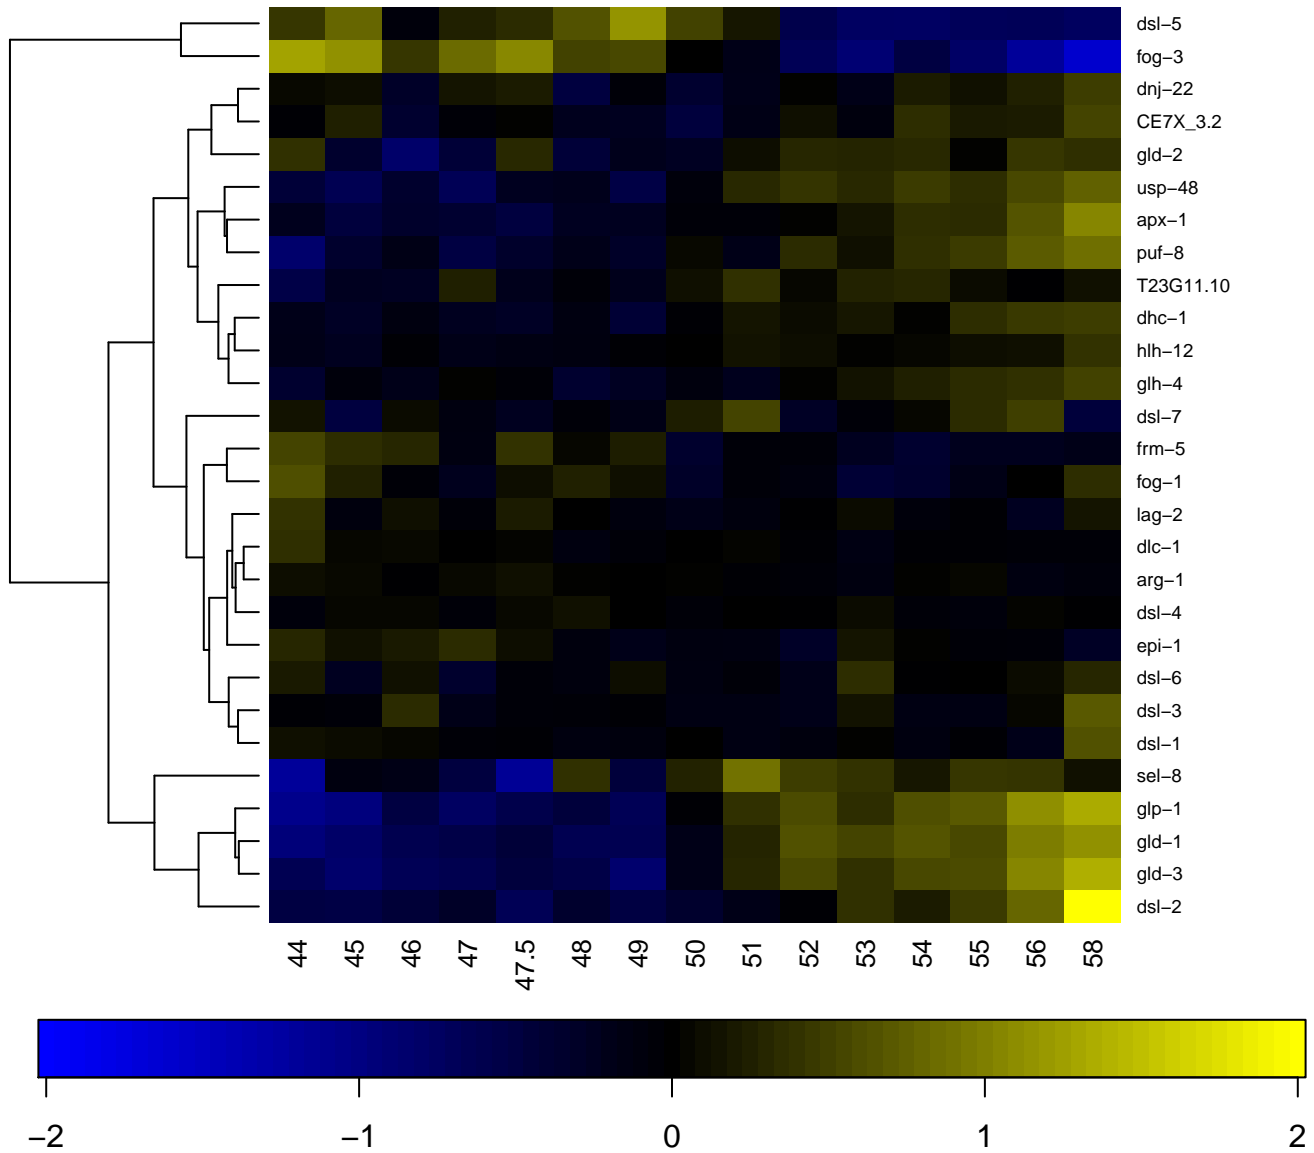





# regulation of chemotaxis

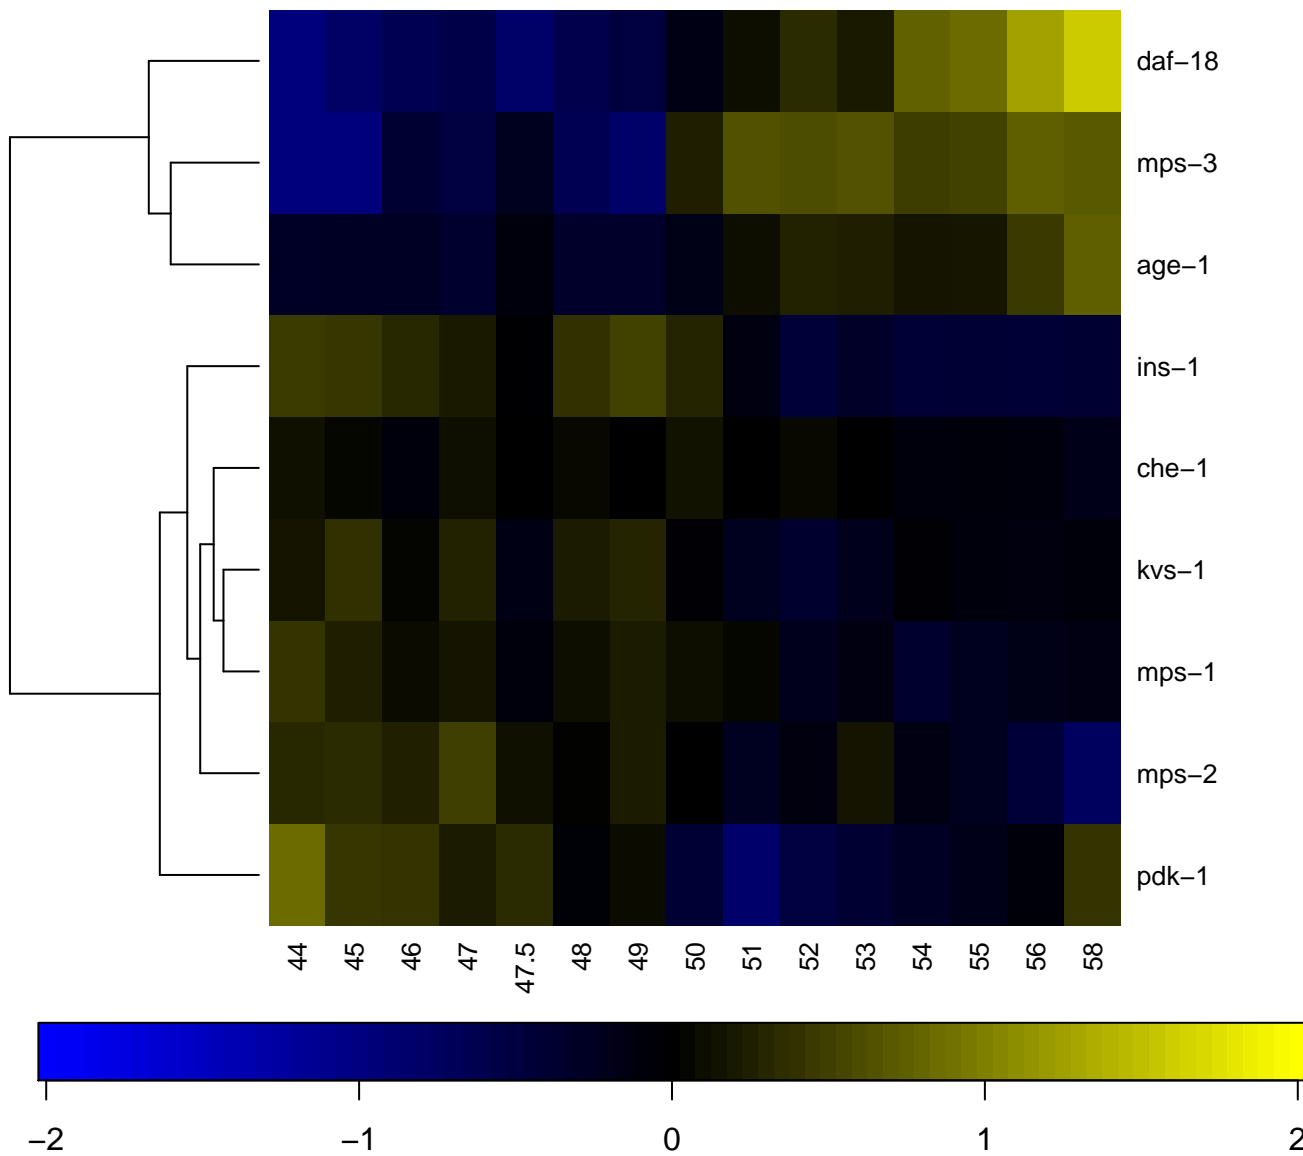







# regulation of locomotion

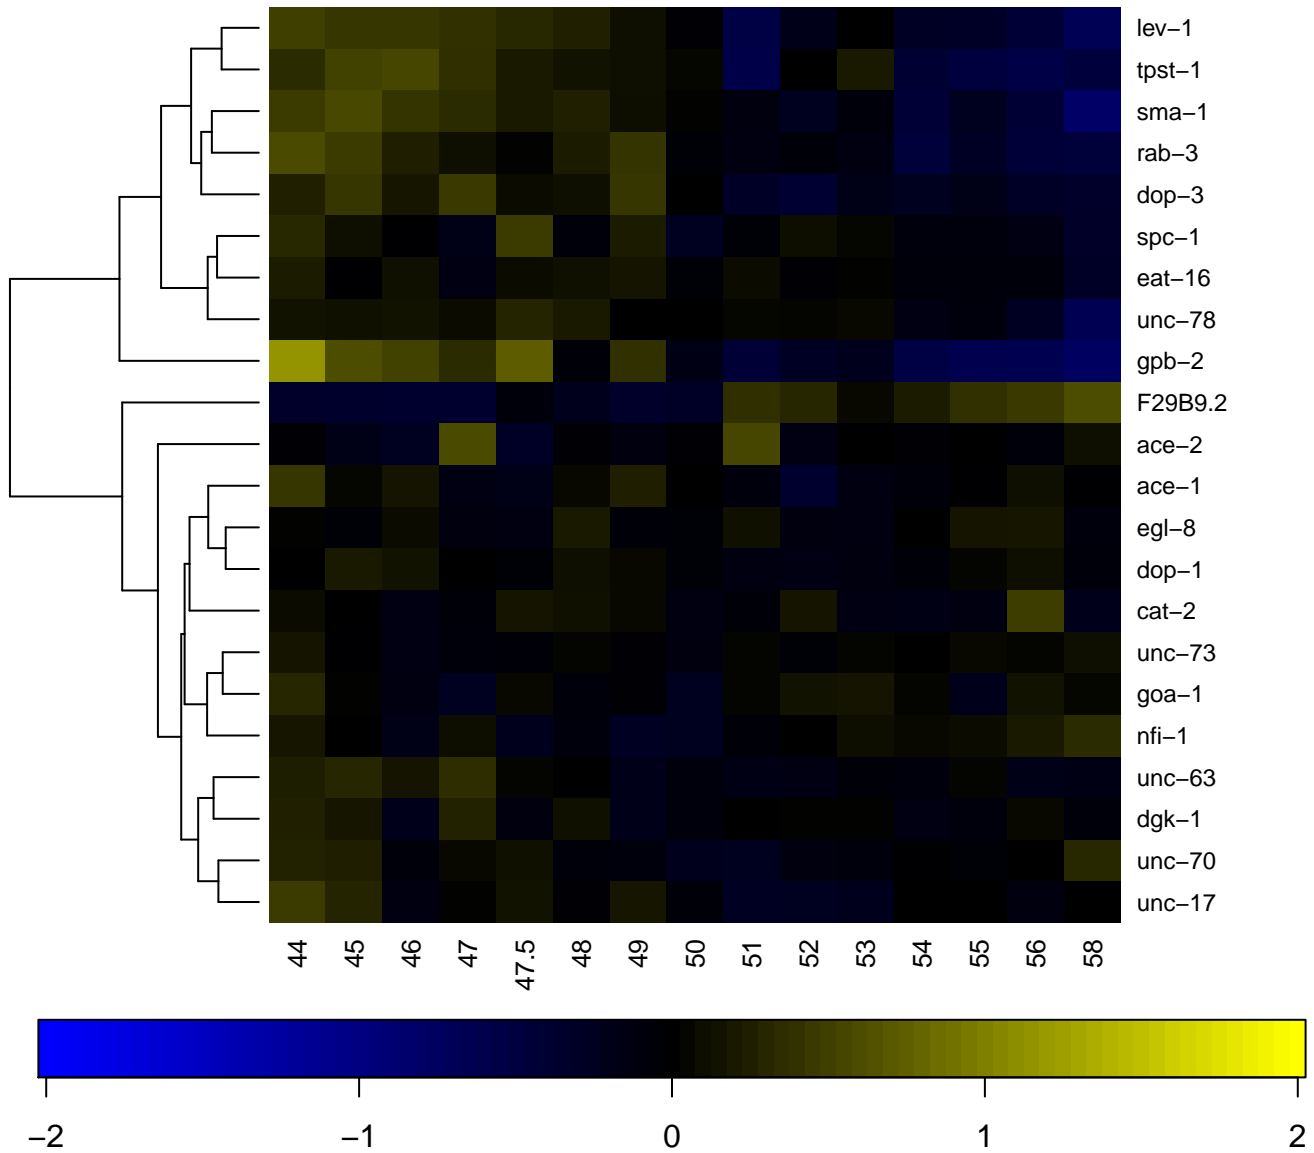

# regulation of meiosis

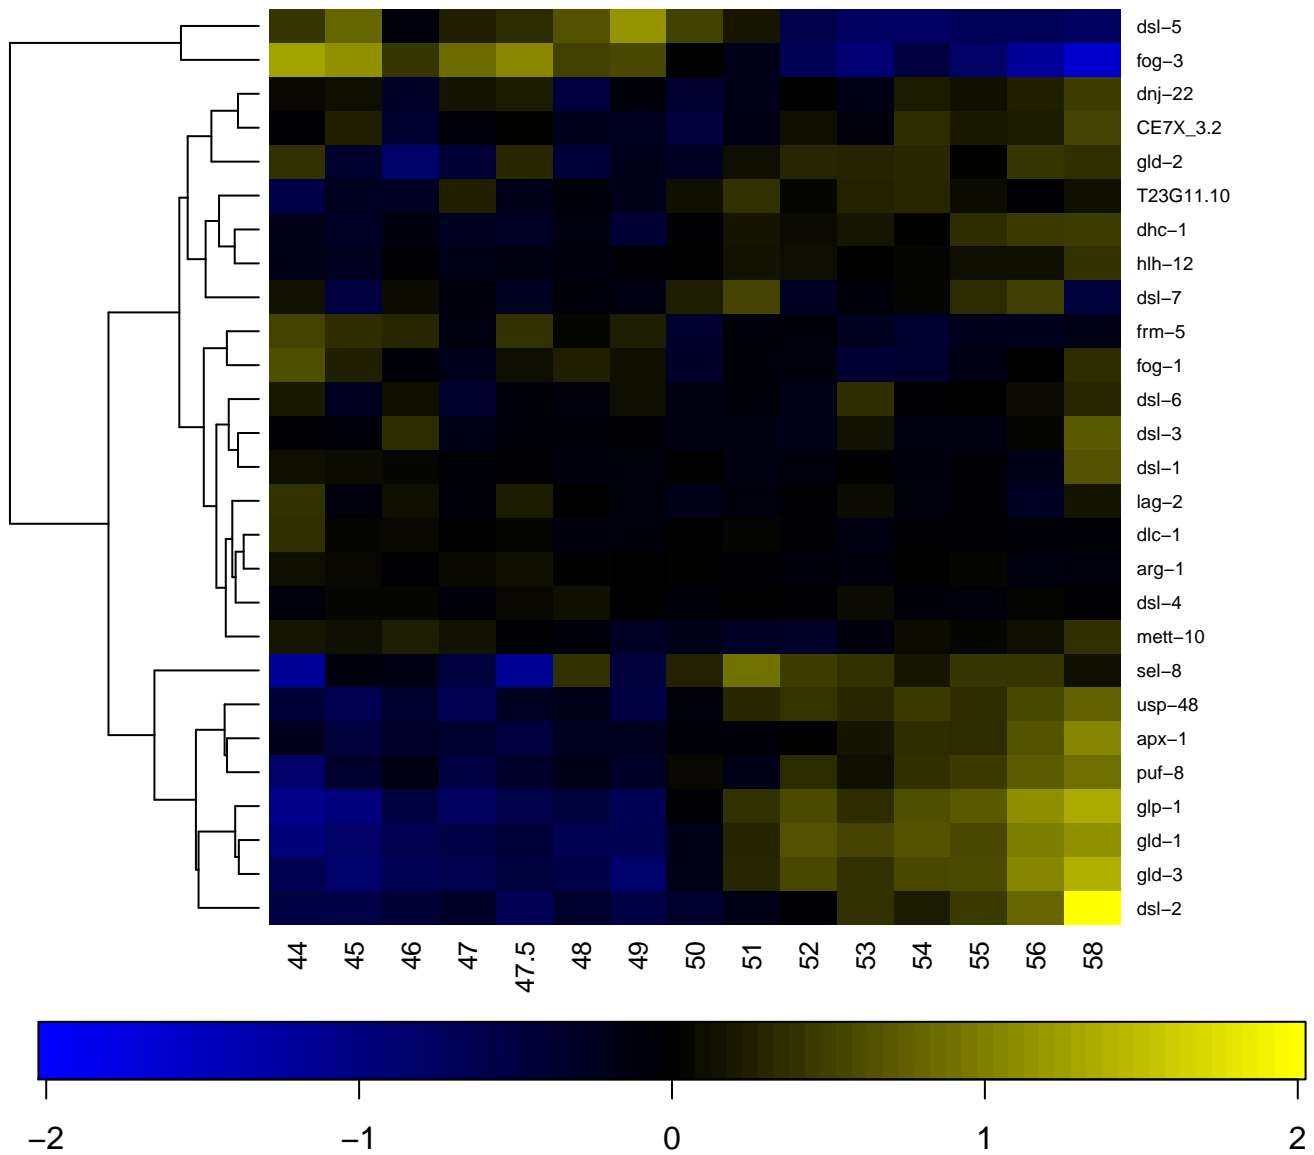

# regulation of multicellular organism growth

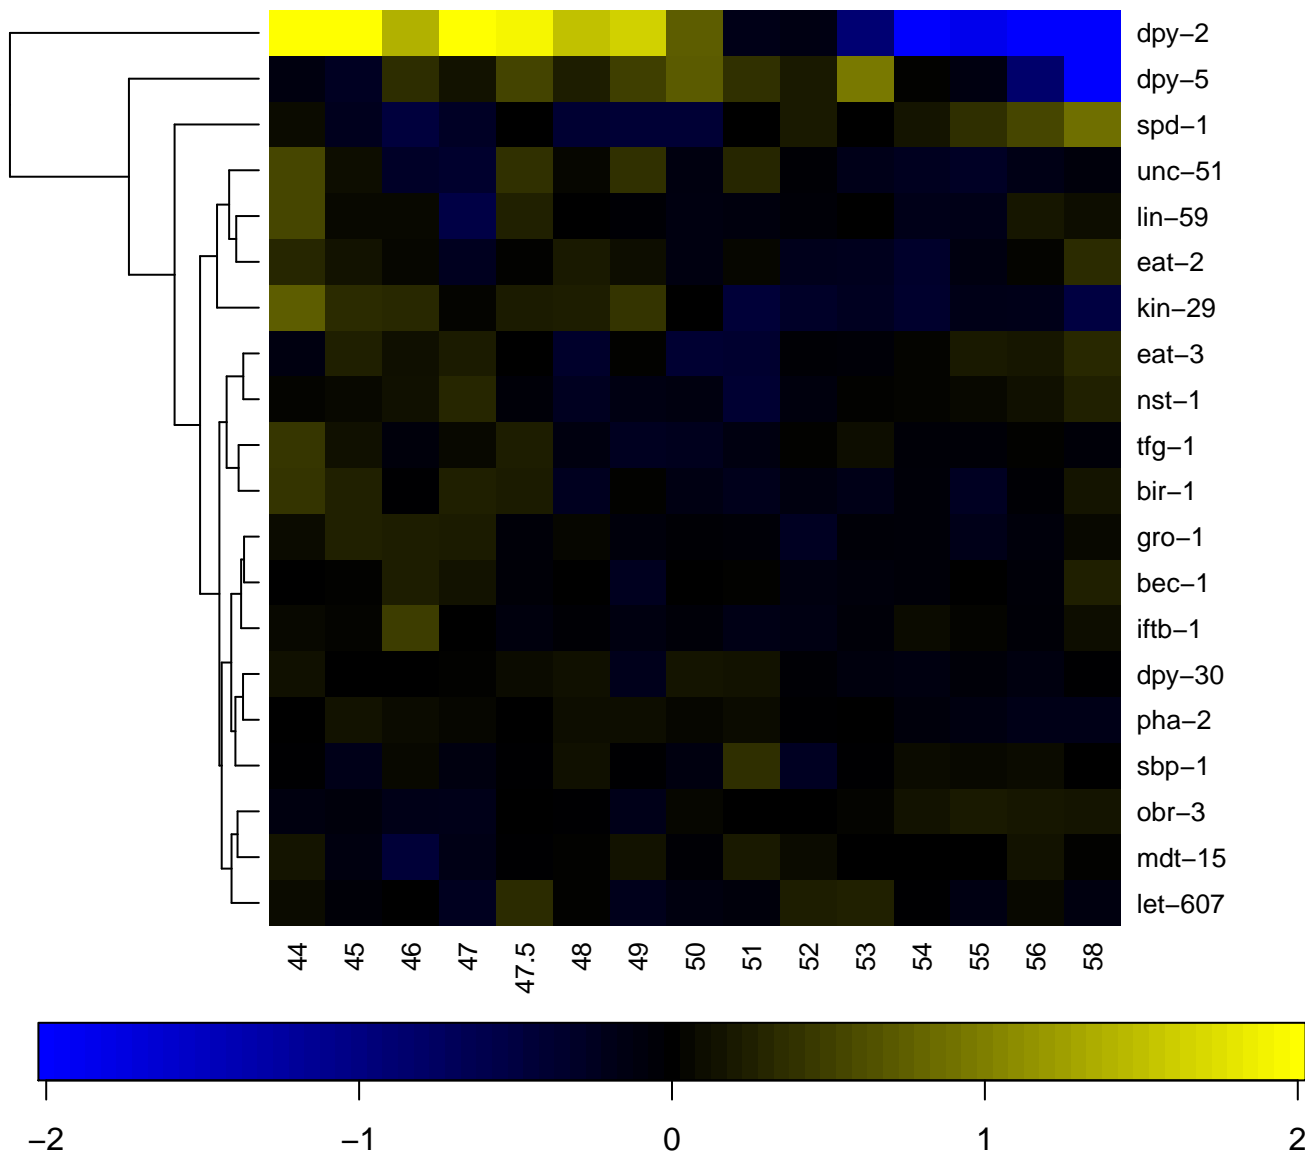







# regulation of oviposition

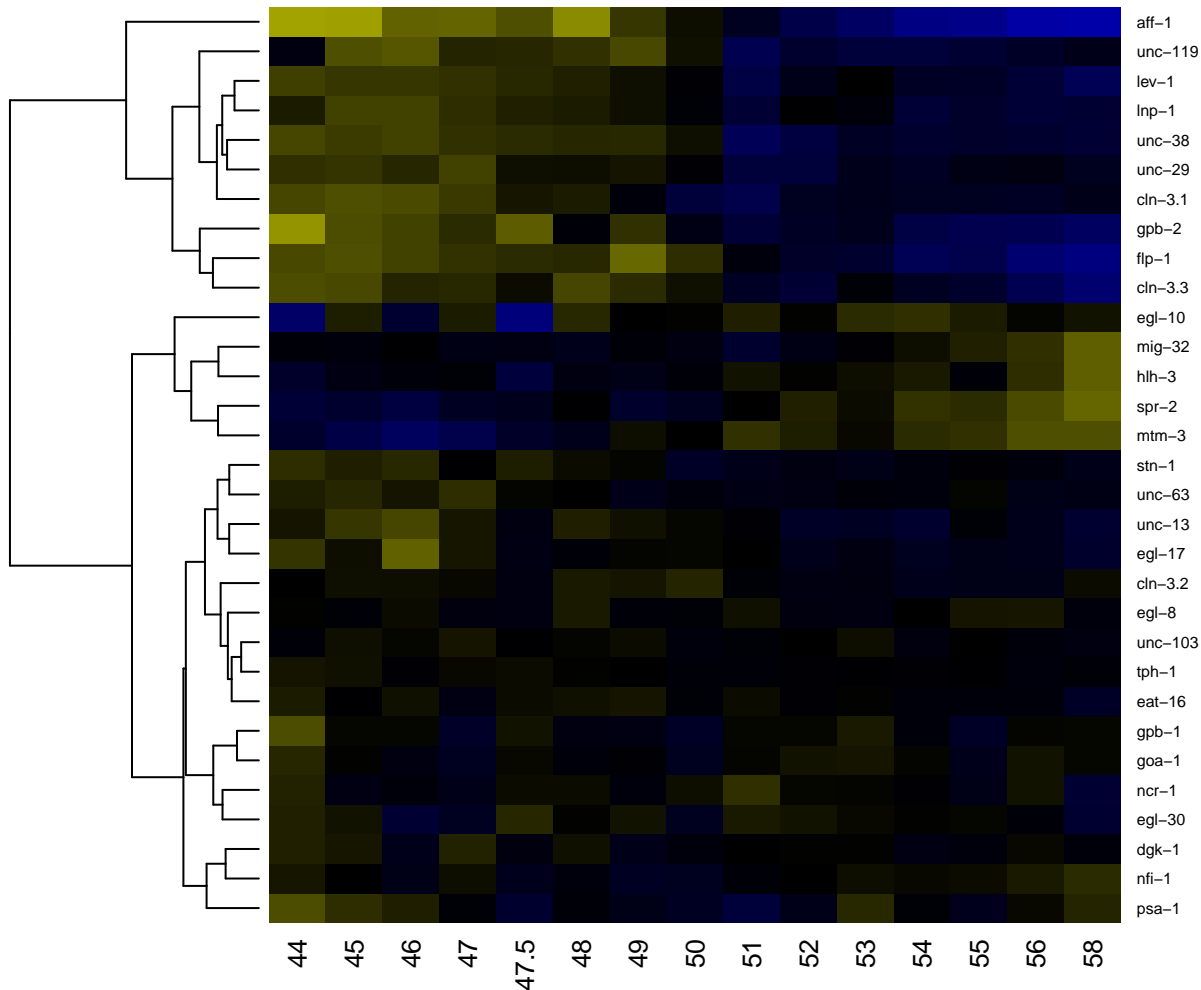

# regulation of pH

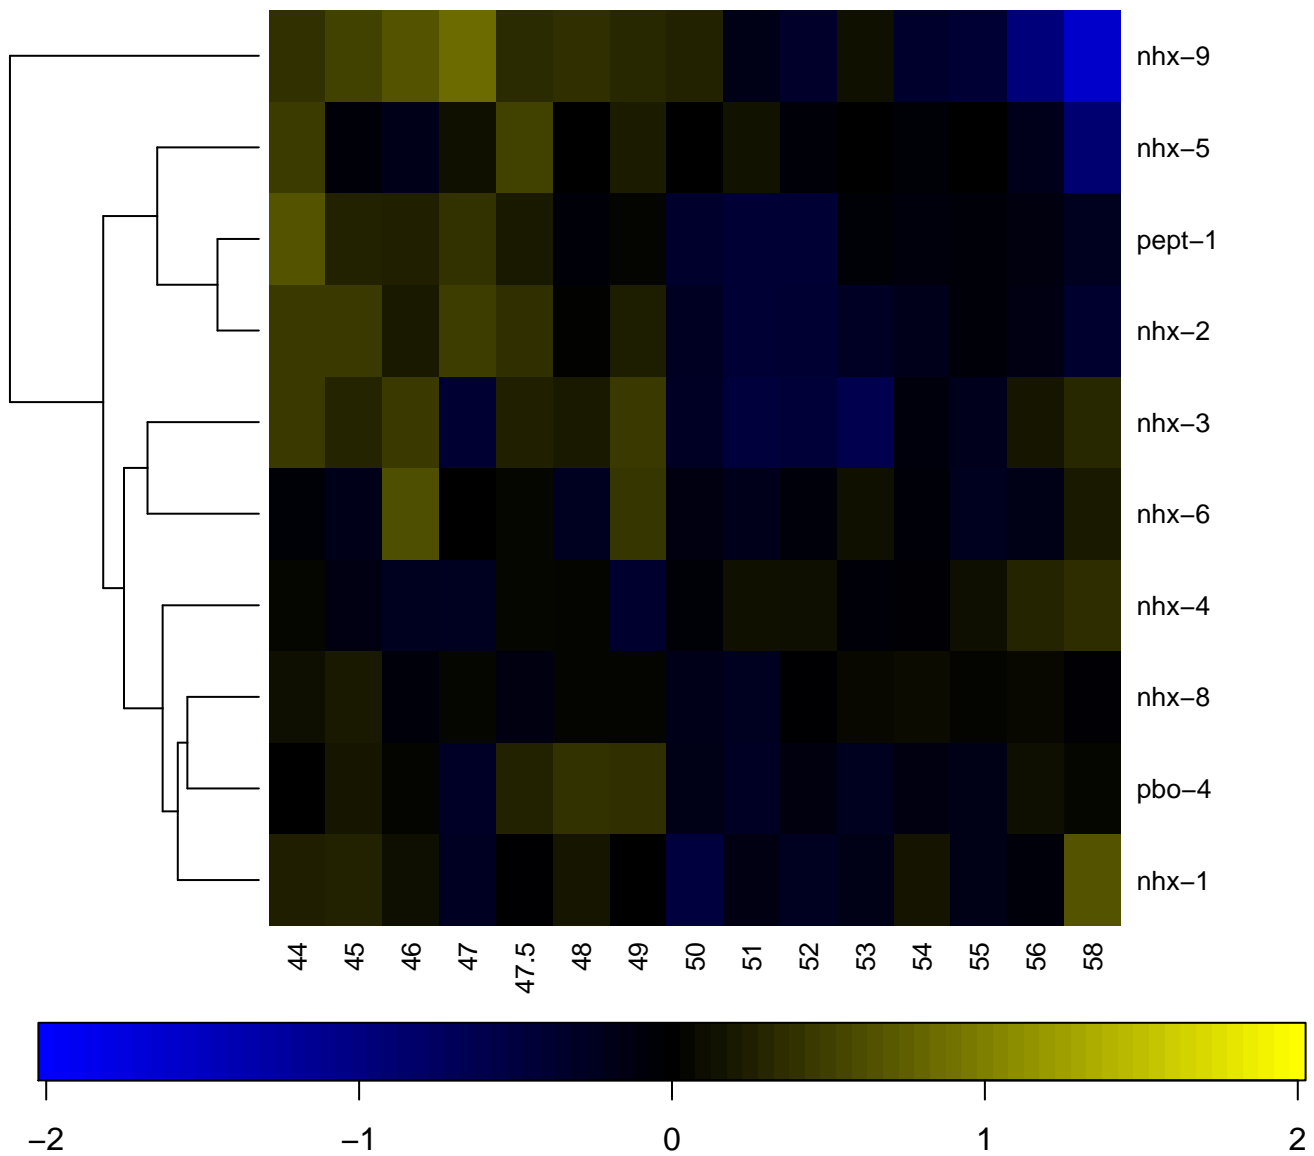

# regulation of pharyngeal pumping

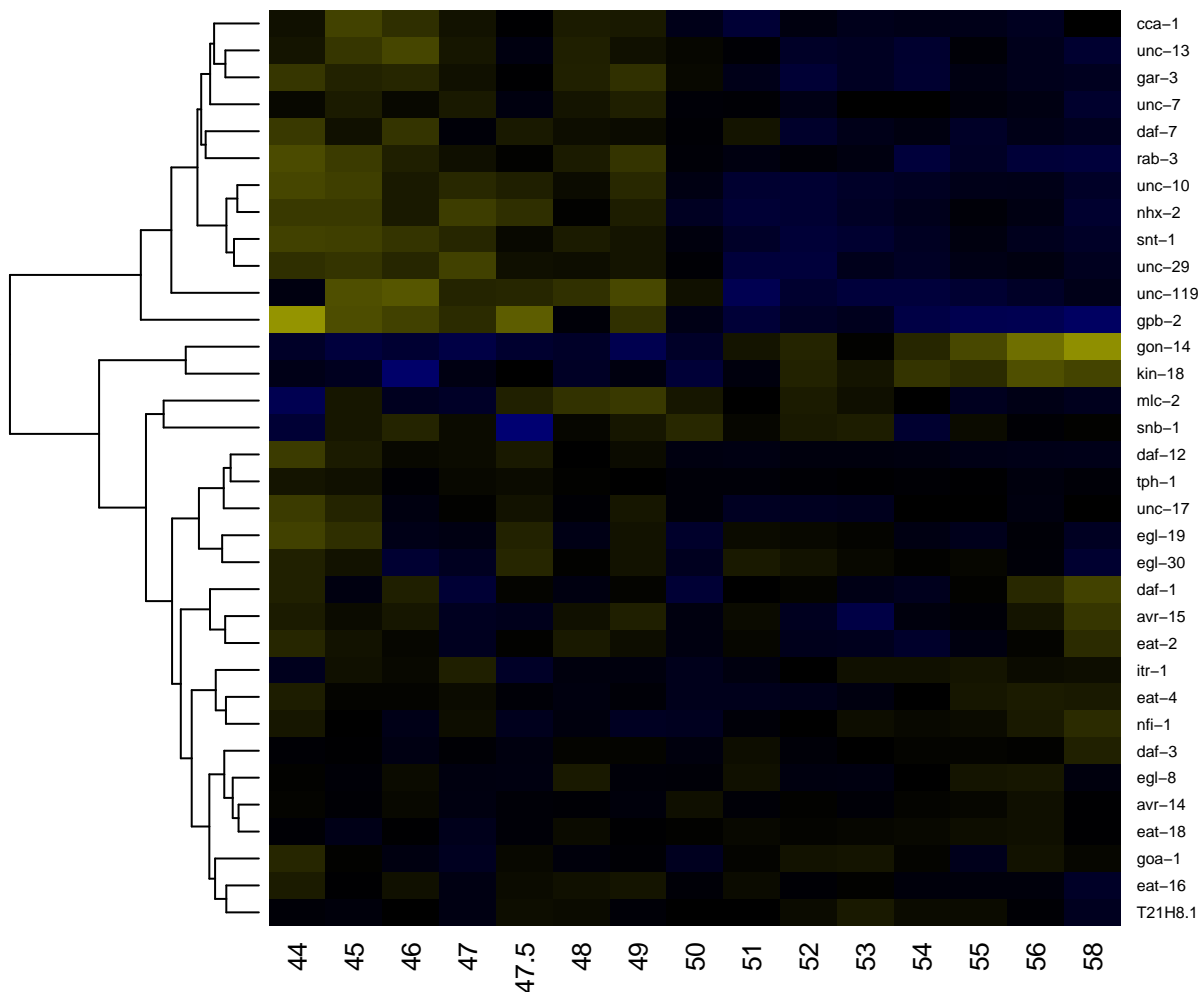

# regulation of protein localization

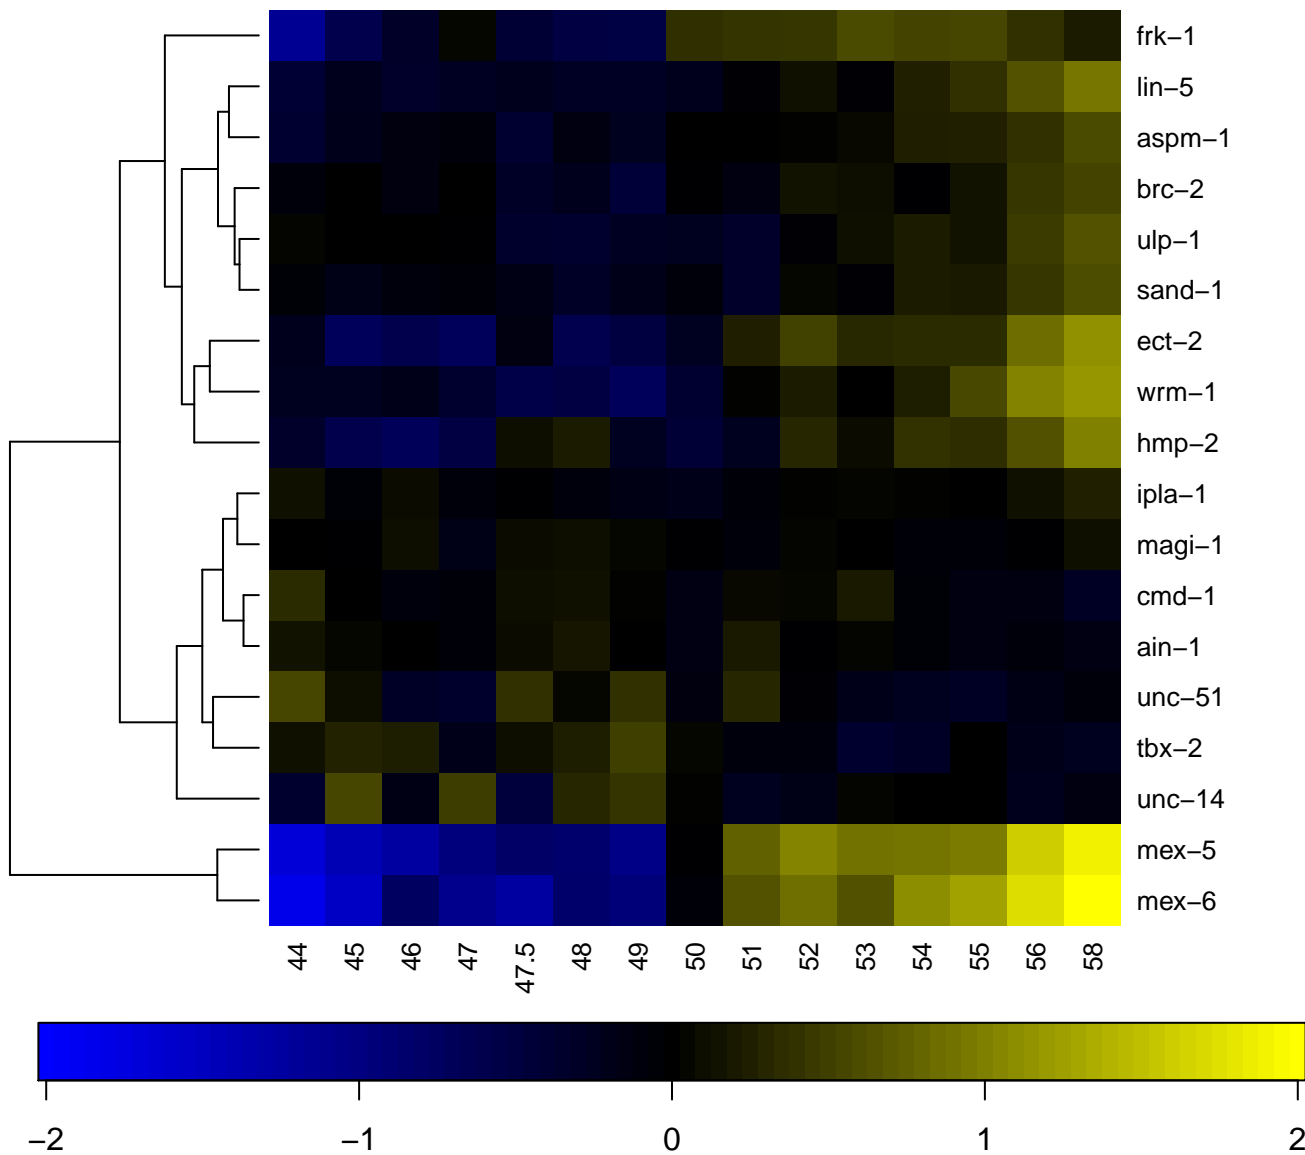

# regulation of protein metabolic process

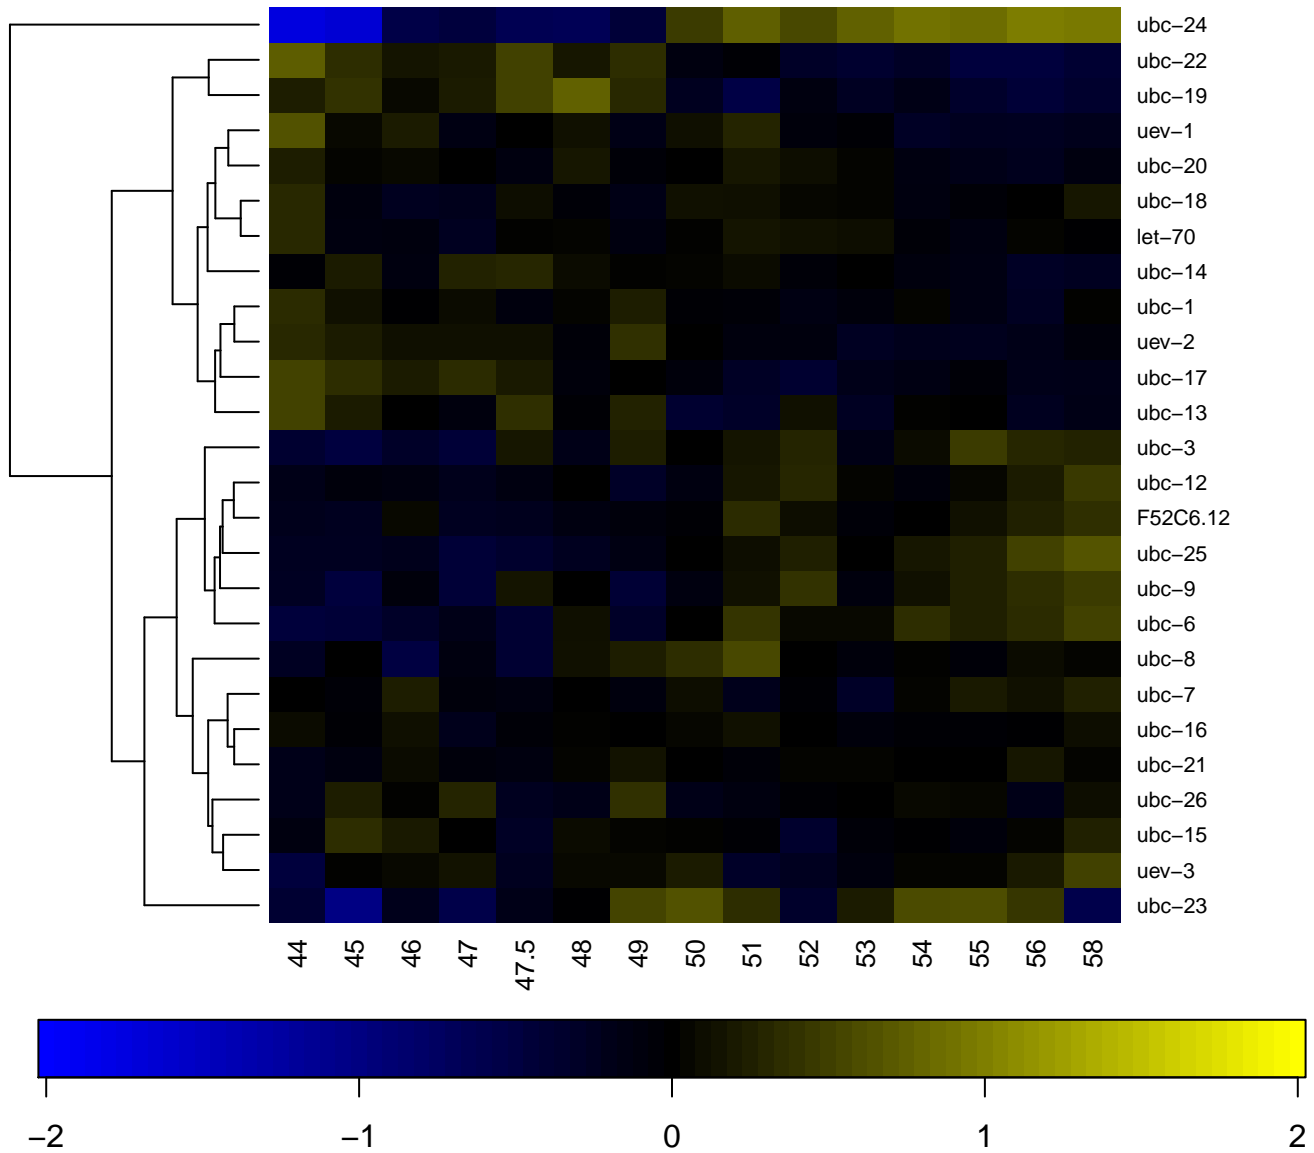

# regulation of Rab GTPase activity

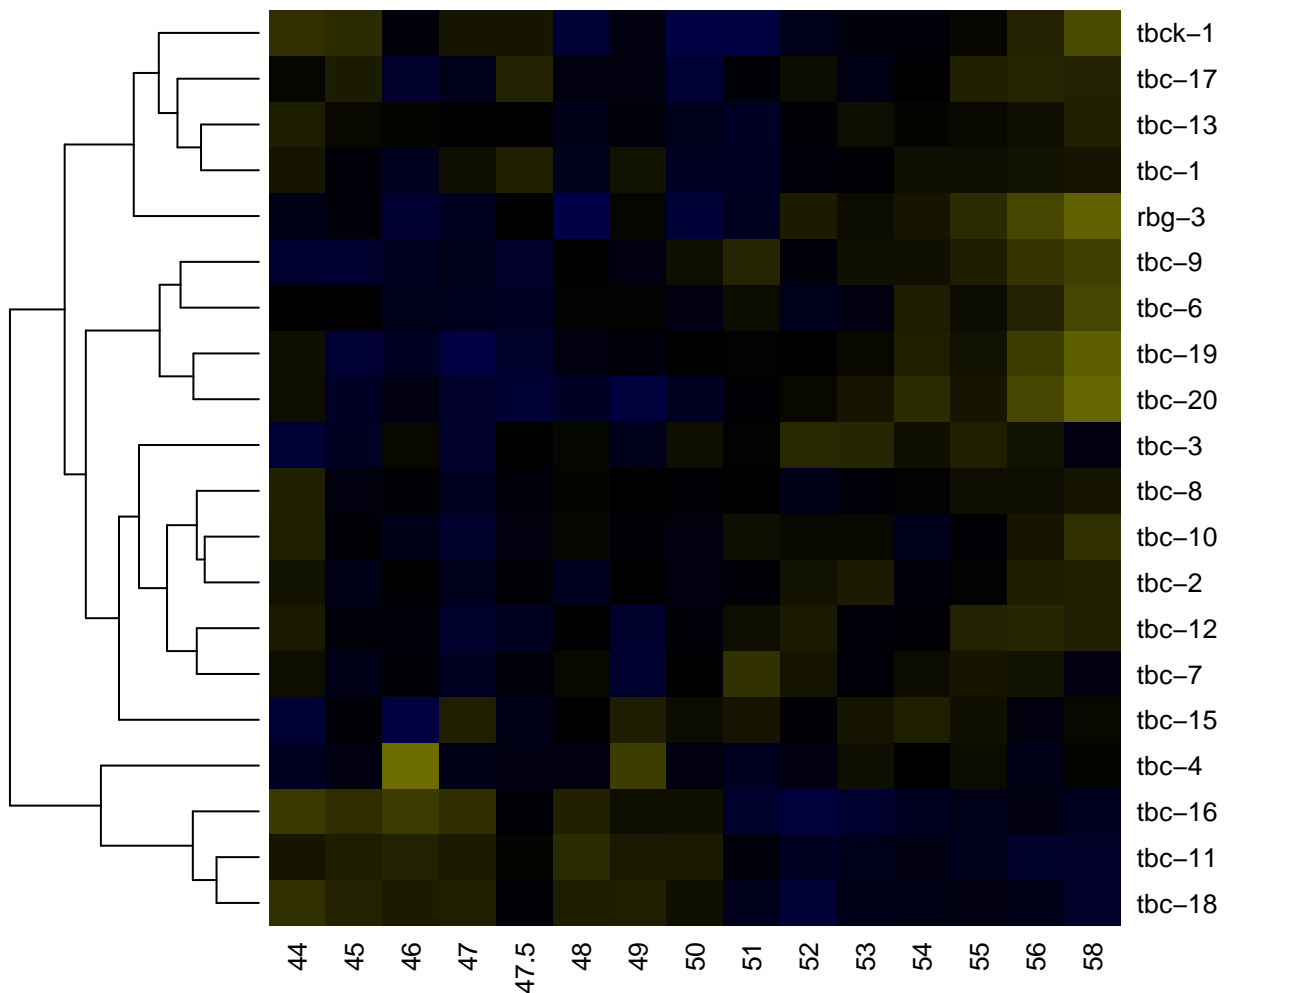



# regulation of Rho protein signal transduction

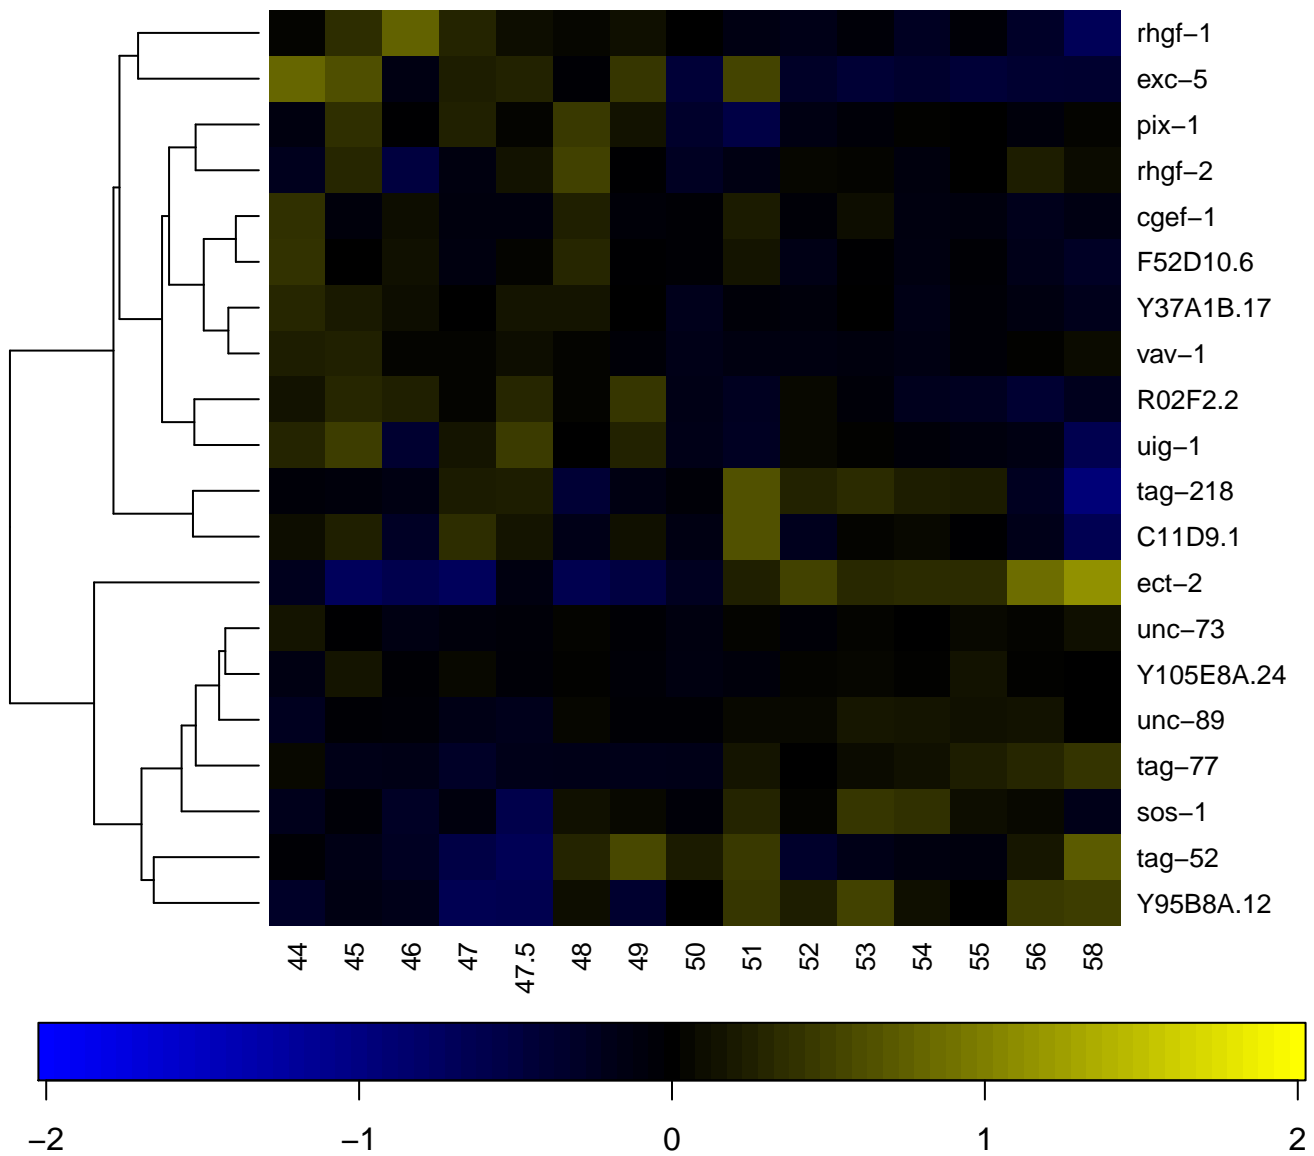



# regulation of synapse organization

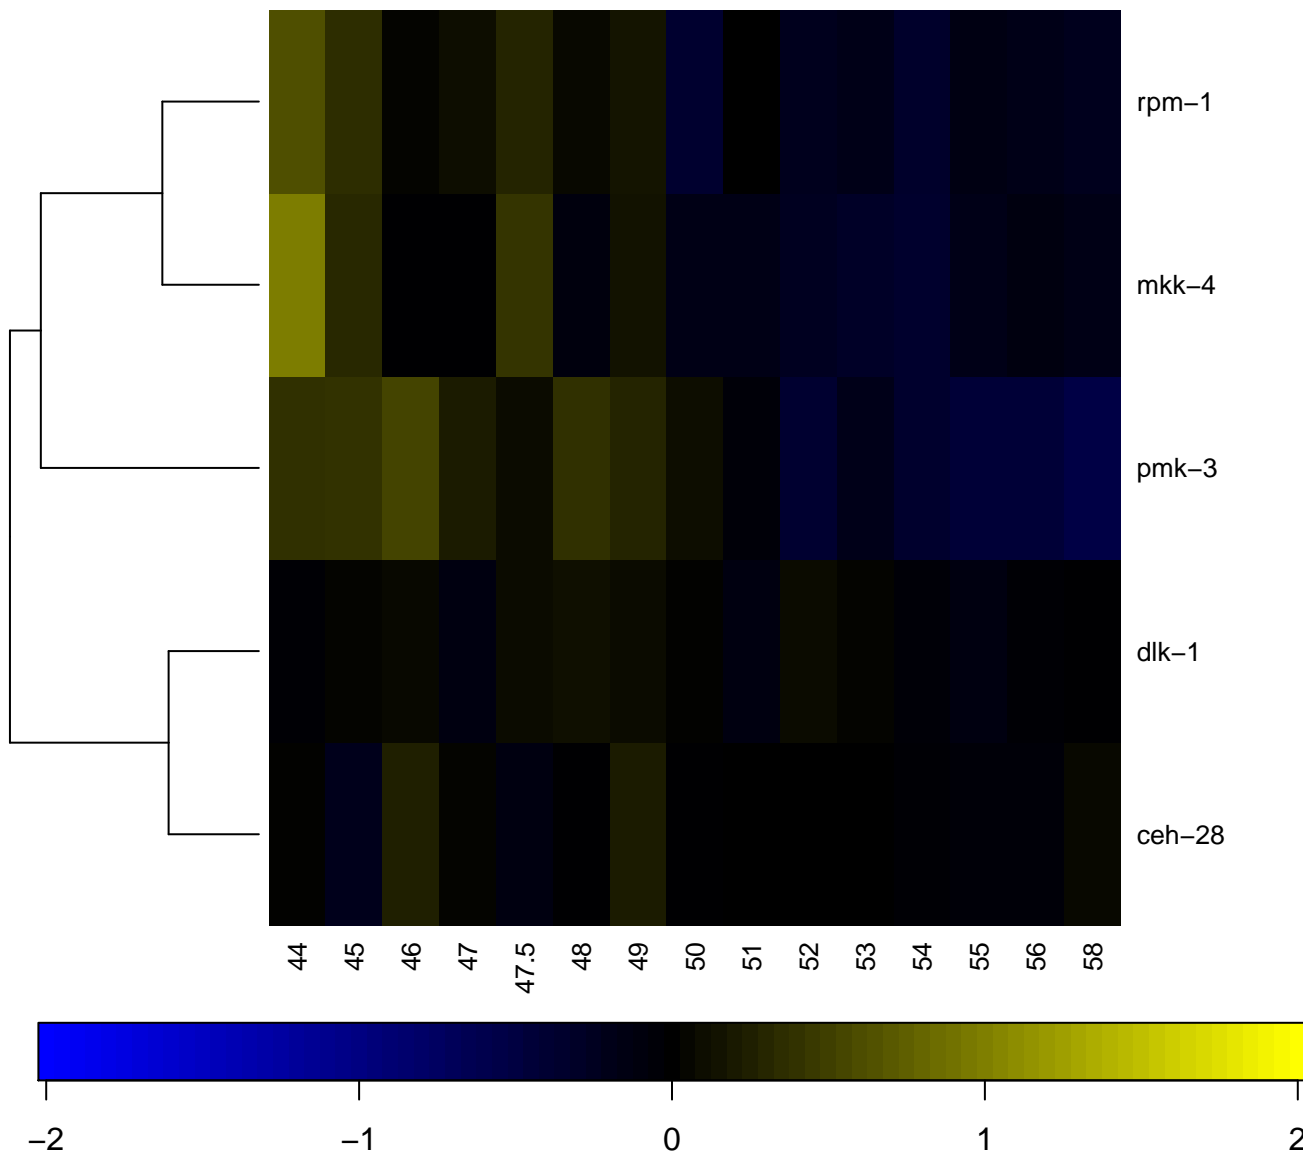

# regulation of transcription

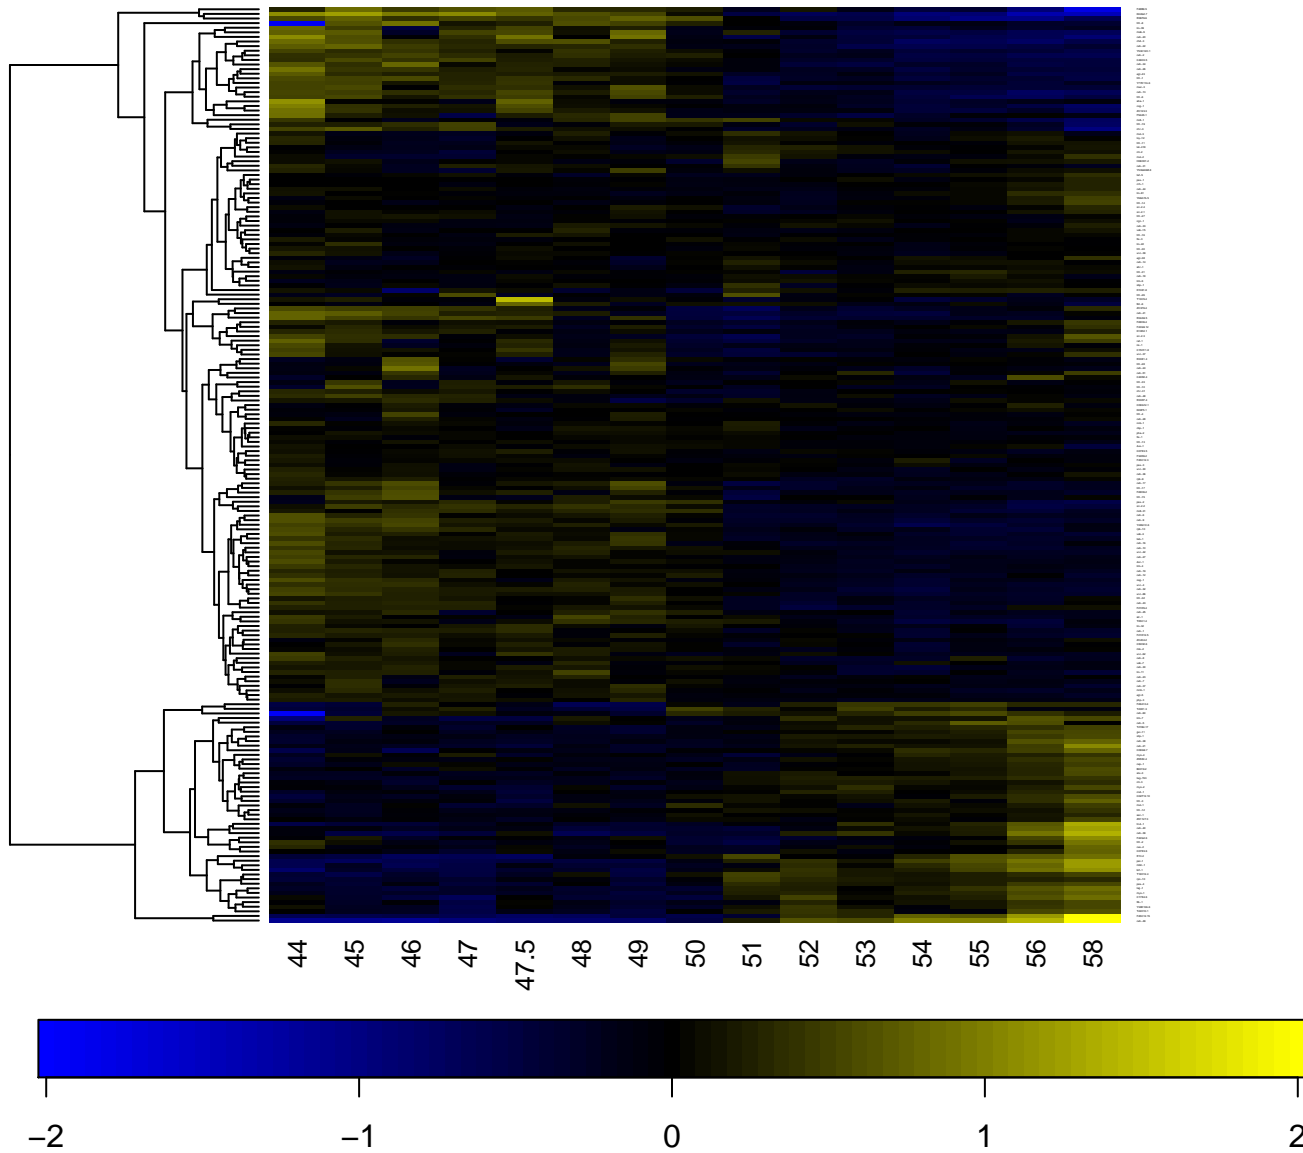

# regulation of transcription from RNA polymerase II promot

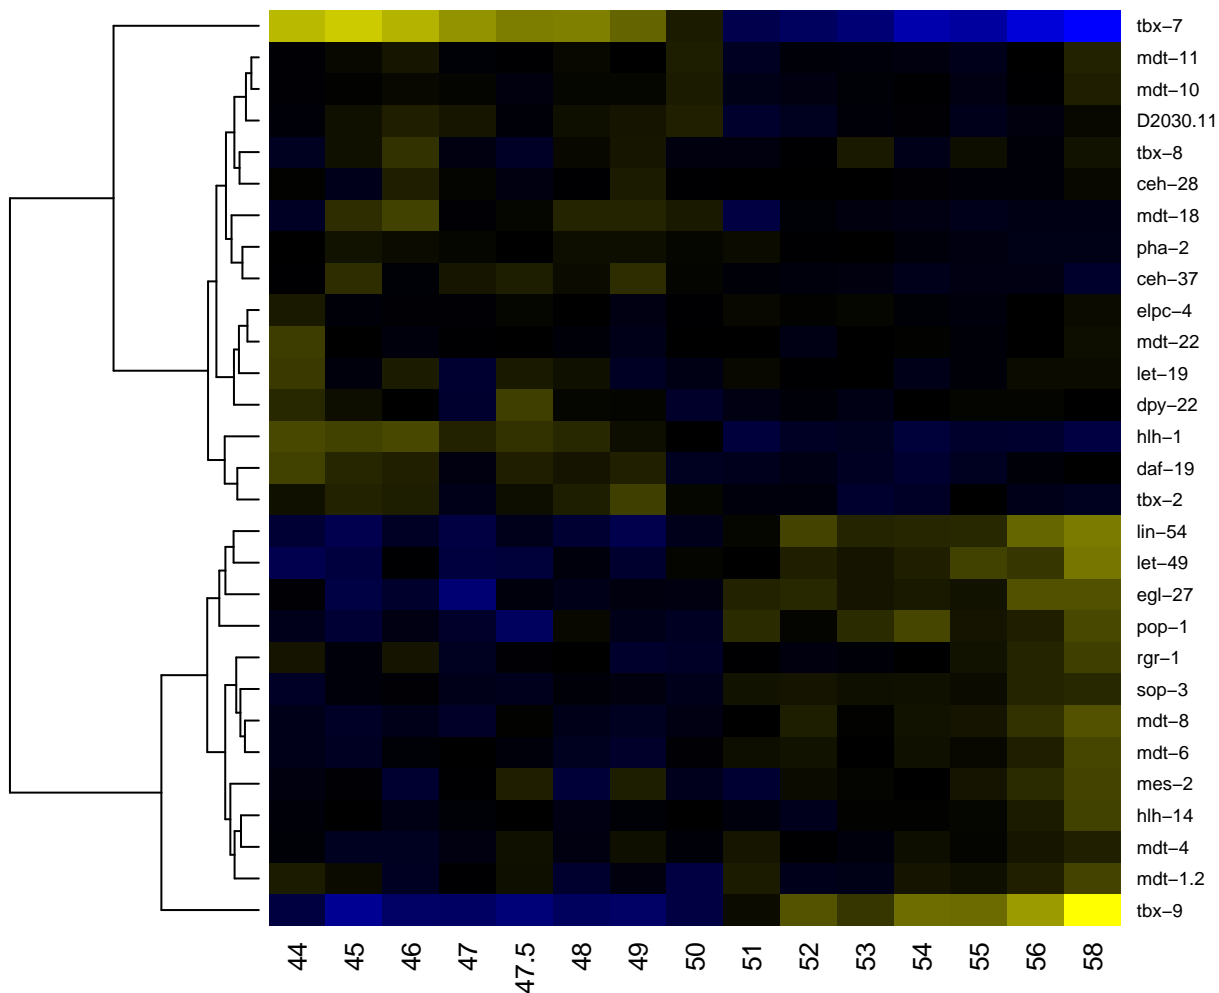

# regulation of transcription, DNA-dependent

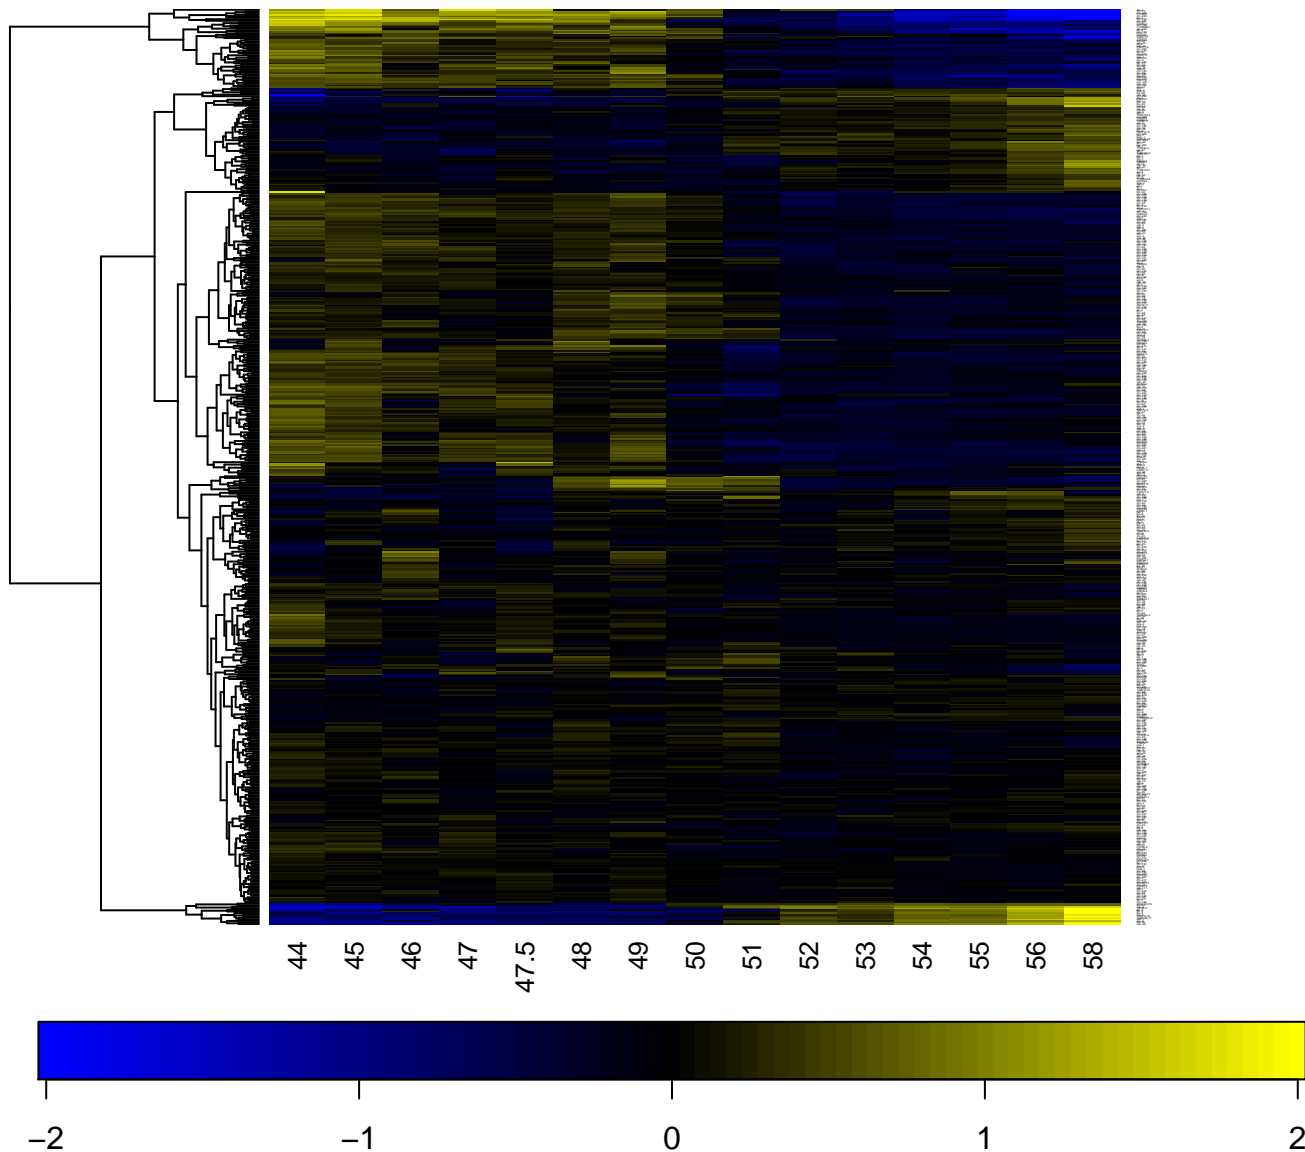

# regulation of tube size

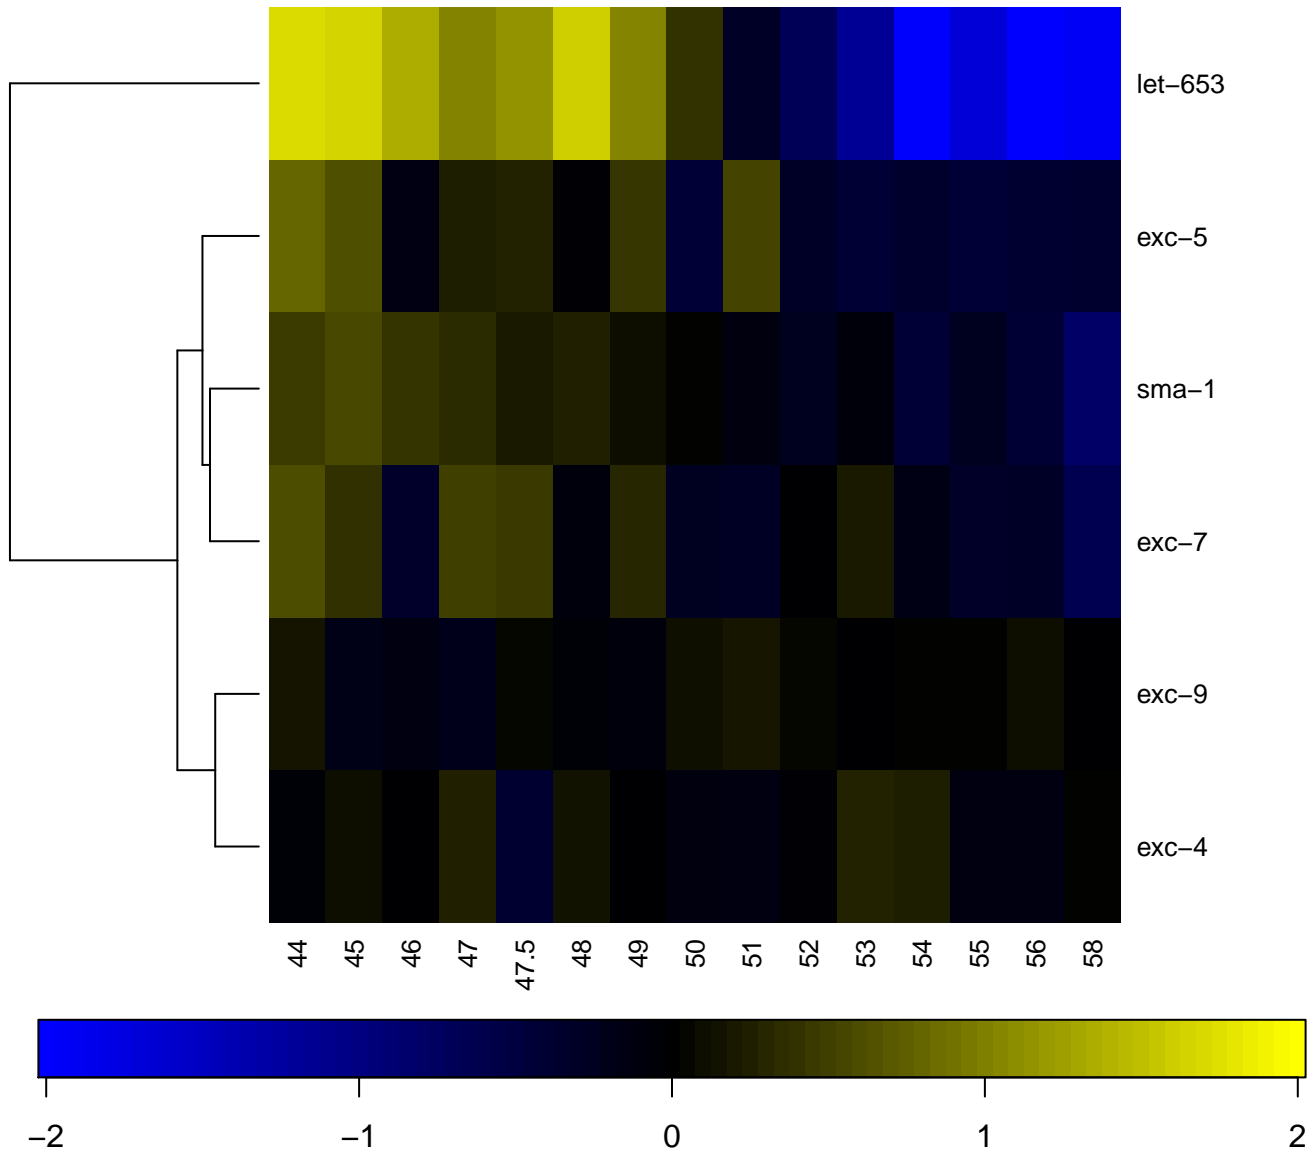





# reproduction

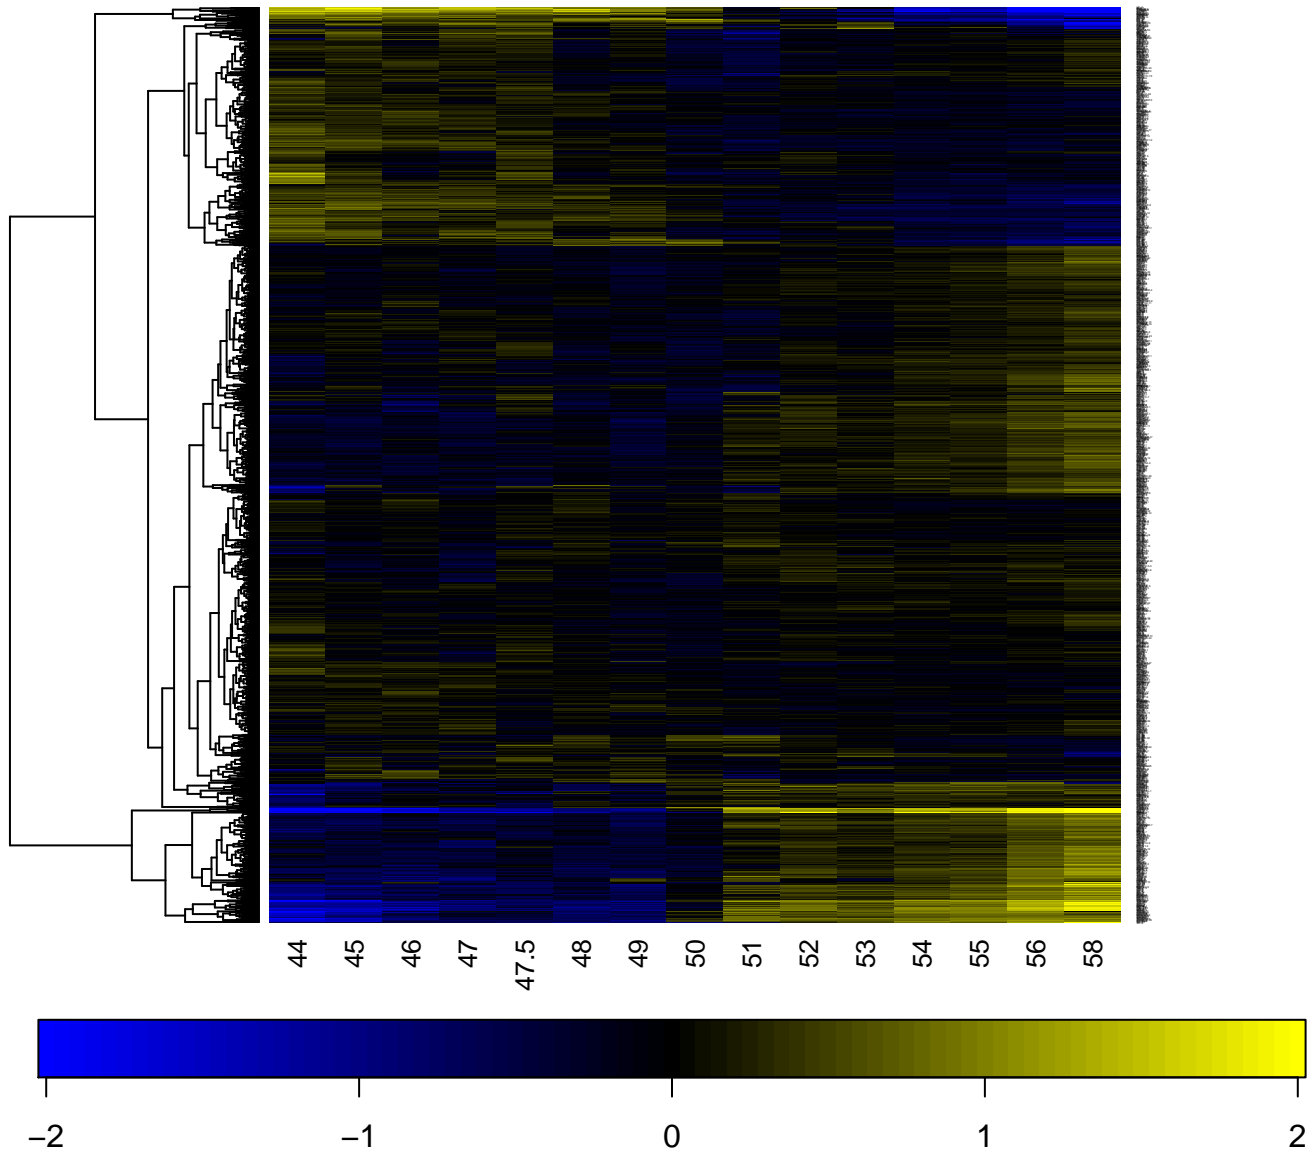





# response to DNA damage stimulus

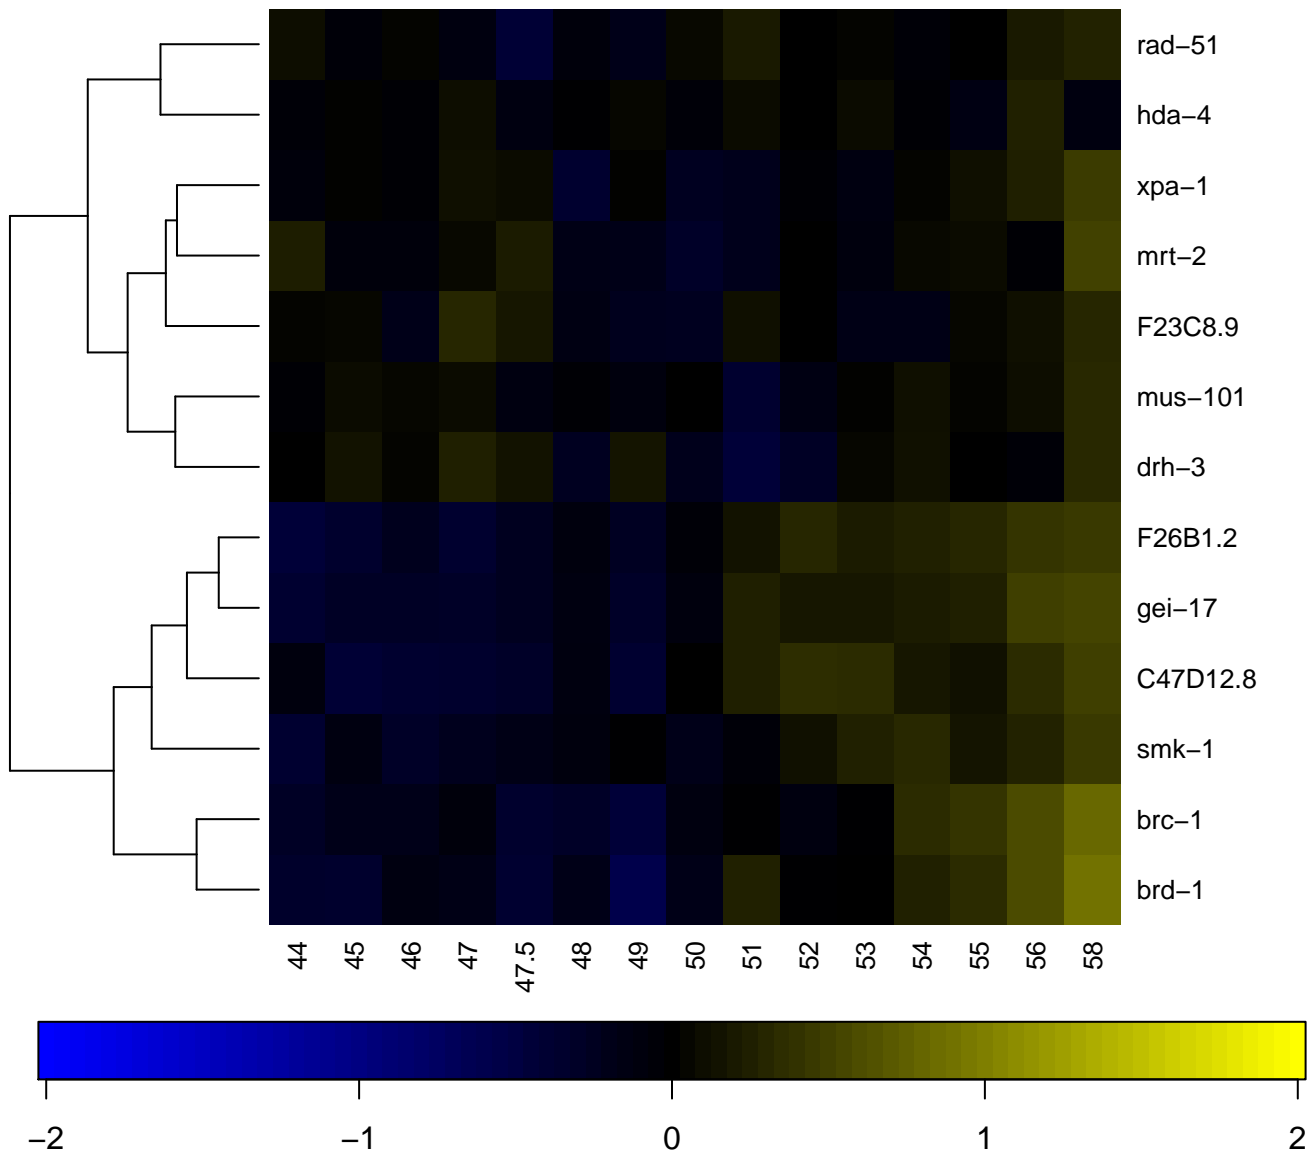



# response to food

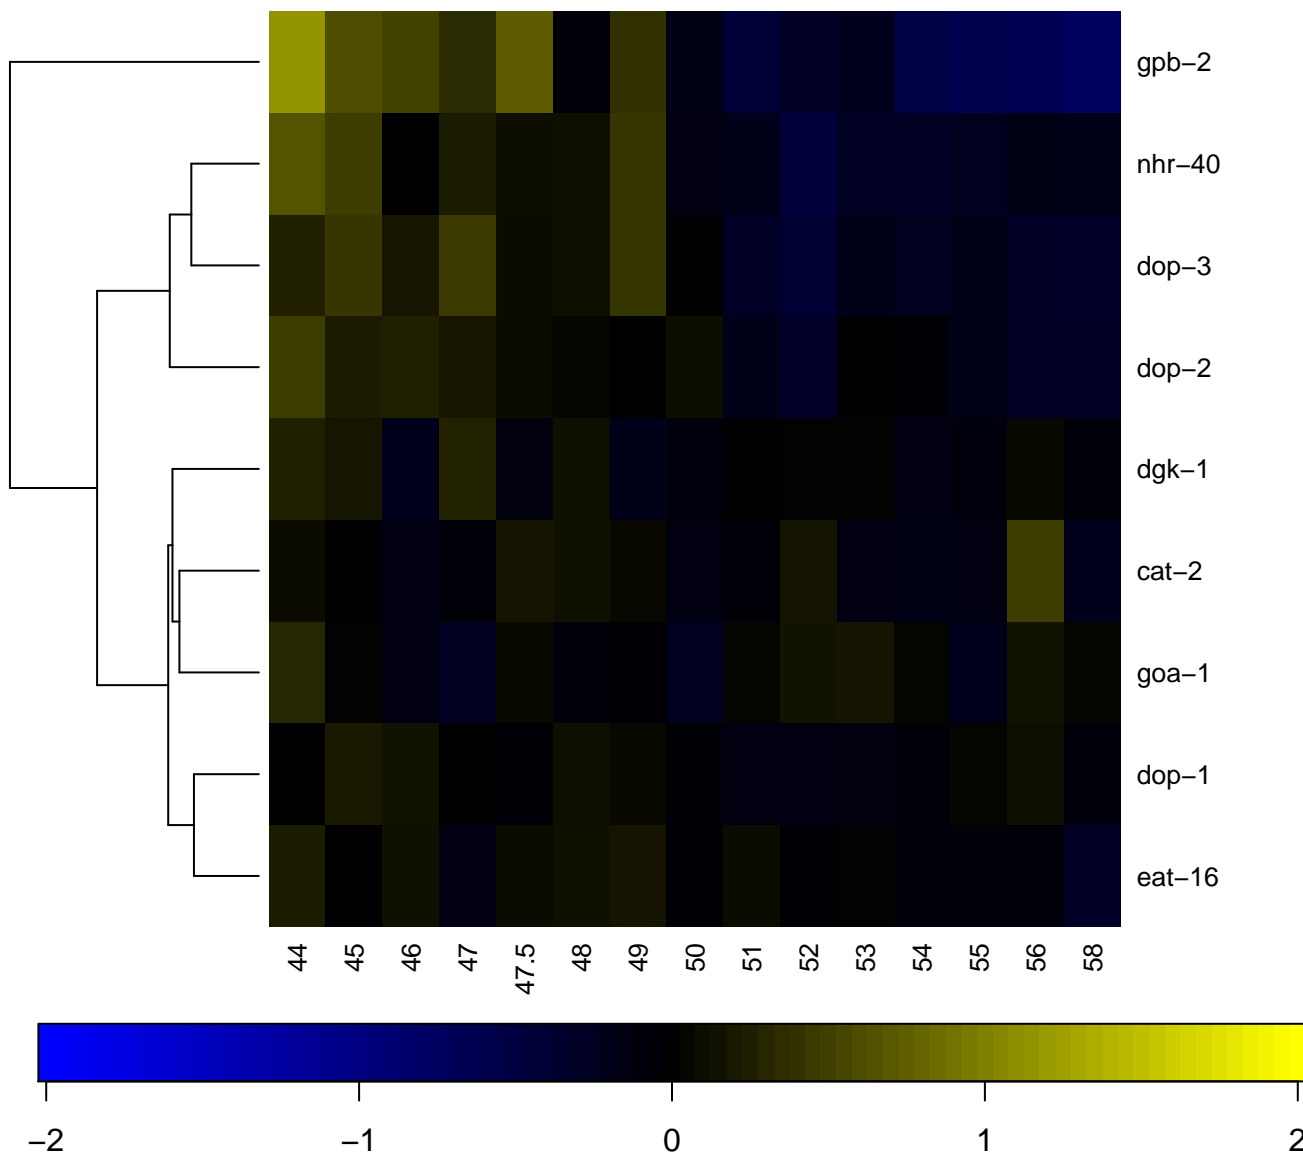

# response to heat

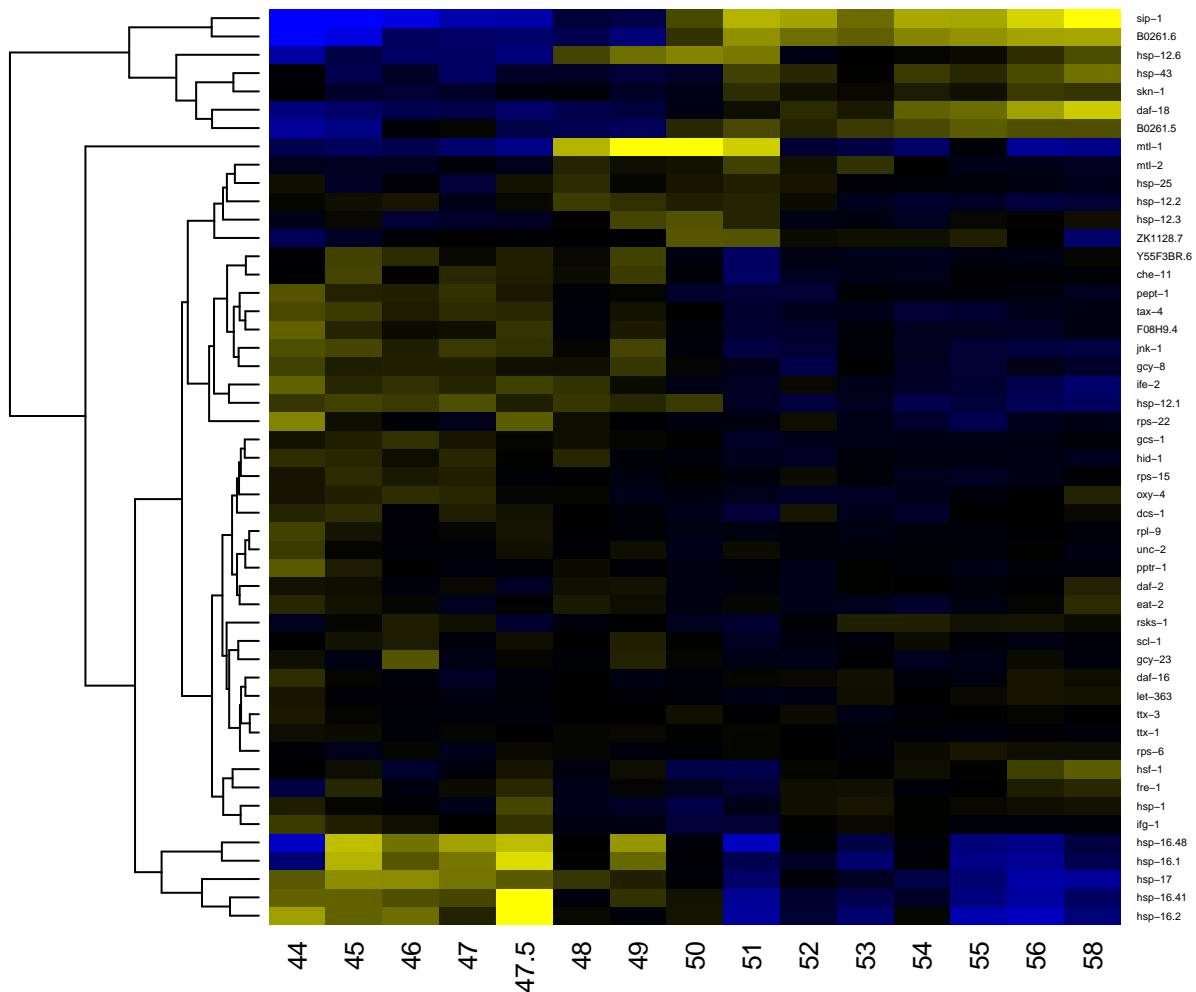





# response to mechanical stimulus

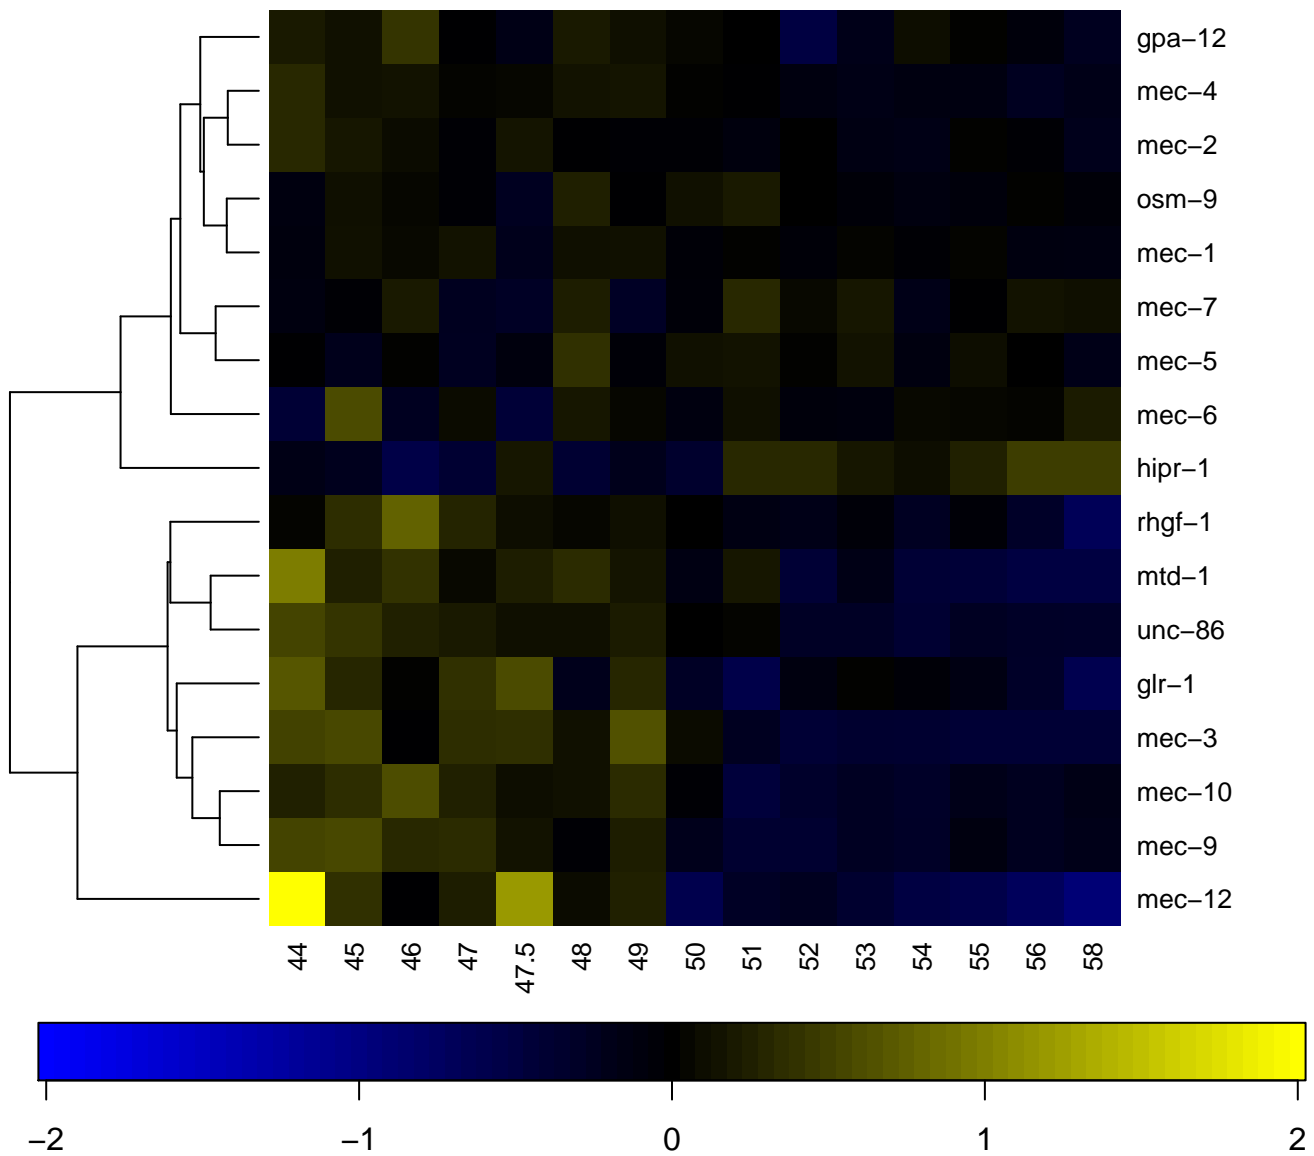







# response to starvation

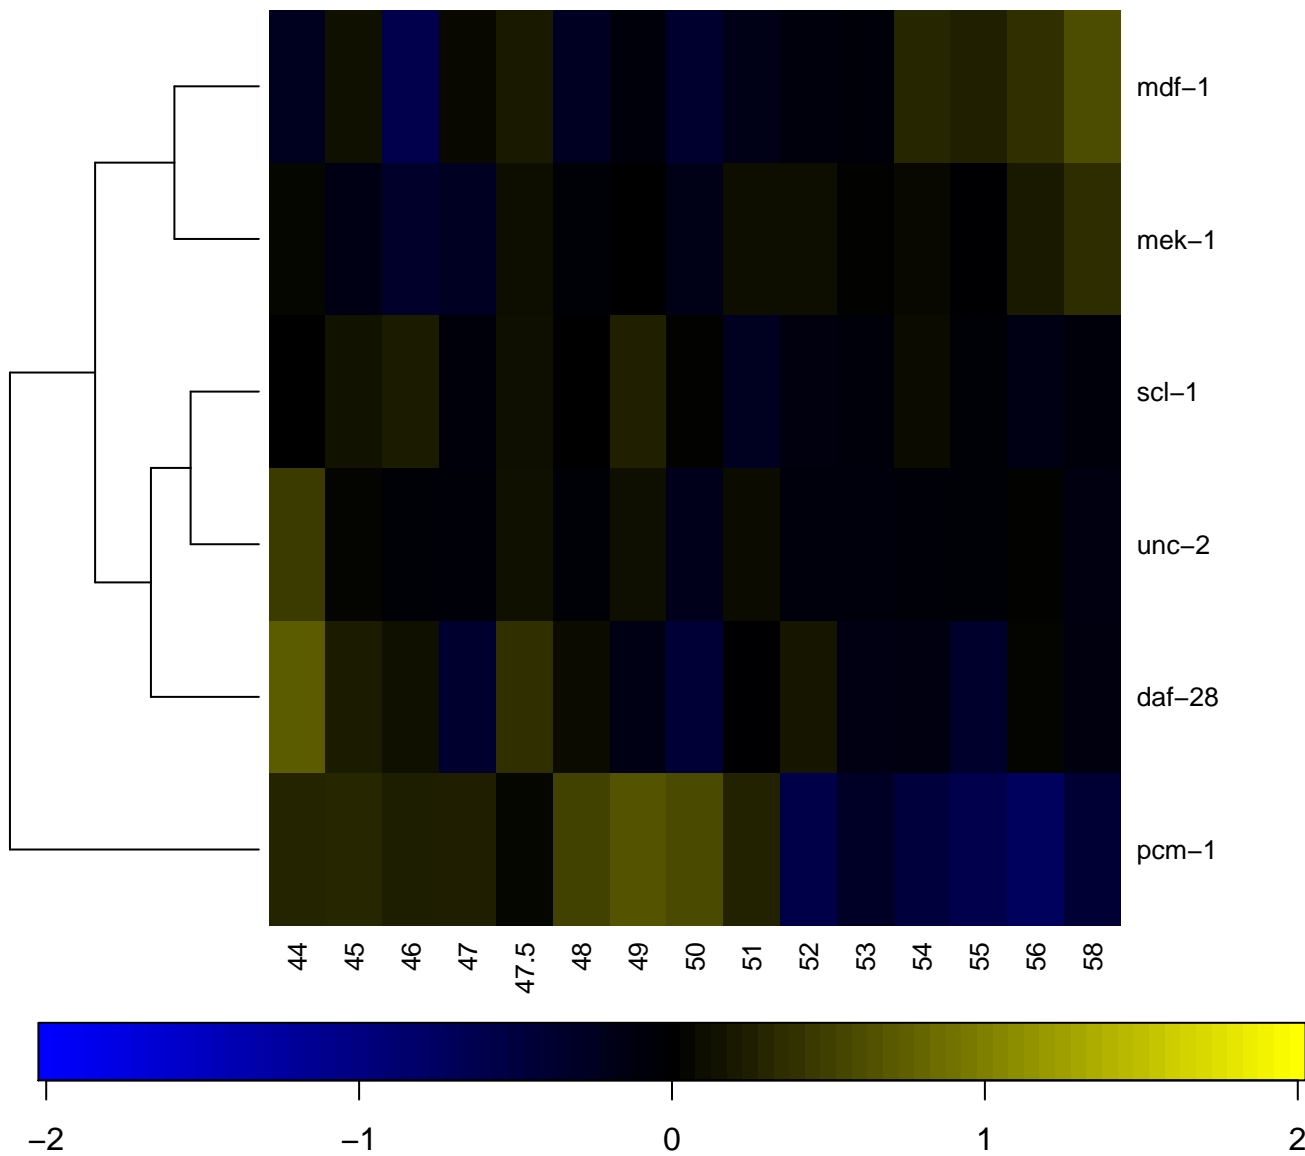

# response to stress

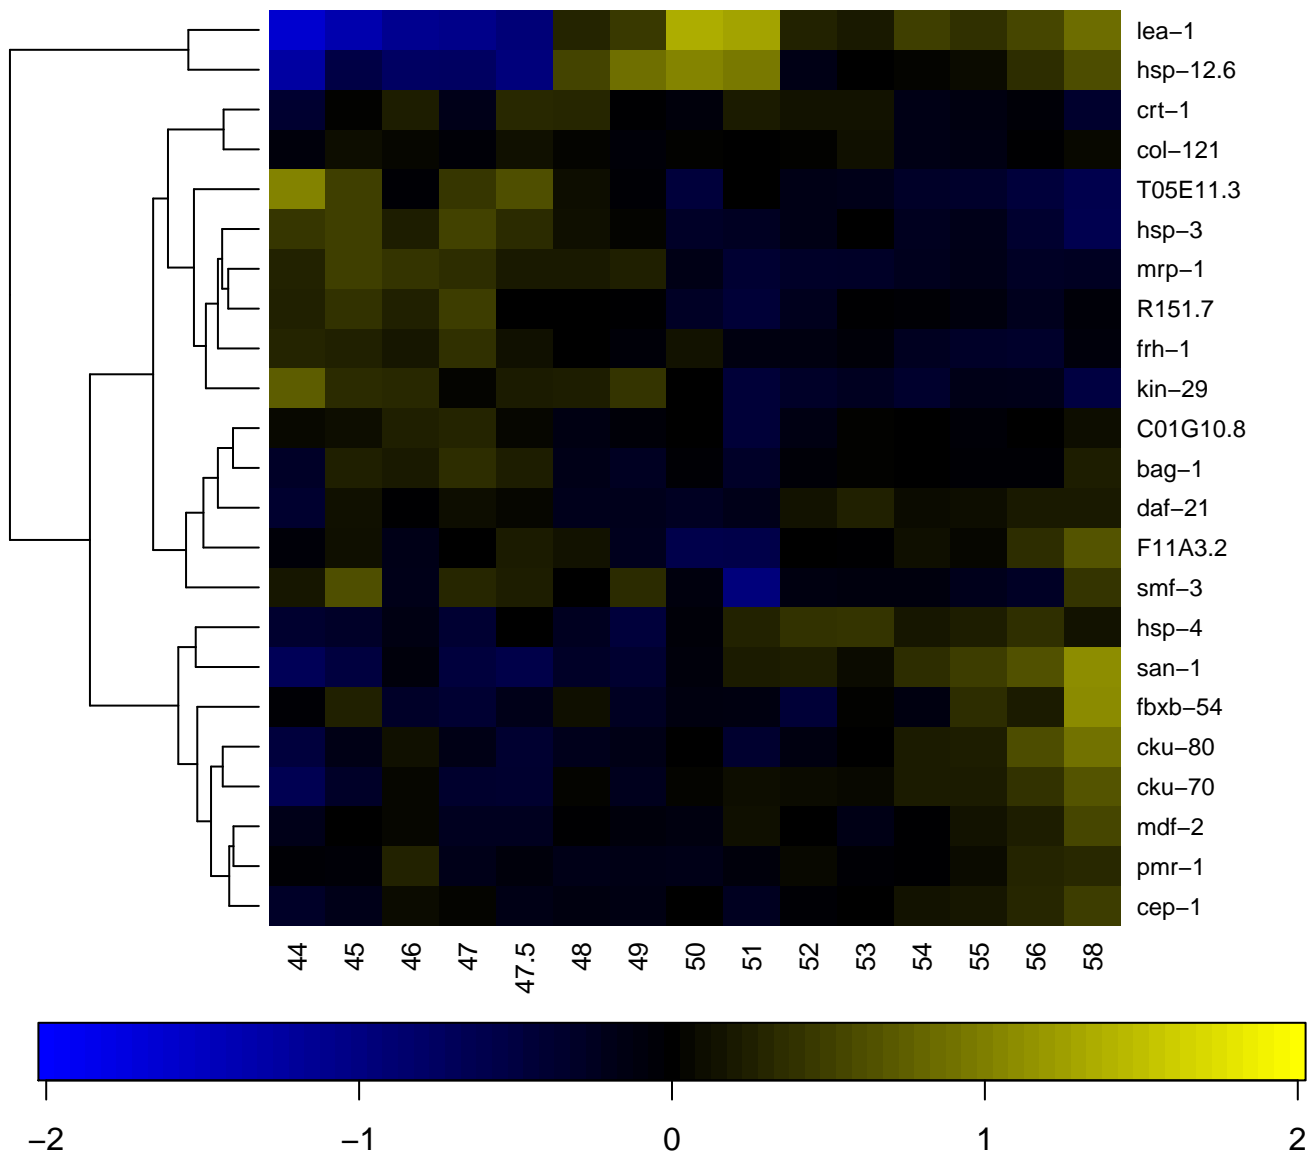







# response to wounding

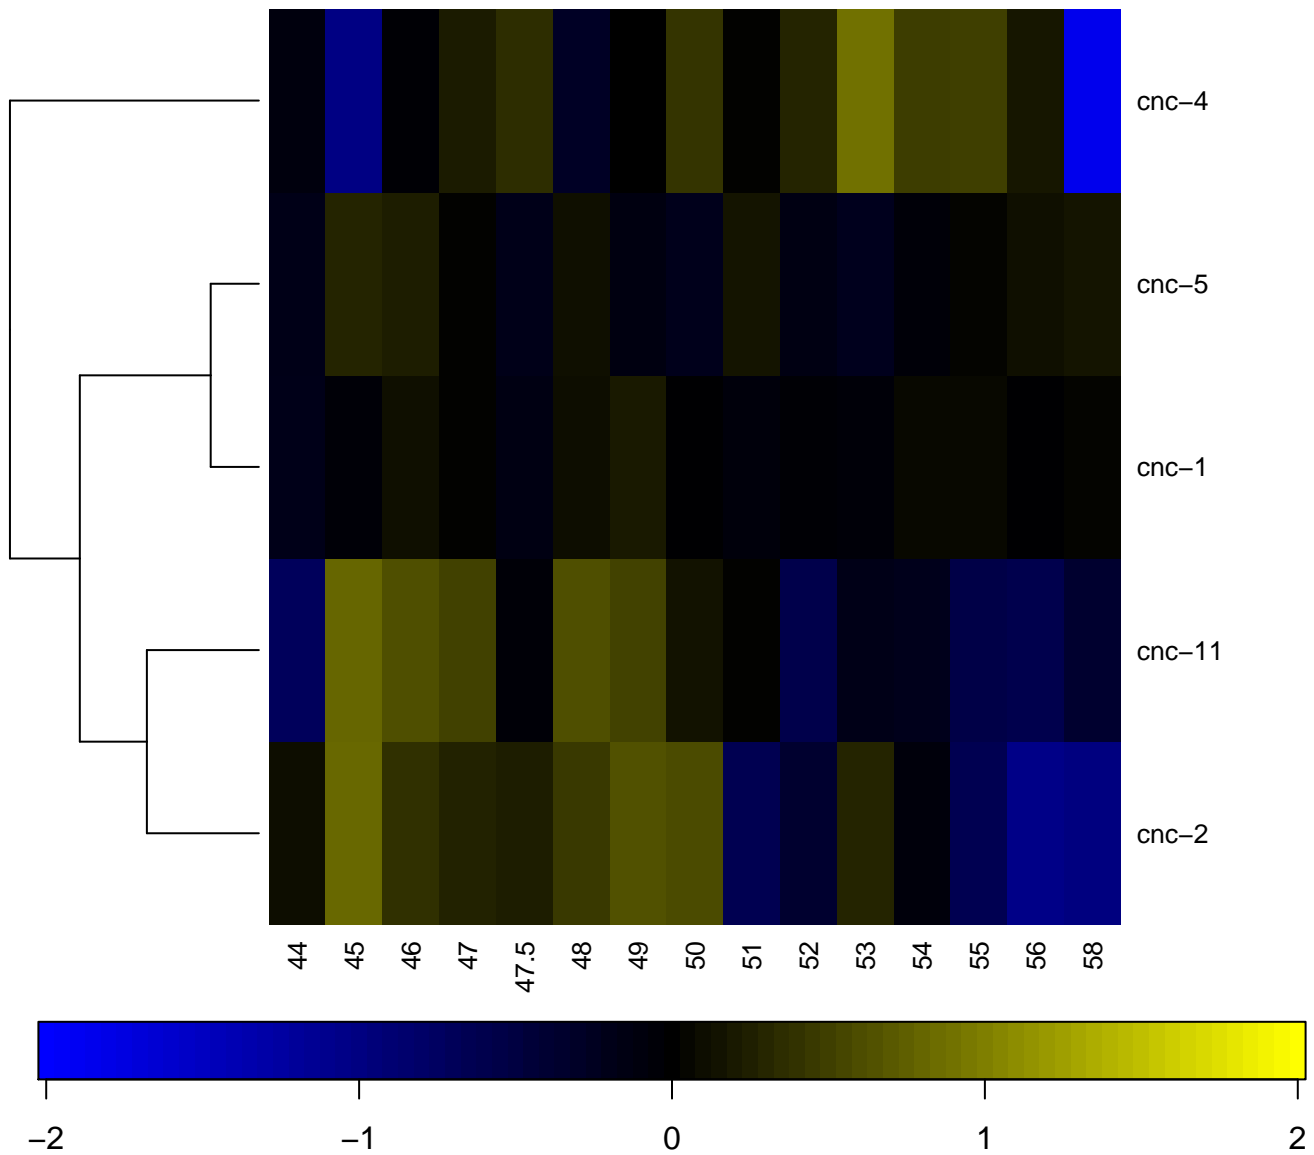



# Rho GTPase binding

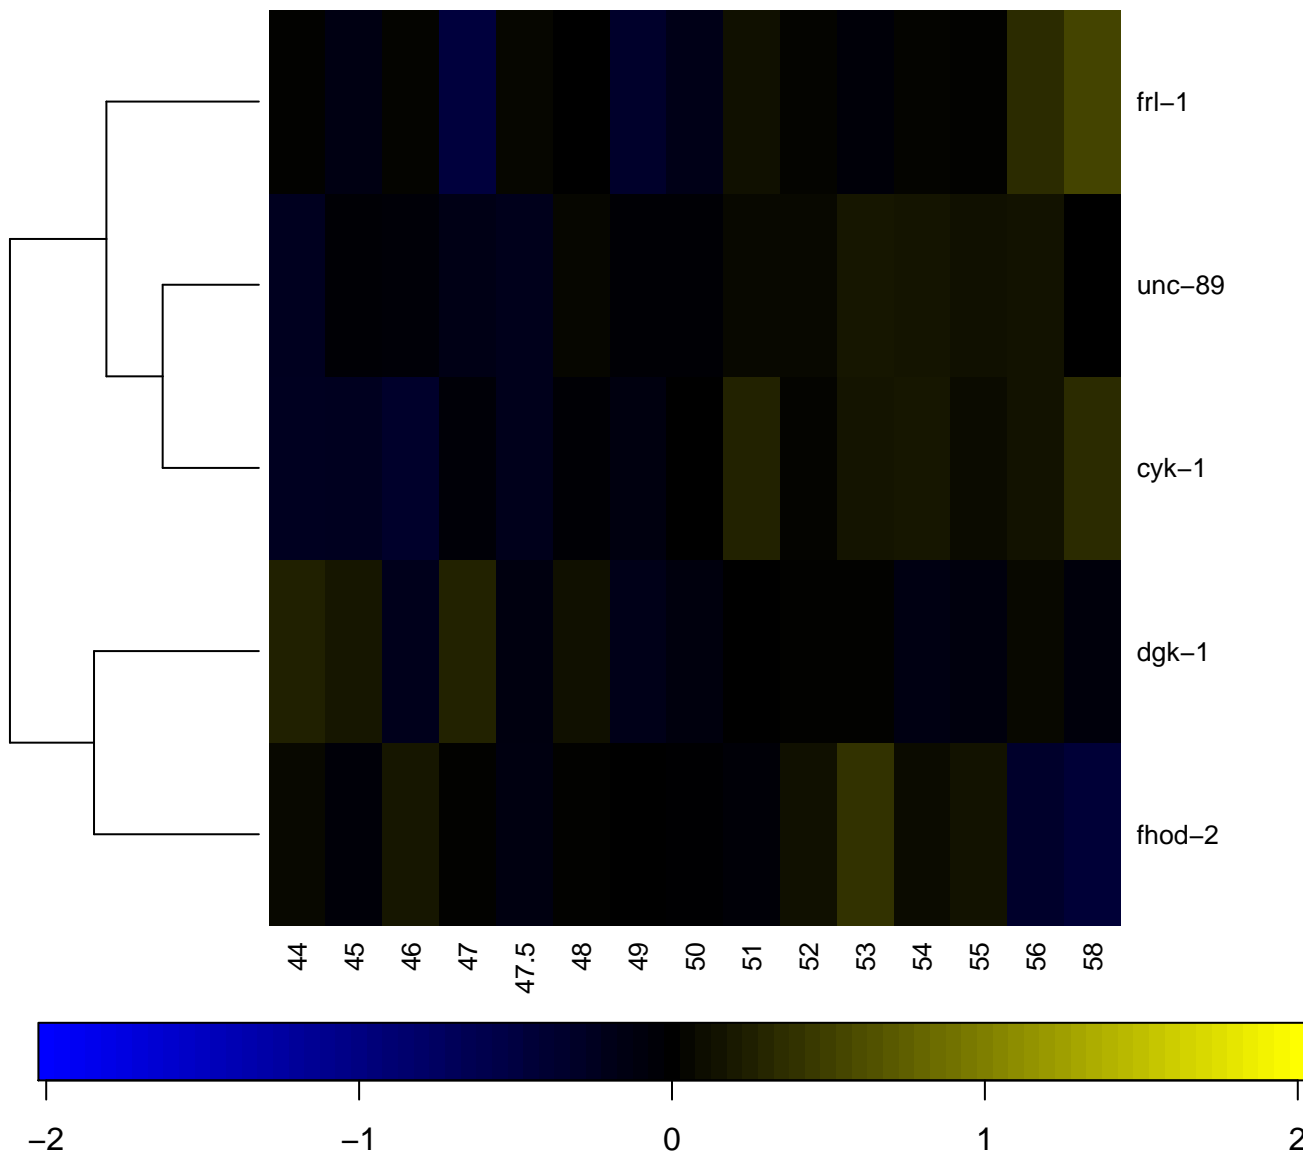

# Rho guanyl–nucleotide exchange factor activity









# ribonucleoside-diphosphate reductase activity

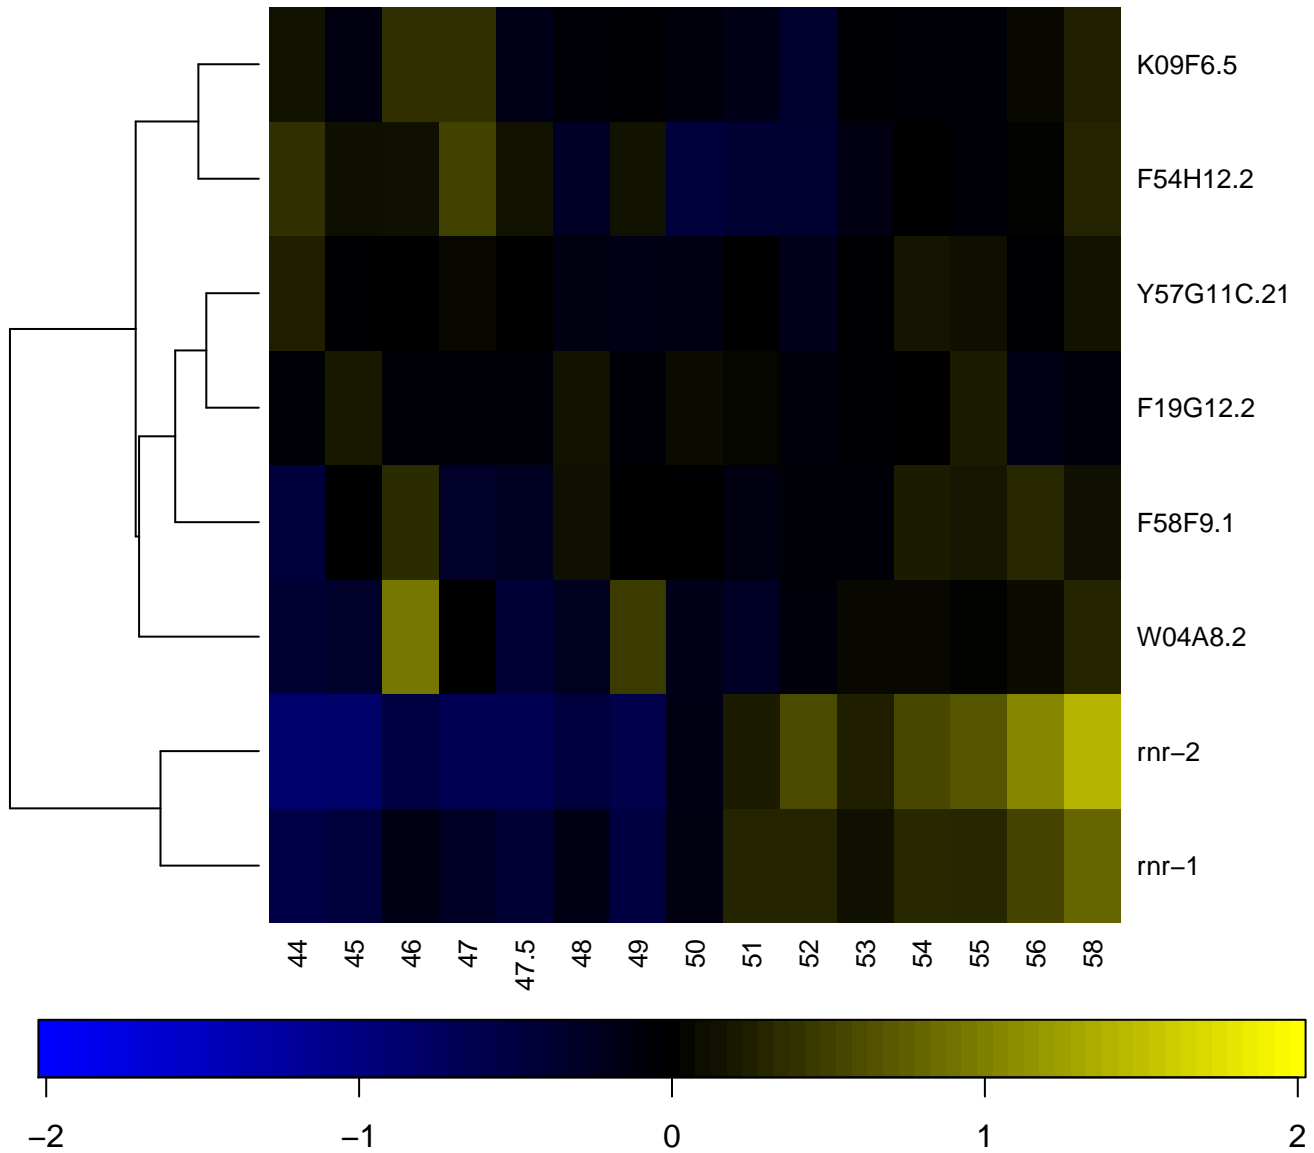



# ribosome

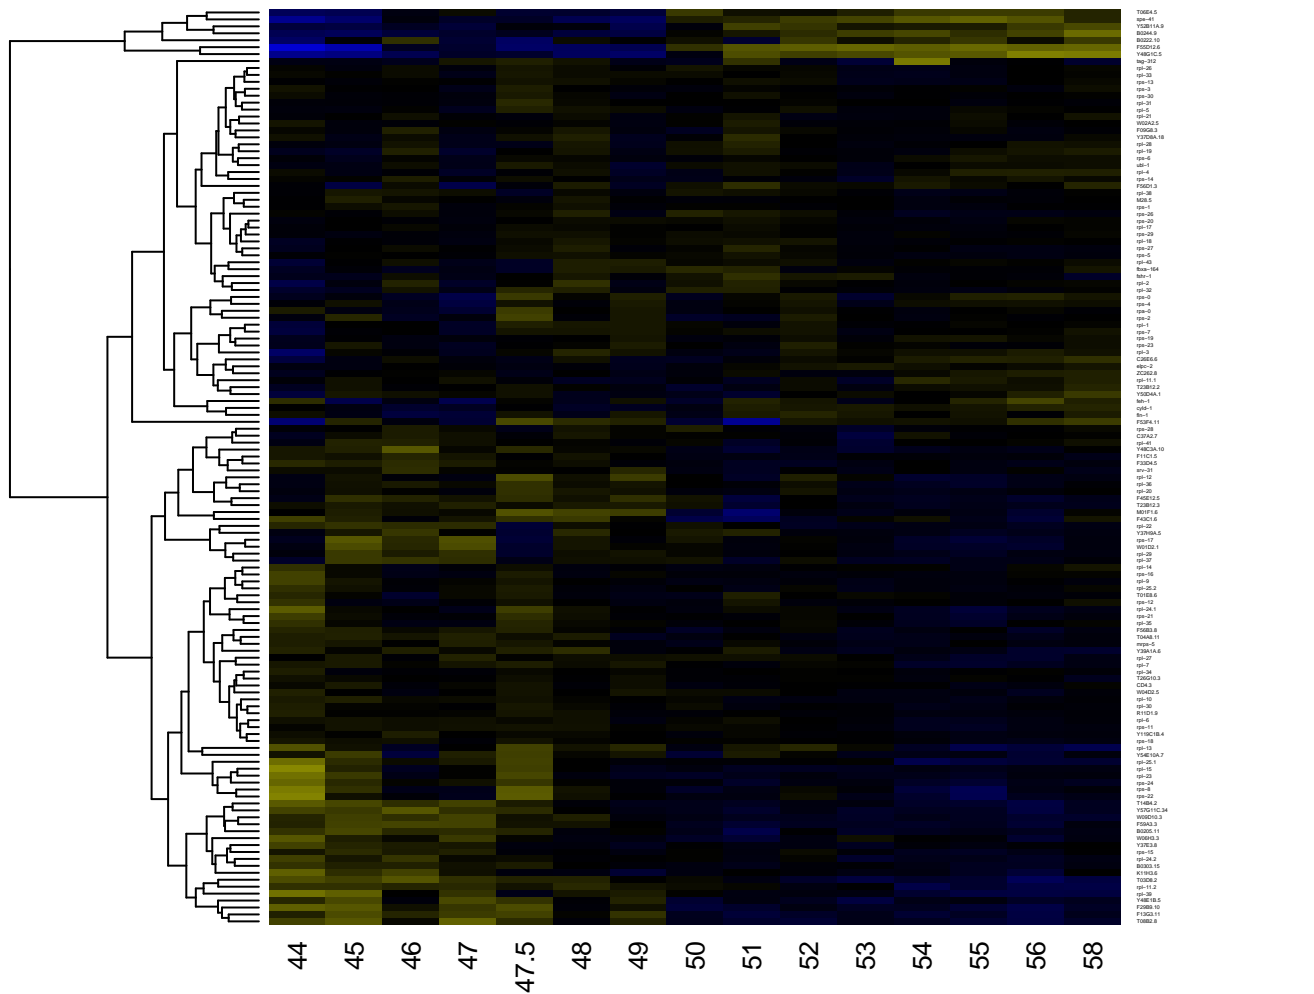

-2

-1

0

1

2

# ribosome biogenesis

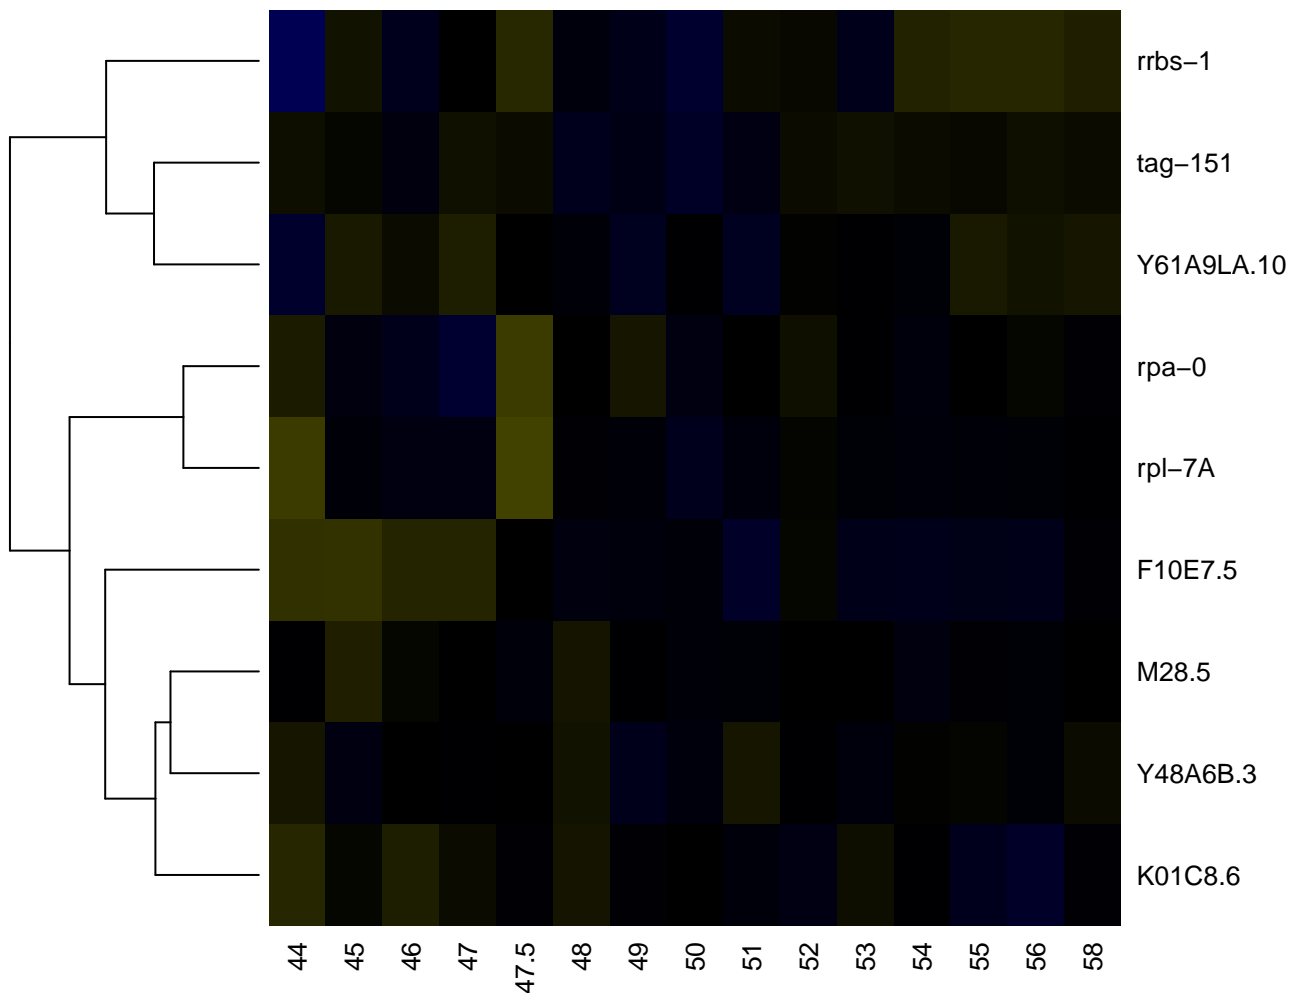

# RNA binding

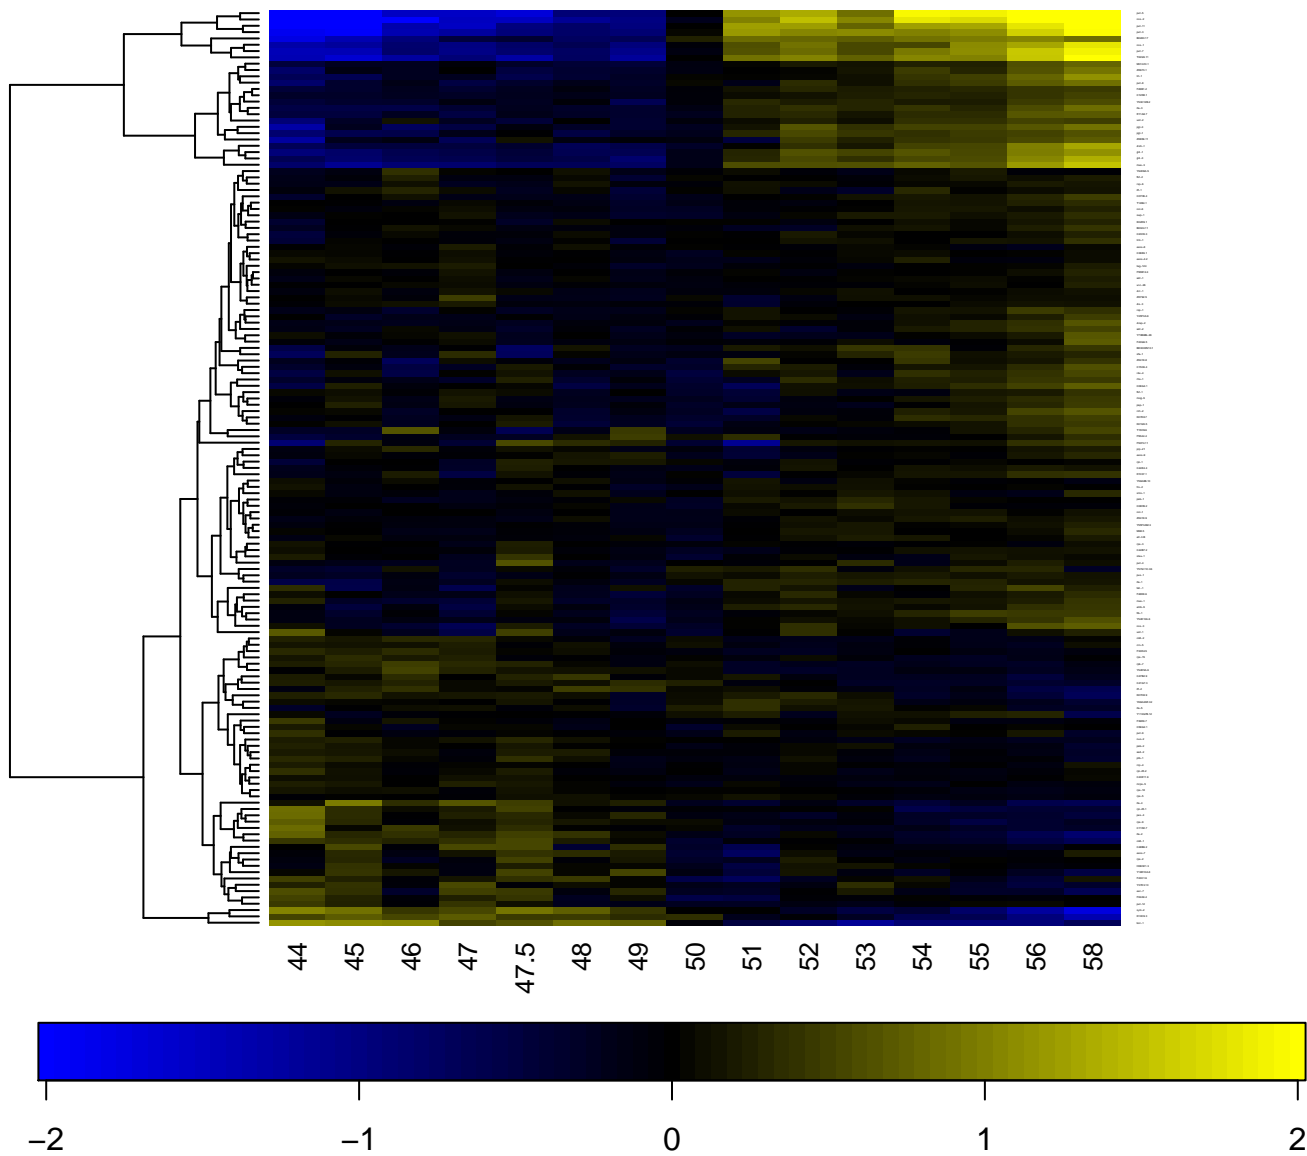

# RNA interference

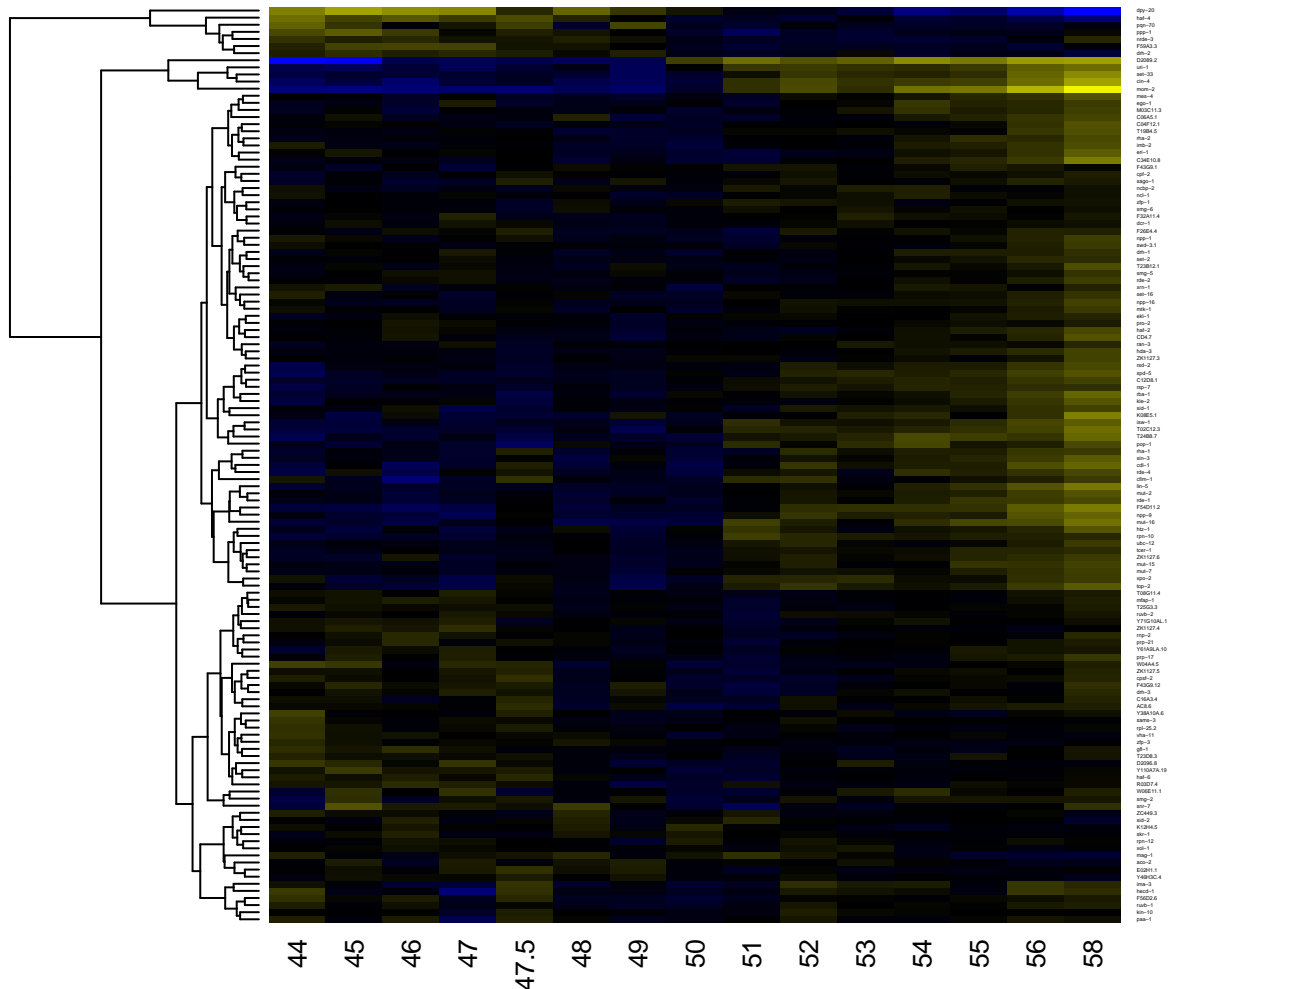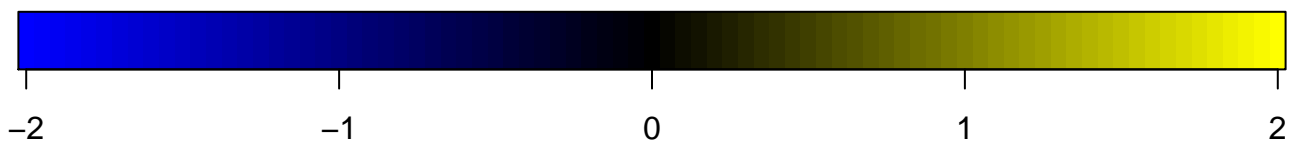





# RNA polyadenylation

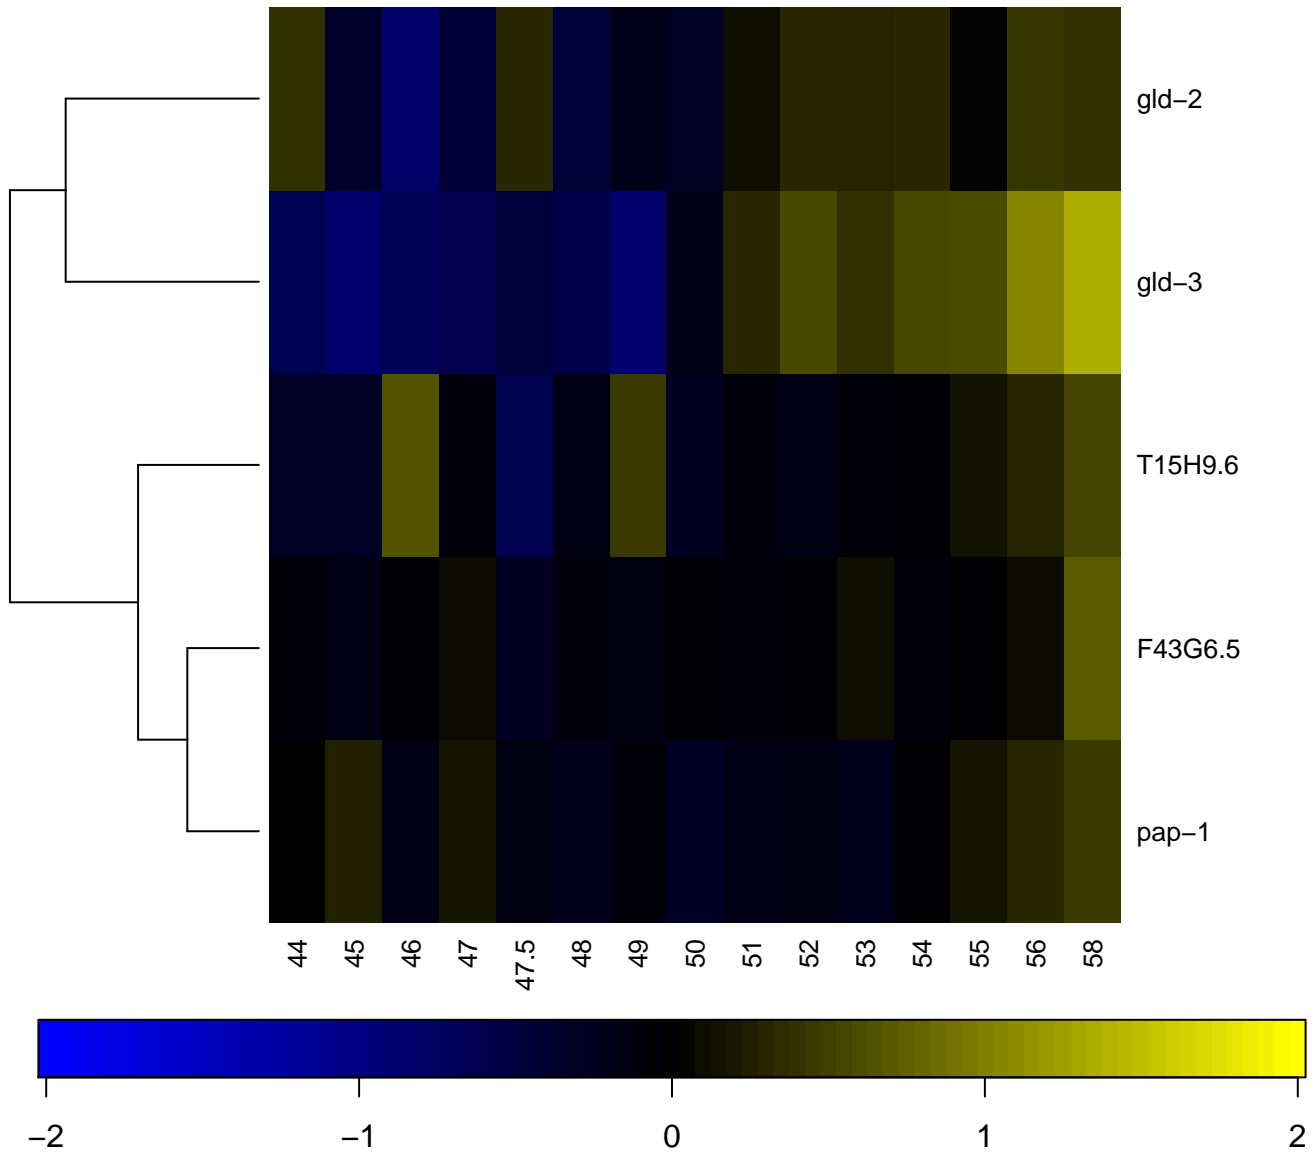

# RNA polymerase II transcription factor activity

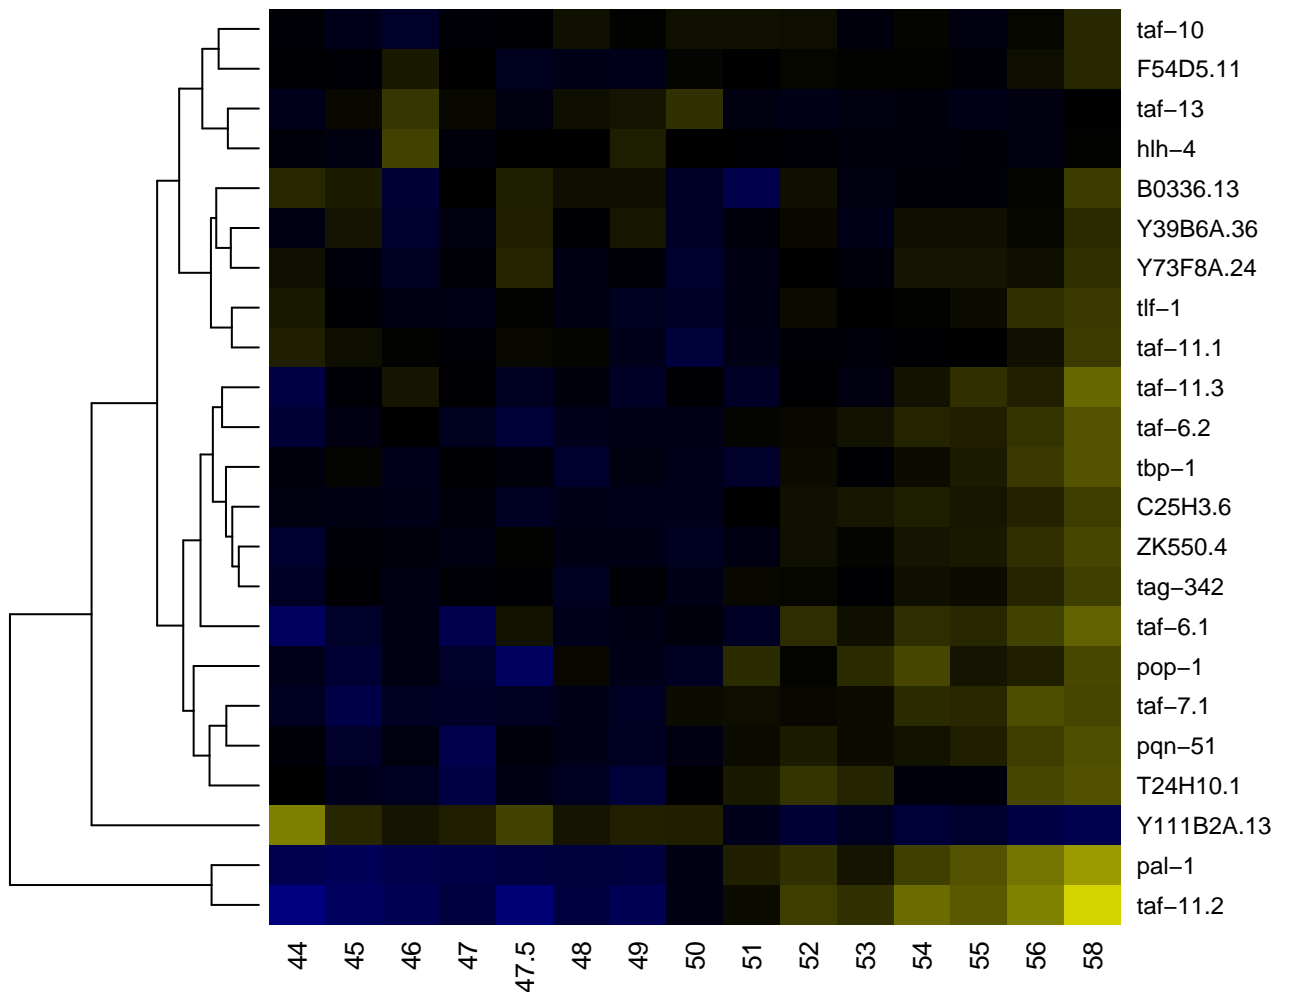



# NA polymerase II transcription factor activity, enhancer binding

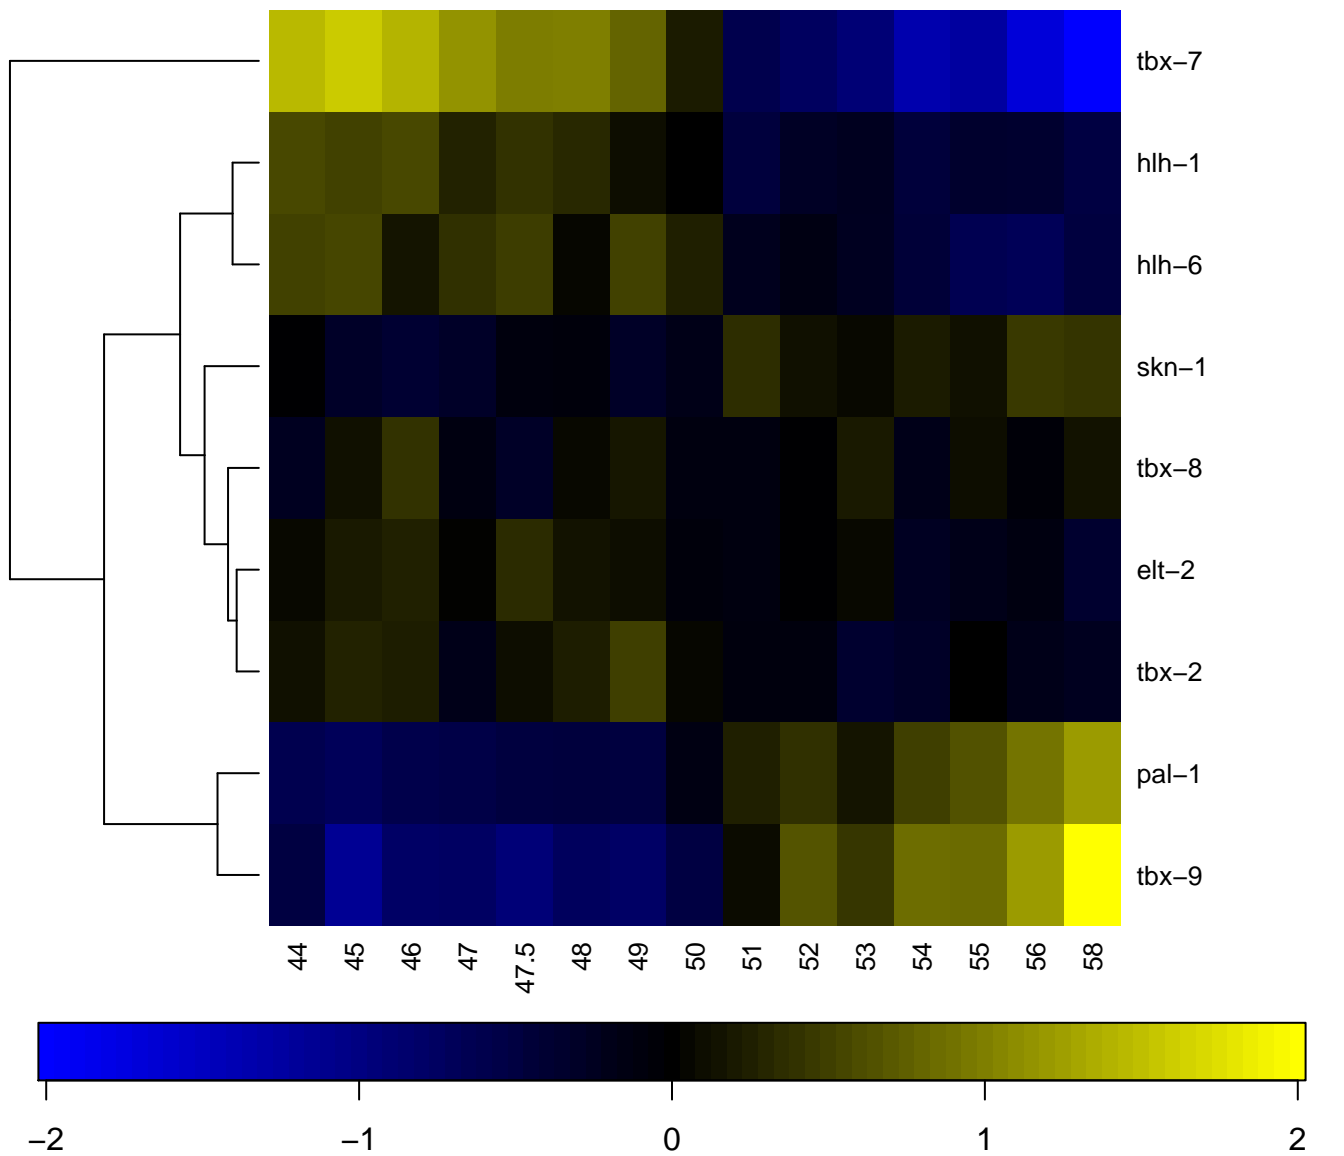

# RNA polymerase II transcription mediator activity

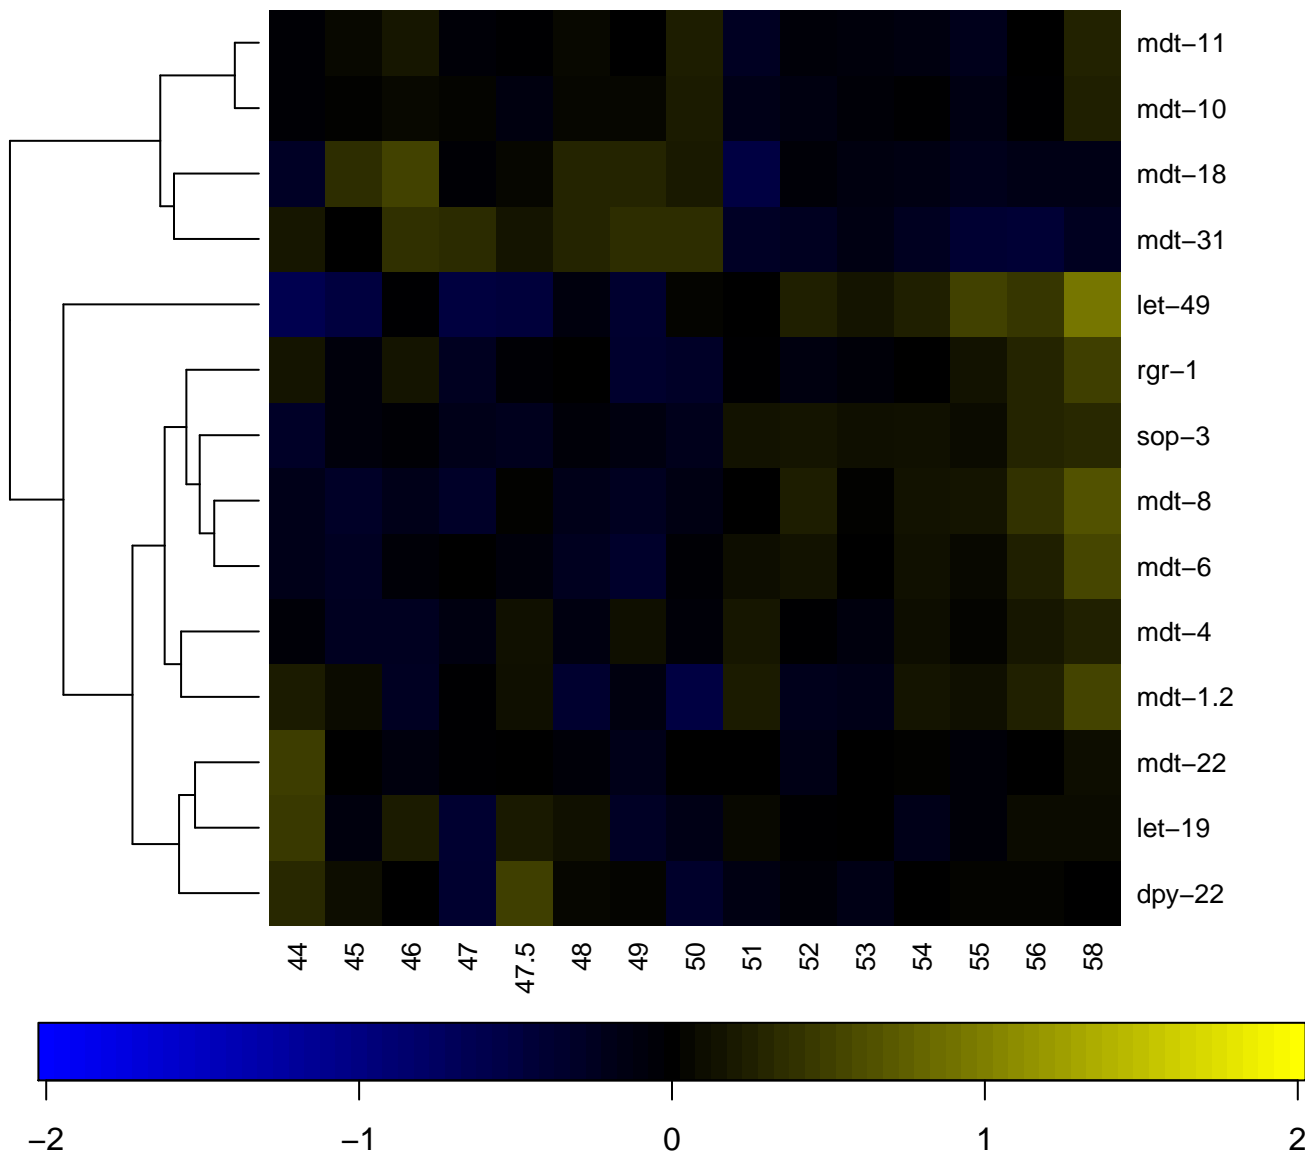

# RNA processing

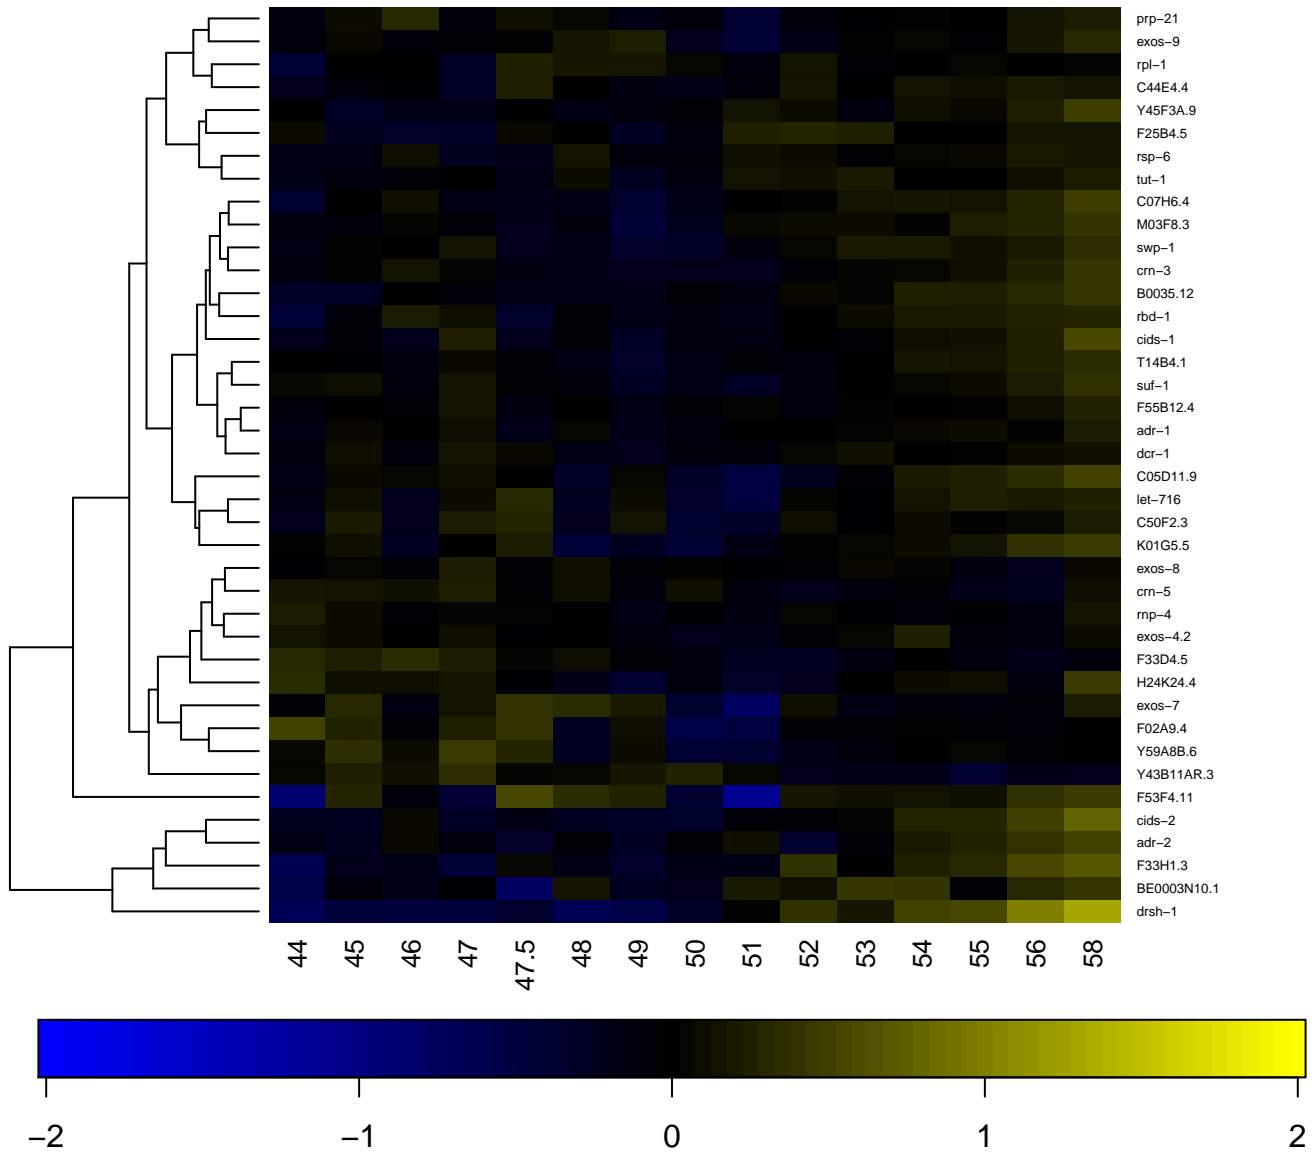



# rRNA processing

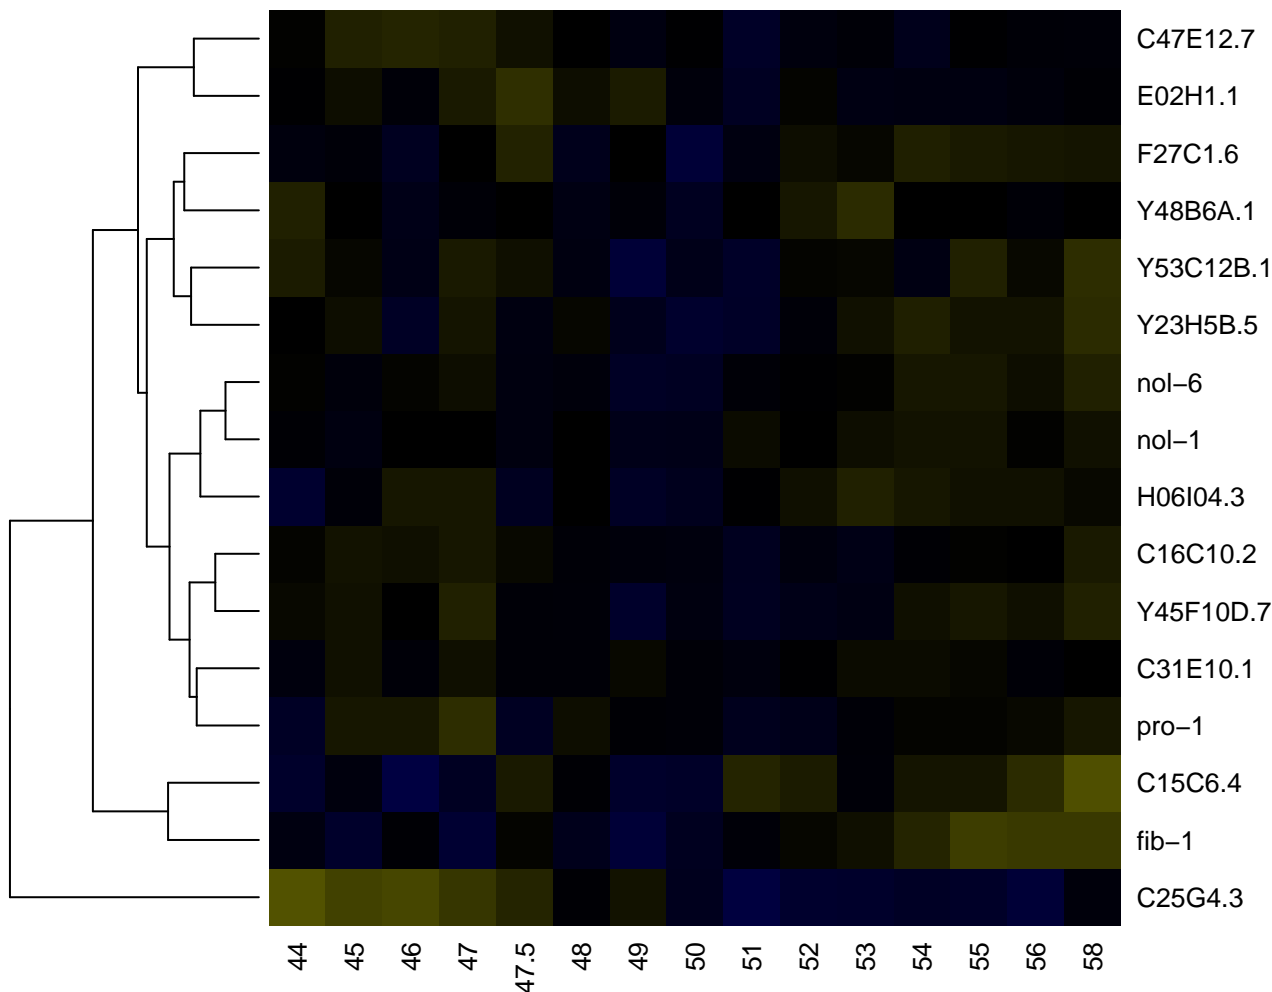

# sarcomere

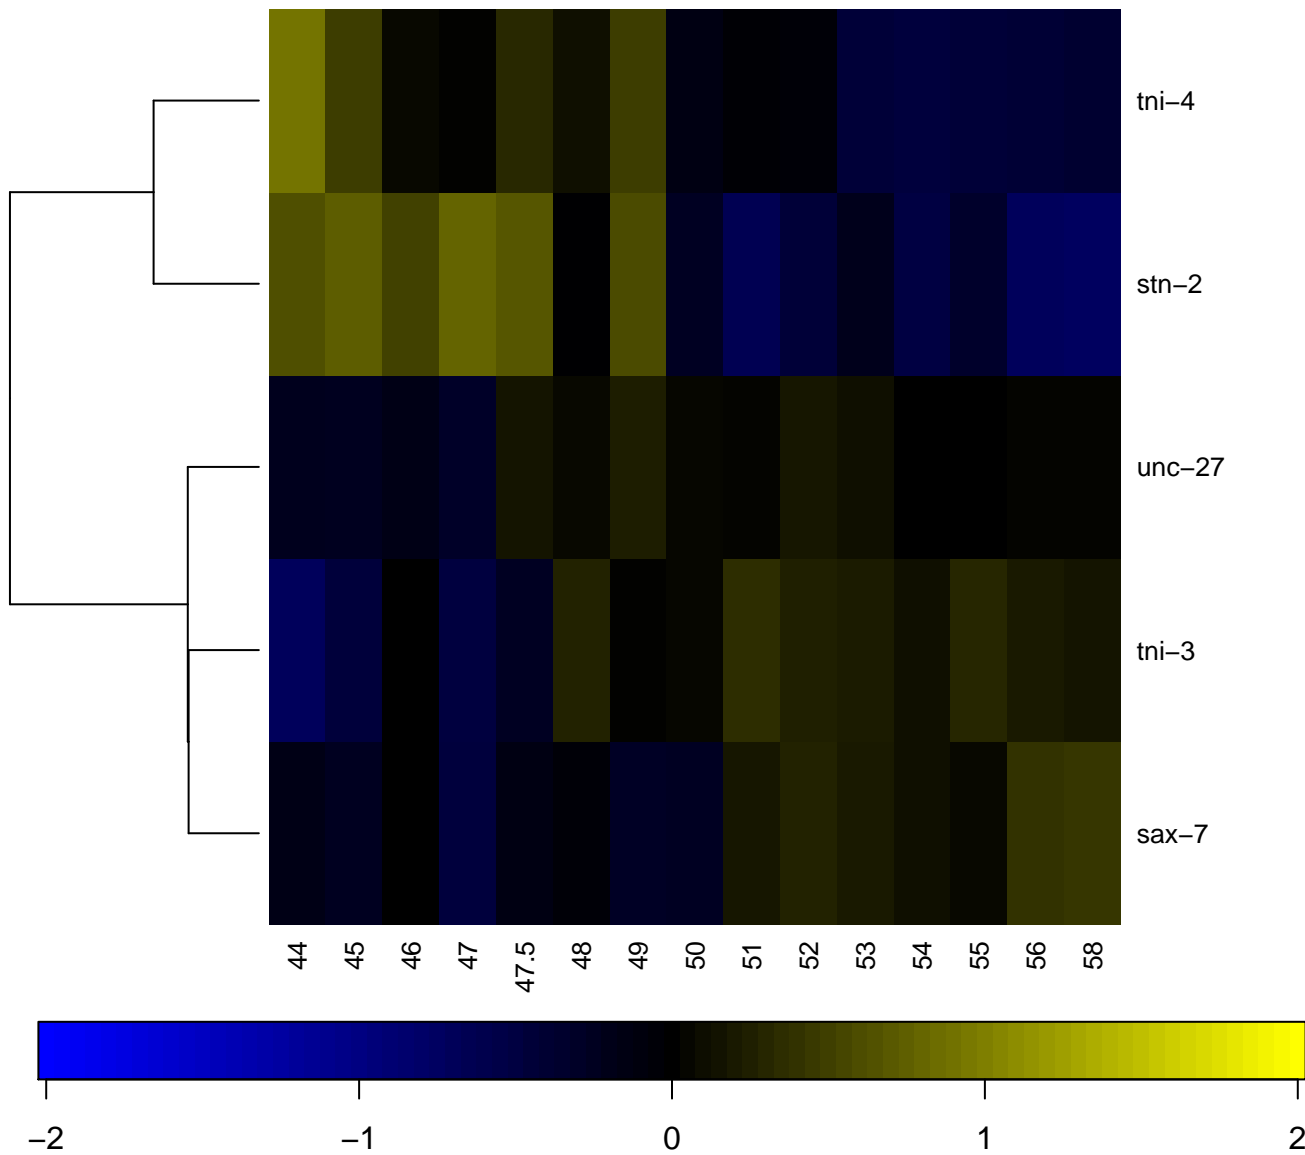







# secretion by cell

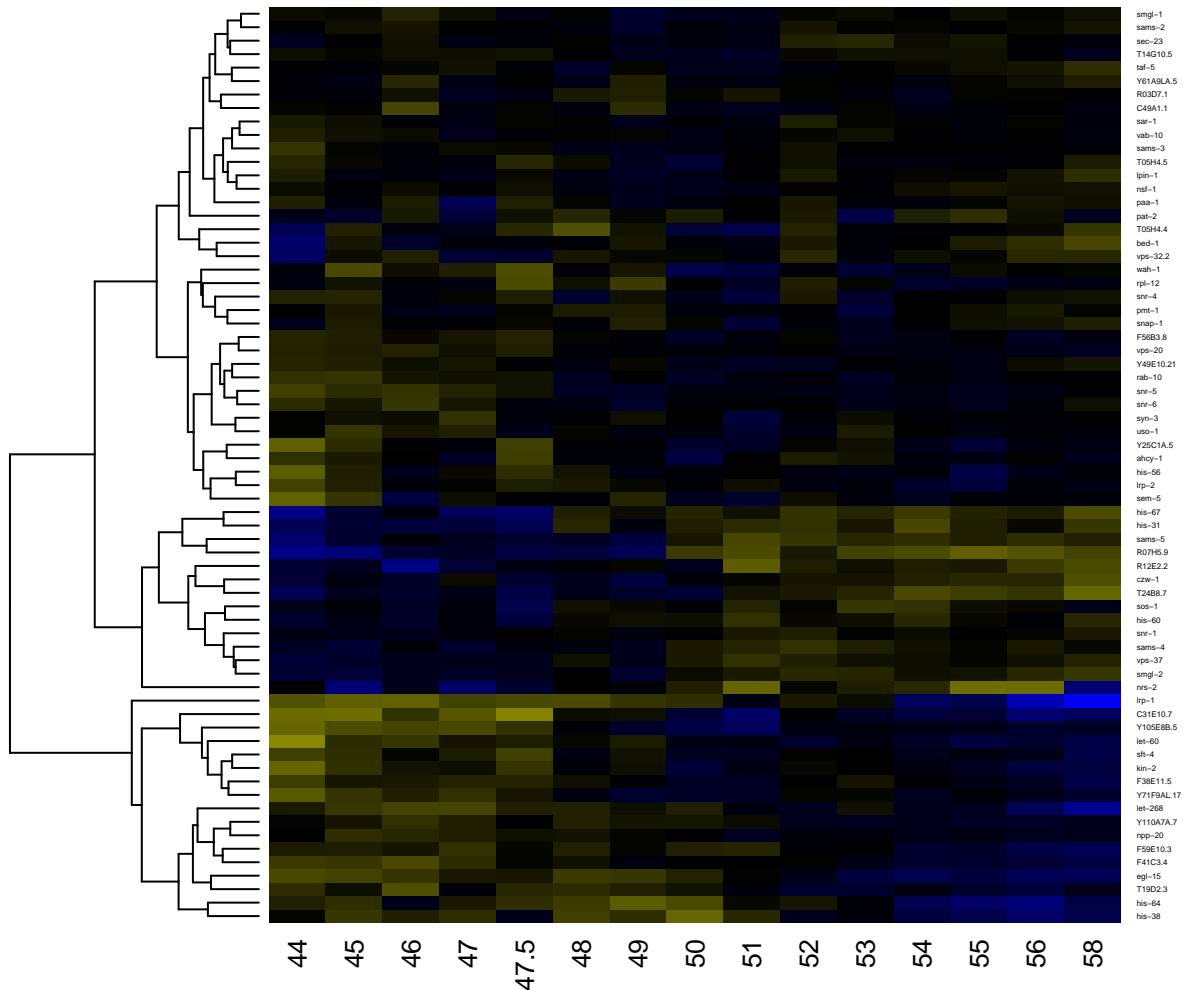



# sensory perception

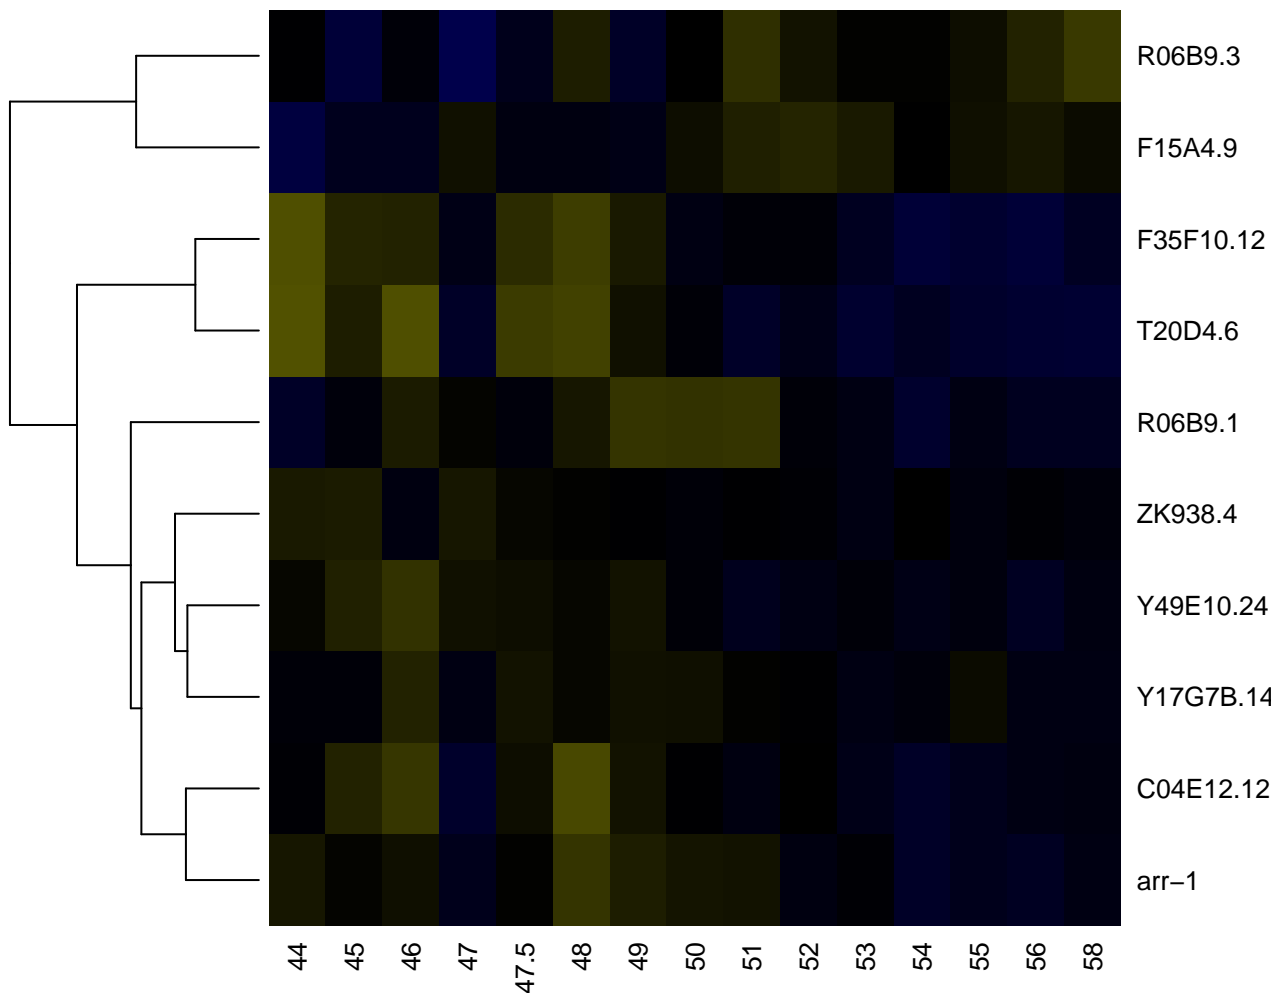

# sensory perception of chemical stimulus

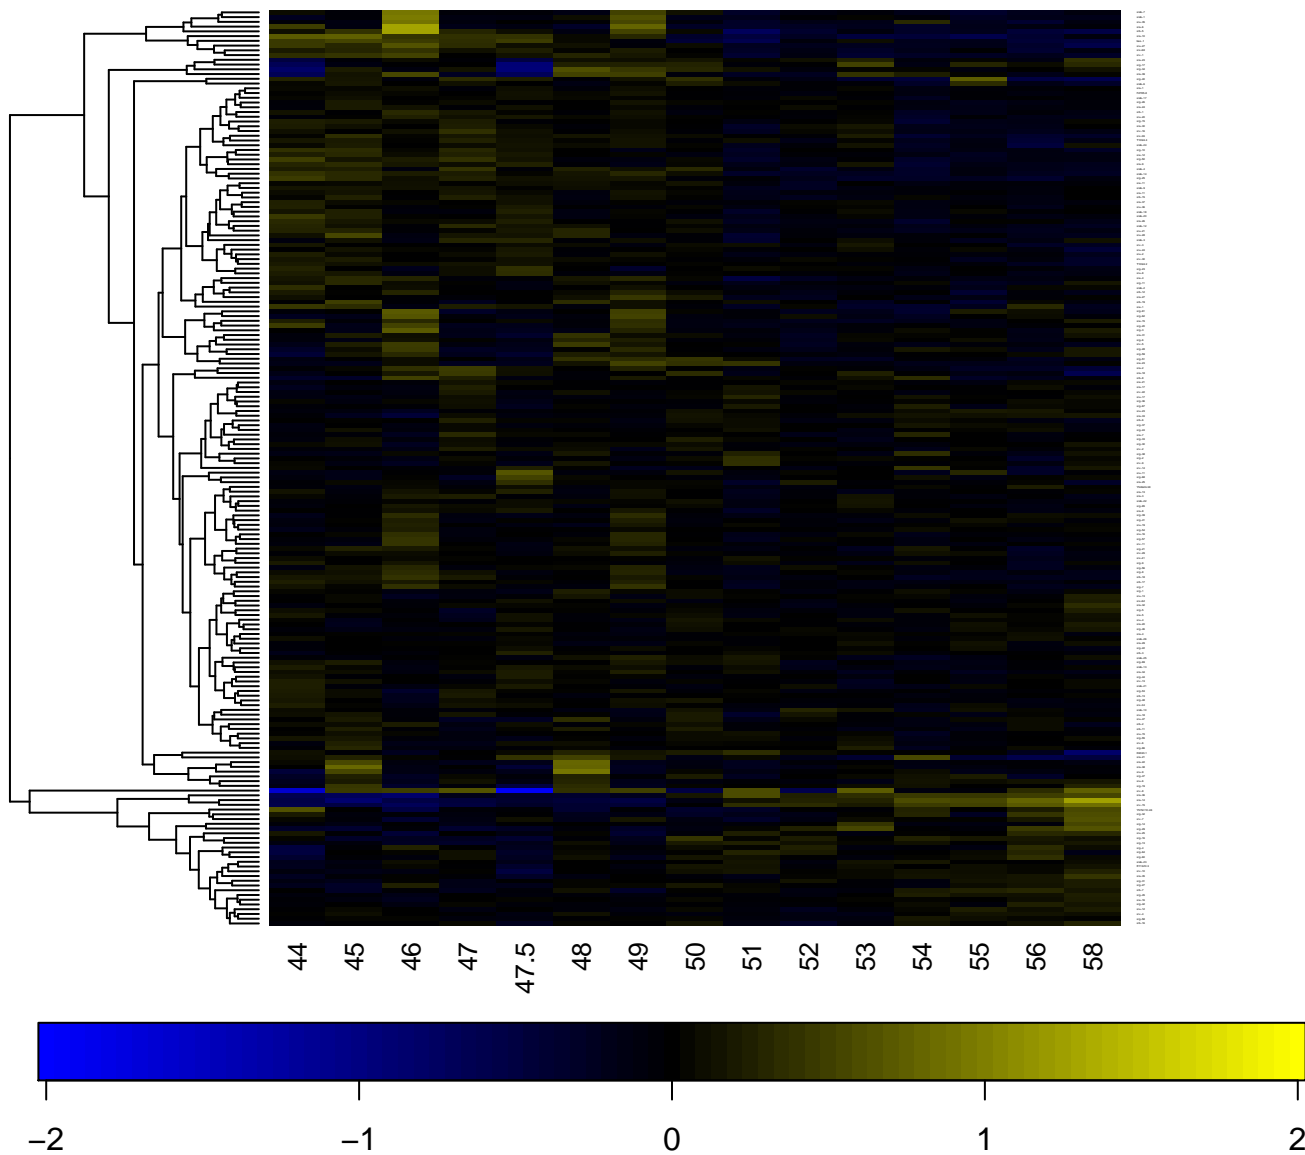

# sensory perception of mechanical stimulus

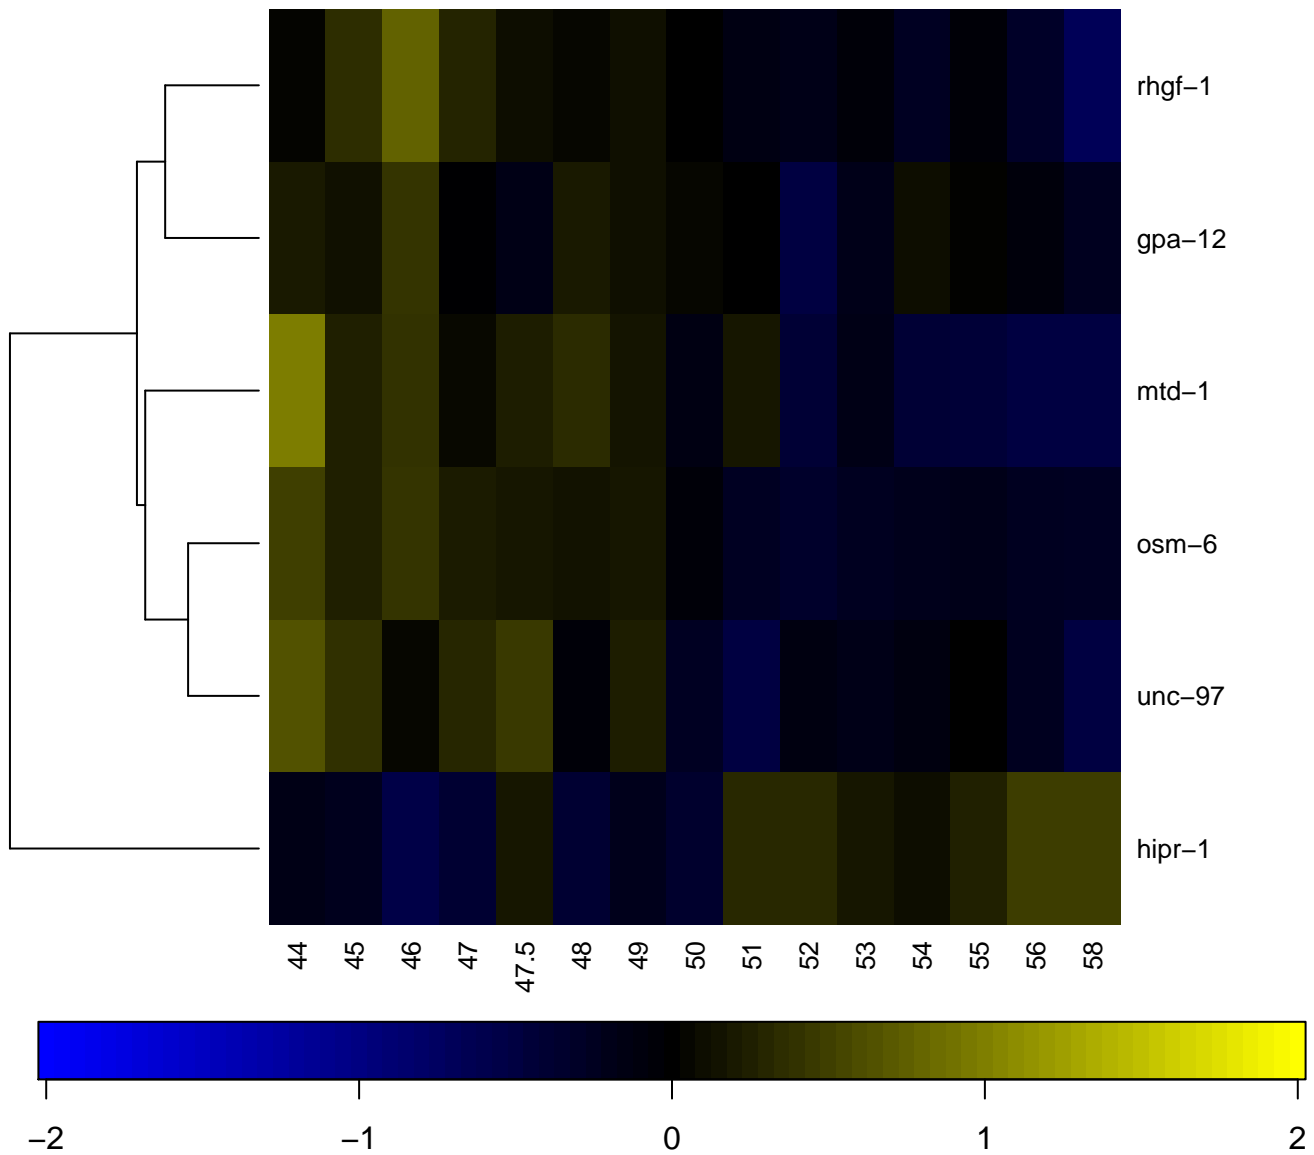

# sequence-specific DNA binding

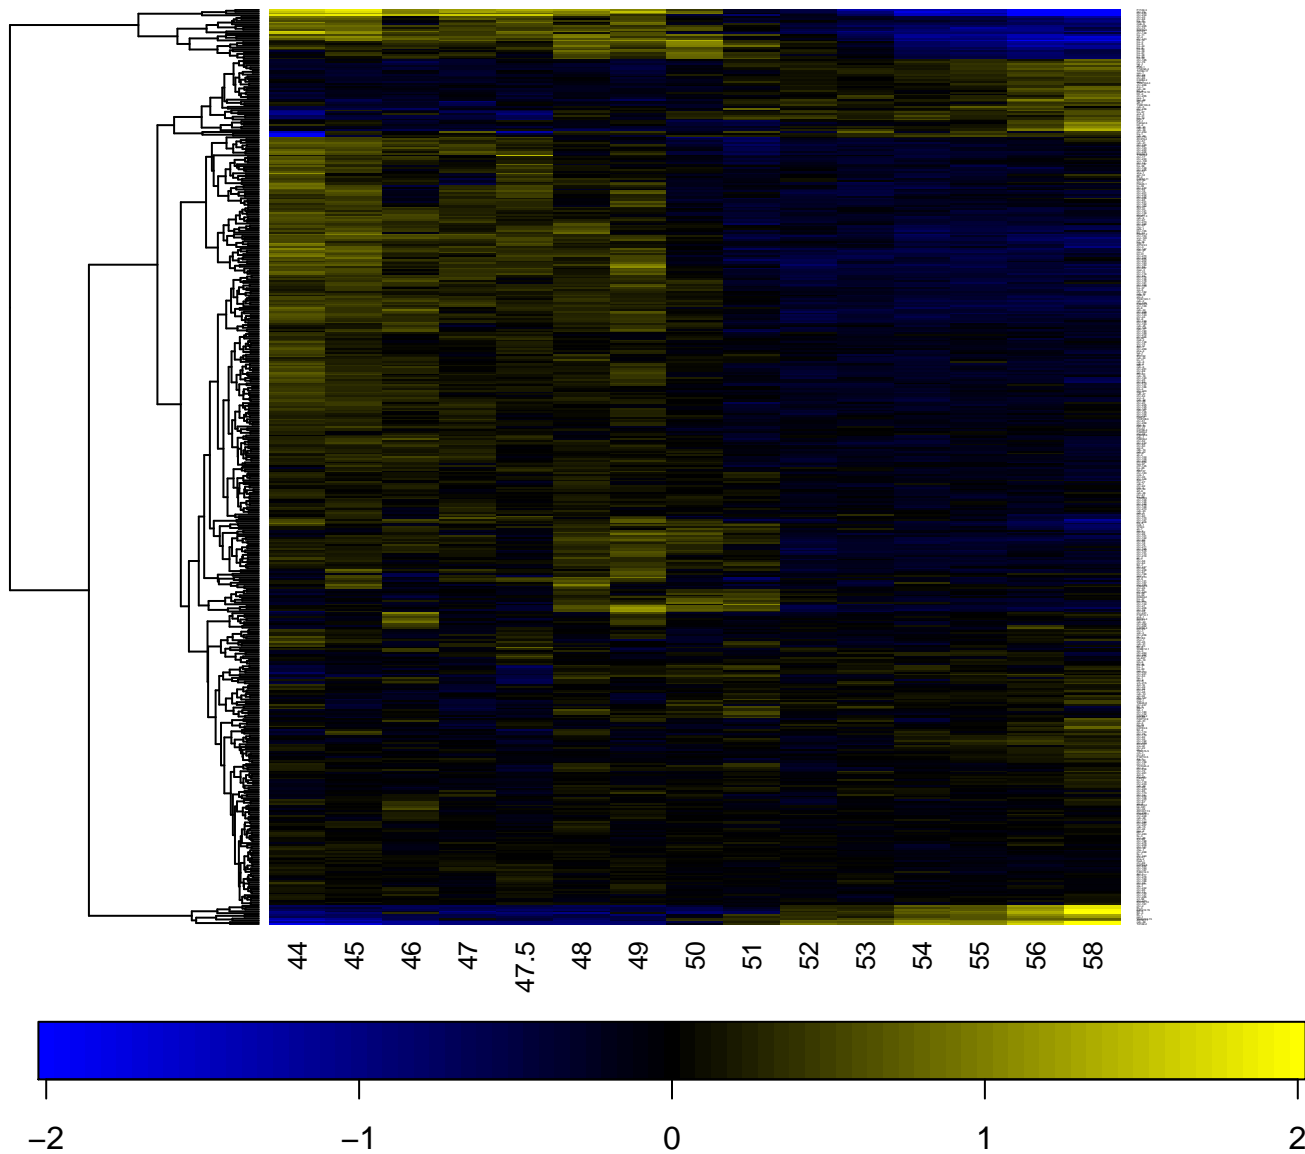



# serine-type endopeptidase activity

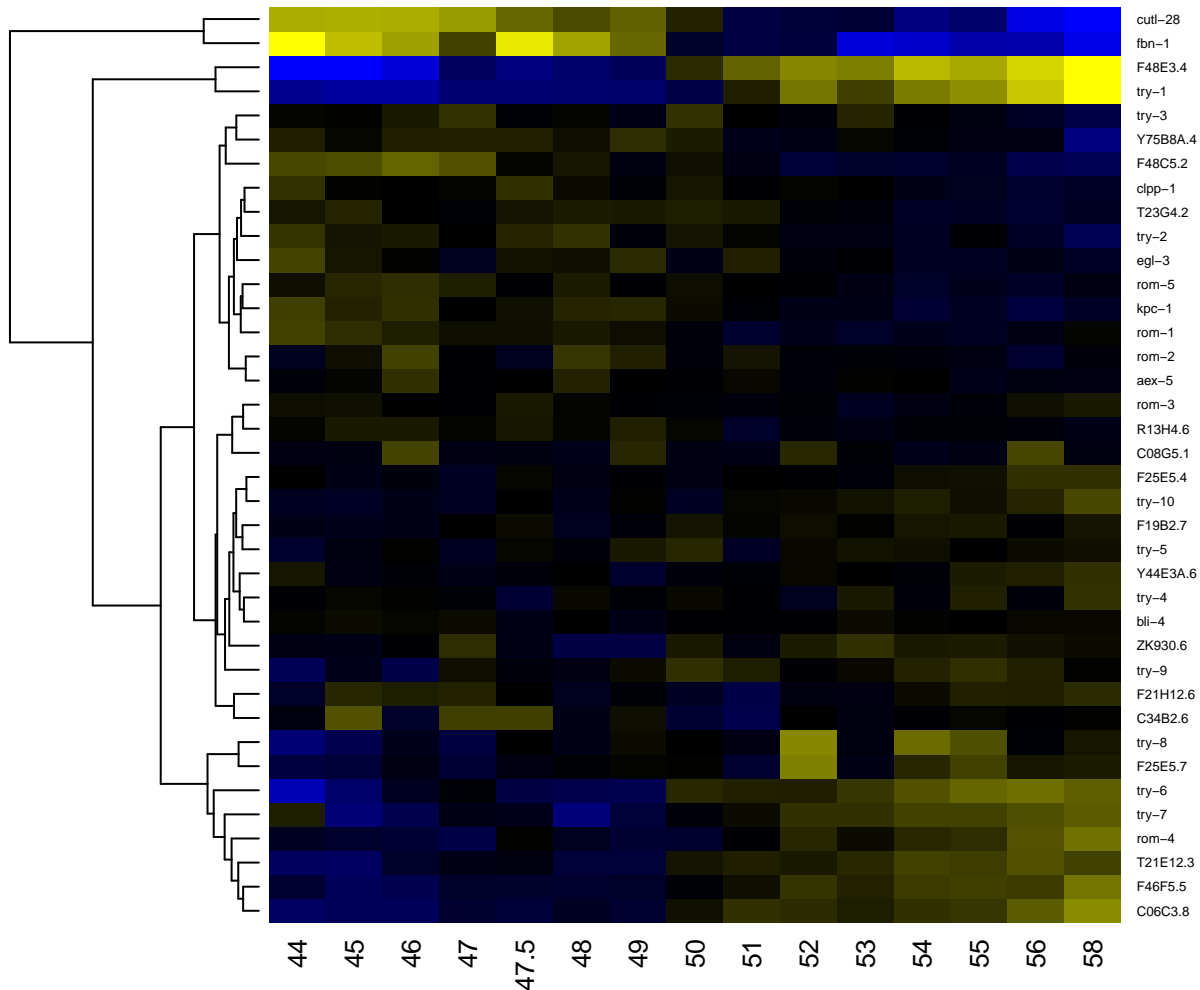



# serine-type endopeptidase inhibitor activity

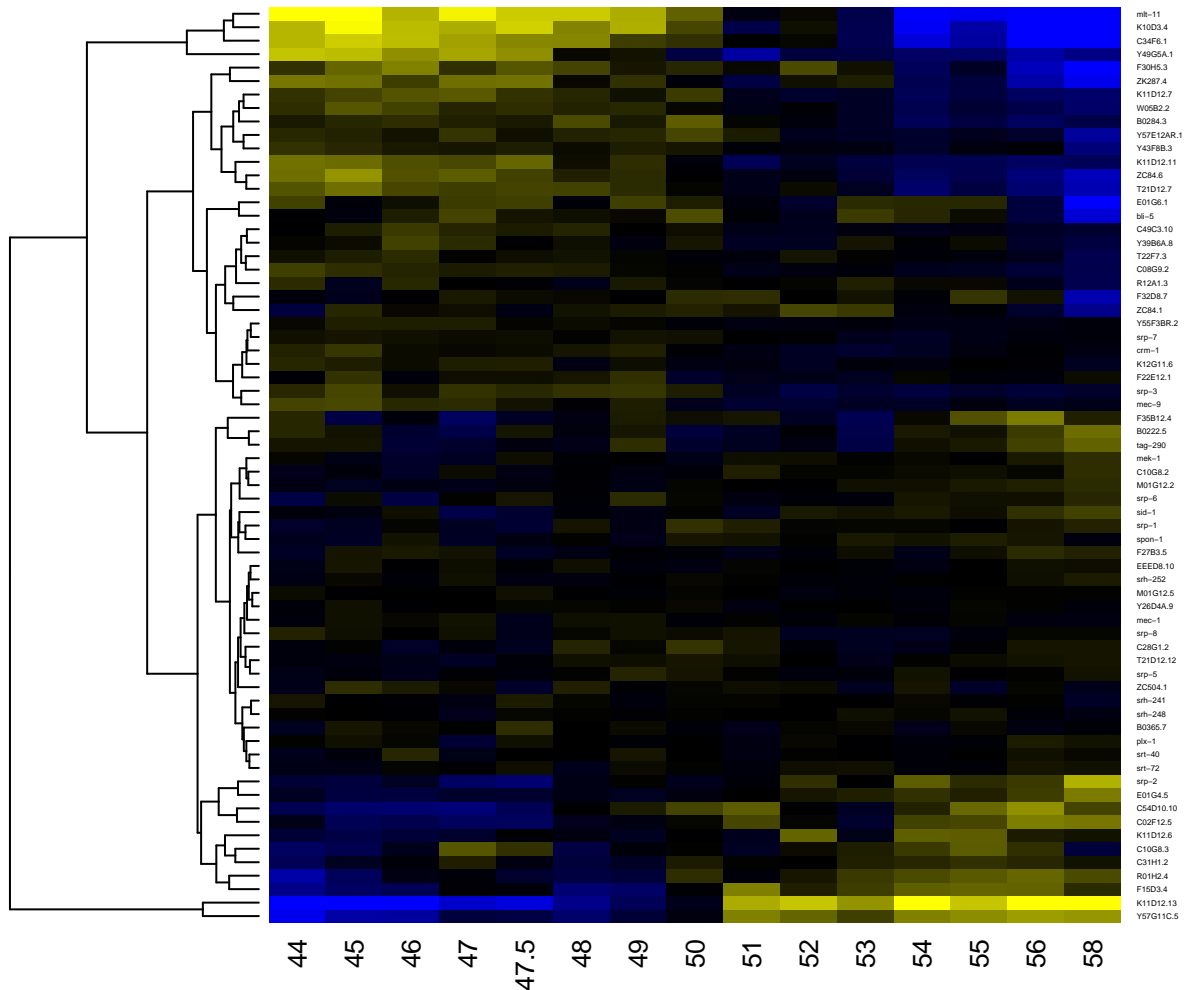

# serine-type peptidase activity

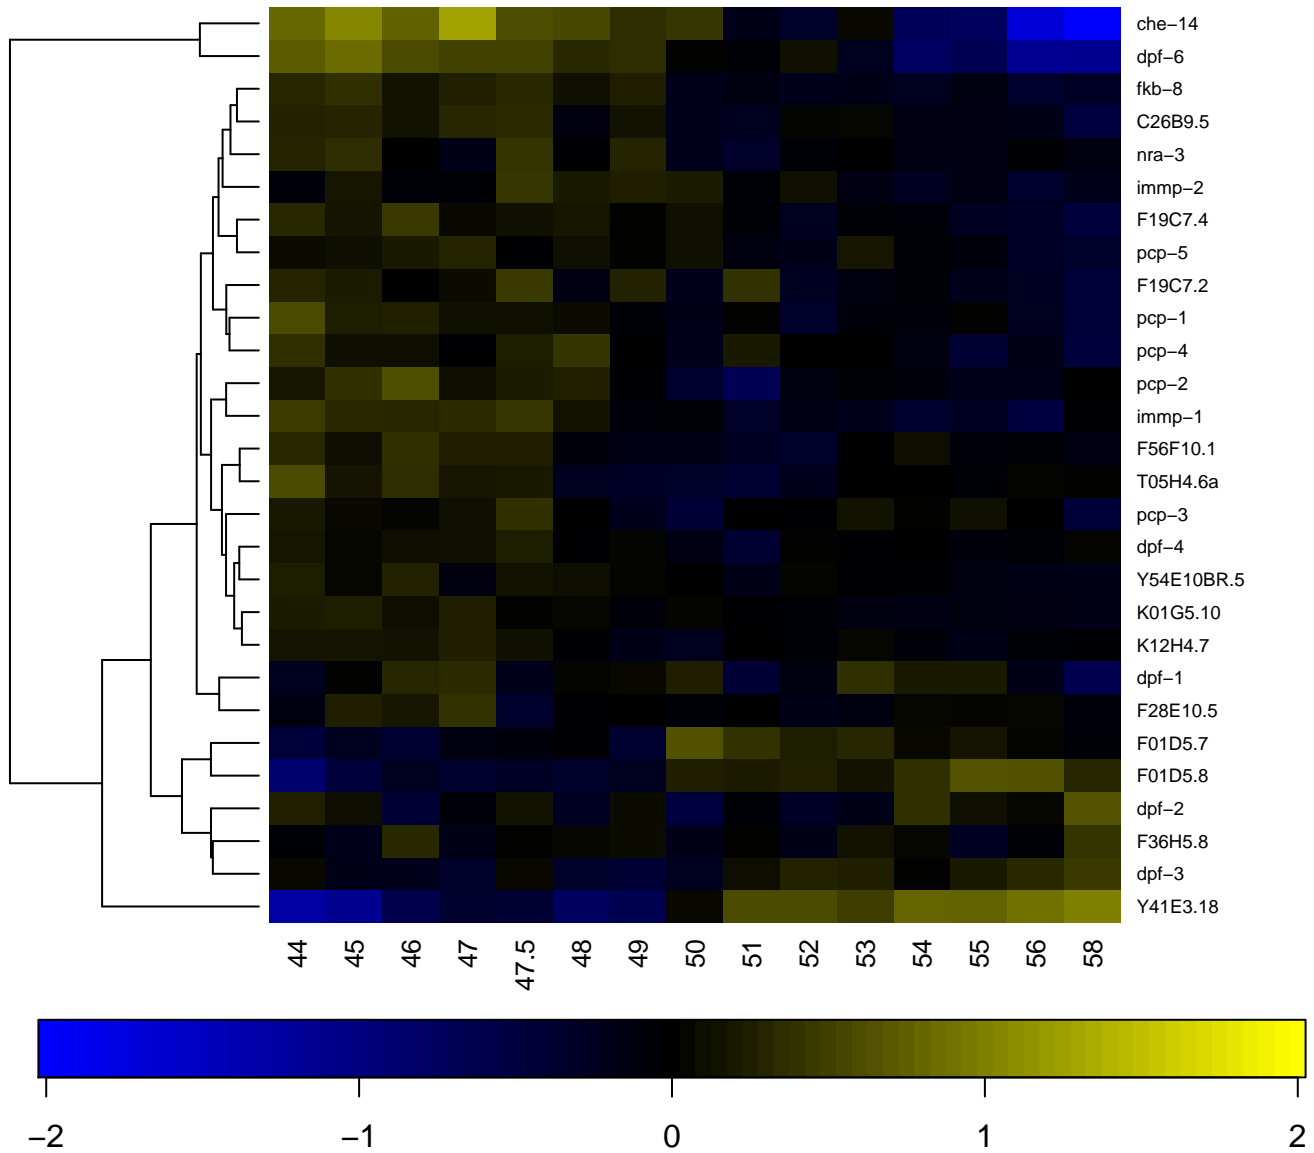



# sex differentiation

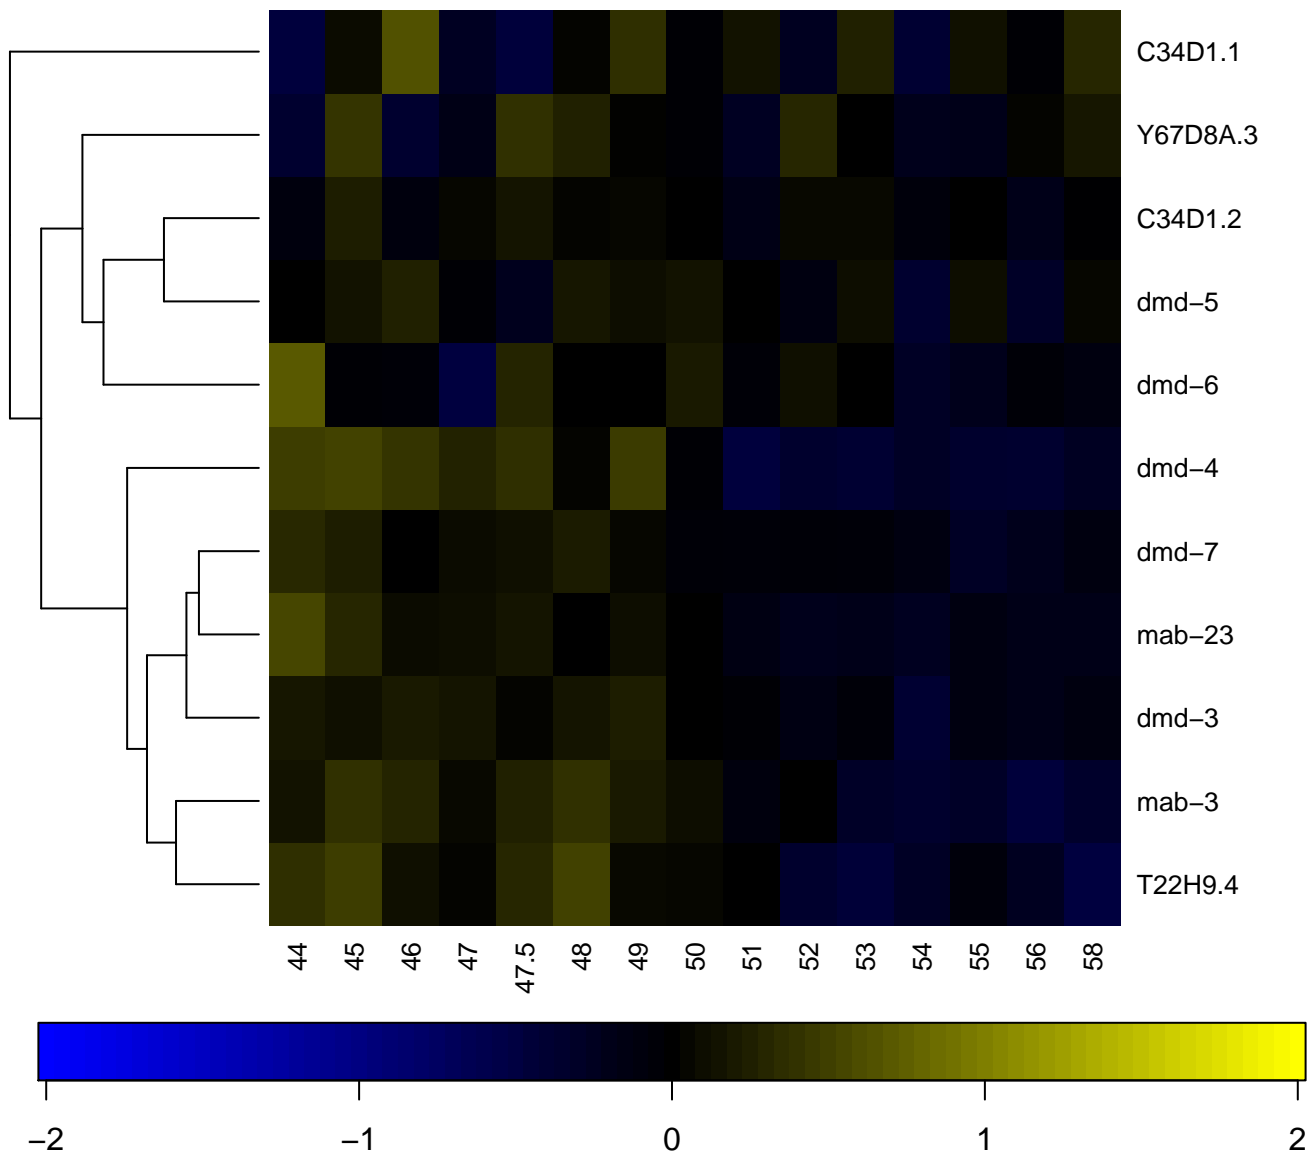



# signal transducer activity

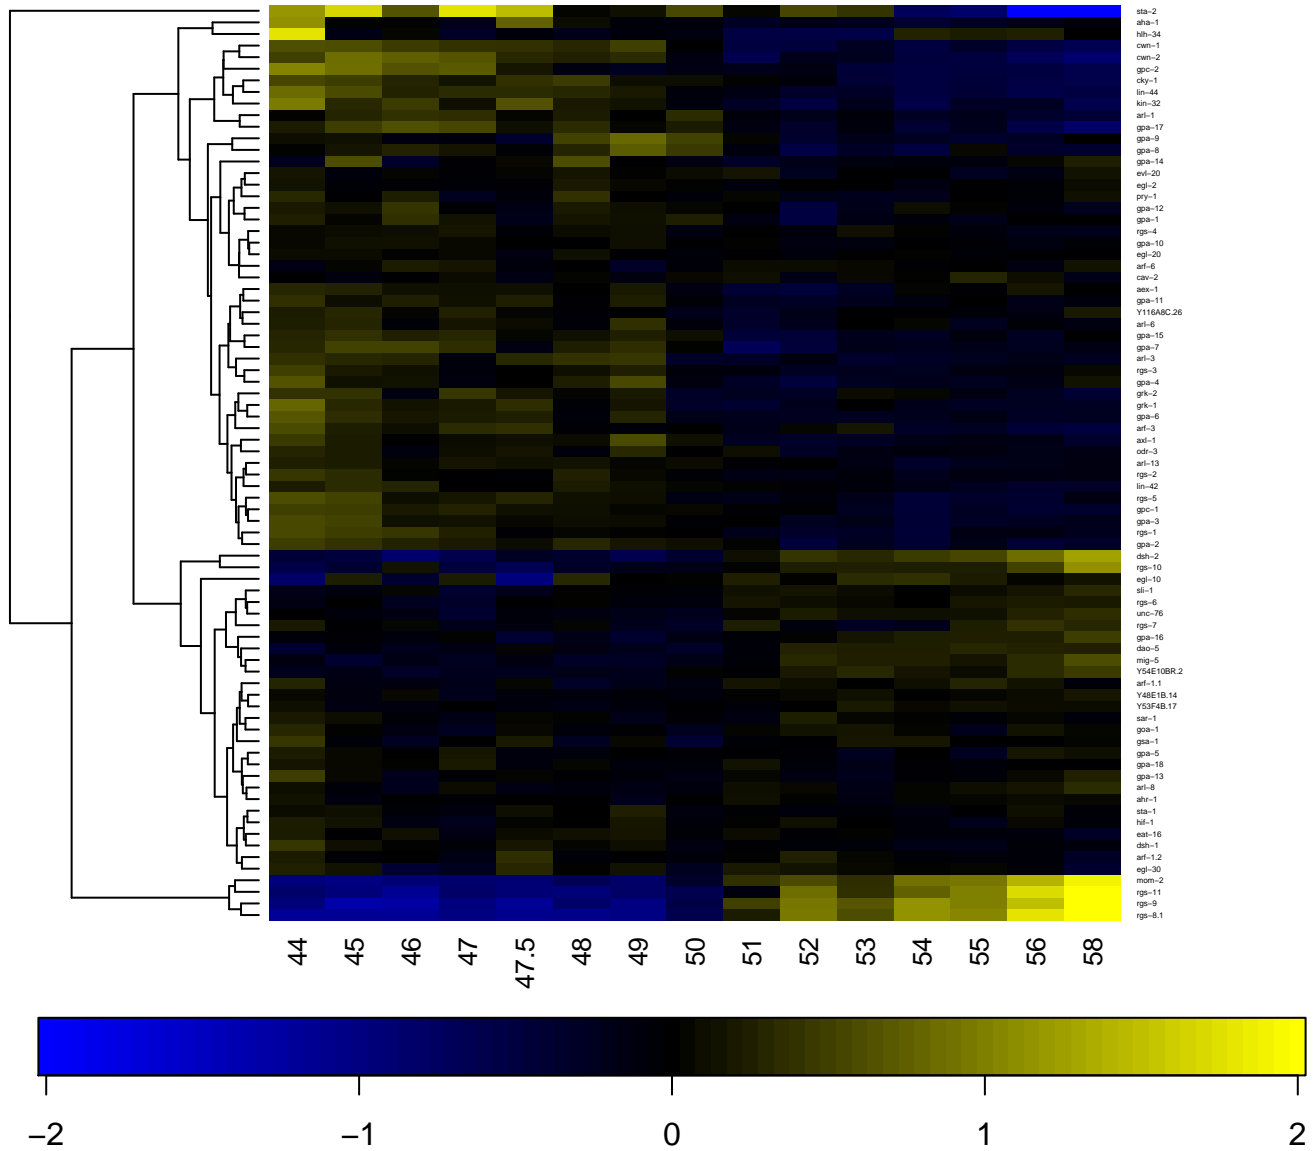

# signal transduction

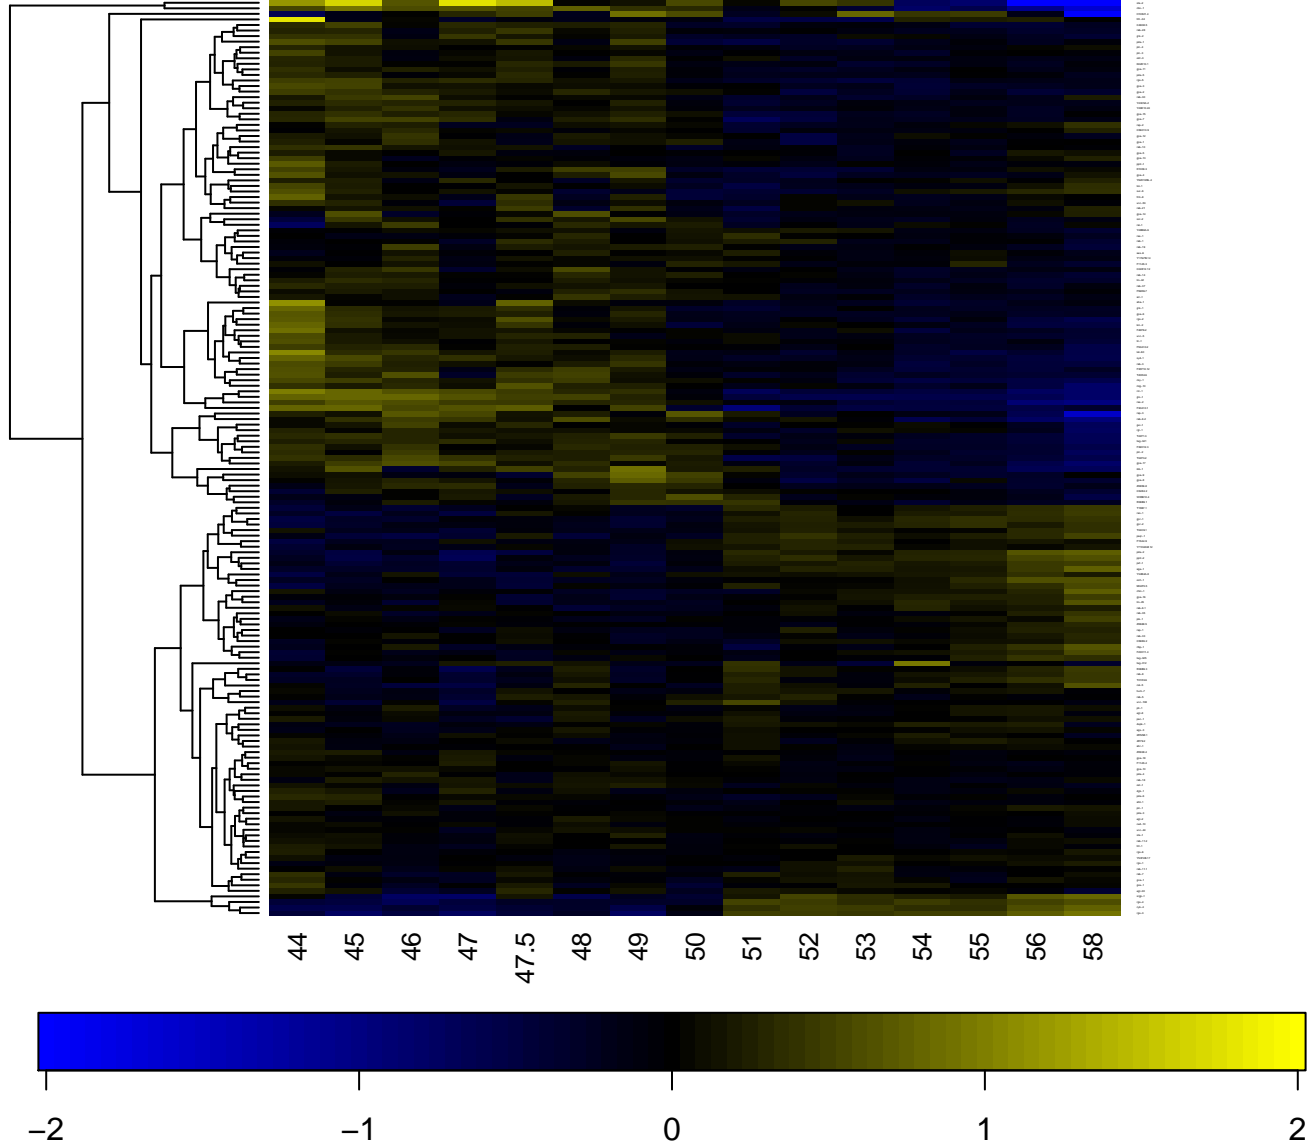





# single-stranded RNA binding

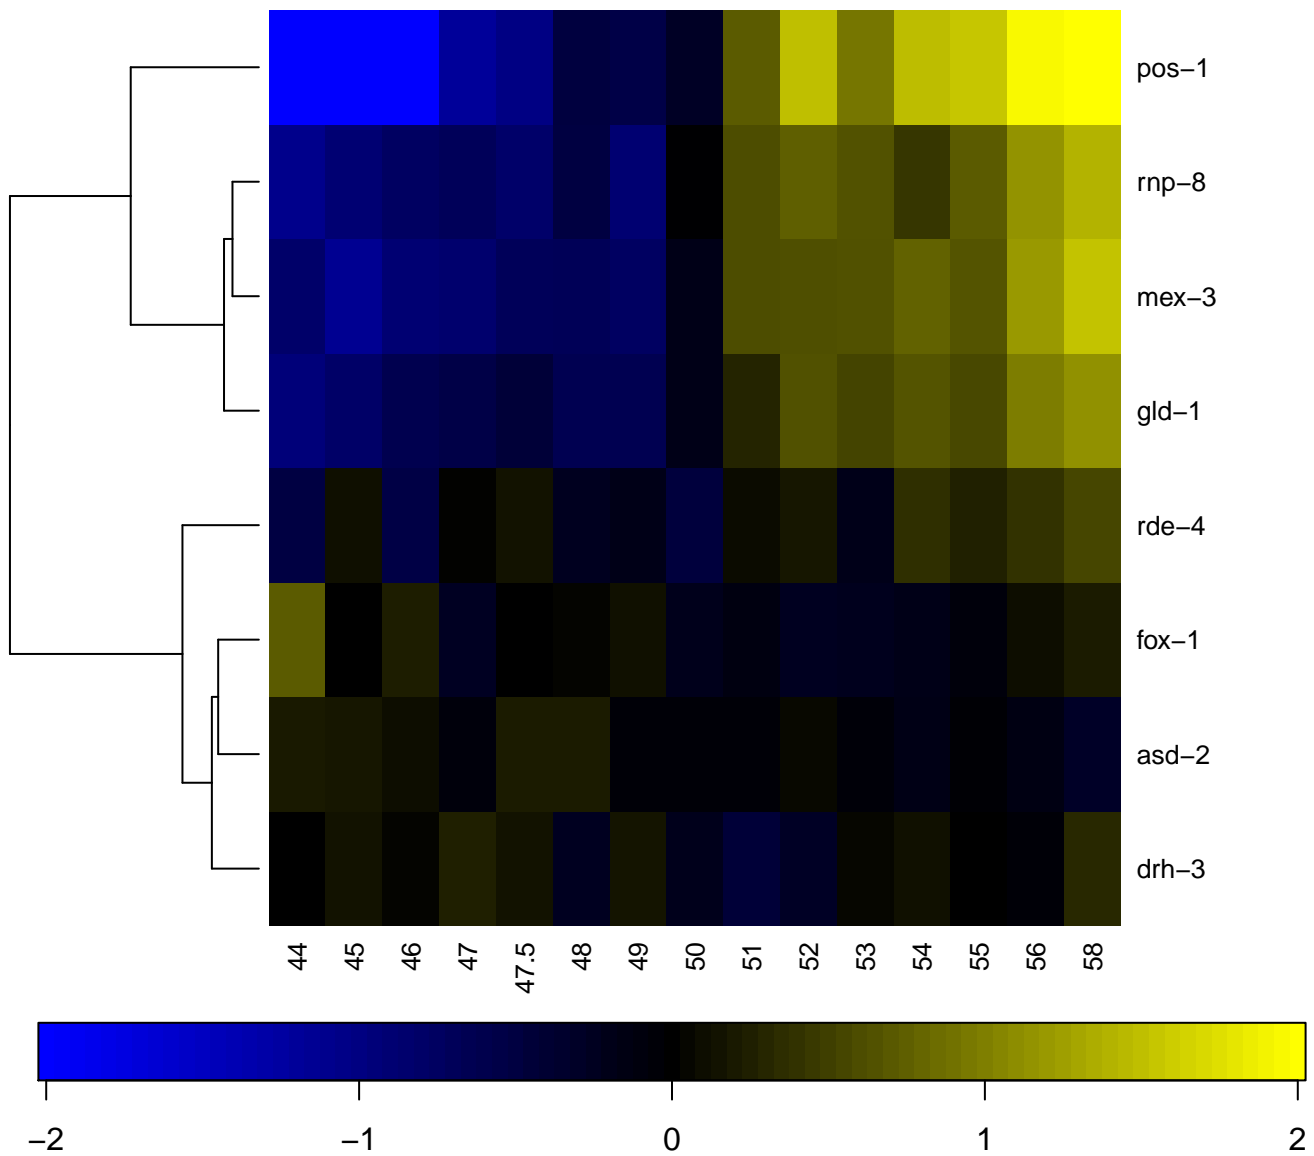

# single fertilization

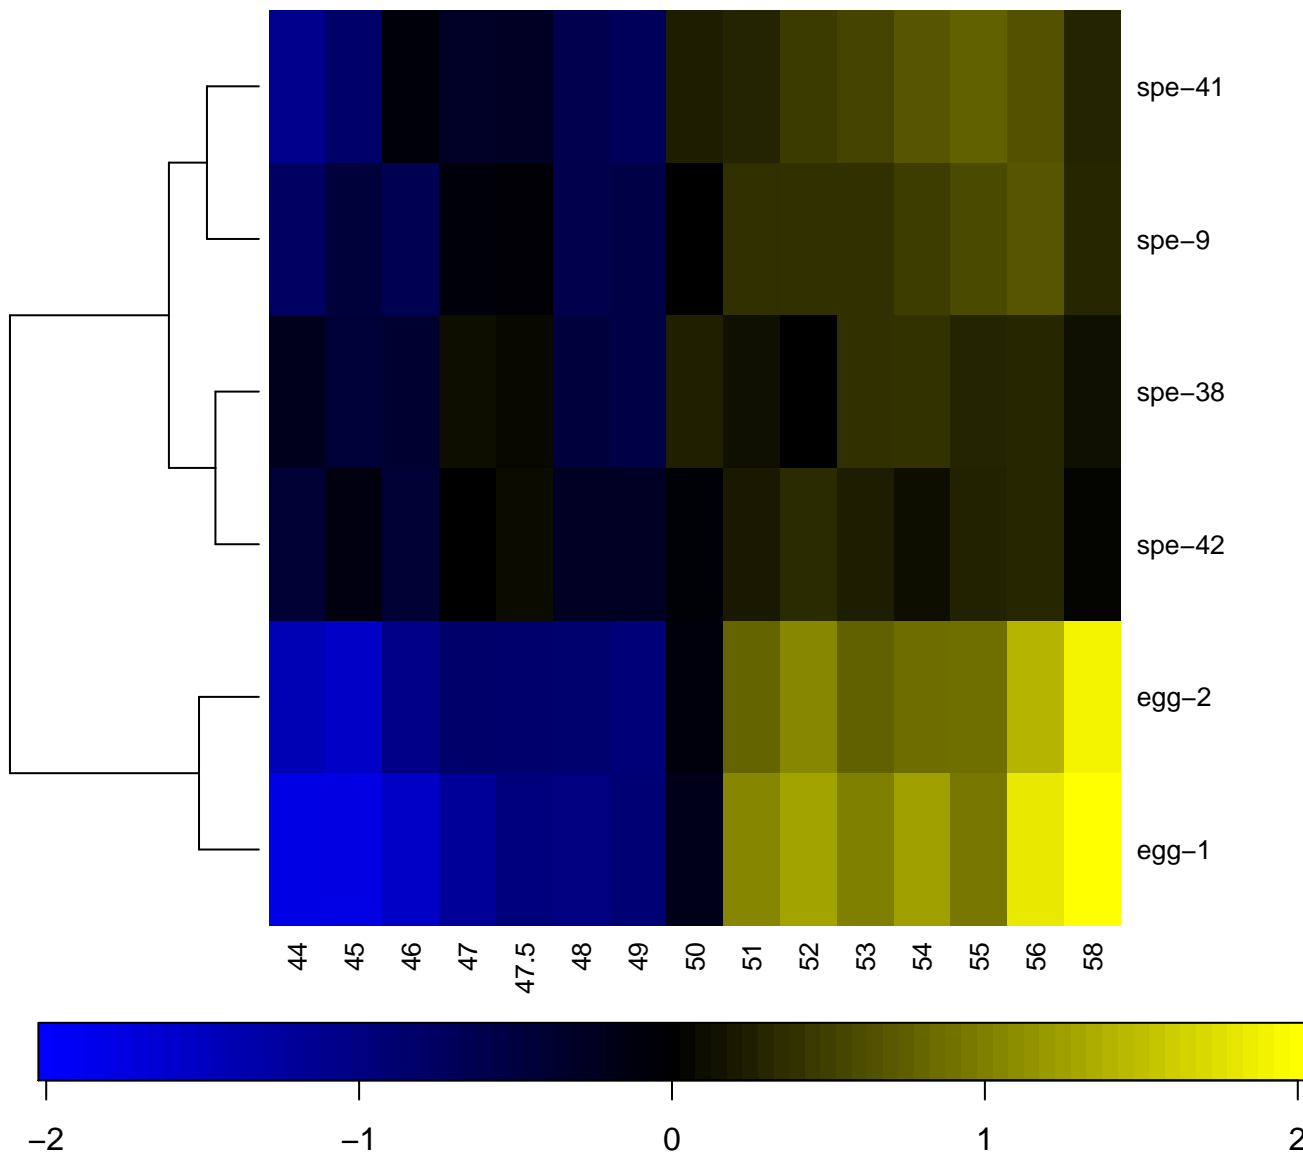

# small conjugating protein ligase activity



# small GTPase mediated signal transduction

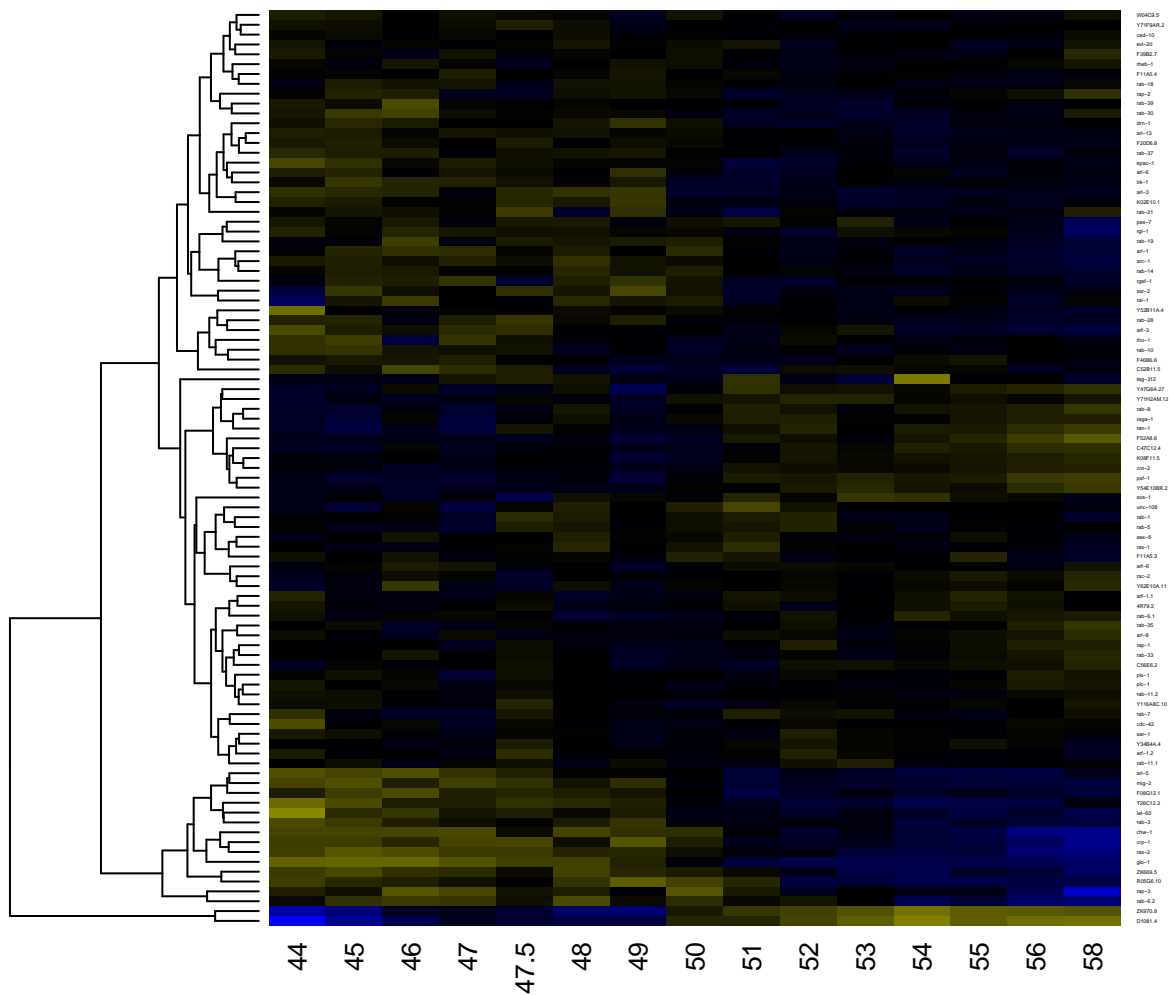







# sodium channel activity

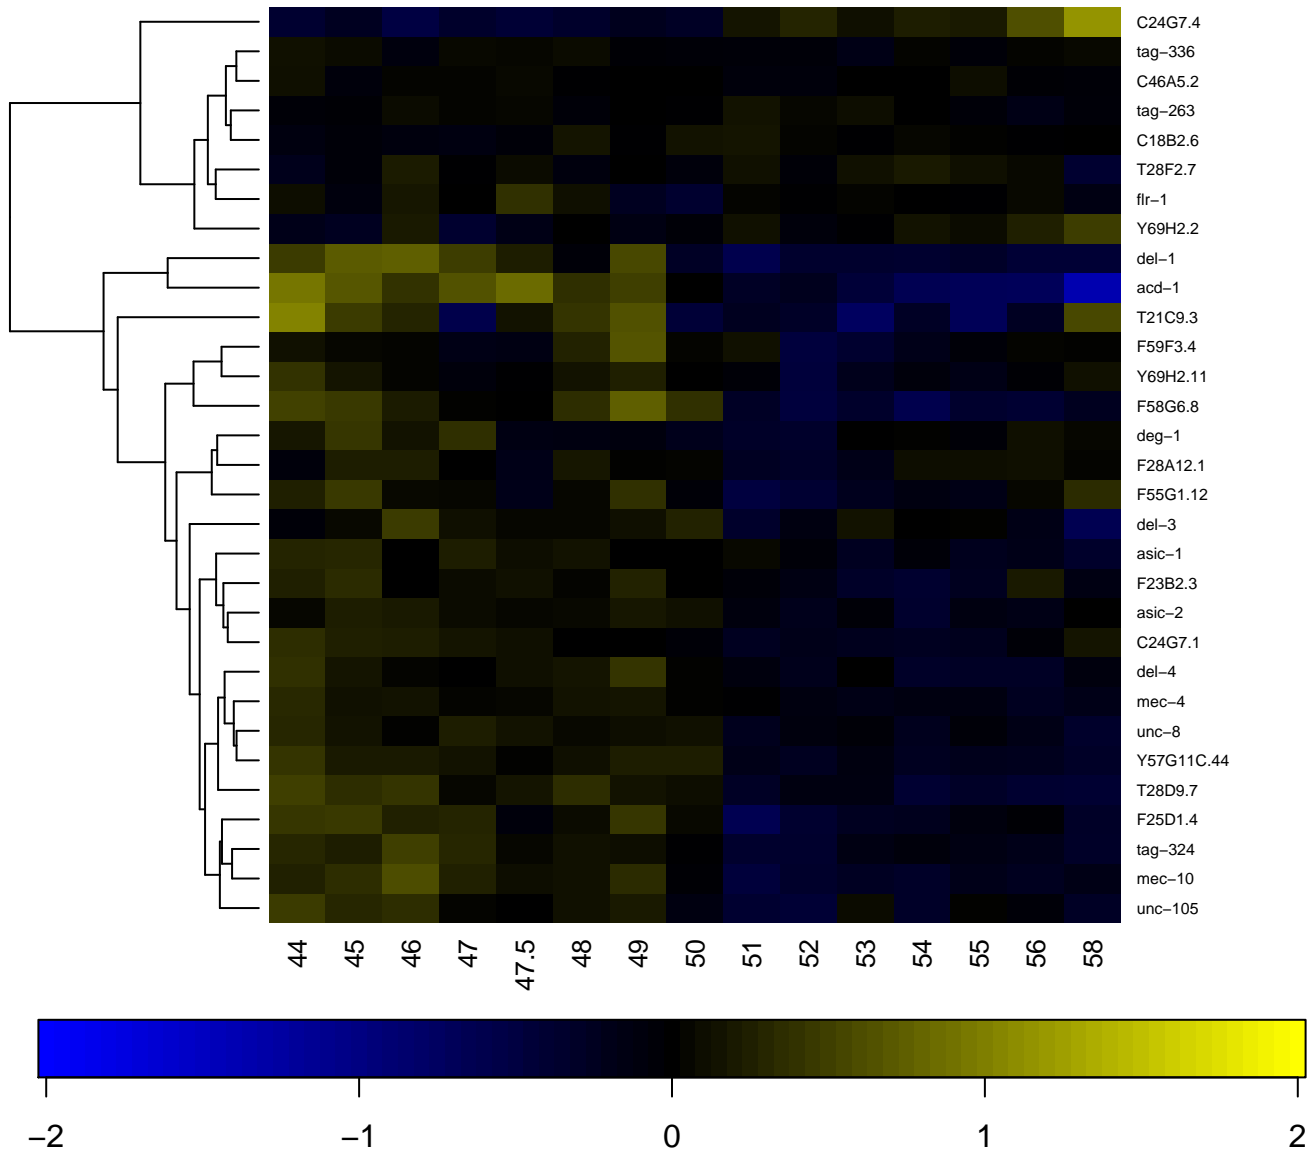



# sodium ion transport

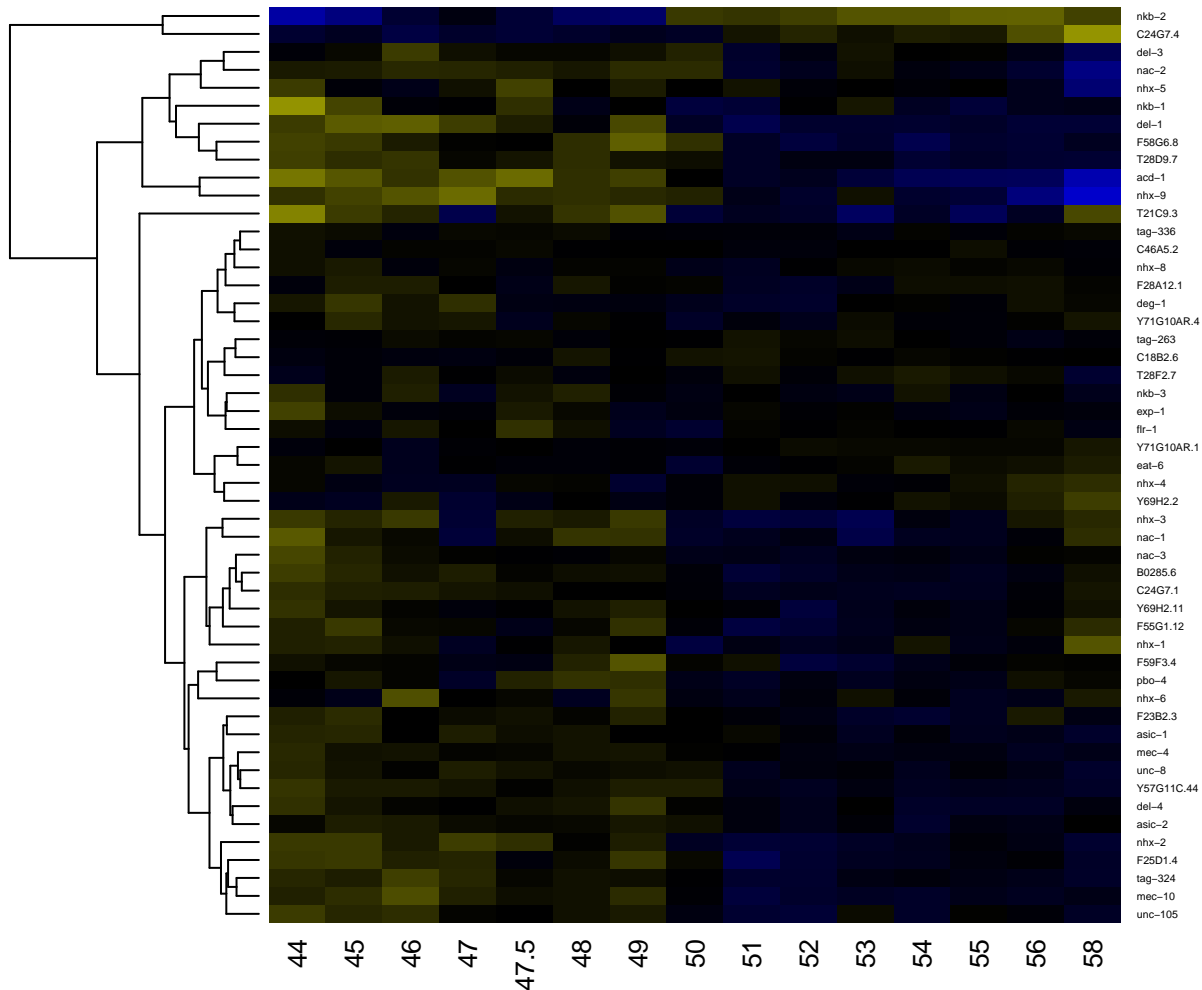

# sodium:dicarboxylate symporter activity

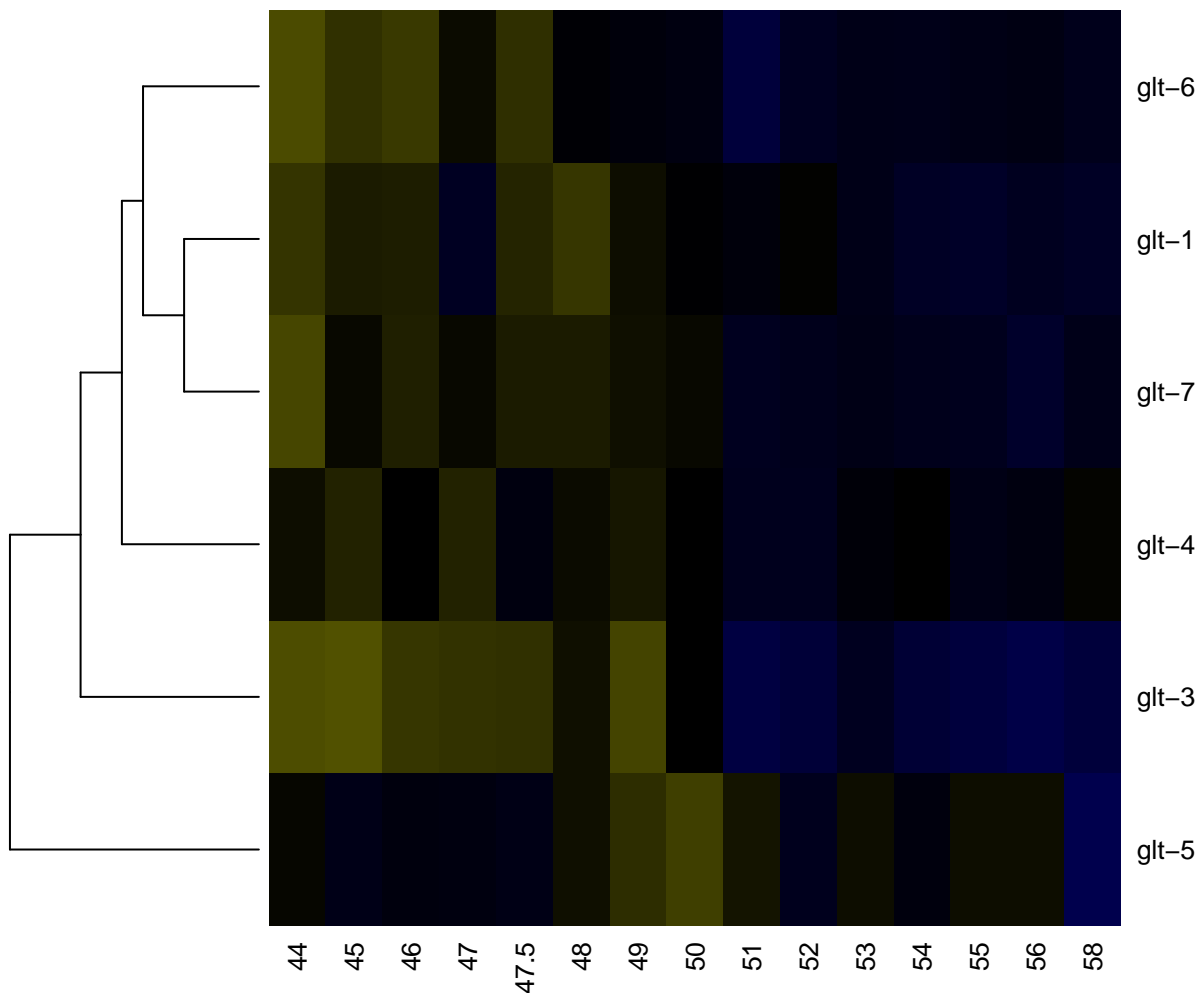

# sodium:hydrogen antiporter activity

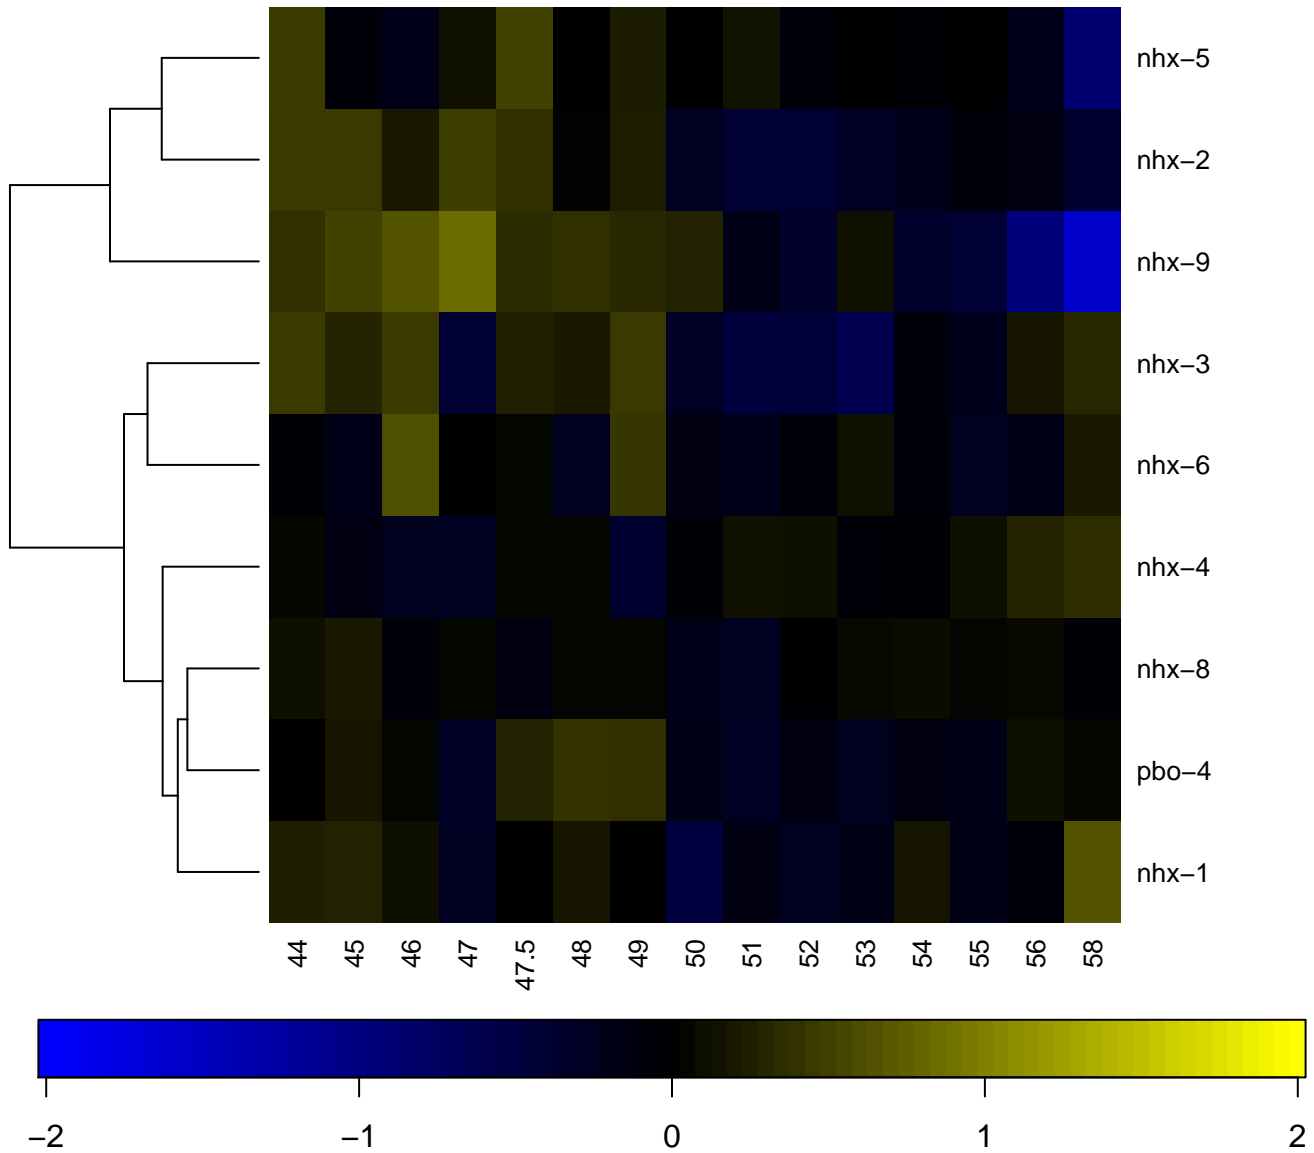





# specific RNA polymerase II transcription factor activity

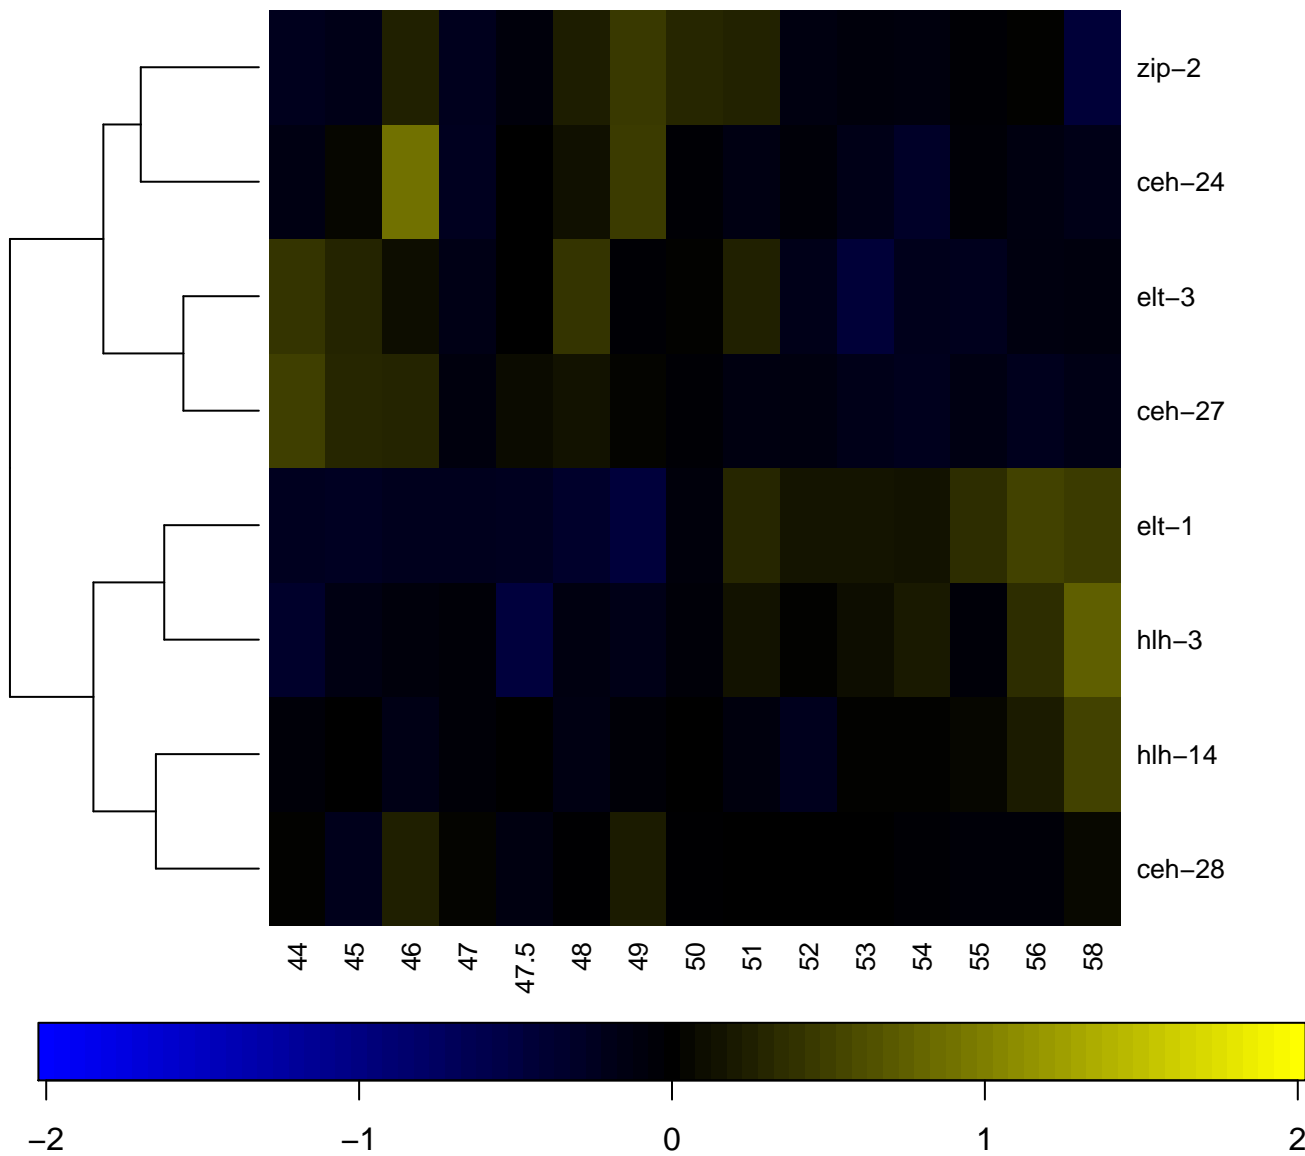



# spermatogenesis

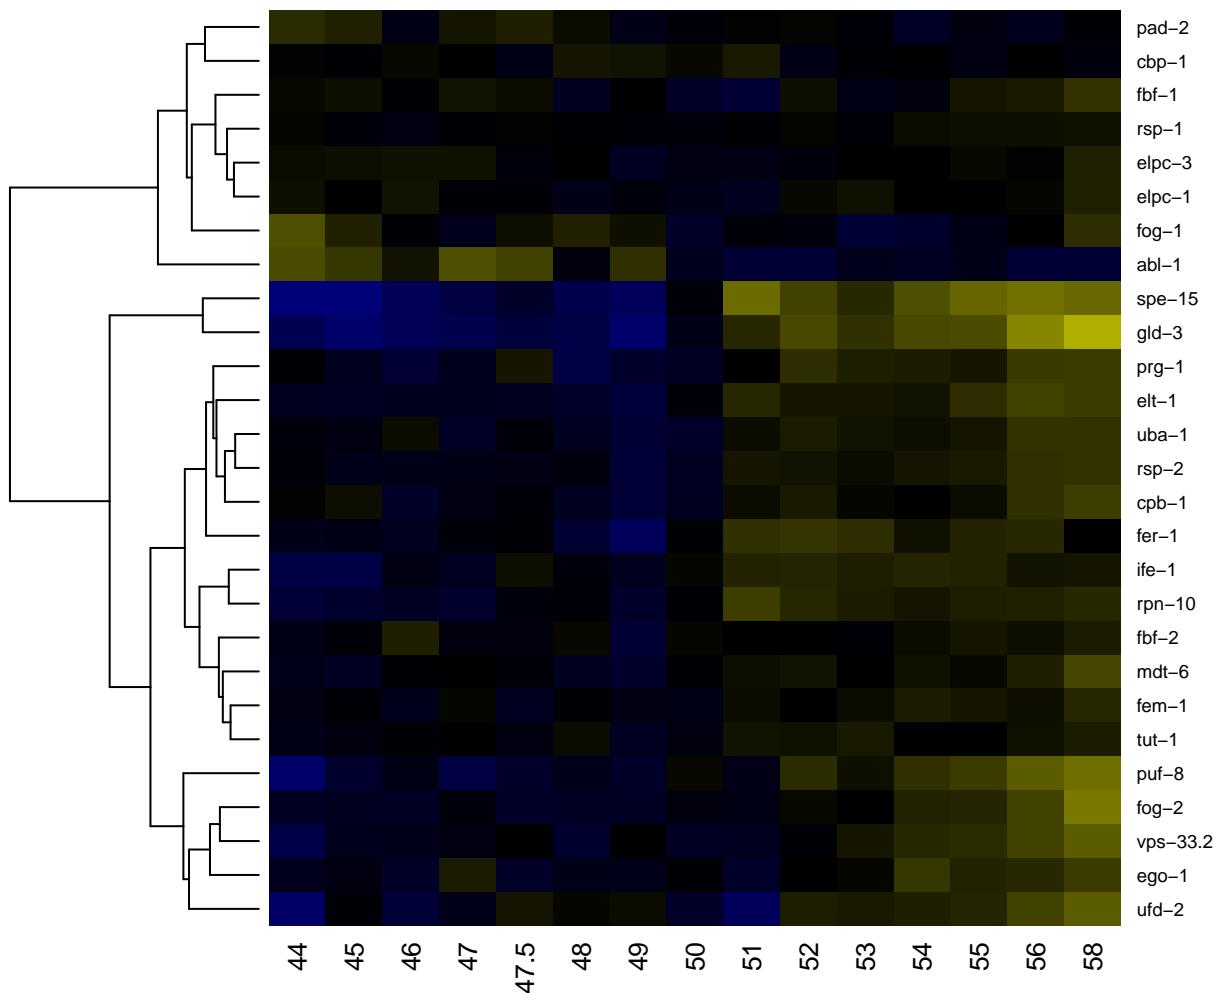

-2

-1

0

1

2















# Srb-mediator complex







# stearoyl-CoA 9-desaturase activity

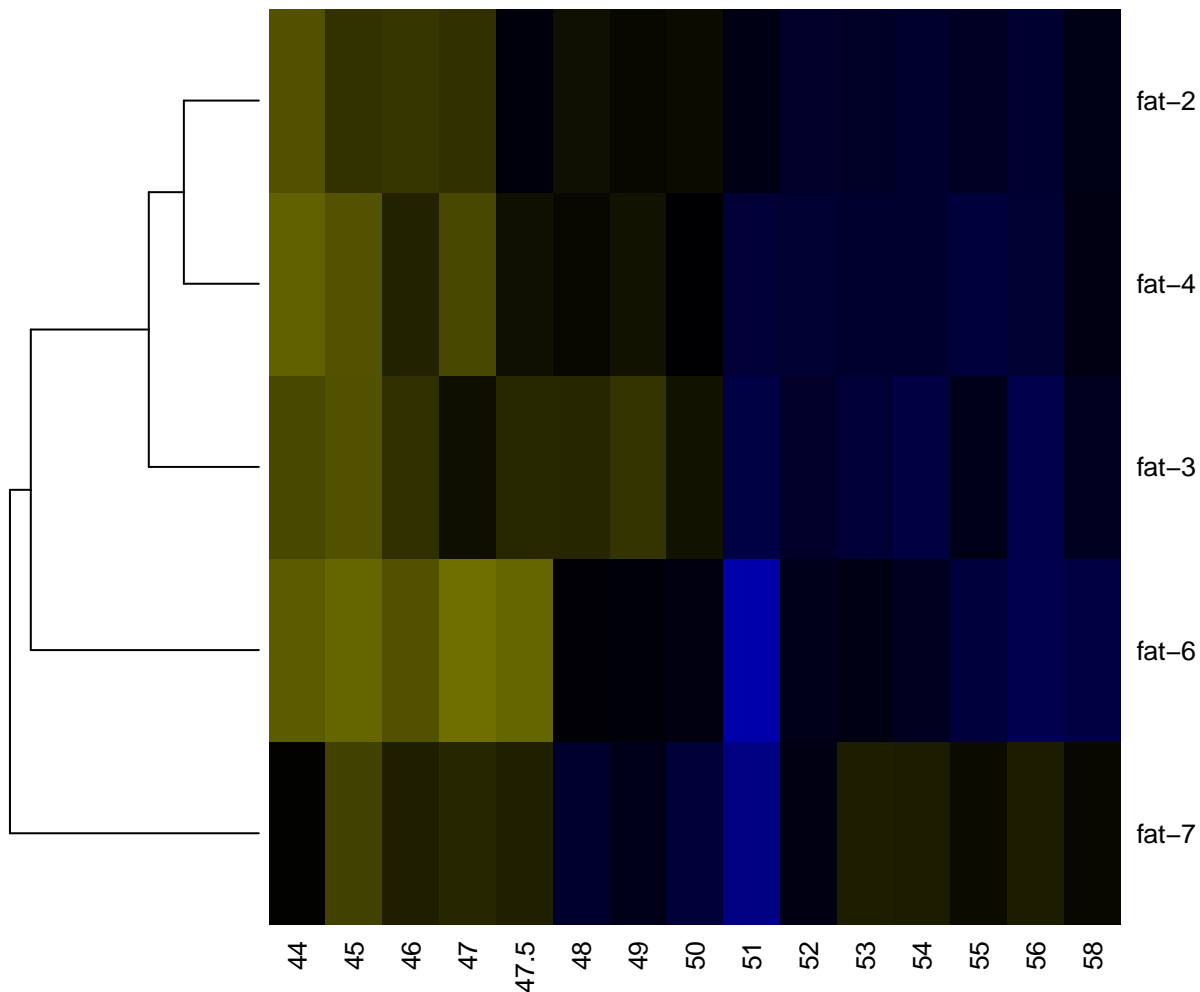

-2

-1

0

1

2

# steroid biosynthetic process

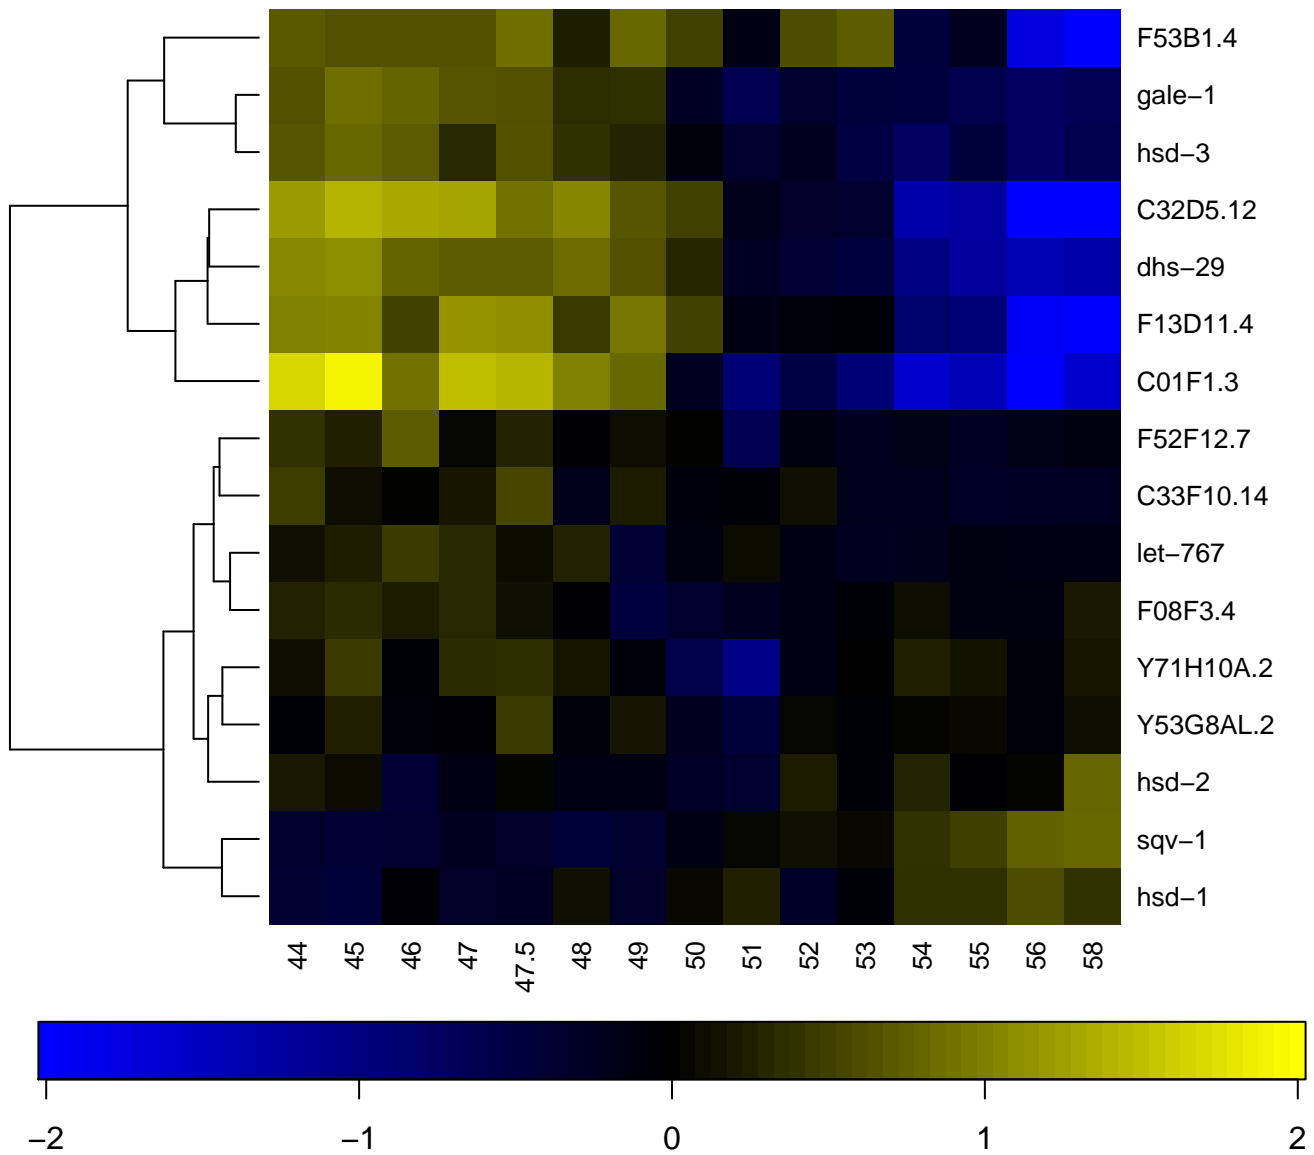

# steroid hormone receptor activity

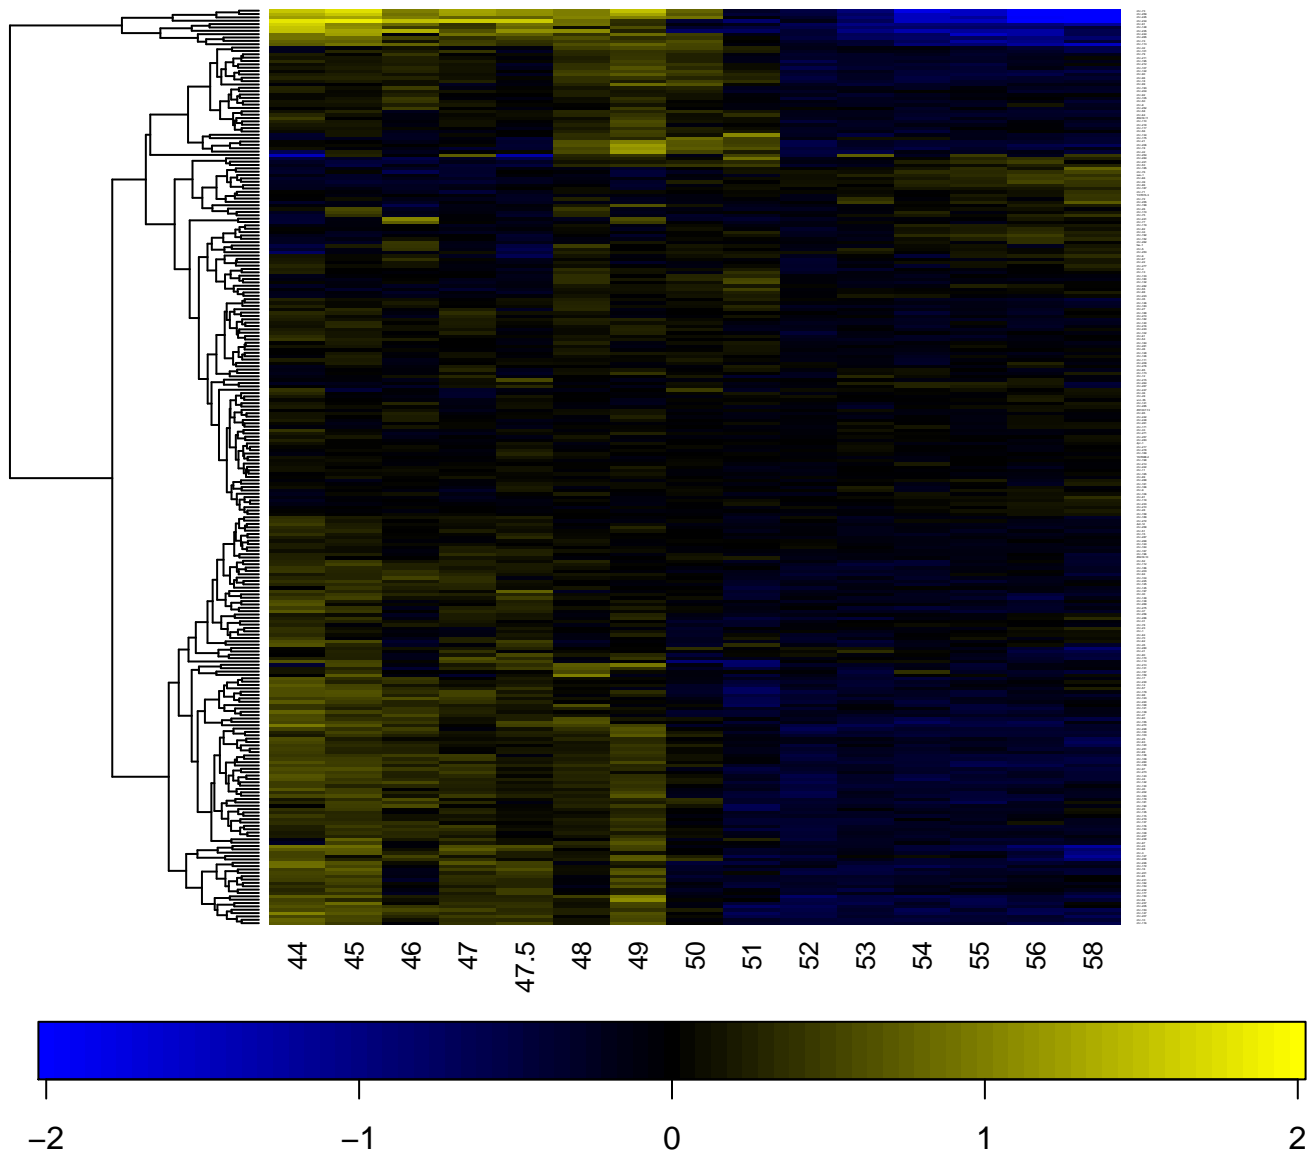

# sterol metabolic process

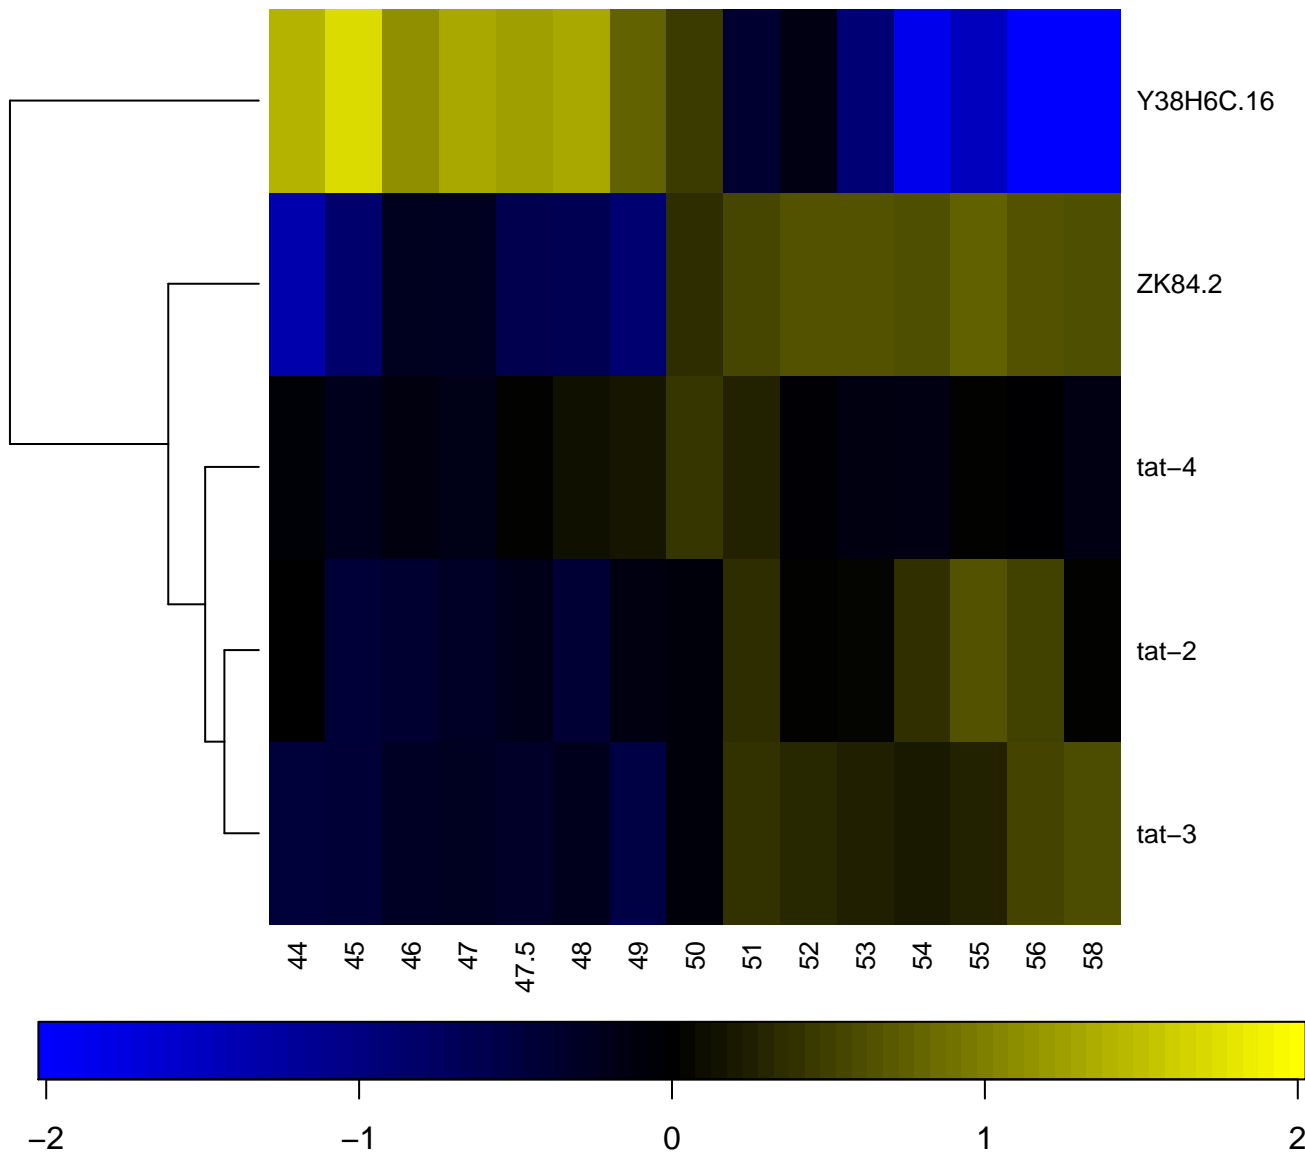



# striated muscle dense body

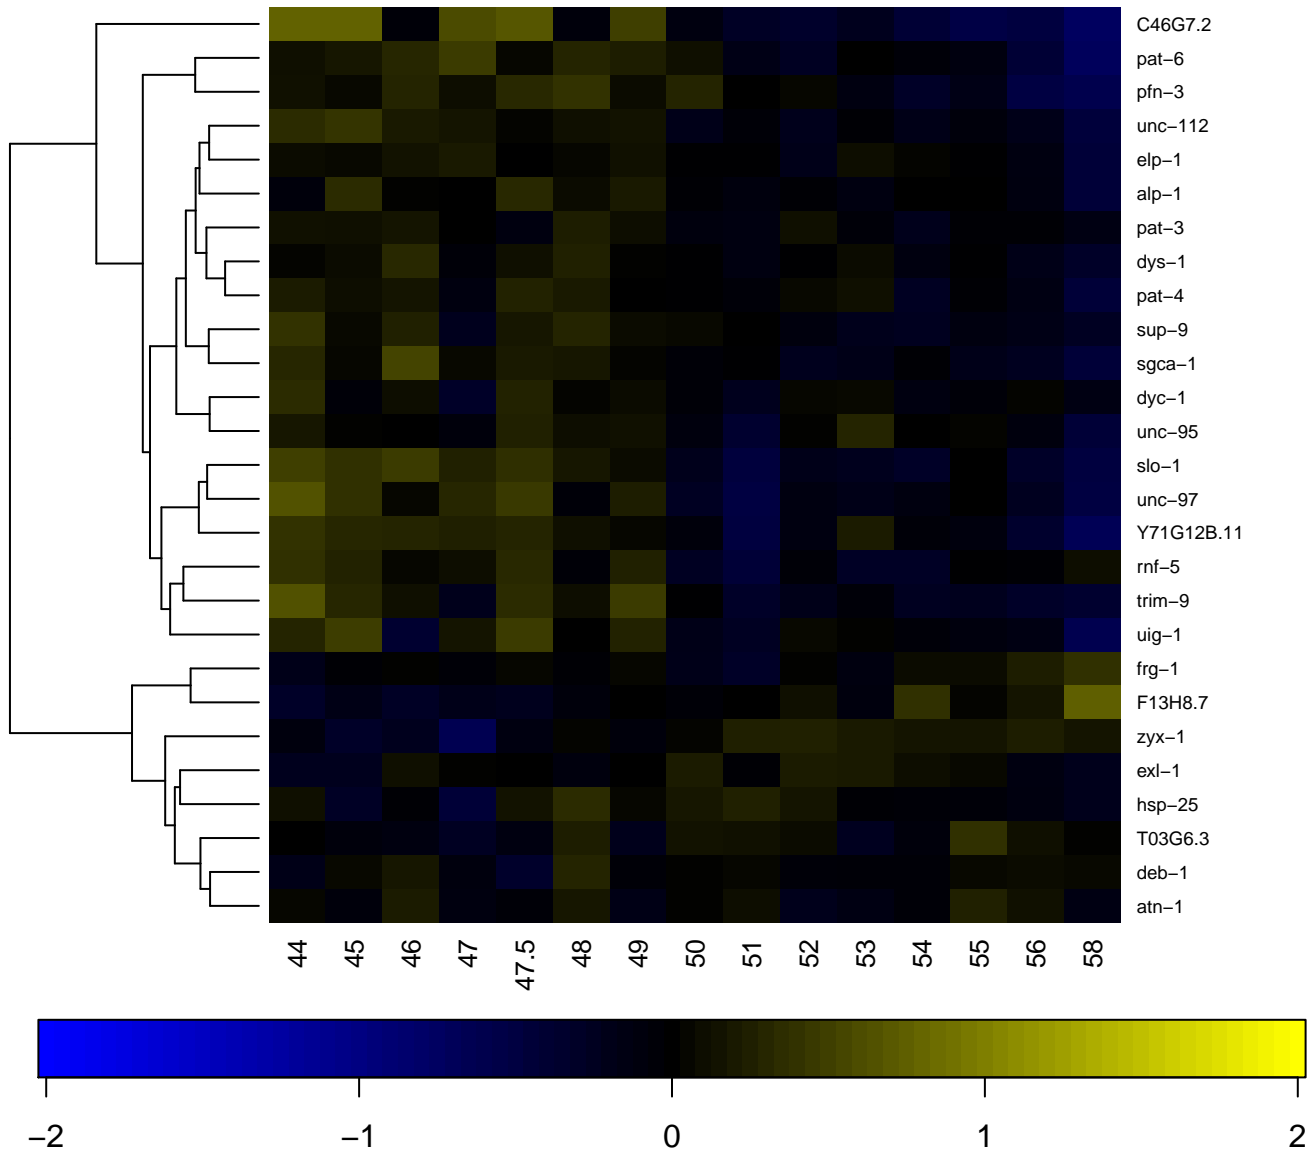



# structural constituent of collagen and cuticulin-based cuticle

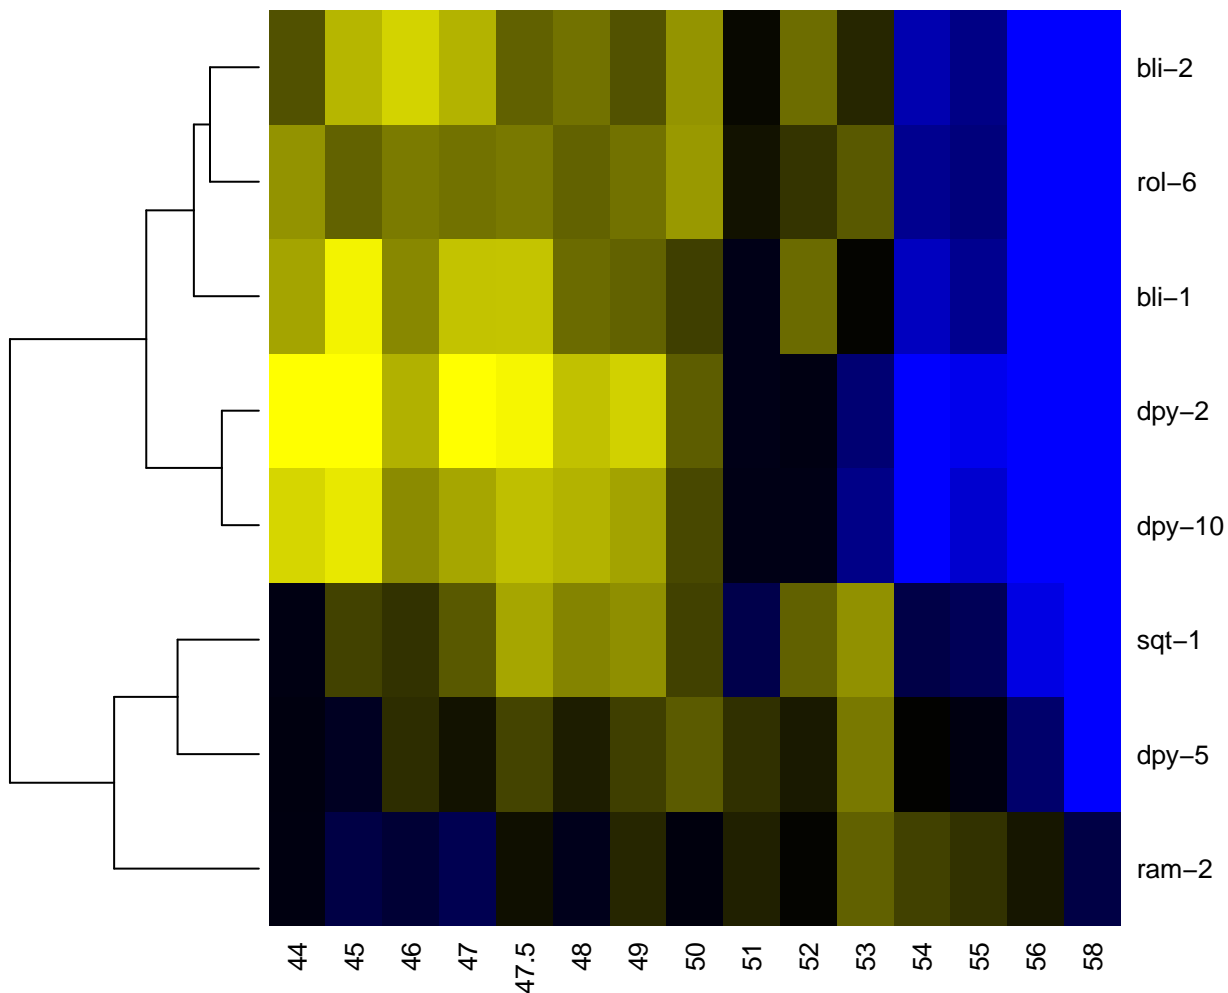



# structural constituent of cuticle

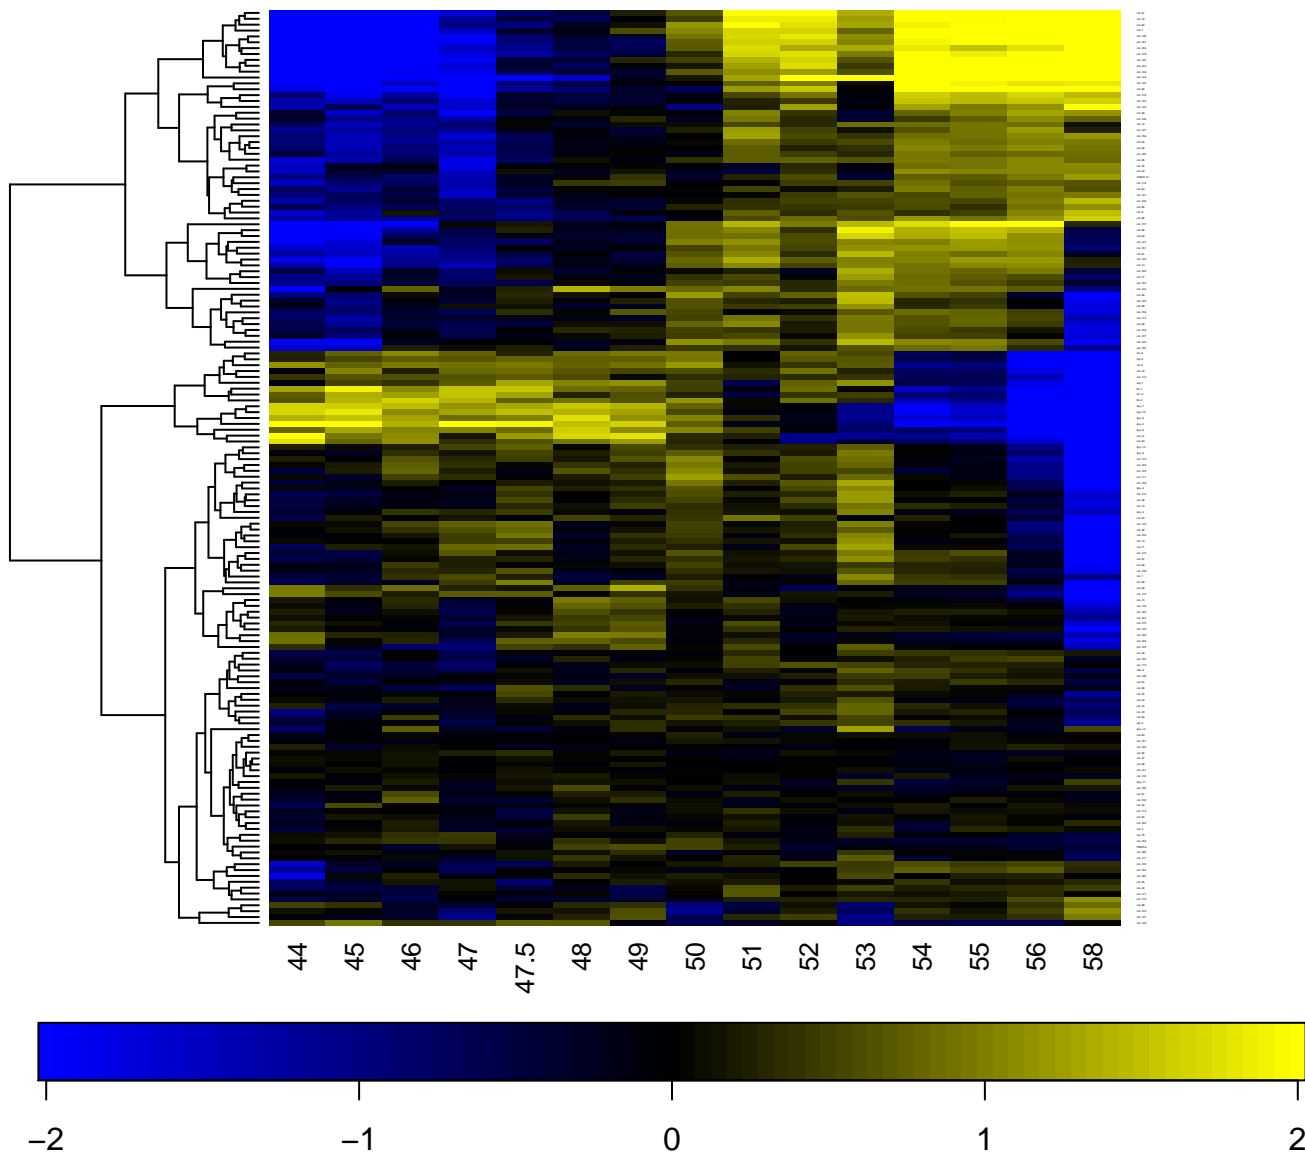

# structural constituent of cytoskeleton

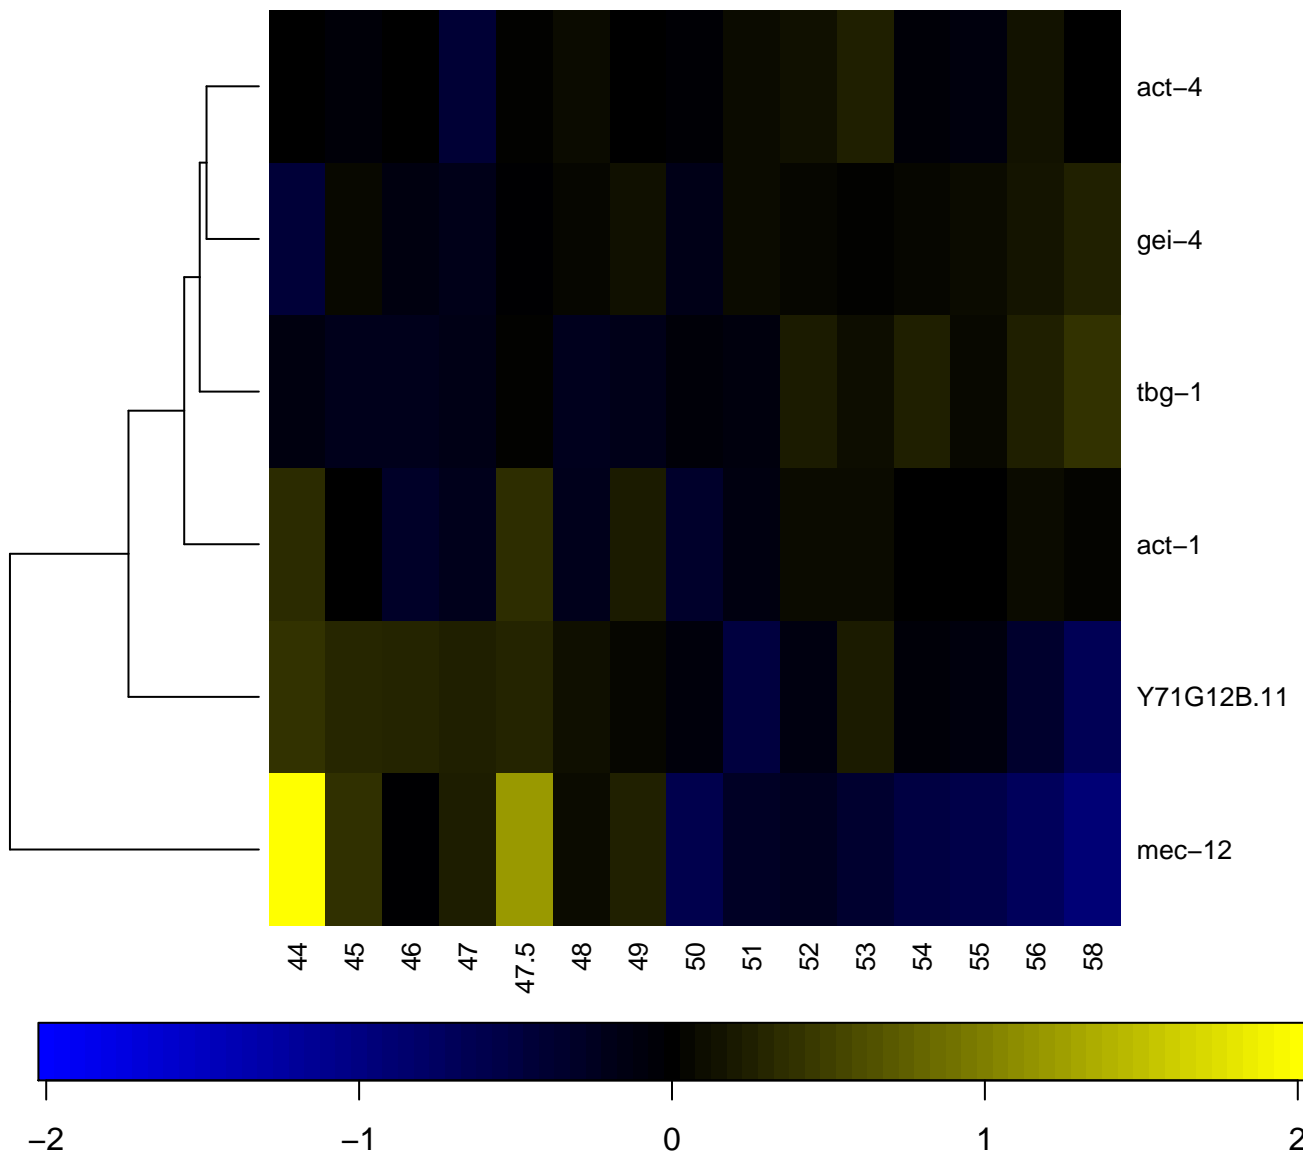

# structural constituent of ribosome

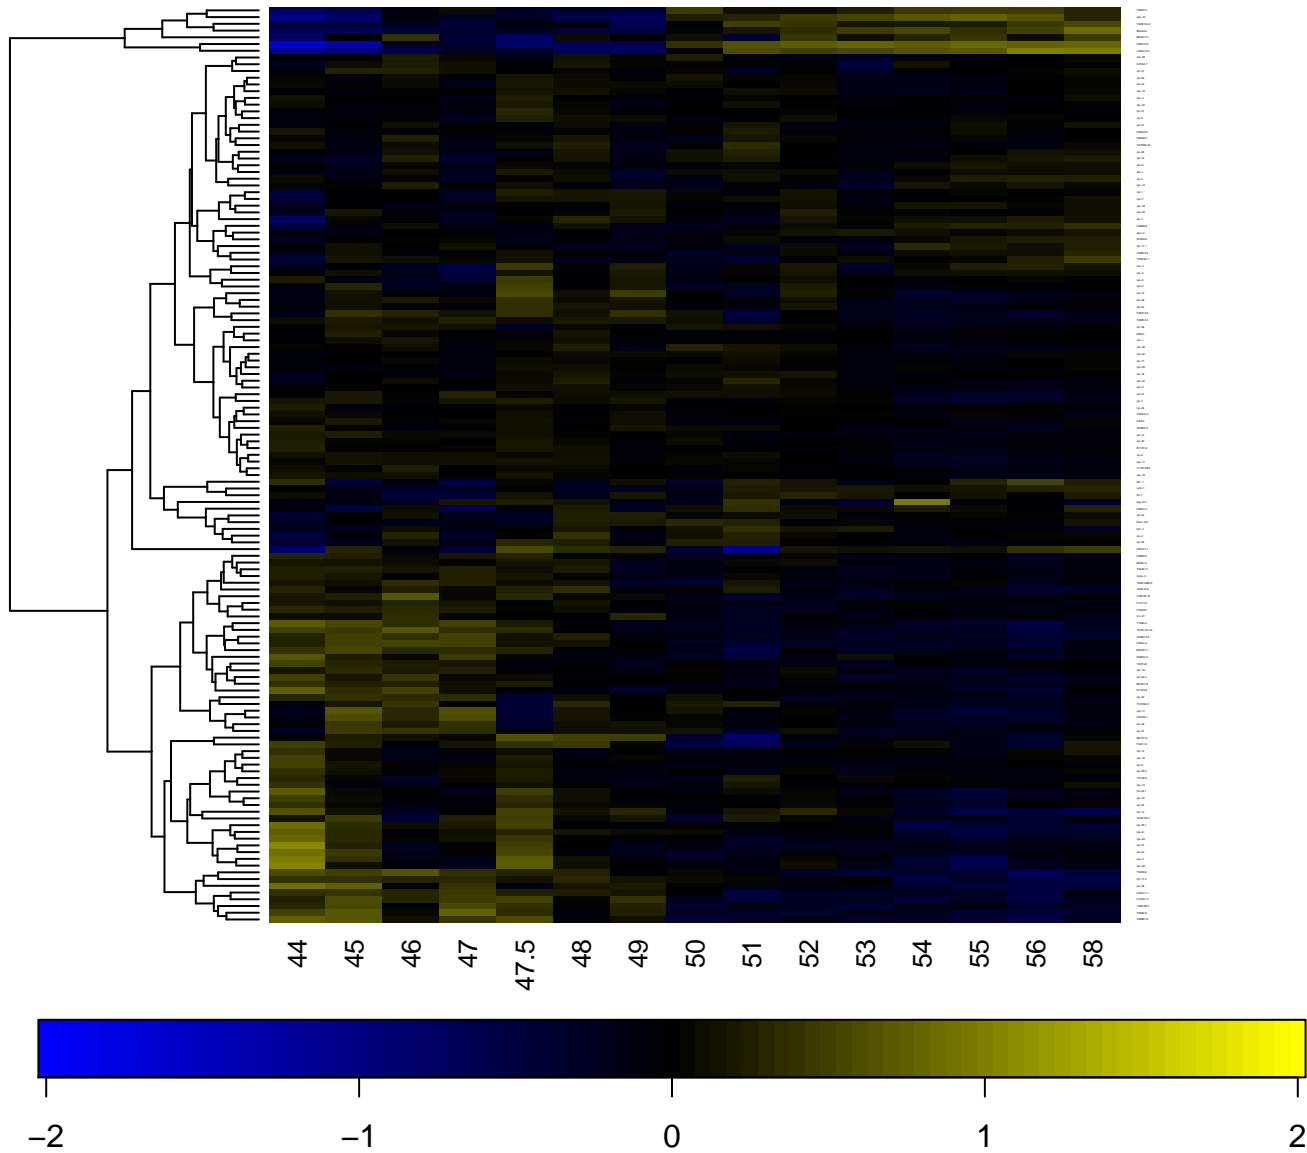

# structural constituent of vitelline membrane

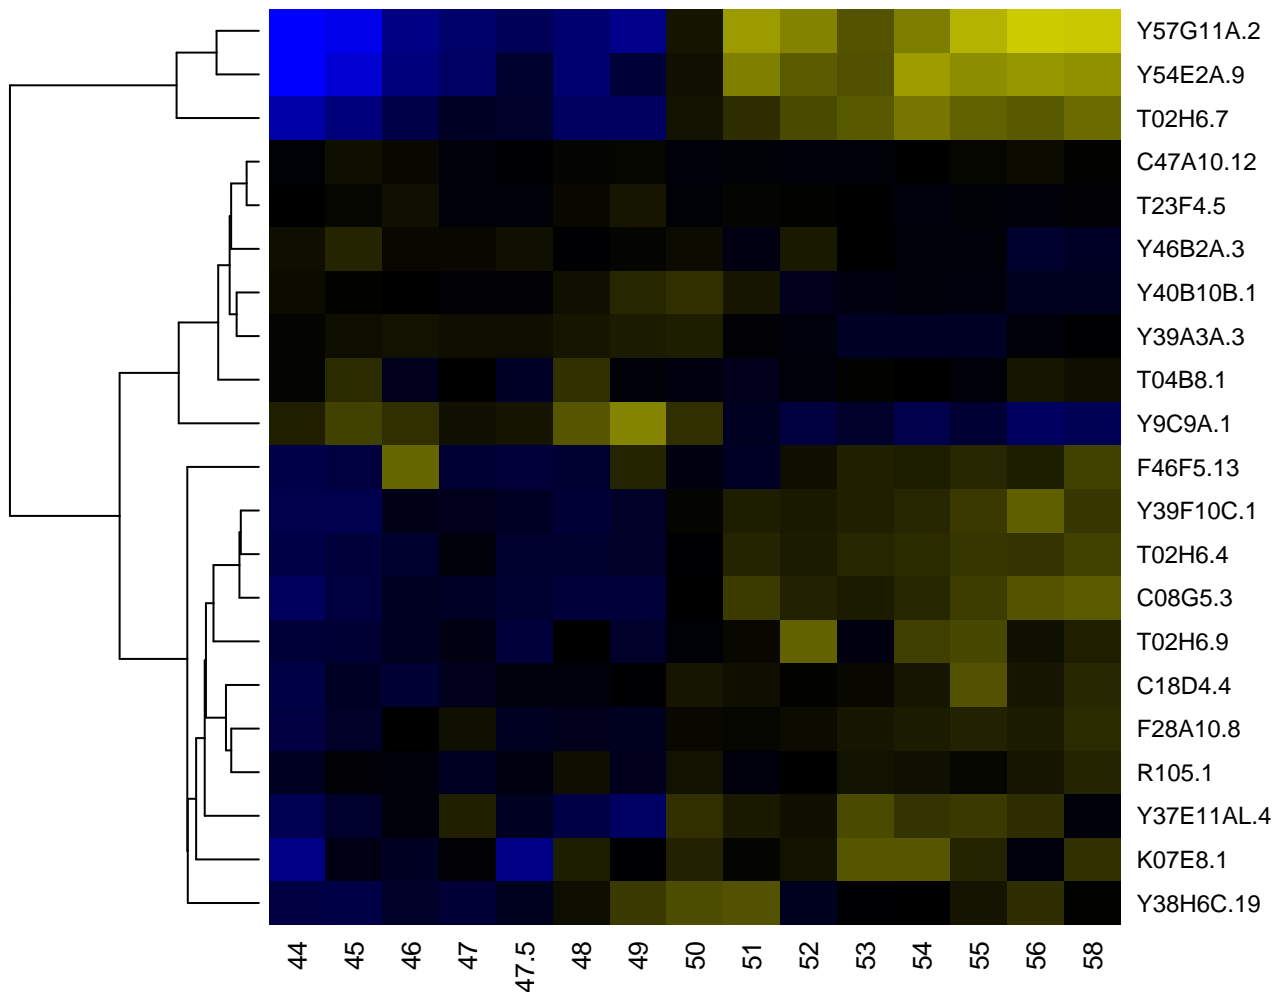

# structural molecule activity

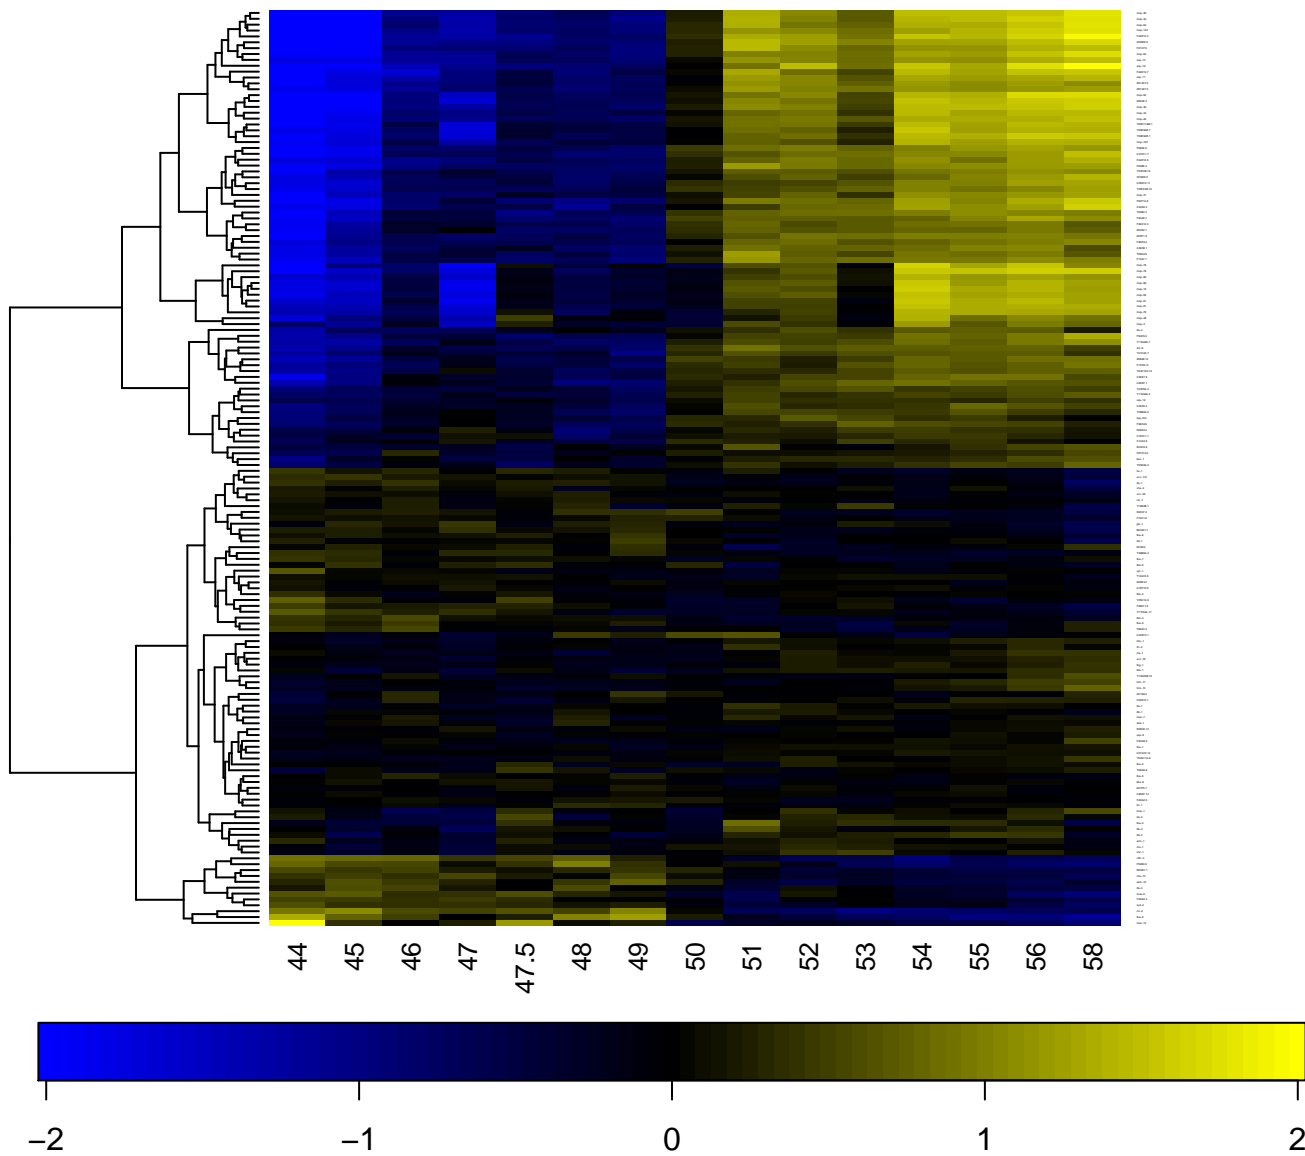

# substrate-specific transmembrane transporter activity

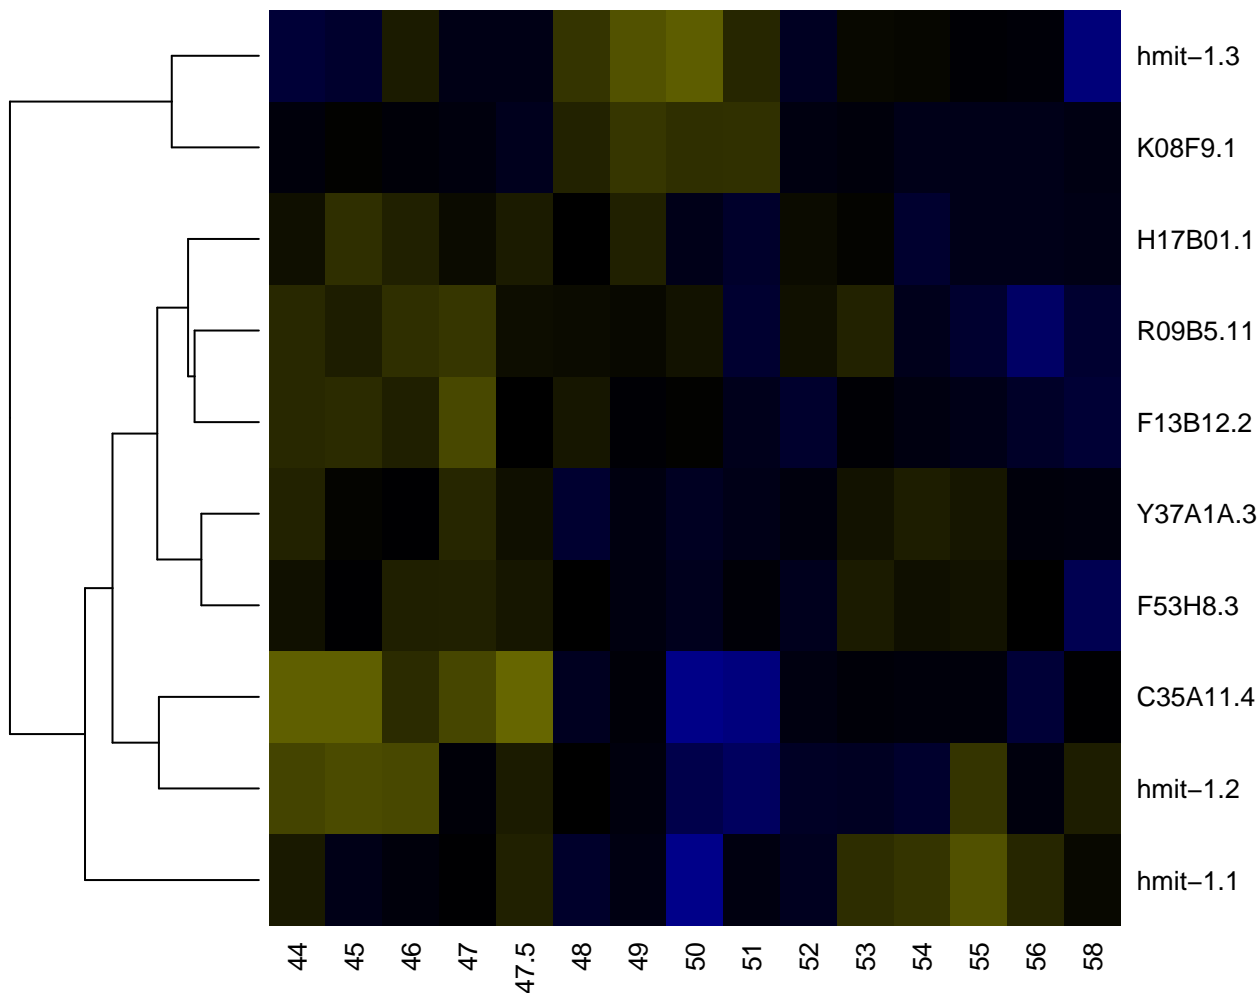

# sugar binding

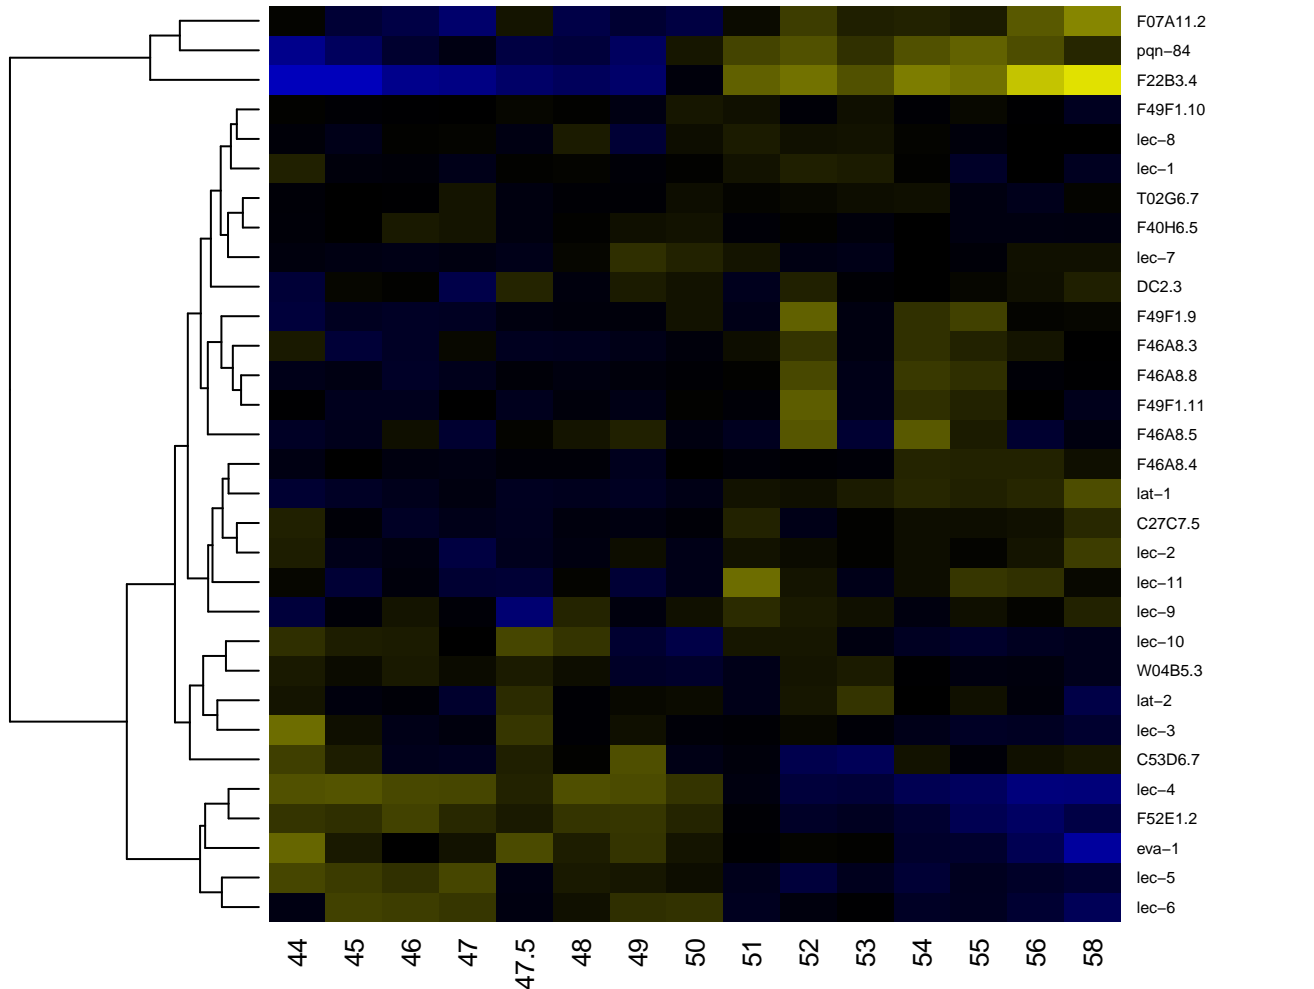

# sugar:hydrogen symporter activity

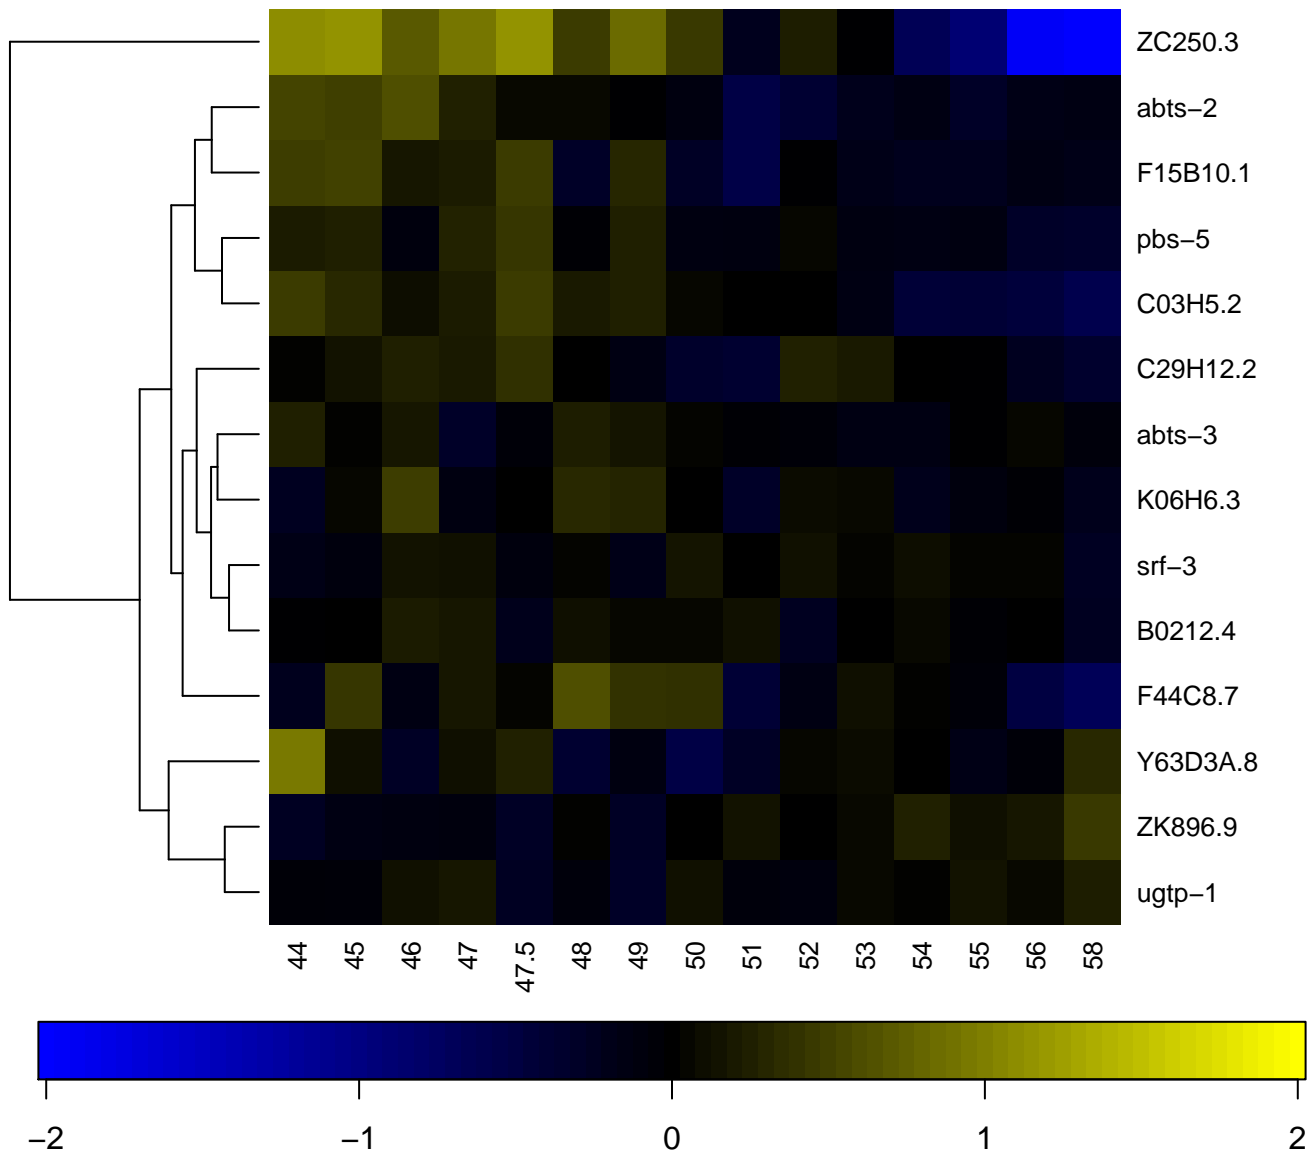



# sulfate transport

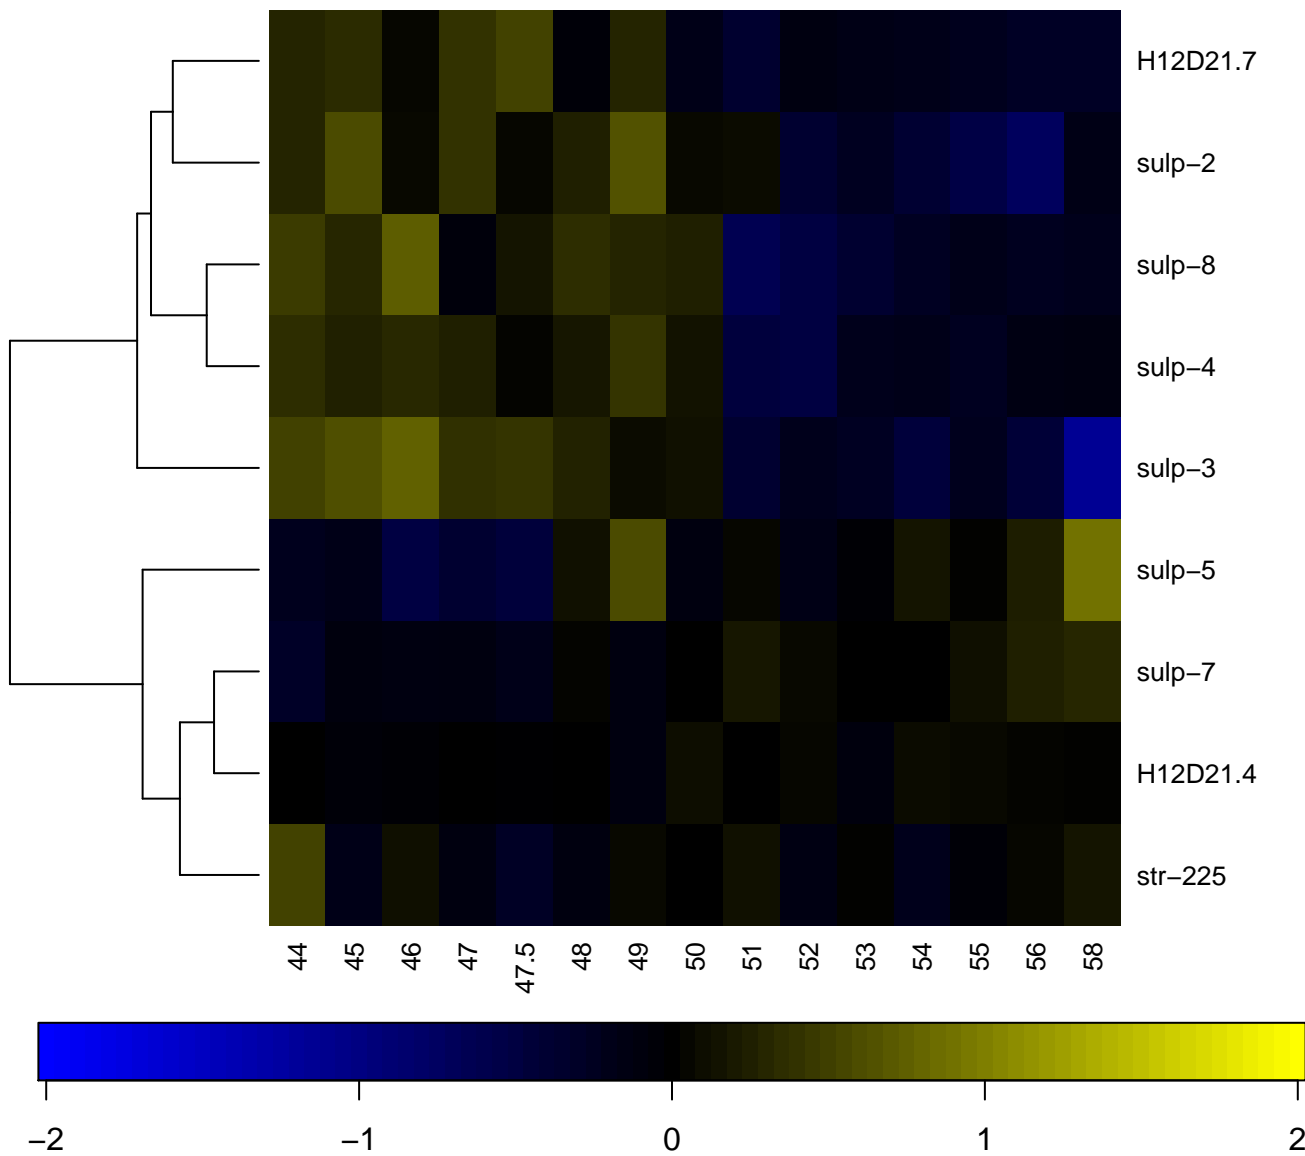





# superoxide metabolic process

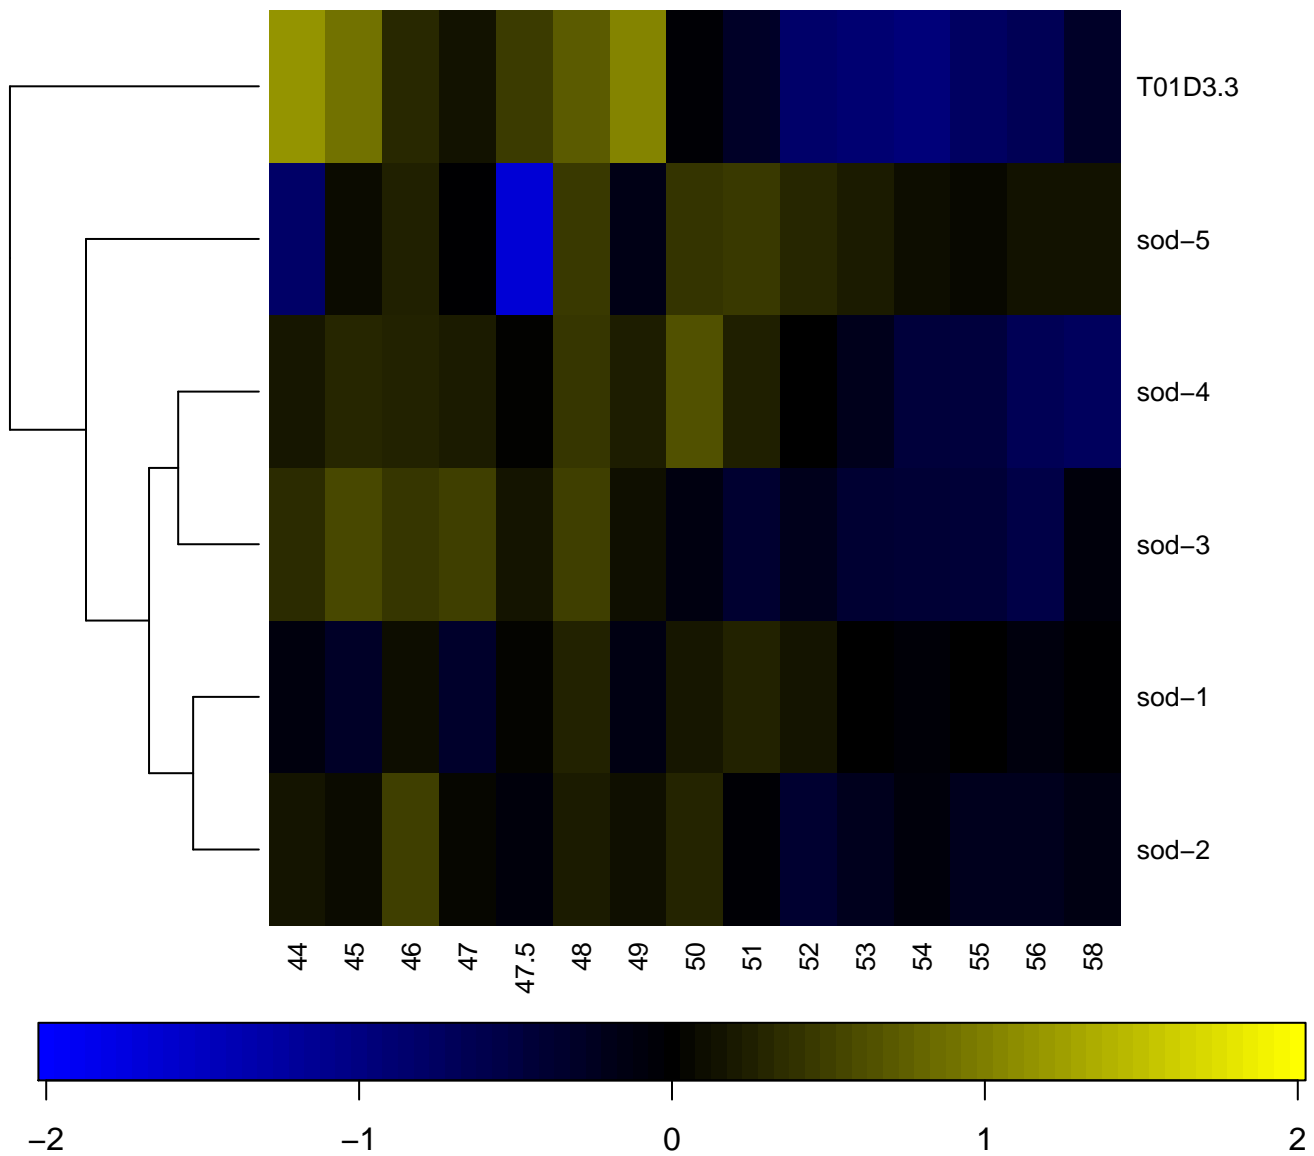

# synapse

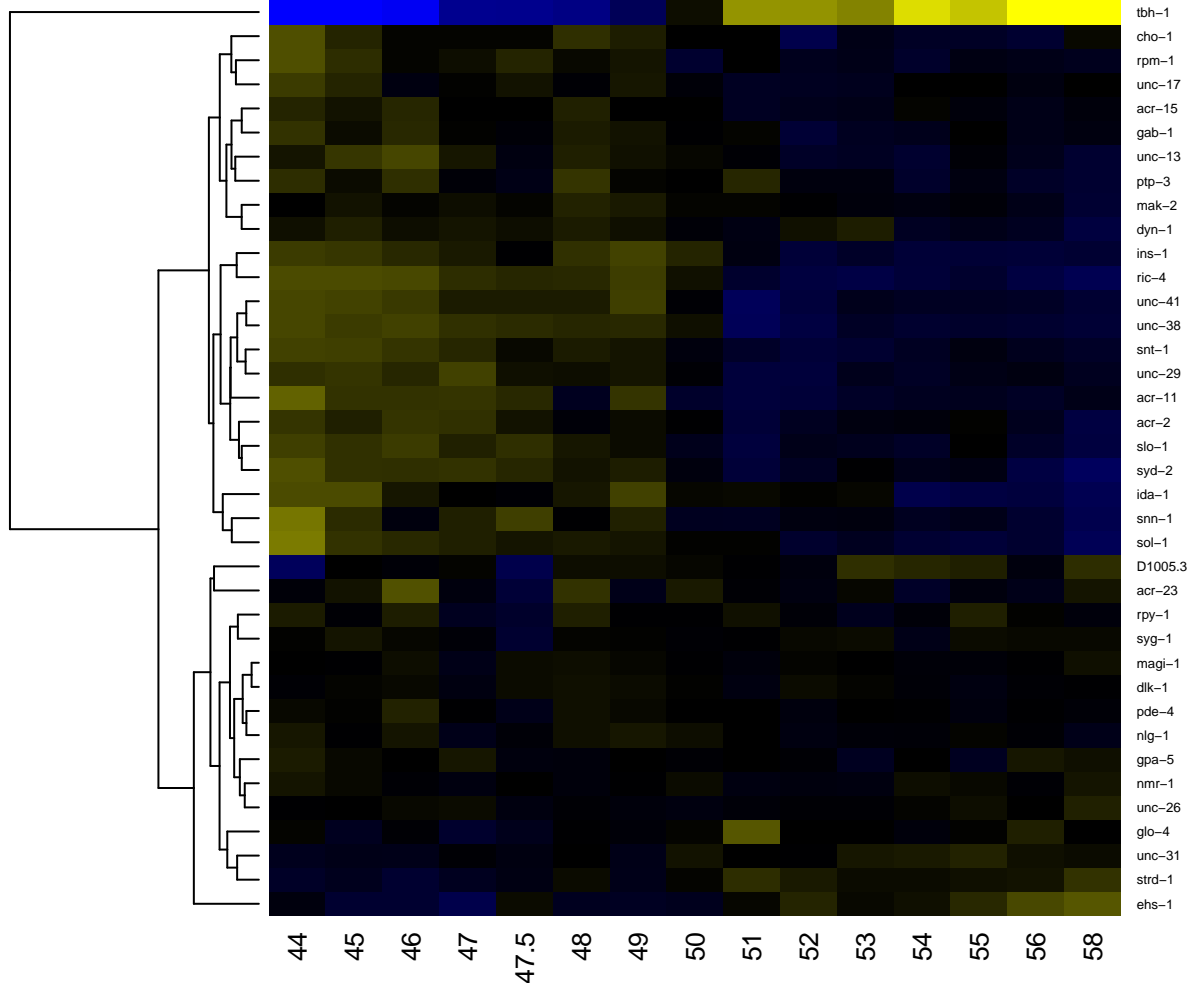





# synaptic transmission, cholinergic

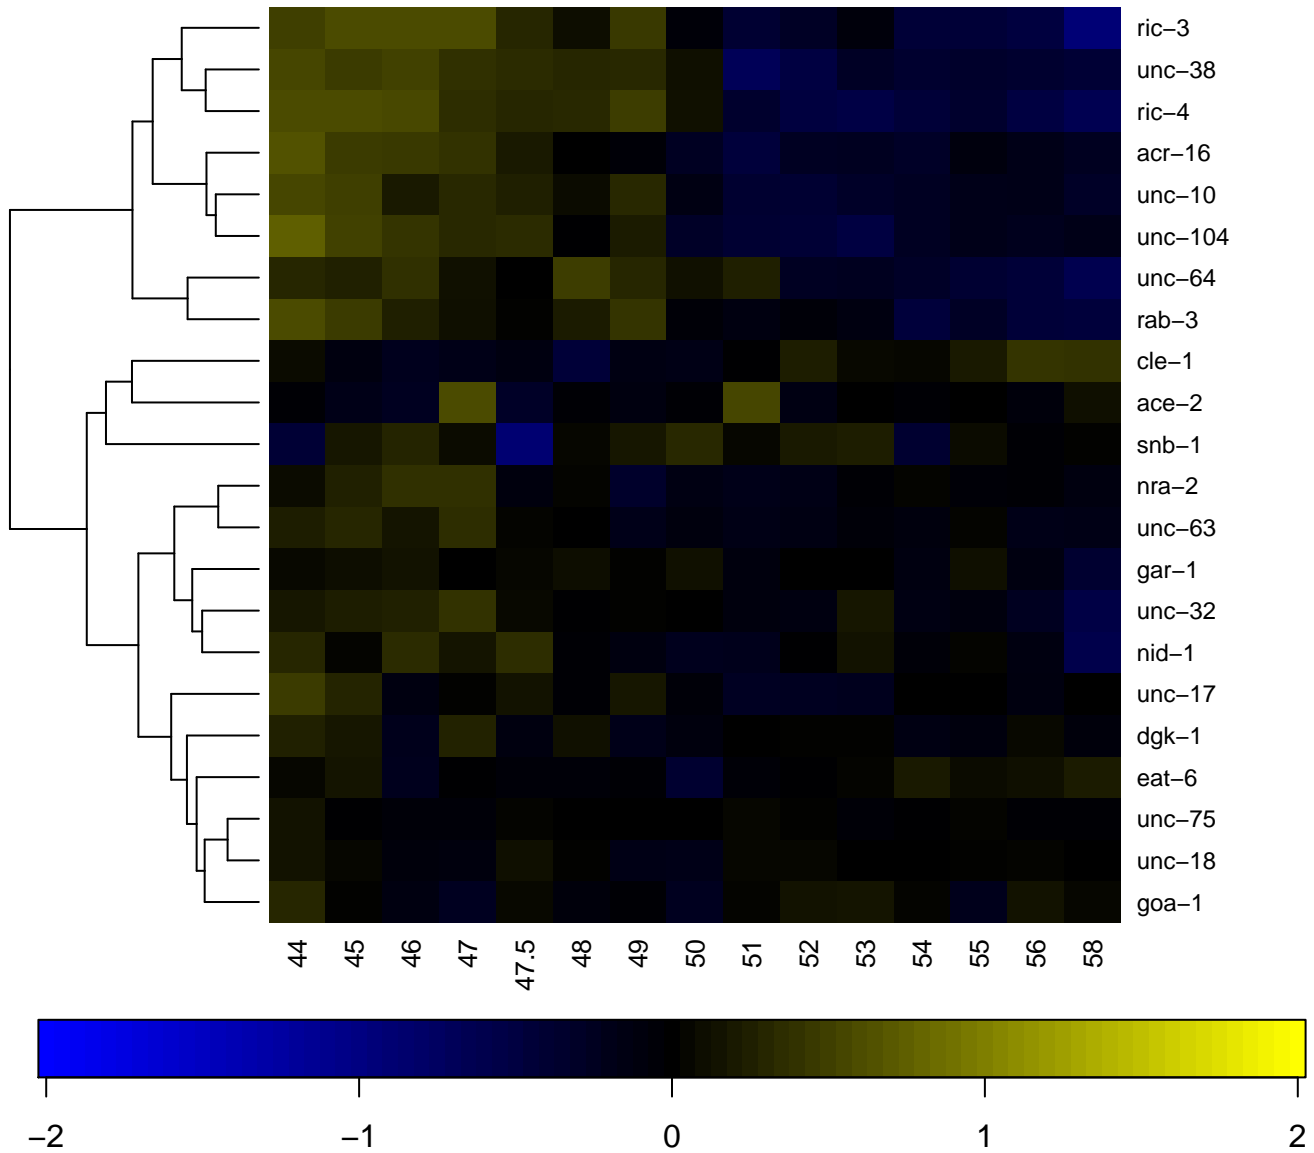



# synaptic transmission, GABAergic

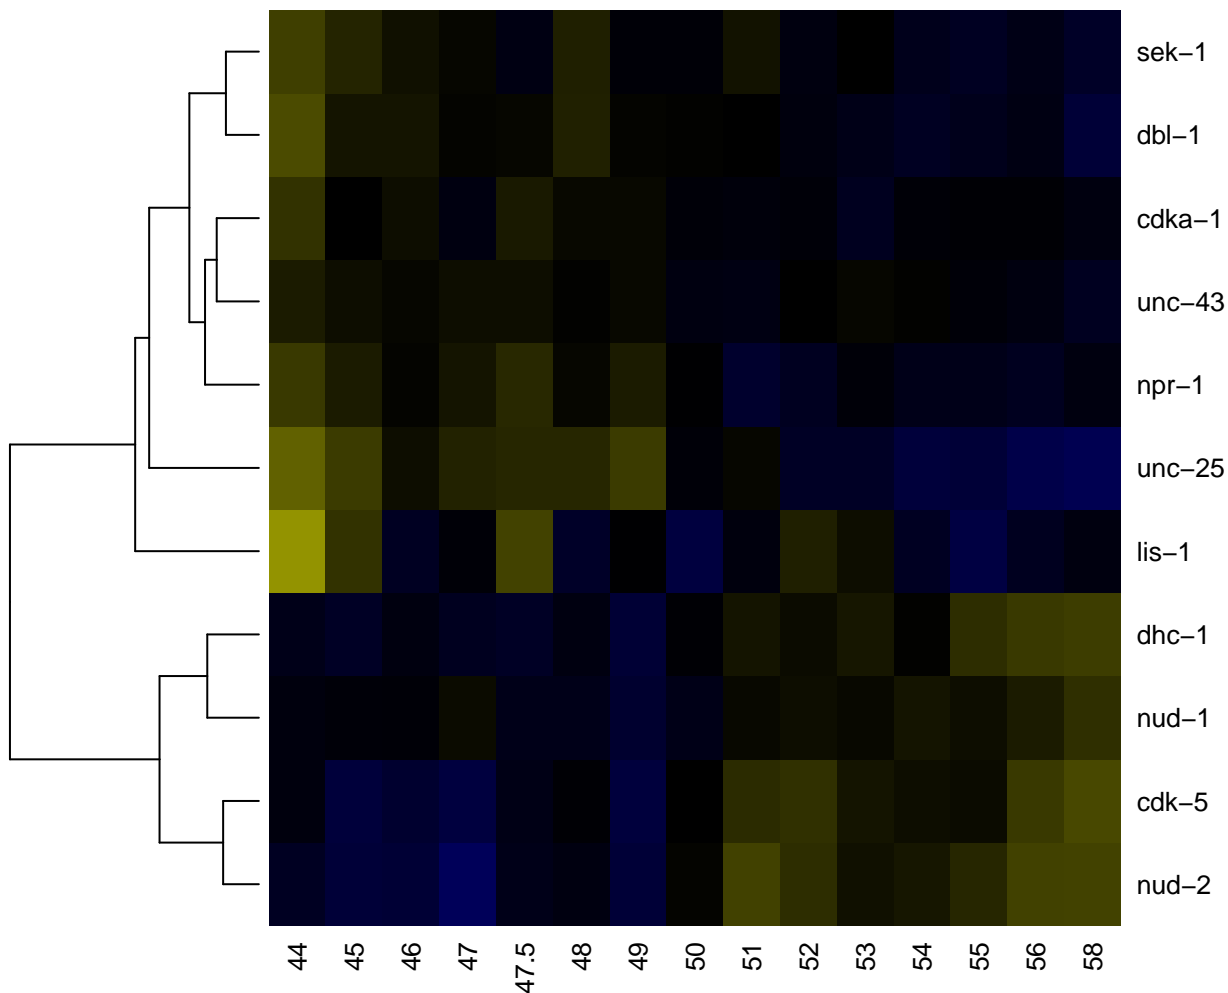









# tail tip morphogenesis

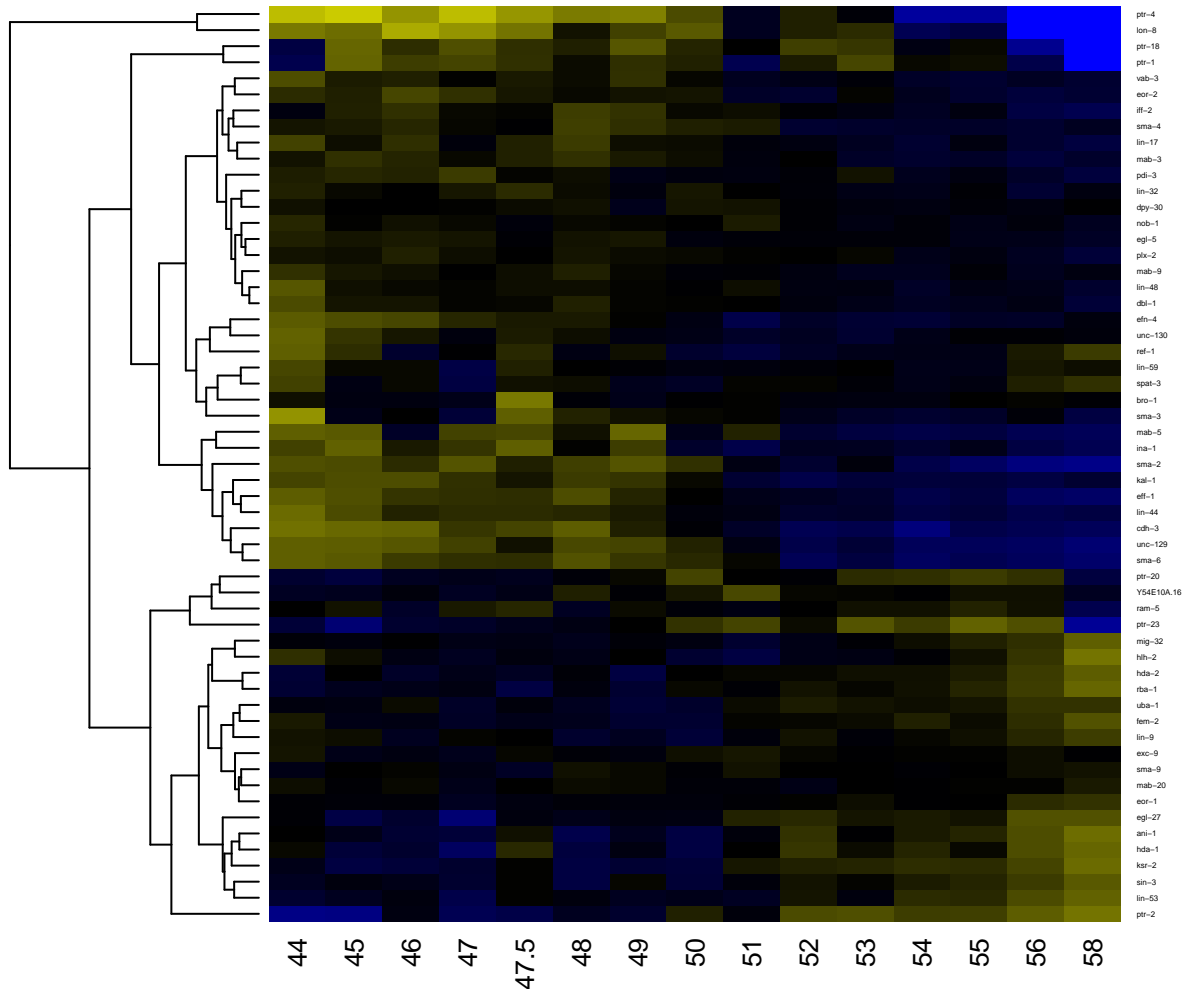



# thermosensory behavior

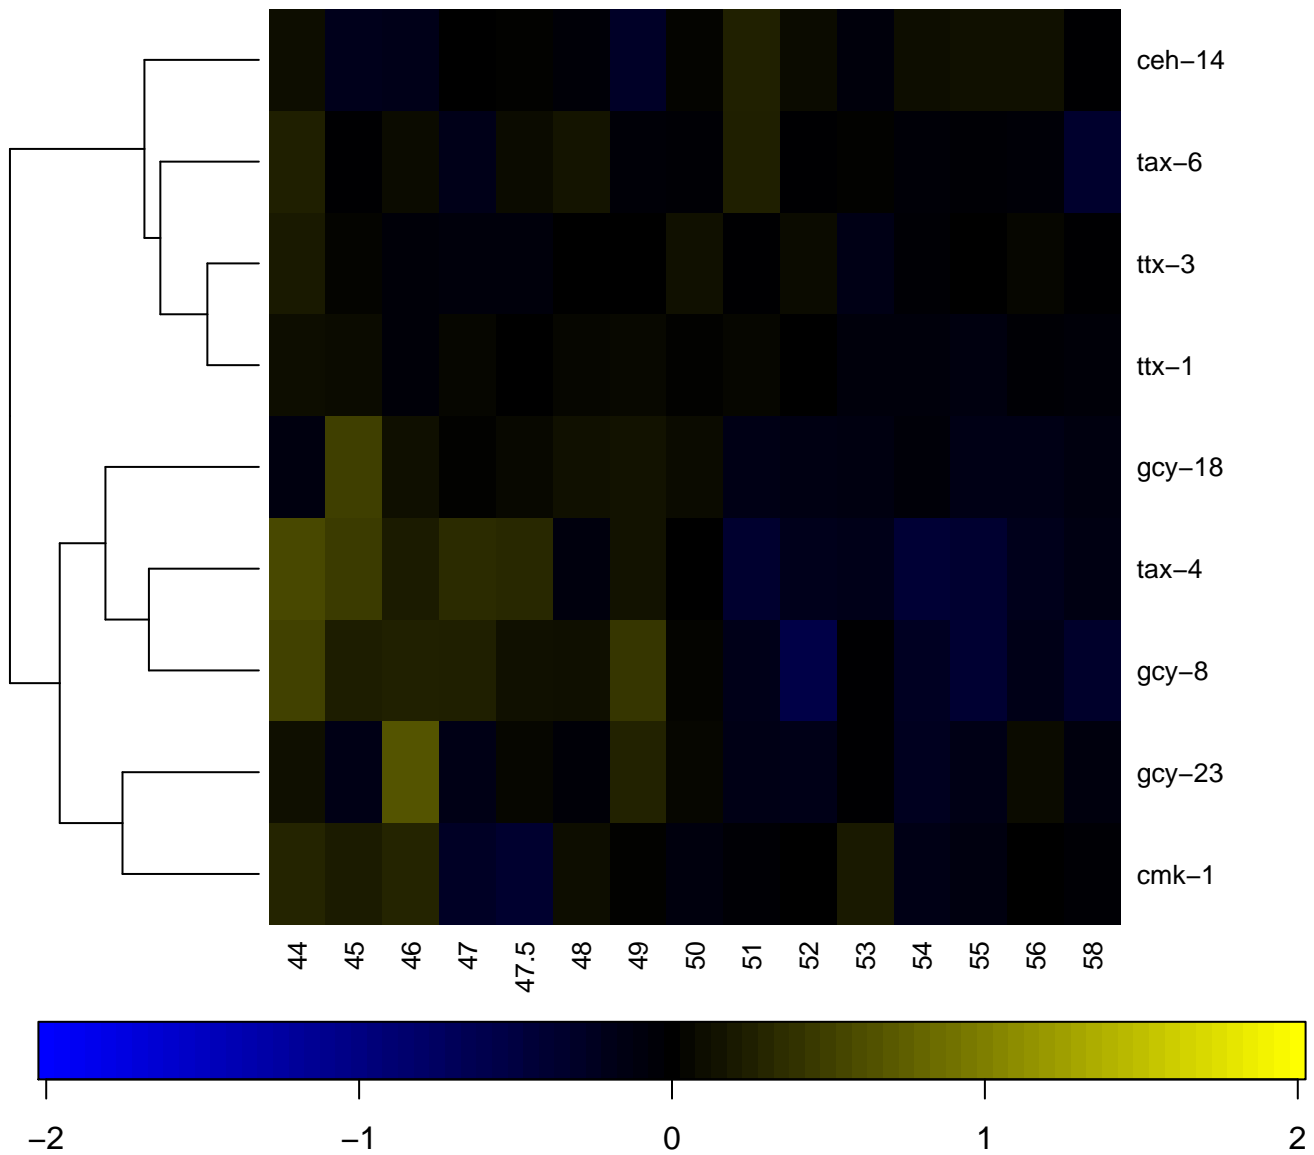





# thiamin pyrophosphate binding

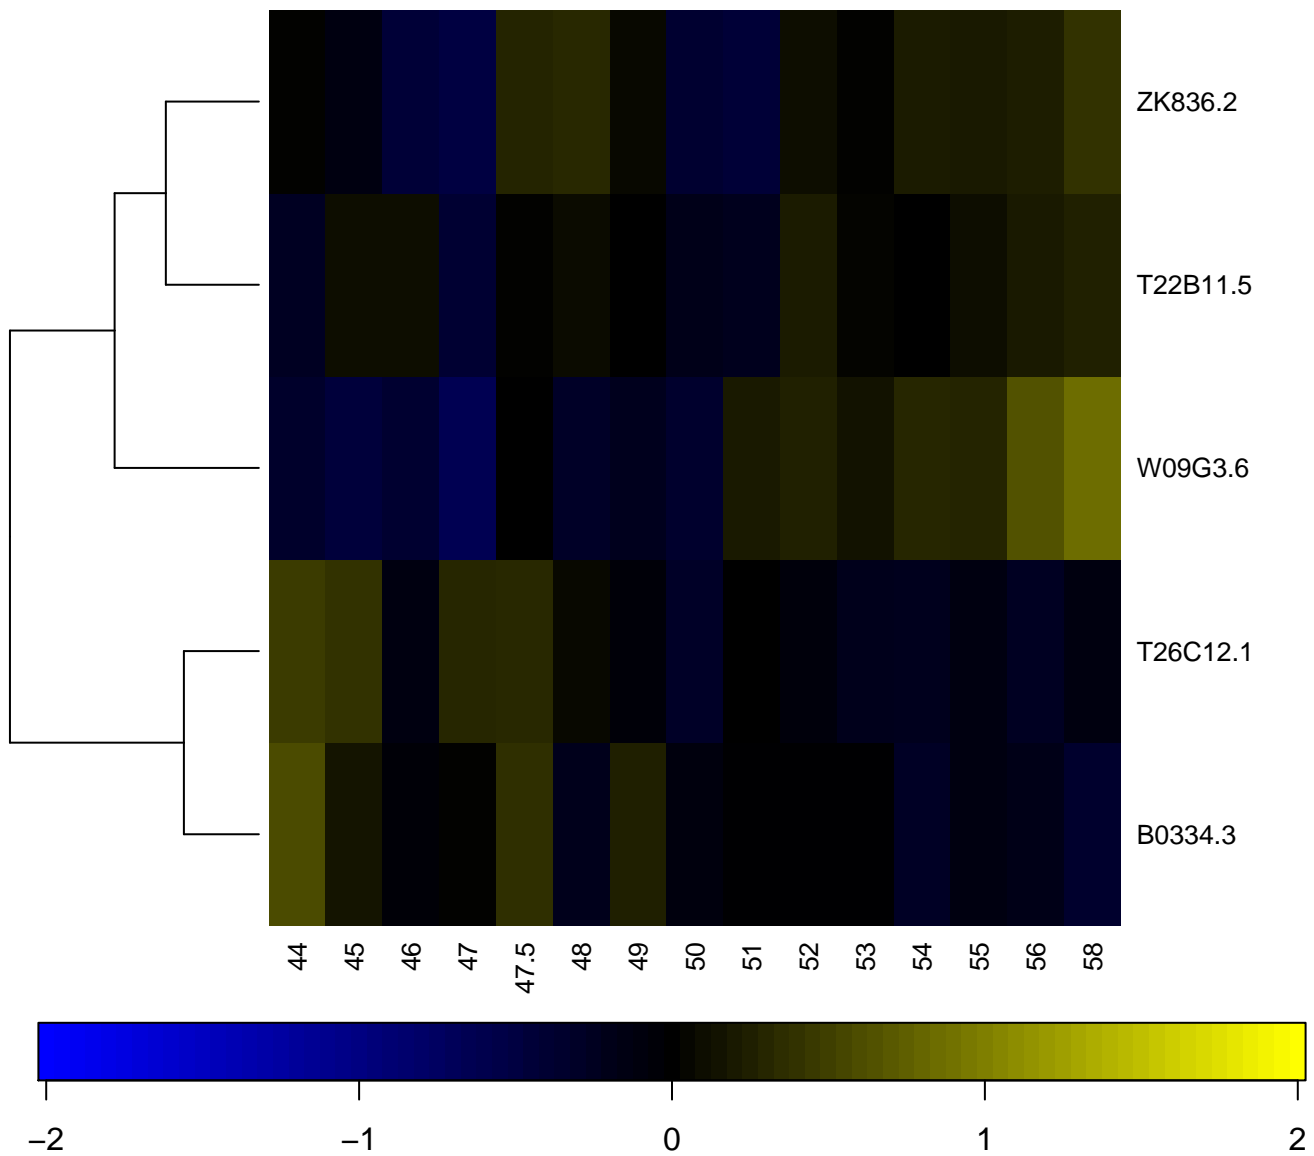





# transcription

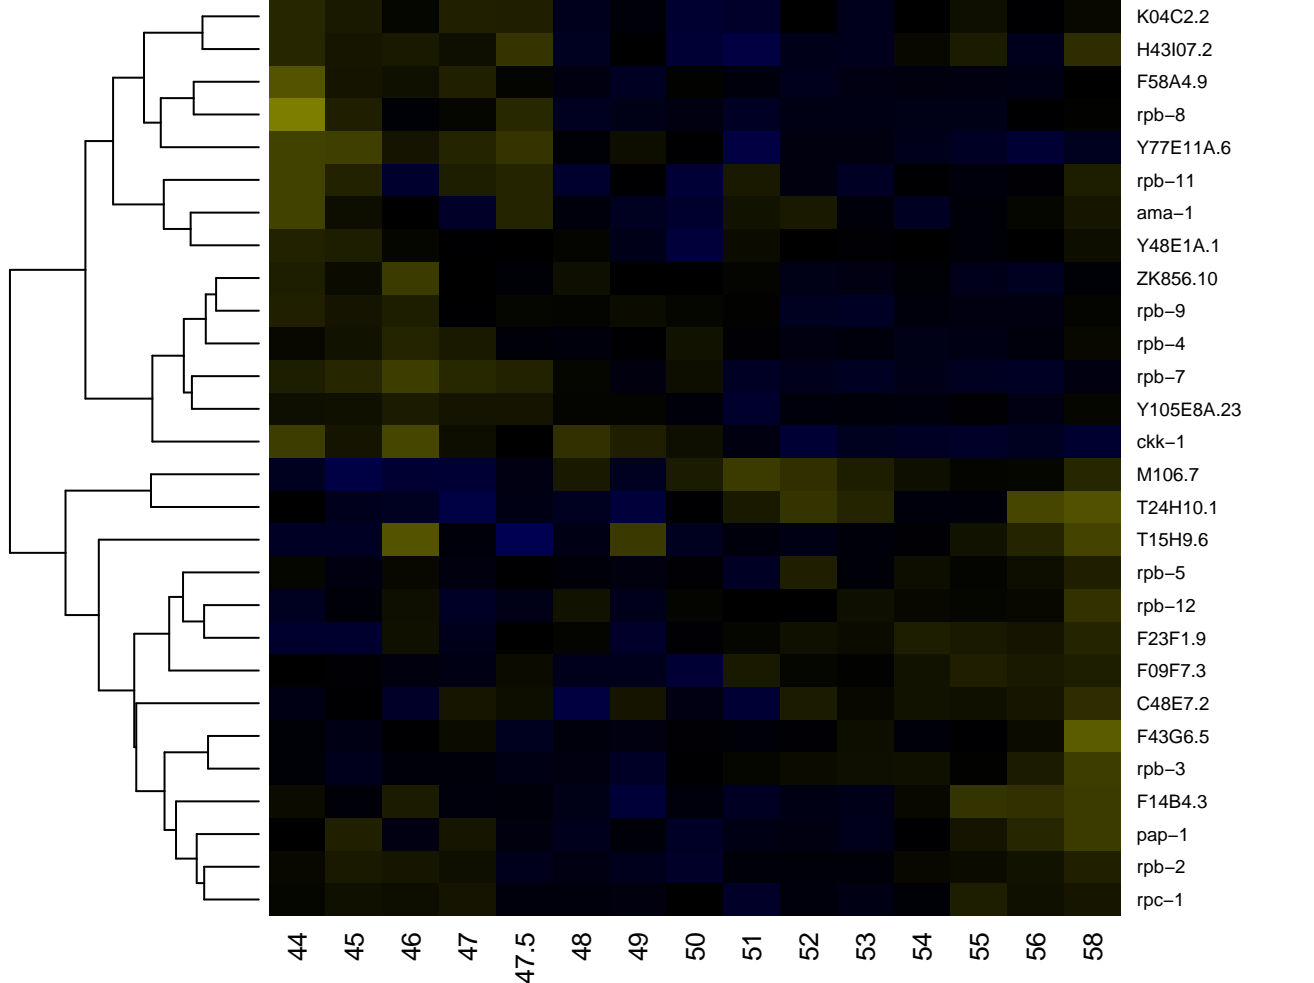

-2

-1

0

1

2

# transcription activator activity

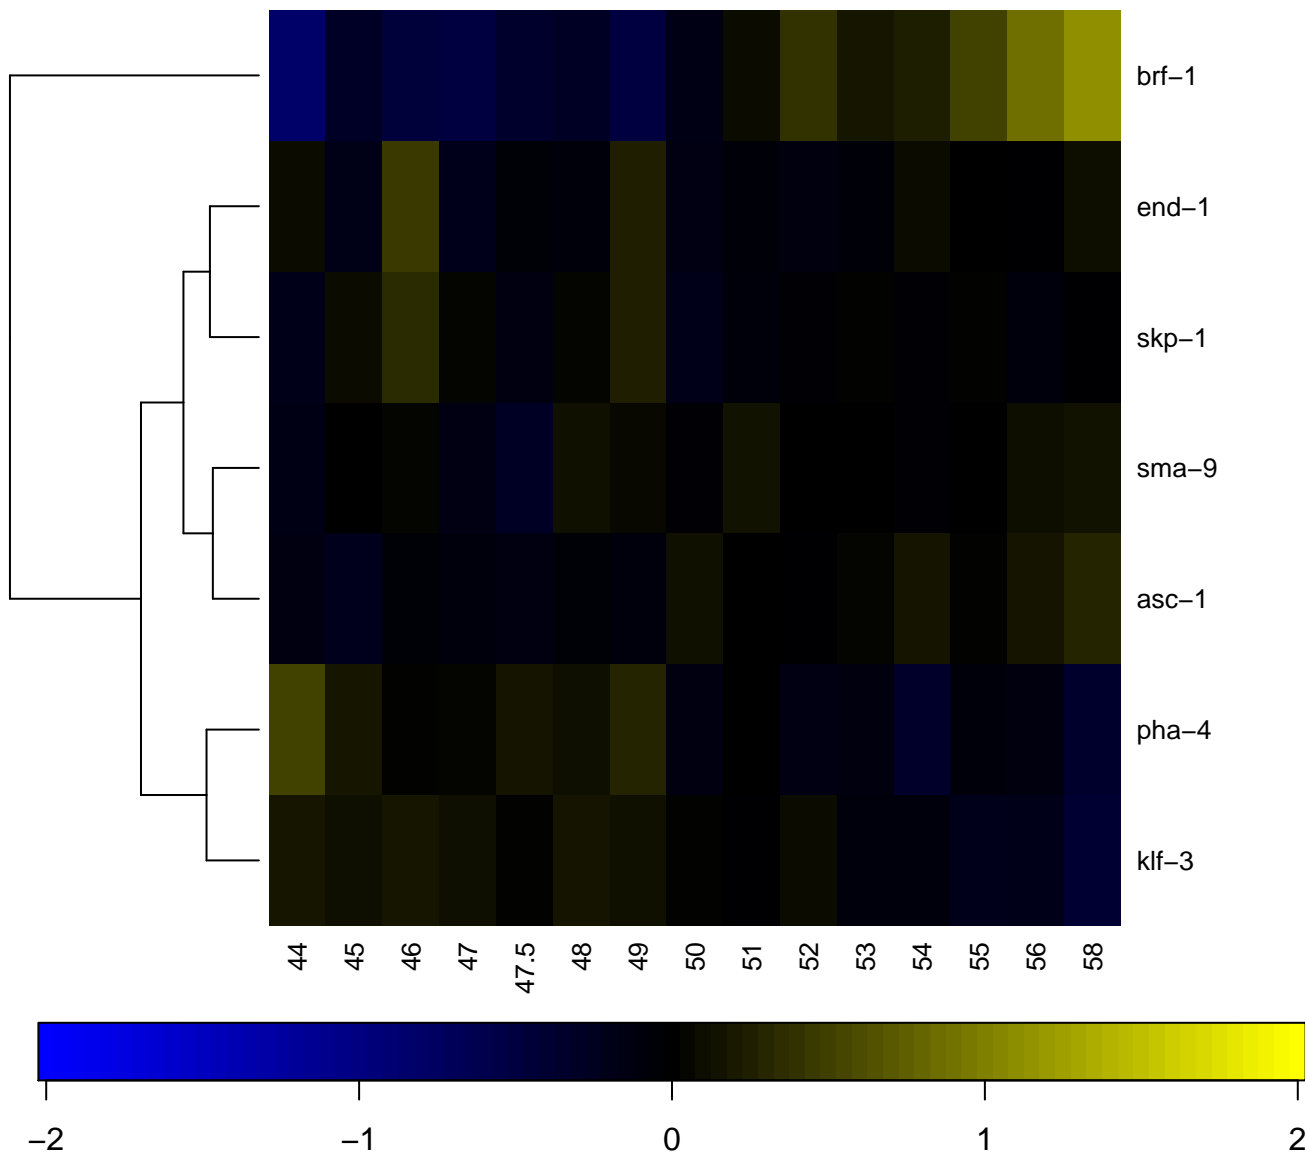



# transcription cofactor activity

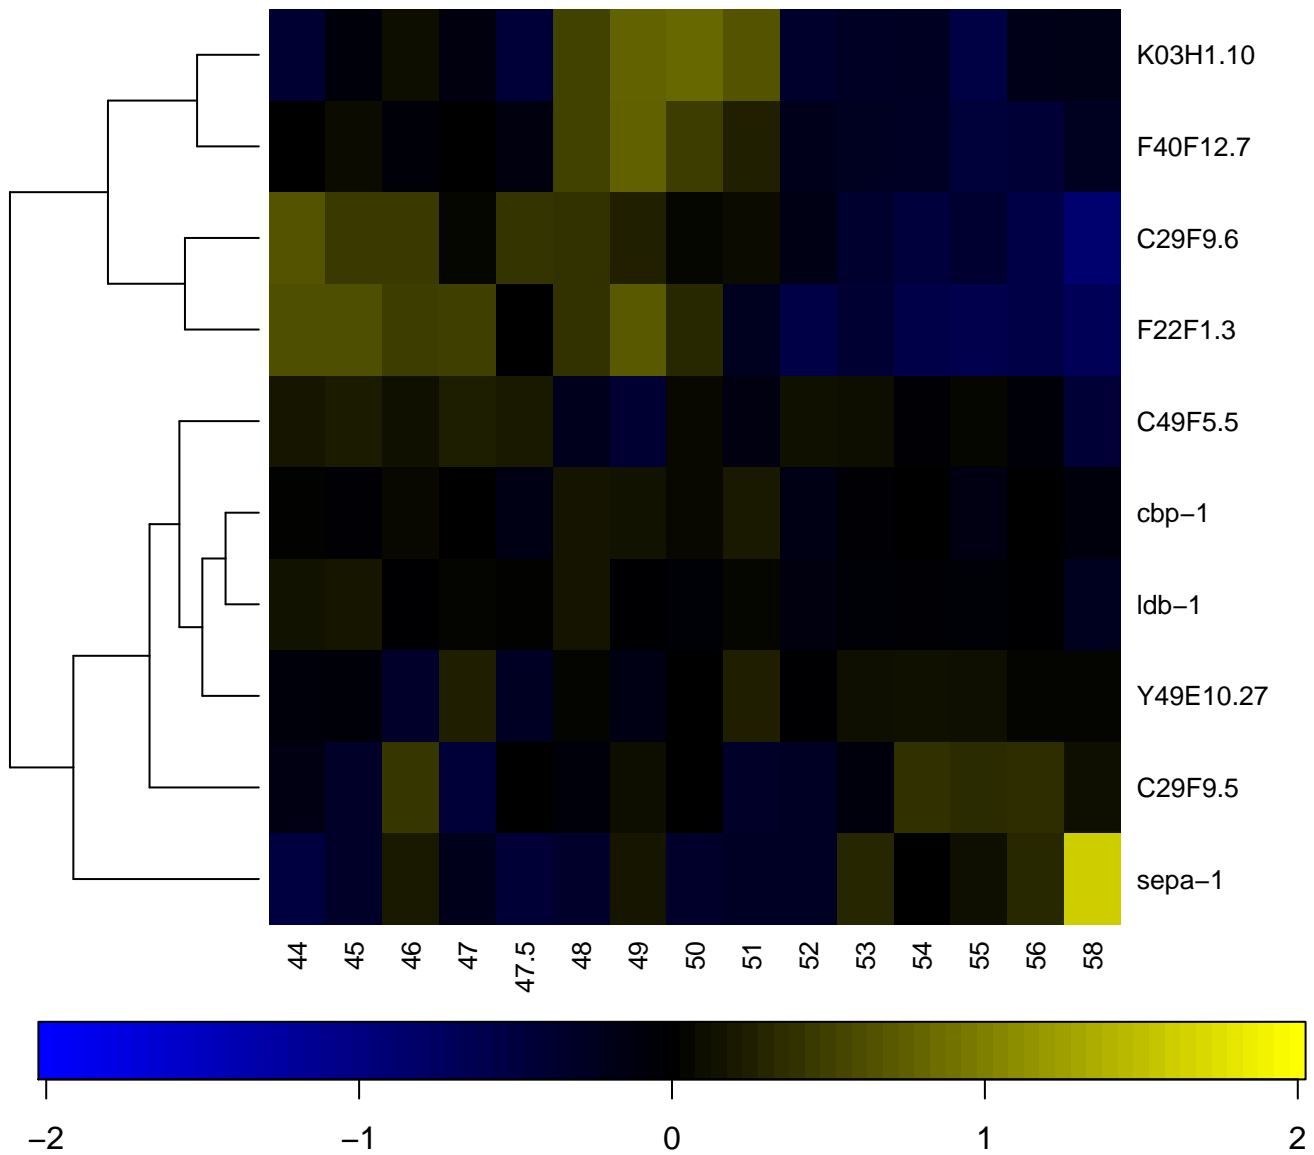





# transcription factor activity

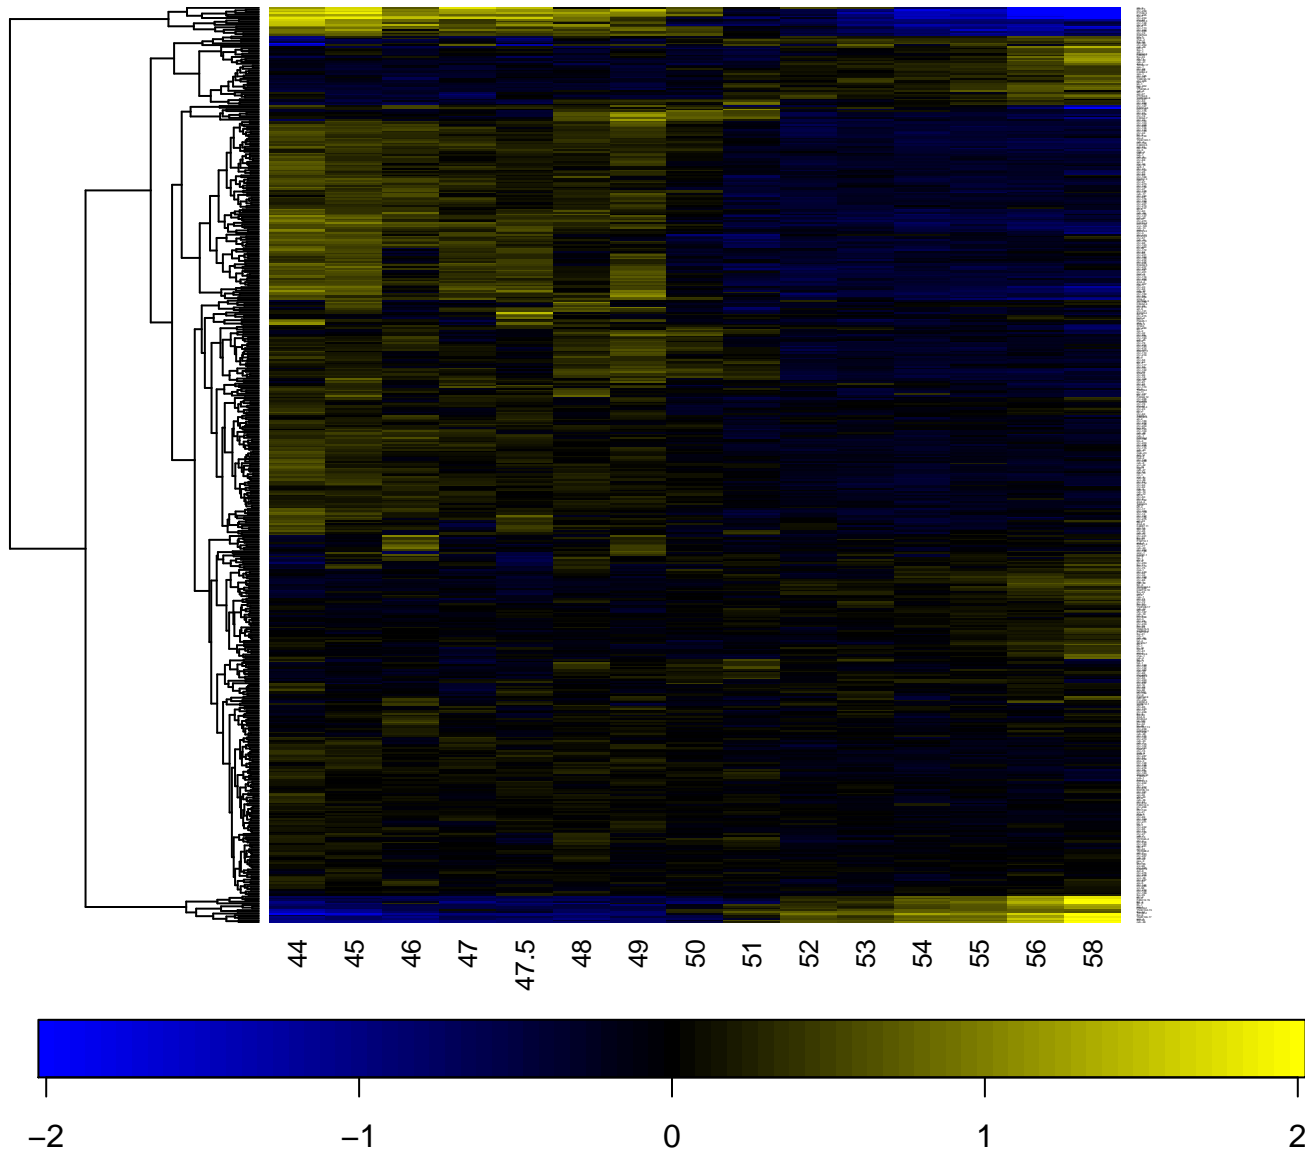

# transcription factor binding

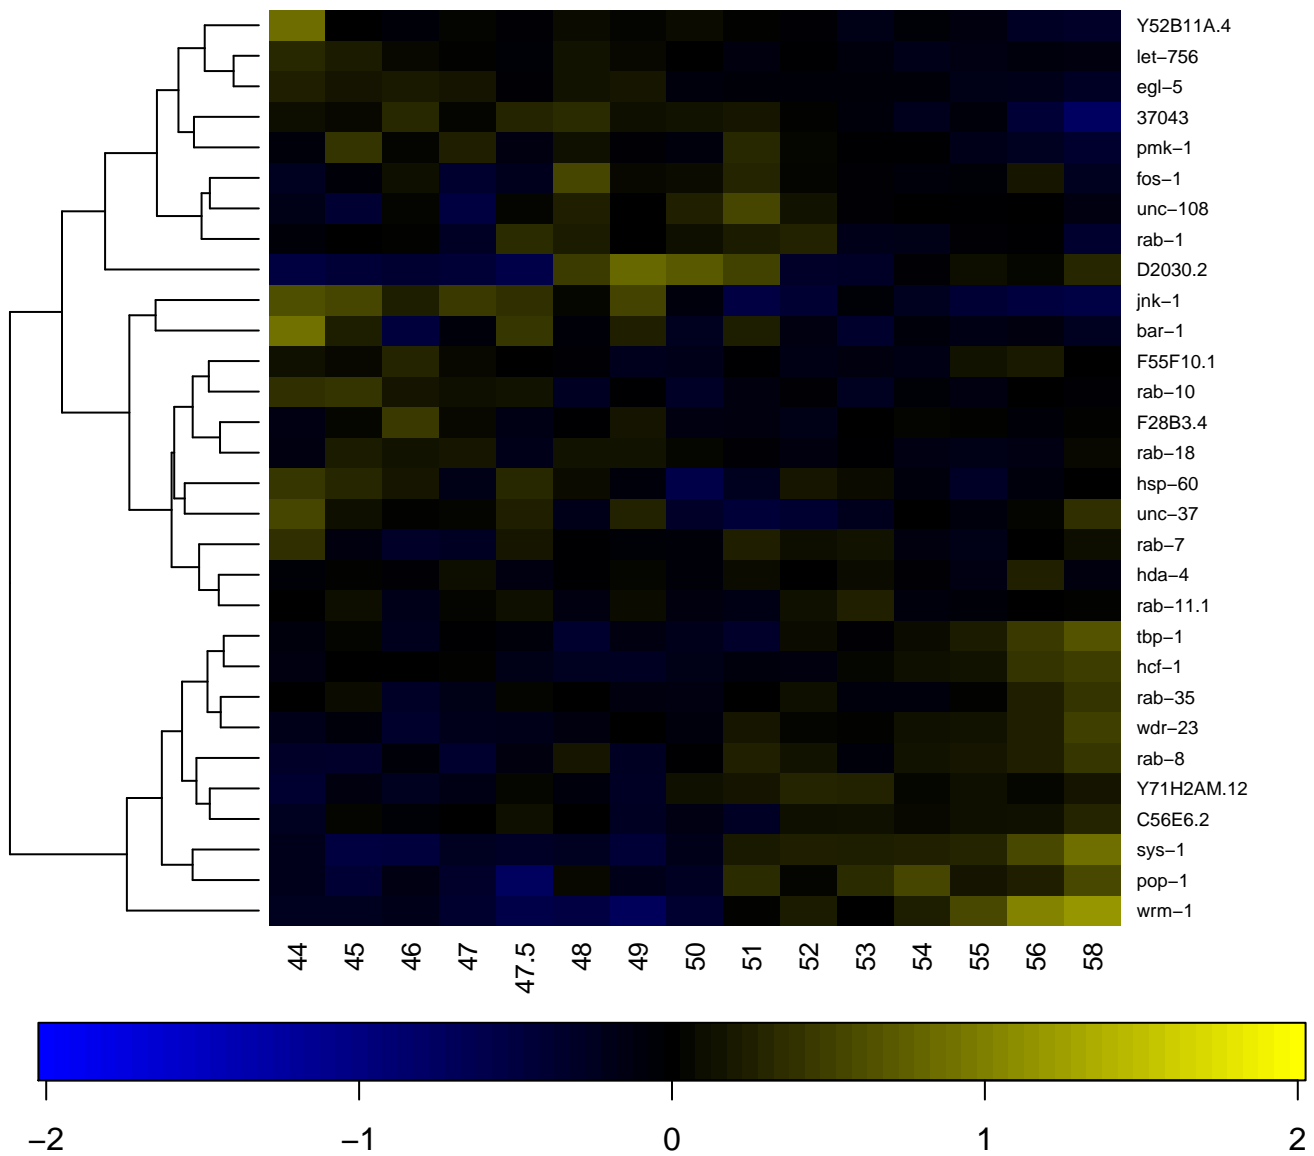

# transcription factor complex

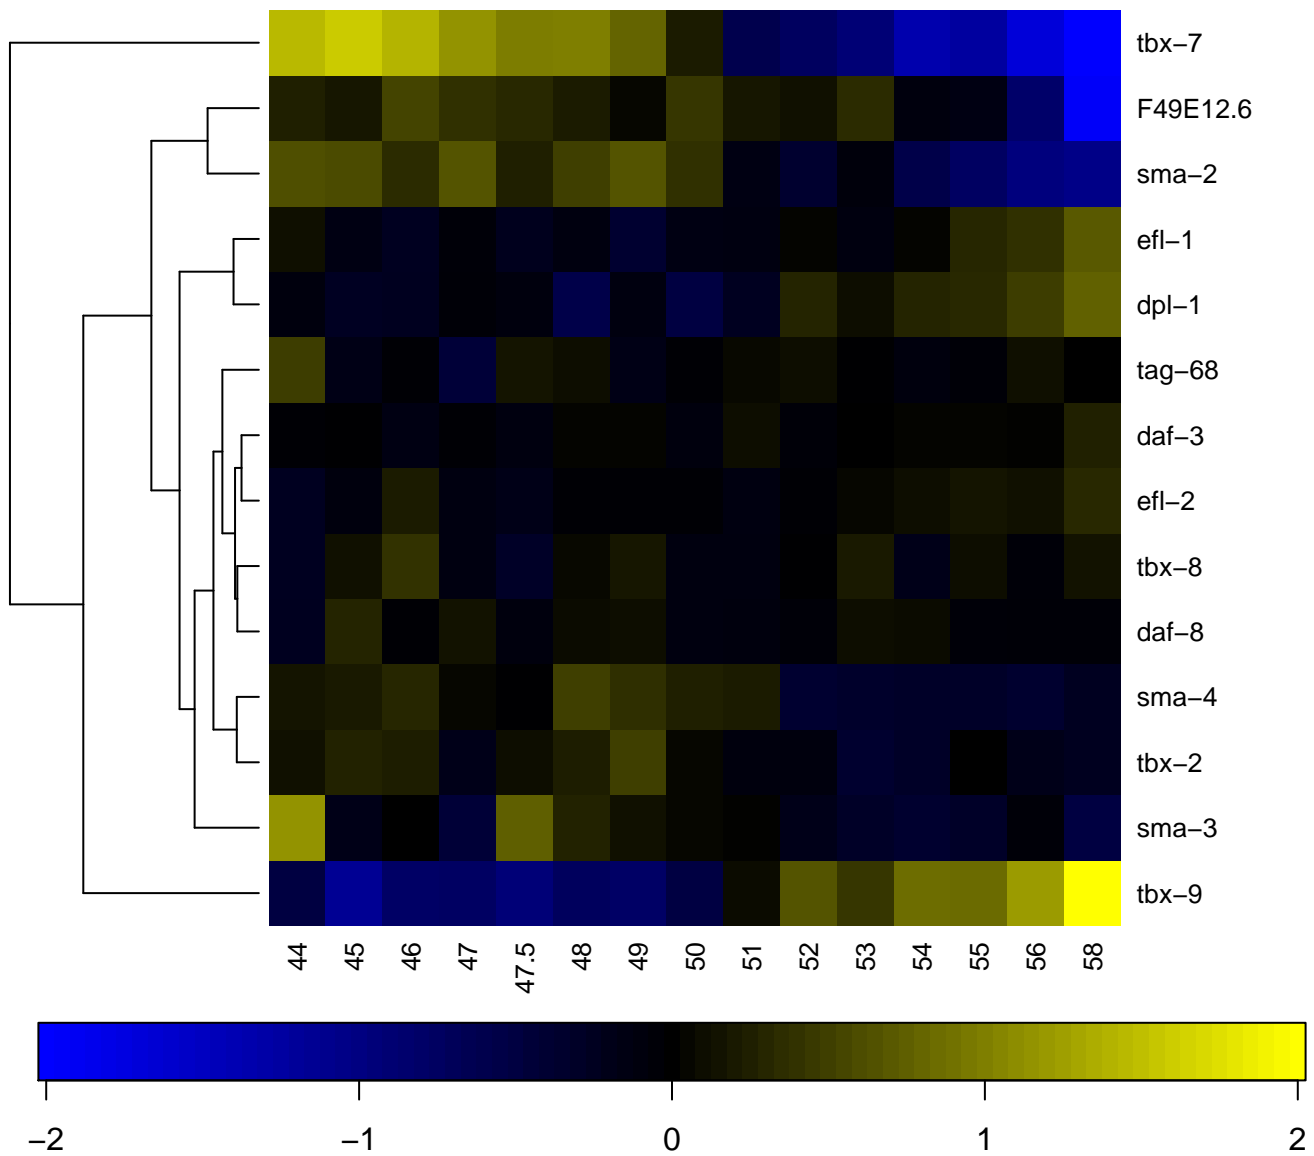



# transcription initiation

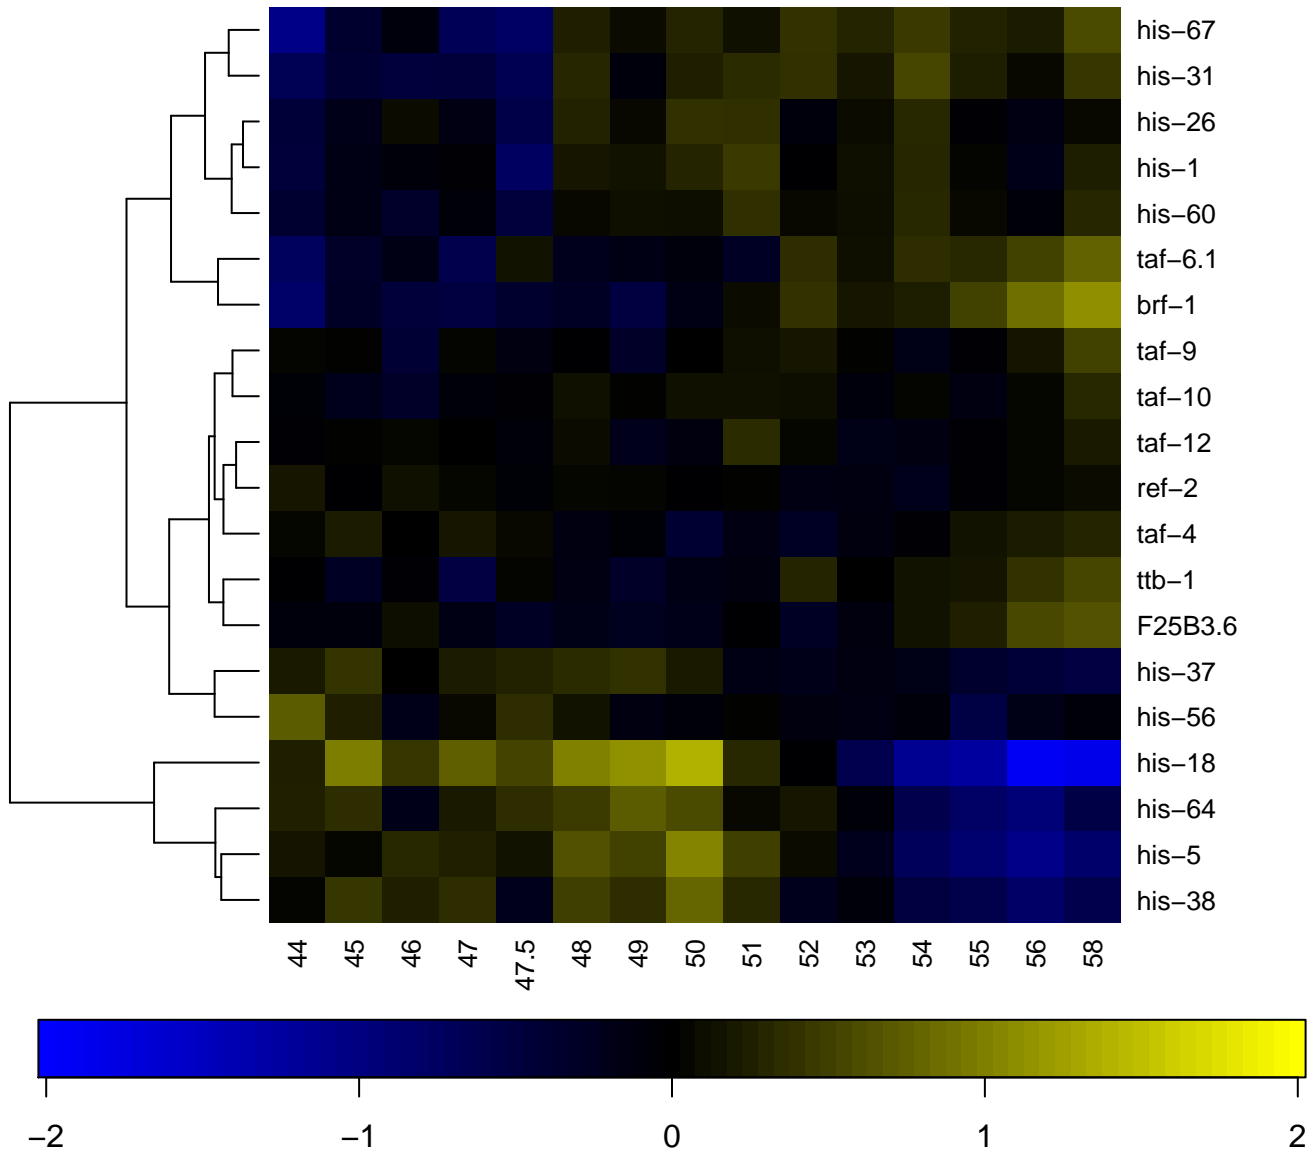







# transcription regulator activity

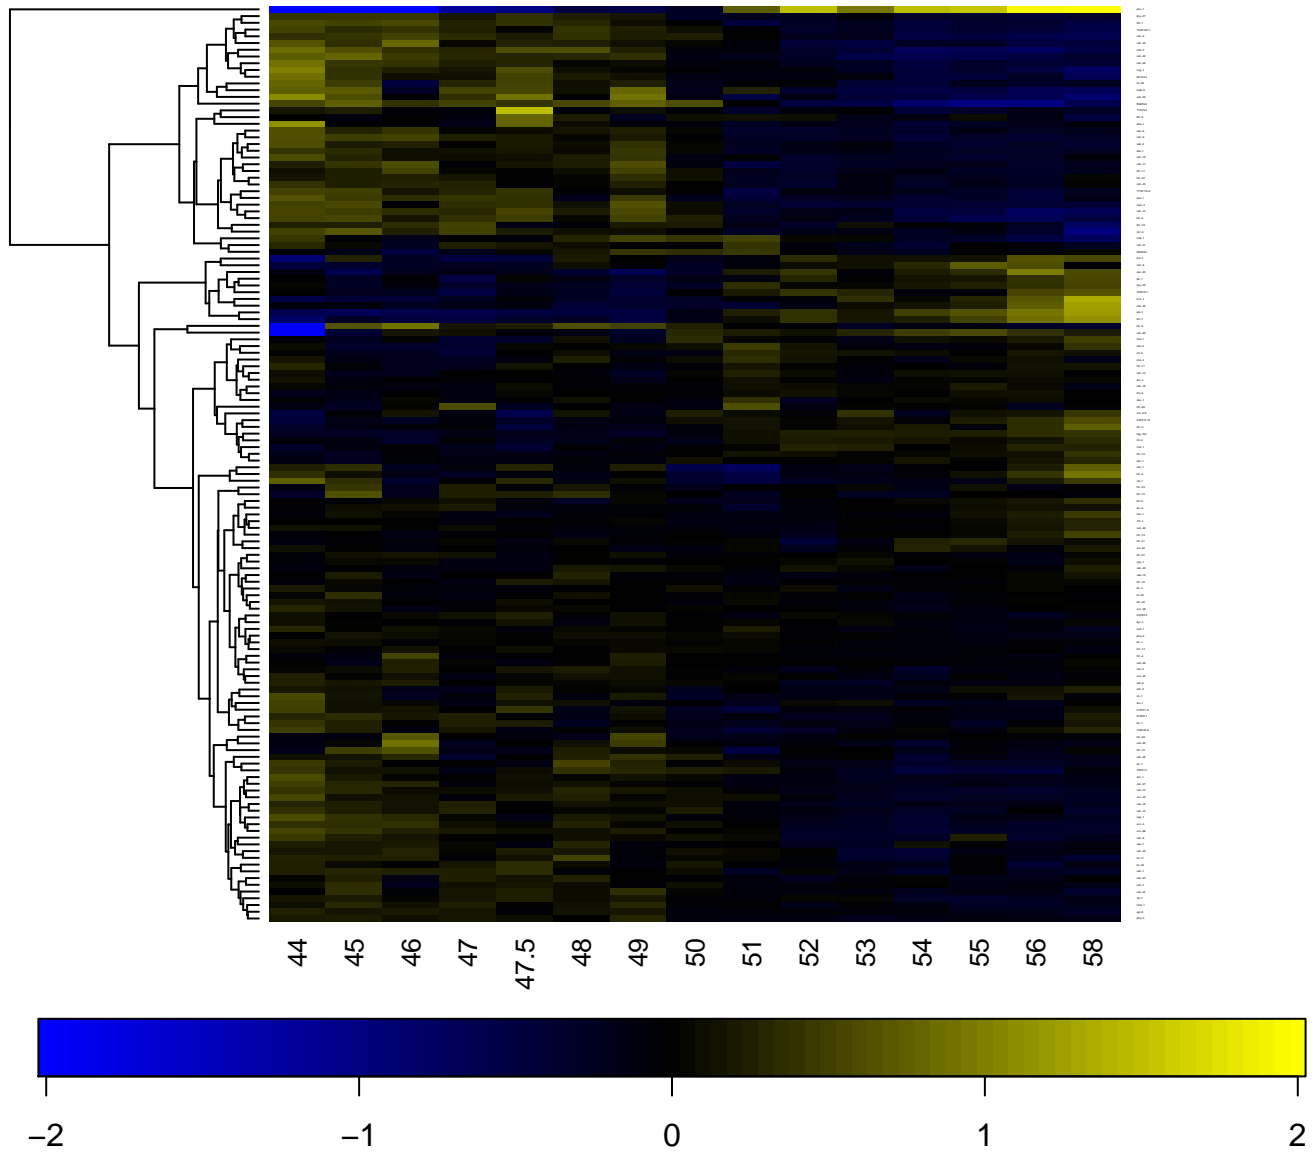

# transcription repressor activity

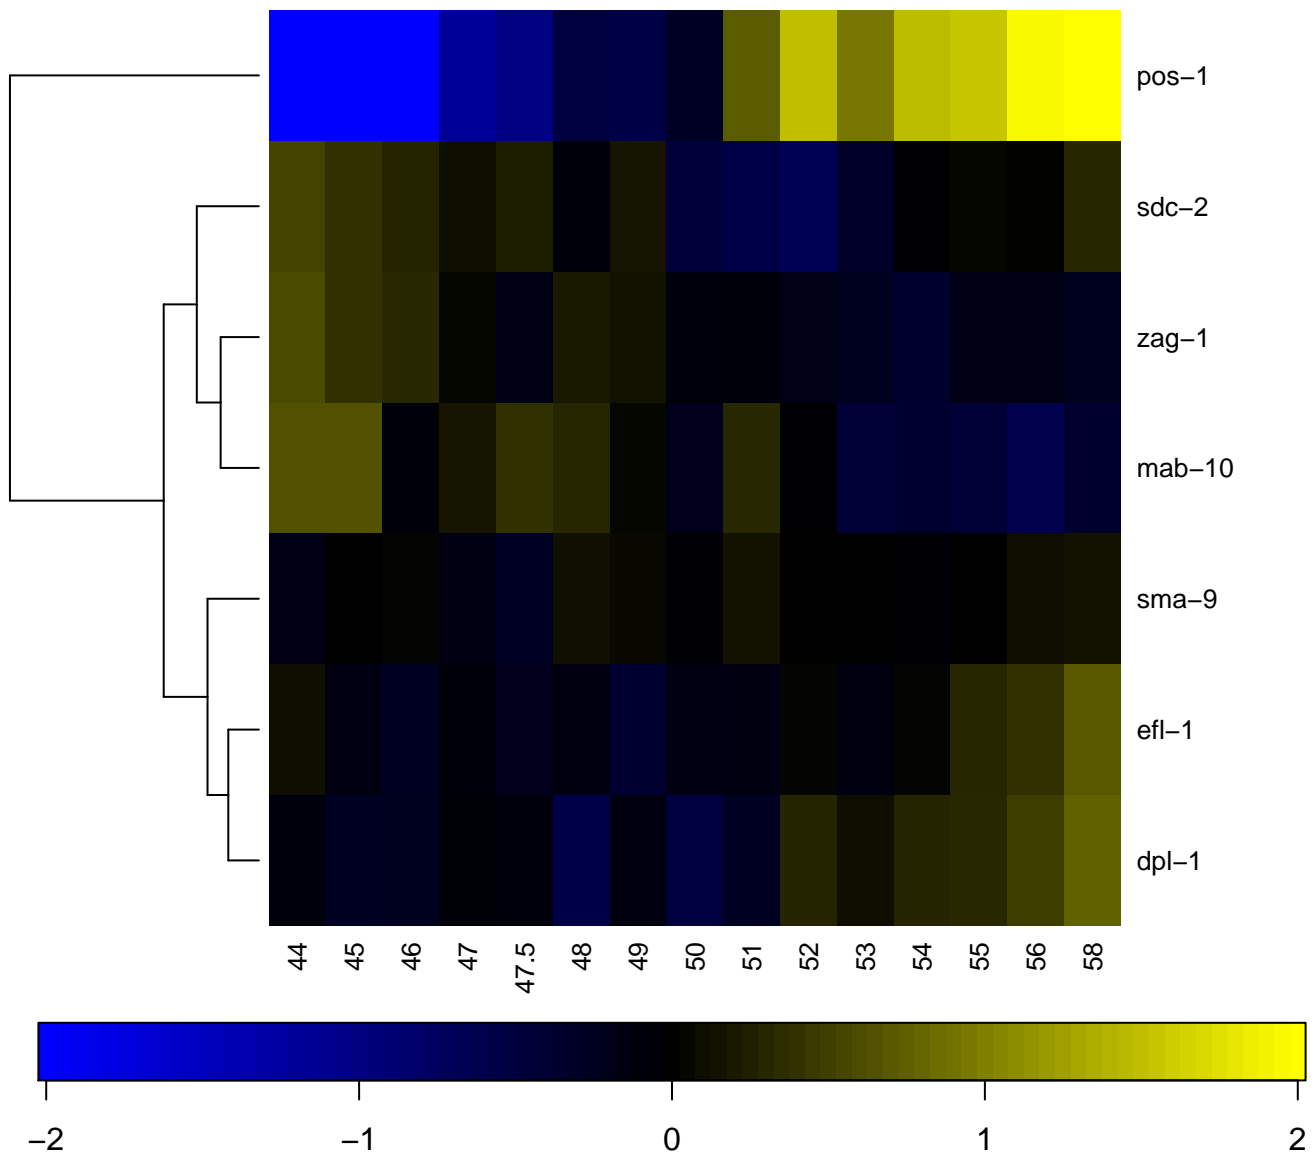

# transferase activity

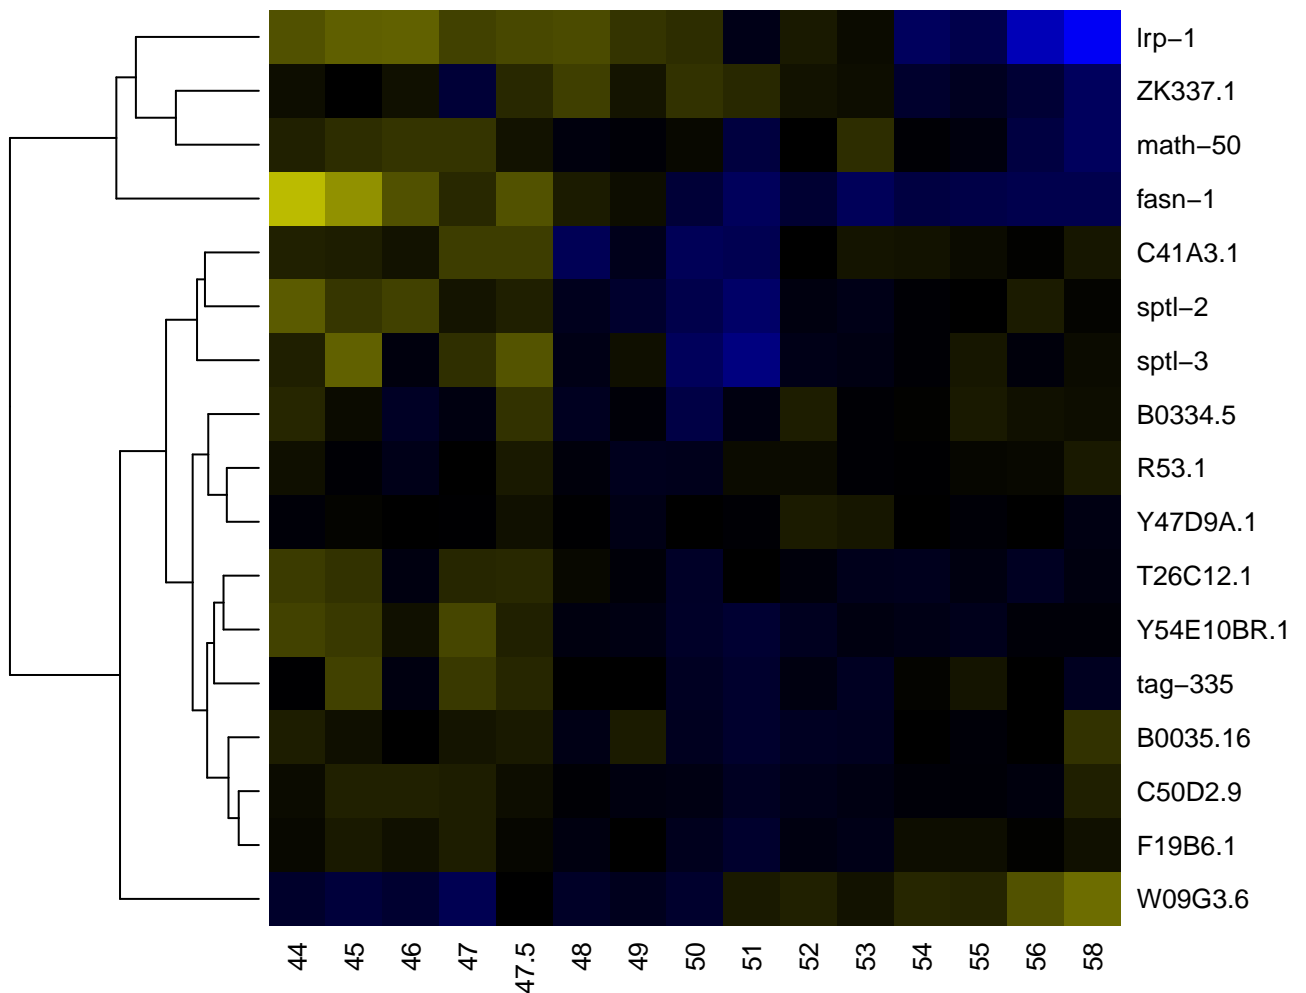

# ase activity, transferring acyl groups other than amino-acyl

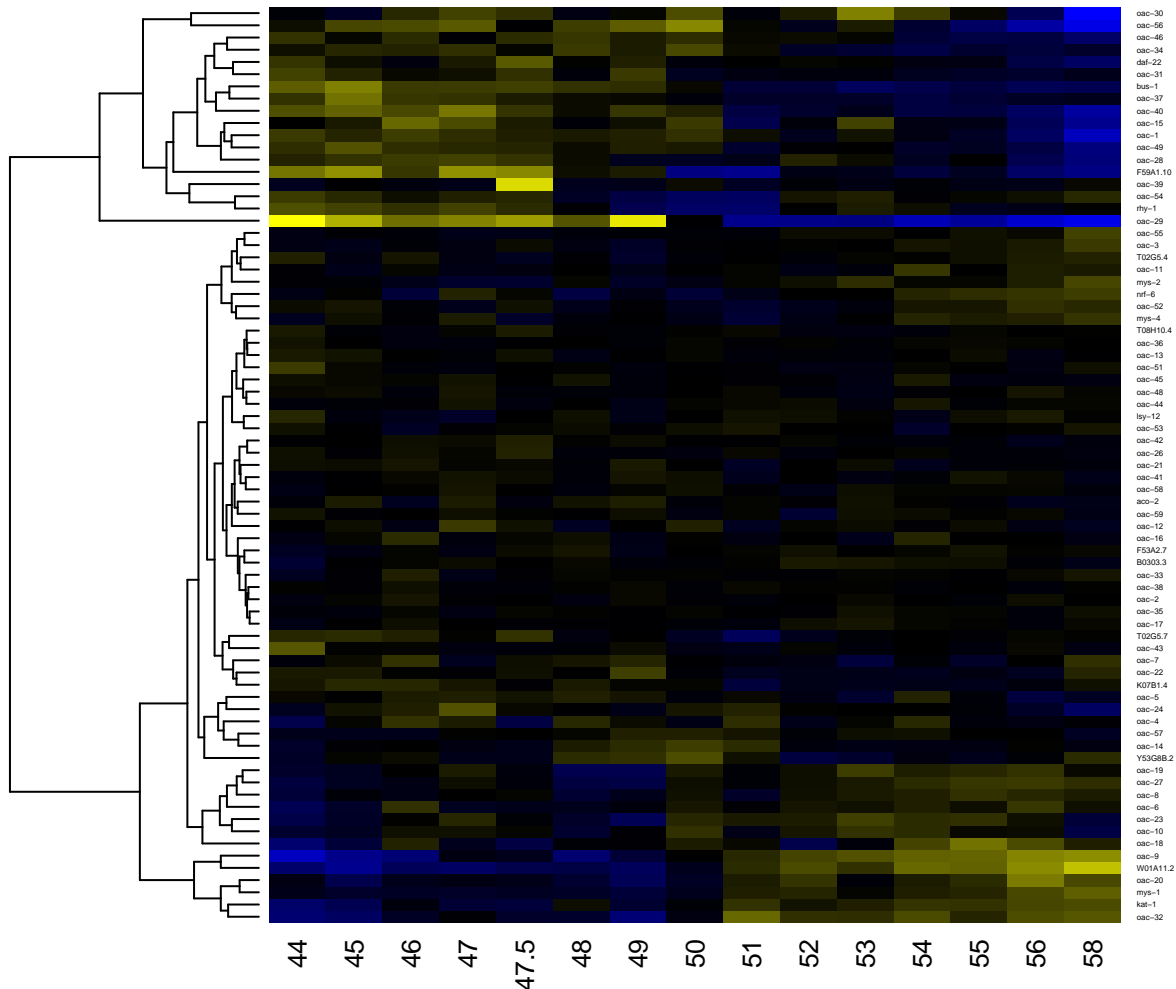



# transferase activity, transferring glycosyl groups

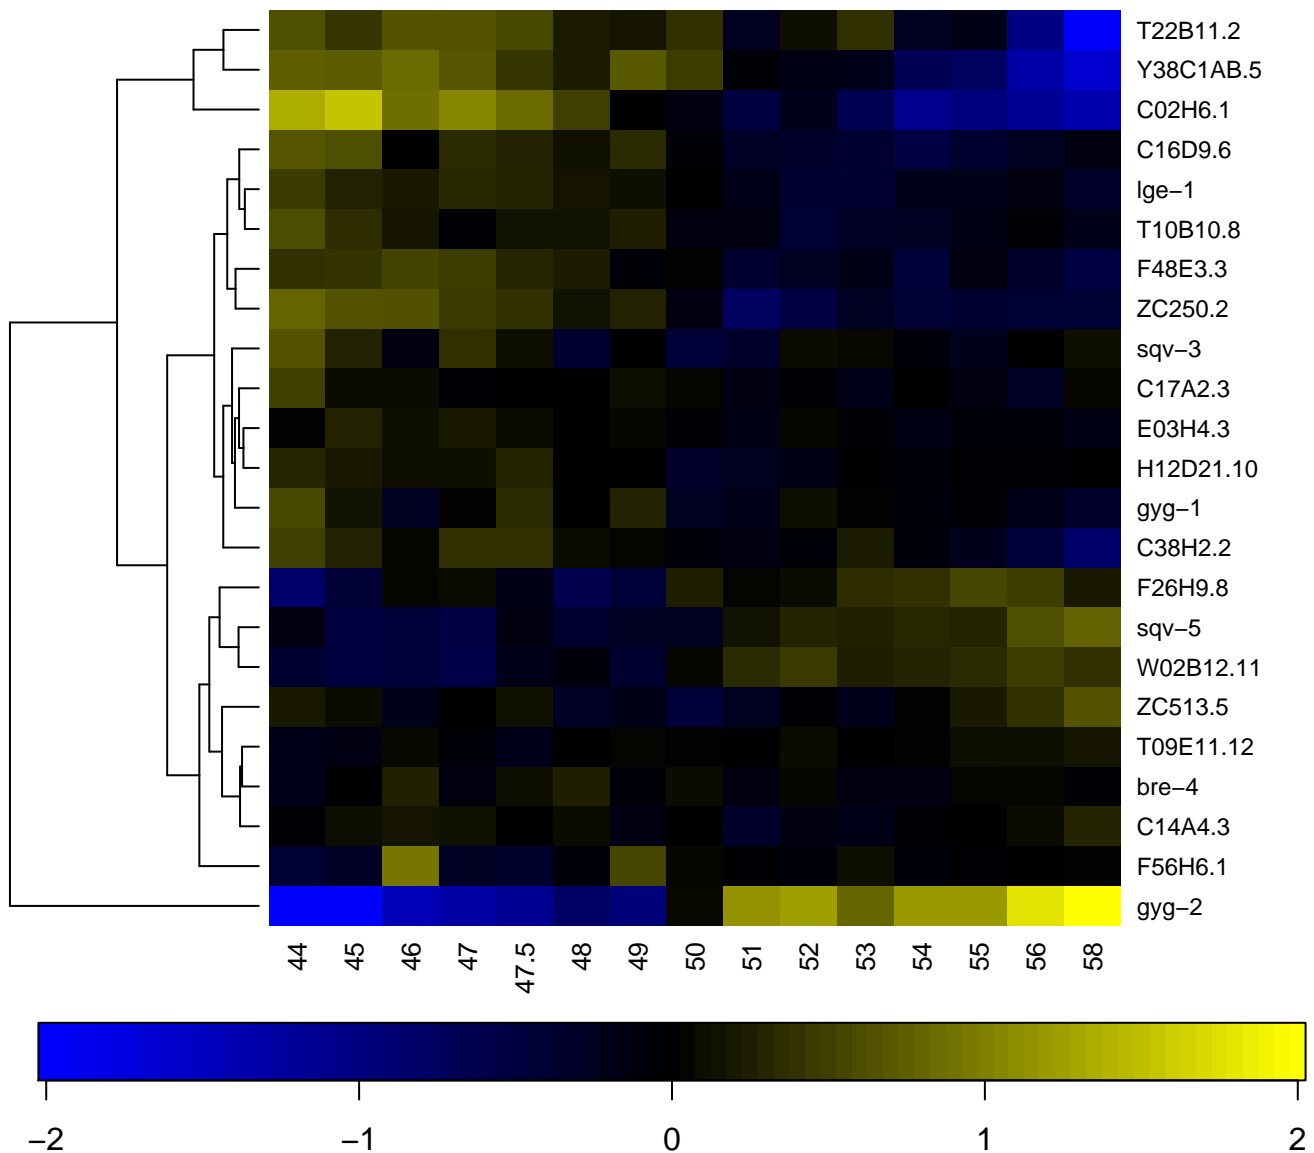

# transferase activity, transferring hexosyl groups

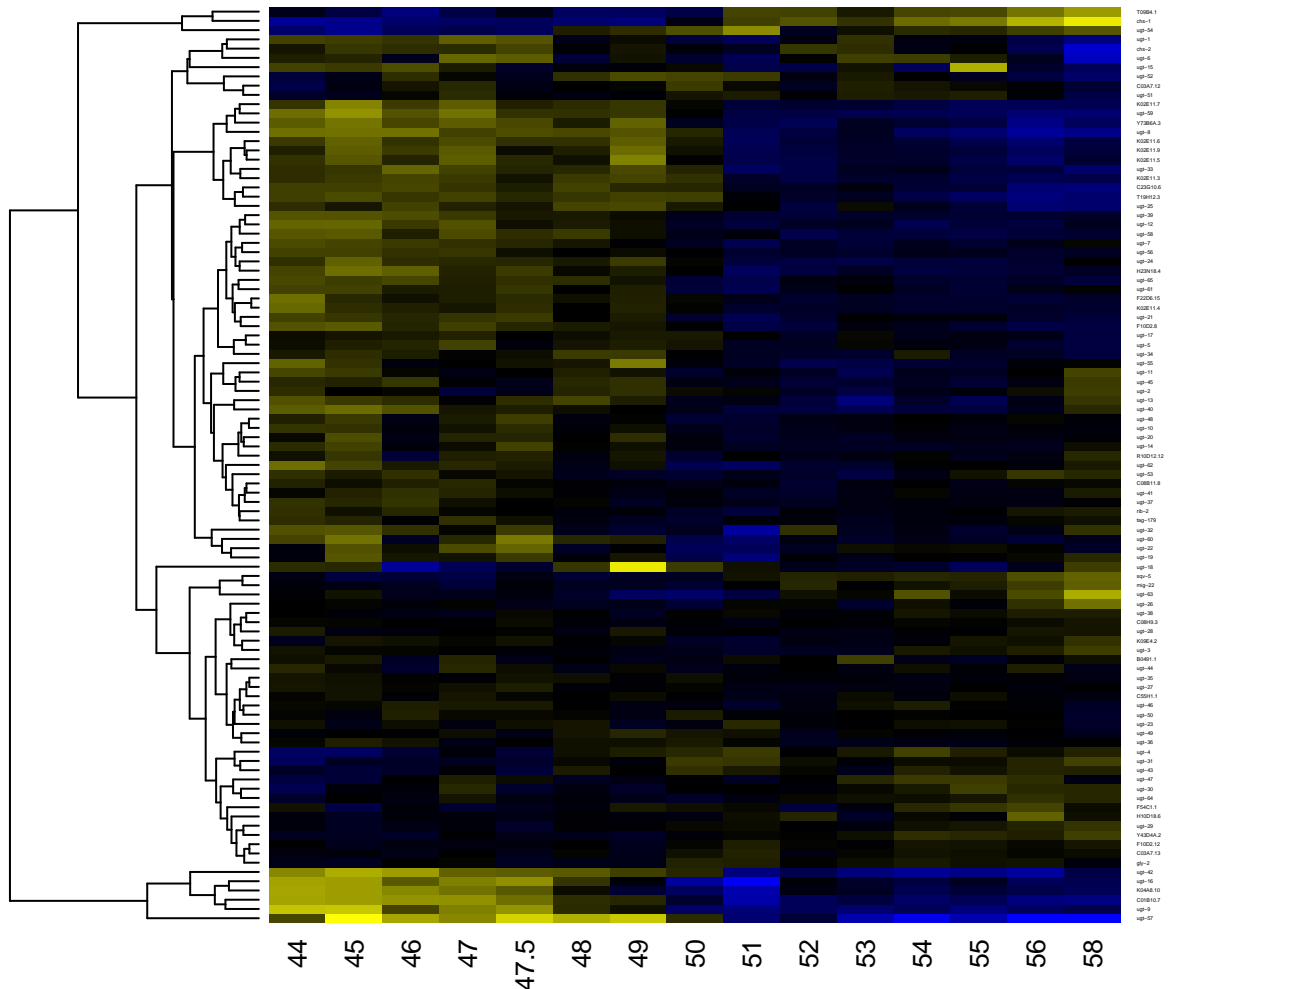

# transferase activity, transferring nitrogenous groups

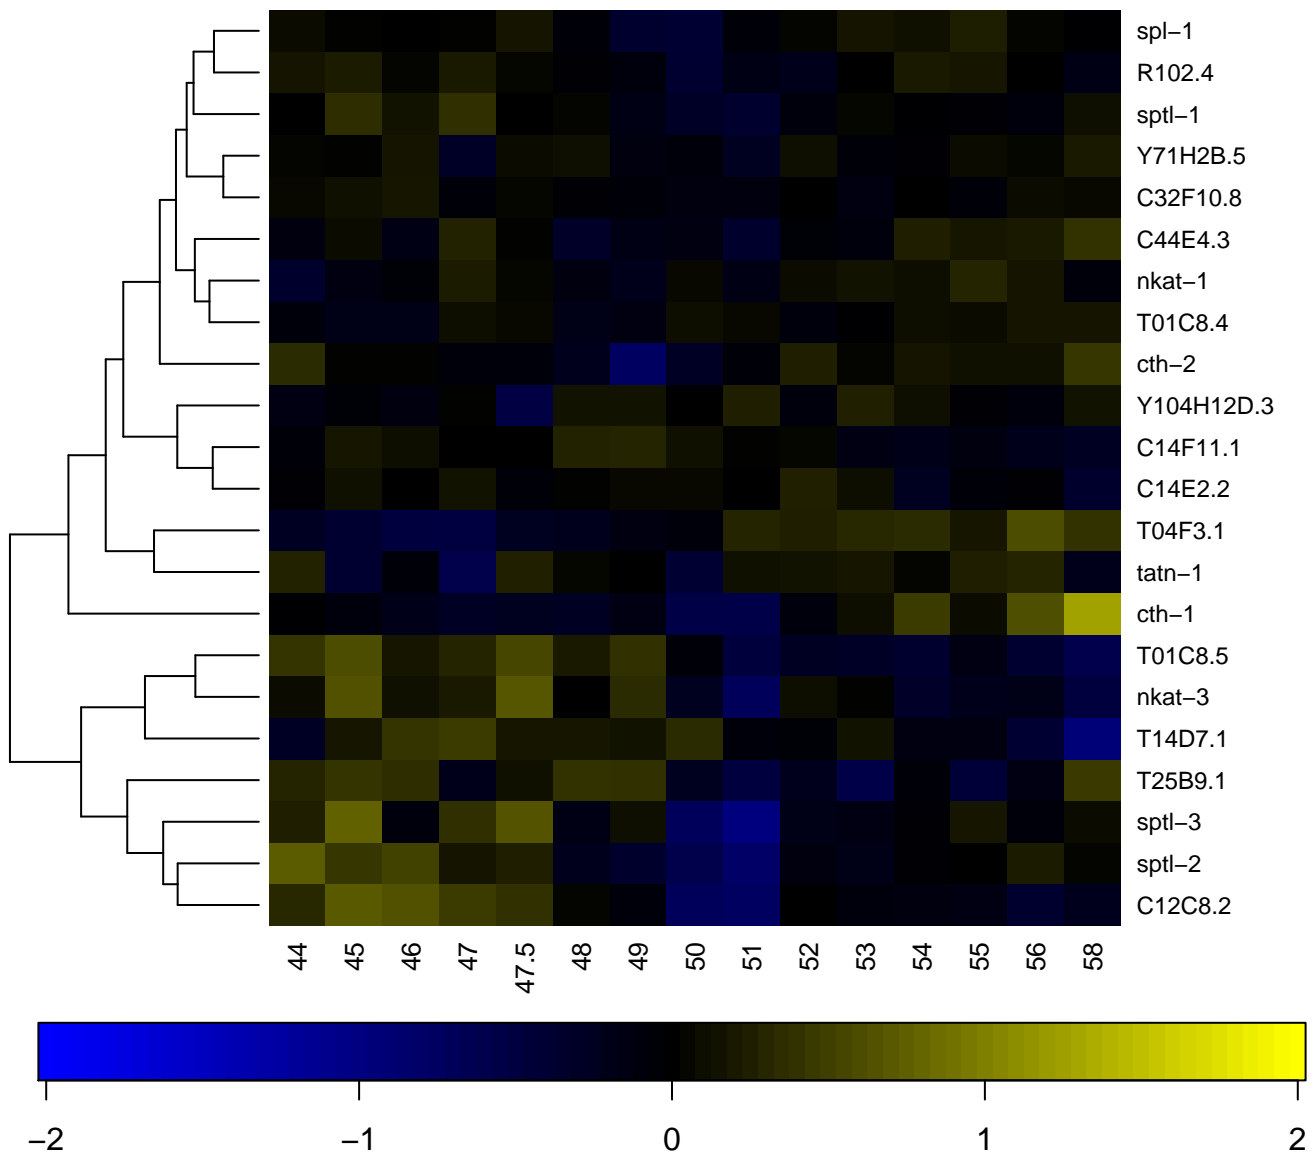



# transferase activity, transferring phosphorus-containing gro

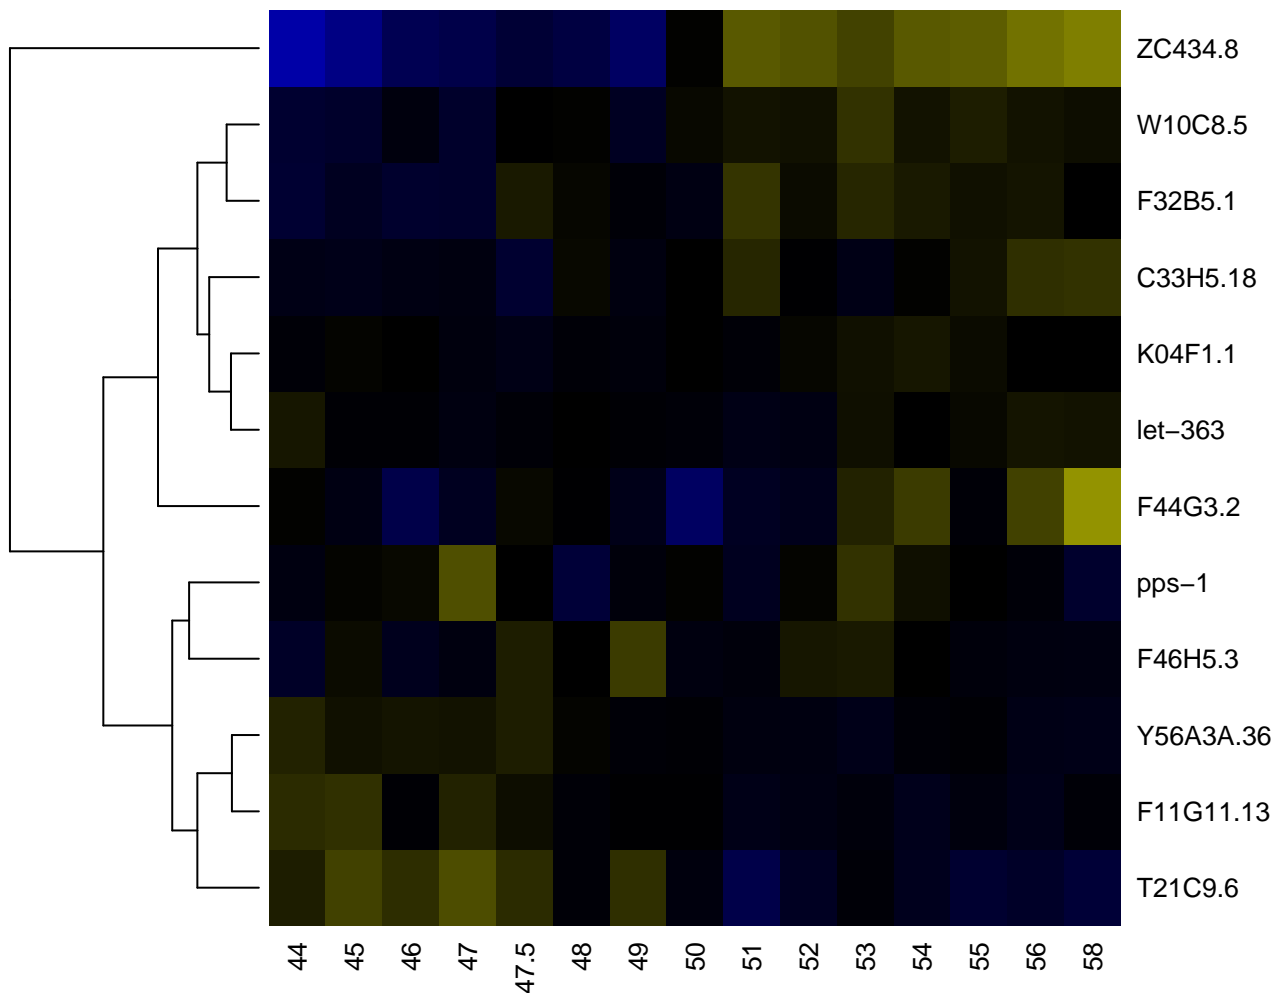

# transforming growth factor beta receptor activity

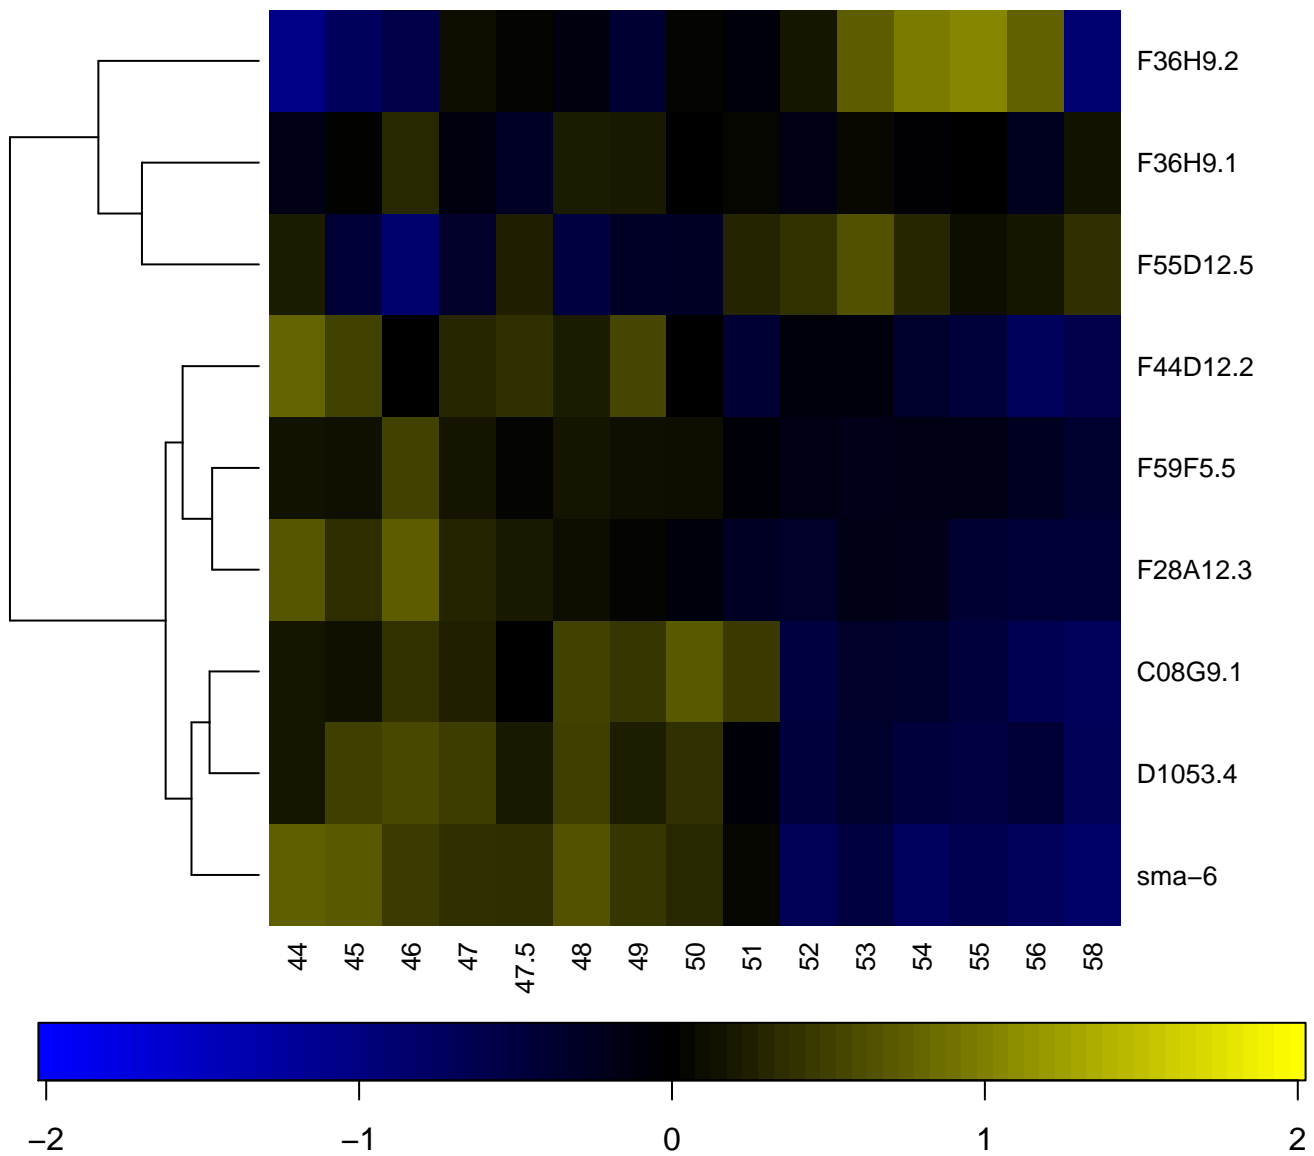



# translation

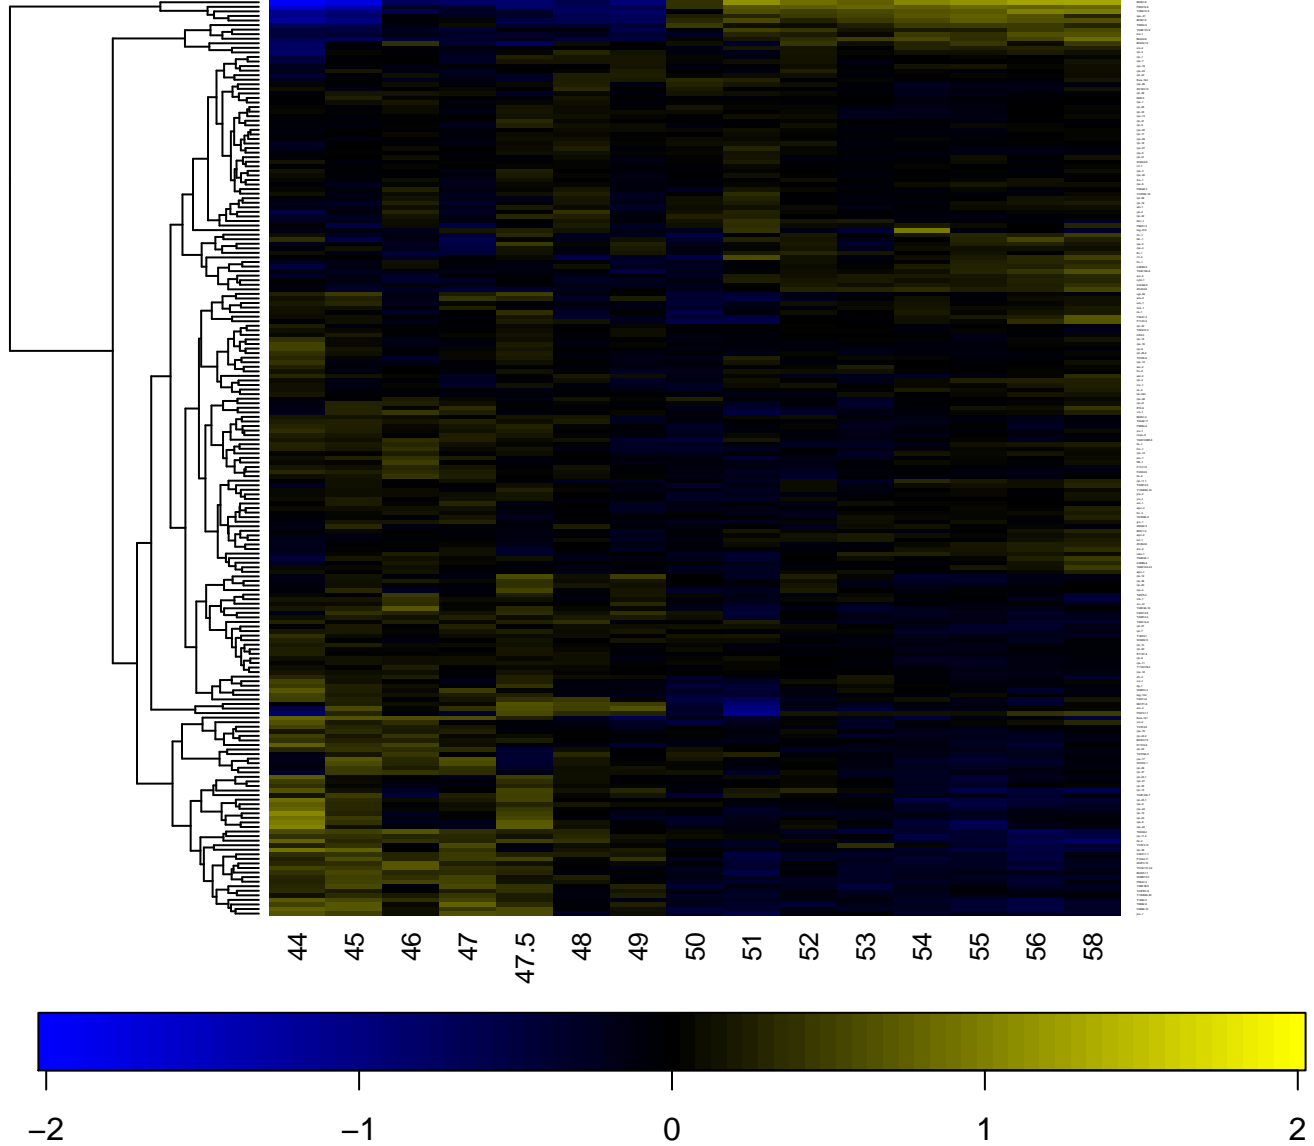



# translation initiation factor activity

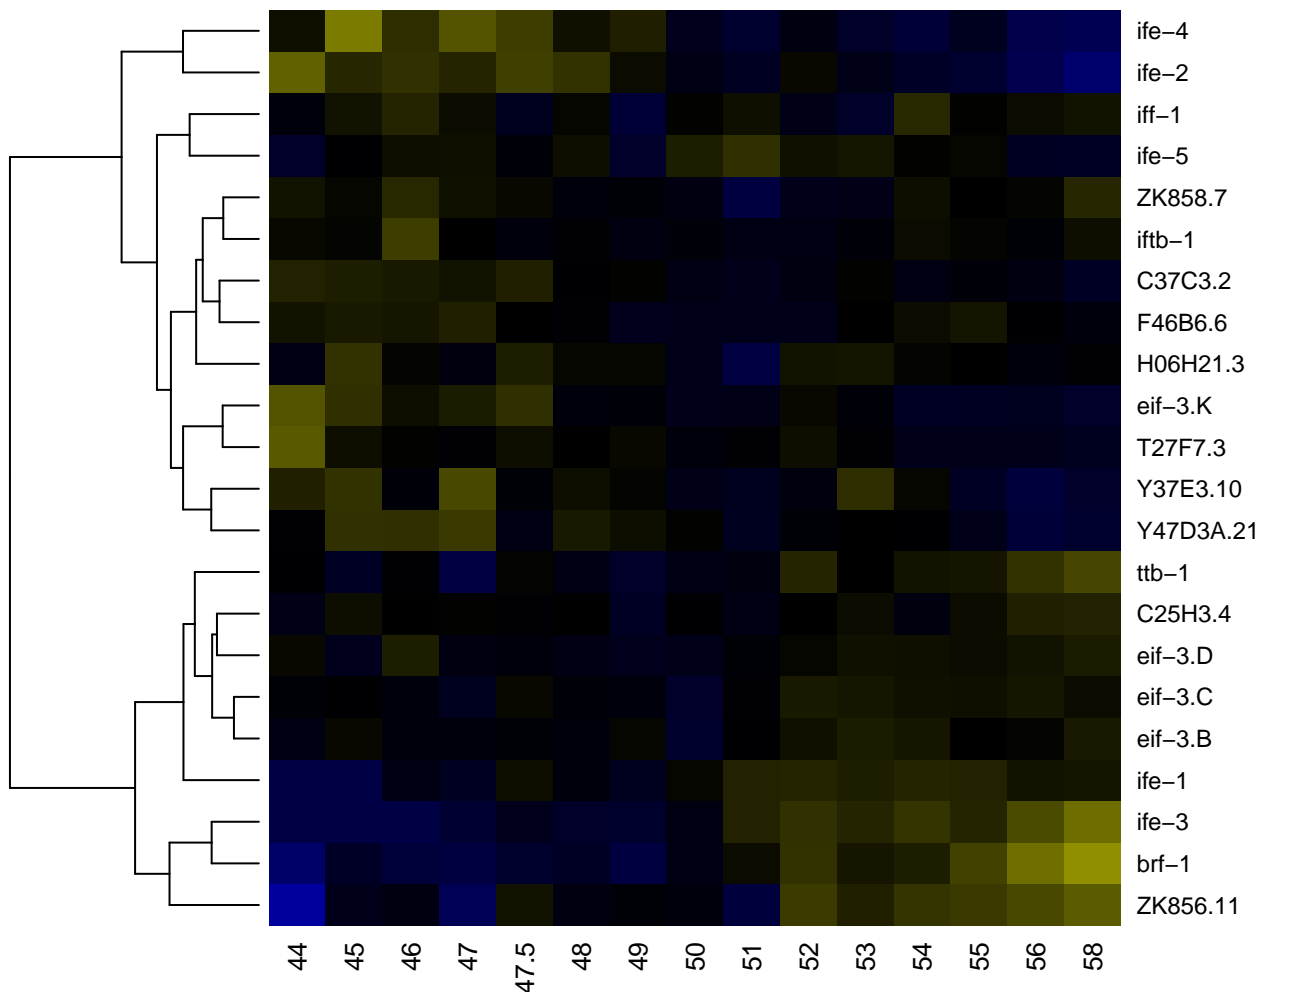



# translational initiation

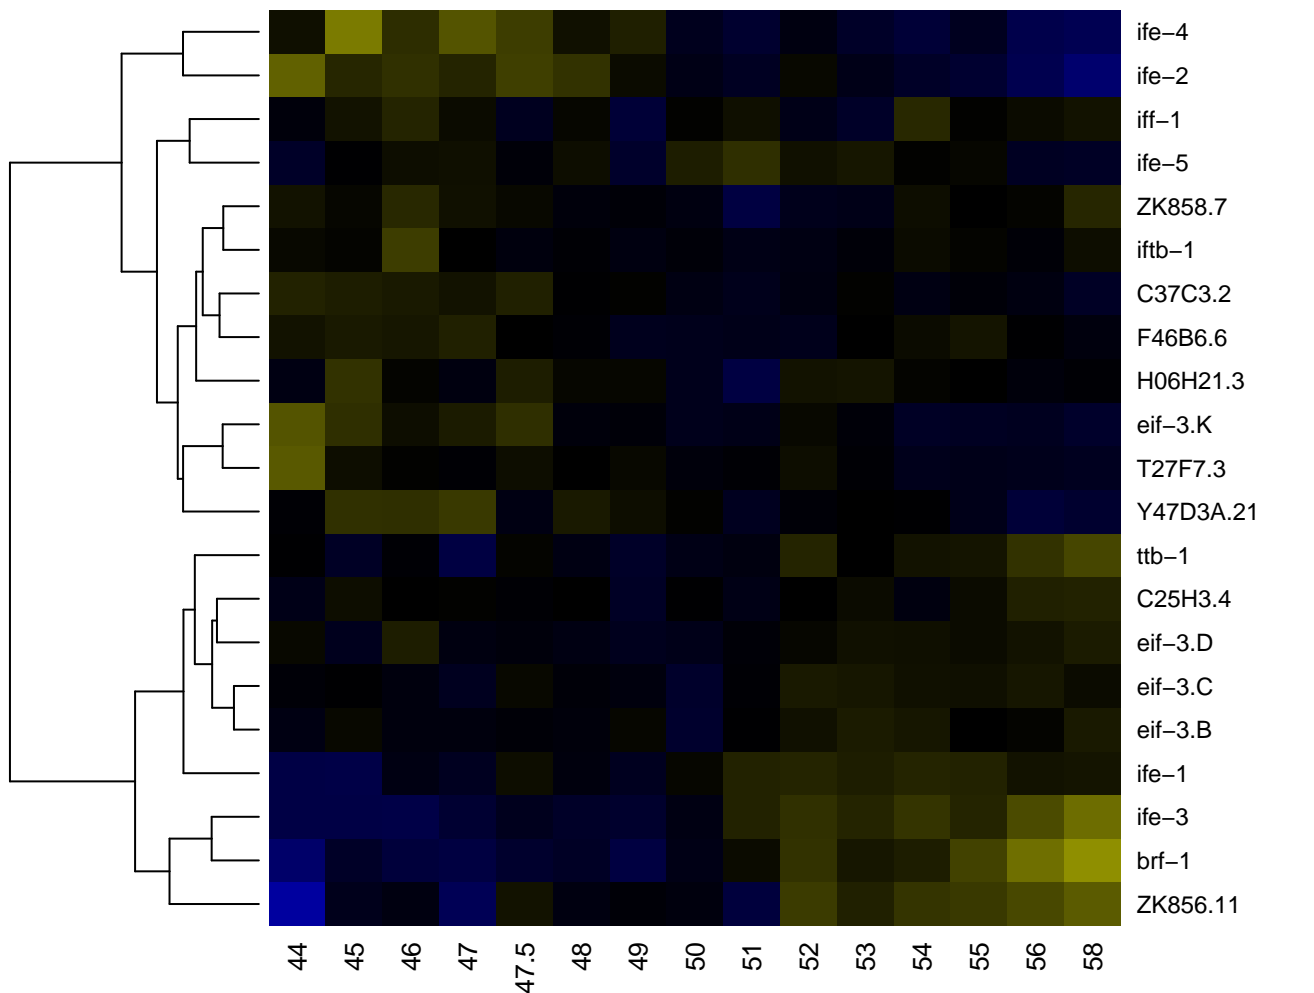



# transmembrane receptor activity

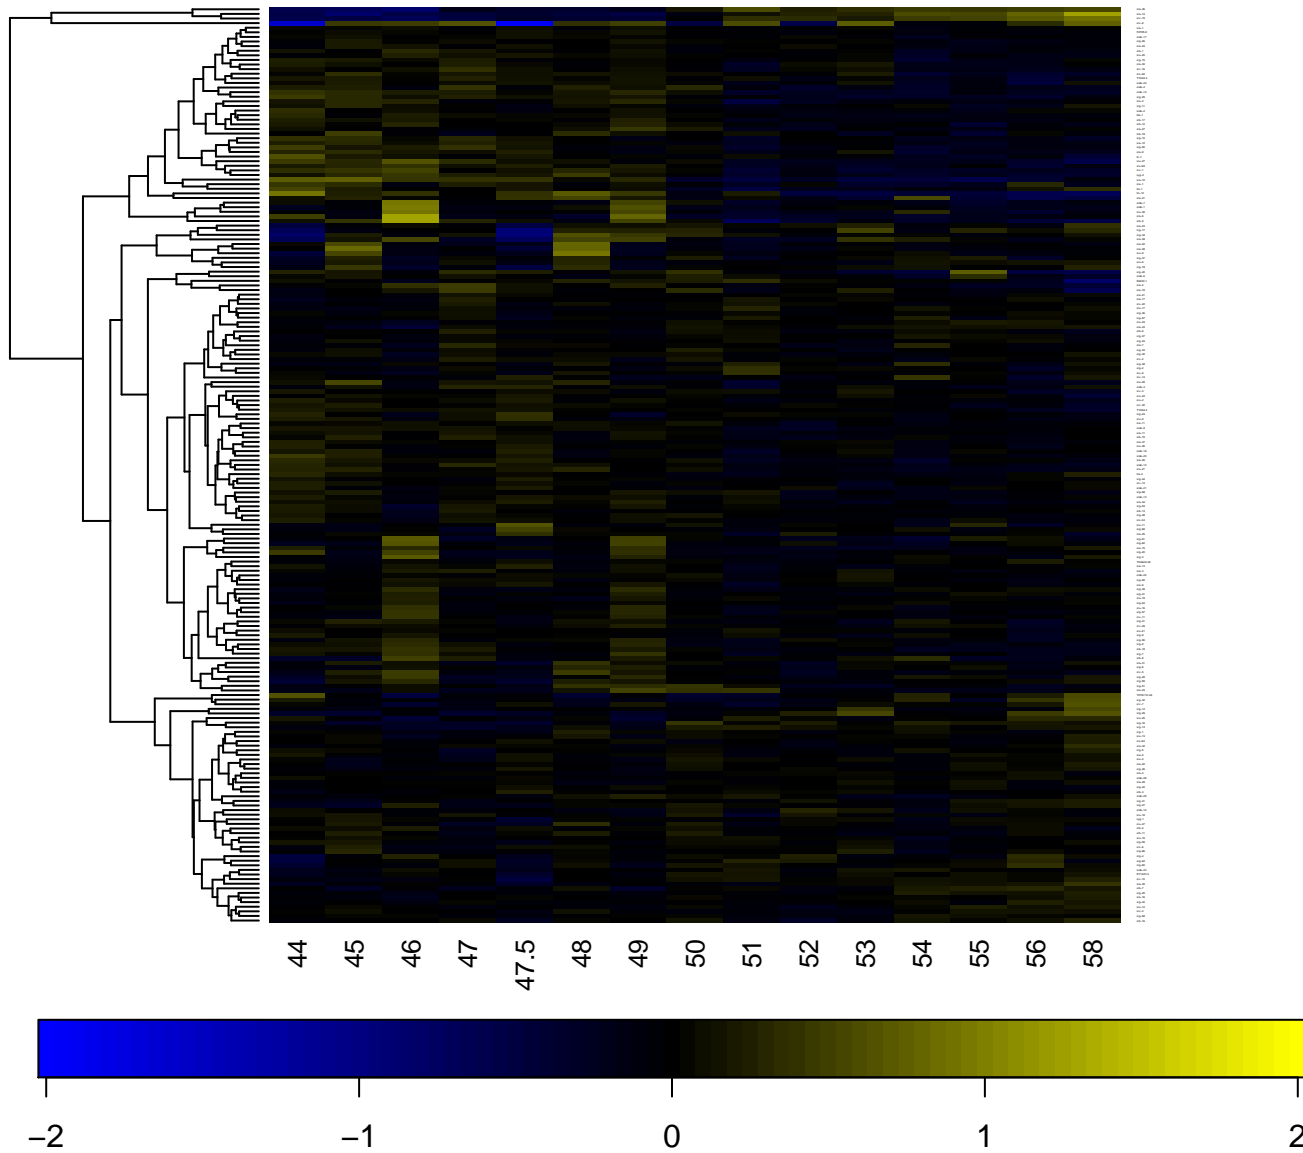

# transmembrane receptor protein serine/threonine kinase acti

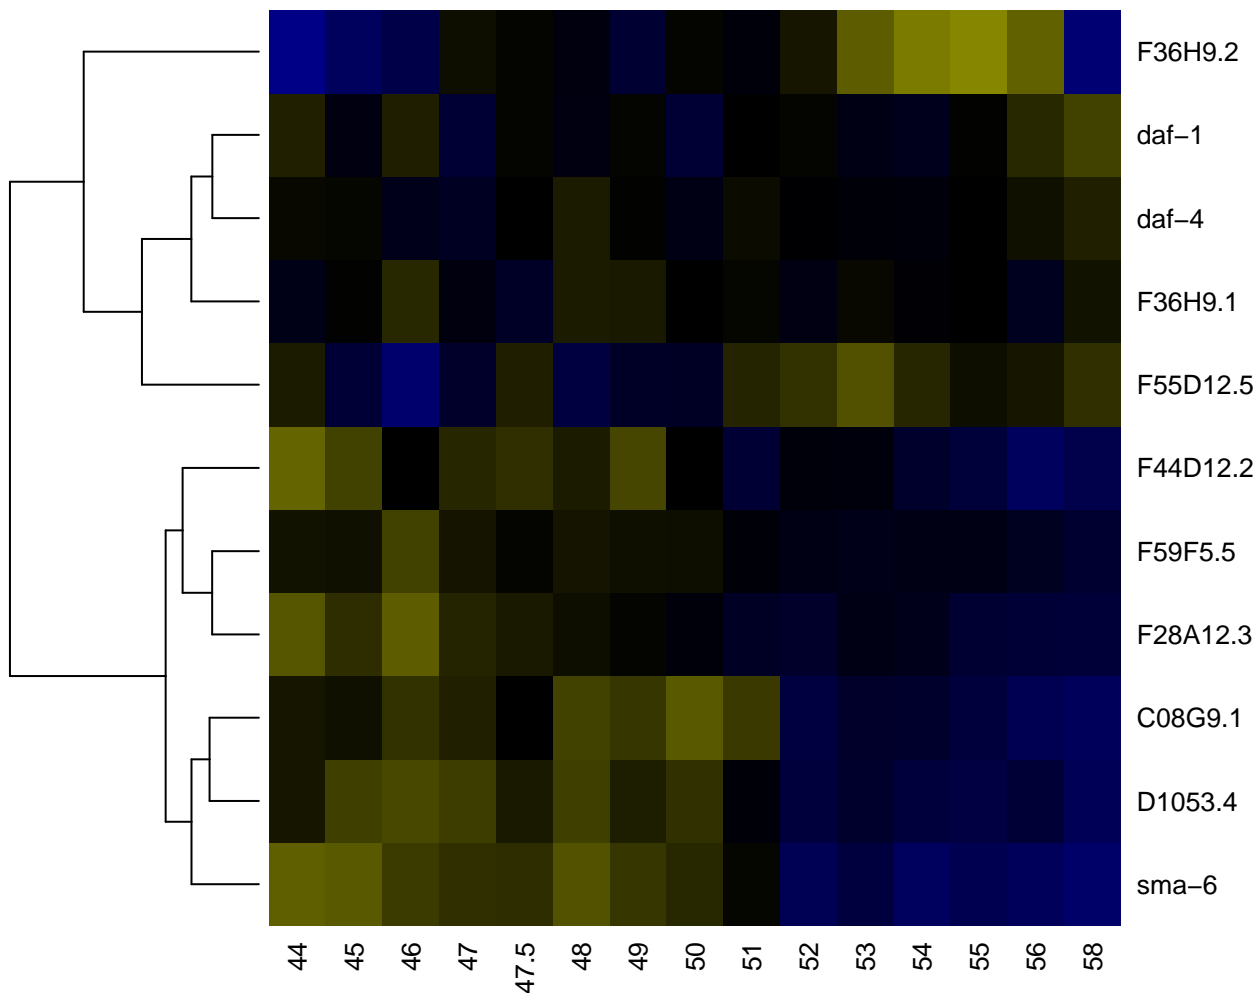



# transmembrane transport

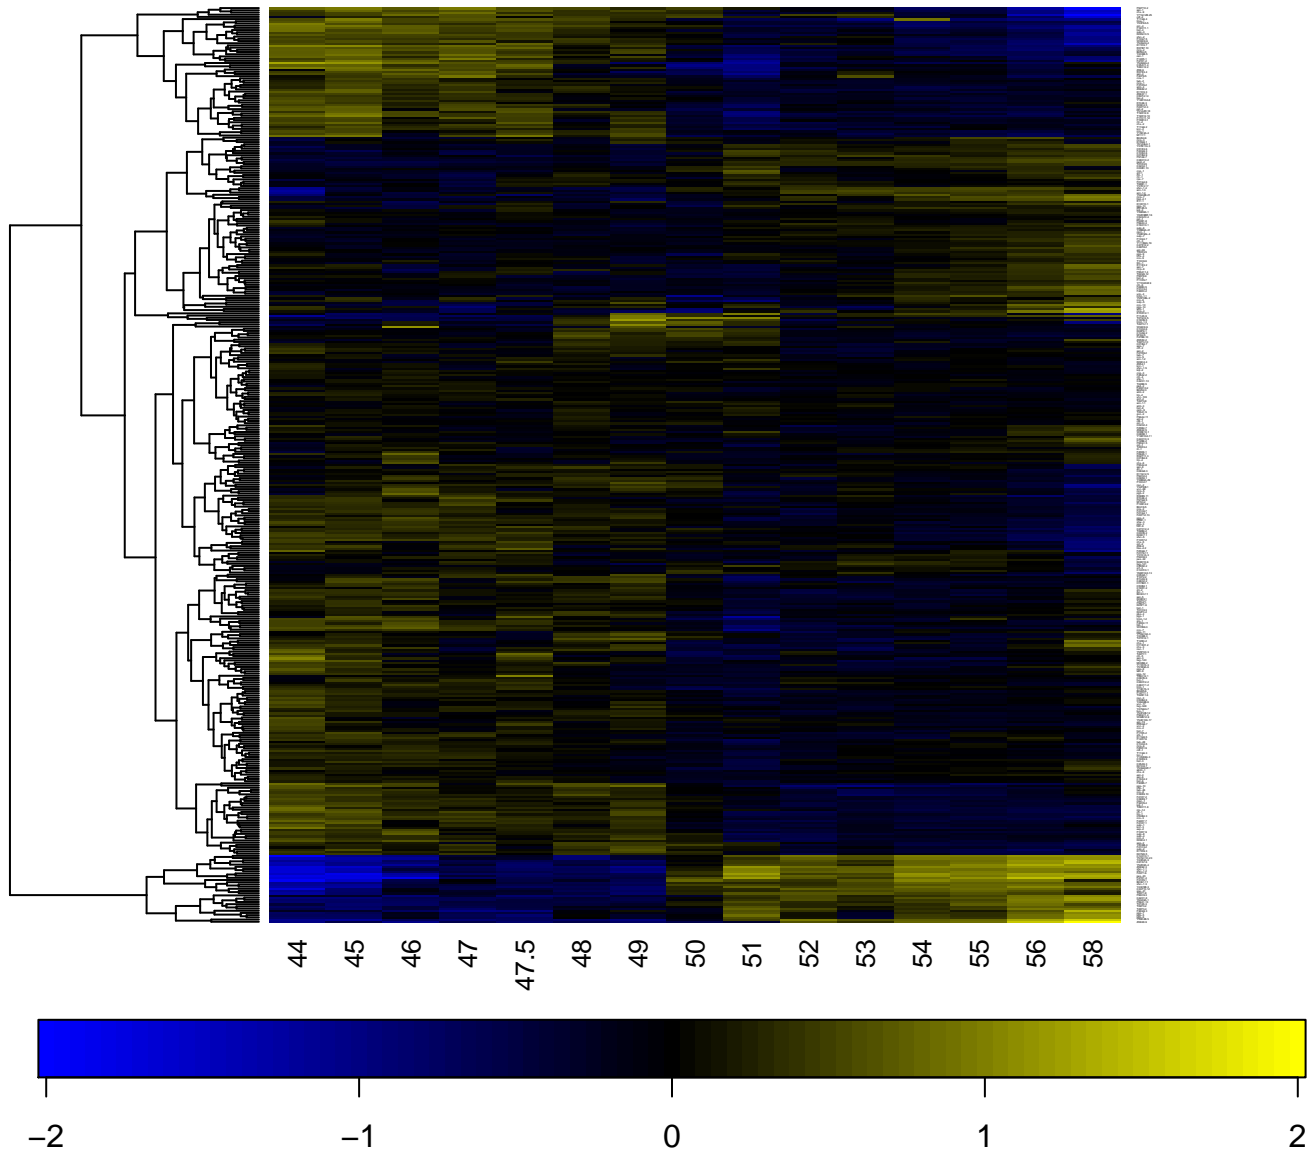

# transport

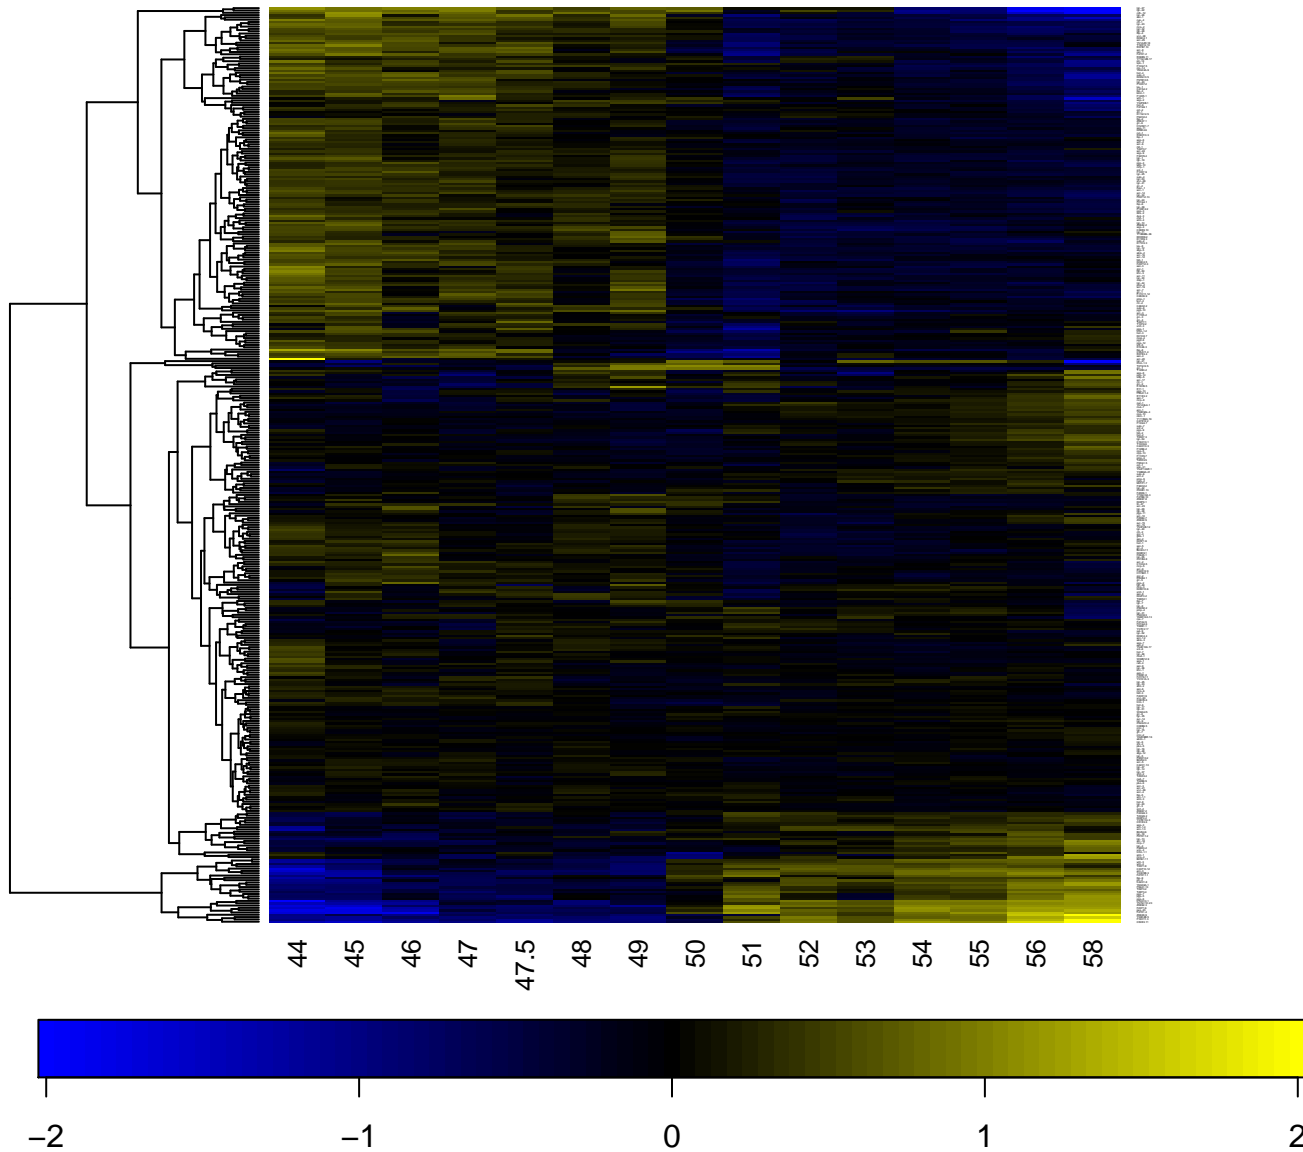

# transporter activity

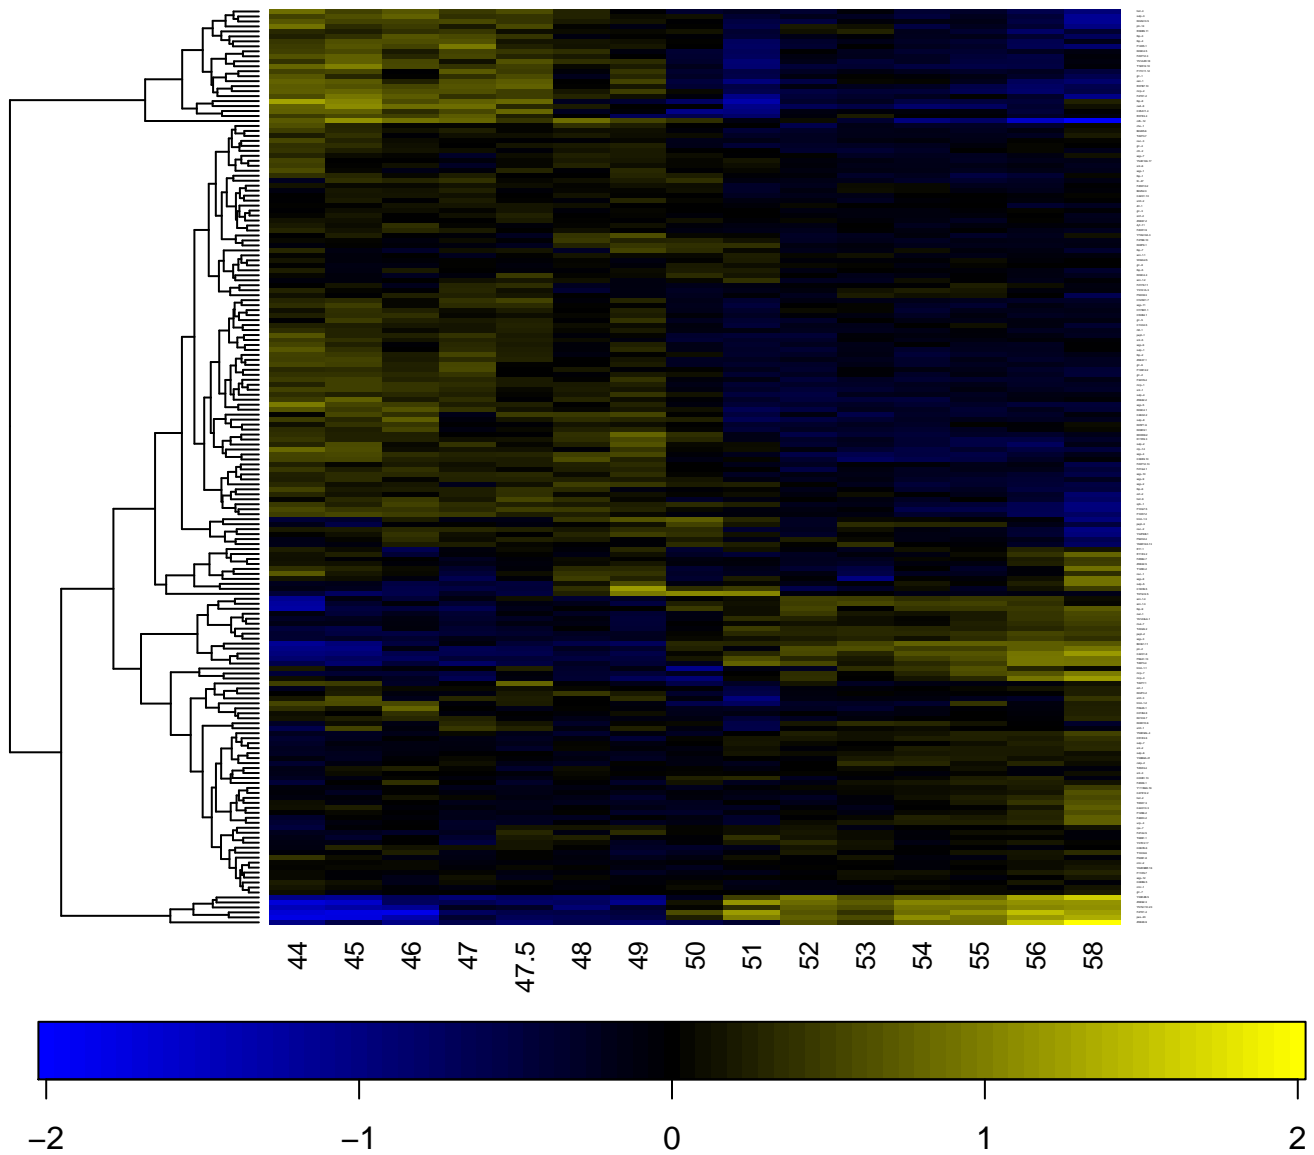



# triacylglycerol lipase activity

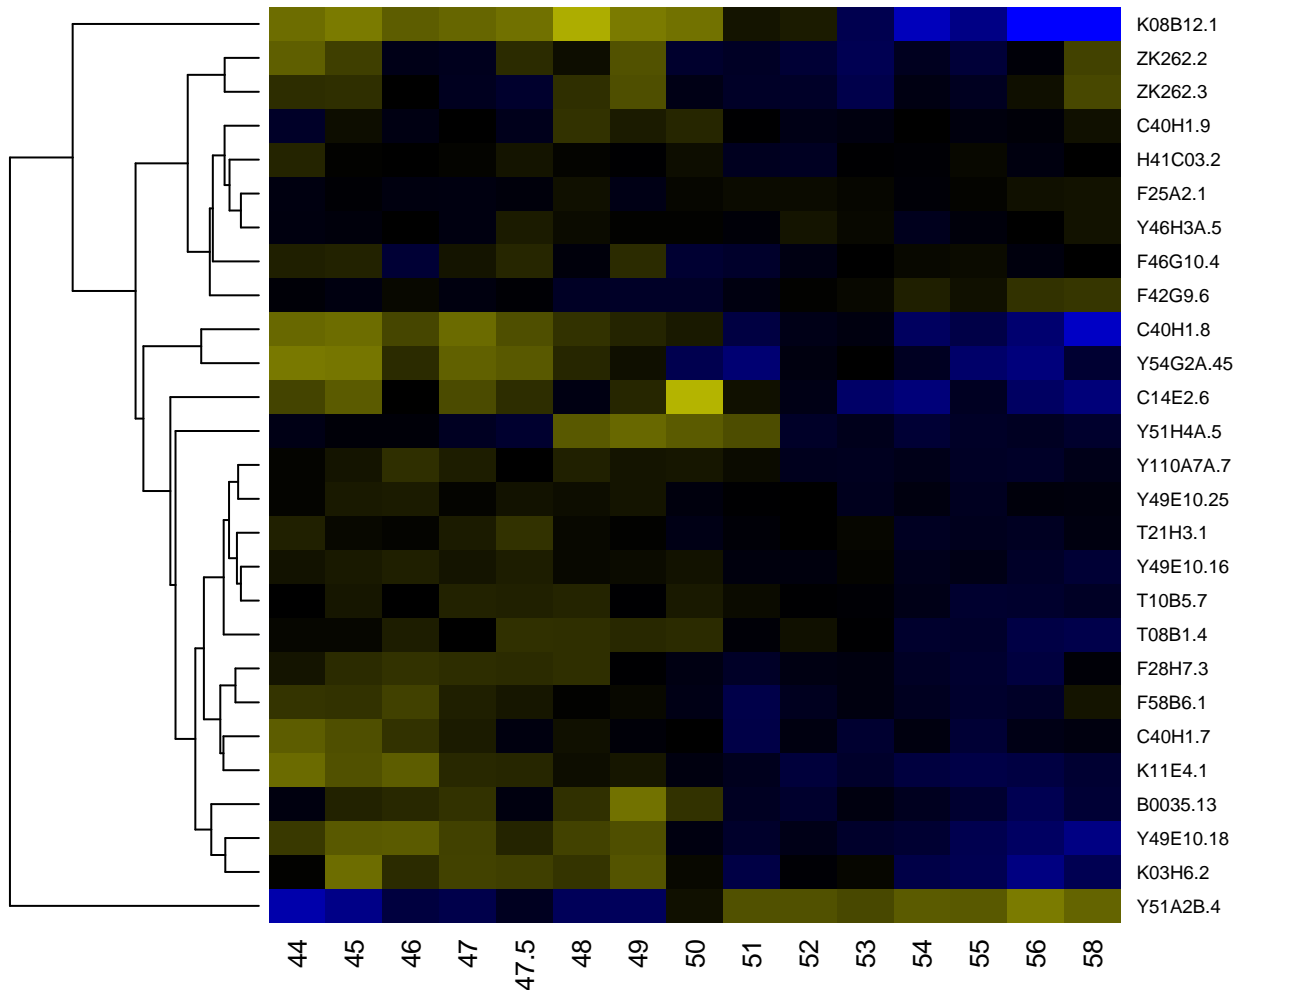



# tricarboxylic acid cycle

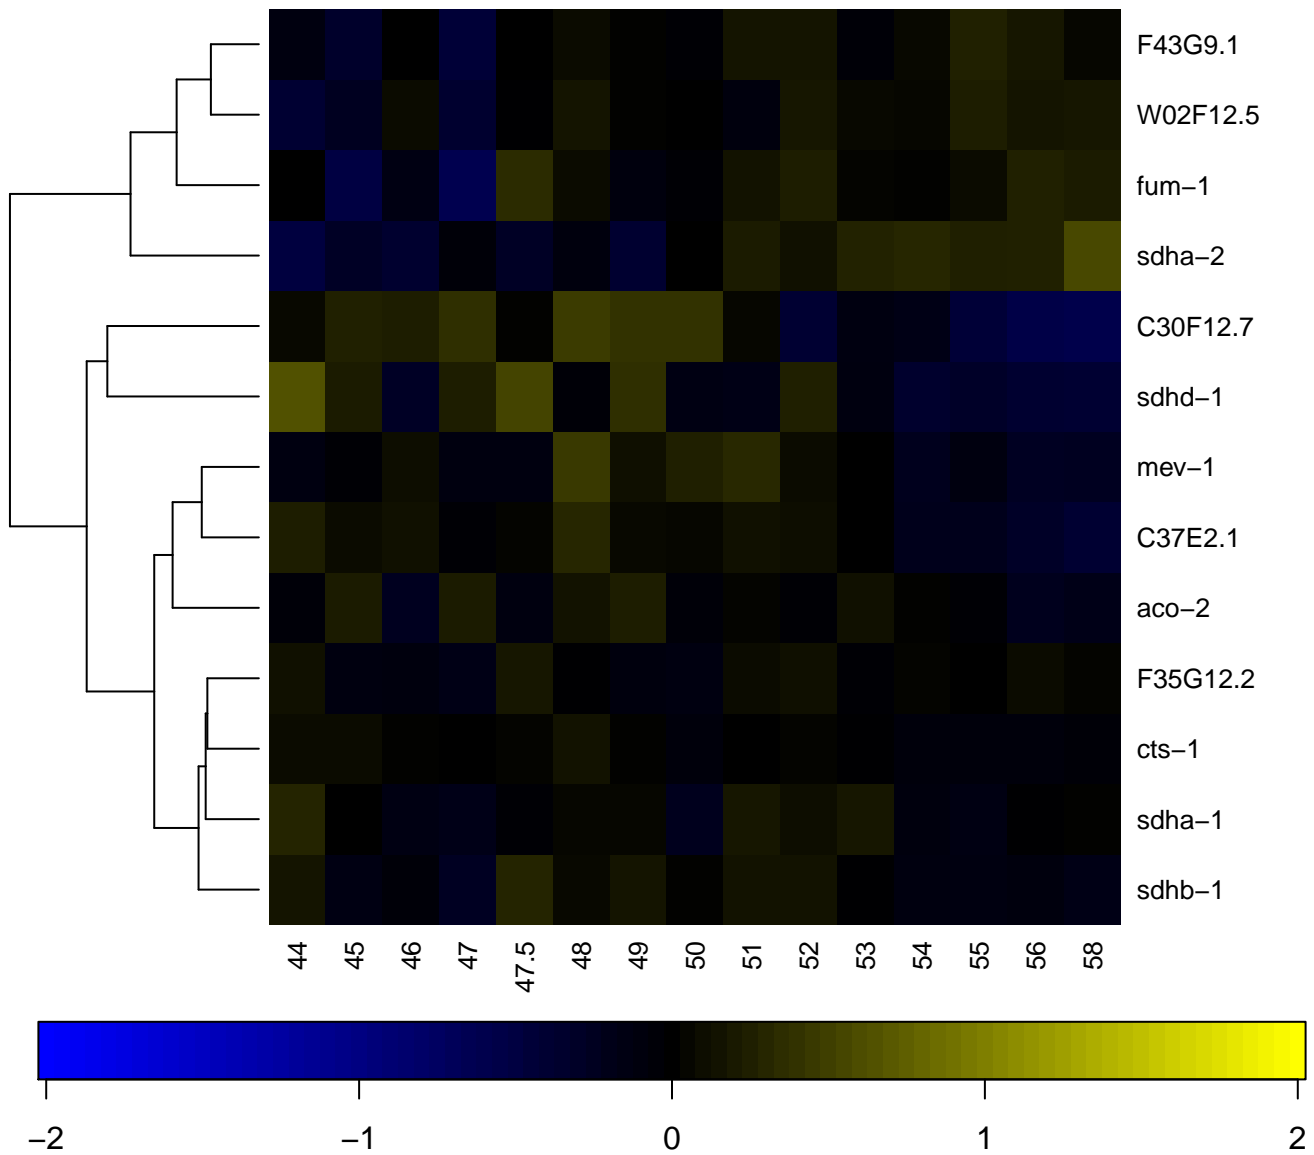





# tRNA aminoacylation for protein translation

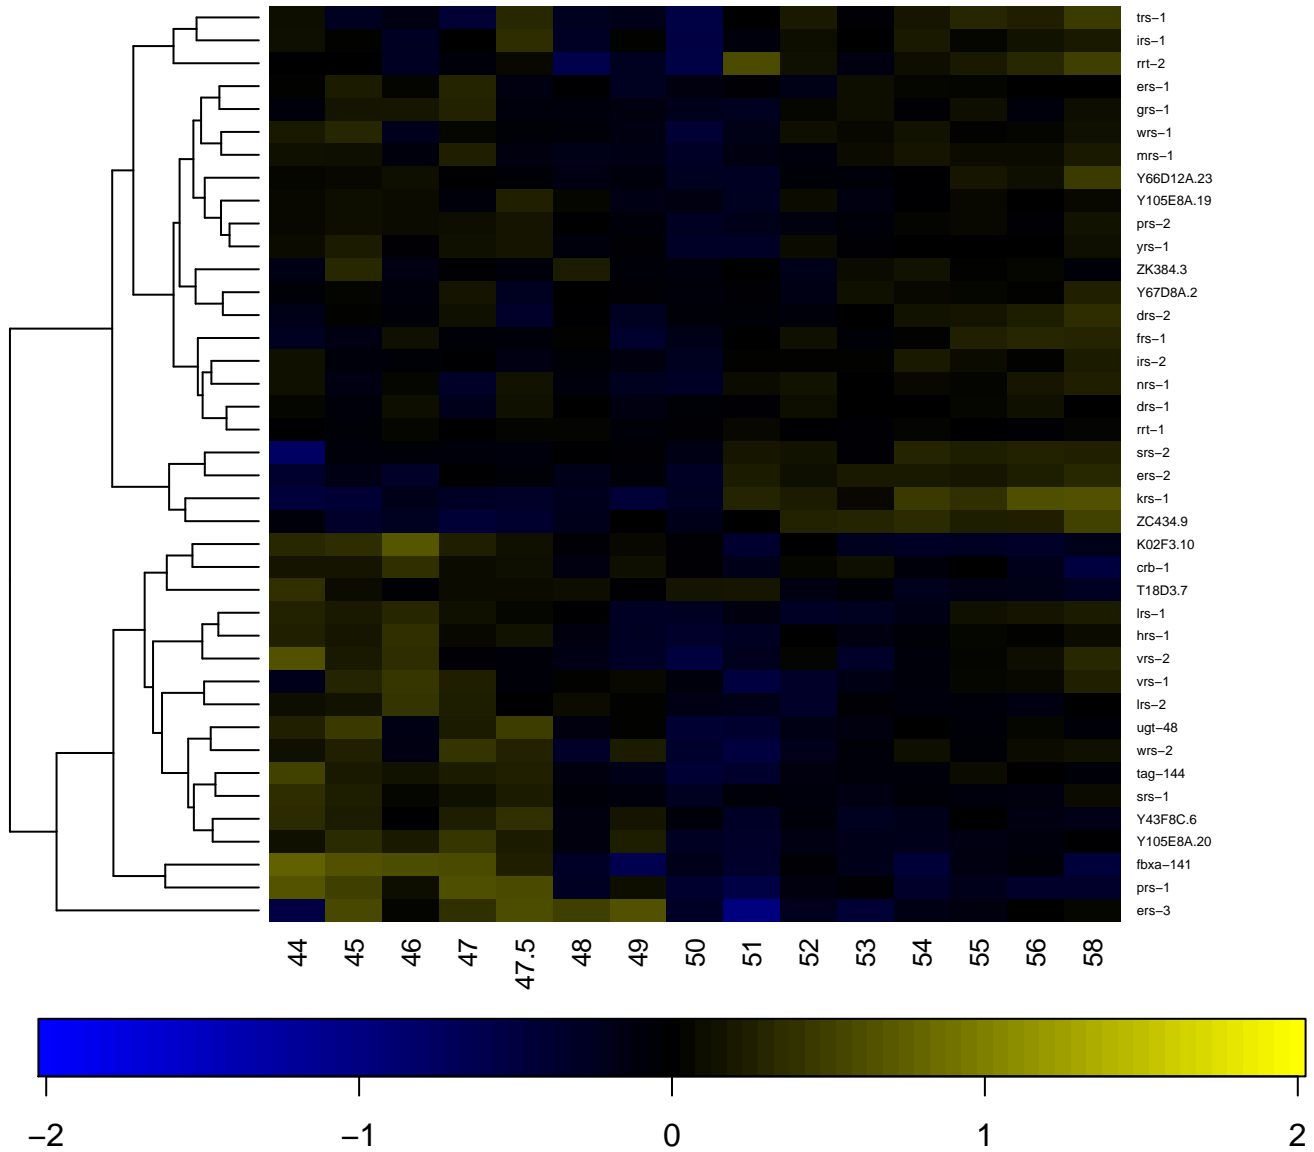

# tRNA binding

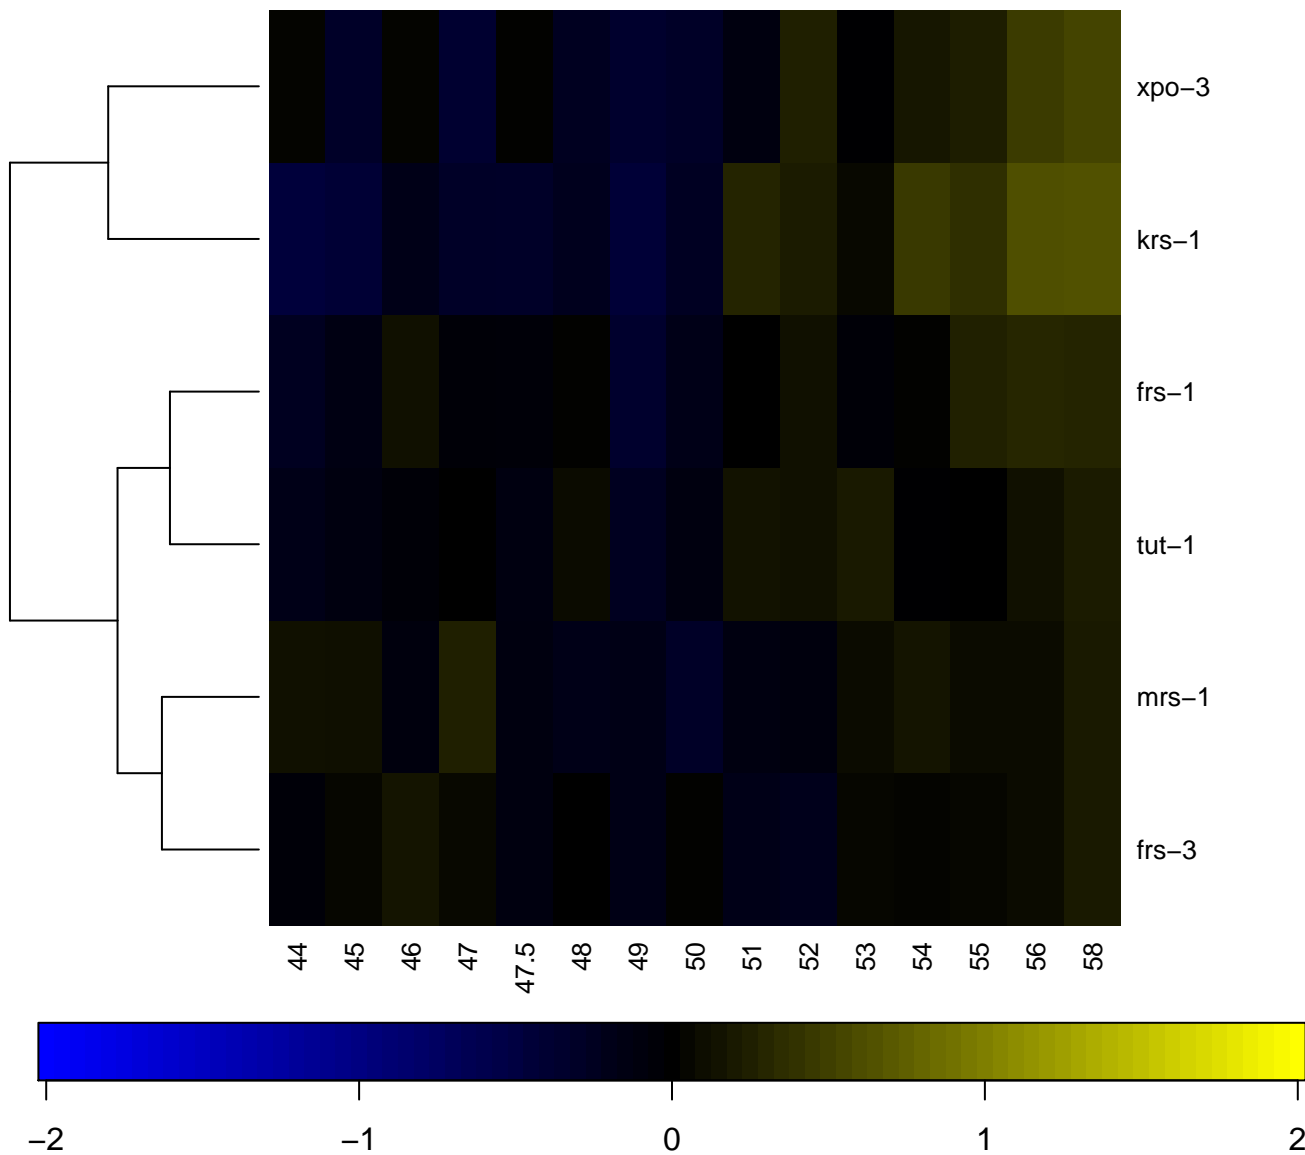



# tRNA modification

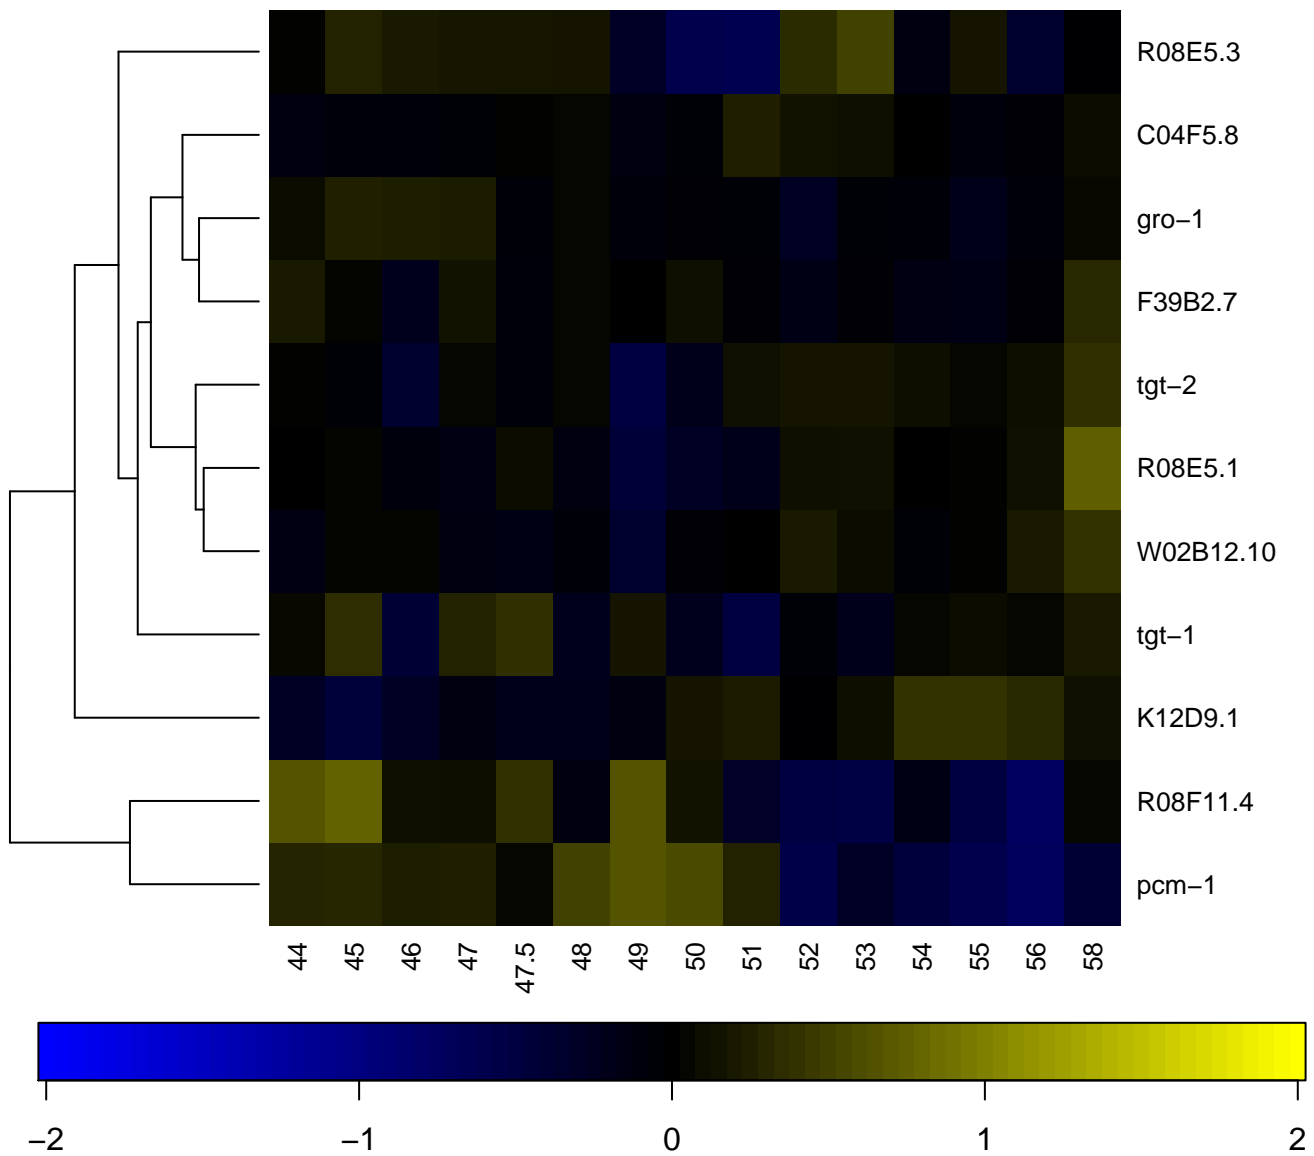









# turning behavior involved in mating

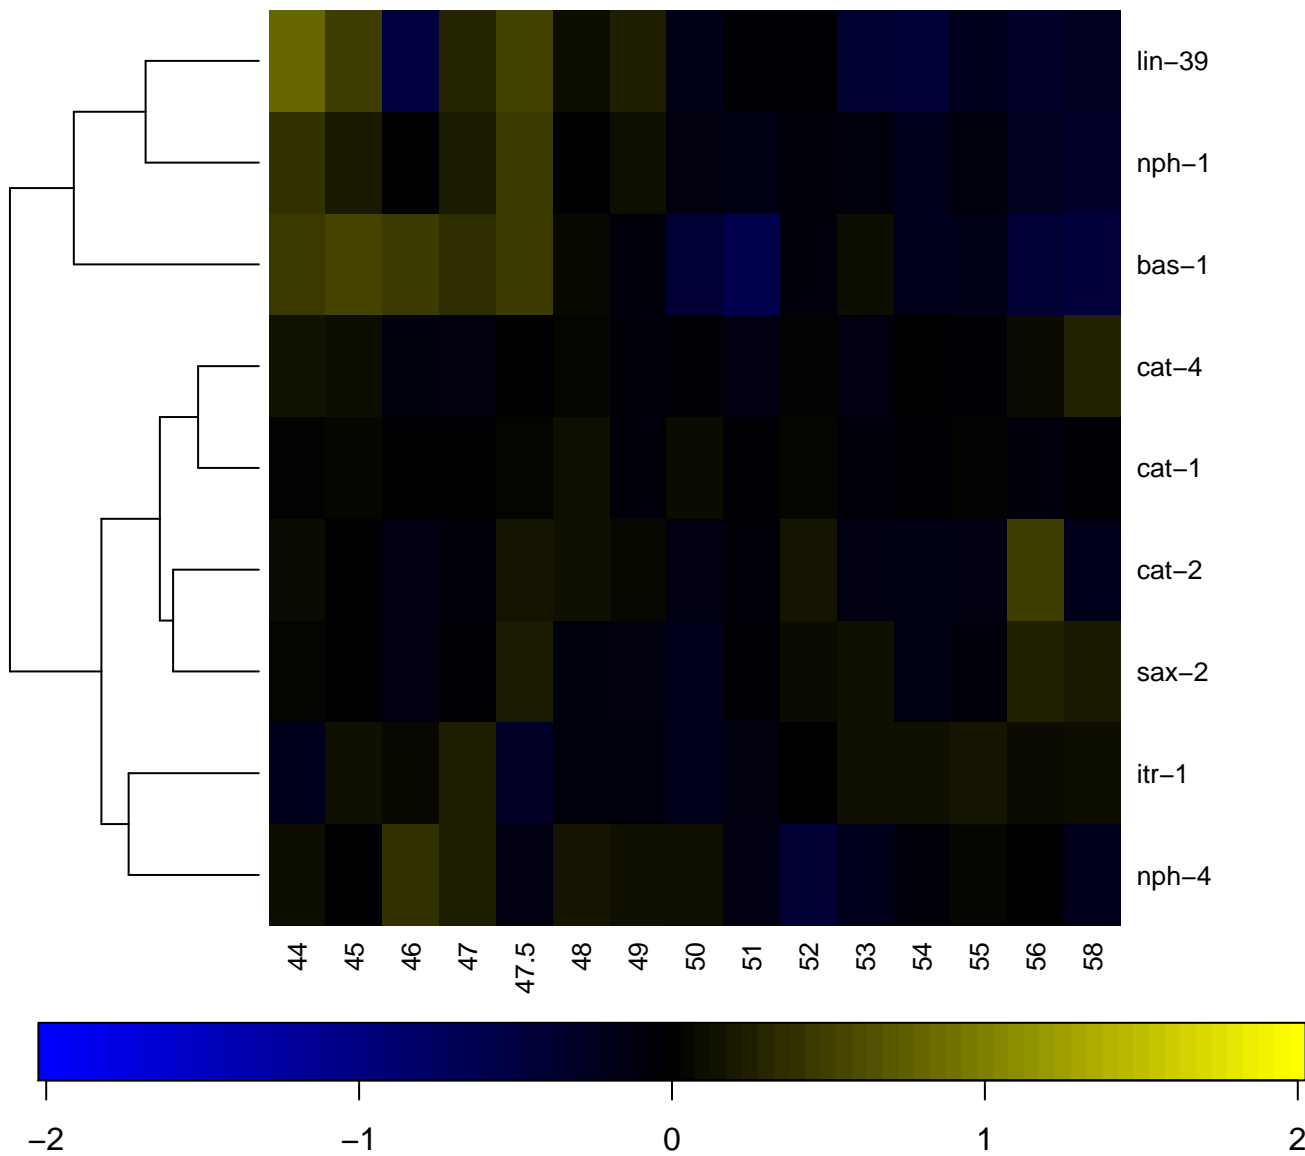



# ubiquinone biosynthetic process

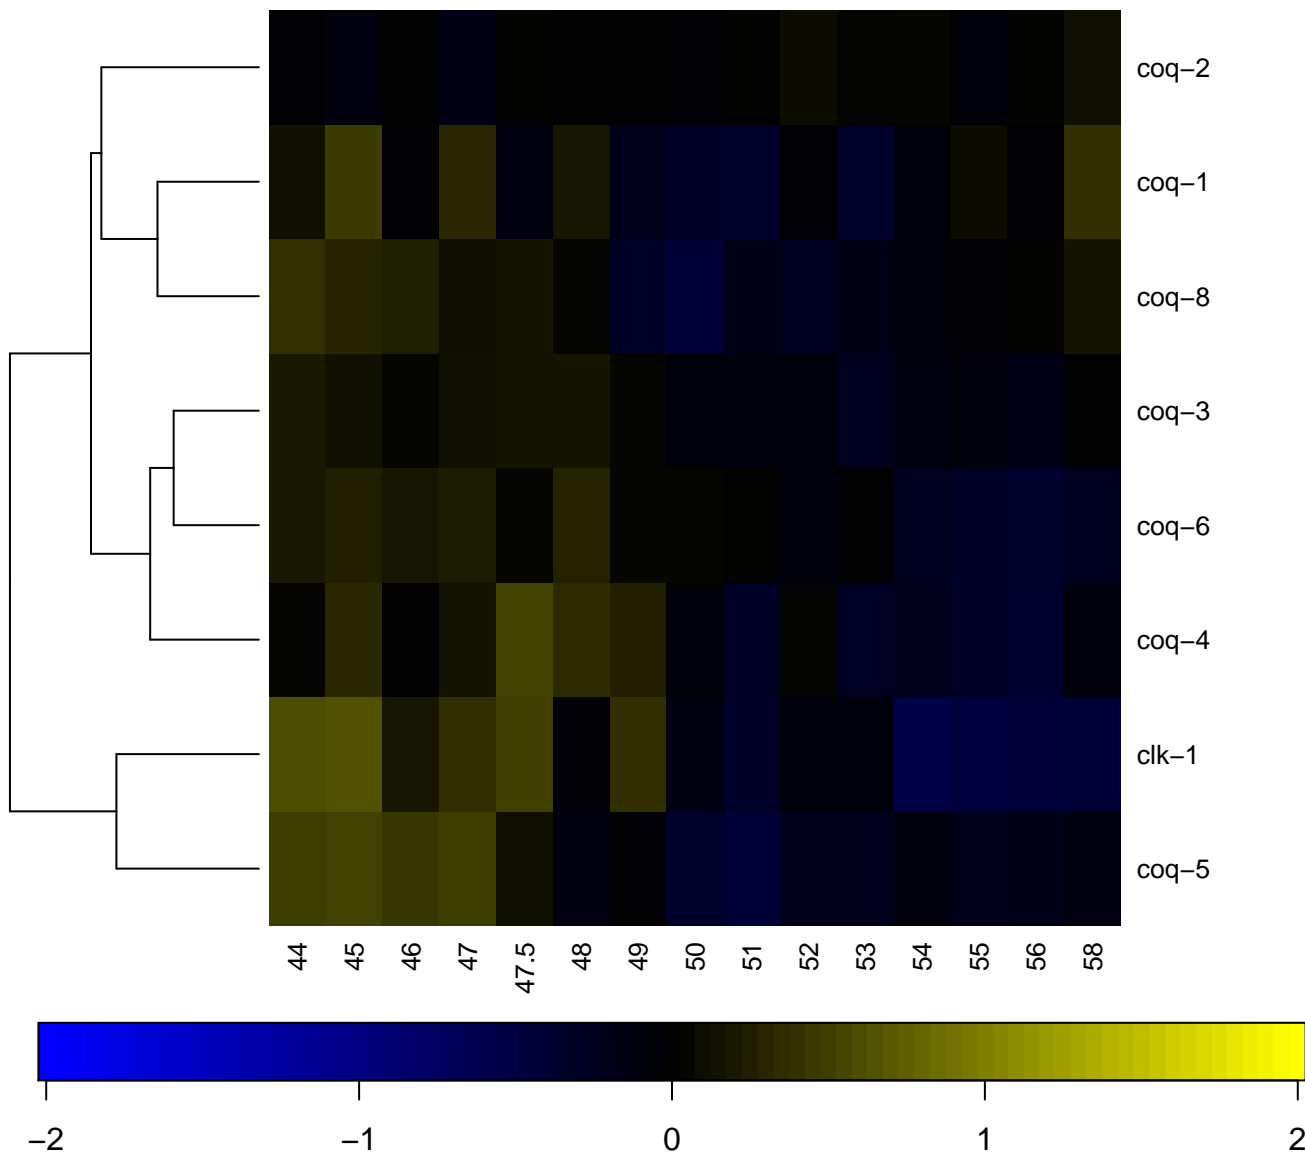

# ubiquitin-dependent protein catabolic process

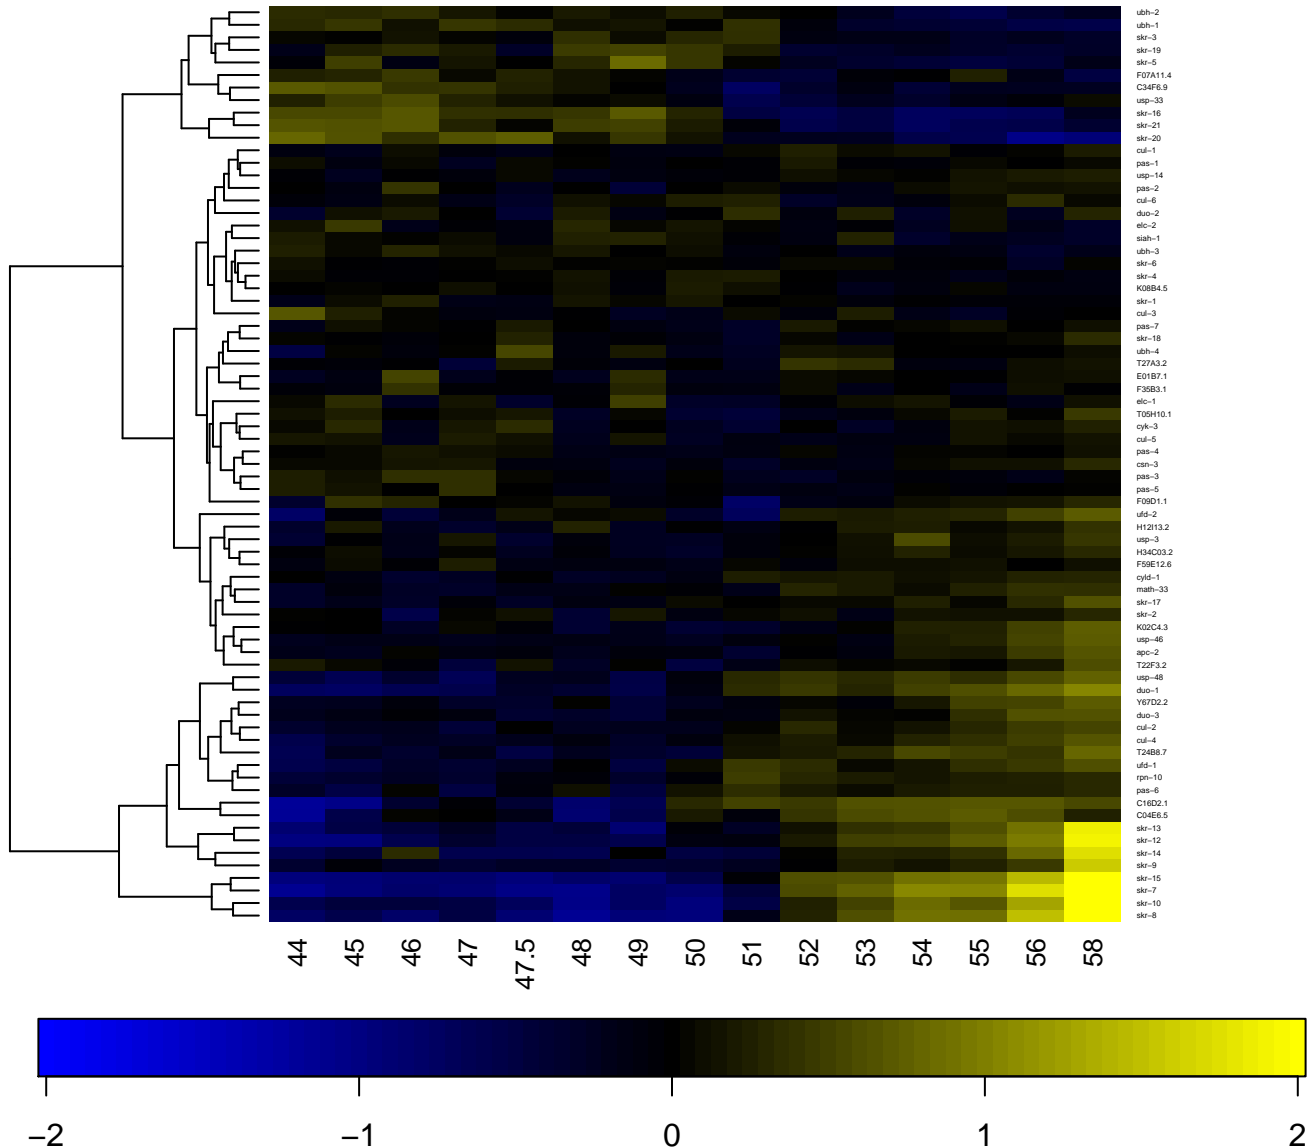



# ubiquitin ligase complex

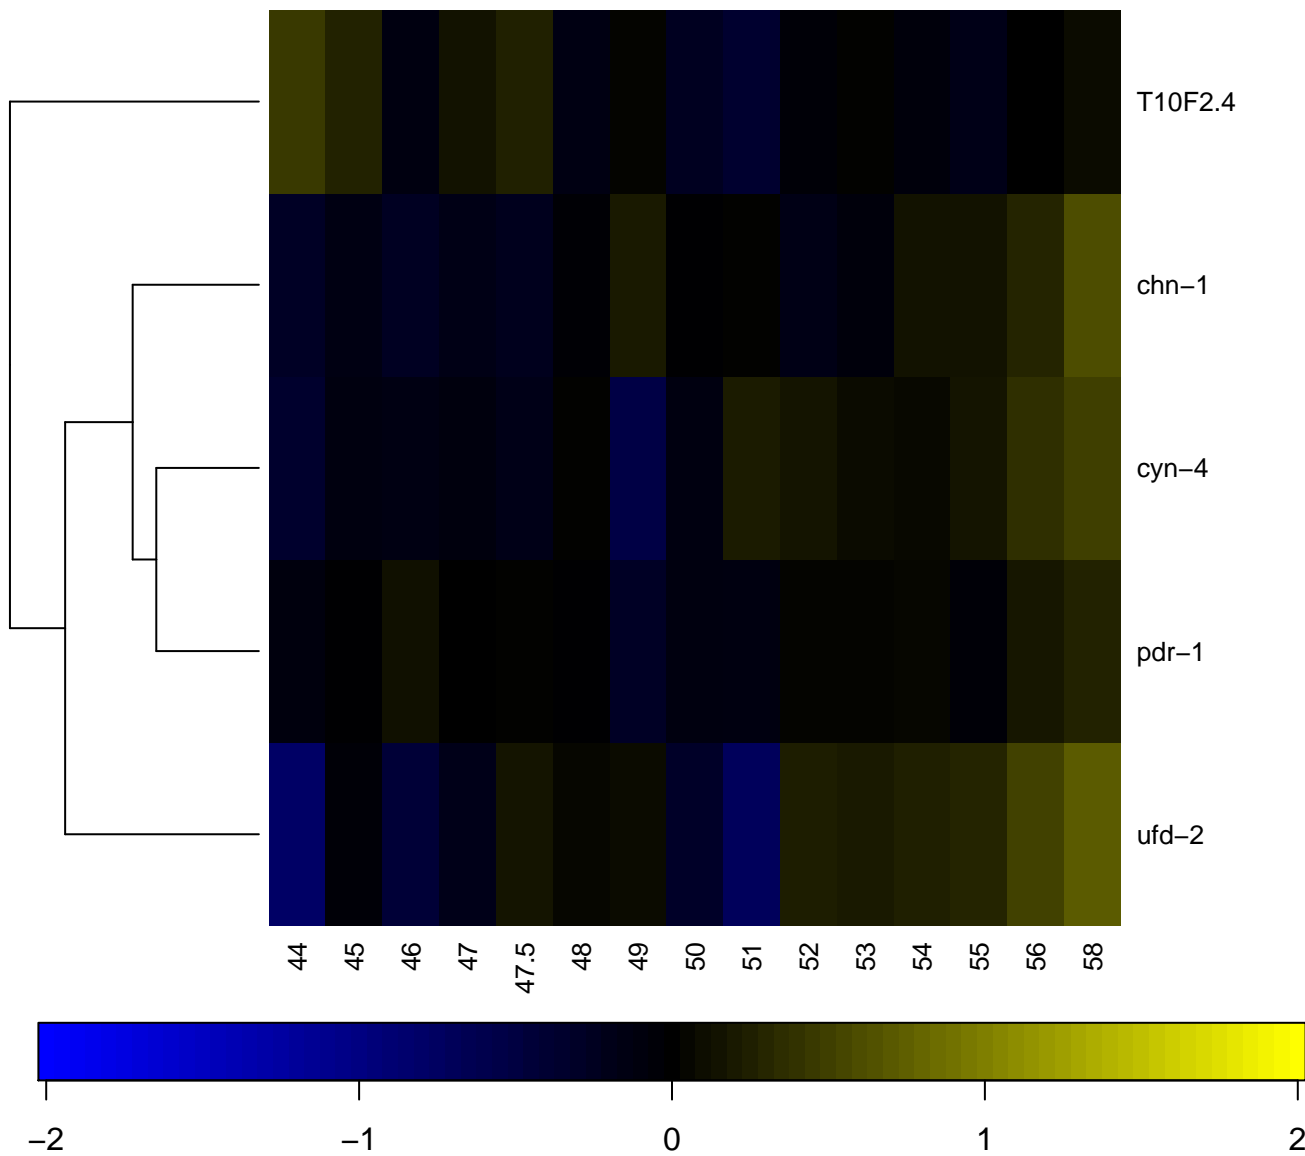



# ubiquitin protein ligase binding

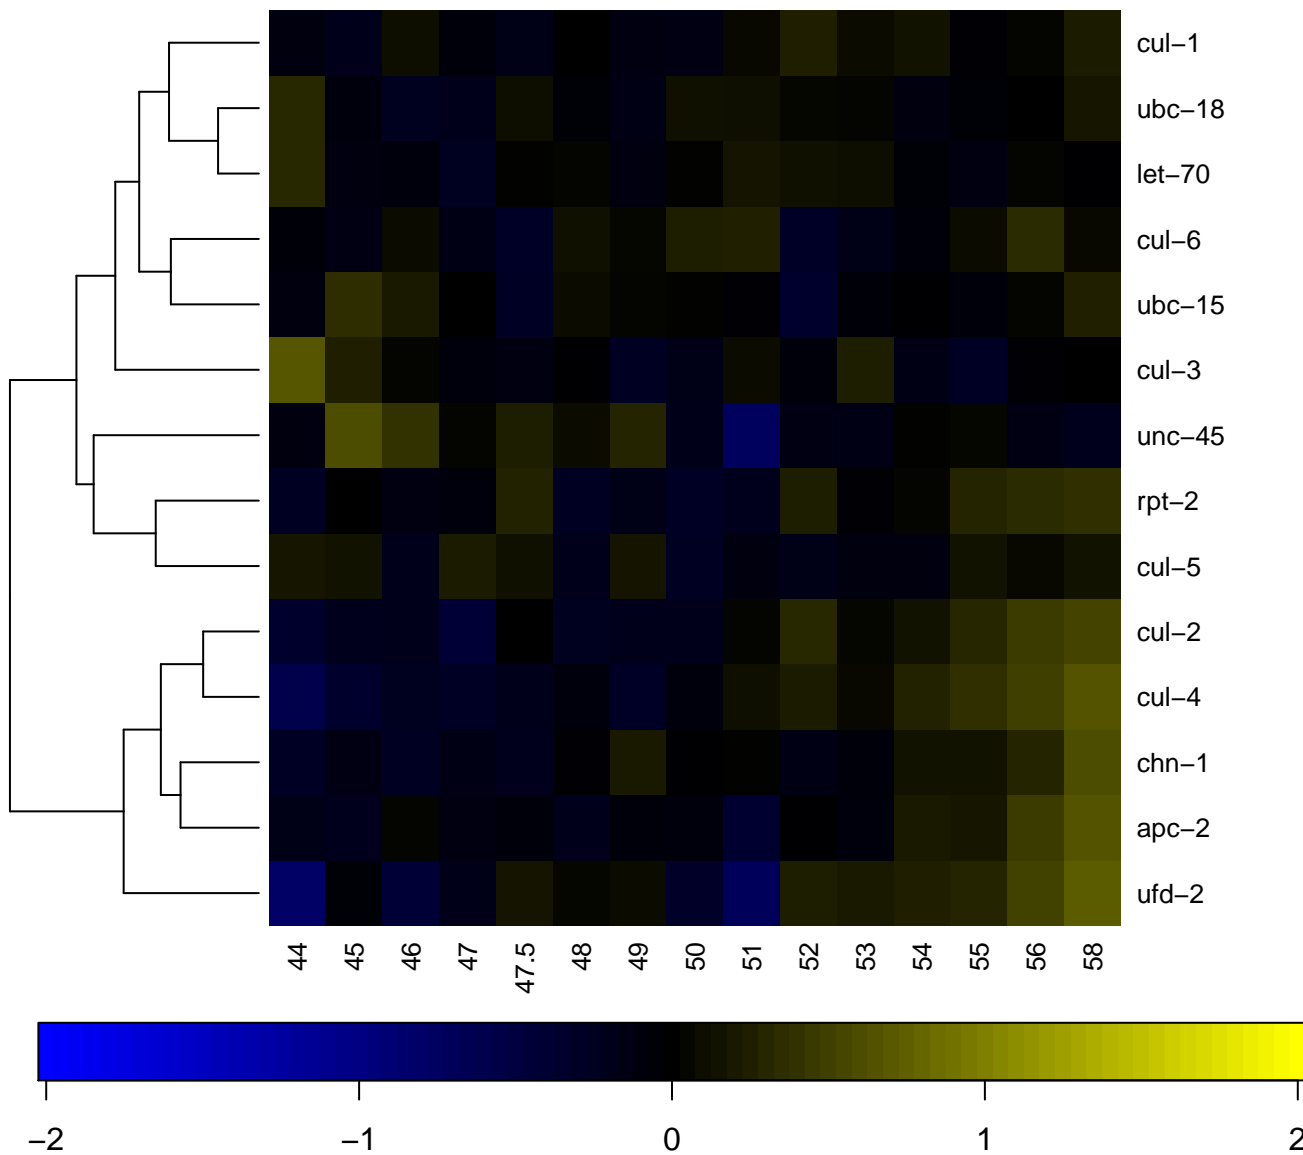



# unfolded protein binding

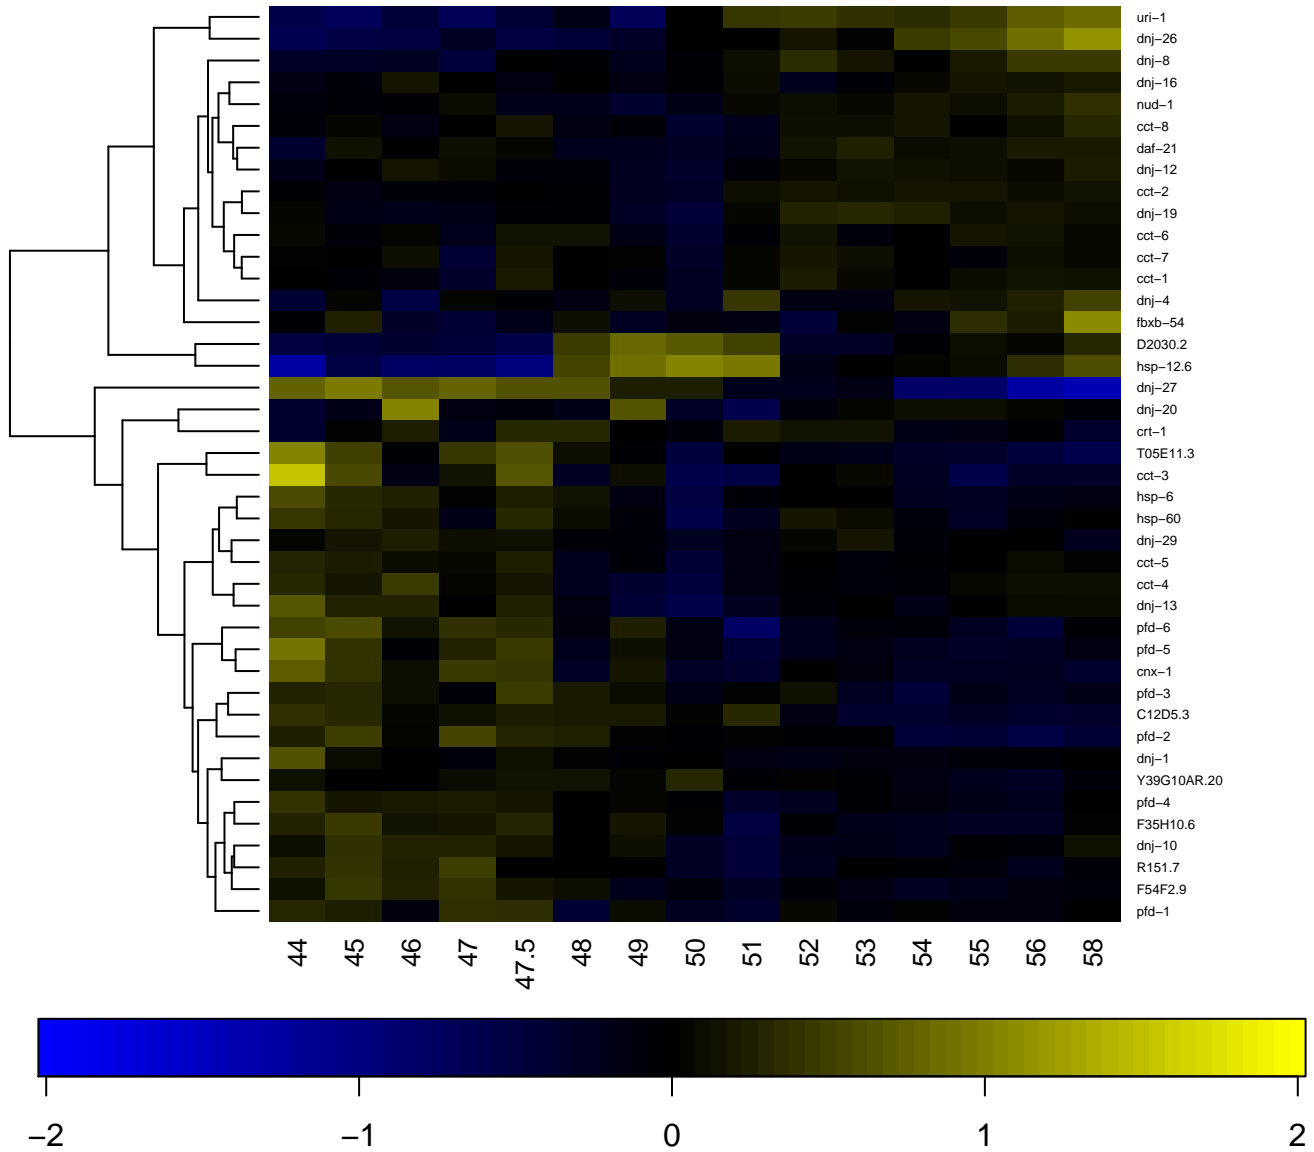



# vesicle-mediated transport

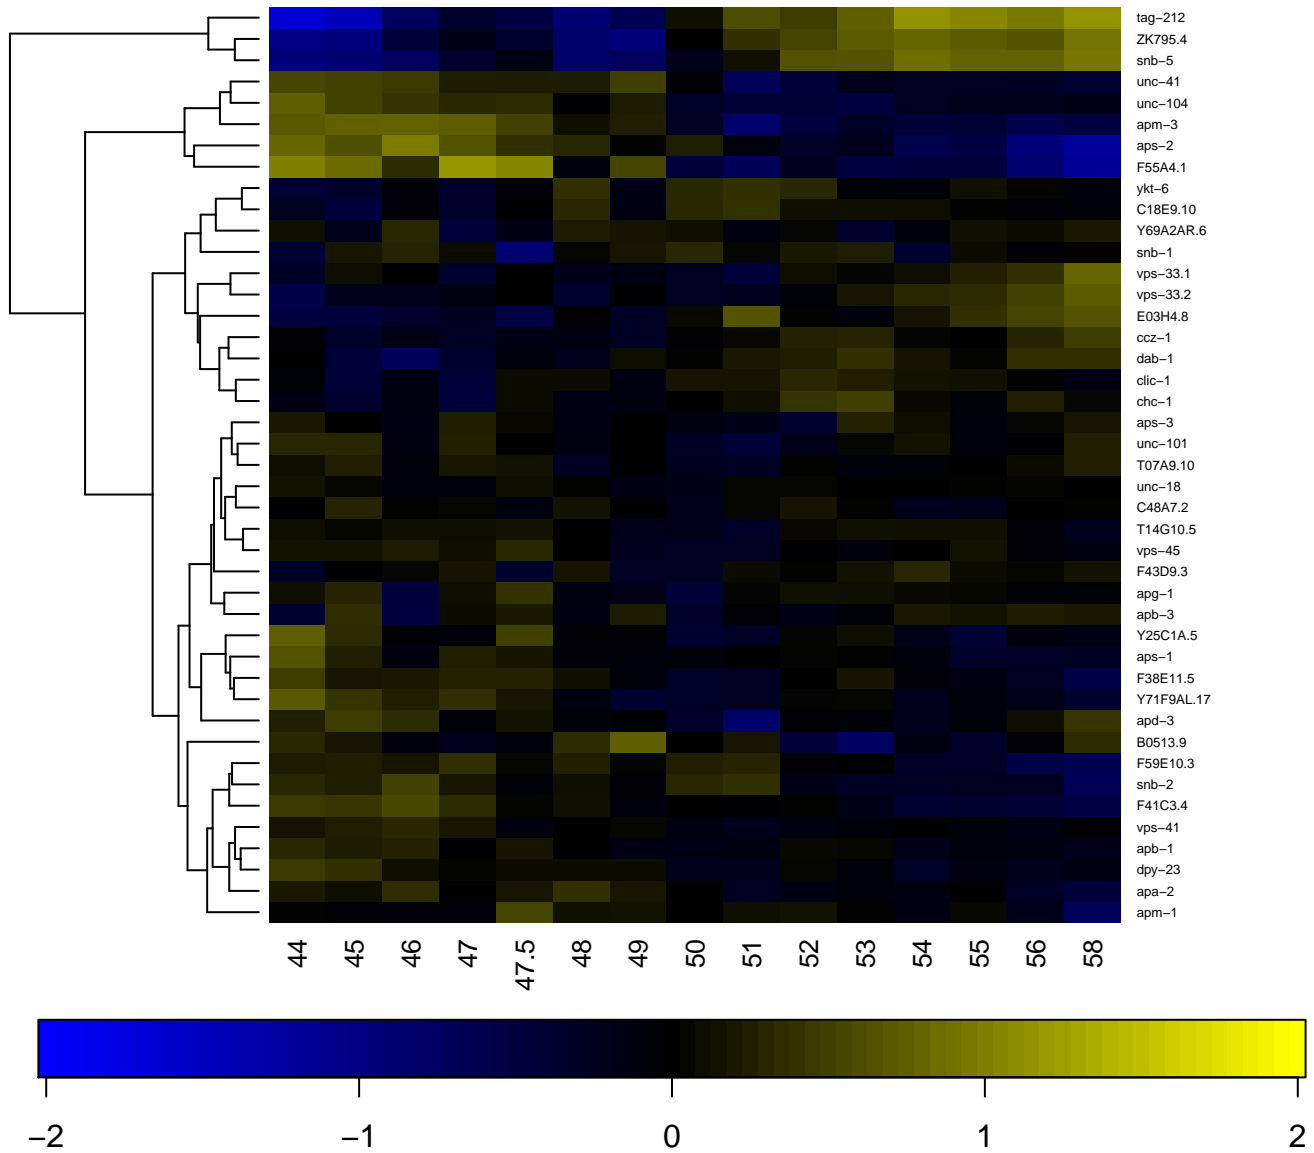

# vesicle docking during exocytosis

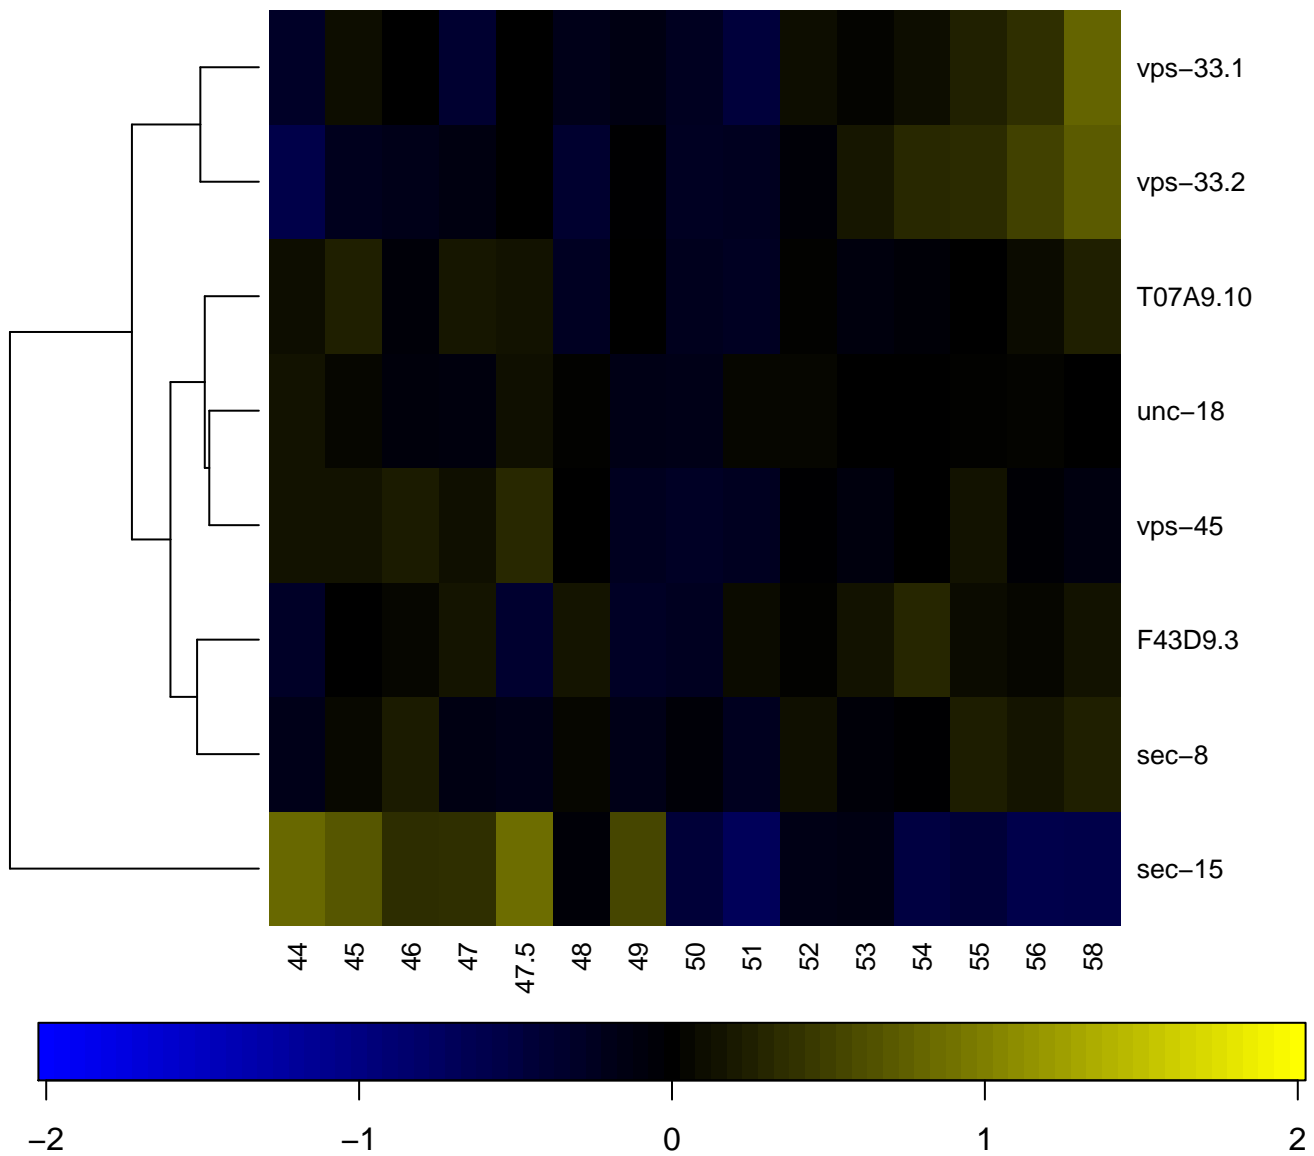

# vitelline membrane formation









# voltage-gated potassium channel activity

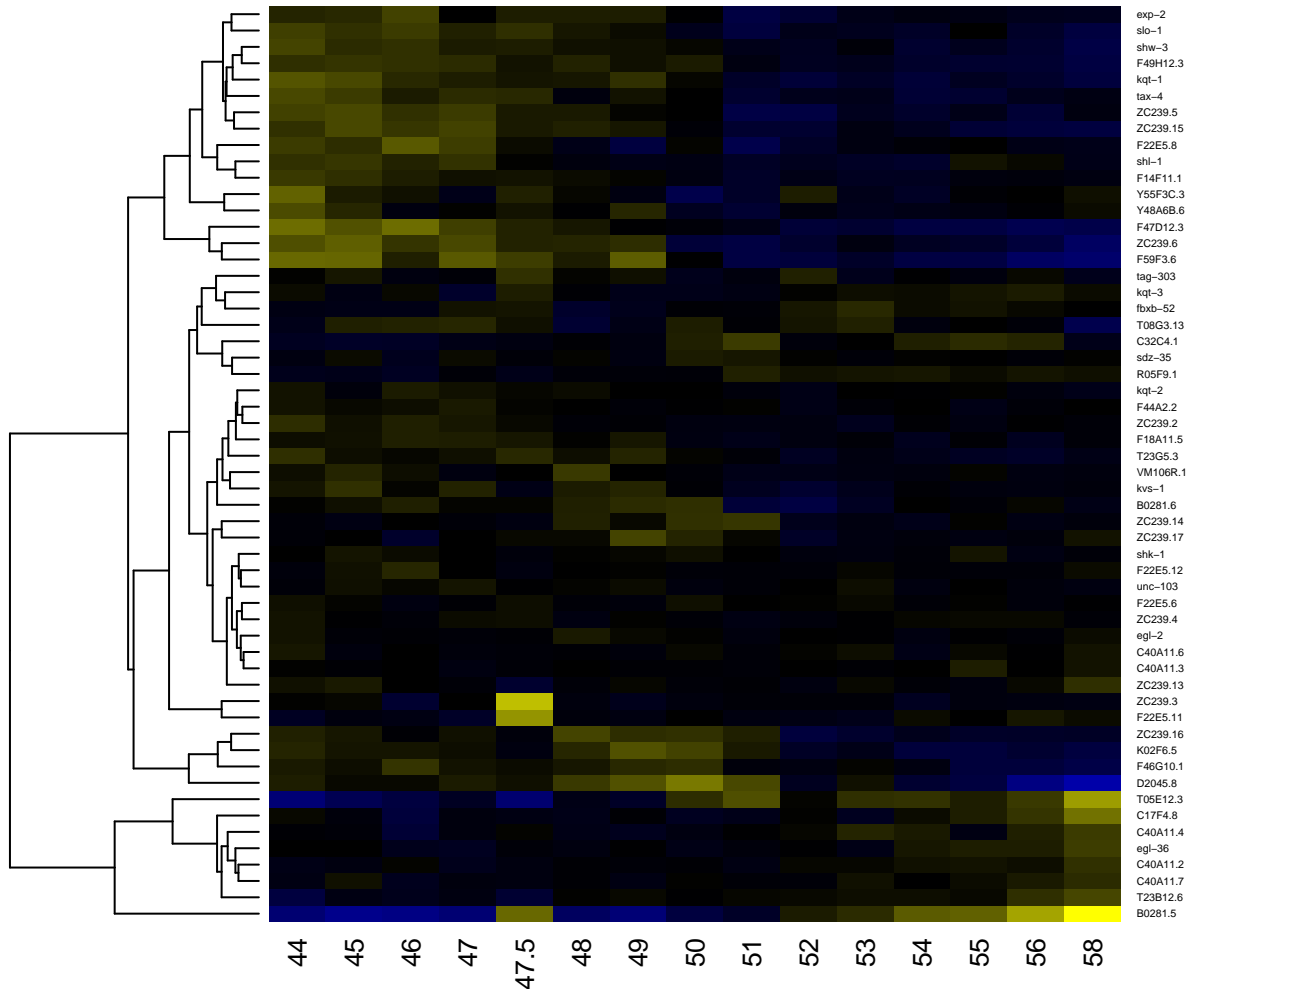

# voltage-gated potassium channel complex

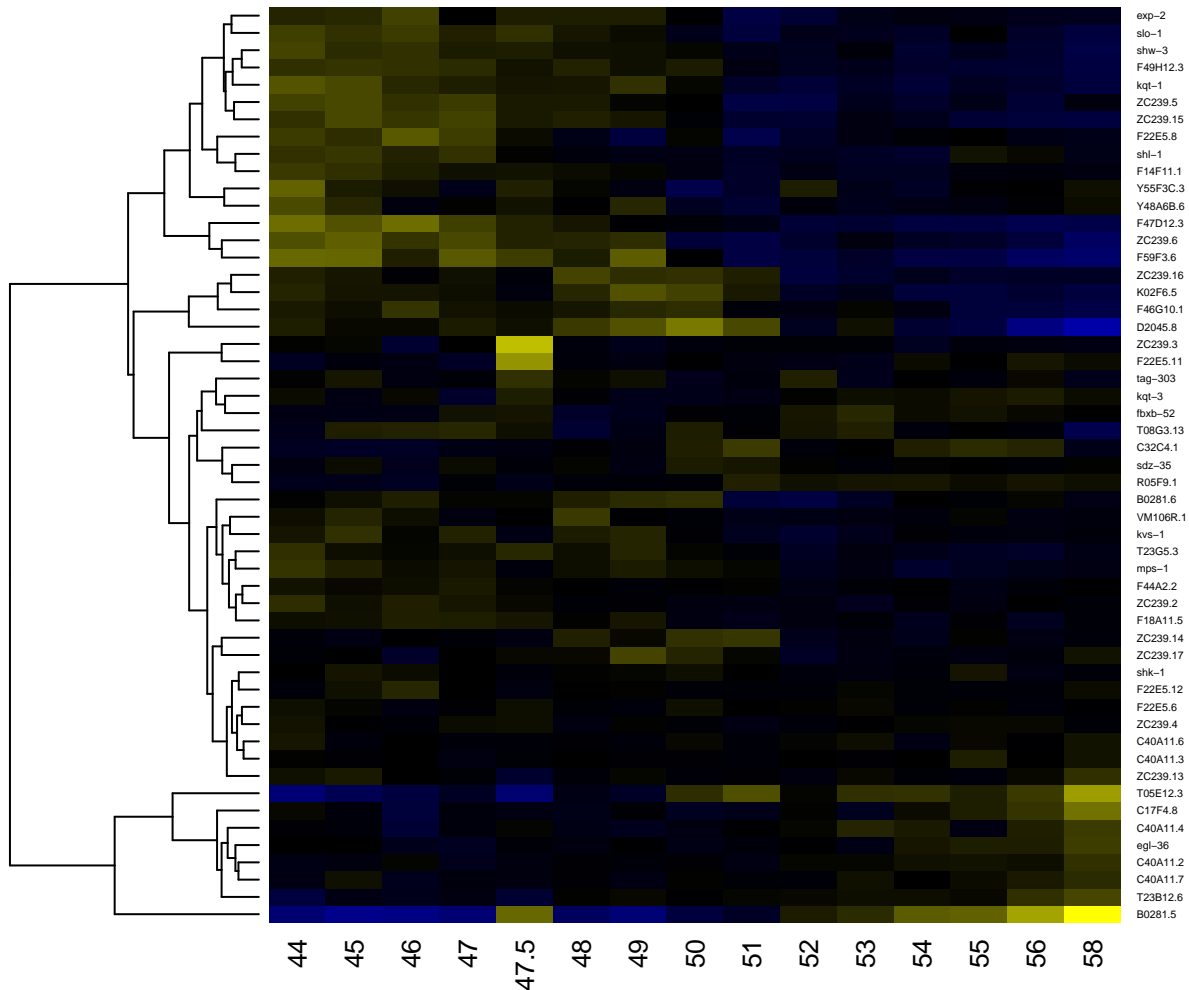









# water transport

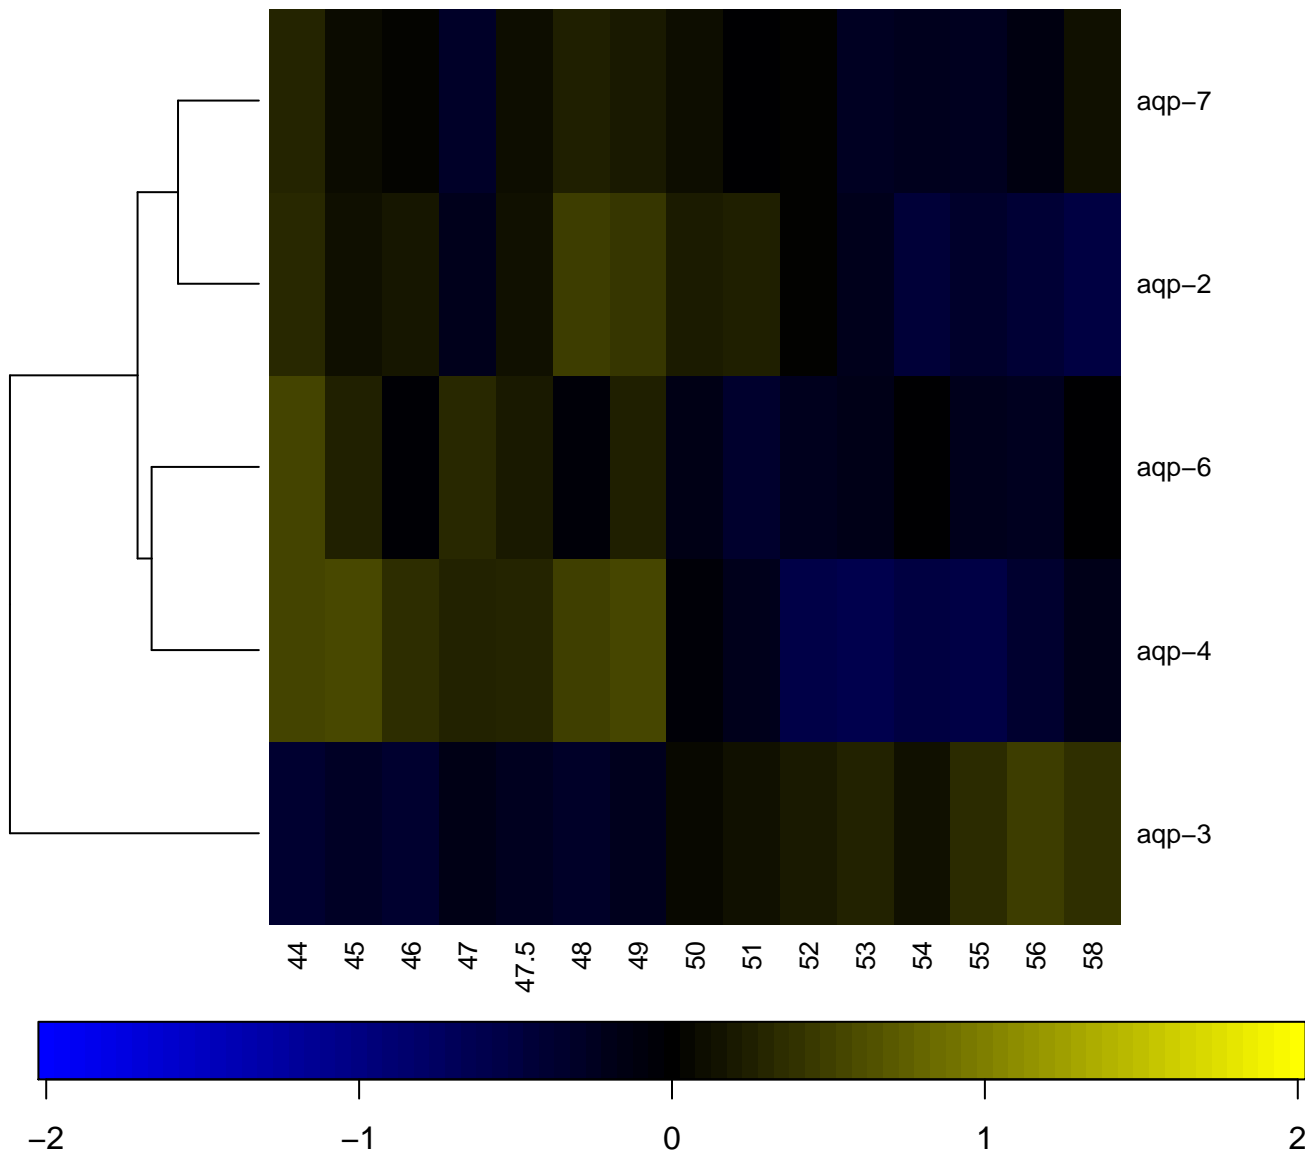







# X chromosome

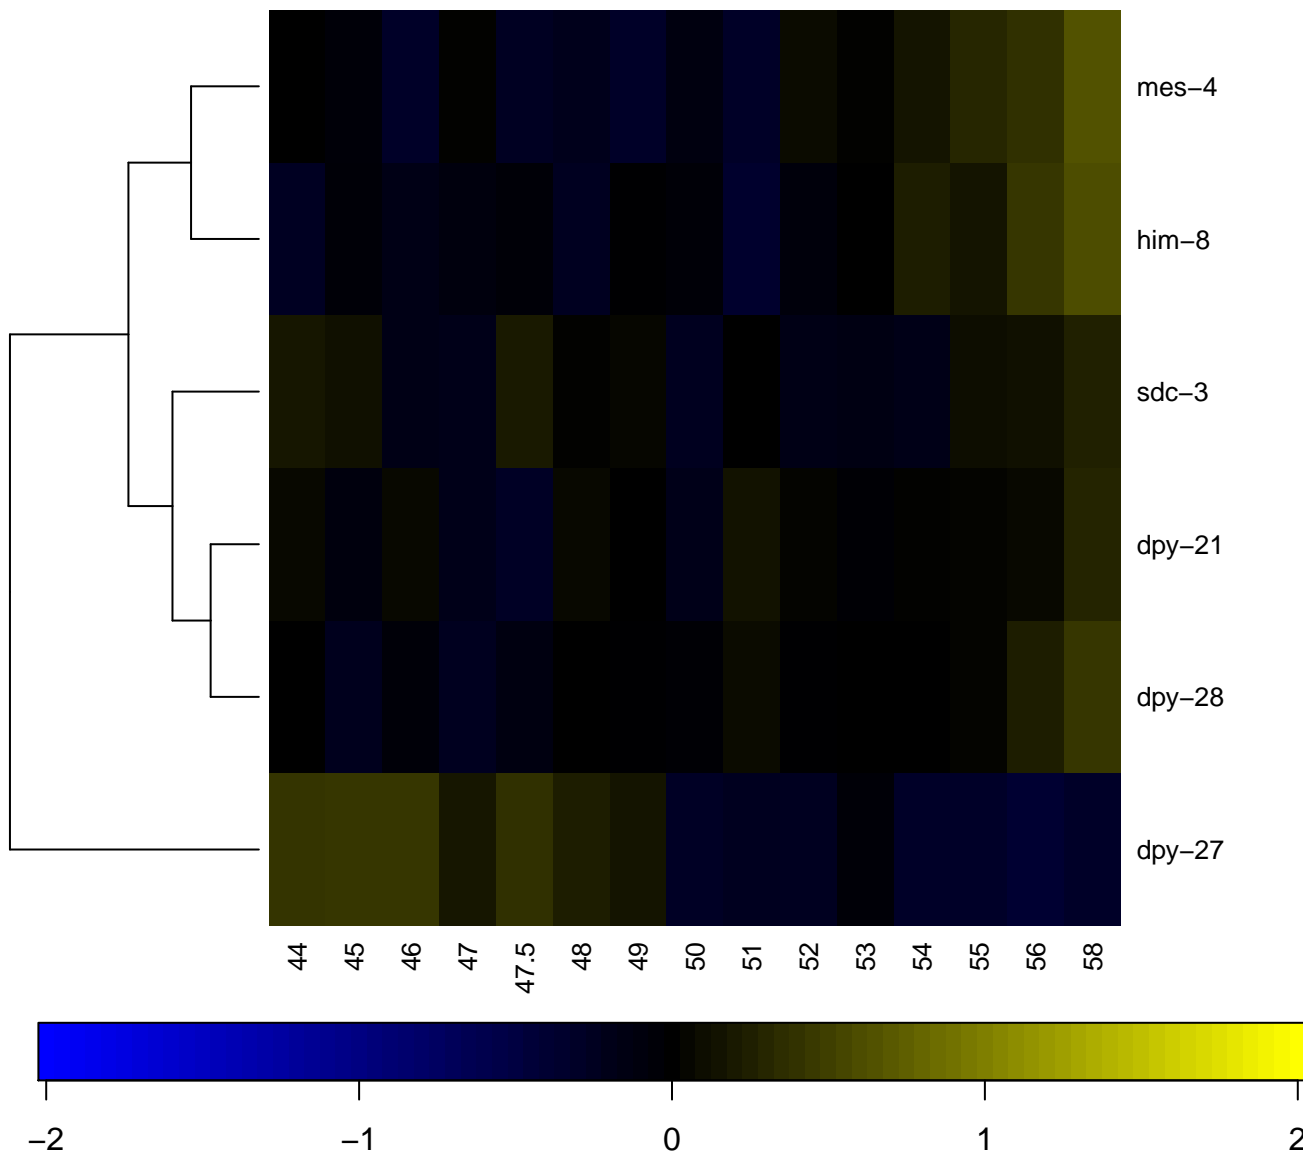

# zinc ion binding

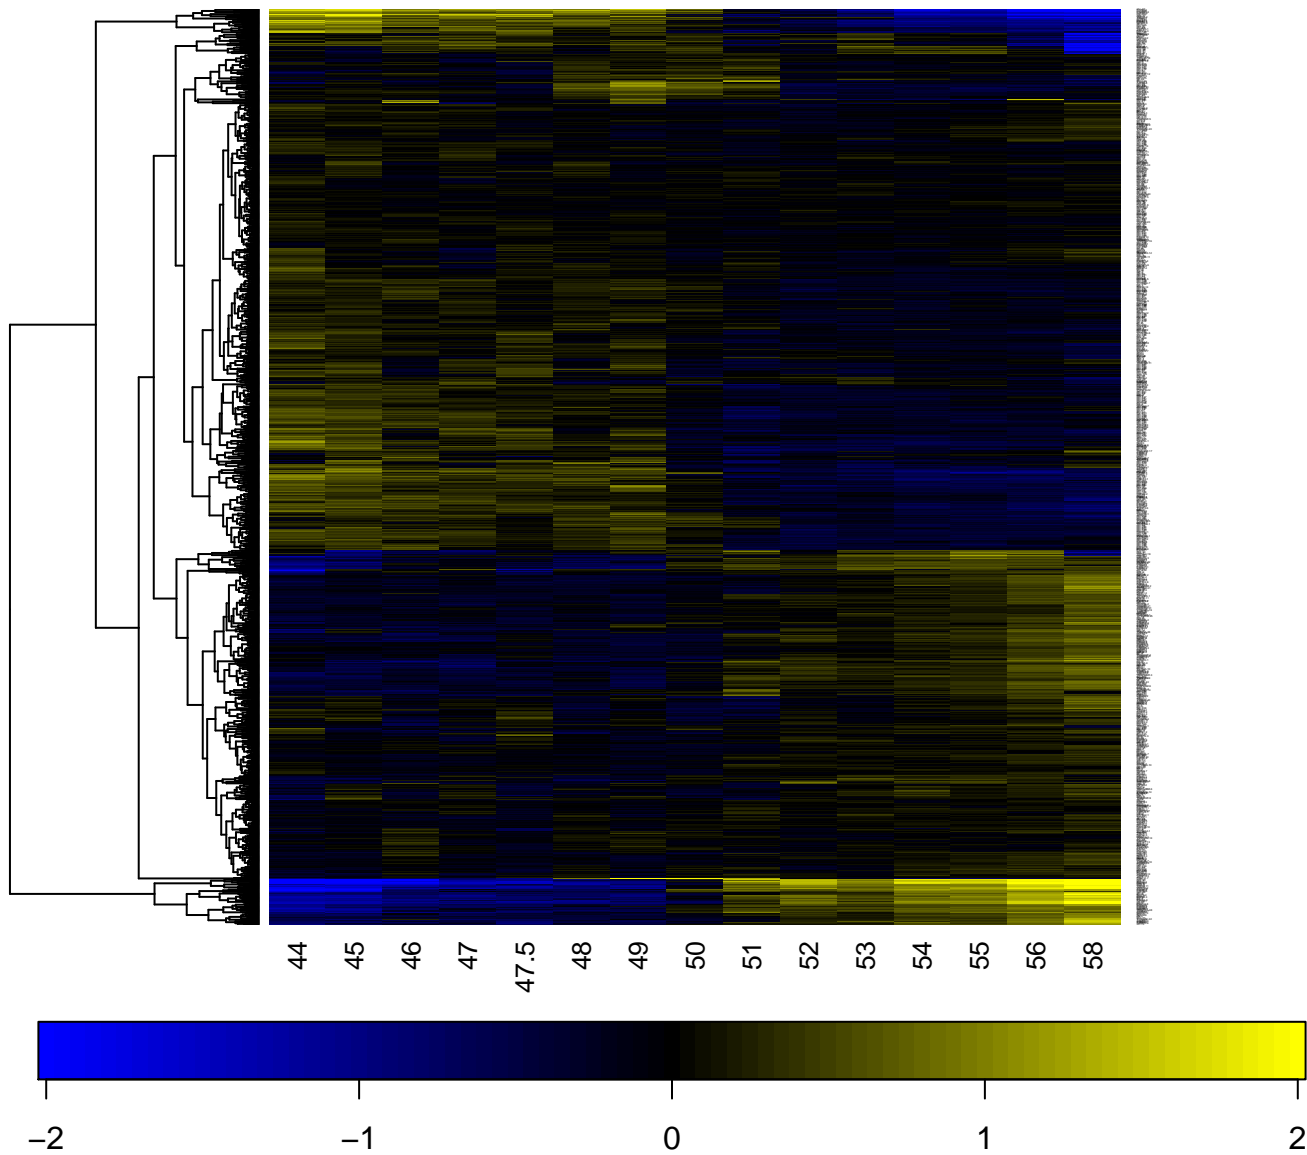

**Supplementary file E | Dynamic gene expression patterns of all Gene Classes.**

The “heatmap” function of “R” was used to cluster genes of each individual Gene Classes according to their expression pattern. Gene Class name is shown per page as figure title. The time in hours is shown on the x-axis. Gene names are shown on the y-axis. The scale bar shows the log<sub>2</sub> ratio with the mean for each time-point. Blue is lower than the mean and yellow is higher than the mean.

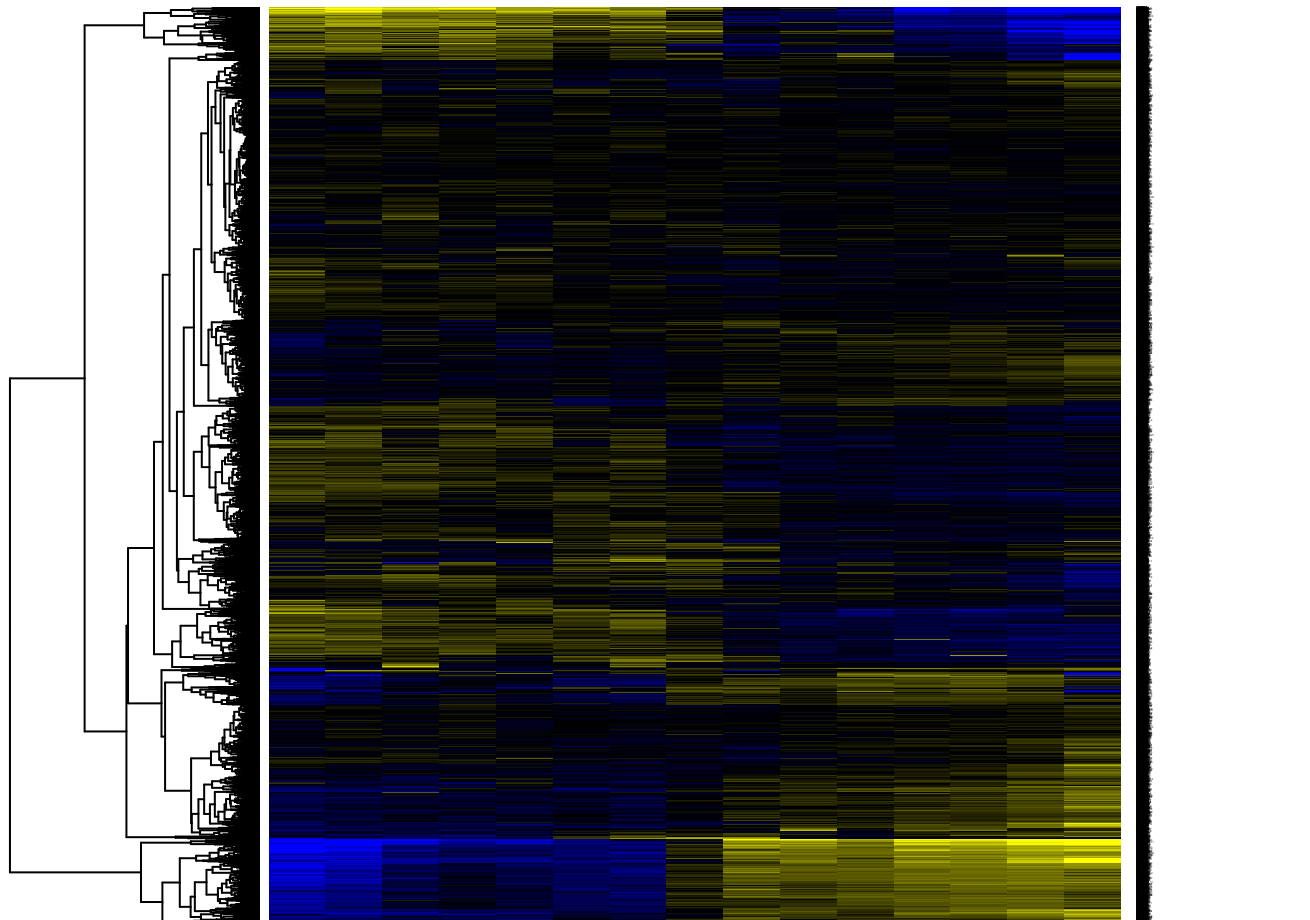

44 45 46 47 47.5 48 49 50 51 52 53 54 55 56 58

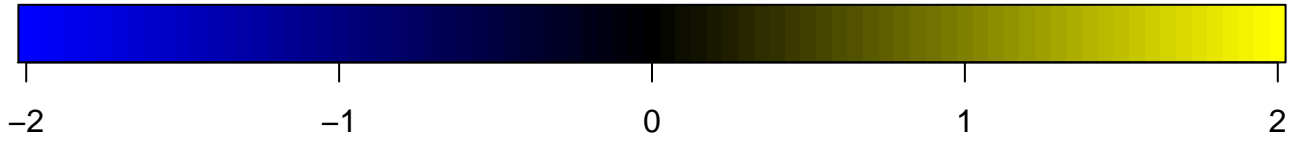



# aat

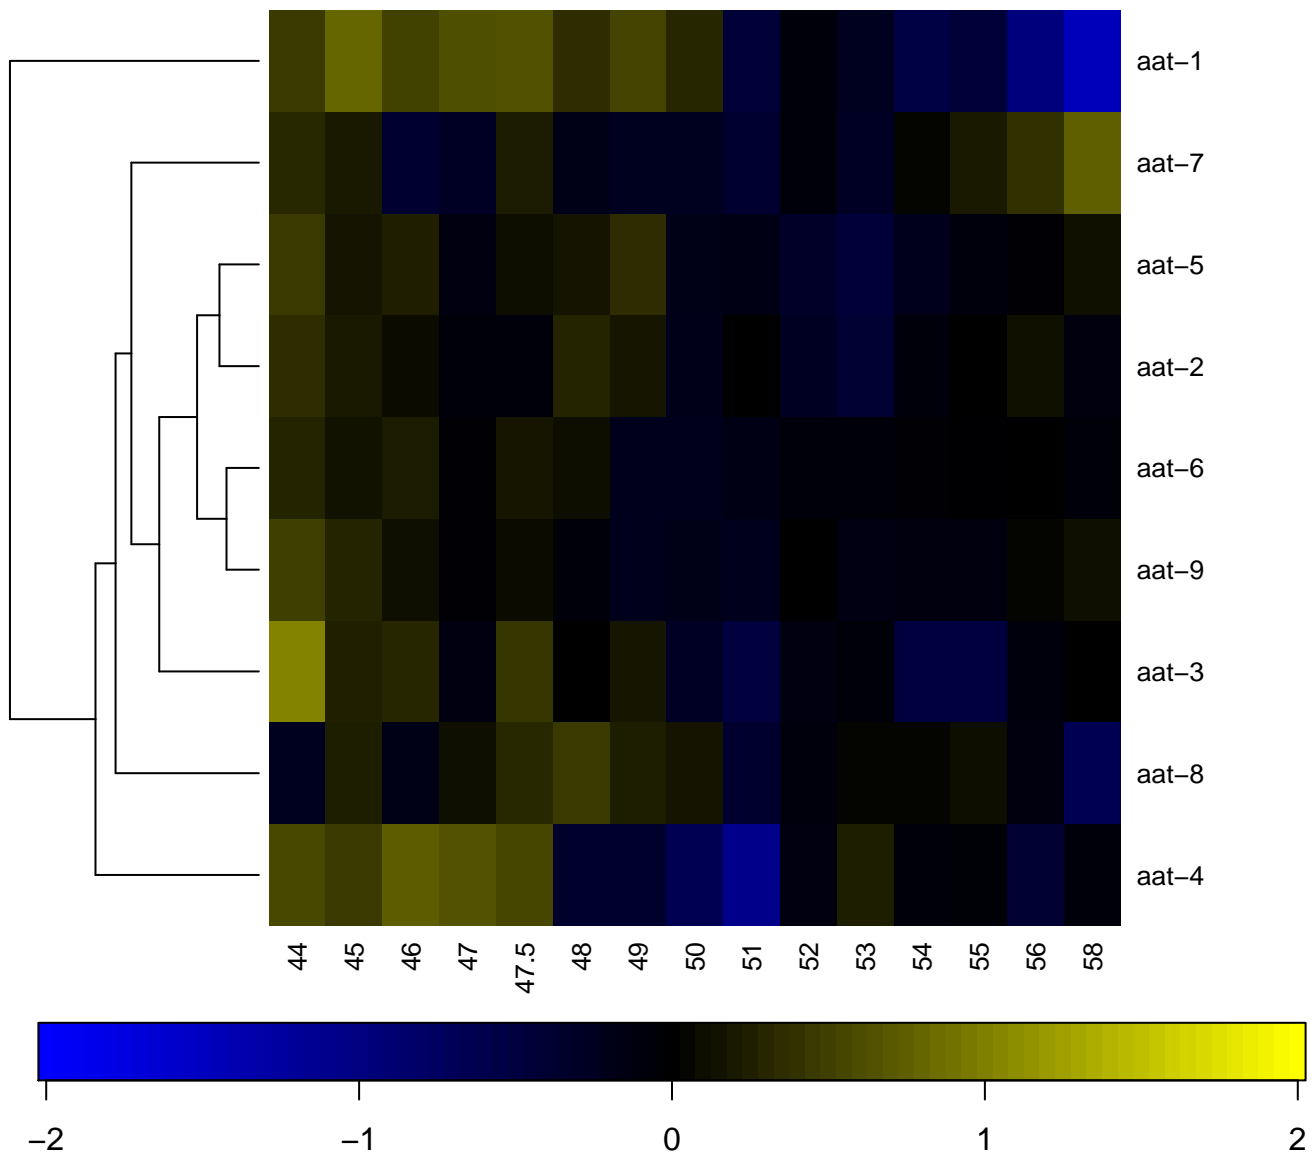



# abf

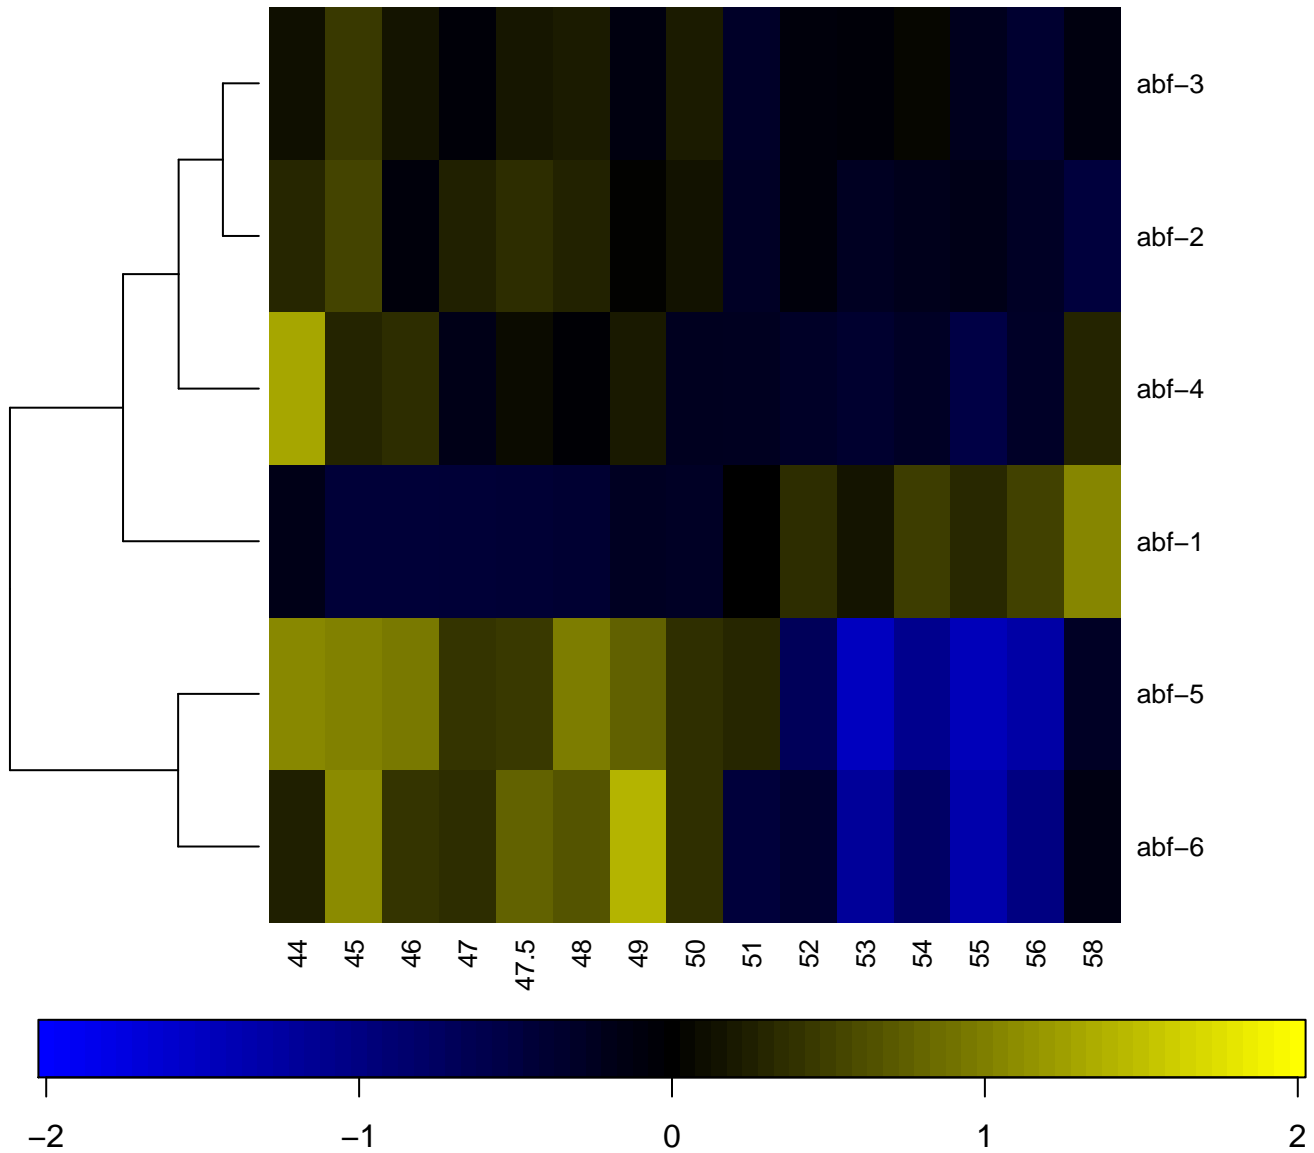



# abu

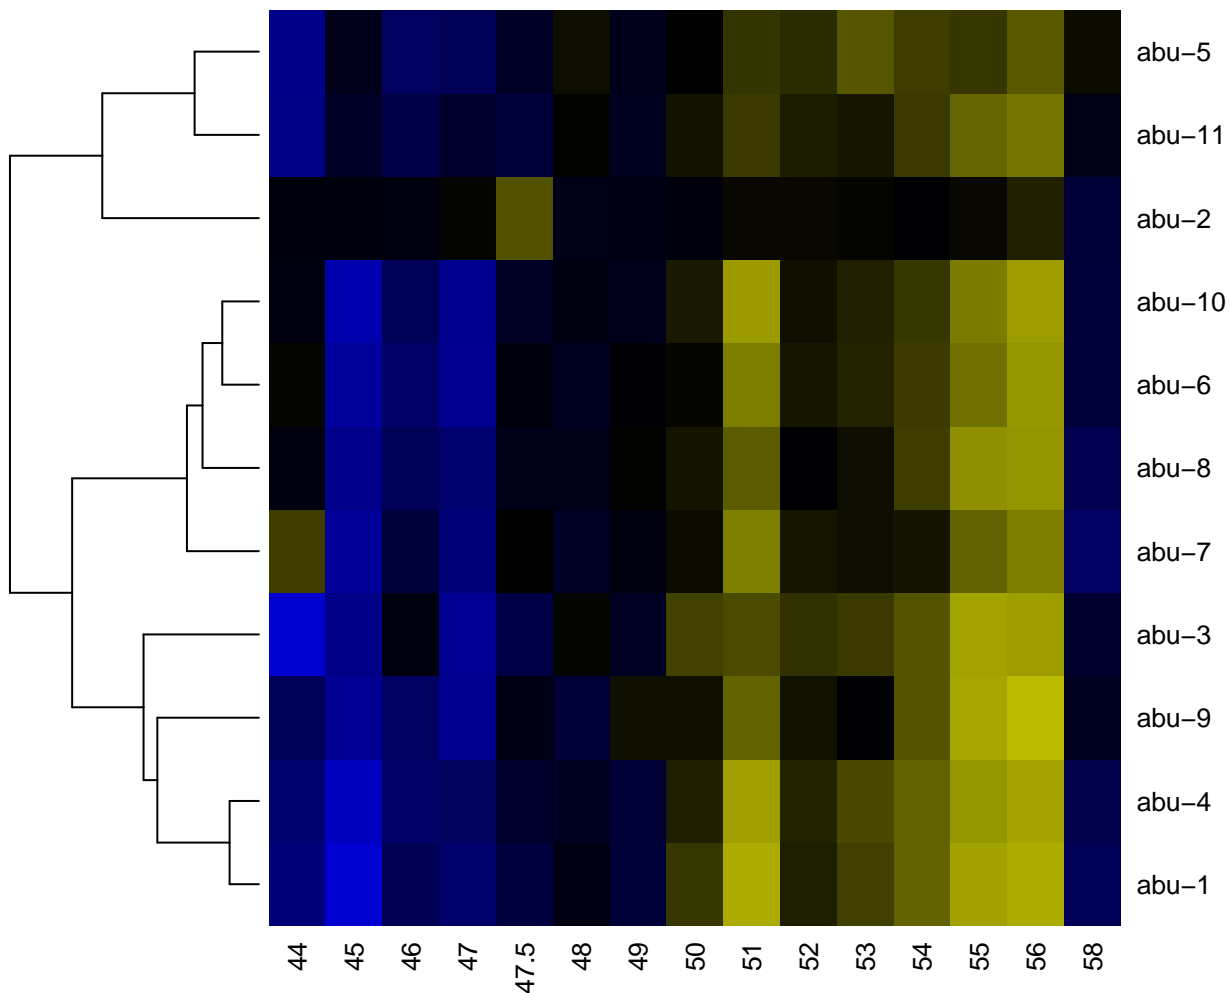

-2

-1

0

1

2

# acbp

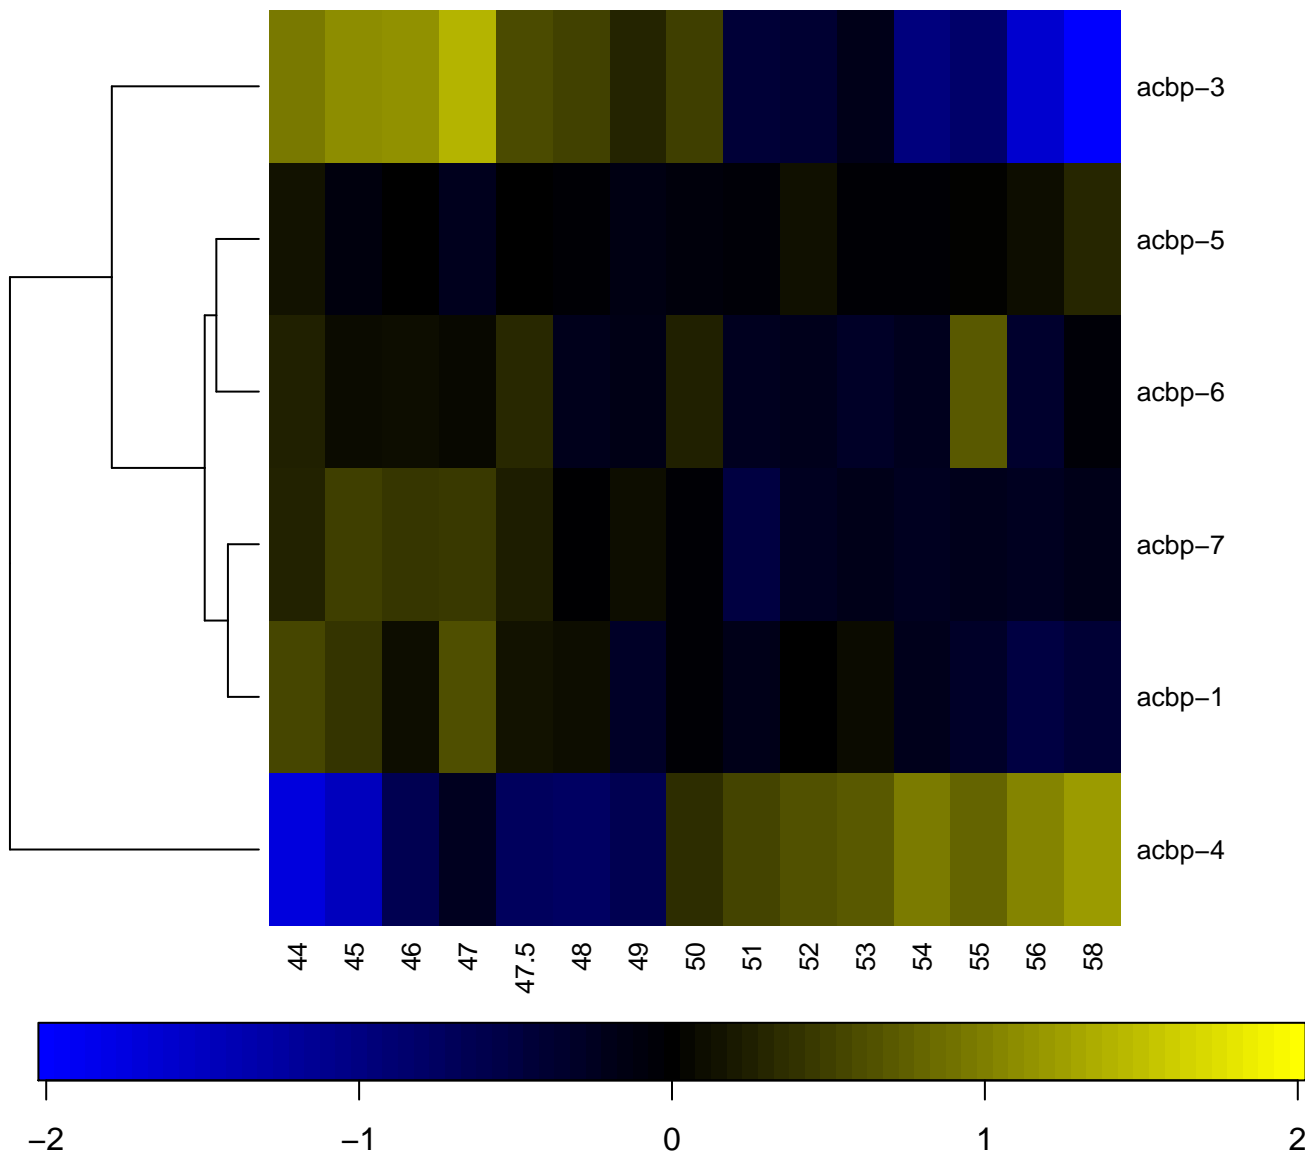

# acdH

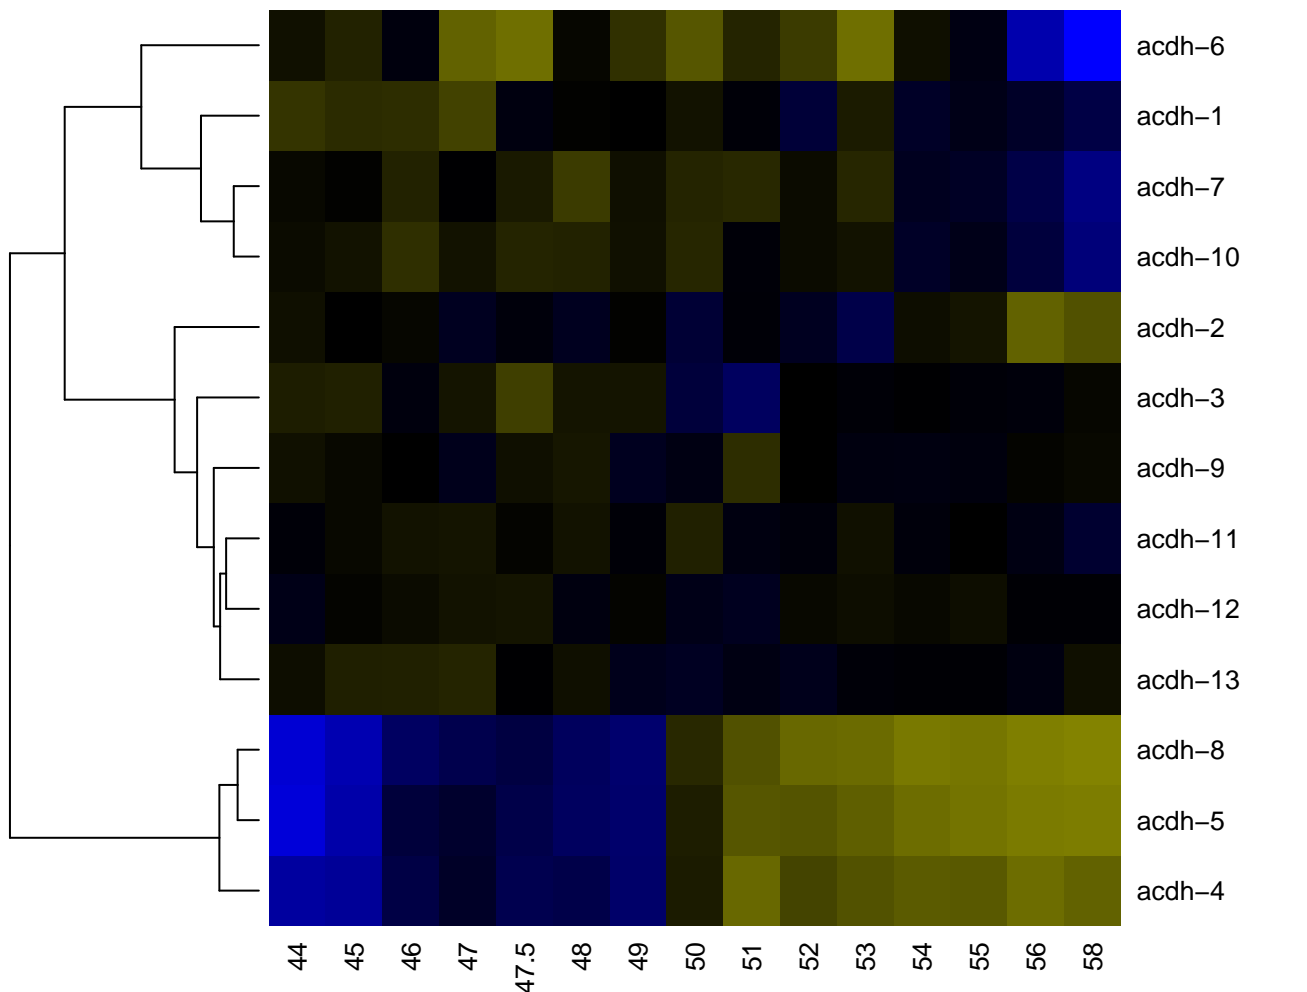

-2

-1

0

1

2

# acl

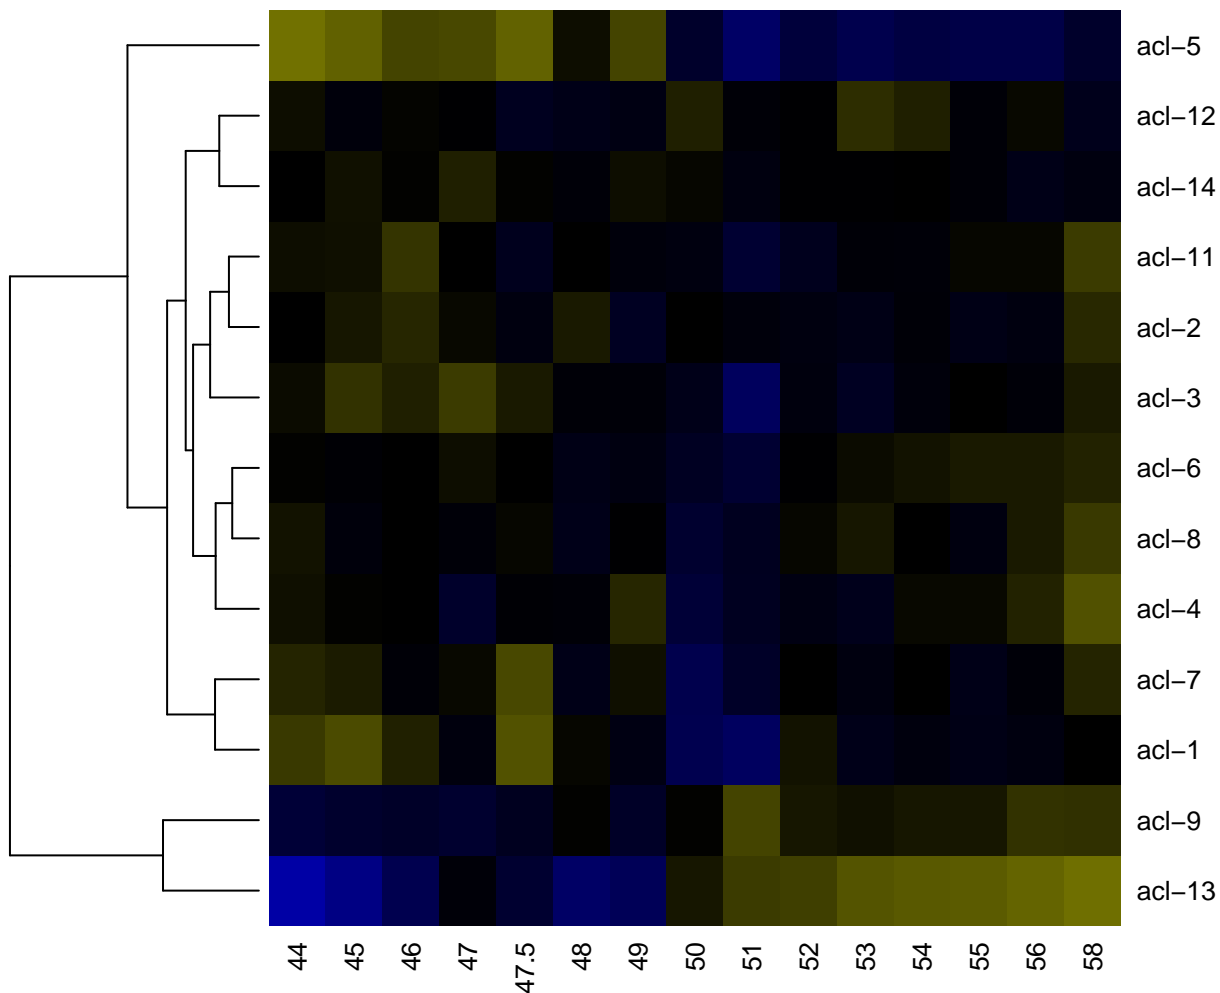

# acp

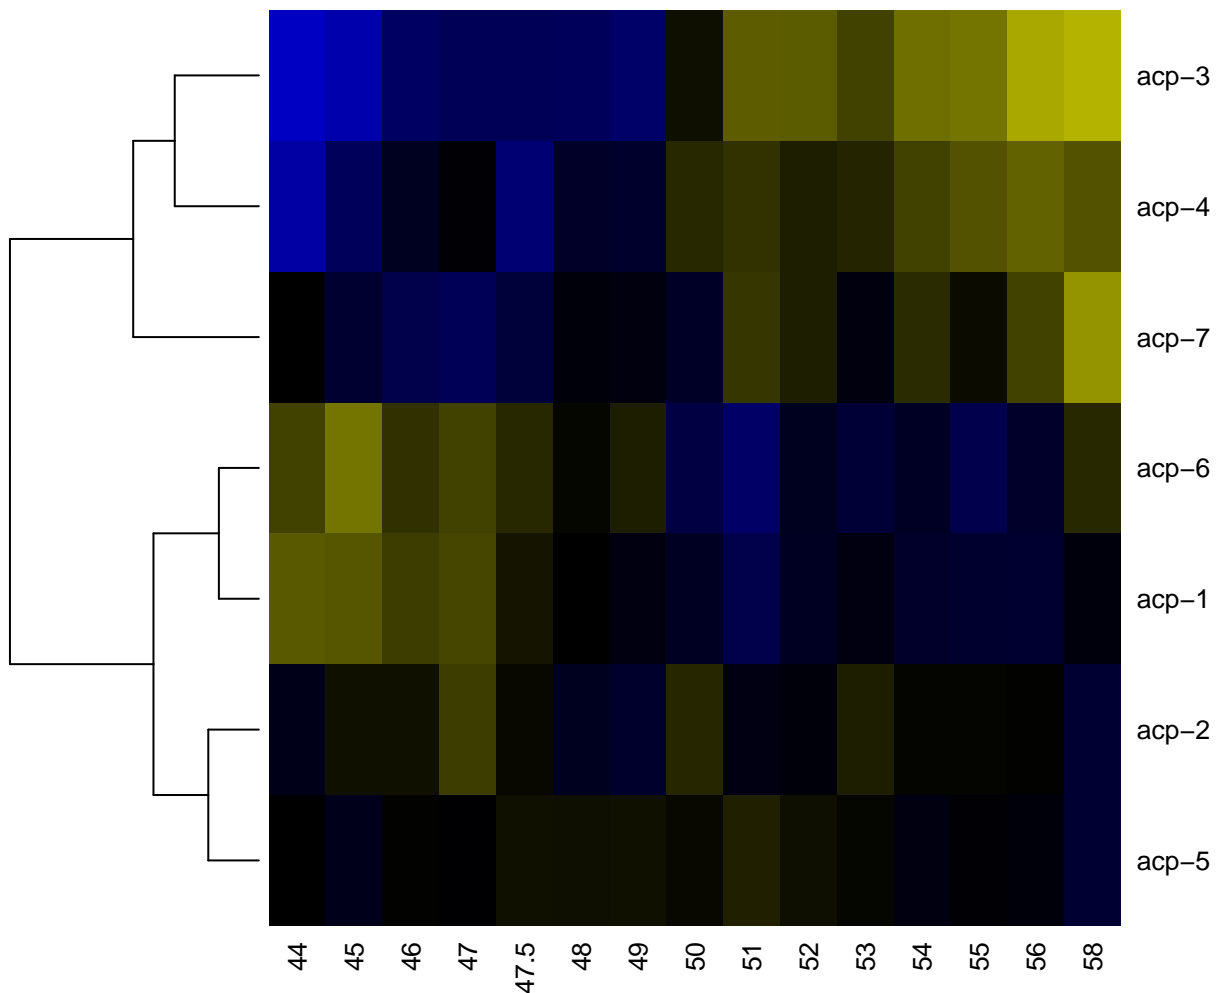

-2

-1

0

1

2

# acr

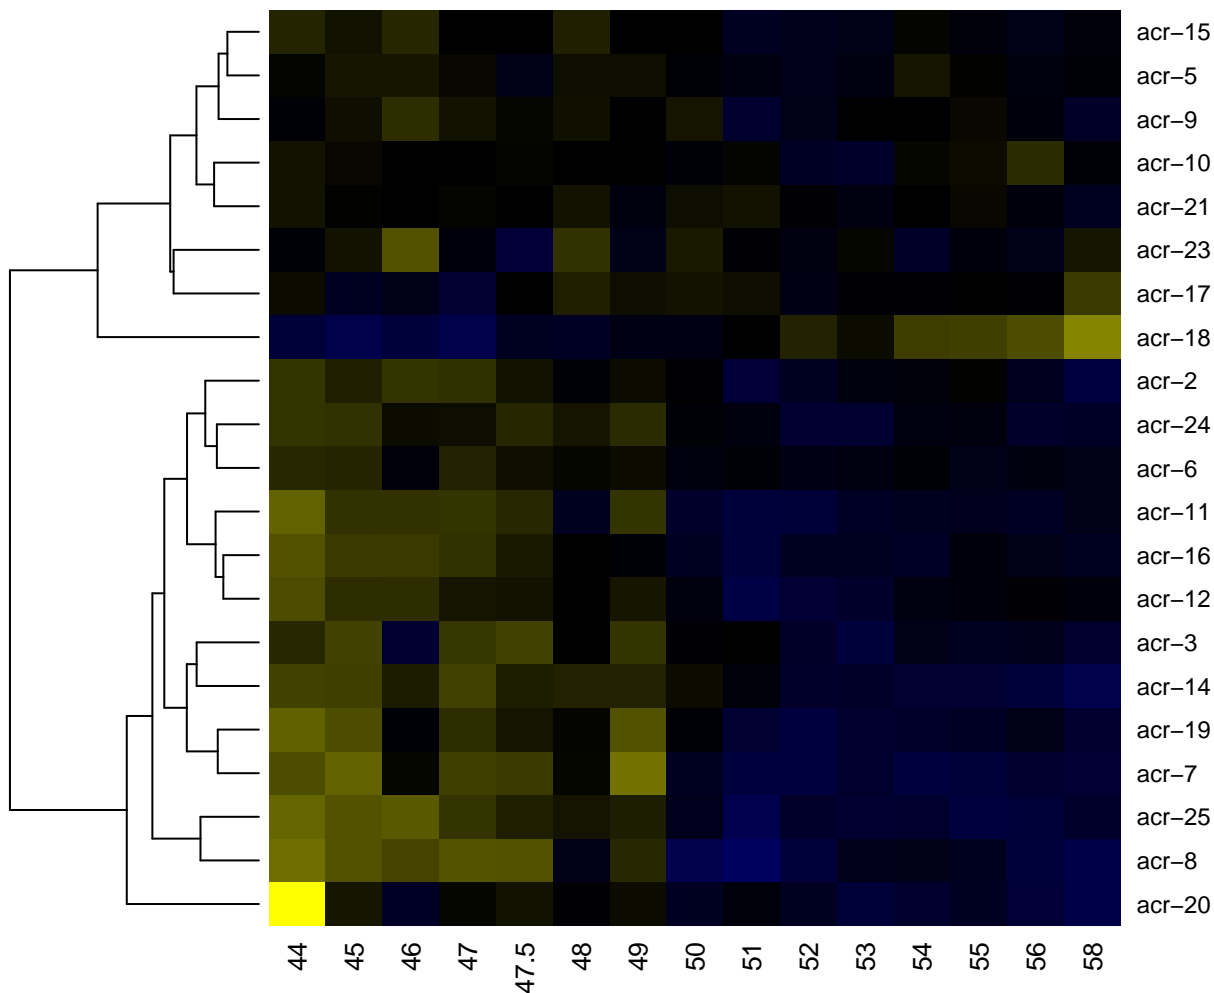



# acs

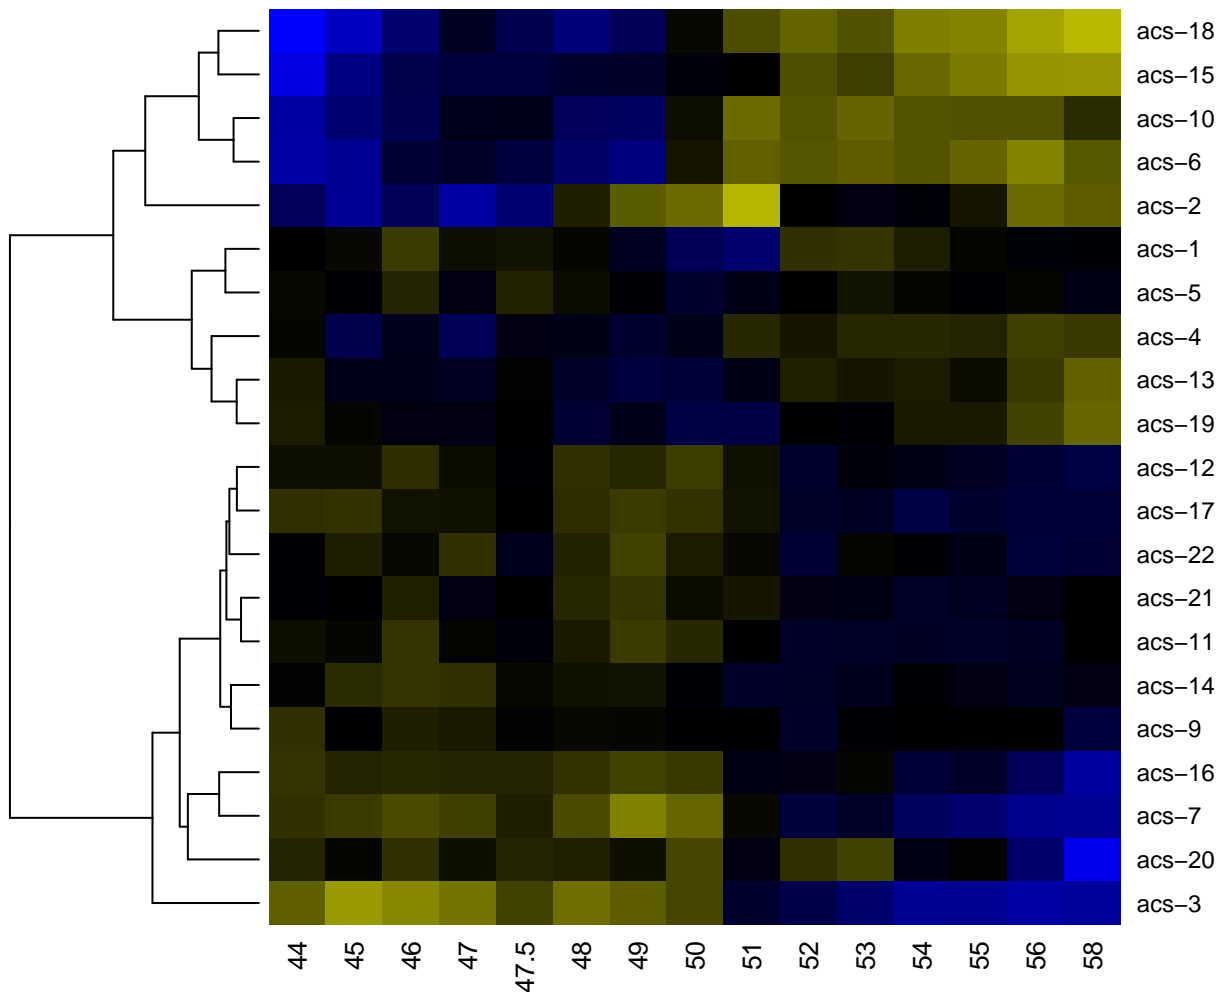

# act

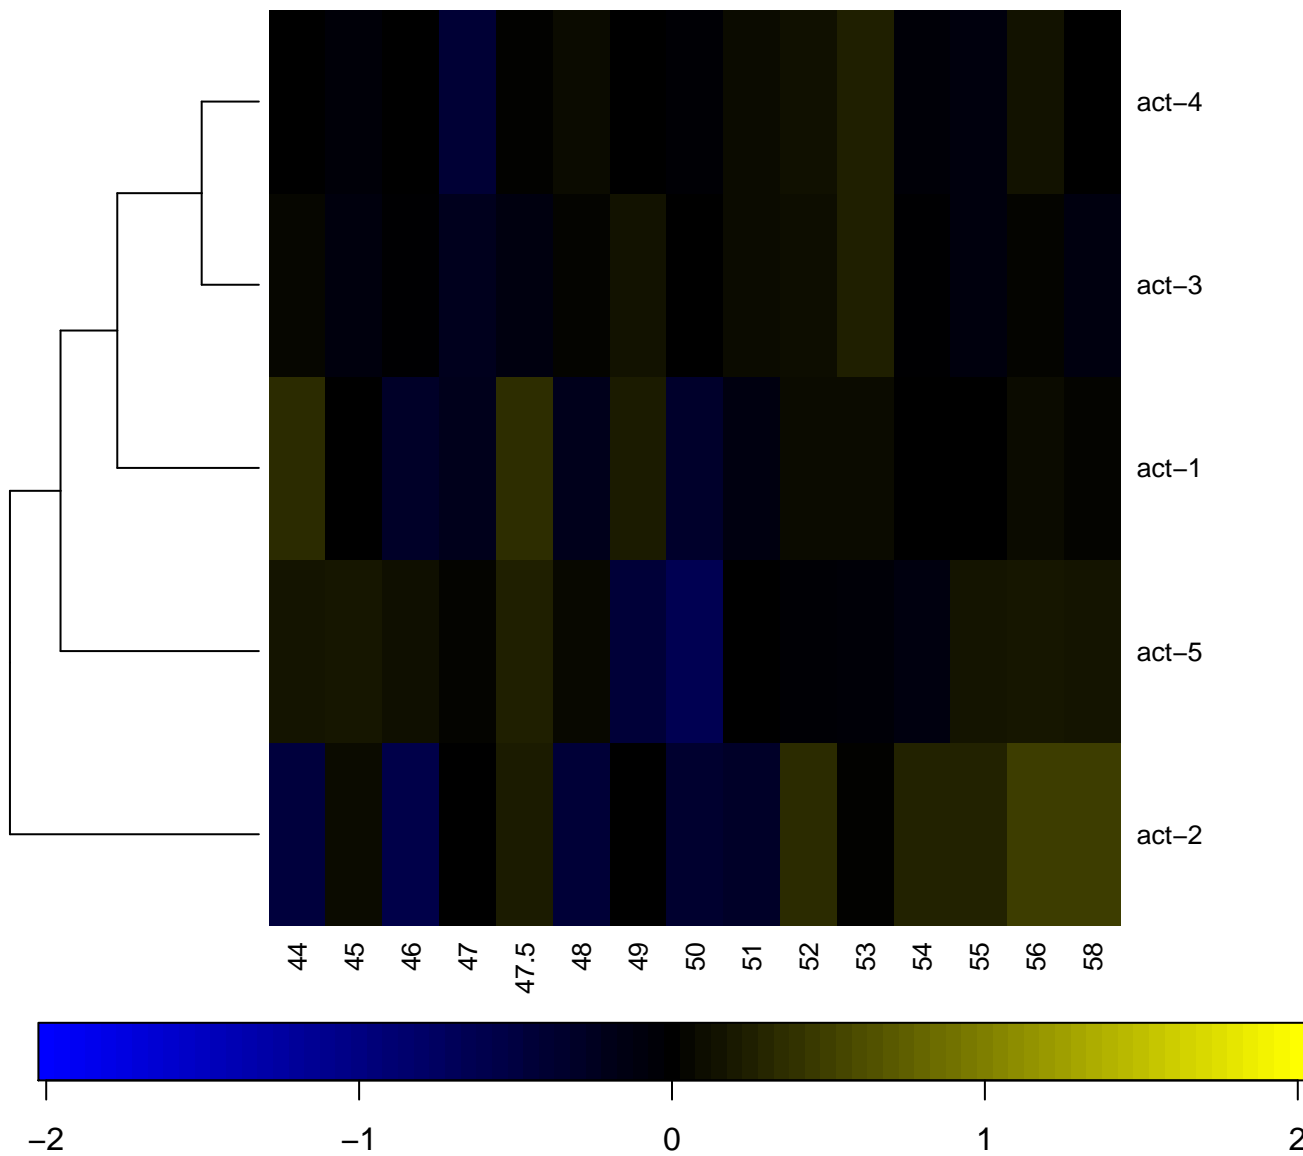





# aqp

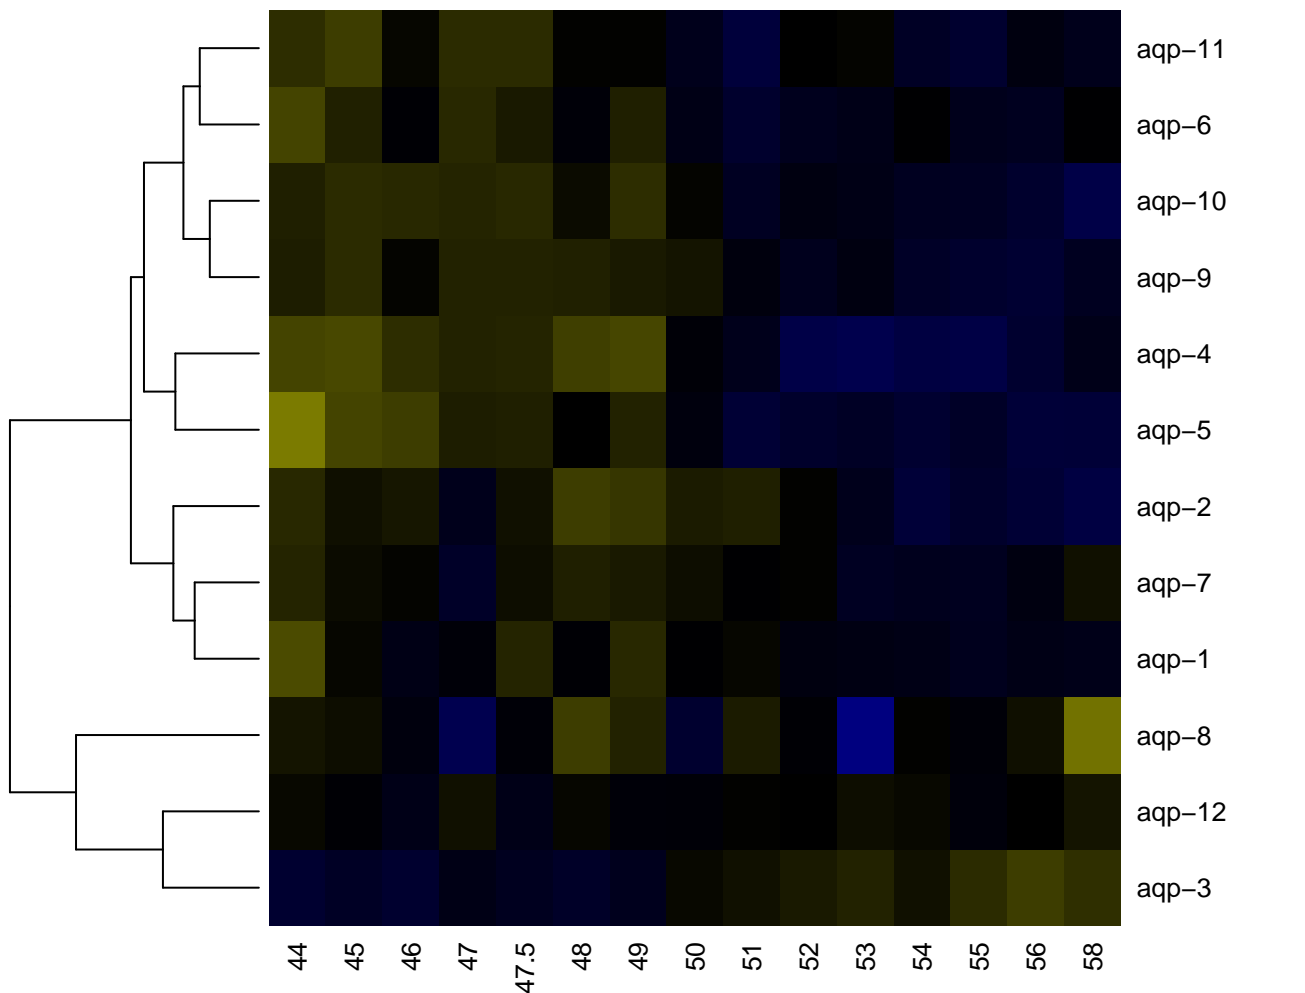

-2

-1

0

1

2

# arl

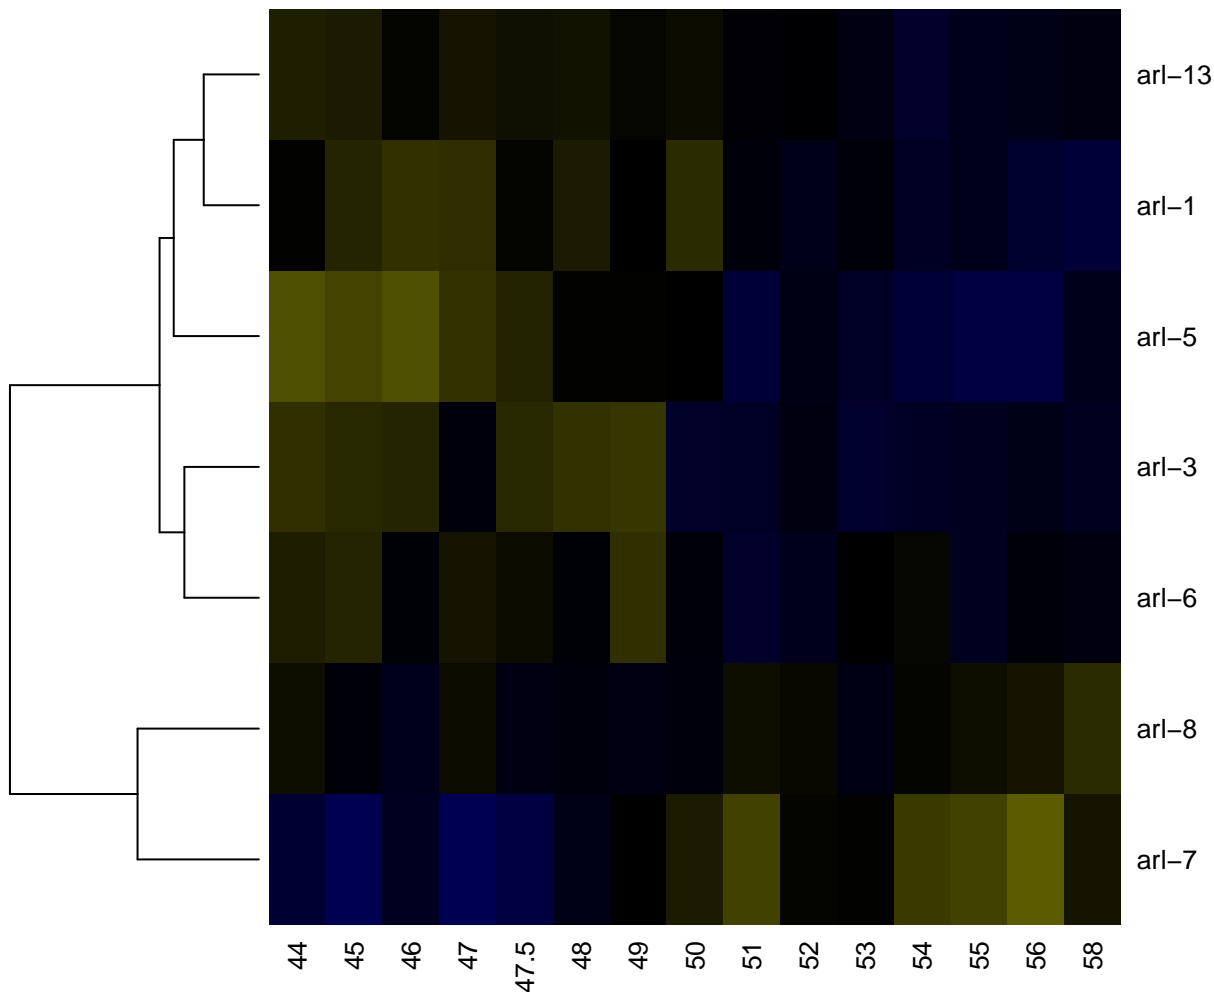

-2

-1

0

1

2

# arrd

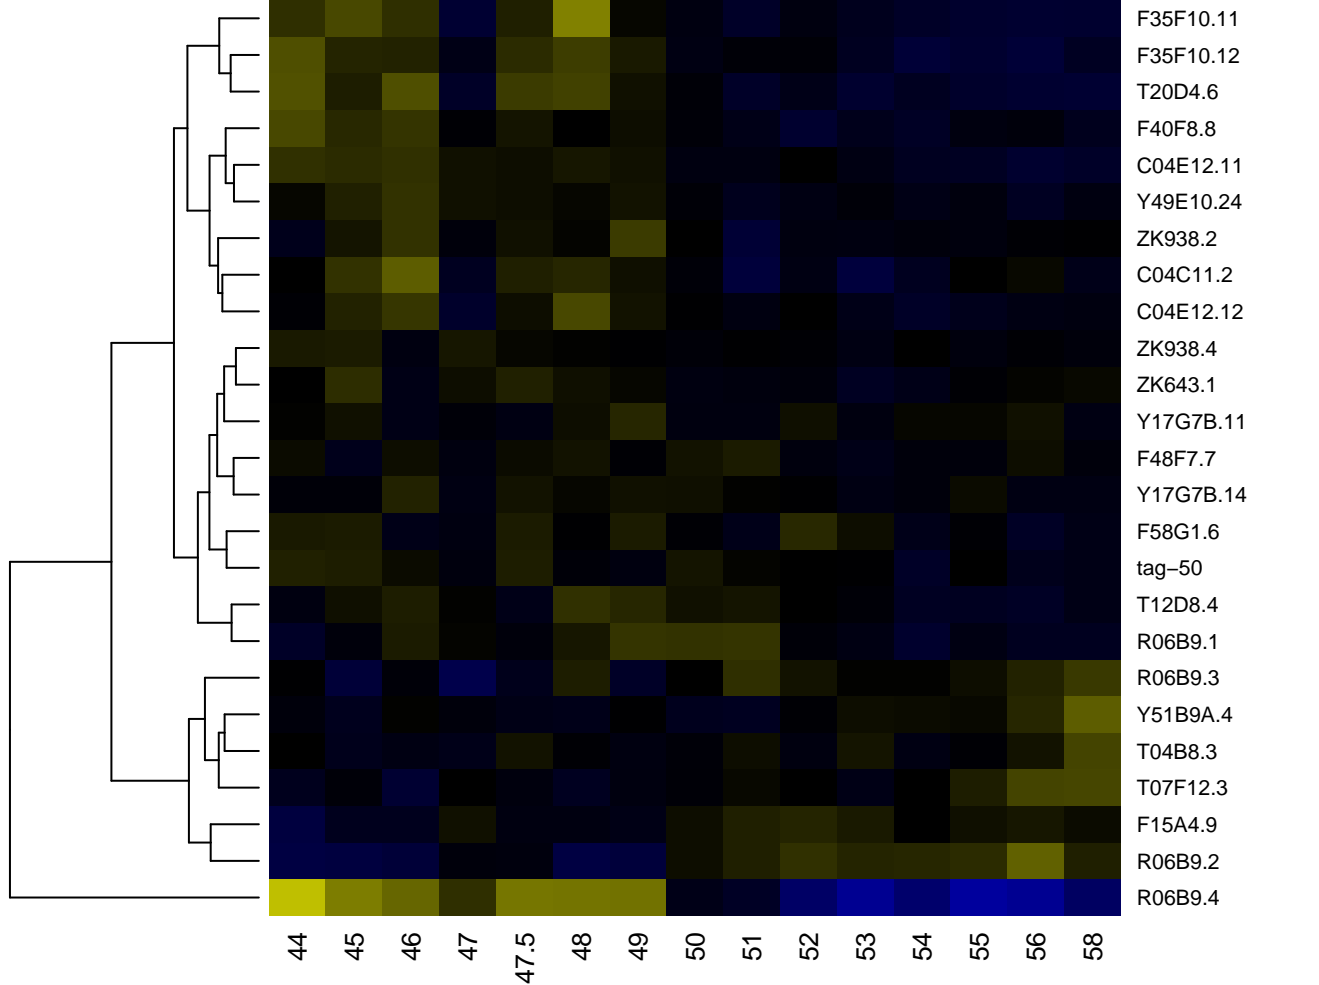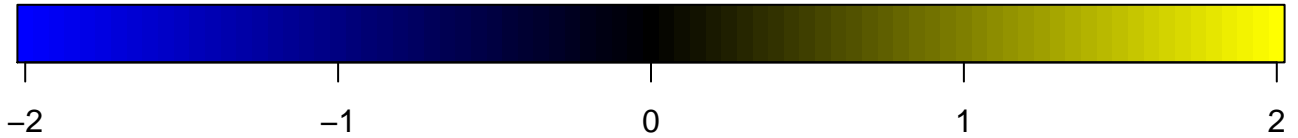







# atg

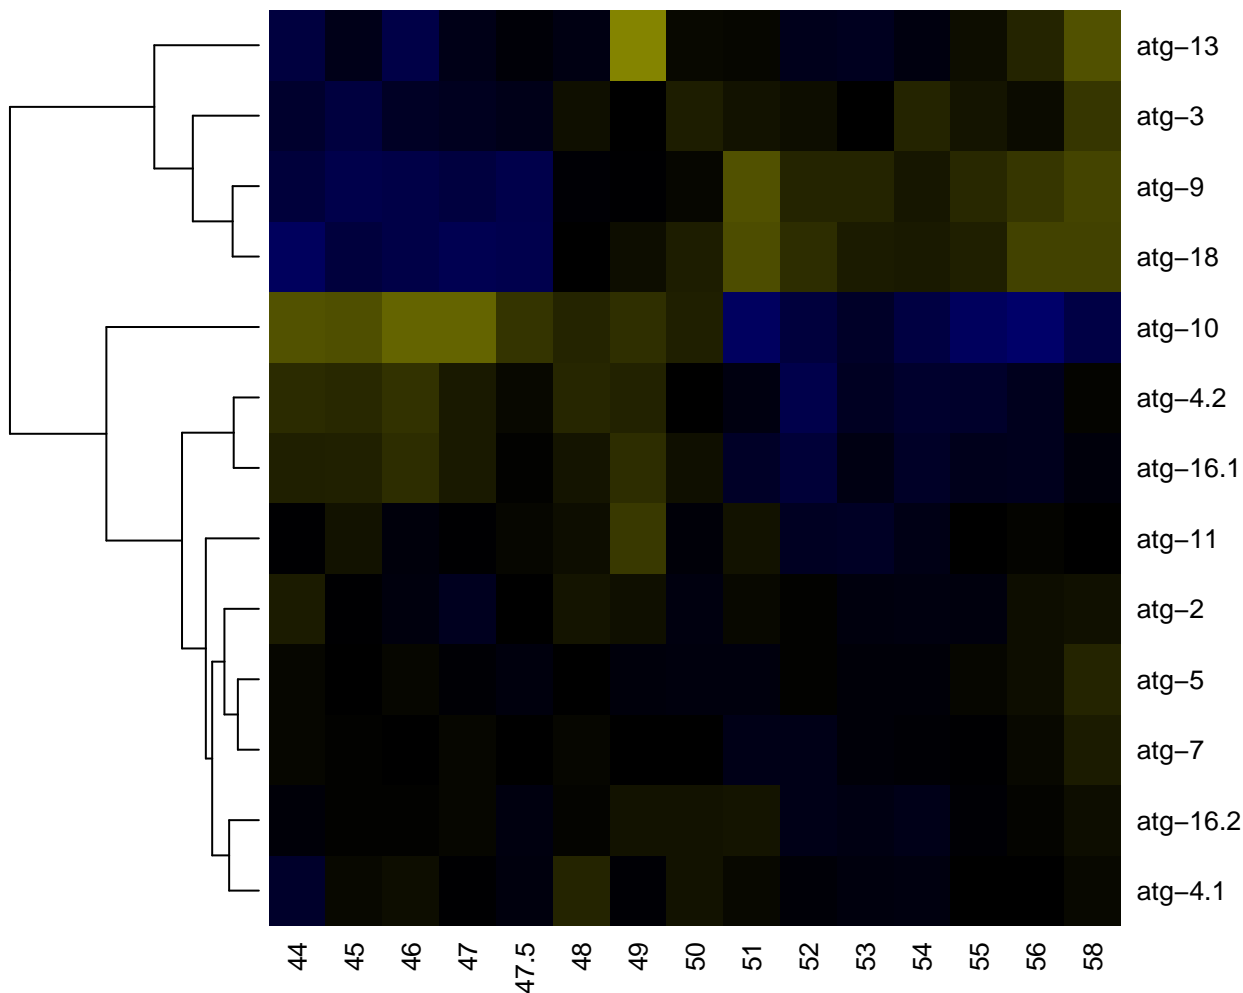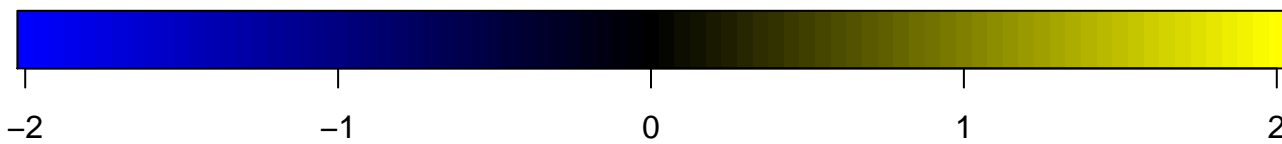

# bath

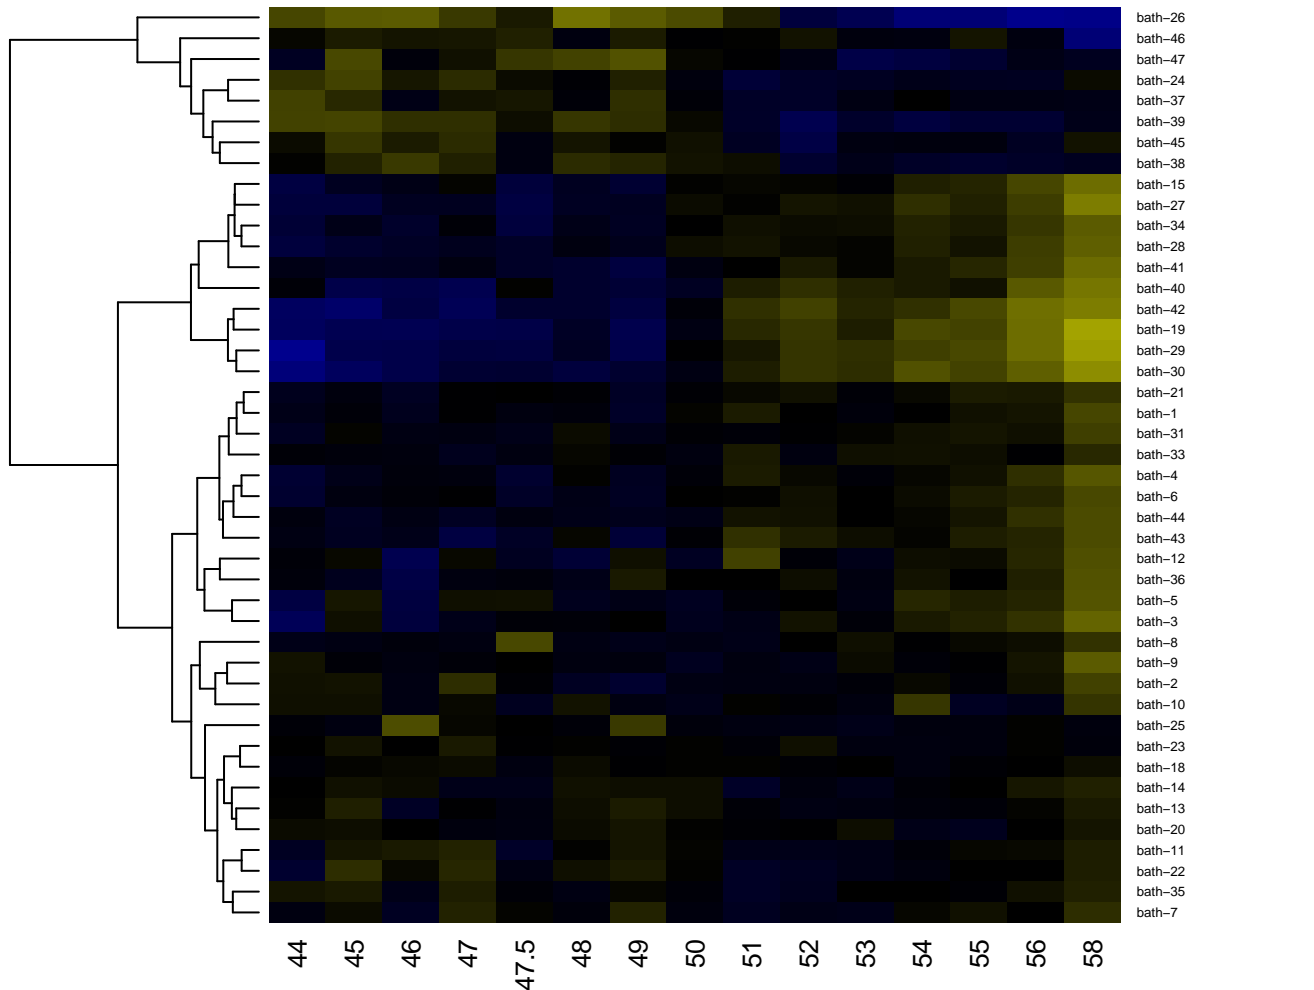

-2

-1

0

1

2





# btb

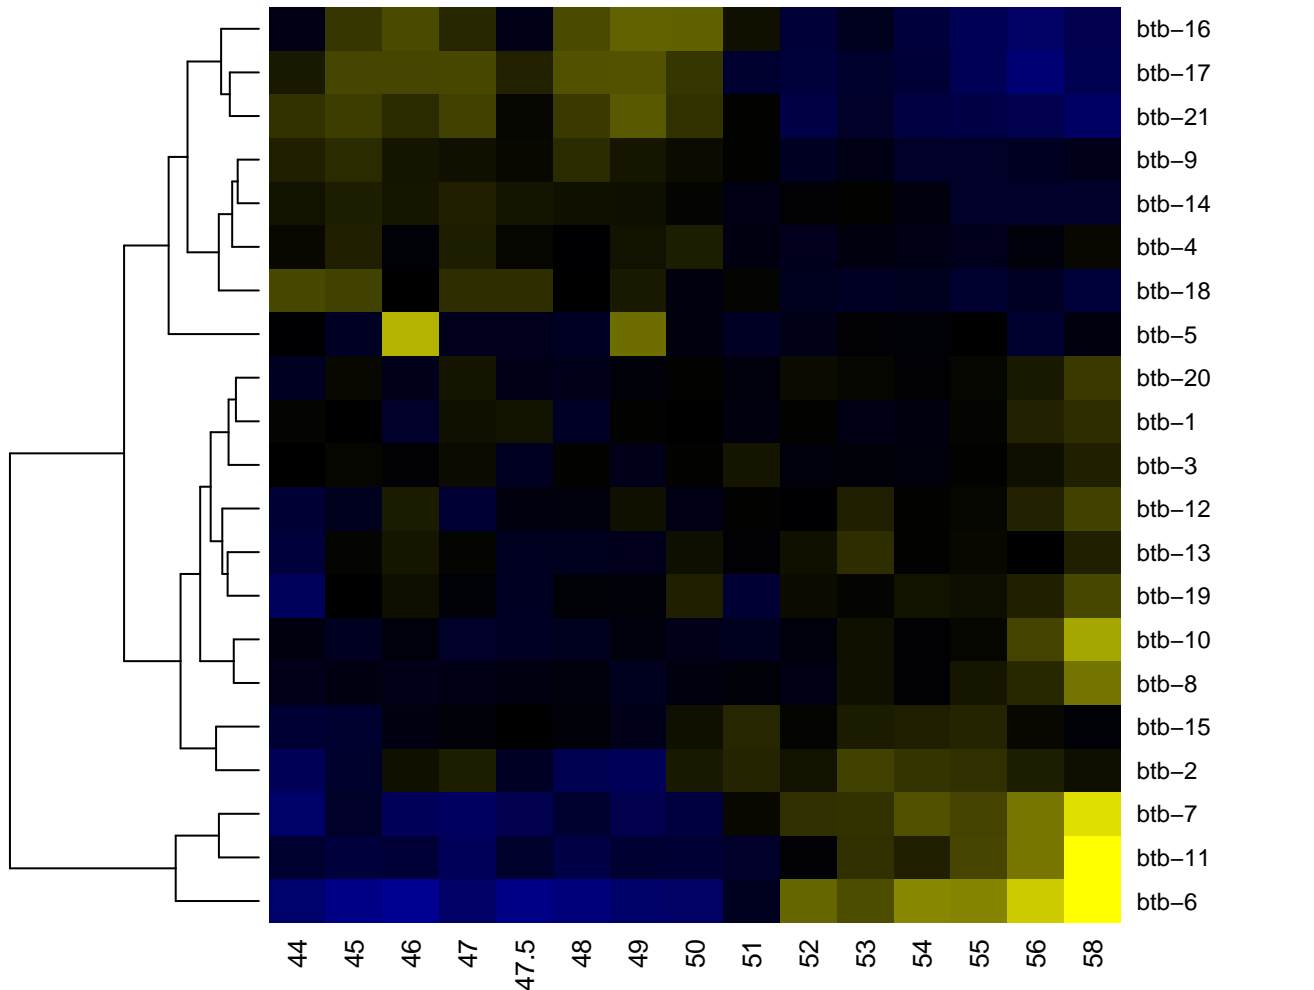

# cah

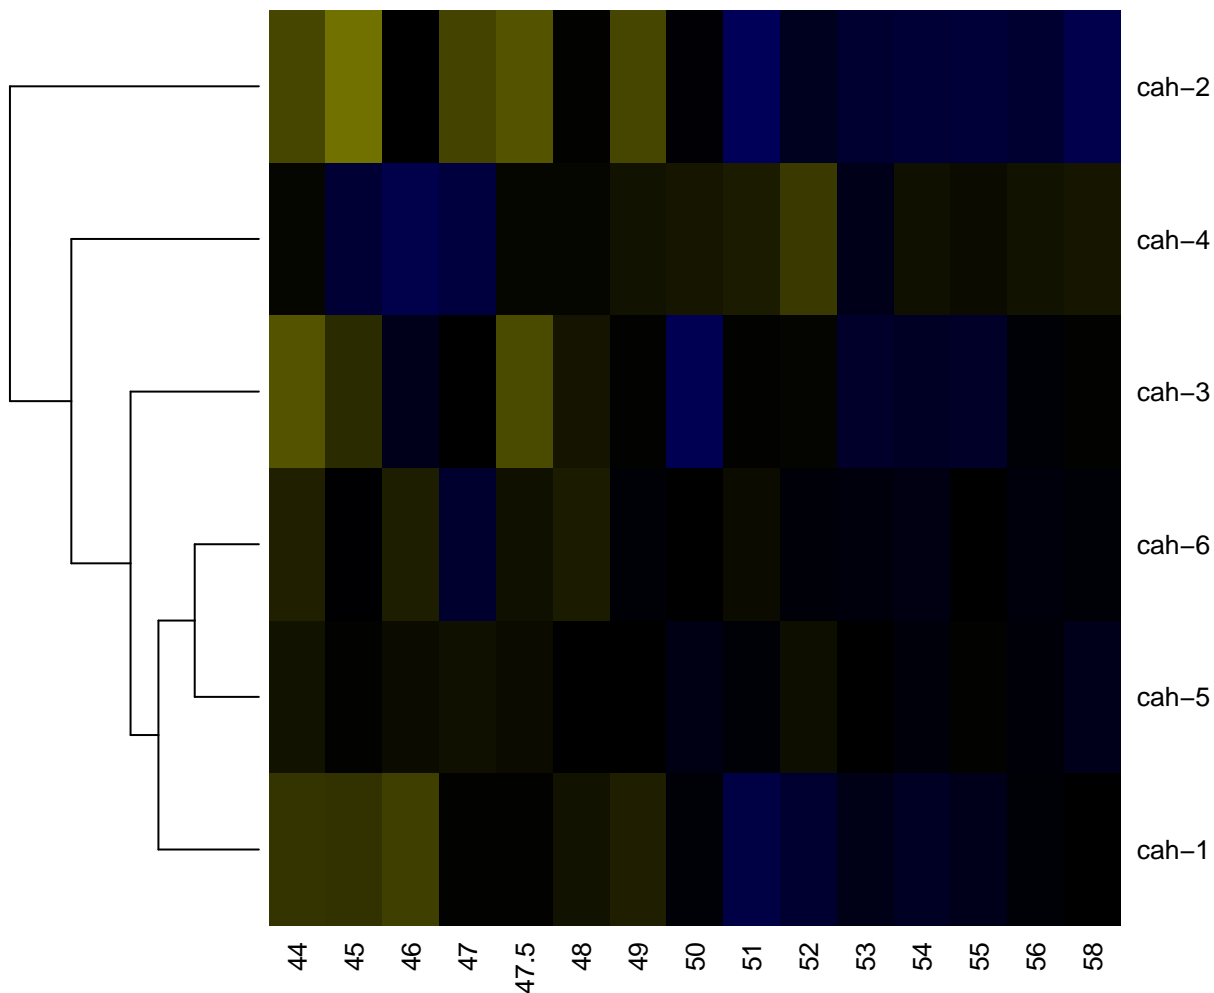

# cal

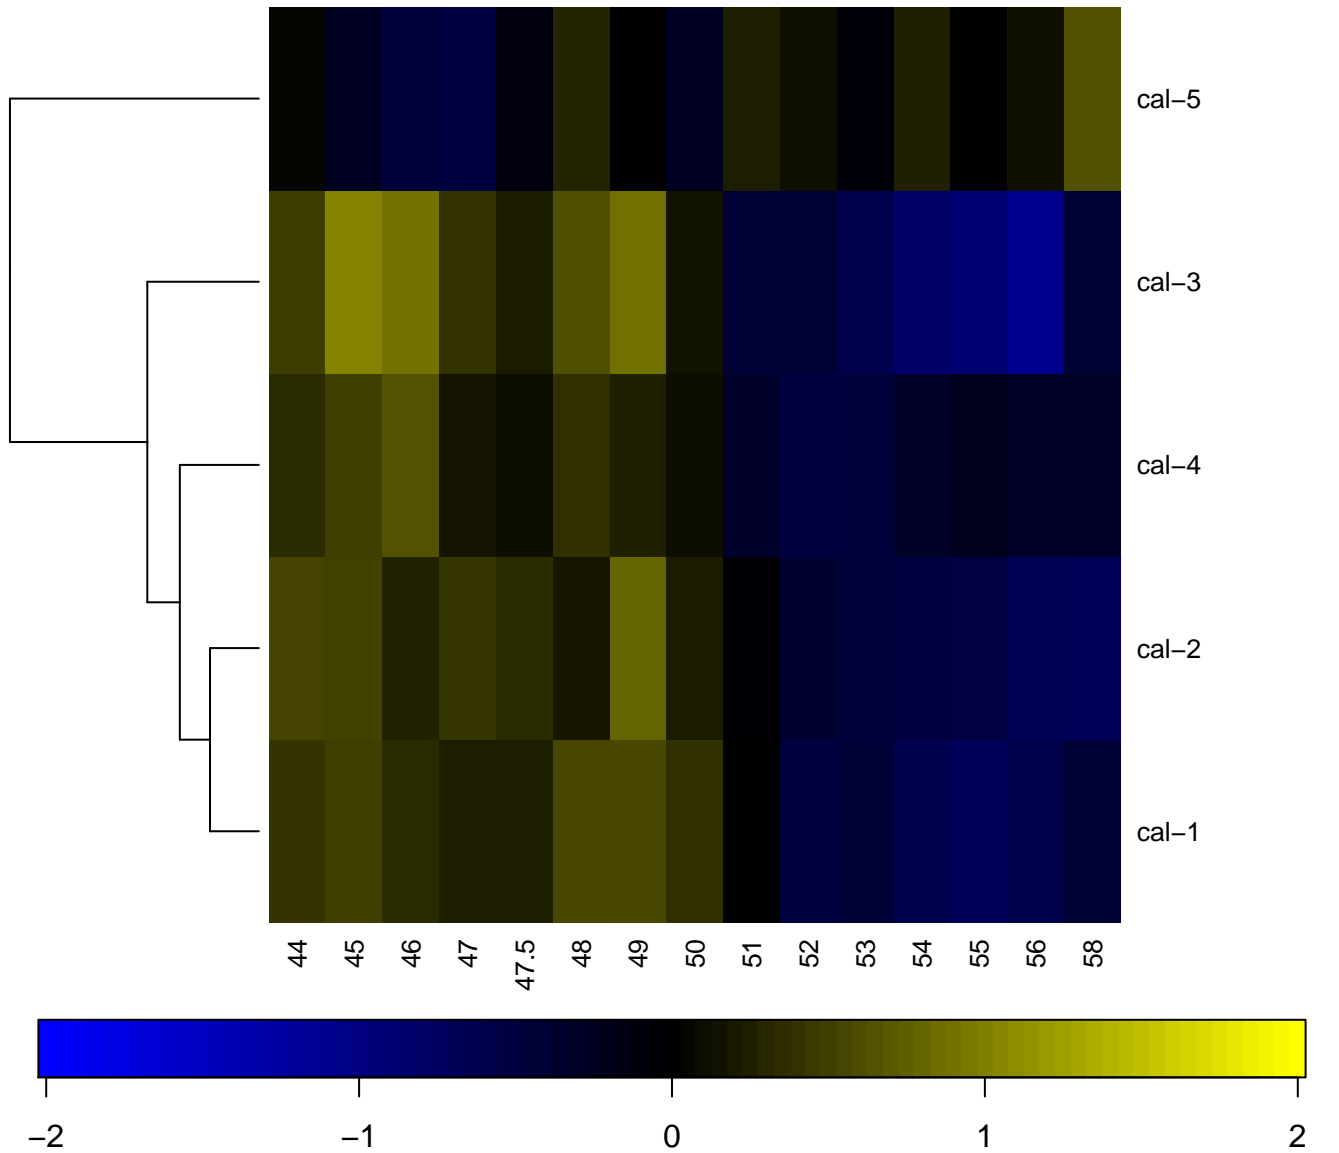



# catp

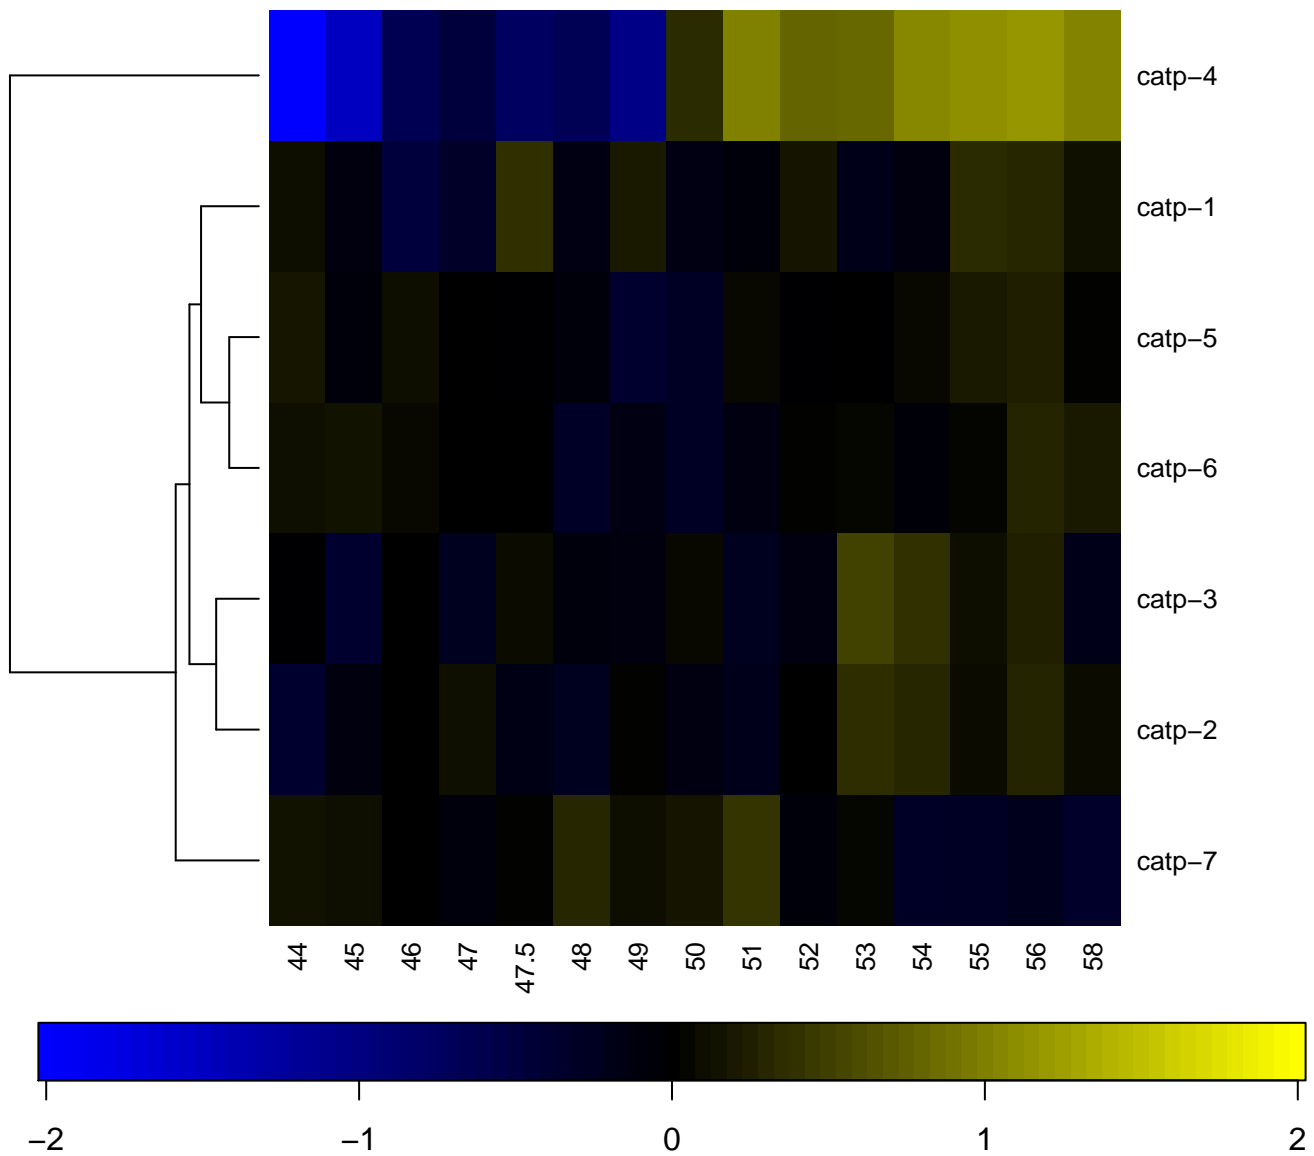

# cct

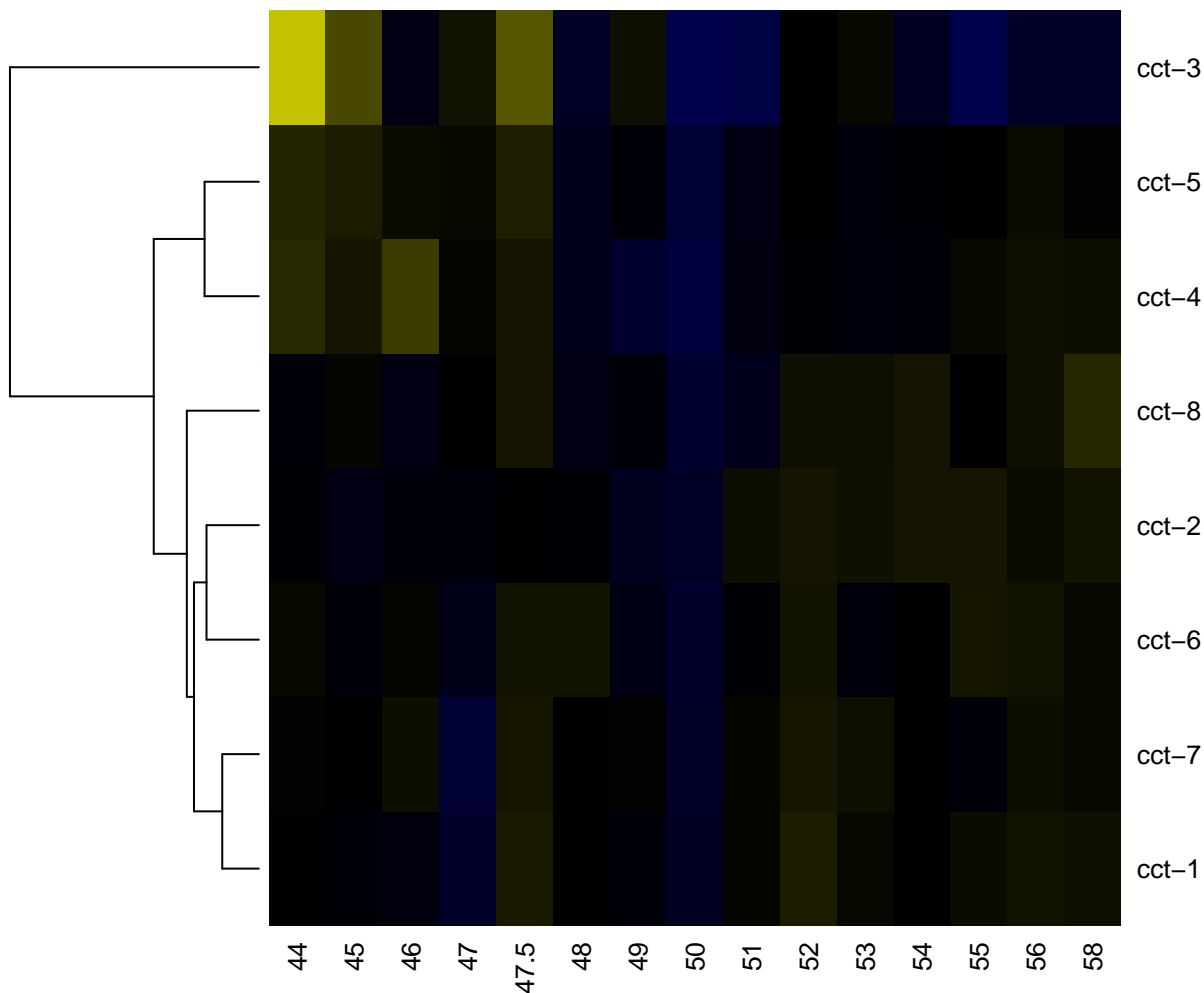

-2

-1

0

1

2

# cdc

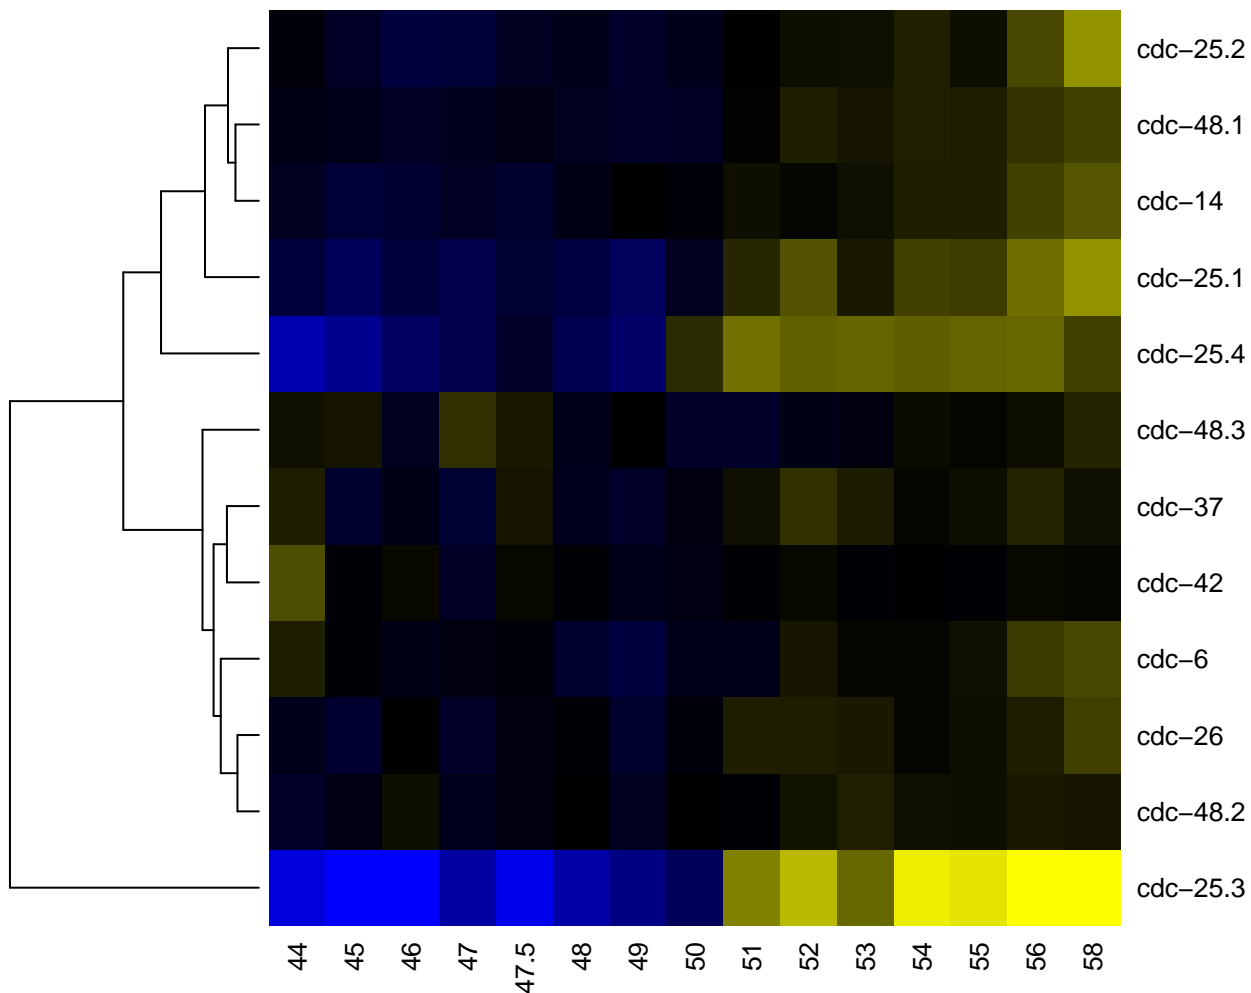

# cdh

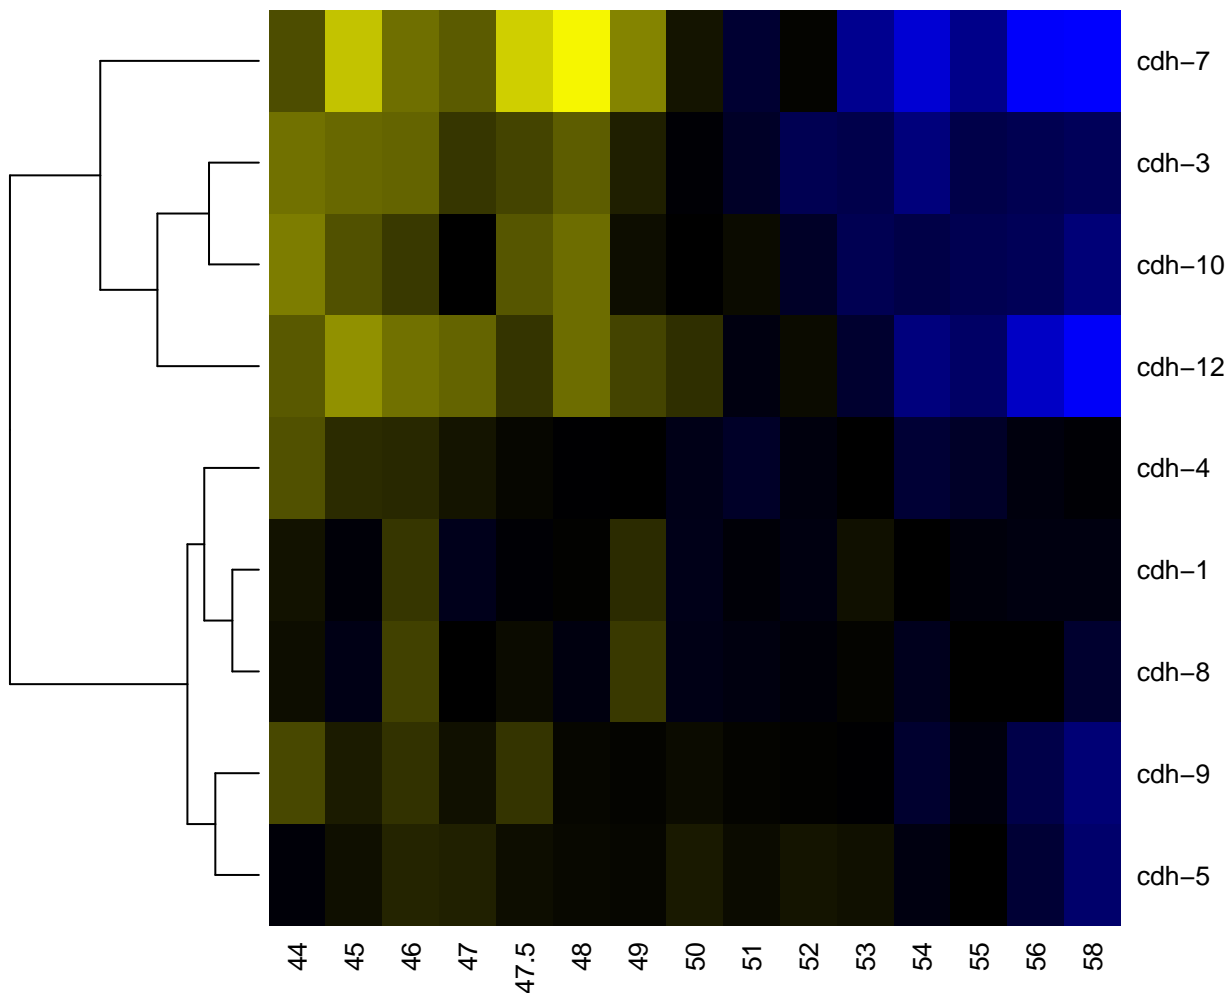

-2

-1

0

1

2



# cdr

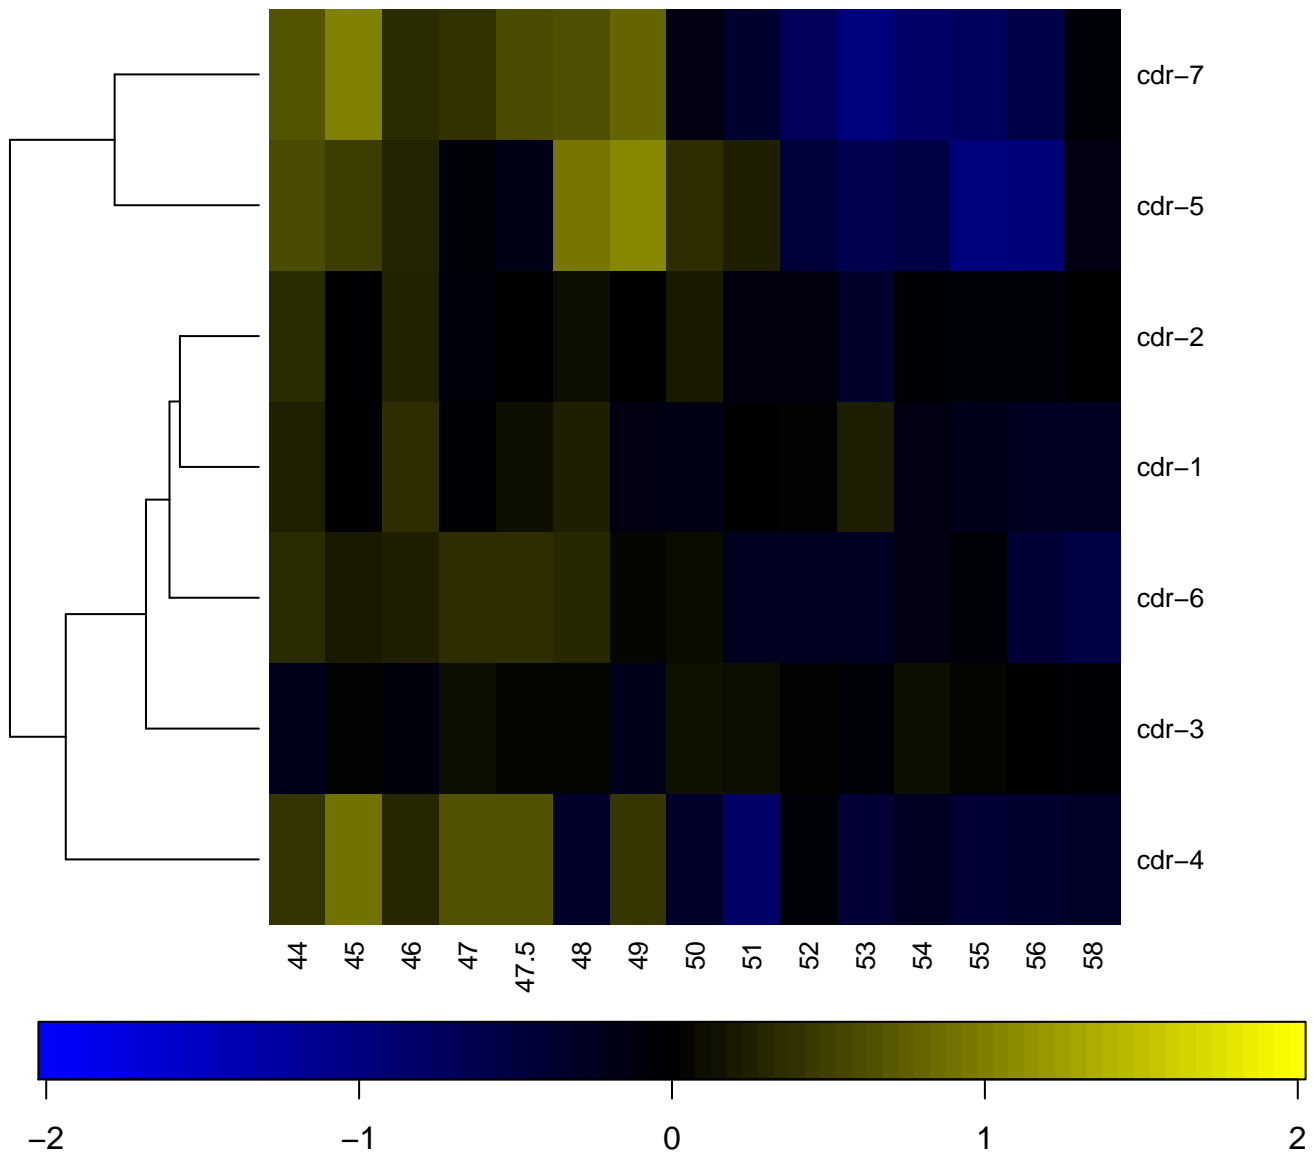

# ced

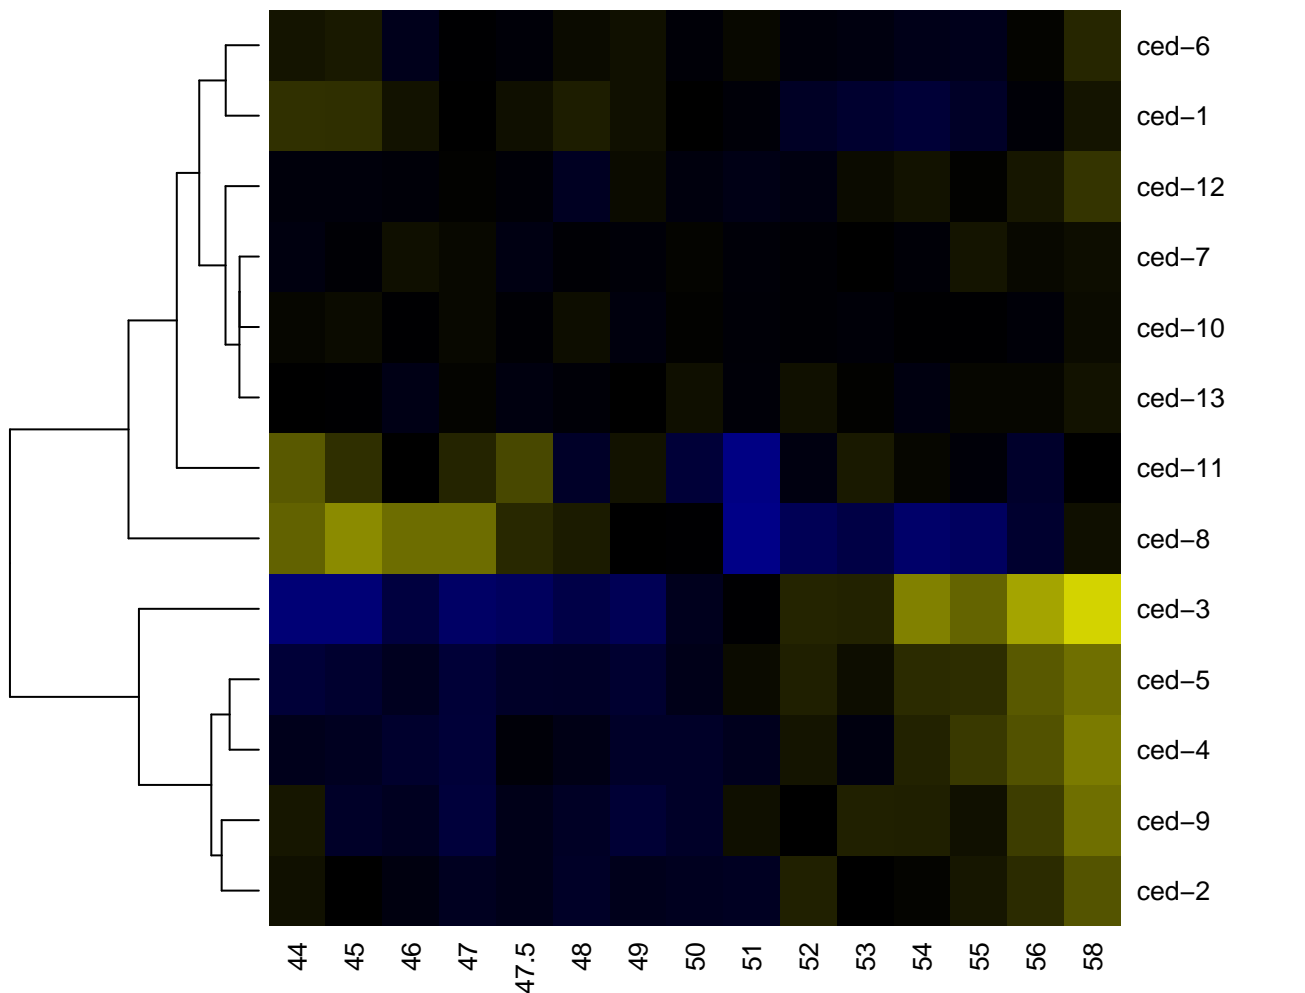

-2

-1

0

1

2

# ceh

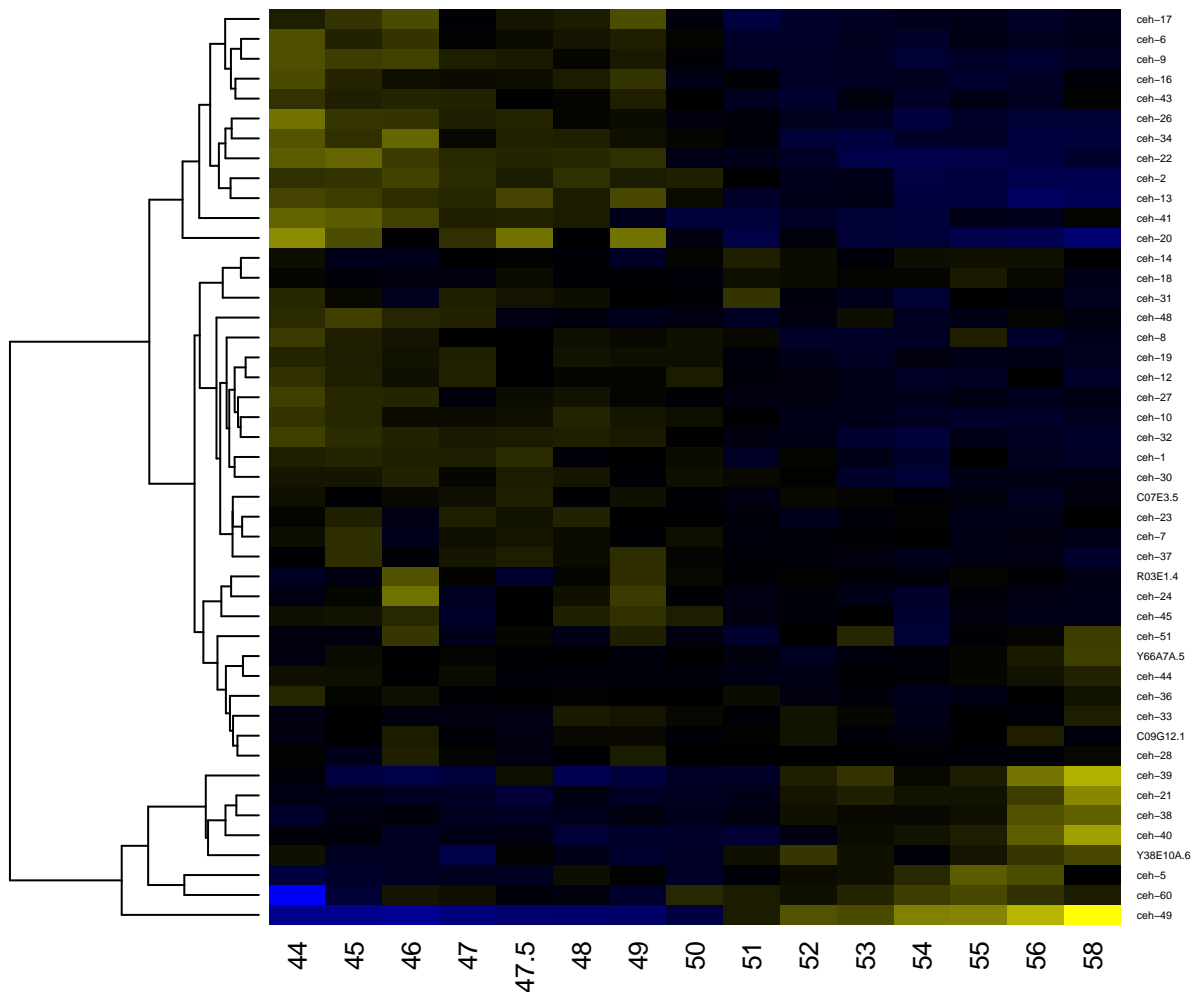



# che

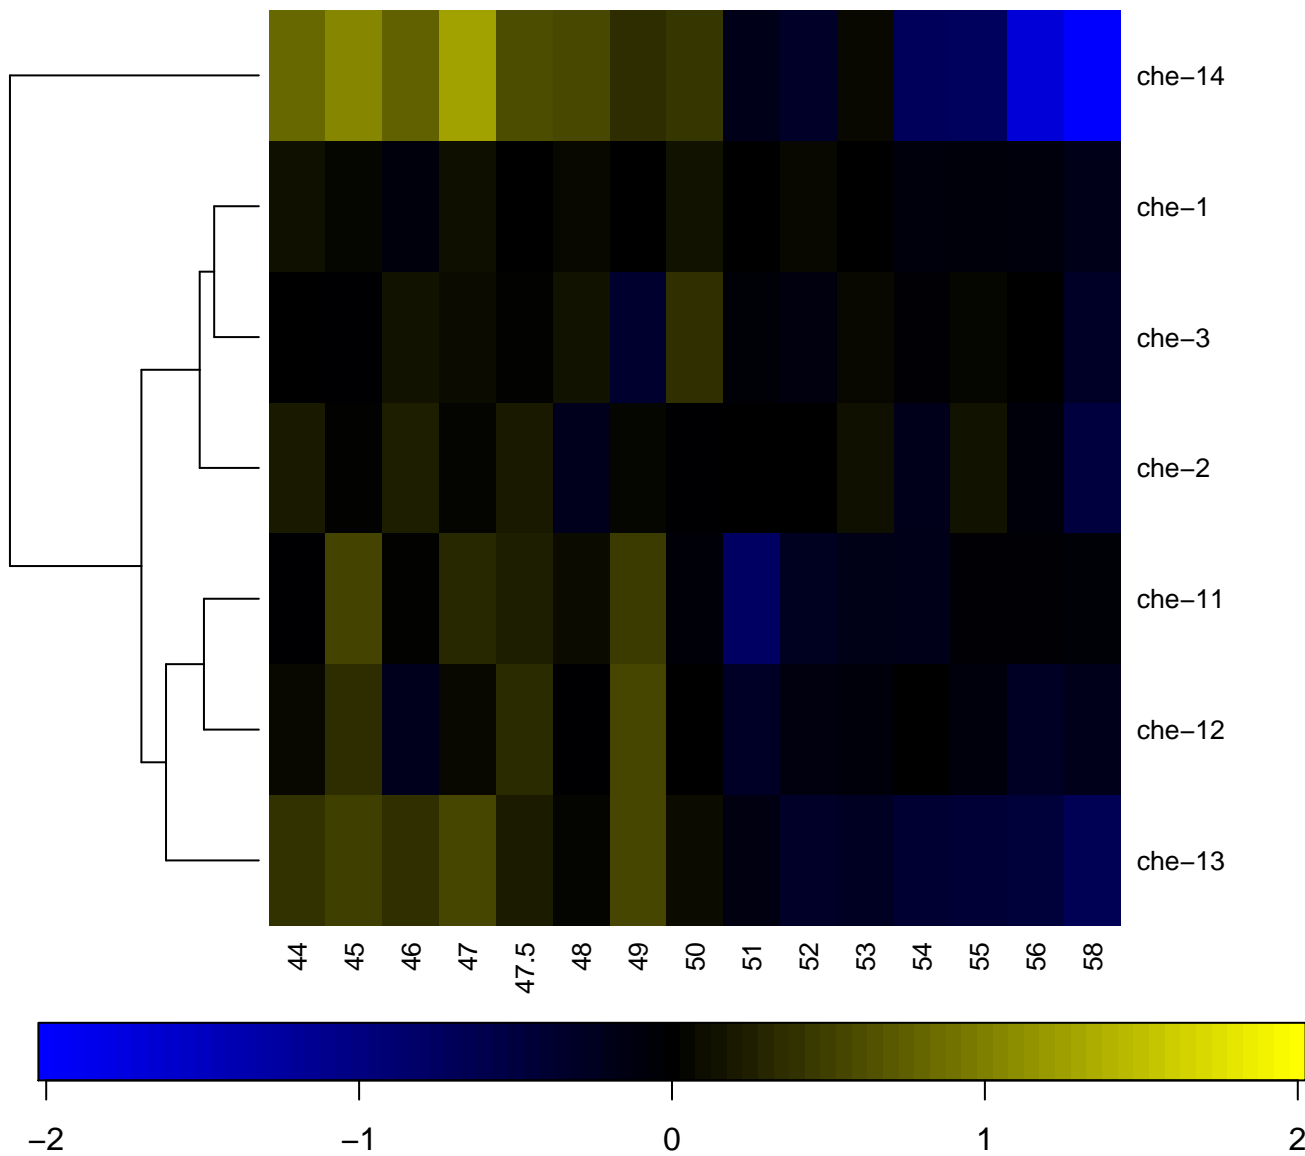



# clec

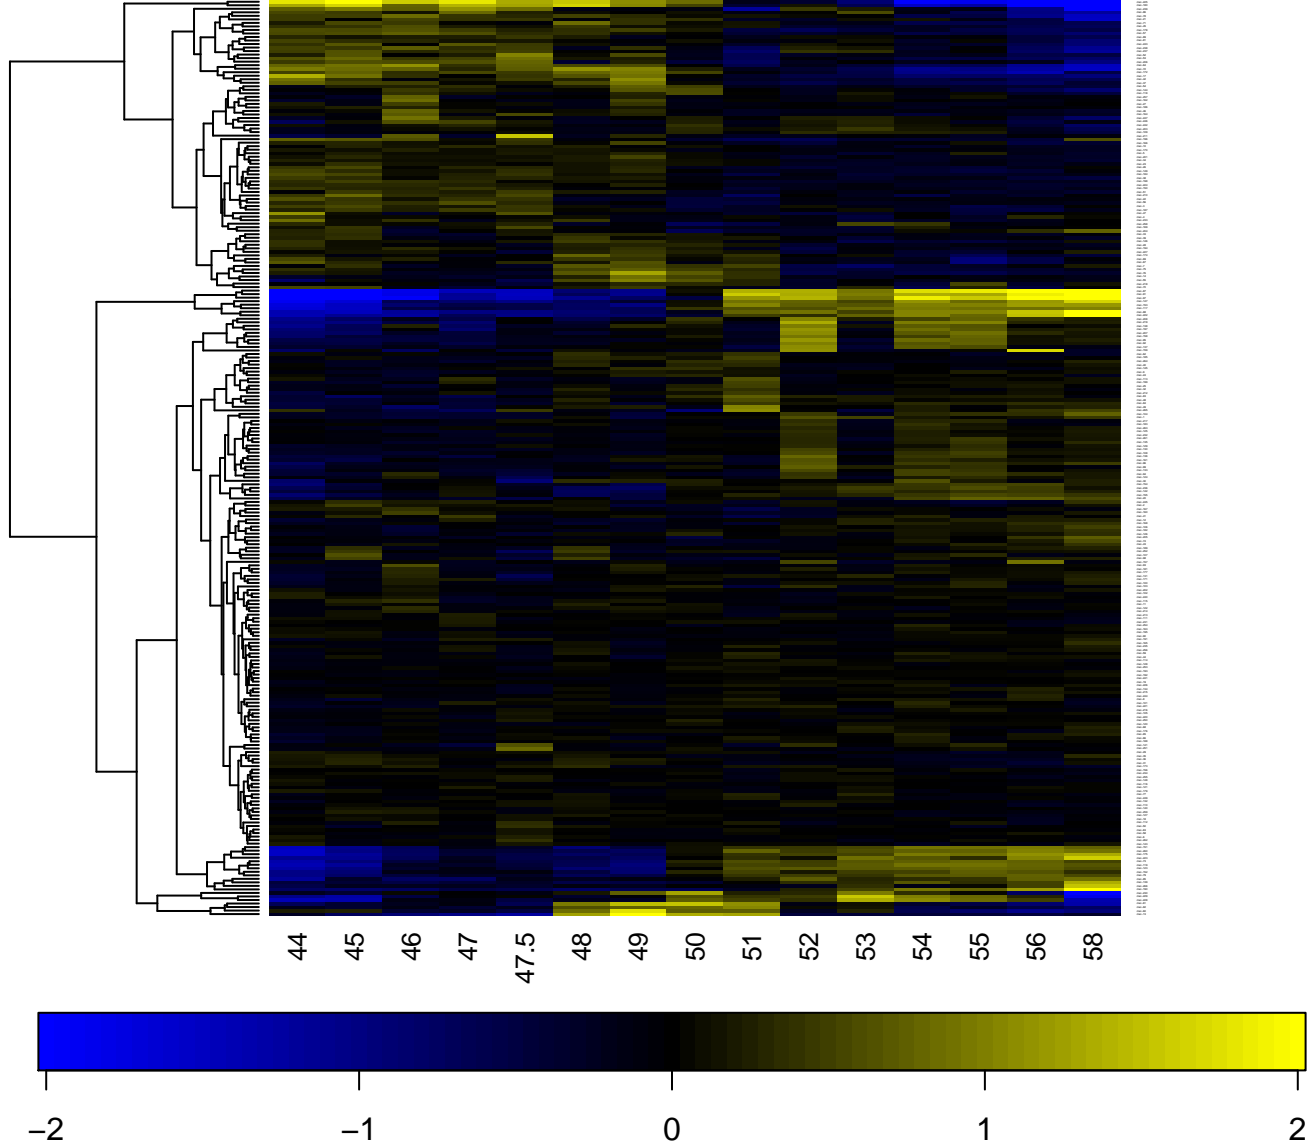





# cnc

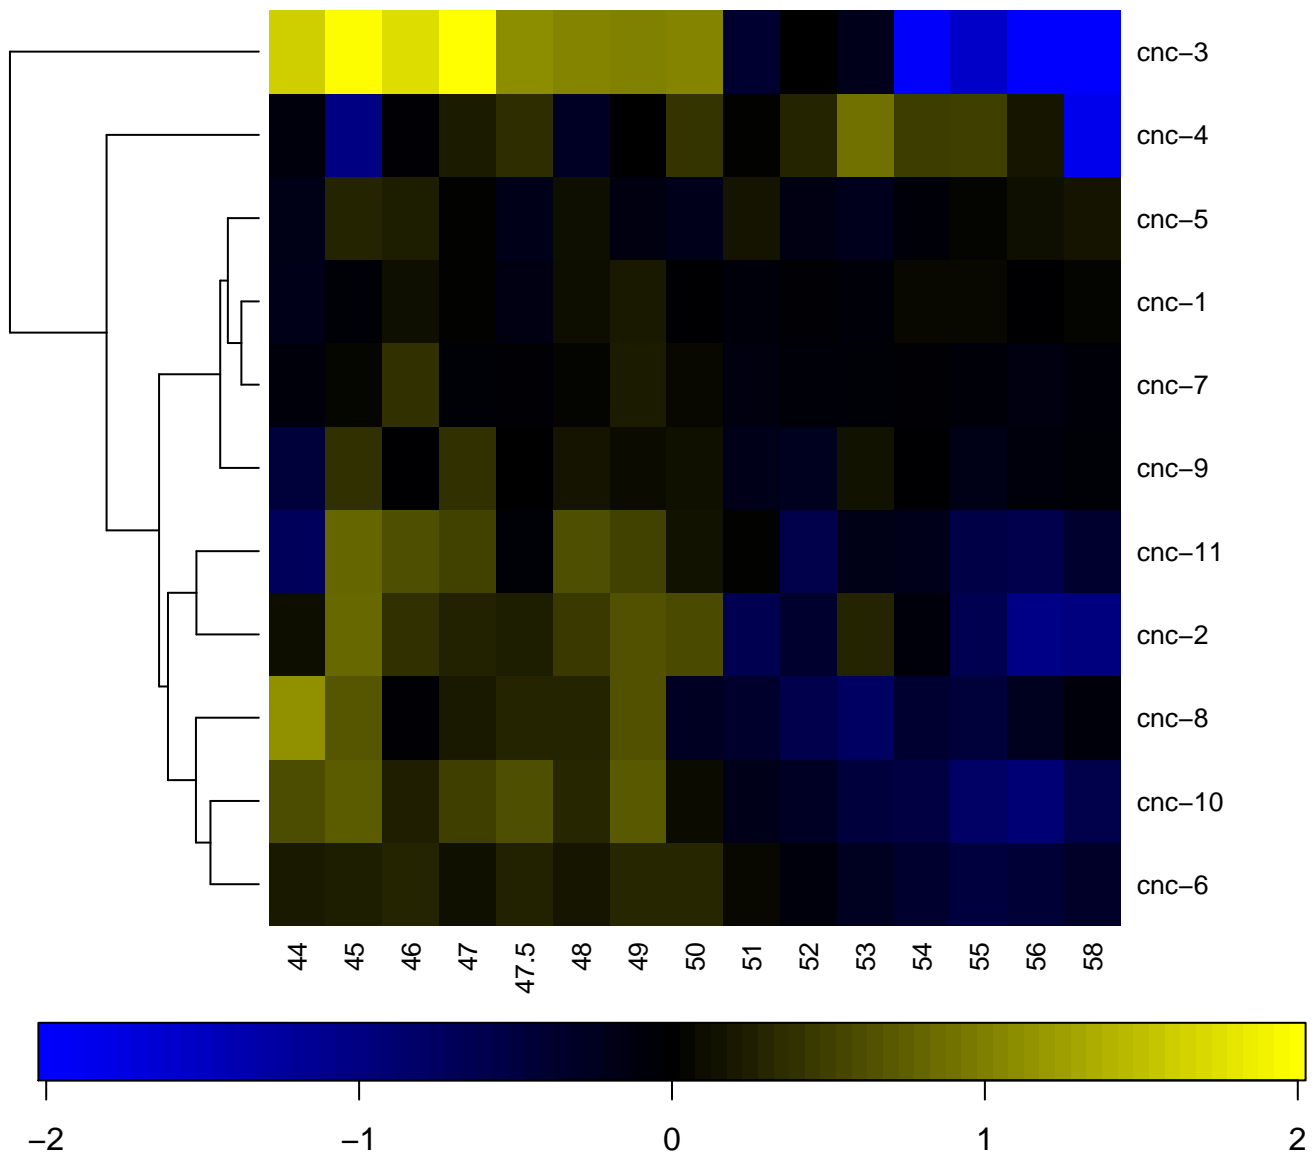

# cogc

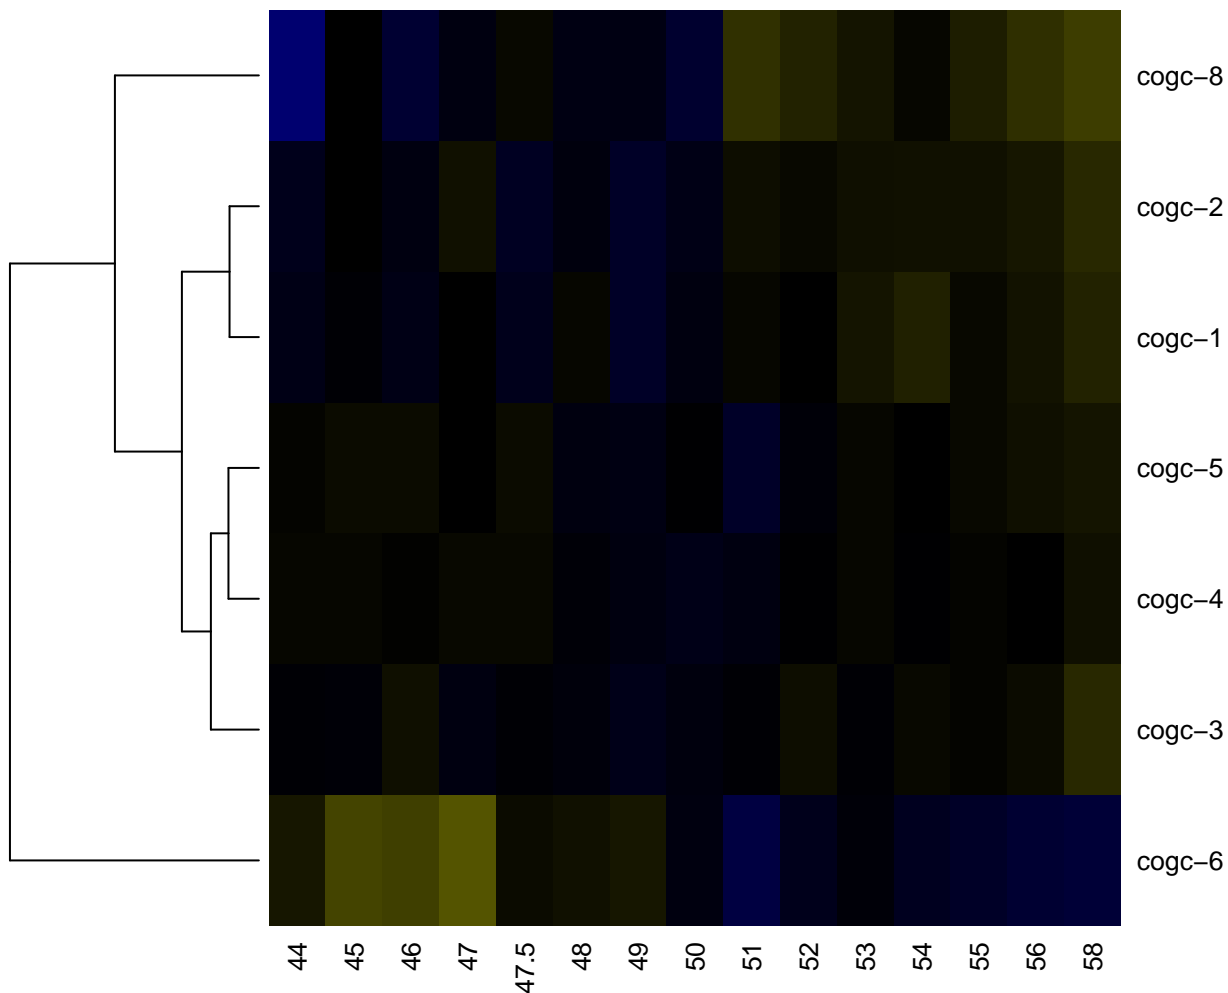

-2

-1

0

1

2





# coq

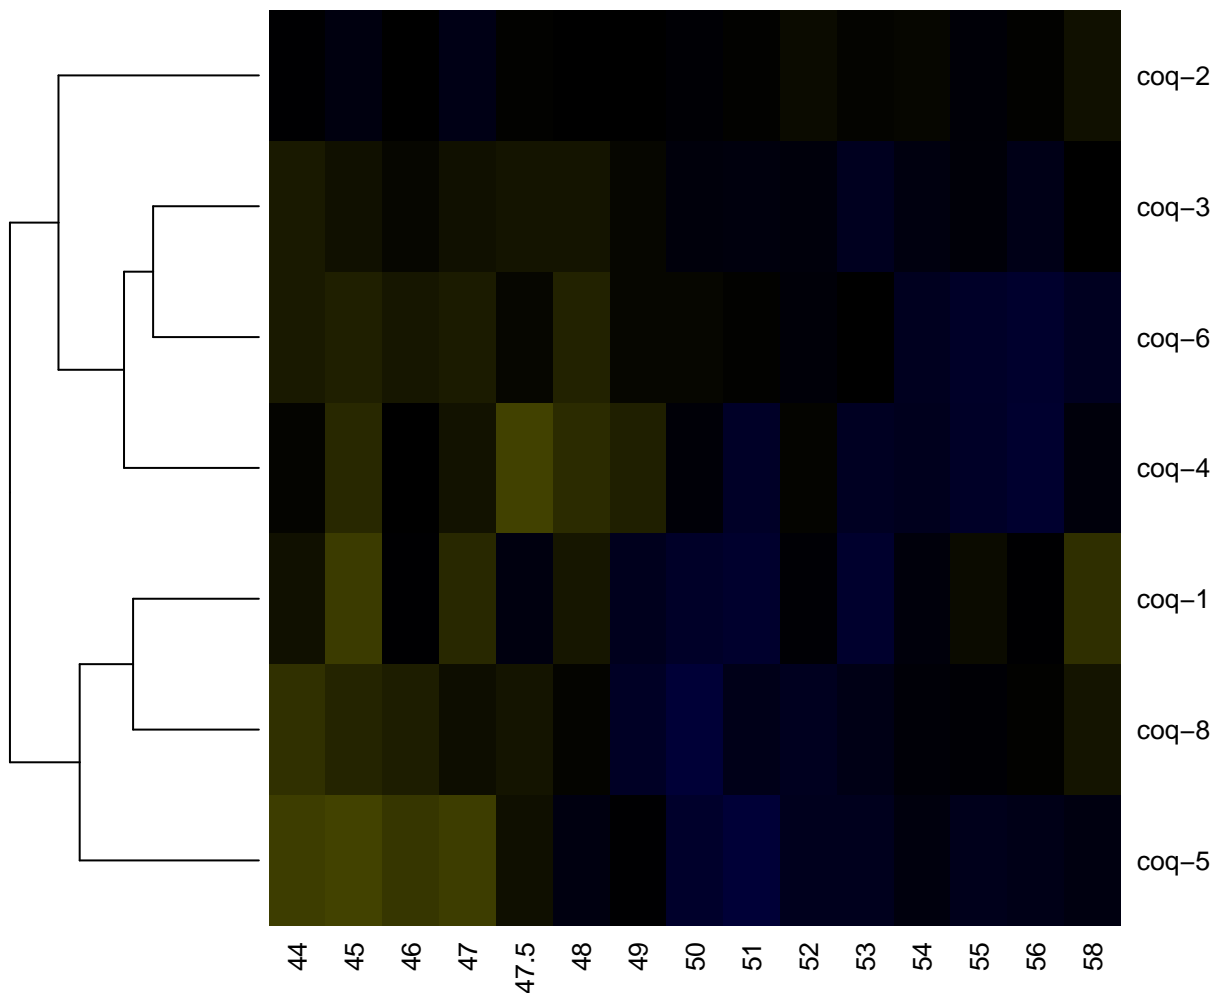

-2

-1

0

1

2

# cpg

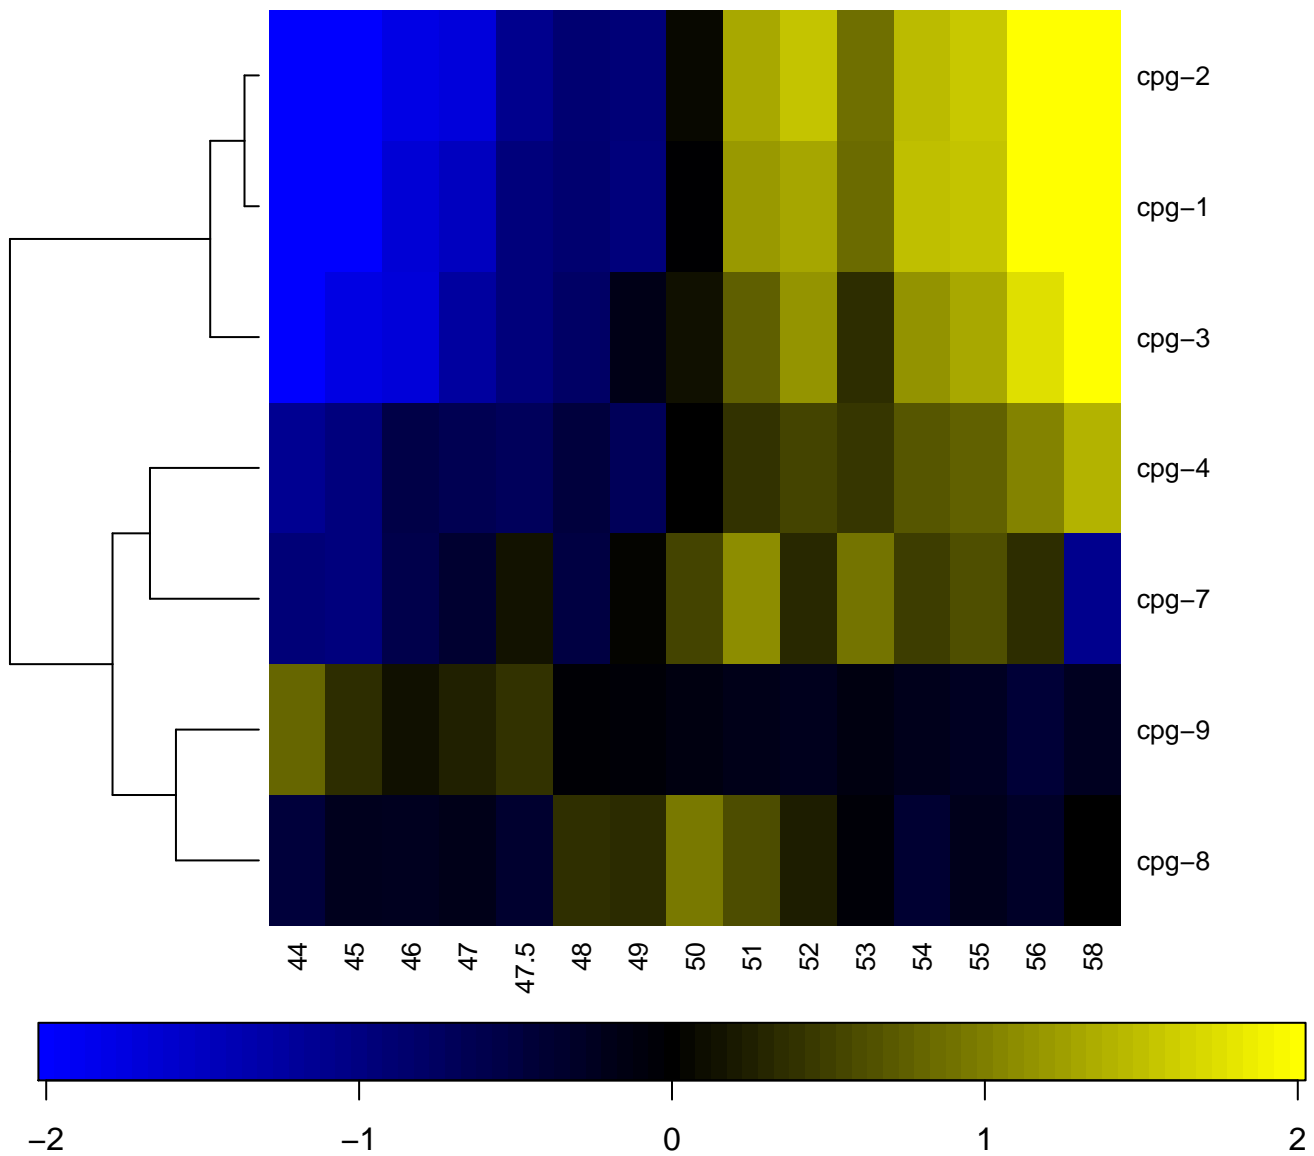

# cpna

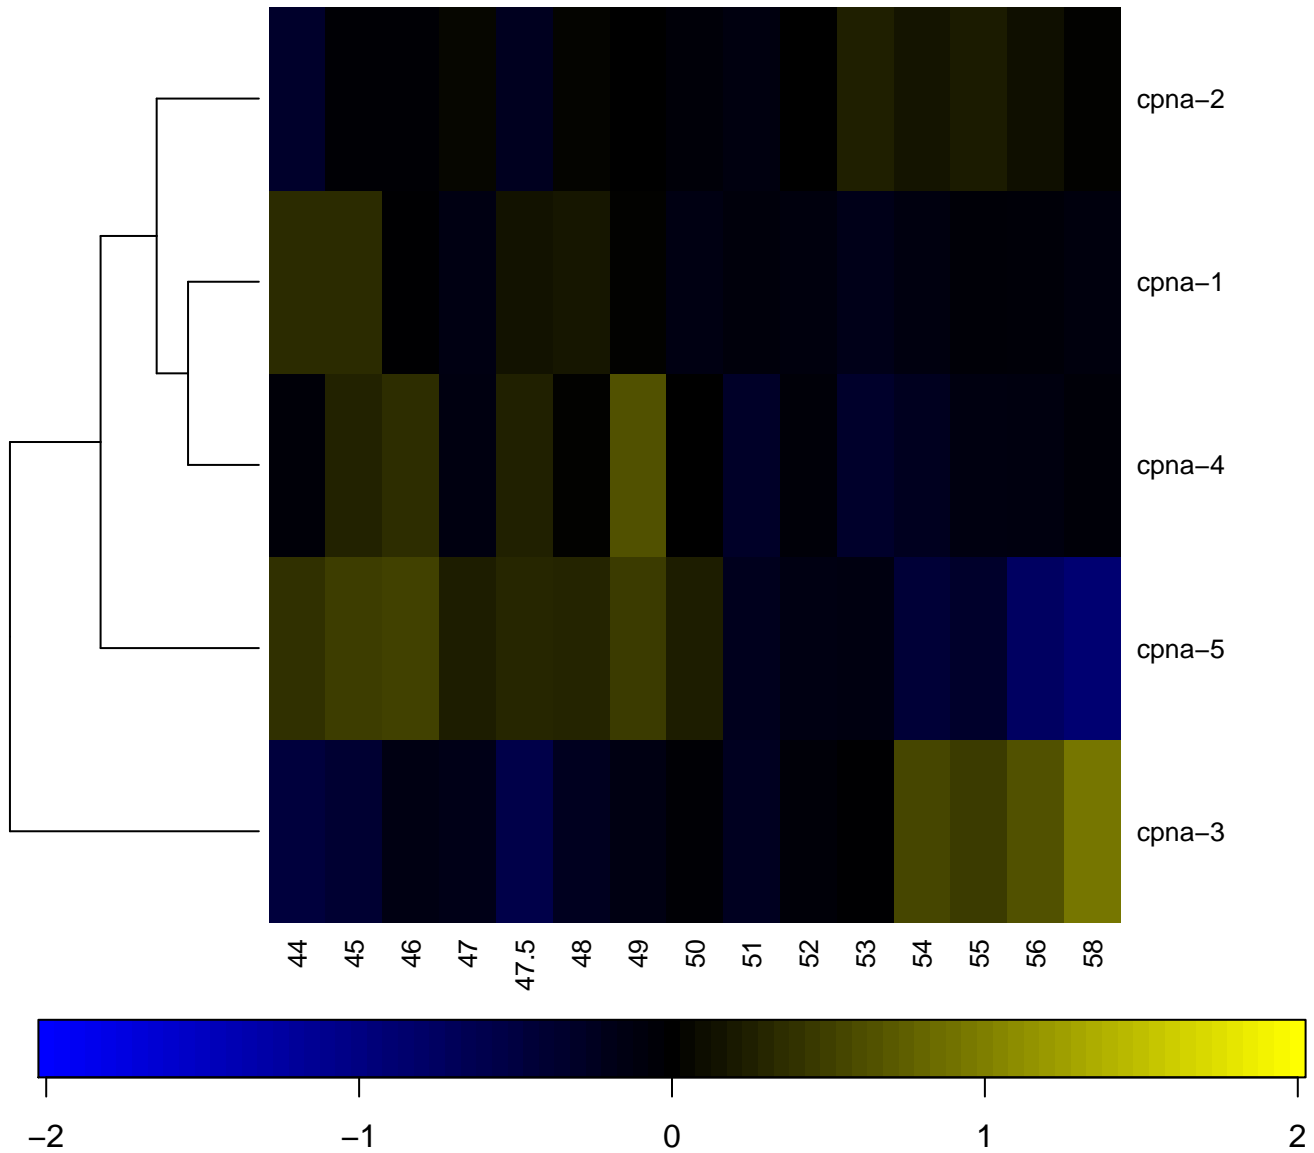

# cpr

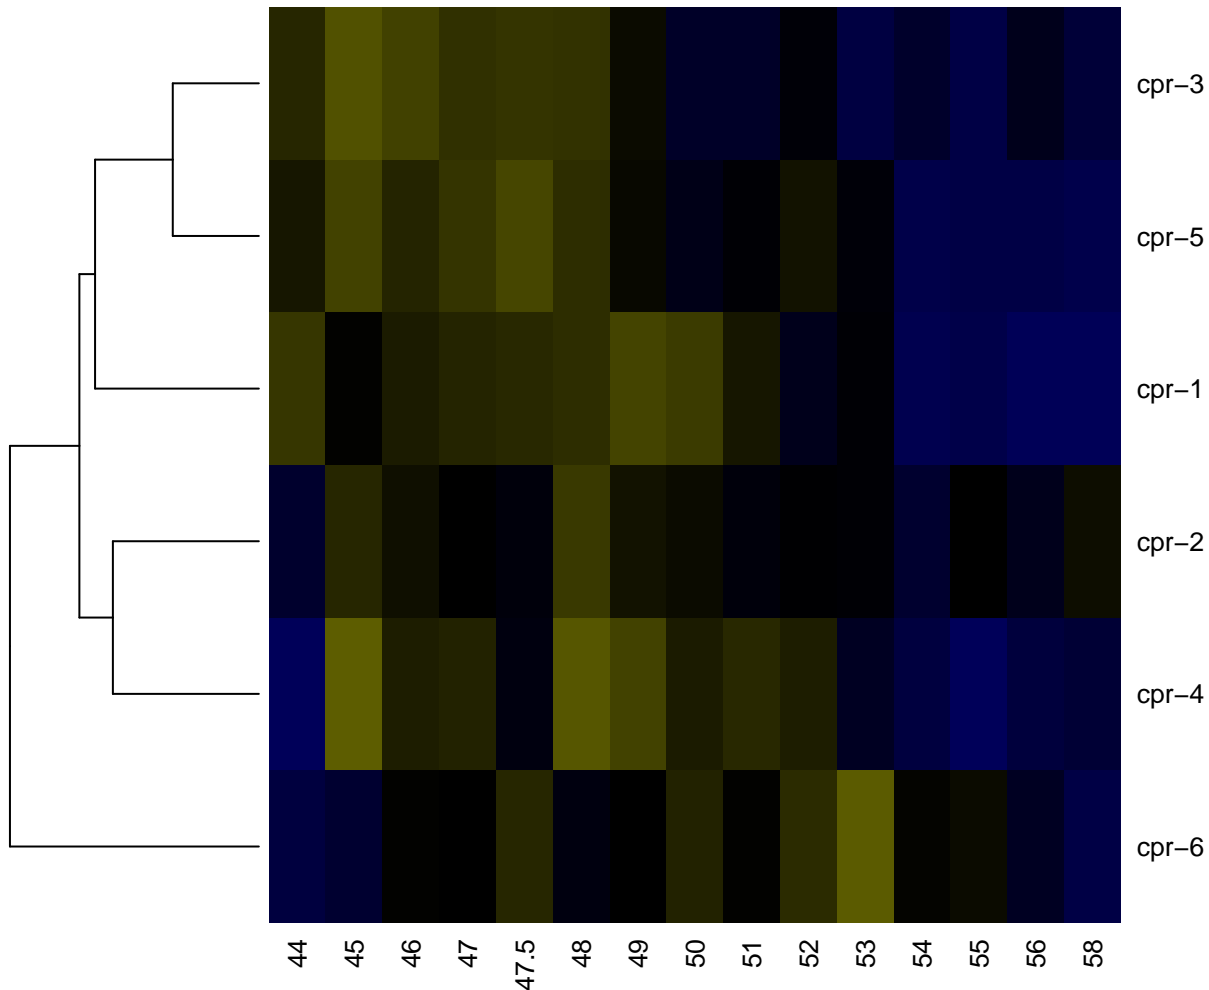

# cpt

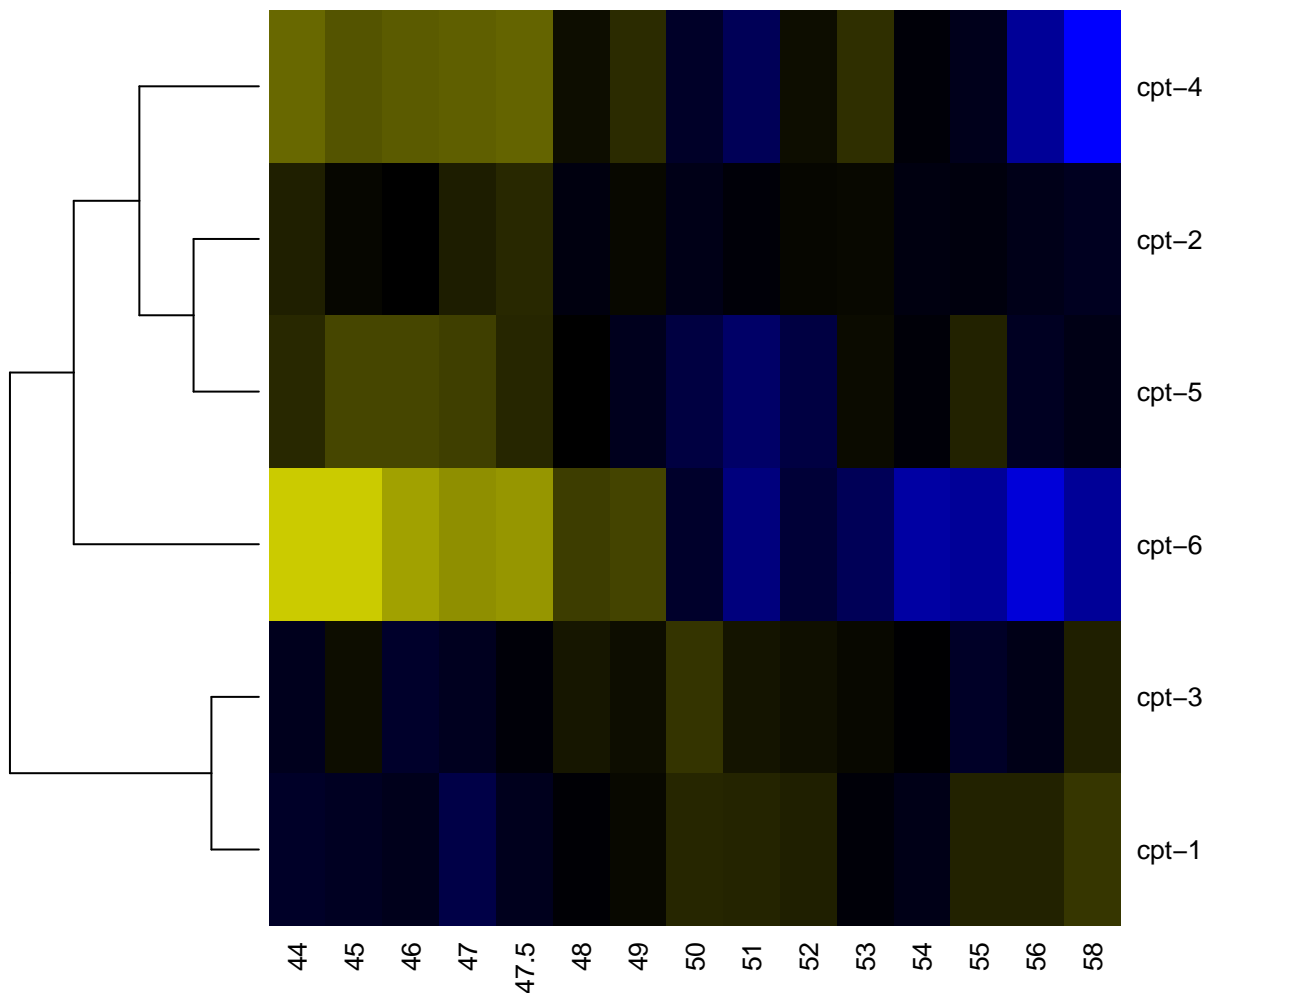

-2

-1

0

1

2











# cutl

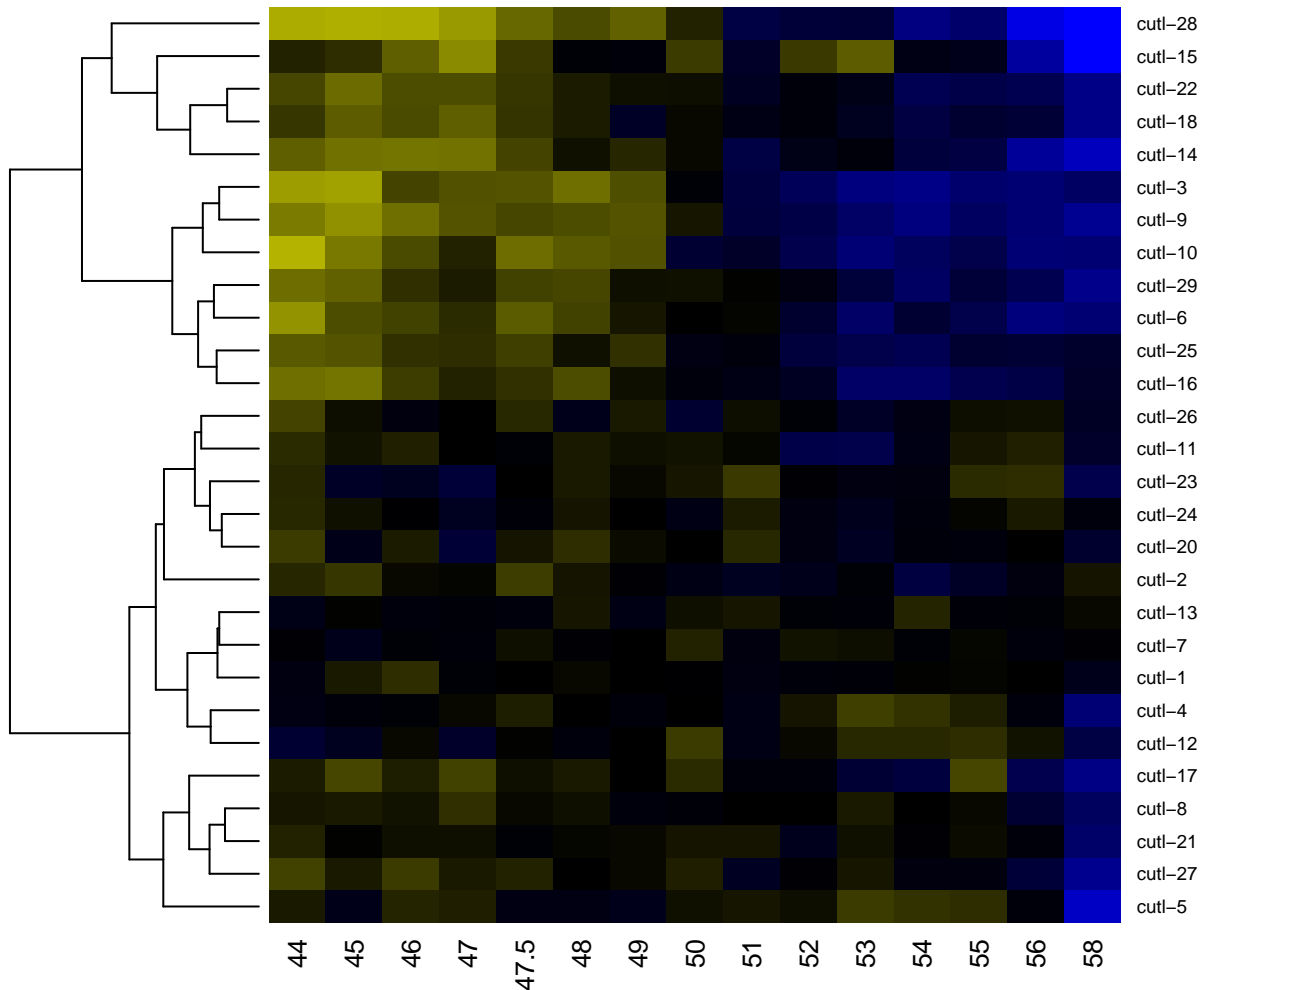

-2

-1

0

1

2



# cyn

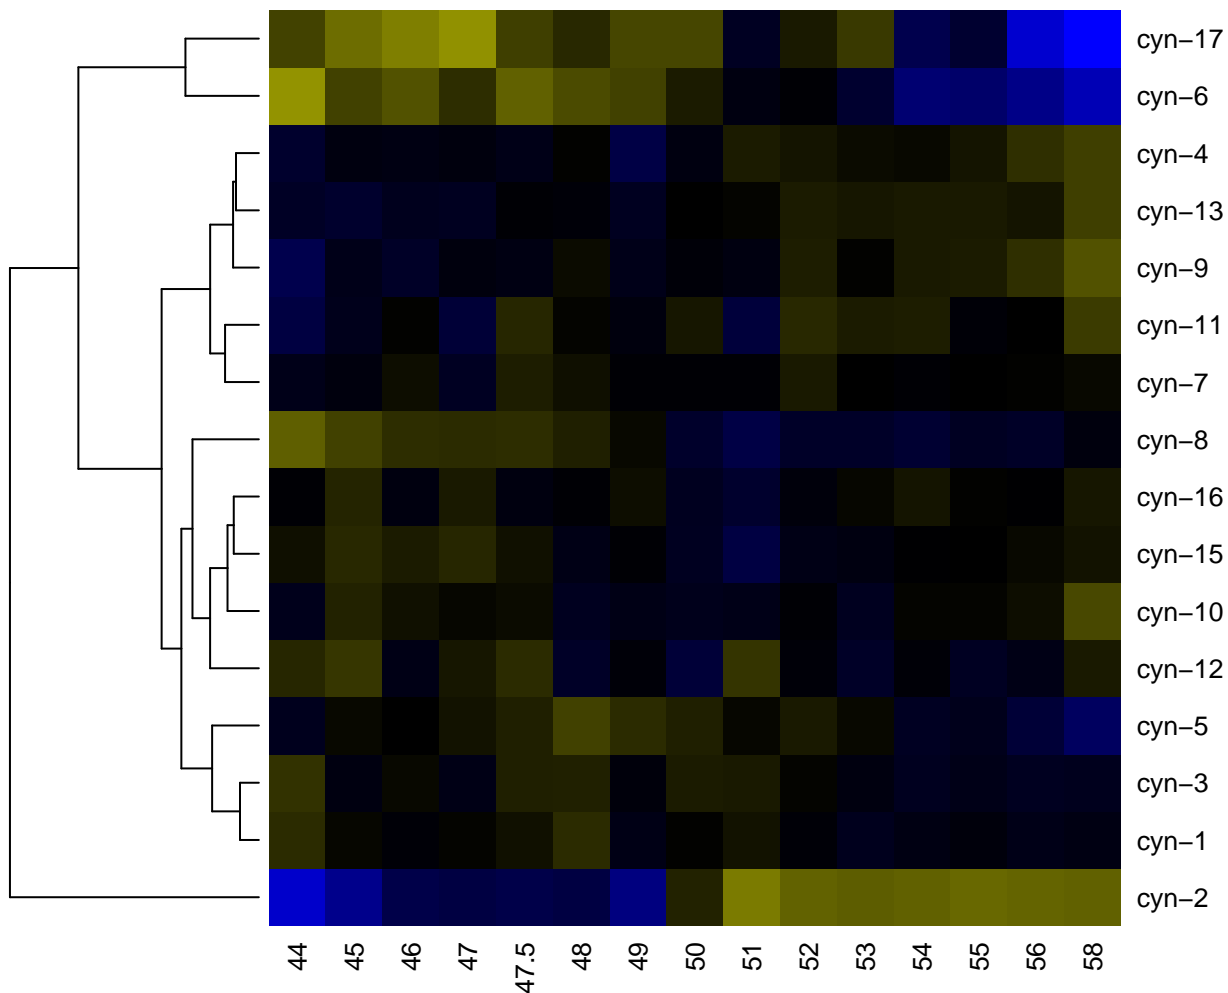

-2

-1

0

1

2

# cyp

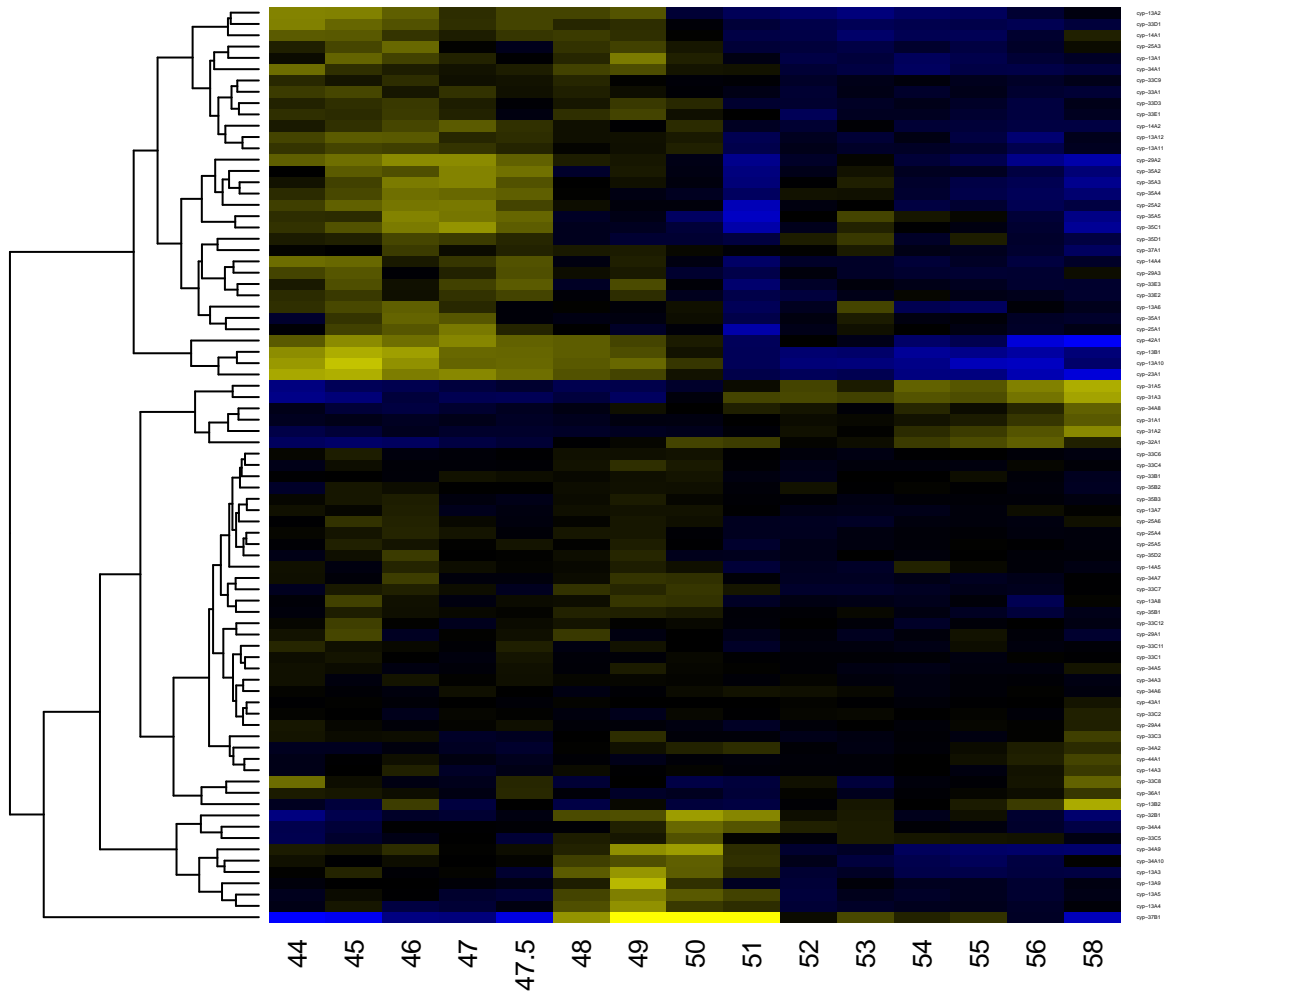

# daf

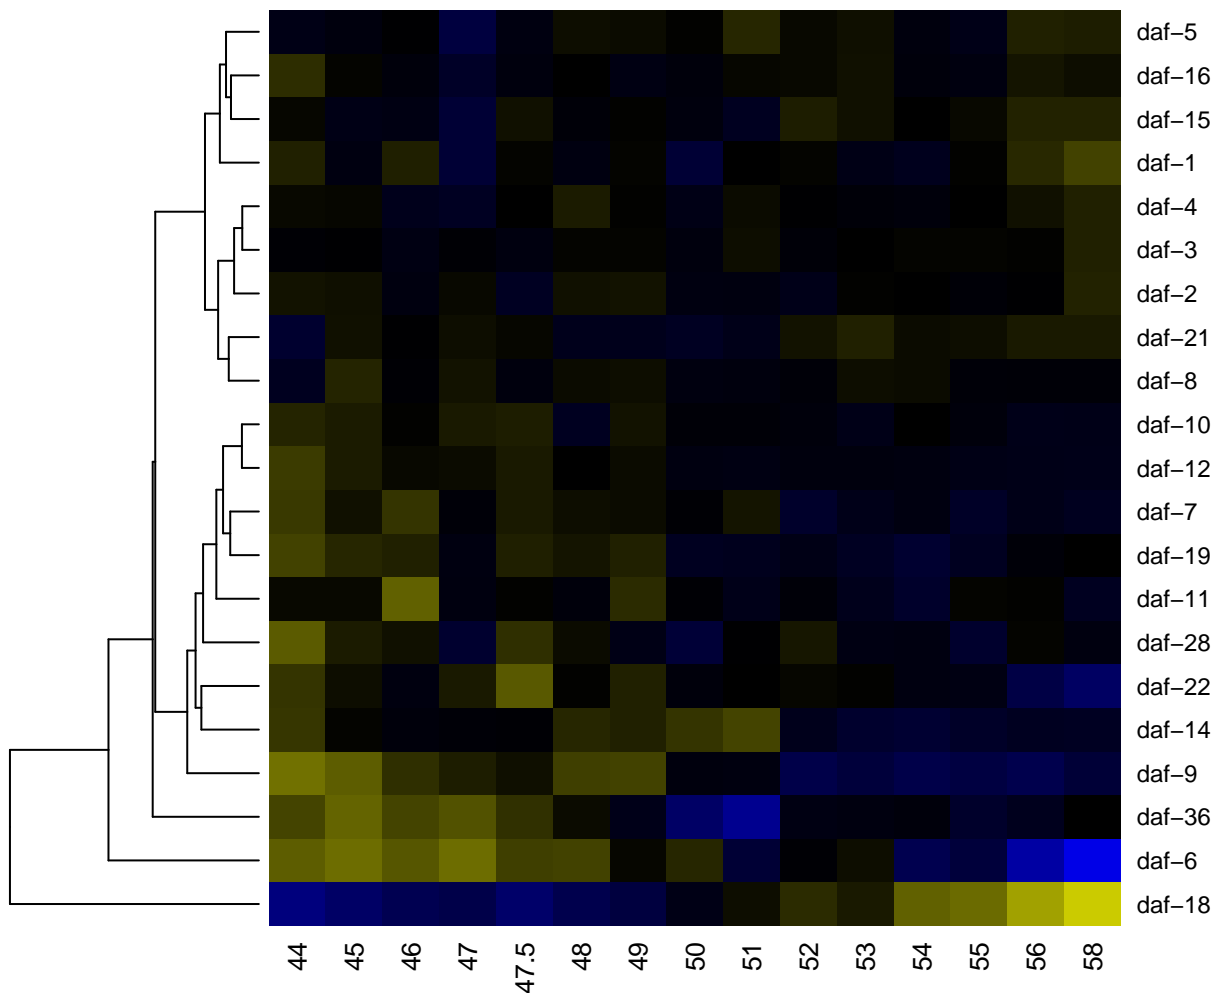

# dao

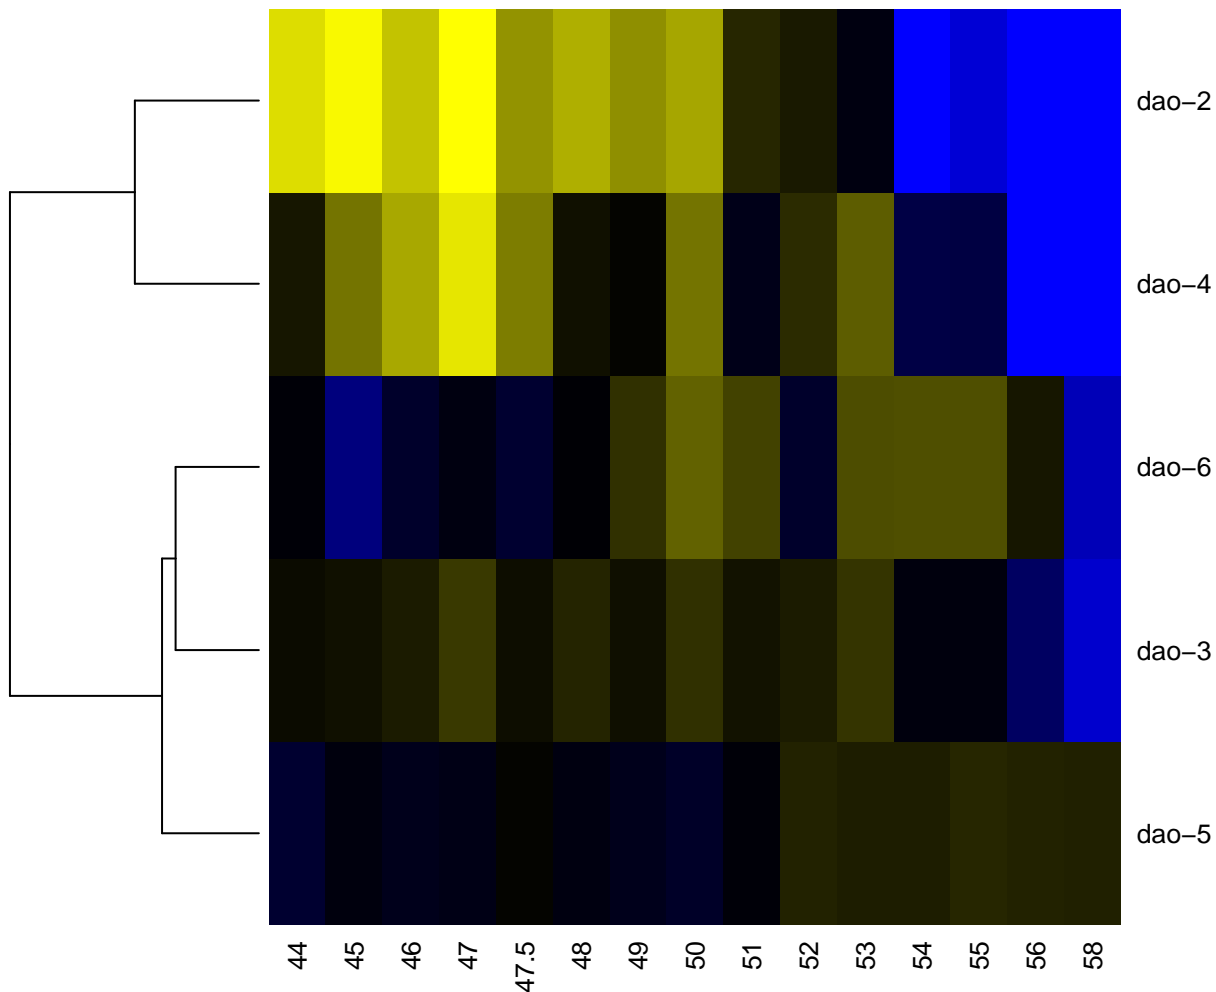

-2

-1

0

1

2

# dct

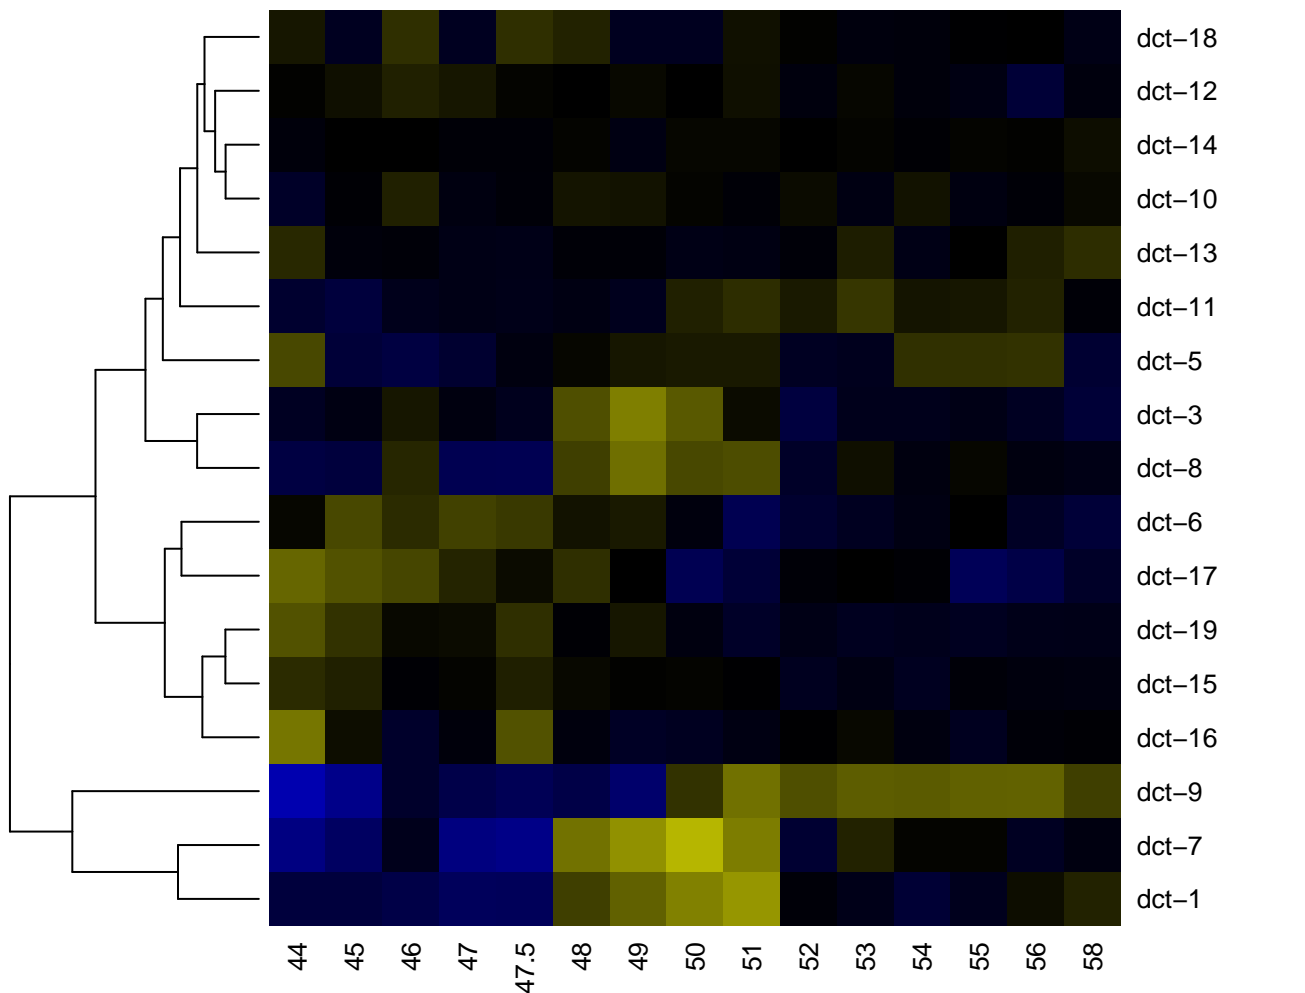

-2

-1

0

1

2



# dgk

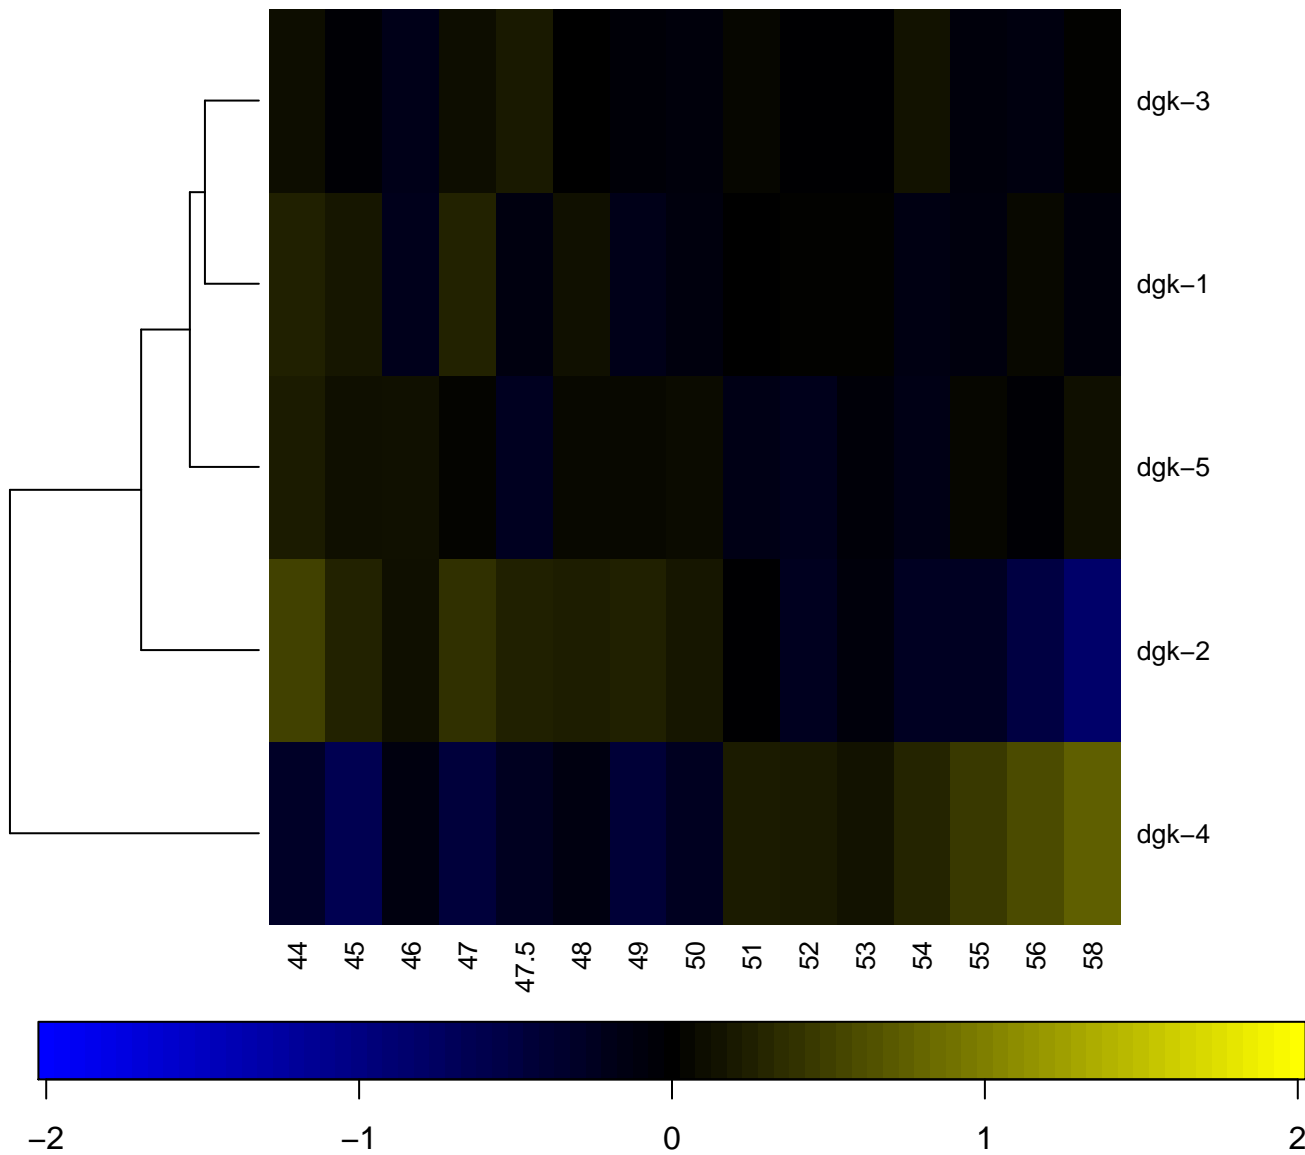

# dhs

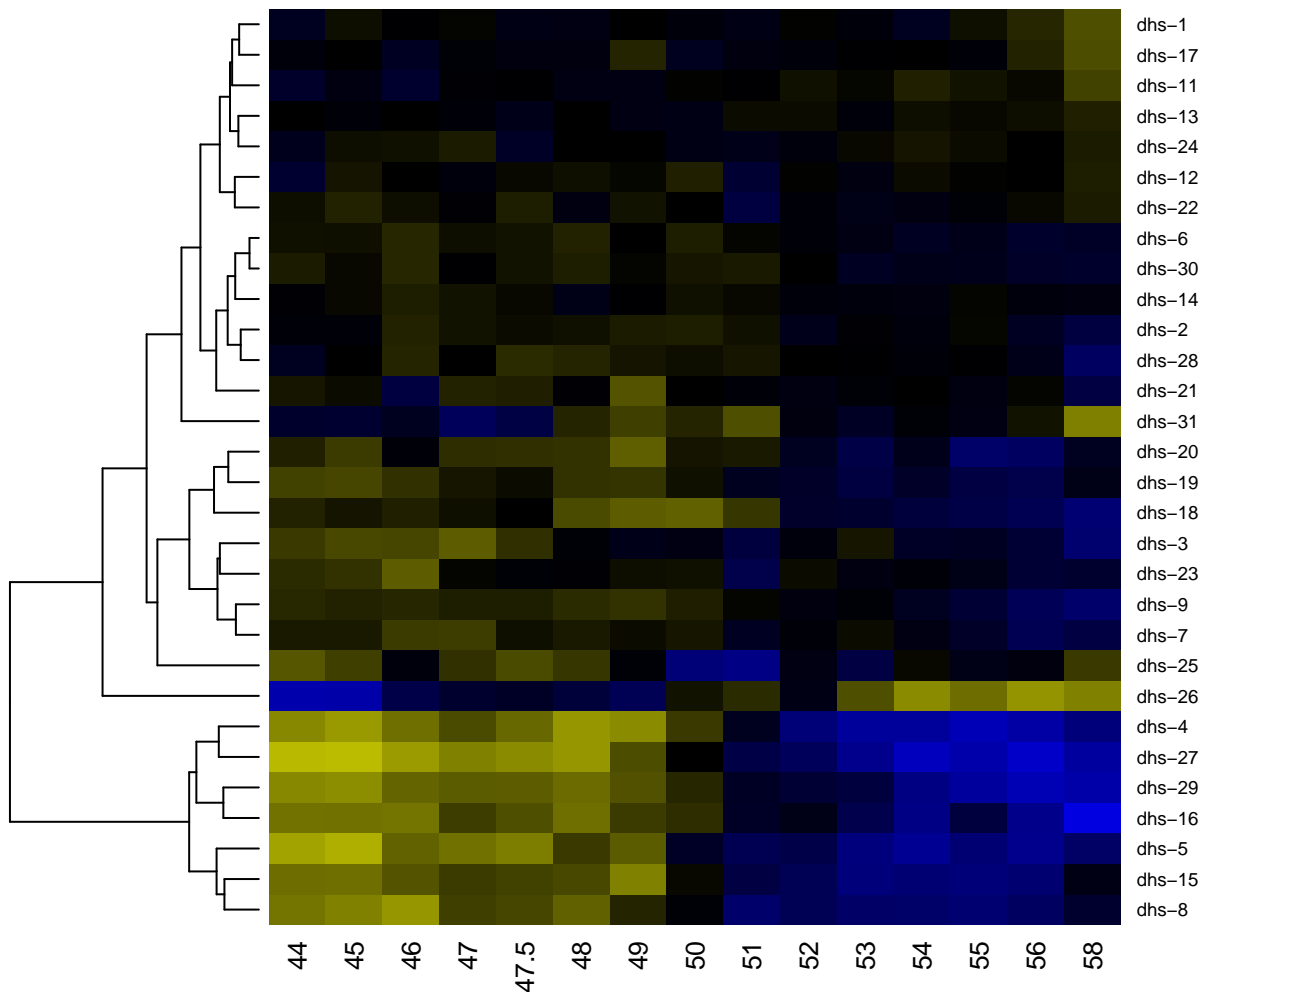

-2

-1

0

1

2

# dlc

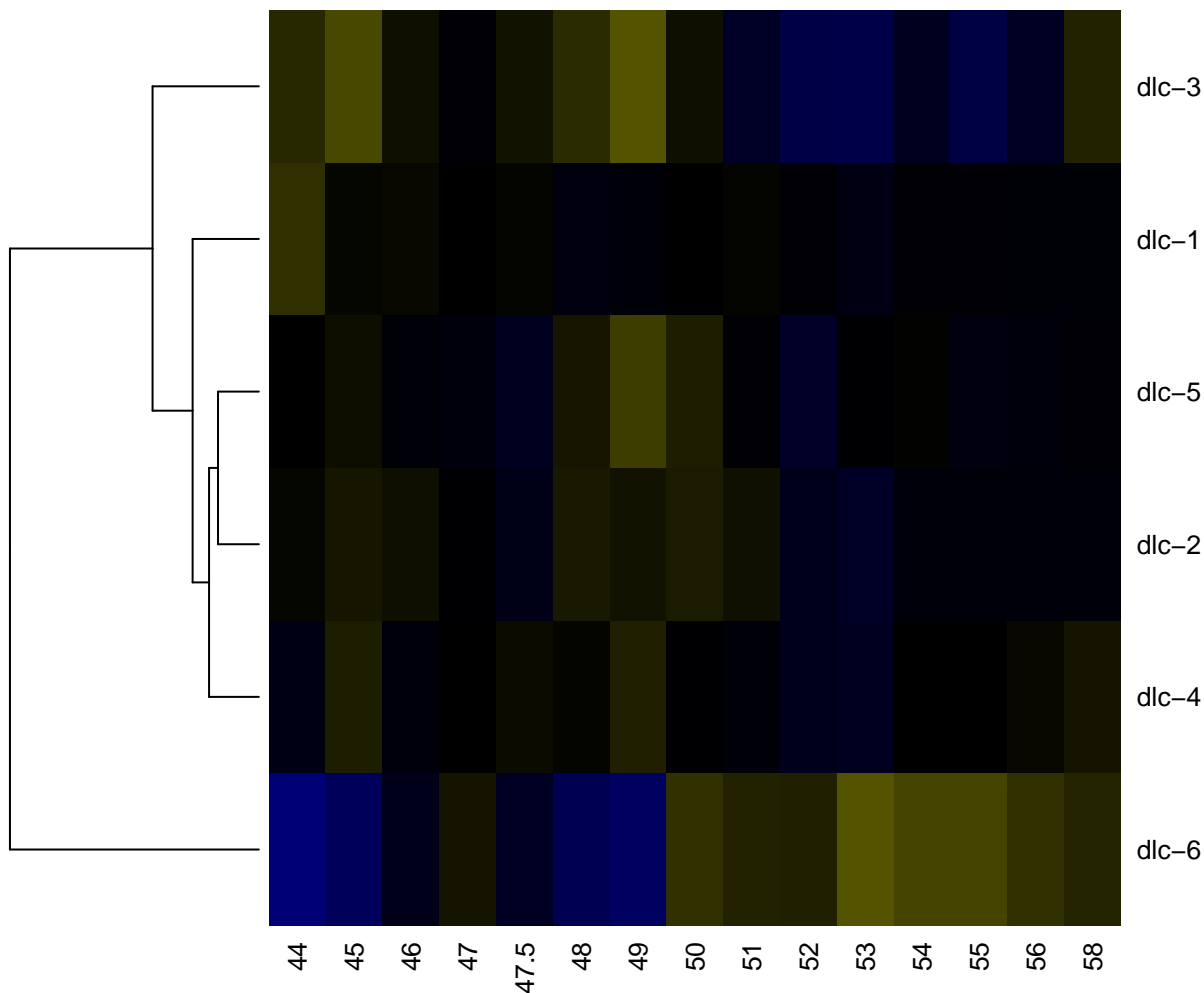





# dnj

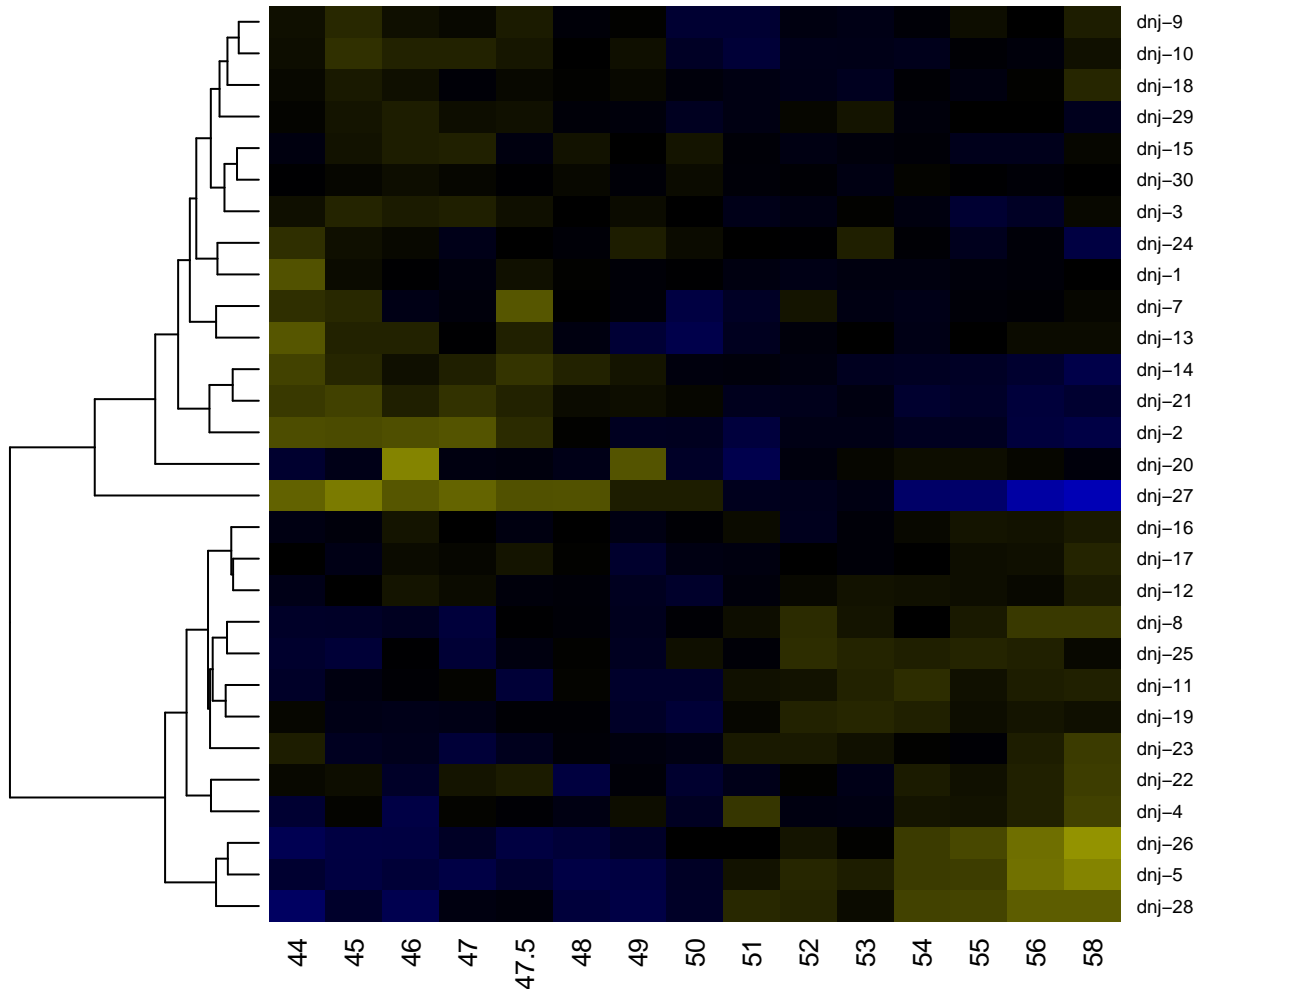

# dod

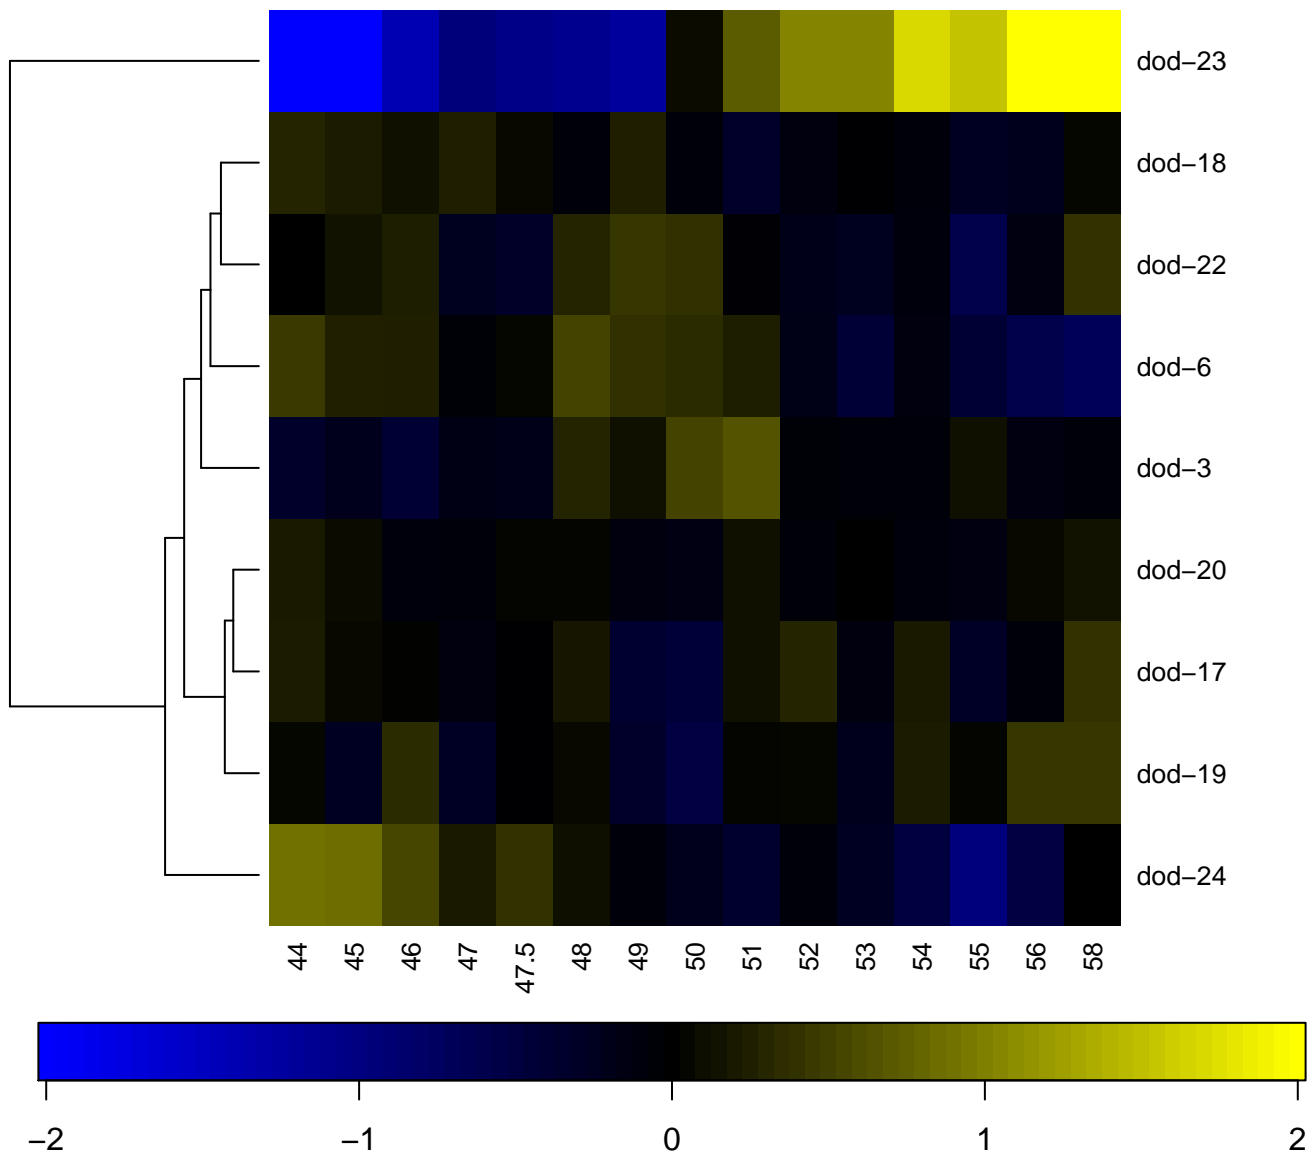

# dop

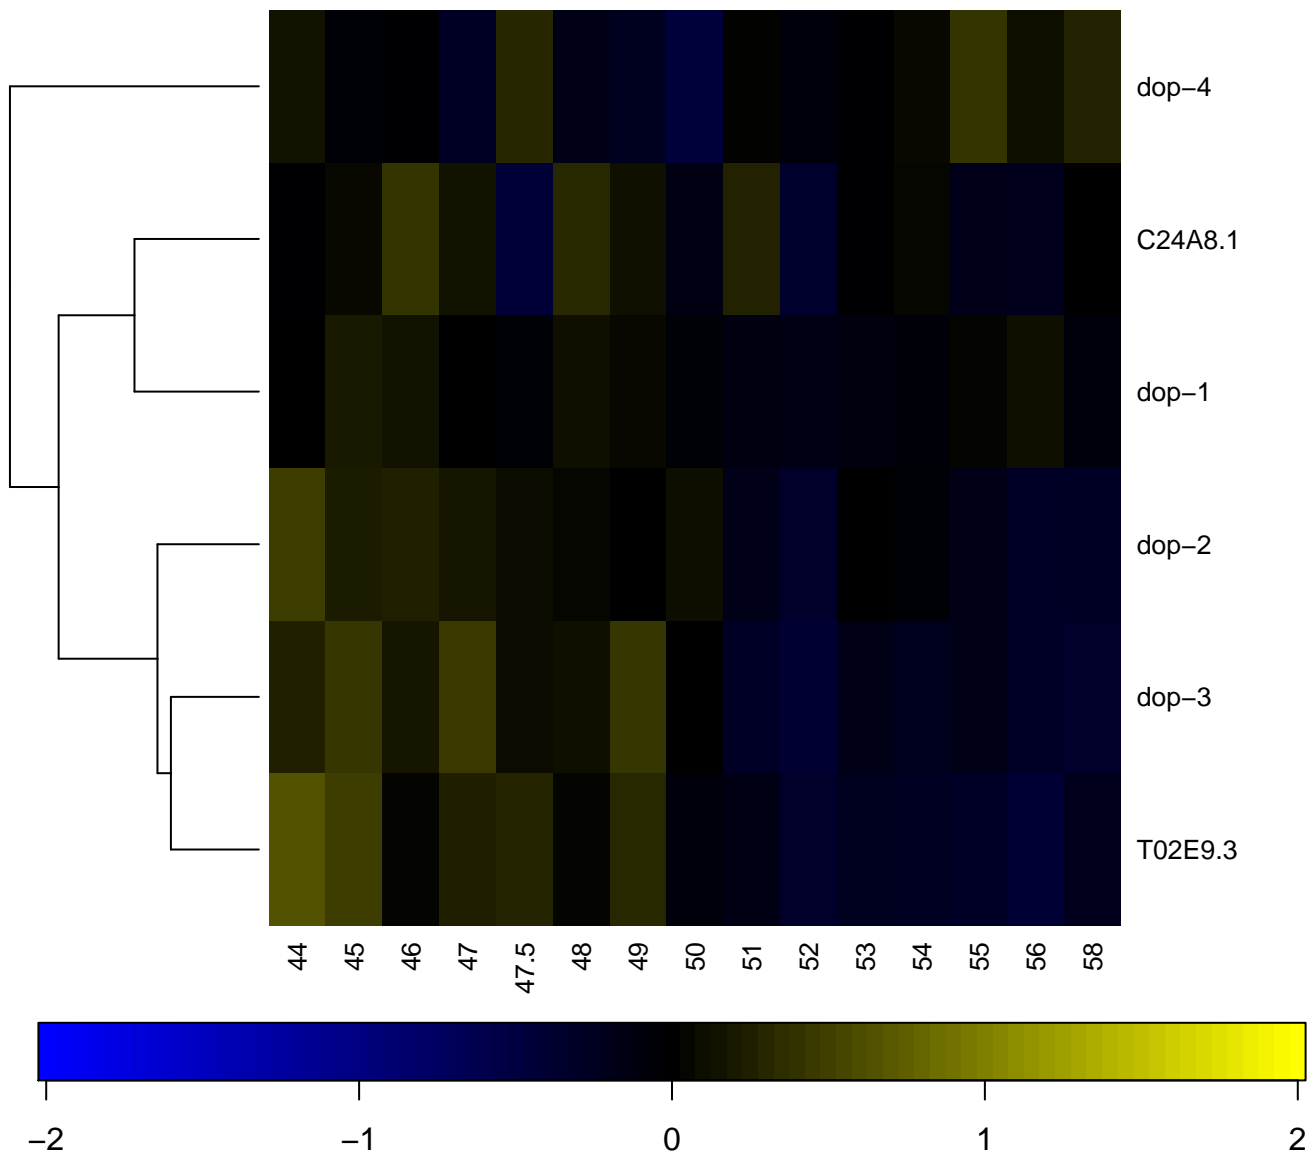



# dpf

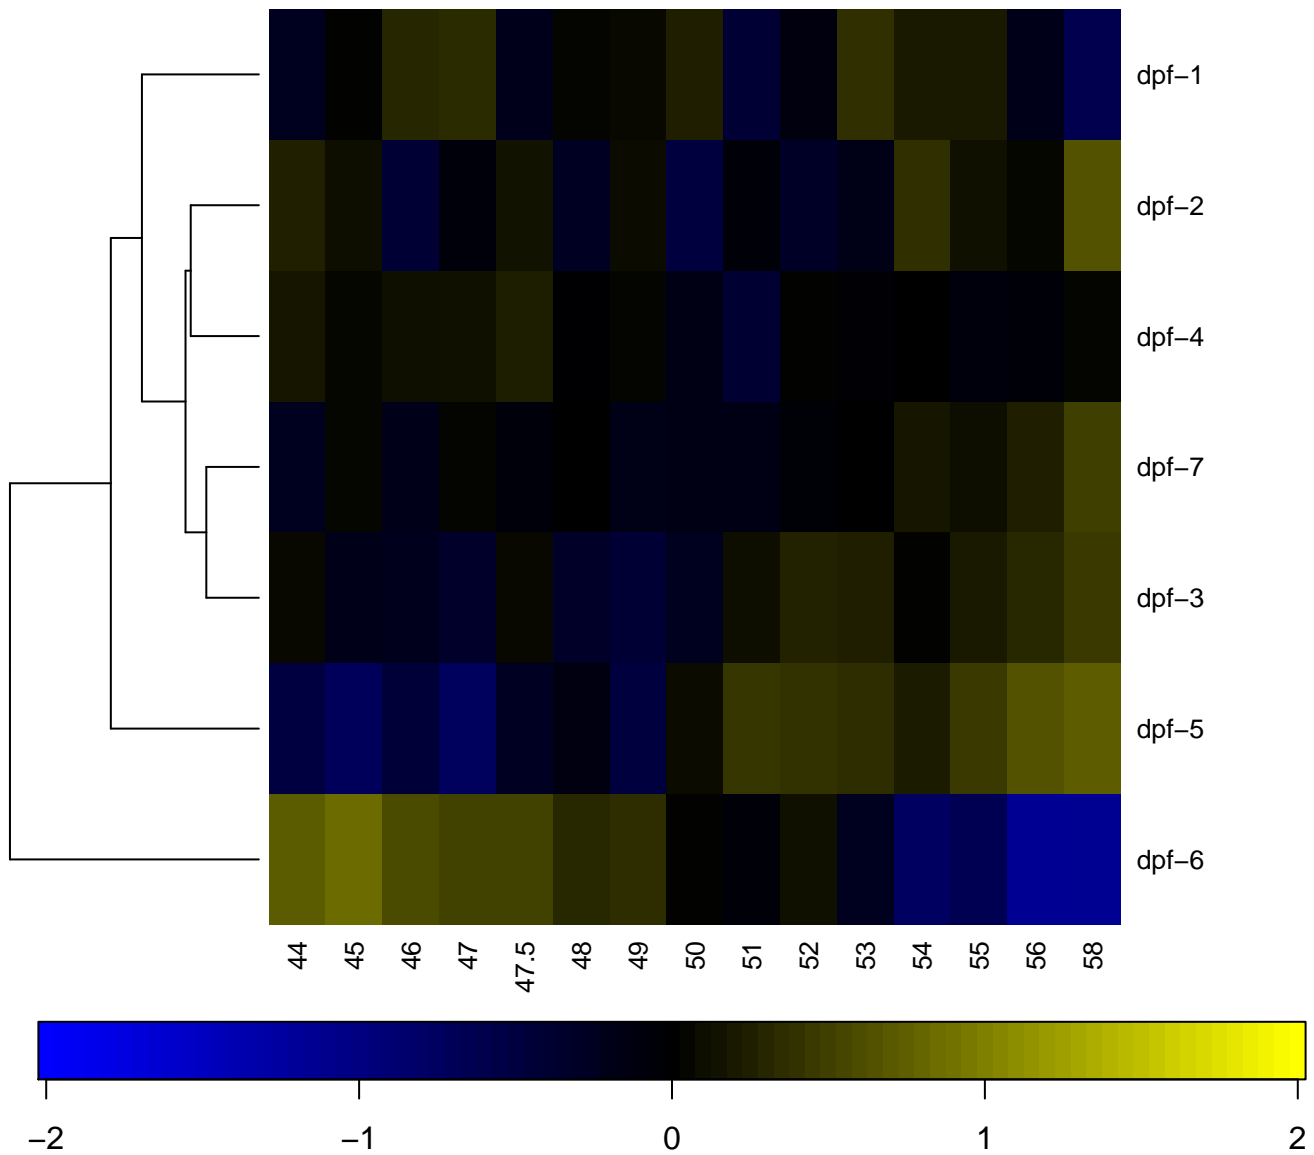

# dpy

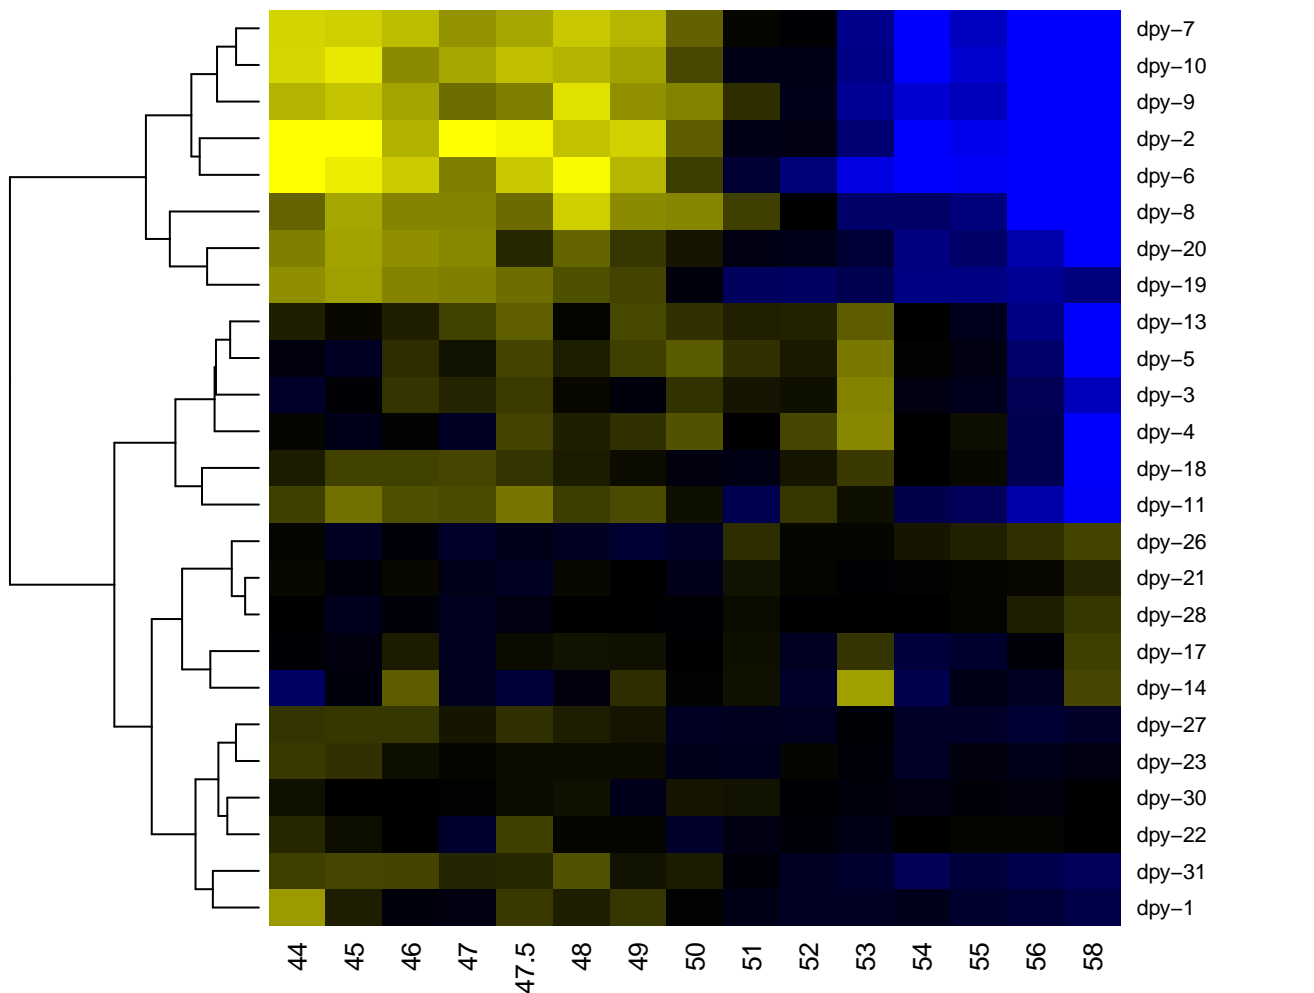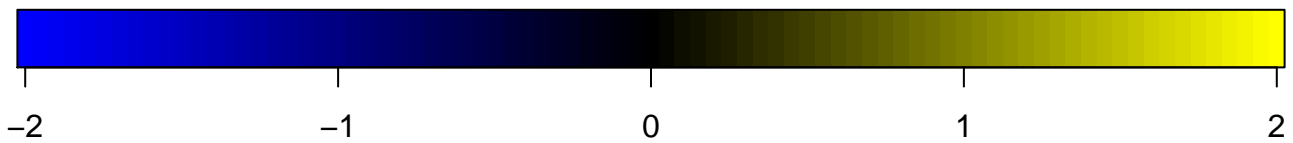

# dsl

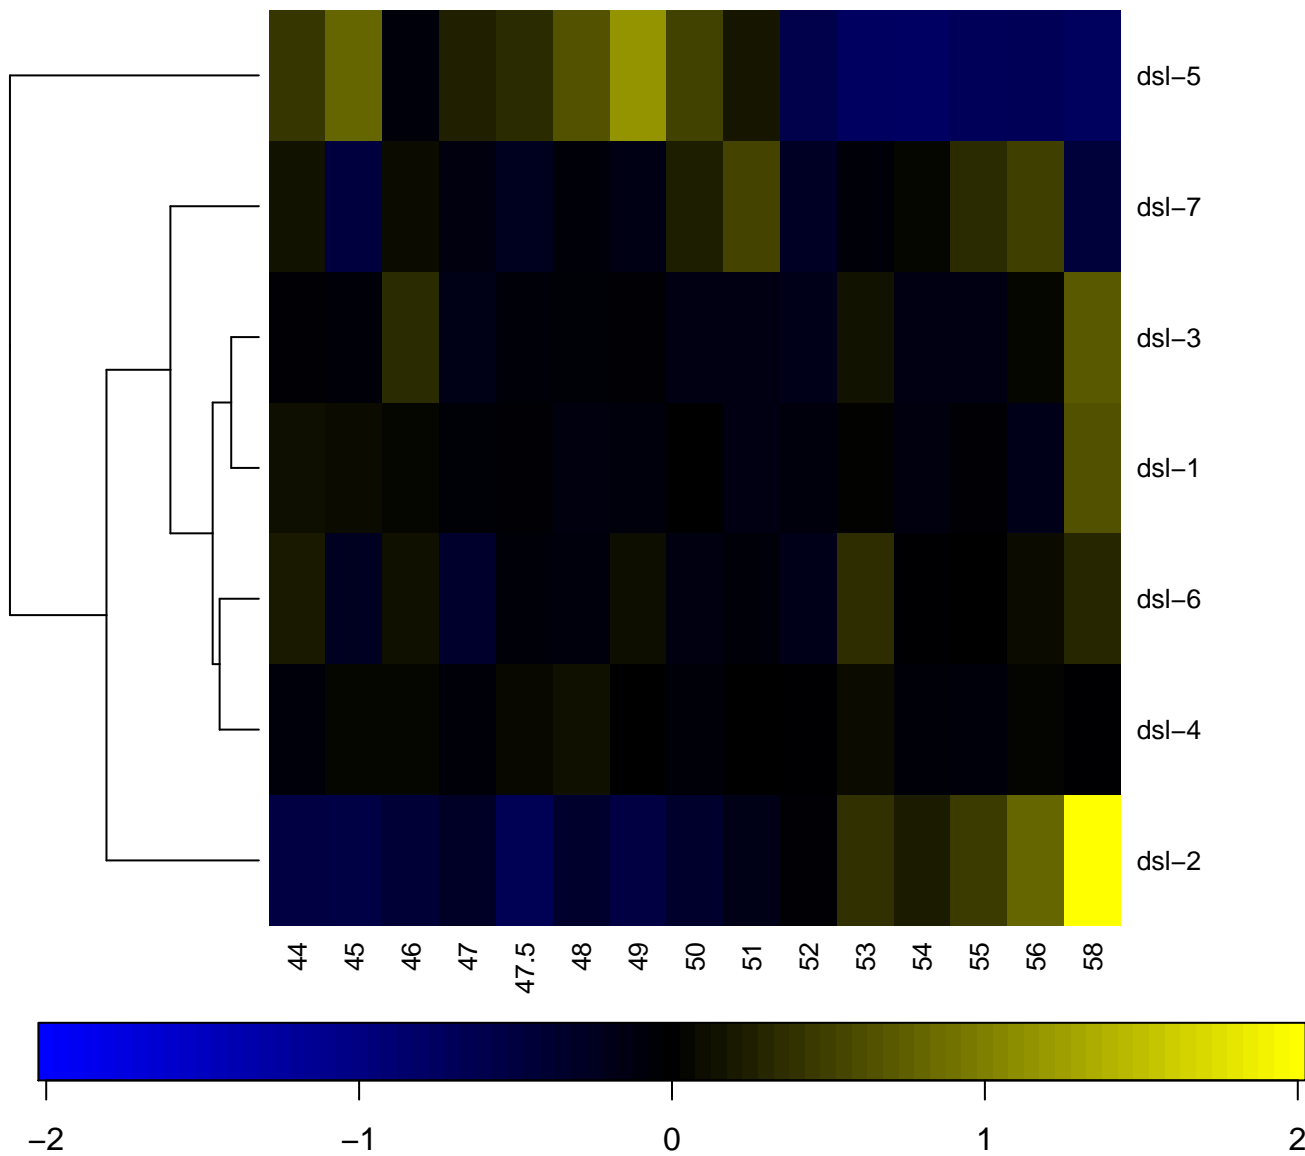

# dyf

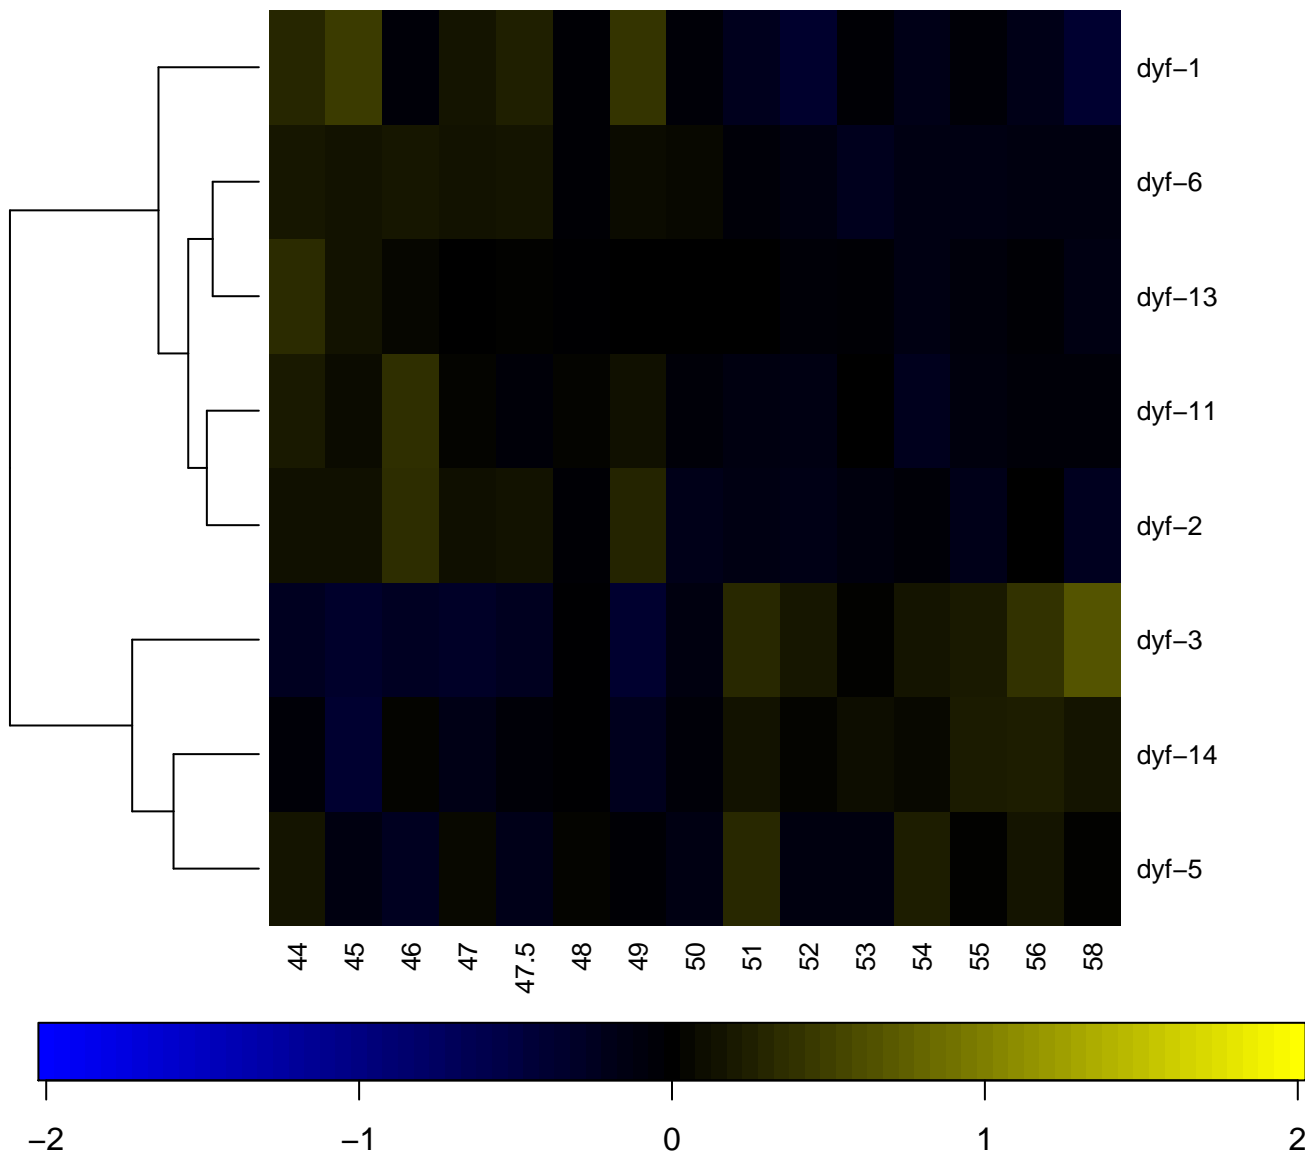

# eat

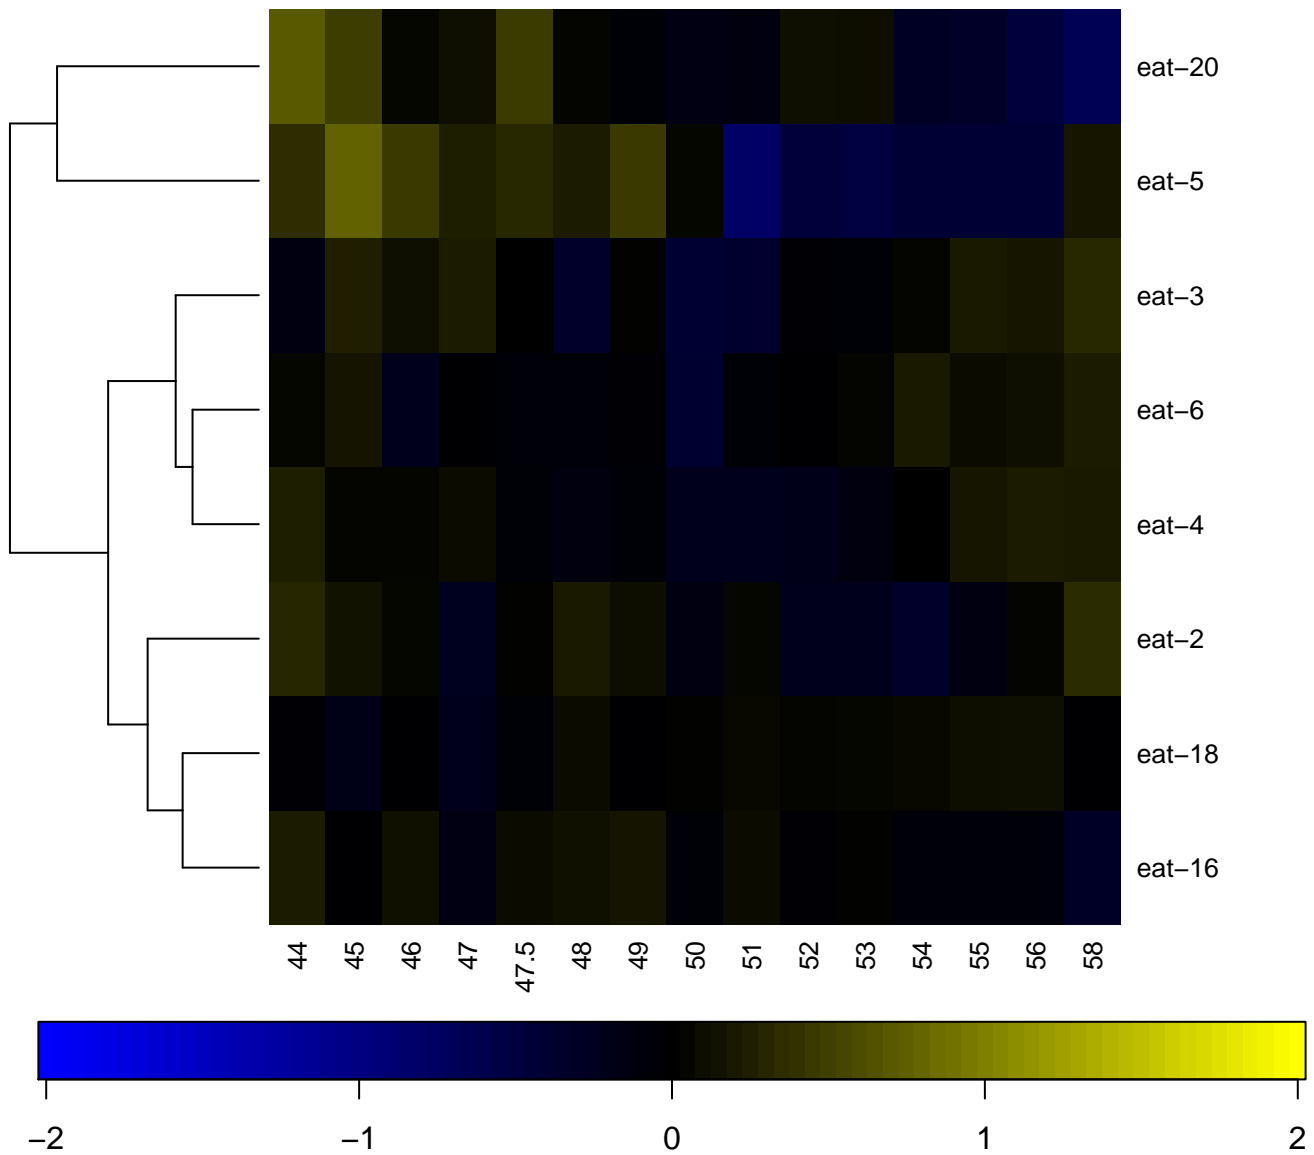

# ech

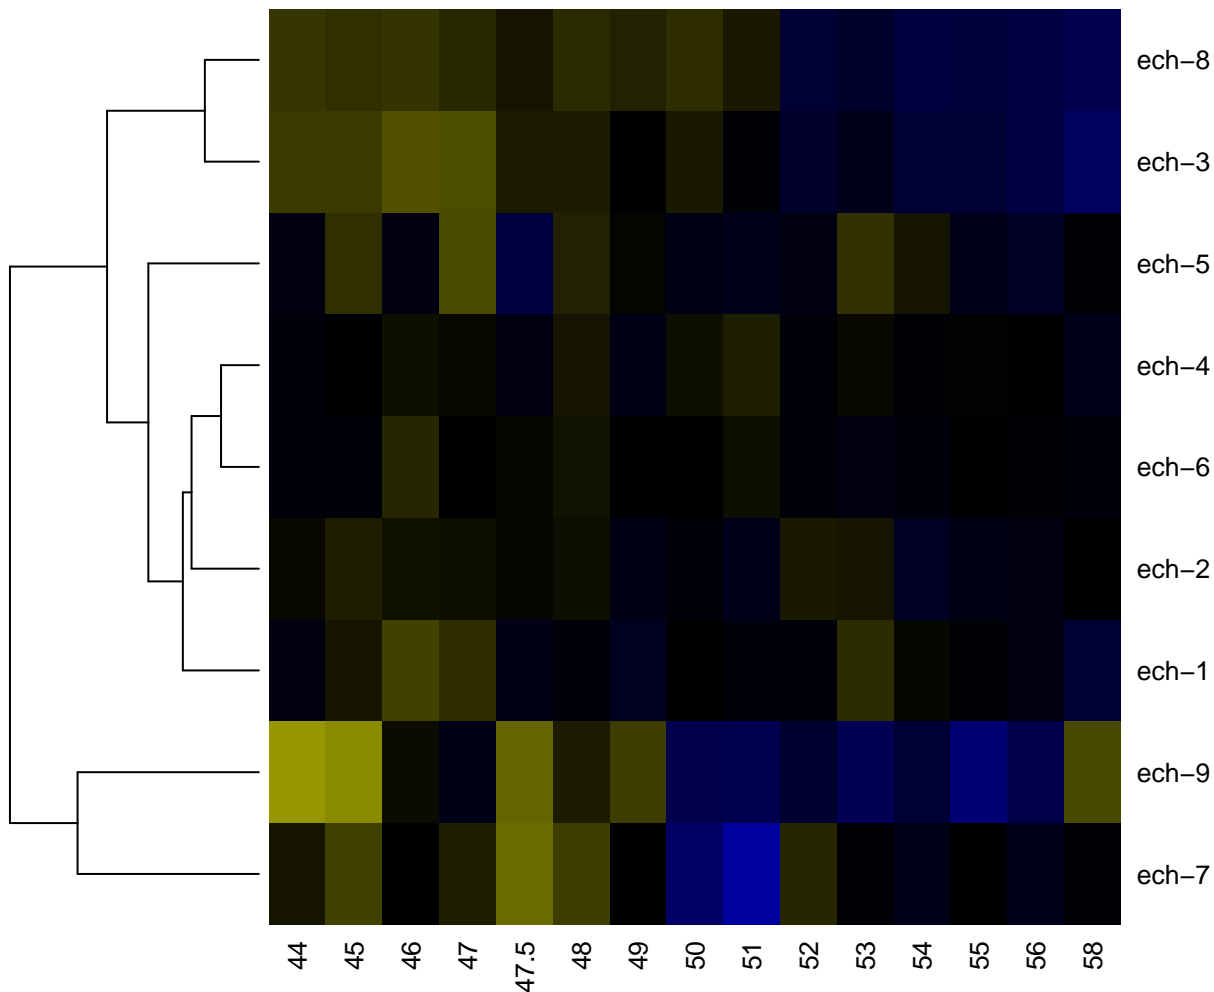

-2

-1

0

1

2



# egg

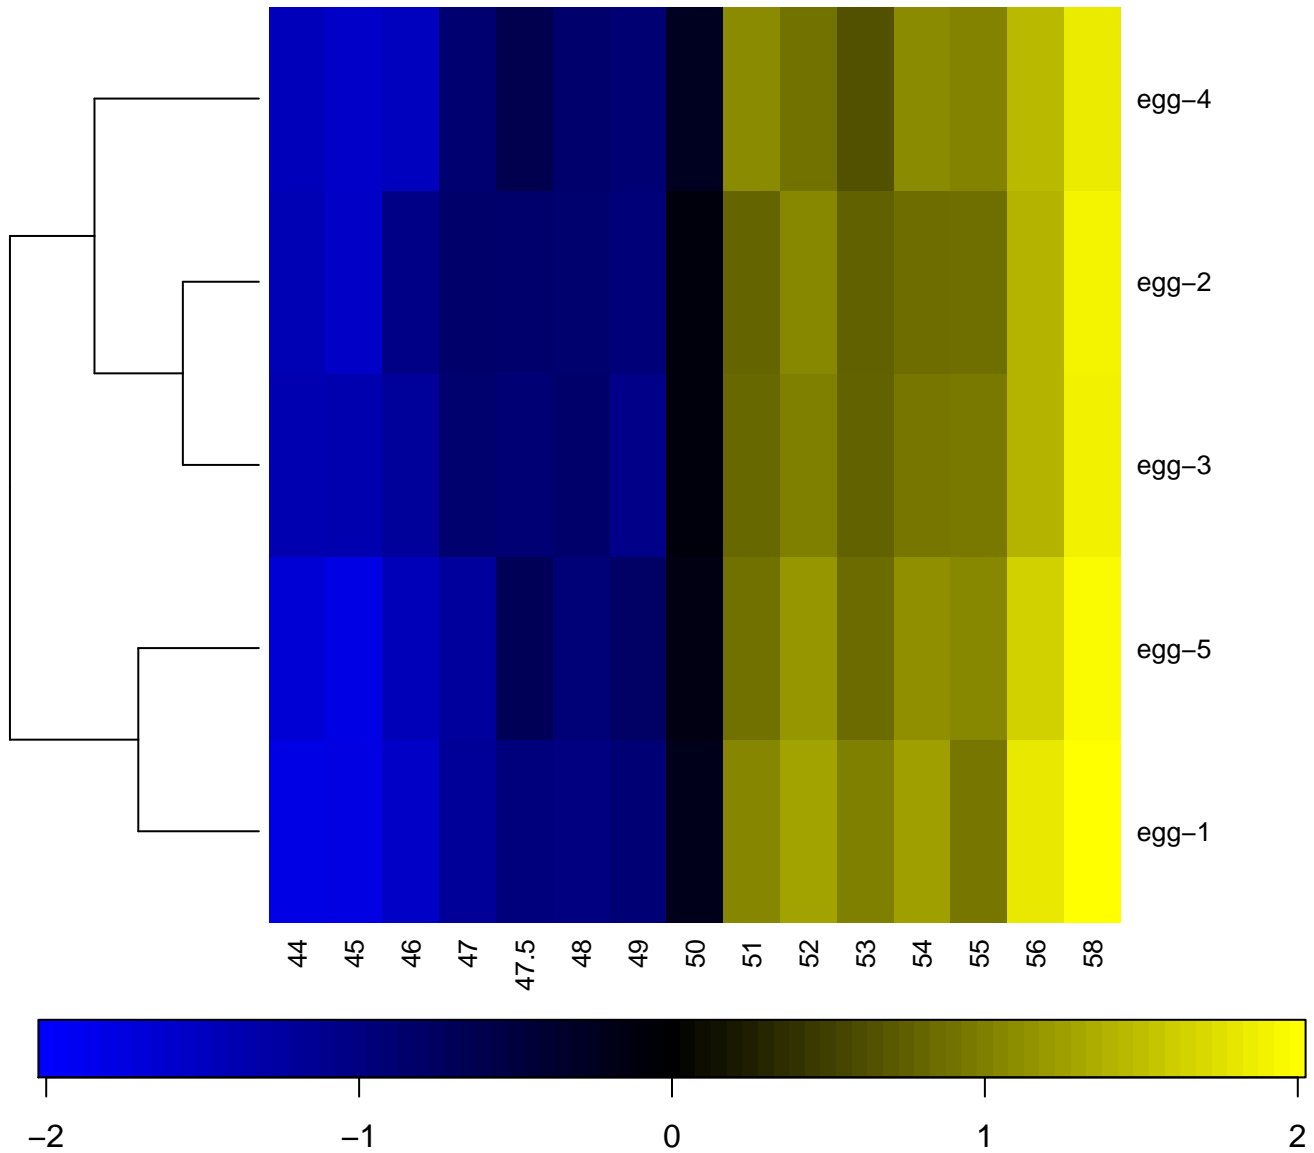



# egl

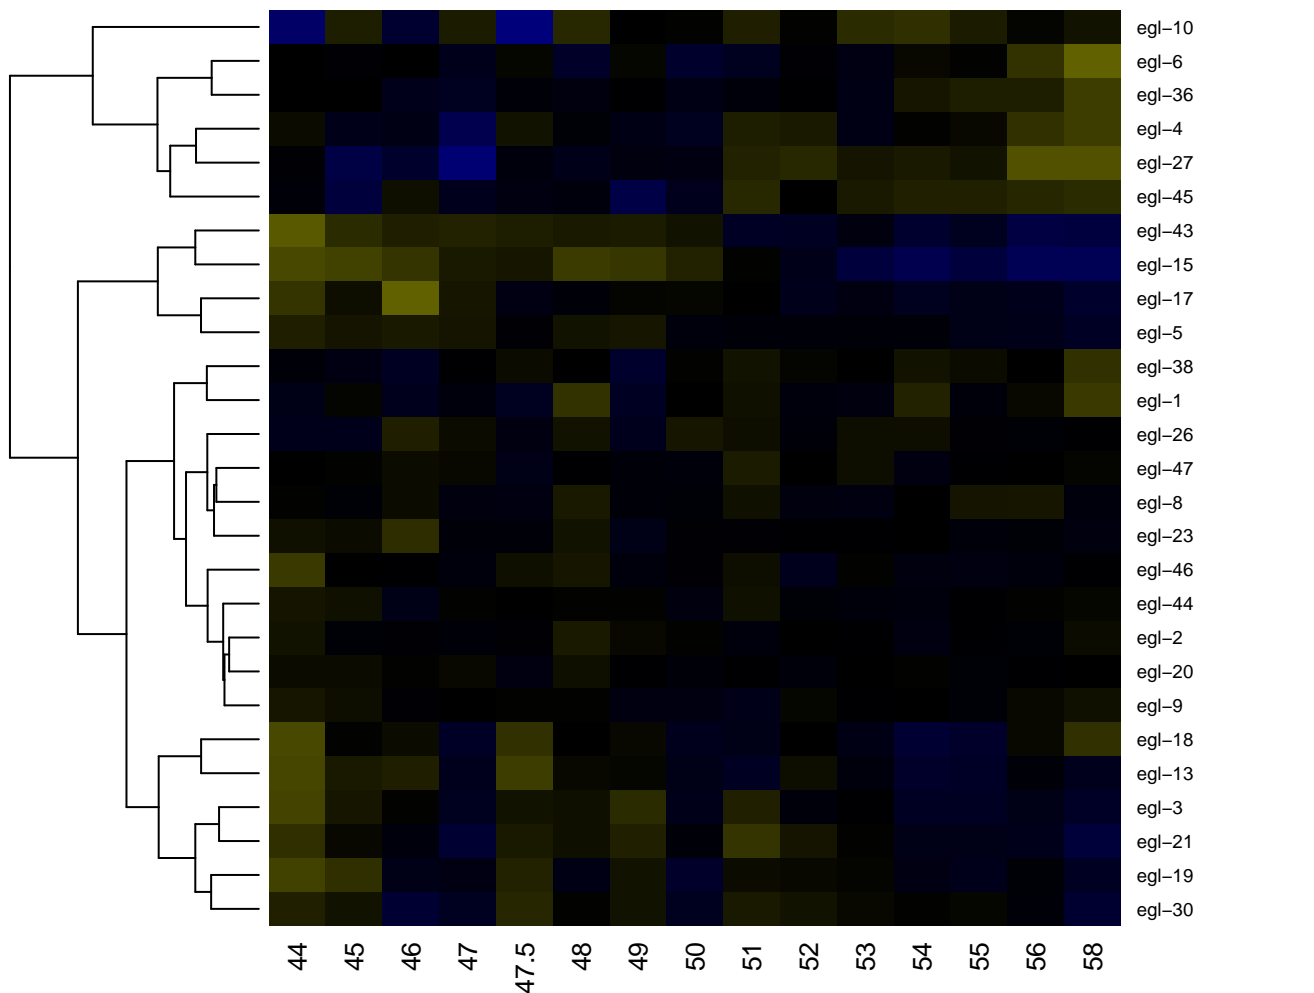

-2

-1

0

1

2

# eif

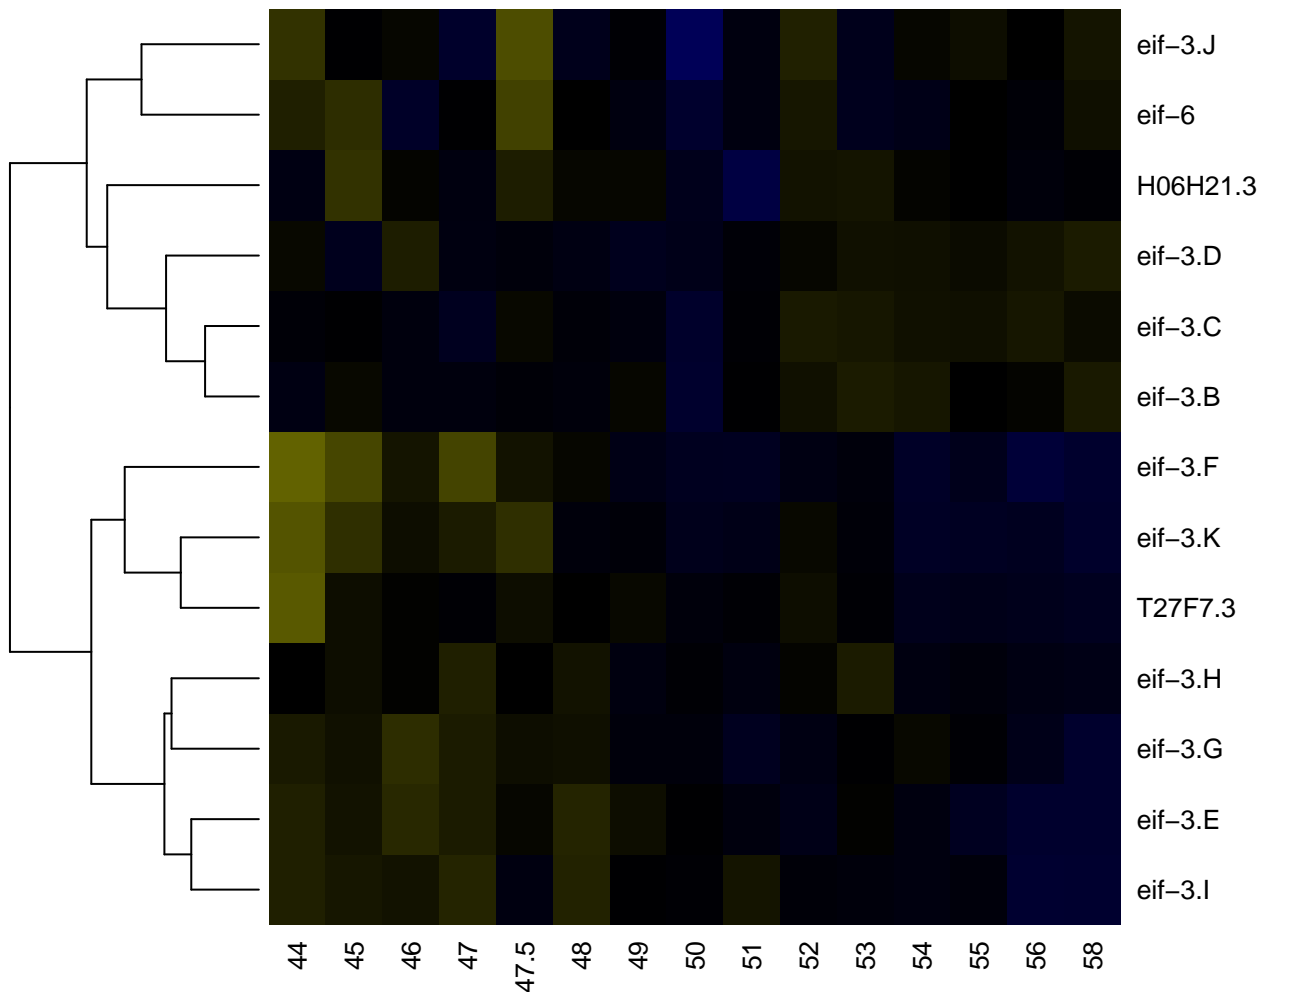

-2

-1

0

1

2

# elo

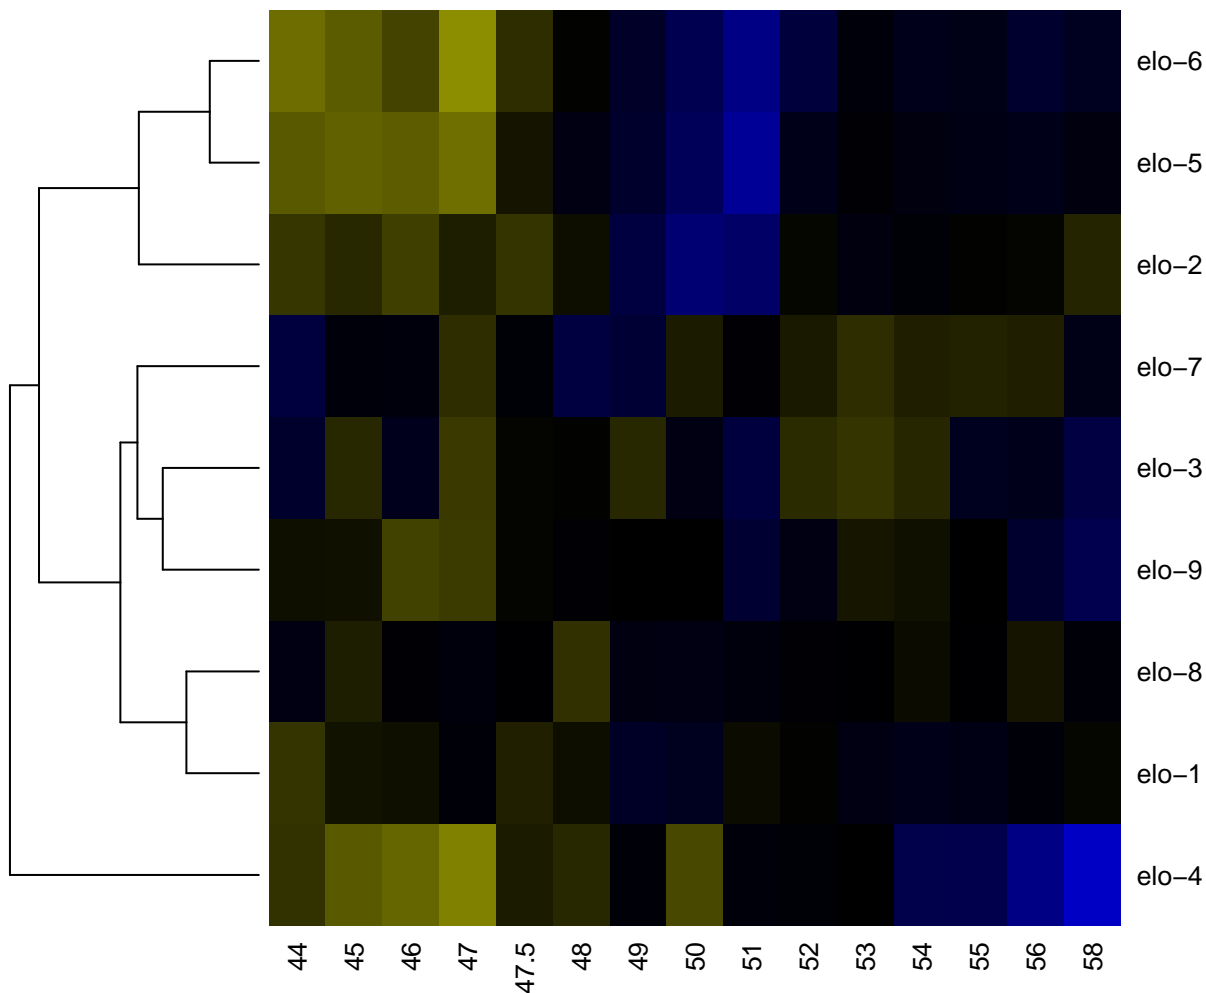

-2

-1

0

1

2

# elt

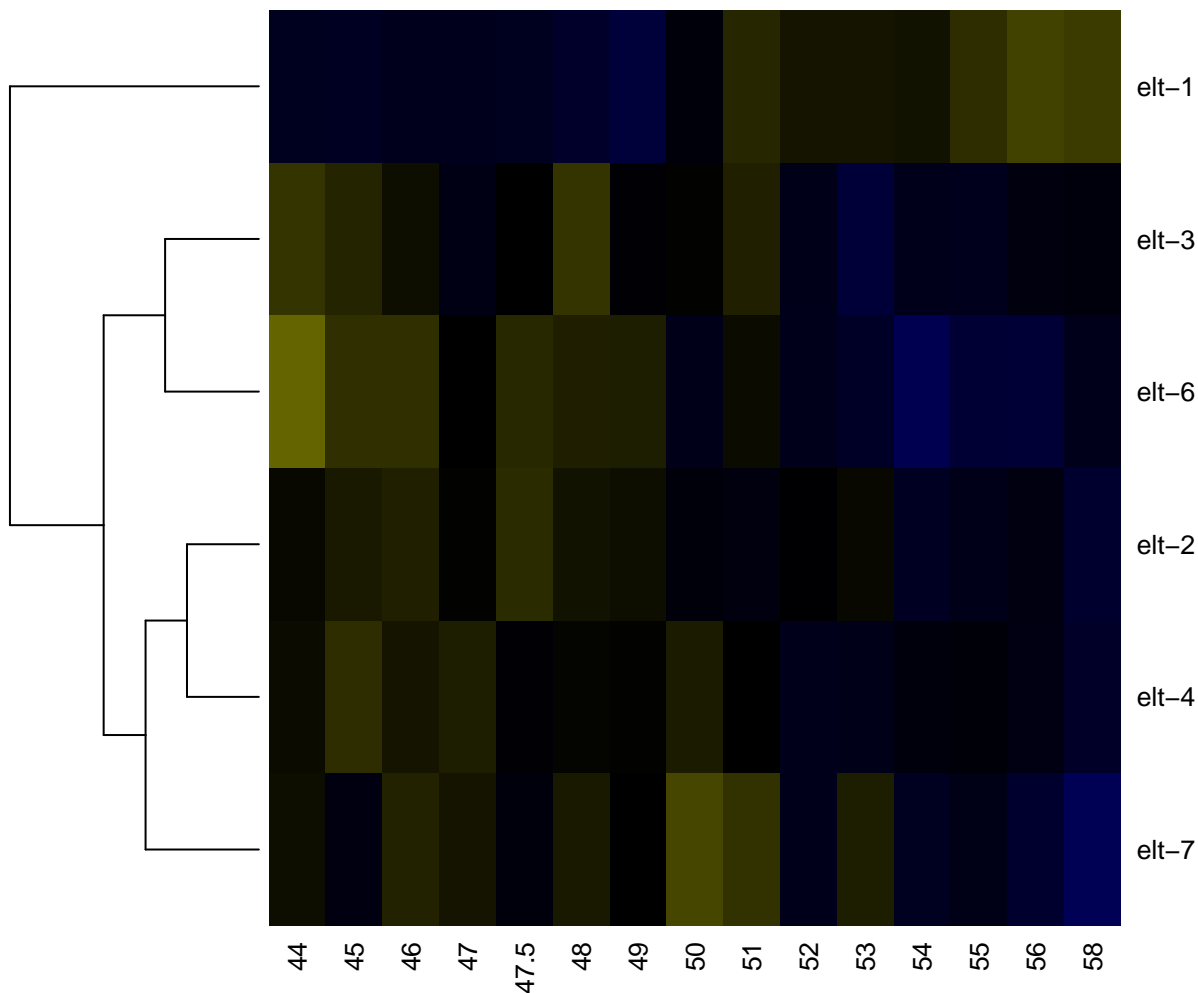

-2

-1

0

1

2



# eri

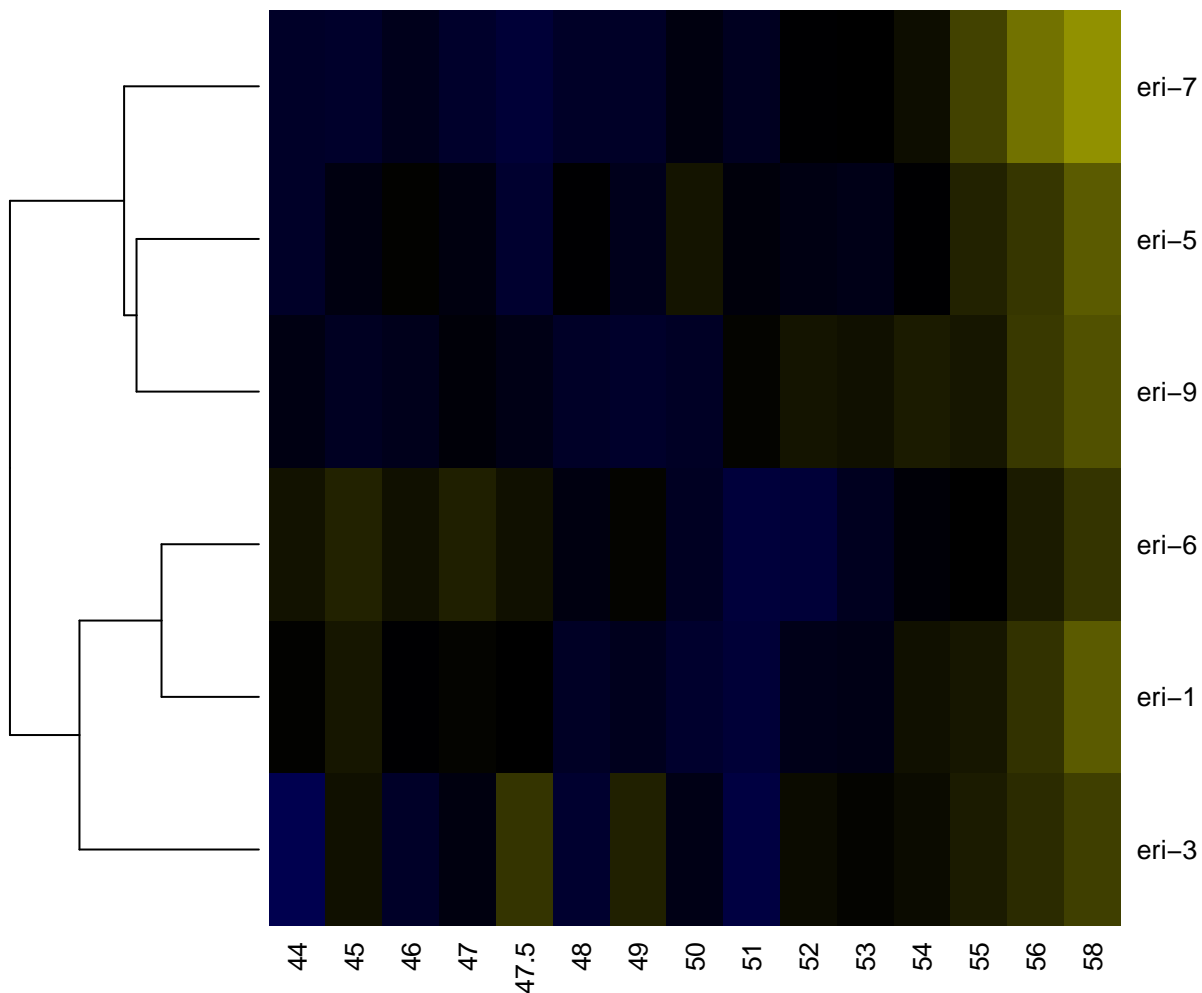

-2

-1

0

1

2







# far

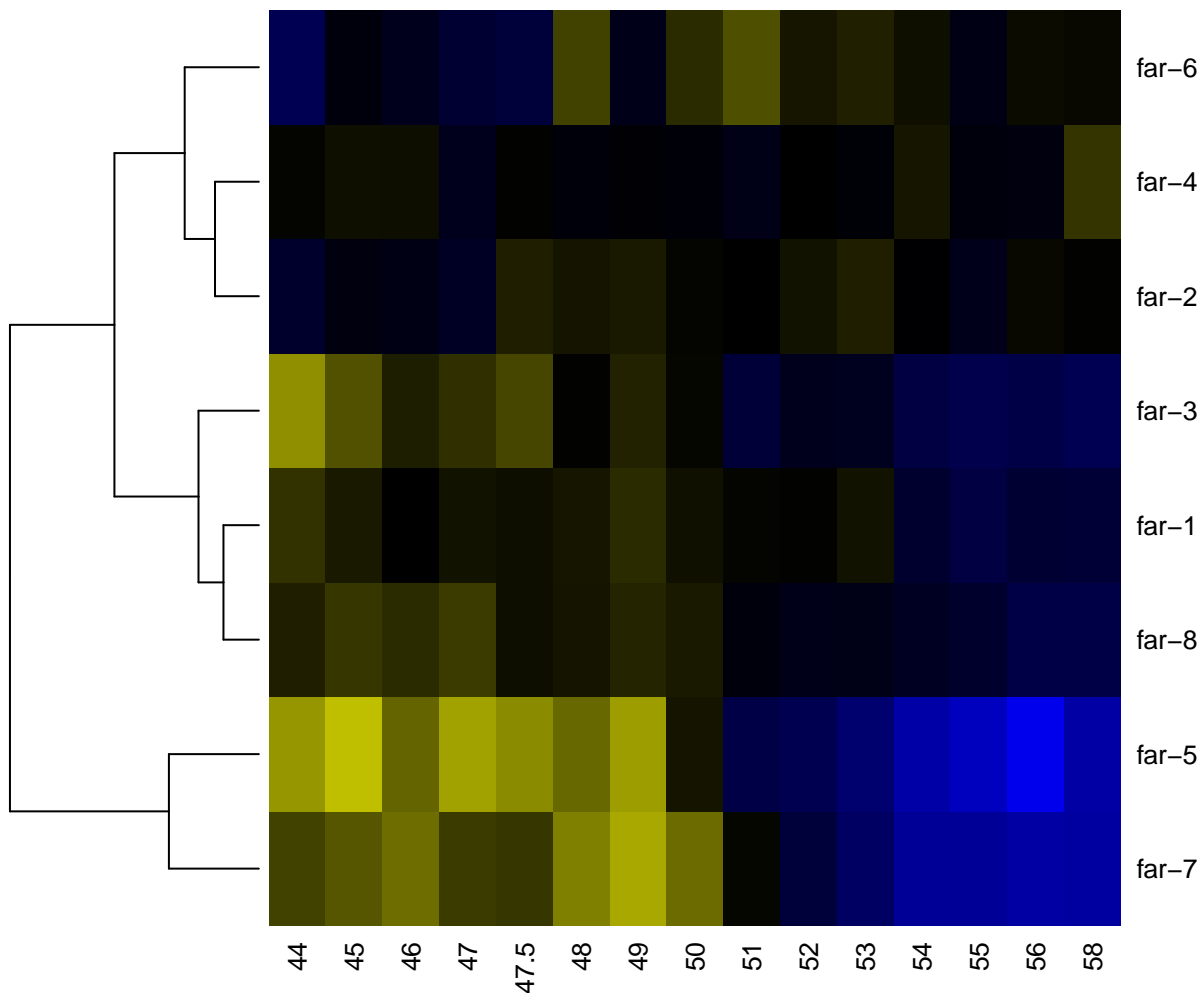

-2

-1

0

1

2

# fat

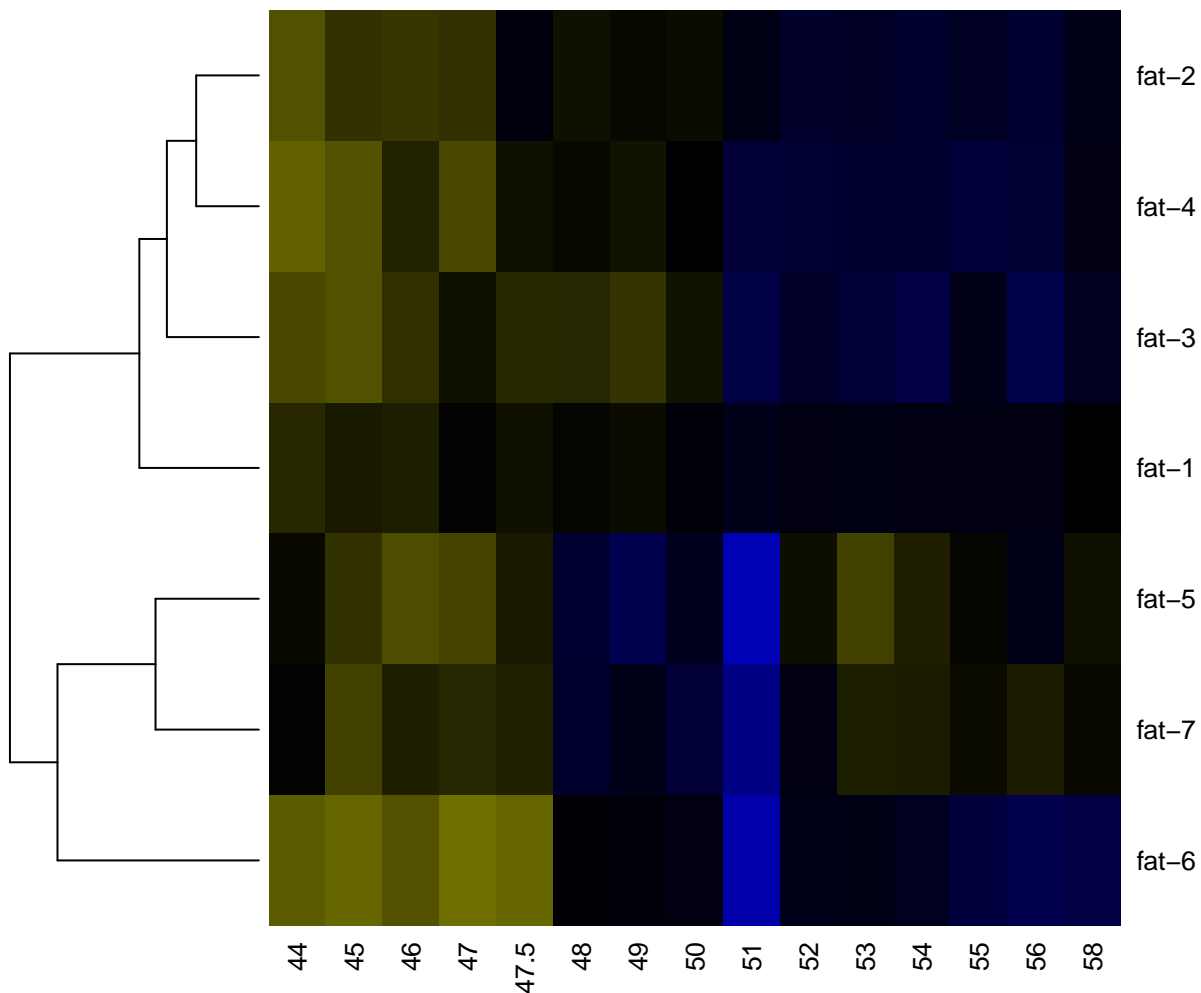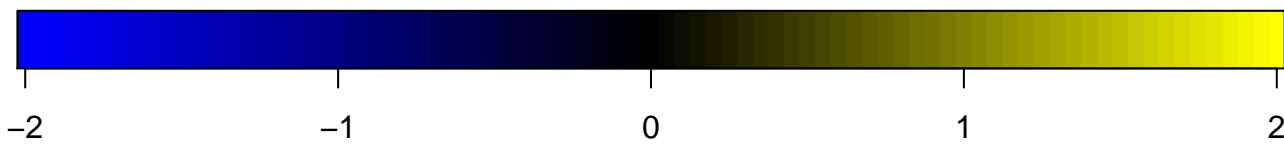

# fbxa

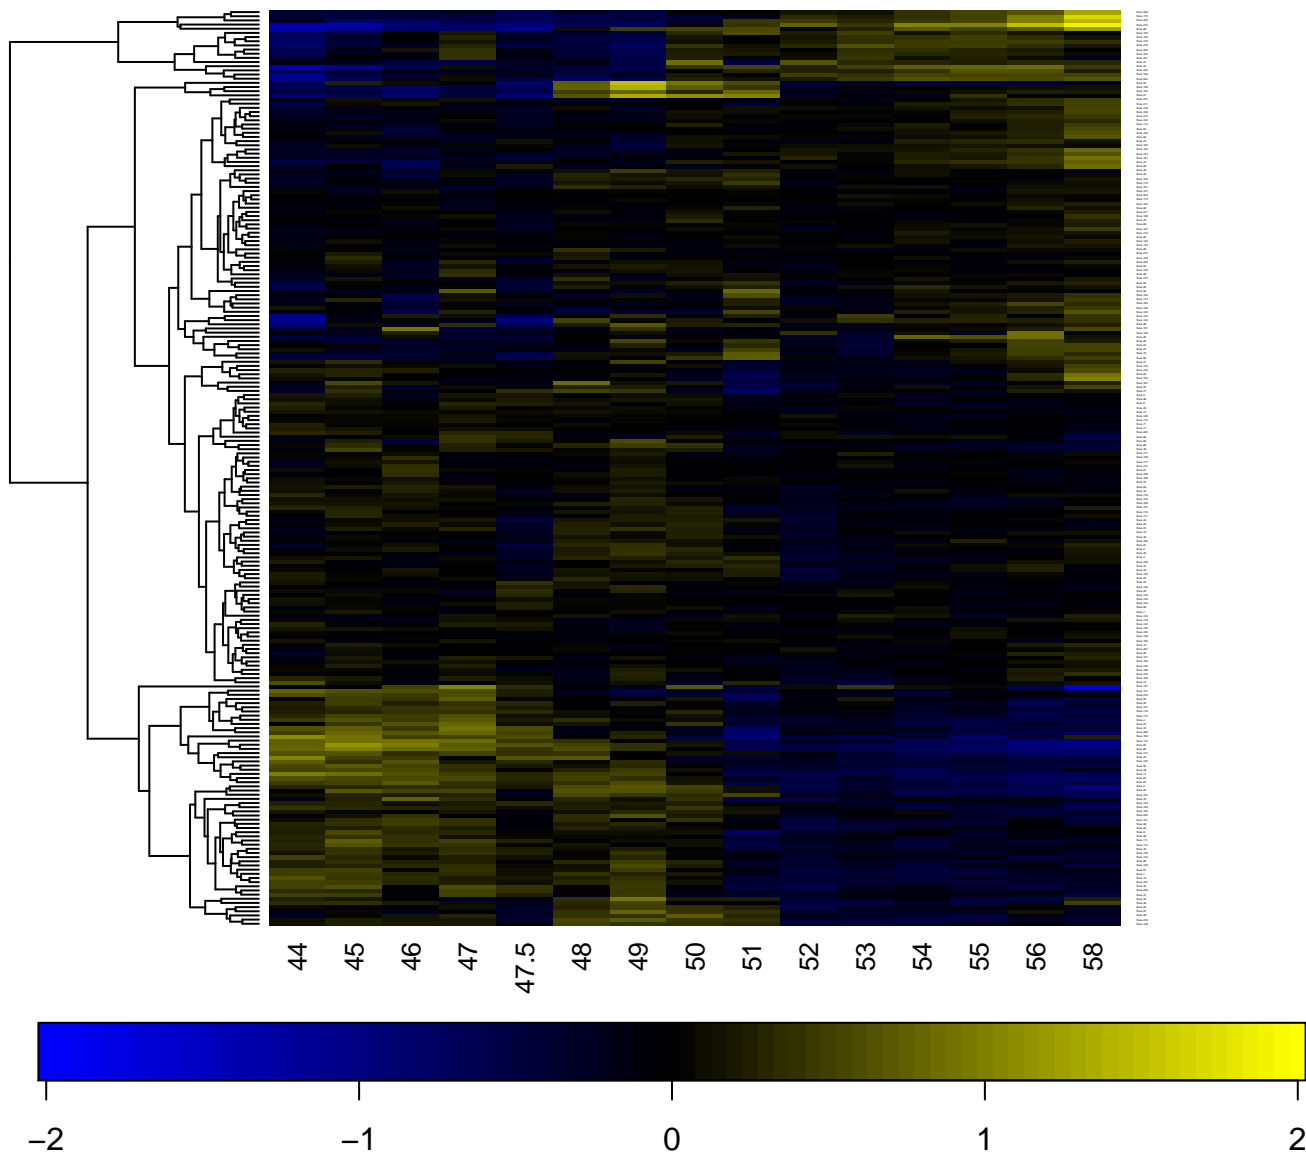

# fbxb

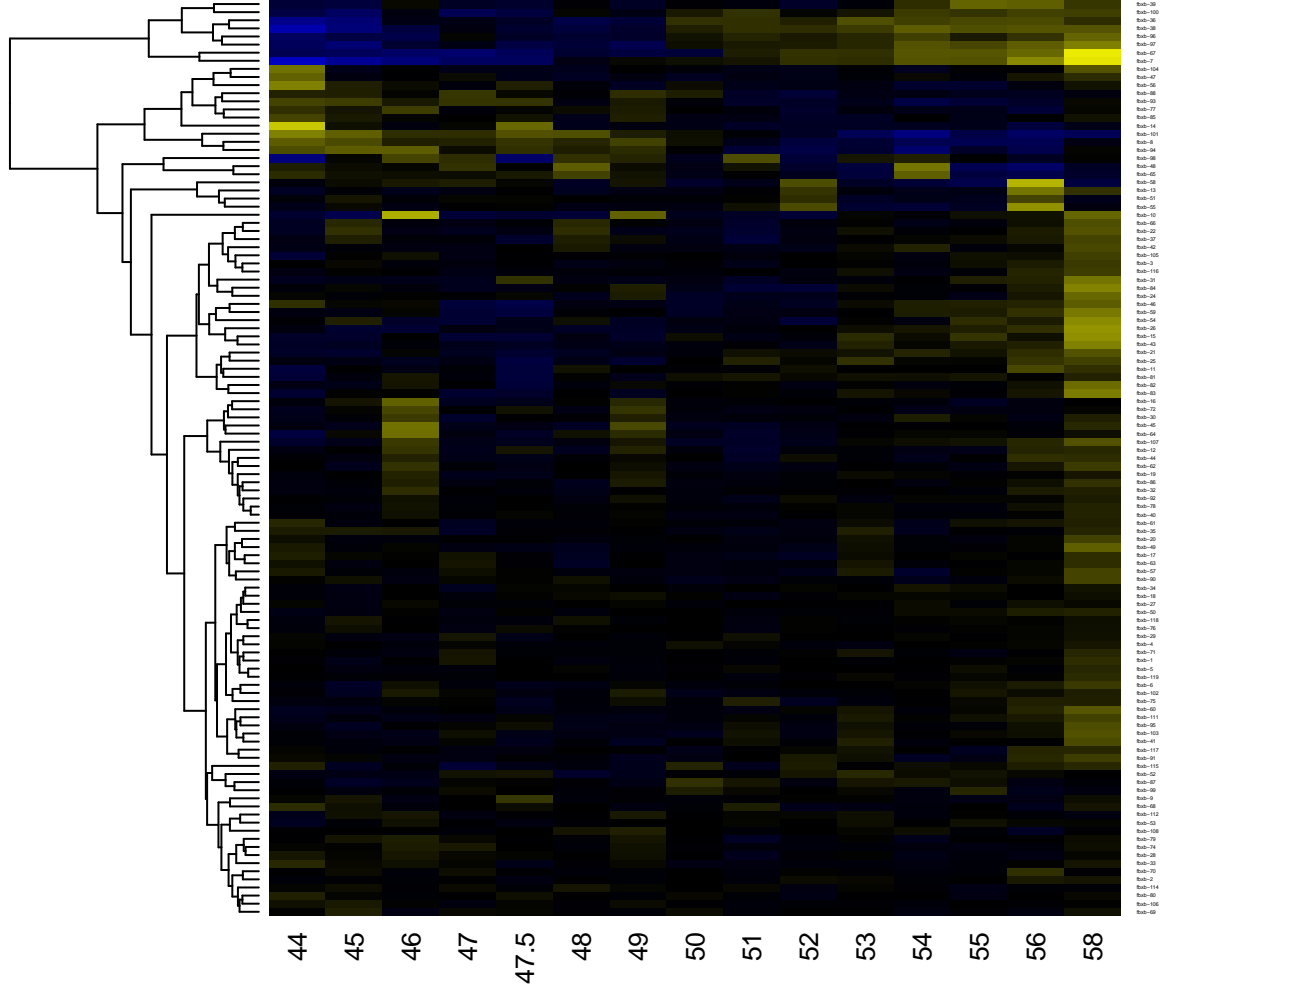

44 45 46 47 47.5 48 49 50 51 52 53 54 55 56 58

fb-39  
fb-100  
fb-34  
fb-38  
fb-36  
fb-07  
fb-07  
fb-104  
fb-07  
fb-34  
fb-38  
fb-32  
fb-77  
fb-36  
fb-14  
fb-101  
fb-31  
fb-38  
fb-38  
fb-05  
fb-31  
fb-13  
fb-35  
fb-35  
fb-35  
fb-32  
fb-27  
fb-32  
fb-105  
fb-31  
fb-116  
fb-31  
fb-34  
fb-34  
fb-35  
fb-34  
fb-34  
fb-15  
fb-33  
fb-21  
fb-11  
fb-30  
fb-16  
fb-16  
fb-30  
fb-30  
fb-34  
fb-12  
fb-34  
fb-32  
fb-32  
fb-36  
fb-36  
fb-32  
fb-30  
fb-30  
fb-30  
fb-01  
fb-35  
fb-30  
fb-38  
fb-17  
fb-33  
fb-07  
fb-30  
fb-34  
fb-14  
fb-27  
fb-30  
fb-118  
fb-18  
fb-29  
fb-31  
fb-71  
fb-31  
fb-119  
fb-102  
fb-30  
fb-75  
fb-30  
fb-111  
fb-36  
fb-103  
fb-31  
fb-117  
fb-32  
fb-115  
fb-07  
fb-07  
fb-30  
fb-31  
fb-112  
fb-33  
fb-108  
fb-33  
fb-74  
fb-33  
fb-33  
fb-21  
fb-14  
fb-30  
fb-35

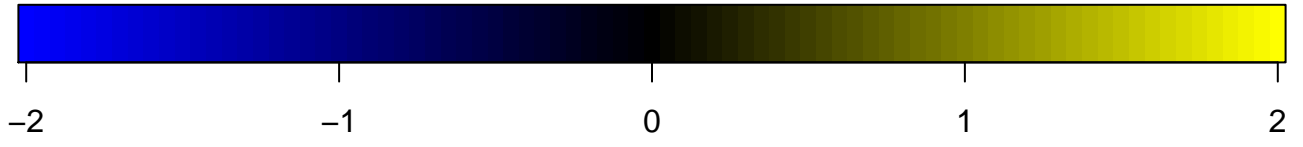

# fbxc

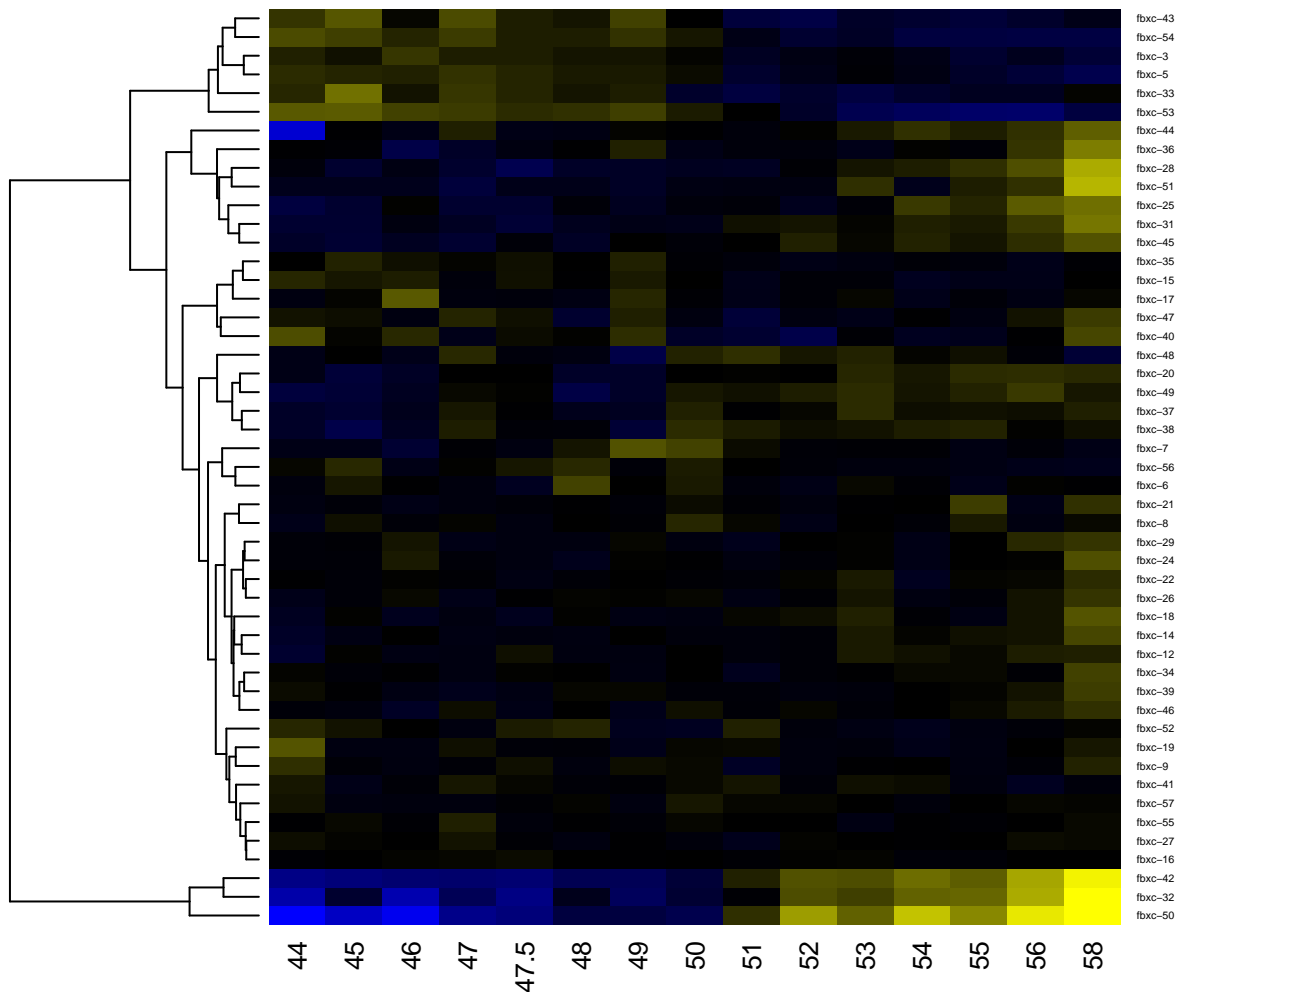

-2

-1

0

1

2

# fip

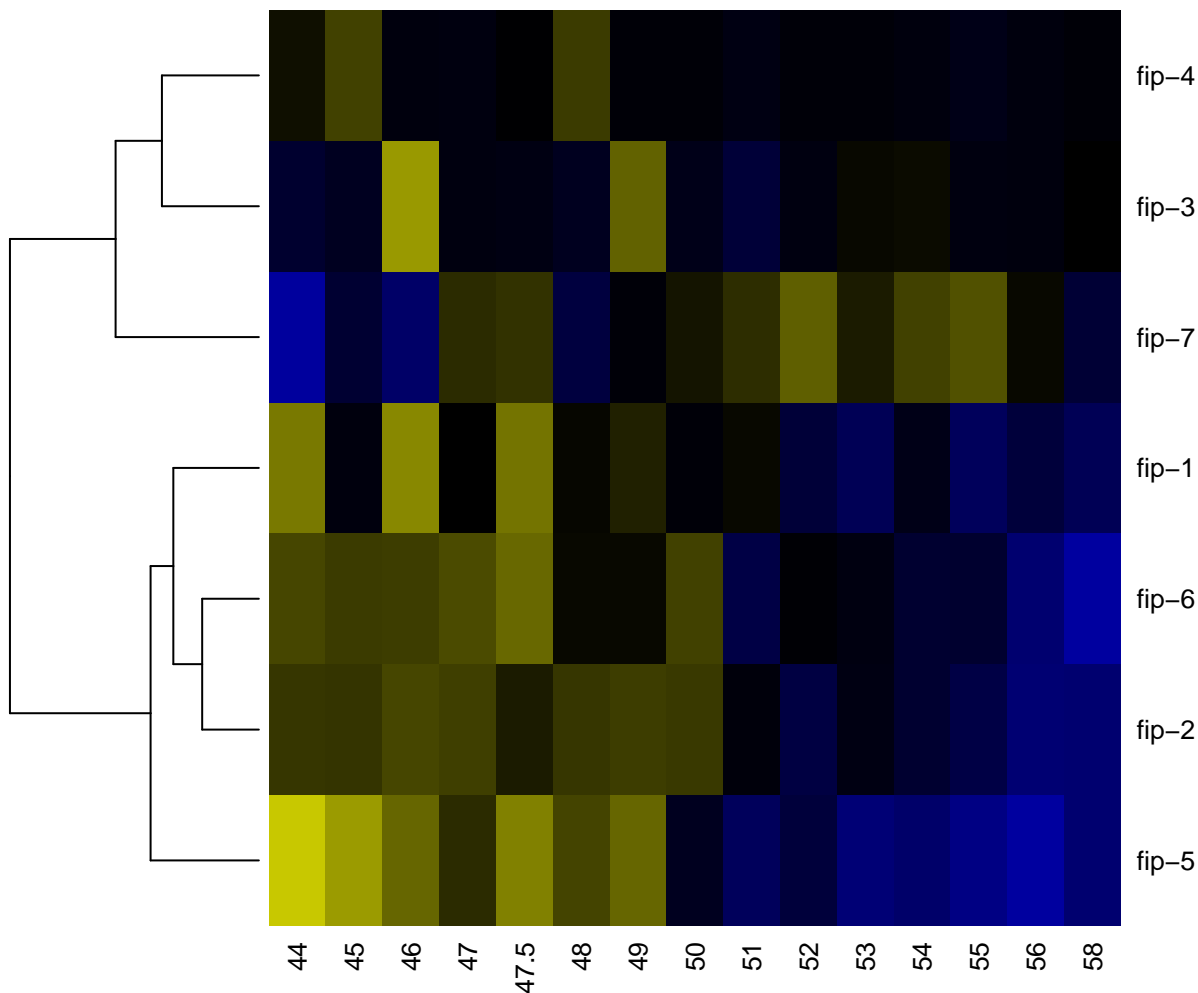

# fipr

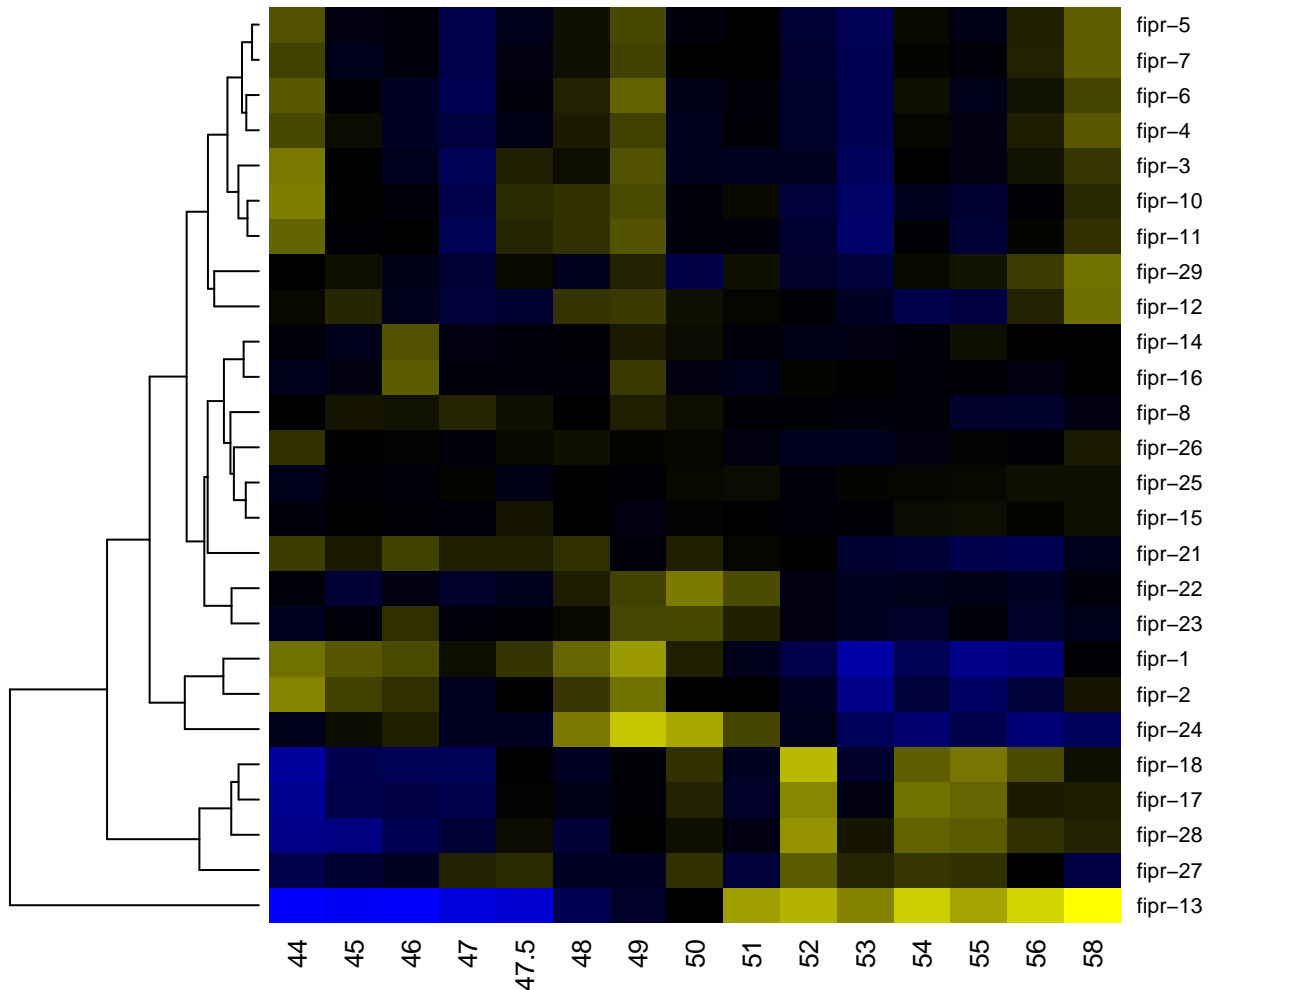

-2

-1

0

1

2

# fkf

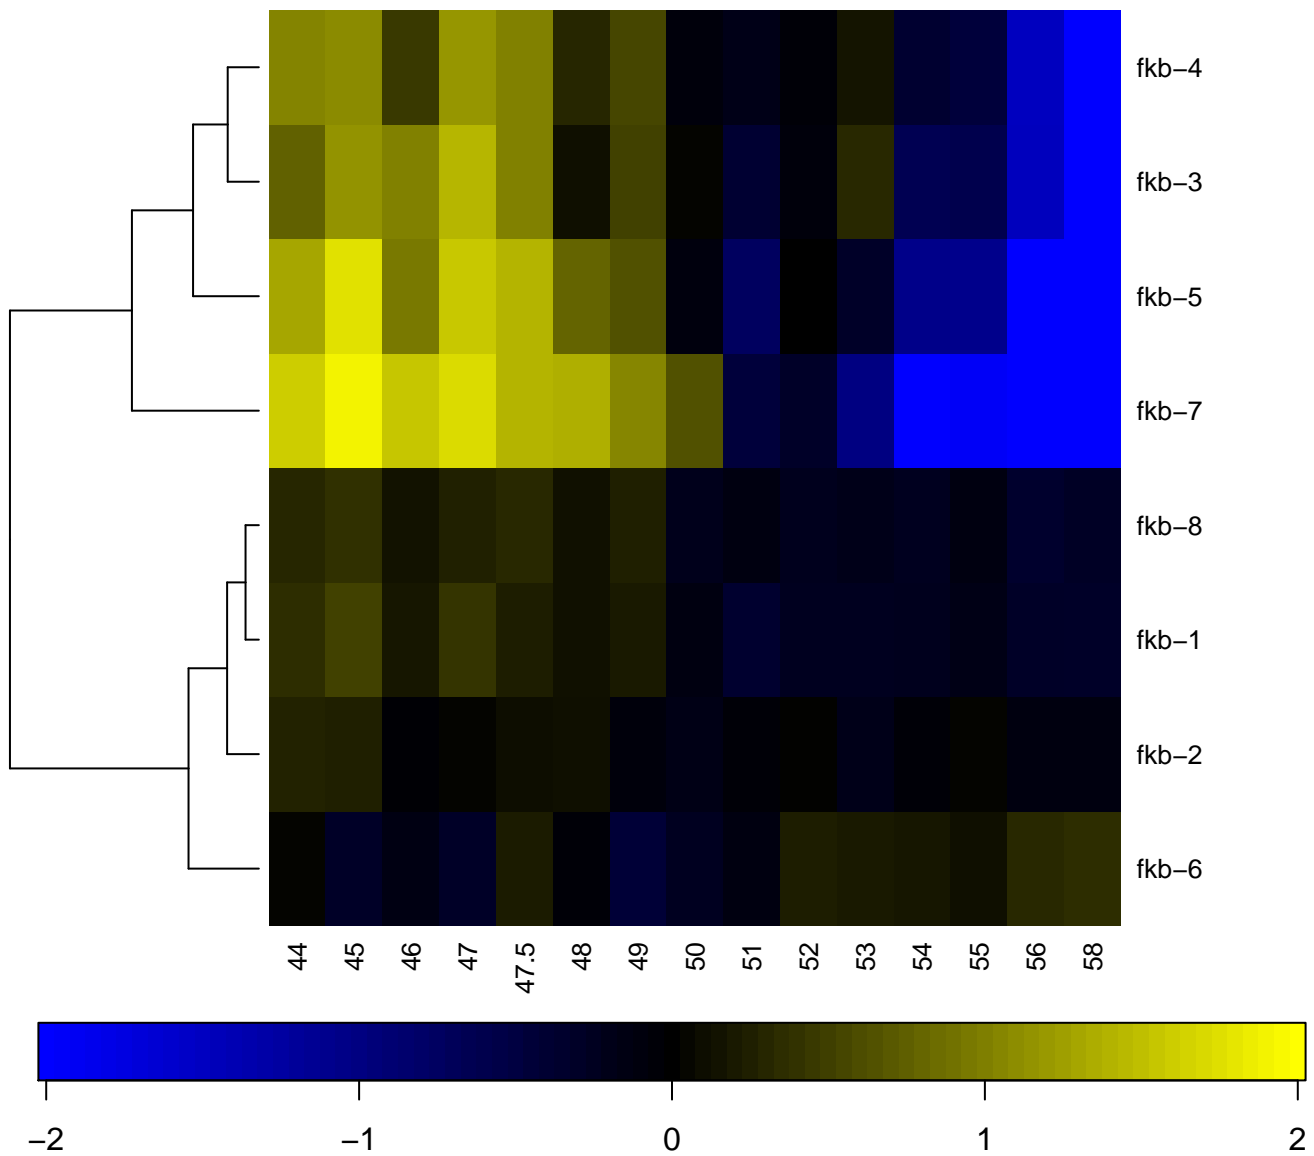



# fkh

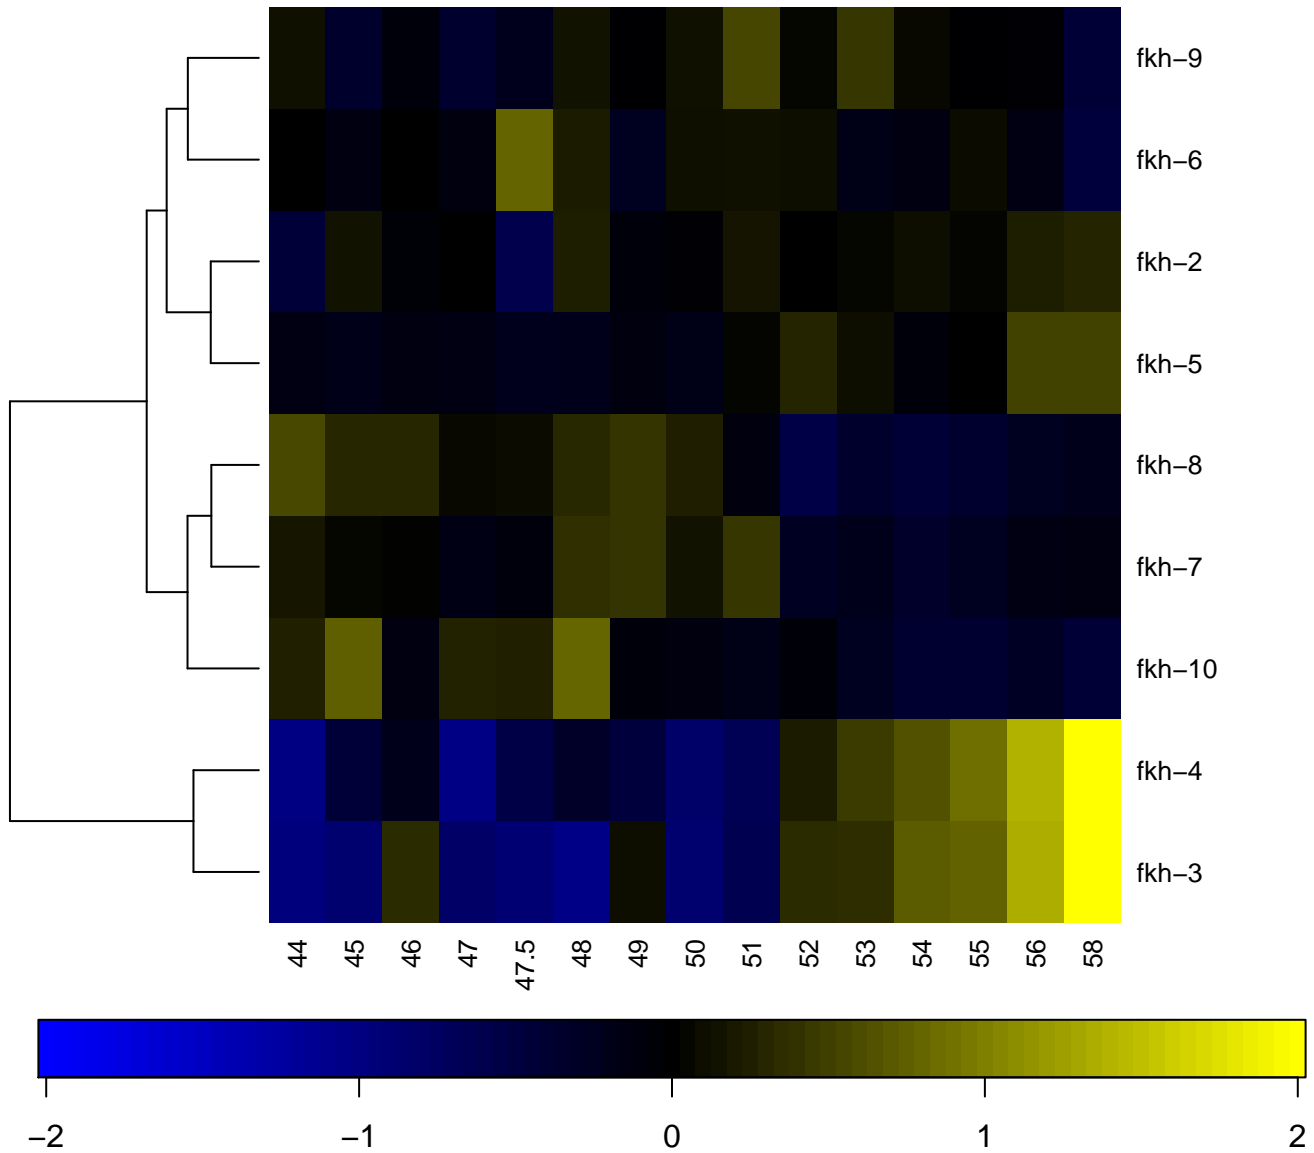

# flp

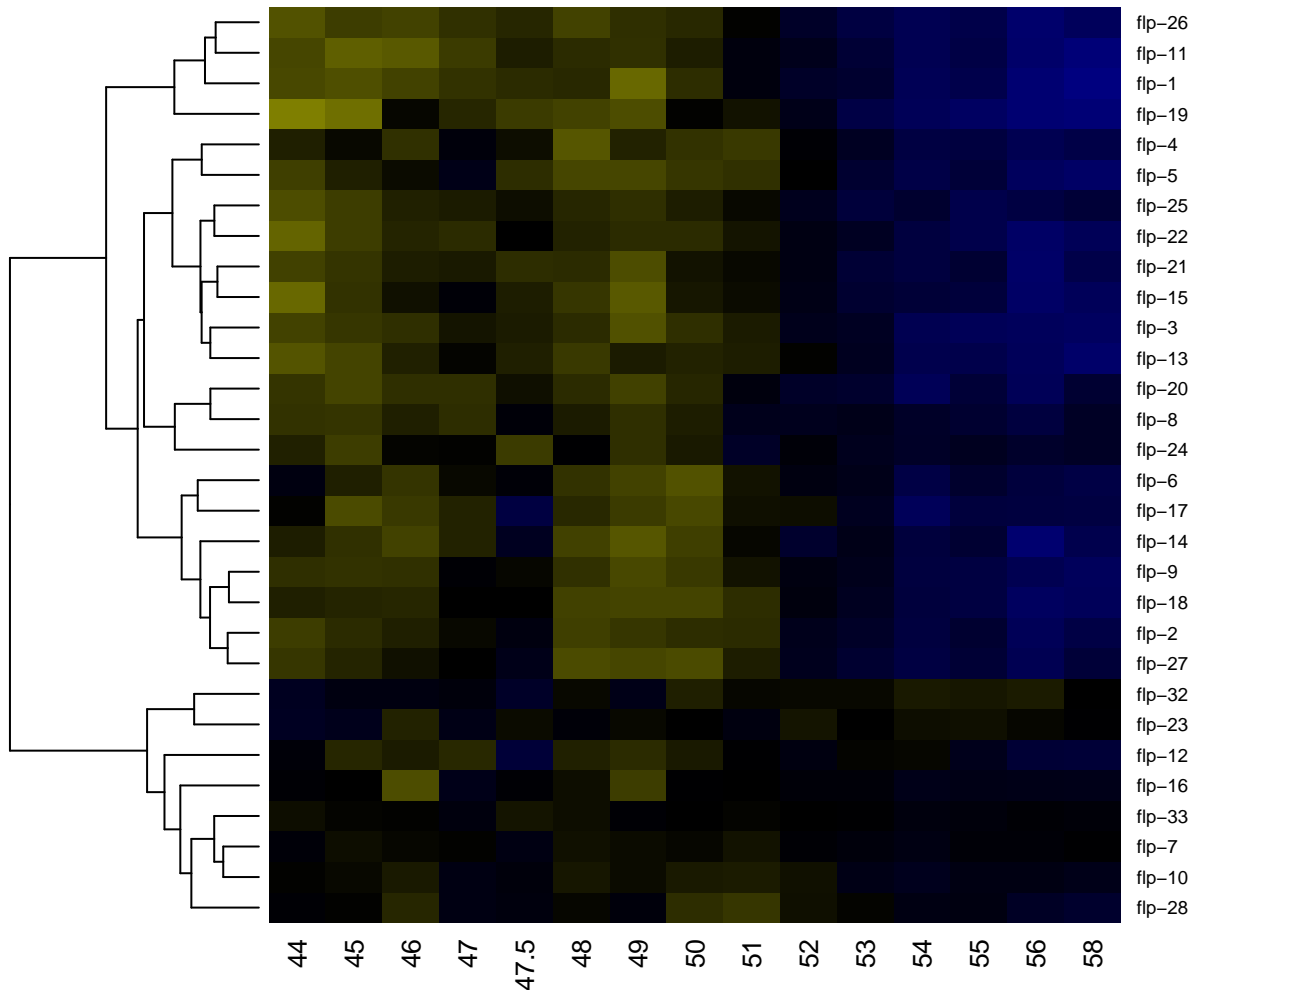



# frm

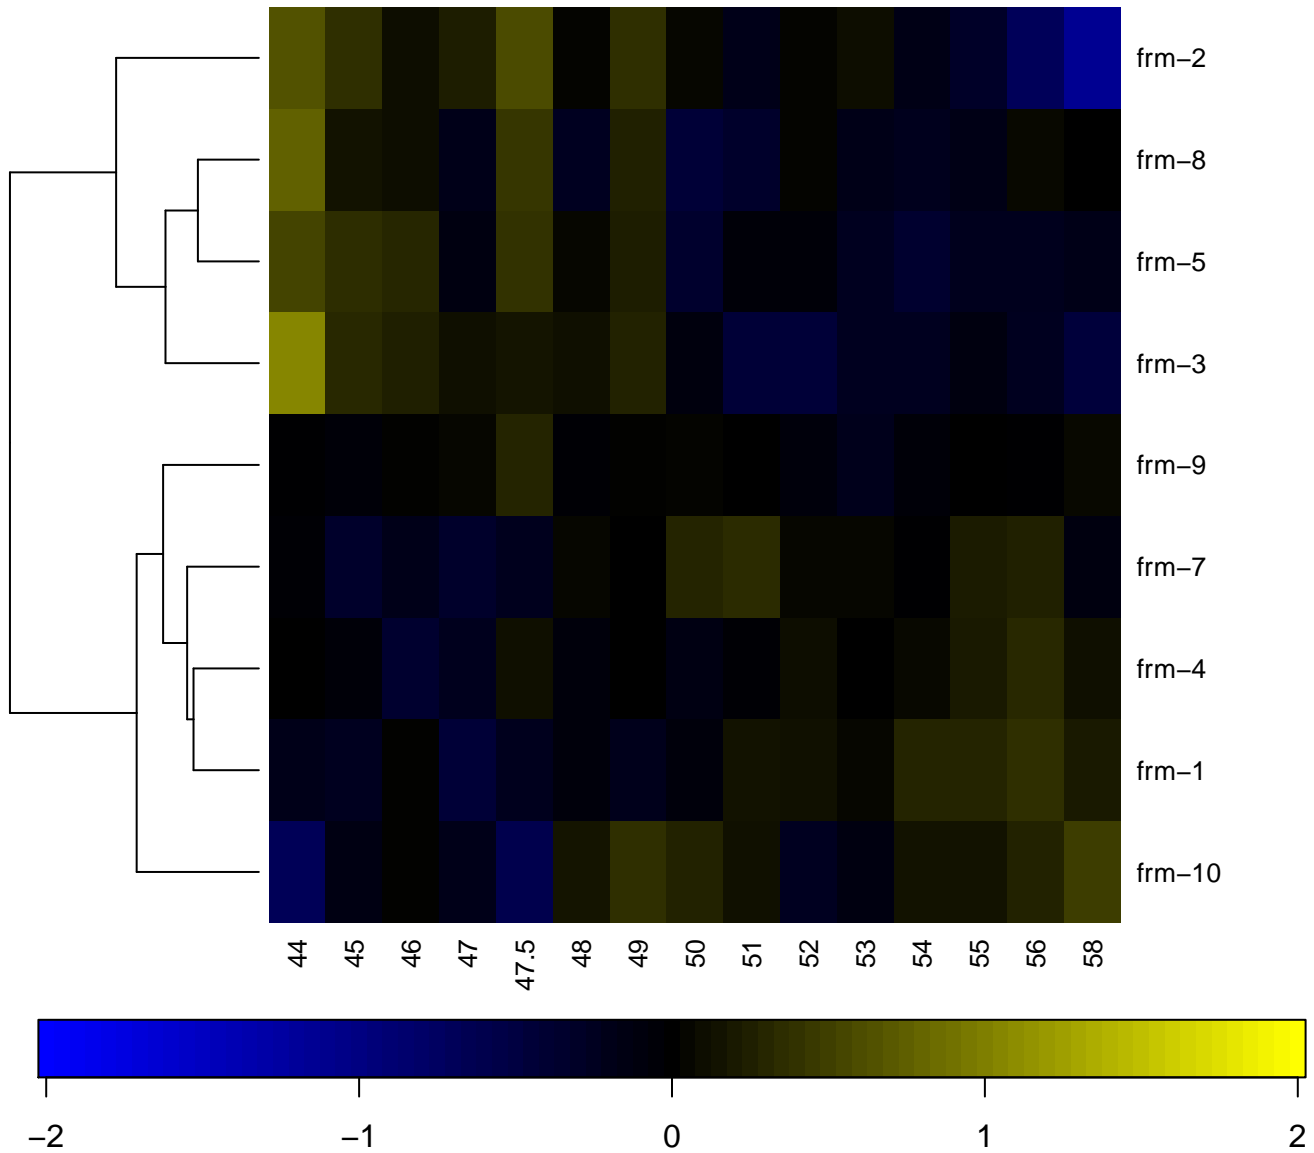

# fut

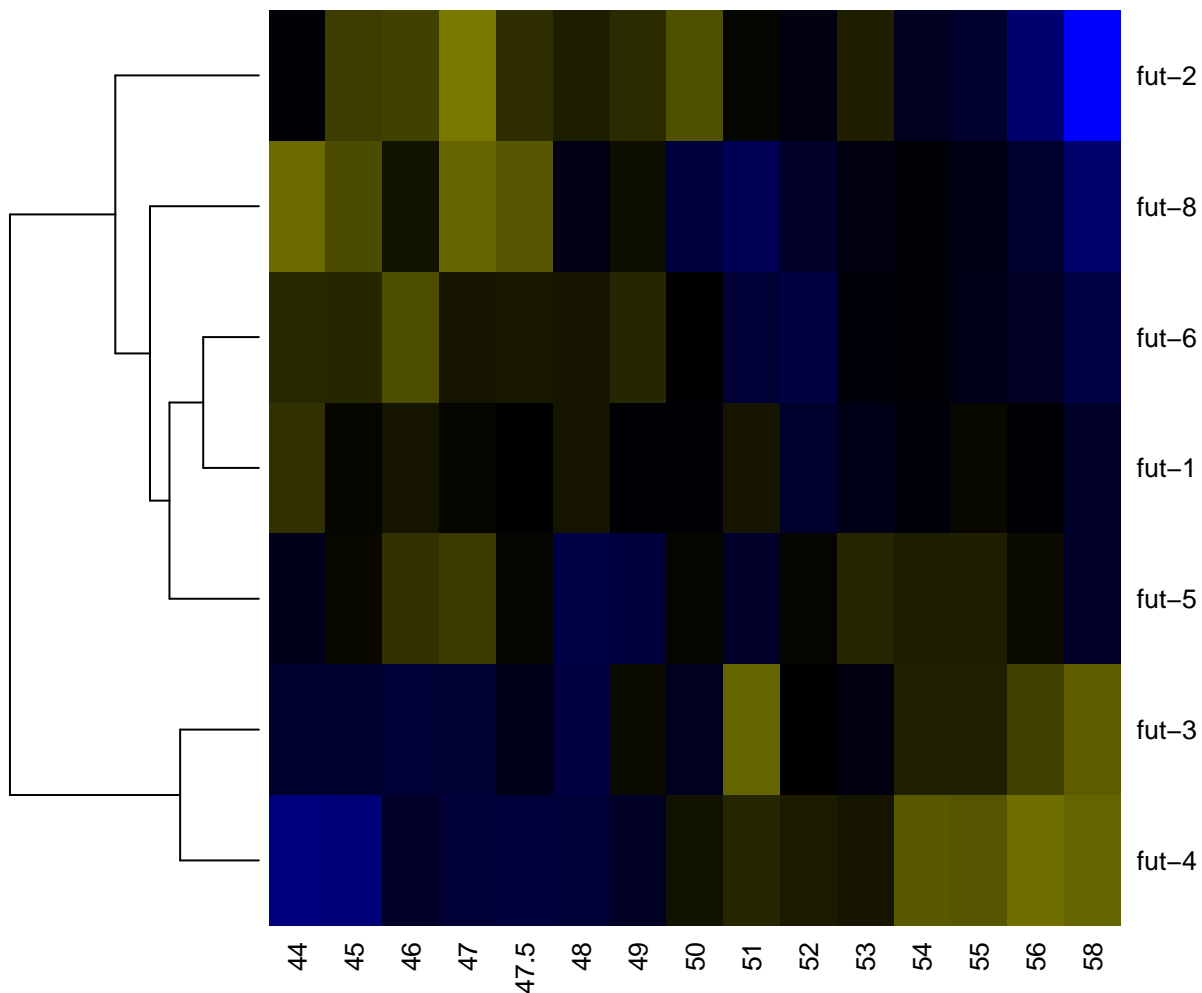

# gcy

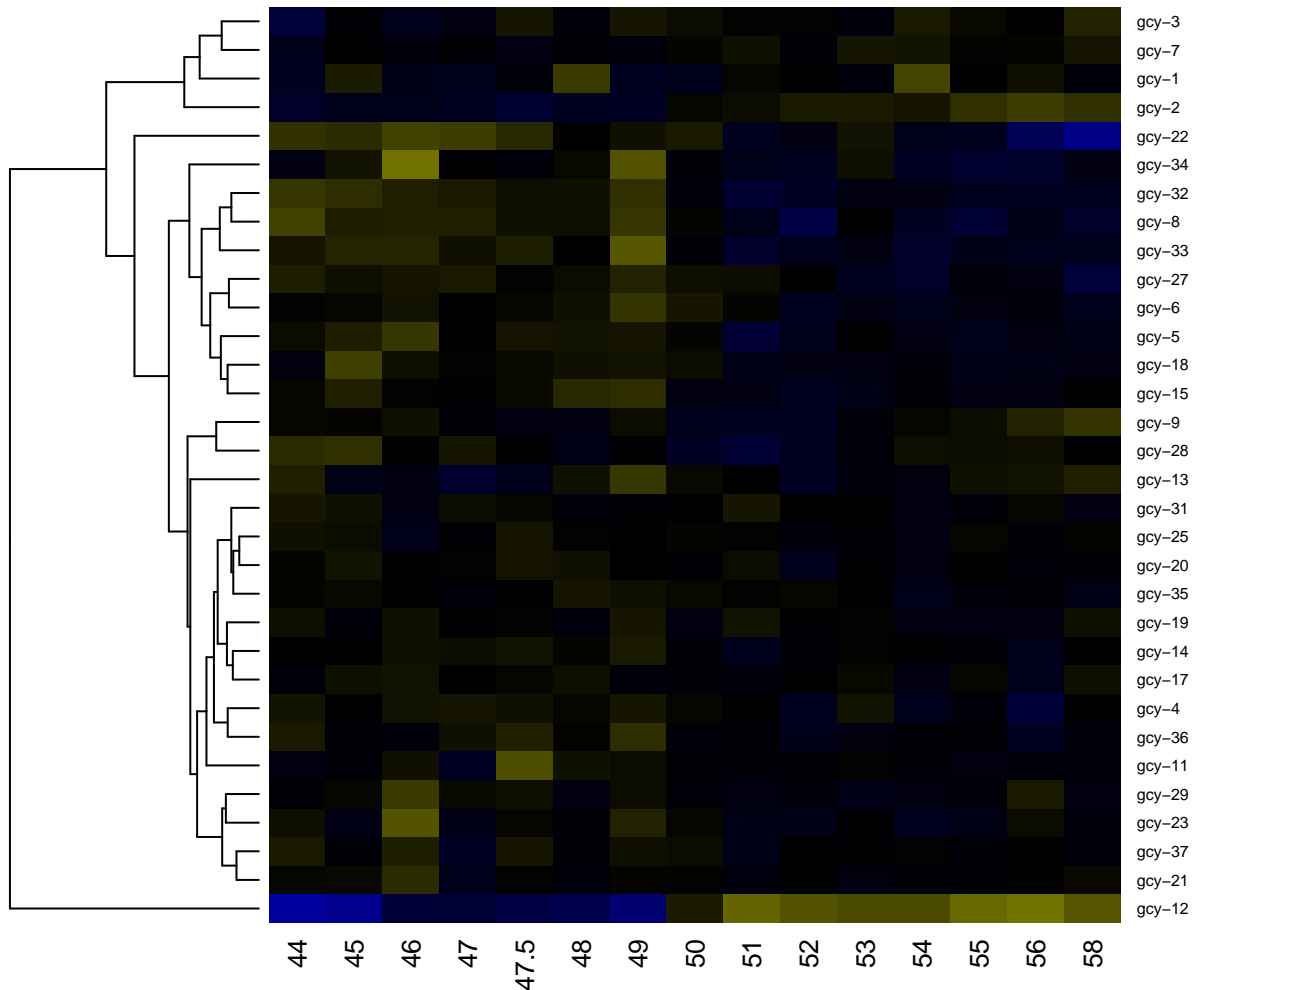

# gei

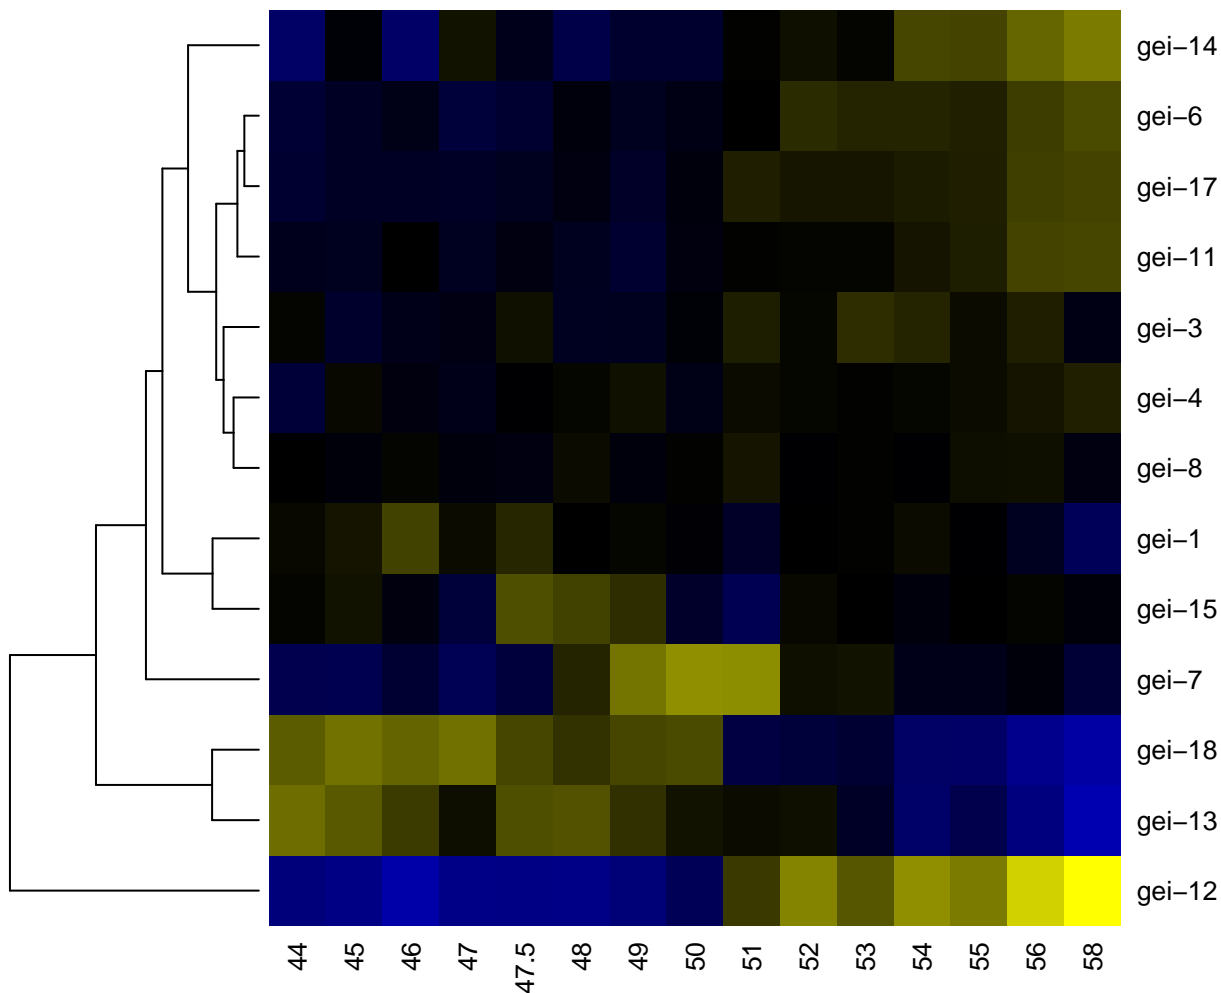

-2

-1

0

1

2





# glct

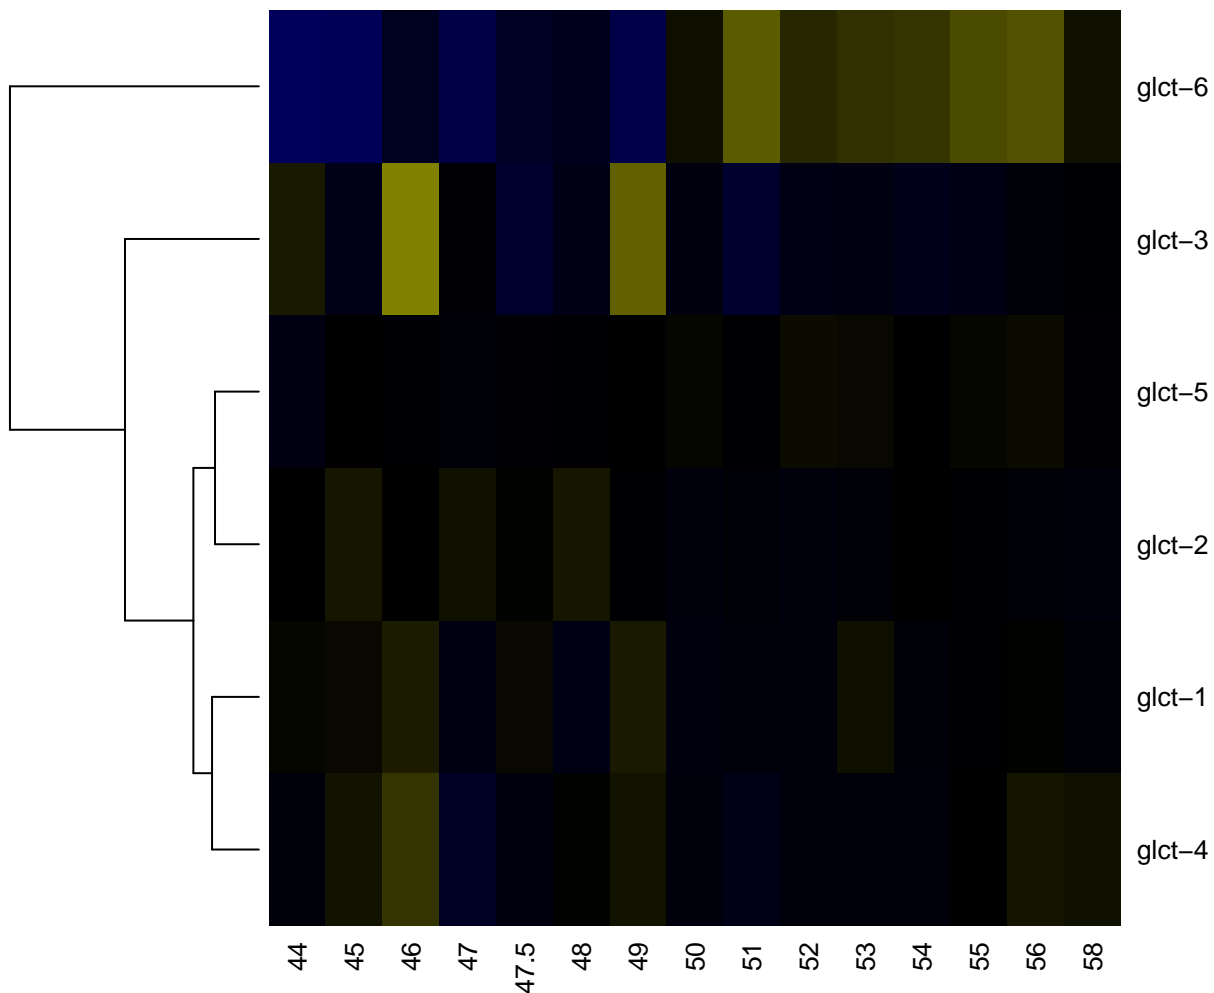

-2

-1

0

1

2

# gln

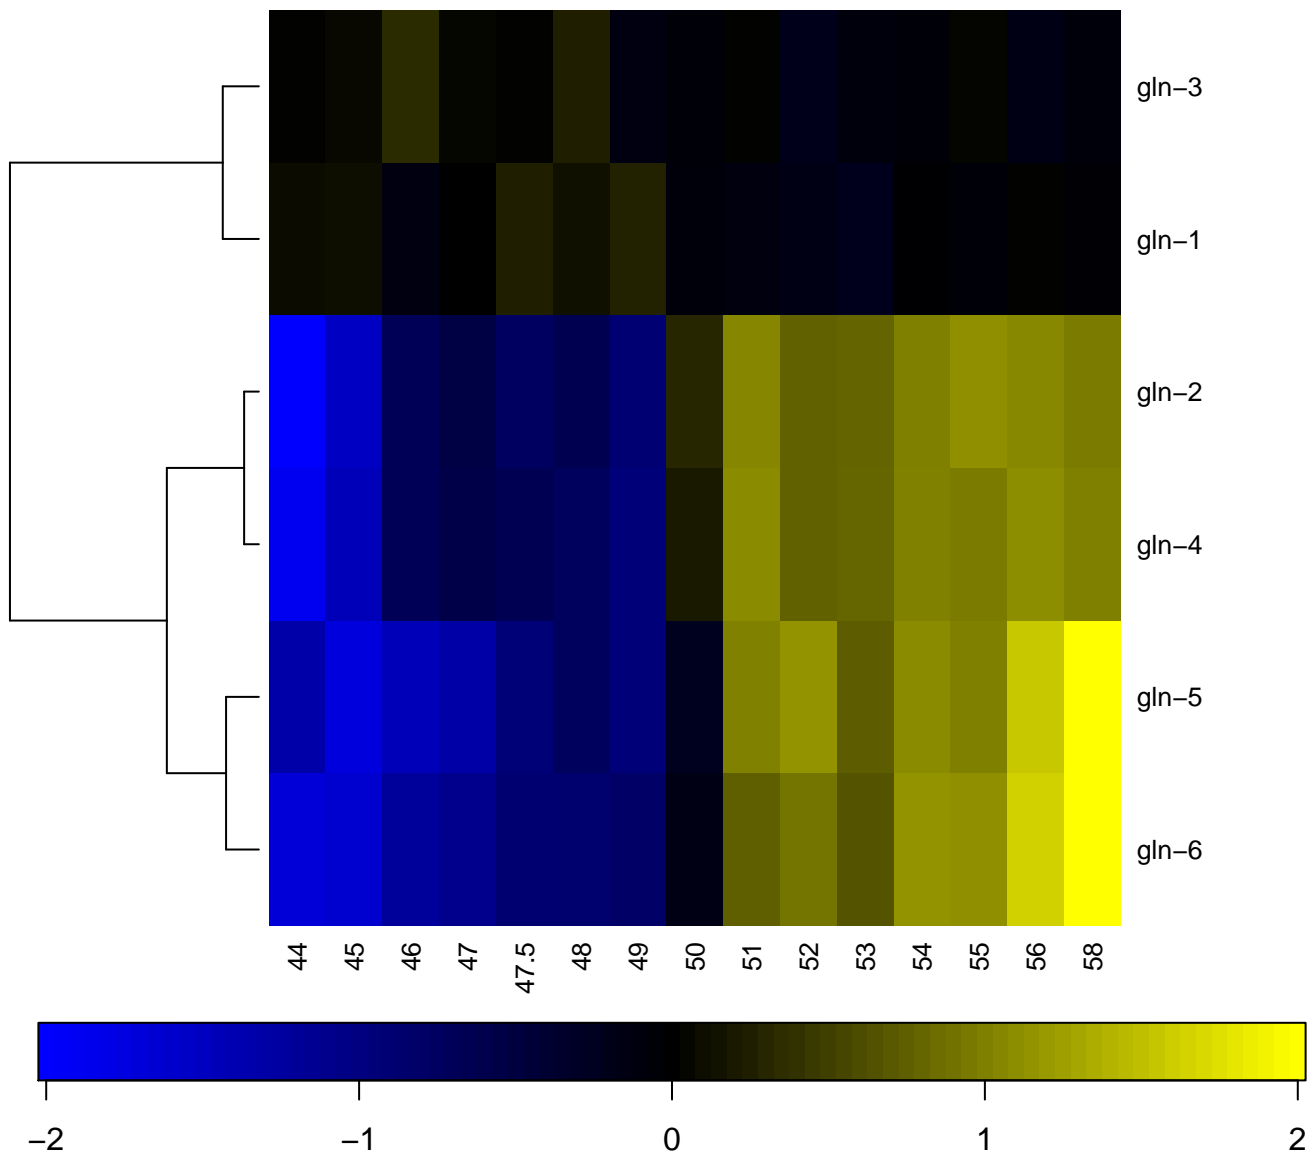

# glr

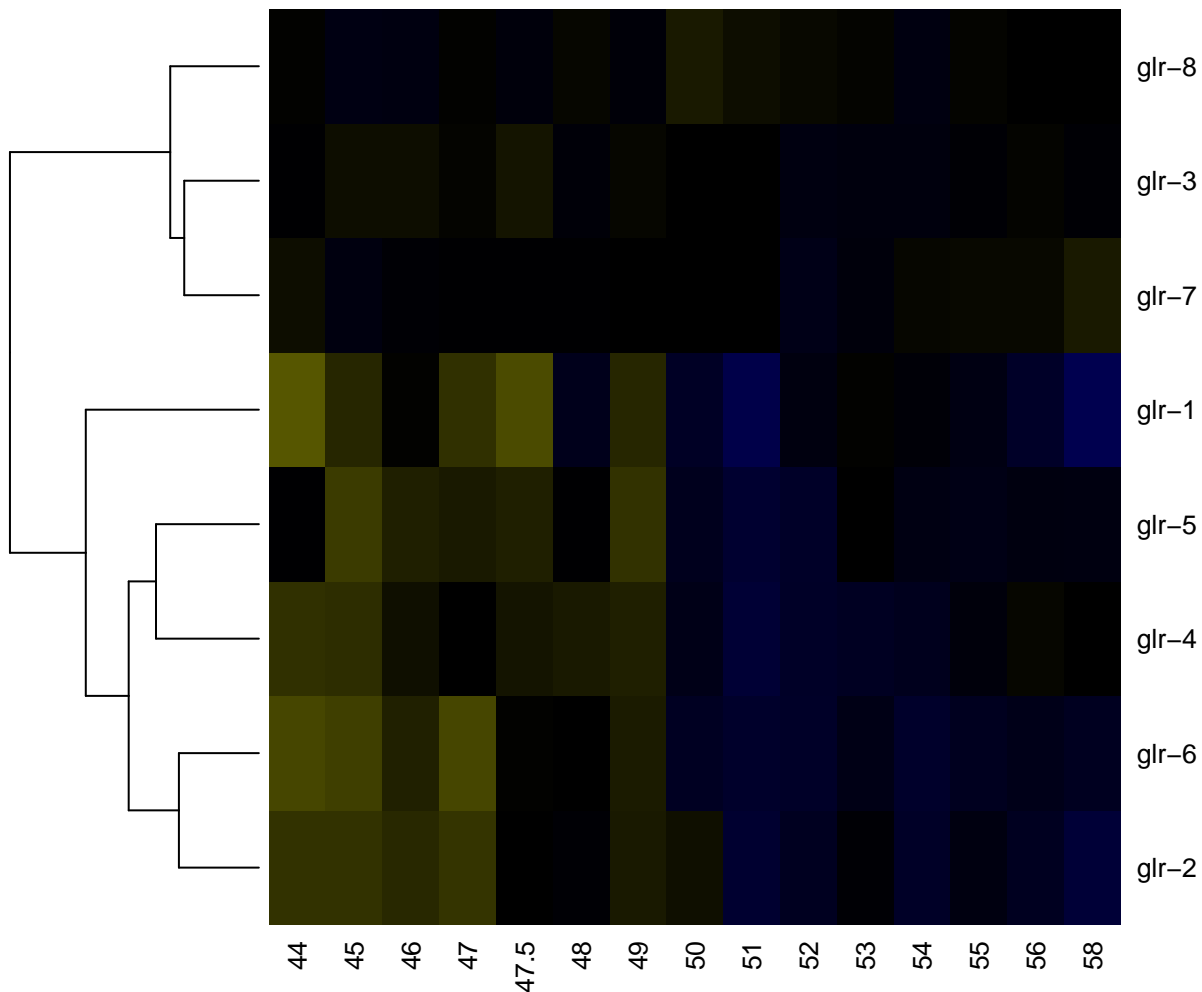

# glt

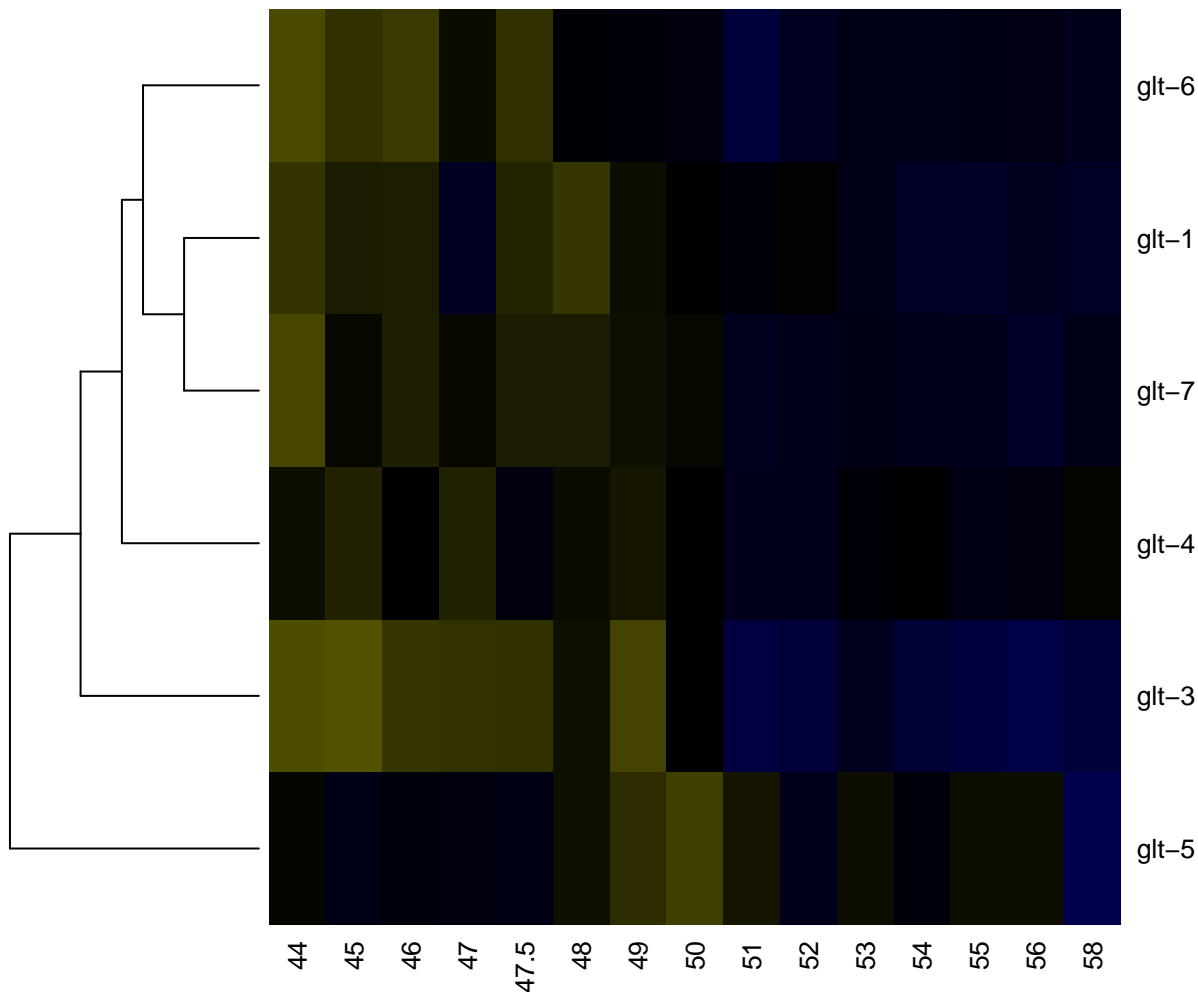

-2

-1

0

1

2

# gly

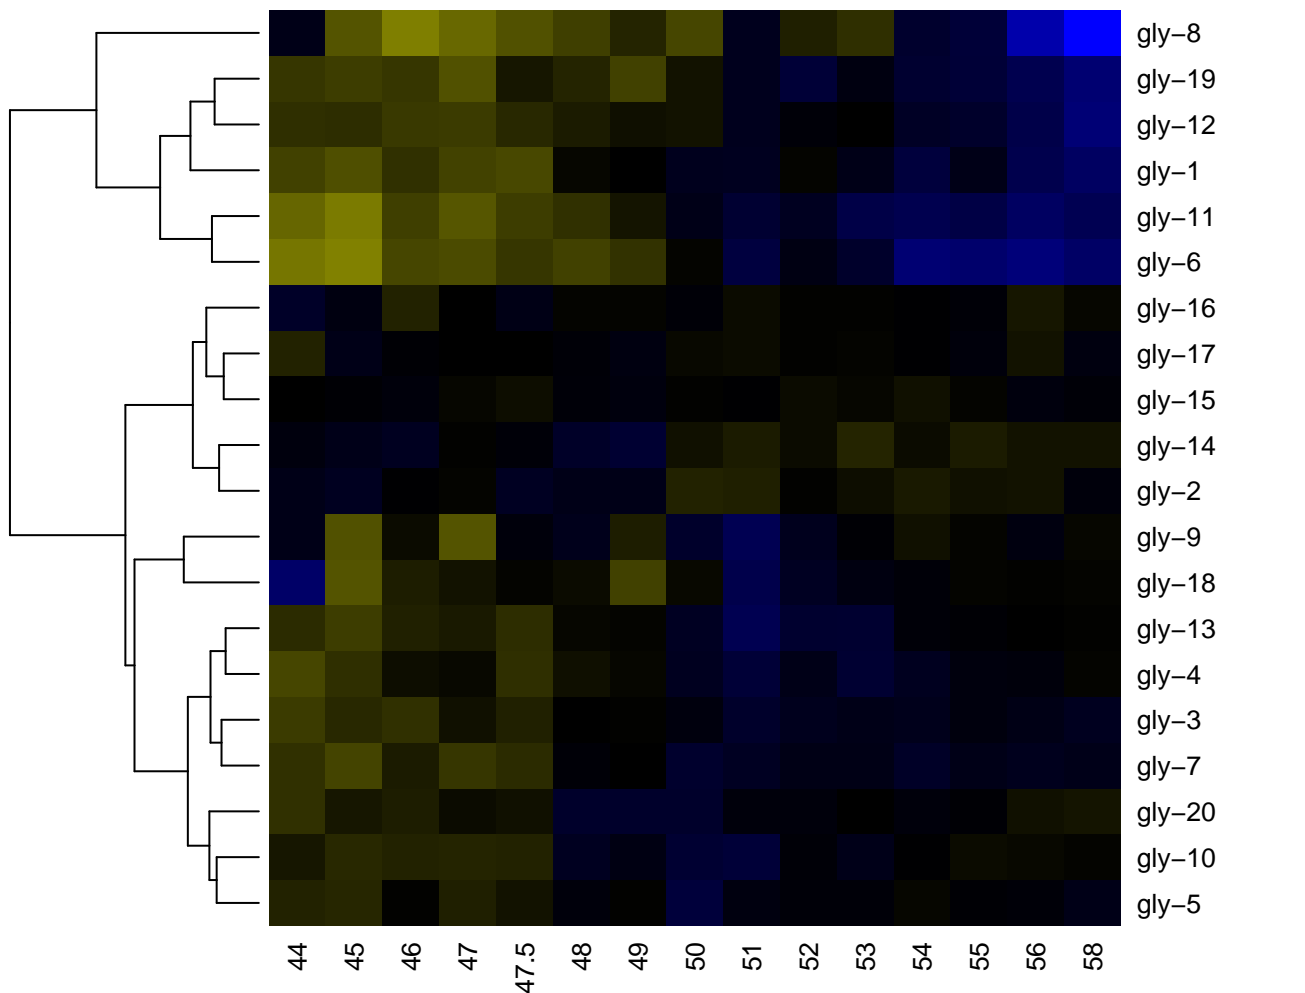

-2

-1

0

1

2

# gnrr

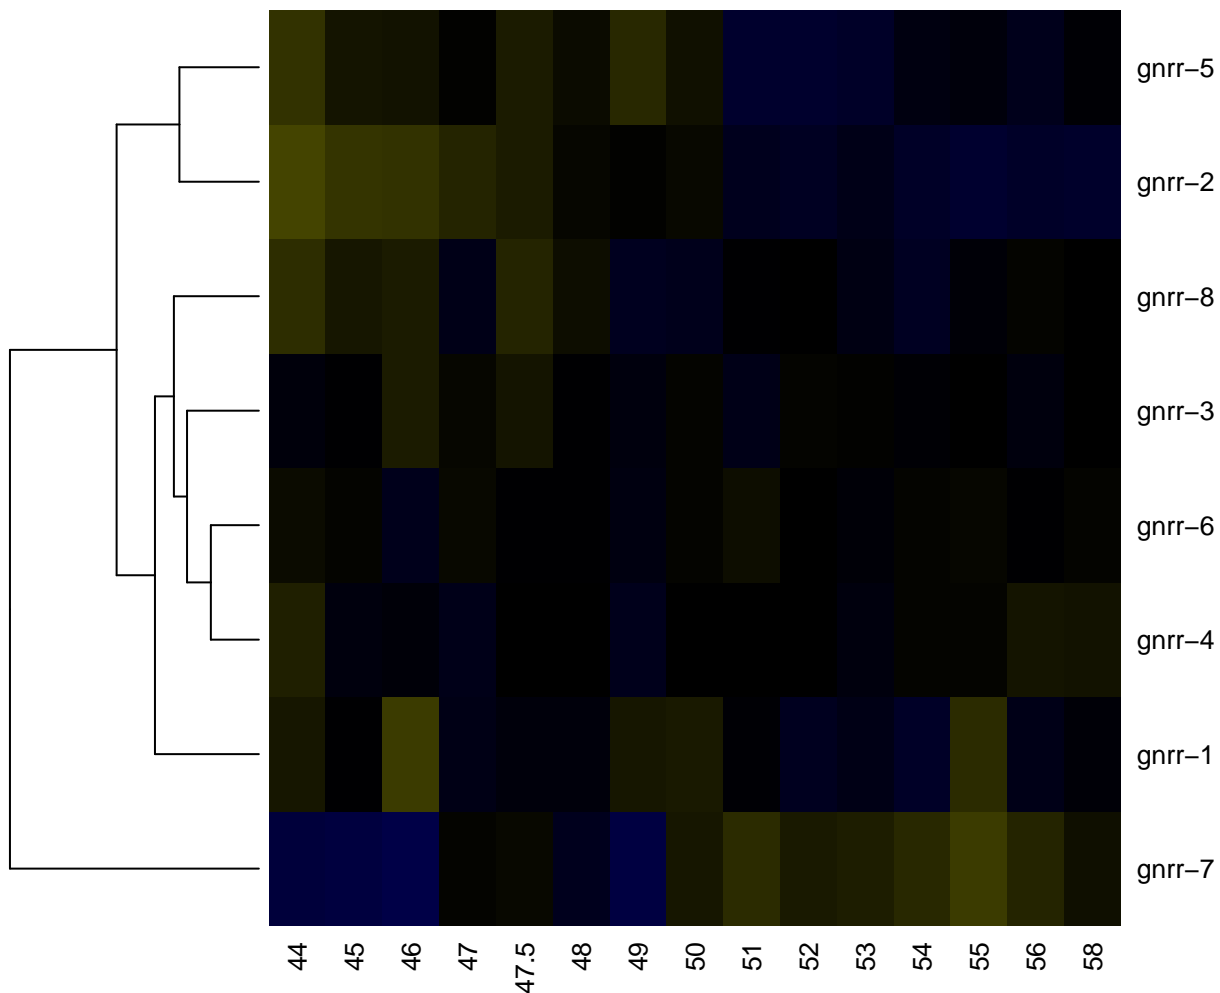

# gpa

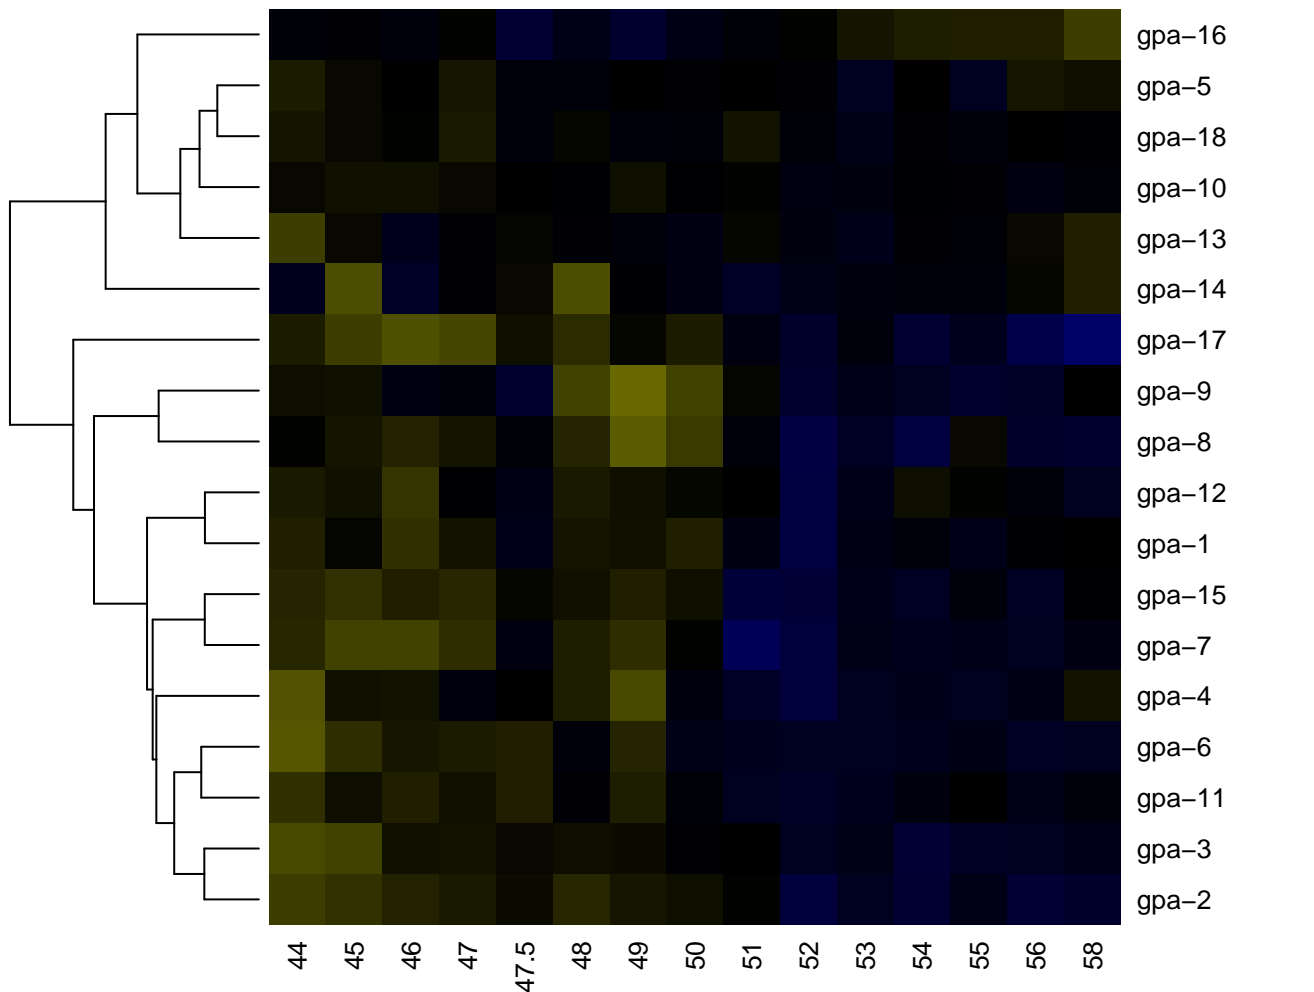

-2

-1

0

1

2

# grd

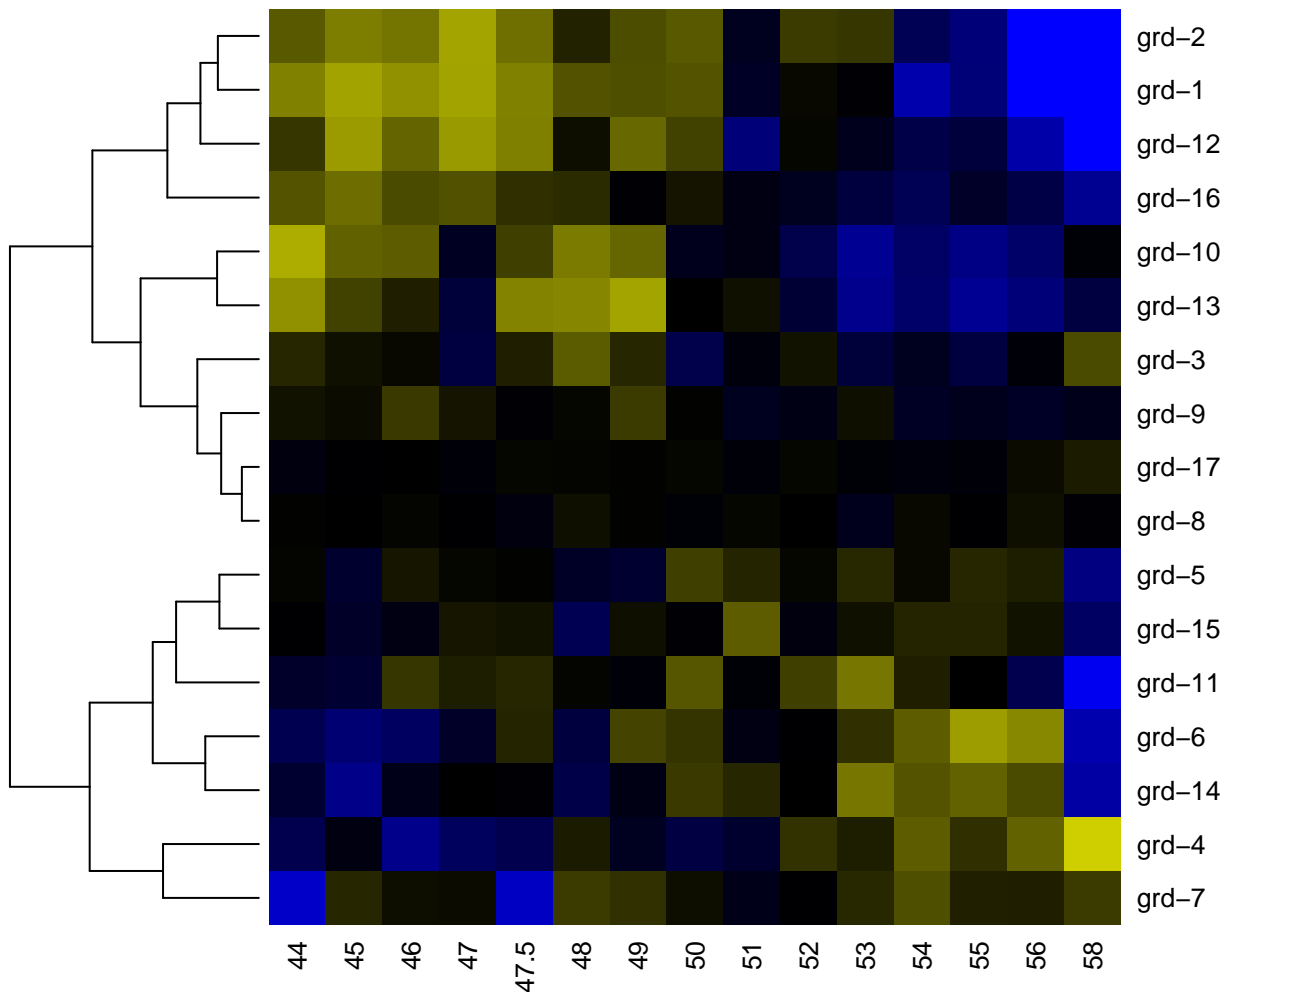

-2

-1

0

1

2



# grl

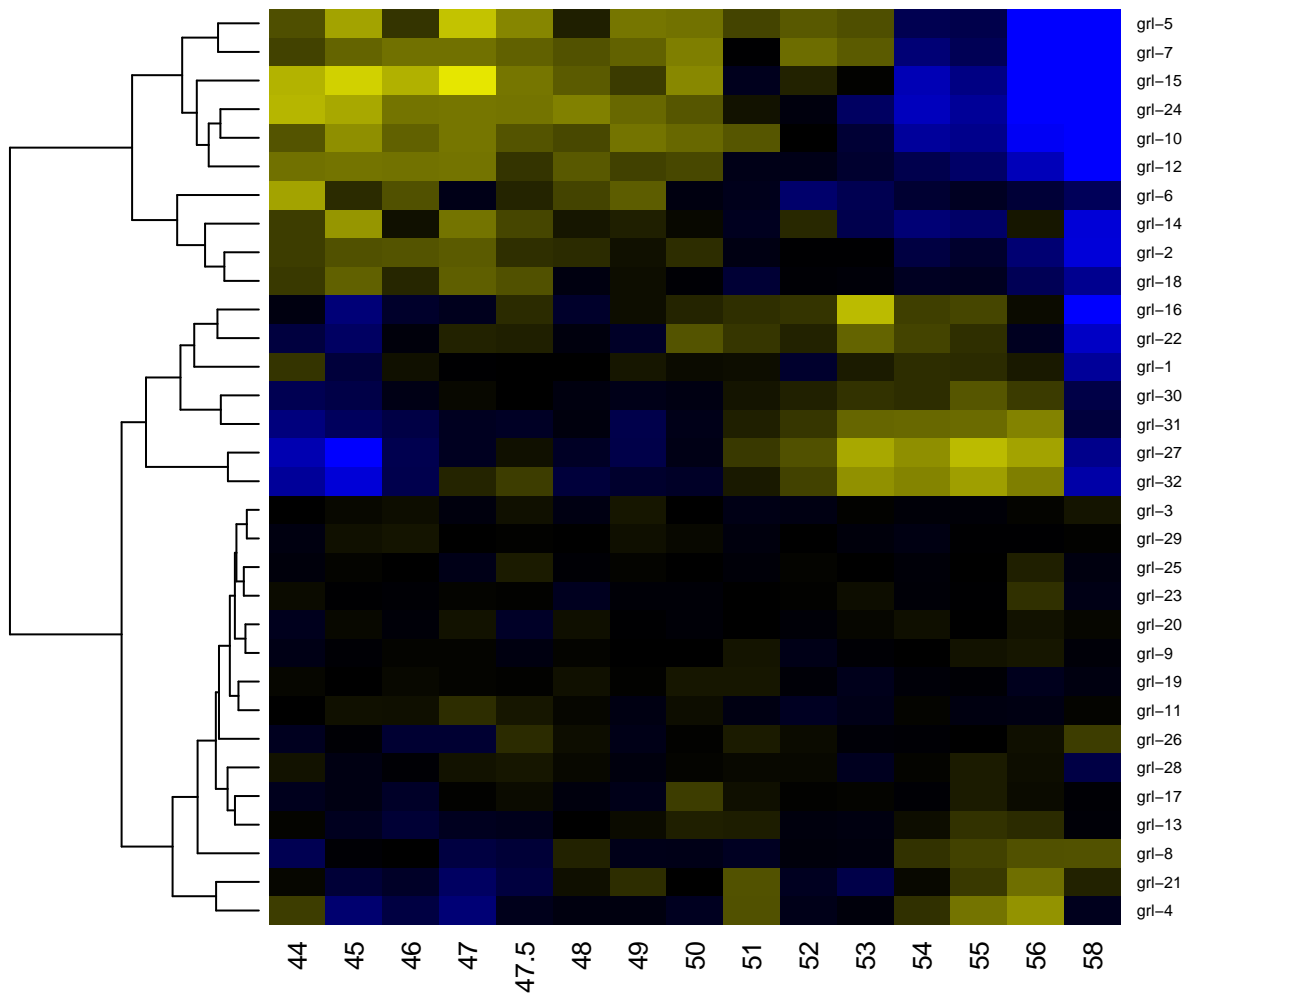

-2

-1

0

1

2

# gst

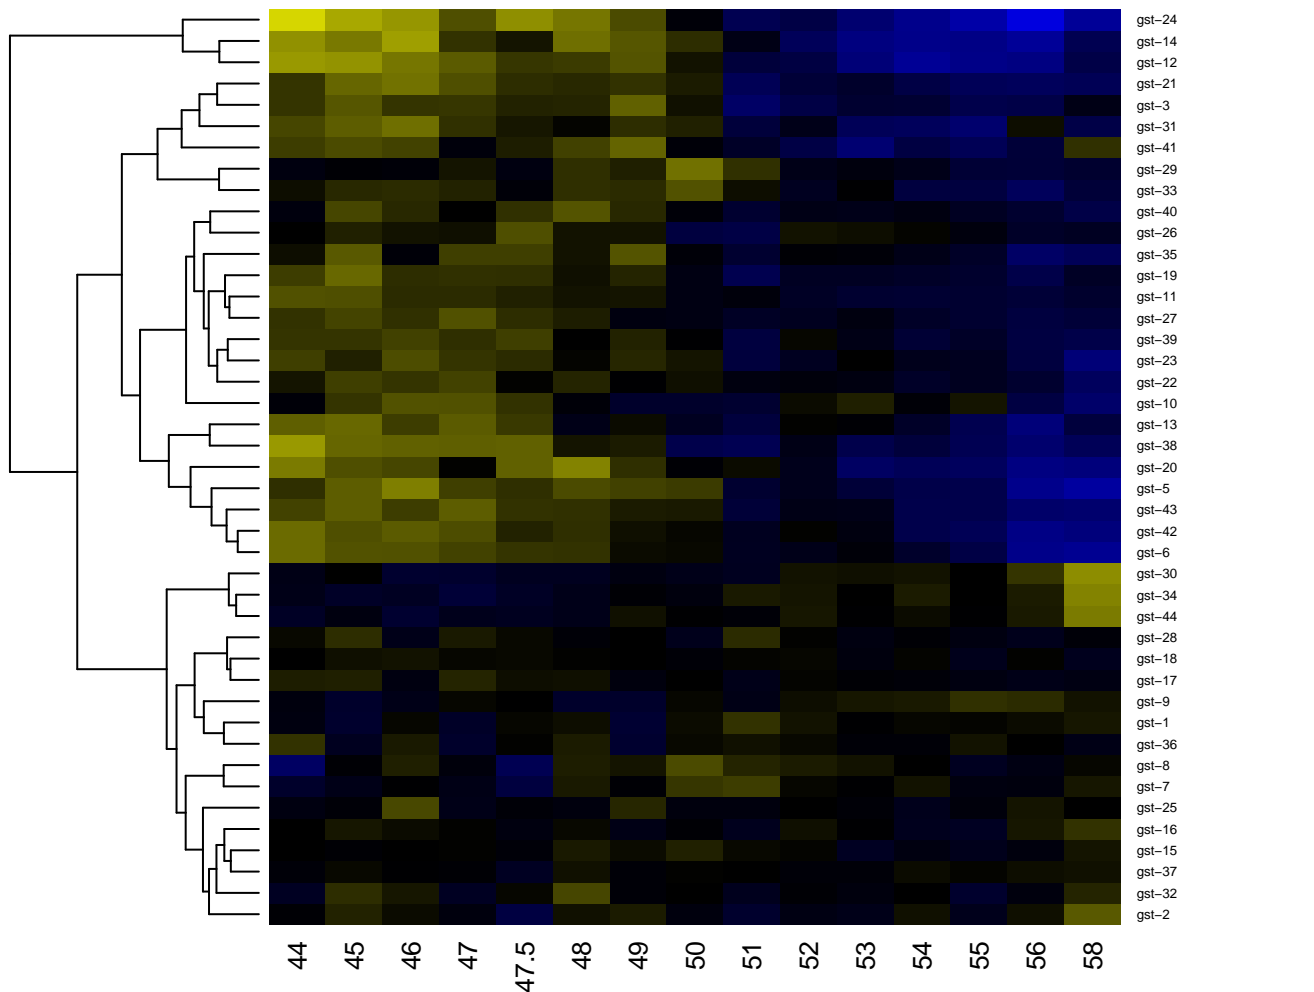

-2

-1

0

1

2

# haf

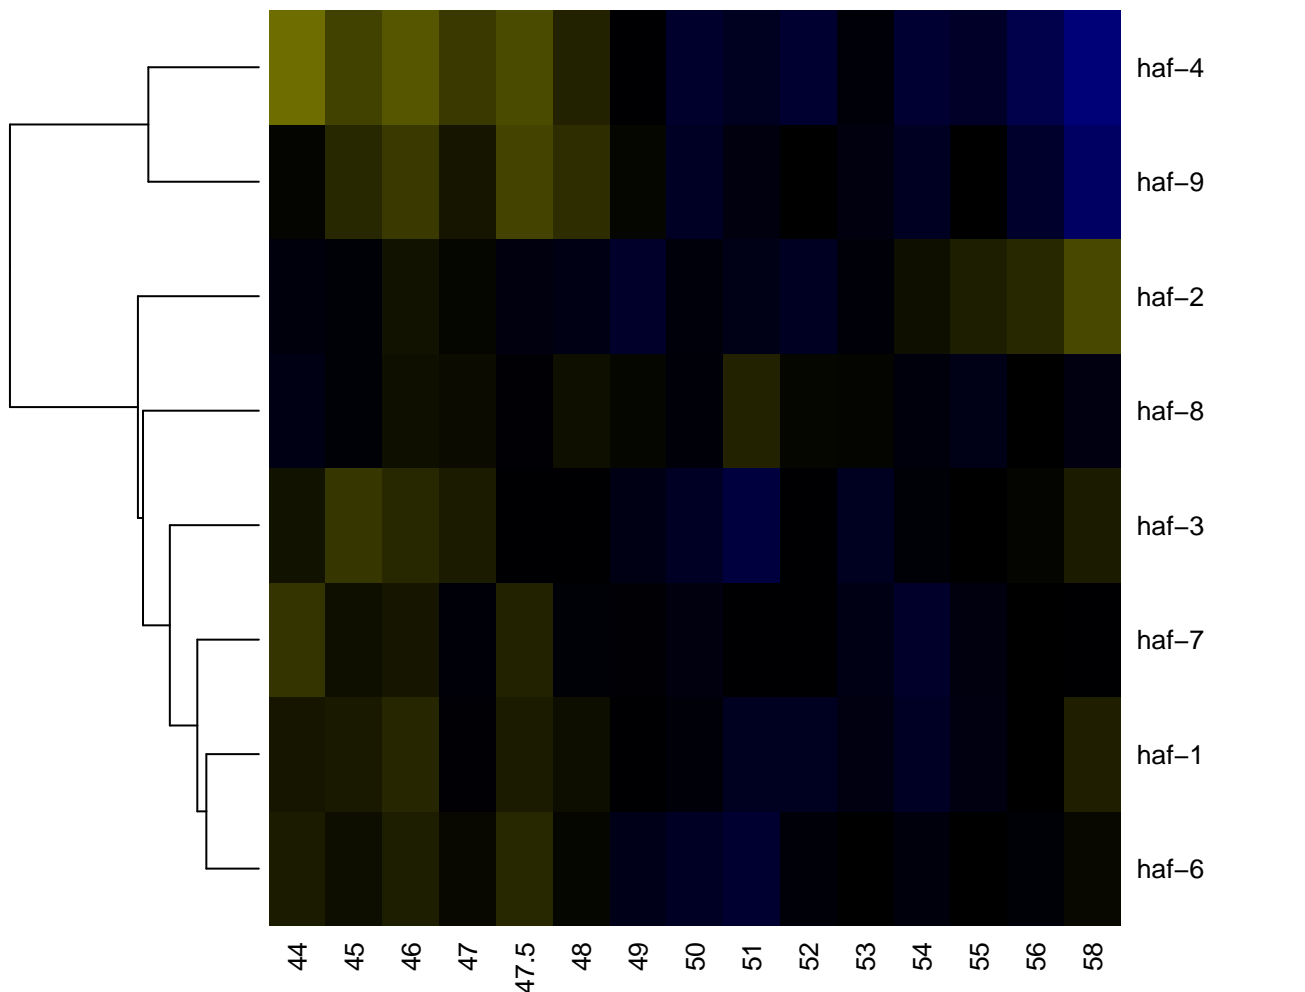

-2

-1

0

1

2

# hcp

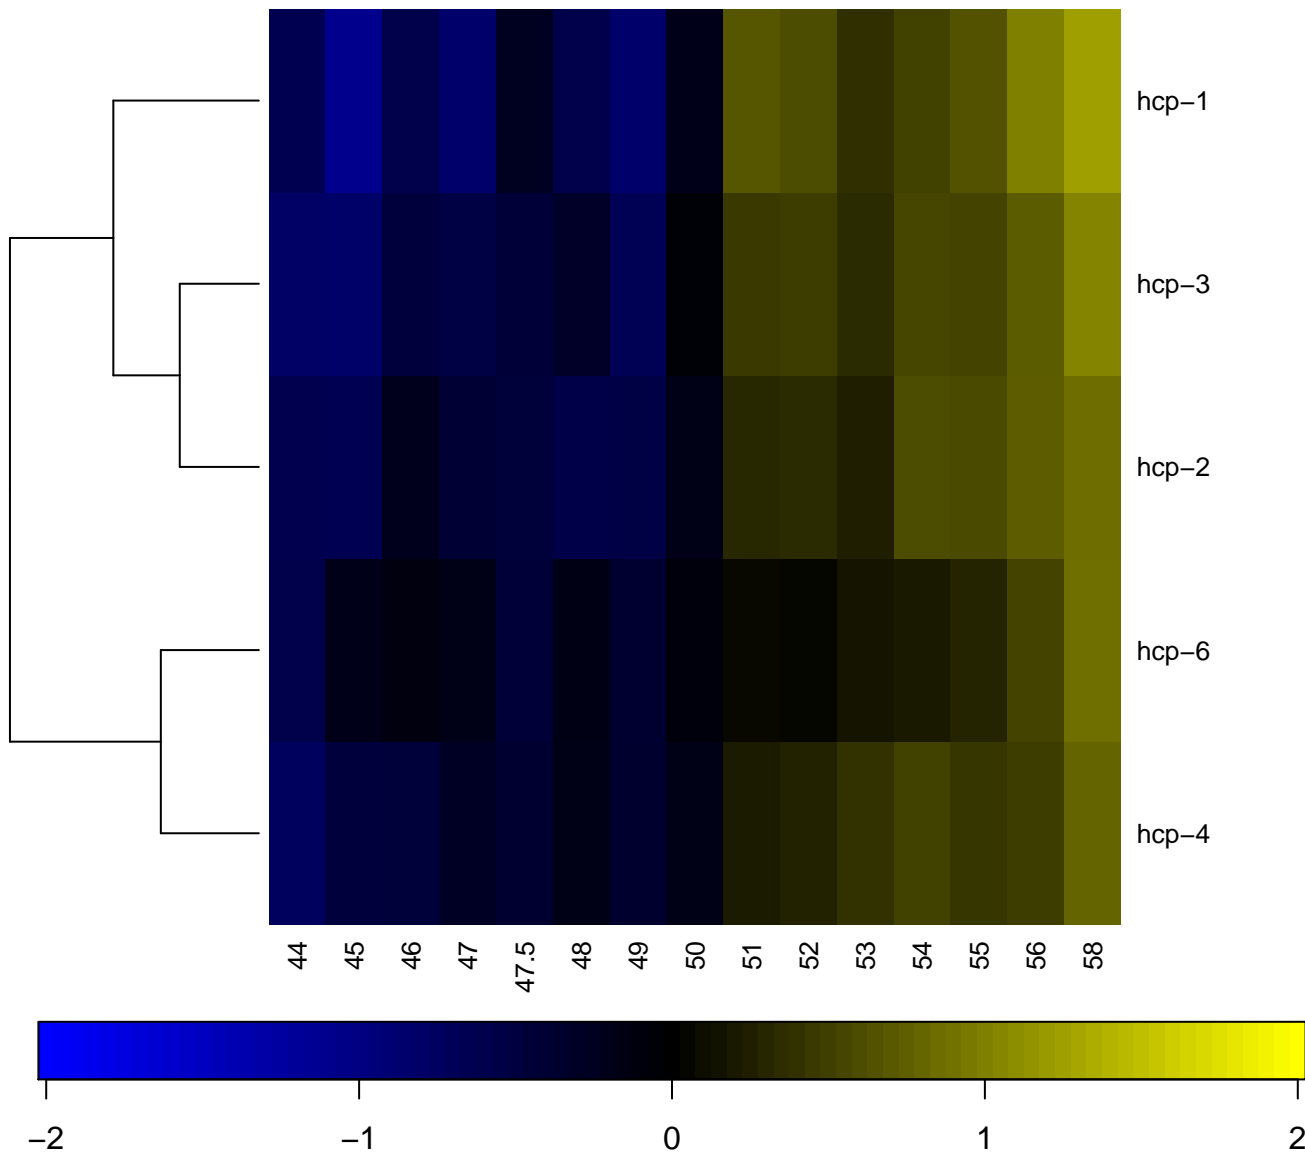

# hda

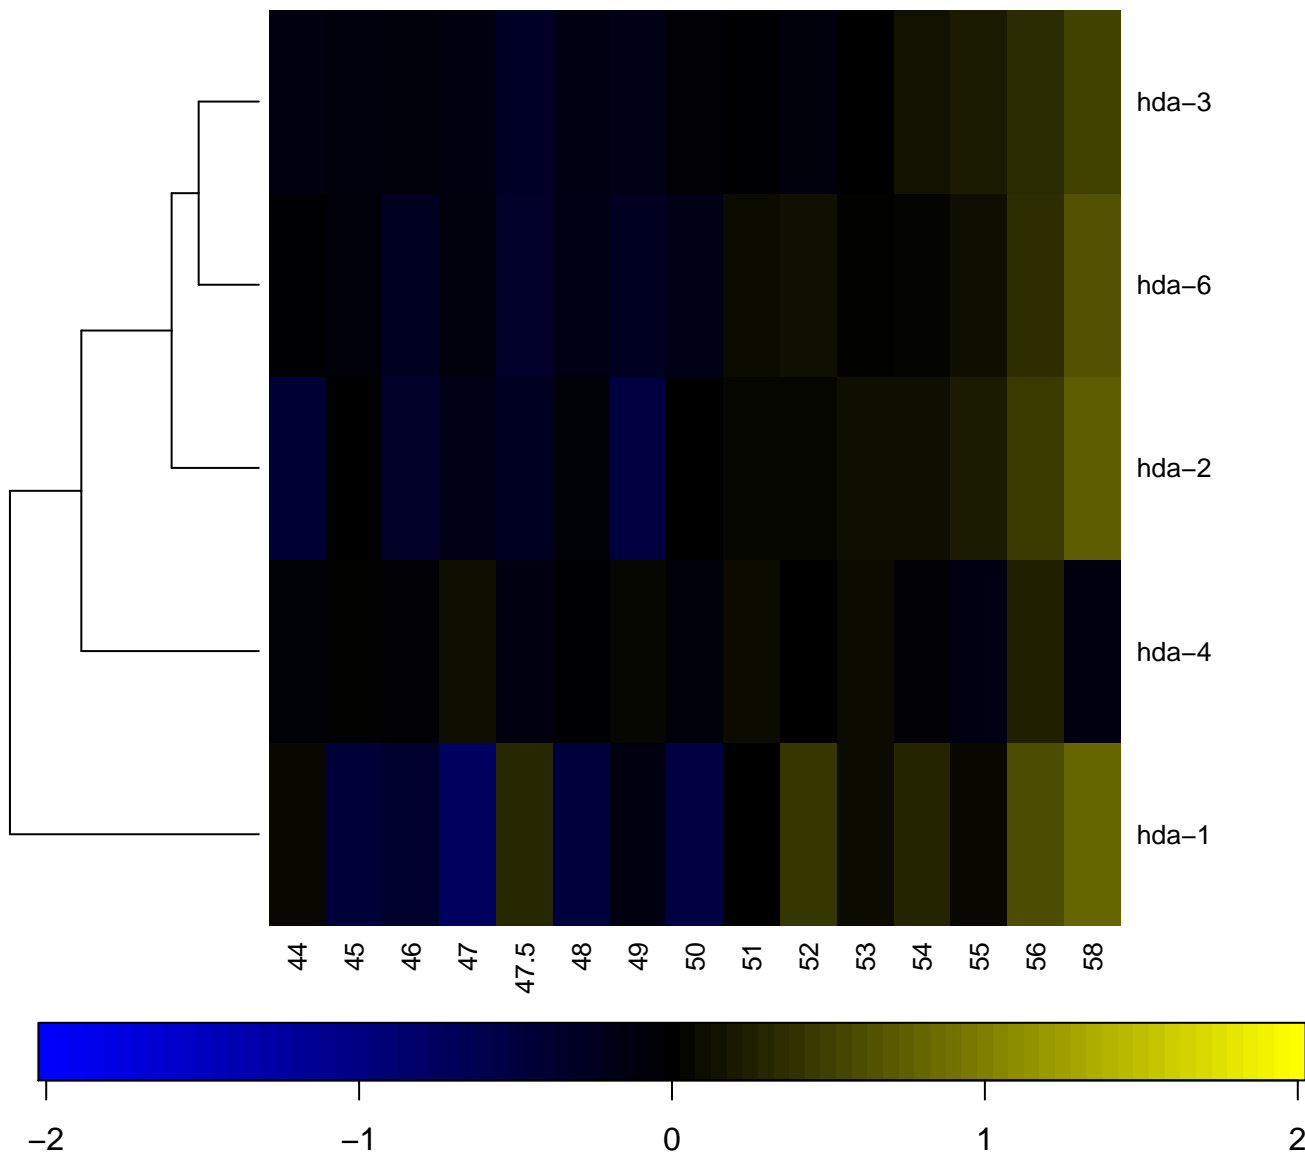

# hex

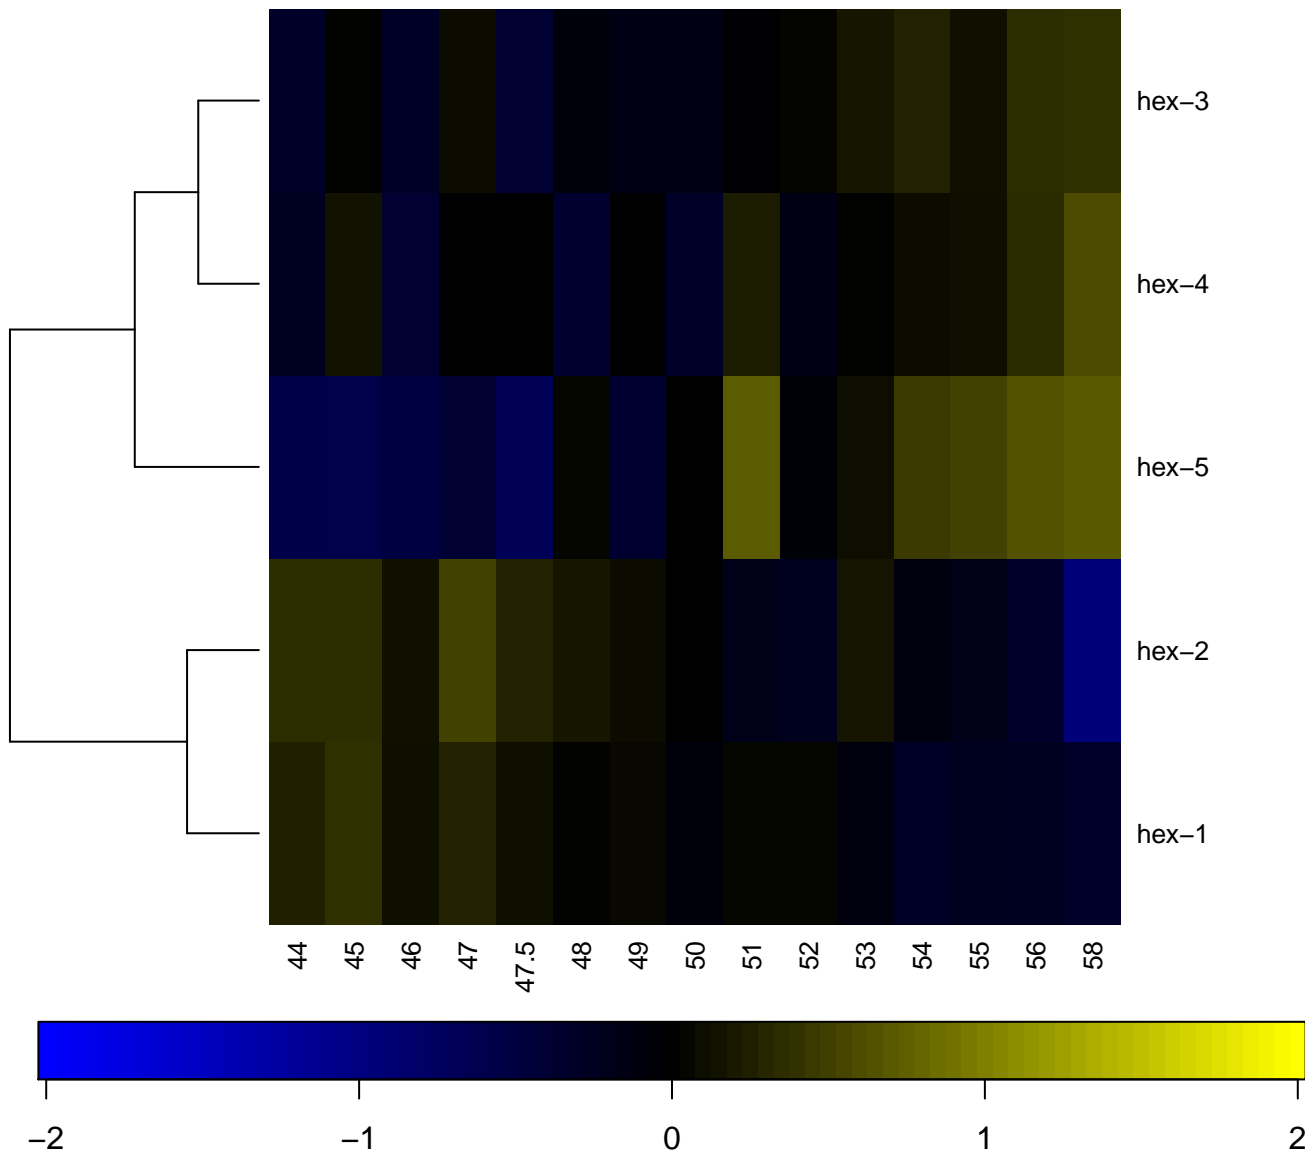

# hil

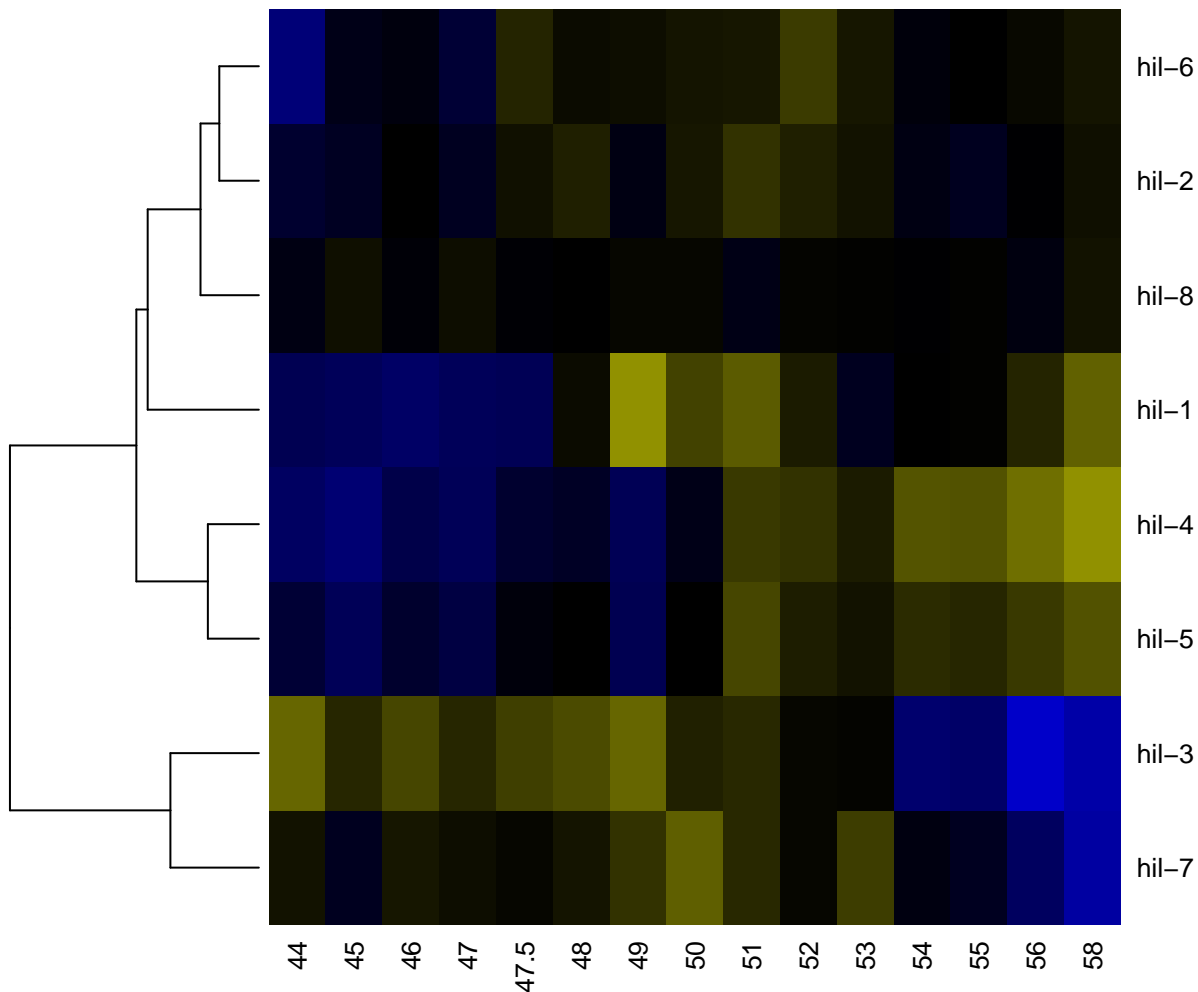

# him

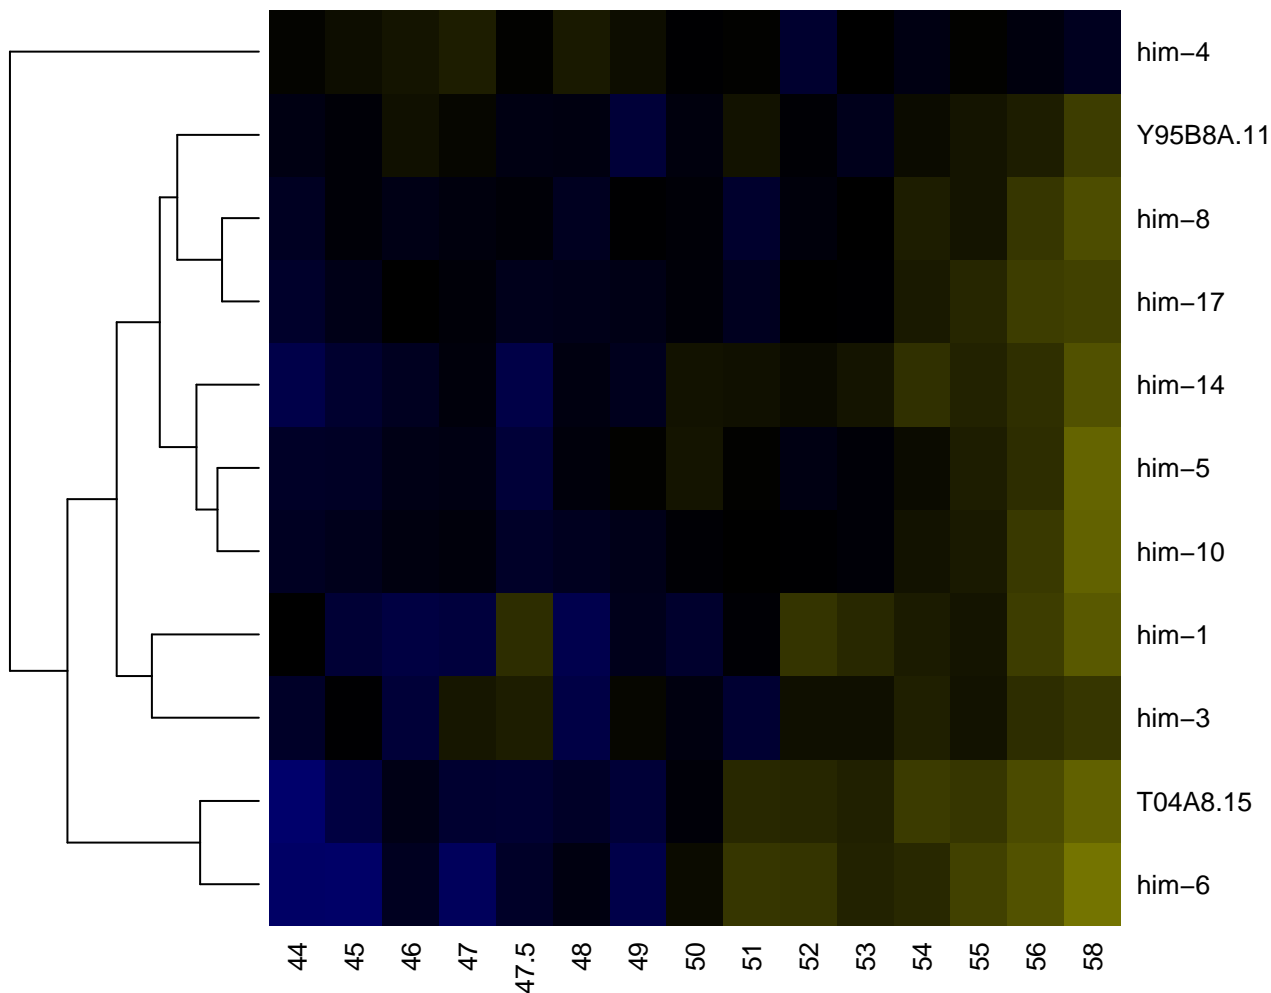





# hlh

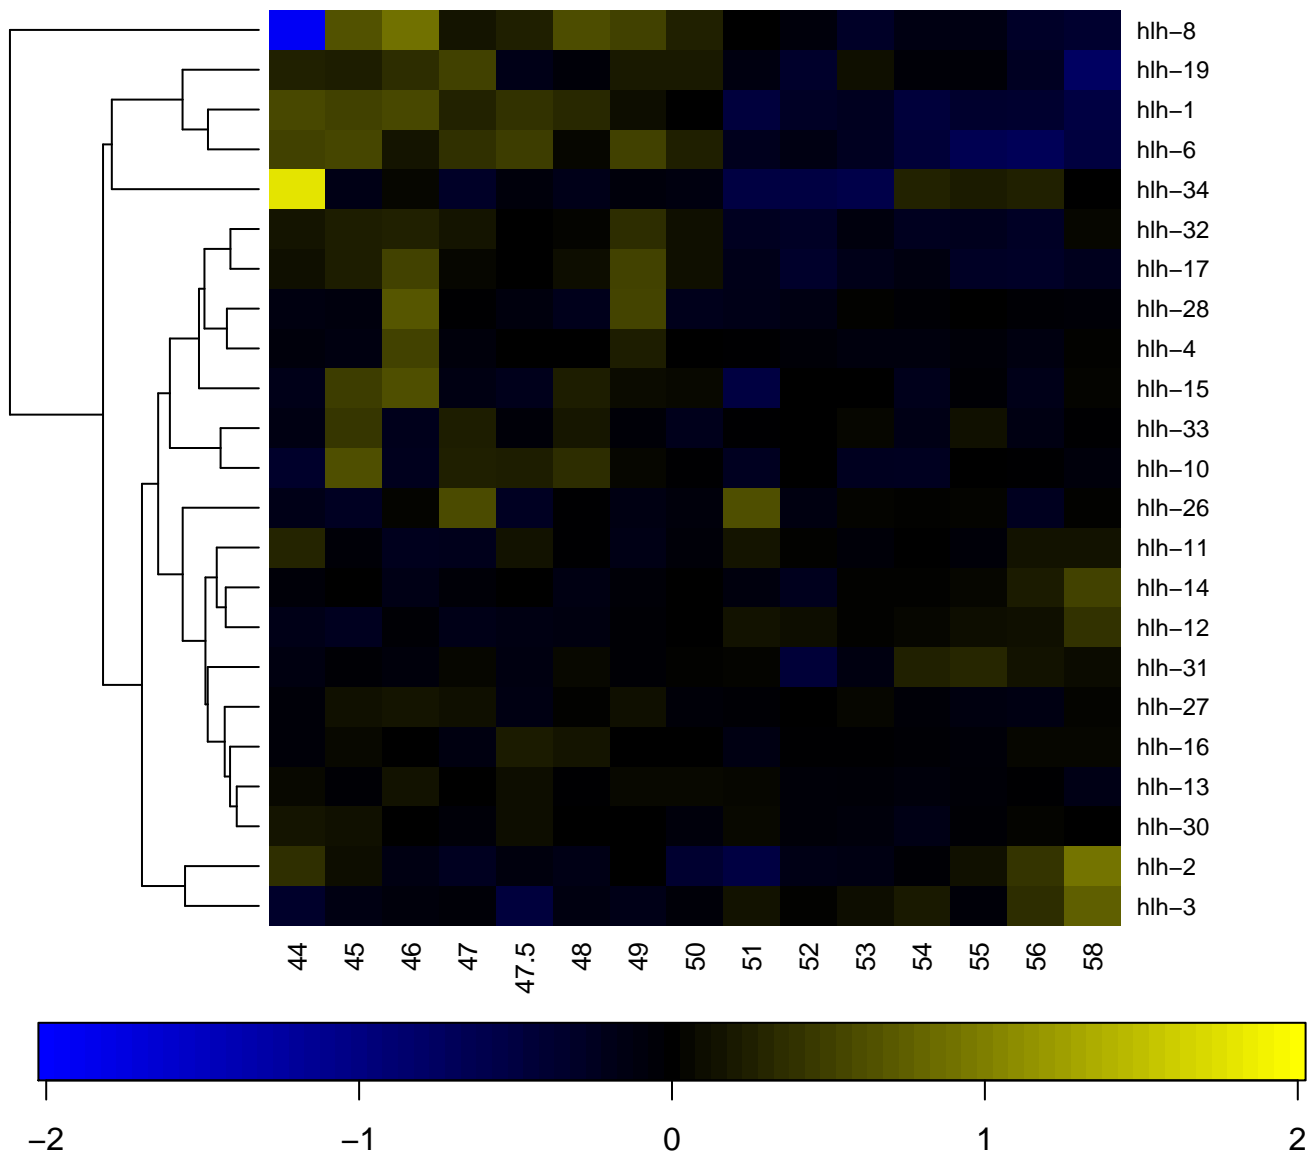

# hmg

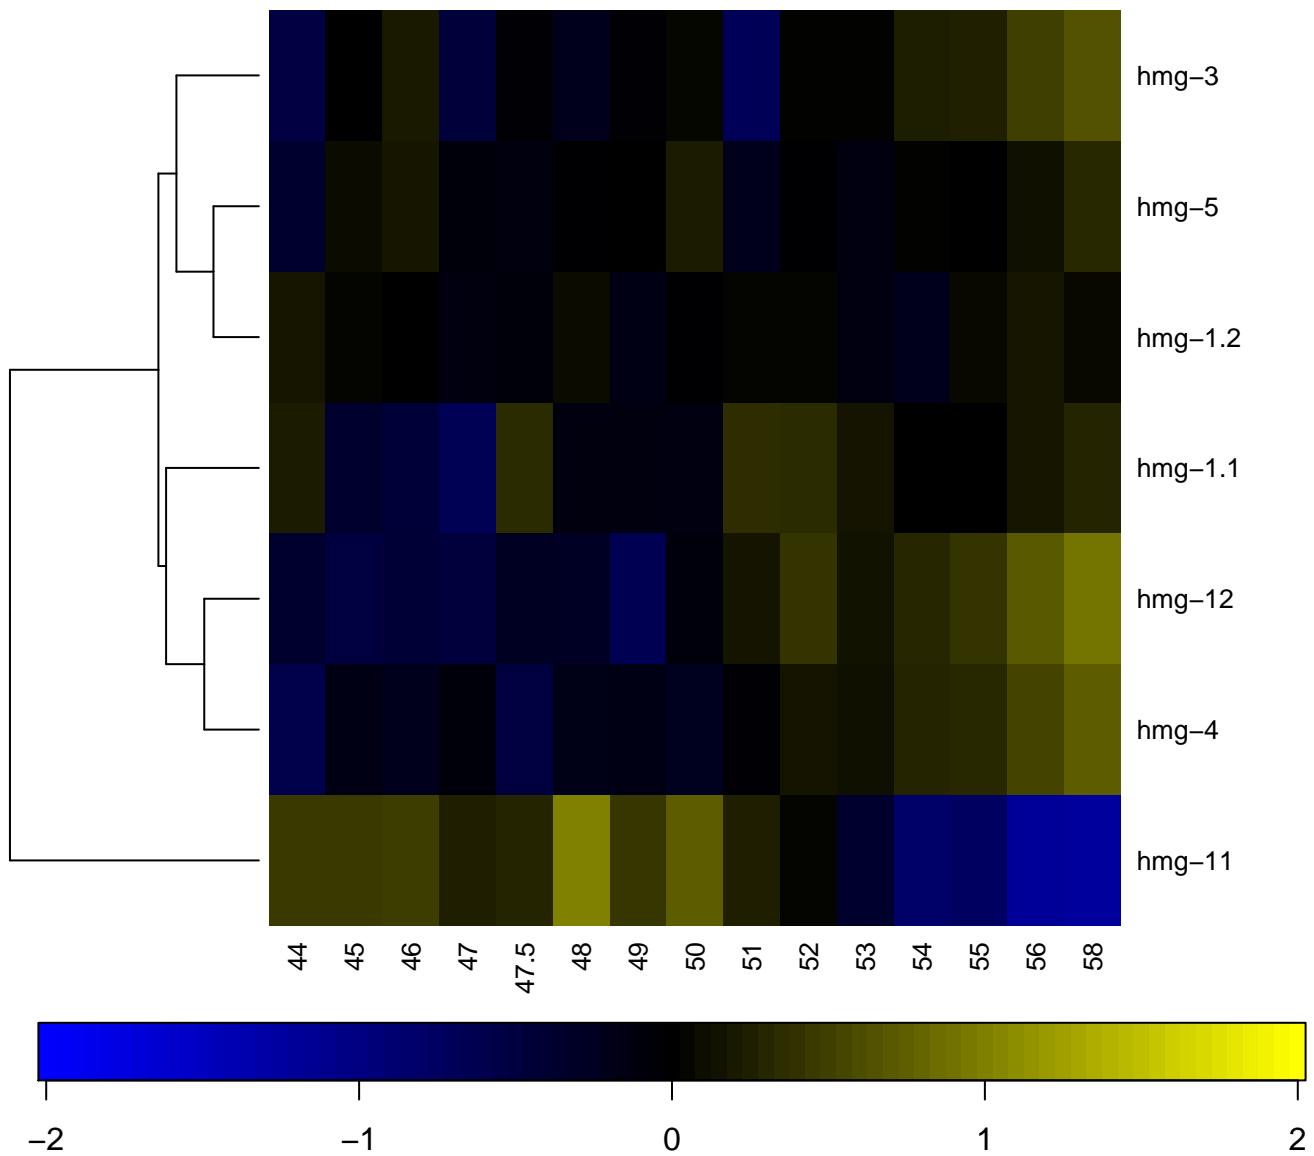



# hsp

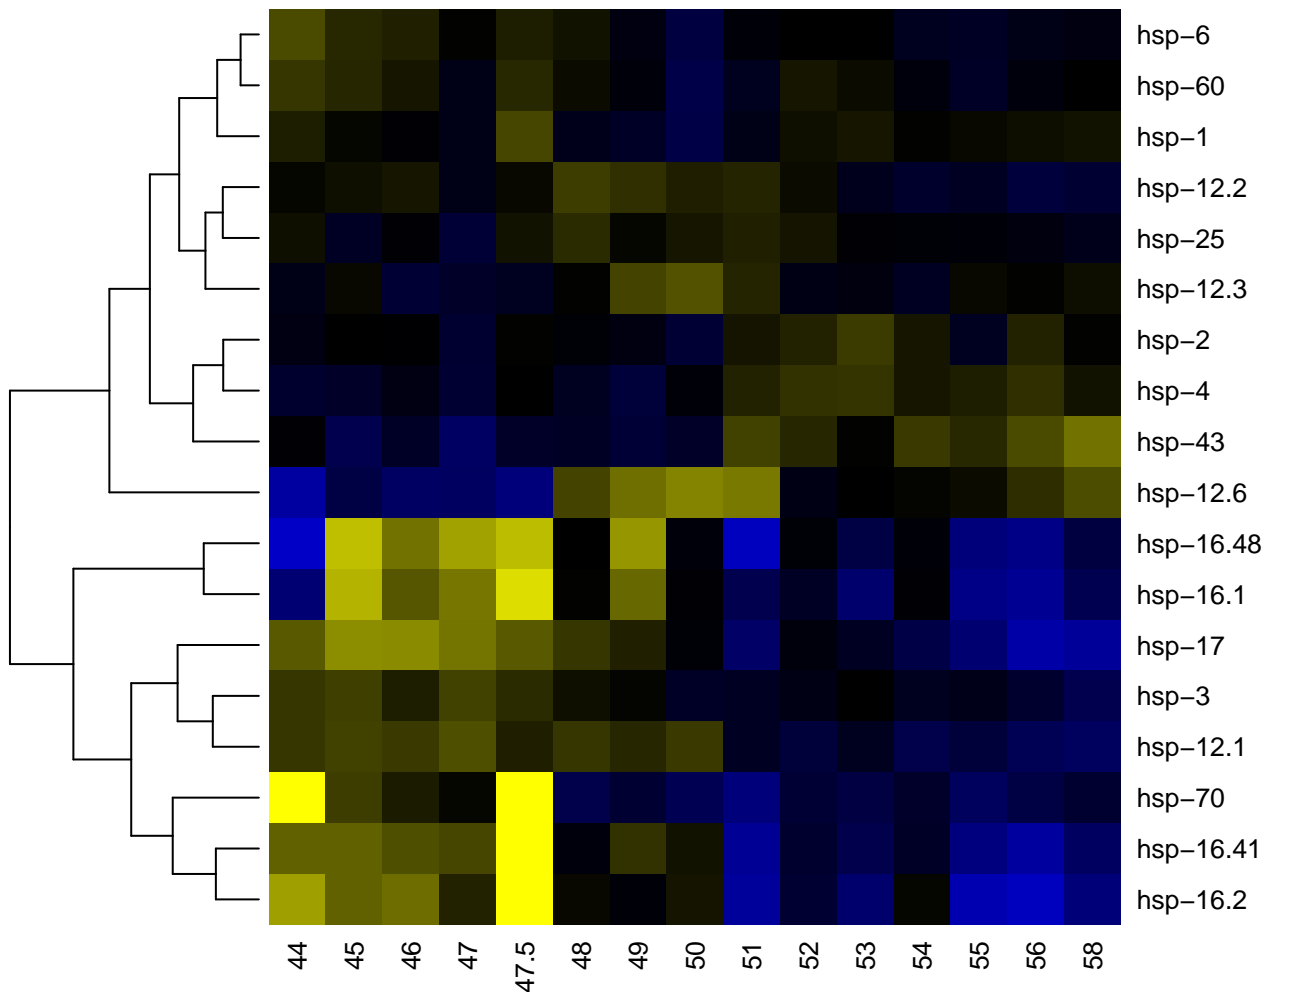





# ife

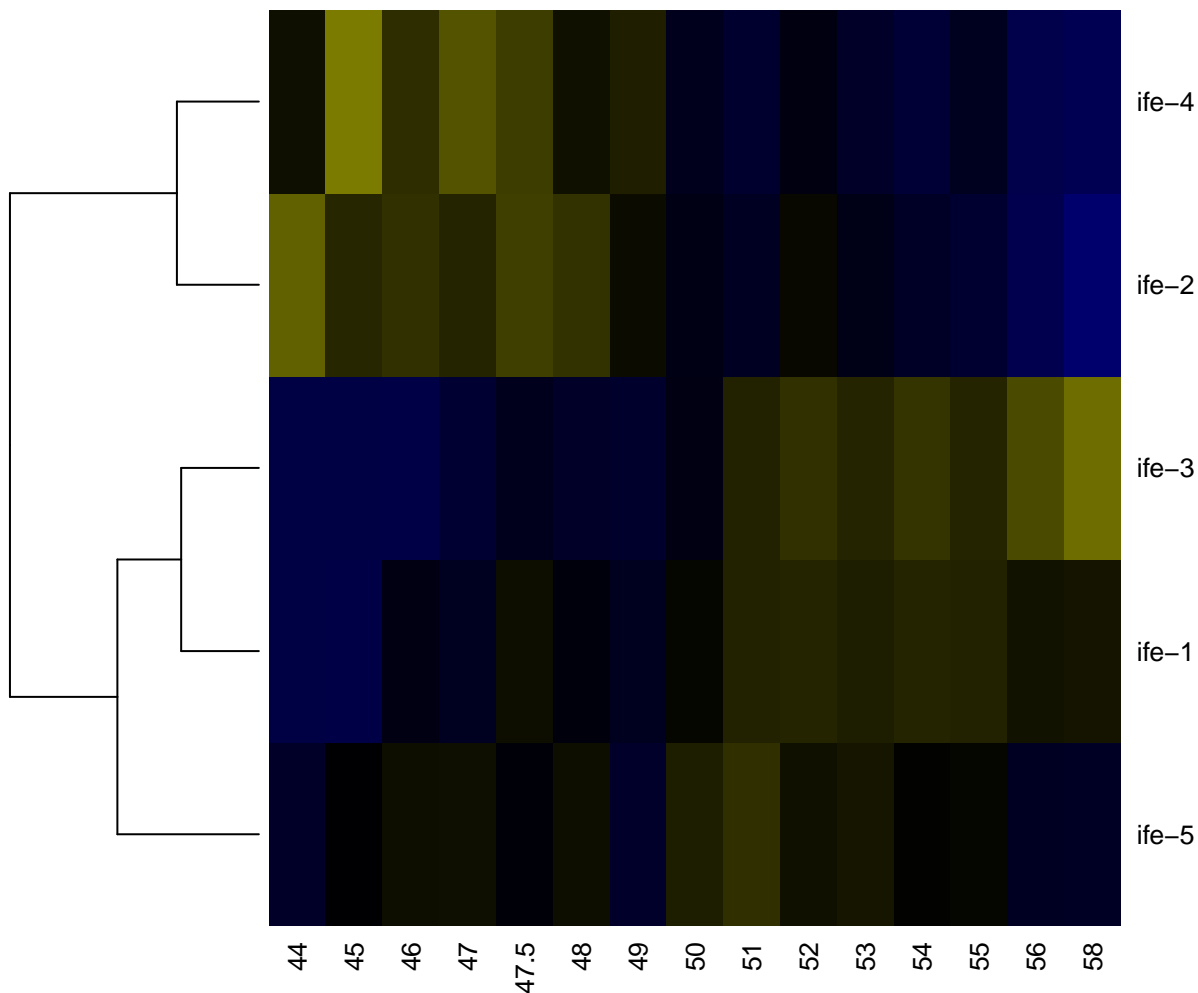

-2

-1

0

1

2



# ilys

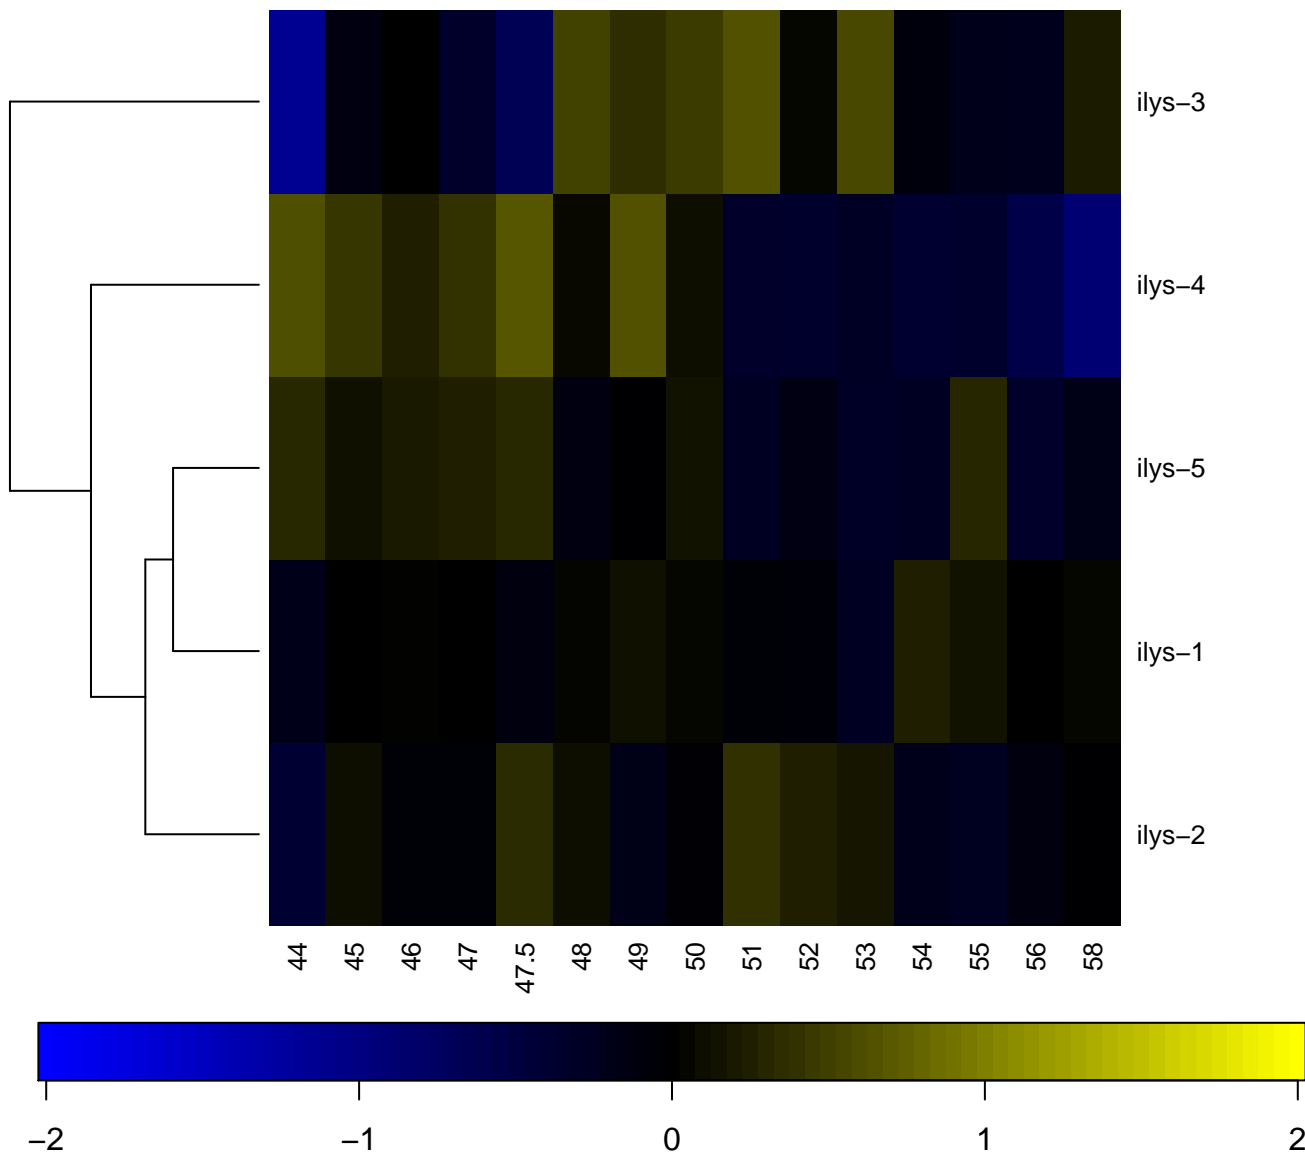

# ins

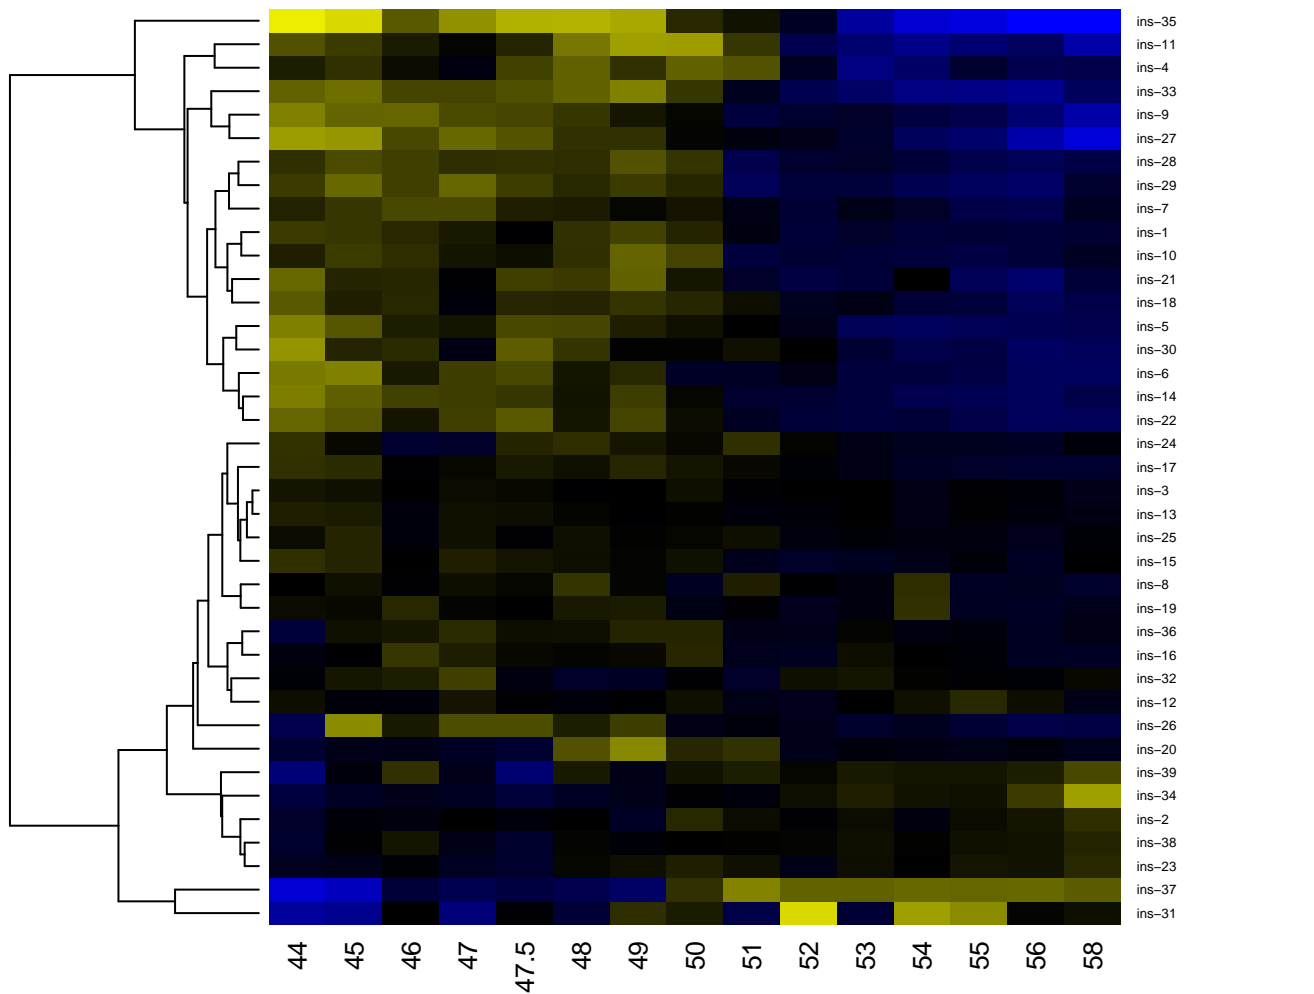

-2

-1

0

1

2

inx

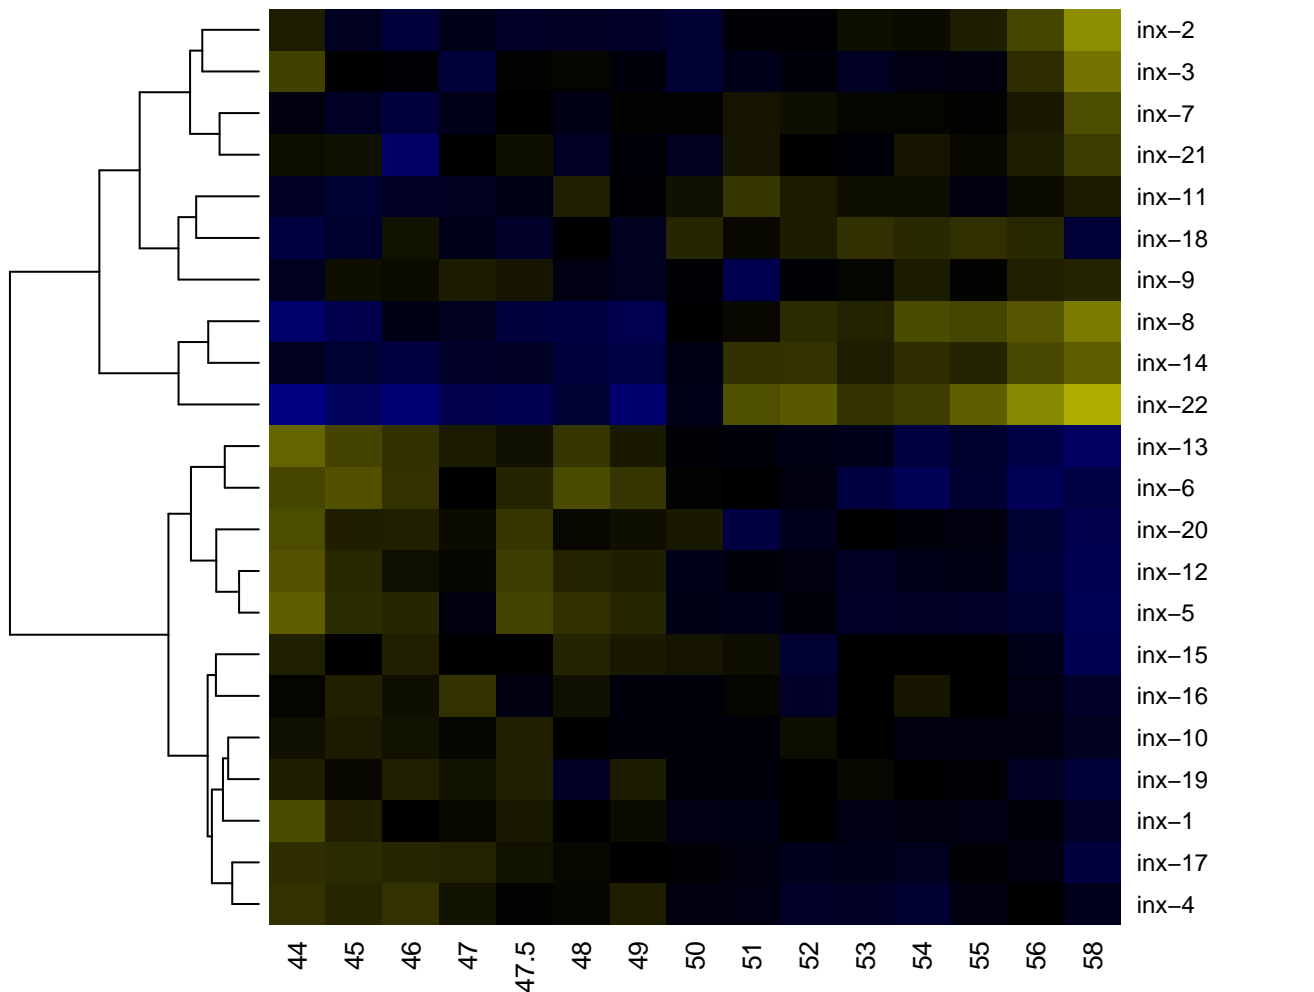

-2

-1

0

1

2

kbp

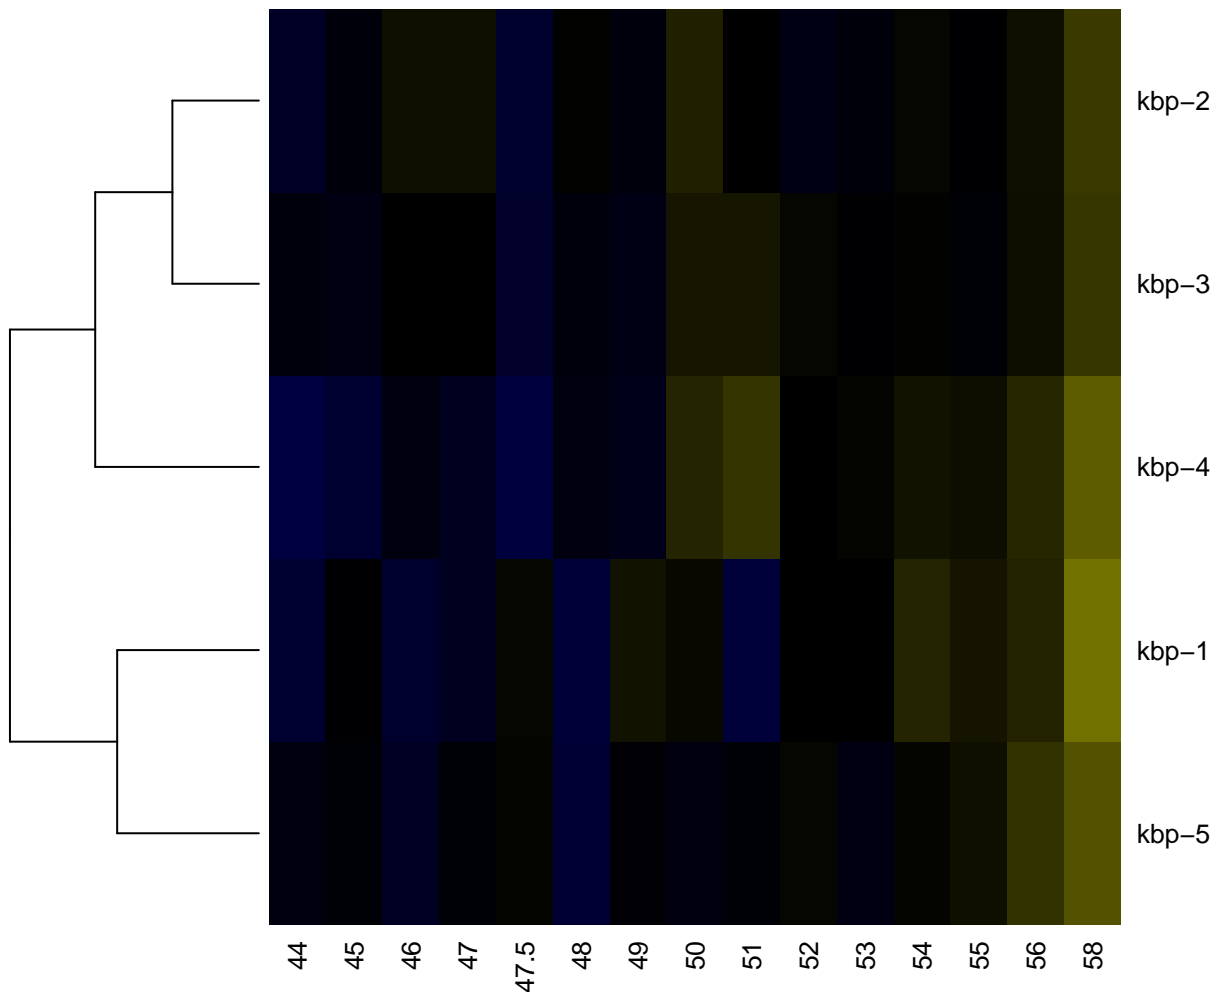

-2

-1

0

1

2

# kin

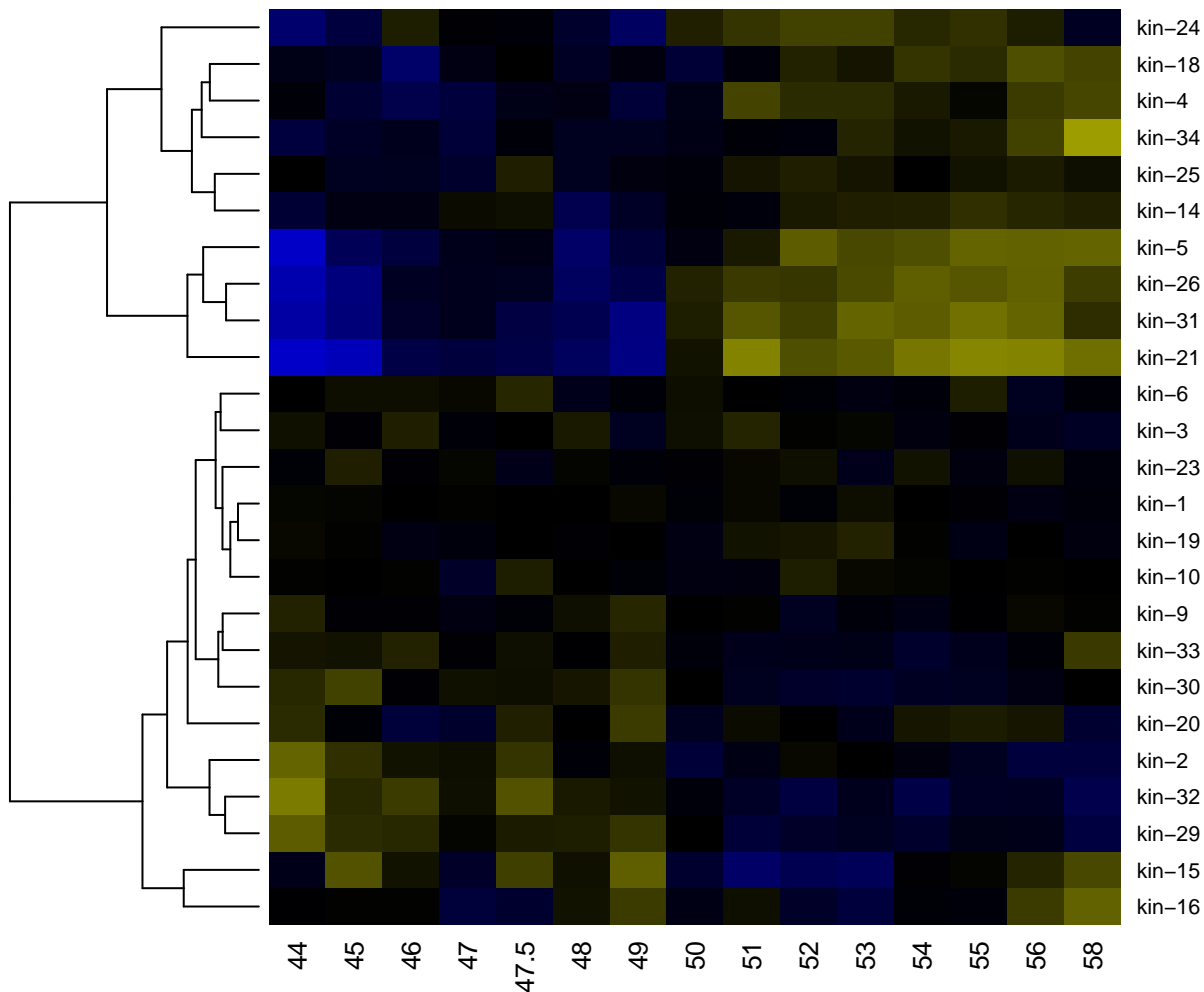

# k1p

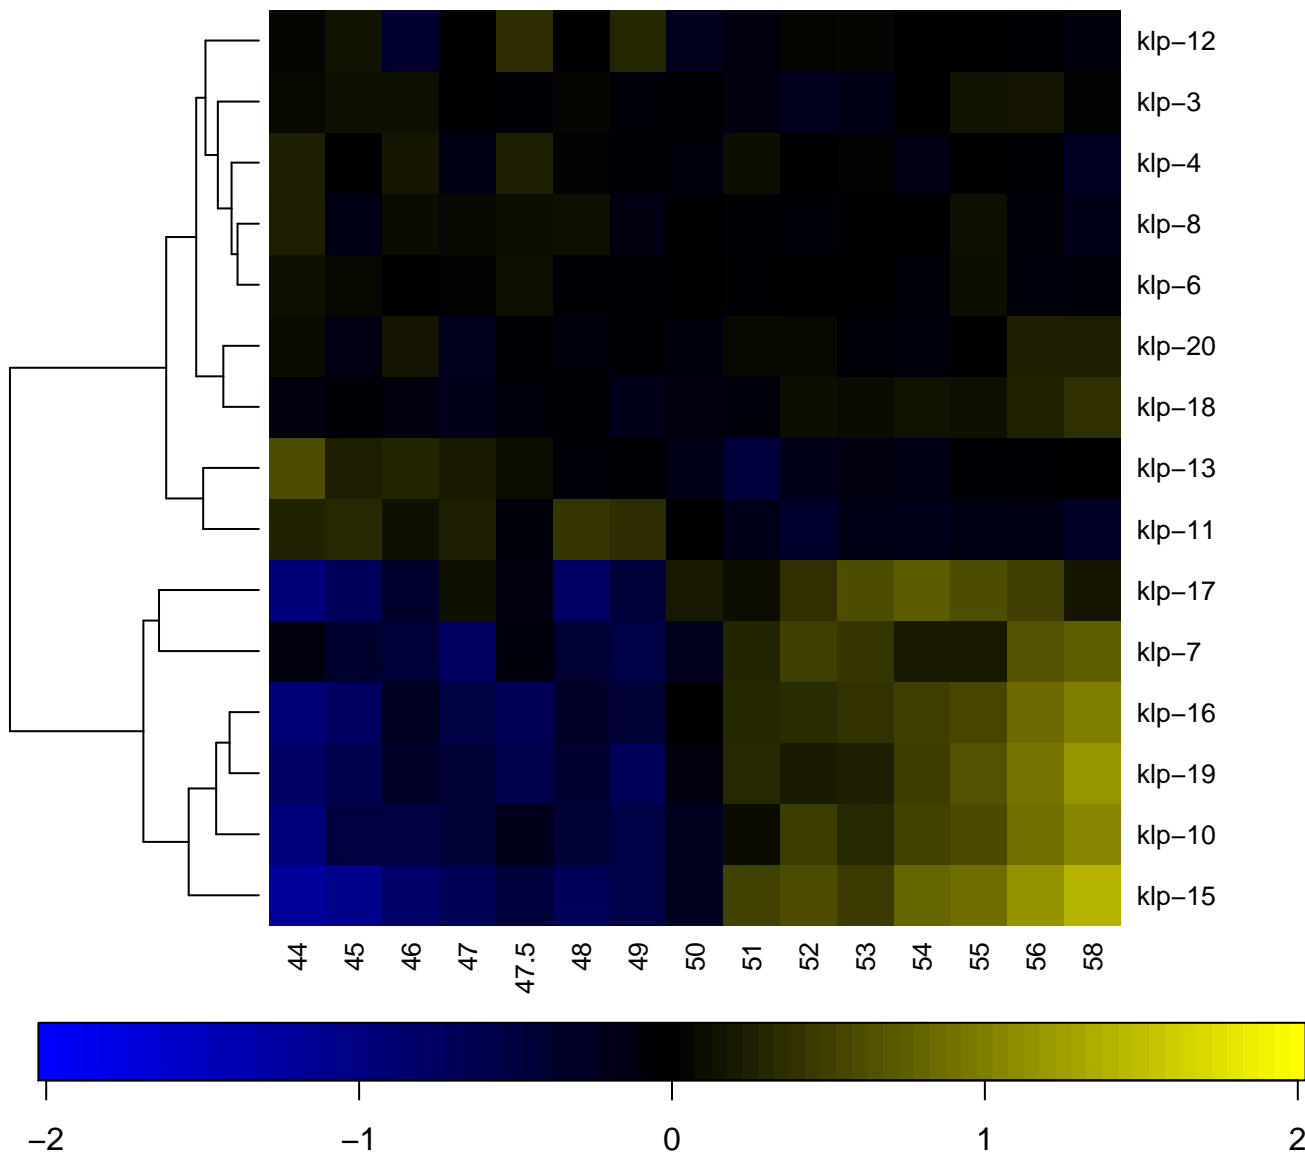

# lact

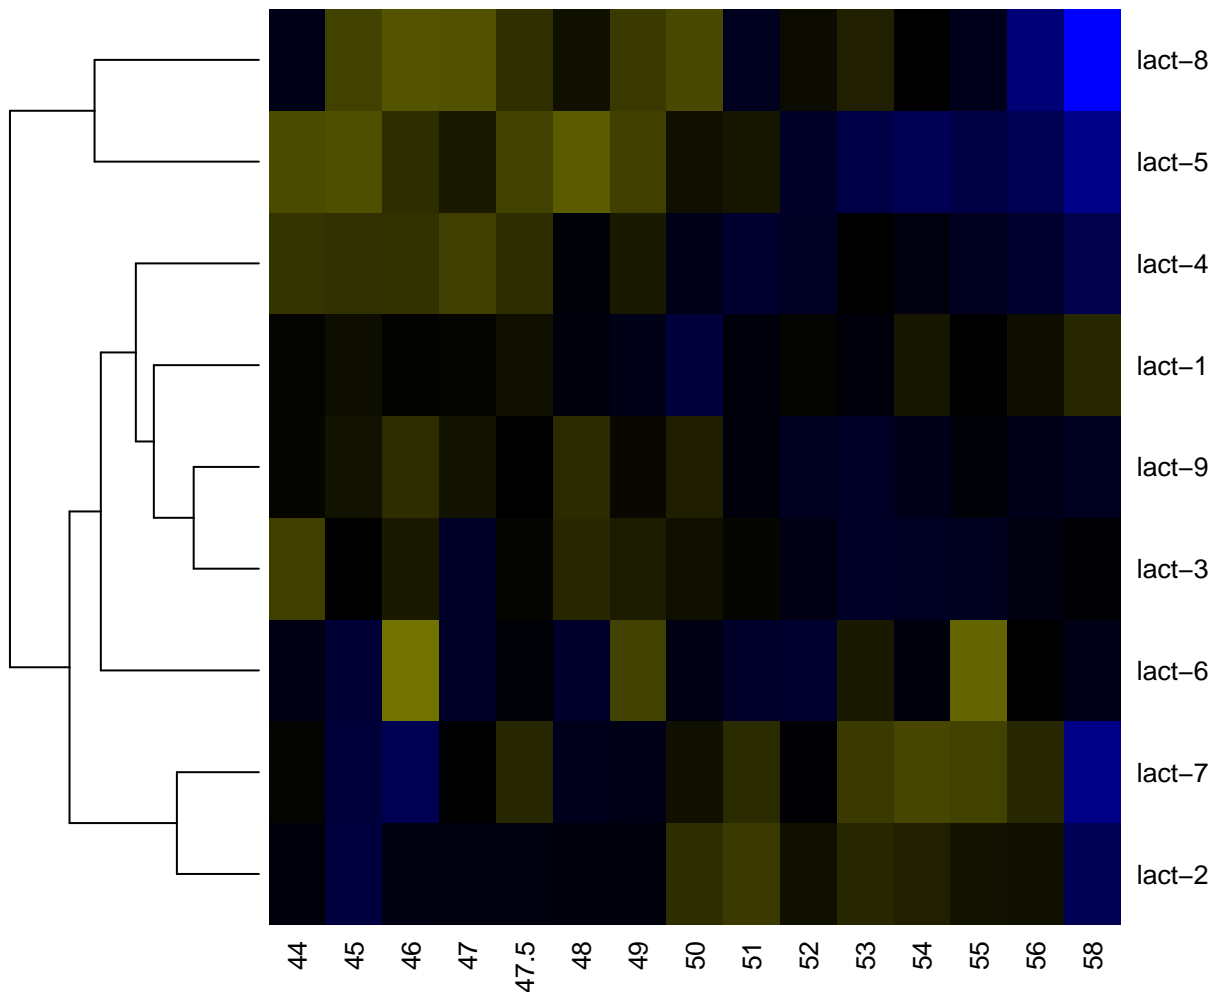

-2

-1

0

1

2











# lim

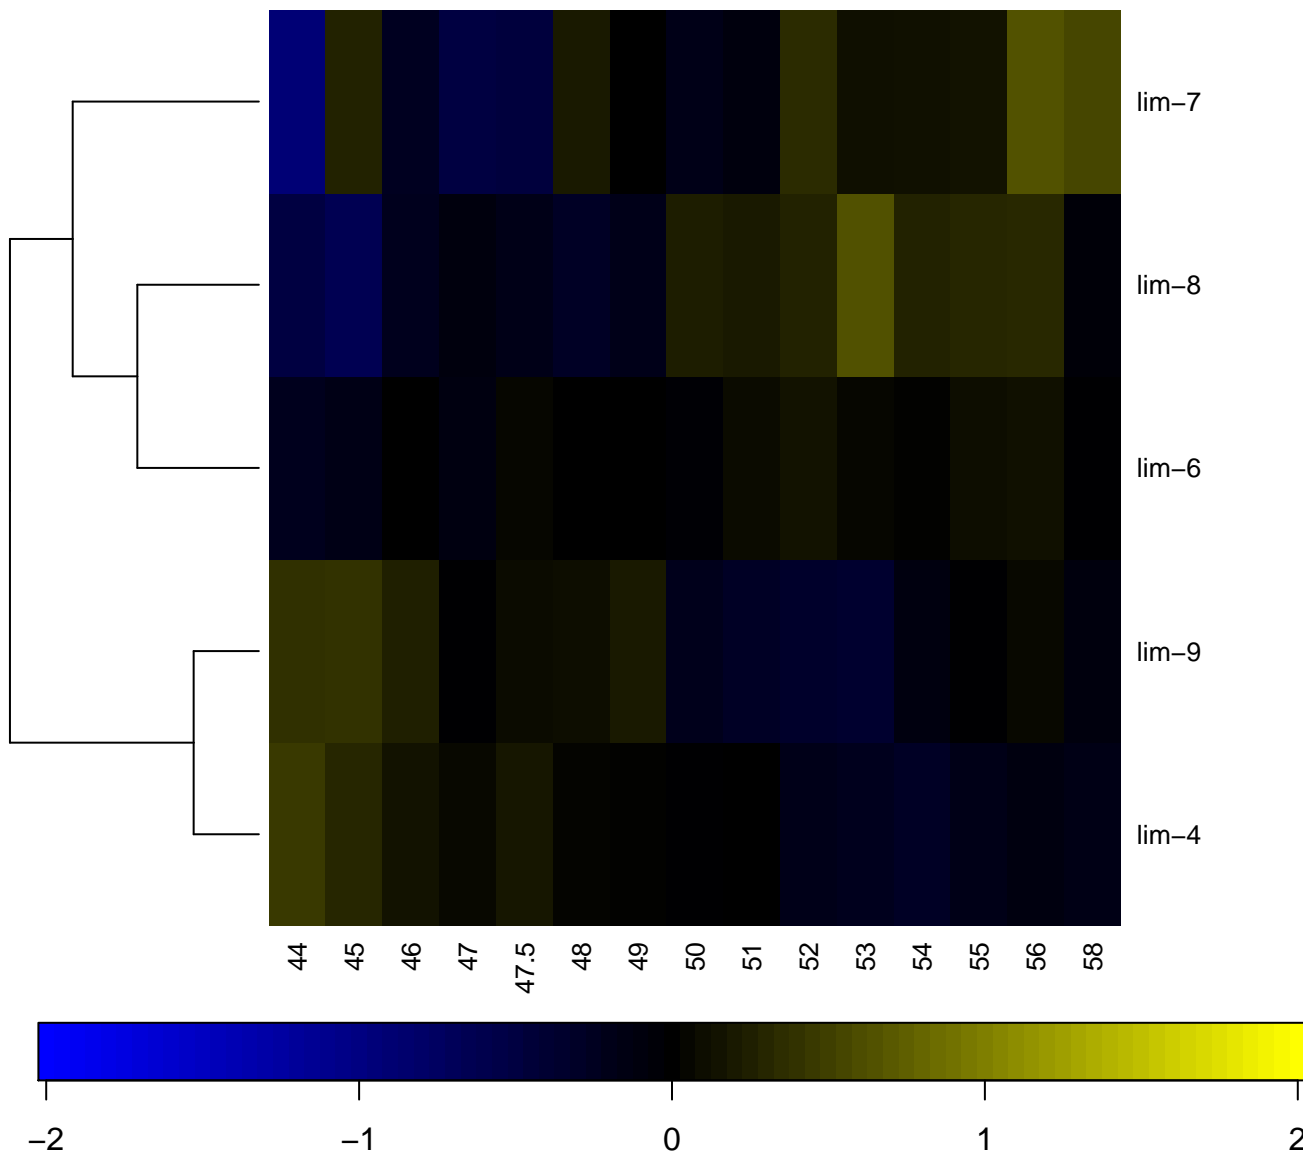

lin

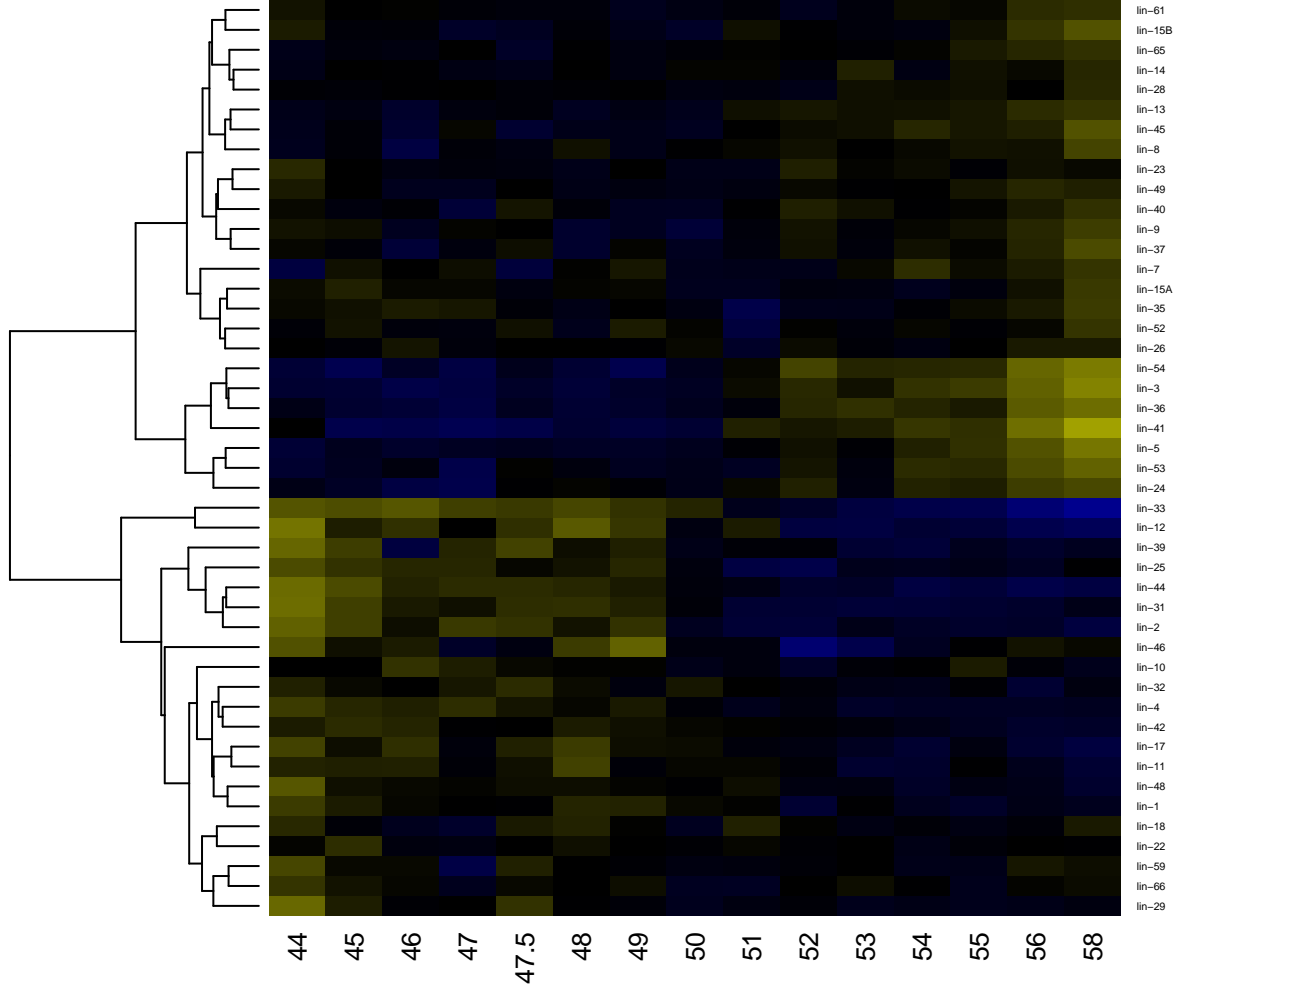

-2

-1

0

1

2

# lipI

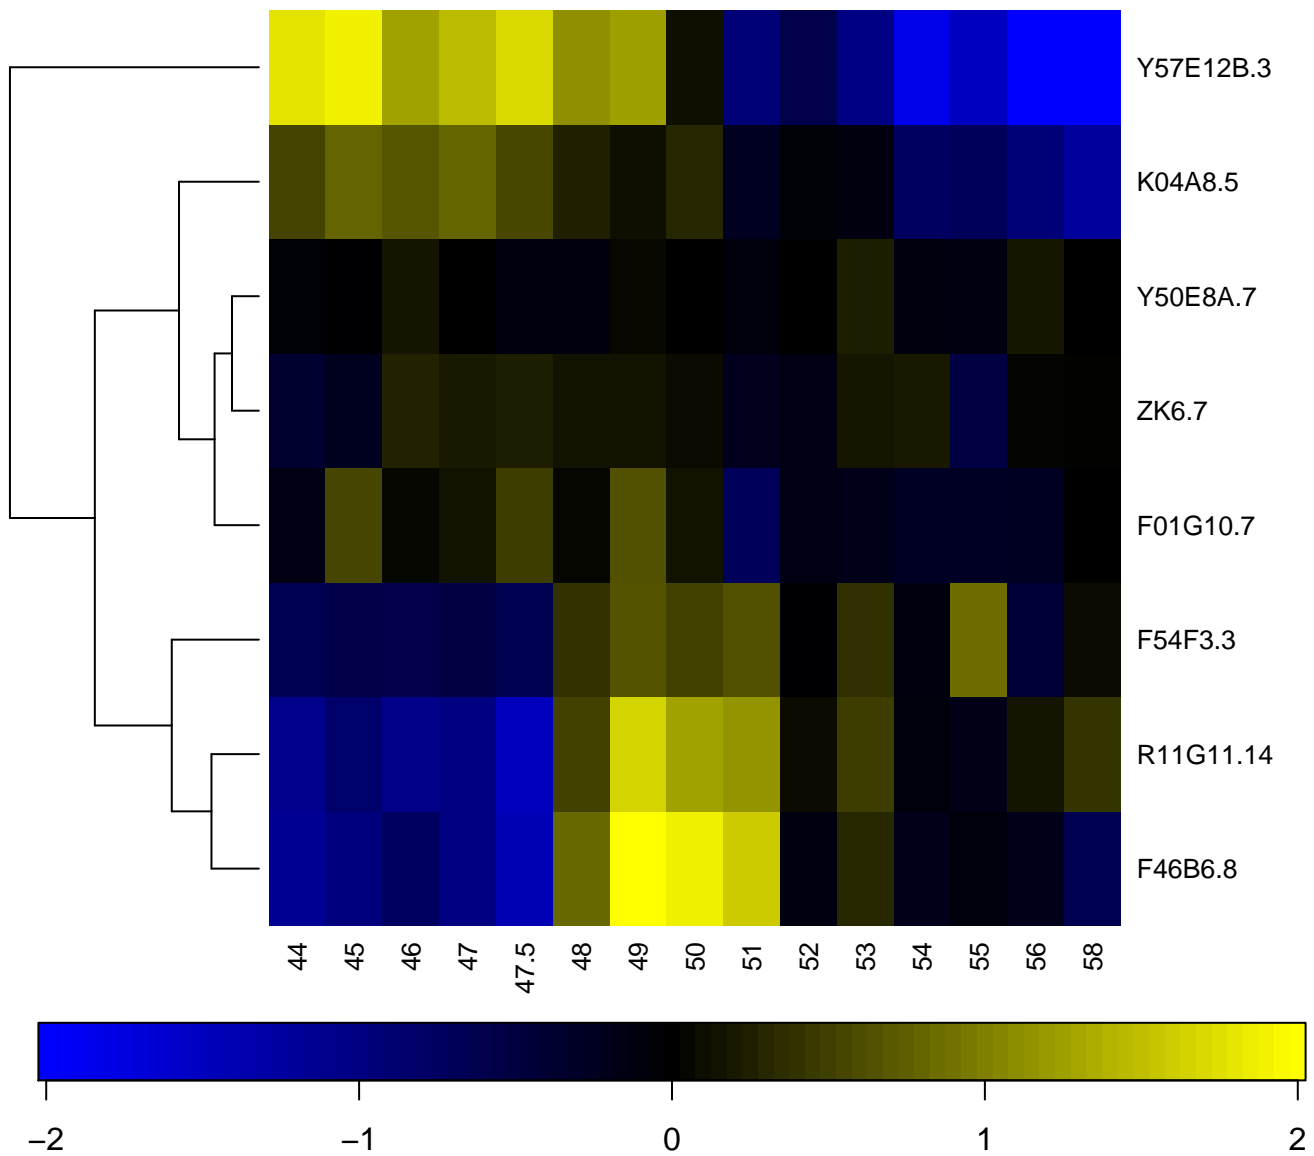







# lpr

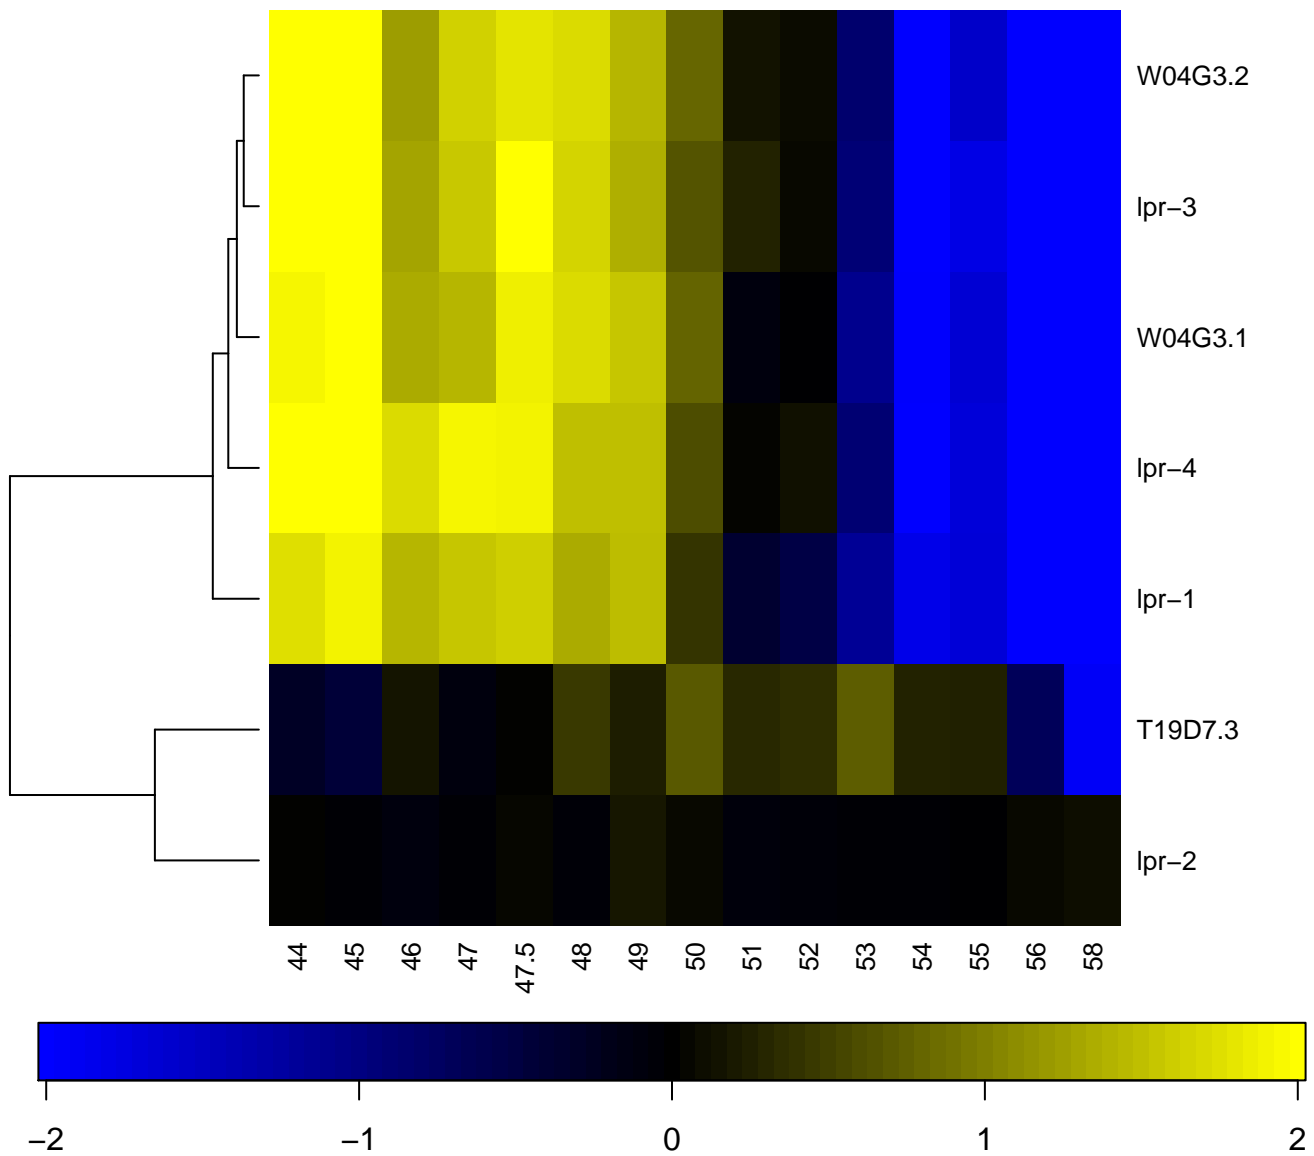

# lsm

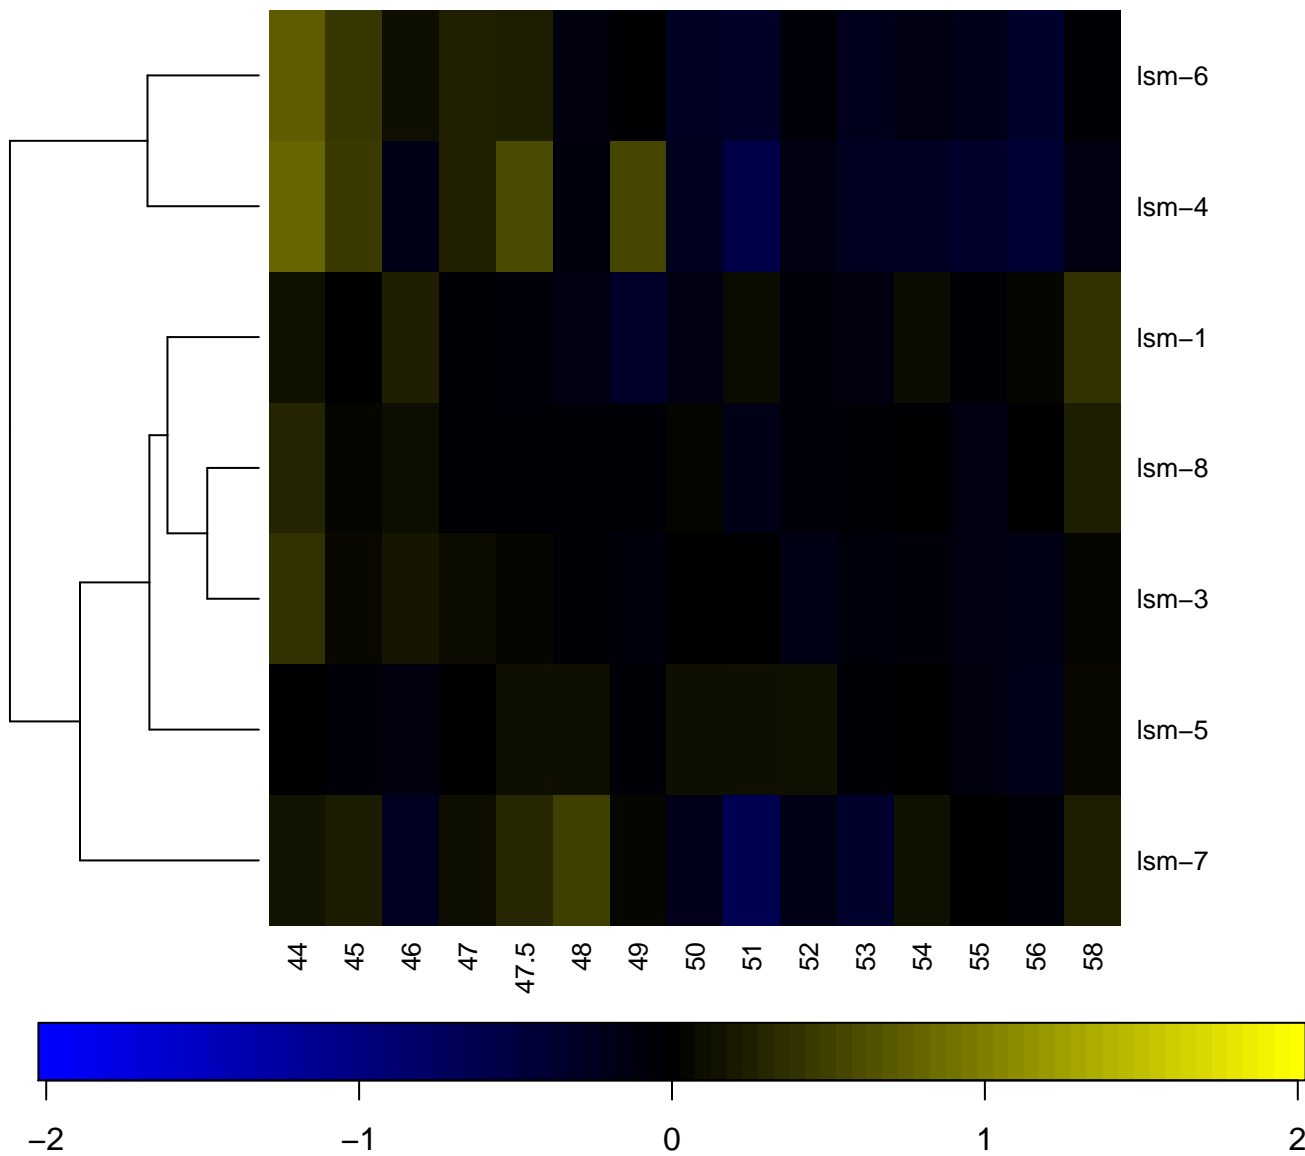



# lys

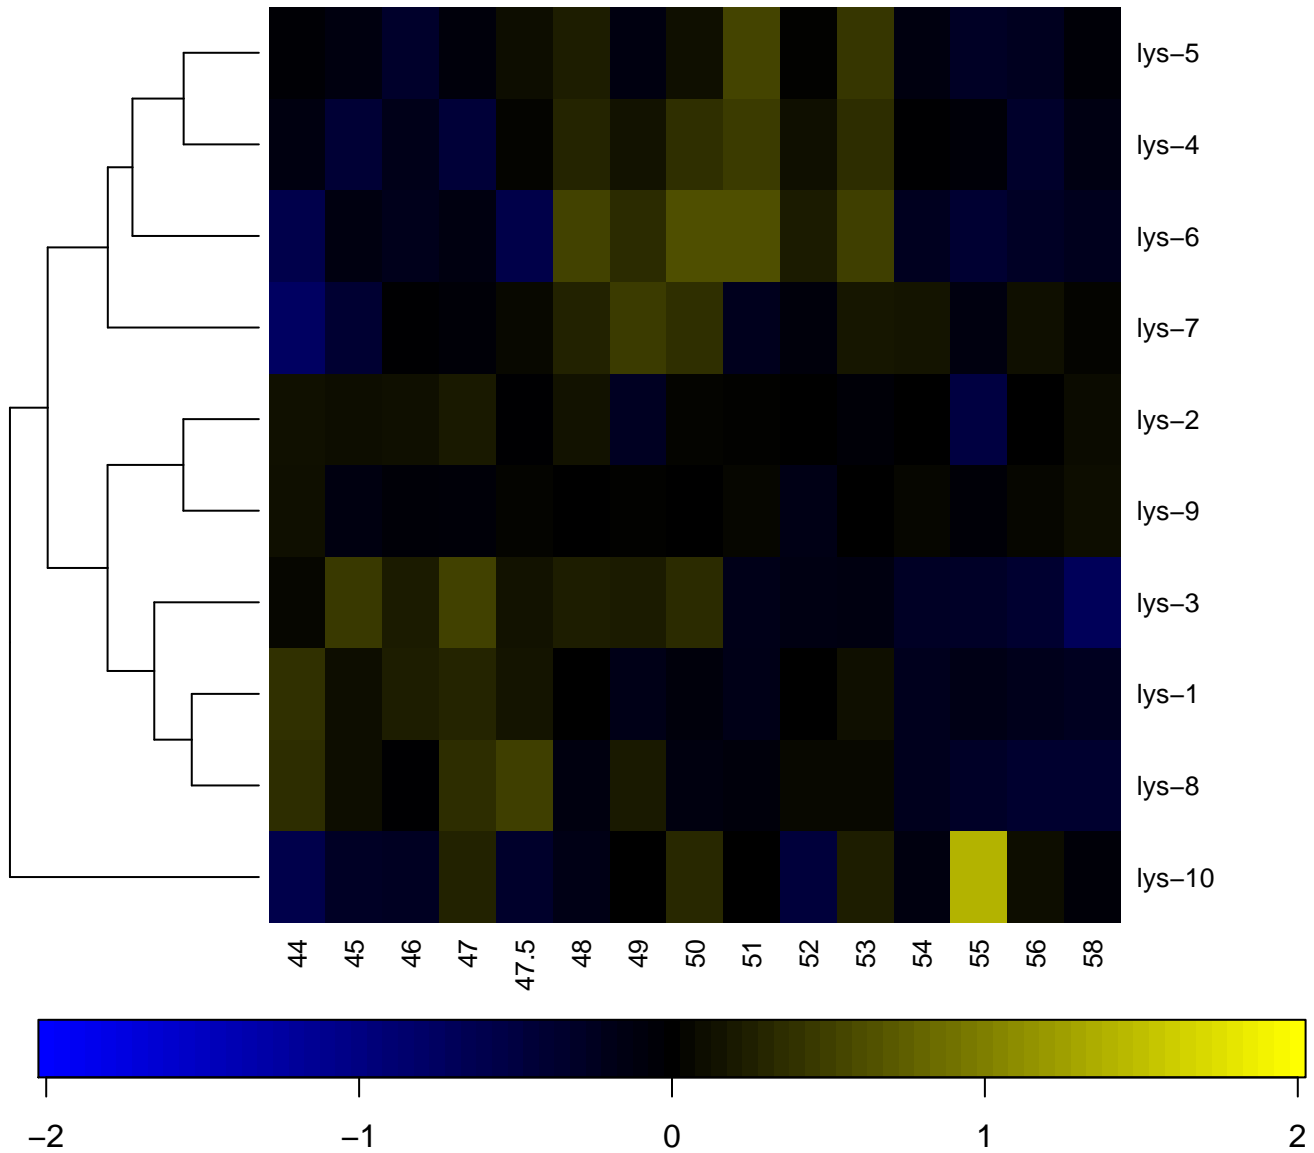

# mab

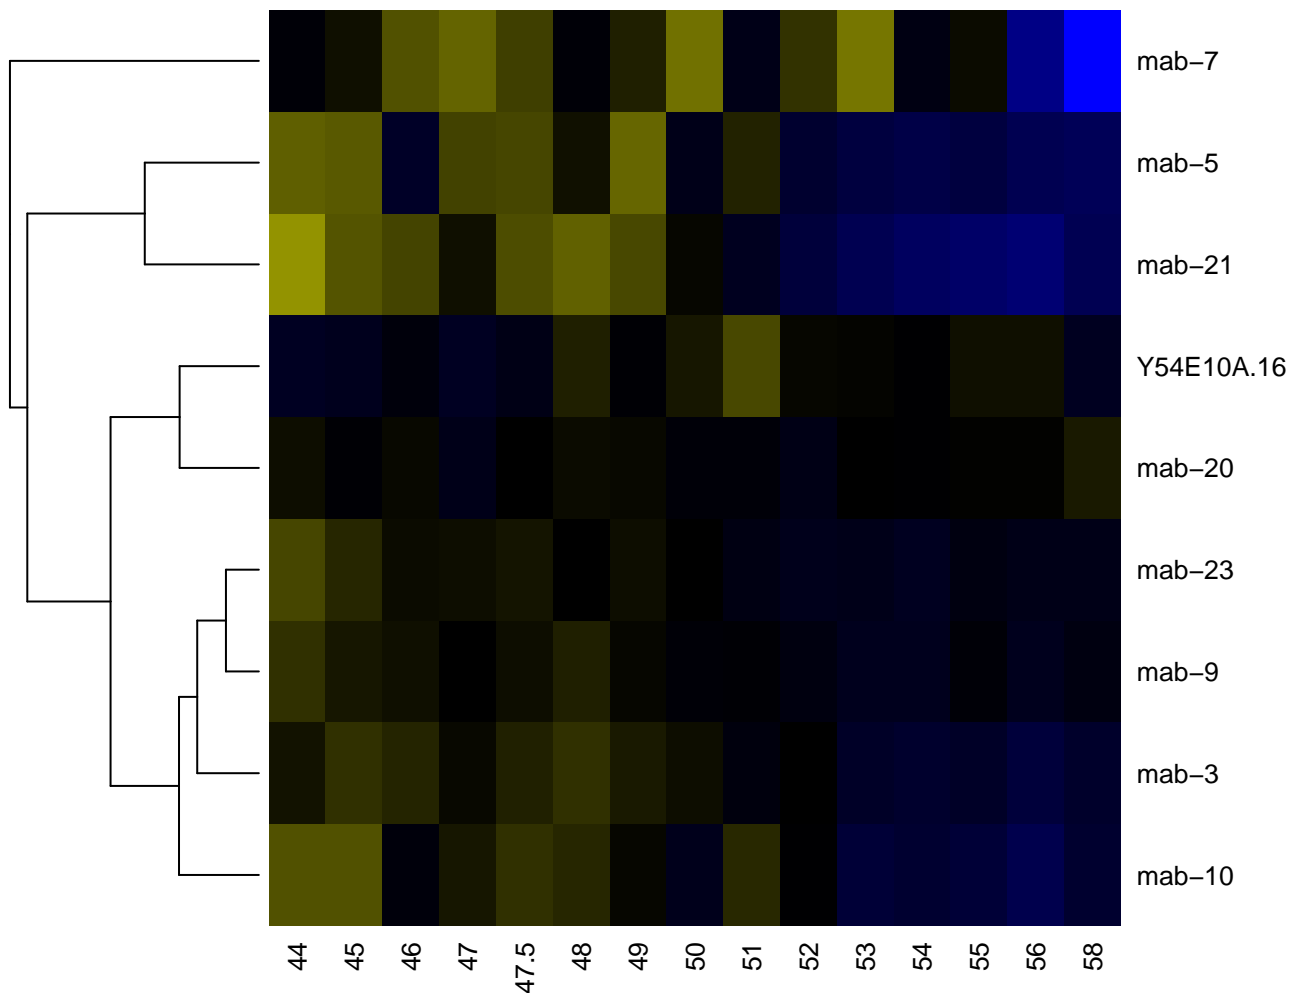

# math

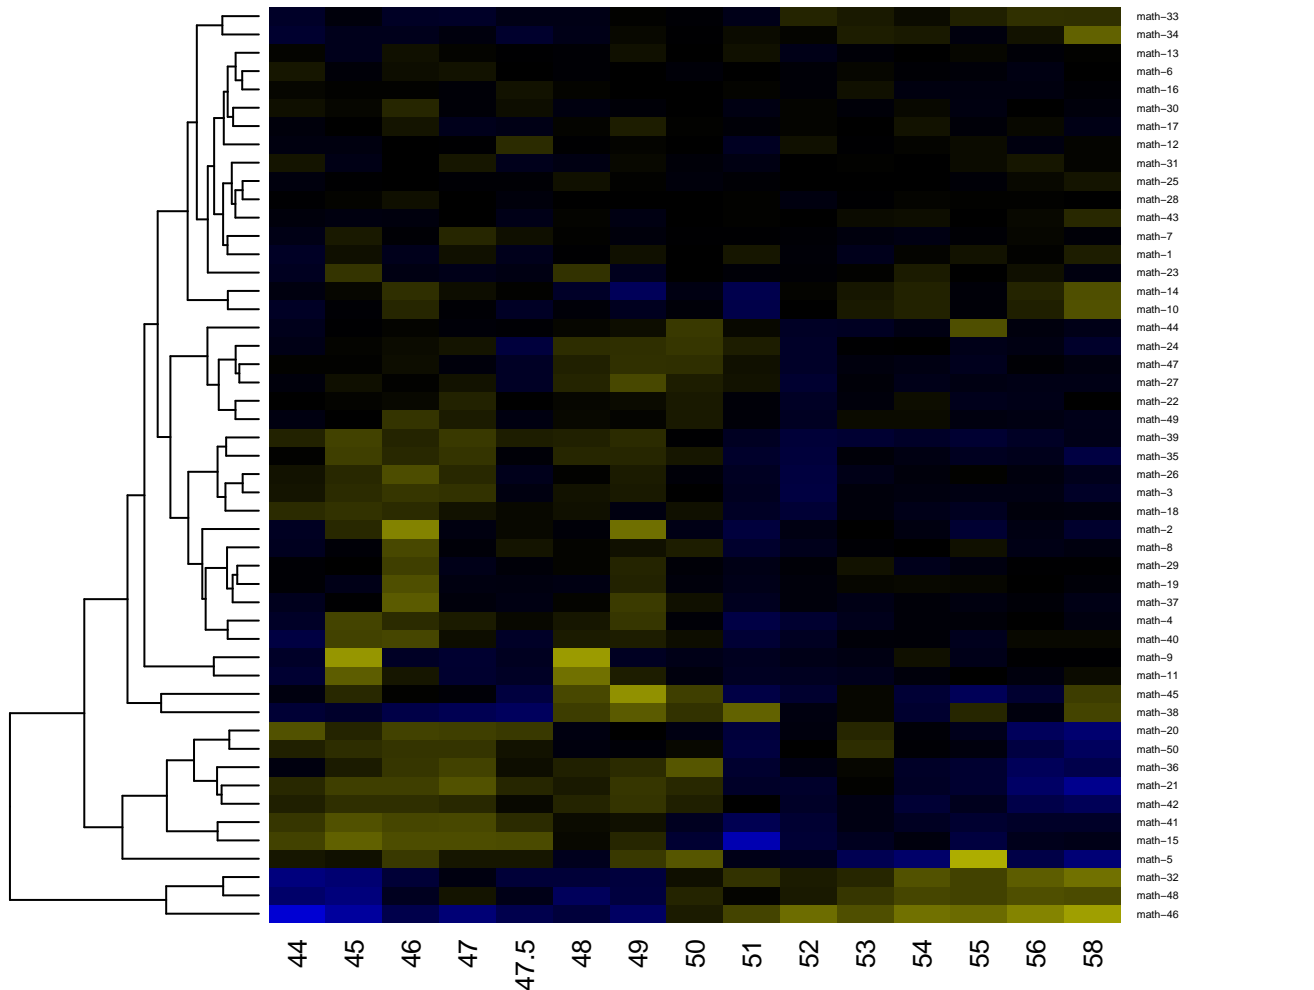

-2

-1

0

1

2







# mdt

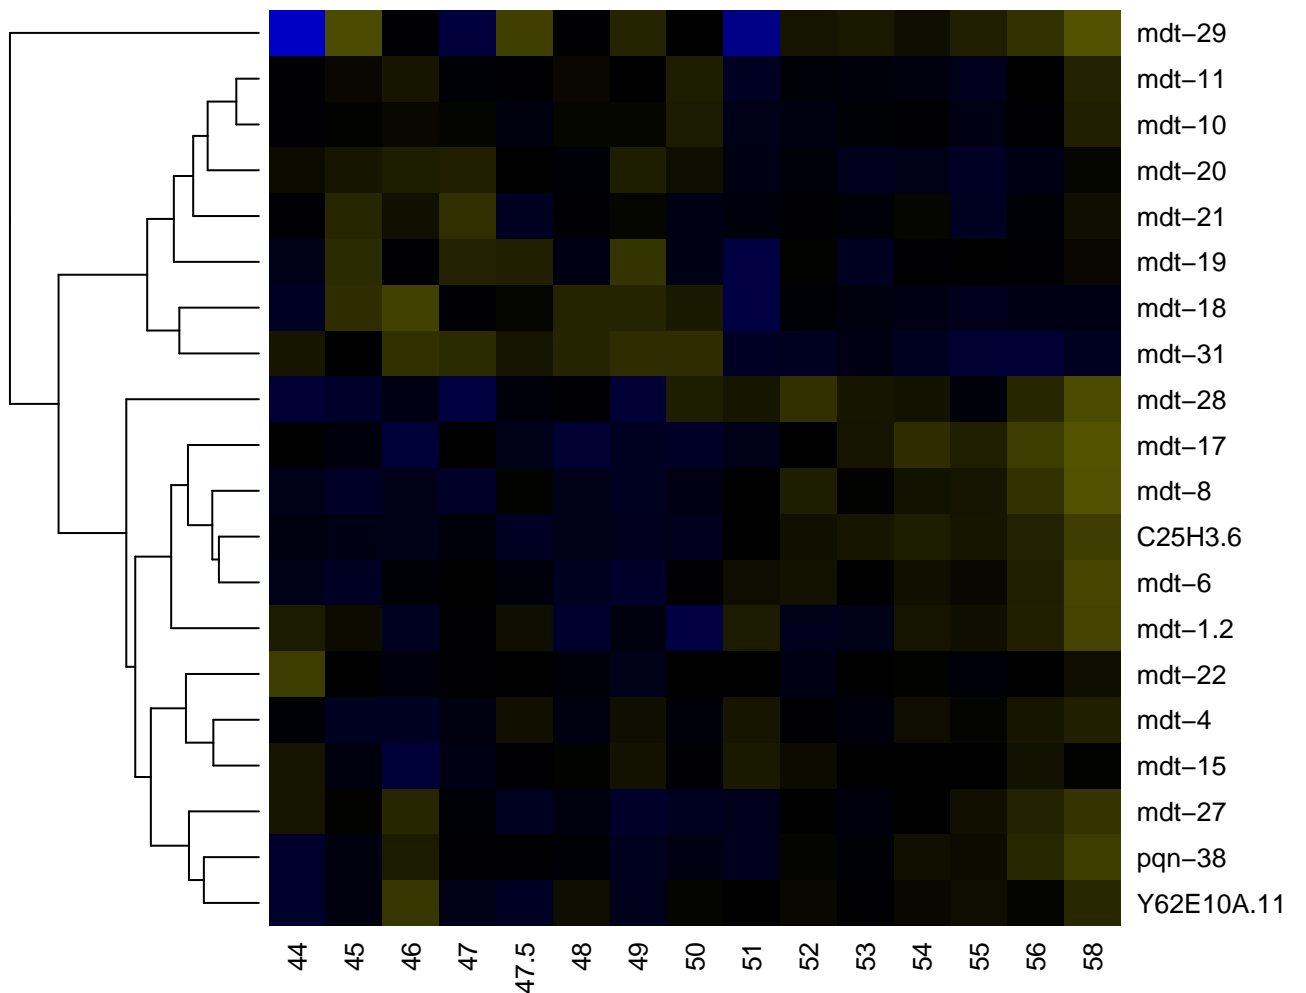

-2

-1

0

1

2

# mec

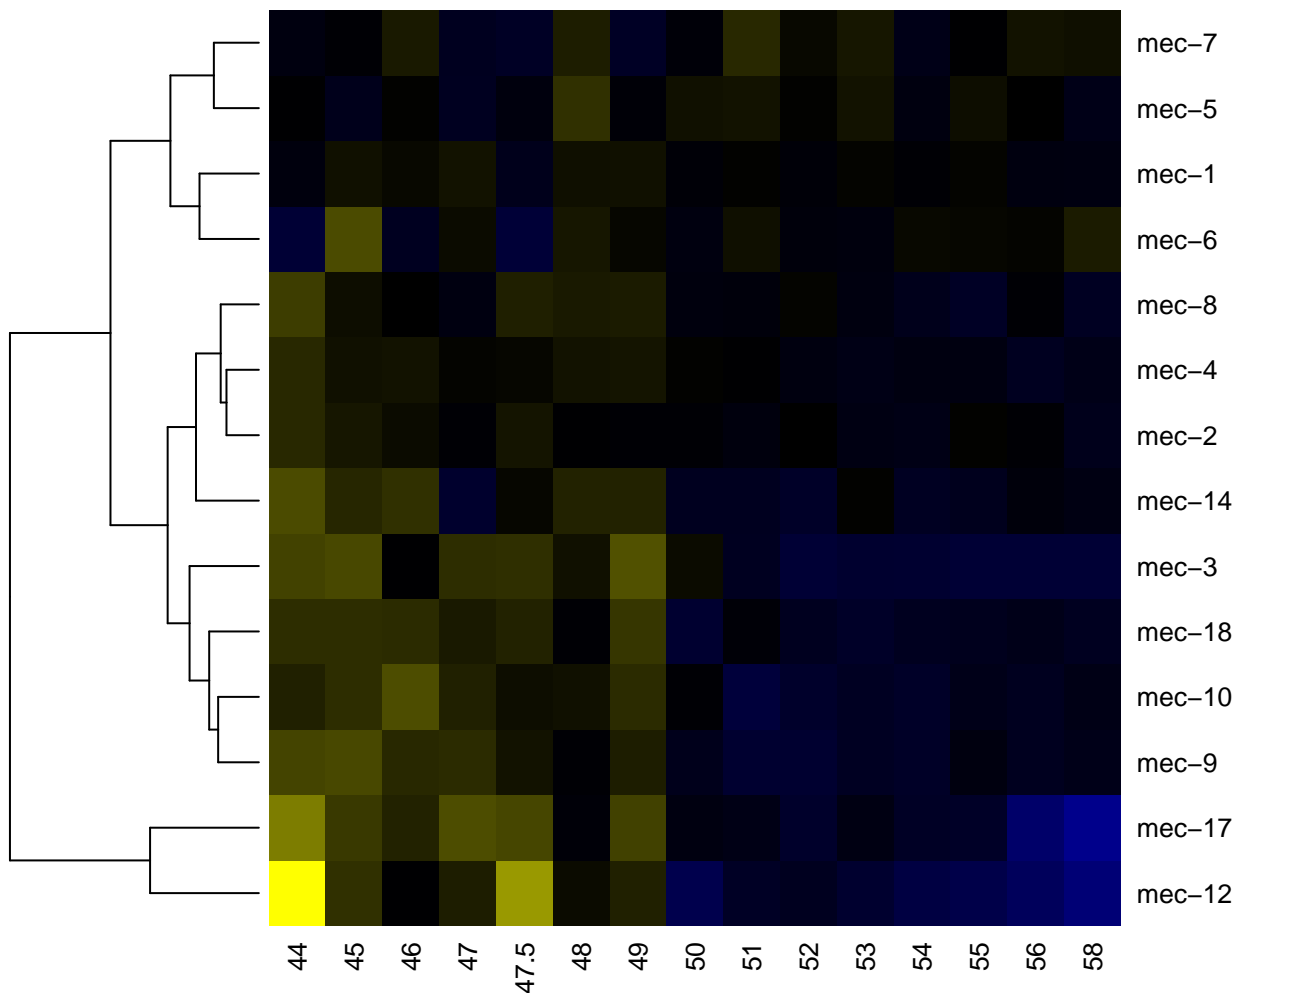

# mel

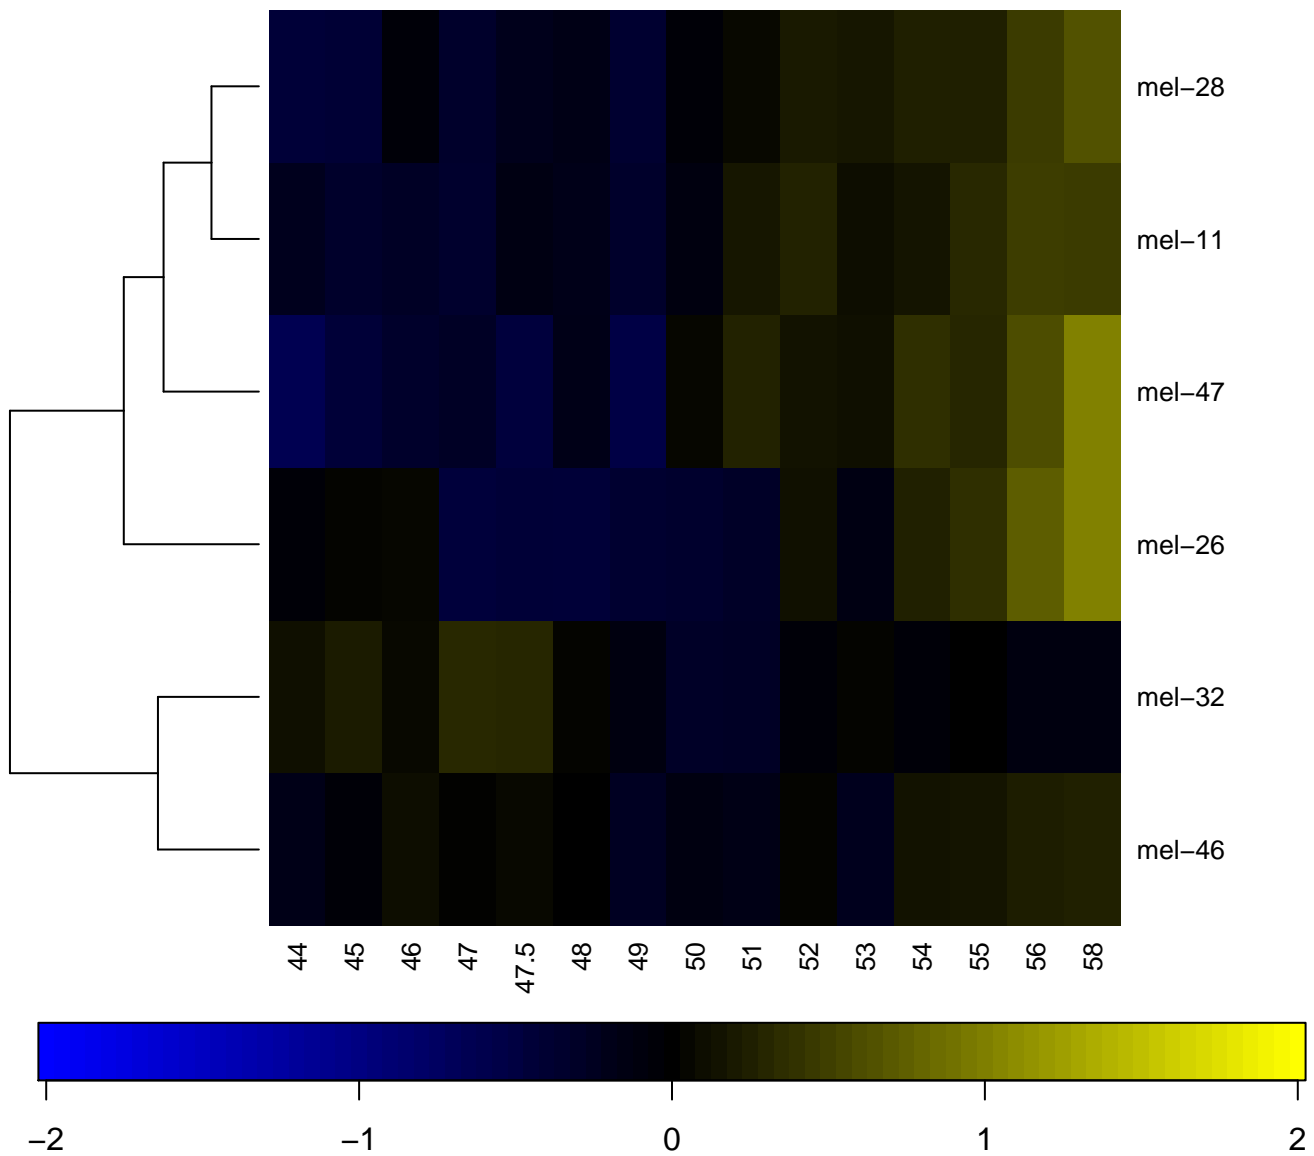

# mes

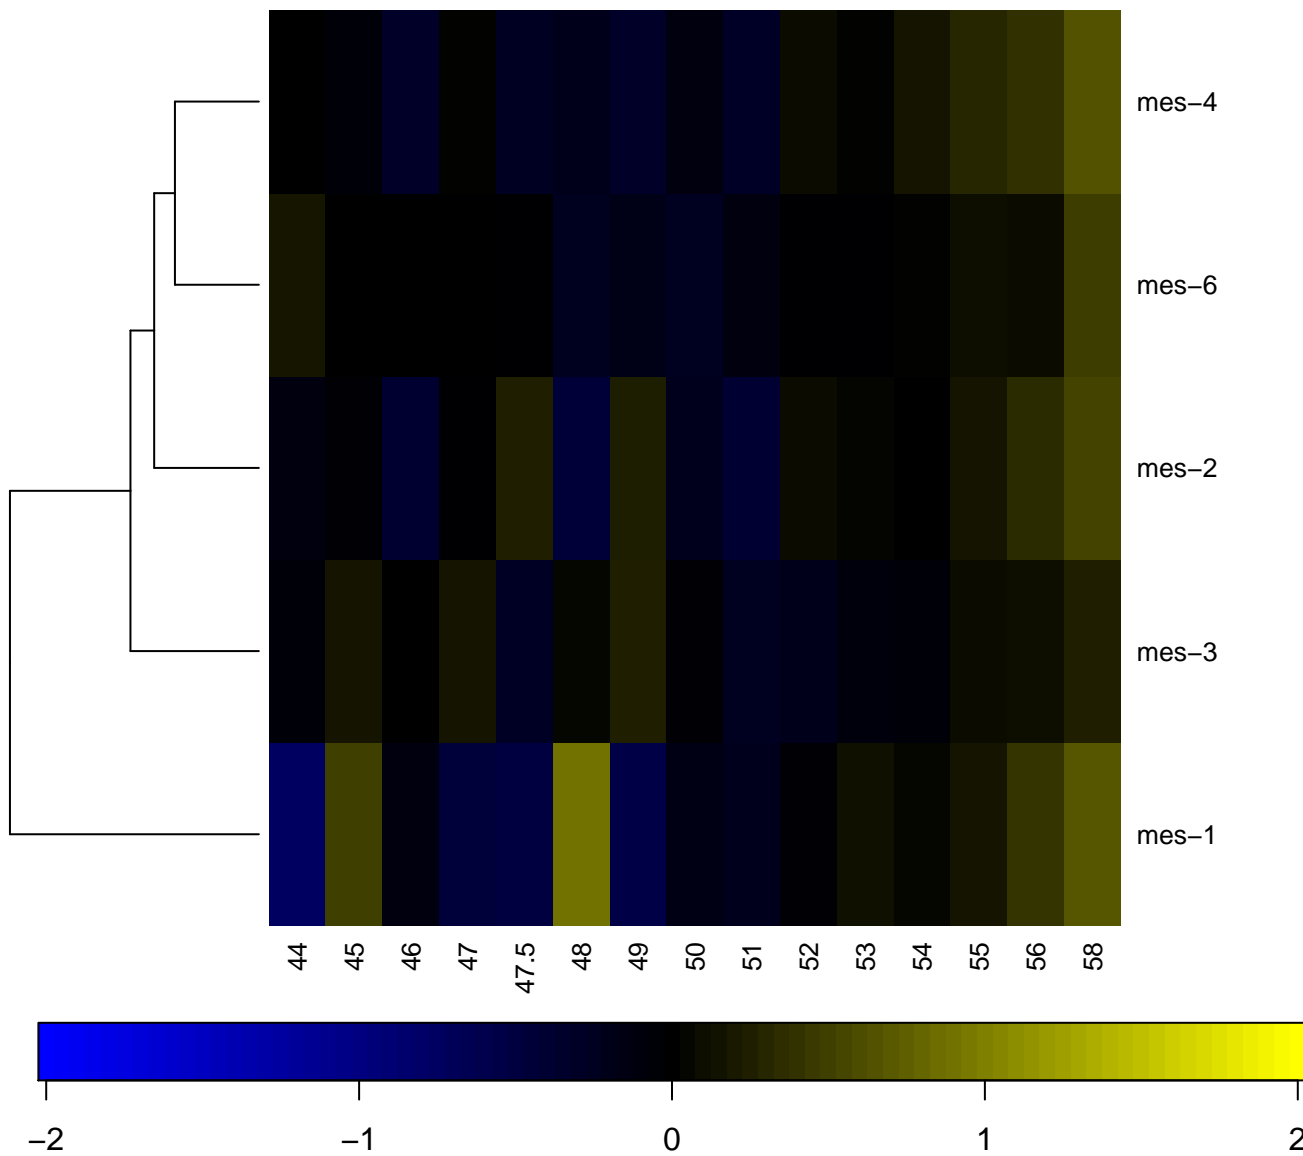





# mltn

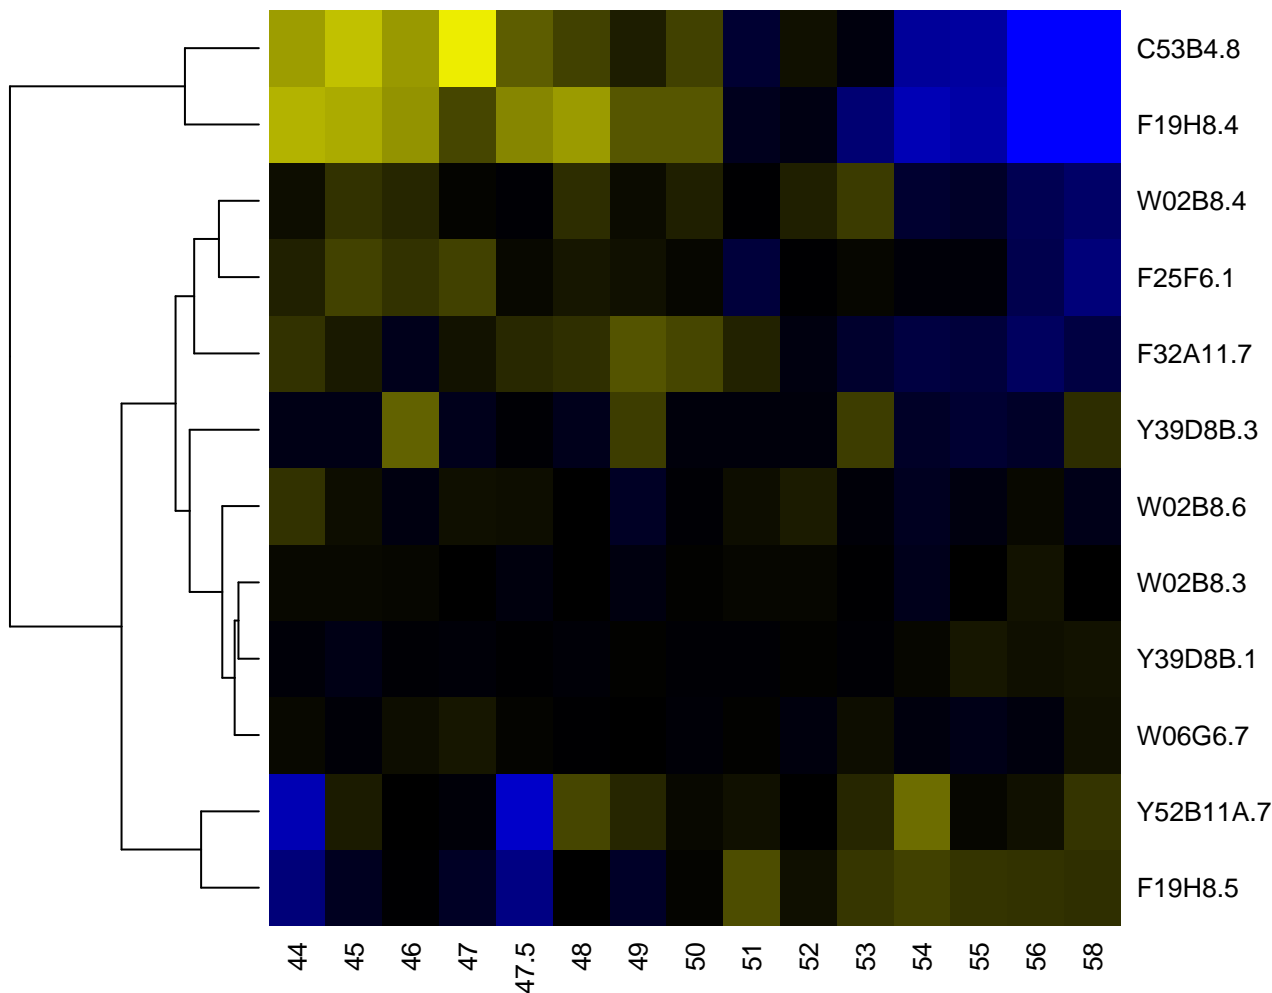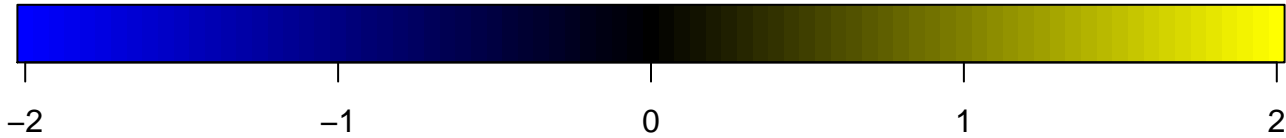

# mrp

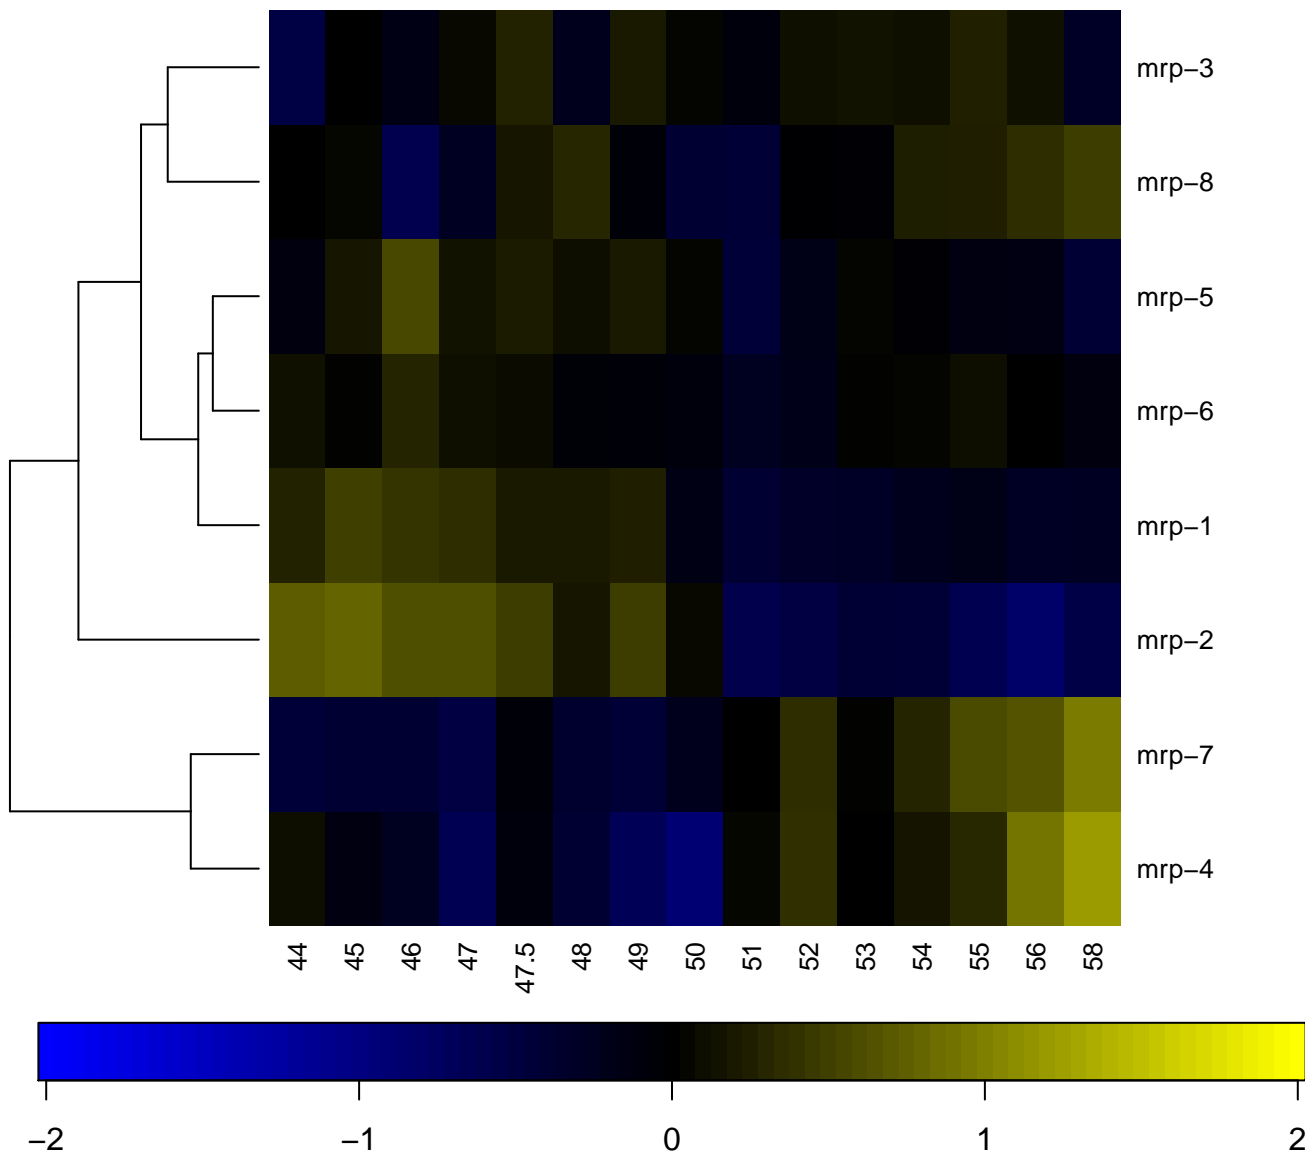



# mSP

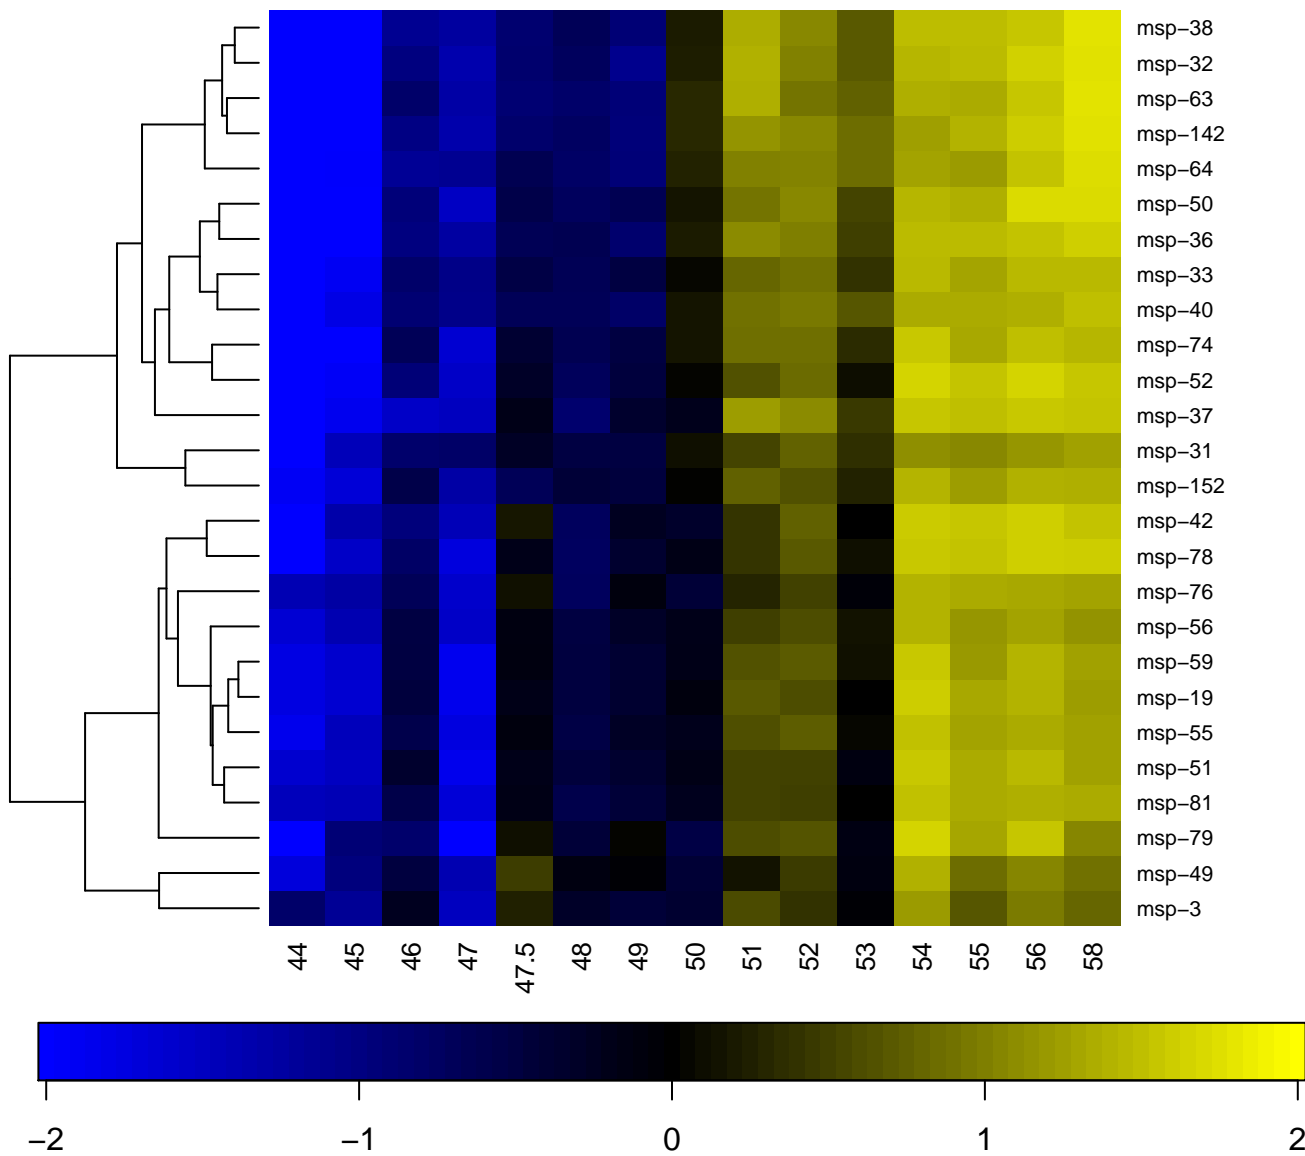





# nas

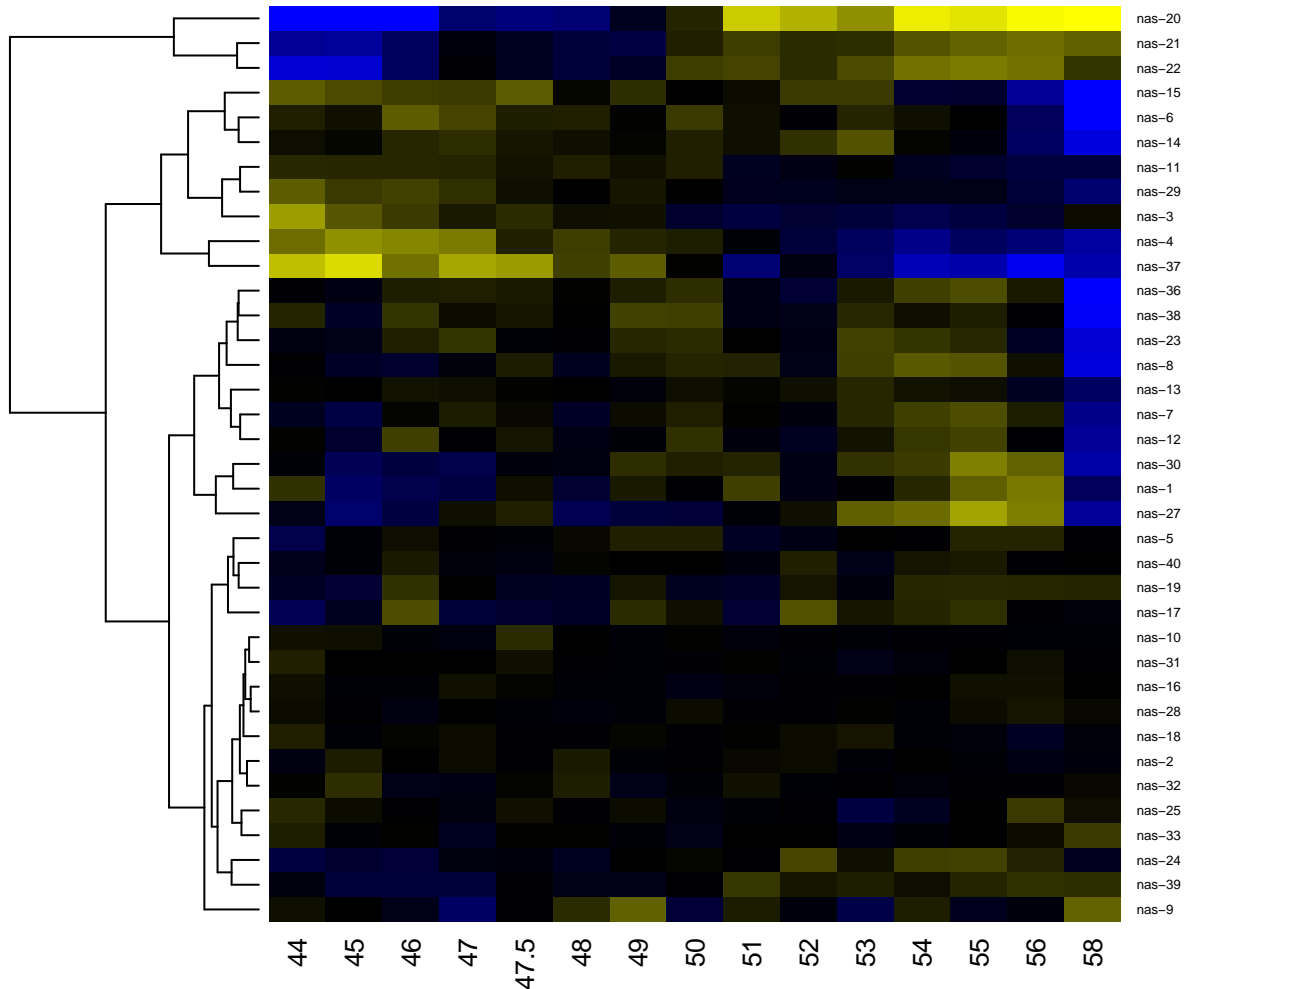

# ncx

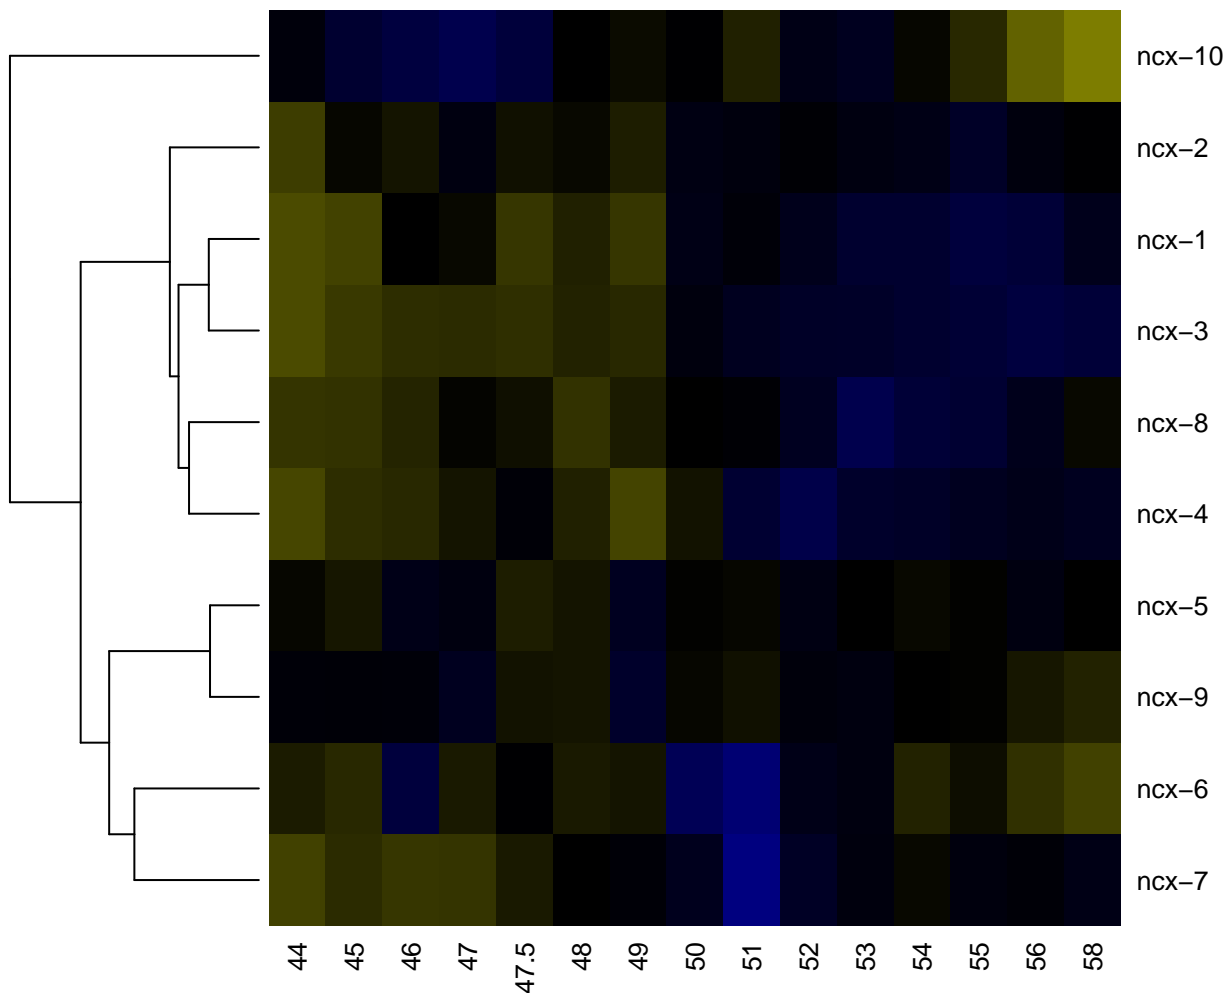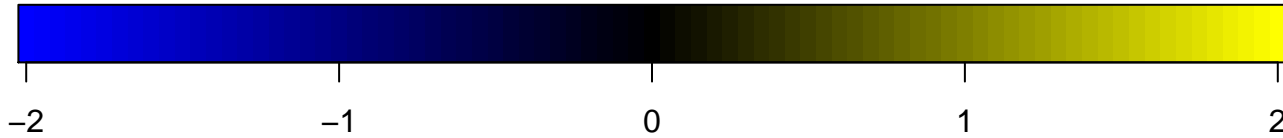

ndx

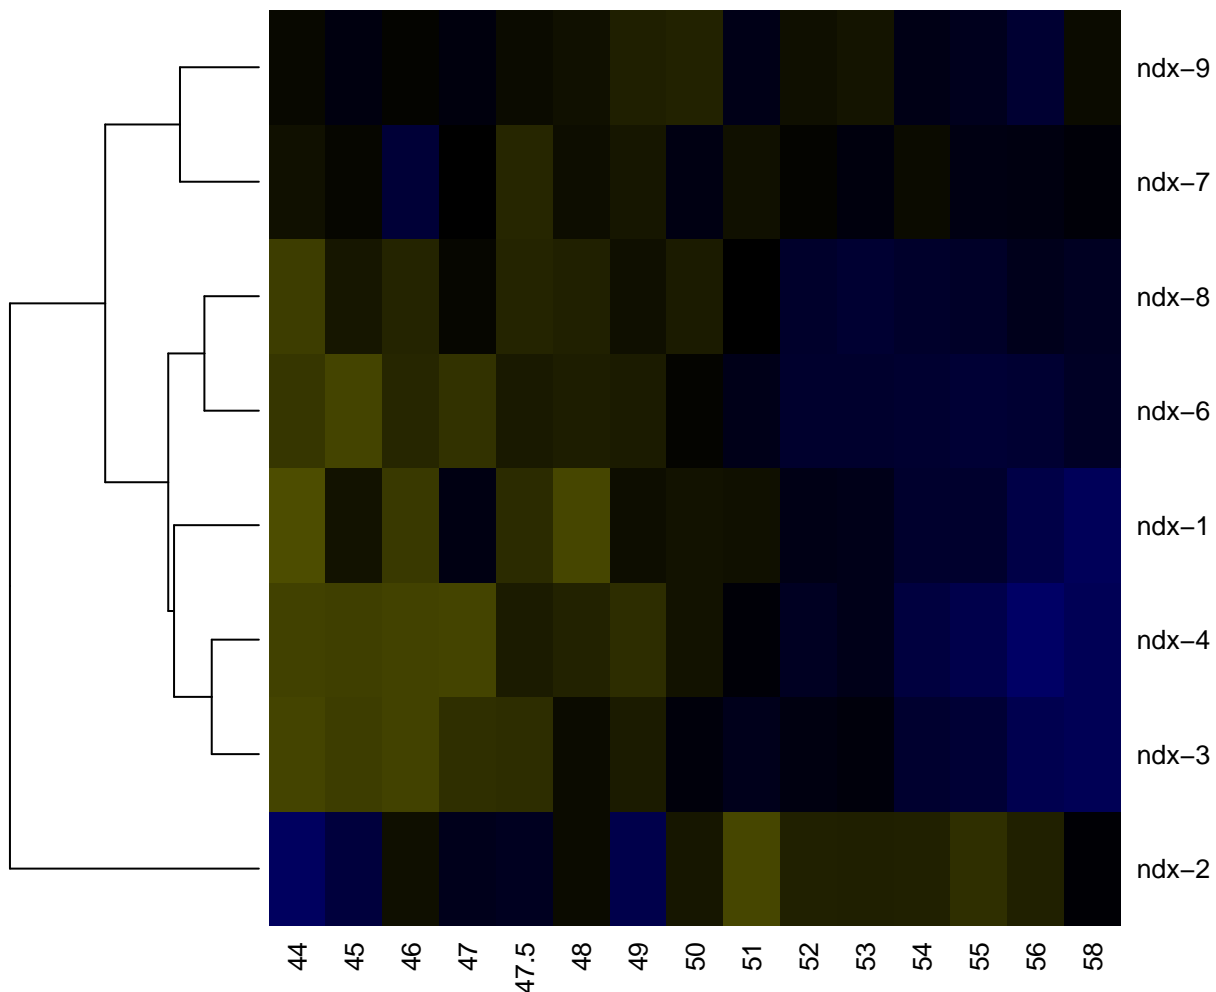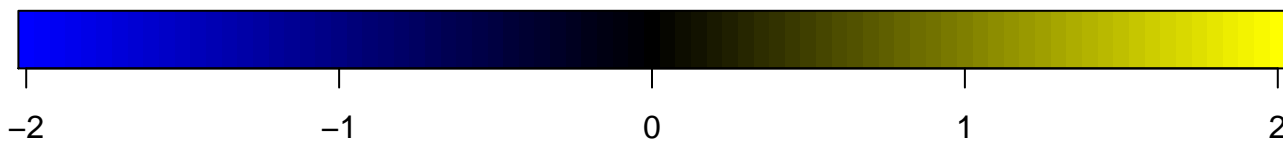

nhc

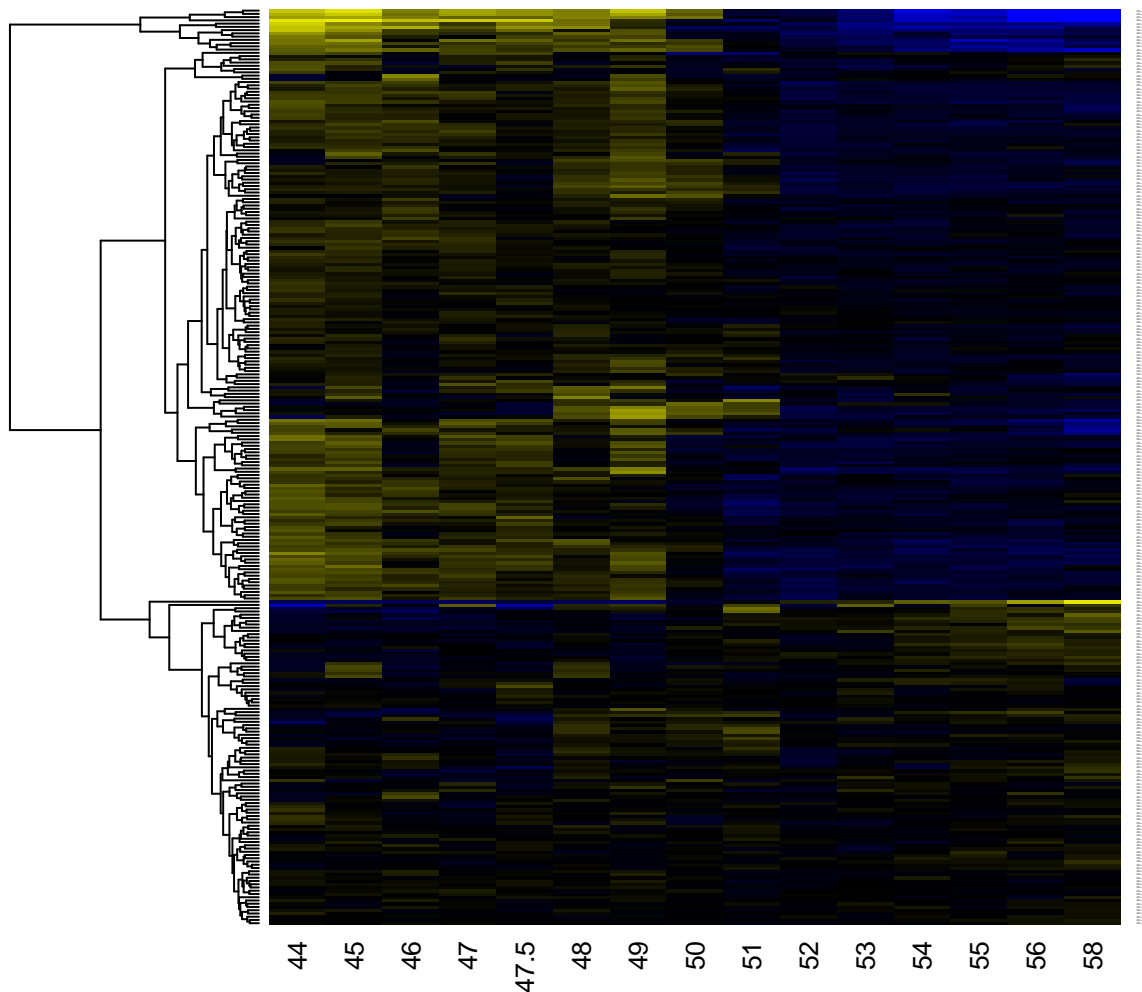

-2

-1

0

1

2





# nlp

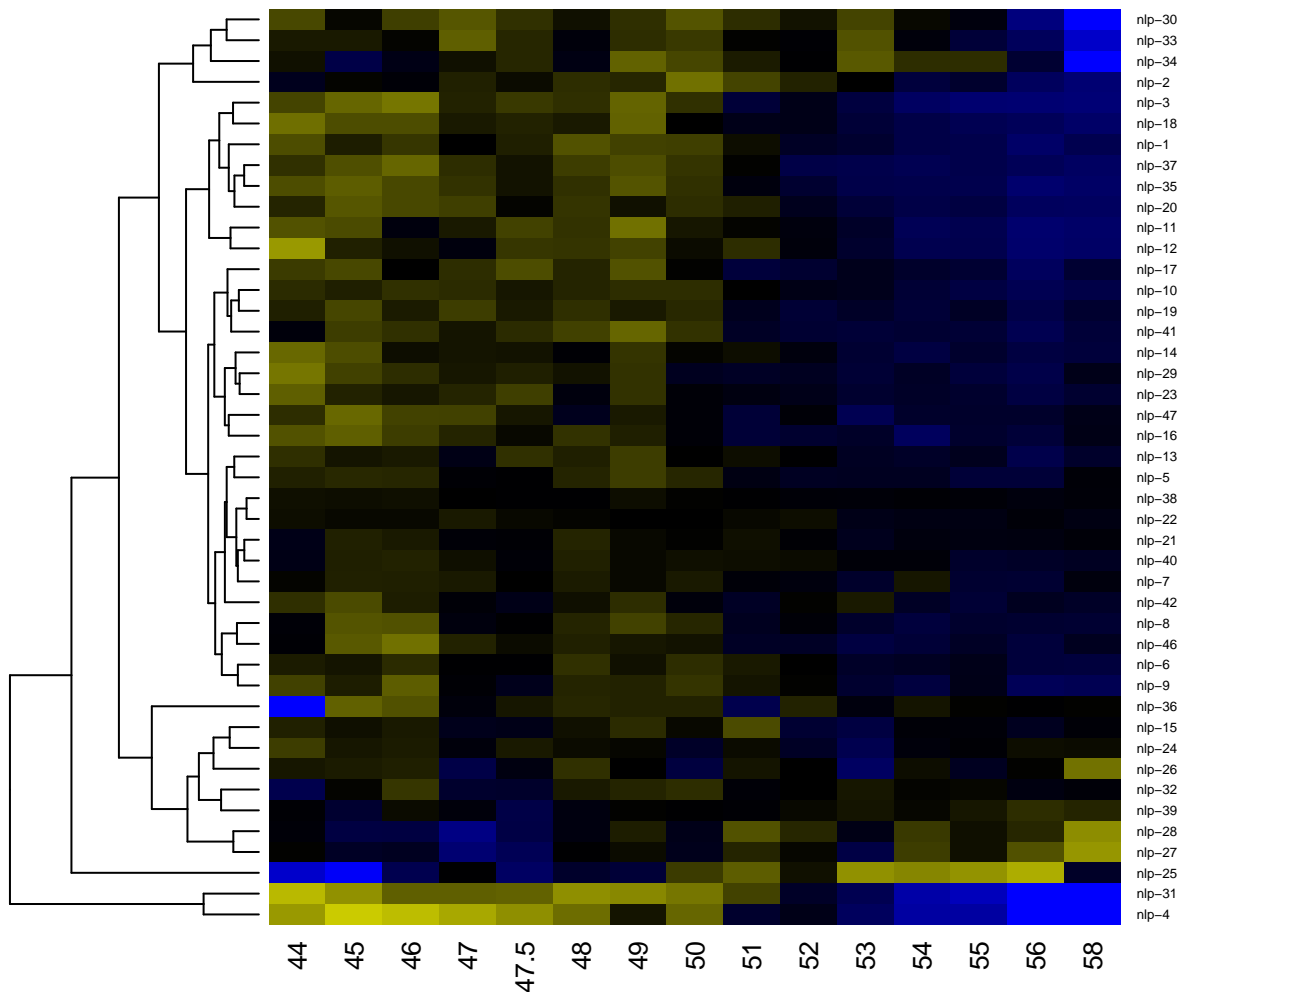







# nspb

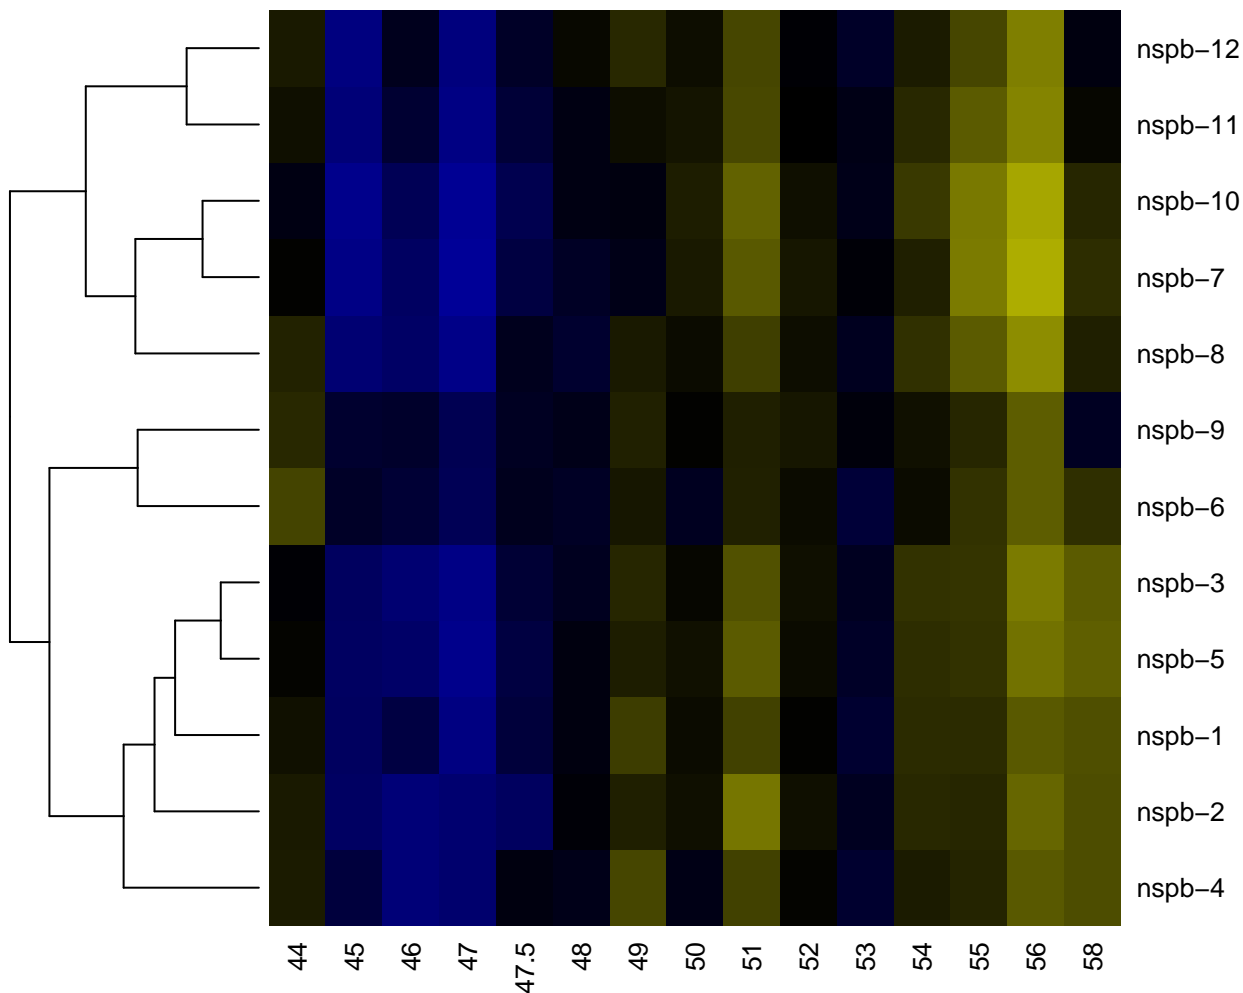

# nspc

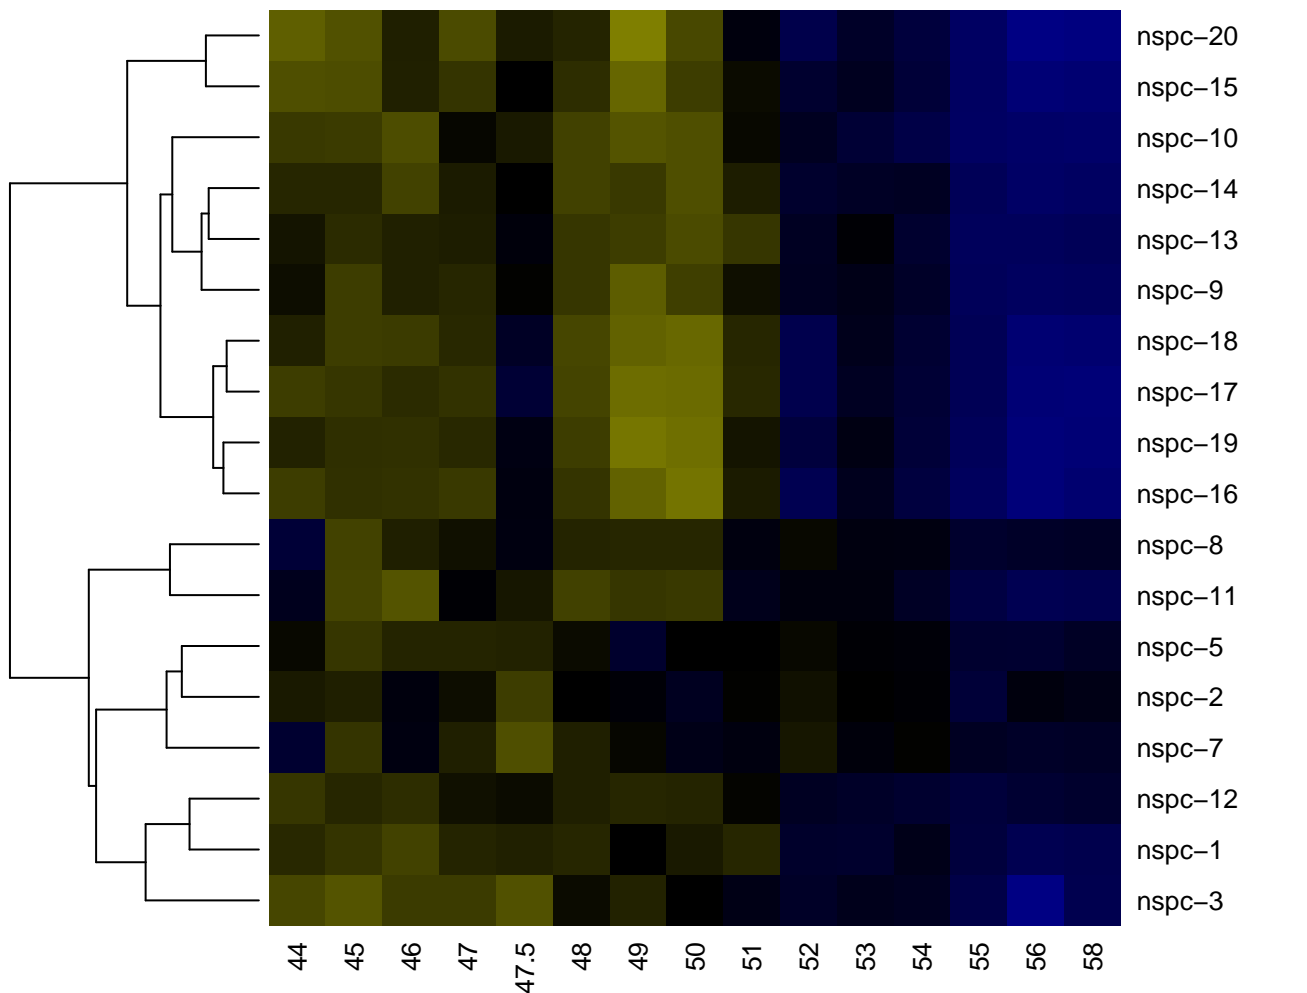

-2

-1

0

1

2

# nspd

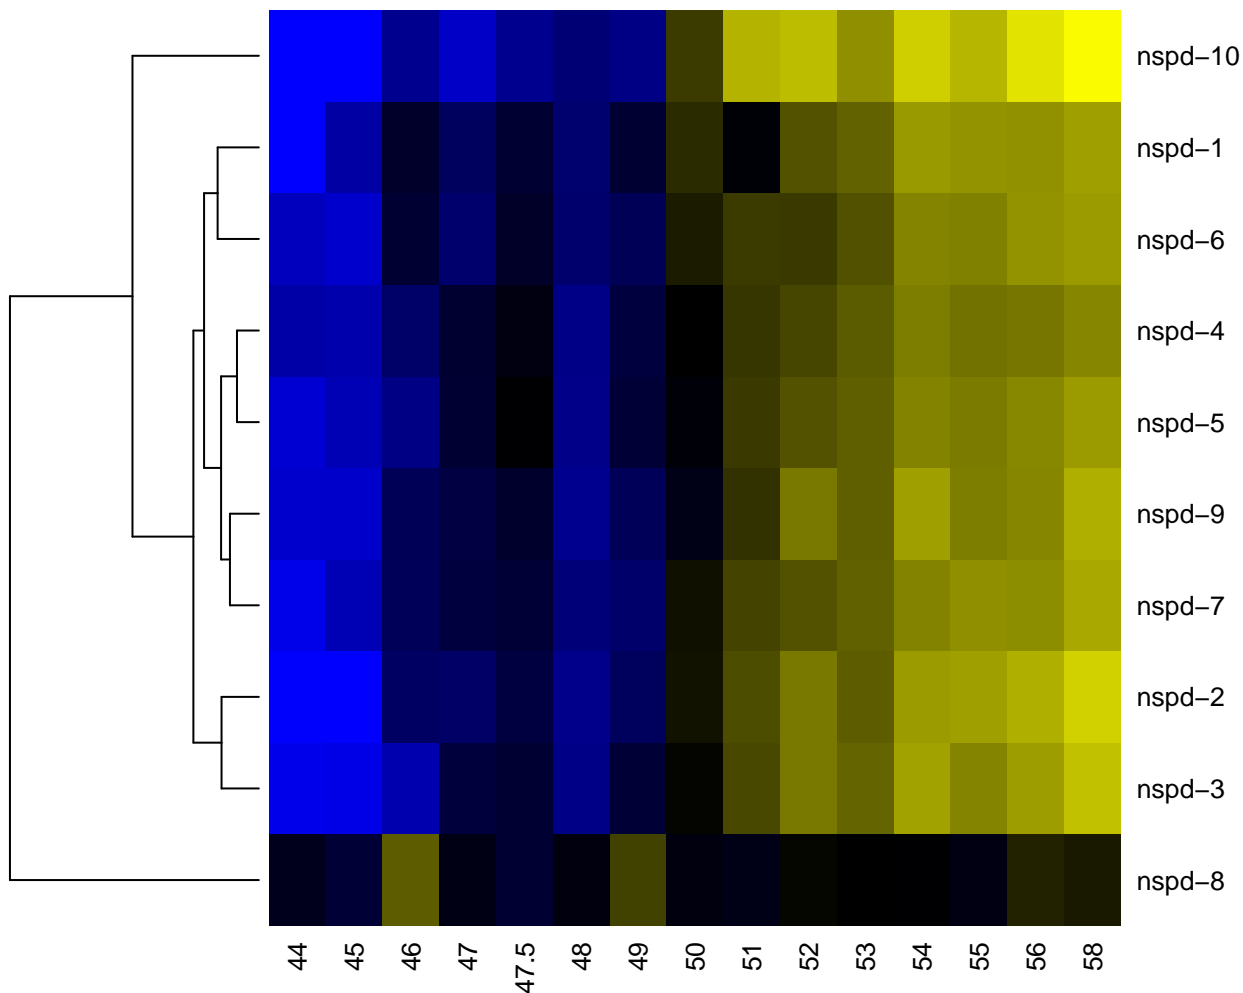

# nspe

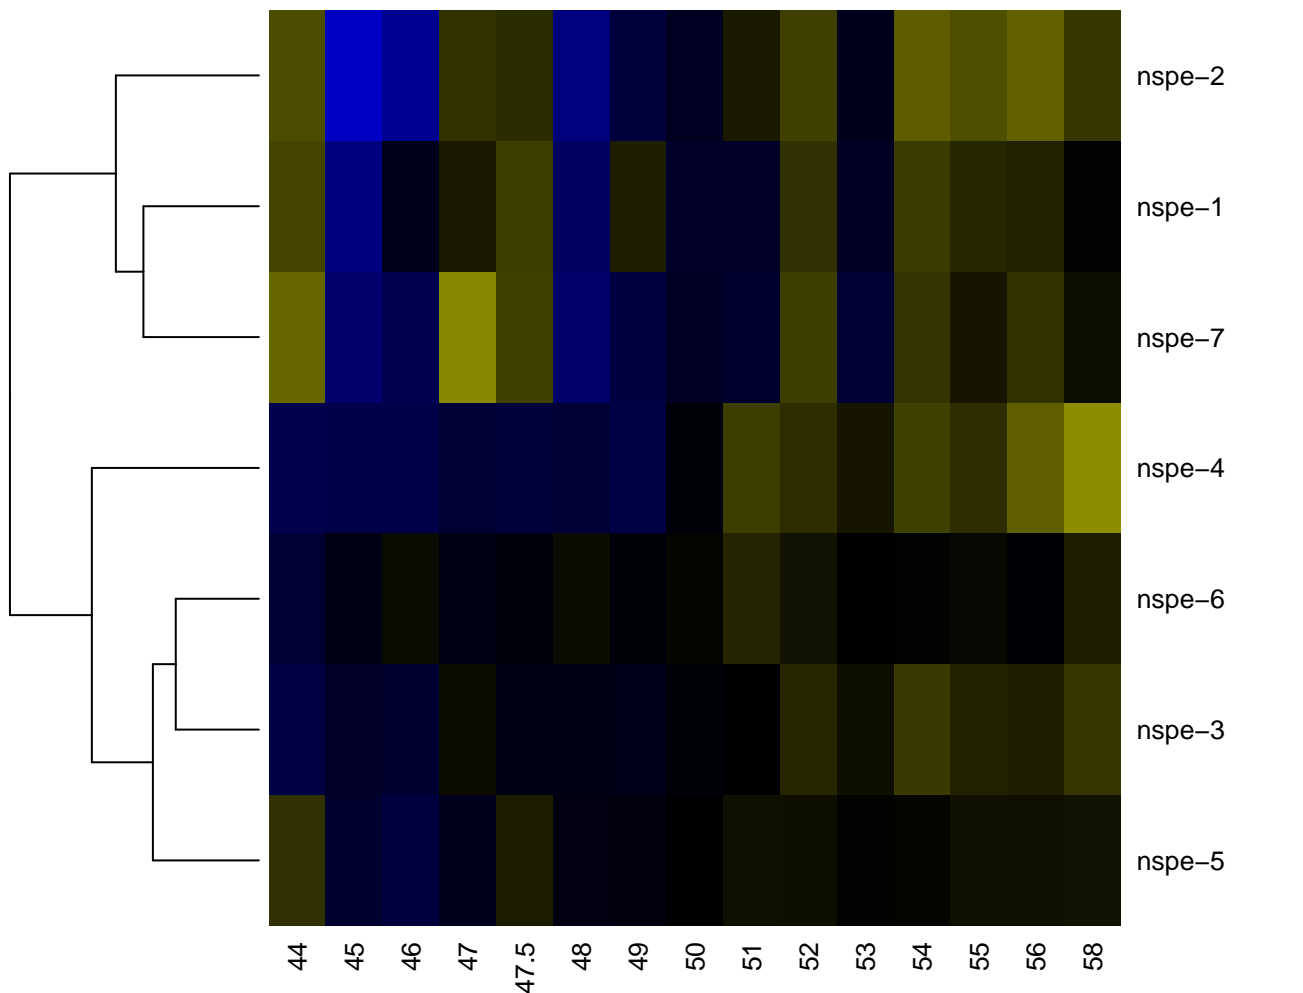

-2

-1

0

1

2



# nuo

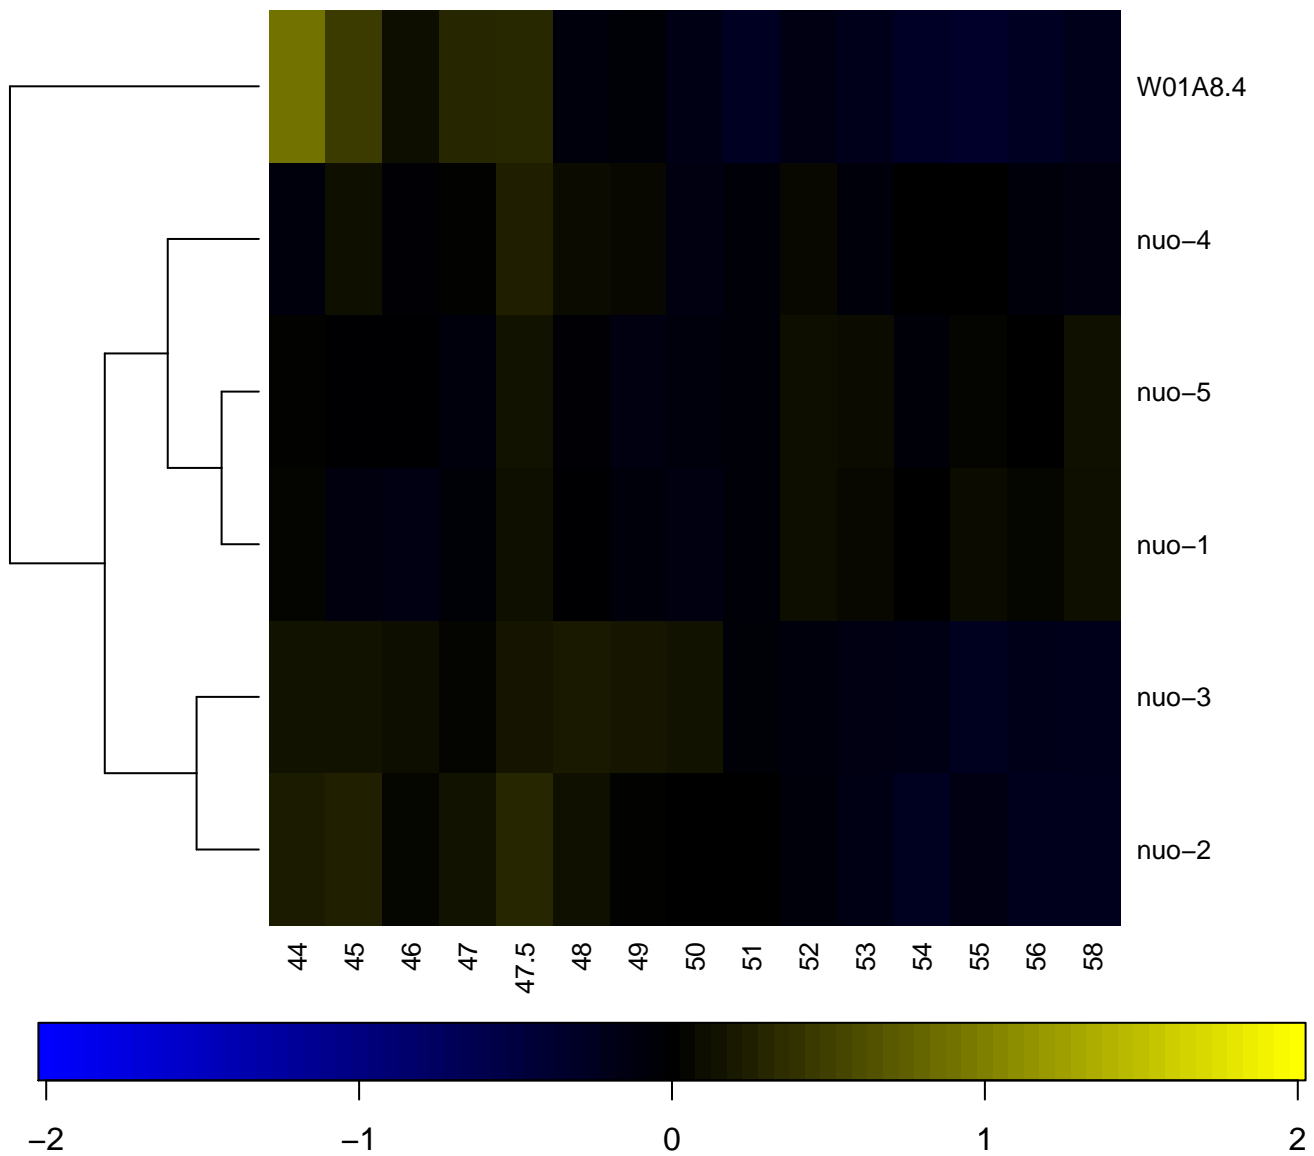

# oac

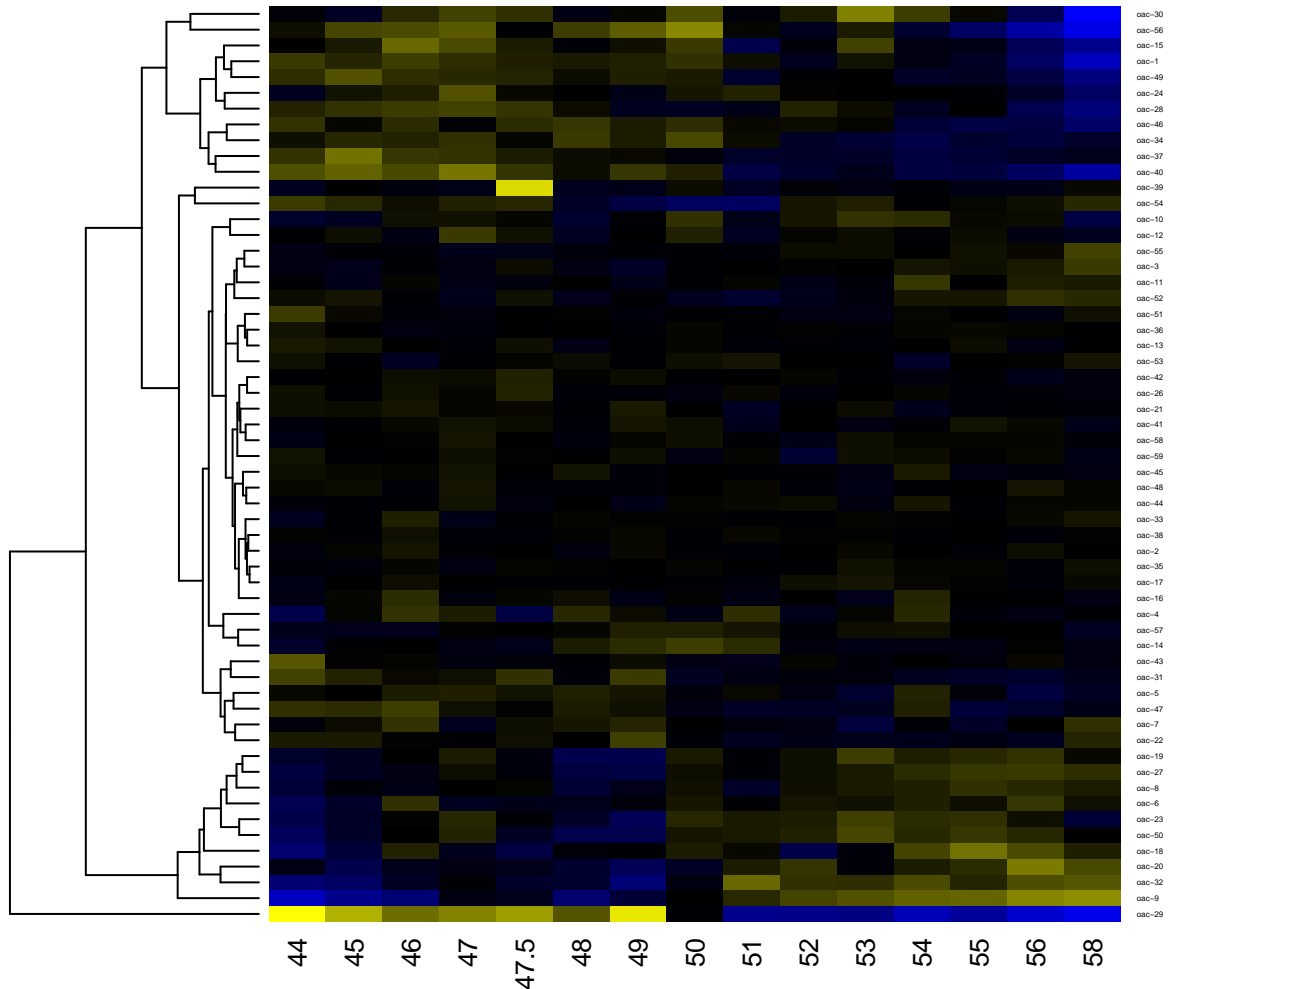

-2

-1

0

1

2







# par

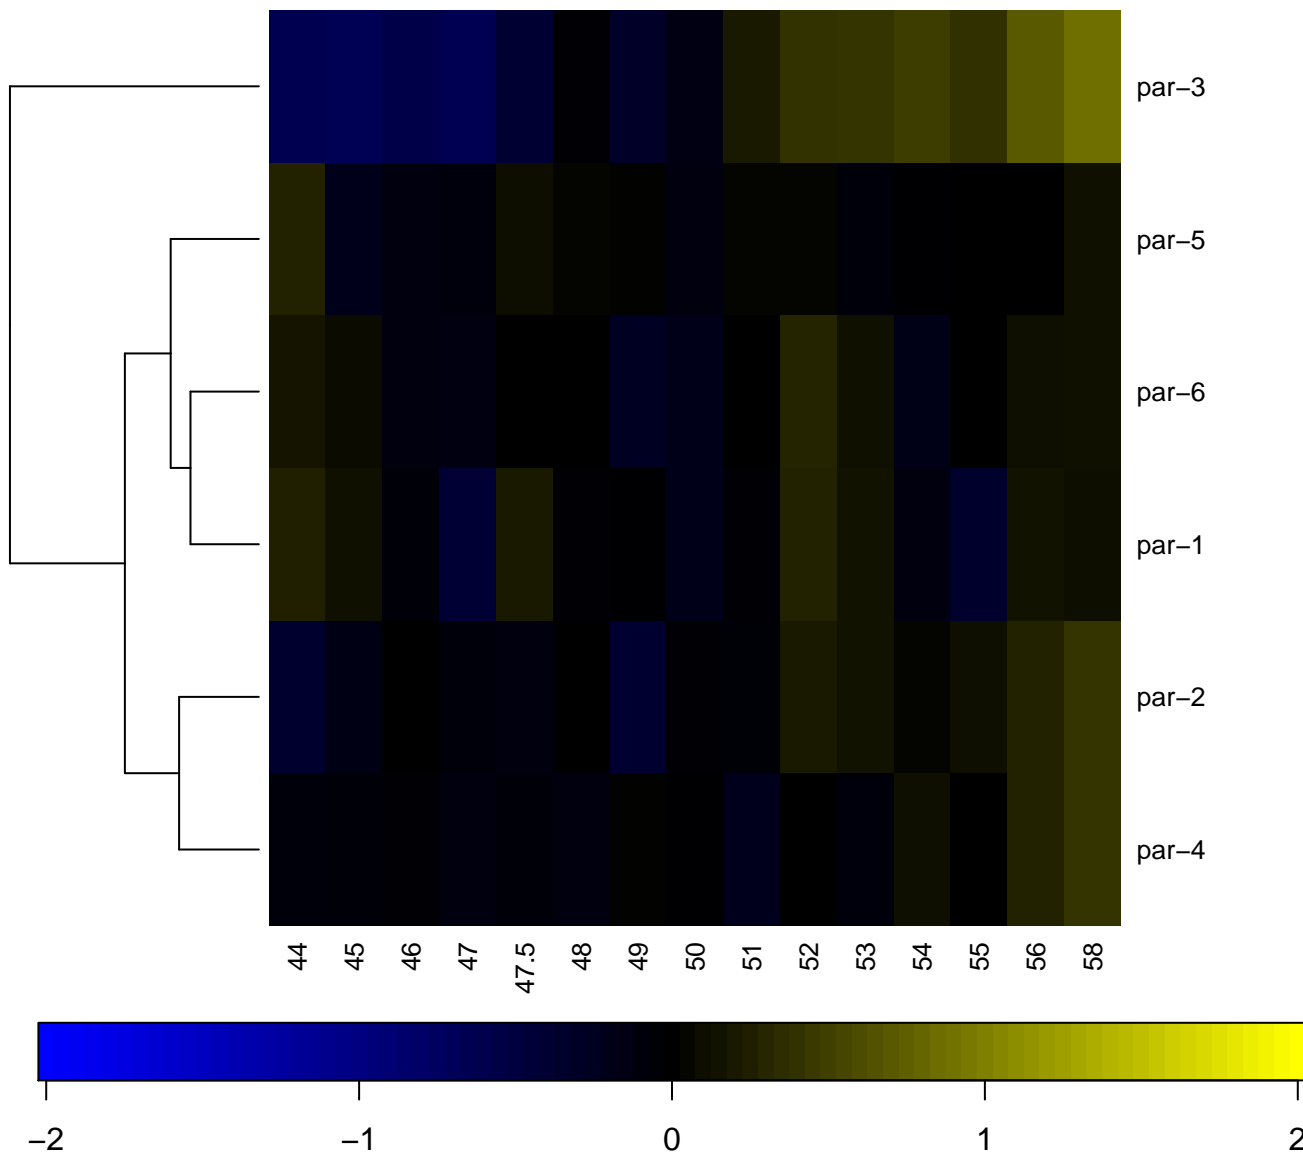

# pas

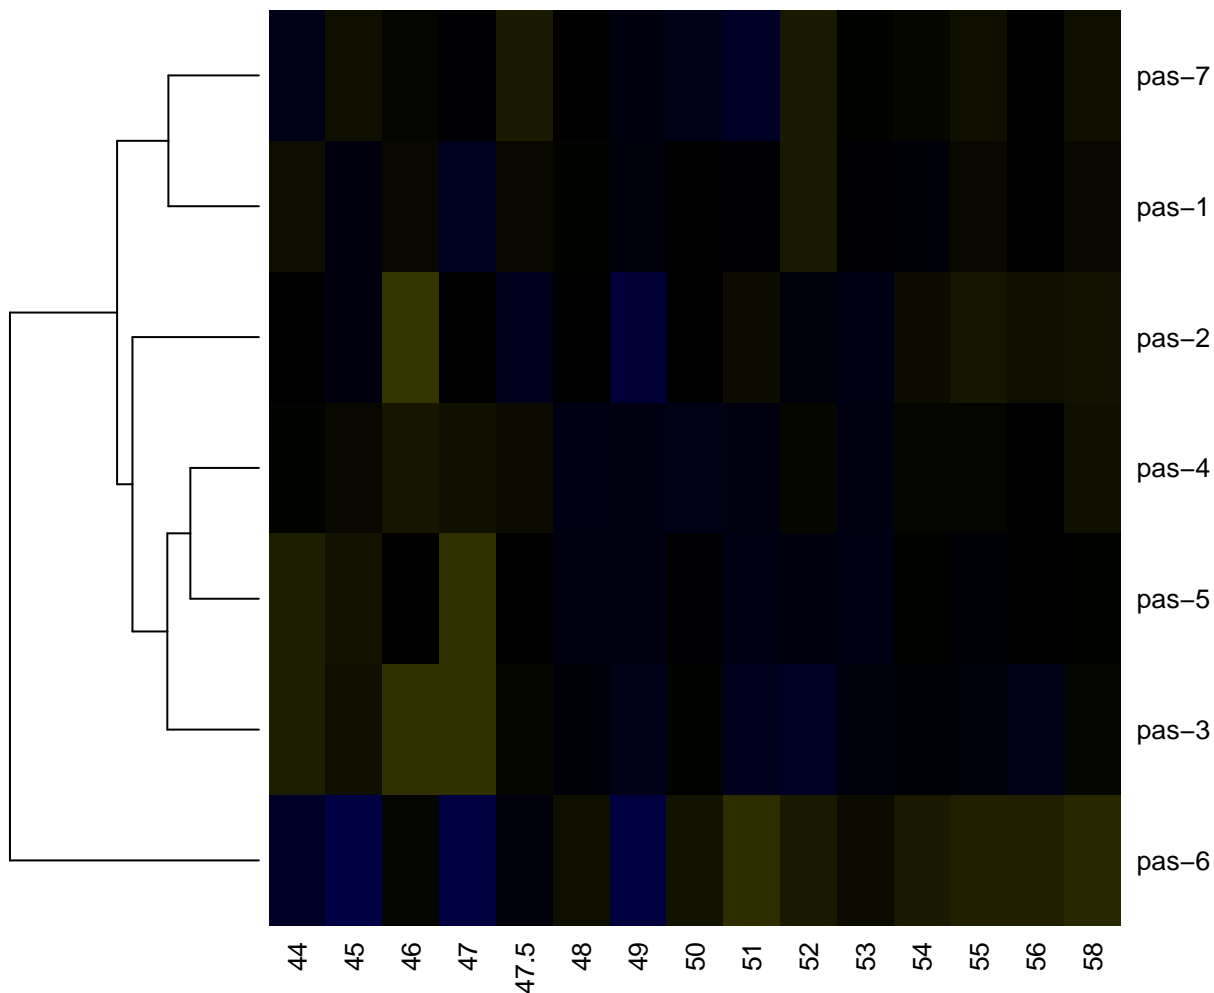

pat

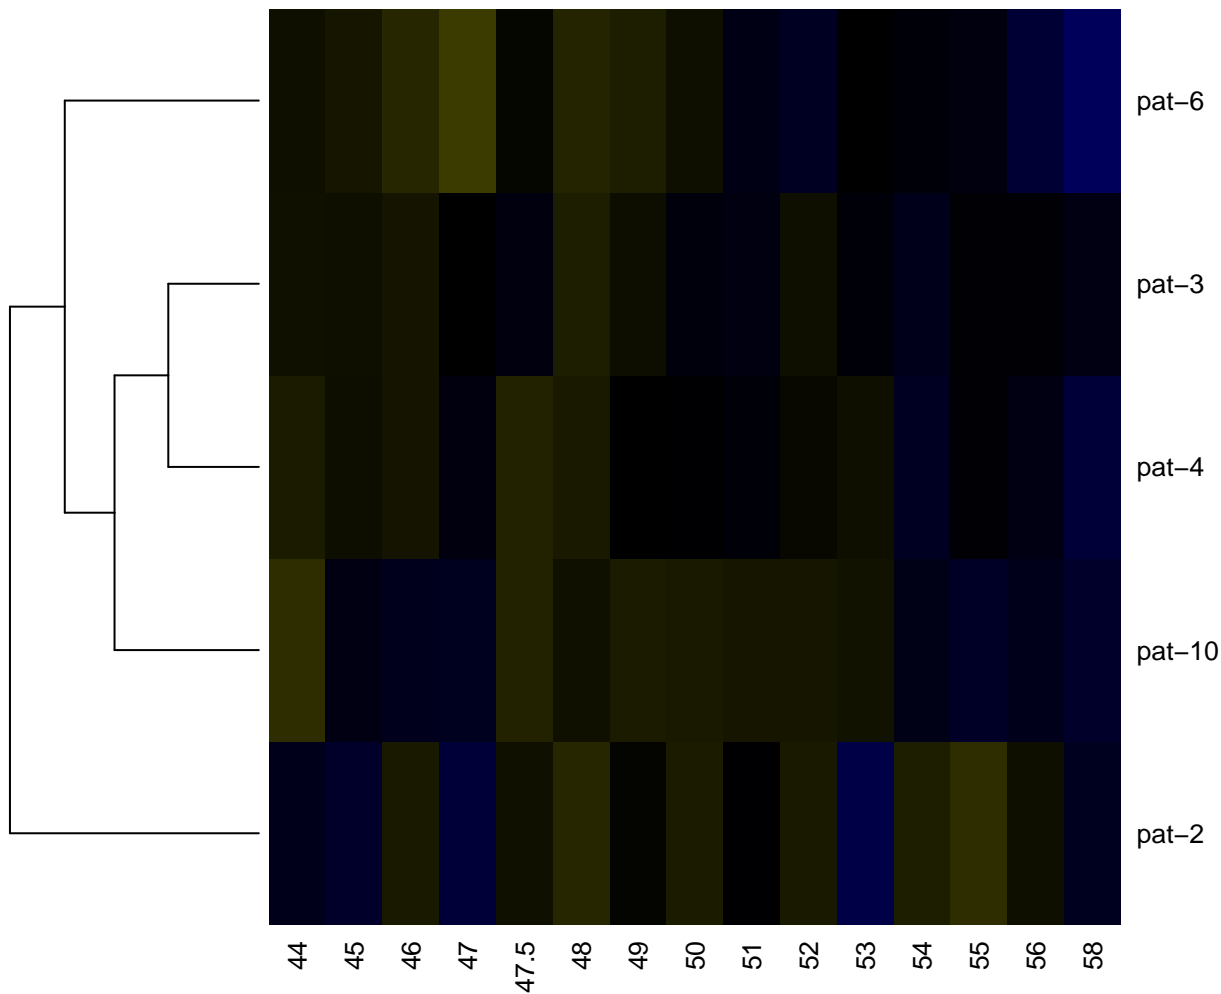

pat-6

pat-3

pat-4

pat-10

pat-2

44

45

46

47

47.5

48

49

50

51

52

53

54

55

56

58

-2

-1

0

1

2





# pcp

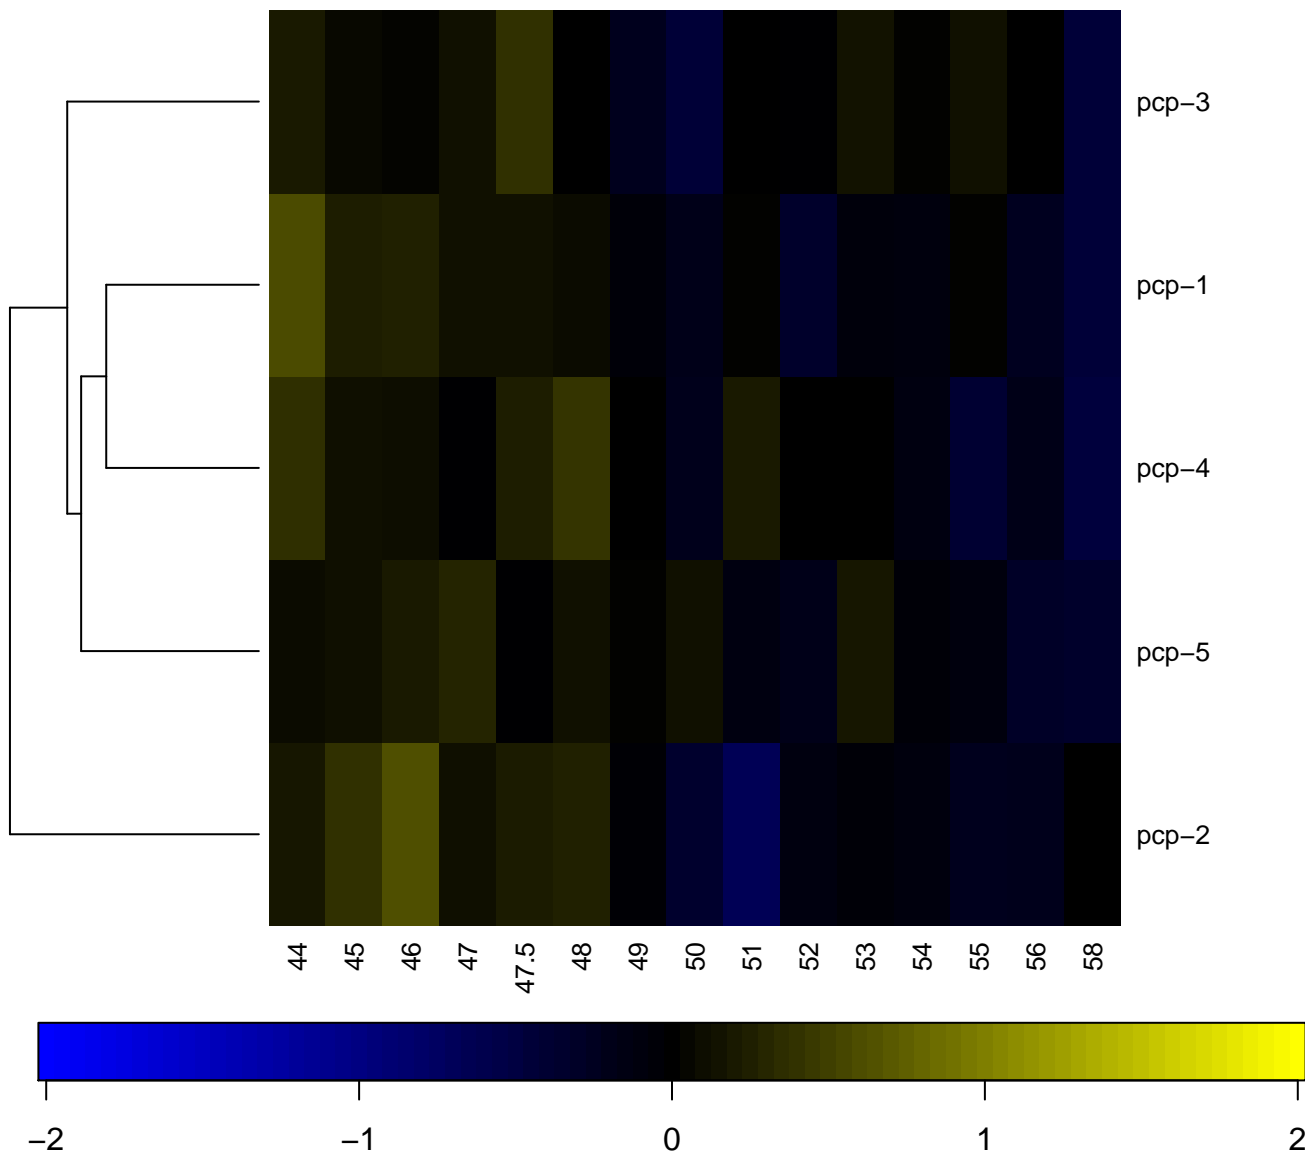

# pde

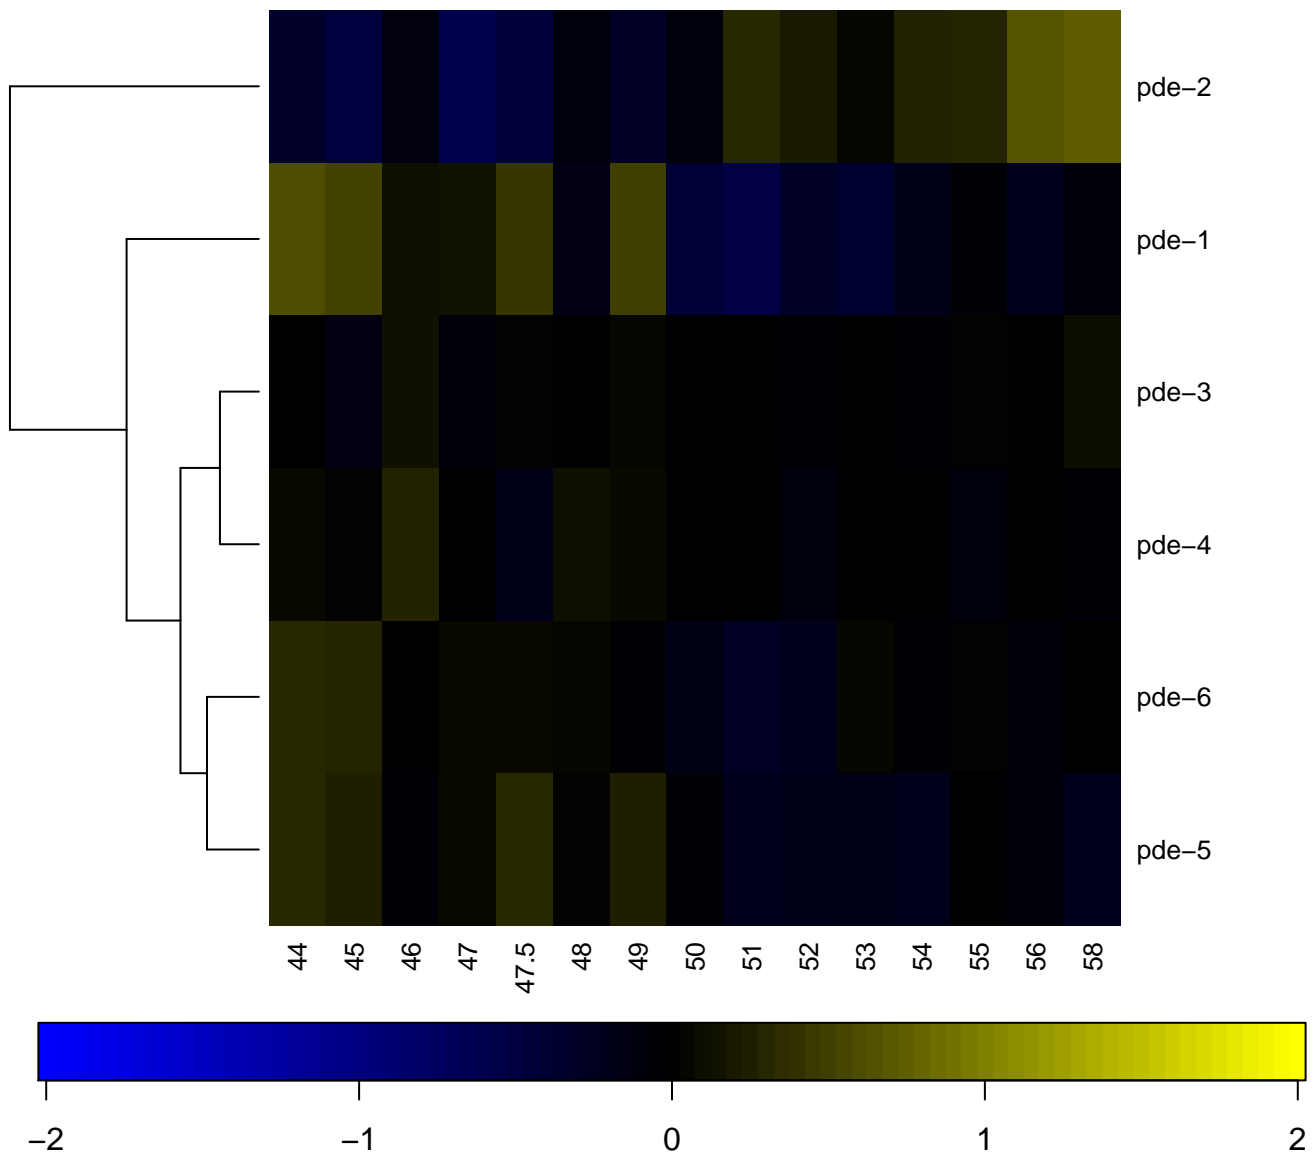

# pes

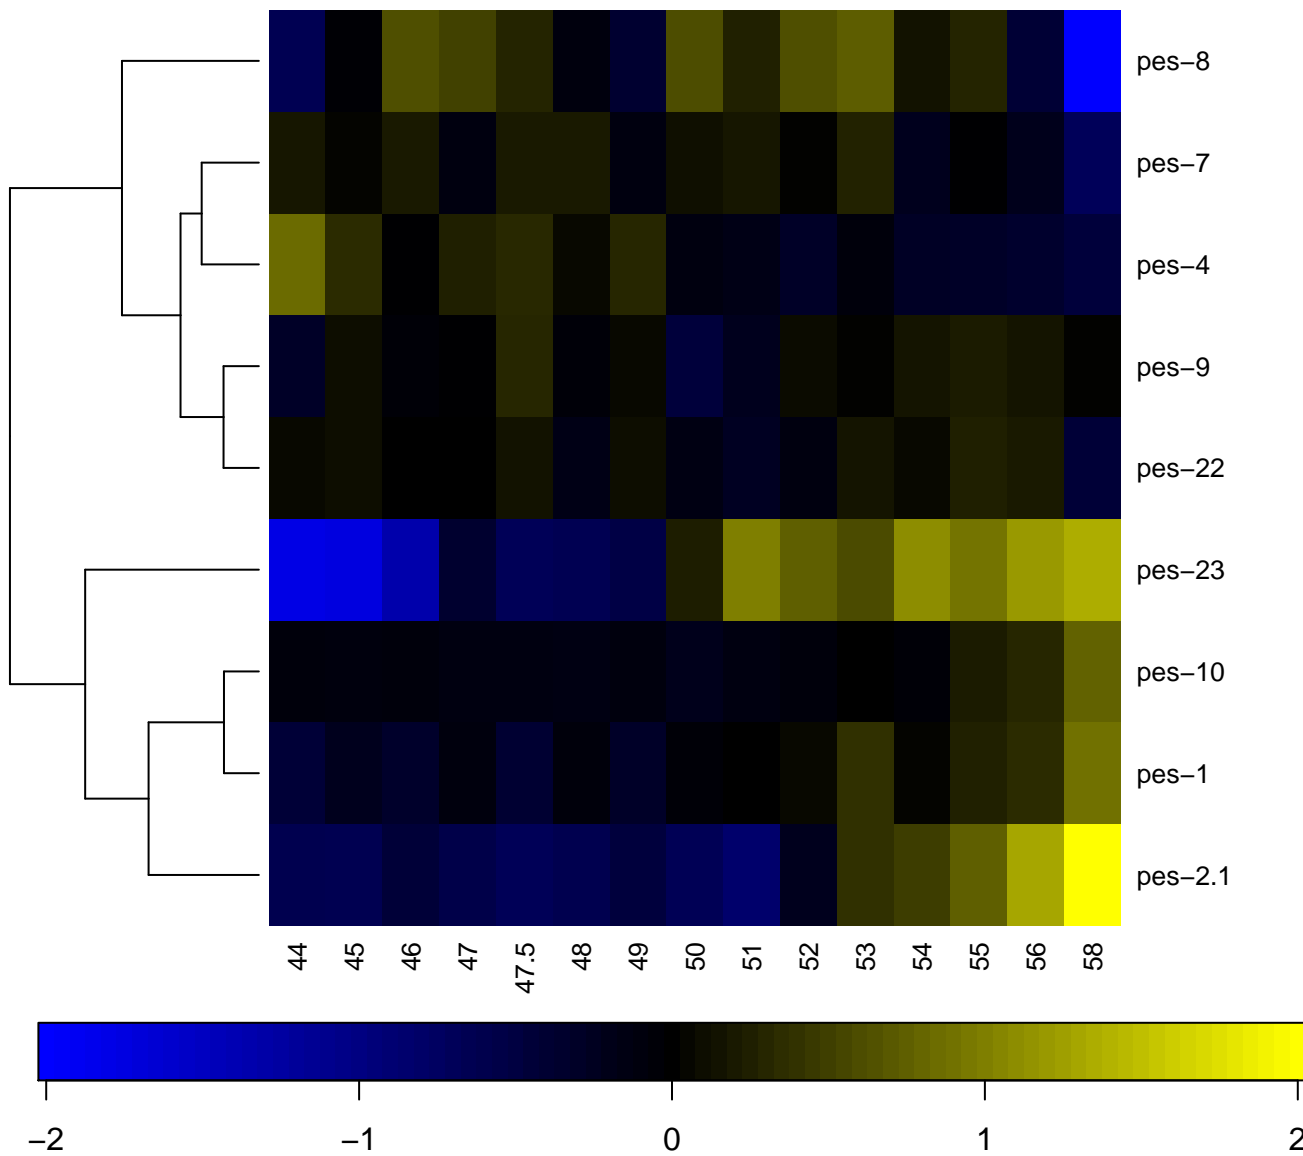

# pfd

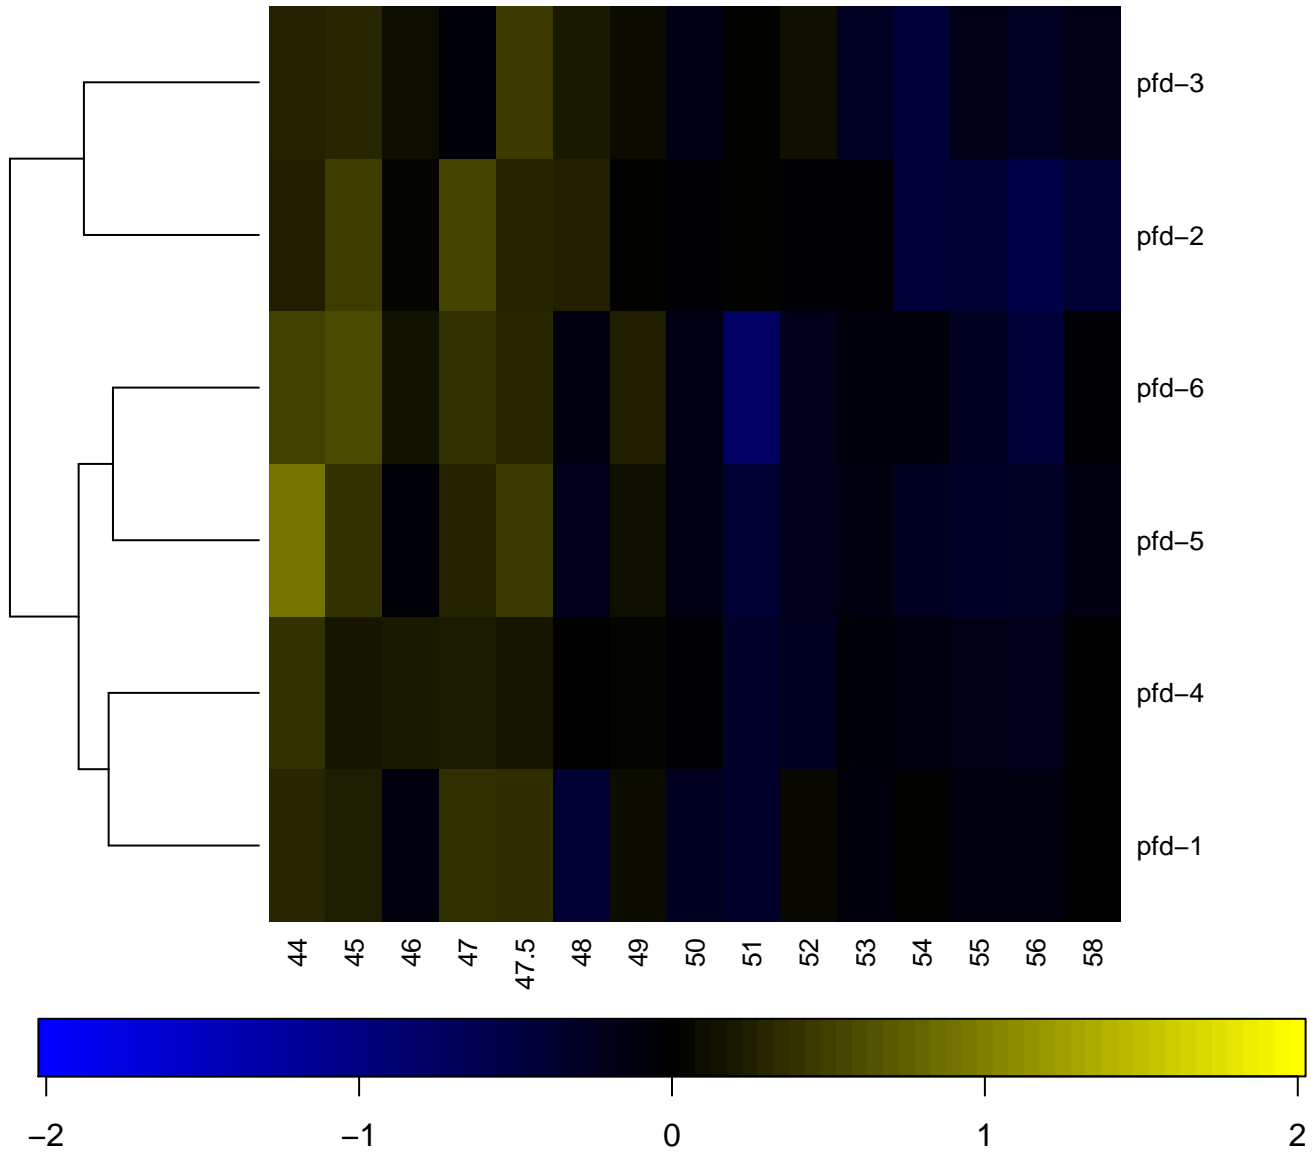

# pgp

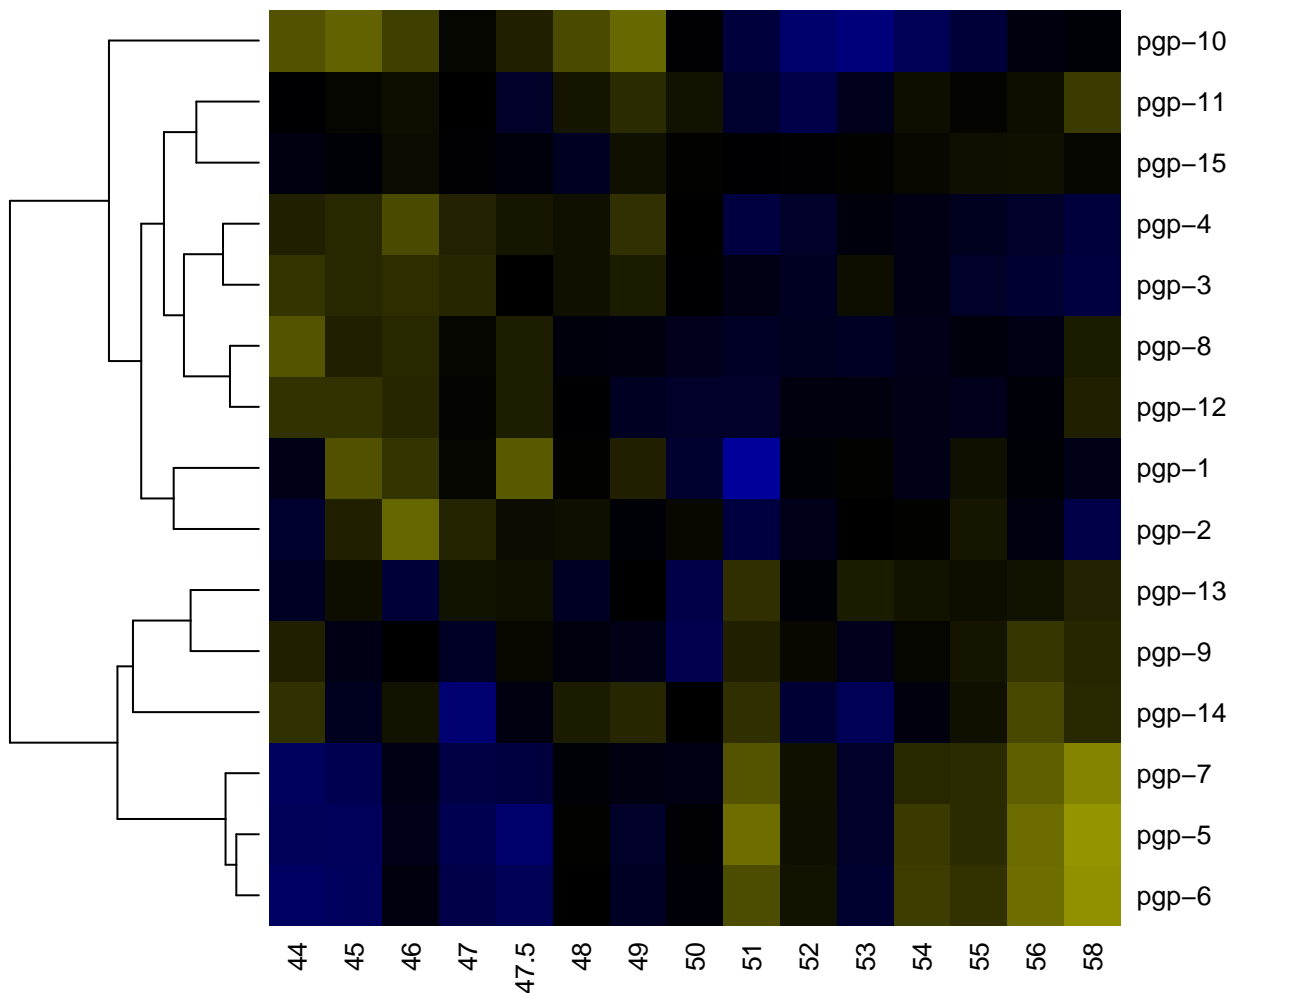







# pme

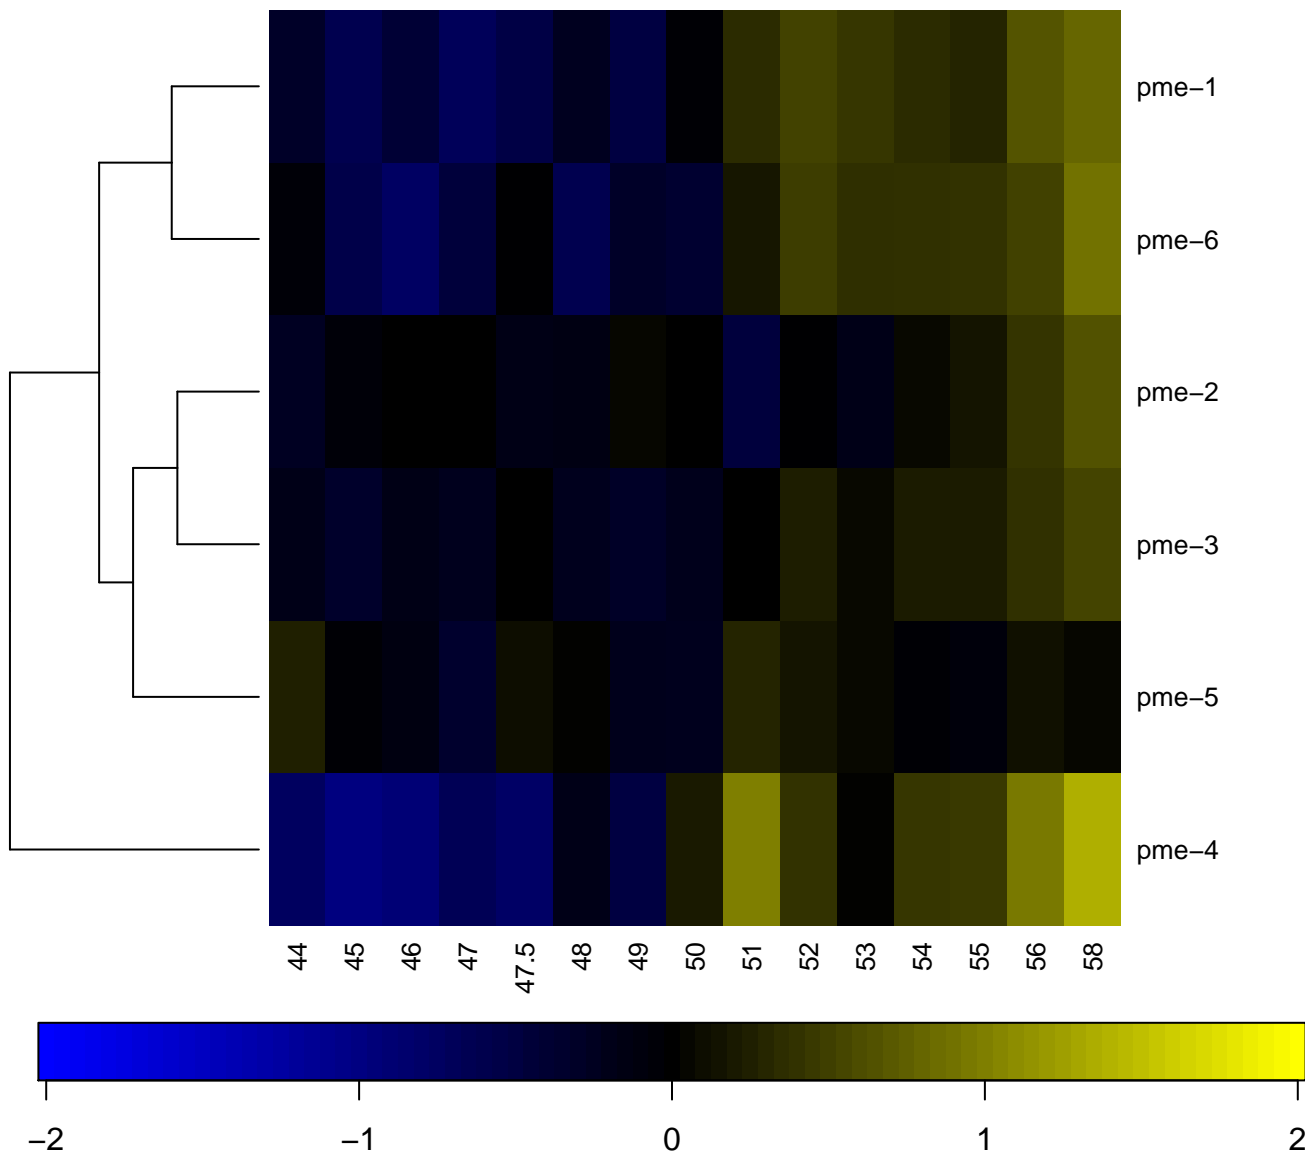

# pmp

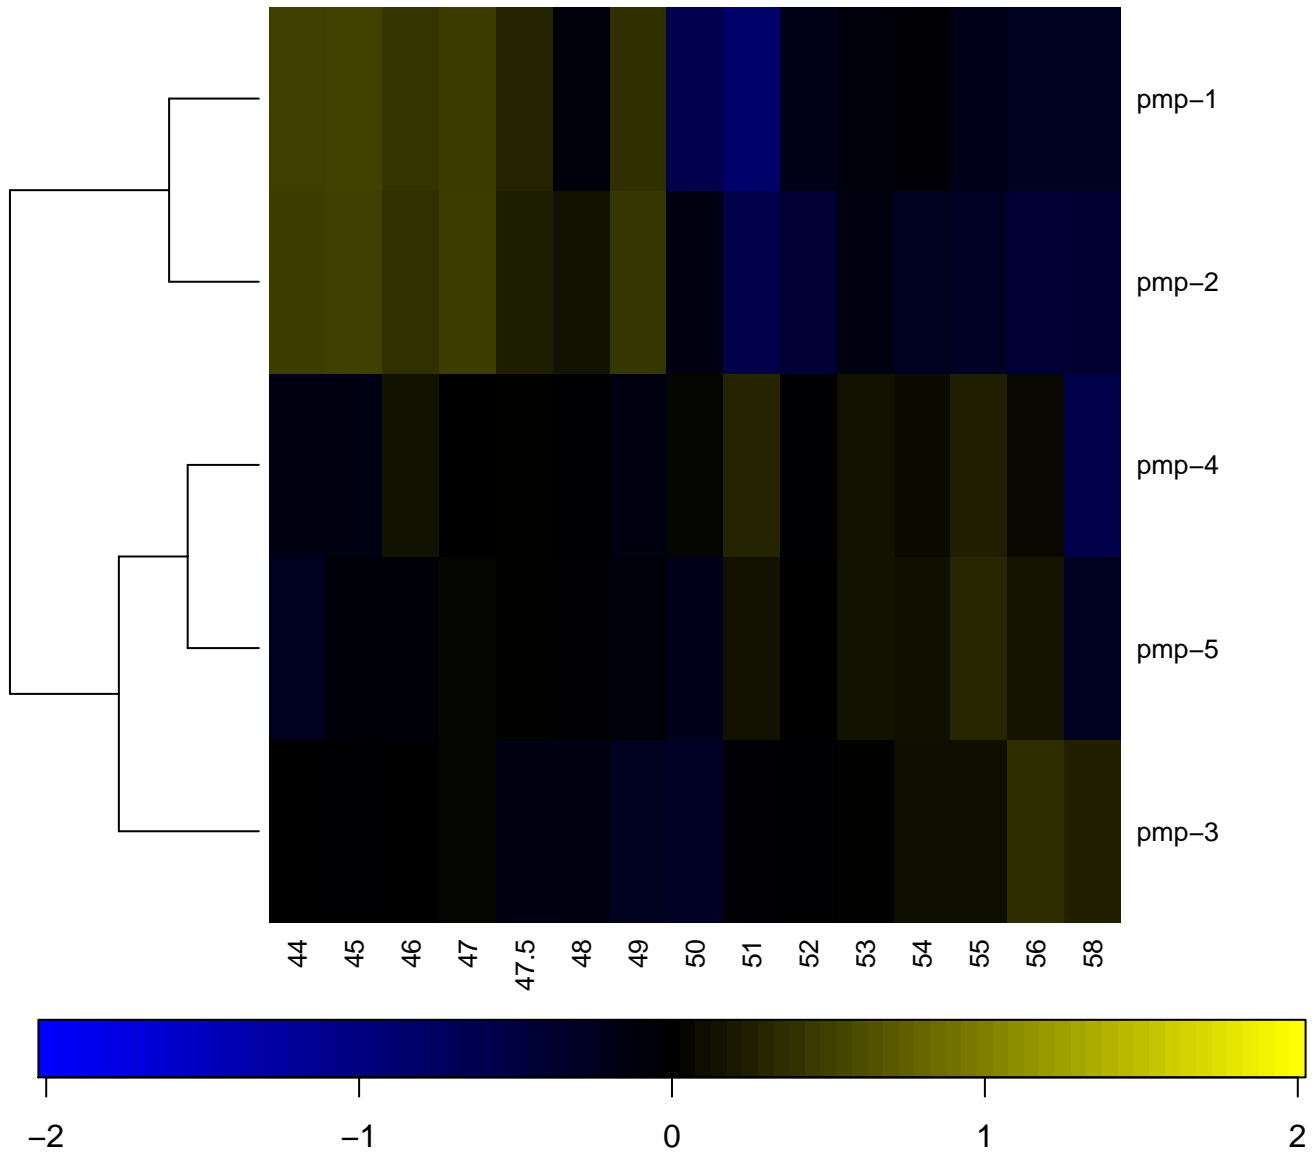

# pph

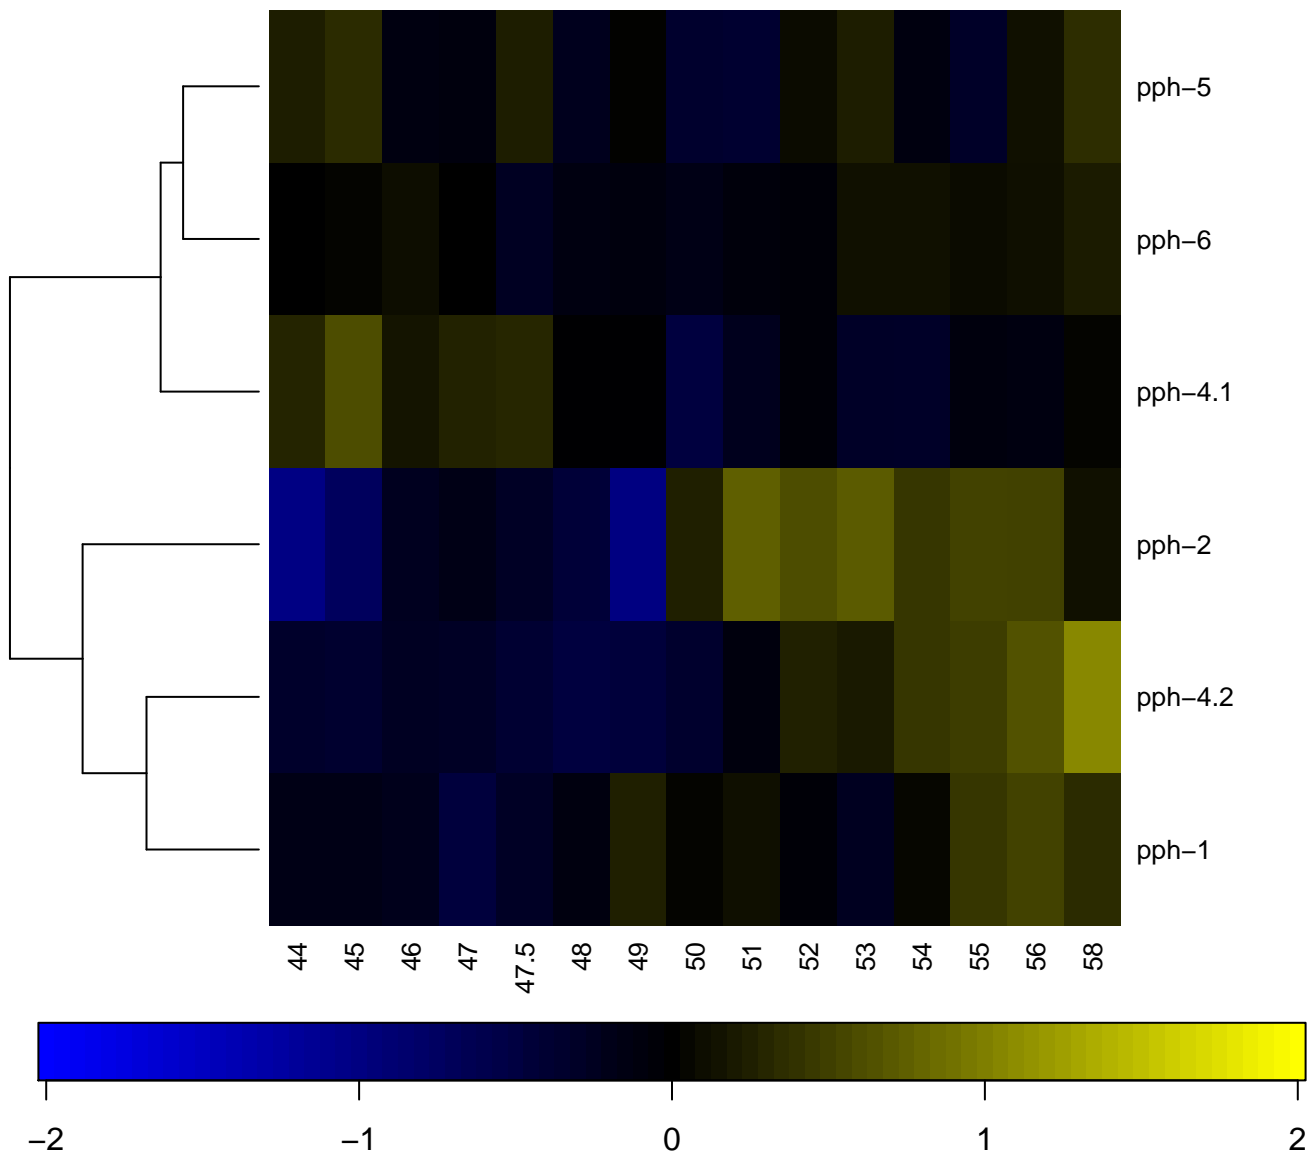

# pqn

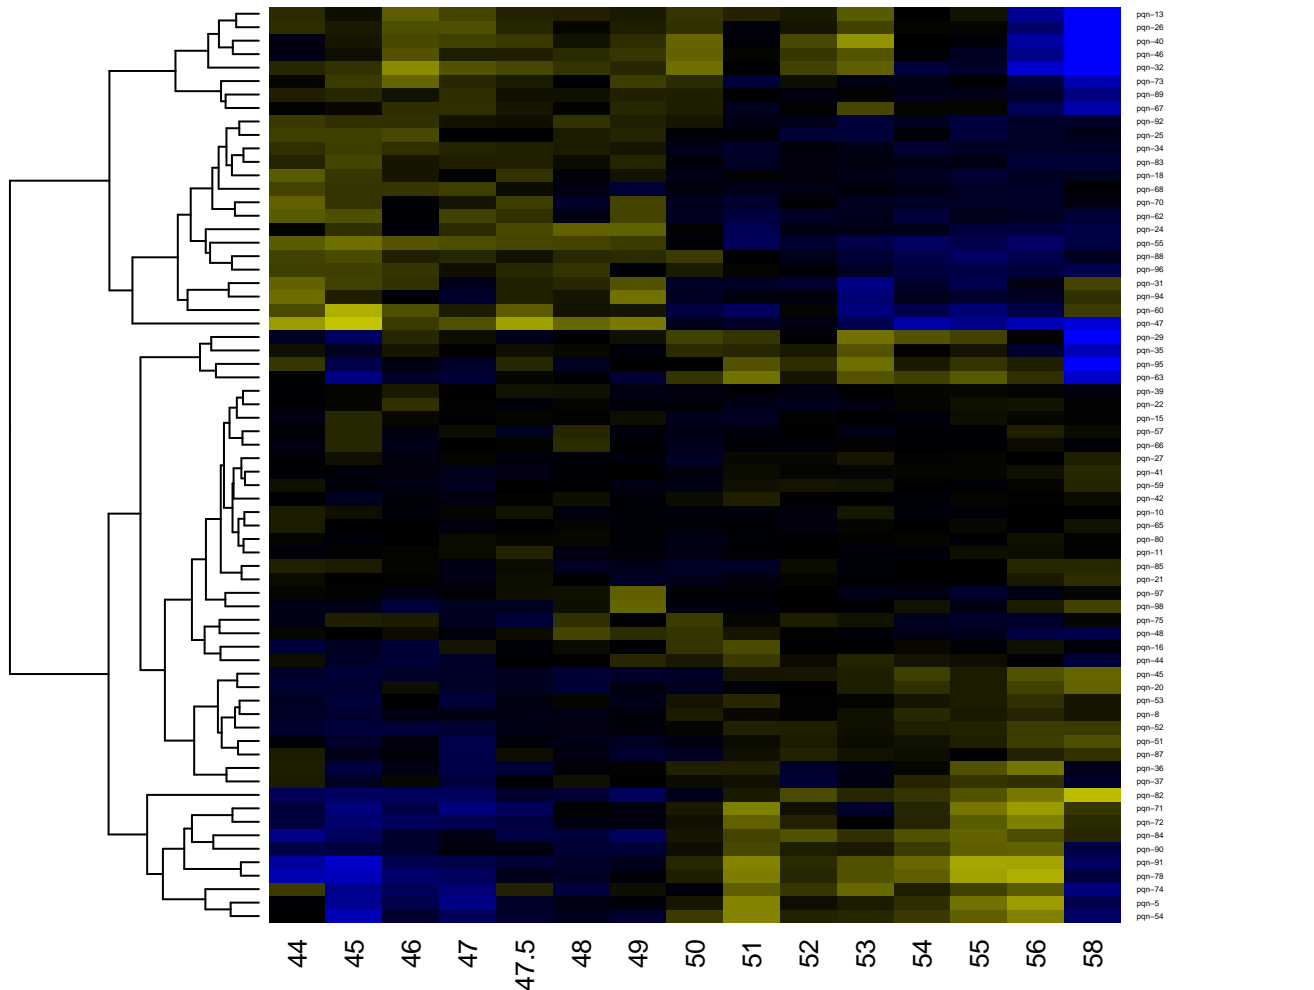

-2

-1

0

1

2



# prx

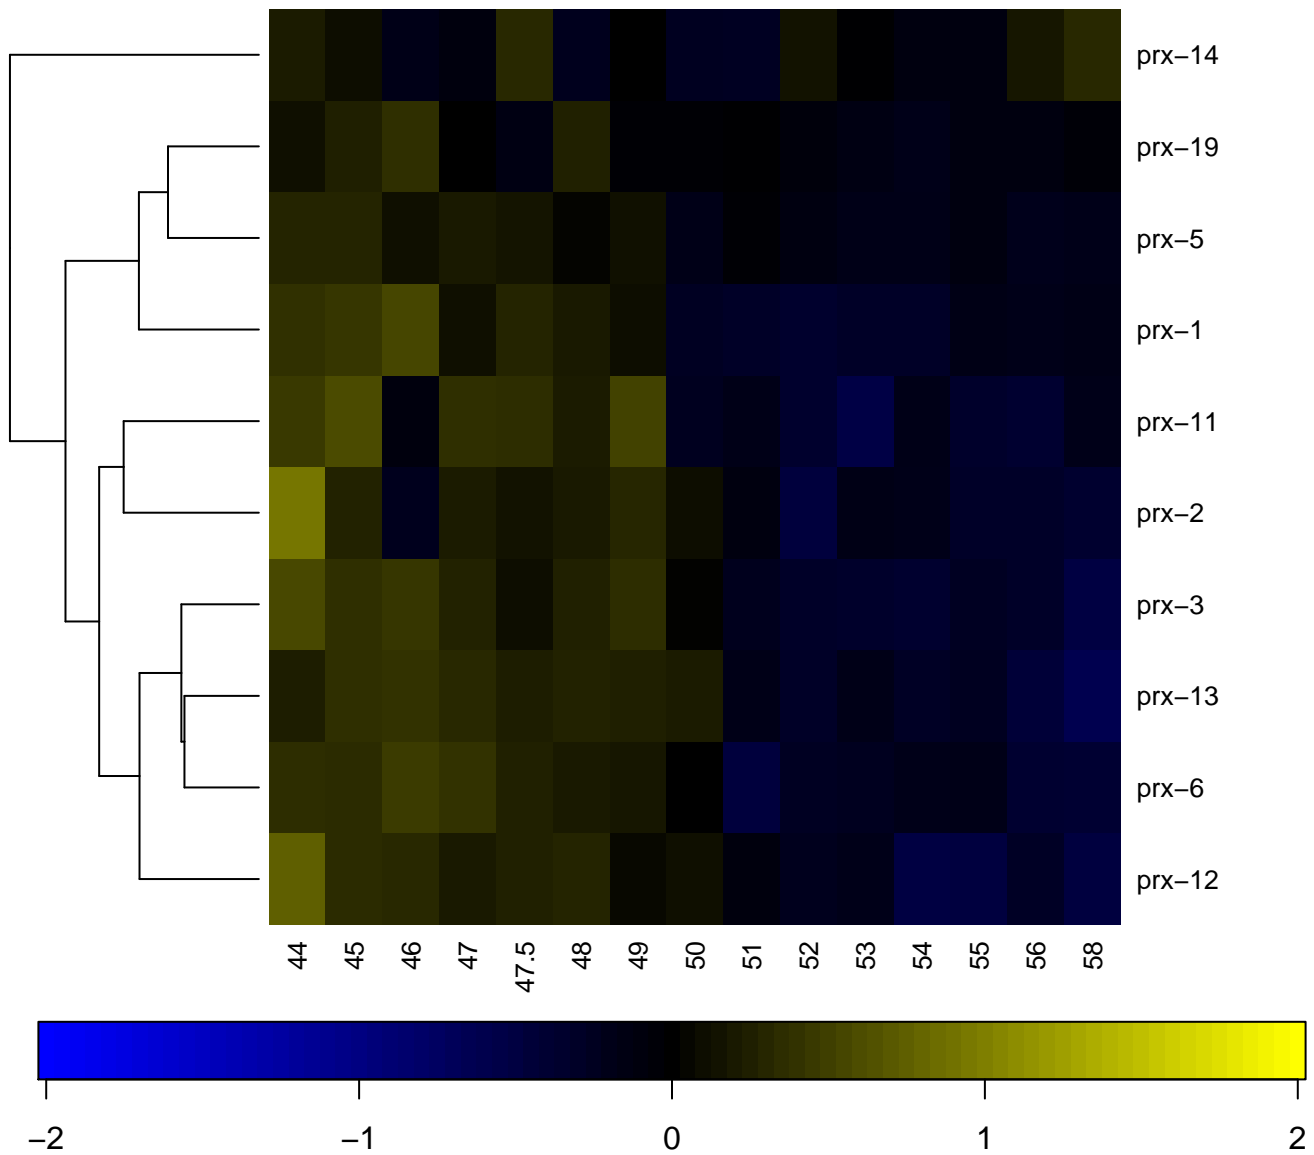

# ptr

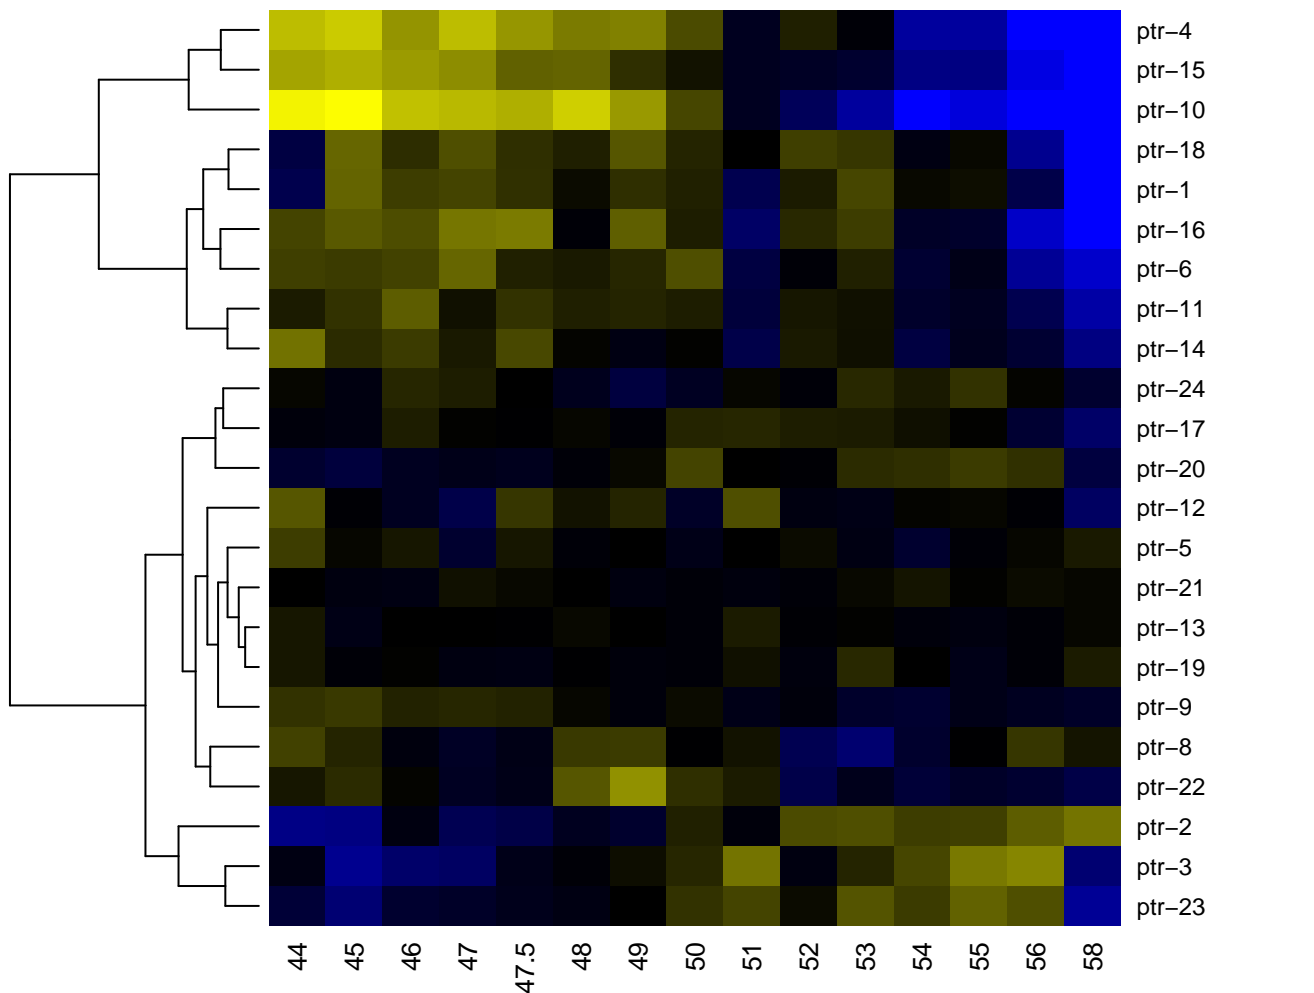

-2

-1

0

1

2

# puf

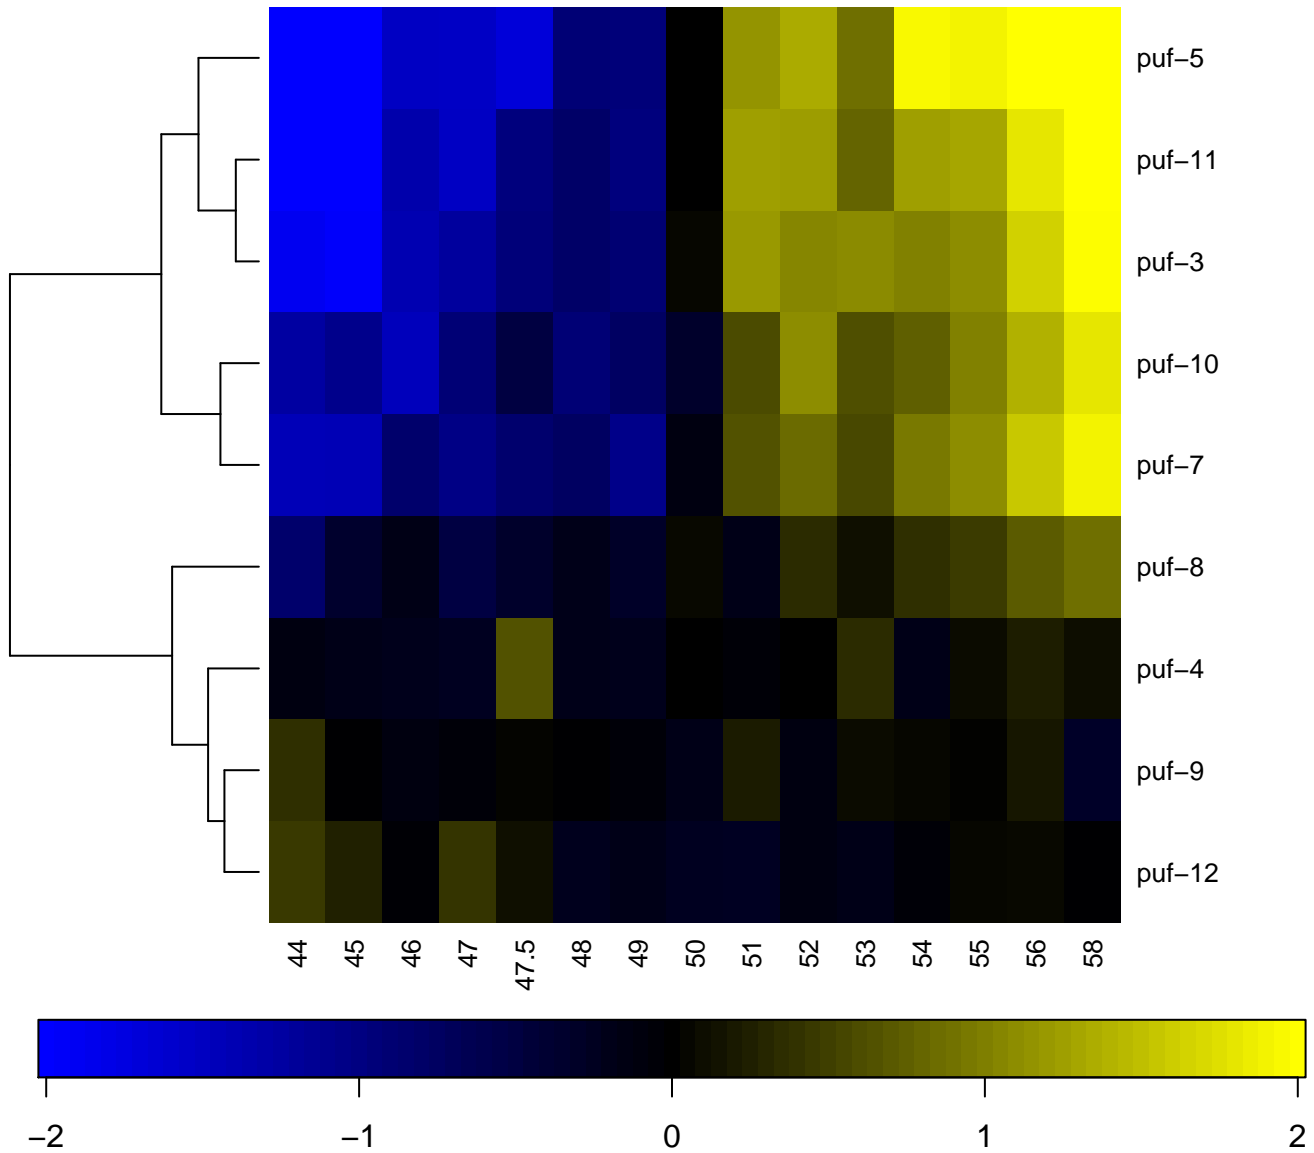



# rab

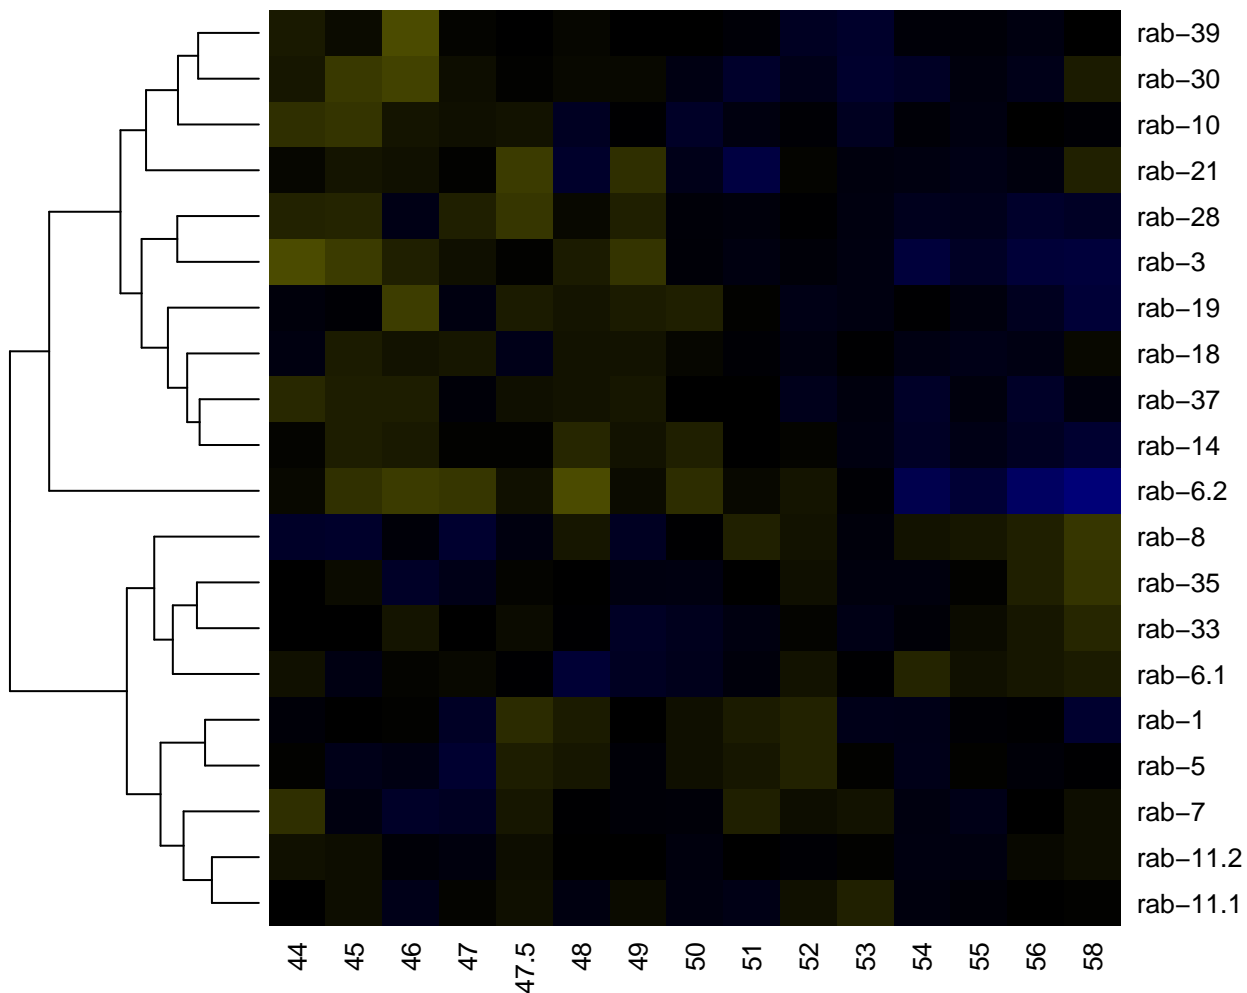





# rga

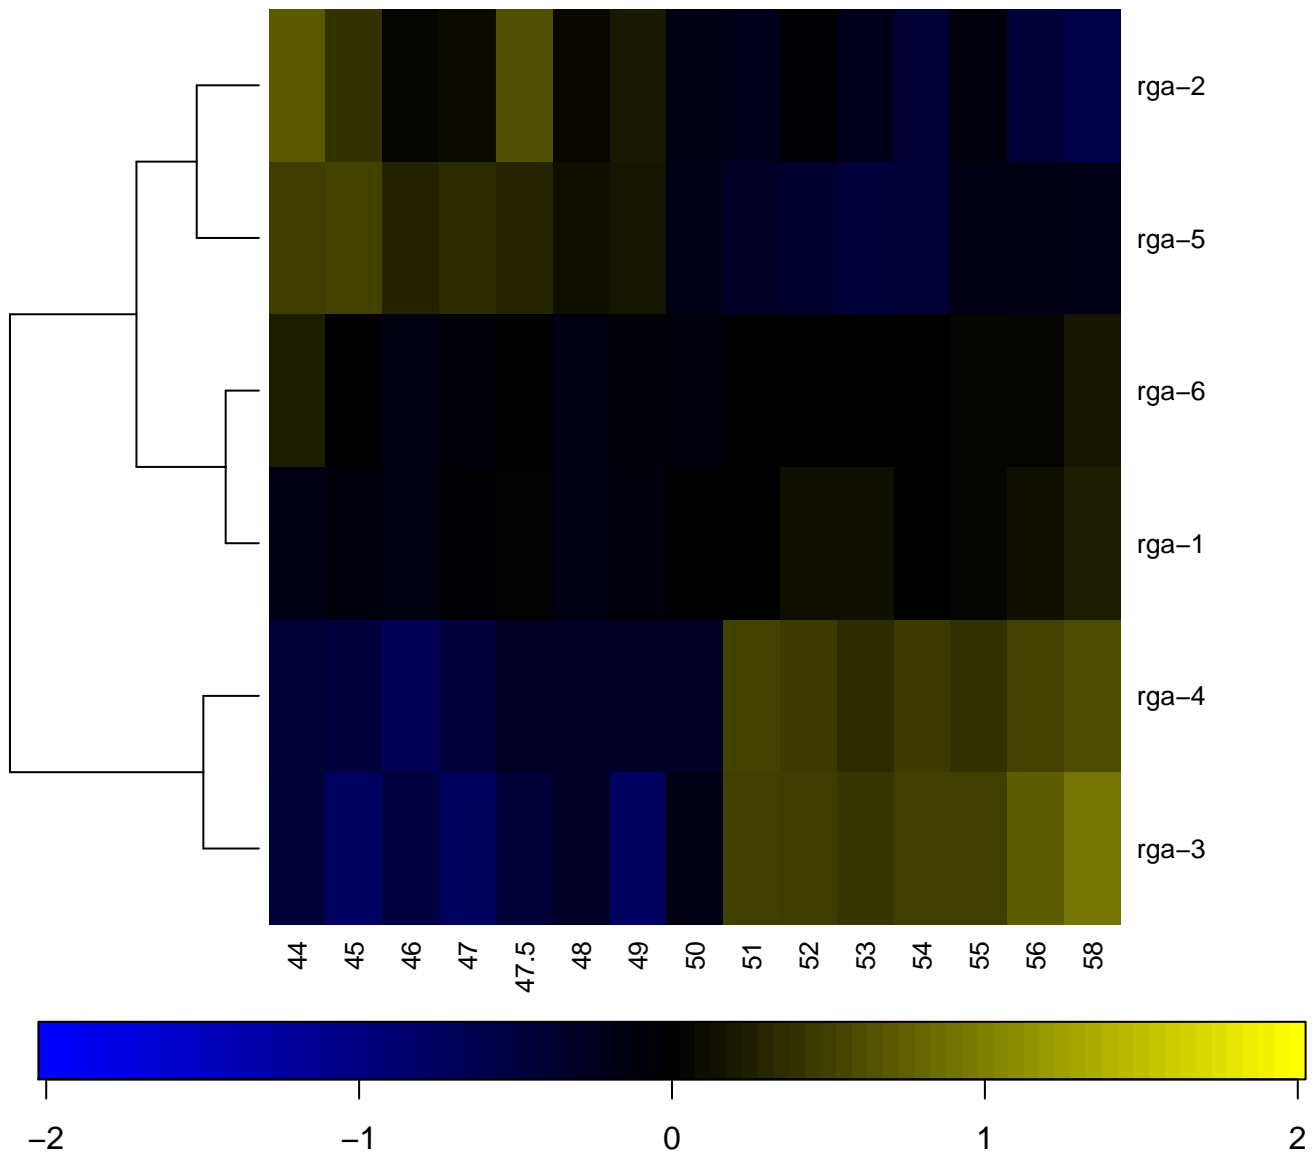

# rgs

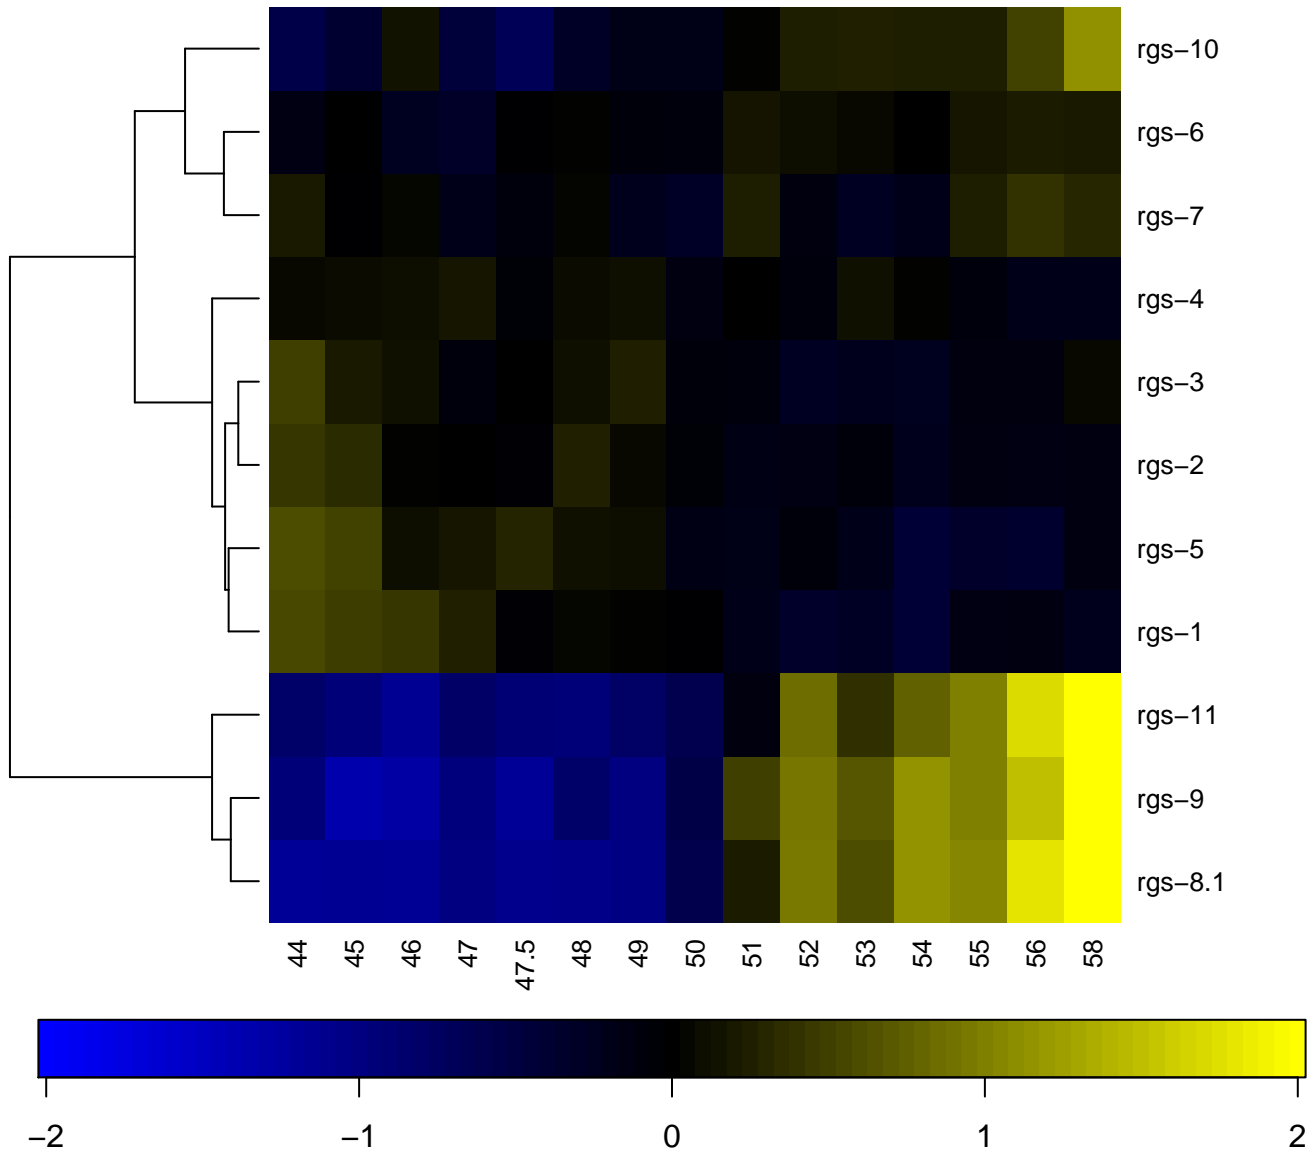



# rmd

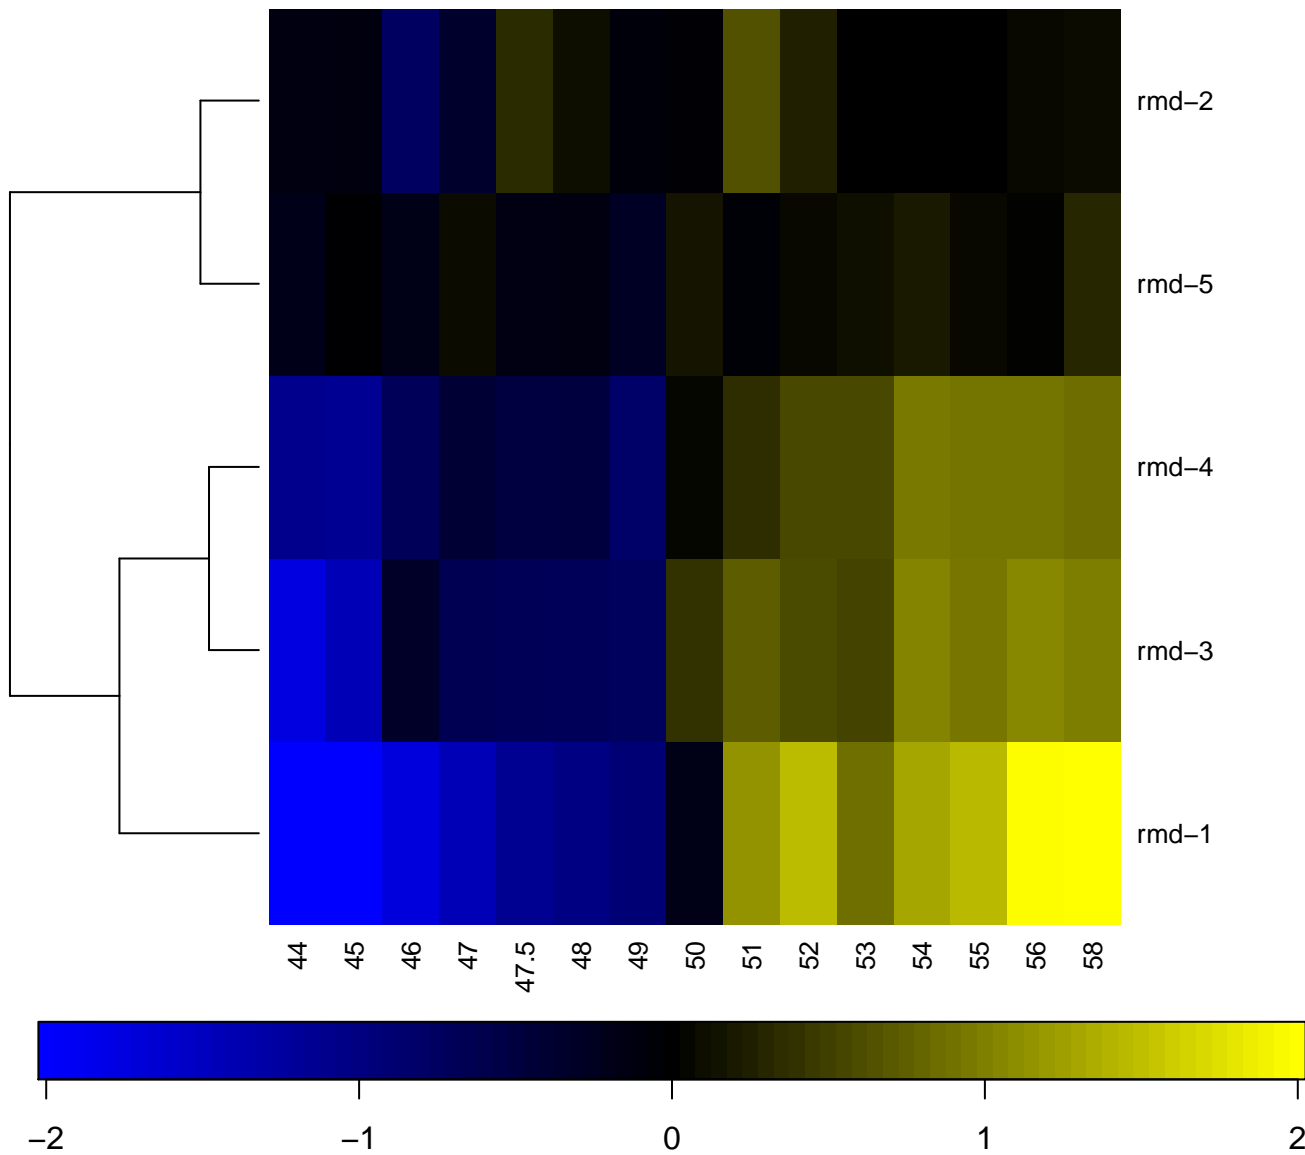

# rme

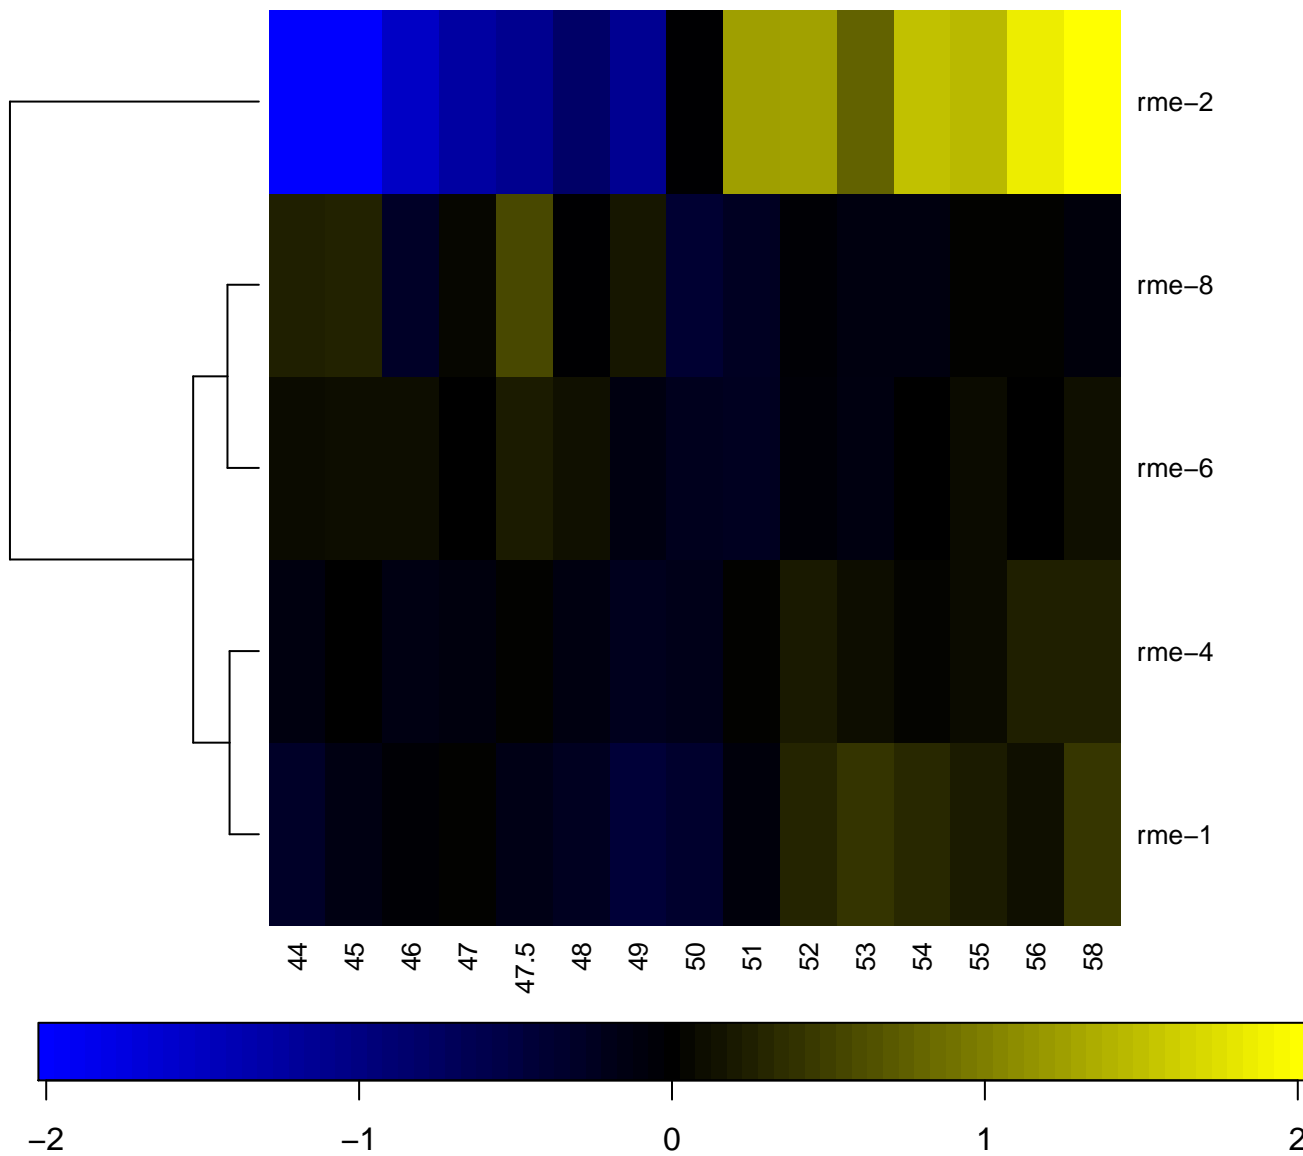











# rpl

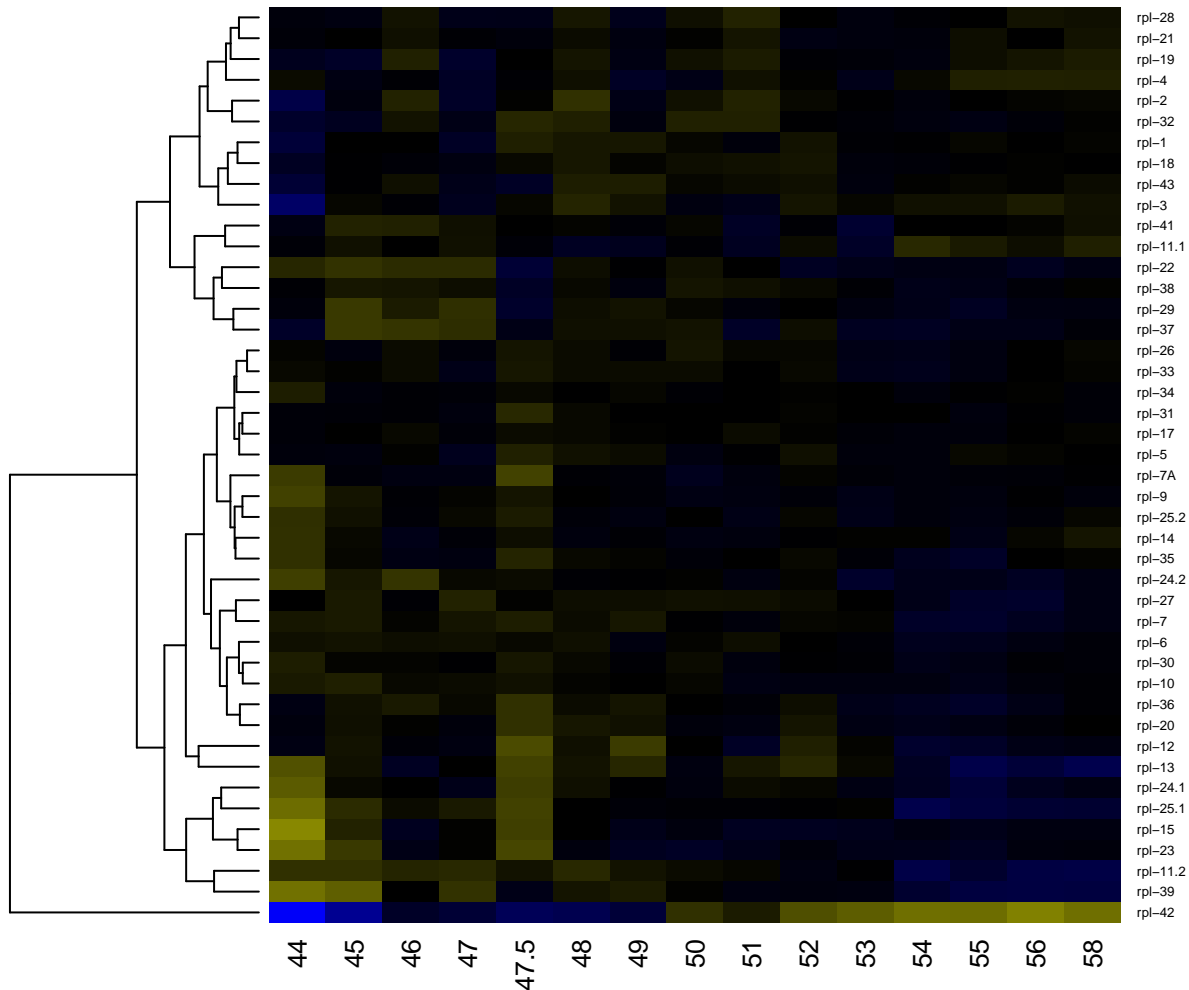

# rpn

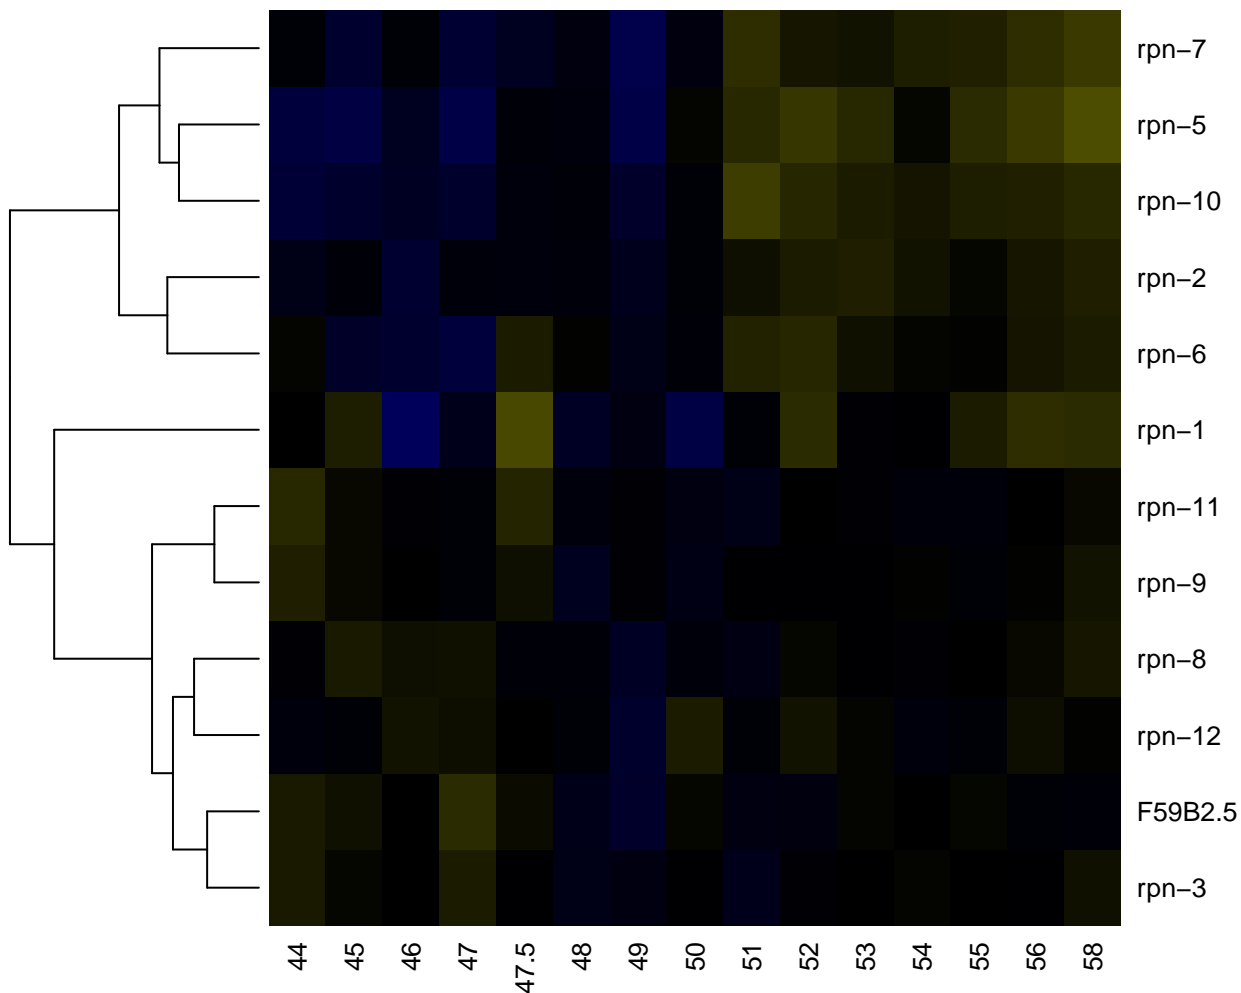

# rps

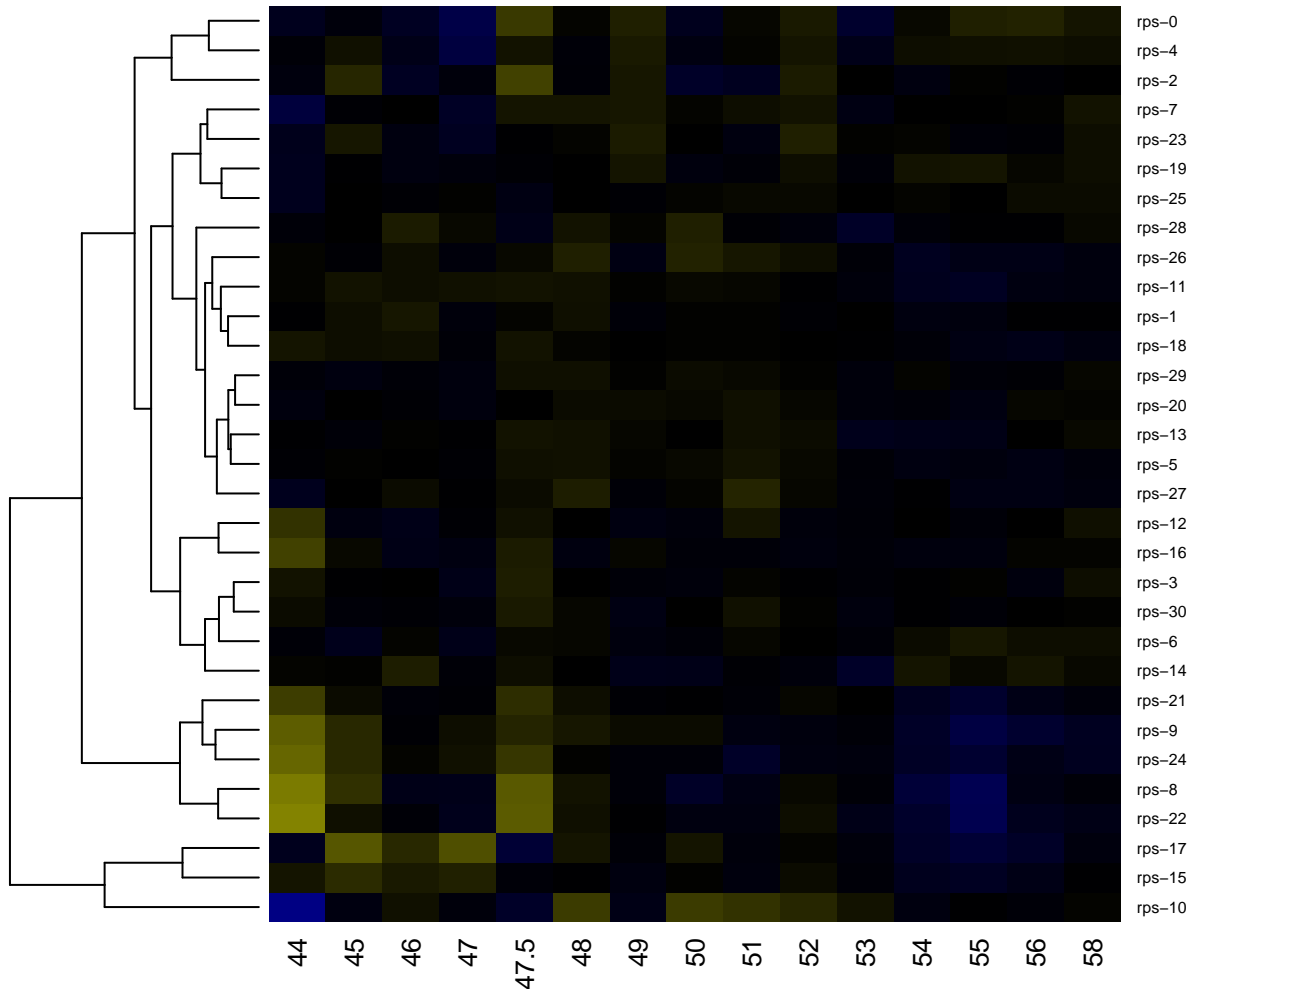

-2

-1

0

1

2





# rsp

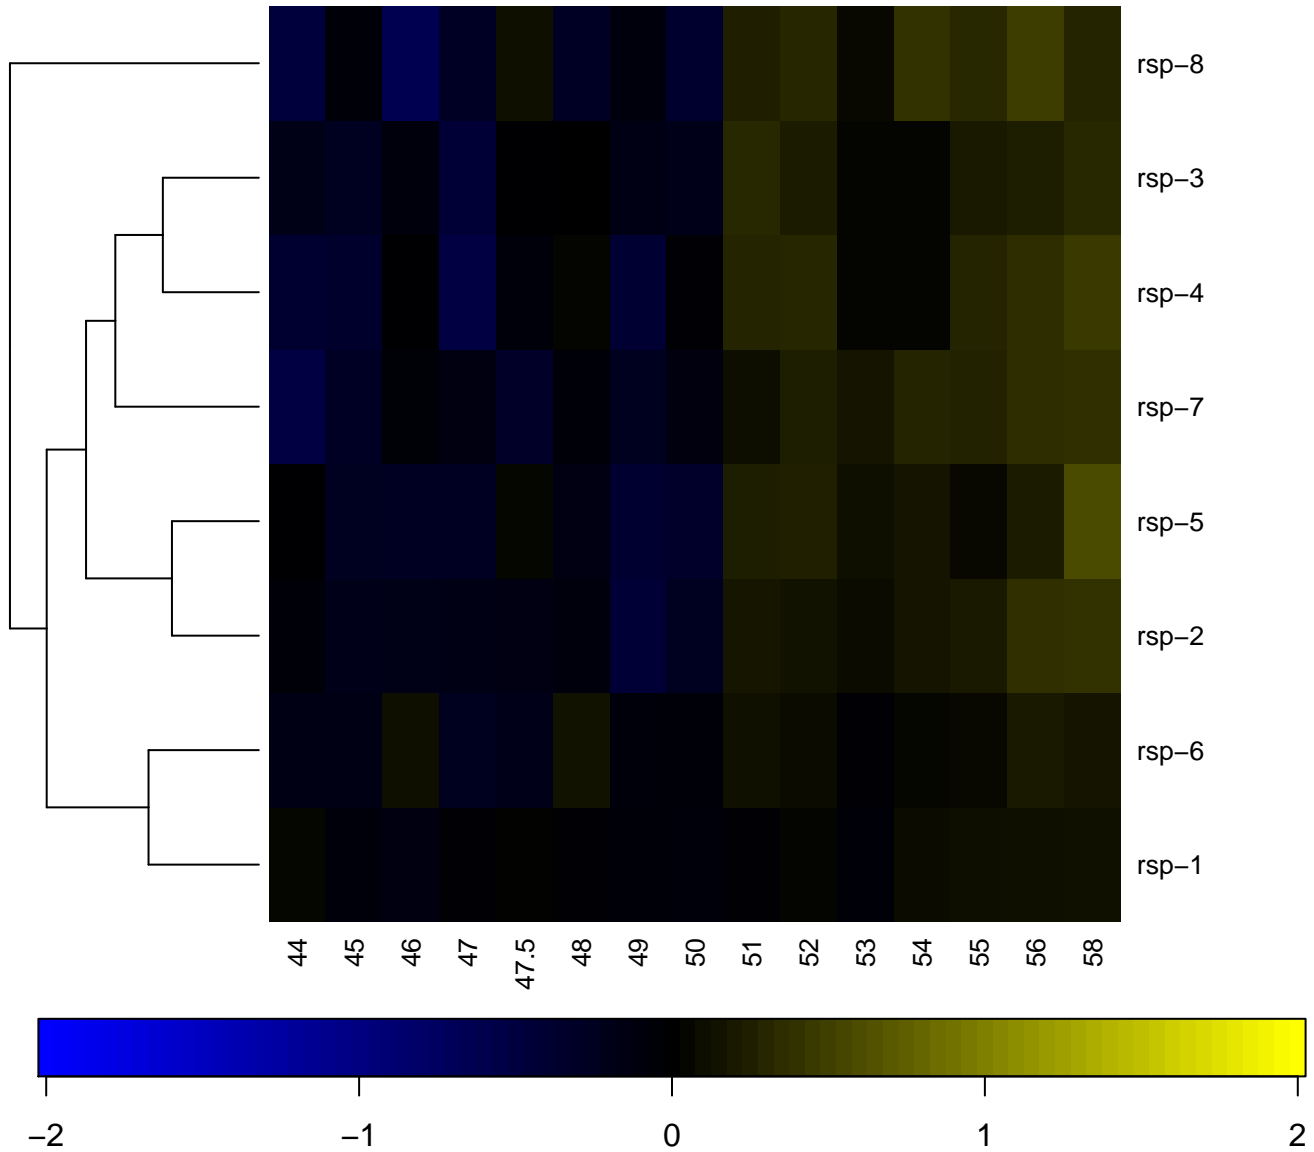



# scav

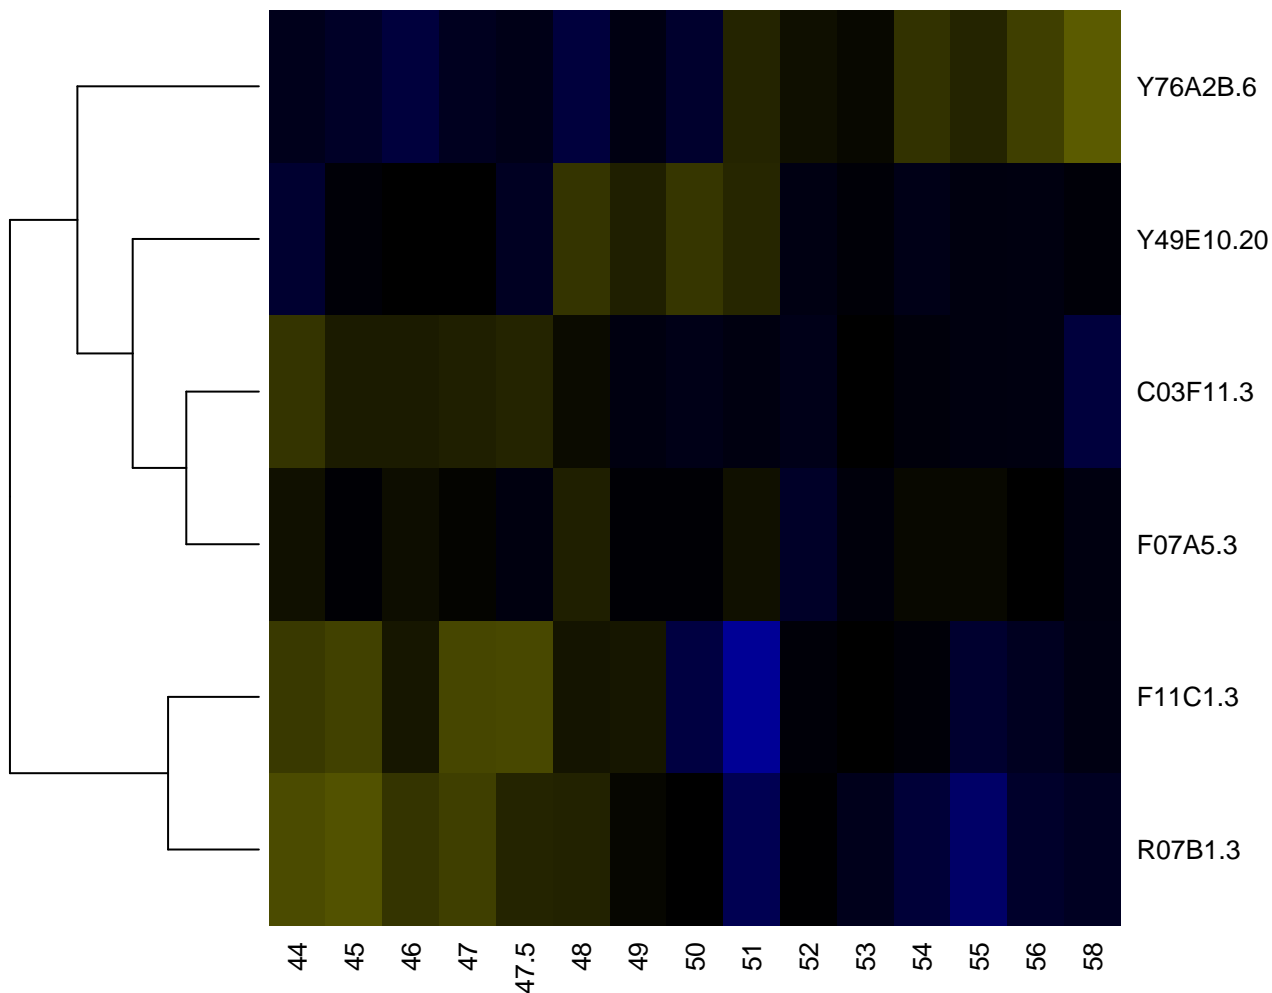

-2

-1

0

1

2

# scl

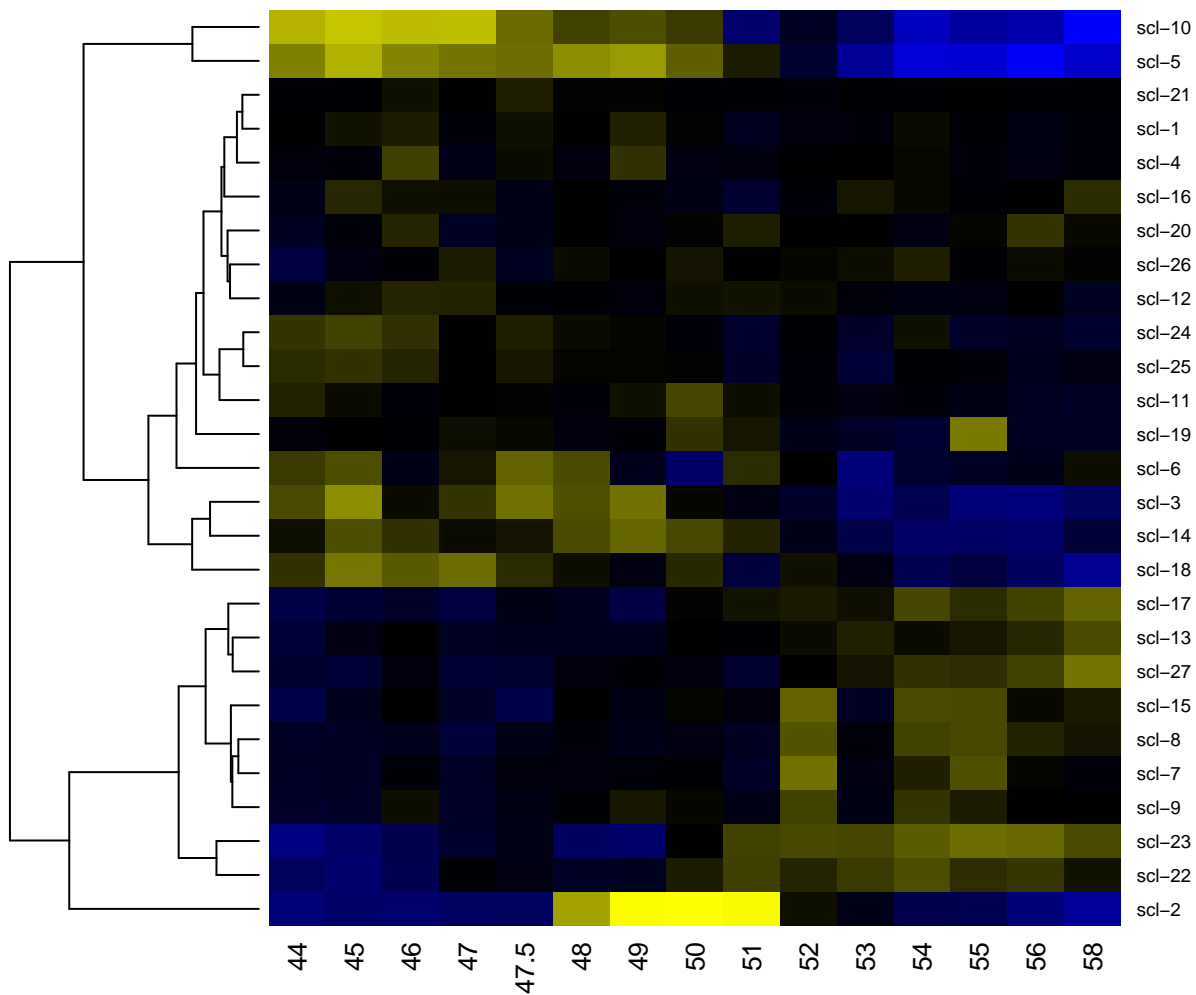

# scrm

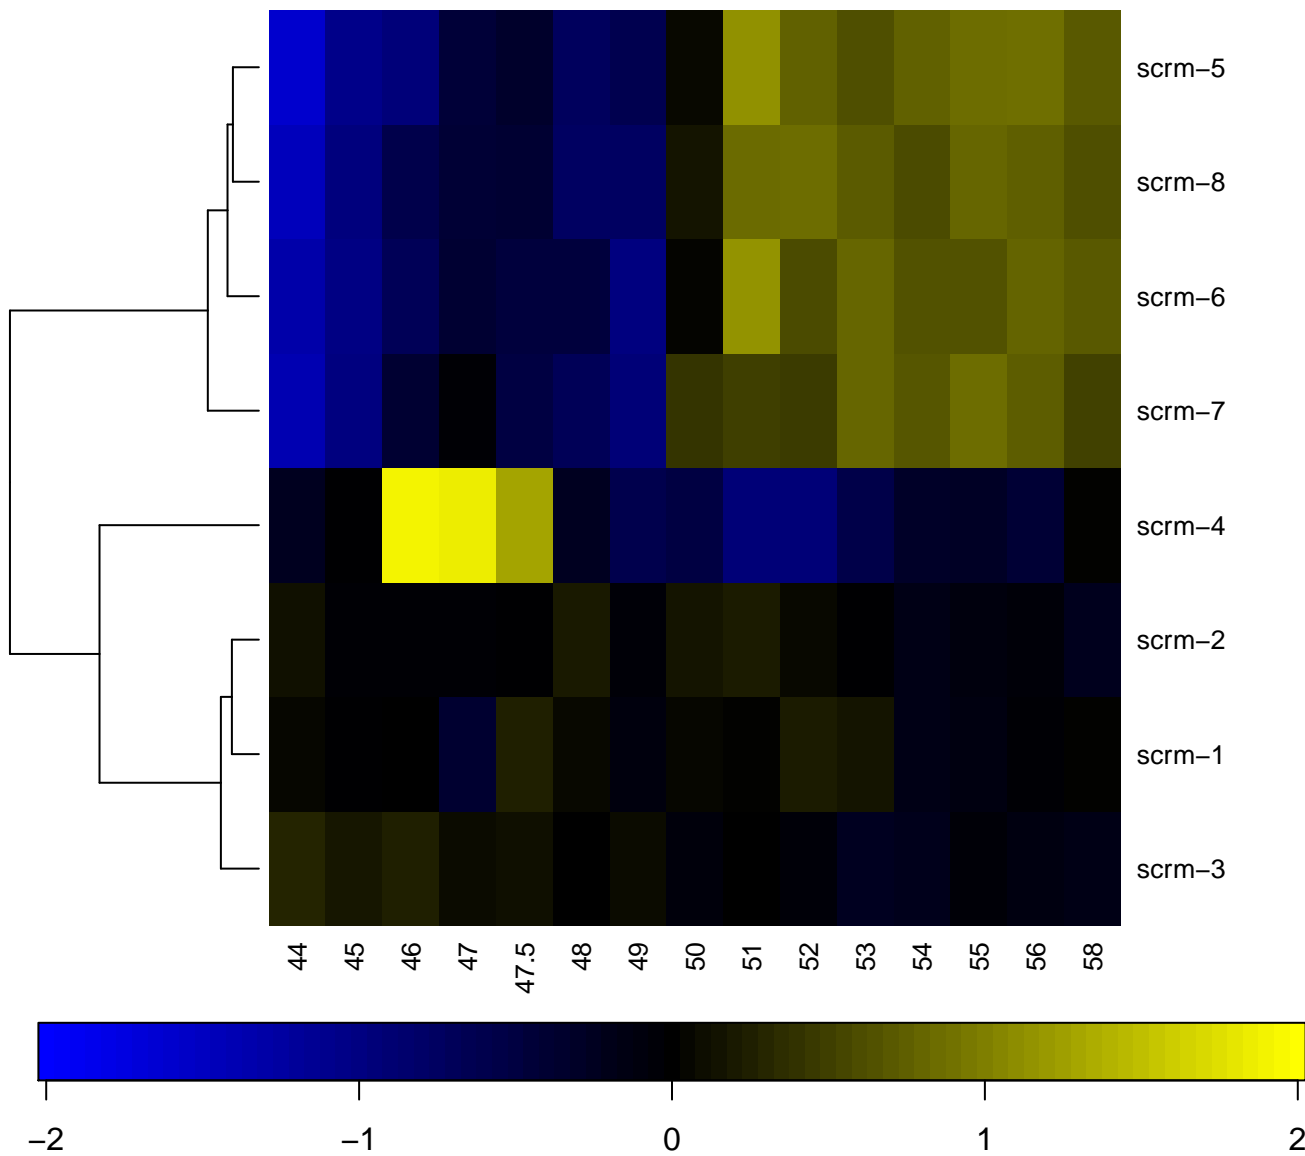

# sdz

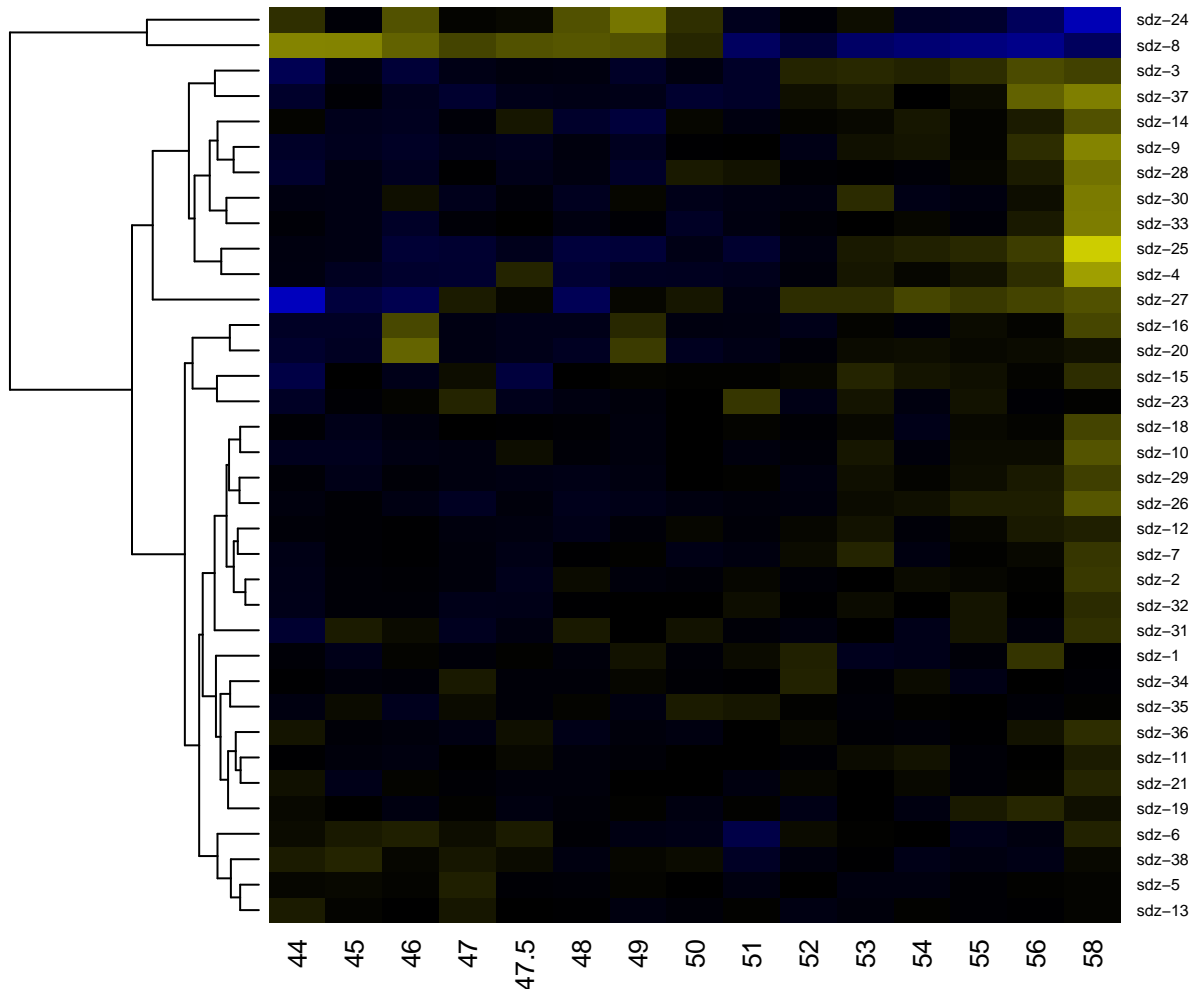

-2

-1

0

1

2

**sec**

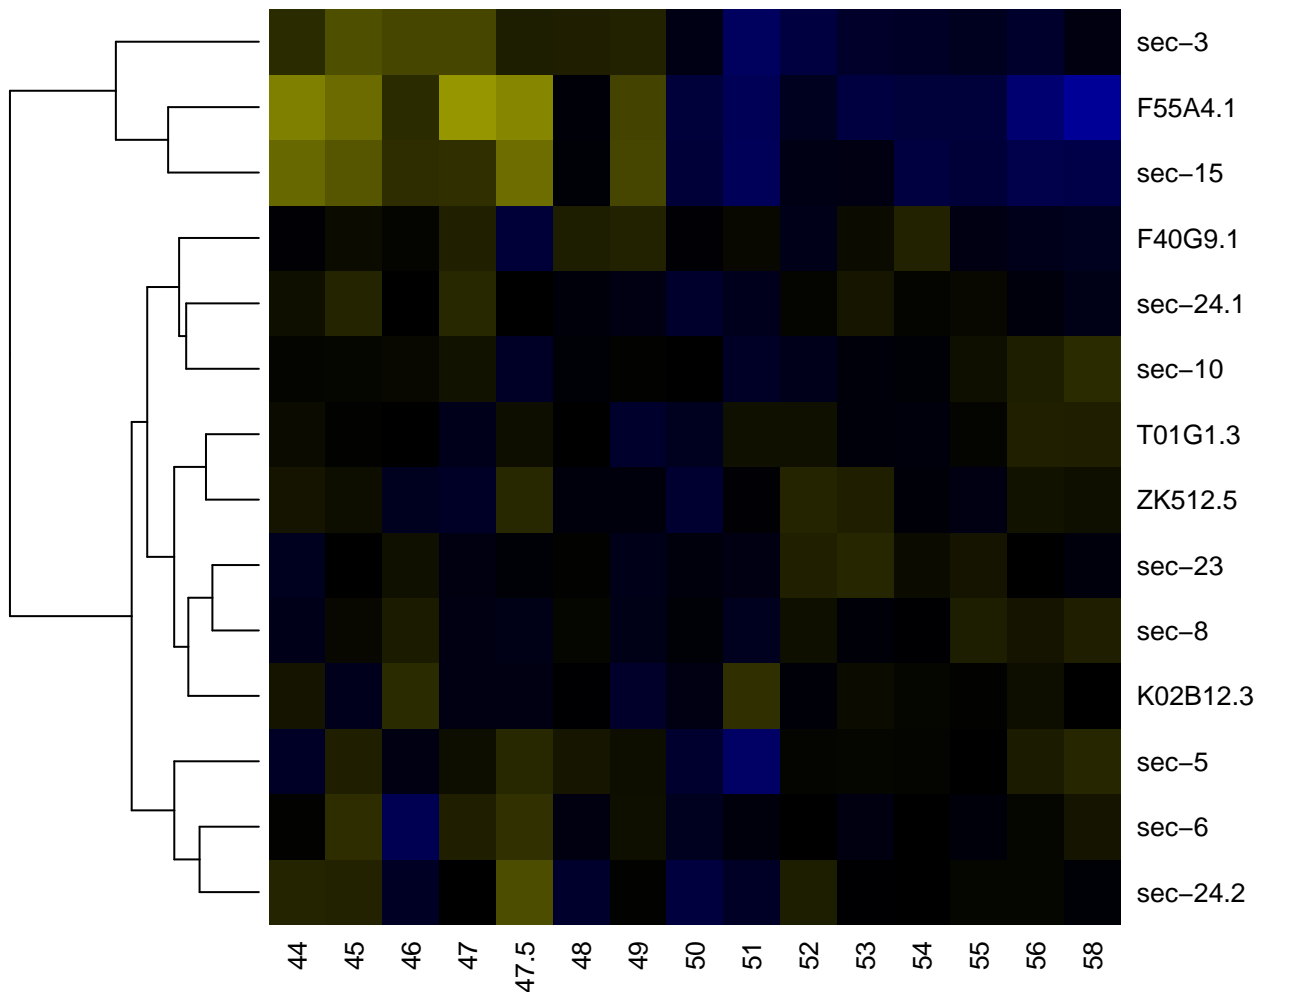

# sel

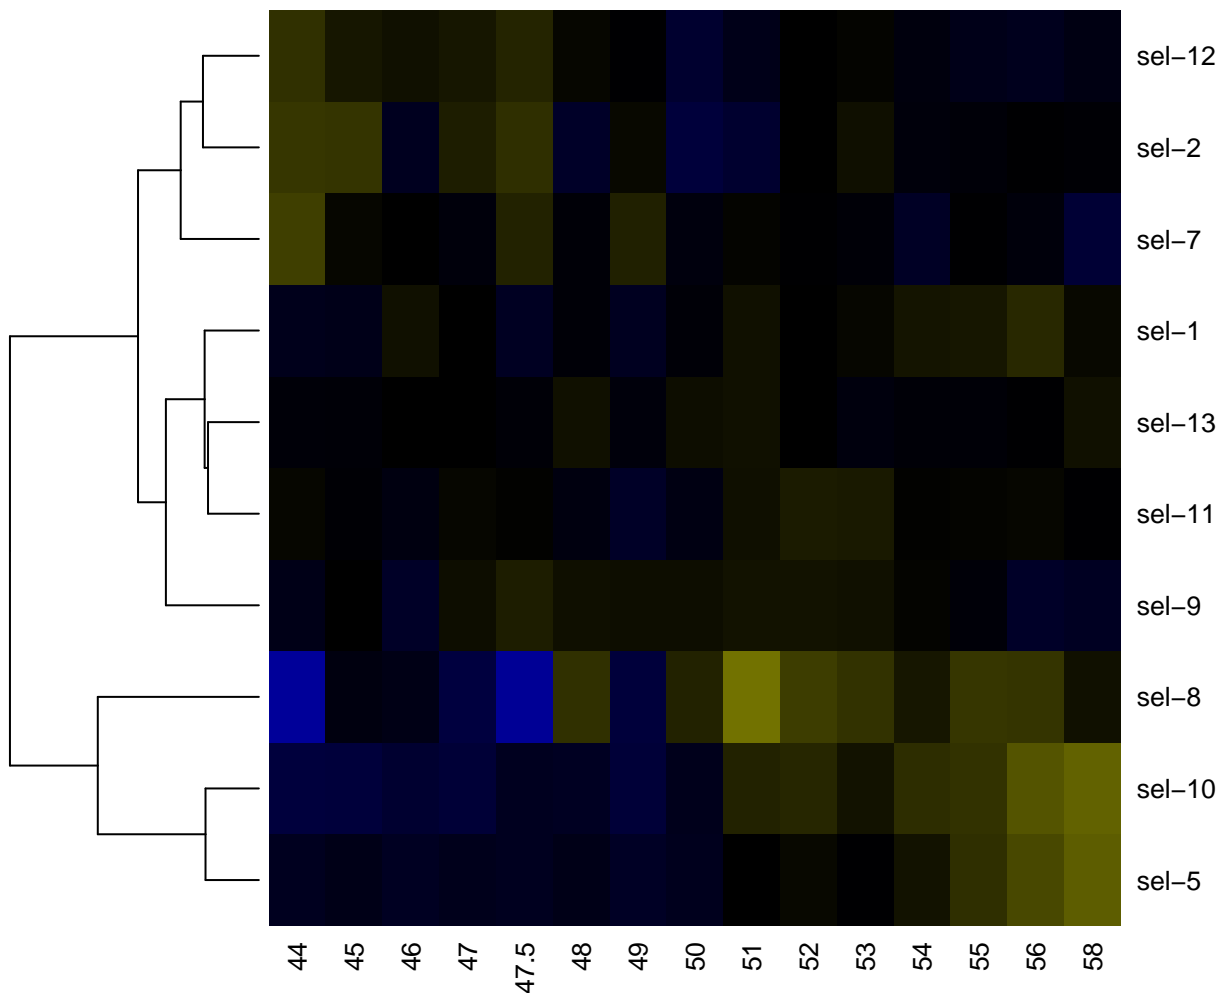



# ser

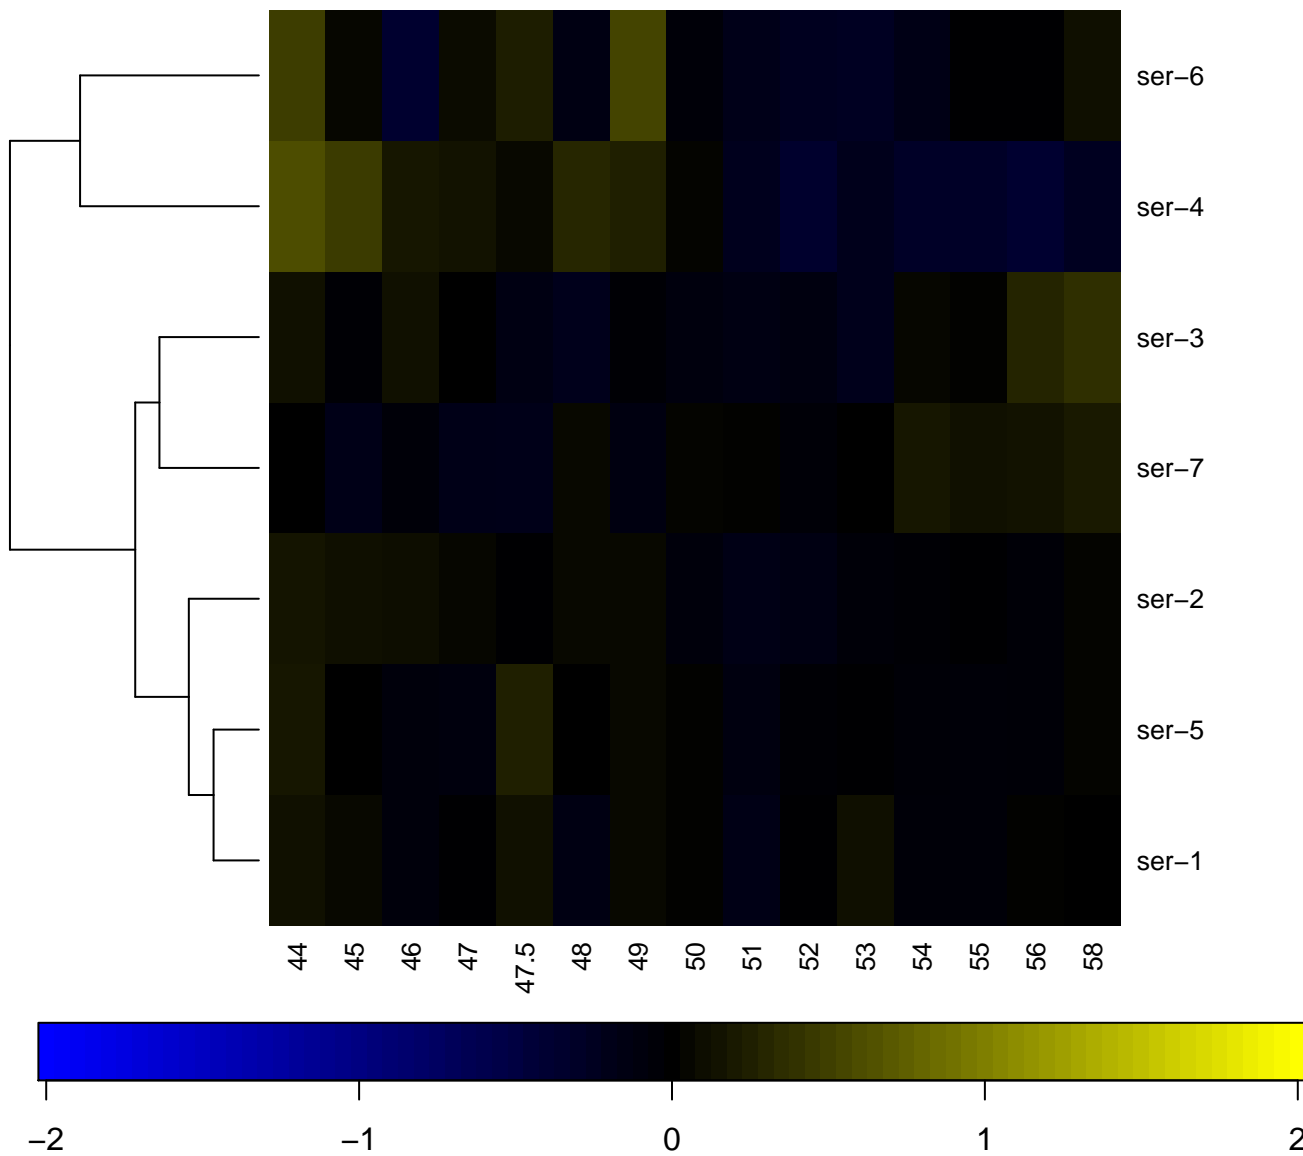

# set

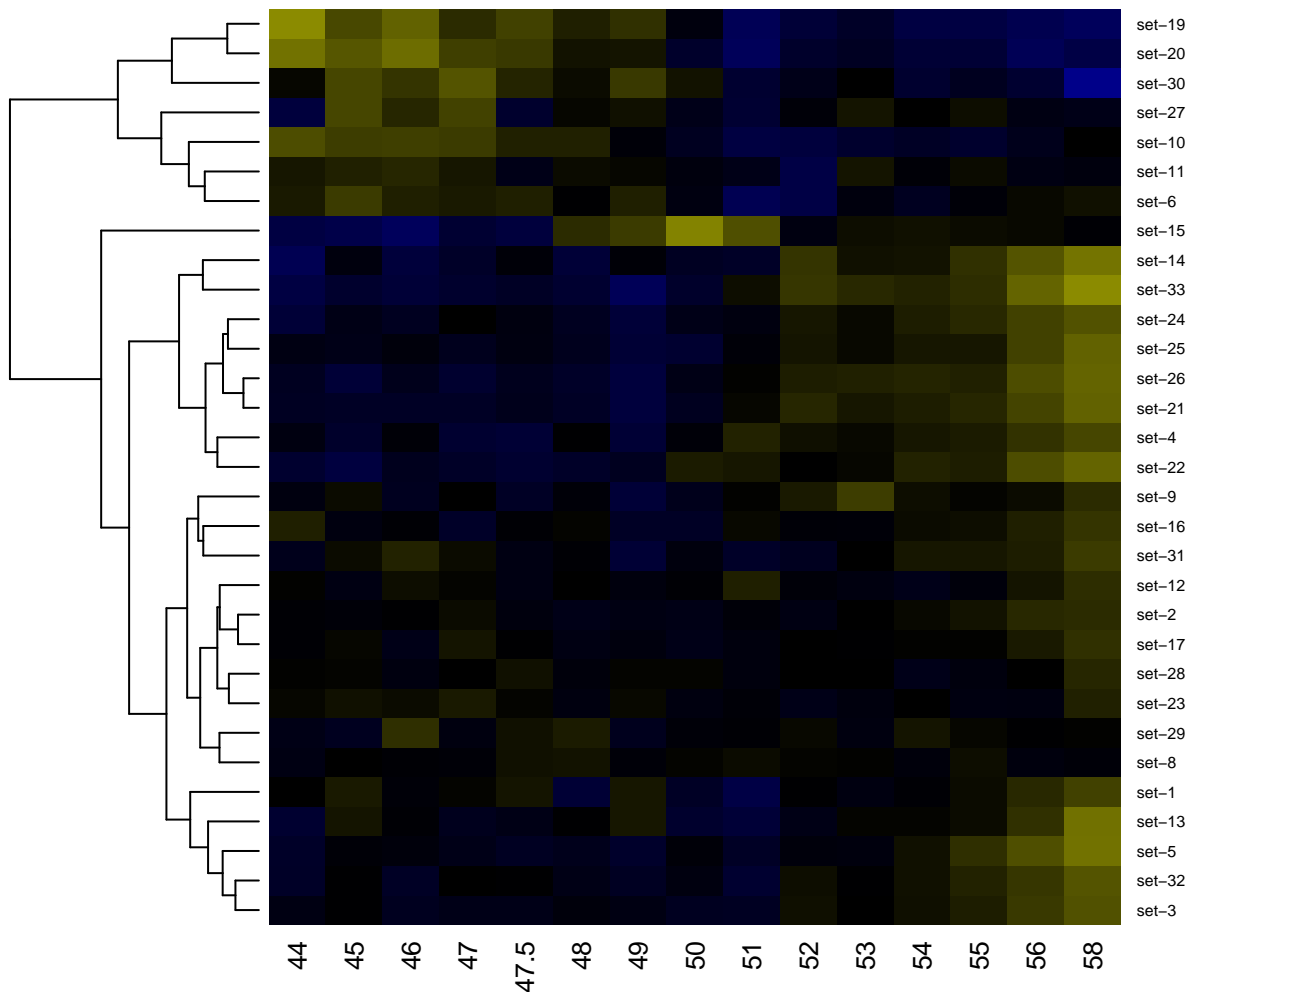

-2

-1

0

1

2

# sfxn

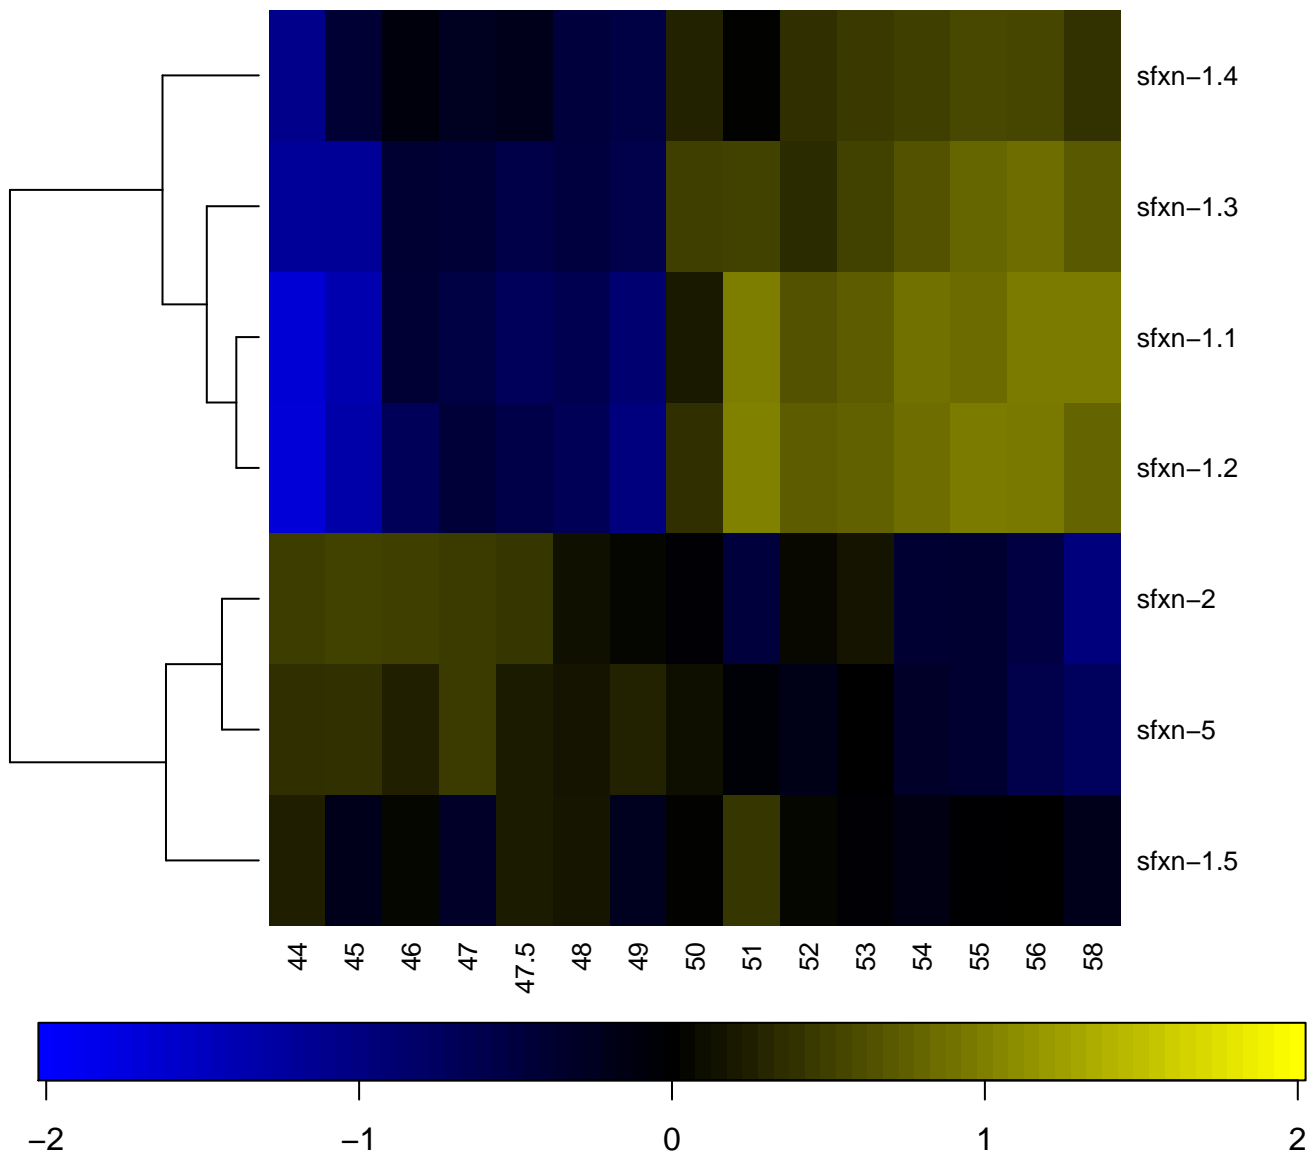



# sma

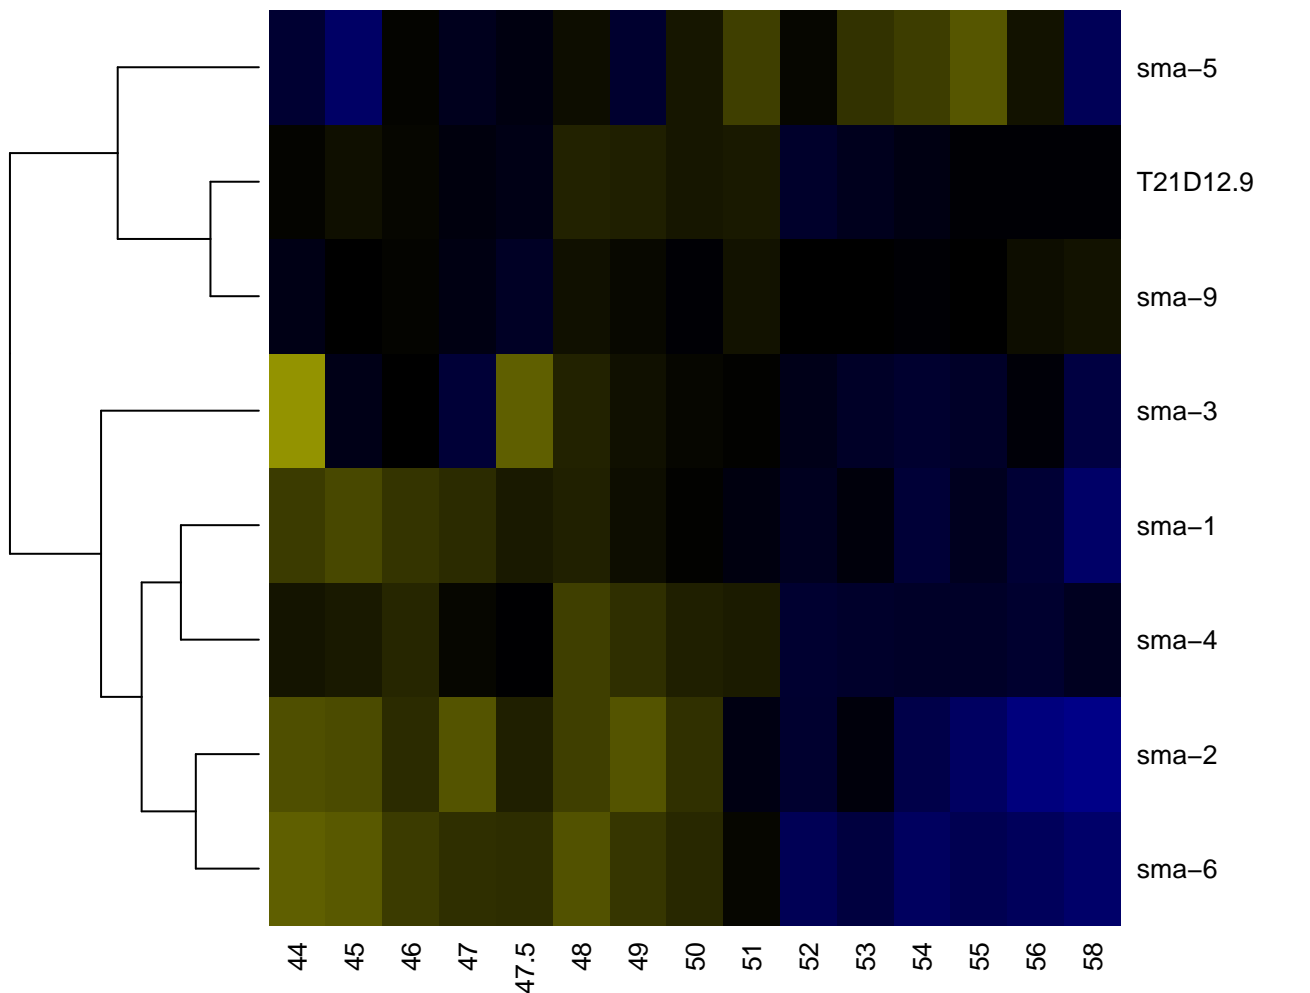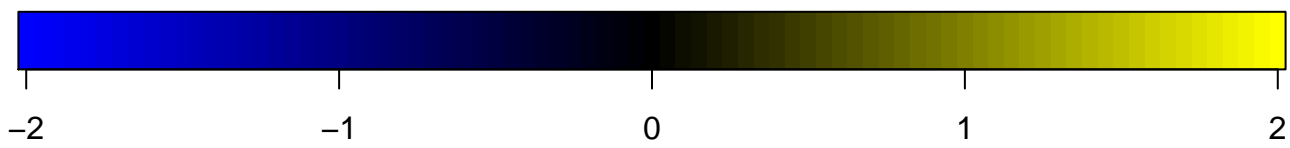

# smg

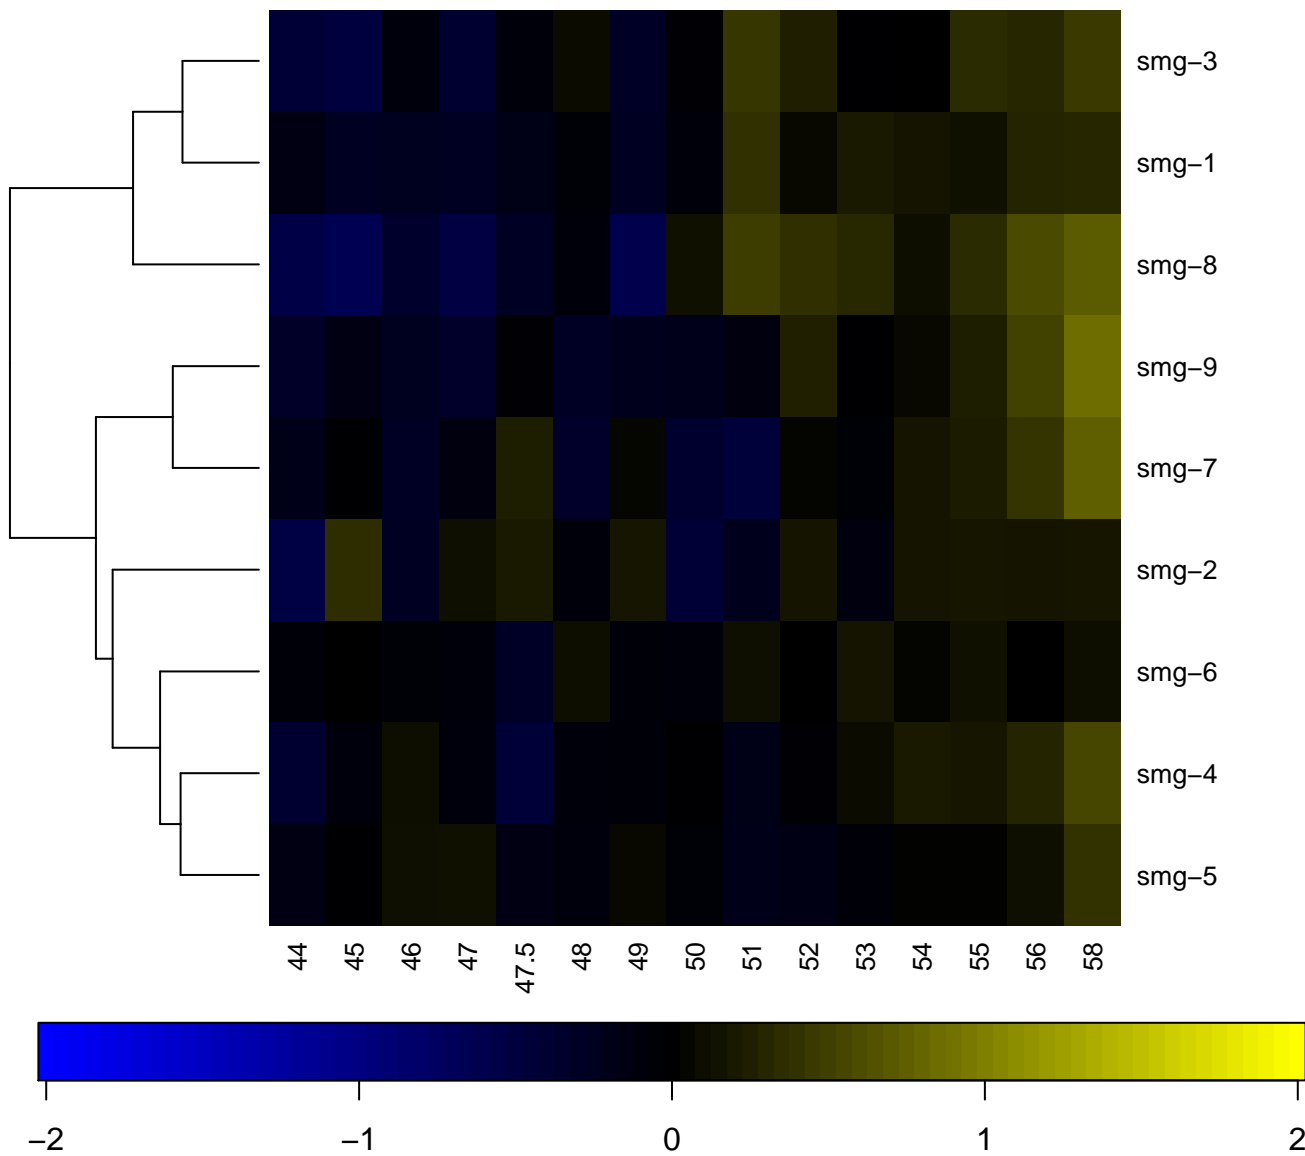

# snb

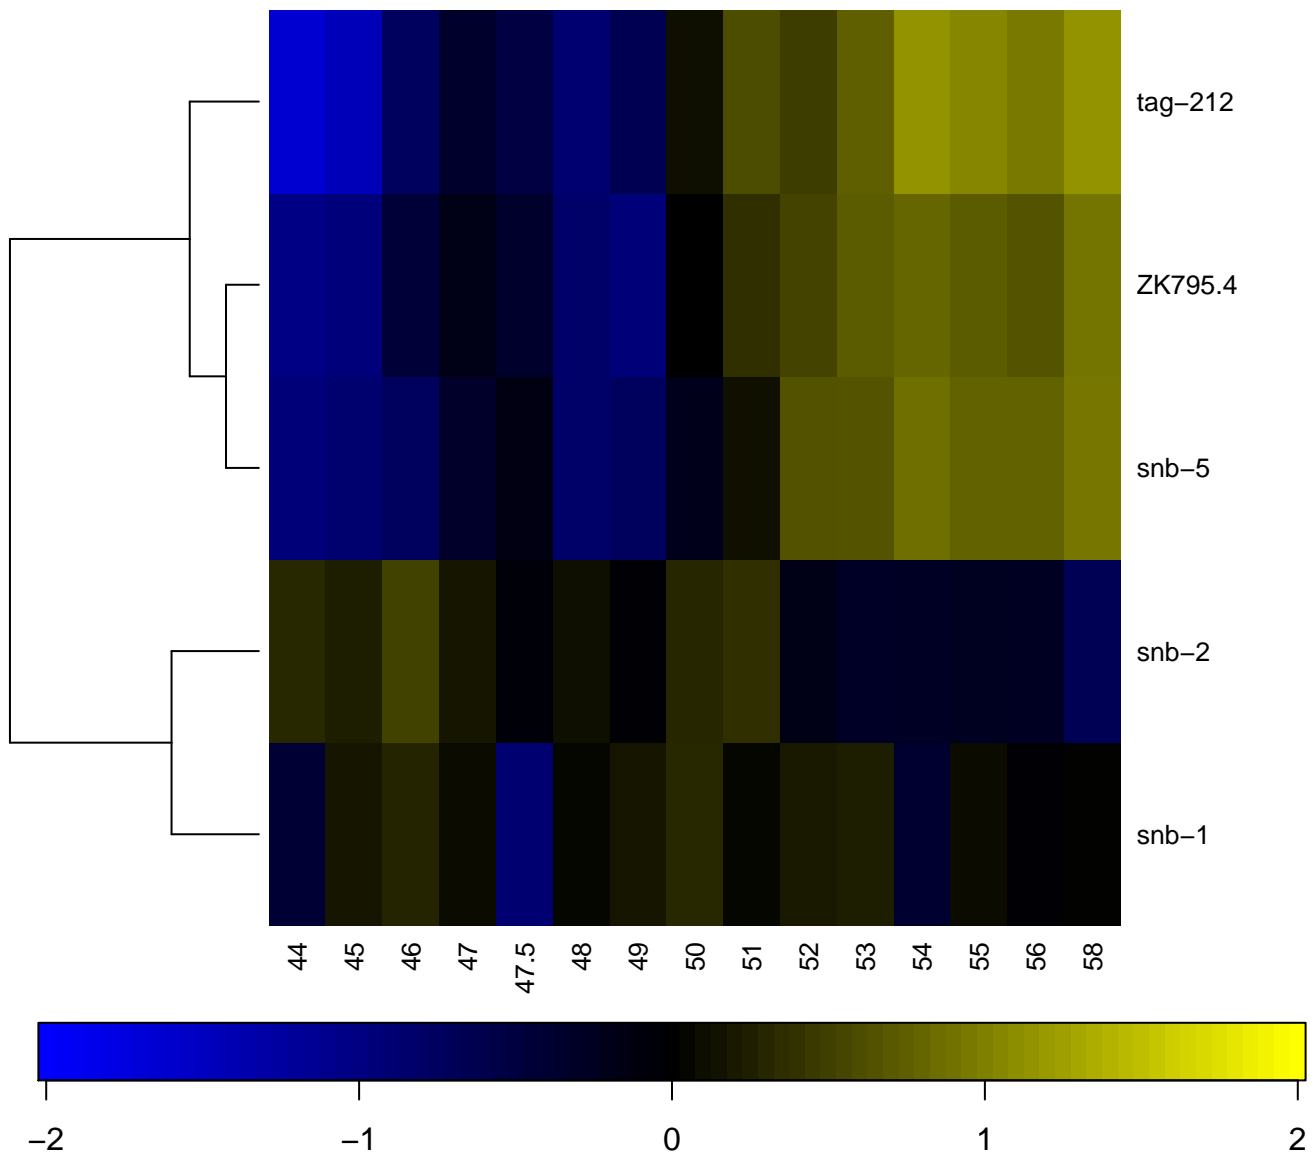

# snf

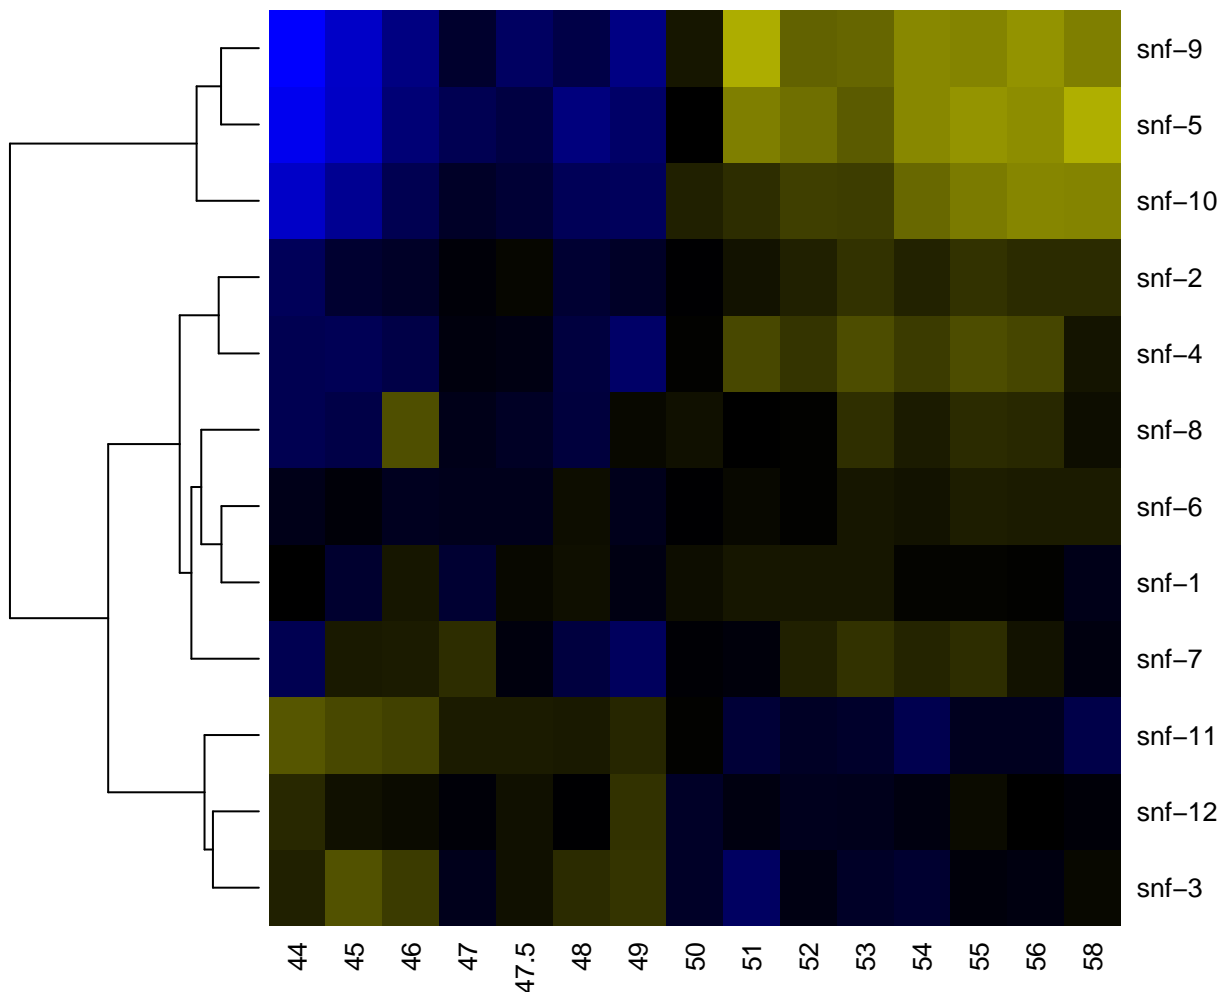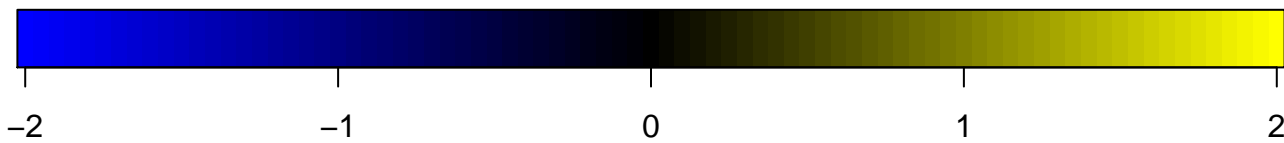









# spe

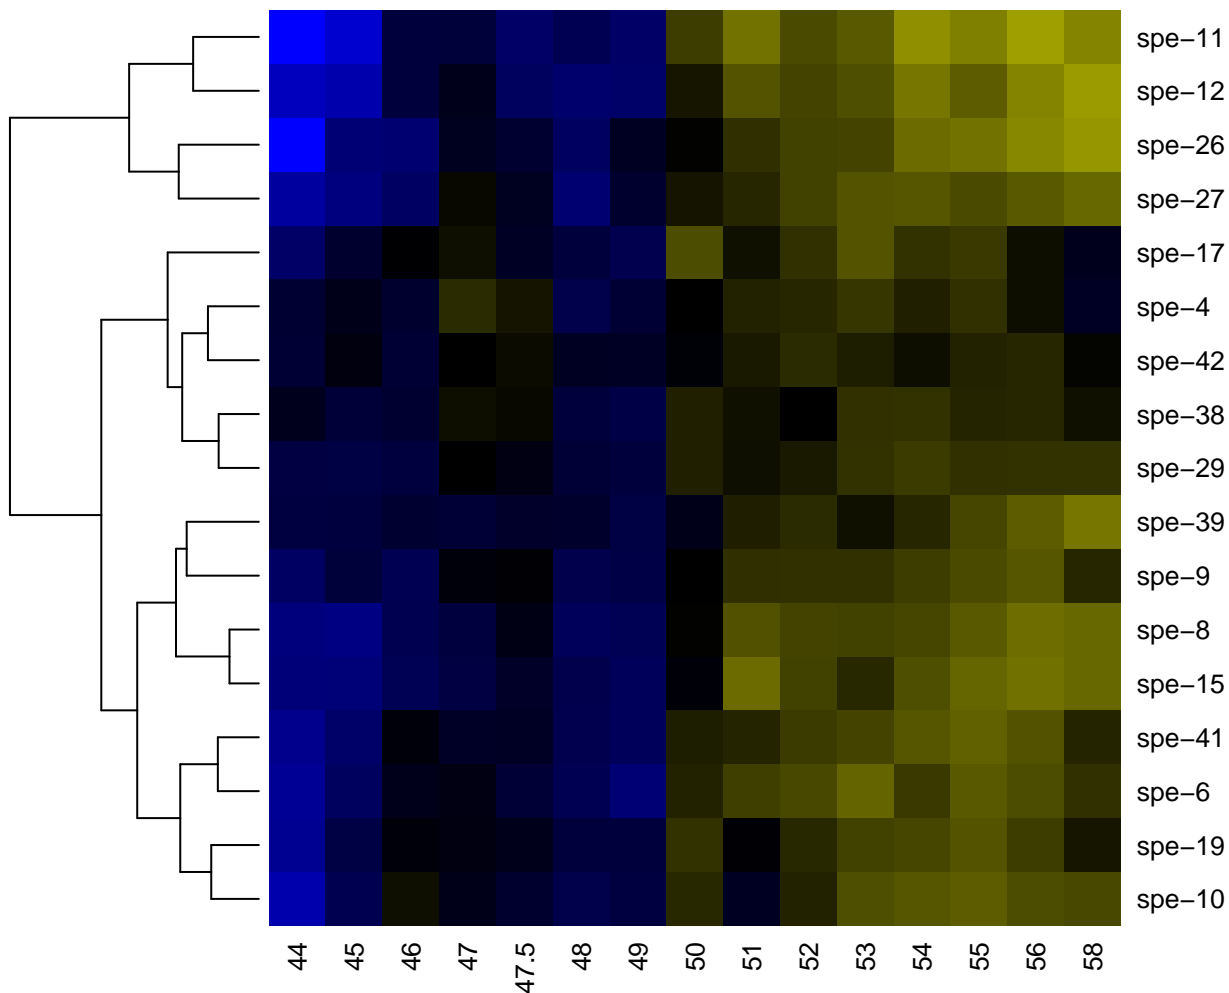

# spp

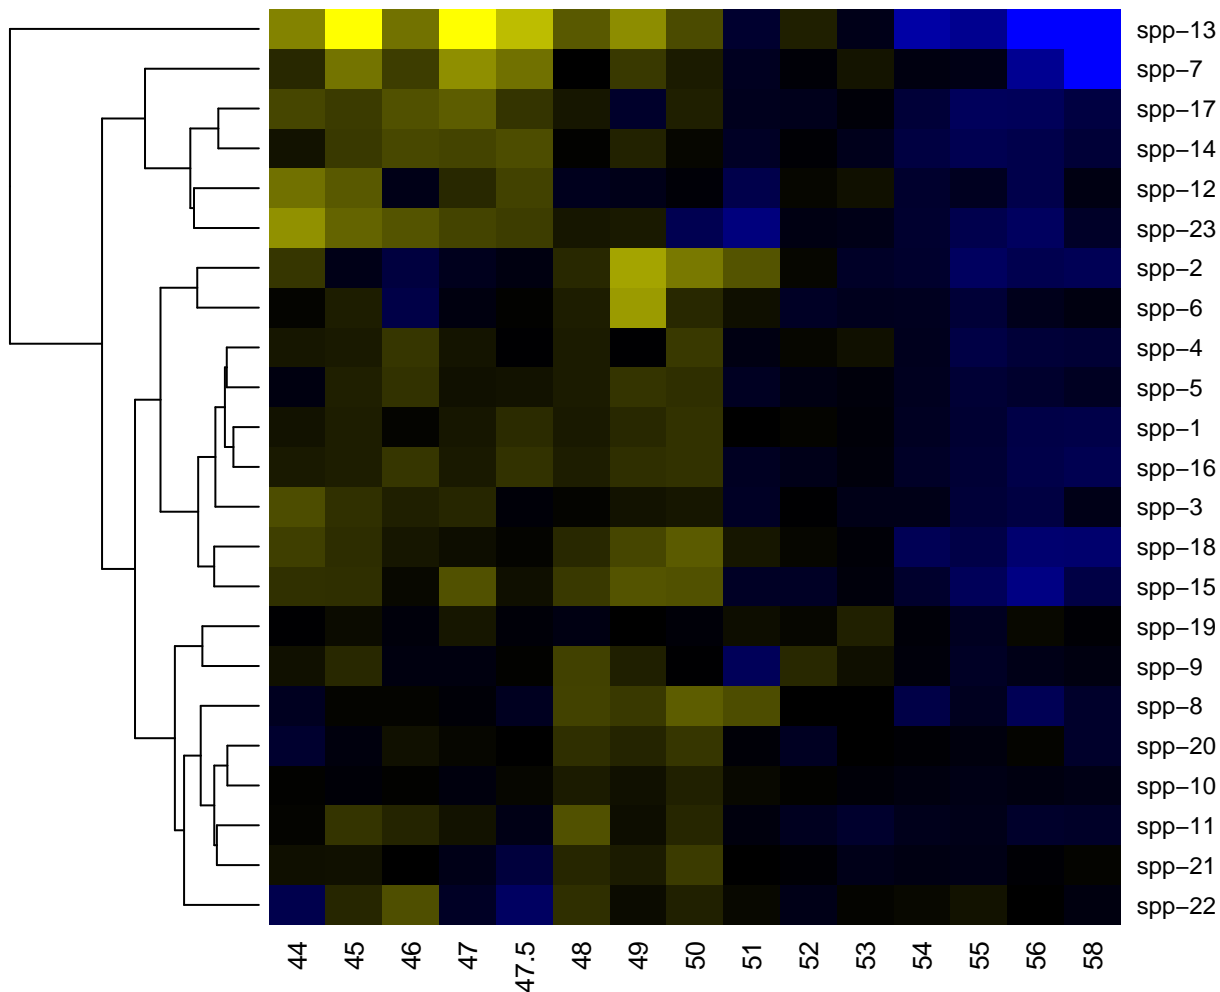



# sqv

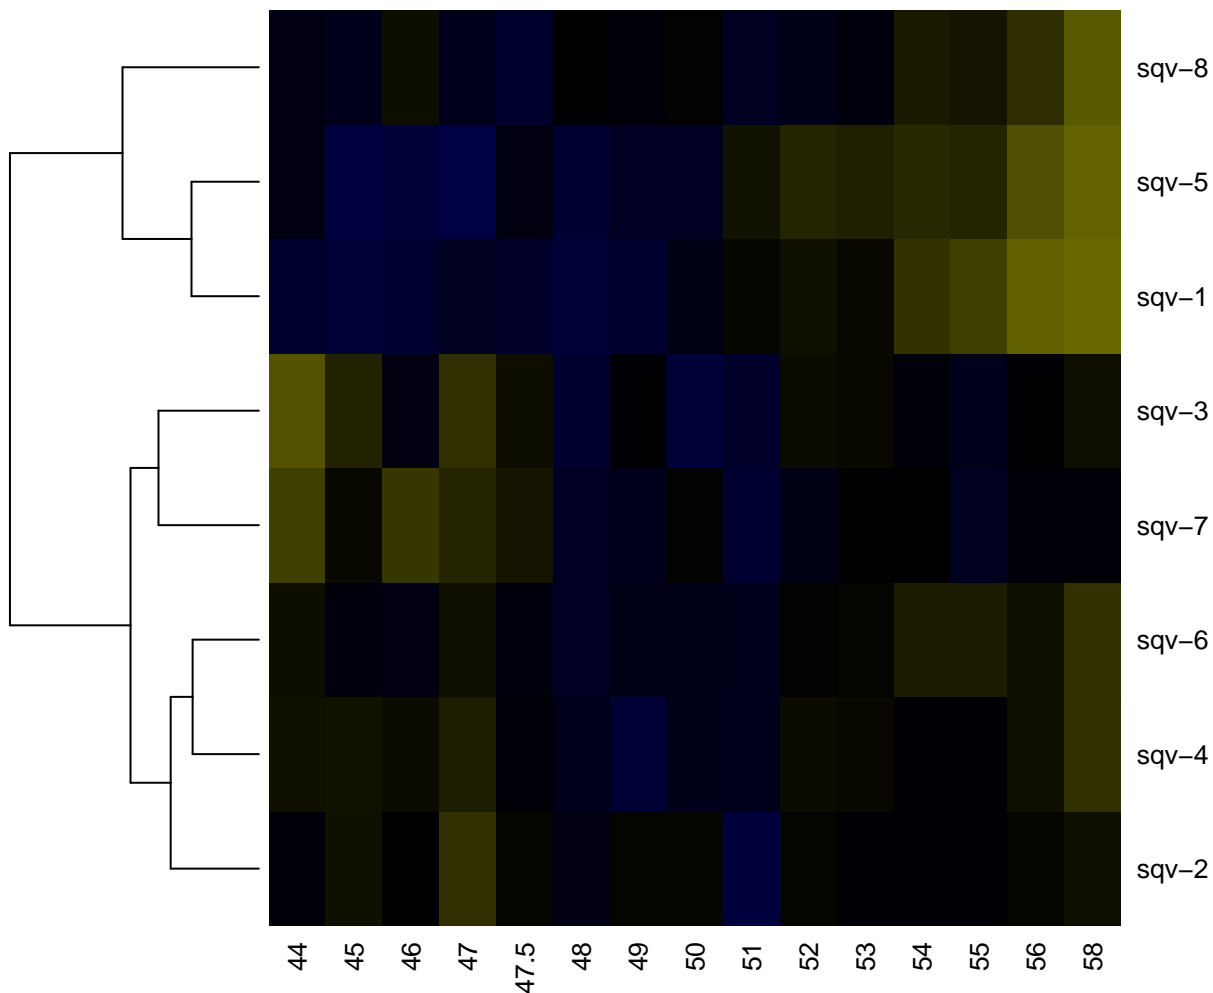

-2

-1

0

1

2

# sra

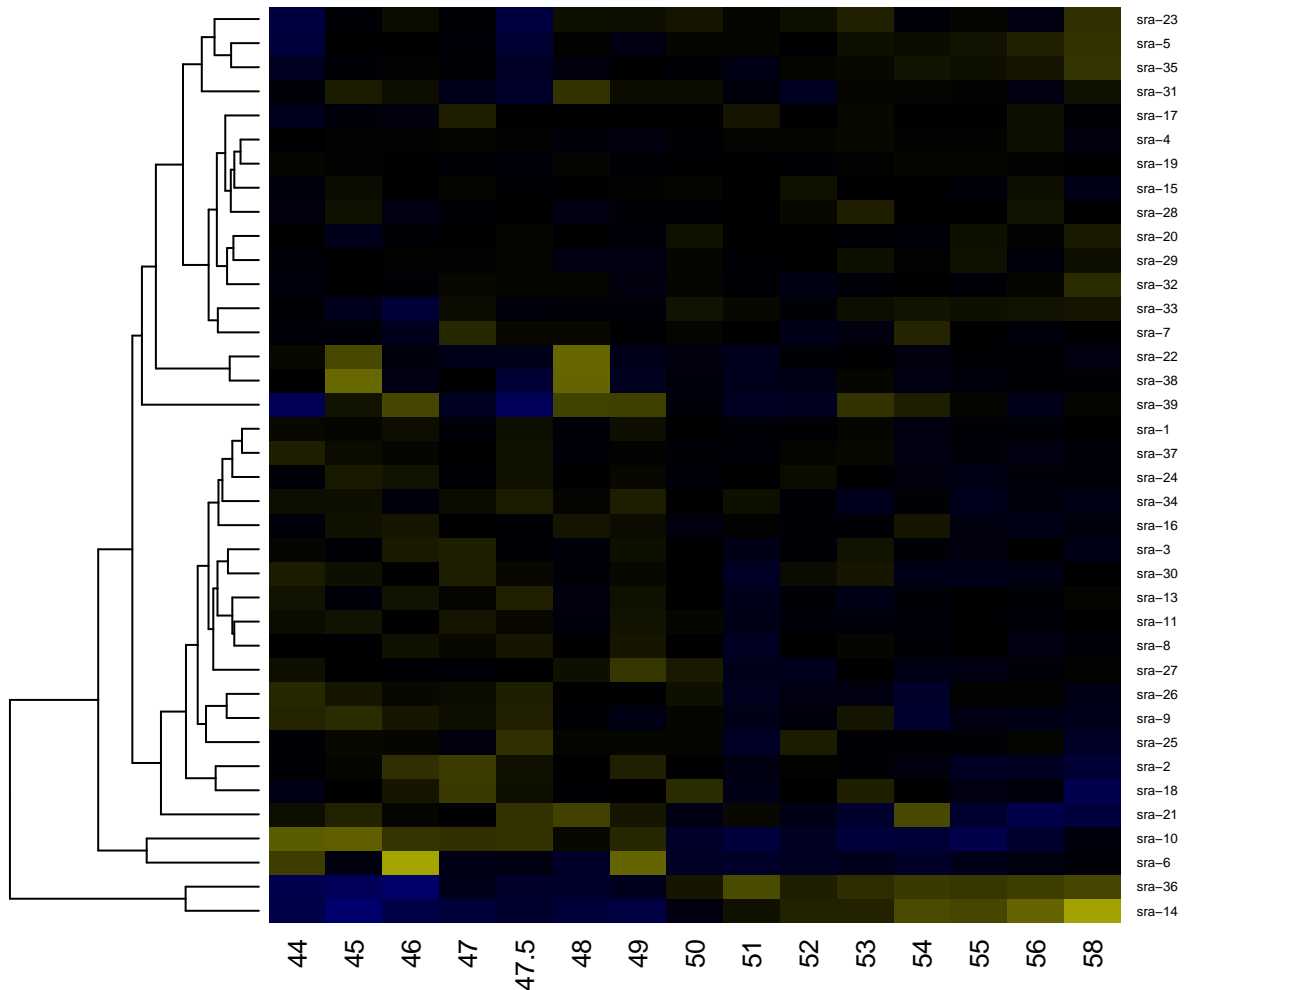



# srab

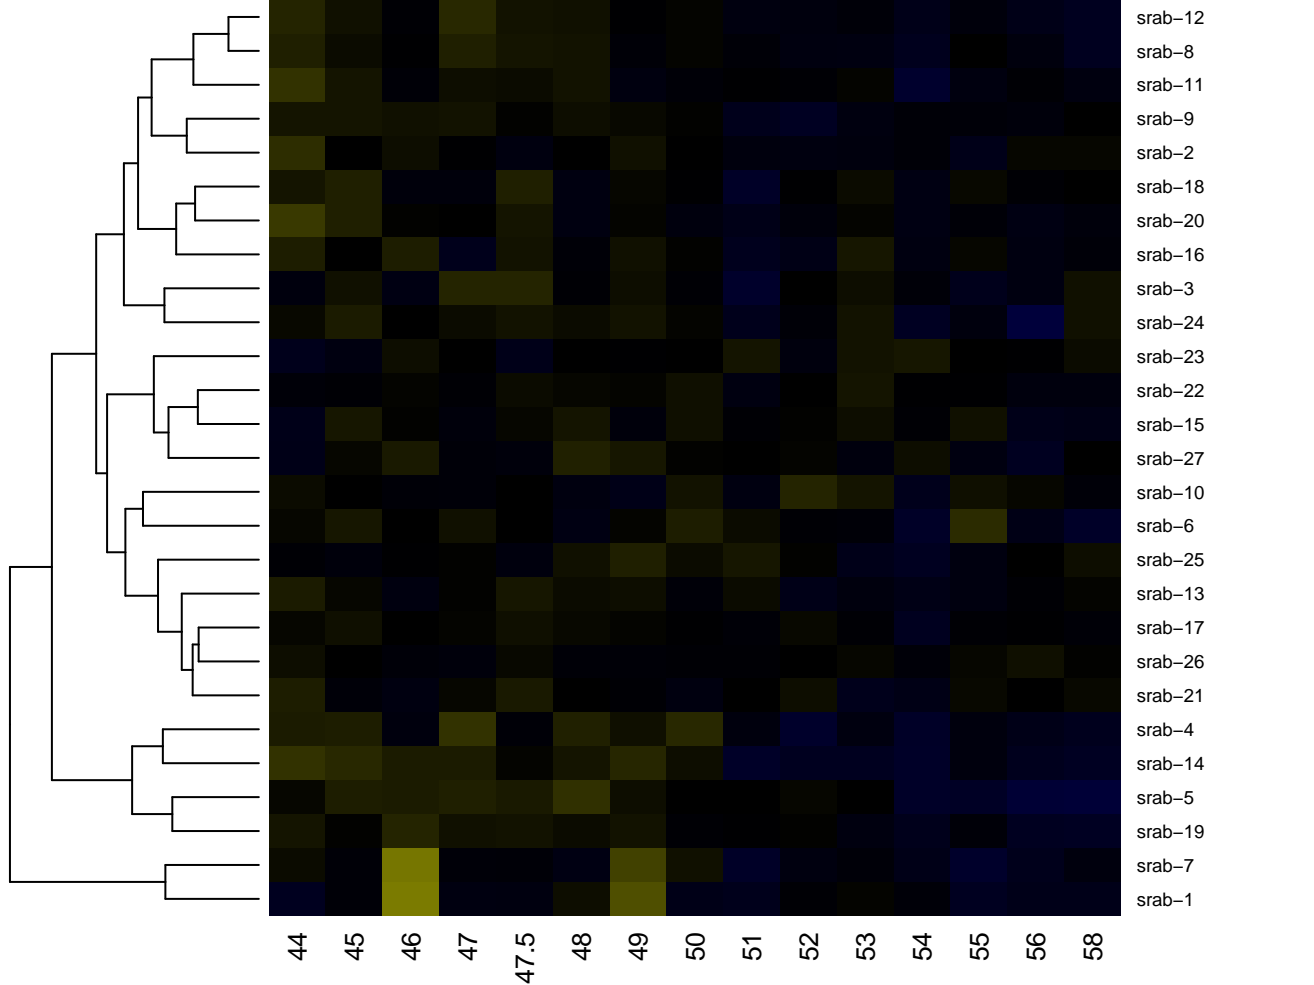

-2

-1

0

1

2

# srb

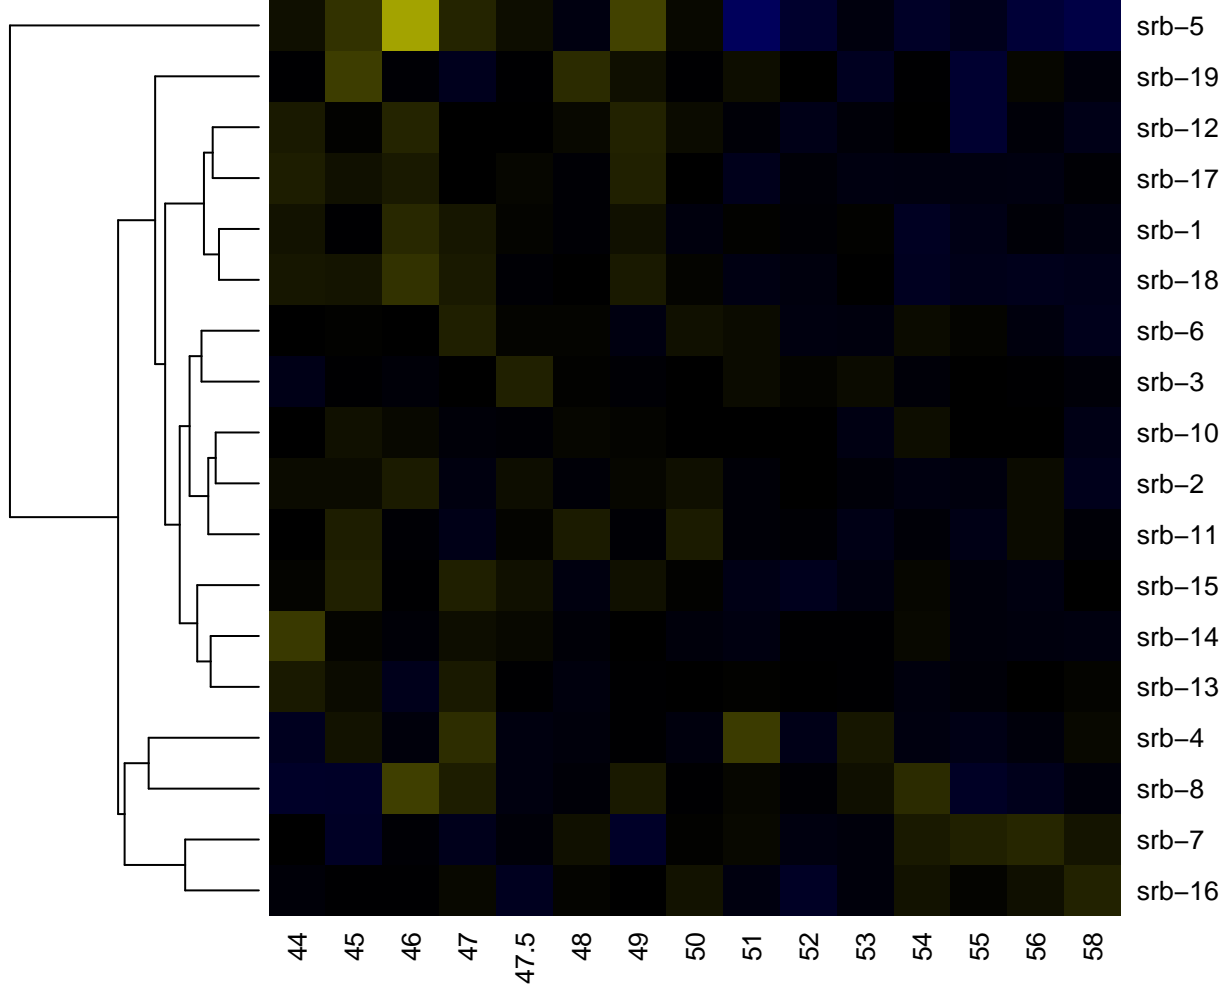

# srbc

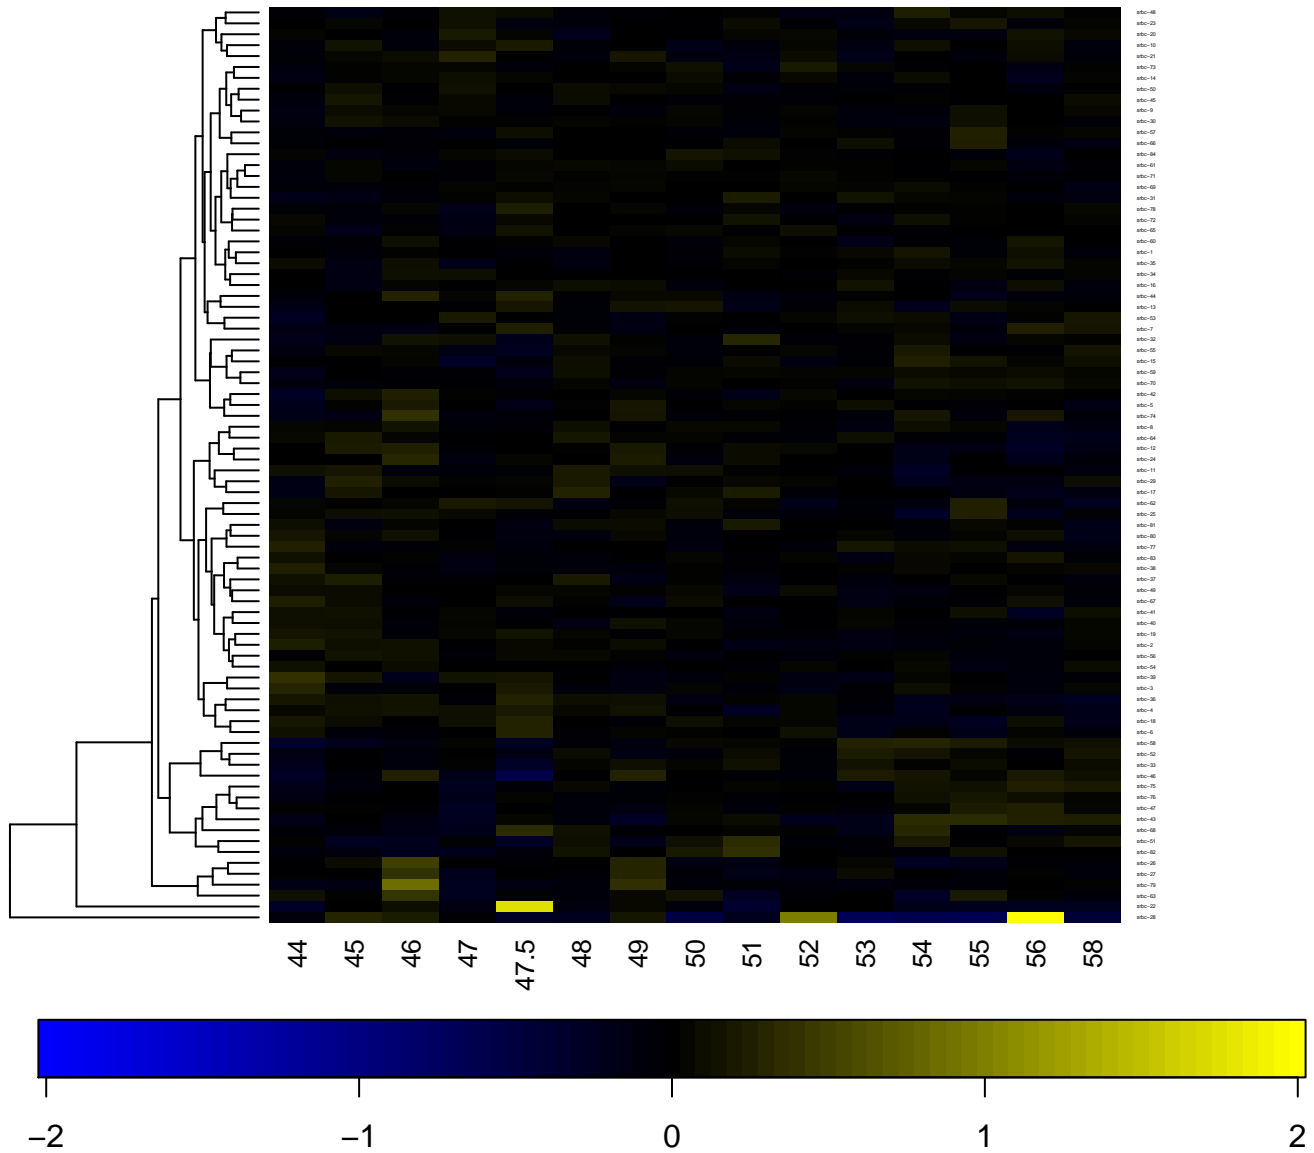

# srd

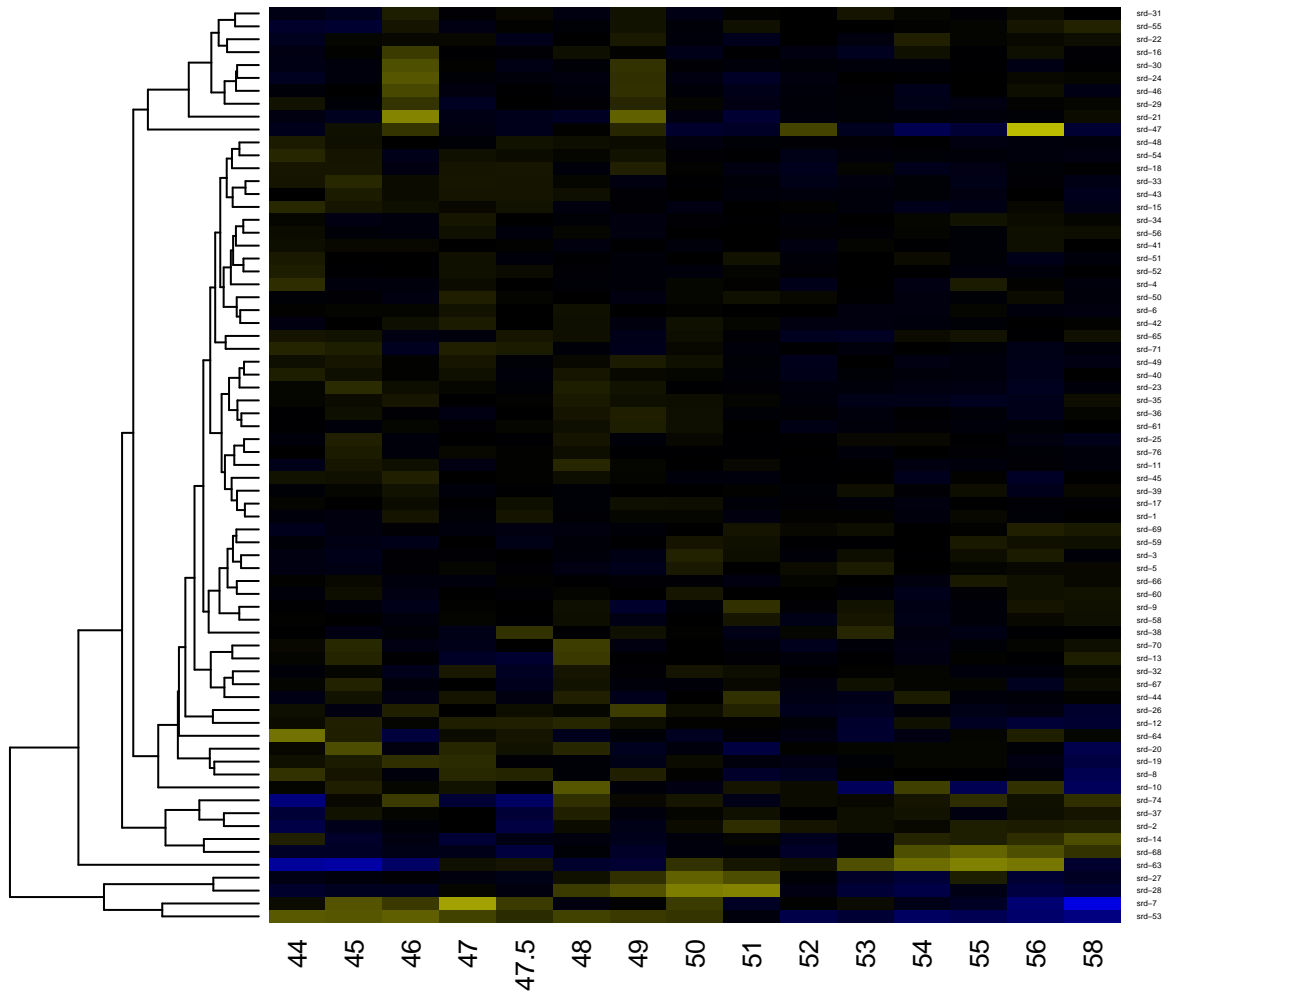



# srg

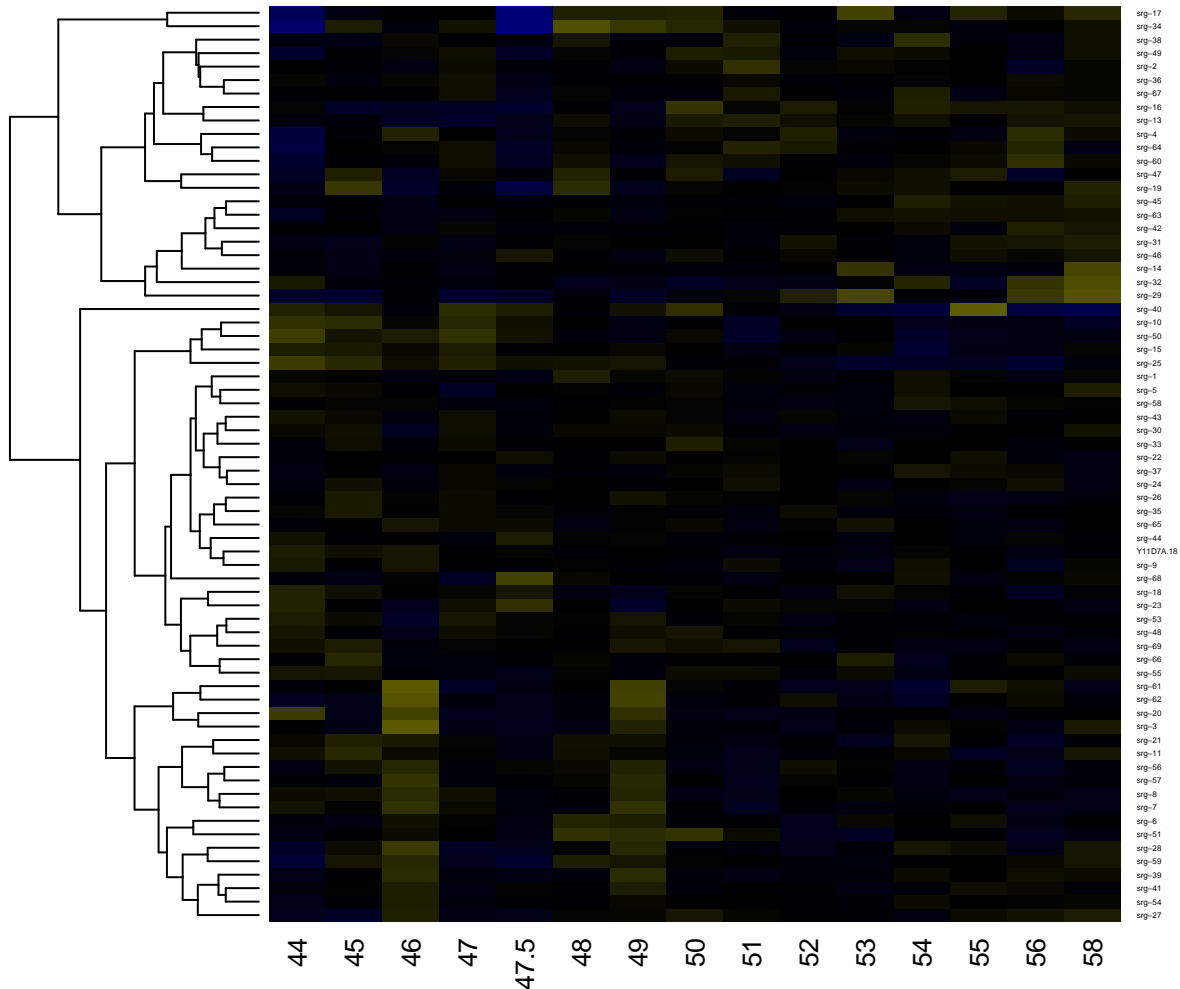

srh

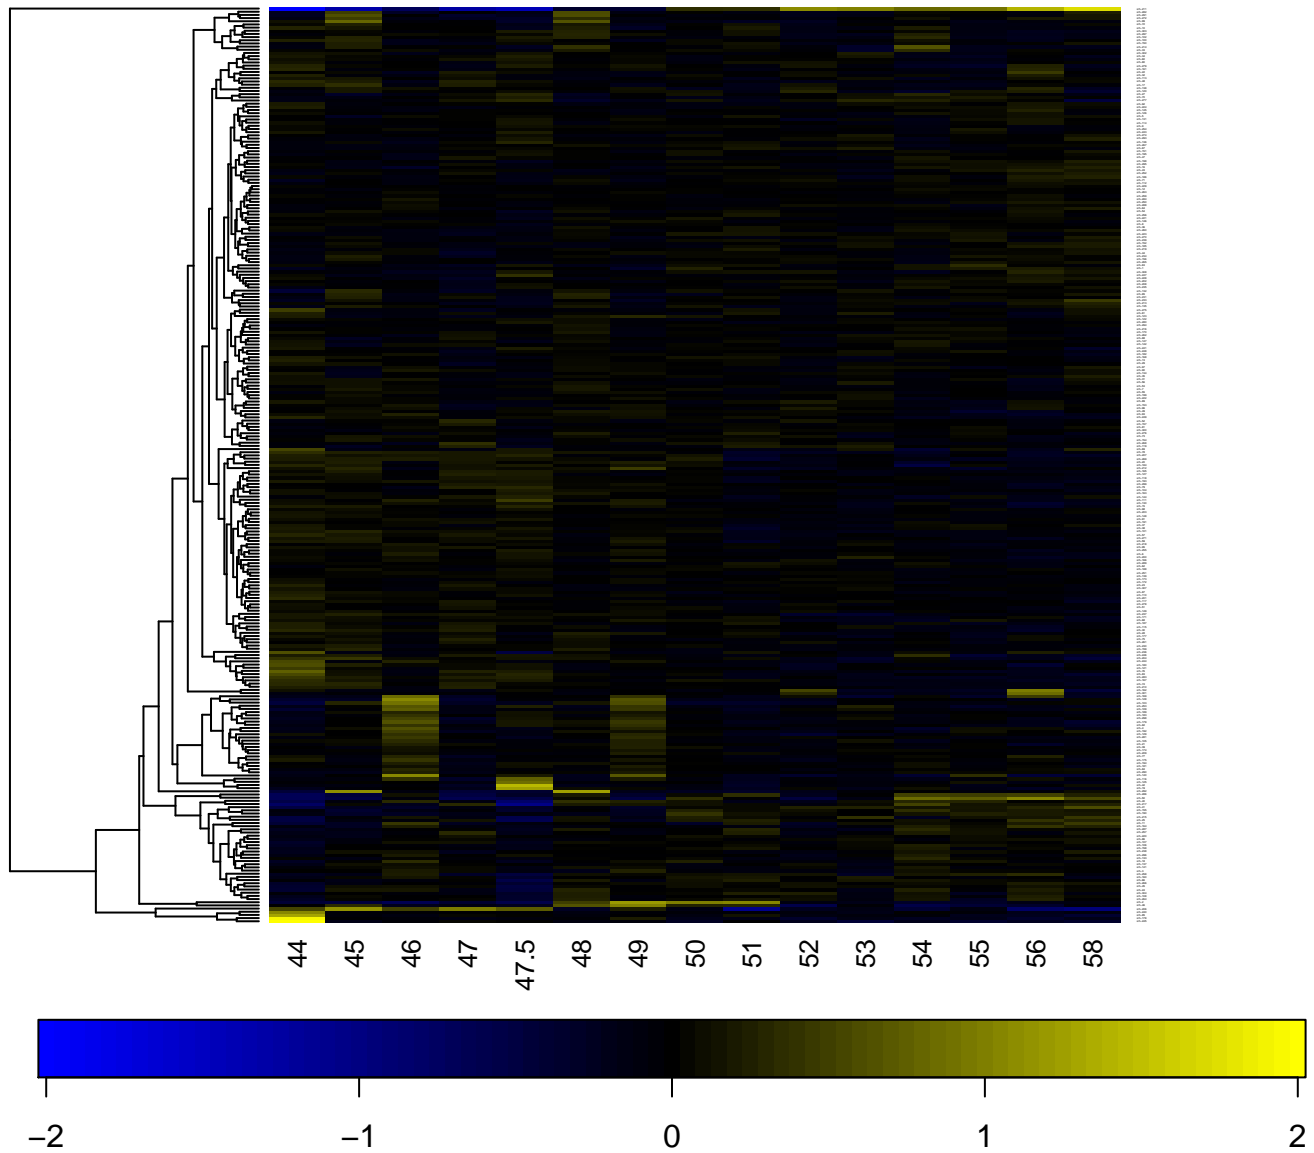

# sri

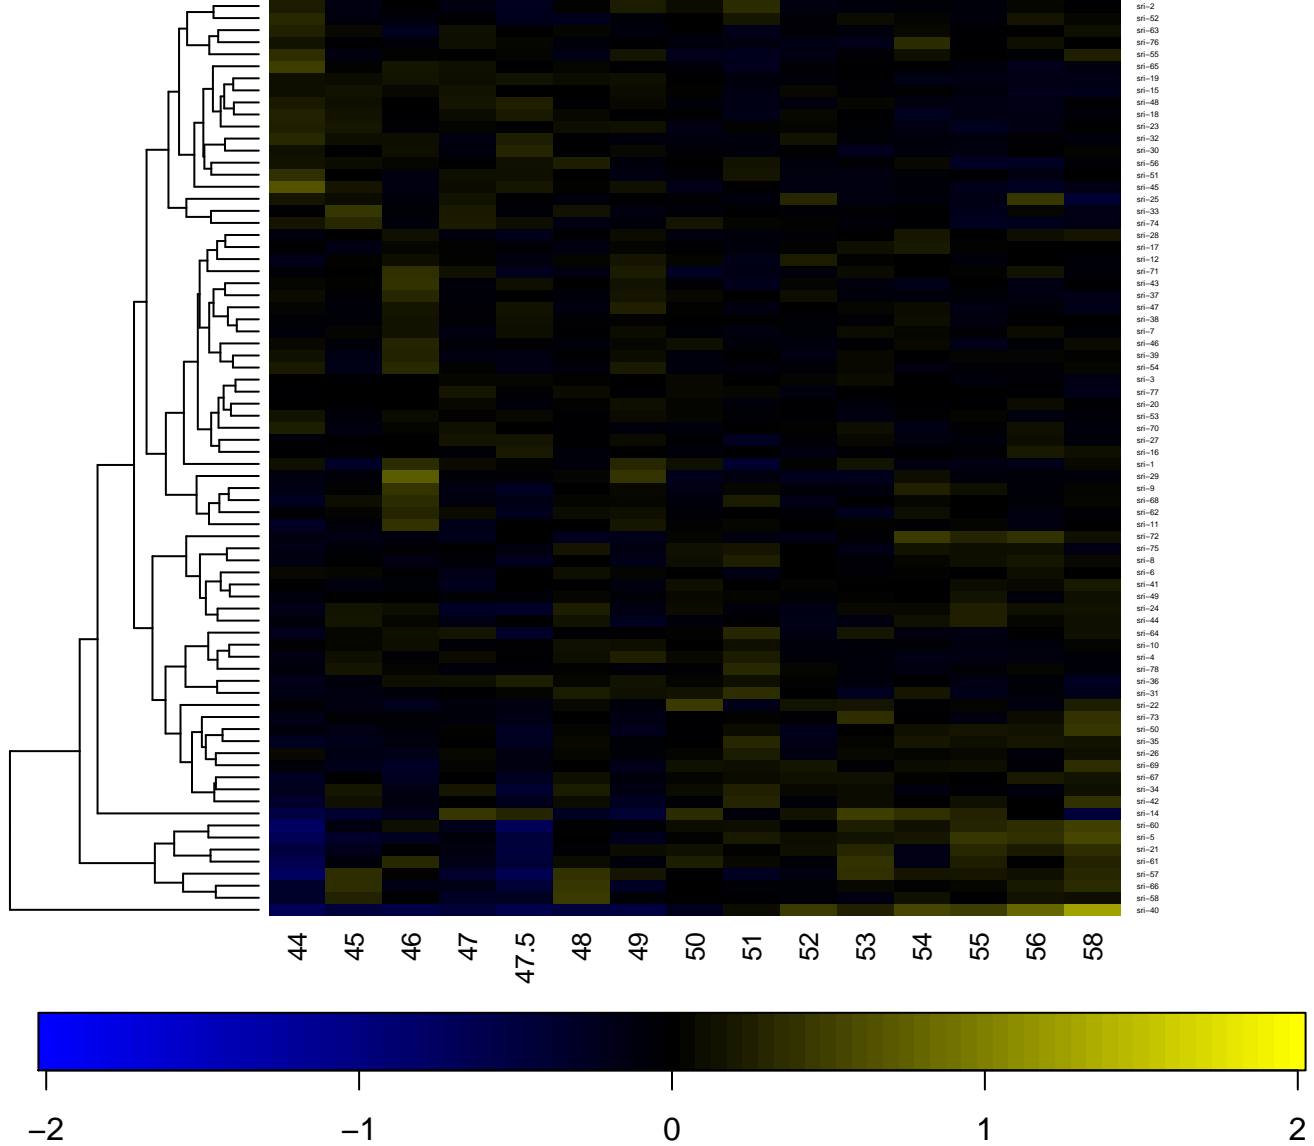



srj

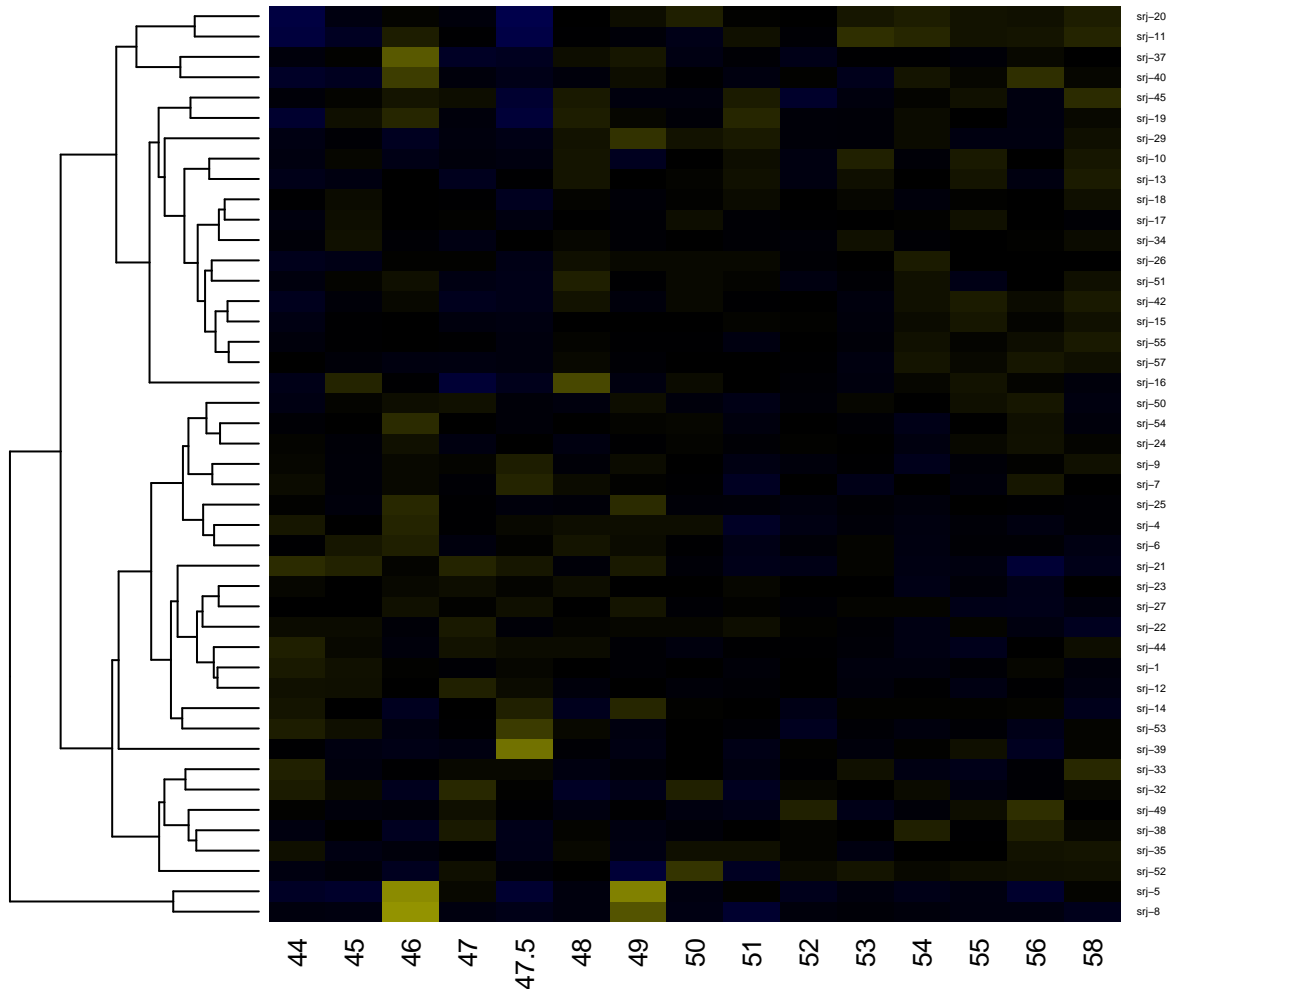

-2

-1

0

1

2

# srm

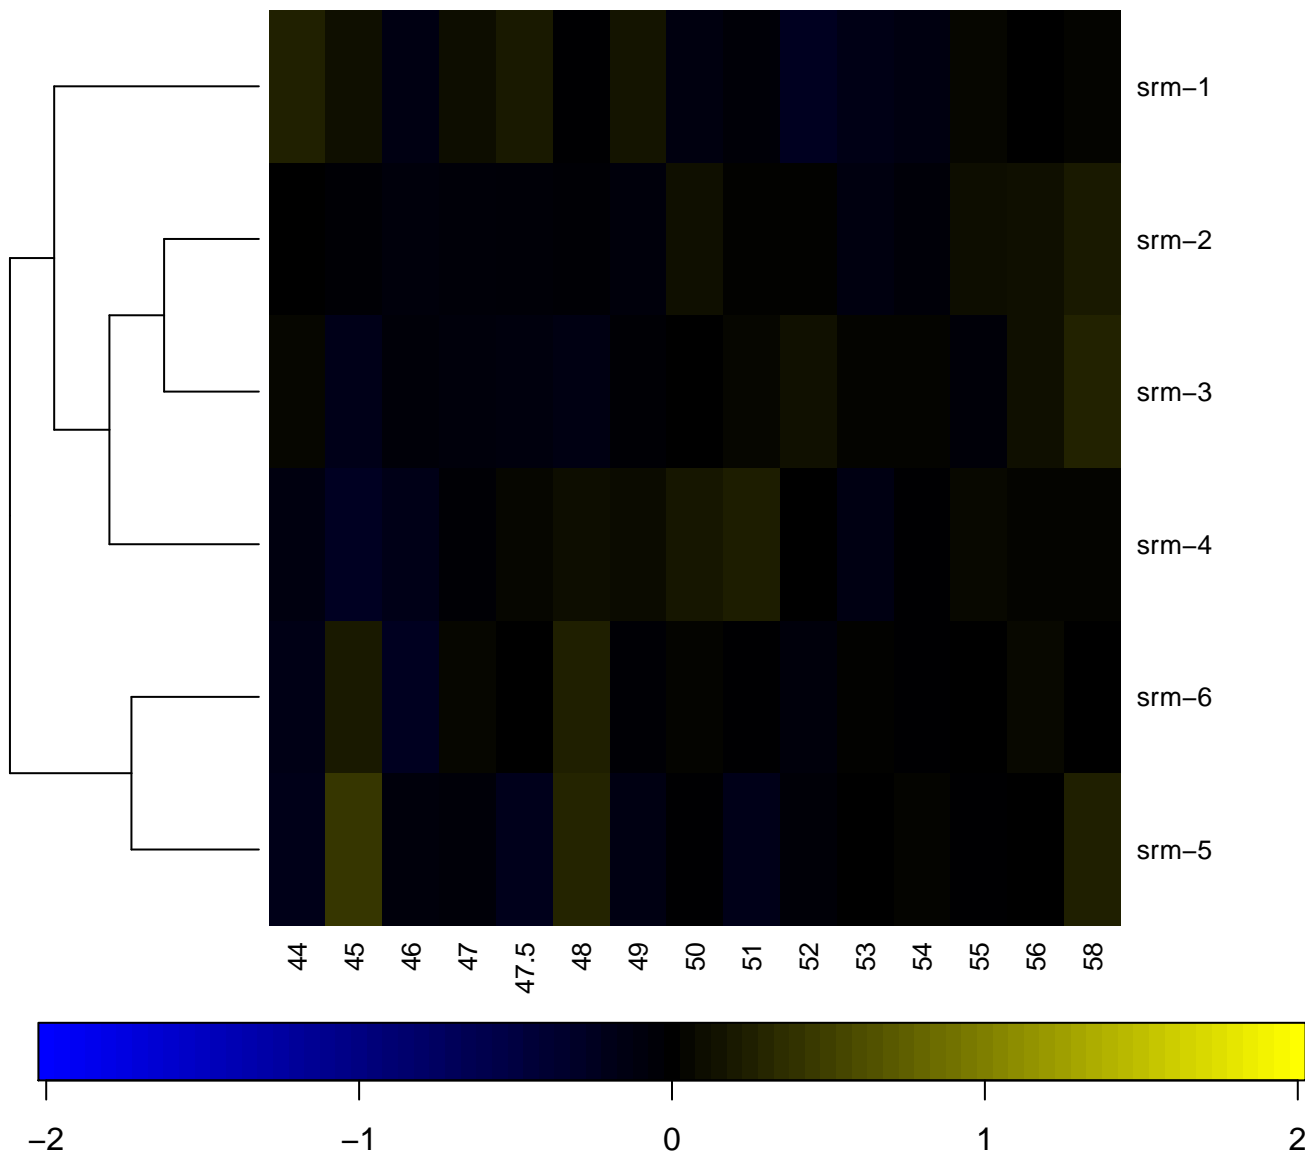

# srp

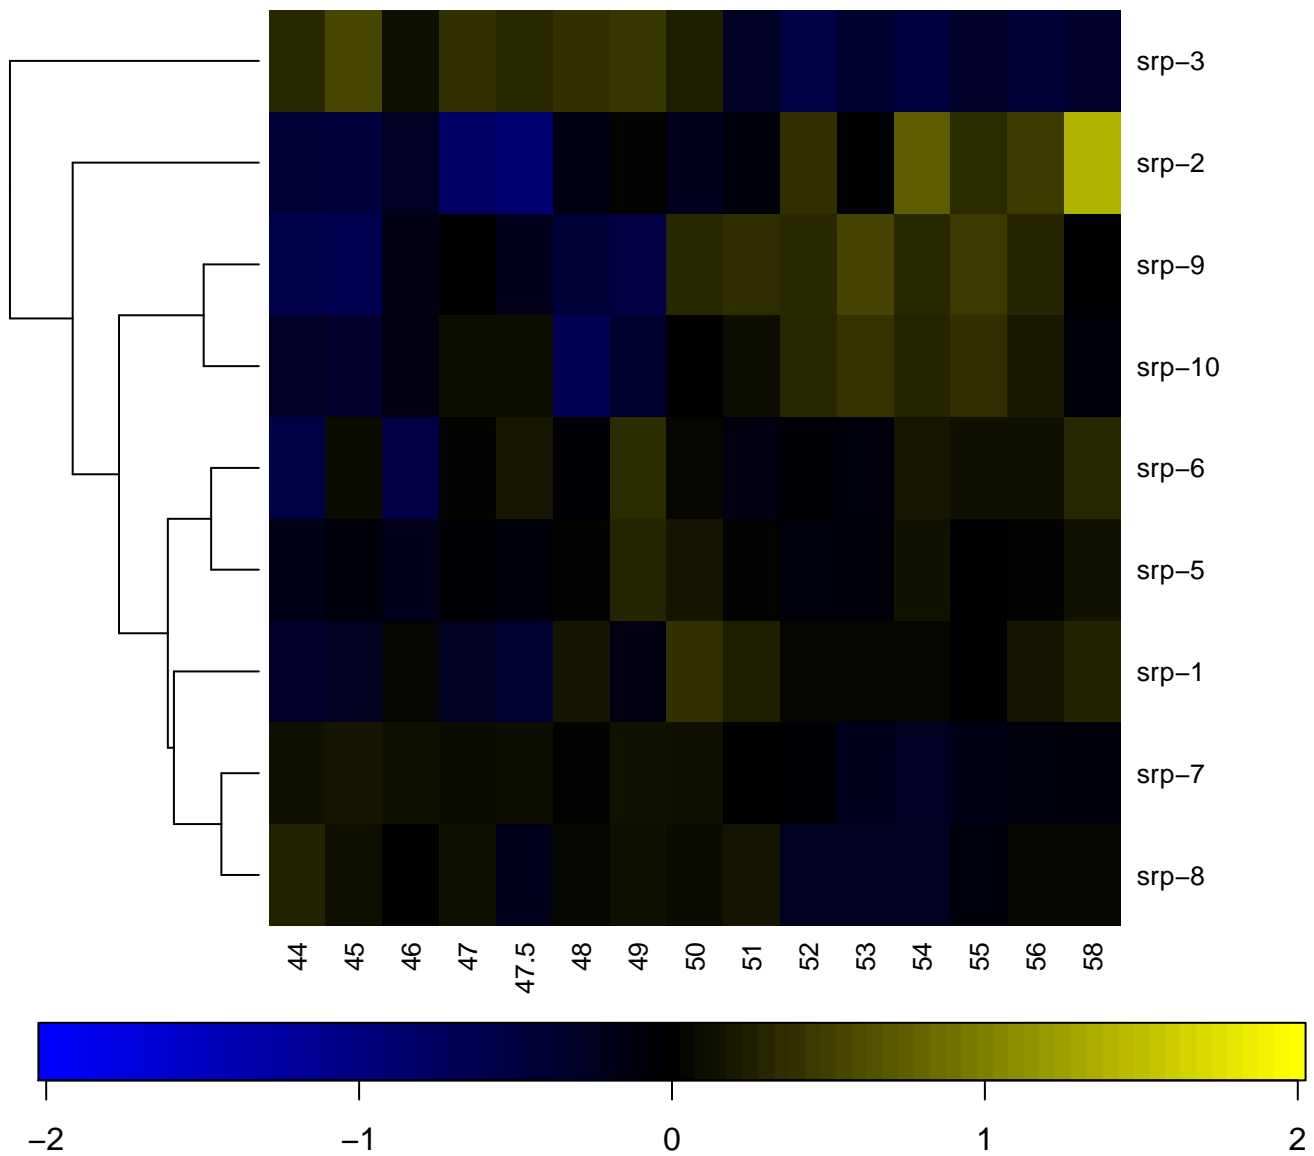

# srr

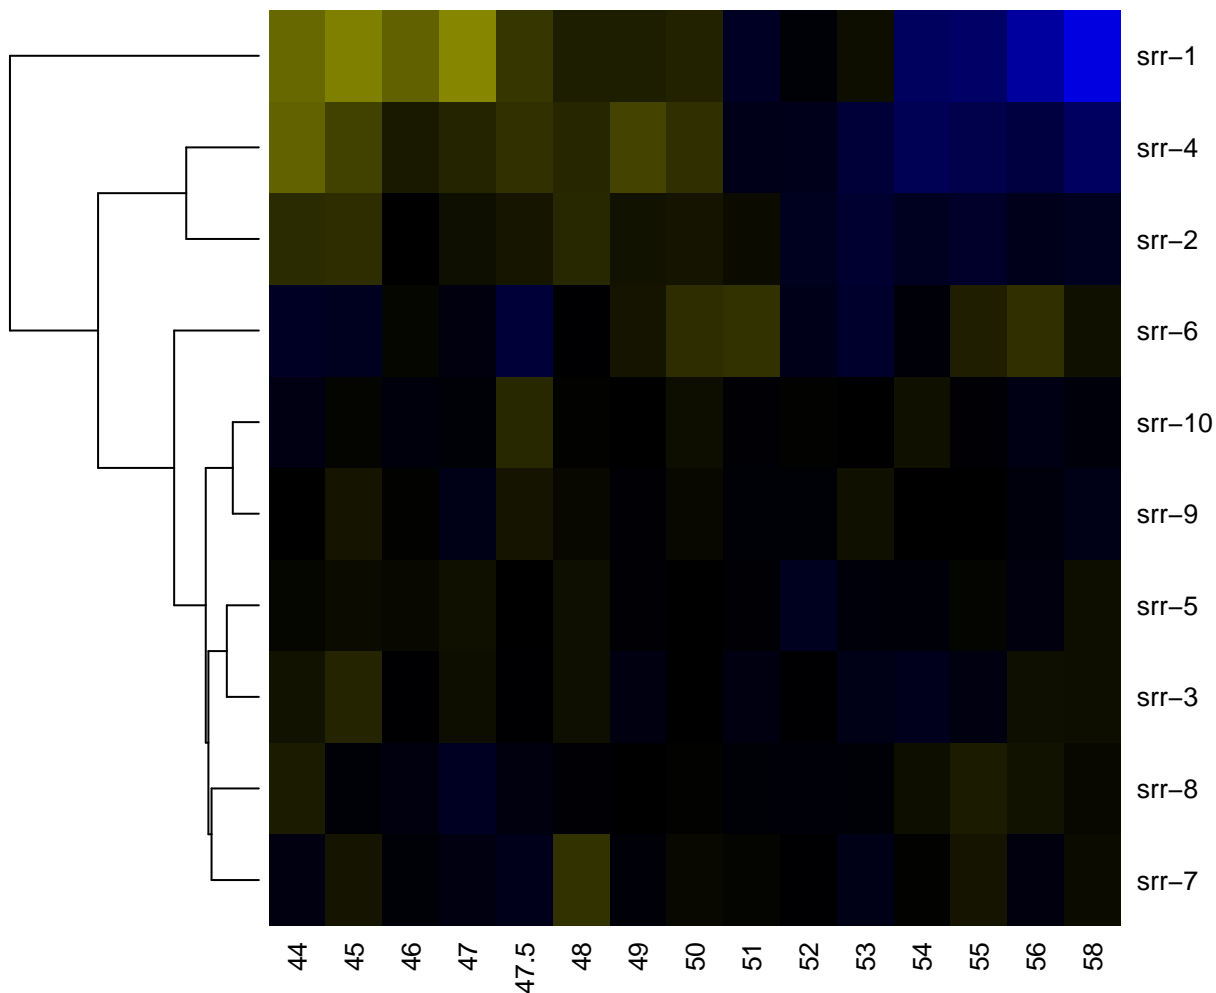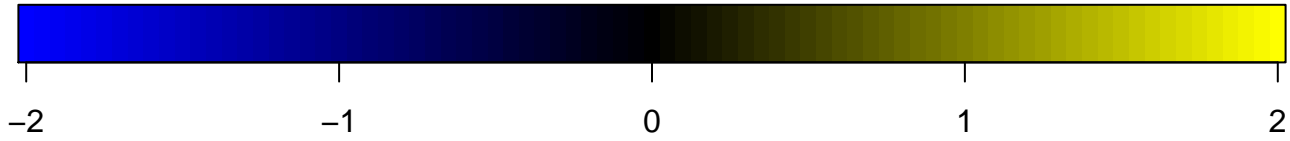

# srsx

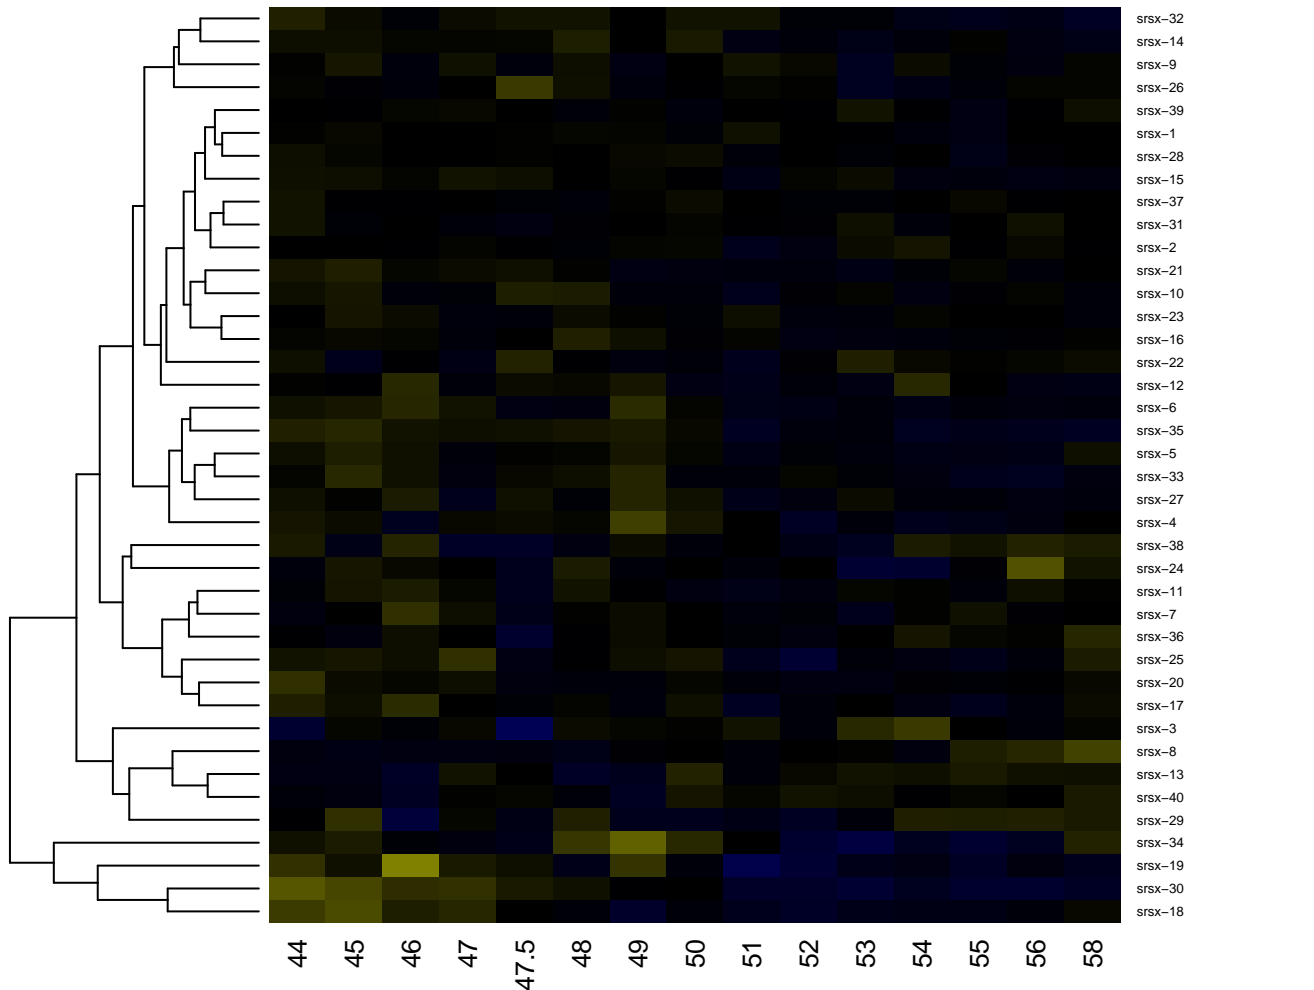

-2

-1

0

1

2

# srt

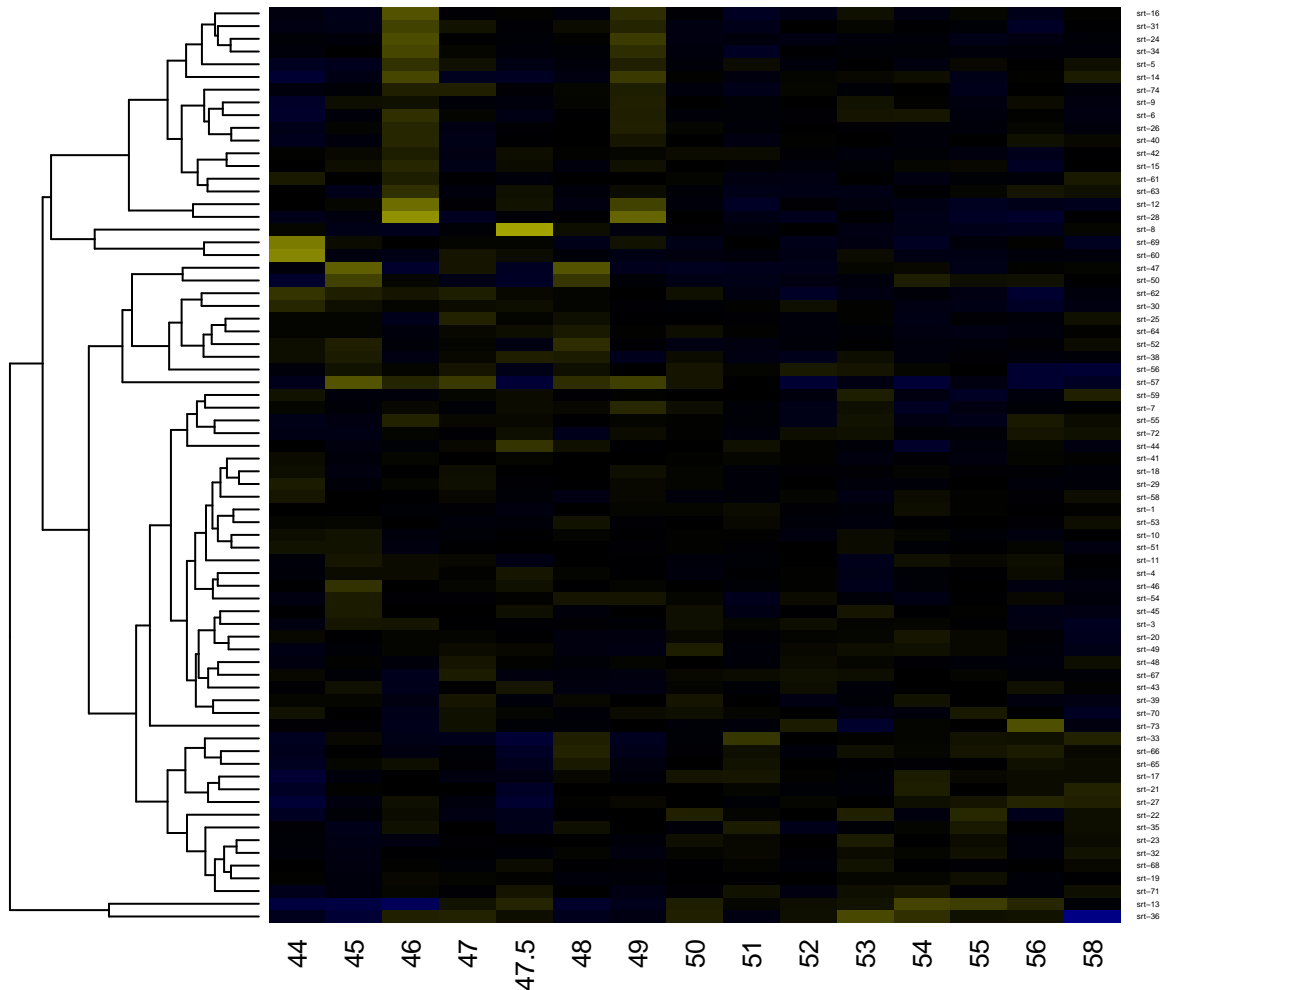

-2

-1

0

1

2

# sru

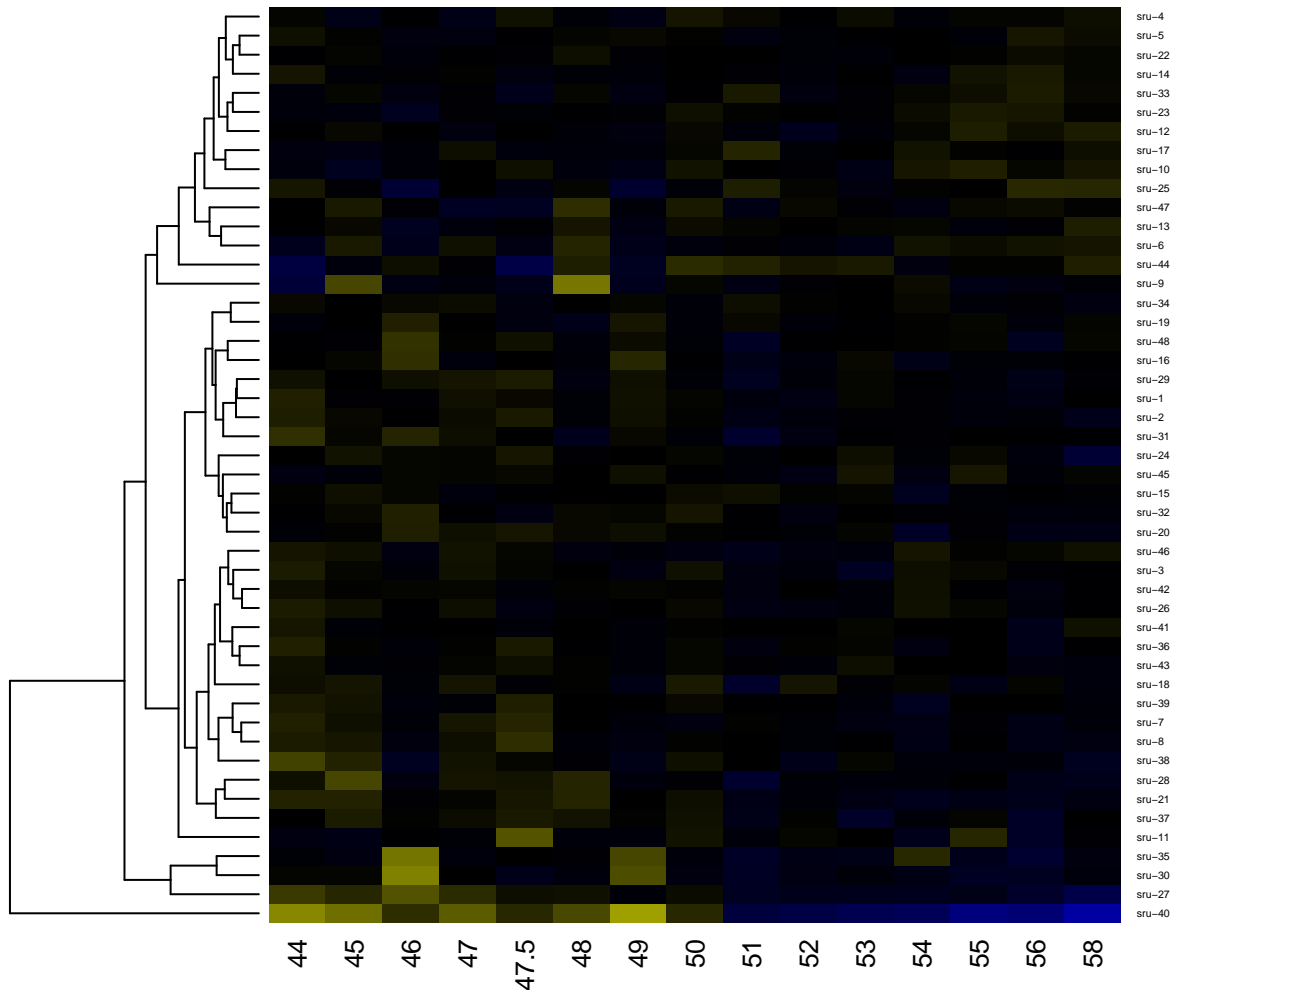

-2

-1

0

1

2

# srv

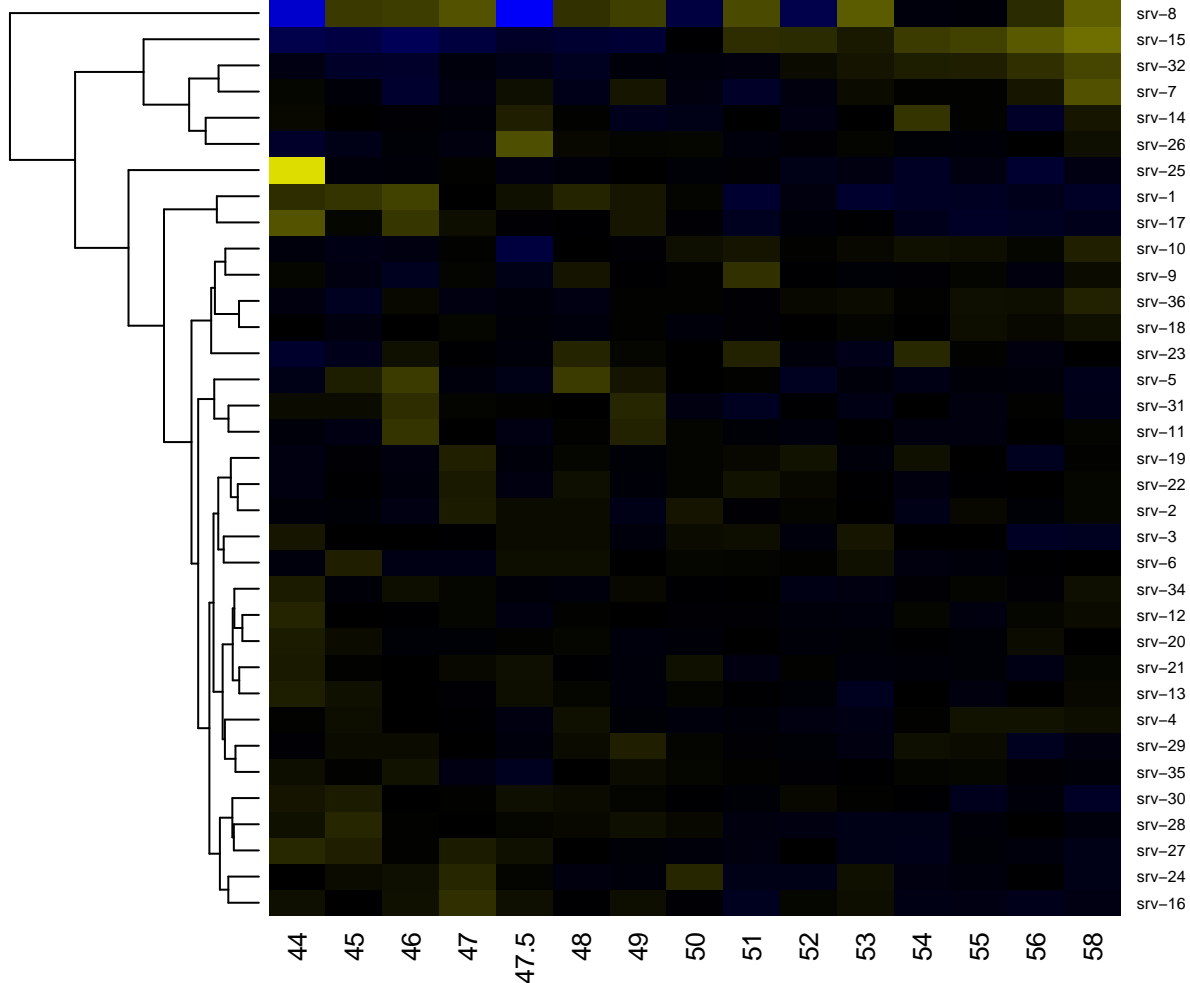

-2

-1

0

1

2



srw

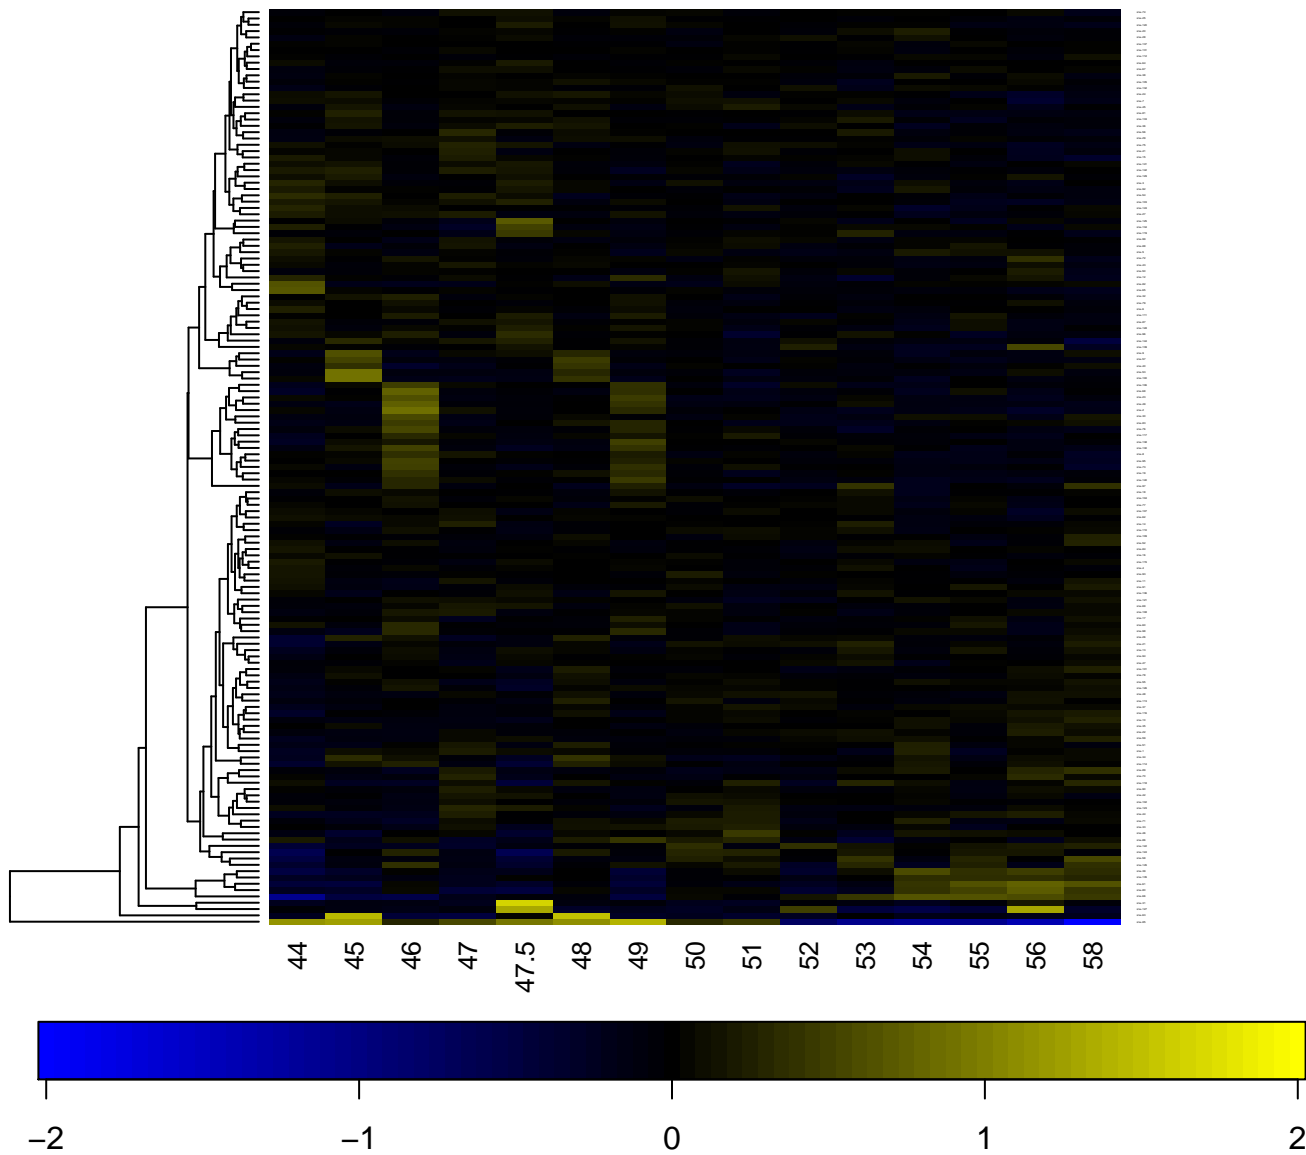

srx

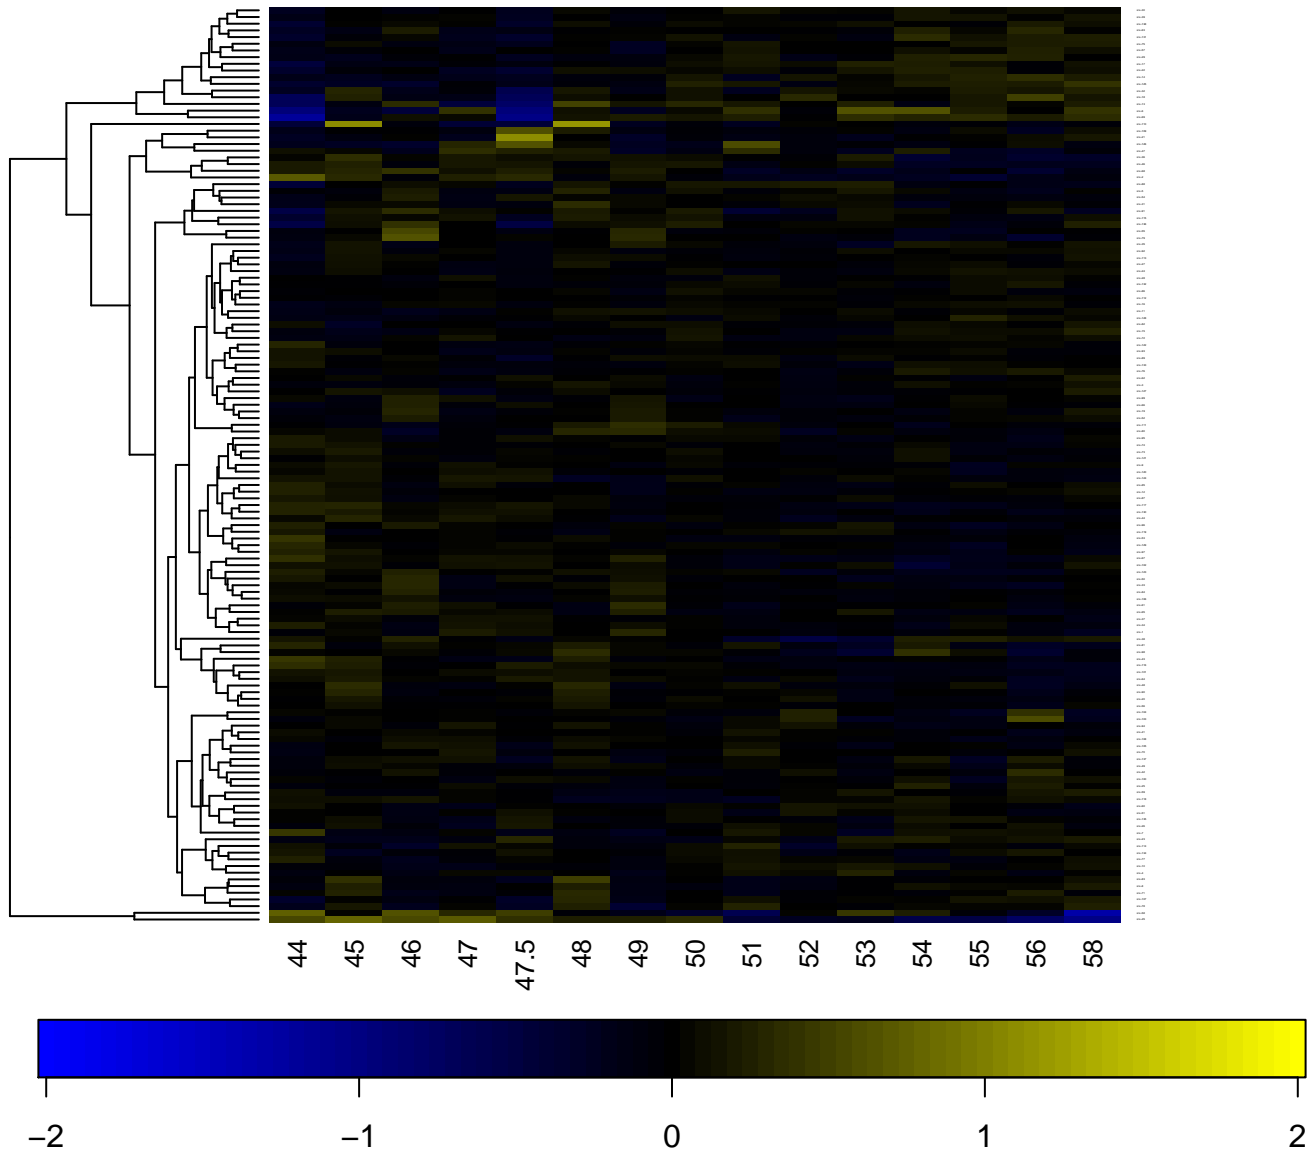



# srz

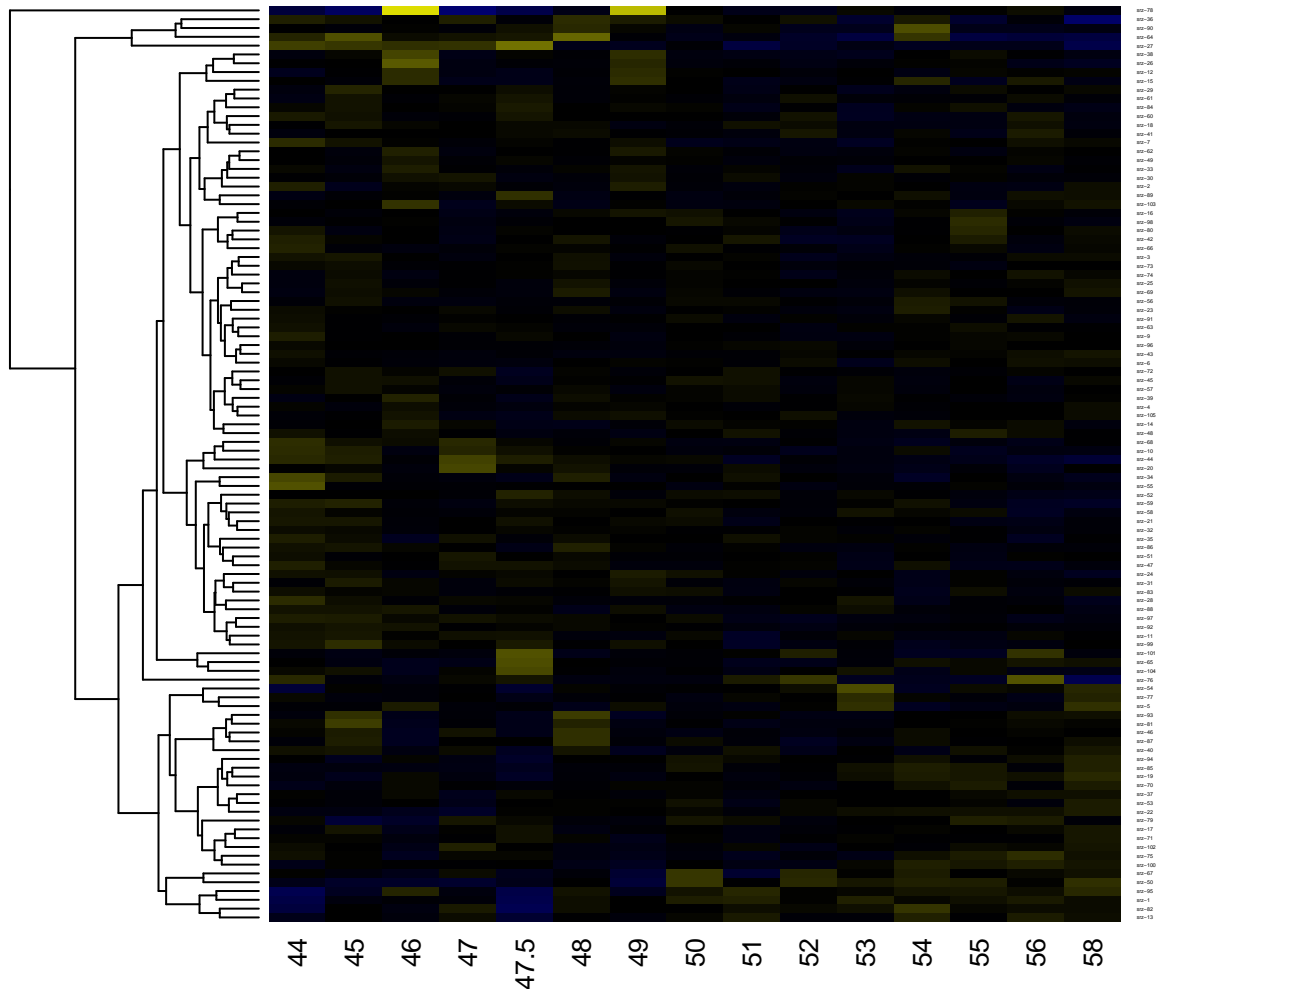

-2

-1

0

1

2

# ssp

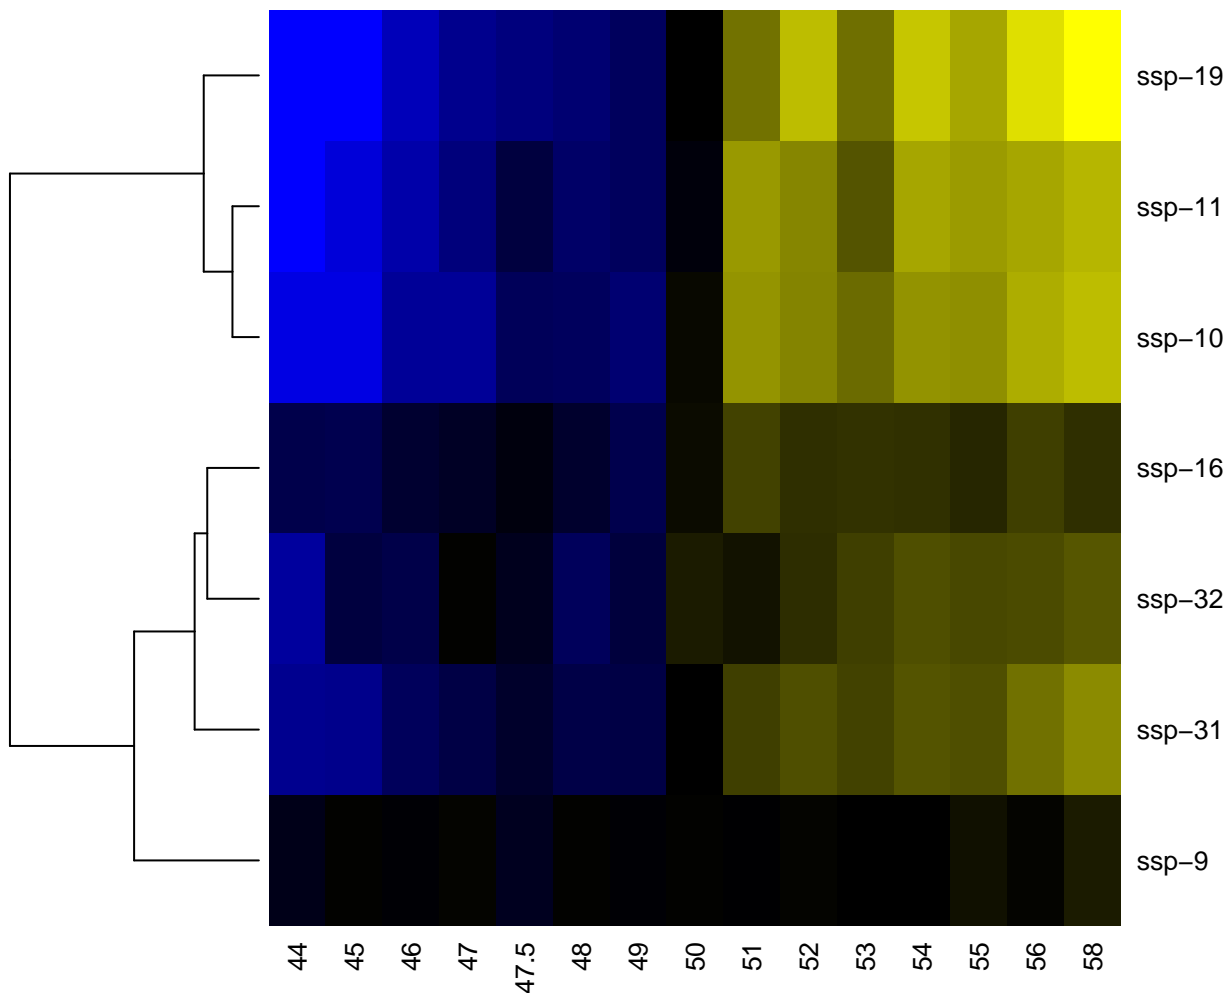

-2

-1

0

1

2

# sto

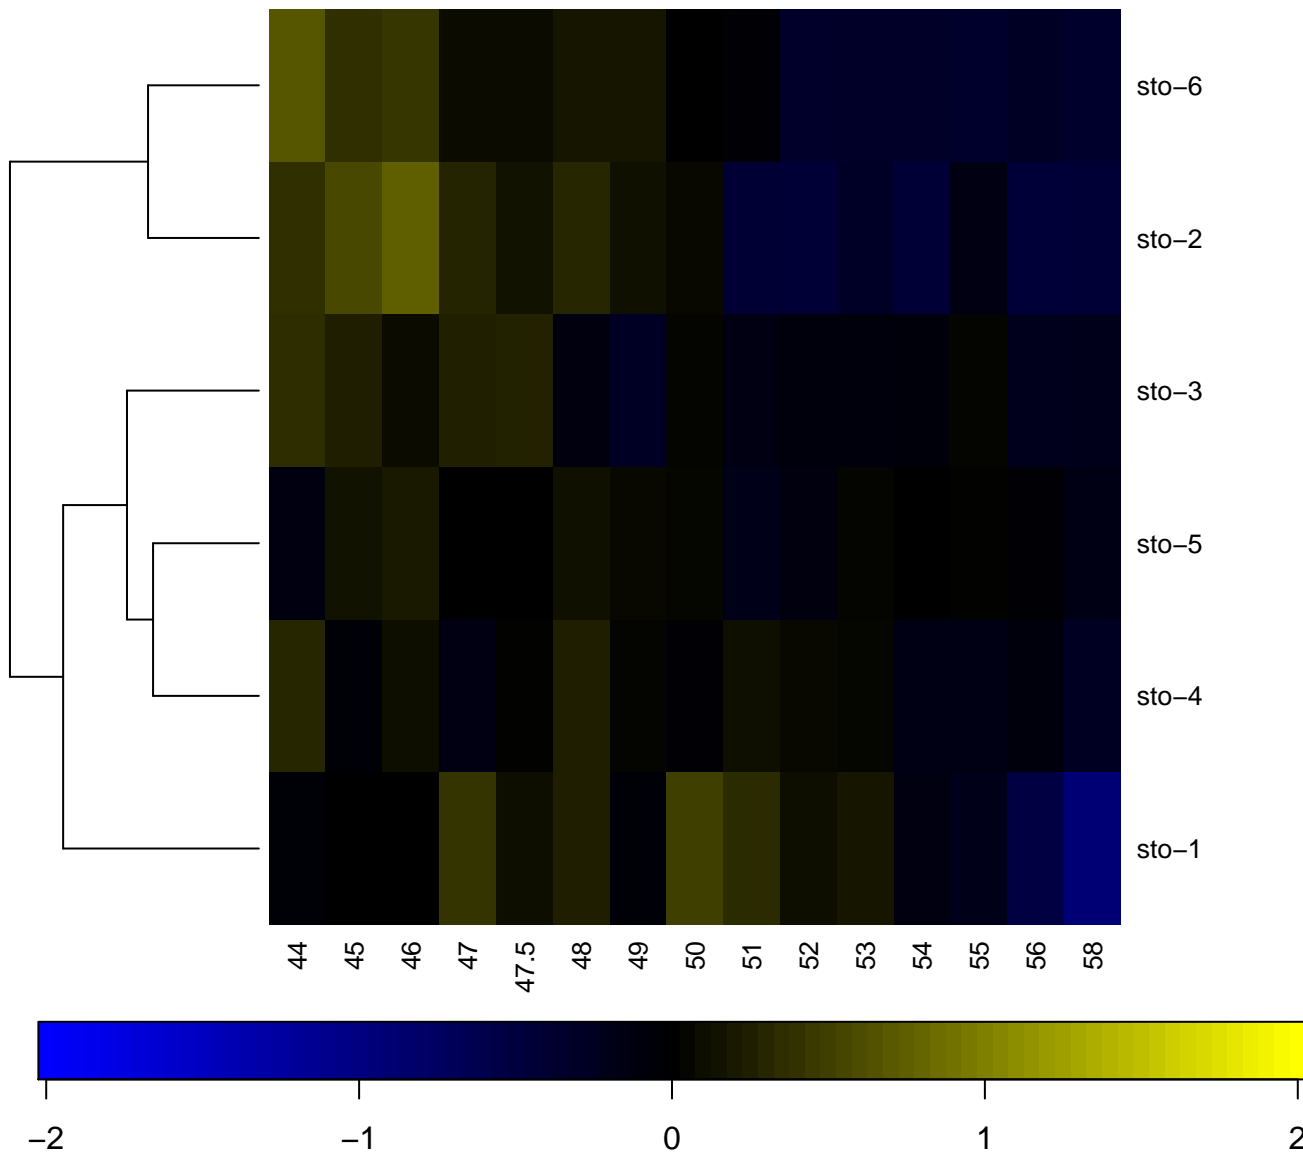

**str**

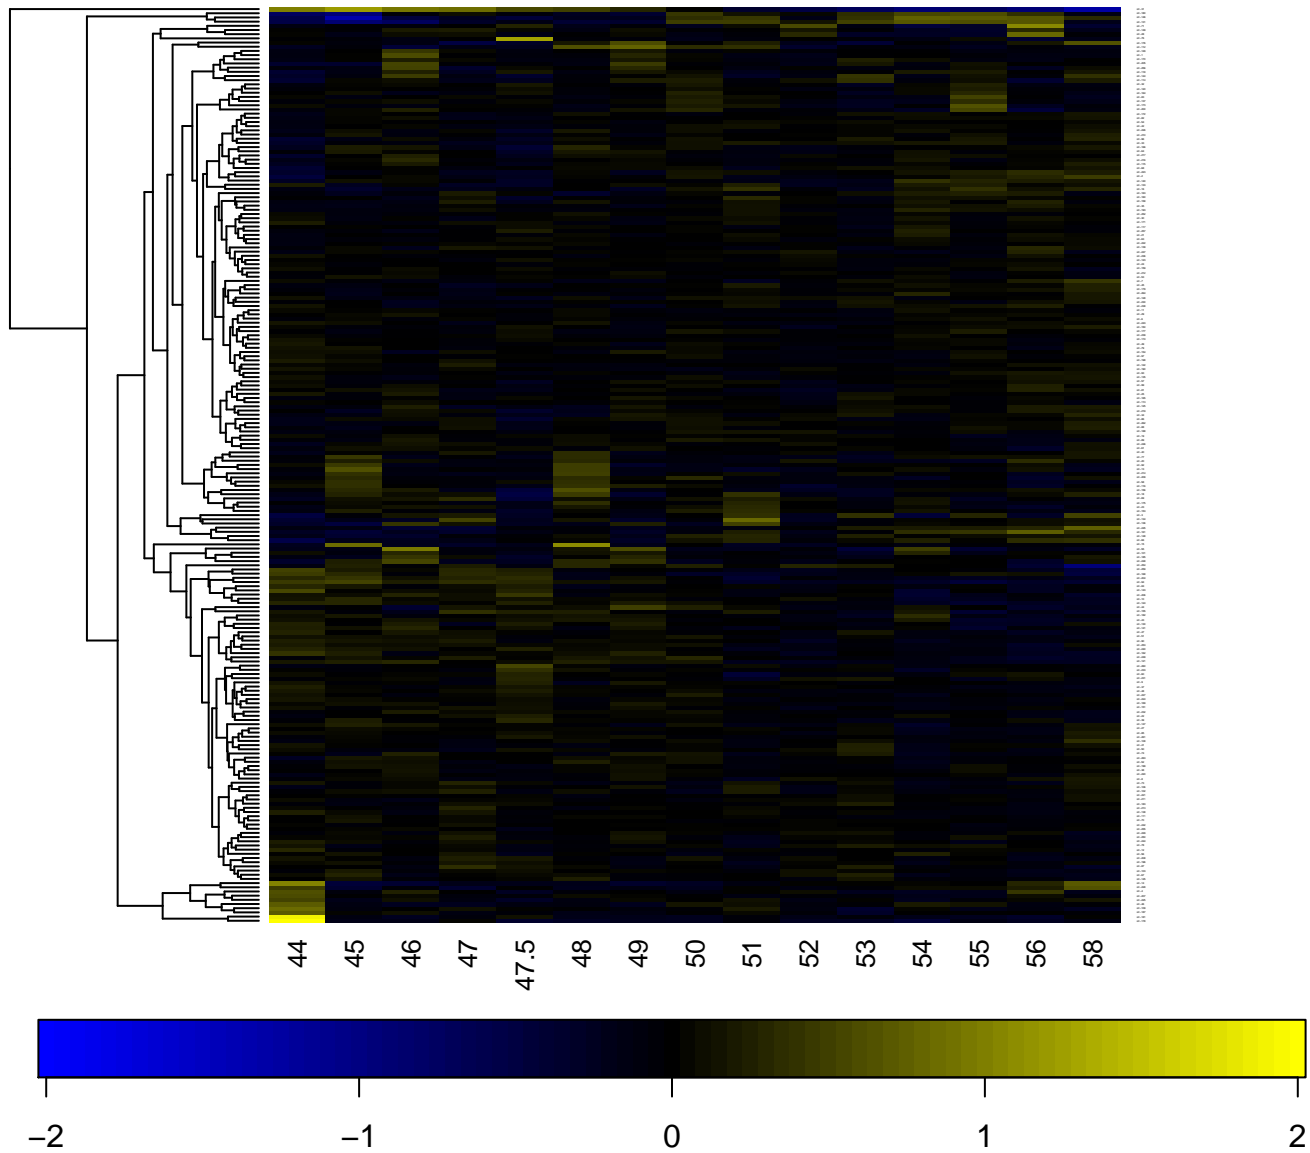













tag

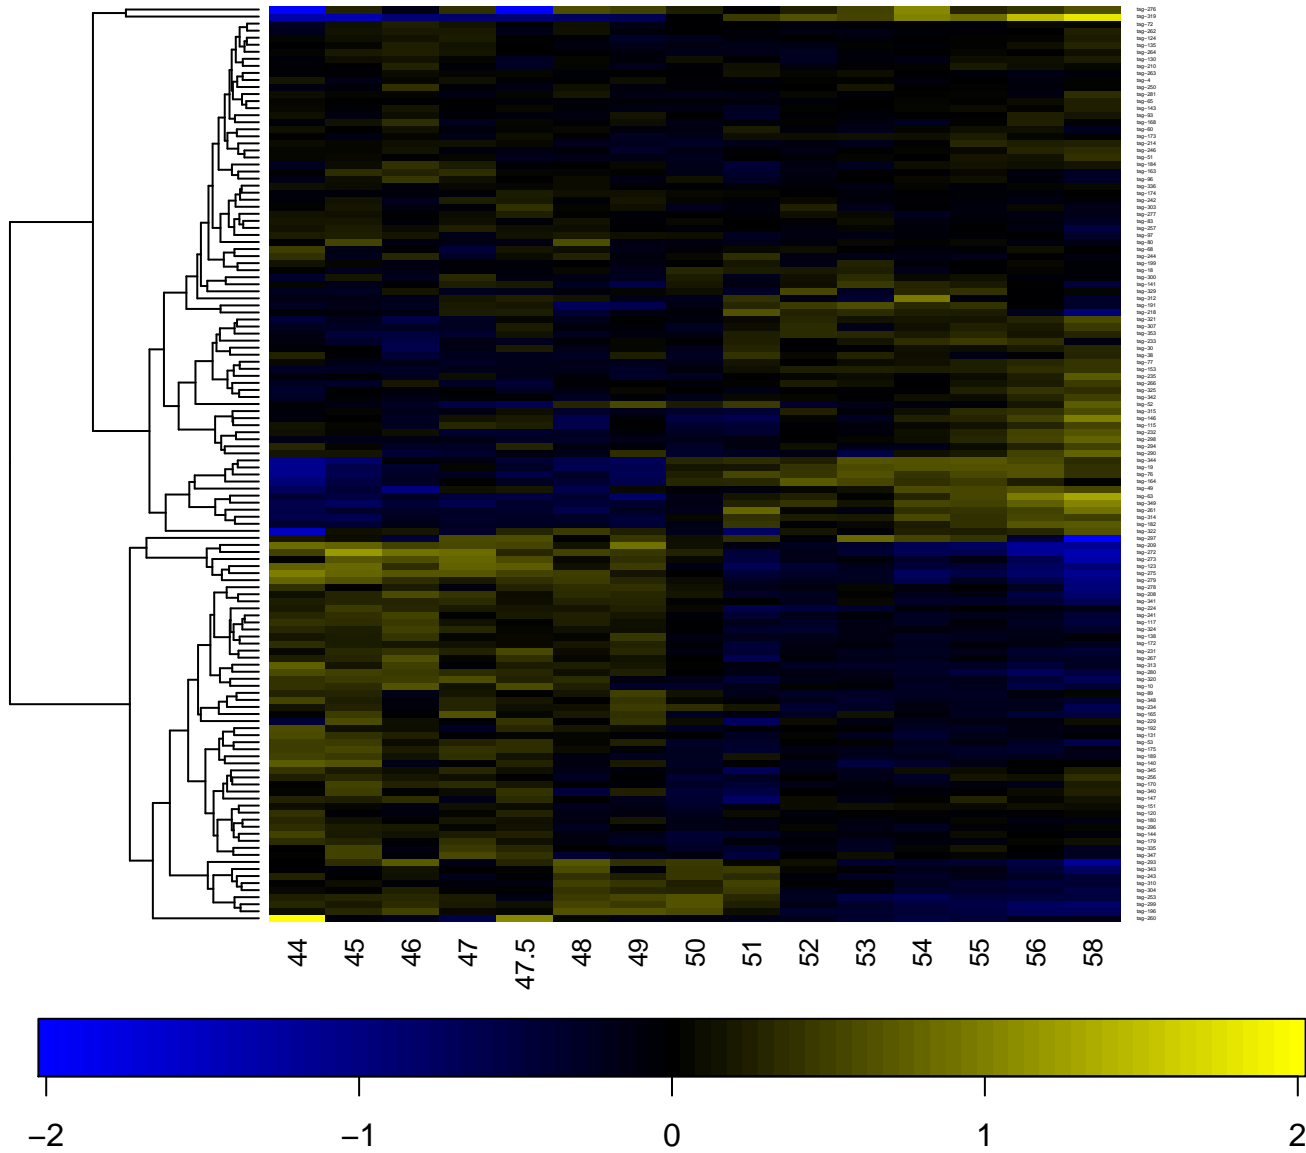

# tat

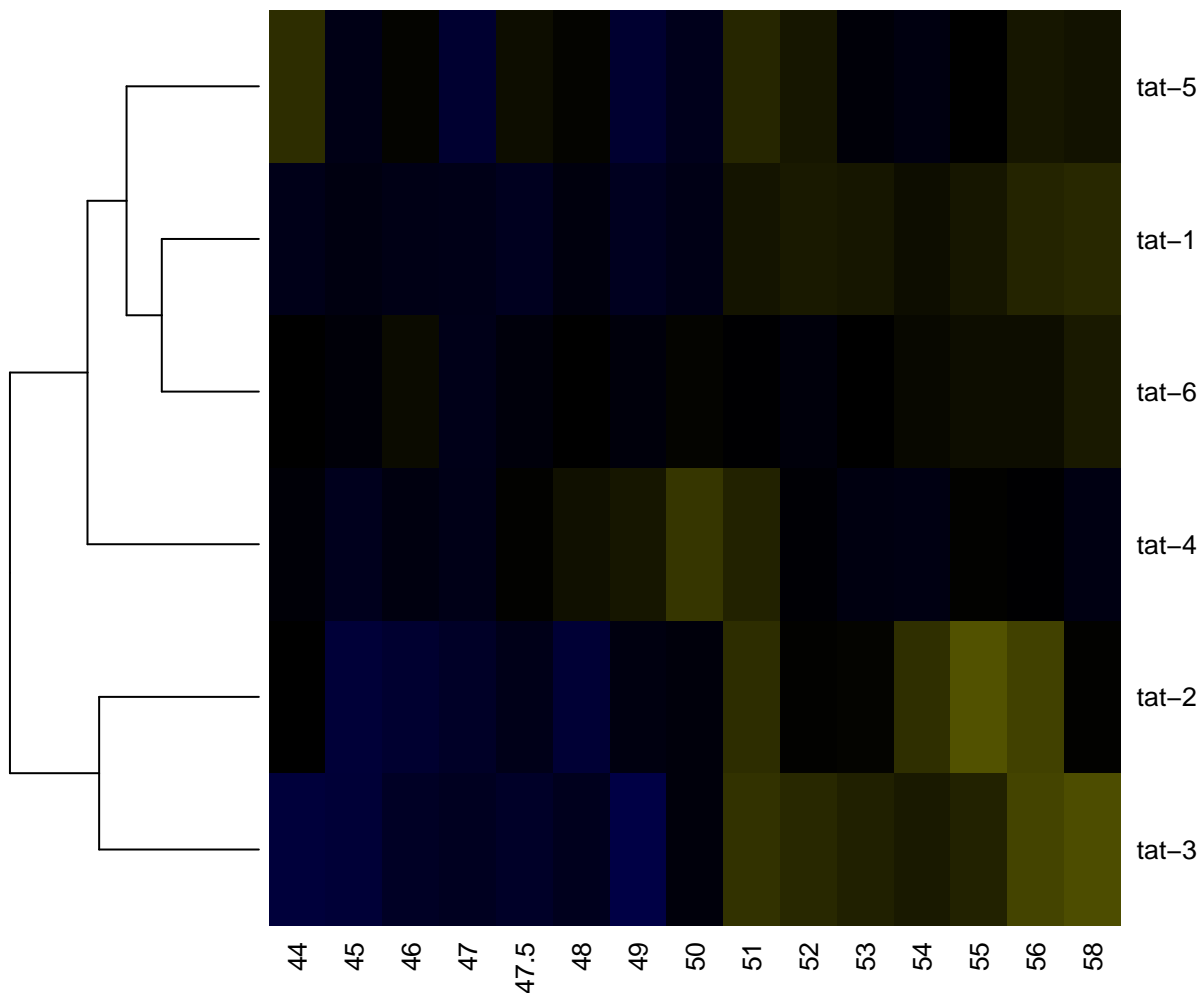

# tba

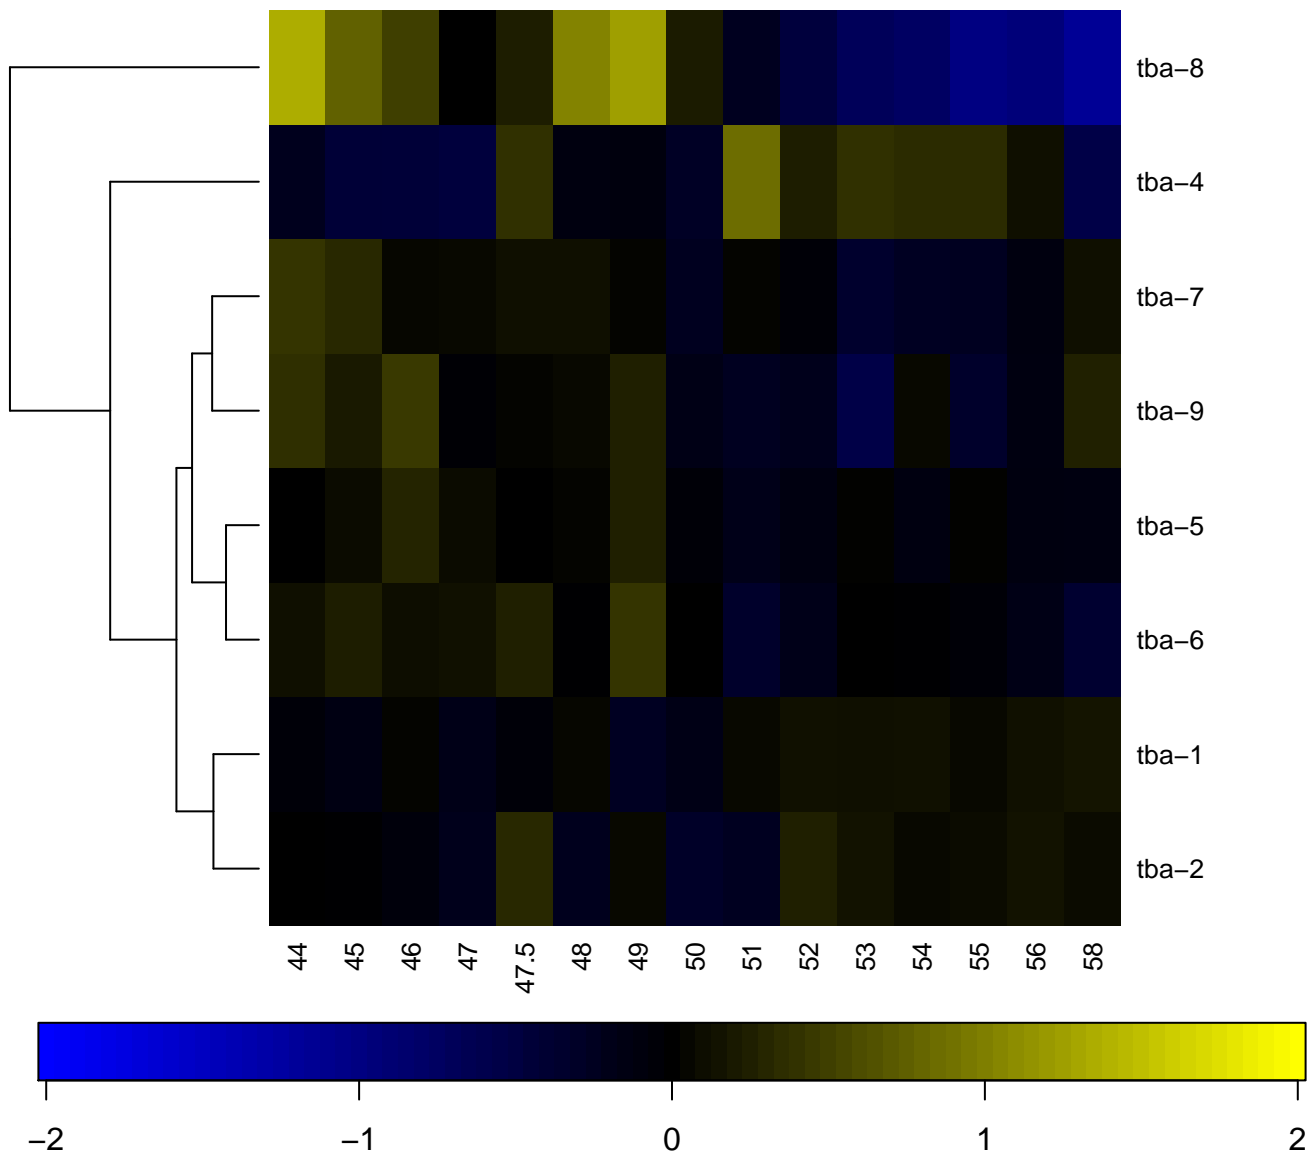





# tbx

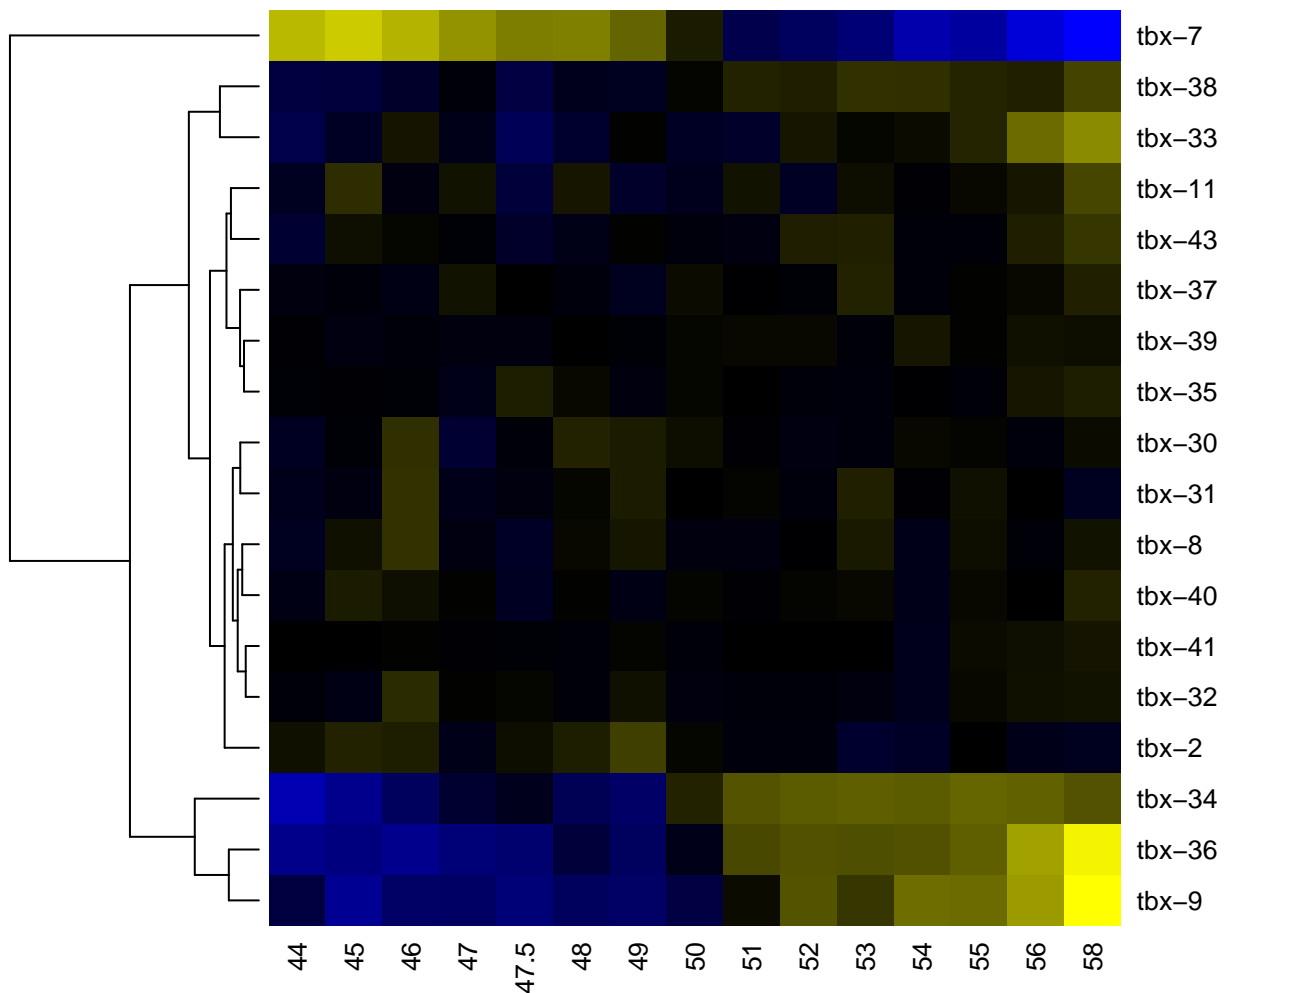

-2

-1

0

1

2





# try

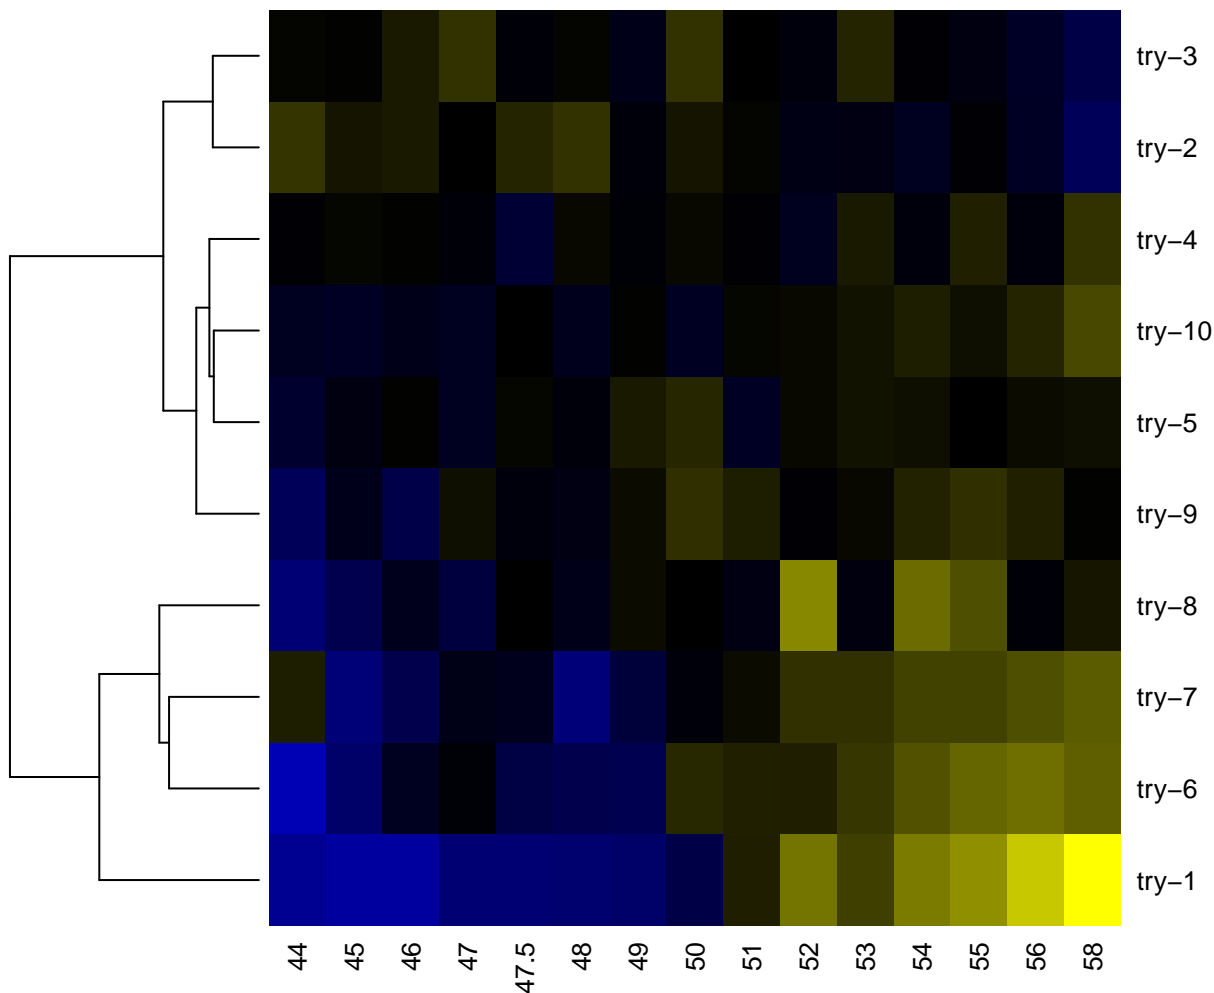

-2

-1

0

1

2

# tsp

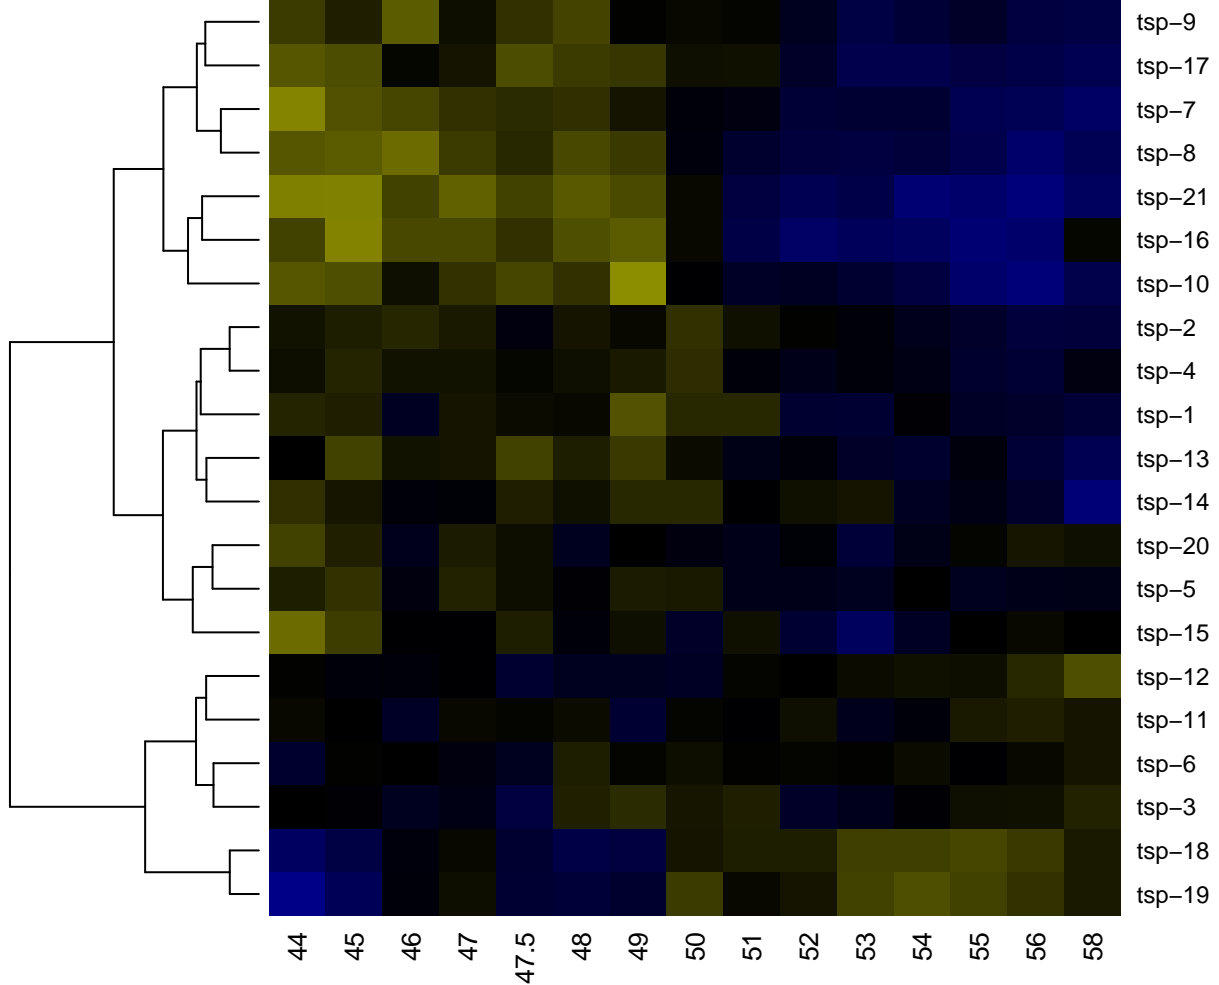

# ttll

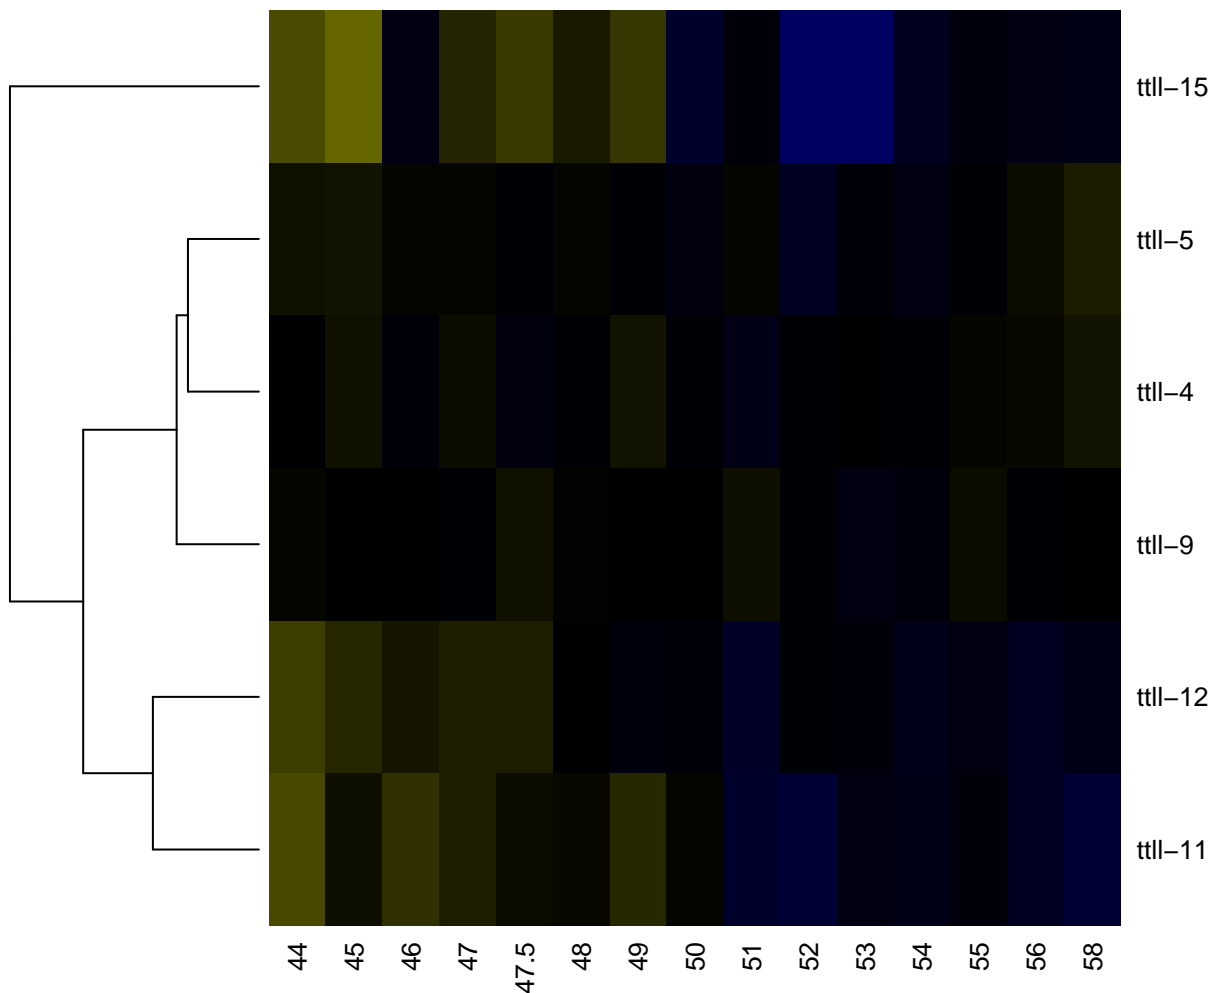

-2

-1

0

1

2

ttr

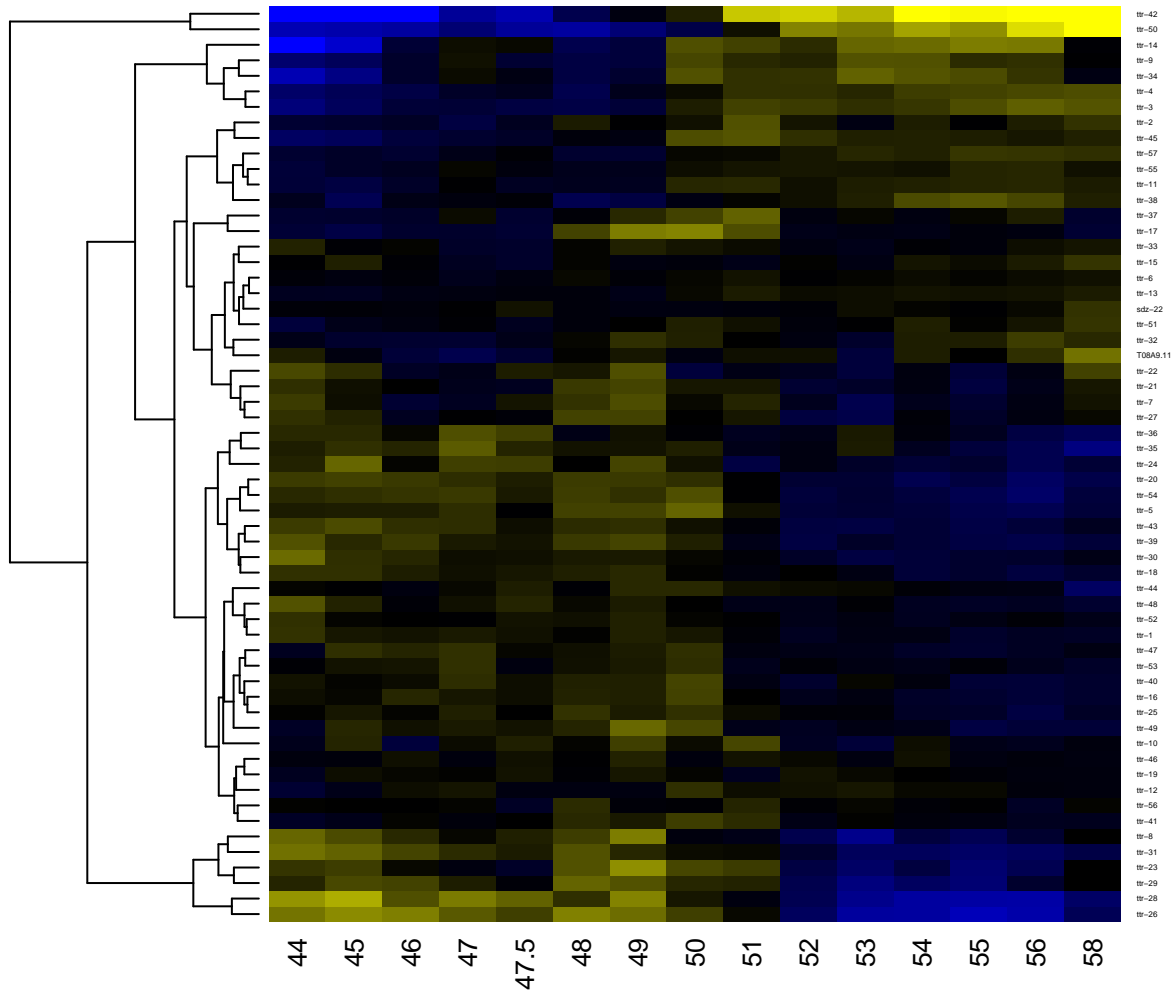

-2

-1

0

1

2

# twk

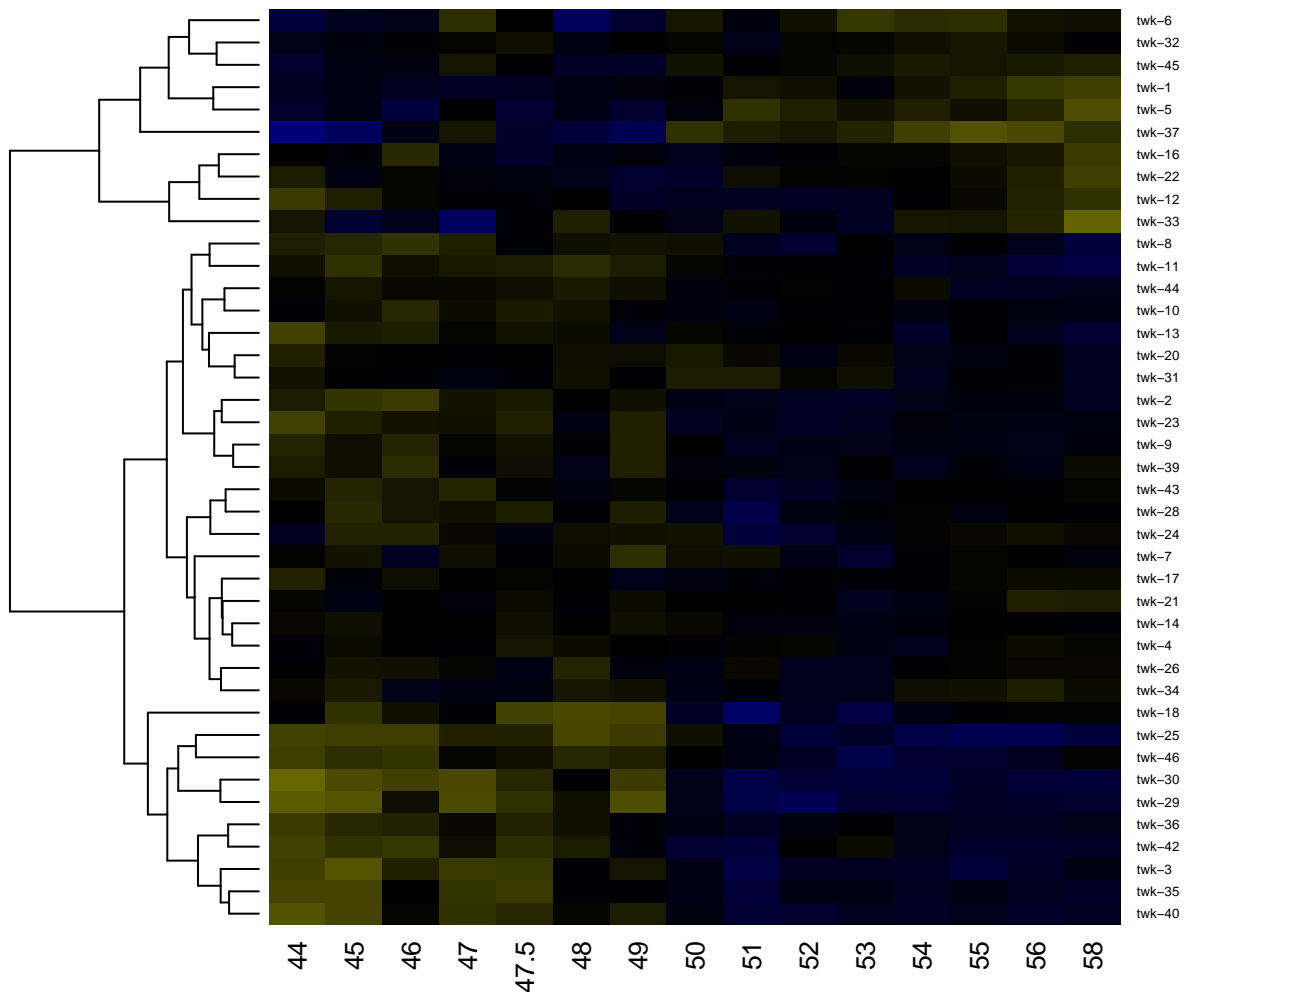

-2

-1

0

1

2



# tyr

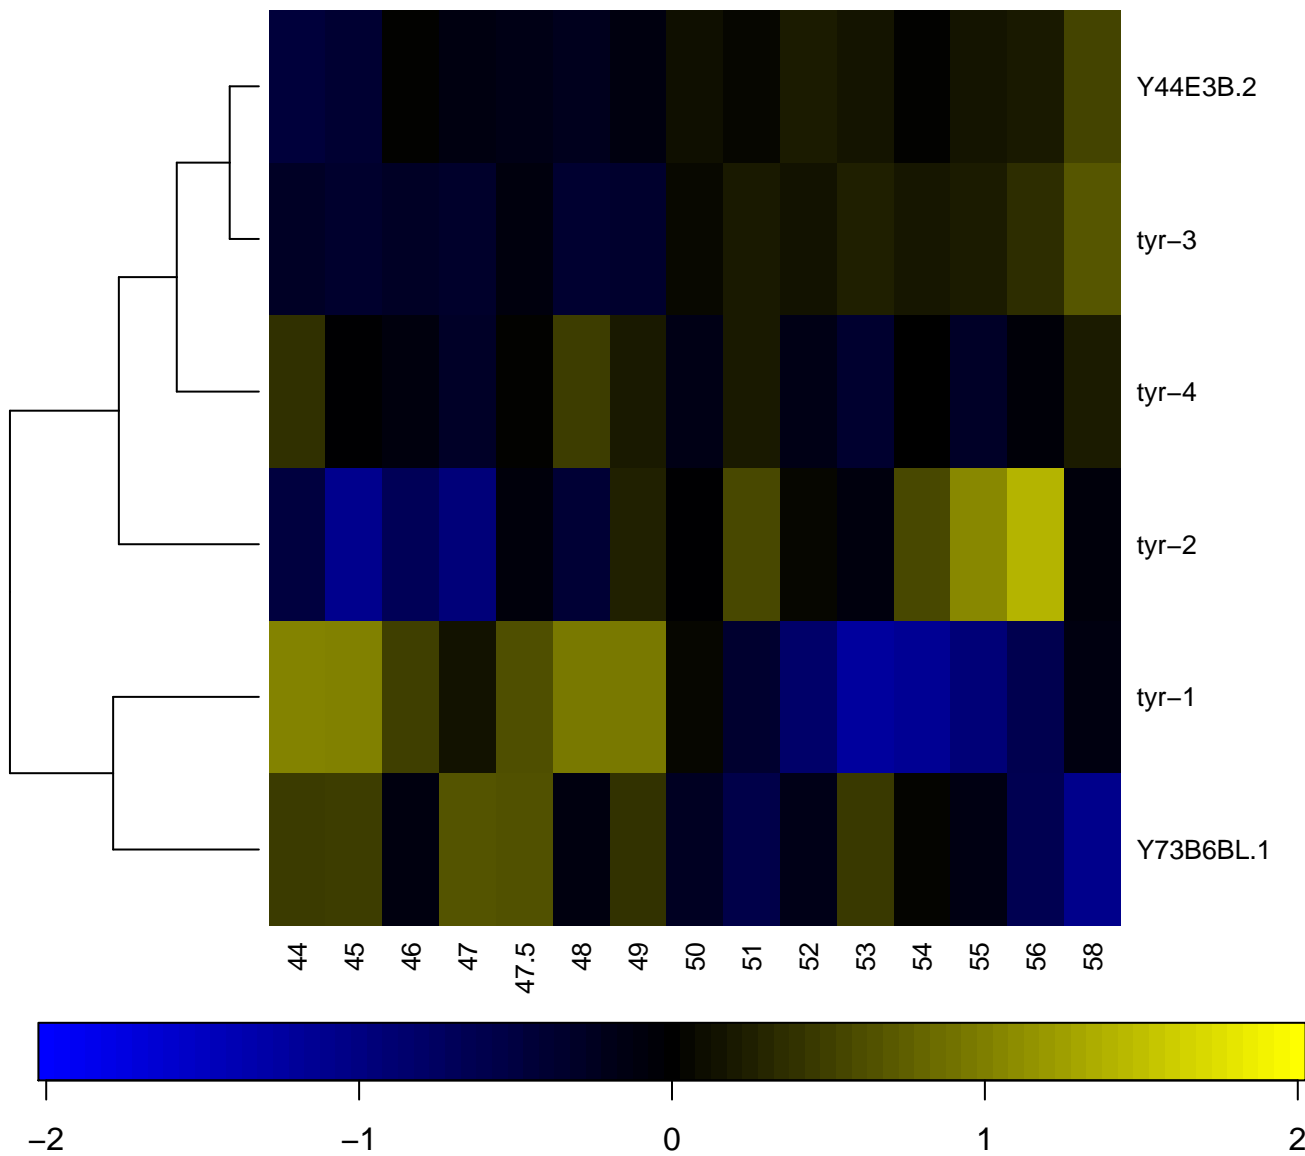

# ubc

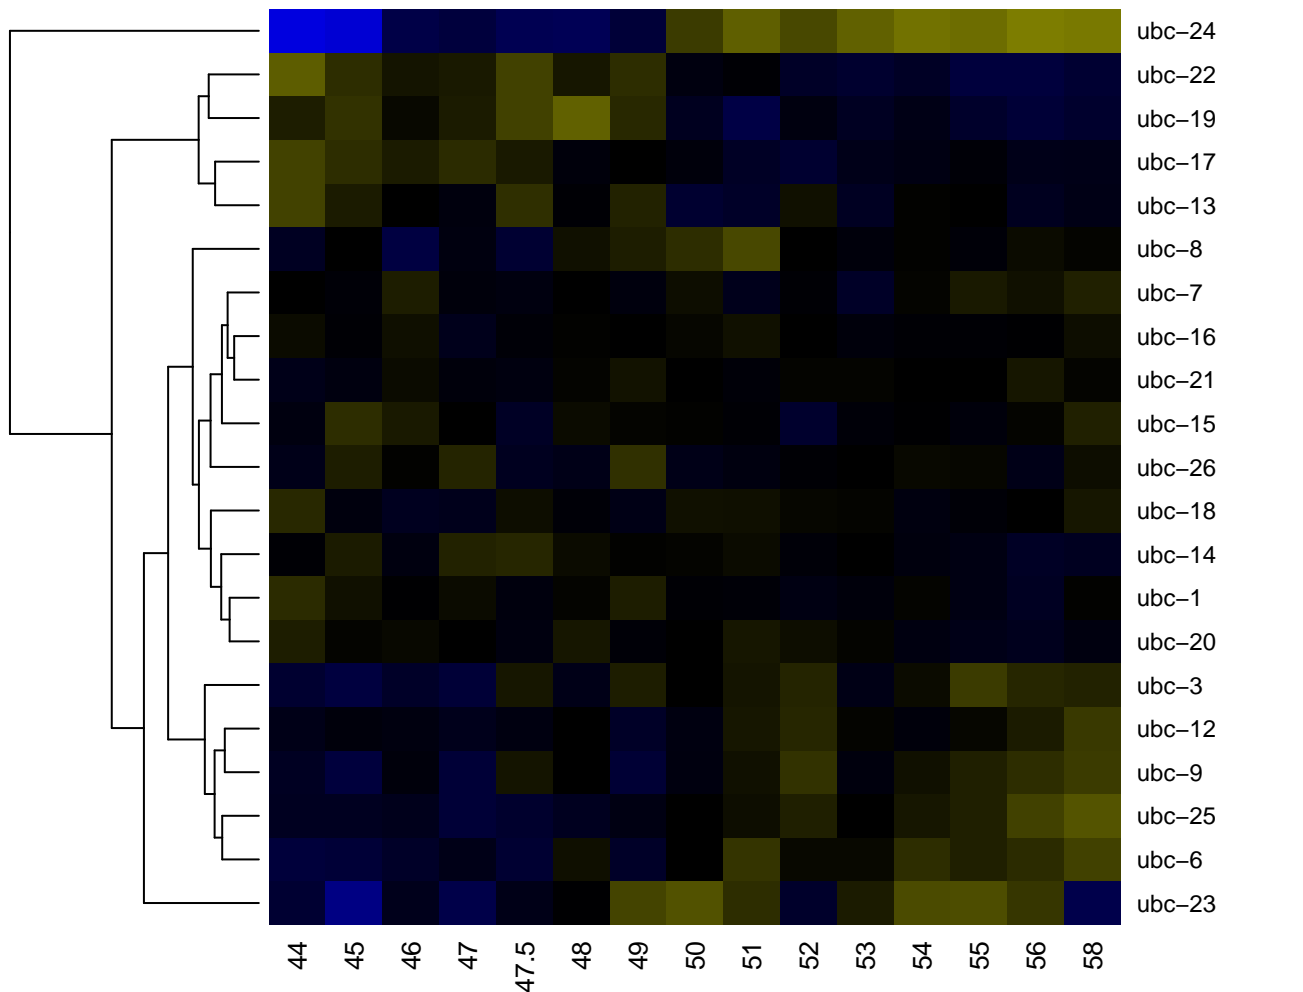

# ubxn

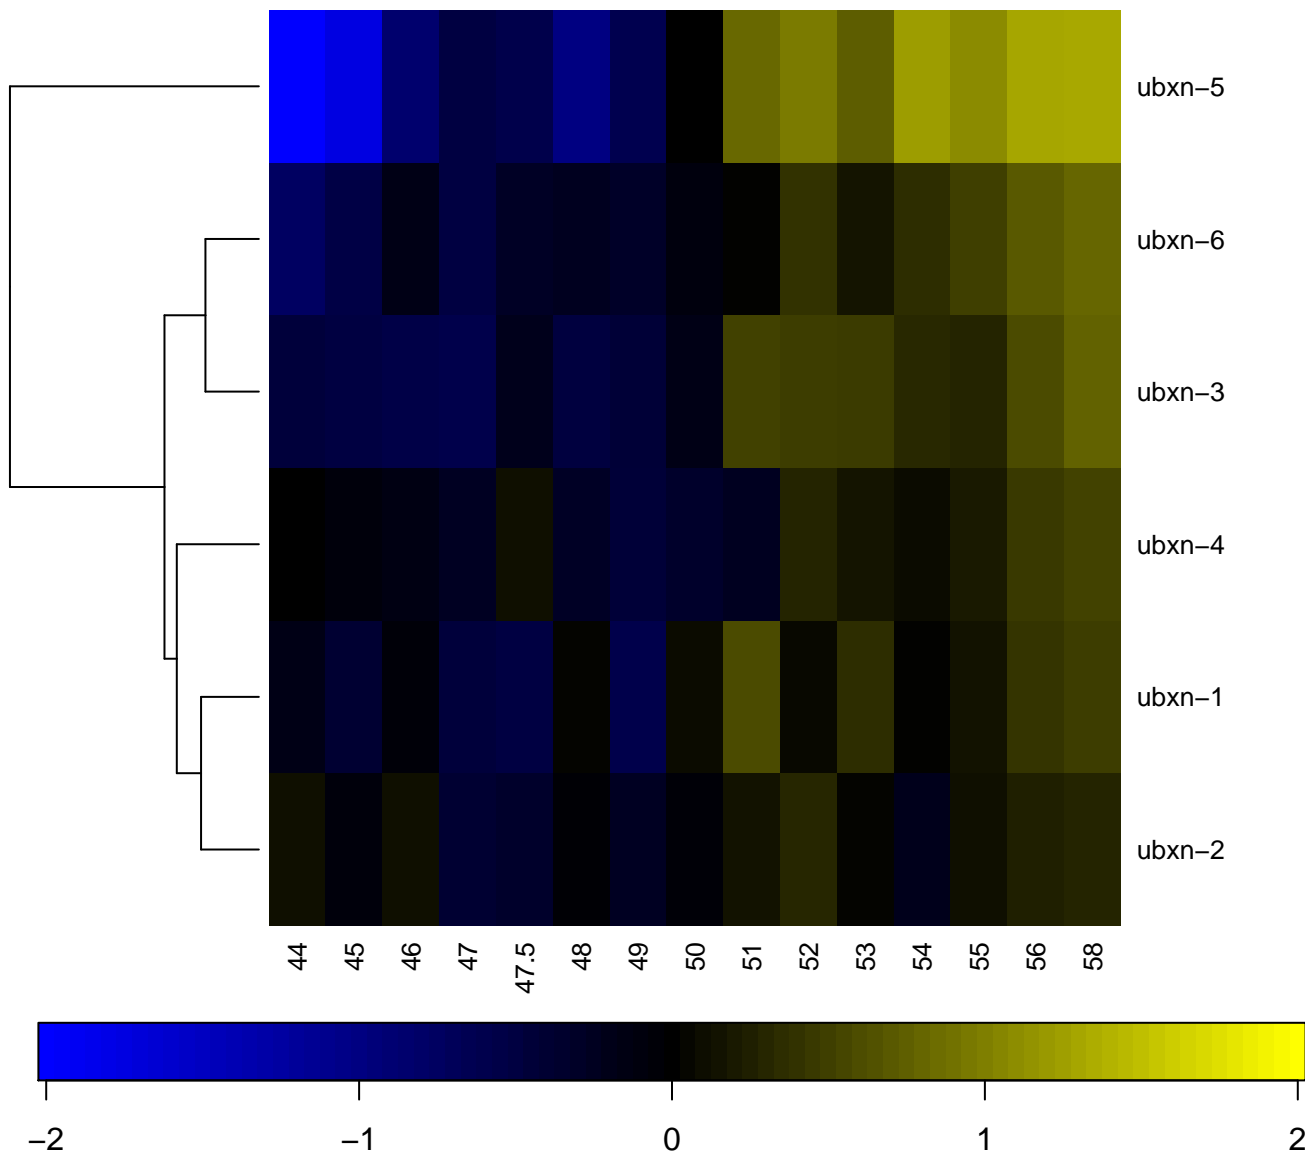

# ugt

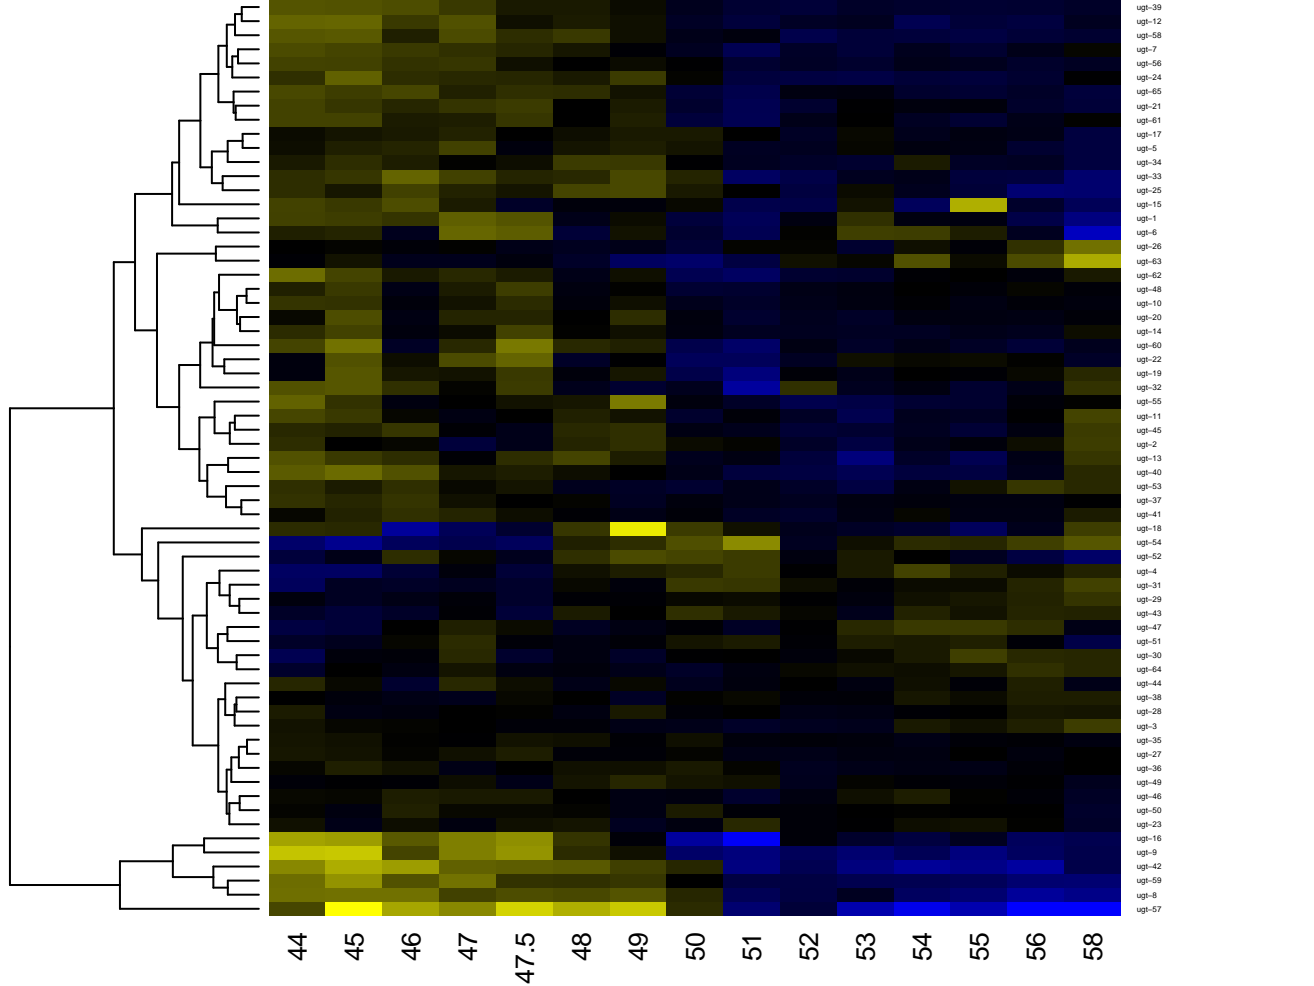

-2

-1

0

1

2



unc

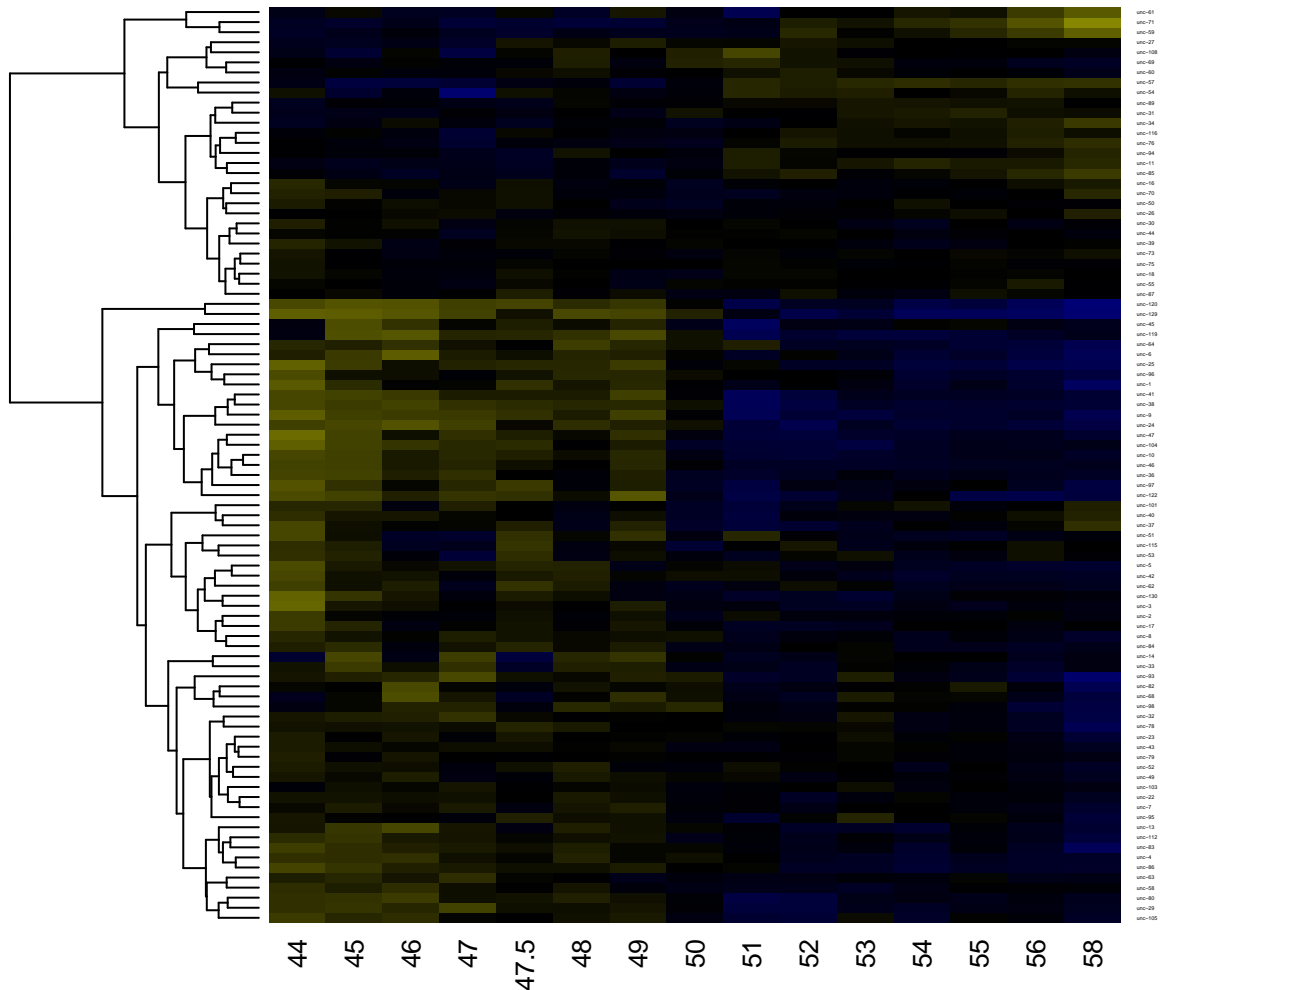







# vha

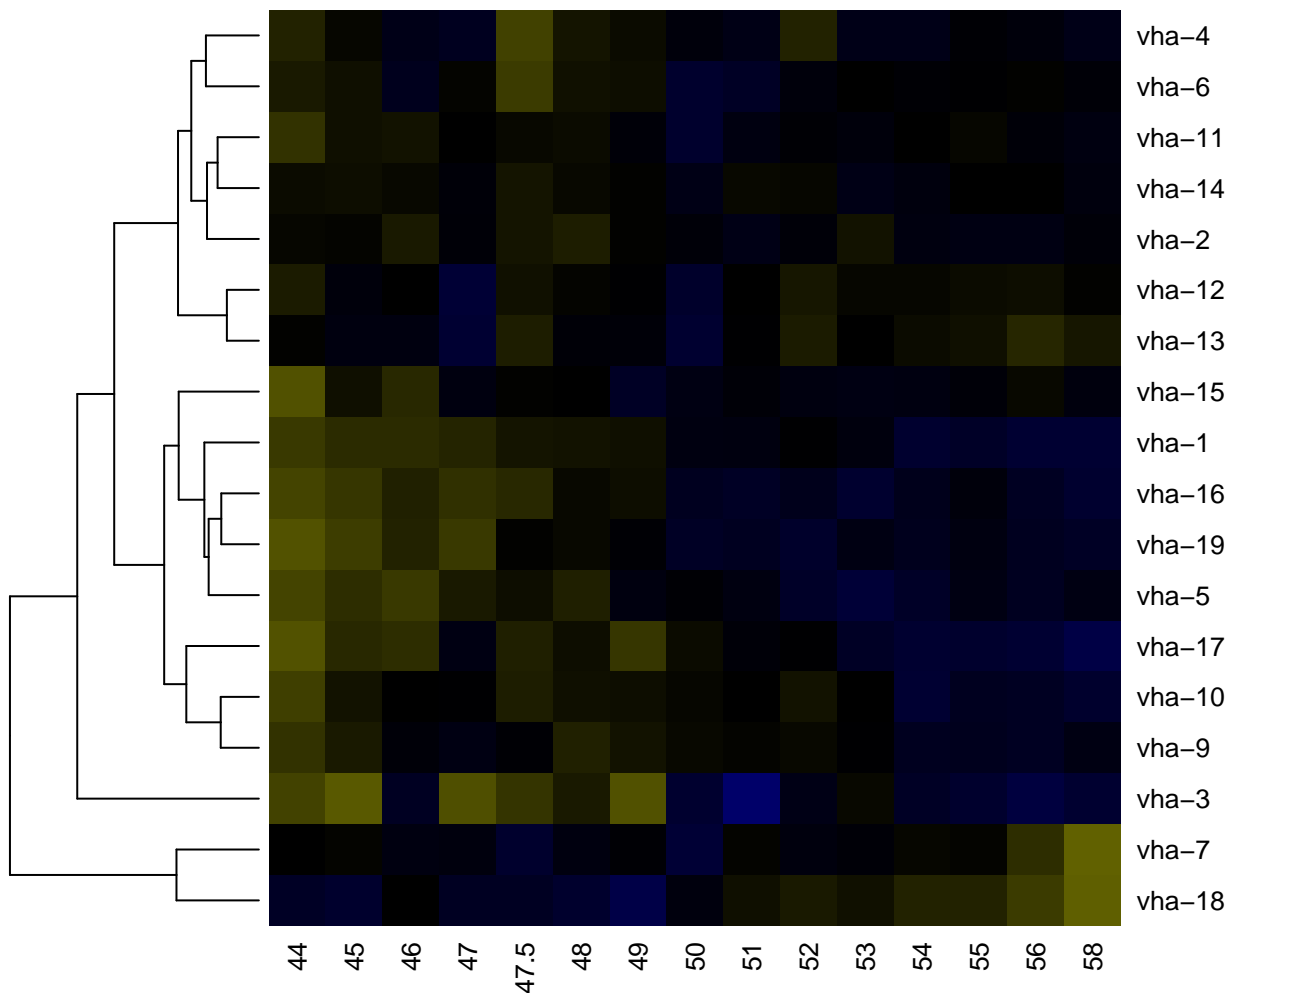

-2

-1

0

1

2

# vit

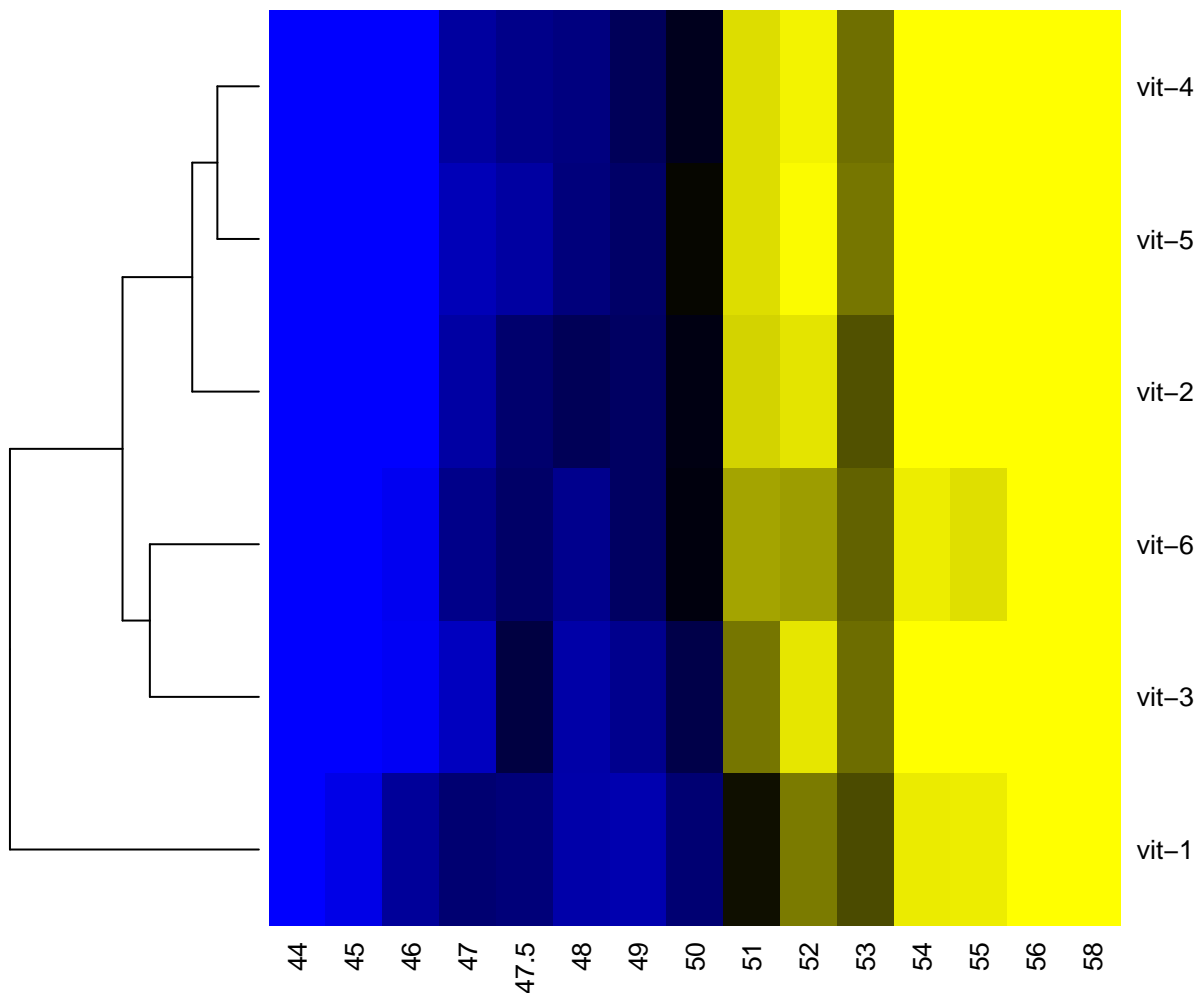

# vps

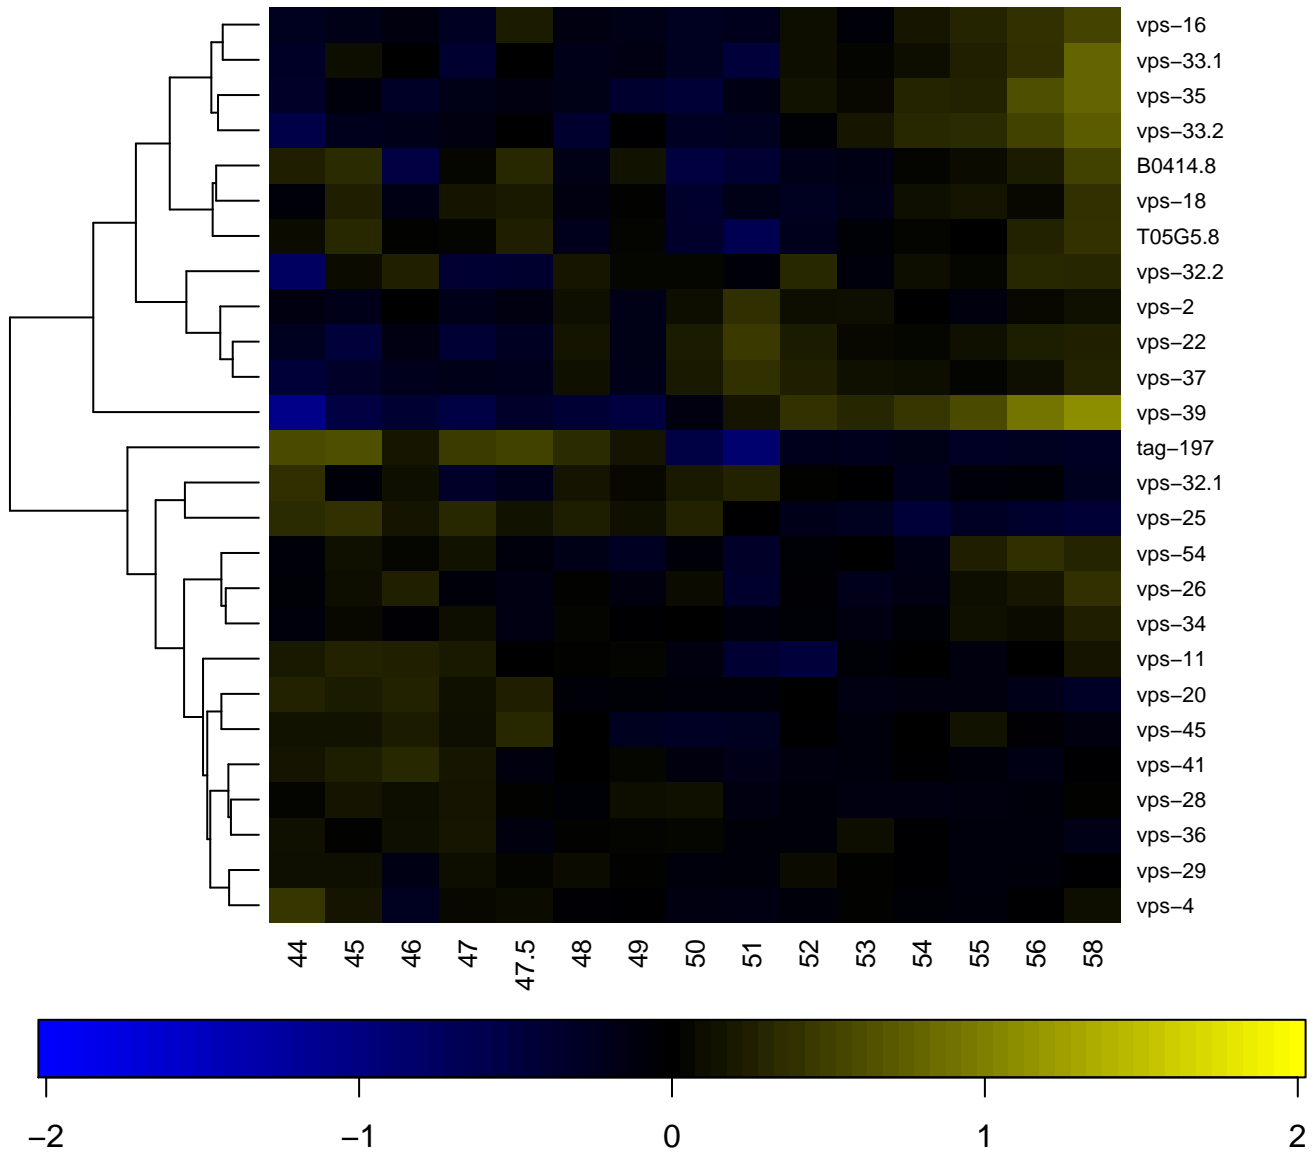

# wht

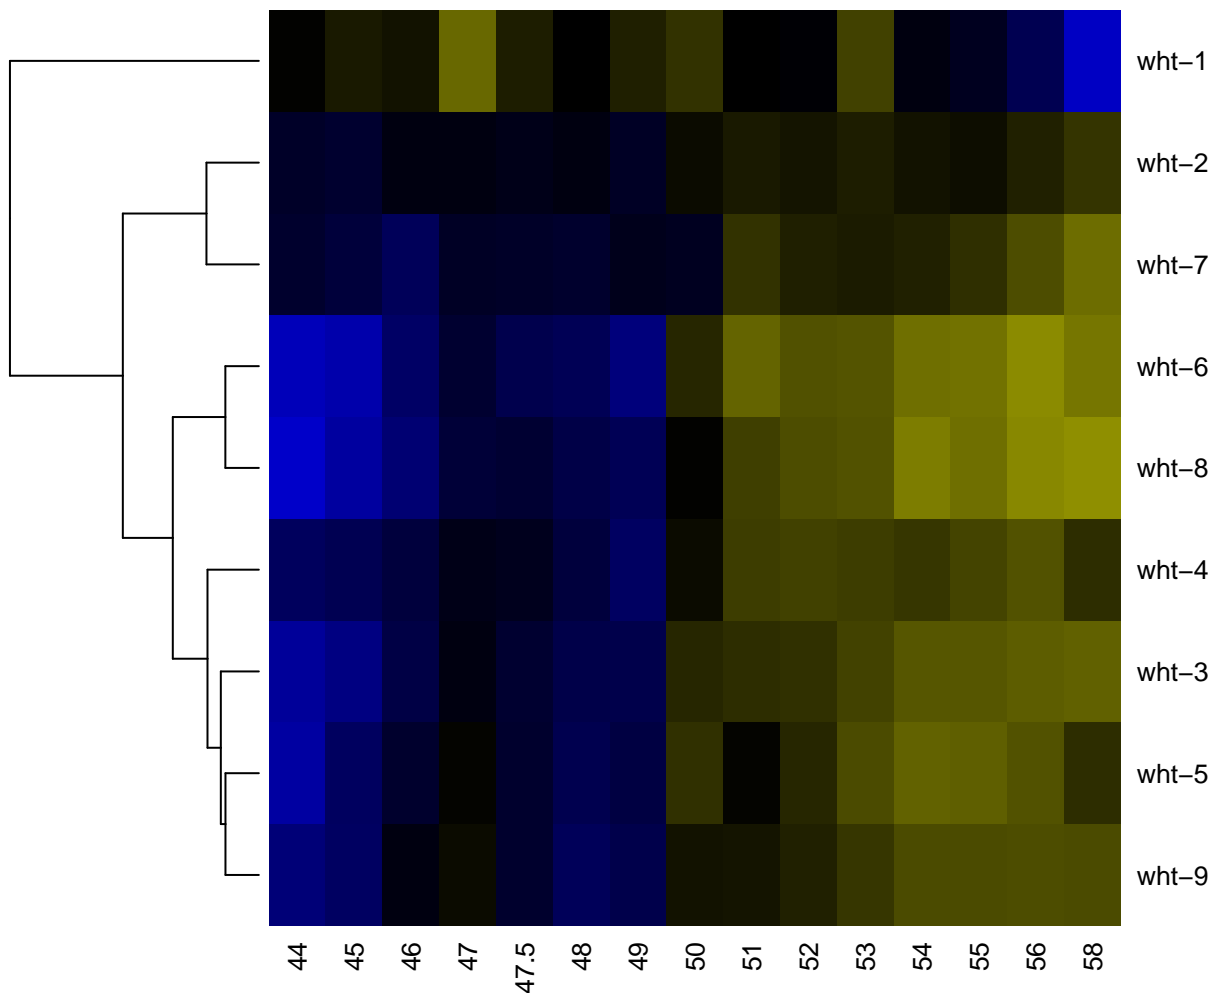

-2

-1

0

1

2

# wrt

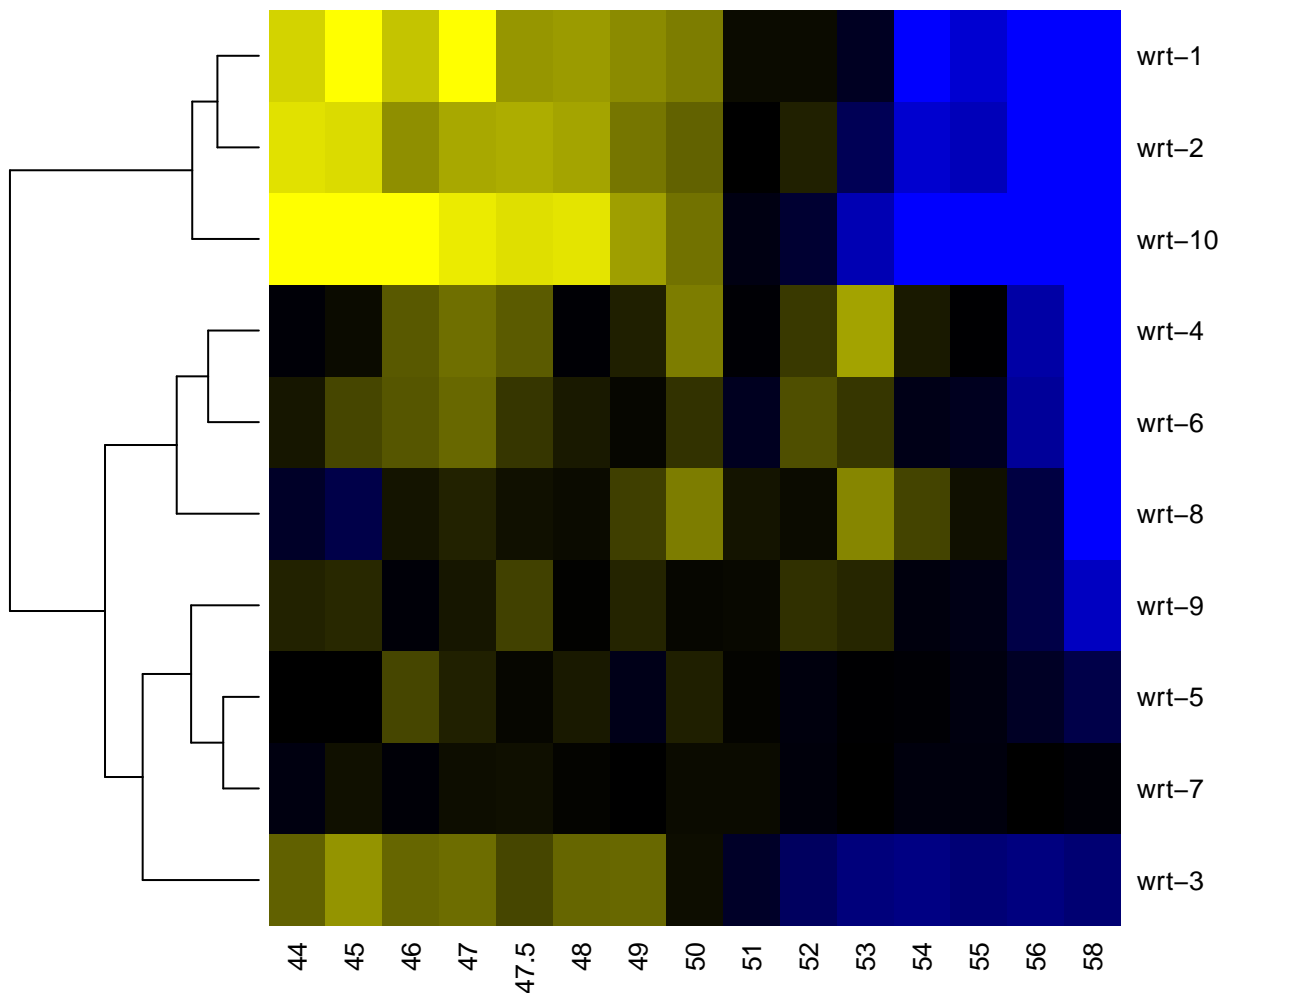

-2

-1

0

1

2



# zig

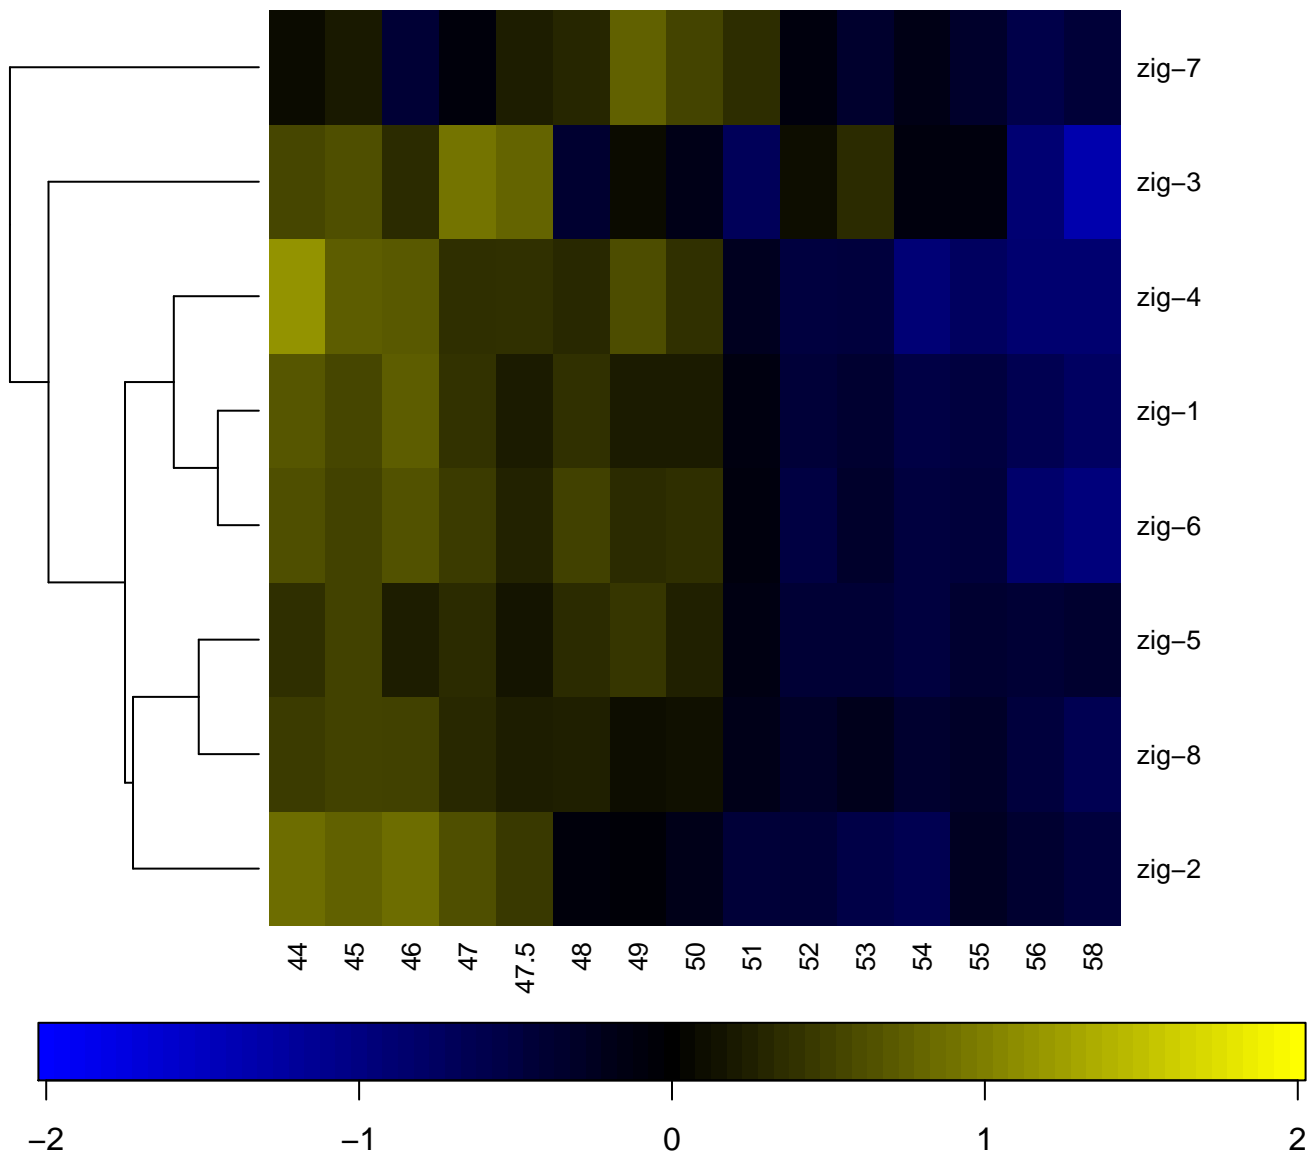









**Supplementary file F | Dynamic gene expression patterns of all Anatomy terms.**

The “heatmap” function of “R” was used to cluster genes of each individual Anatomy terms according to their expression pattern. Anatomy term name is shown per page as figure title. The time in hours is shown on the x-axis. Gene names are shown on the y-axis. The scale bar shows the log<sub>2</sub> ratio with the mean for each time-point. Blue is lower than the mean and yellow is higher than the mean.

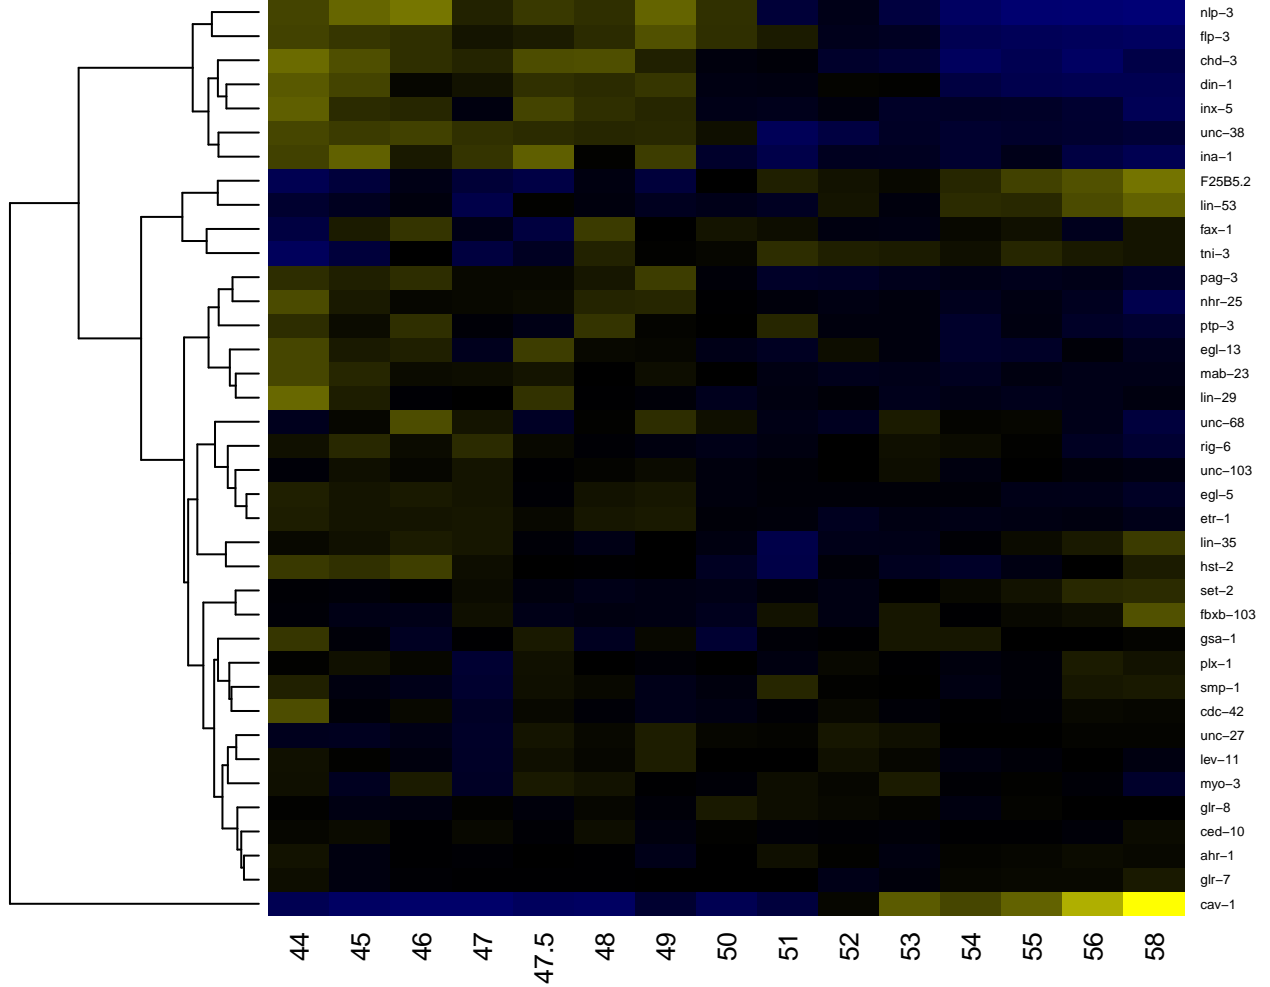

# AB

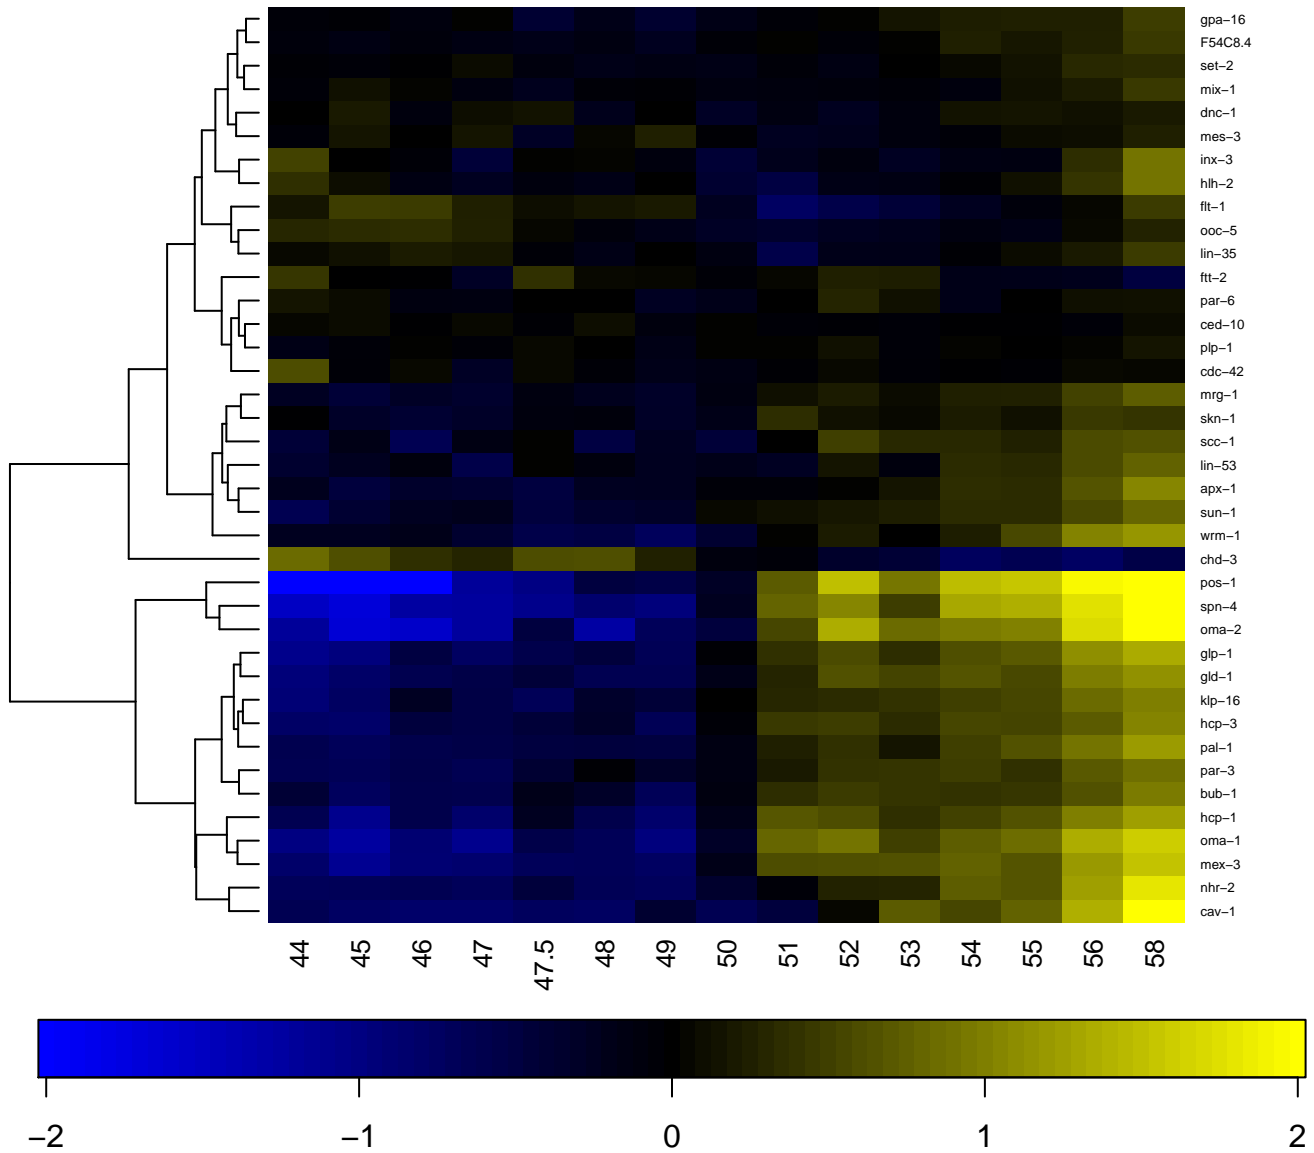

# ABa

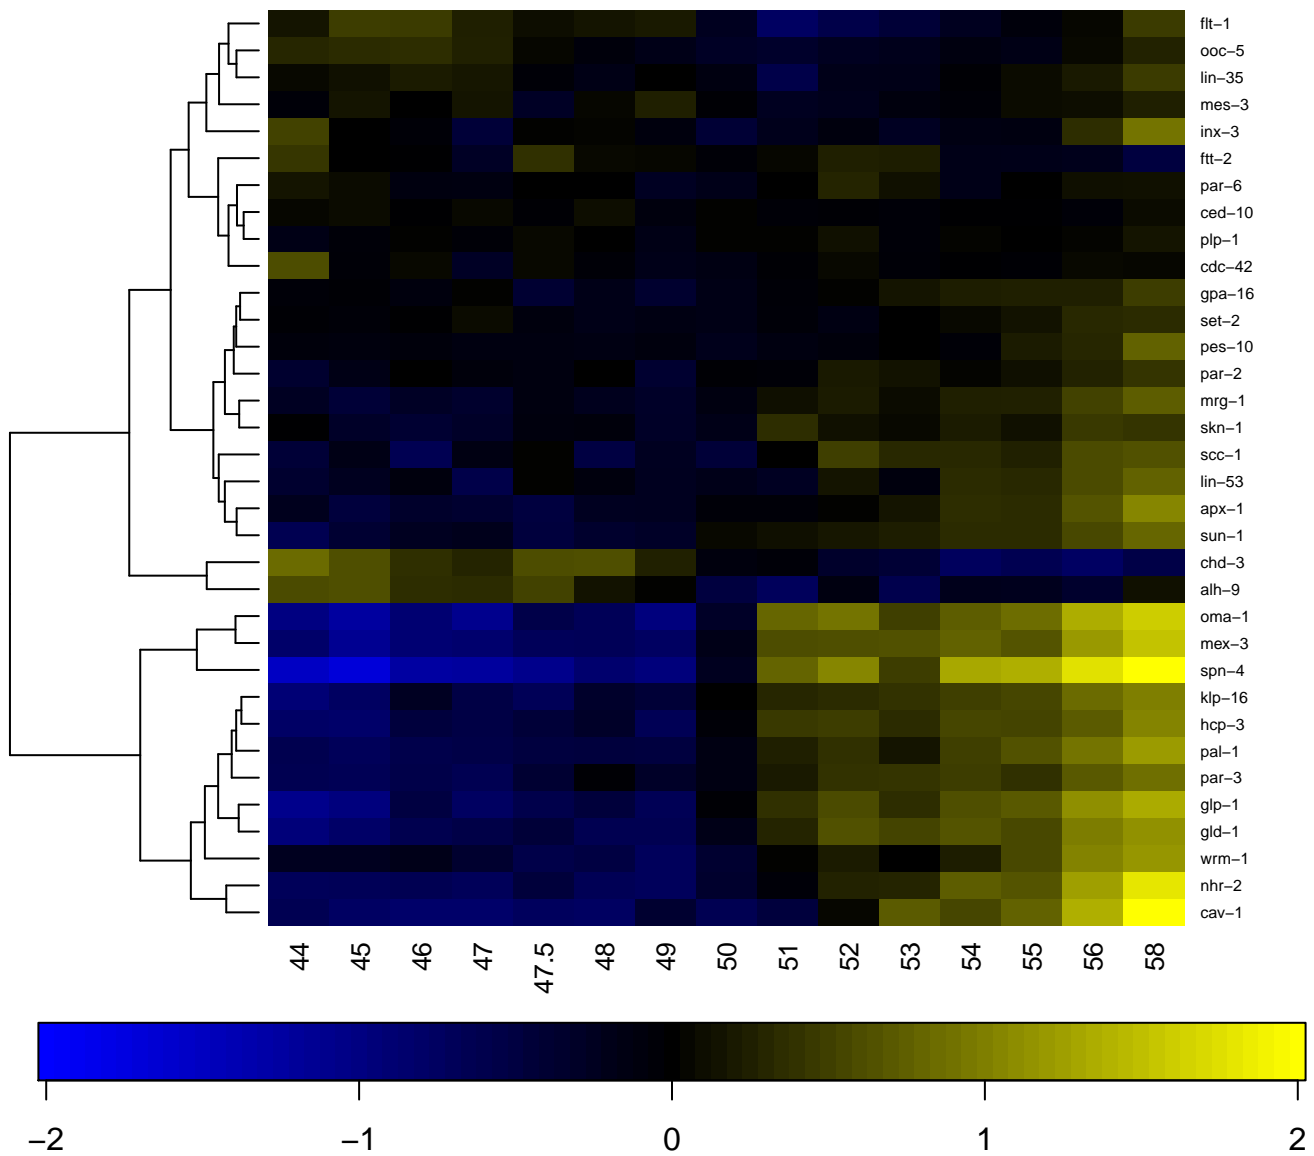

# ABal

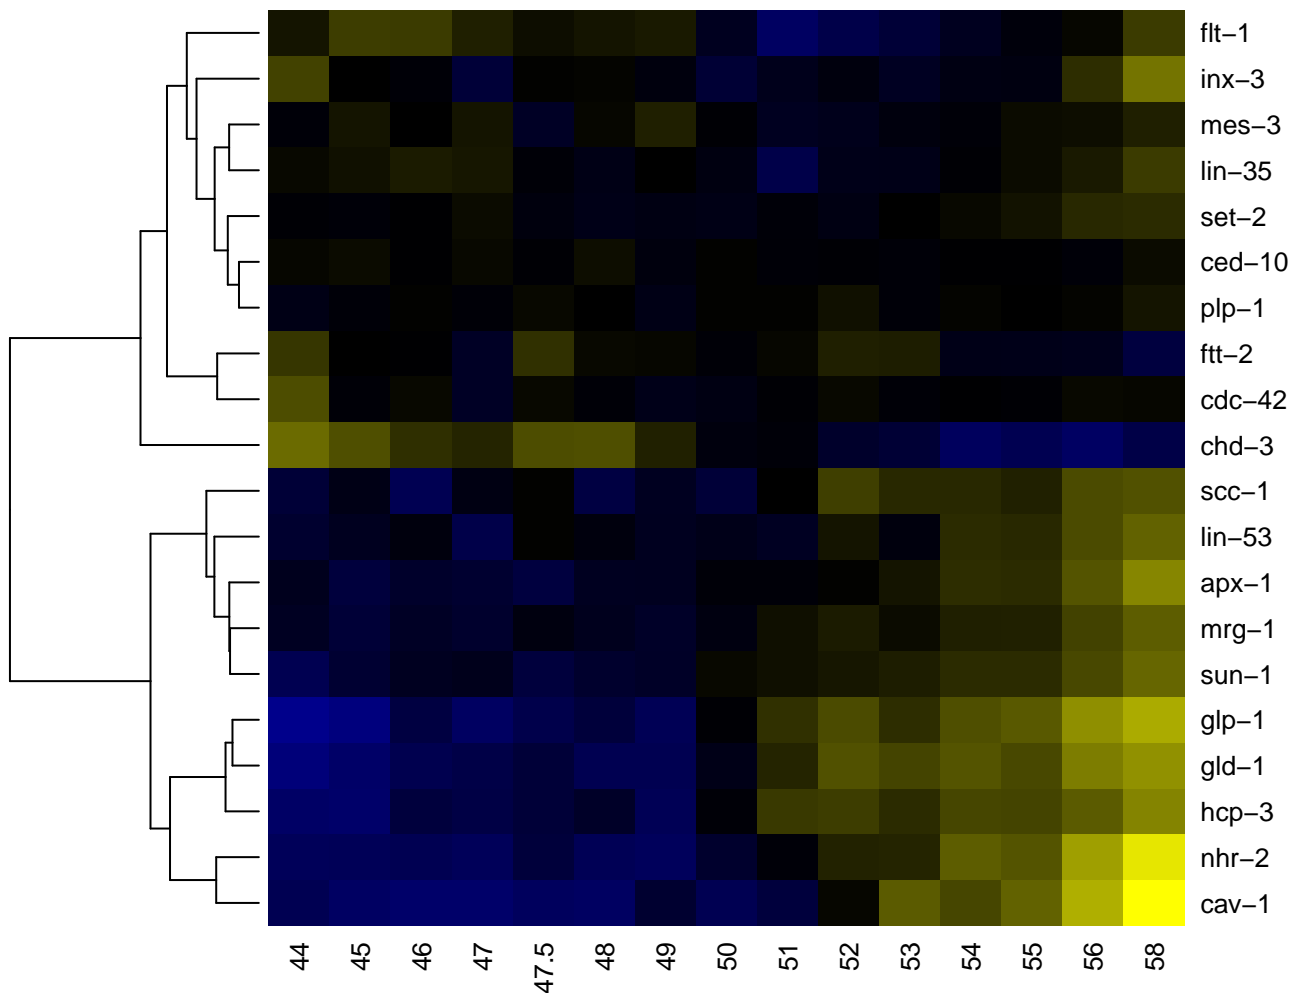

# ABala

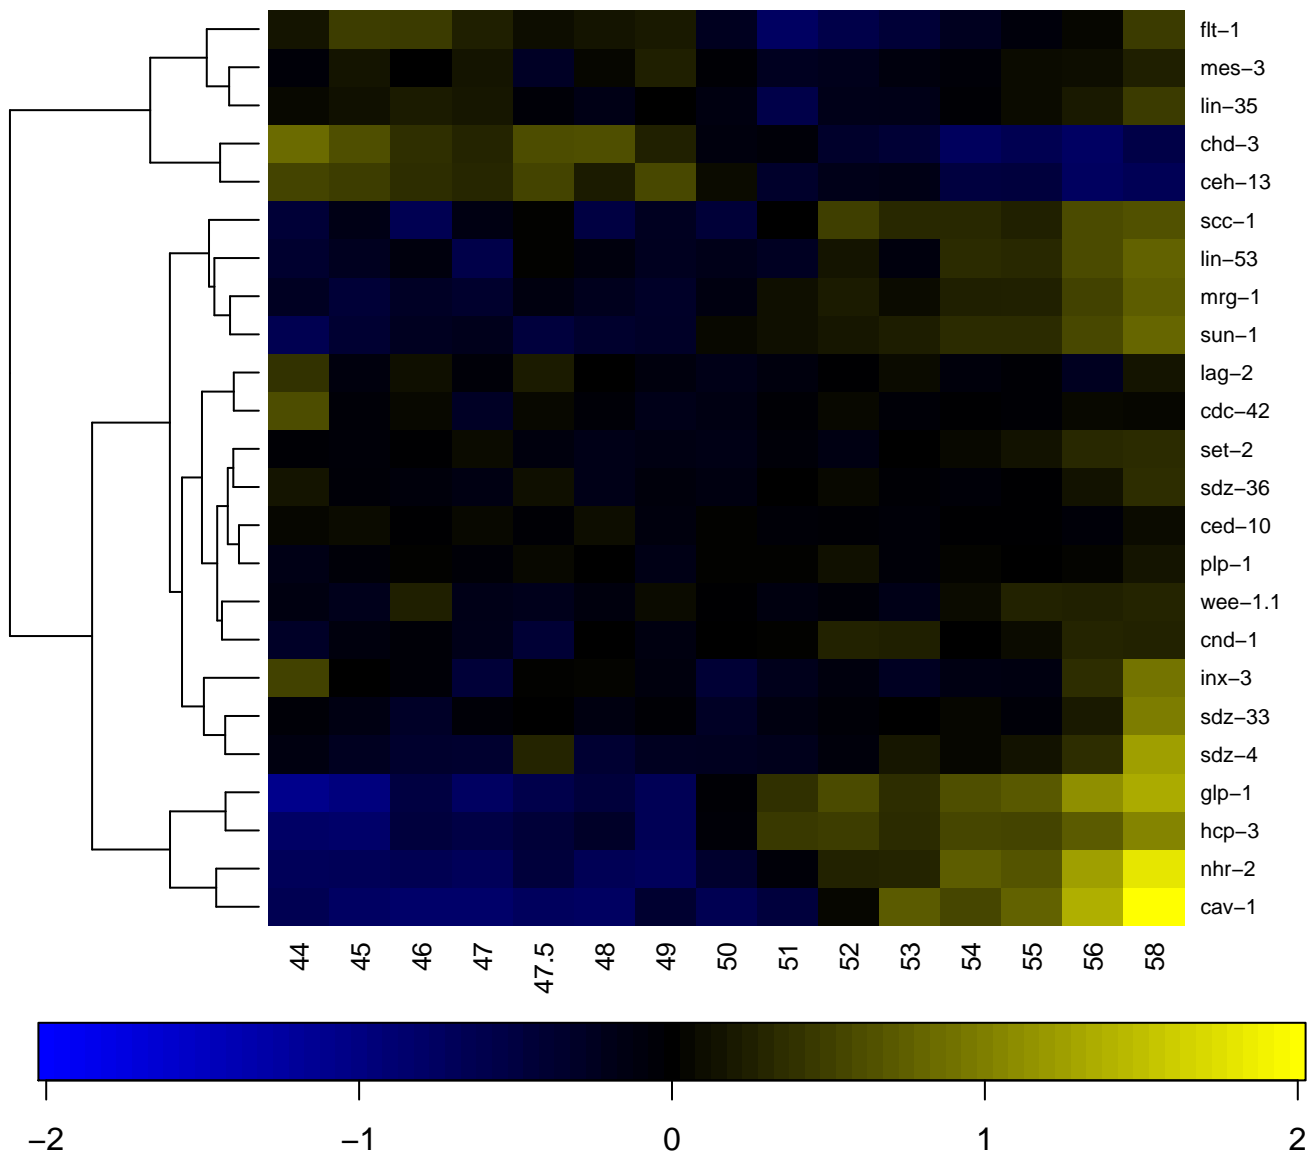



# ABalaa

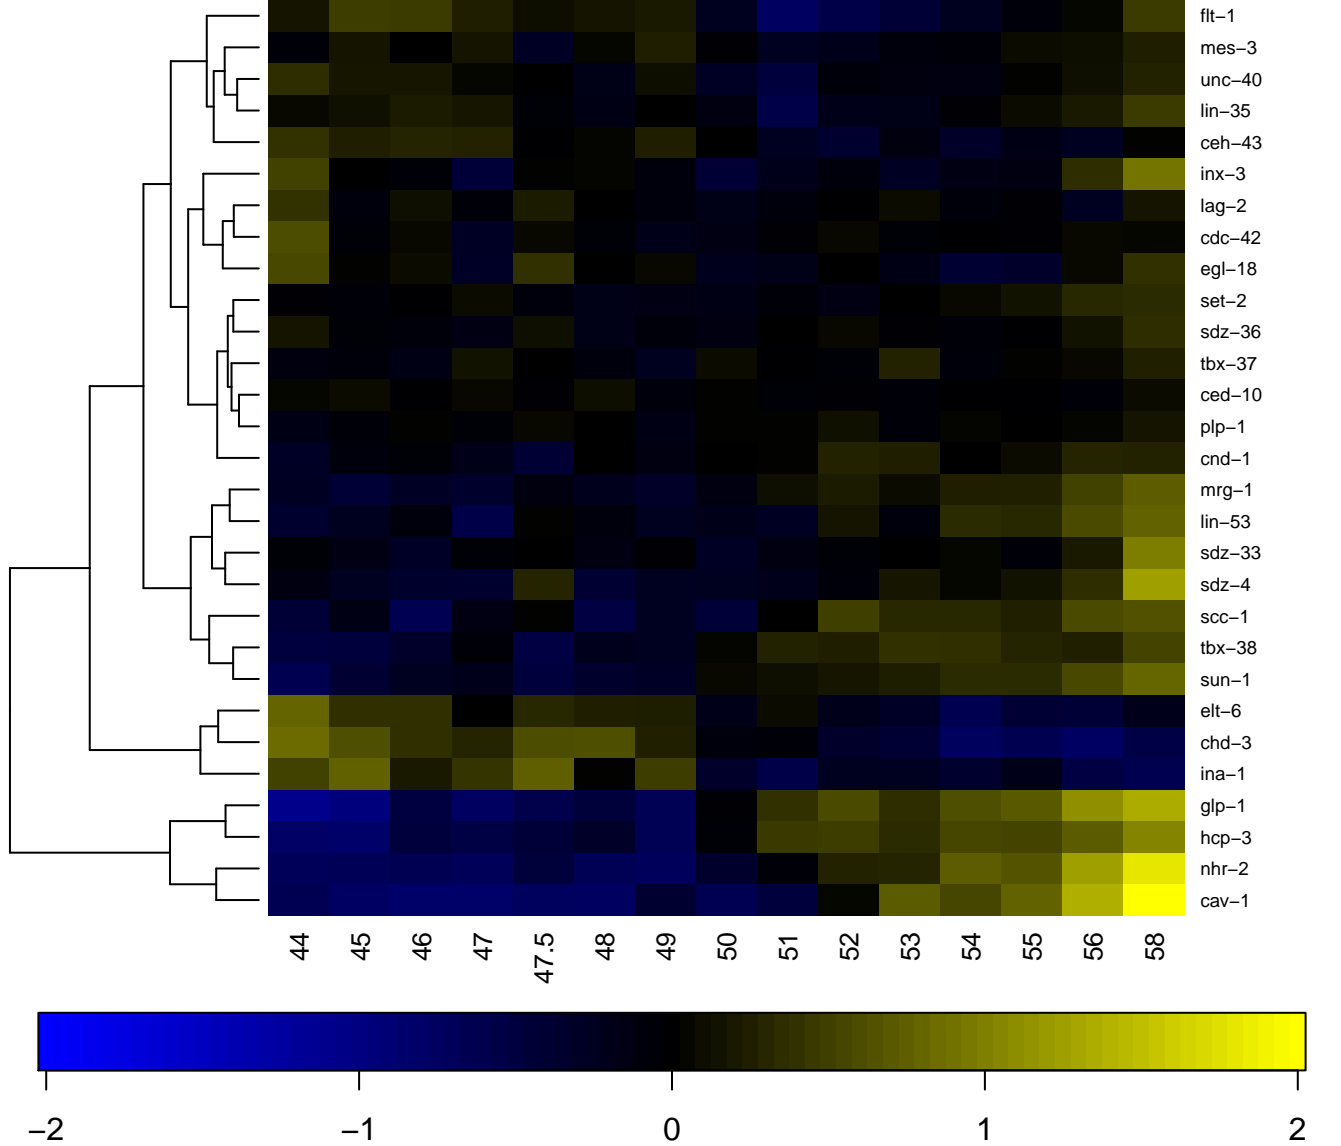

# ABalaaa

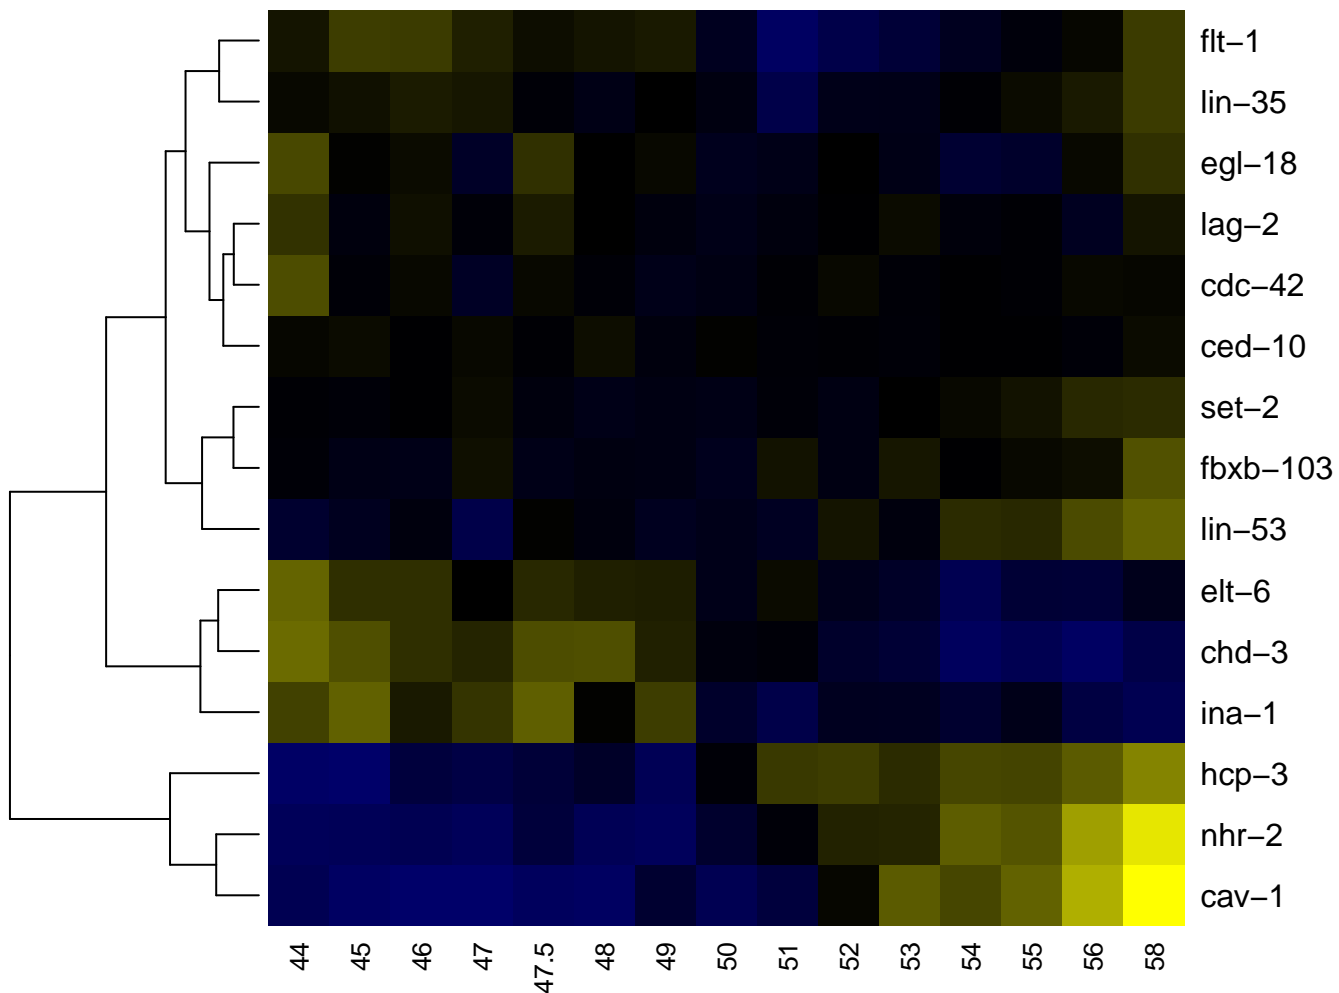

# ABalaaaa

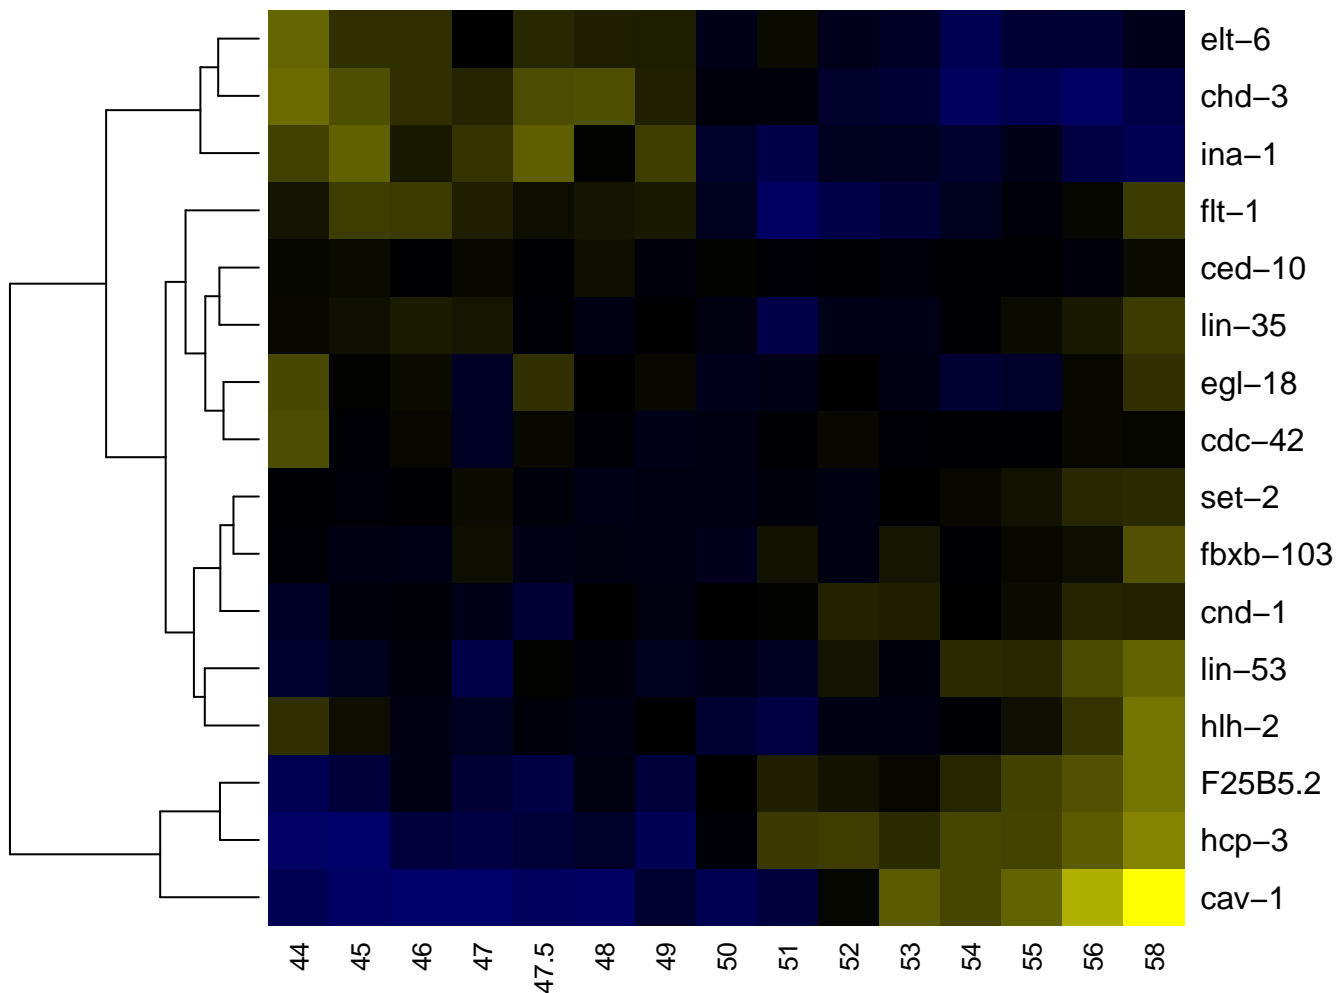

# ABalaaaal

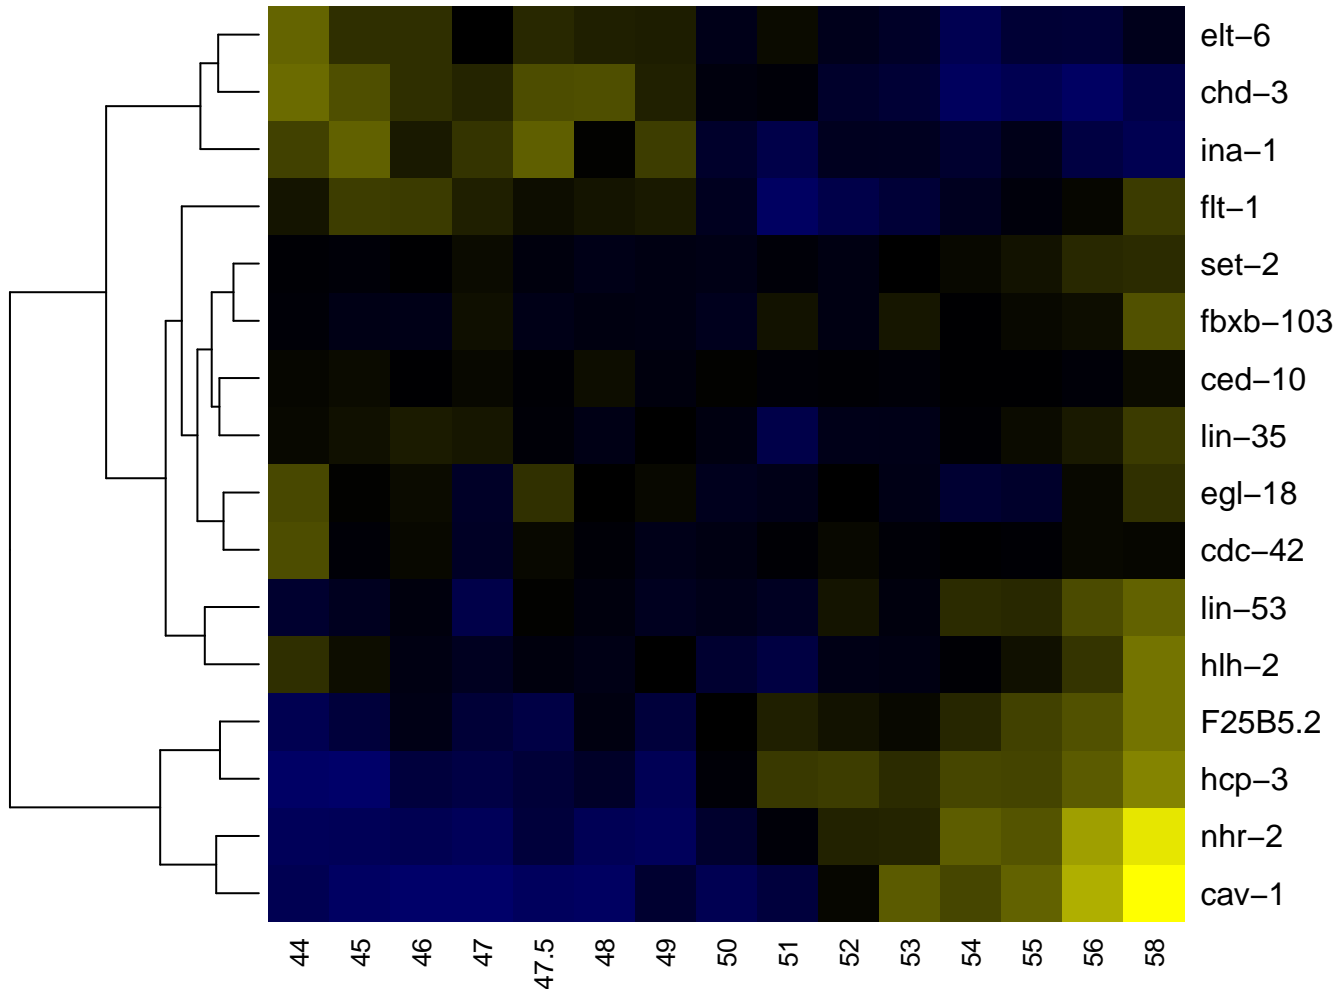

# ABalaaaala

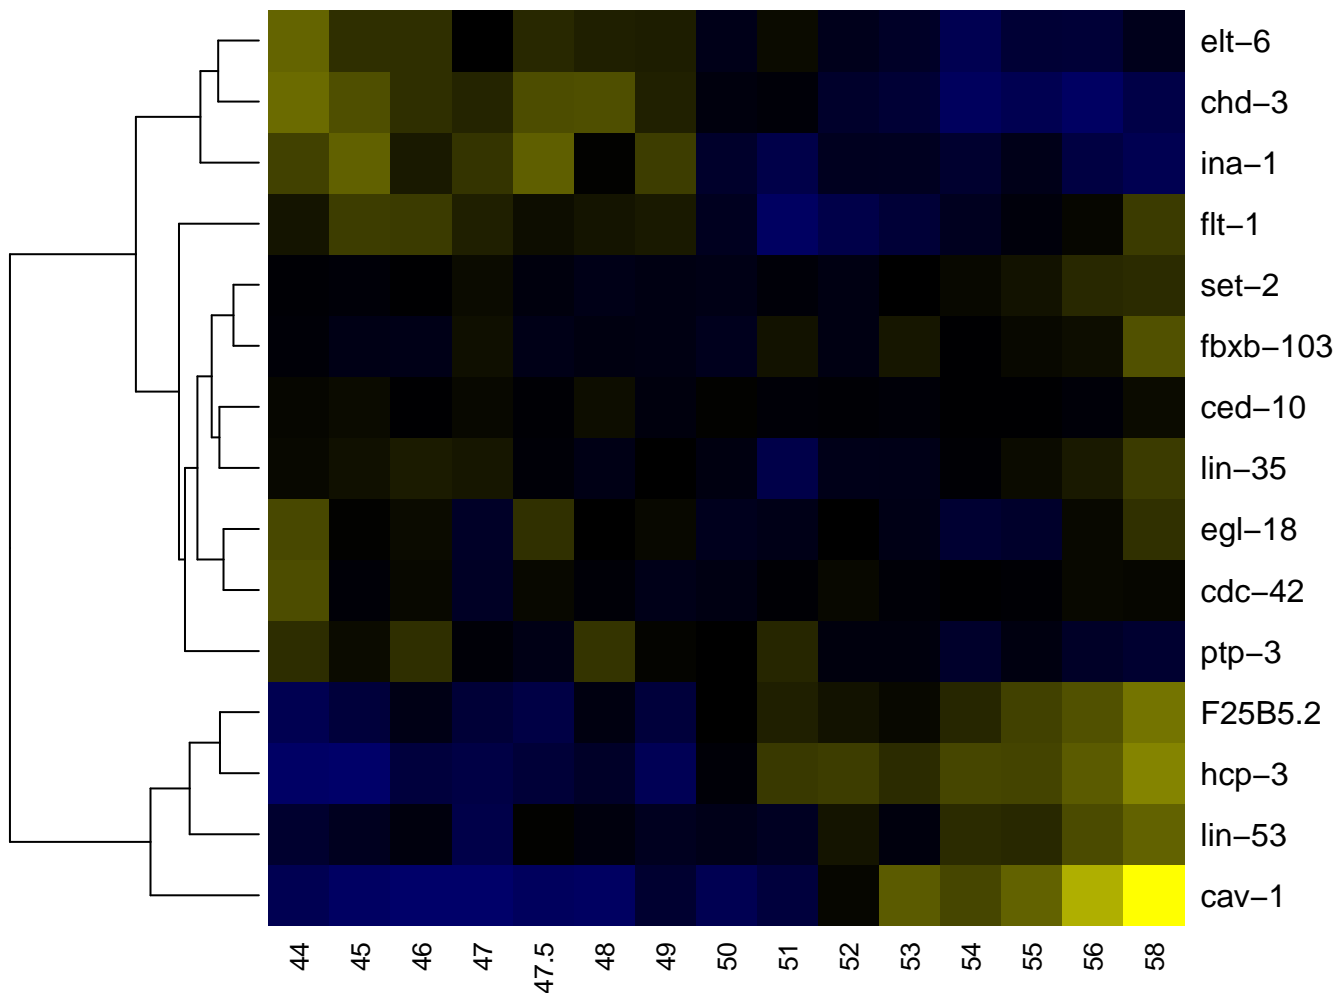

# ABalaaaalar

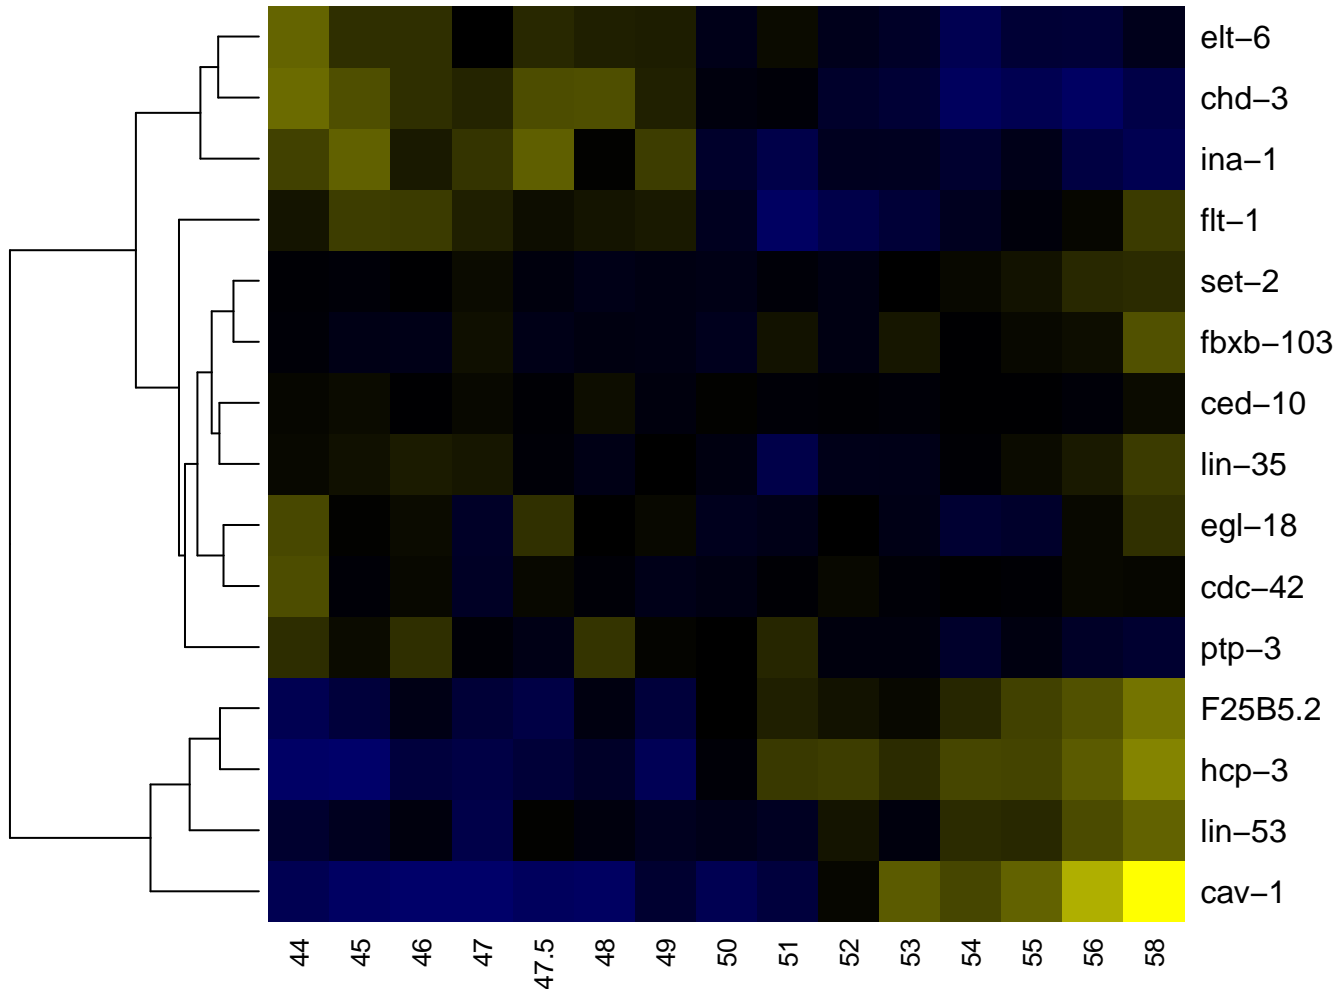



# ABalaaaalpa

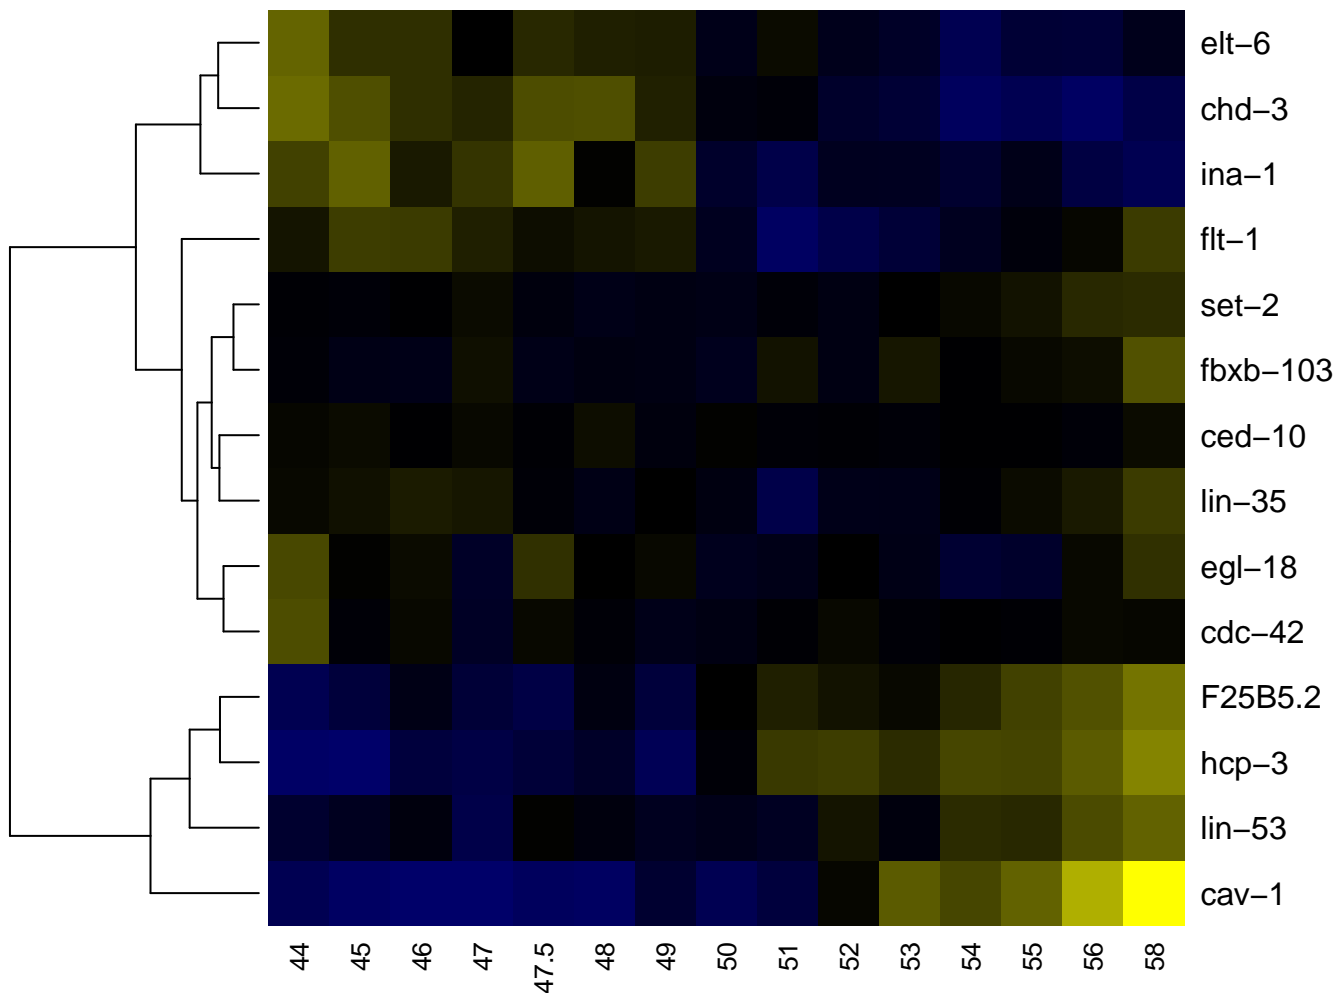



# ABalaaar

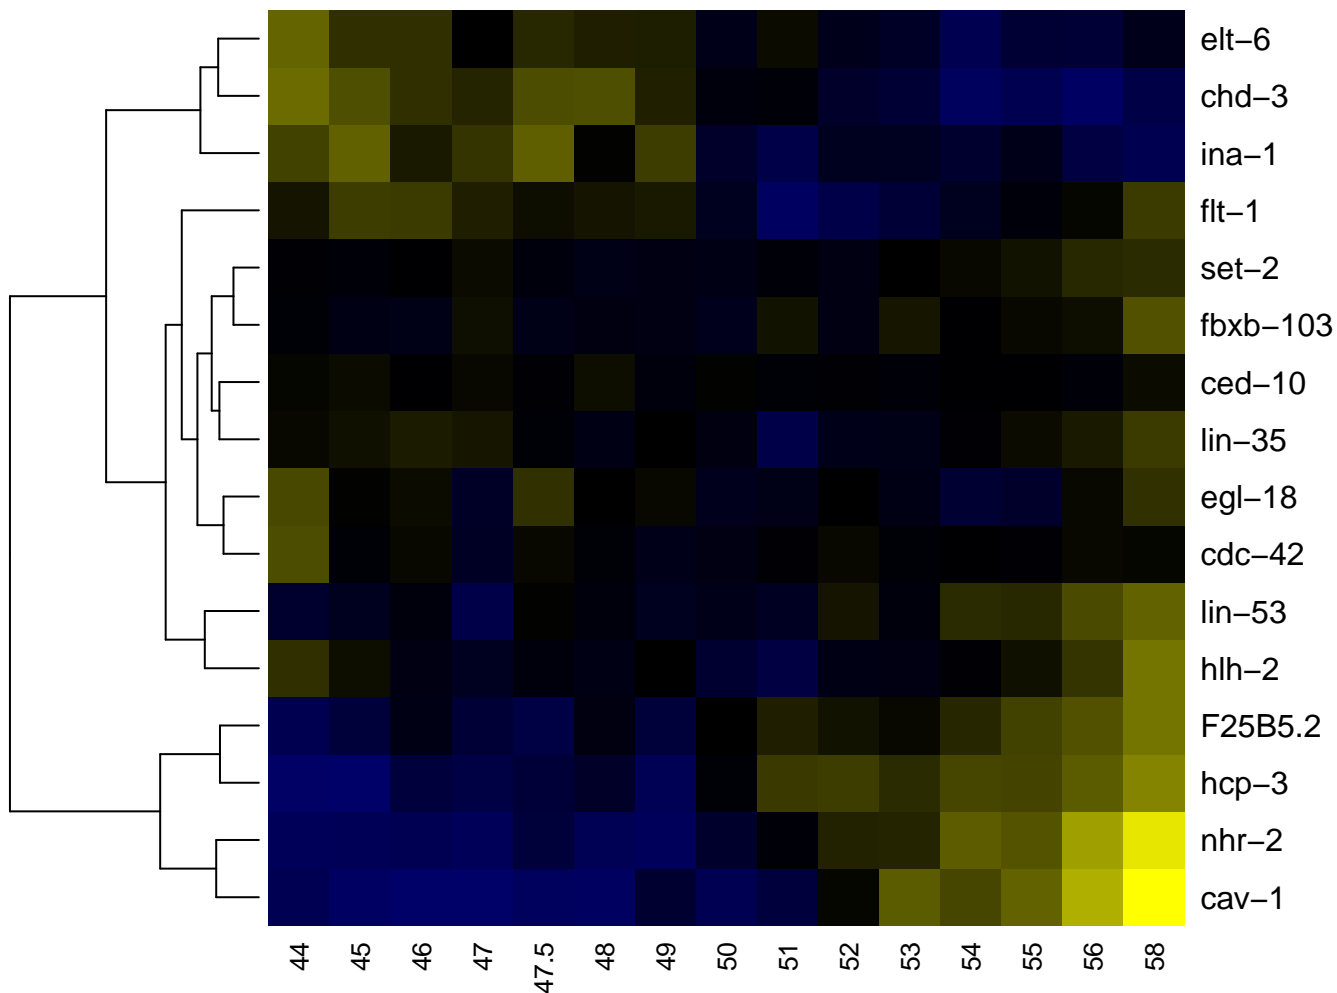

# ABalaaari





# ABalaaaarr



# ABalaaarra

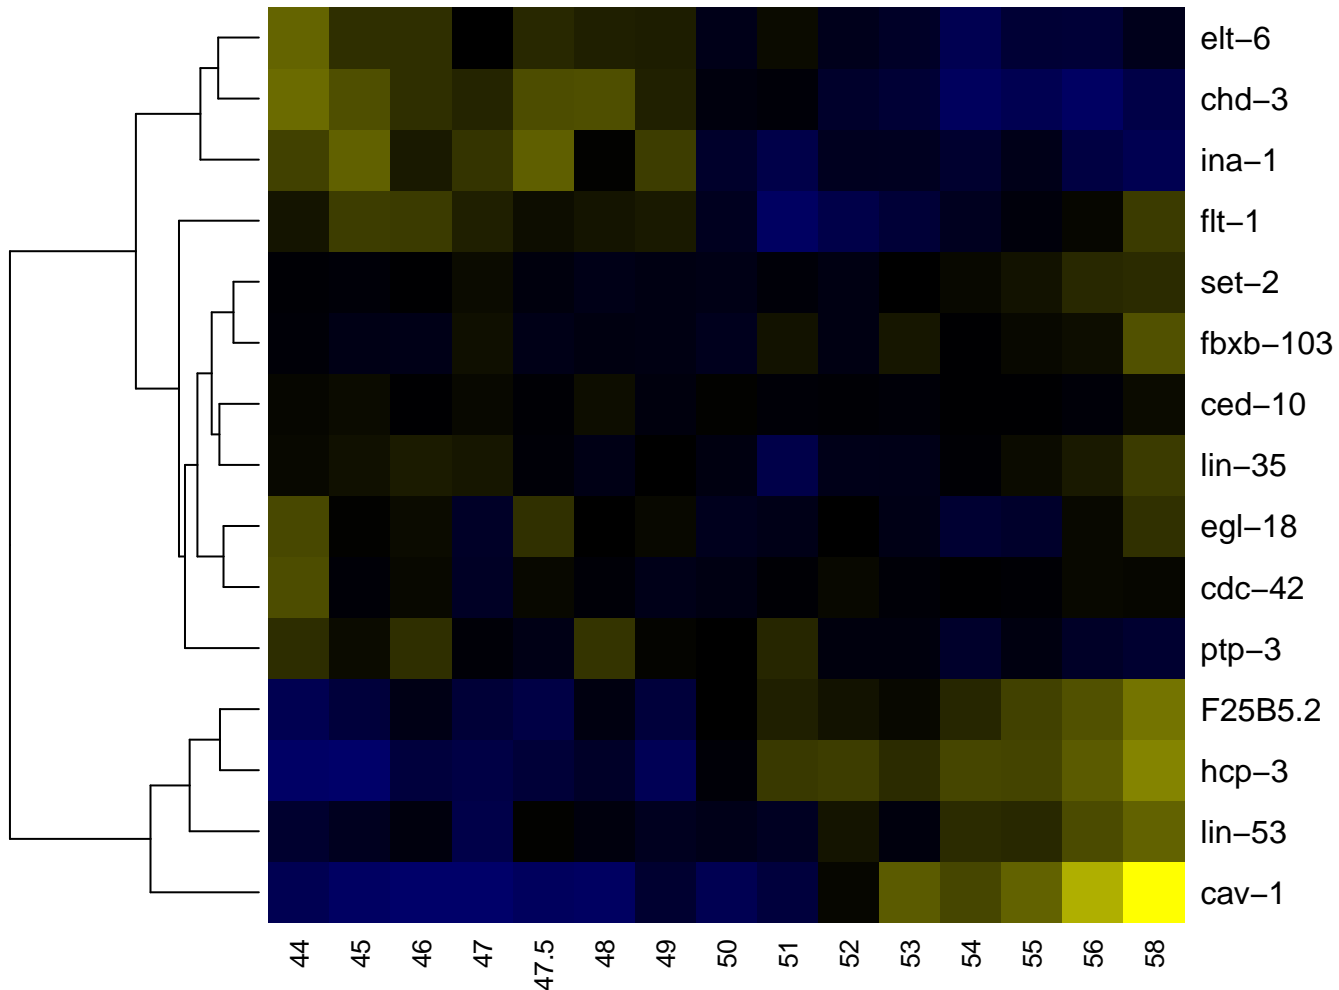

# ABalaaap



# ABalaaapa



# ABalaaapal

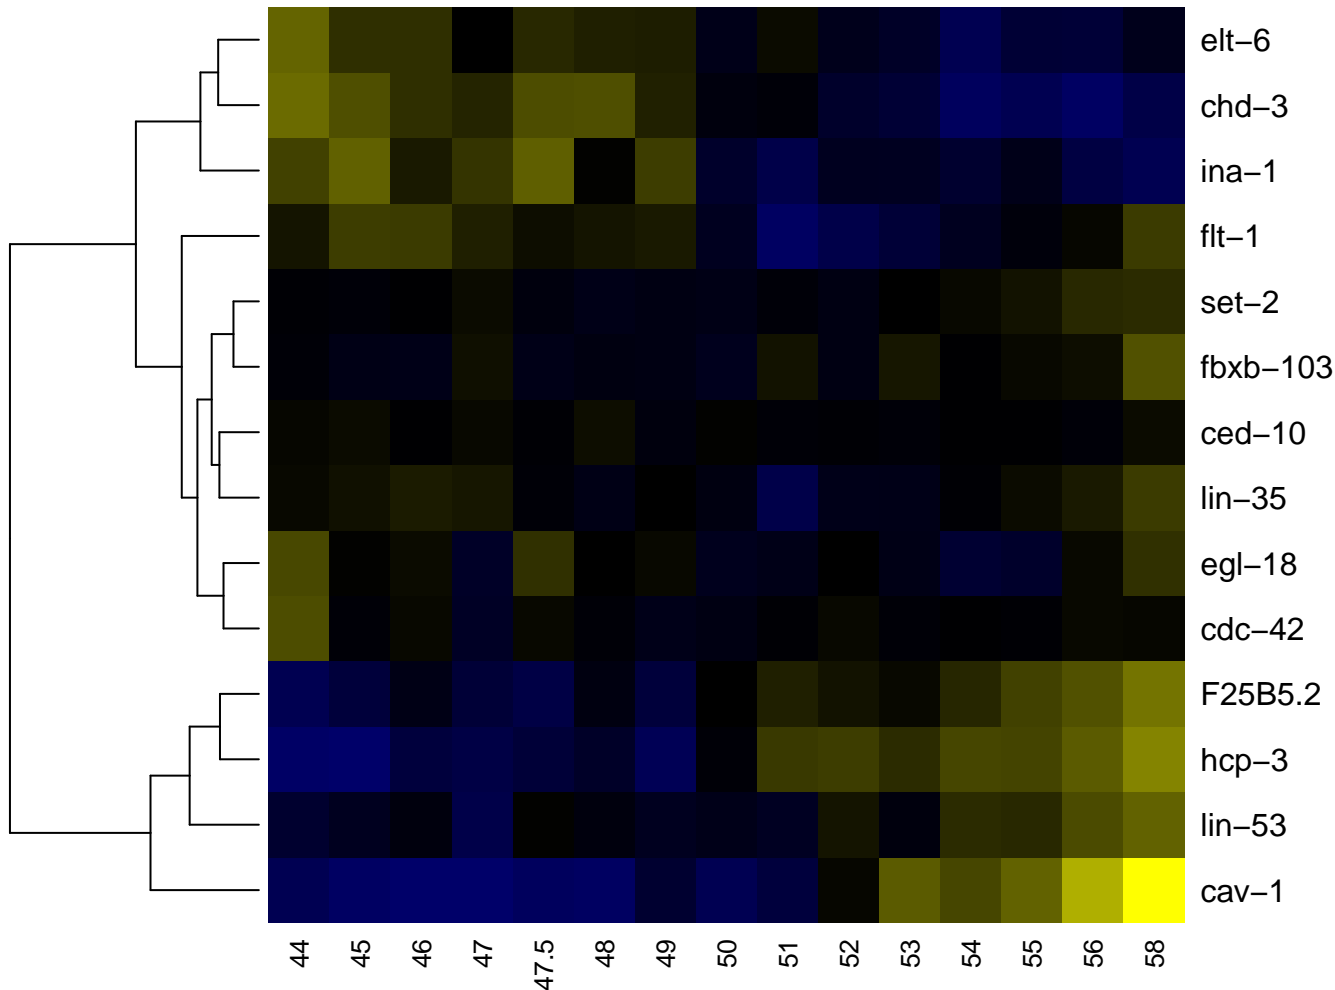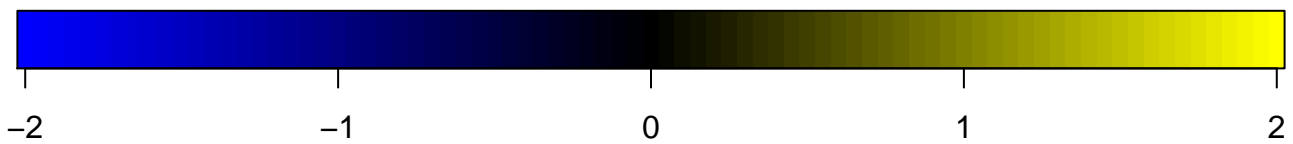



# ABalaaapar



# ABalaaapar1



# ABalaaapp

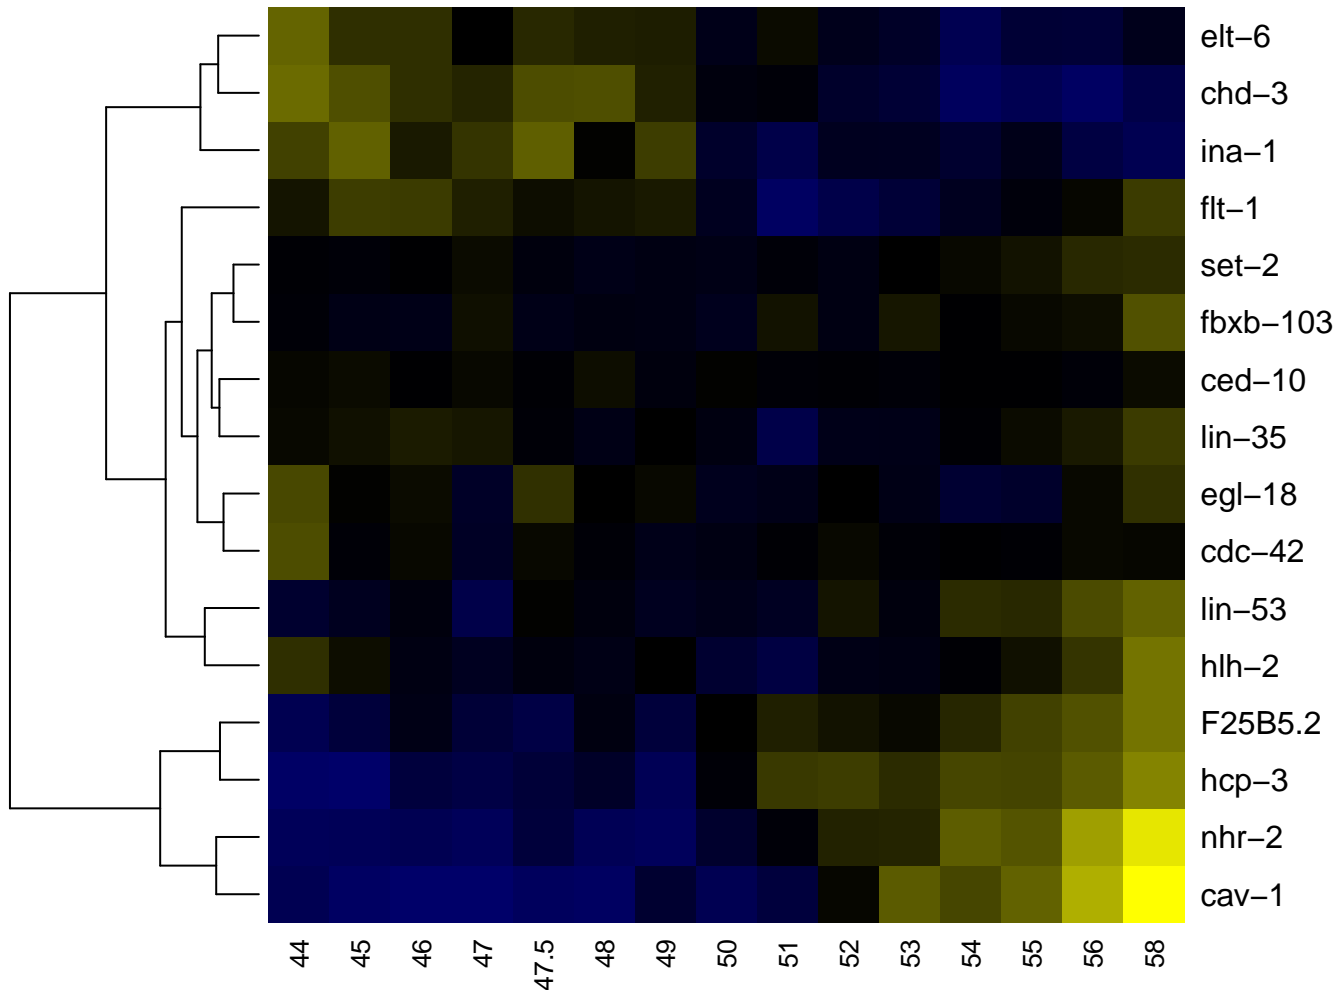

# ABalaaappi

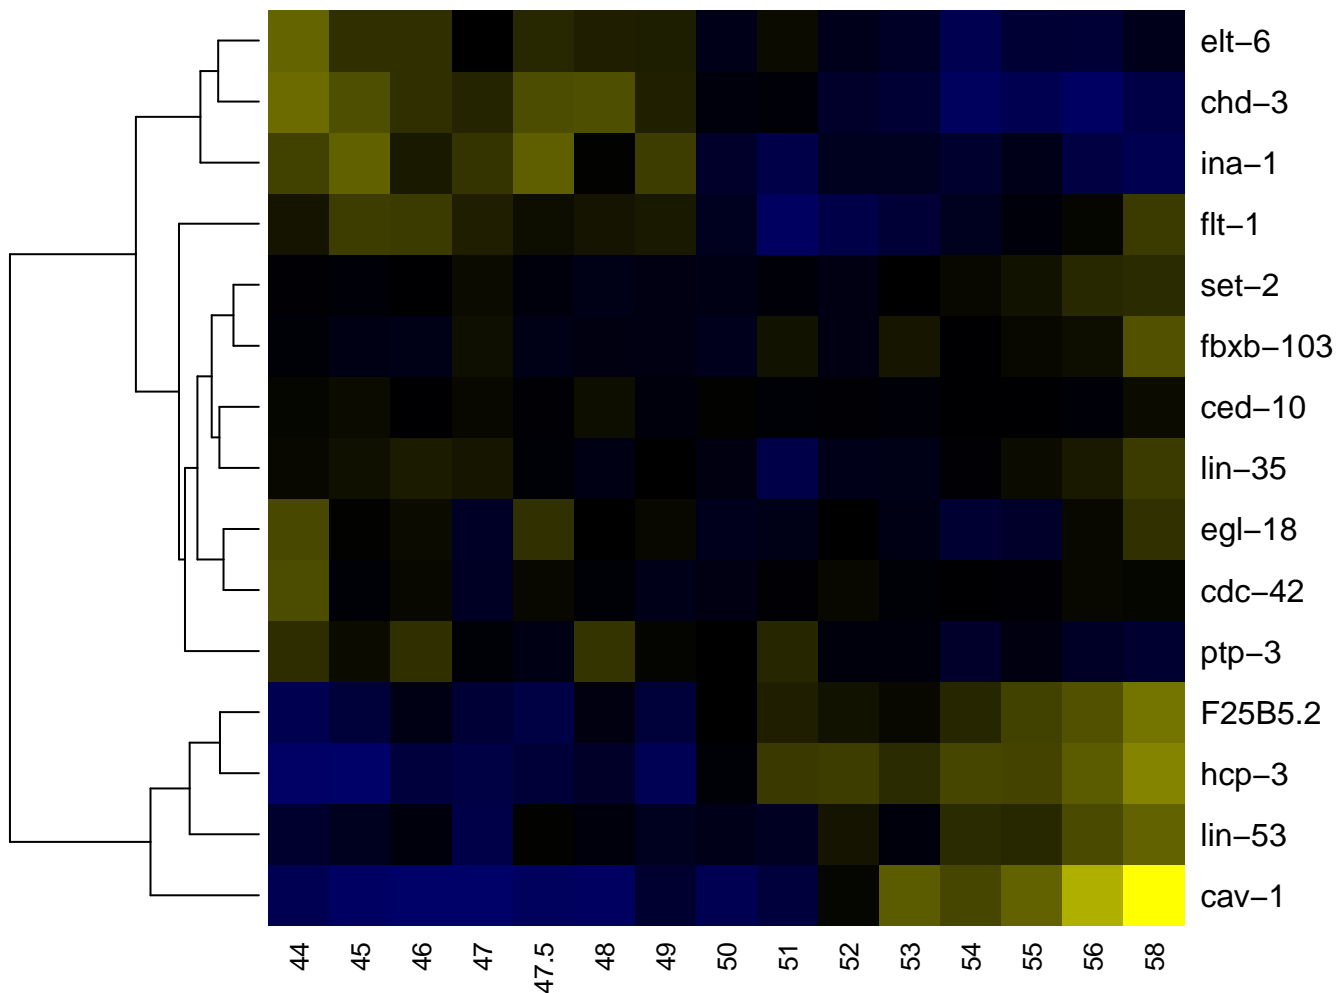

# ABalaaapplr



# ABalaaappr



# ABalaap

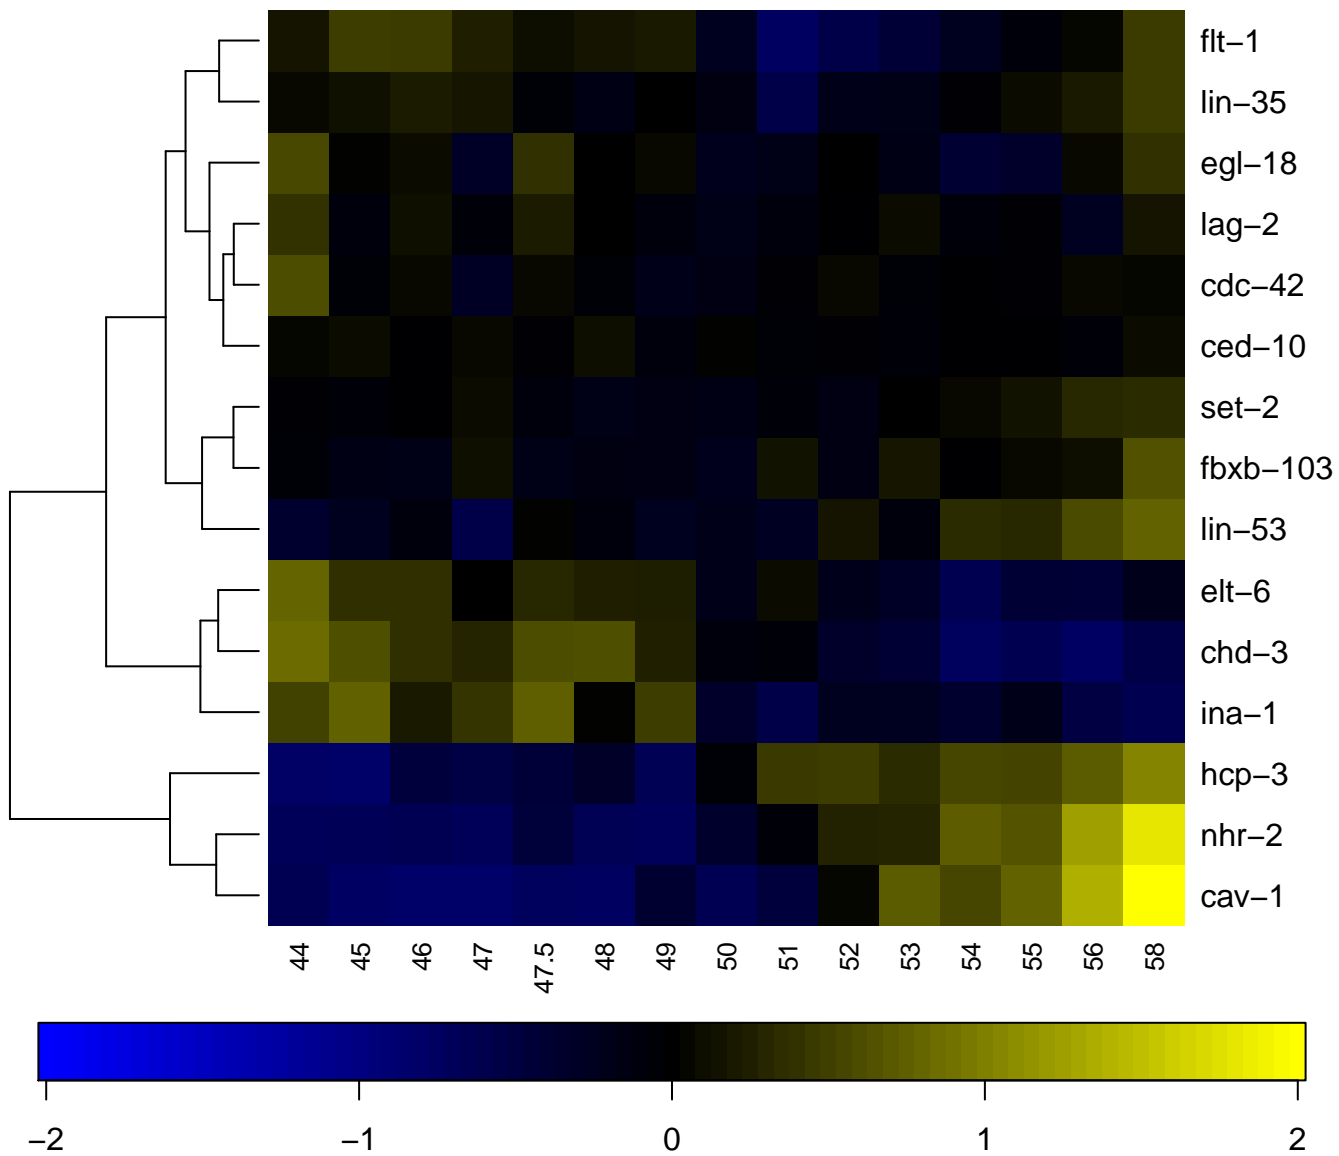

# ABalaapa





# ABalaapaa

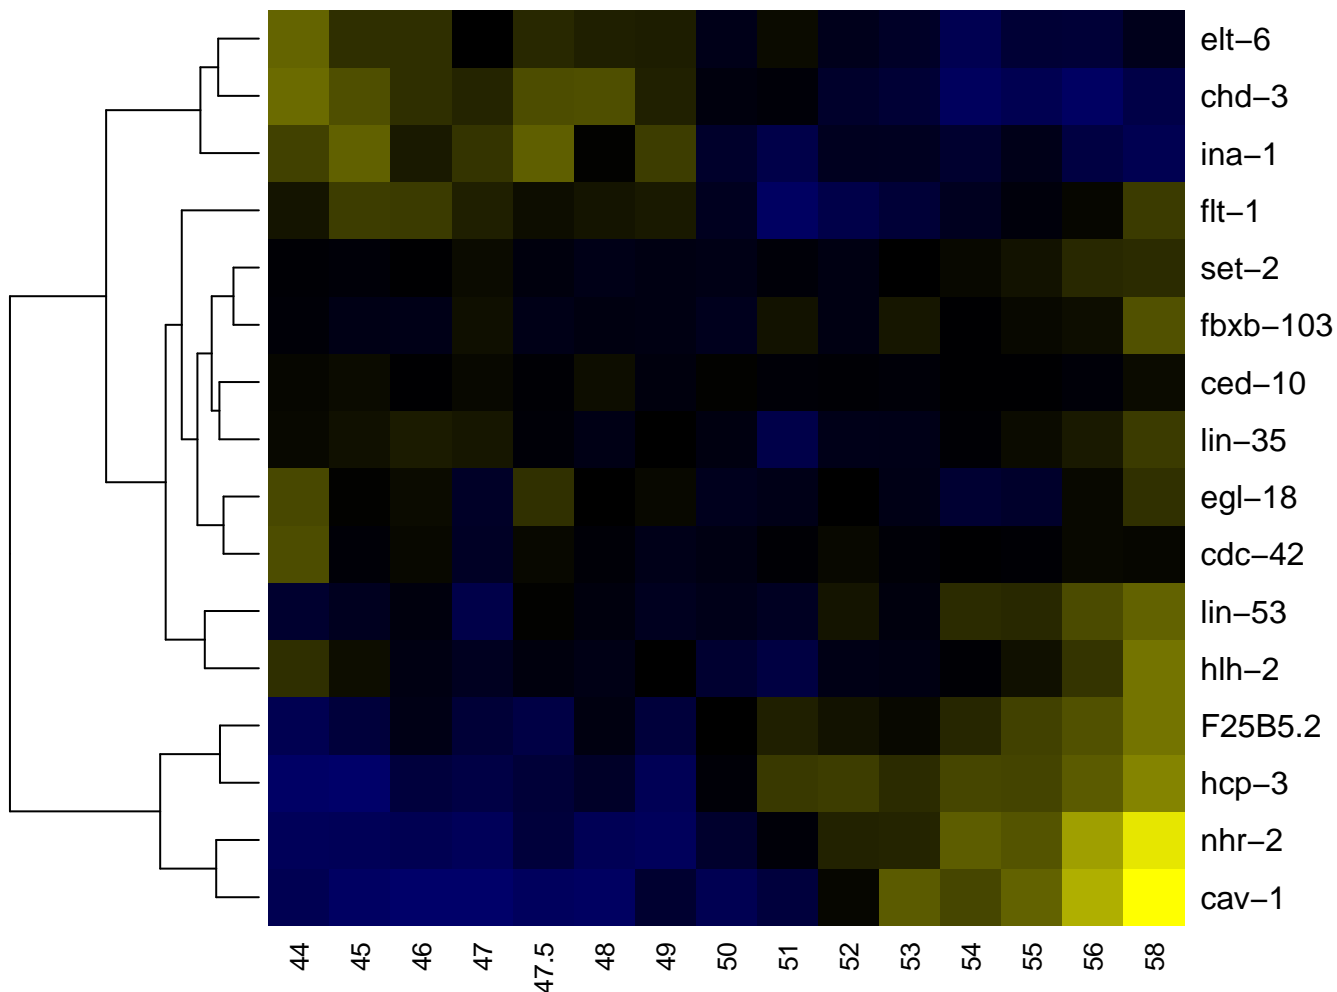

# ABalaapaaa



# ABalaapaaal



# ABalaapaap





# ABalaapap



# ABalaapapa



# ABalaapapp





# ABalaapappa



# ABalaapp

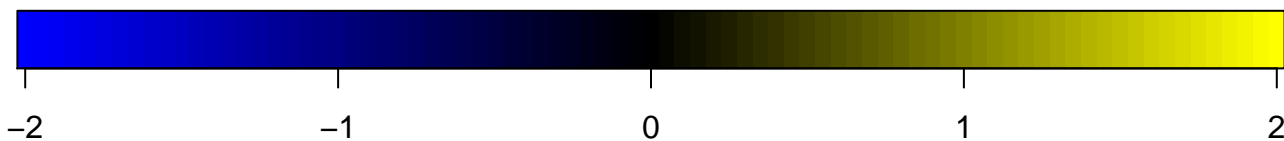

# ABalaappa

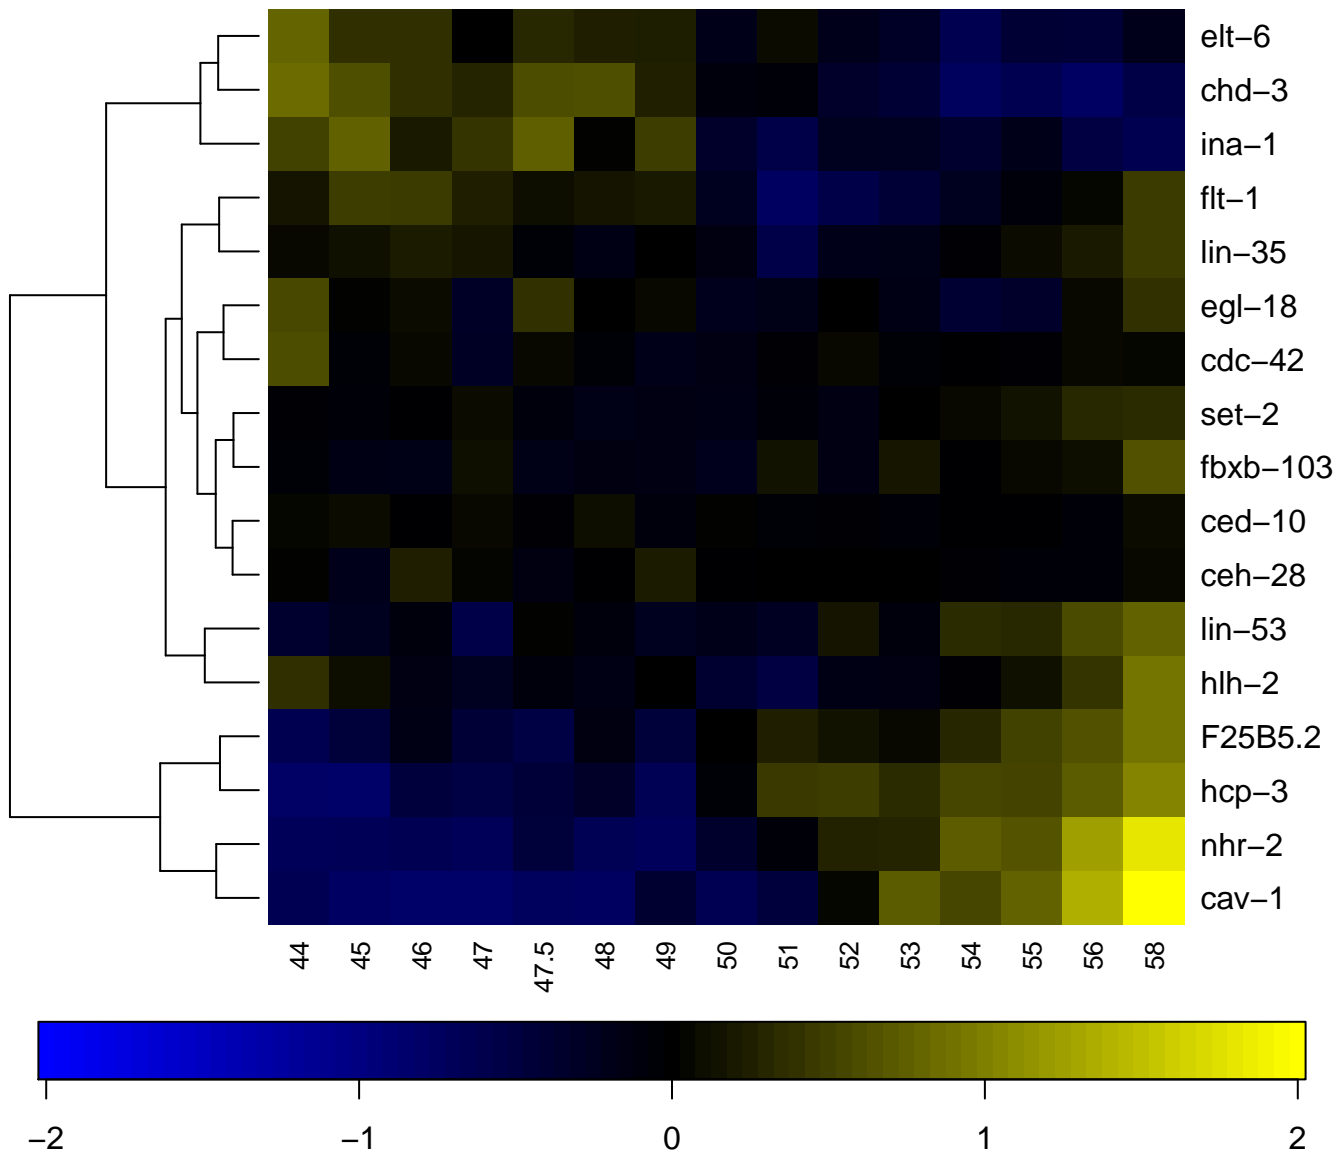

# ABalaappa

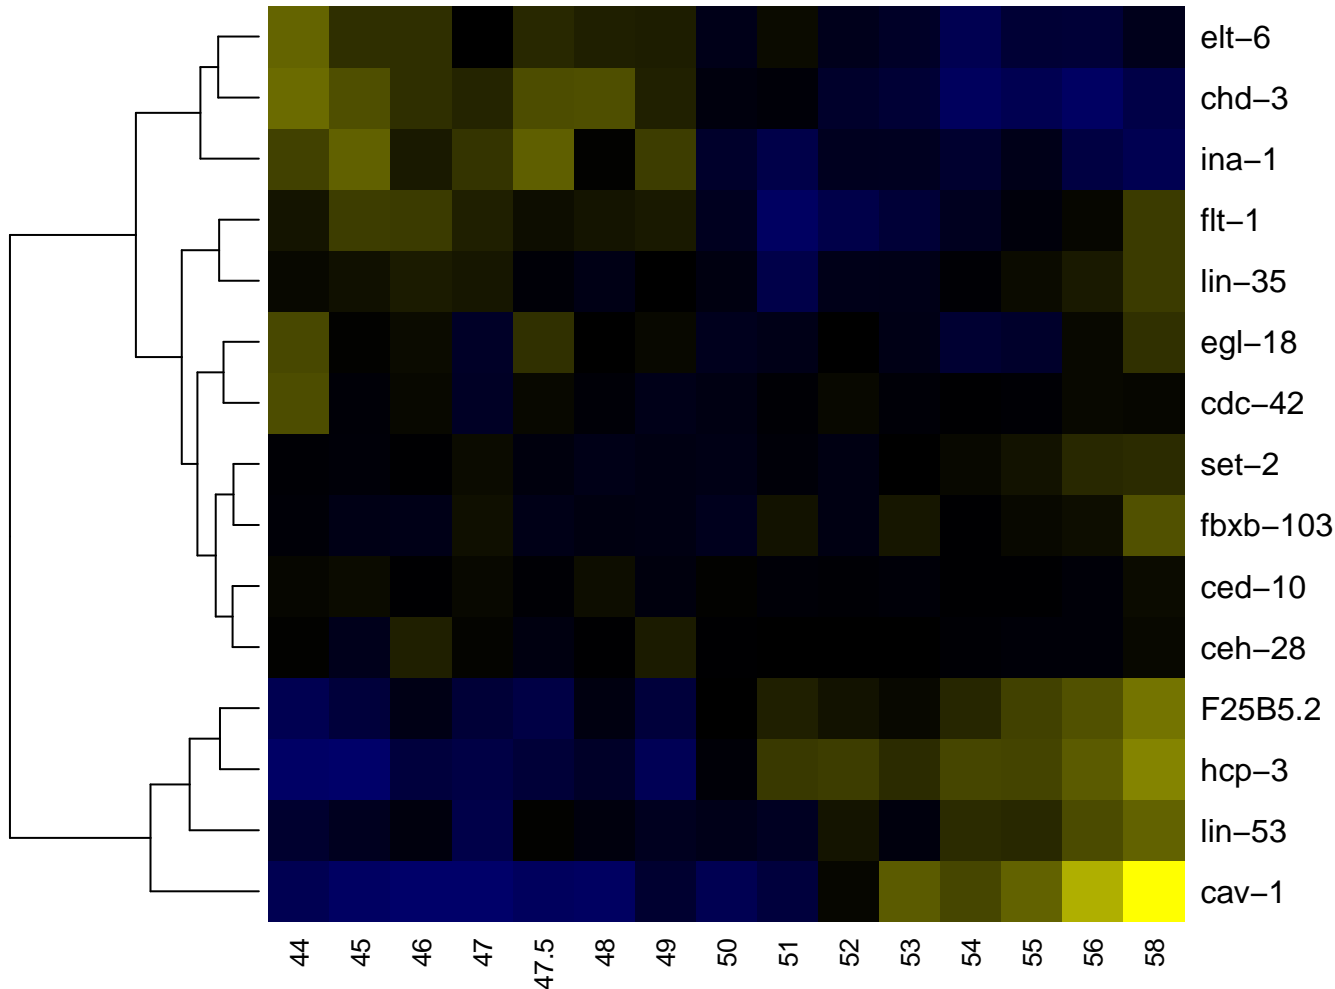

# ABalaappap

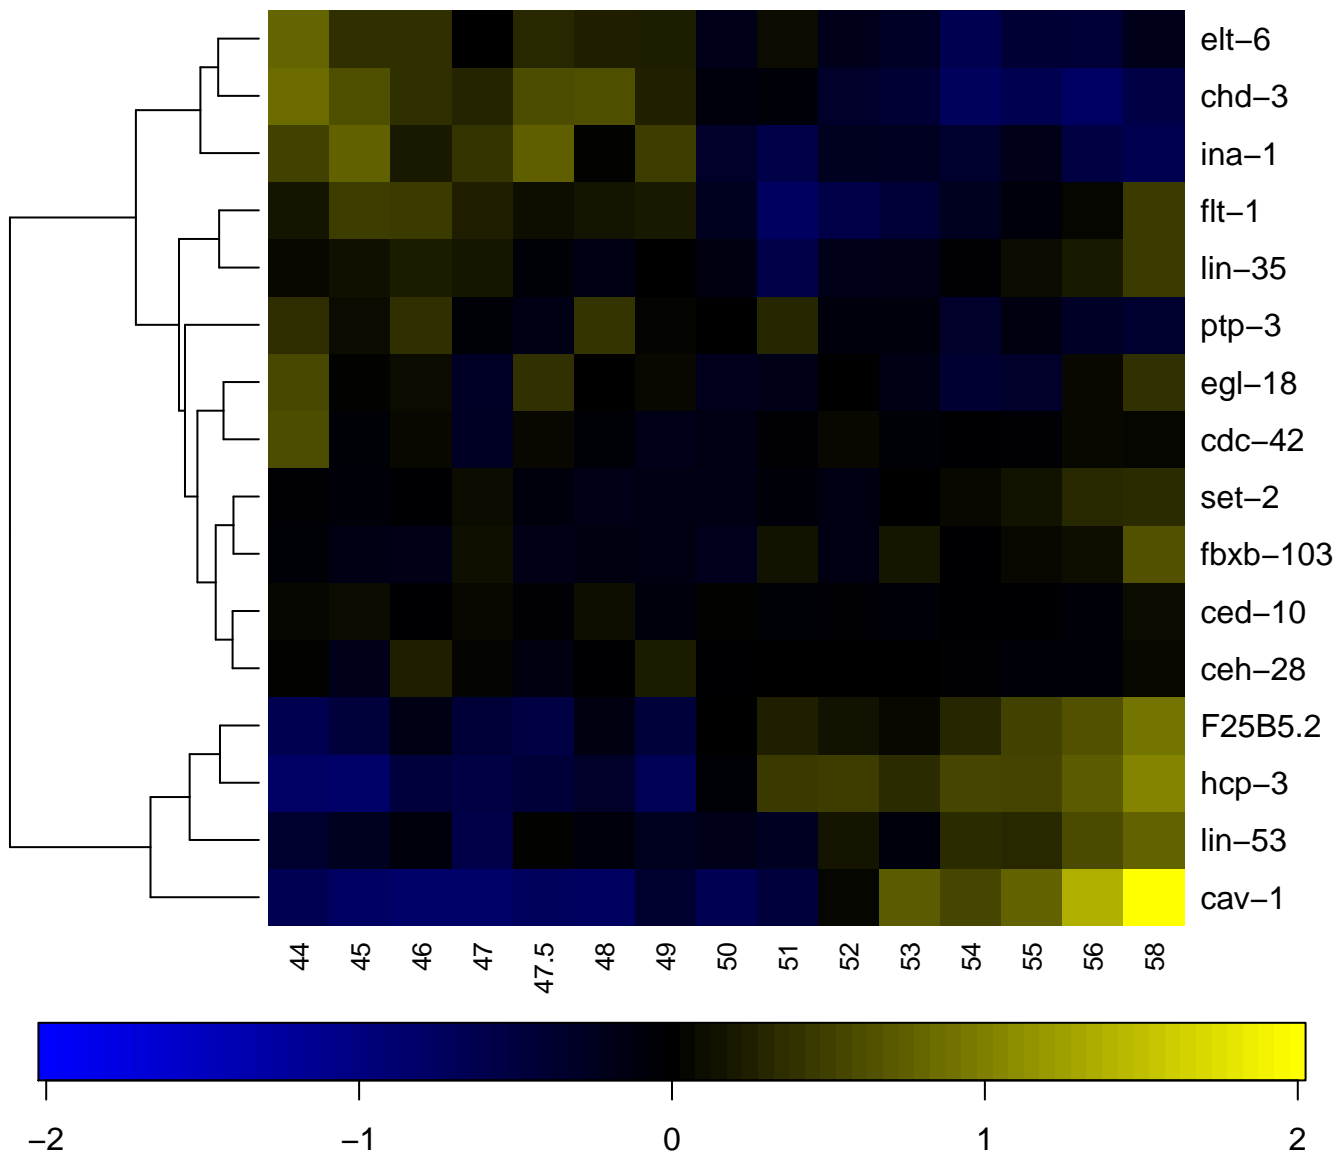

# ABalaapp

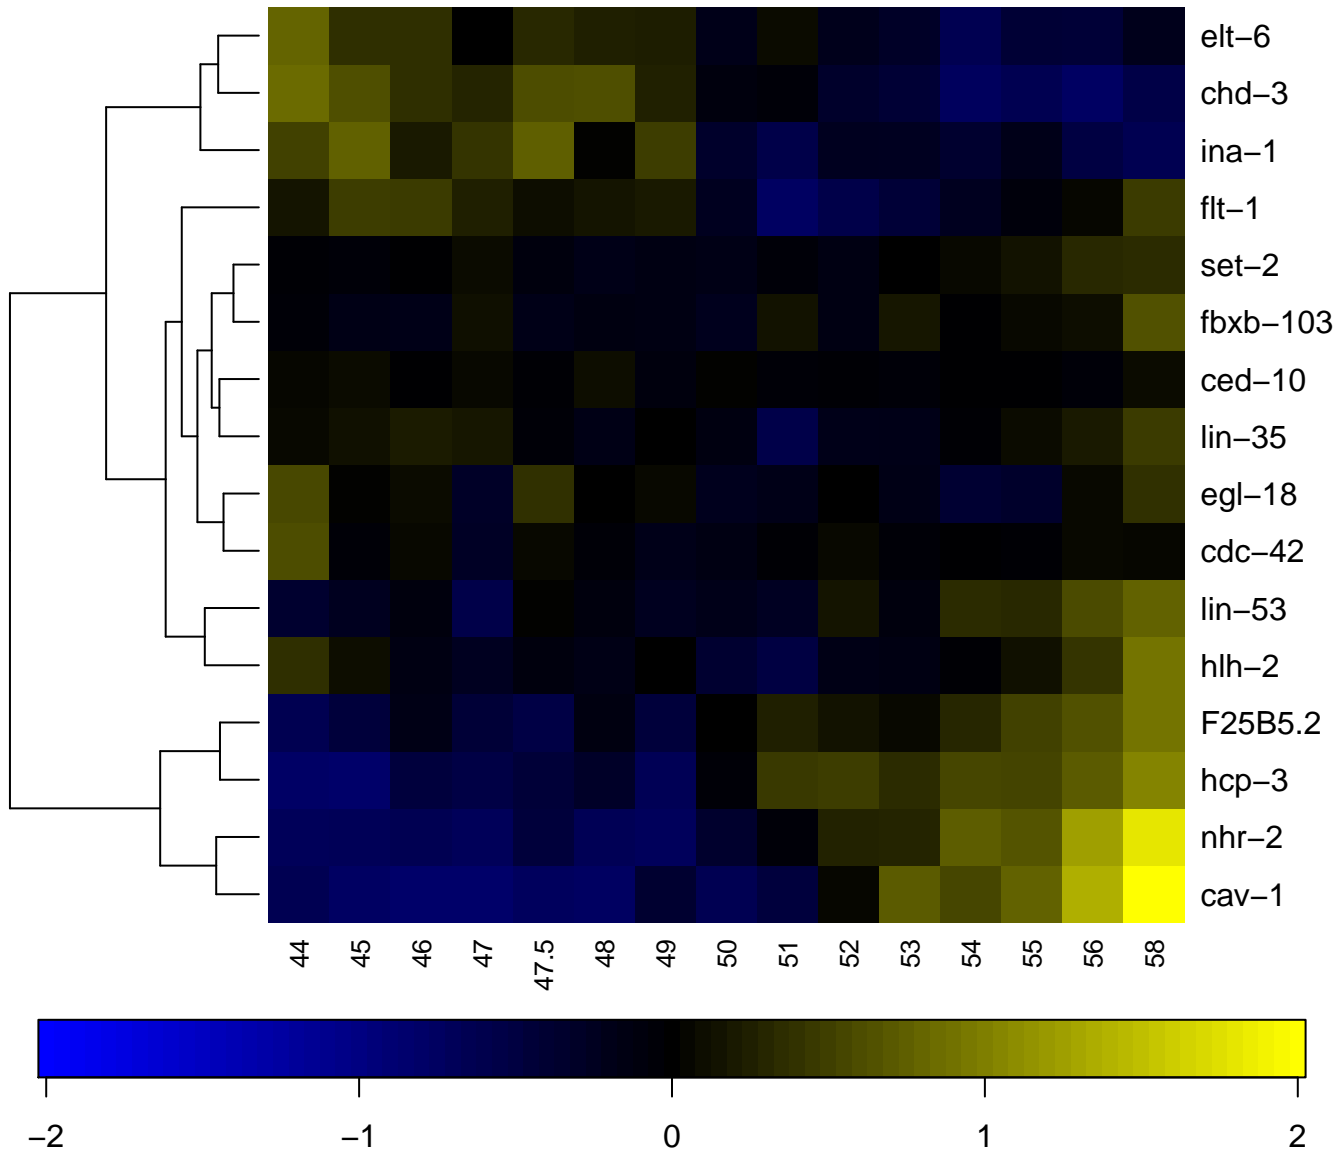

# ABalaappa



# ABalaappap





# ABalaapppp



# ABalaappppa



# ABalaappppap

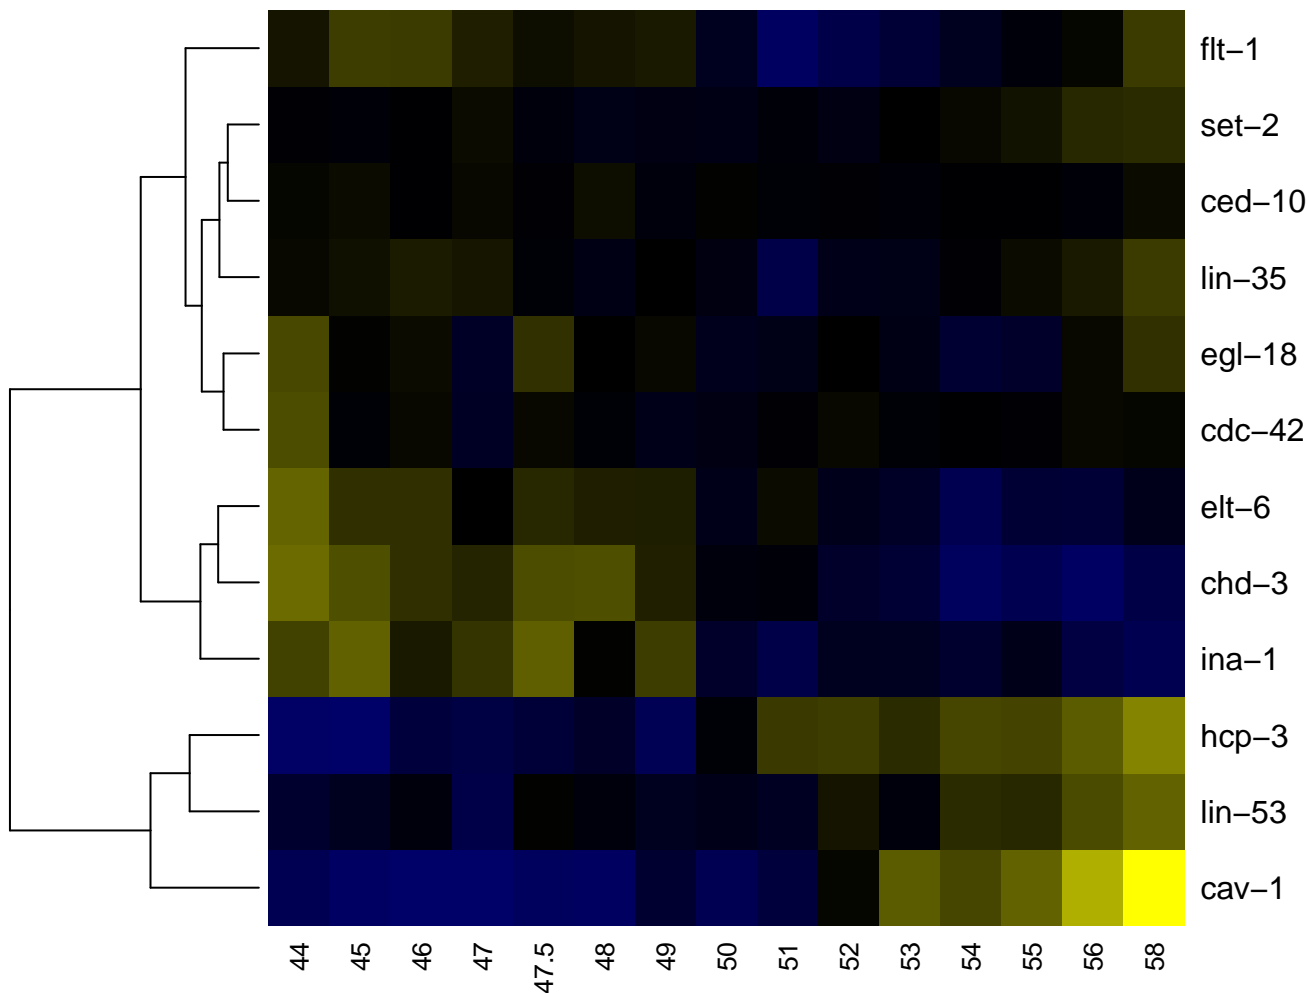

# ABalap

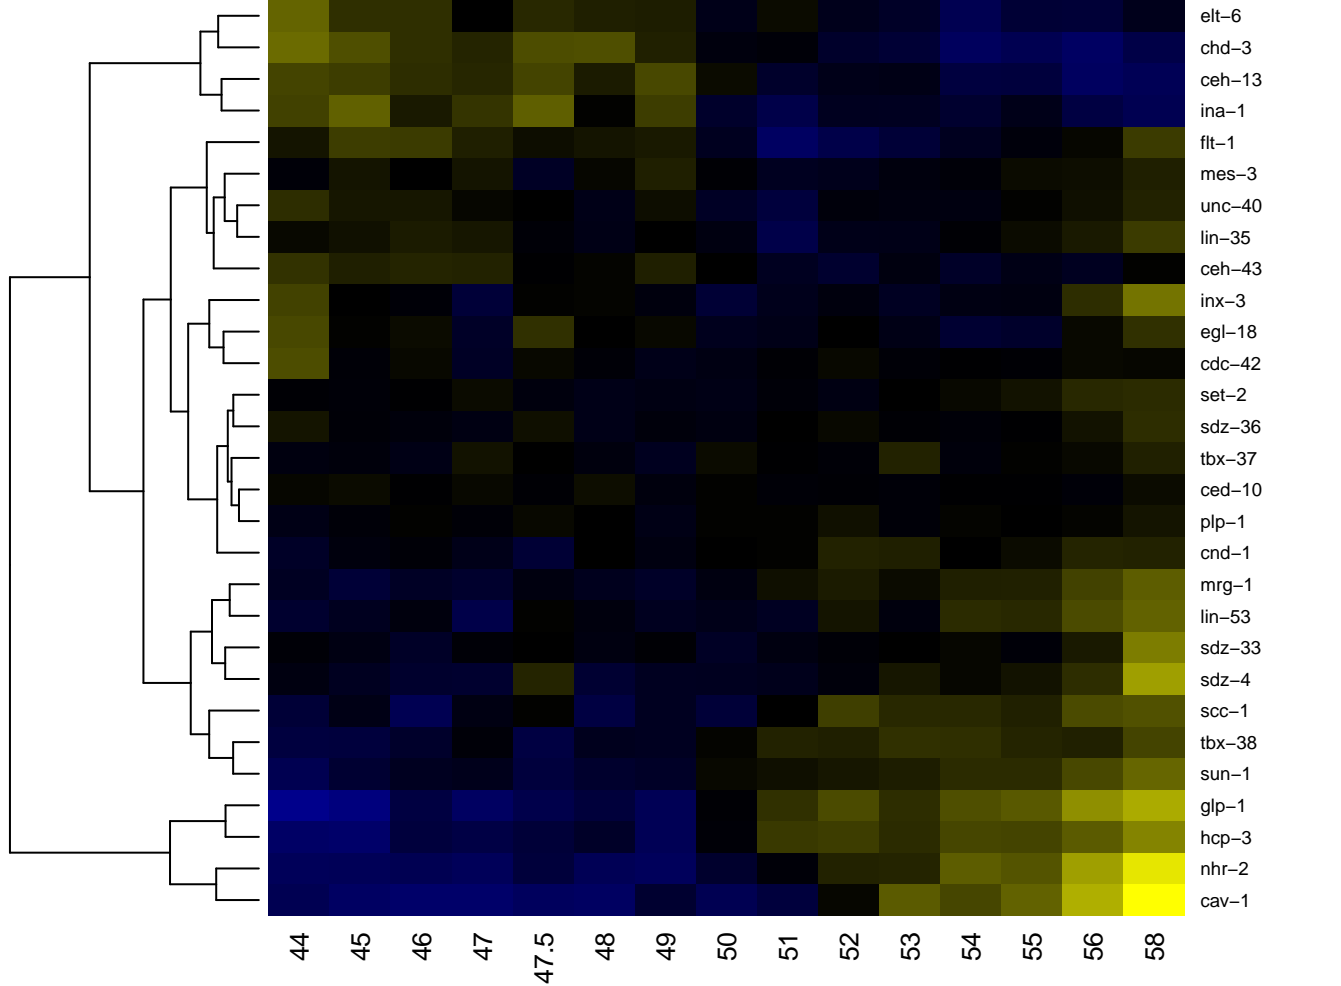

# ABalapa

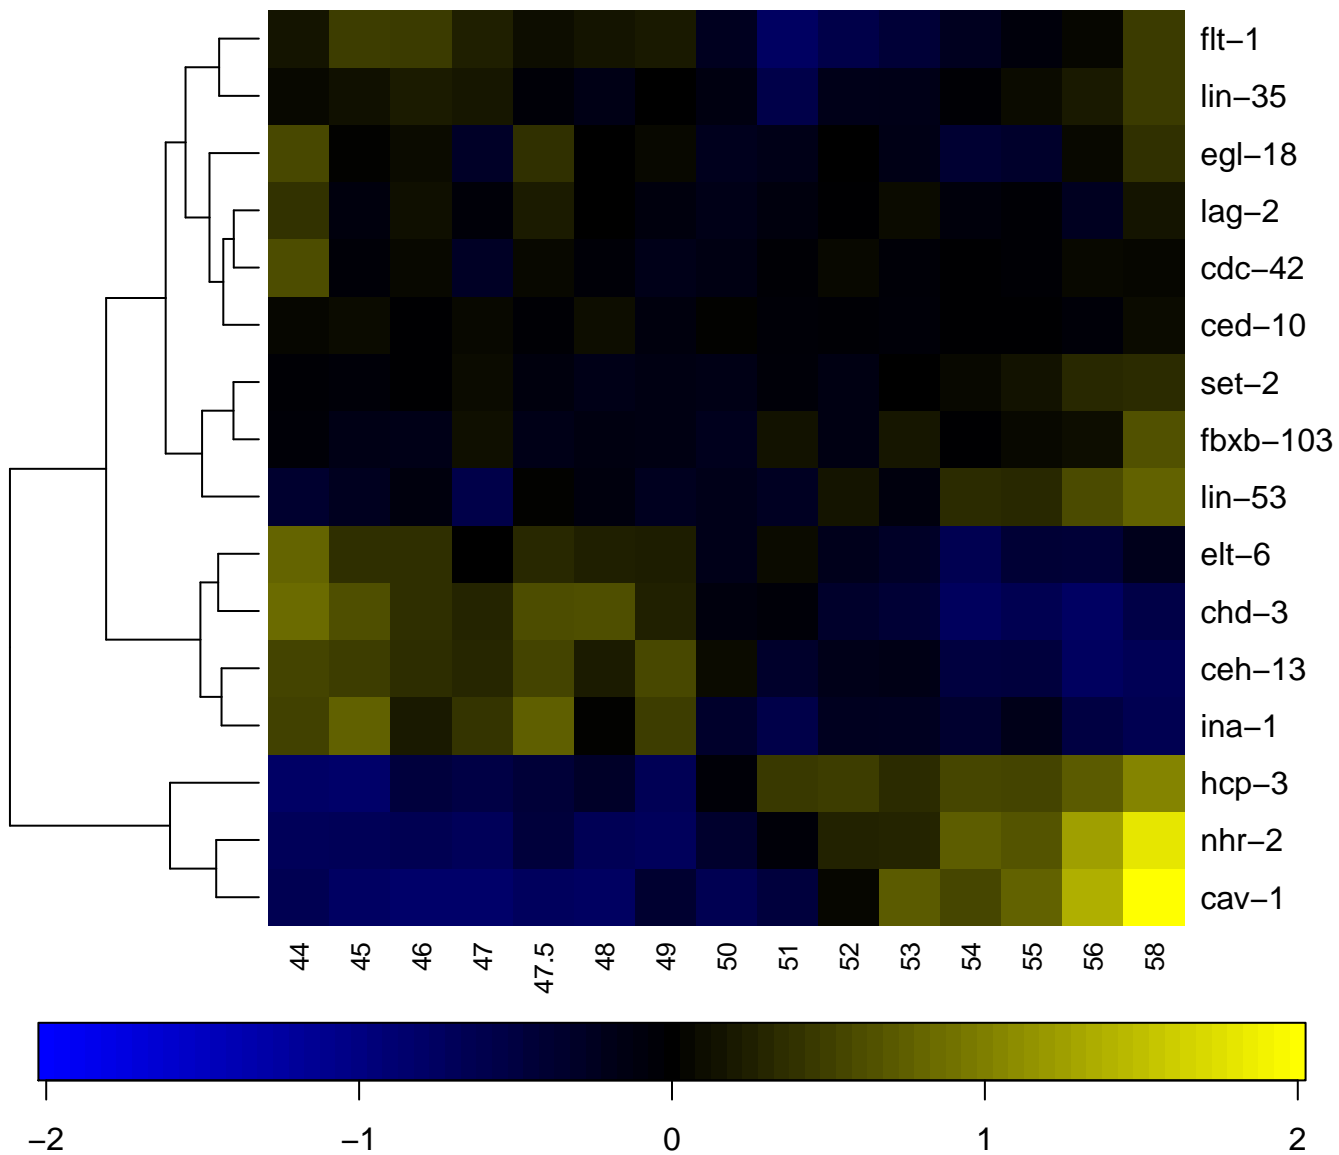

# ABalapaa

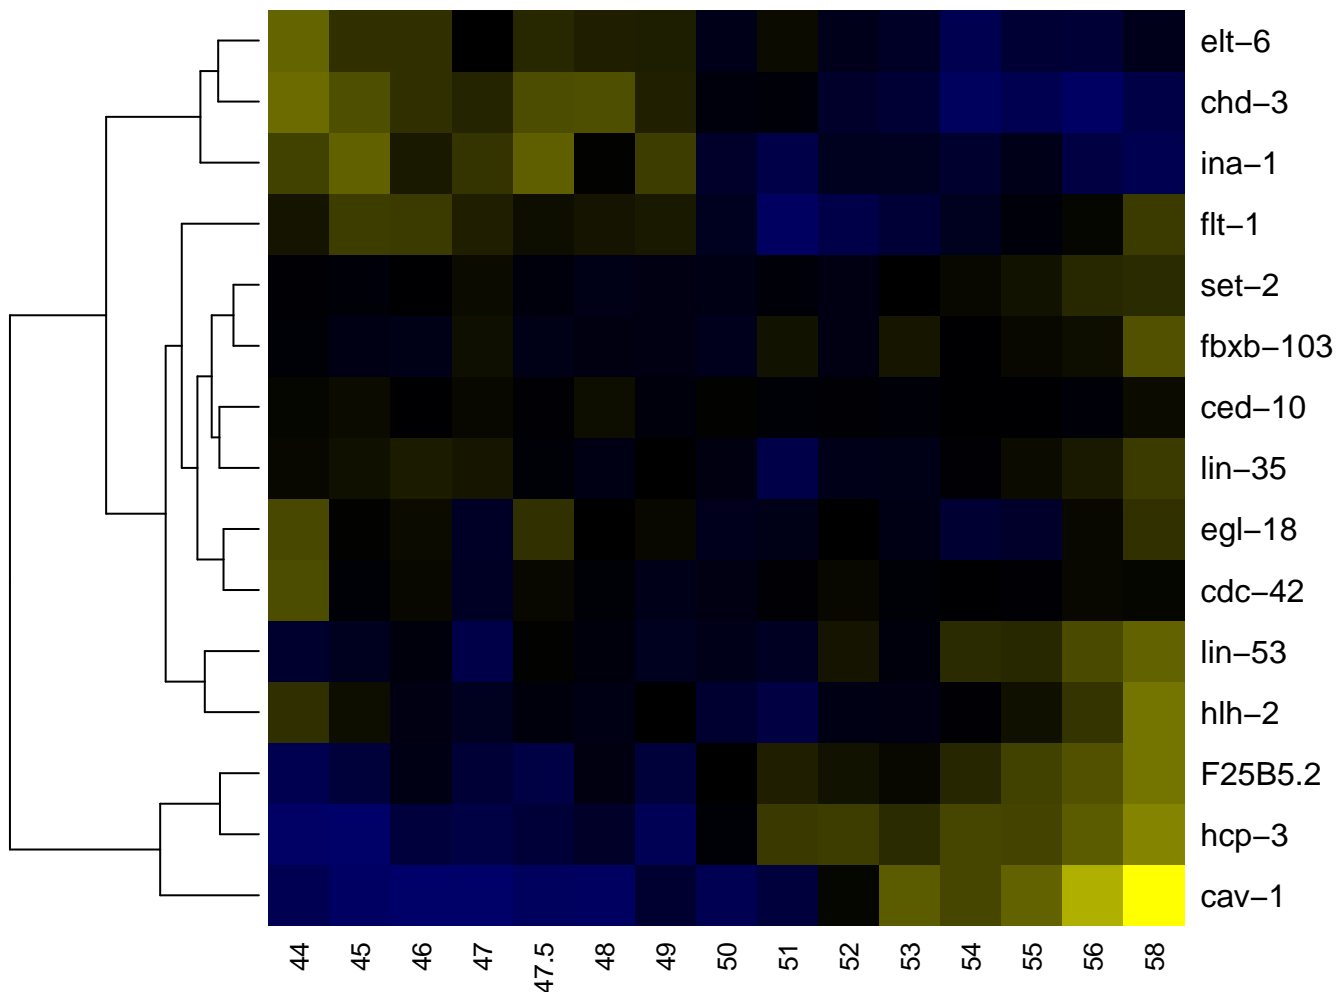



# ABalapaaaa

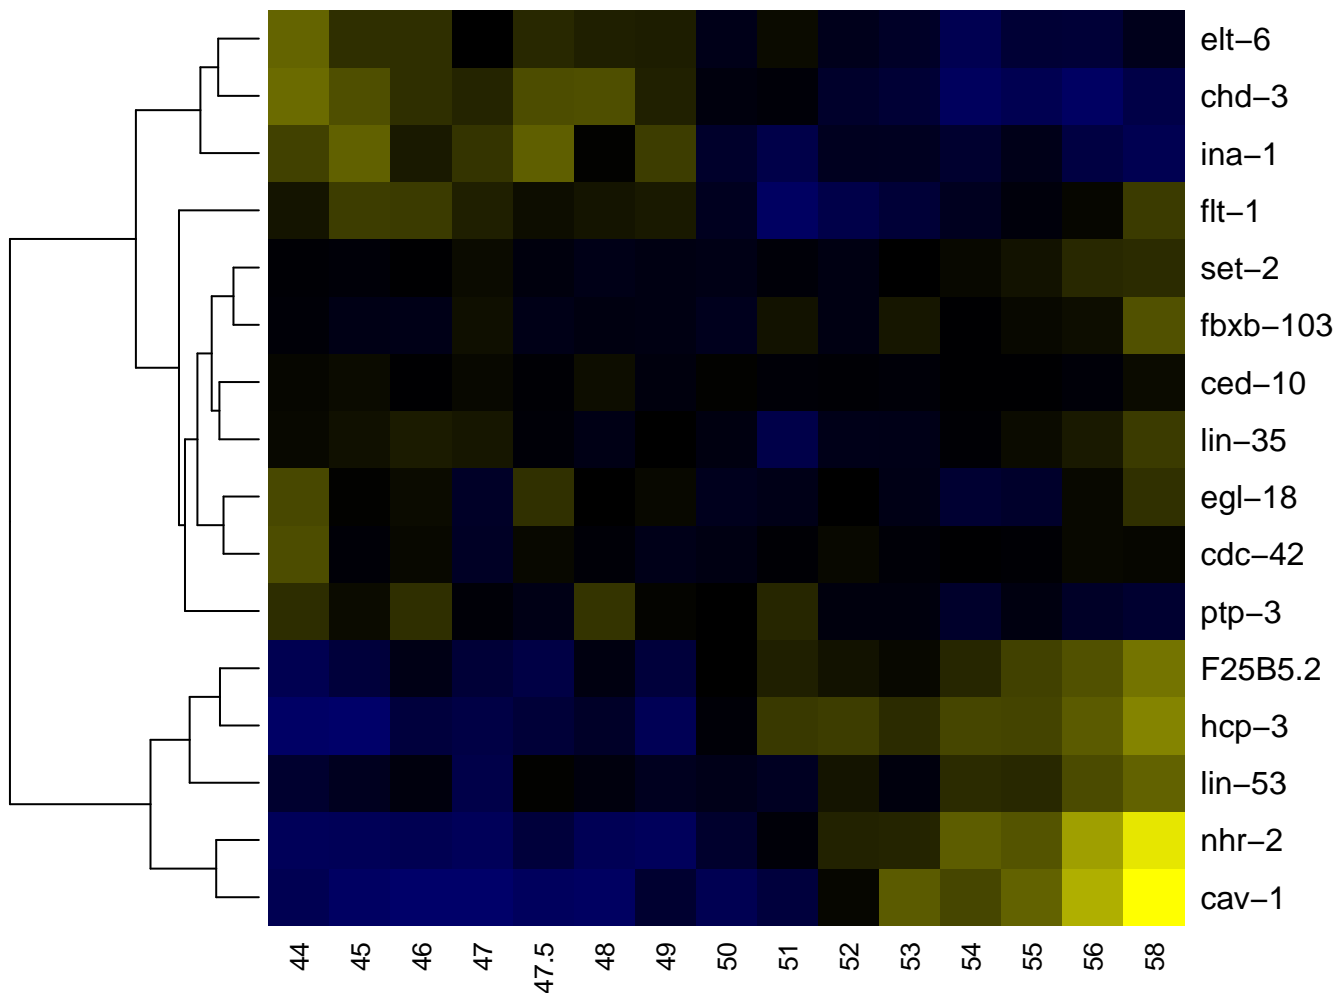



# ABalapaaaap

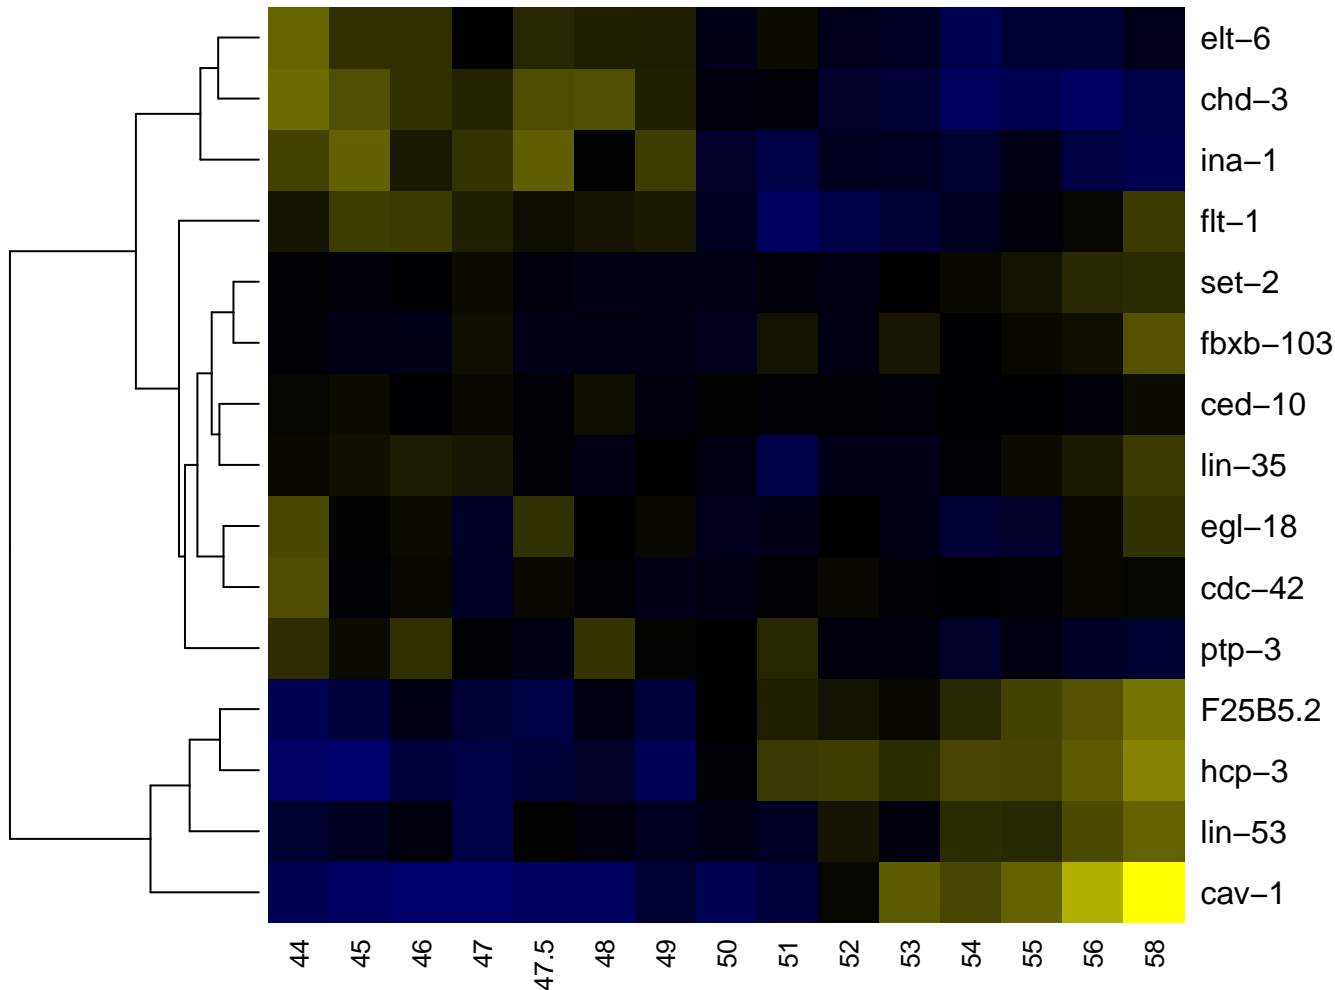

# ABalapaap

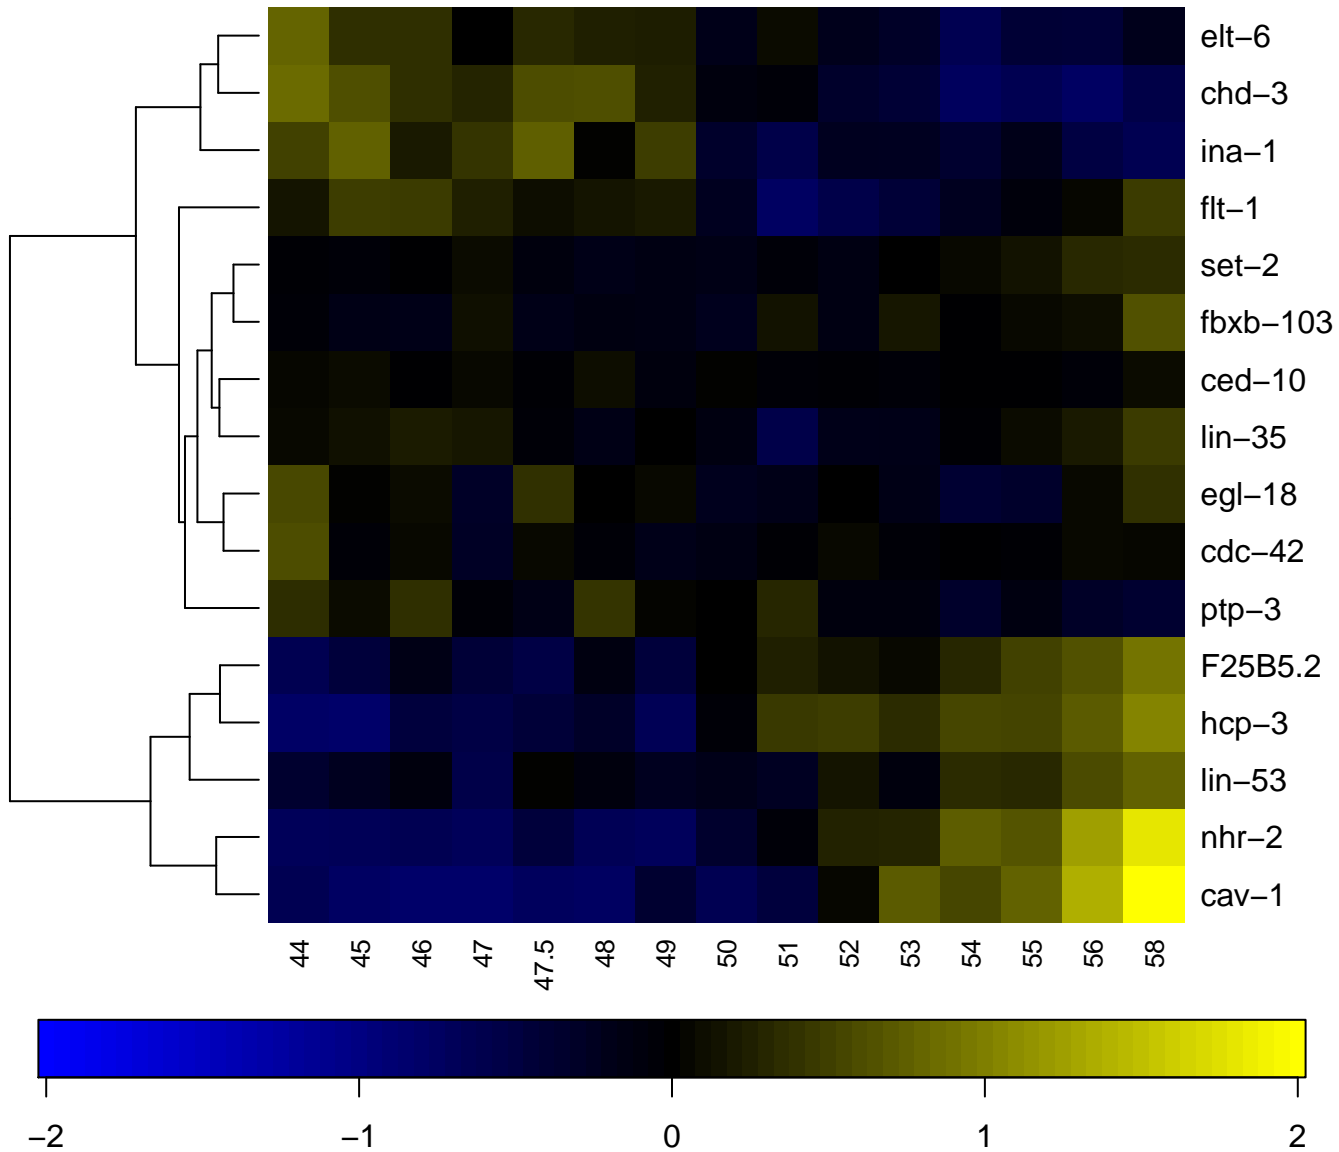





# ABalapaapap



# ABalapaapp

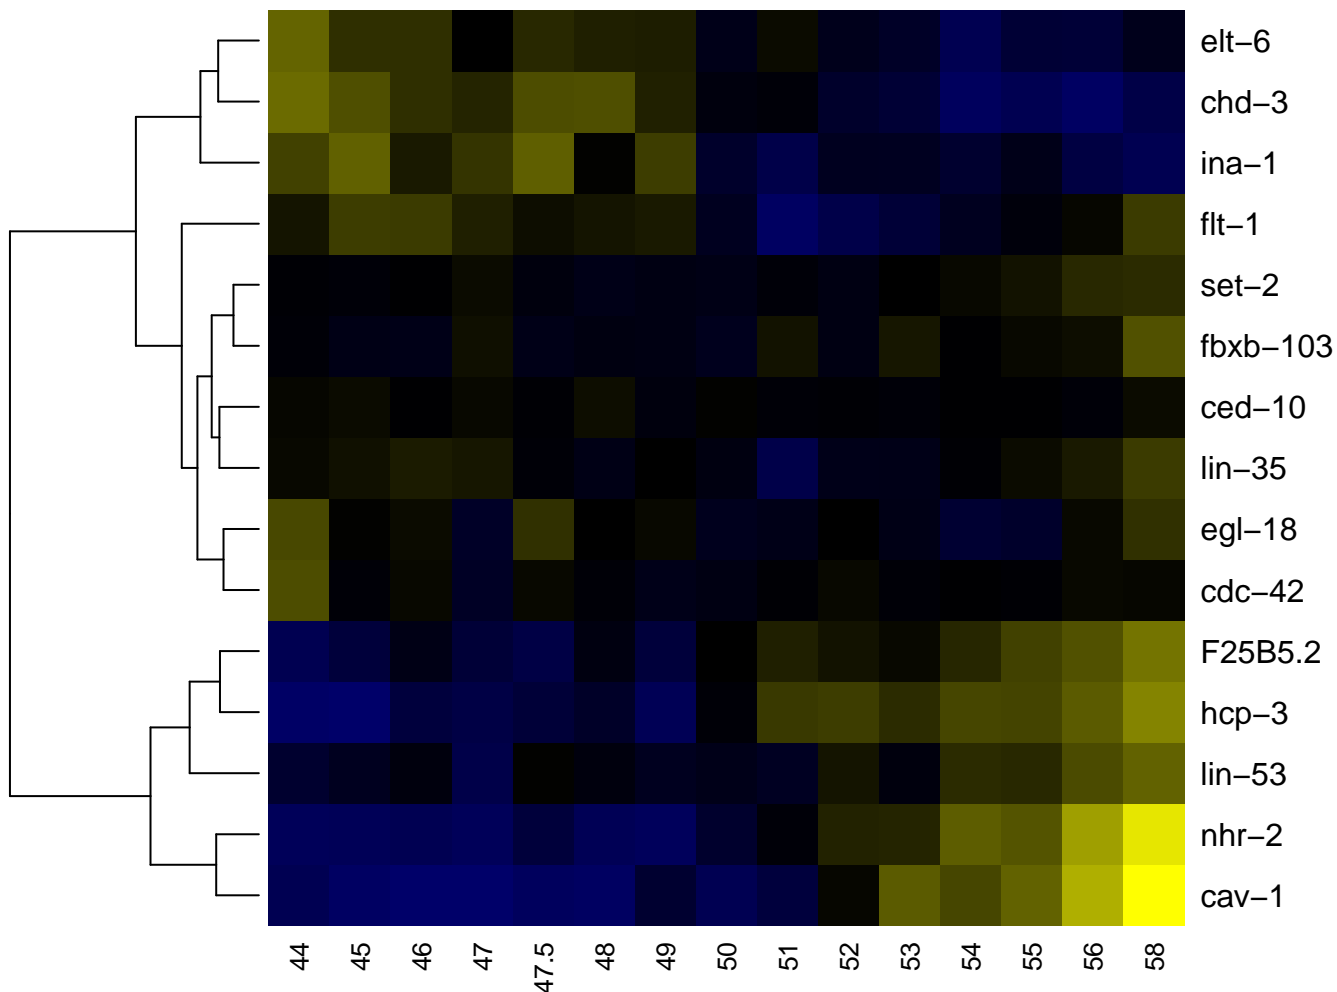

# ABalapaappa



# ABalapaappap

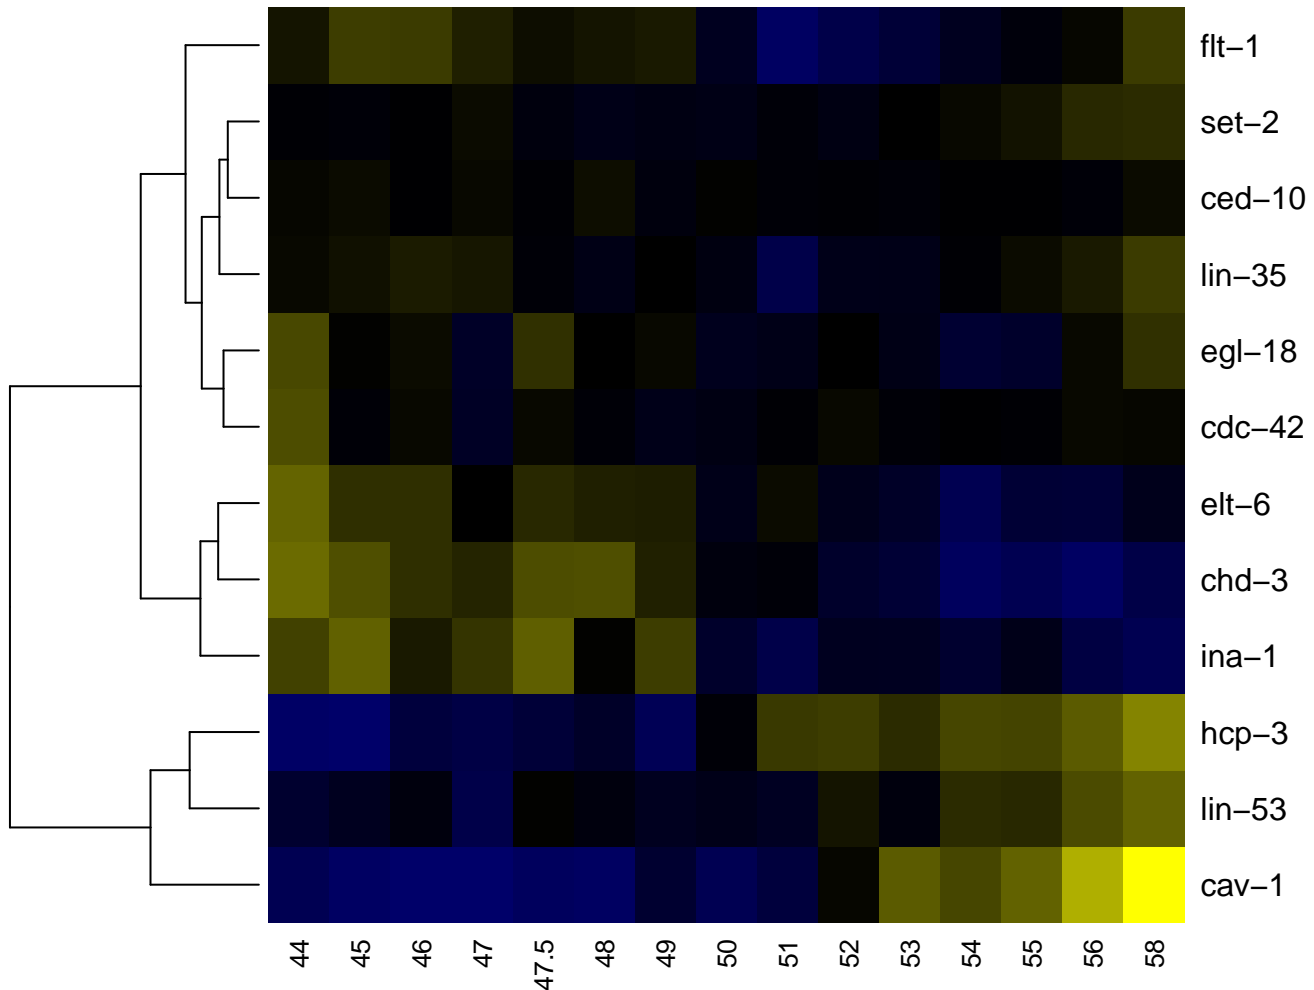



# ABalapap

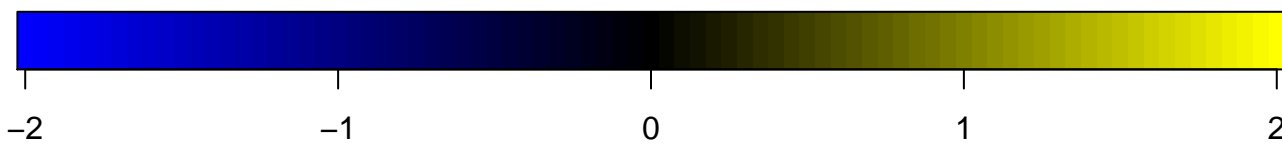

# ABalapapa

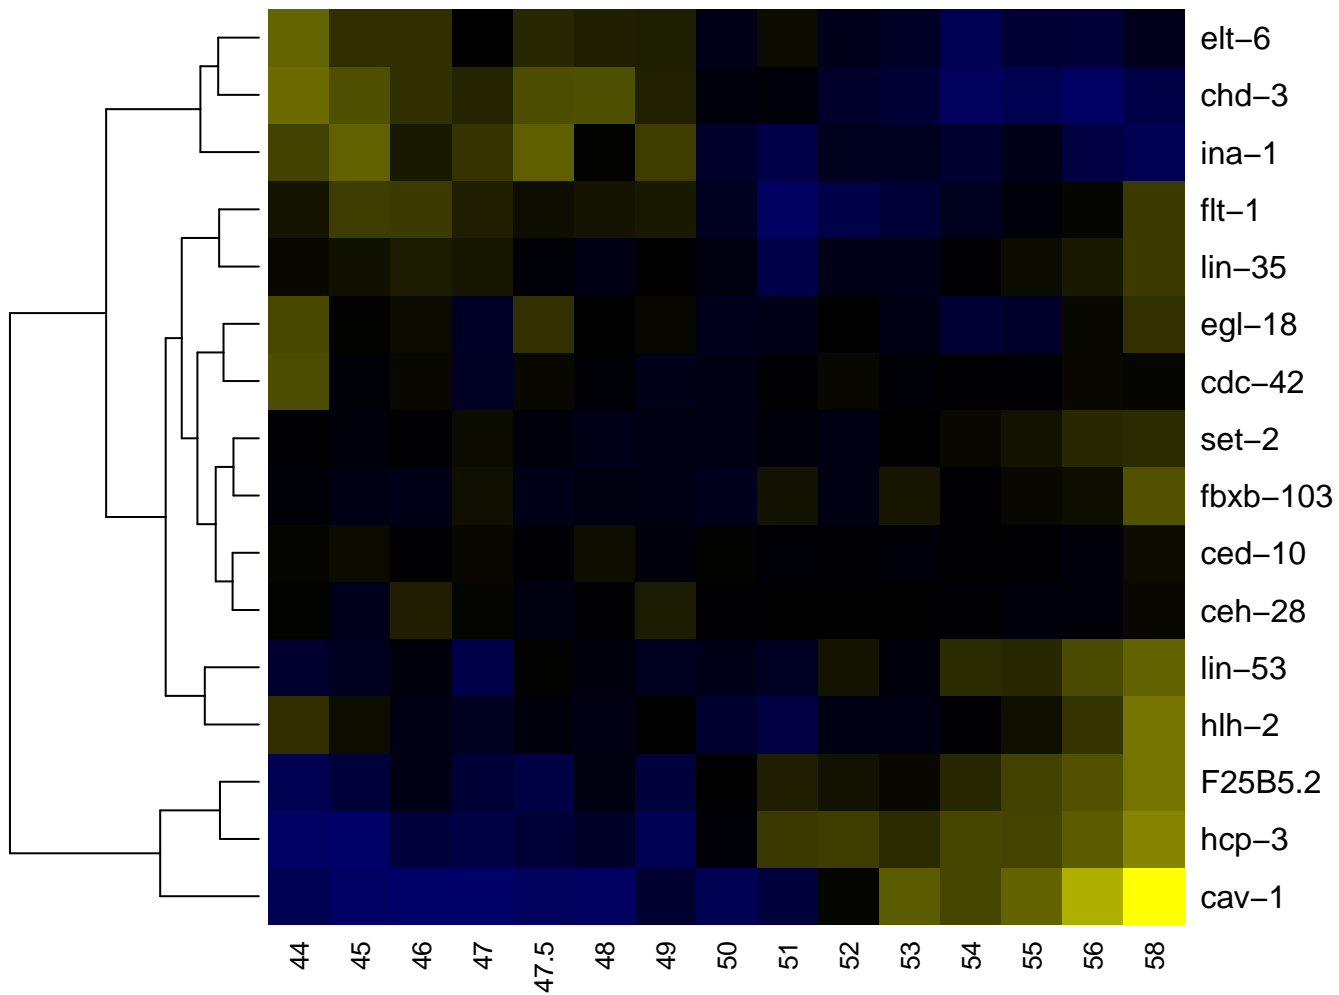

-2

-1

0

1

2

# ABalapapaa

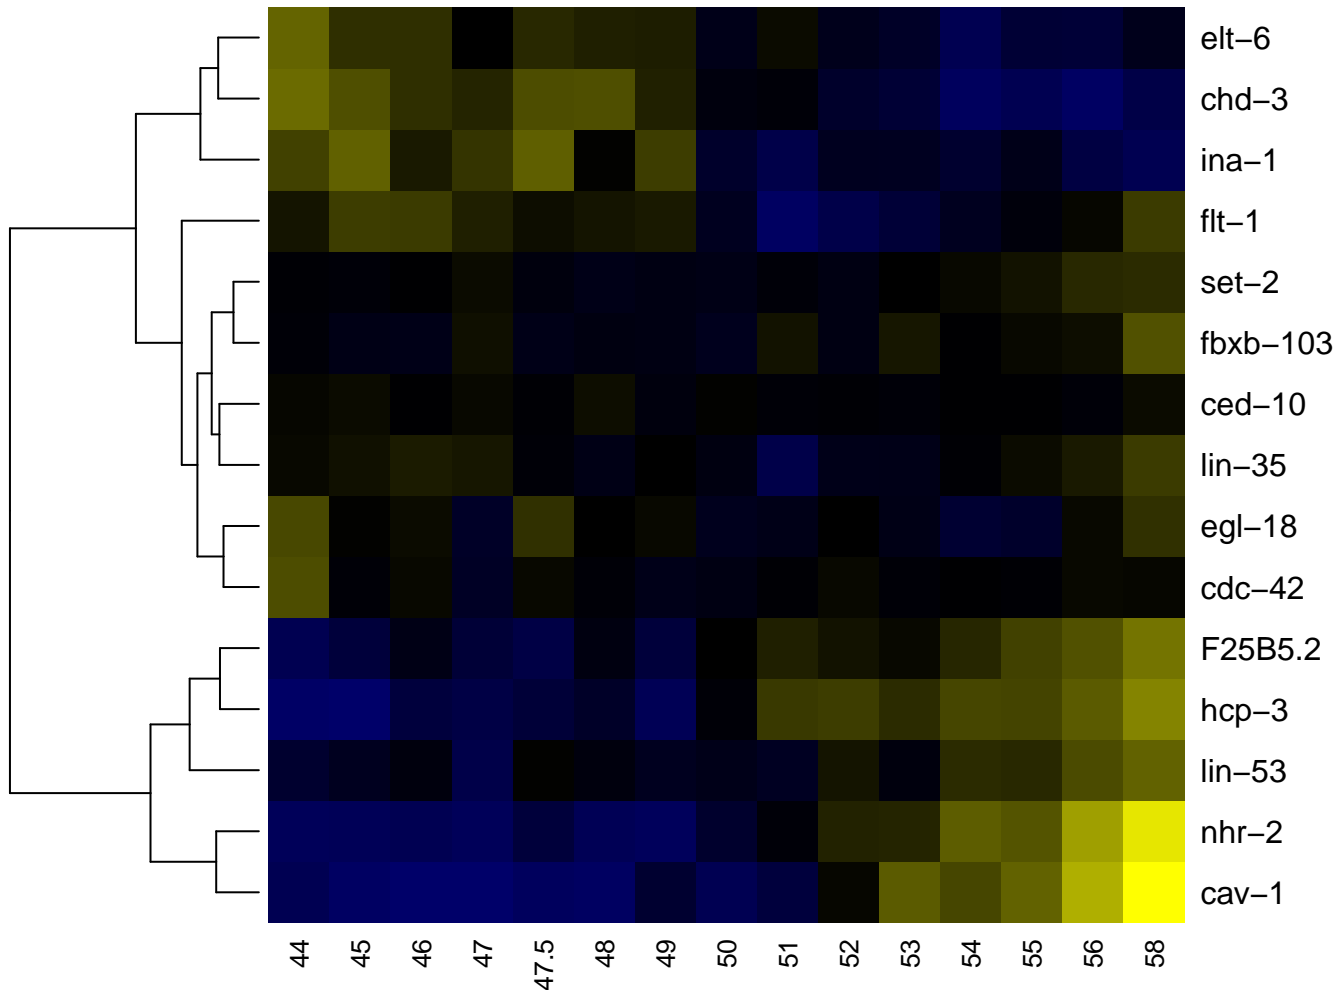

# ABalapapap

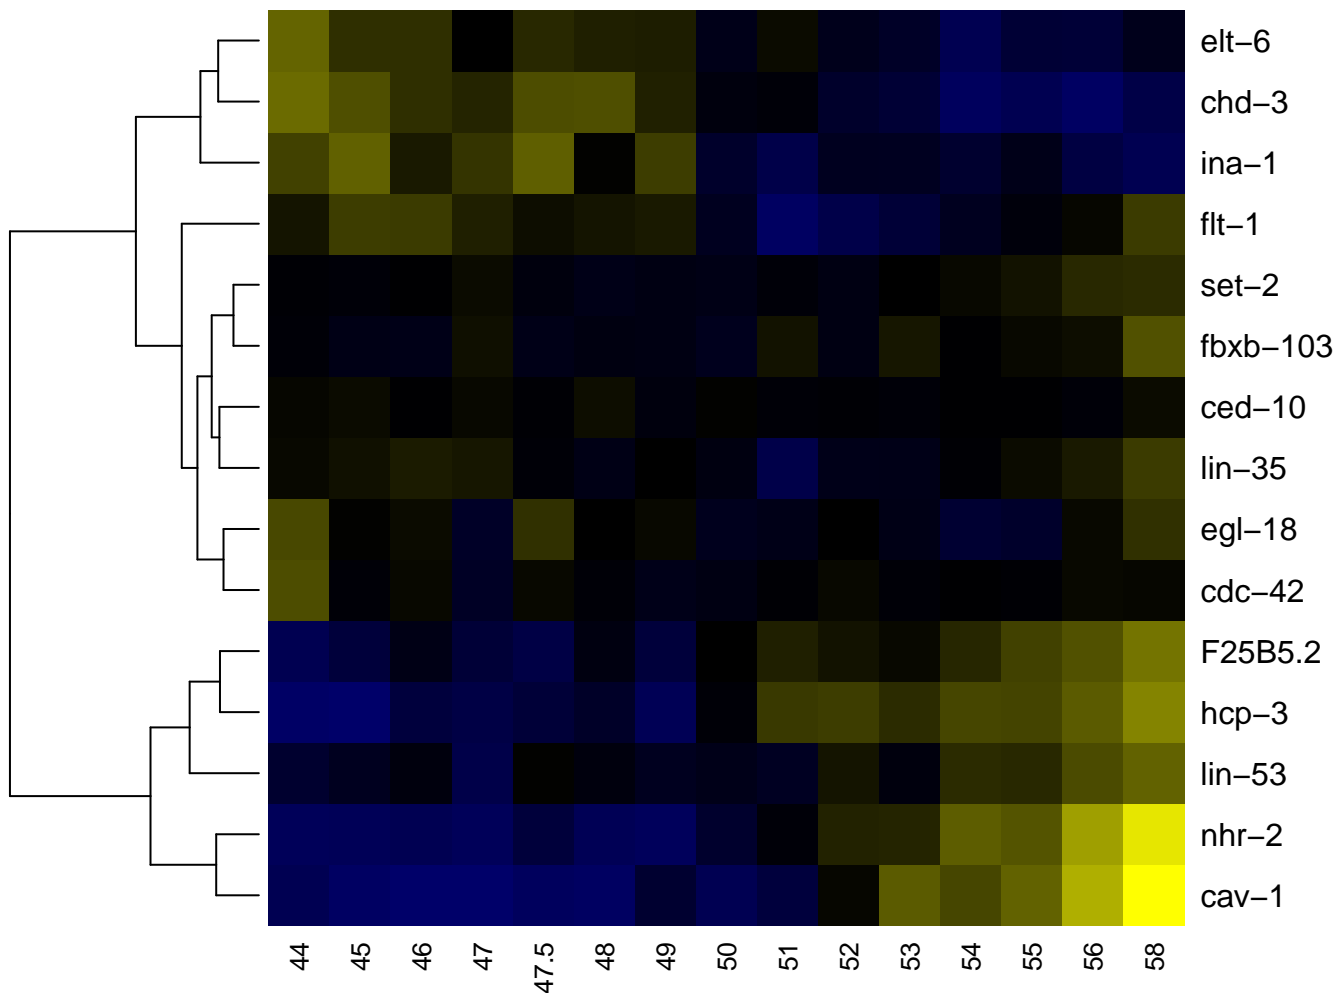

# ABalapapapa



# ABalapapapap

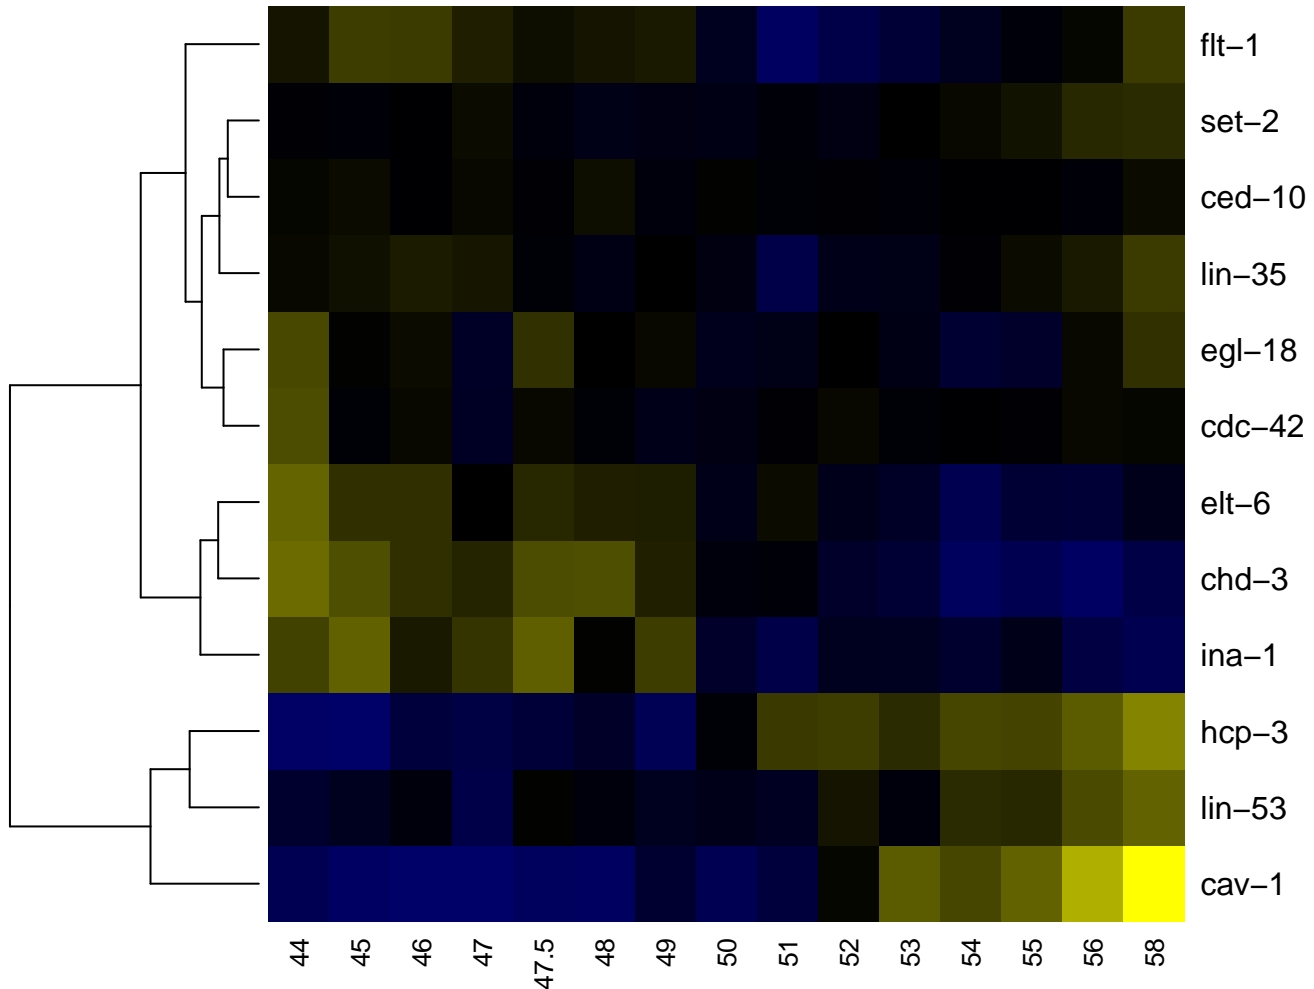

# ABalapapp

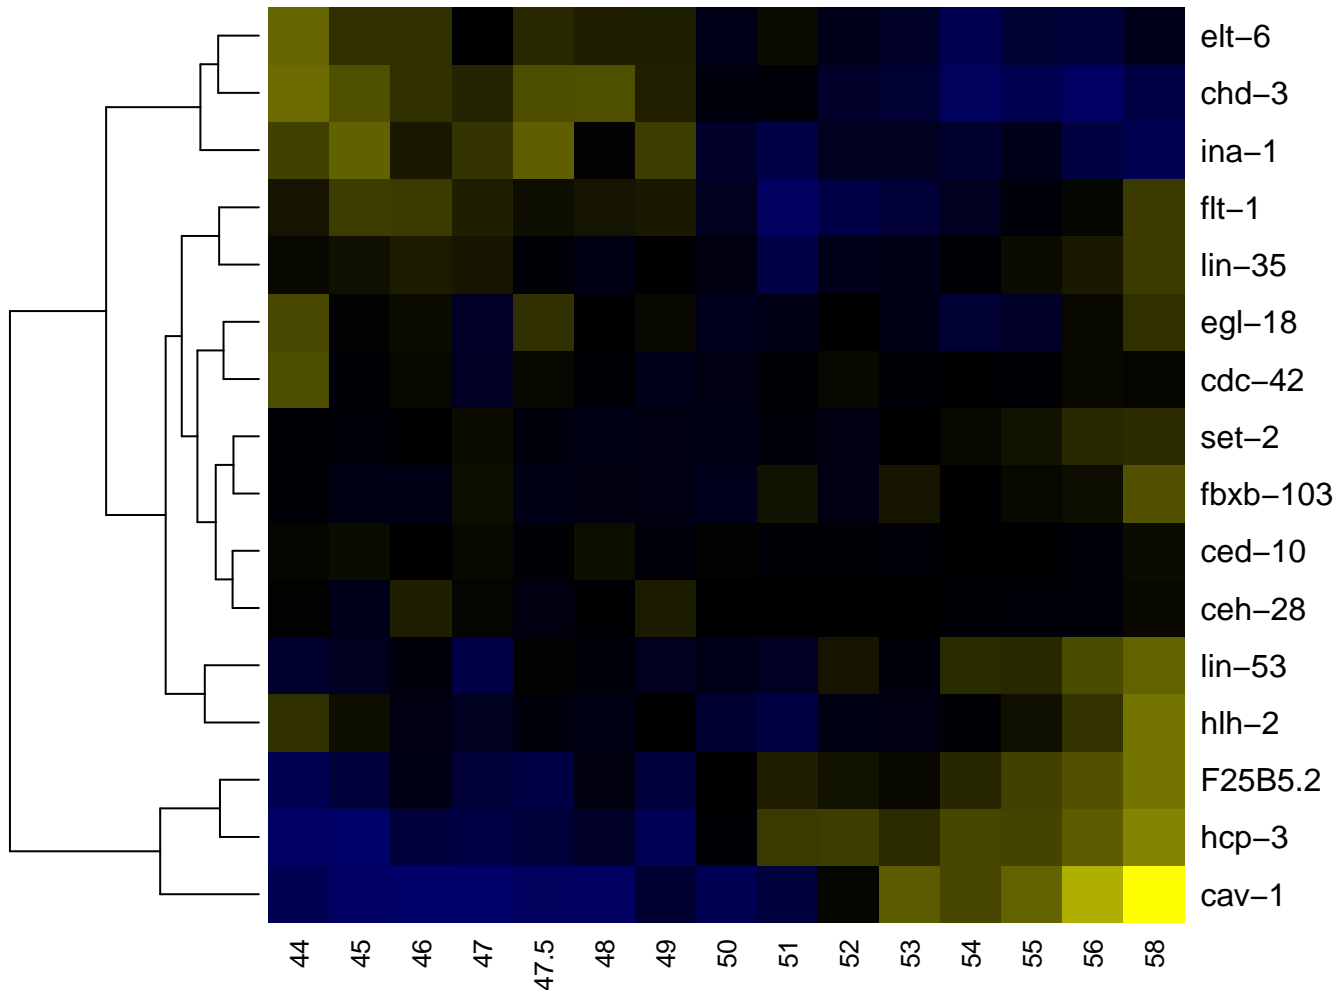

# ABalapappa

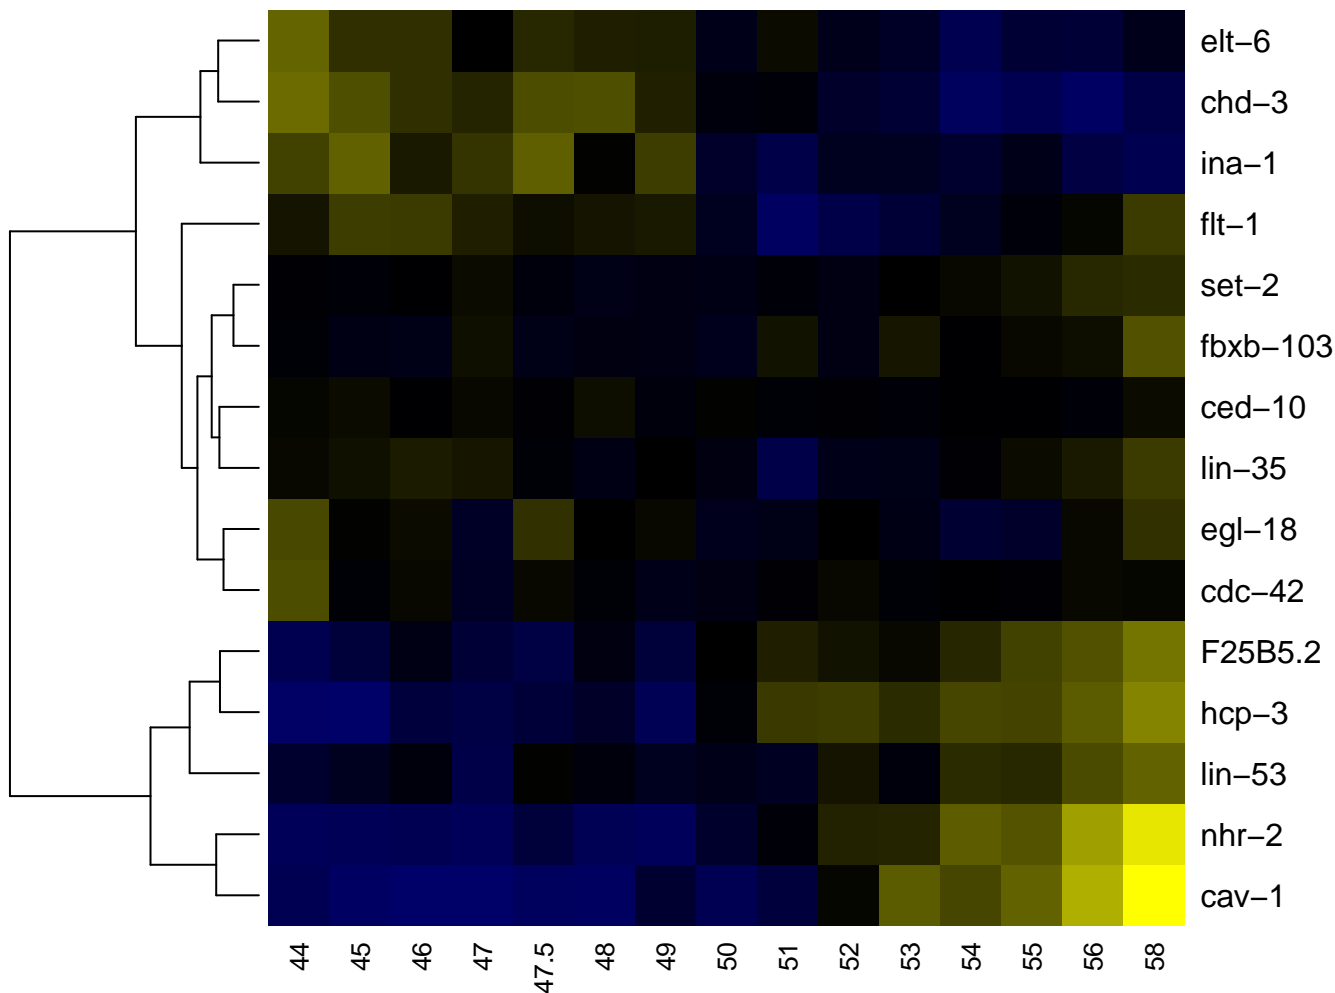



# ABalapappaa



# ABalapappaap

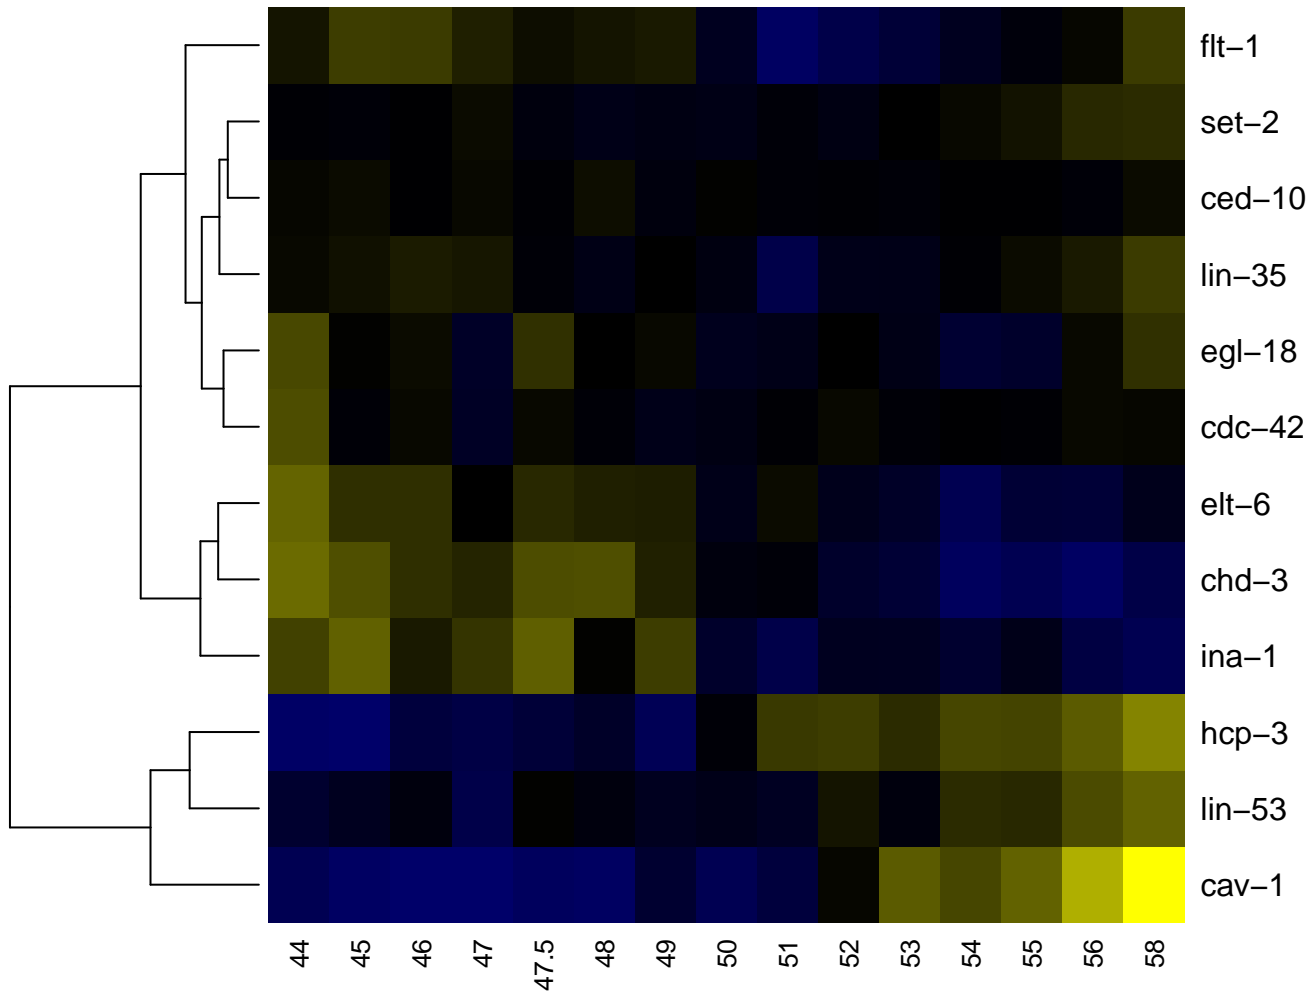

# ABalapapp



# ABalapp

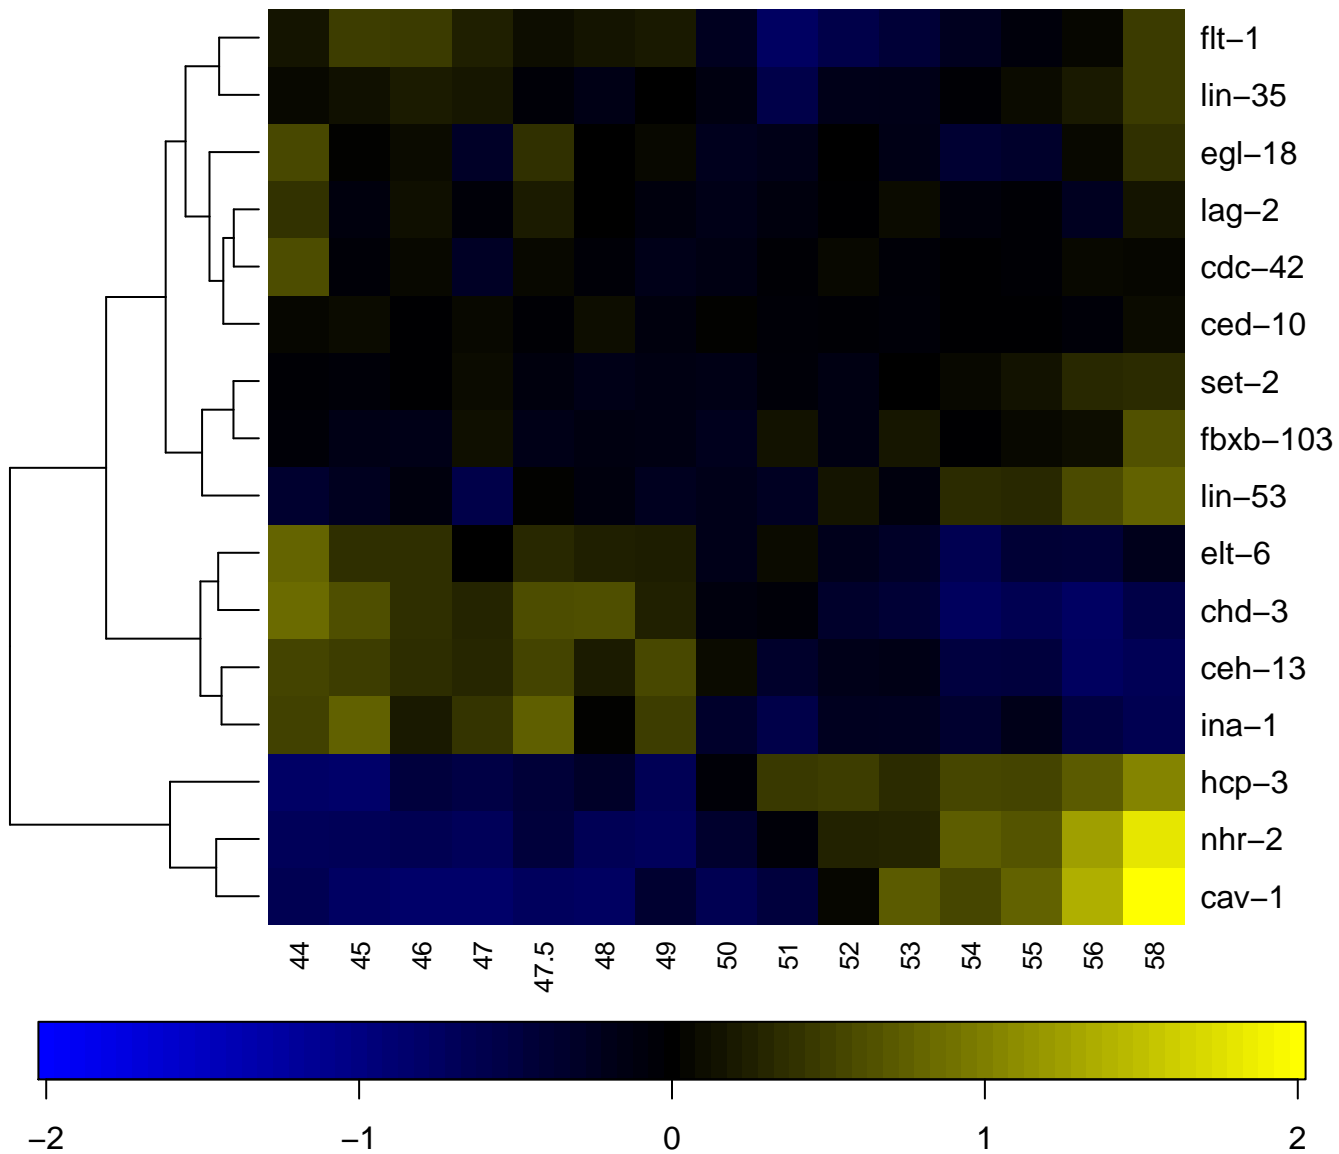



# ABalappaa

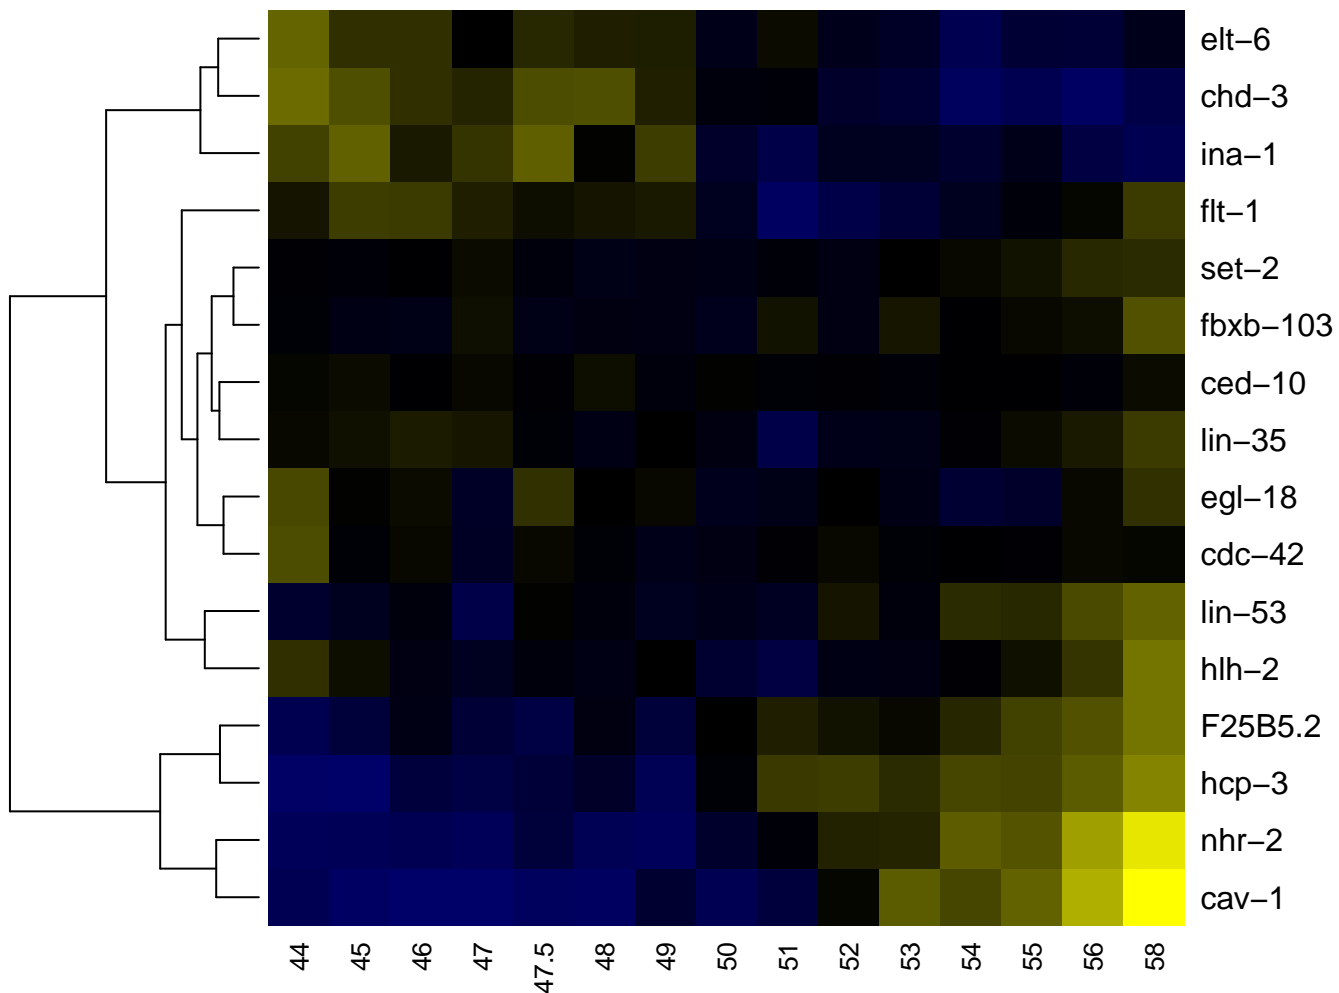

# ABalappaaa



# ABalappaap





# ABalappaapp

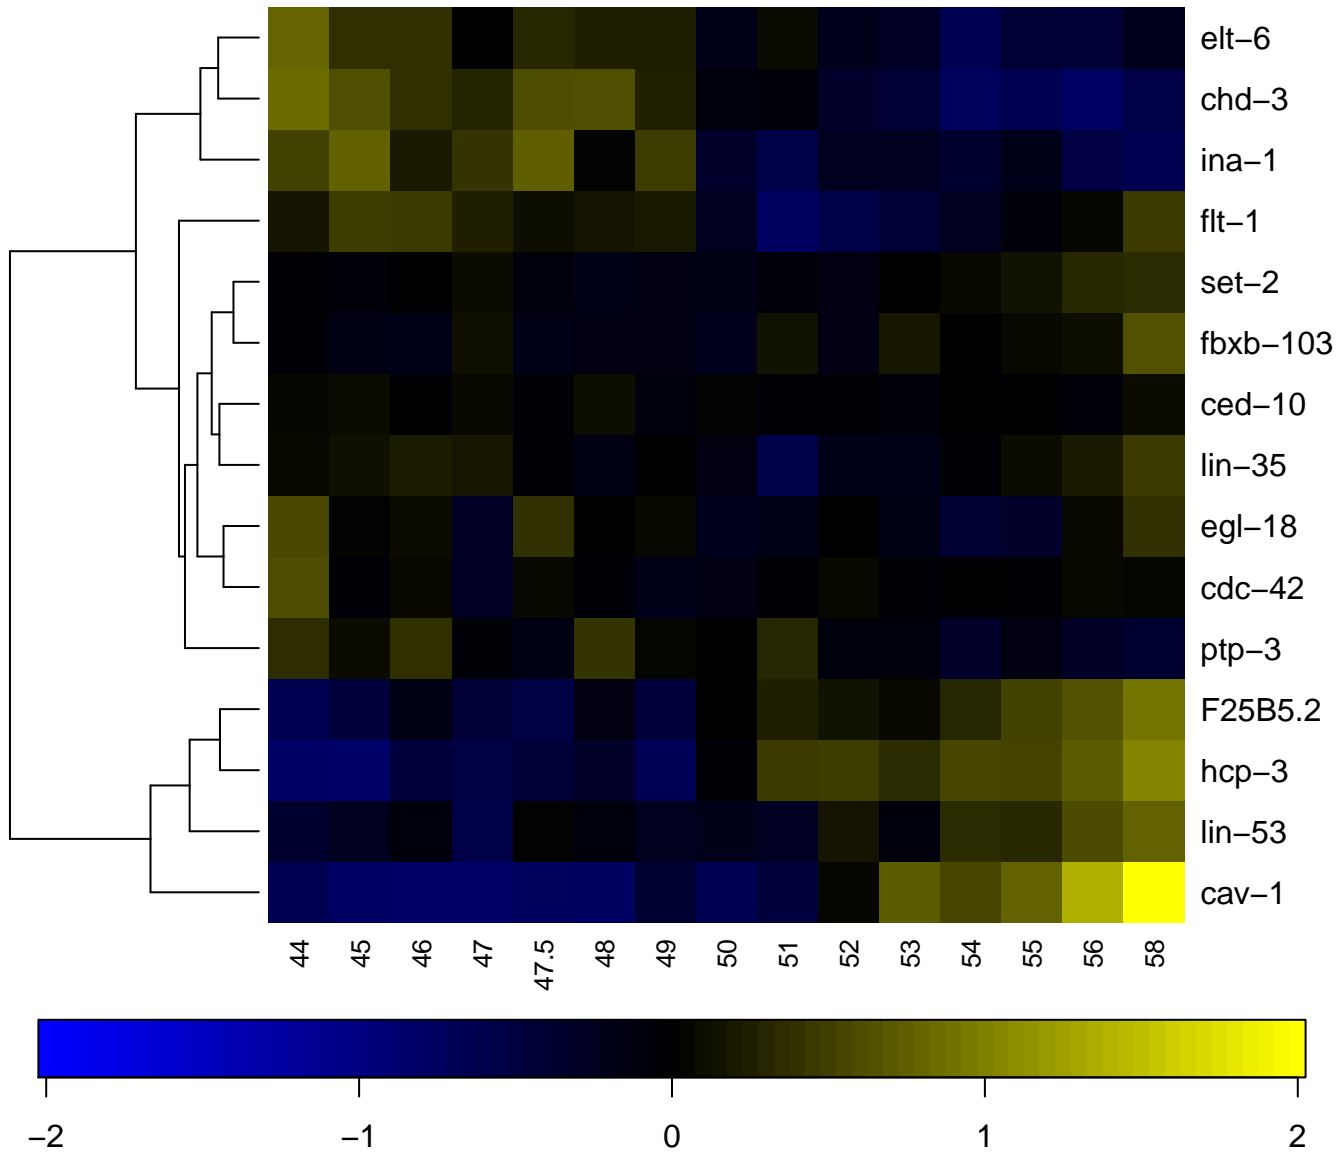

# ABalappap



# ABalappapa



# ABalappapap









# ABalappaa

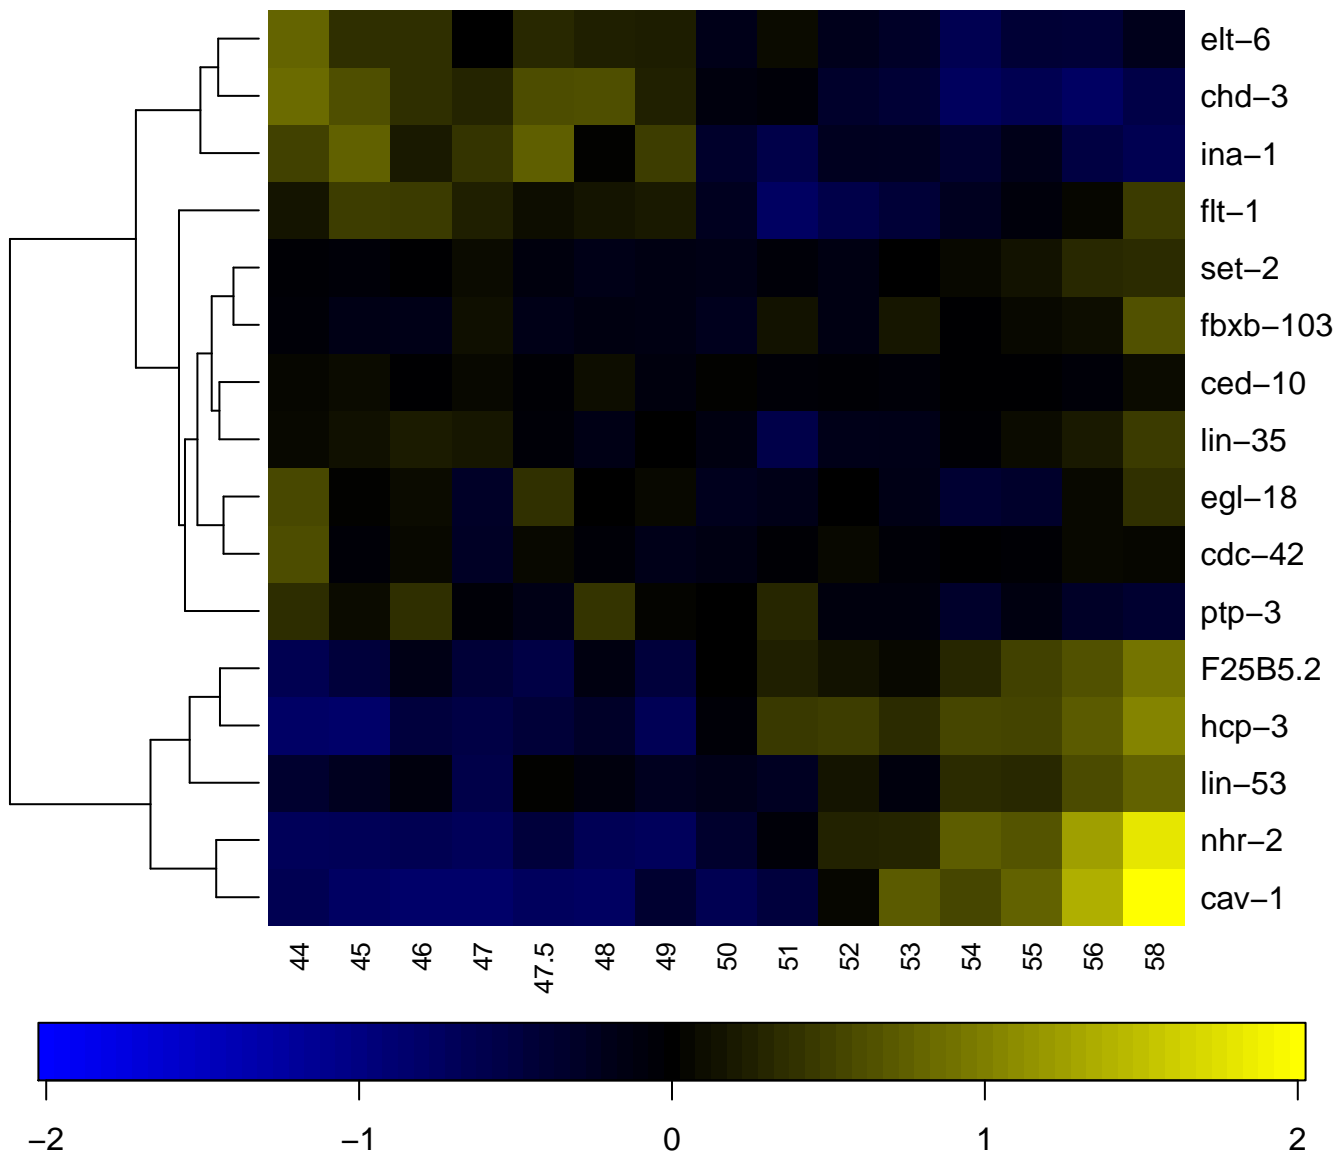



# ABalapppap



# ABalappapa



# ABalapppapap

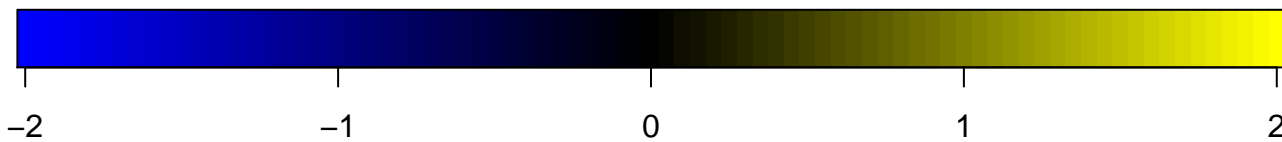

# ABalapppp

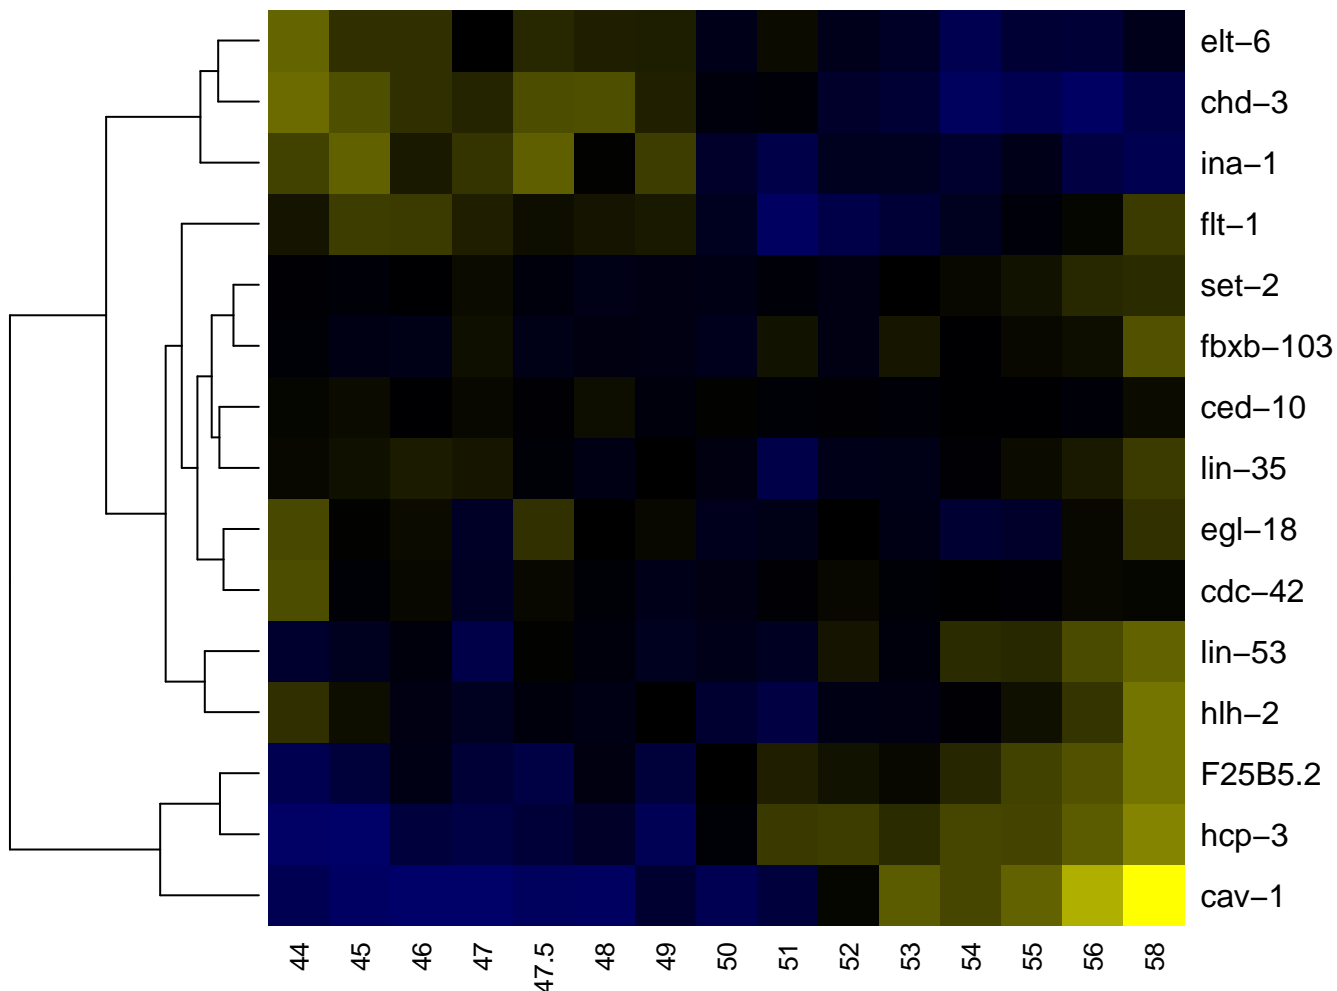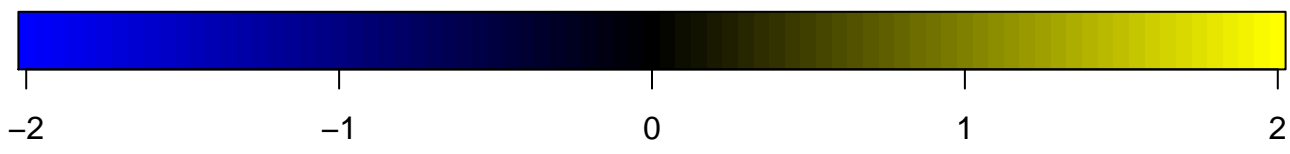

# ABalappppa



# ABalappppaa



# ABalappppaap



# ABalappppp





# ABalp

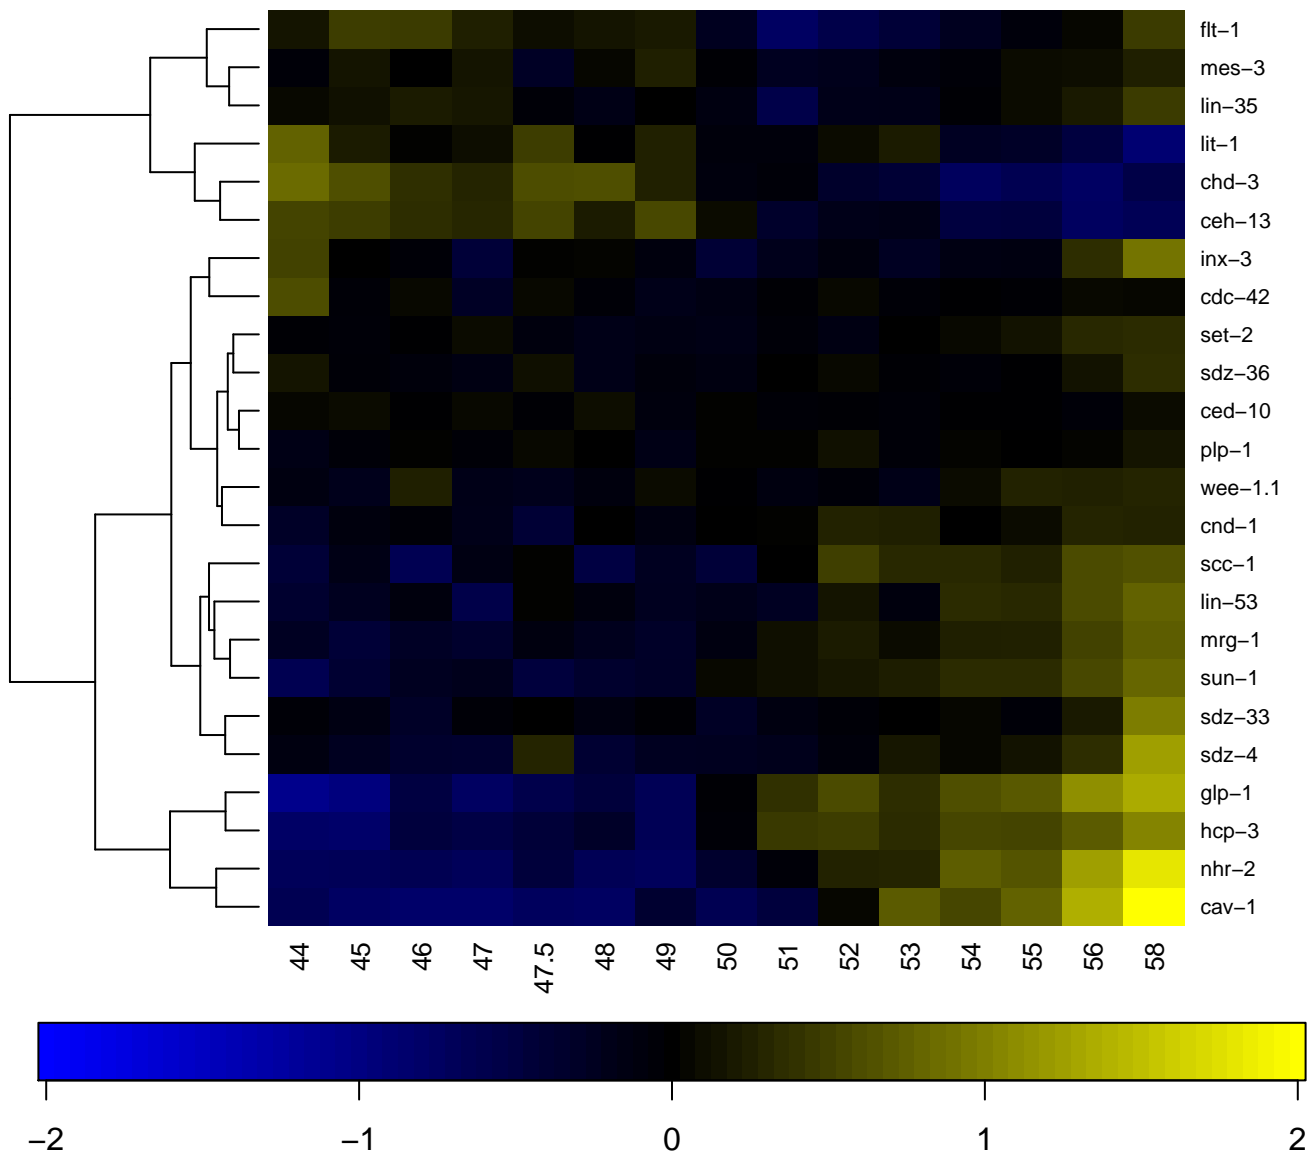

# ABalpa

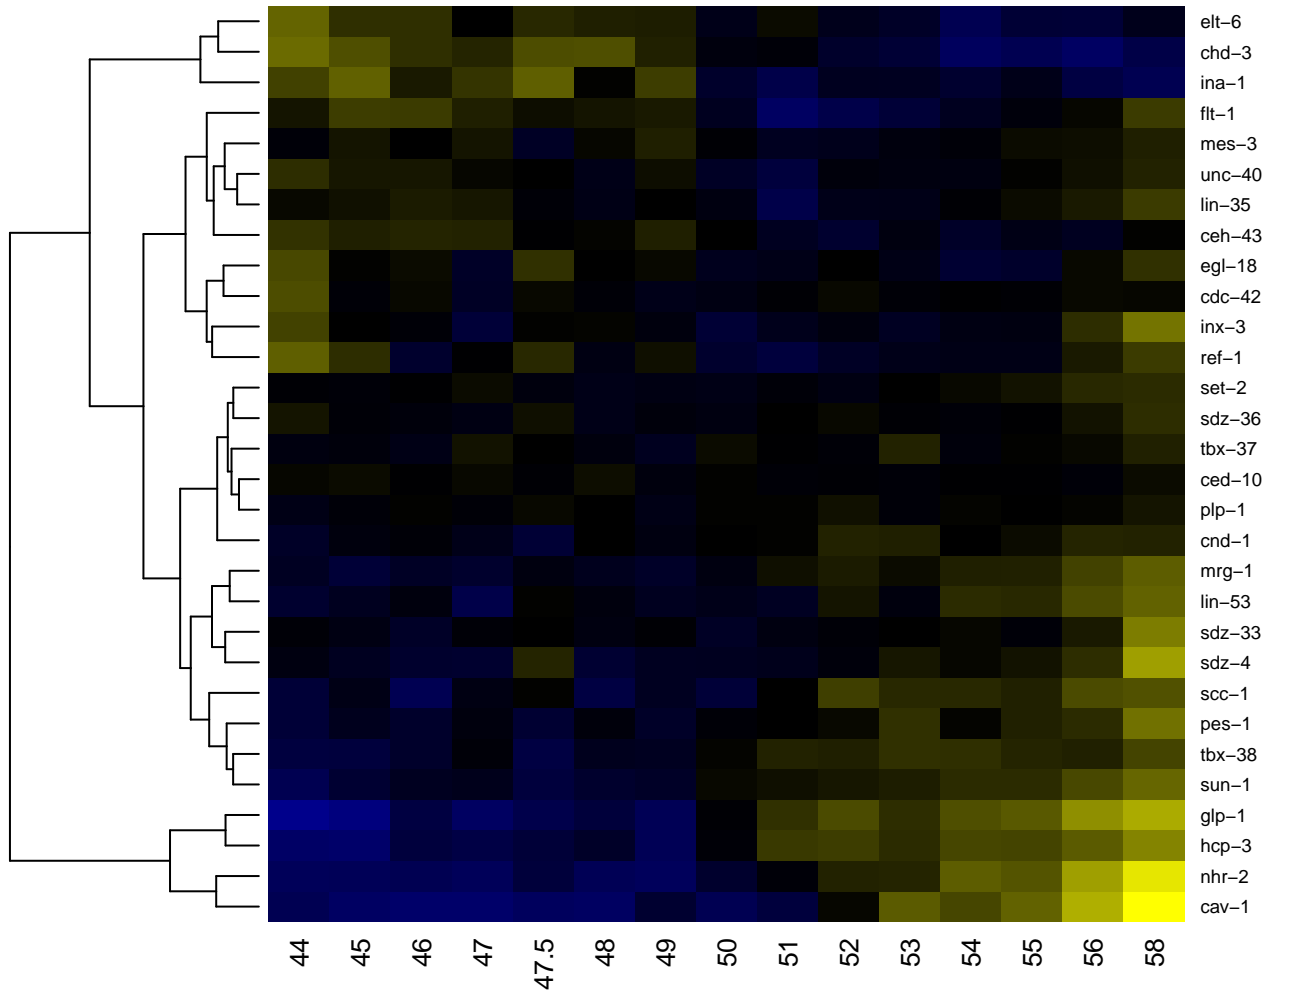

-2

-1

0

1

2

# ABalpa

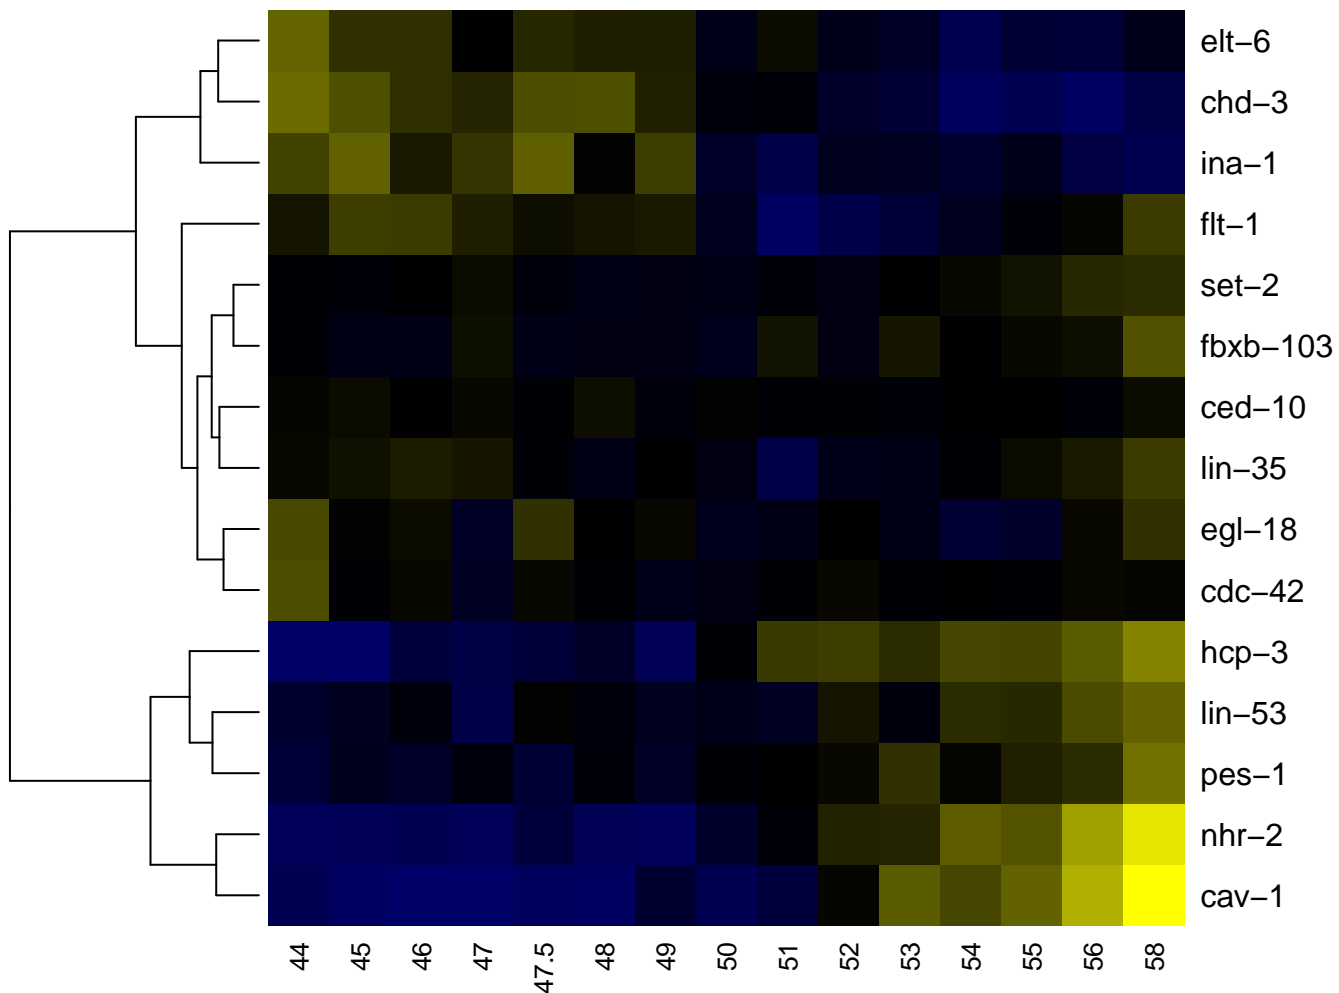

# ABalpaaa

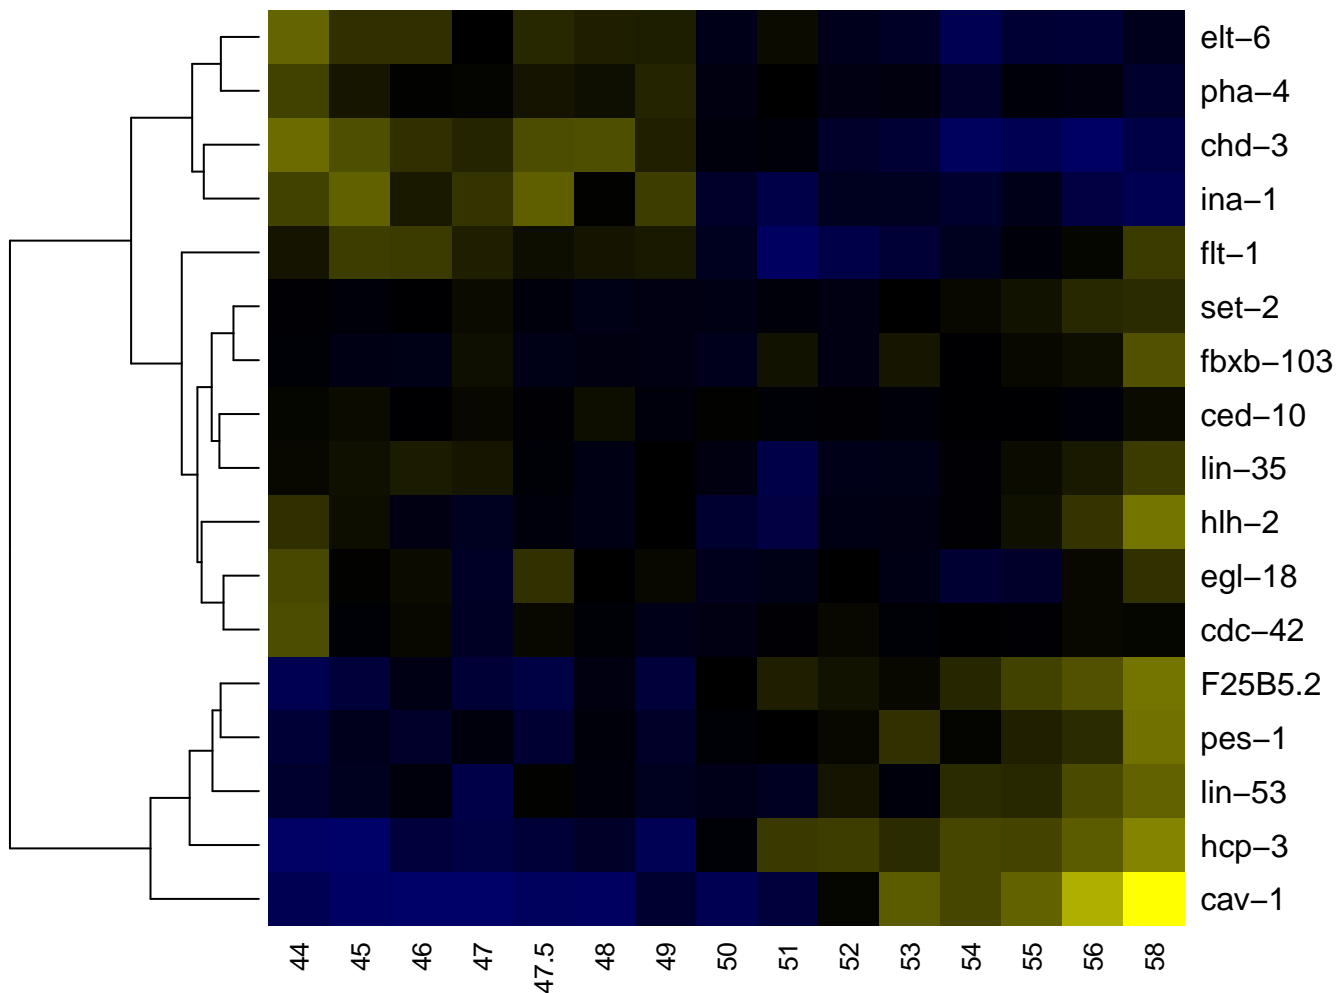

-2

-1

0

1

2

# ABalpaaaa

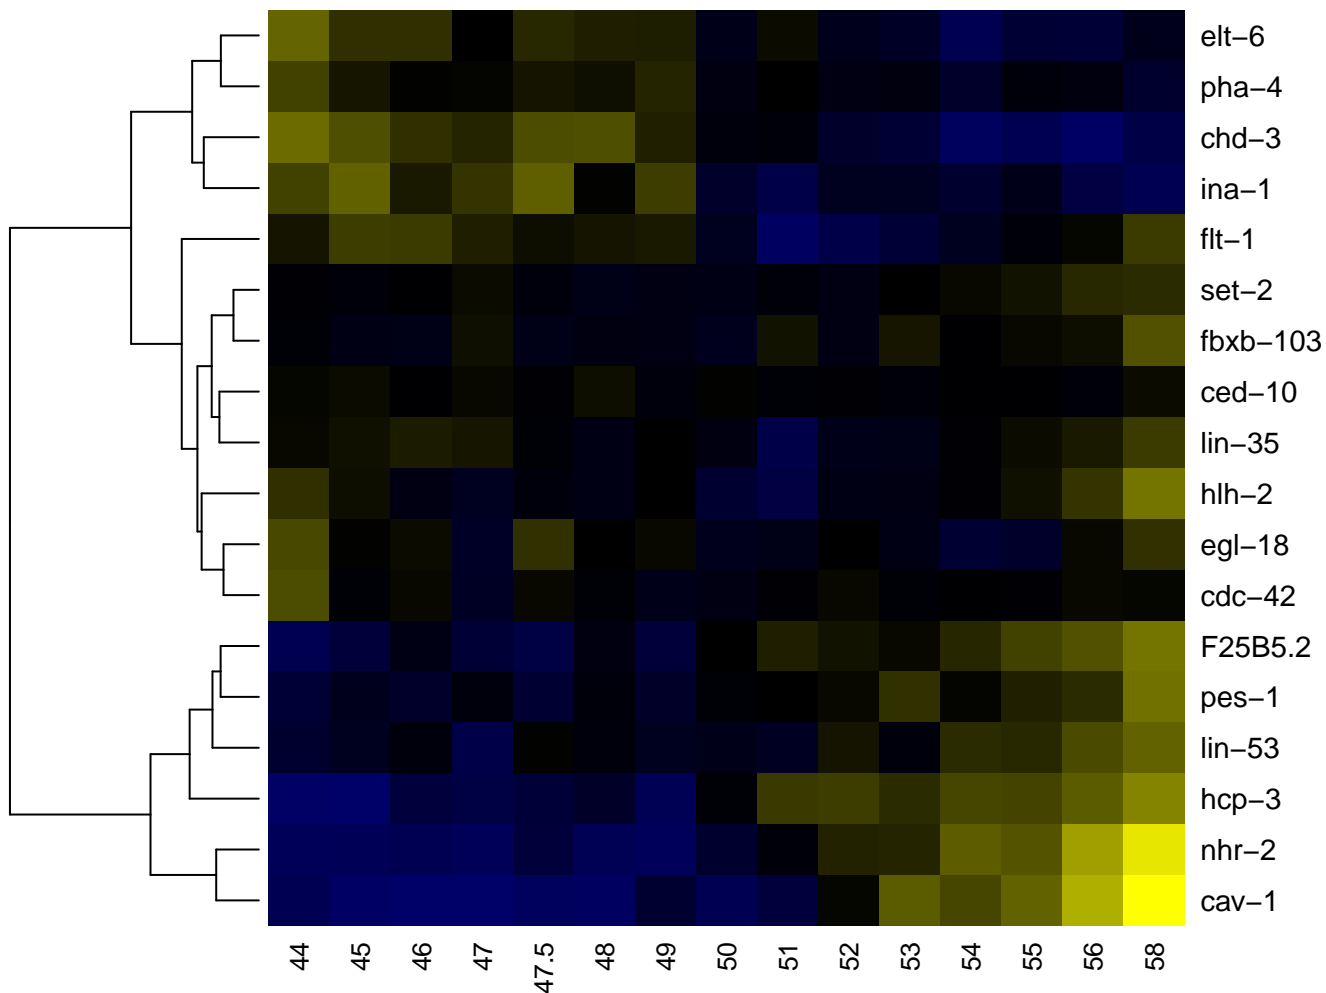

# ABalpaaaaa





# ABalpaaaapp





# ABalpaap

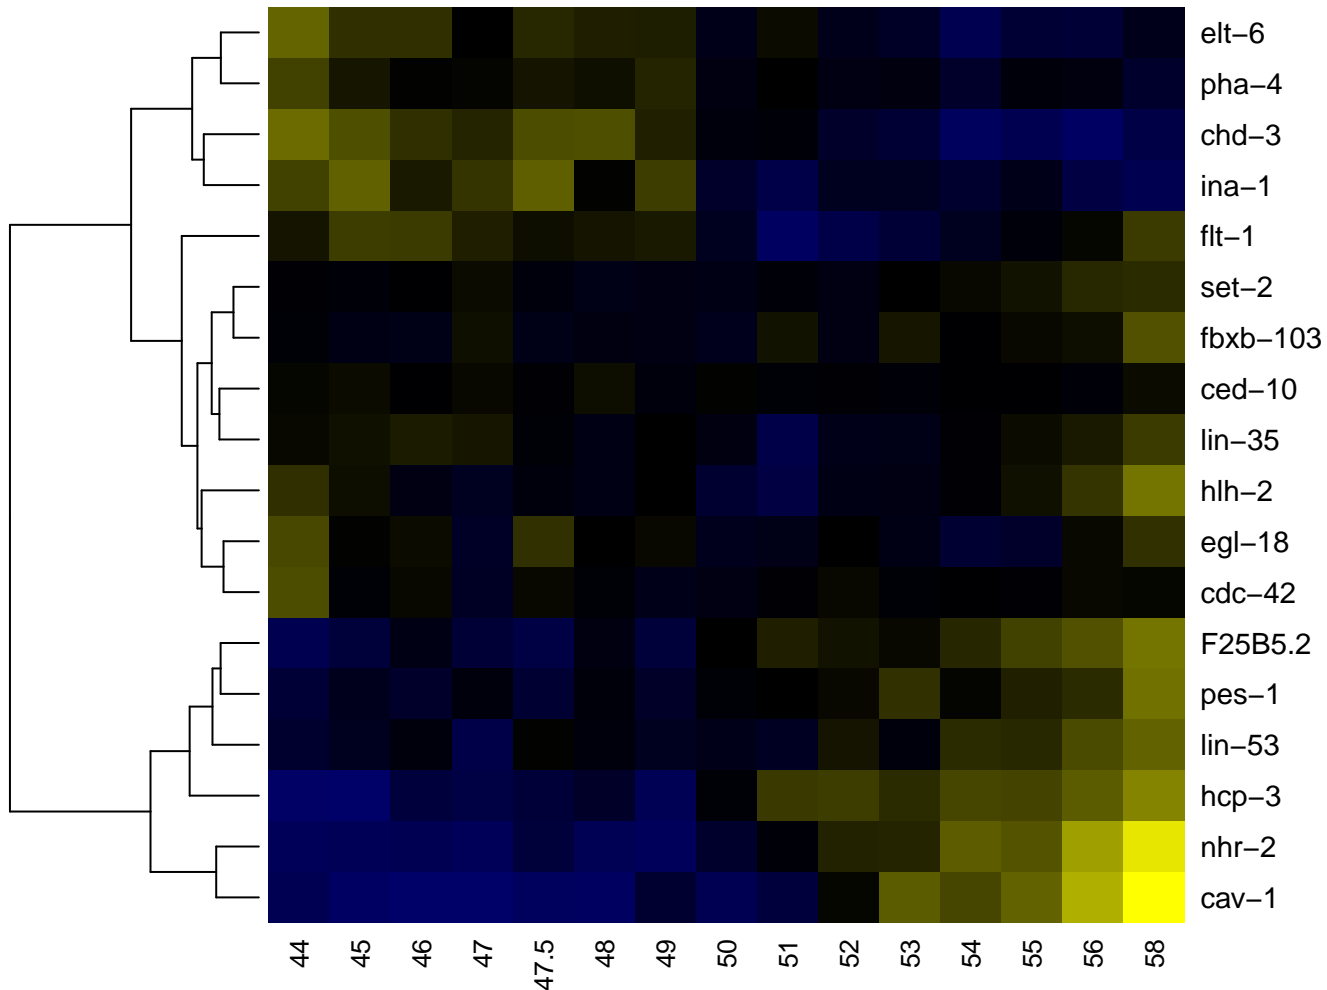

# ABalpaapa

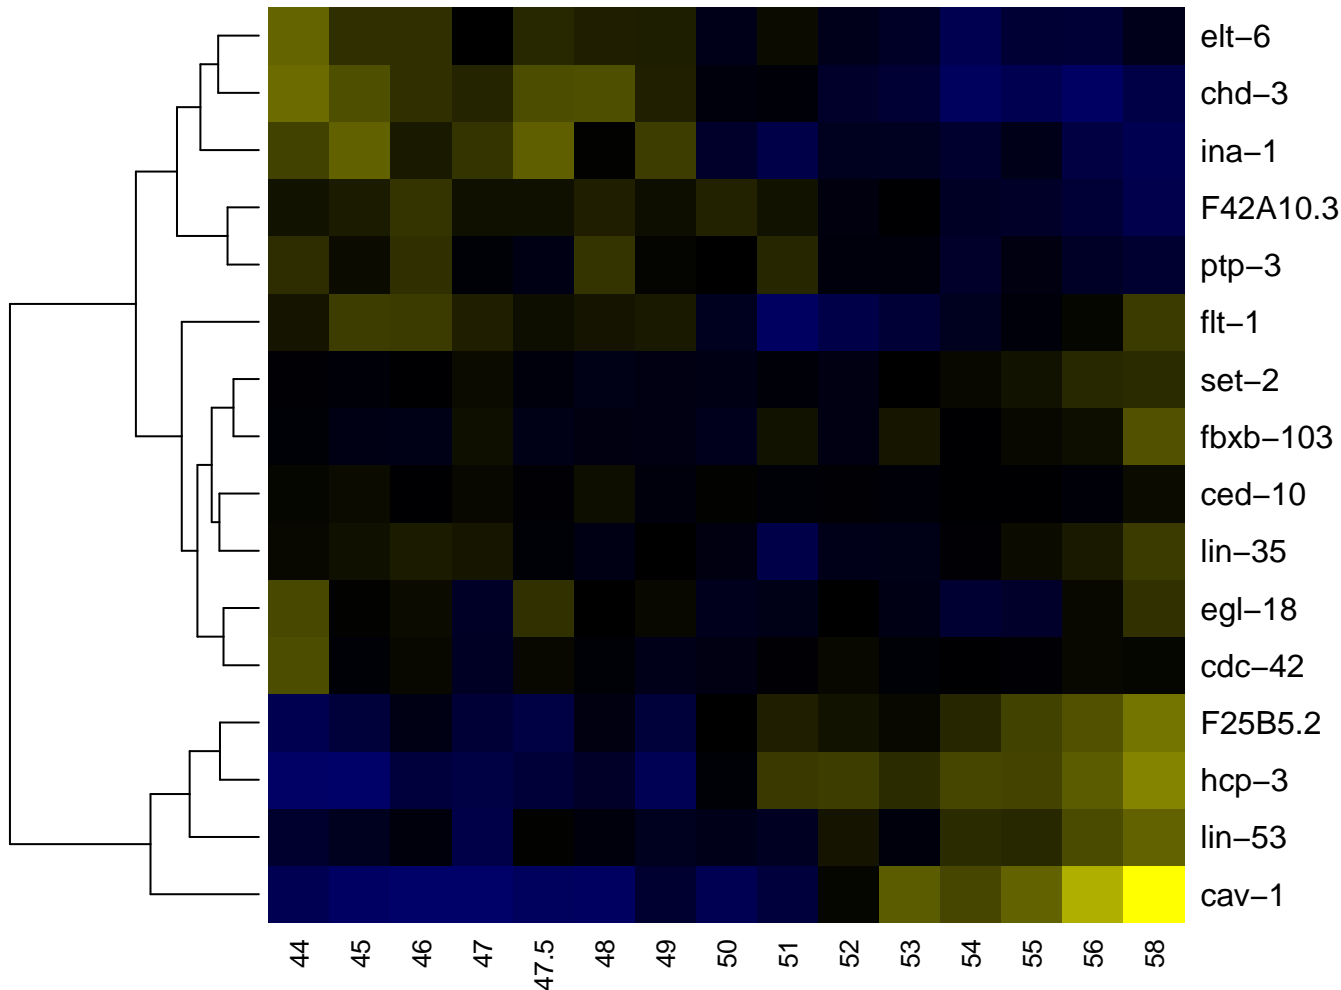

-2

-1

0

1

2

# ABalpaapap



# ABalpaapp



# ABalpaappa



# ABalpaap



-2

-1

0

1

2



# ABalpaapaa

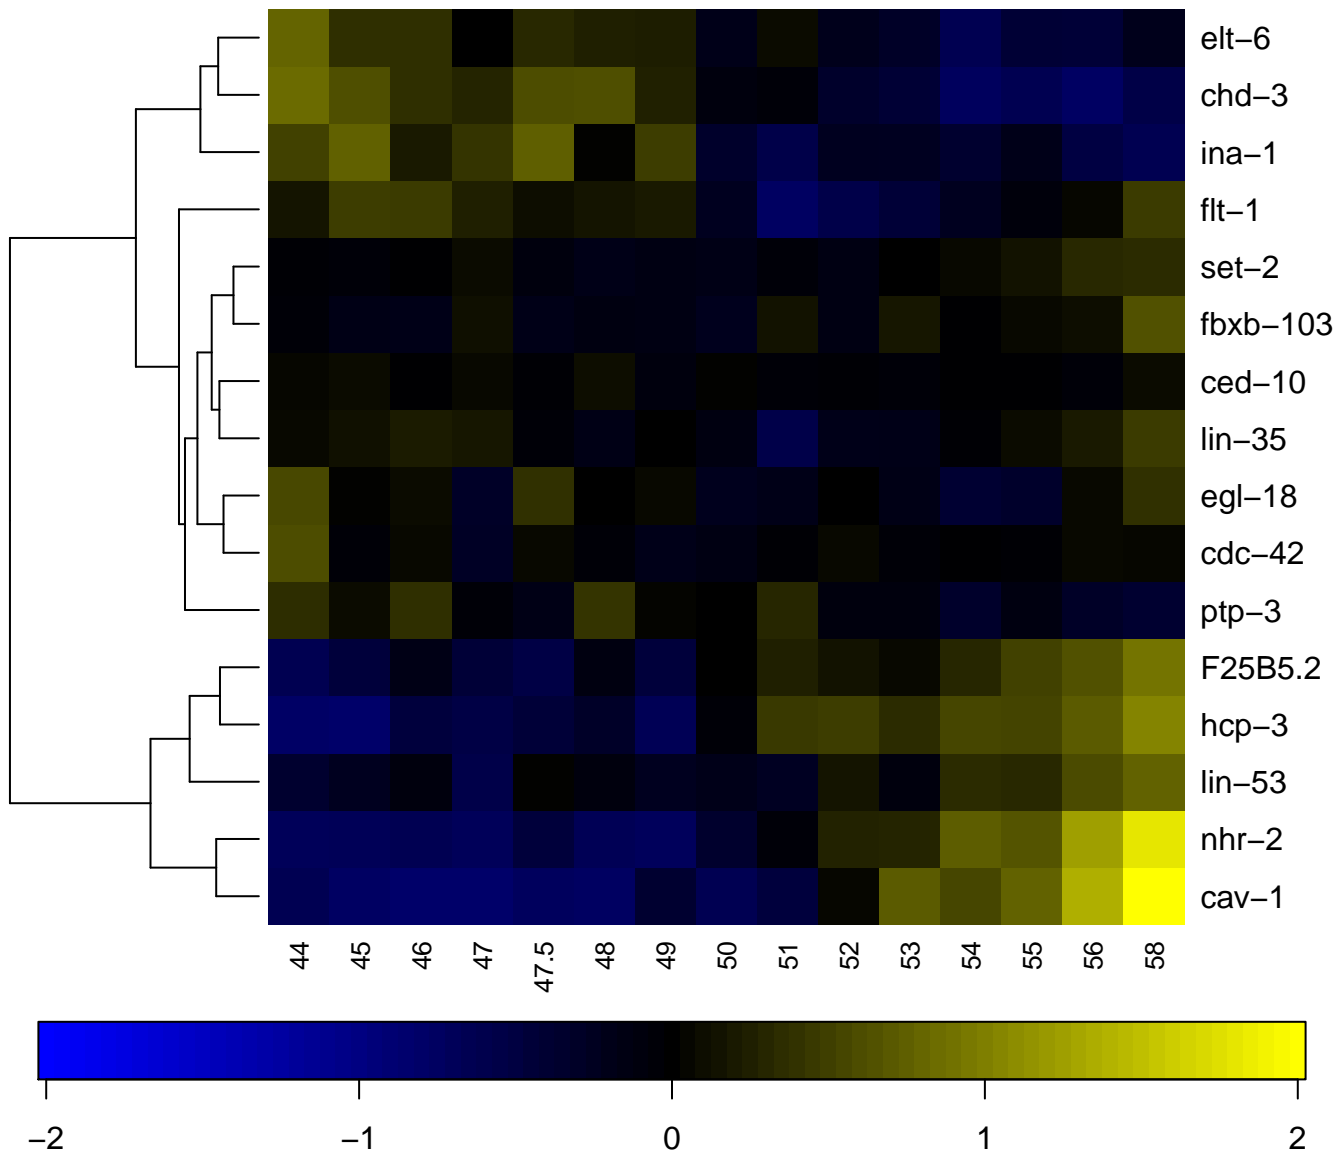



# ABalpaapap

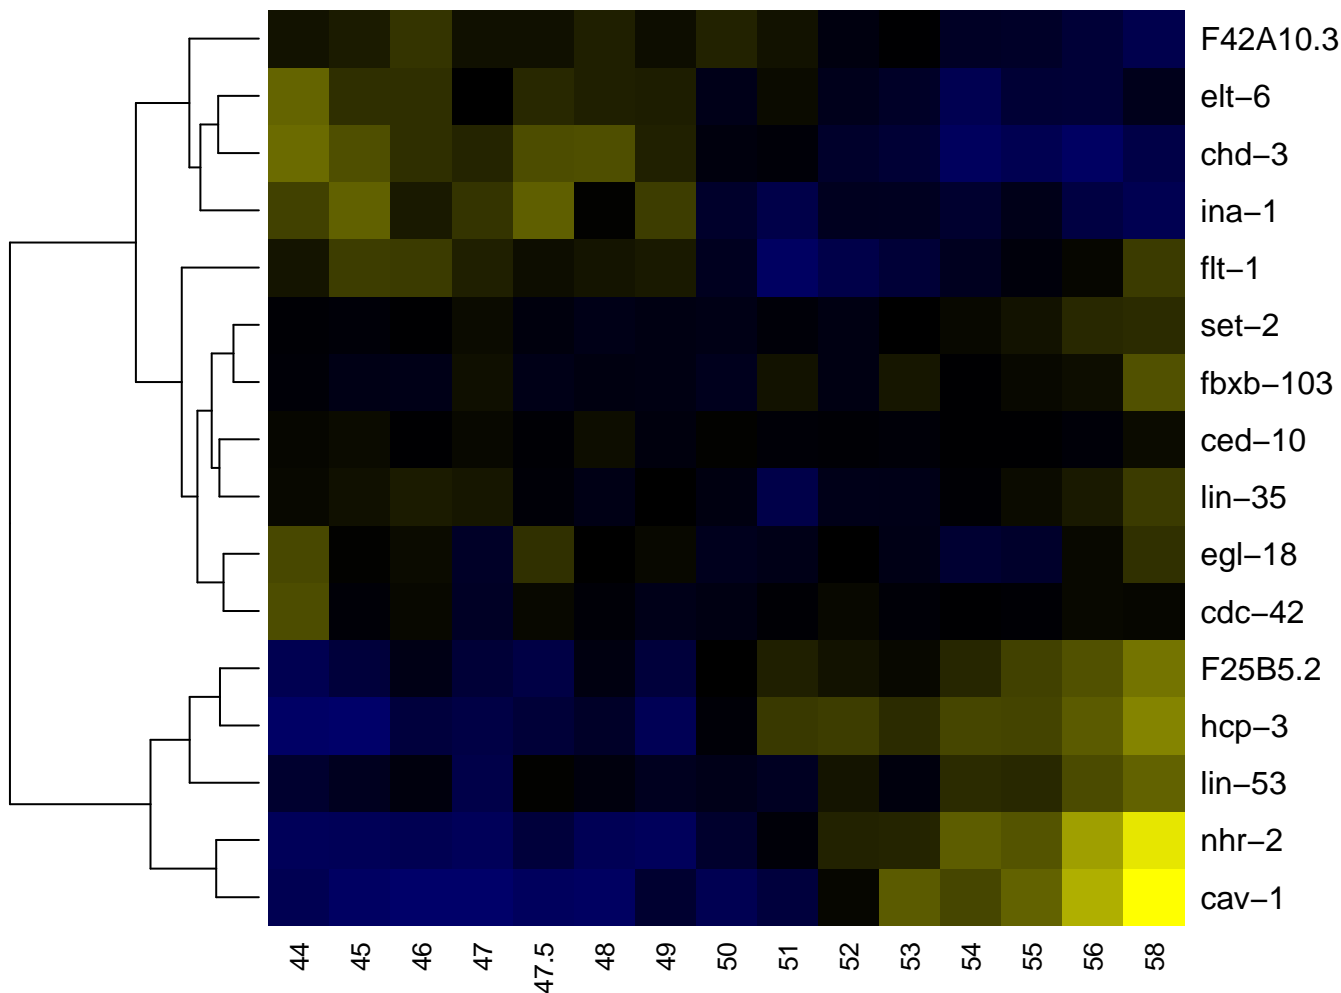

# ABalpaapp

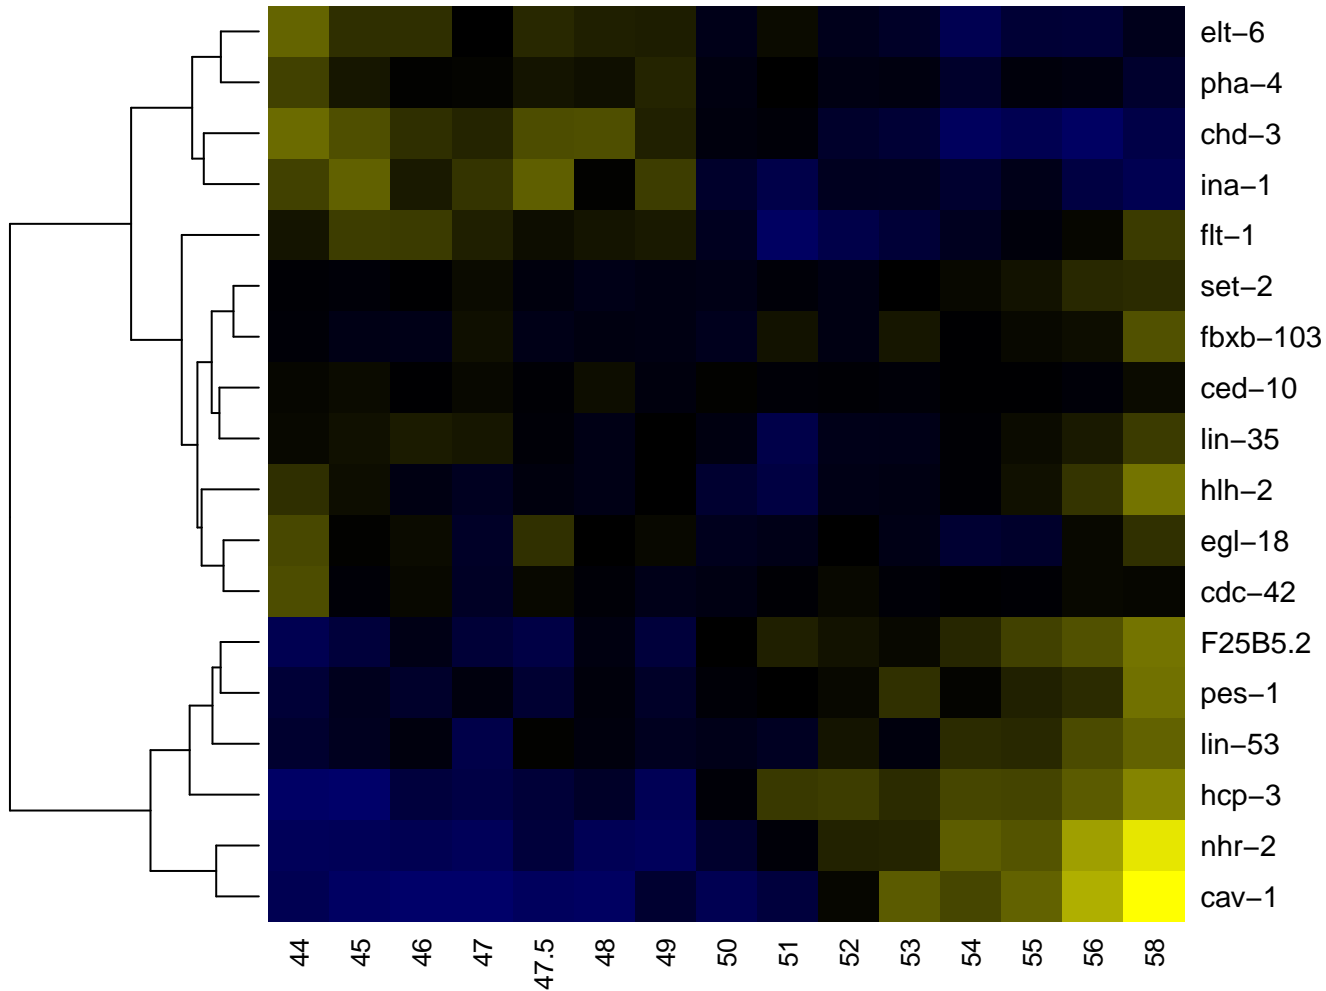

# ABalpaappa



# ABalpaapp



# ABalpap



# ABalpapa



-2

-1

0

1

2

# ABalpapaa

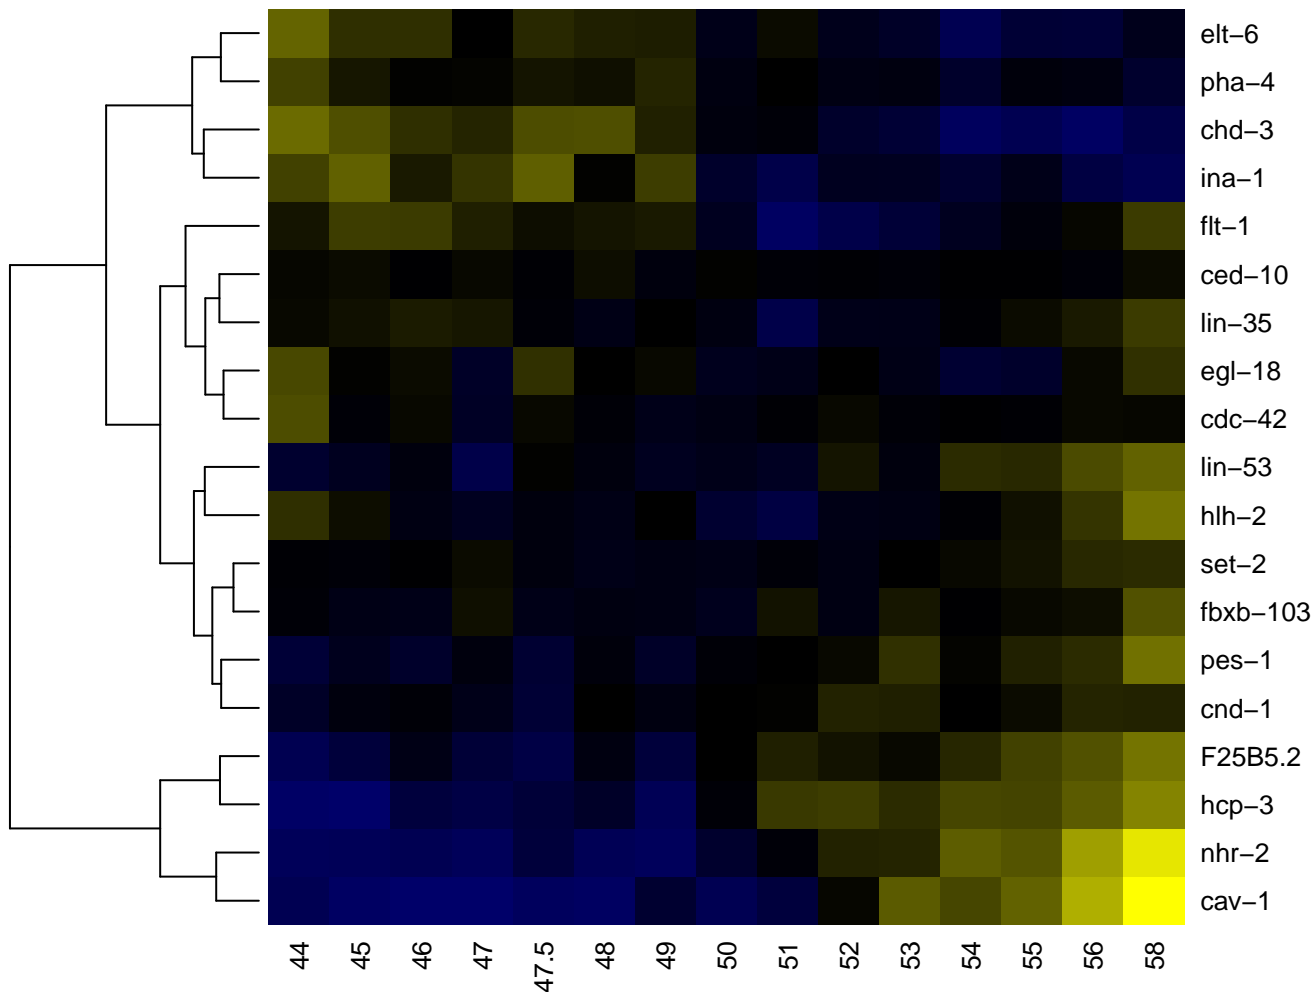

# ABalpapaaa

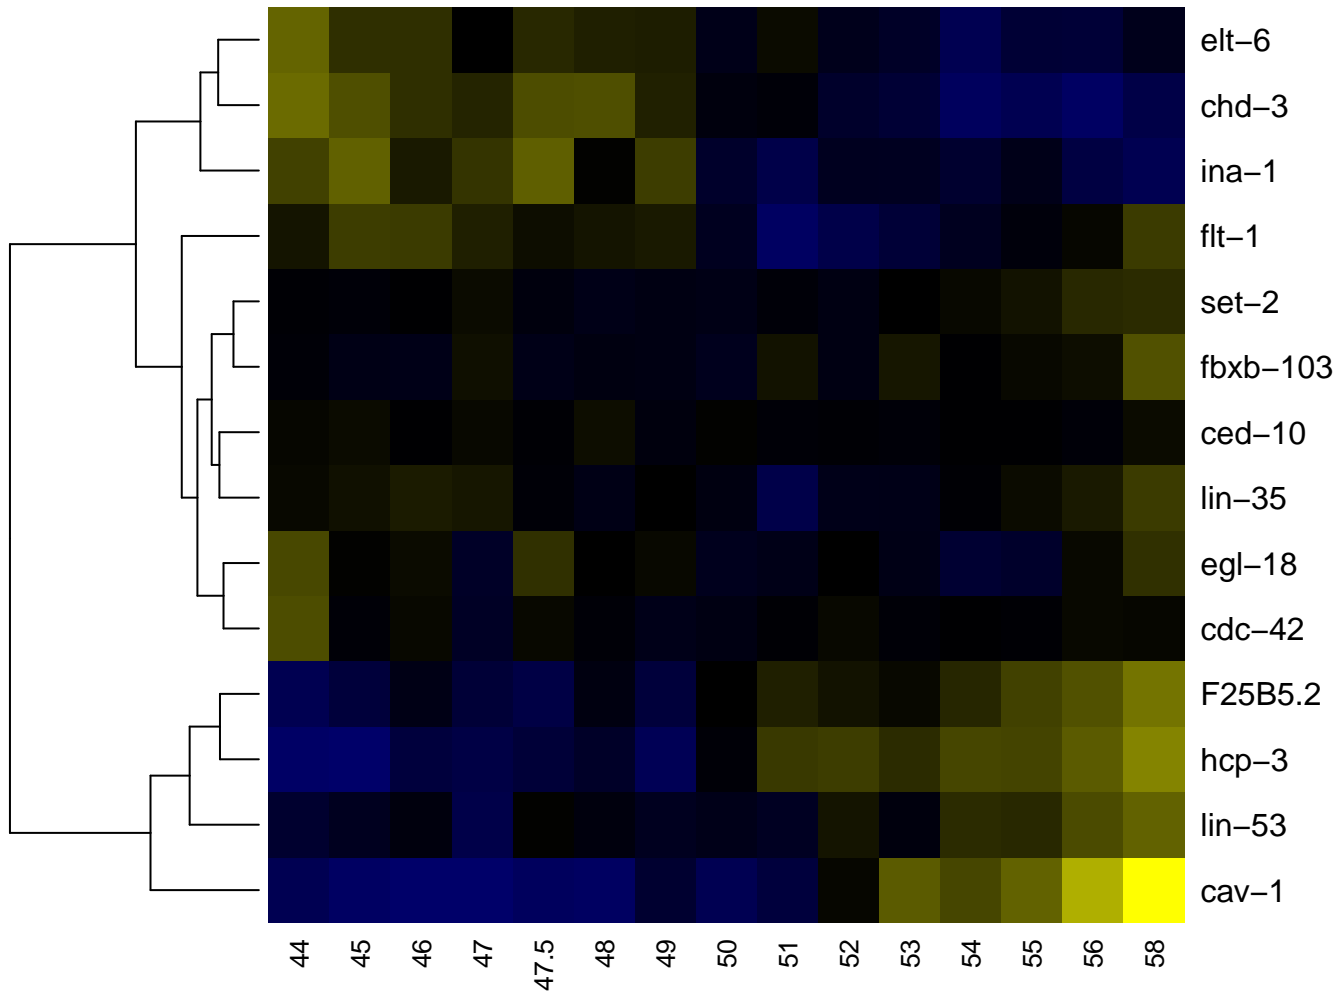



# ABalpapaap



# ABalpapaapp

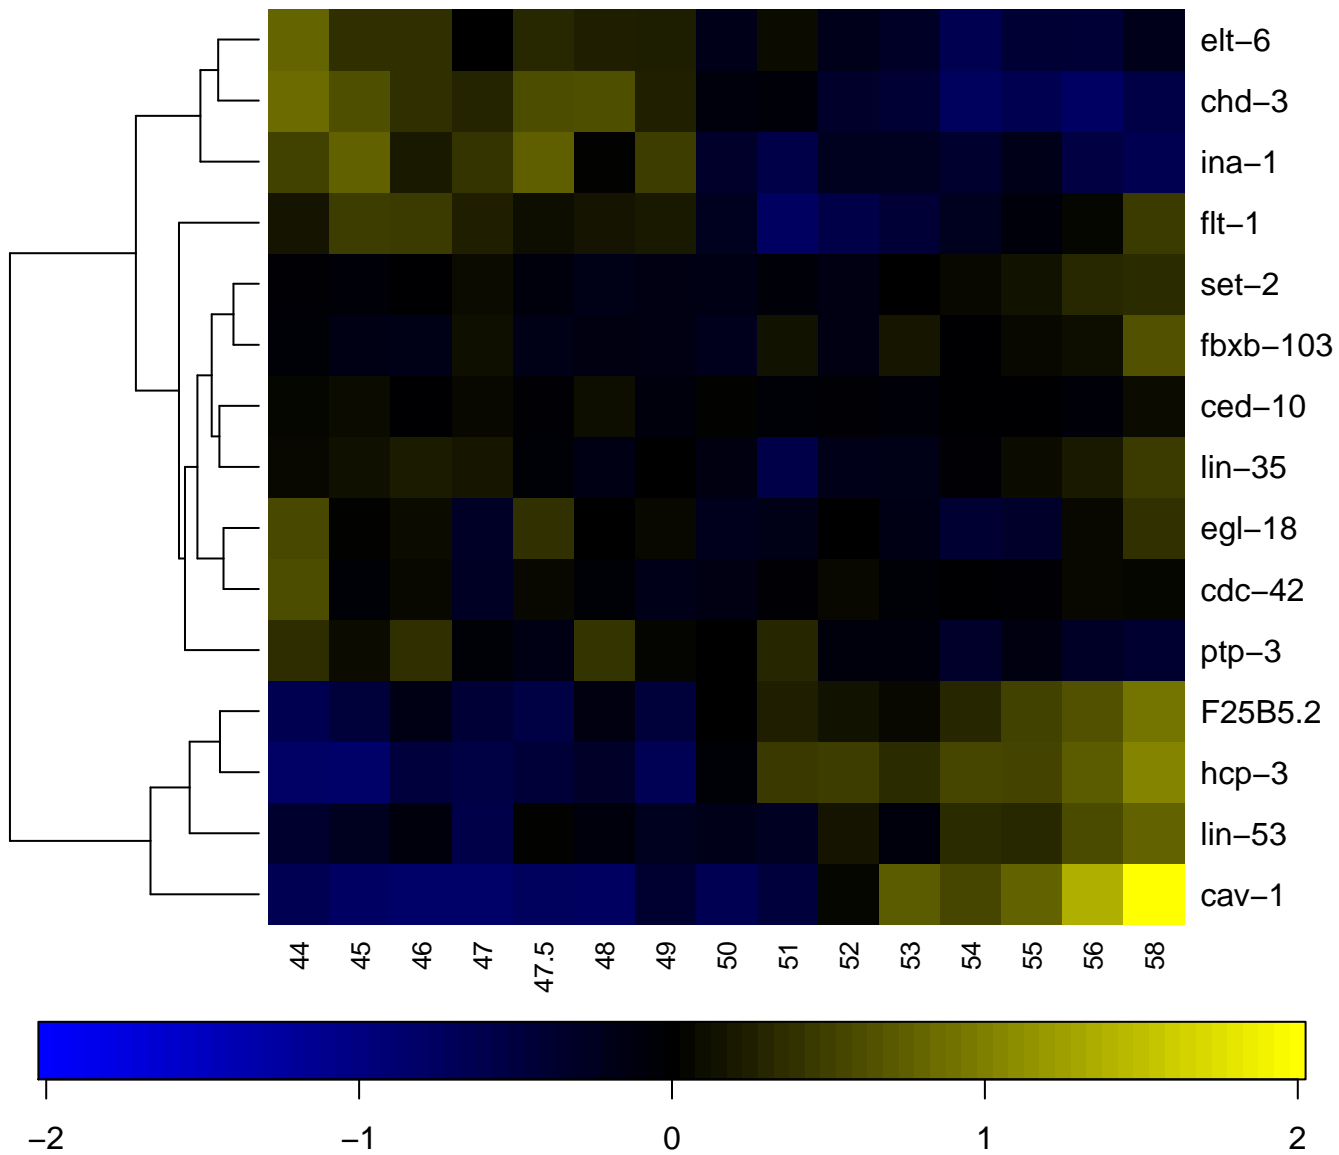

# ABalpapap

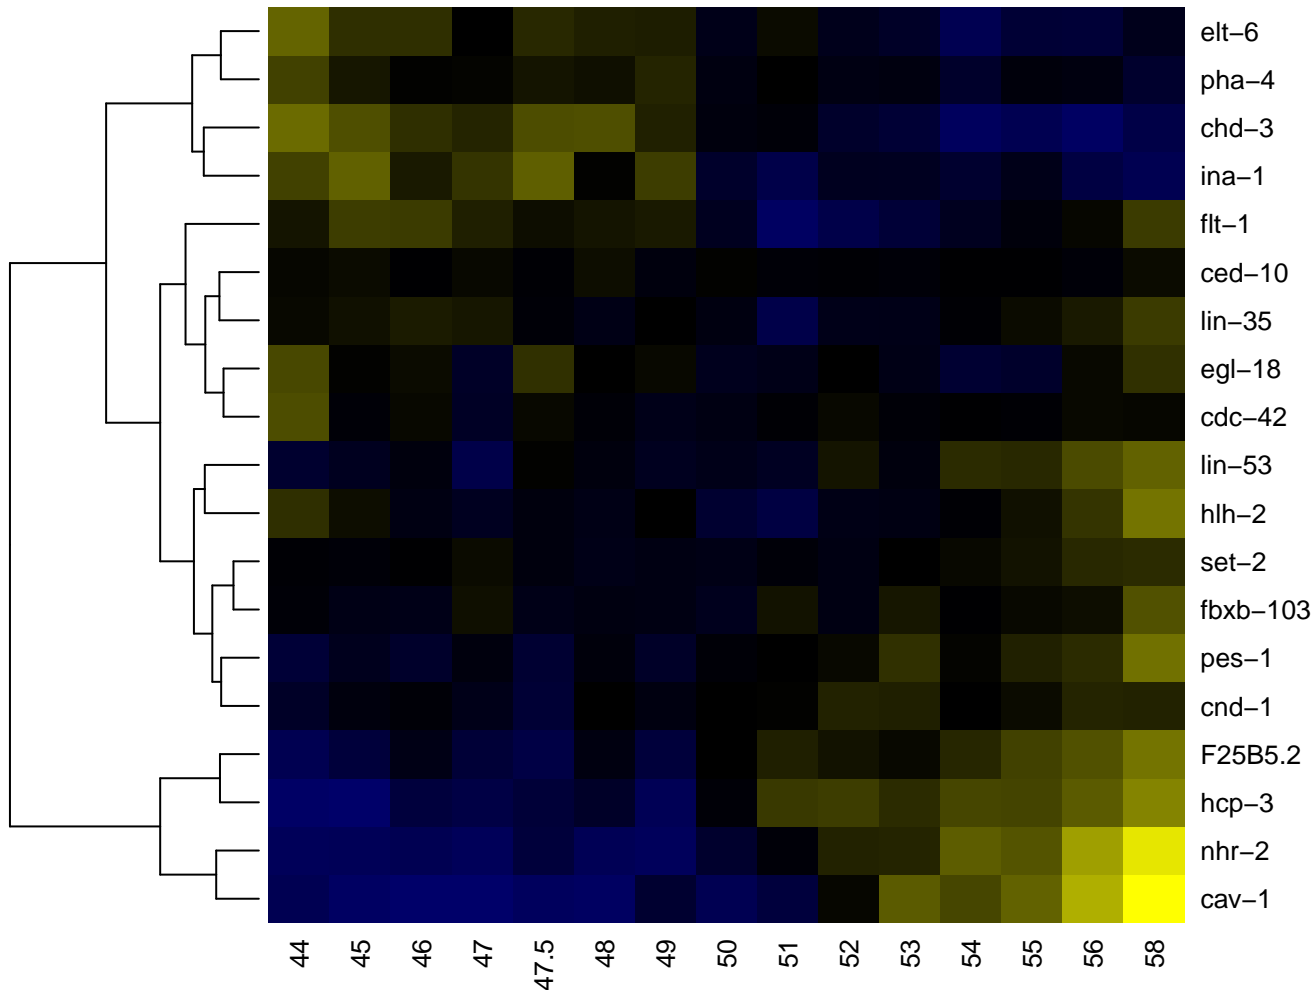

# ABalpapapa

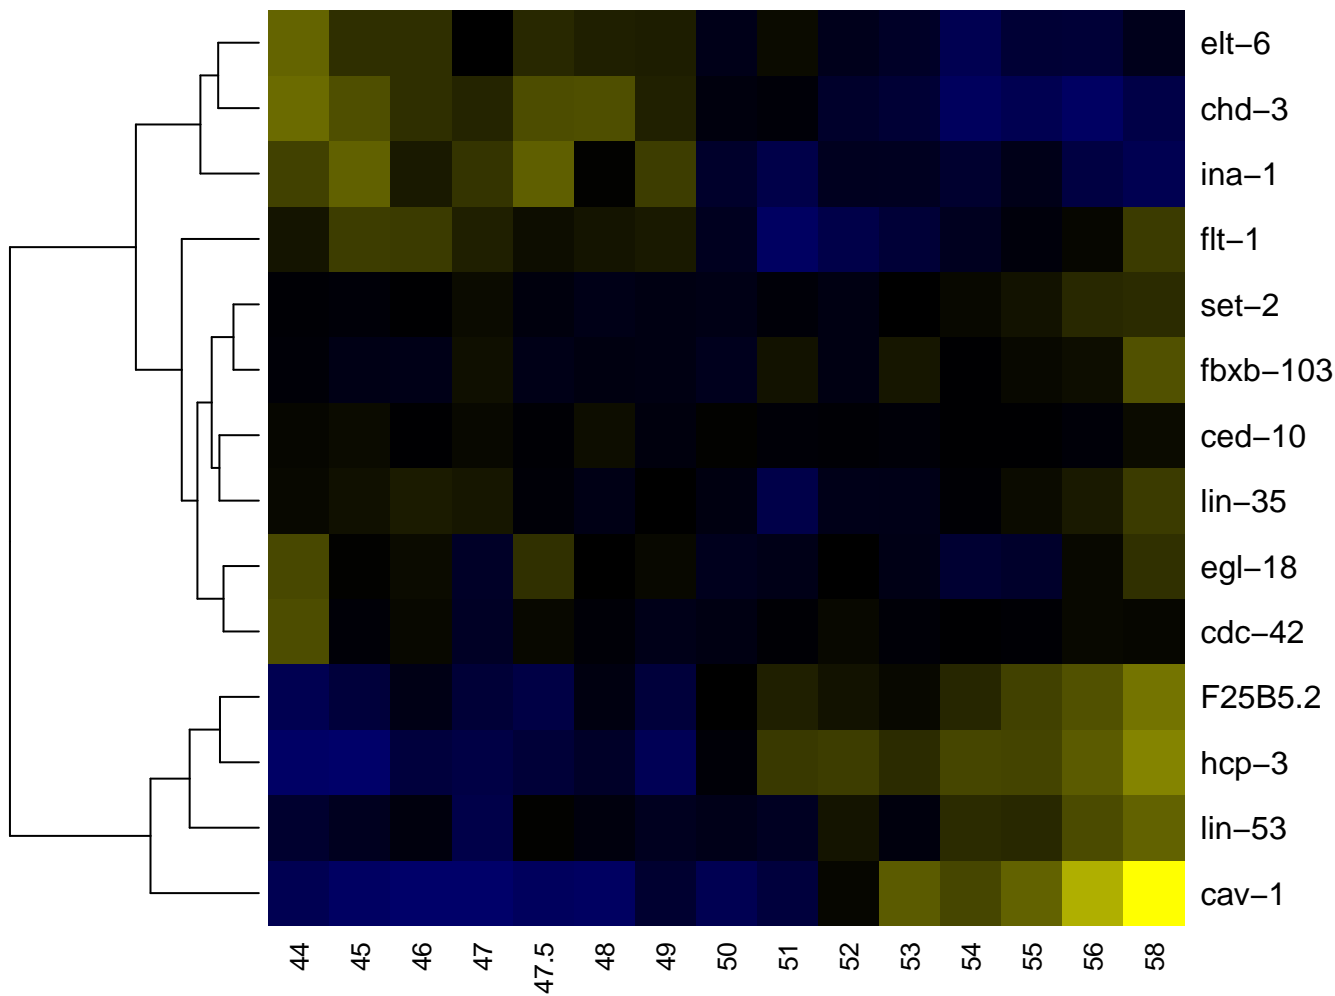

# ABalpapapap

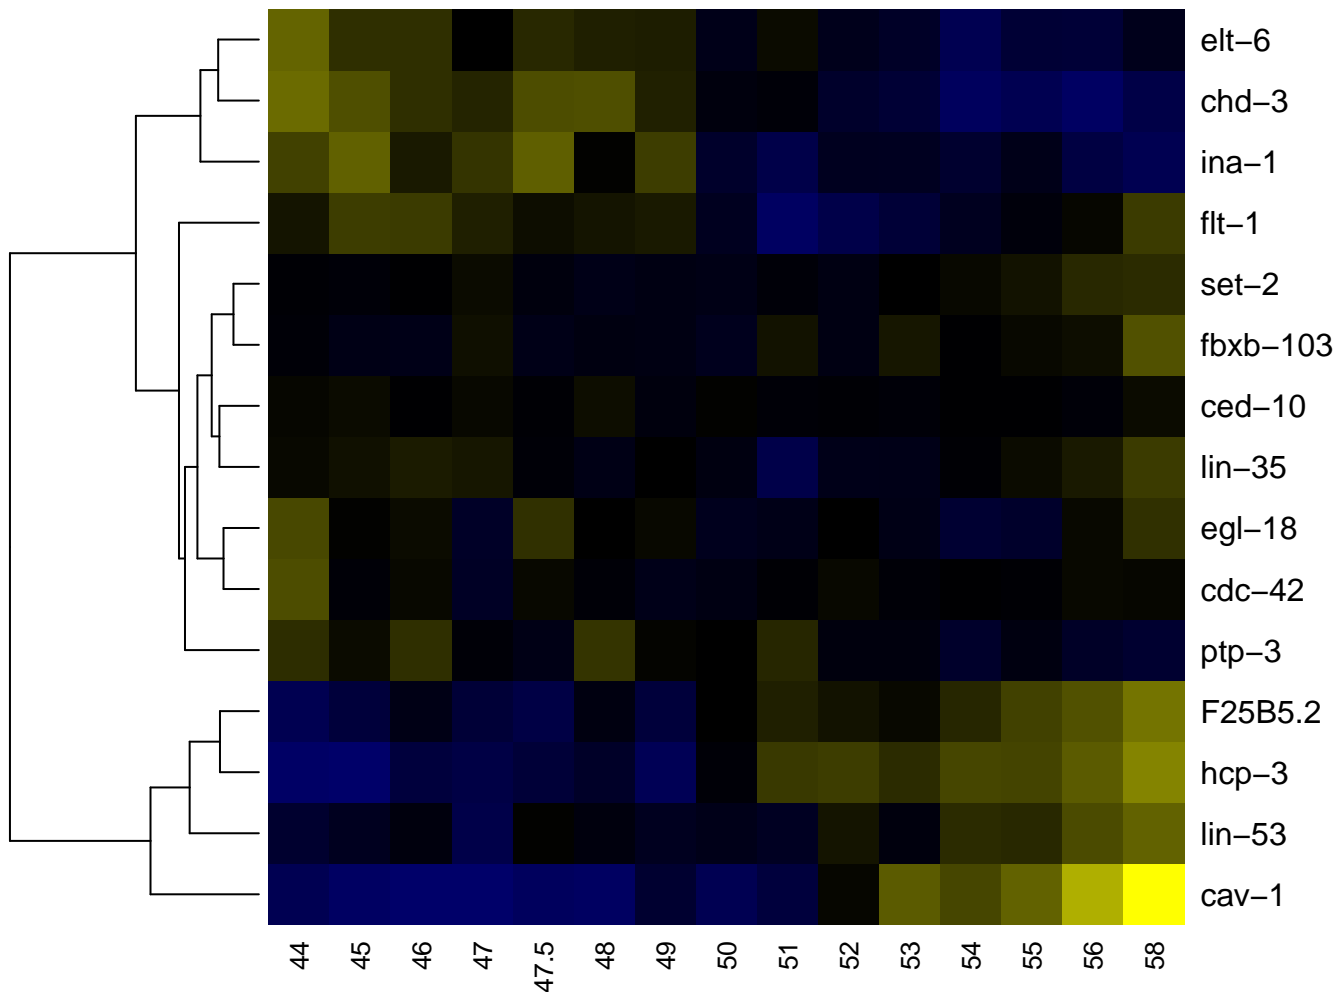

# ABalpapapapa

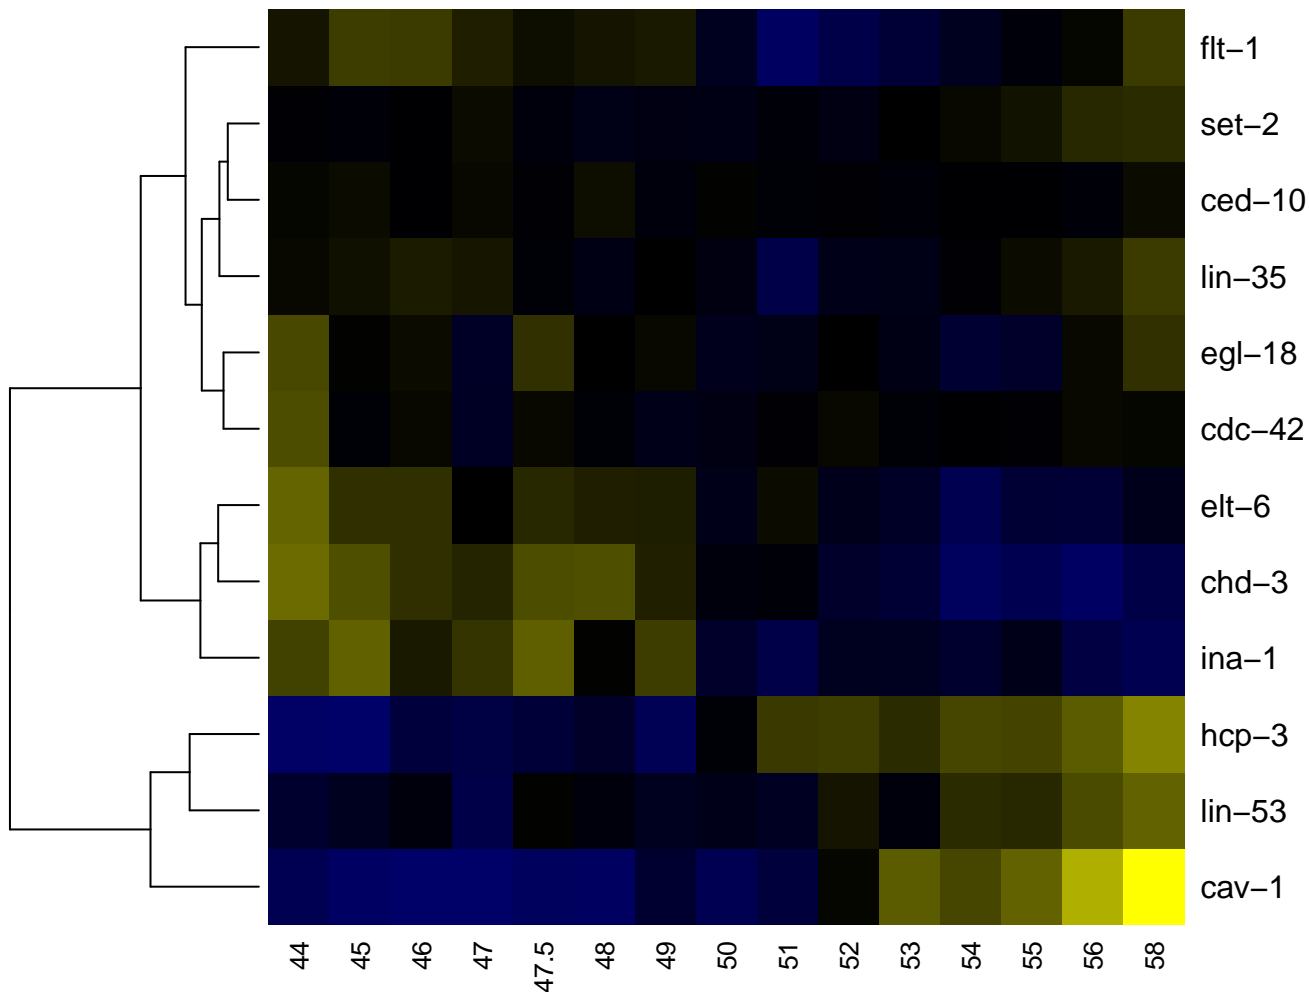

# ABalpapapp







# ABalpapp





# ABalpappaa



# ABalpappaaa



# ABalpappaap



# ABalpappaapp



# ABalppapp



# ABalpppp

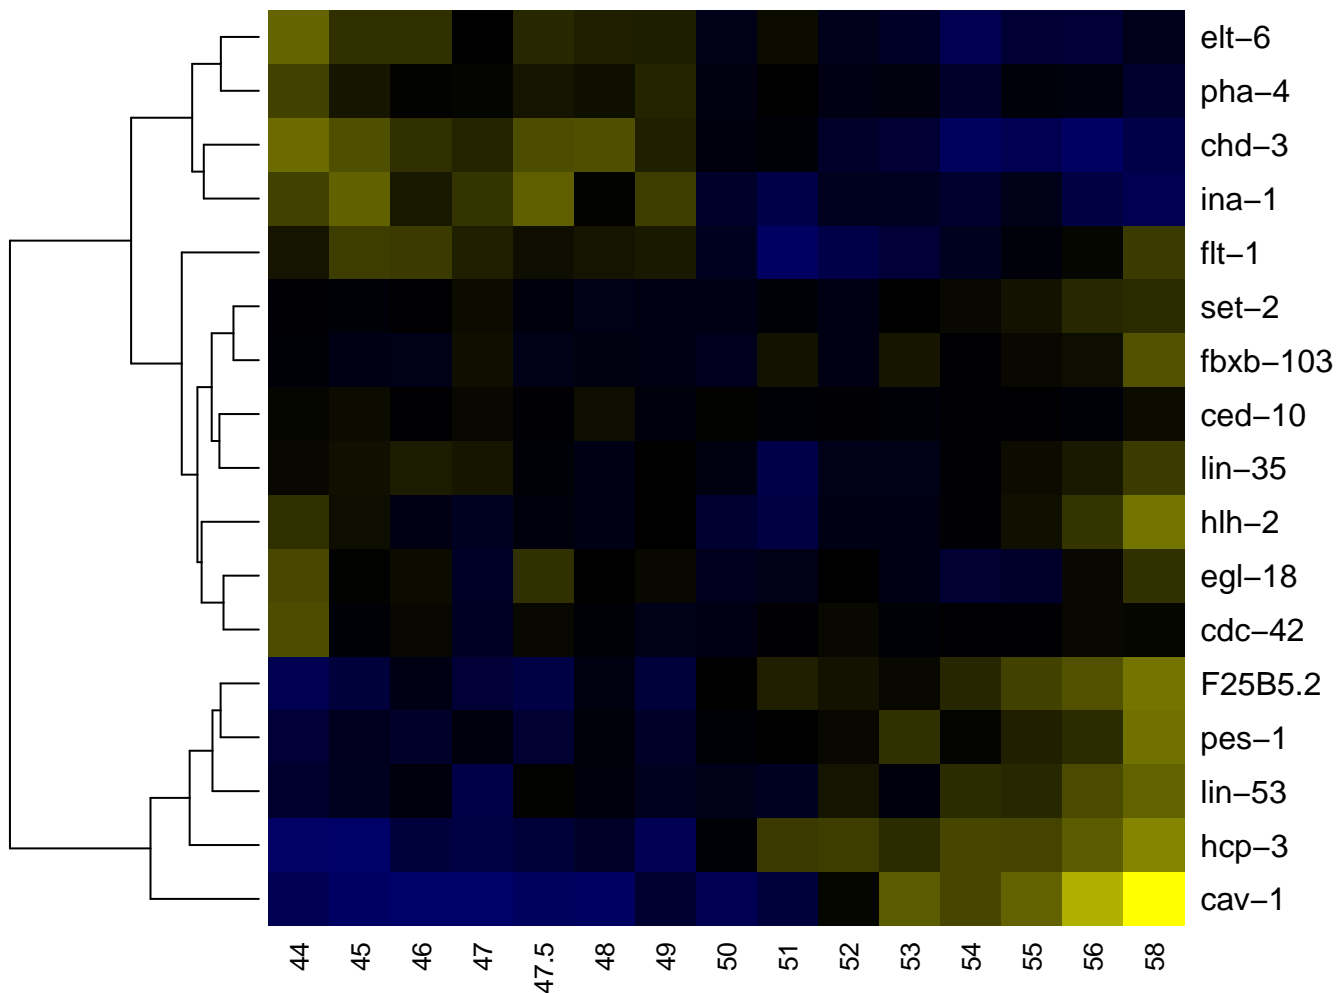



# ABalpappa

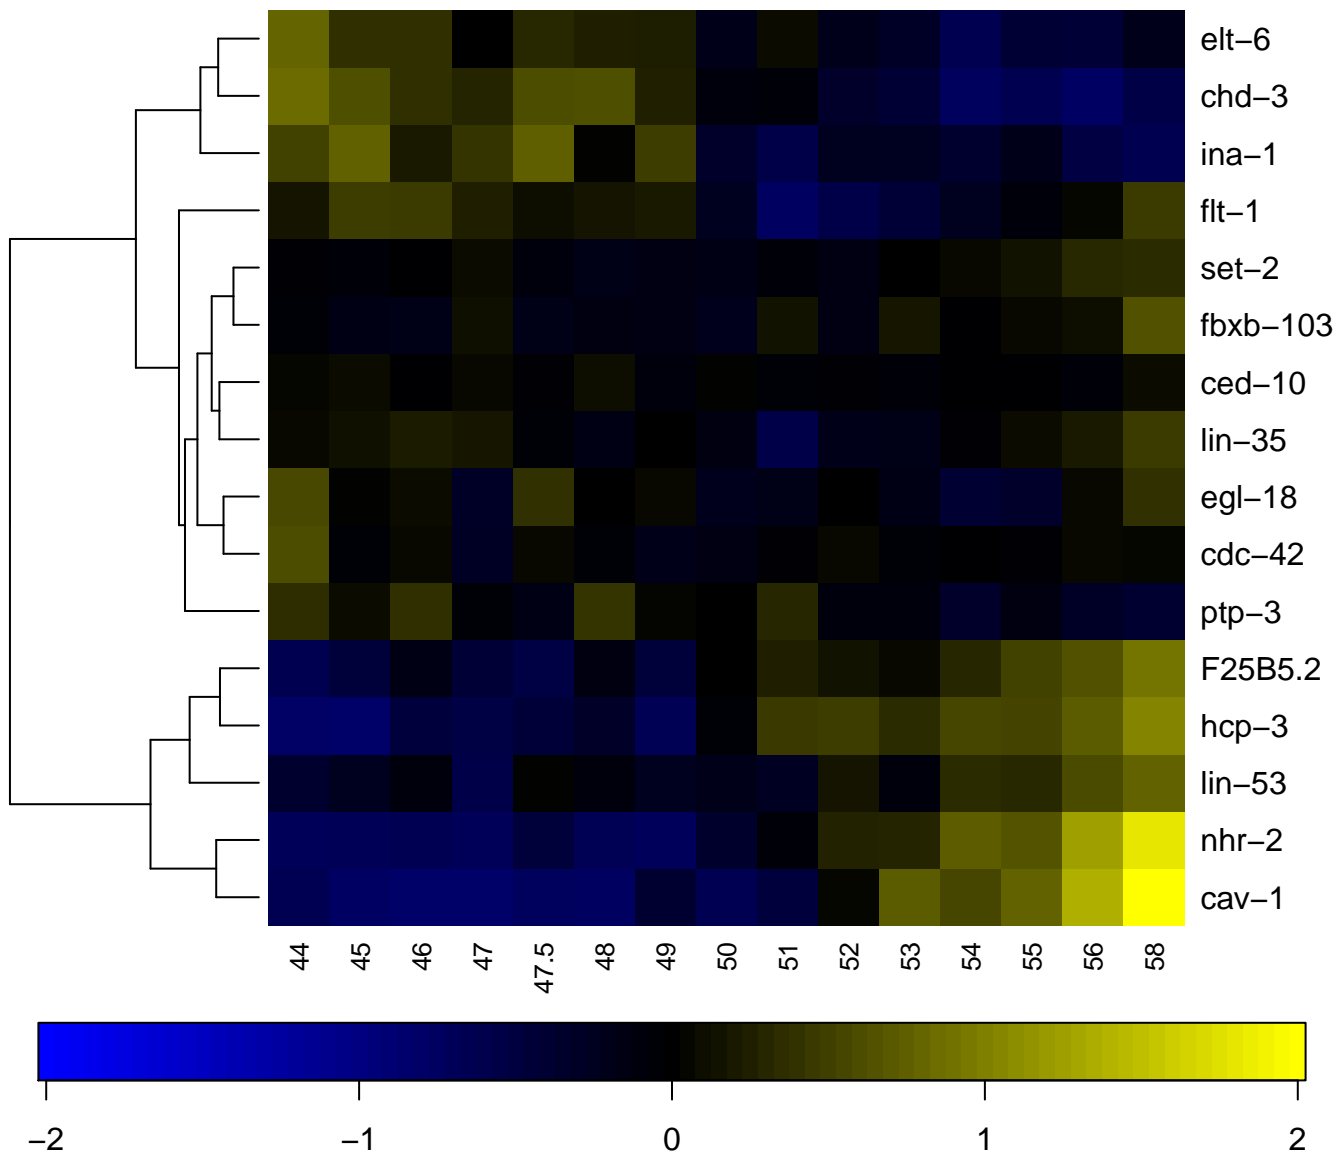

# ABalppappap



# ABalppppp



# ABalpp

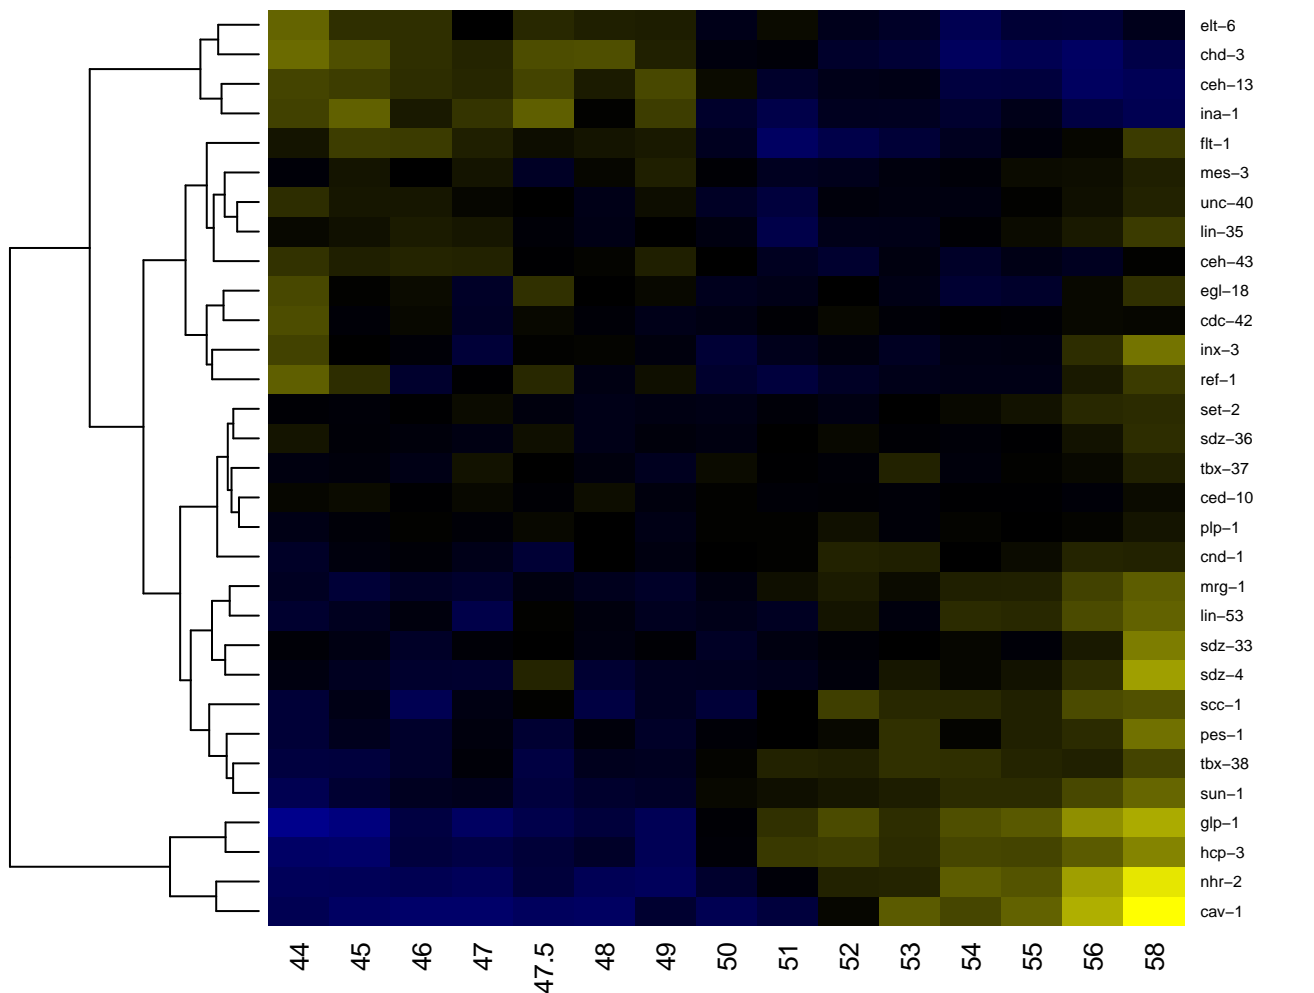



# ABalppaa

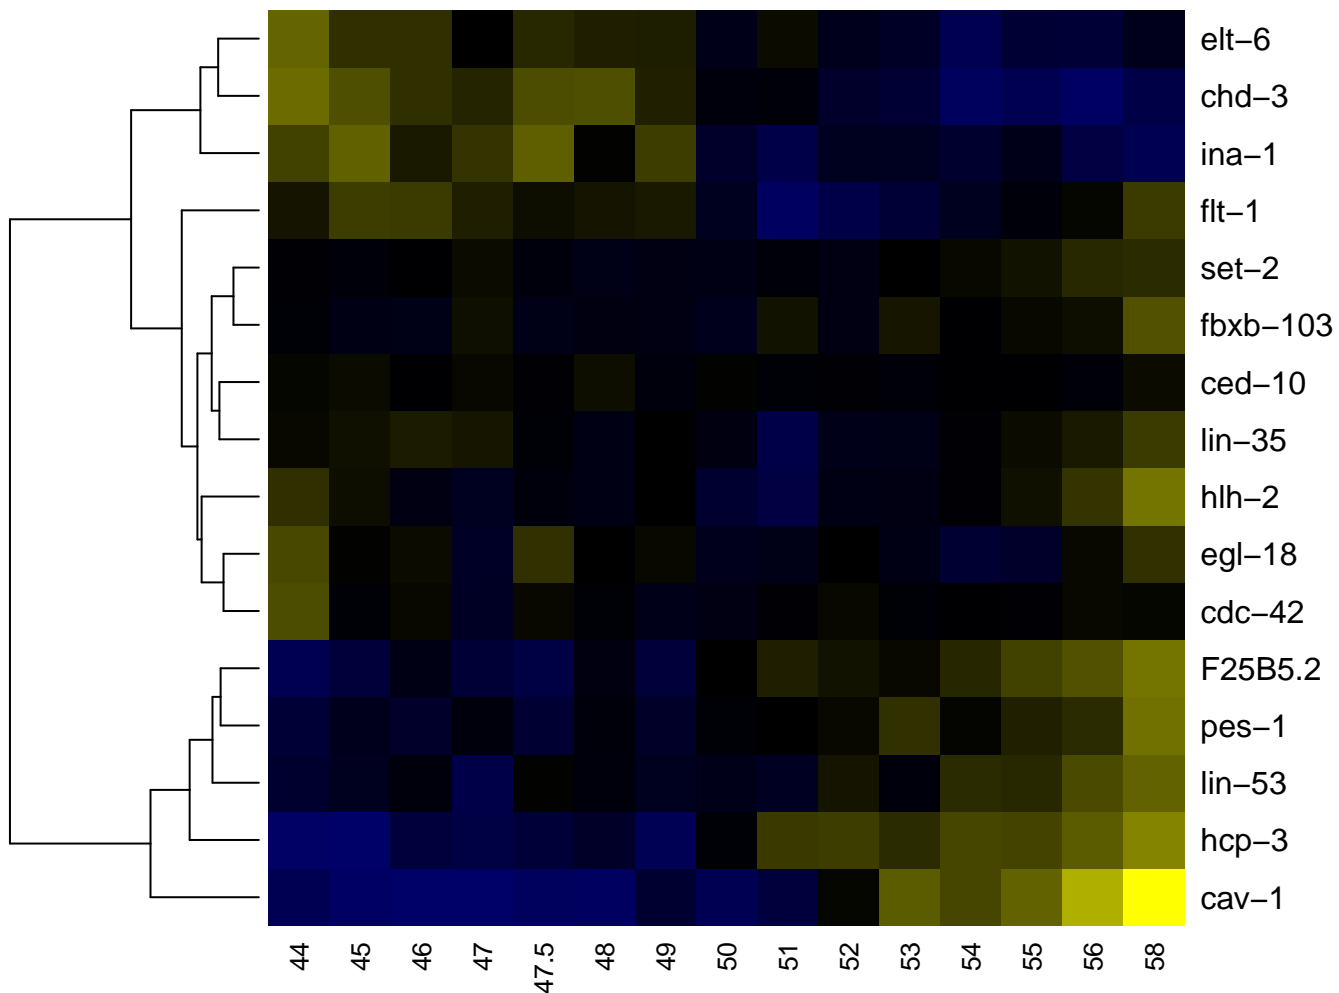

# ABalppaa

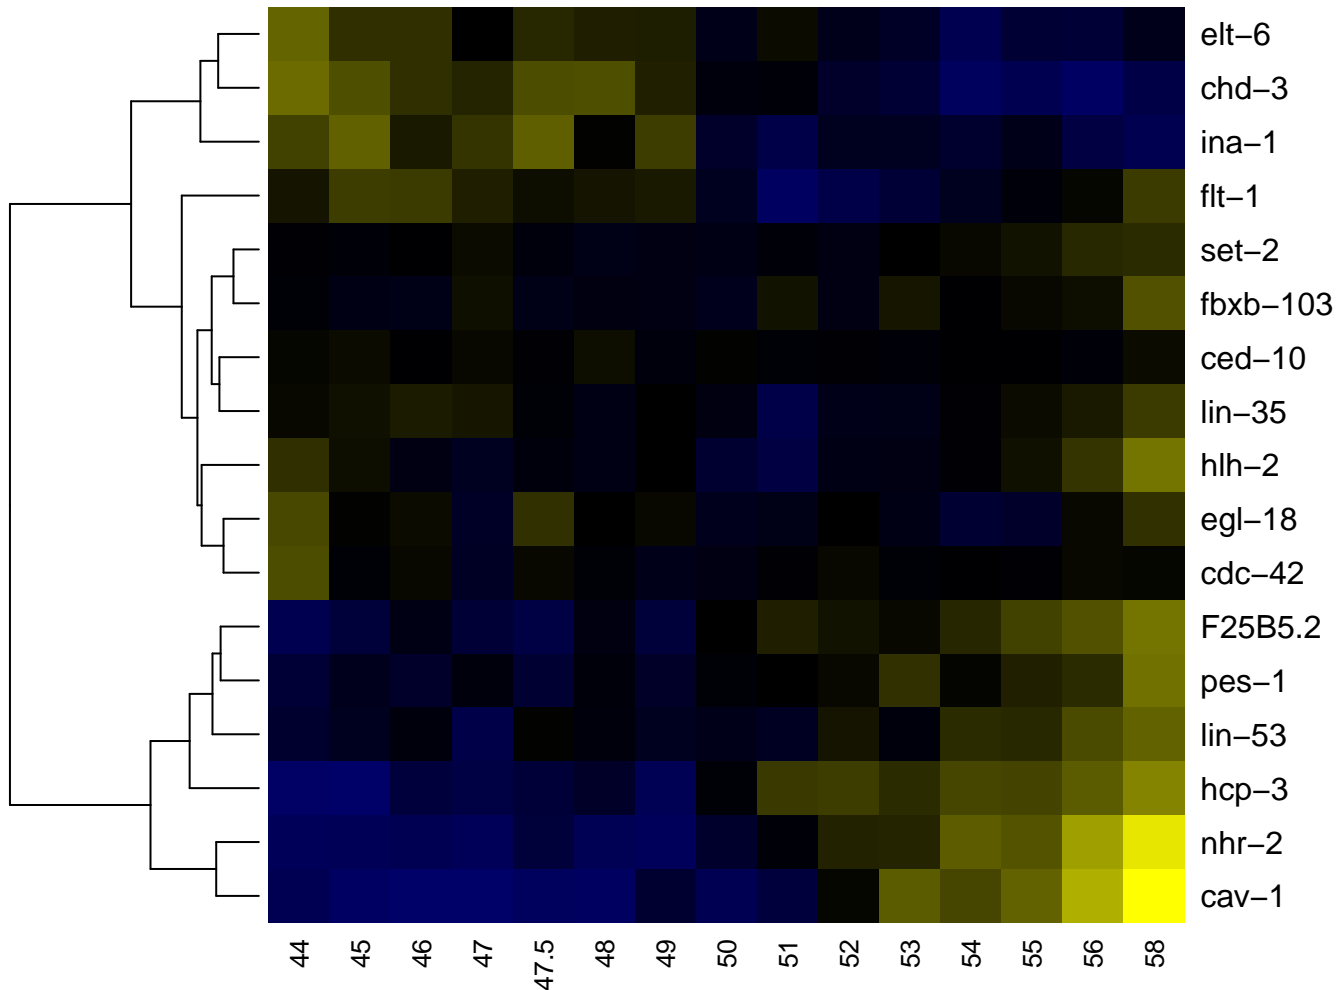

# ABalppaaa





# ABalppaap



# ABalppaap



# ABalppaapa



# ABalppaapp



# ABalppaappa



# ABalppap

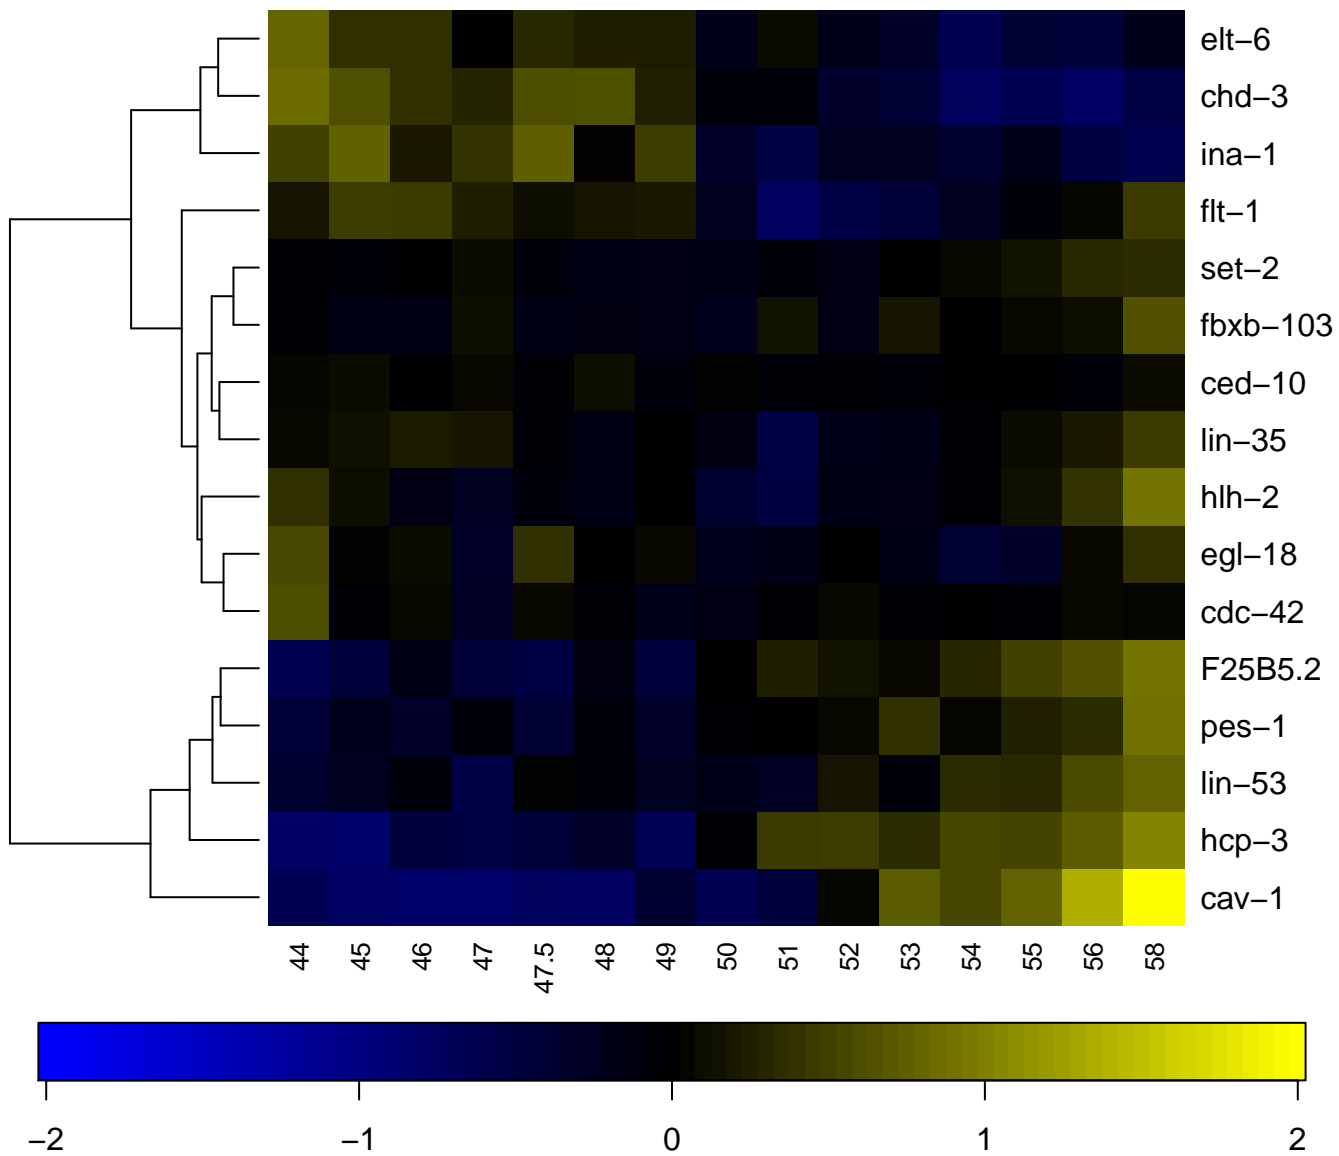

# ABalppapa

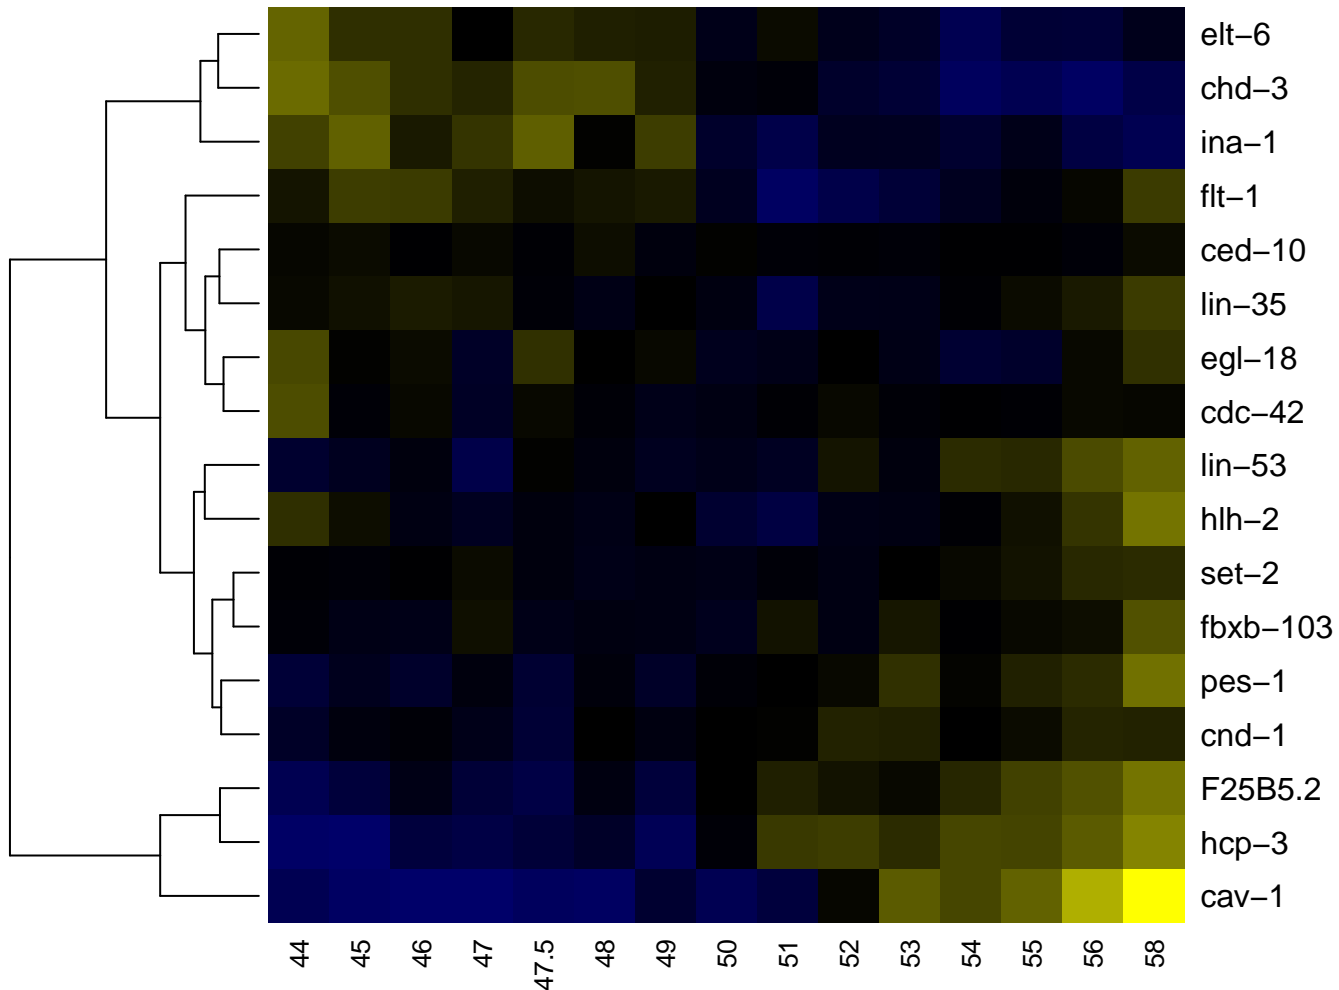





# ABalppapap

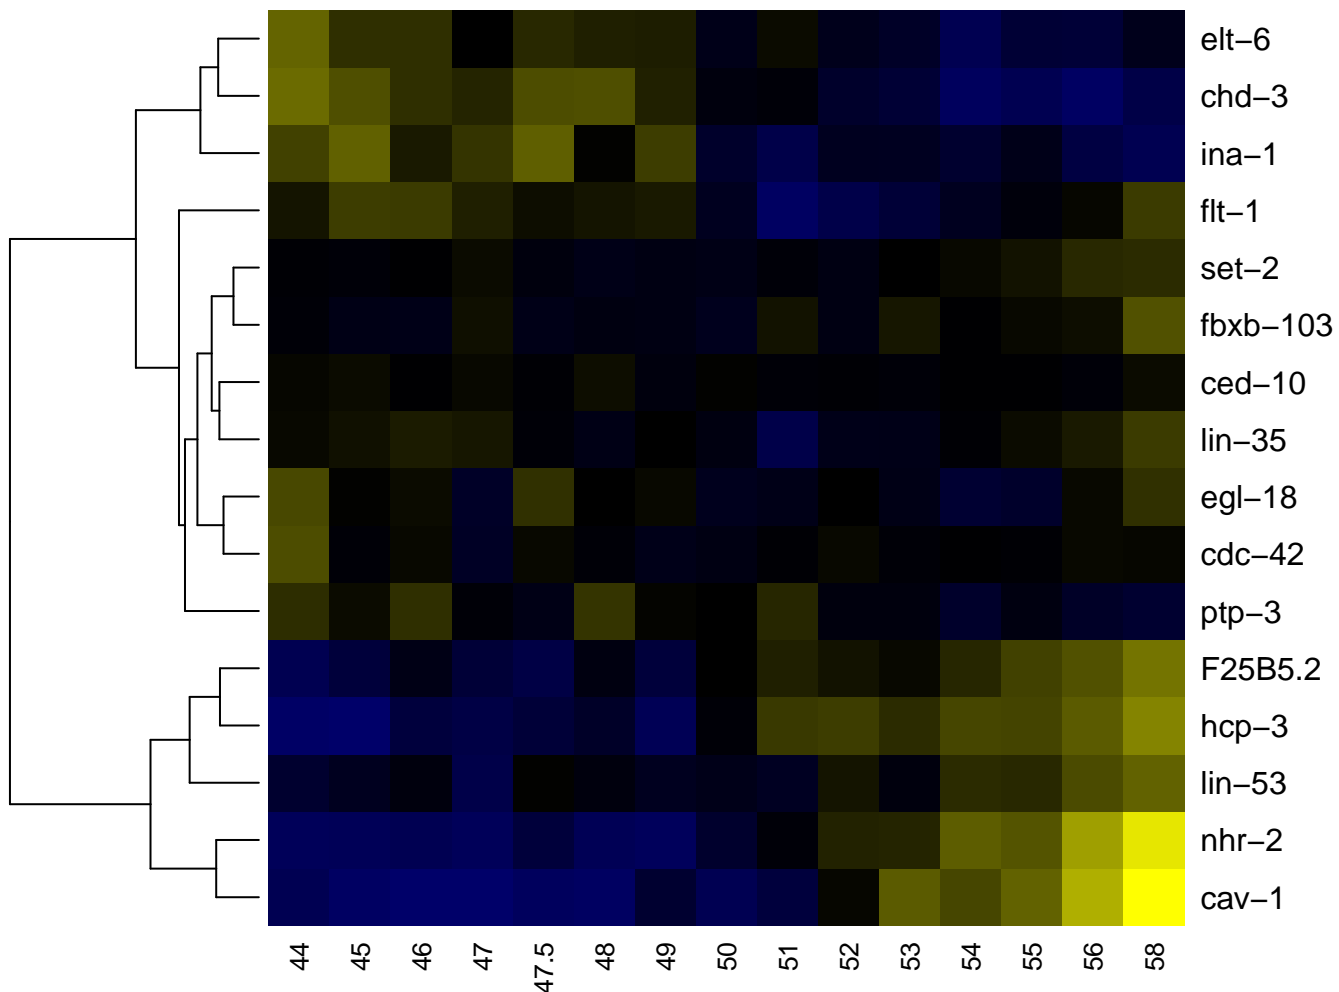

# ABalppapp

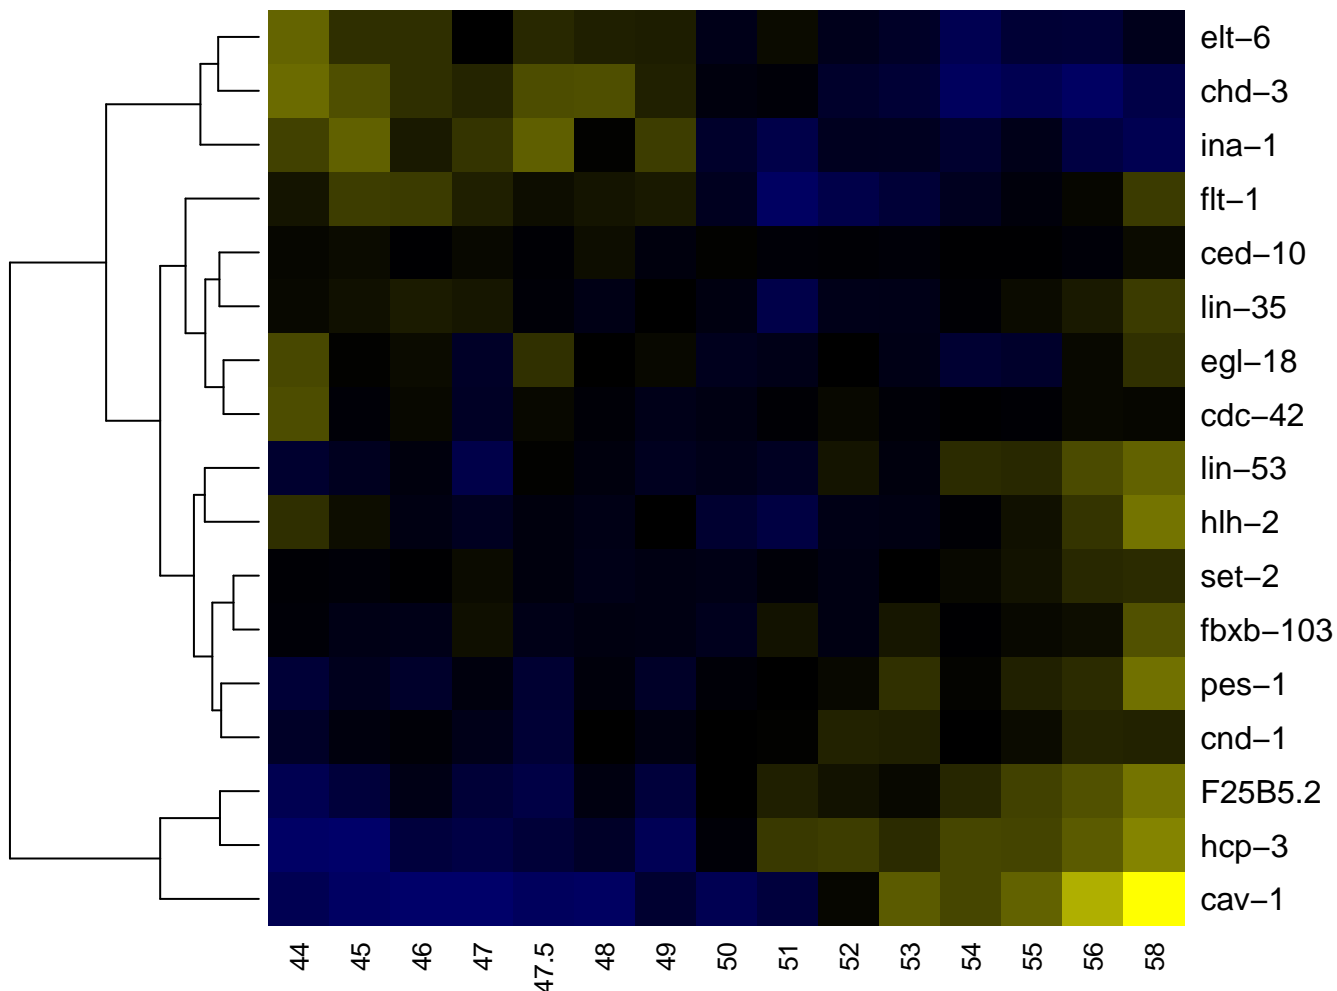

# ABalppappa

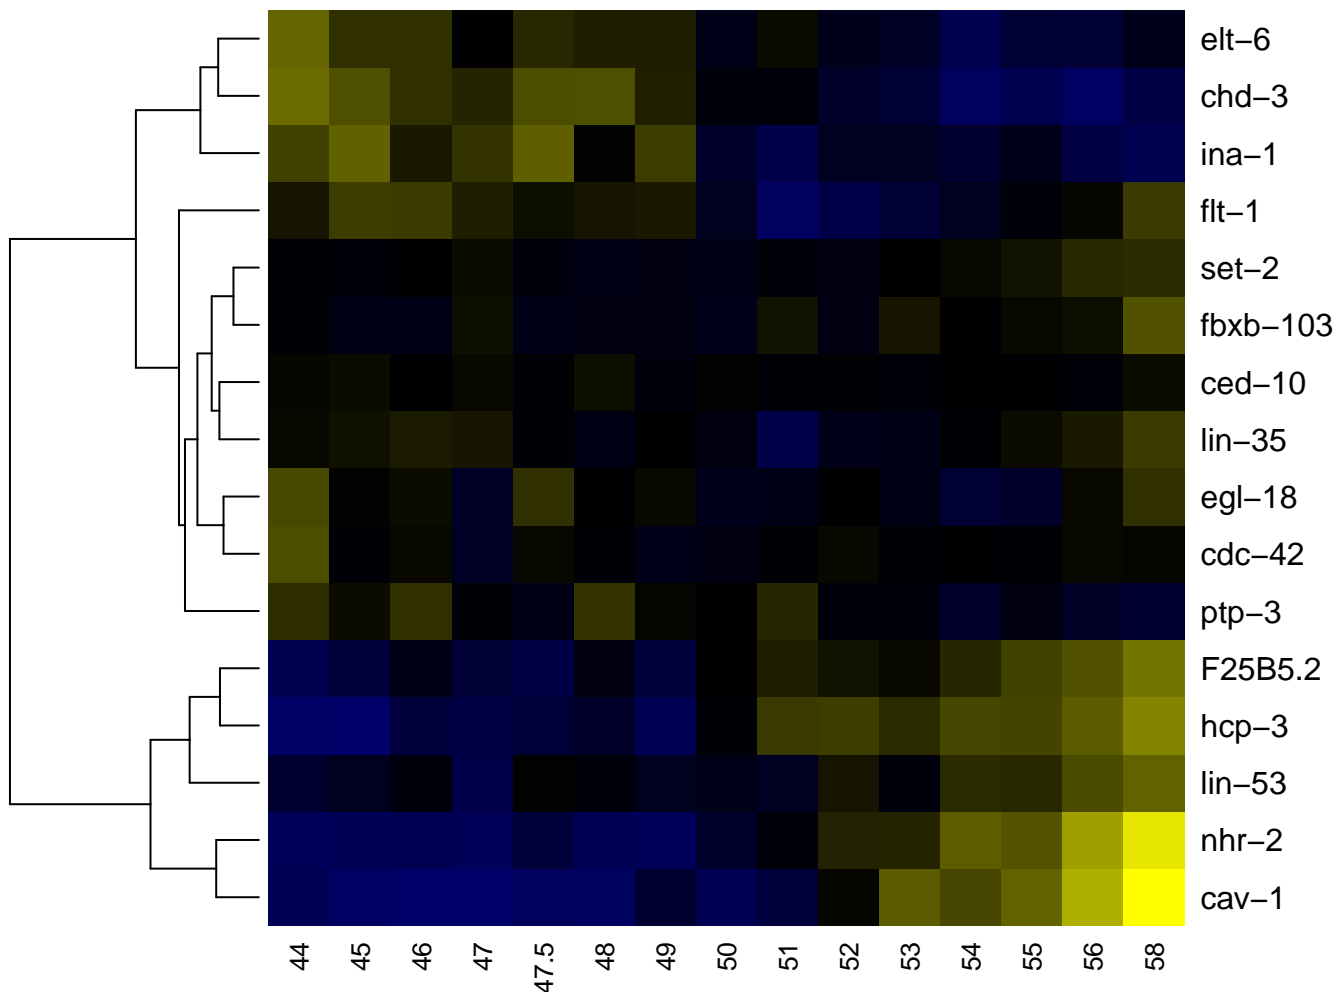

# ABalppapp





# ABalppappap





# ABalpppa





# ABalppaa

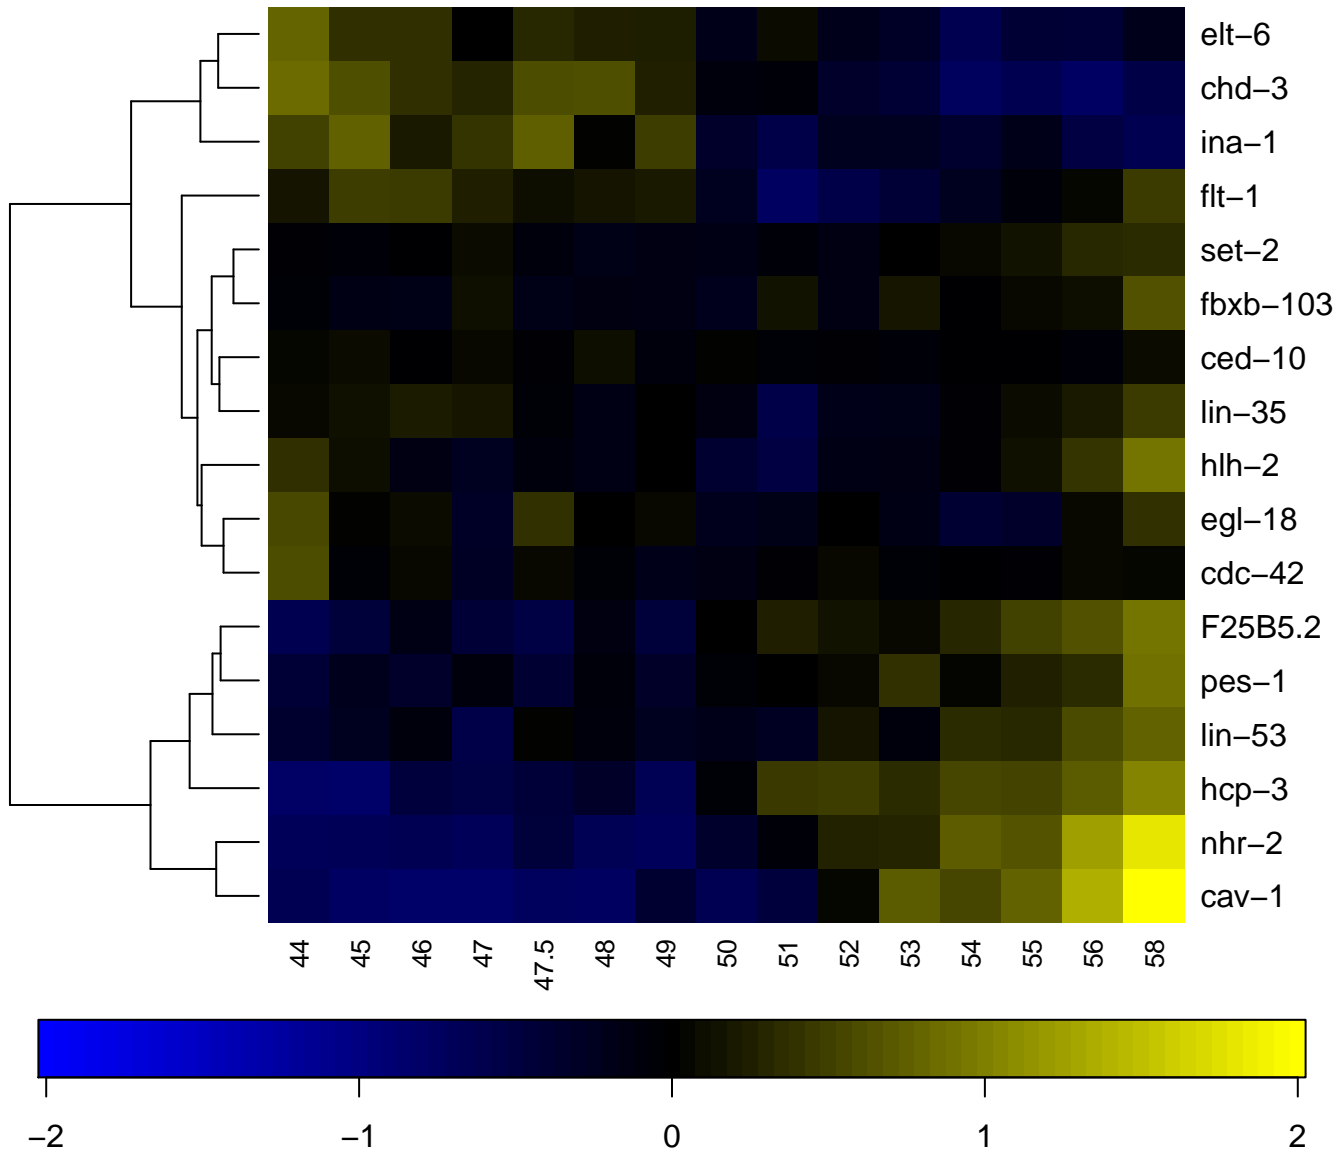

# ABalpppaa



# ABalpppaap



# ABalpppaapv



# ABalpppap

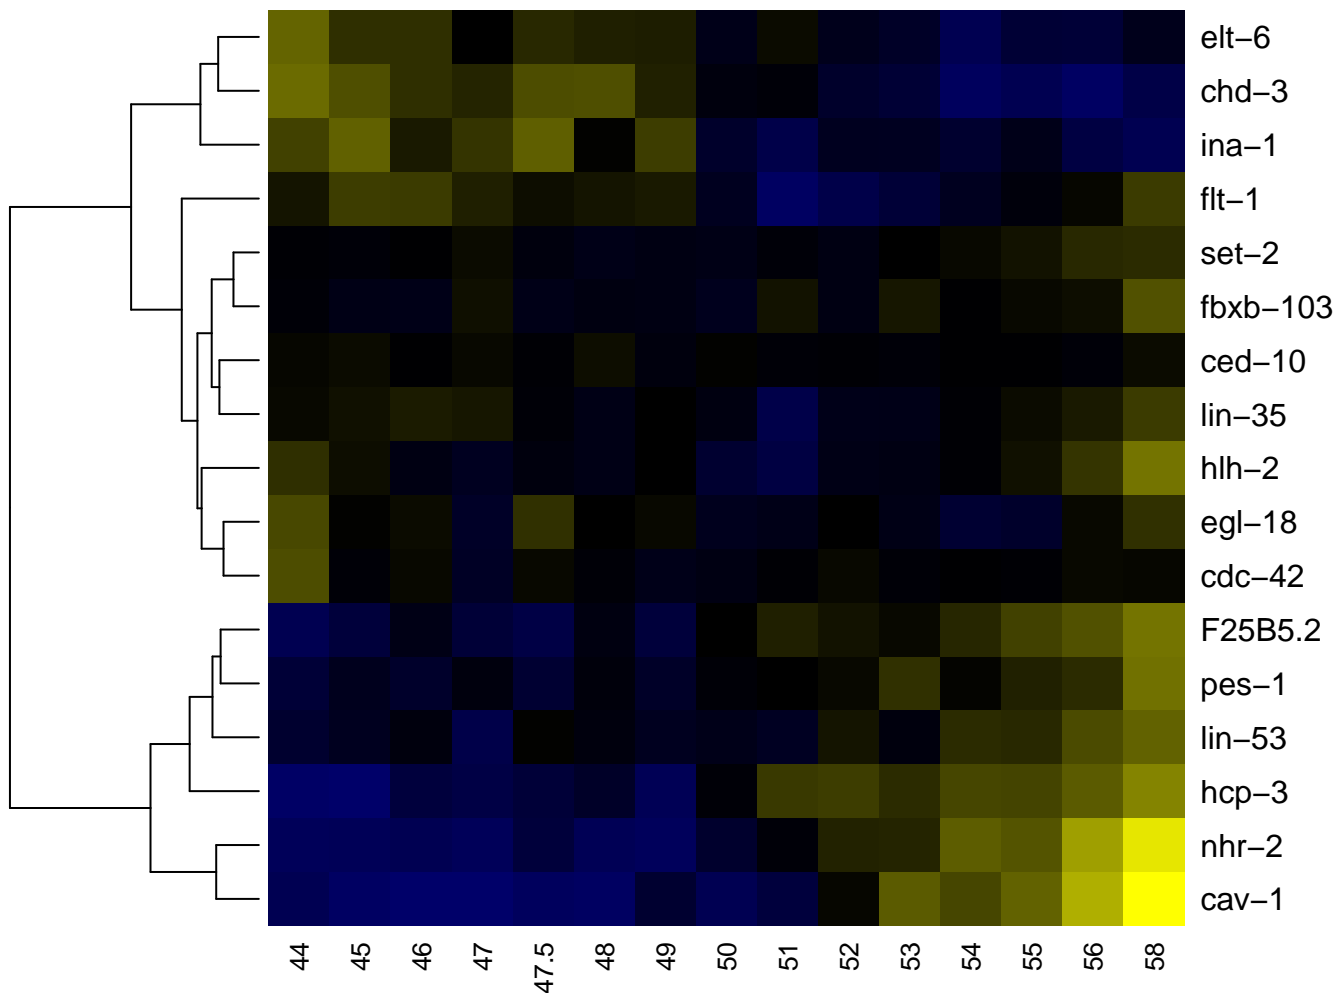

# ABalppapa



# ABalppapp



# ABalppappa





# ABalpppappp



# ABalppppppp



# ABalpppp



# ABalppppa

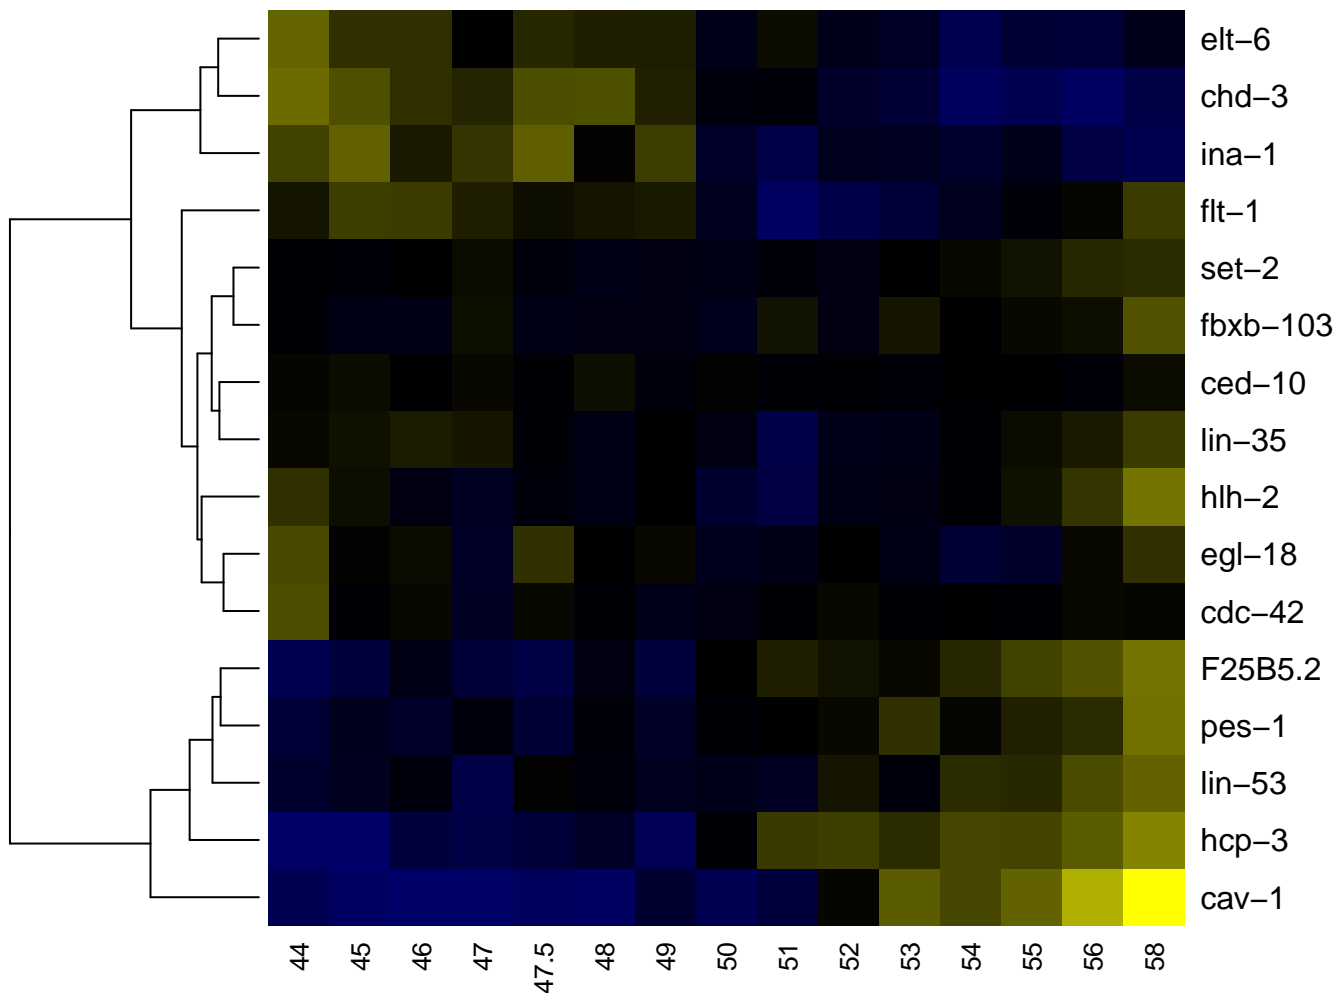

# ABalppppaa

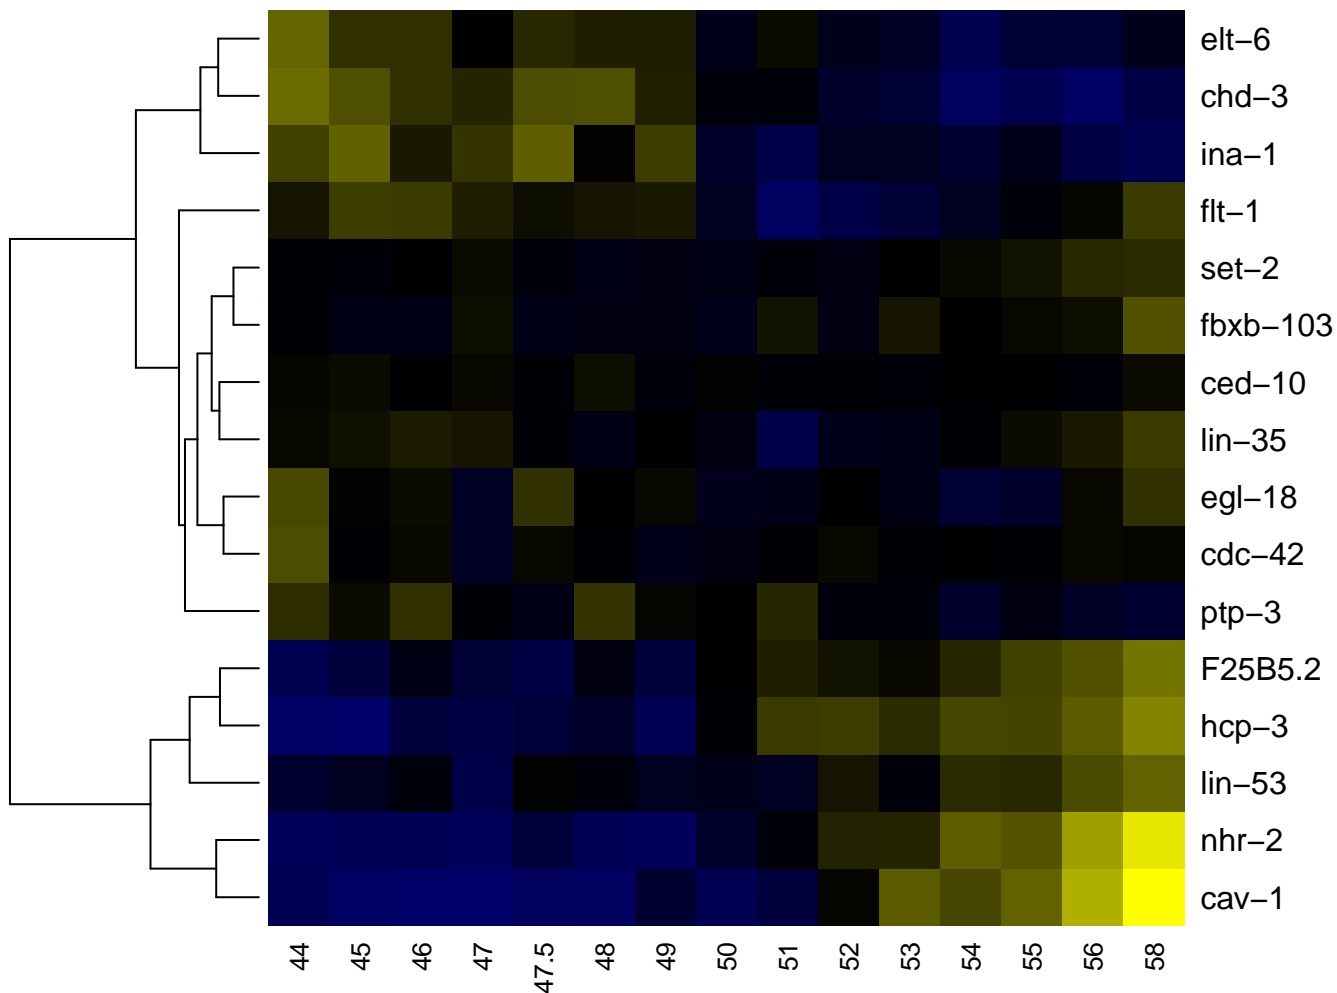

# ABalppppaav



# ABalppppap



# ABalppppapa





# ABalppppapap



# ABalppppapp



# ABalppppp



# ABalpppppa

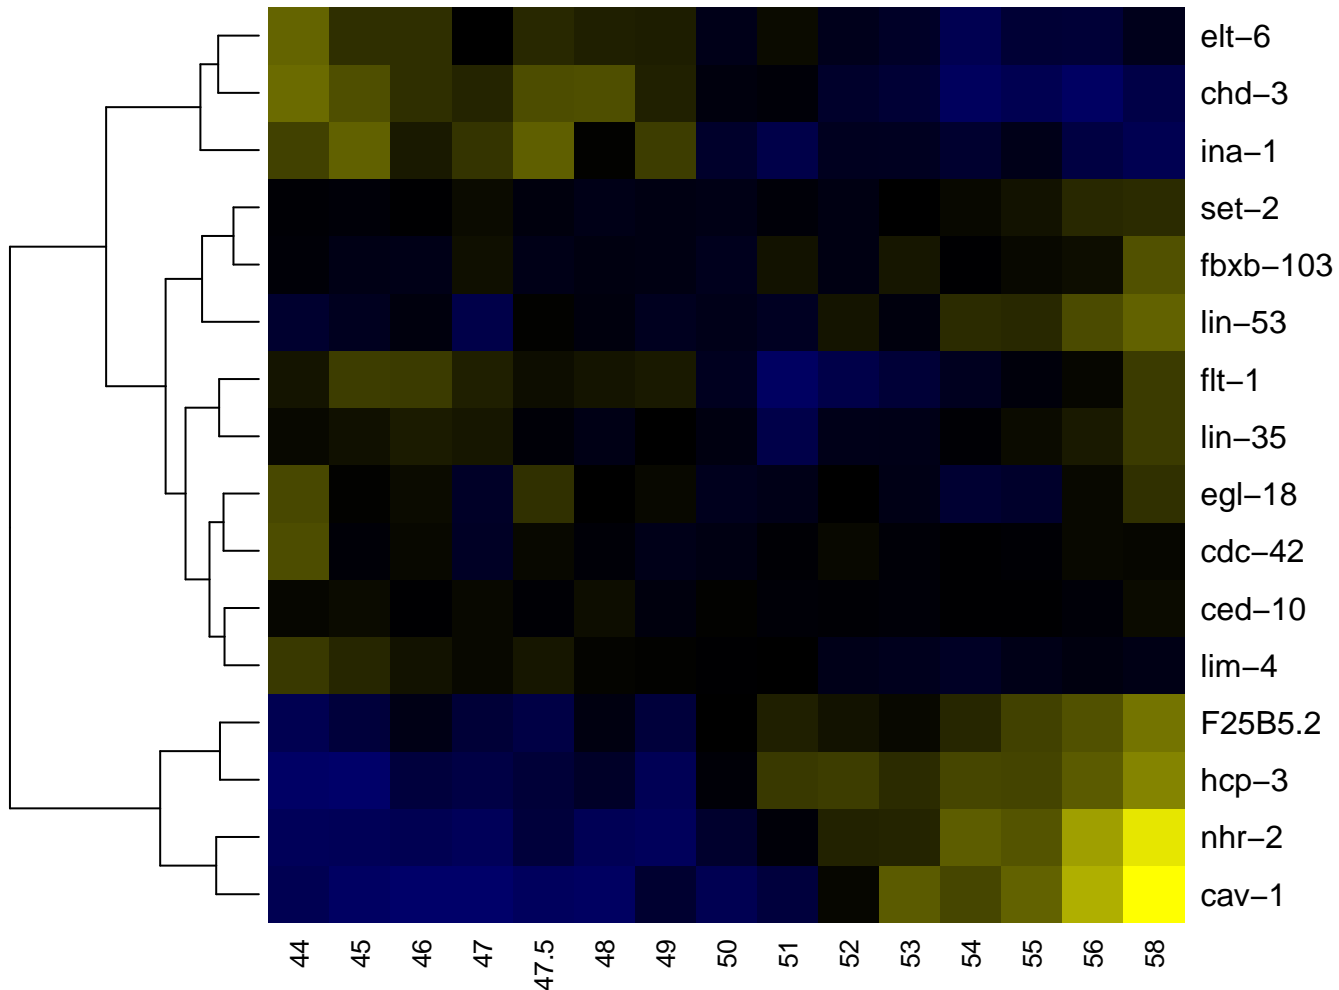

# ABalpppppp

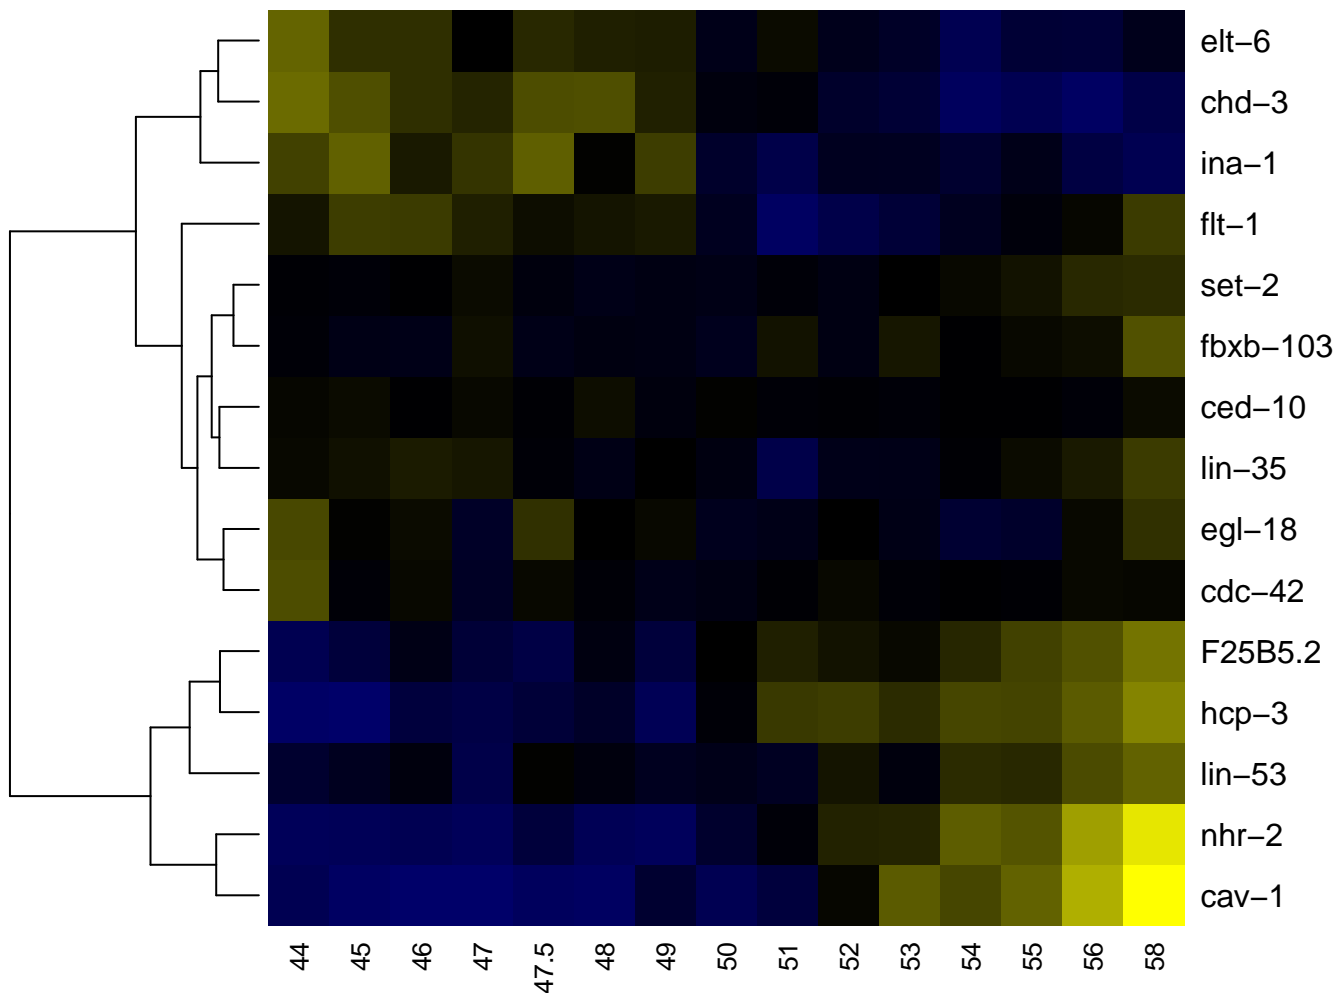

# ABalpppppppa



# ABalpppppppap



# ABalppppppp







# ABara

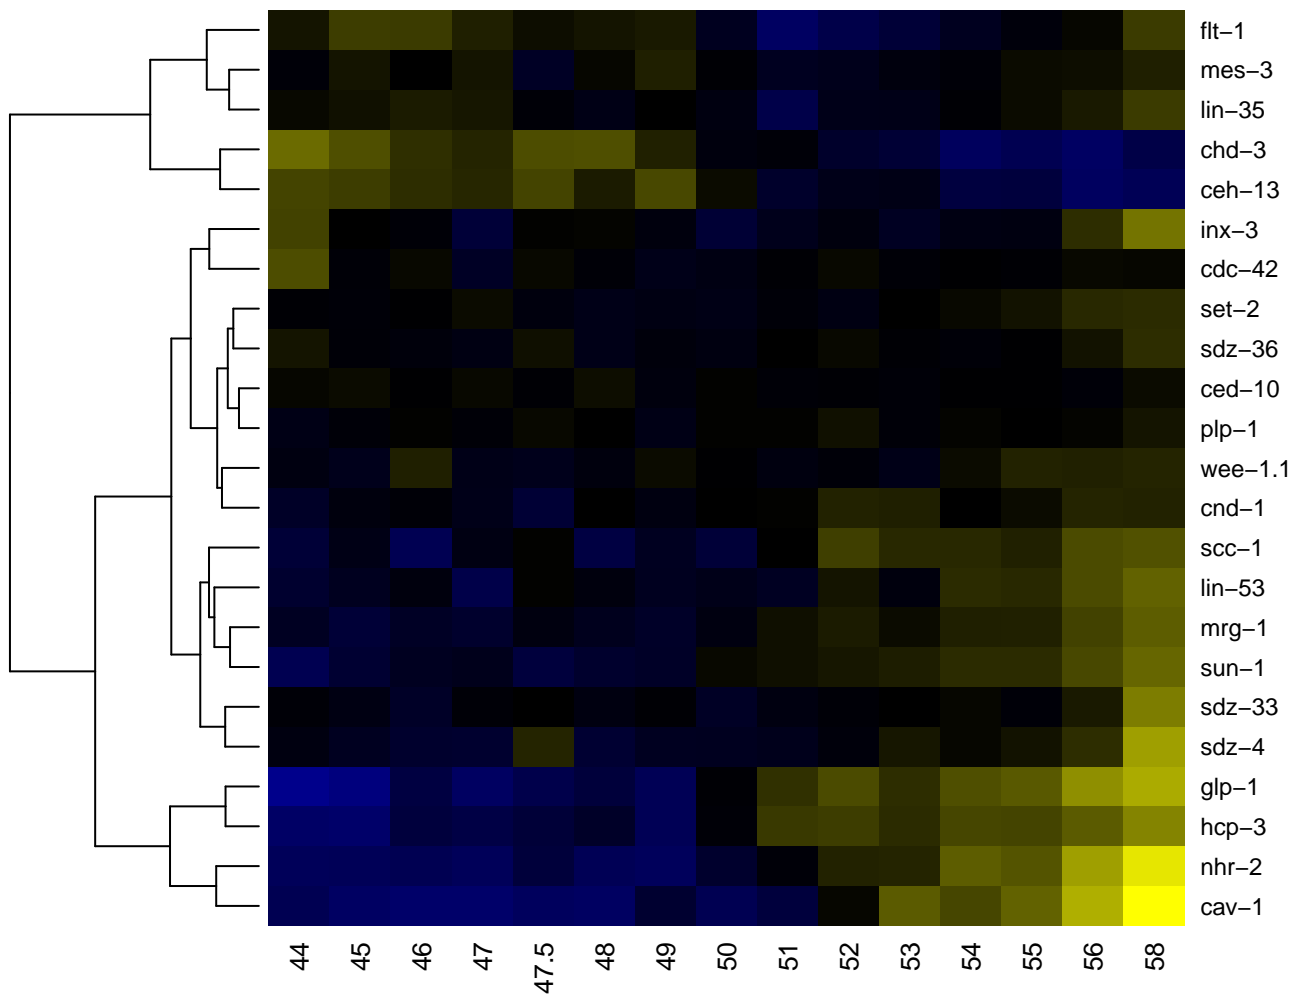

-2

-1

0

1

2



# ABaraaa

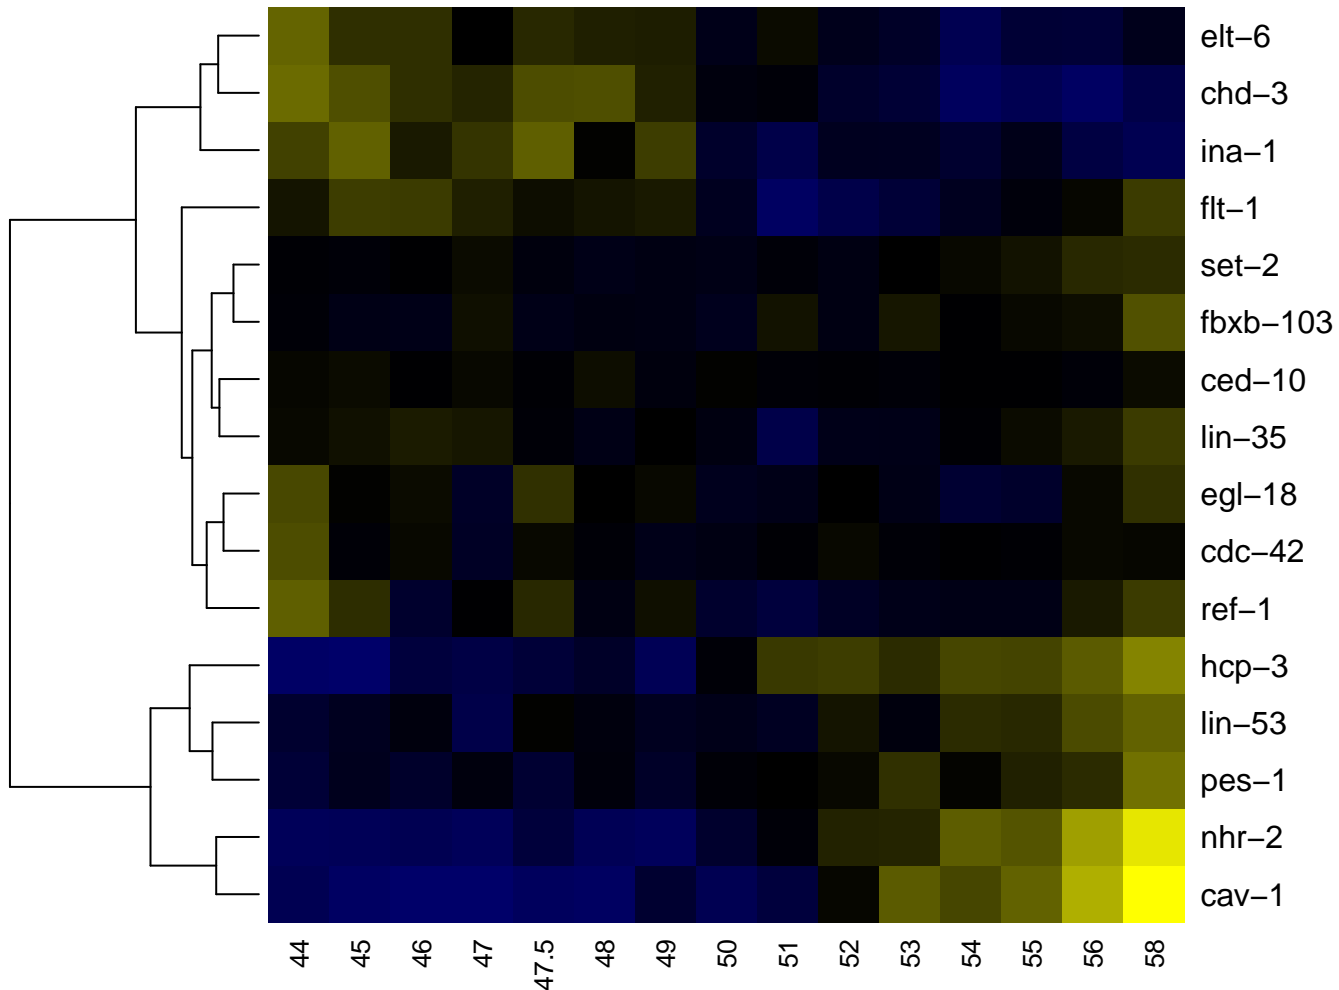

# ABaraaaa

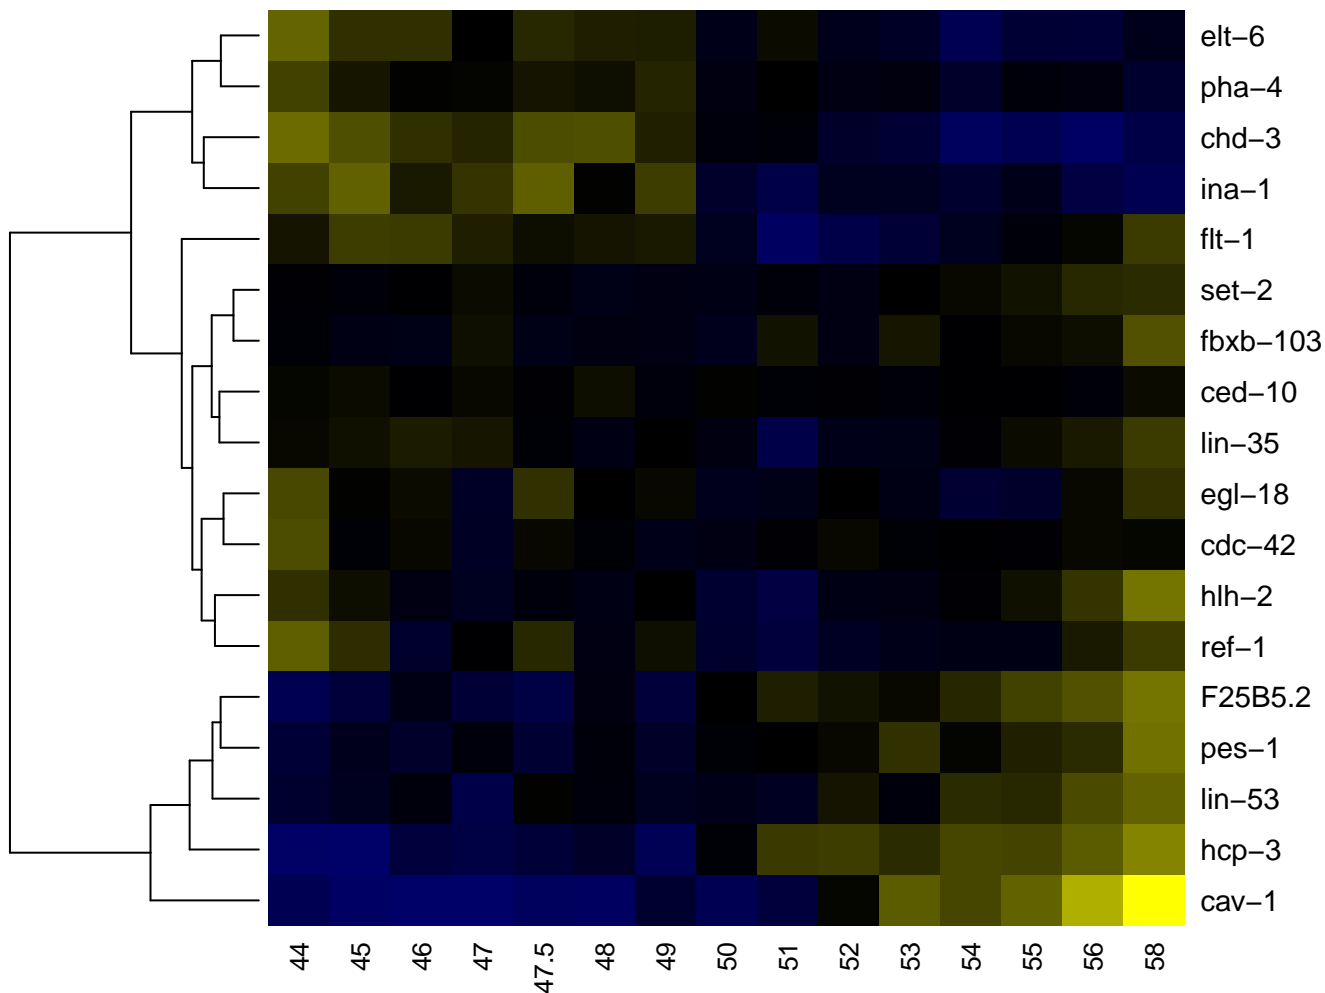

# ABaraaaaa

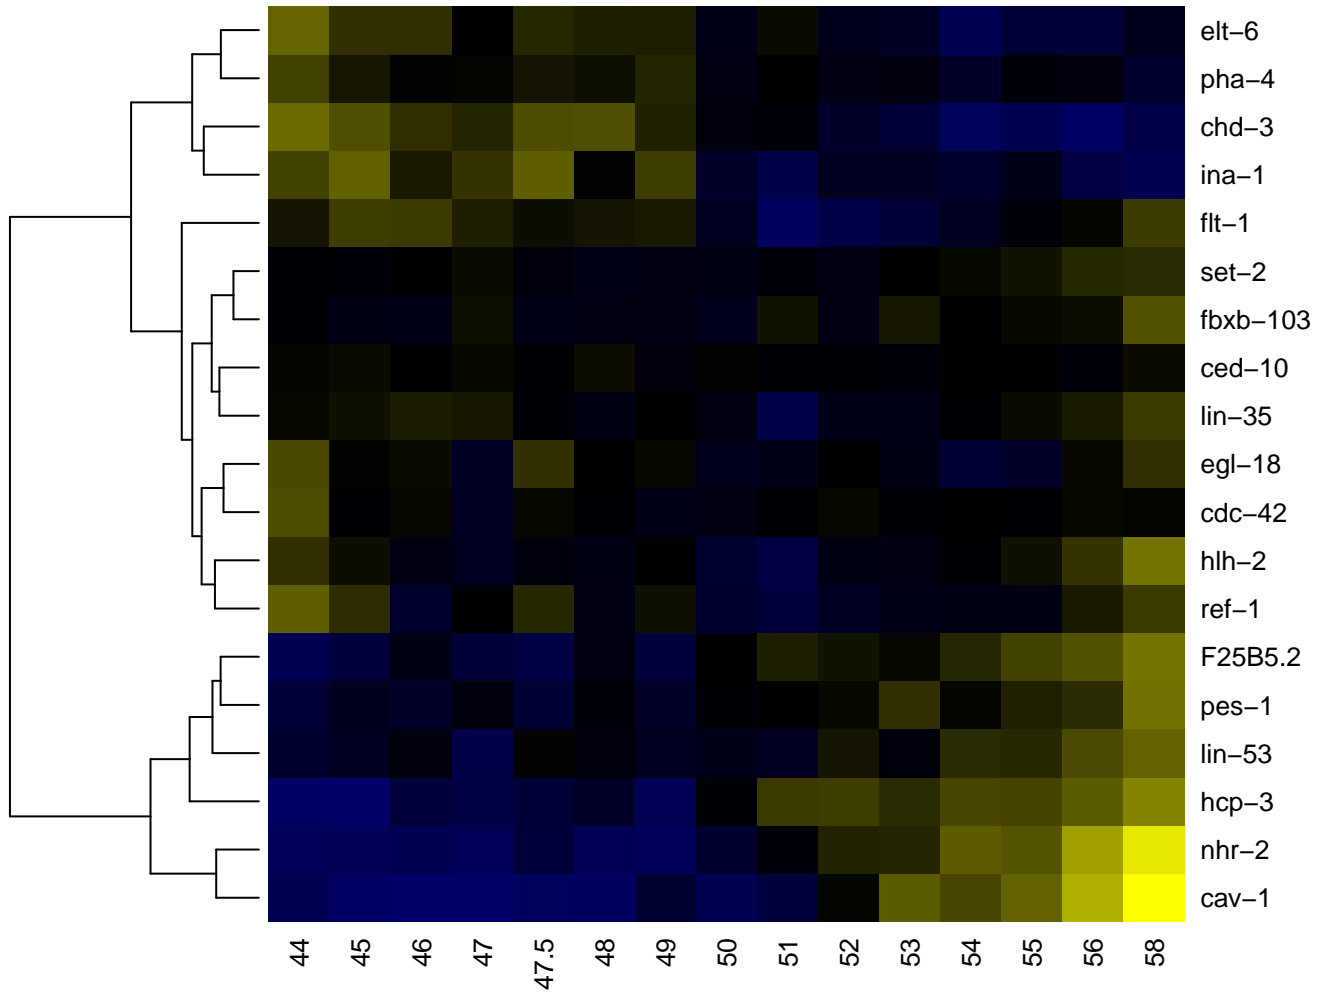

# ABaraaaaa



# ABaraaaap





# ABaraaaap

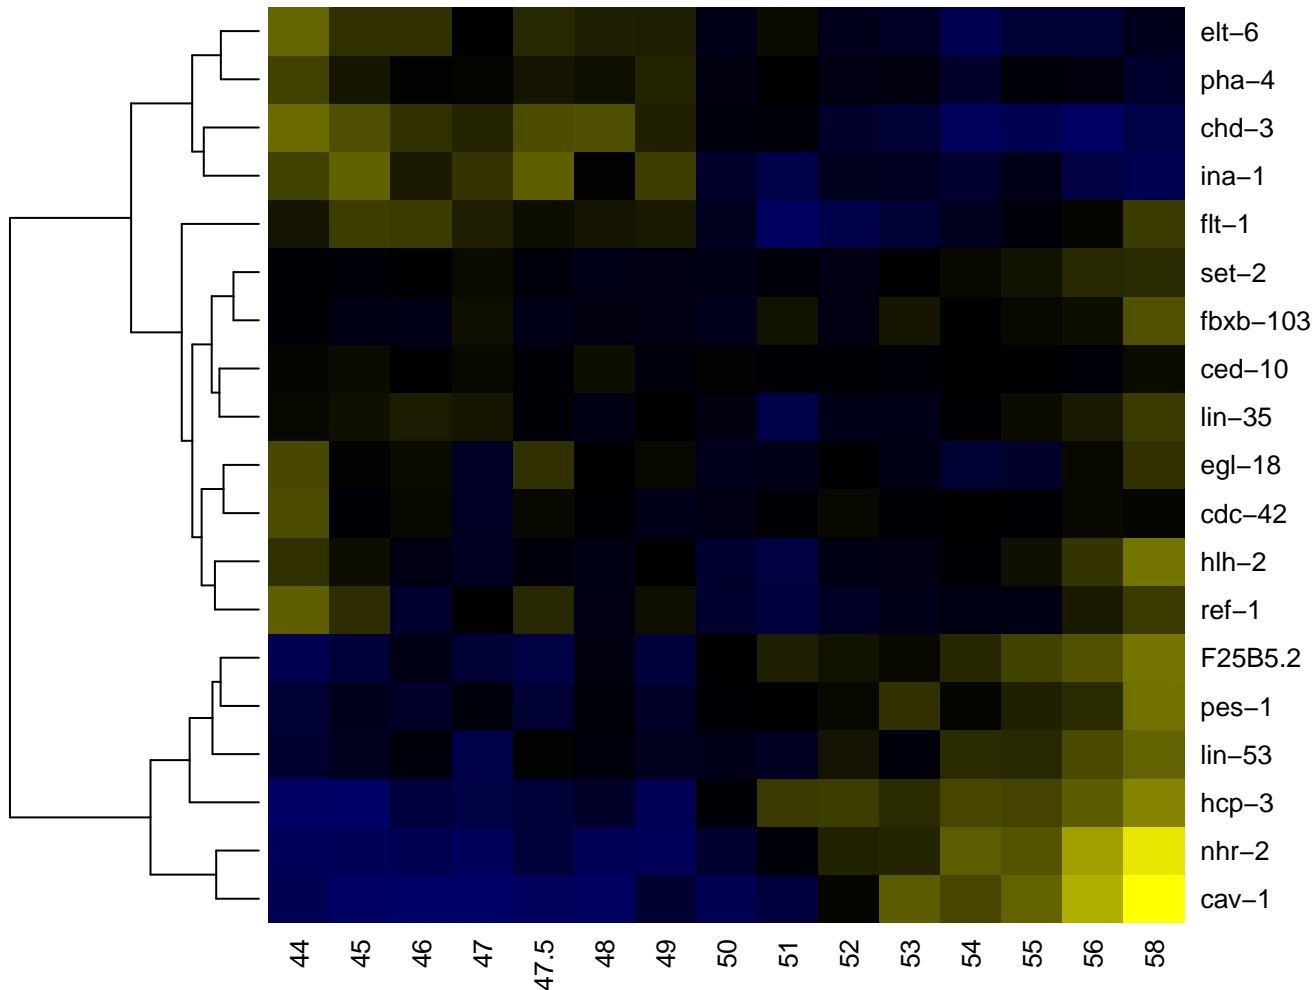

# ABaraaaapa



# ABaraaaapaa



# ABaraaaapp



# ABaraaap



# ABaraaapa

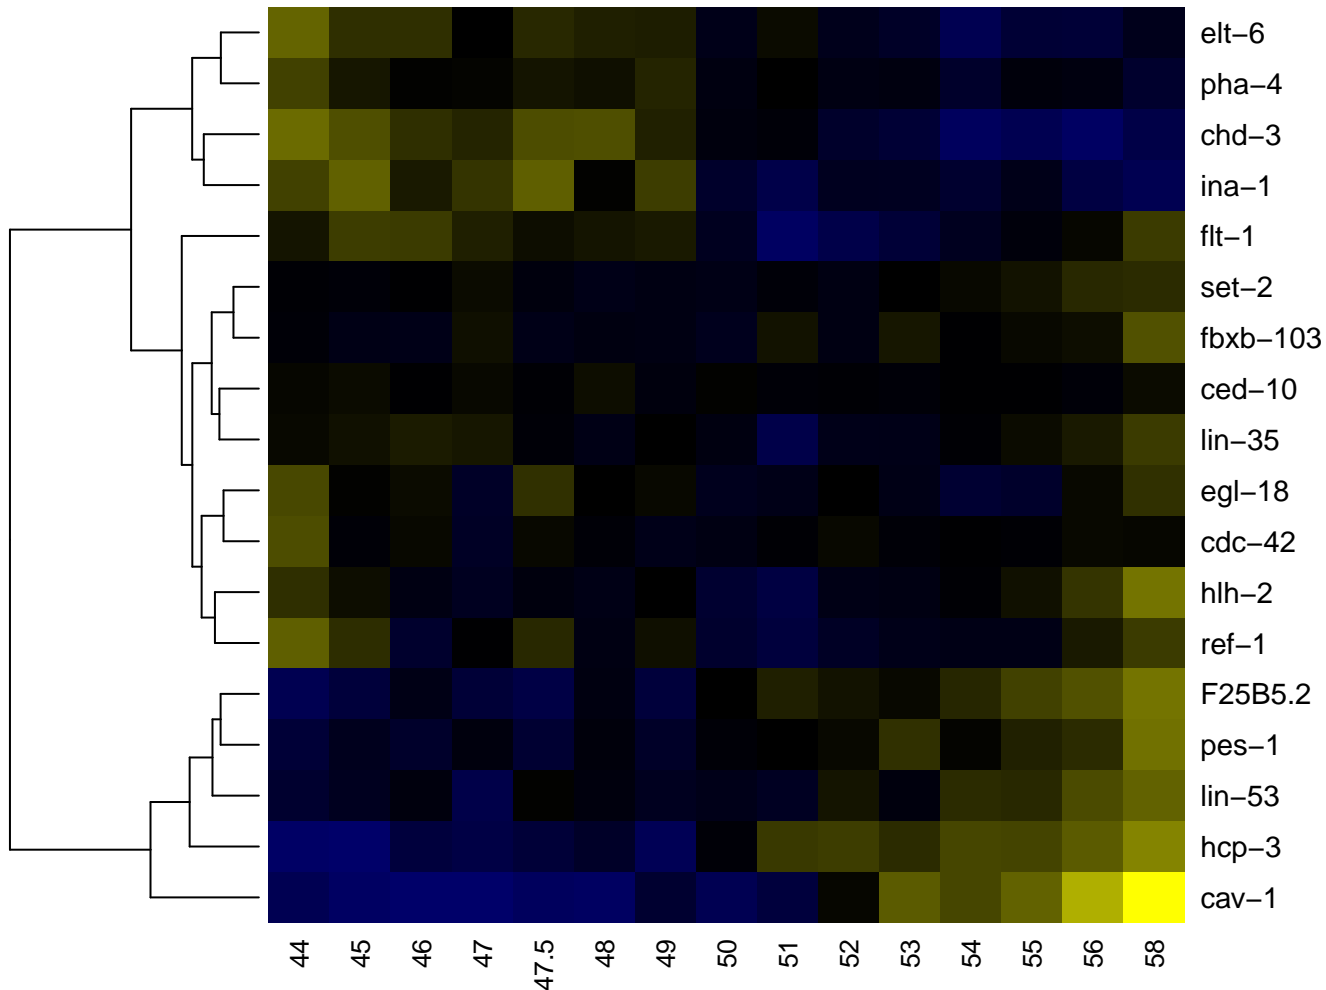

-2

-1

0

1

2

# ABaraaapaa



# ABaraaapap





# ABaraaapp

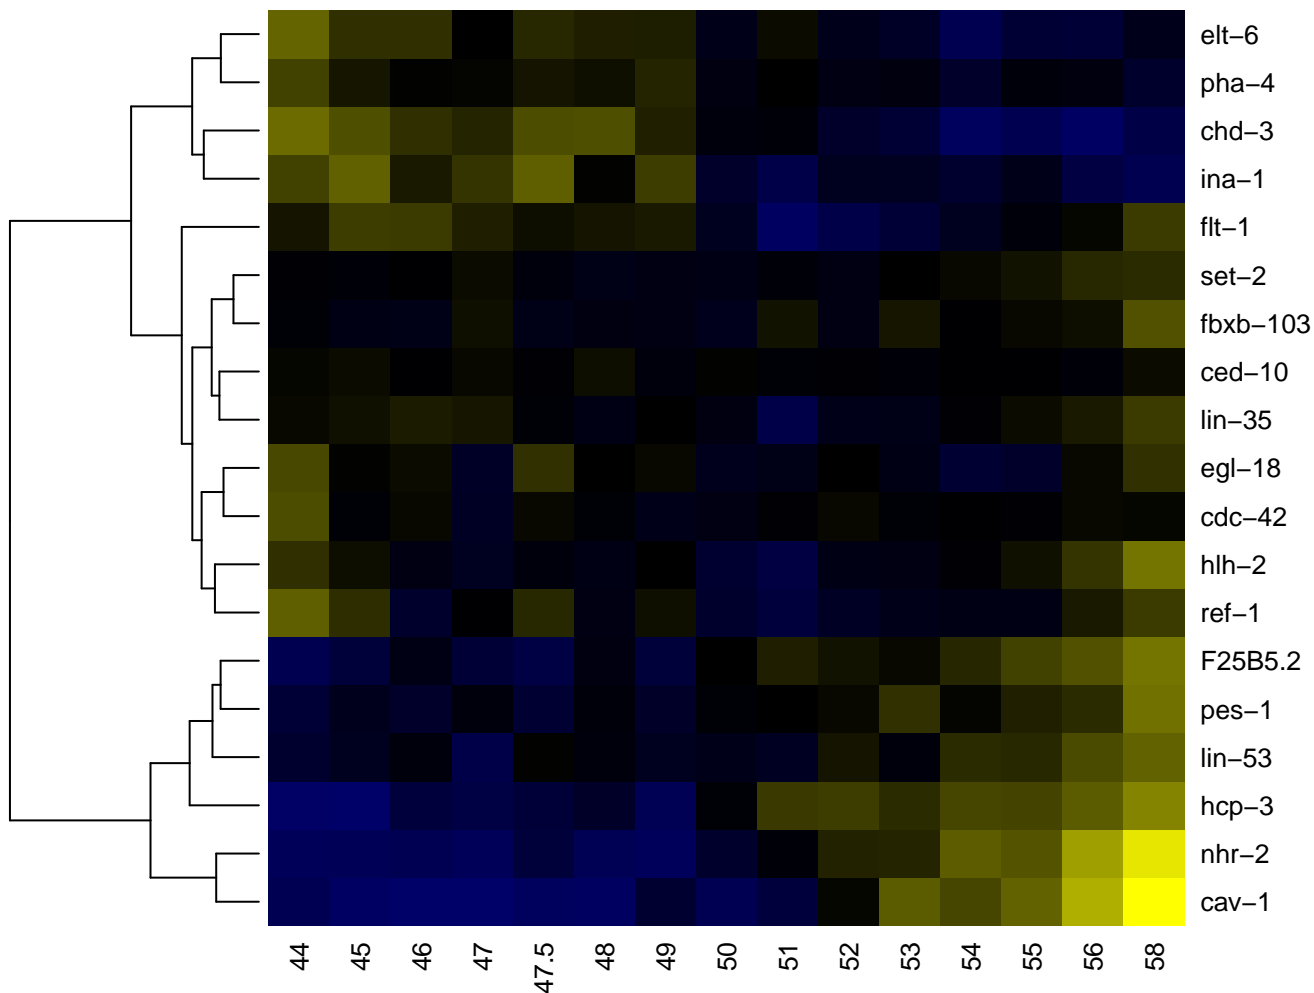

# ABaraaappa



# ABaraaapp

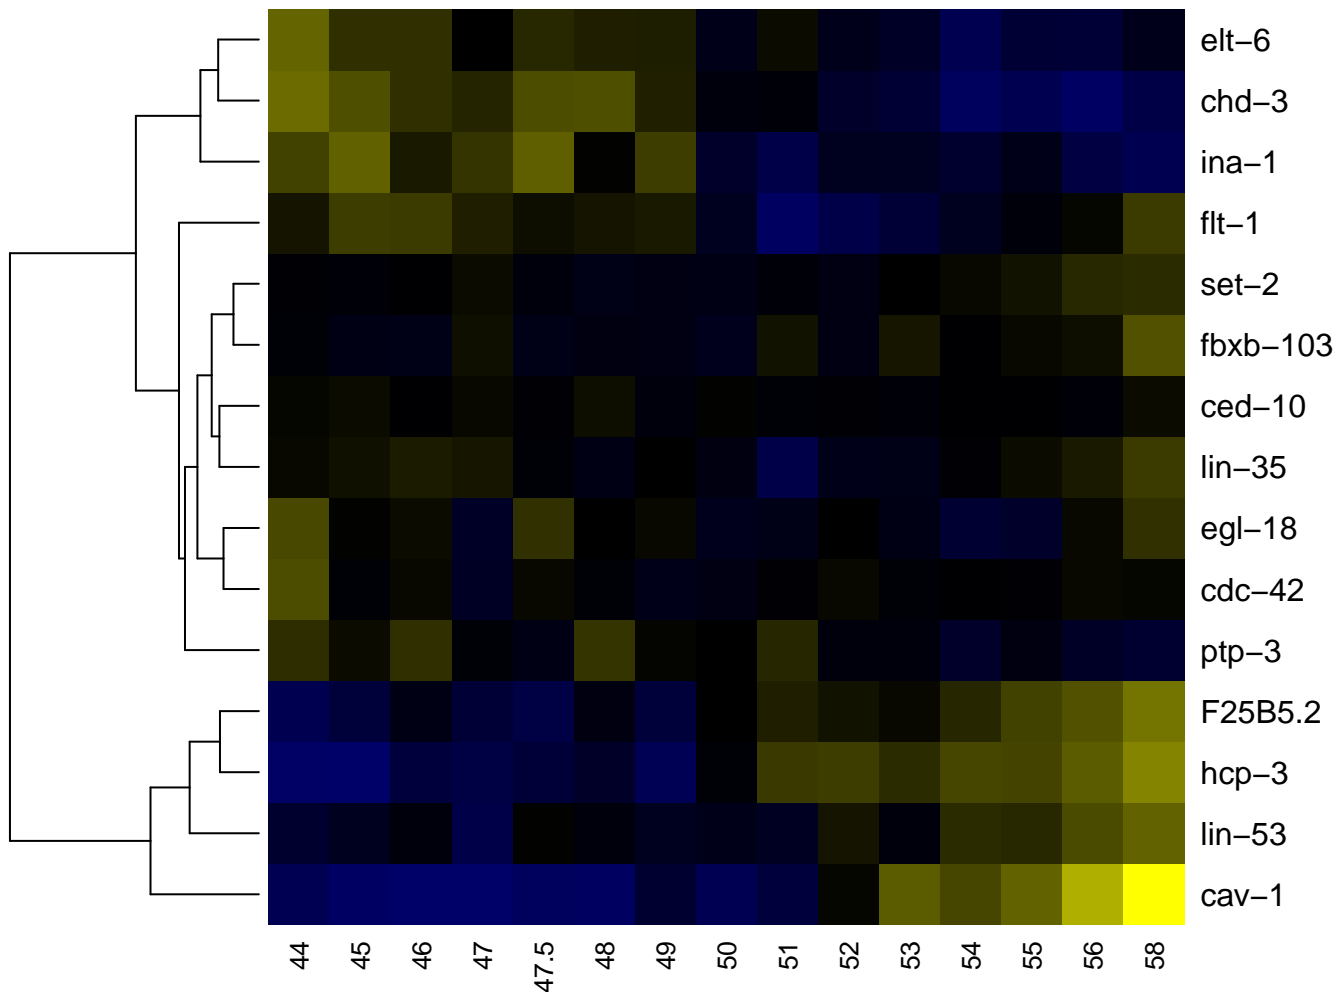

# ABaraap



# ABaraapa

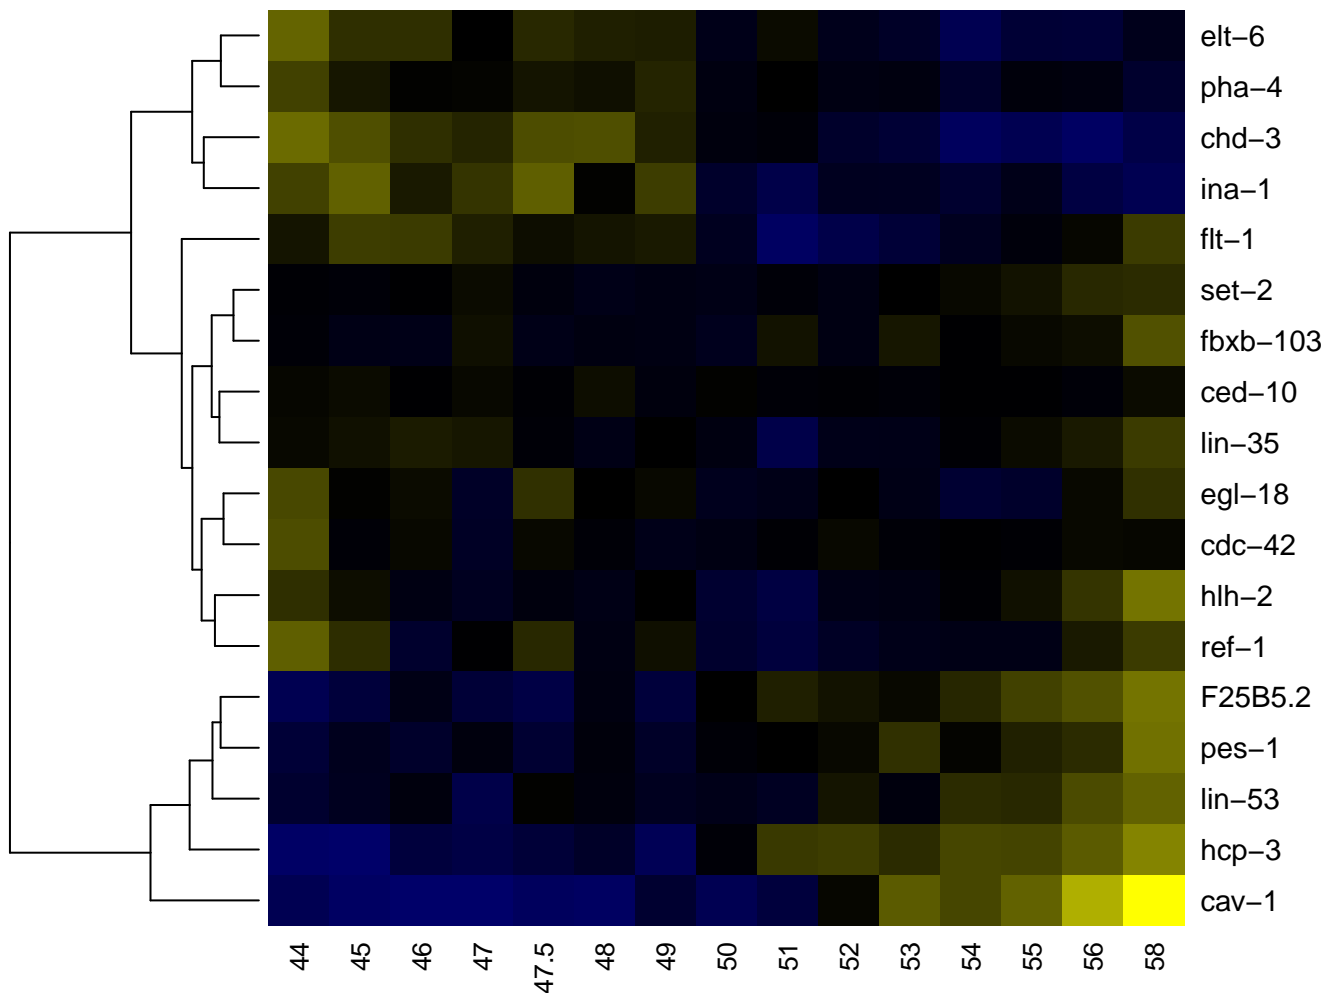

# ABaraapaa



# ABaraapaaa



# ABaraapaap





# ABaraapap





# ABaraapapaa



# ABaraapapaad



# ABaraapapp



# ABaraapp



# ABaraappa







# ABaraappap



# ABaraapp

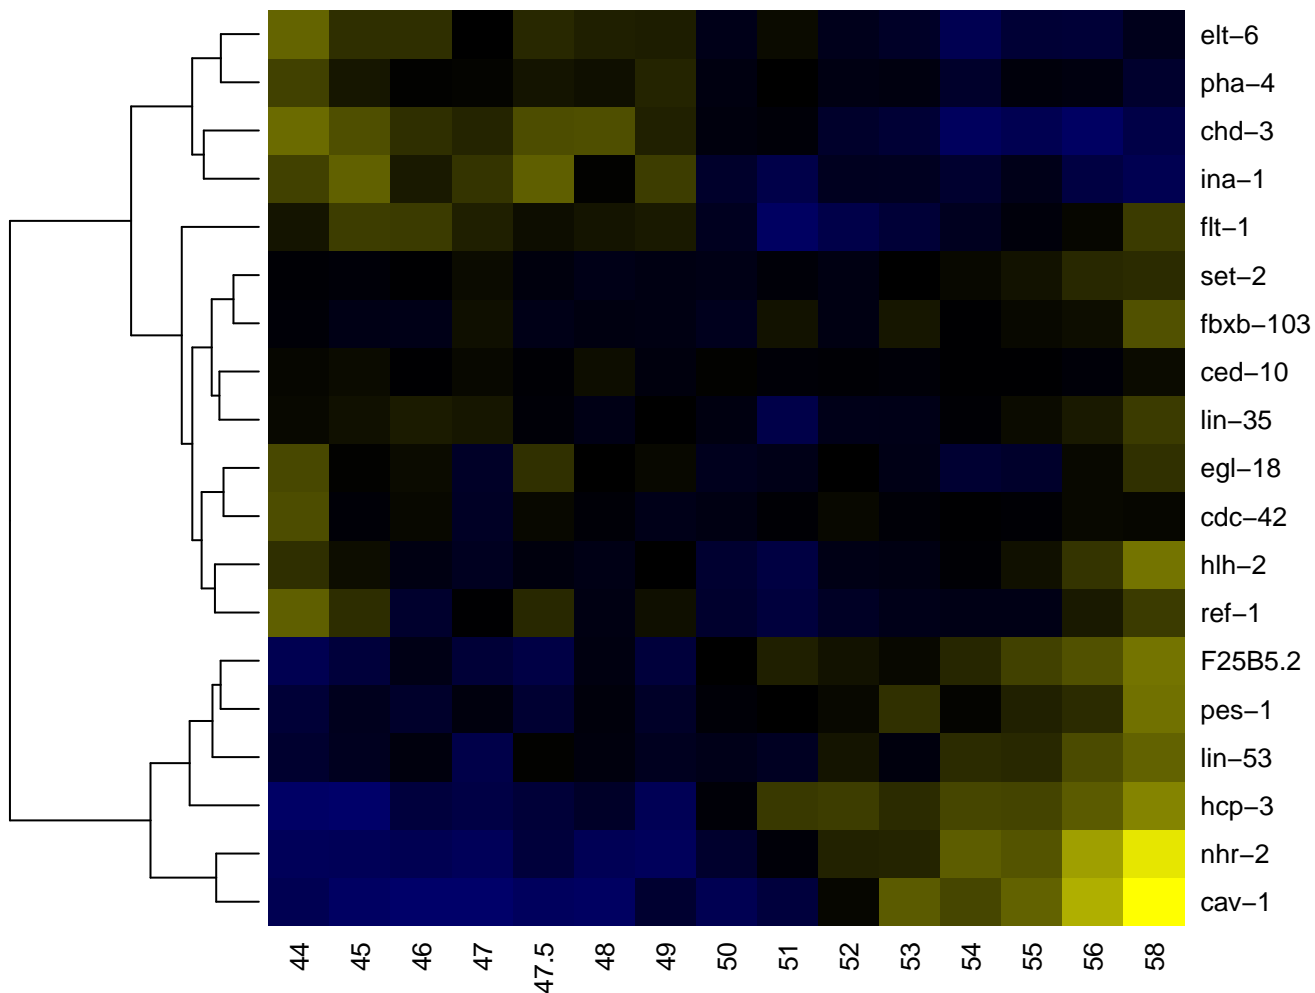

# ABaraappa

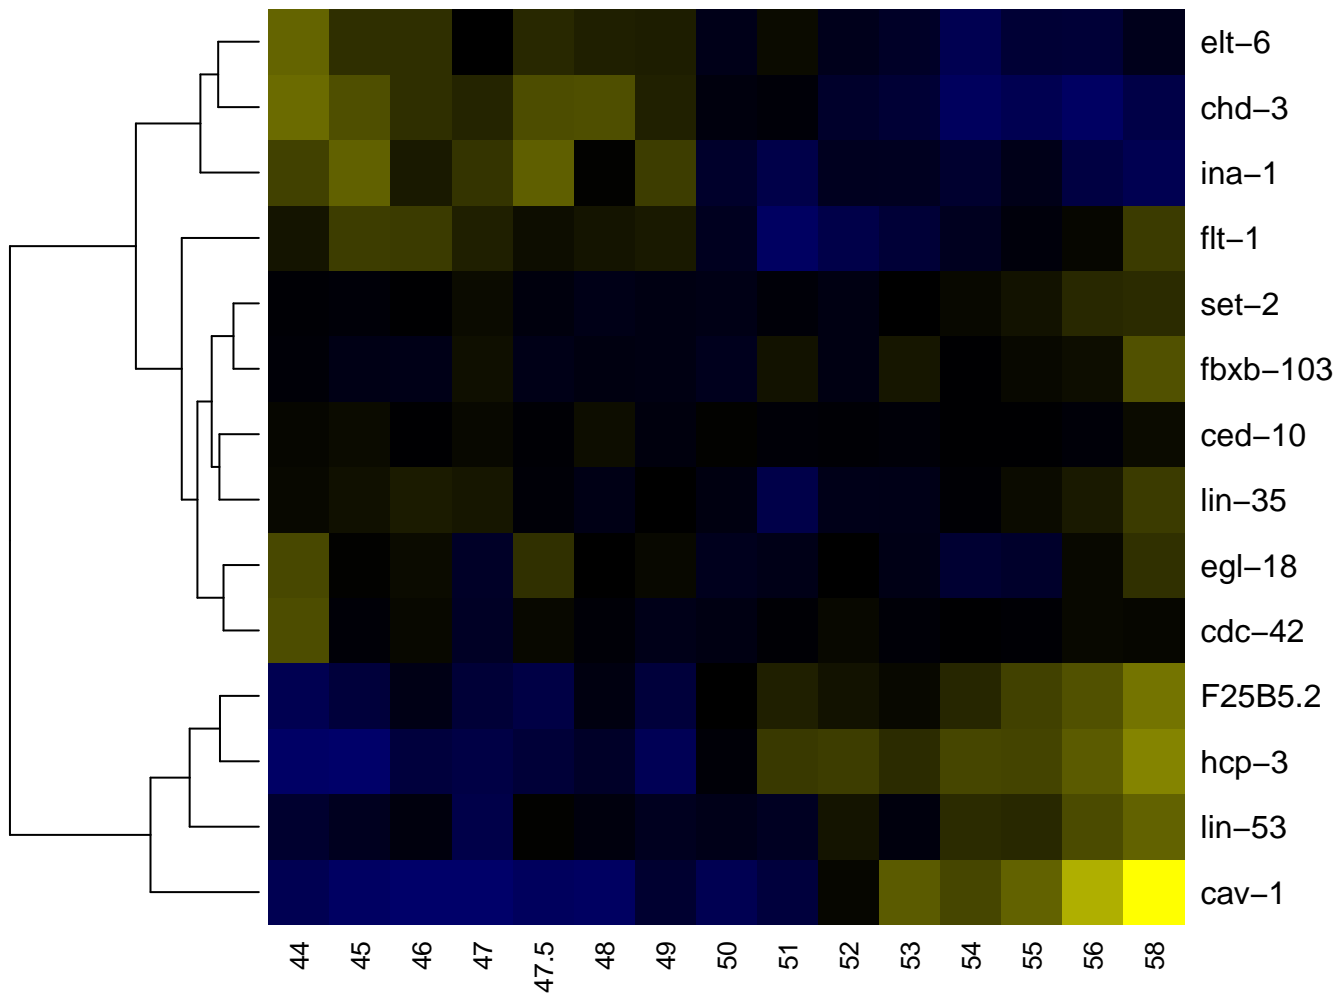



# ABaraappaad



# ABaraapppp



# ABarap

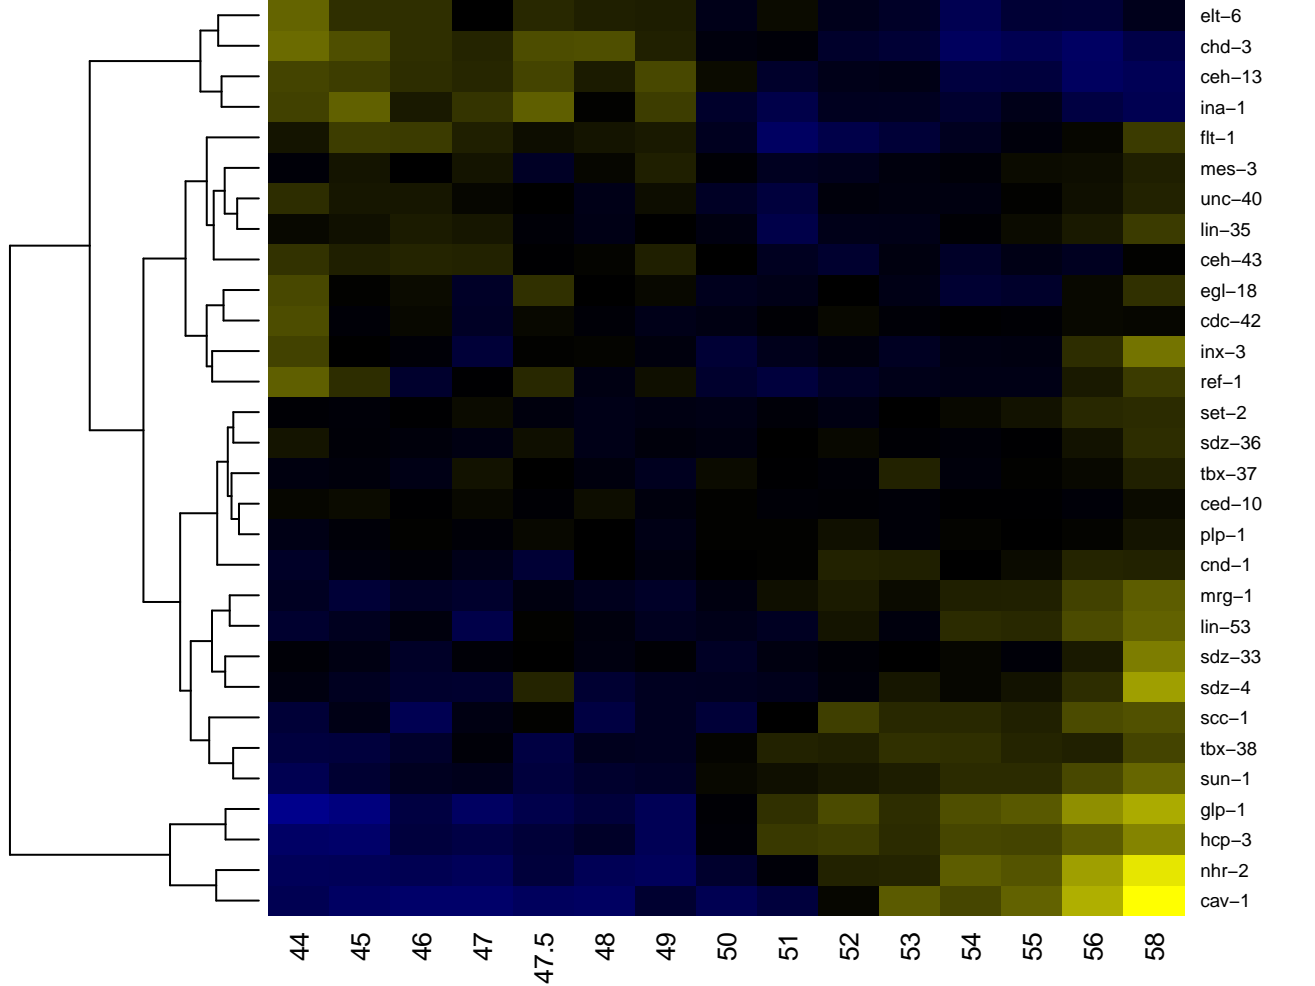

-2

-1

0

1

2

# ABarapa

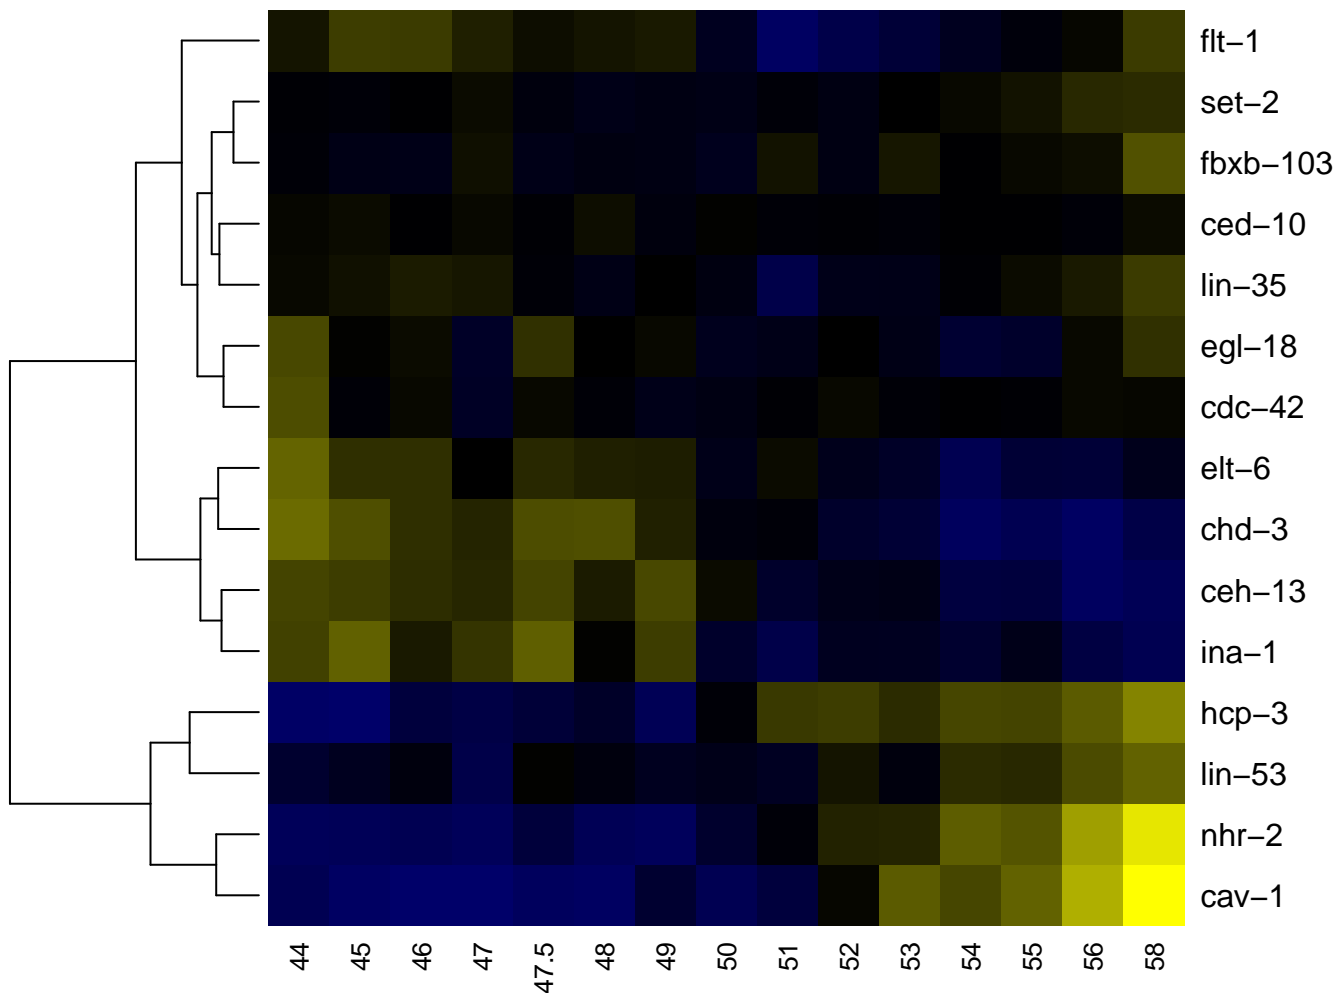



# ABarapaa

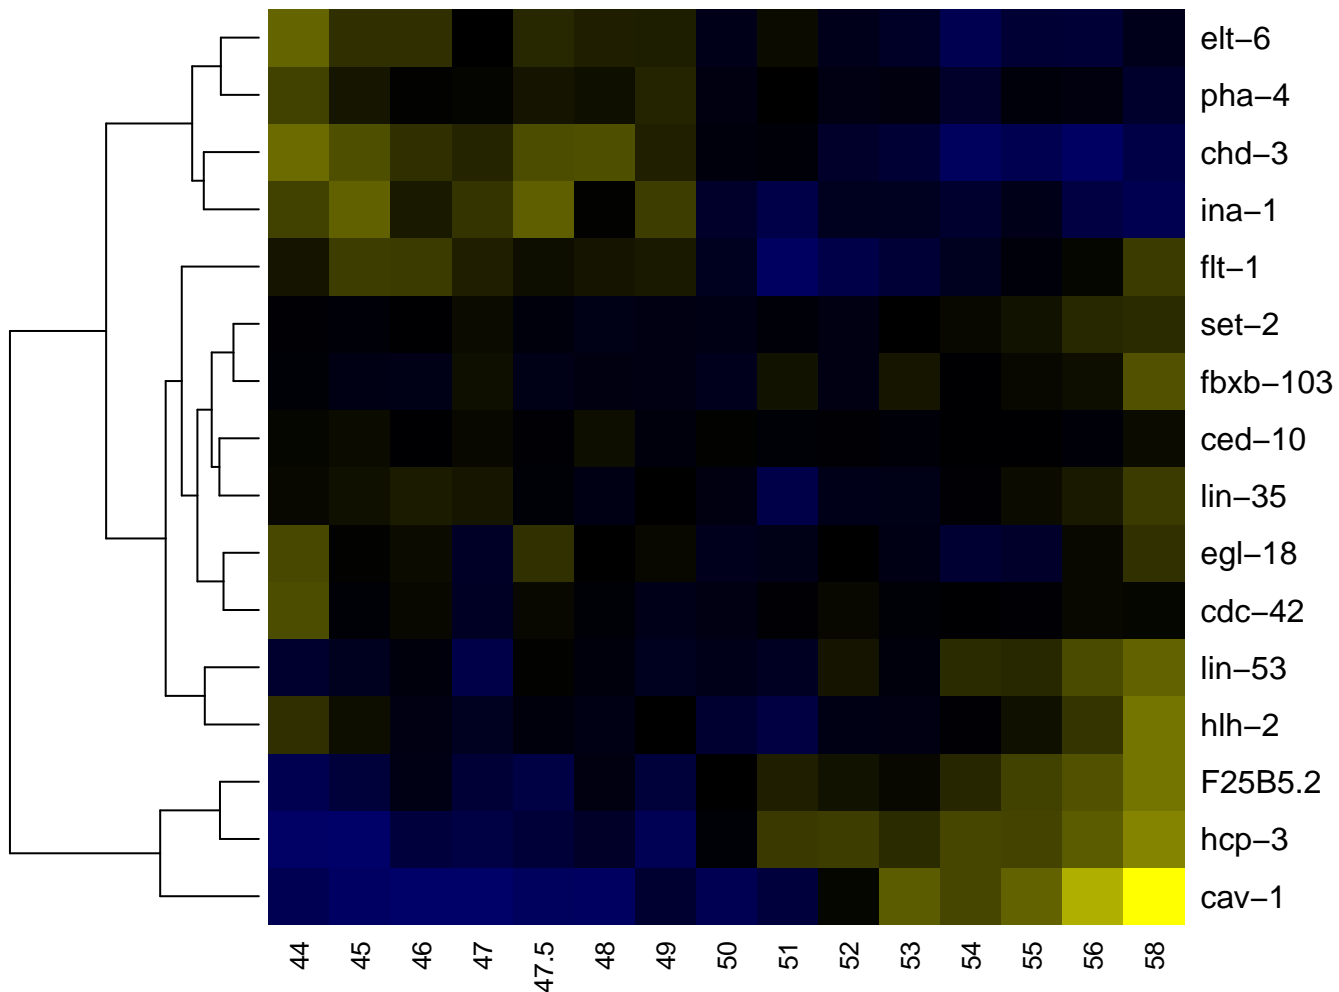

# ABarapaaa



# ABarapaaa

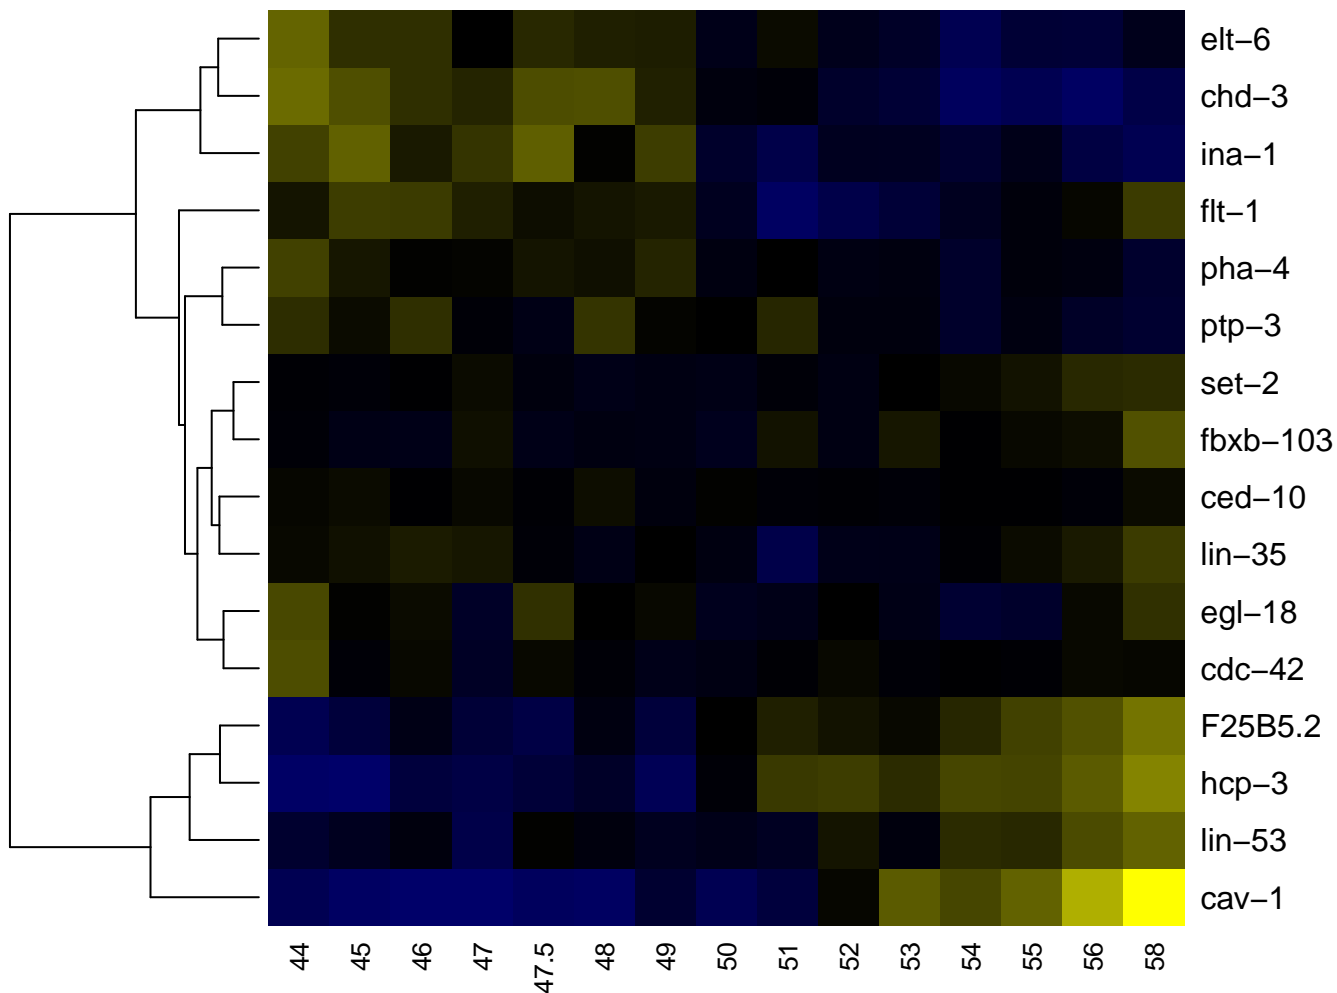

# ABarapaaap

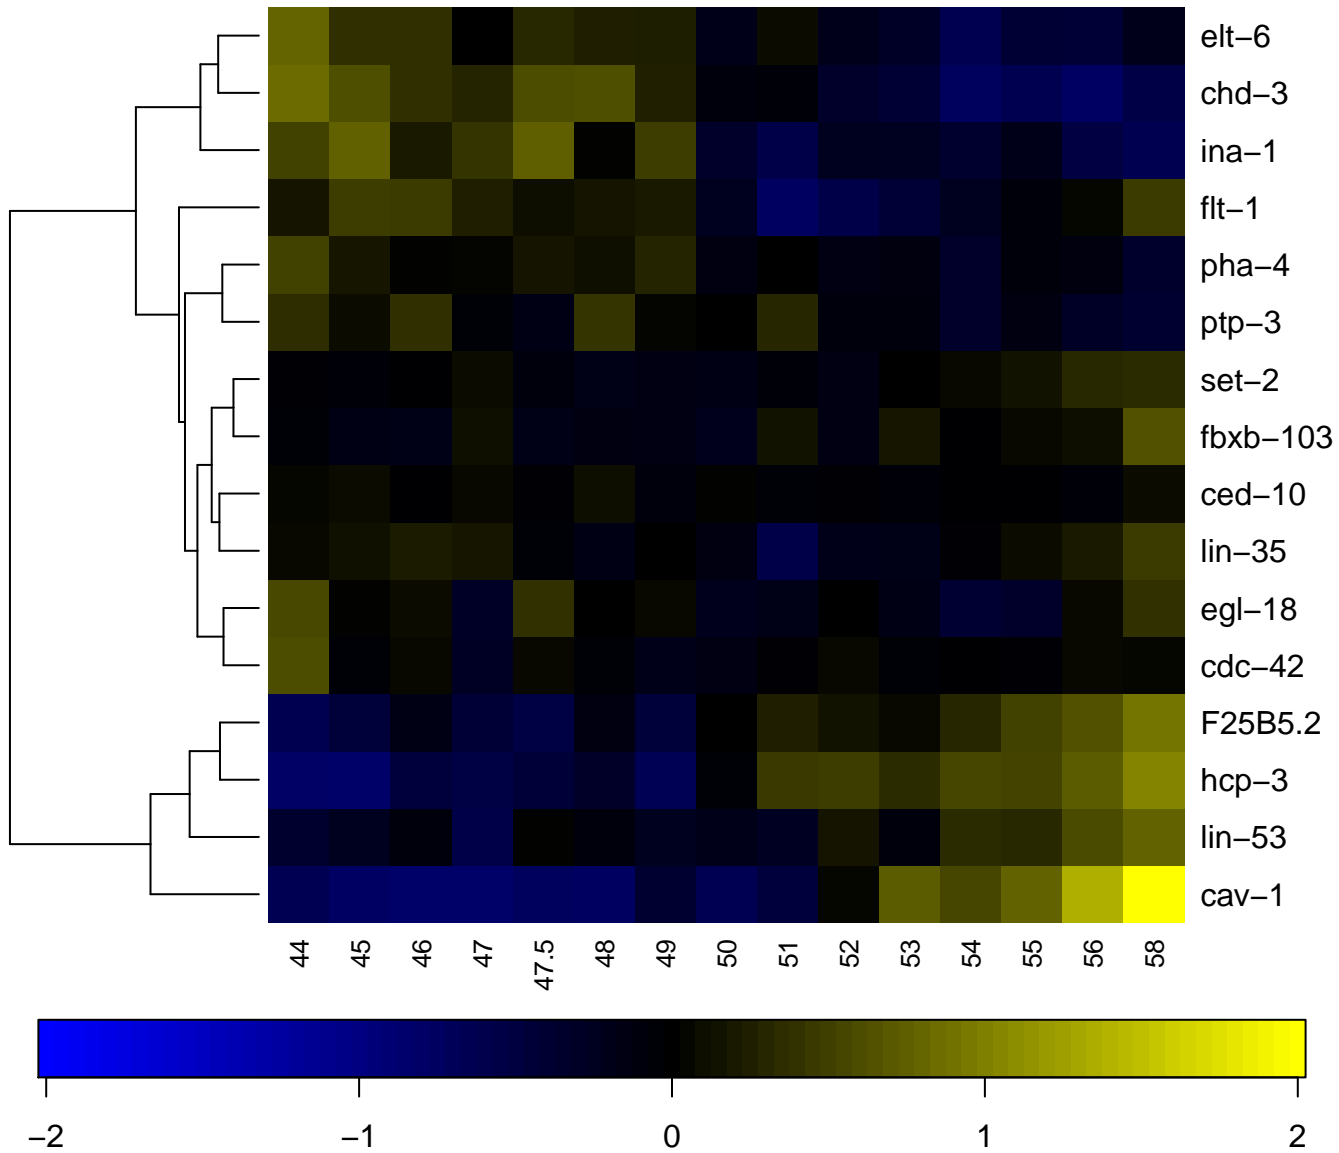

# ABarapaaapp



# ABarapaap



# ABarapaapa



# ABarapaapap





# ABarapaapp

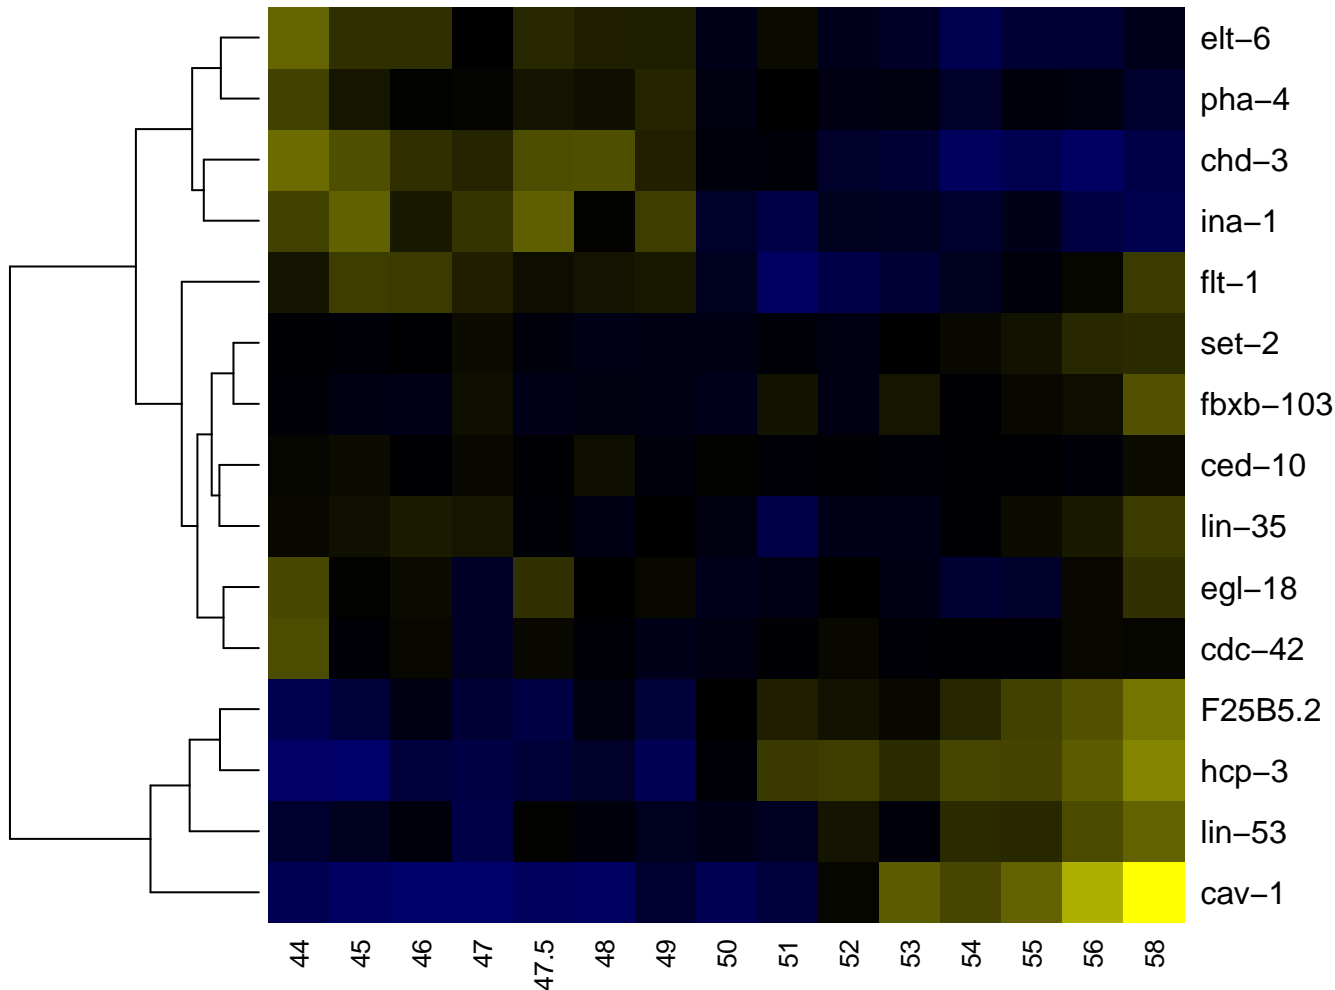

# ABarapap

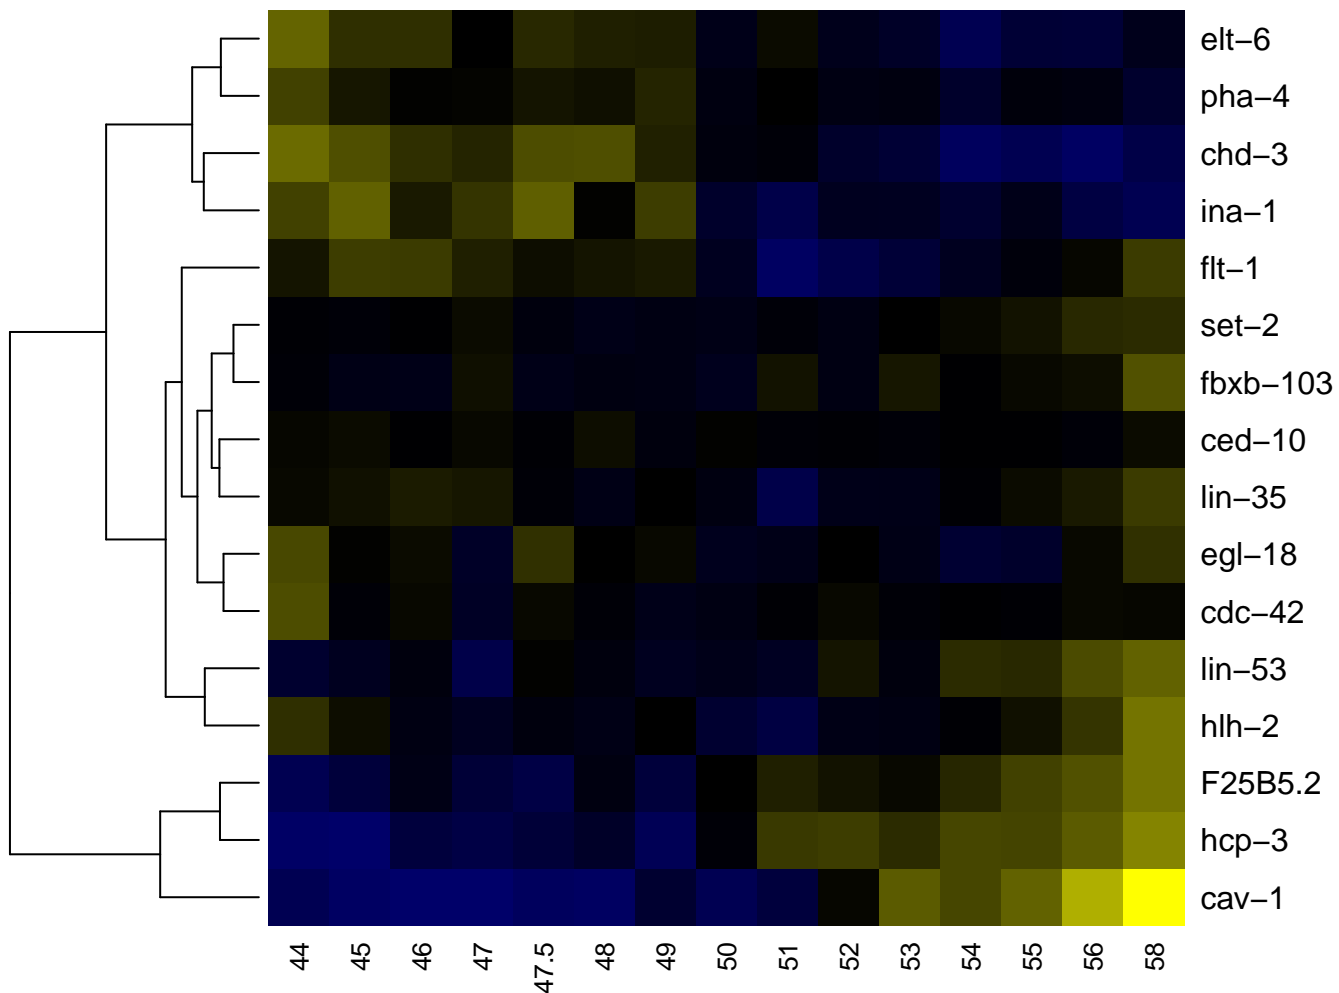

# ABarapapa

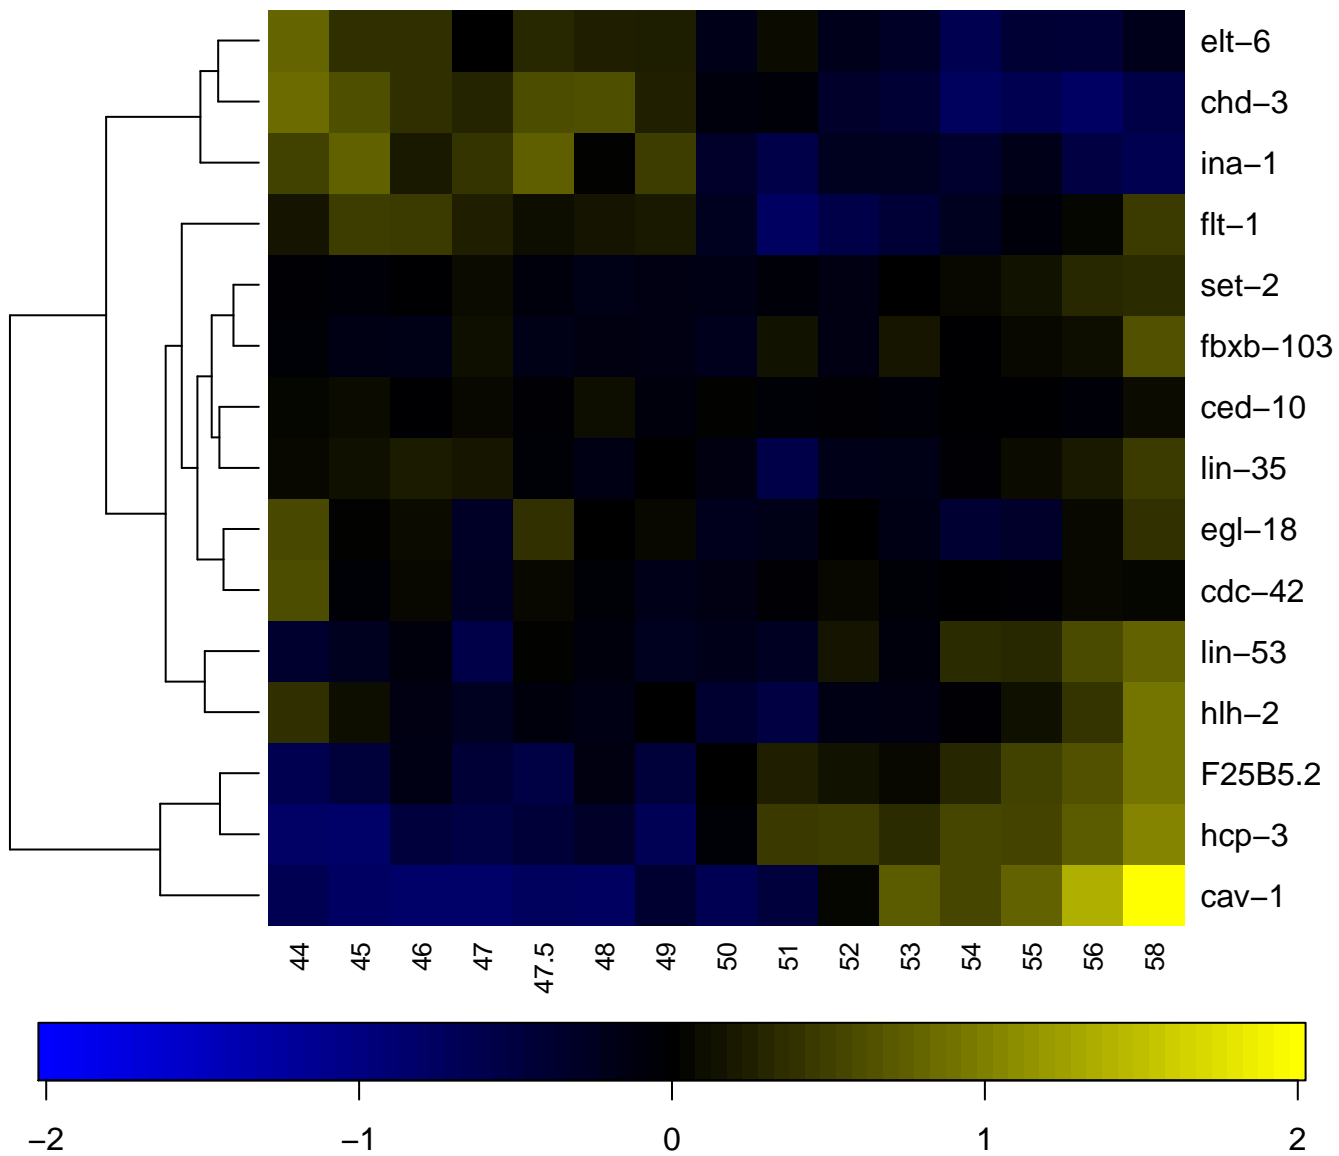

# ABarapapaa

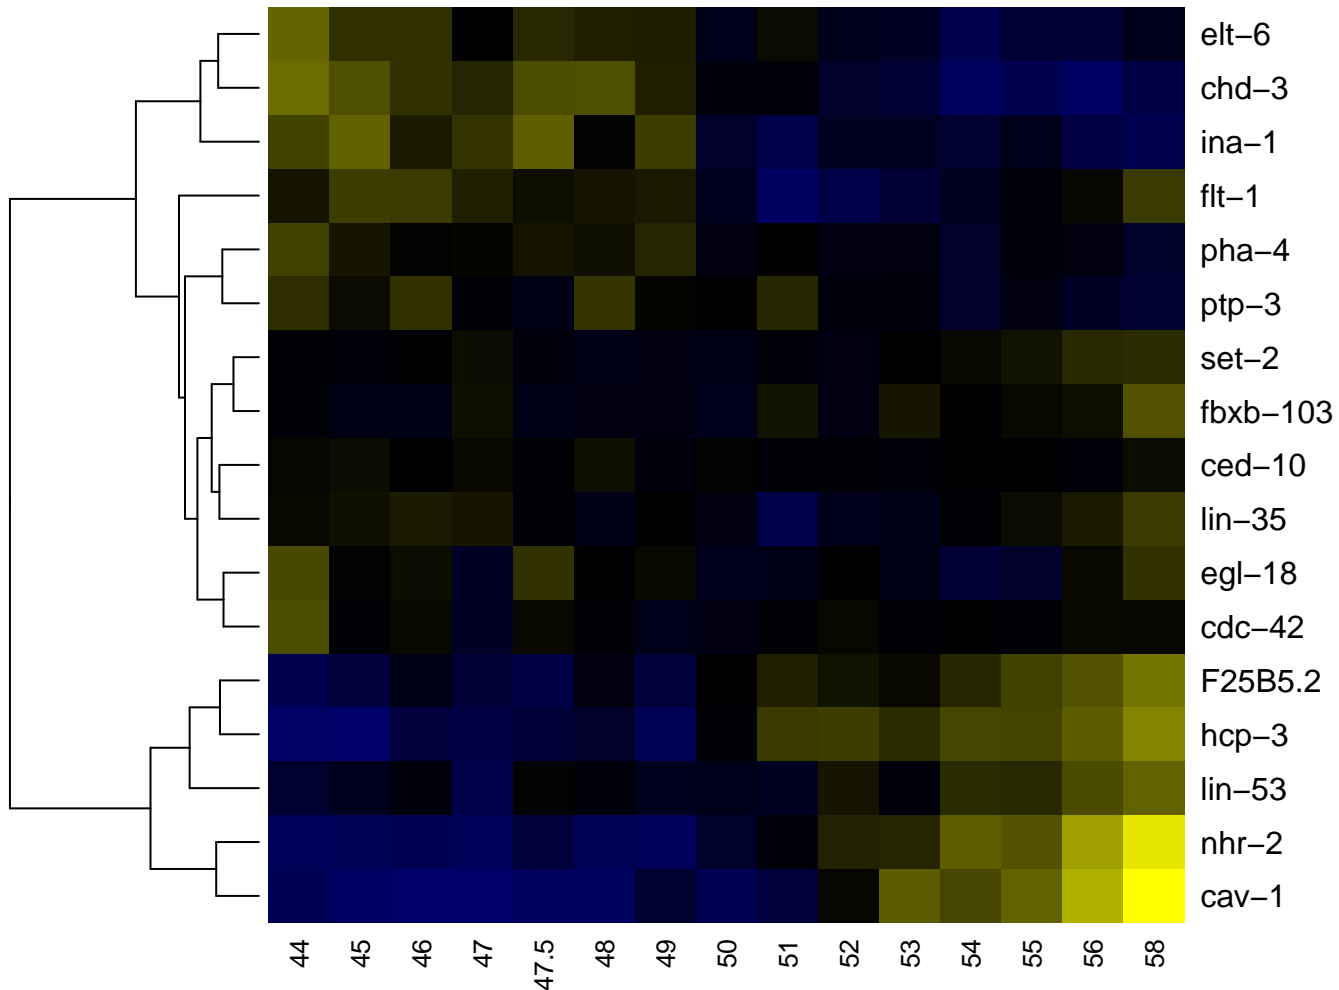

-2

-1

0

1

2



# ABarapapaap



# ABarapapaapp



# ABarapapap

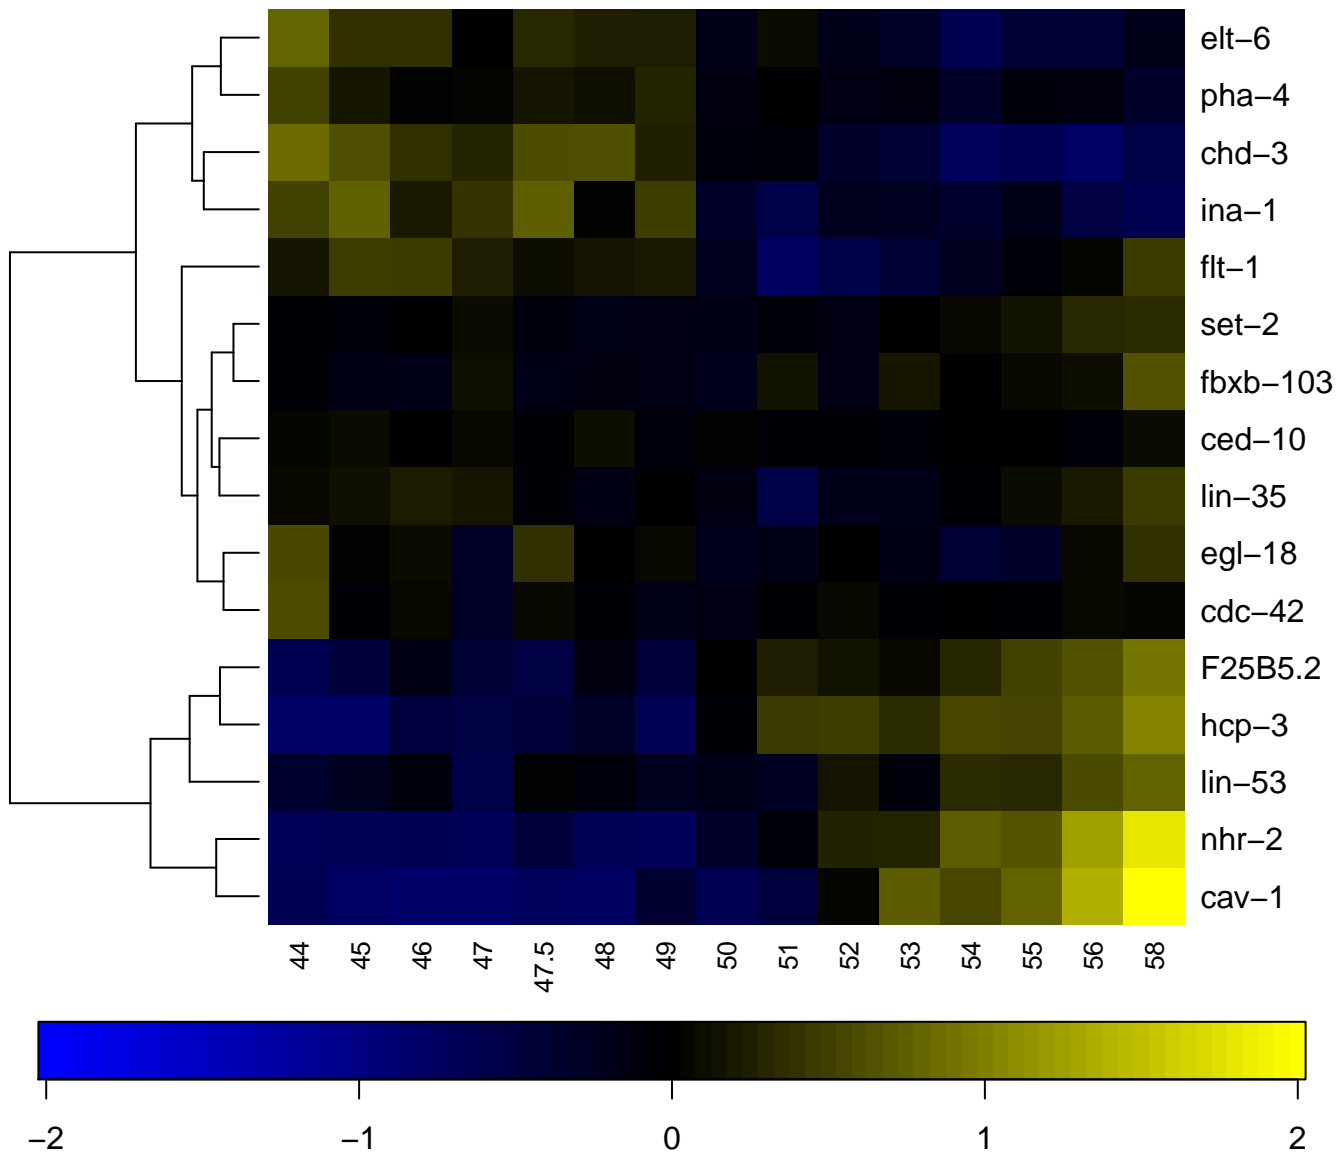





# ABarapappa



# ABarapappap



# ABarapapp

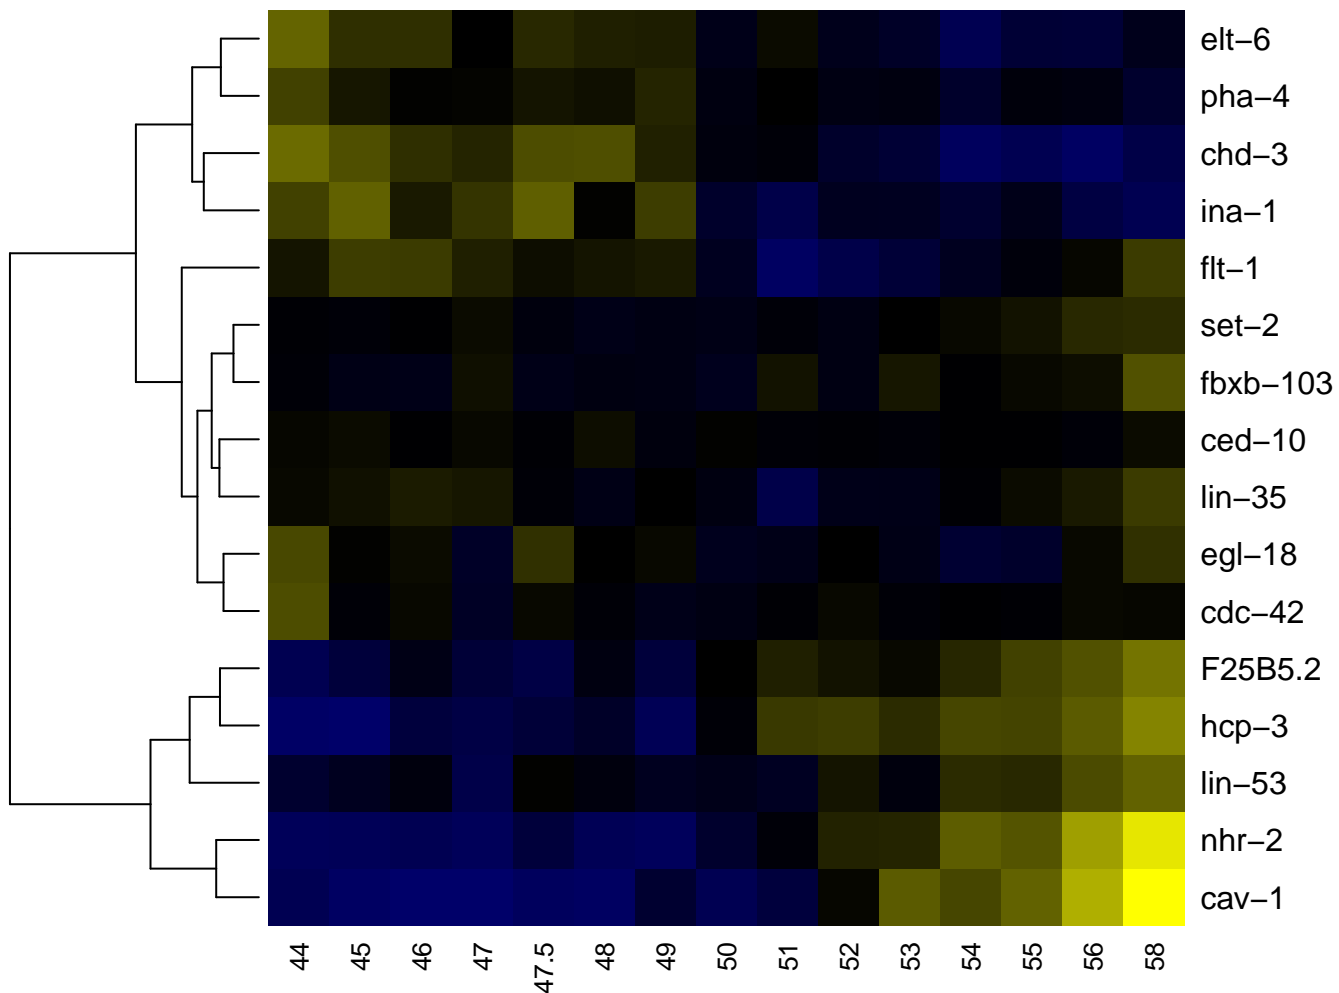

# ABarapp



# ABarappa



# ABarappaa



# ABarappaaa







# ABarappaap



# ABarappaapp



# ABarappap



# ABarappapa



# ABarappapap



# ABarappapapa

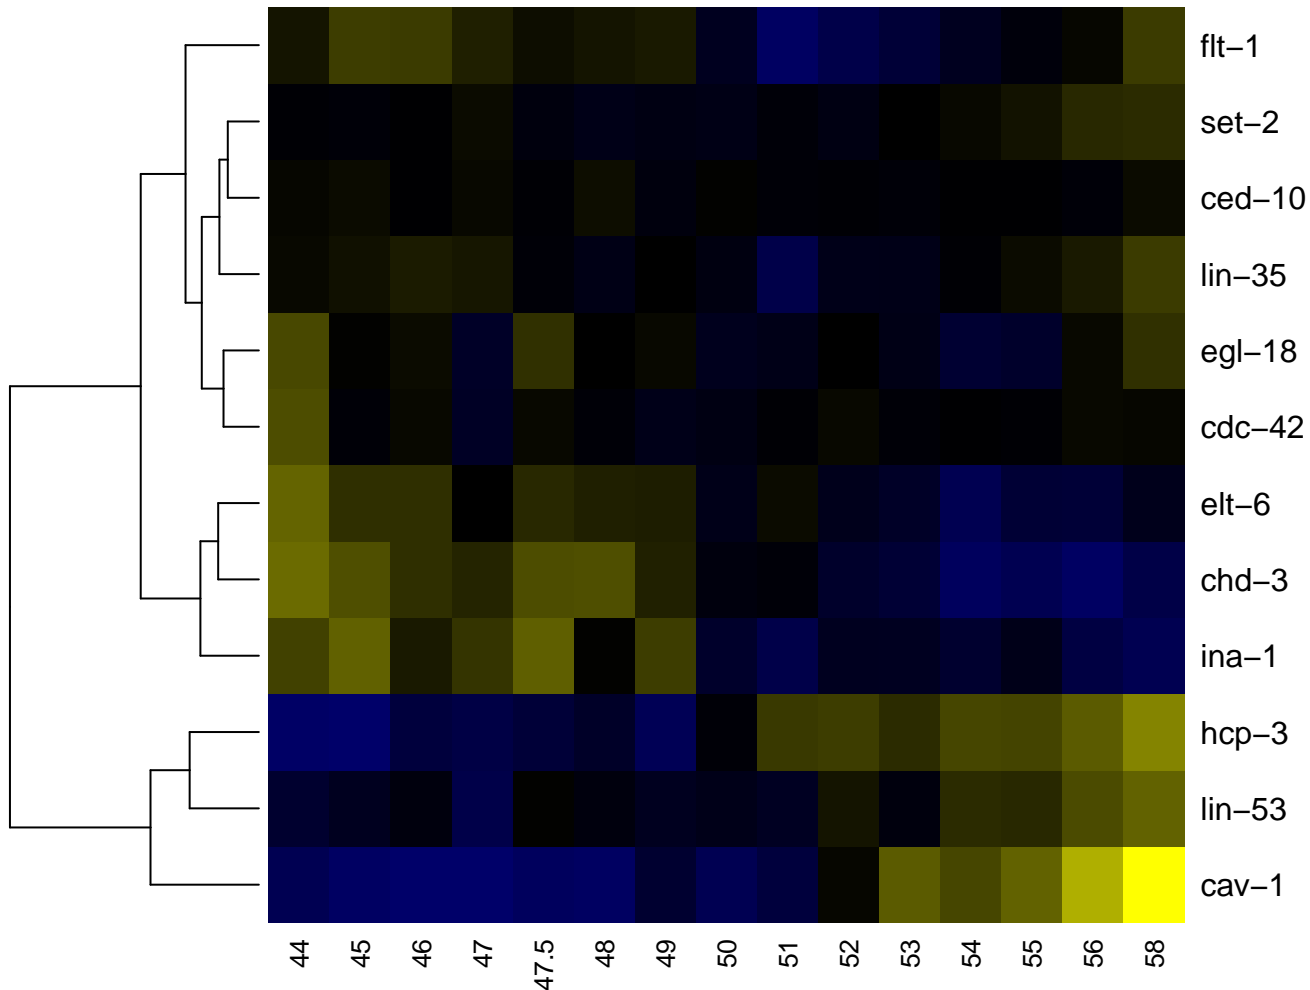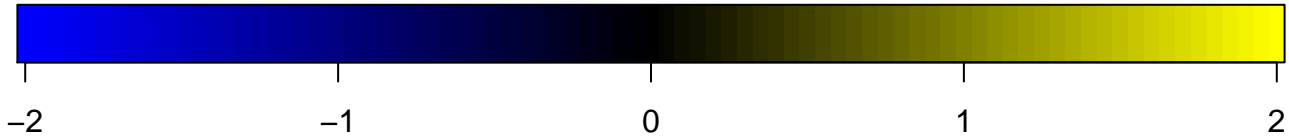

# ABarappapp





# ABarapp

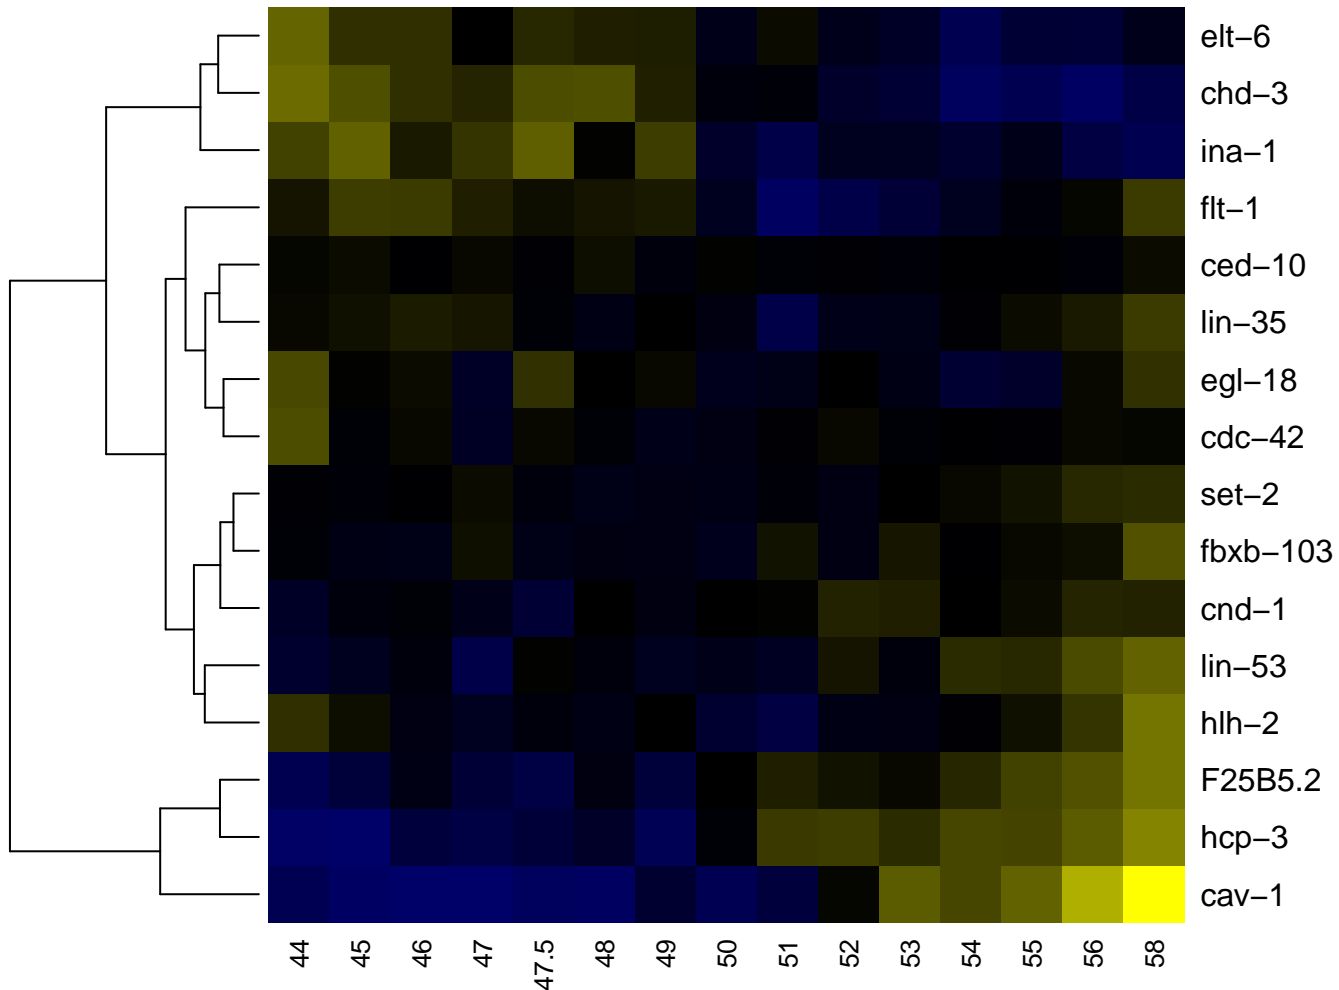

# ABarapppa









# ABarappppa



# ABarappppp



# ABarapppppa





# ABarapppppap

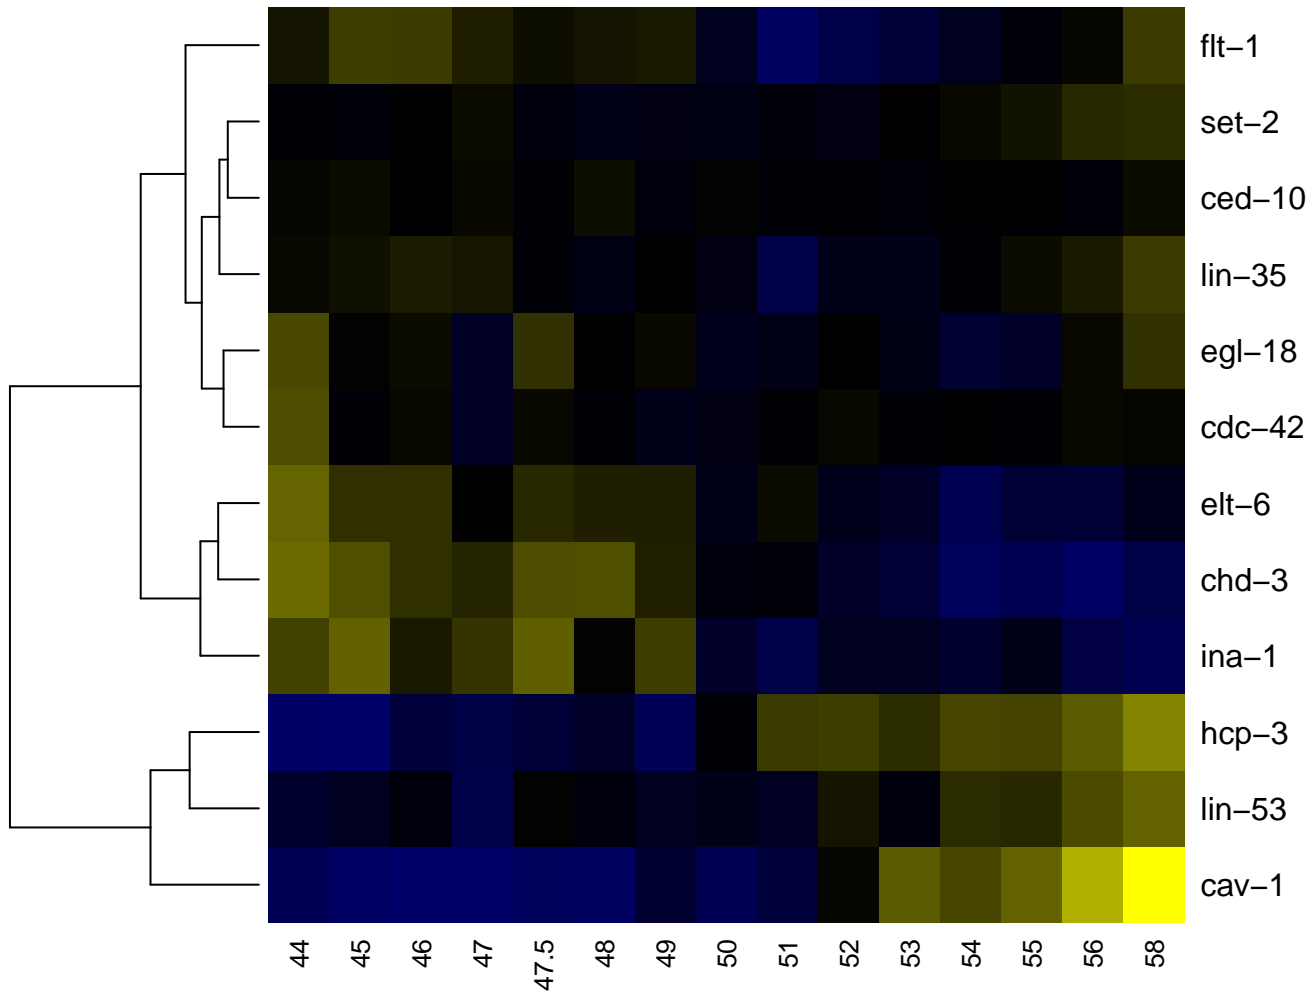

# ABarp

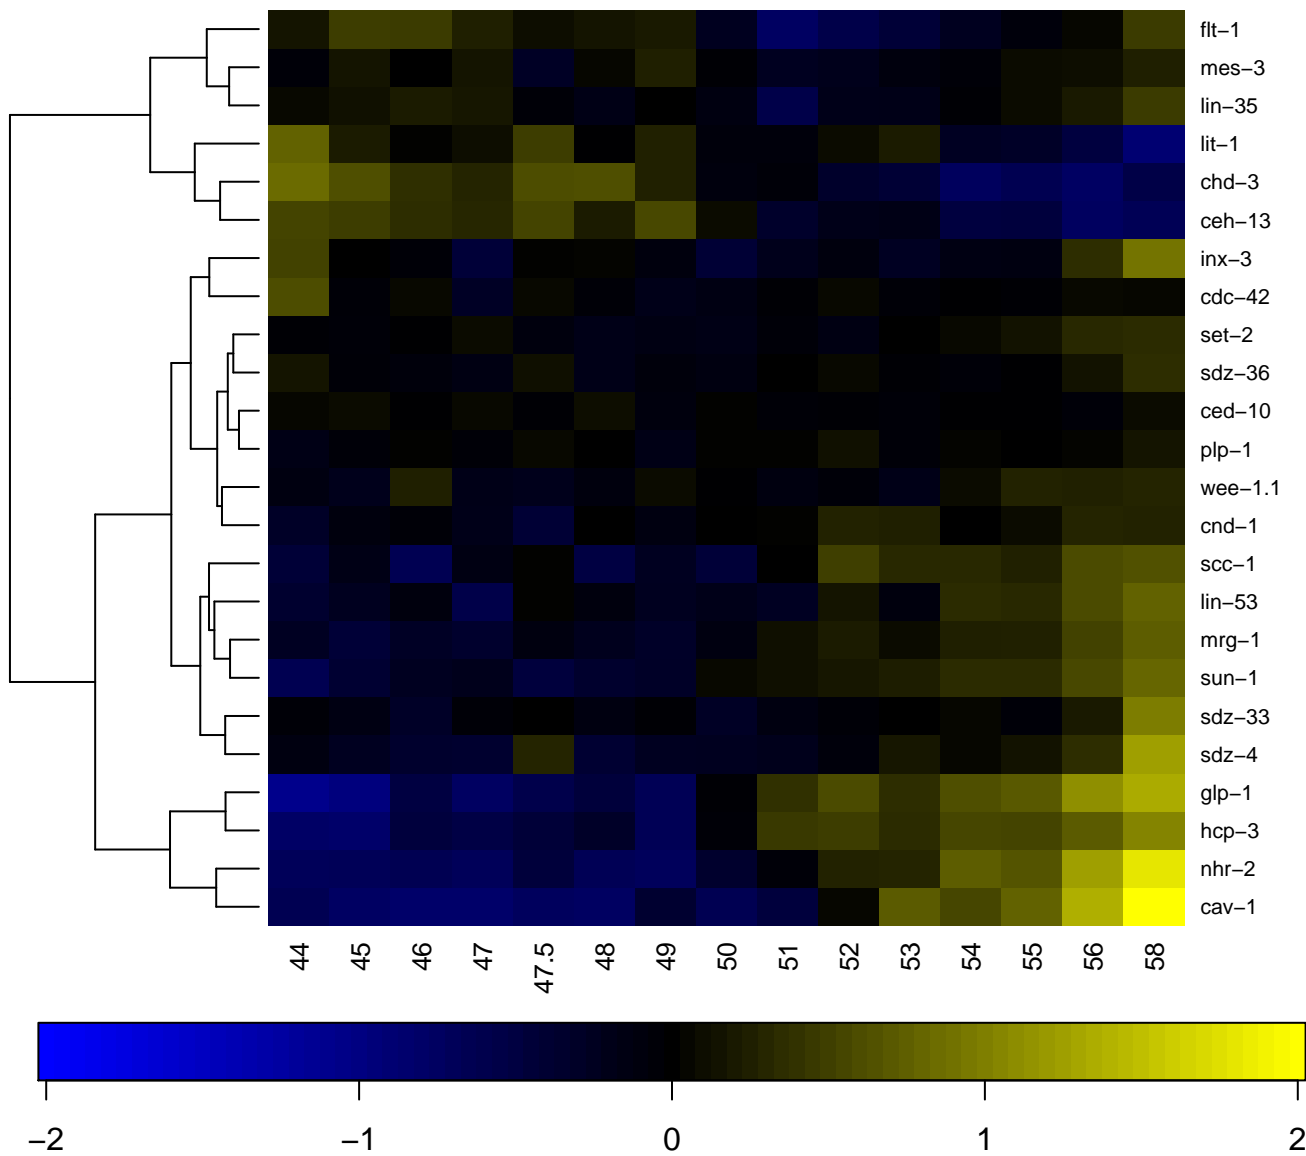



# ABarpaa

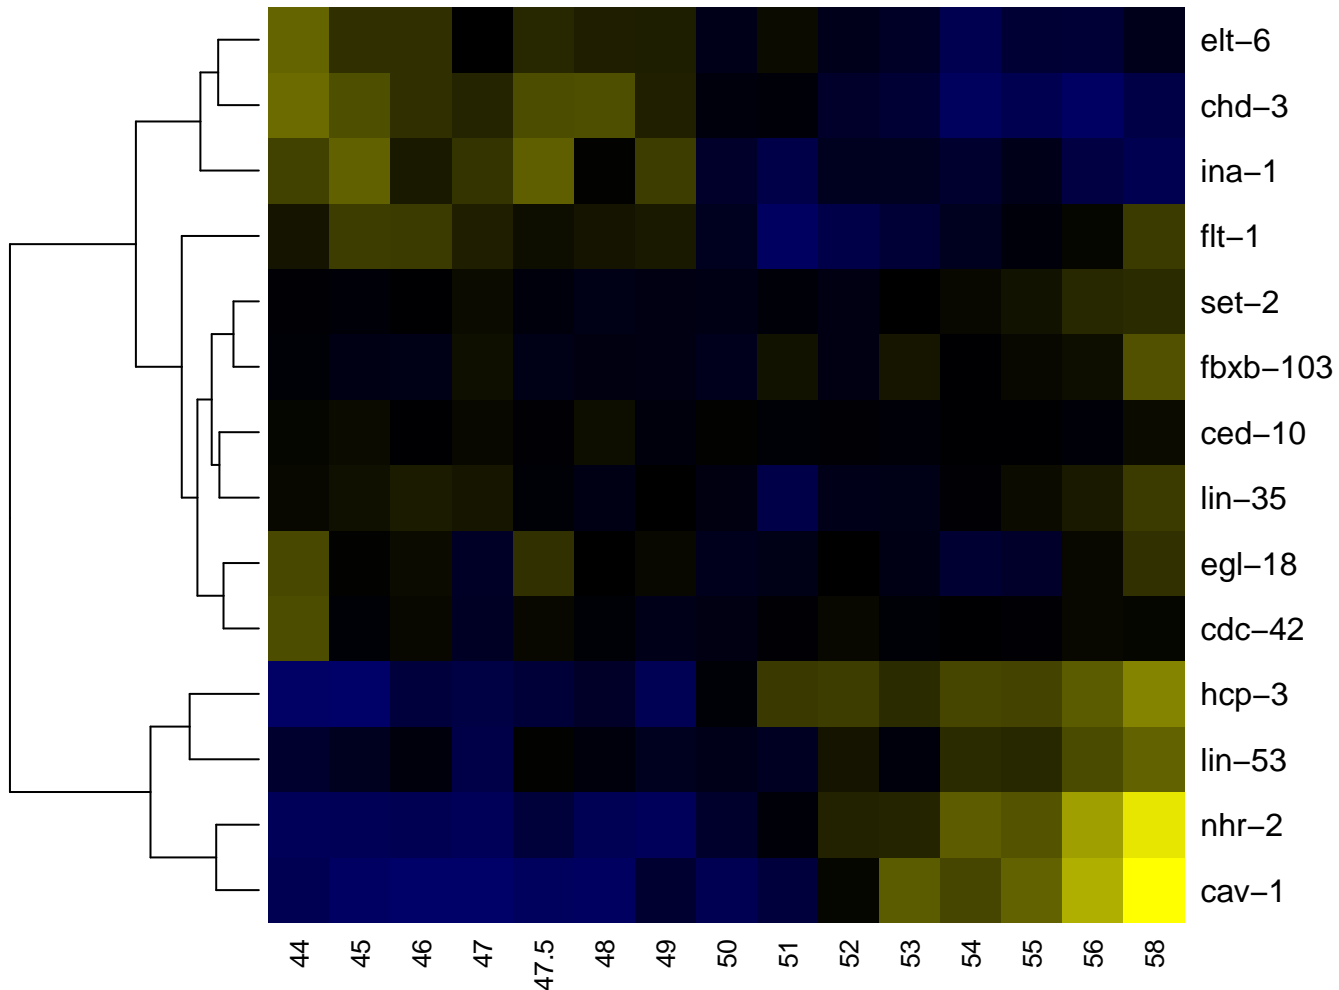

# ABarpaaa



# ABarpaaa



# ABarpaaaa

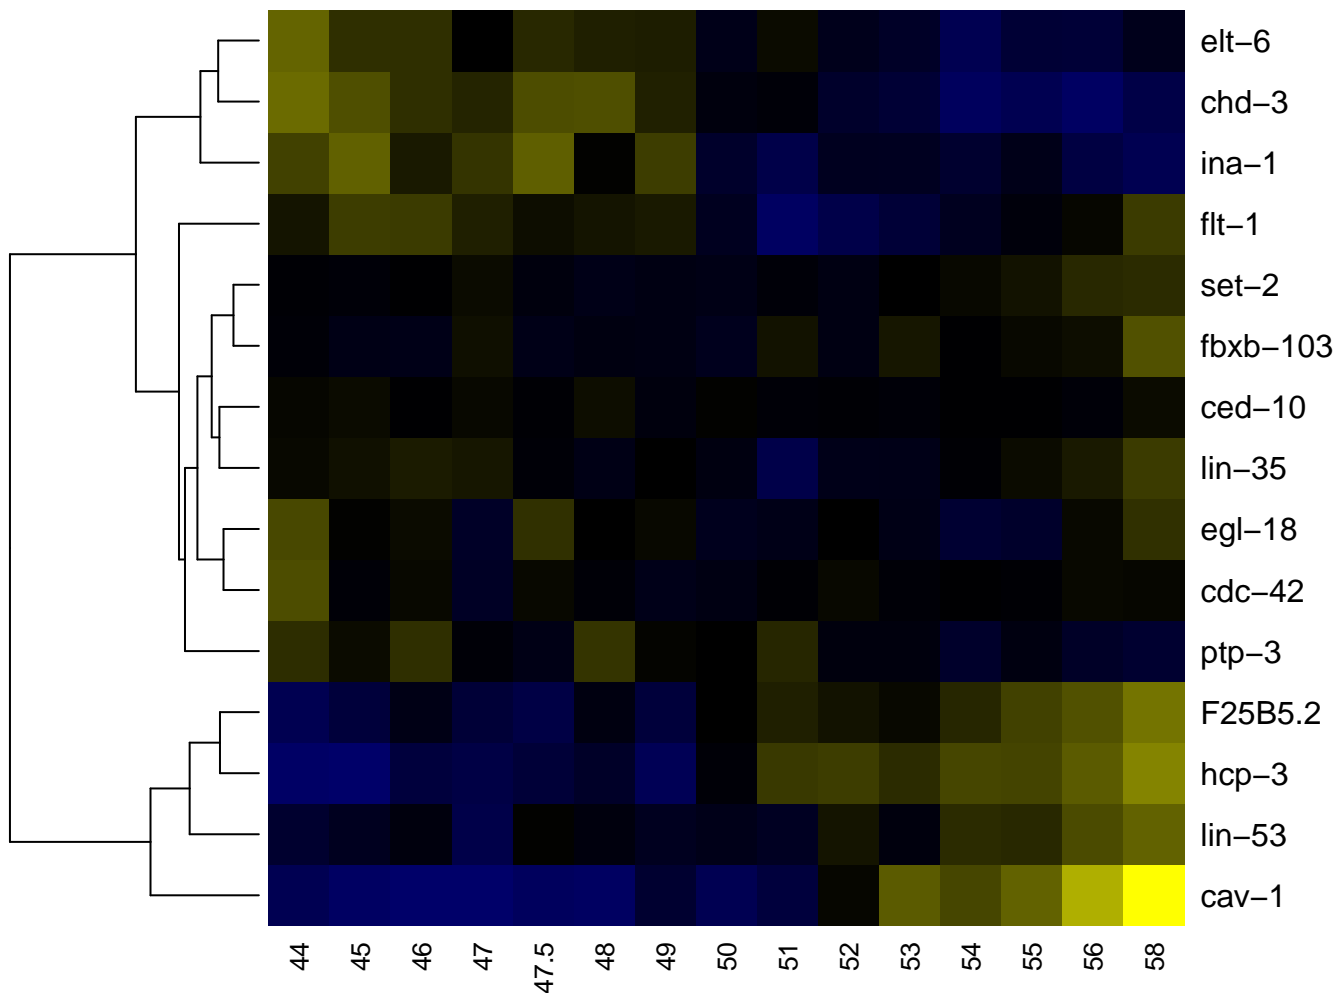

# ABarpaaaap





# ABarpaaap

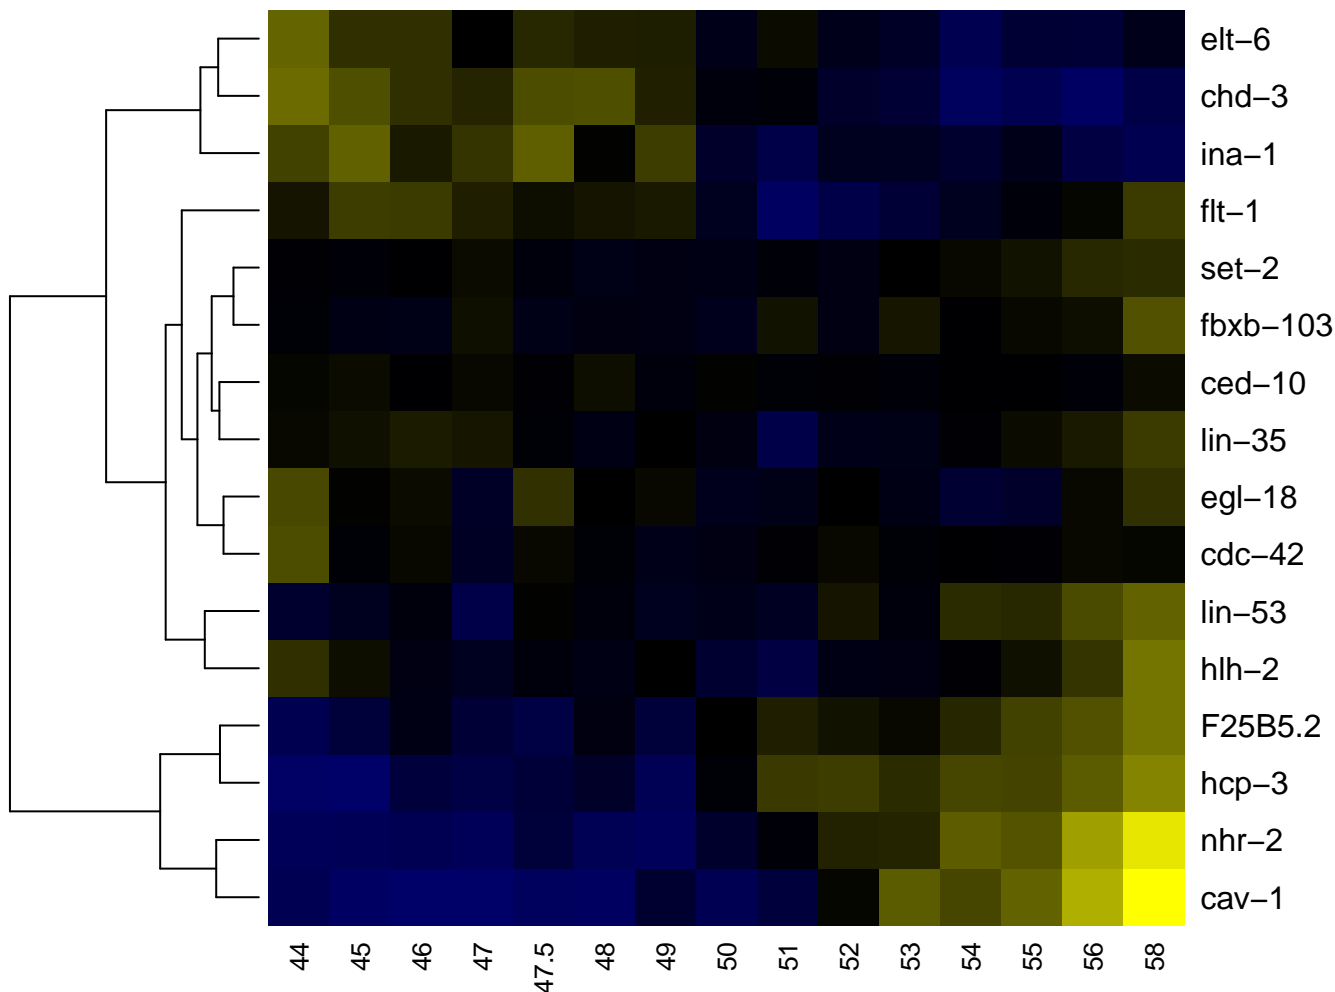

# ABarpaaapa



# ABarpaaapp



# ABarpaap

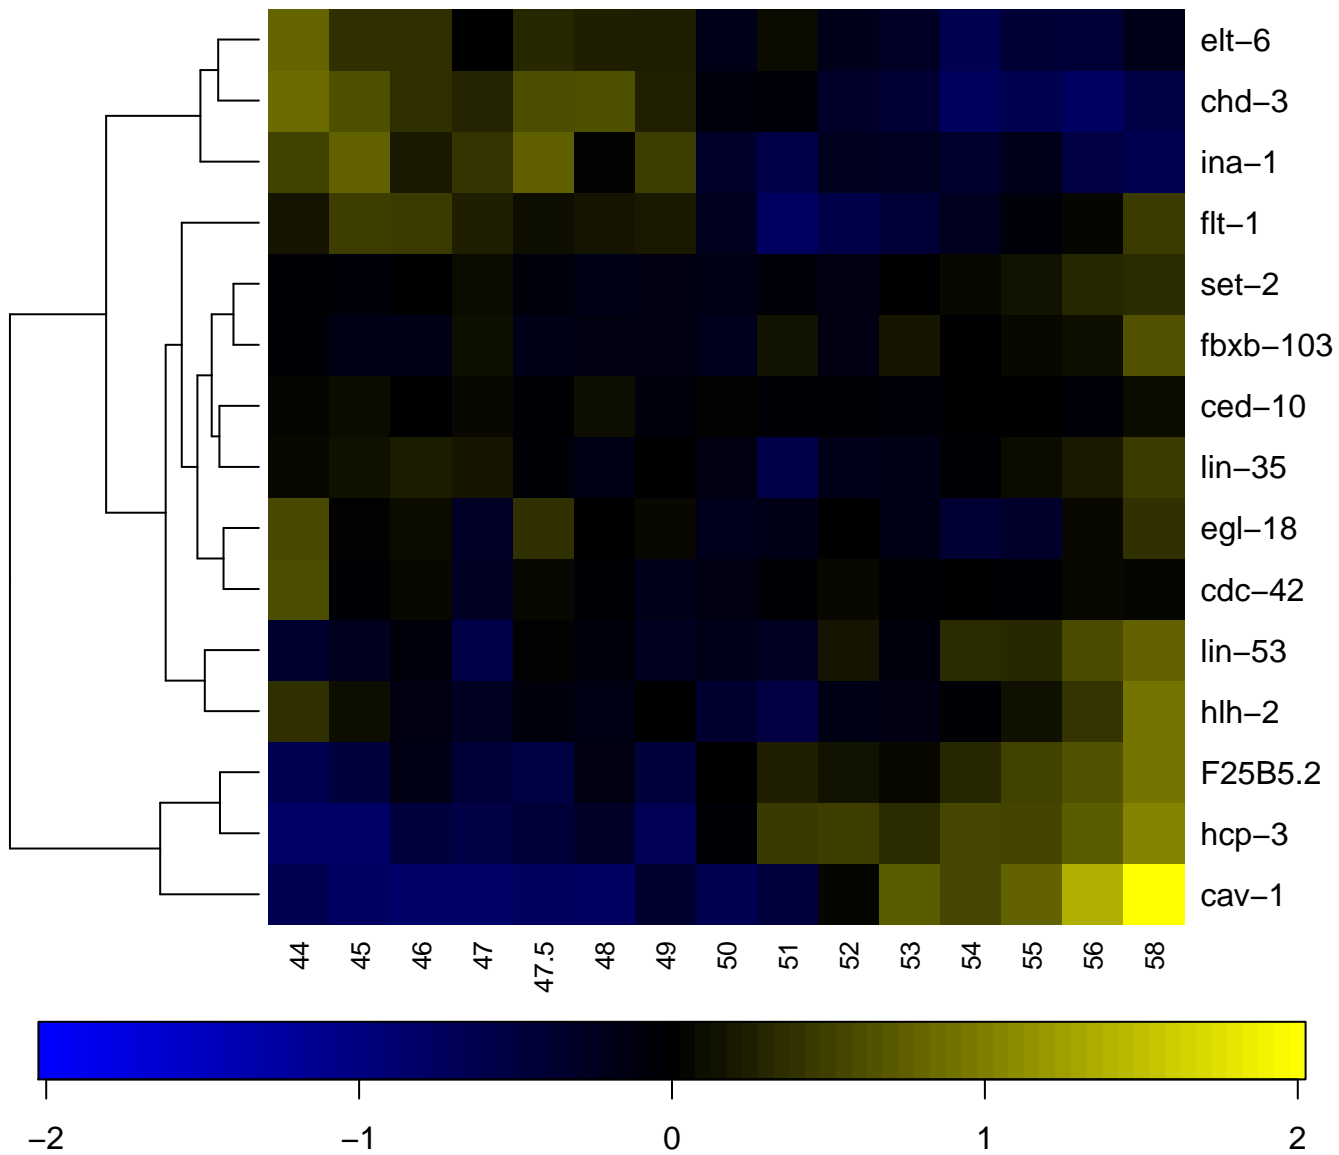

# ABarpaapa



# ABarpaapaa



# ABarpaapap



# ABarpaapp

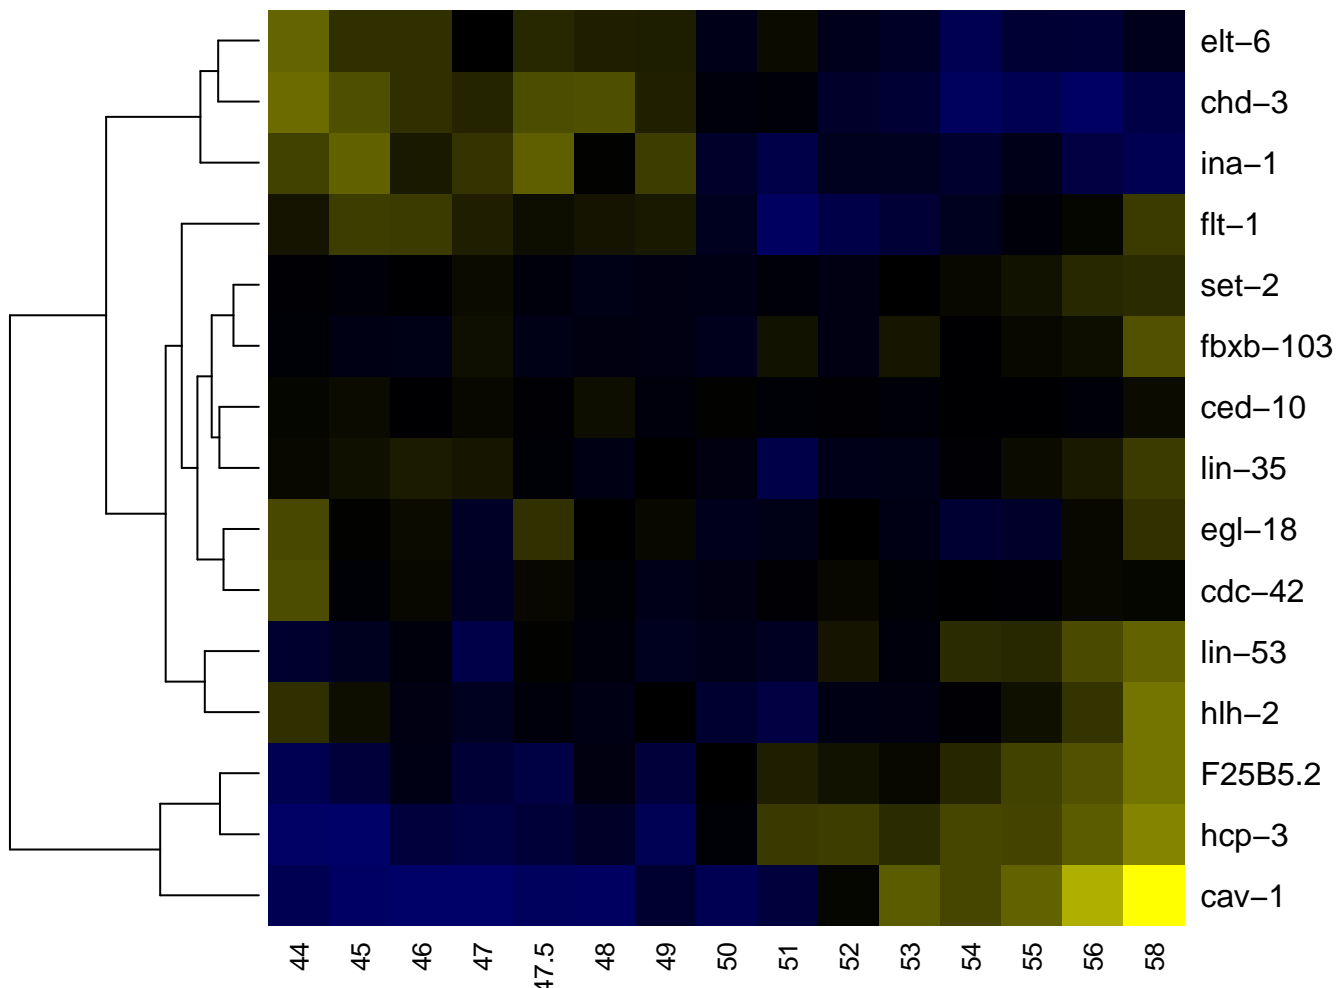



# ABarpaappa



# ABarpaapp

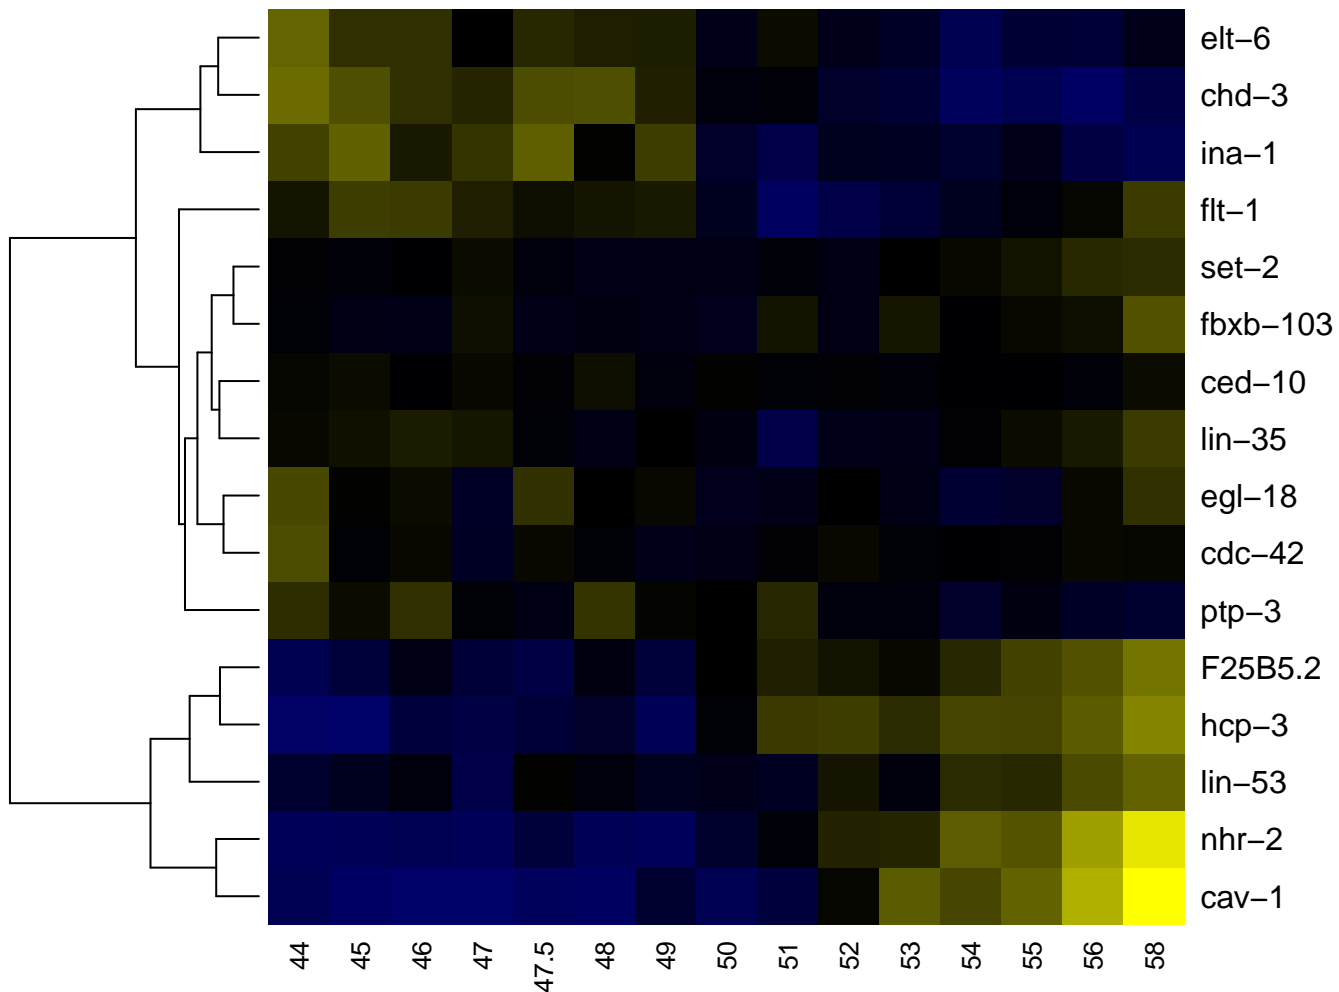

# ABarpap

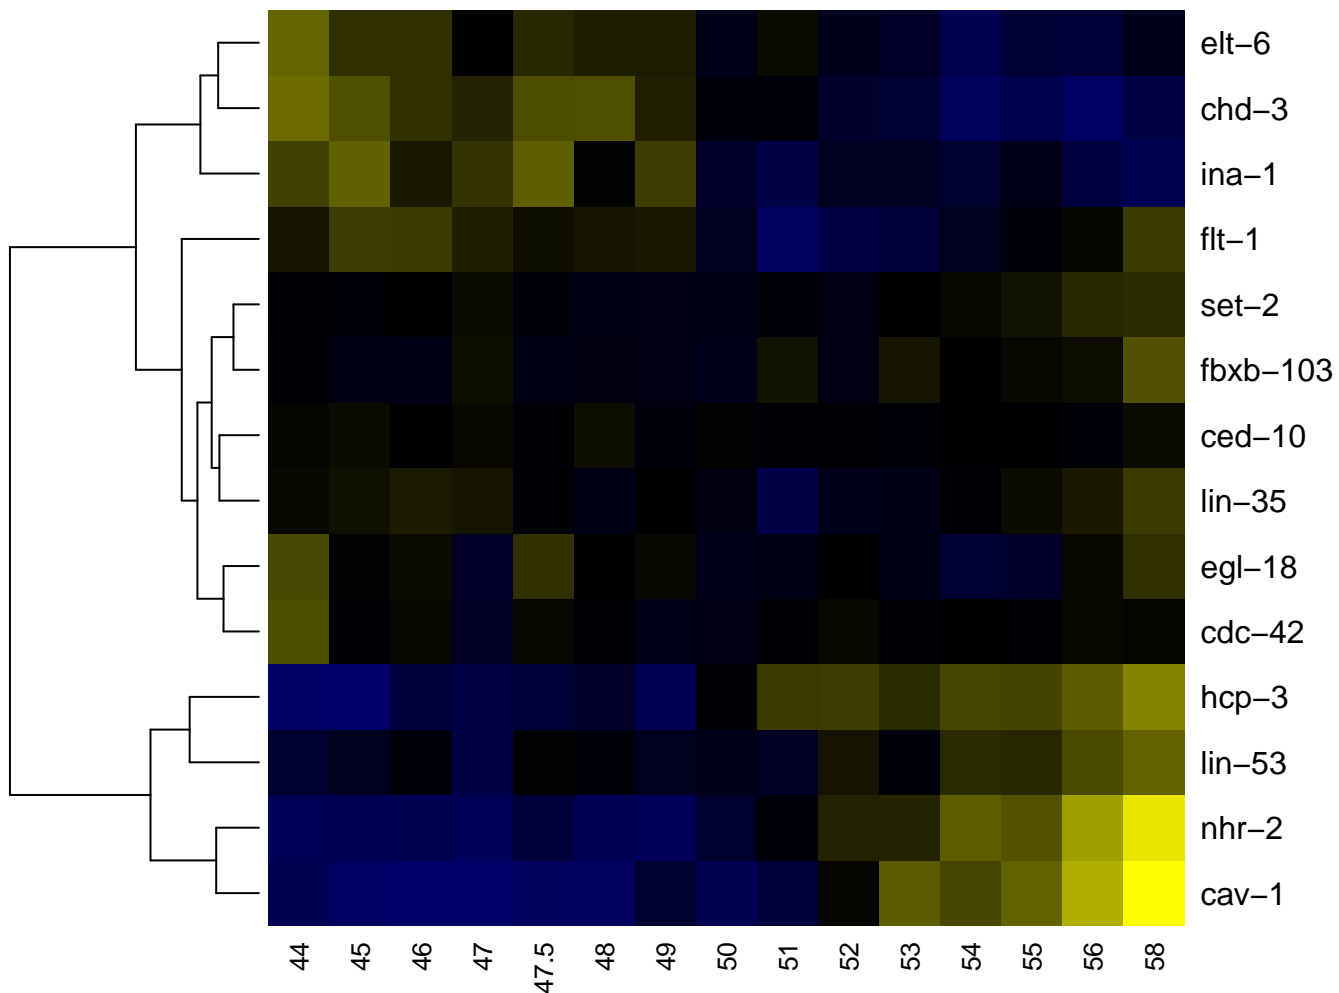



# ABarpapaa



# ABarpapaaa



# ABarpapaap



# ABarpapaap





# ABarpapaapa



# ABarpapaapp



# ABarpapap



# ABarpapapa



# ABarpapapp



# ABarpapp



# ABarpappa



# ABarpappap







# ABarpp

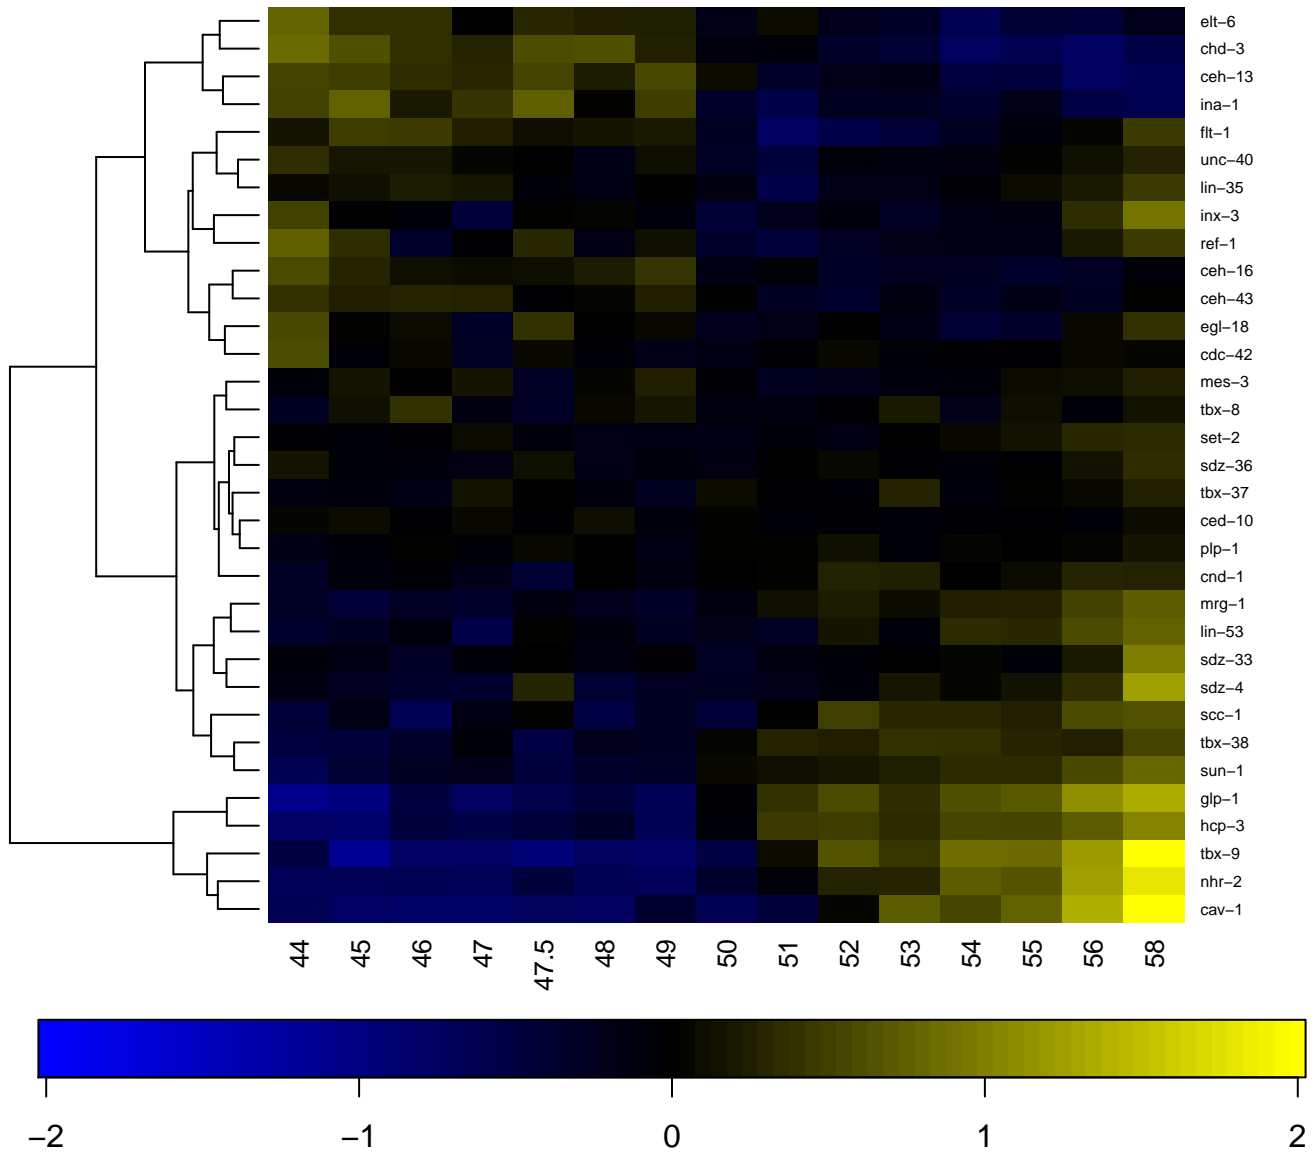

# ABarppa

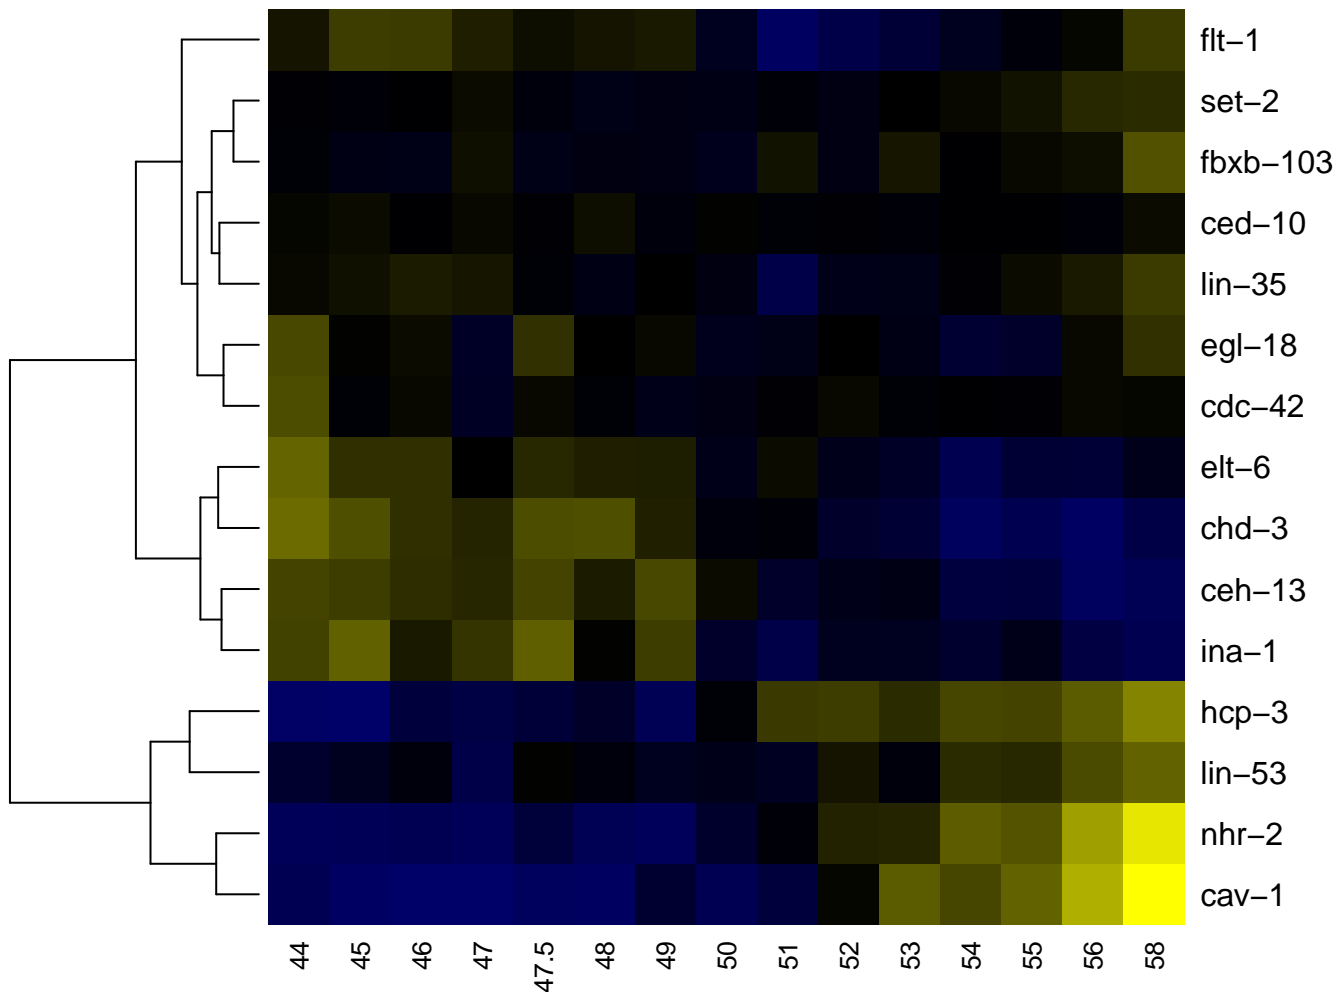

-2

-1

0

1

2

# ABarppaa



# ABarppaaa



# ABarppaap





# ABarppaapp







# ABarppapa



# ABarppapp



# ABarppp

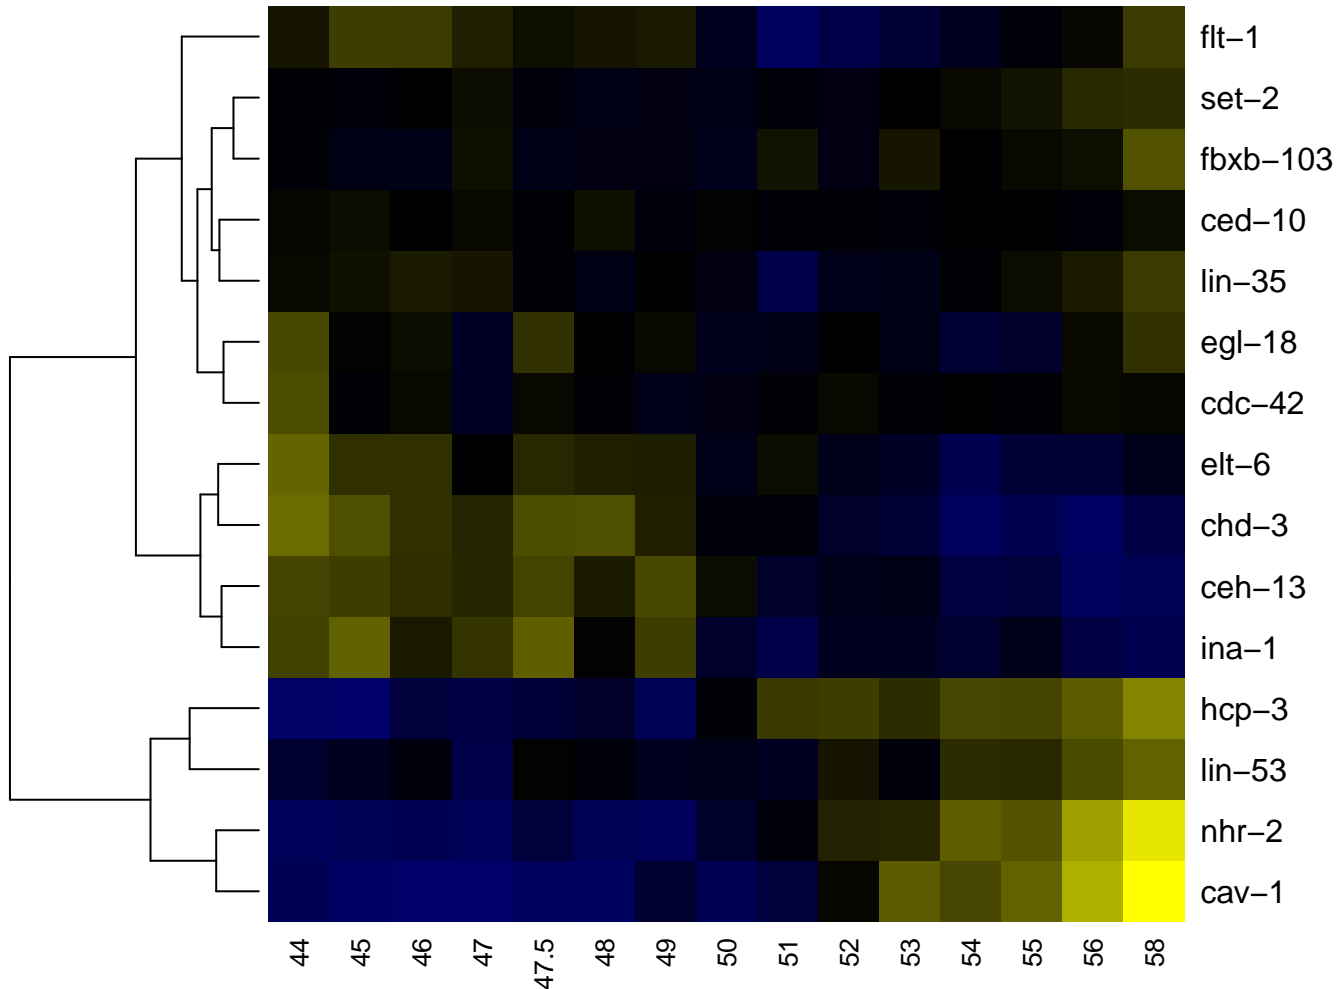

# ABarpppa



# ABarpppa



# ABarpppap

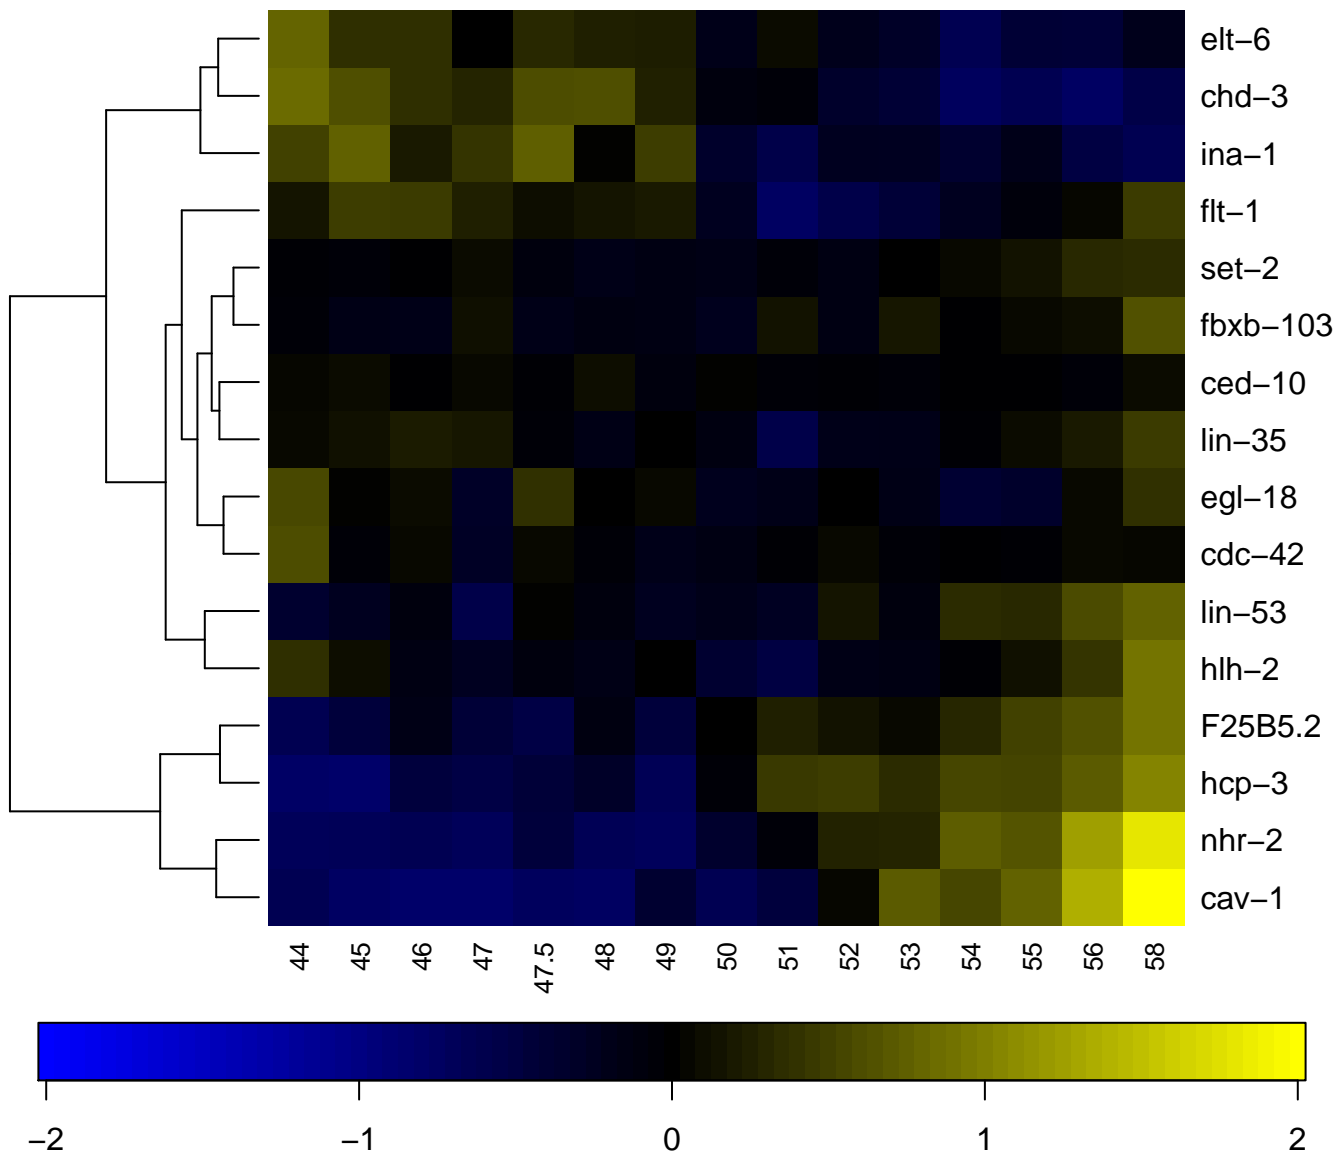

# ABarpppapa

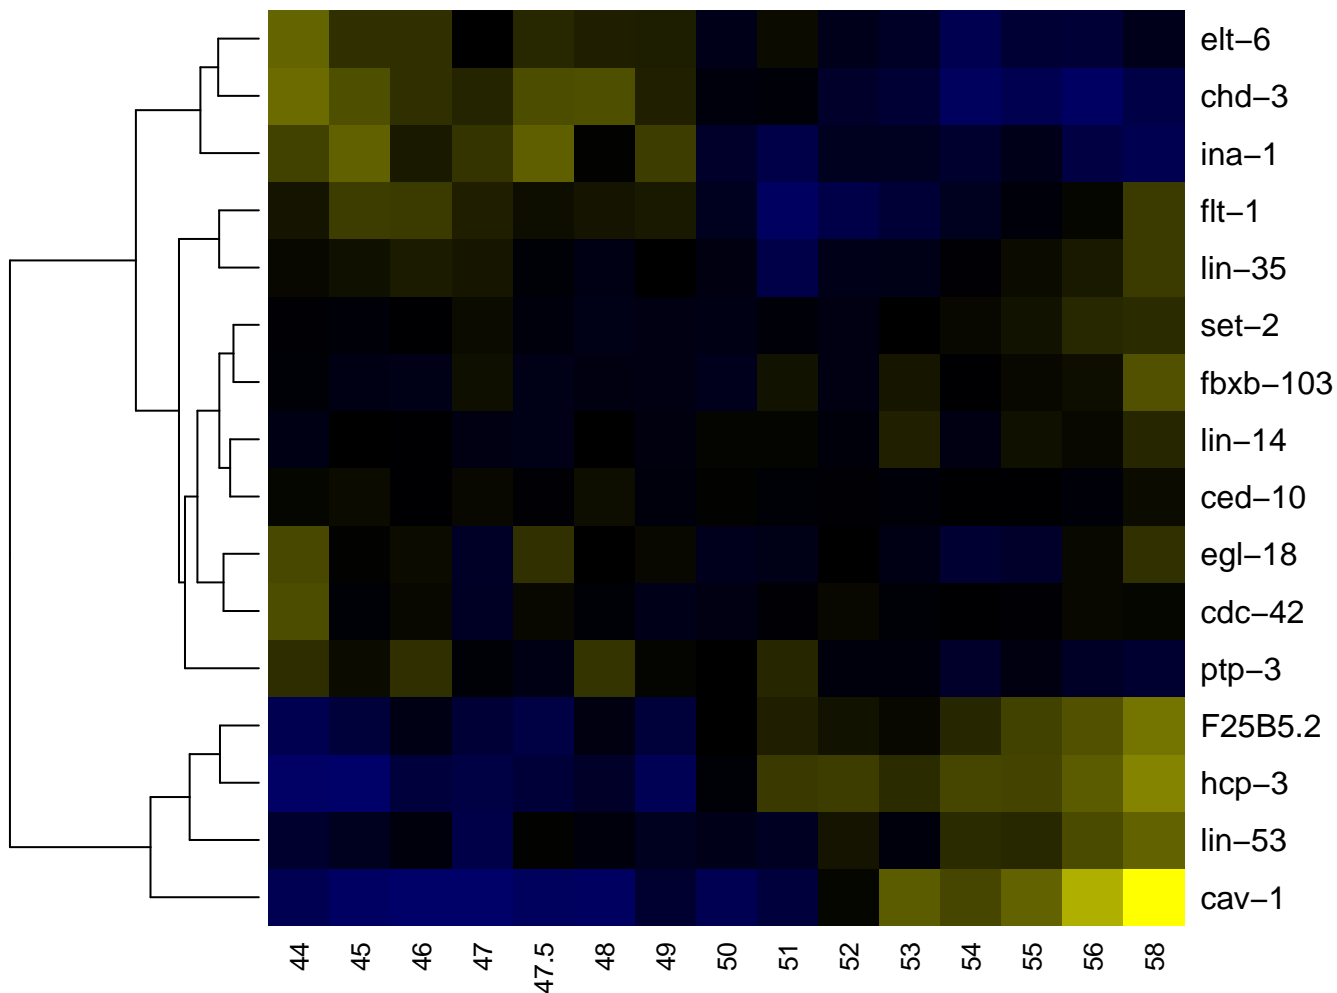



# ABarpppapp



# ABarpppp

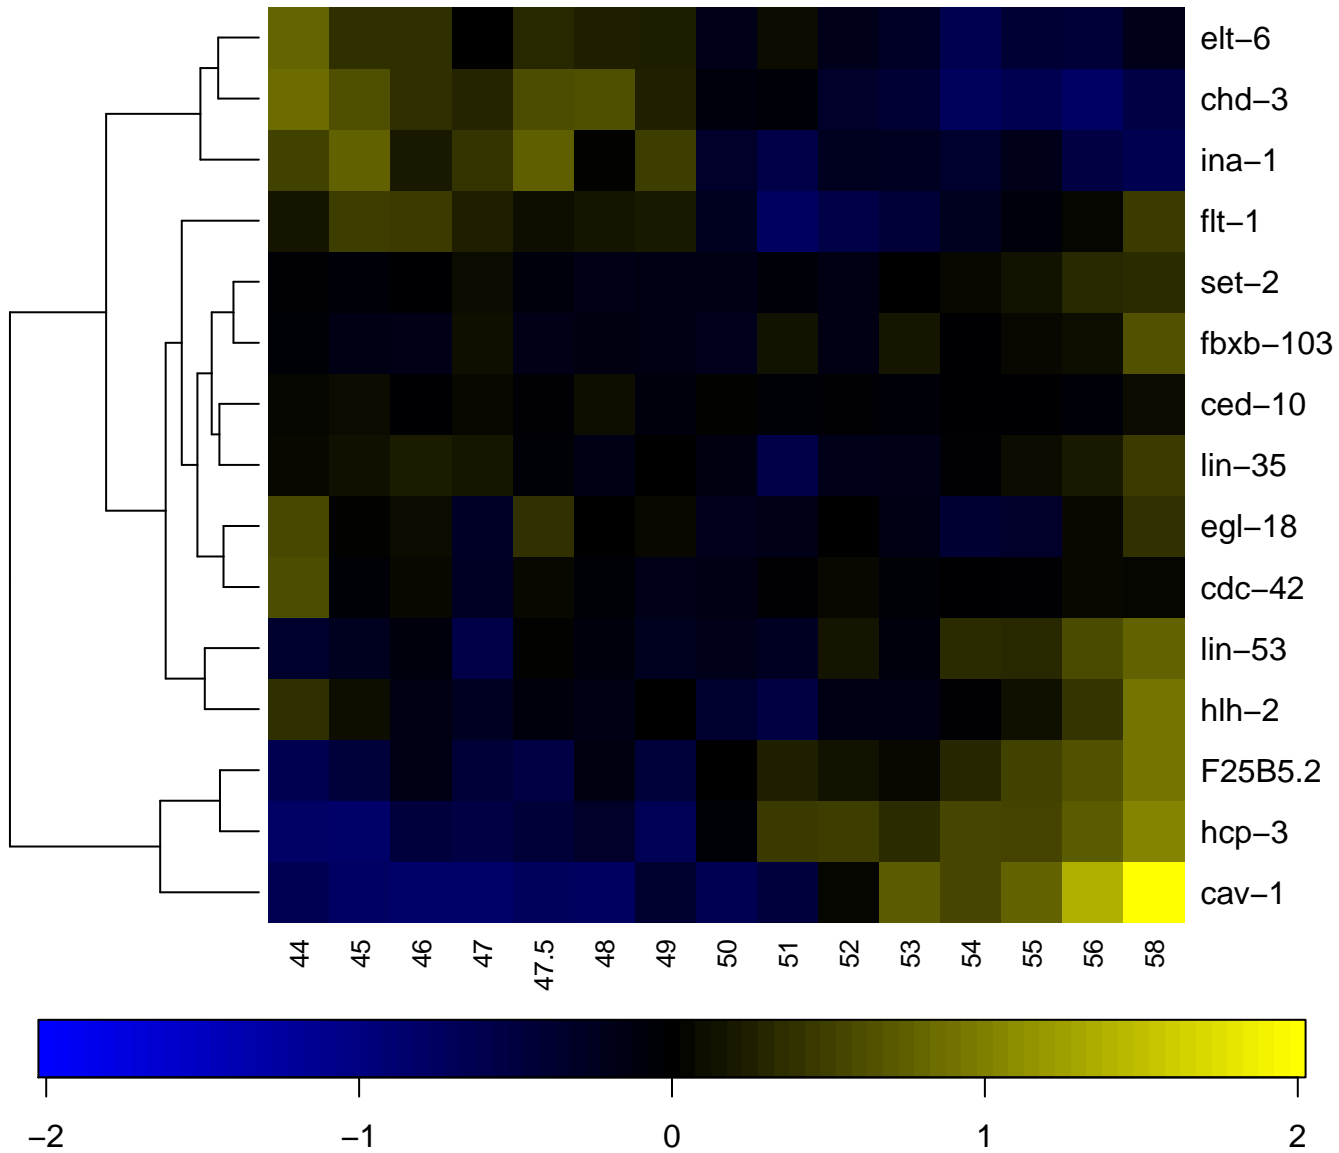

# ABarppppa



# ABarppppp



# ABp

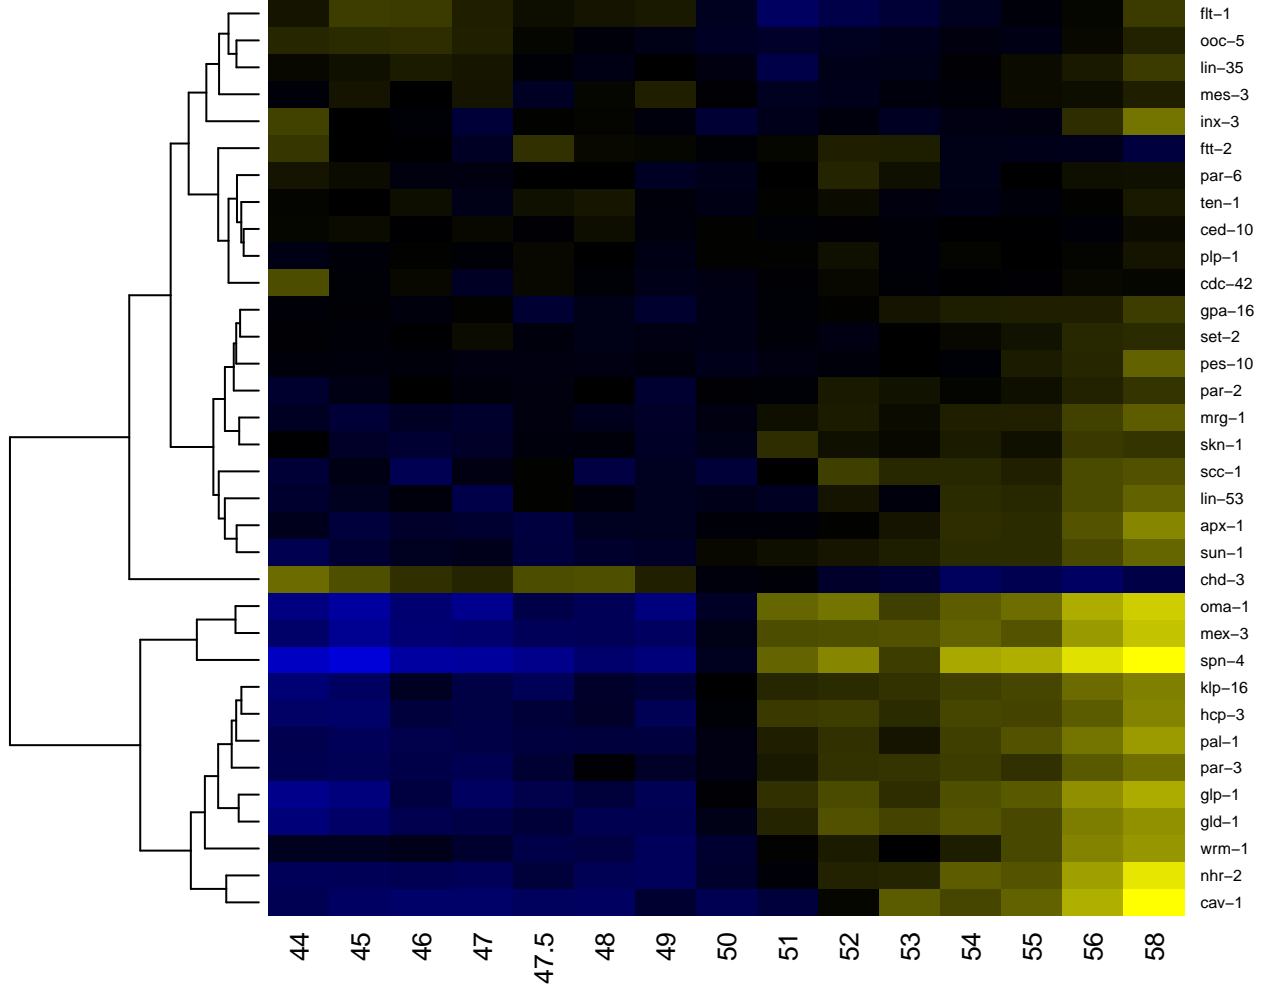

# ABpl

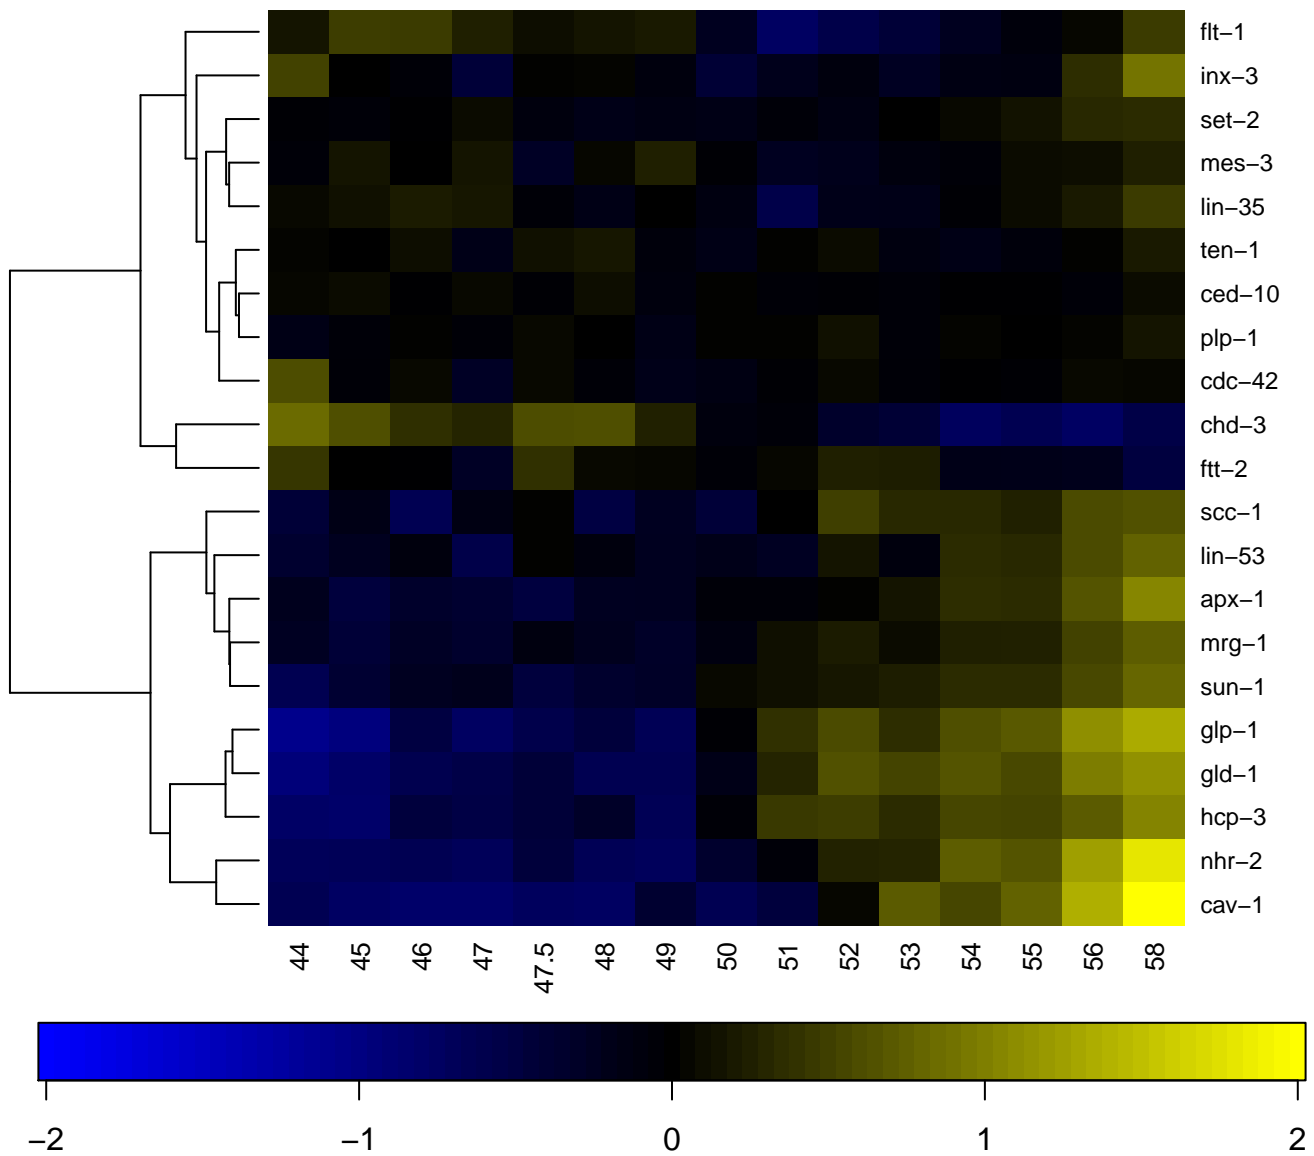

# ABpla

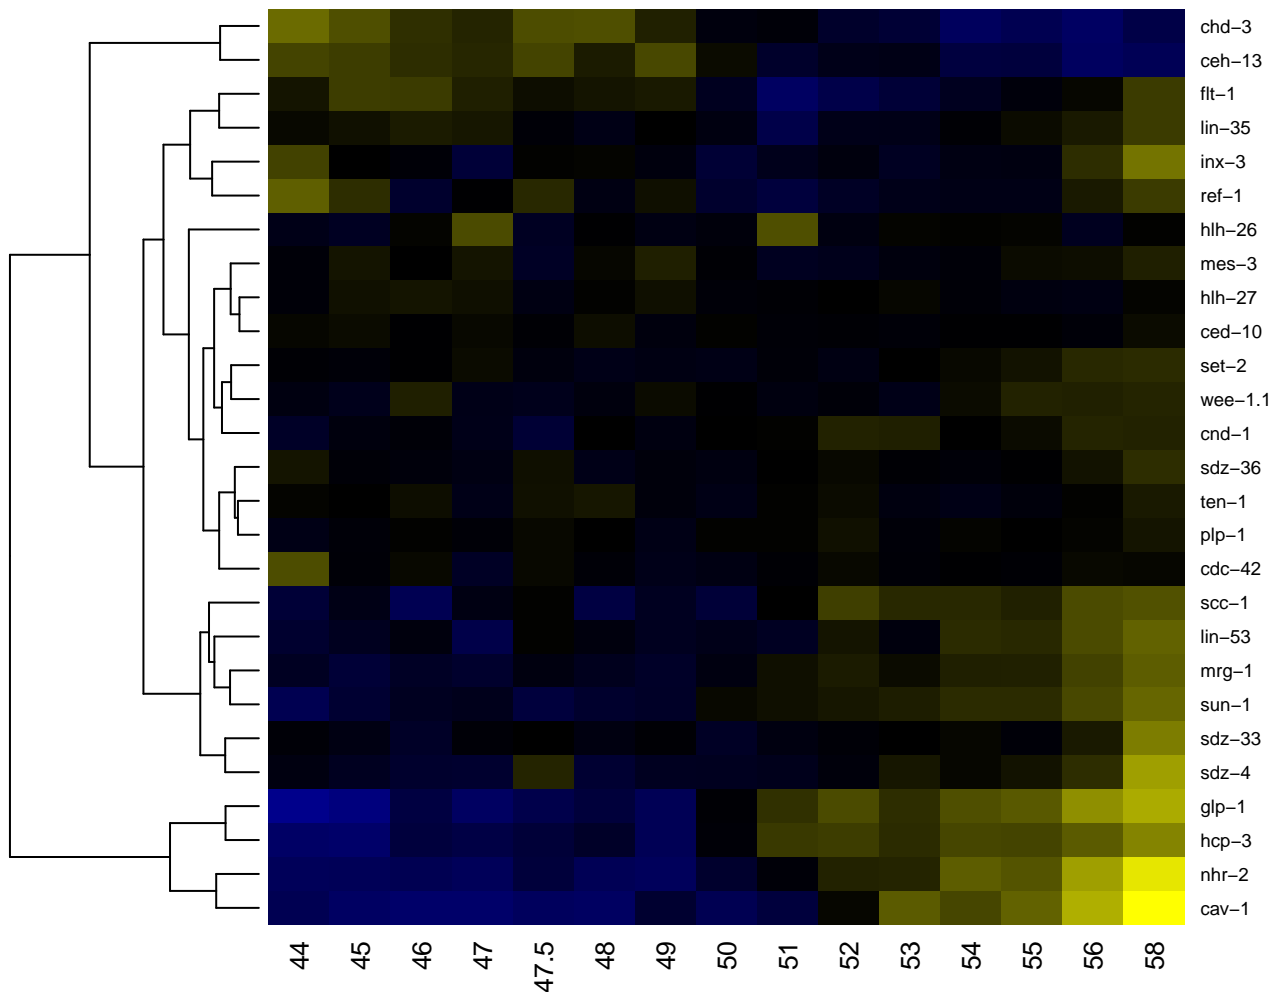

# ABplaa

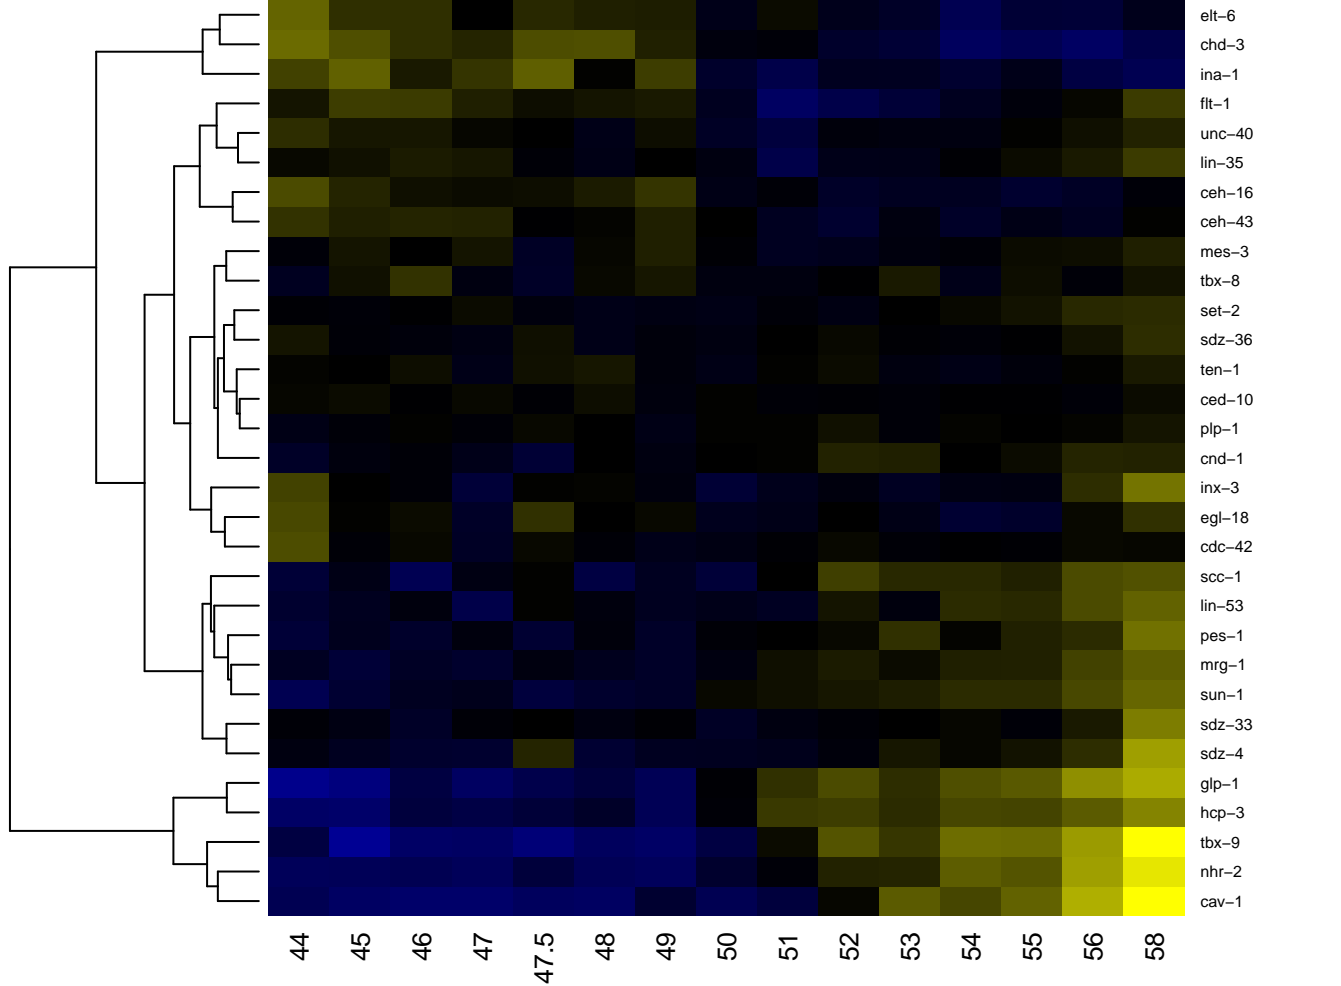



# ABplaaa

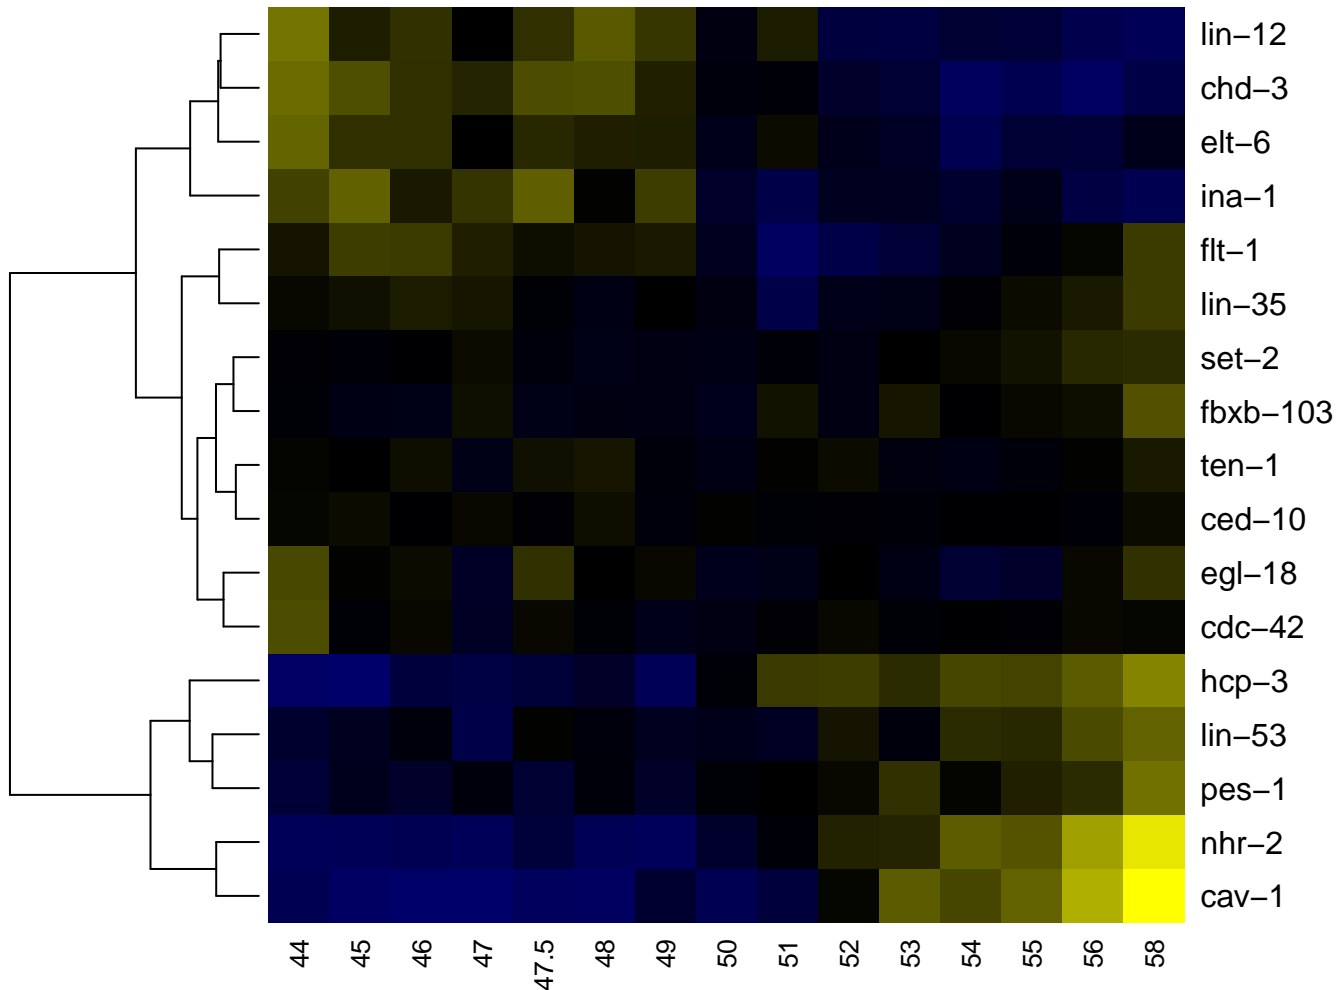

# ABplaaa

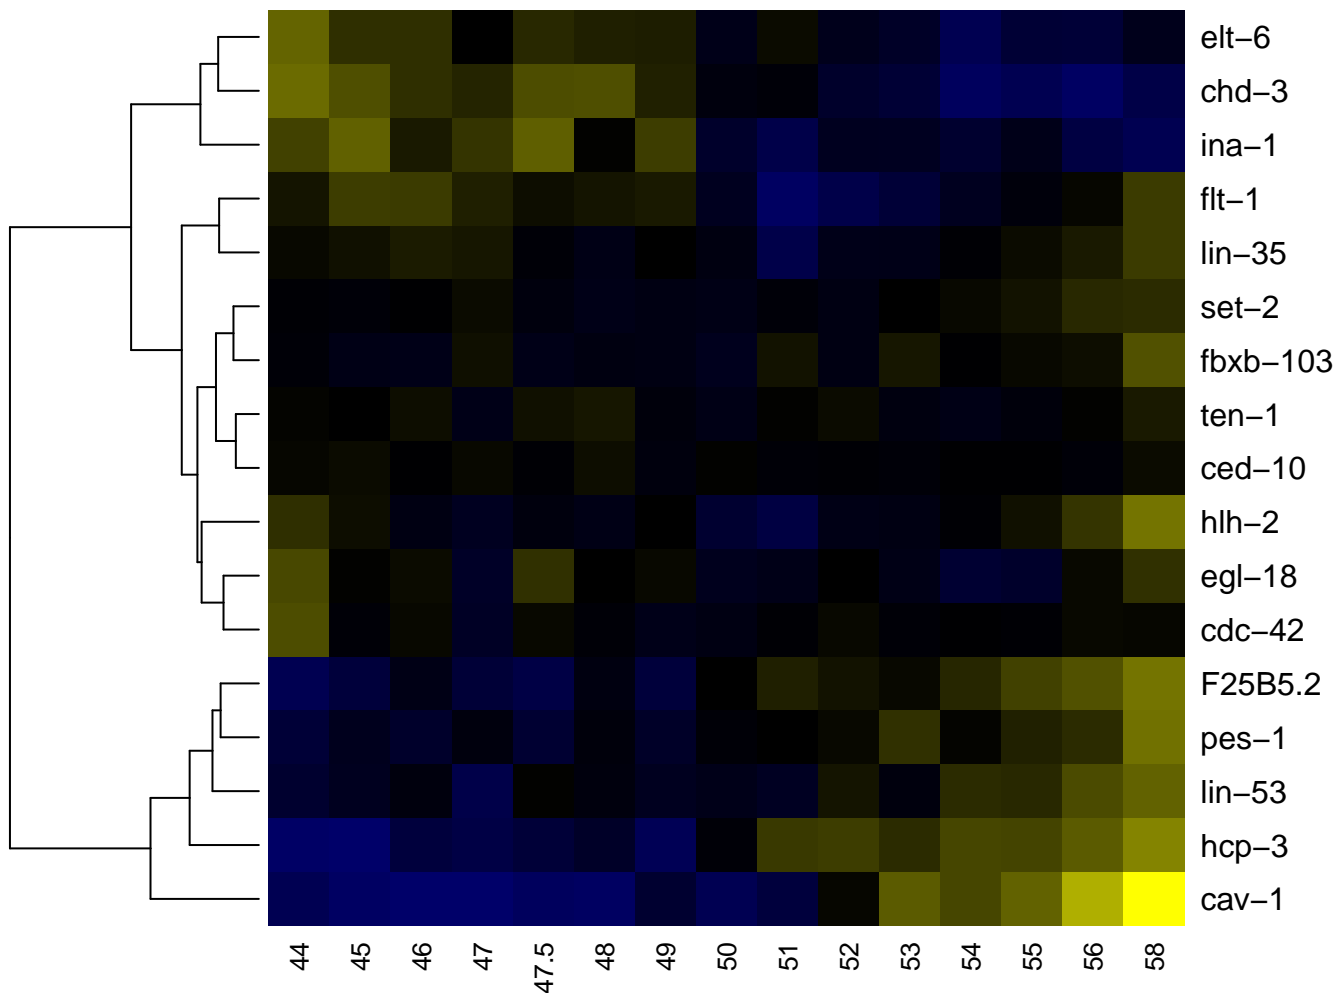

# ABplaaaaa

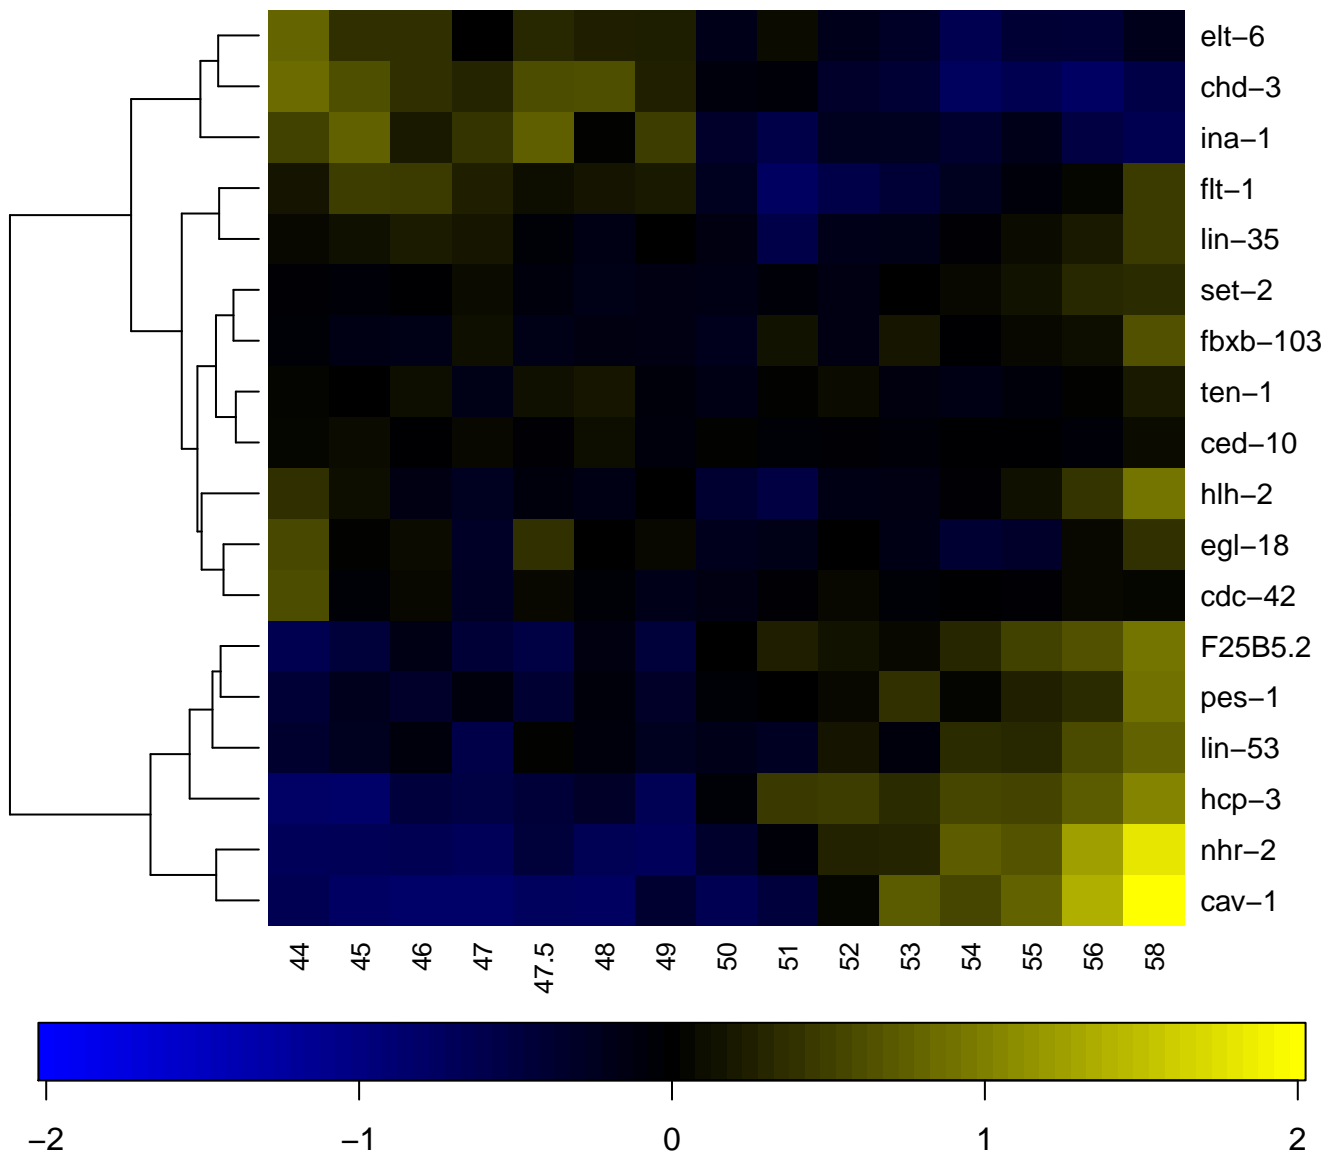

# ABplaaaaaa

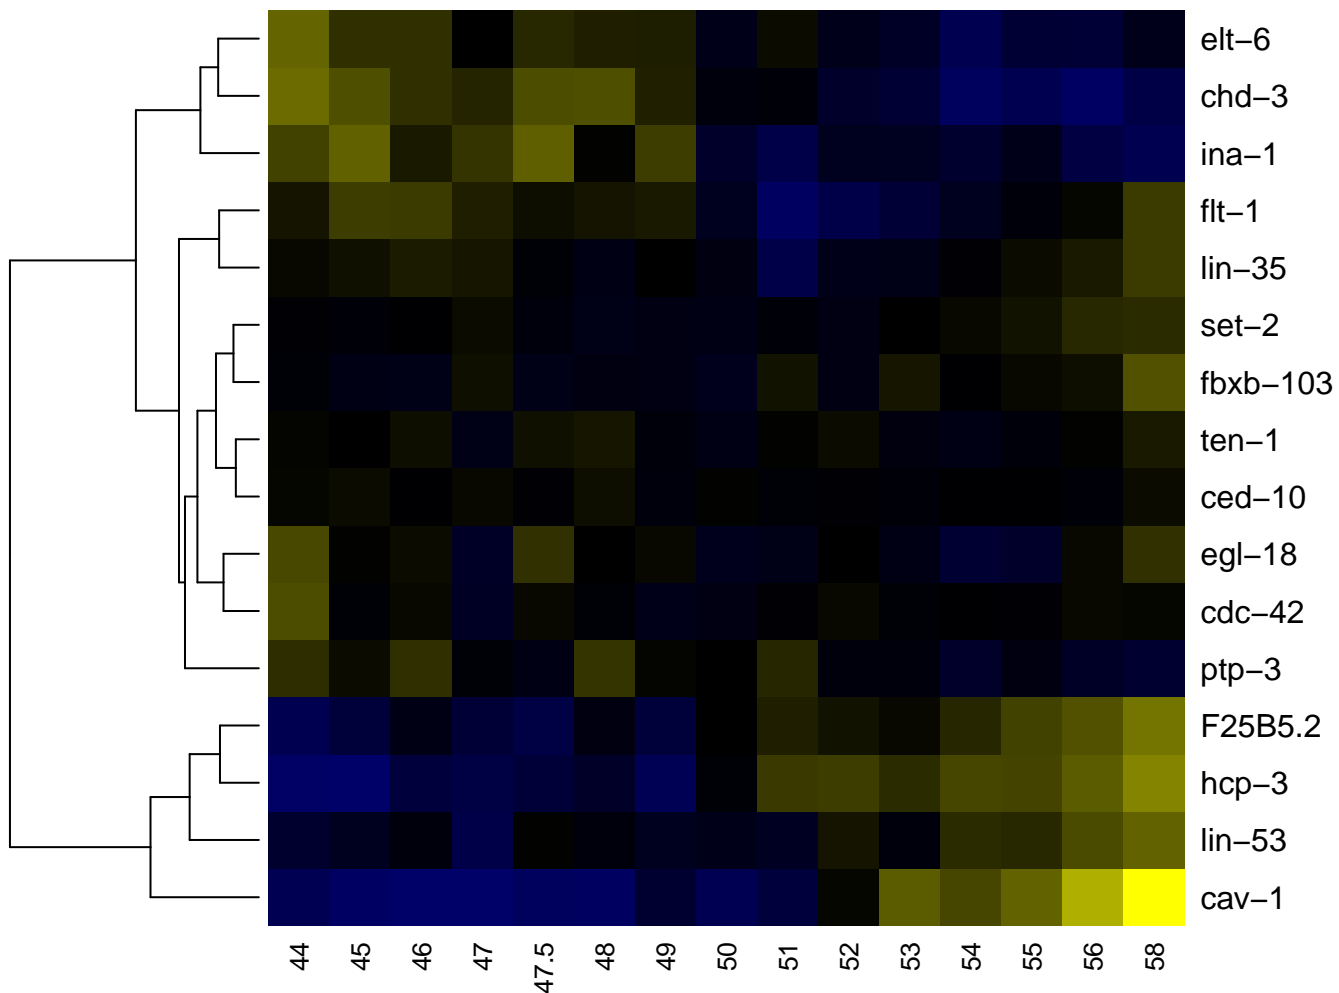

-2

-1

0

1

2



# ABplaaaap

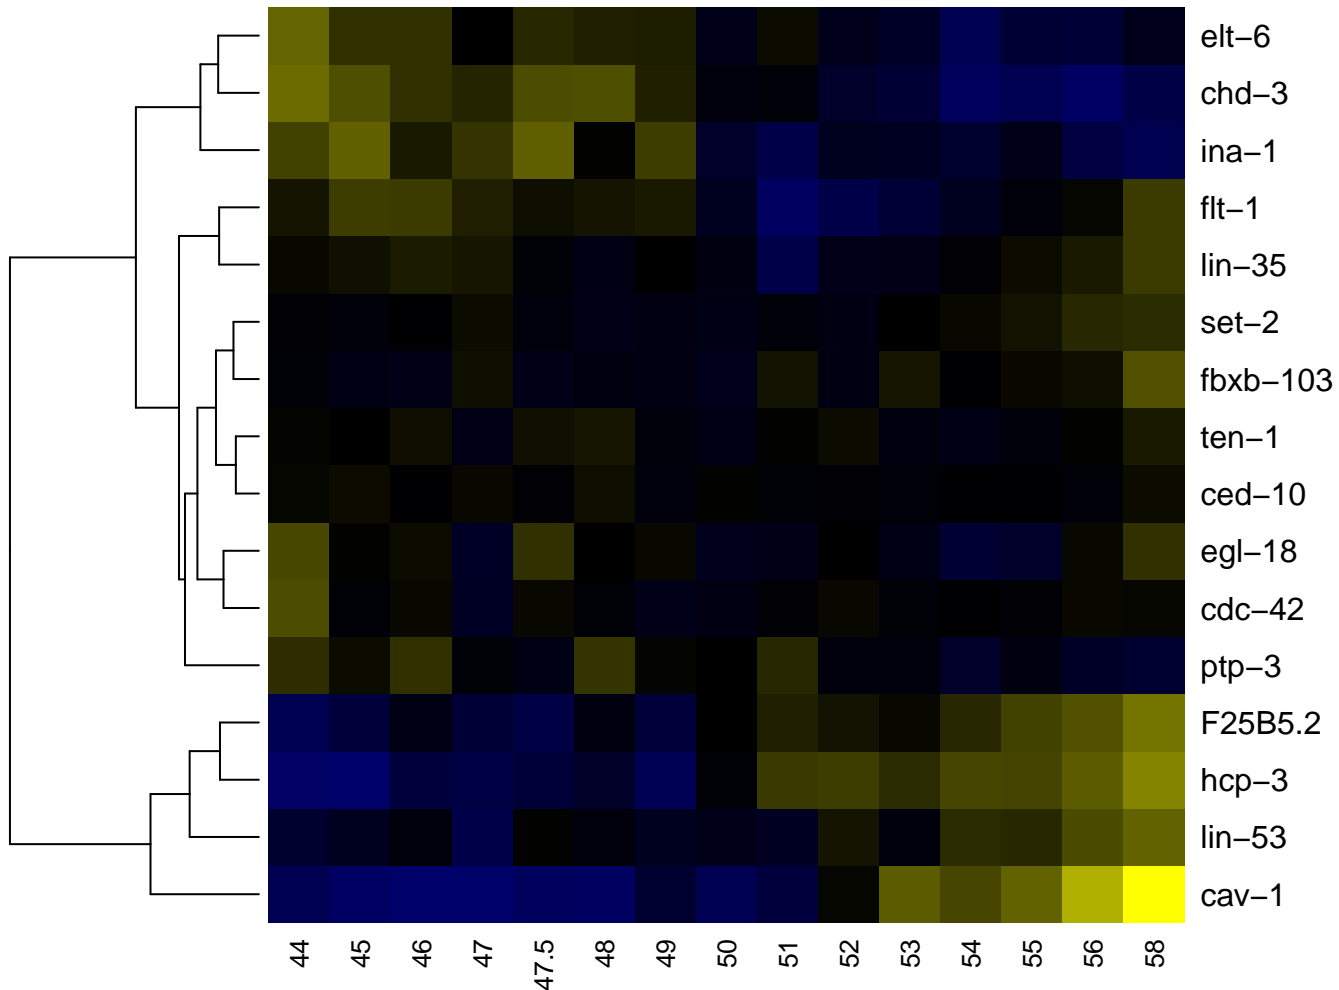

# ABplaaaaapa



# ABplaaaapp





# ABplaaaap

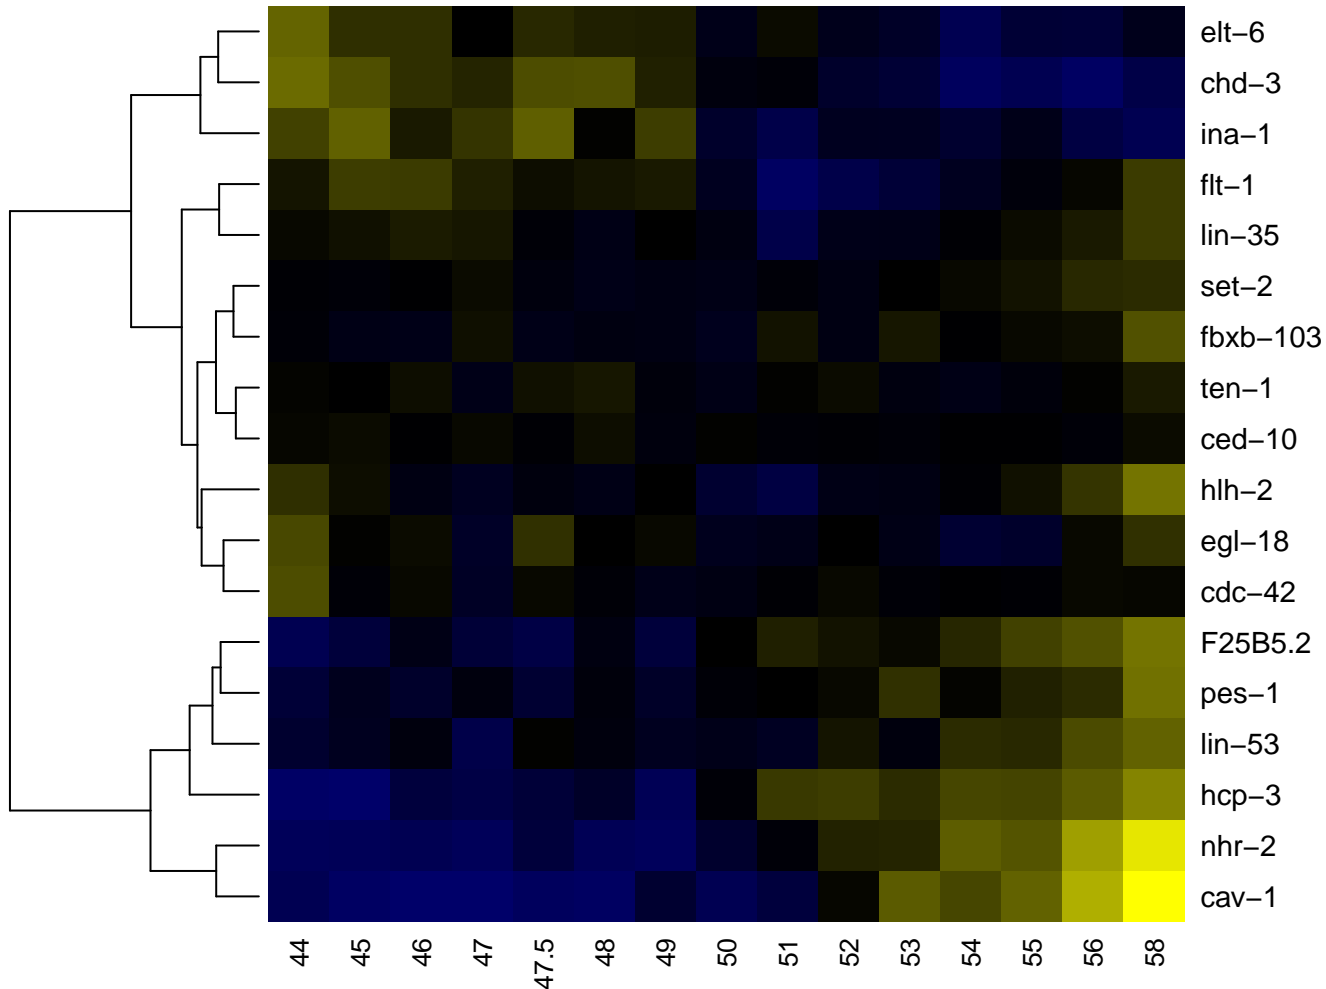

# ABplaaaapa



# ABplaaaapp



# ABplaaap

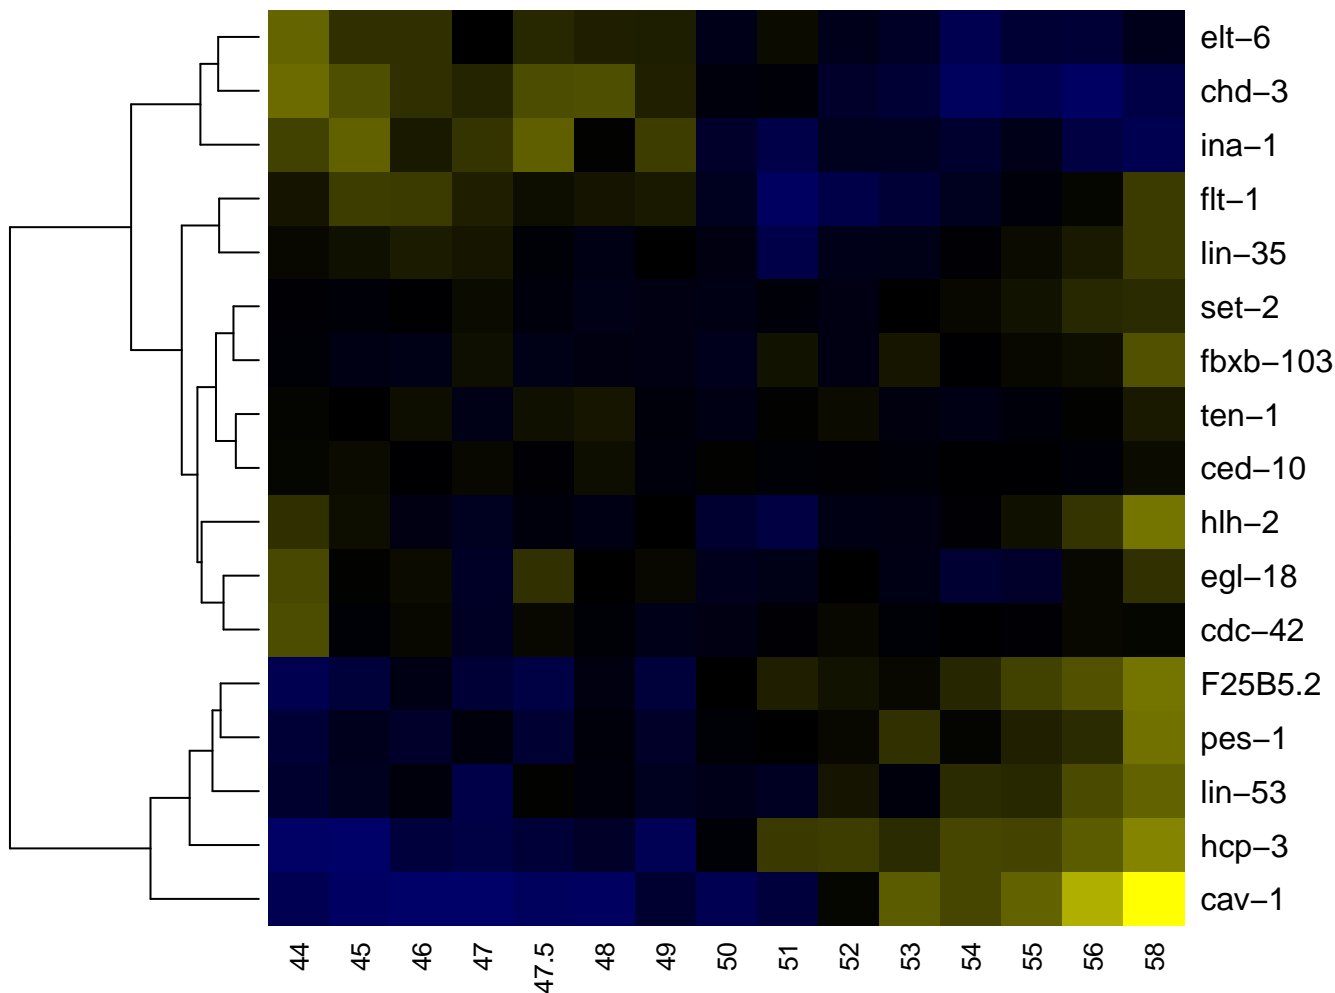

# ABplaaapa

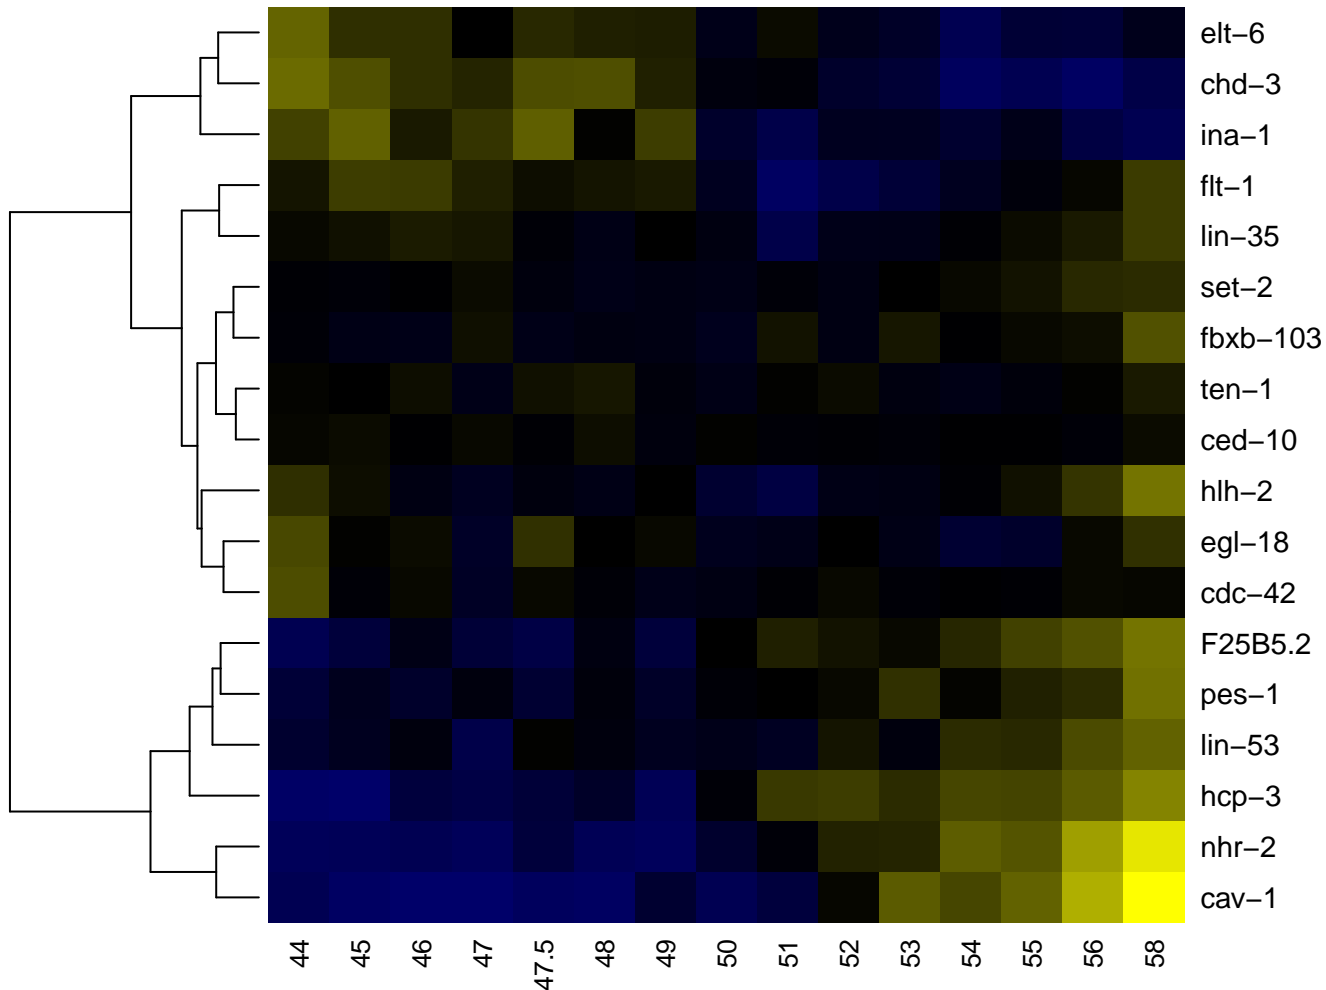

# ABplaaapap



# ABplaaapp



# ABplaat

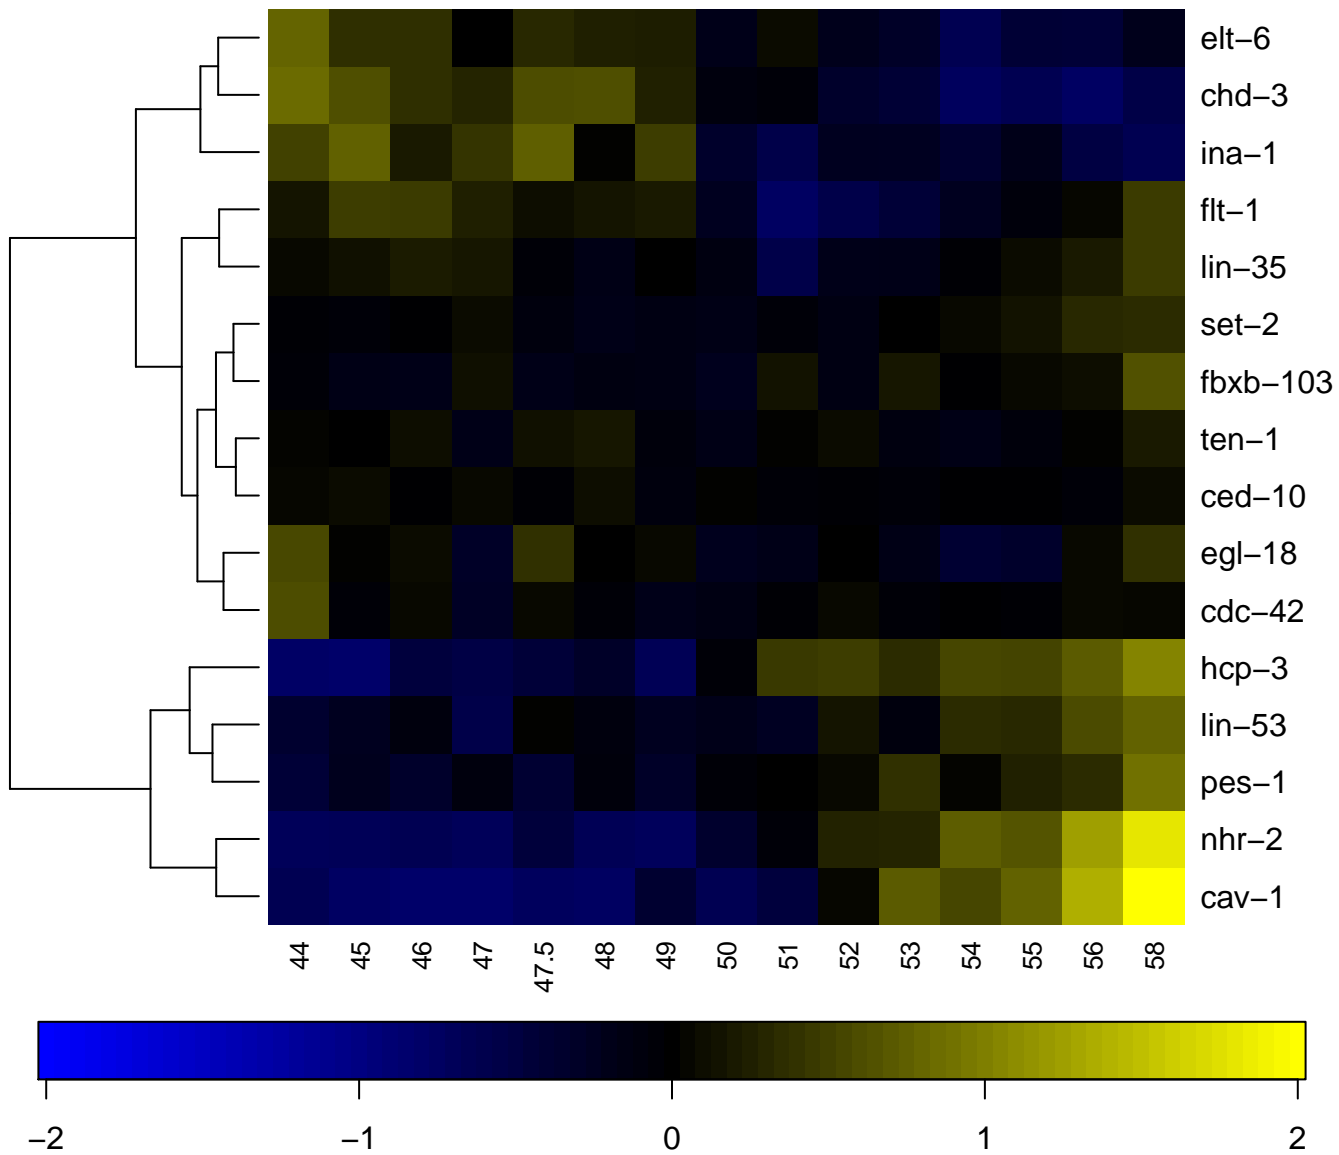



# ABplaapa



# ABplaapaa

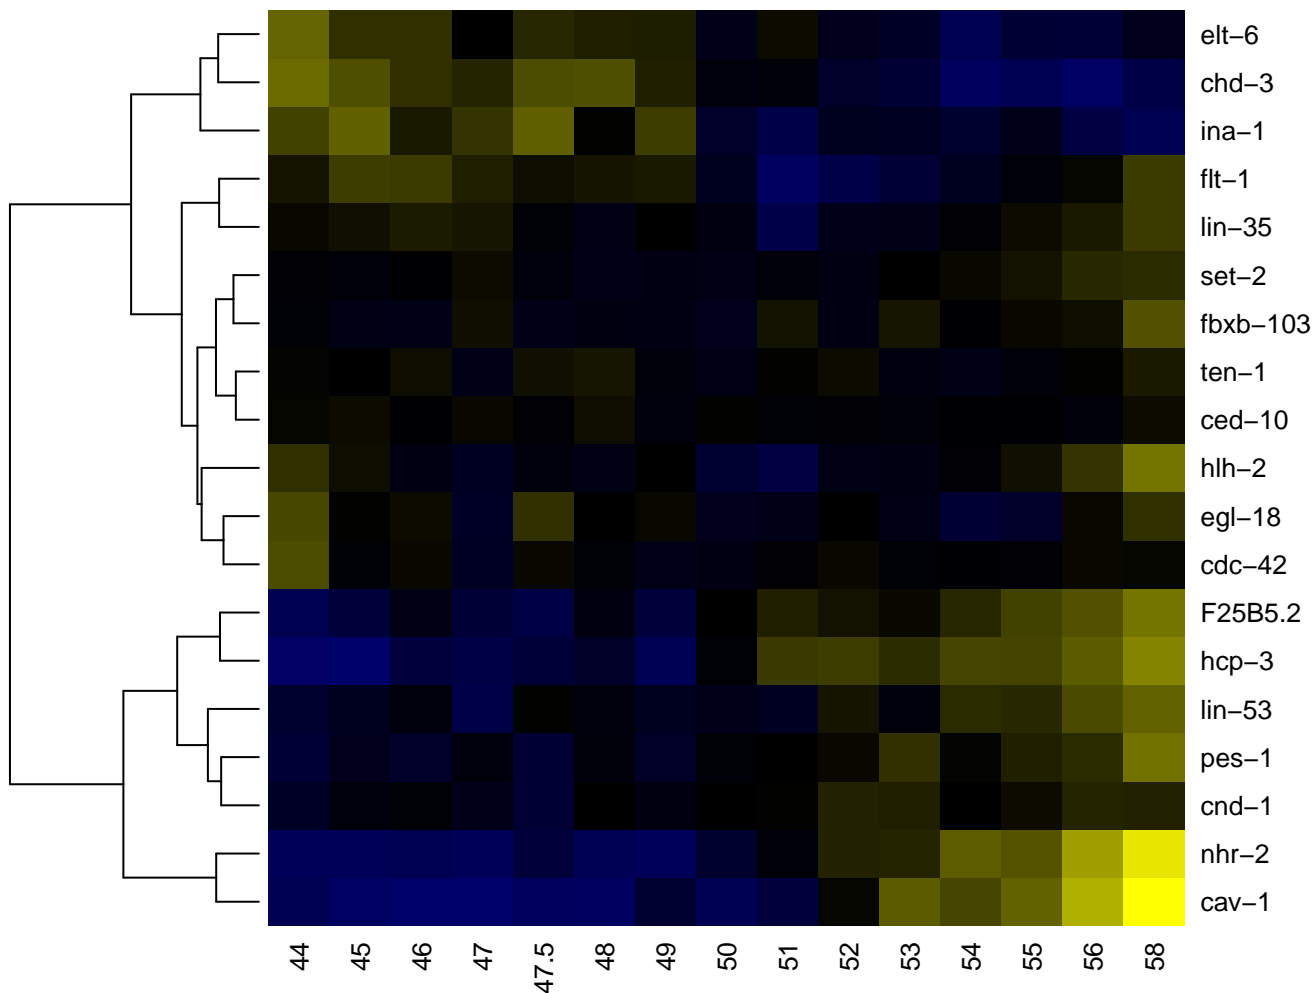

# ABplaapaaa



# ABplaapaaa

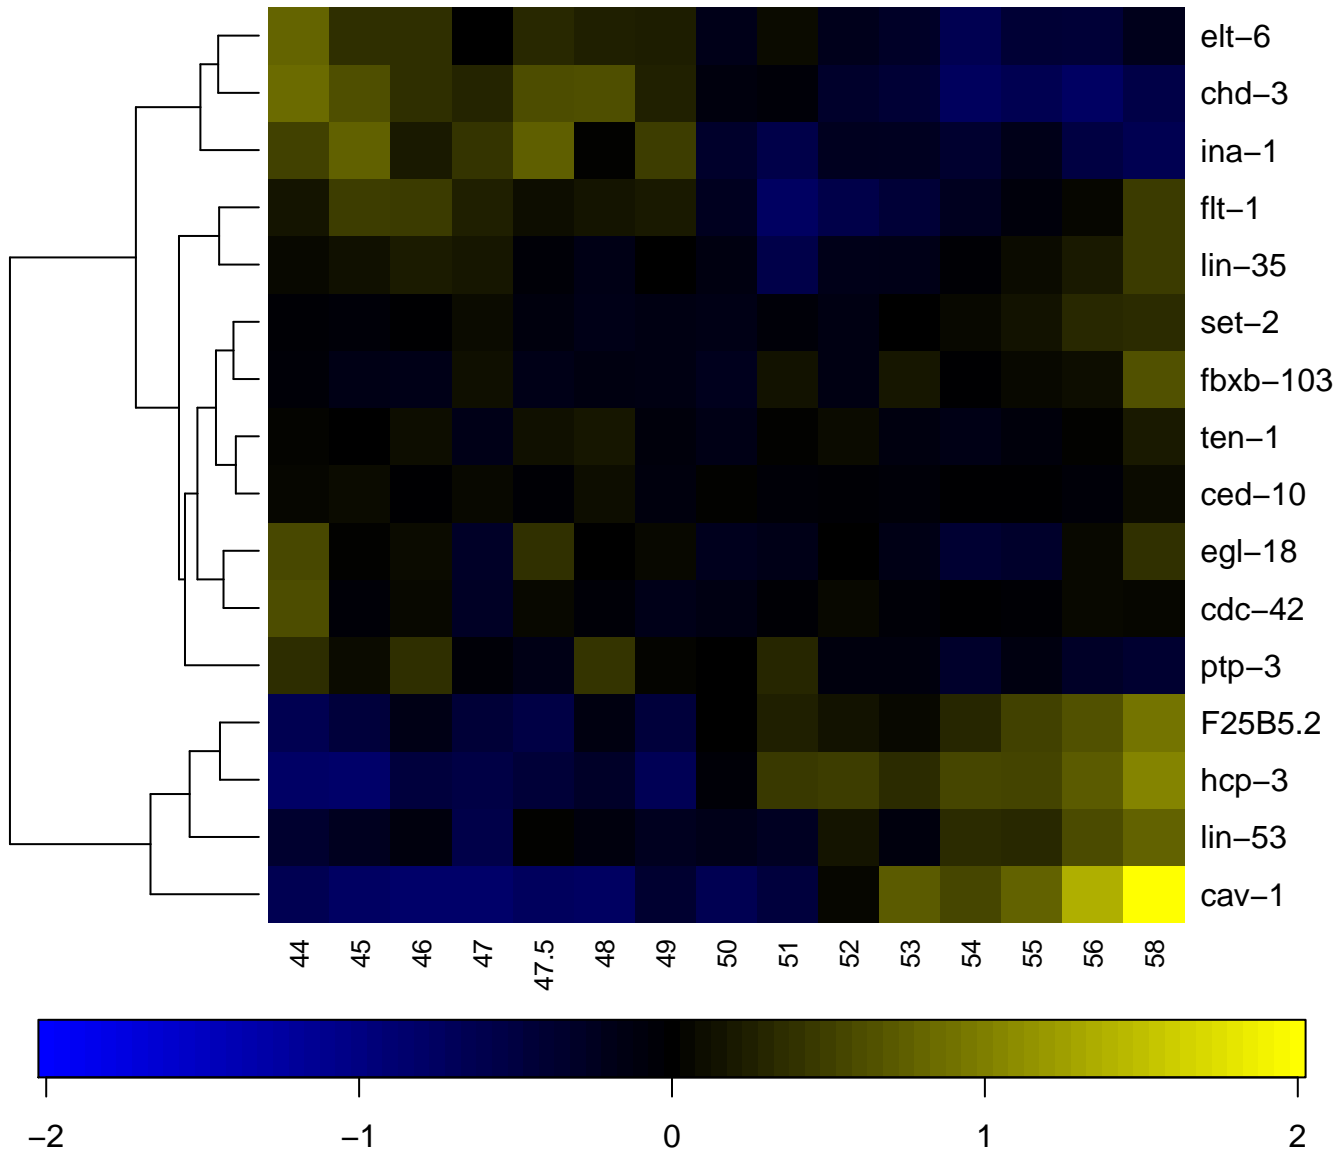

# ABplaapaap



# ABplaapap

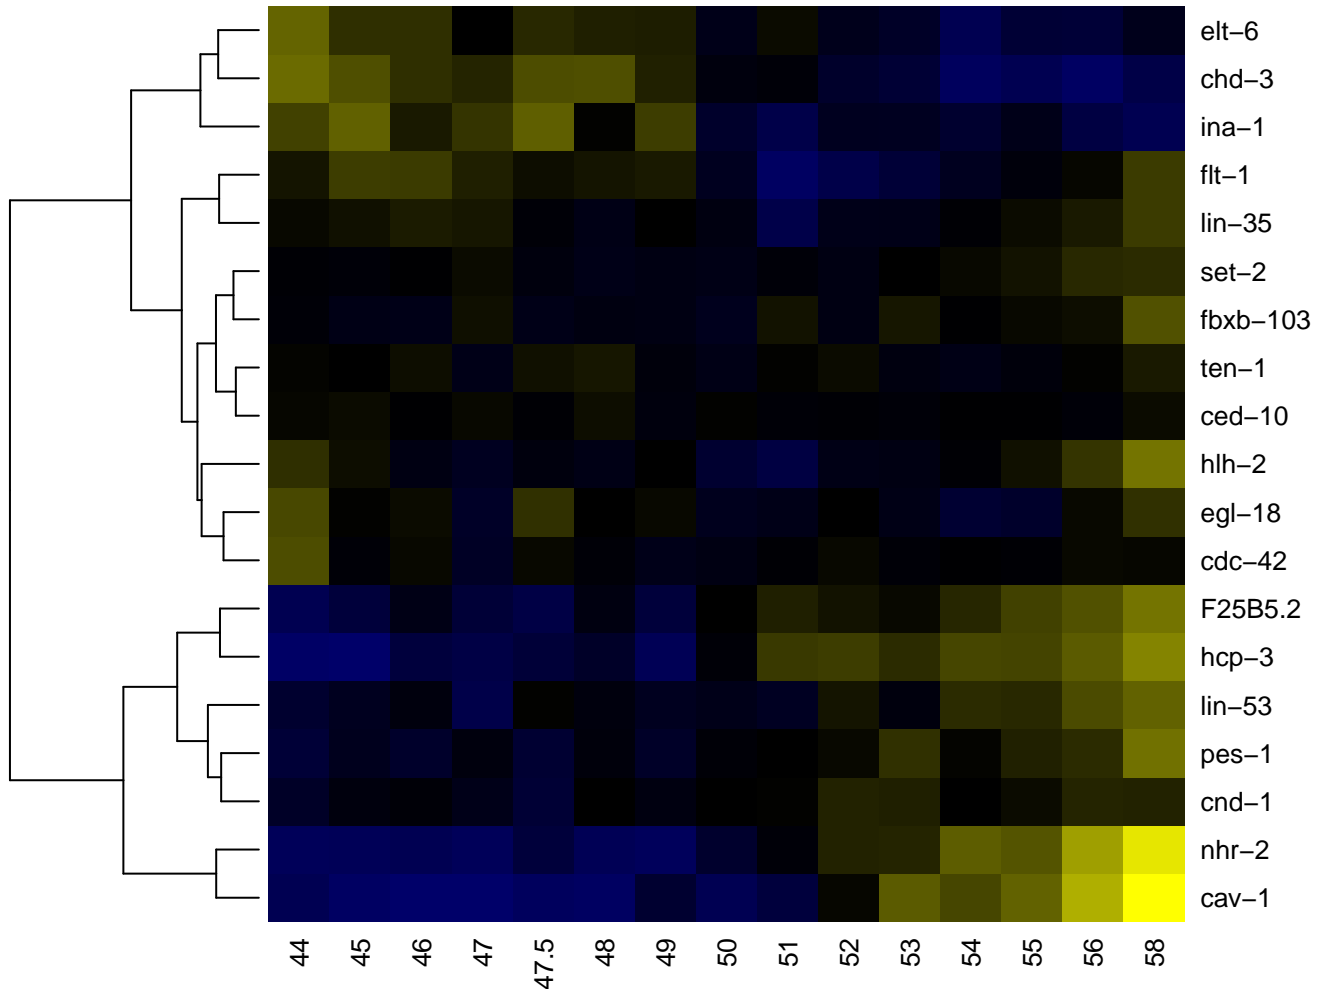

# ABplaapapa

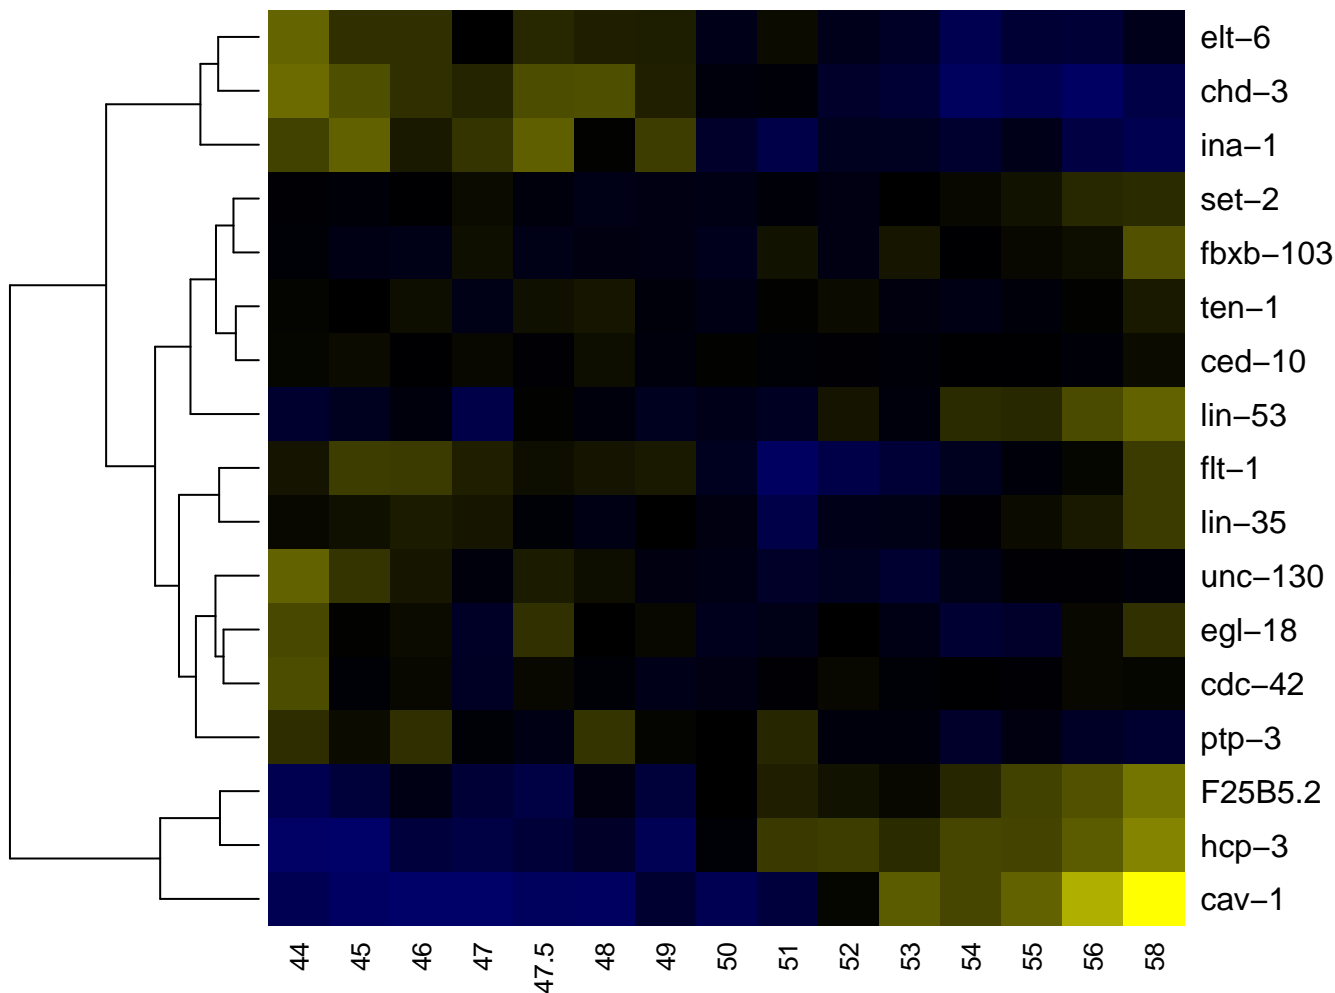

-2

-1

0

1

2

# ABplaapapp

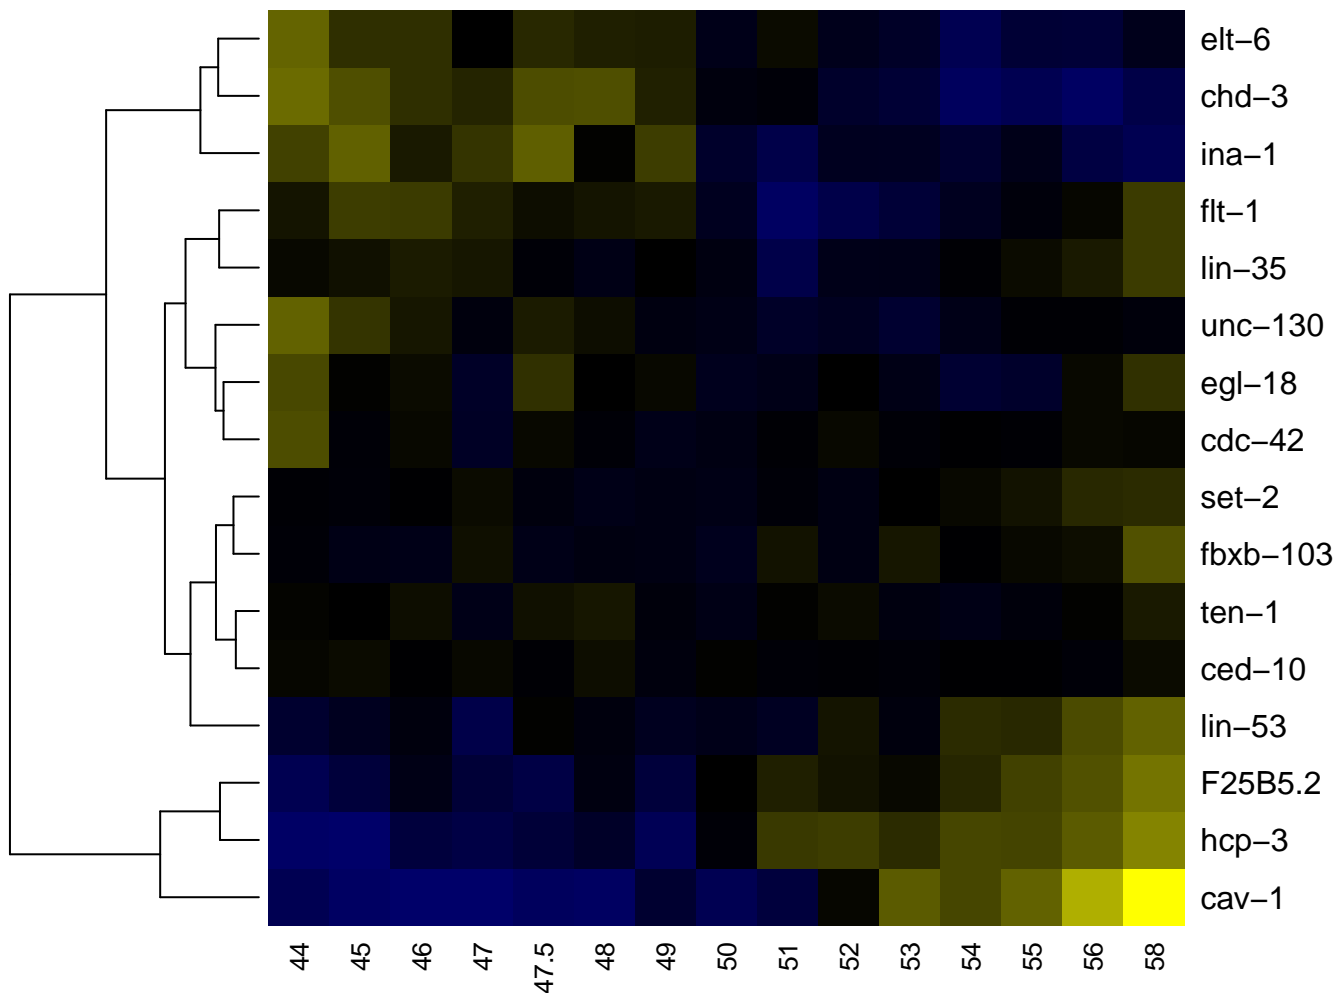



# ABplaapapp



# ABplaappppp

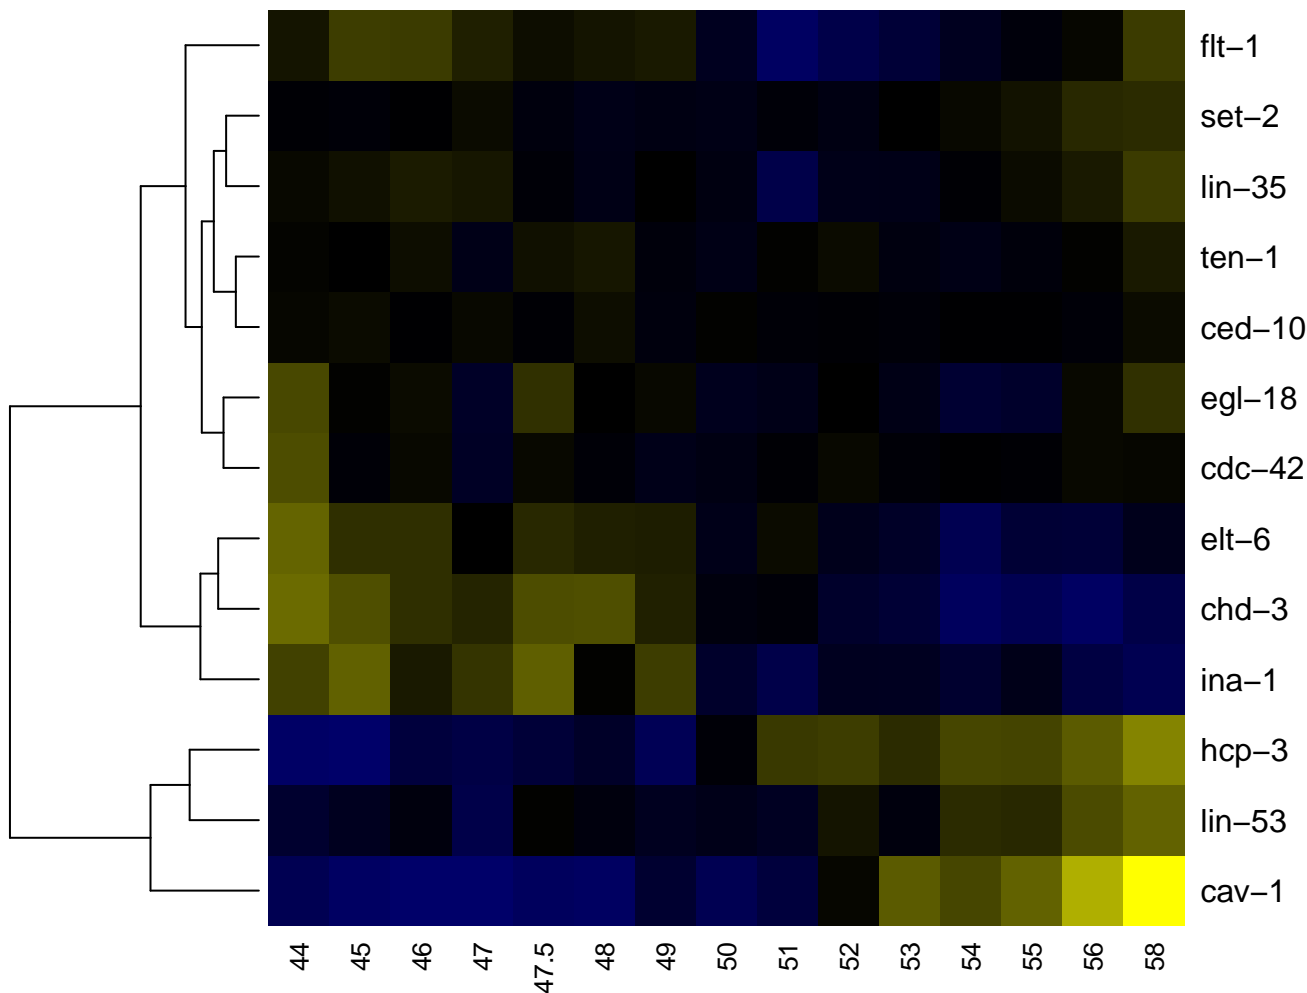

# ABplaapp

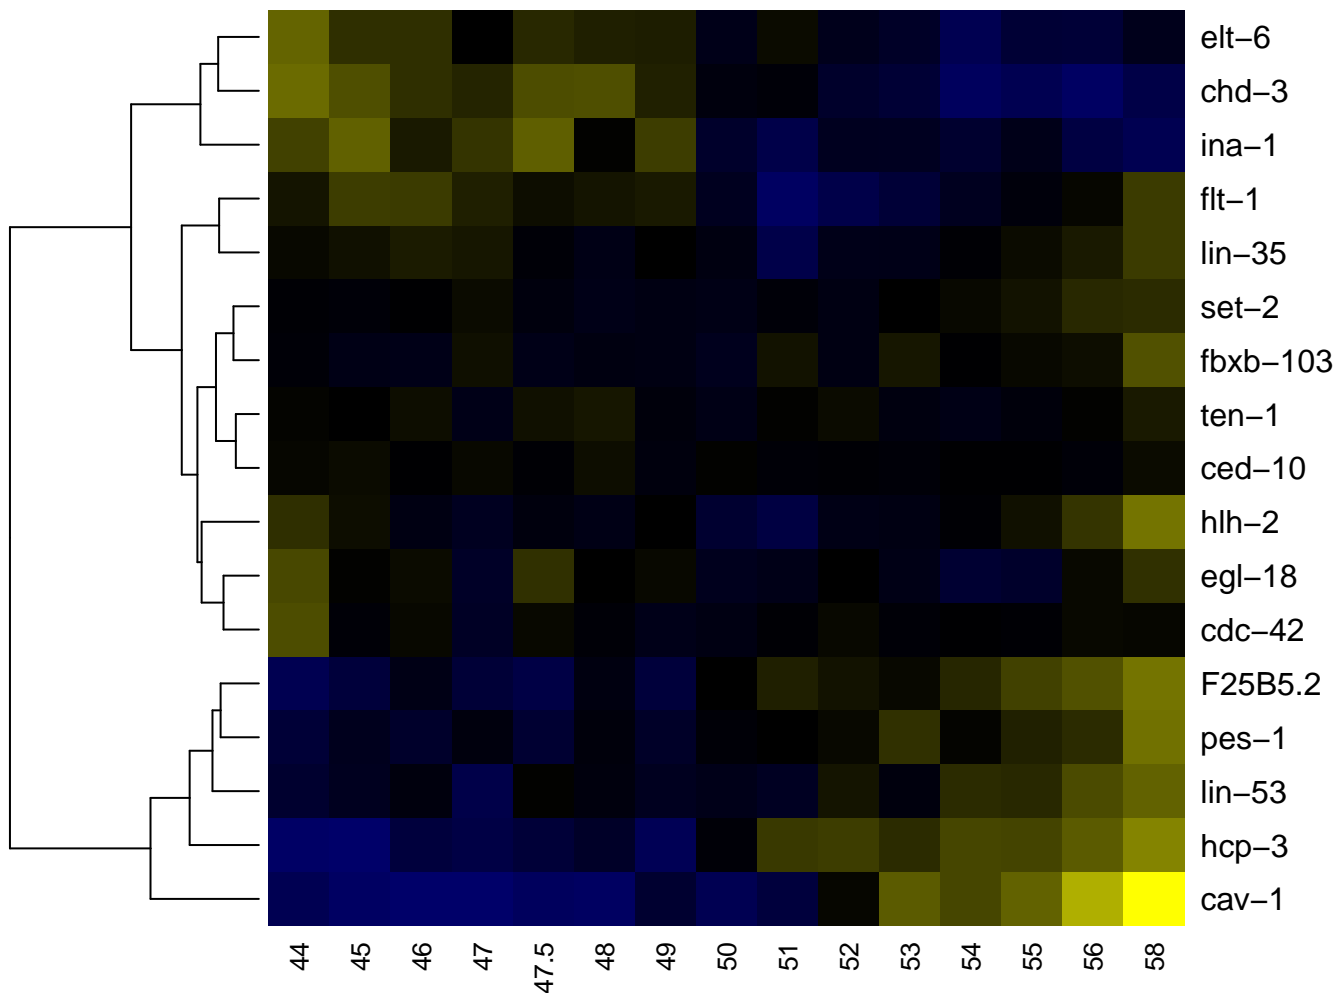

# ABplaappa



# ABplaappaa



# ABplaappap

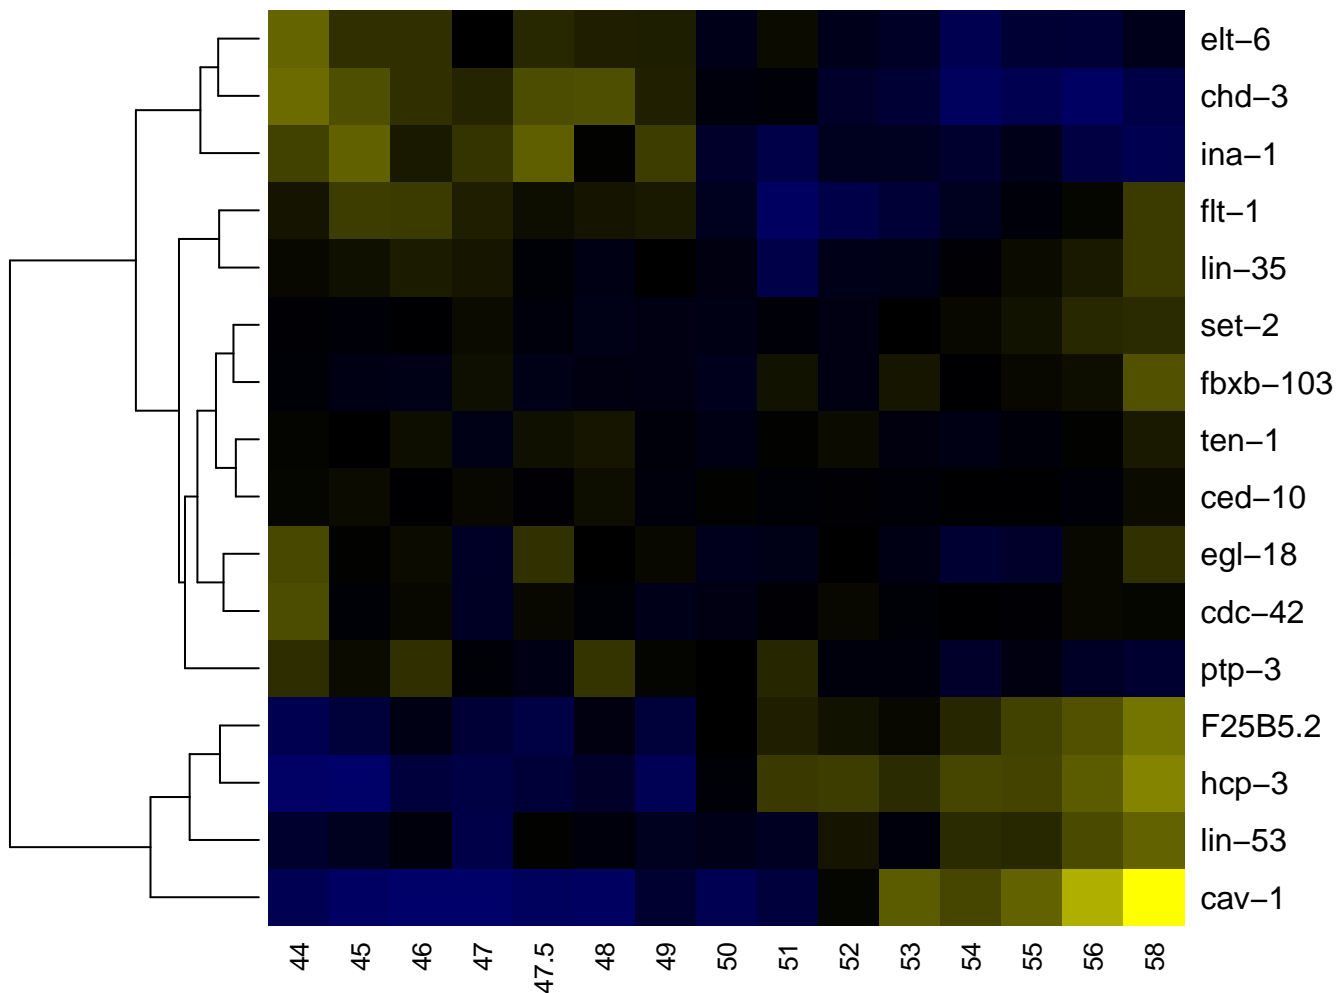

# ABplaappp



# ABplaappa

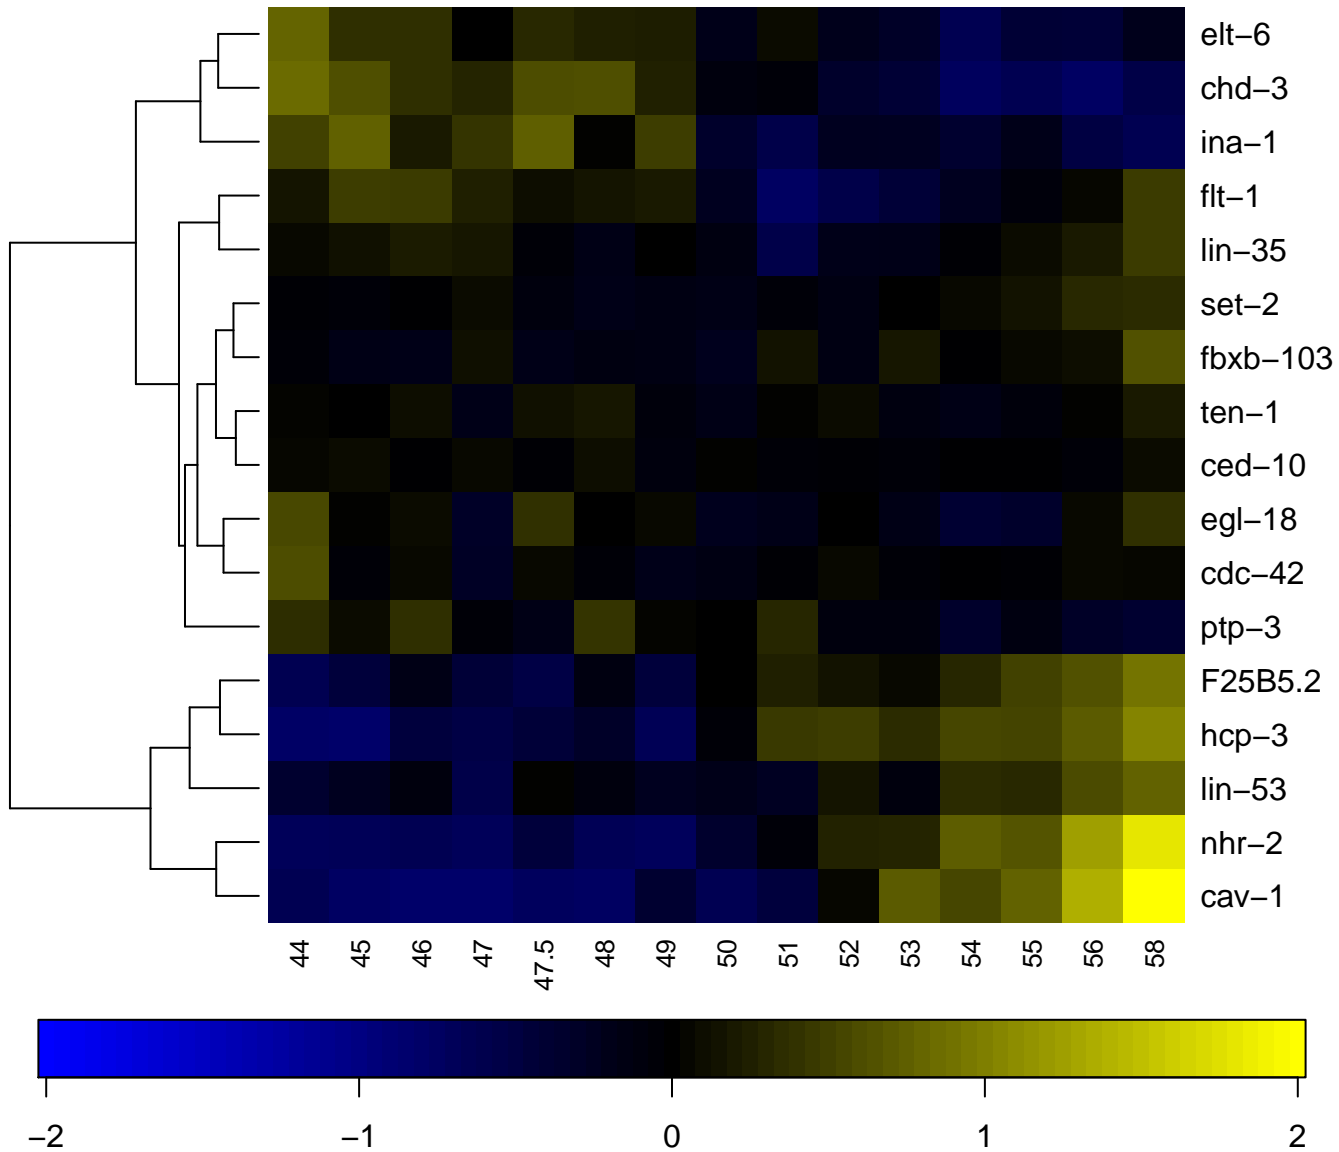



# ABplaapppp

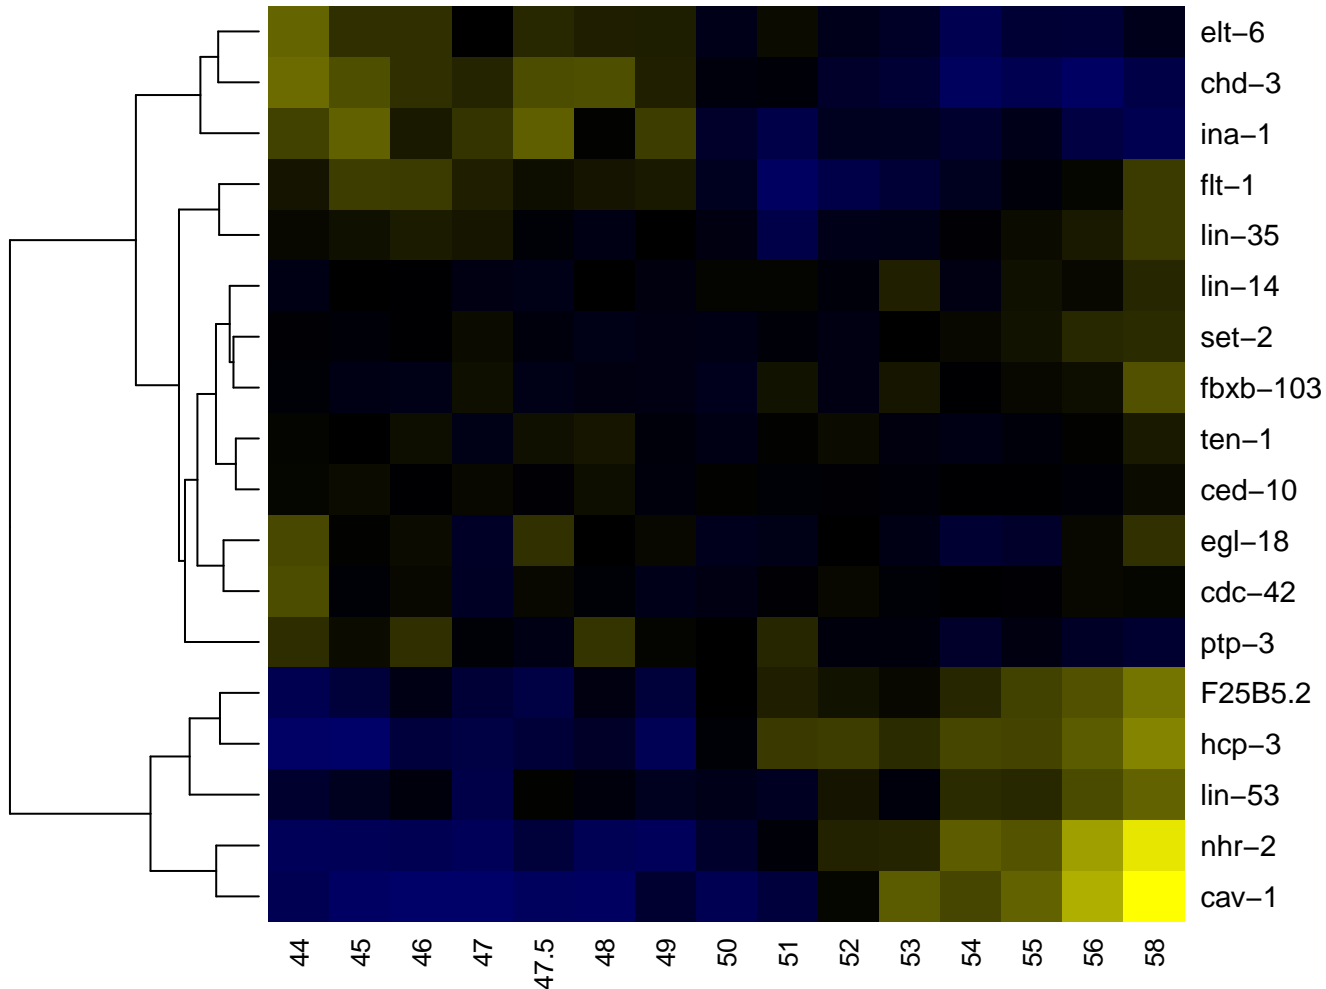

# ABplap

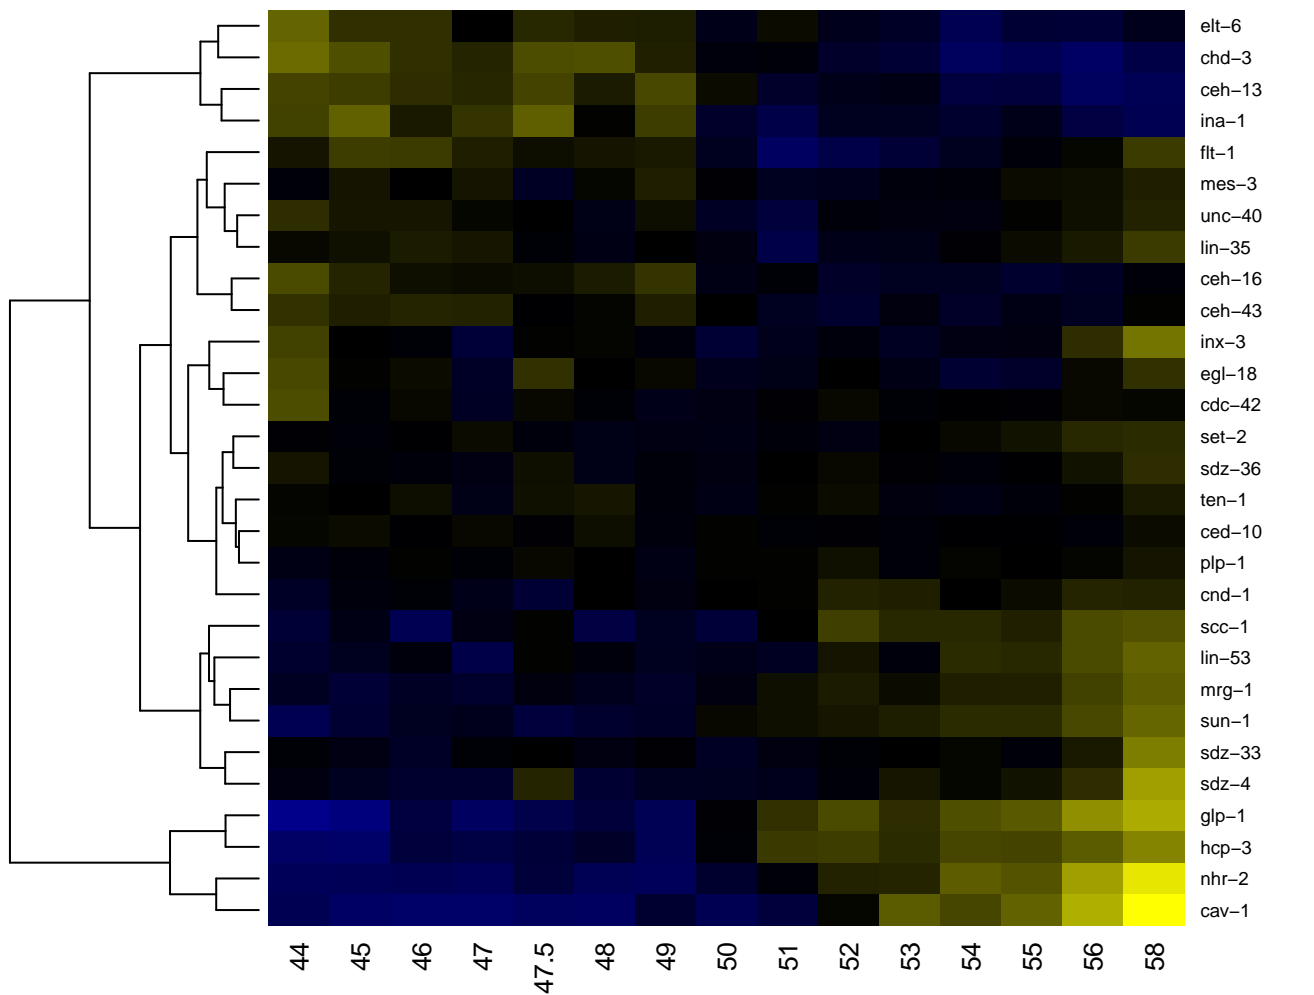



# ABplapaa

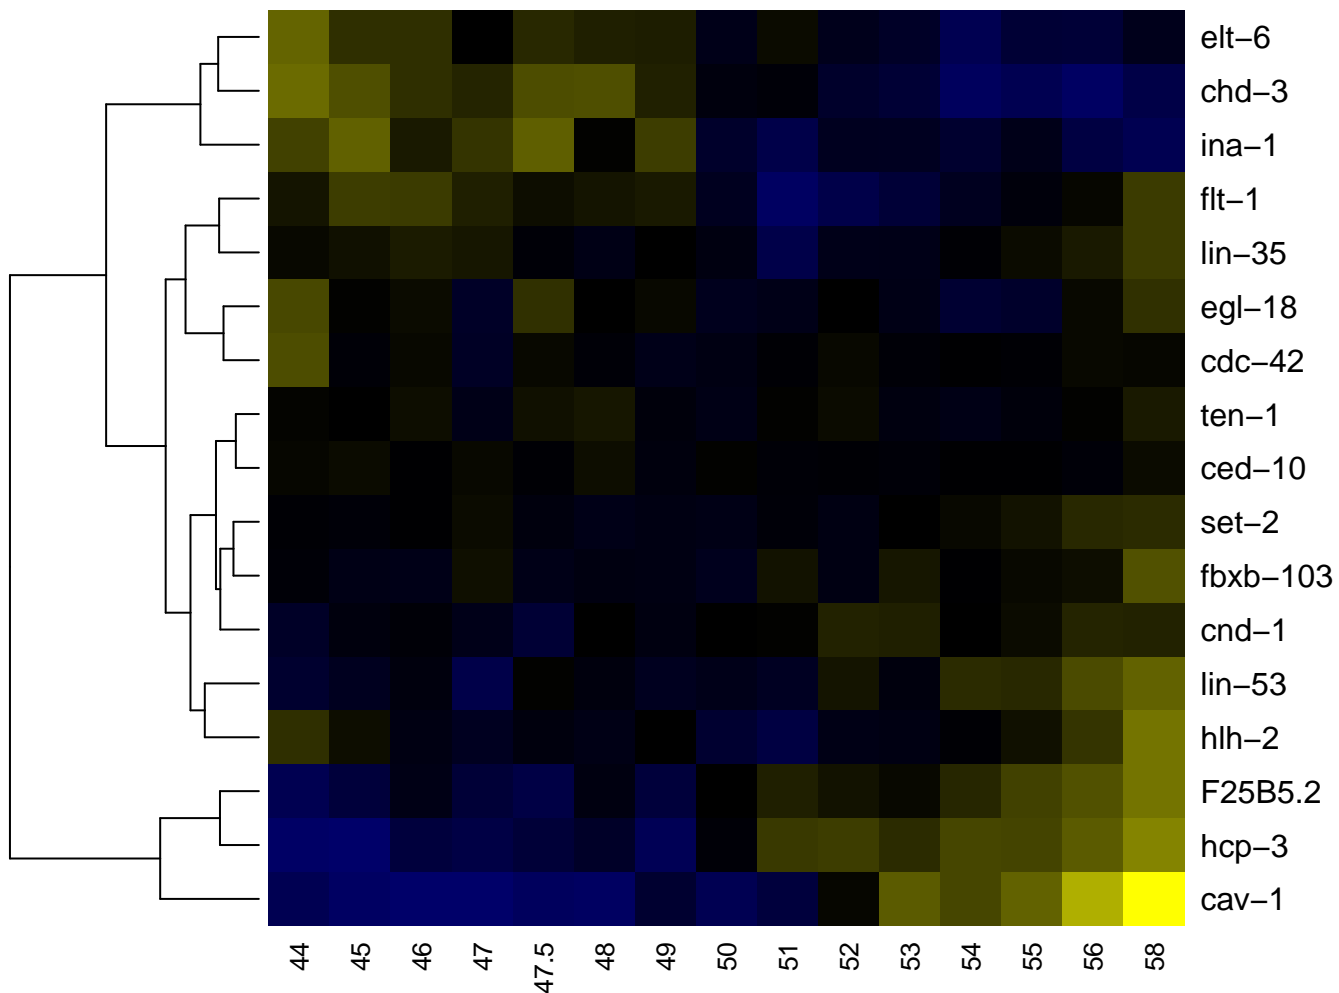

# ABplapaaa

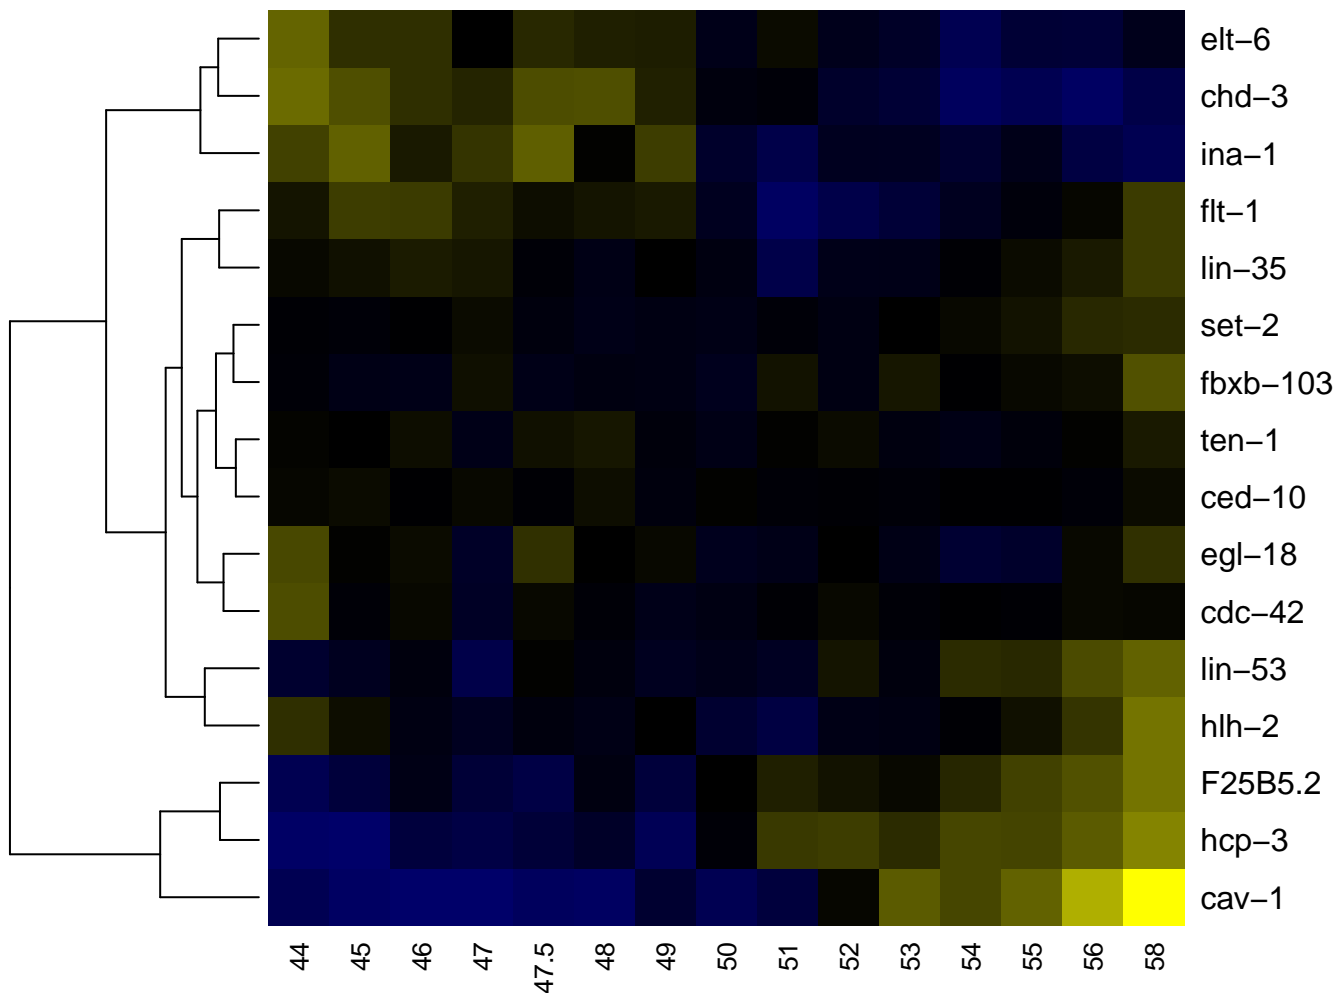



# ABplapaaaa



# ABplapaaaap





# ABplapaaap

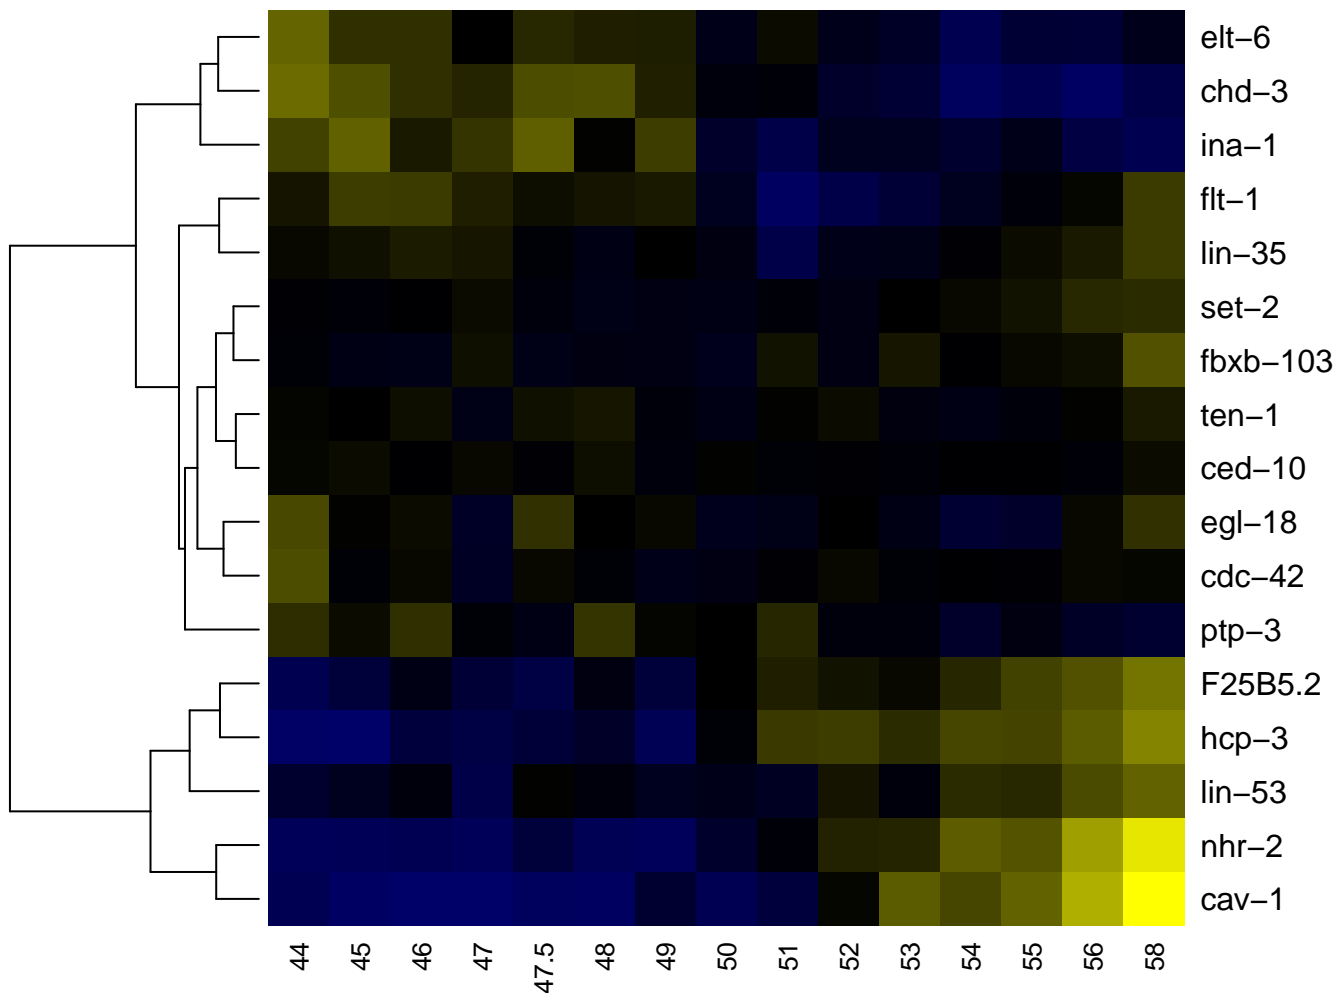

# ABplapaaapa



-2

-1

0

1

2

# ABplapaap

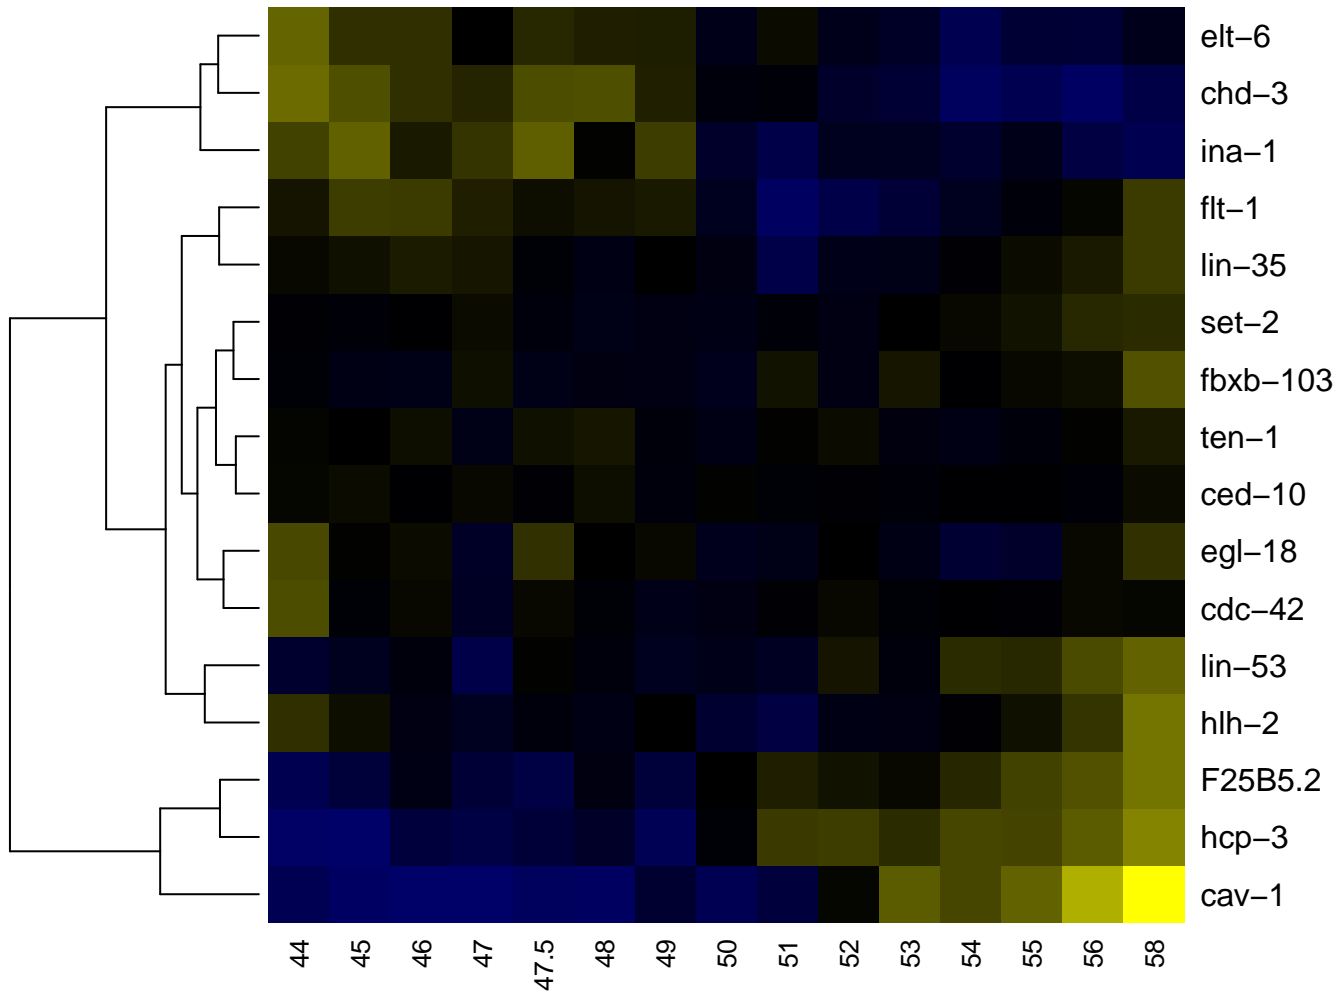

# ABplapaapp

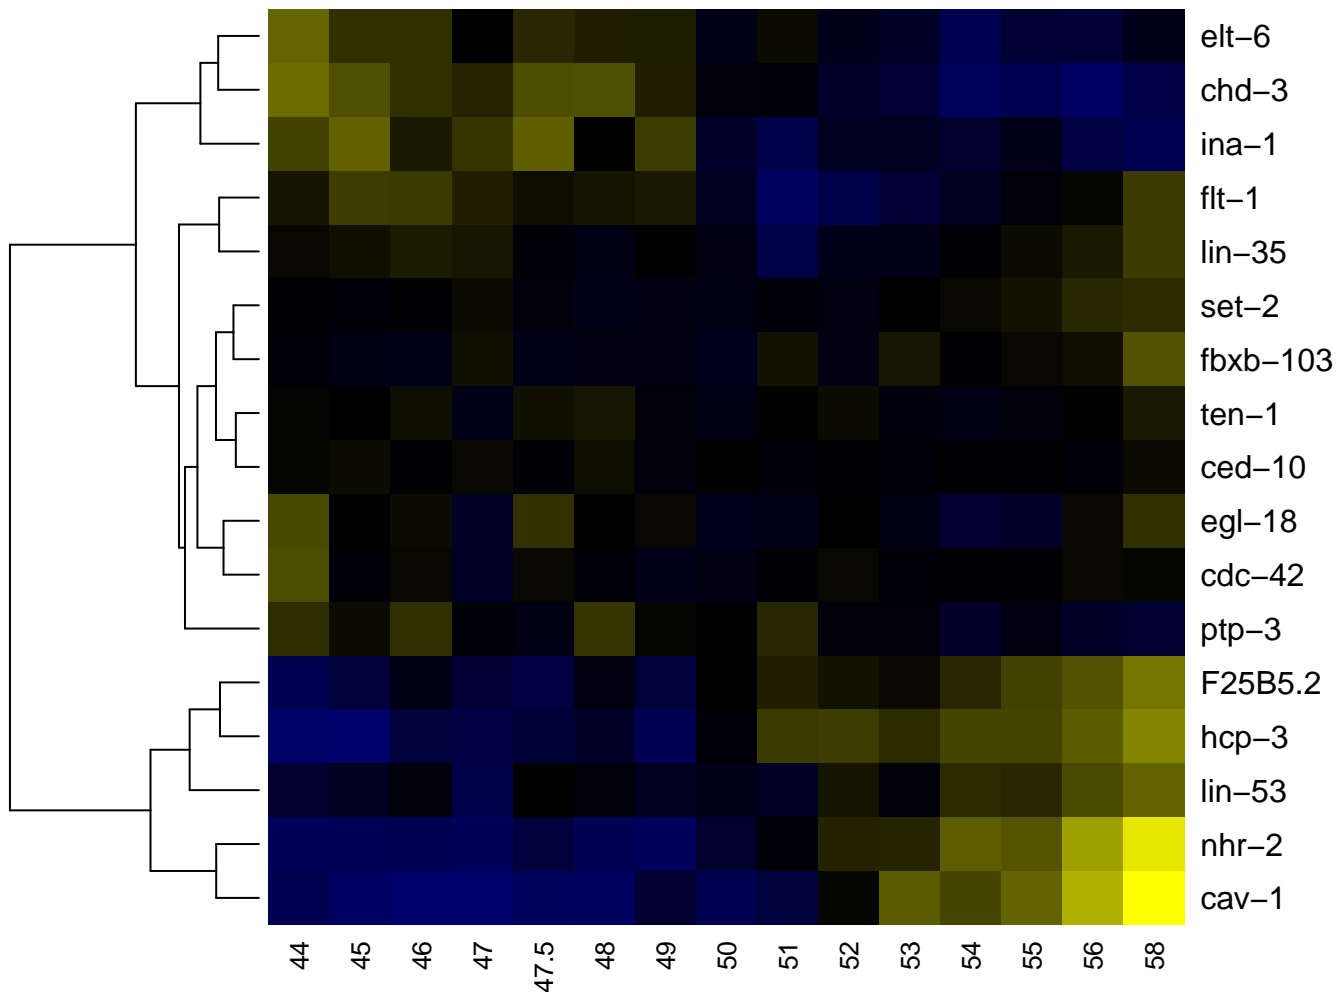

# ABplapap



# ABplapapa

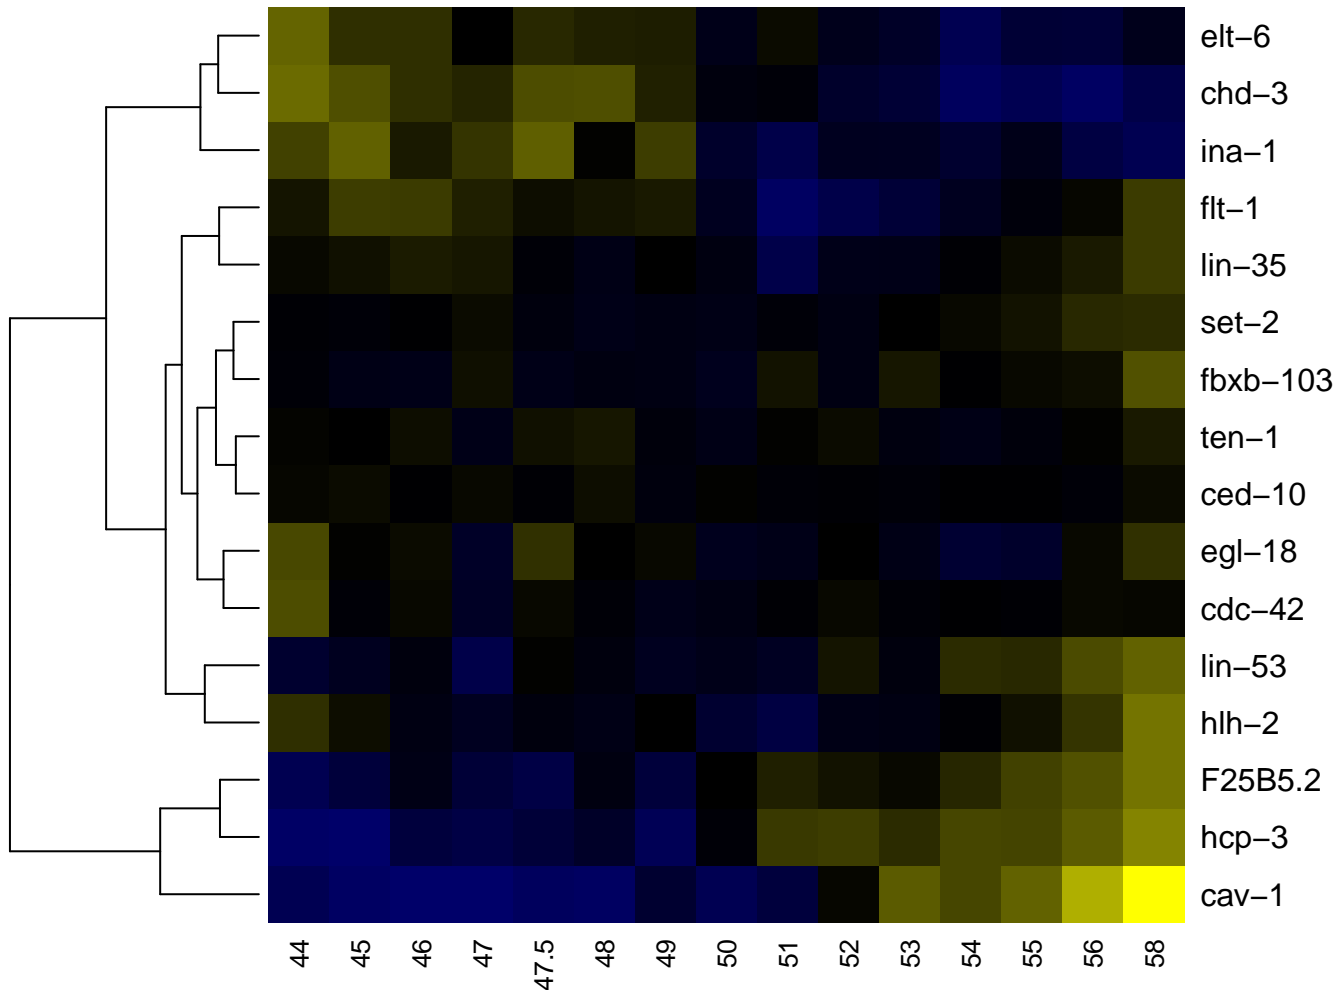

# ABplapapaa

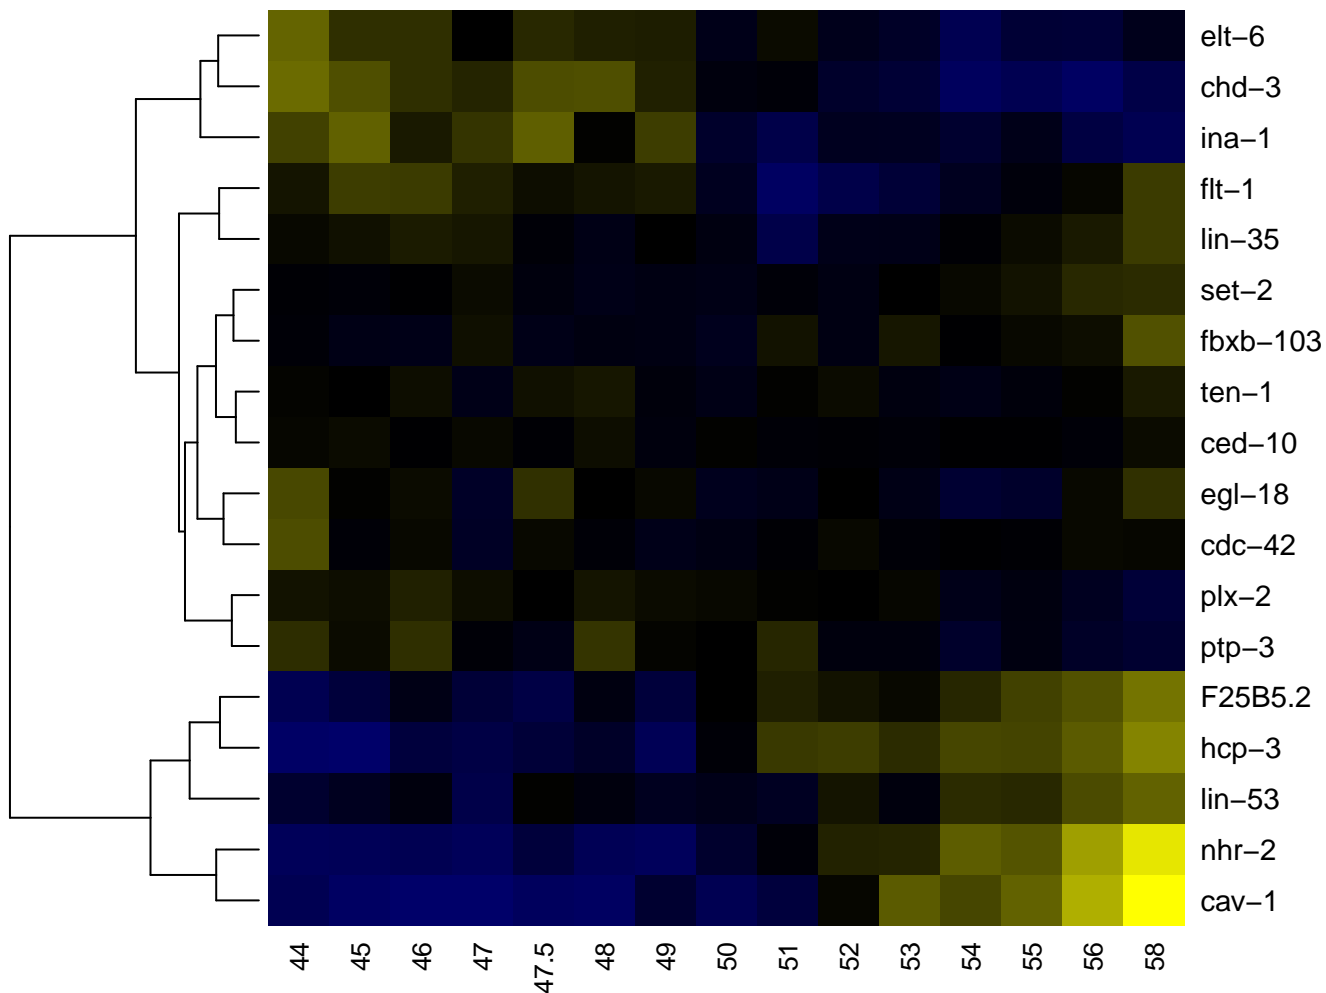

# ABplapapap

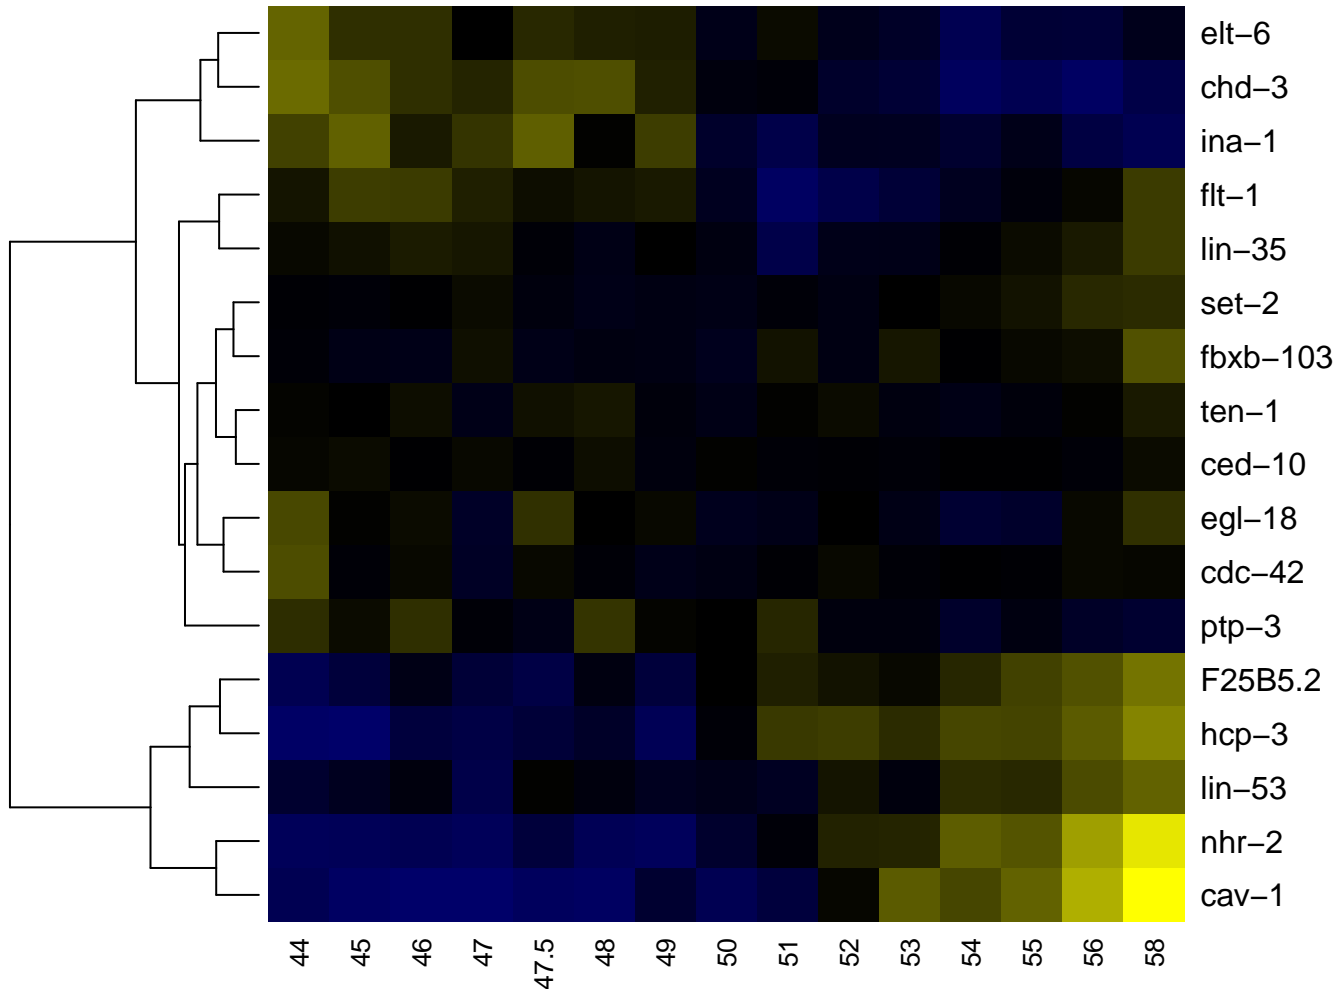



# ABplapapp



# ABplapapp



# ABplapappa



# ABplapapppp

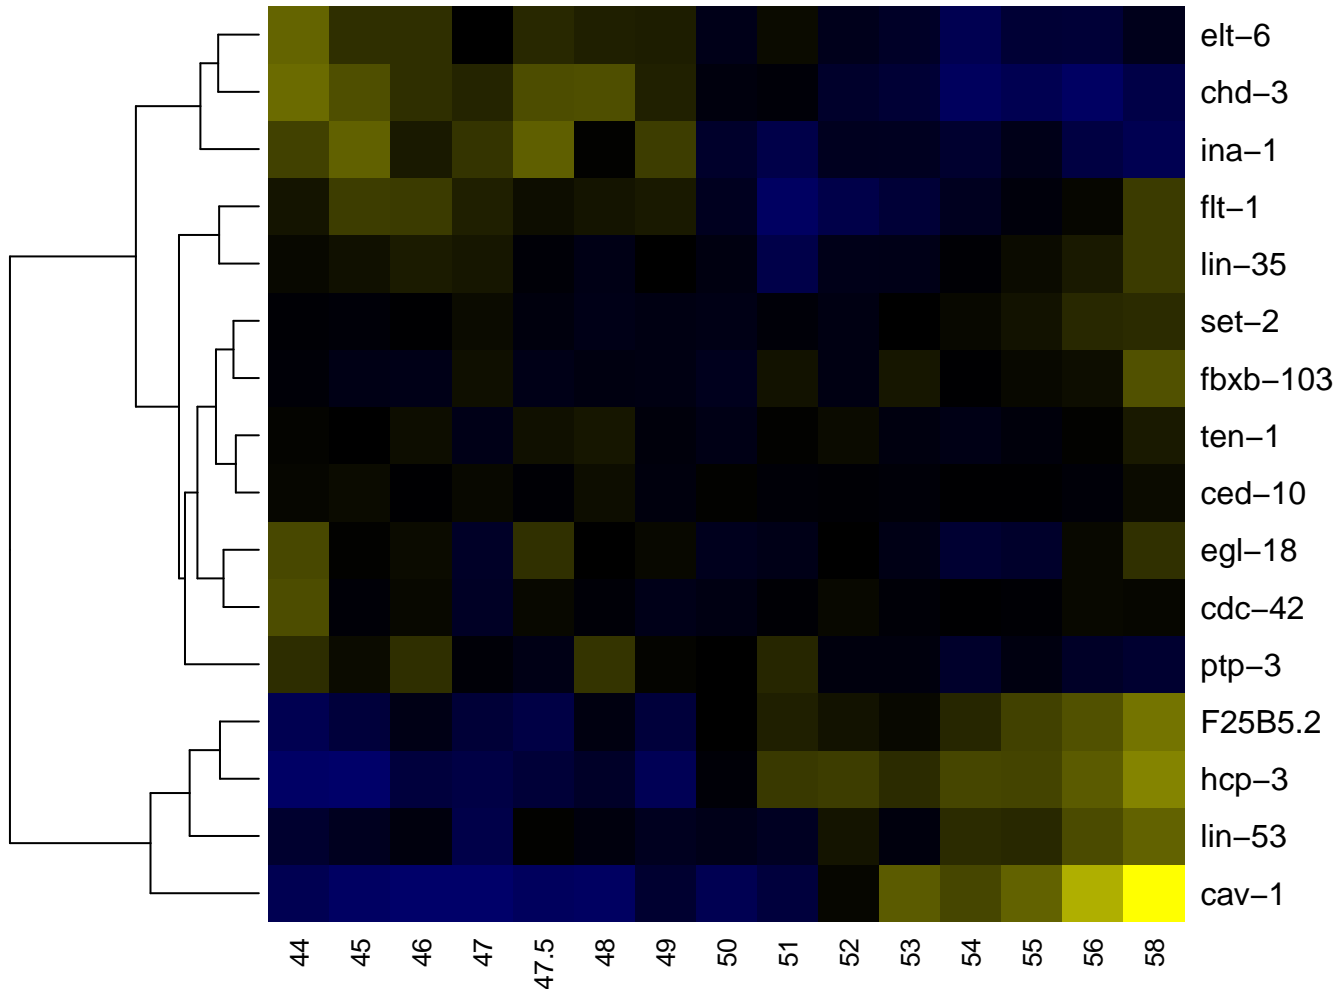

# ABplappppa



# ABplapppppp

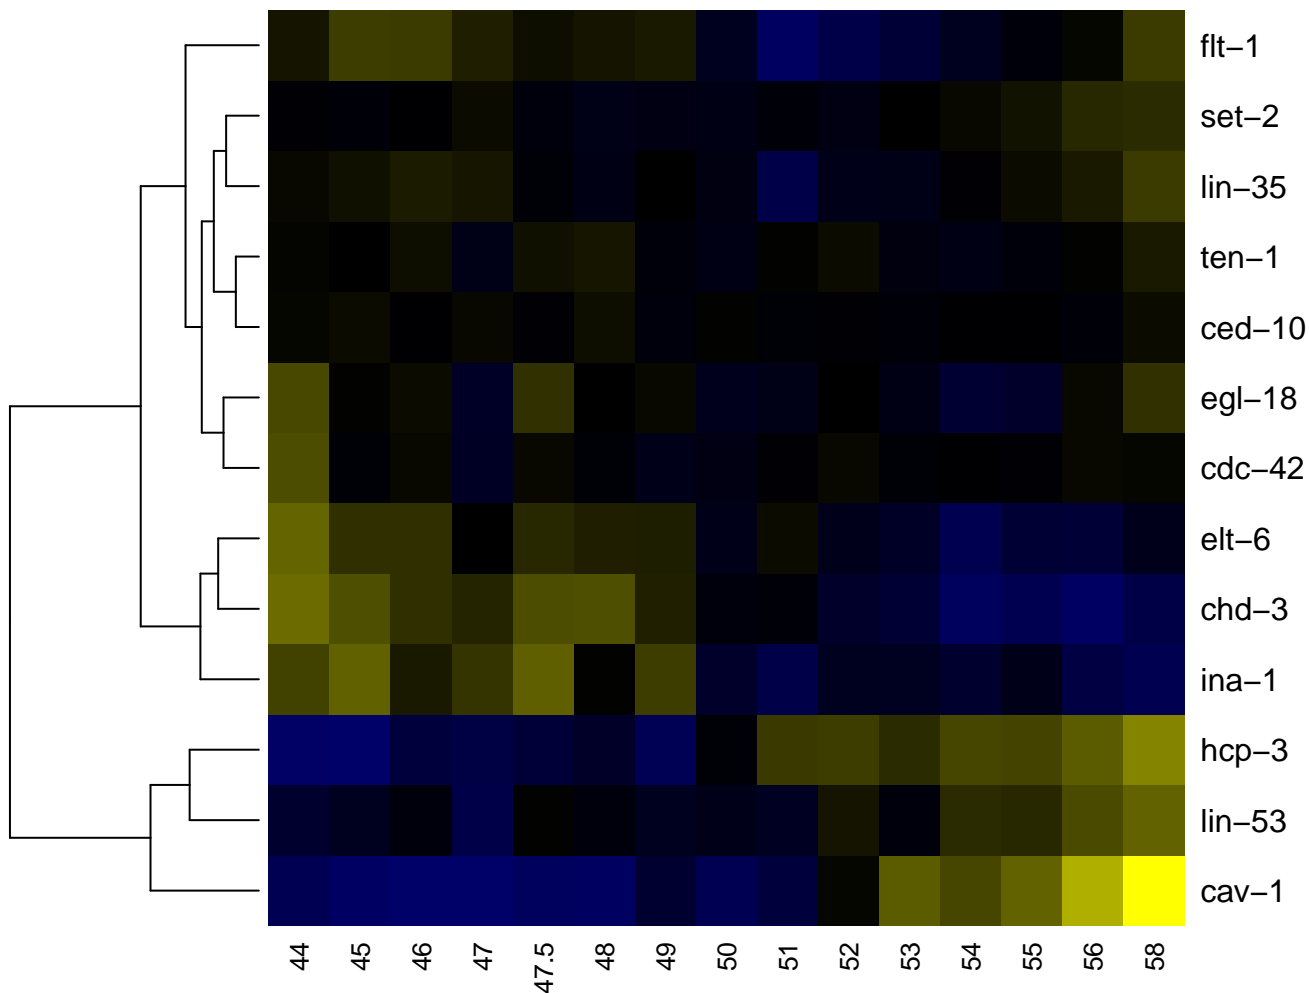



# ABplappa





# ABplappaa



# ABplappaaa



# ABplappaap

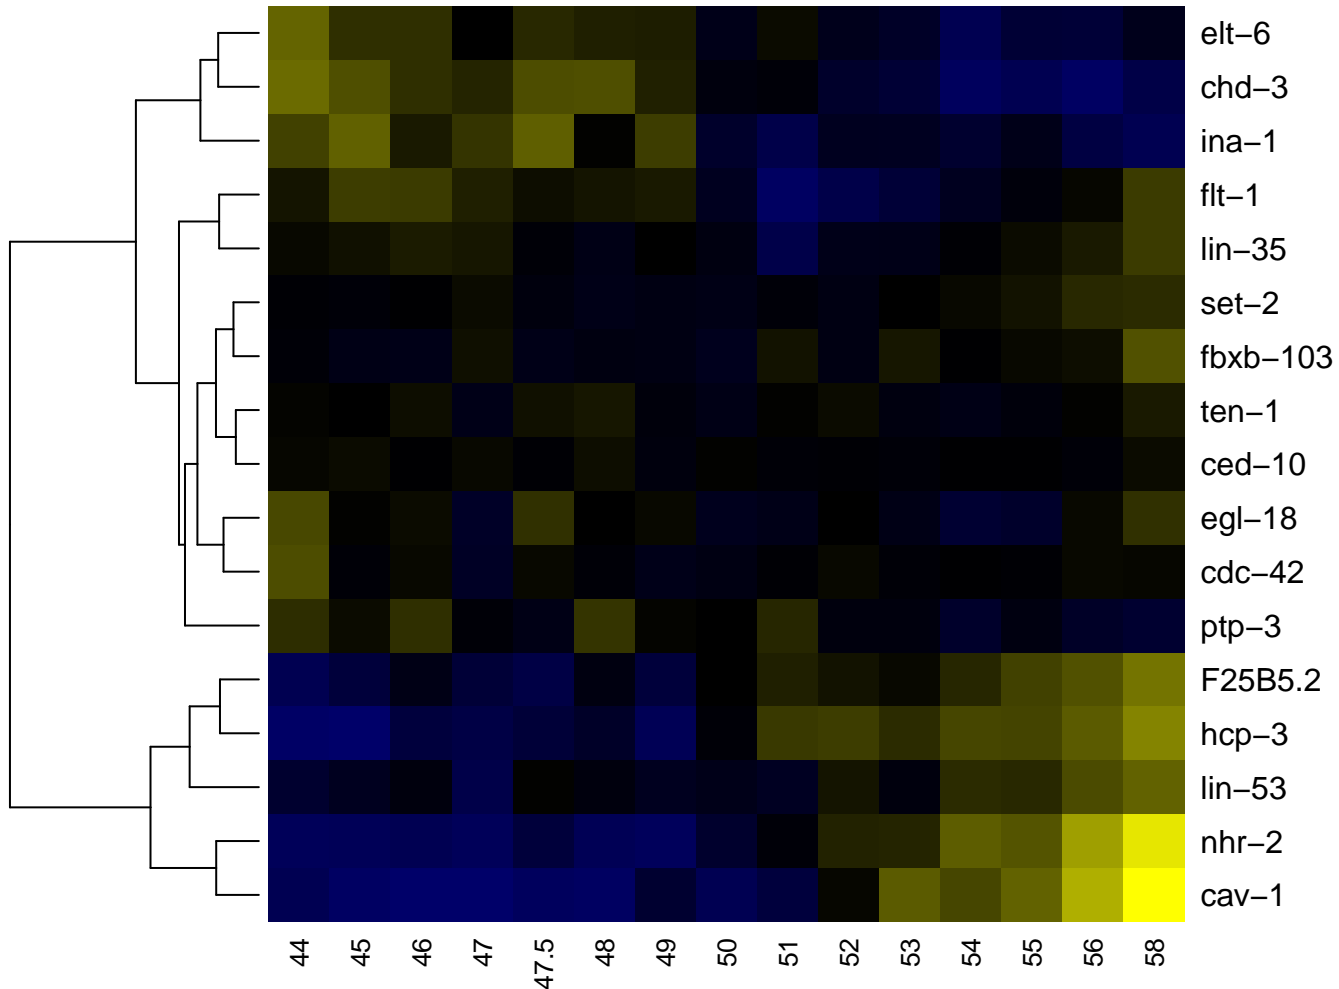

# ABplappap



# ABplappapp

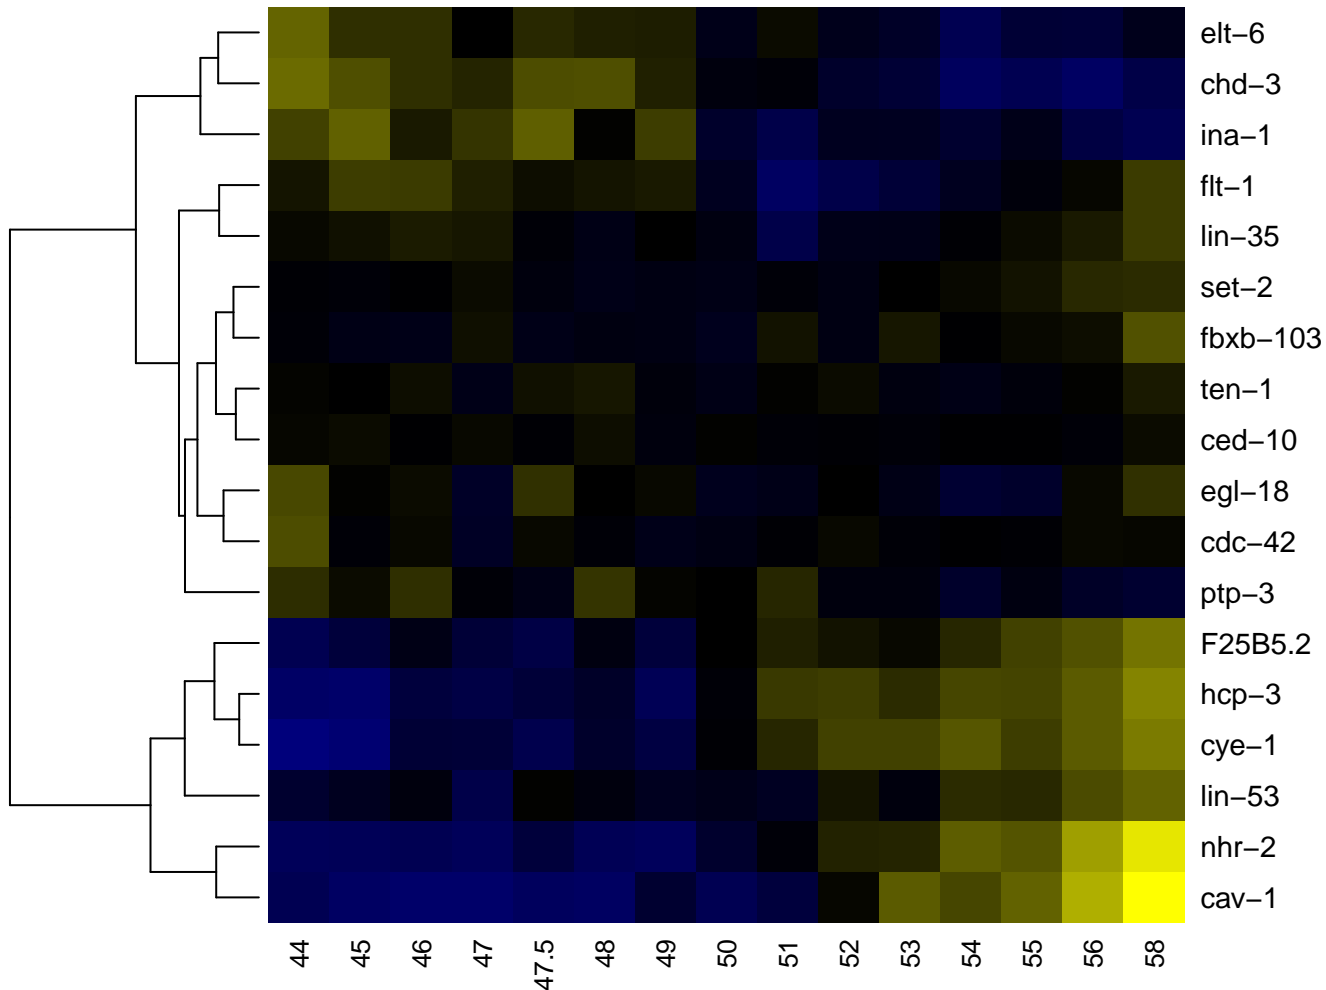

# ABplapp



# ABplapppa

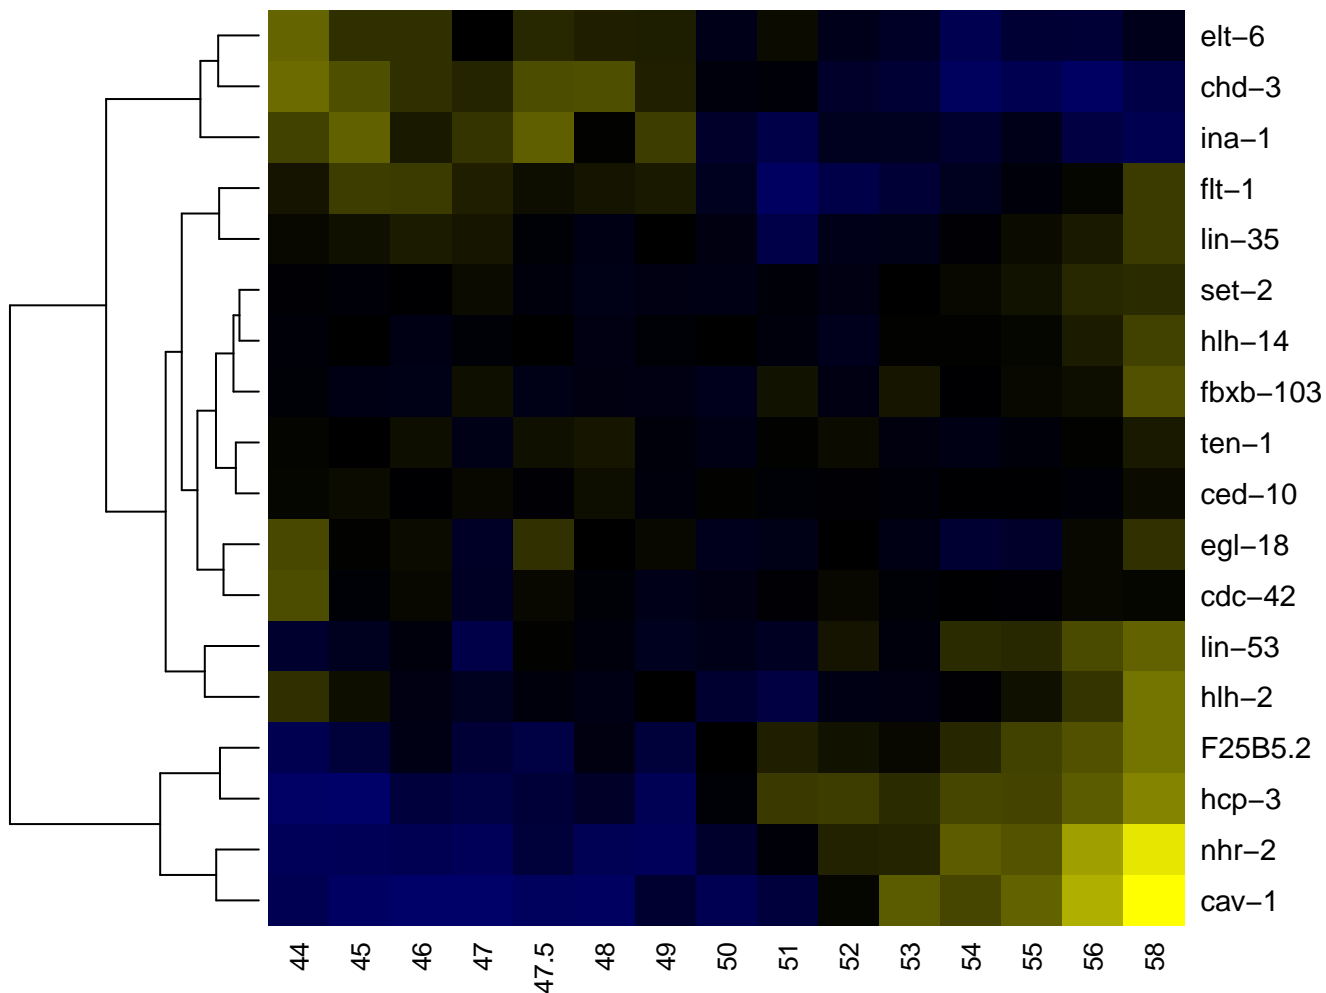

# ABplappaa

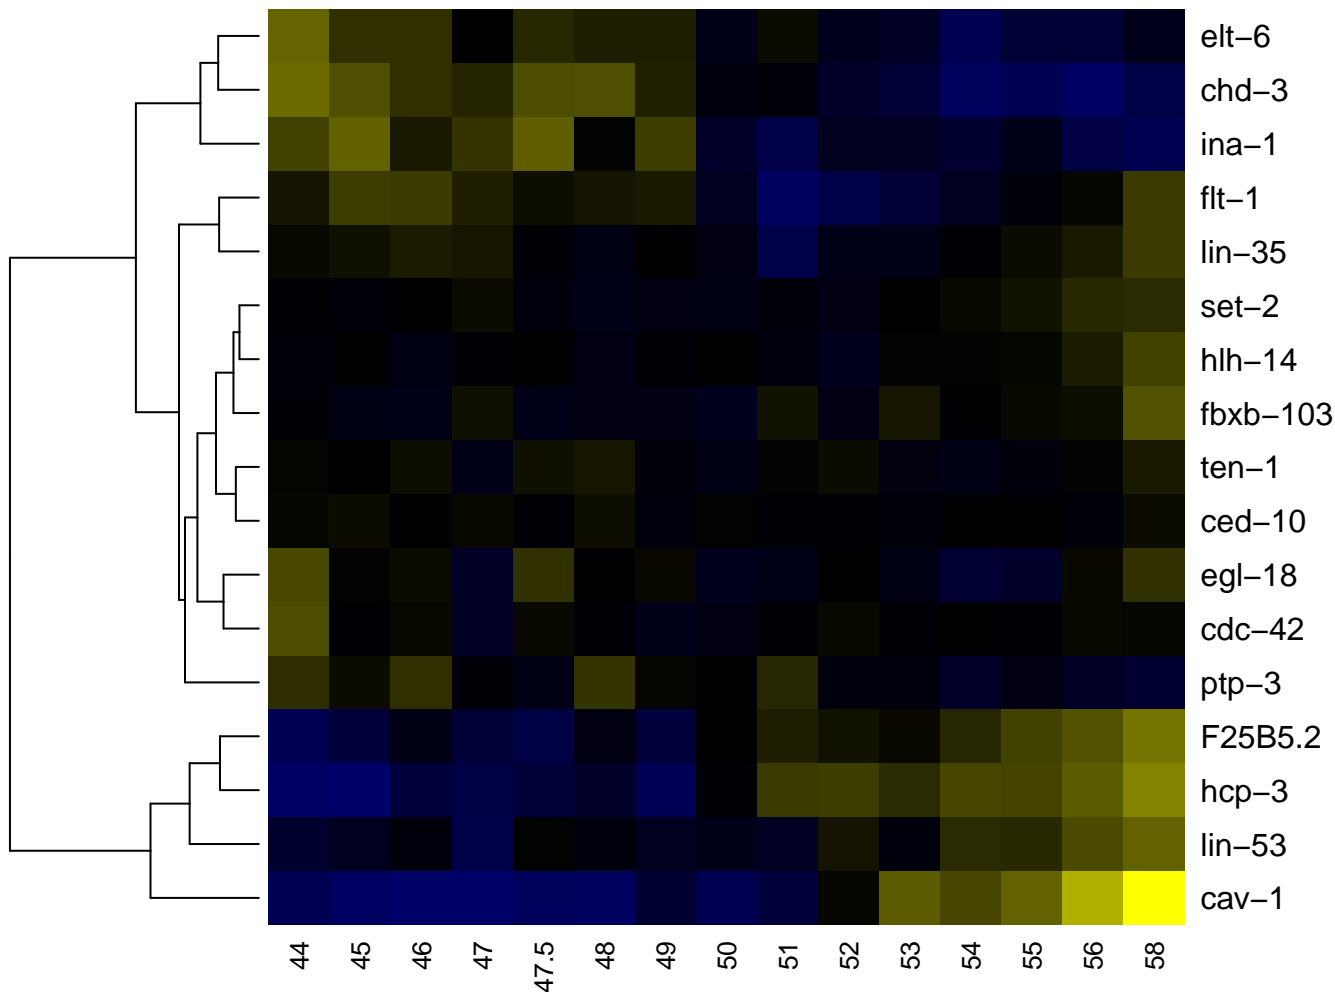



# ABplapppaap

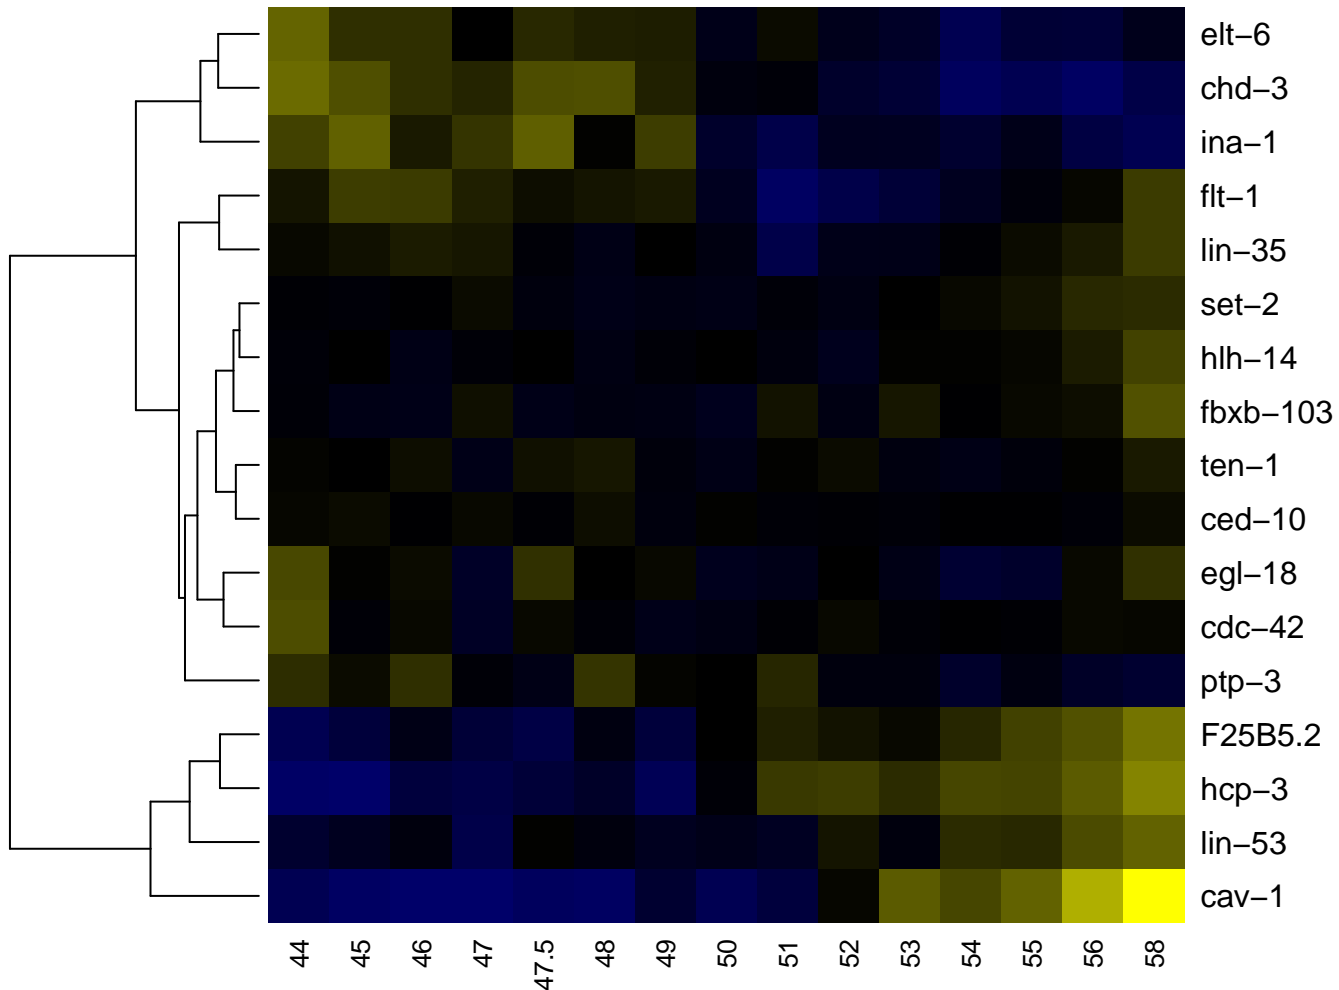

# ABplappap



# ABplappapa



# ABplappapp

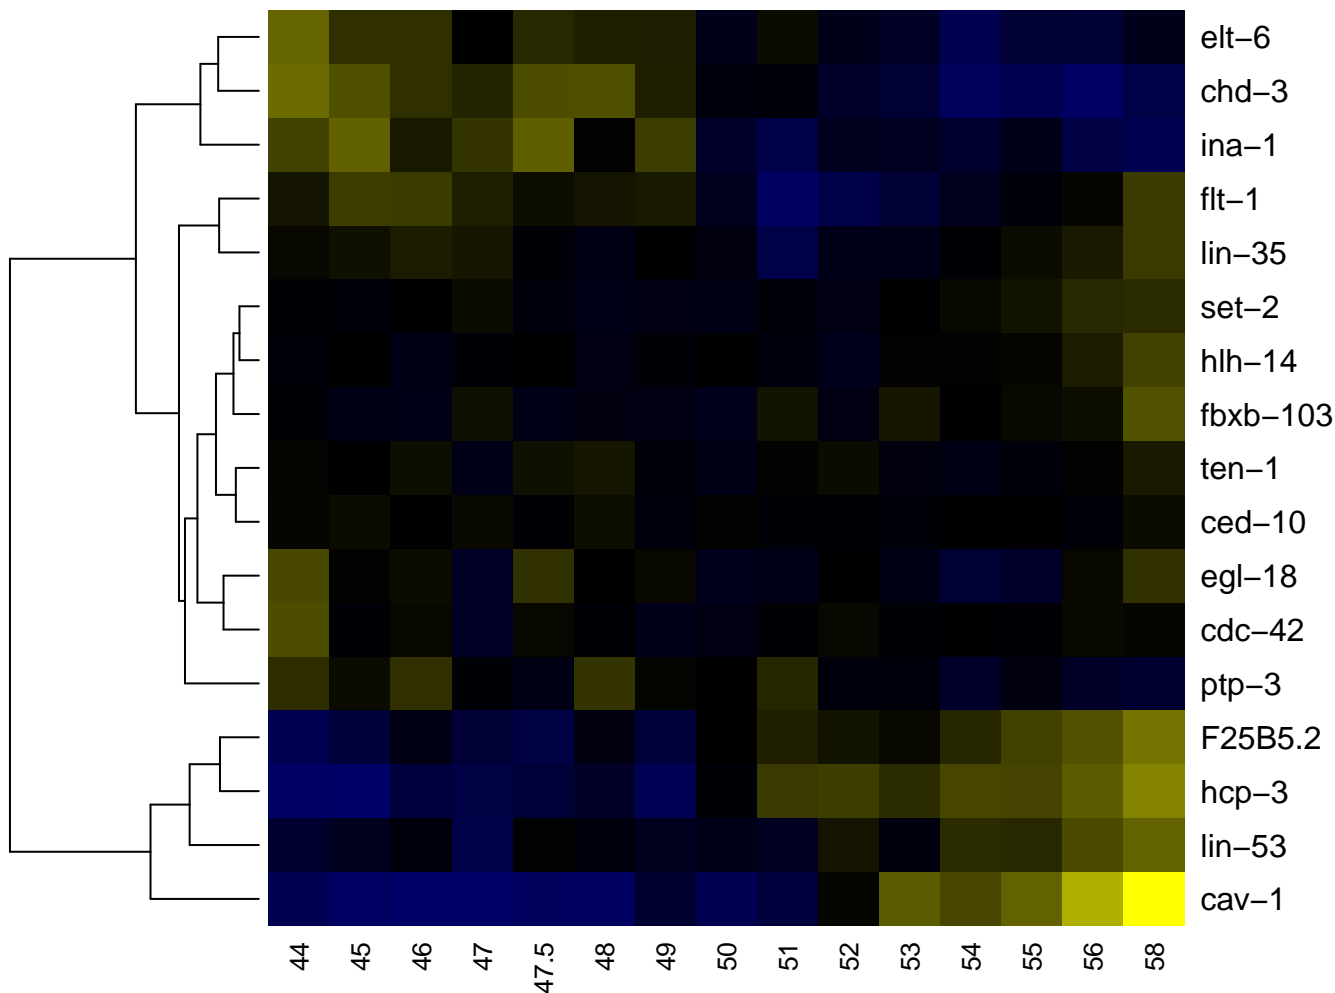

# ABplapppp

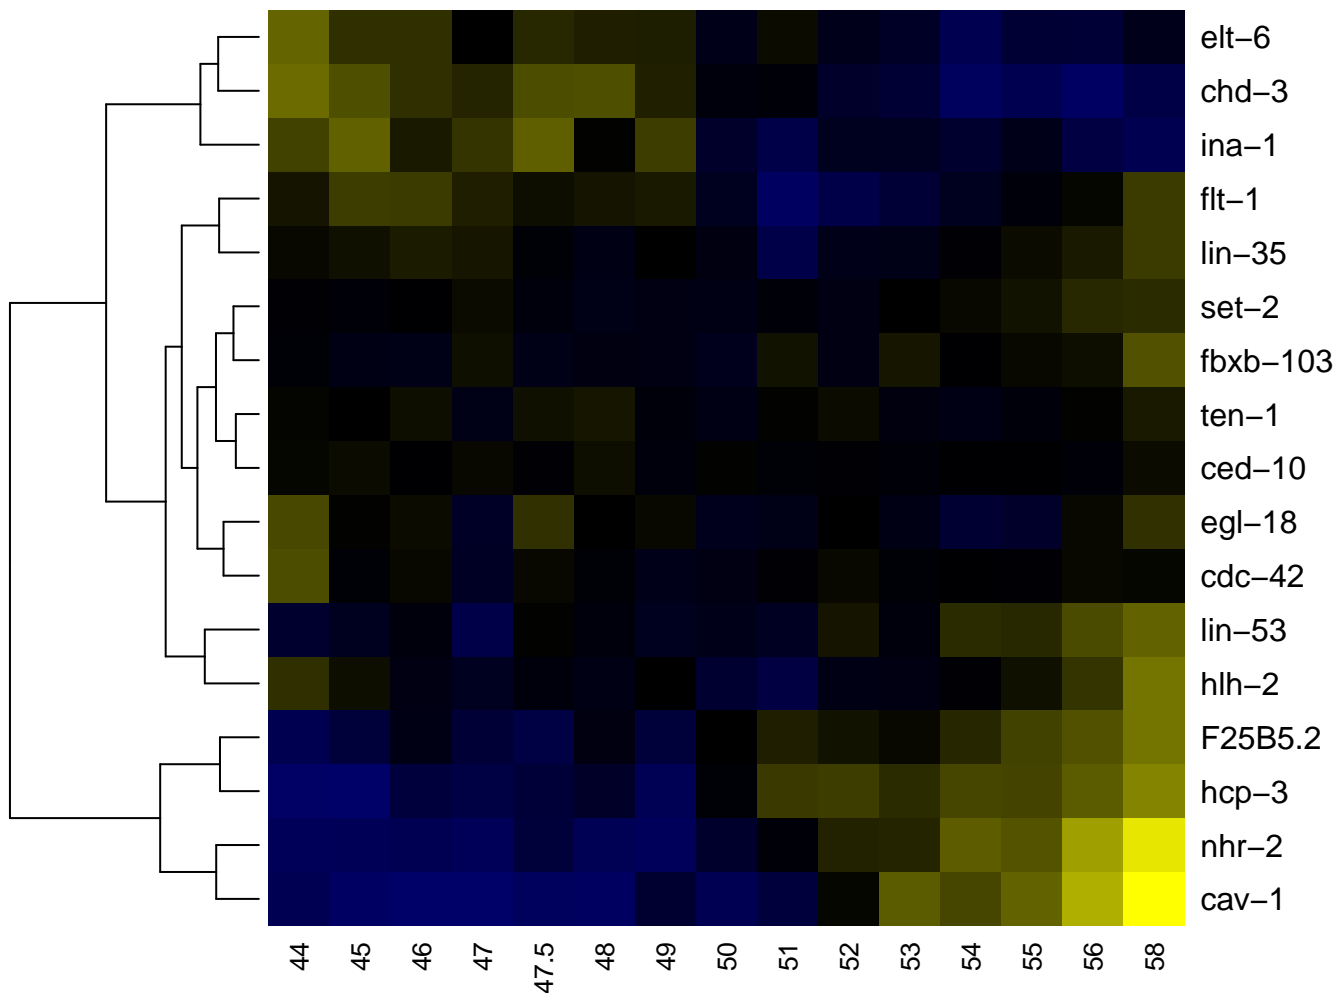

# ABplappppa



# ABplp

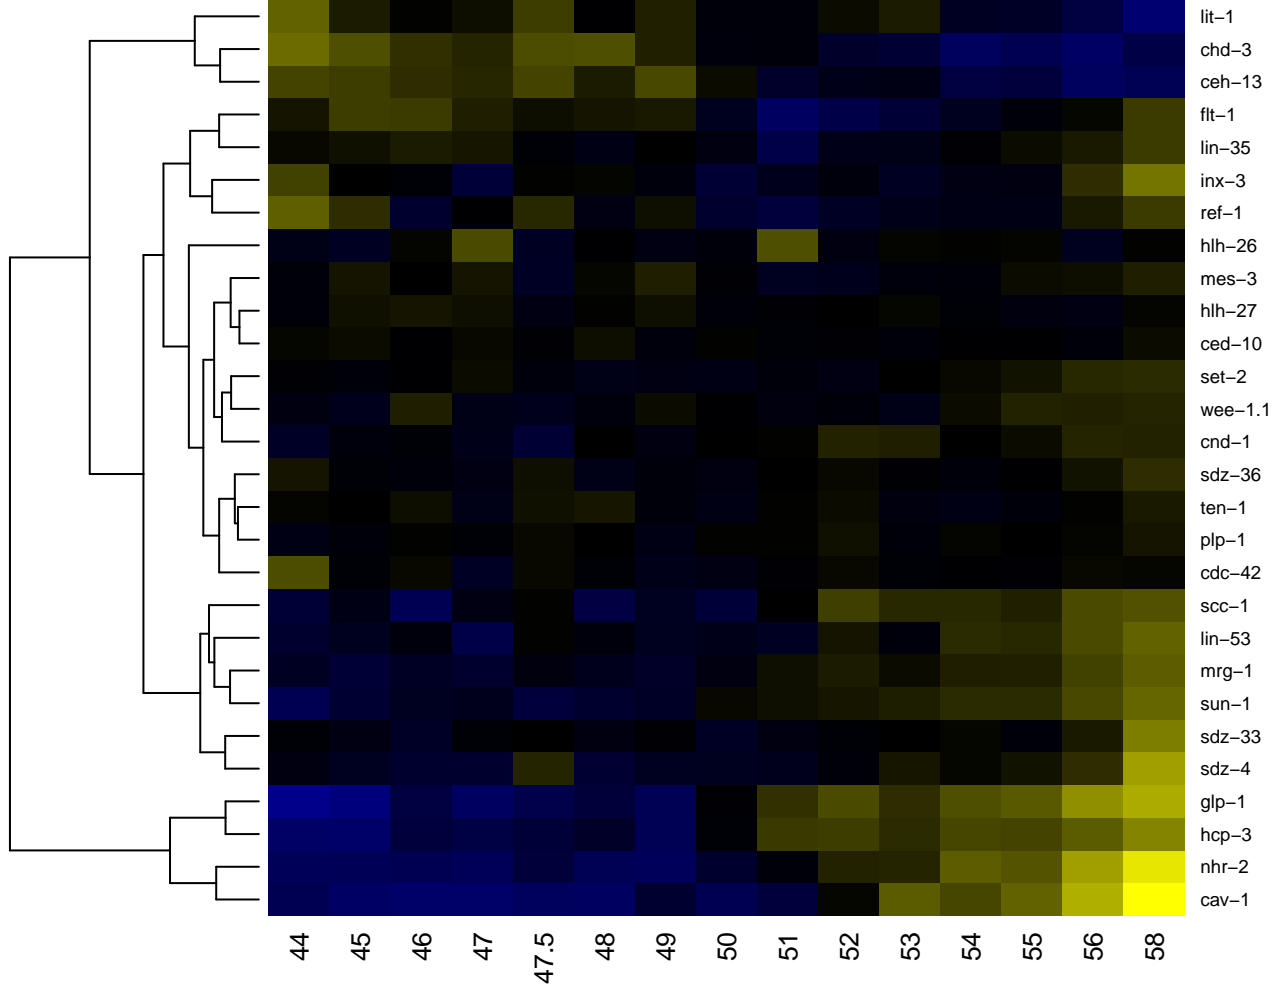

-2

-1

0

1

2

# ABplpa

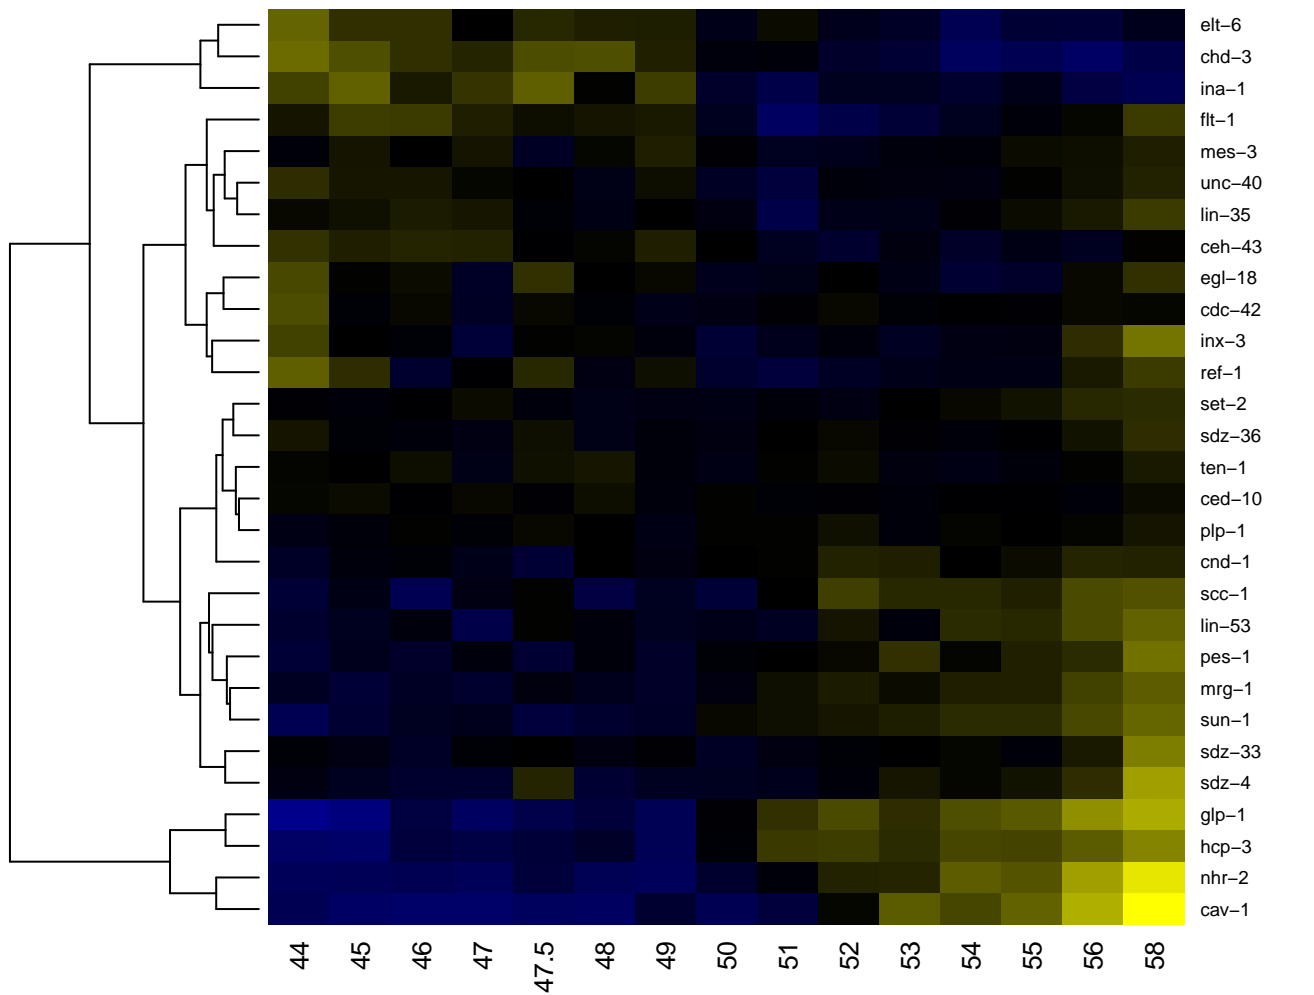

-2

-1

0

1

2



# ABplpaa

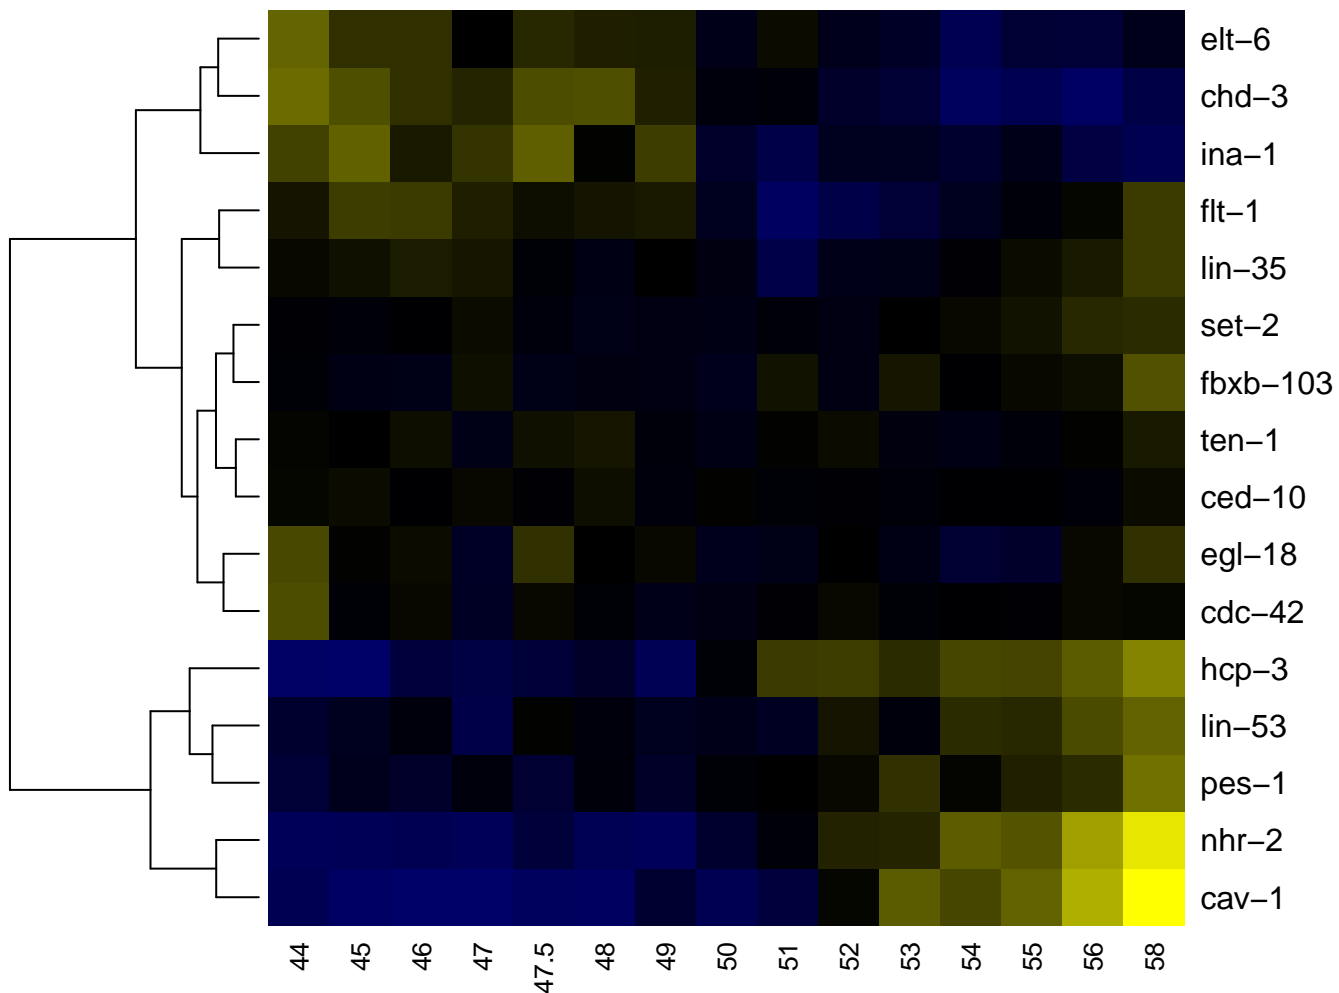

# ABlpaaa

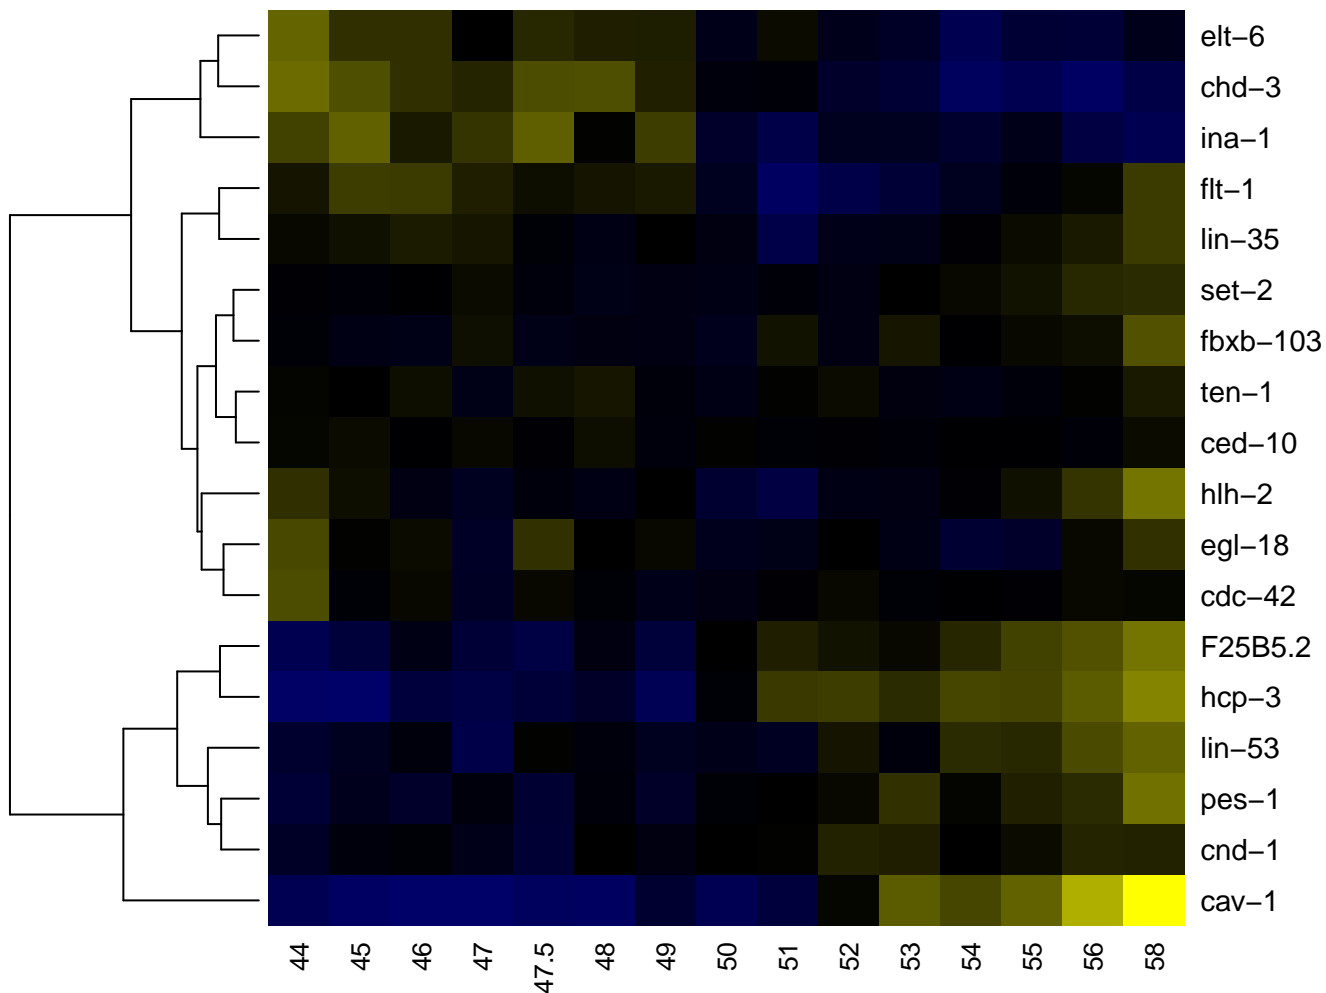

# ABplpaaa



# ABplpaaaaa

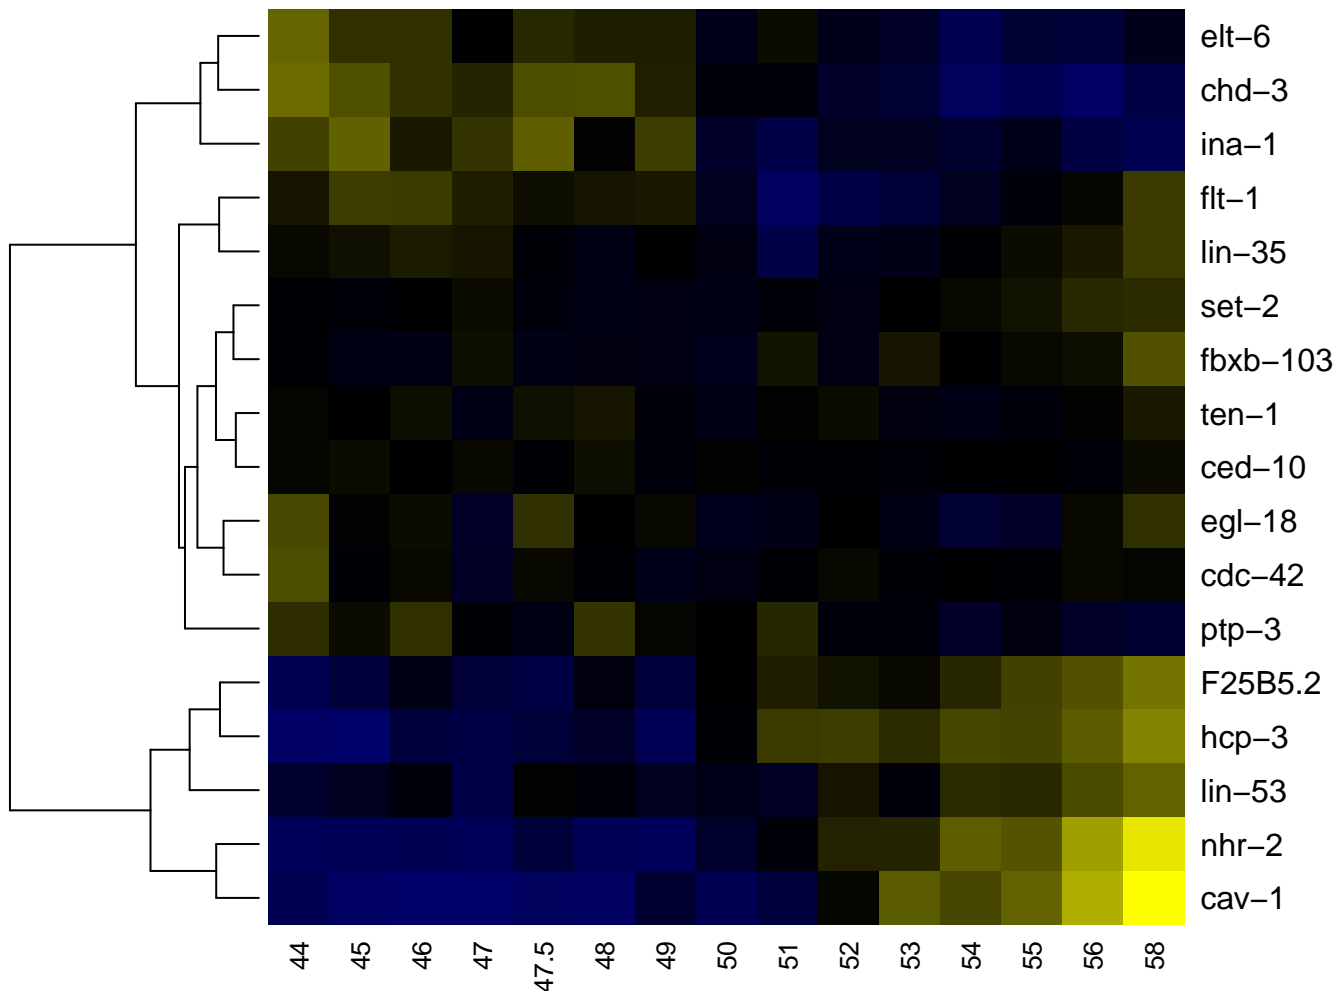

# ABplpaaaap

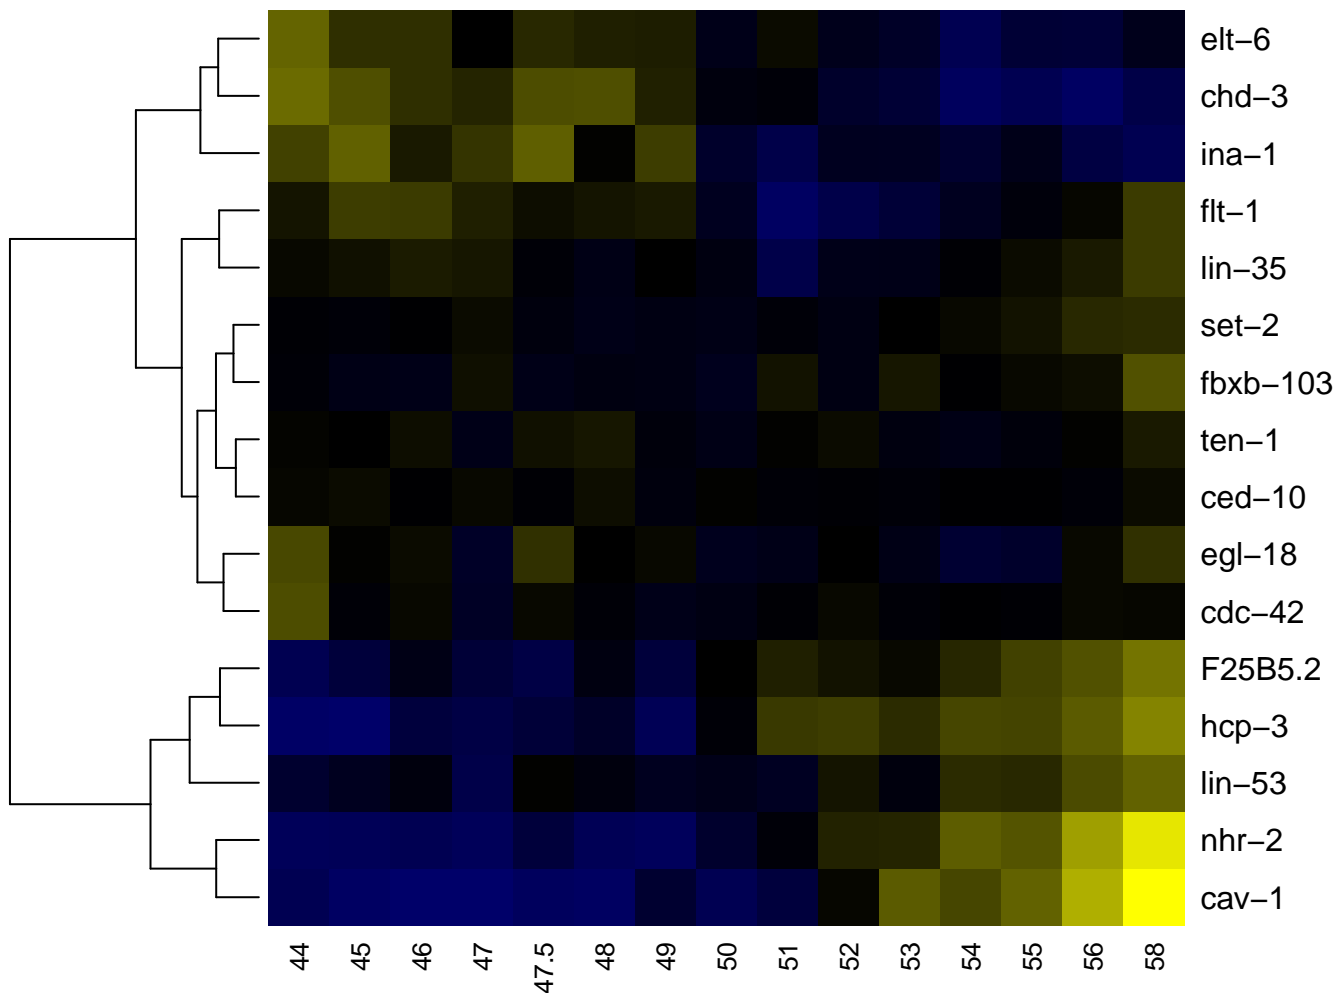

# ABplpaaap

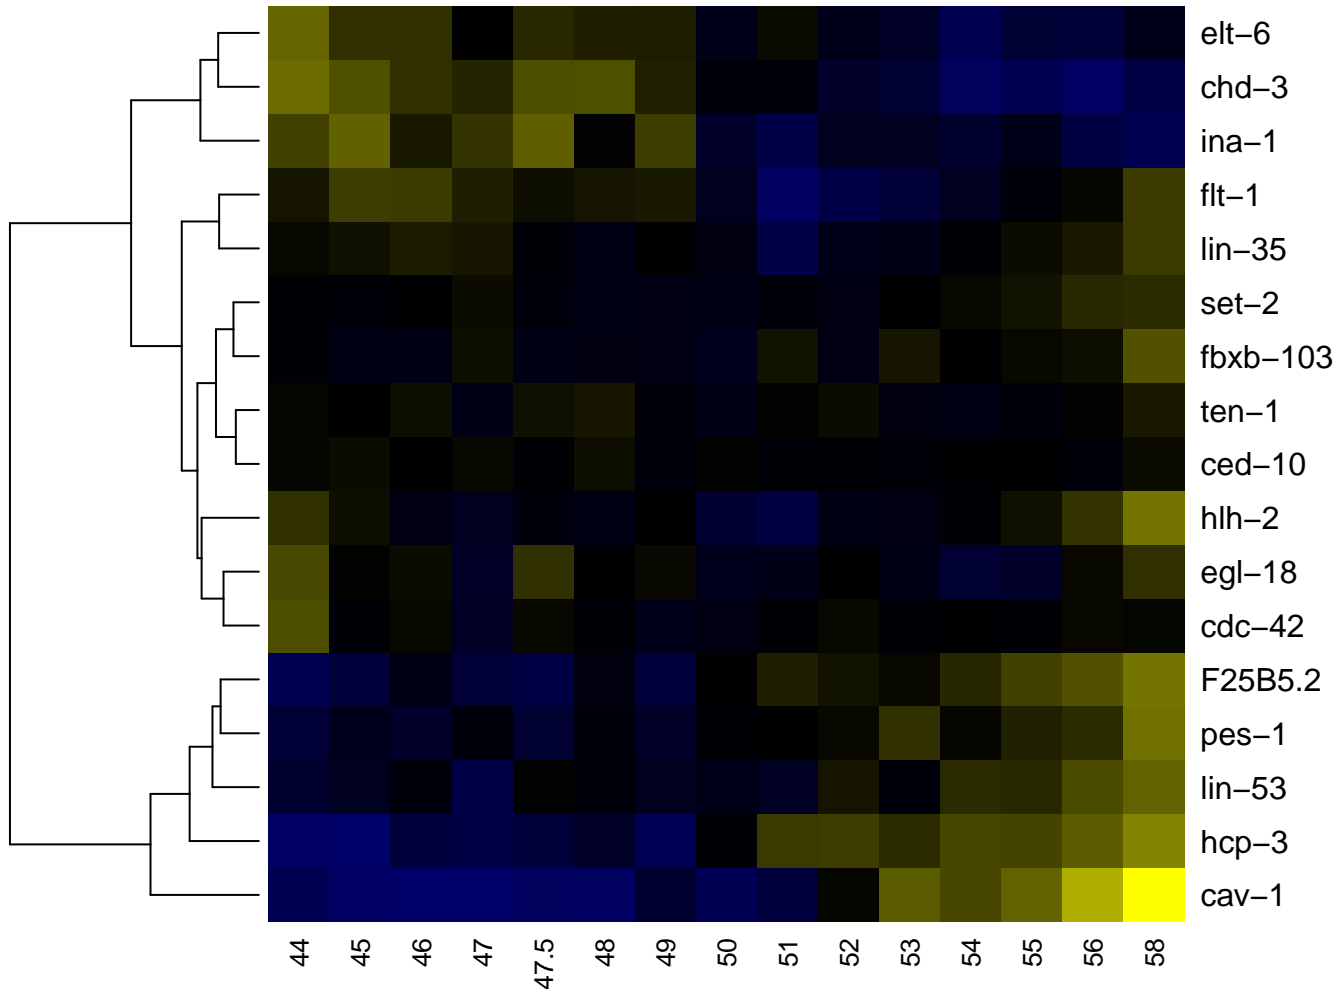

# ABplpaaapa

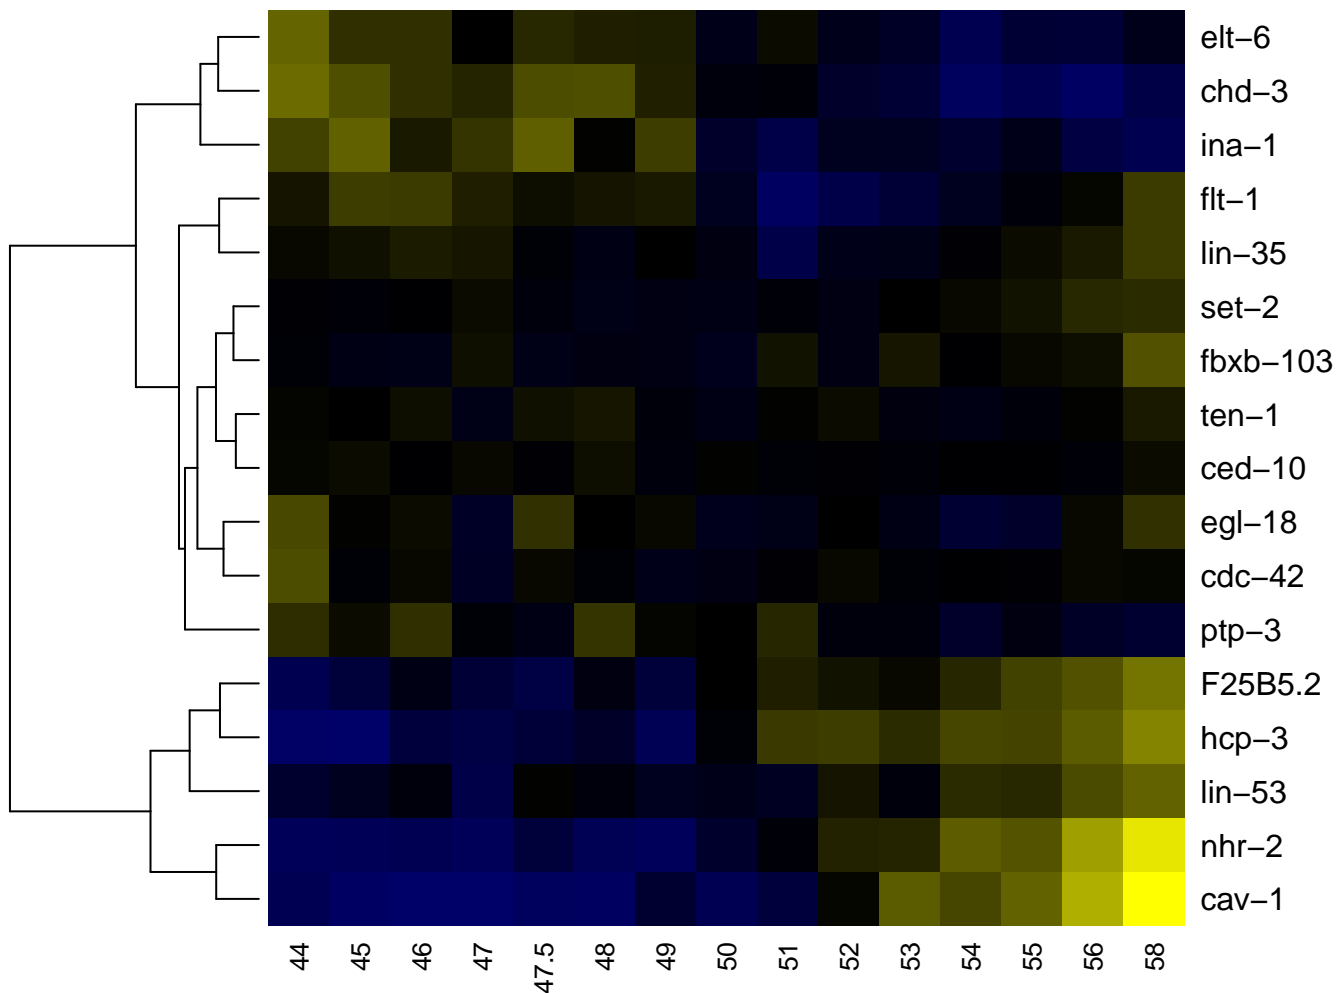

# ABplpaaapp

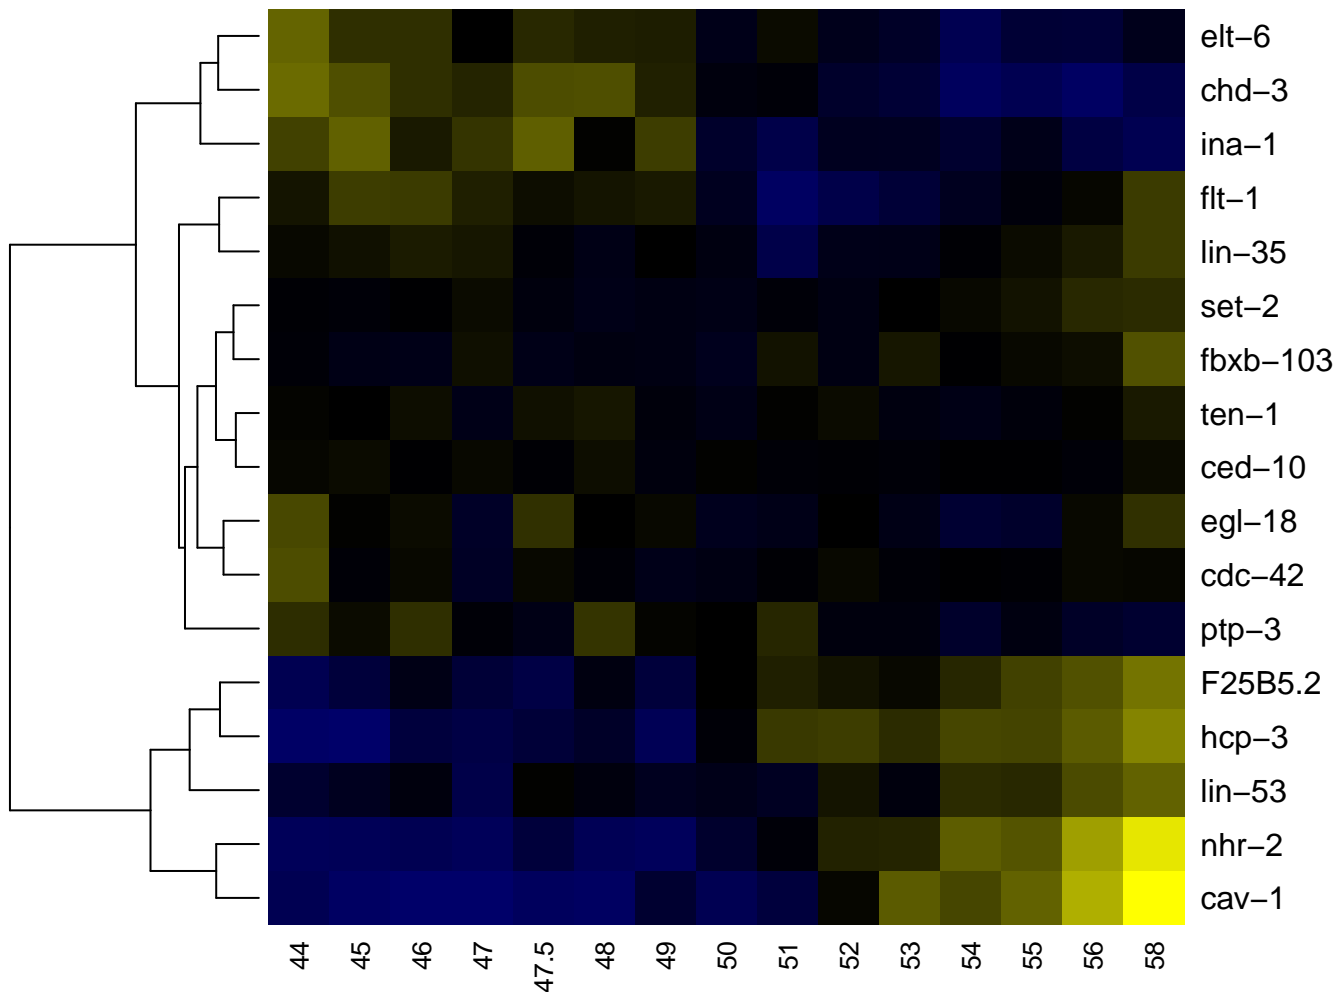



# ABplpaaappa



# ABplpaaappap



# ABpIpaap



# ABplpaapa



# ABplpaapaa



# ABplpaapap



# ABplpaapp



# ABplpaappa

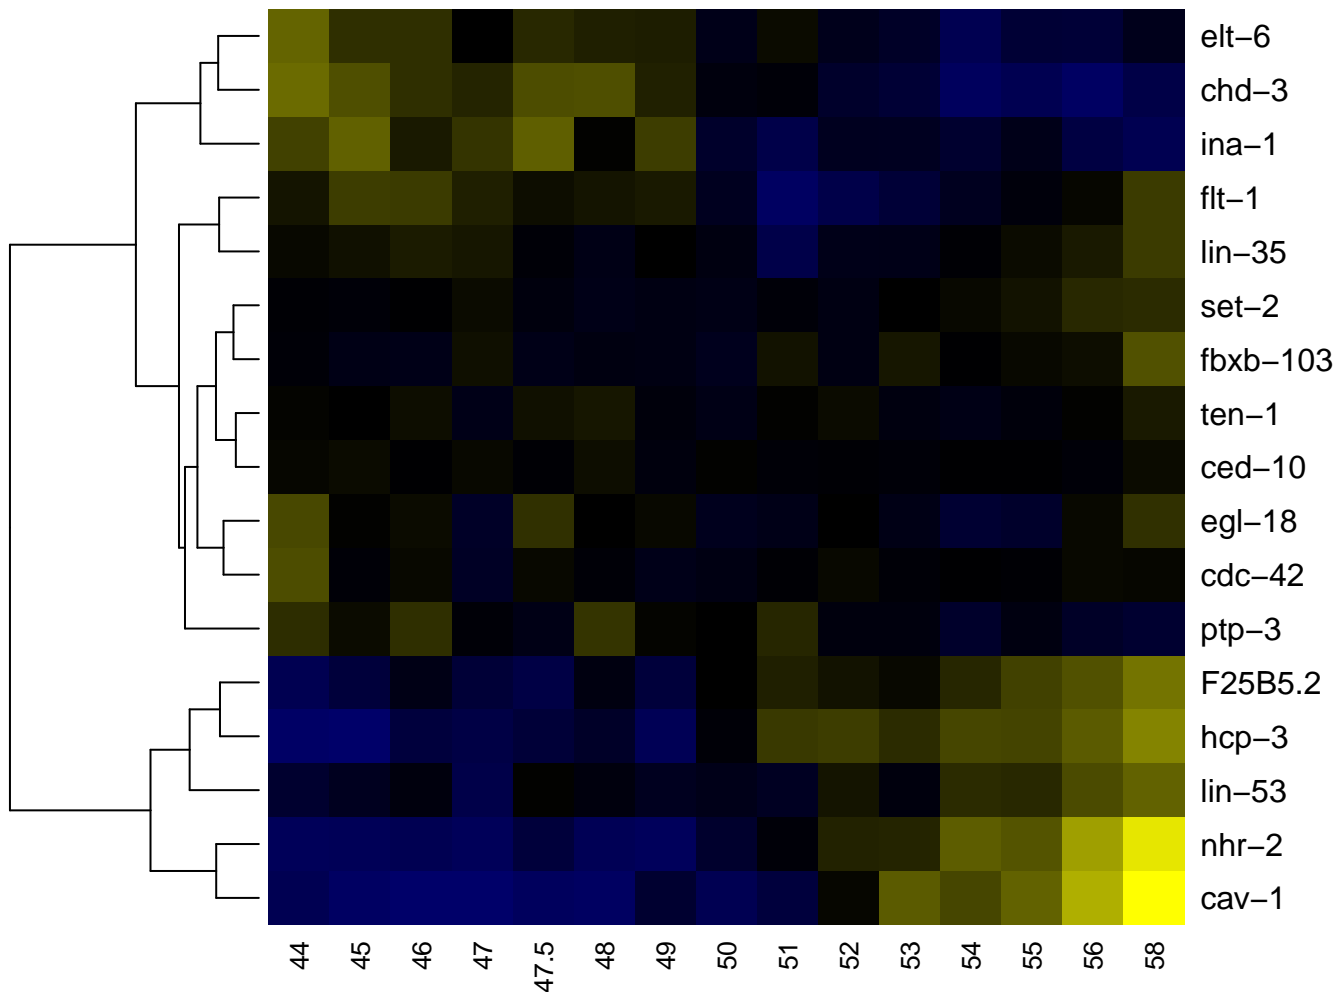



# ABpIpaapp

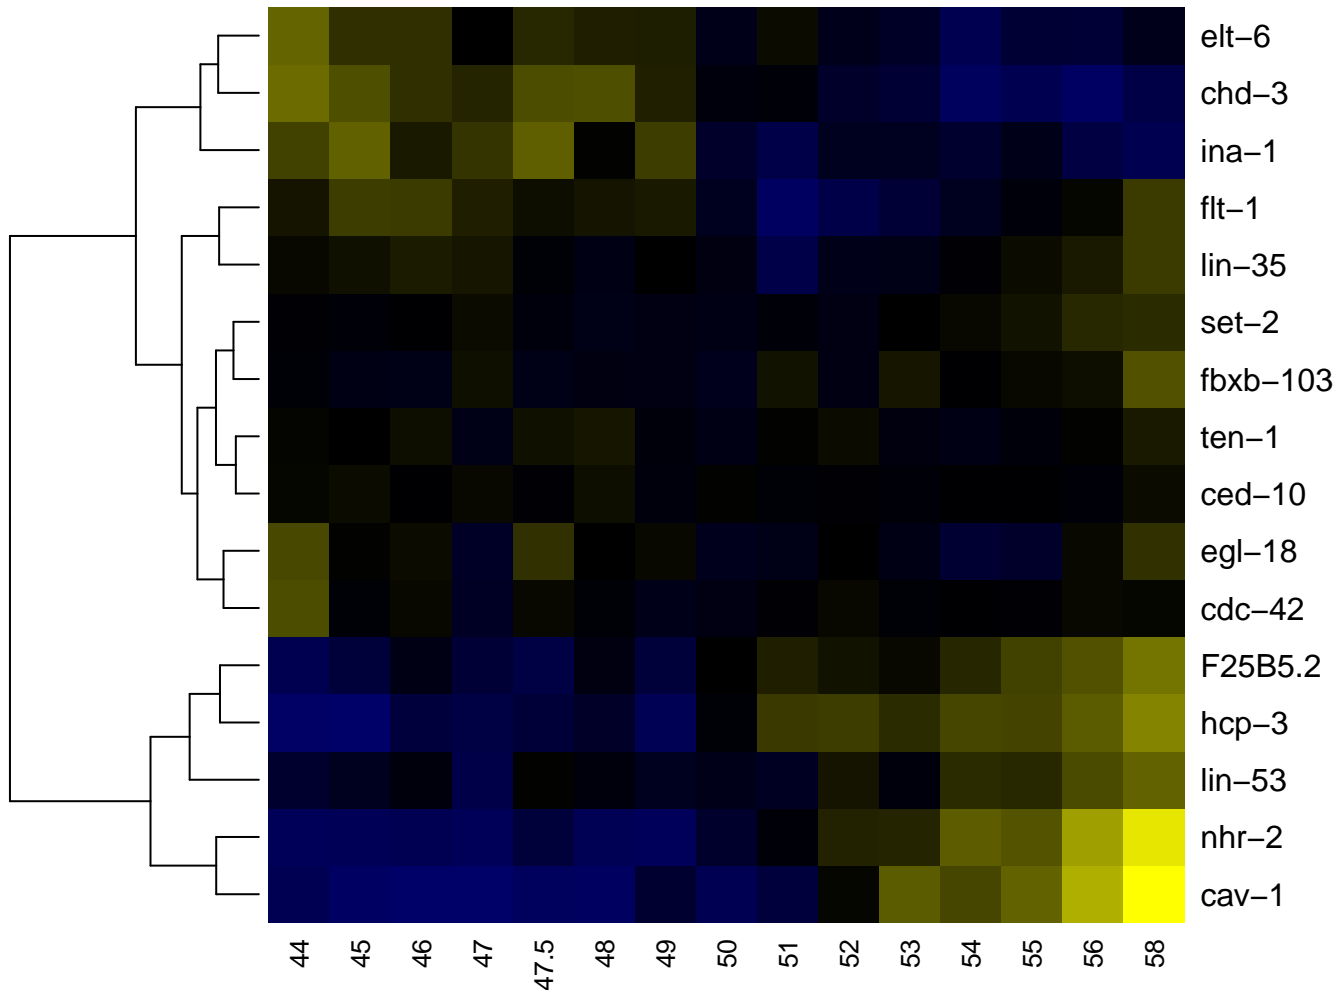

# ABplpaapppp



# ABplpaappppp



# ABplpap



# ABlpapa



# ABlpapaa



# ABPlpapaaa

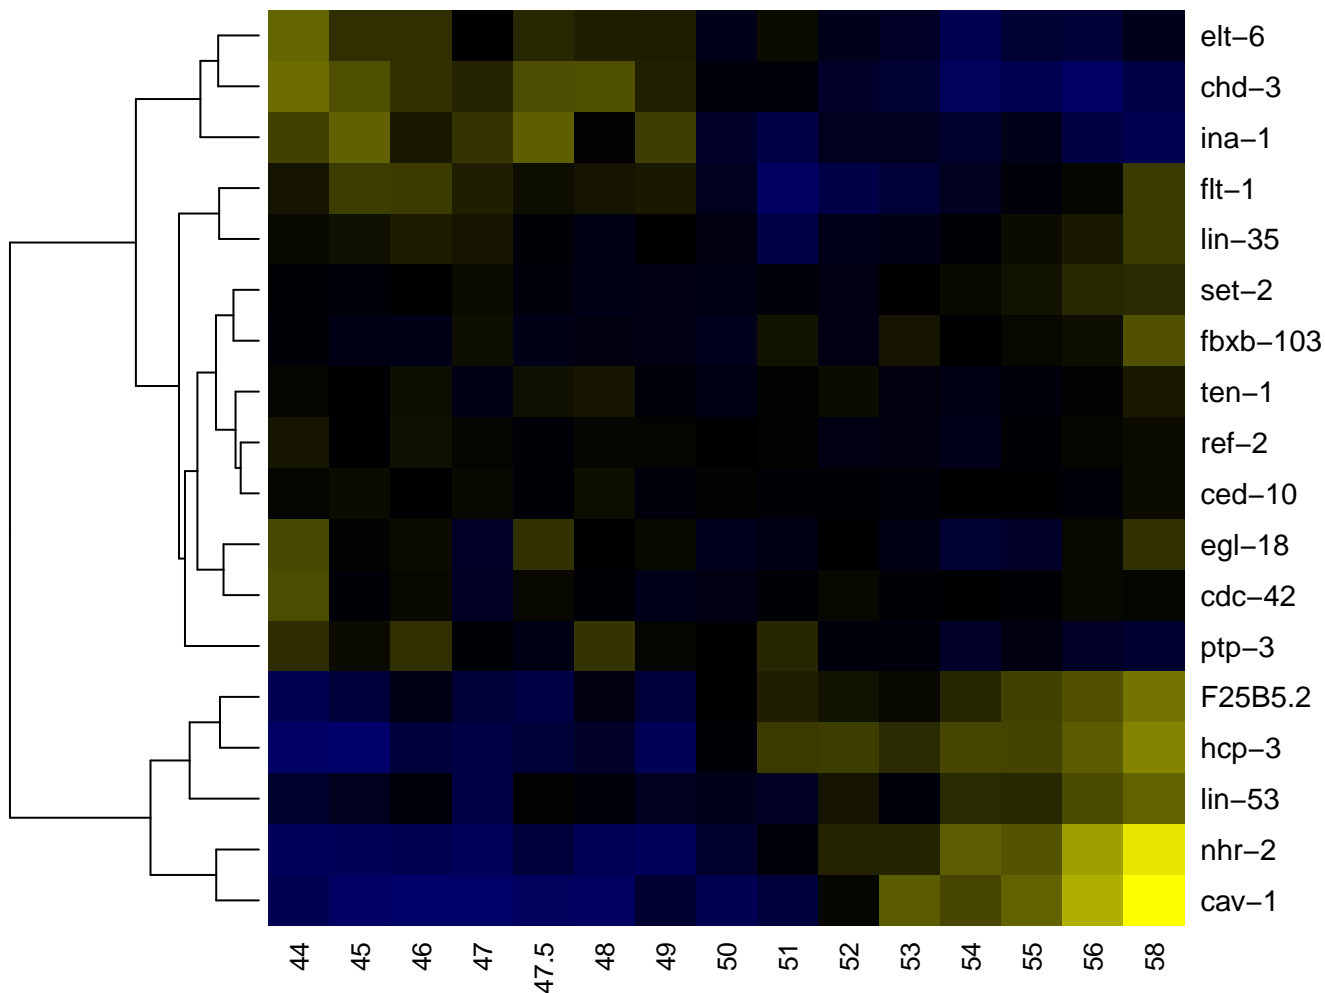

# ABplpapaap





# ABlpapap



# ABplpapapa



# ABpIpapapp



# ABplapp

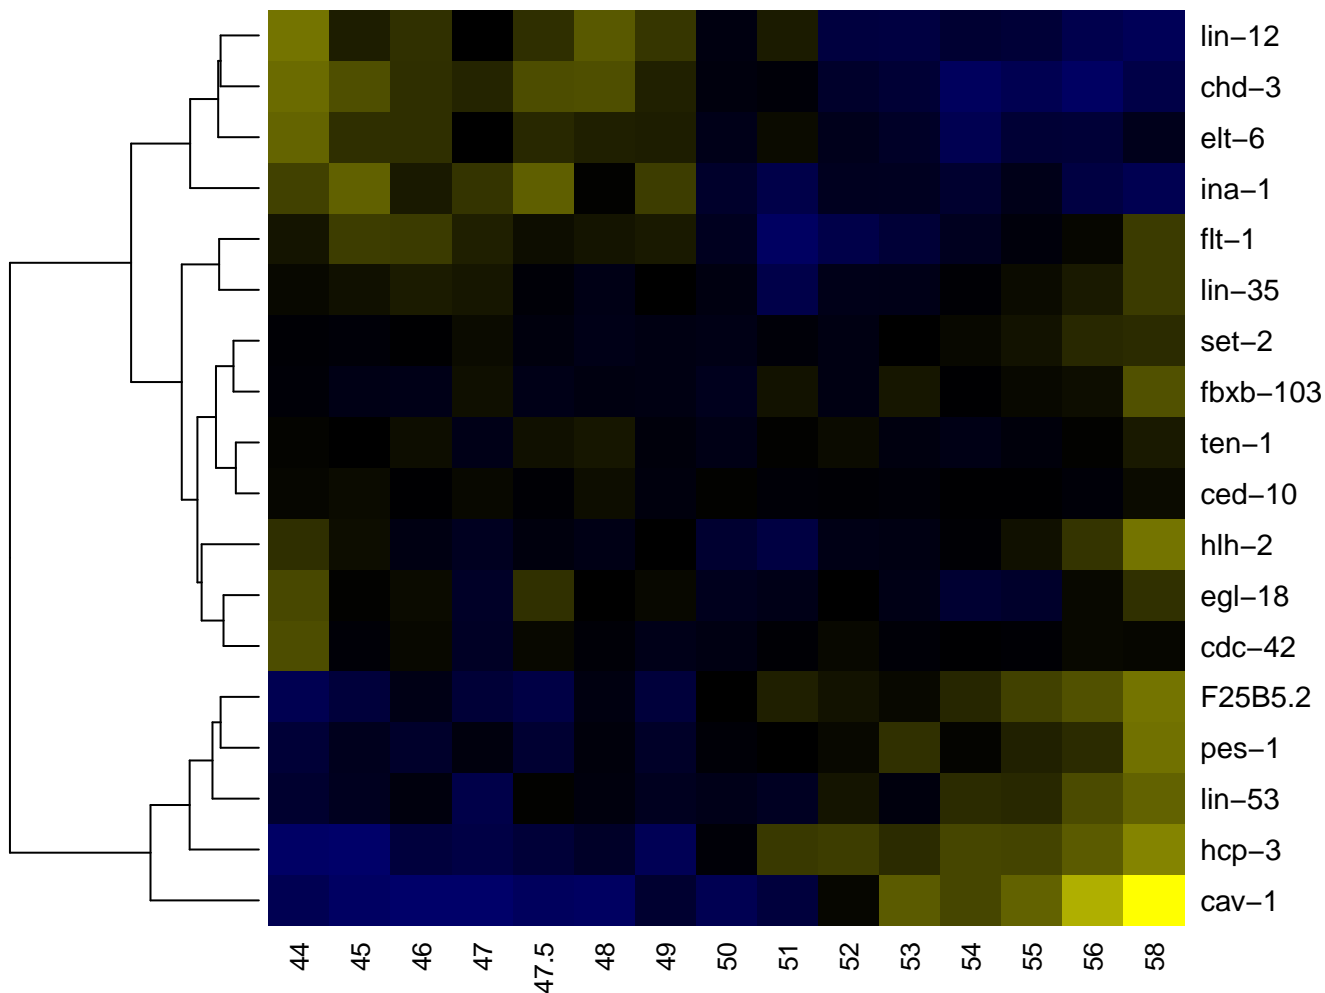

# ABplpappa



# ABplpappaa

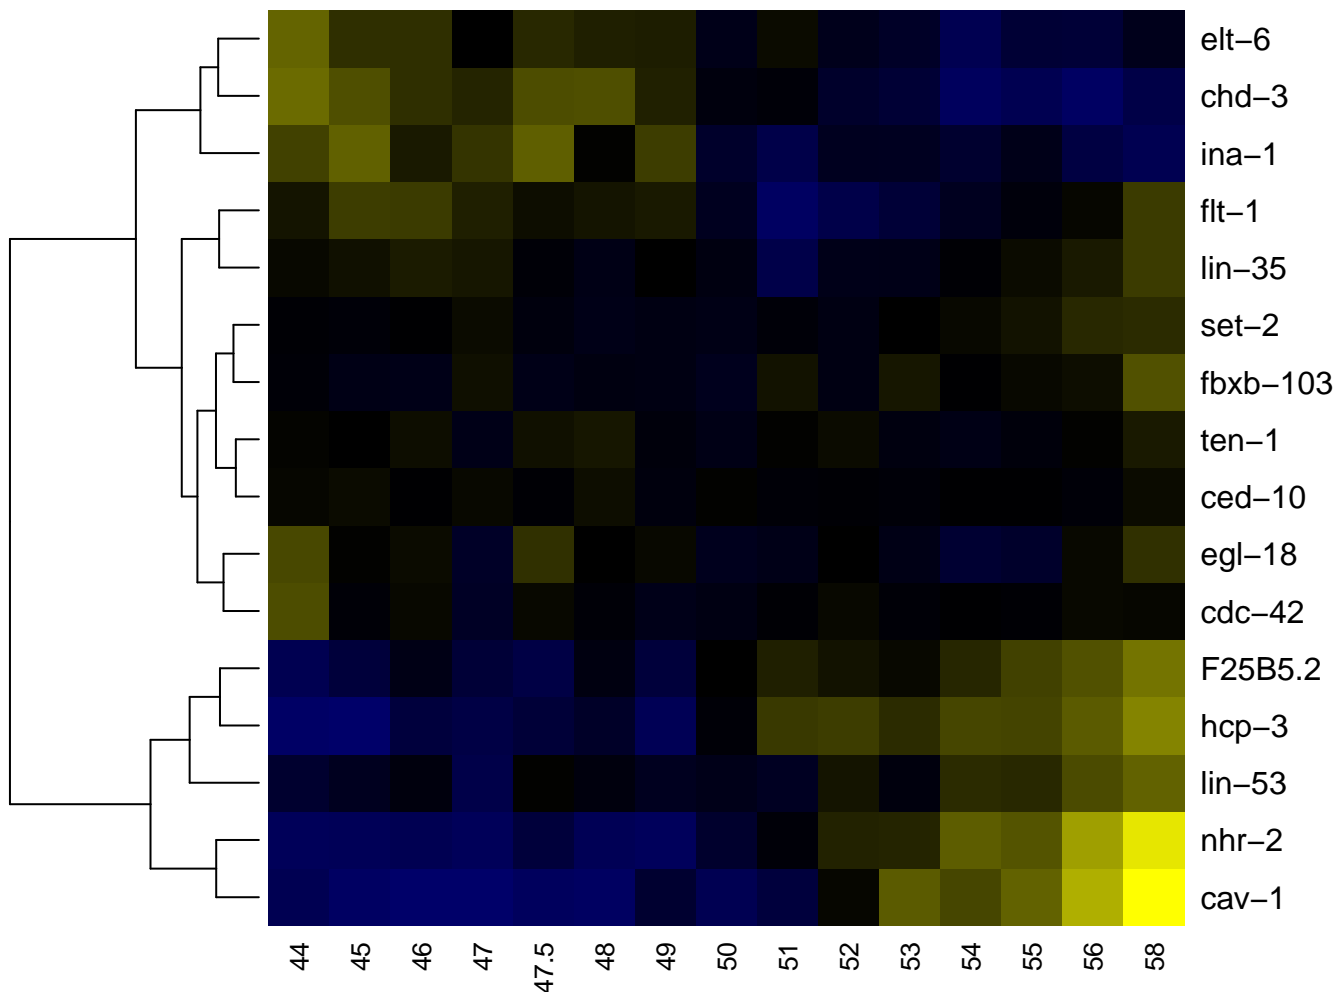

# ABPlpappap



# ABplpappp

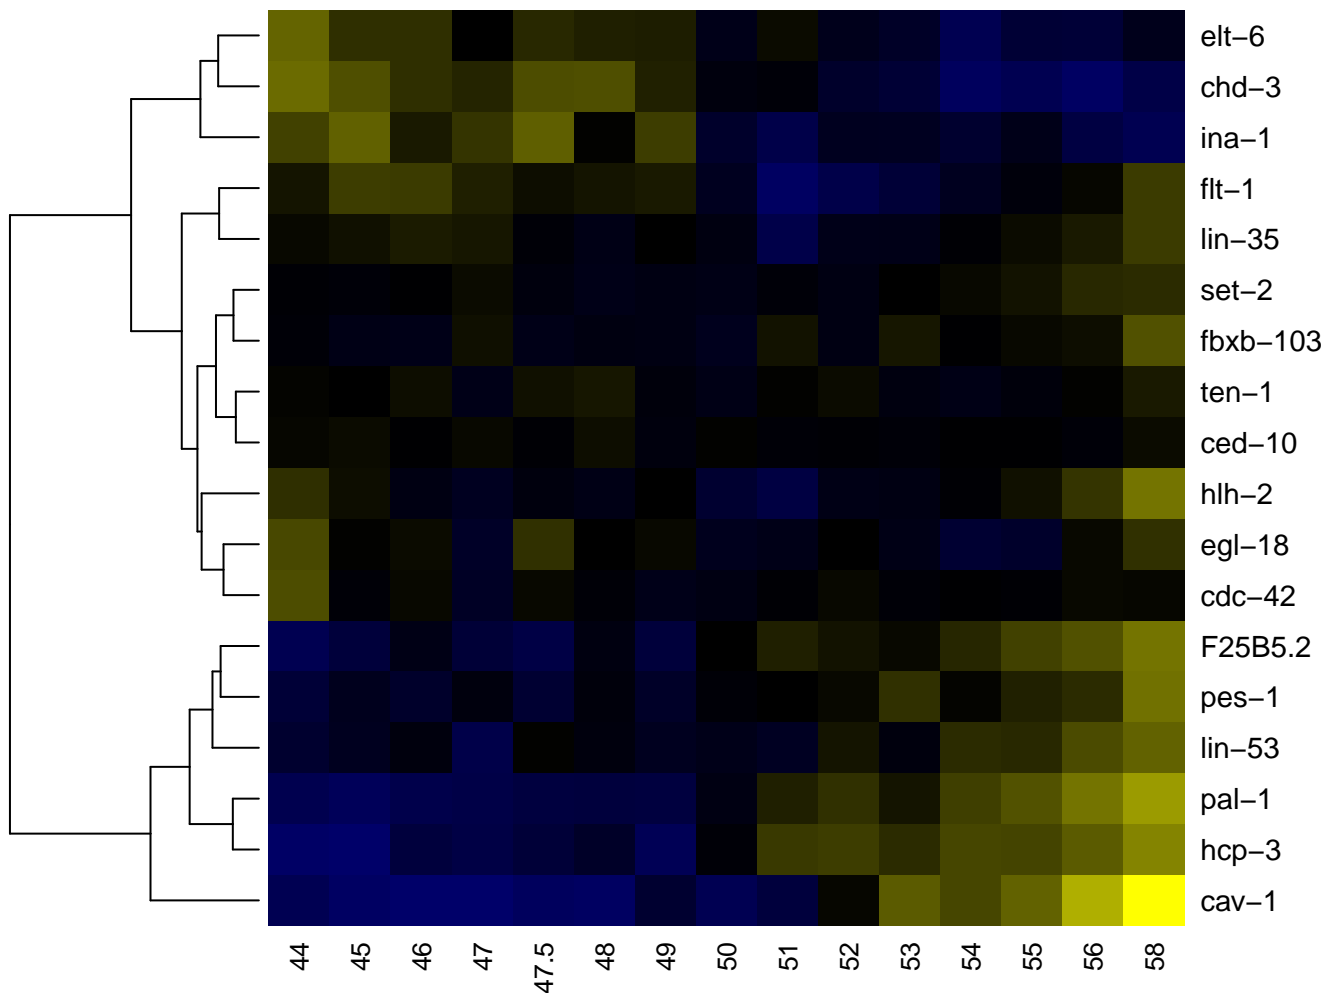





# ABplppppp

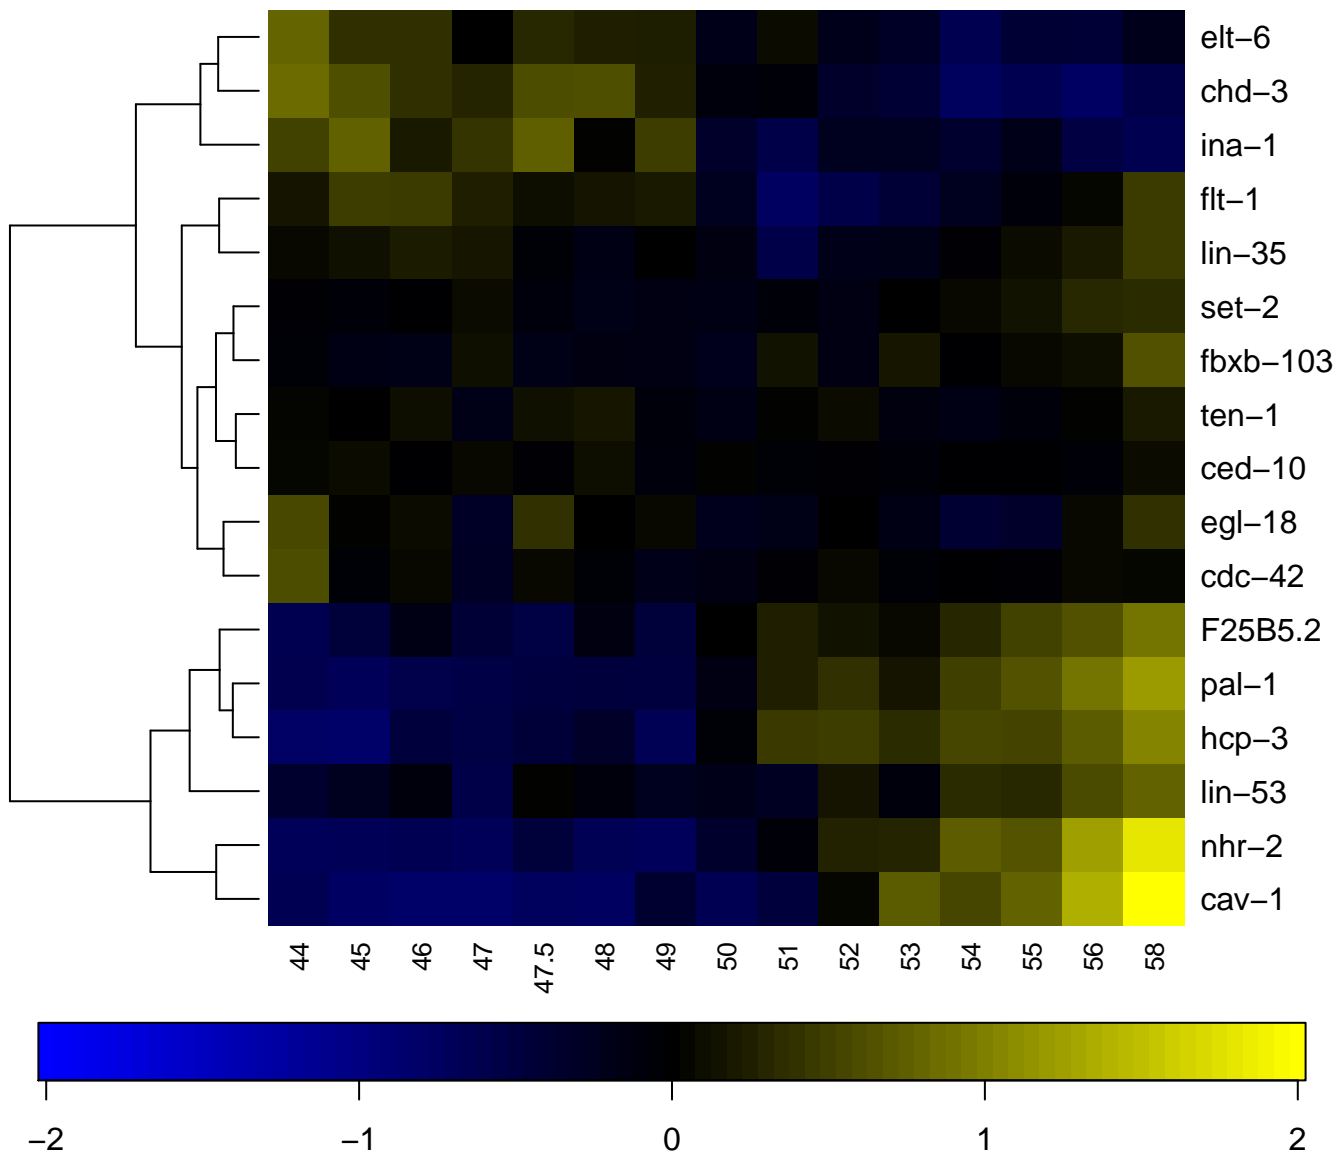

# ABplpp

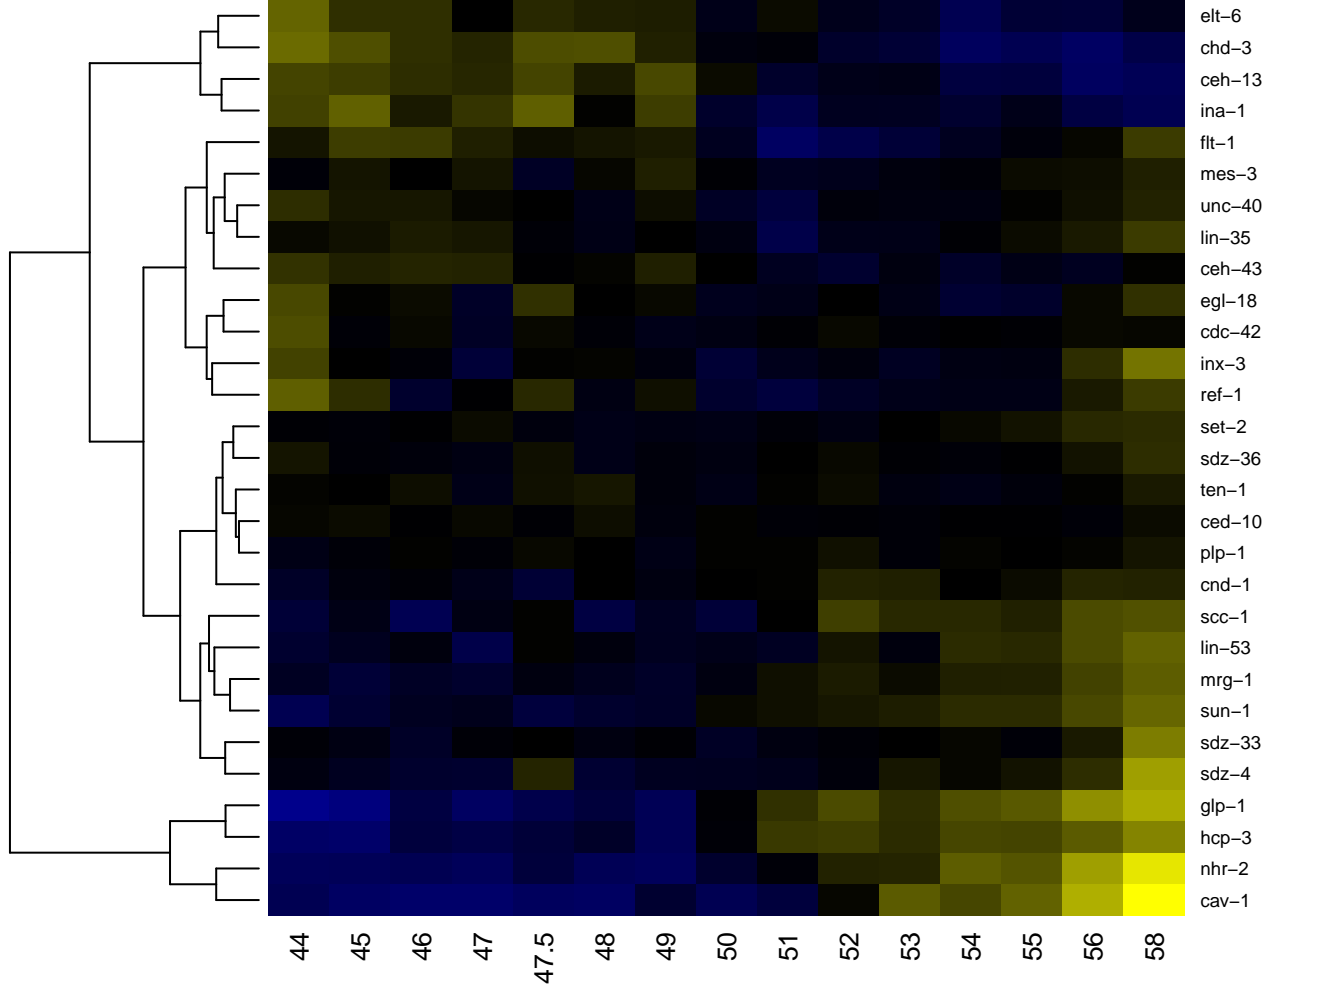



# ABpIppaa



# ABpIppaaa

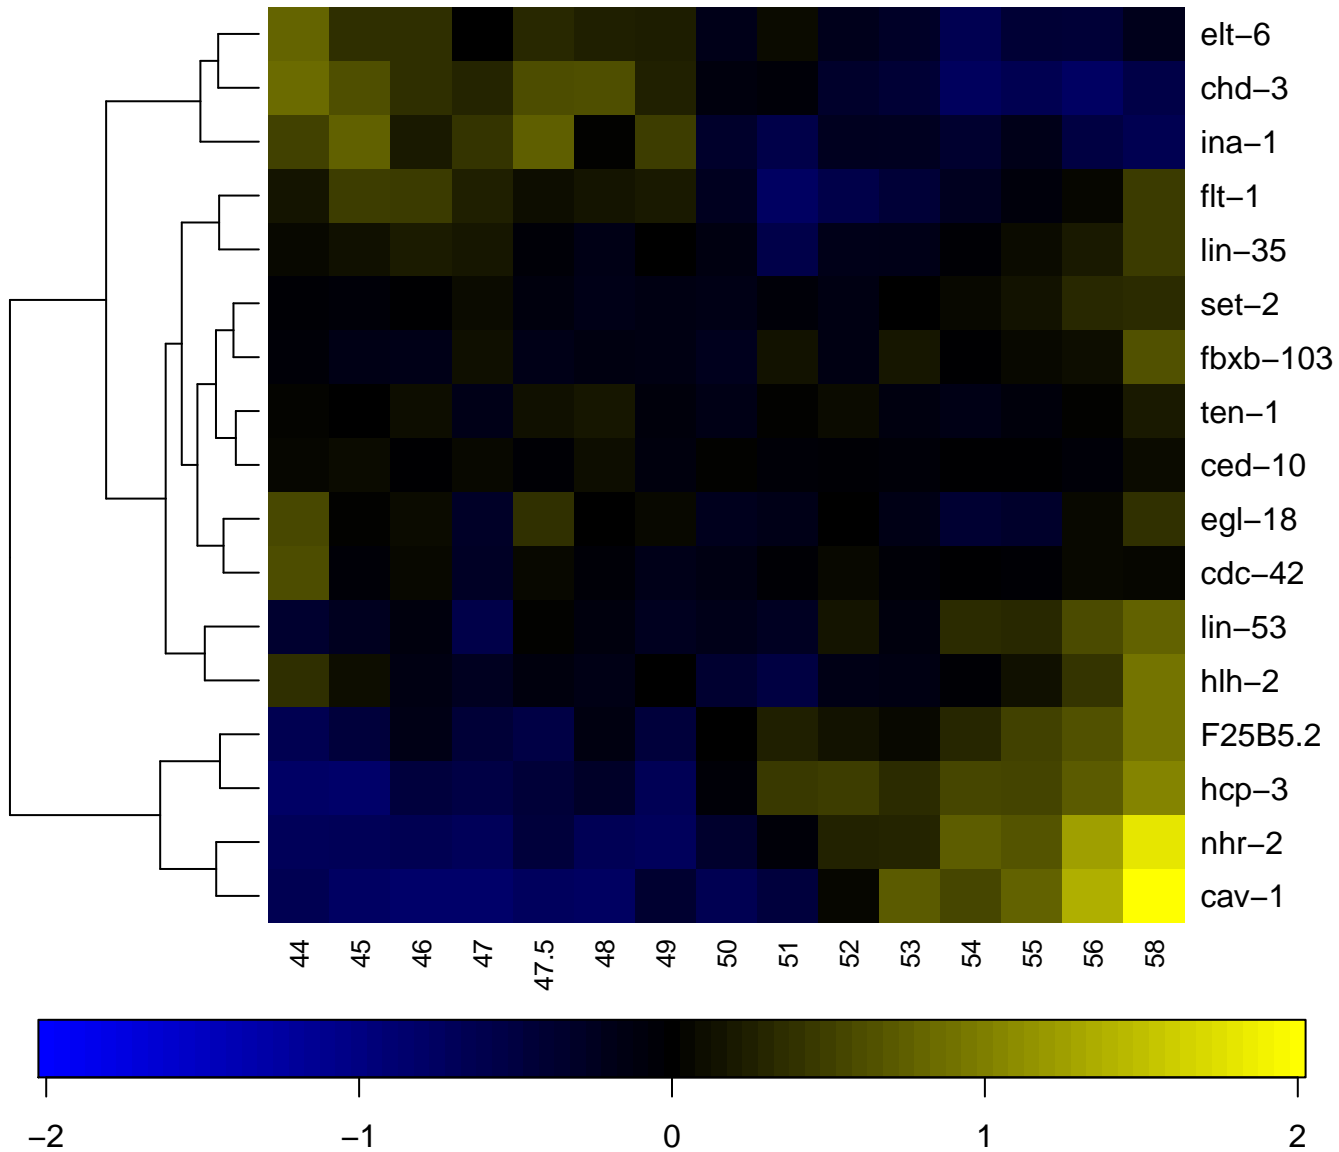

# ABplppaaa



# ABplppaaaap





# ABplppaaaapa

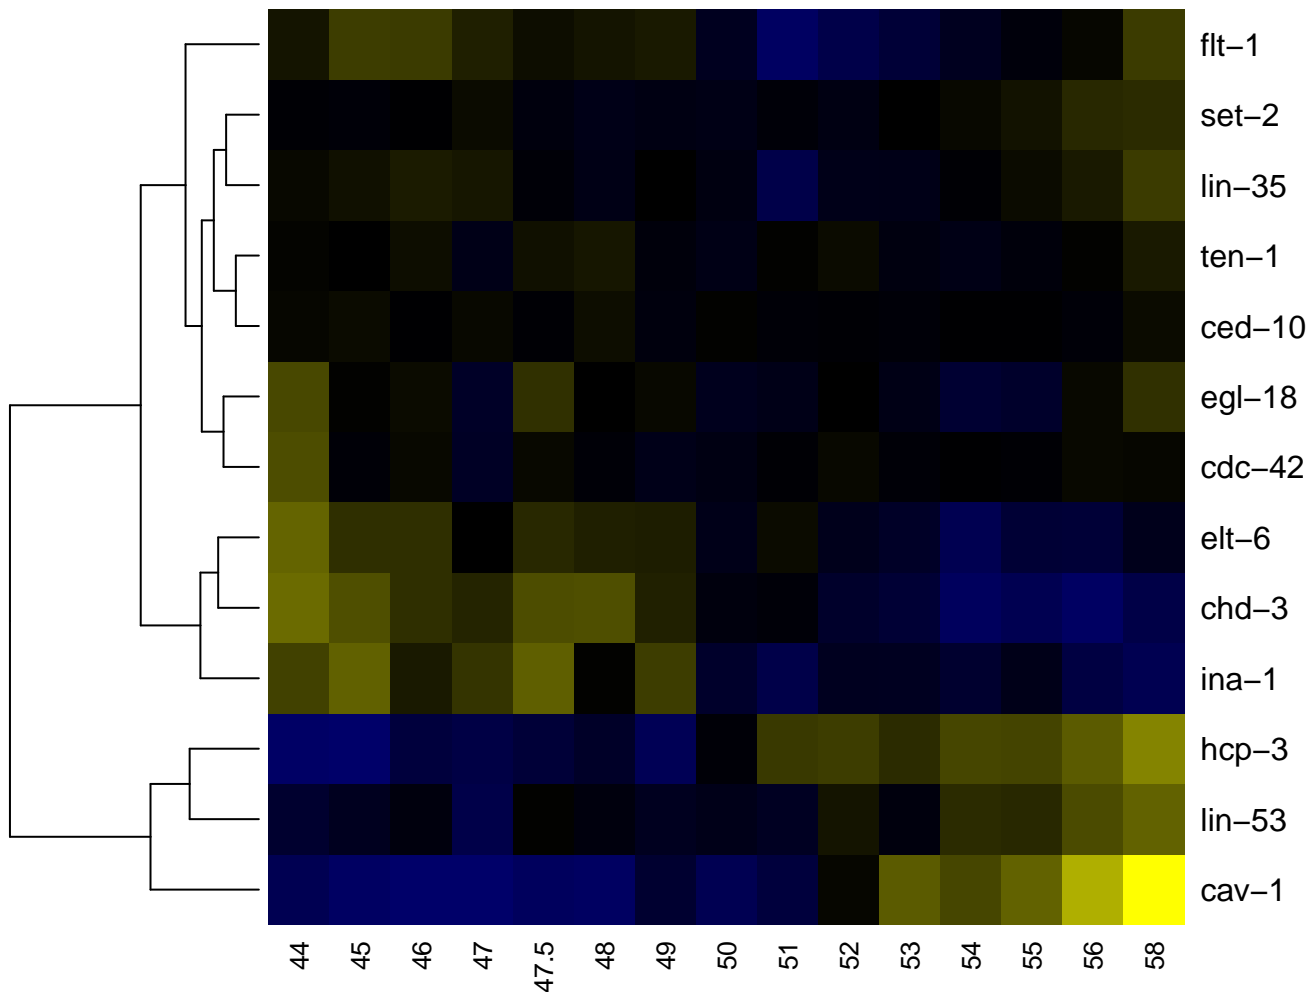

# ABplppaaap

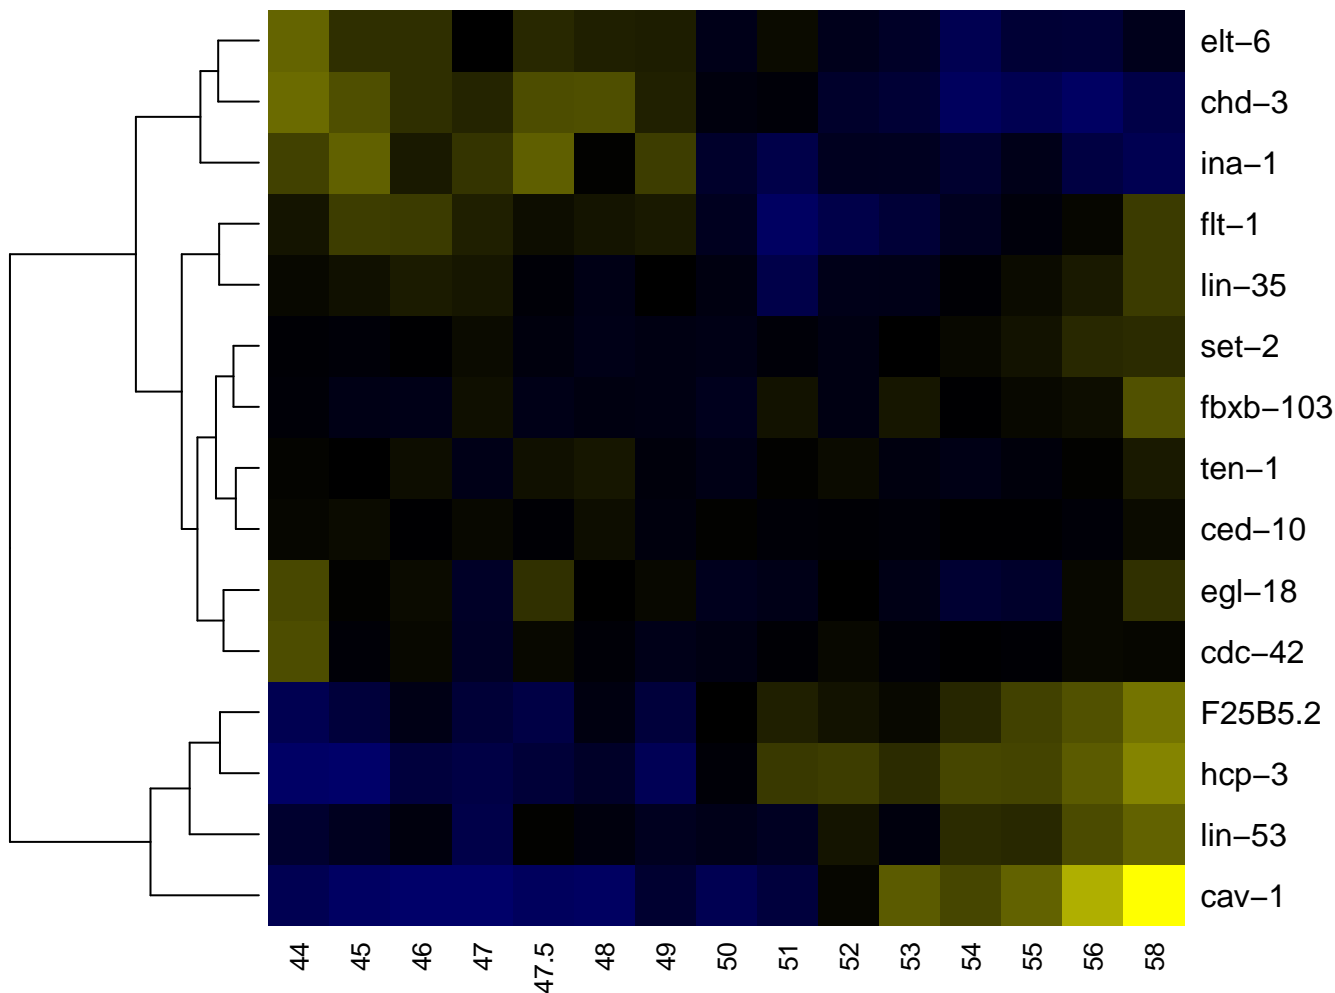

# ABplppap

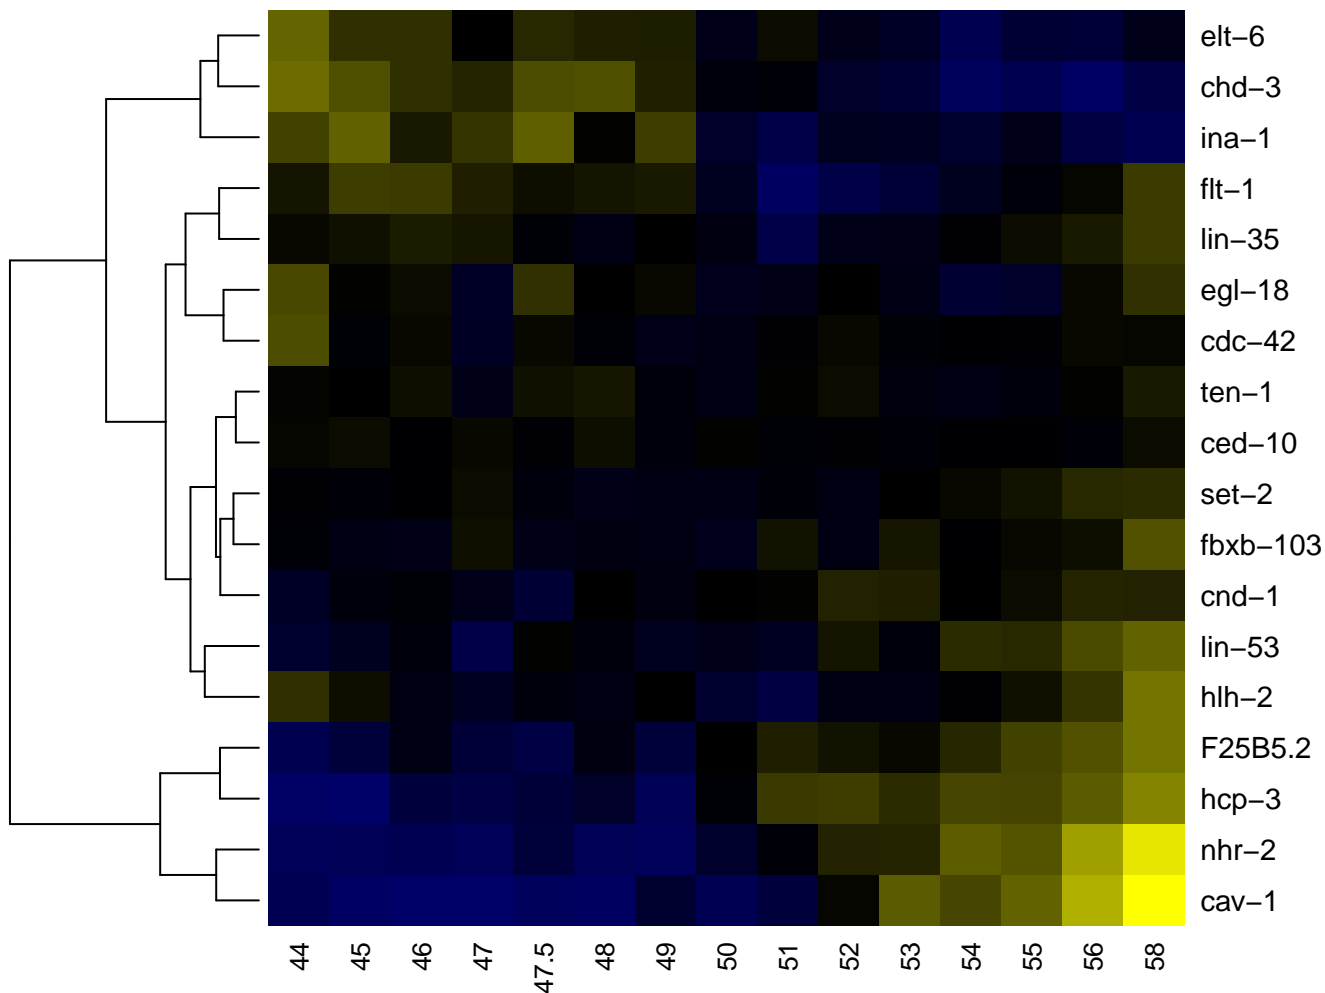

# ABplppaapa



# ABplppaapa



# ABpIppaapp



# ABplppap



# ABplppapa





# ABpIppapaa



# ABplppapaaa



# ABpppapap



# ABplppapp



# ABp1ppappa



# ABpIppapp





# ABplpppa





# ABplppaa



# ABplpppaaa



# ABplpppaap

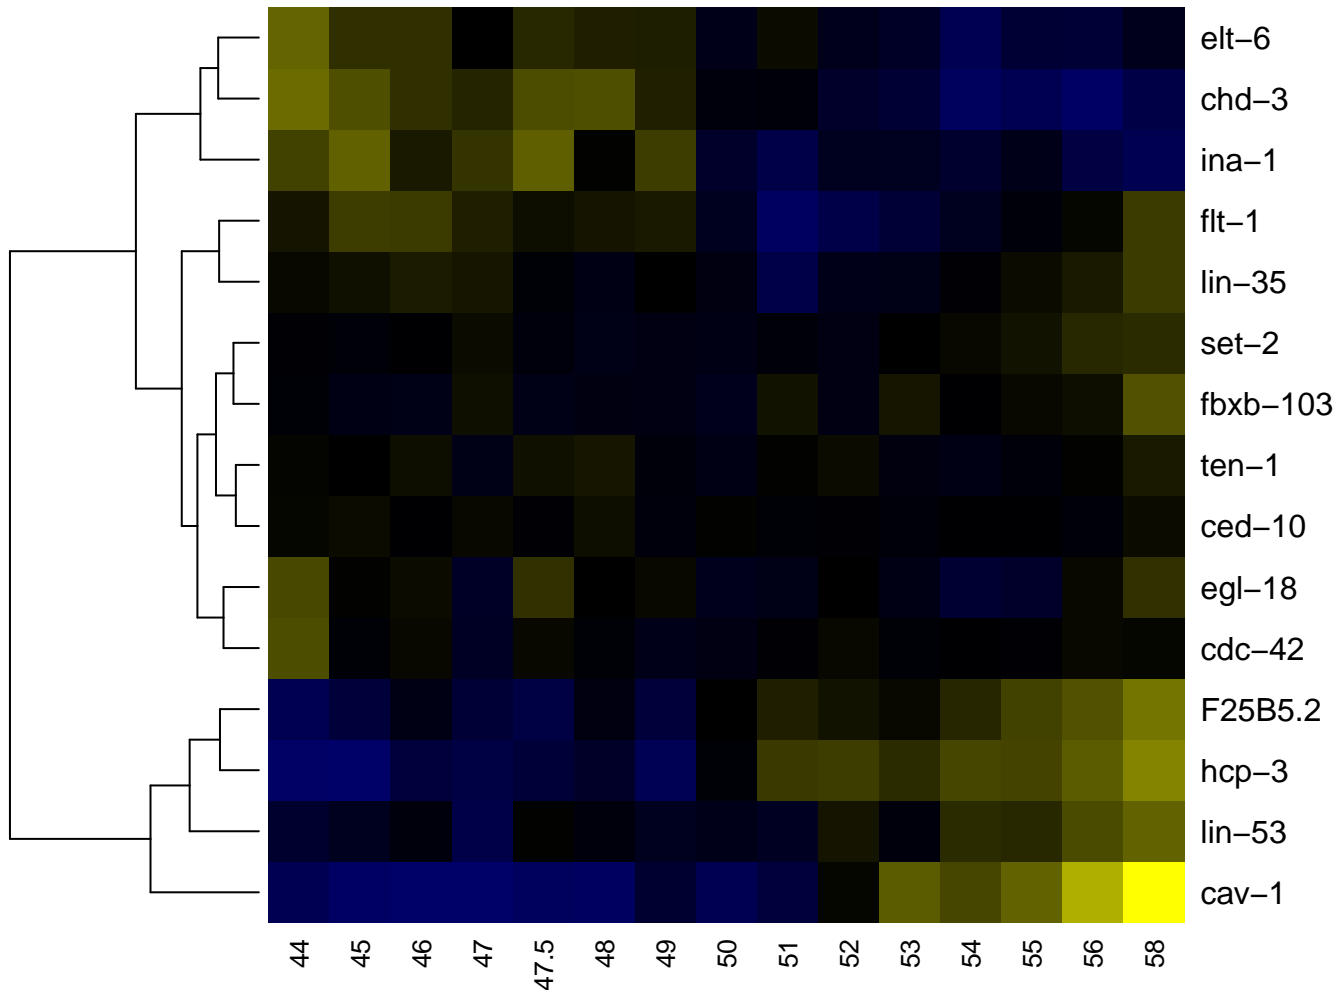

# ABplpppaapa

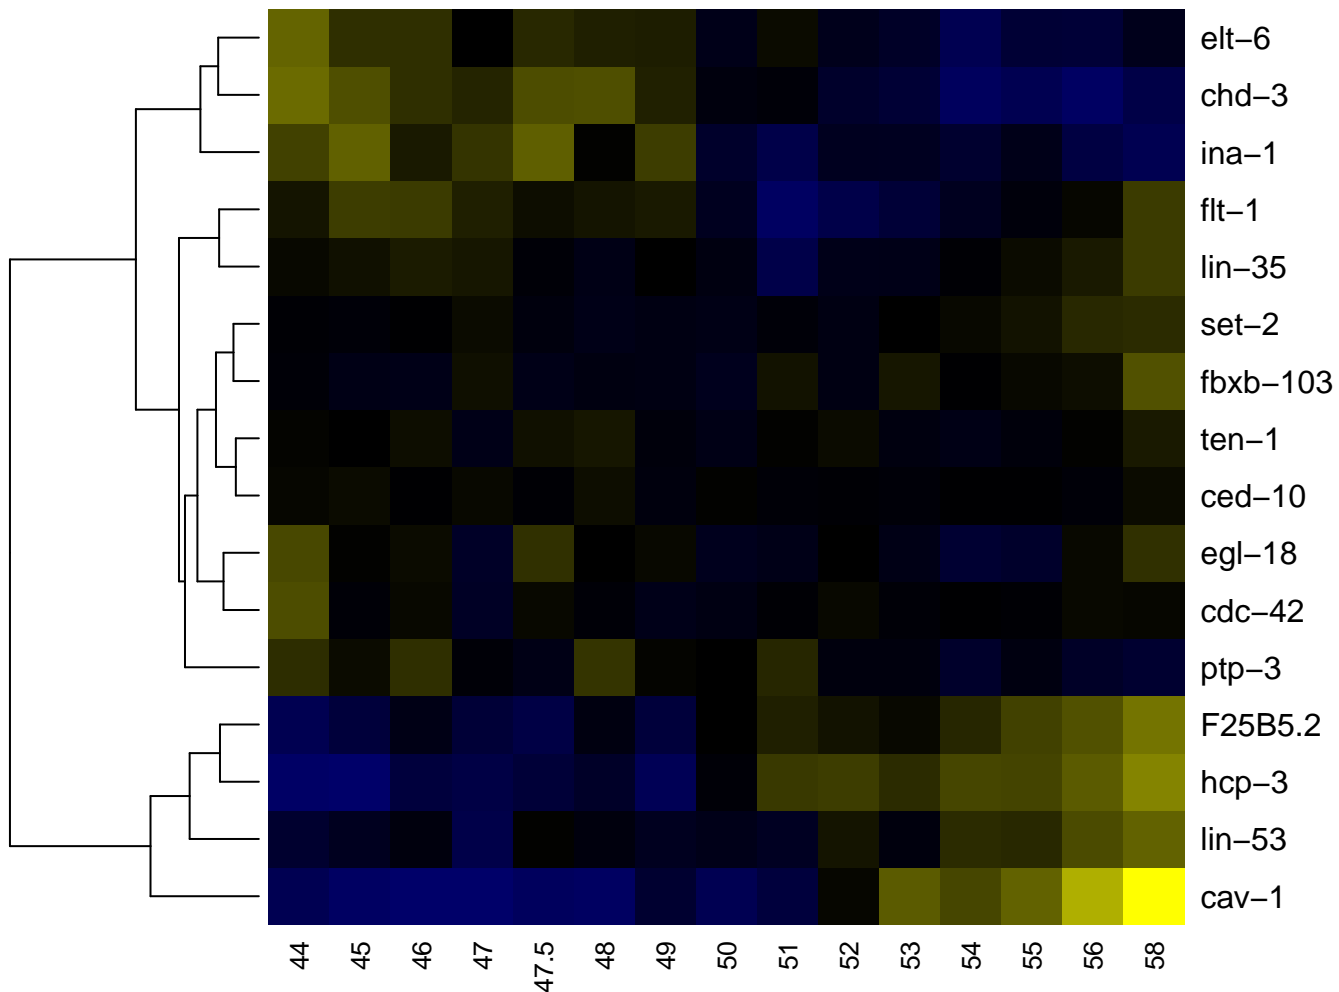

# ABplpppap



# ABp1pppapa



# ABplpppapap



# ABplppapp





# ABplpppp



# ABplppppa

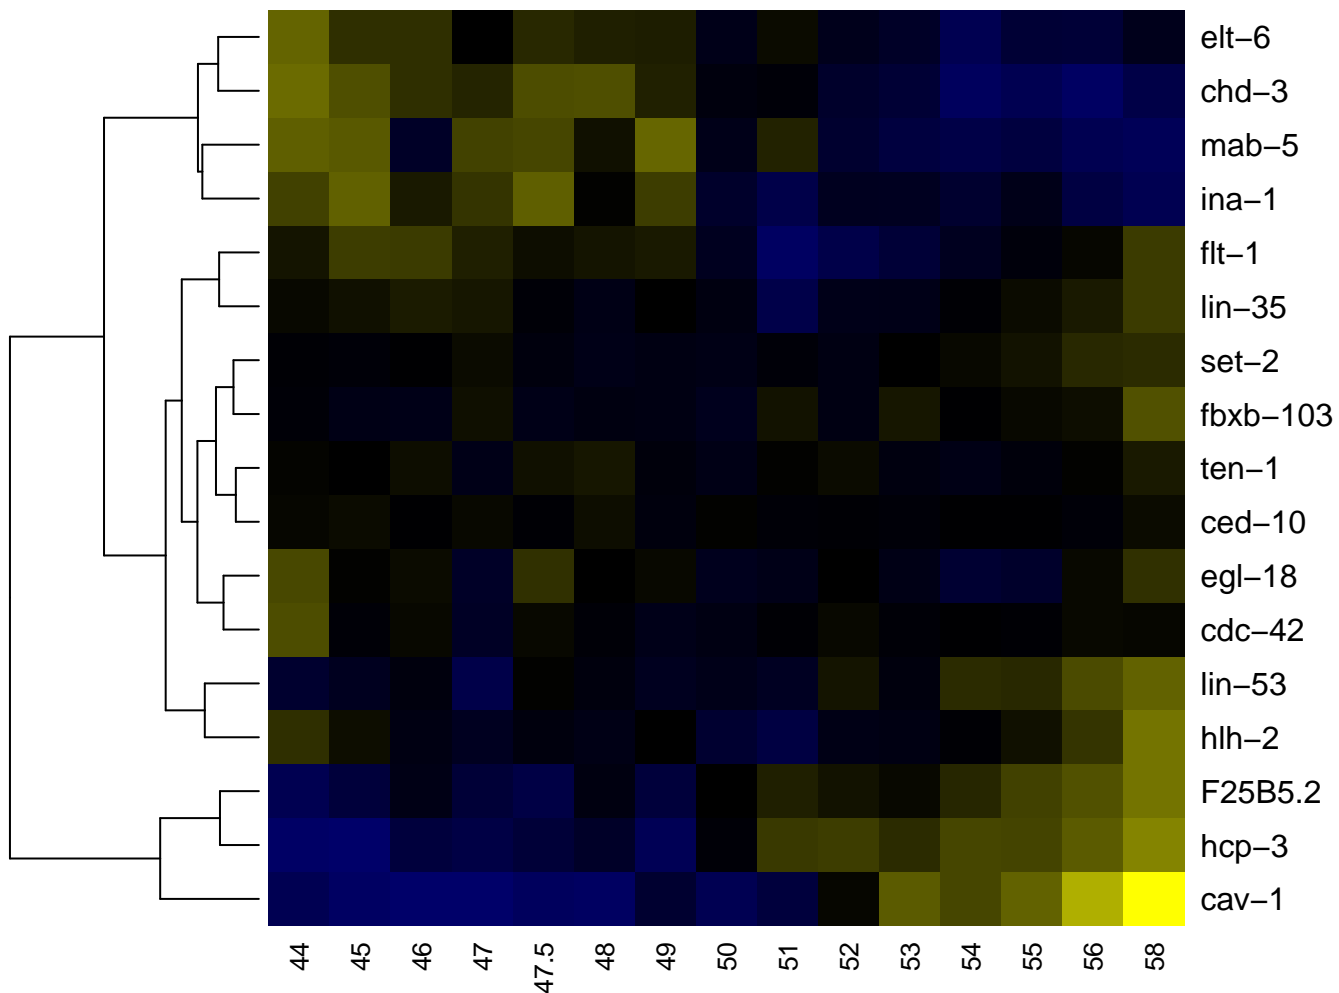

# ABplppppaa

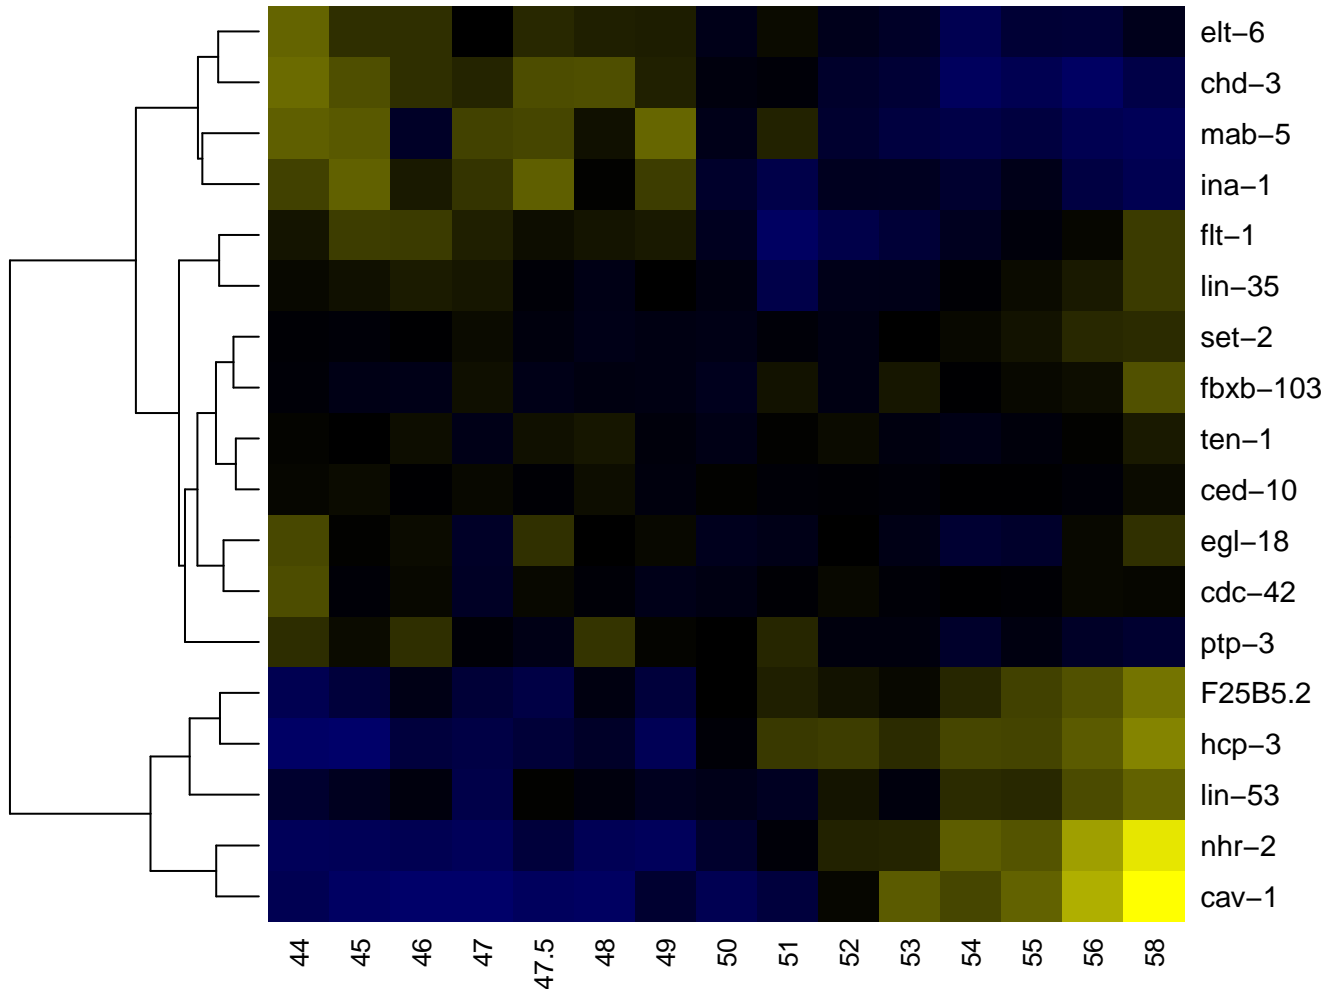

# ABplppppap

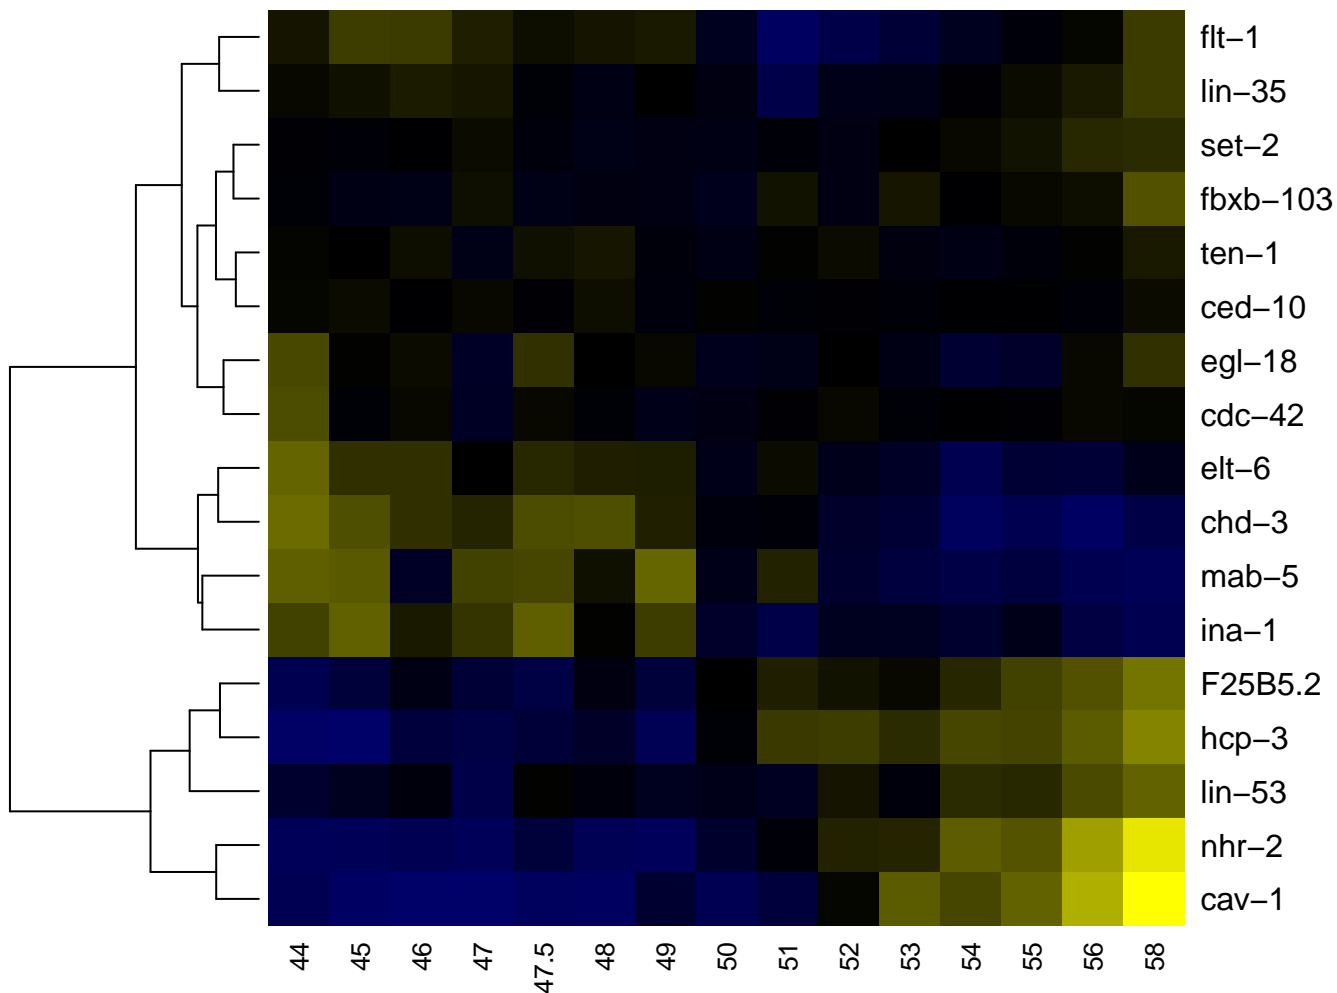

# ABplppppp

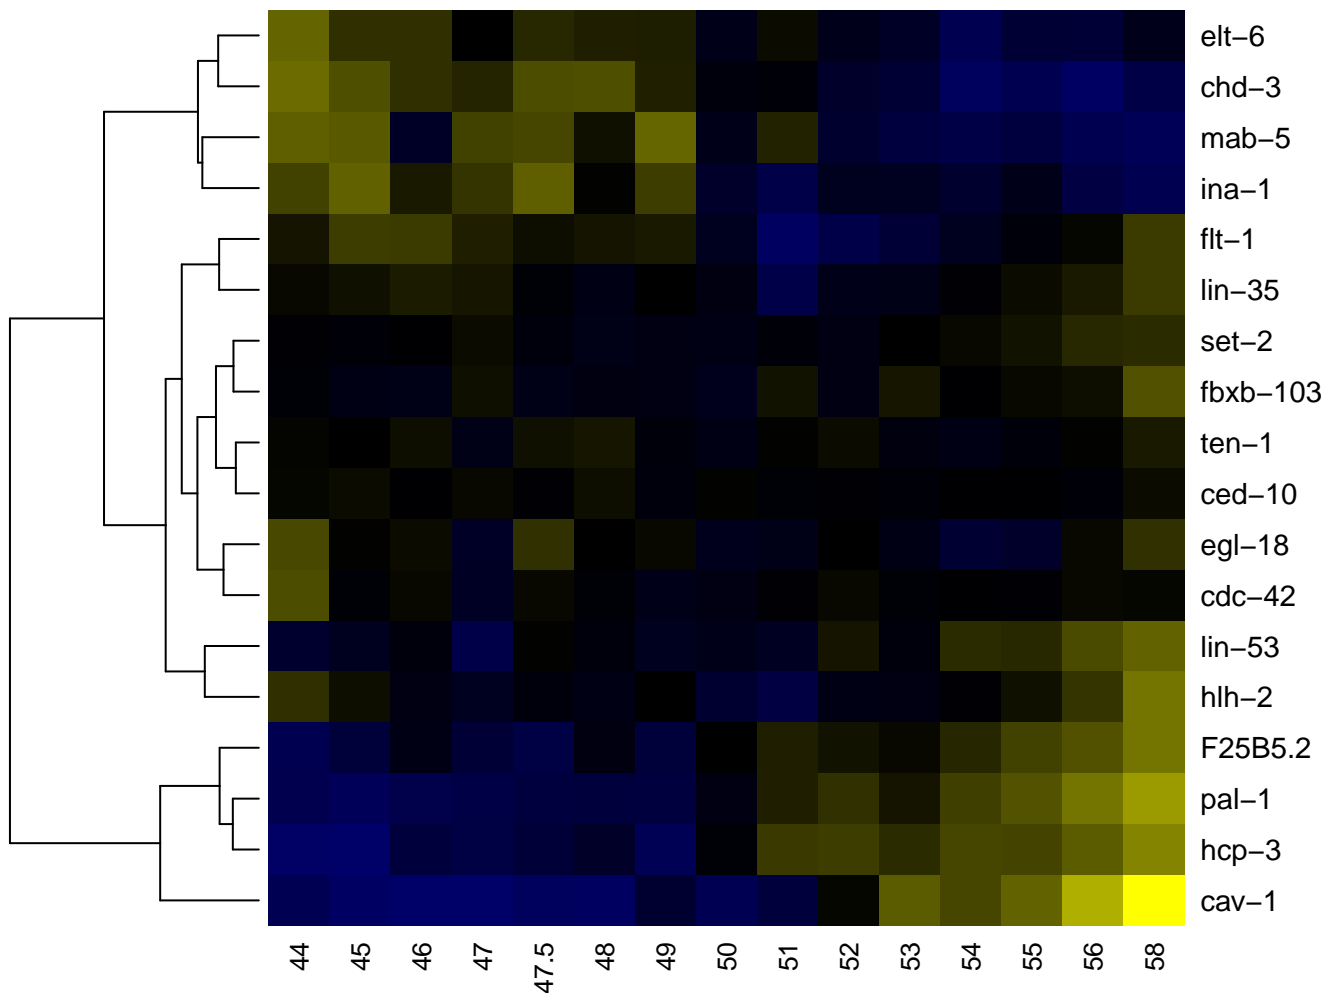

# ABplpppppa

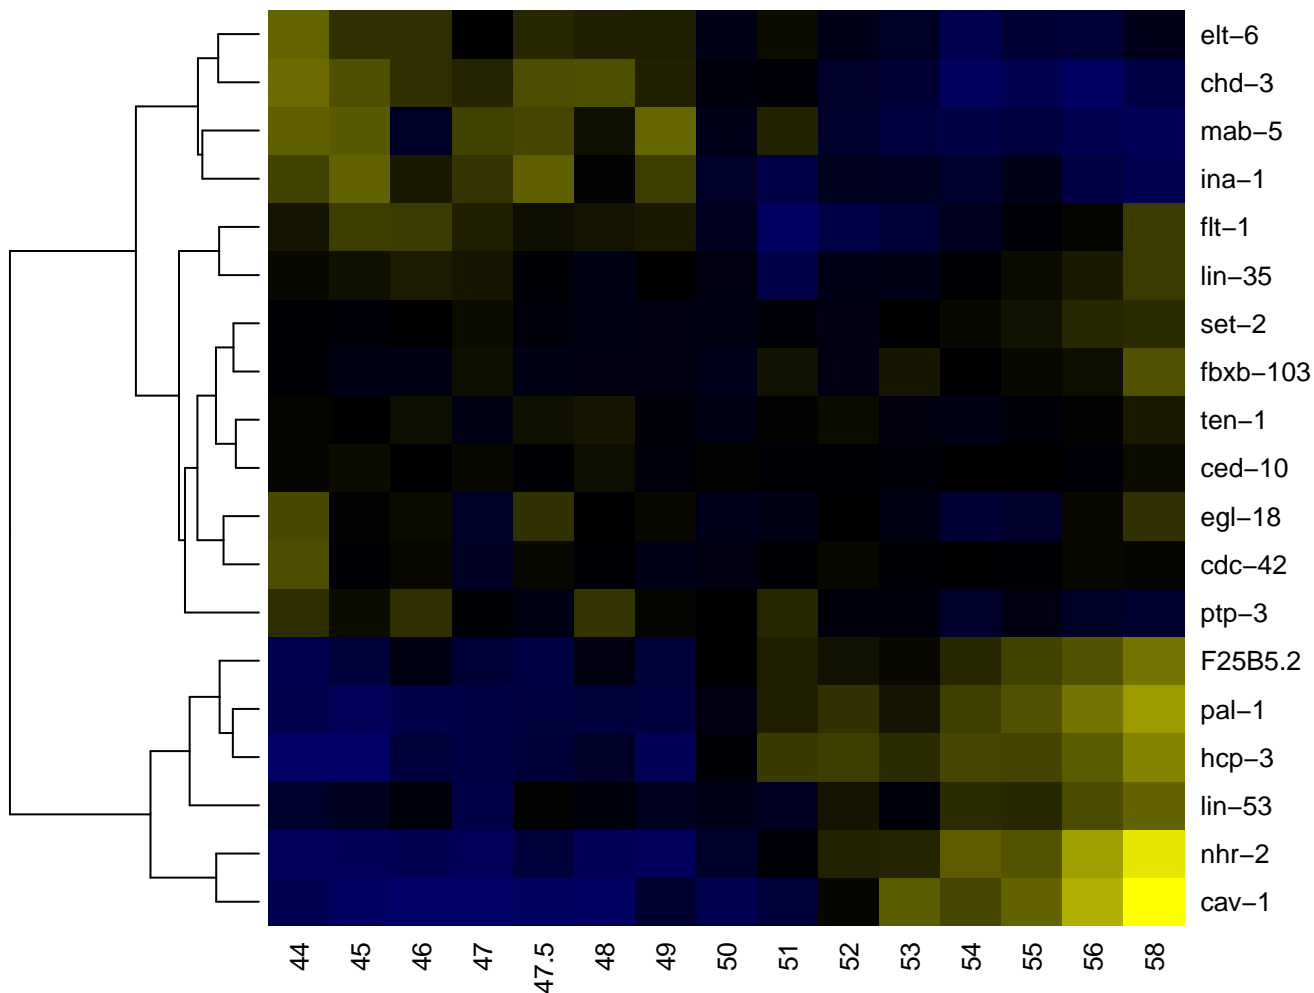

# ABpIpppppp

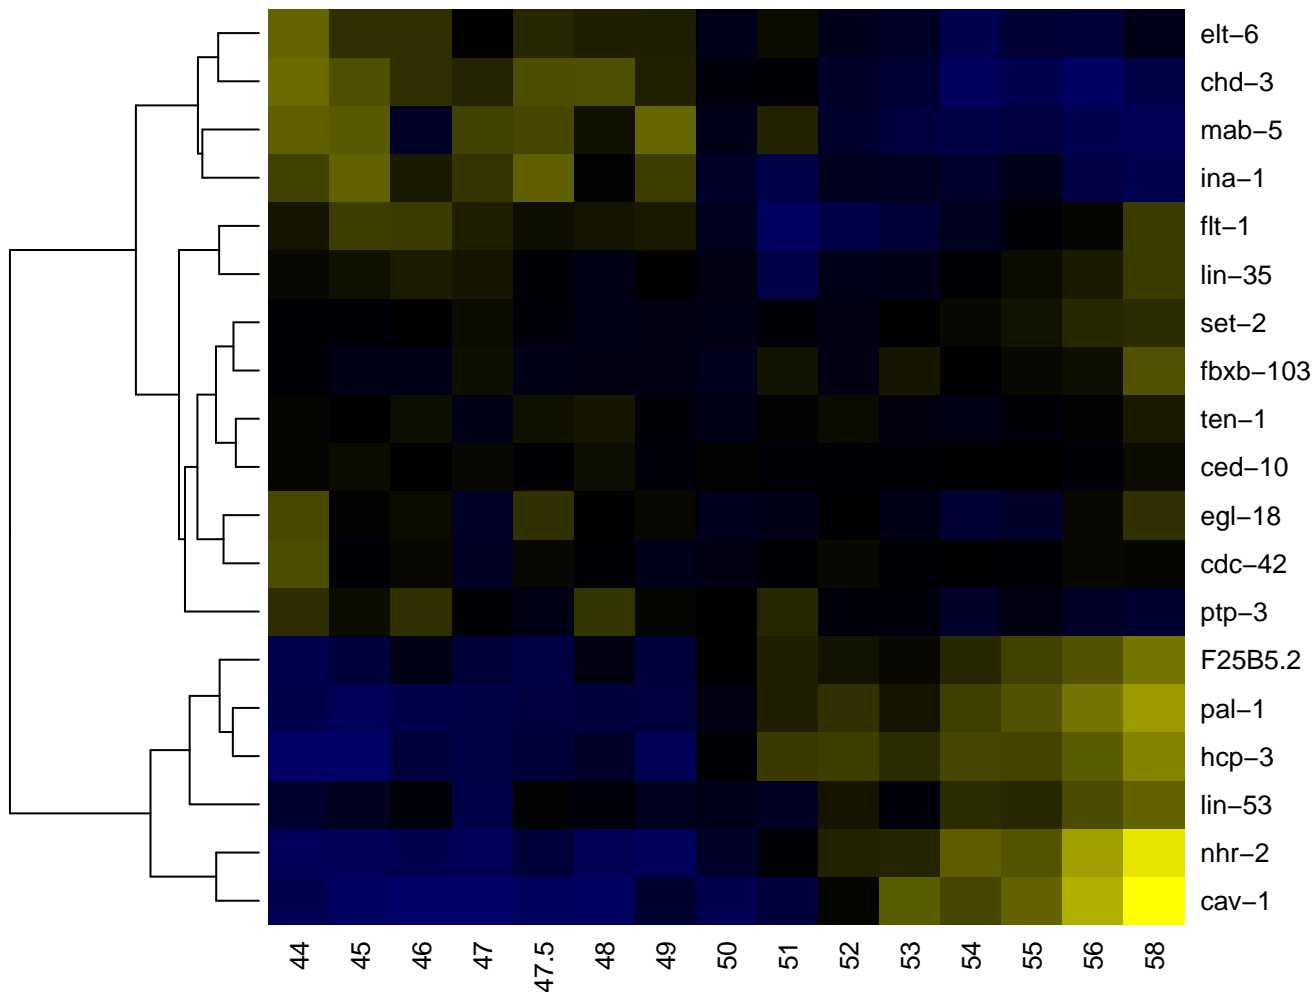

# ABp1pppppppp

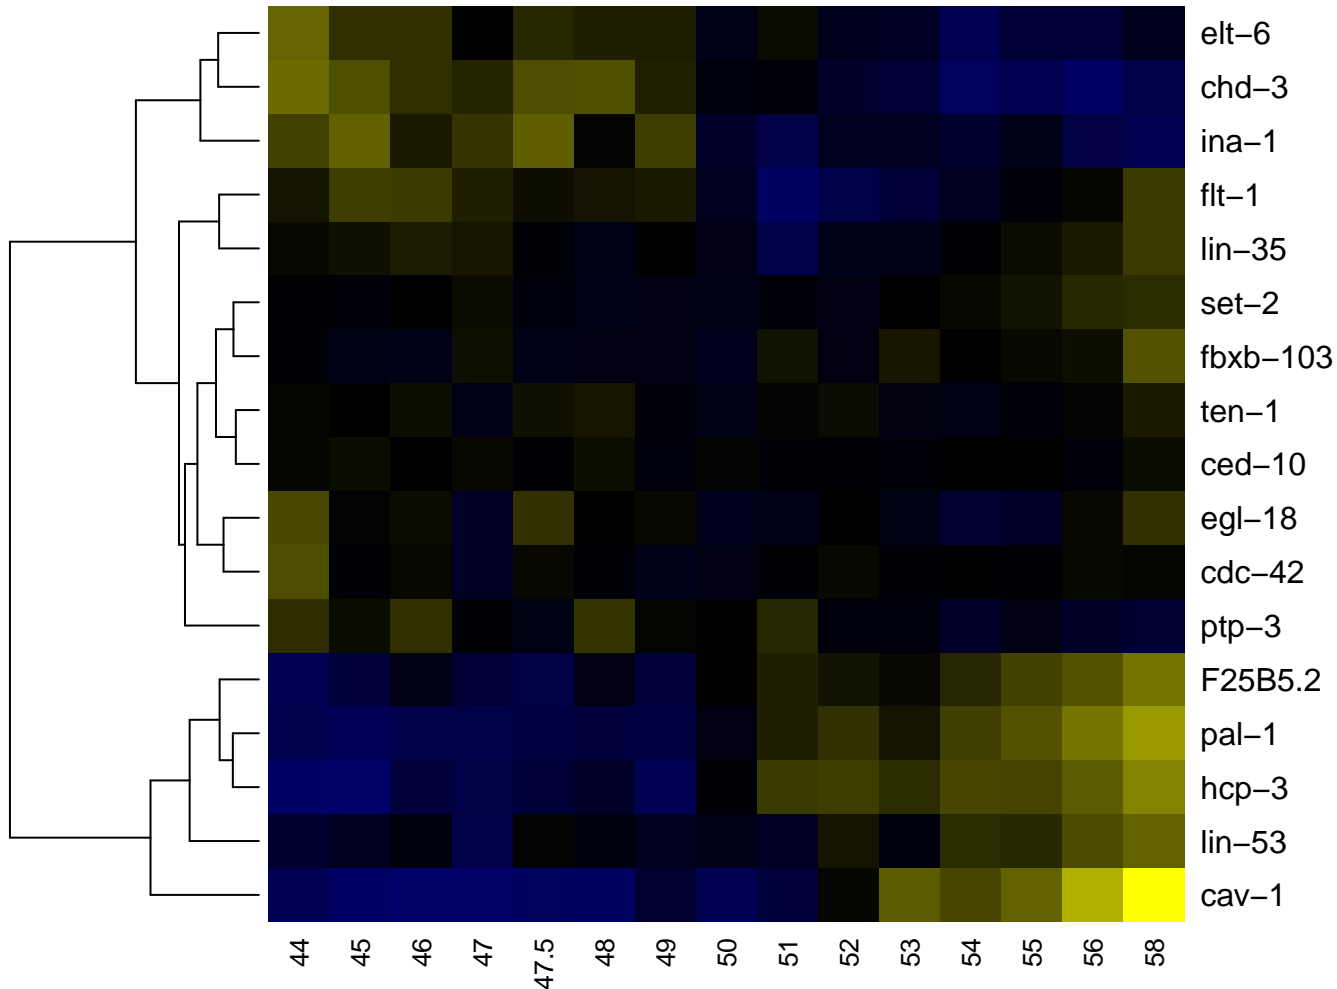



# ABpr

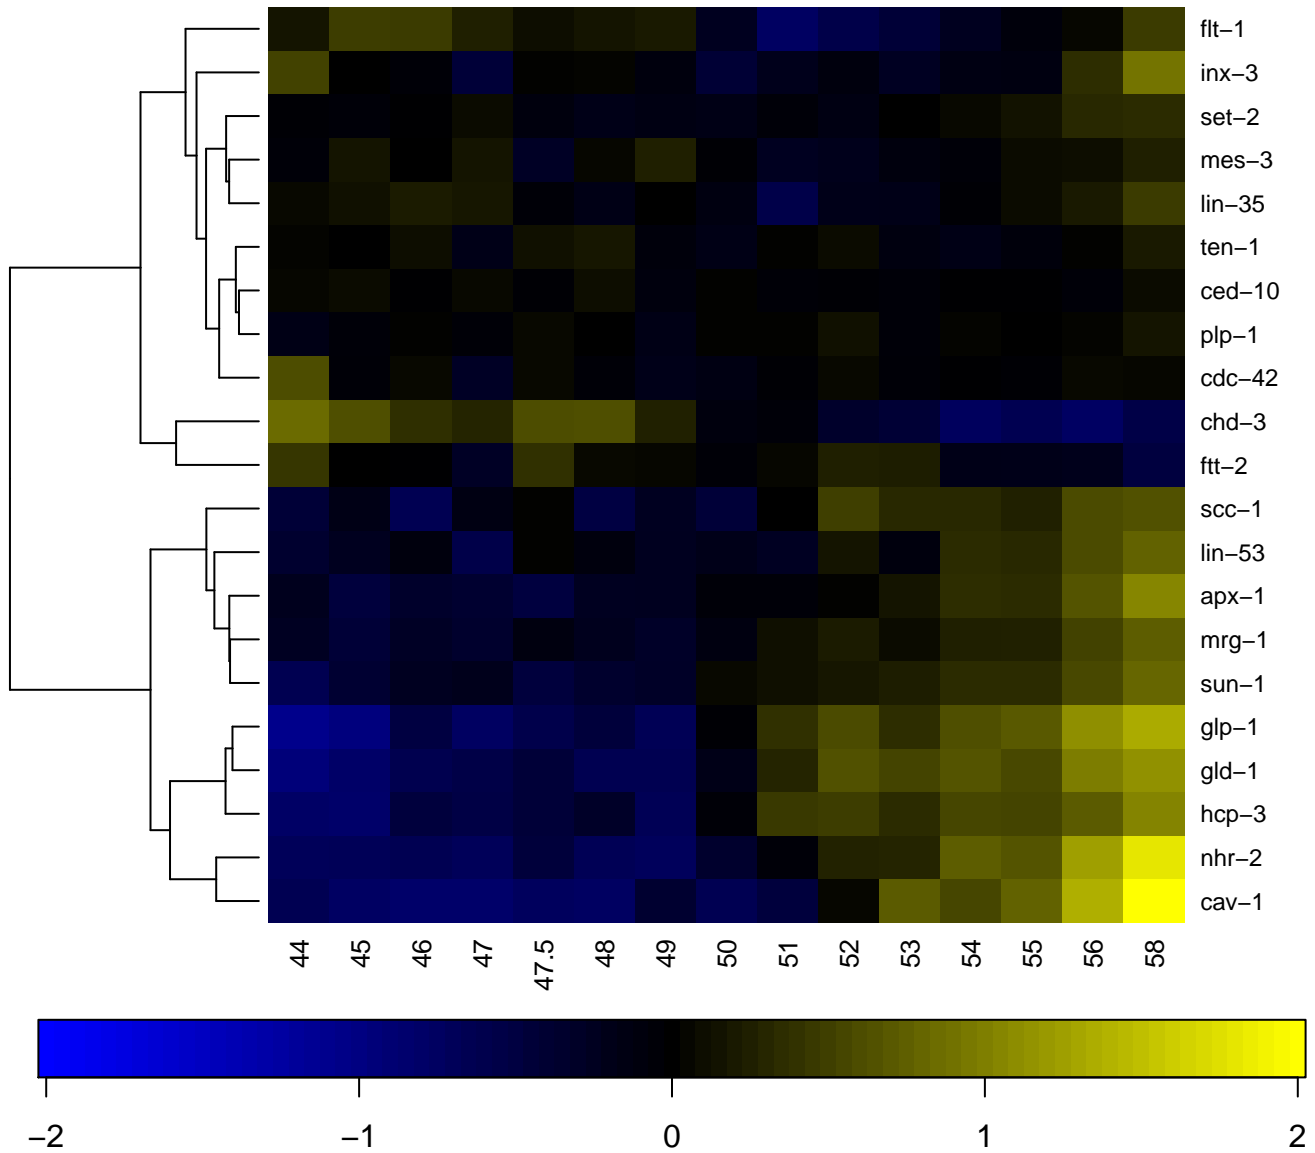

# ABpra

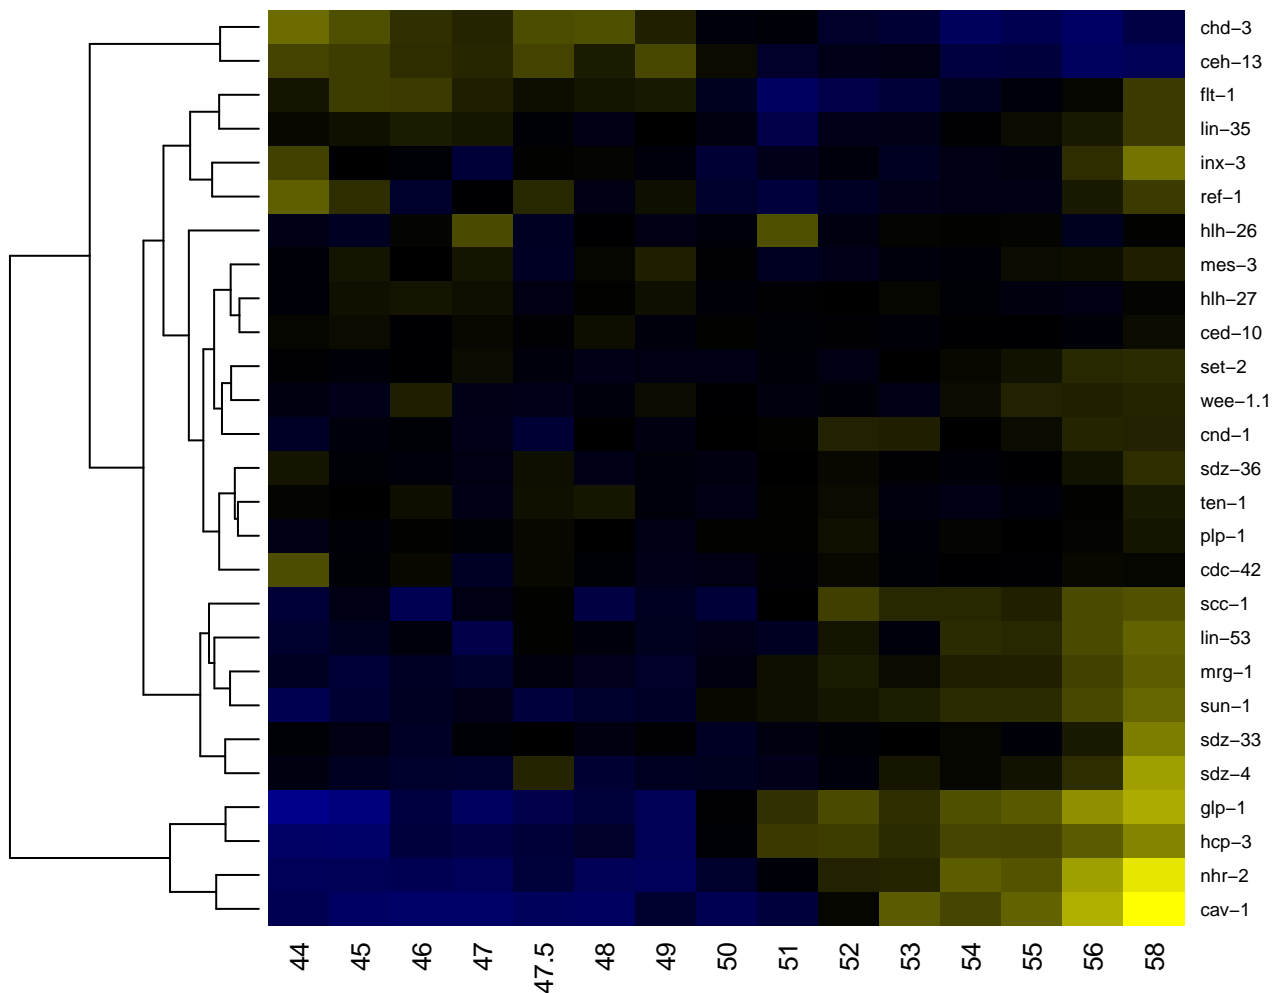

# ABpraa

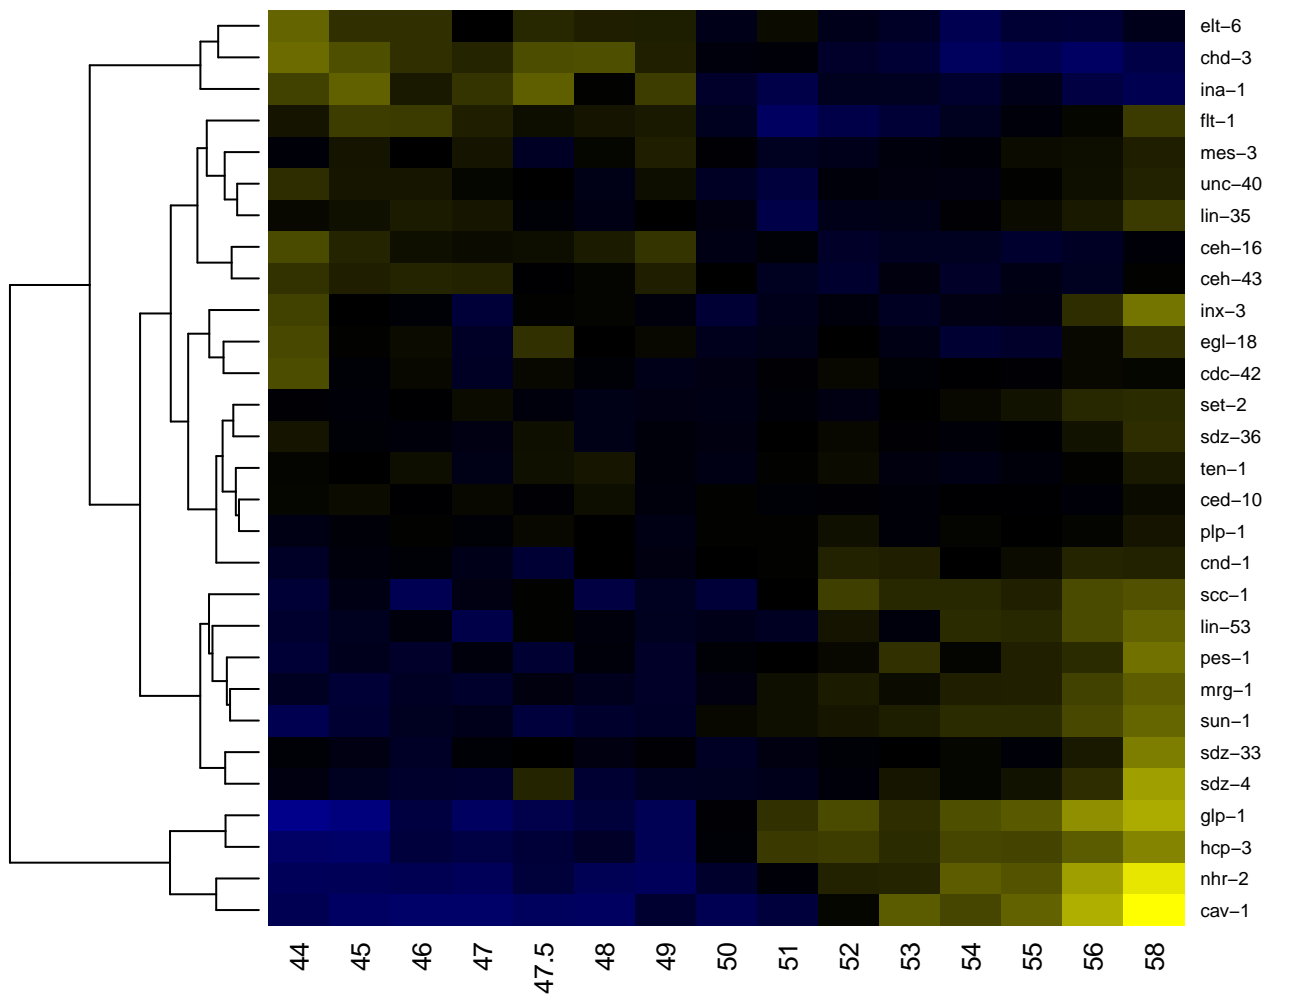

# ABpraaa



# ABpraaa

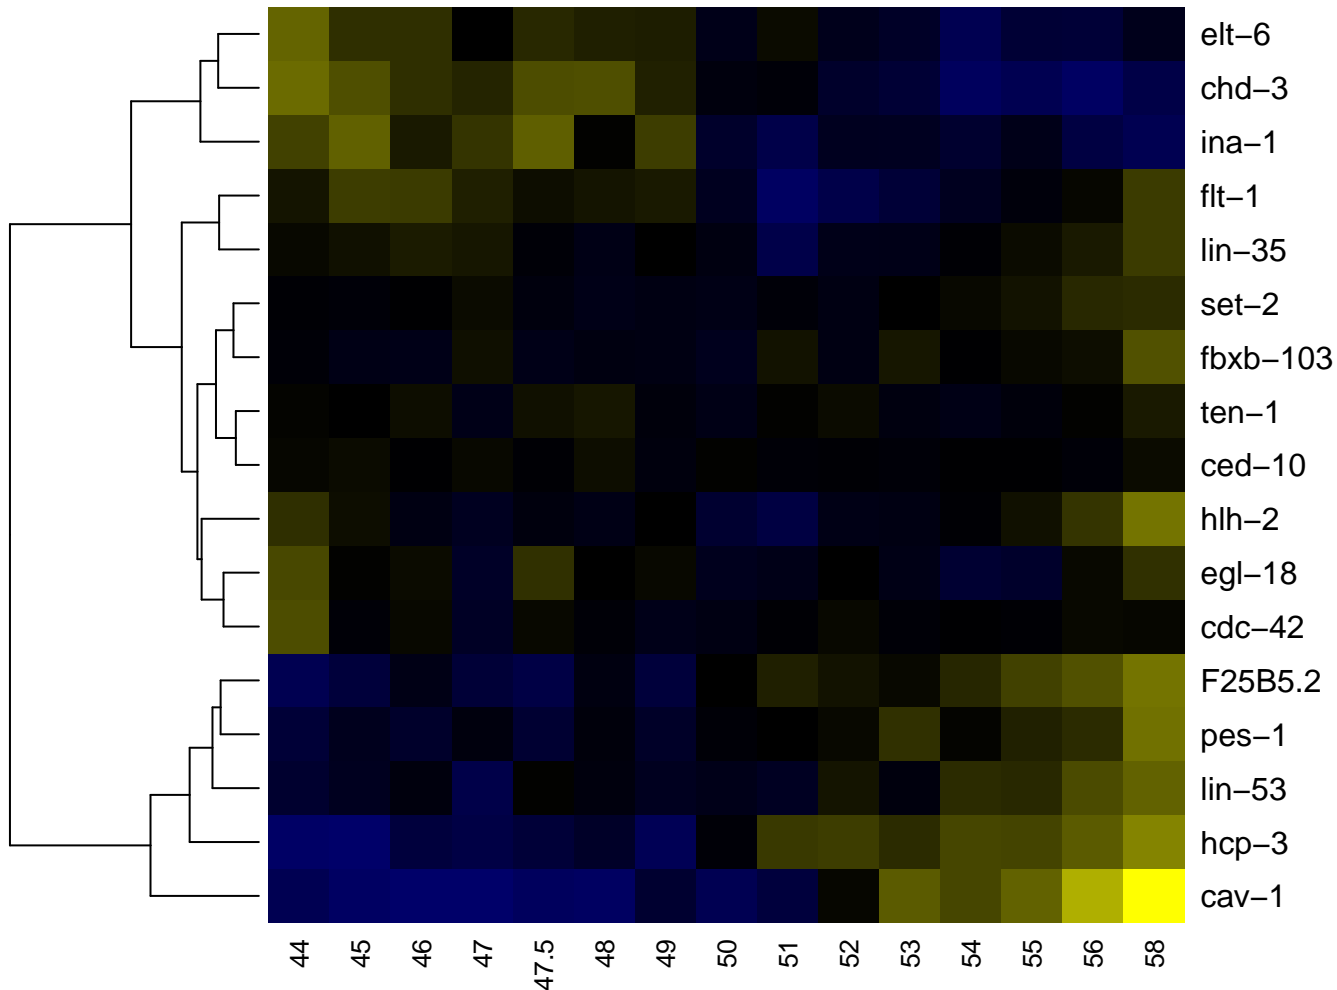

# ABpraaaaa



# ABpraaaaaa



# ABpraaaaap





# ABpraaaaapv



# ABpraaaap

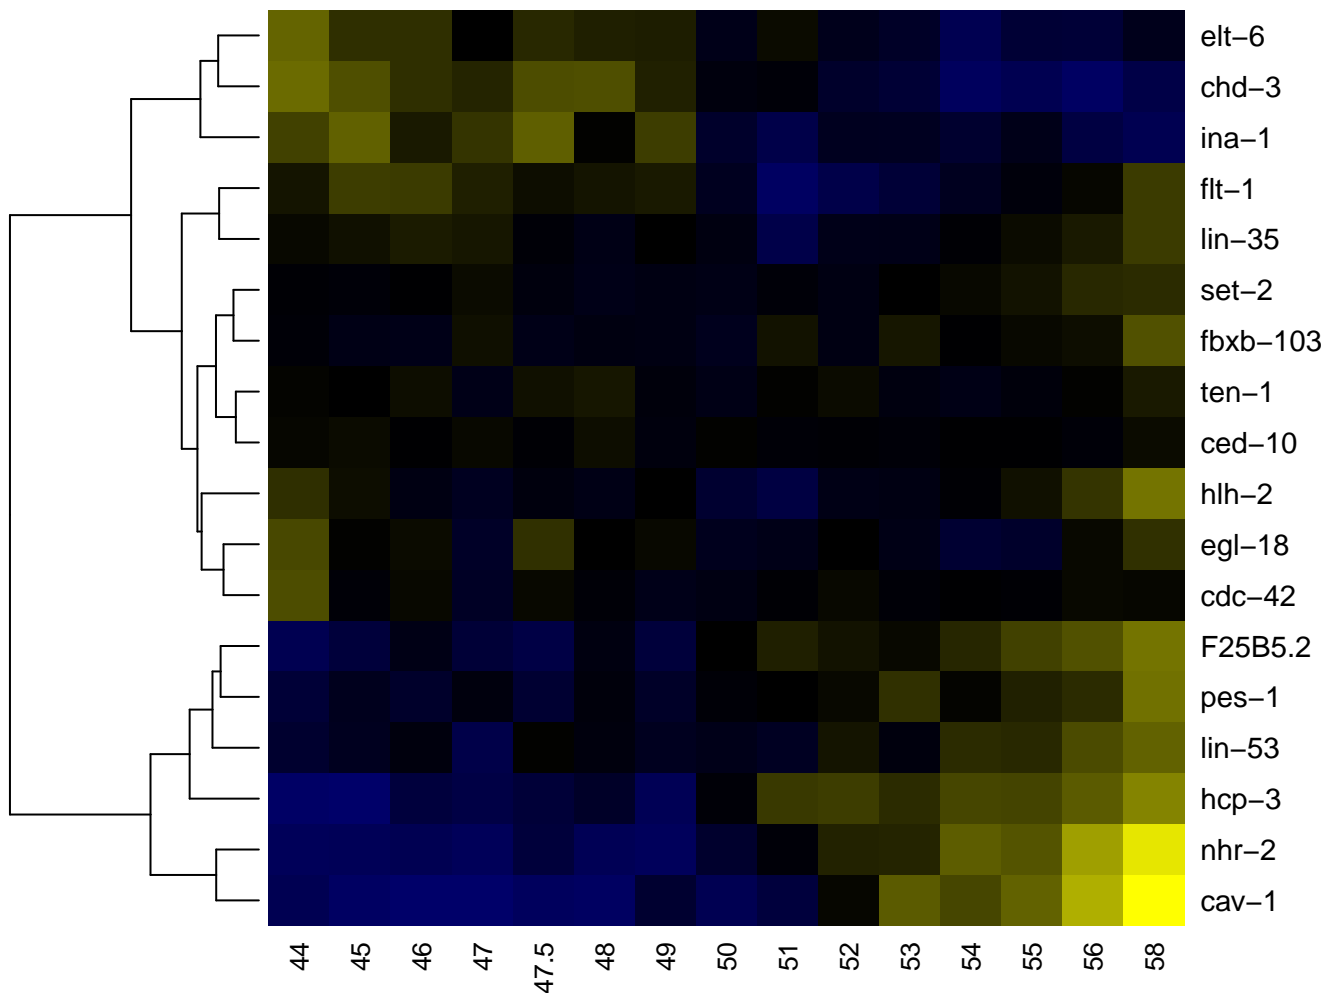

# ABpraaaapa



# ABpraaaapp

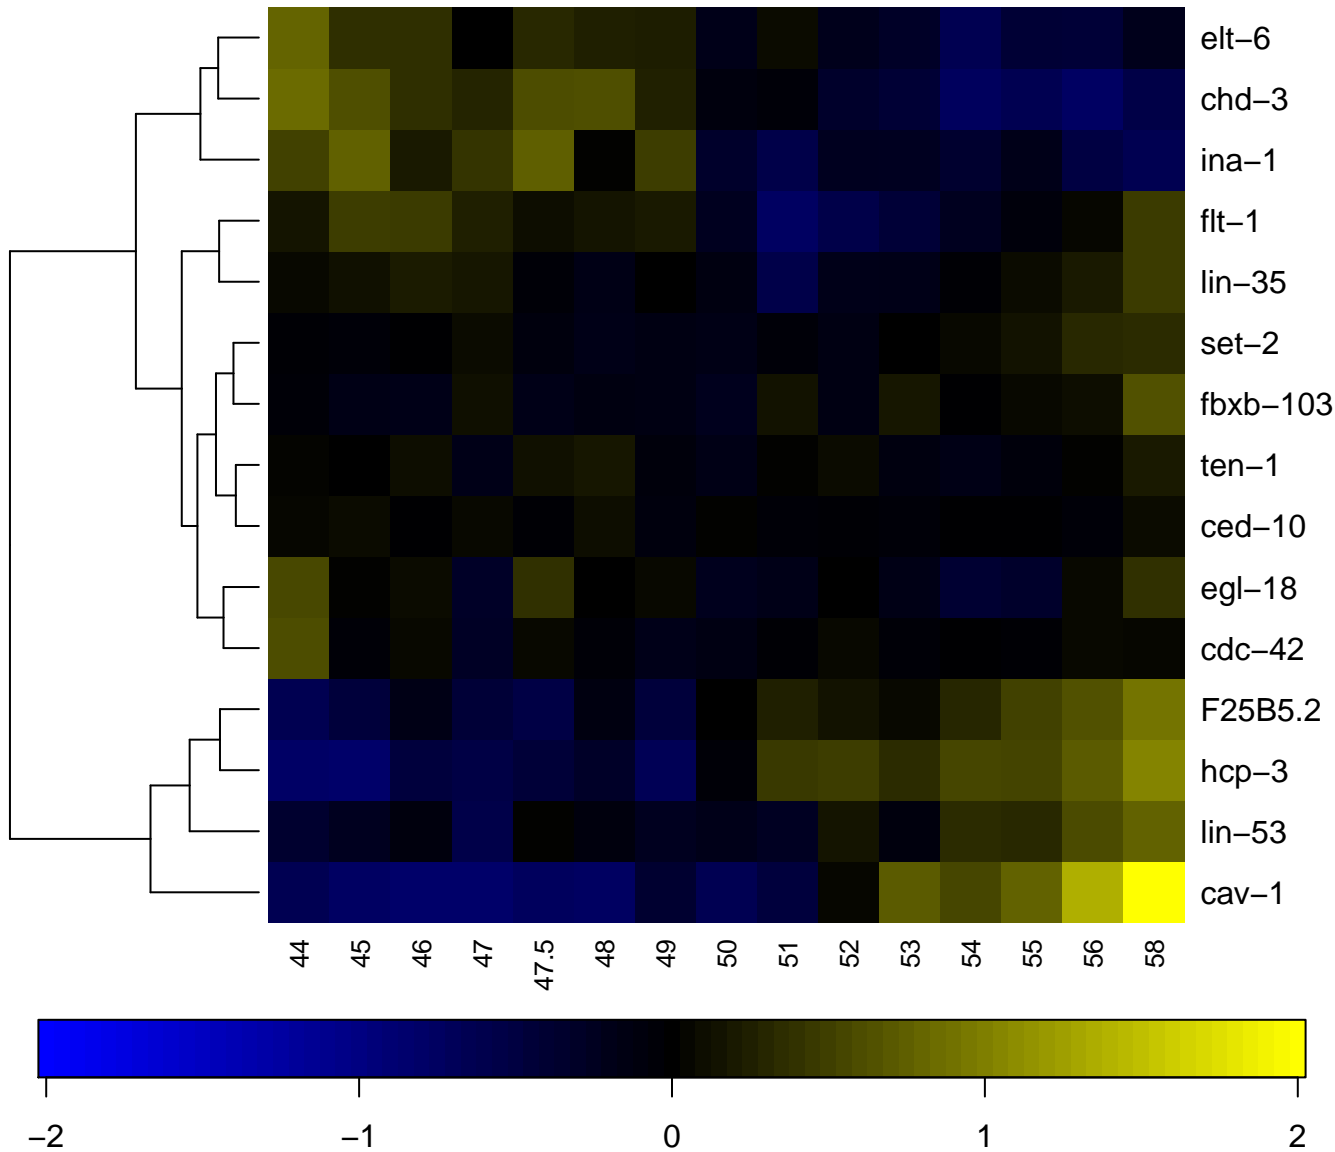

# ABpraaaappa



# ABpraaaappp



# ABpraaaapppp



# ABpraaap

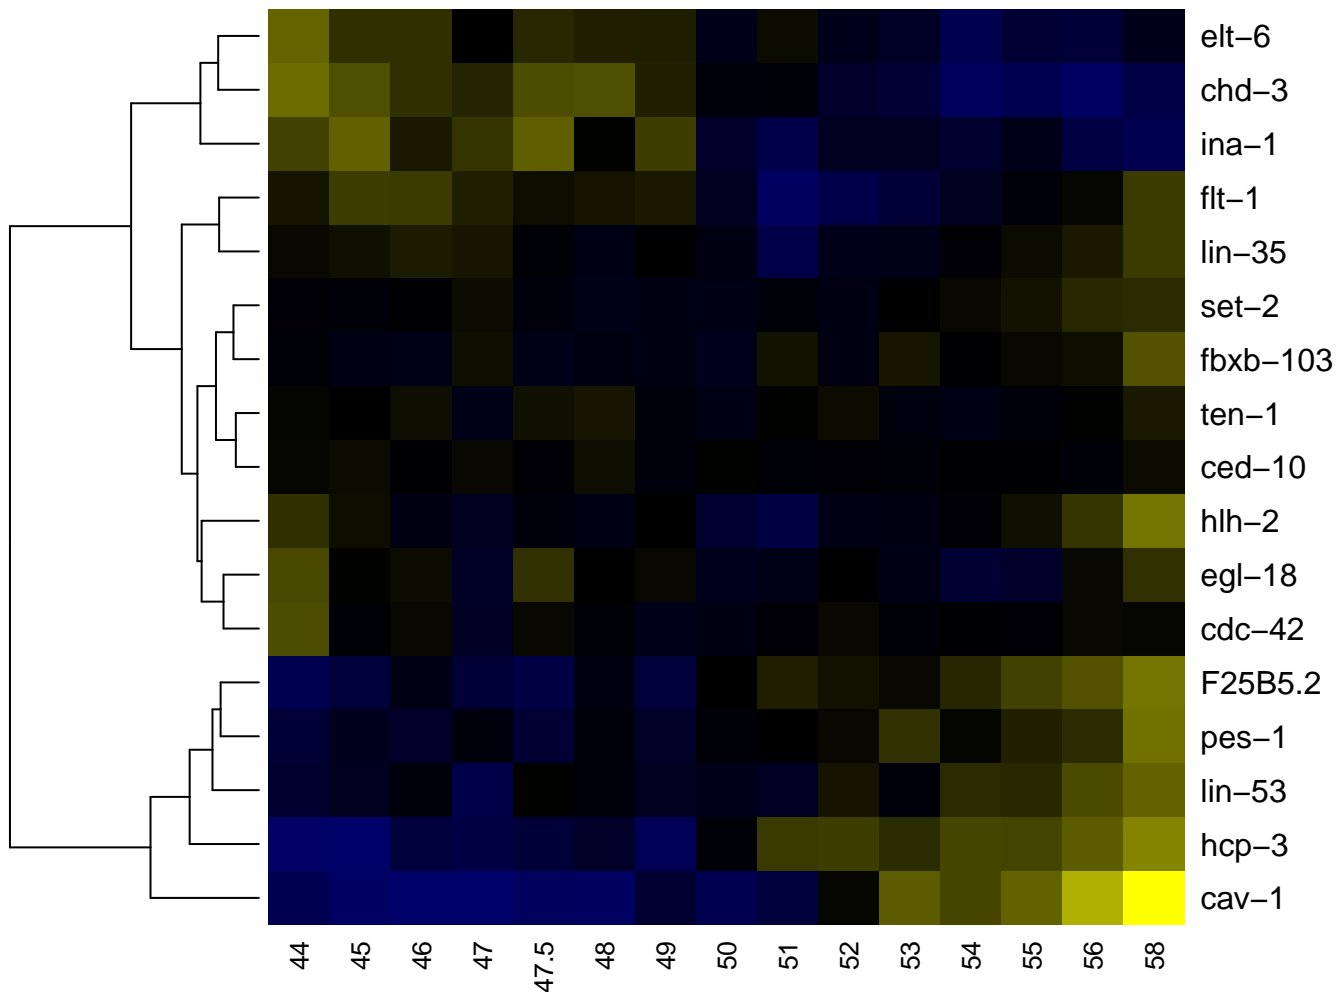



# ABpraaapa

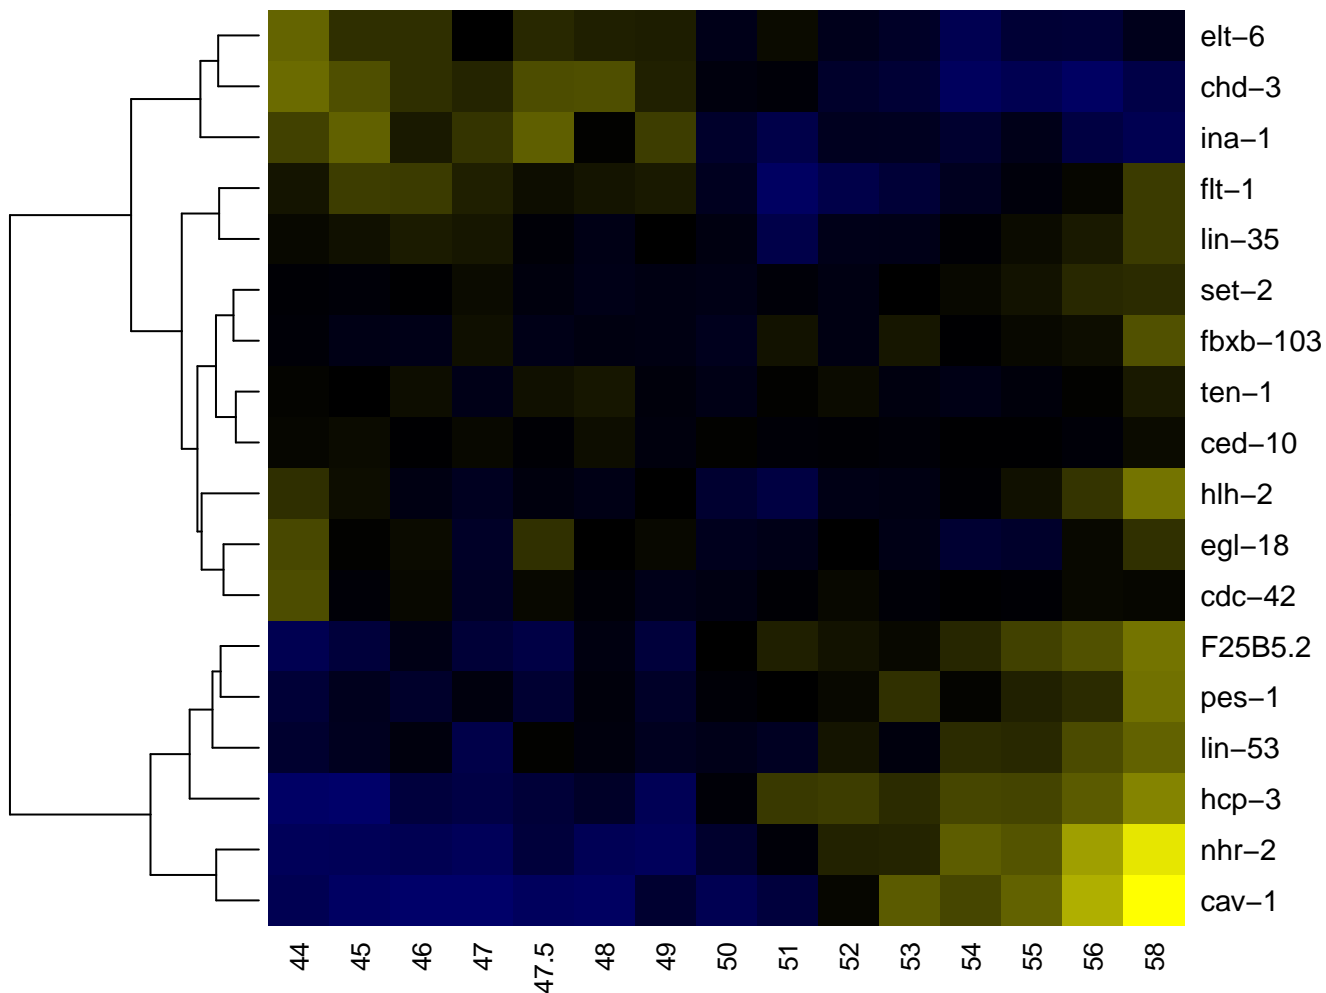

# ABpraaapaa



# ABpraaapaav



# ABpraaapap



# ABpraapapa



# ABpraaapapap



# ABpraapapp



# ABpraaapp

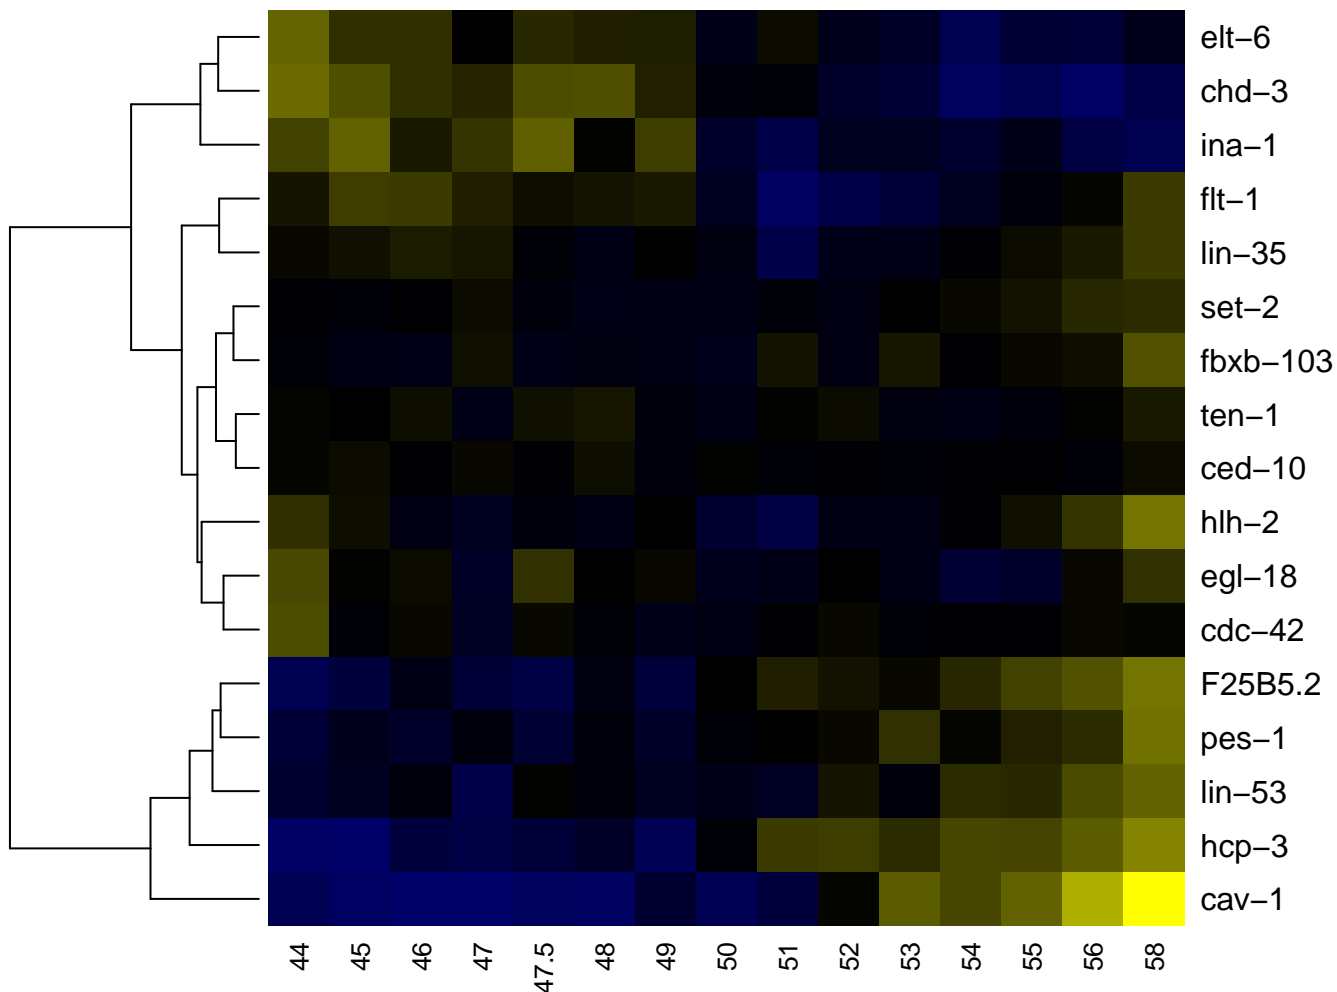



# ABpraaappa

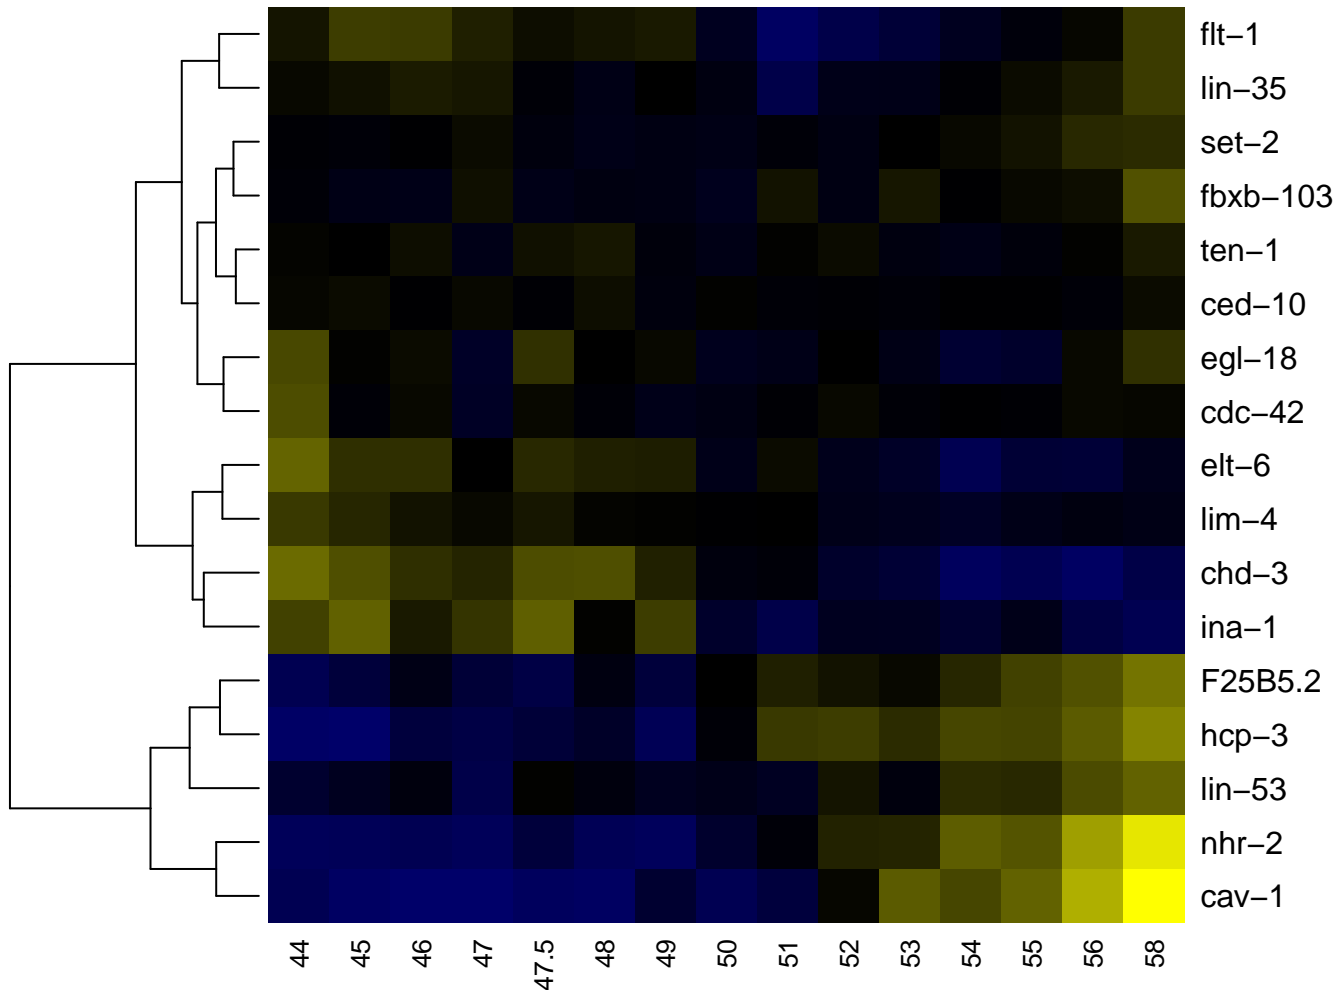

# ABpraaapp



# ABpraaappa



# ABpraaappap



# ABpraapppp



# ABpraap



# ABpraapa



# ABpraapaa





# ABpraapaaa



# ABpraapaaa



# ABpraapaap



# ABpraapap



# ABpraapapa

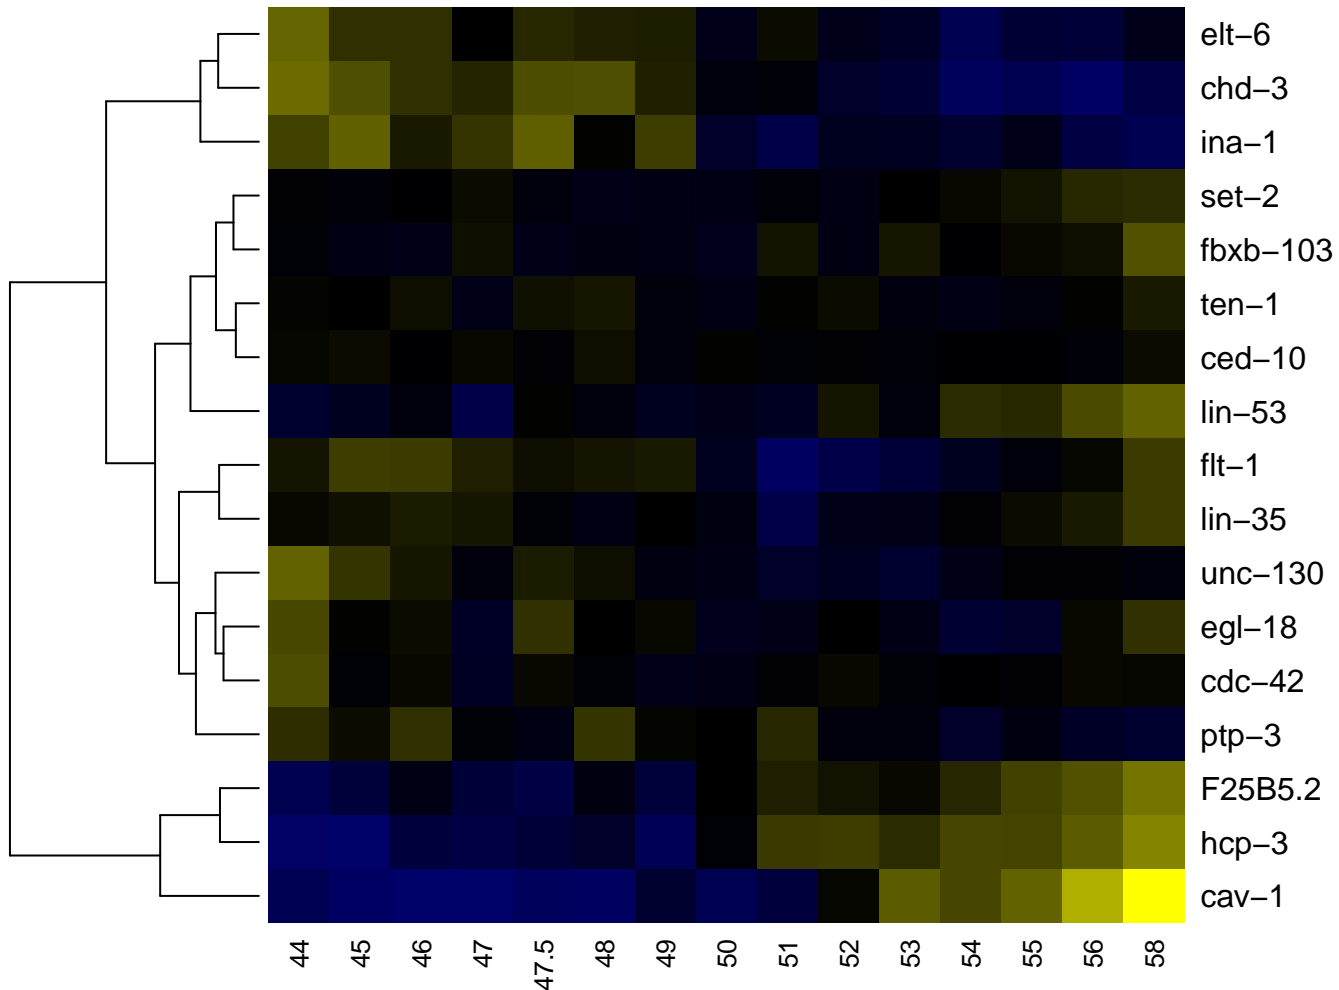

-2

-1

0

1

2

# ABpraapapp



# ABpraapapp



# ABpraapapppp

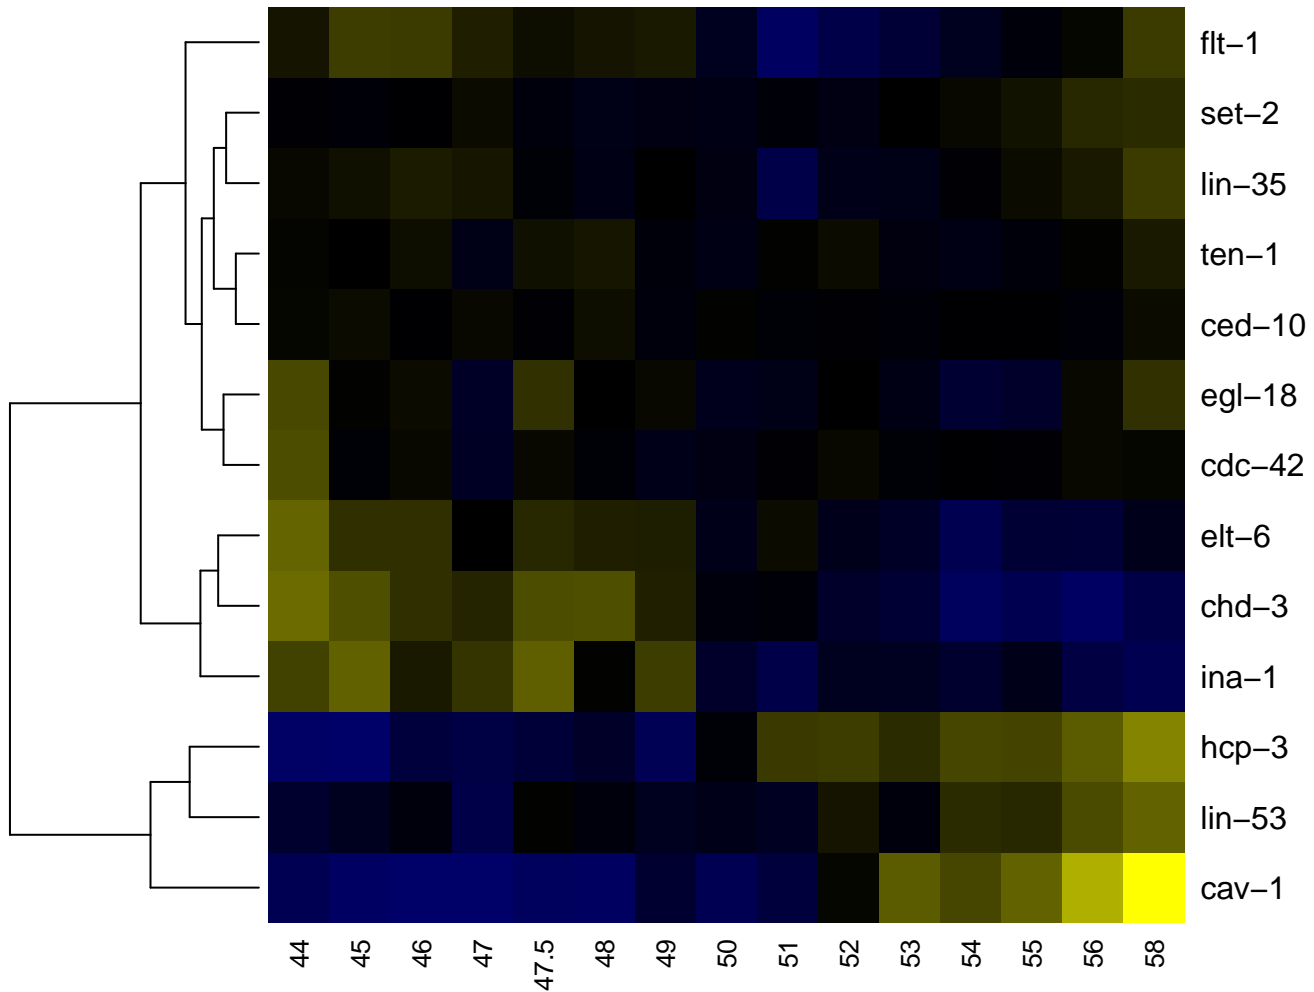



# ABpraapp

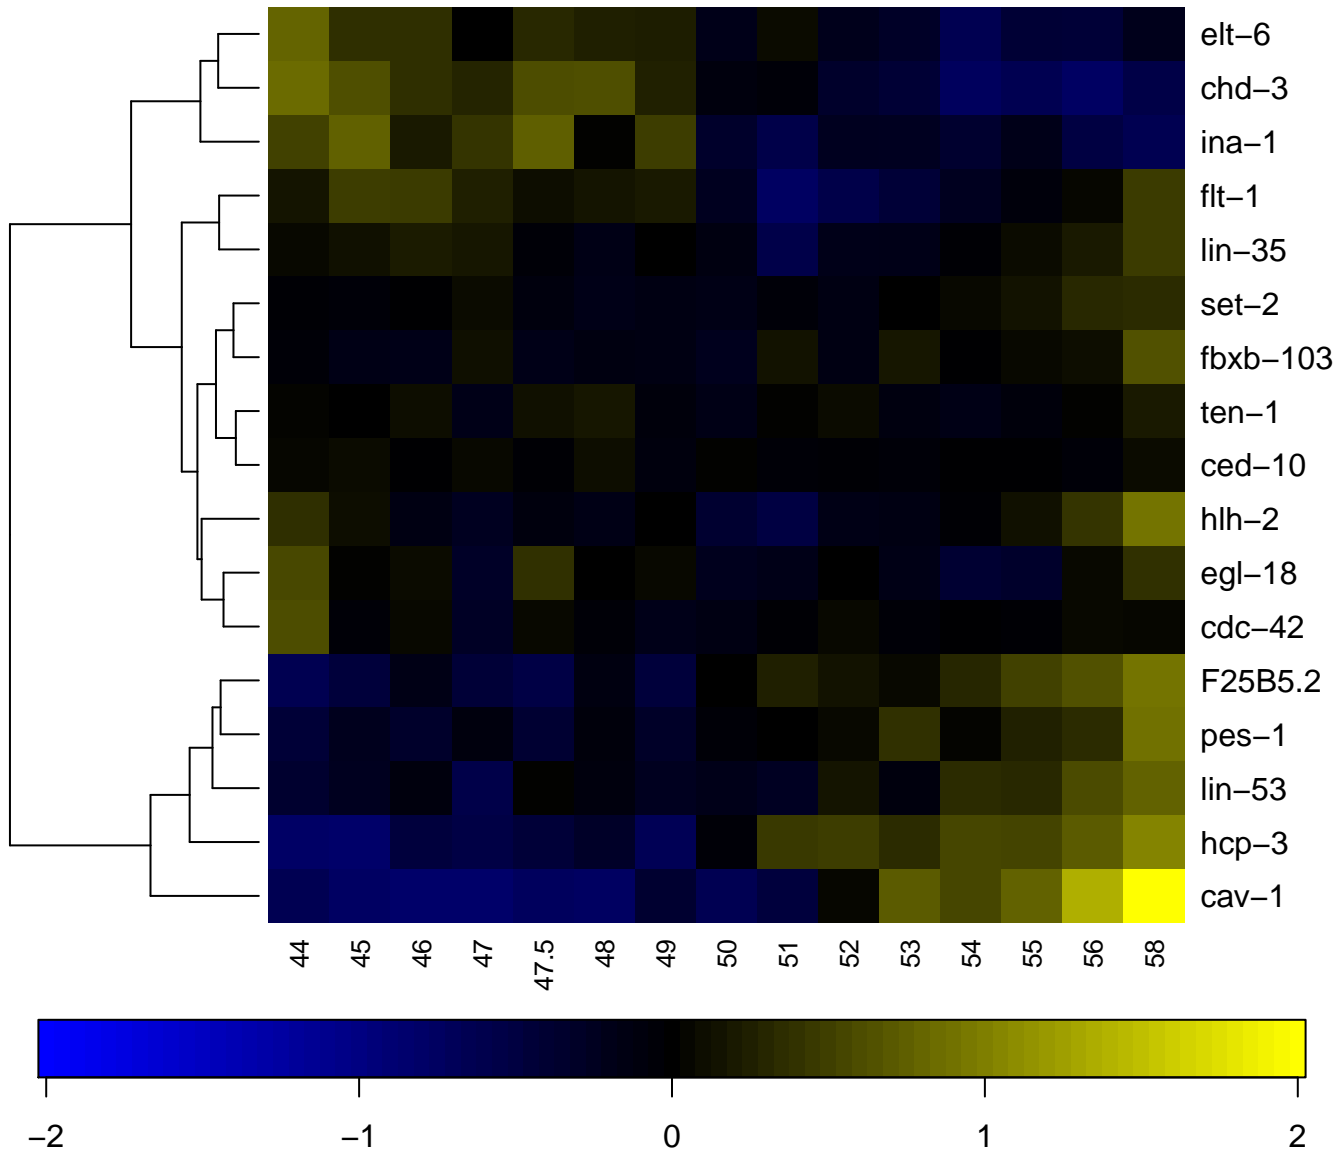

# ABpraappa



# ABpraappa



# ABpraappap



# ABpraapp

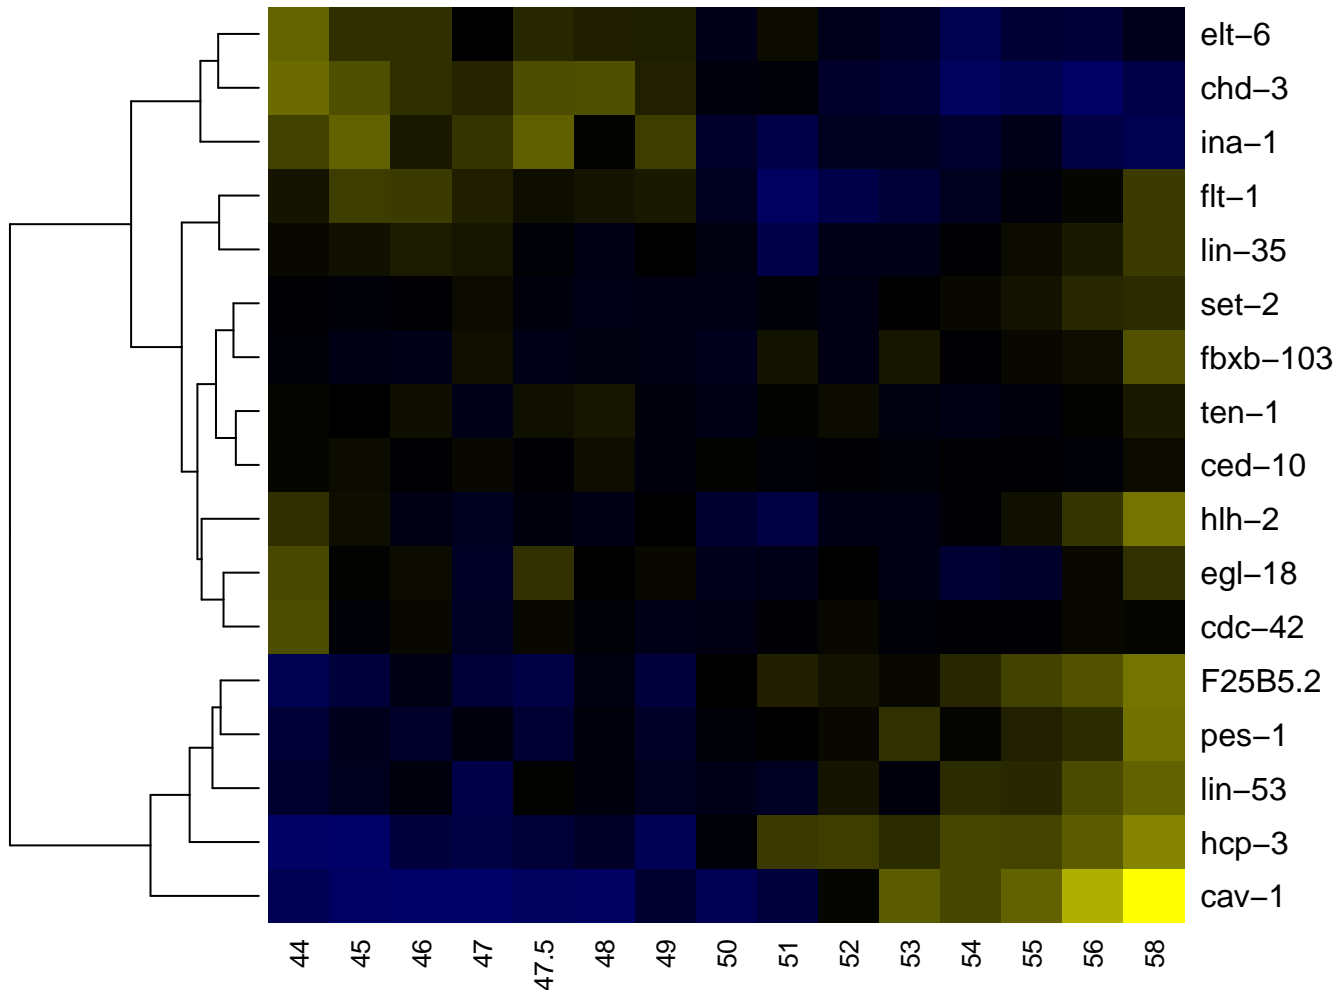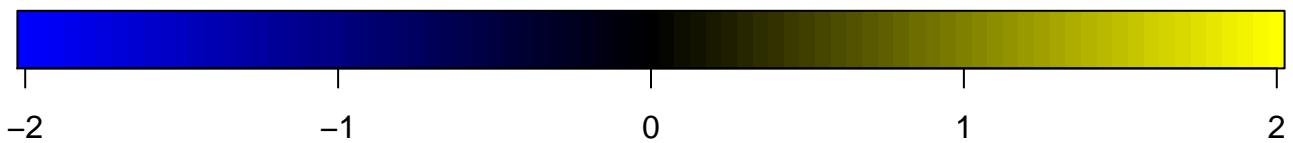

# ABpraappa

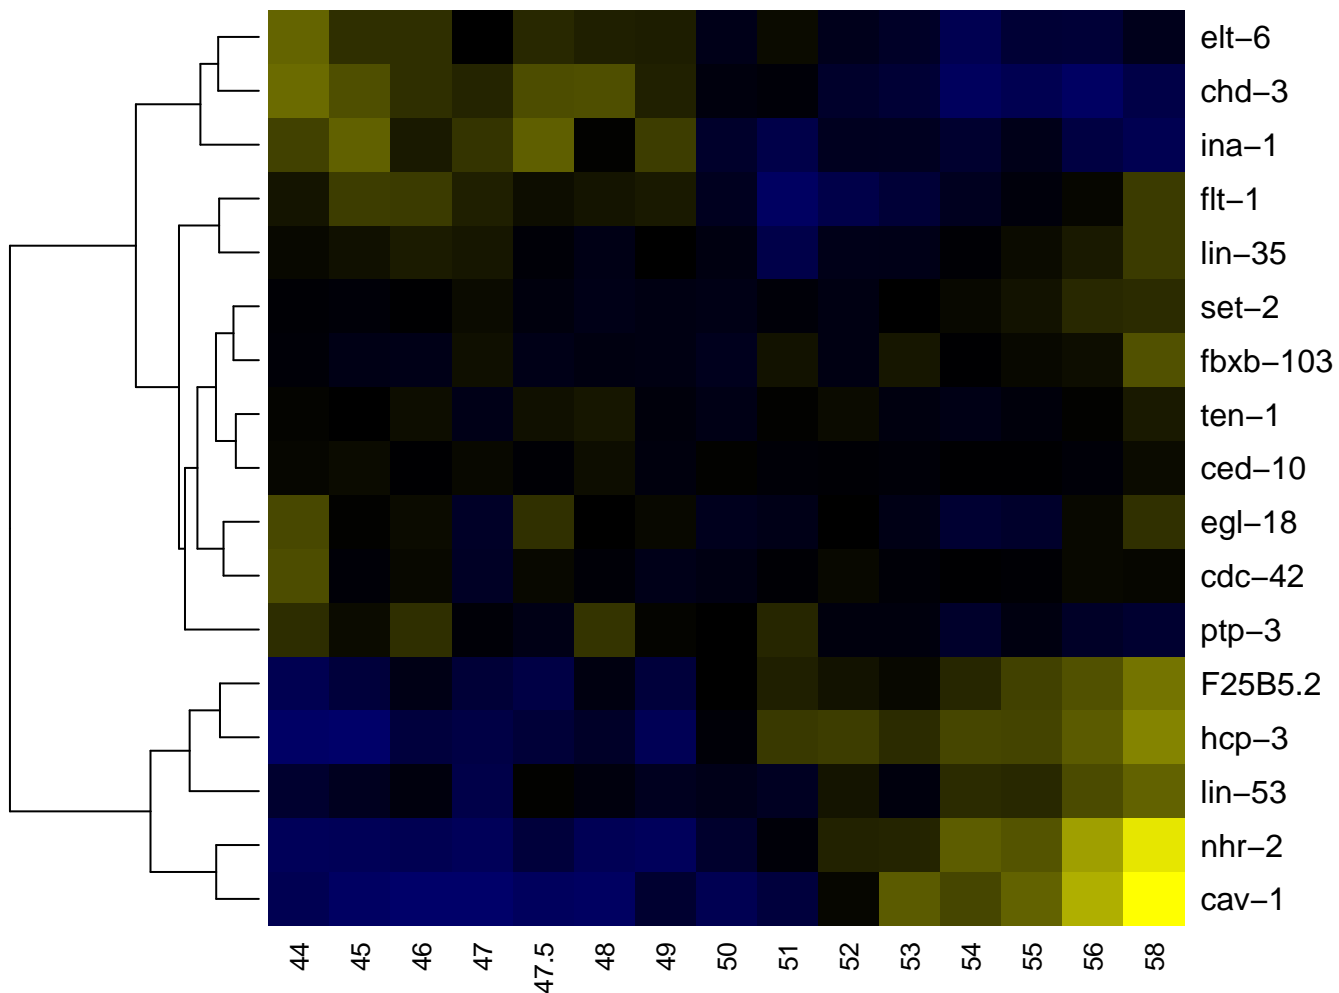

# ABpraapppp

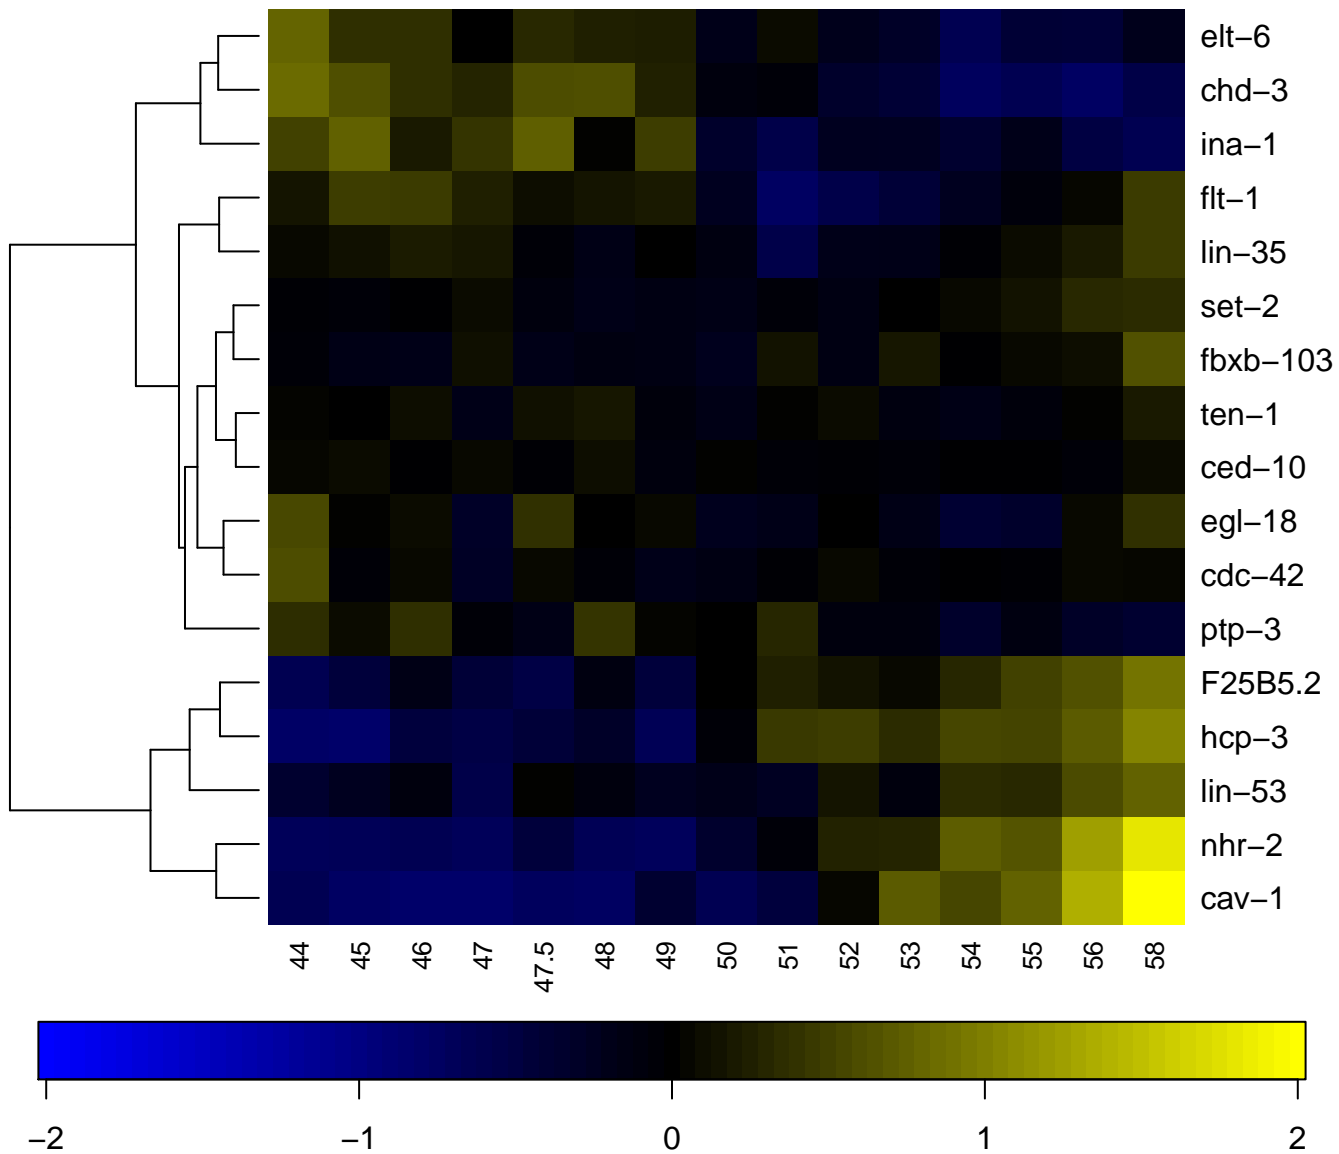

# ABprap





# ABprapa

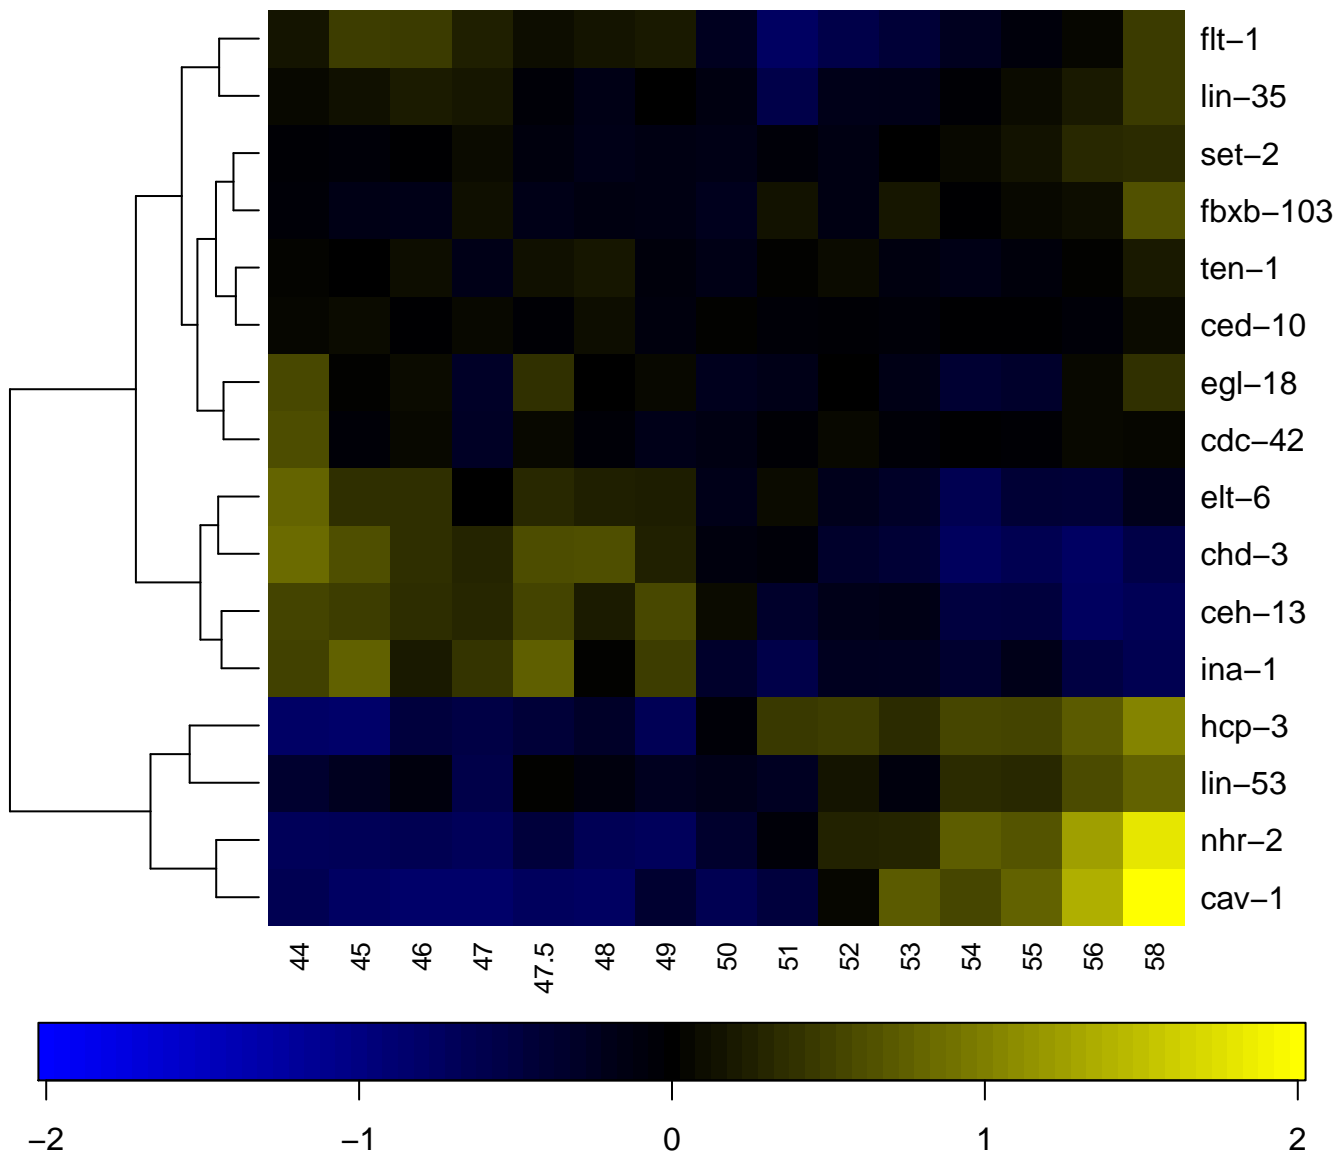

# ABprapaa

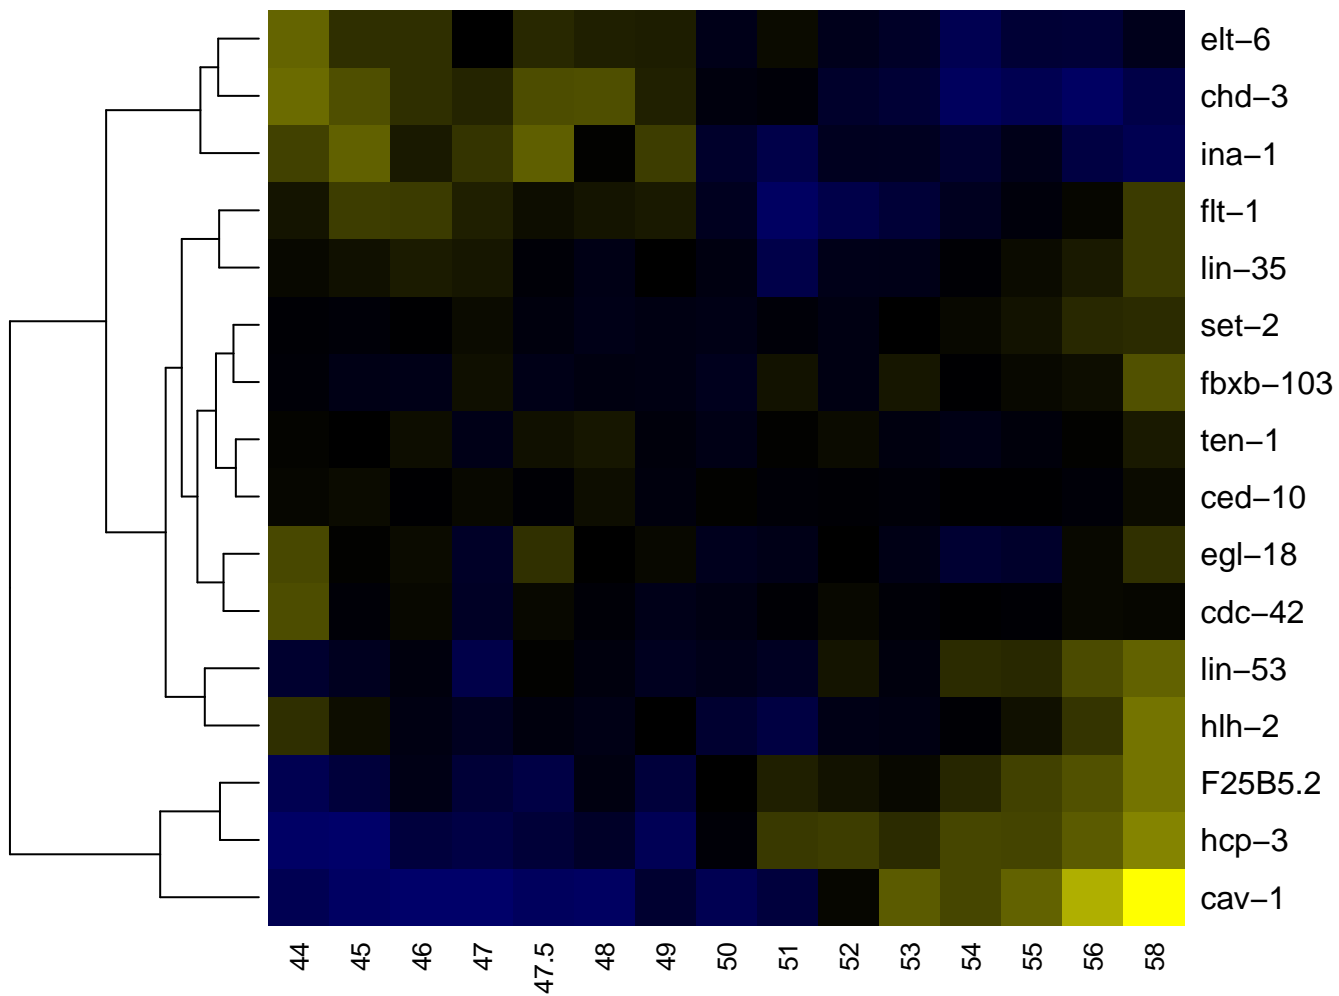

# ABprapaaa

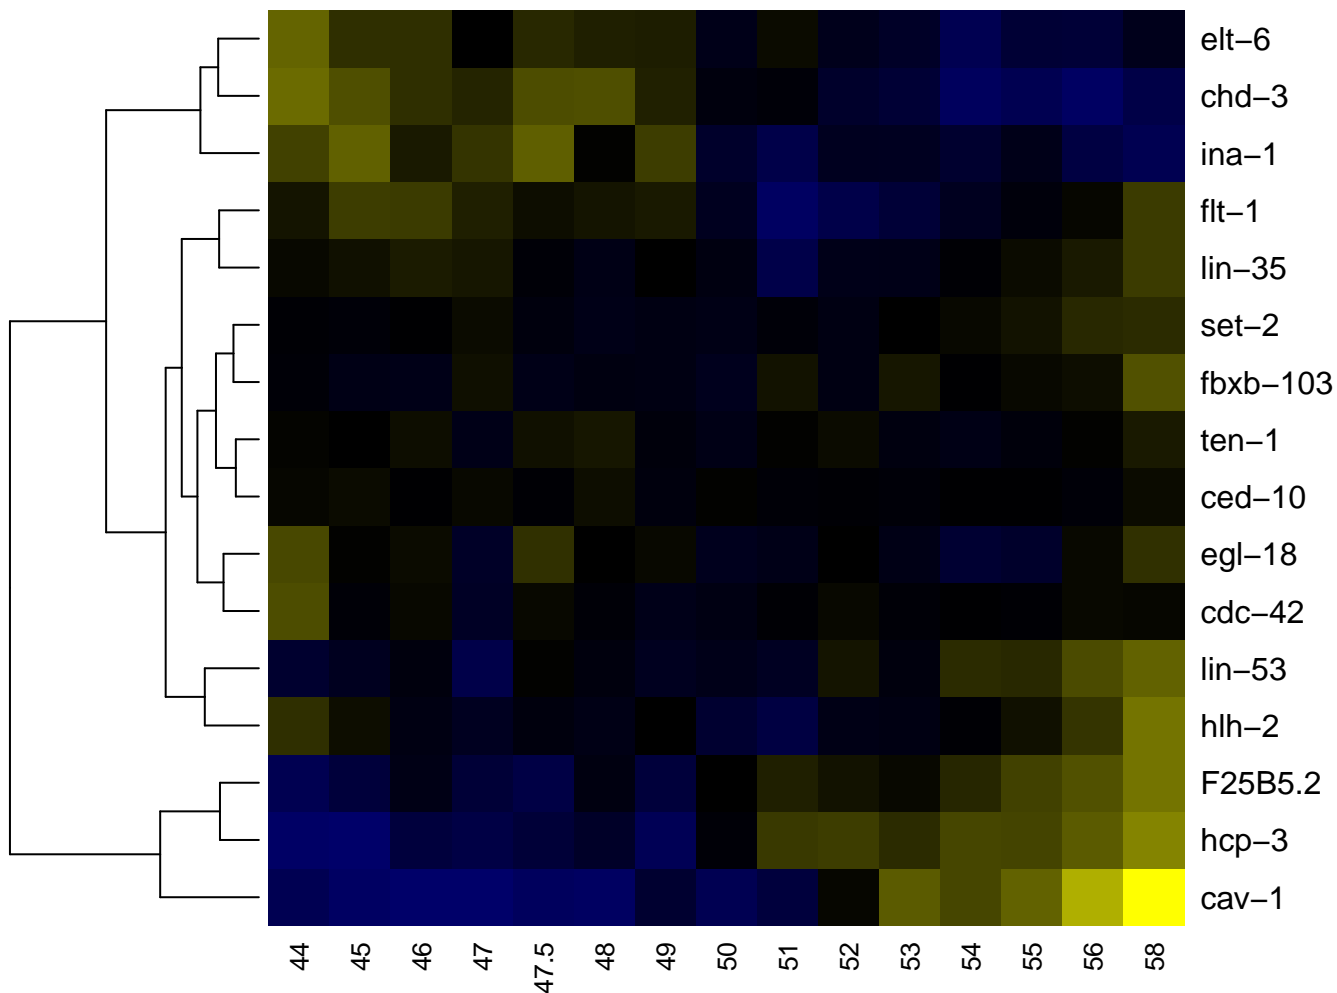

# ABprapaaa



# ABprapaaaaa



# ABprapaaaap



# ABprapaaap

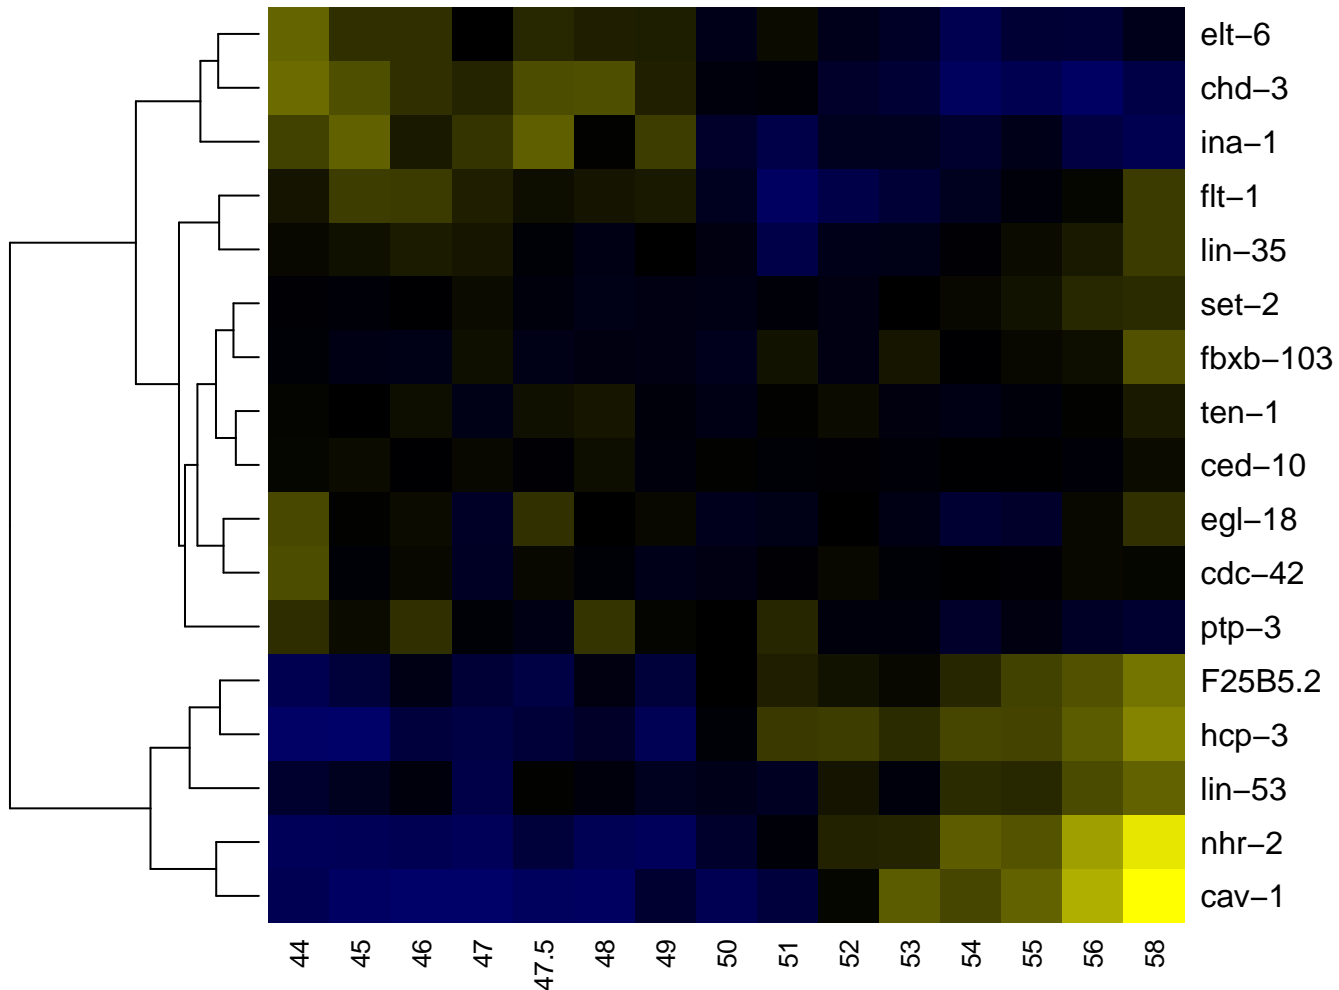

# ABprapaaapa





# ABprapaap

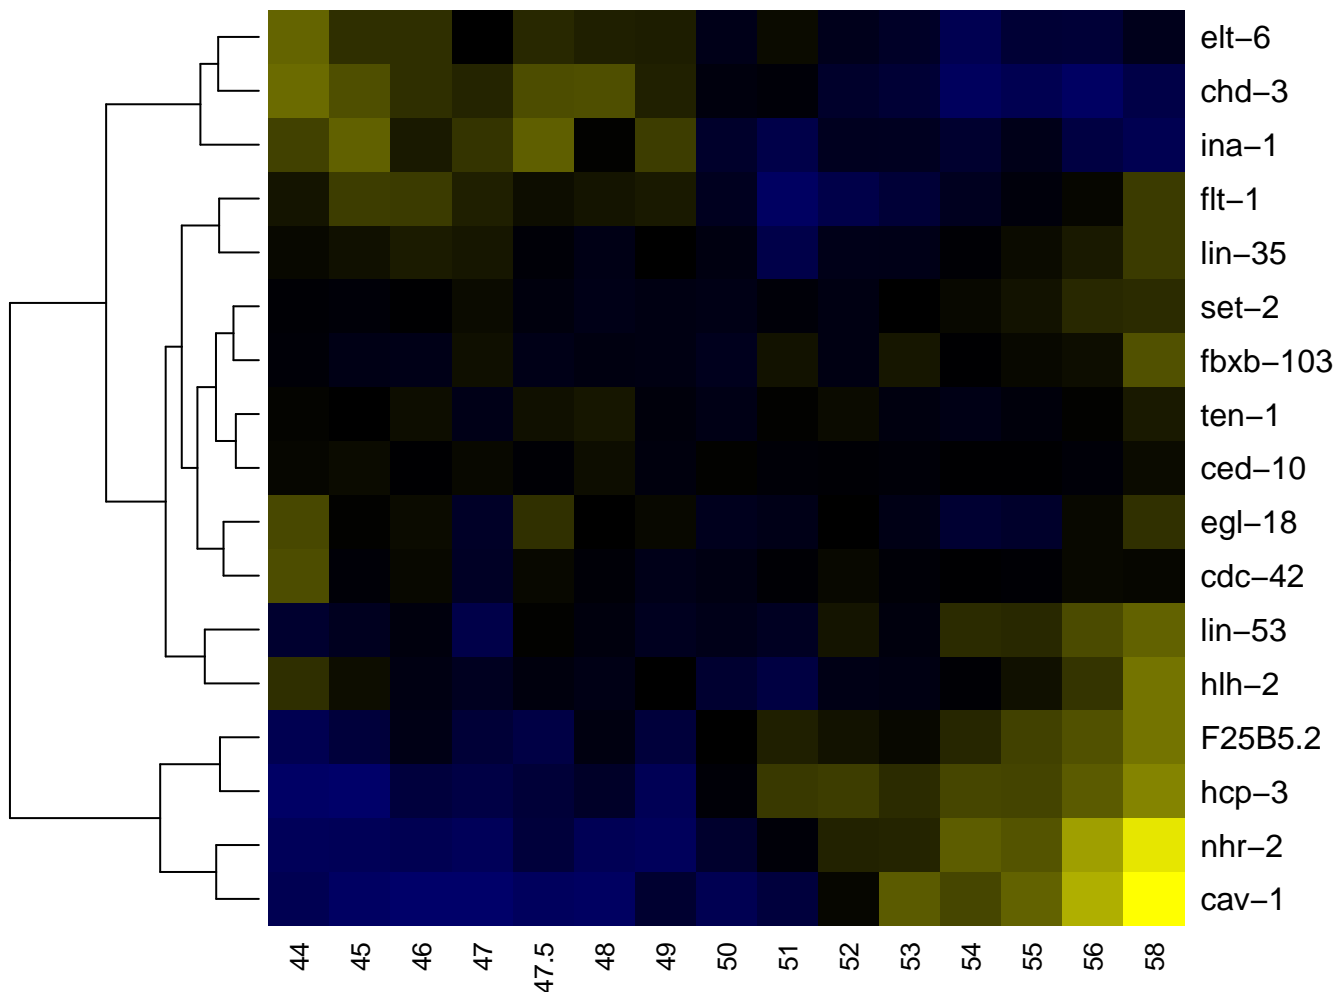

# ABprapaapp



# ABprapap

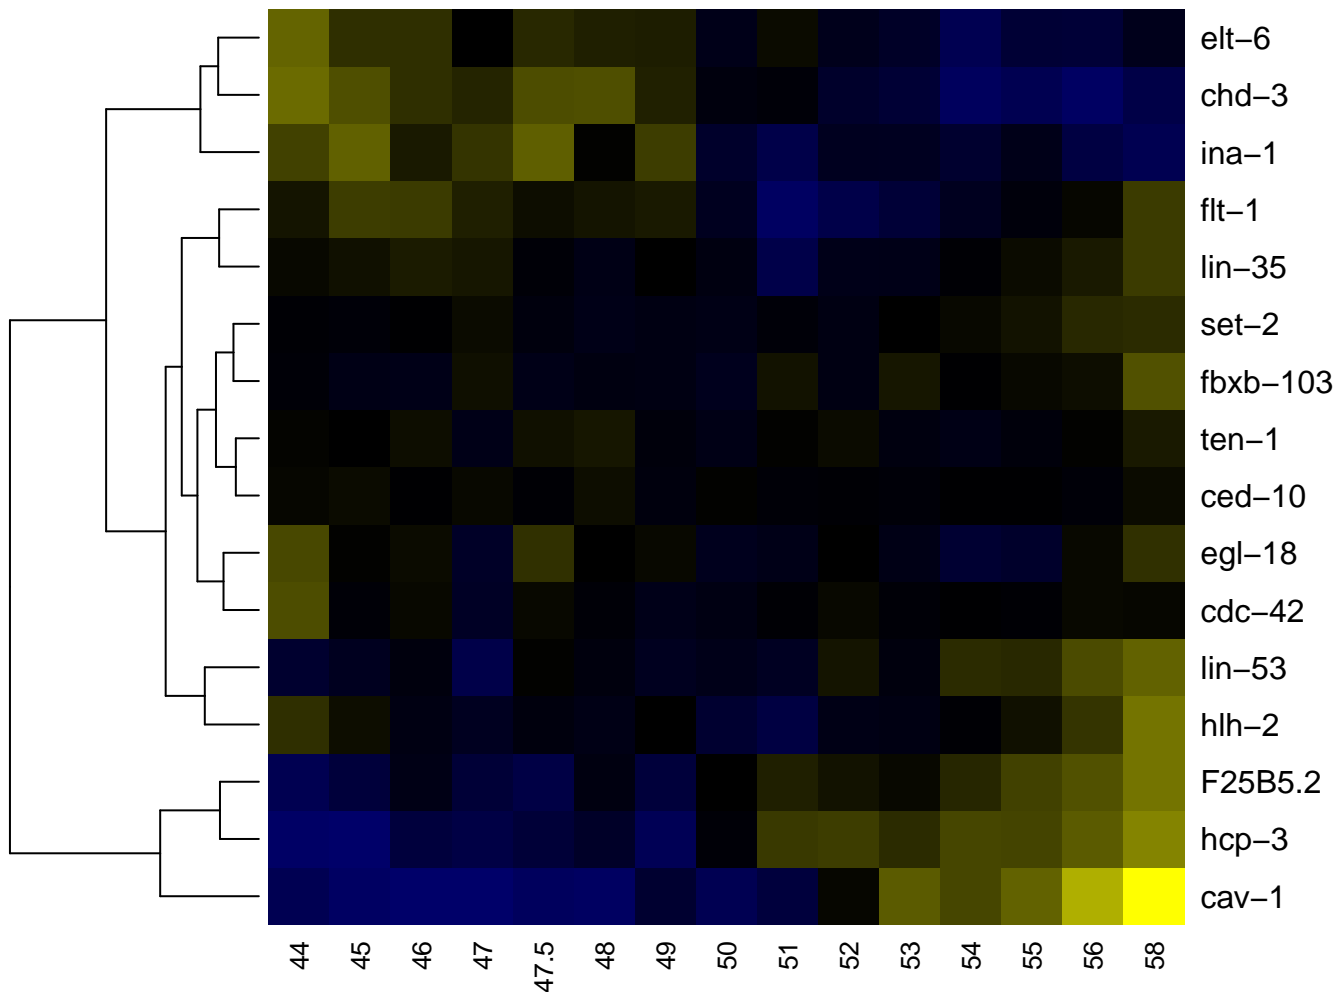

# ABprapapa



# ABprapapaa

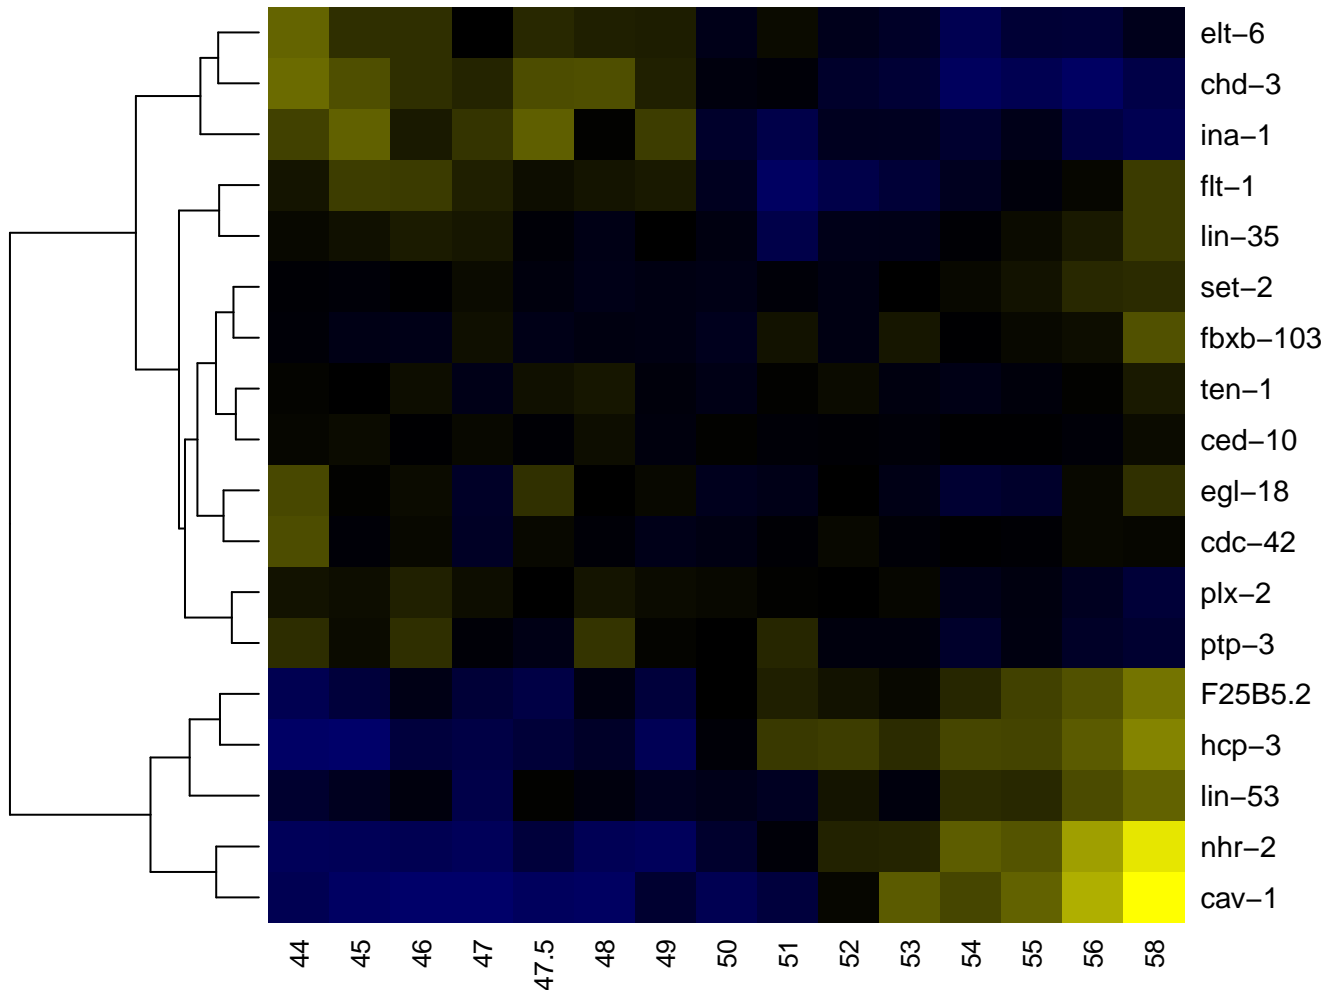

# ABprapapap



# ABprapapp



# ABprapapp





# ABprapapppa



# ABprapapppp



# ABprapappppa



# ABprapappppp



# ABprapp

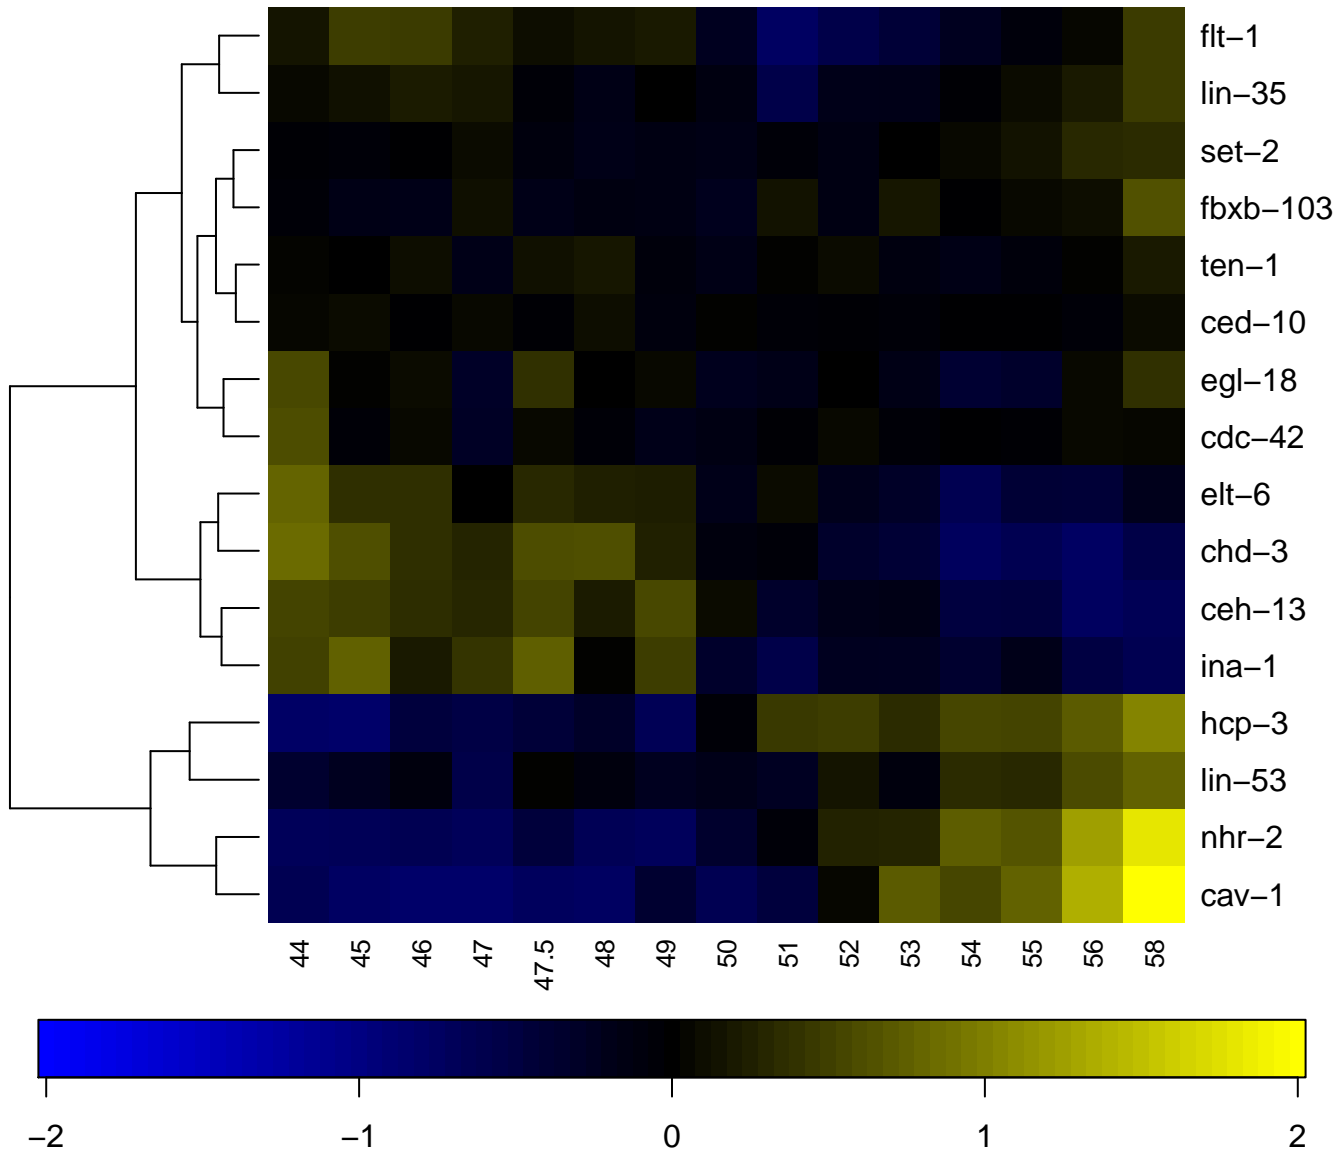

# ABprappa



# ABprappaa



# ABprappaaa





# ABprappaap



# ABprappap



# ABprappapp



# ABprapp



# ABprapppa

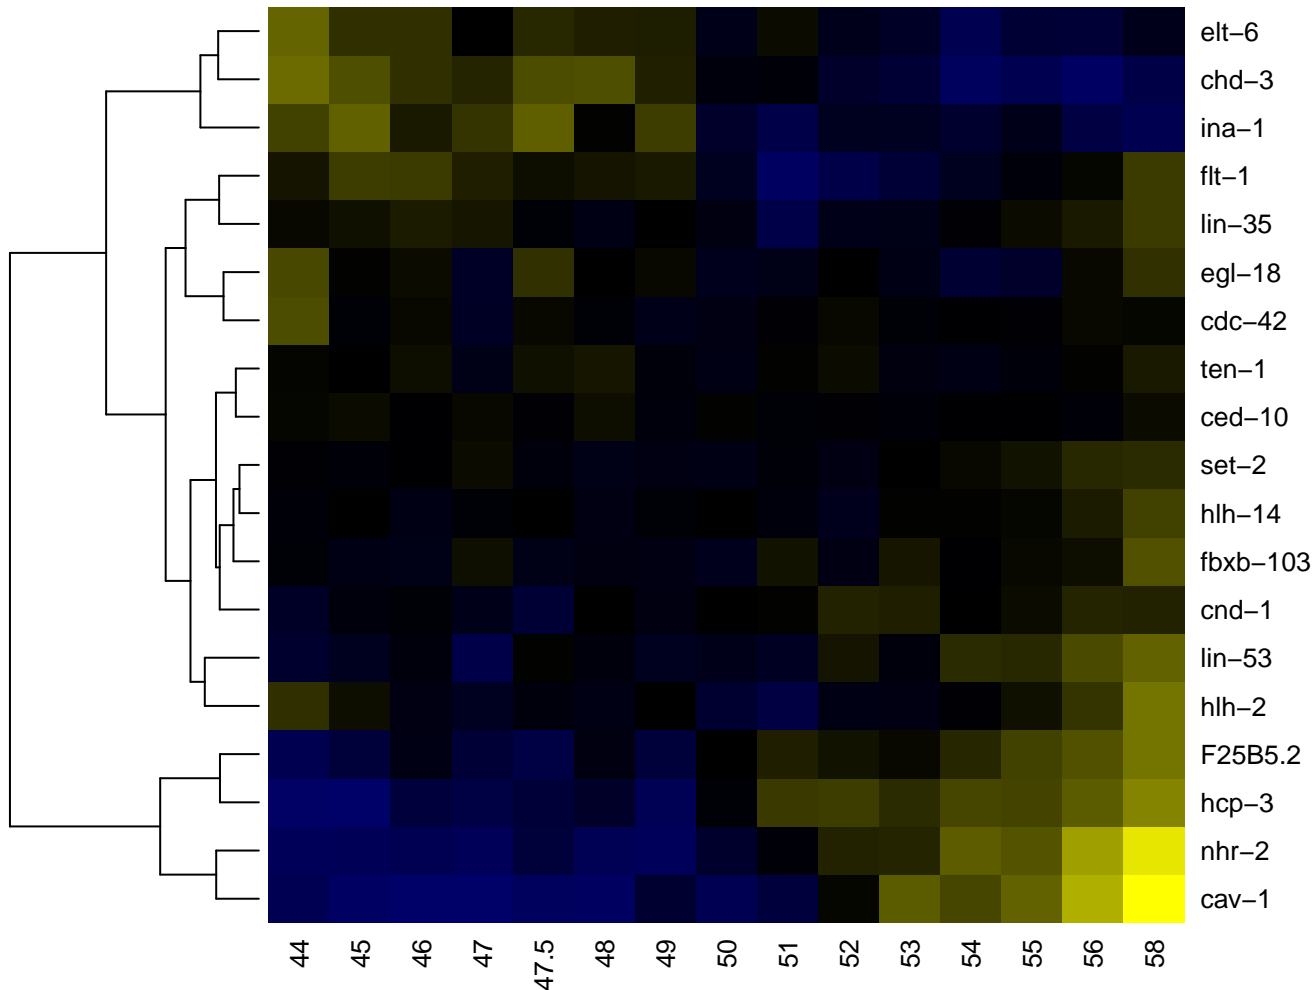

# ABprappaa



# ABprapppaap



# ABprappap





# ABprappapa



# ABprappapp



# ABprapppp



# ABprappppa



# ABprp



-2

-1

0

1

2

# ABprpa

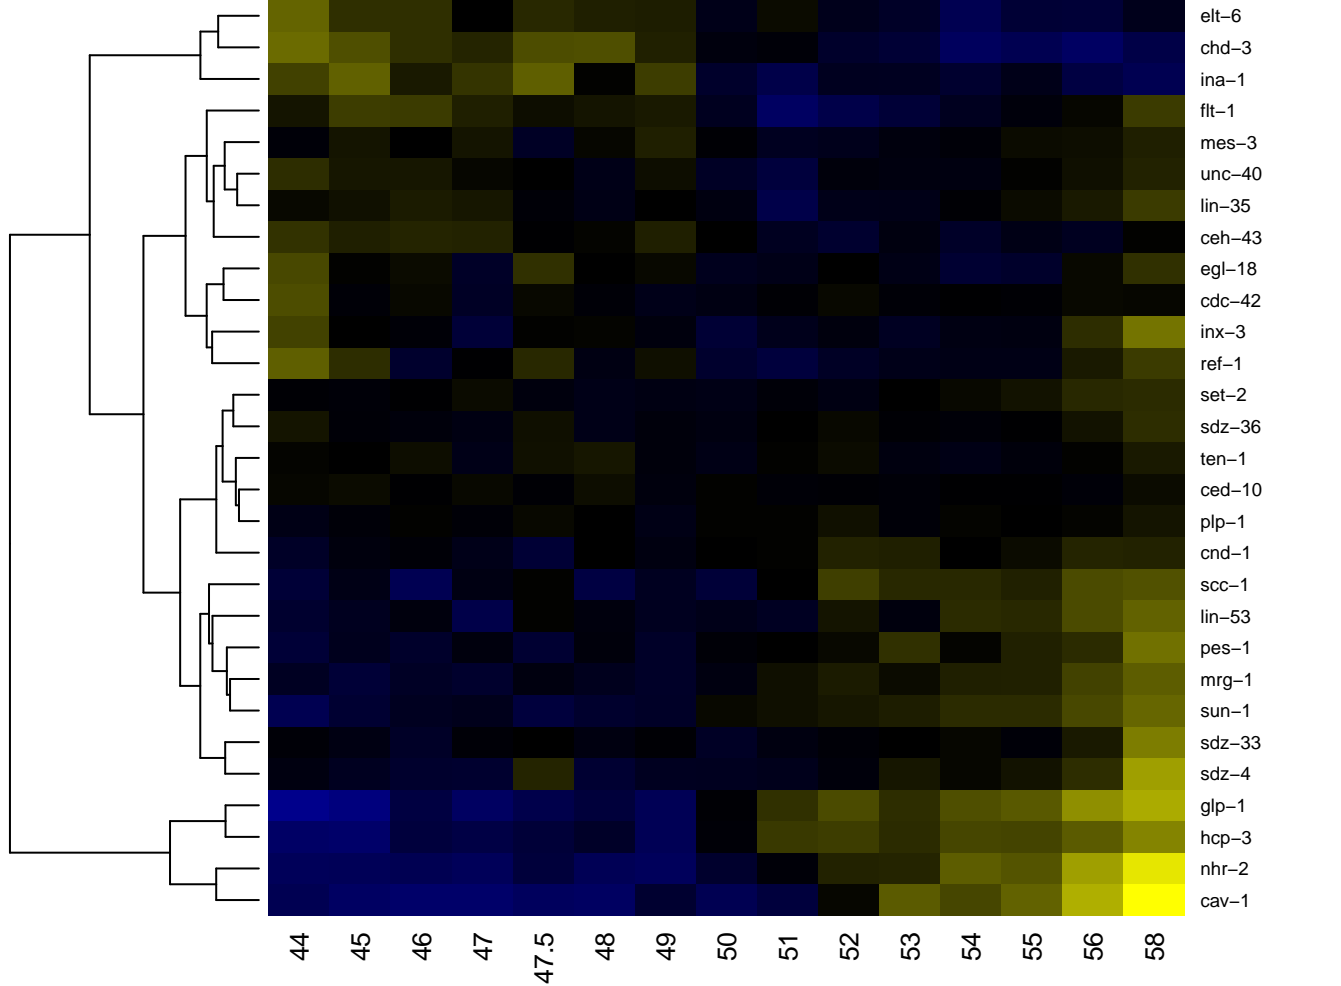

# ABprpaa



# ABprpaaa

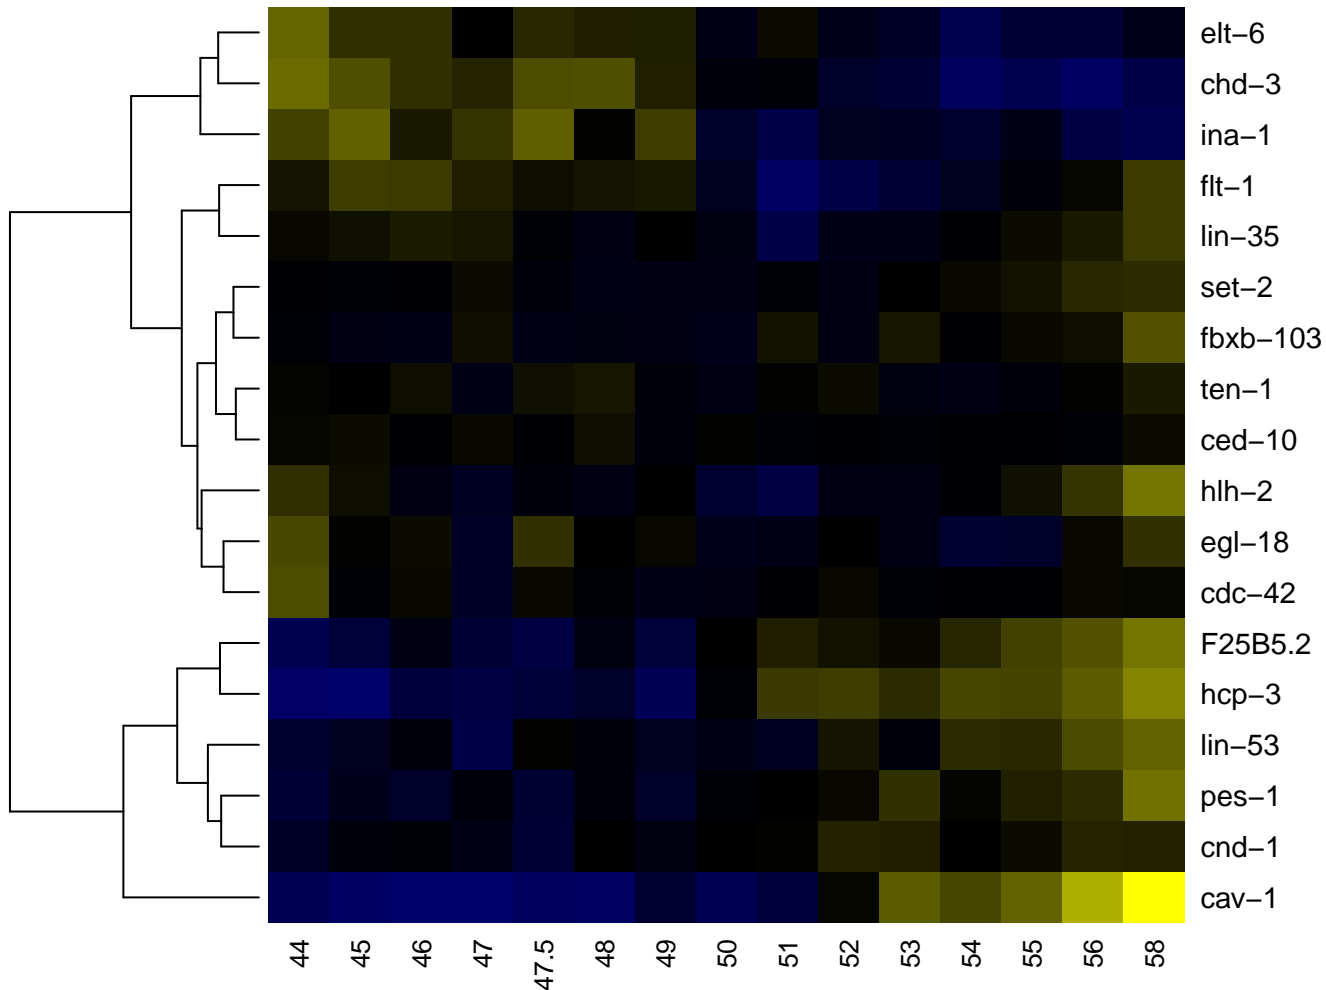



# ABprpaaa



# ABprpaaaaa



# ABprpaaaap



# ABprpaaap



# ABprpaaapa



# ABprpaaapp



# ABprpaaappa



# ABprpaaappap





# ABprpaap



# ABprpaapa



# ABprpaapa



# ABprpaapap



# ABprpaapp



# ABprpaapp



# ABprpaappa



# ABprpaapp





# ABprpaapppp



# ABprpaappppp





# ABprpapa



# ABprpapaa



# ABprpapaaa

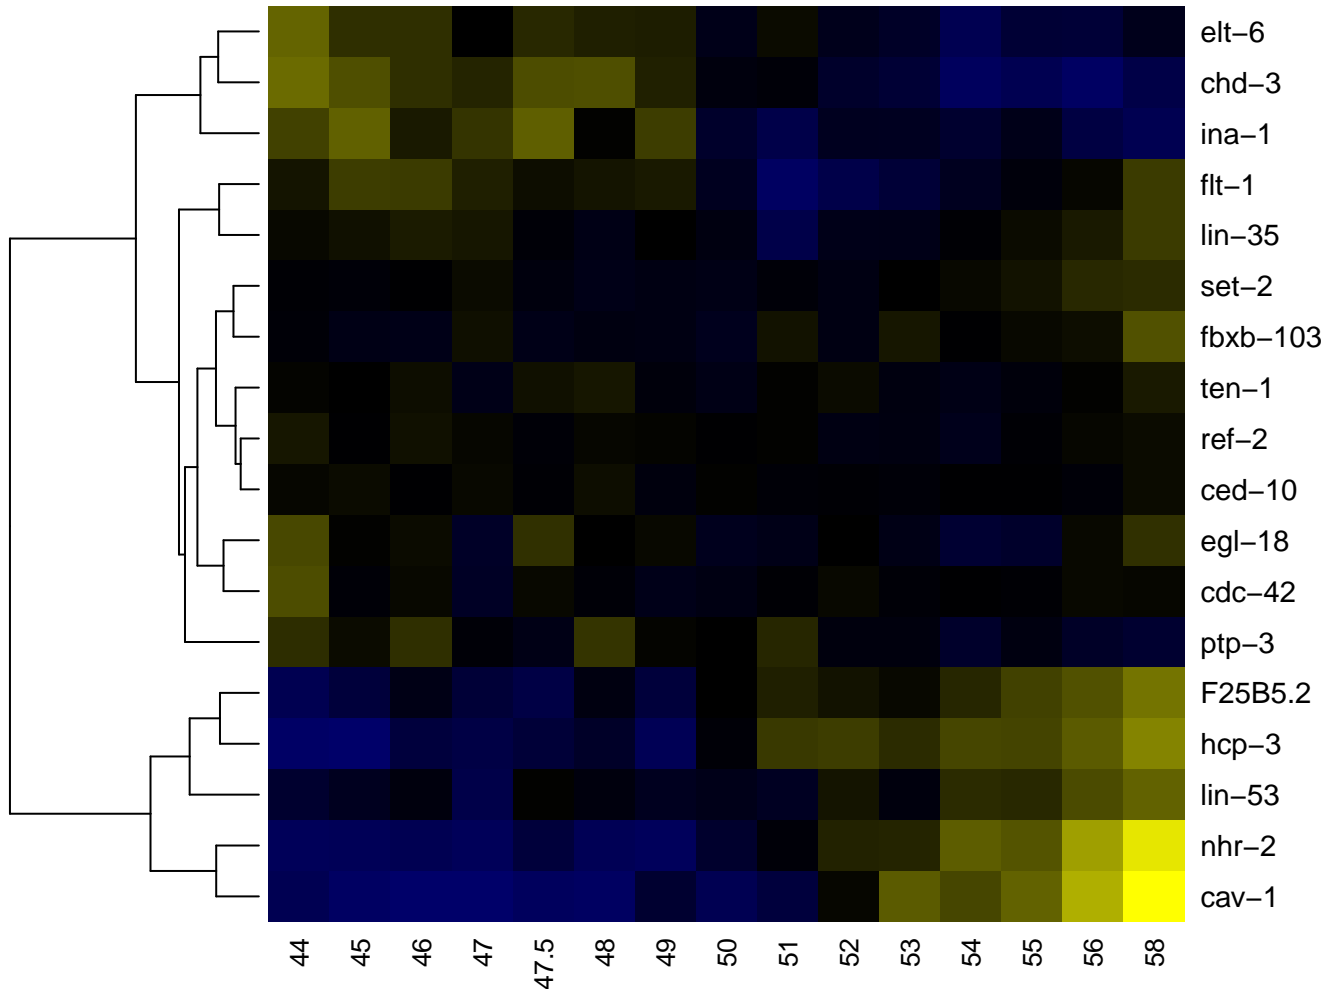

# ABprpapaap



# ABprpapap

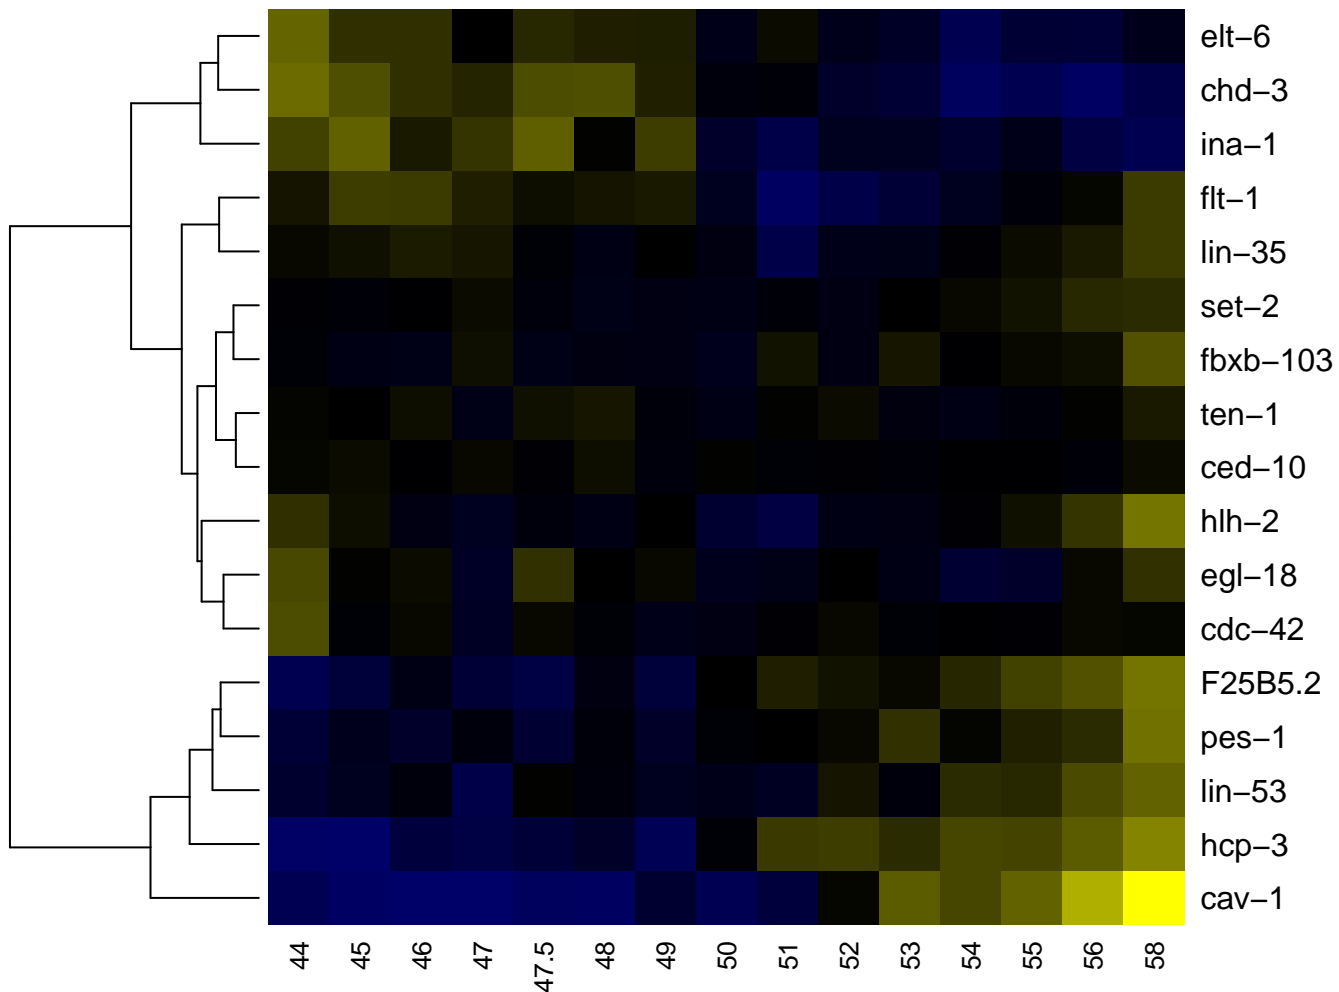



# ABprpapapa

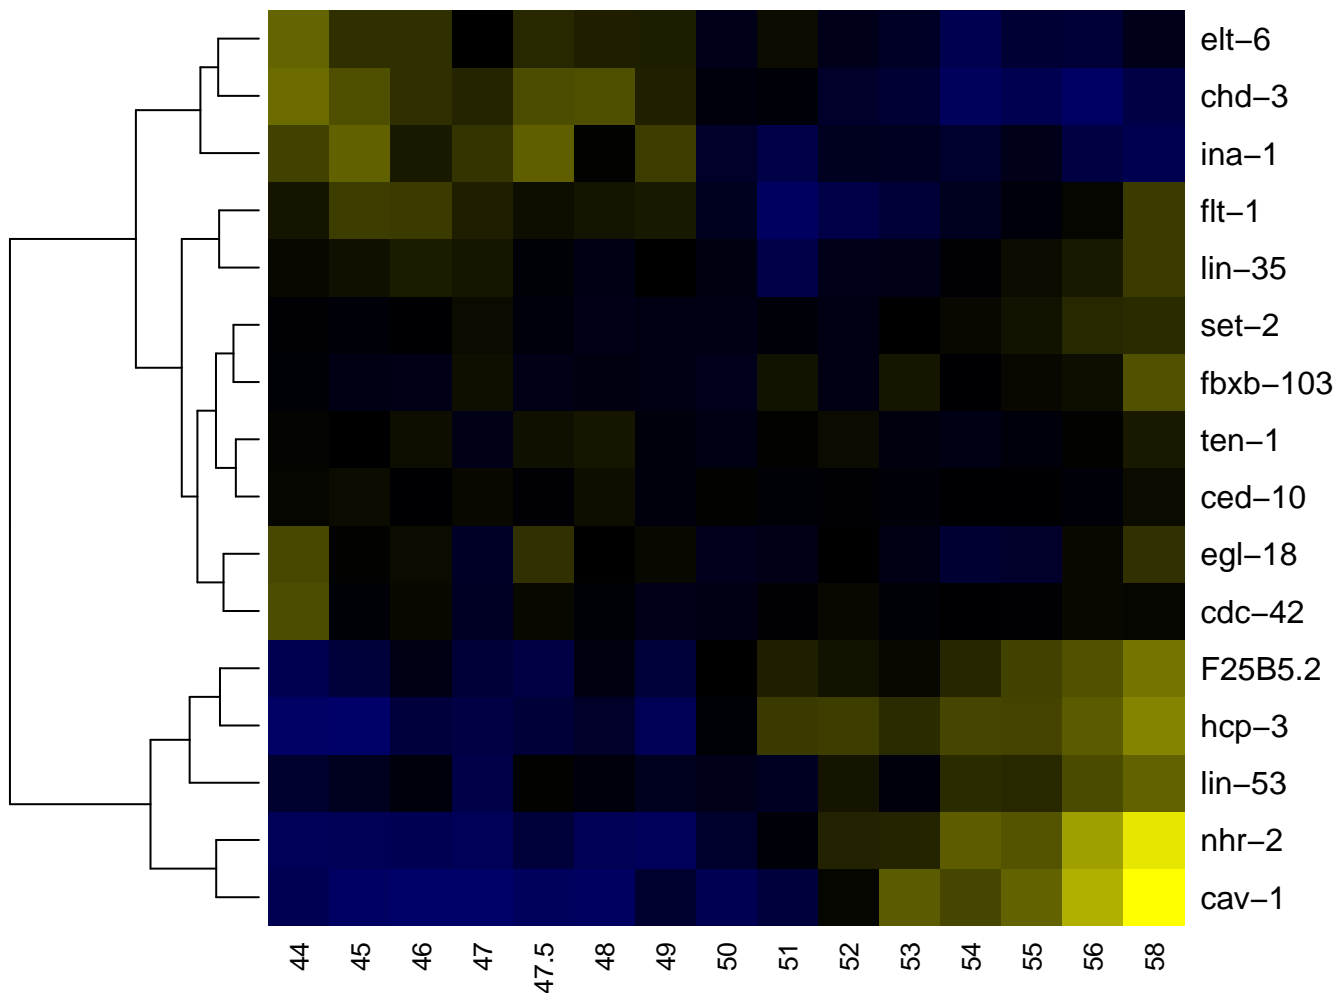

# ABprpapapp



# ABprpapp



# ABprpappa



# ABprpappaa

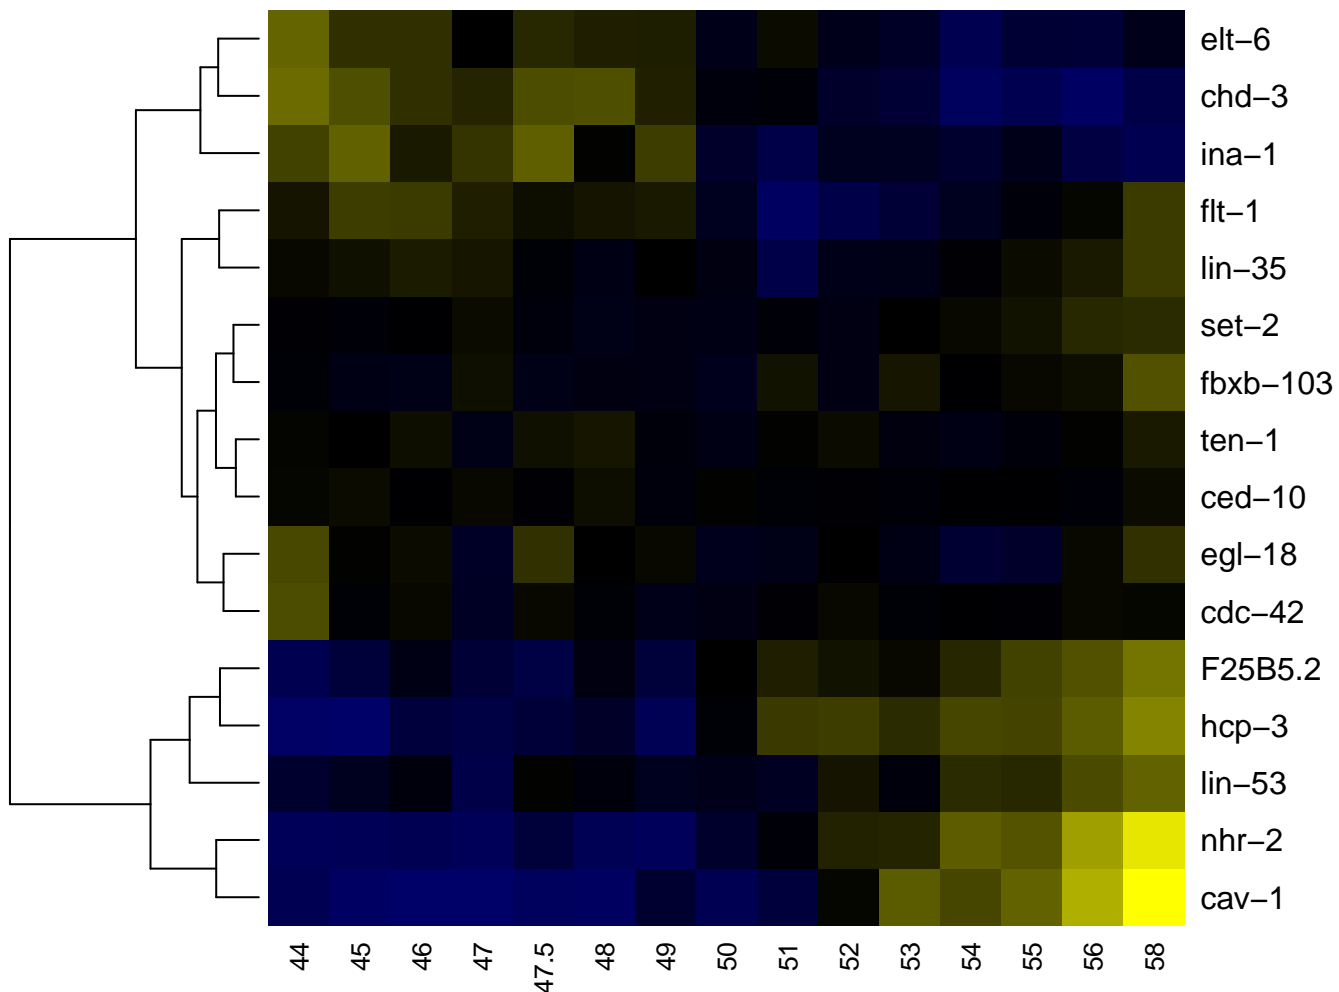

# ABprpappap



# ABprpappp



# ABprpappa

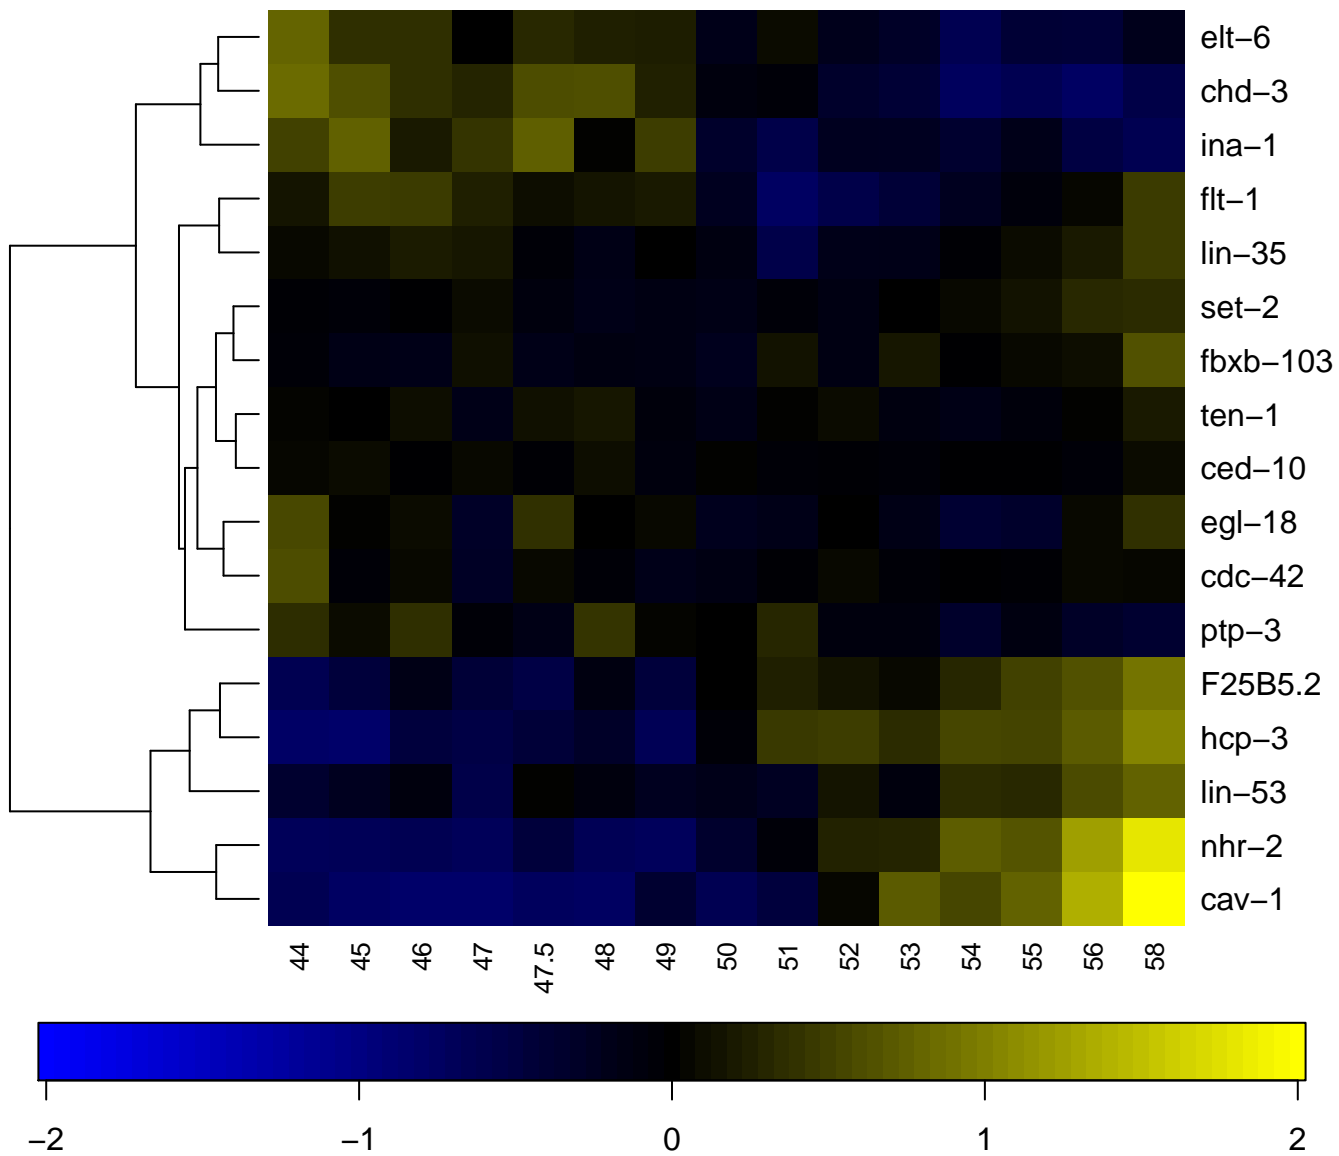



# ABprpapppp

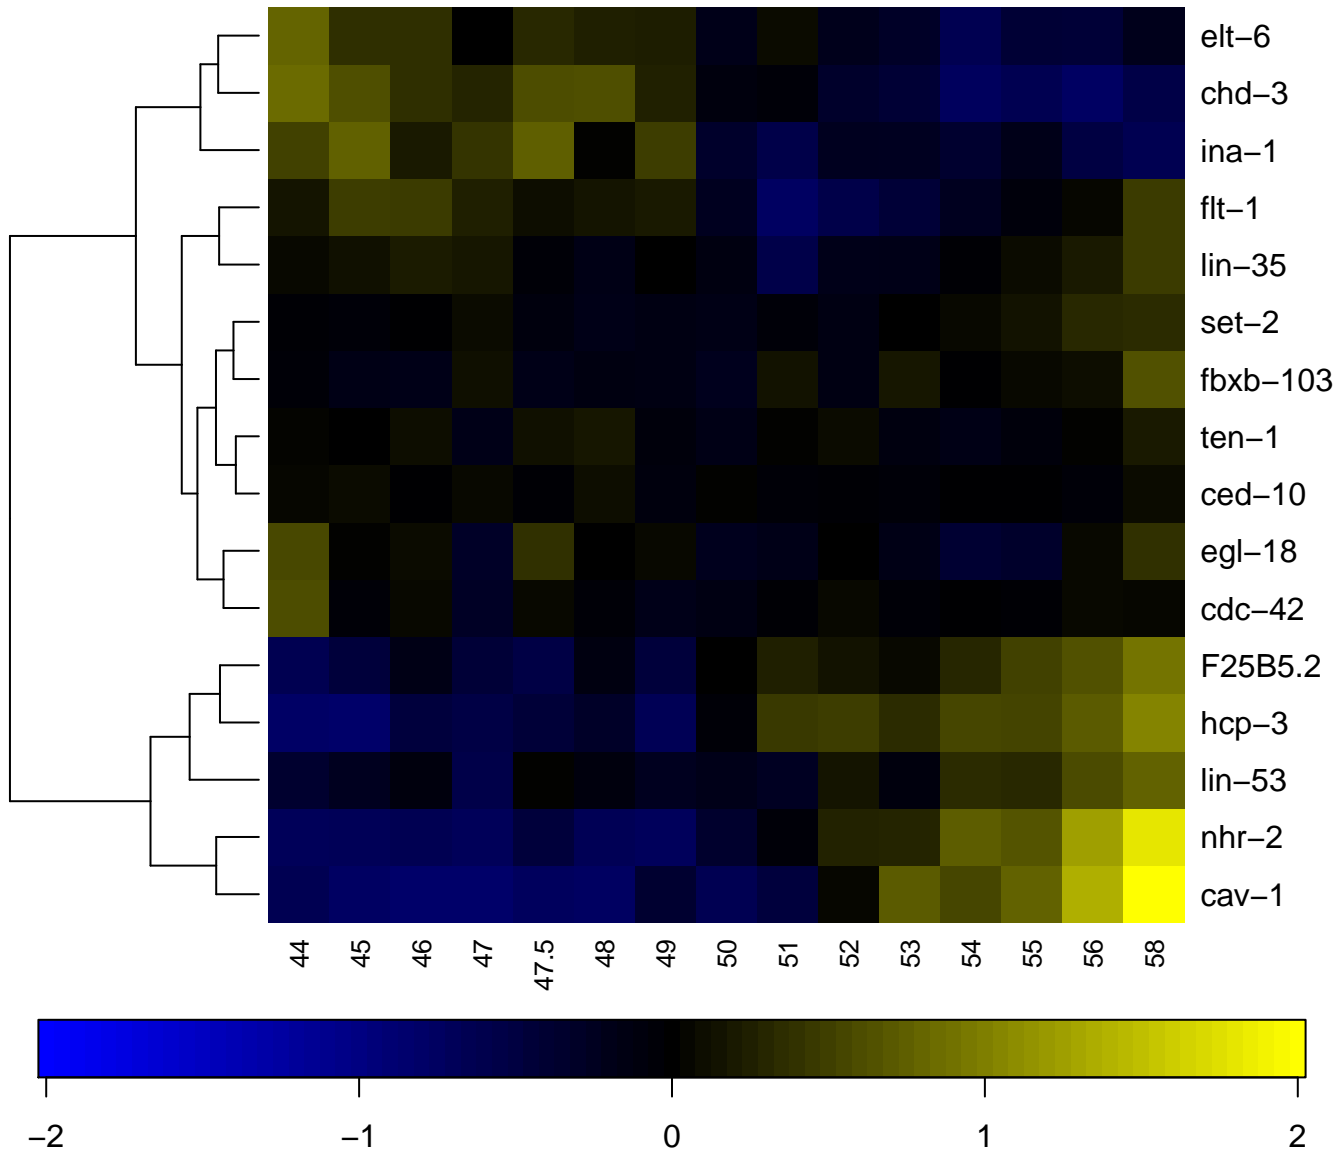

# ABprpp

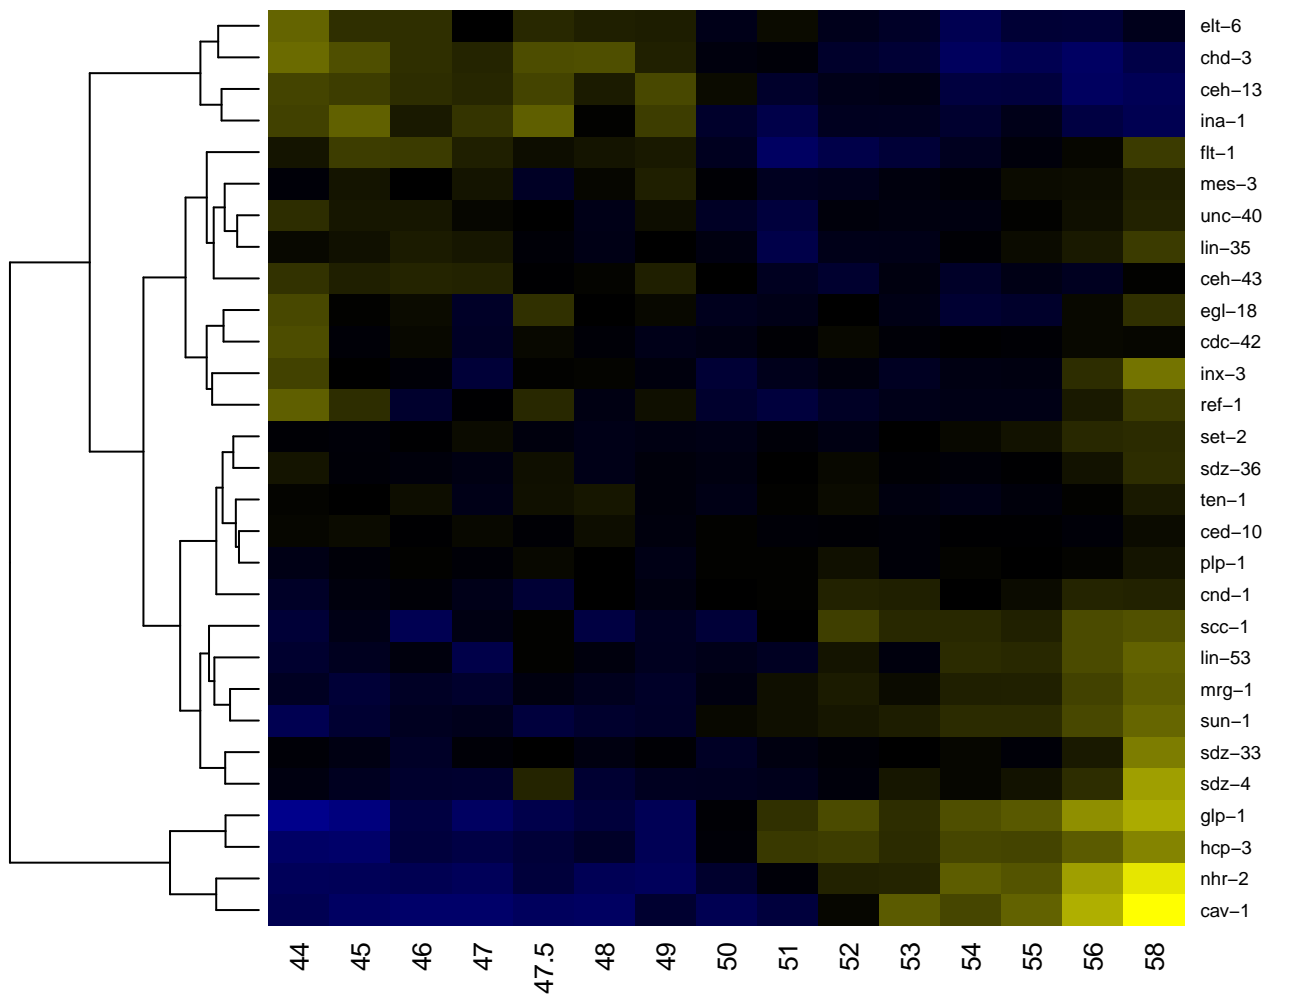



# ABprppaa



# ABprppaaa



# ABprppaaa



# ABprppaaaap



# ABprppaaaapa





# ABprppaaap



# ABprppaap



# ABprppaapa



# ABprppaapaa



# ABprppaapp



# ABprppap



# ABprppapa

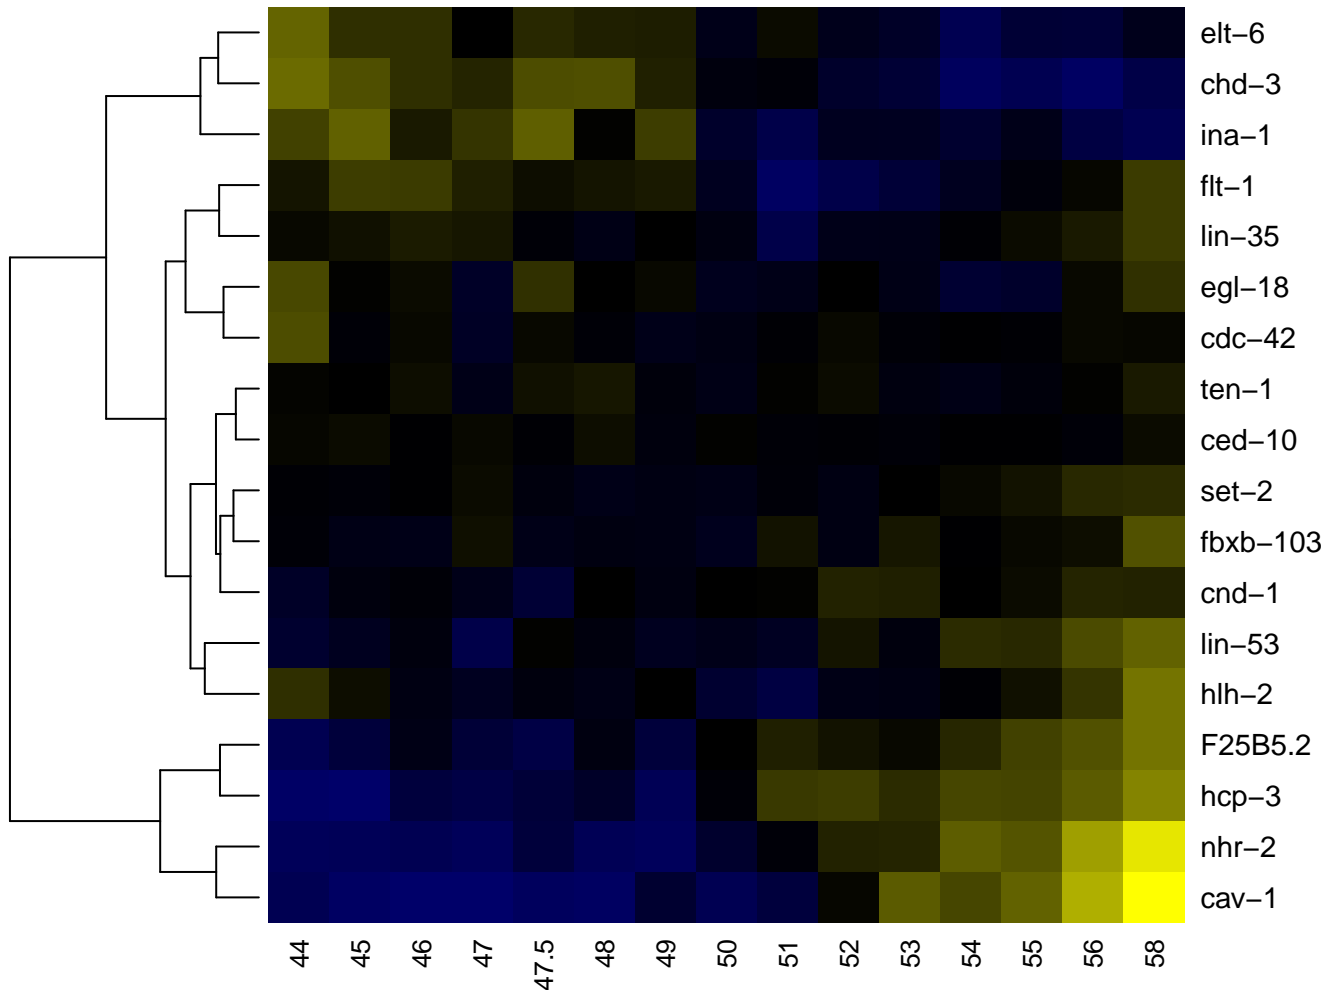

# ABprppapaa





# ABprppapaaa



# ABprppapap



# ABprppapp



# ABprppappa



# ABprppappp



# ABprppp

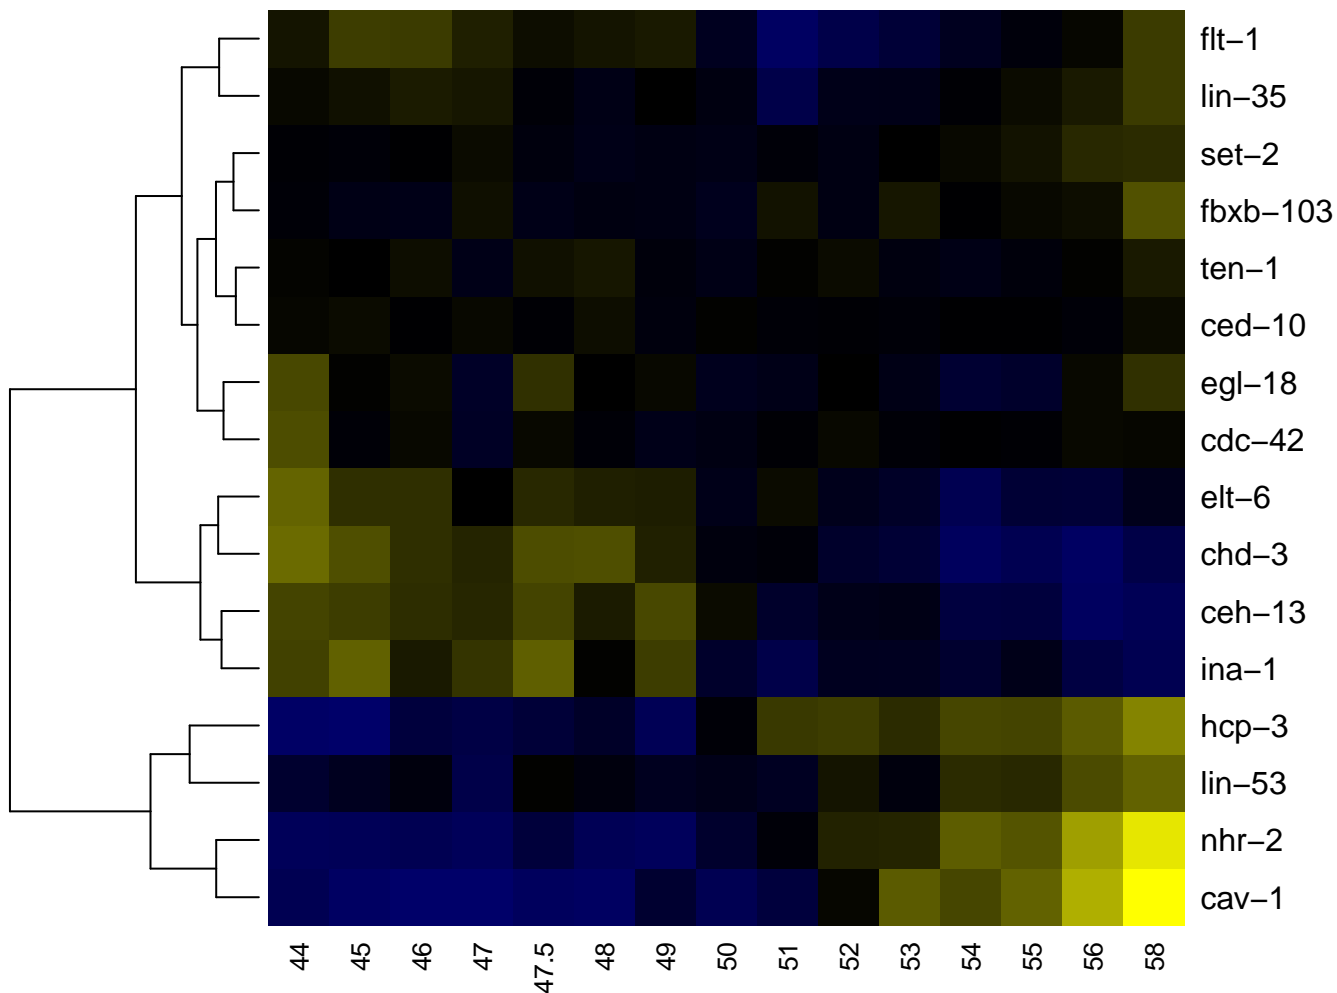

# ABprpppa



# ABprpppa





# ABprpppaaa



-2

-1

0

1

2

# ABprpppaap



# ABprpppaapa



# ABprpppap



# ABprpppapa



# ABprpppapap



# ABprpppapp



# ABprpppp





# ABprppppa



# ABprppppaa

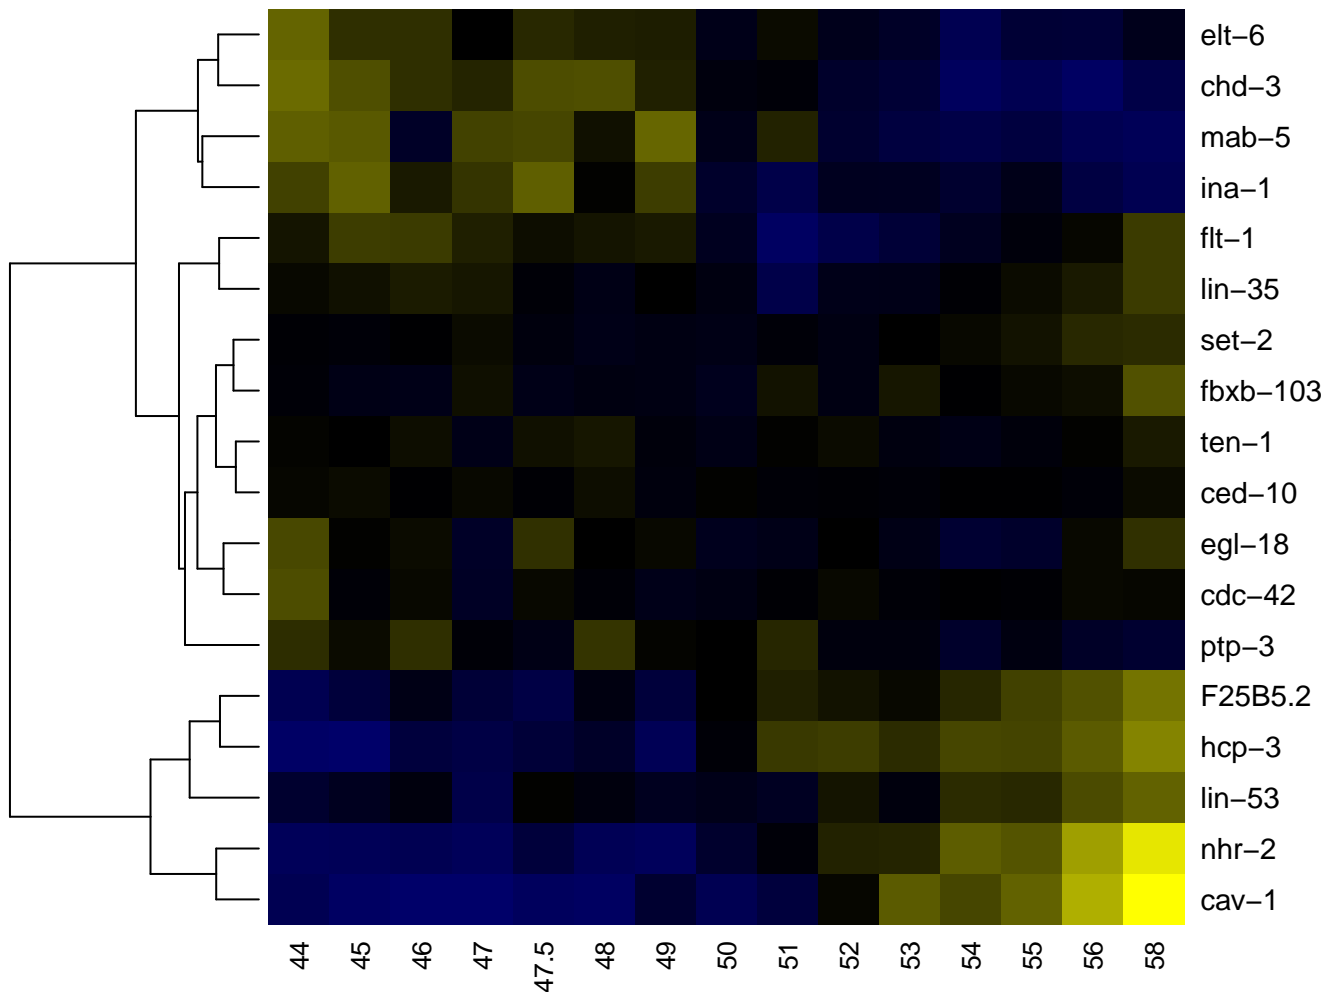

# ABprppppap

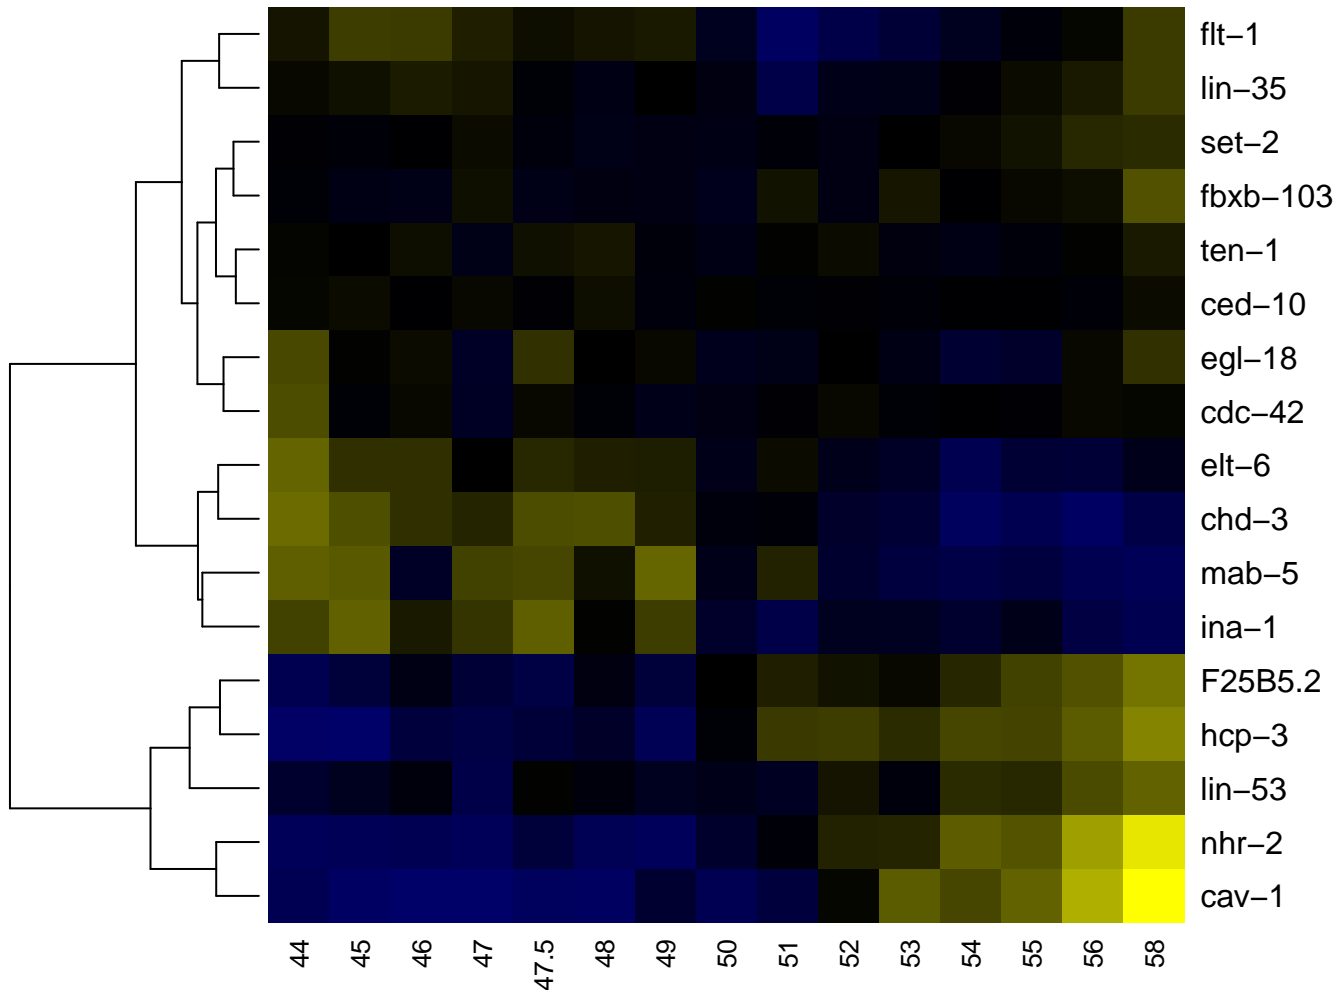

# ABprppppp



# ABprpppppa

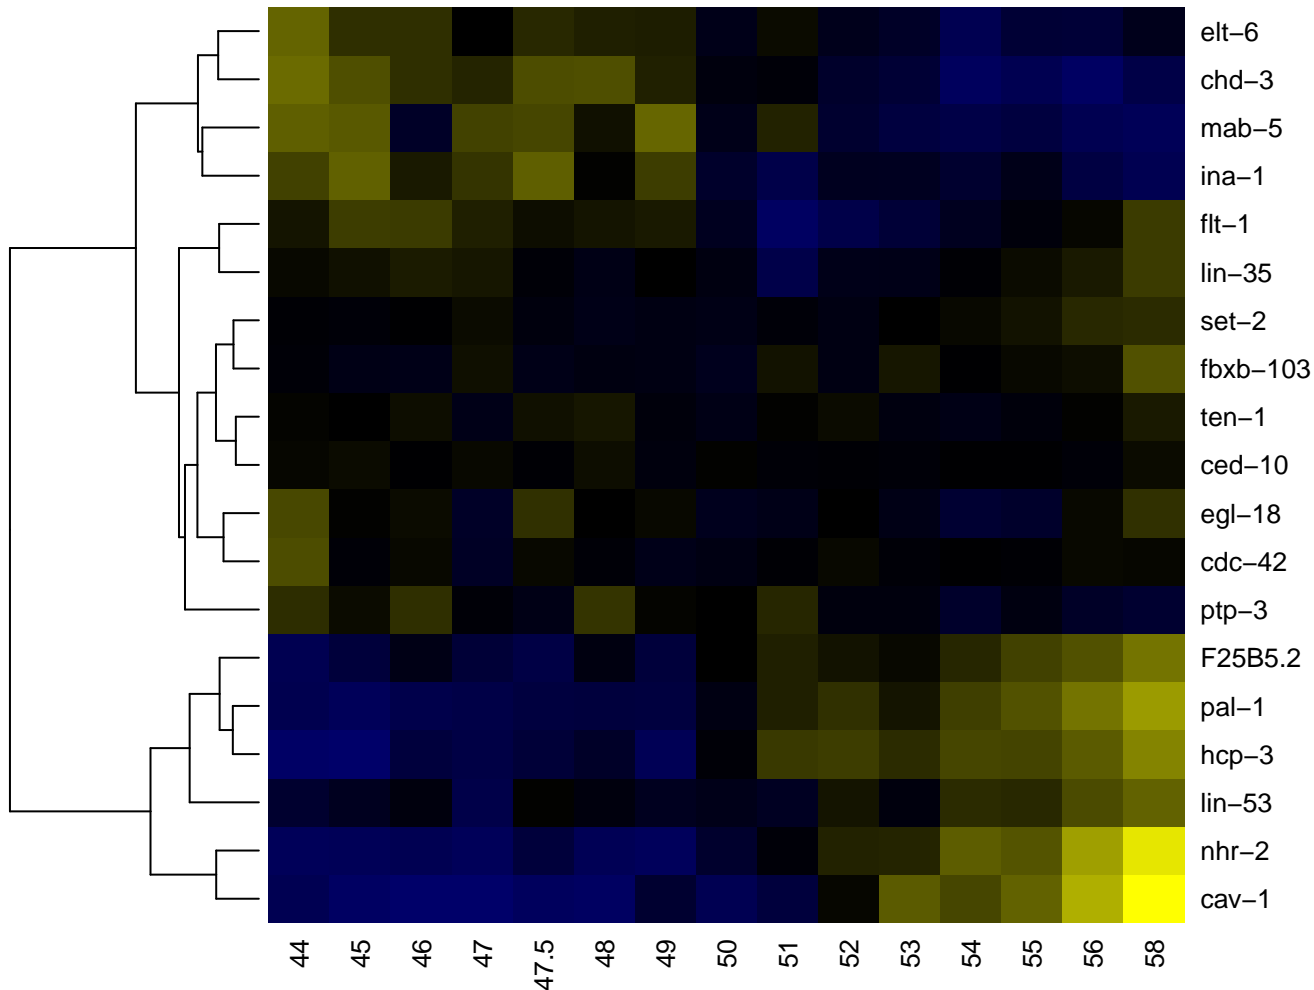

# ABprppppppaa

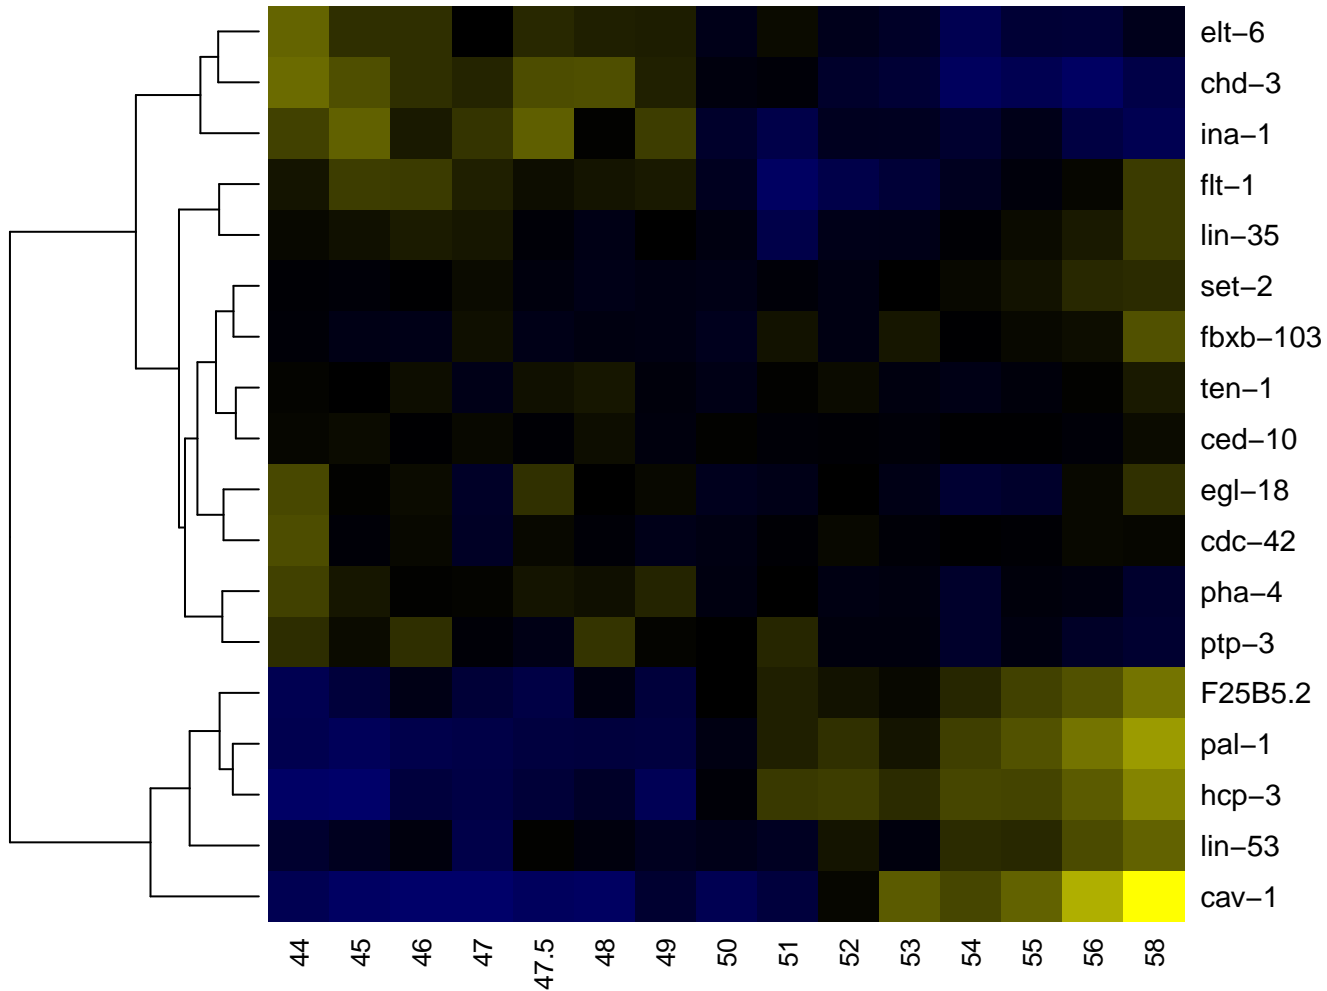

# ABprpppppp



# ABprpppppppp

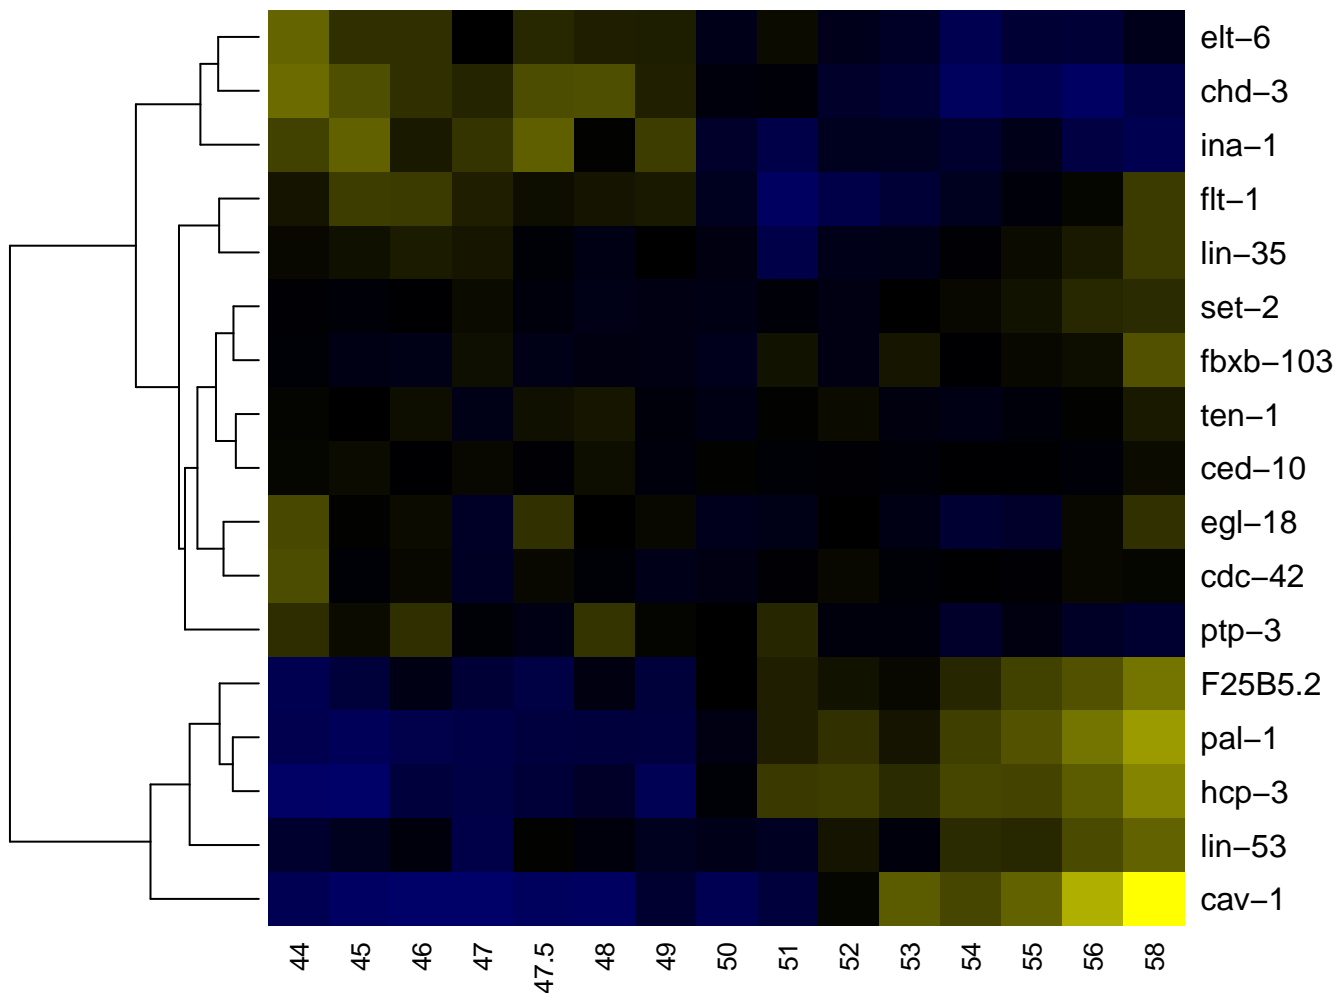



# ADAL

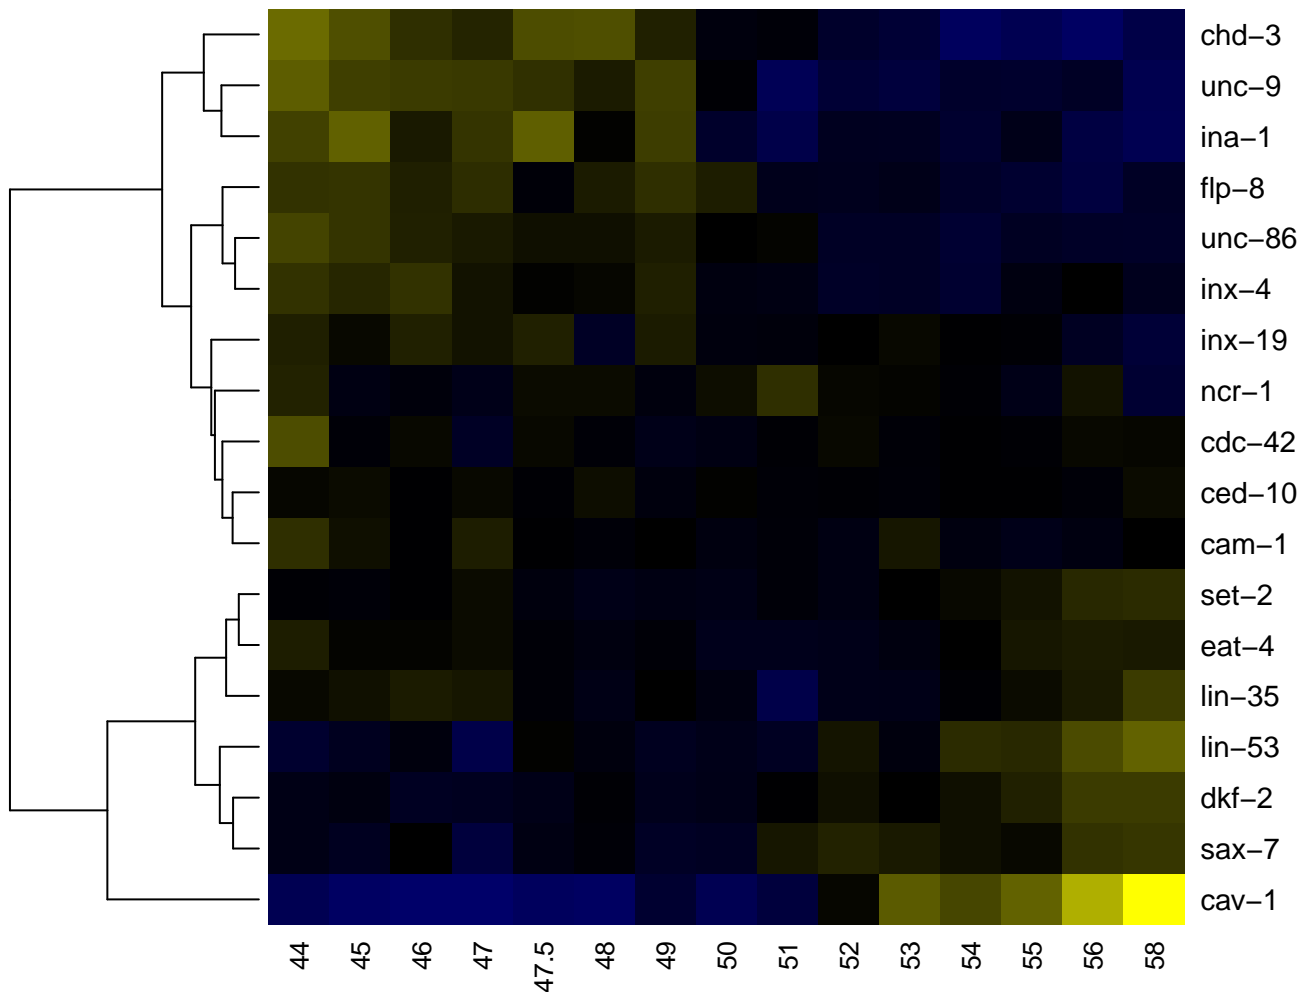

# ADAR

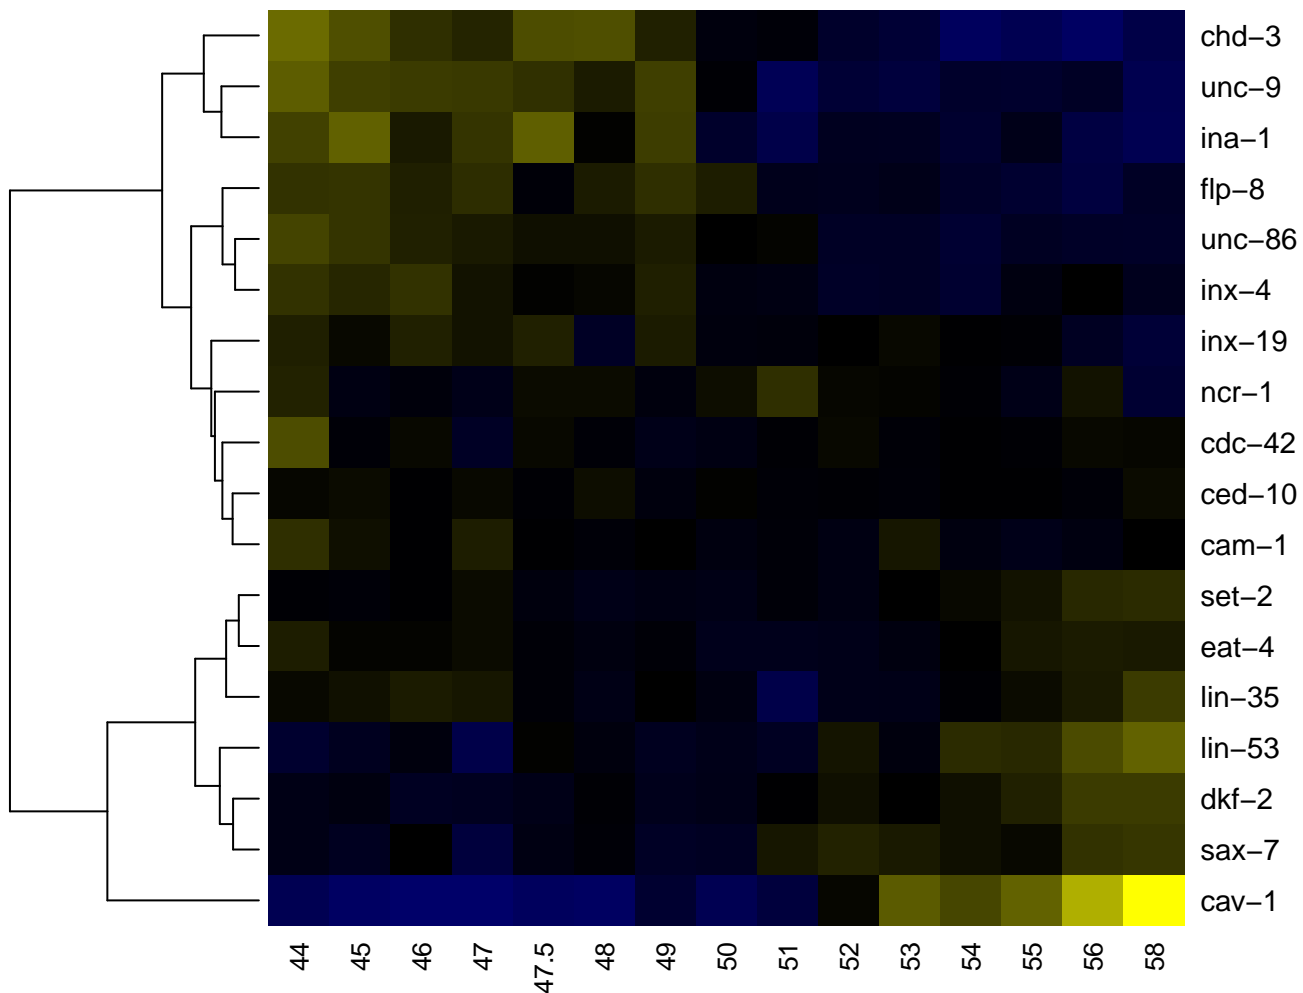

# ADEL

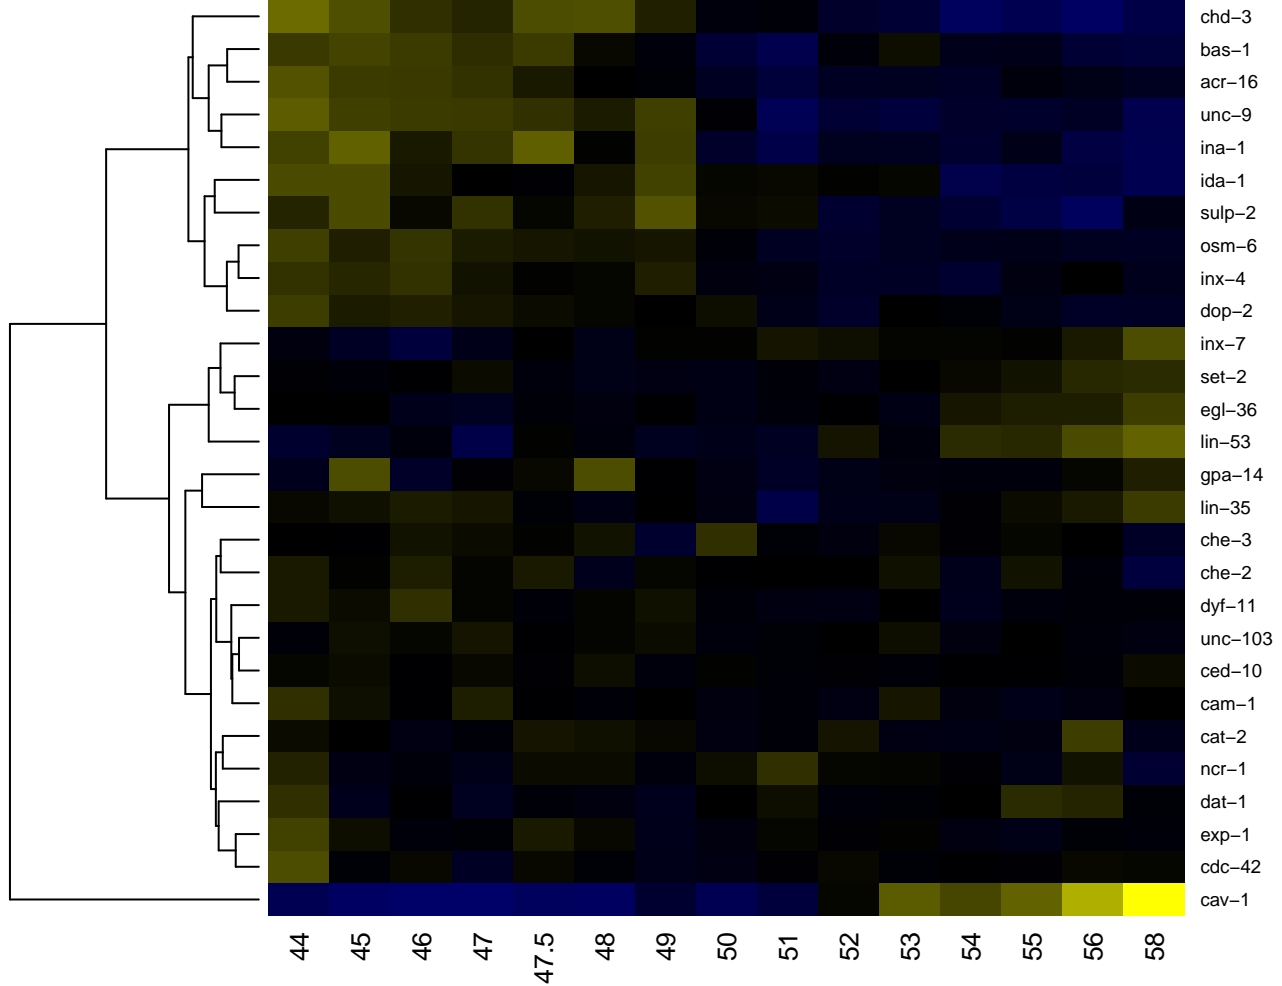







# ADFL

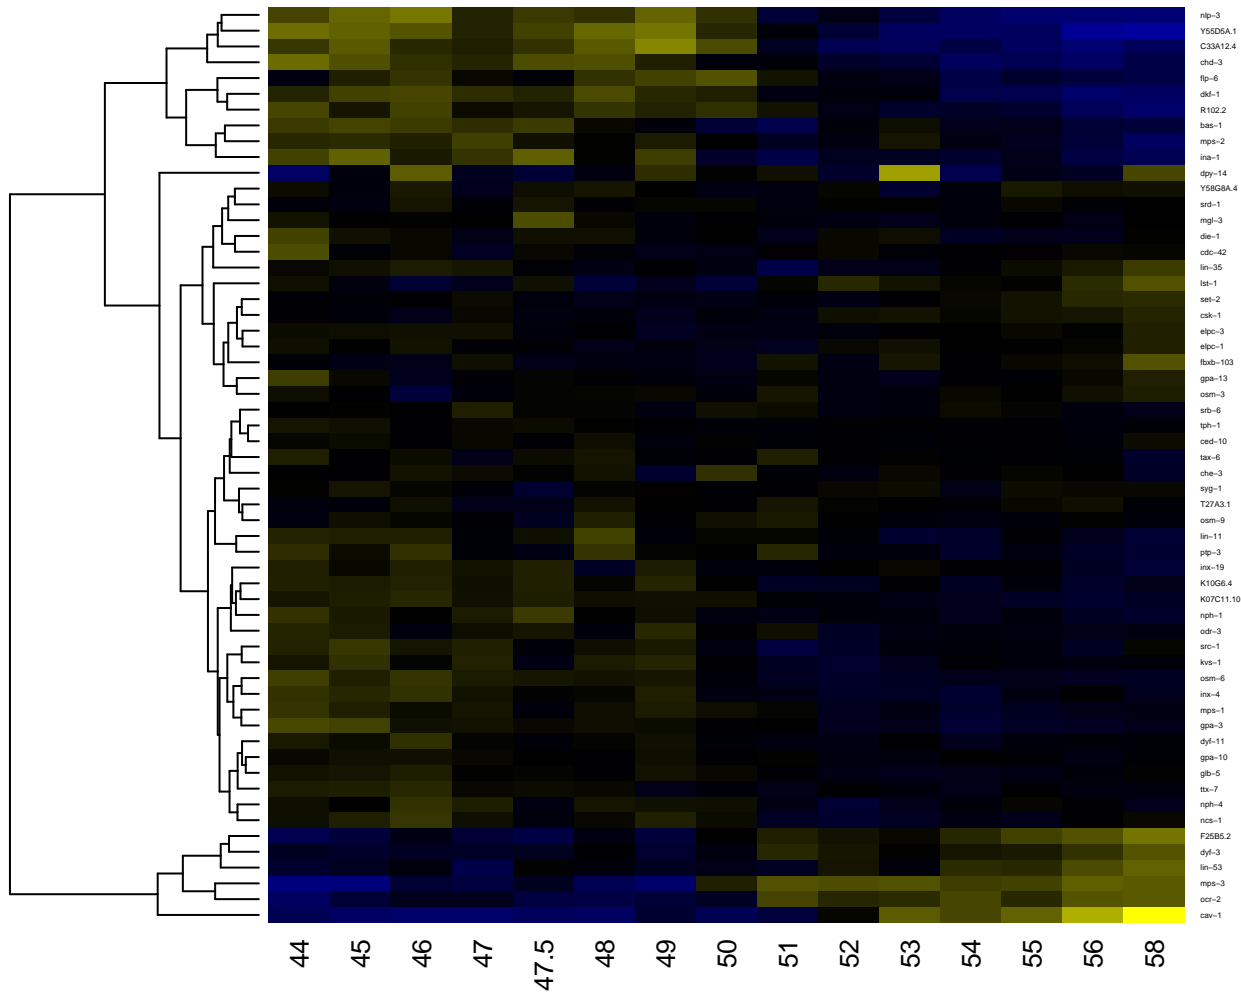

# ADFR

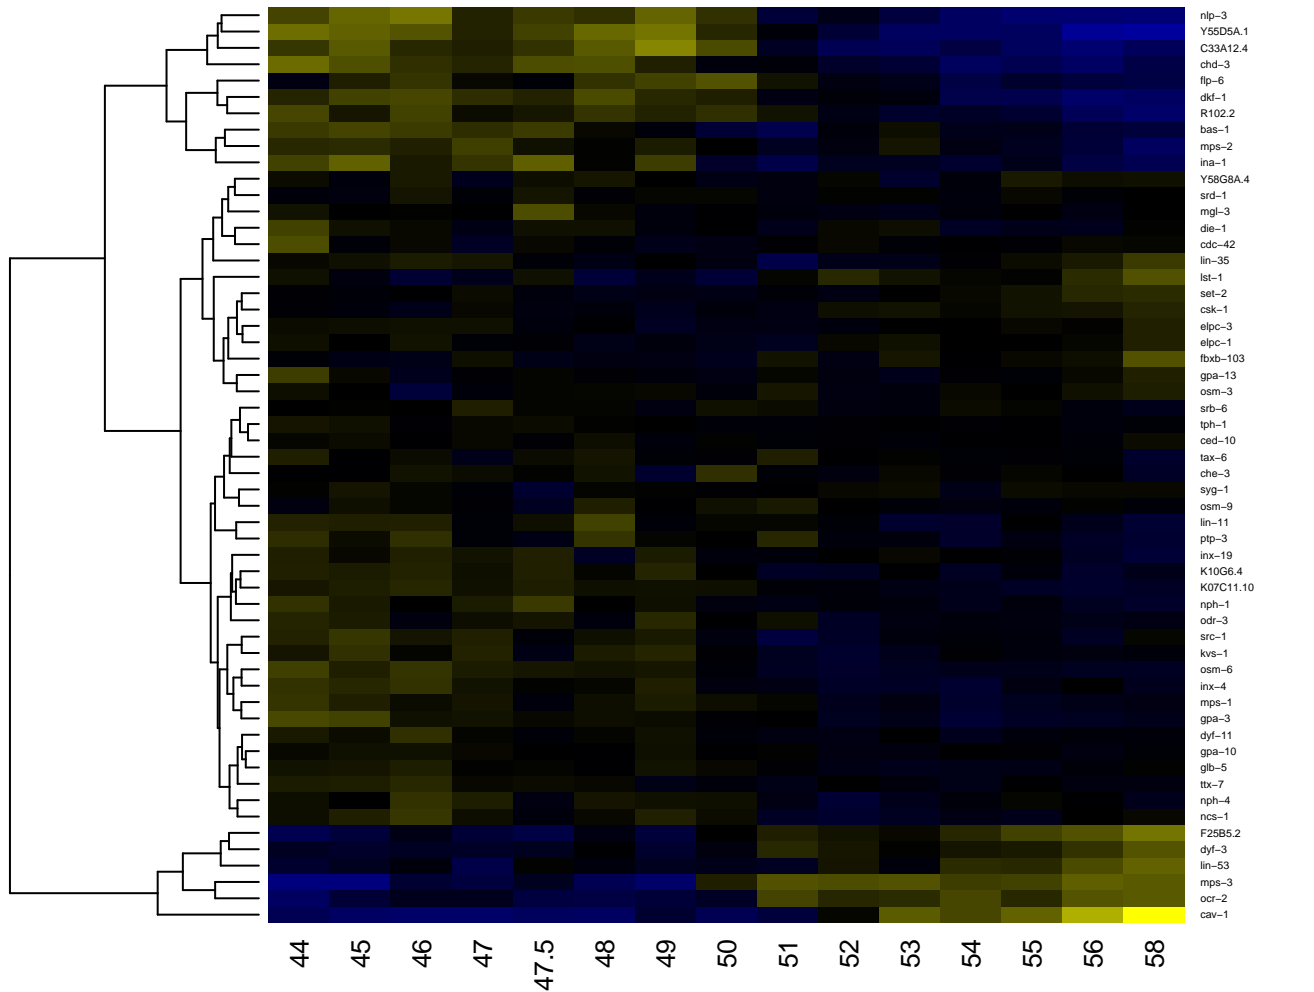



# ADLL

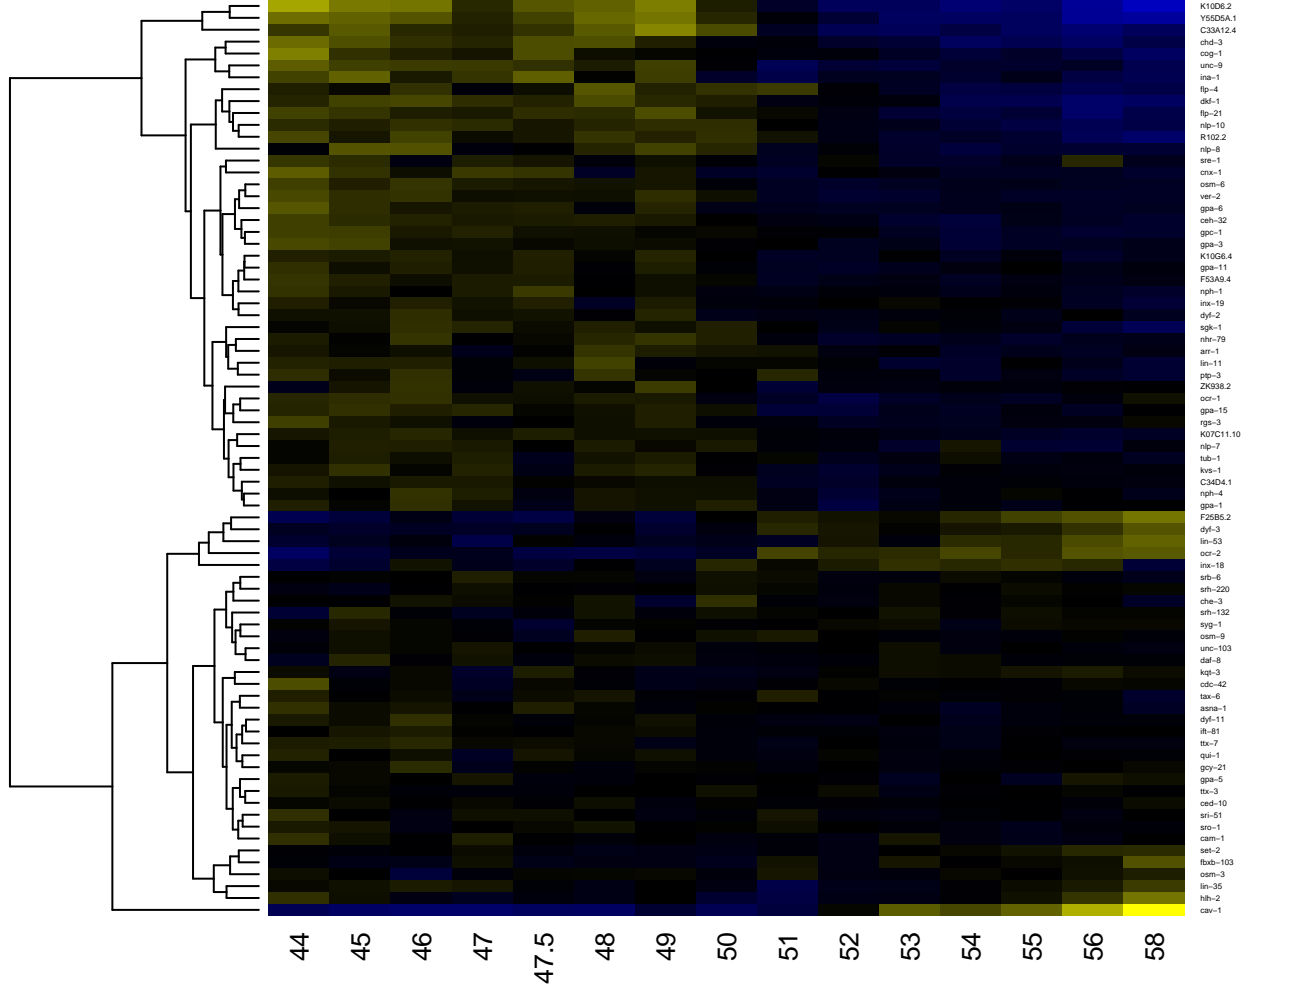

-2

-1

0

1

2

# ADLR

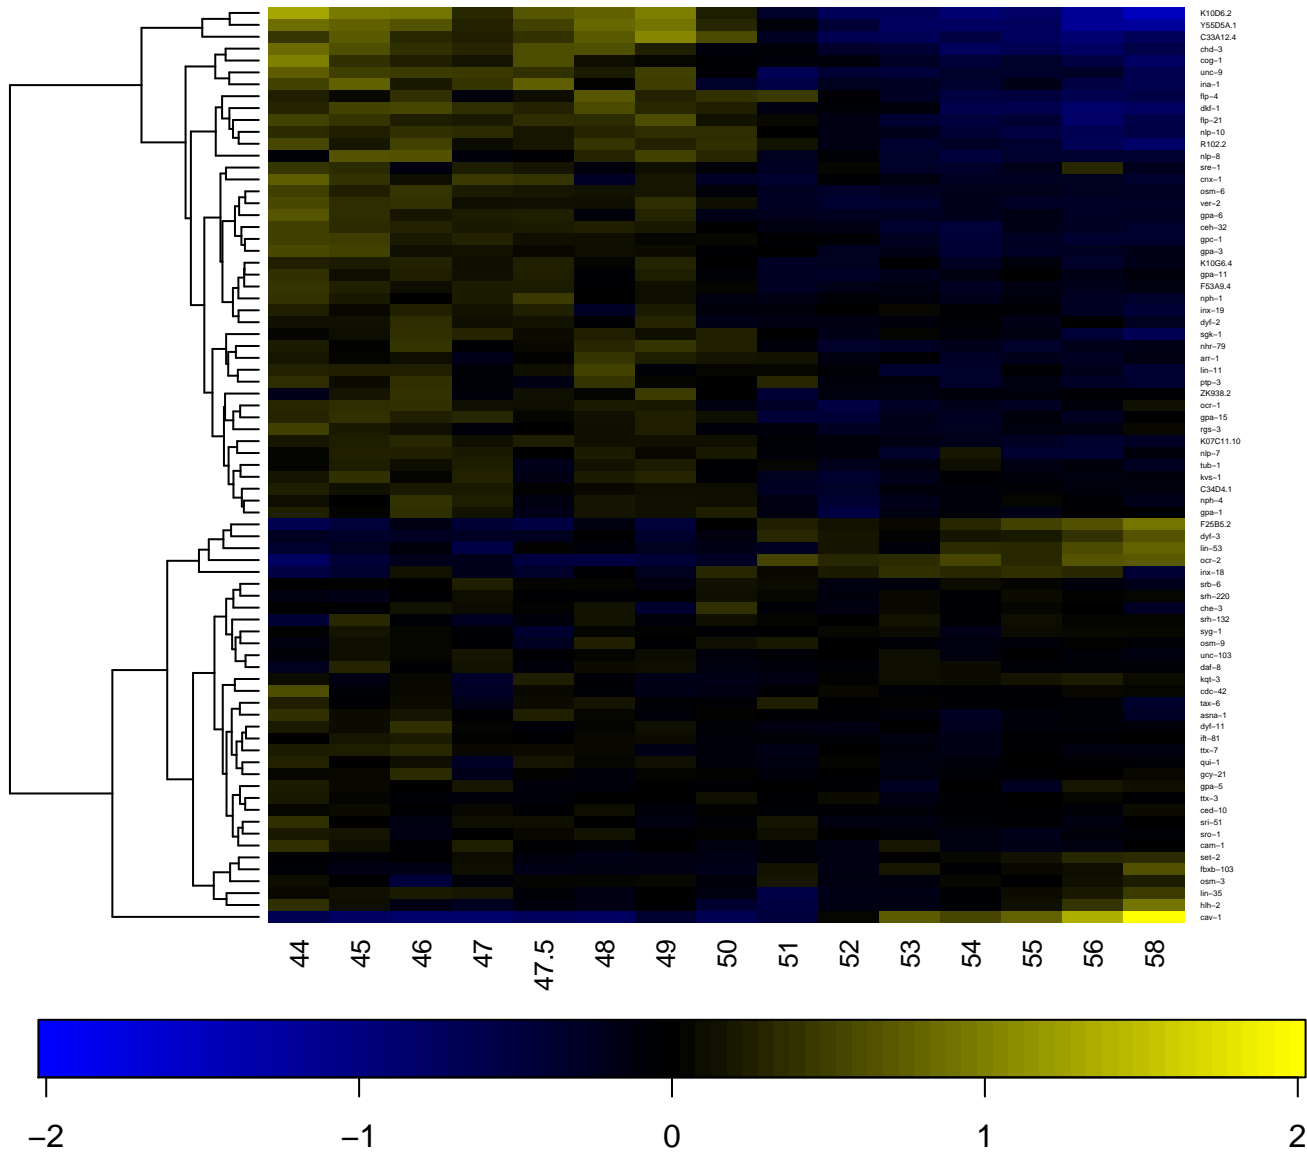

# AFDL

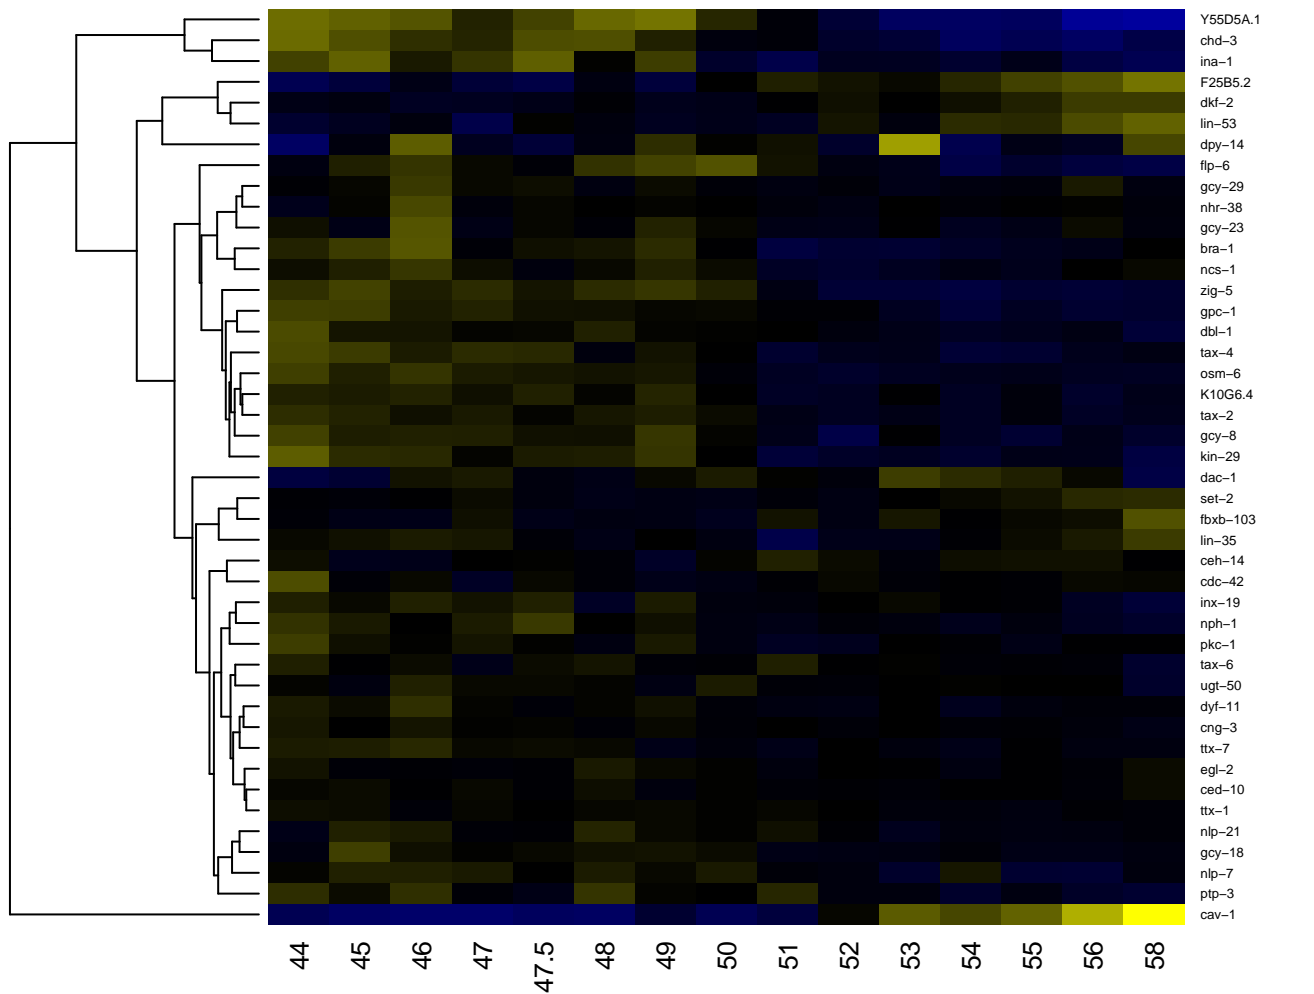

# AFDR

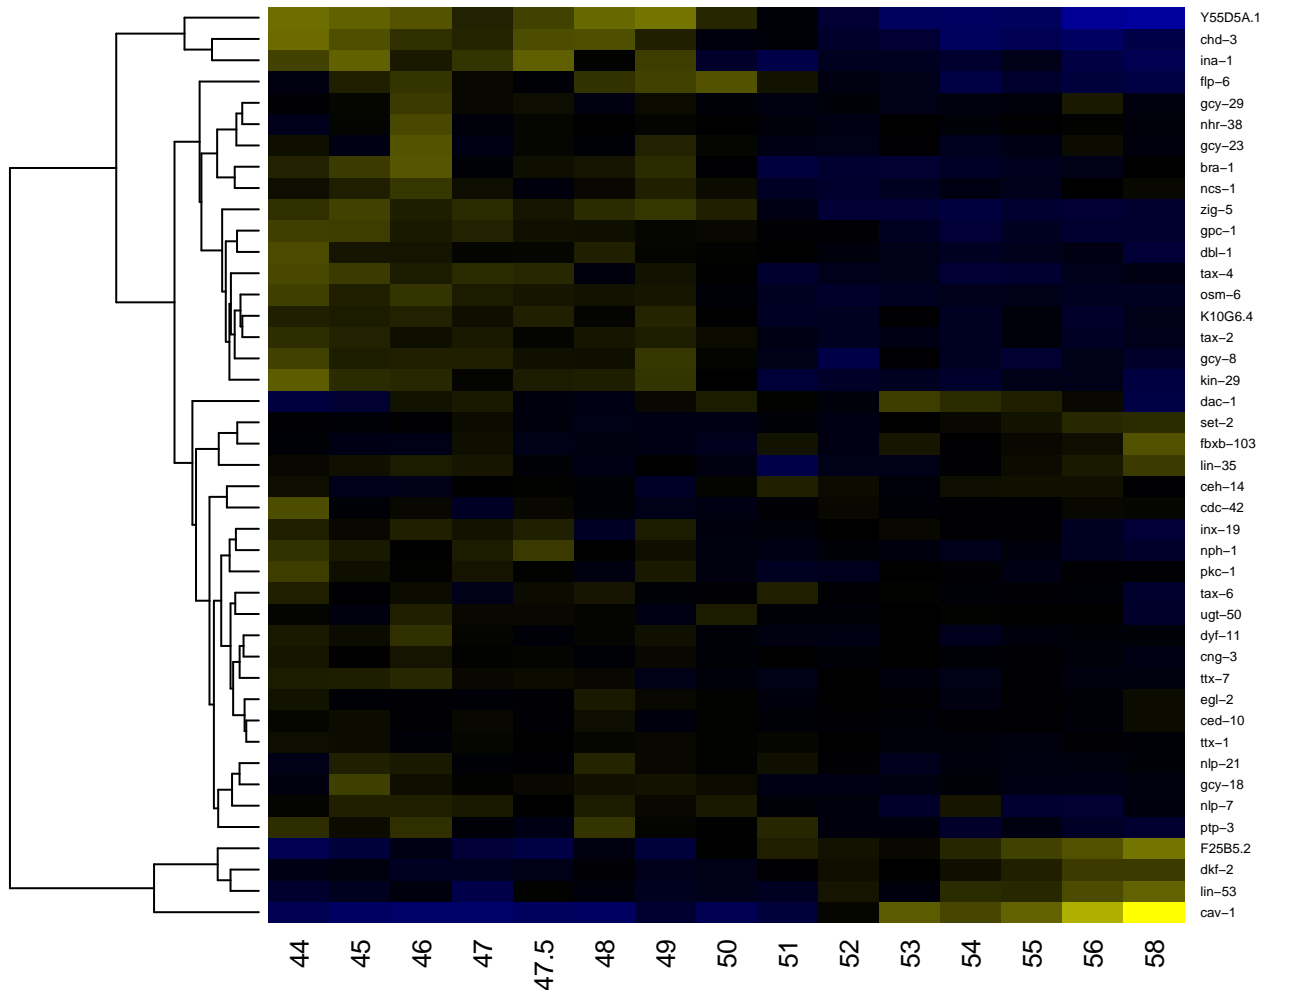

# AIAL

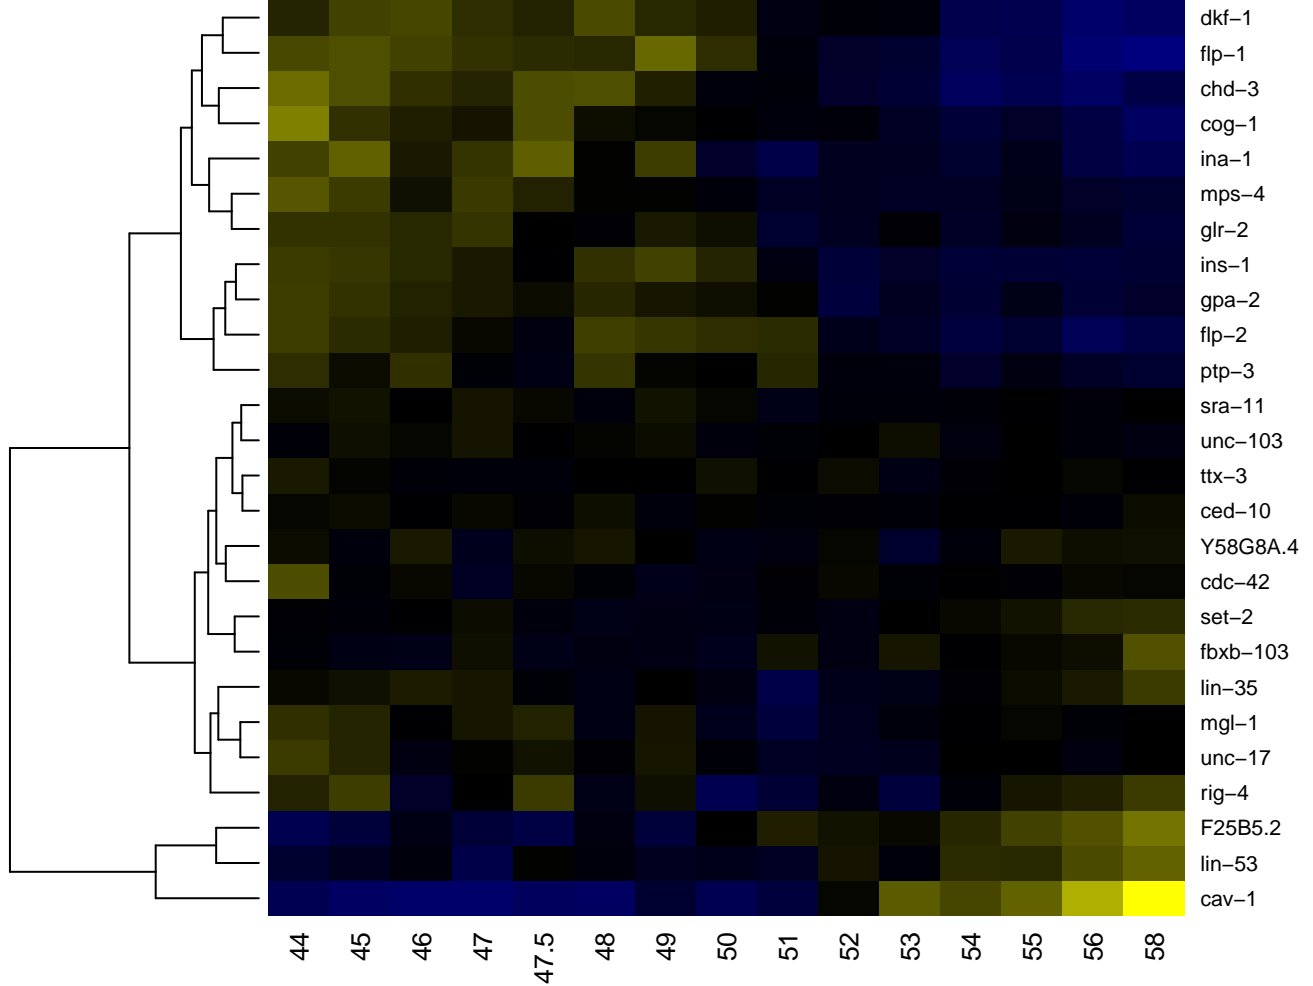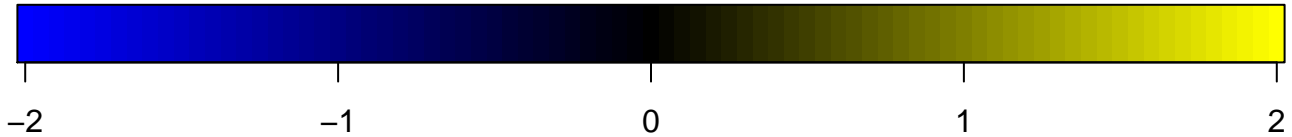

# AIAR

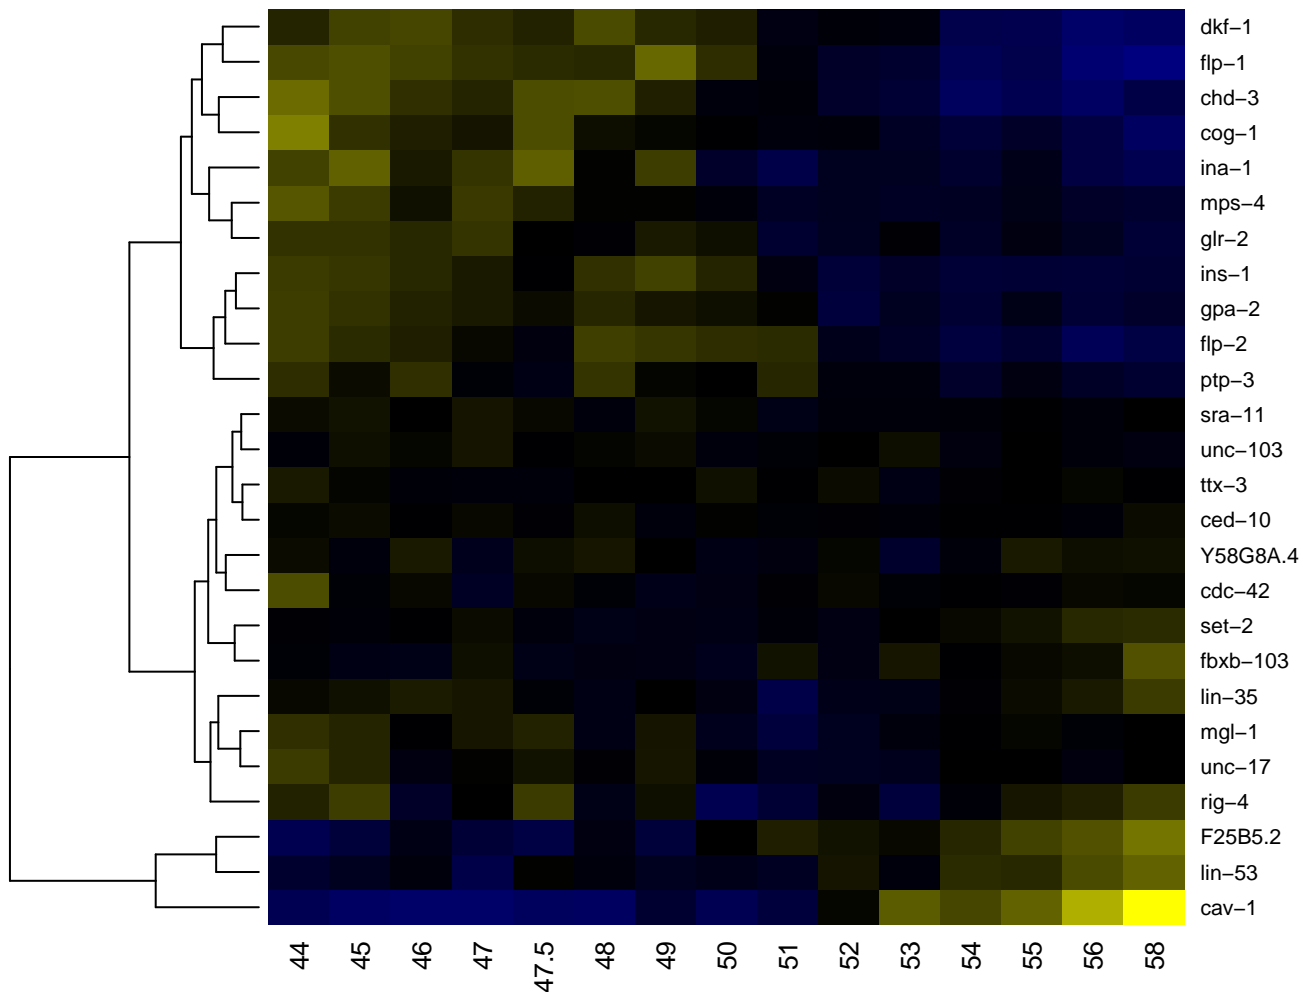

# AIBL

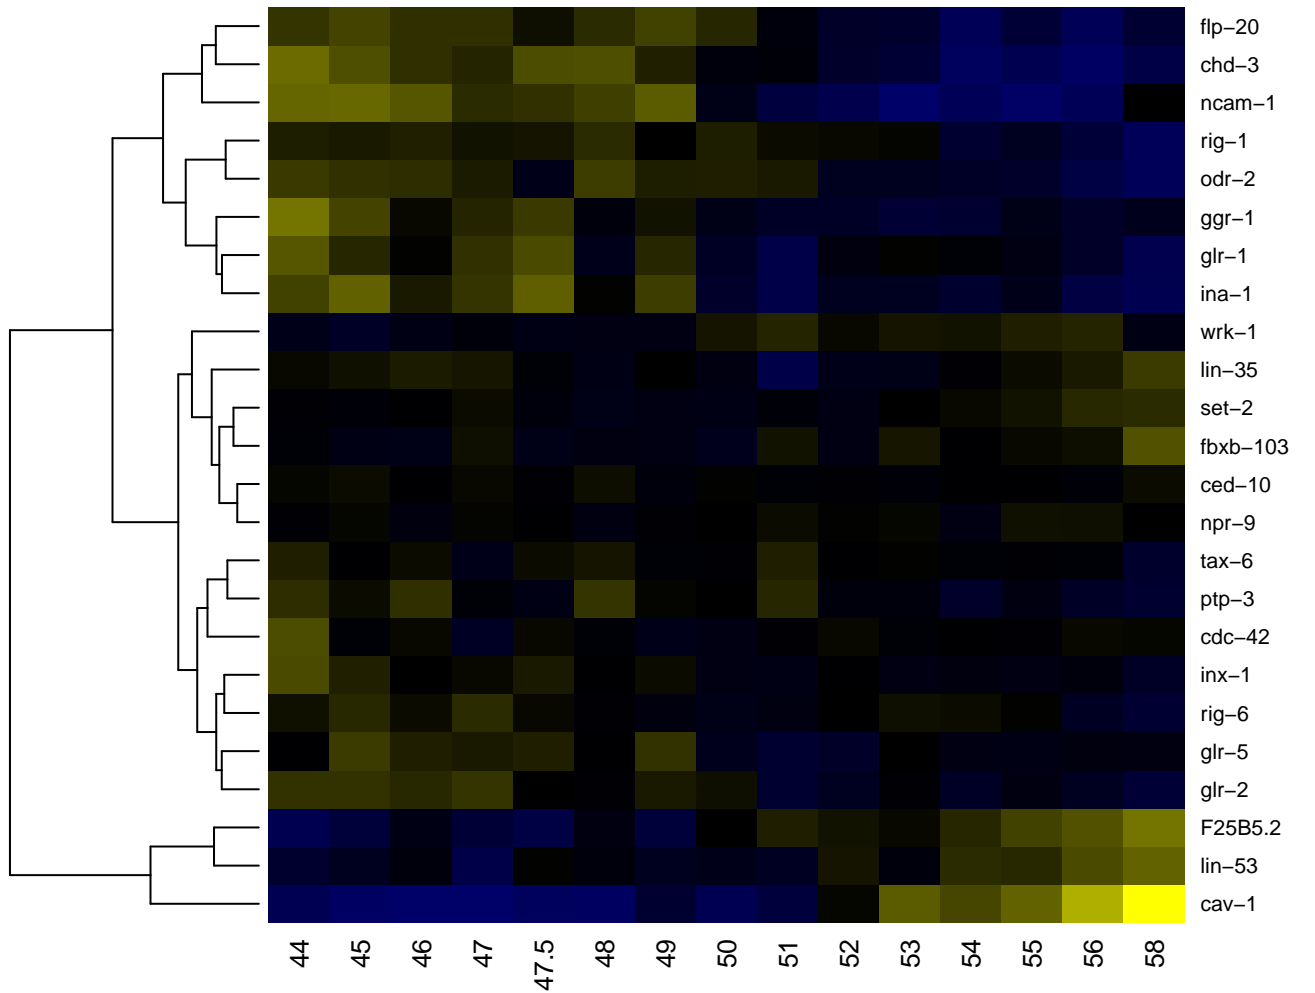

# AIBR

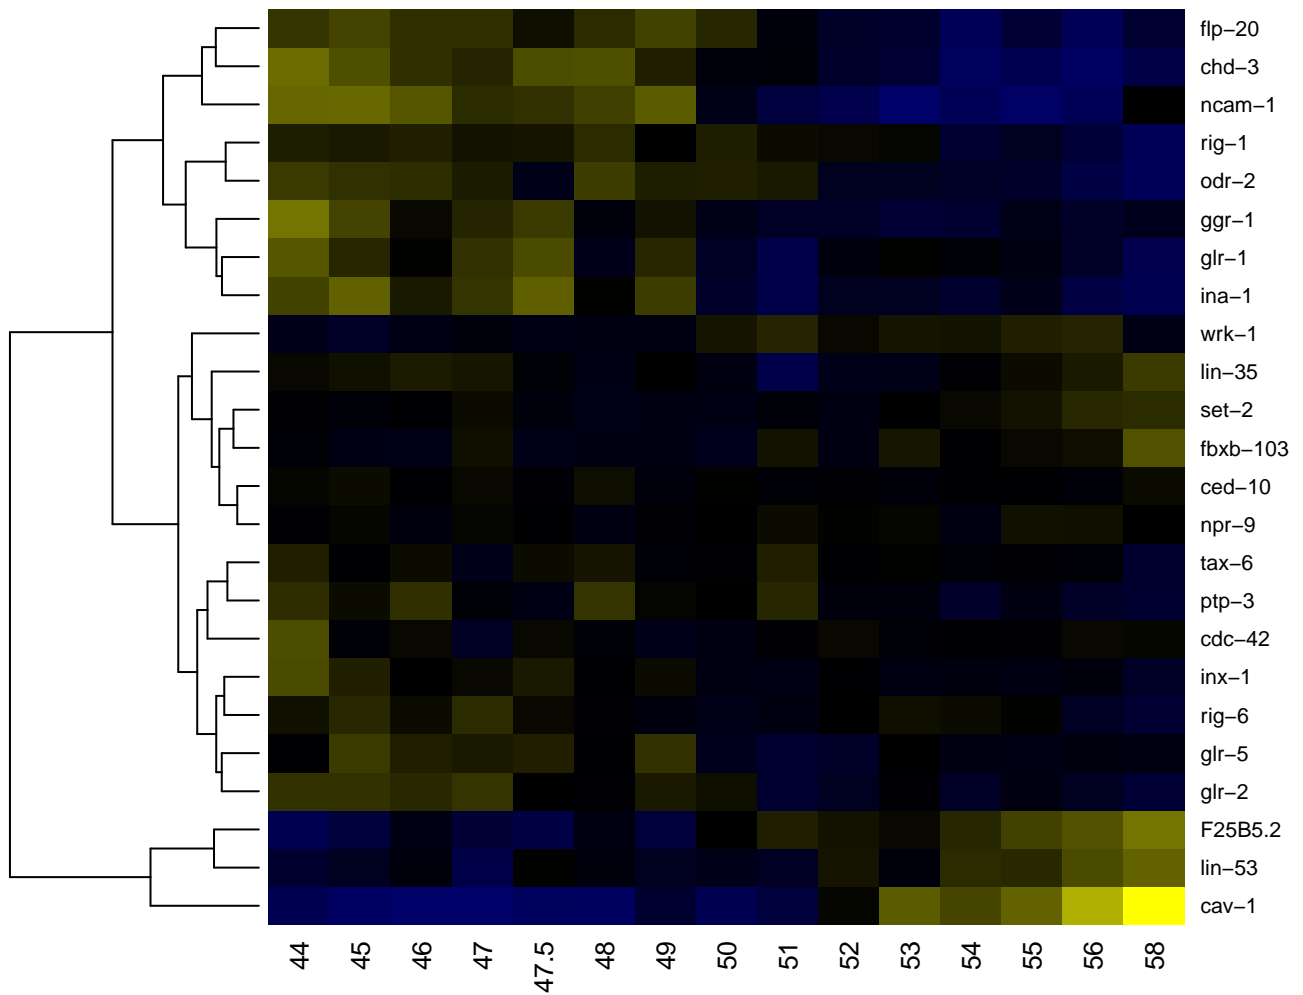



# AIML

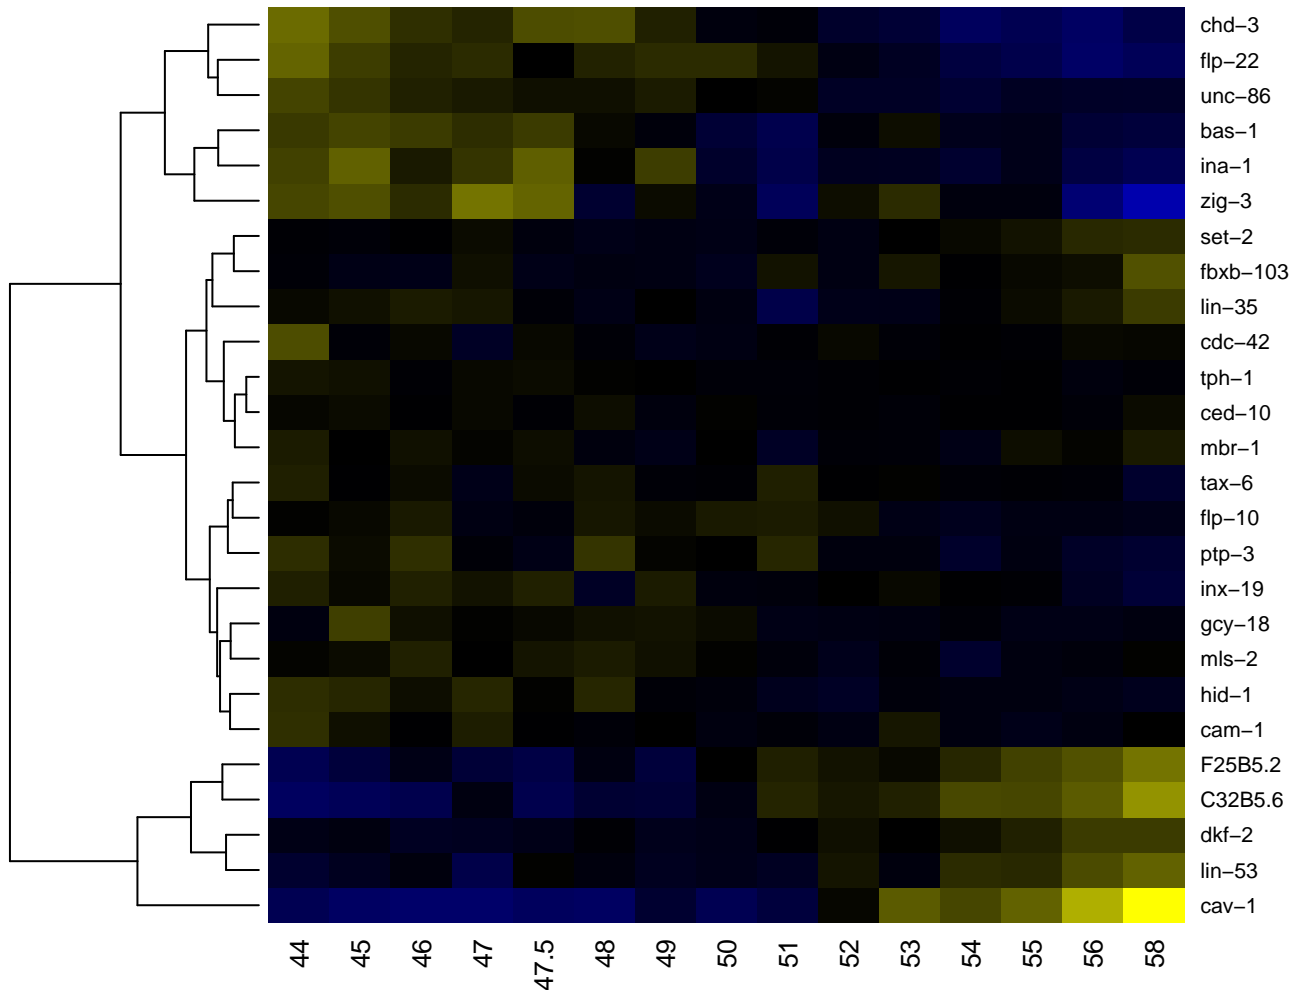

# AIMR

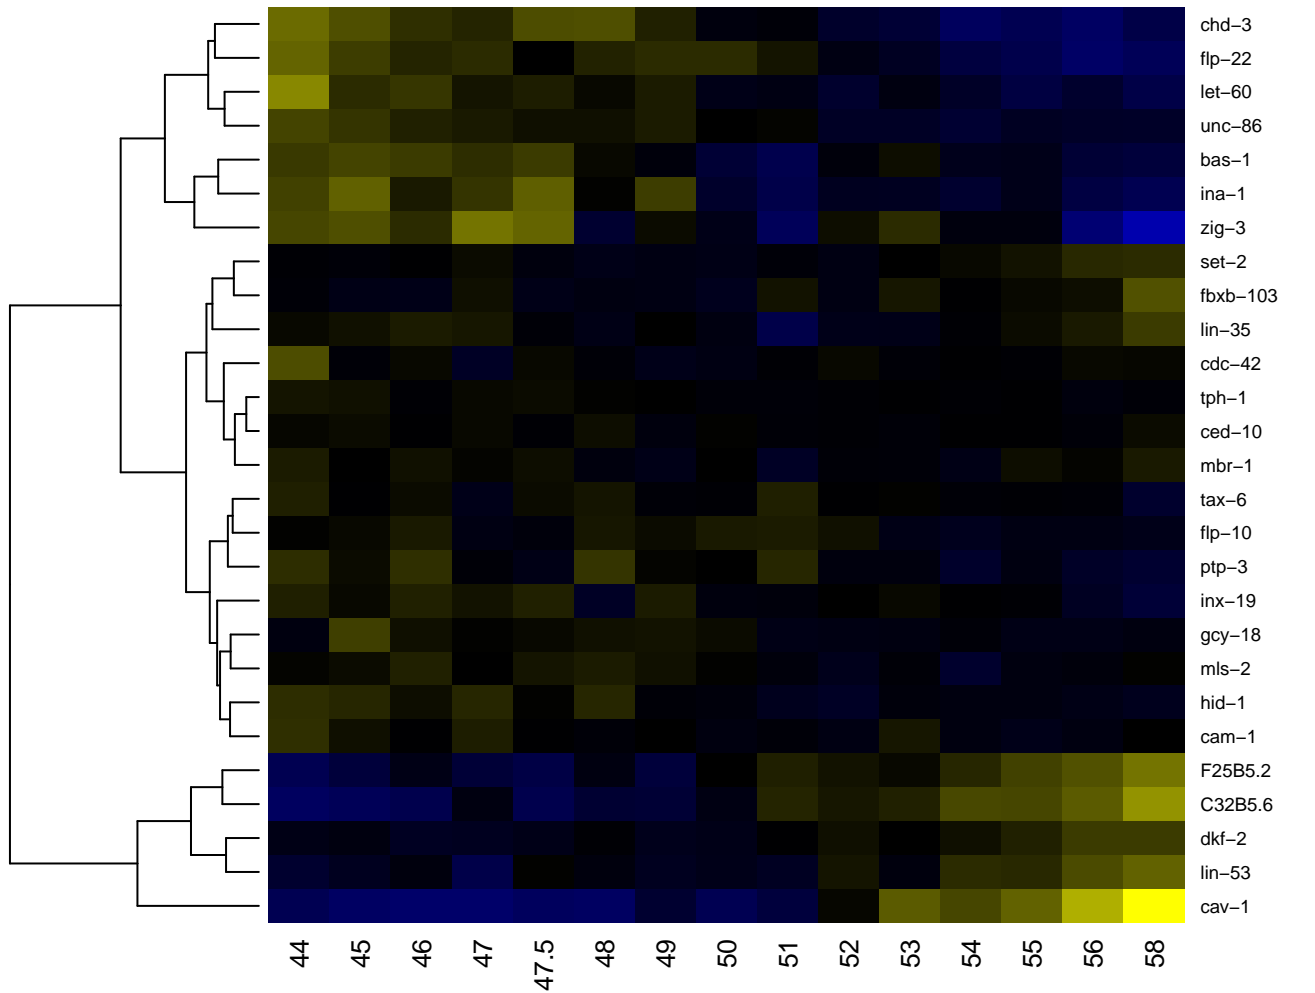

# AINL

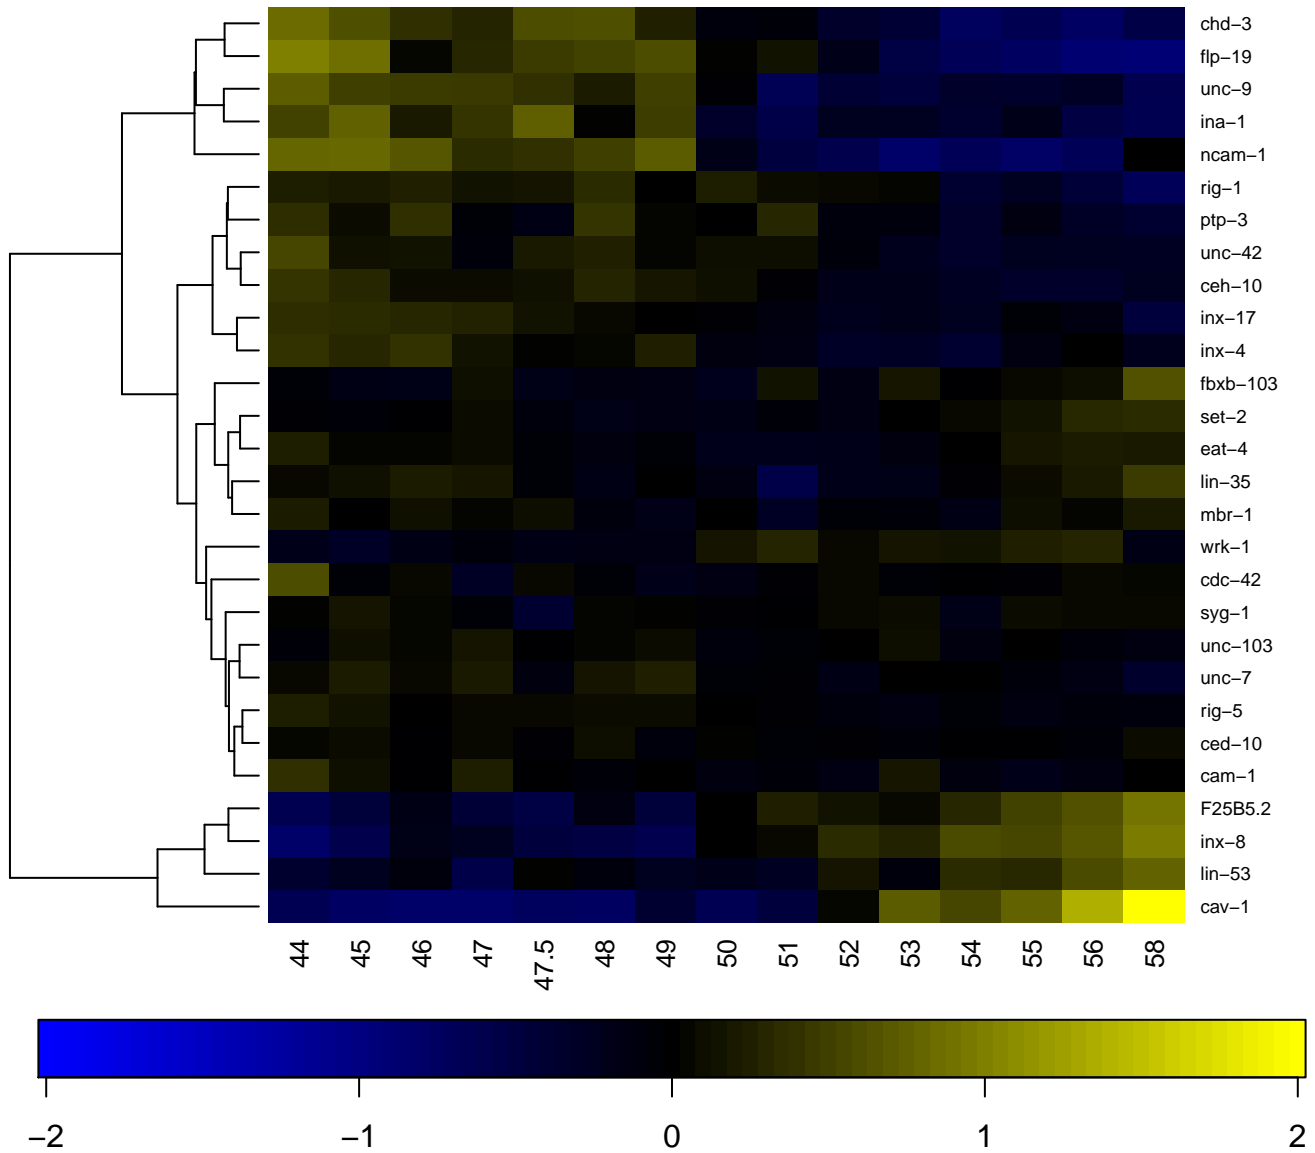

# AINR

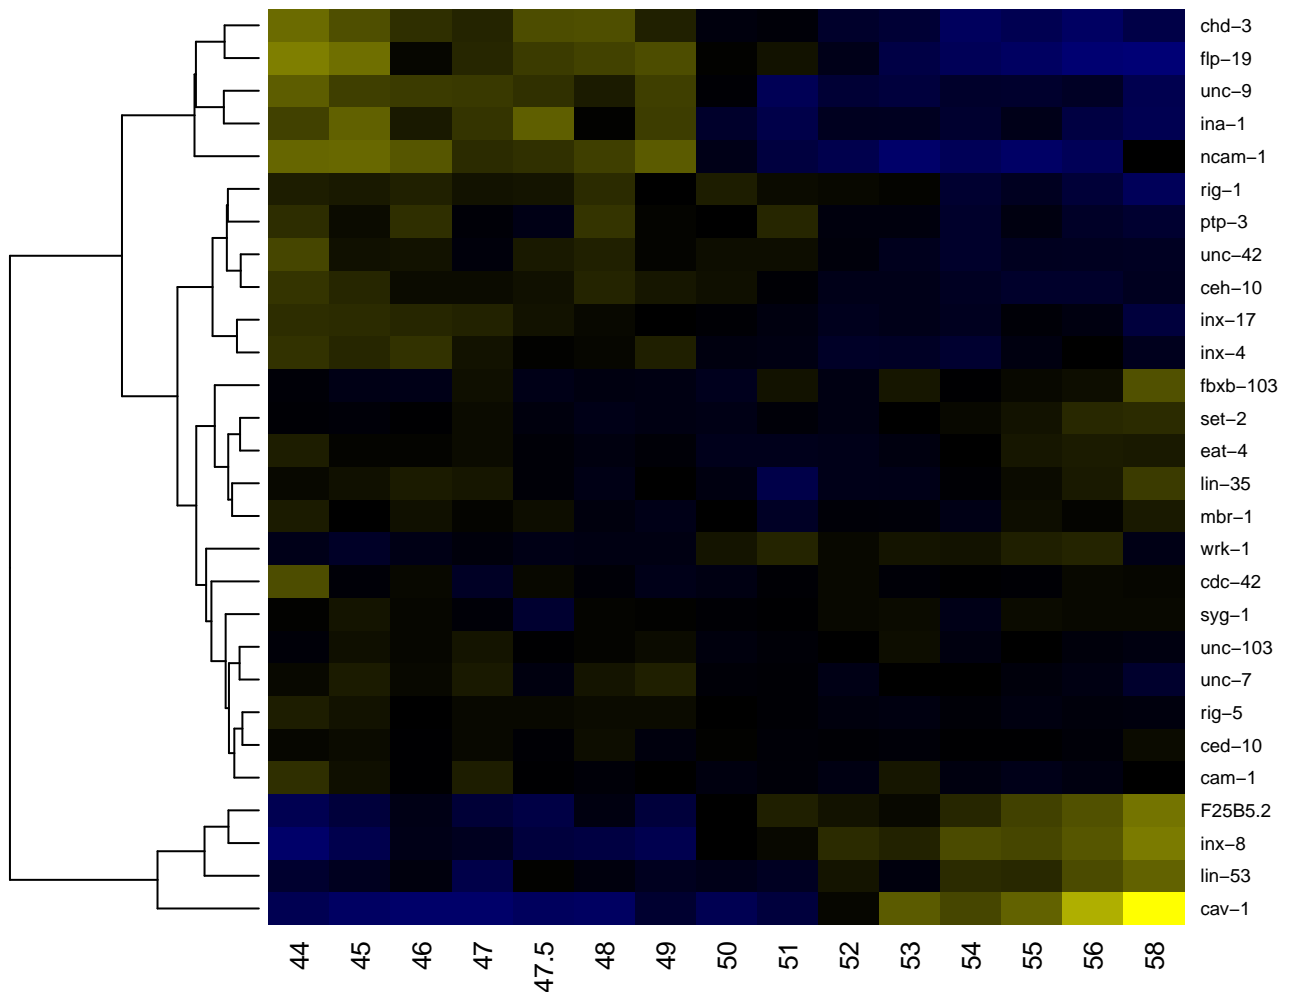

# AIYL

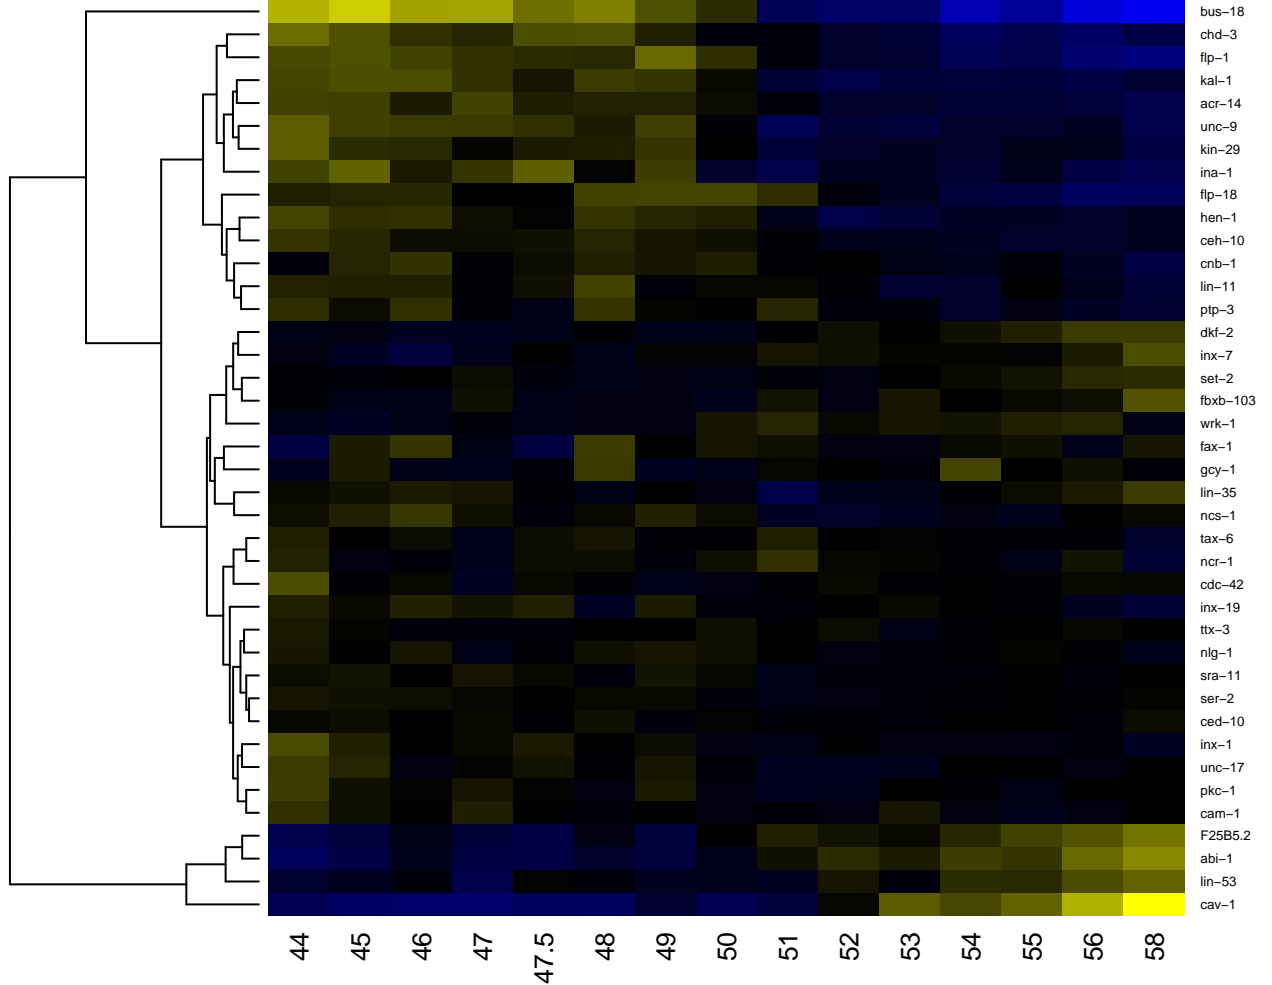

# AIYR

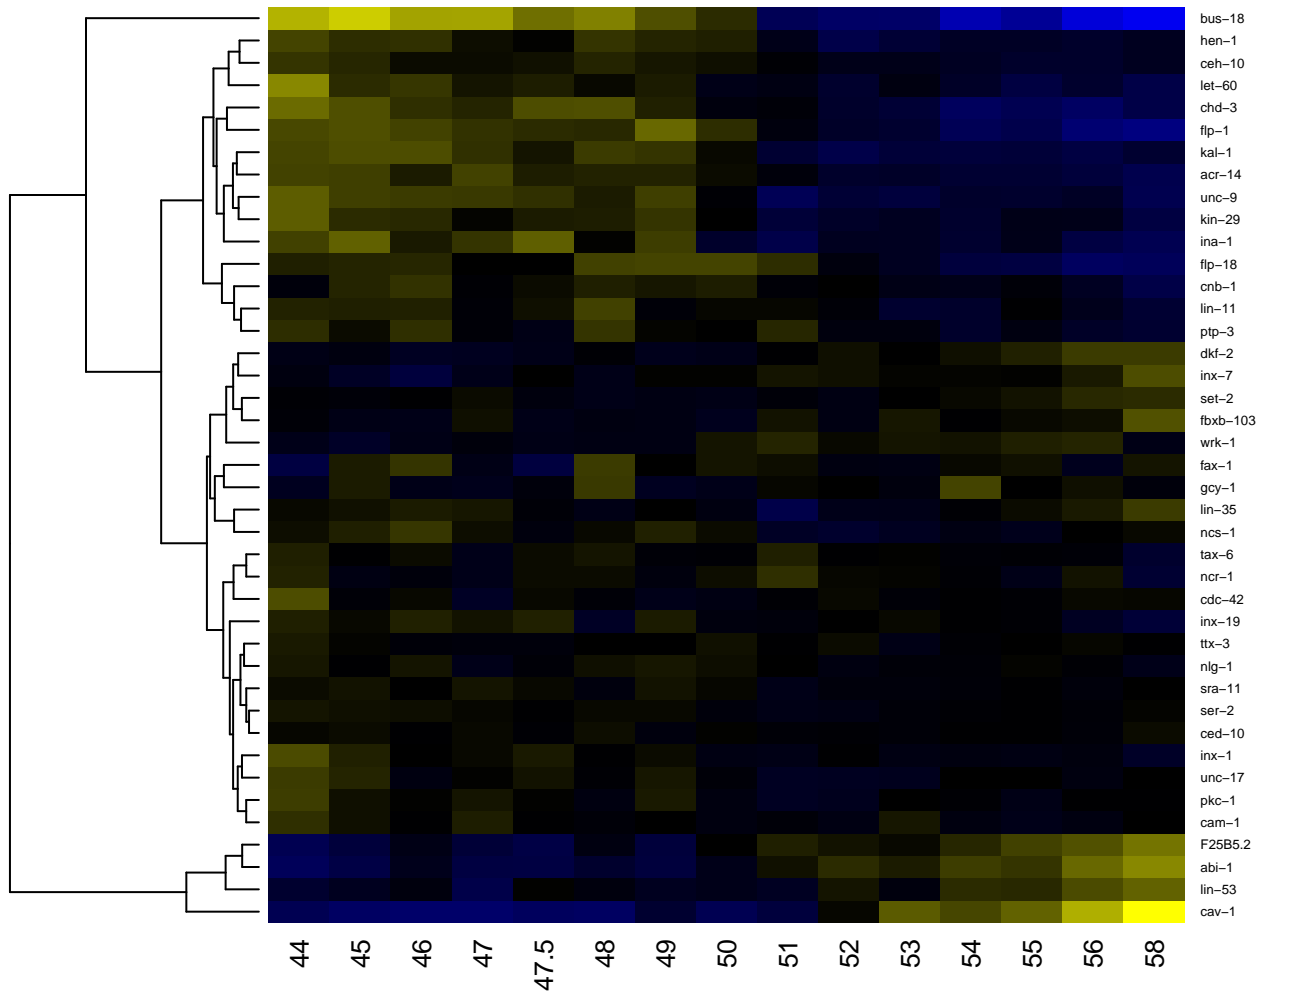

# AIZL

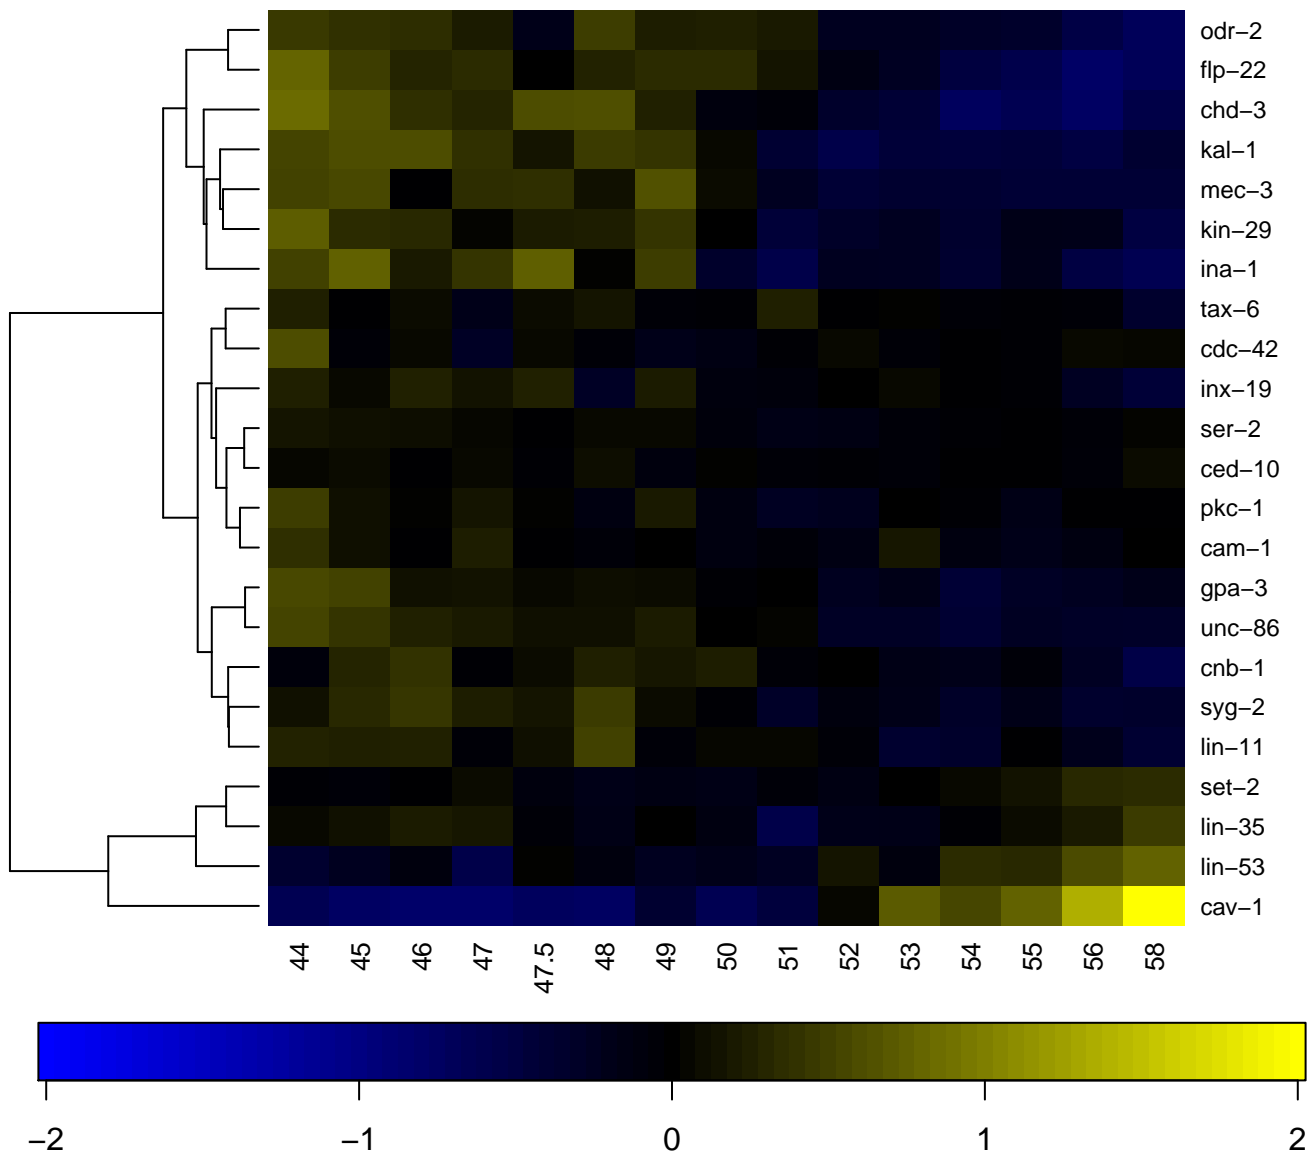

# AIZR

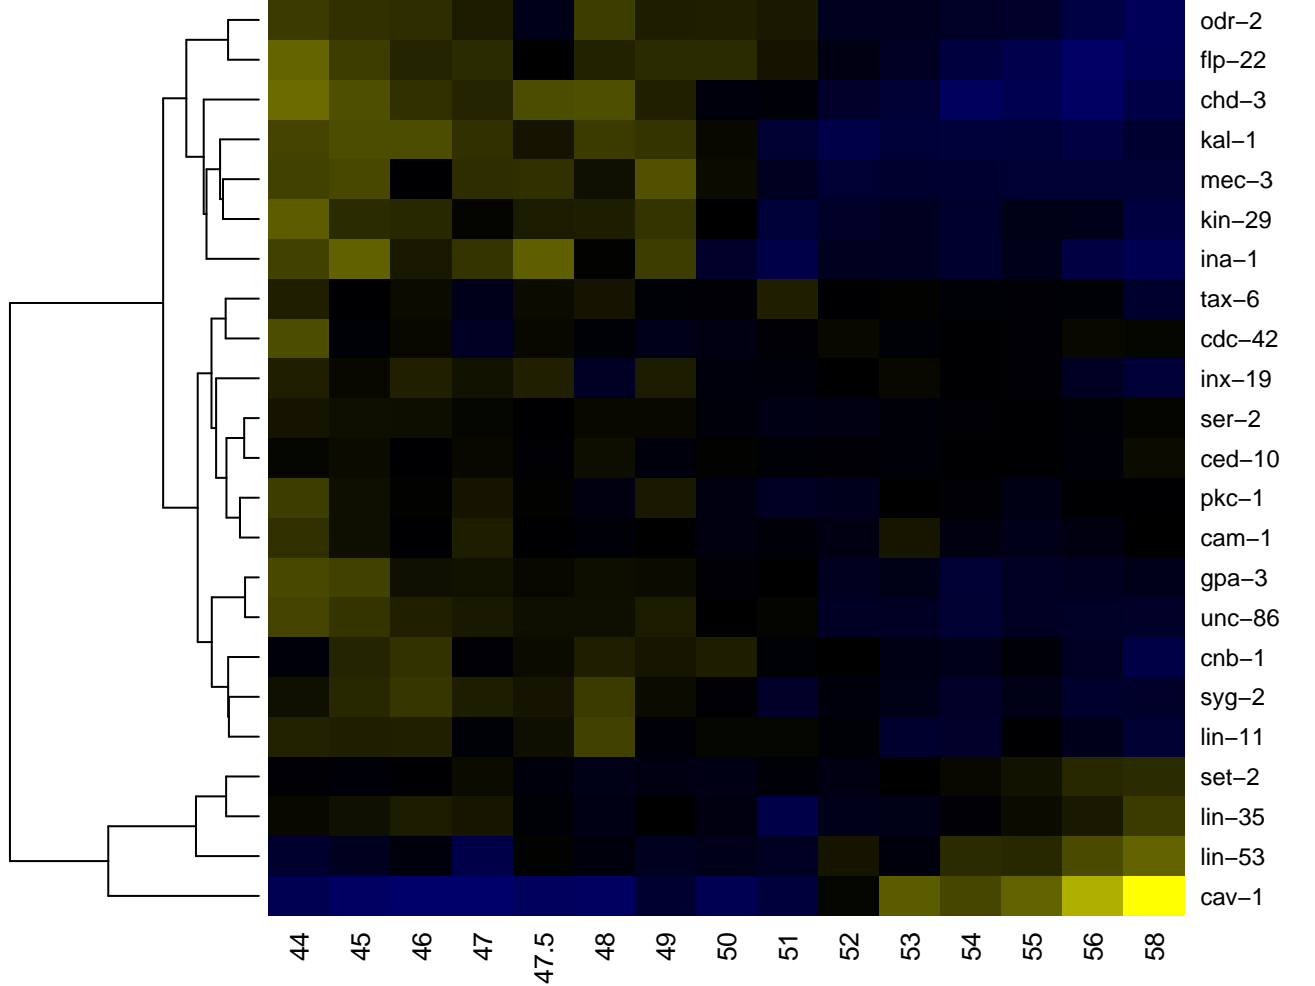



# ALA

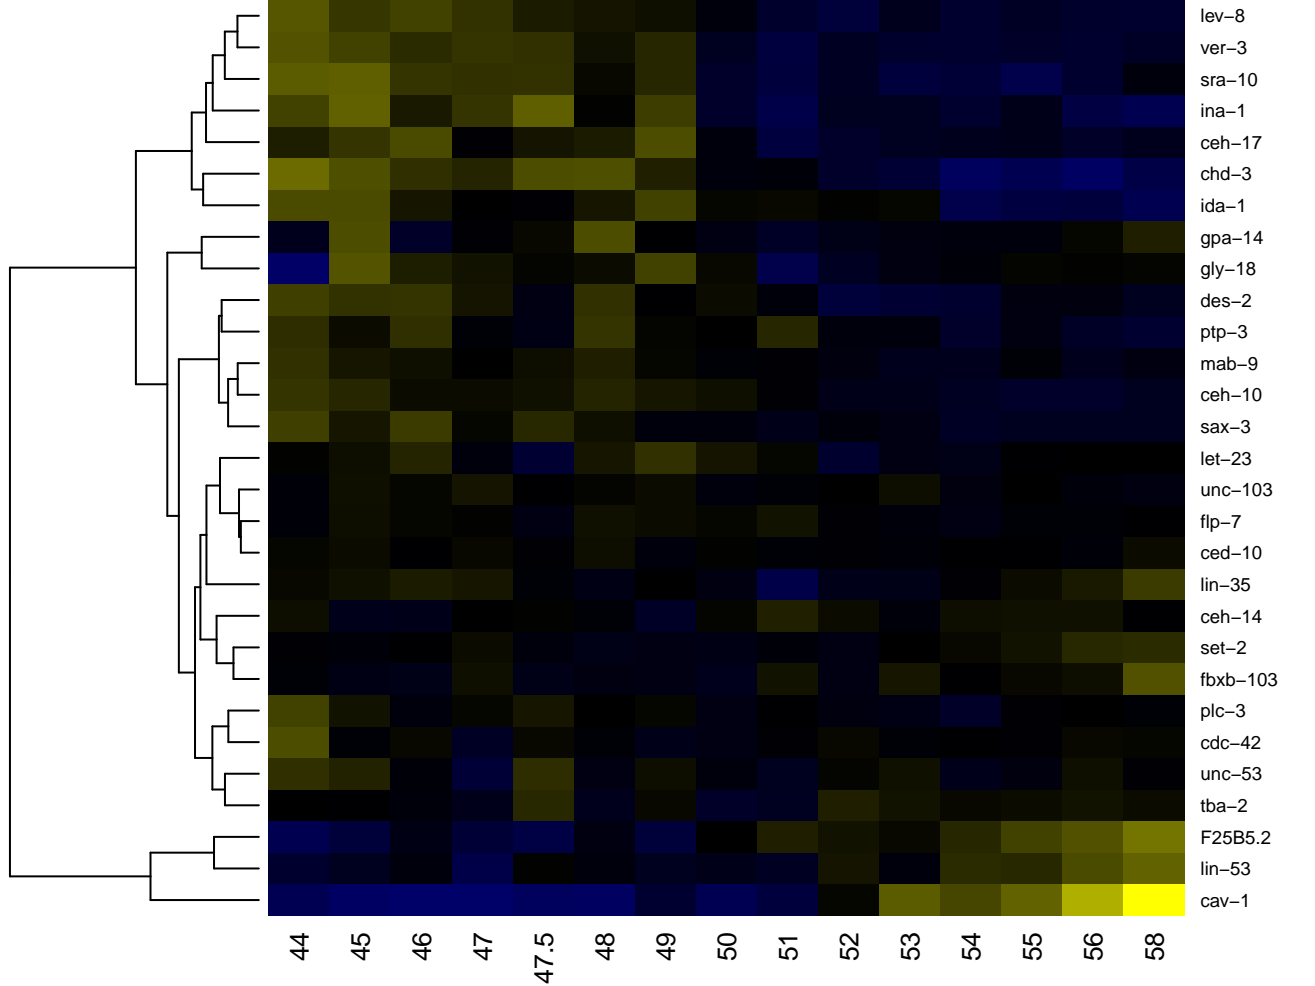

# ALML

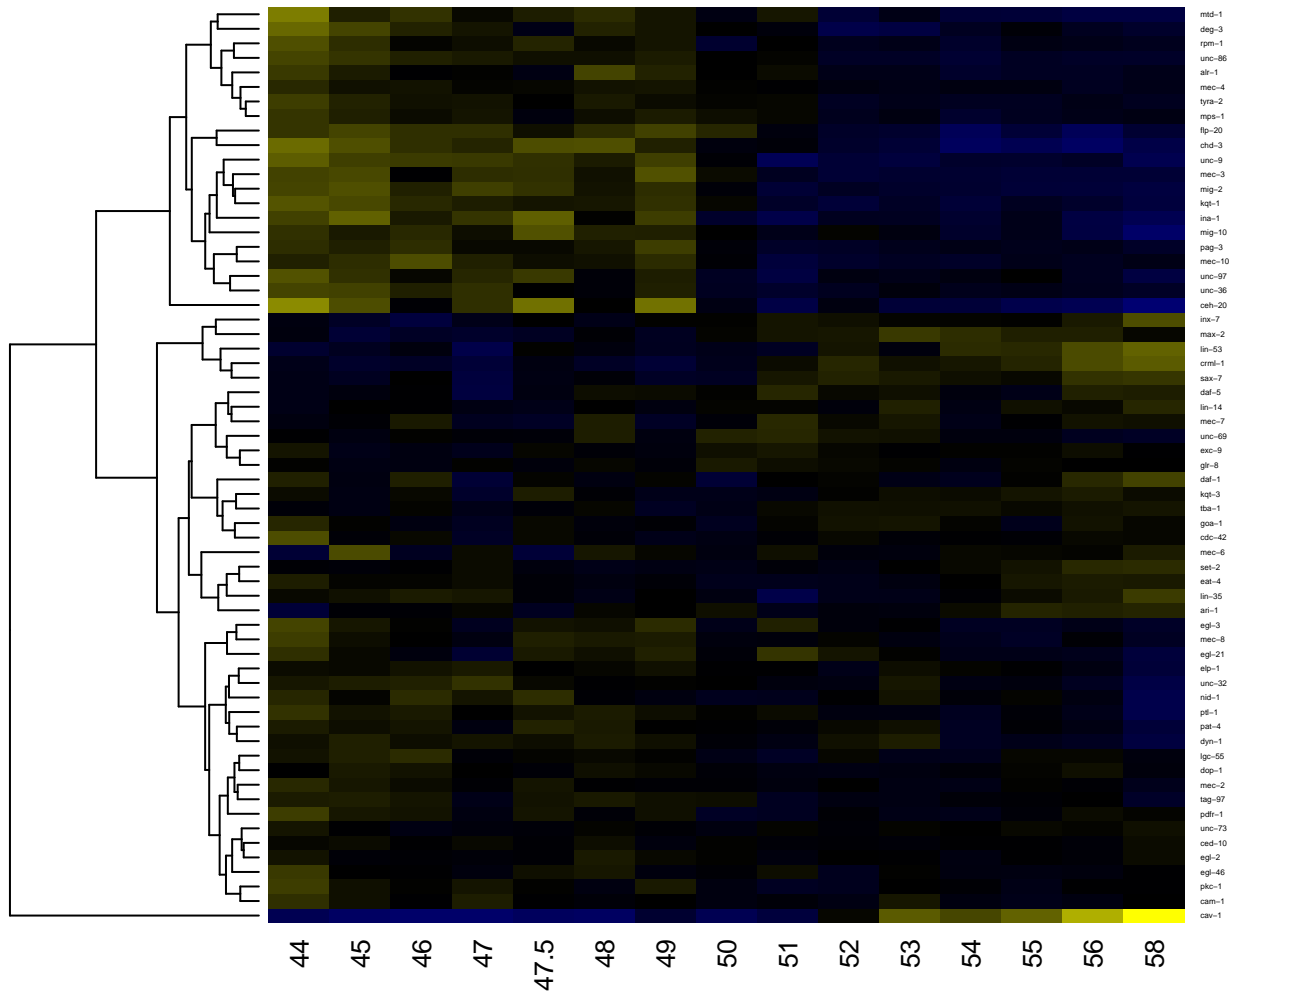

# ALMR

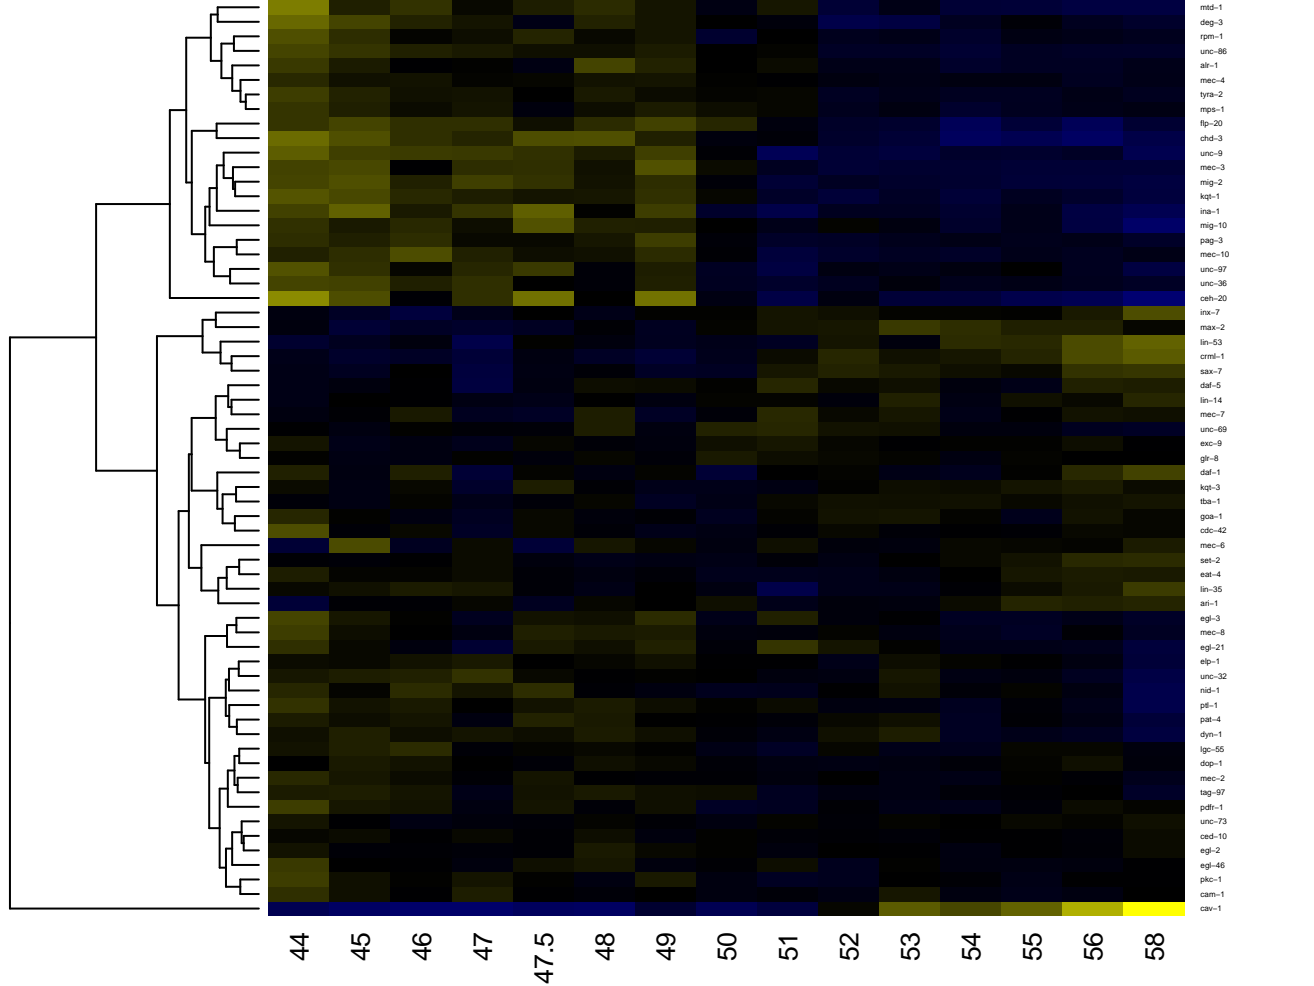

# ALNL

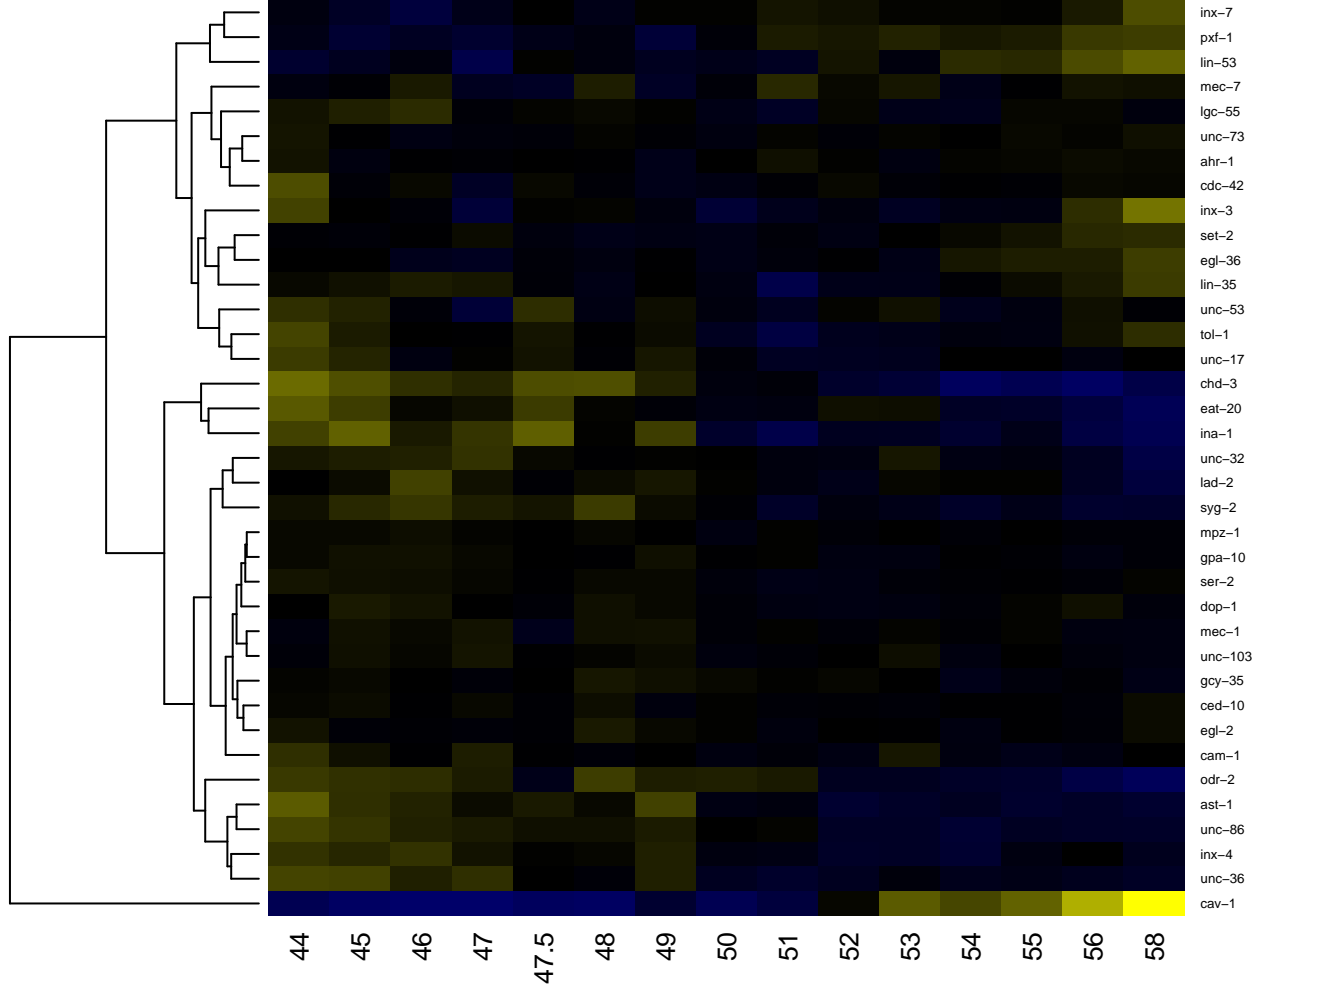

# ALNR

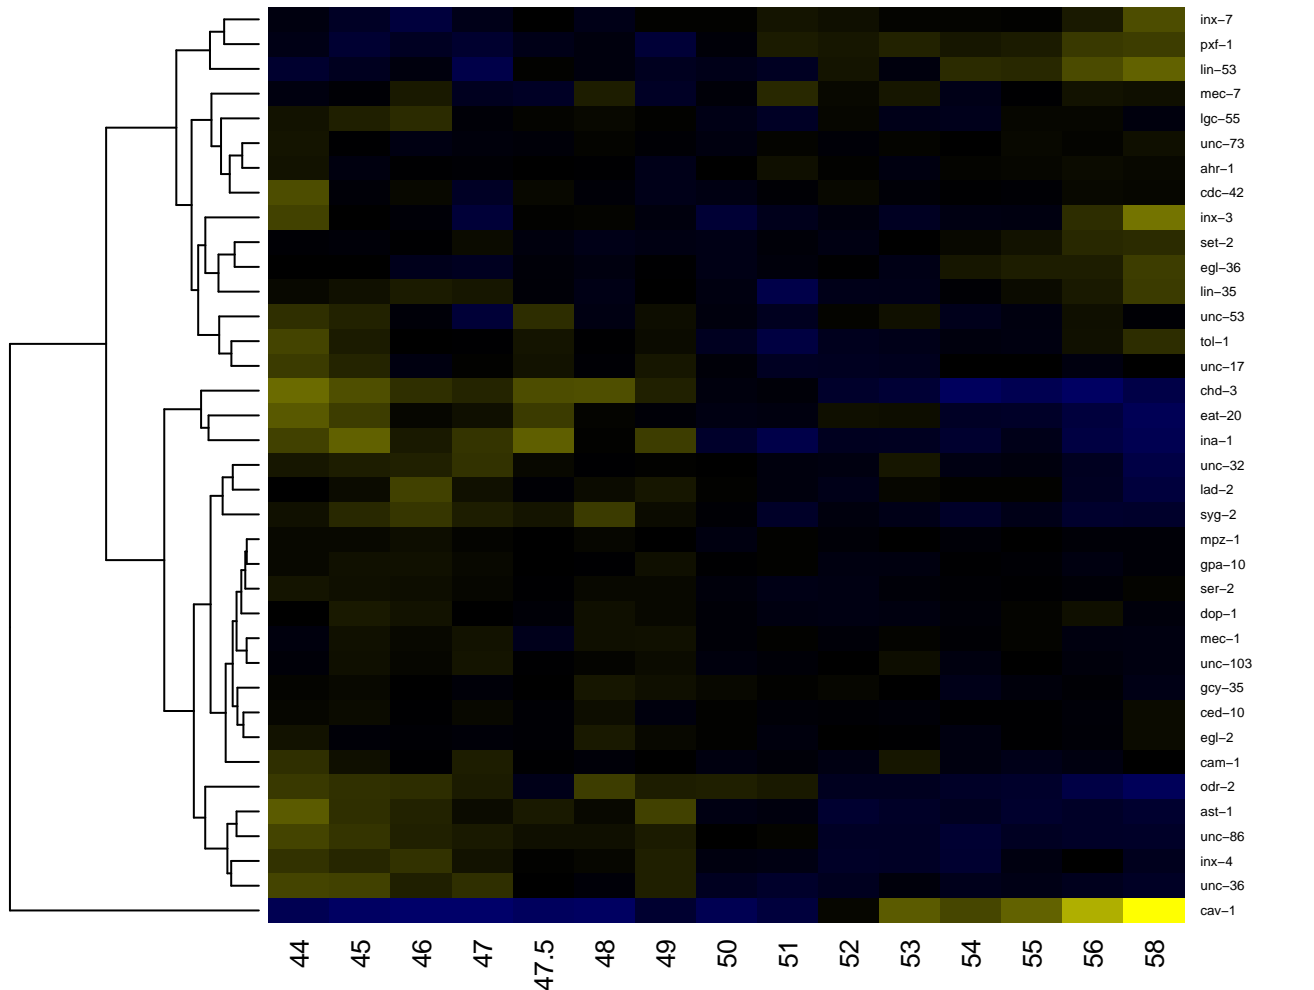

-2

-1

0

1

2

# amphid neuron

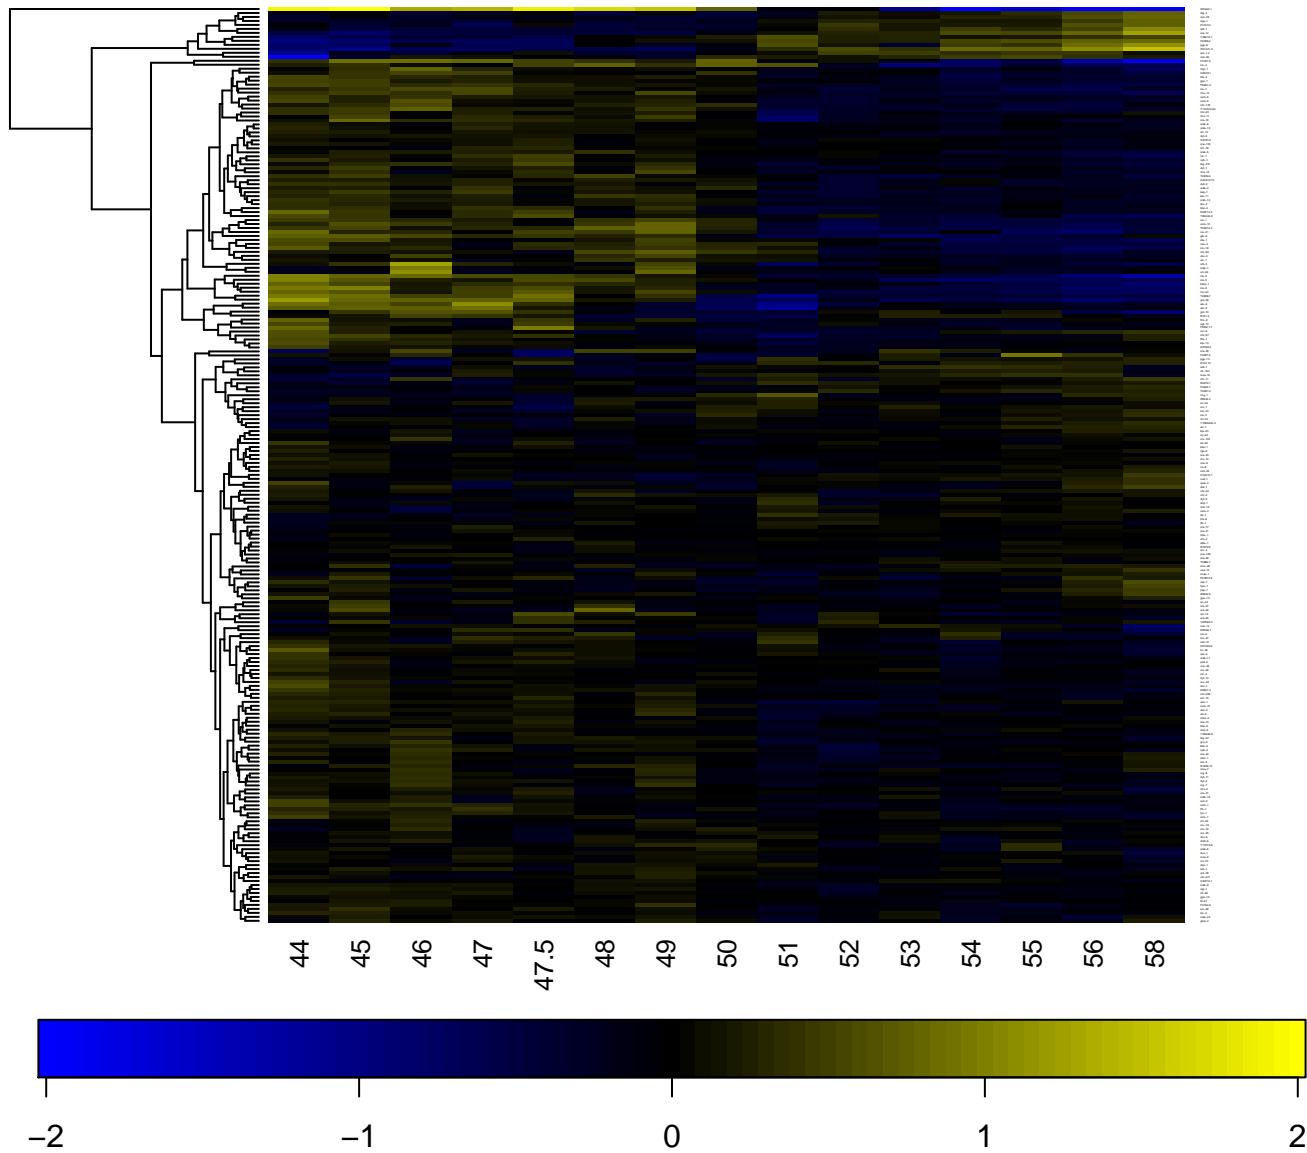

# AMshL

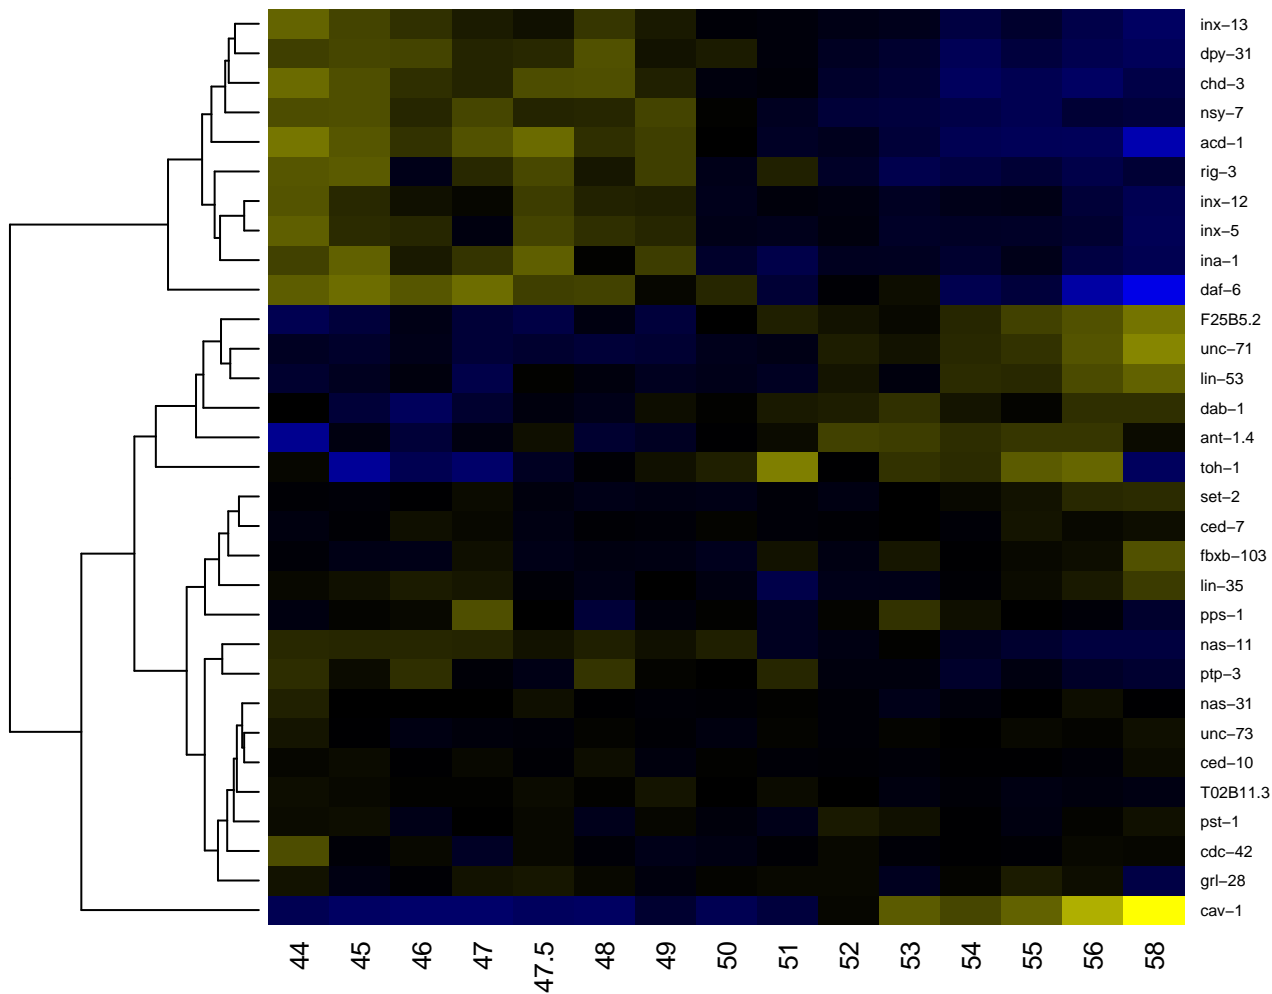

# AMshR

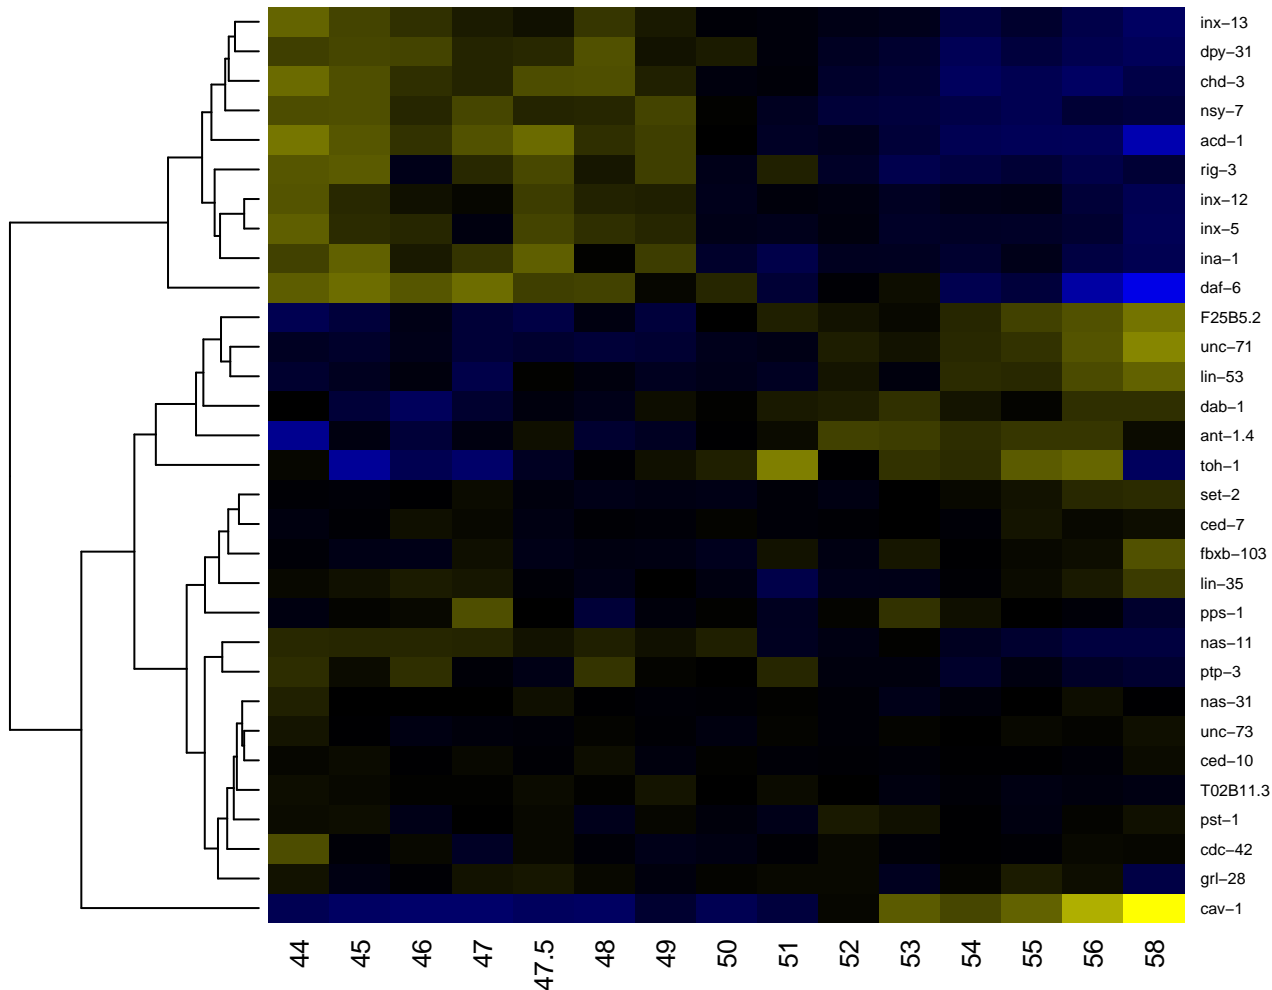

-2

-1

0

1

2



# AMsoL

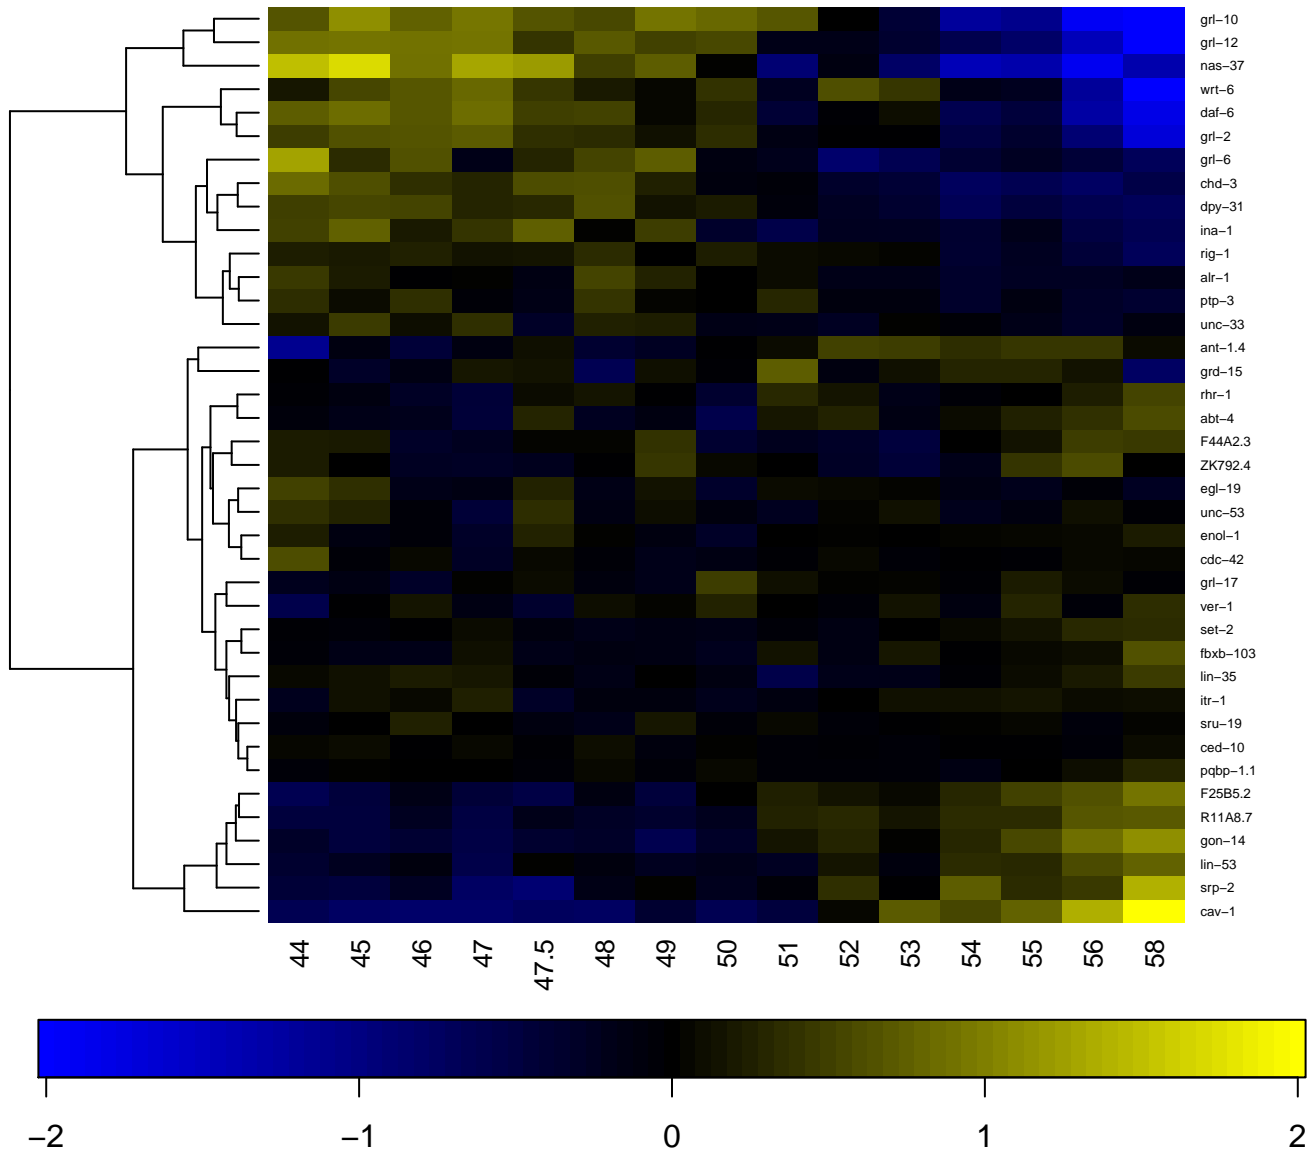

# AMsoR



# anal depressor muscle

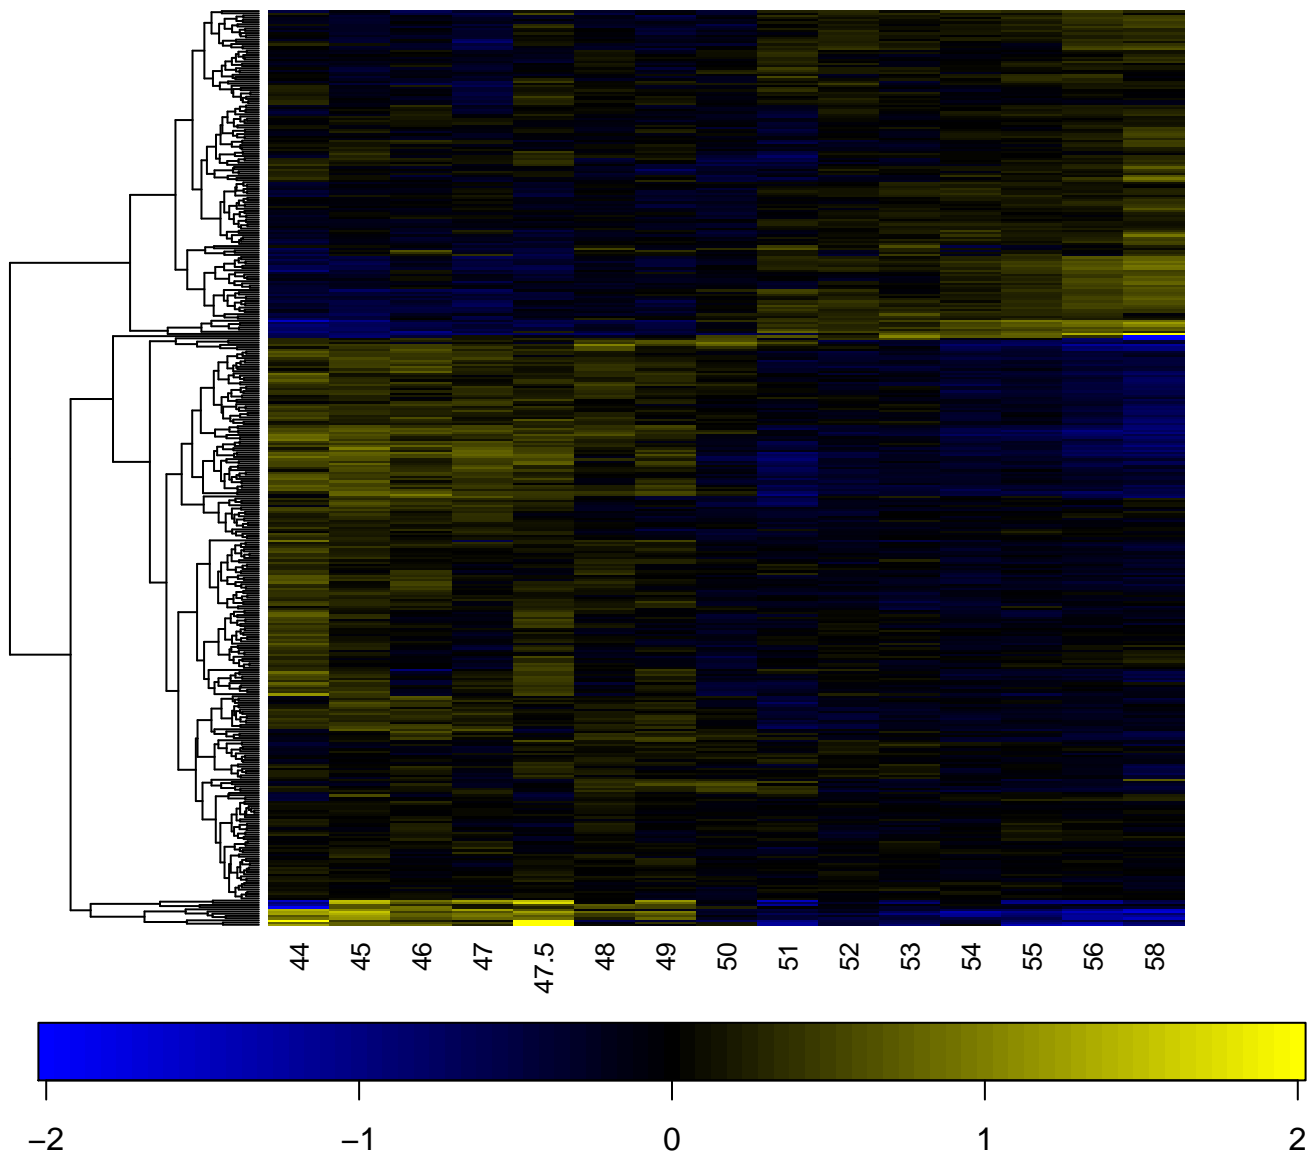

# anal sphincter muscle

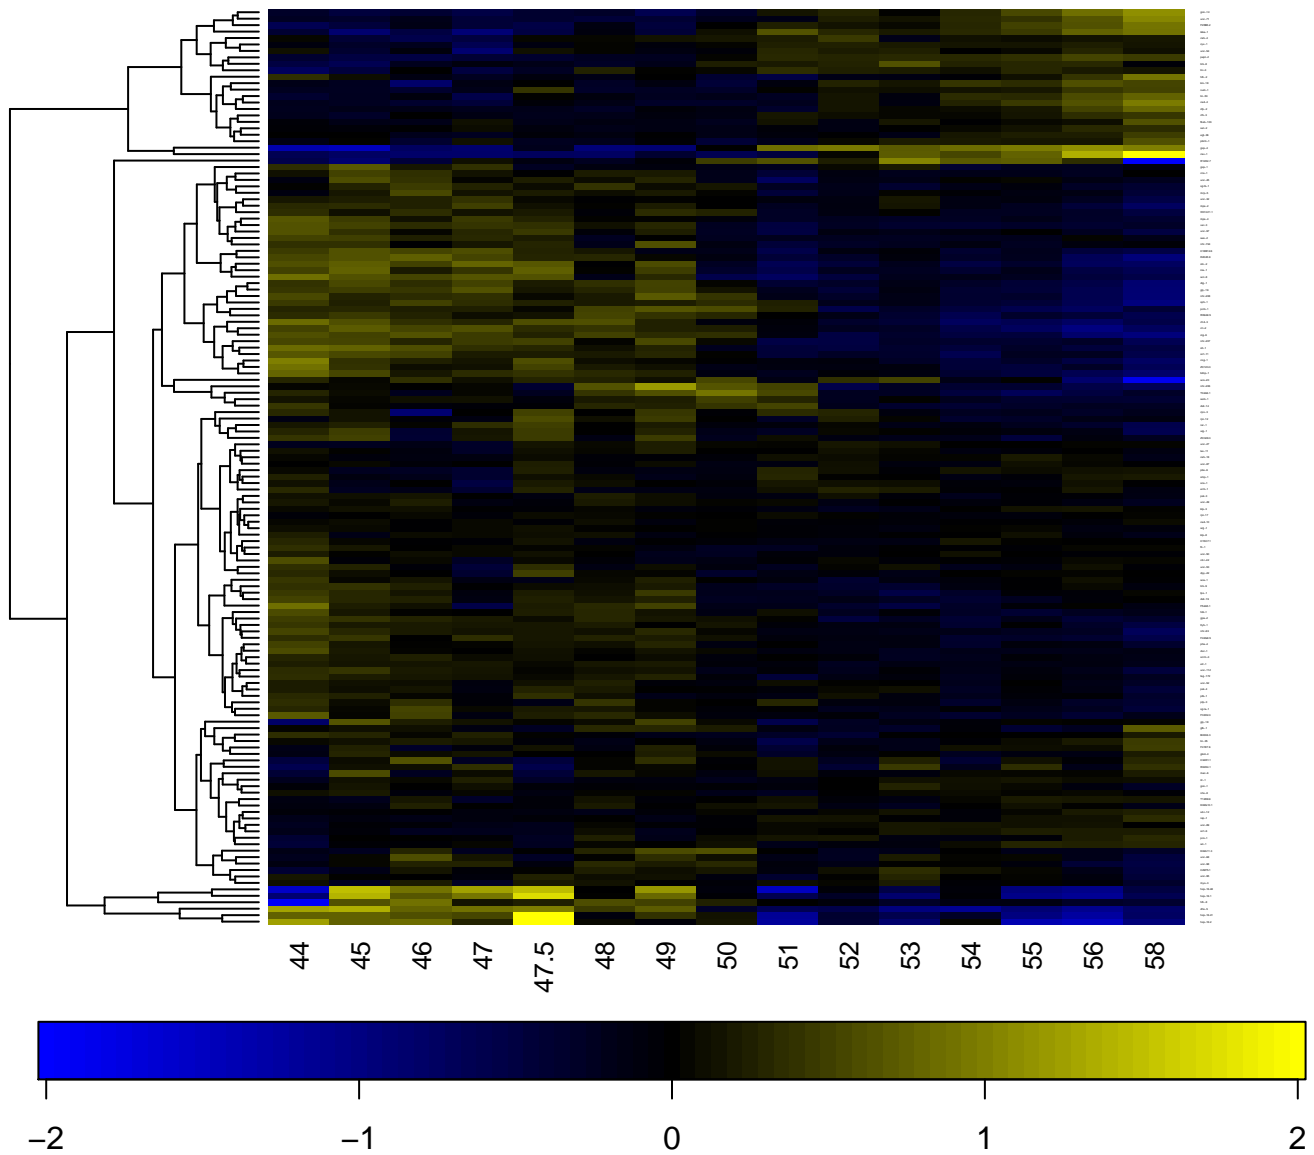

# Anchor cell

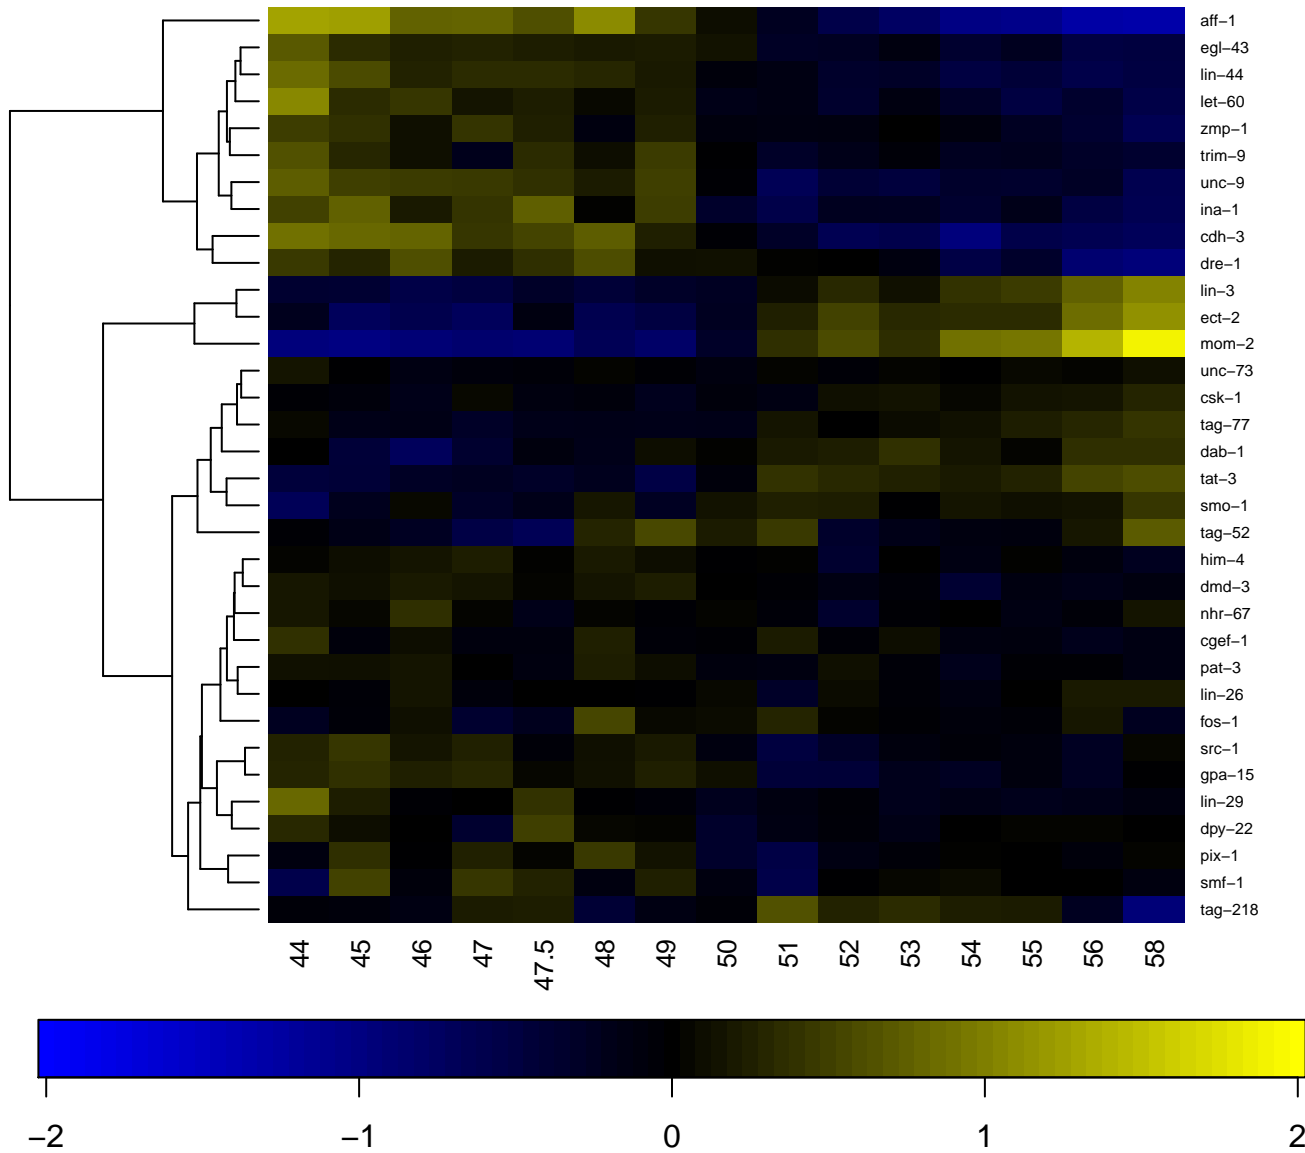

# anterior arcade cell

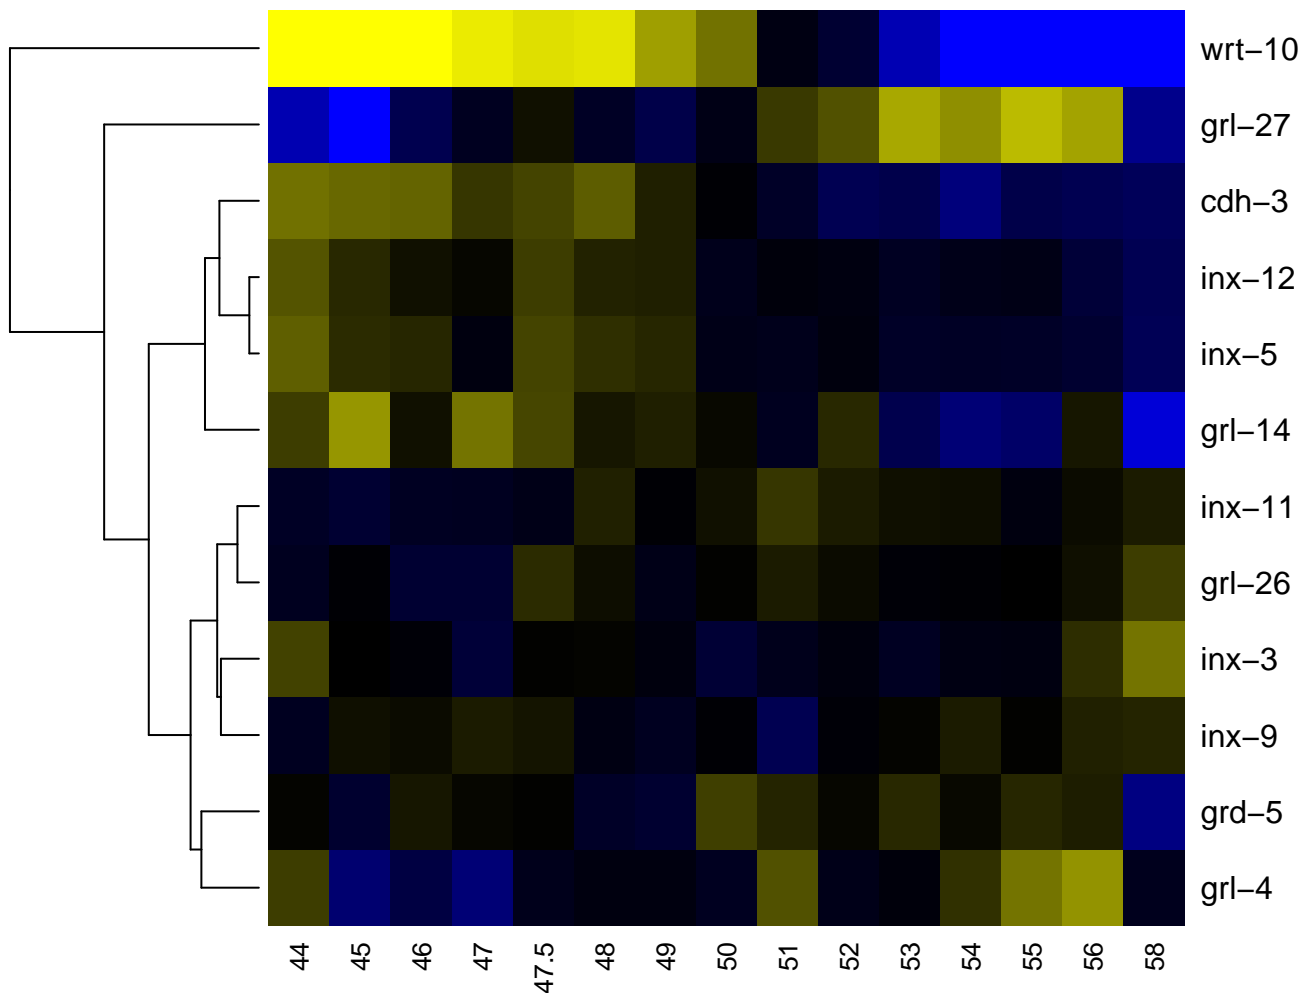

# anterior ganglion

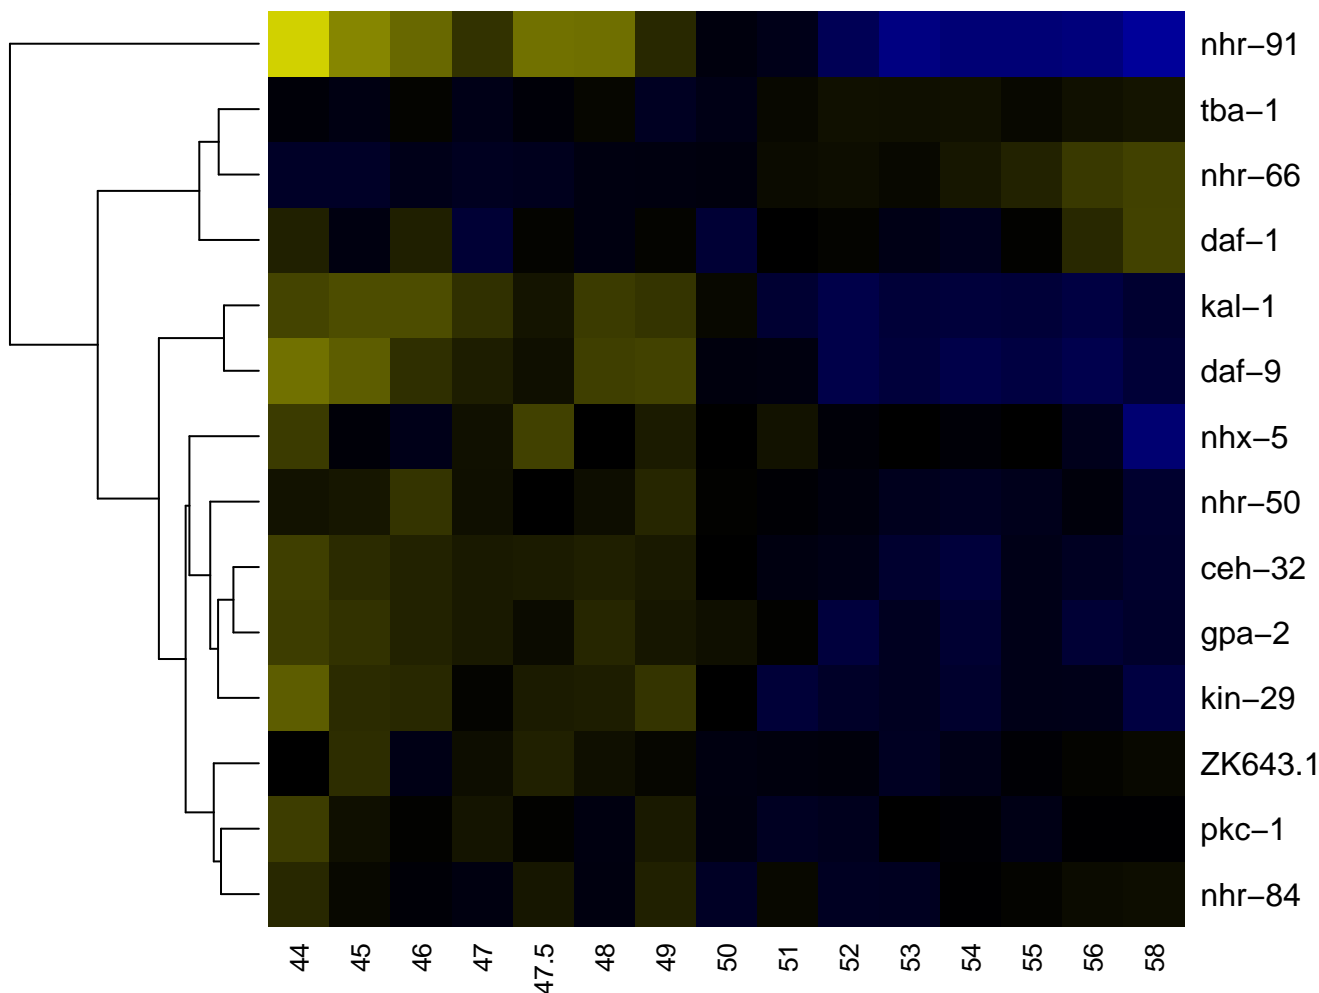

-2

-1

0

1

2

# anterior hypodermis

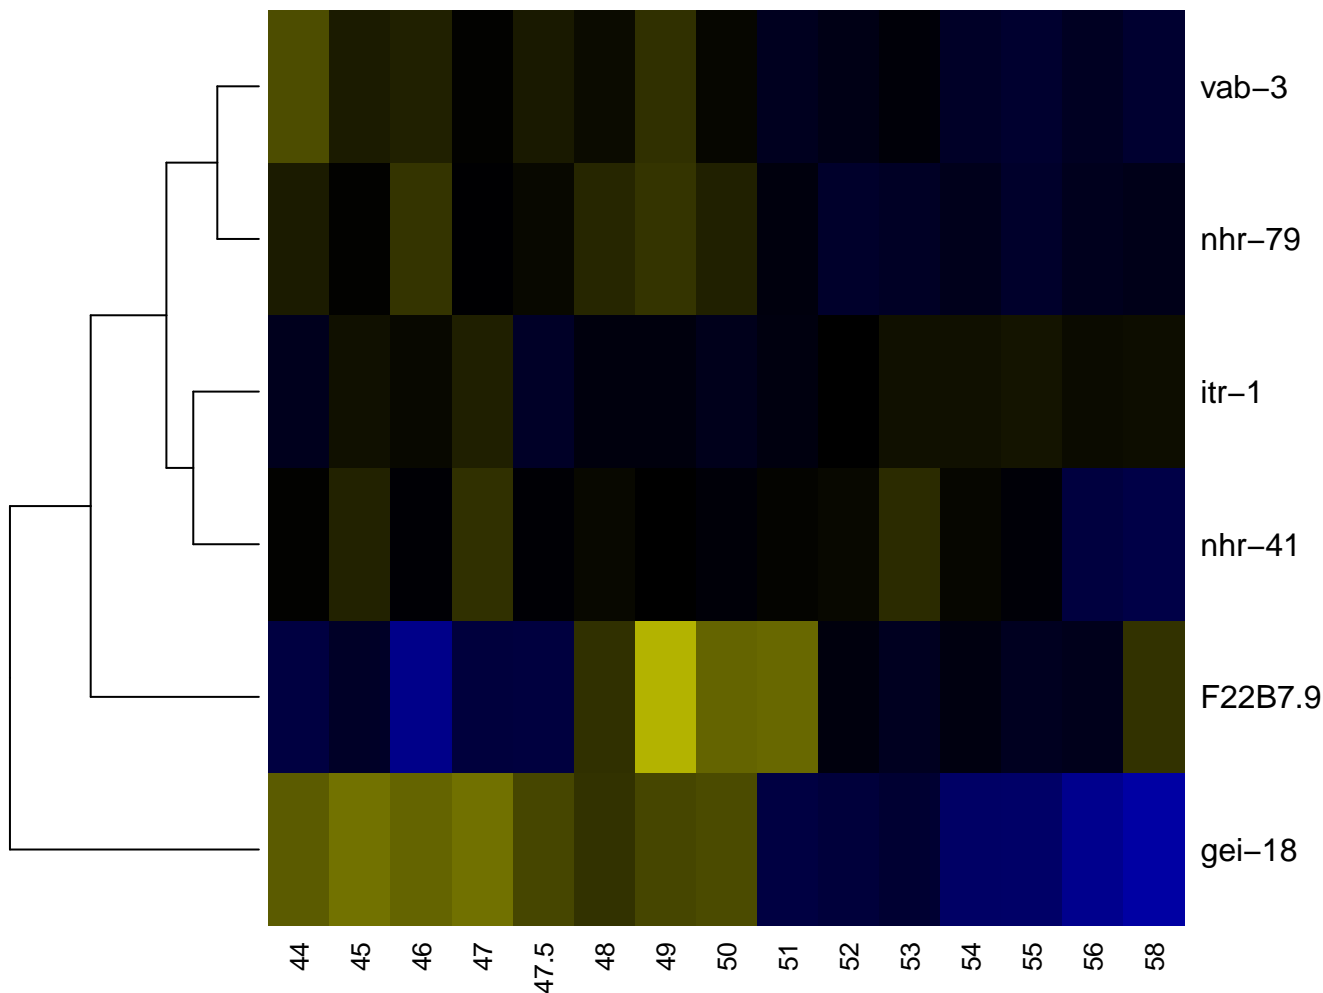

-2

-1

0

1

2



# anterior oblique muscle

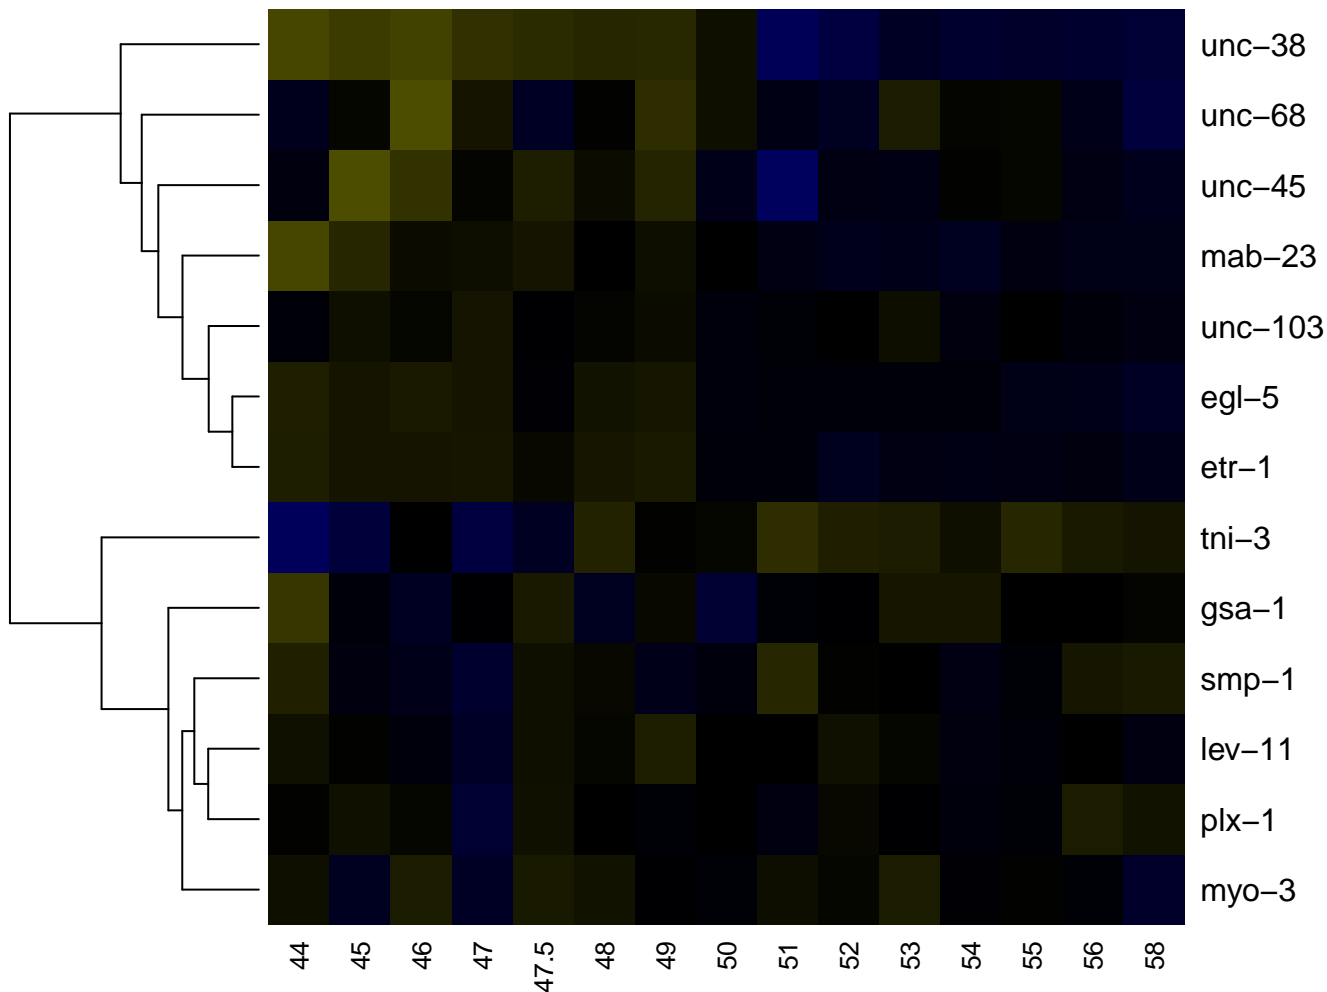

# anus

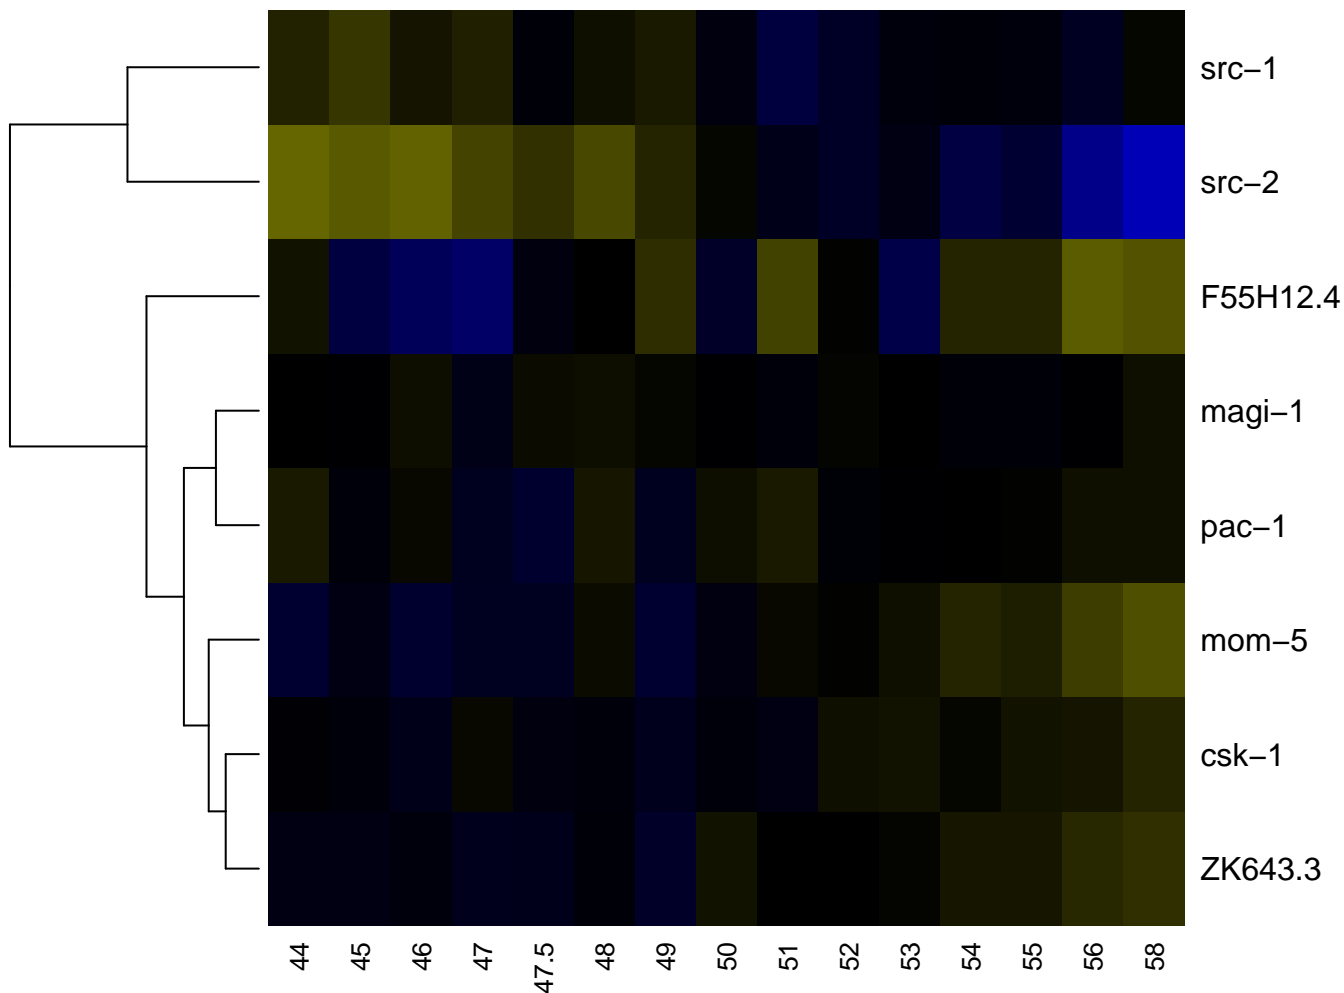

# AQR

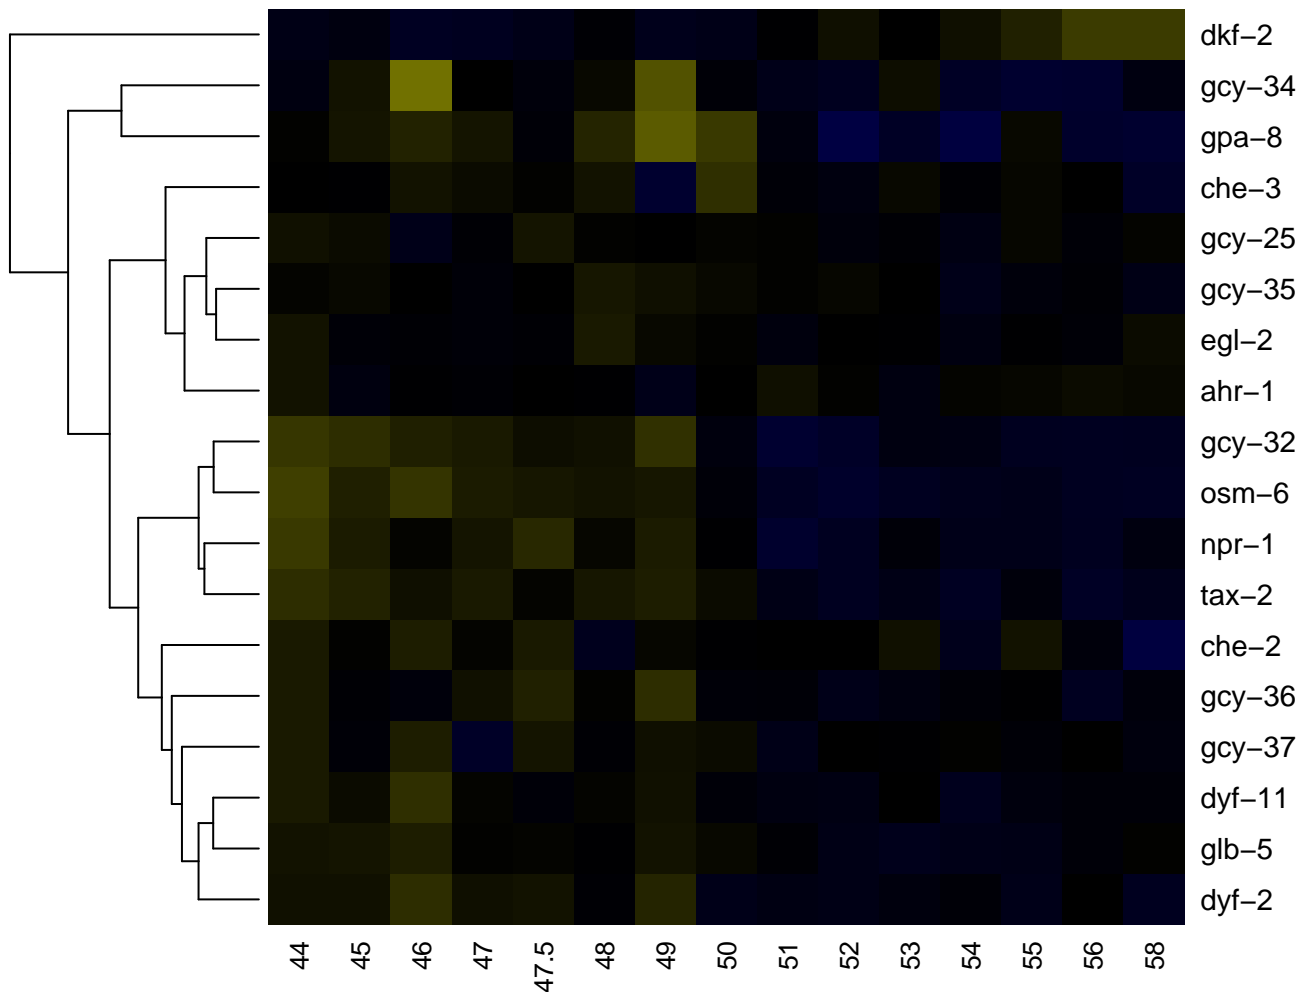

-2

-1

0

1

2

# arc ant DL

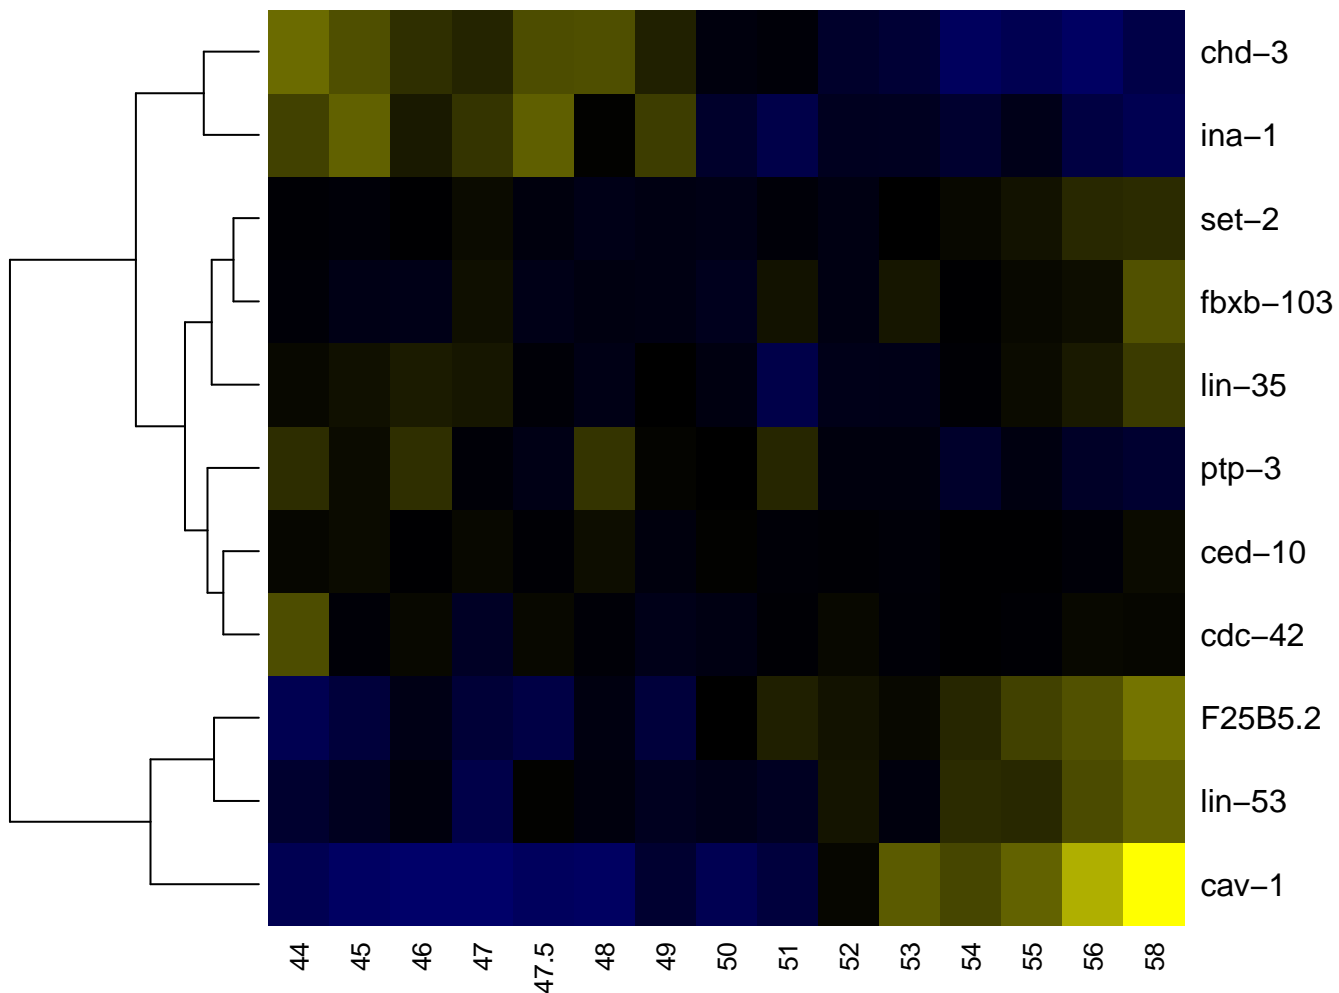

# arc ant DR

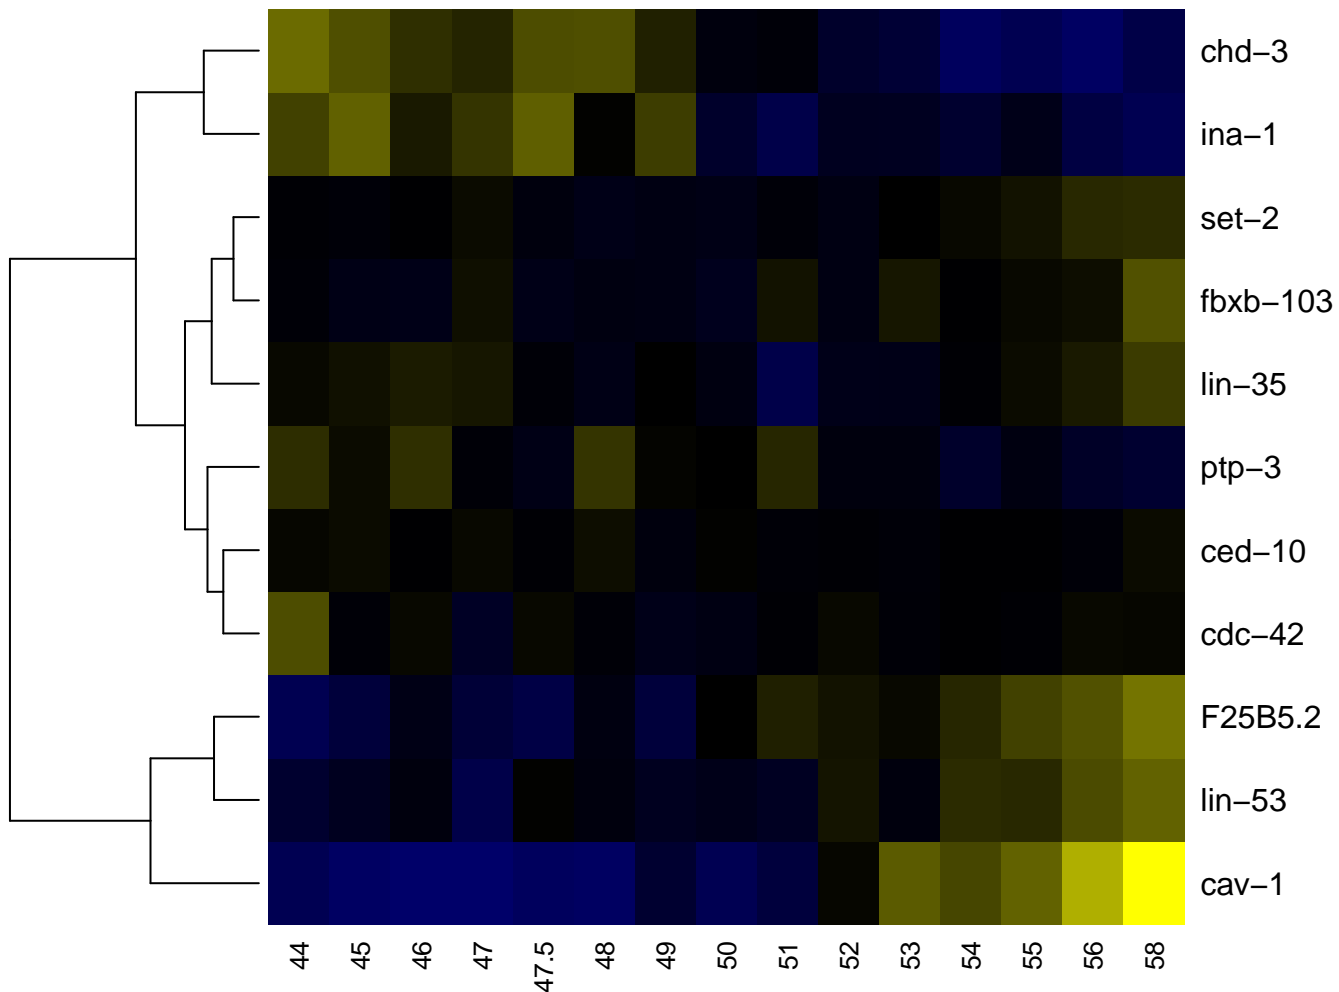

# arc ant V



# arc post D



# arc post DL





# arc post DR



# arc post V



# arc post VL



# arc post VR

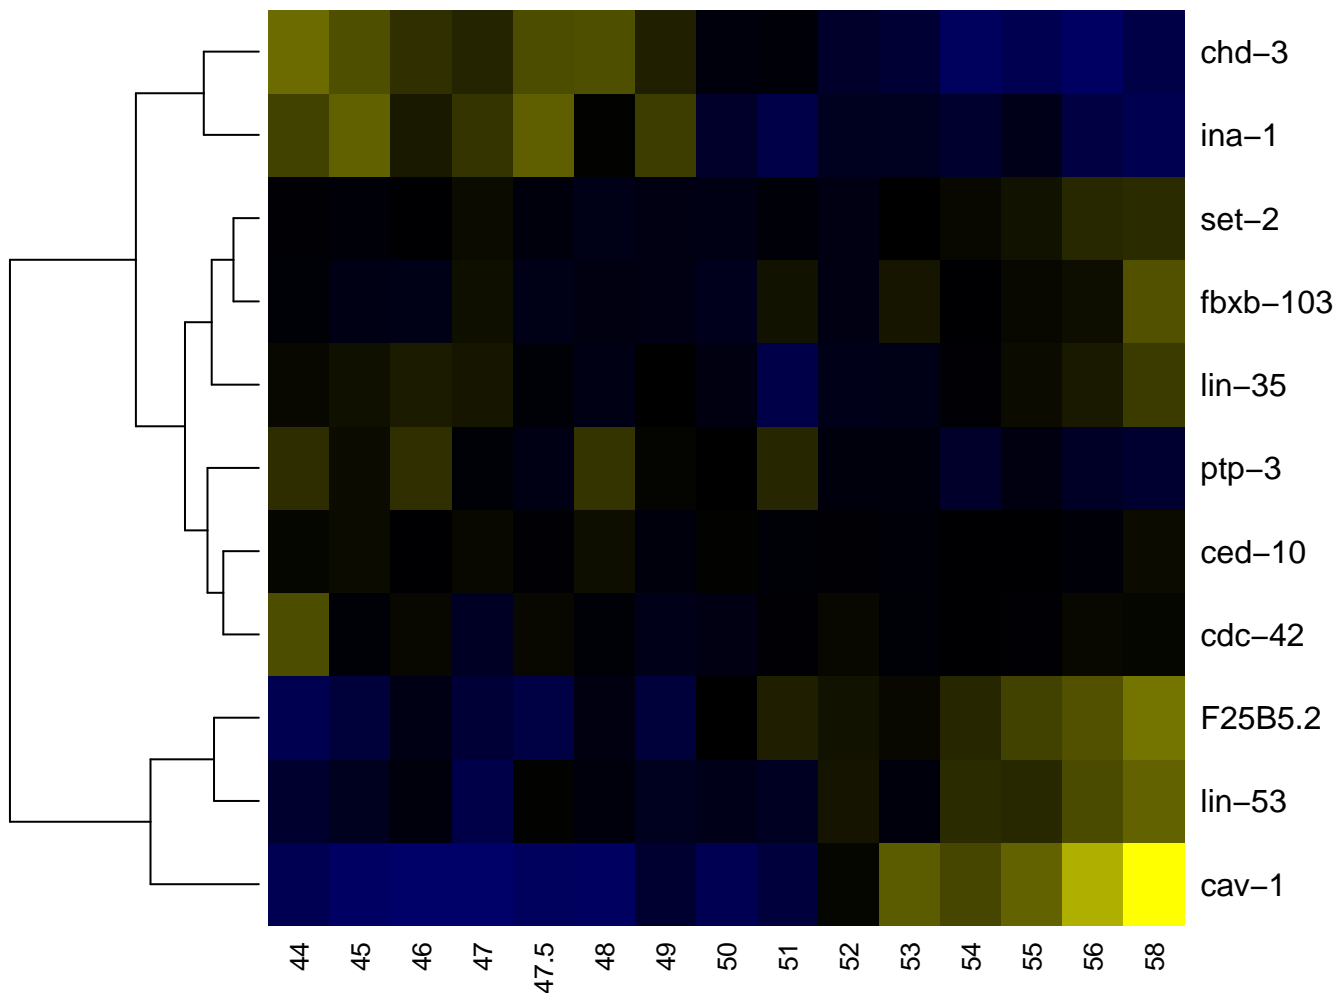



# AS neuron

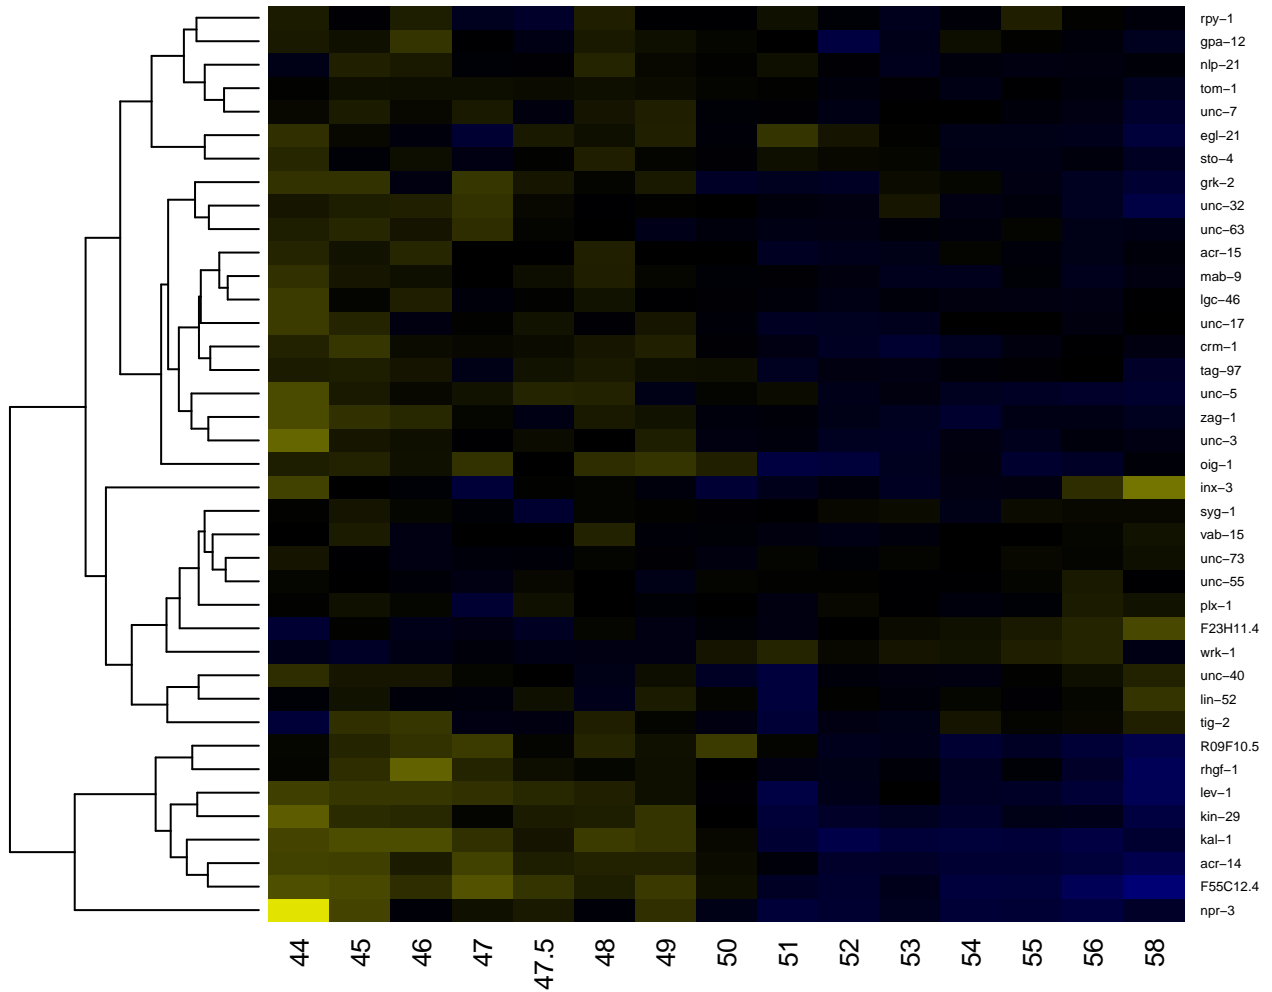

# ASEL

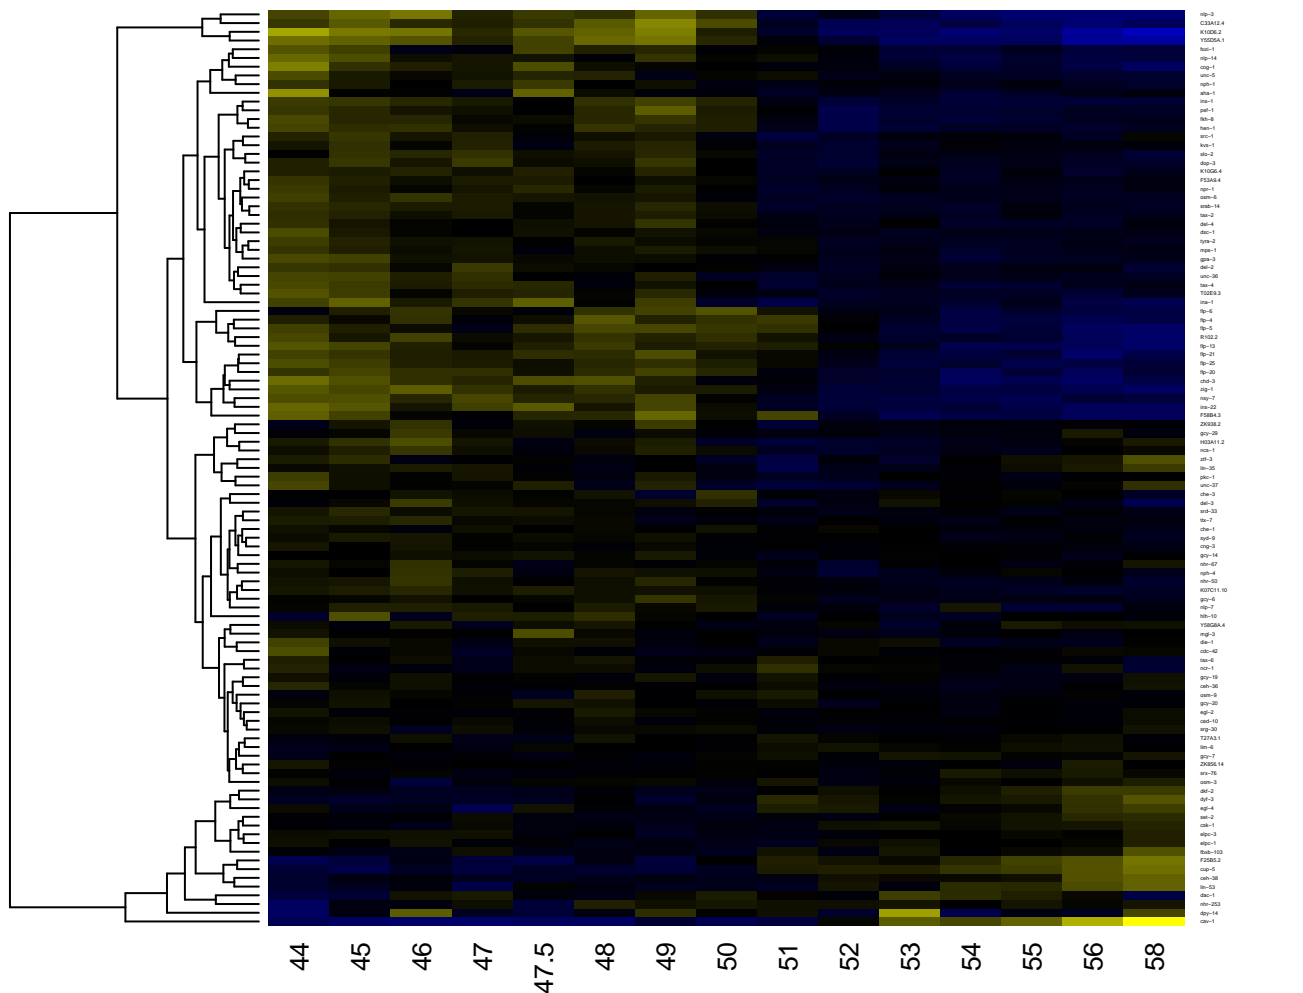

-2

-1

0

1

2





# ASGL

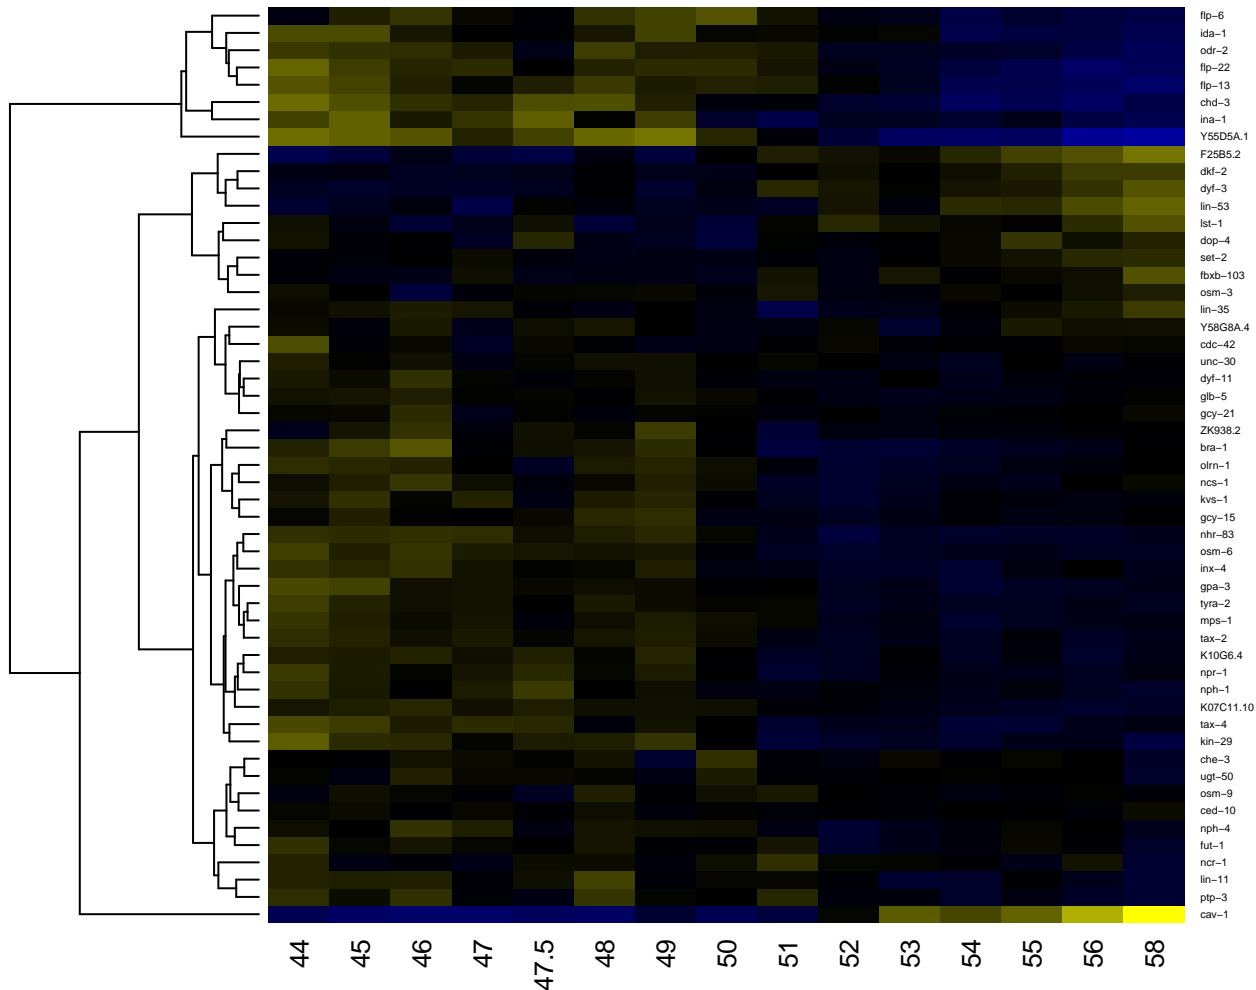

# ASGR

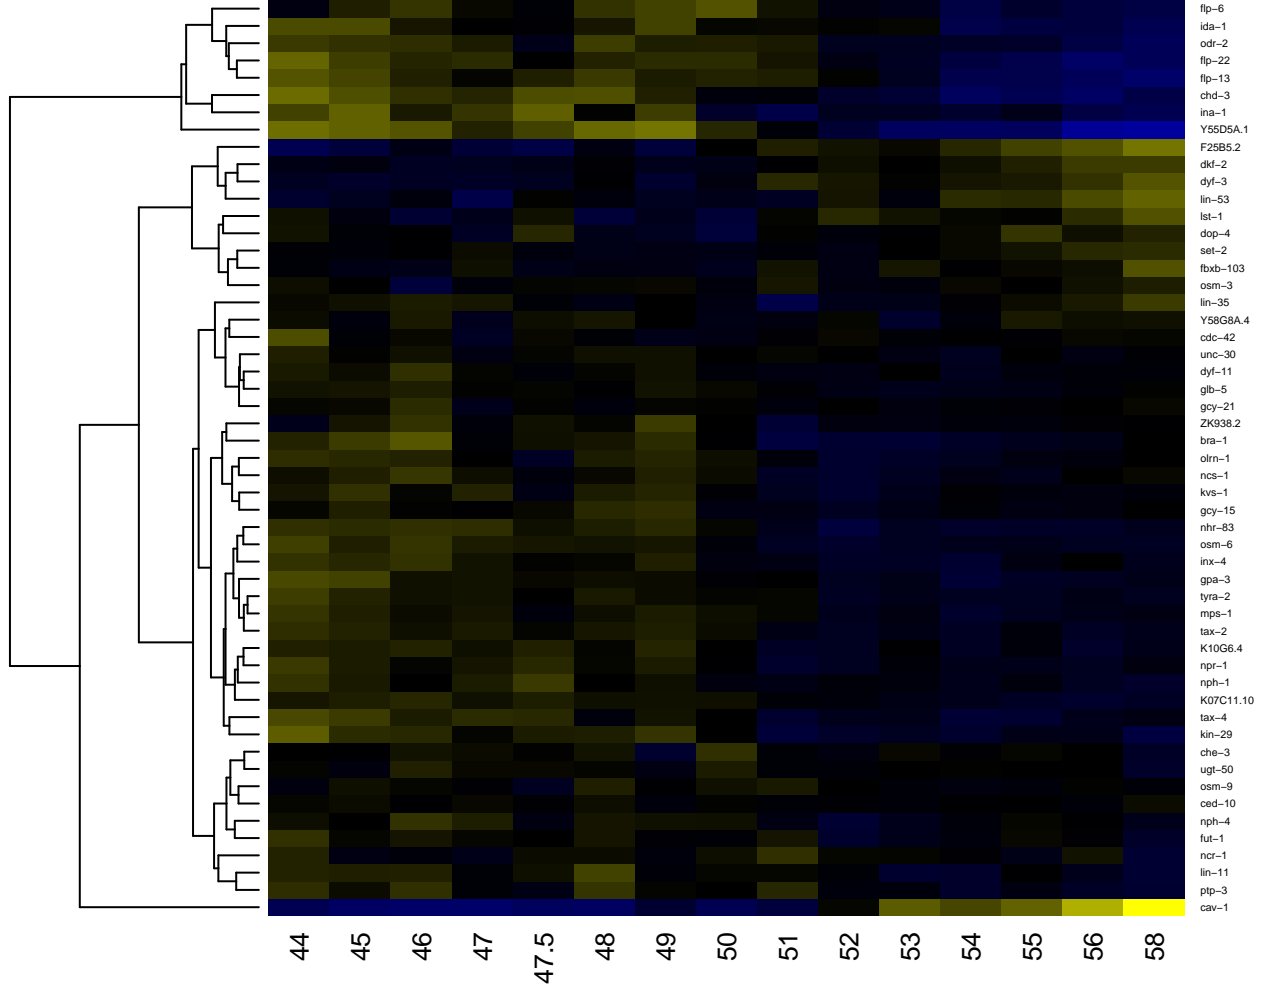

# ASHL

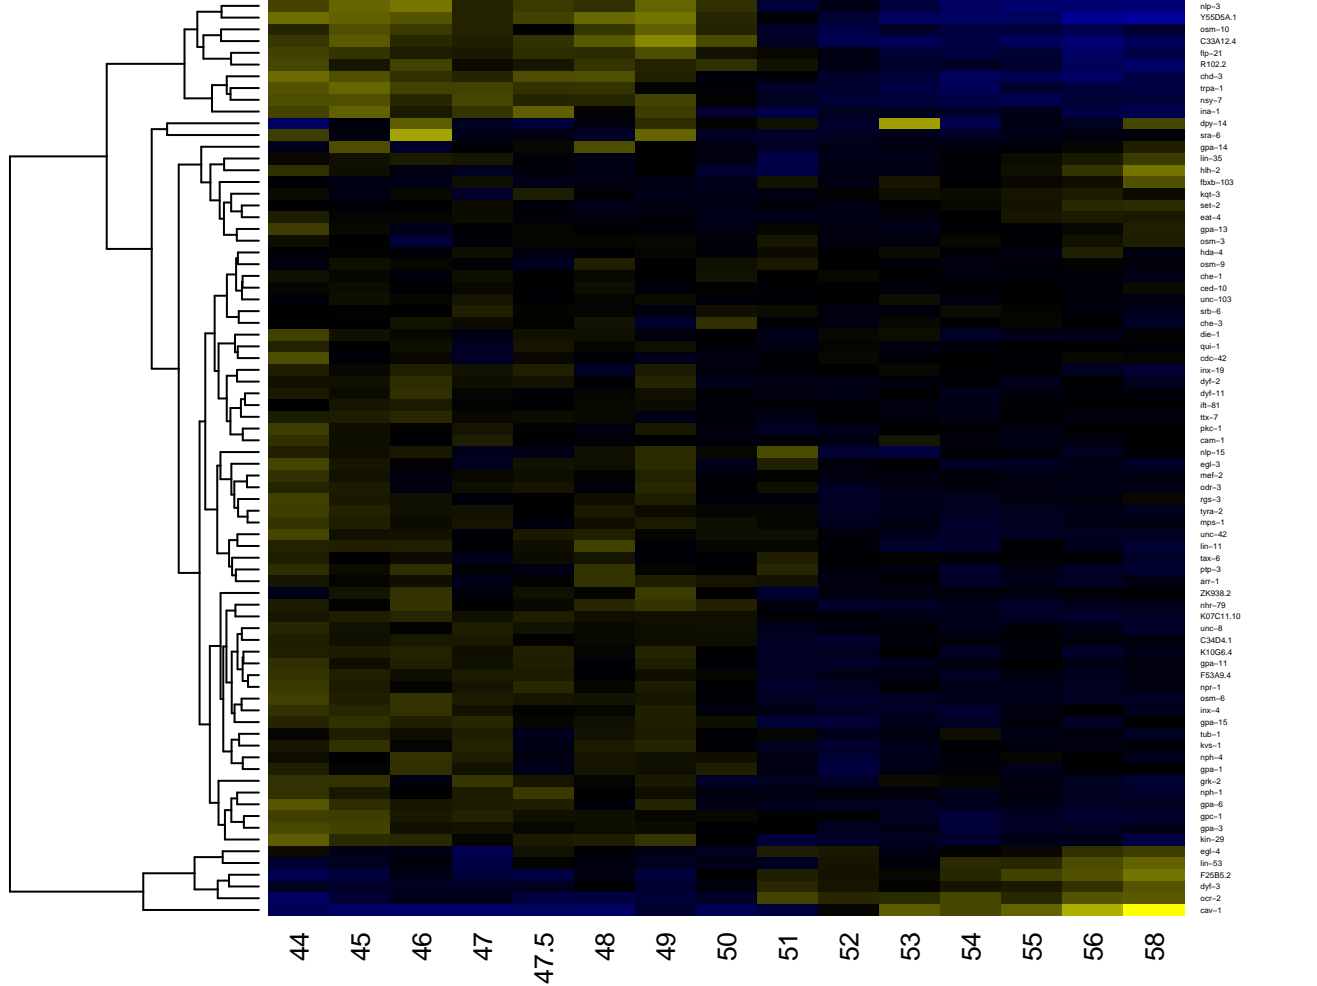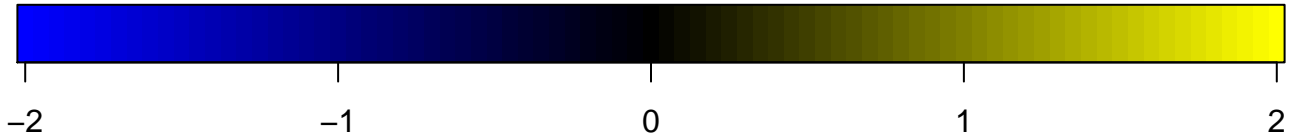

# ASHR

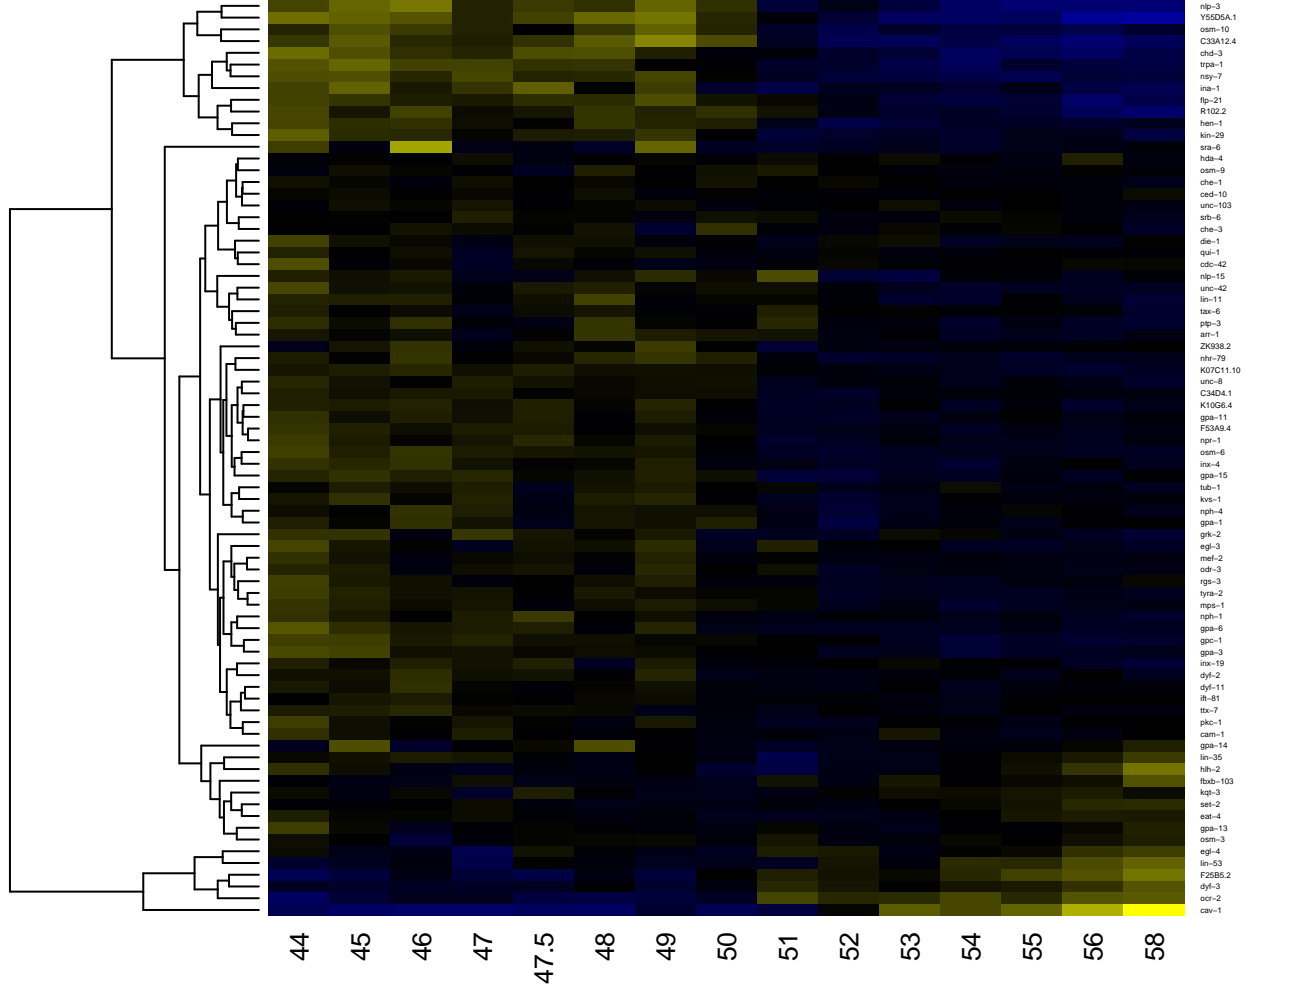

-2

-1

0

1

2



# ASIR

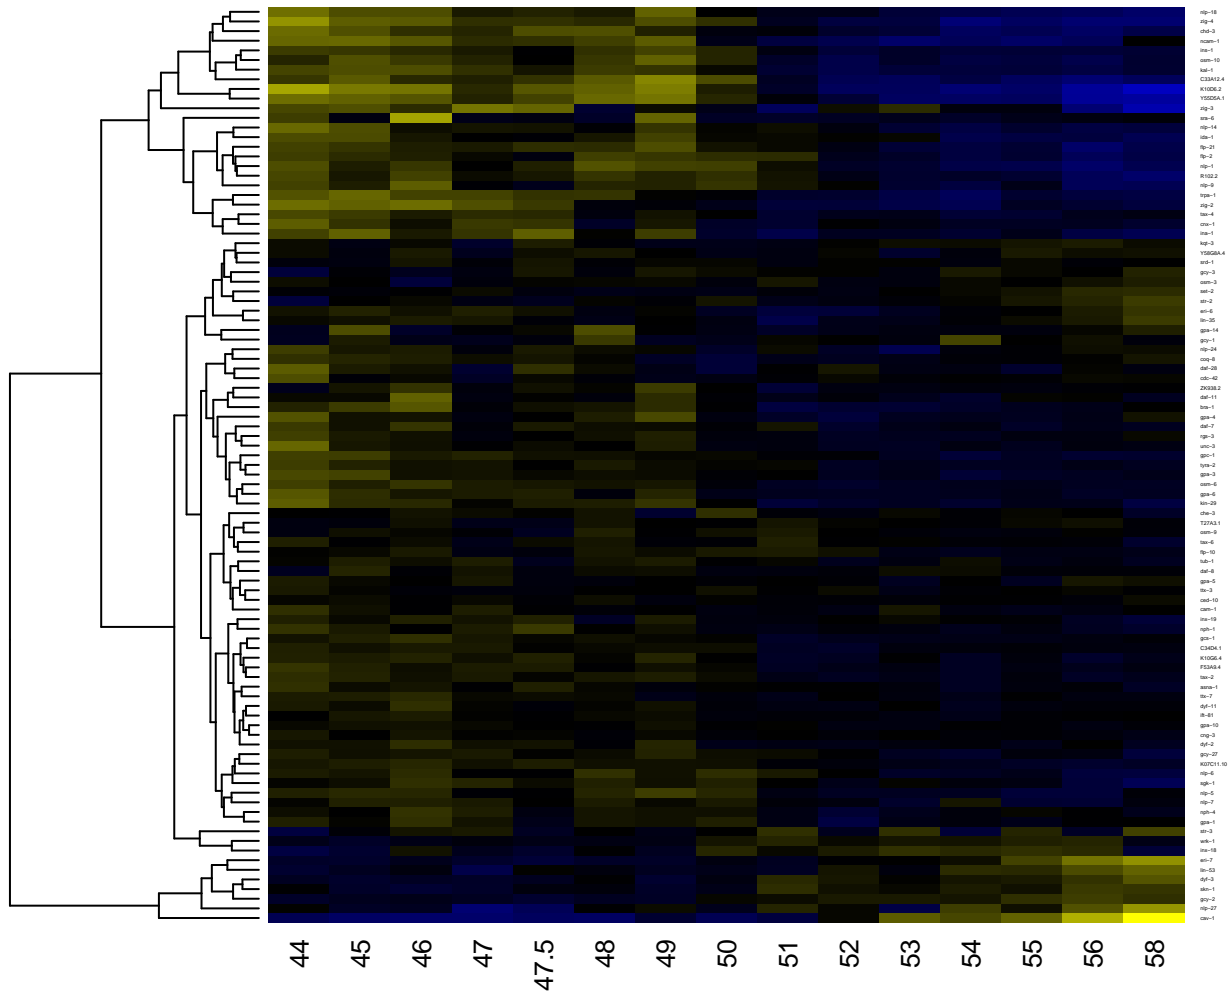

-2

-1

0

1

2

# ASJL

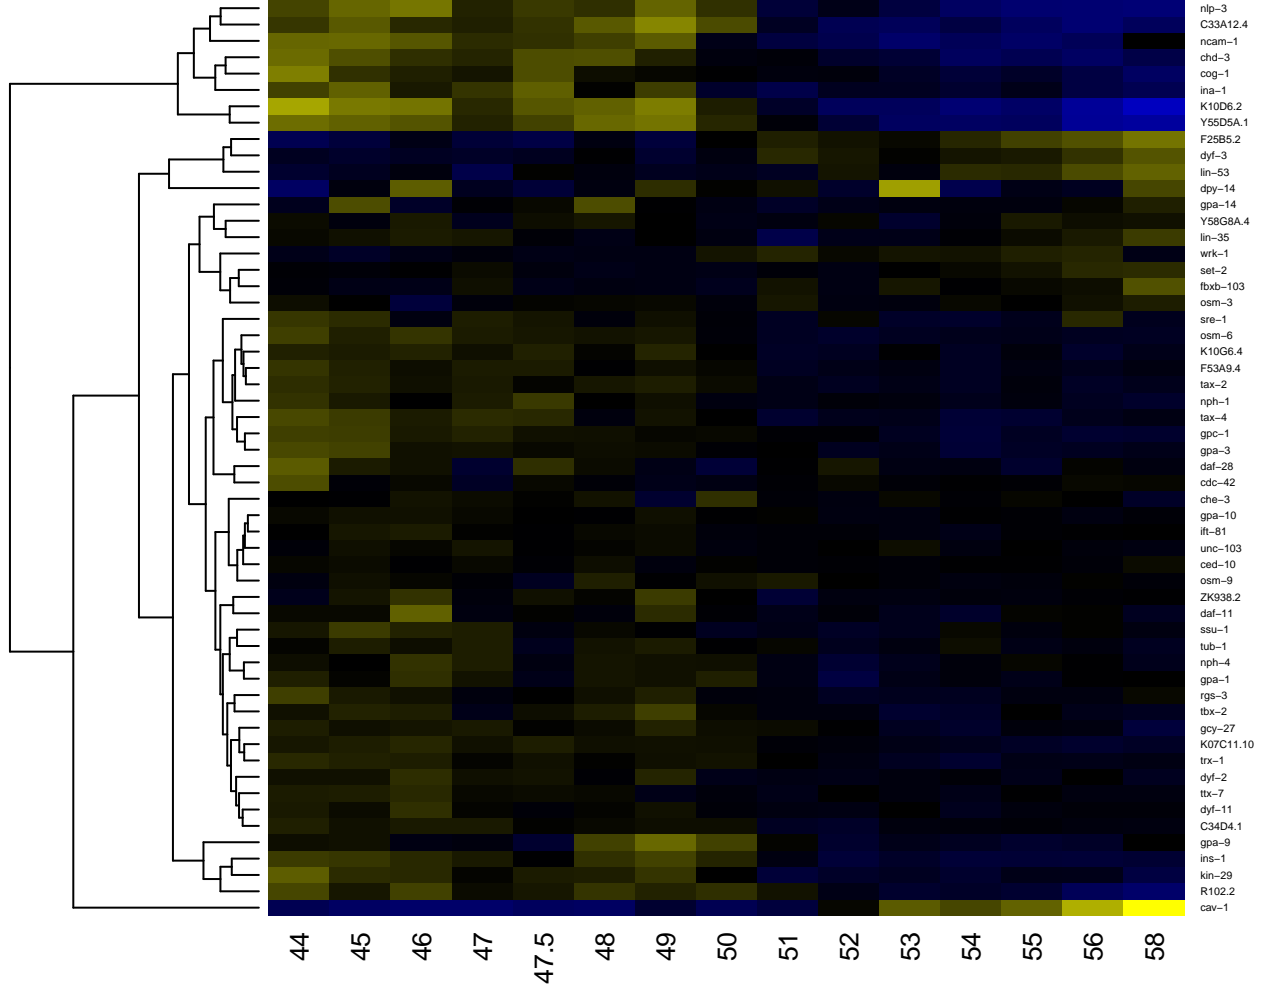

# ASJR

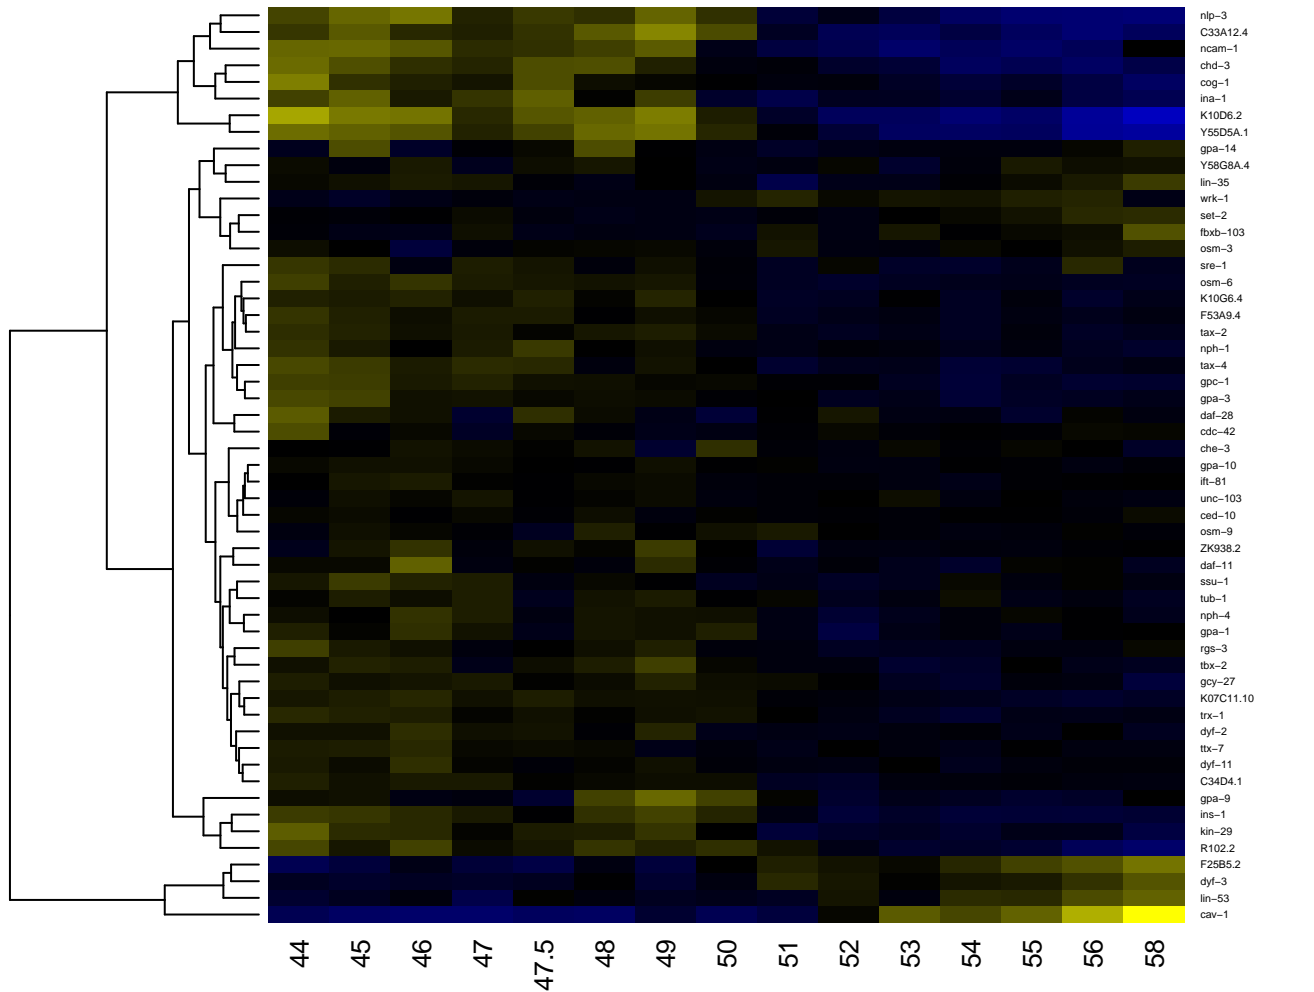



# ASKL

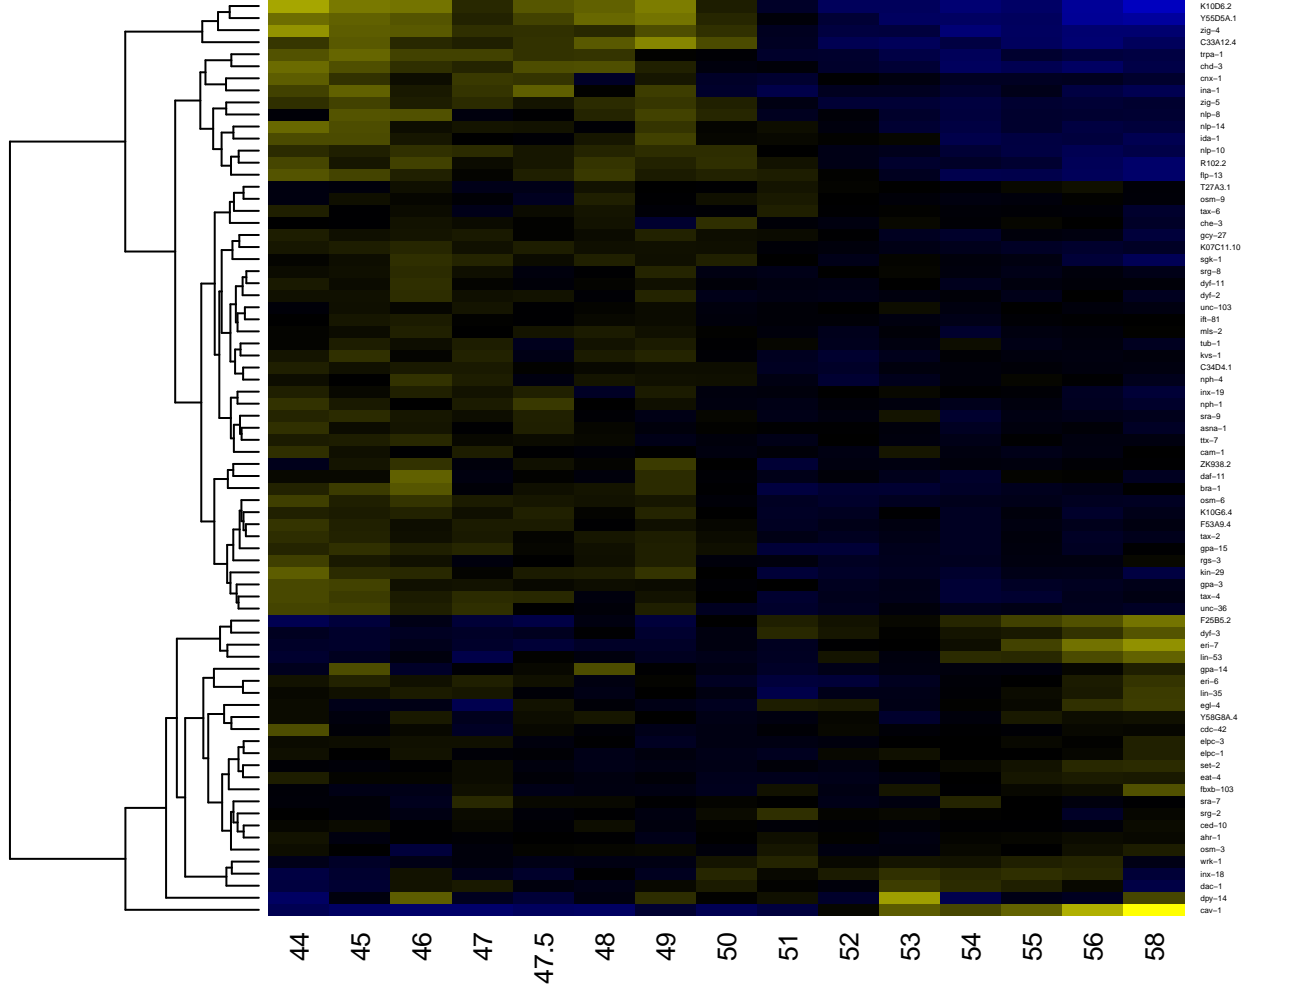

-2

-1

0

1

2

# ASKR

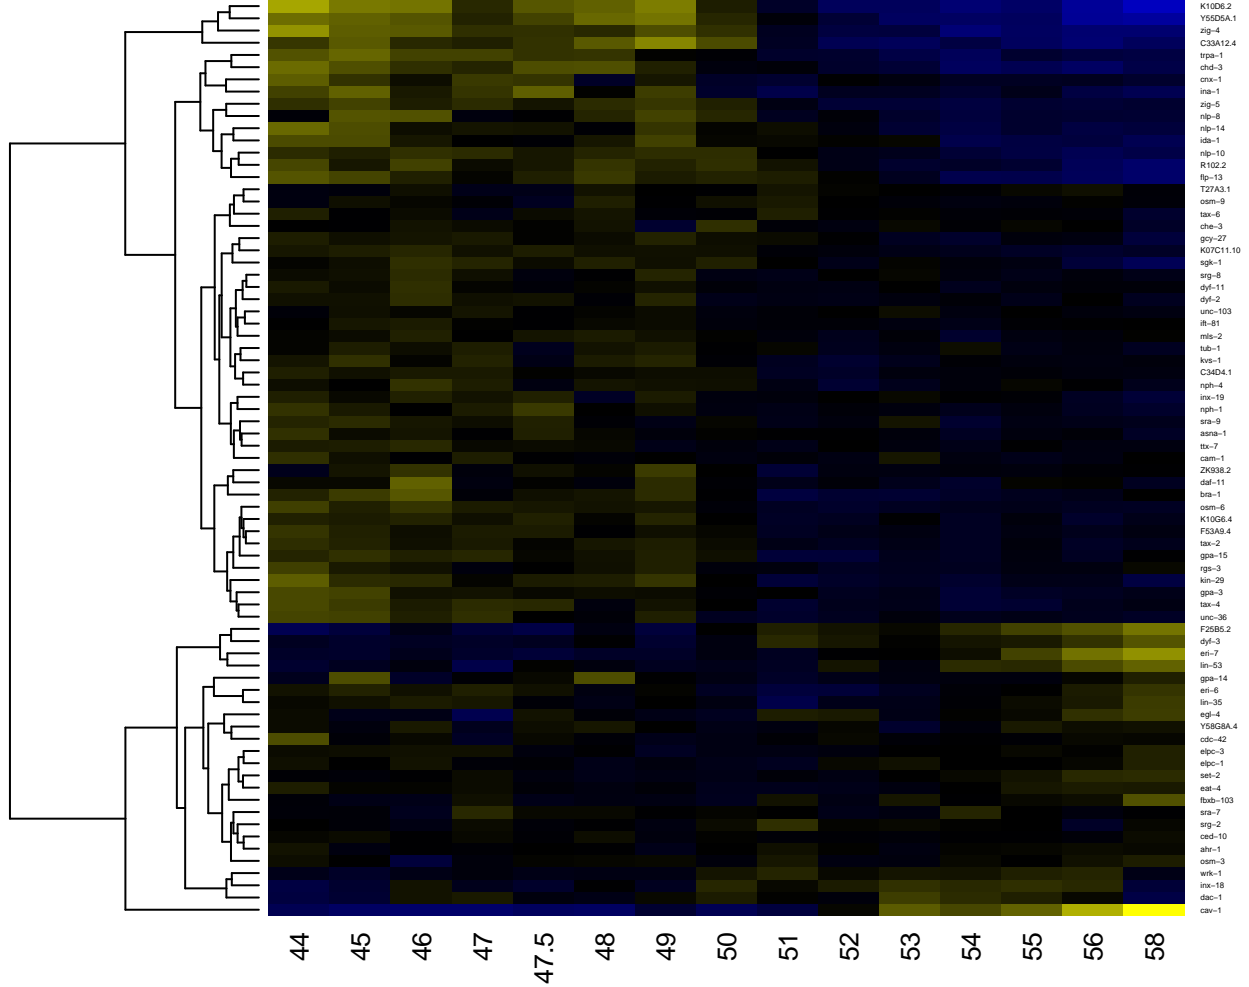

K10D6.2  
Y5SD6A.1  
zig-4  
C33A12.4  
trpa-1  
chd-3  
cnx-1  
ina-1  
zig-5  
rip-8  
rip-14  
ids-1  
rip-10  
R102.2  
flp-13  
T27A3.1  
osm-9  
tax-6  
che-3  
gcy-27  
K07C11.10  
sgs-1  
srg-8  
dyf-11  
dyf-2  
unc-103  
il-81  
mfs-2  
tub-1  
kvs-1  
C34D4.1  
nph-4  
inx-19  
nph-1  
sra-9  
asna-1  
ttx-7  
cam-1  
ZK938.2  
daf-11  
bra-1  
osm-6  
K10D6.4  
F53A9.4  
tax-2  
gpa-15  
gpa-3  
kin-29  
gpa-3  
tax-4  
unc-96  
F26B8.2  
dyf-3  
eri-7  
lin-53  
gpa-14  
eri-6  
lin-35  
egl-4  
Y5B5B4.4  
cdc-42  
elpc-3  
elpc-1  
eat-2  
eat-4  
fbxb-103  
sra-7  
srg-2  
ced-10  
ahr-1  
osm-3  
wtk-1  
ttx-18  
dac-1  
cav-1



# AUAL

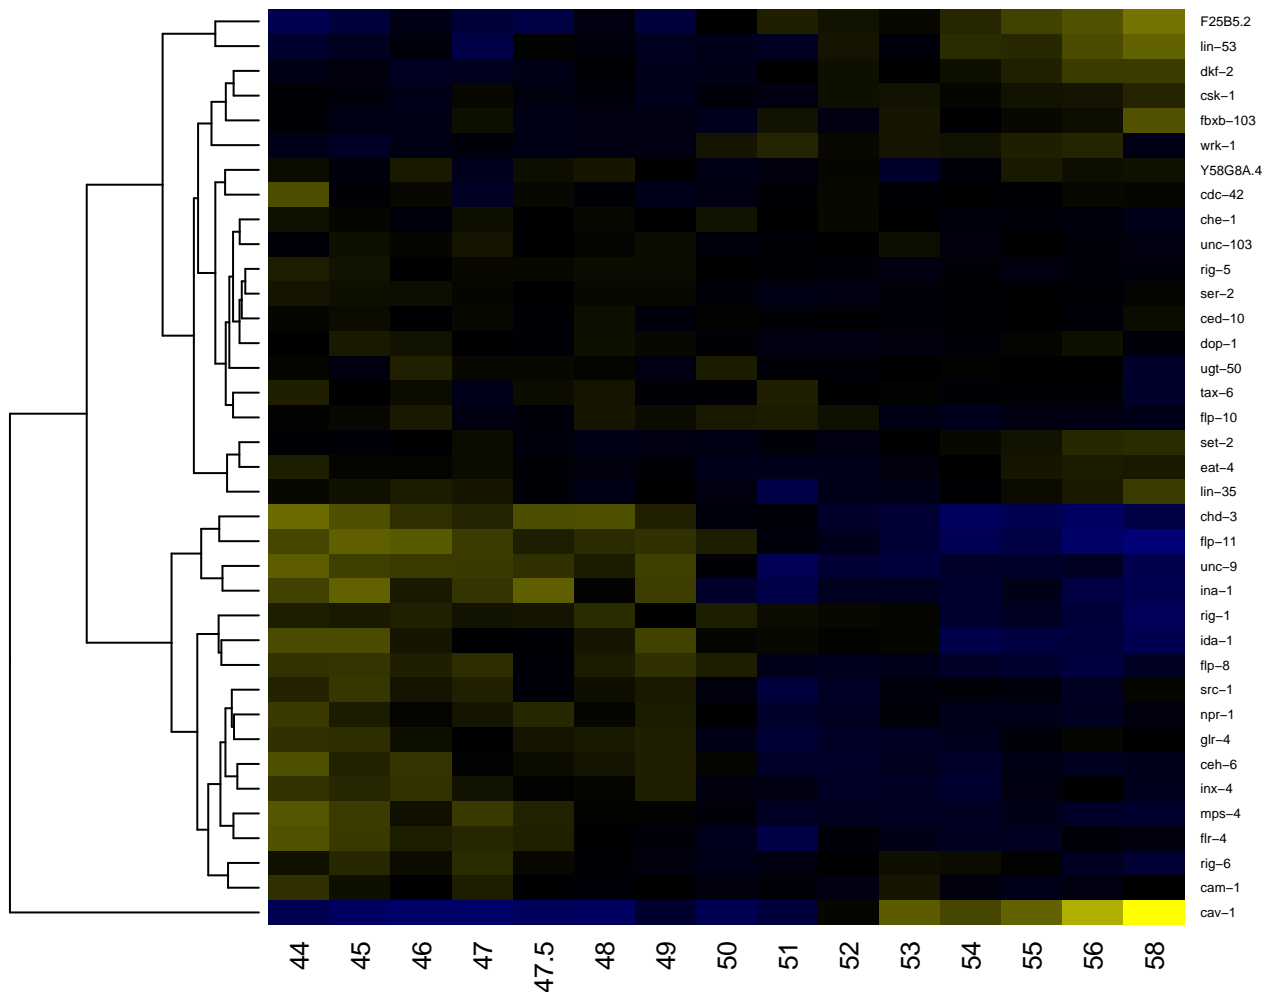

# AUAR



44 45 46 47 47.5 48 49 50 51 52 53 54 55 56 58



# AVAL

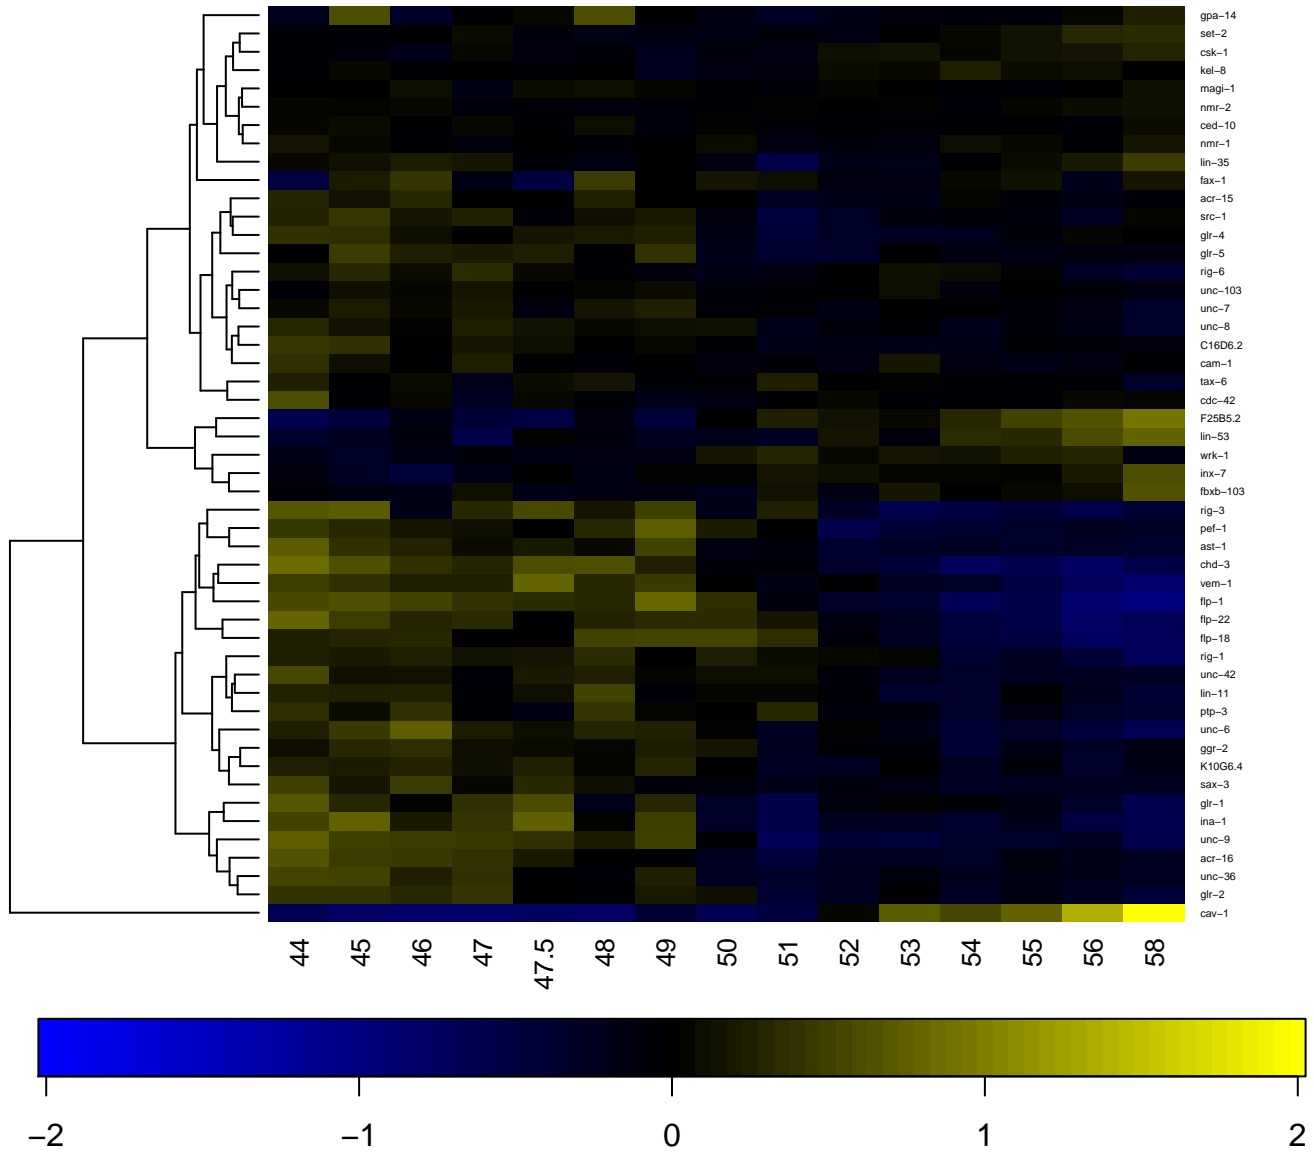

# AVAR

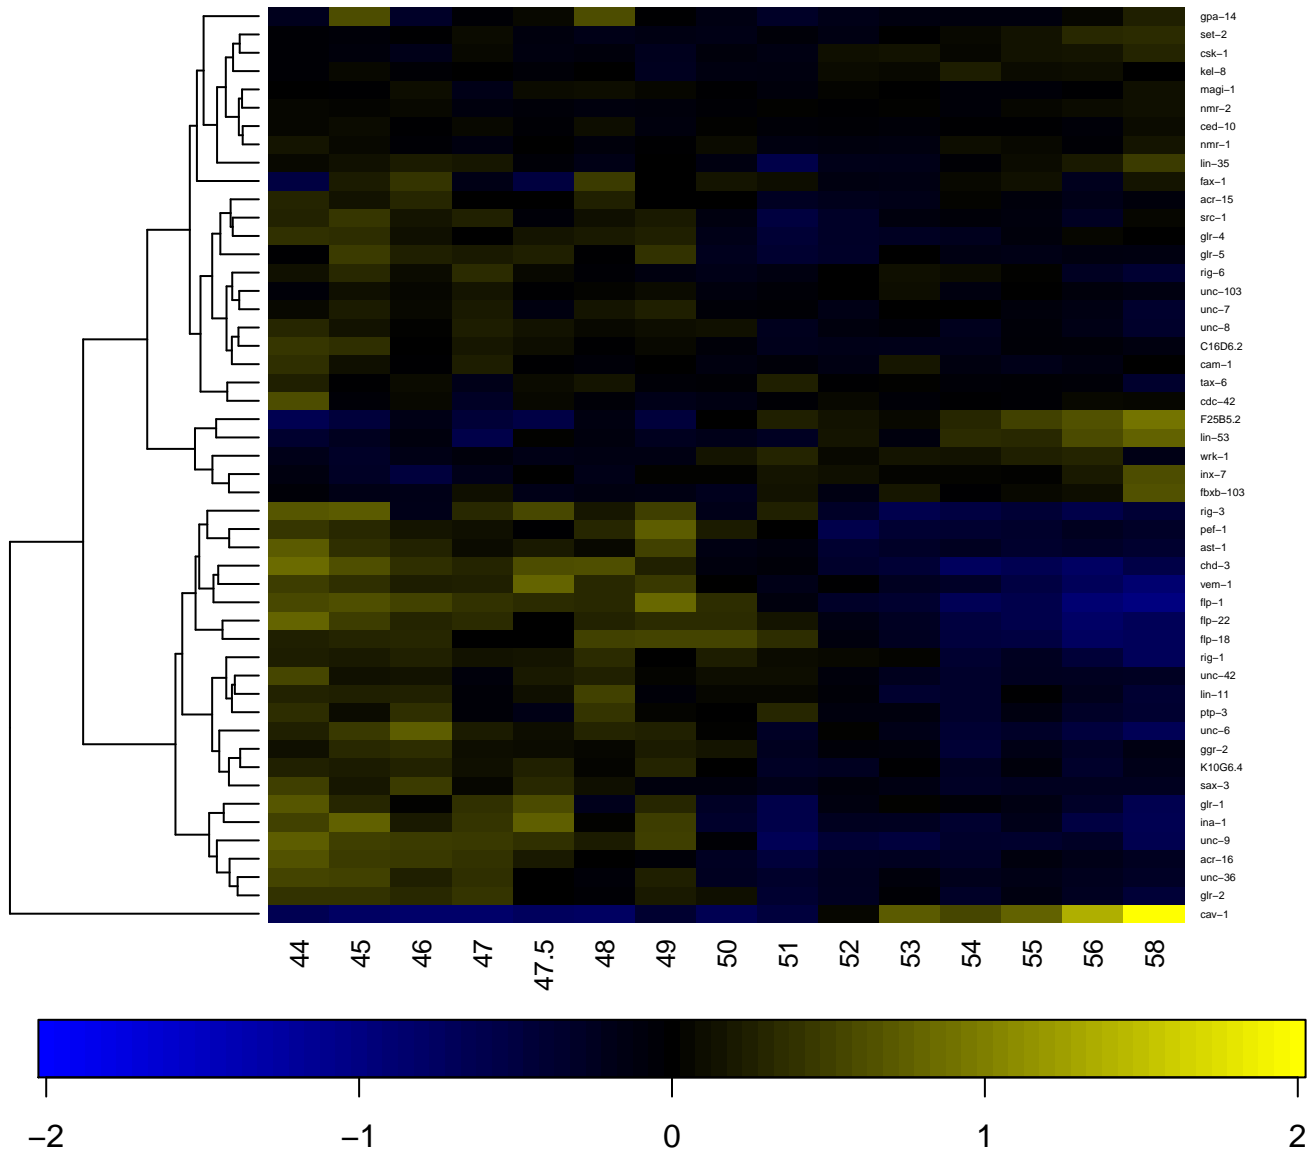

# AVBL

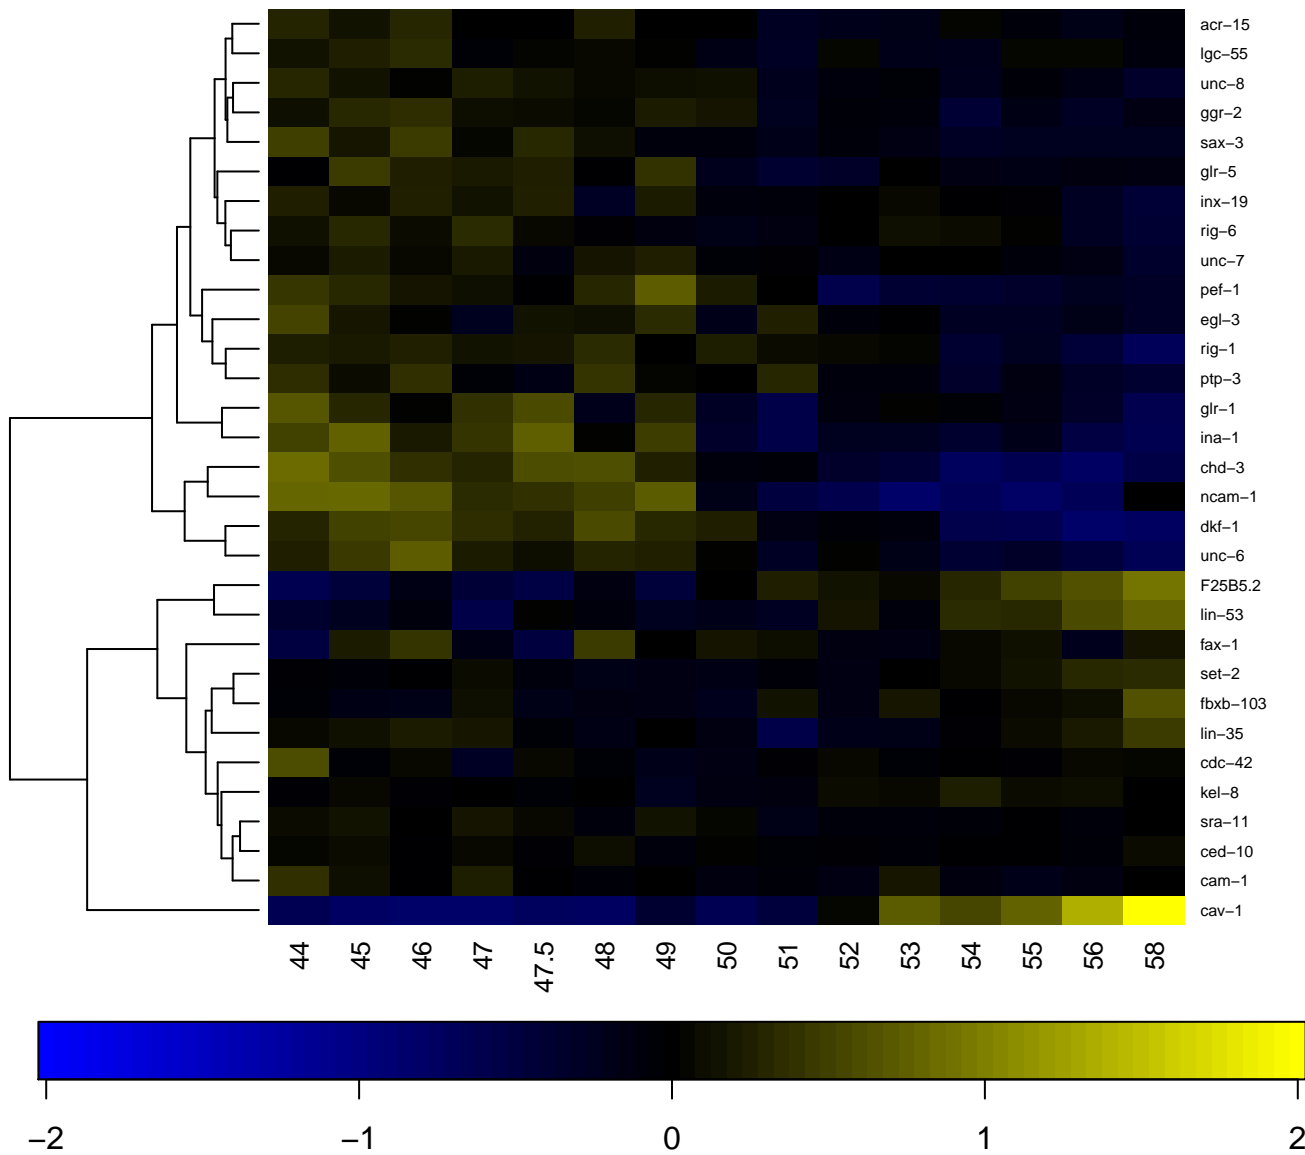

# AVBR

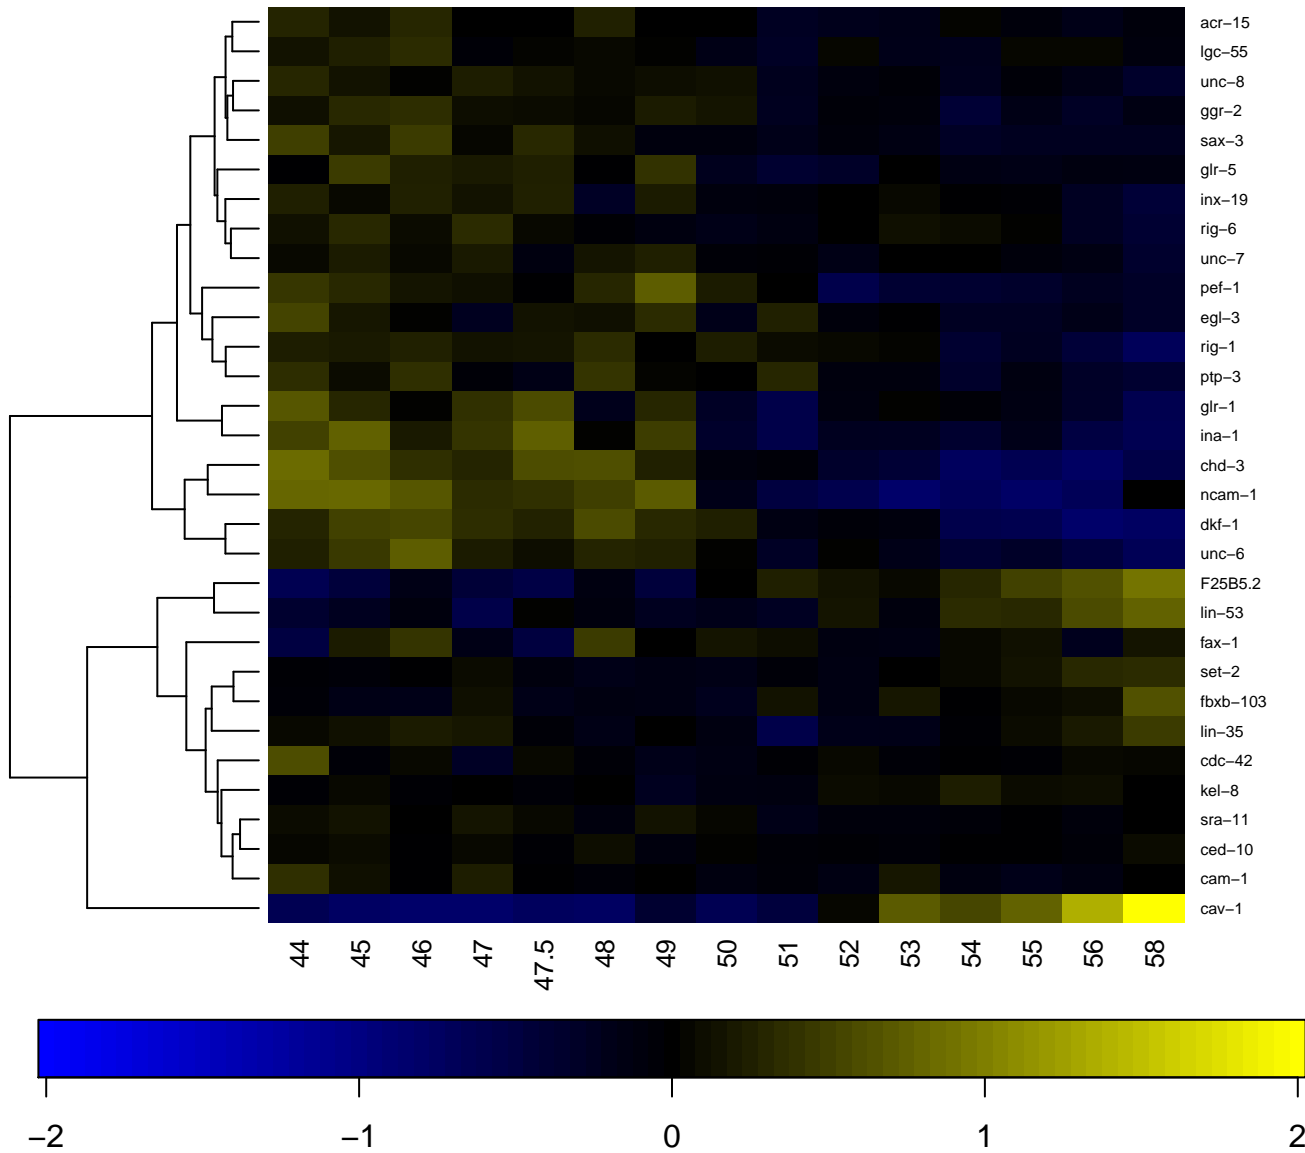



# AVDL

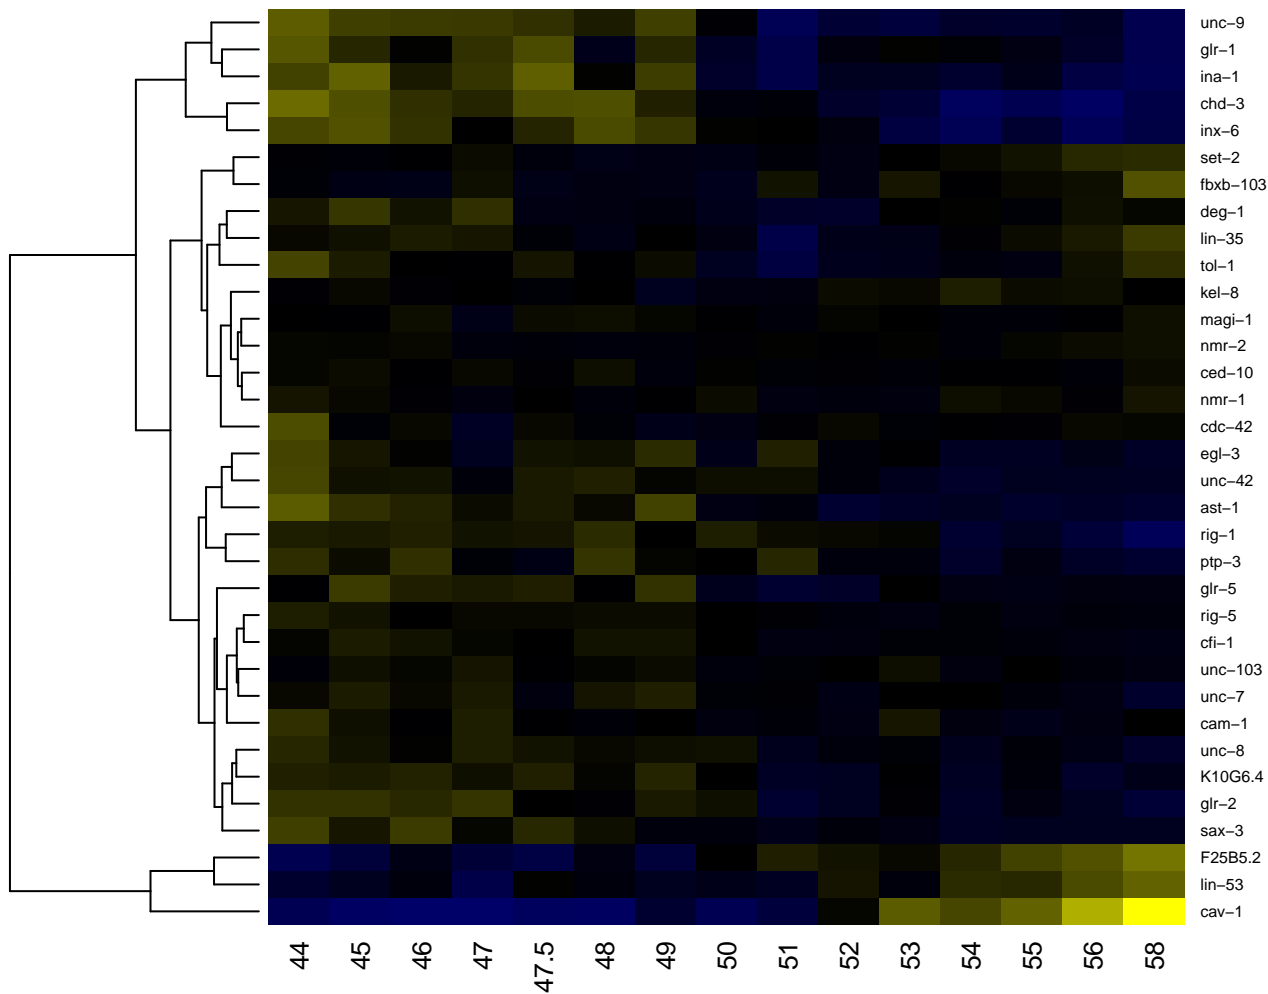

# AVDR

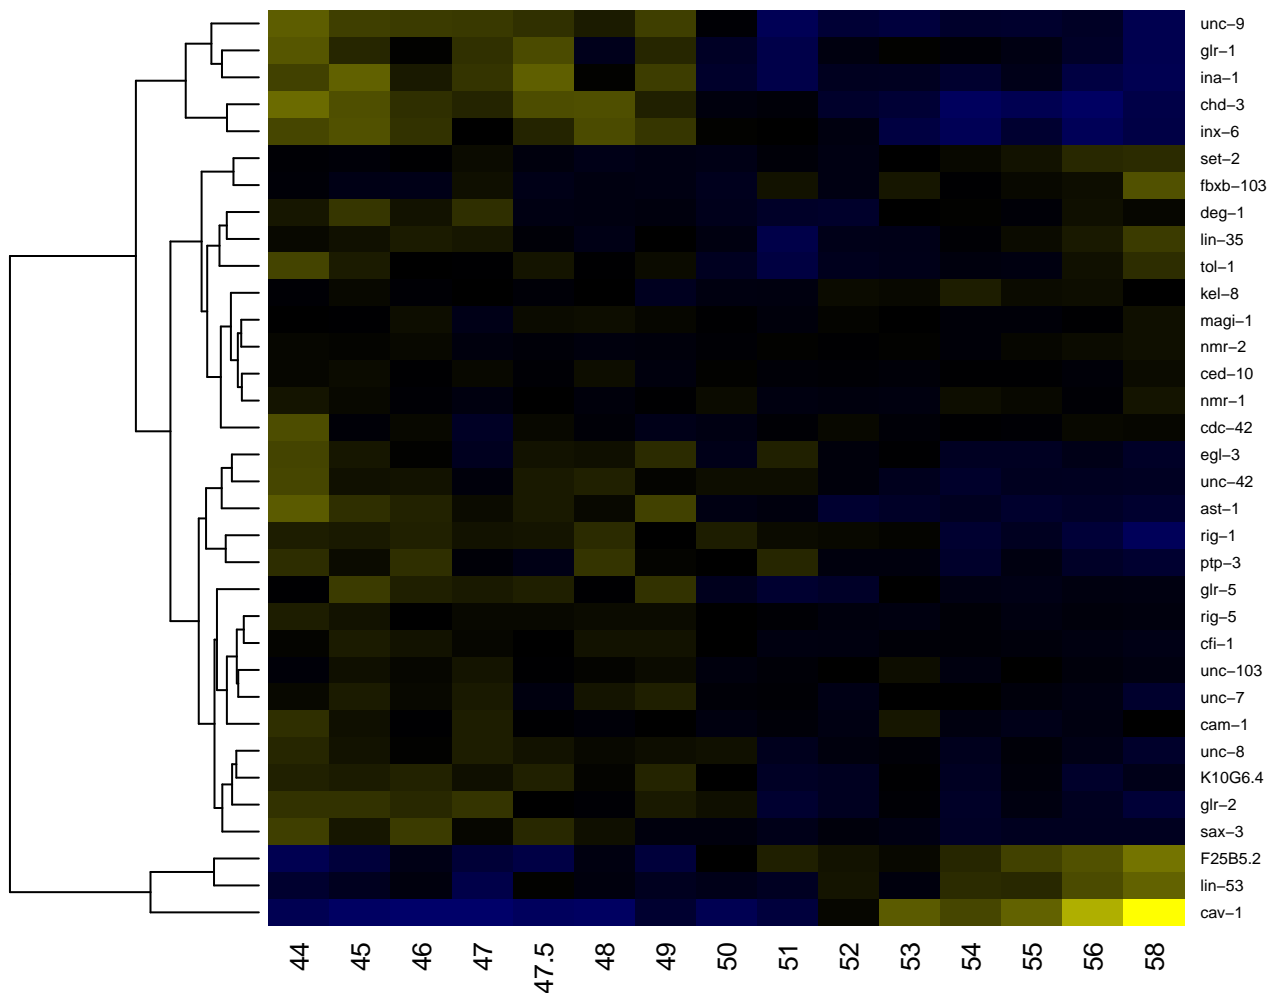

# AVEL

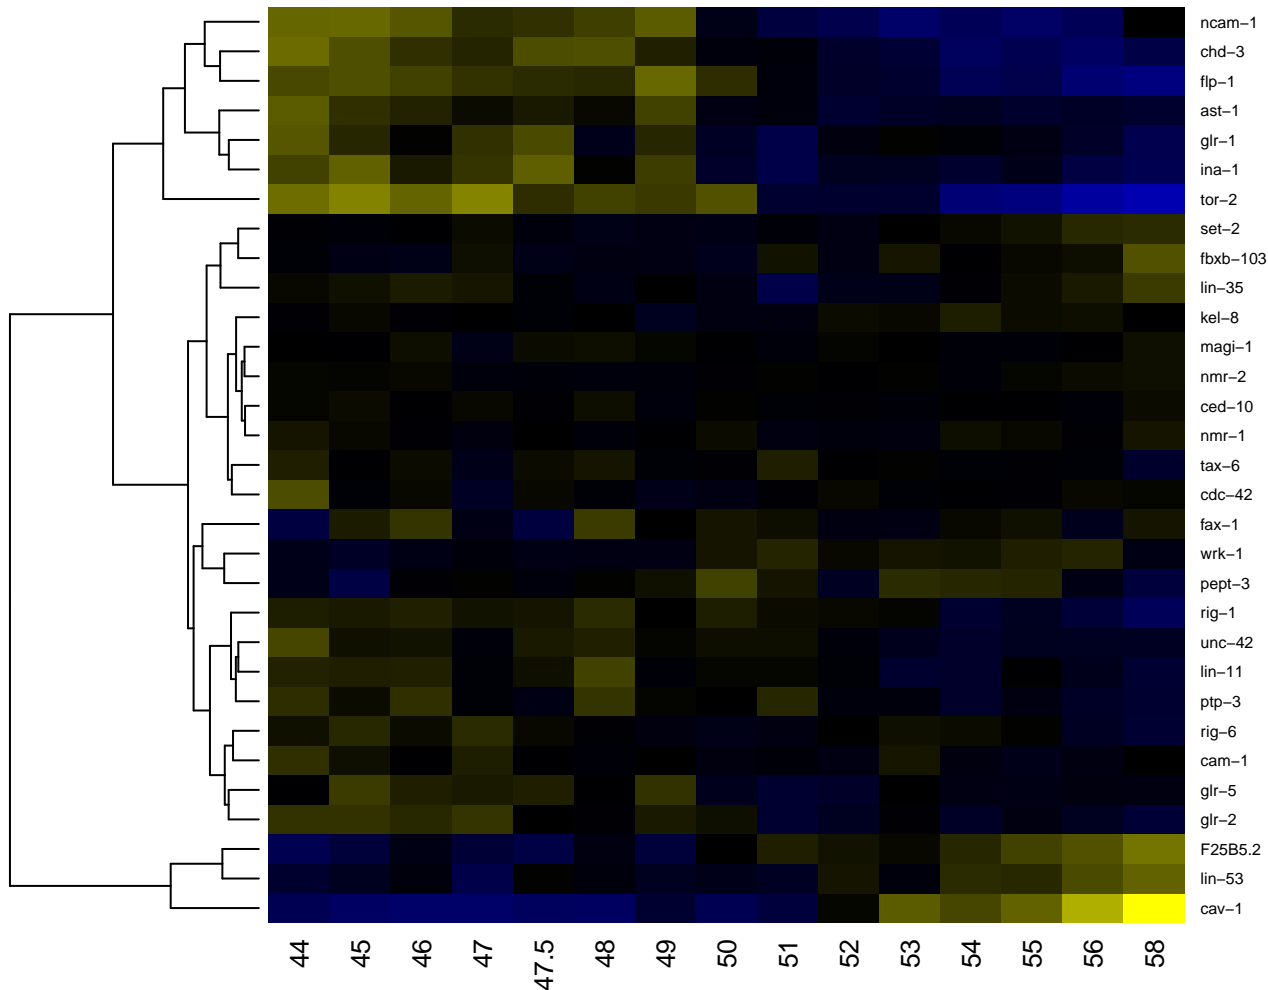

-2

-1

0

1

2

# AVER



# AVG

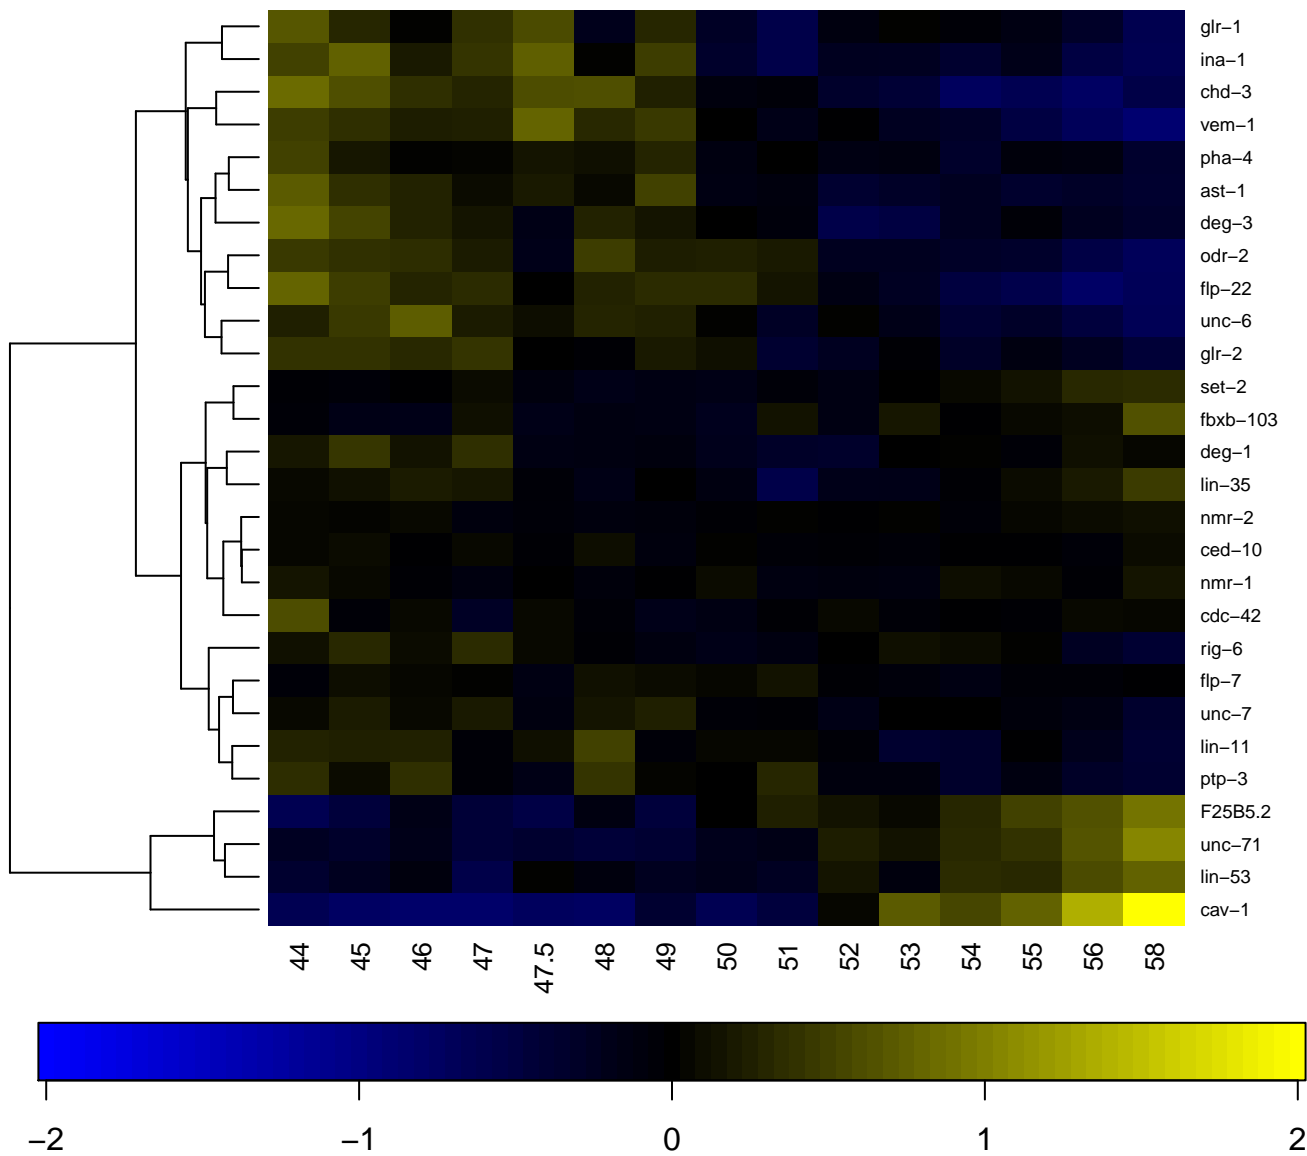

# AVHL

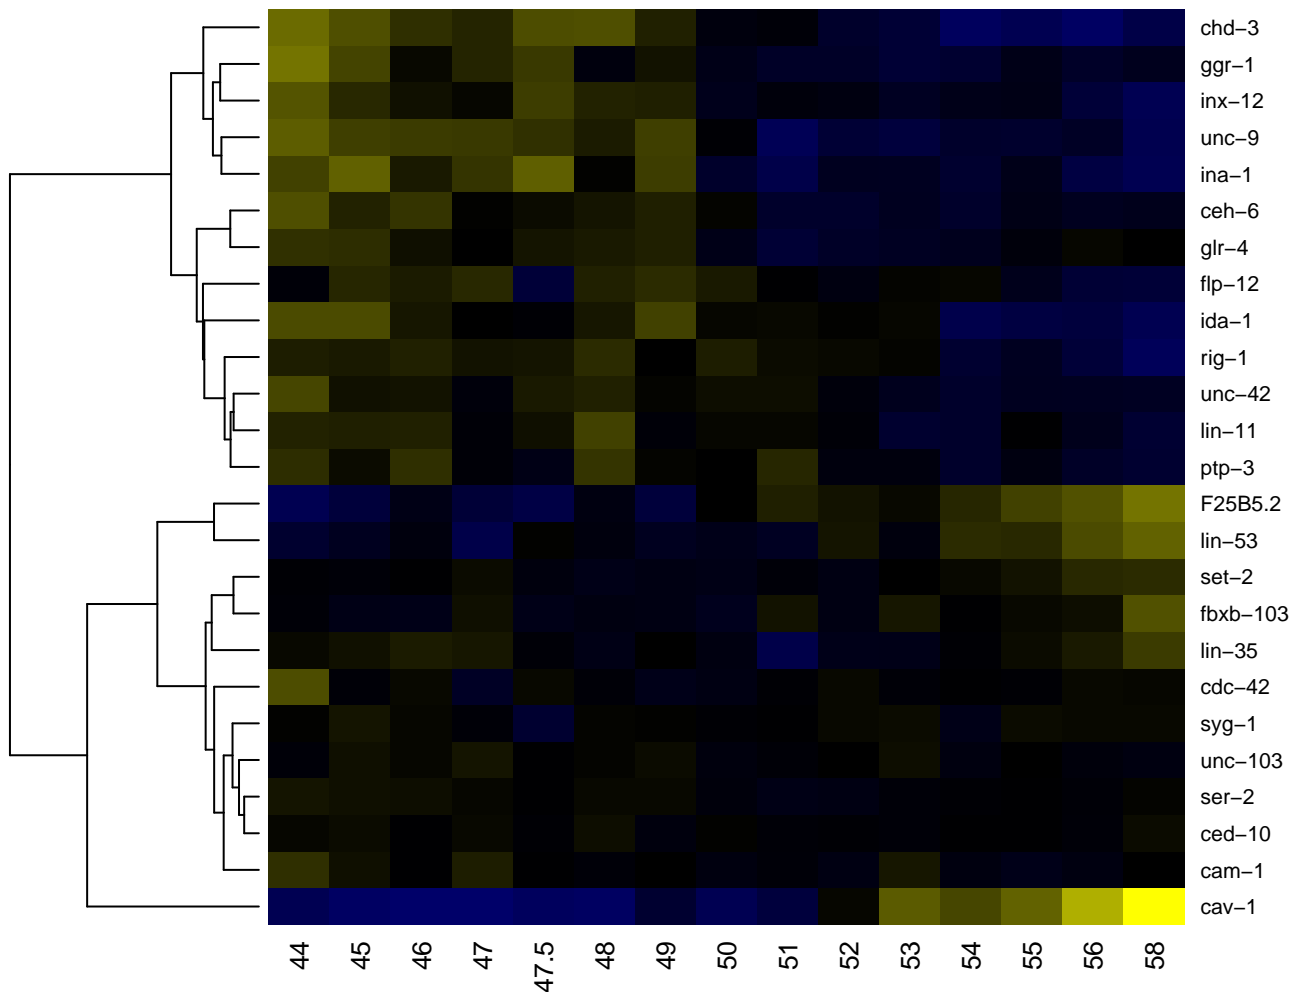

# AVHR

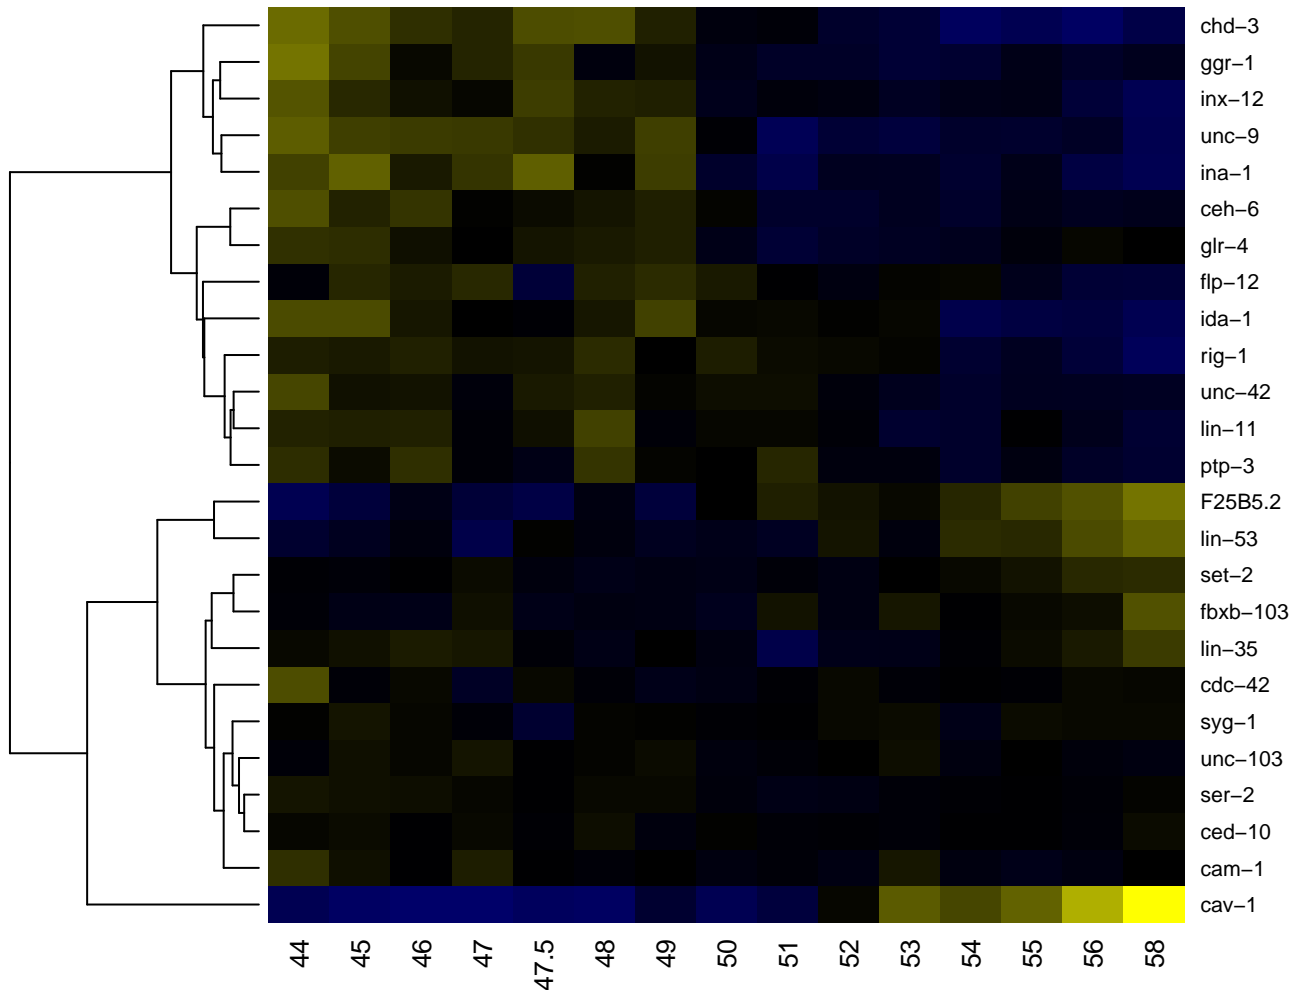

# AVJL

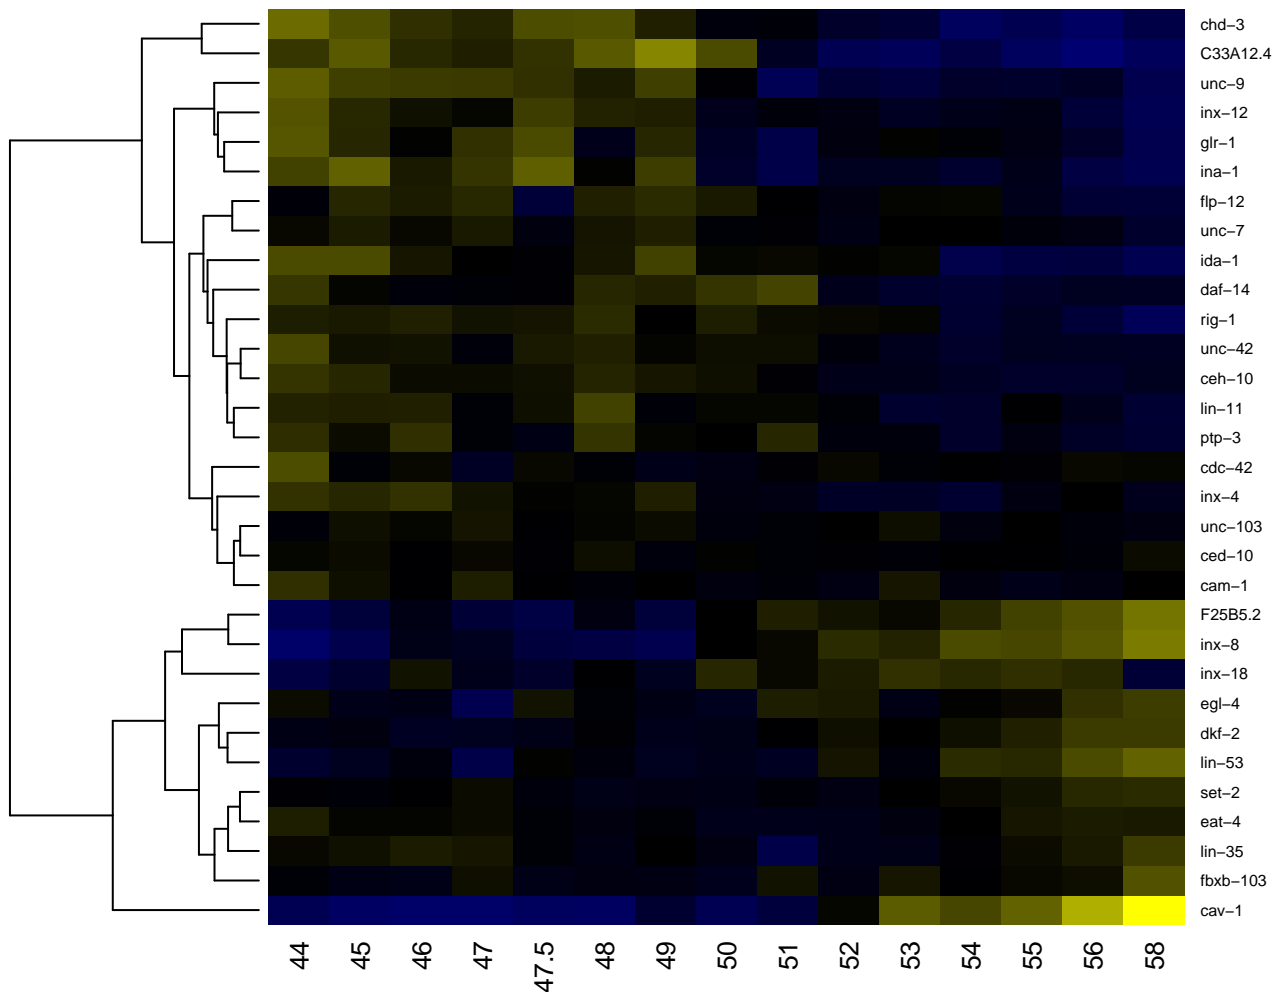



# AVJR

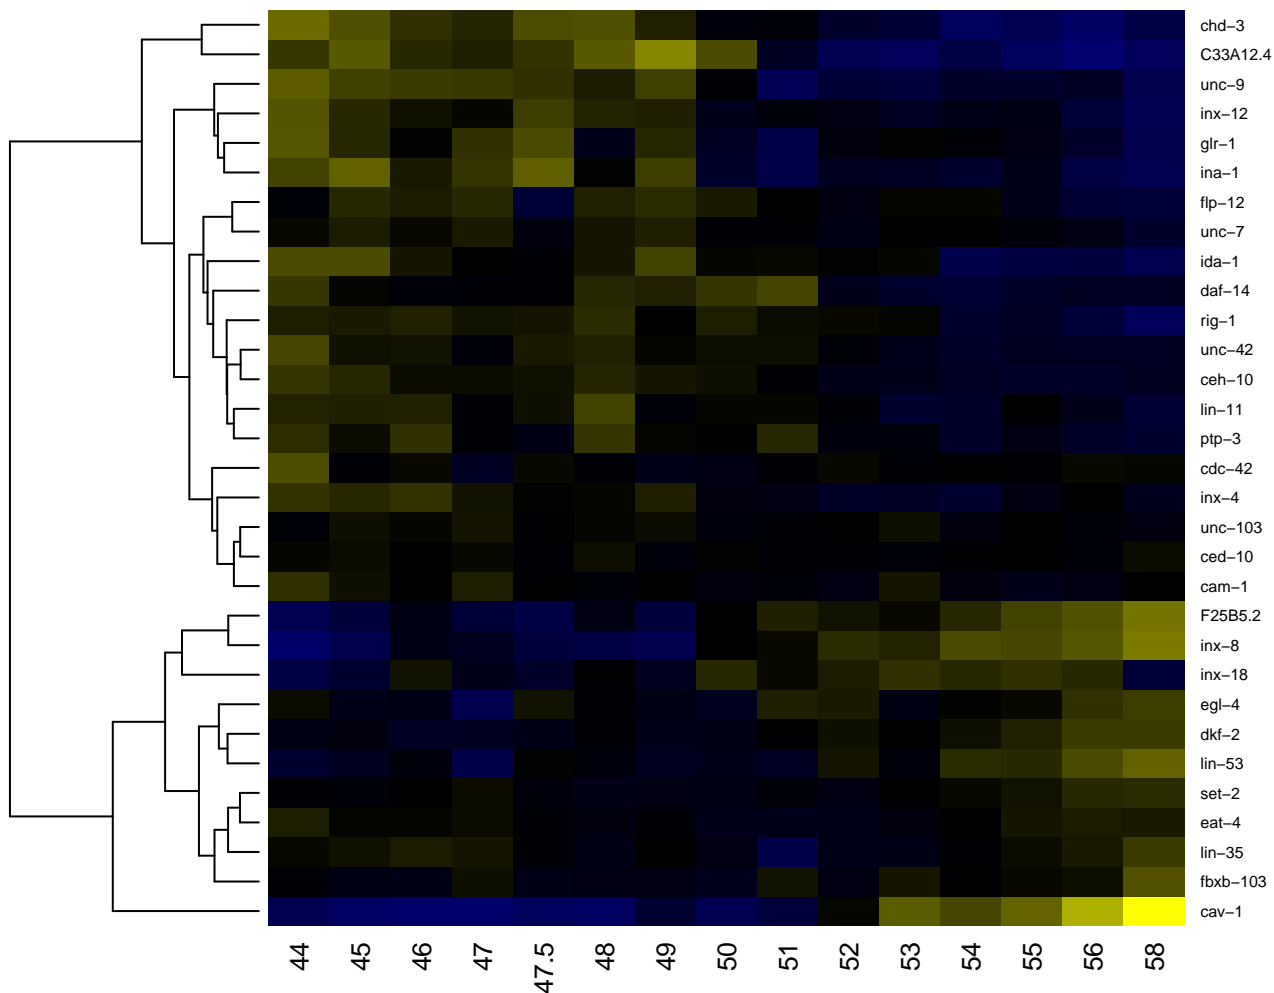

# AVKL

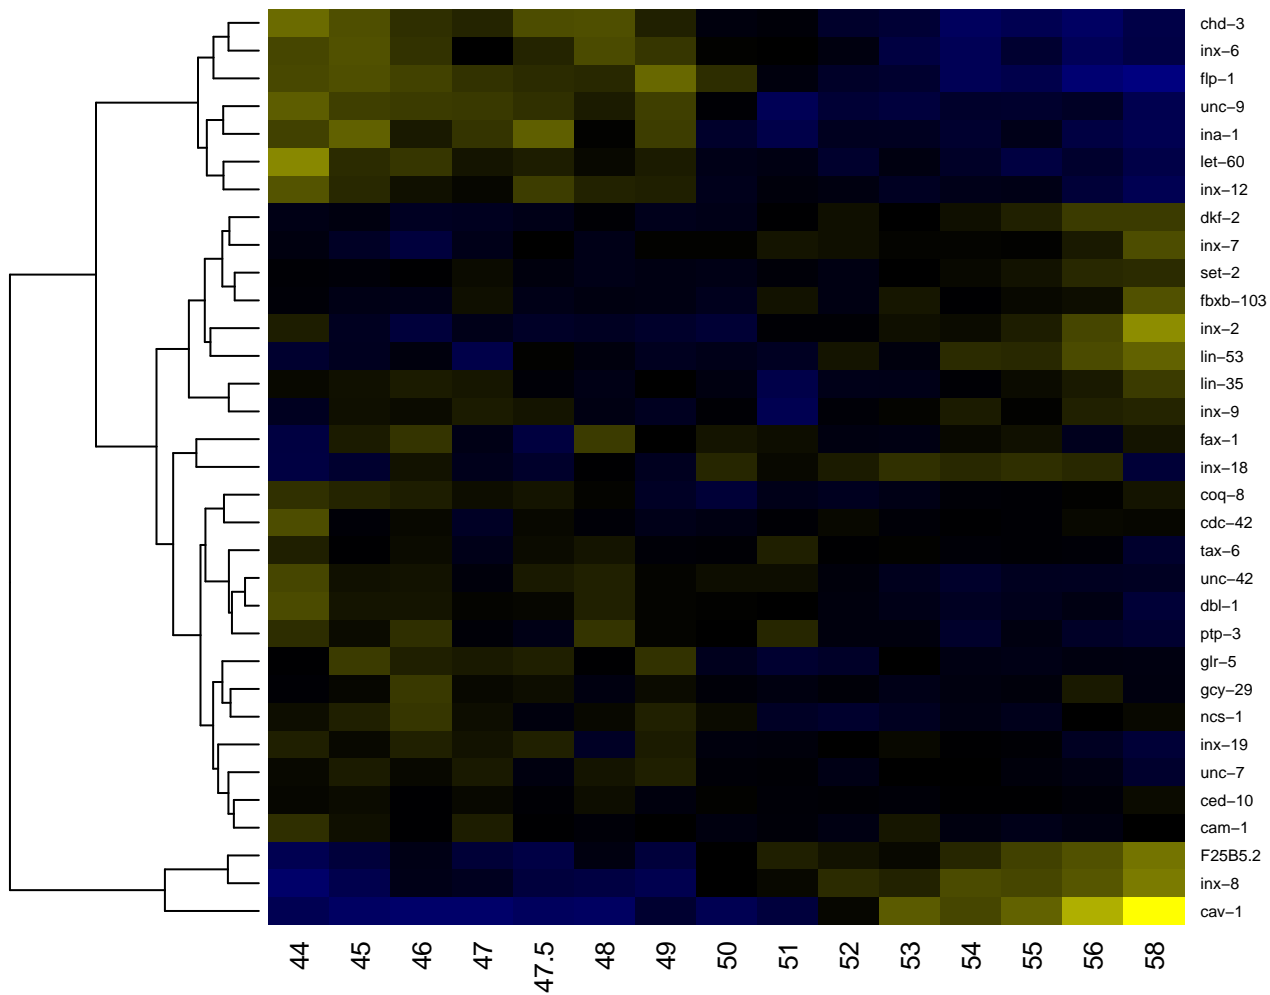

-2

-1

0

1

2

# AVKR

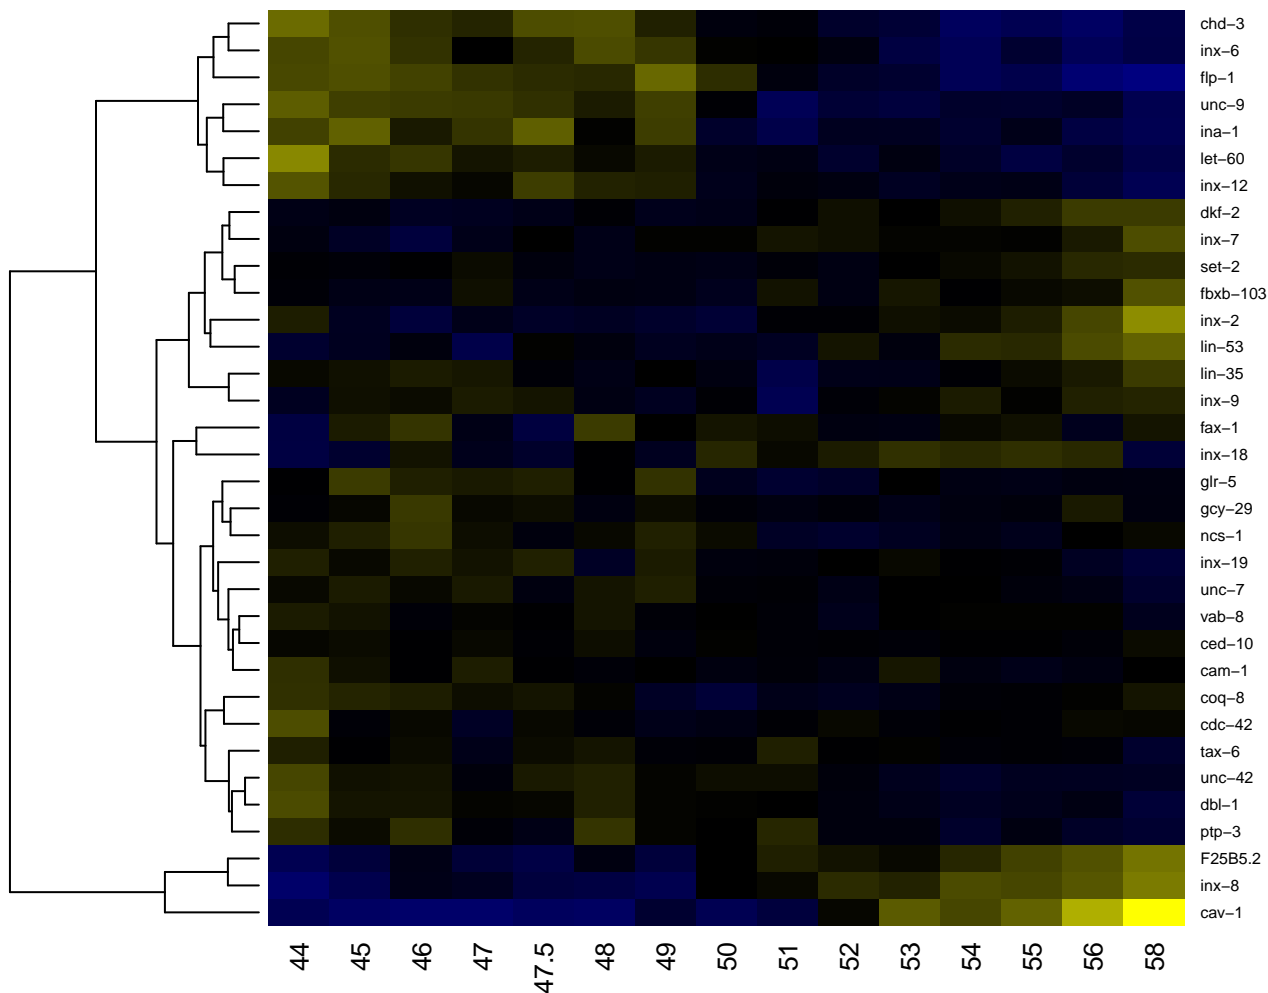

# AVL

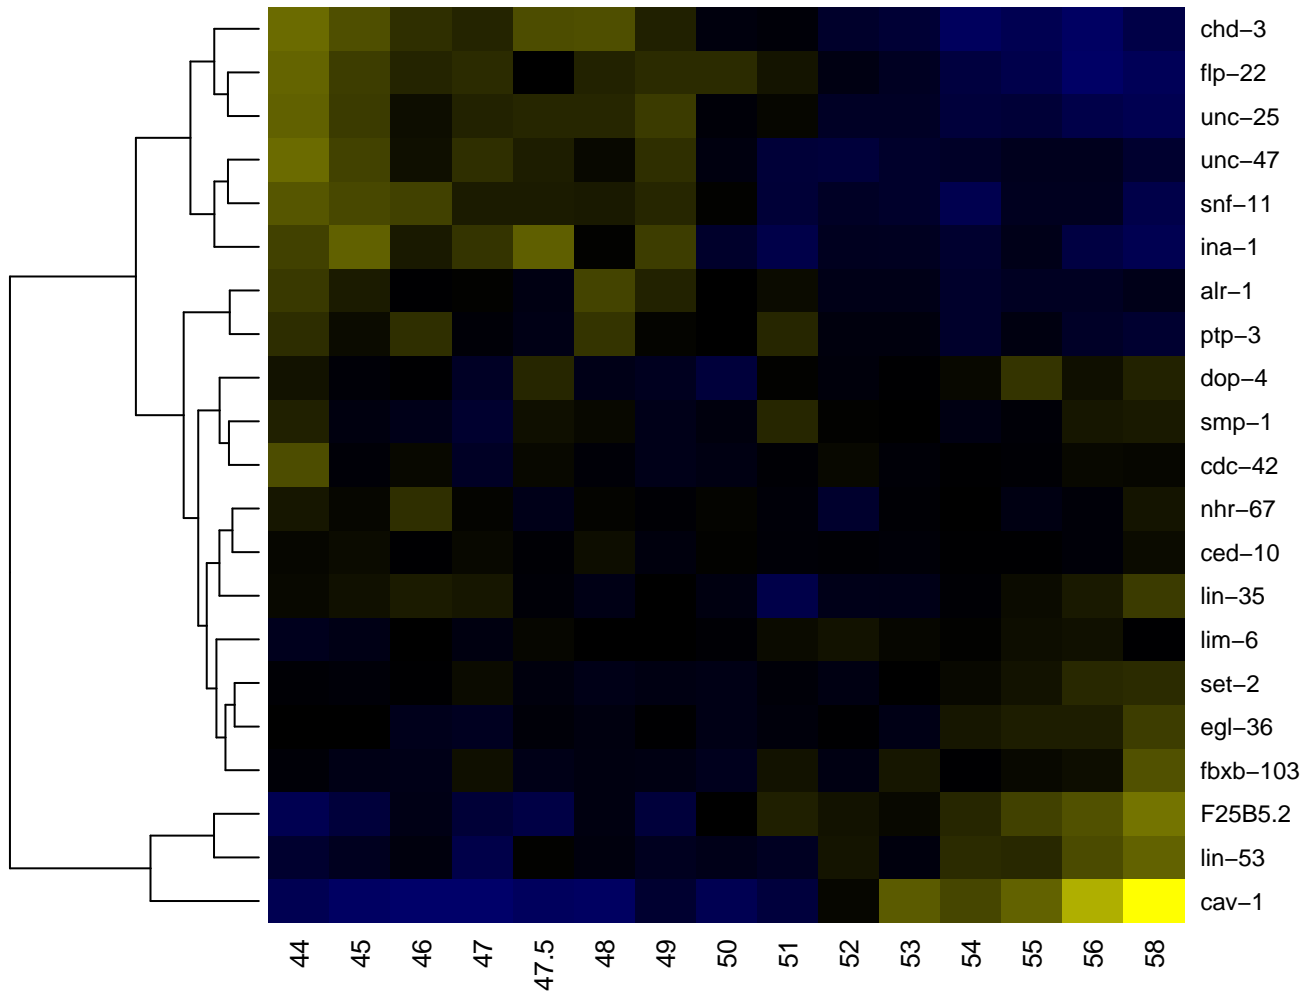



# AWAL

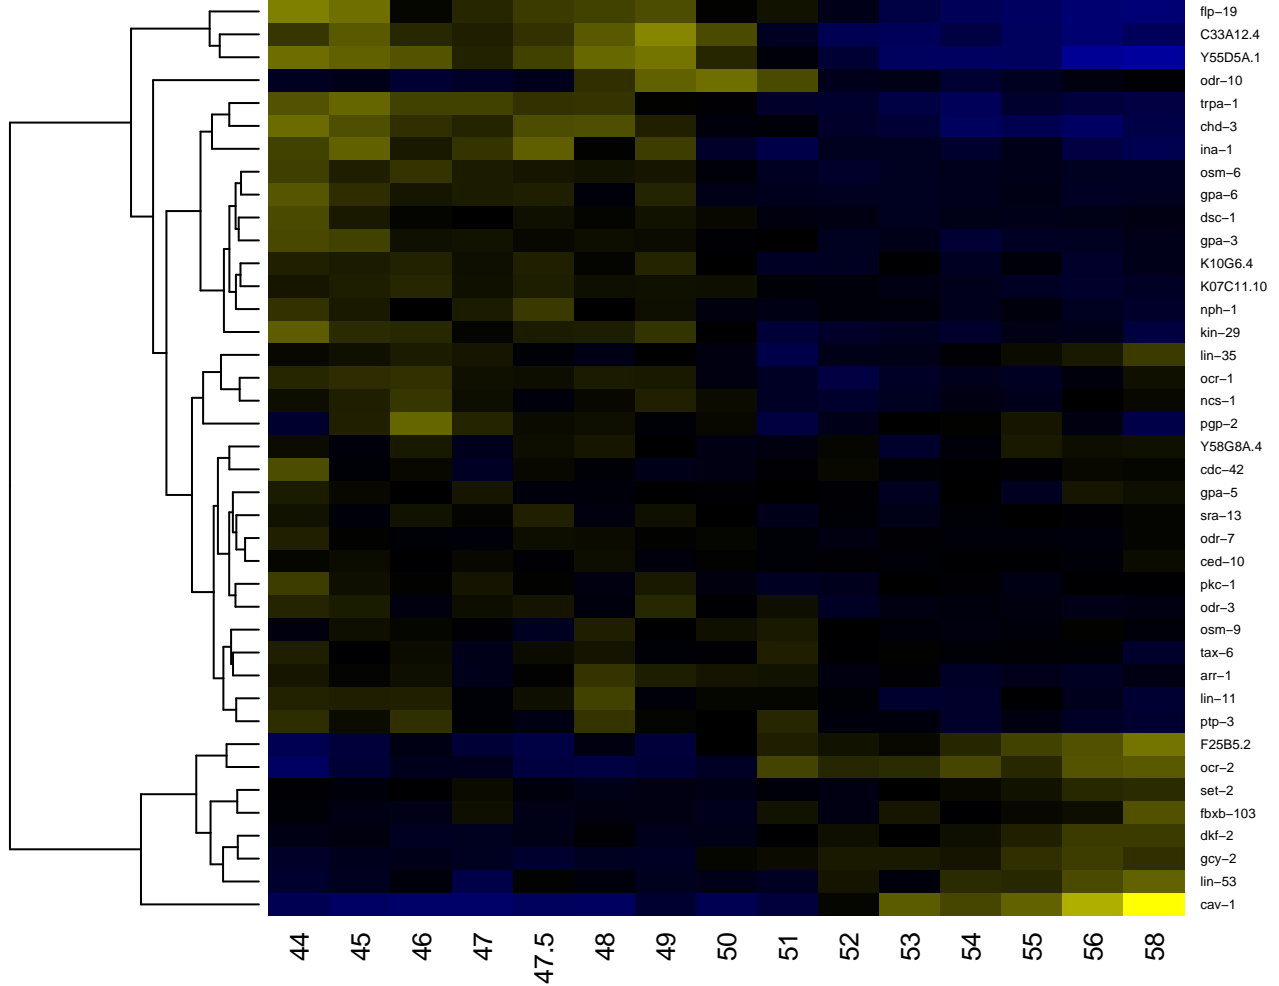

# AWAR

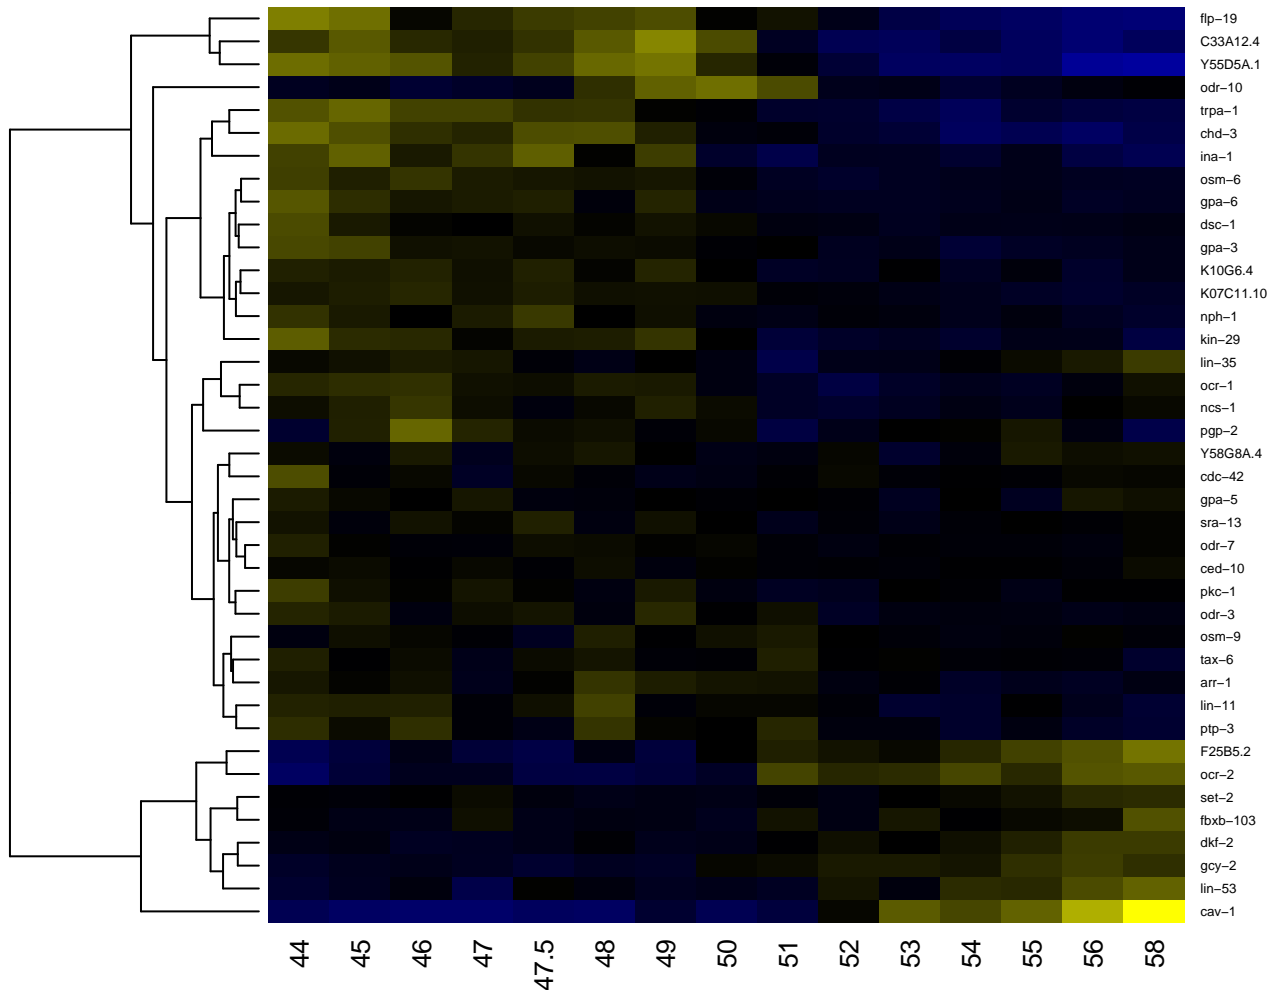

# AWBL

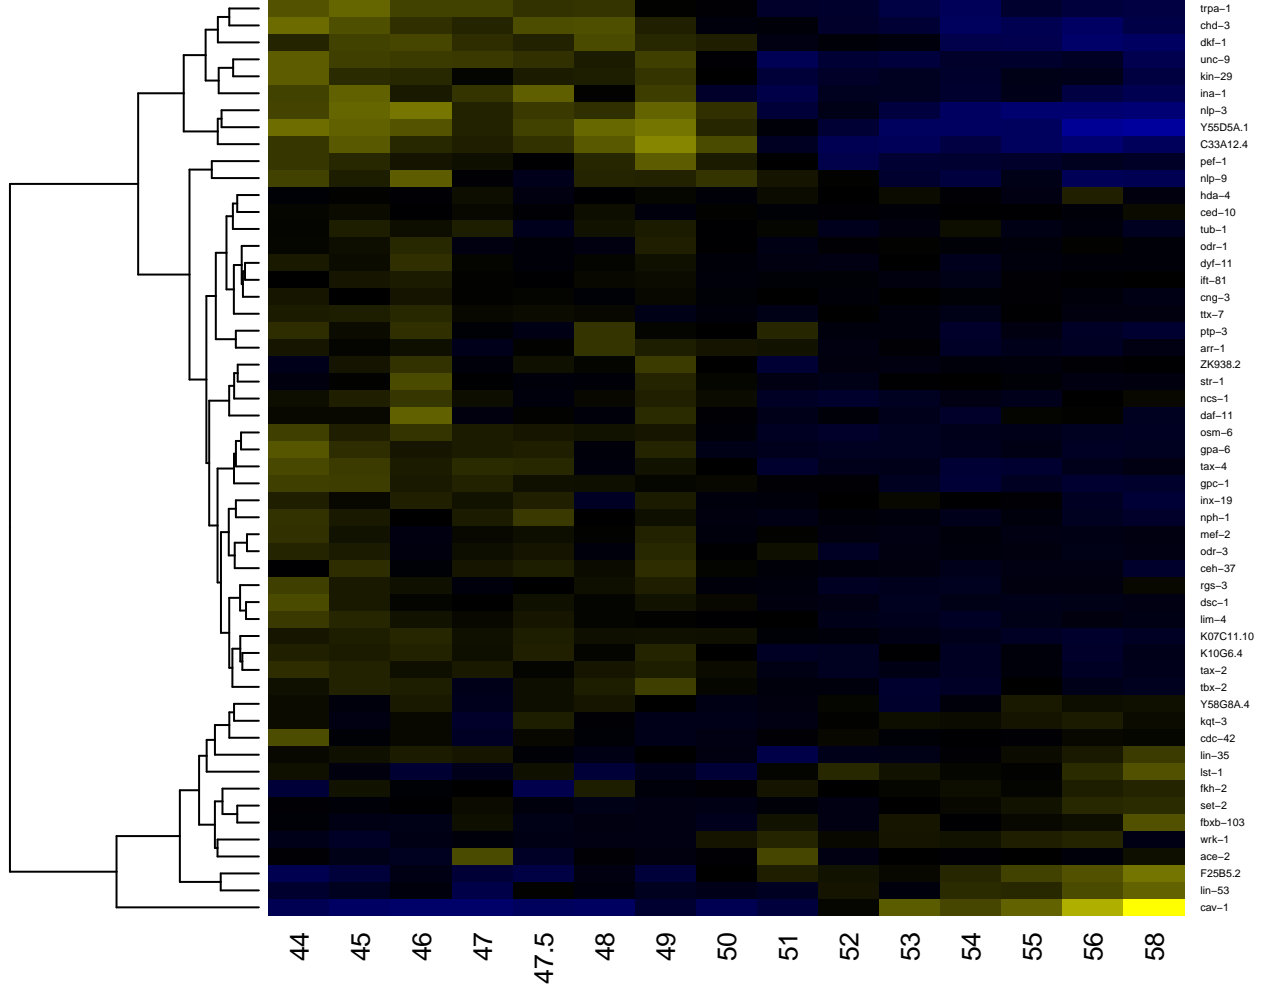



# AWBR

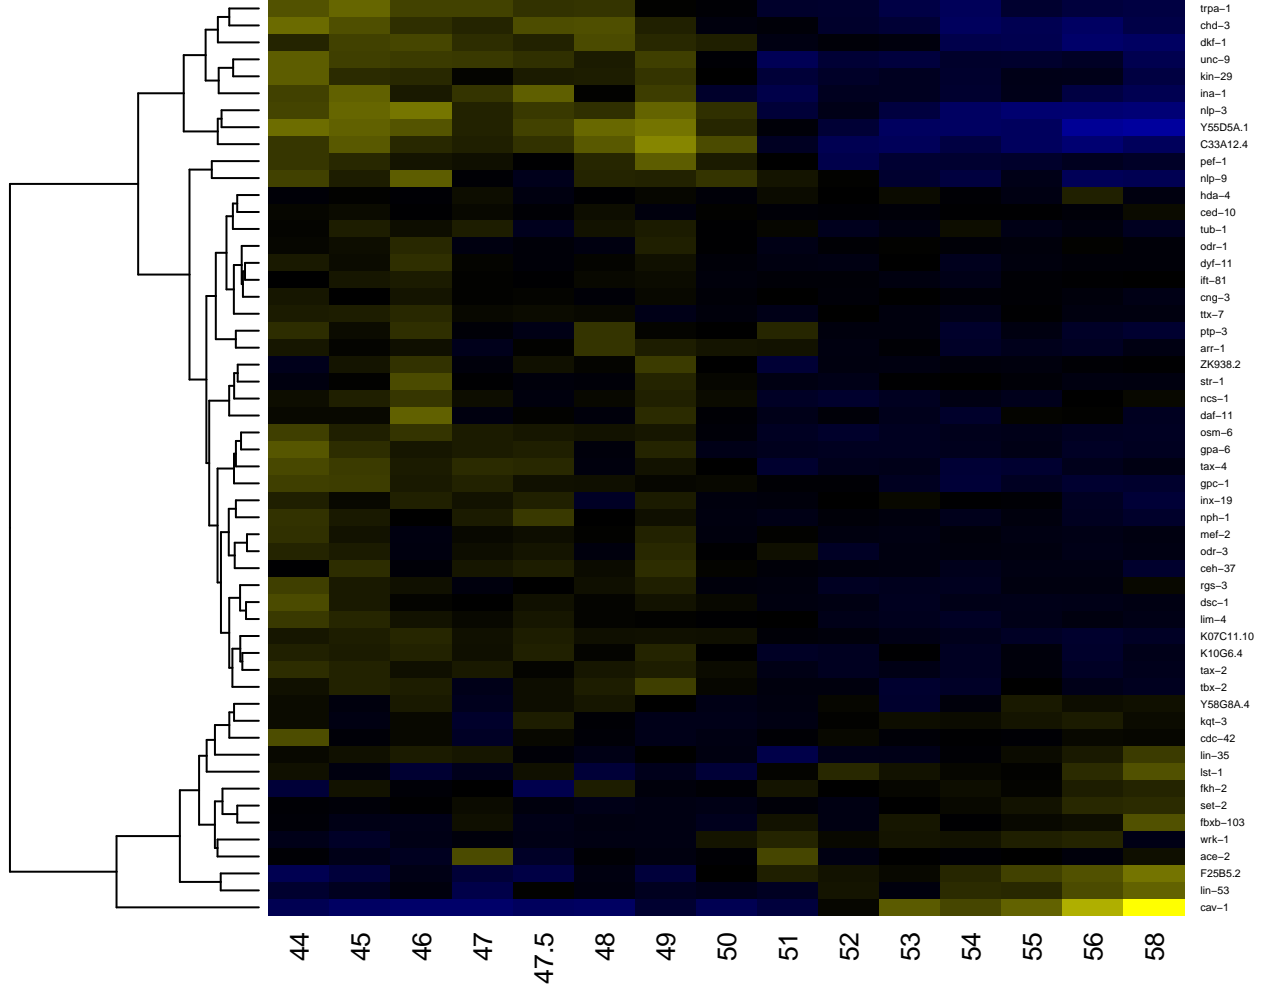

# AWCL

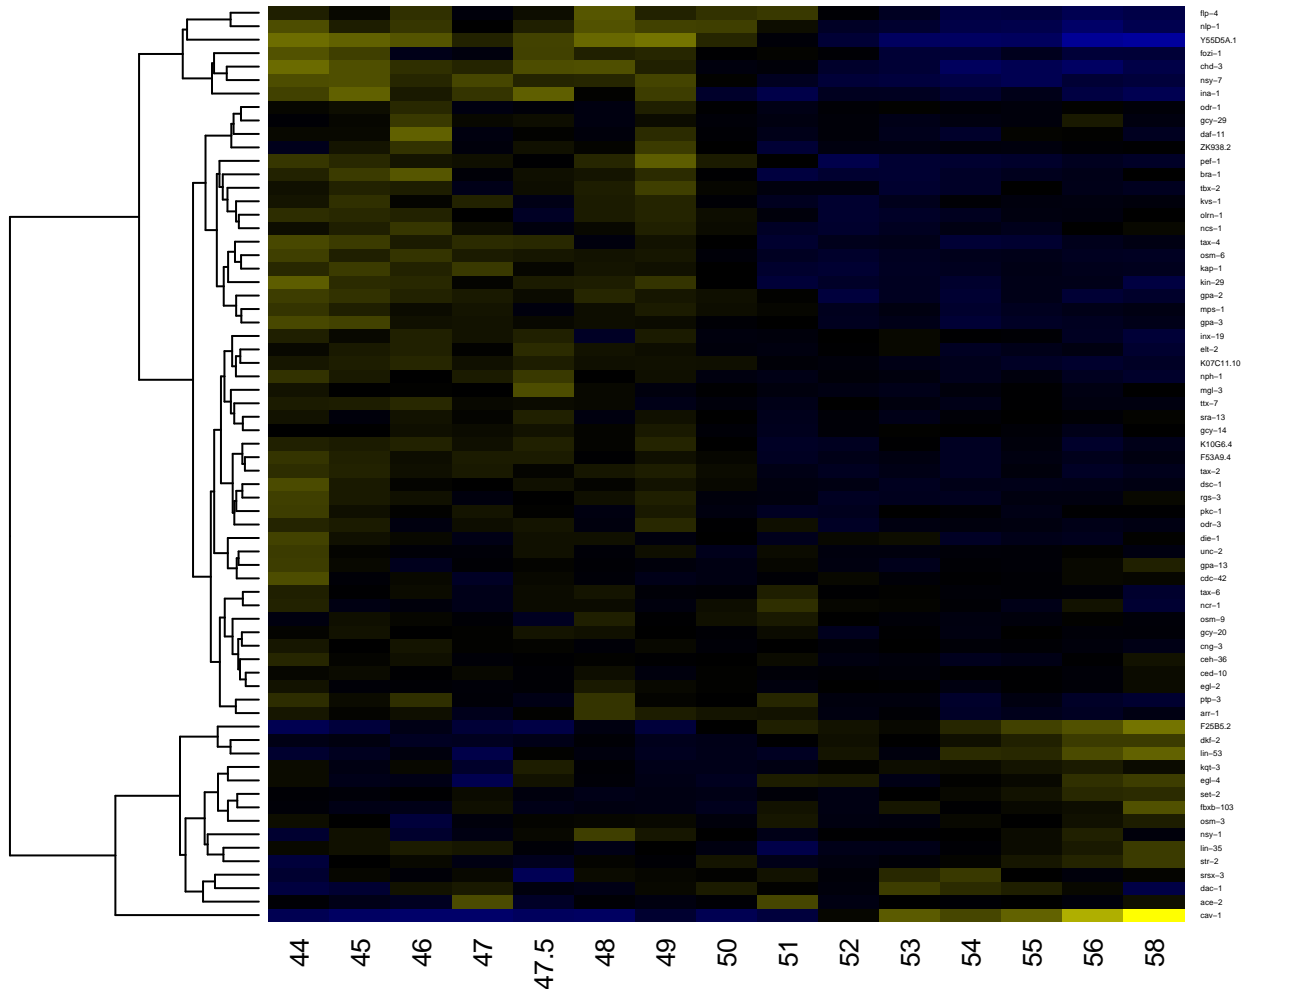

# AWCR

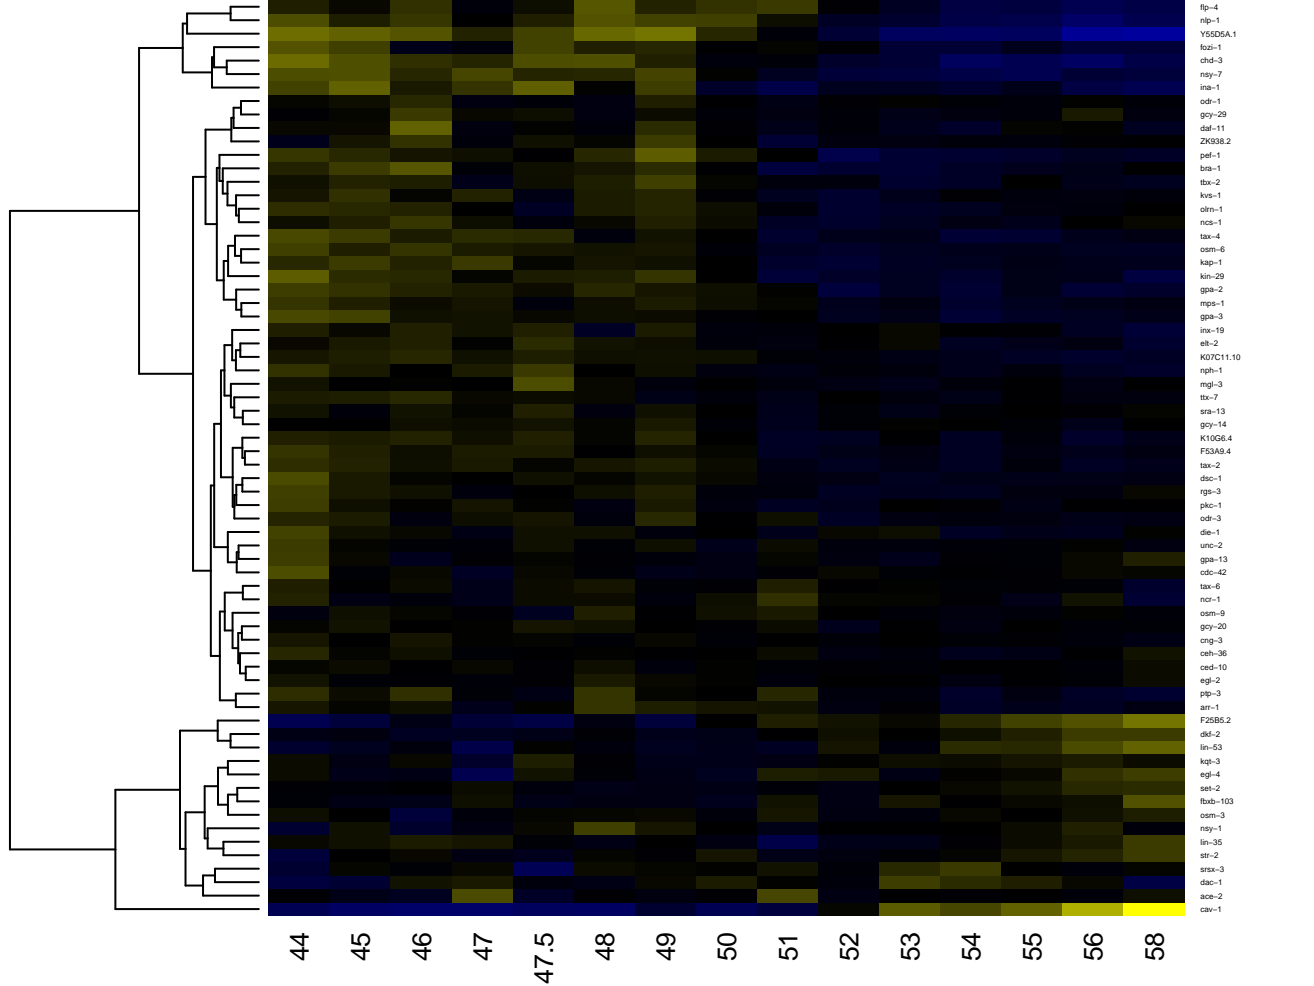

-2

-1

0

1

2

# B cell

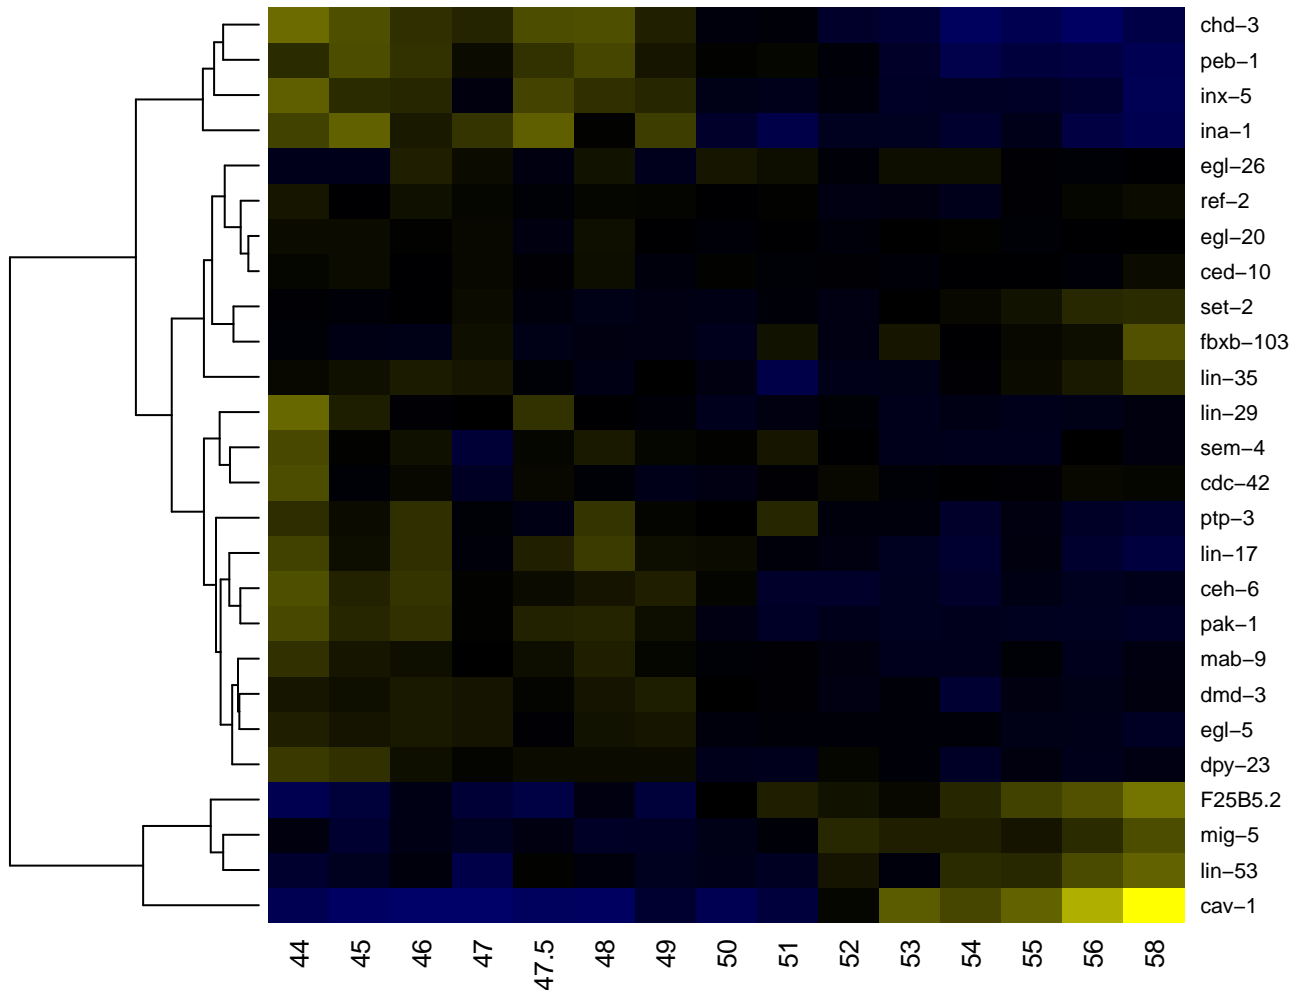

# B.a

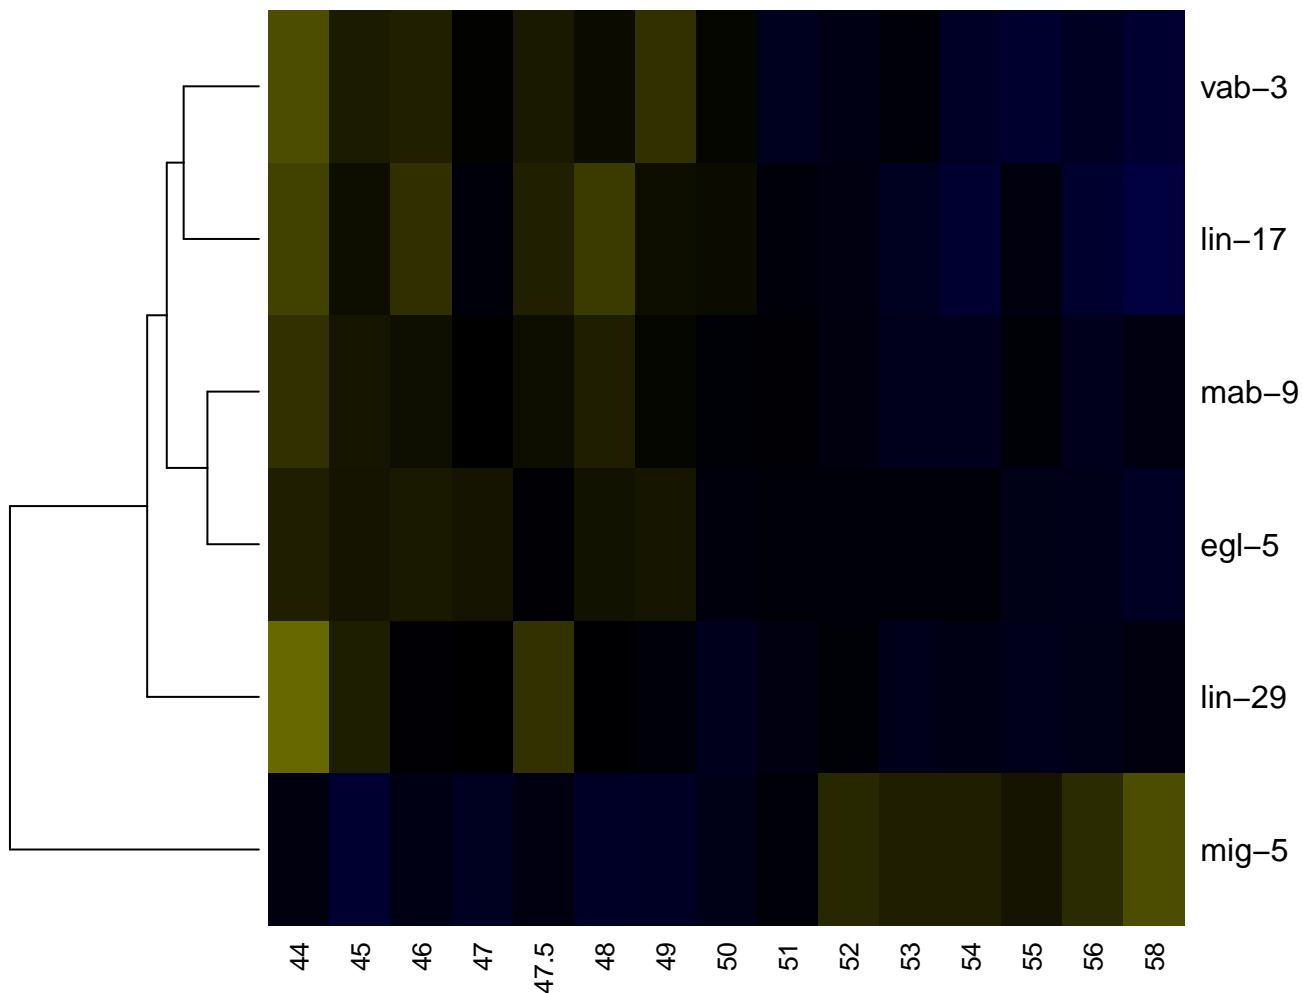

-2

-1

0

1

2

**B.p**

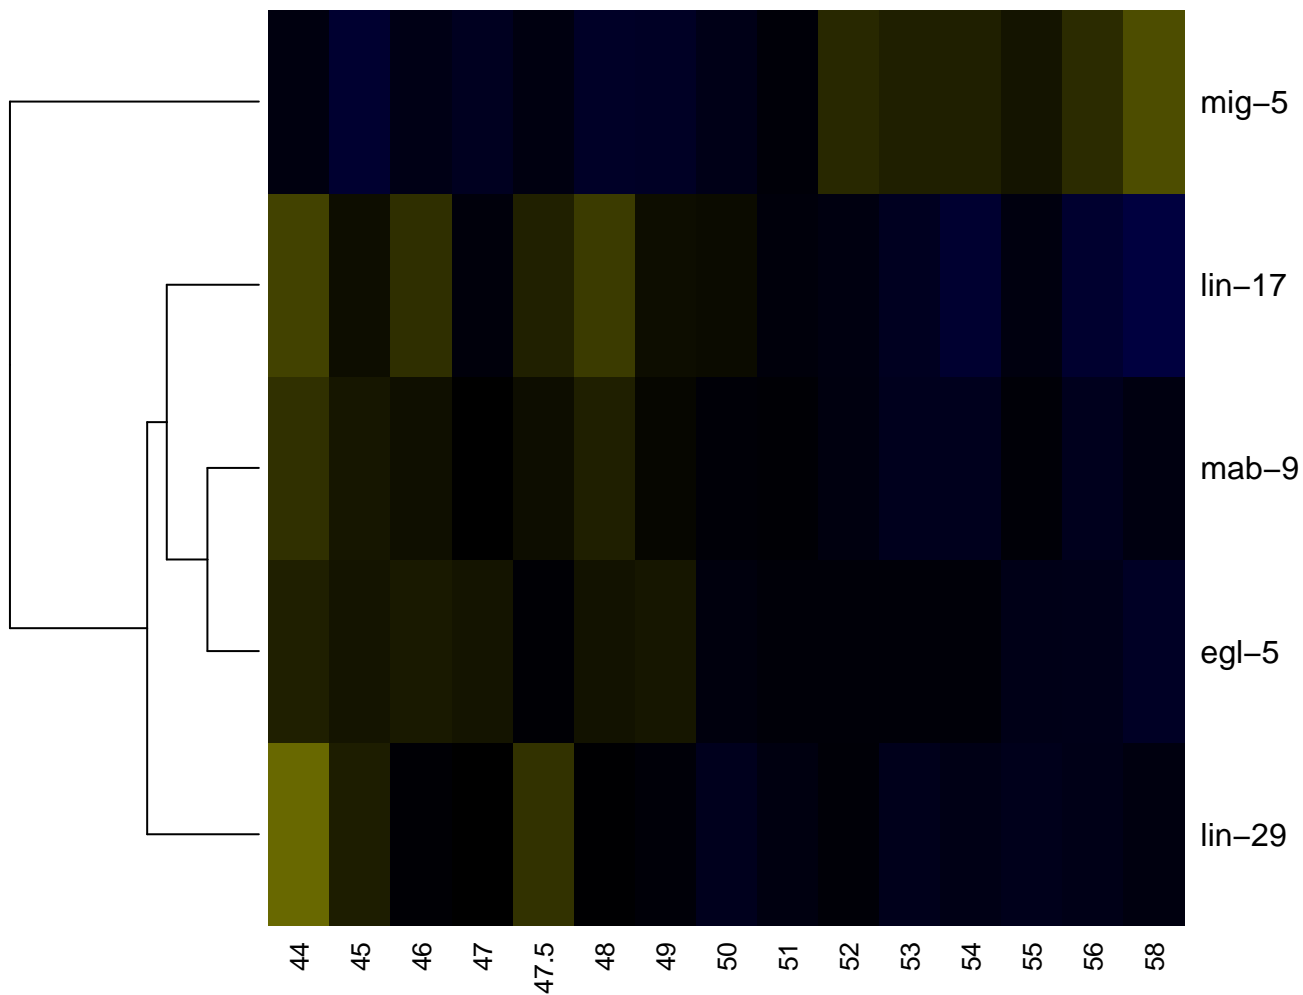

# BAGL

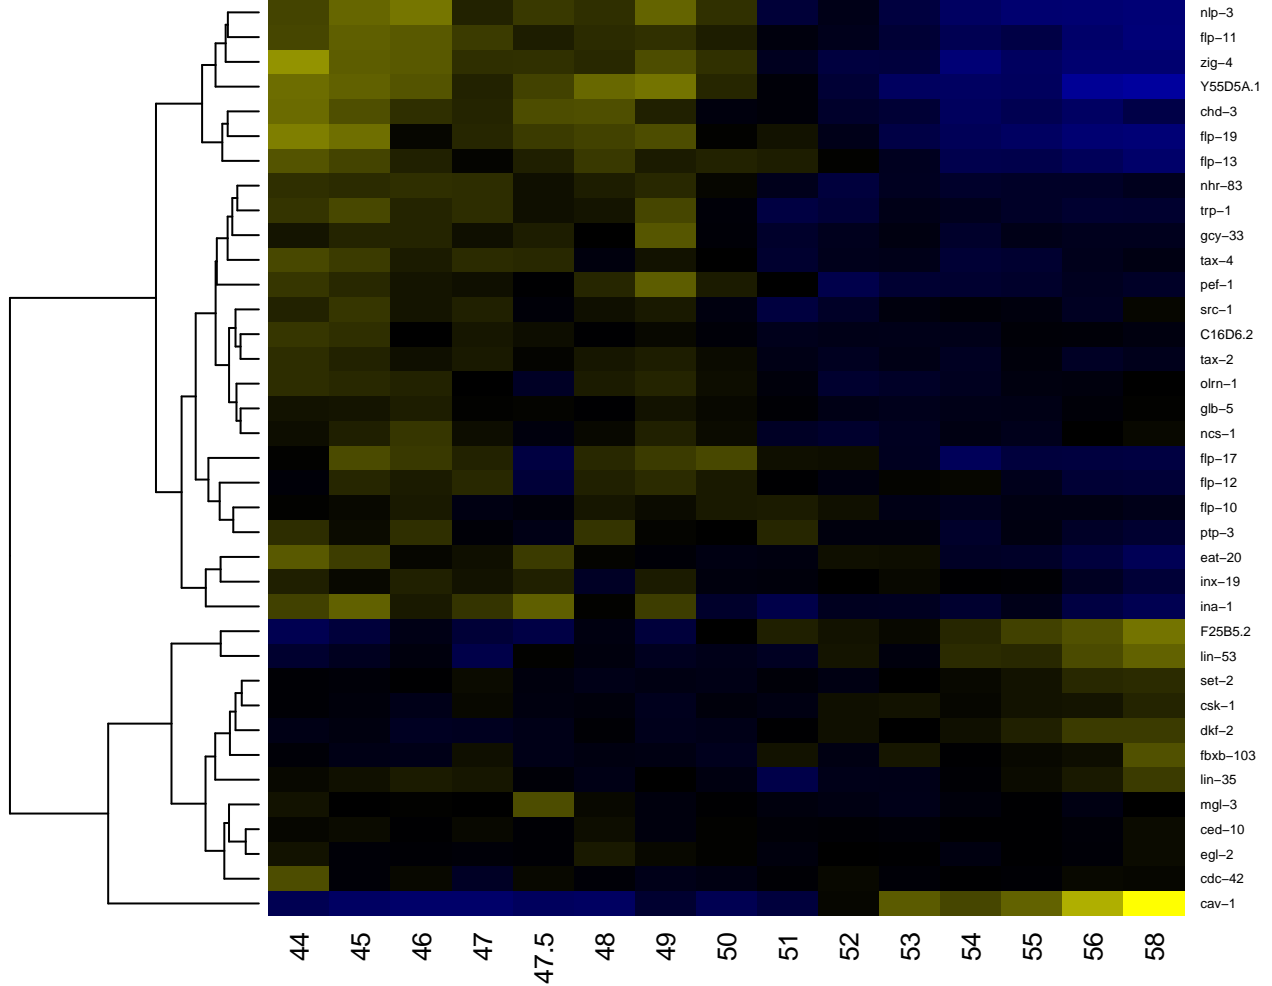

# BAGR

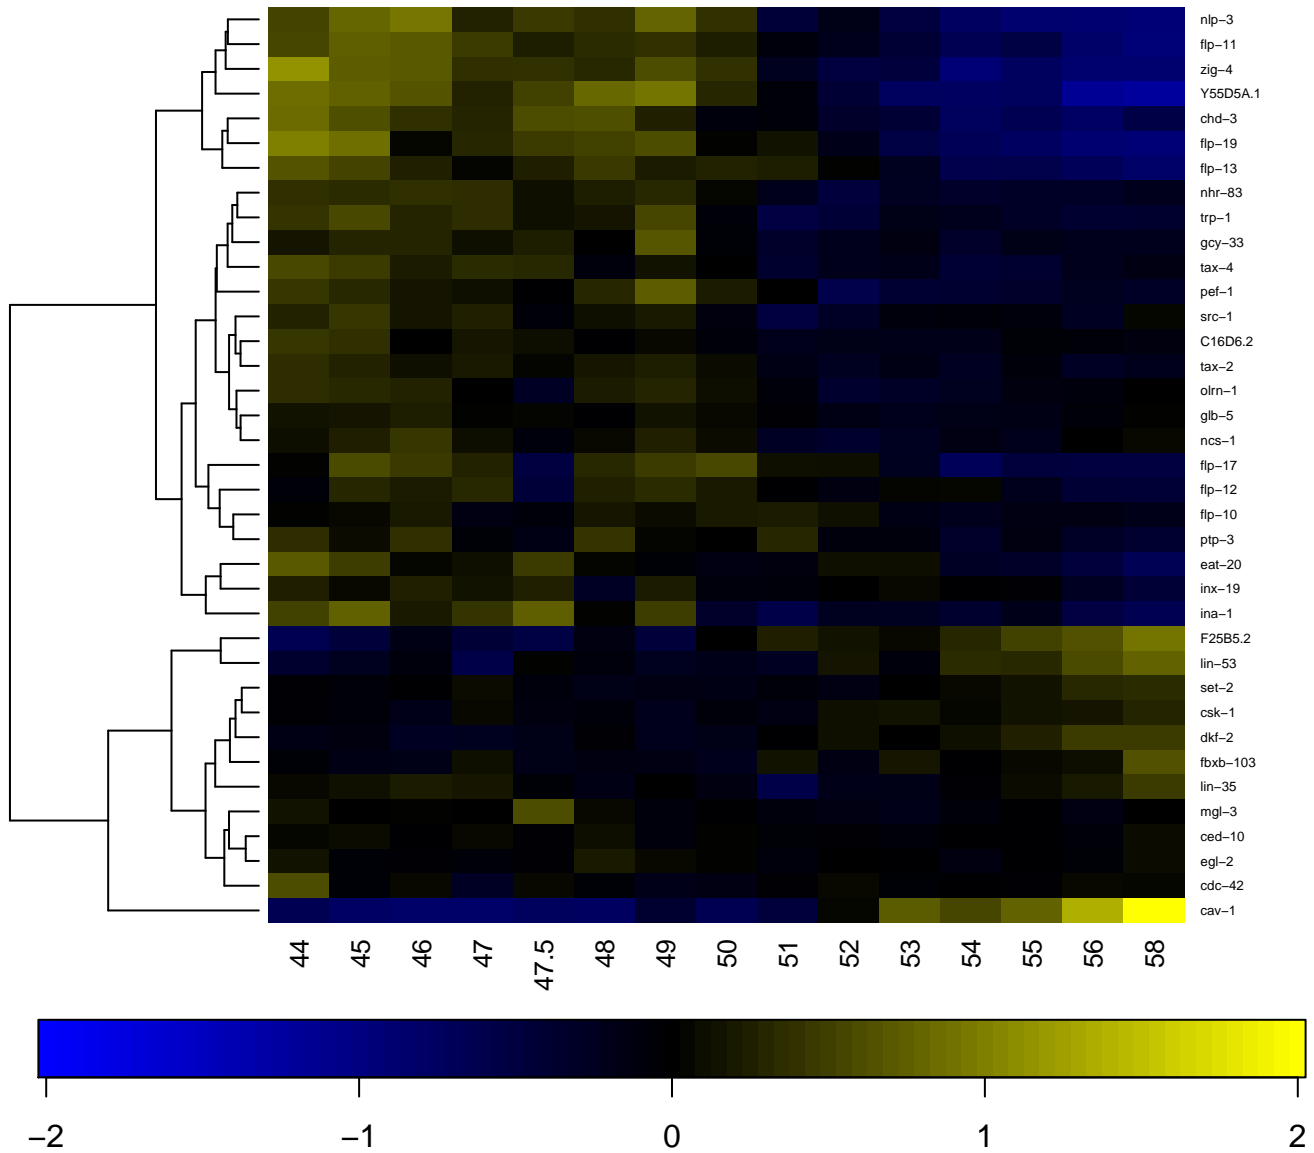





# BDUL

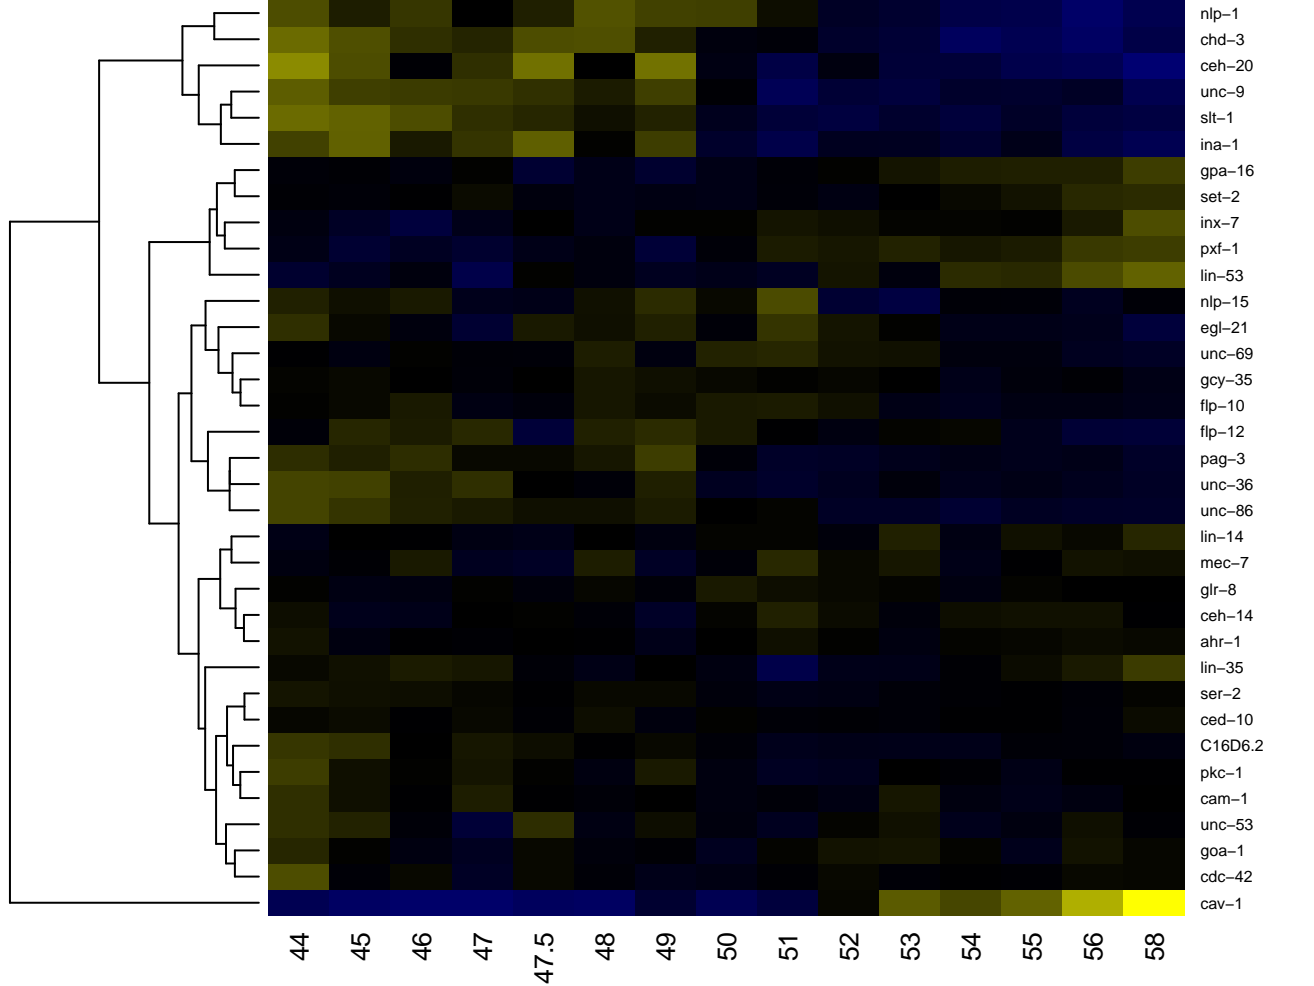

-2

-1

0

1

2

# BDUR



-2

-1

0

1

2

# body region

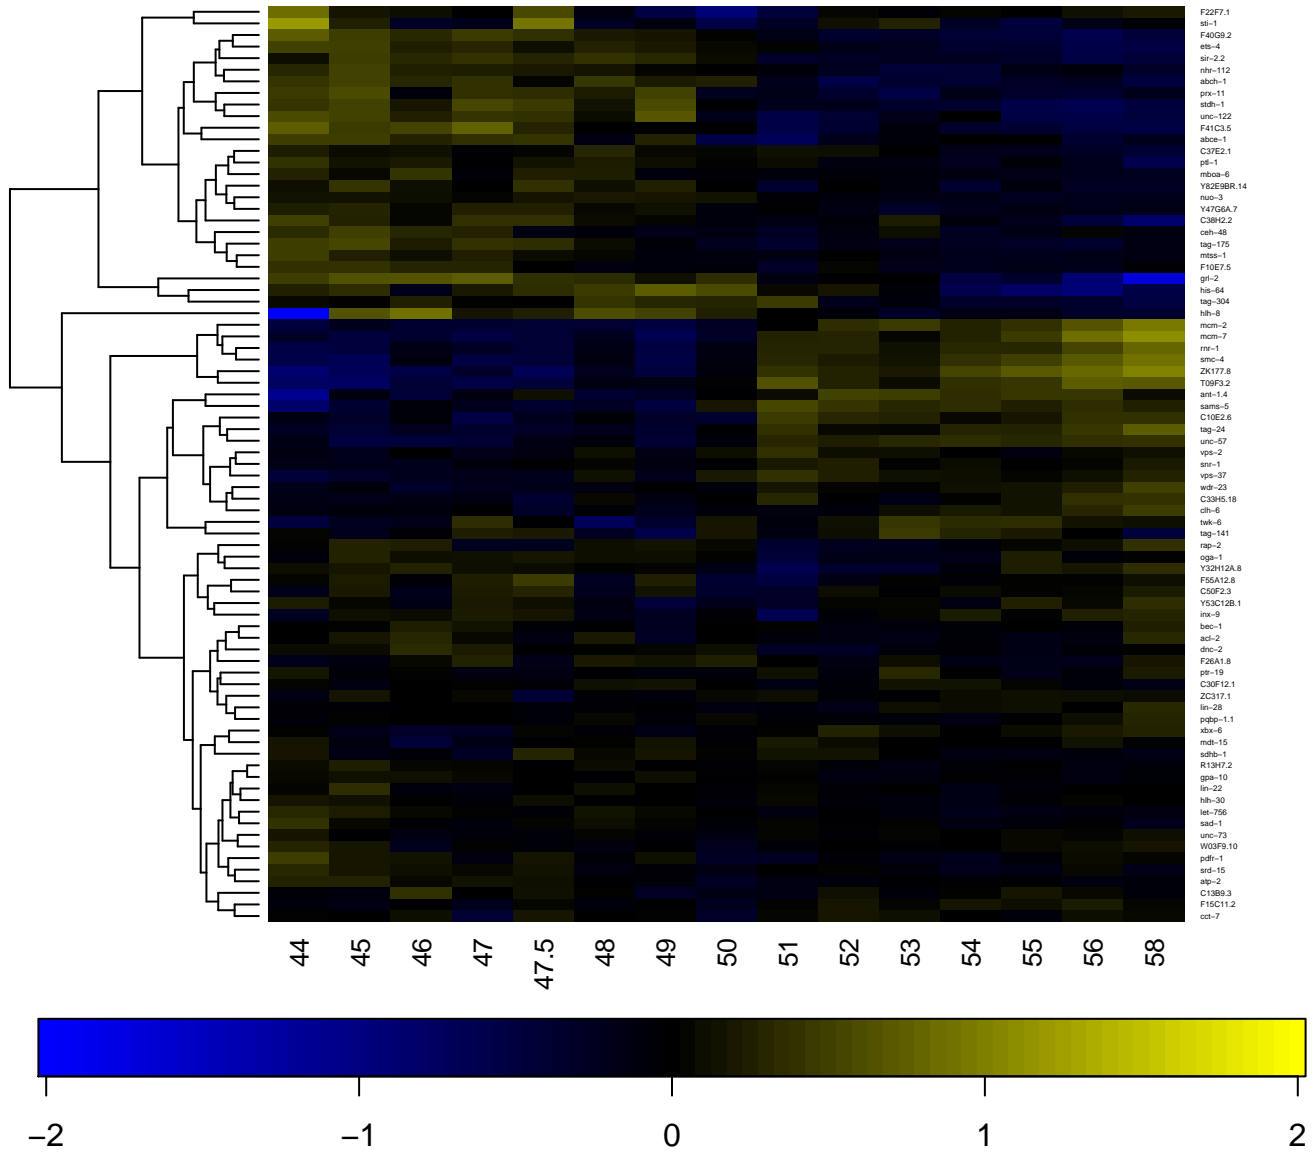

# body wall musculature

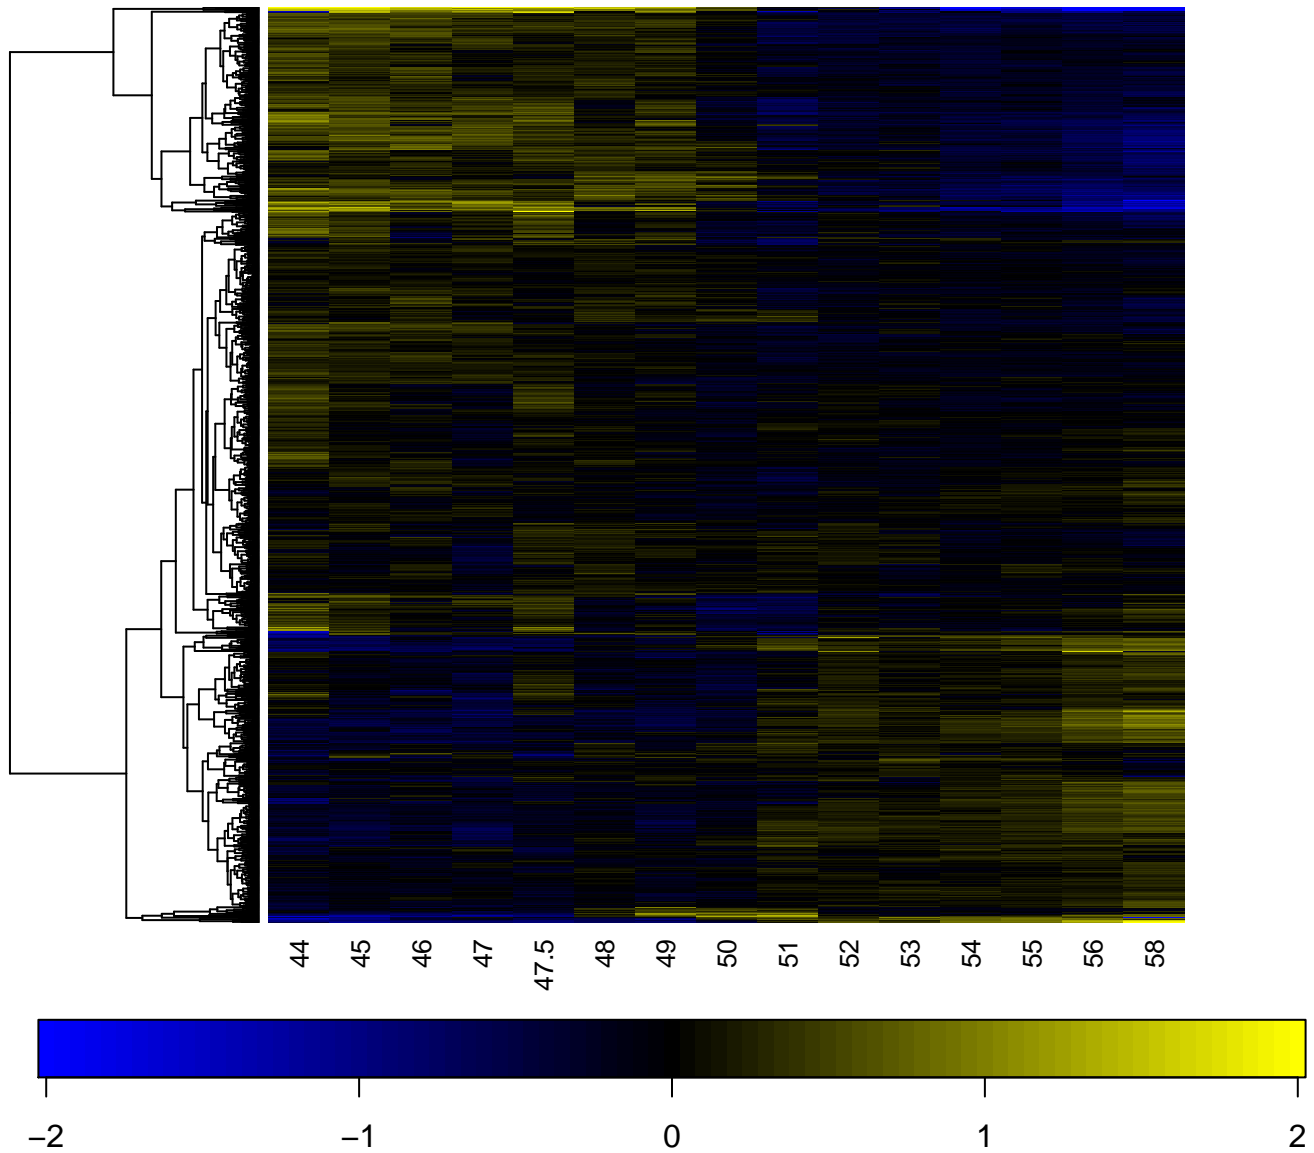



C

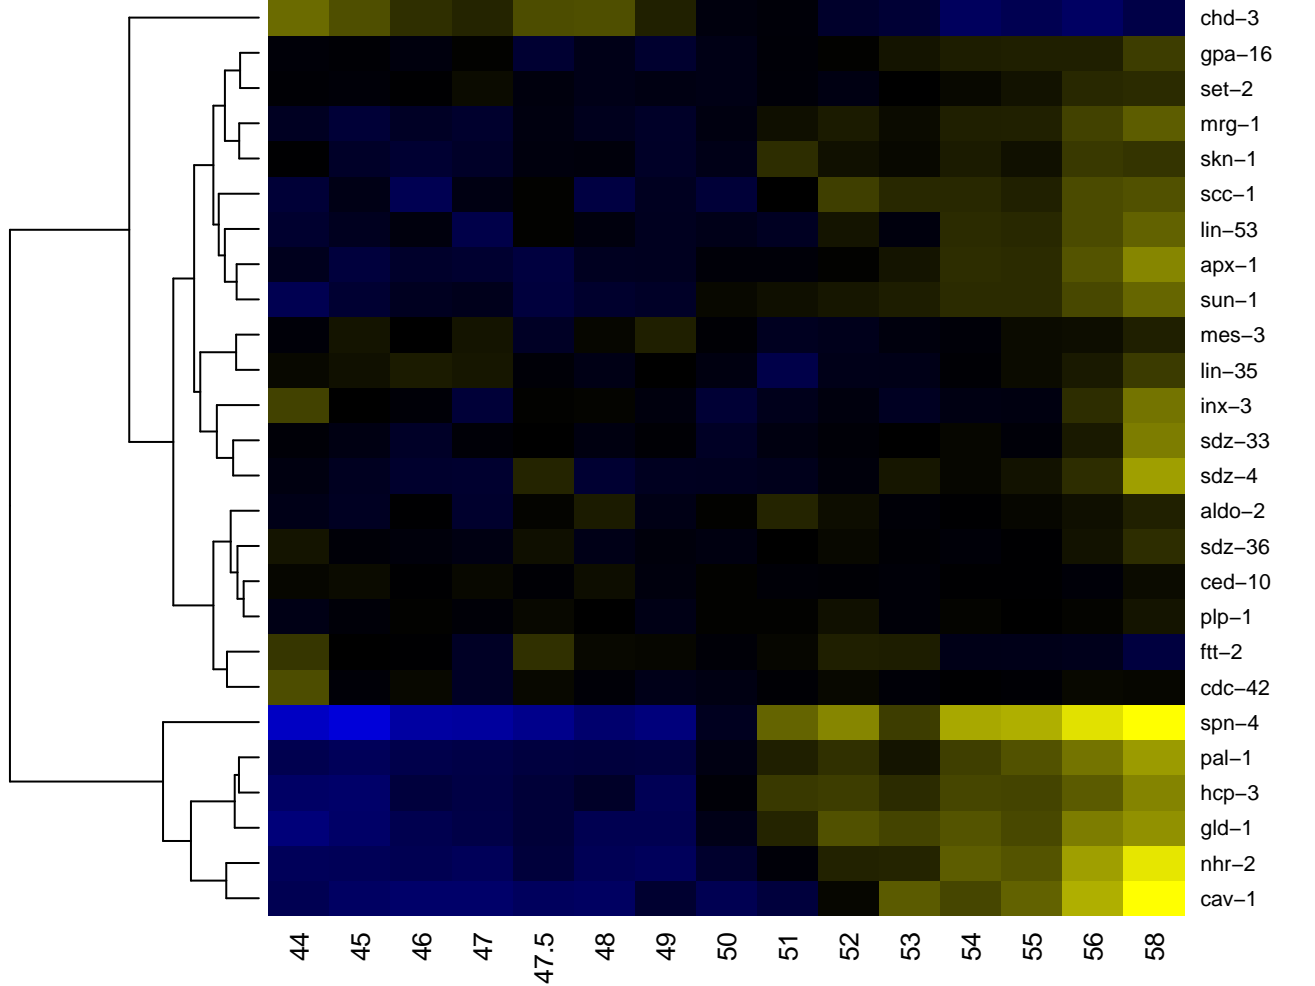

# Ca

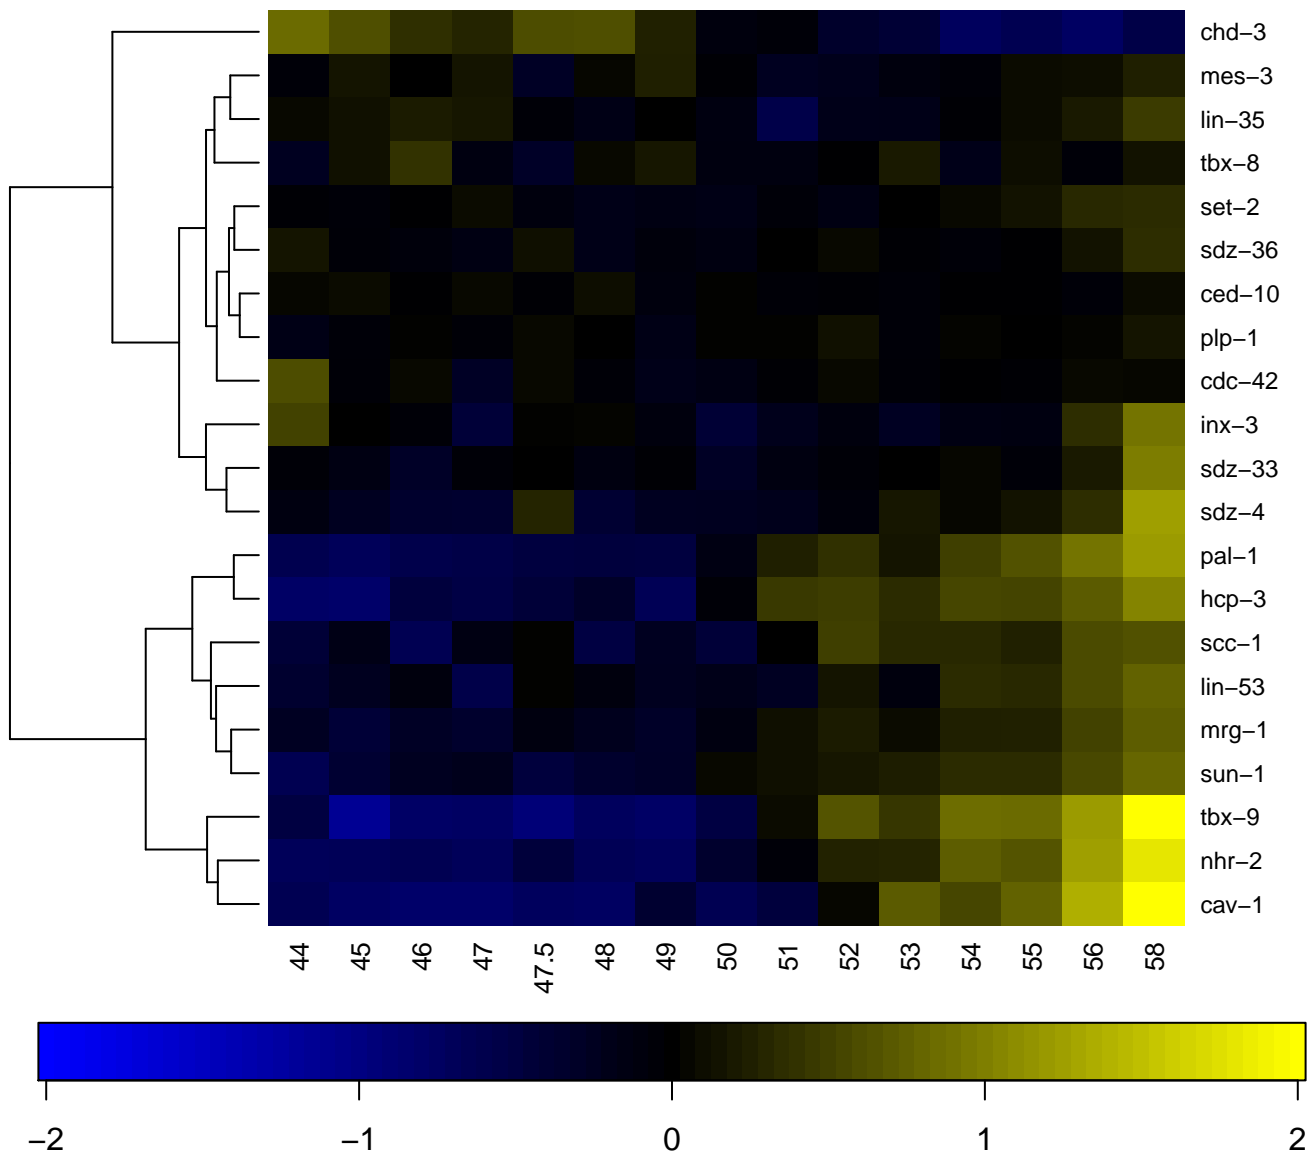



# CA1

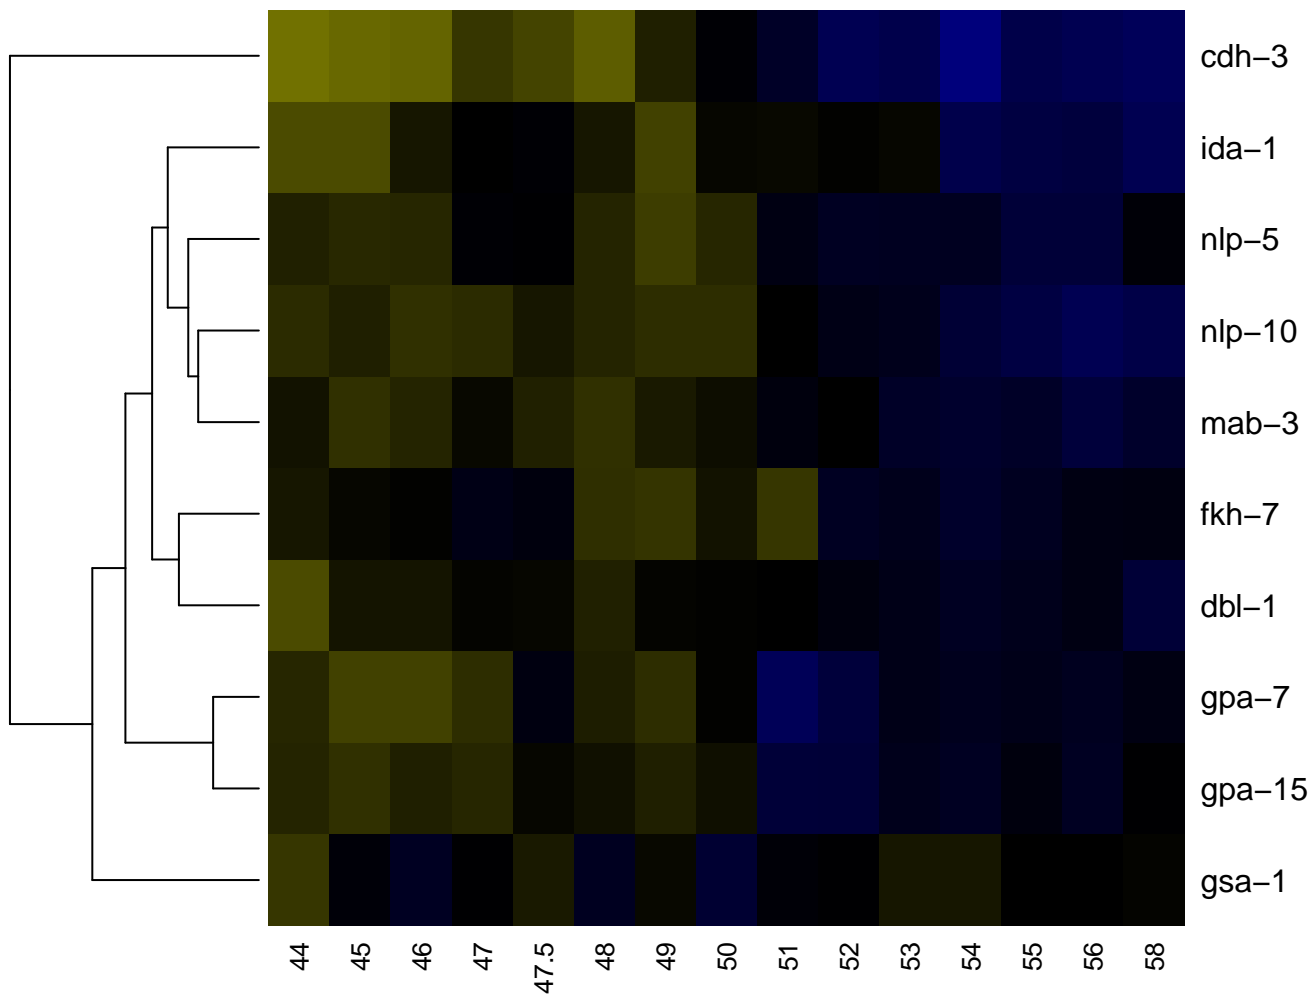

# CA2

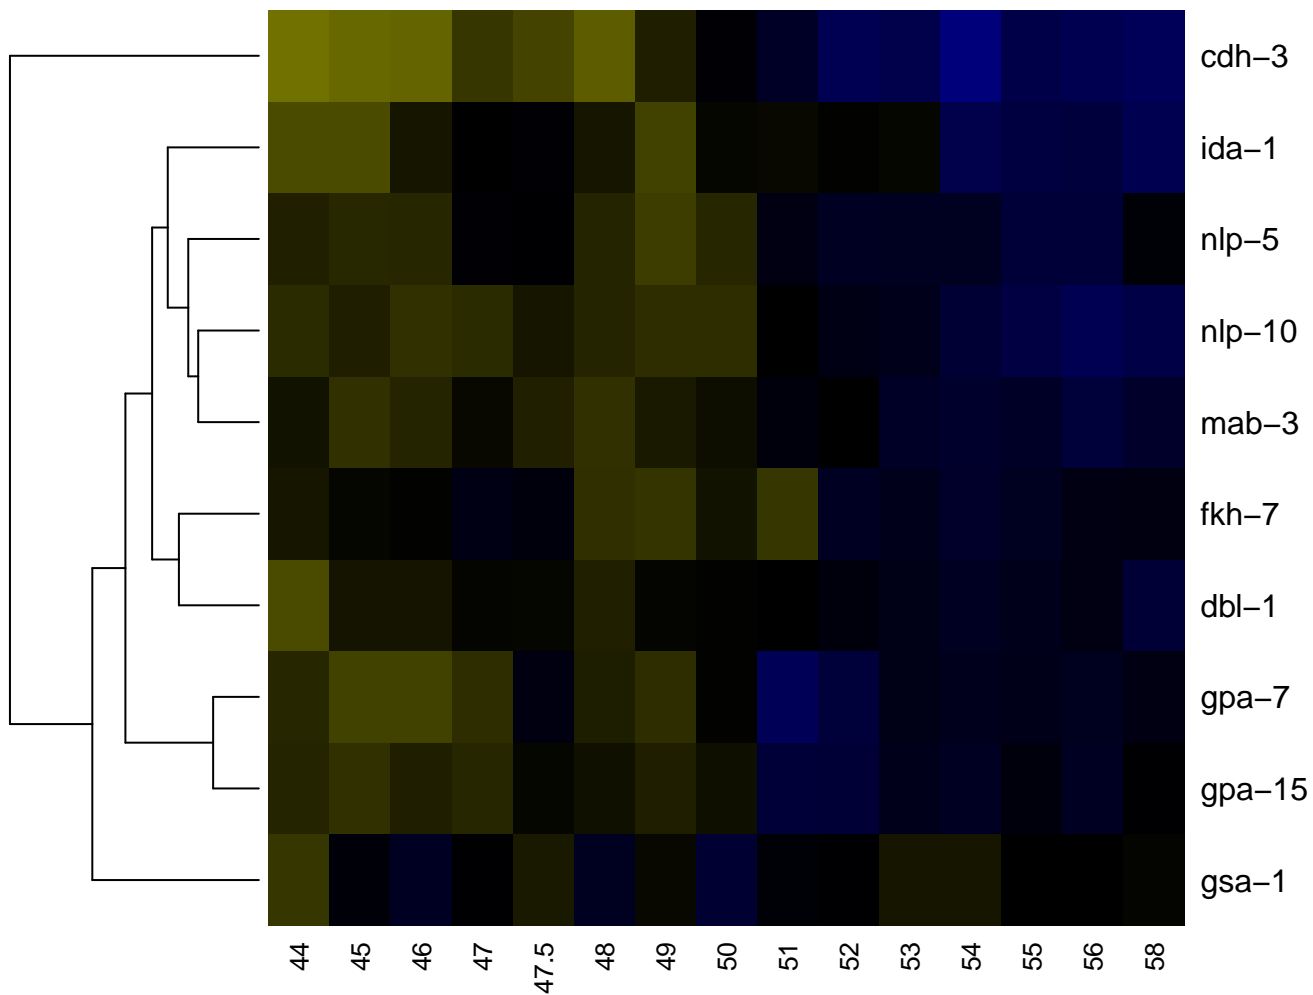

-2

-1

0

1

2

# CA3

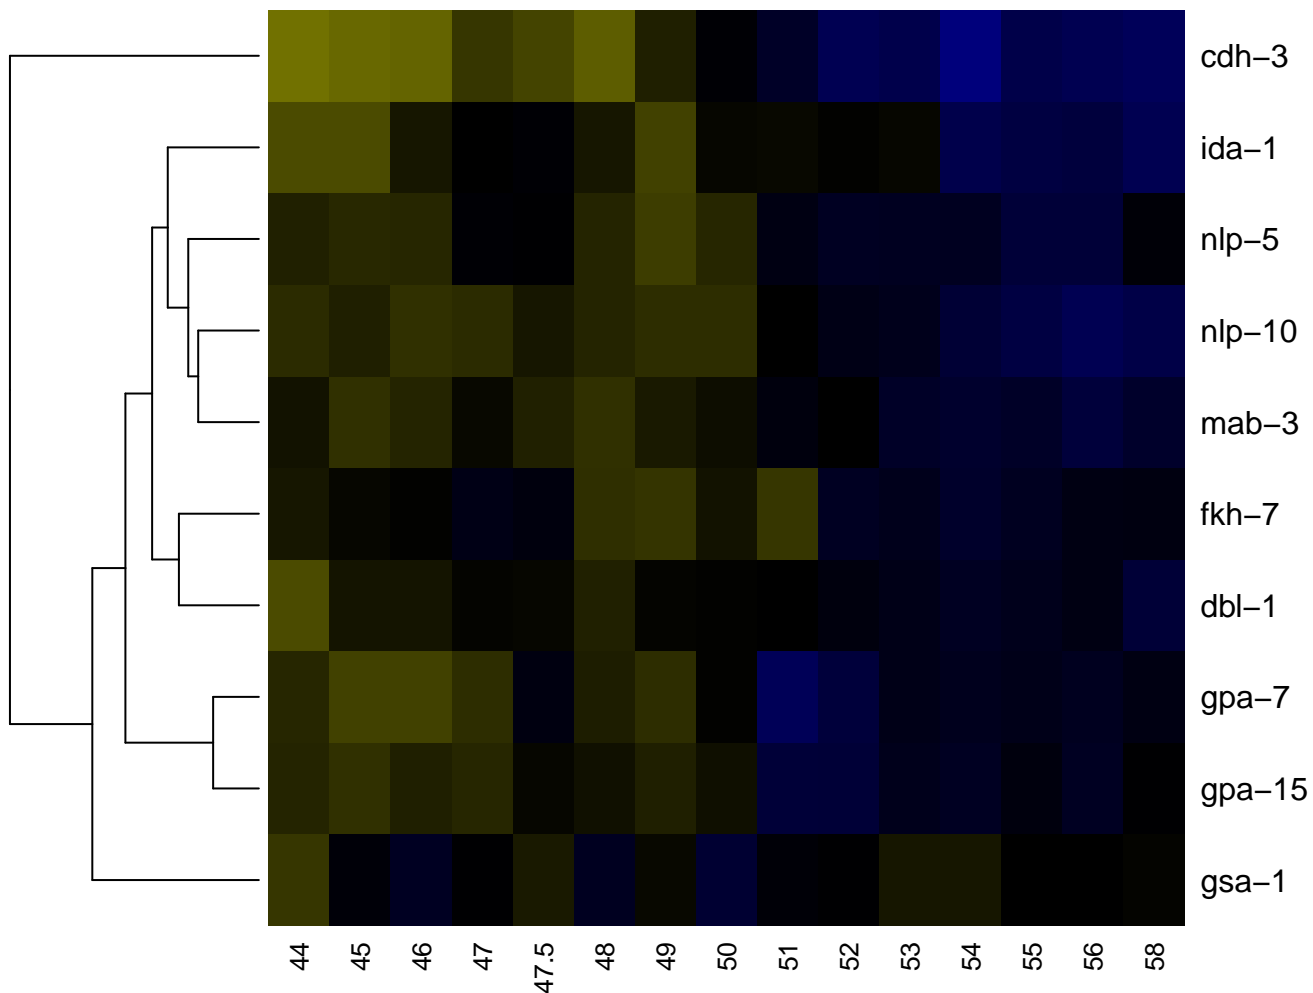

# CA4



# CA5

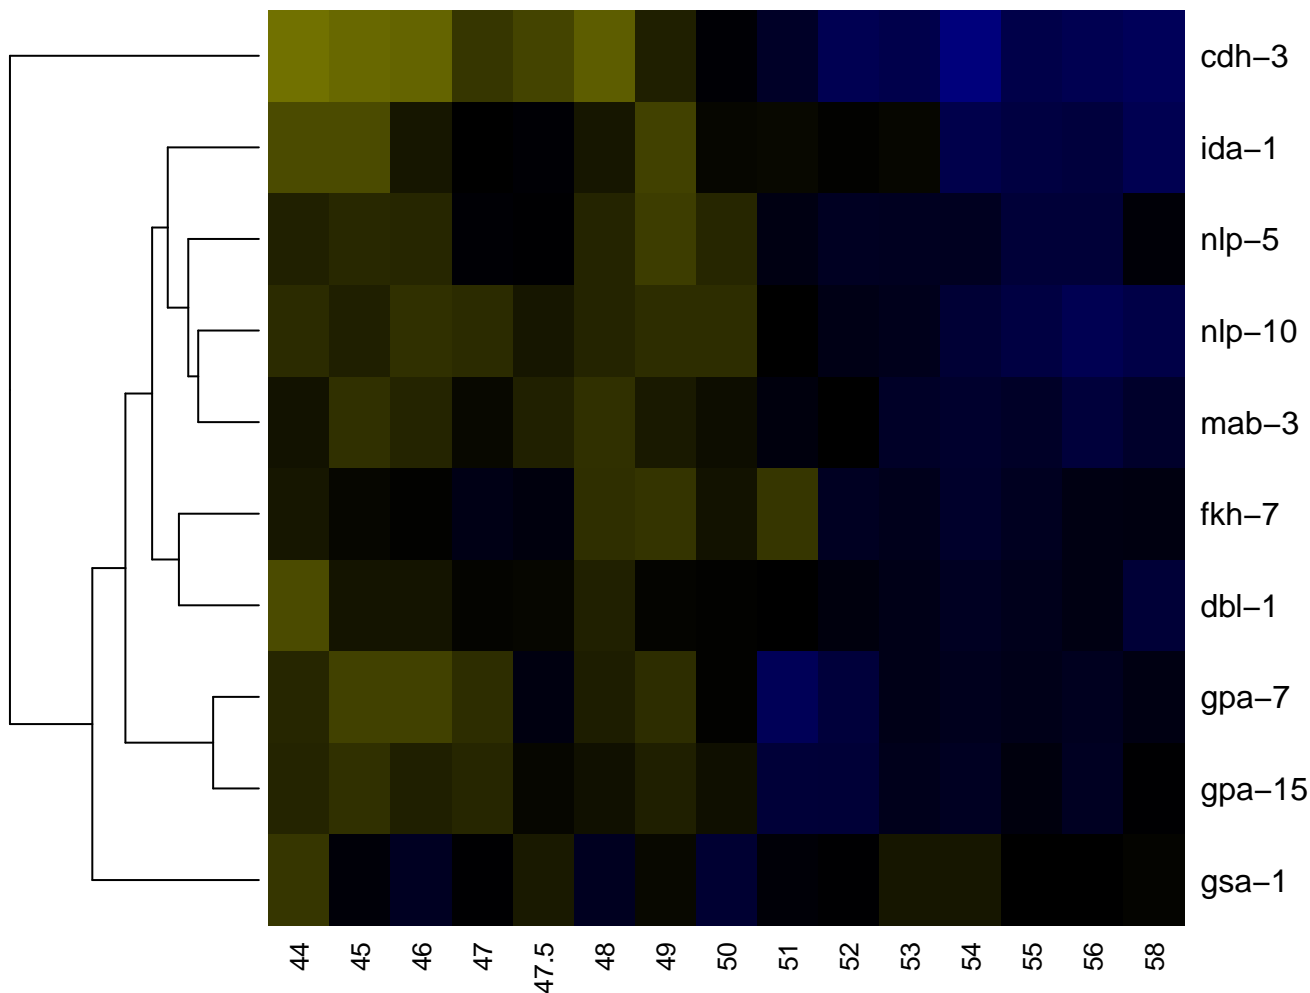

# CA6

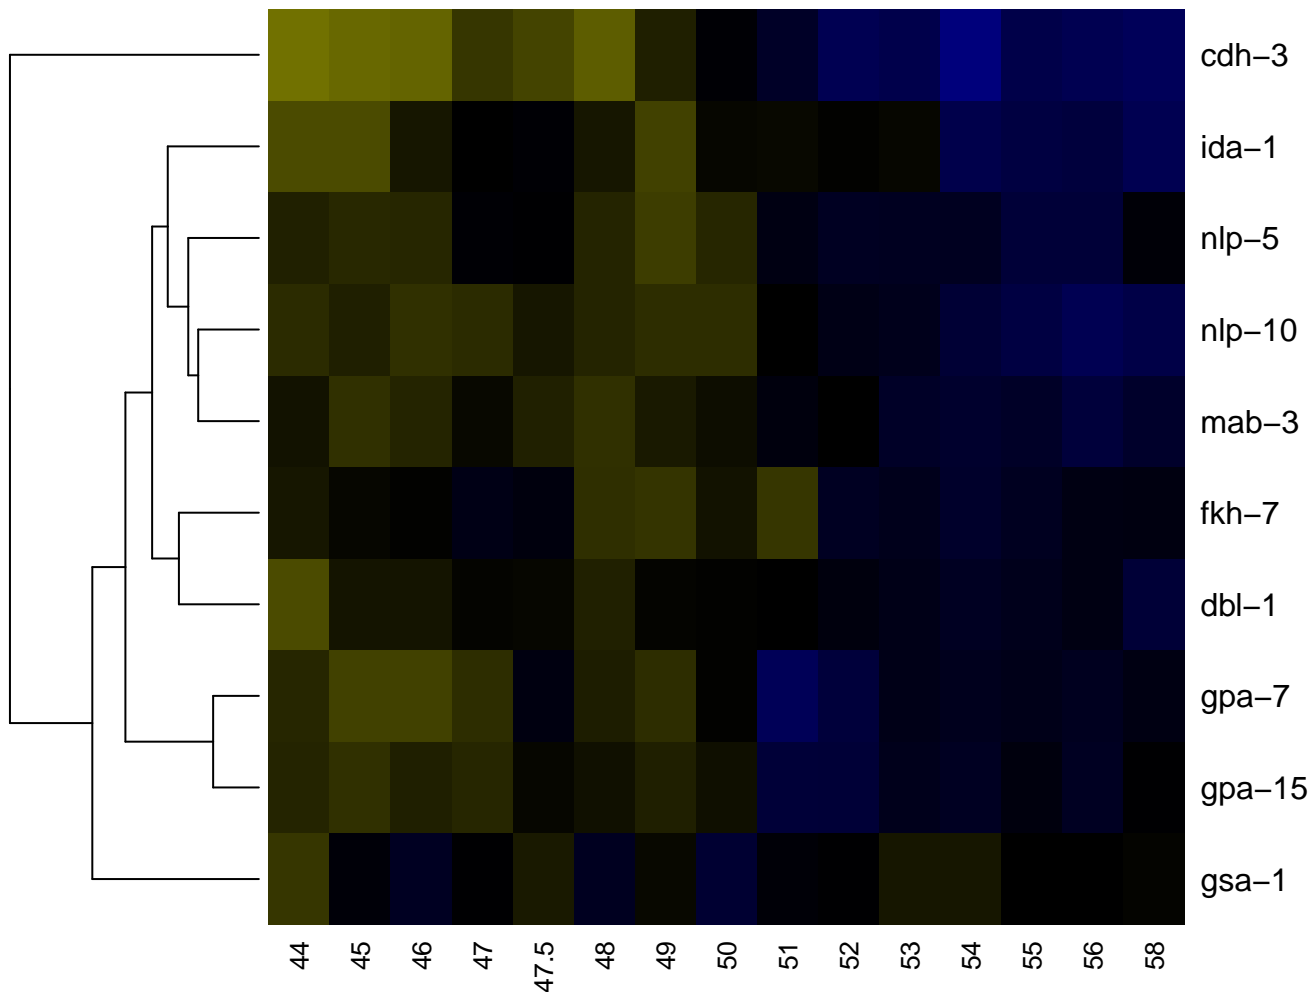

# CA7



# CA8

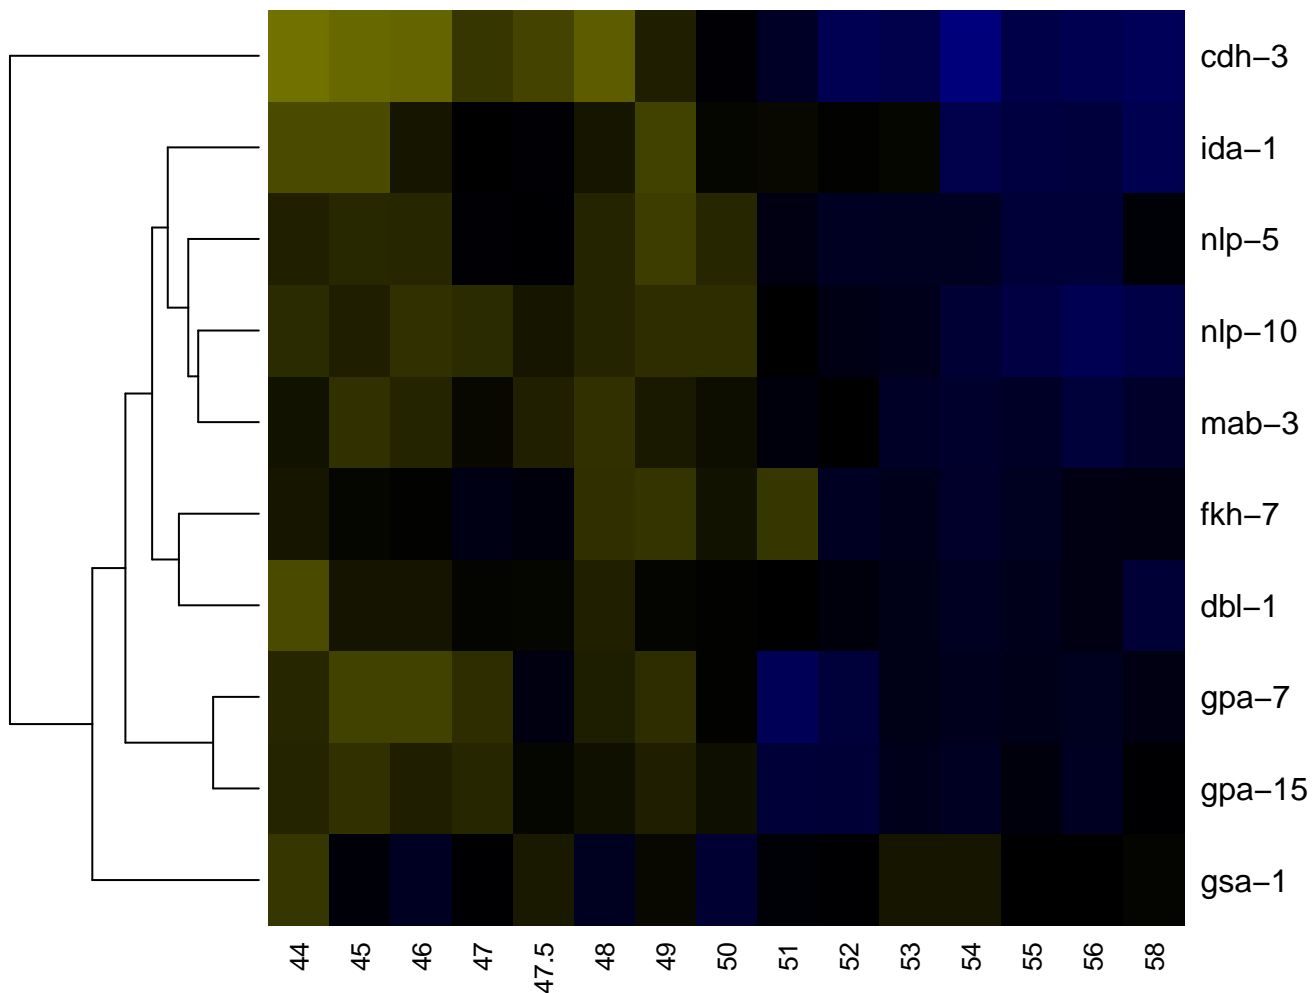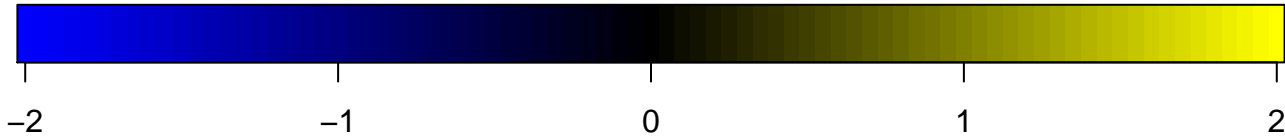



# CA9

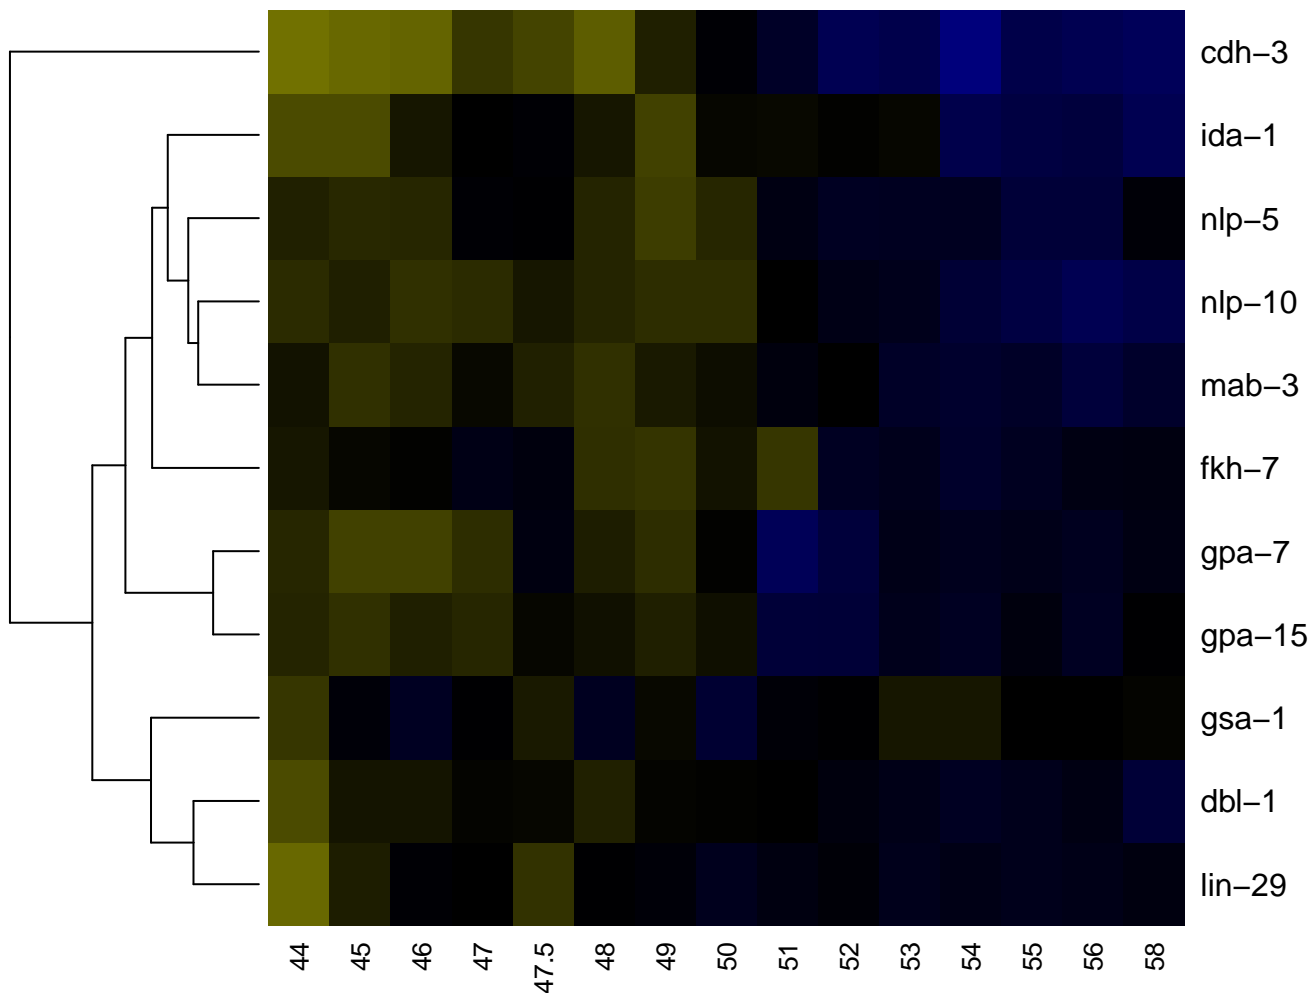

# Caa

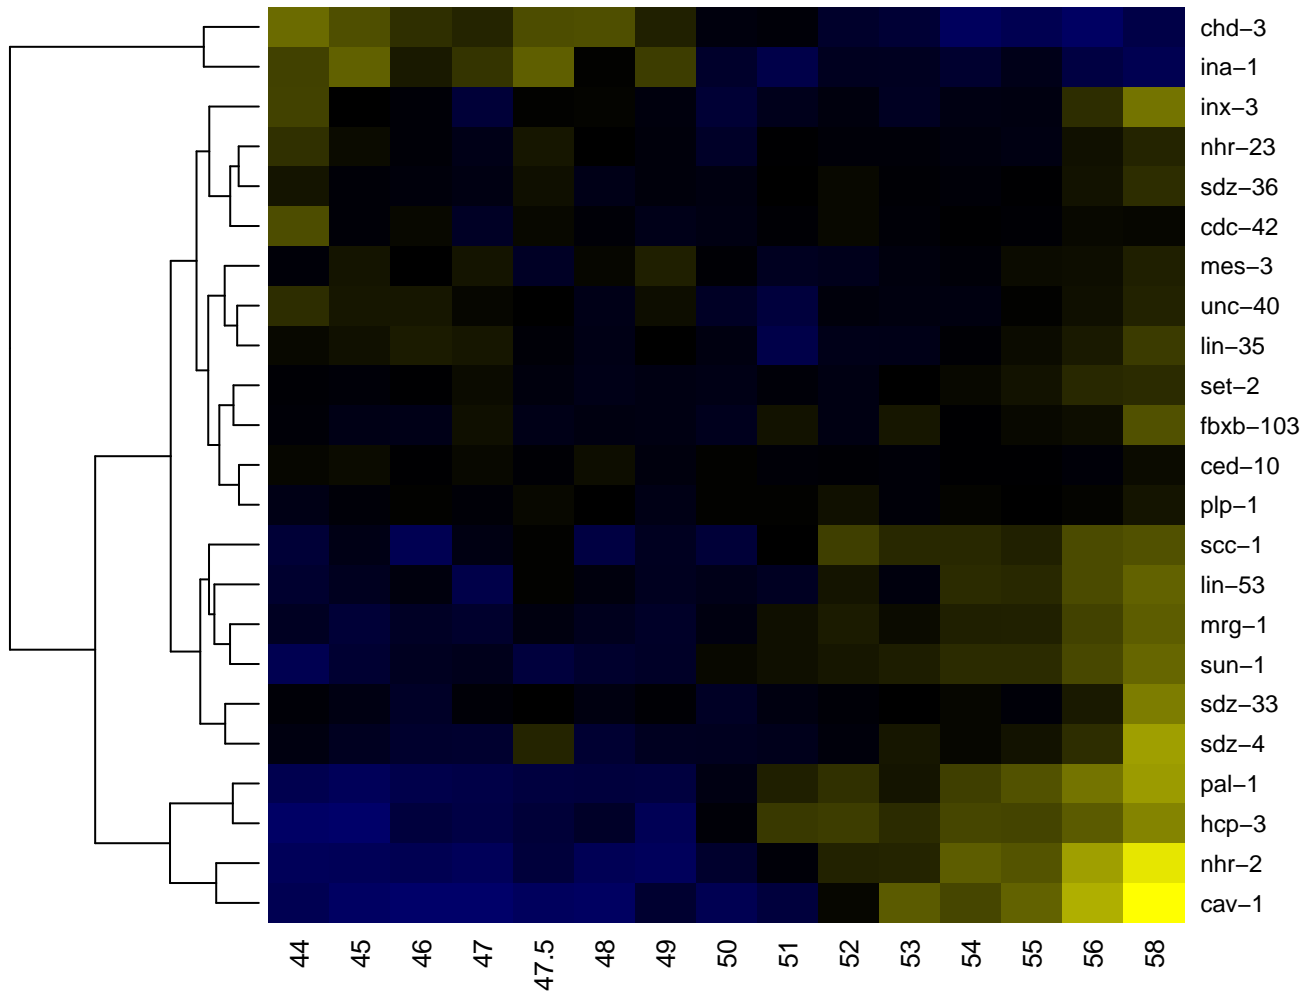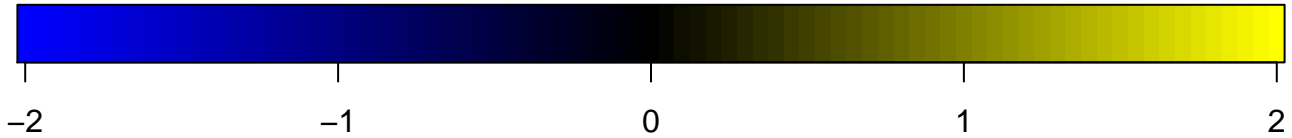

# Caaa

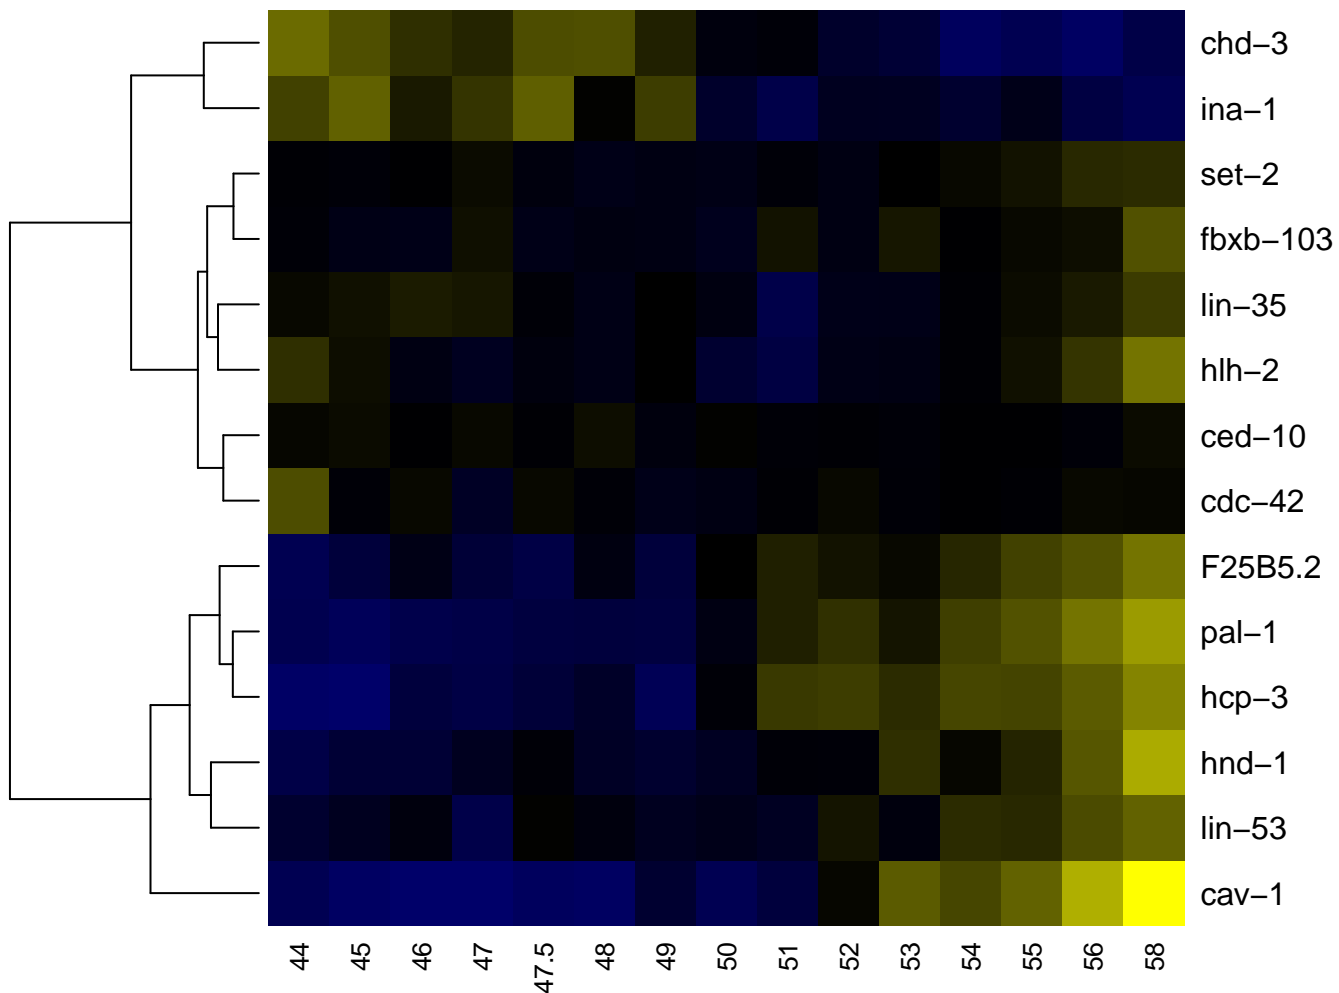

# Caaa

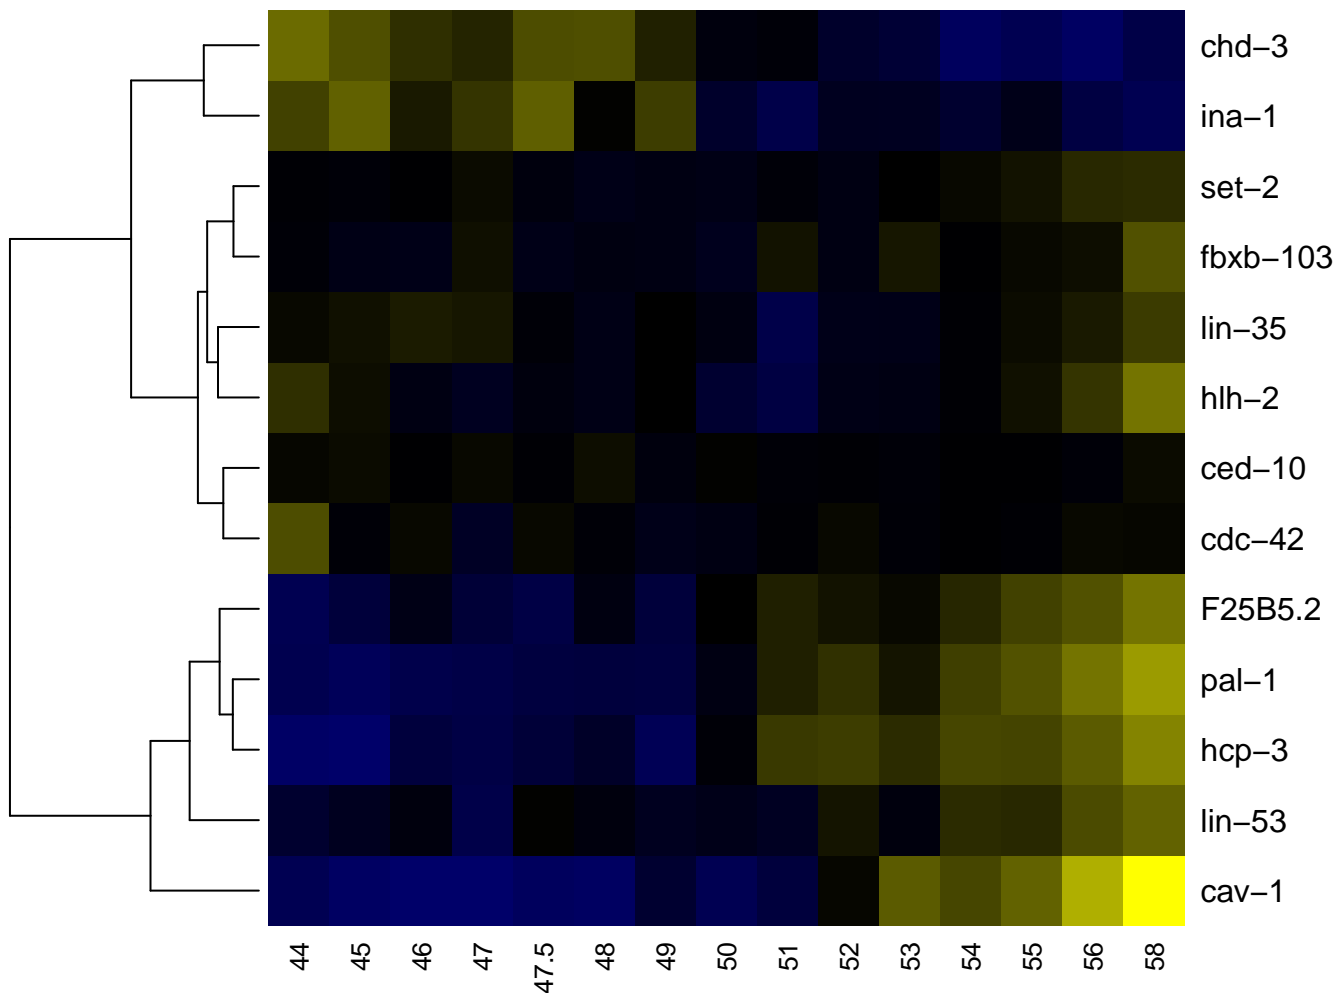

# Caaaaa

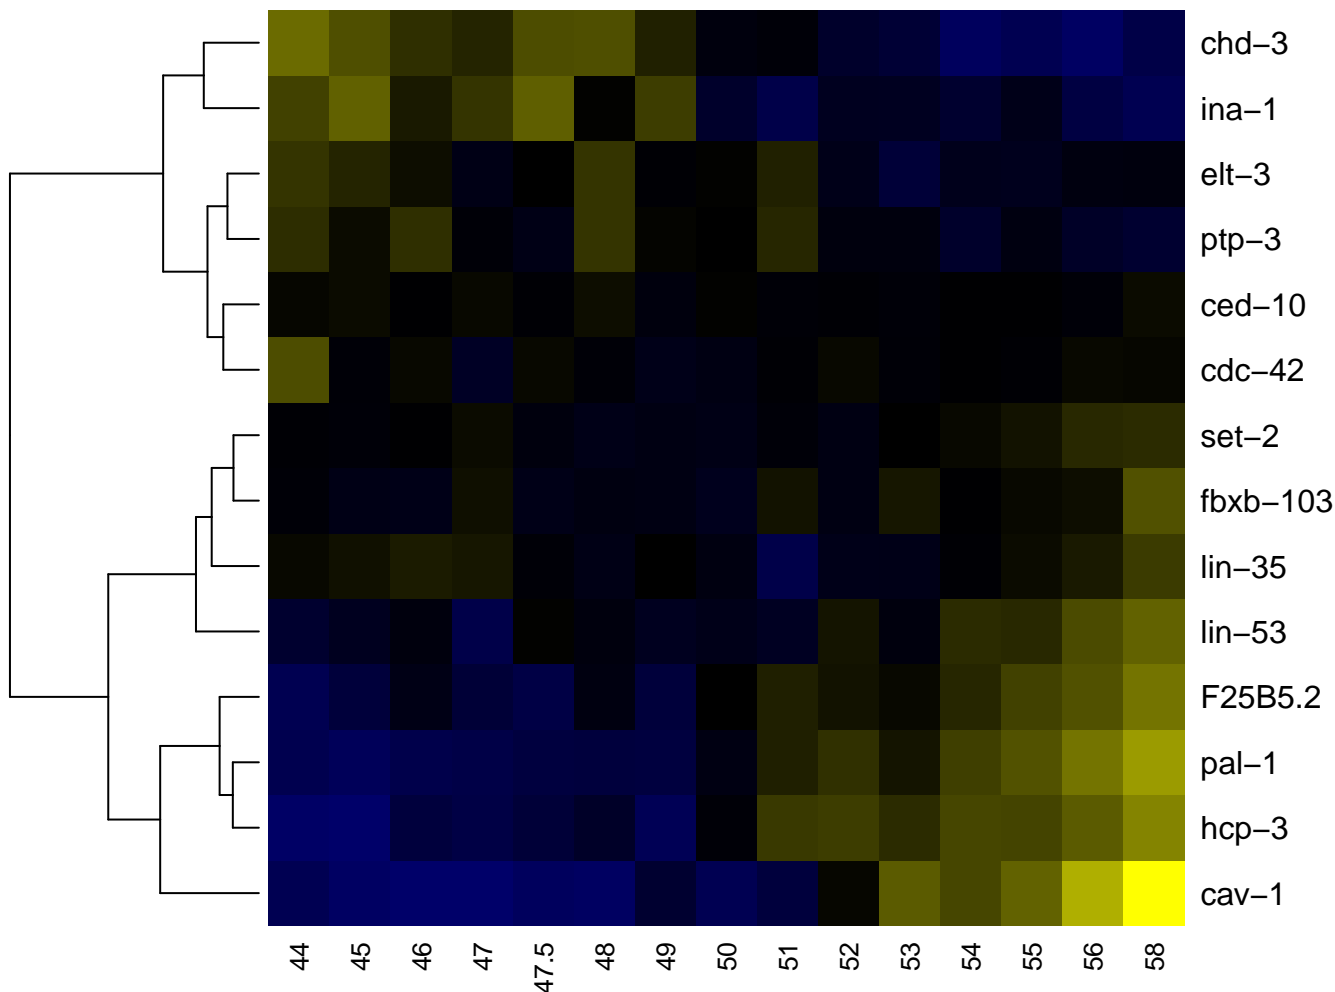

# Caaaap

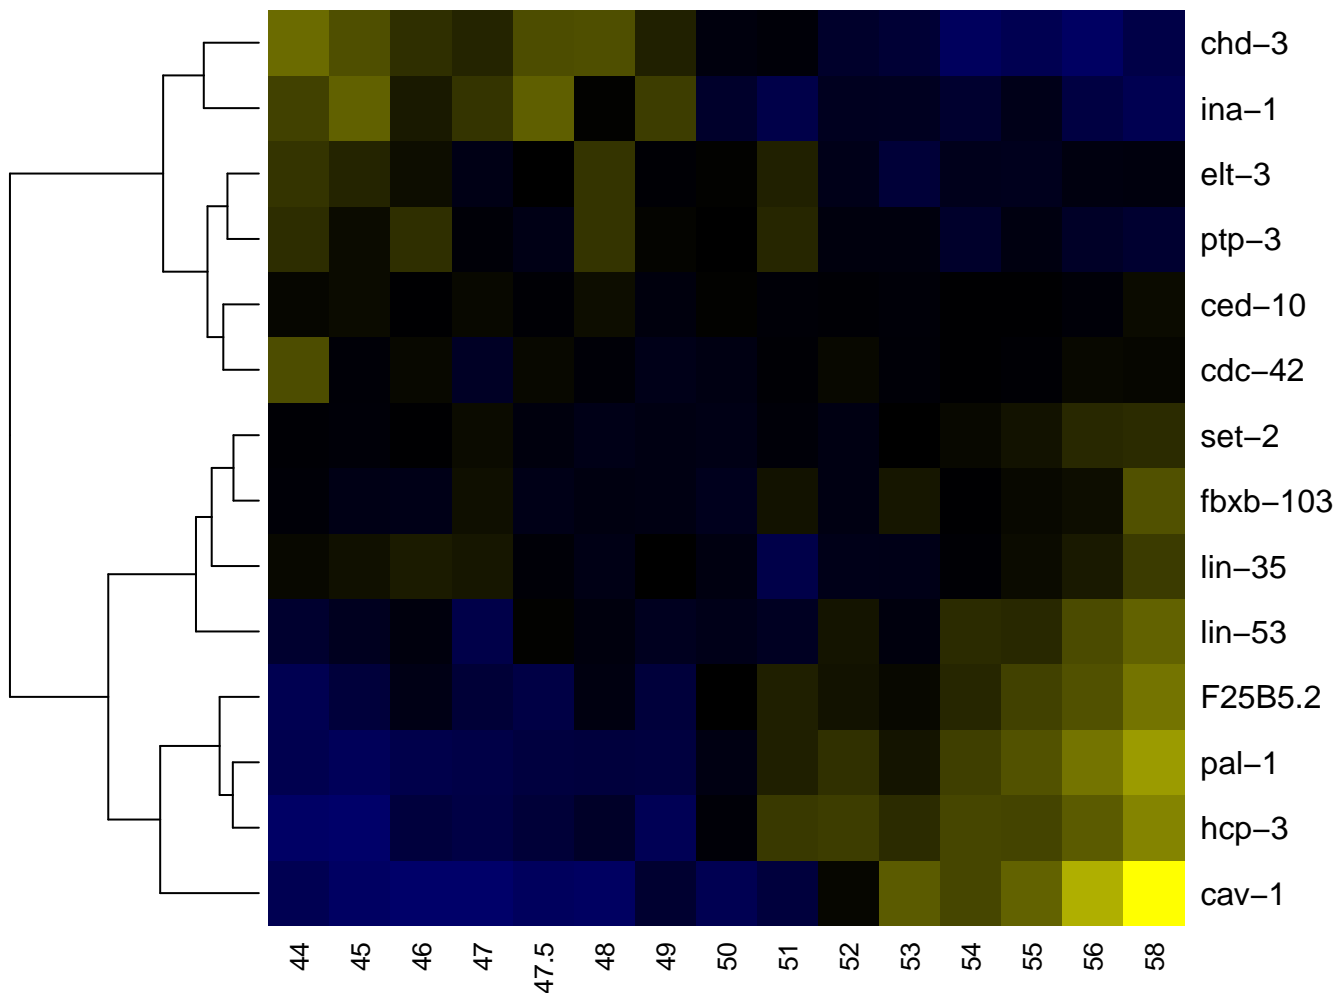

# Caaap

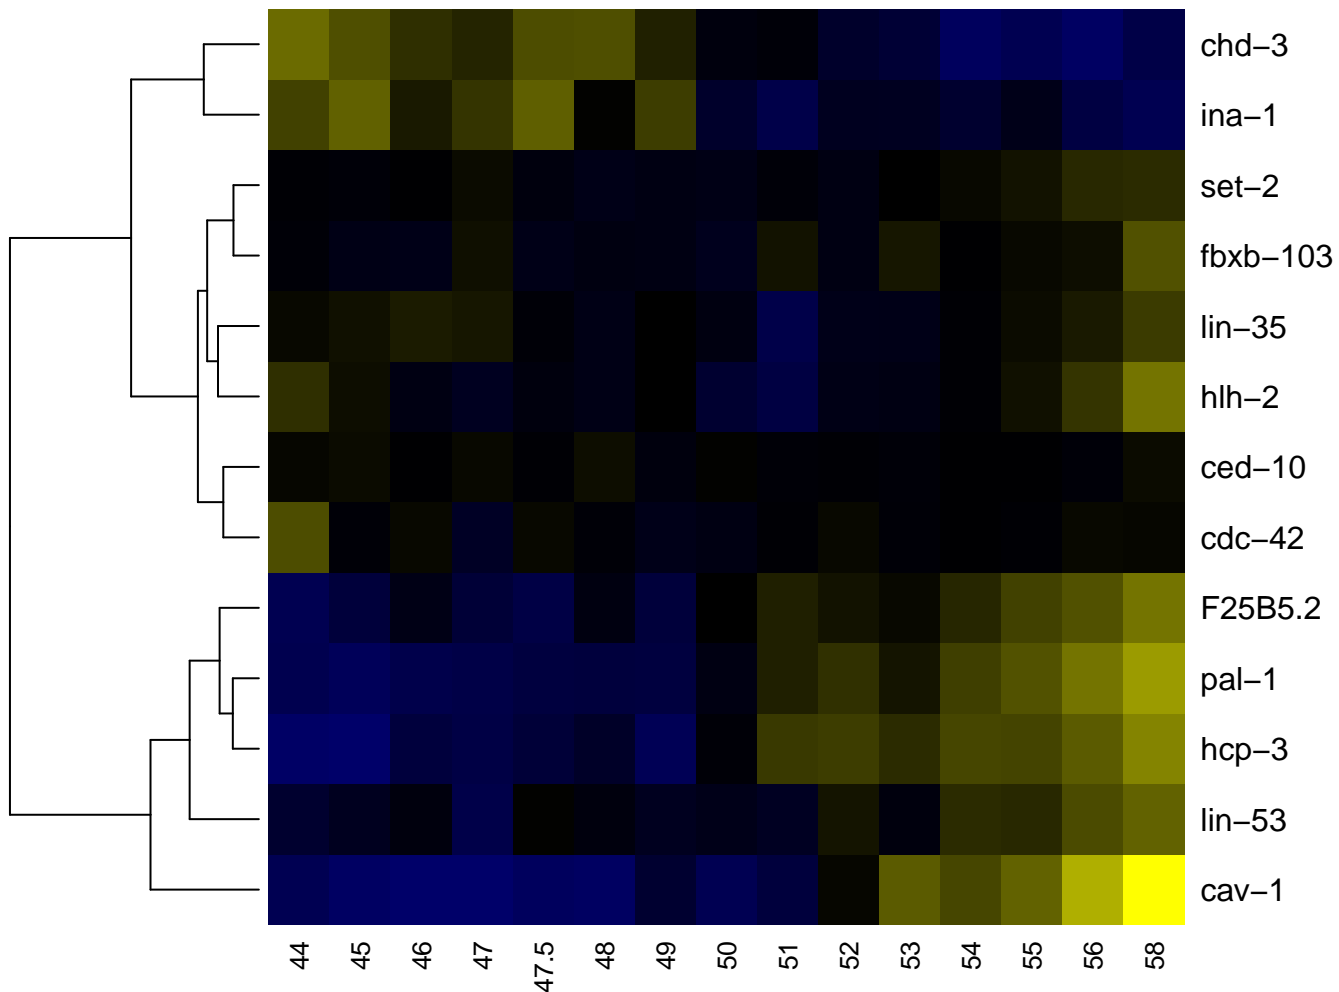

# Caaapa





# Caaapp

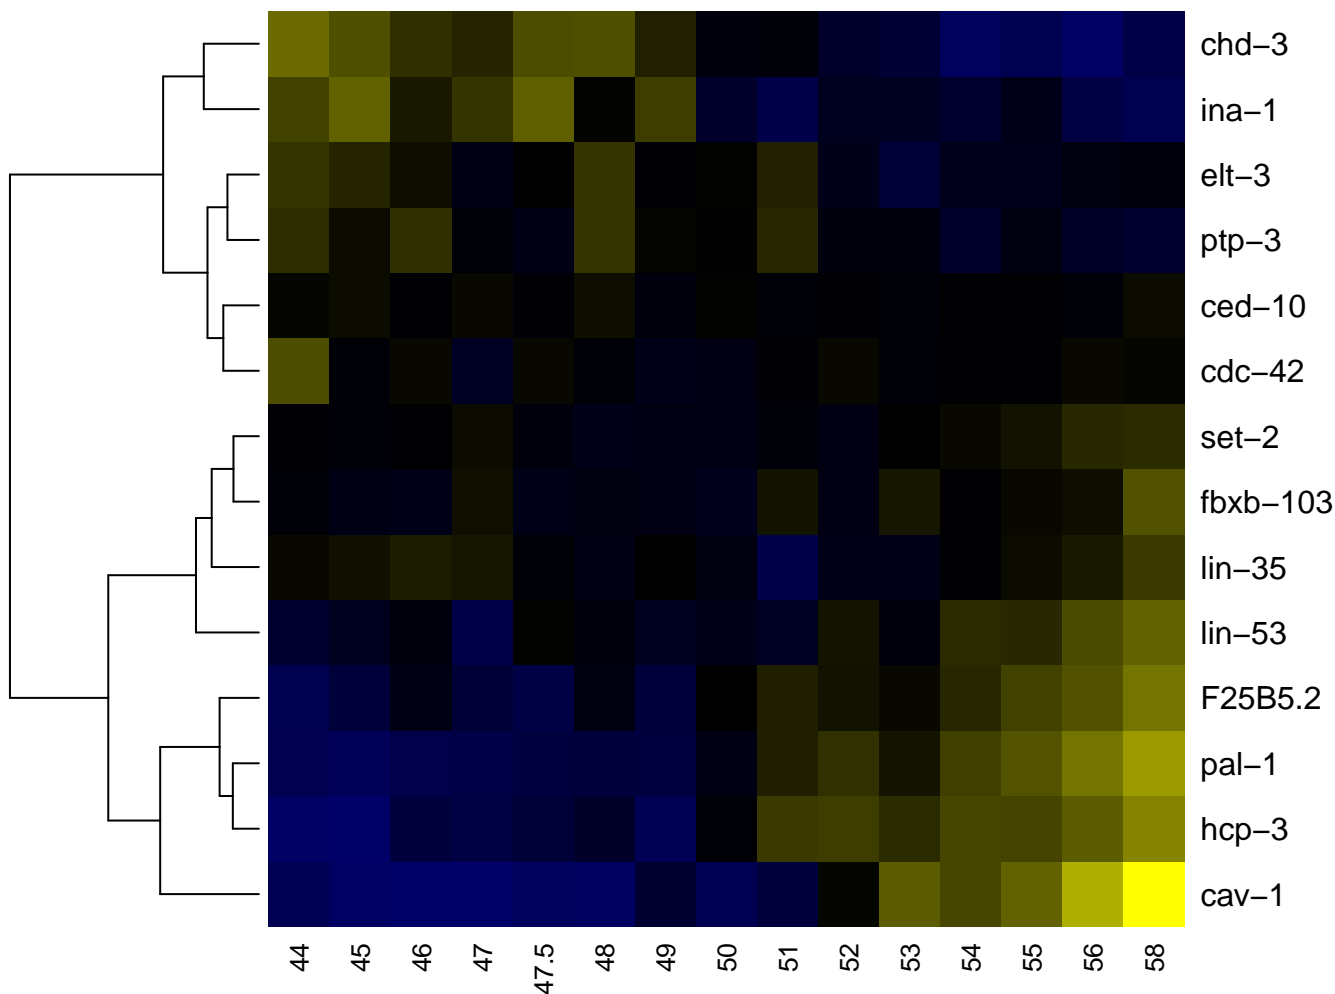

# Caap

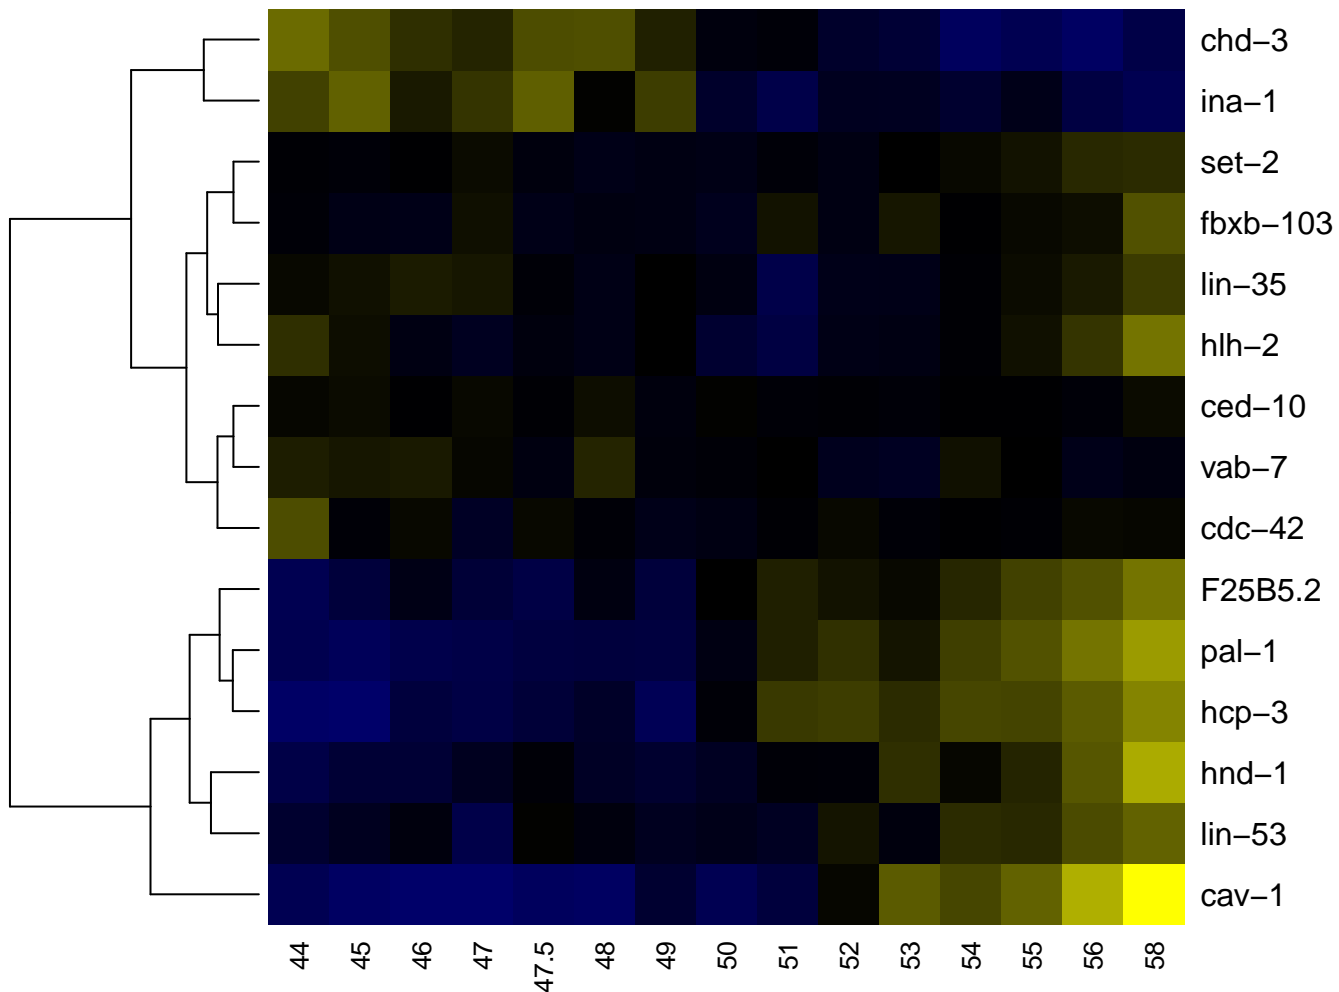

# Caapa

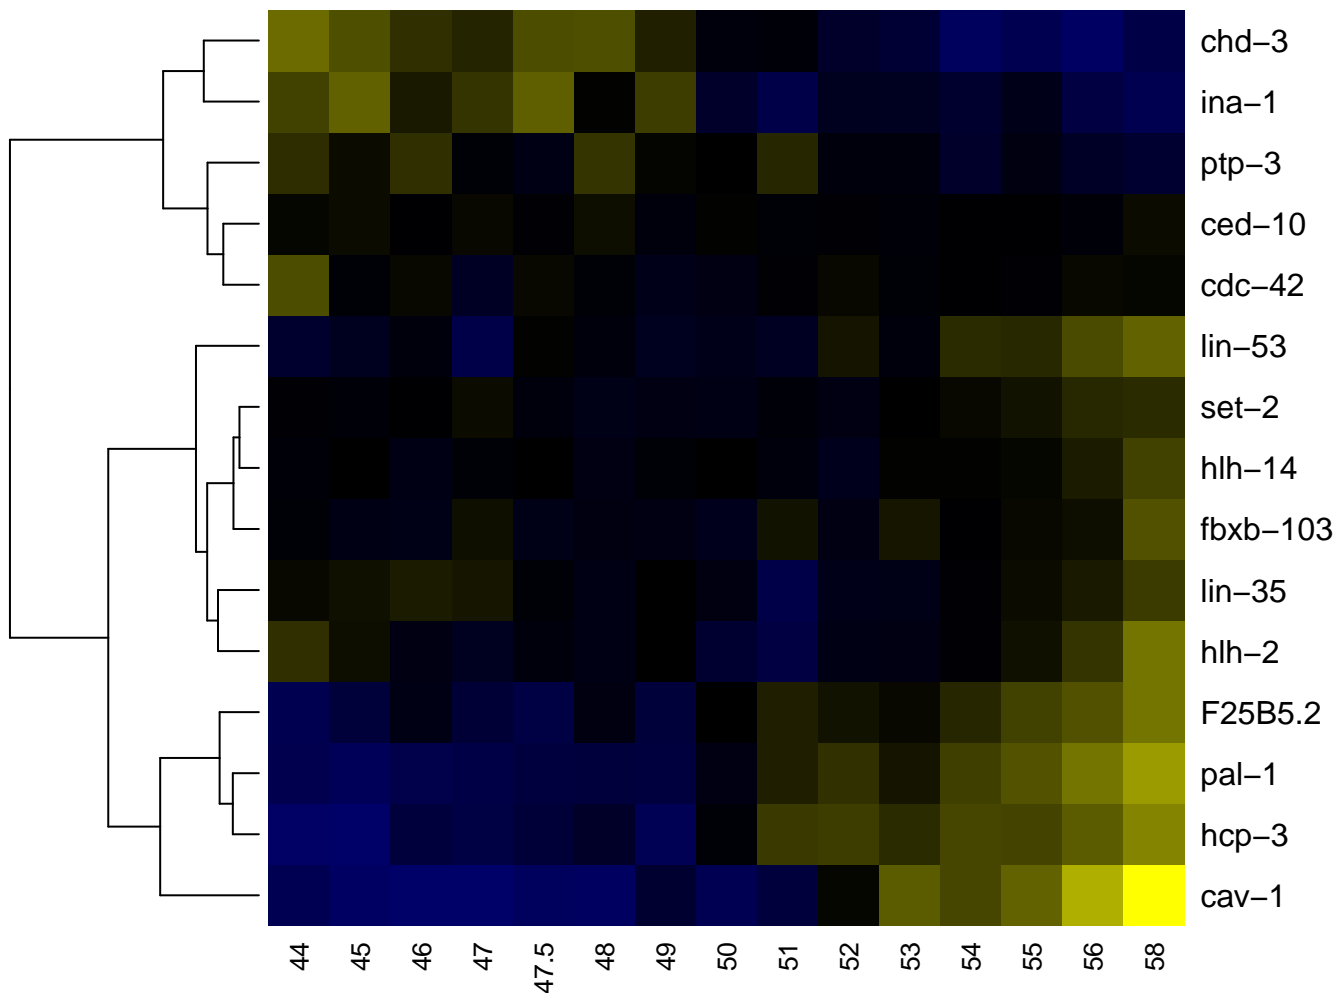

# Caapap

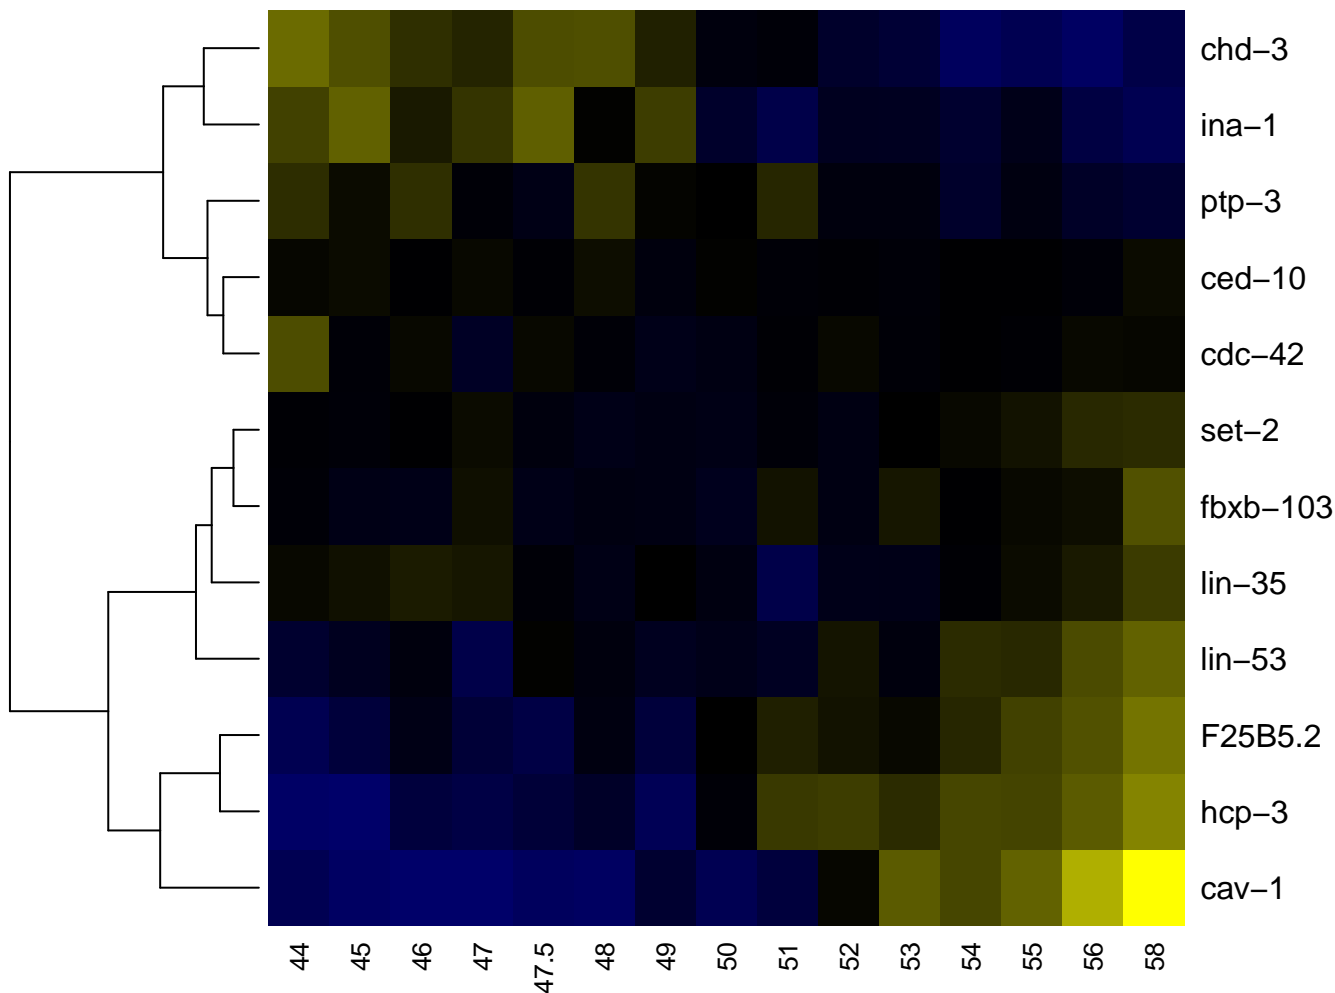

# Caapp



# Caappd

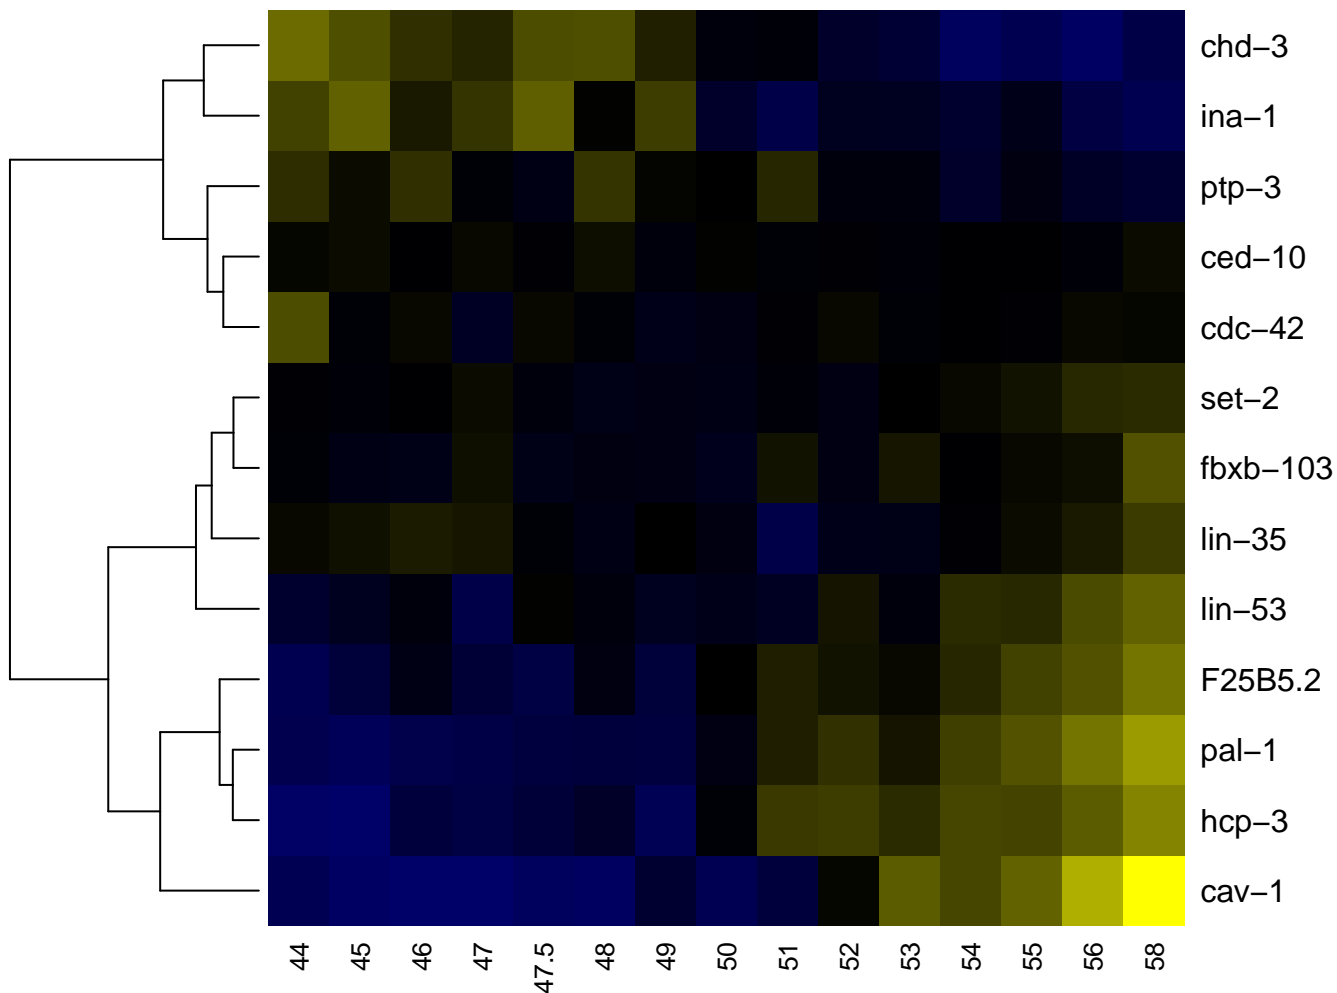

# CANL

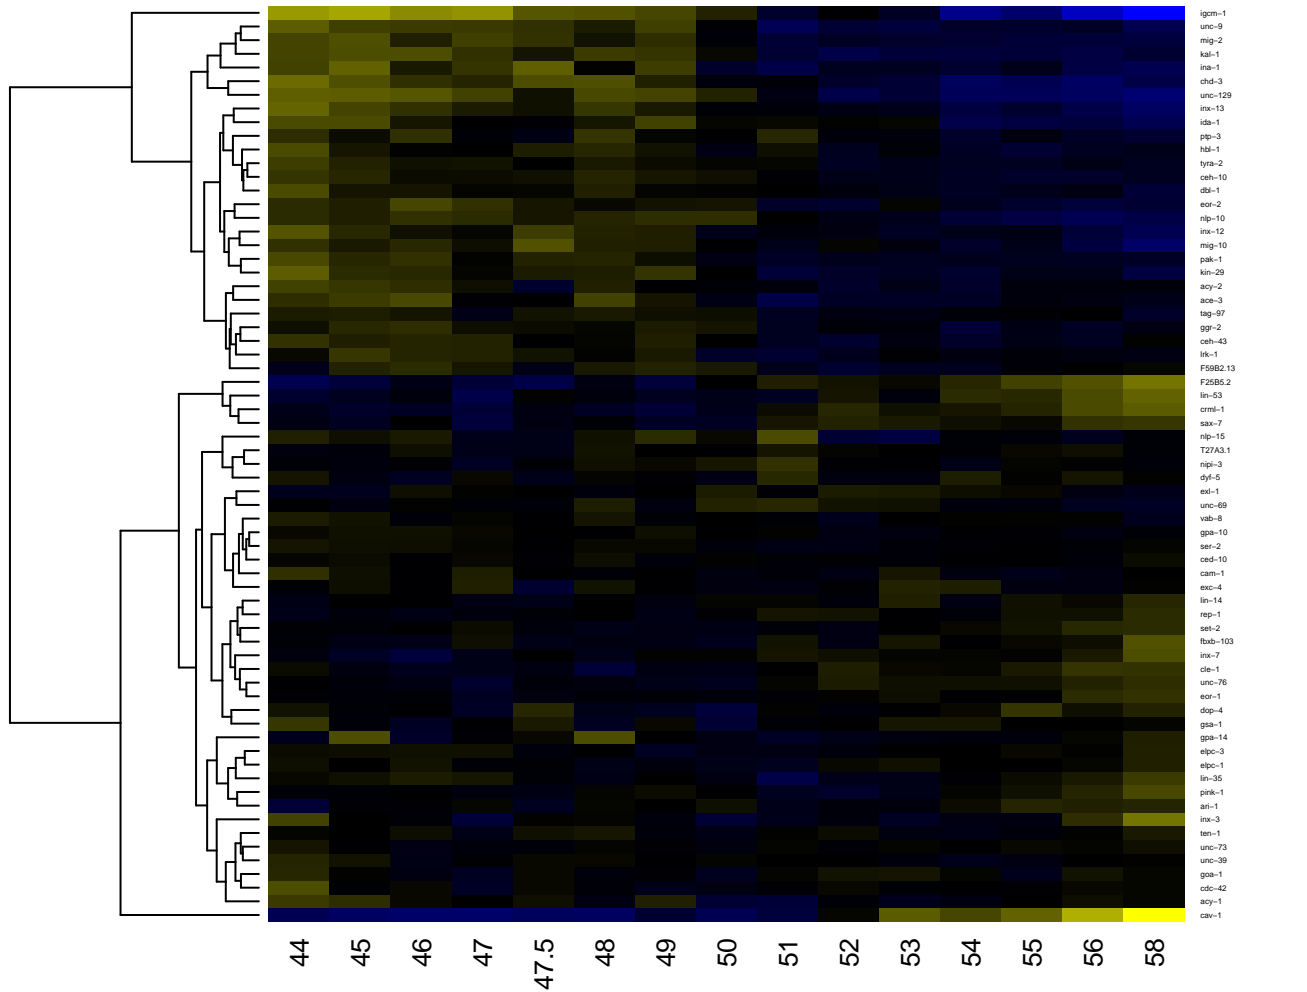

-2

-1

0

1

2

# CANR

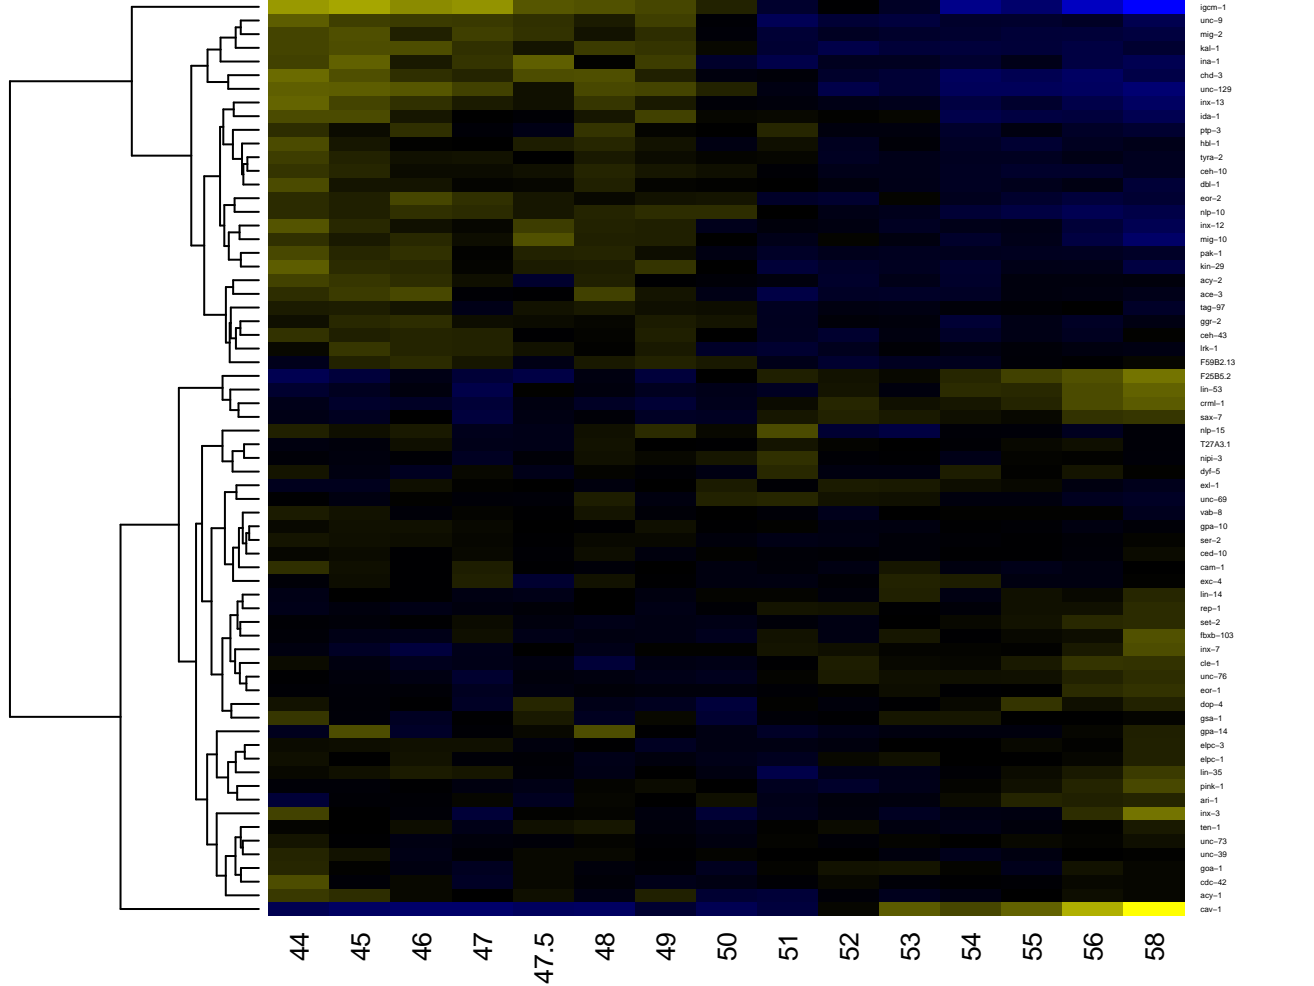

-2

-1

0

1

2



# Cap

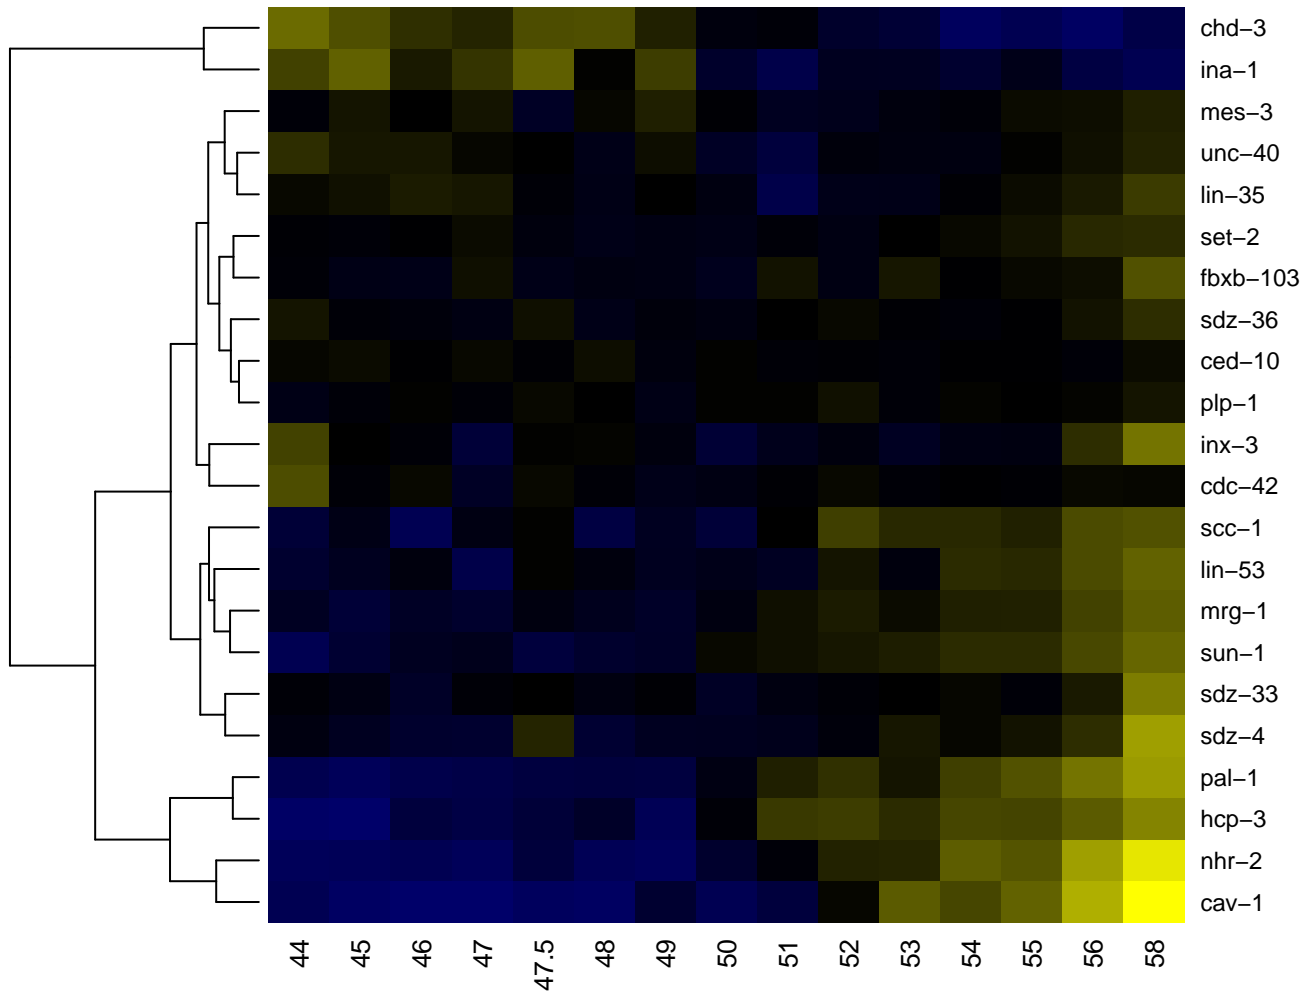

# Capa

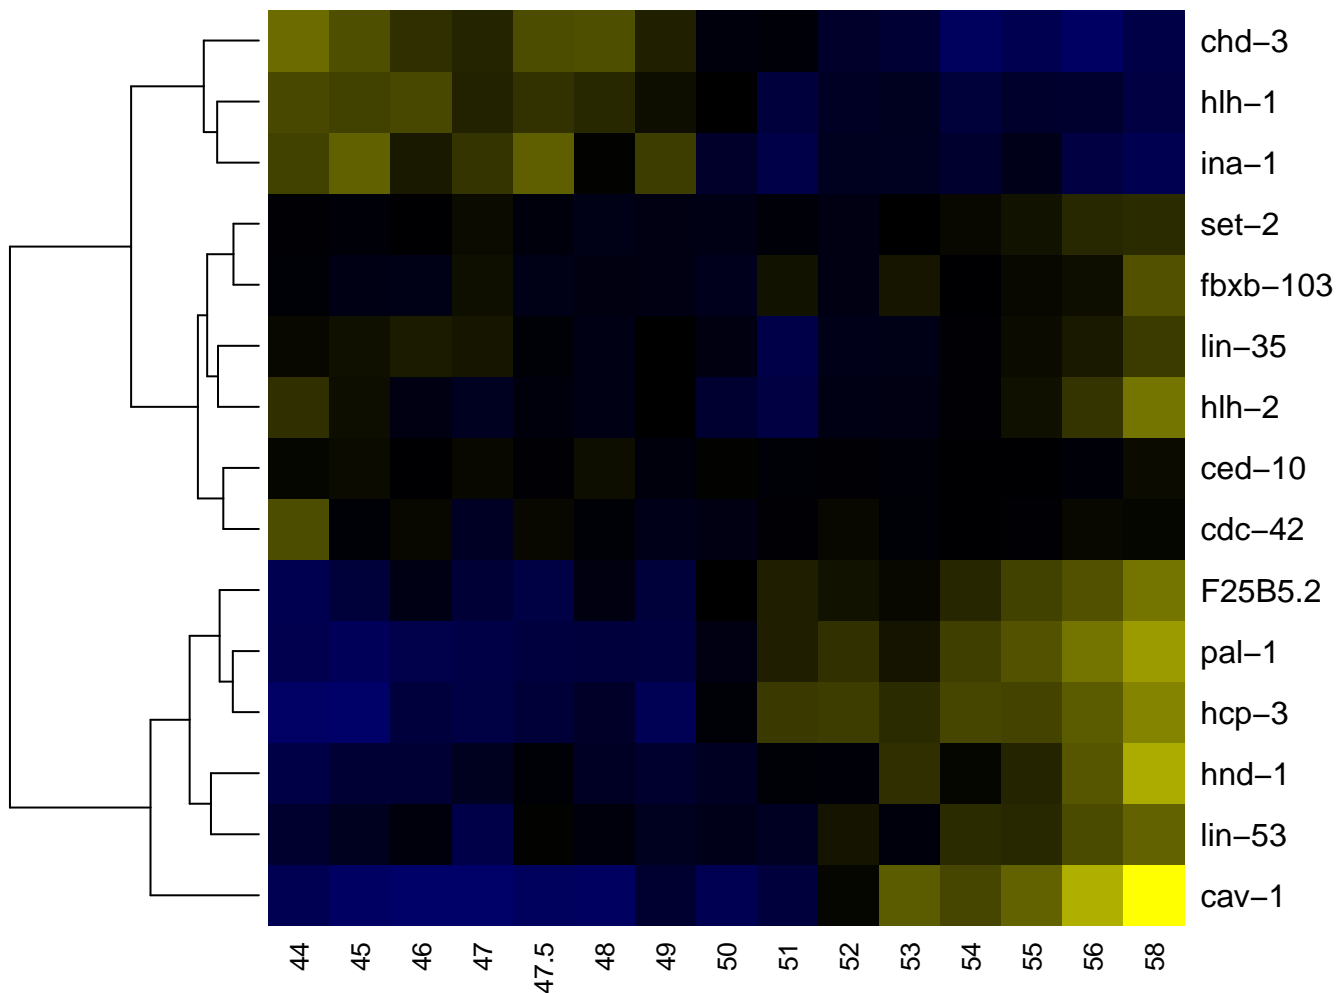

# Capaa



# Capaaa







# Capaap



# Capaapa

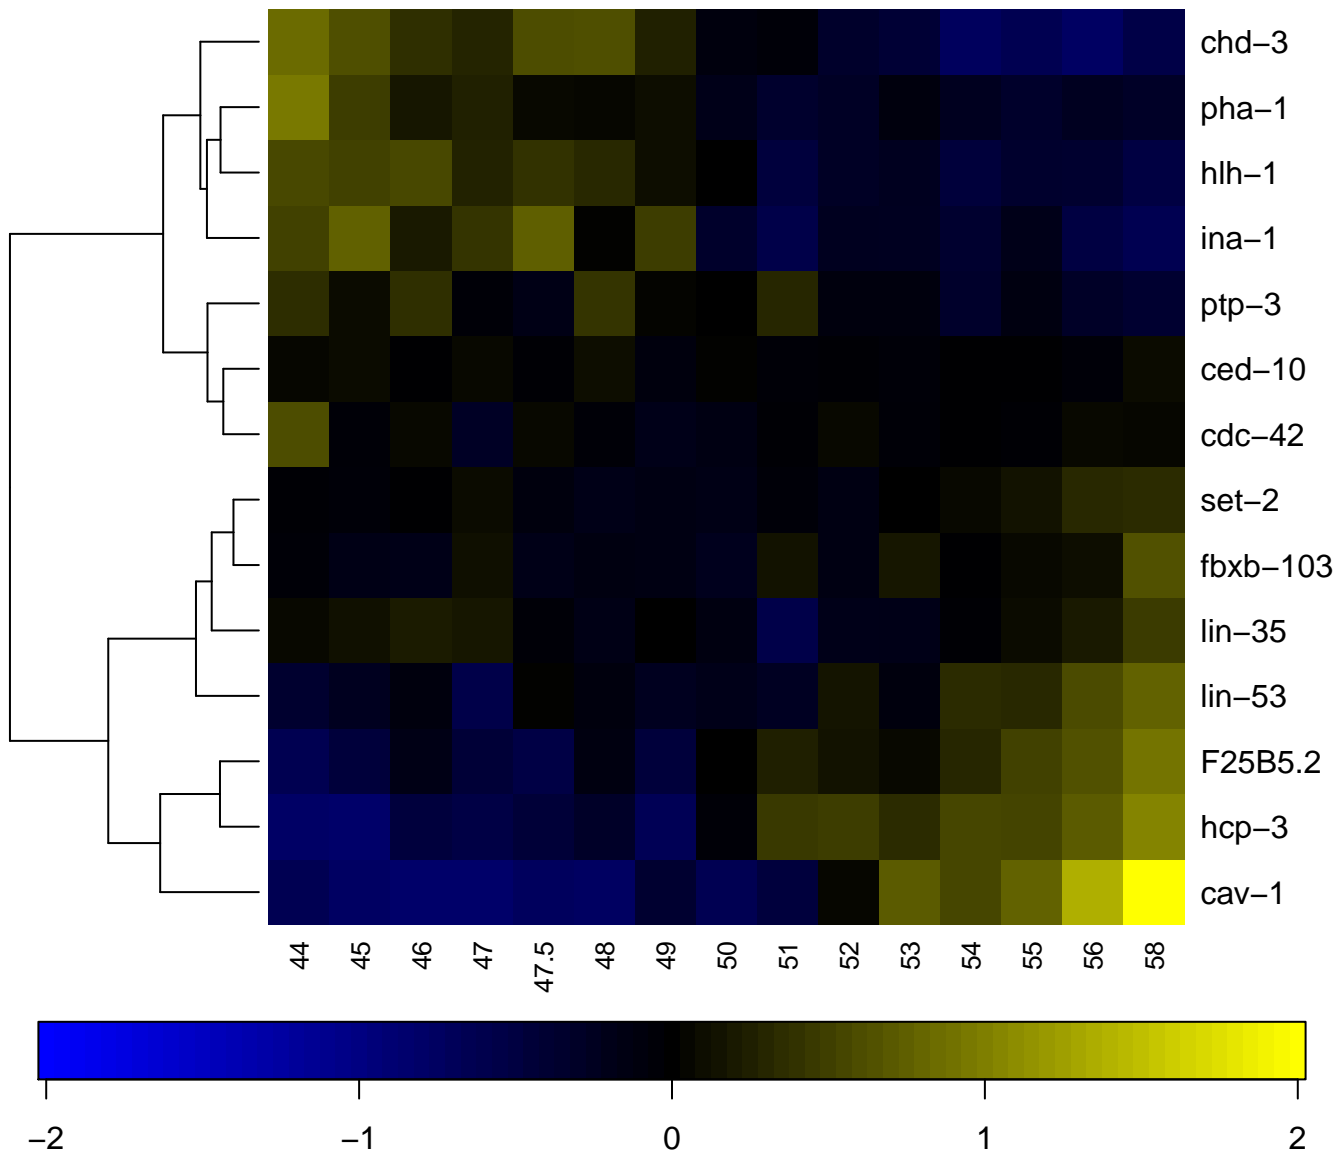





# Capap



# Capapa

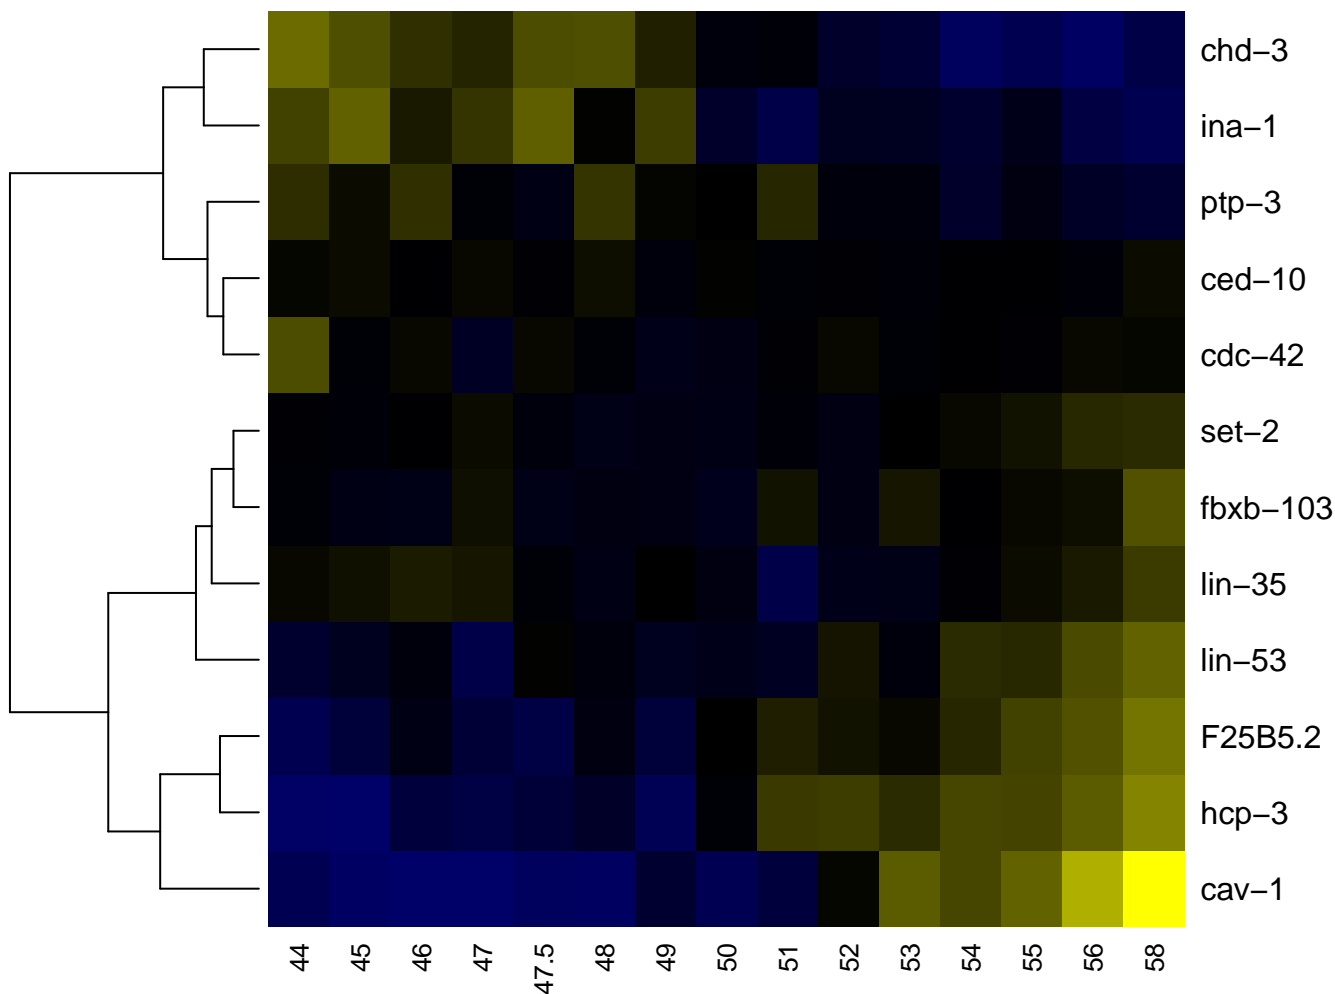



# Capapap

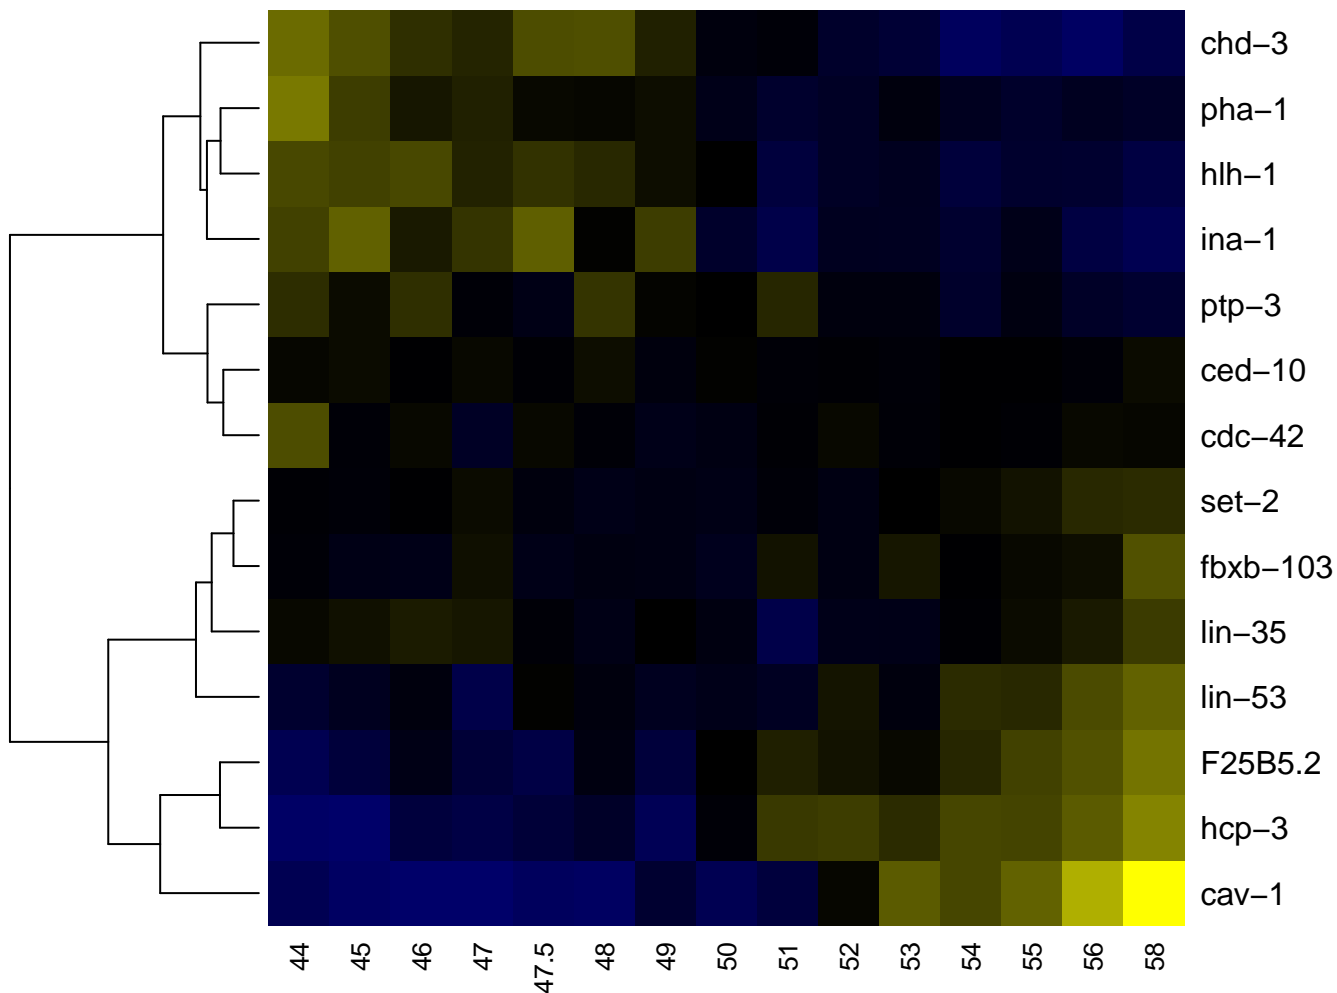



# Capappa

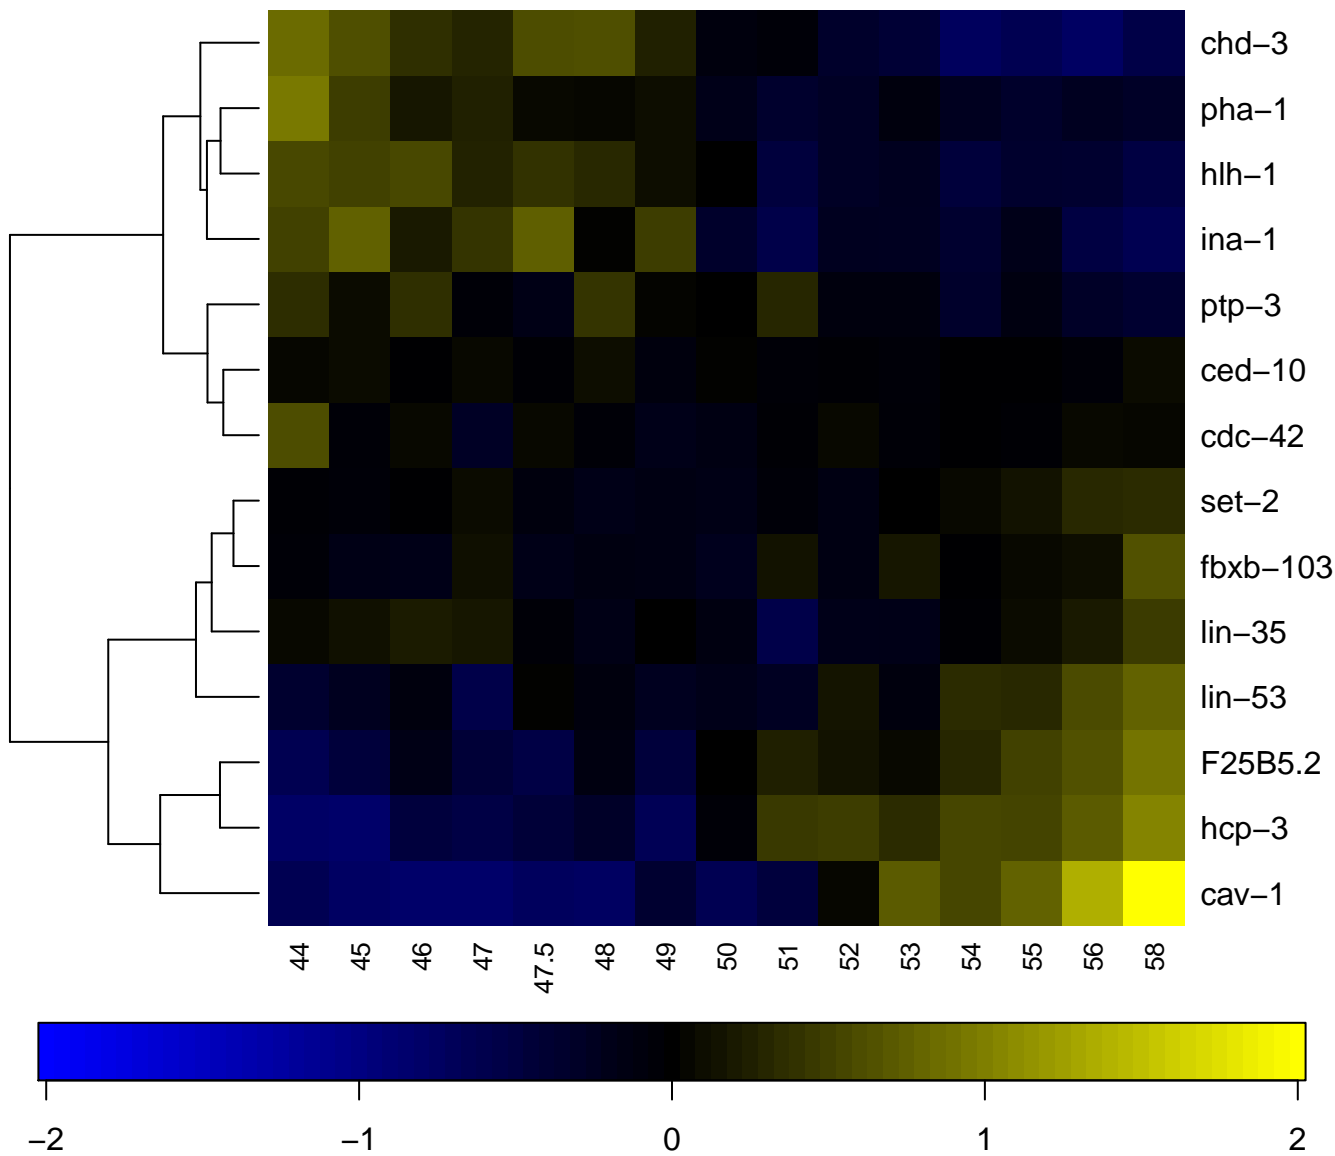

# Capappp

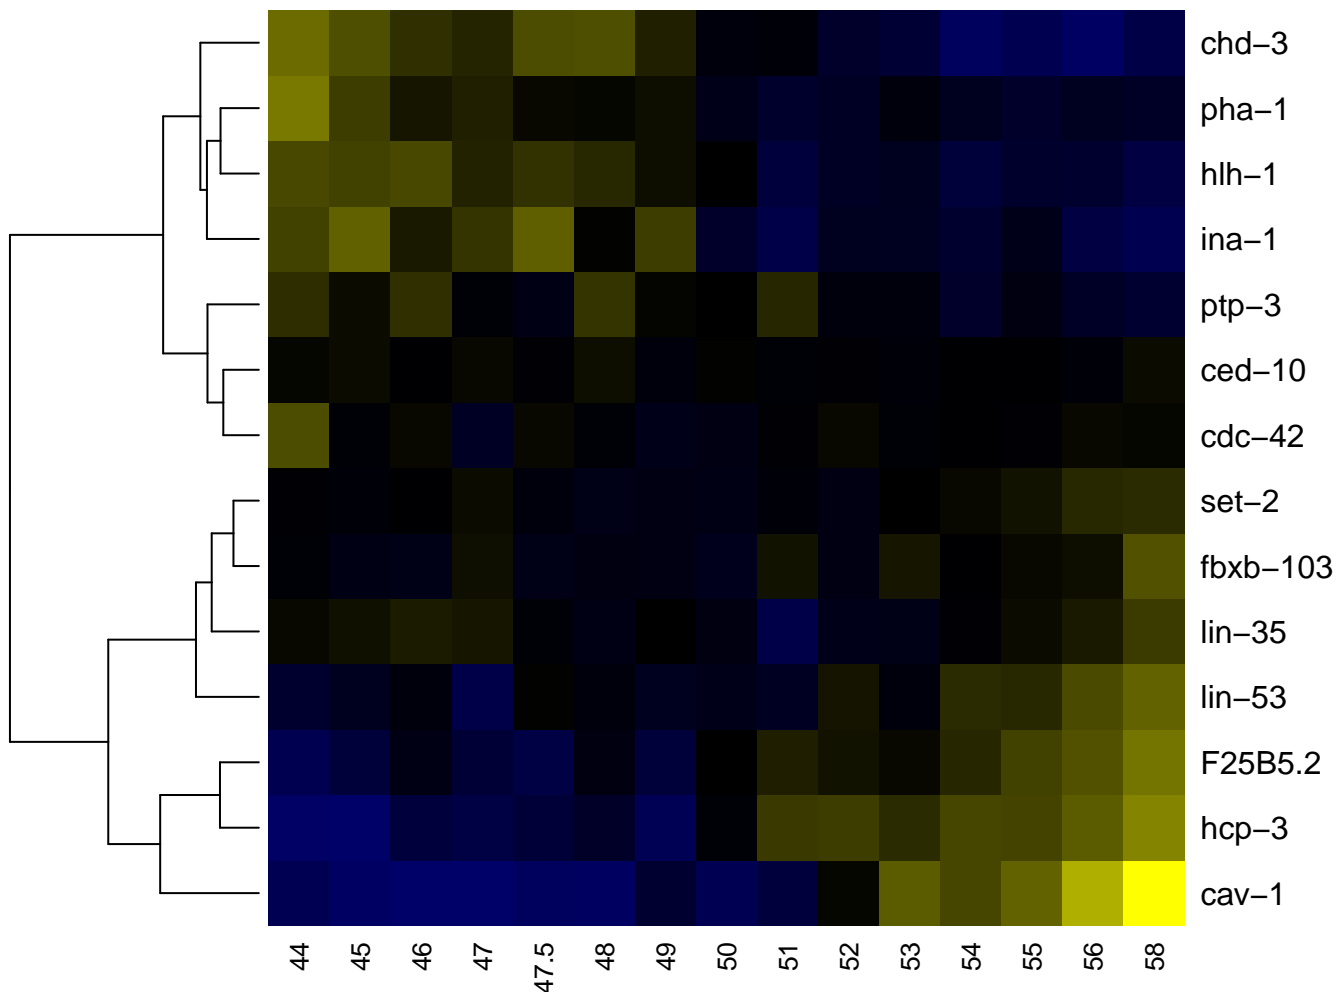

-2

-1

0

1

2



# Capp

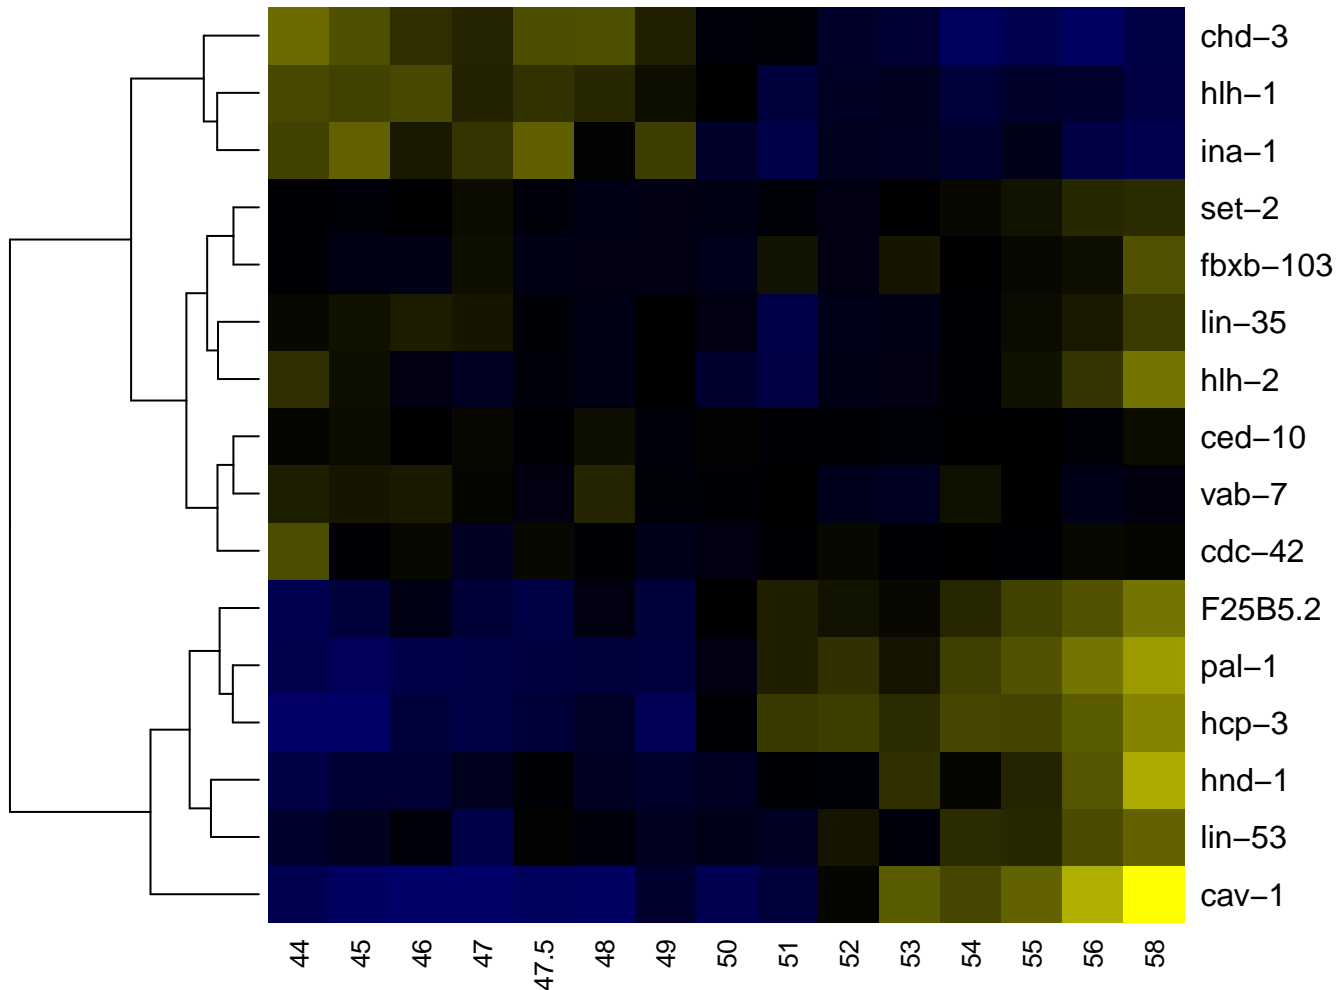

# Cappa



# Cappaa

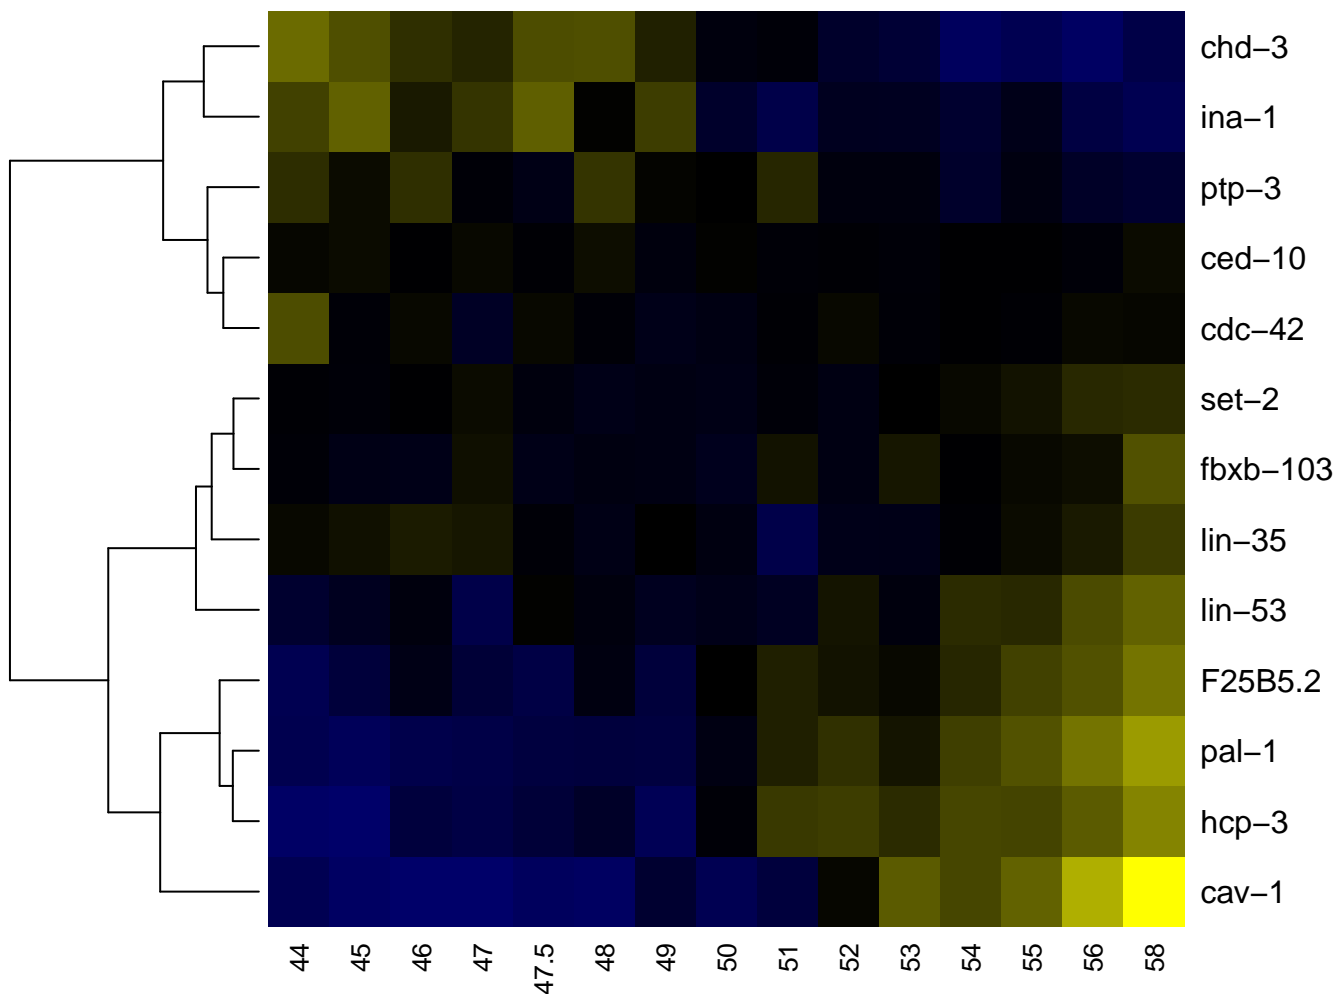





# Cappap

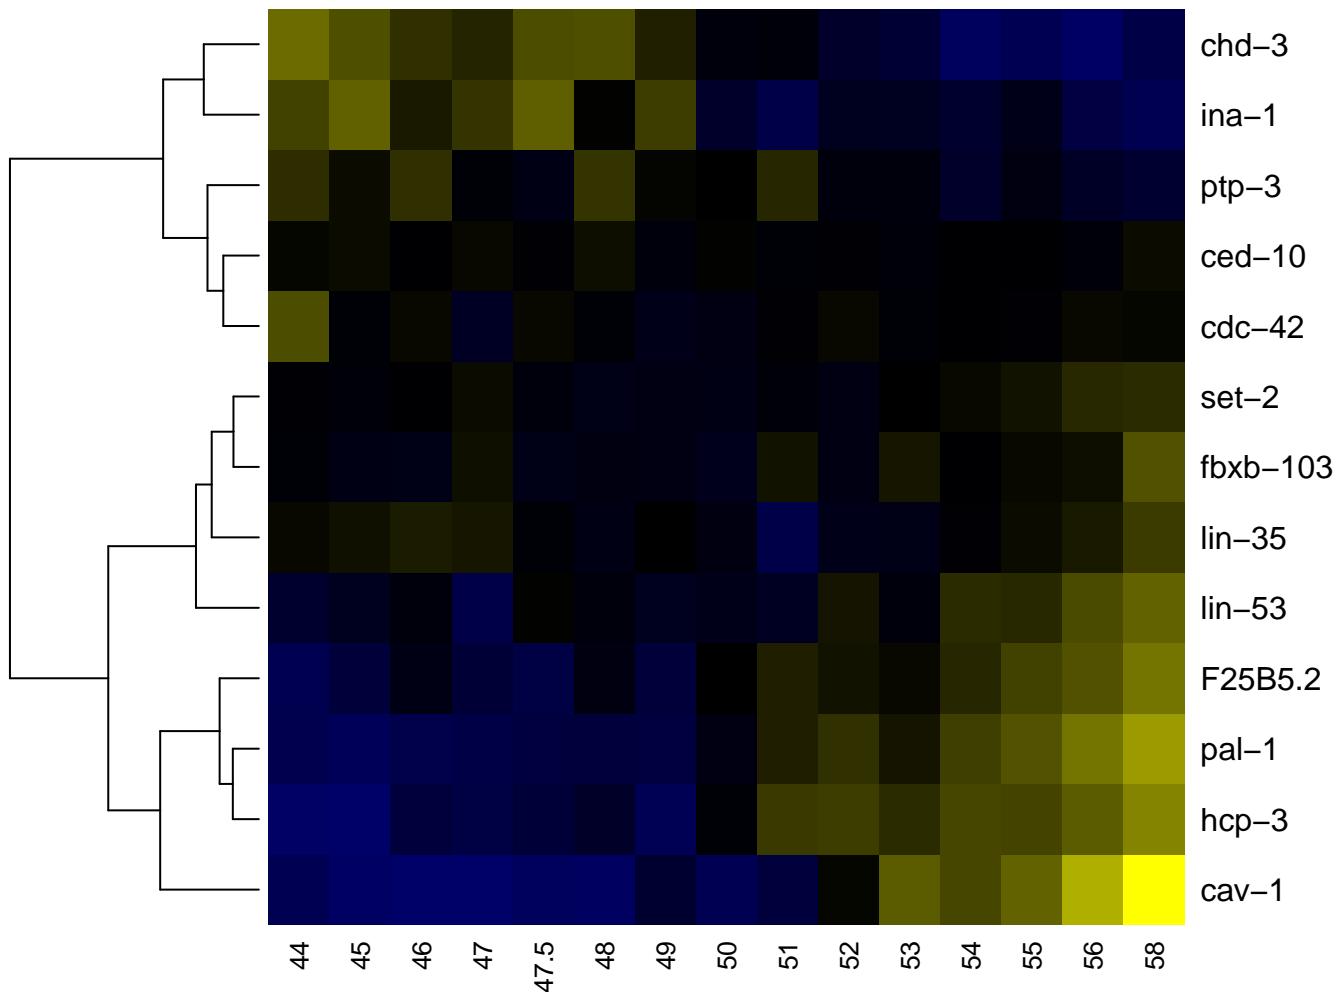

# Cappapa

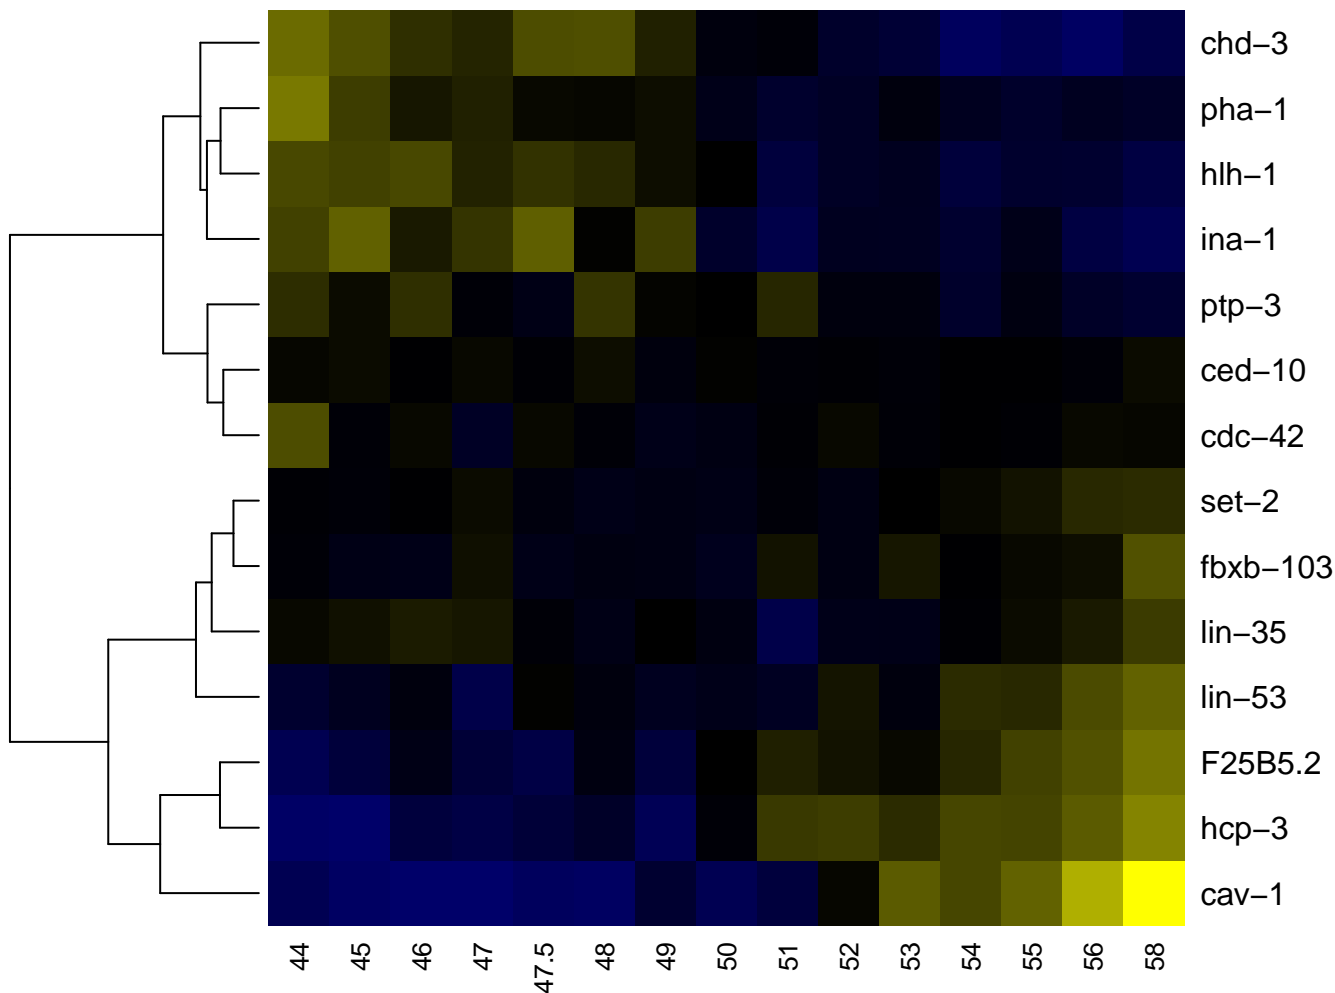

-2

-1

0

1

2







# Cappa







# Capppp

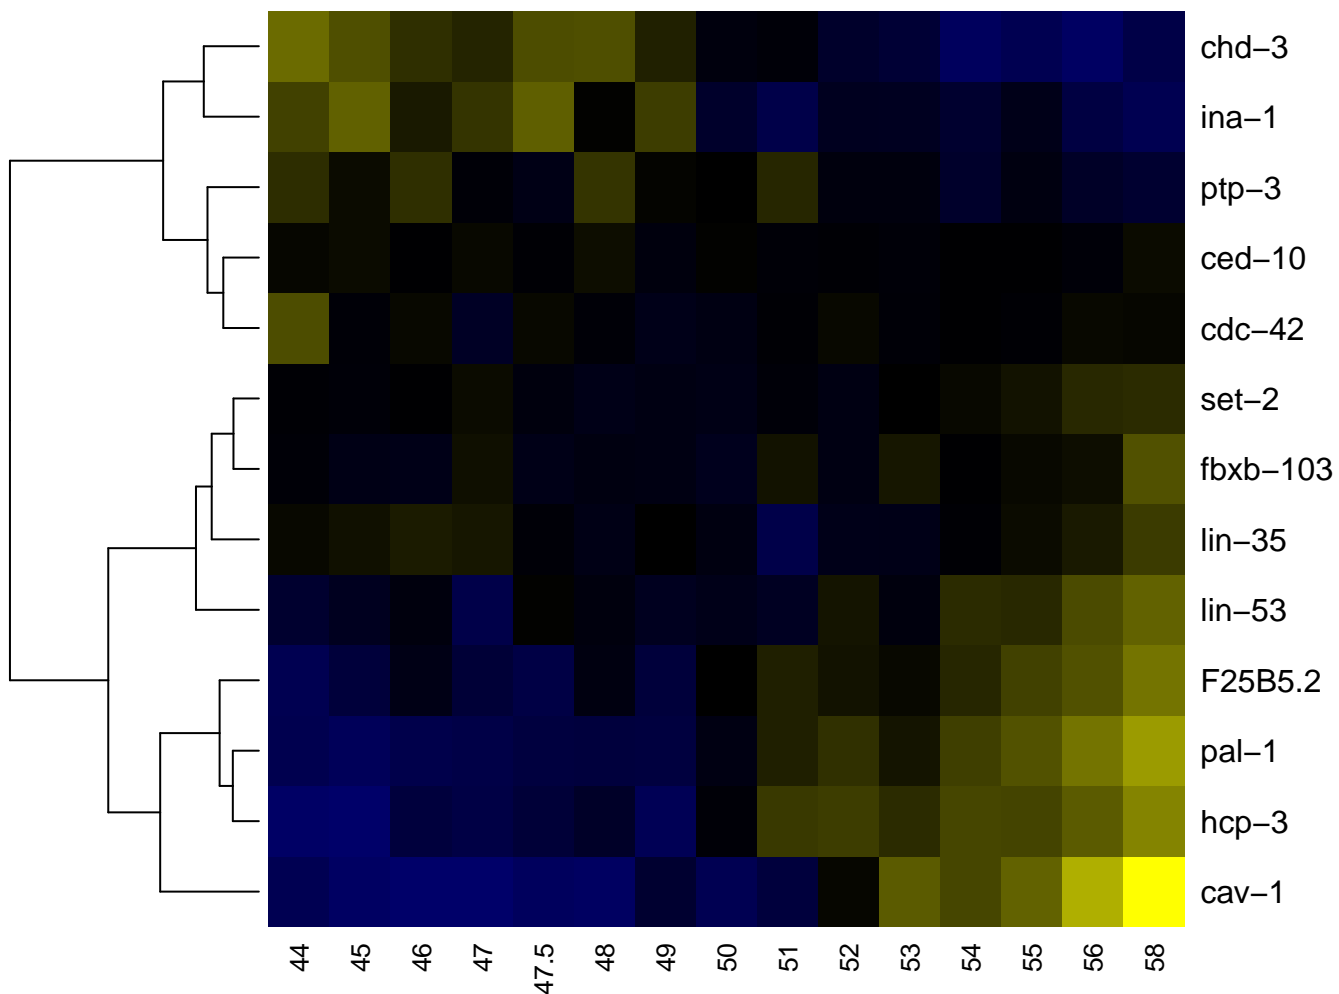

-2

-1

0

1

2

# Capppppd

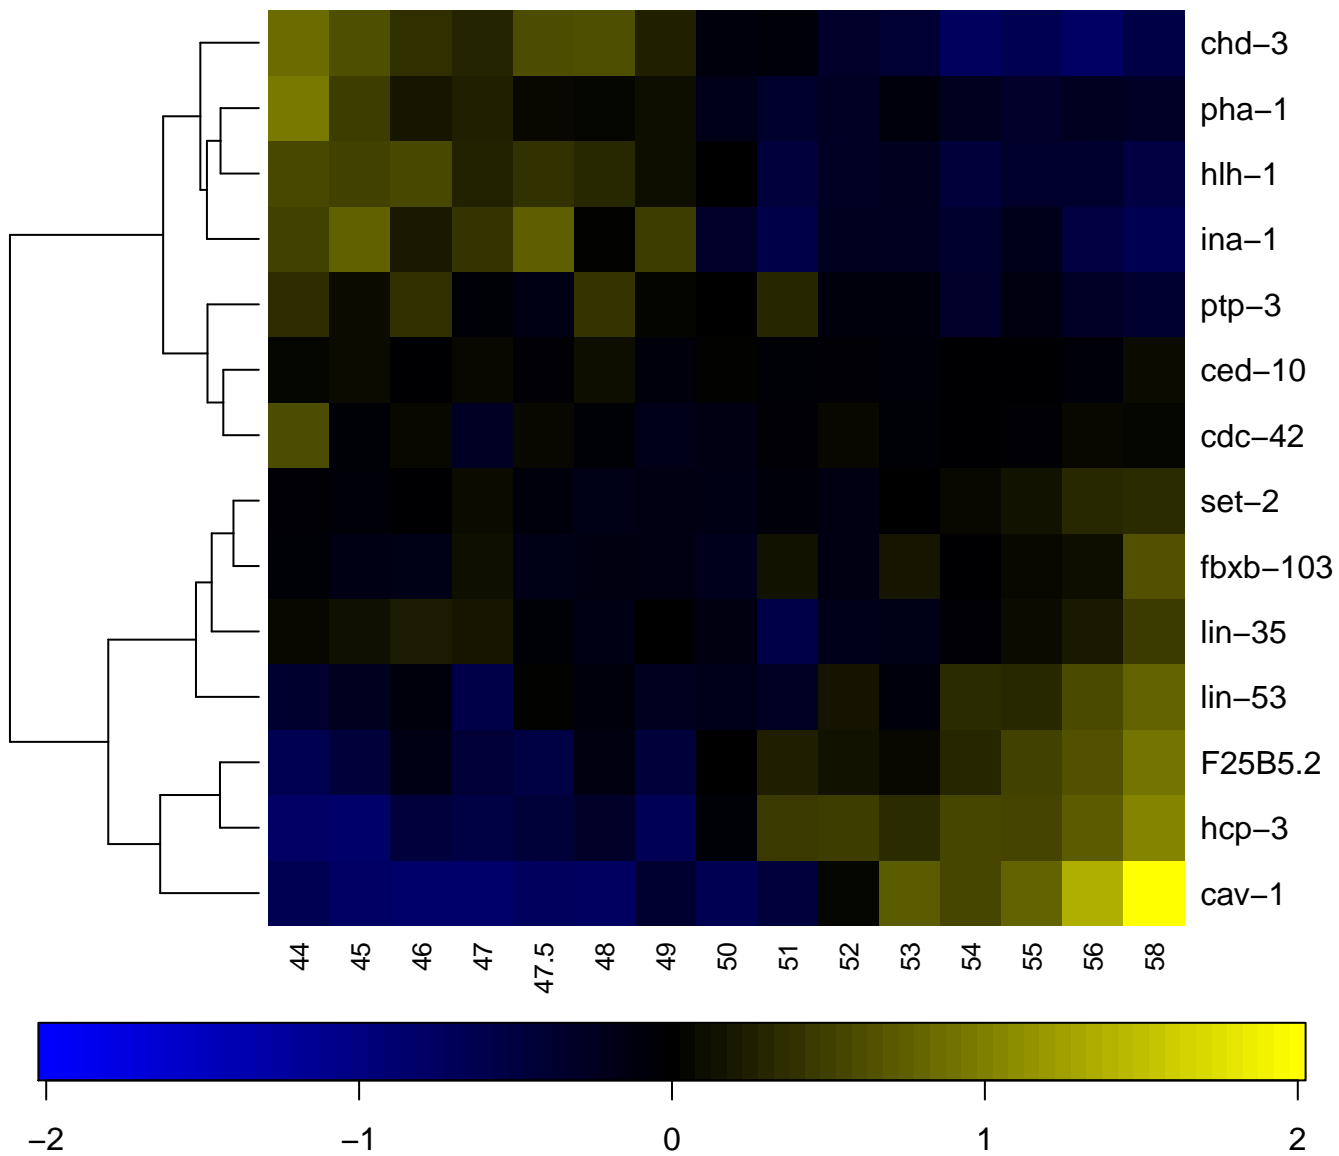

# Cappppv



# ccAL

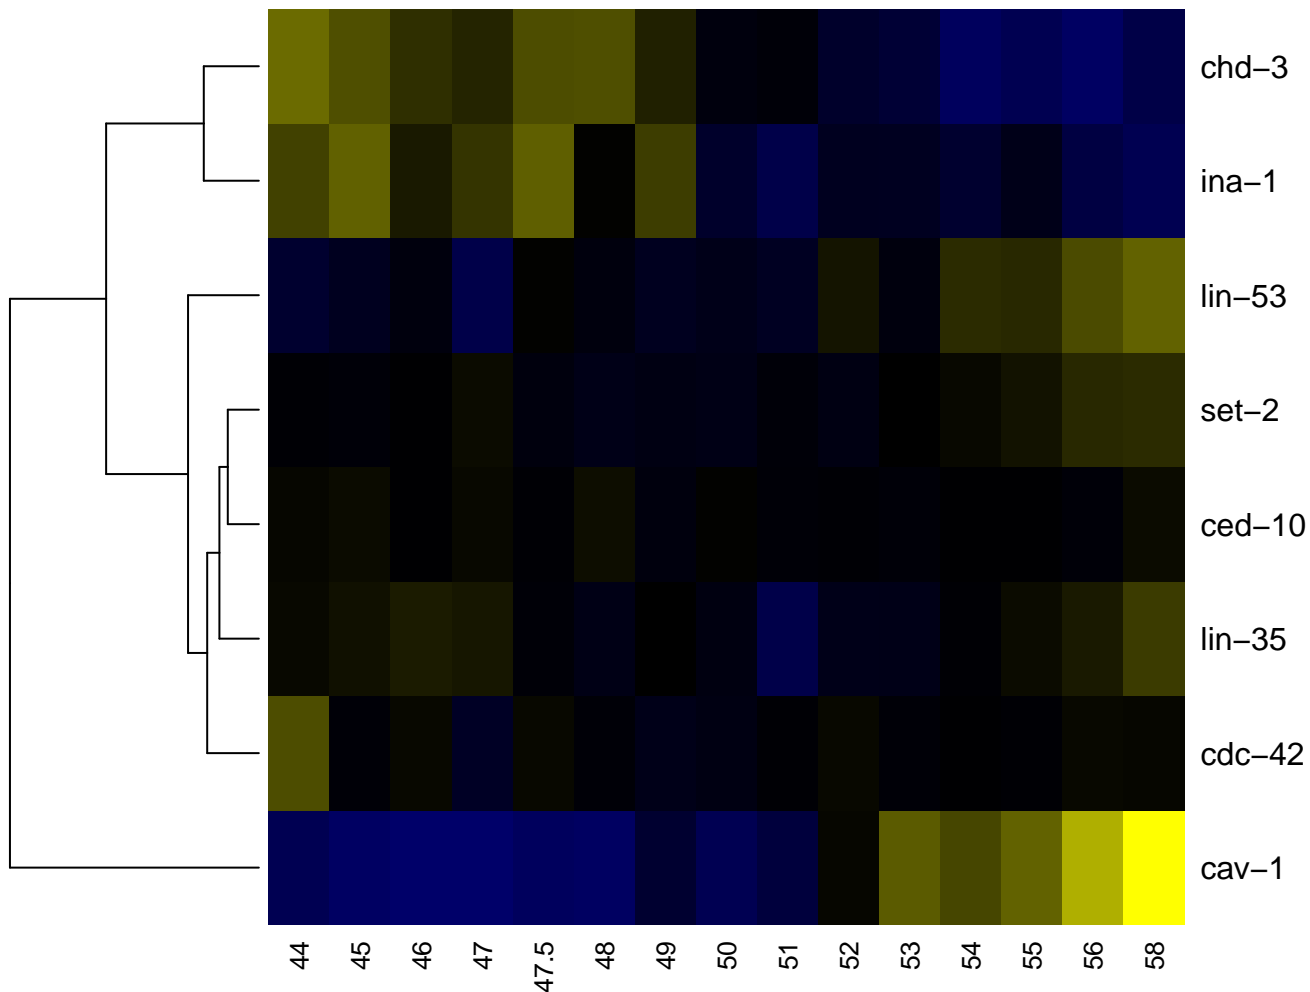

-2

-1

0

1

2



# ccAR

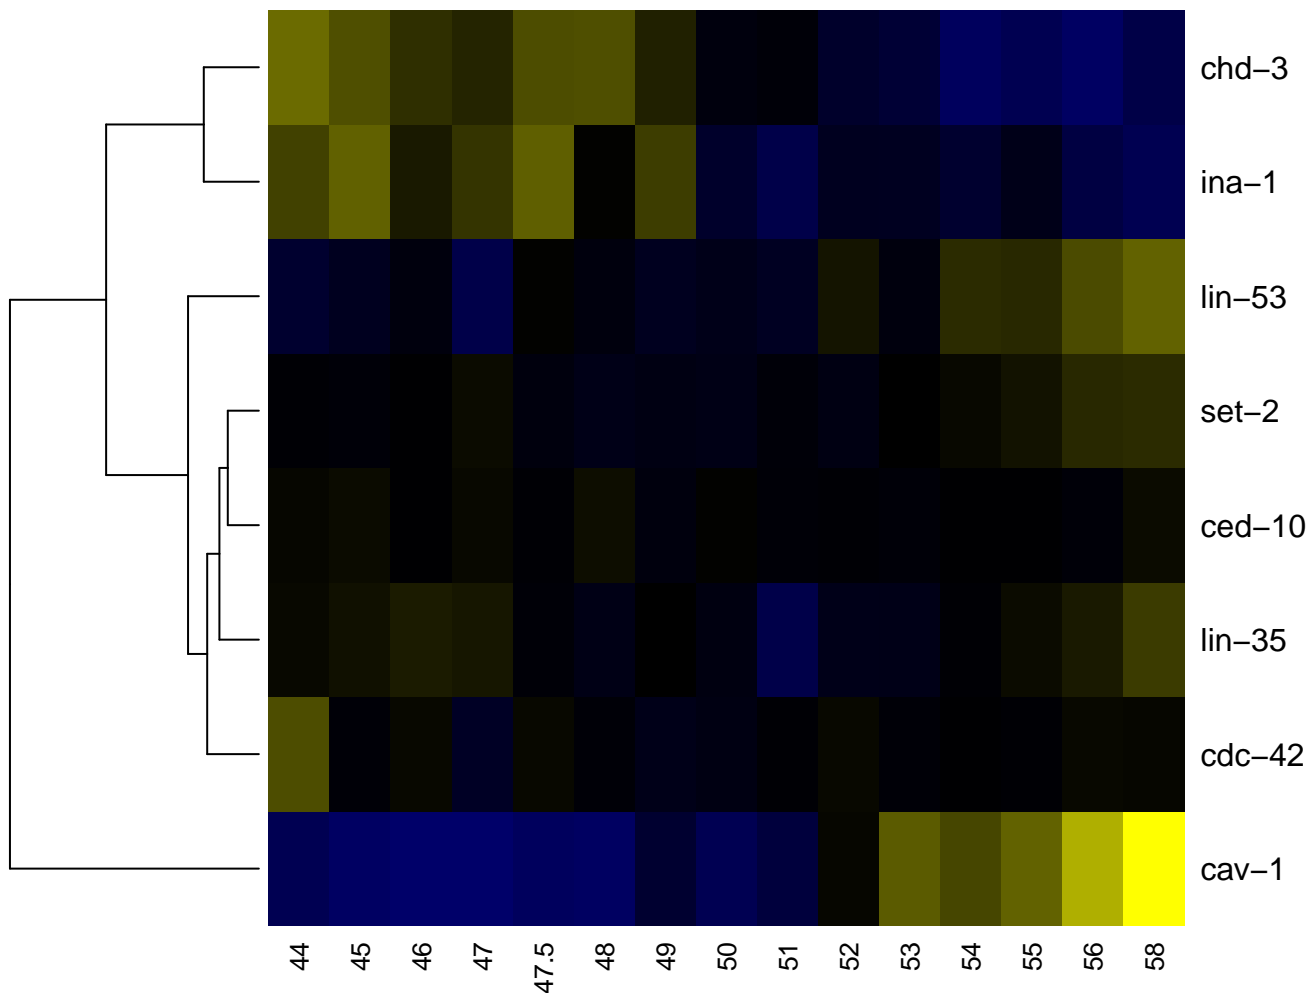

-2

-1

0

1

2

# ccPL

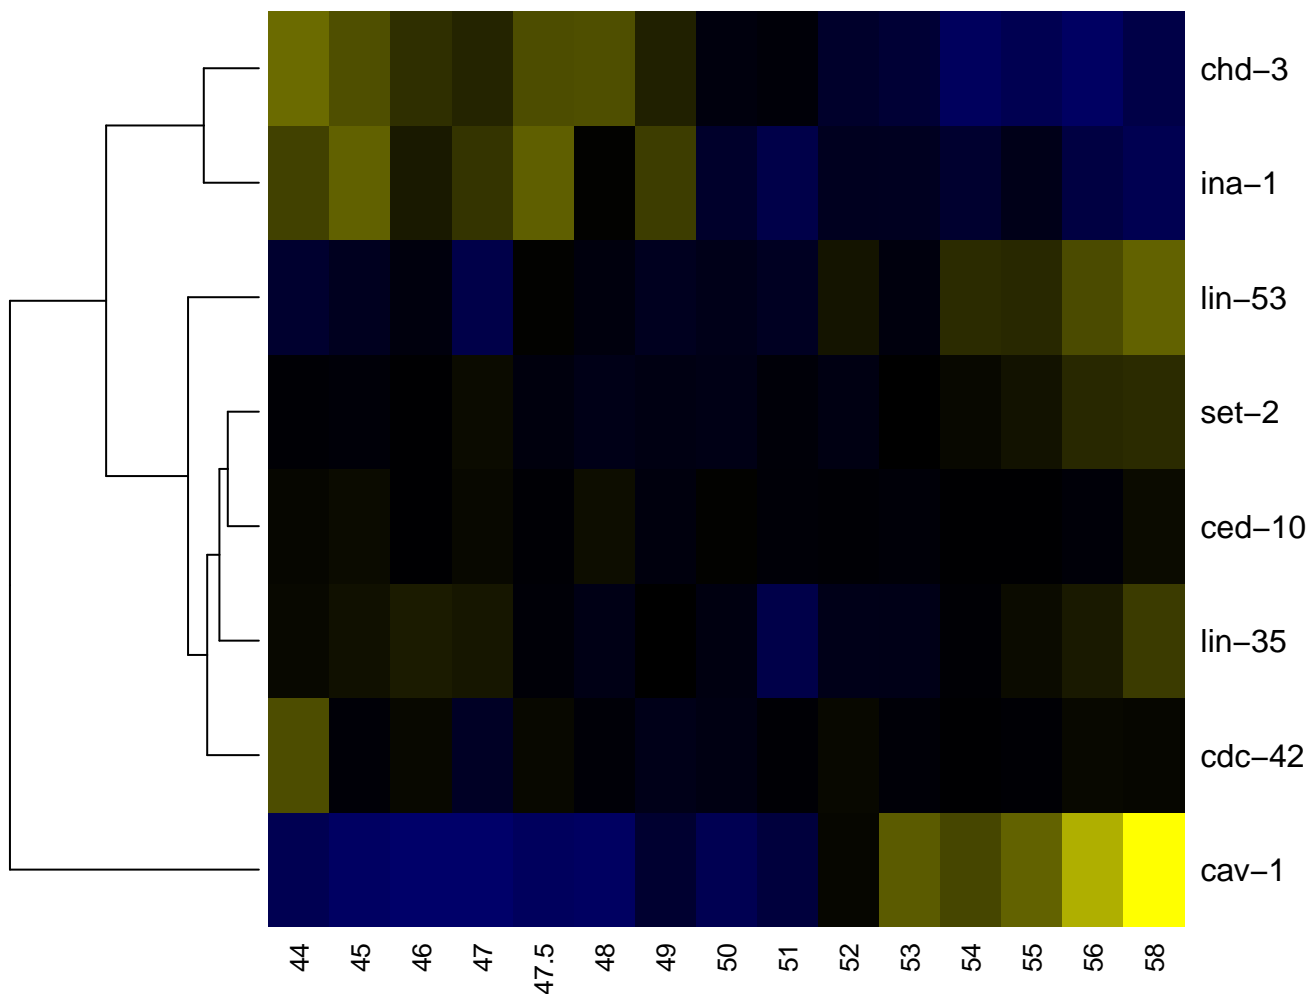

-2

-1

0

1

2

# ccPR



-2

-1

0

1

2

# Cell

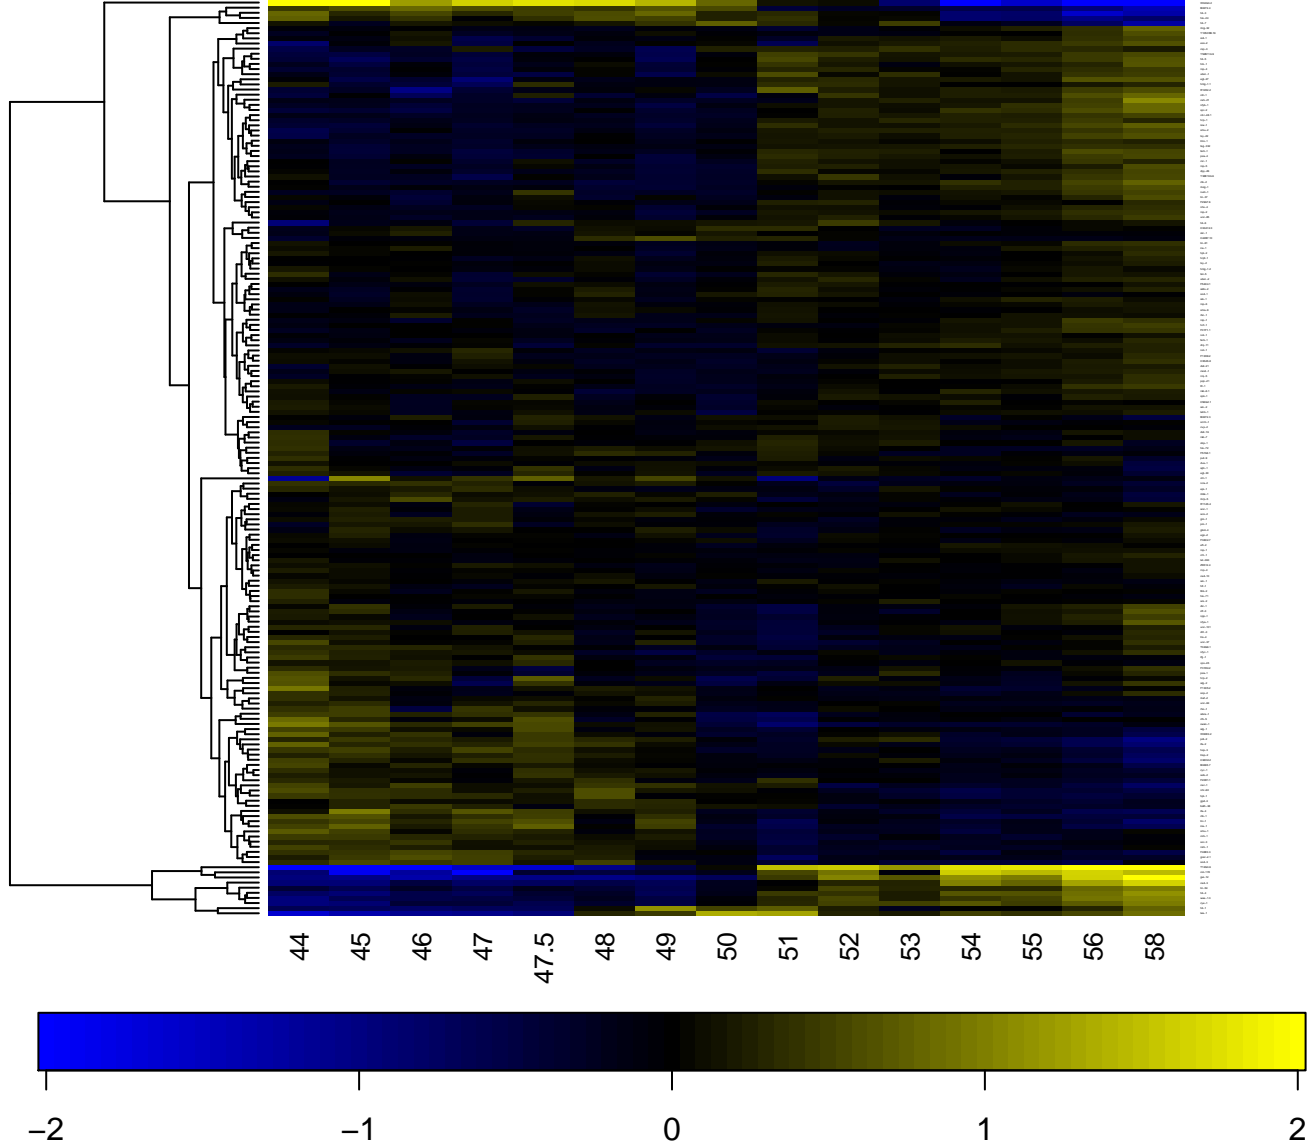

# CEMDL

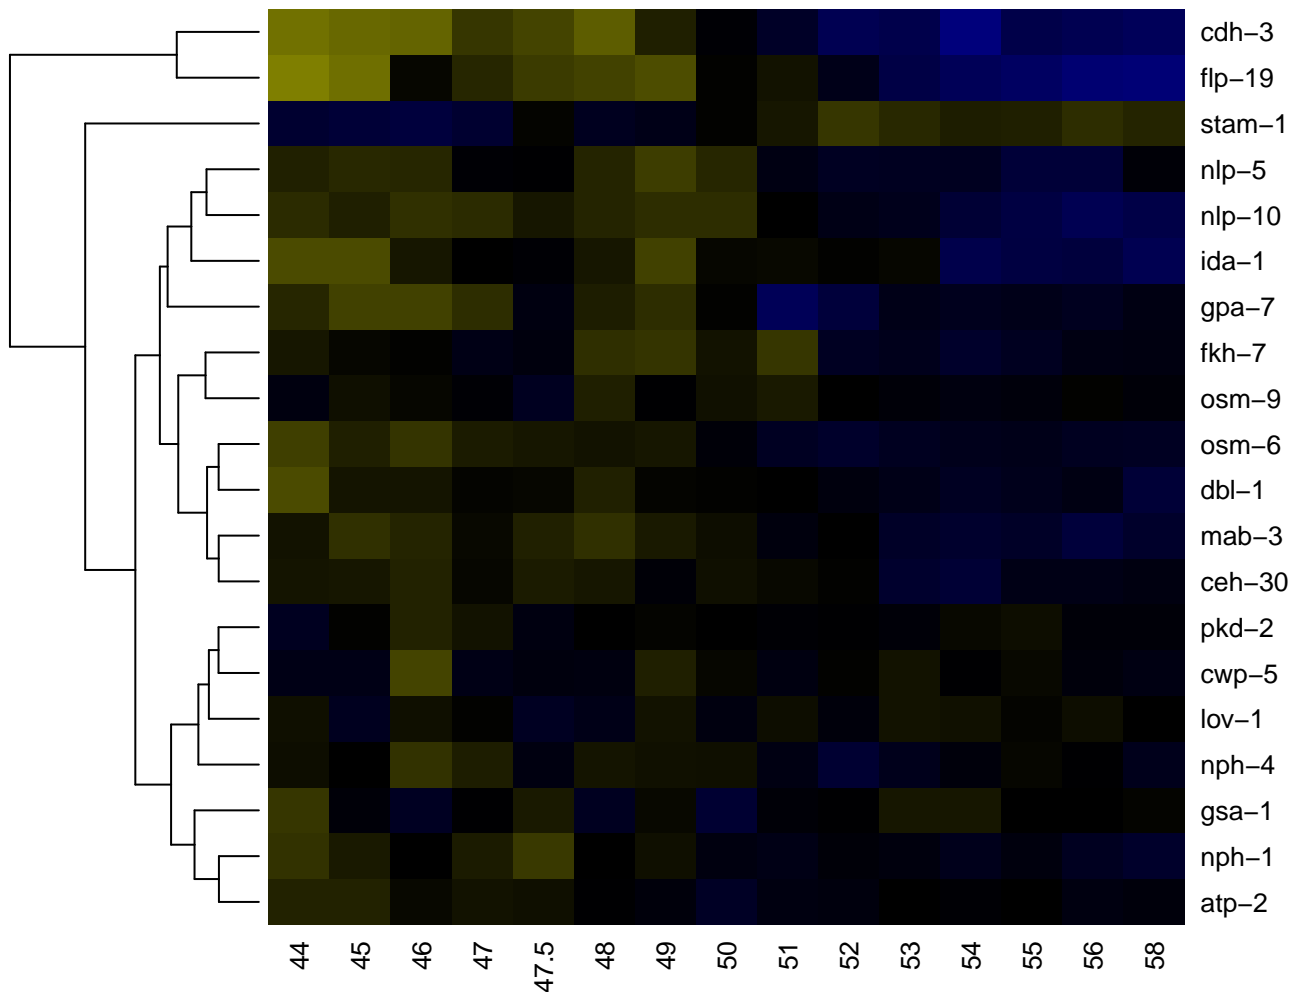

# CEMDR

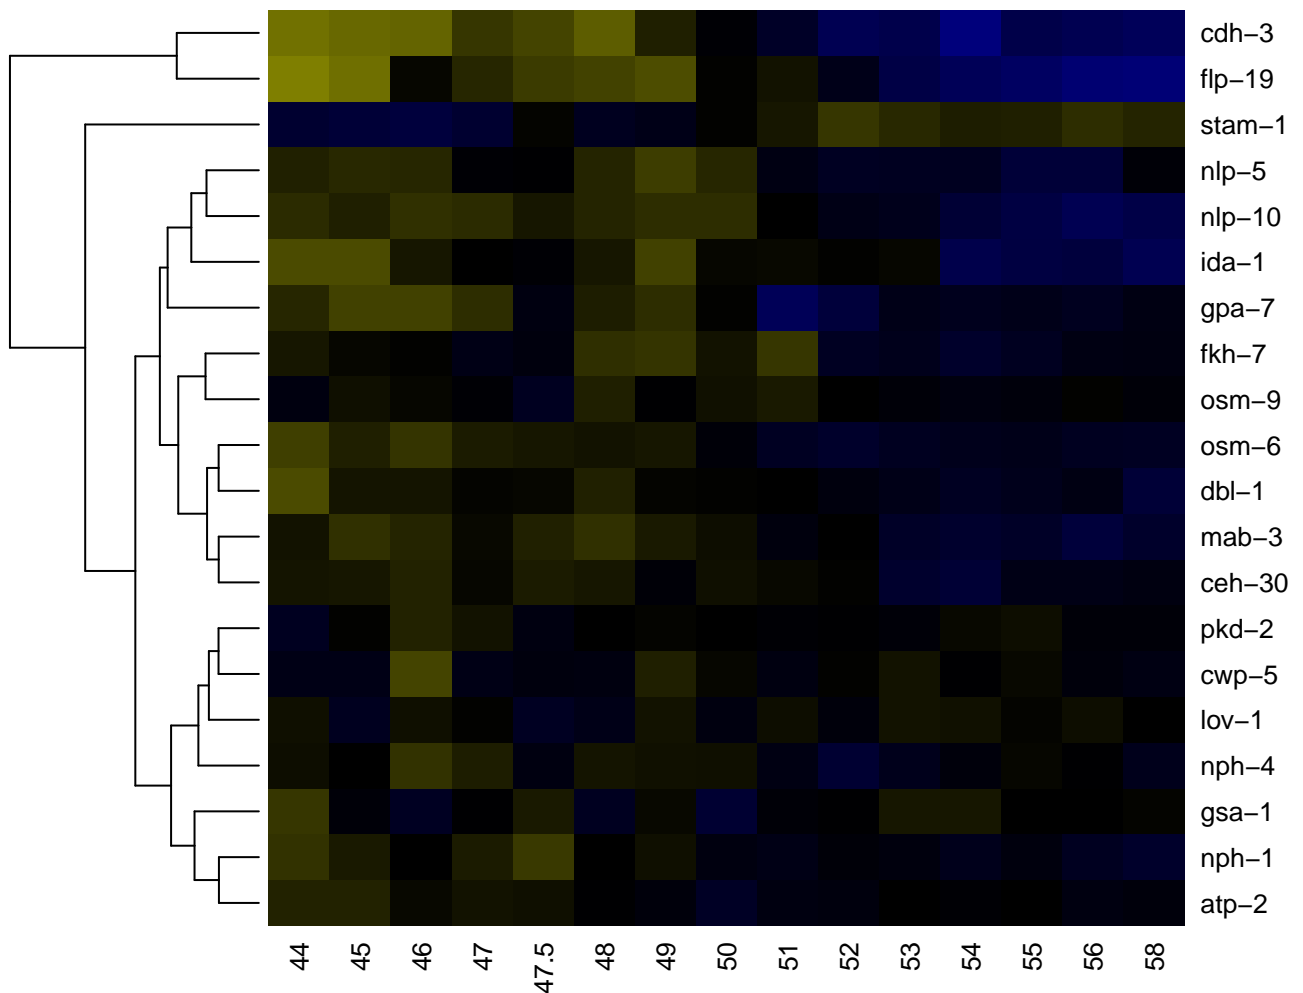

# CEMVL

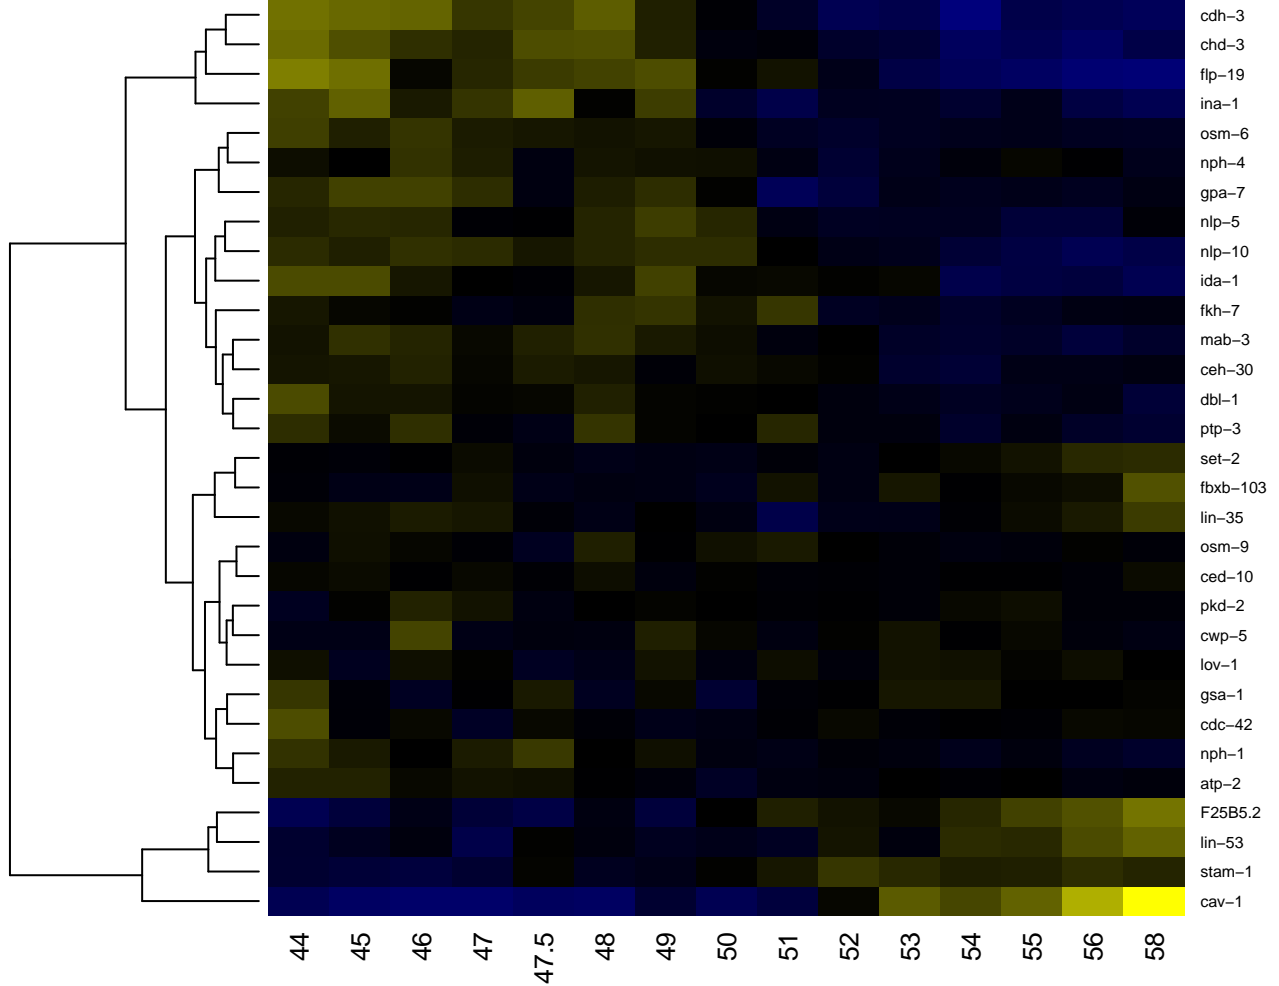

# CEMVR





# CEPDL

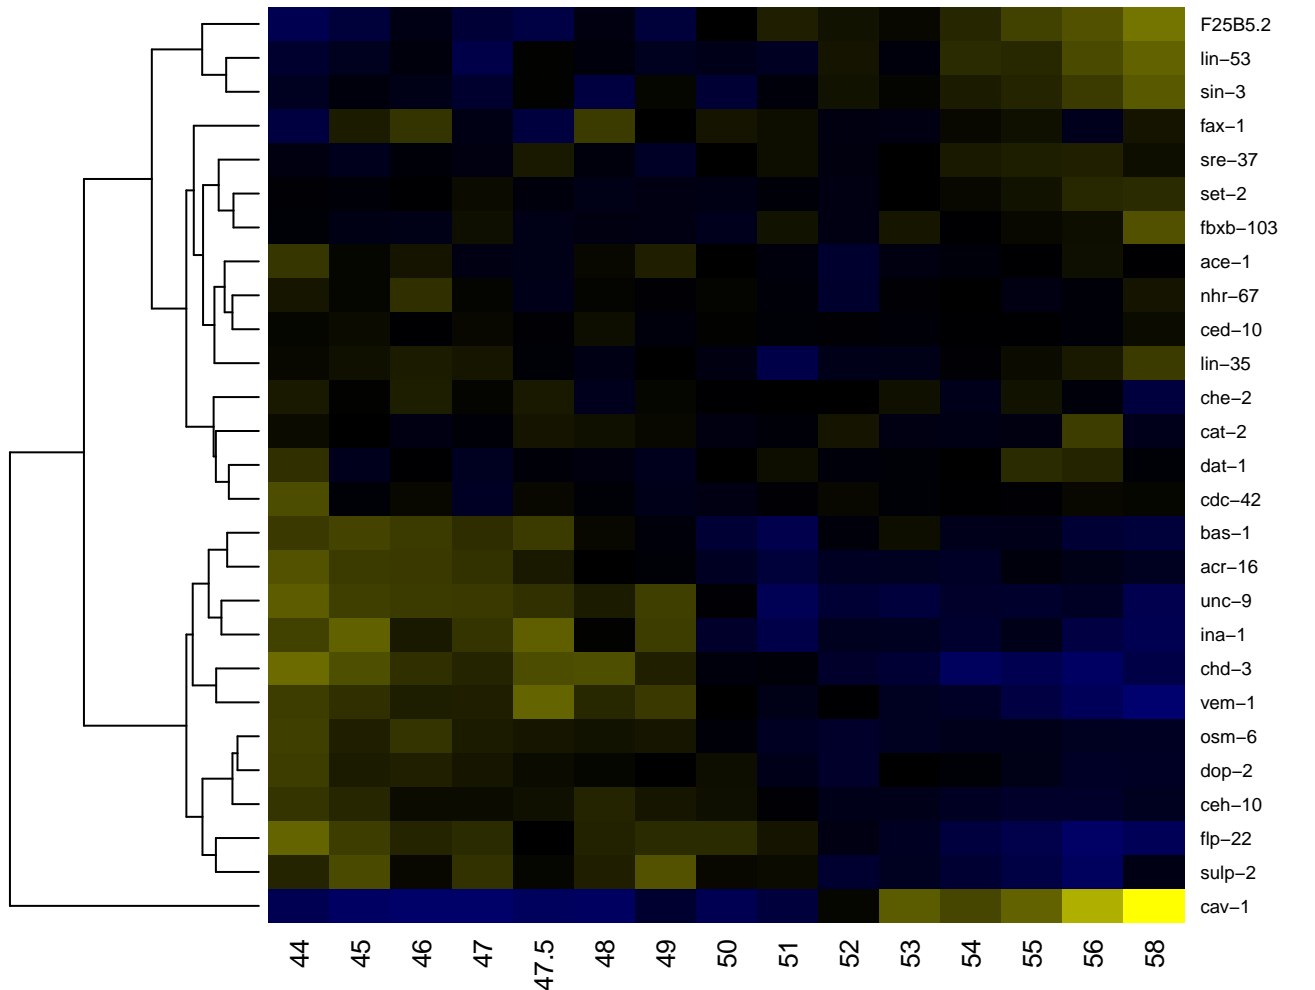

# CEPDR

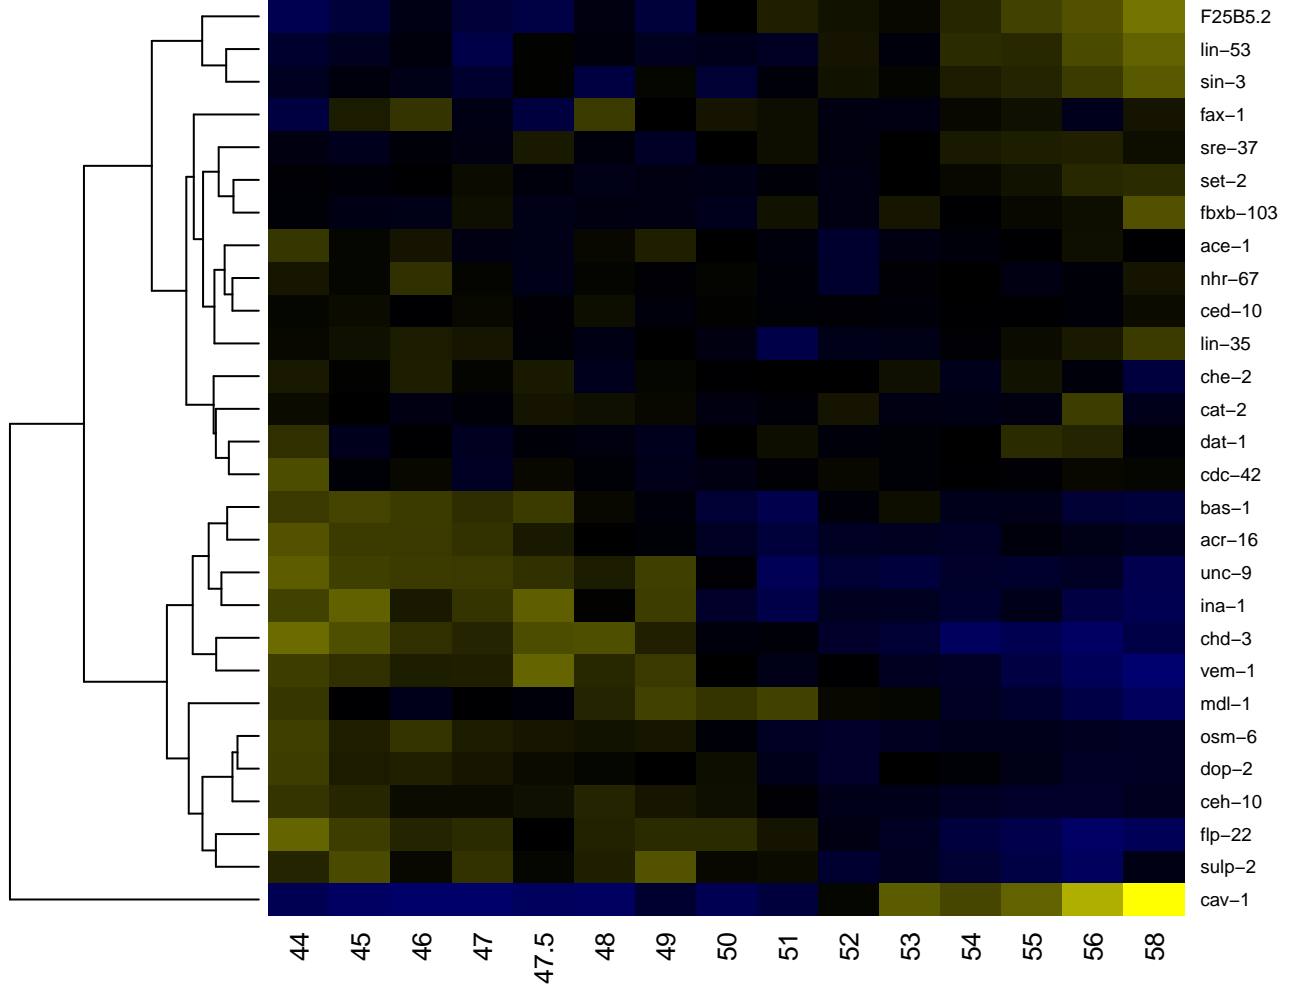

# CEPshDL

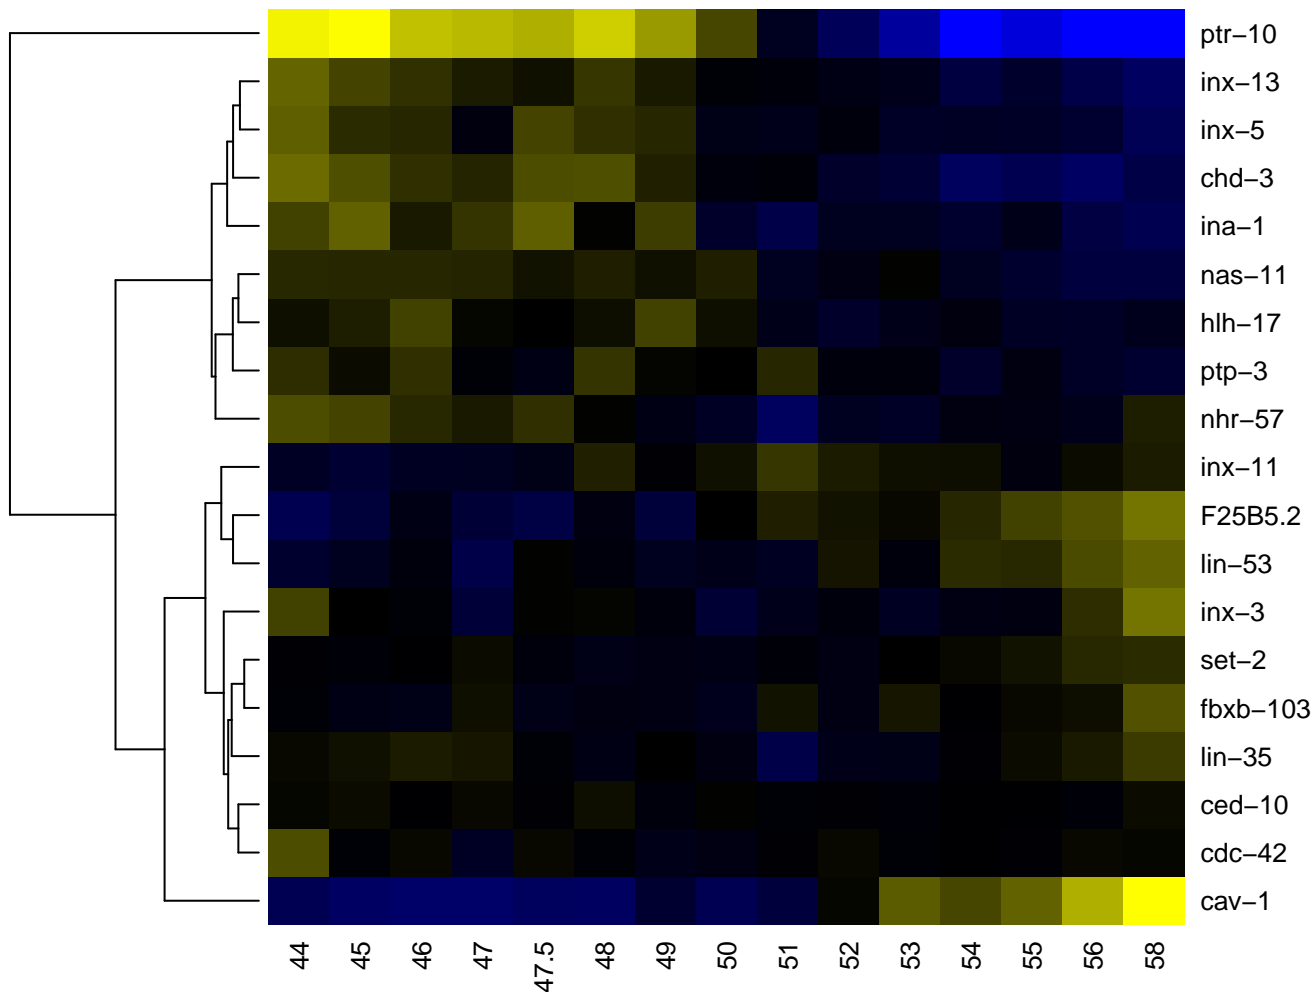

# CEPshDR

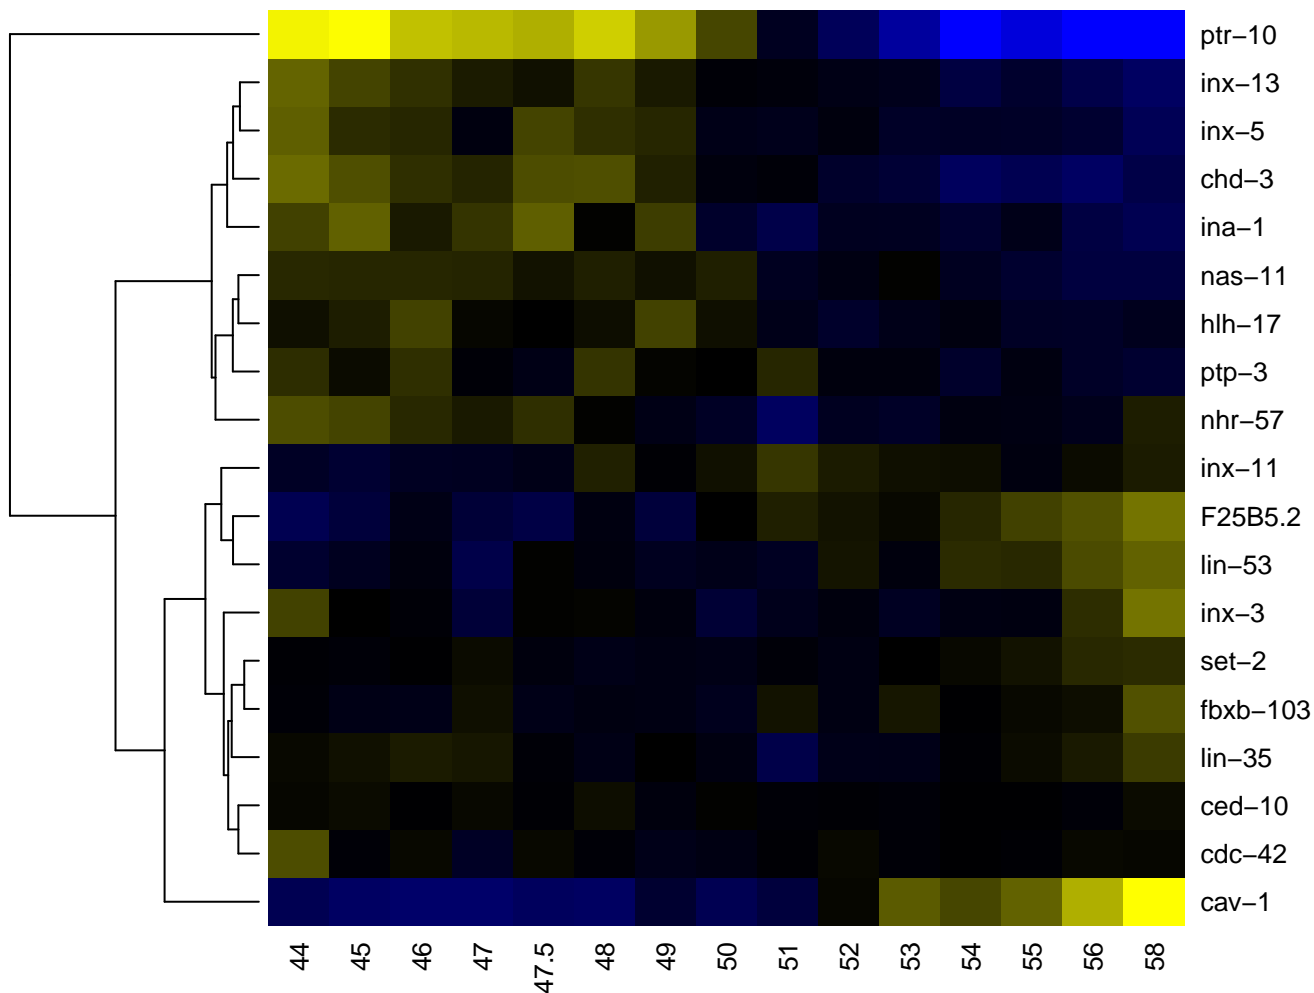

# CEPshVL



# CEPshVR



# CEPsoDL

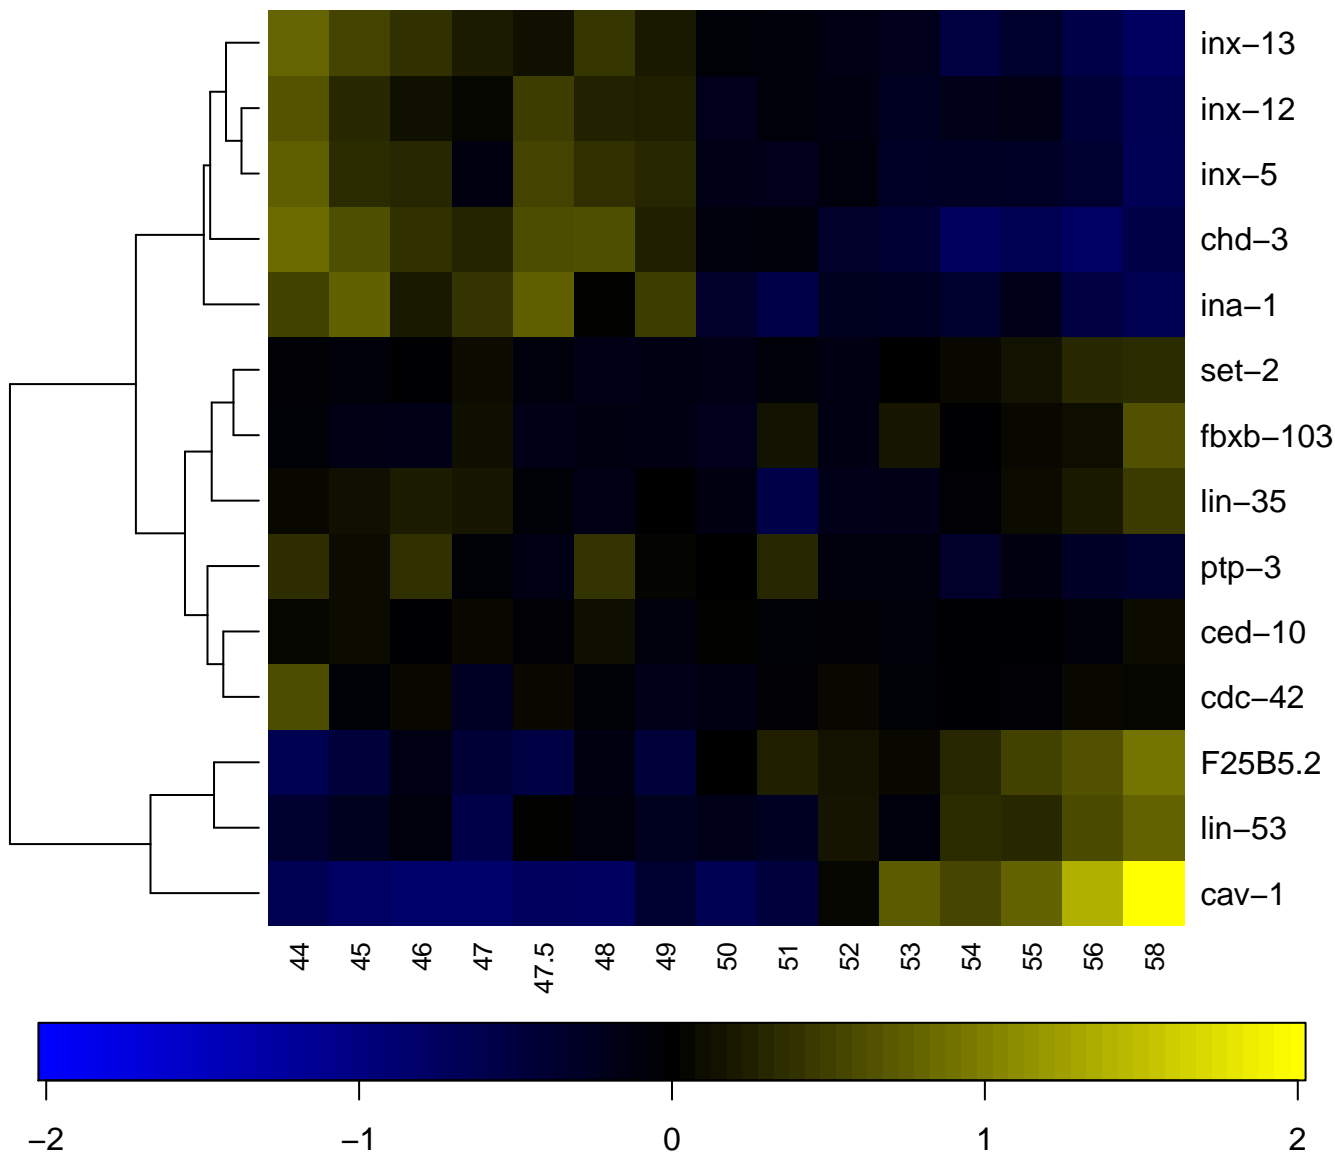







# CEPsoVR



# CEPVL

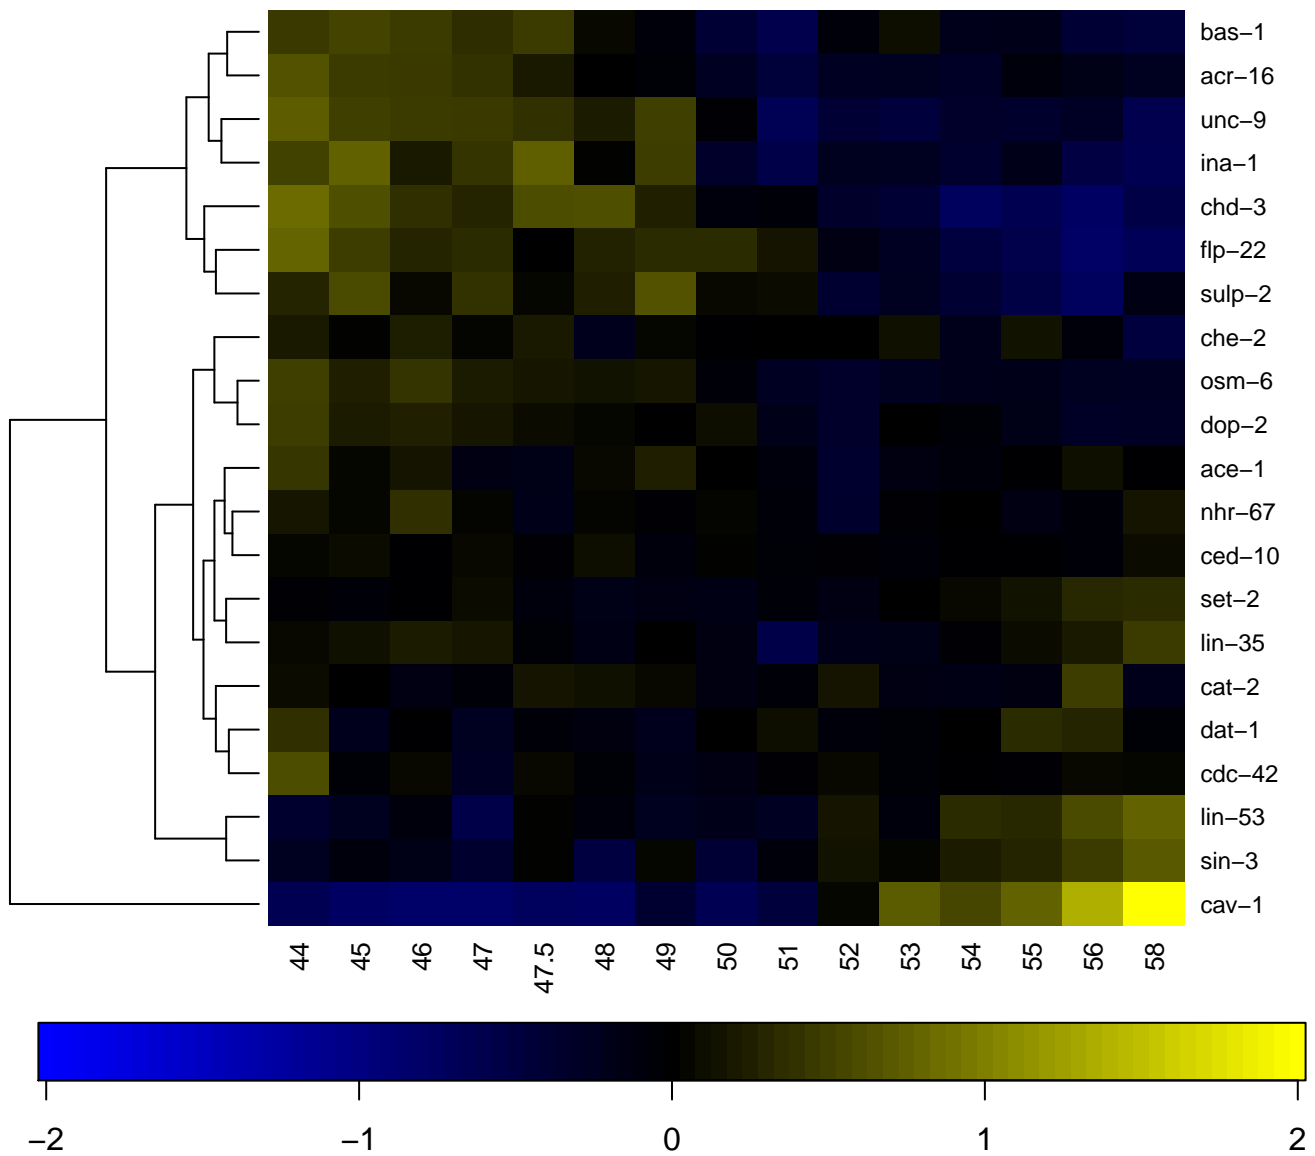

# CEPVR

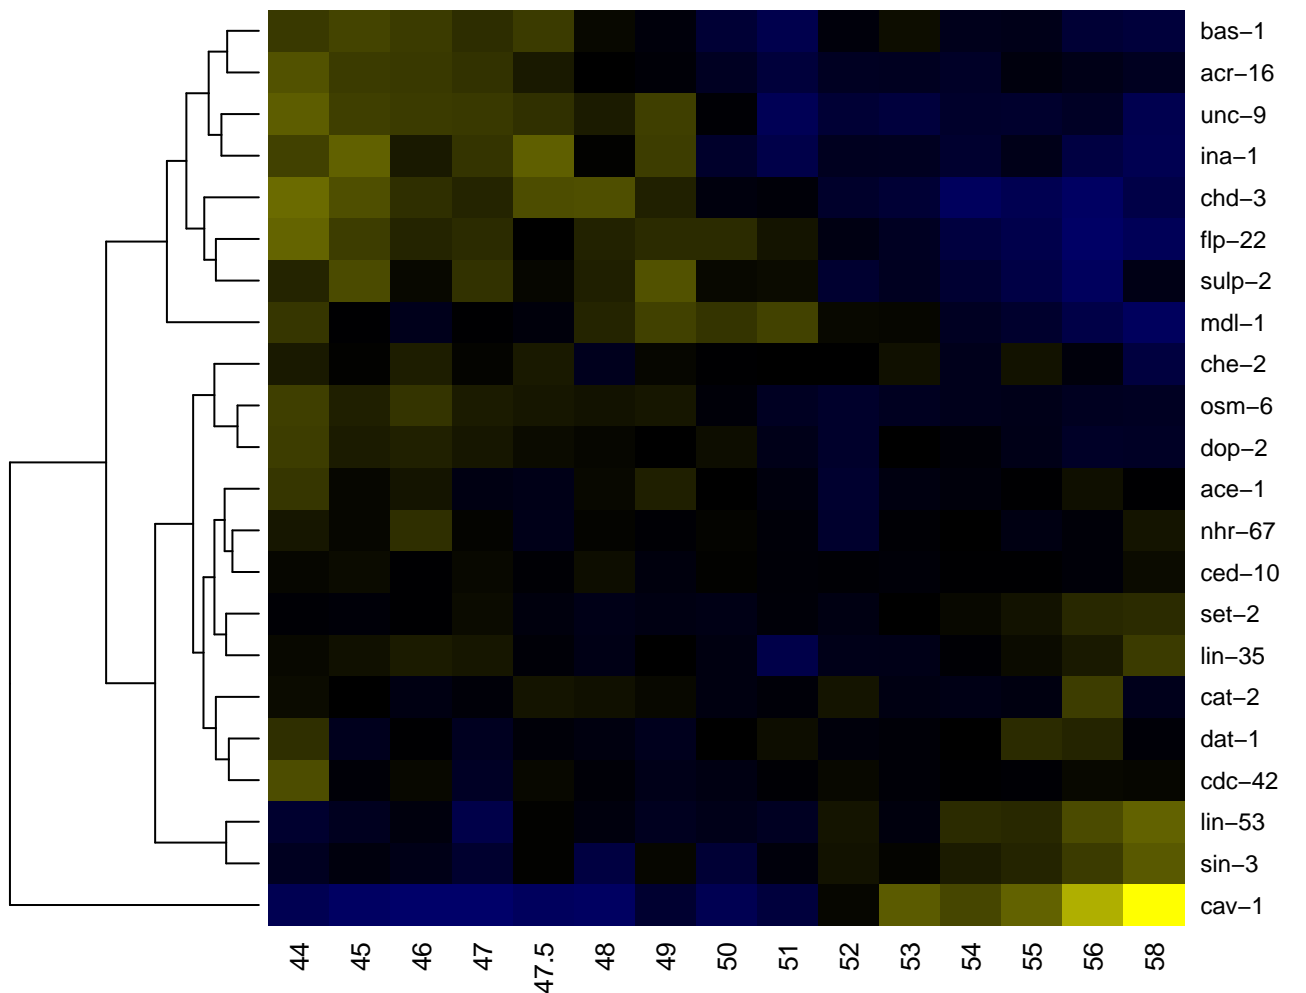

# chemosensory neuron

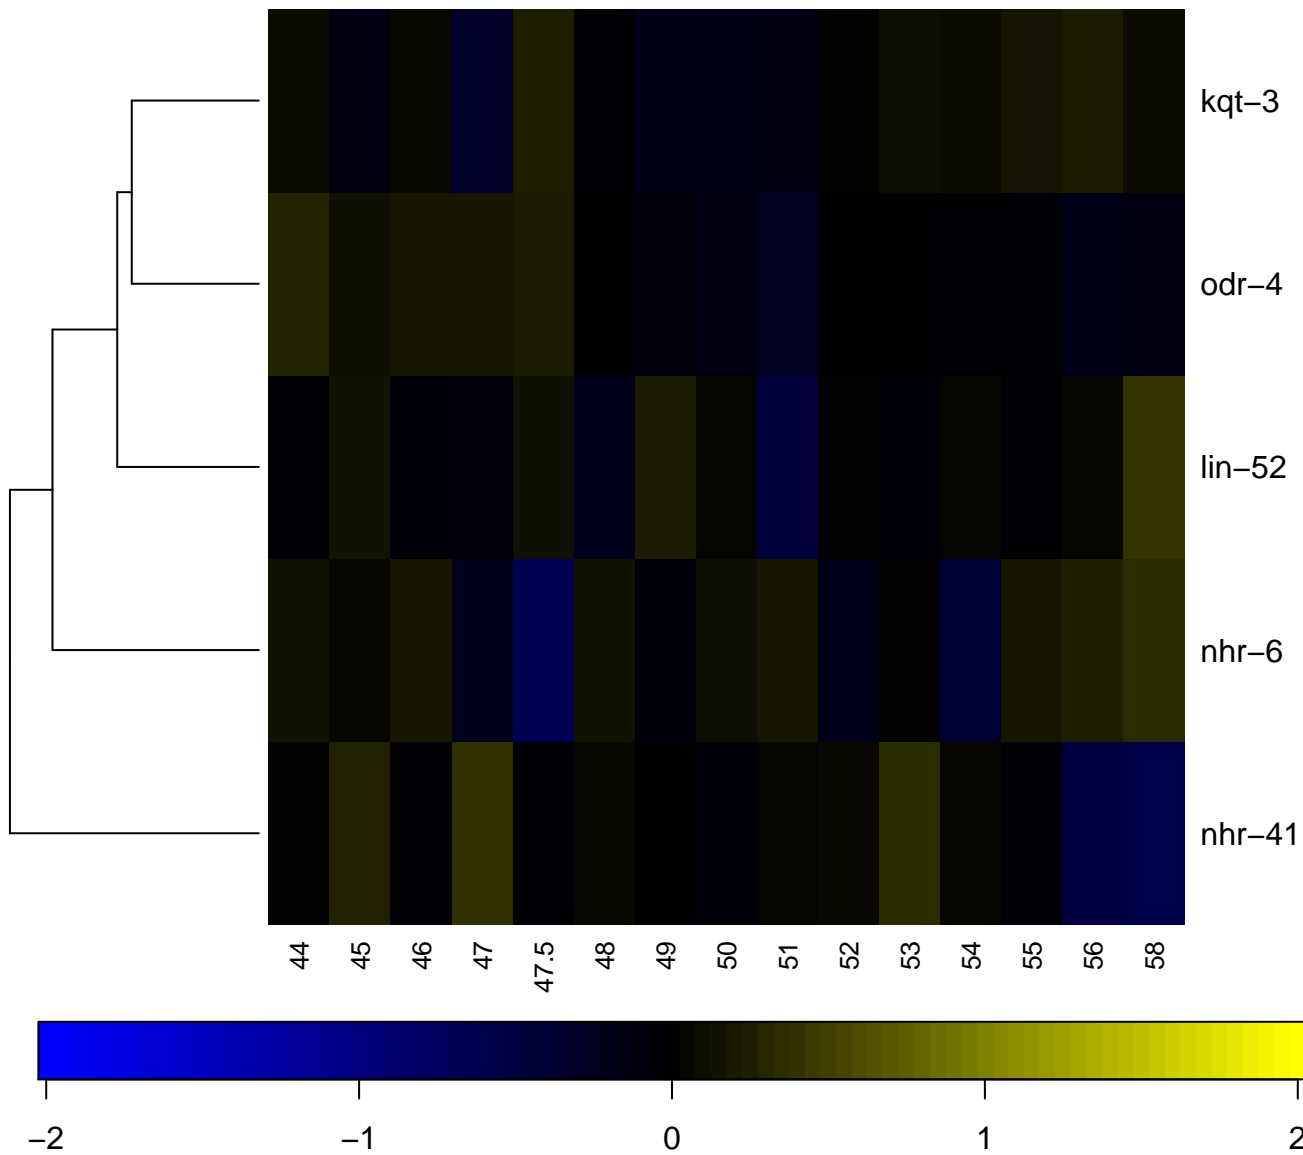

# cholinergic neuron

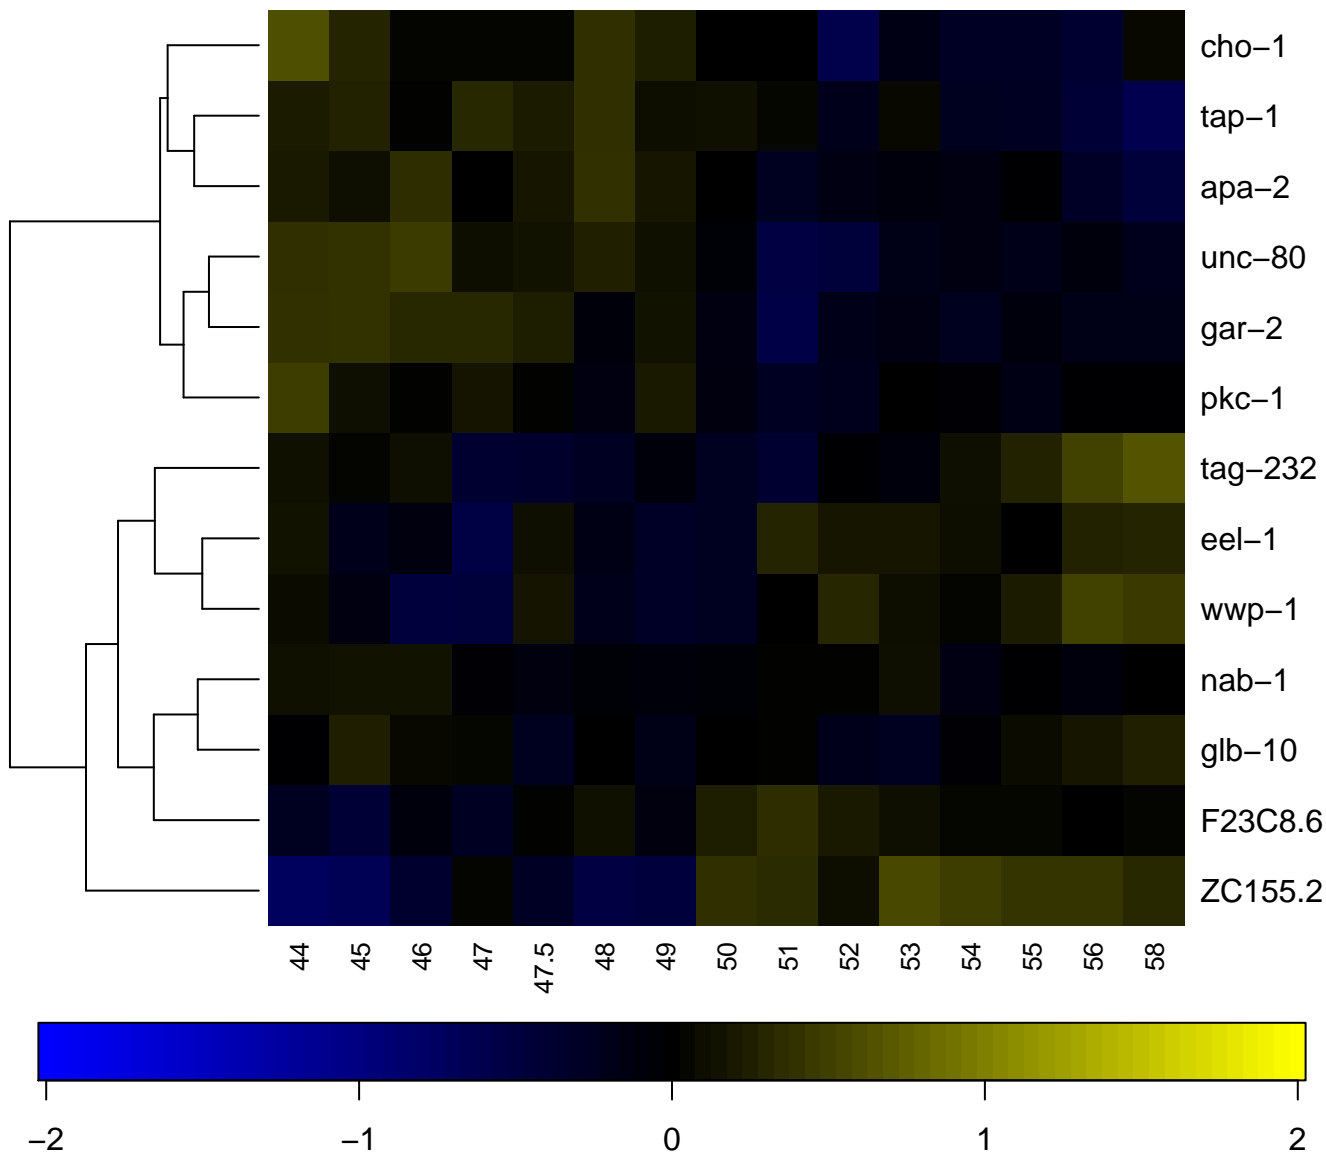



# coelomocyte

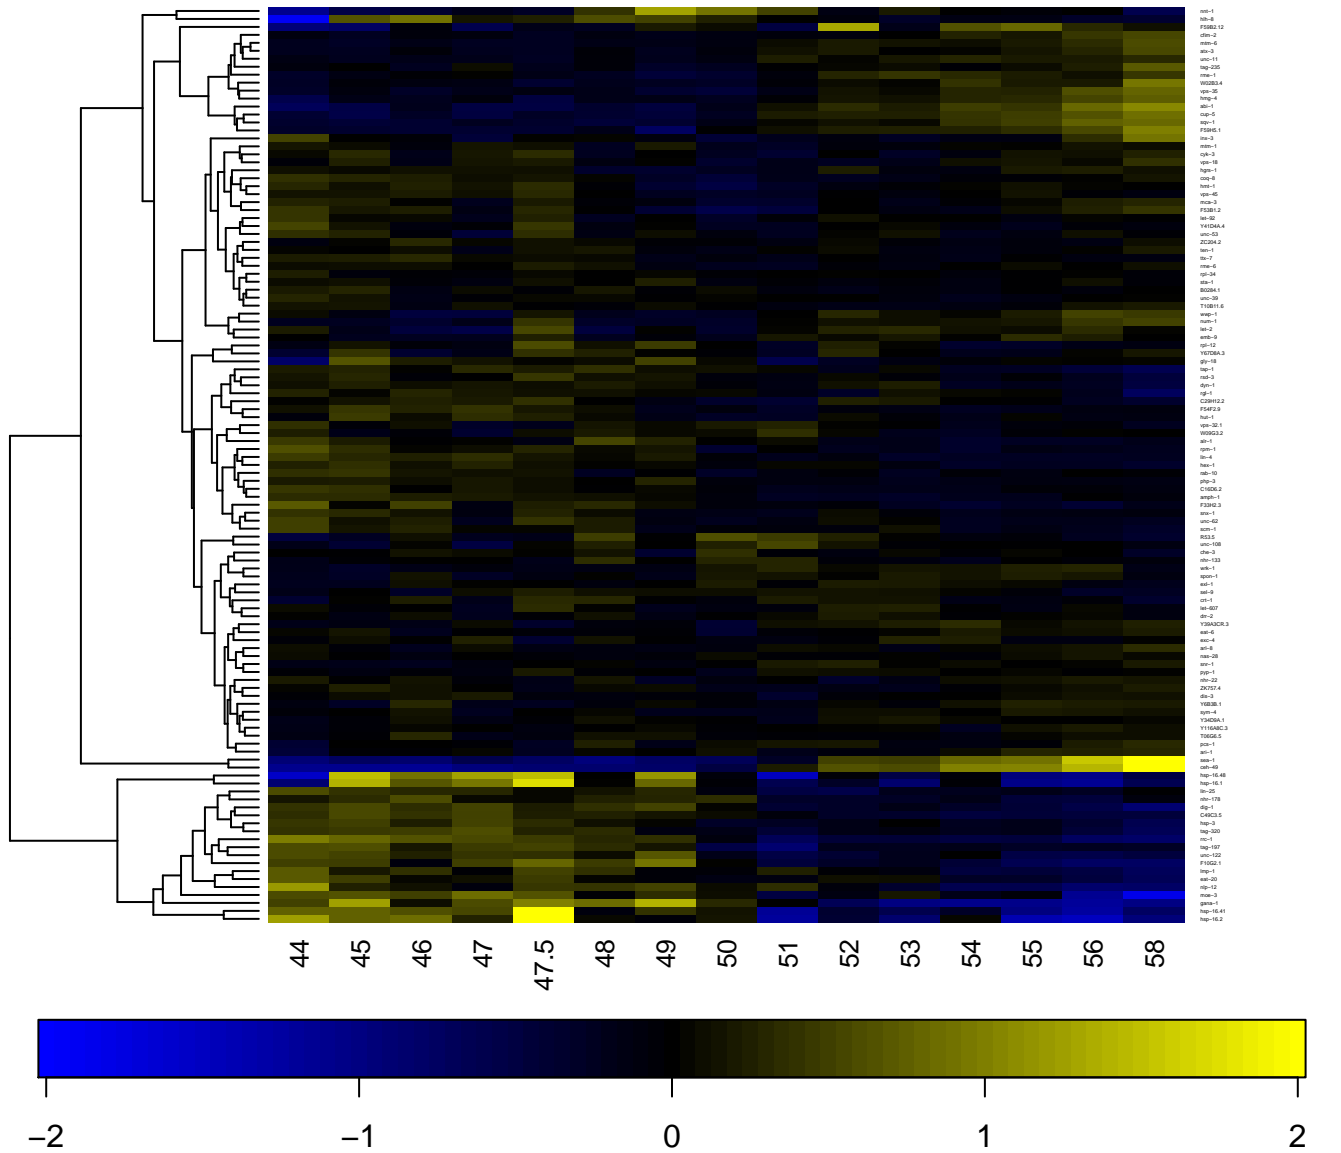



# copulatory spicule

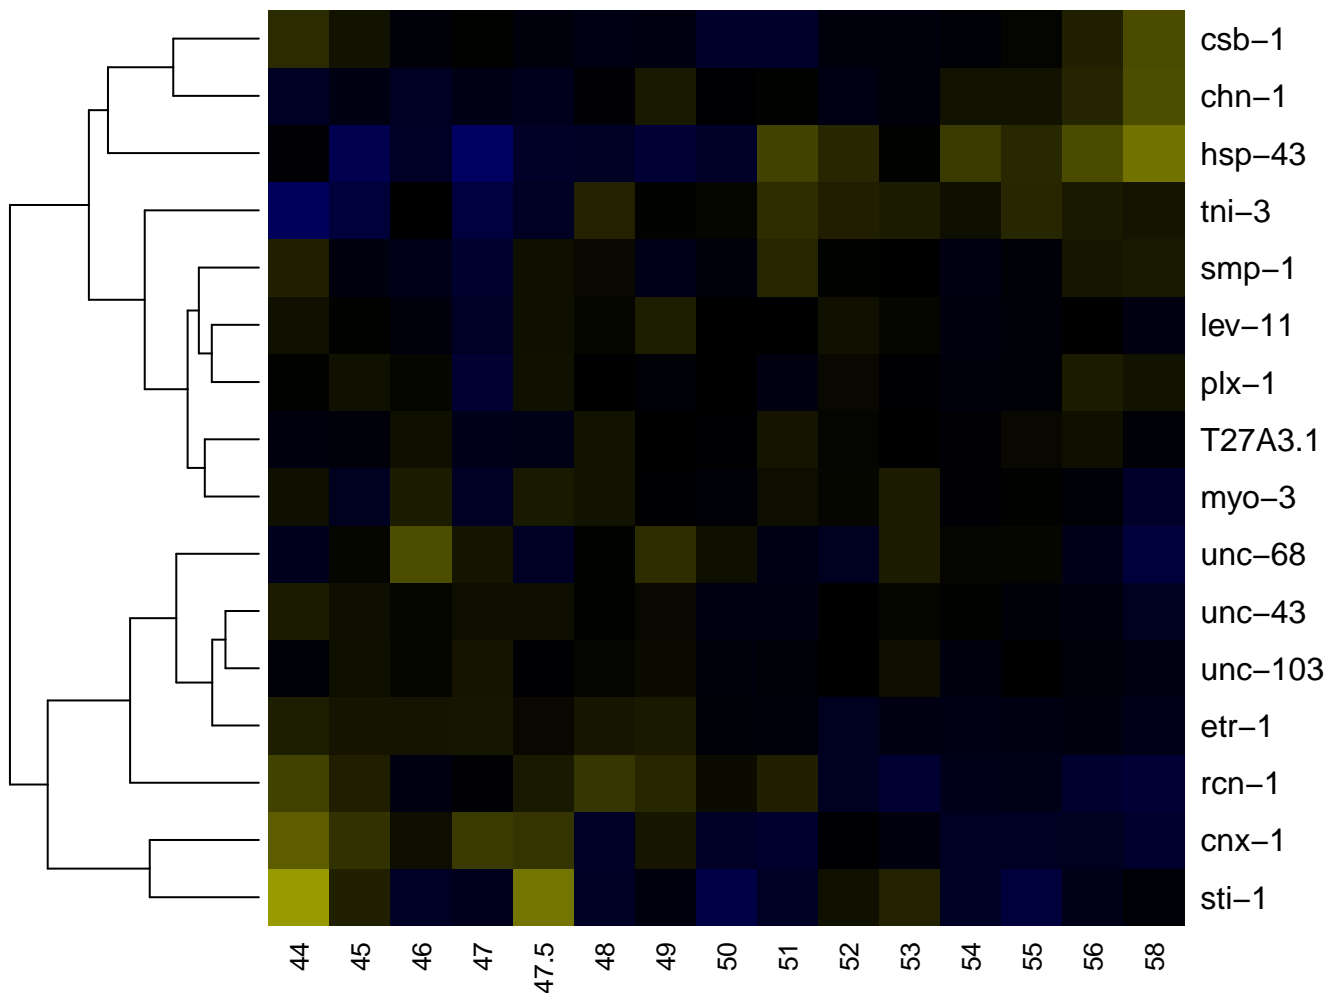



# CP0

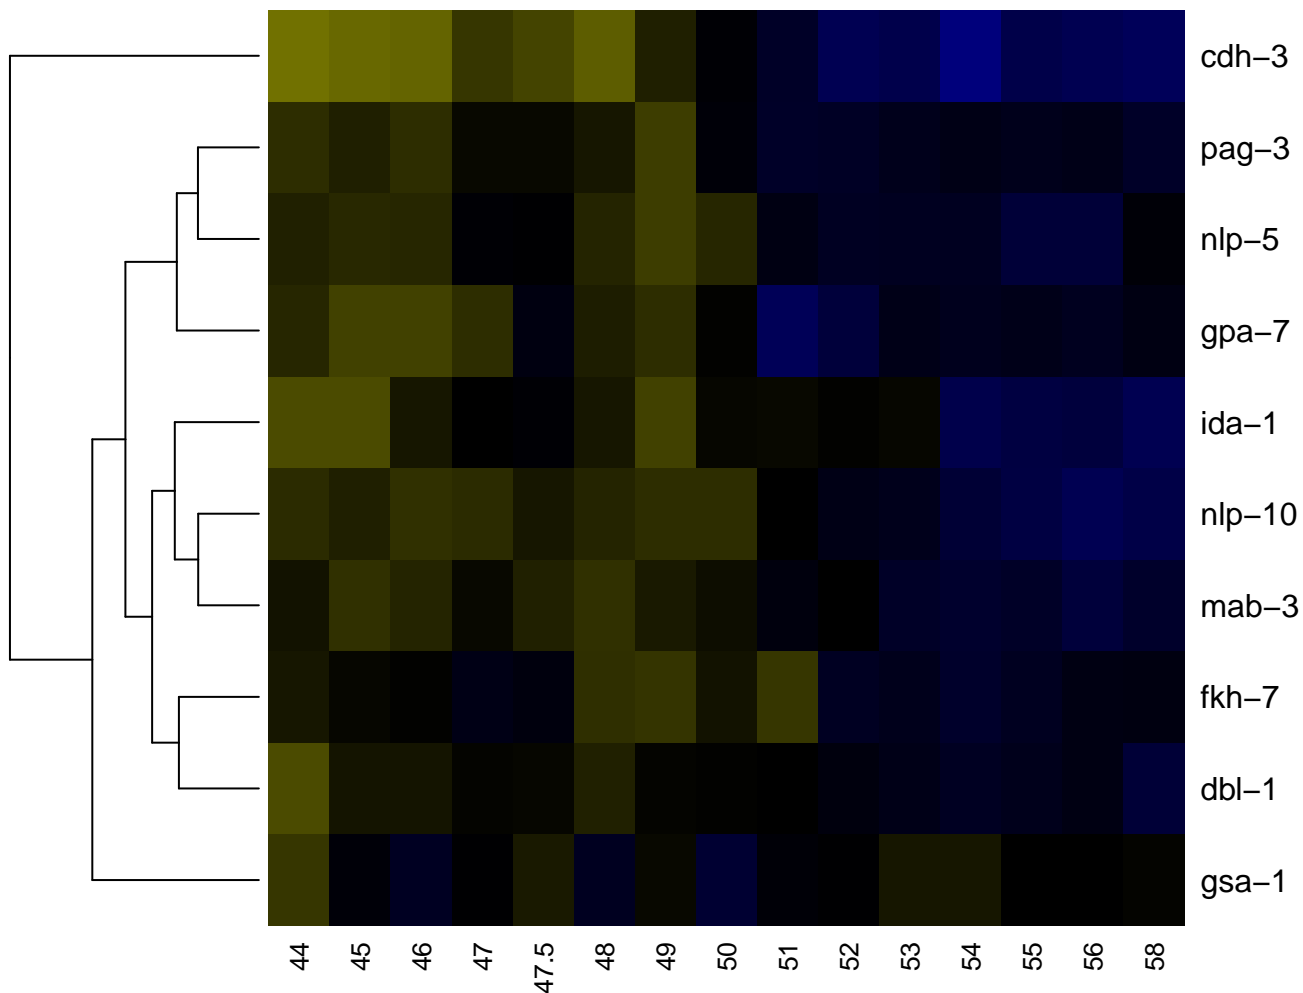

# CP1

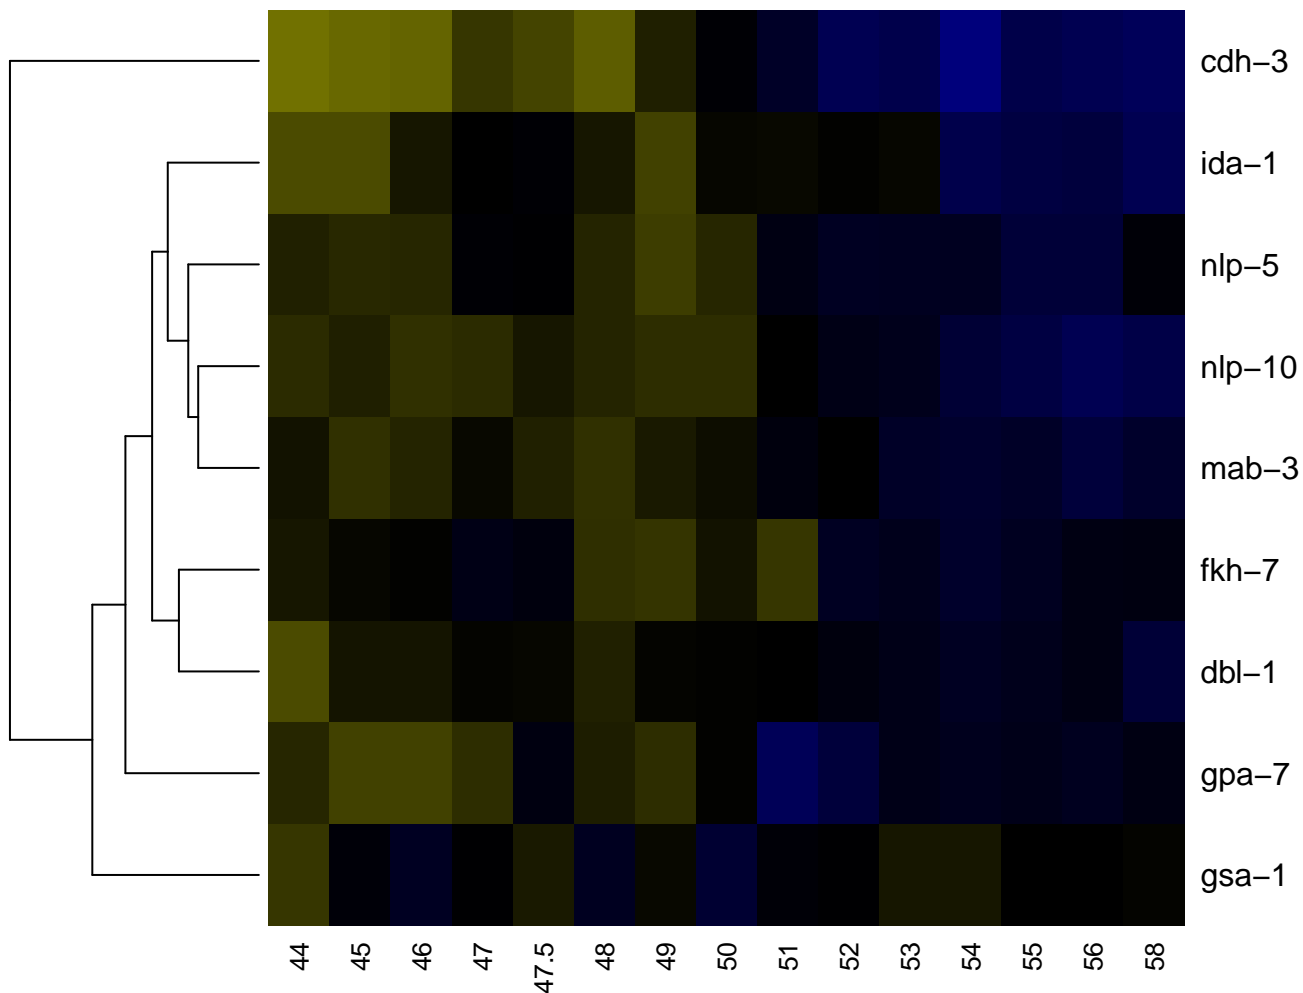

# CP2



# CP3



-2

-1

0

1

2

# CP4



# CP5

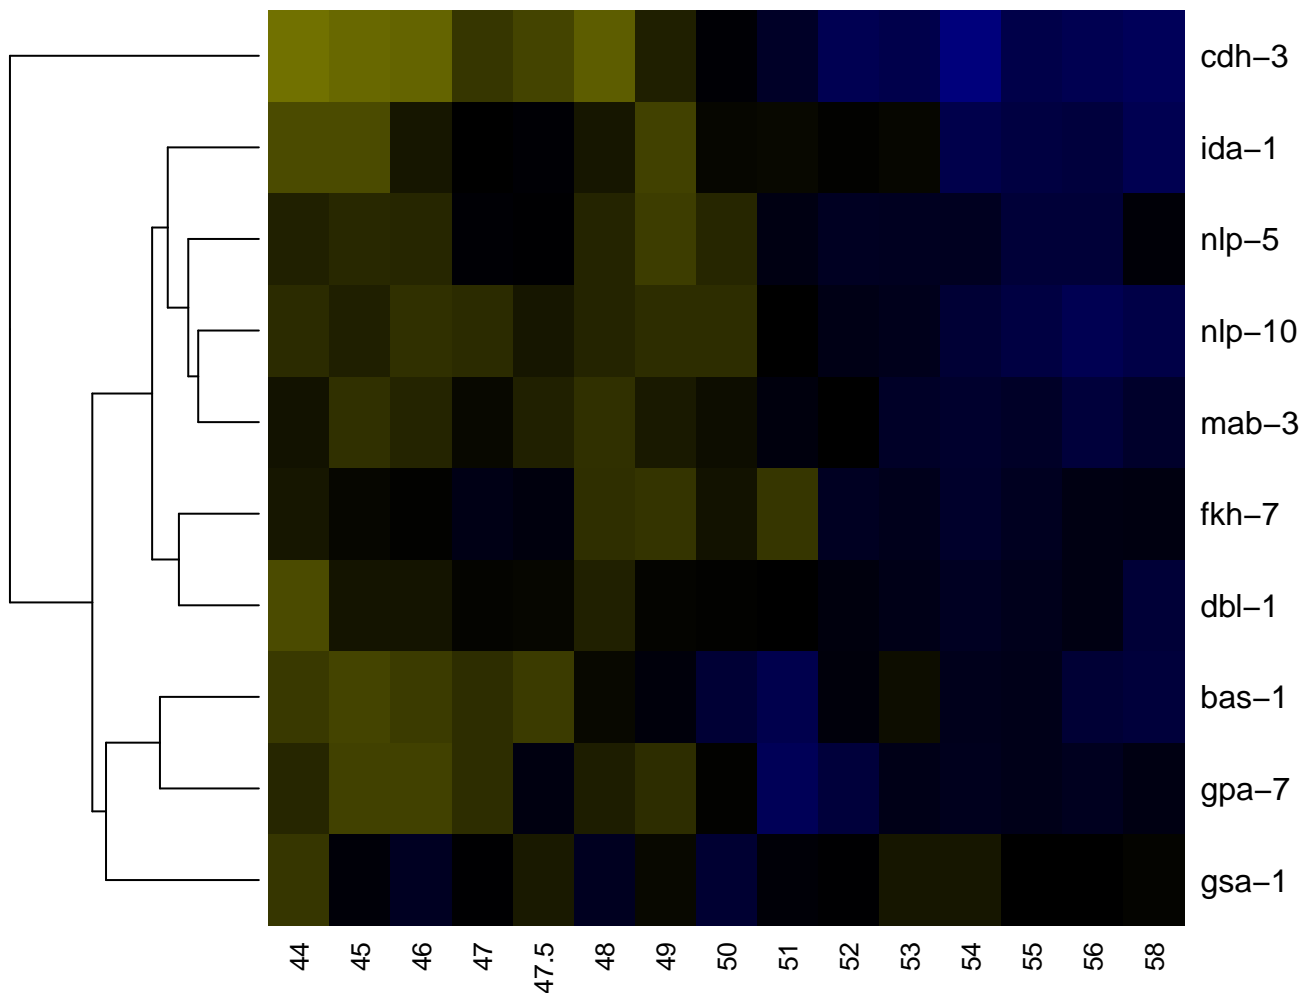



# CP6



# CP7



# CP8

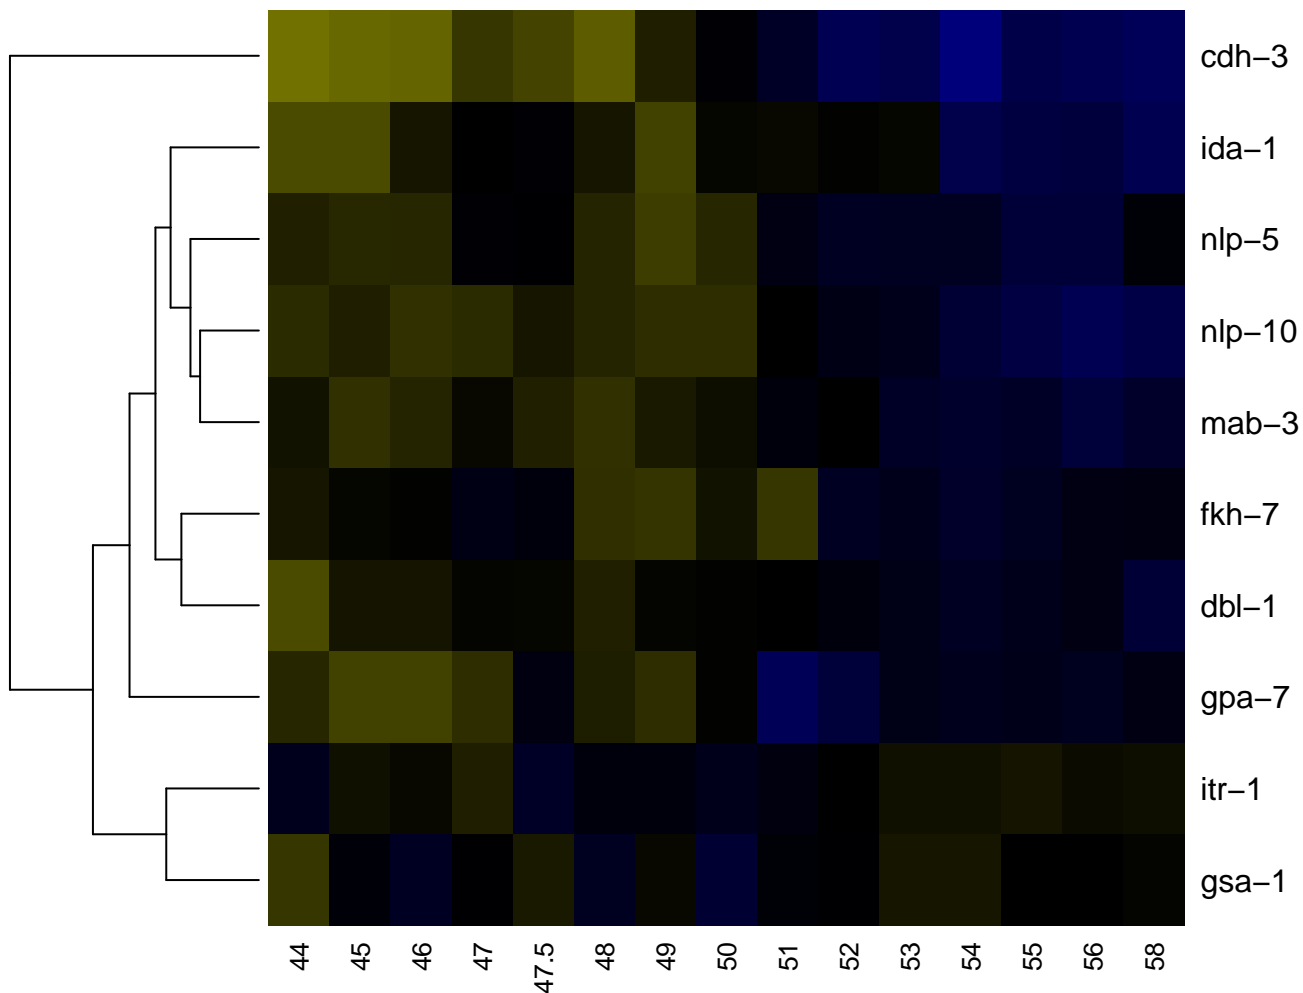

-2

-1

0

1

2

# CP9

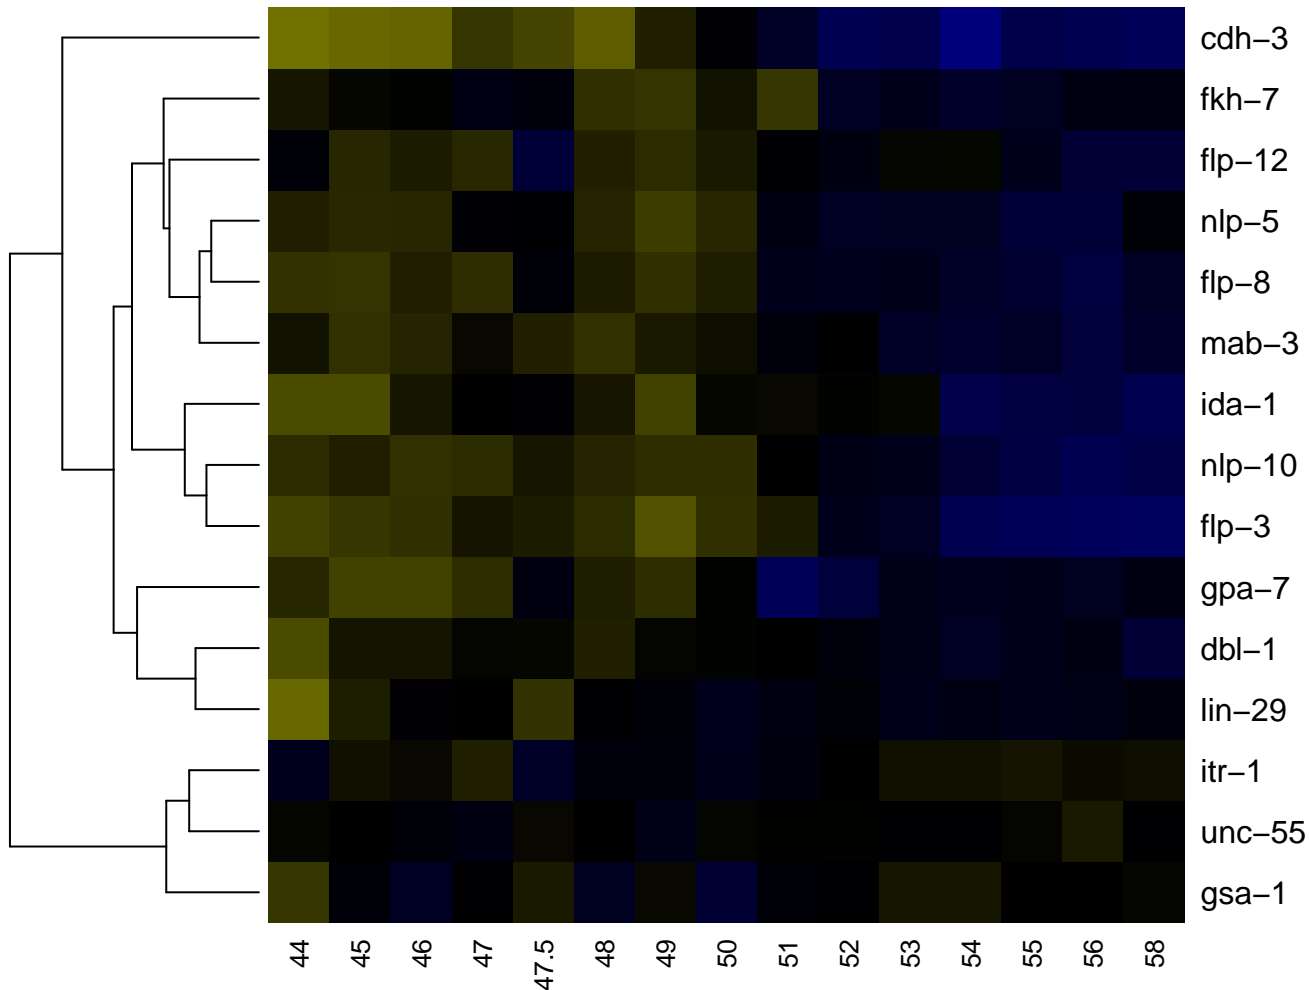

# Cpa

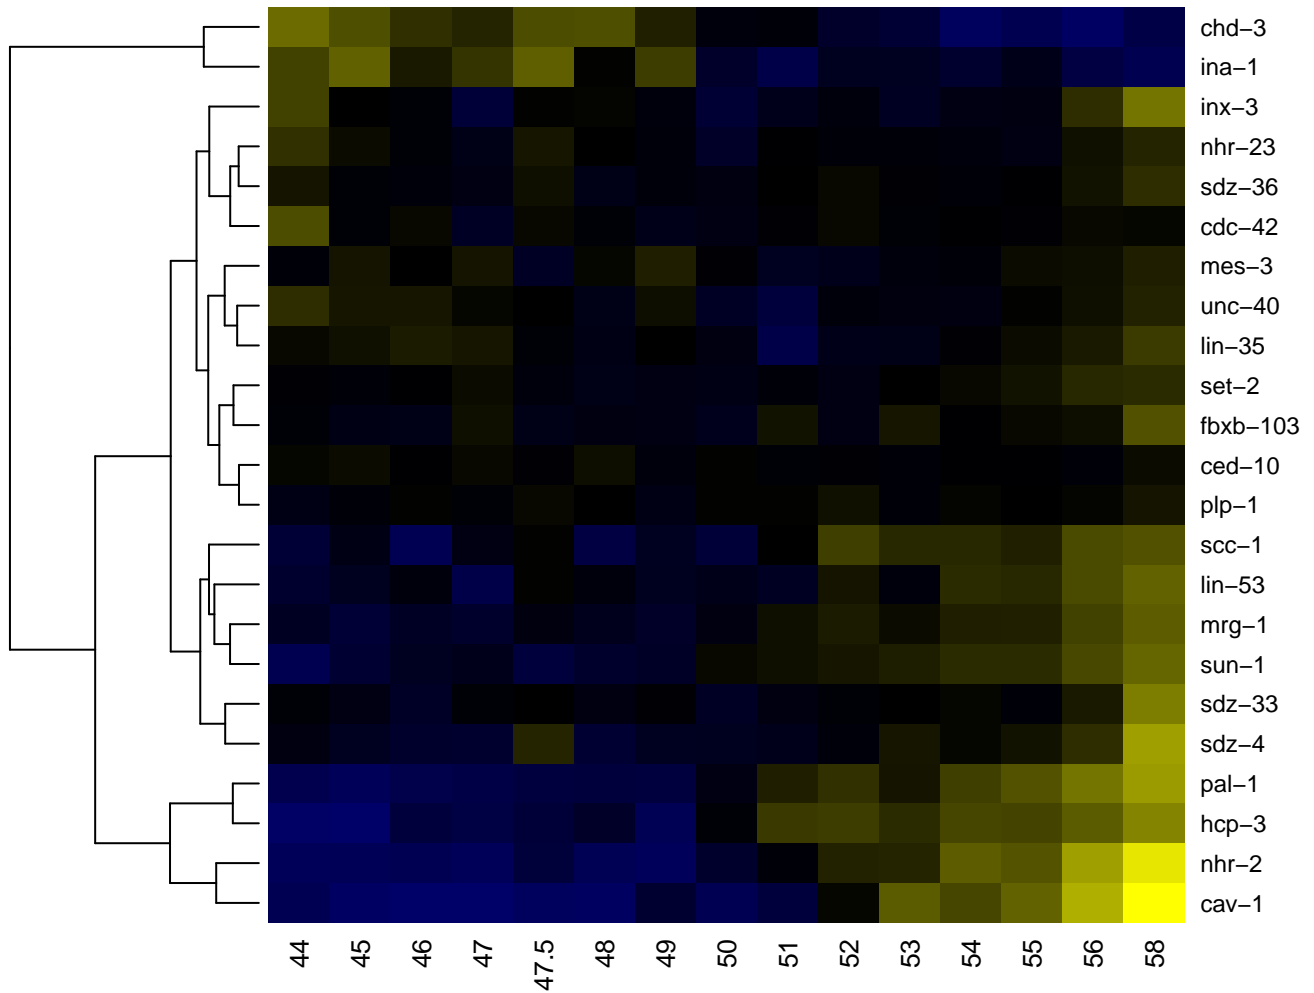

# Cpaa

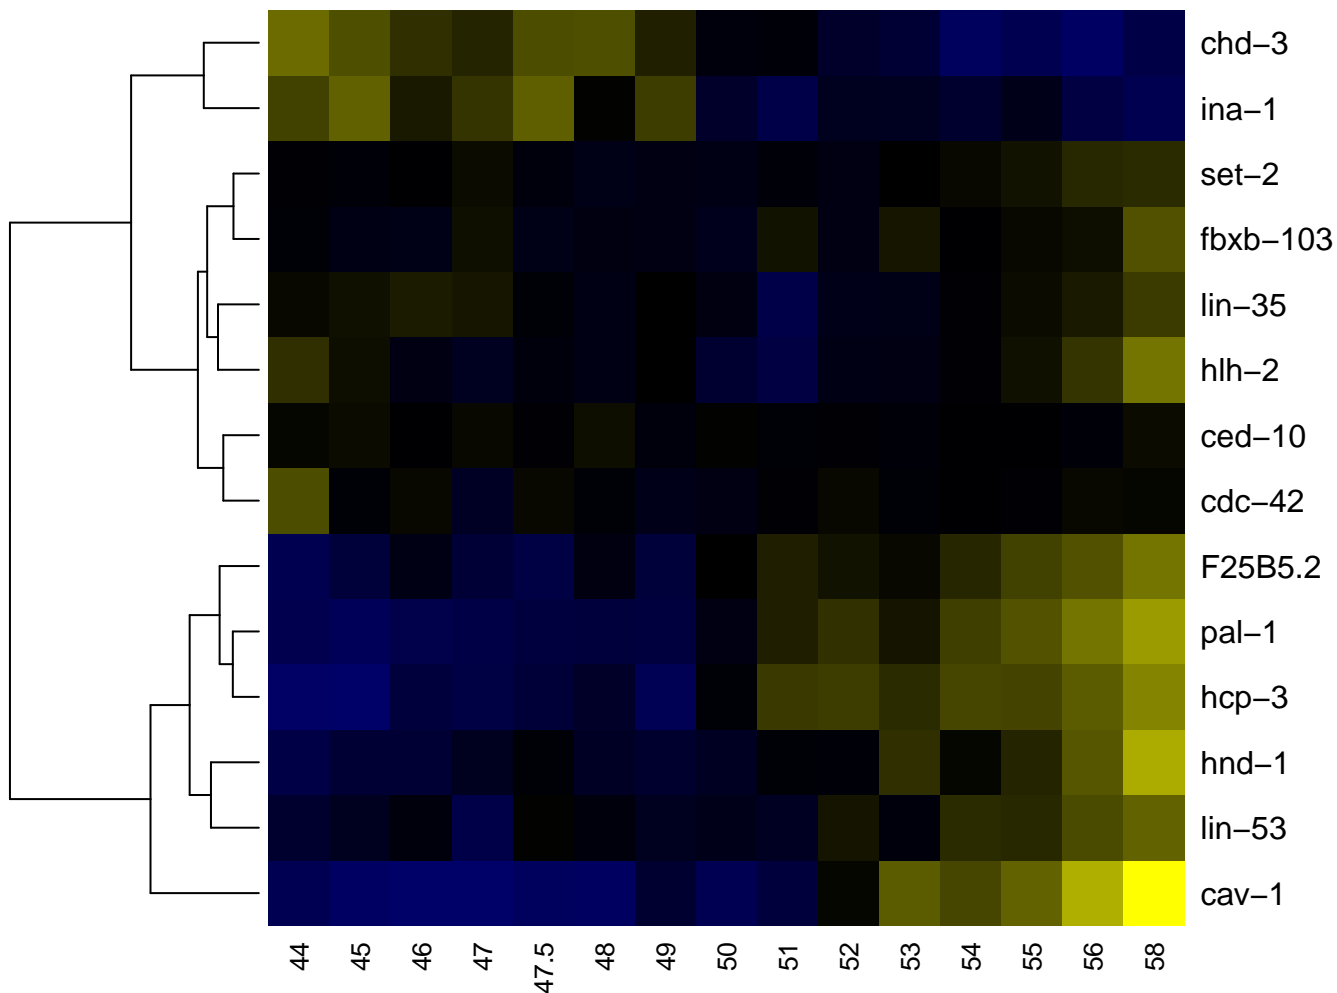

# Cpaaa



# Cpaaaa

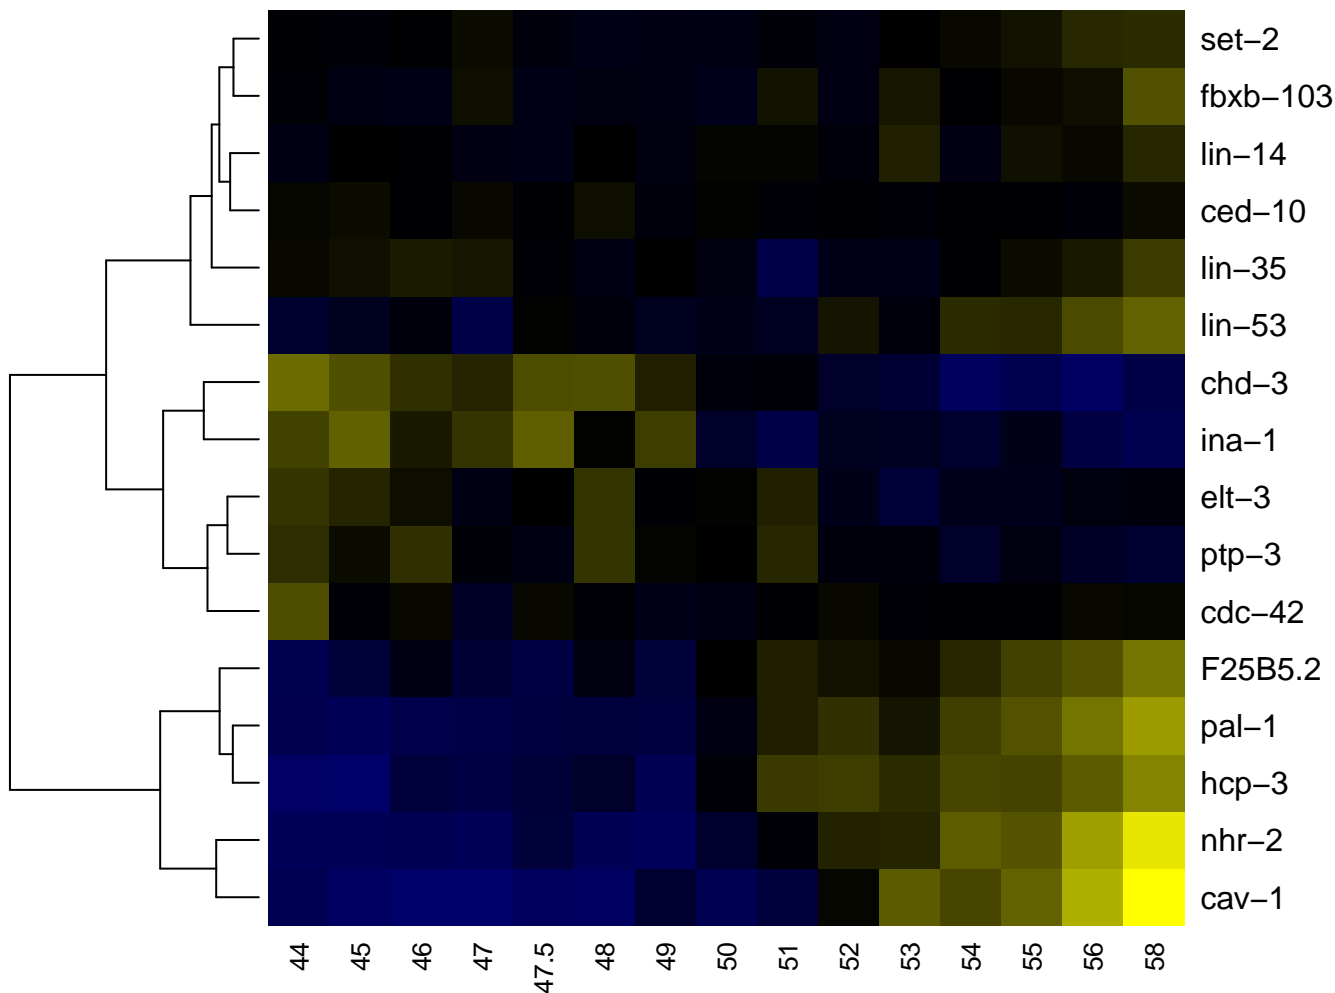



# Cpaaap

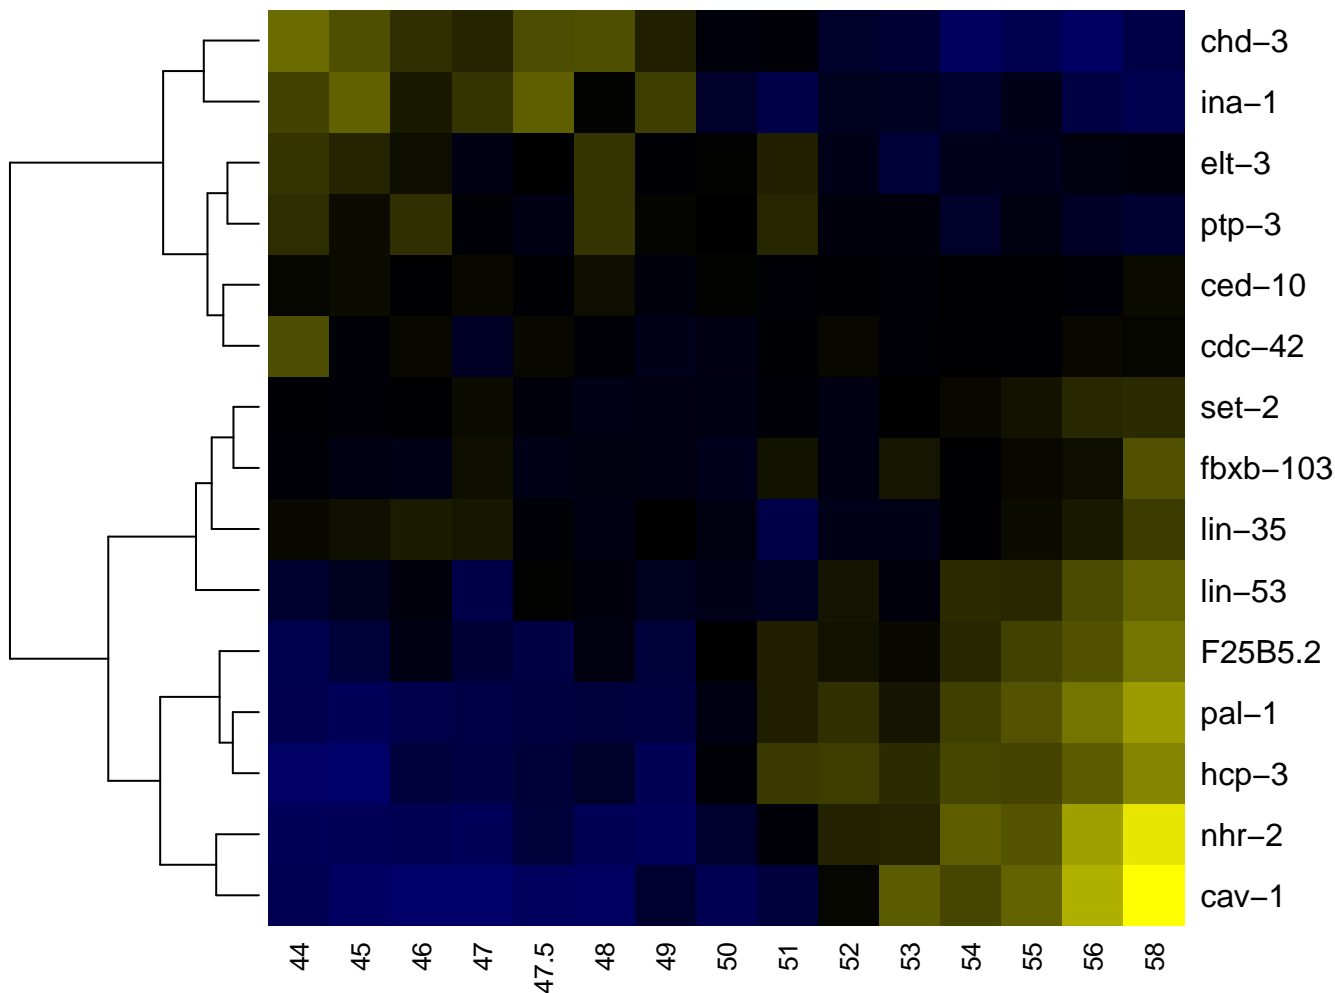

# Cpaap



# Cpaapa



# Cpaapp

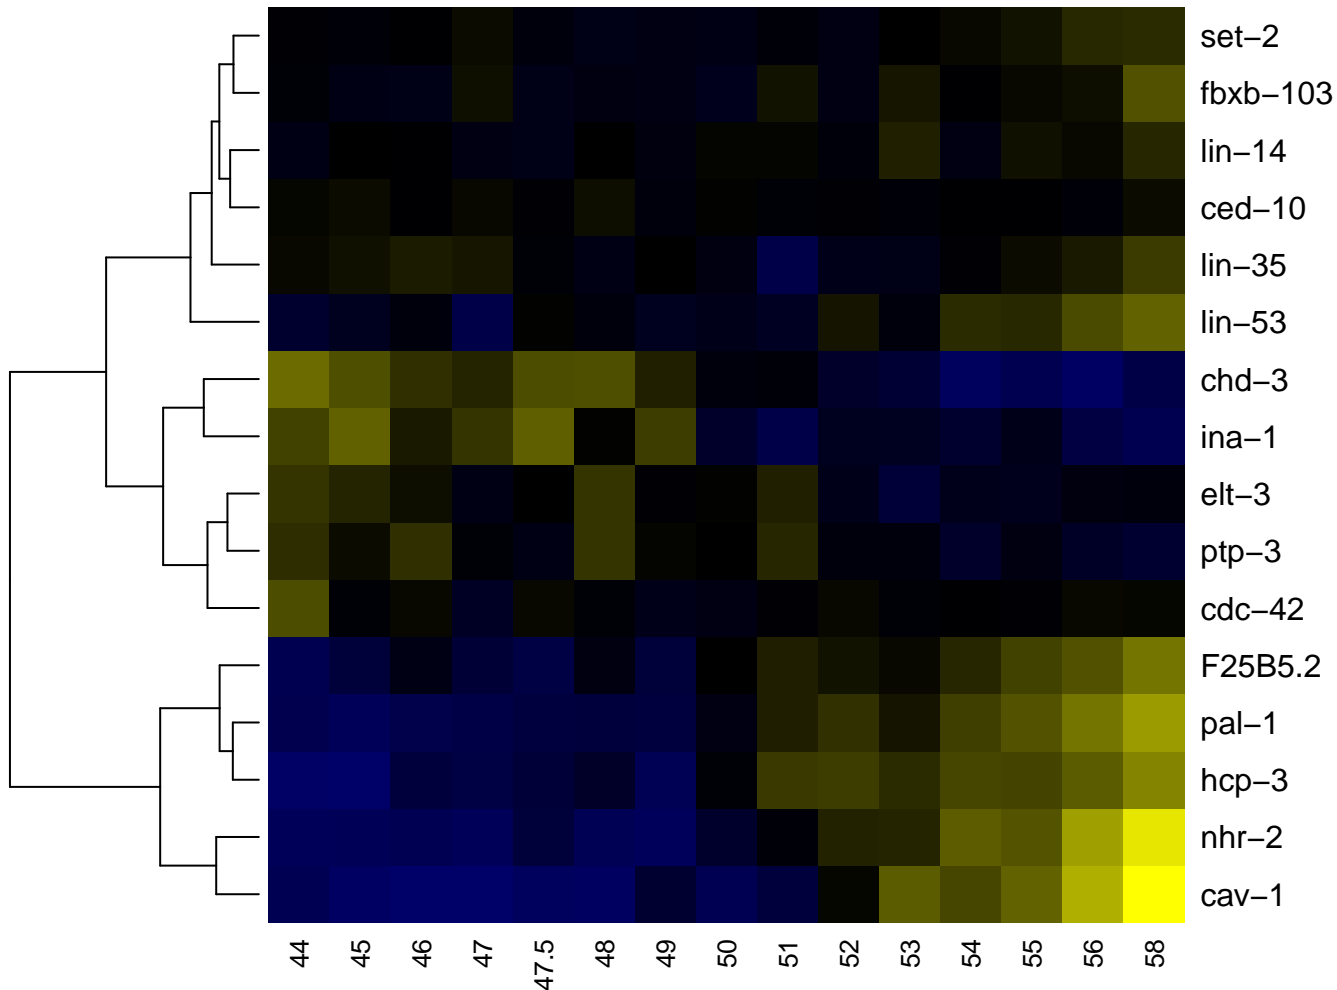

# Cpap





# Сррррр

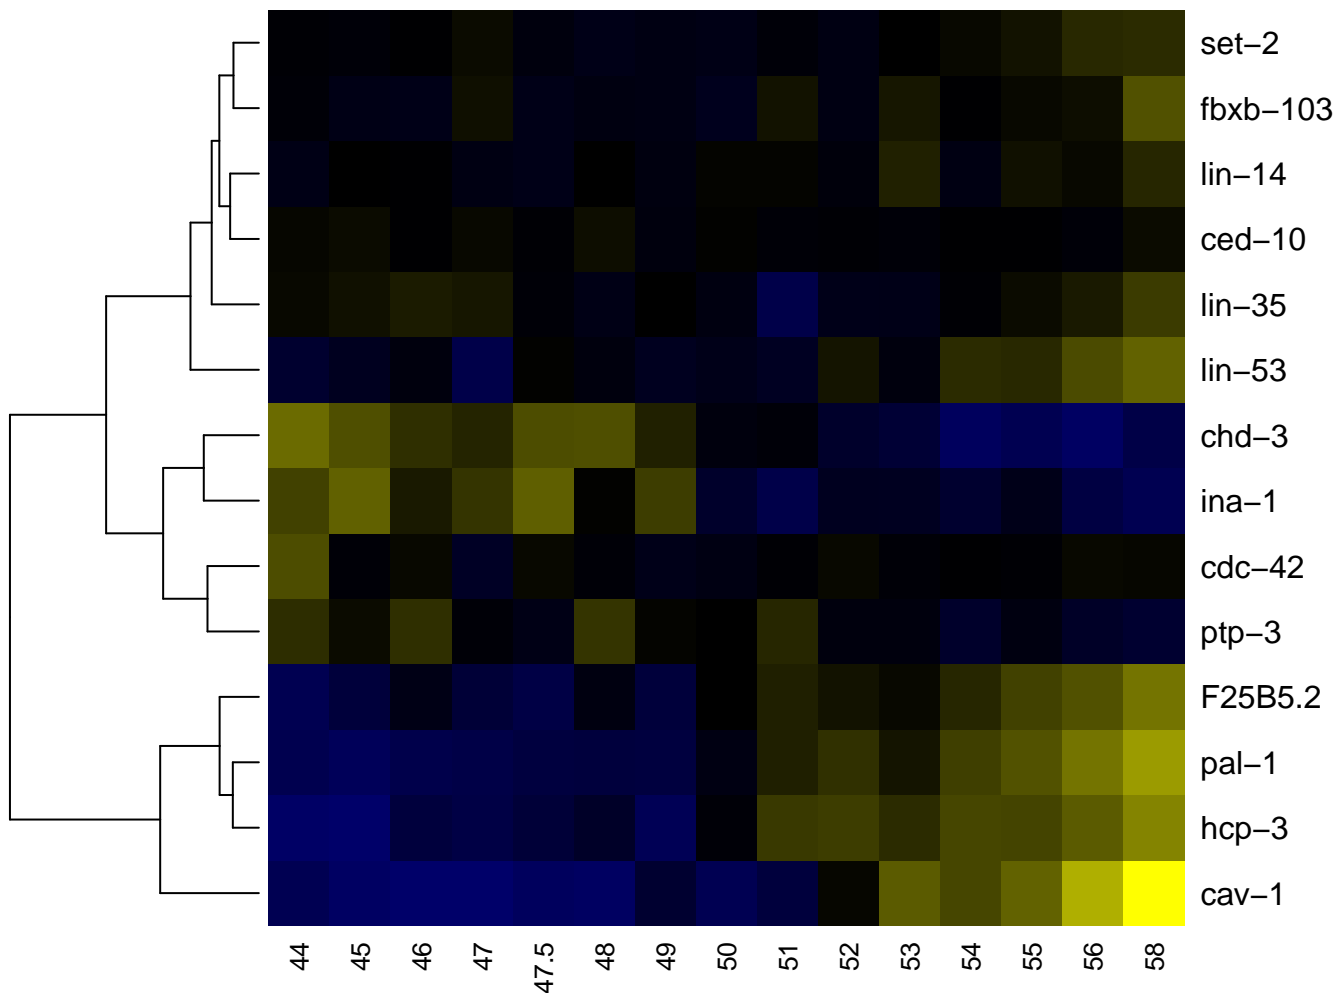

# Cpapap



-2

-1

0

1

2





# Cpappd

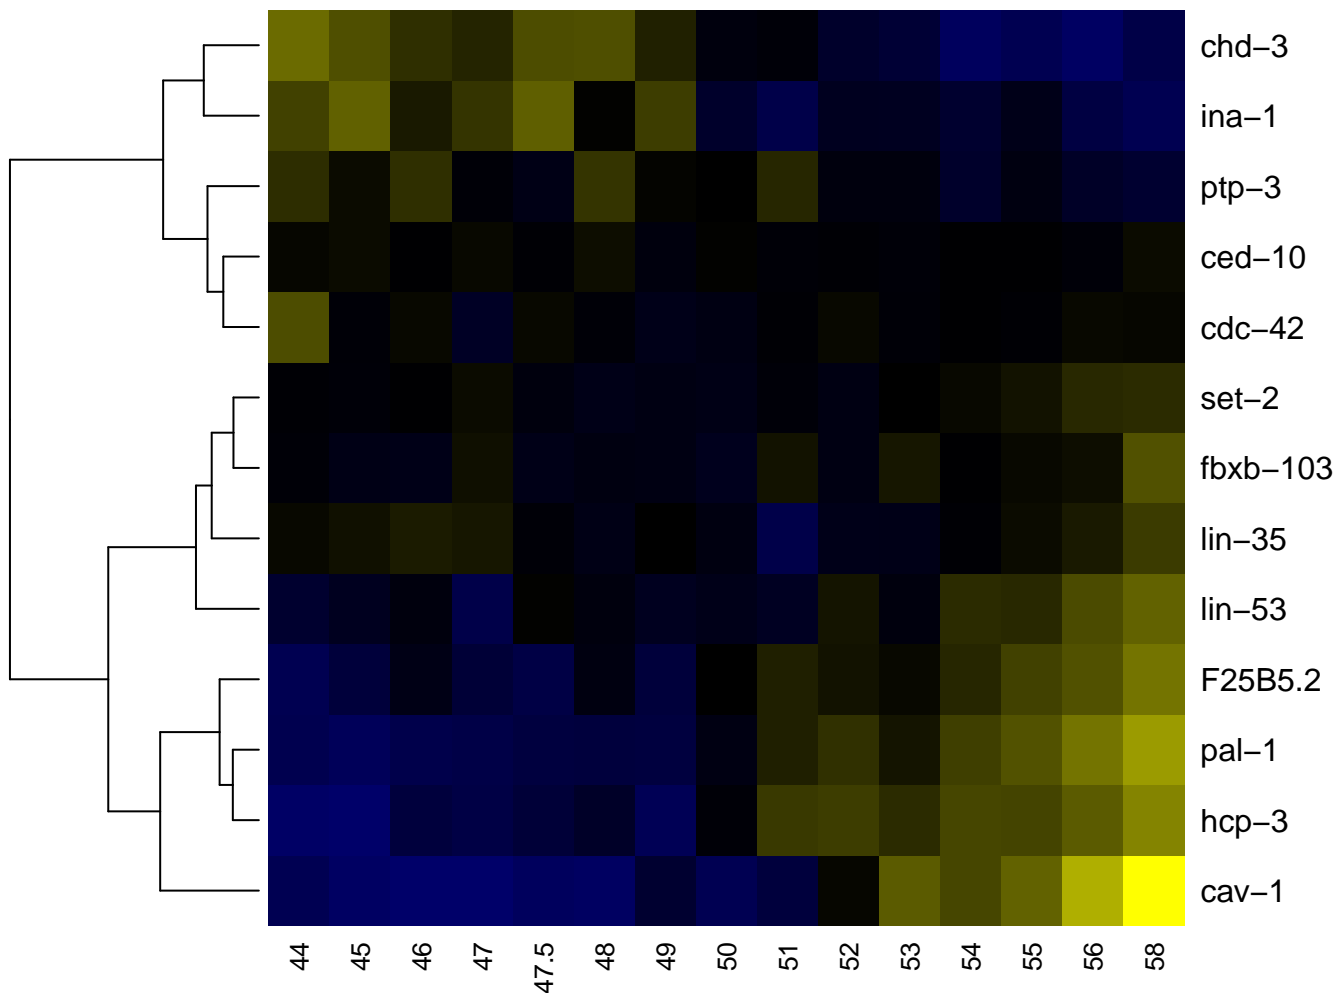

# Cpp

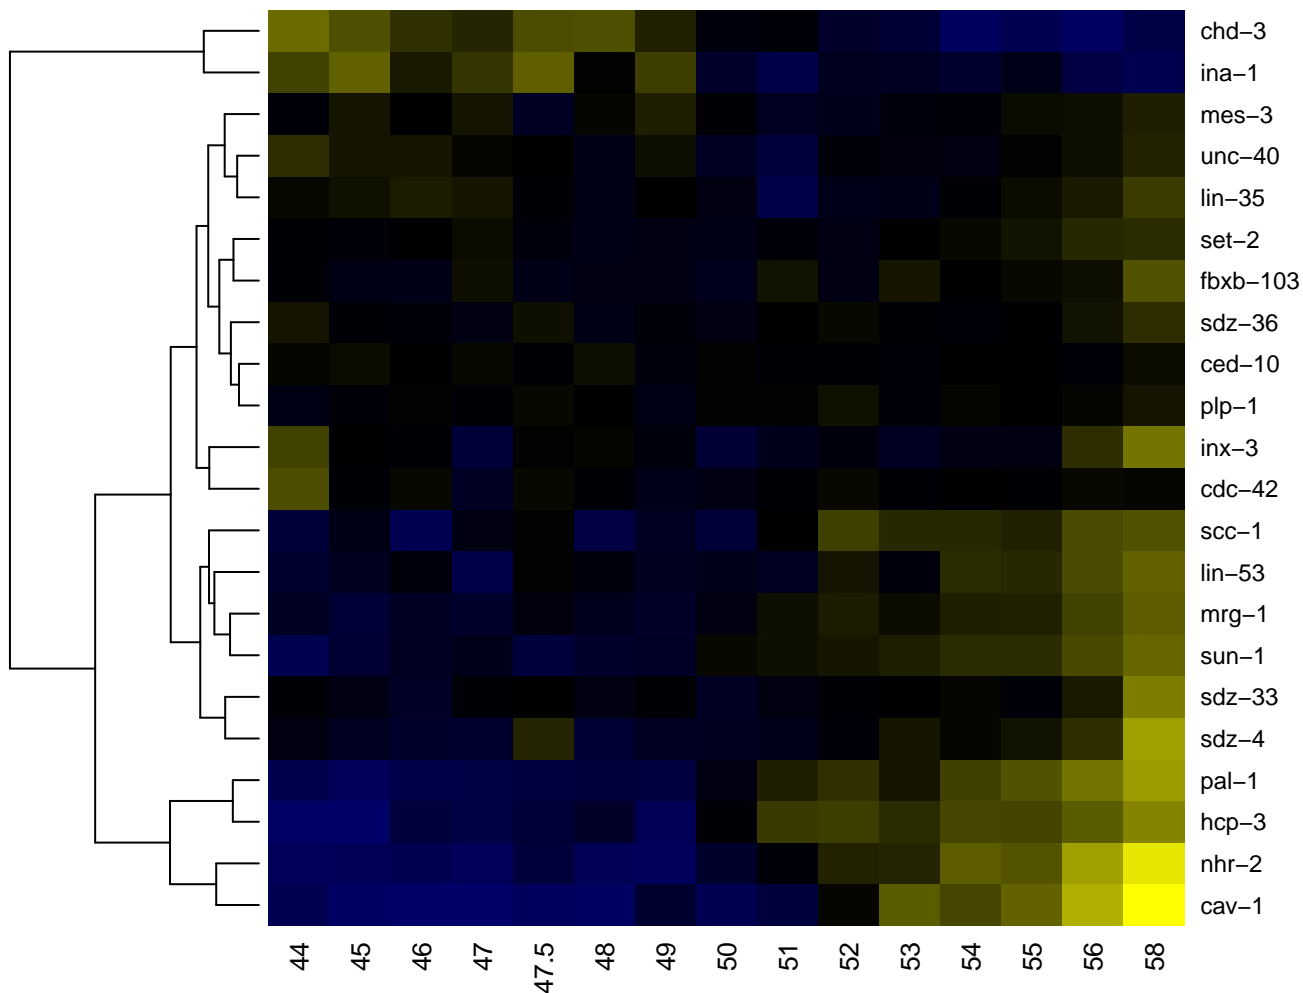

# Cppa



# Cppaa

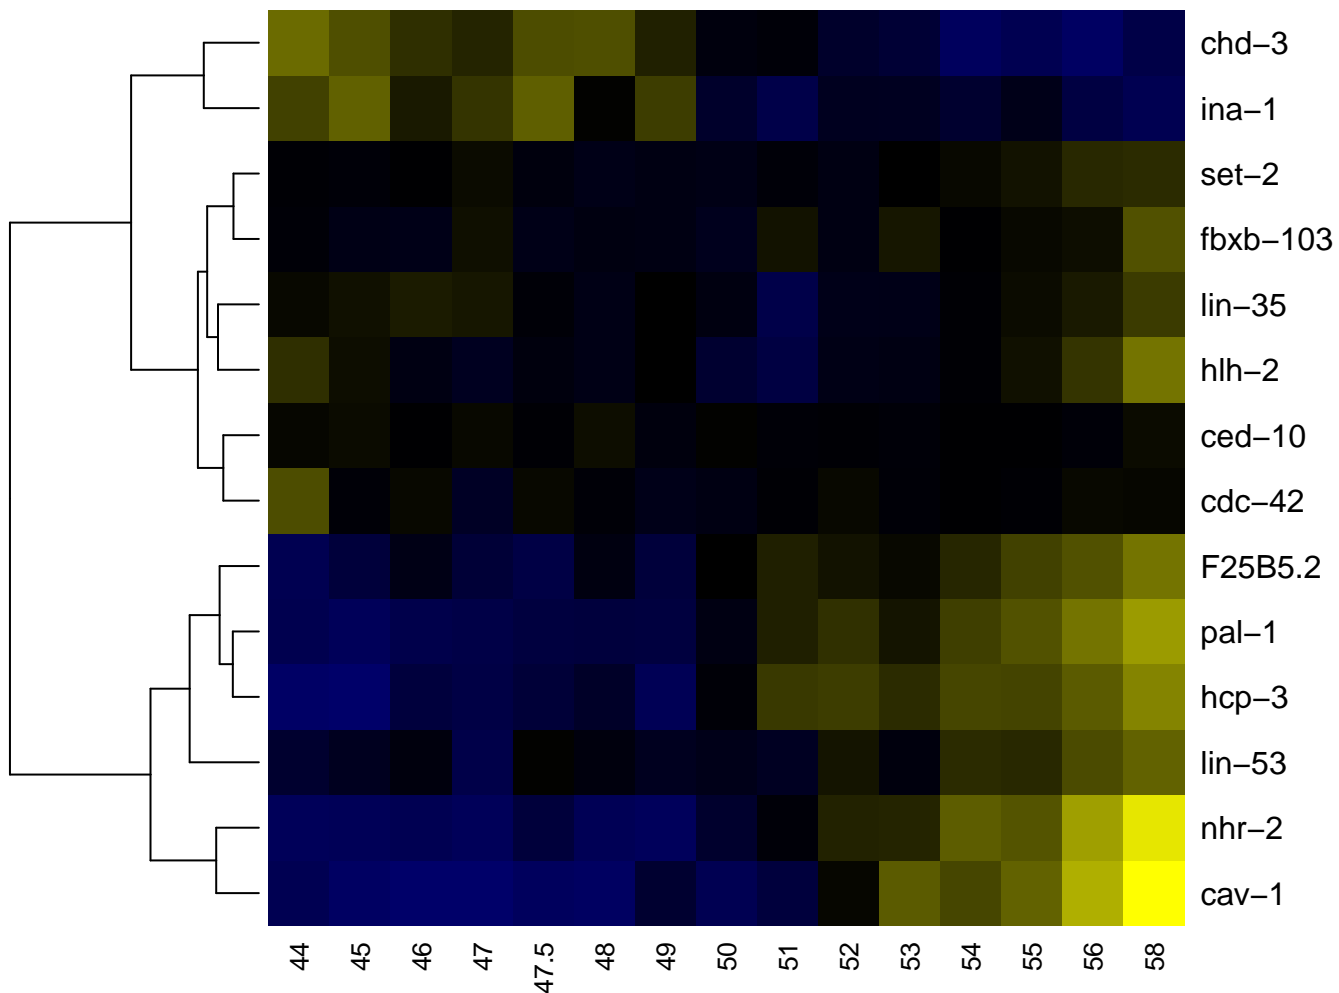

# Cppaaa





# Cppaaap





# Cppaap

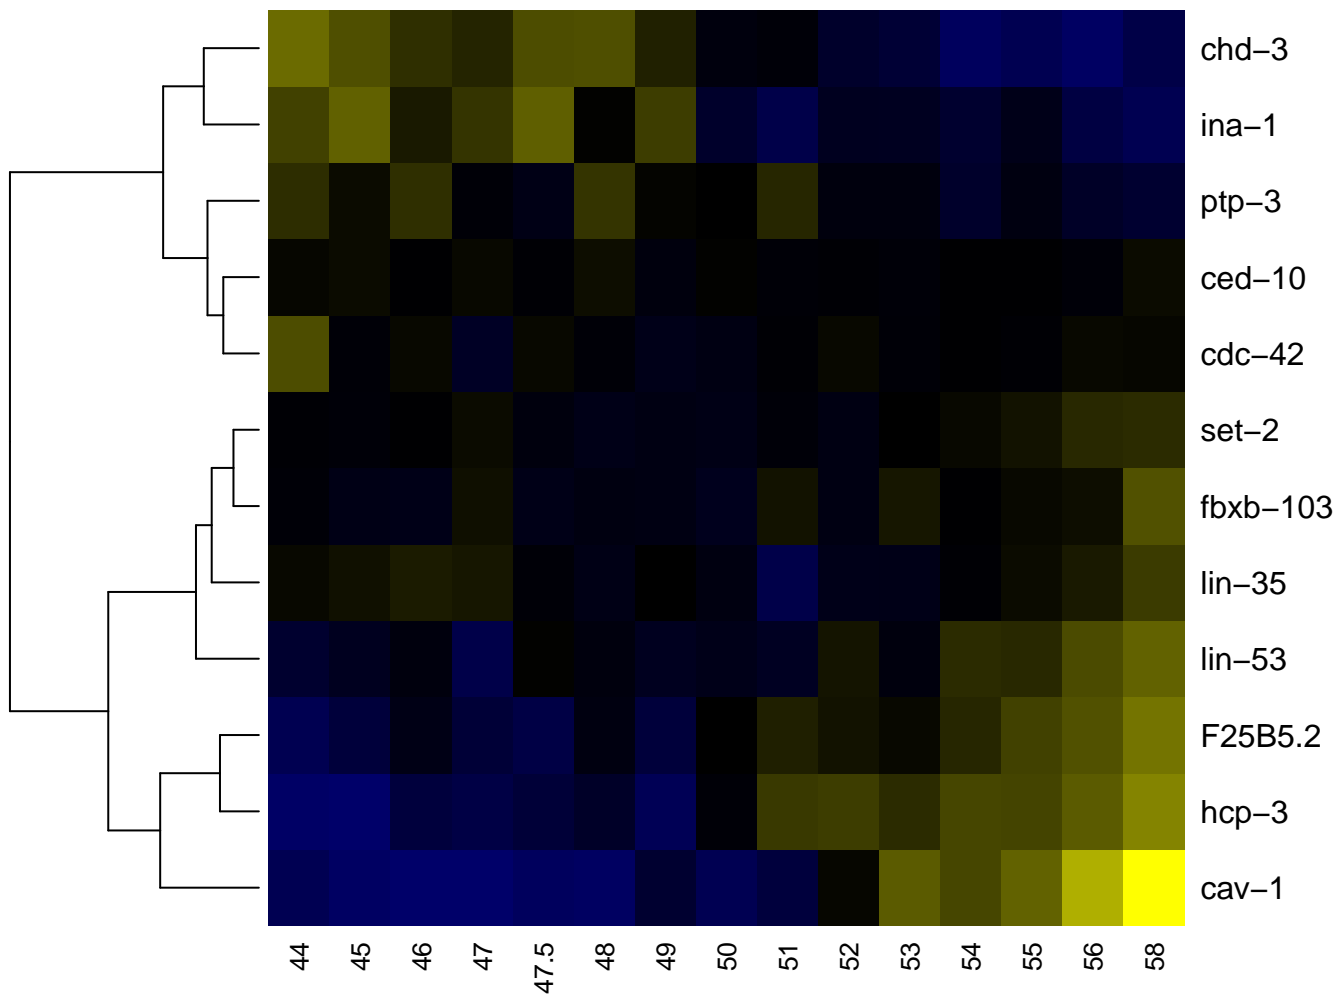





# Cppap



# Cppapa



# Cppapaa





# Cppapp







# Cppappp

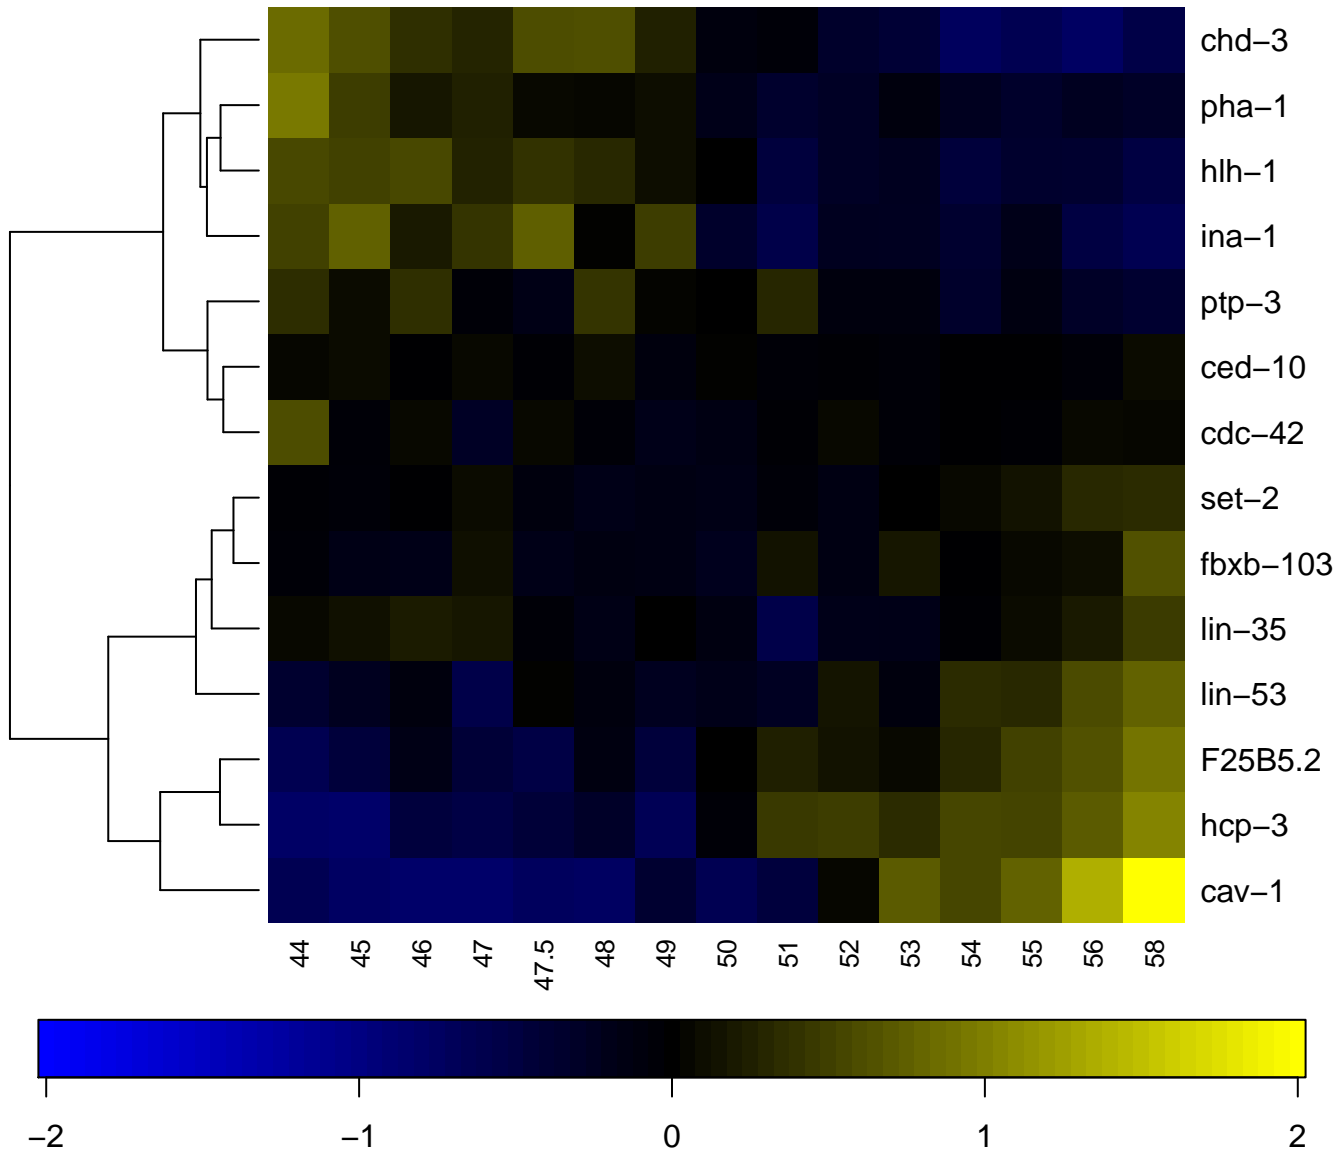

# Cppp

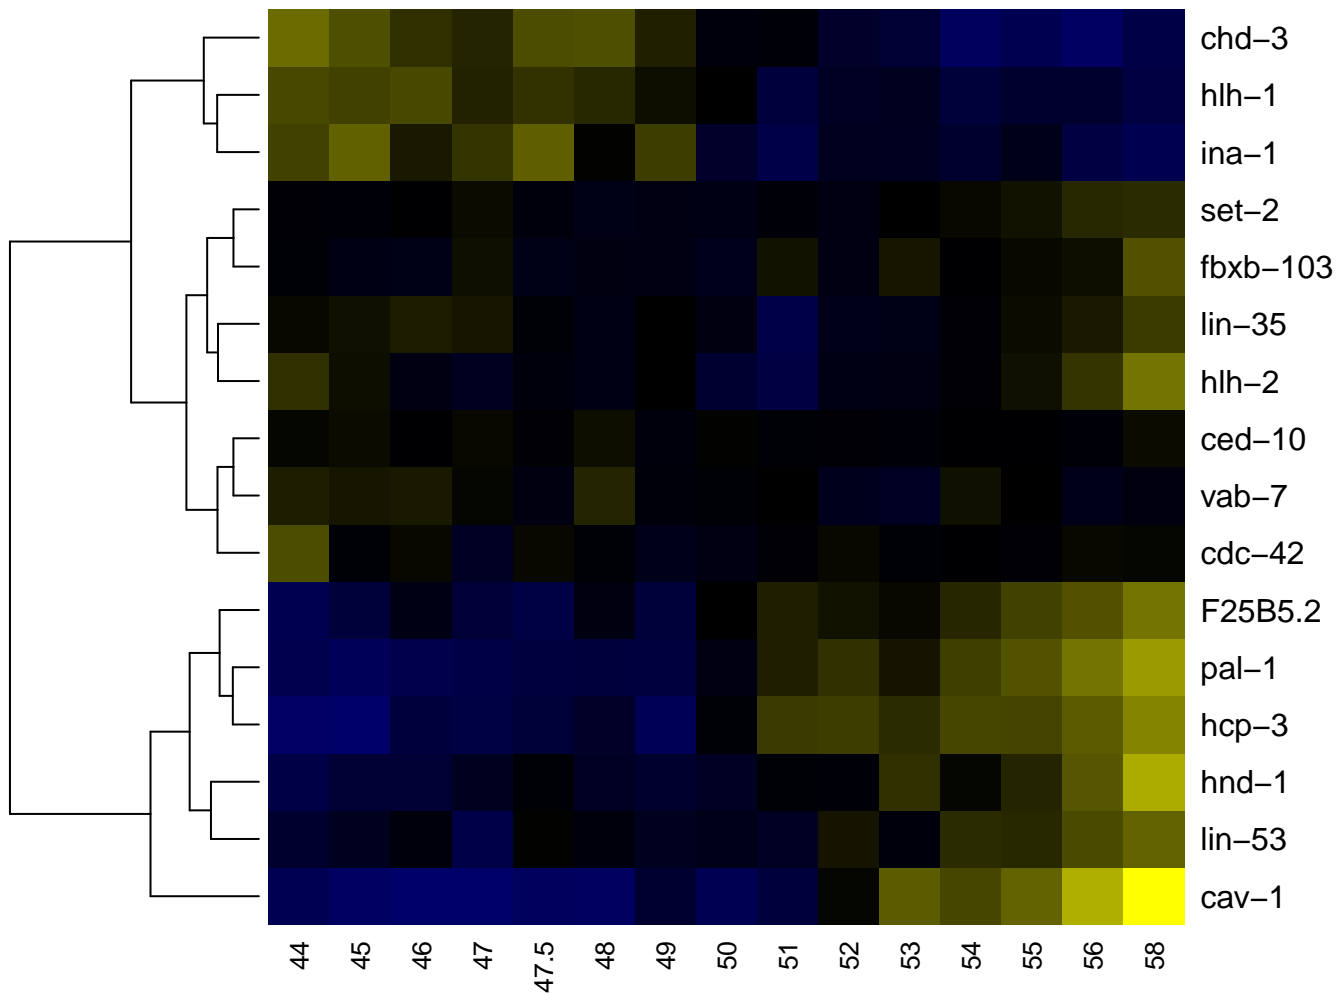



# Cpppaa



# Cpppaaa

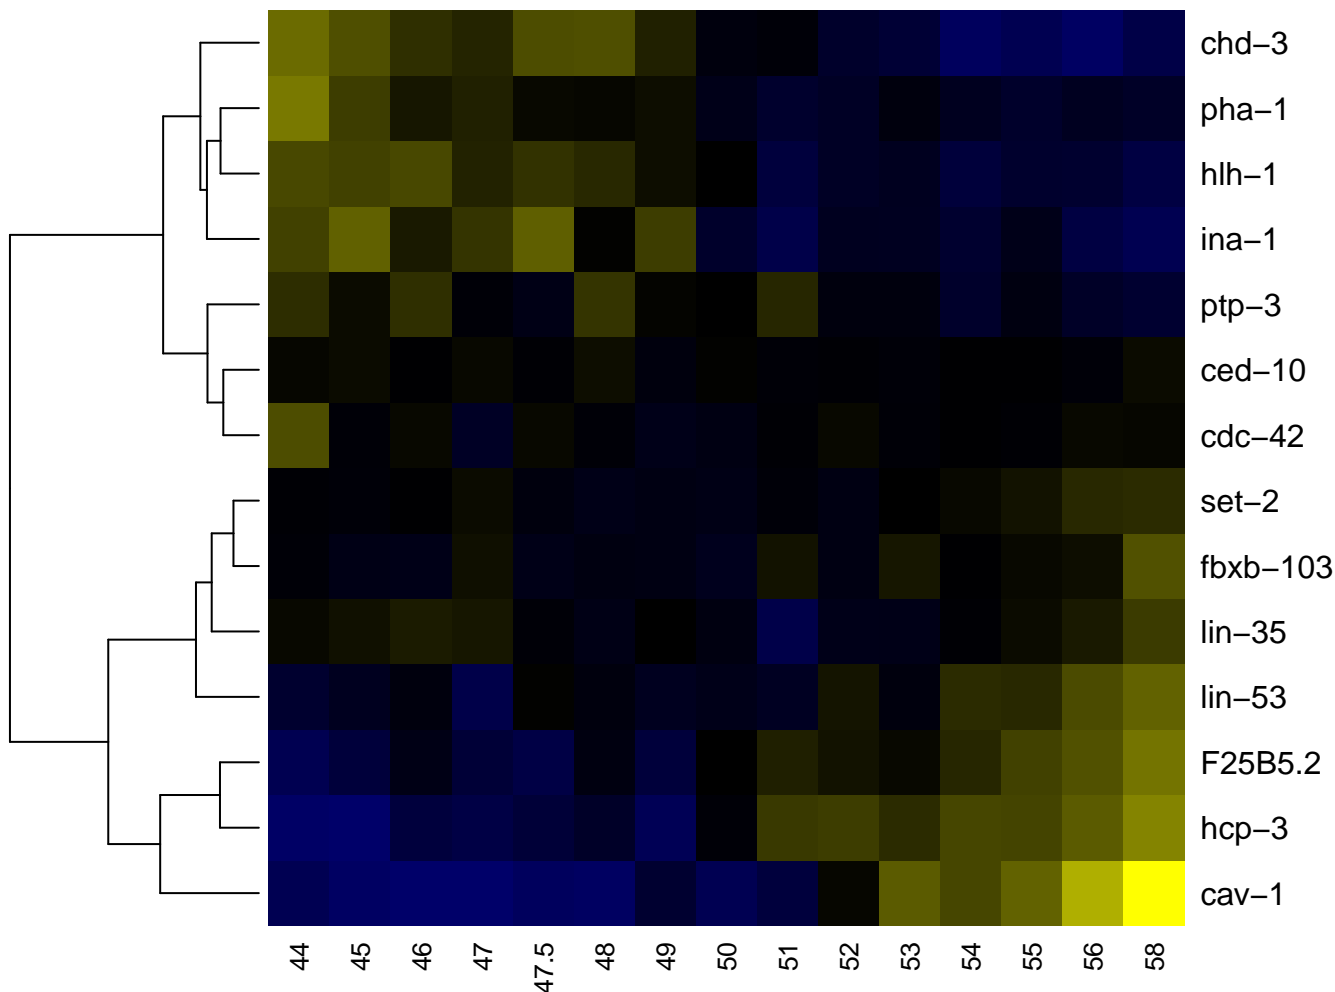



# Cpppap

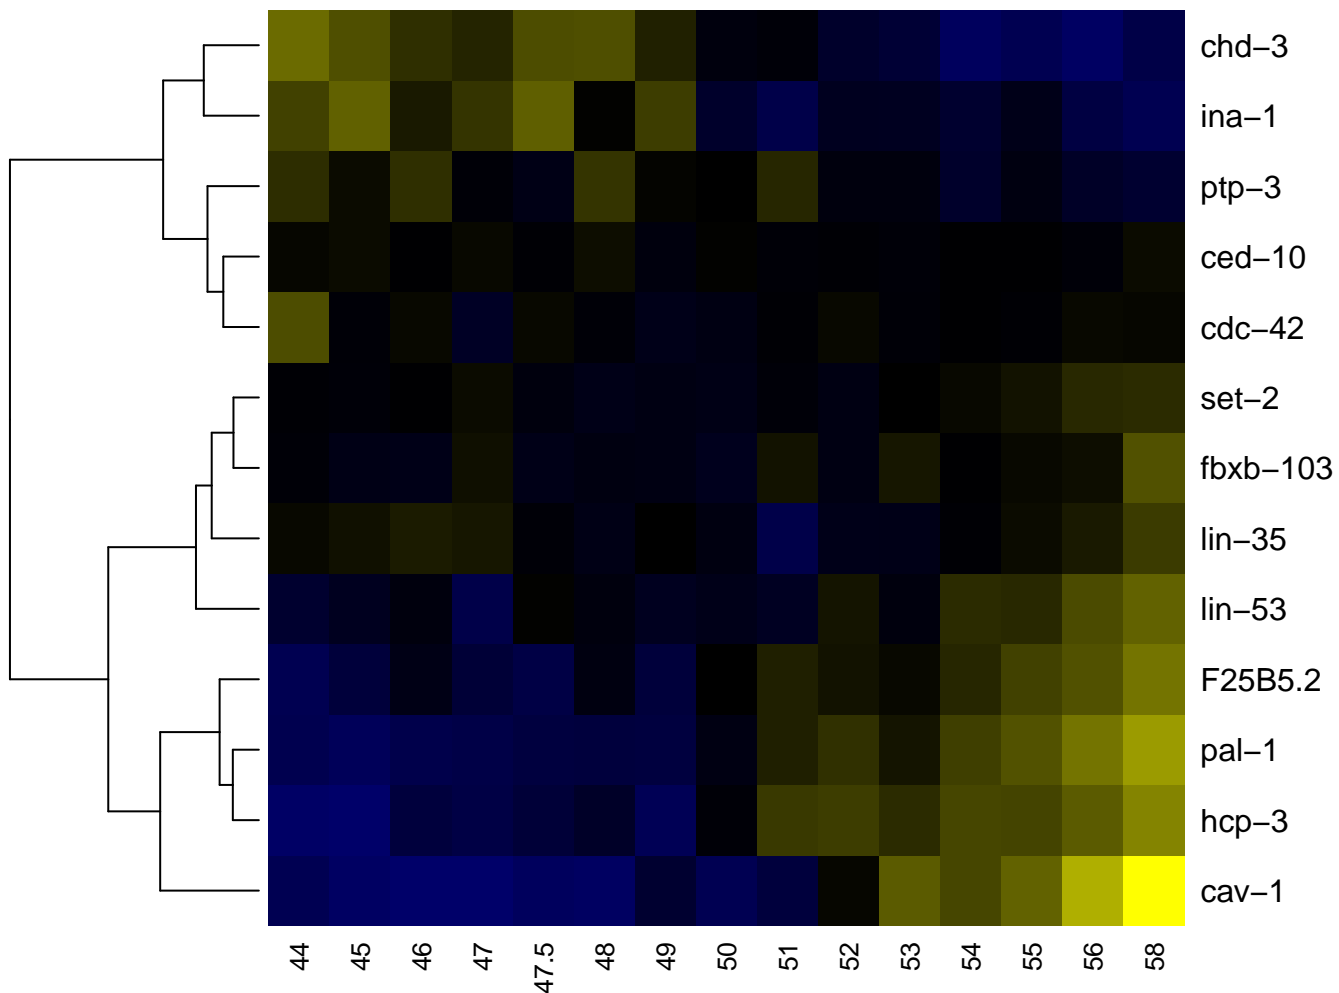









# Cpppppa





# Cppppap



# Cpppppp



-2

-1

0

1

2

# Cpppppd





# Cpppppv



# cuticle

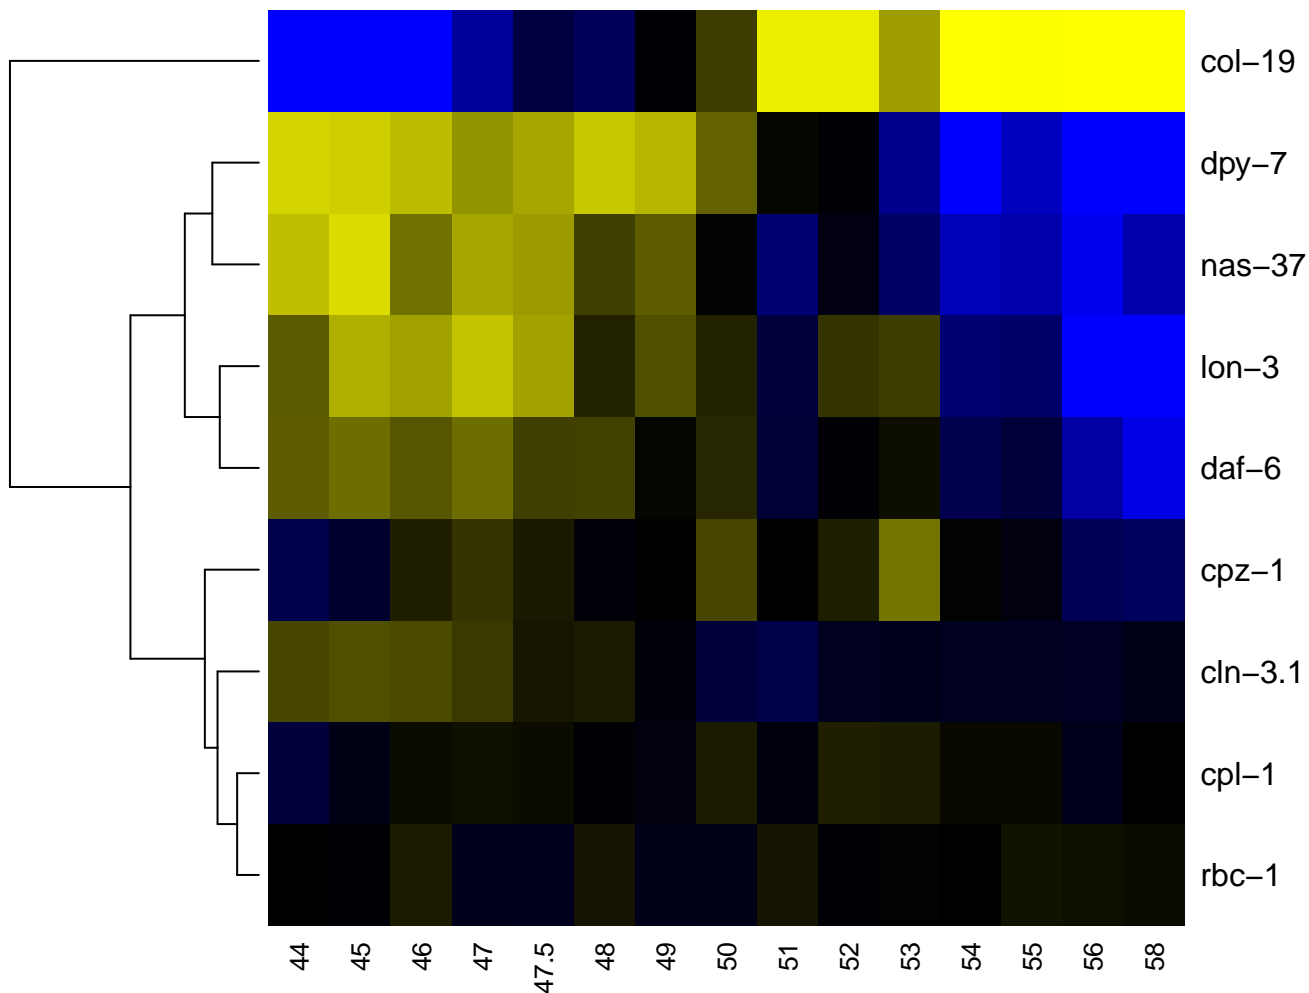

-2

-1

0

1

2

D

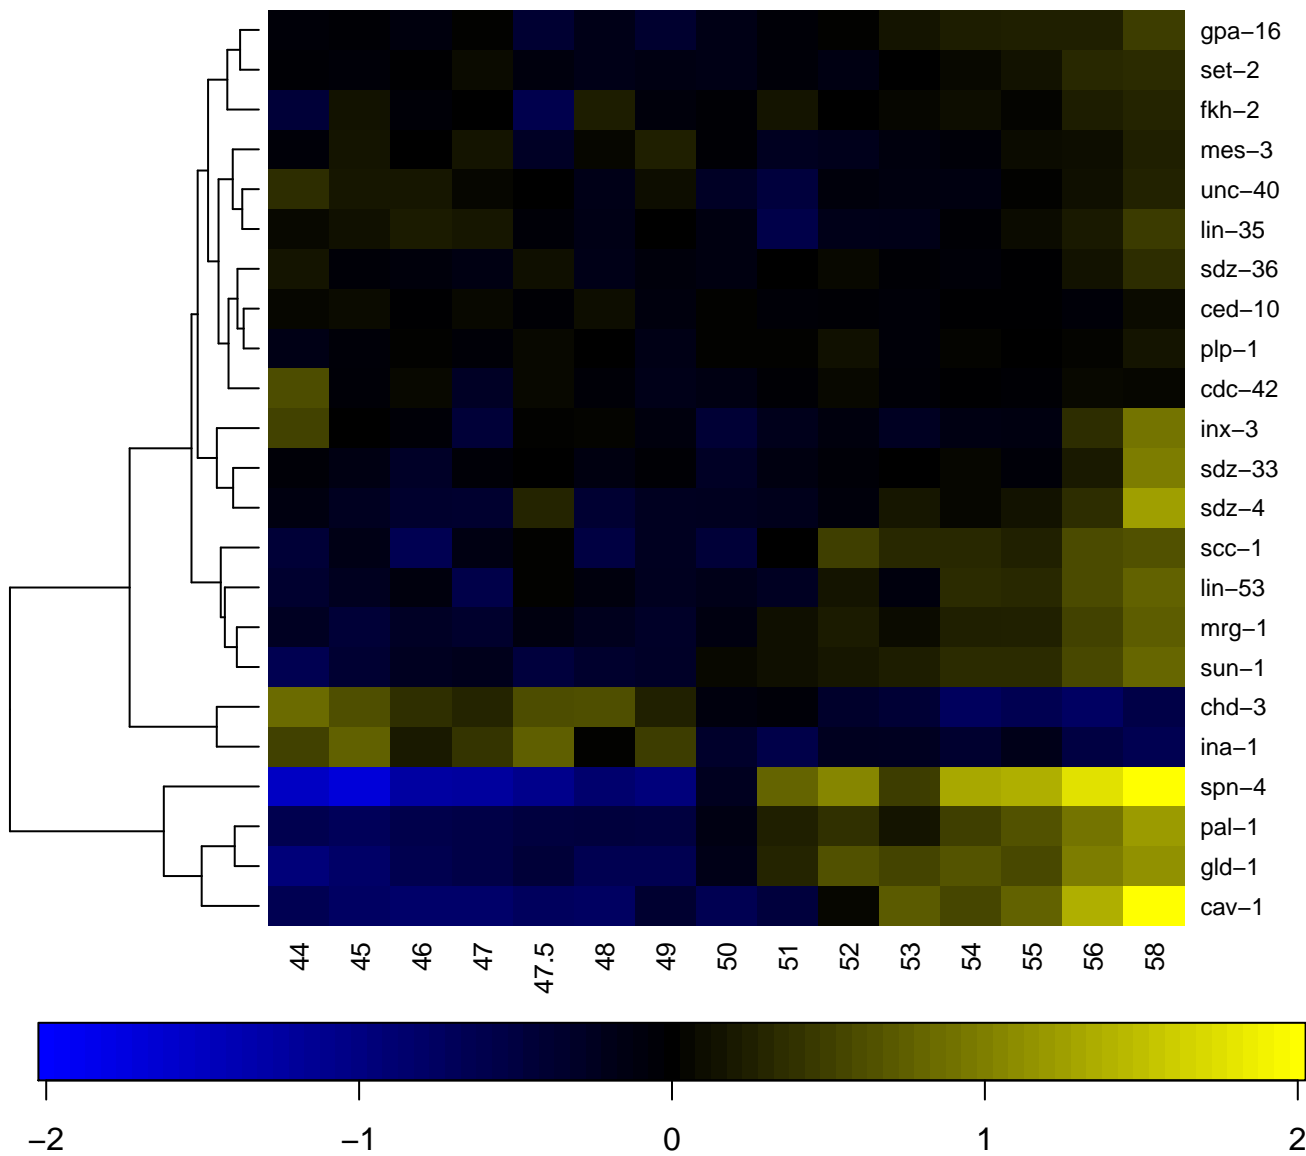

Da

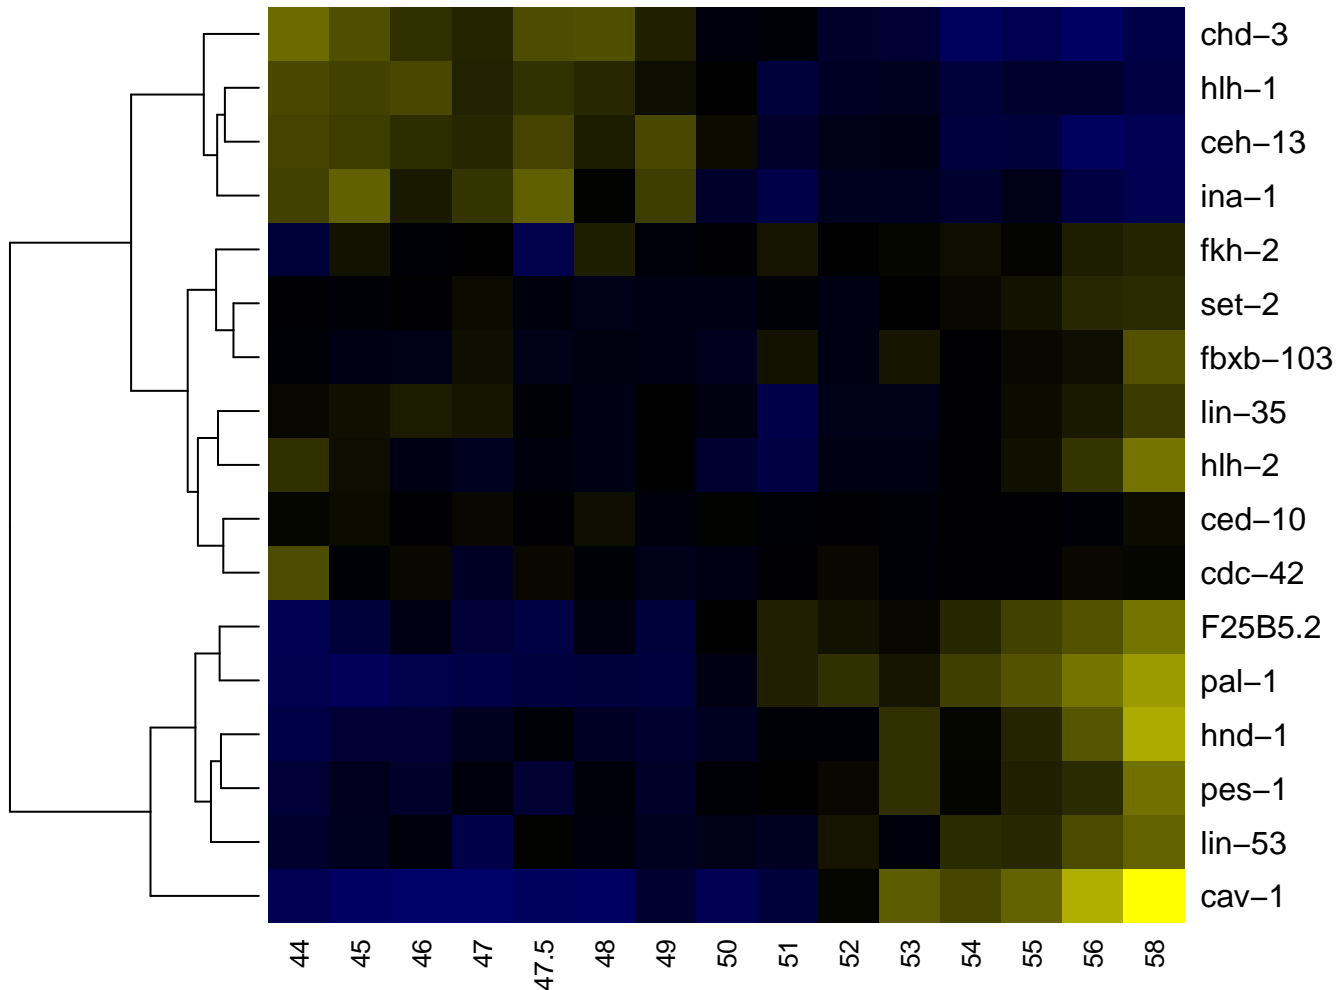

# DA neuron

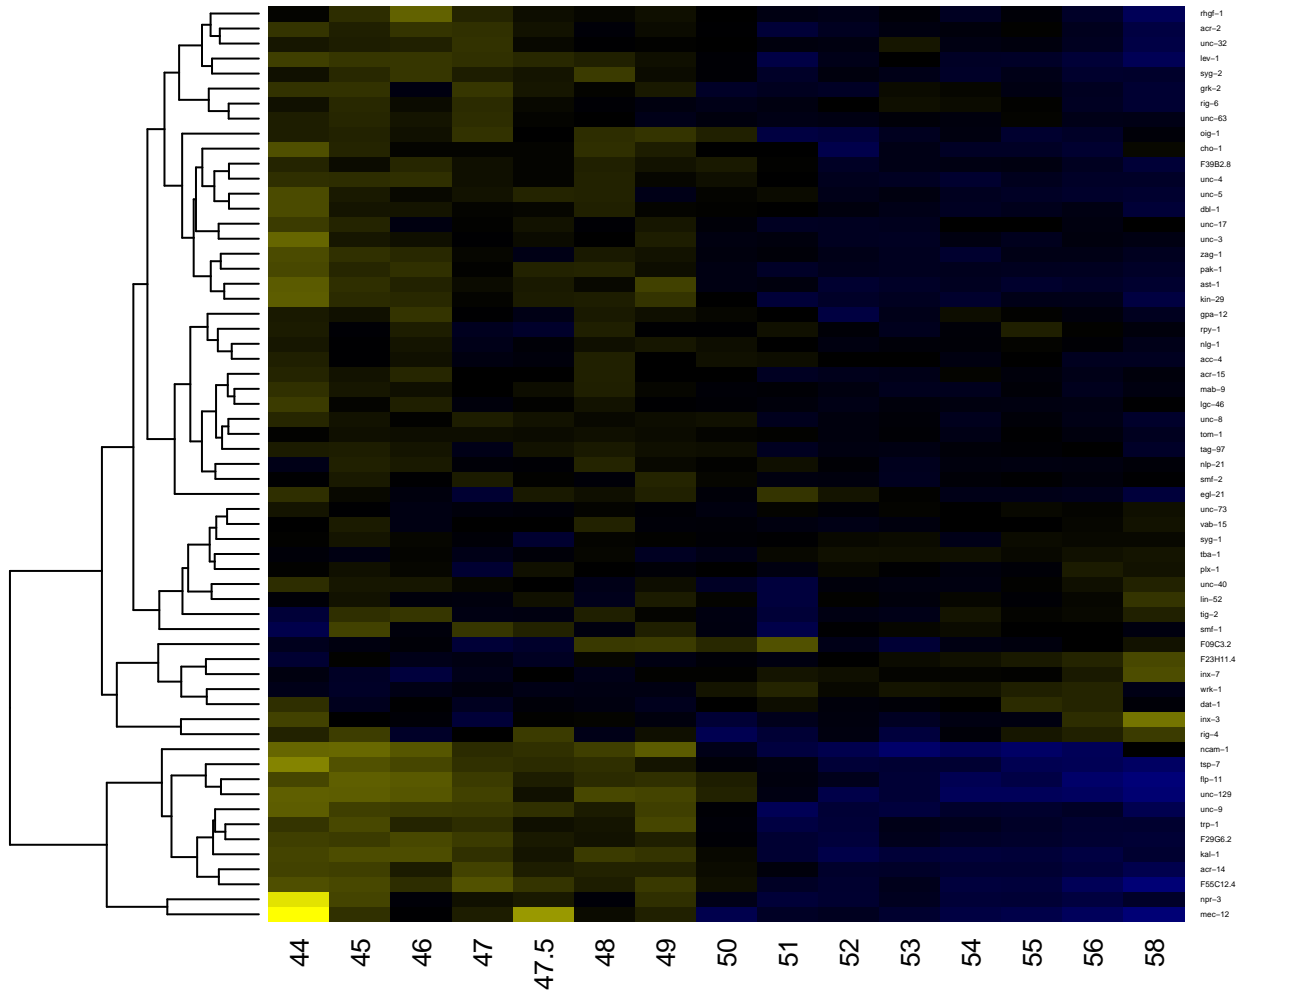

# DA1

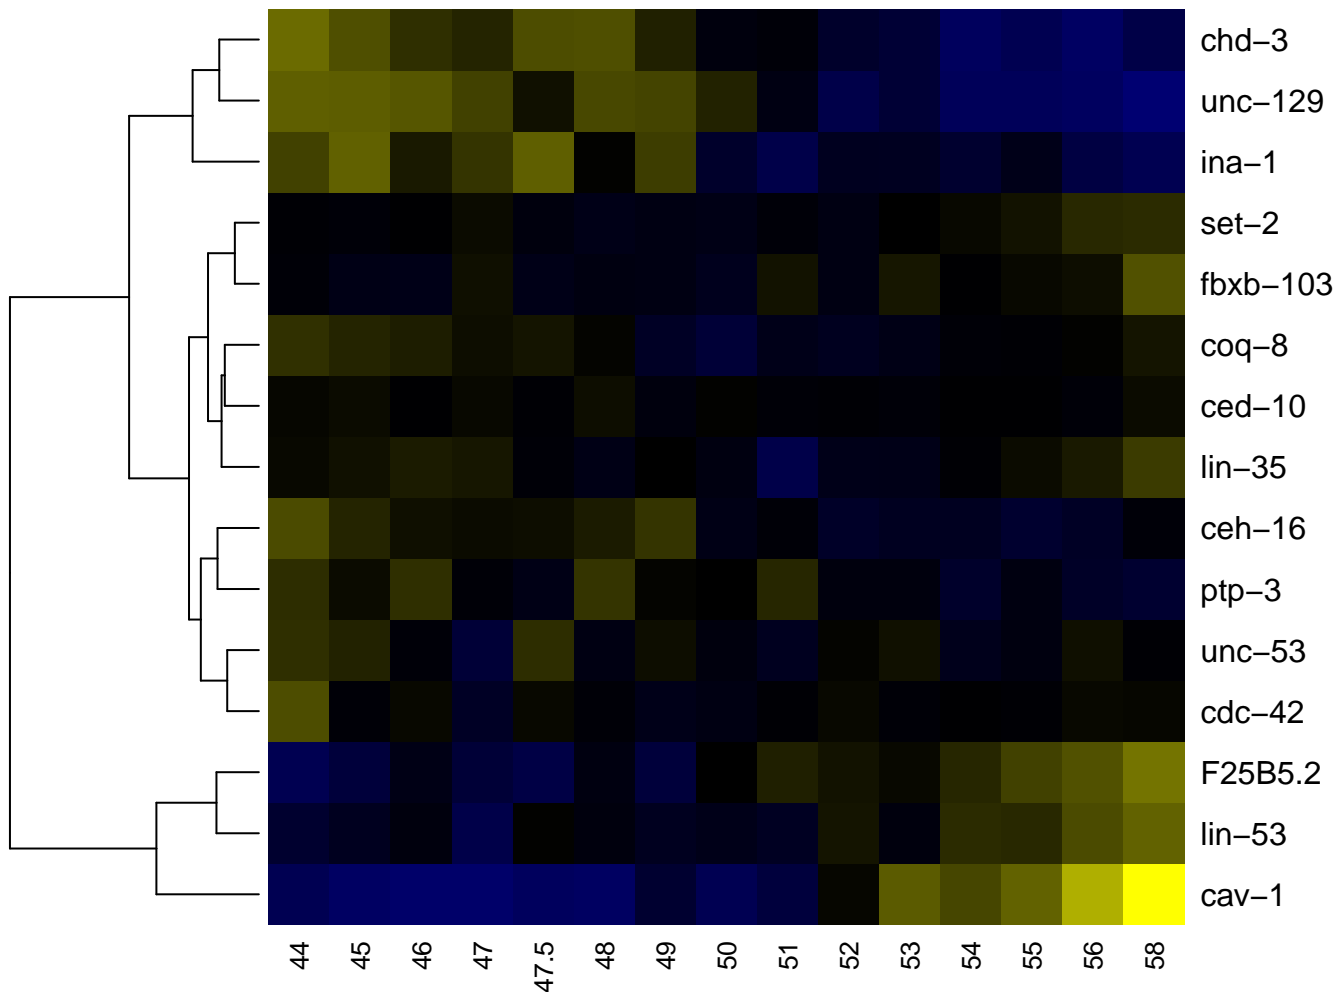

# DA2

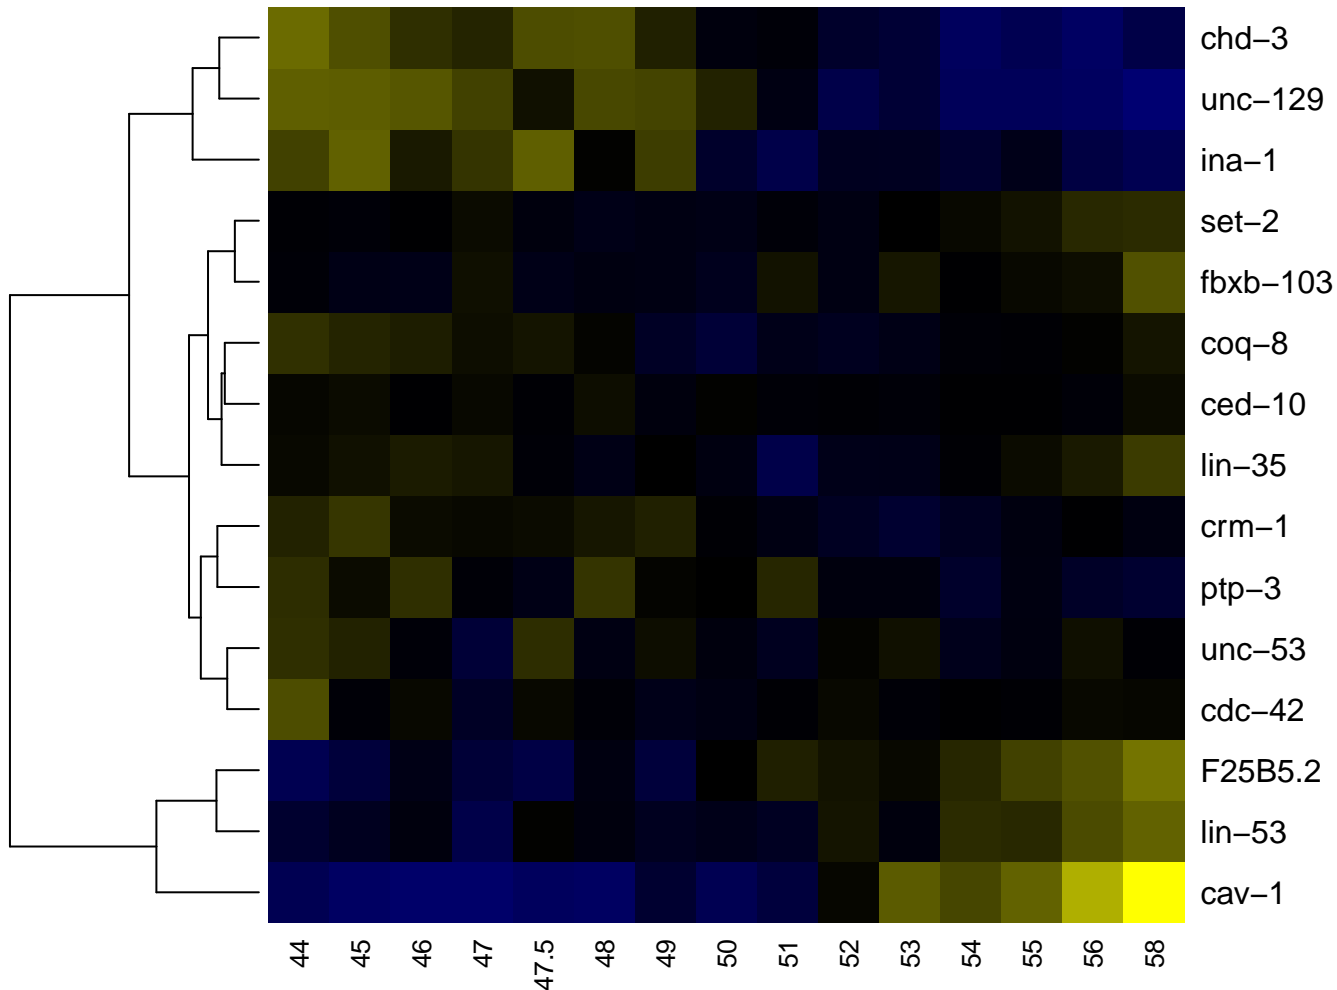

# DA3

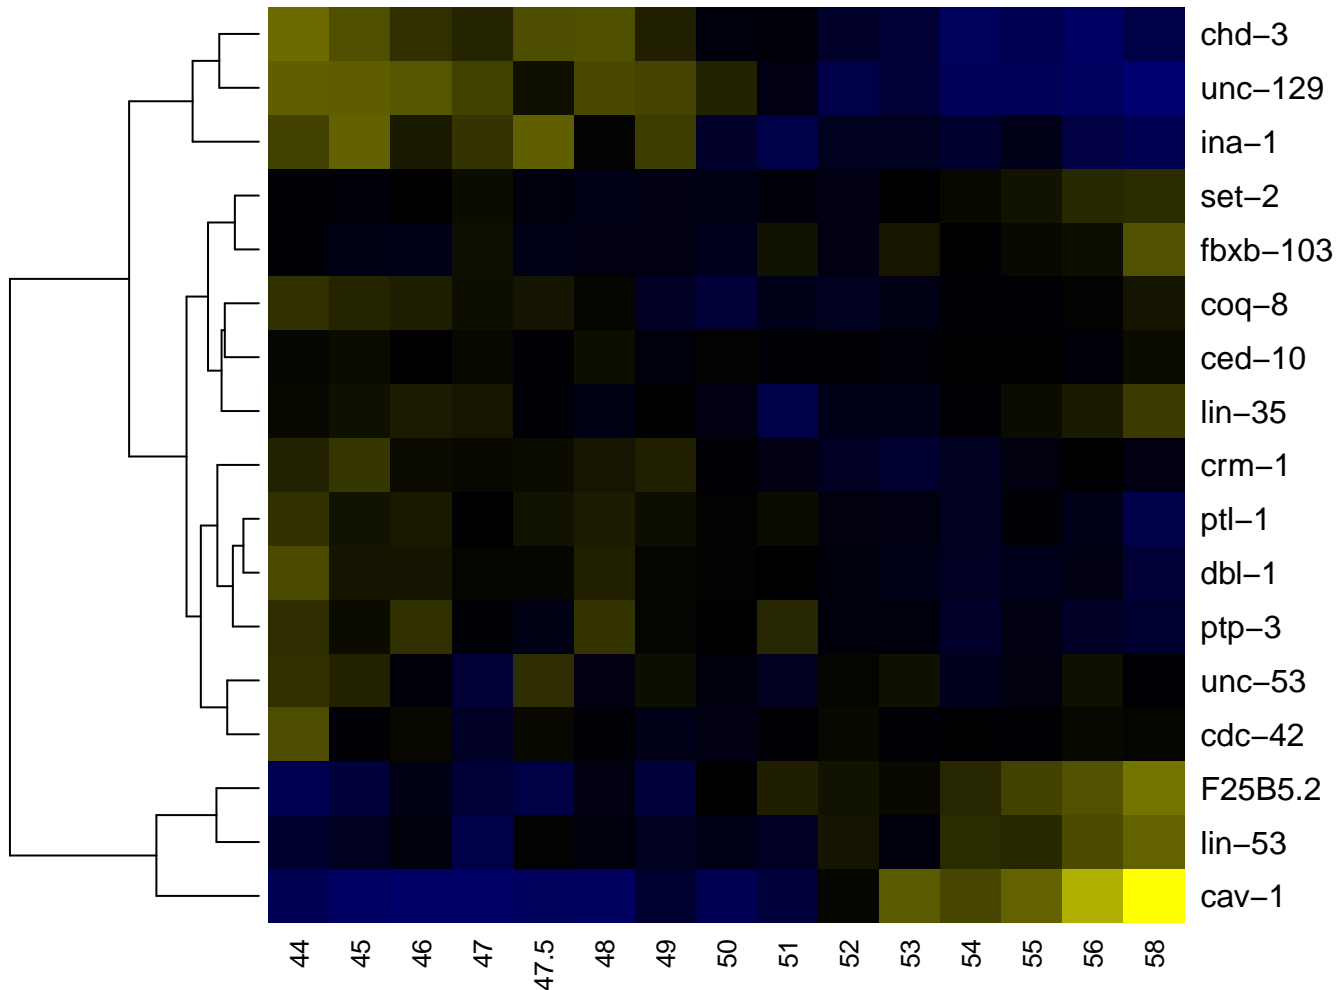



# DA4

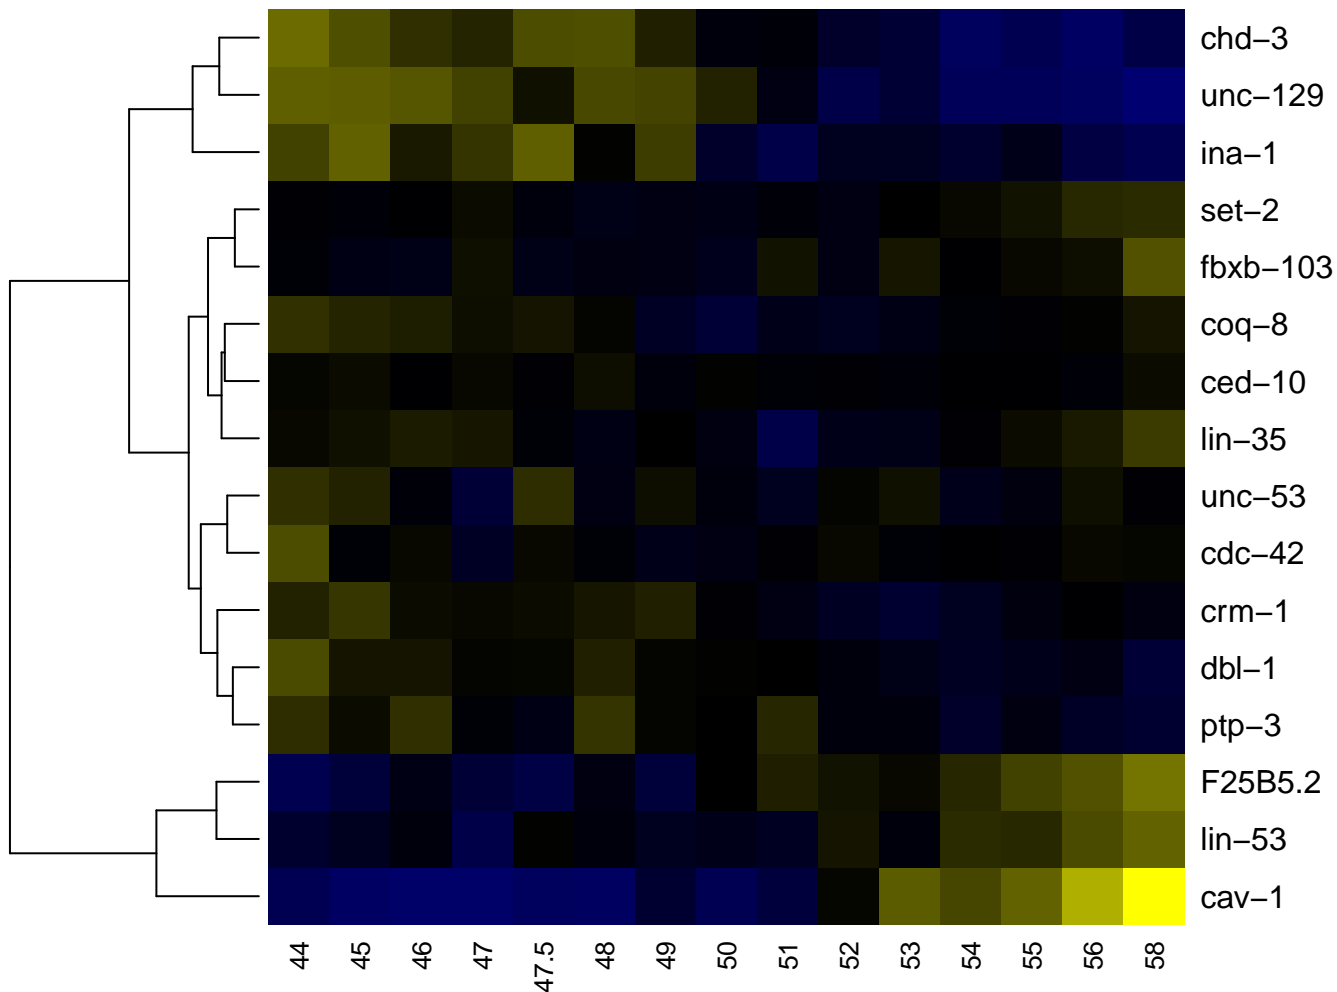

# DA5

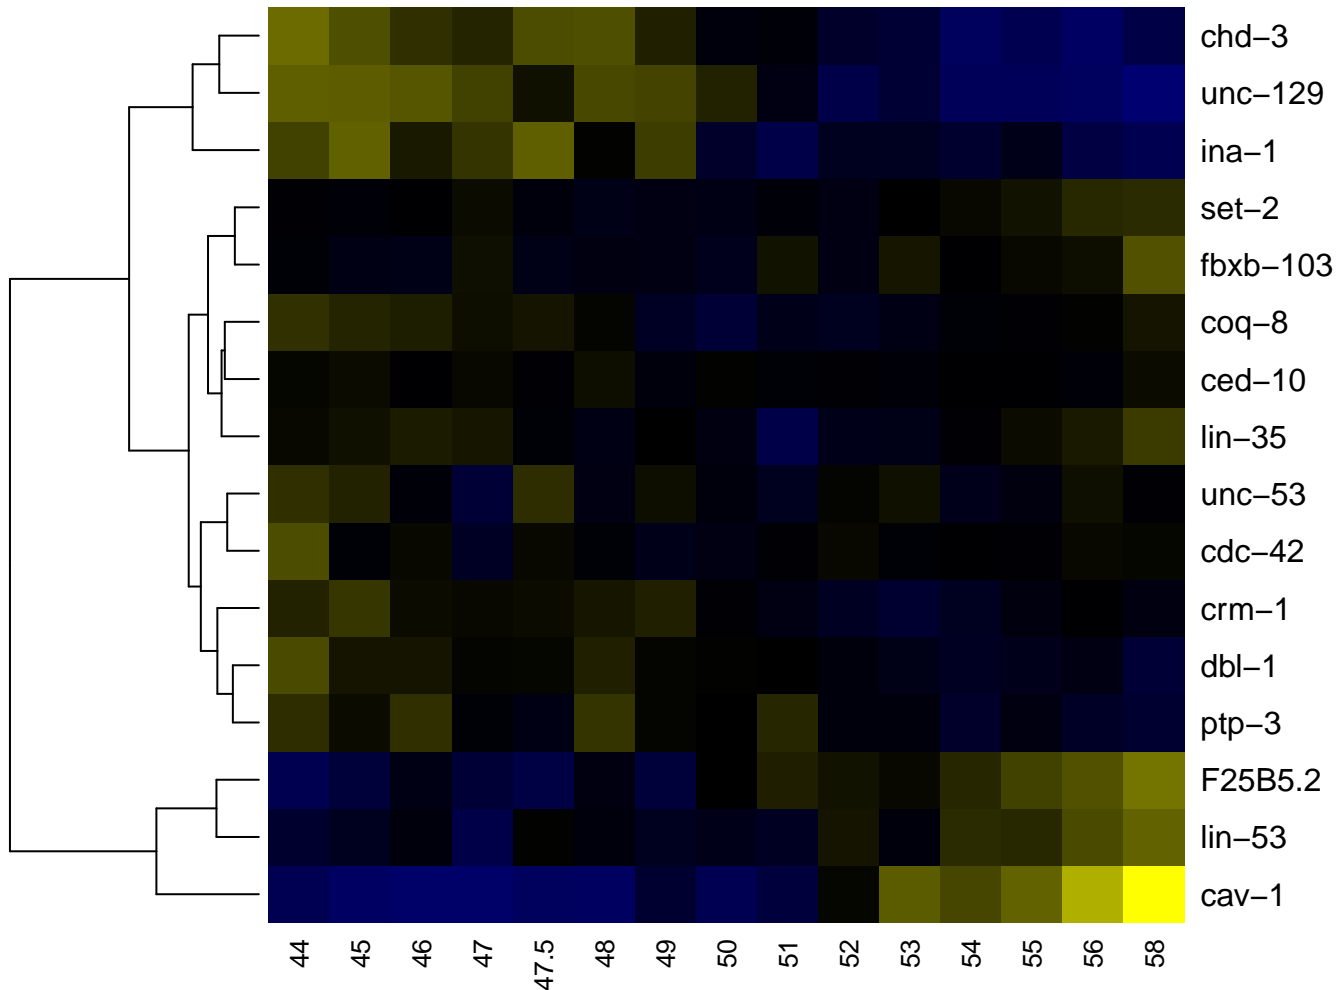

# DA6

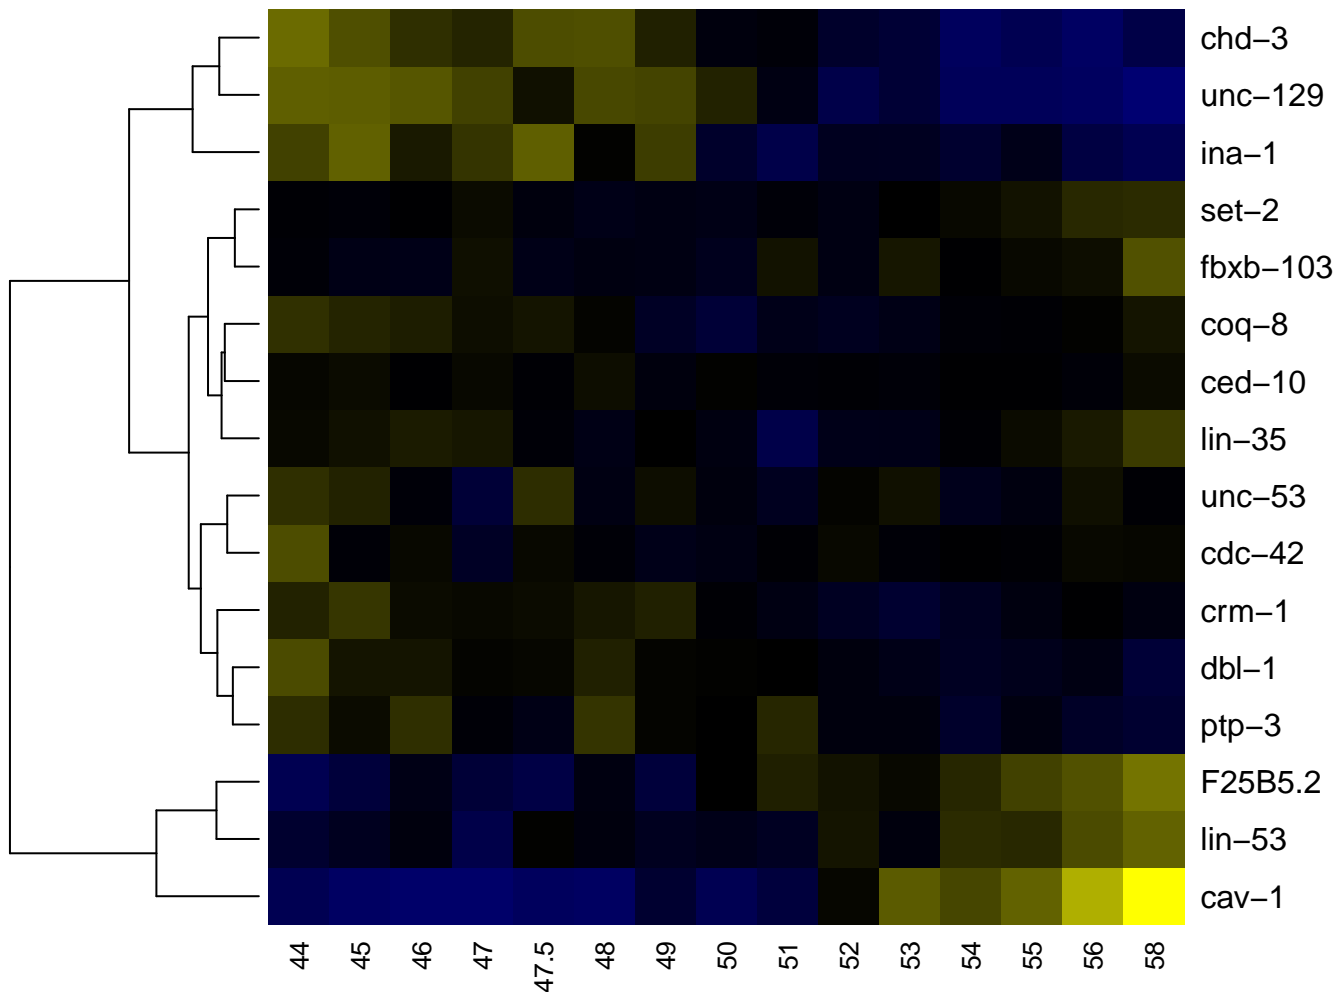

# DA7





# DA9

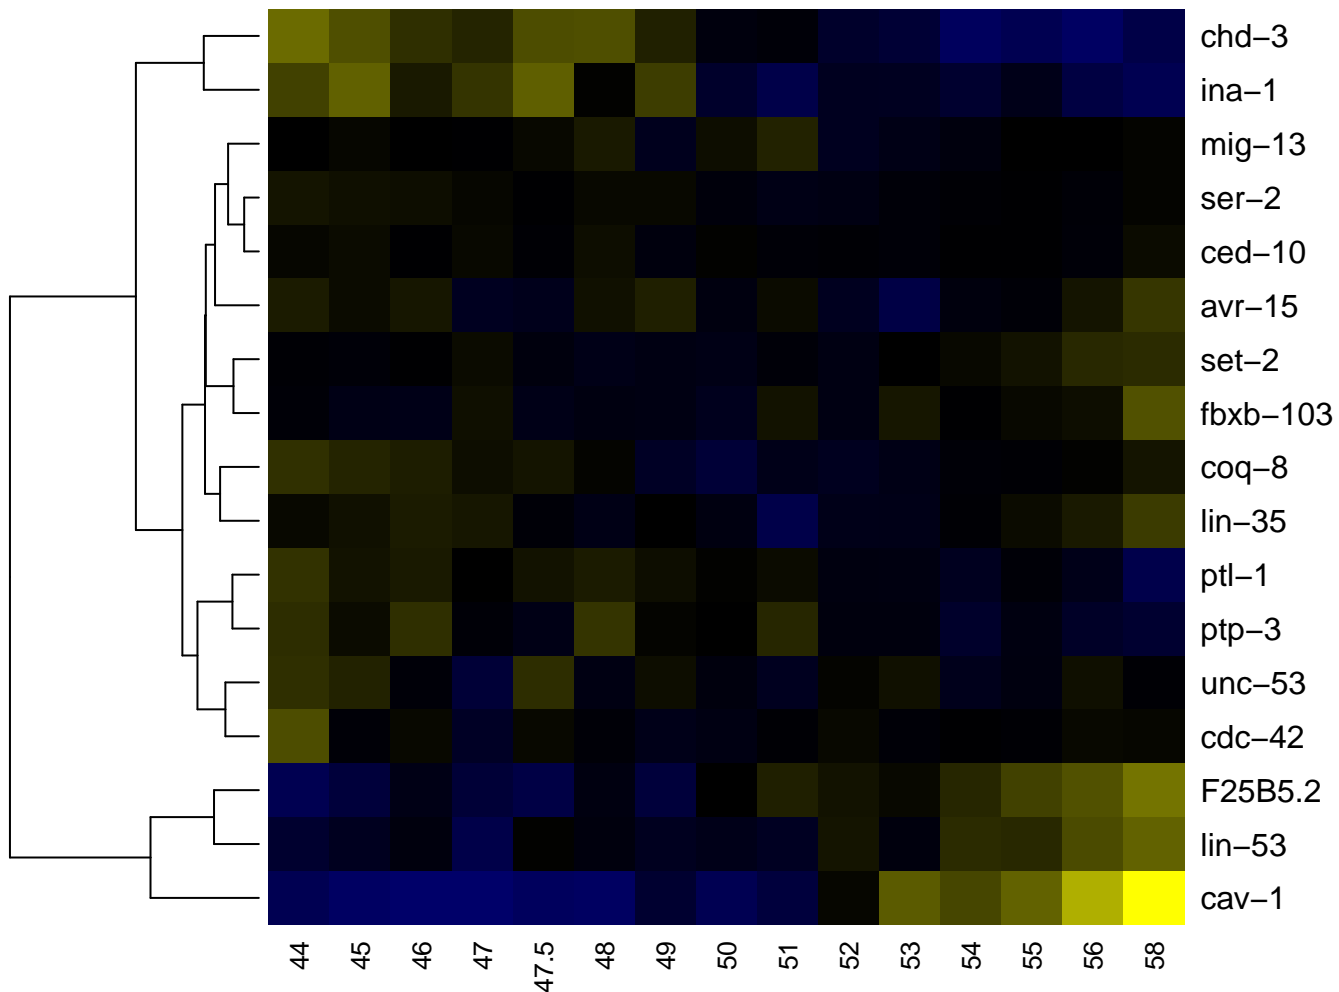

# Daa

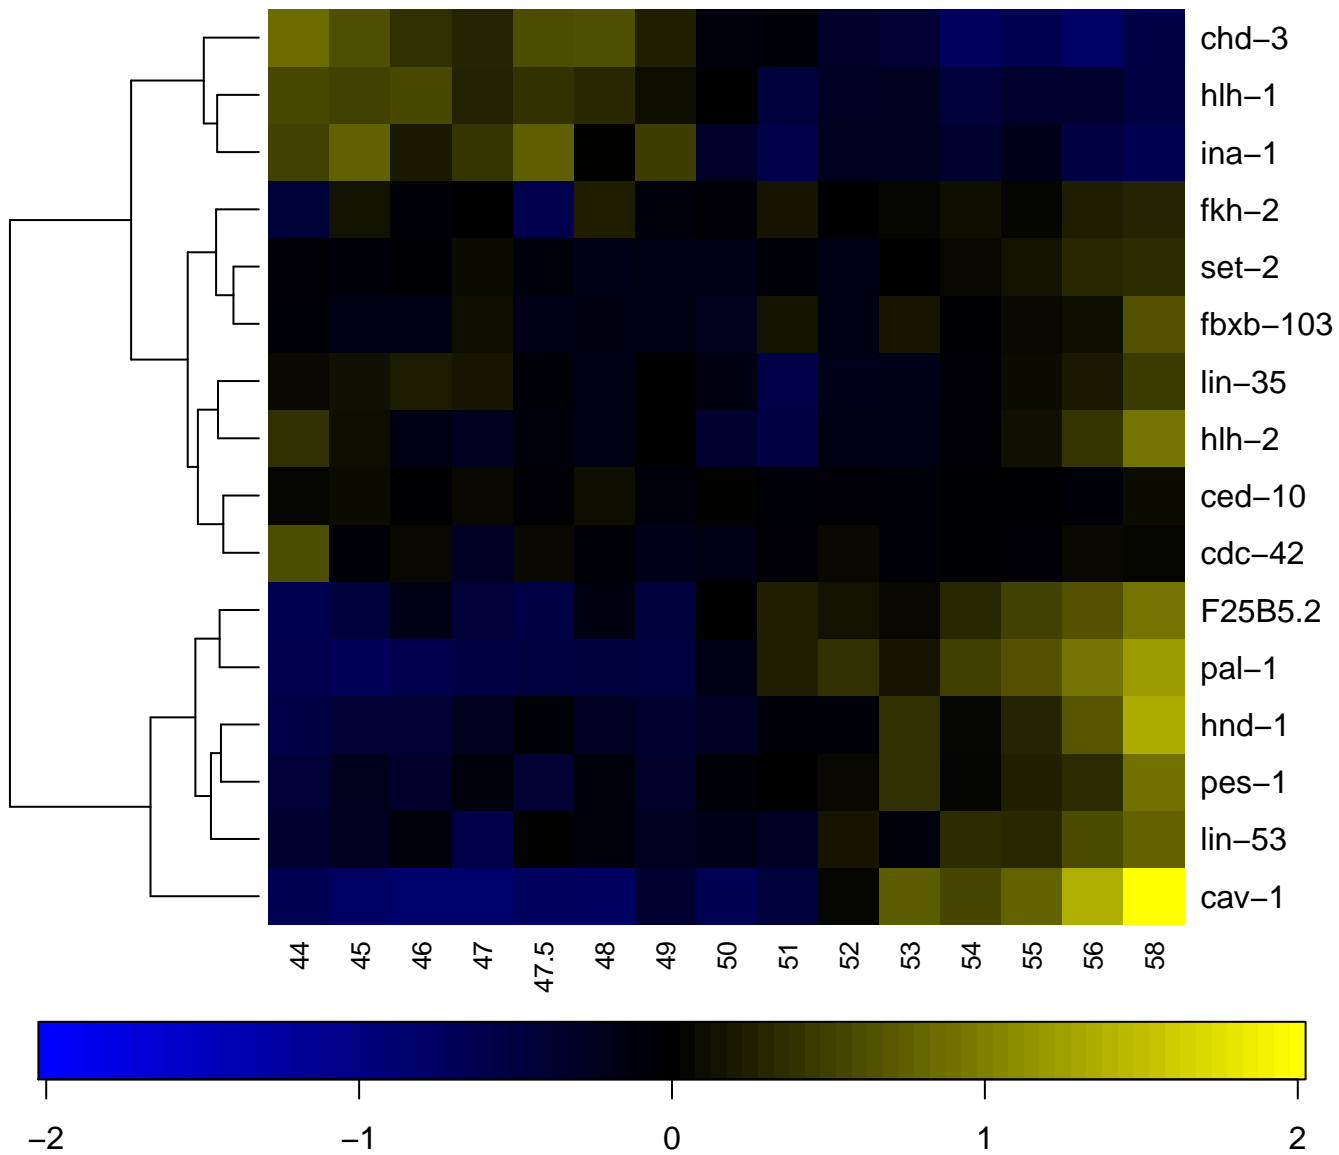

# Daaa

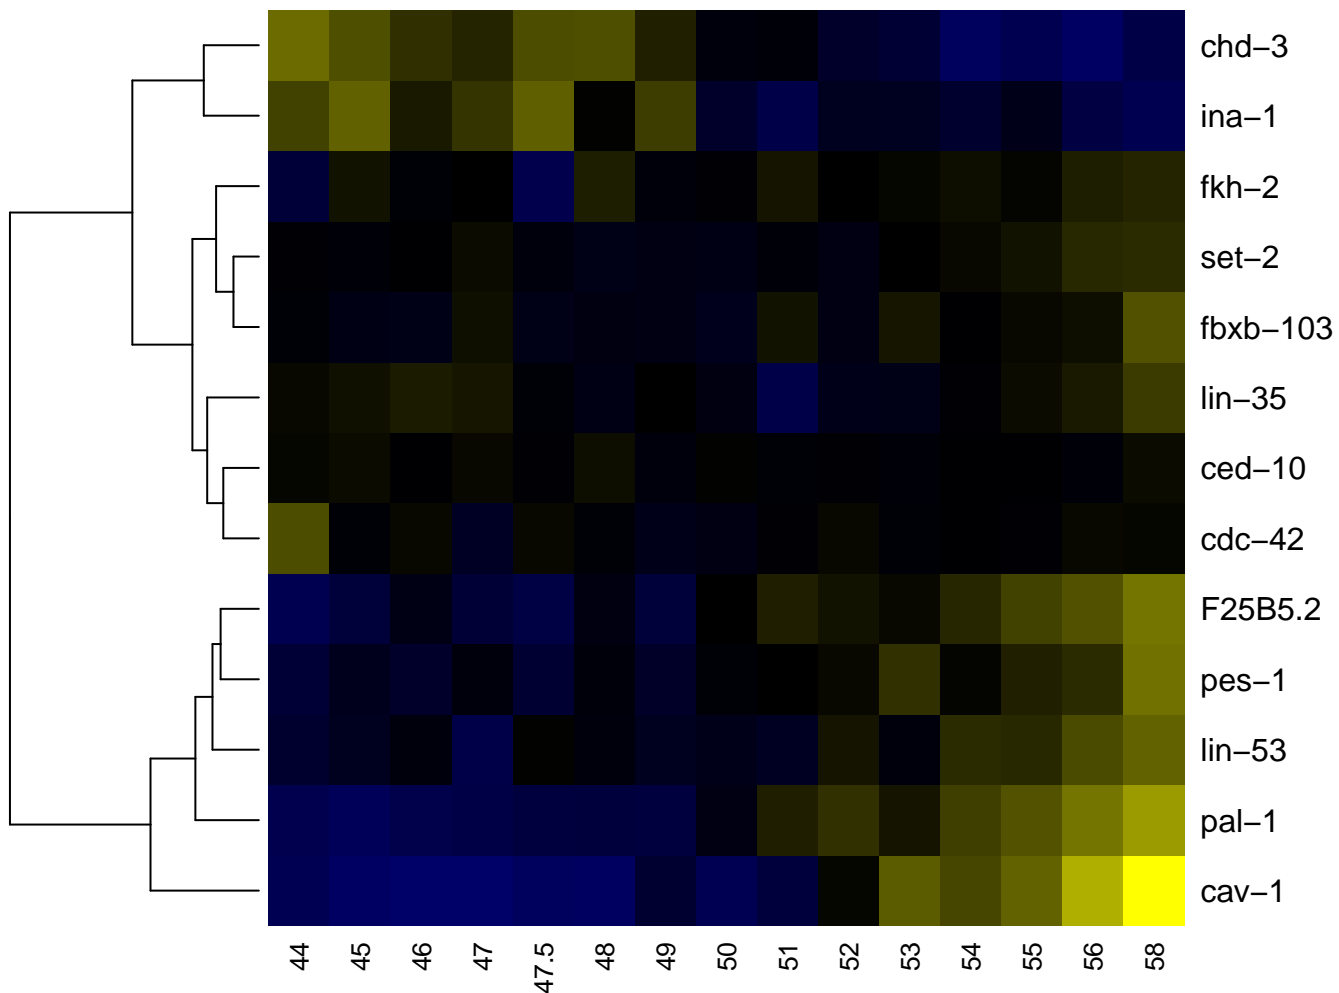



# Daaaa

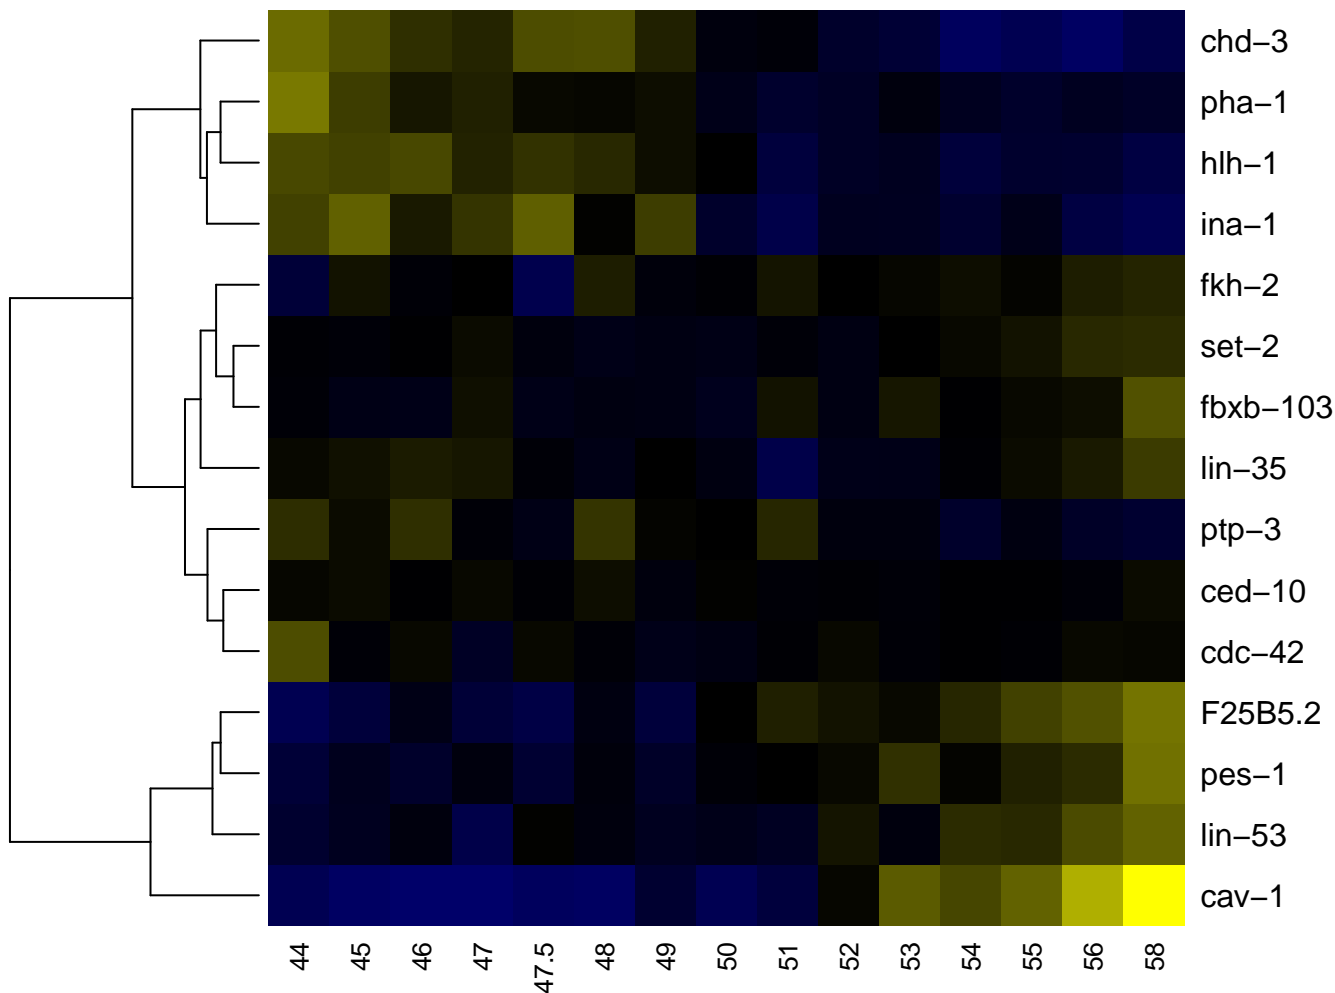

# Daaap

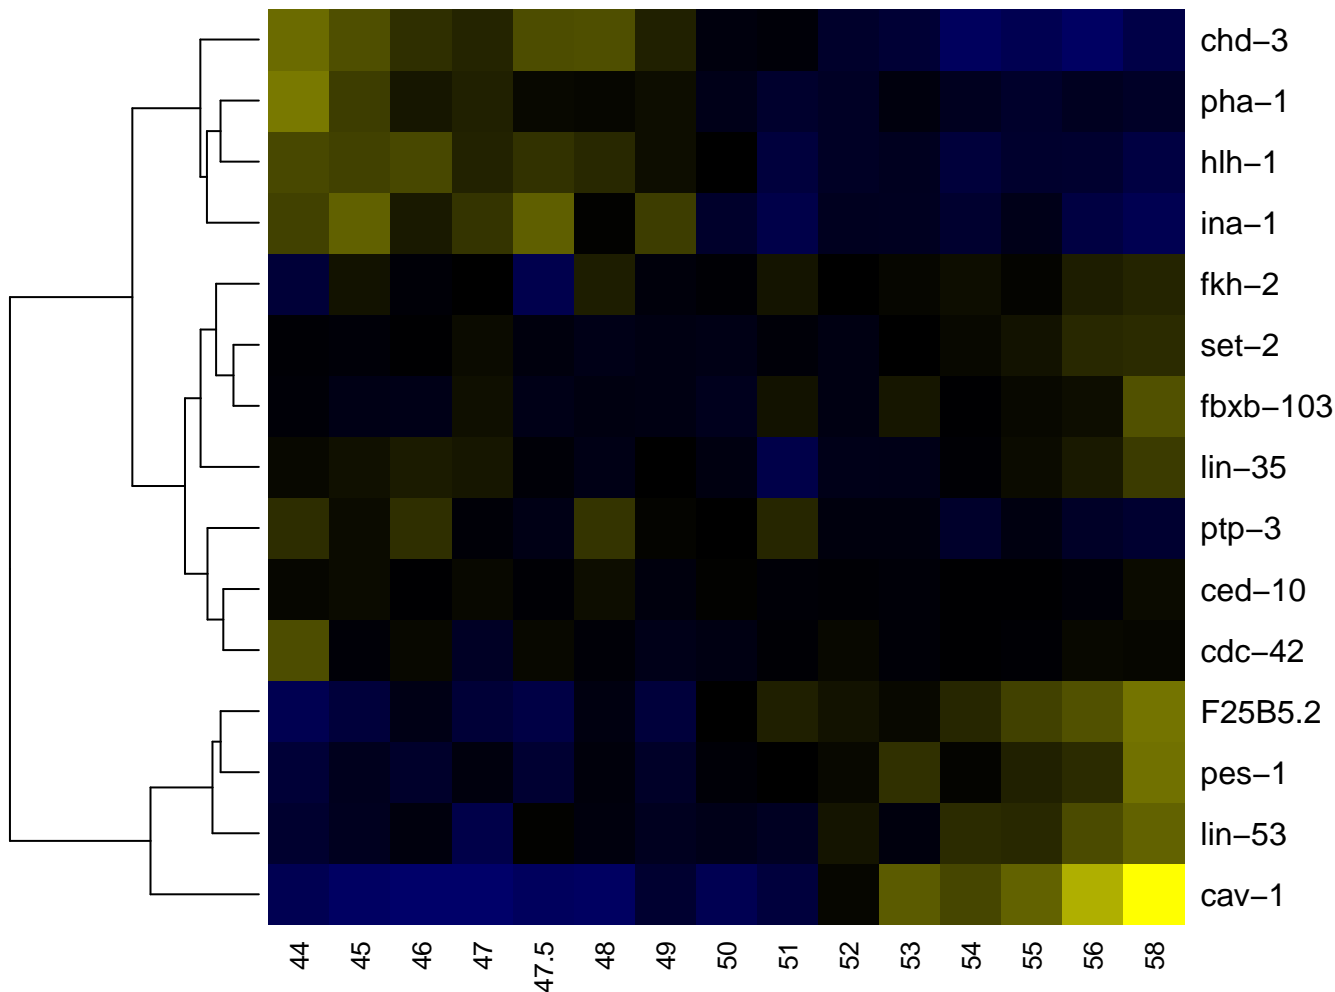

# Daap

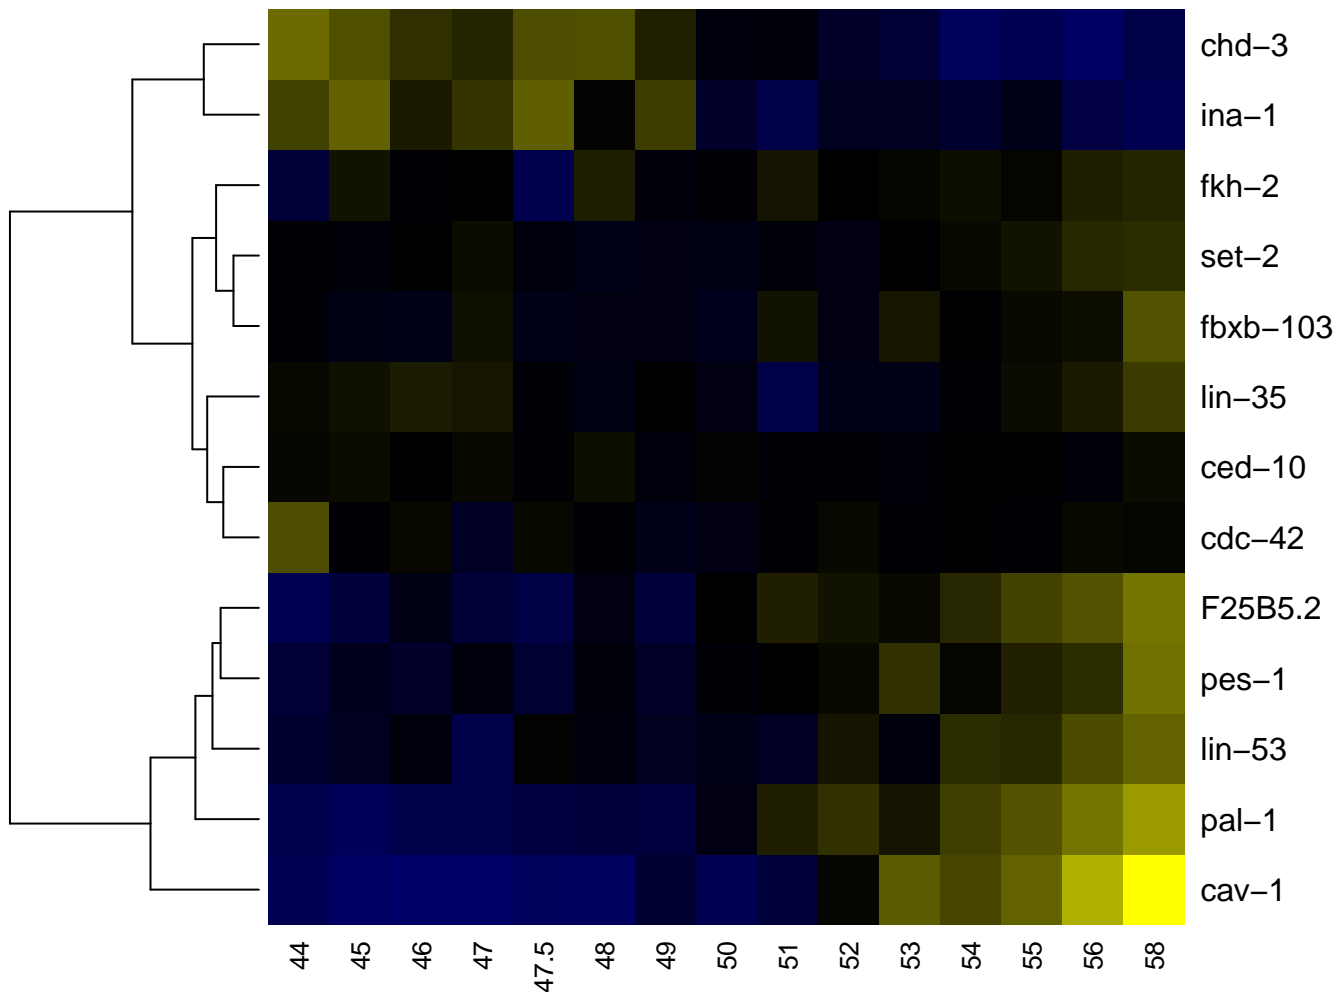

# Daapa



# Daapp



# Dap

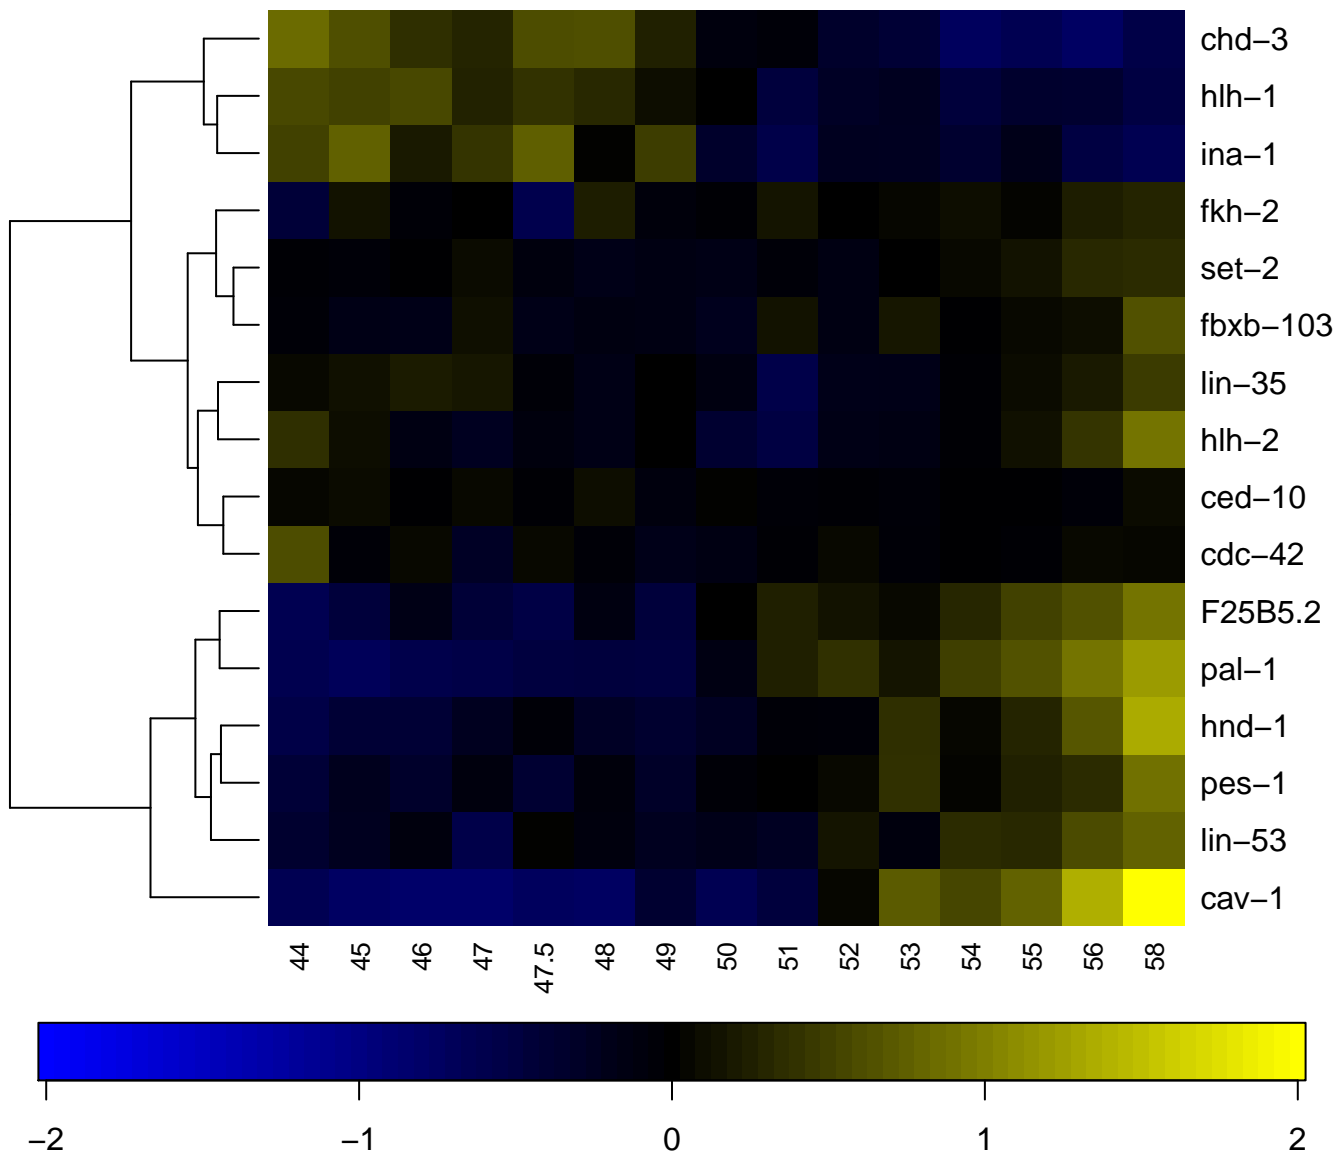

# Dapa

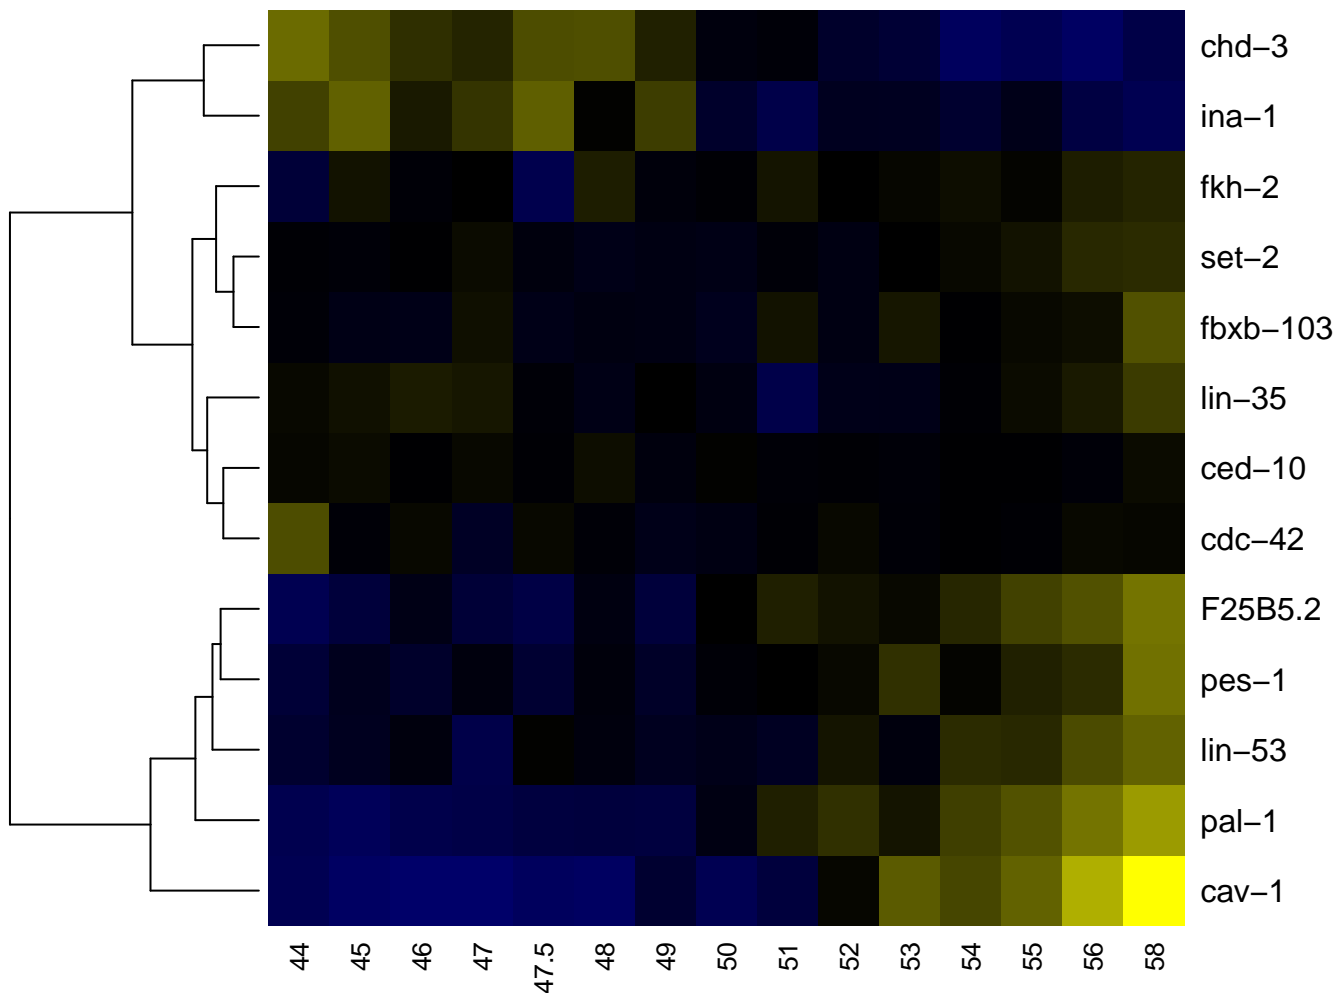

# Dapaa





# Dapap



# Dapp



# Dappa

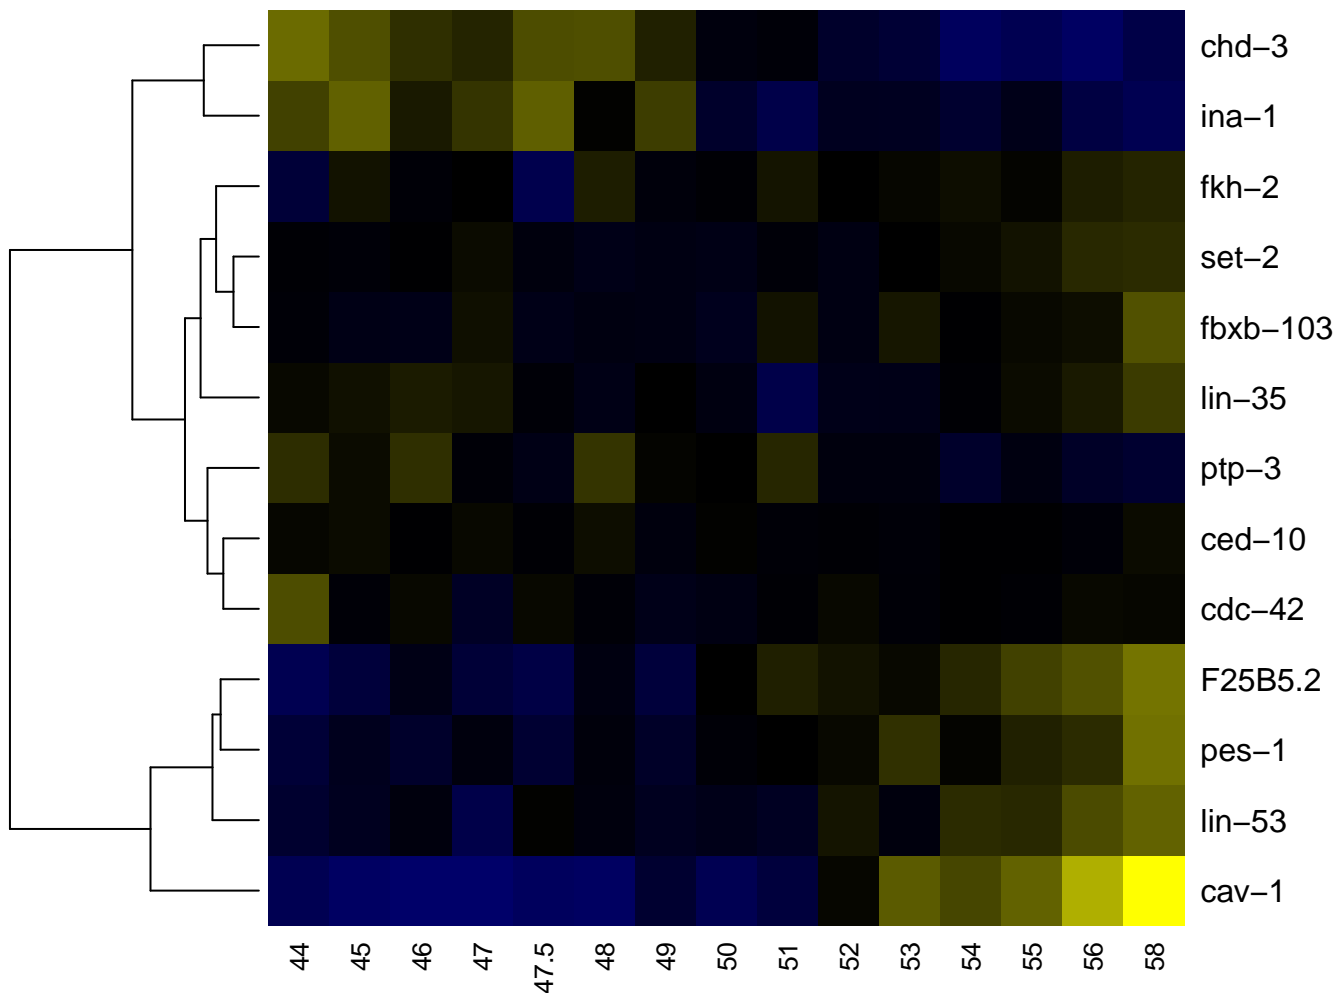

-2

-1

0

1

2

# Dappaa

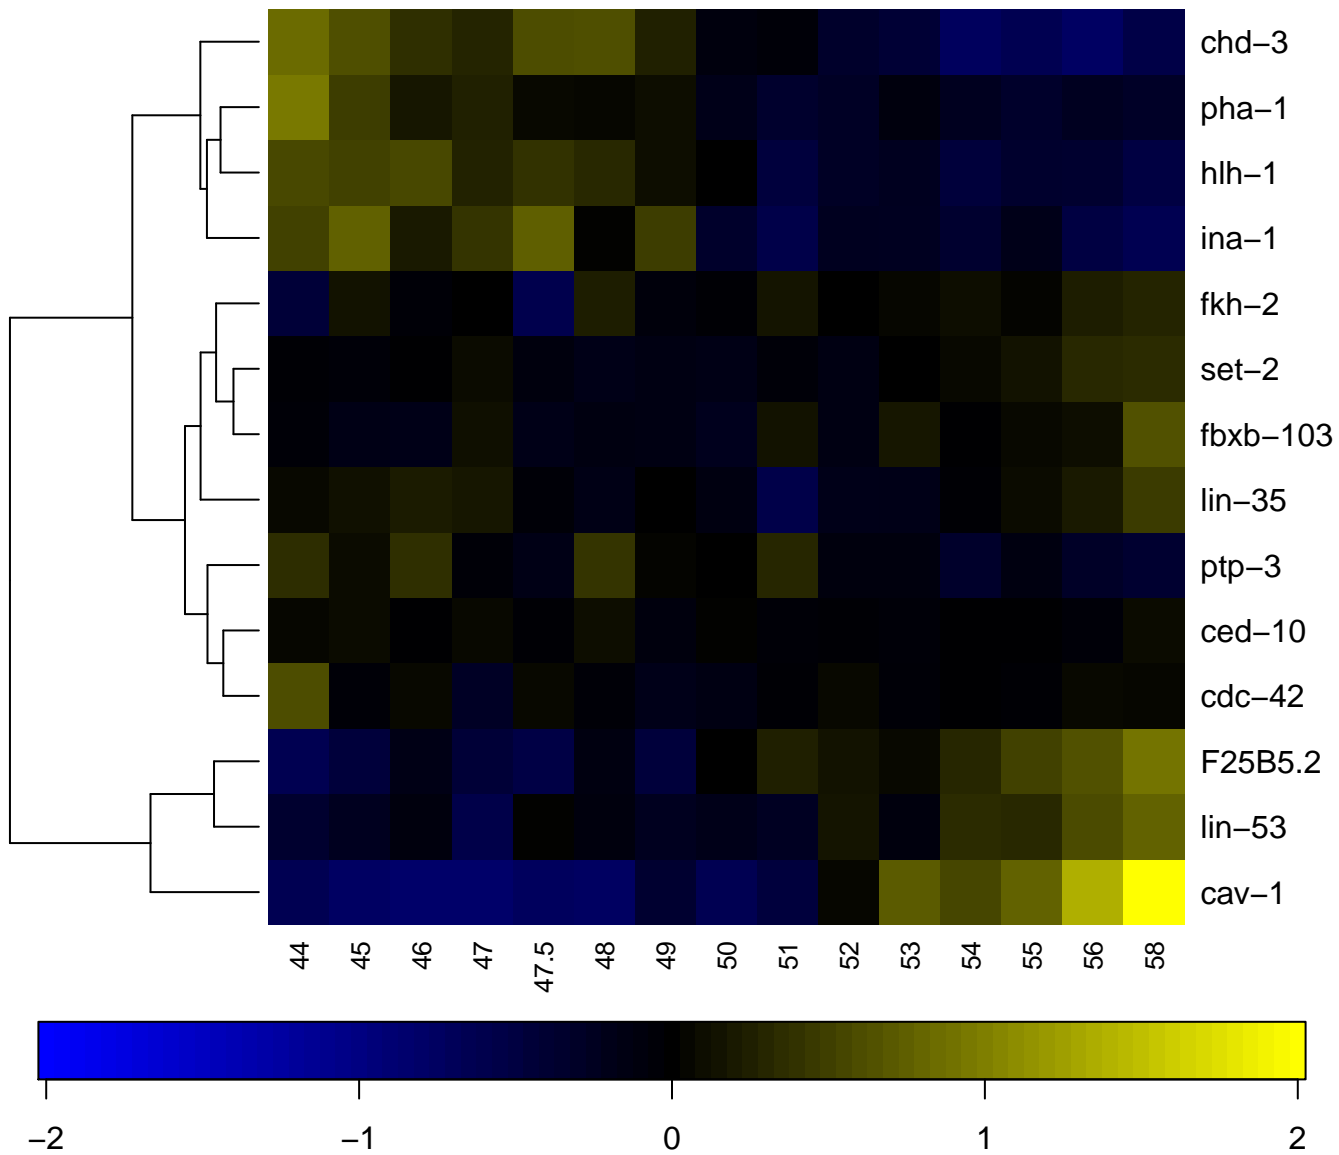

# Dappap

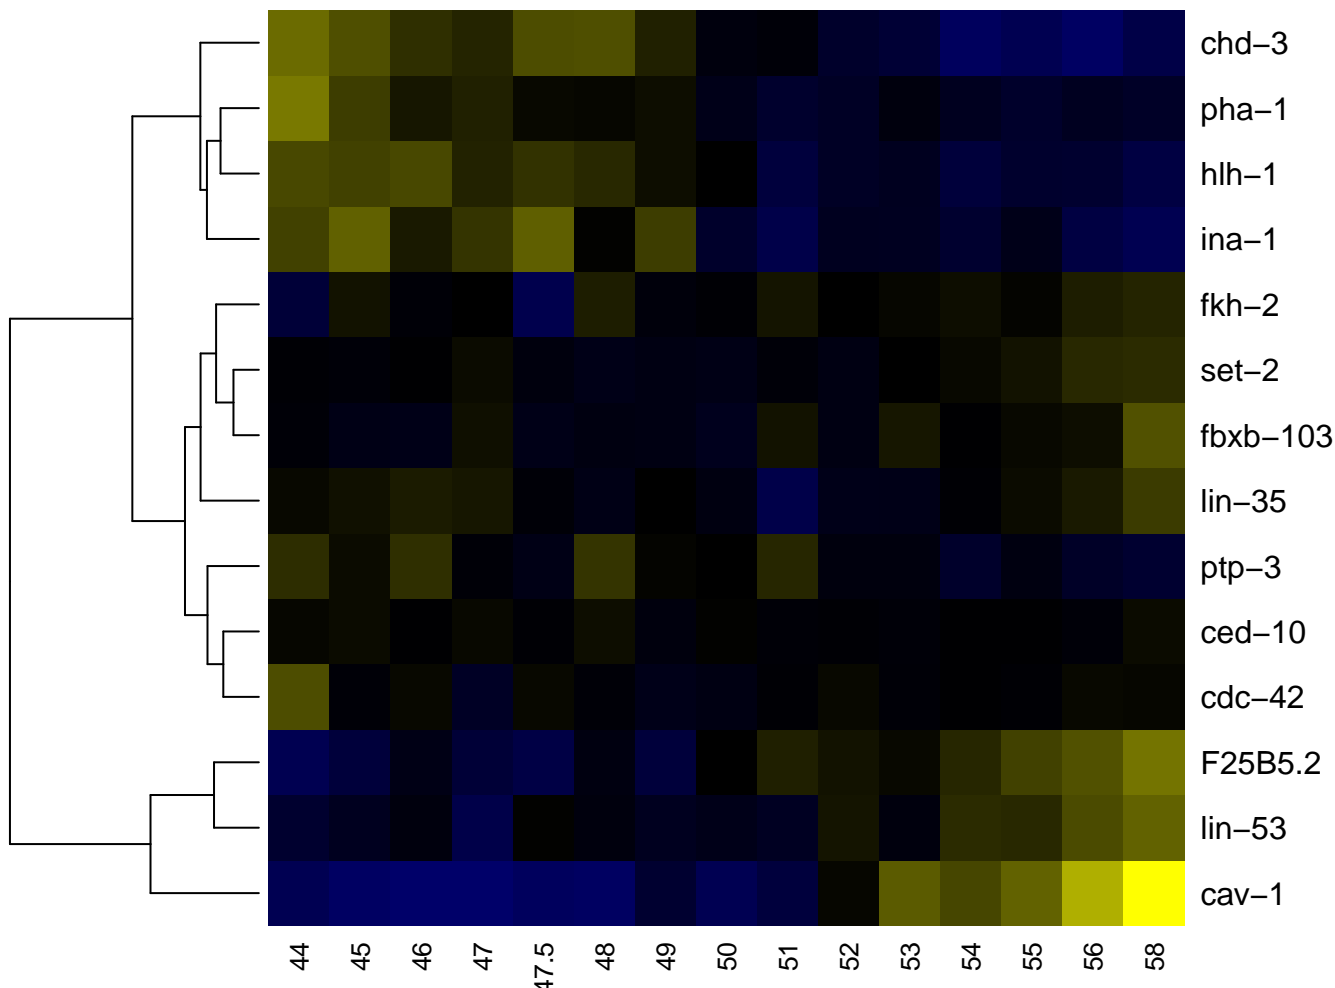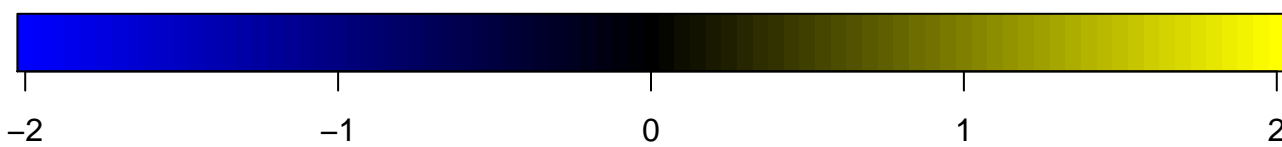

# Dapp



# Dapppa

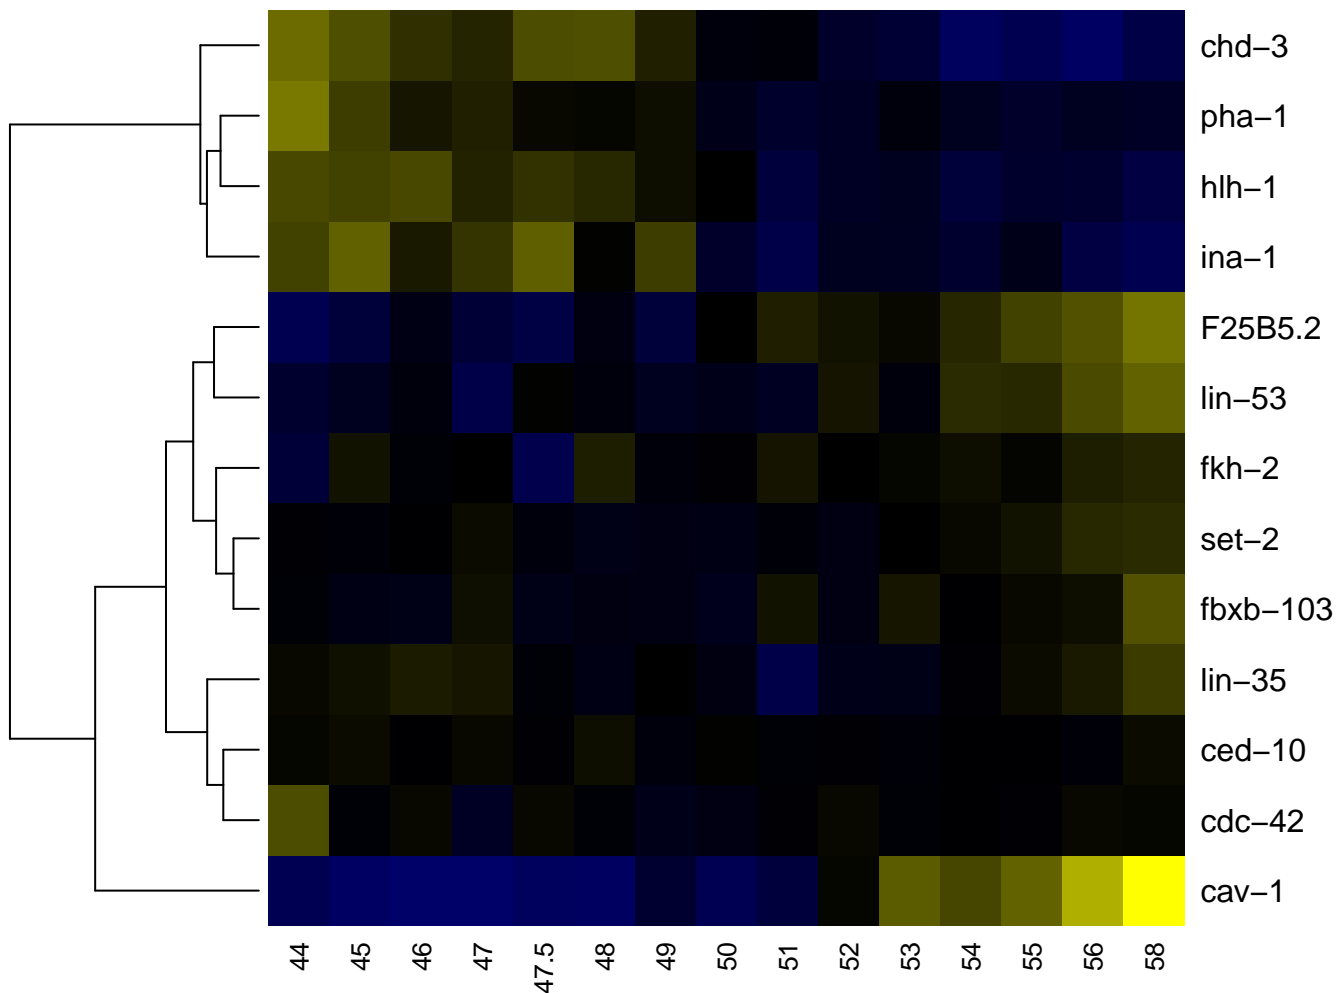





# DB neuron

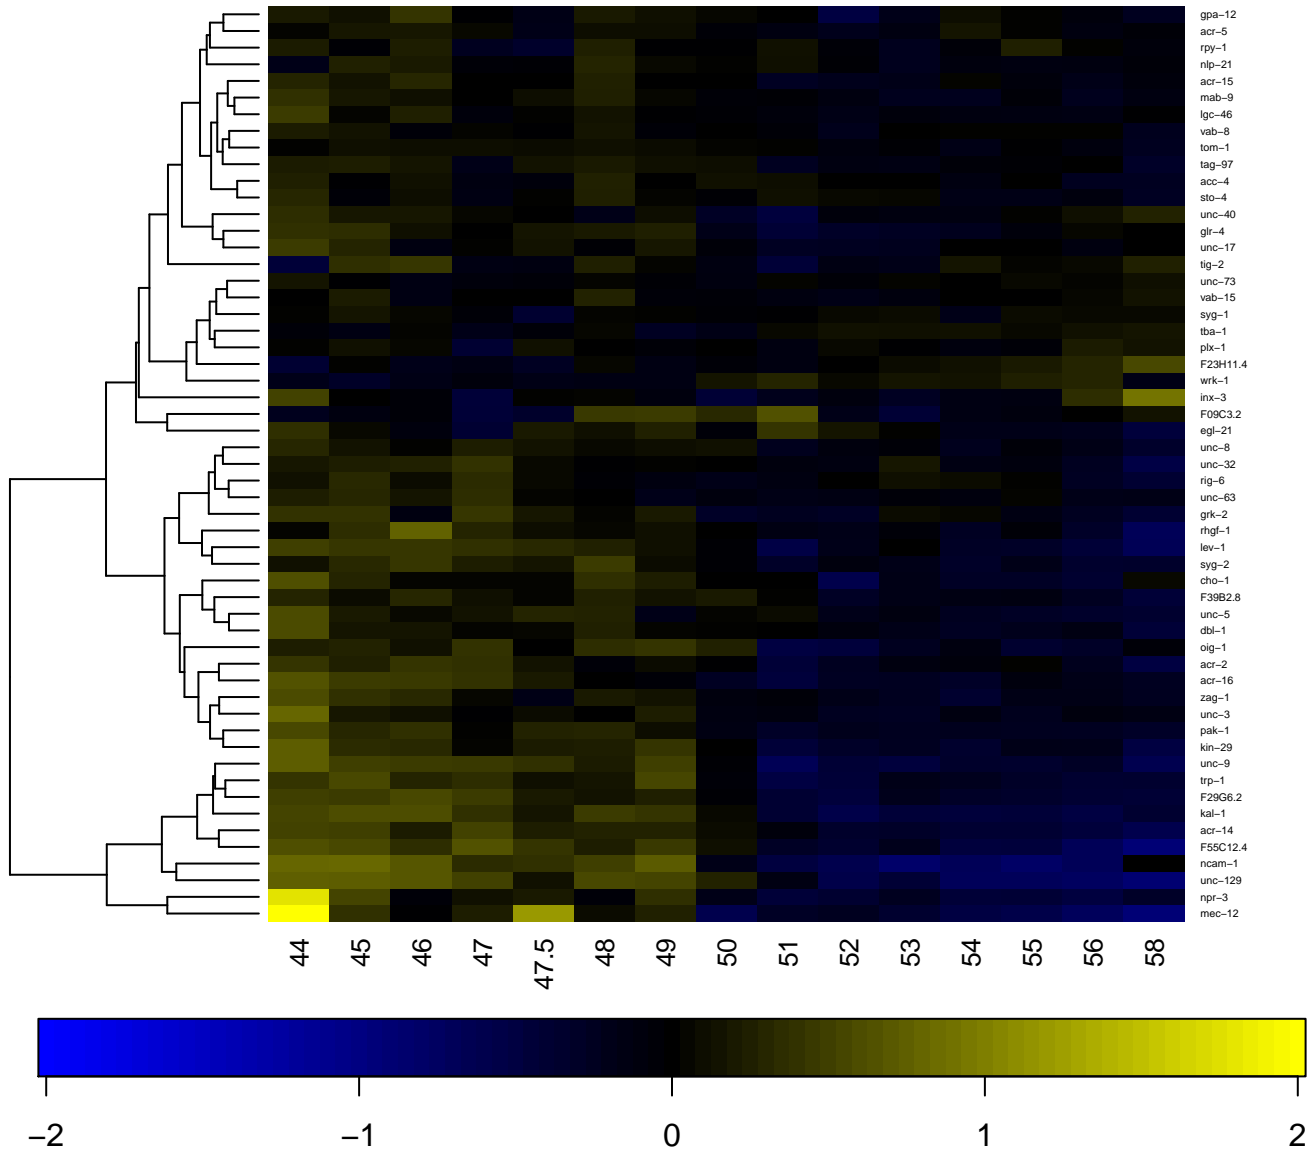





# DB3

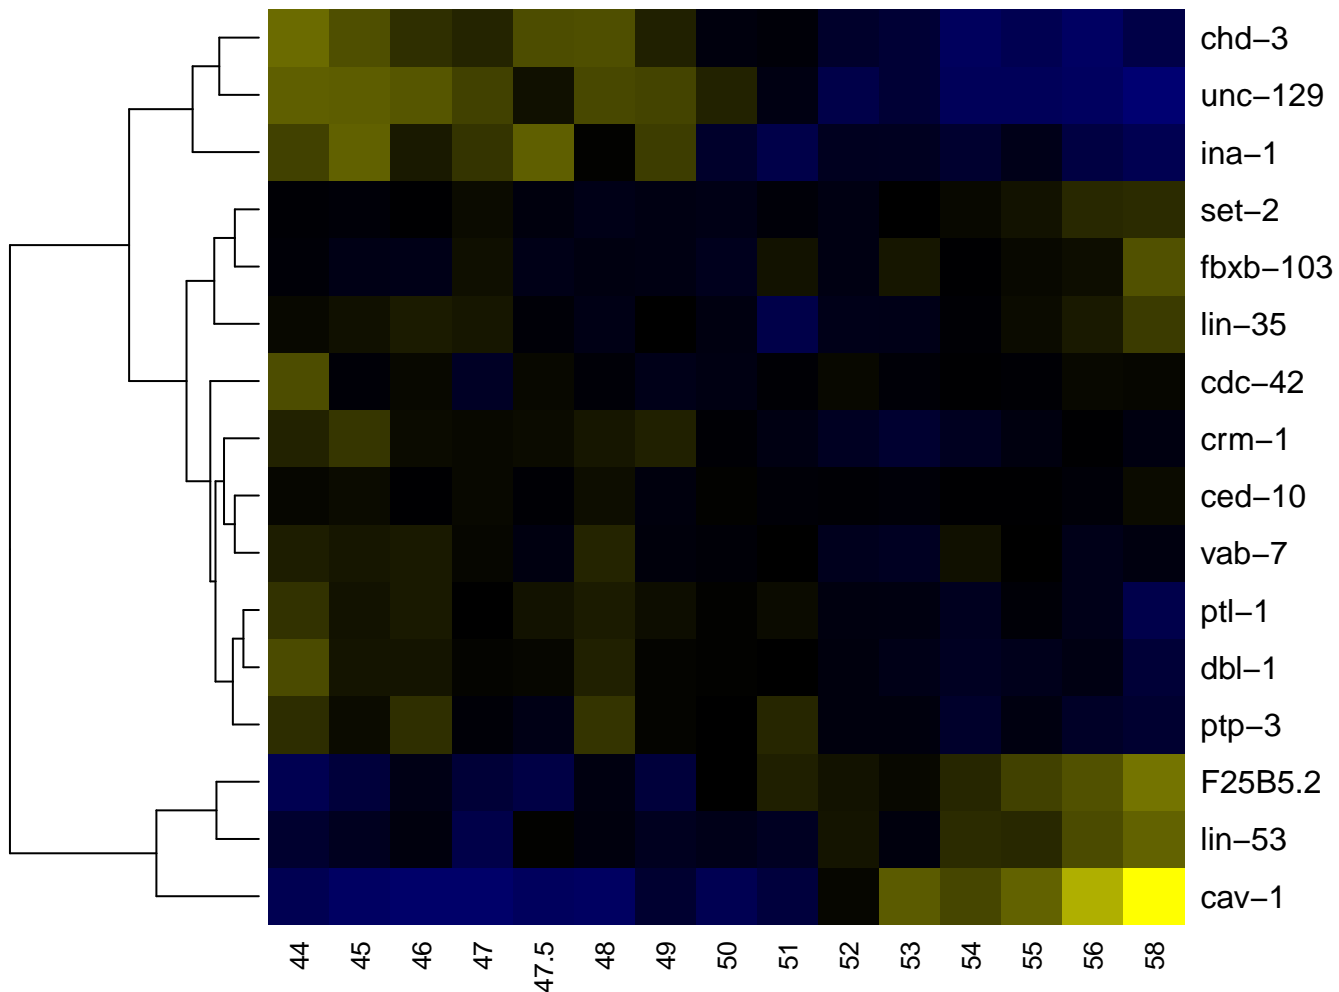

# DB4

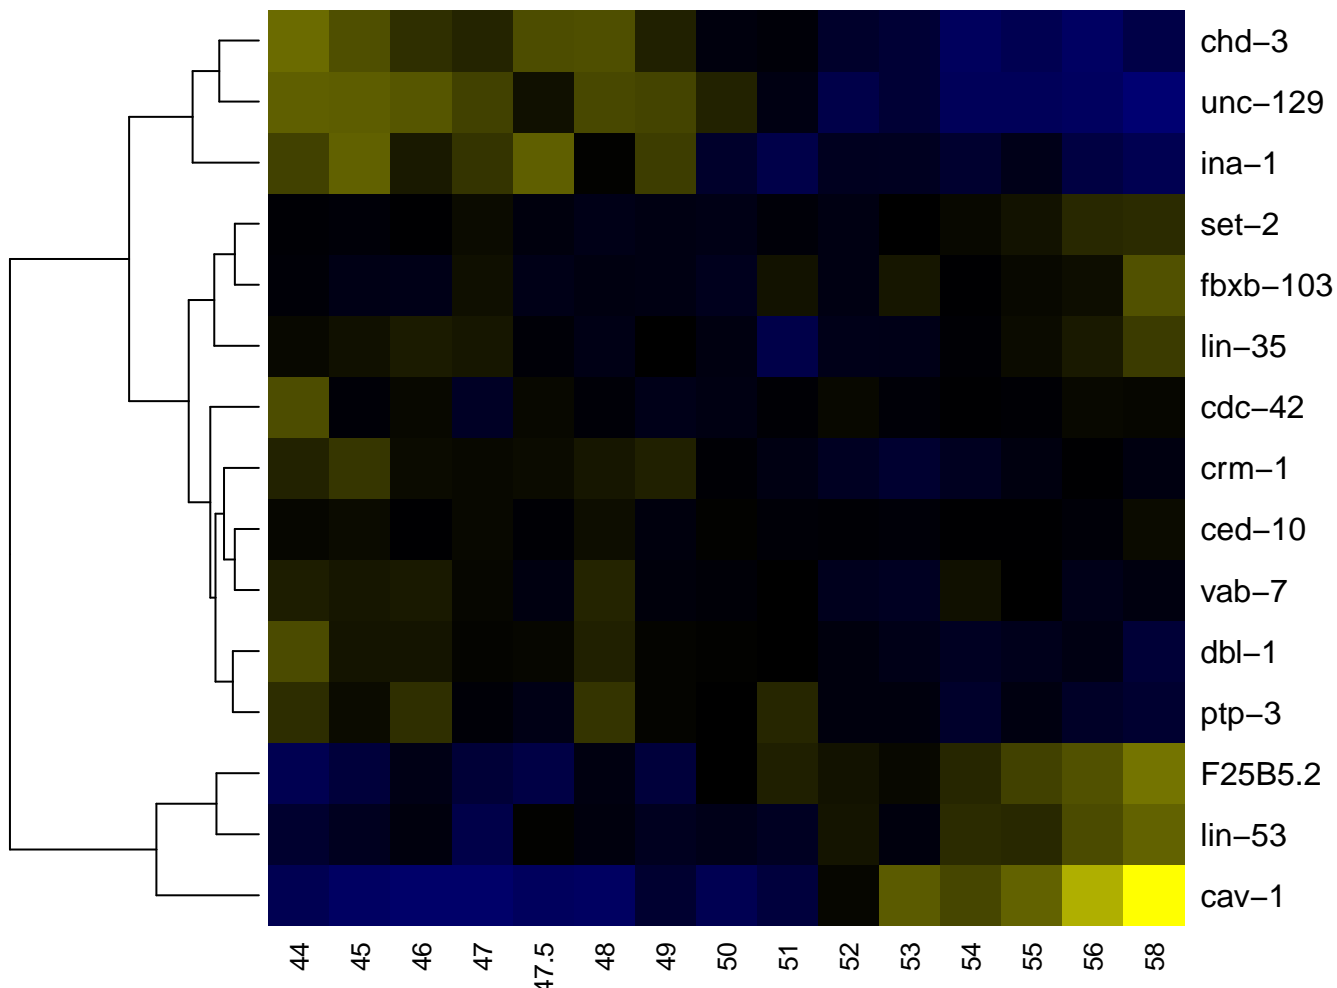

# DB5

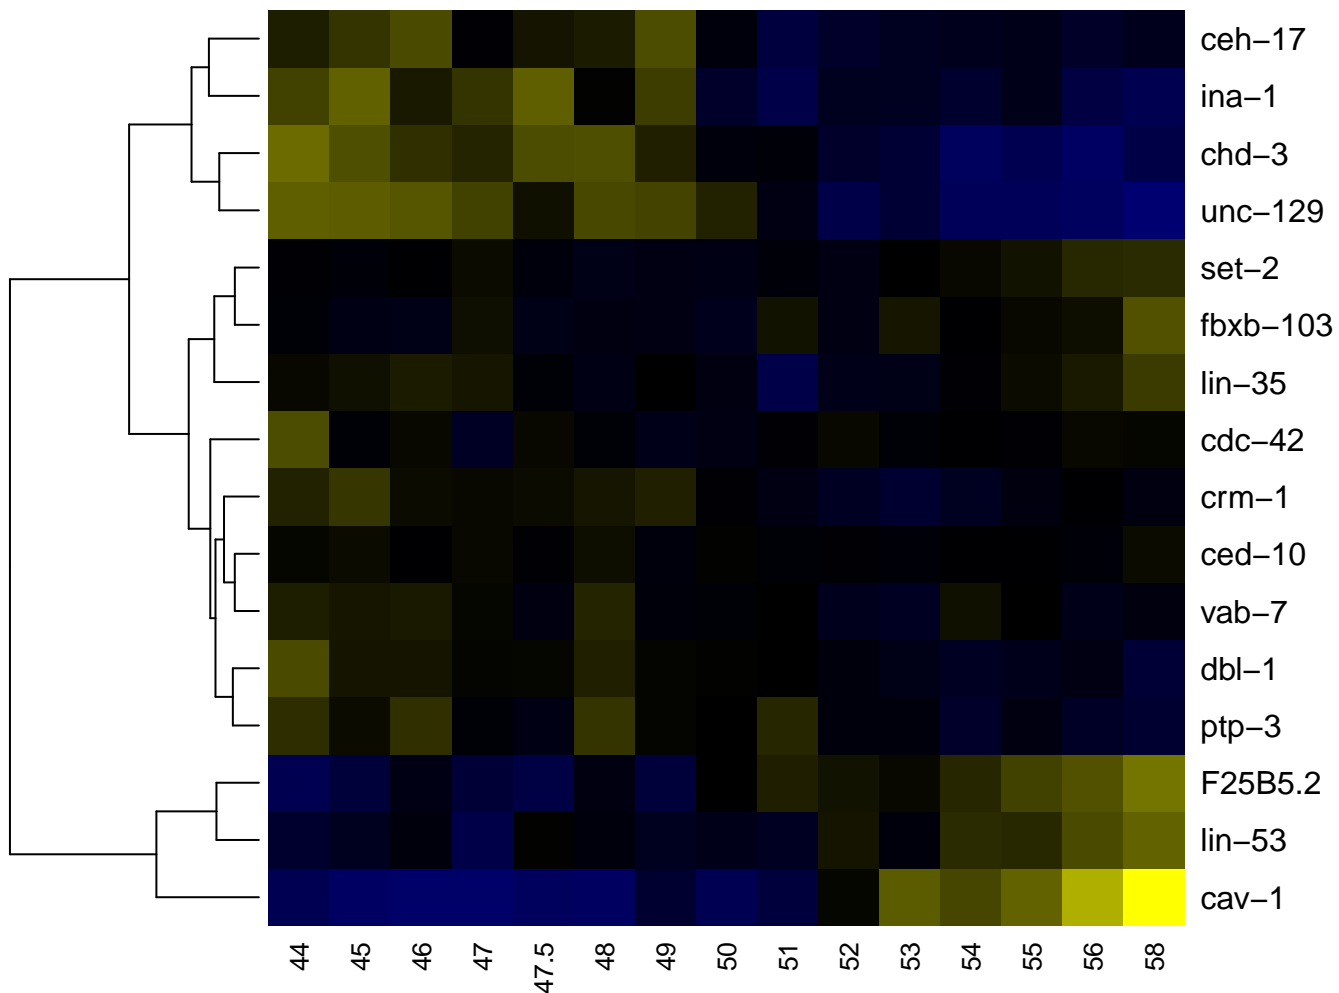

-2

-1

0

1

2

# DB6



# DB7

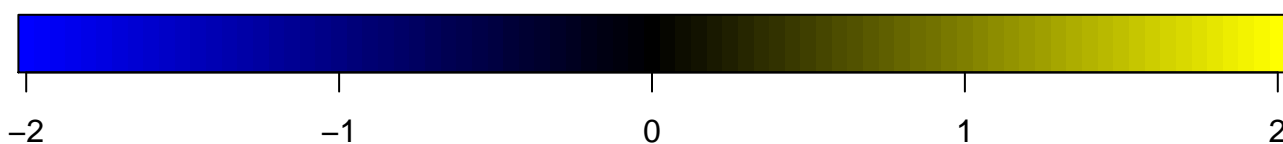



# DD neuron

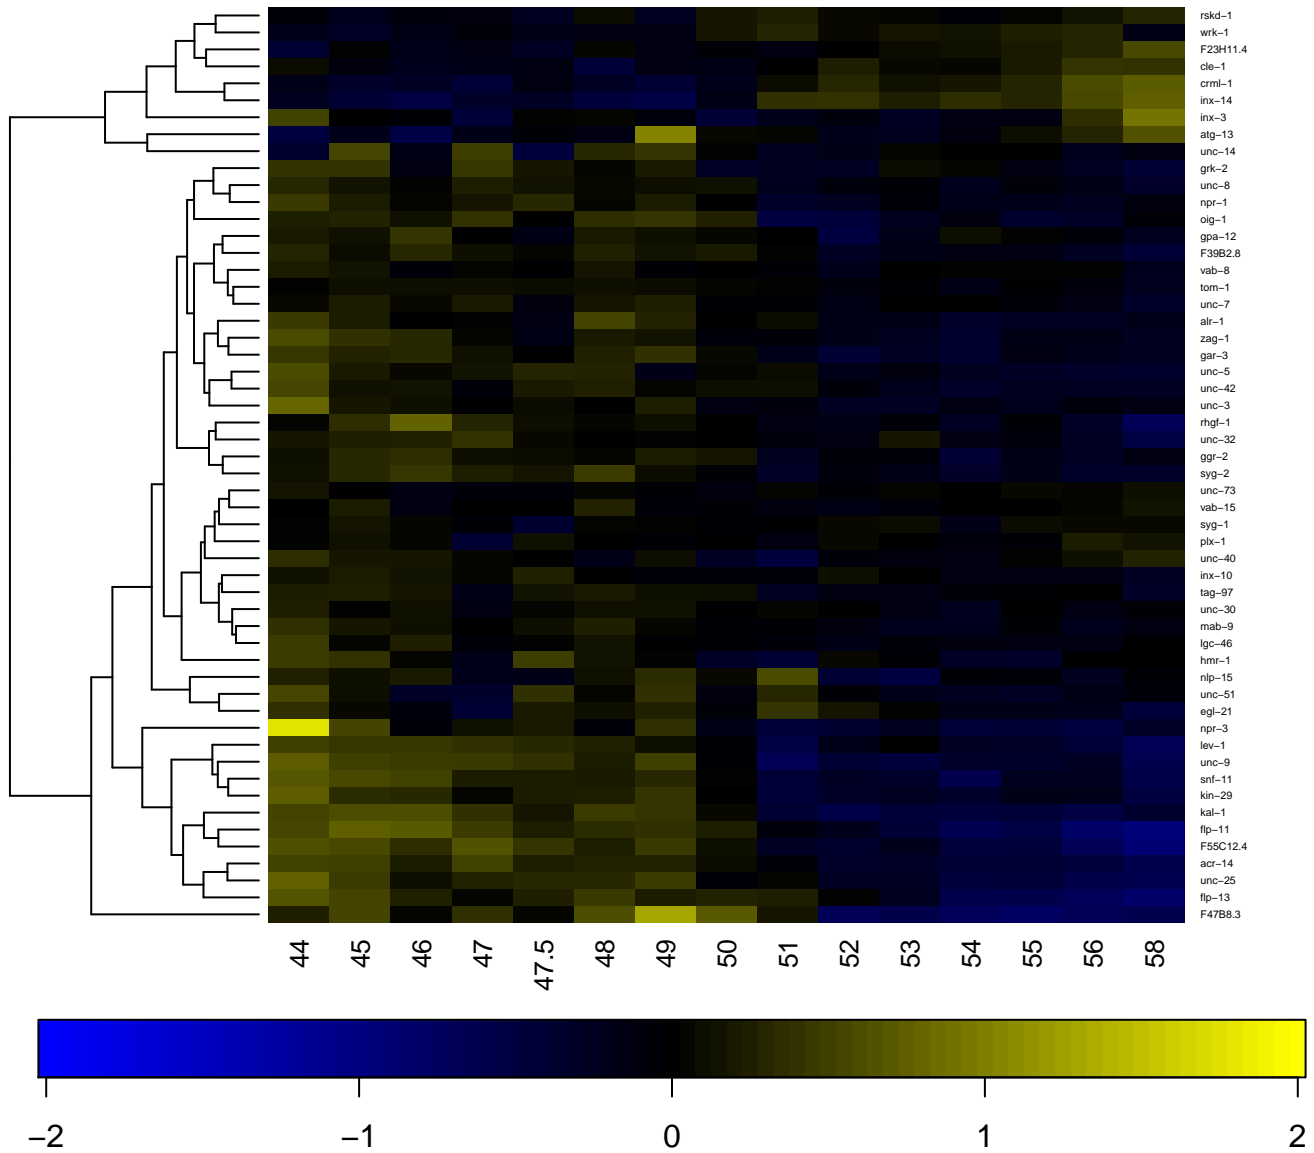



# DD2

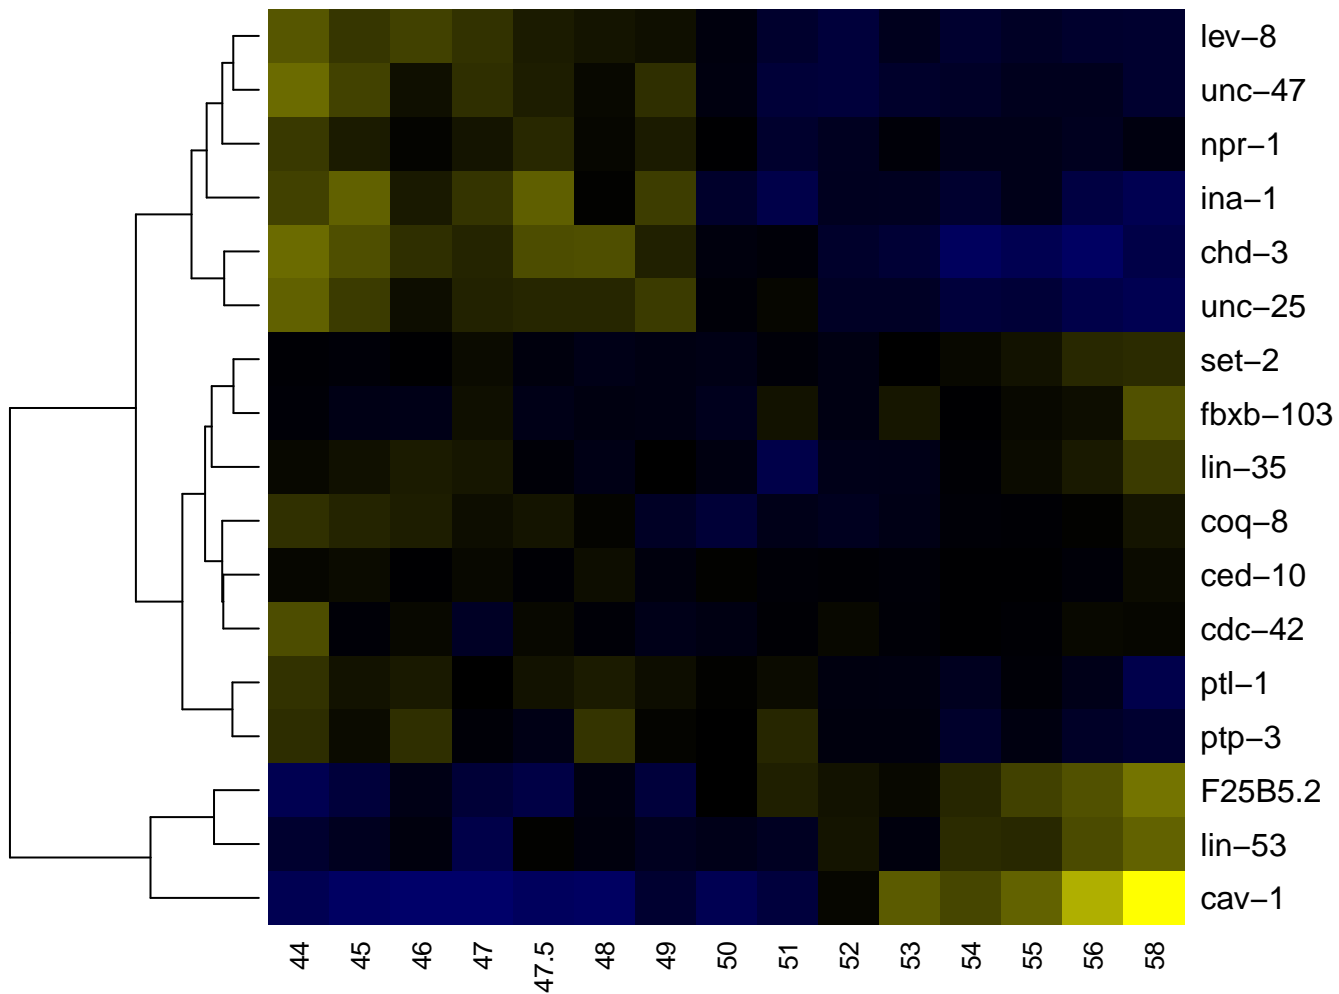

# DD3

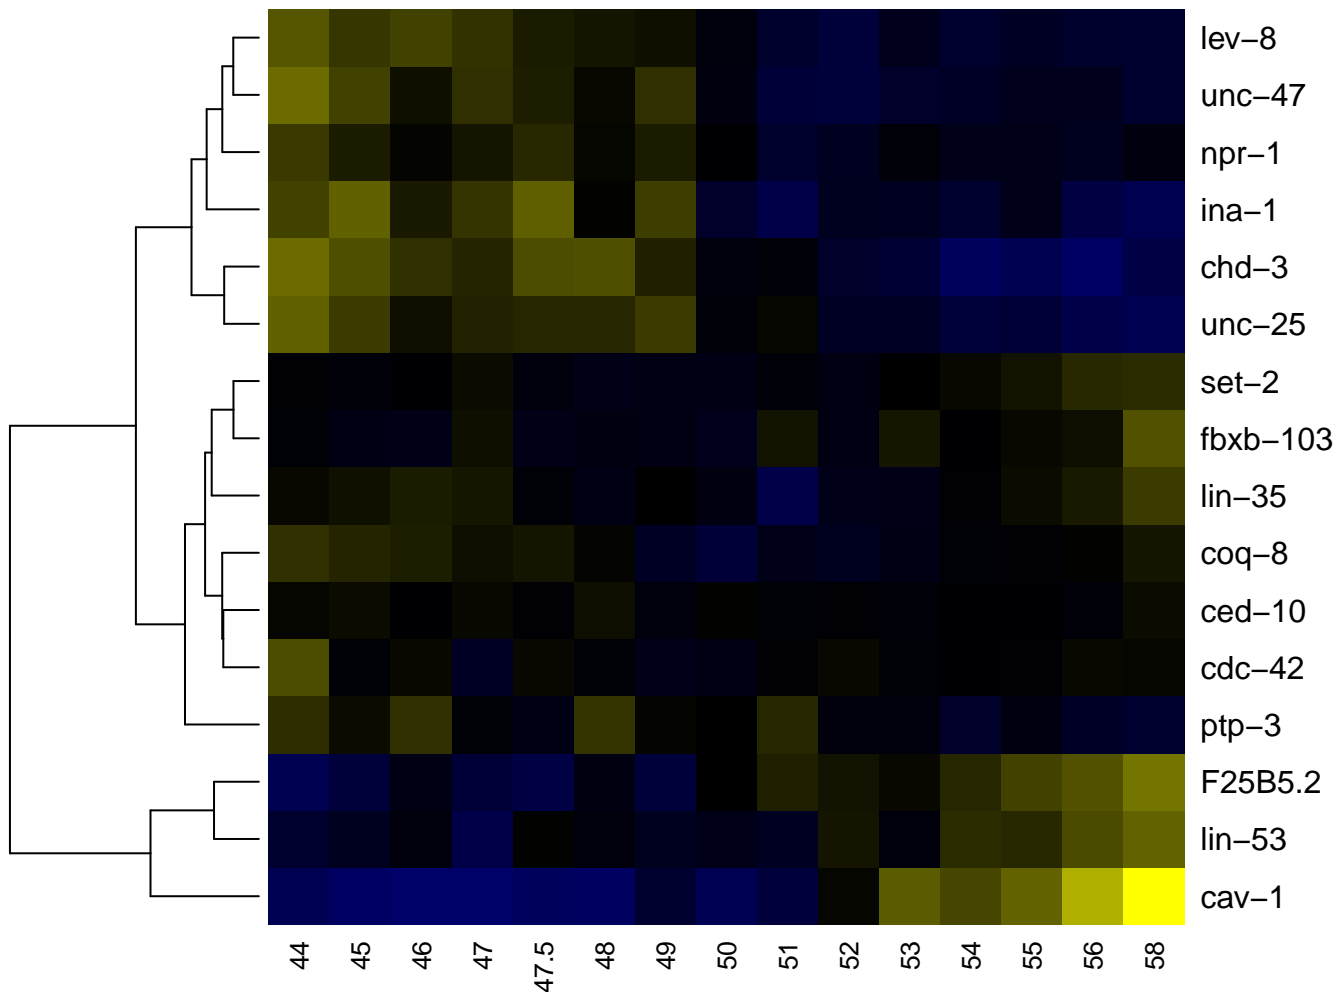

# DD4

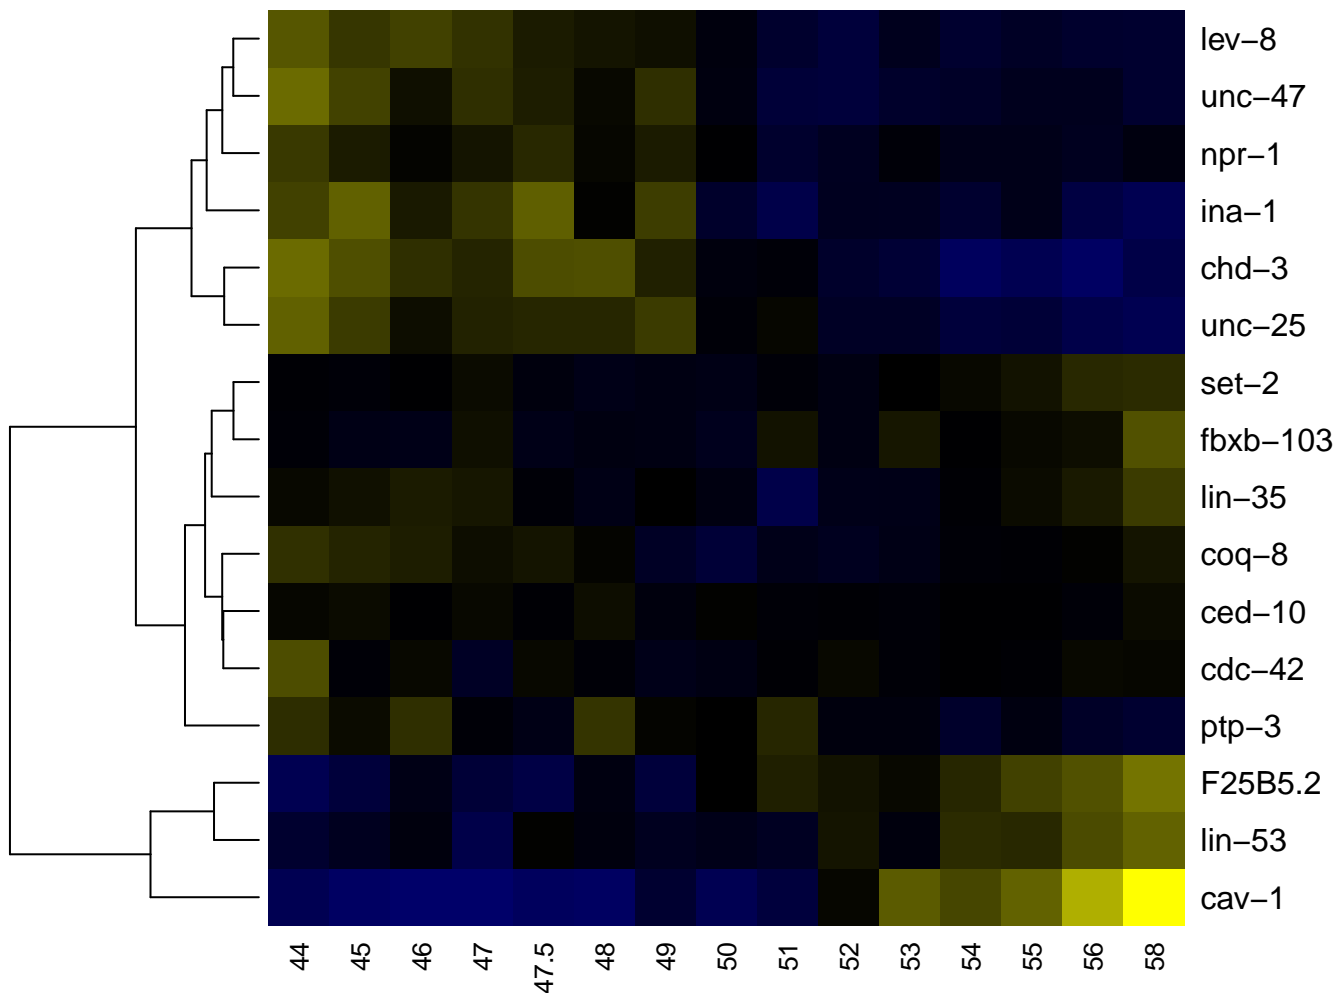

# DD5

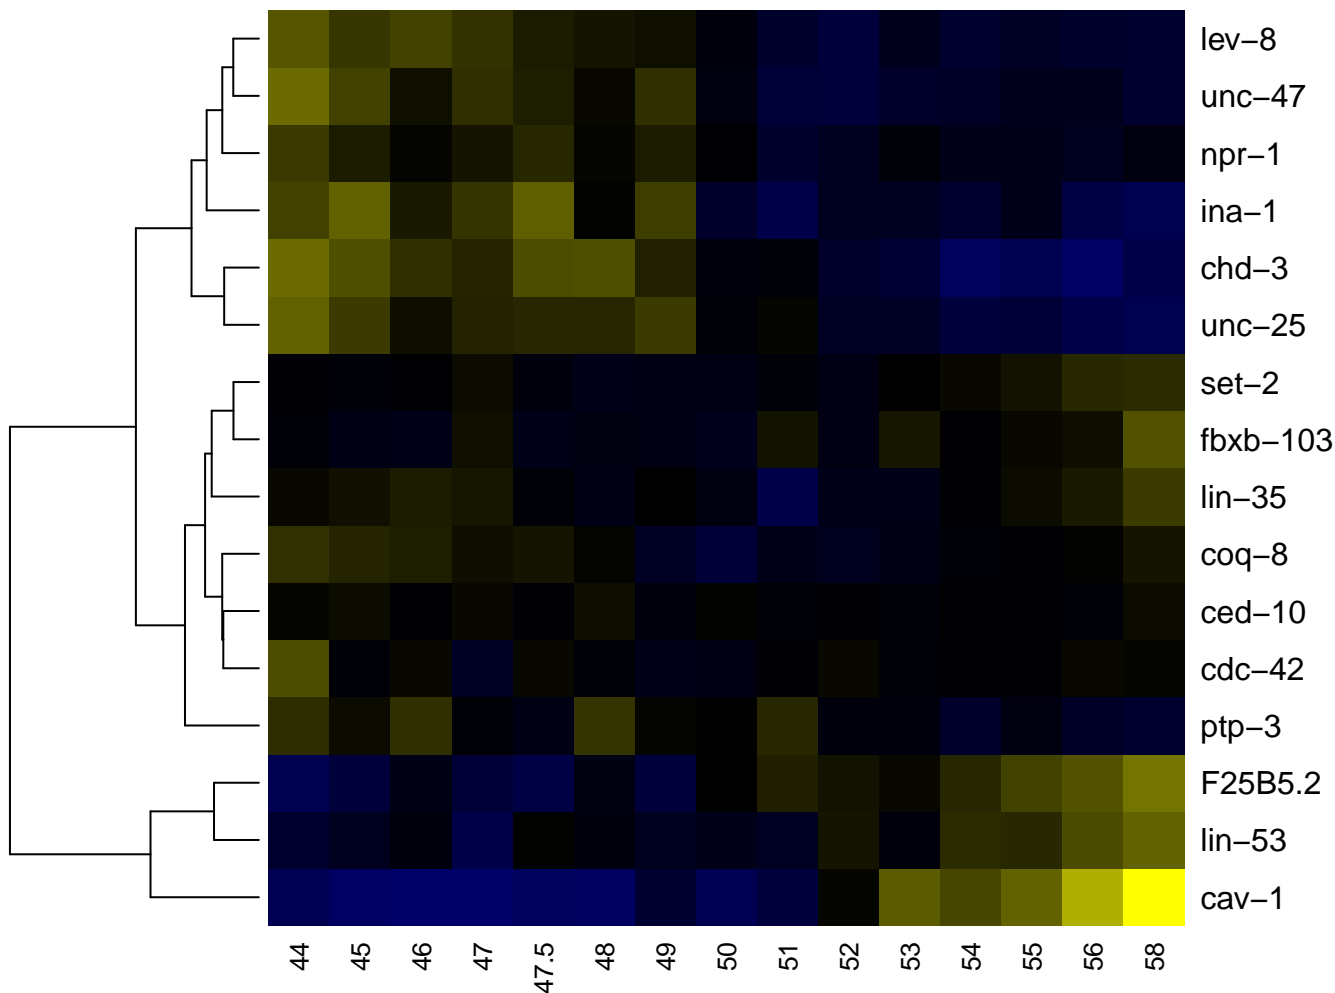

# DD6

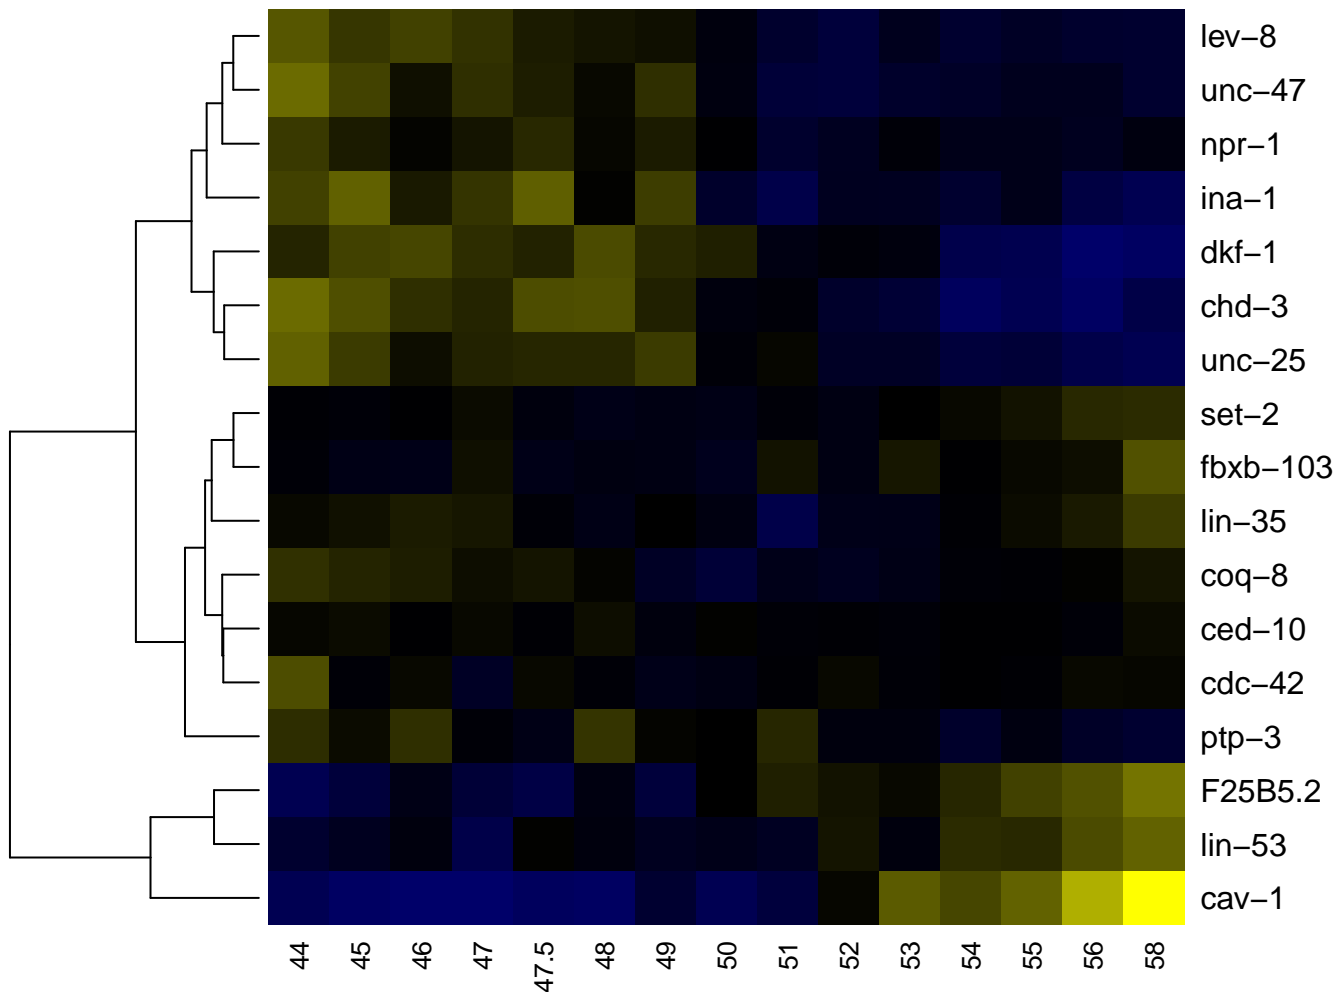

# diagonal muscle

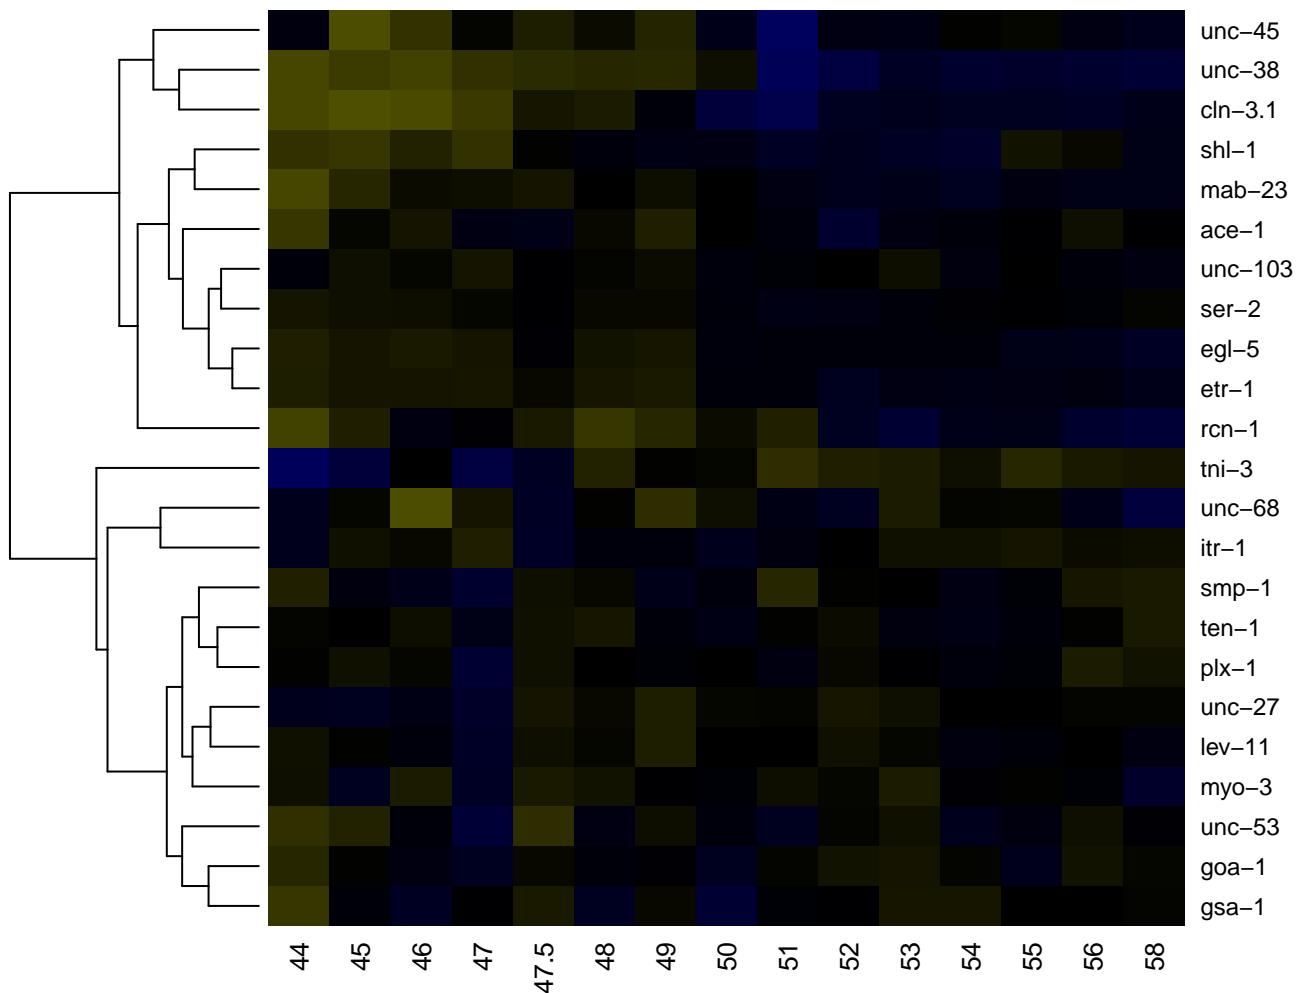



# dorsal nerve cord

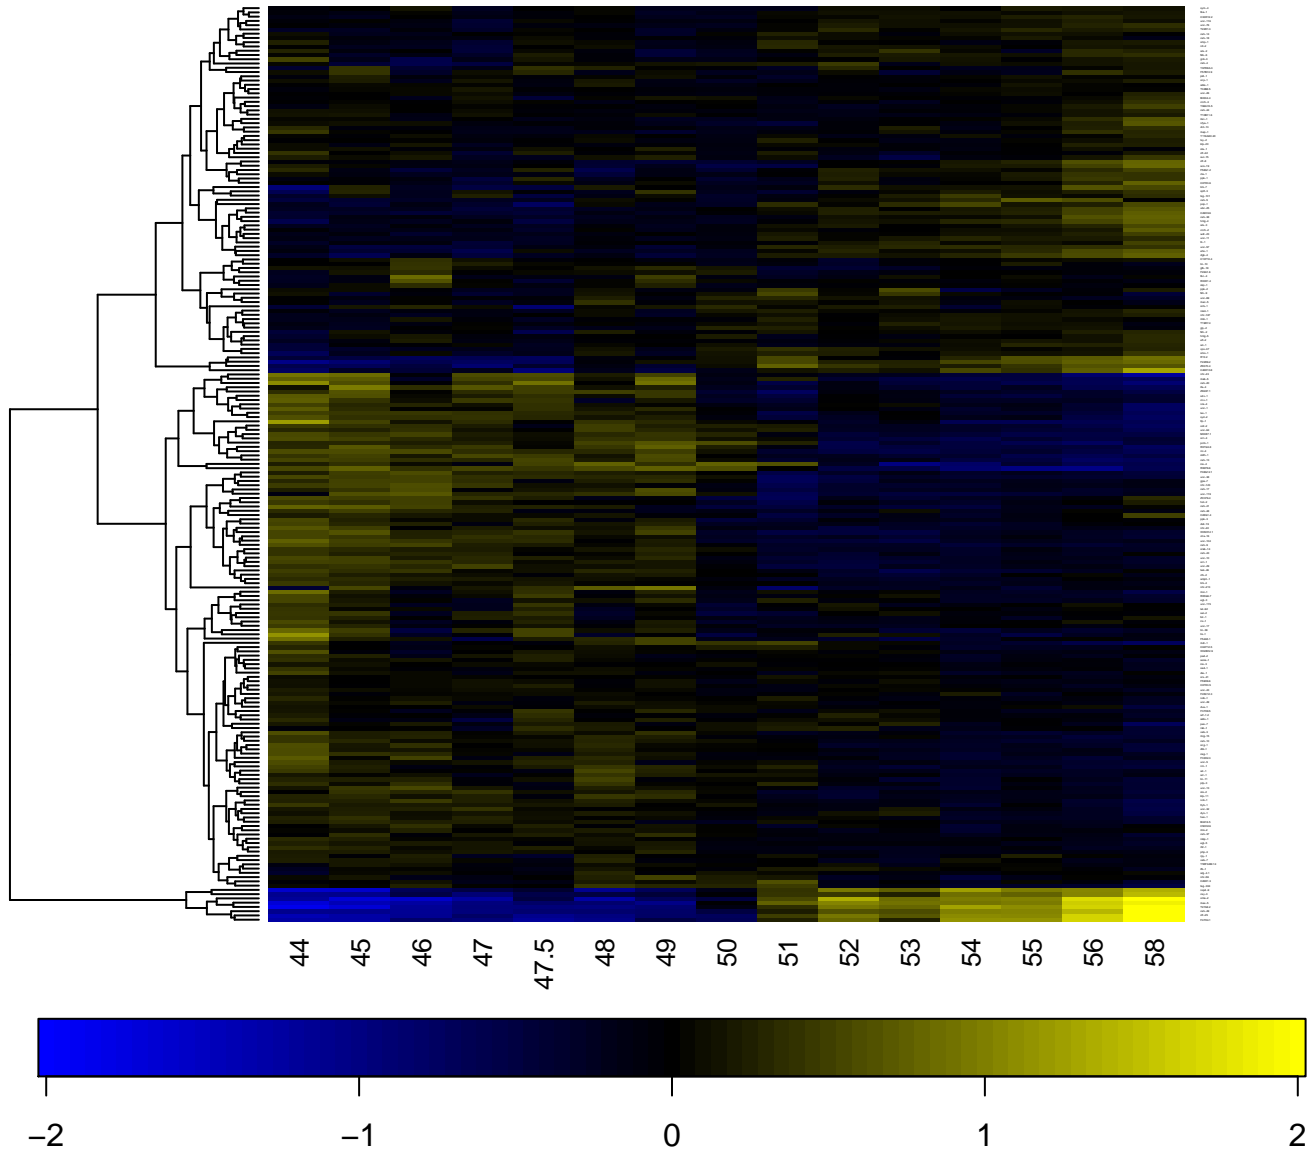

# dorso-rectal ganglion

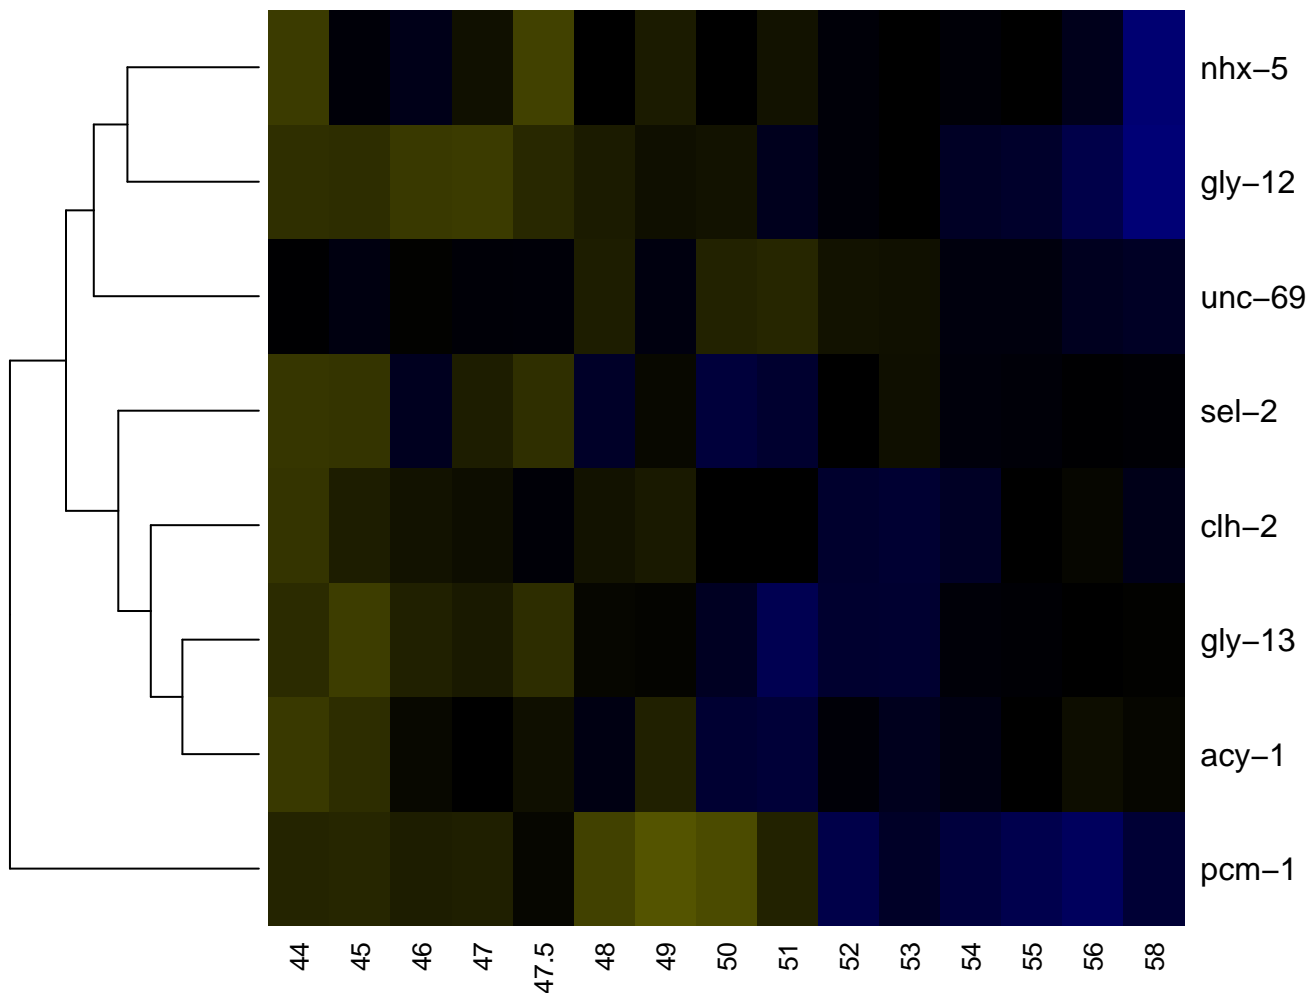

Dp

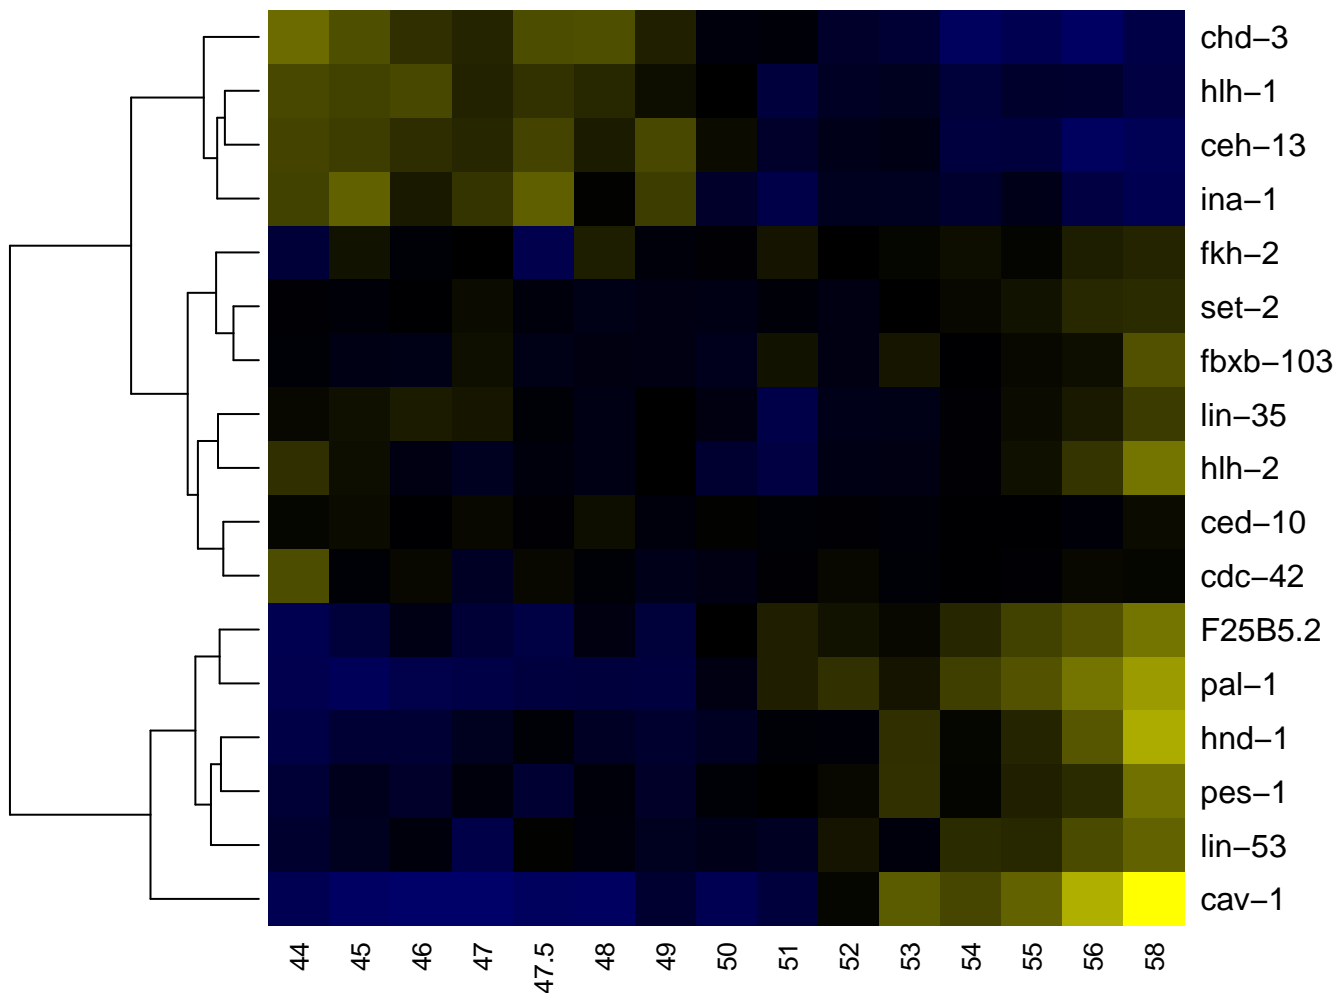

-2

-1

0

1

2

# Dpa

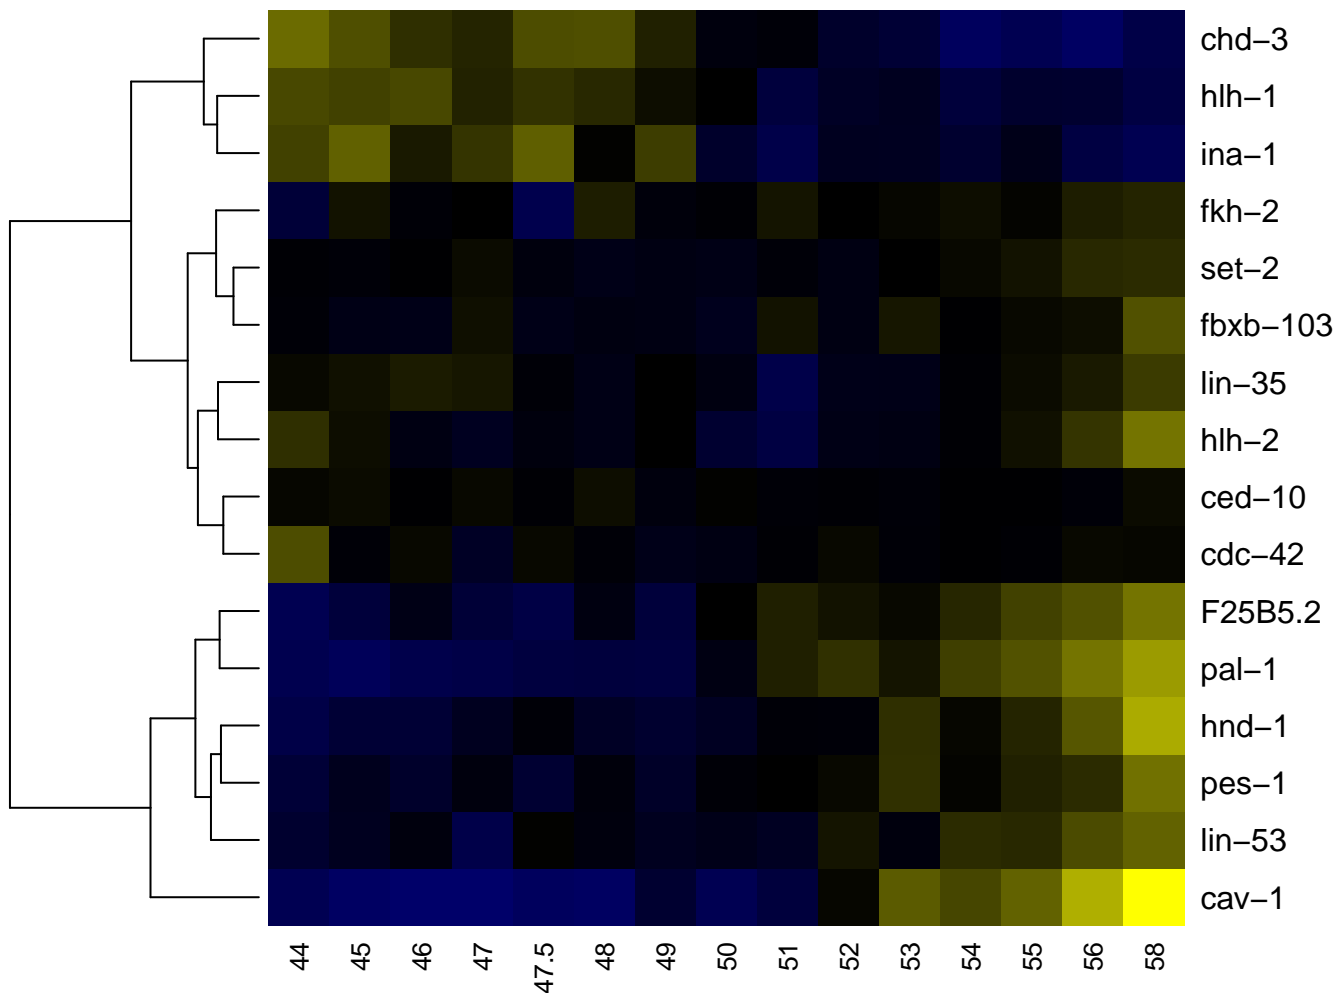

# Dpaa



# Dpaaa



# Dpaap



# Dpap





# Dpapa



# Dpapp



# Dpp

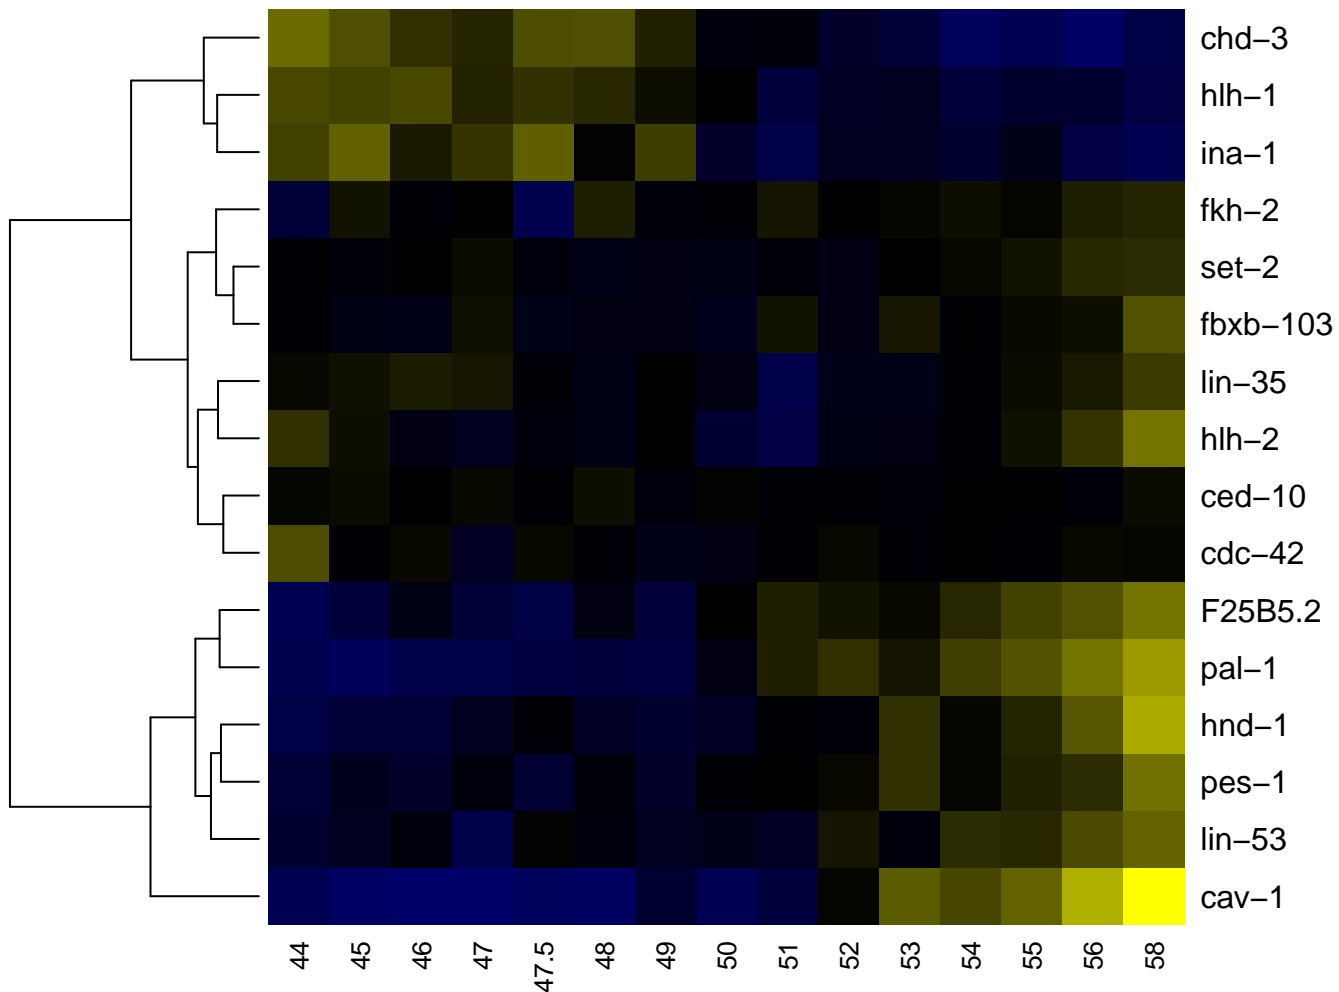

# Dppa



# Dppaa



# Dppap



# Dppp



# Dpppa







# Dpppap

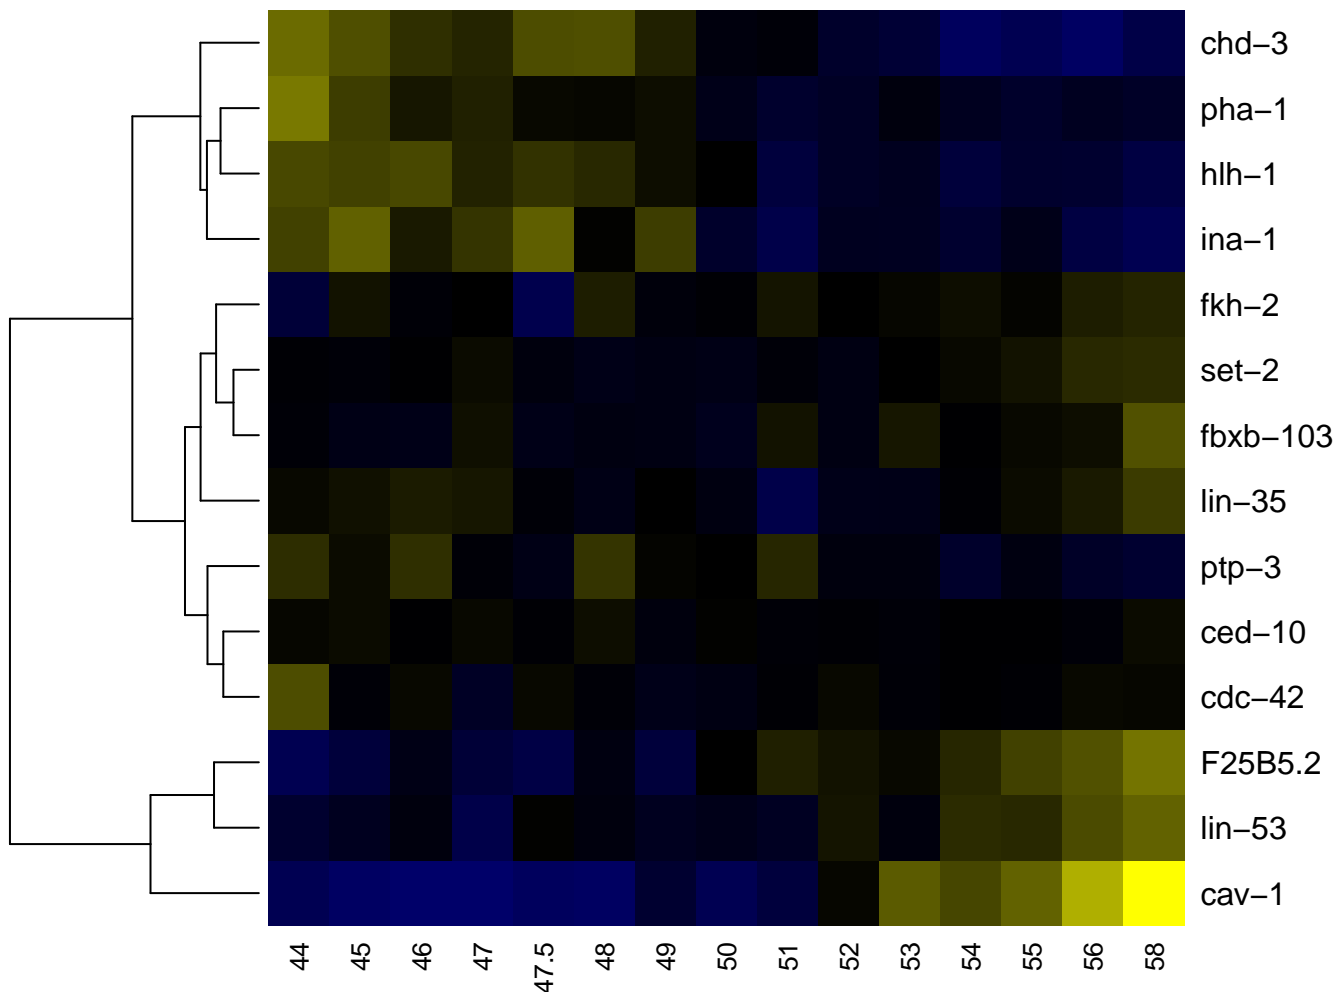

# Dppppp





# Dppppp

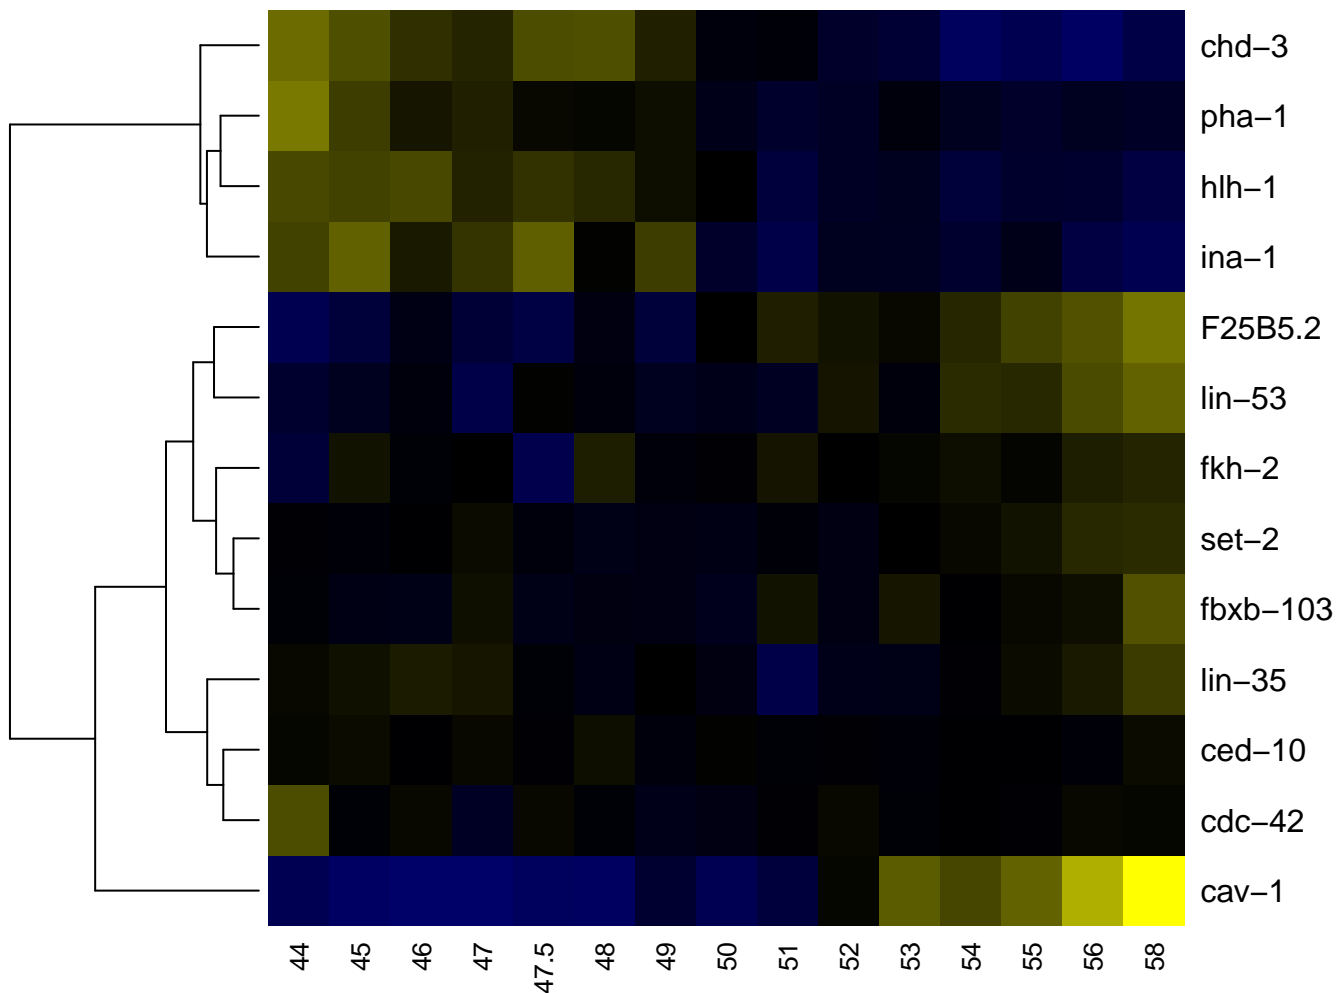

-2

-1

0

1

2

# DVA

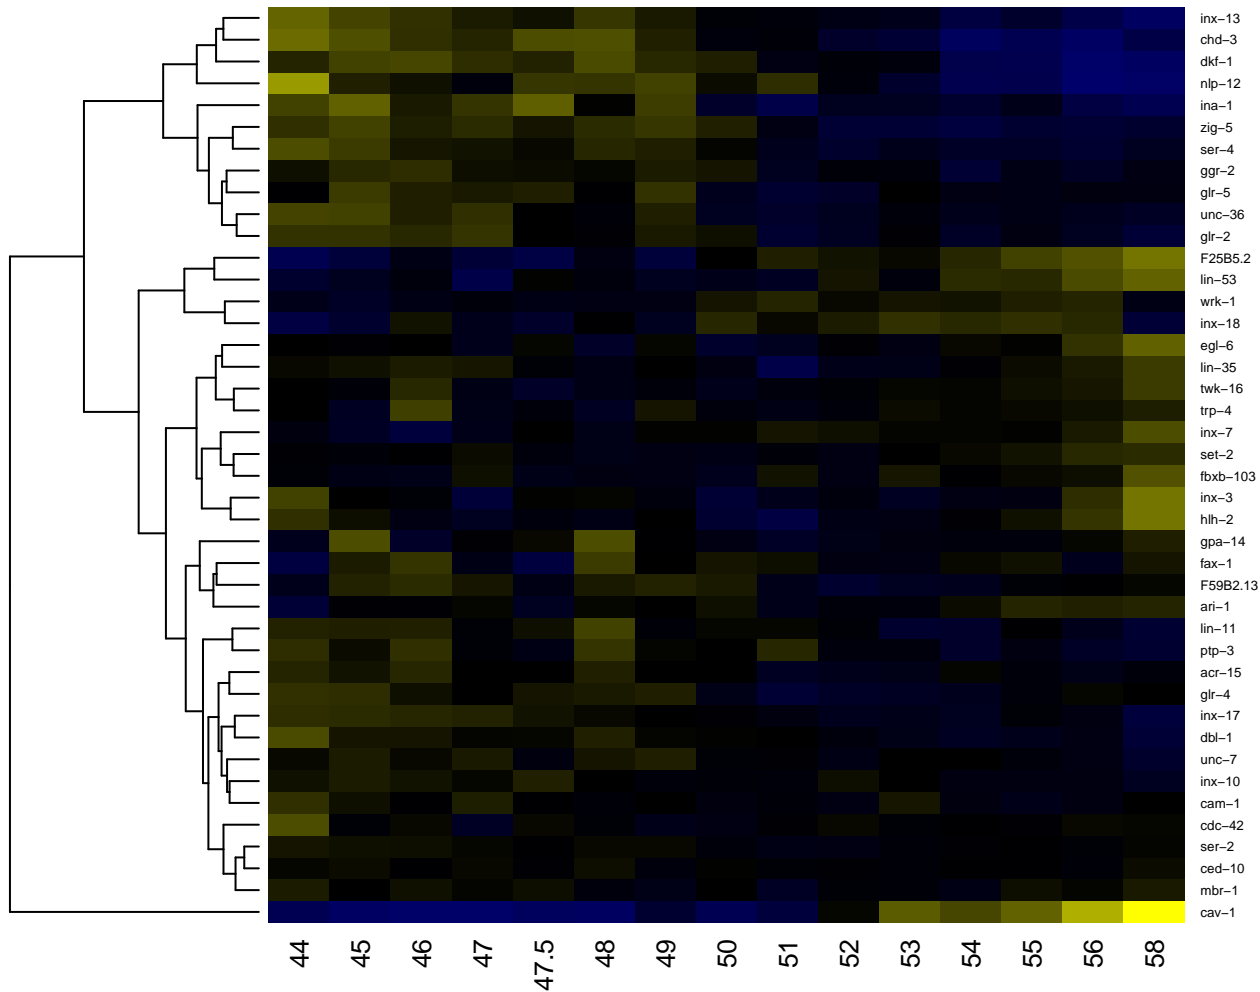

# DVB

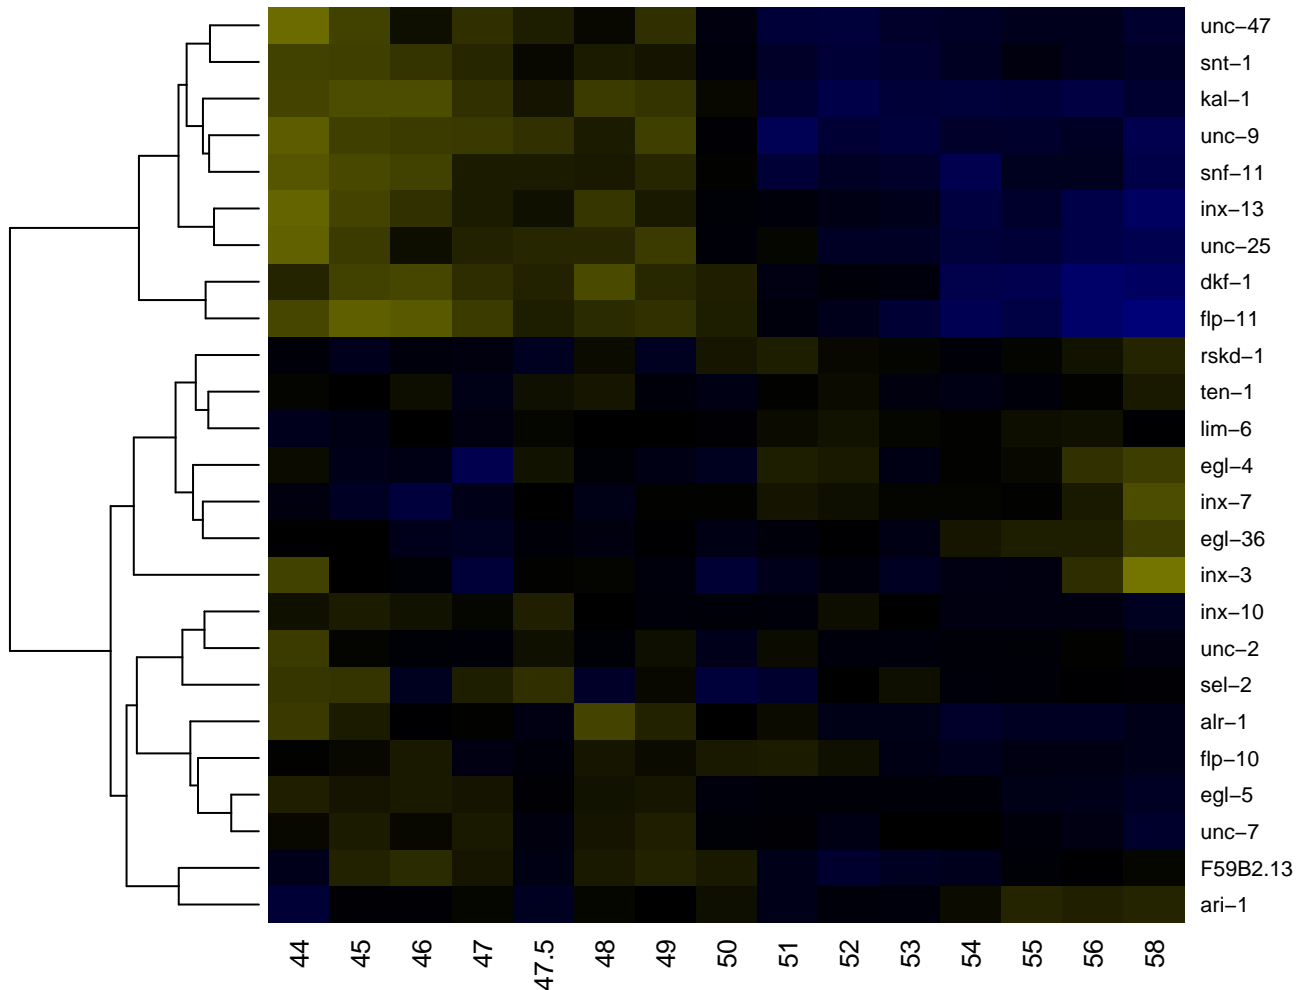

# DVC

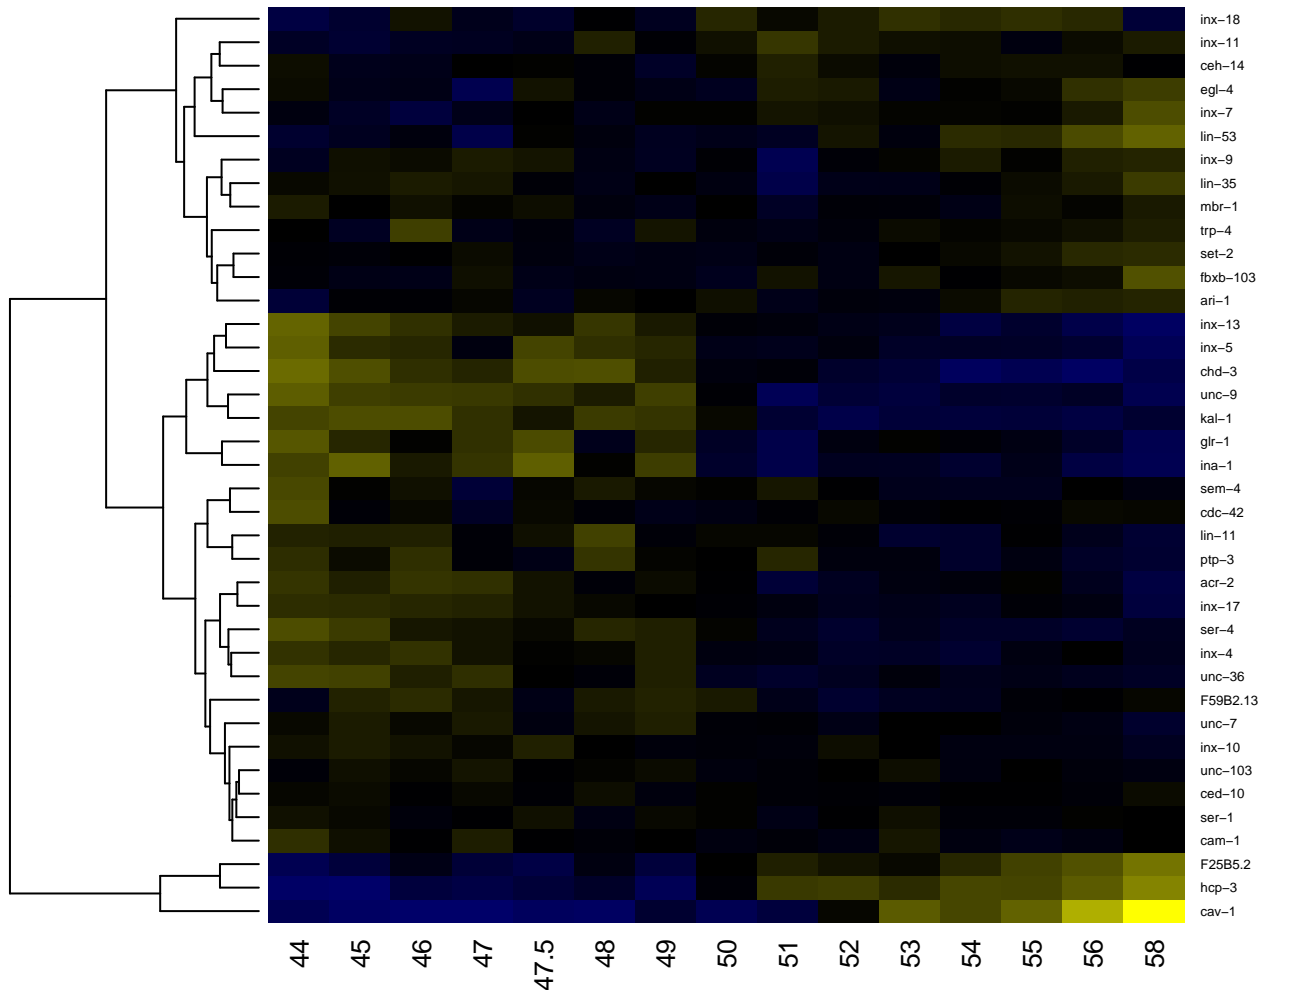



# DVE



# DVF

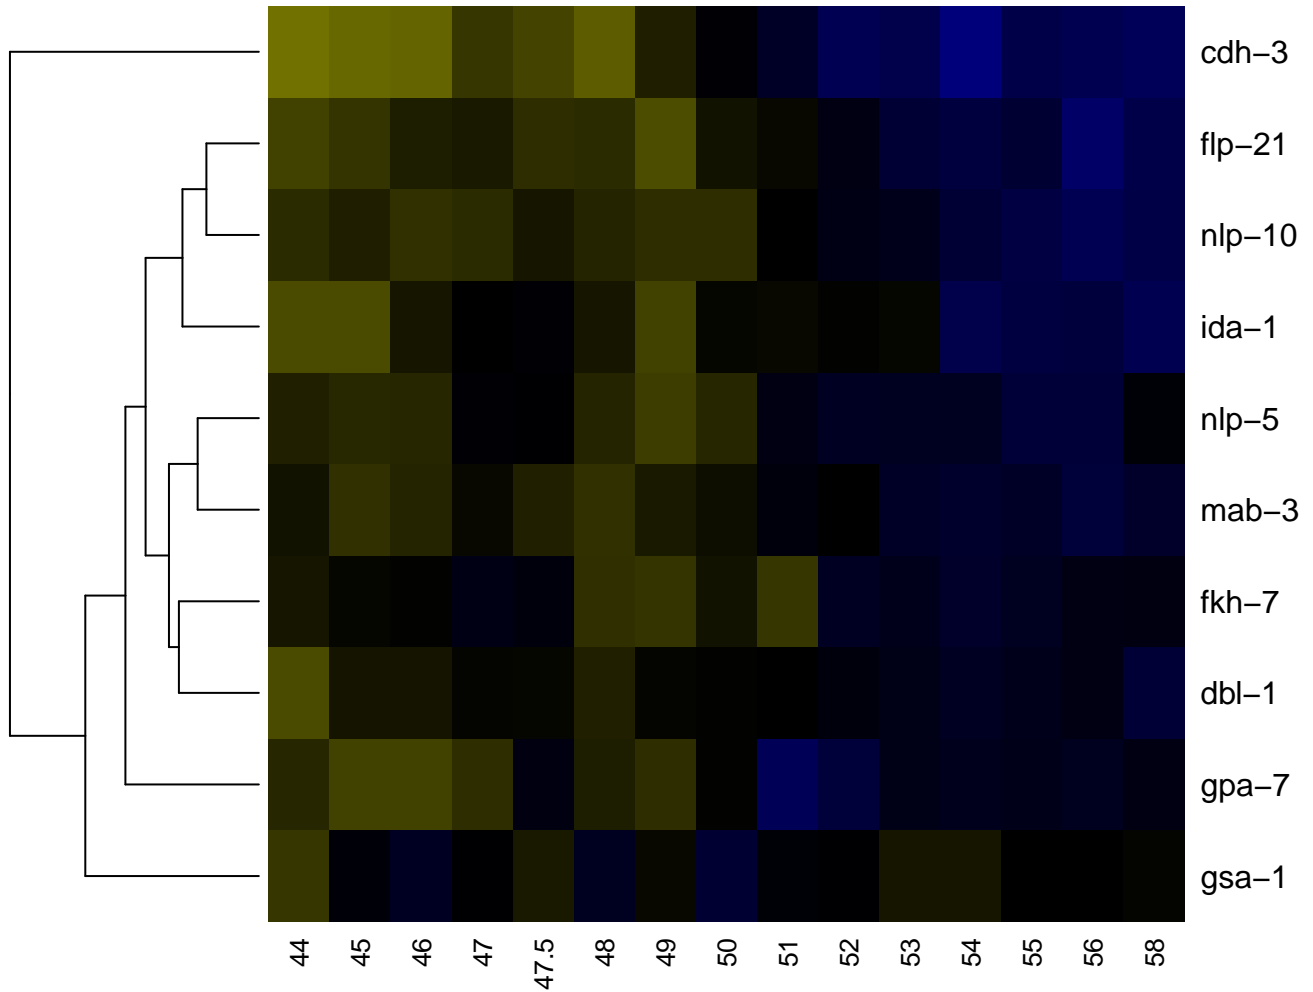

# DX1/2



# DX3/4



# E

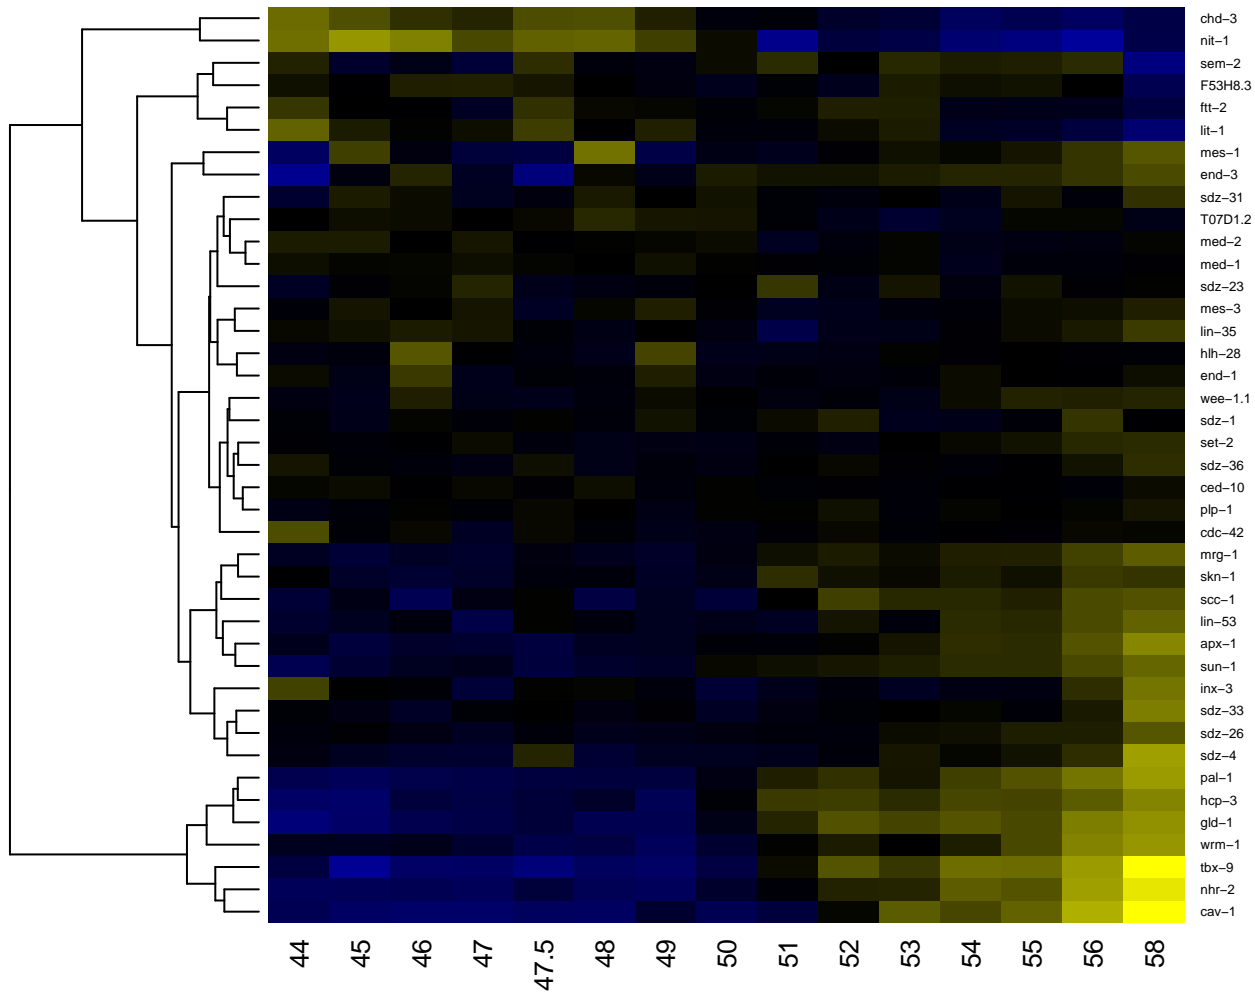

# e1D



# e1VL



# e1VR

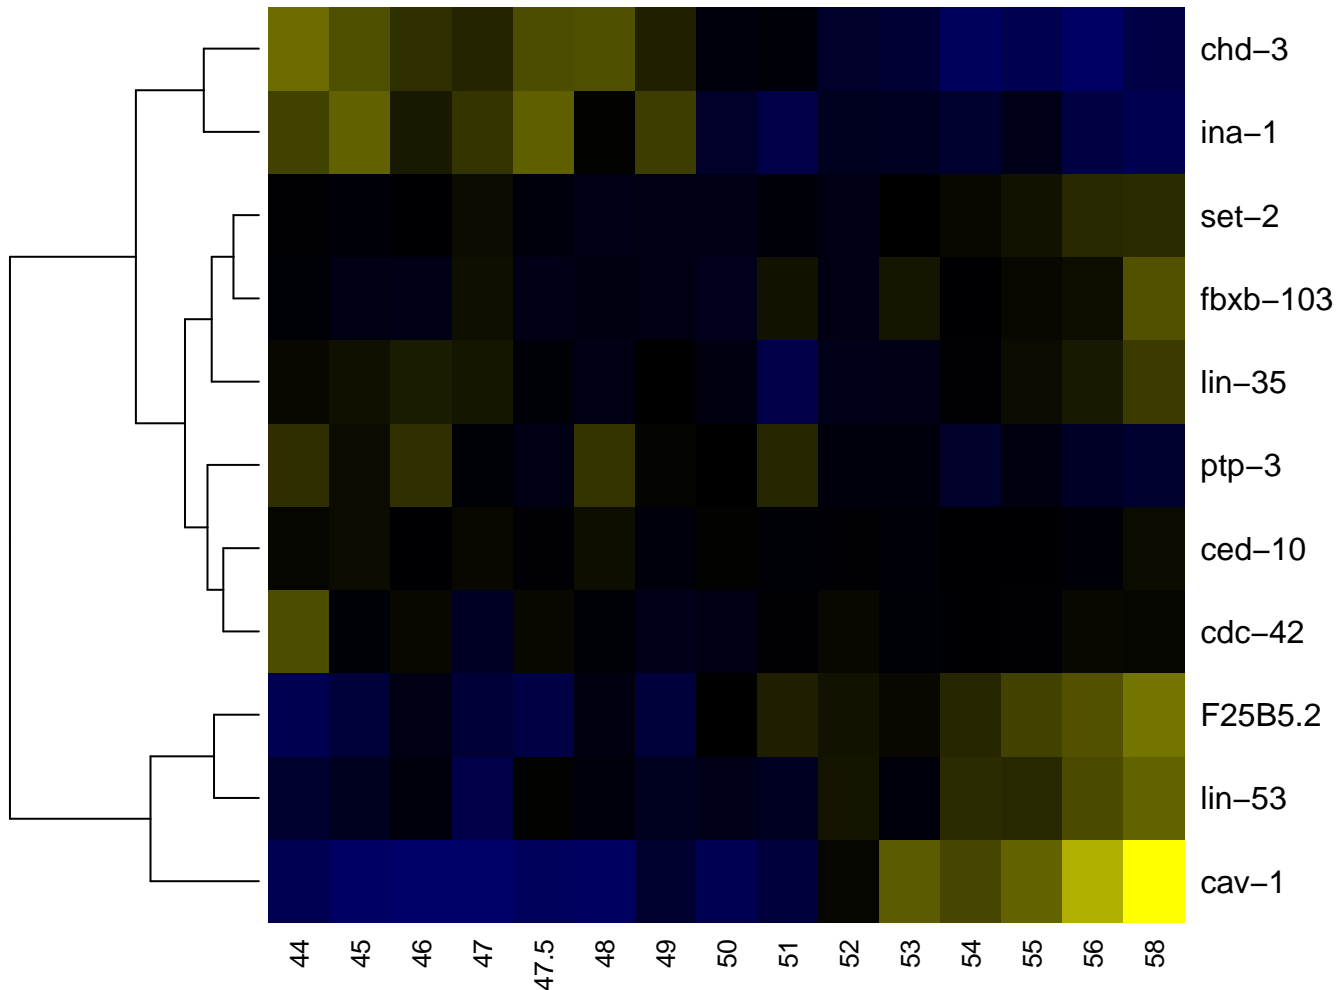







# e2V

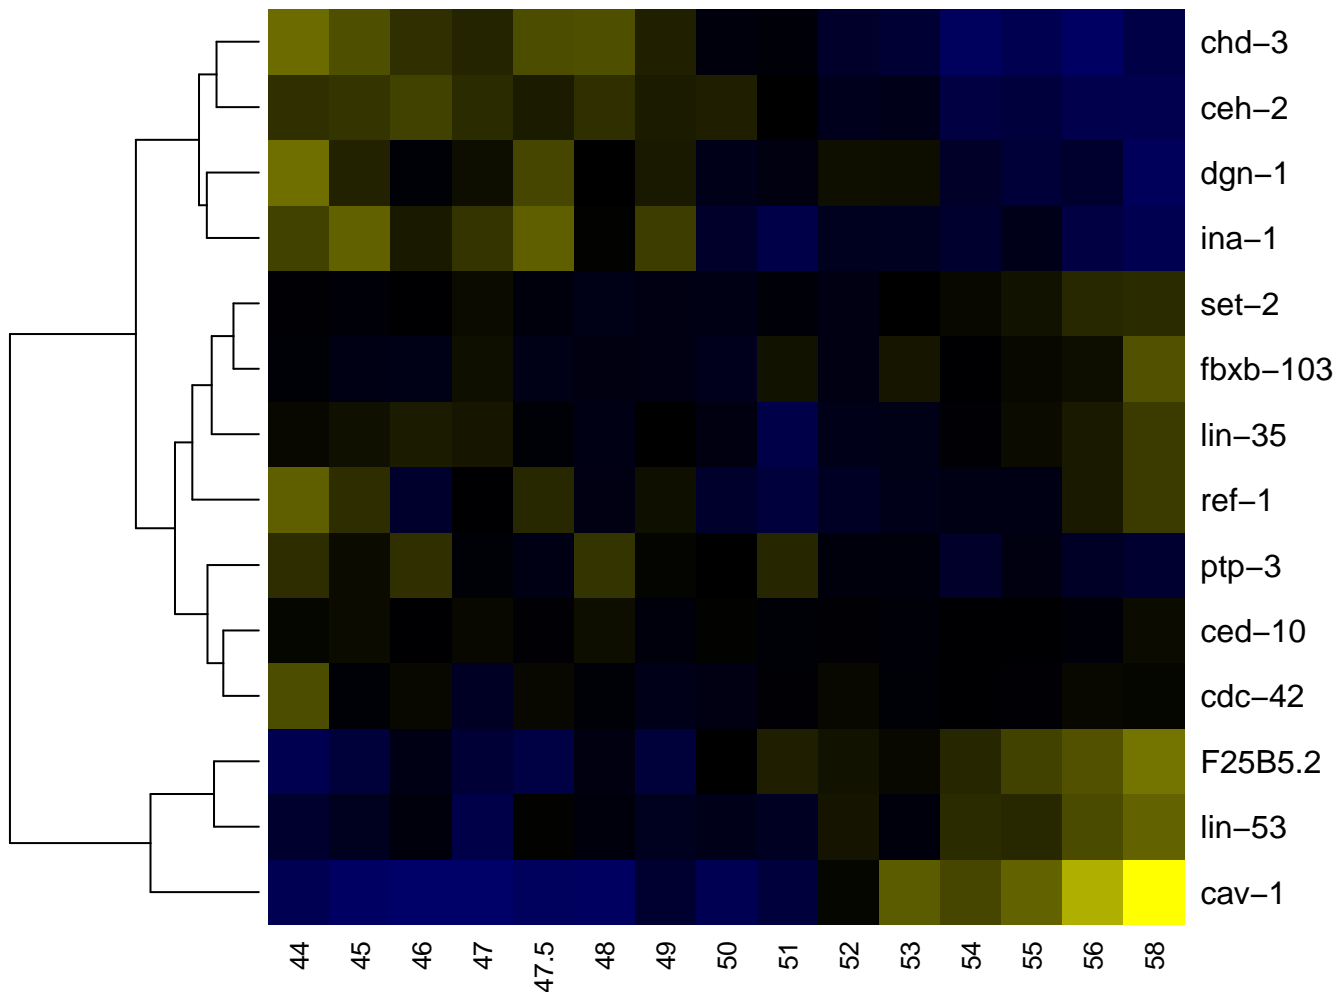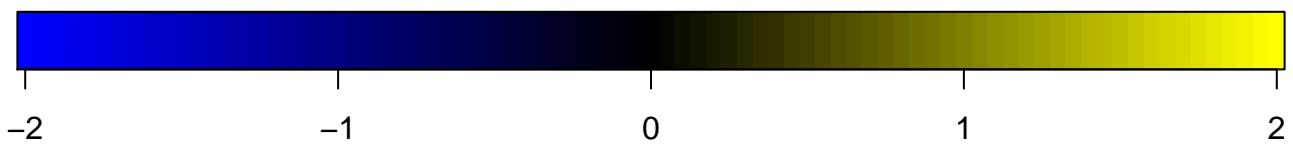

# e3D



# e3VL



# e3VR



# Ea

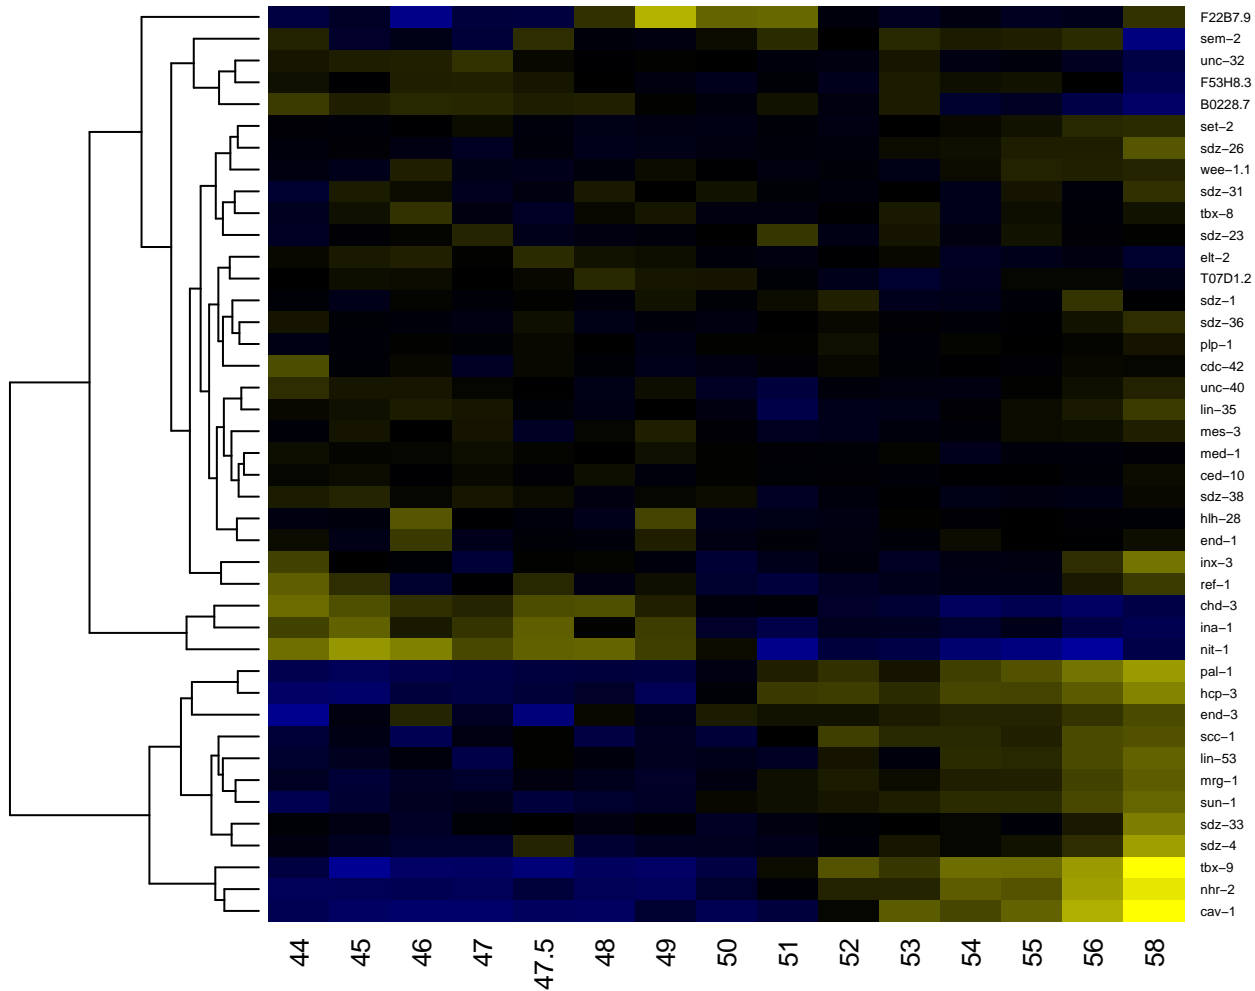

# Eal

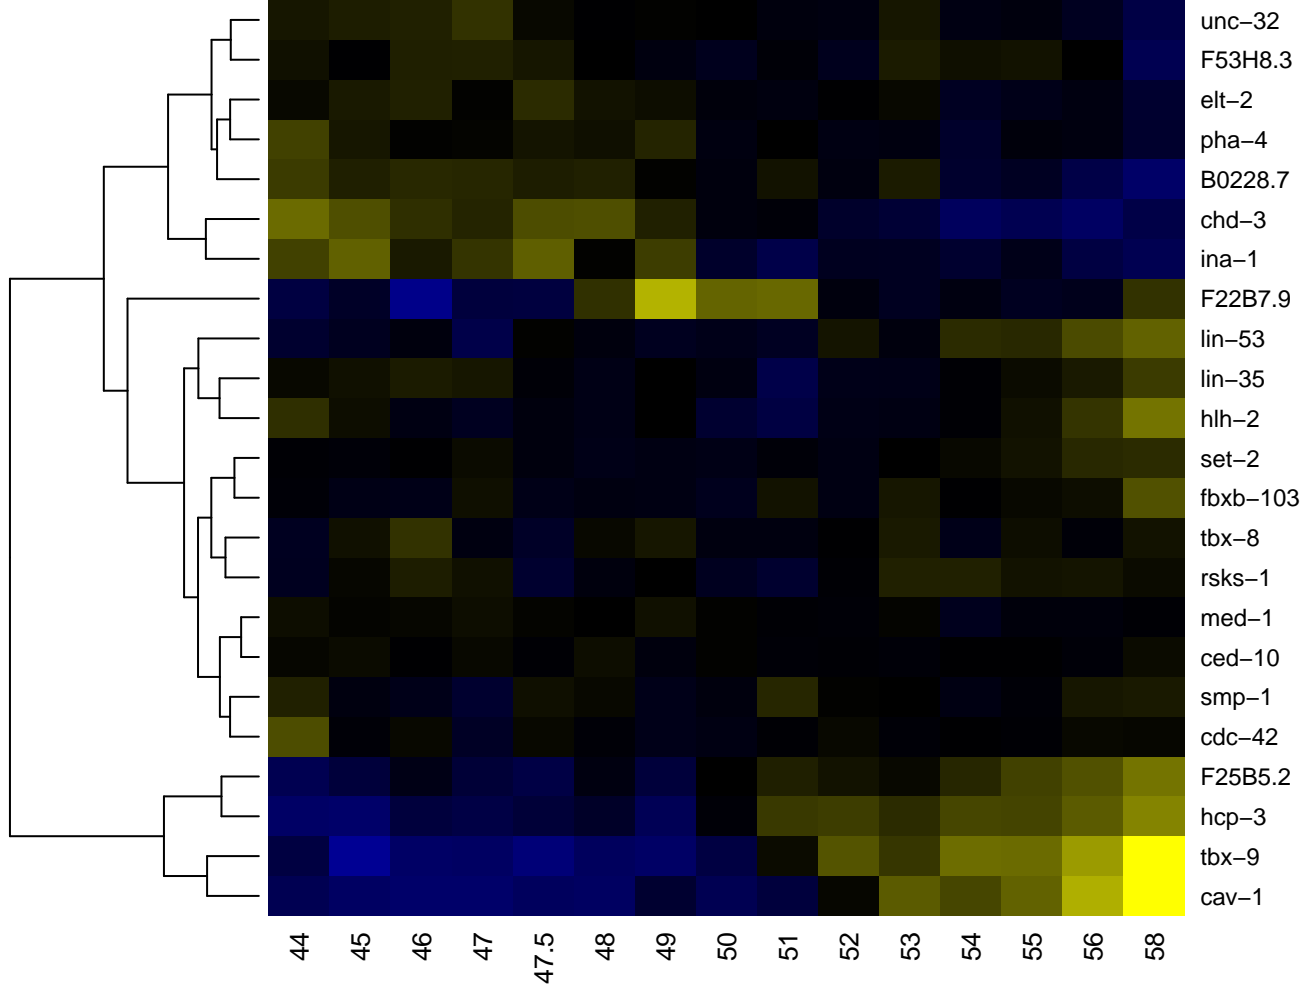



# Eala

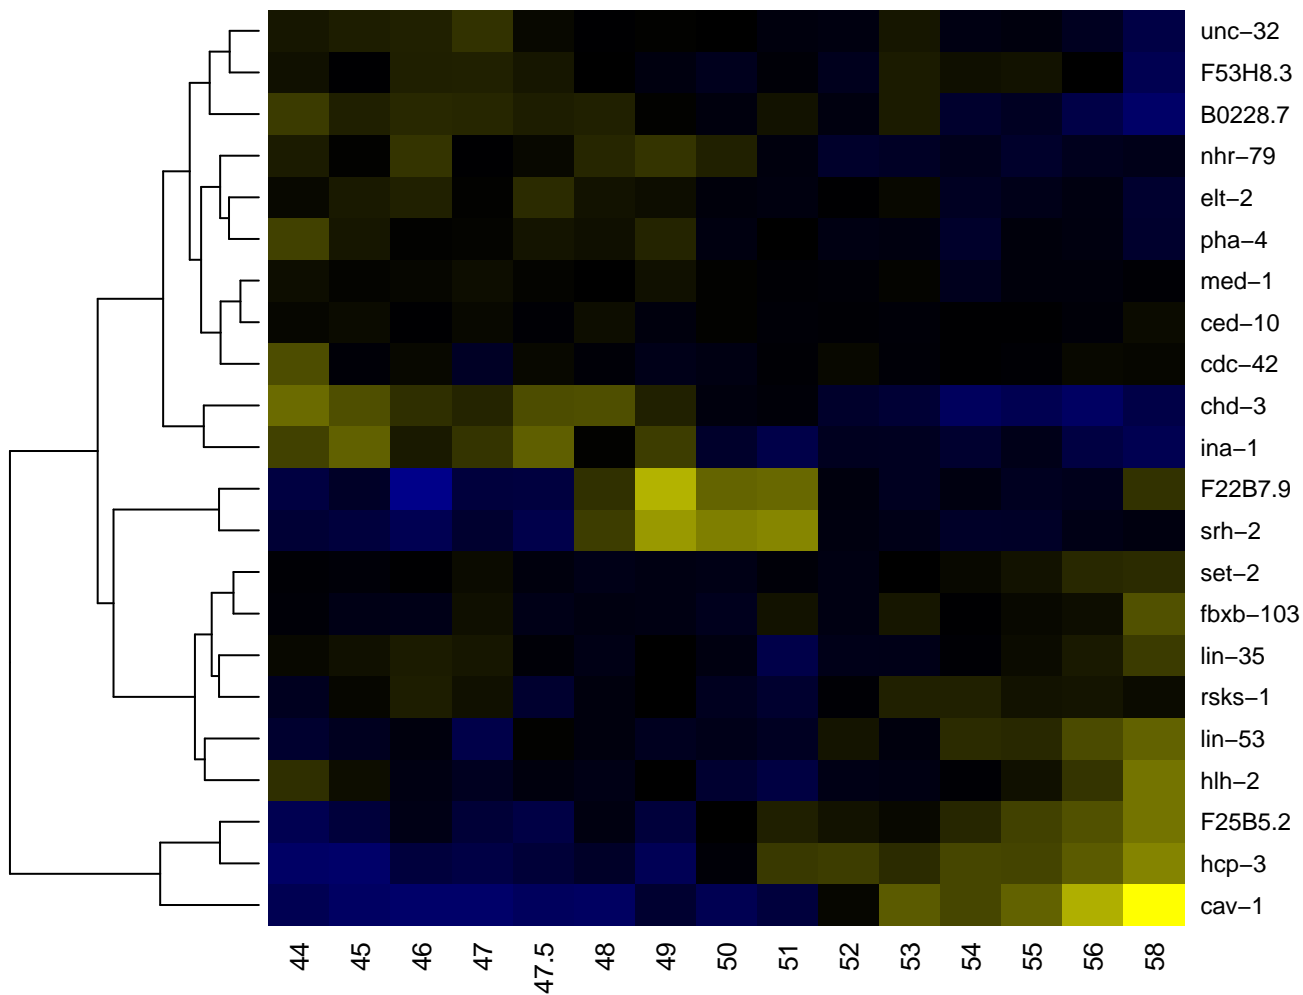

# Ealaa

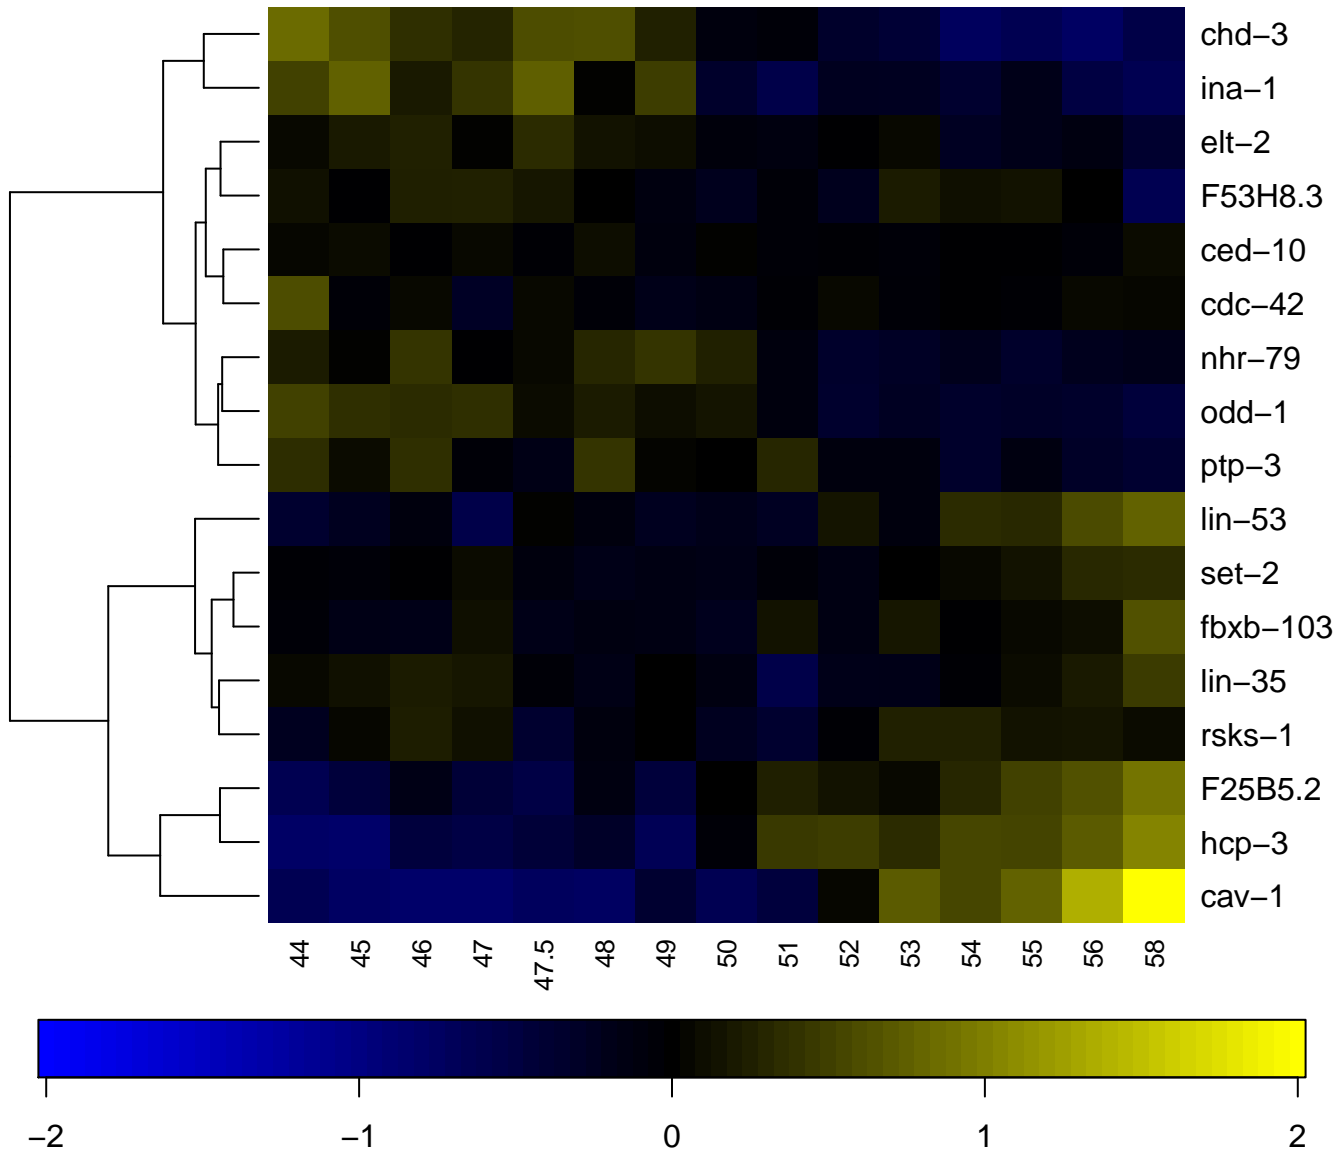

# Ealp

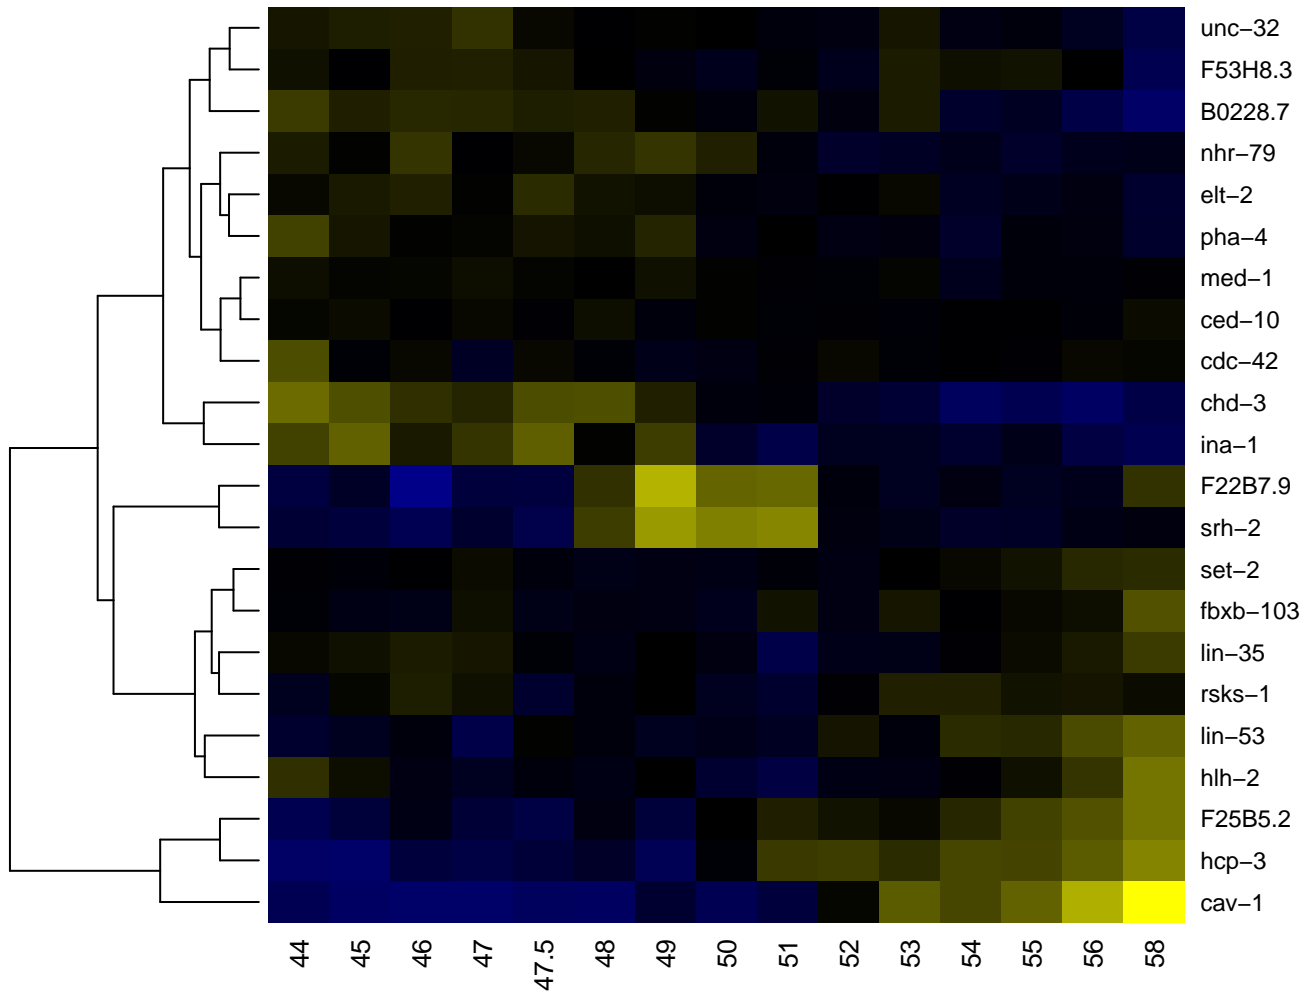

# Ear

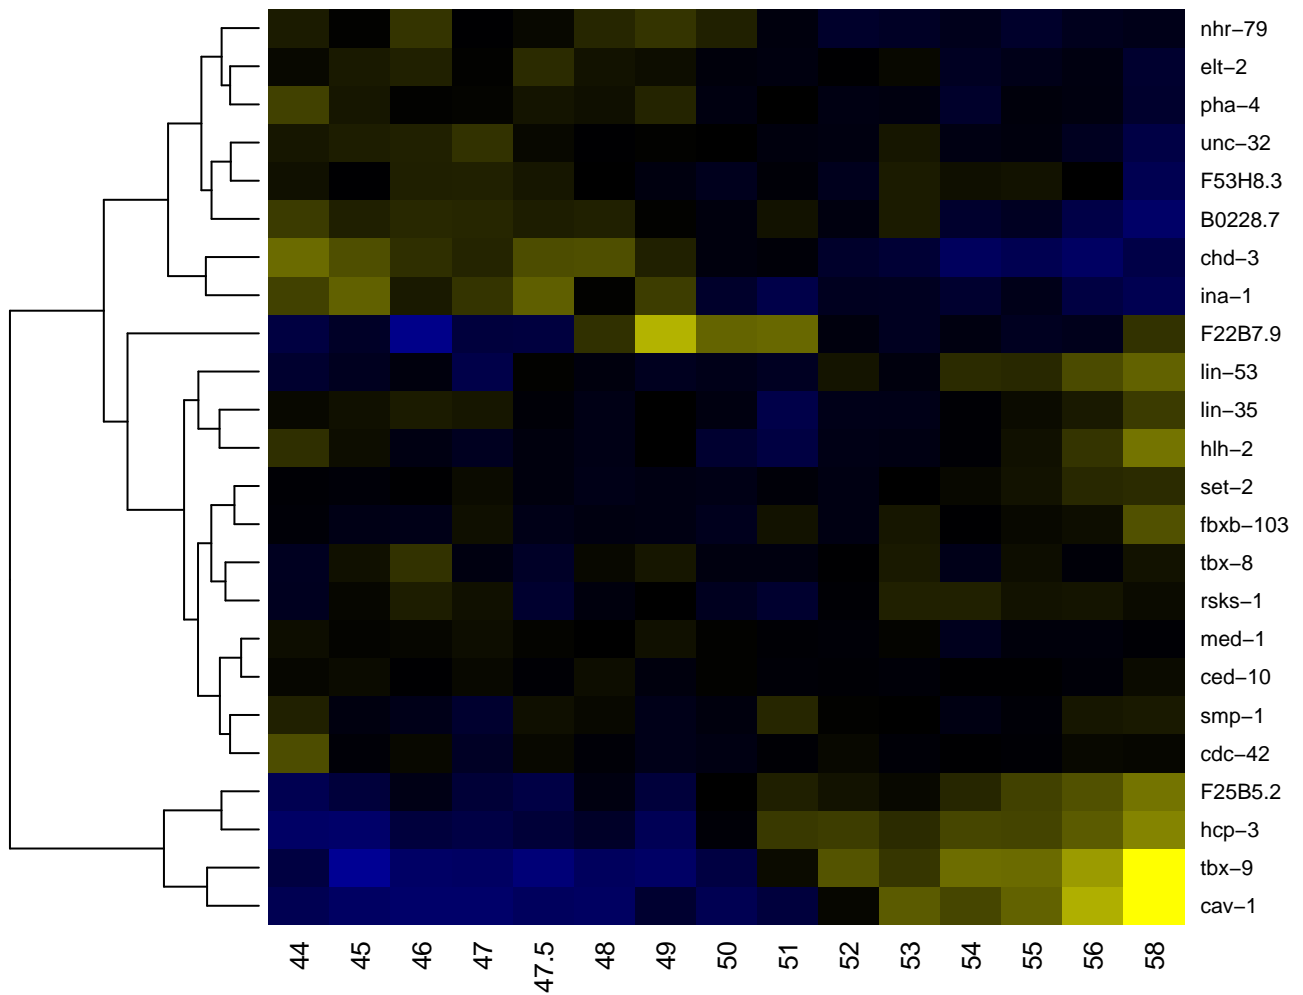

# Eara

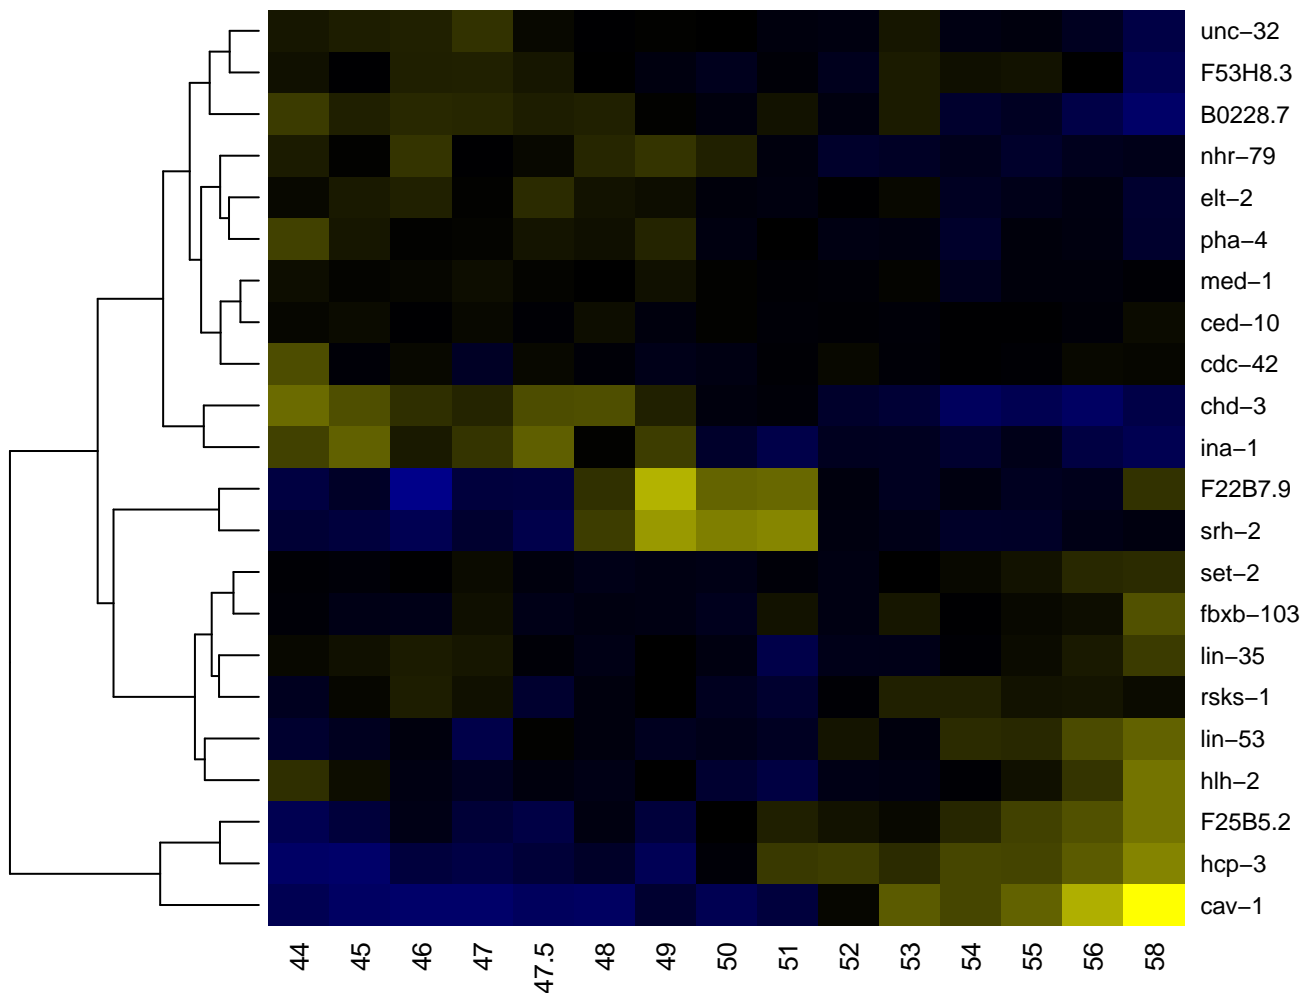

# Earaa

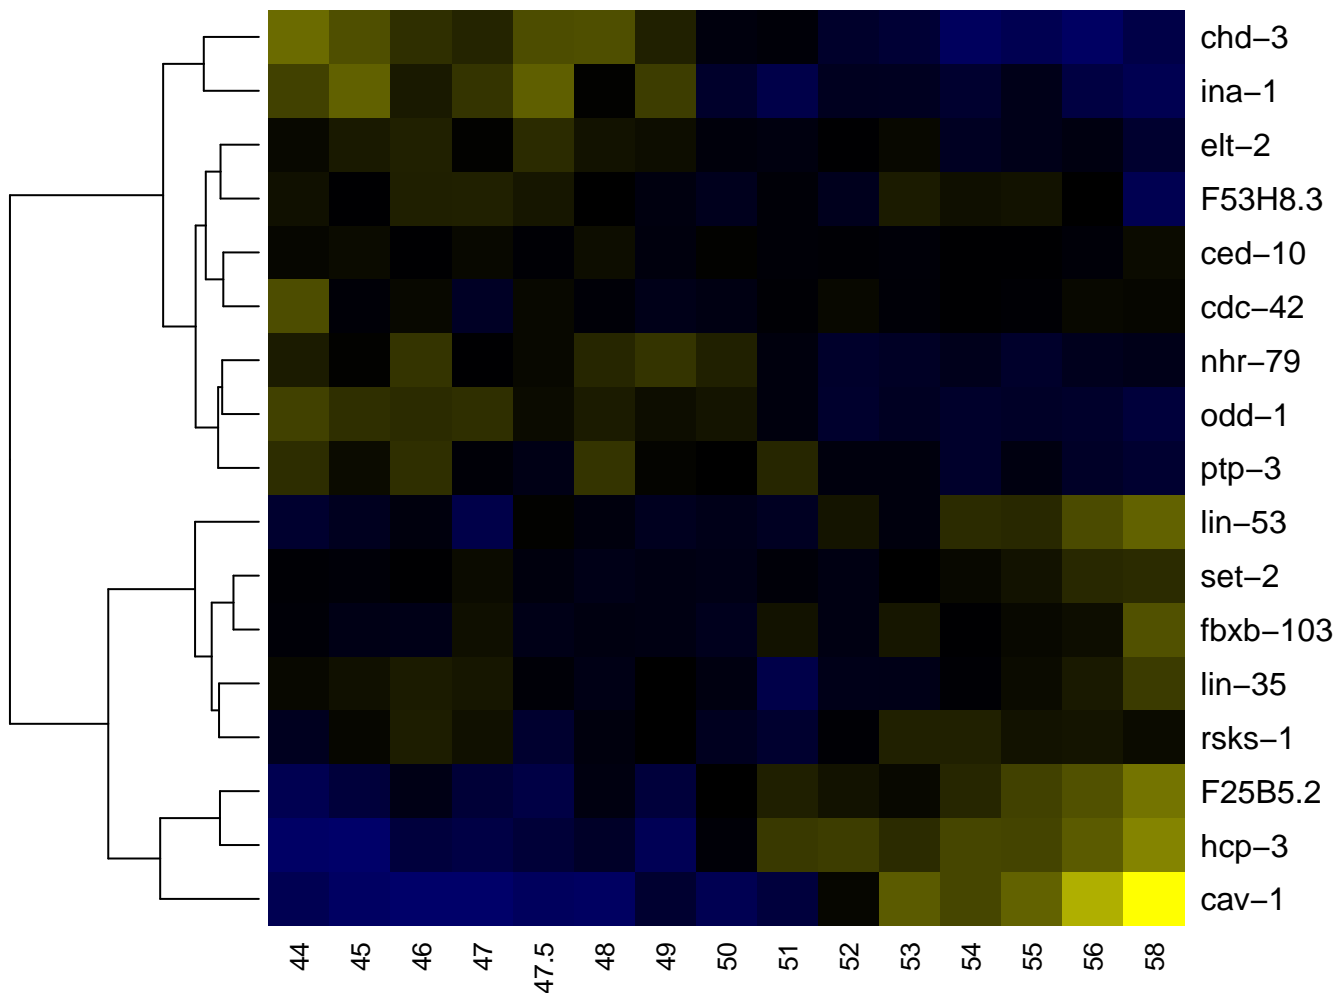

# Earp

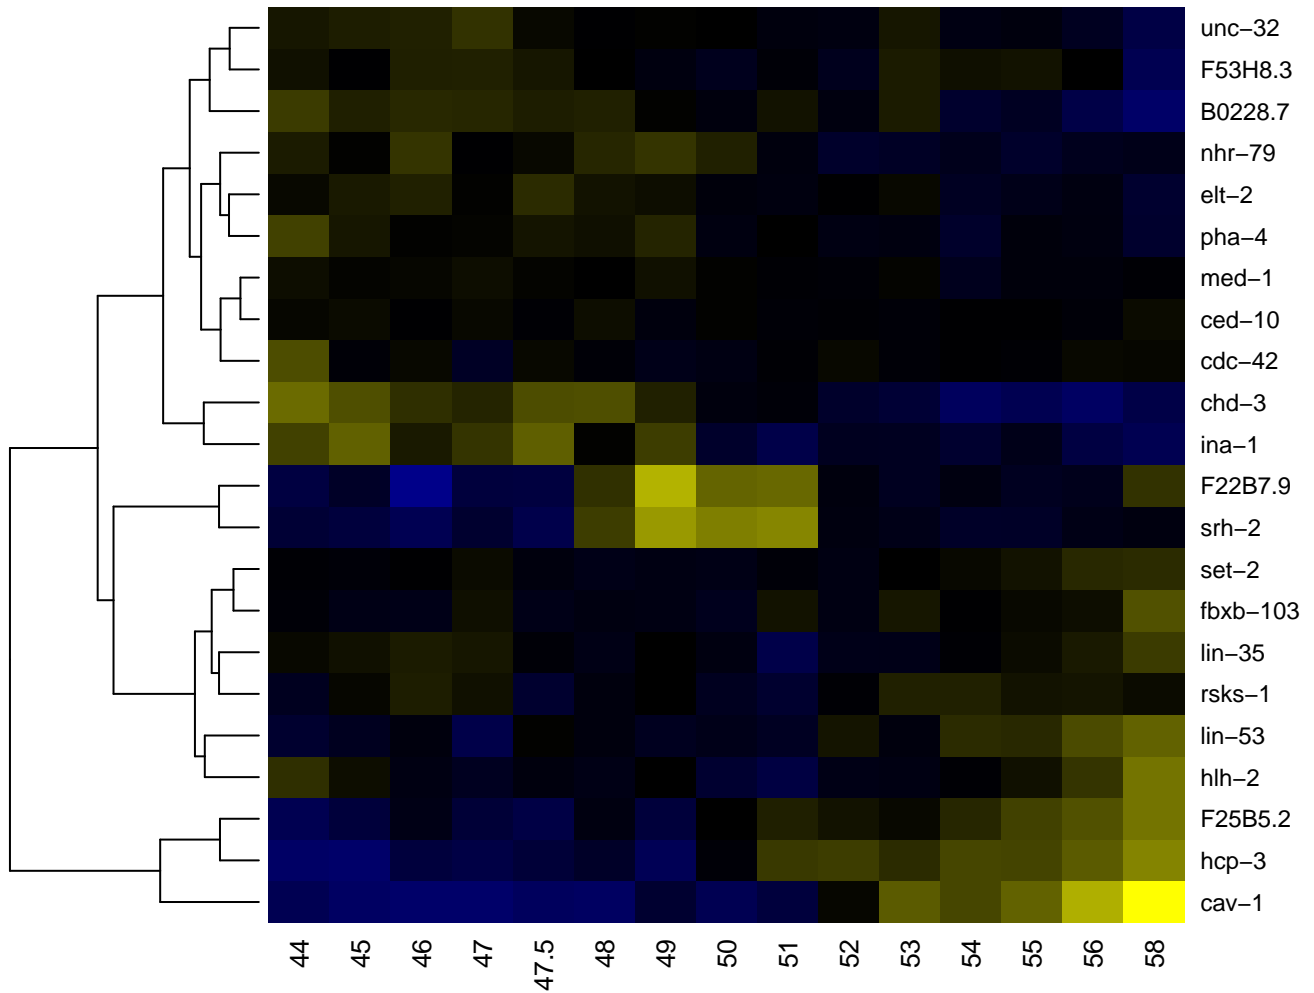

# EF1/2





# EF3/4

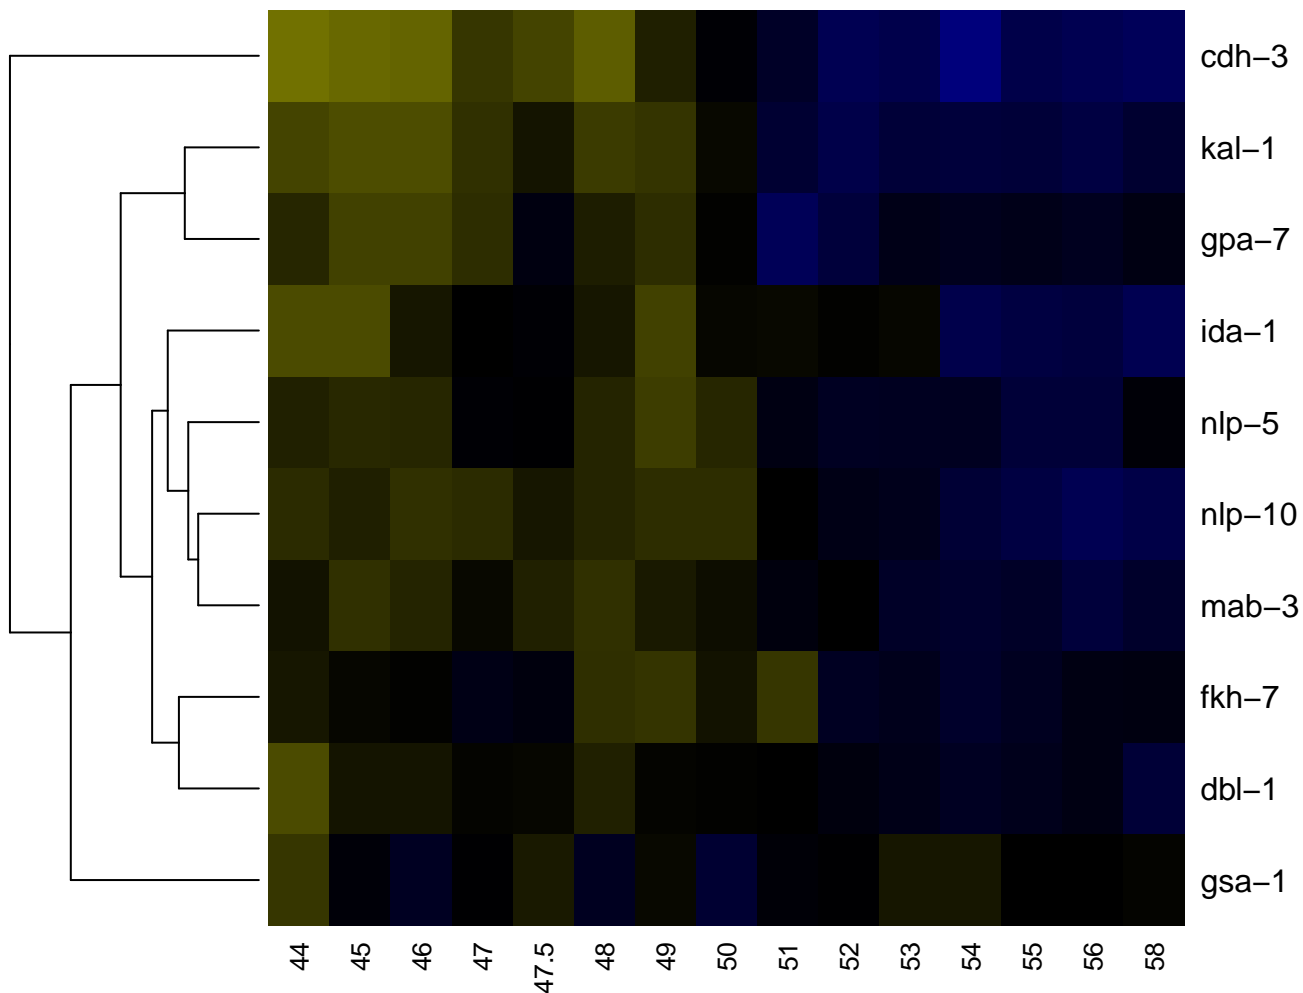

# EMS

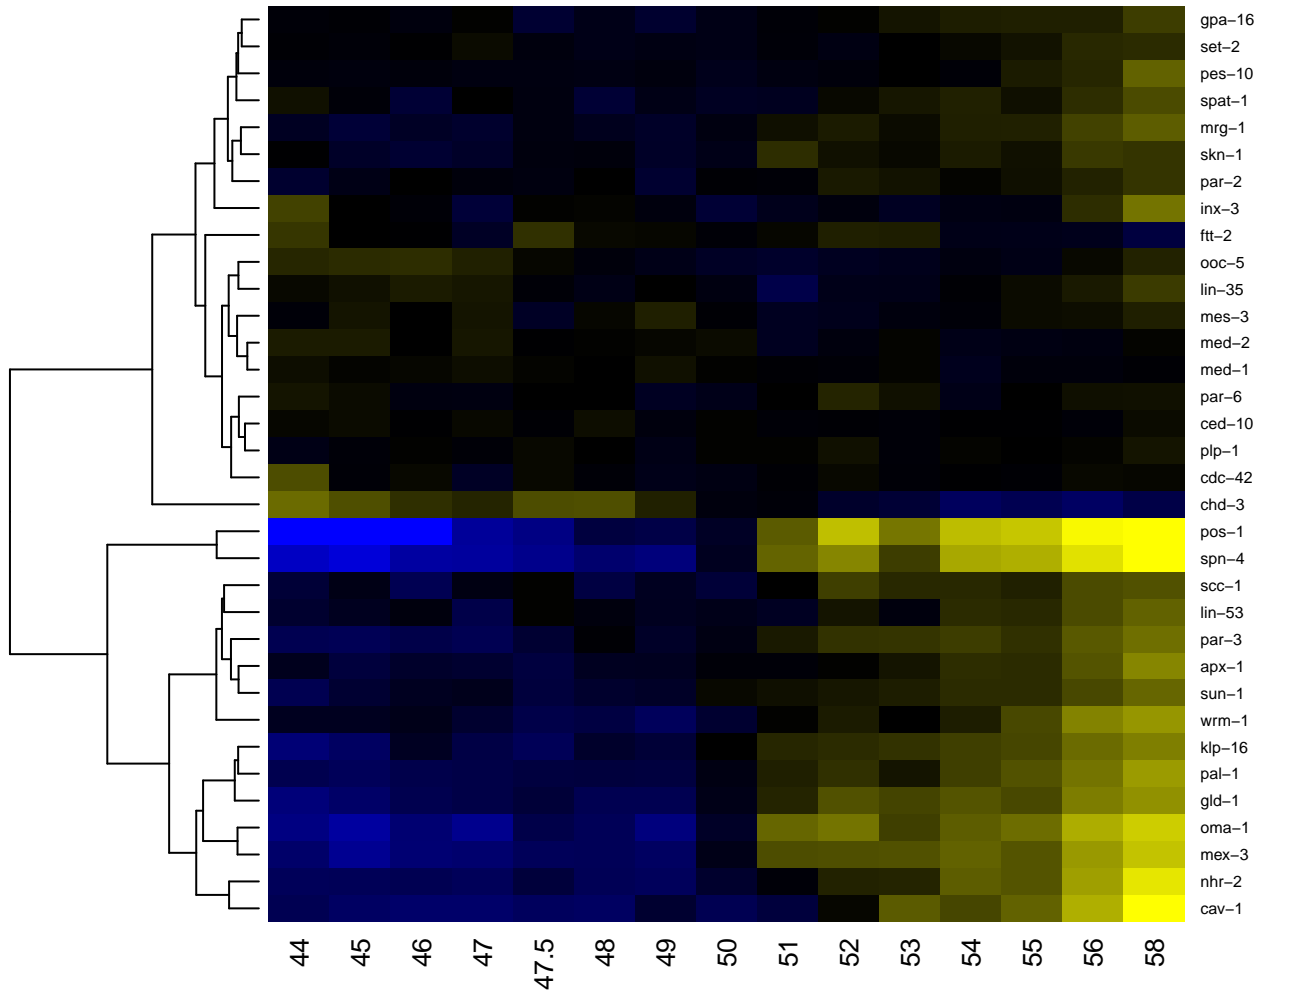

# Ep

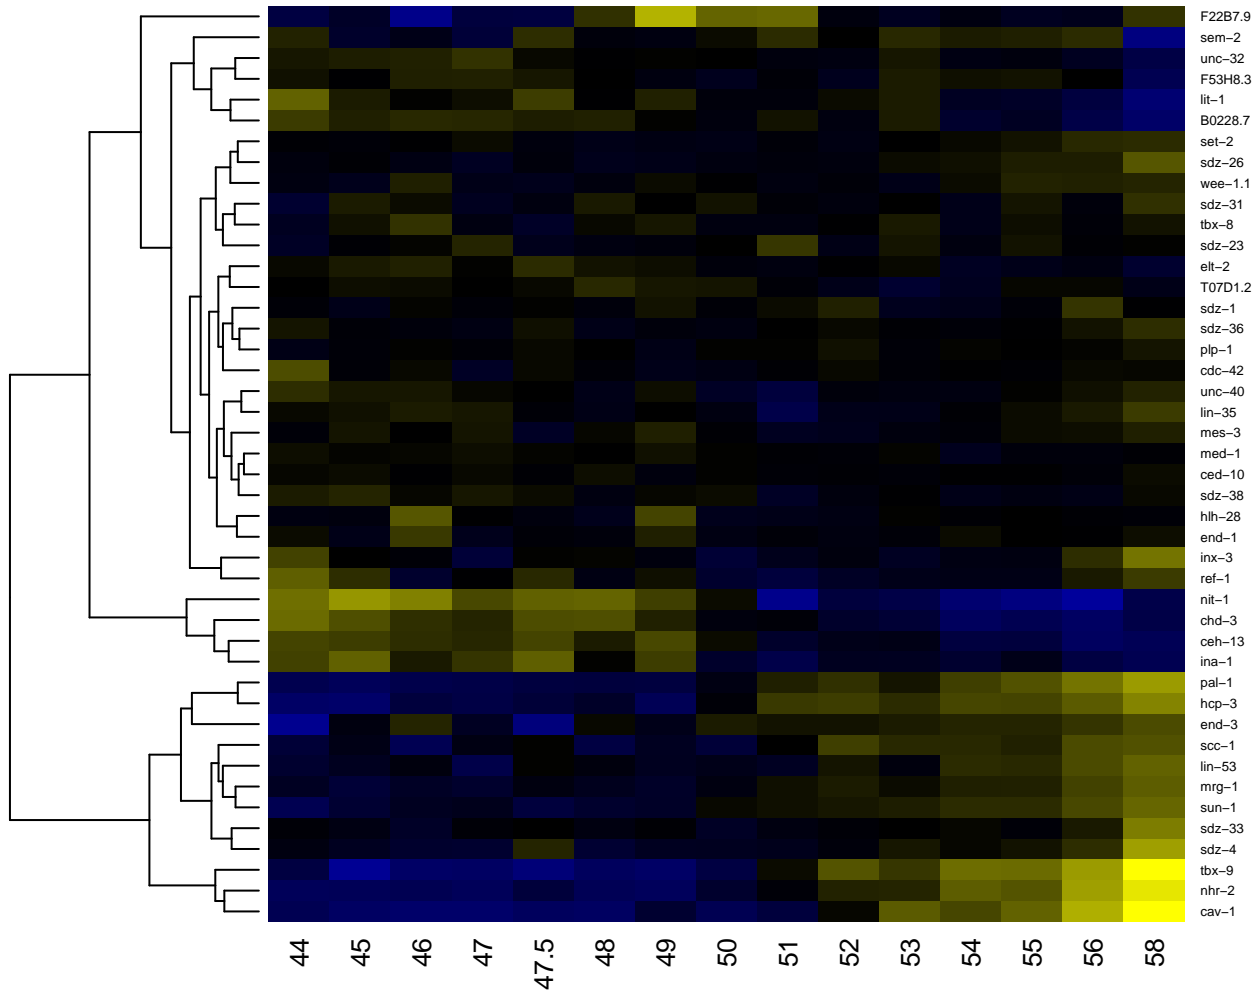

# epithelial cell

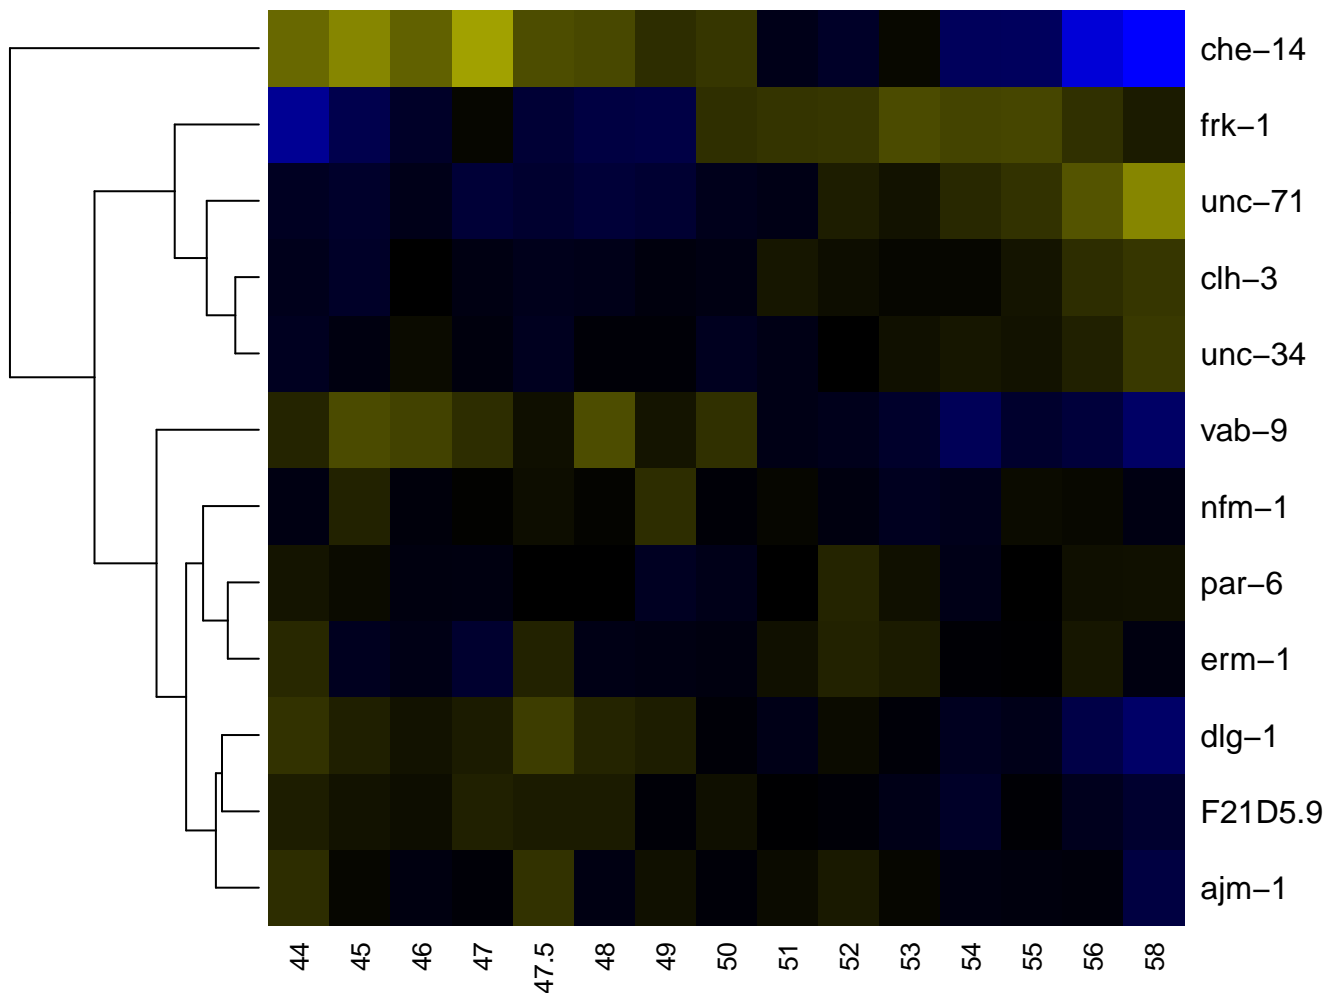

# Epl

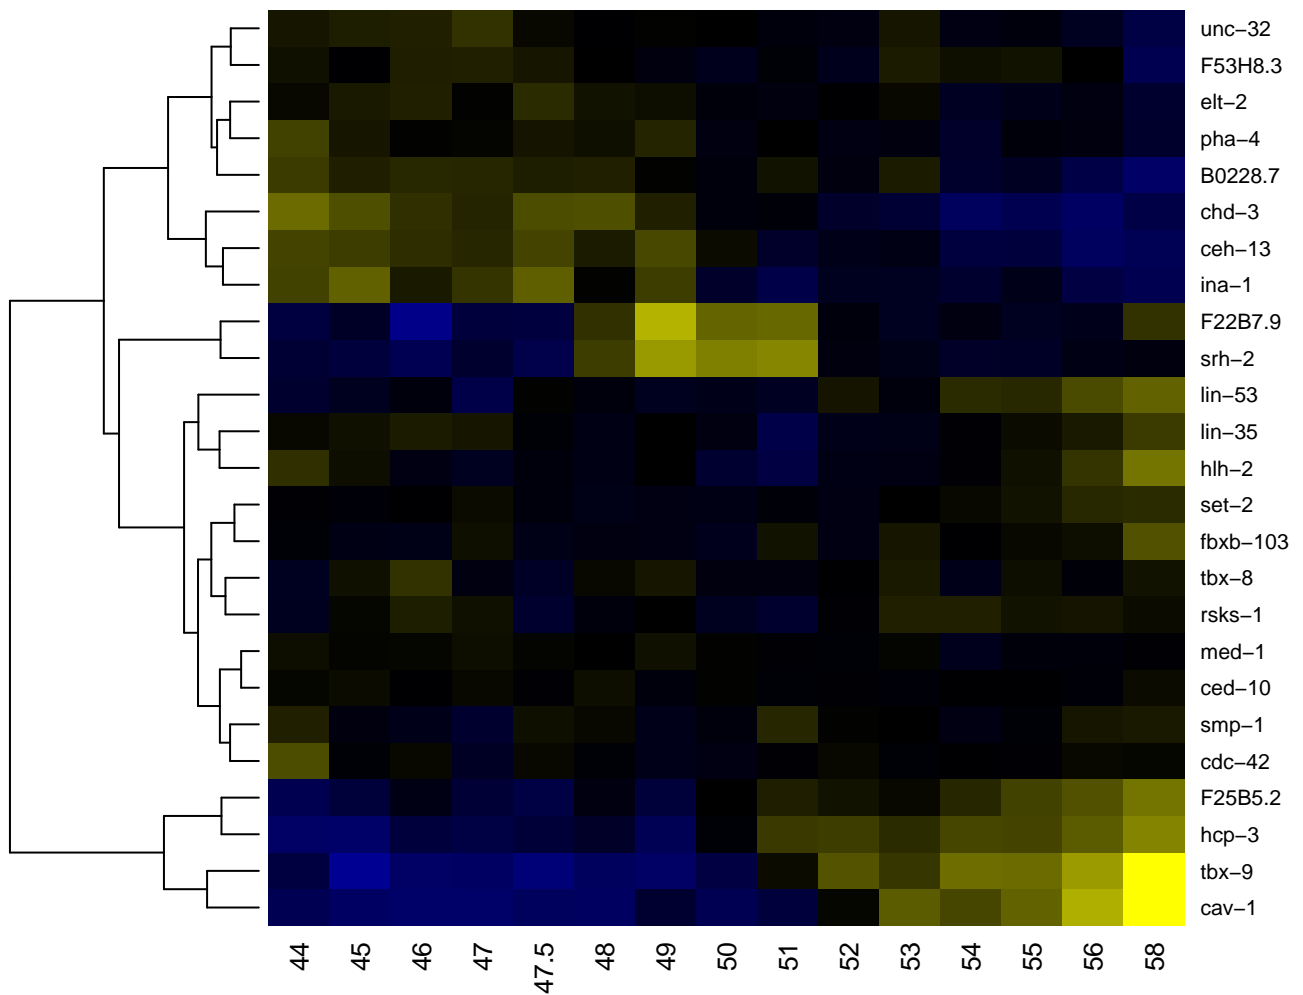

# Epla

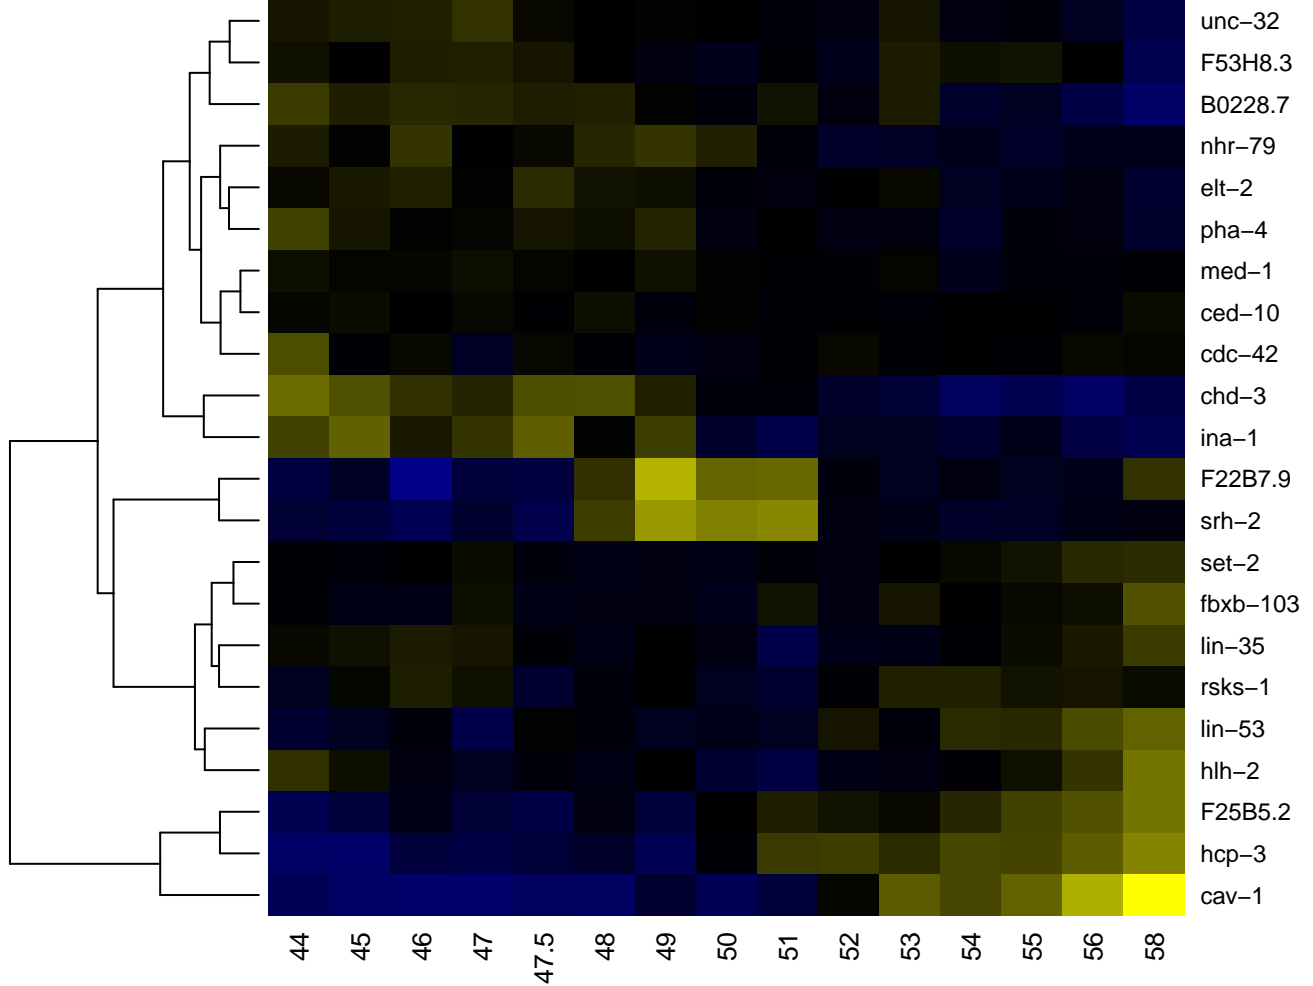

# Eplp



# Eplpp

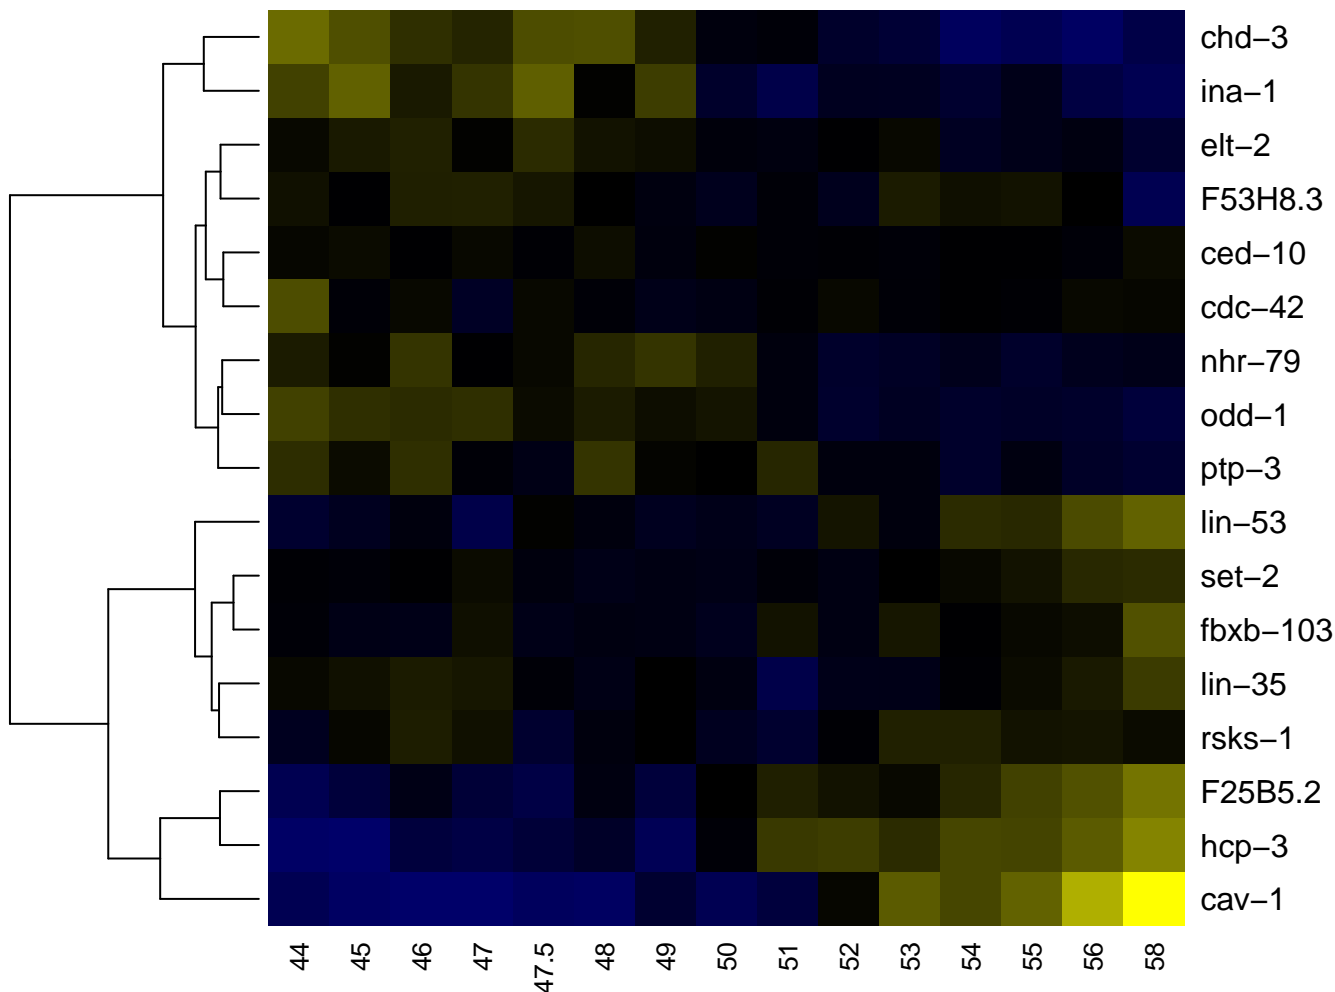



# Epr

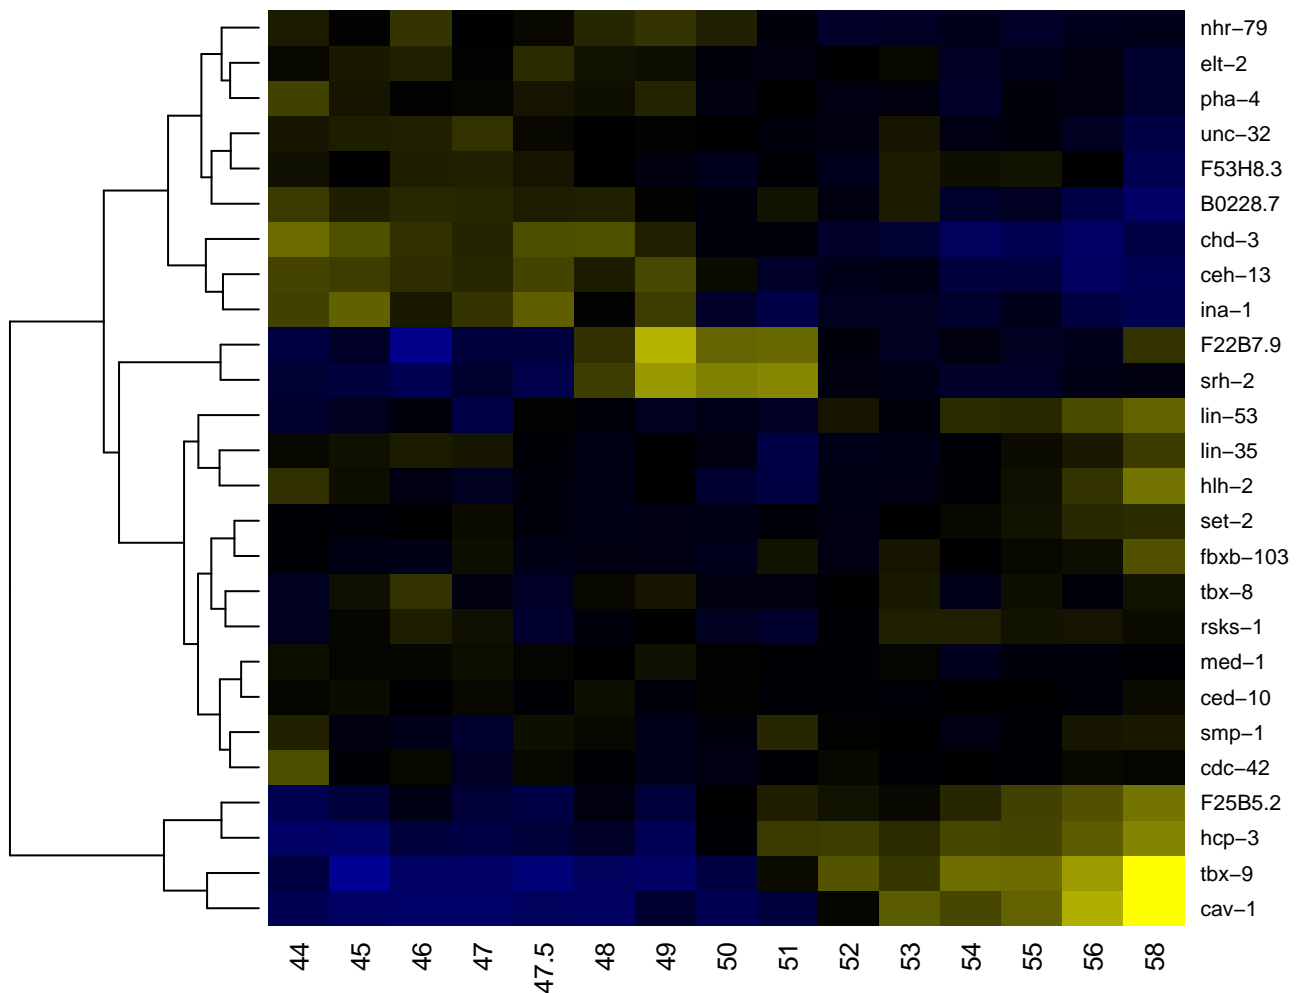

# Epra



# Eprp



# Eprpp

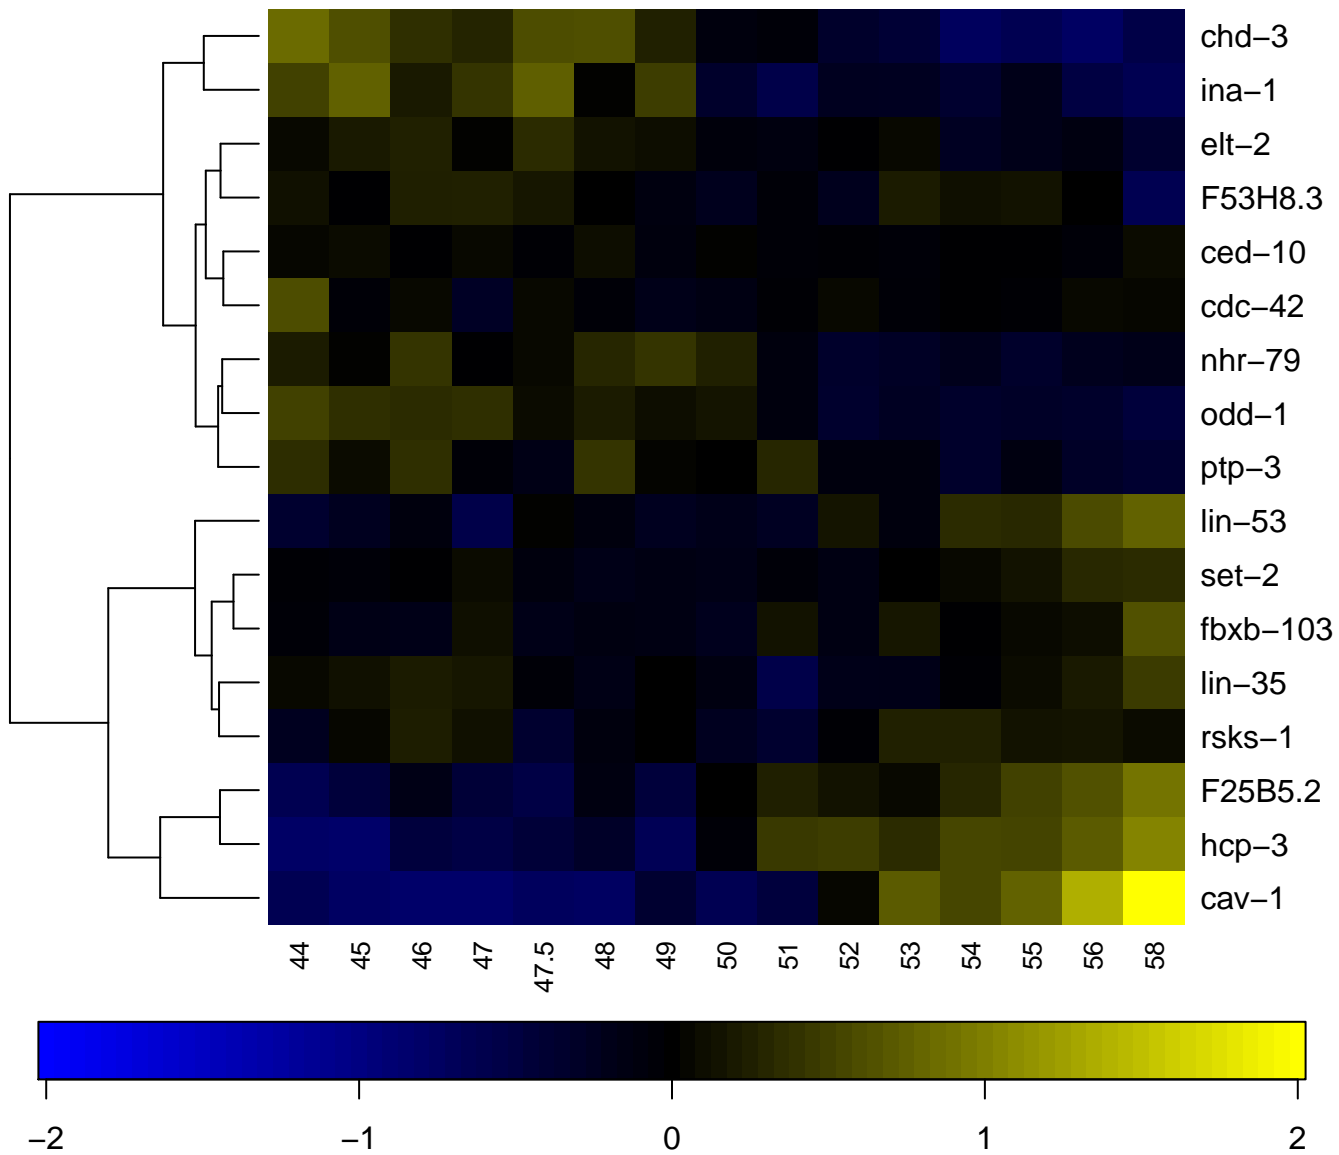

# excretory canal

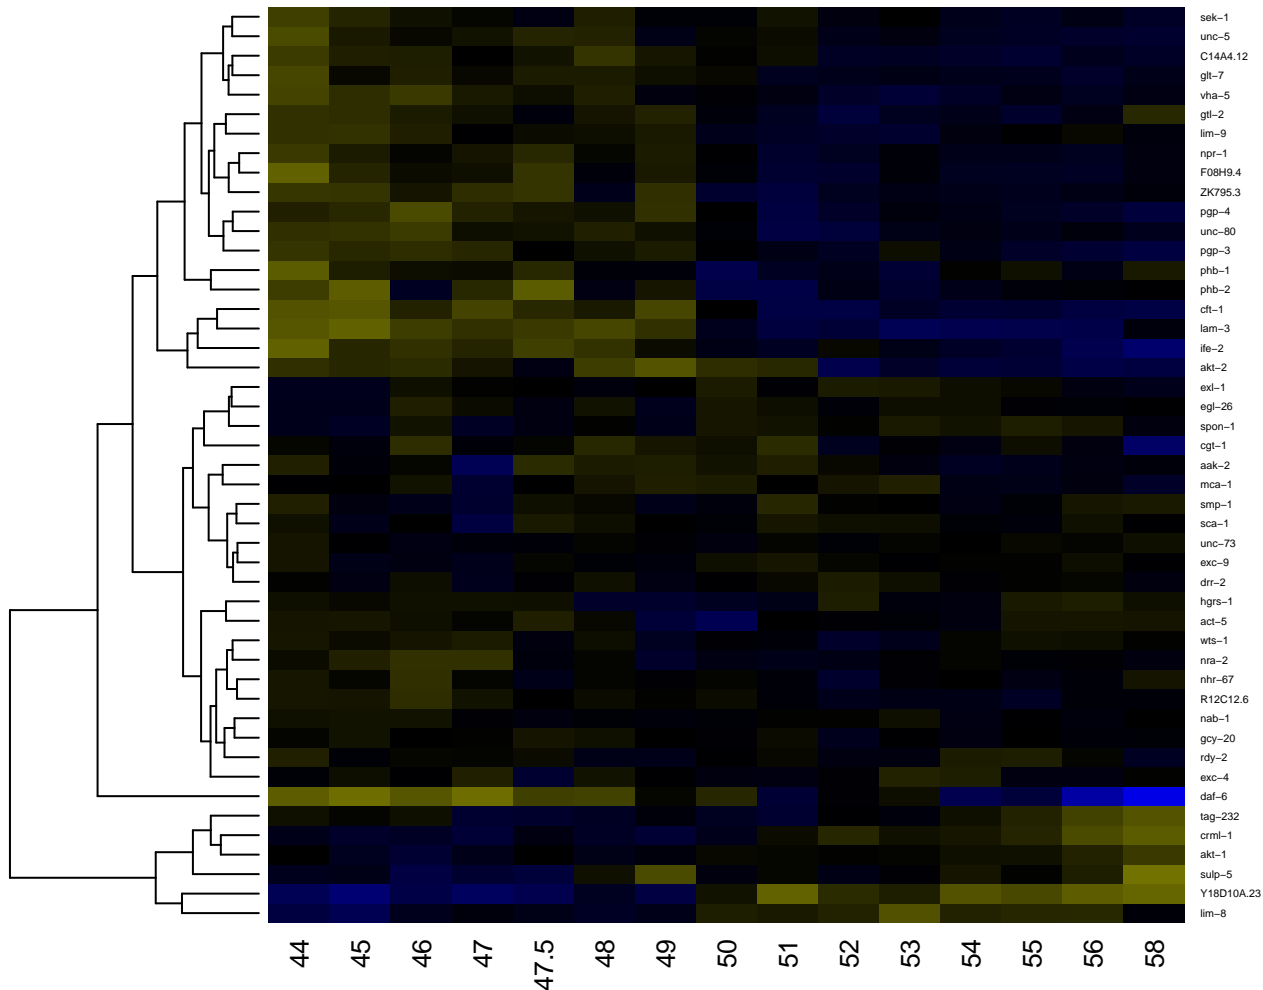

# excretory cell

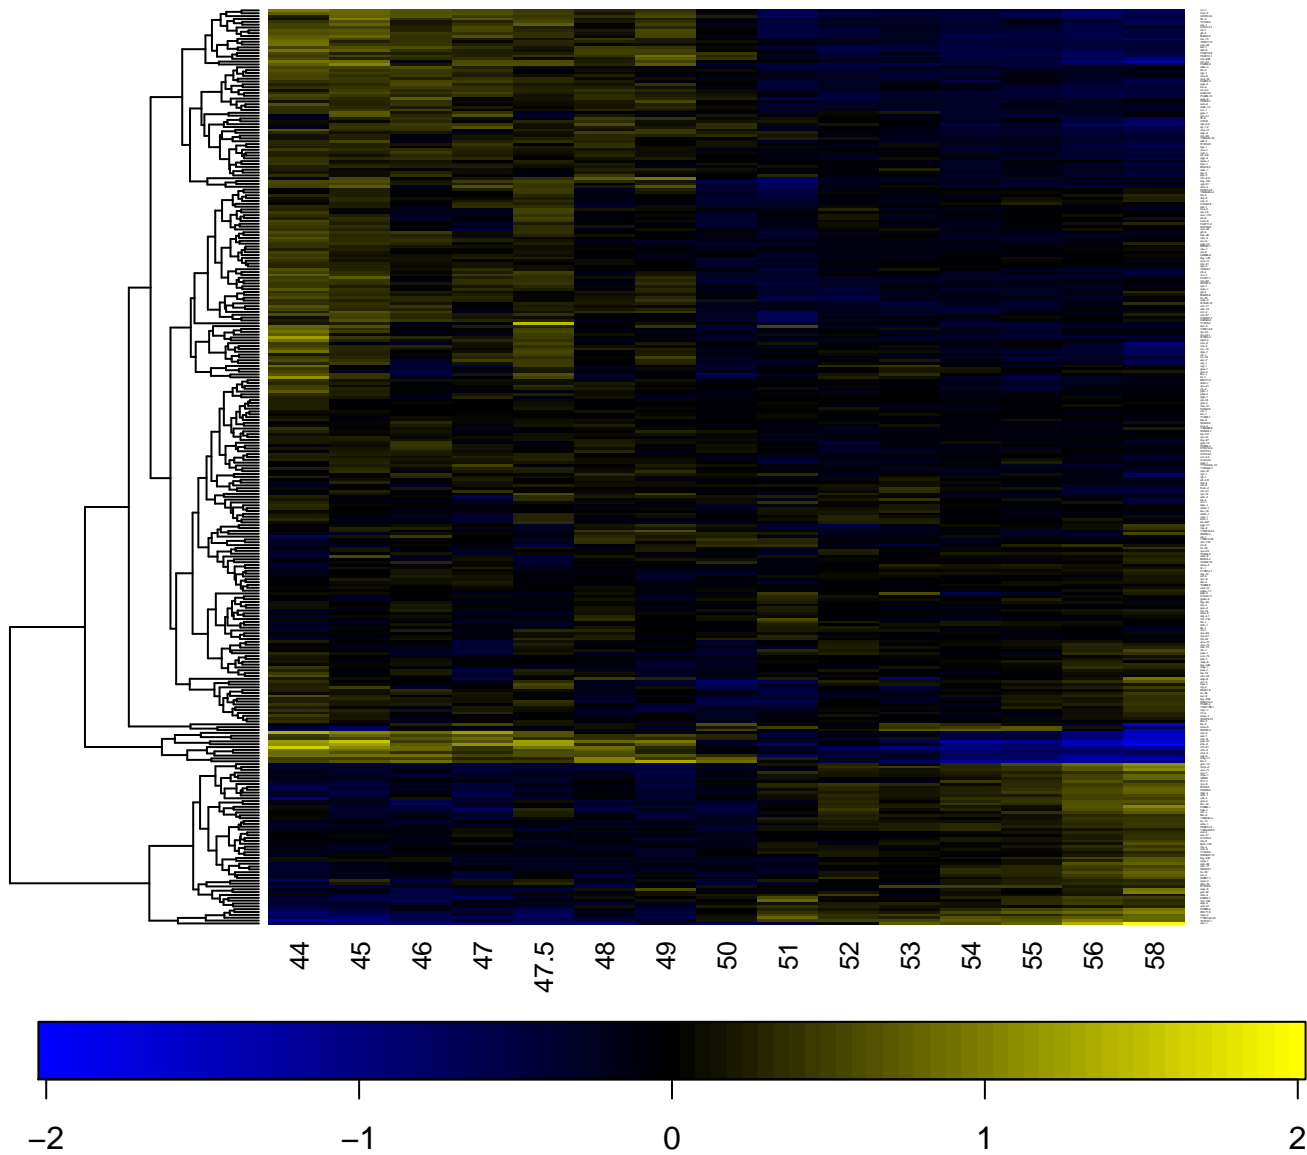

# Excretory duct

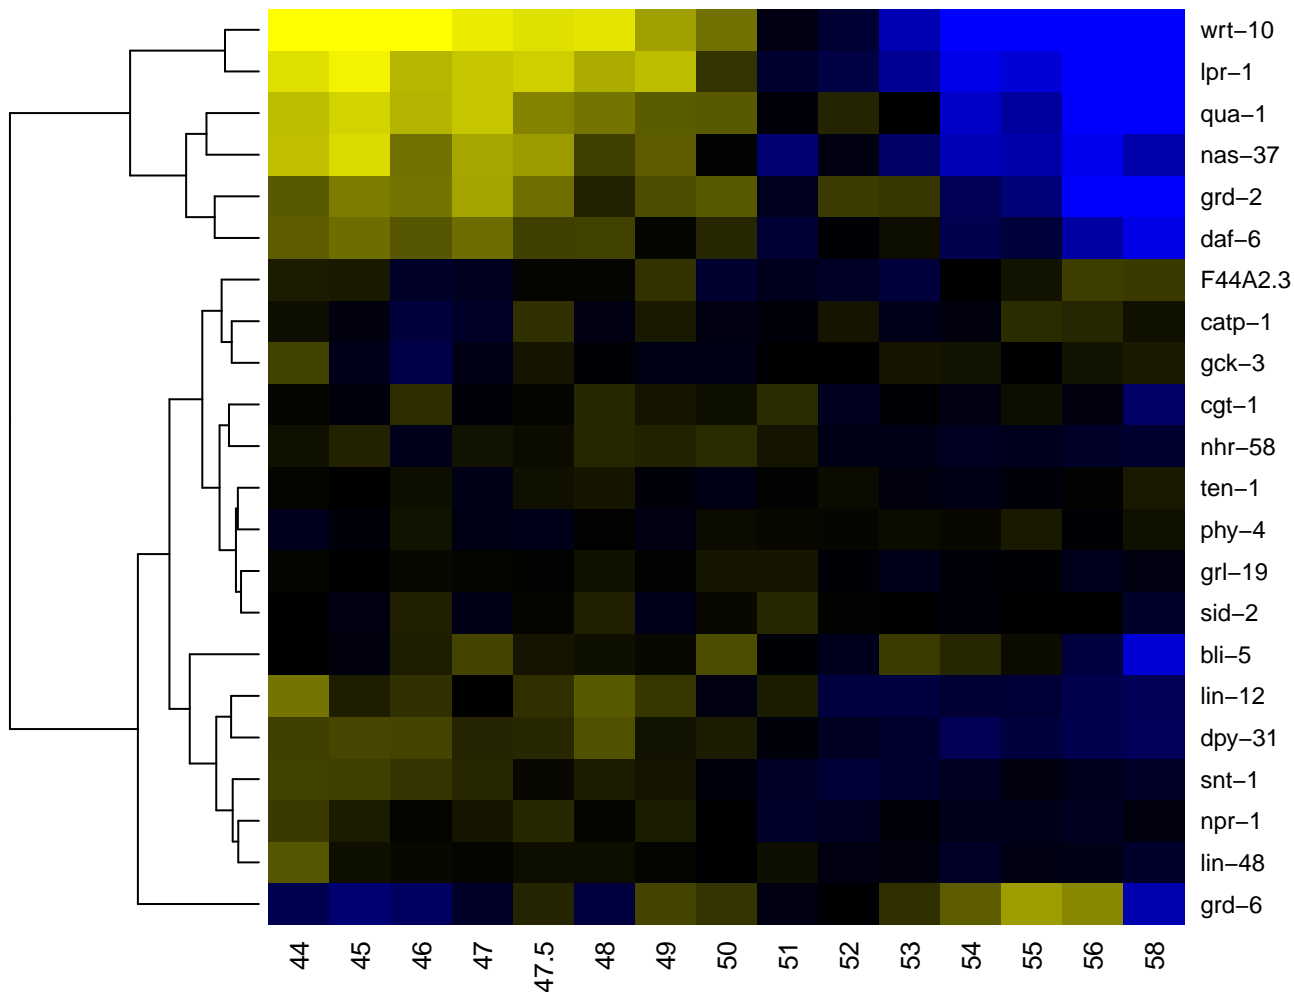

# excretory duct cell

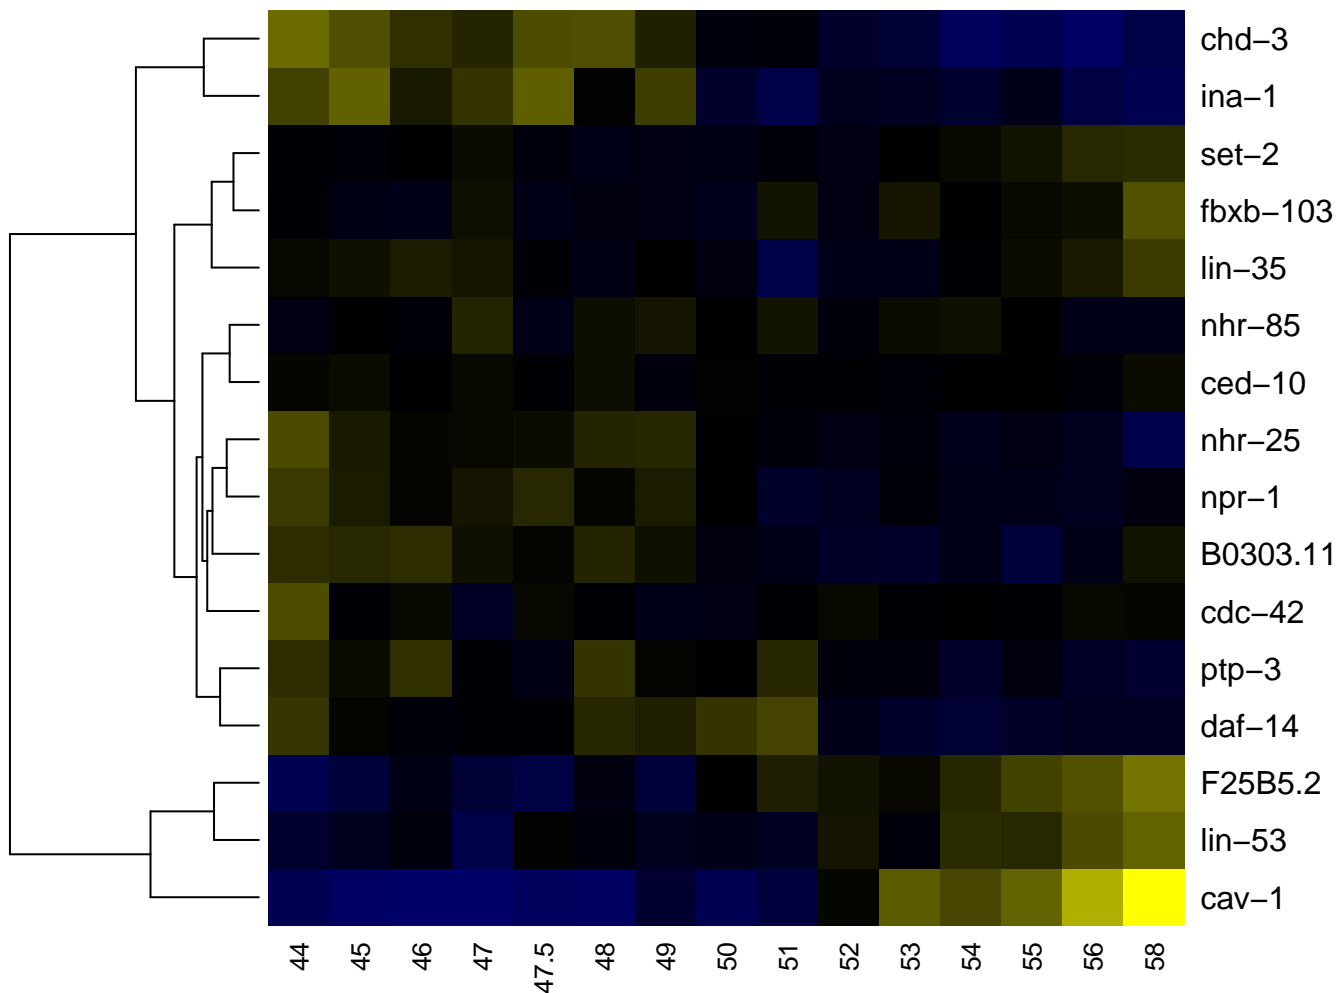



# excretory gland cell

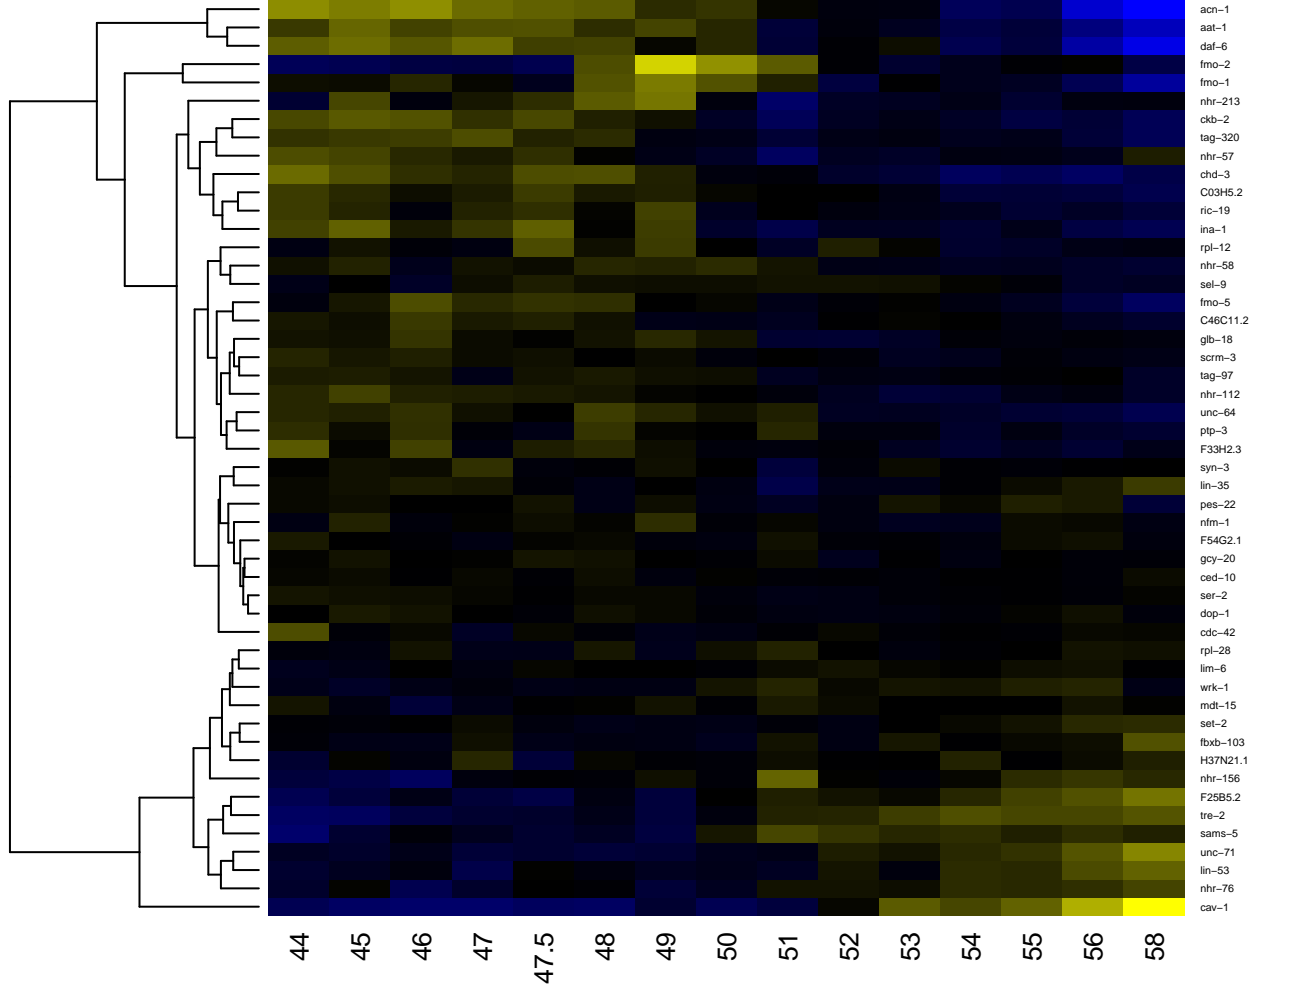

# excretory pore

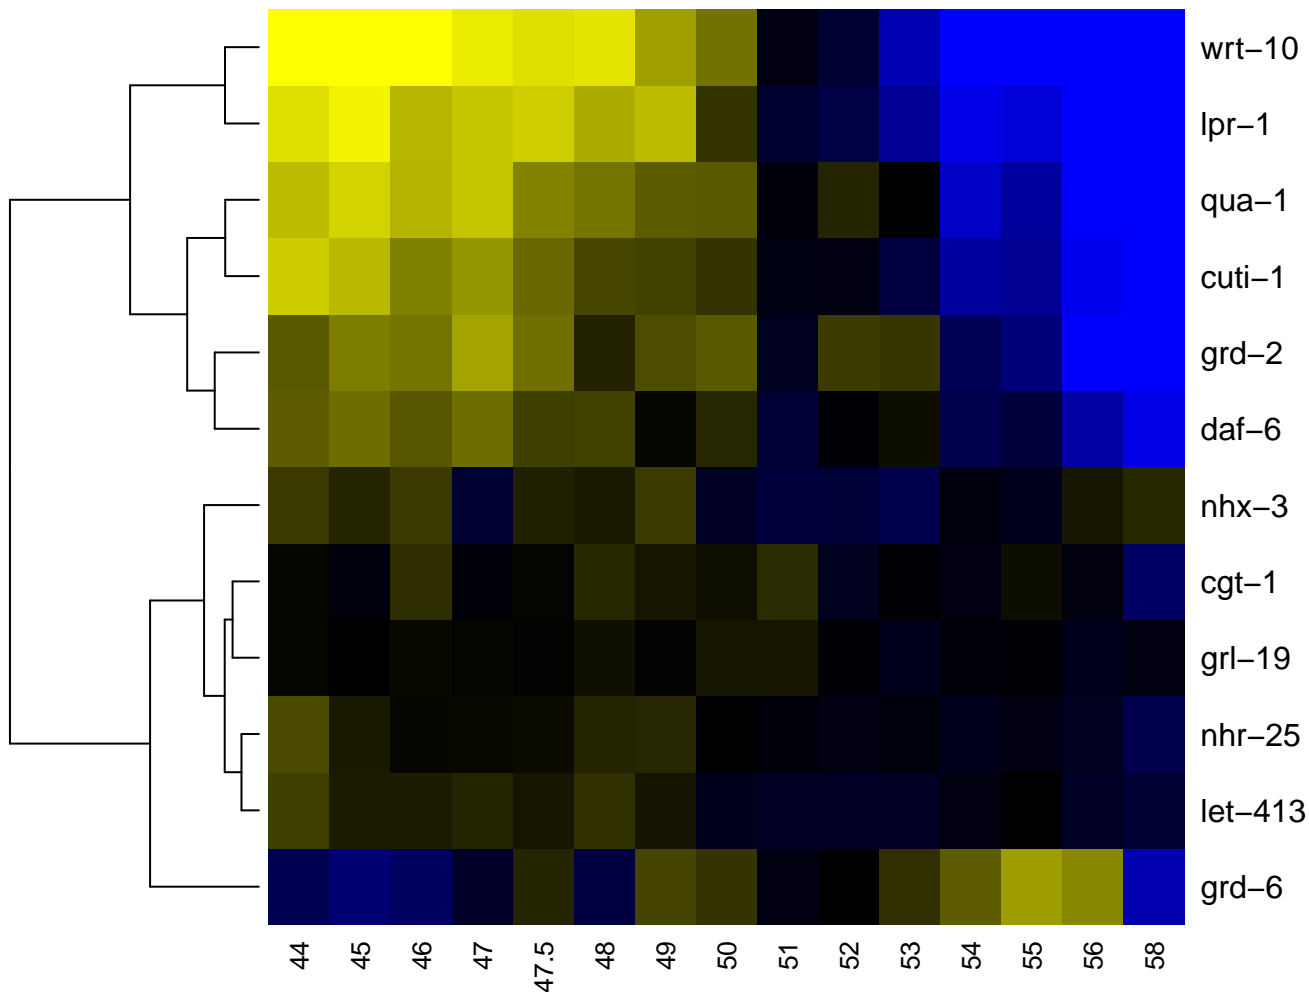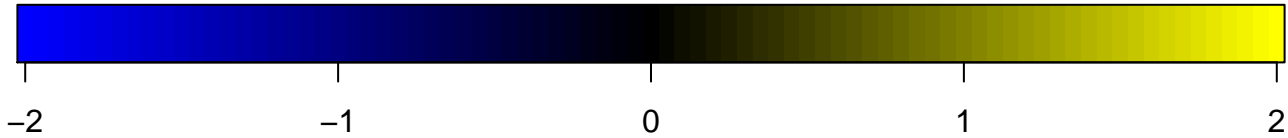

# excretory system

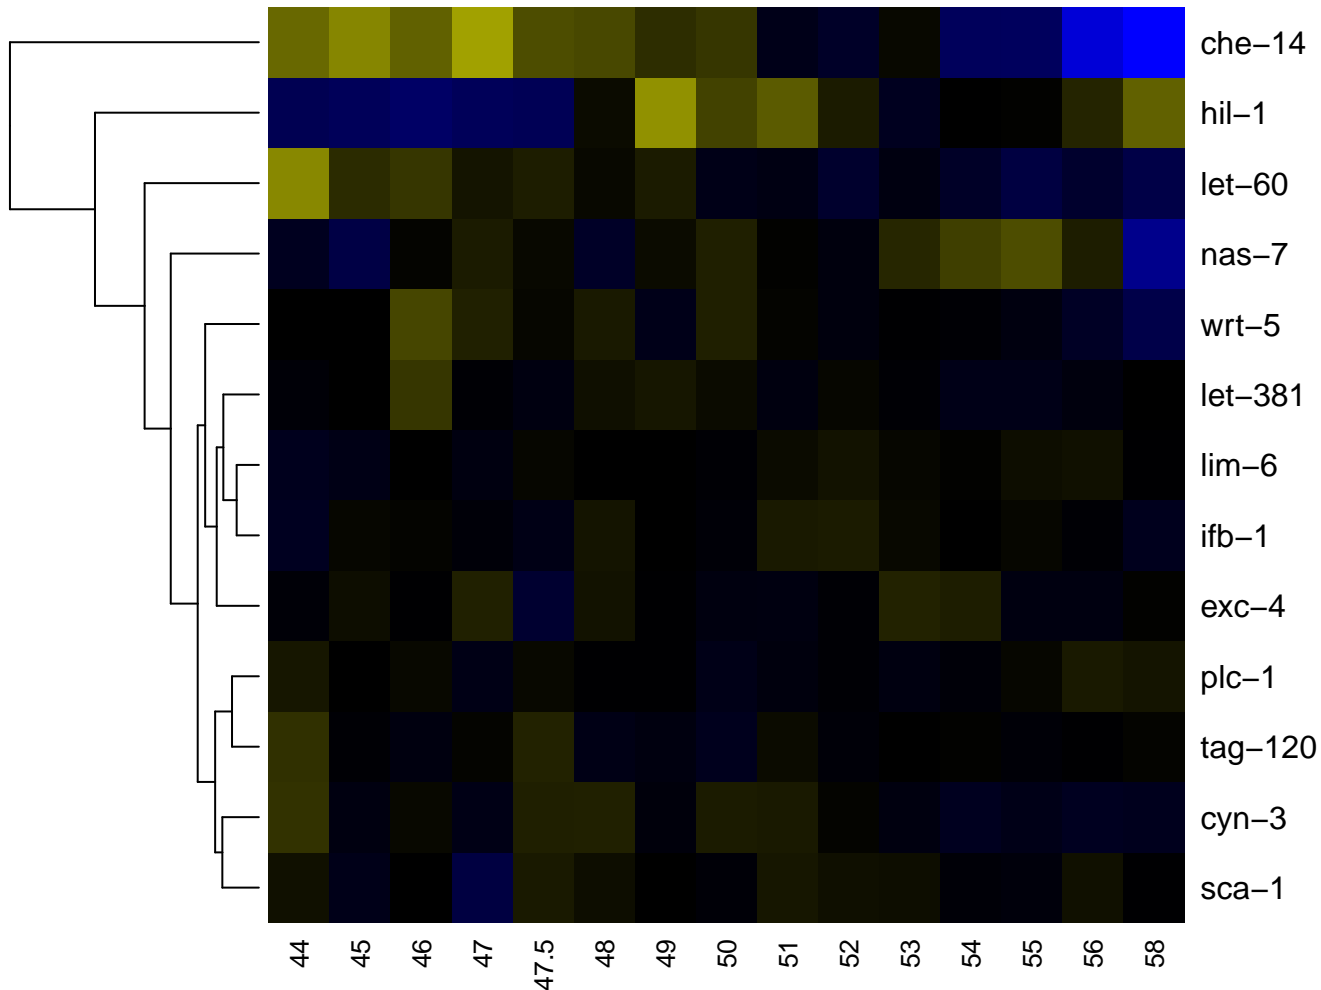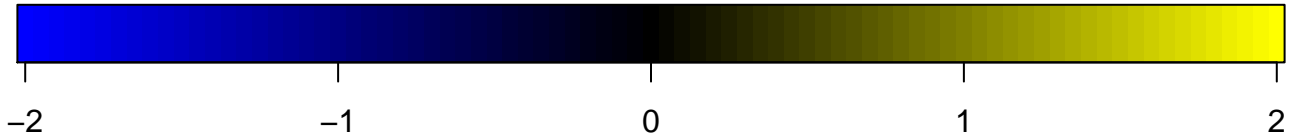

# F cell

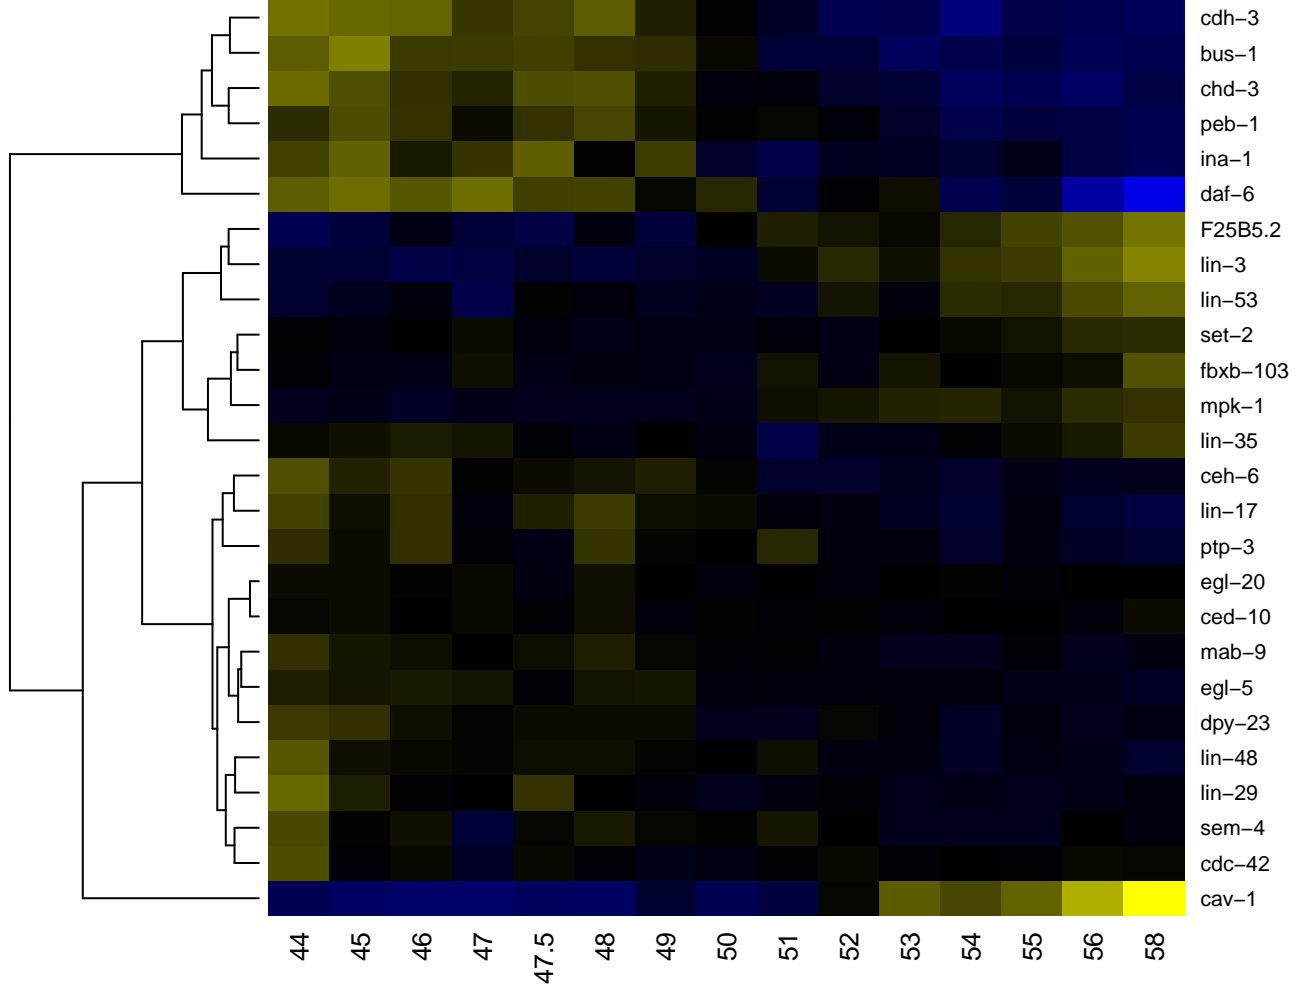

# FLPL

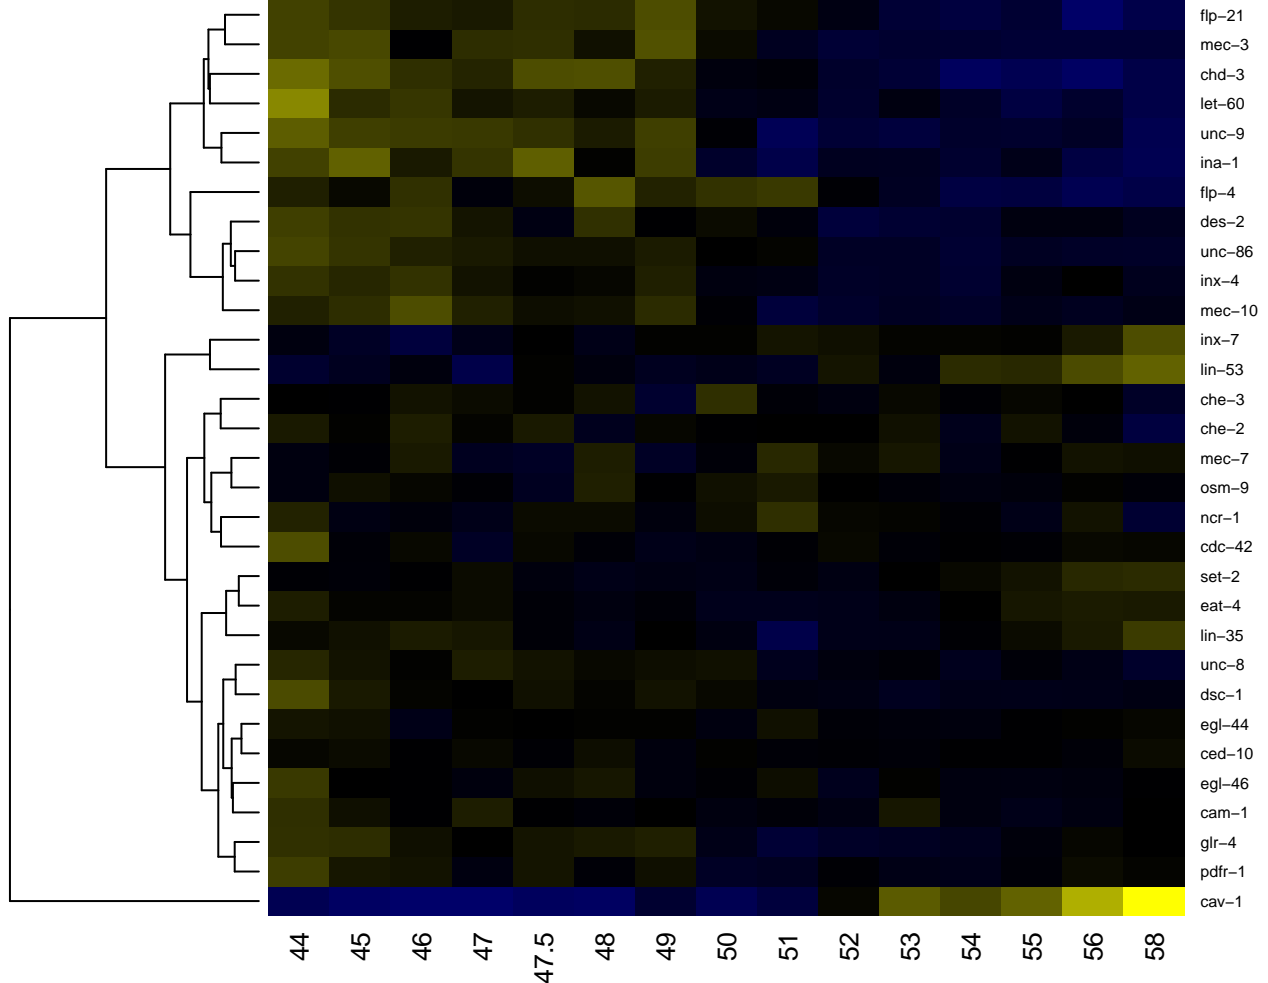

# FLPR

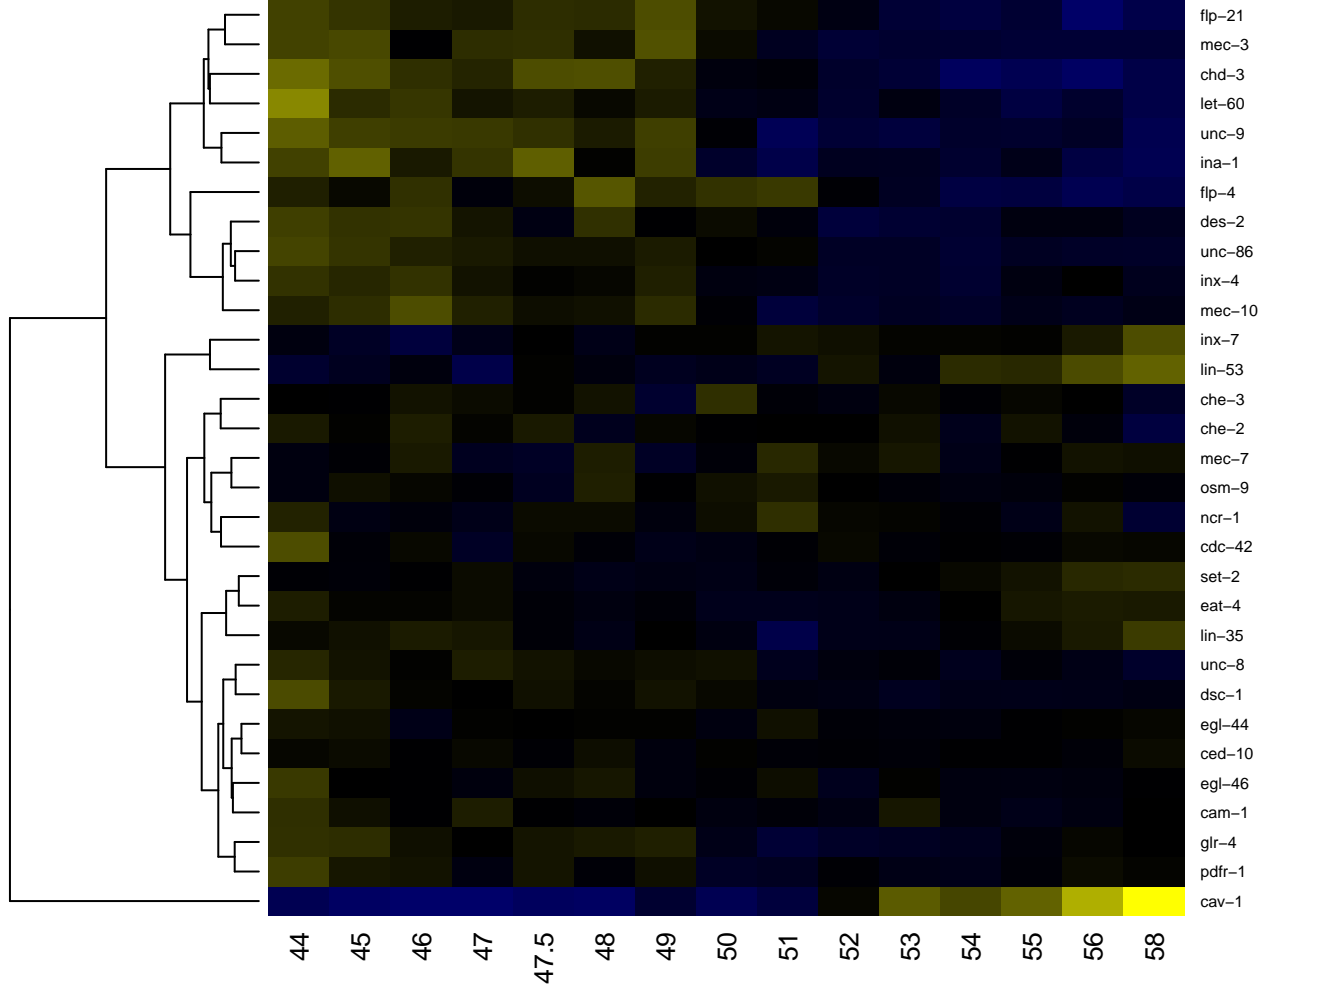

# G1

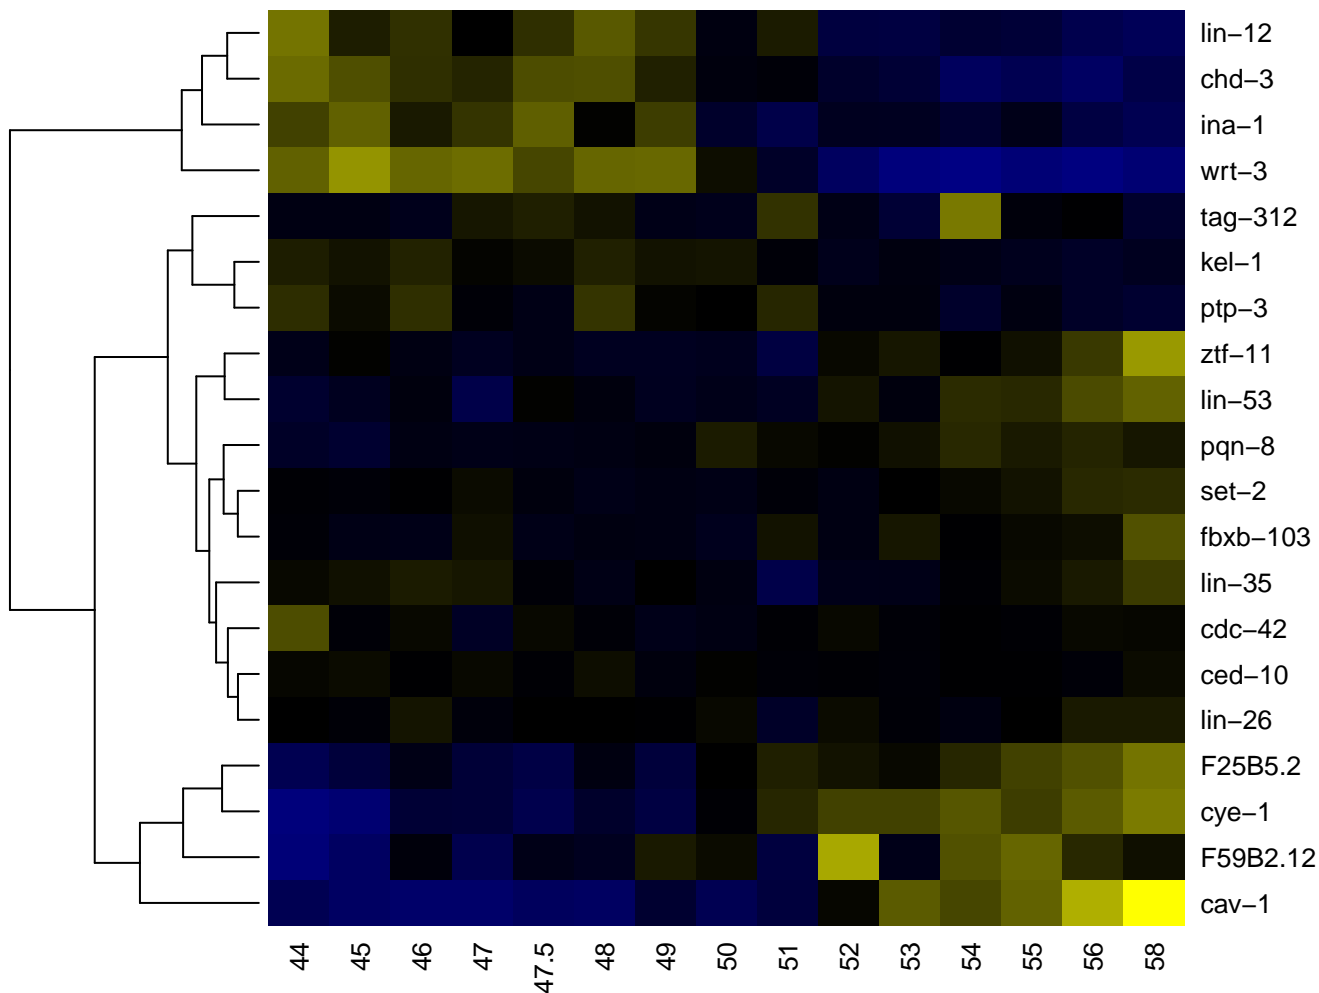

# g1AL

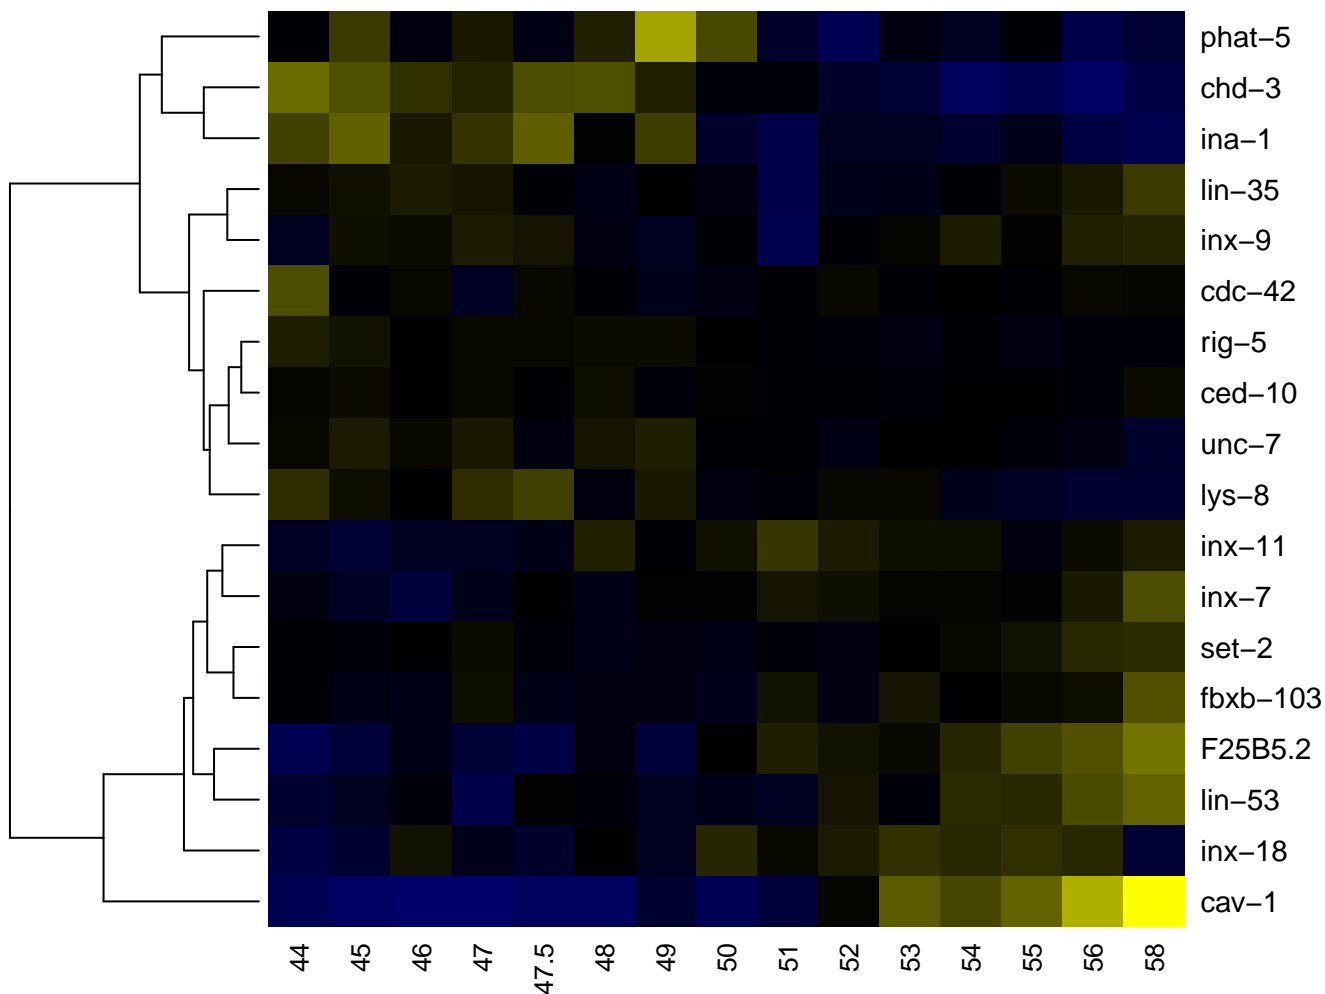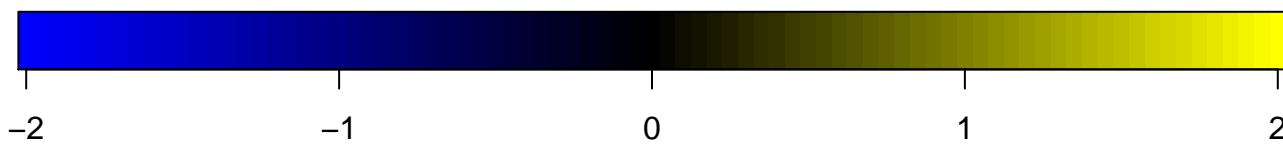



# g1AR

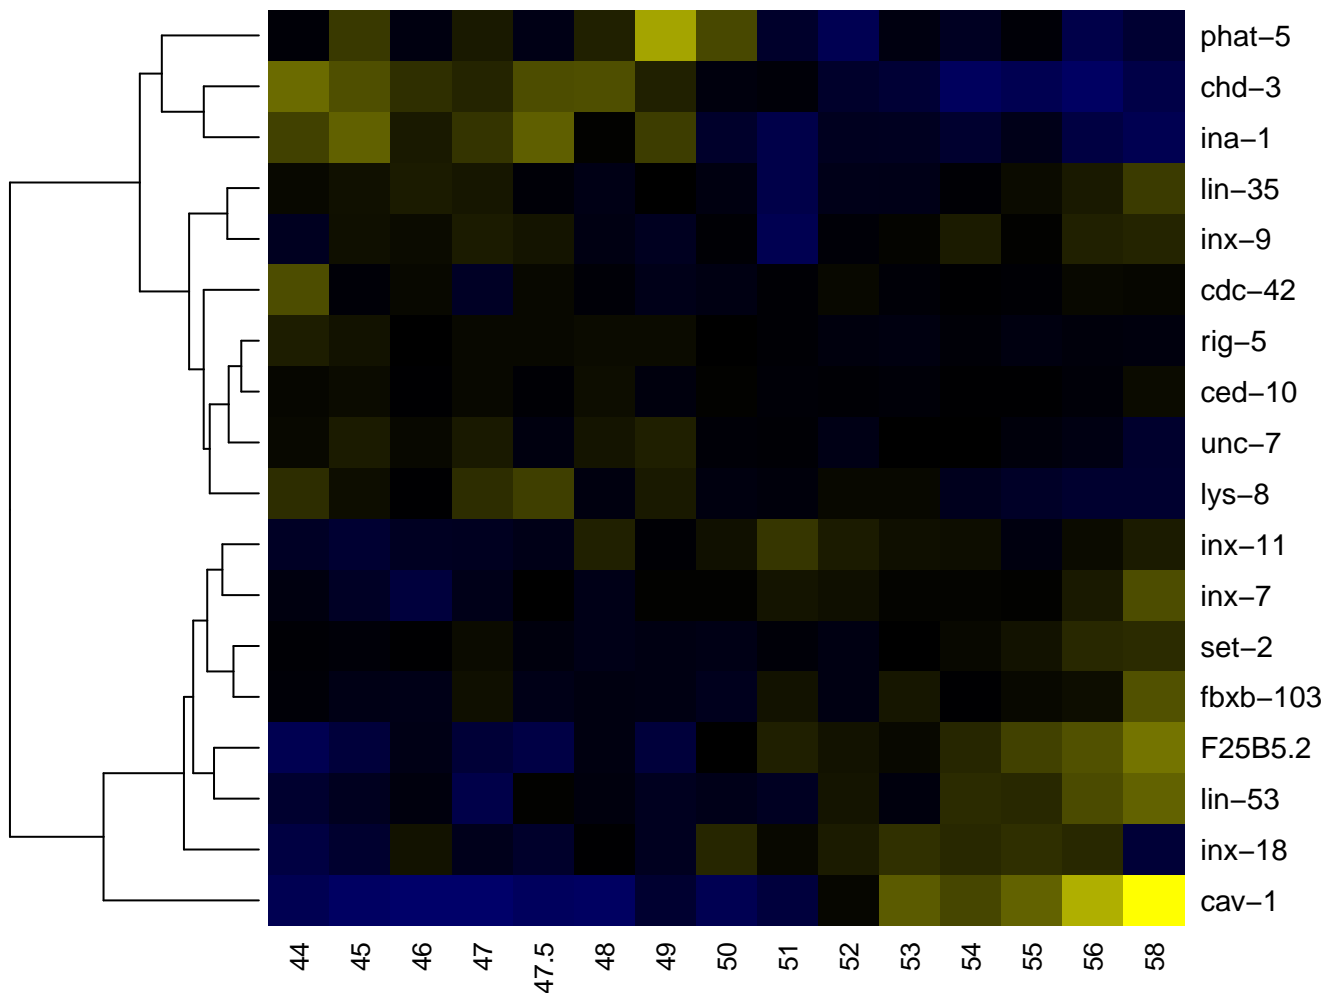

# g1P

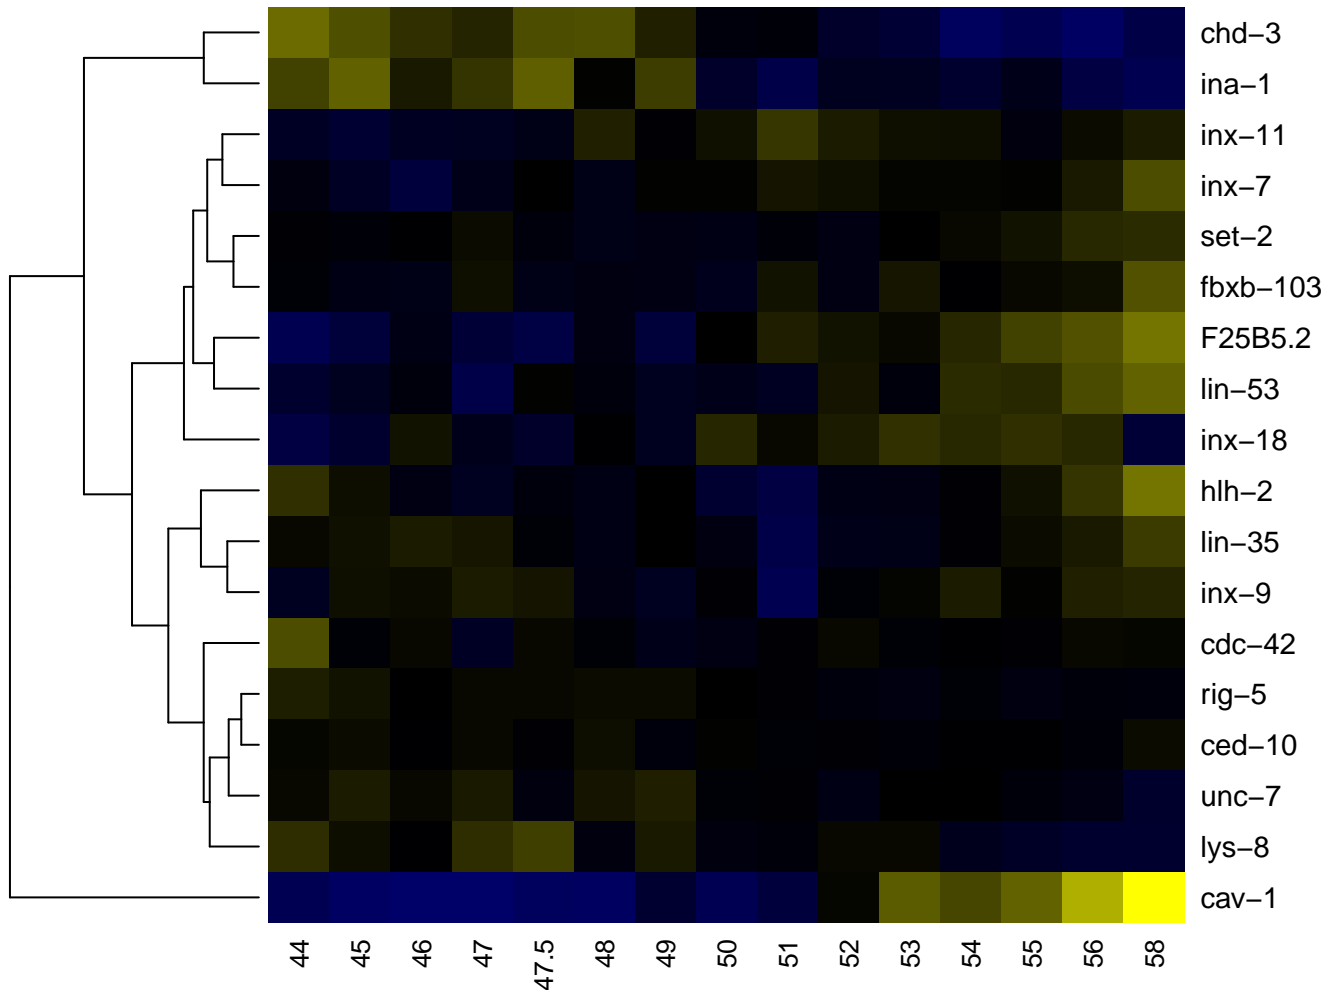

# G2

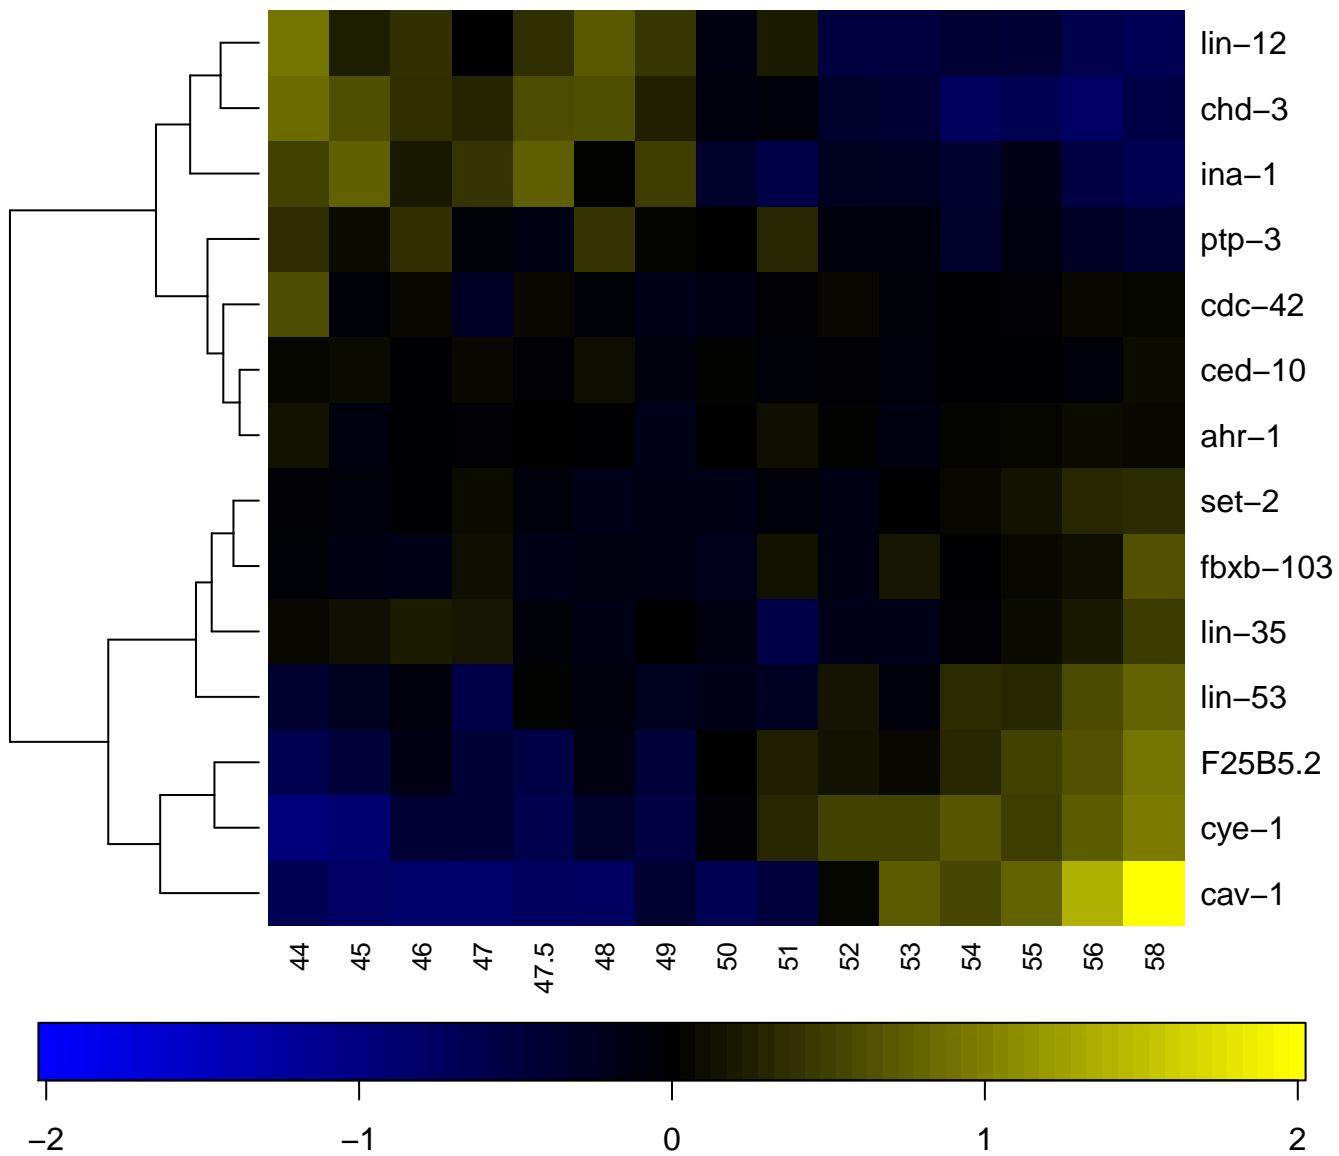

# g2L

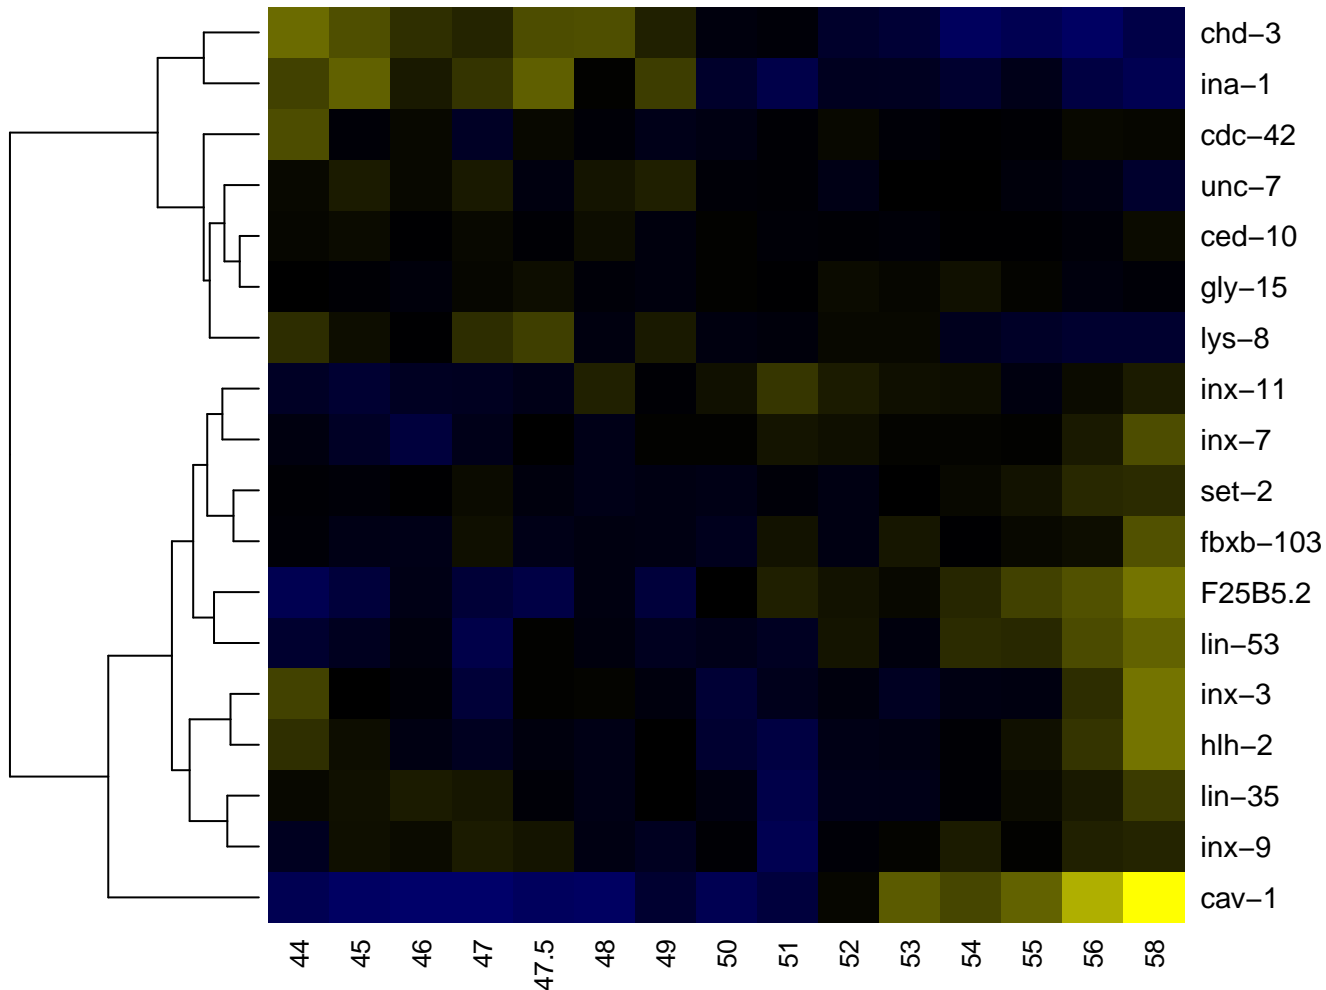

-2

-1

0

1

2

# g2R



# GABAergic neuron

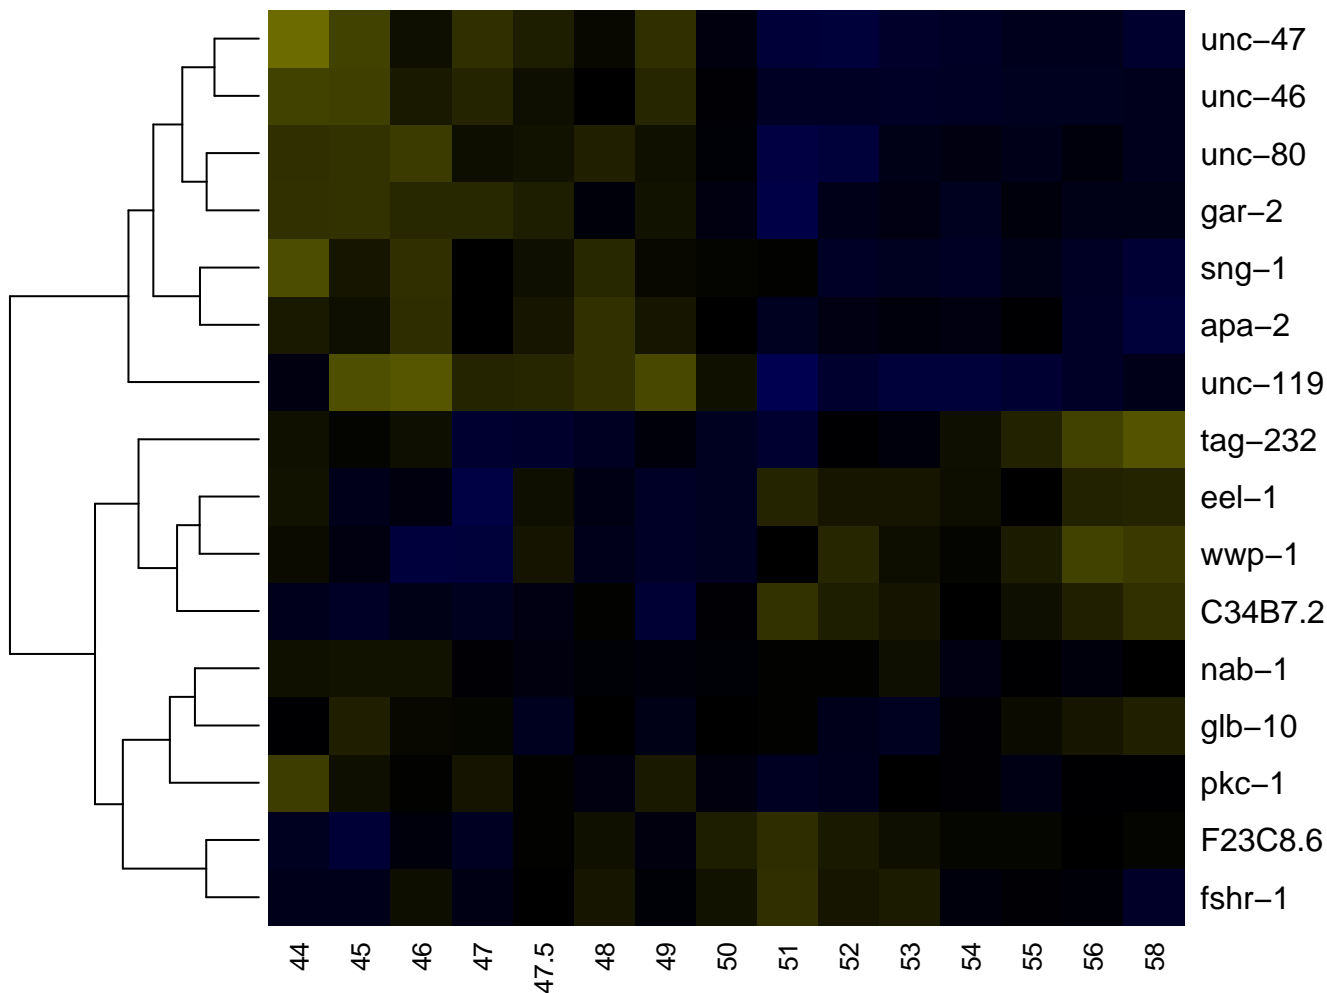

# germ line

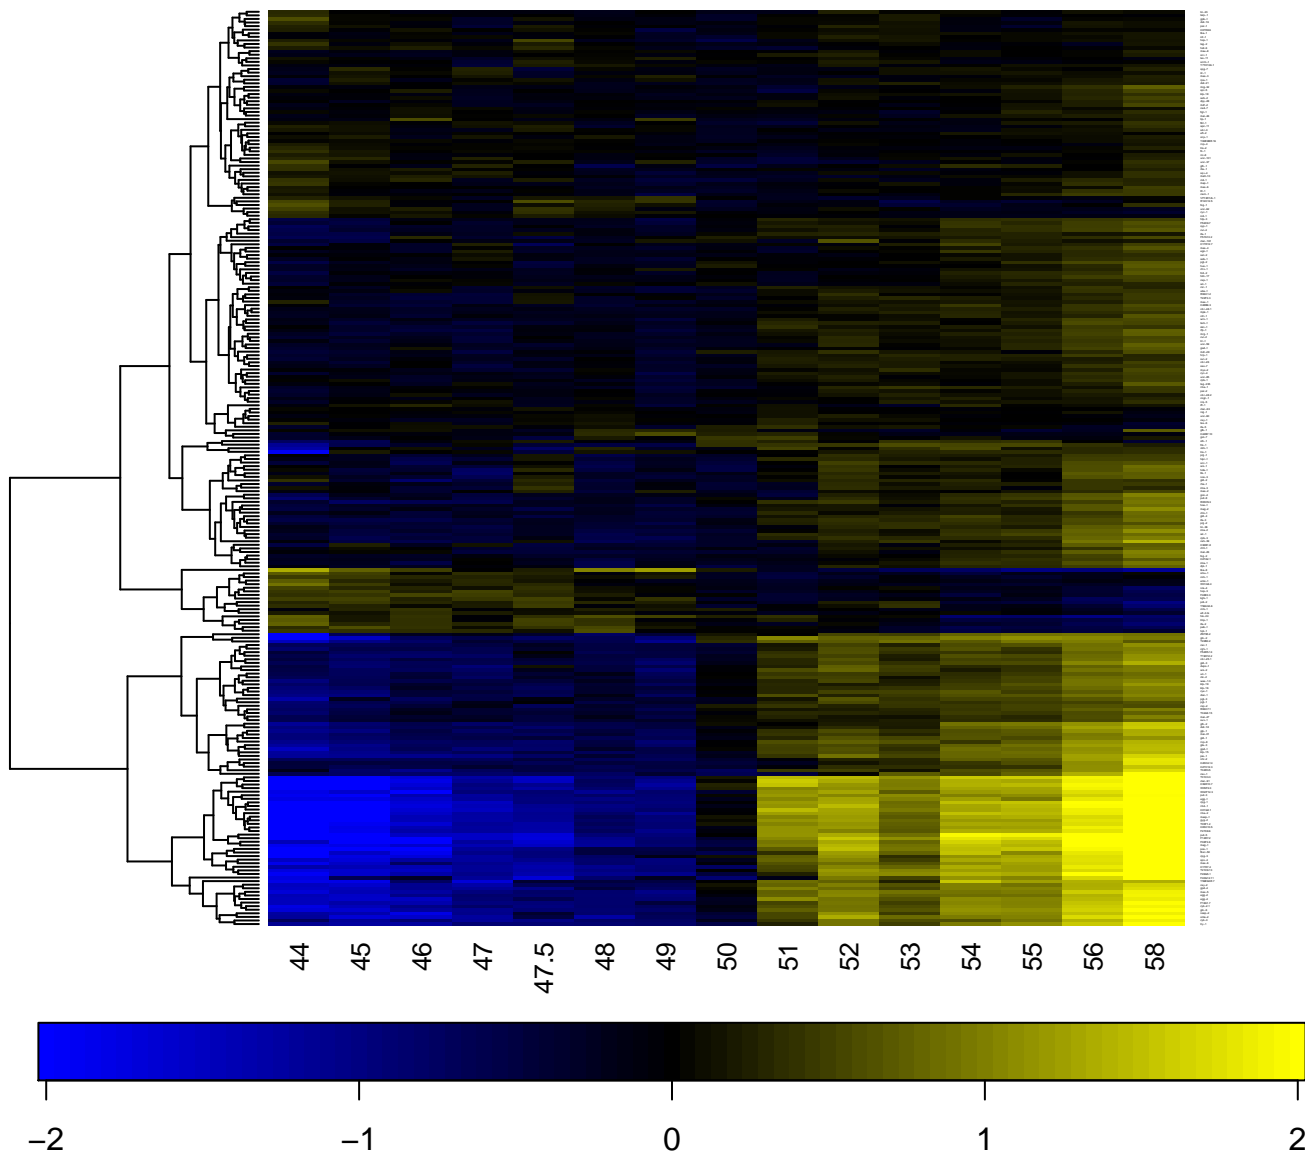

# GLRD

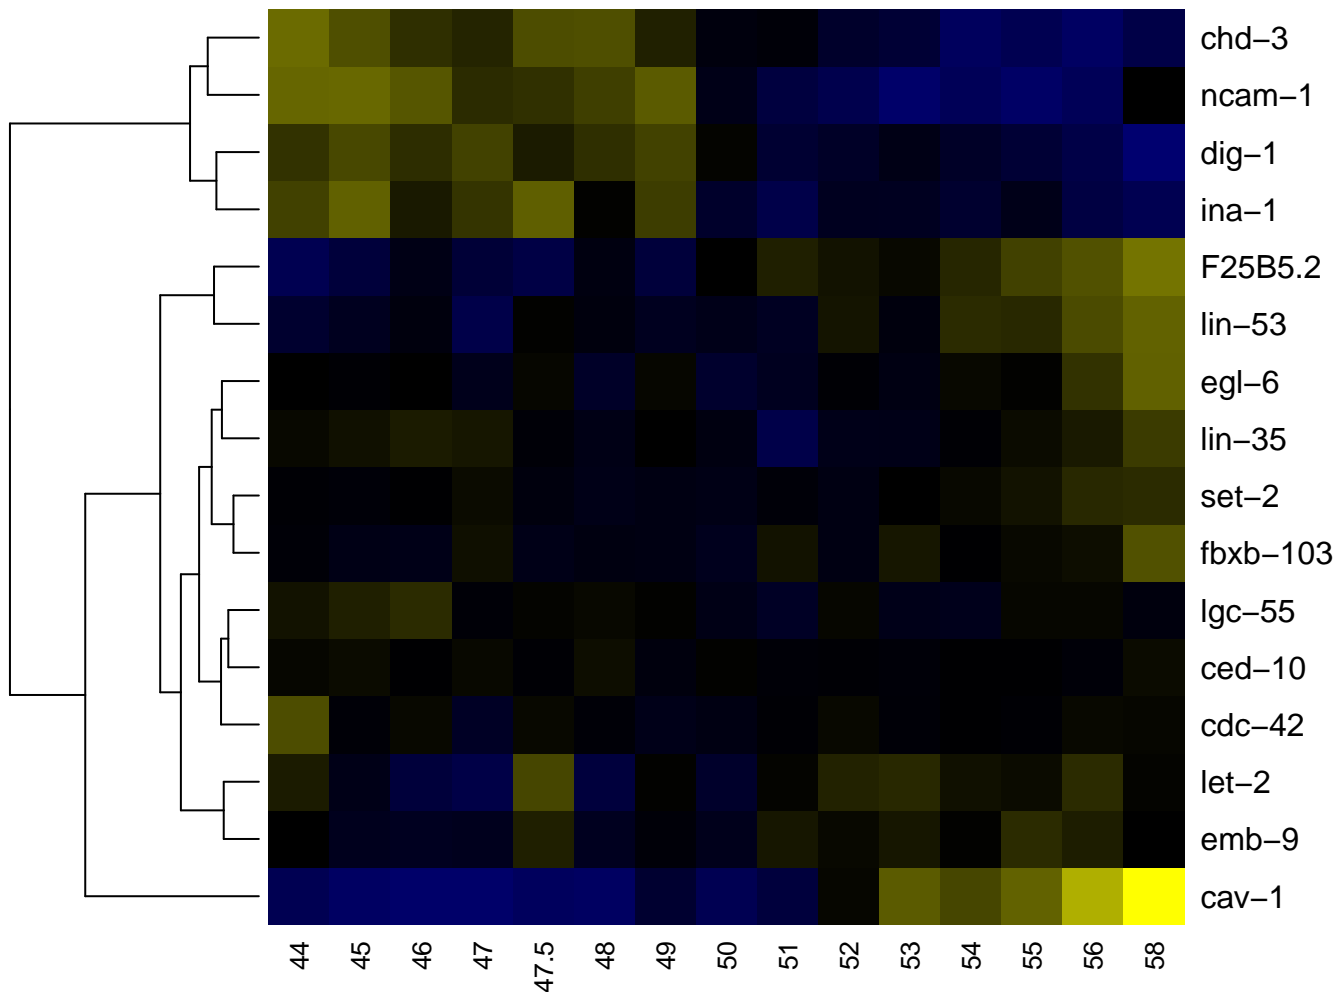



# GLRDR

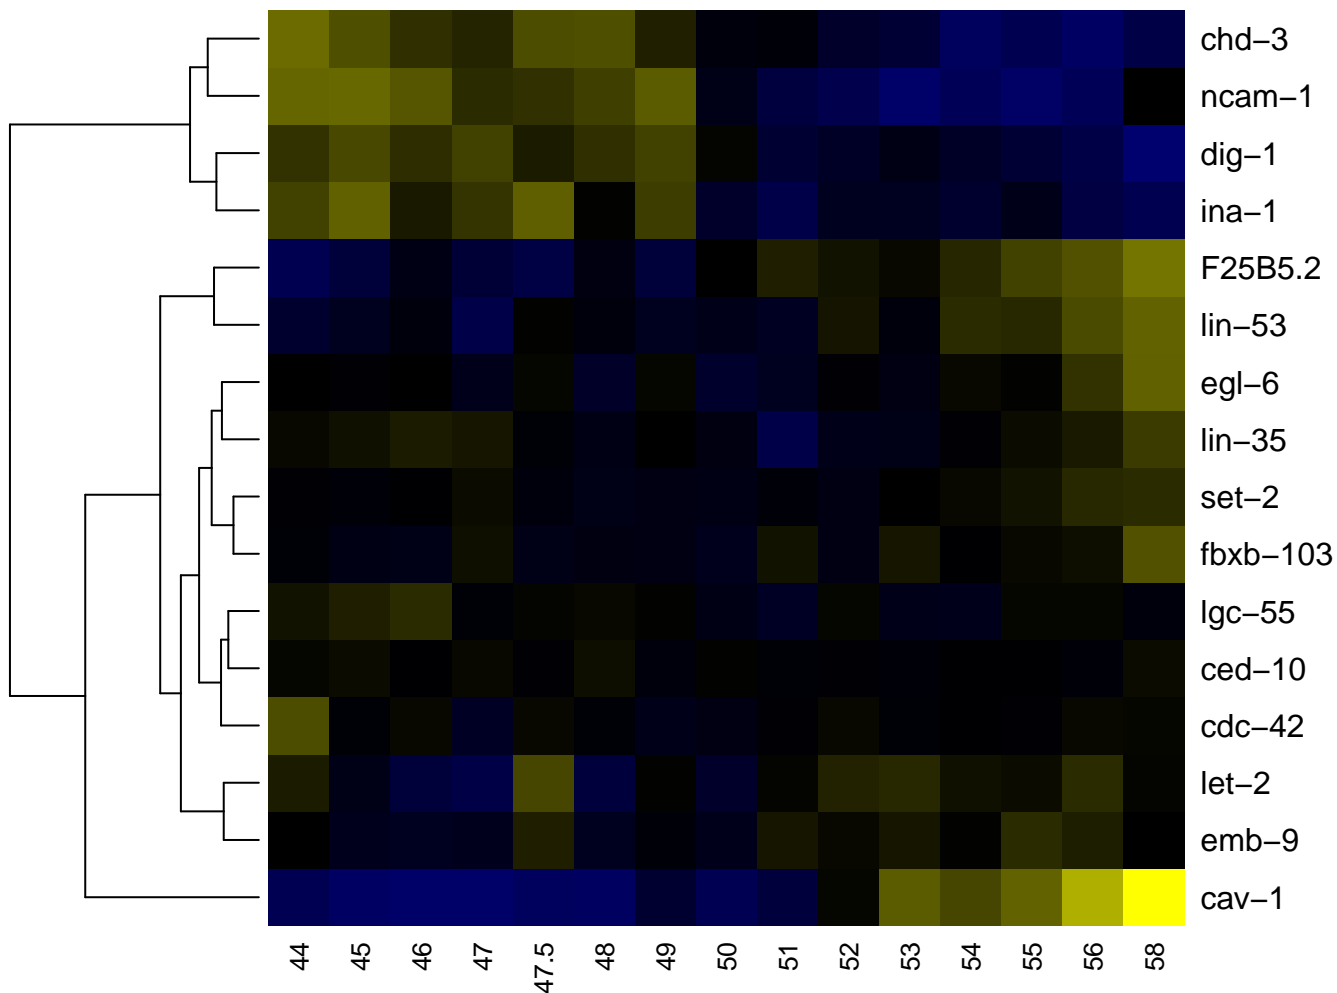

# GLRL

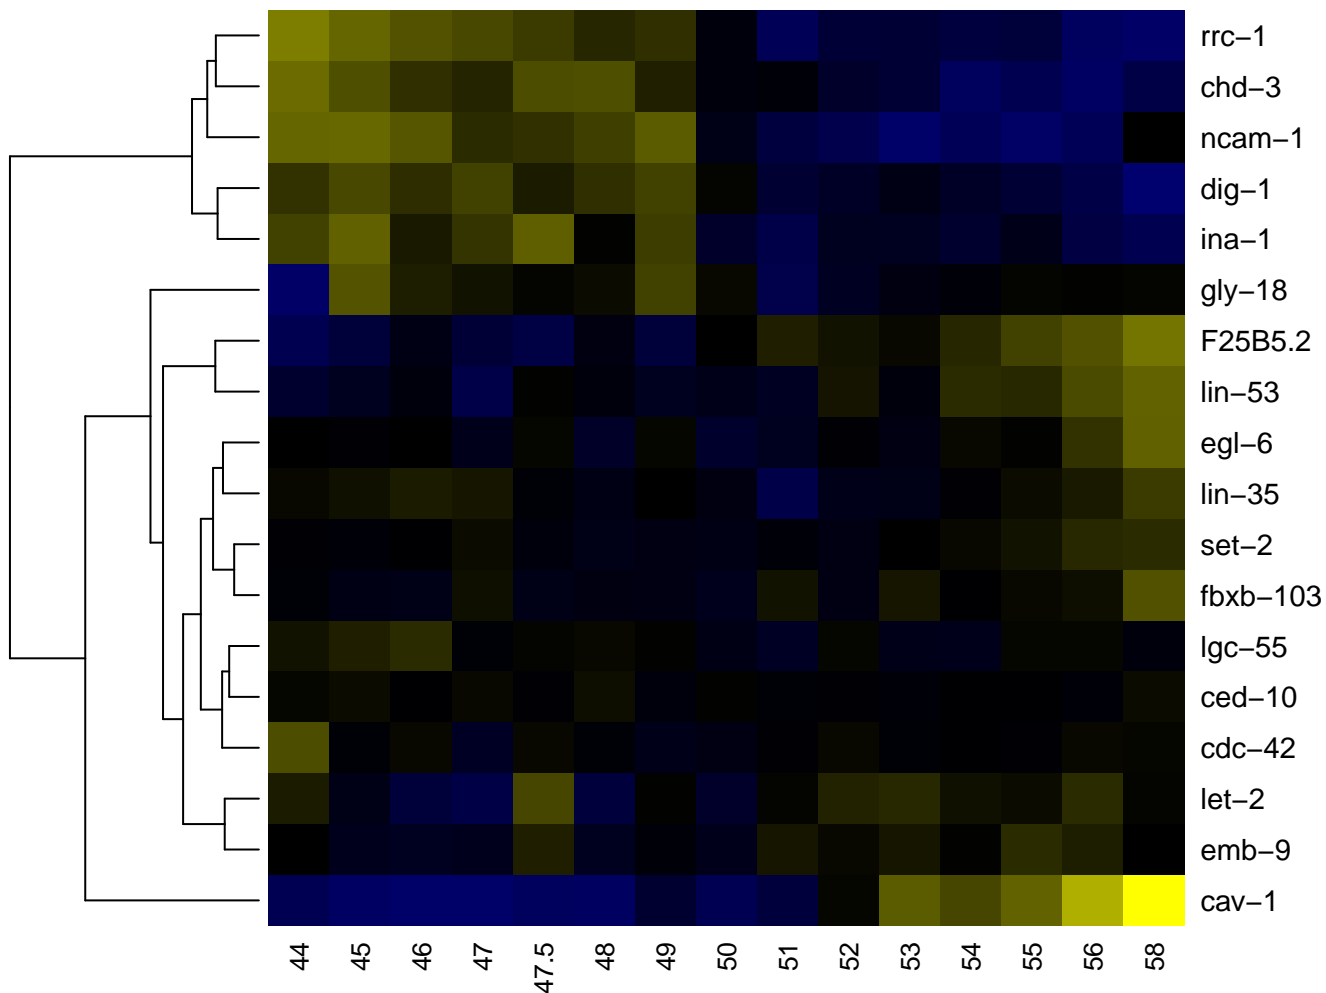

# GLRR



# GLRVL



# GLRVR



# gon\_herm\_dtc\_A

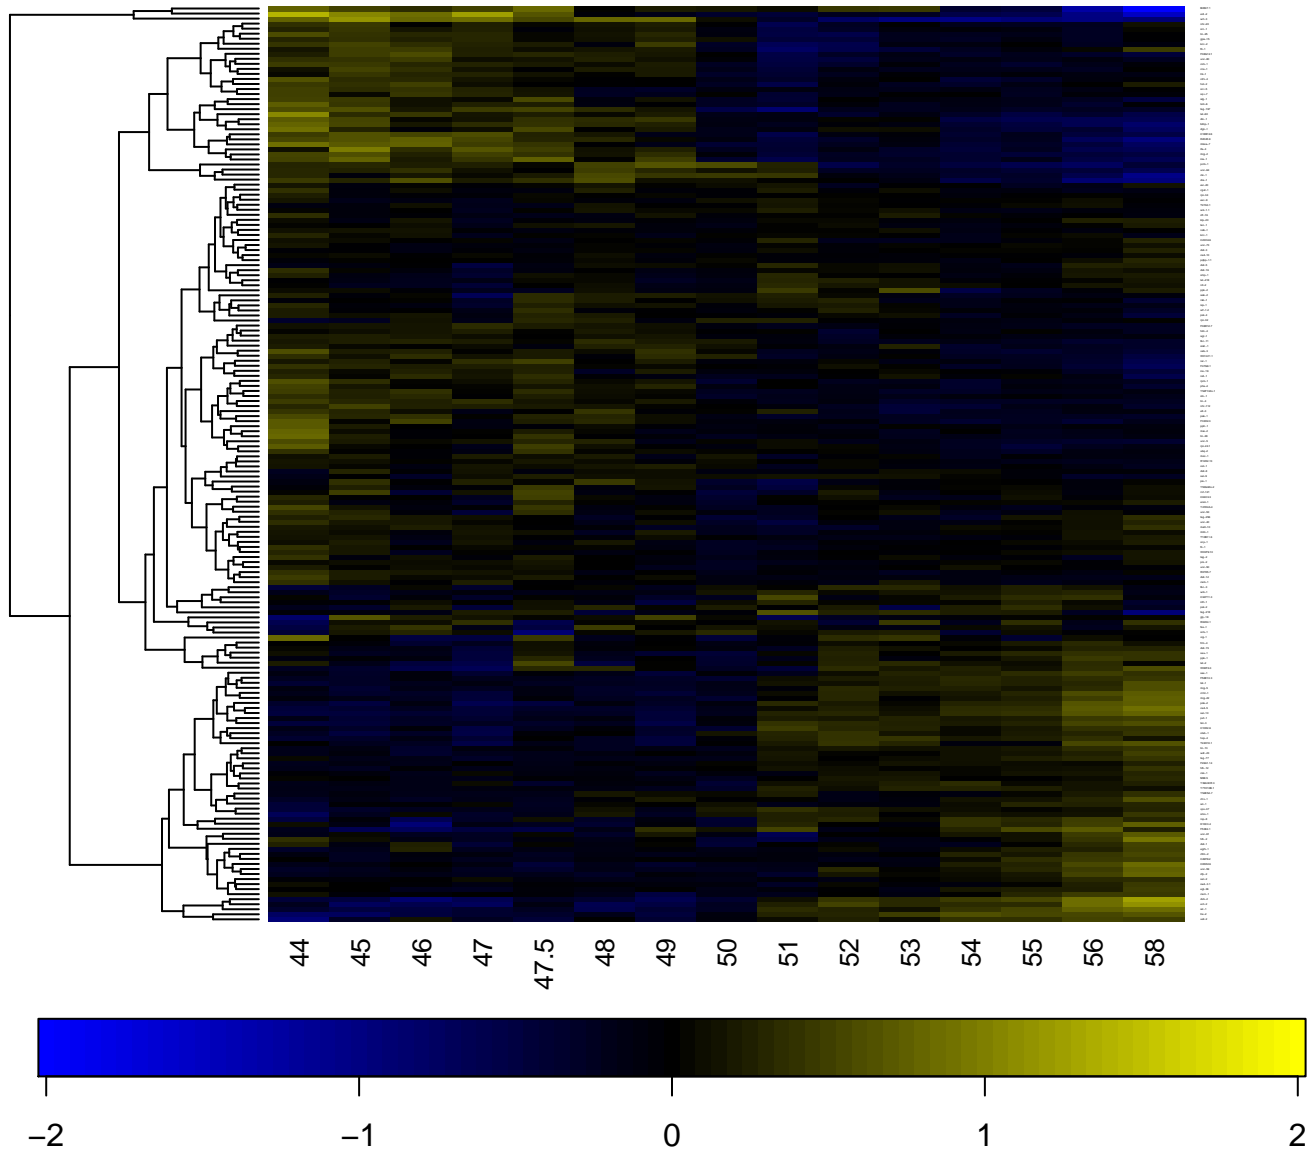

# gon\_herm\_dtc\_P

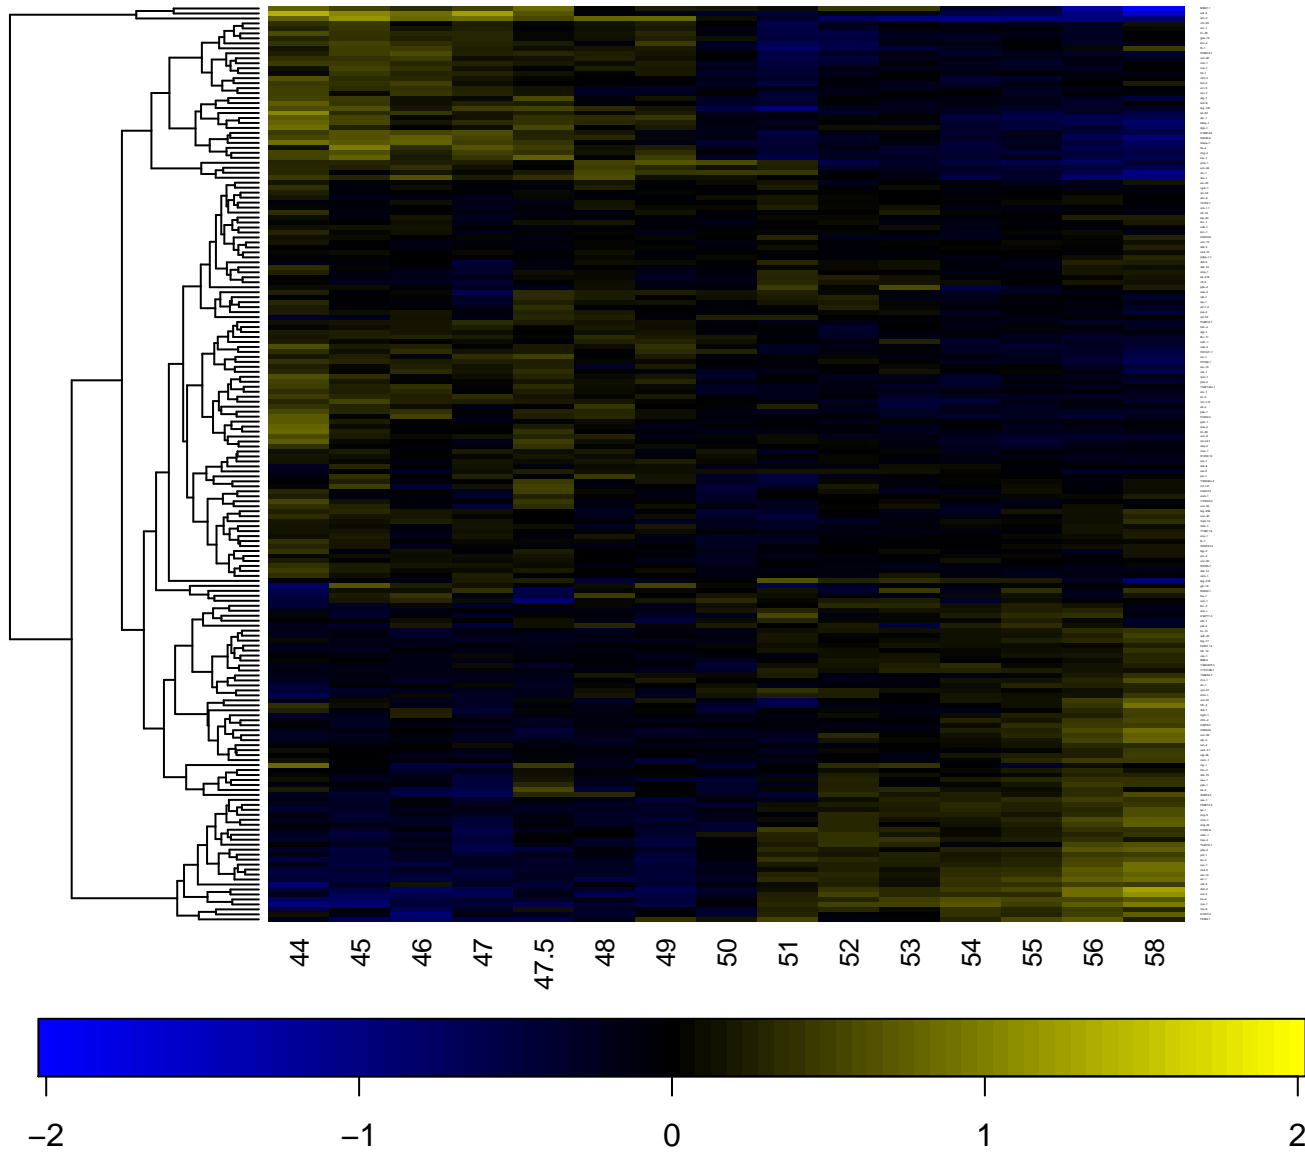





# gon\_male\_dtc posterior

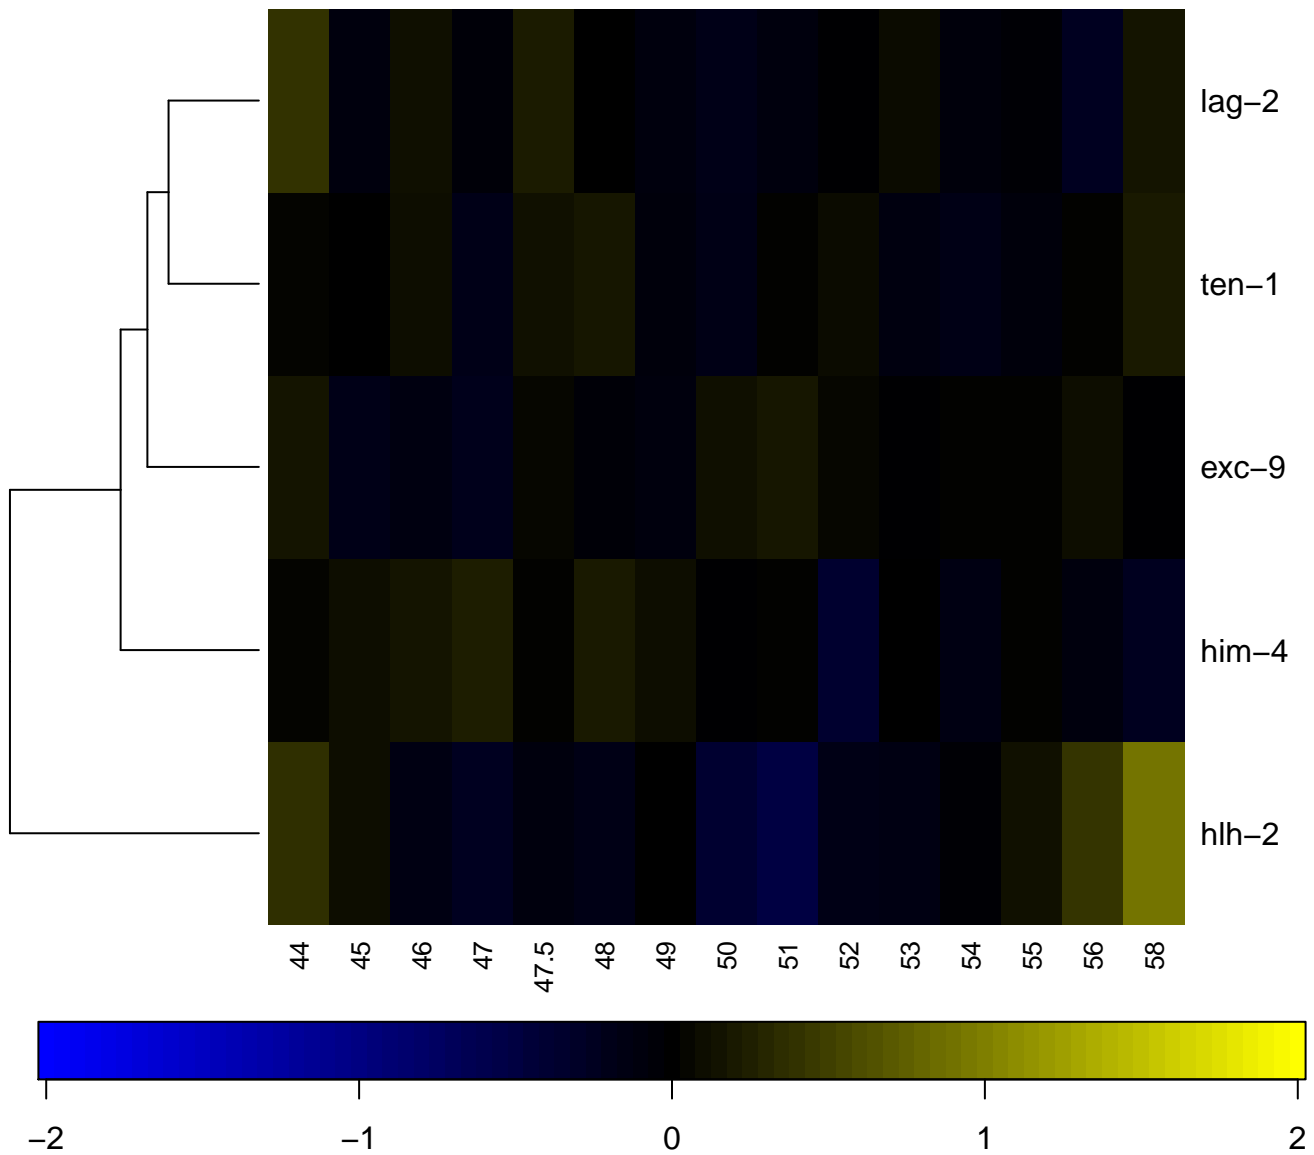

# gonad

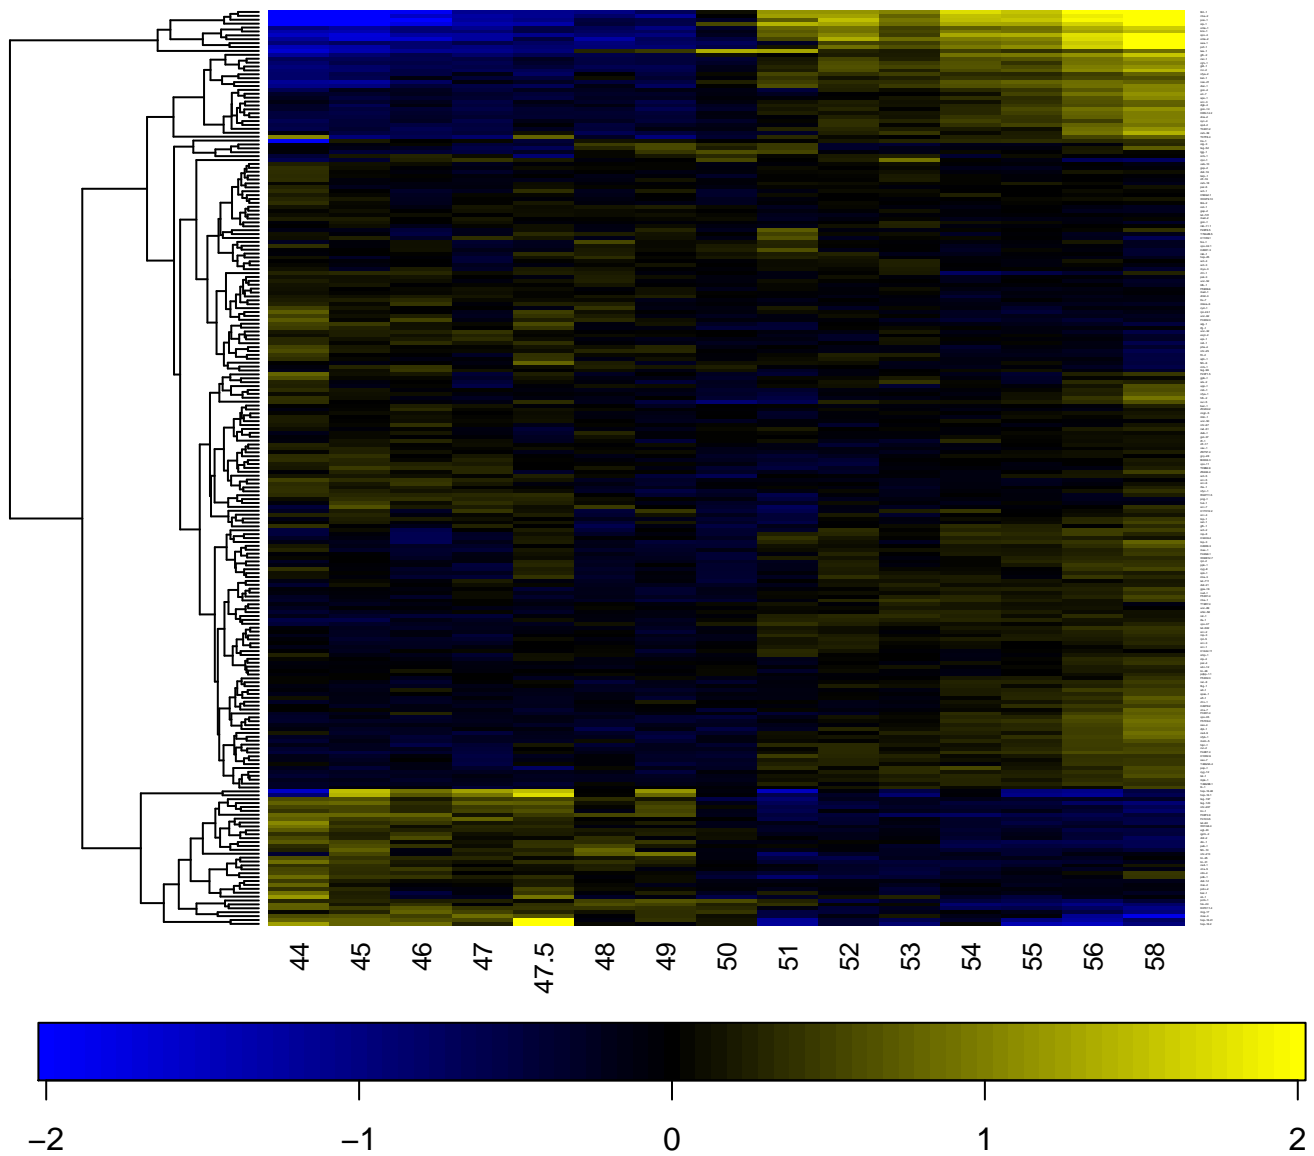

# gonadal sheath cell

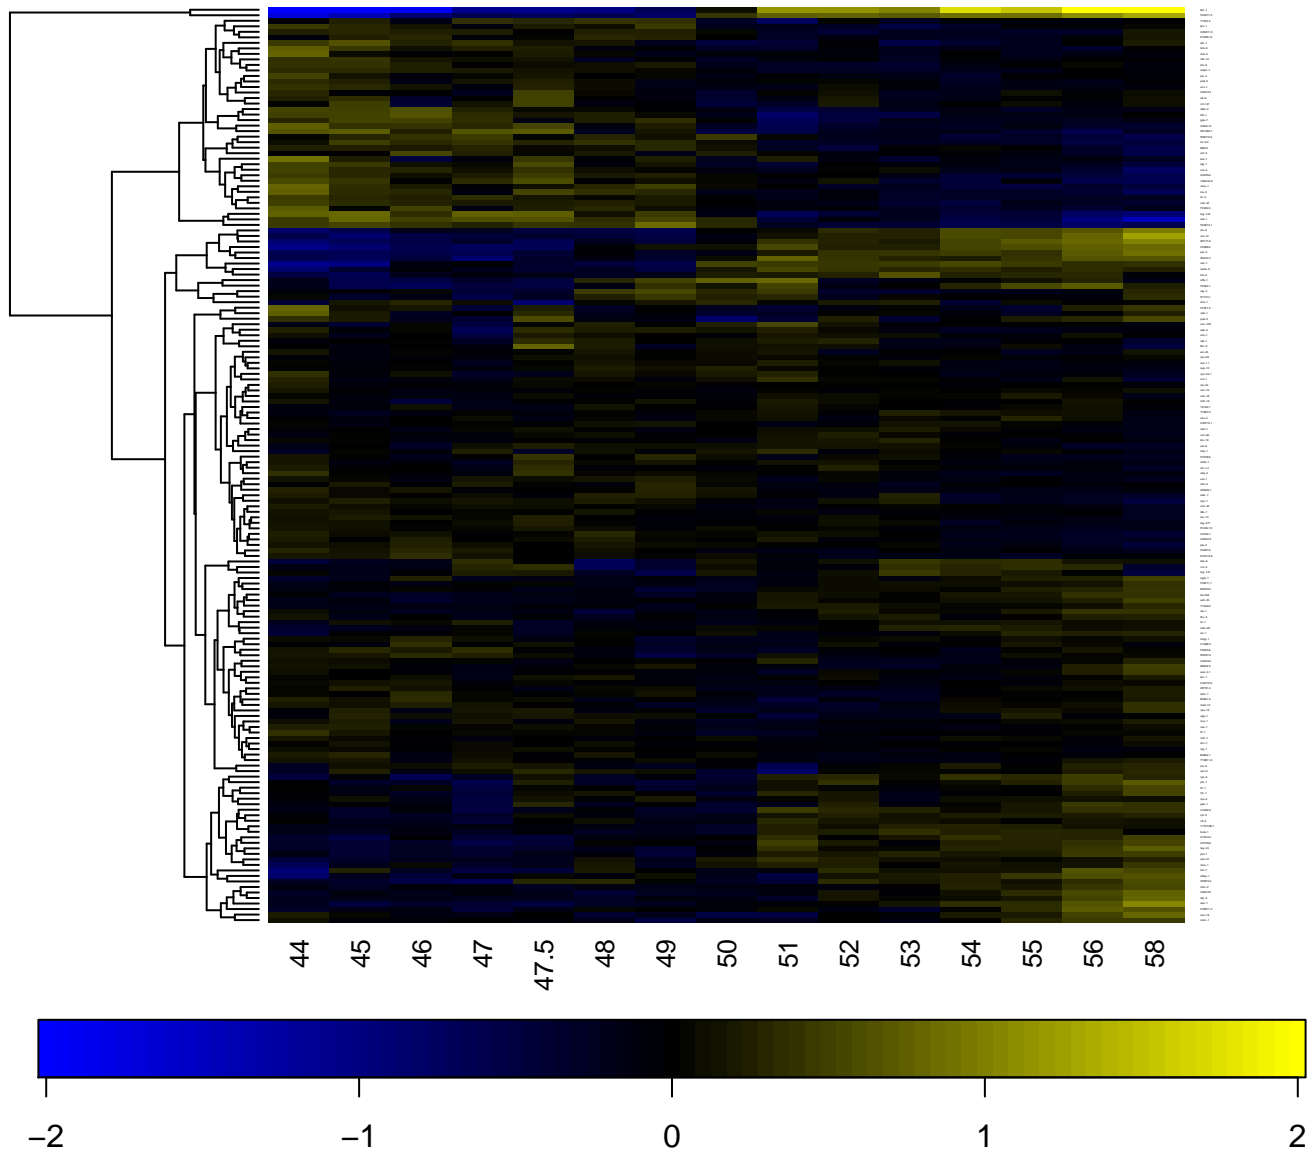

# gubernacular erector muscle

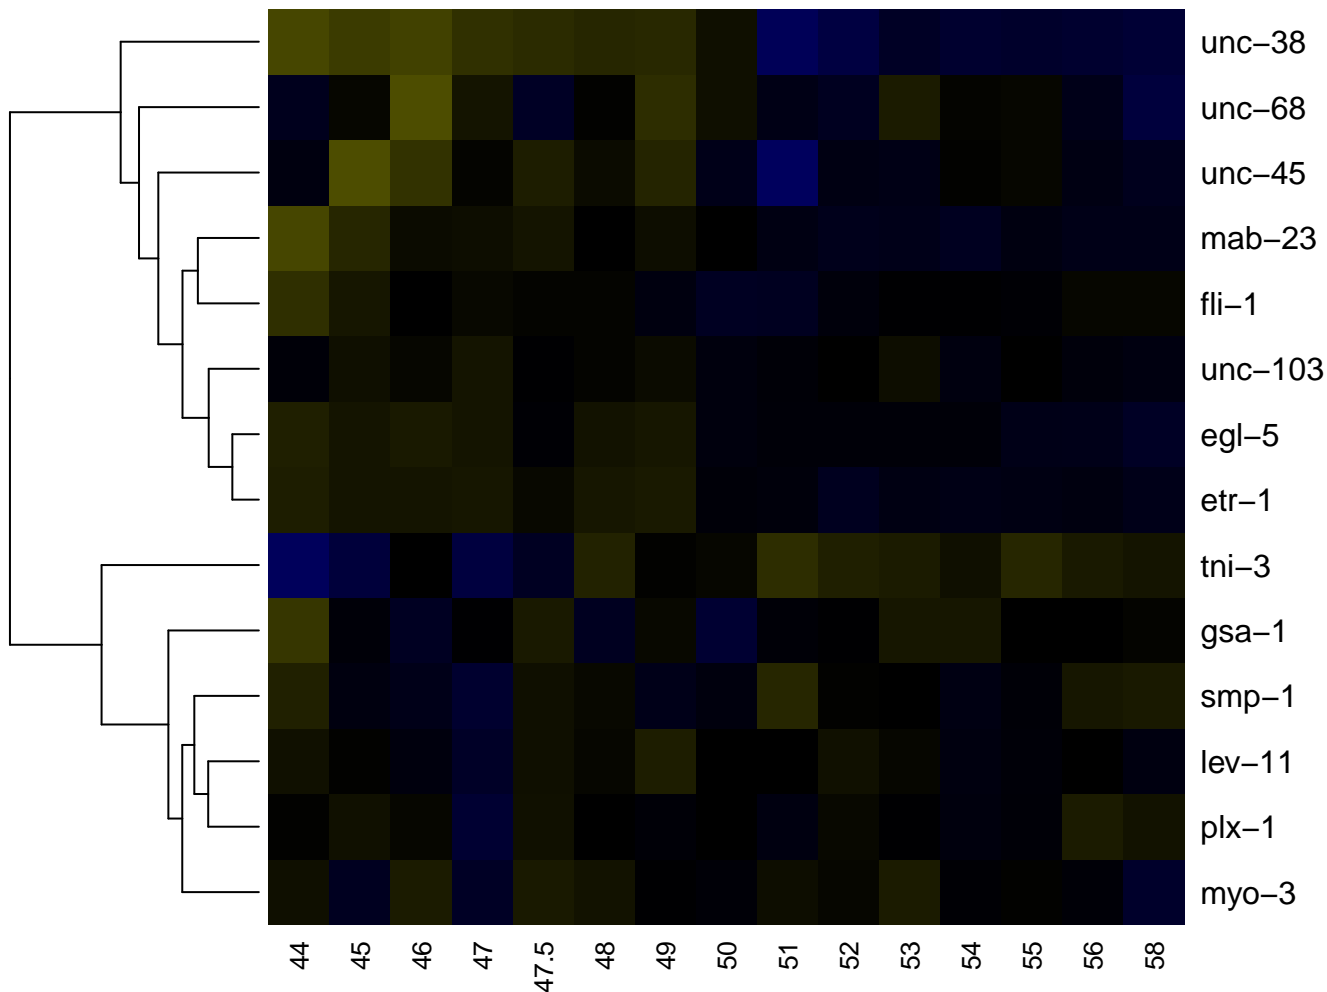

# gubernacular retractor muscle

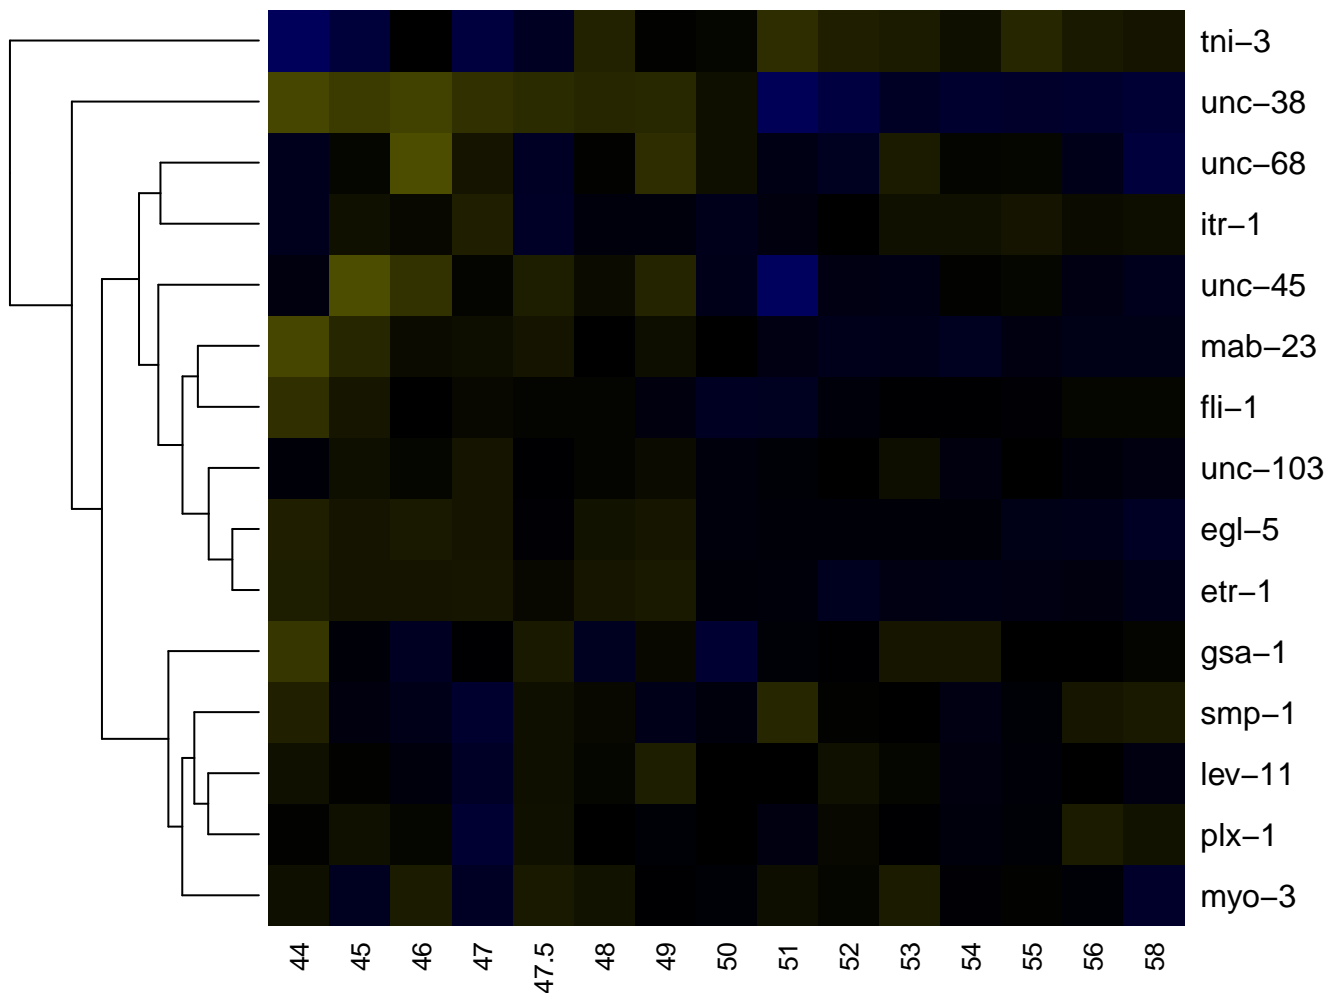

# HOL

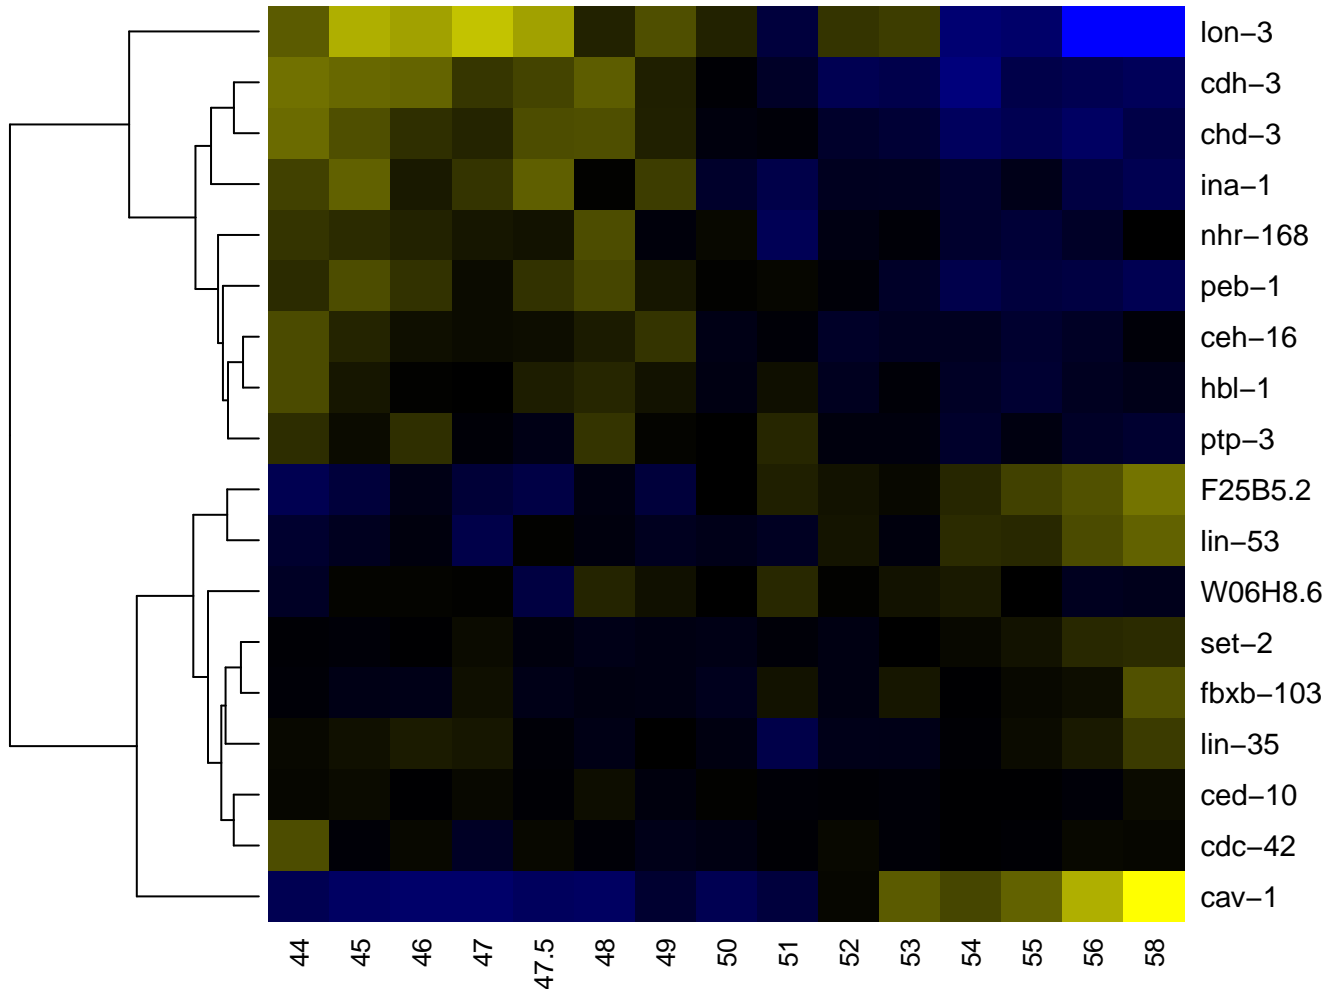

# H0R

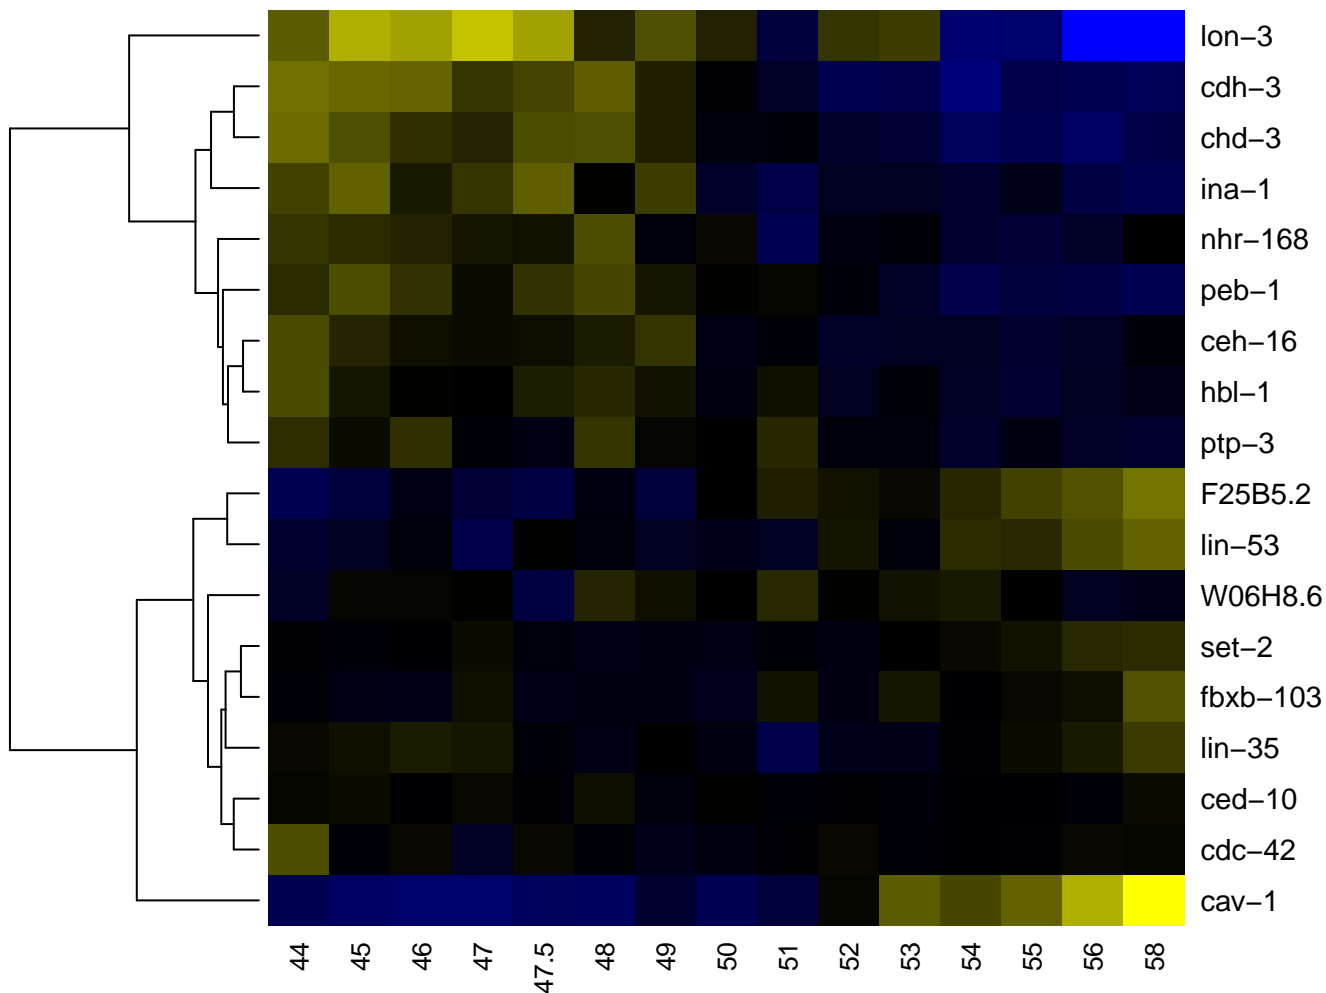

# H1L

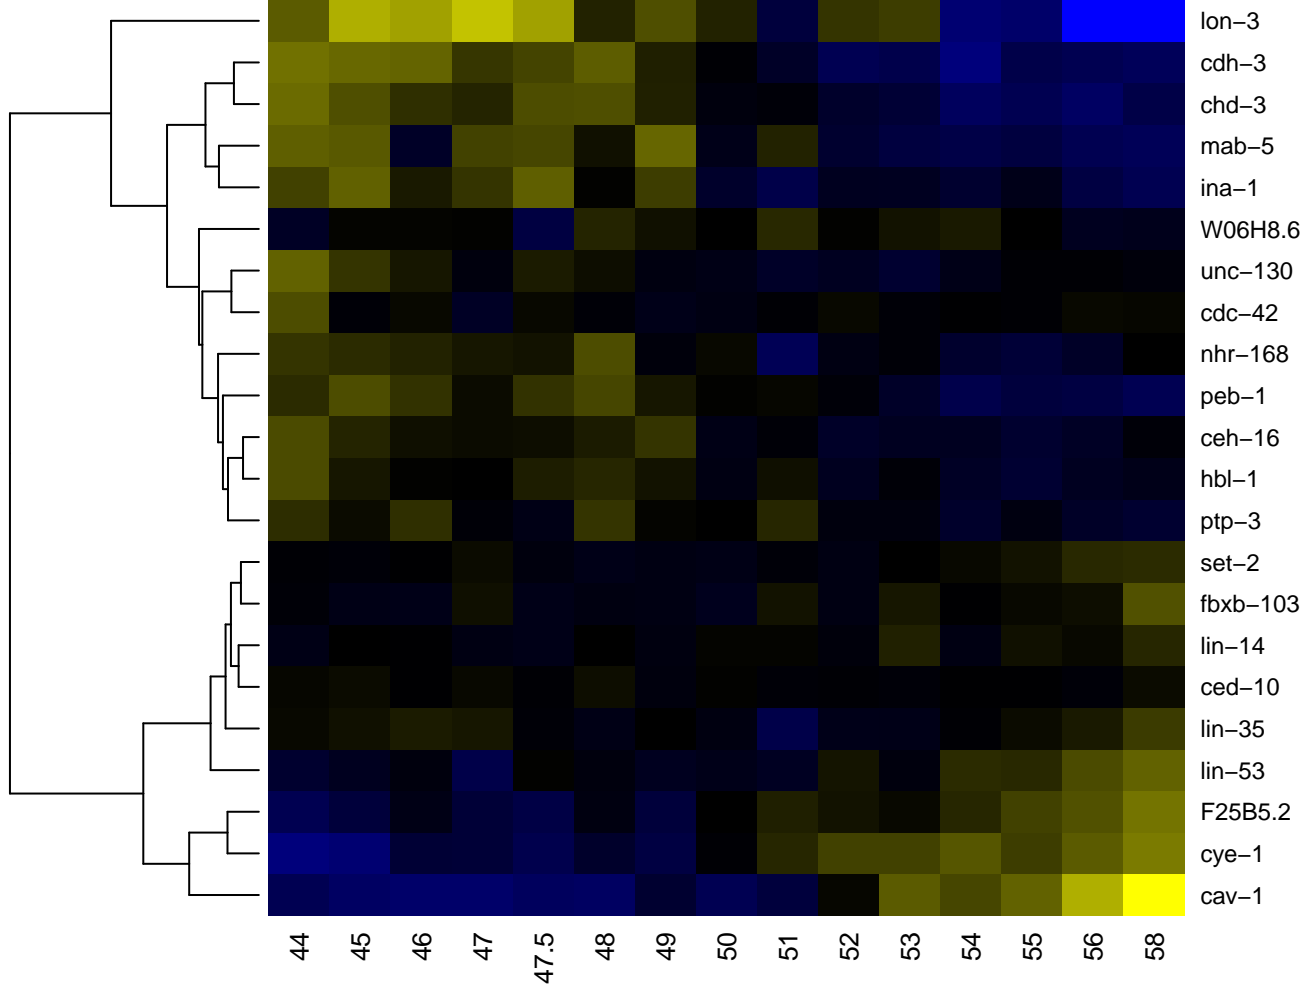



# H1R

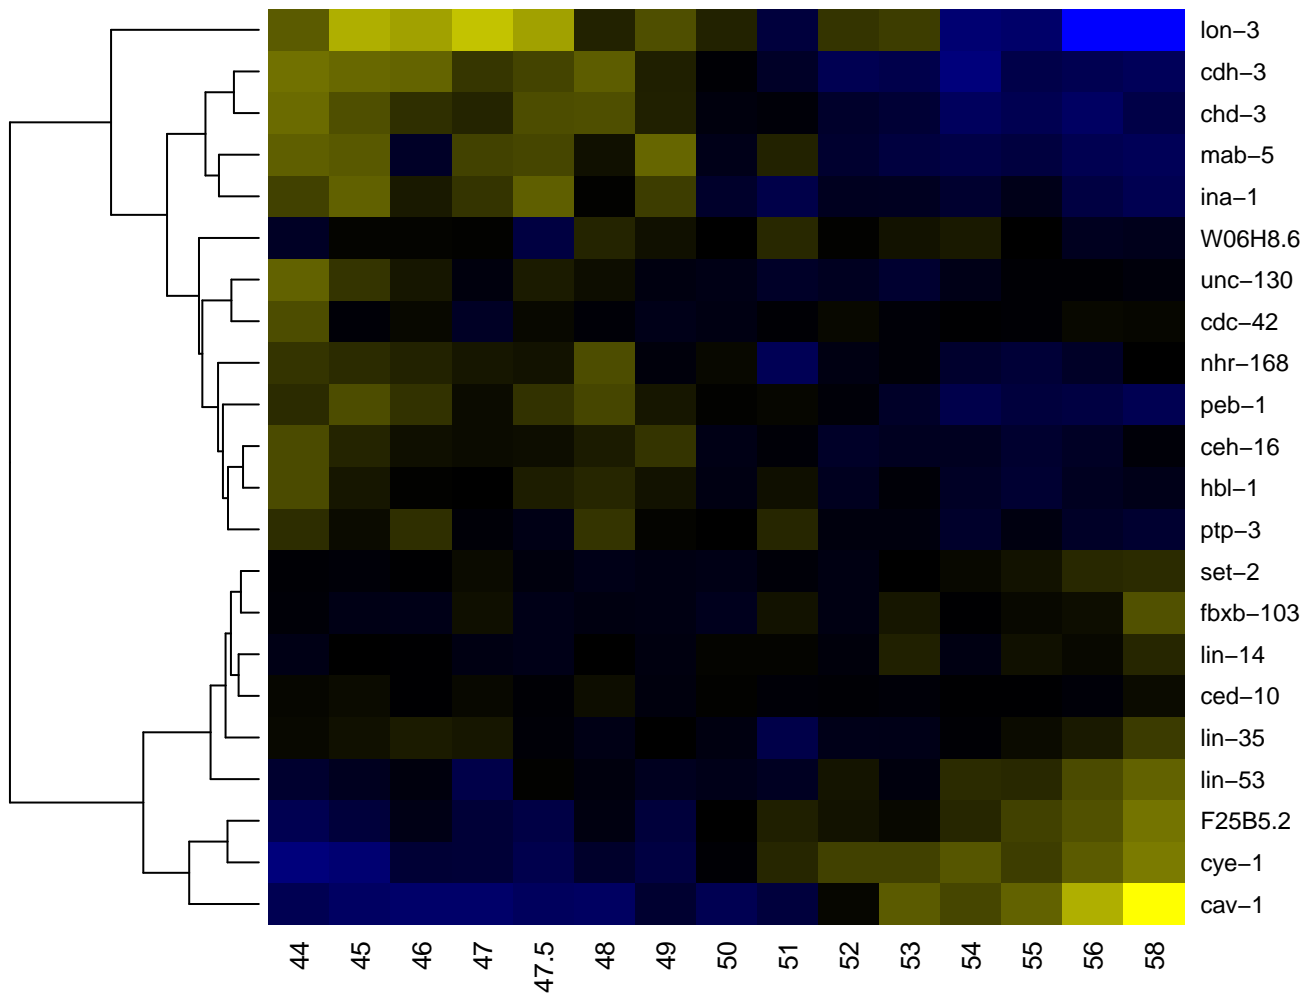

# H2L

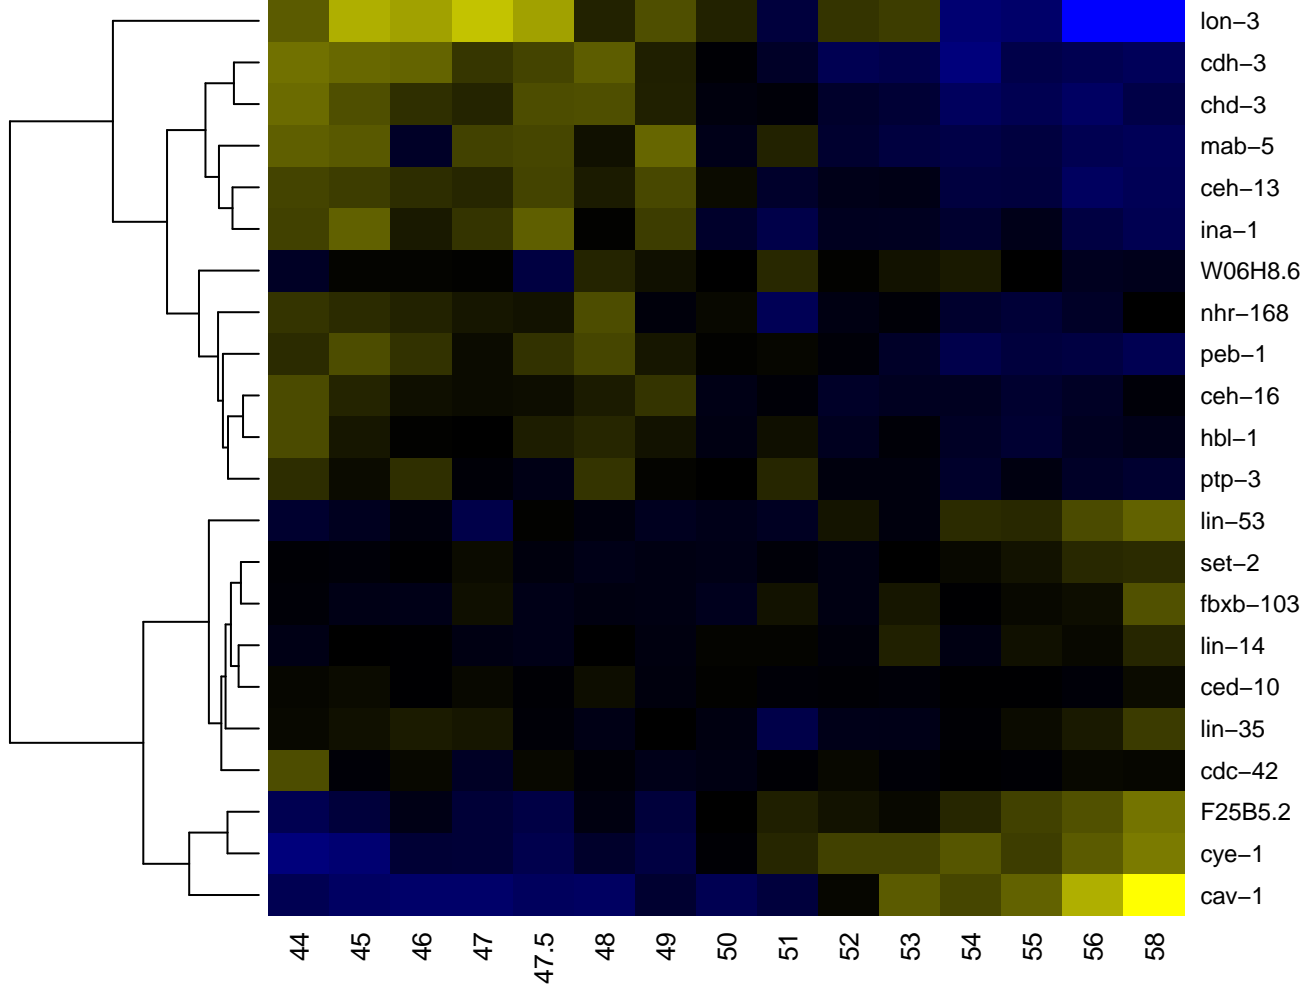

# H2R

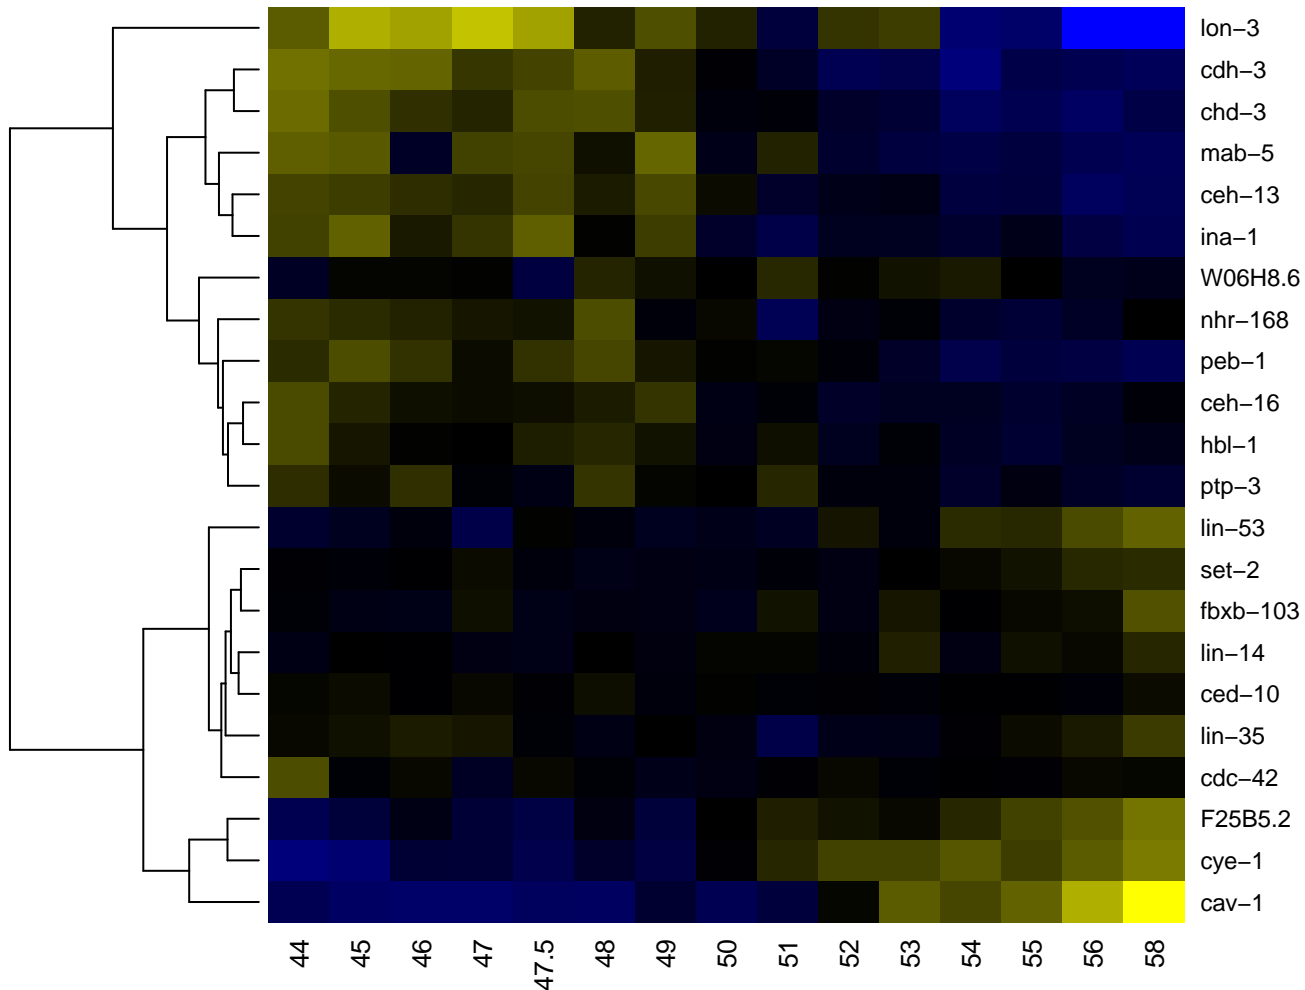

# head

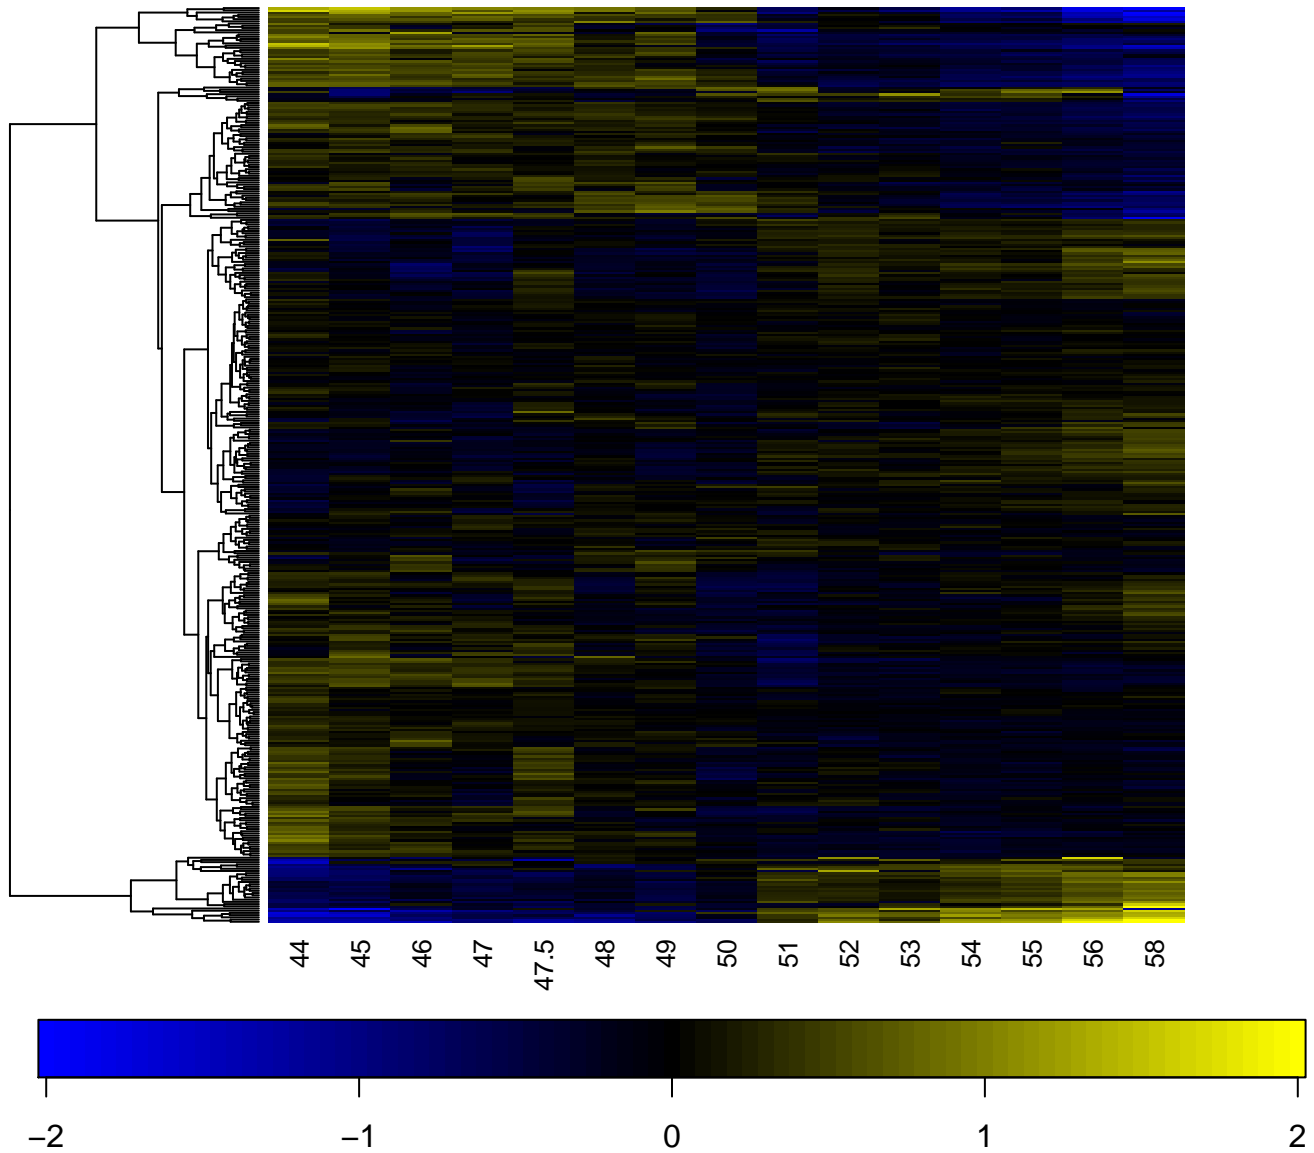

# head ganglion

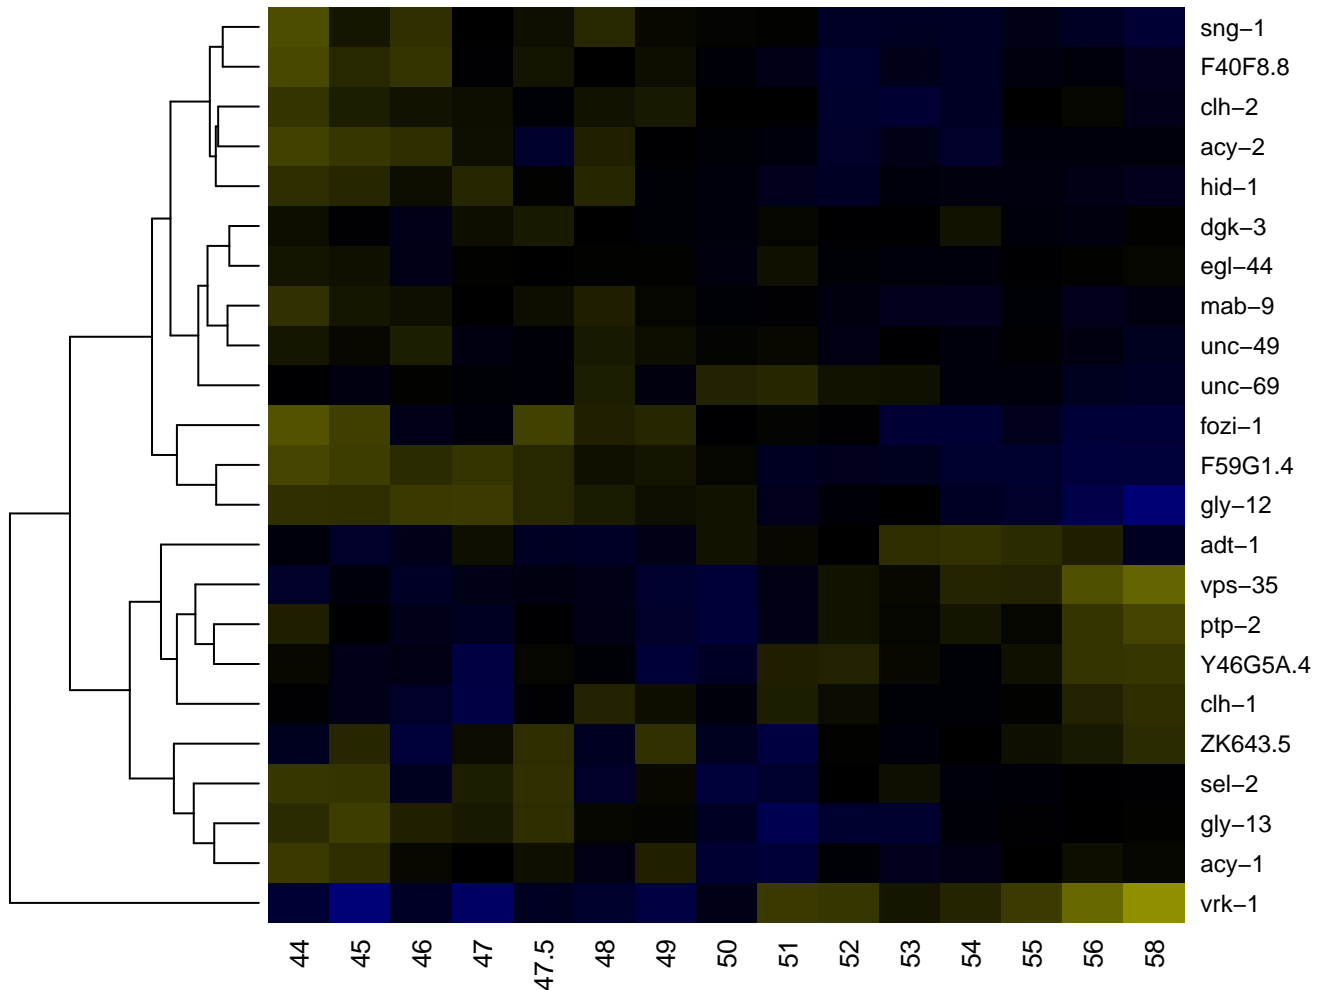

# head muscle

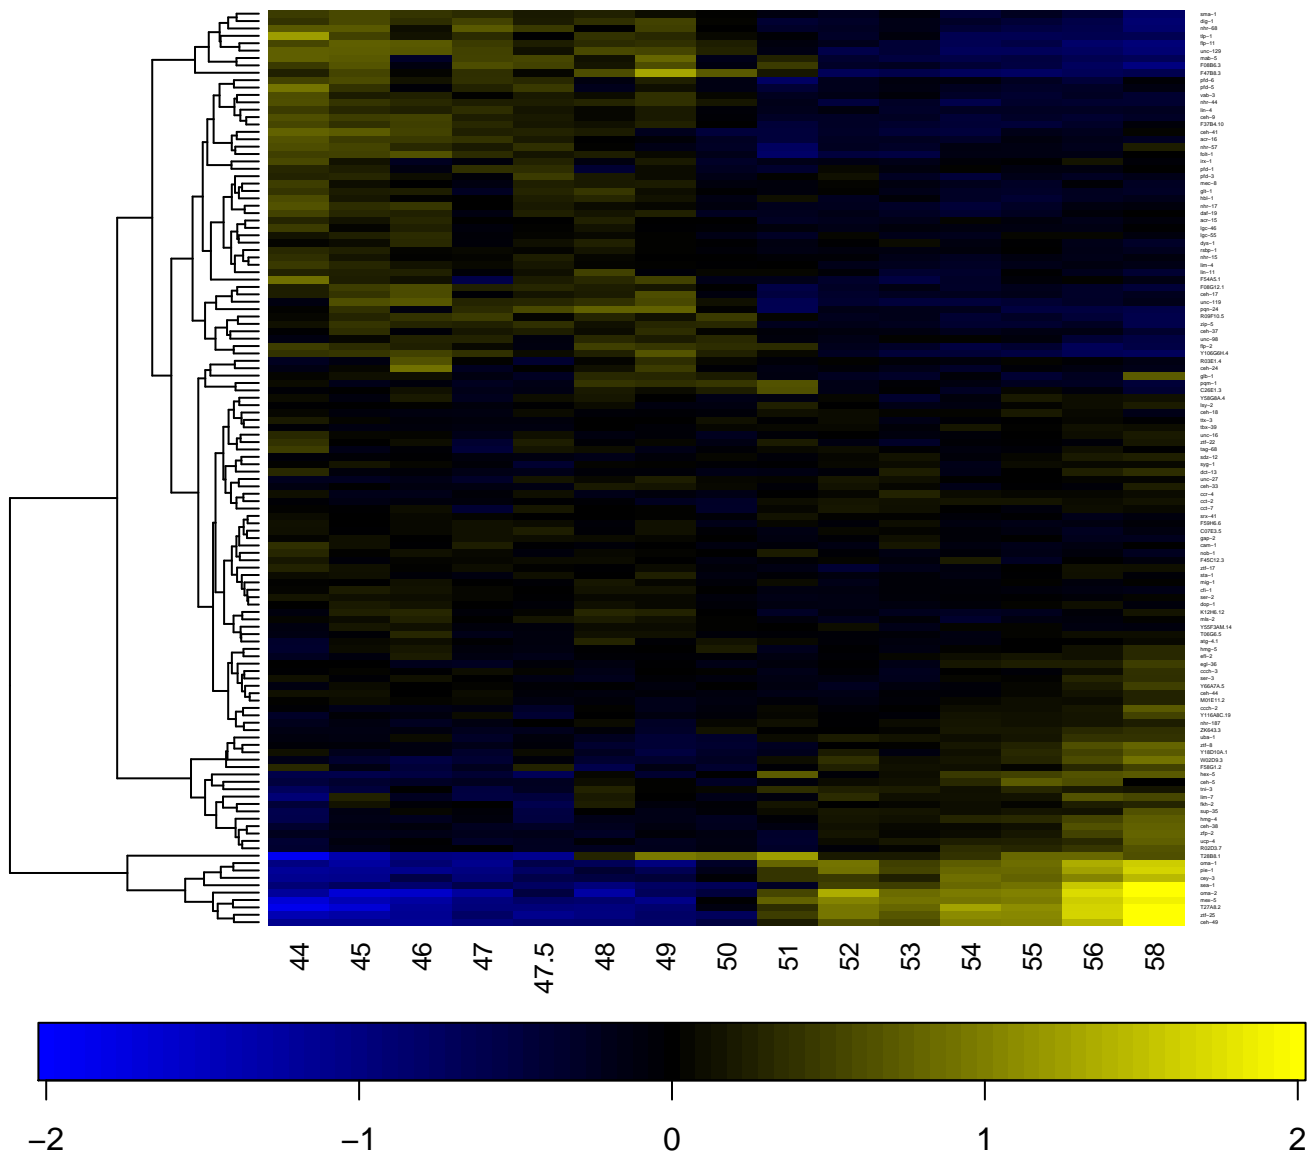

# head neuron

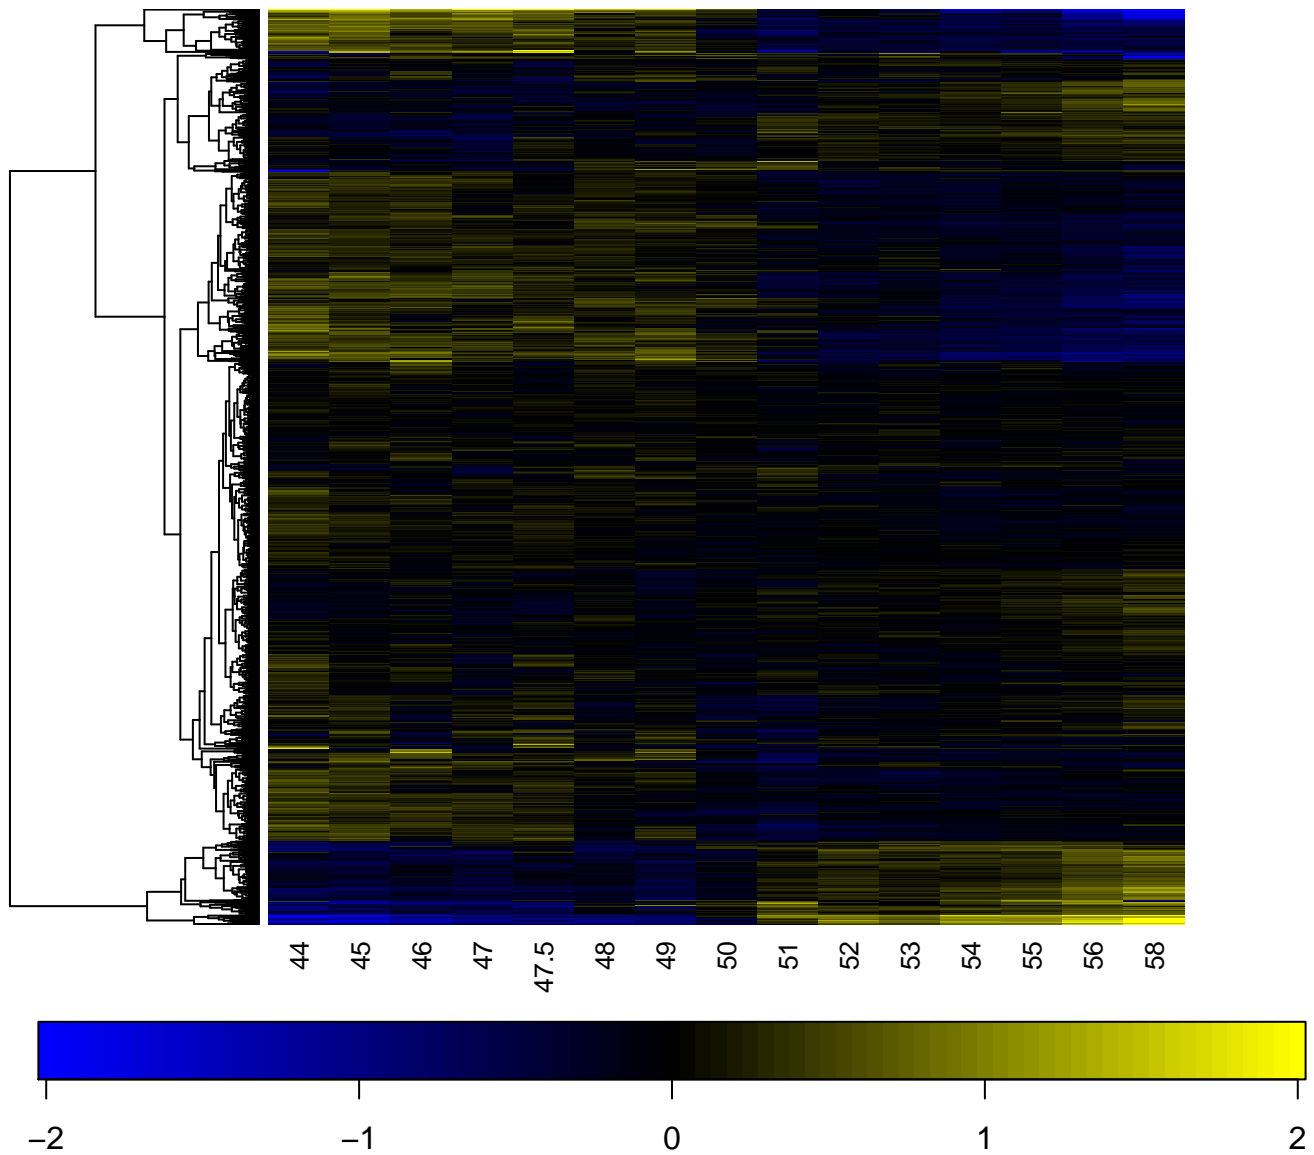

# hermaphrodite gonad

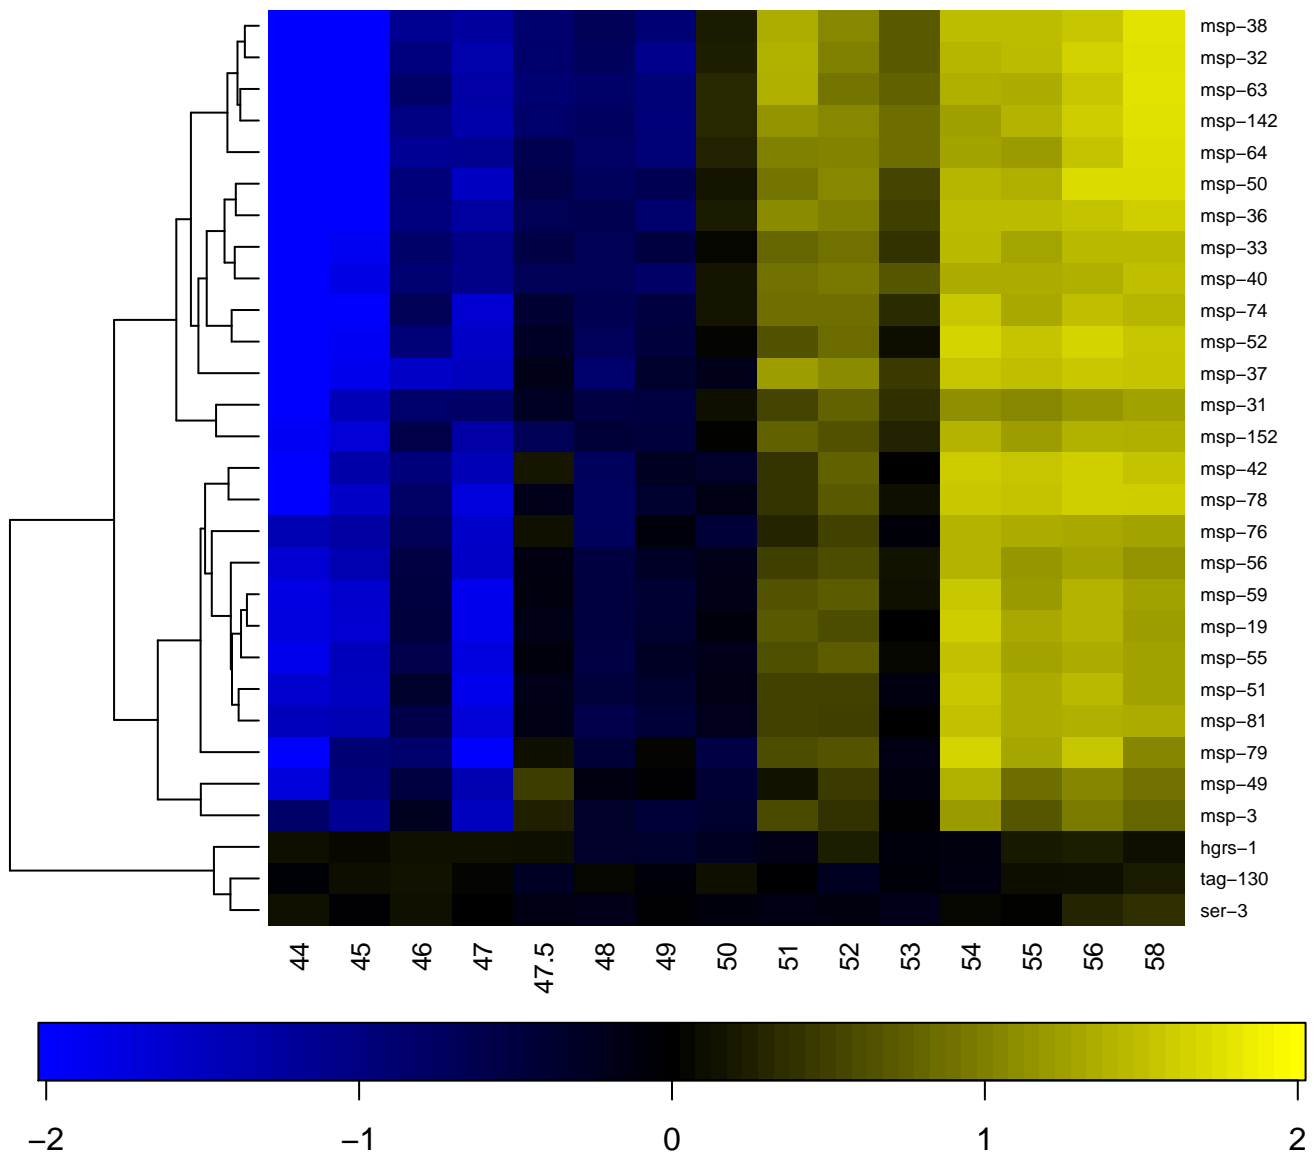



# hmc

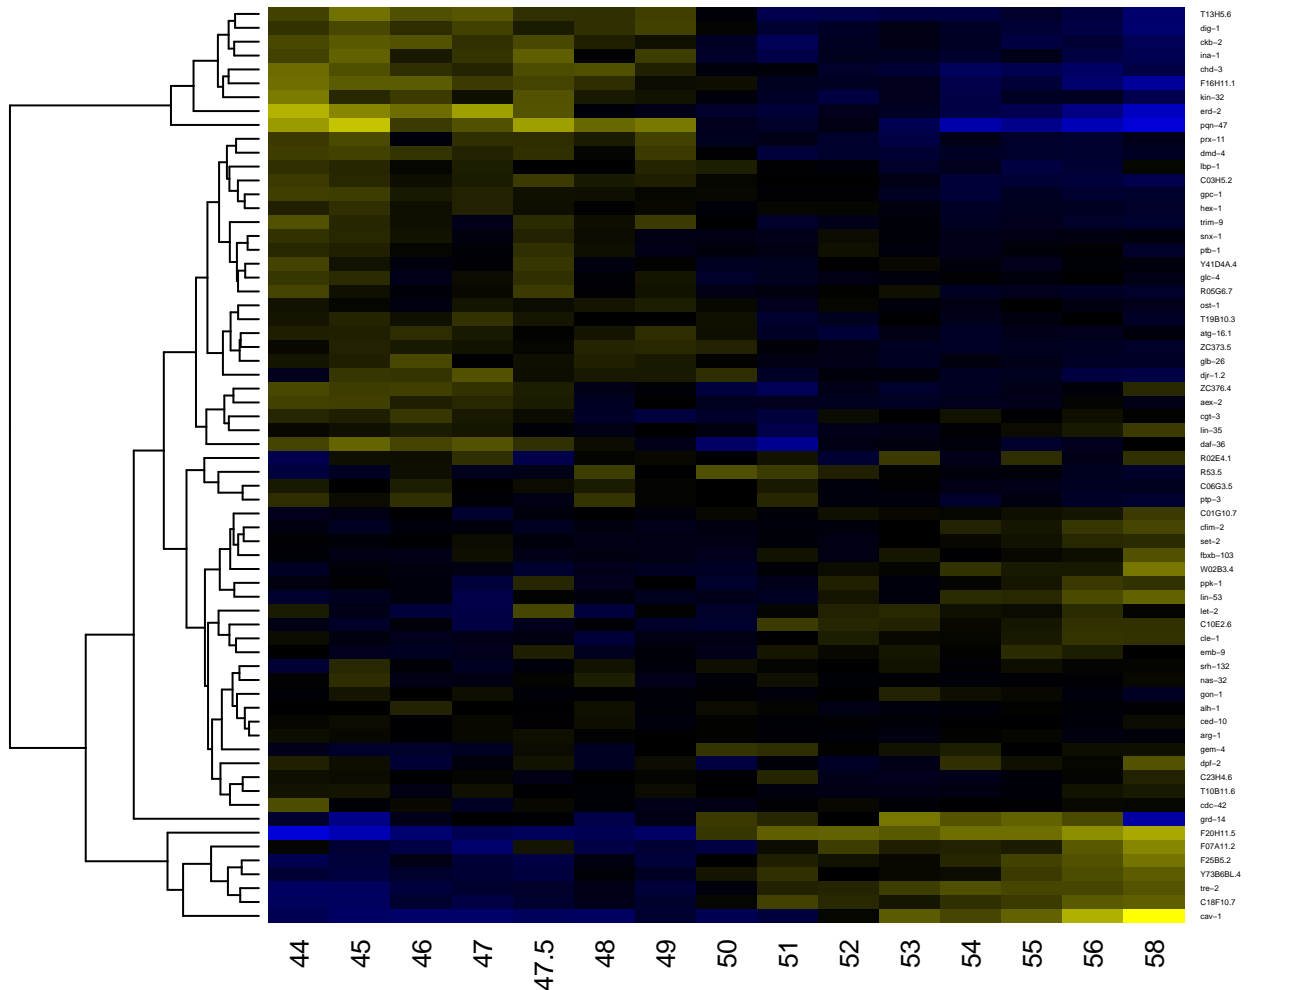

-2

-1

0

1

2

# HOA

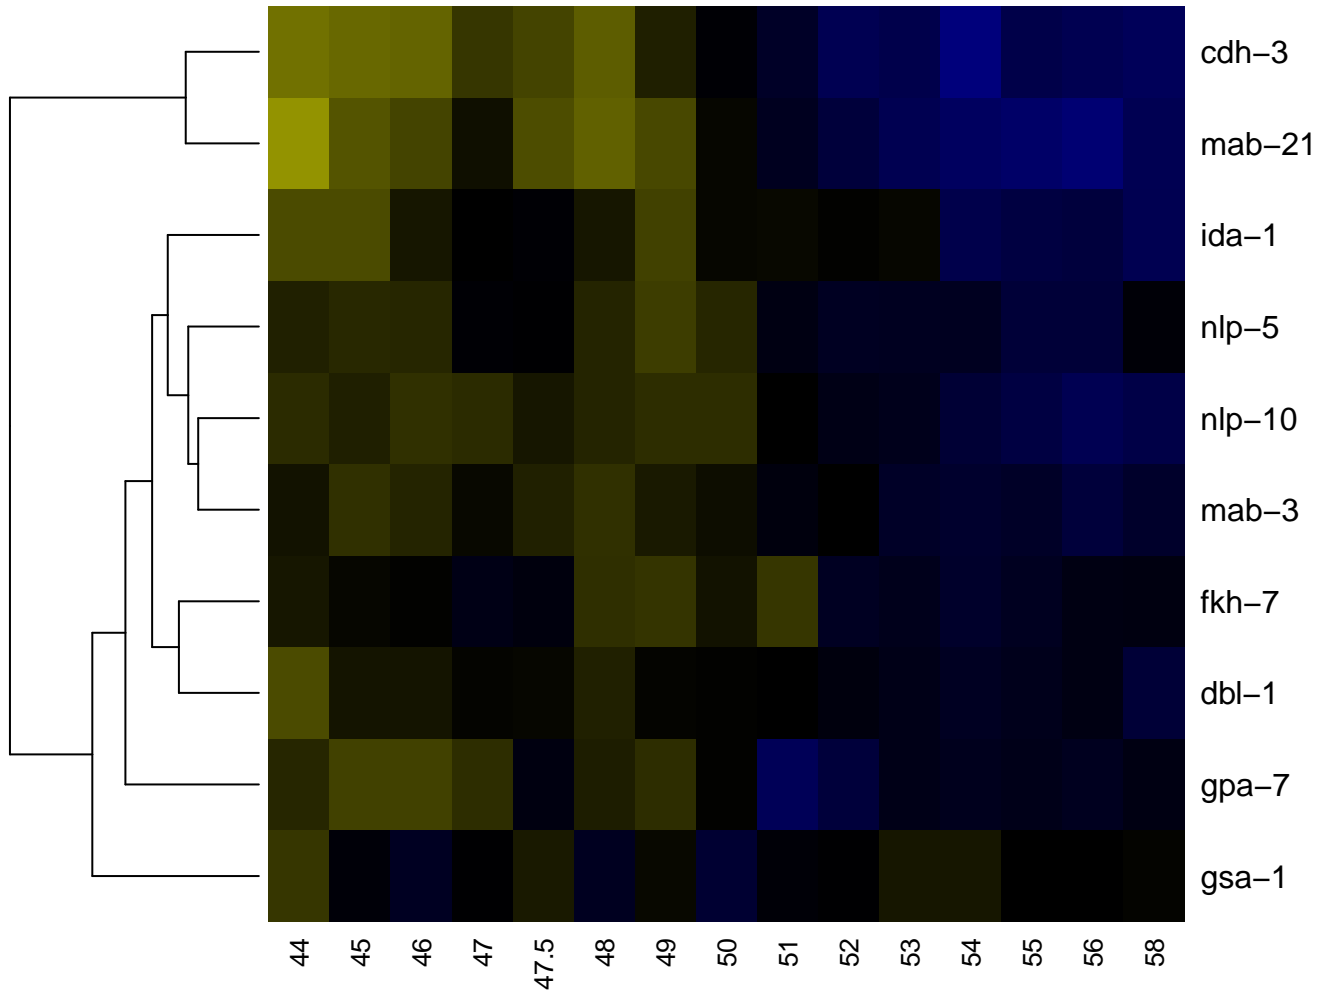

# HOB

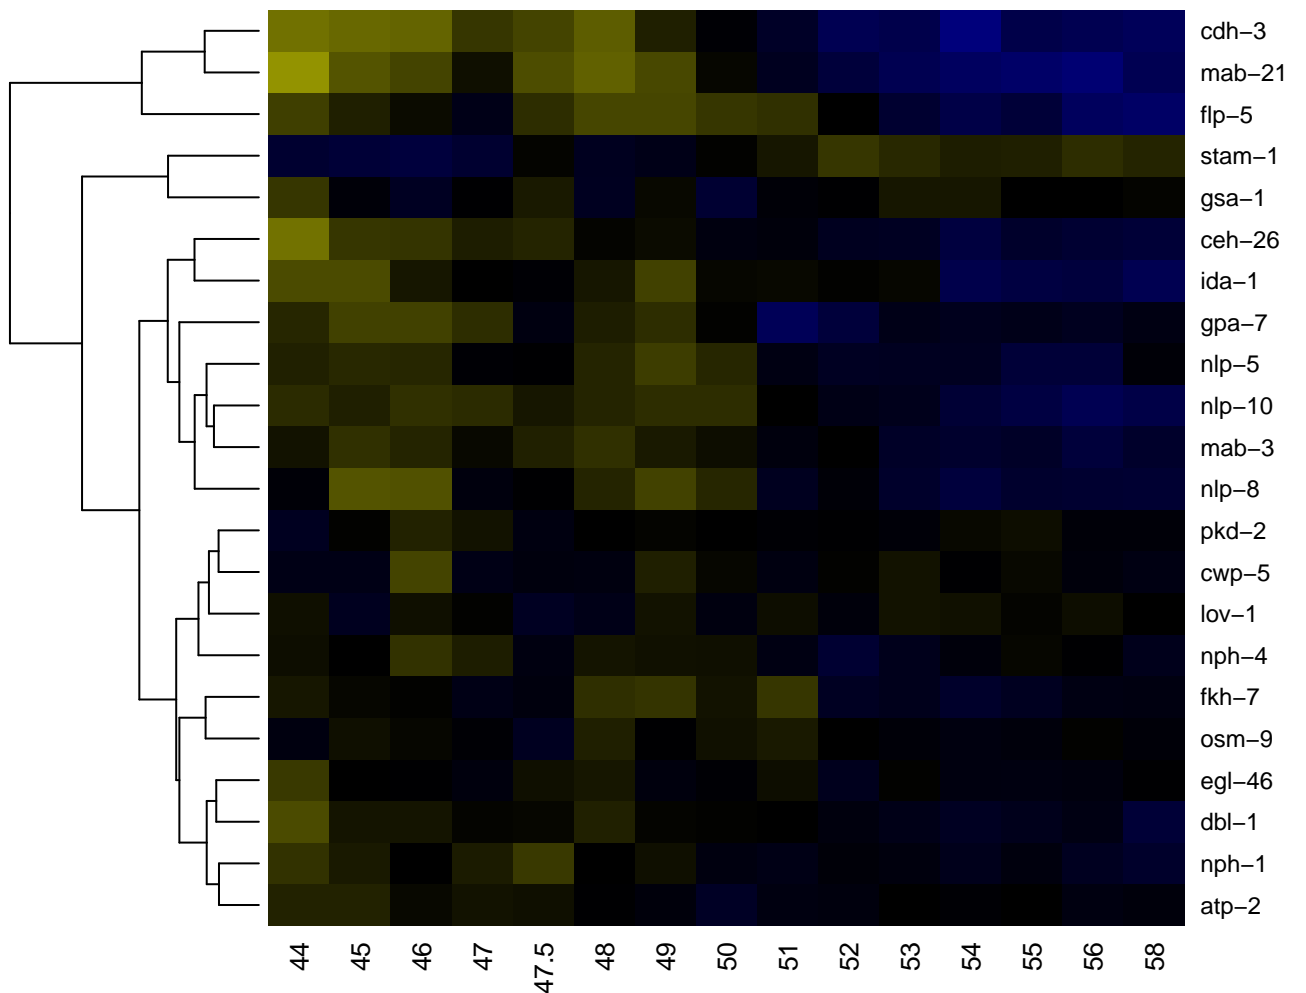

# HSNL

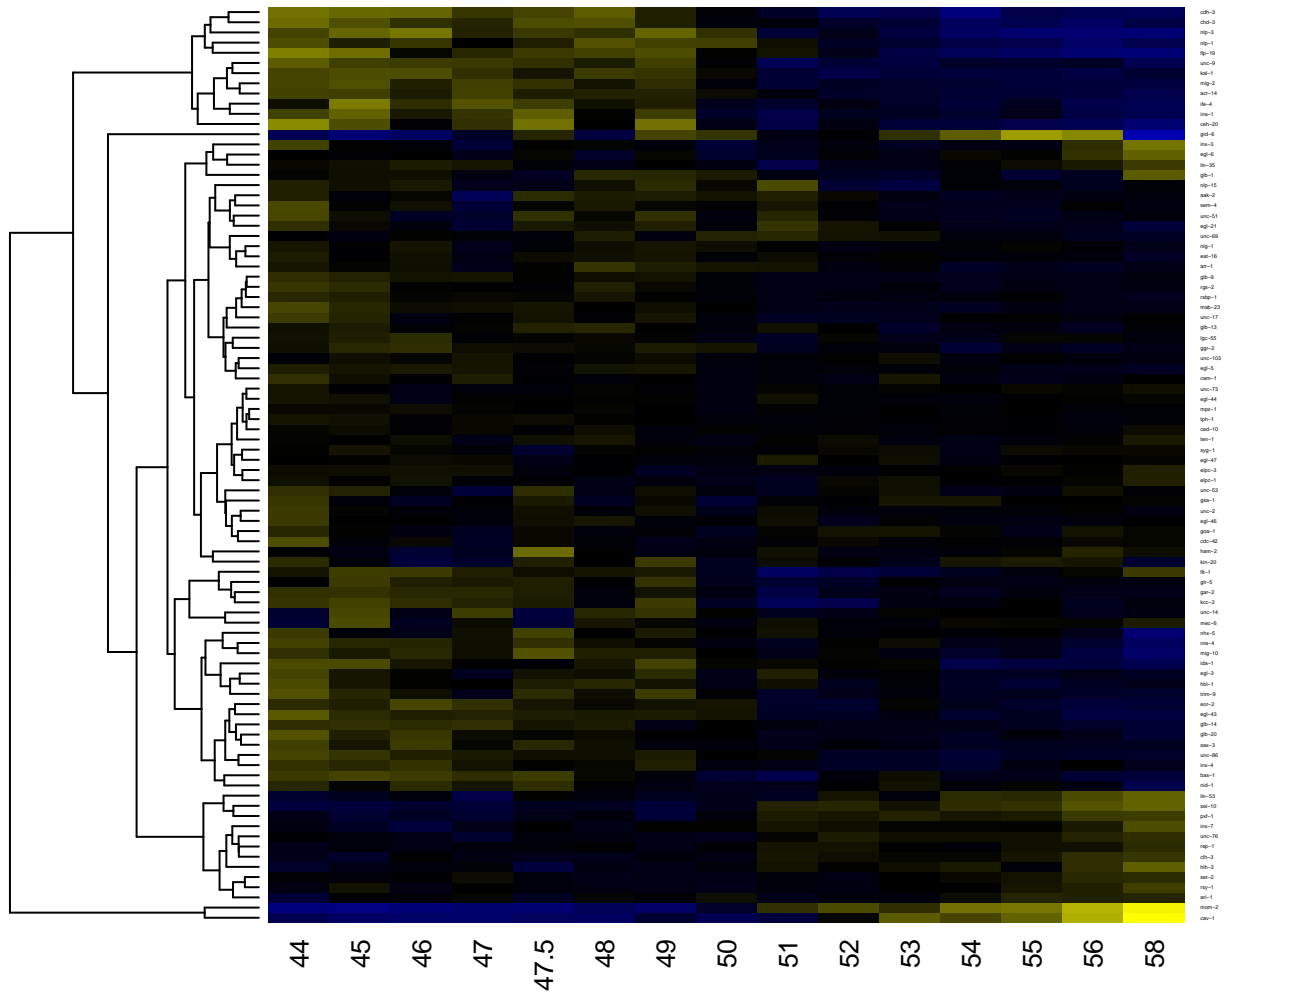



# hyp1

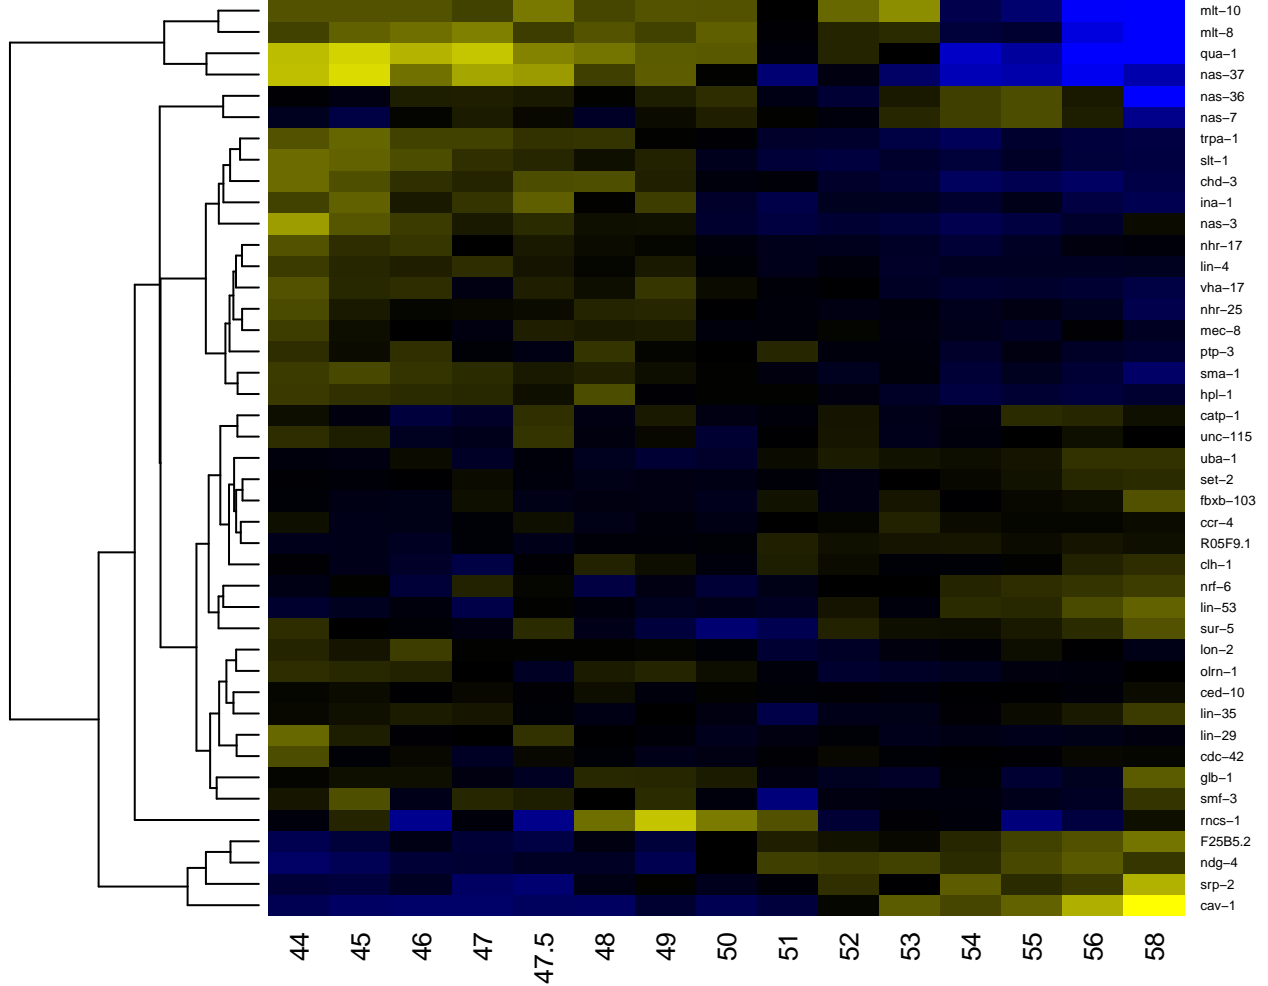

# hyp10

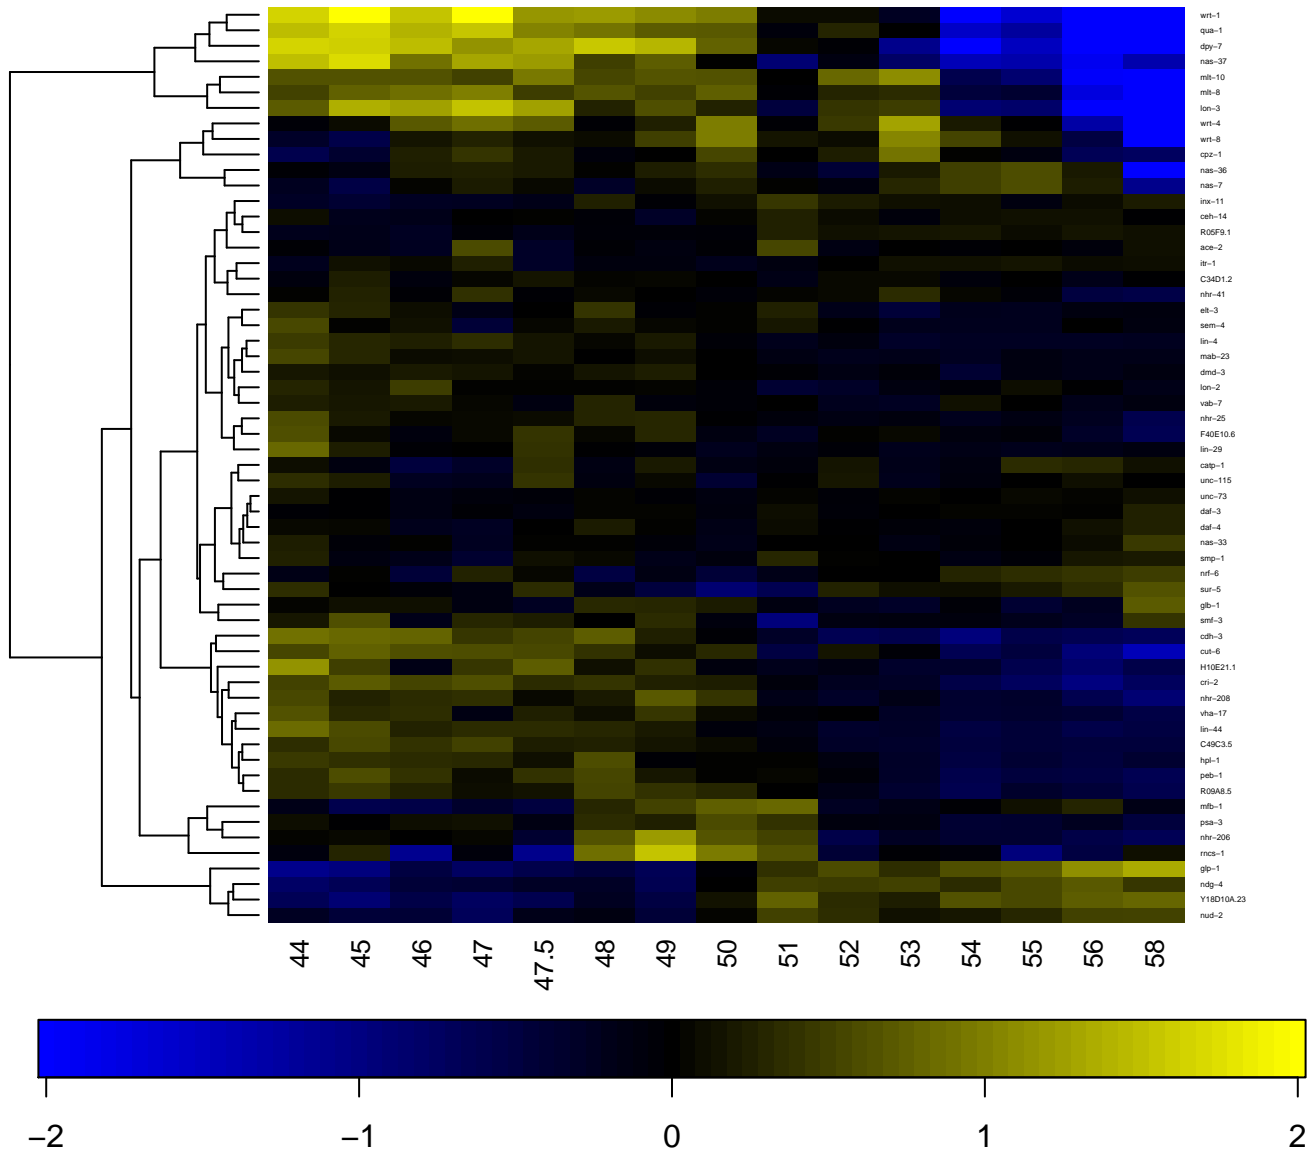

# hyp11

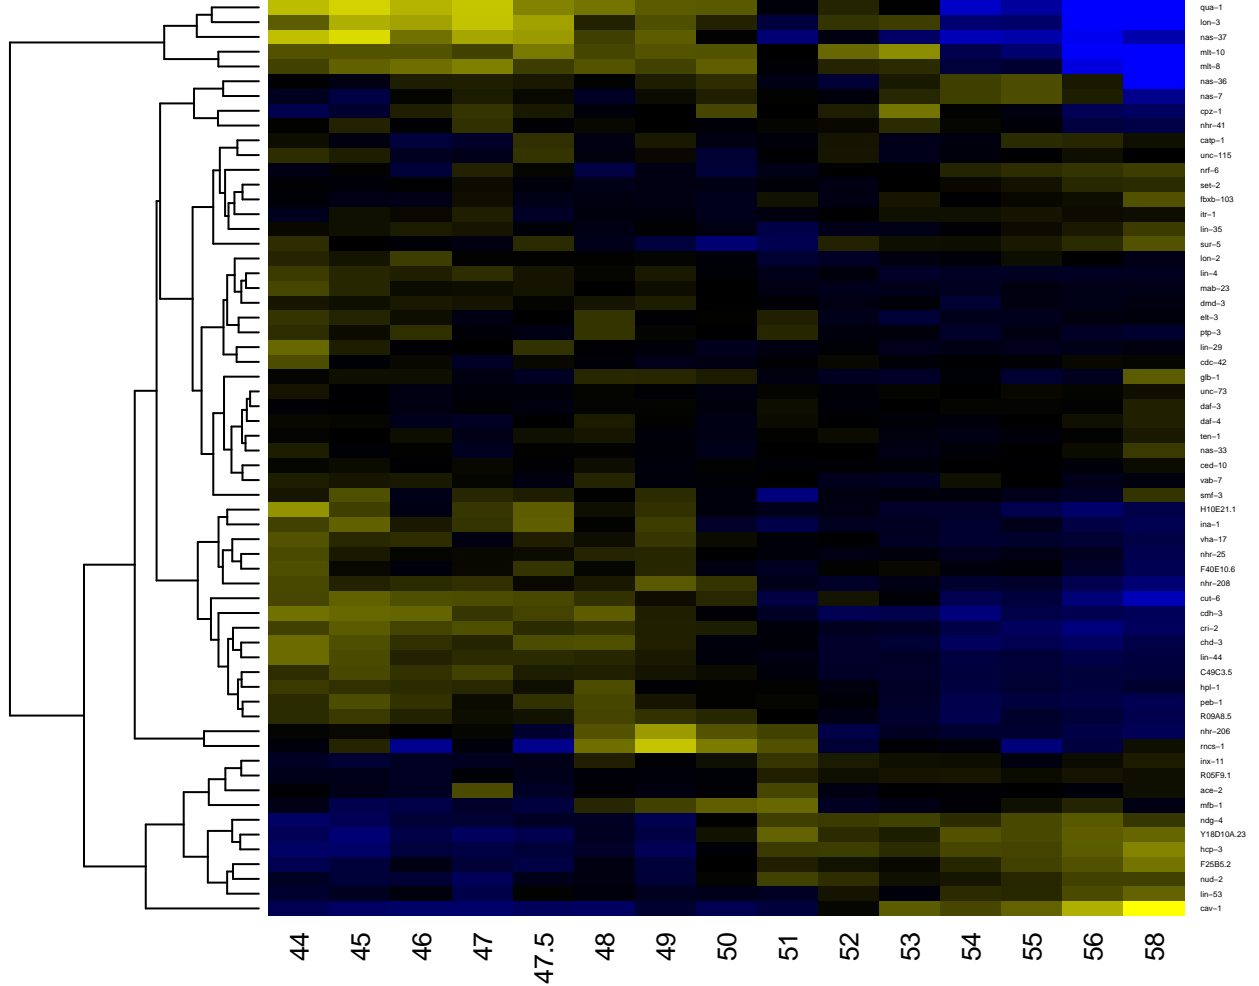

-2

-1

0

1

2



# hyp12

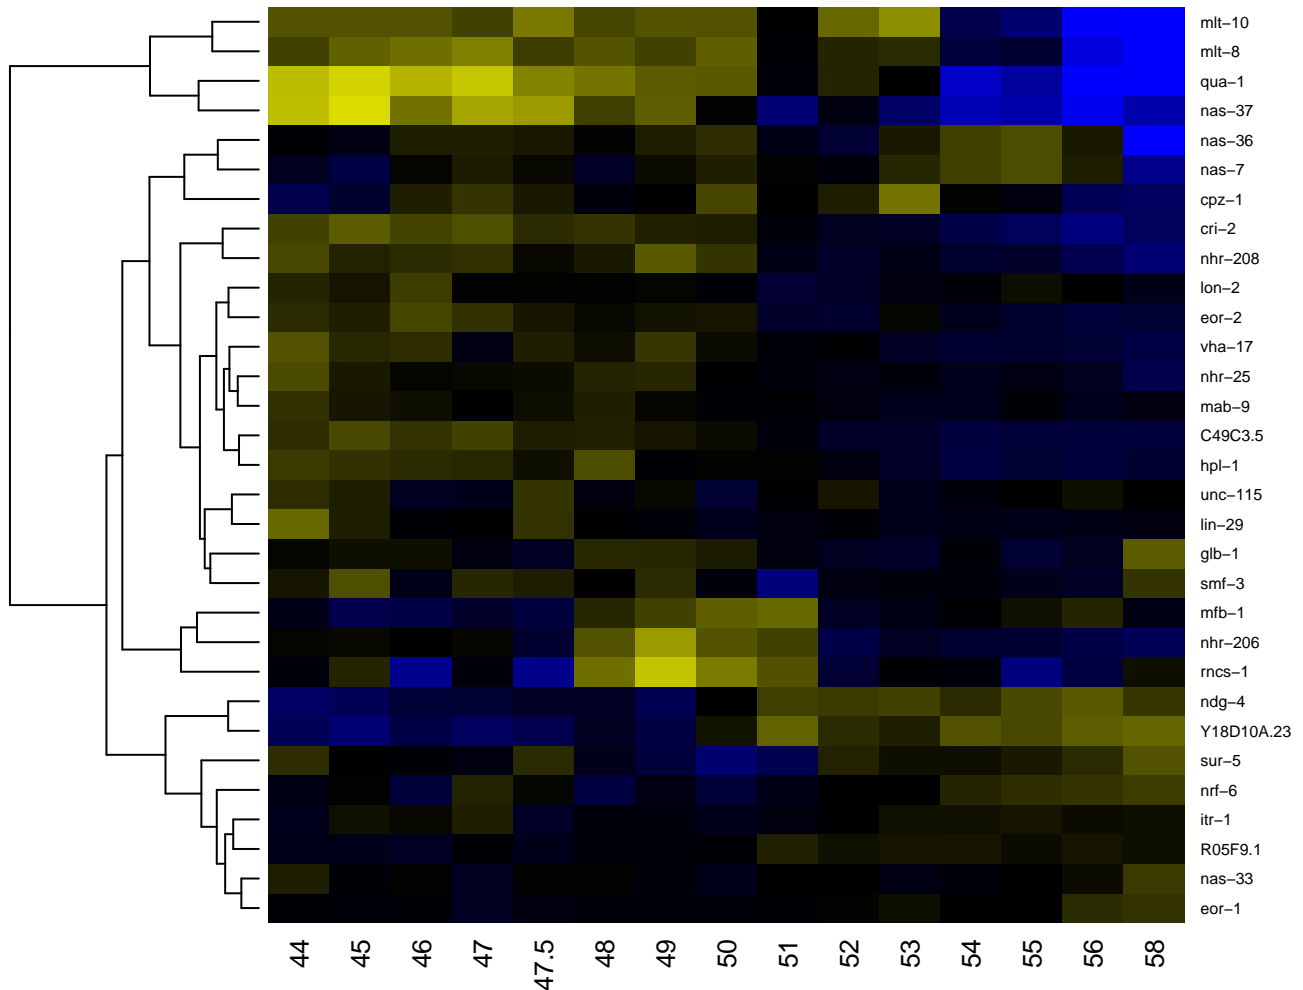

# hyp2

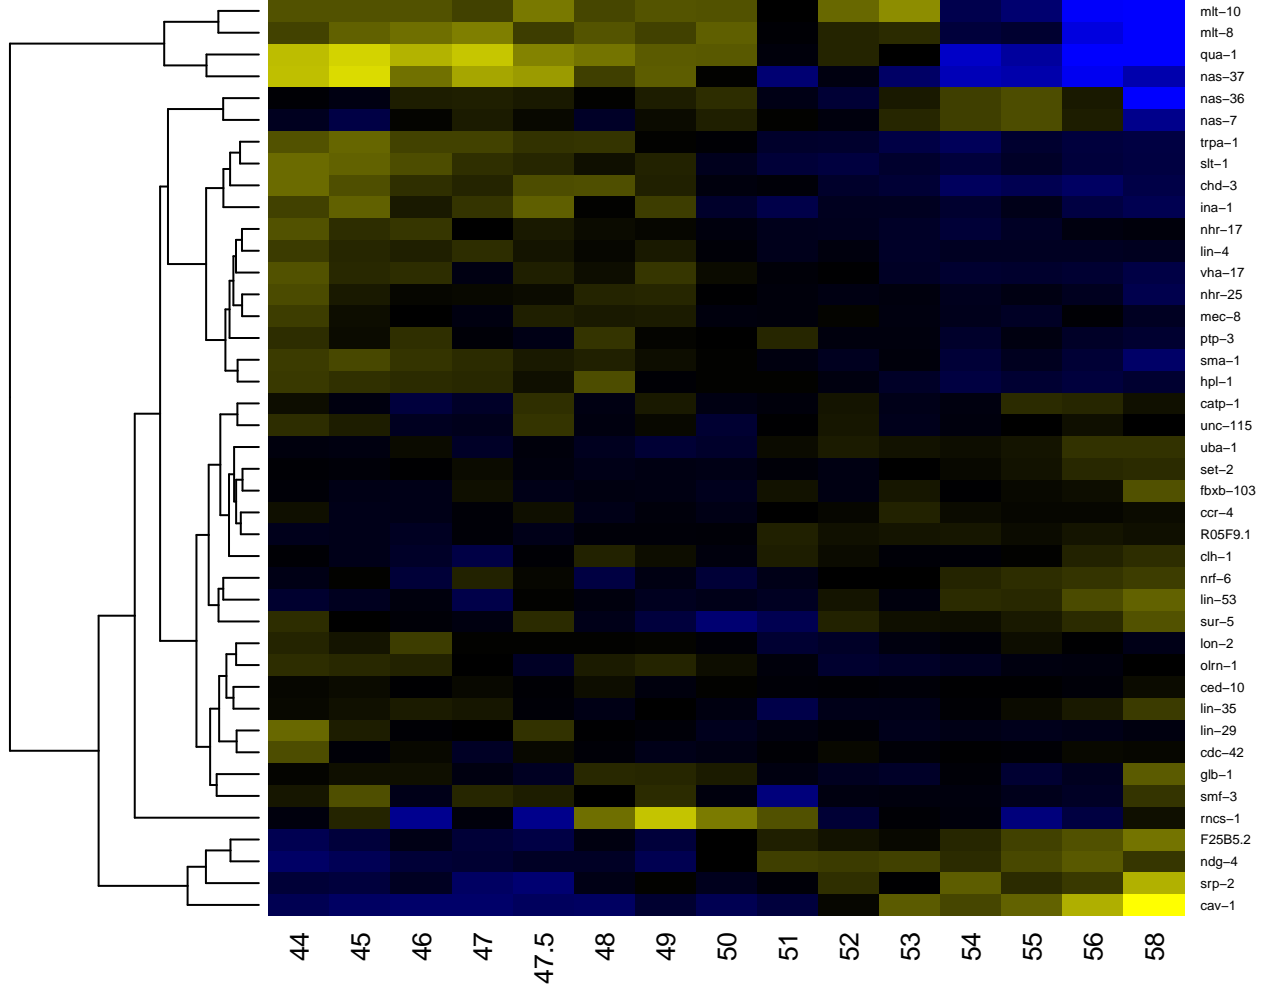

# hyp3

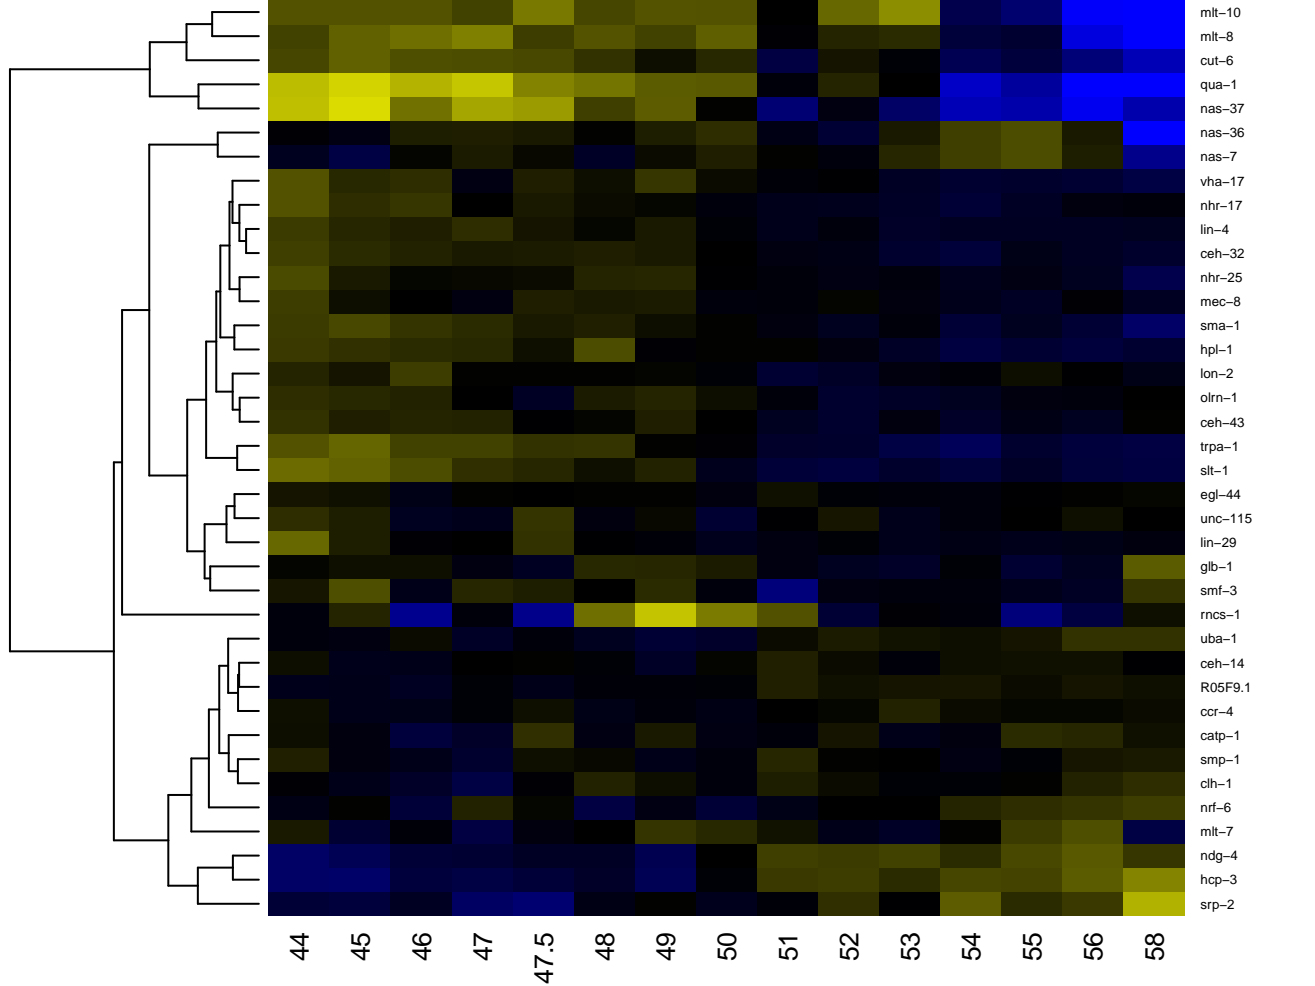

# hyp4

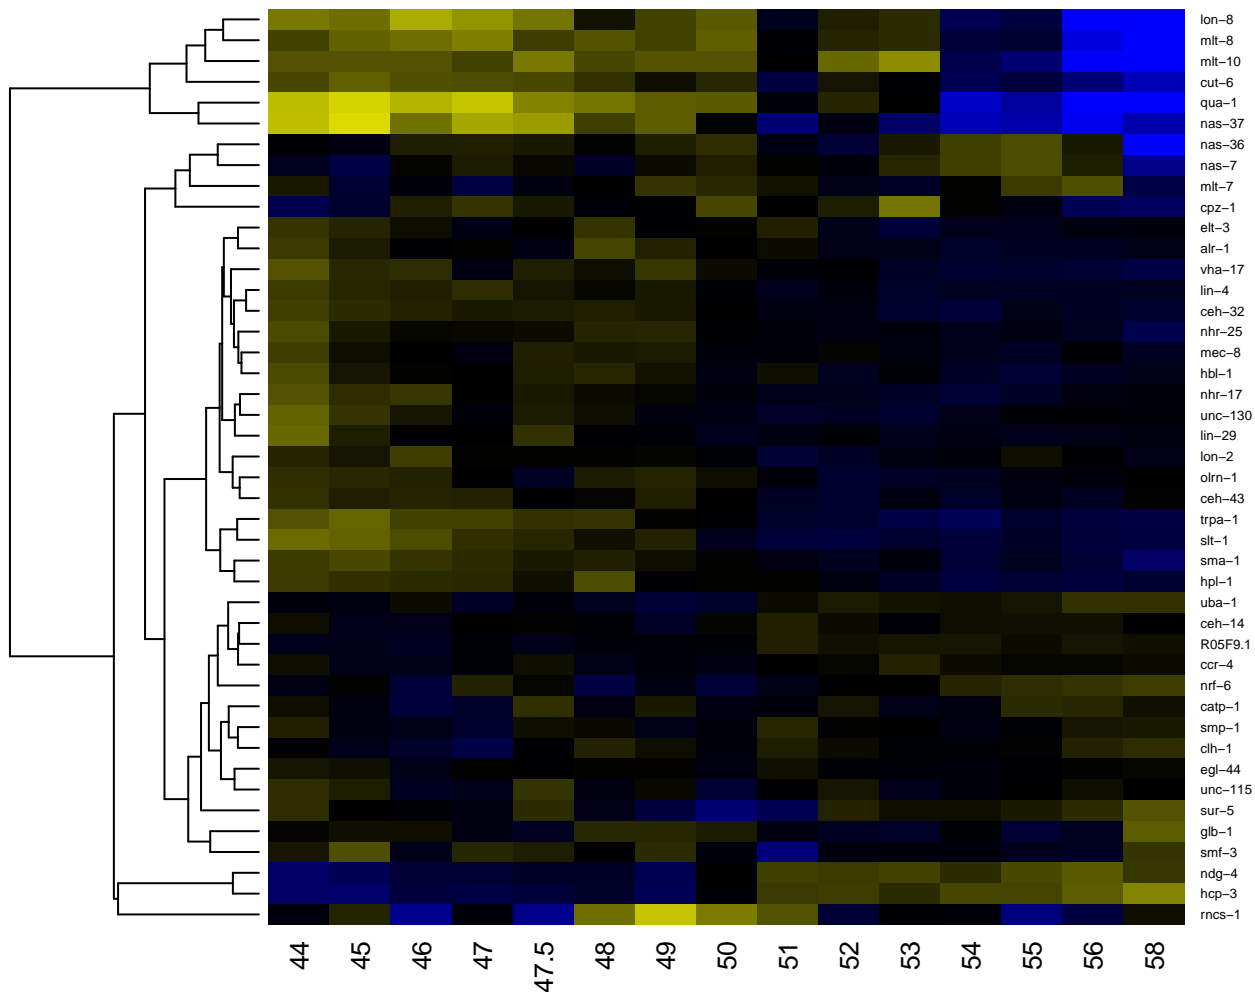

# hyp5

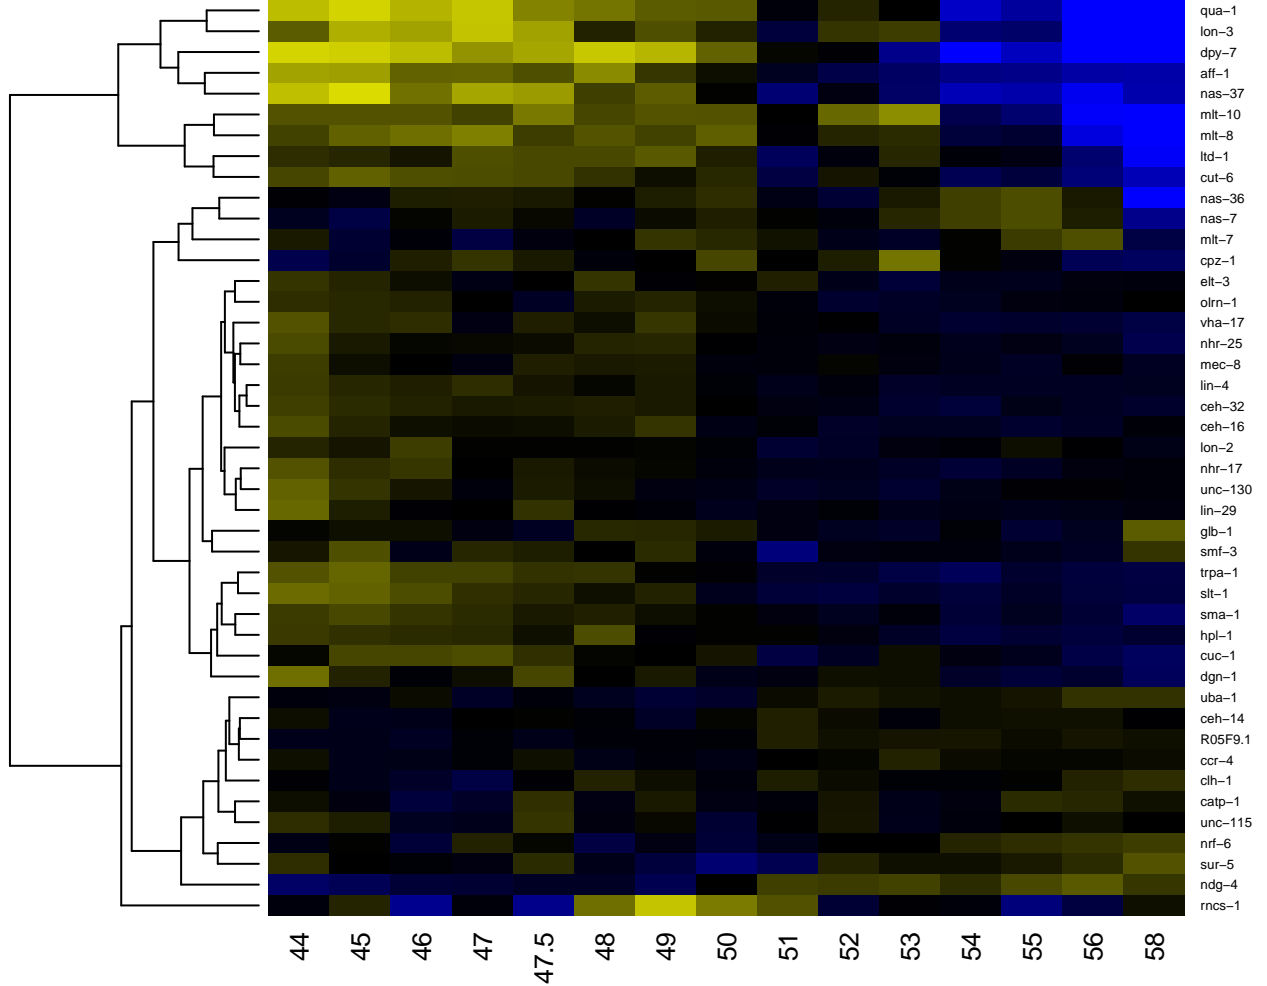

# hyp6

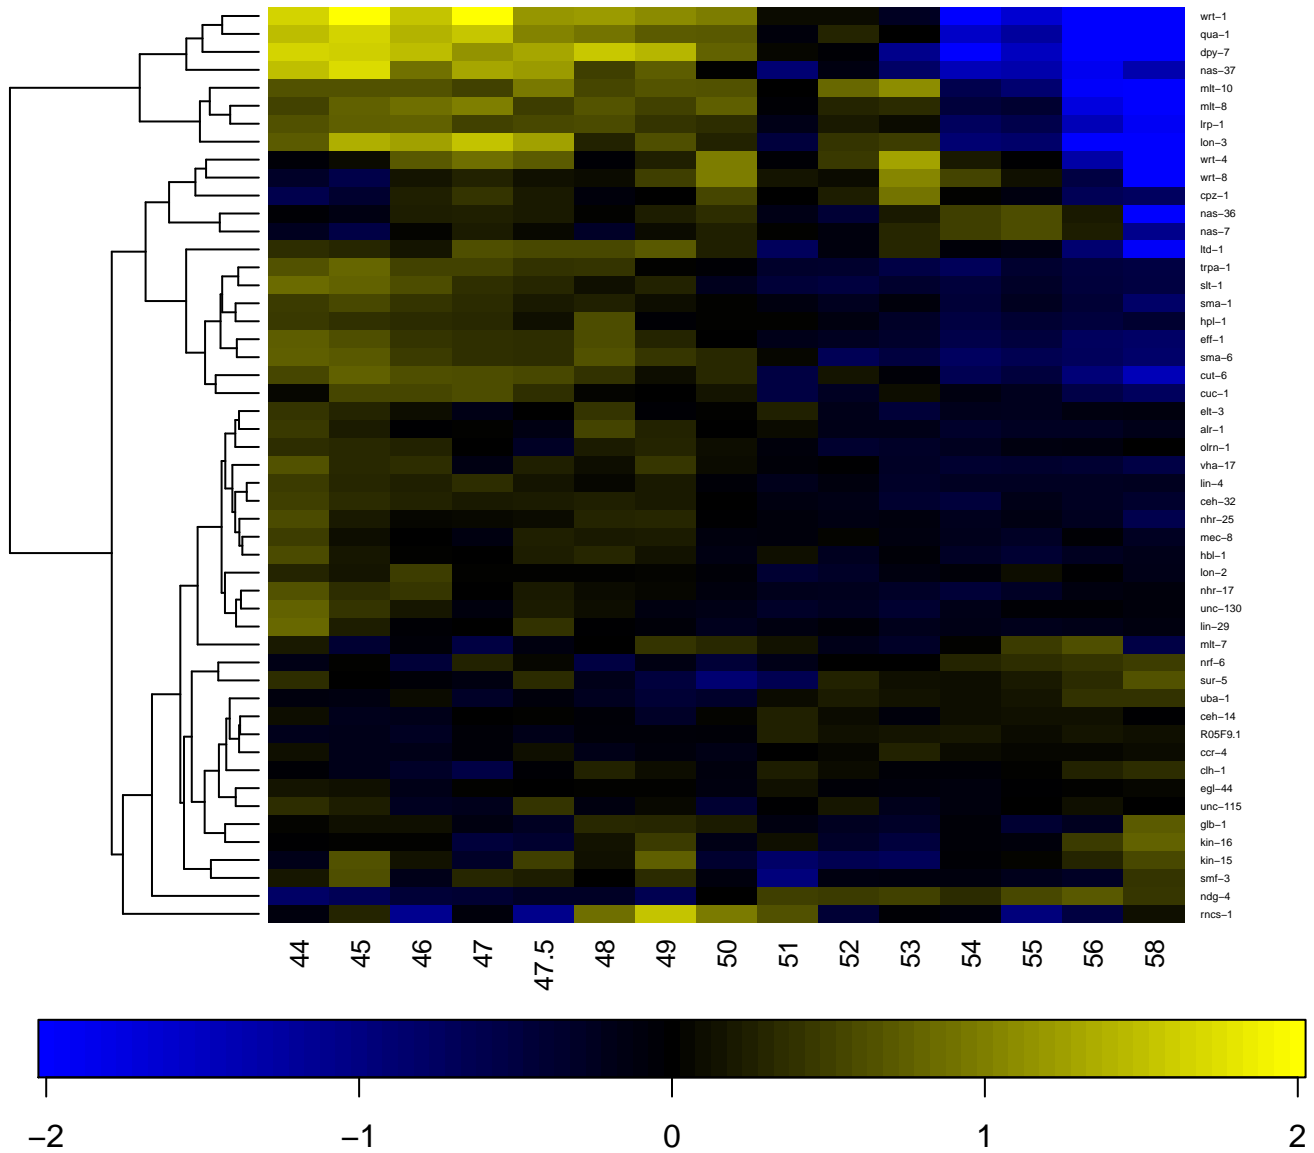

# hyp7

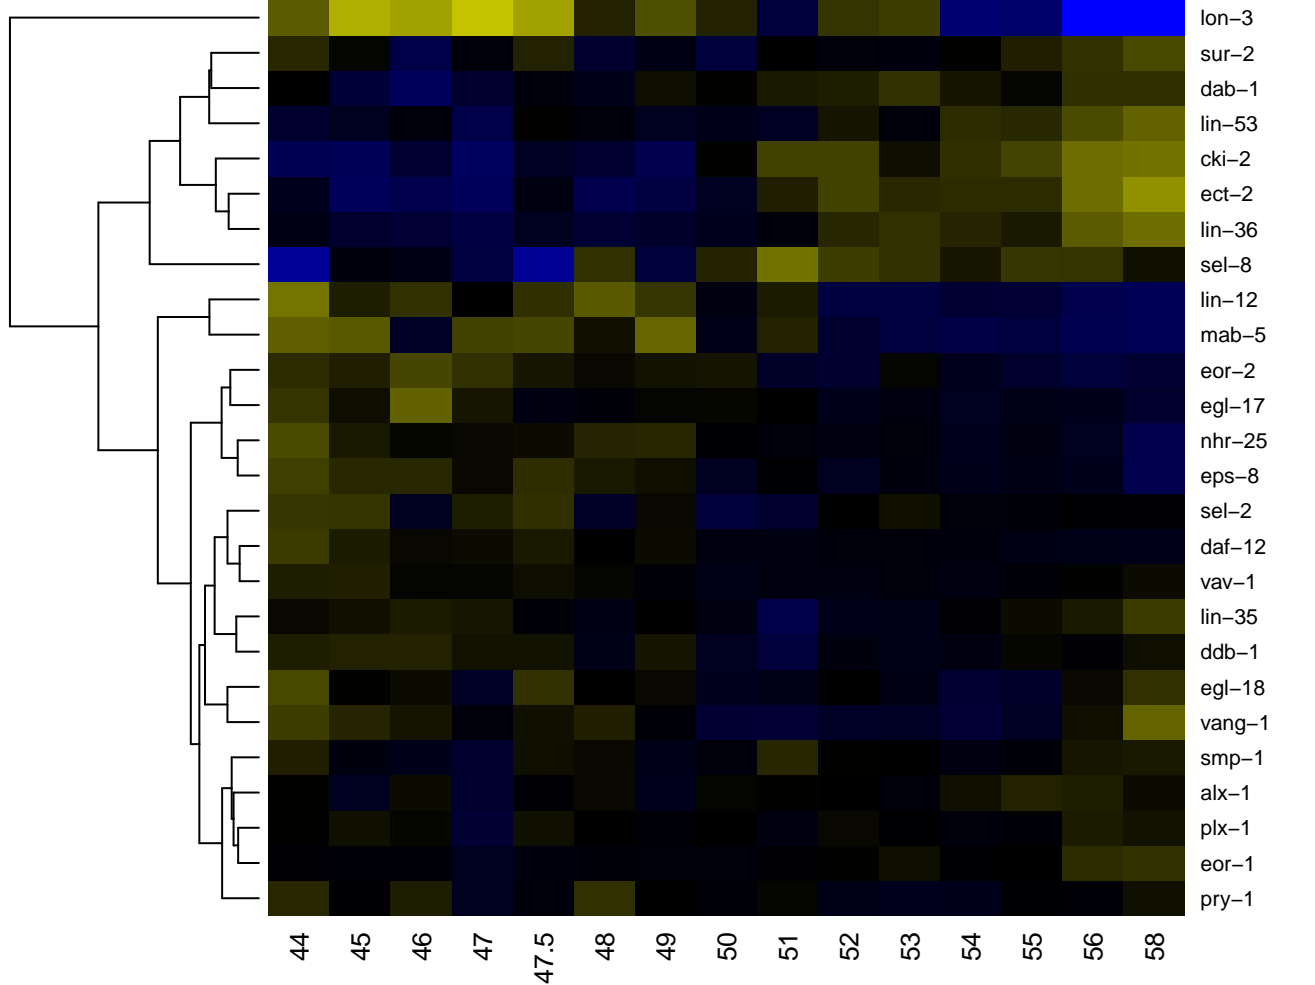

-2

-1

0

1

2

# hyp7 syncytium

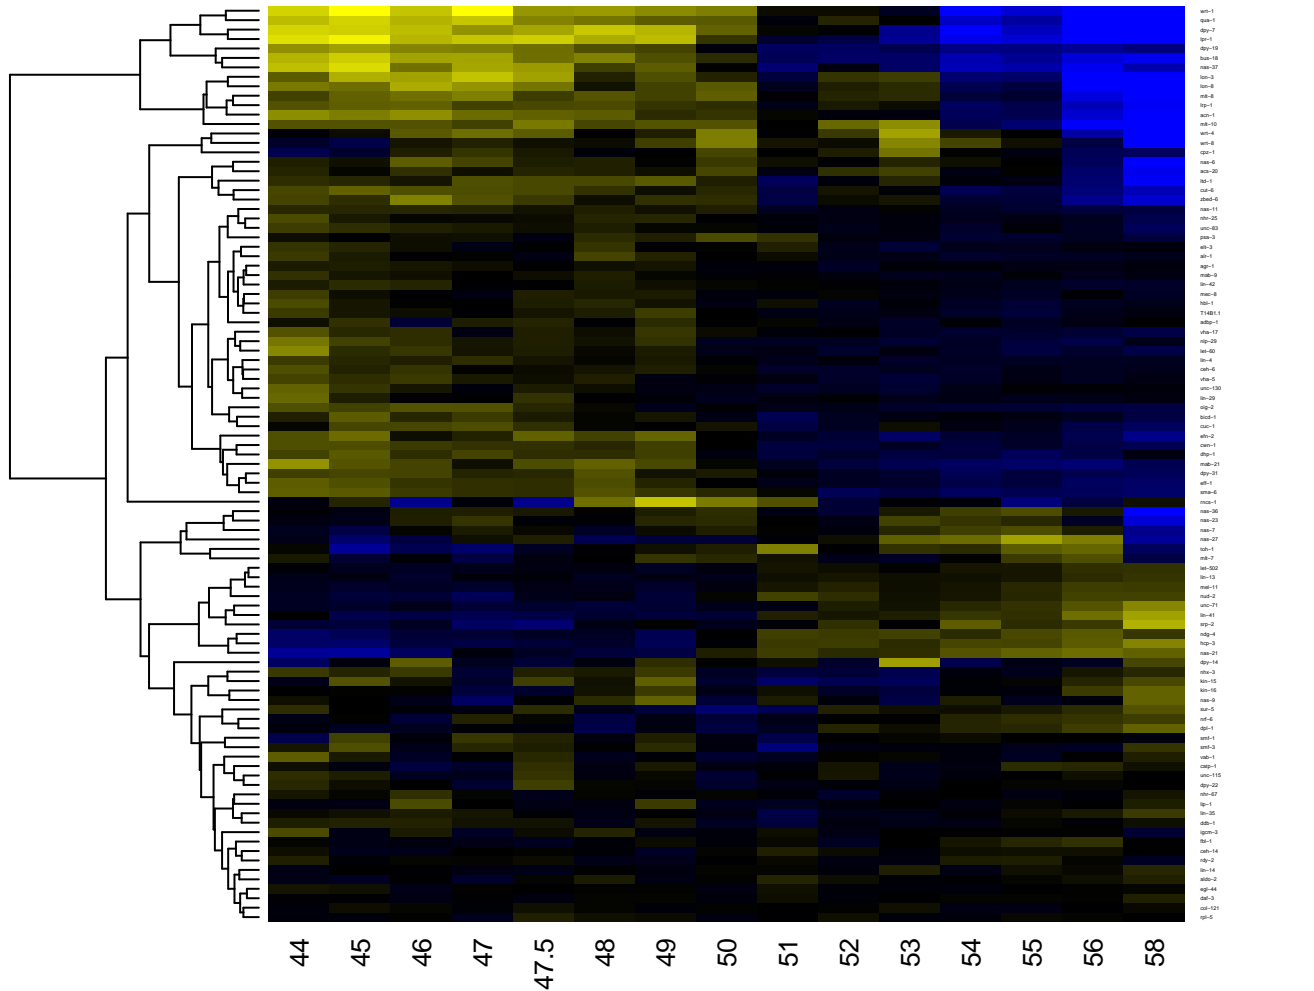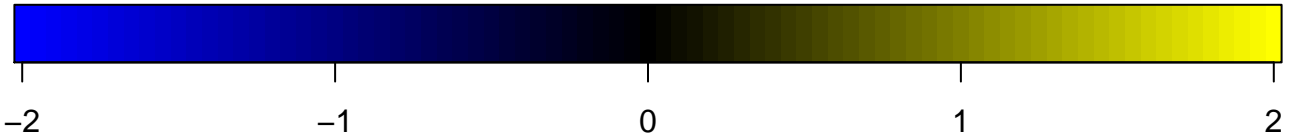



# hyp8

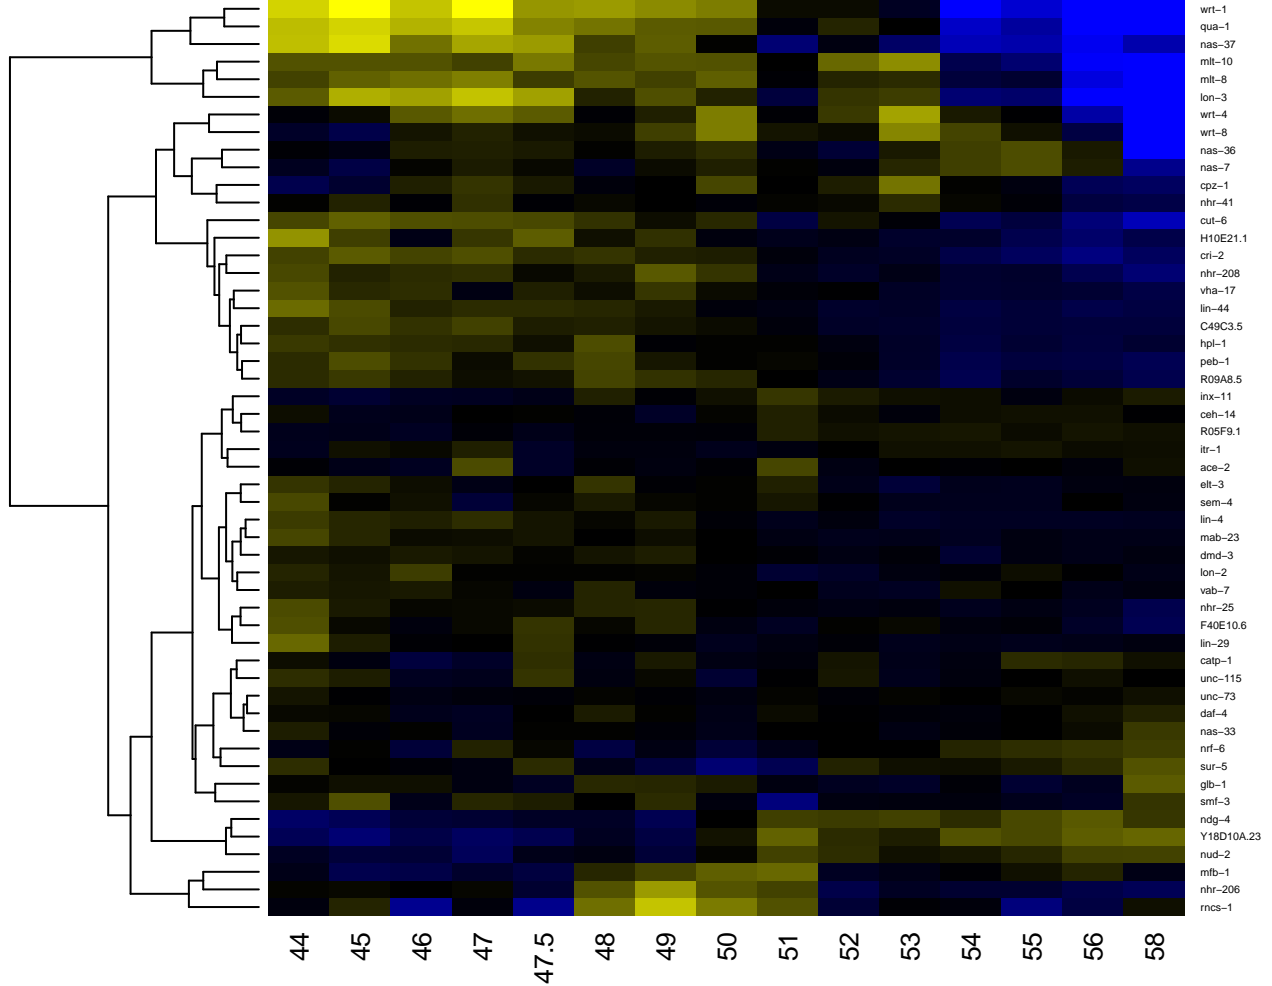

# hyp9

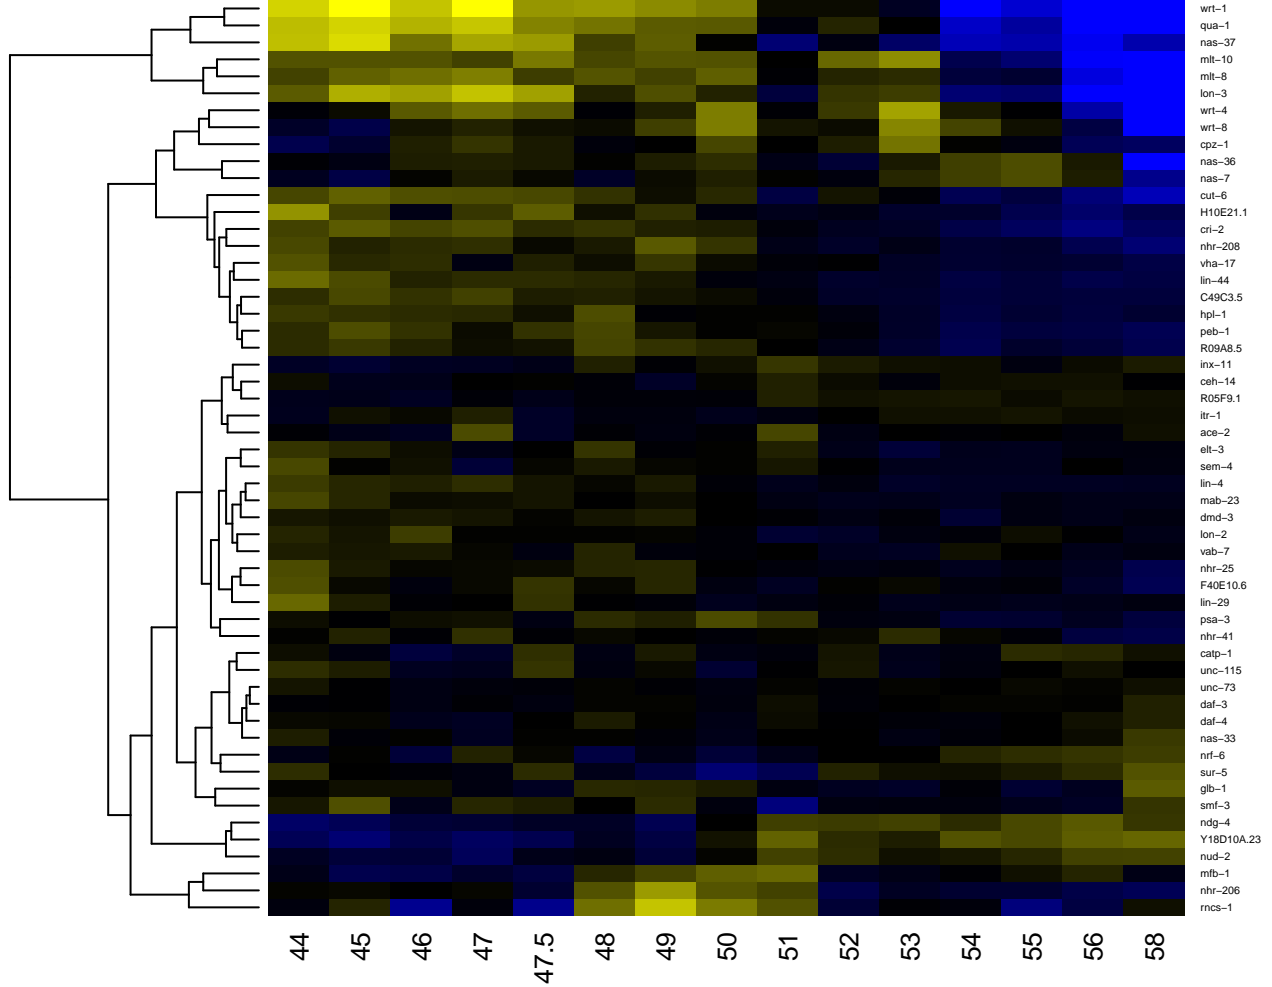

# hypodermis

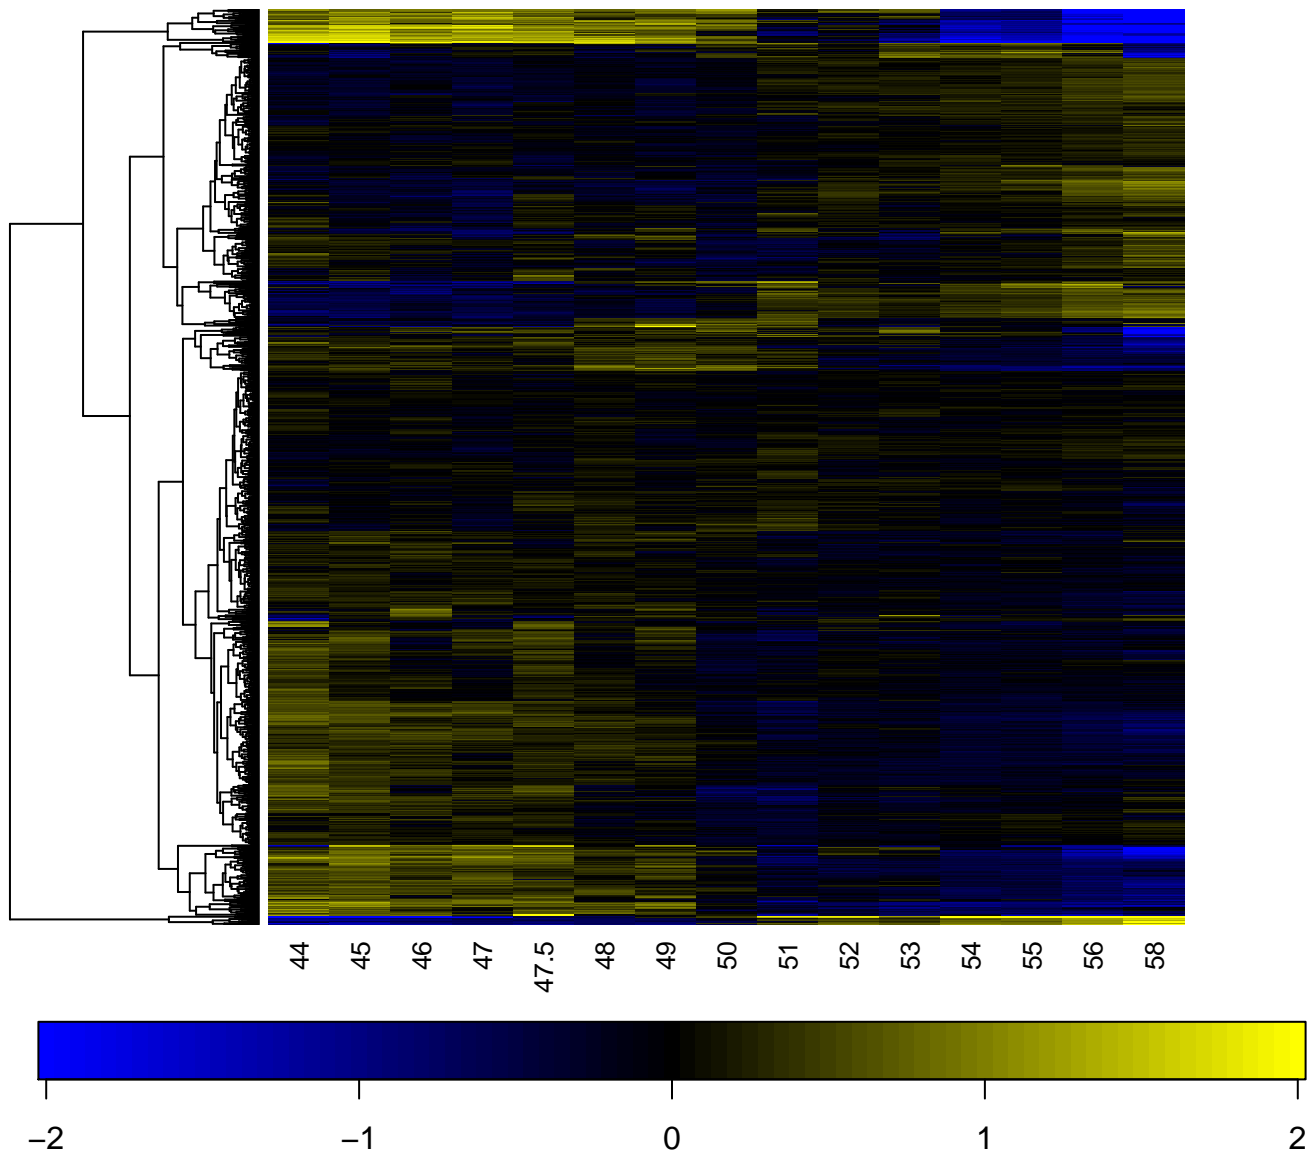



# I1R

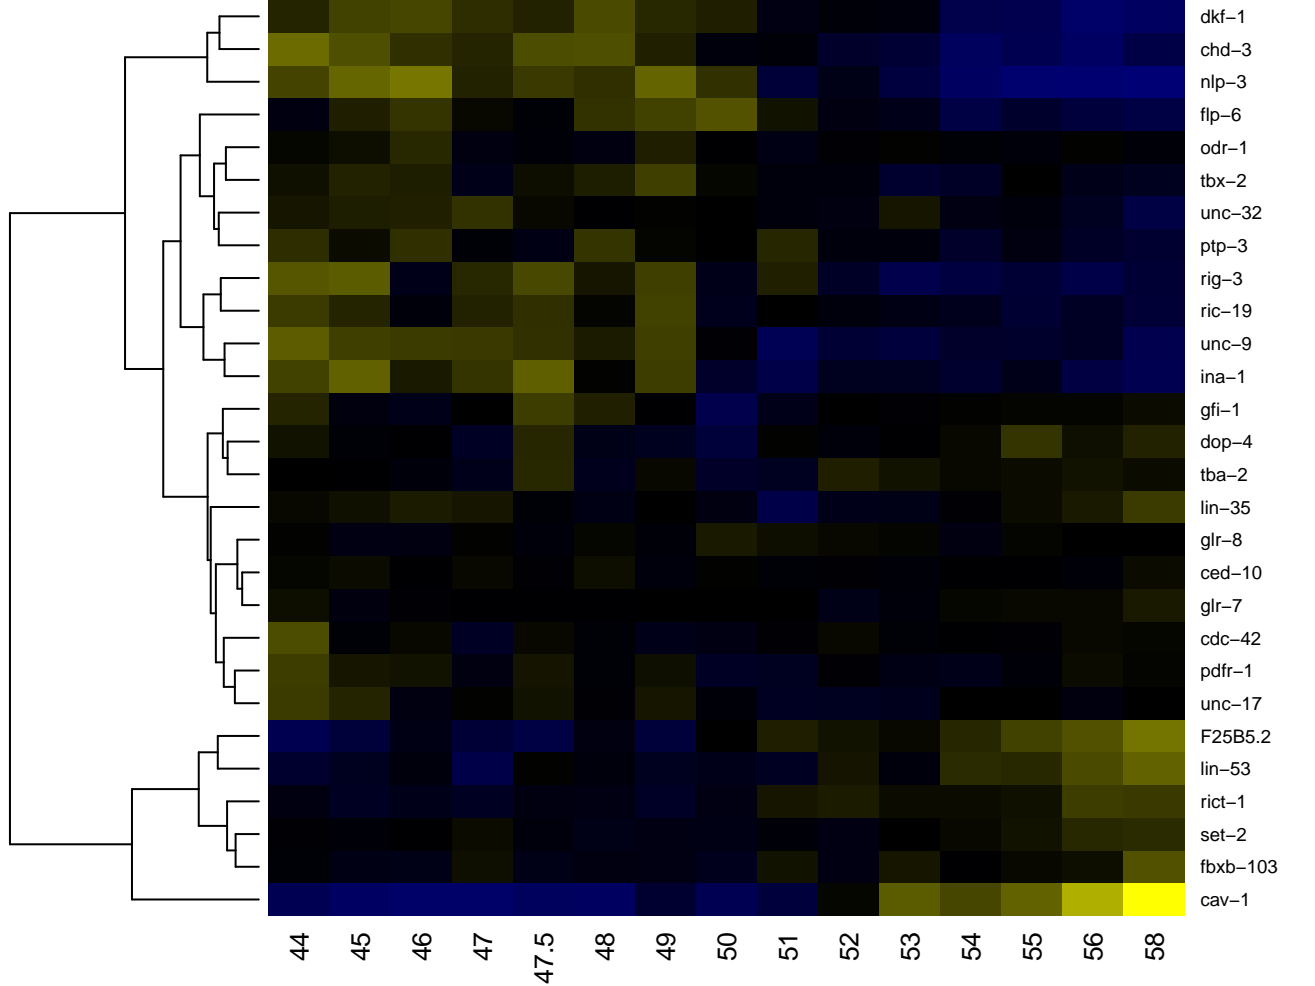



# I2R

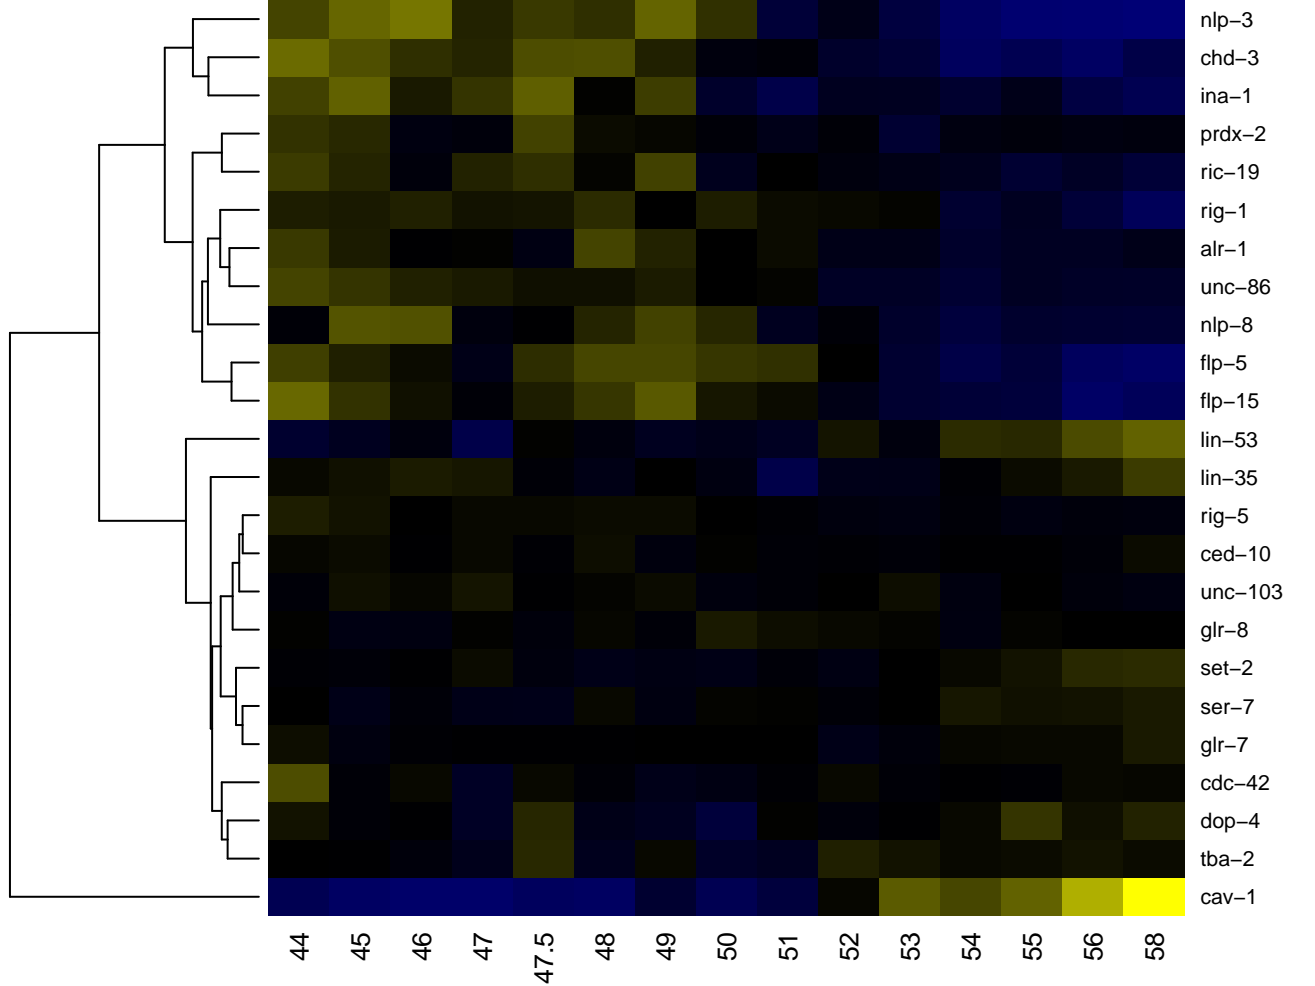

# I3

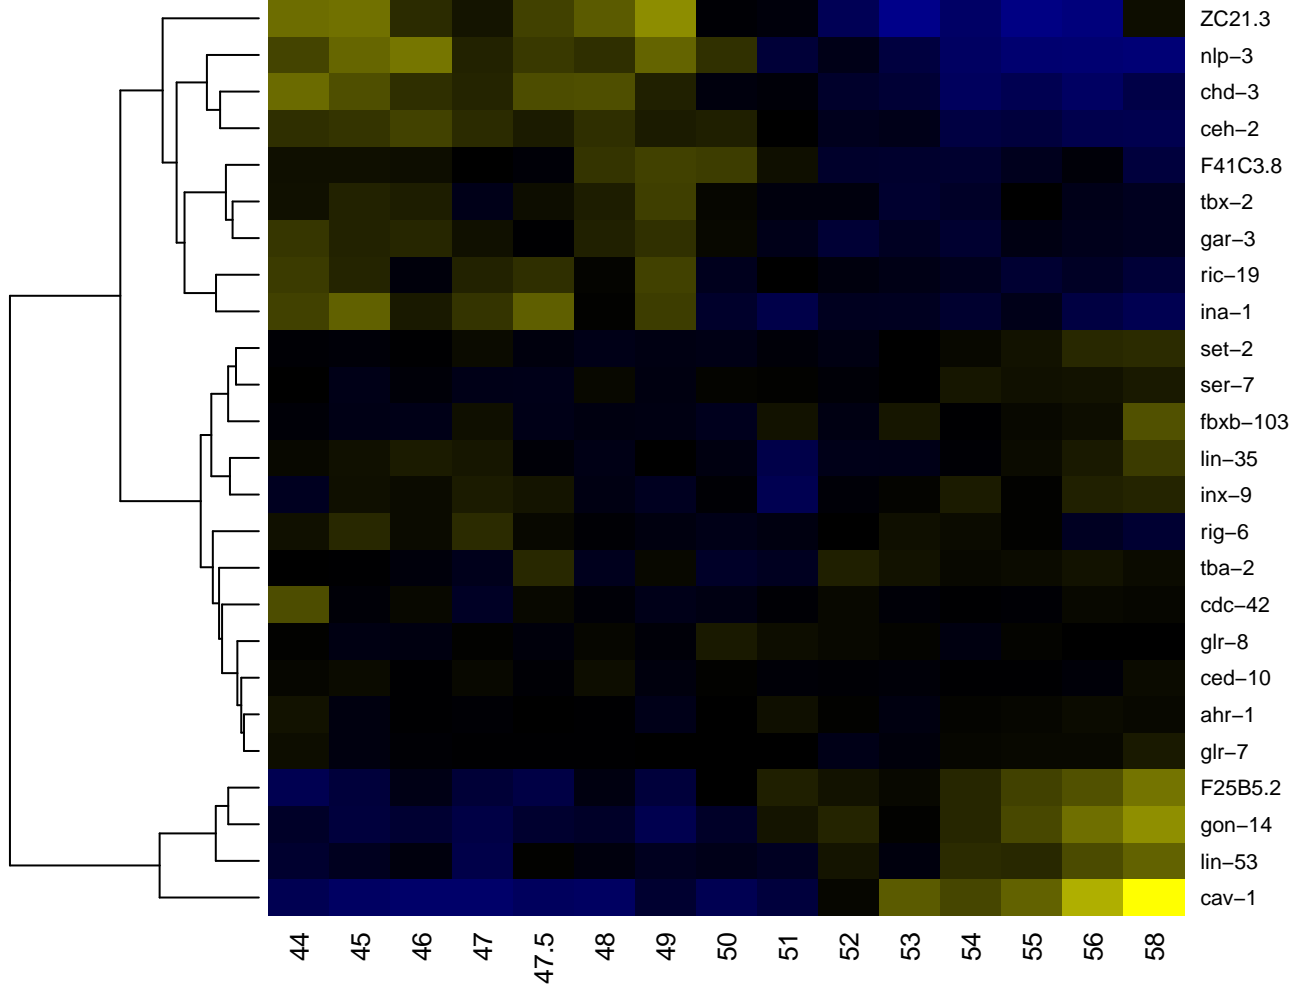



# I4

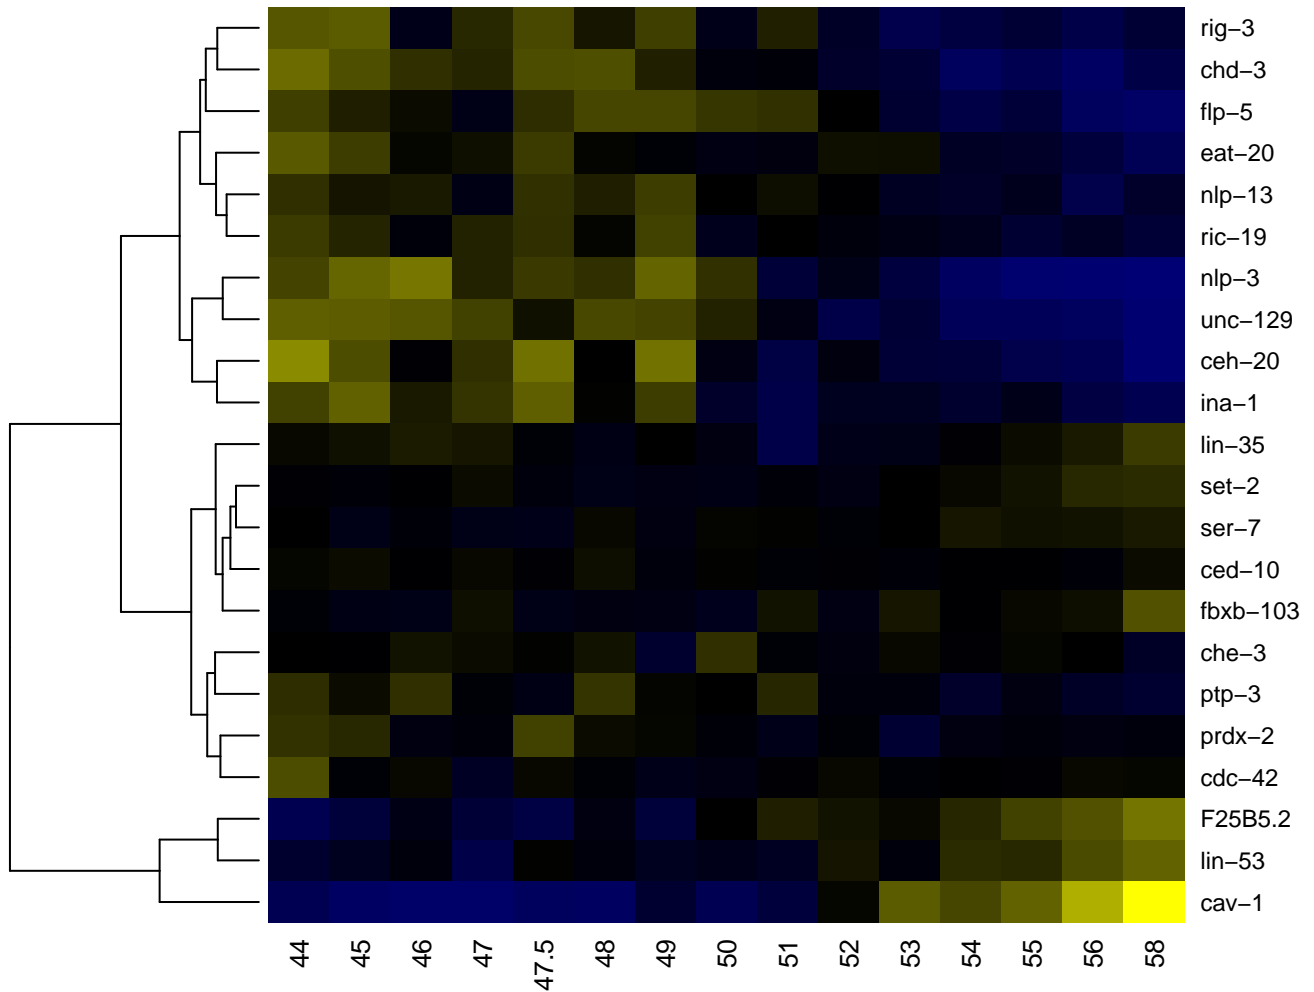

15

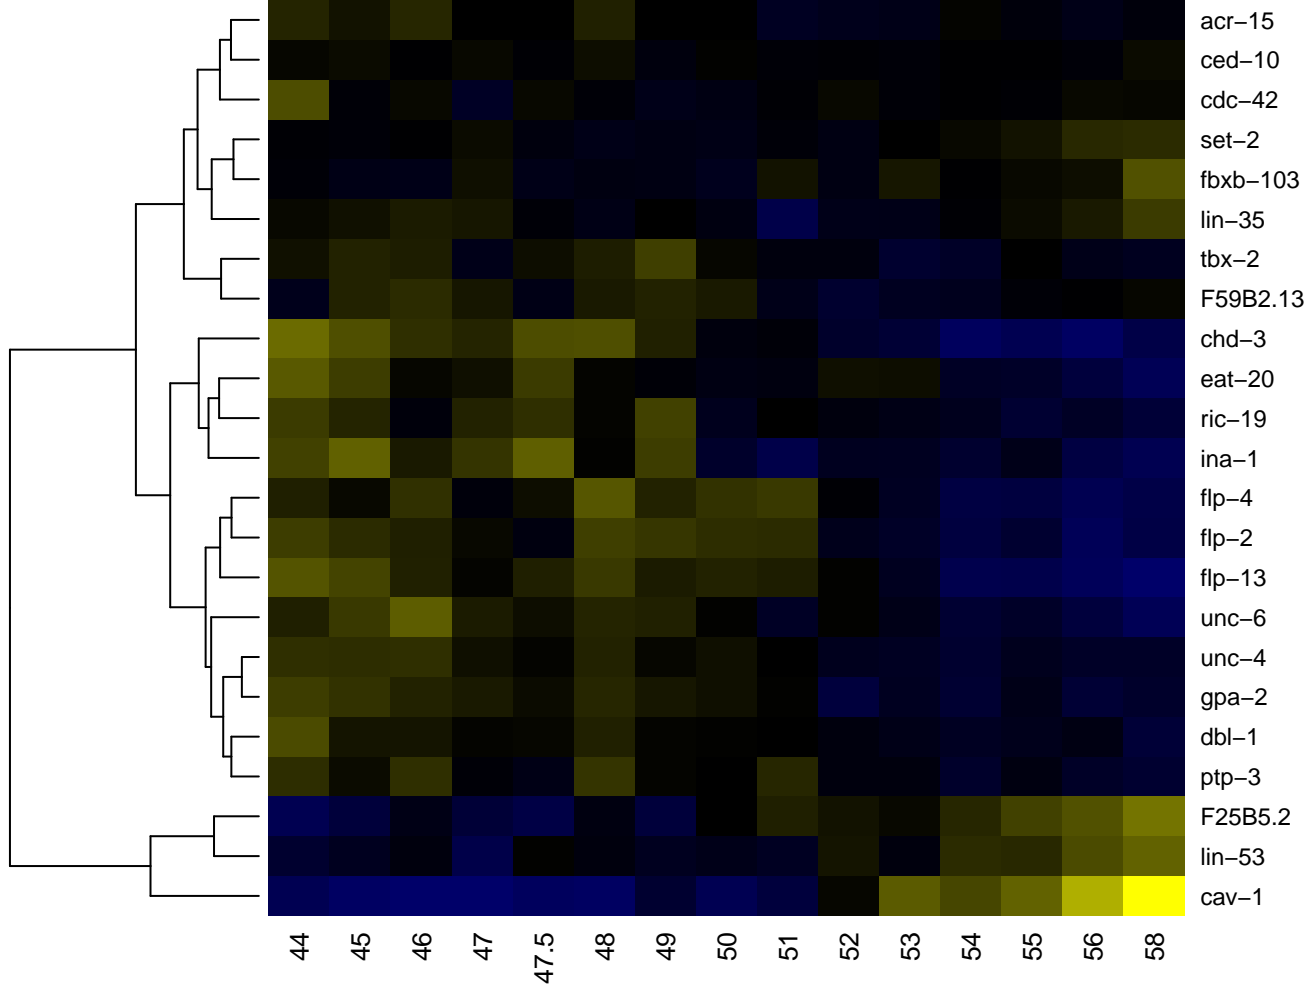

**I6**

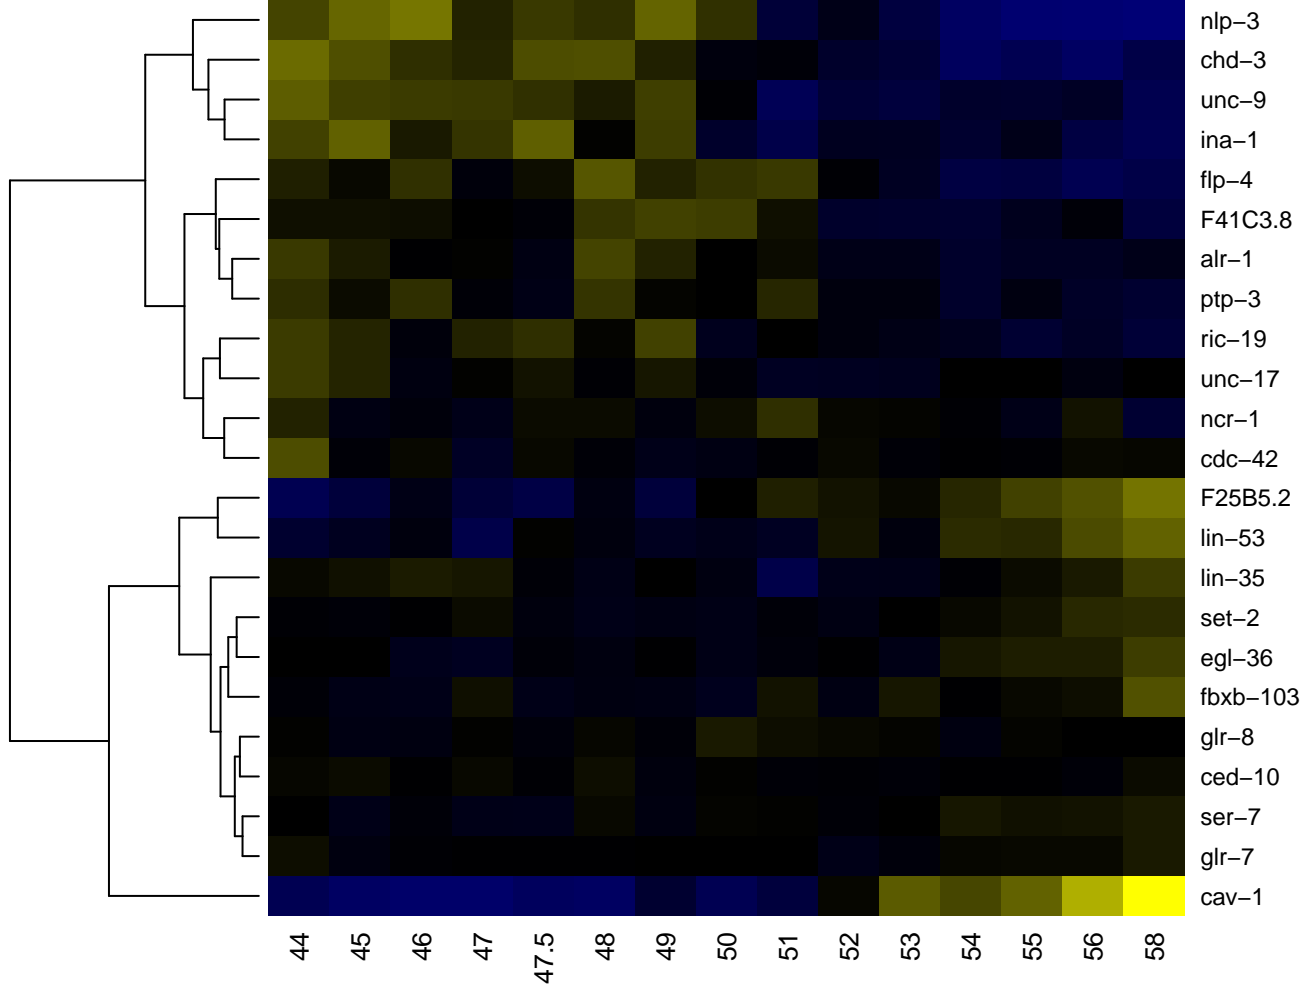

# IL1 neuron

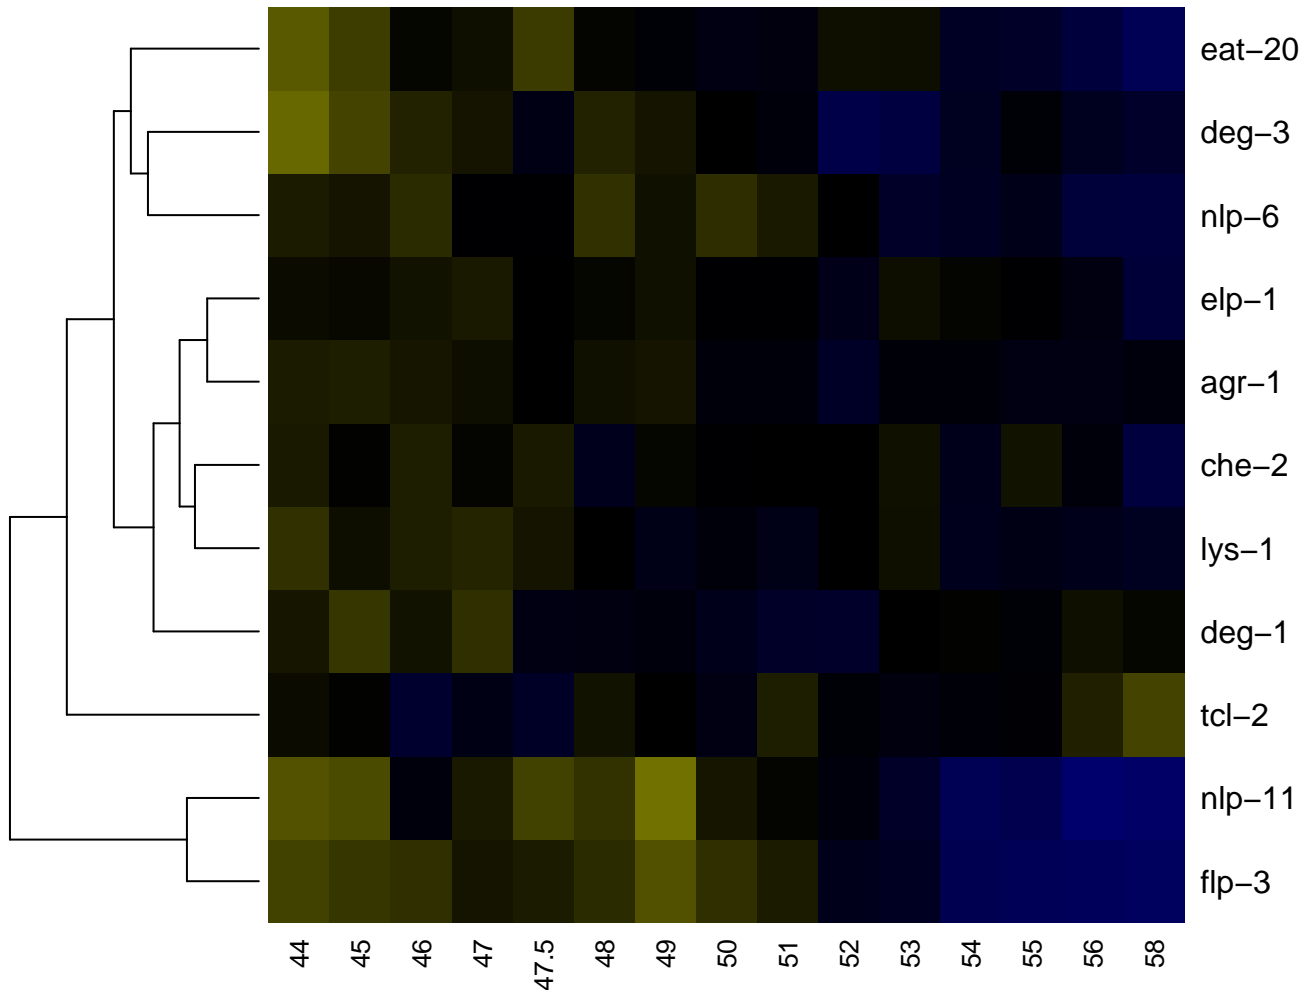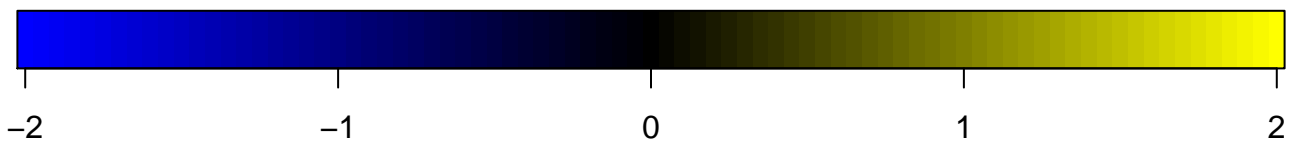

# IL1DL

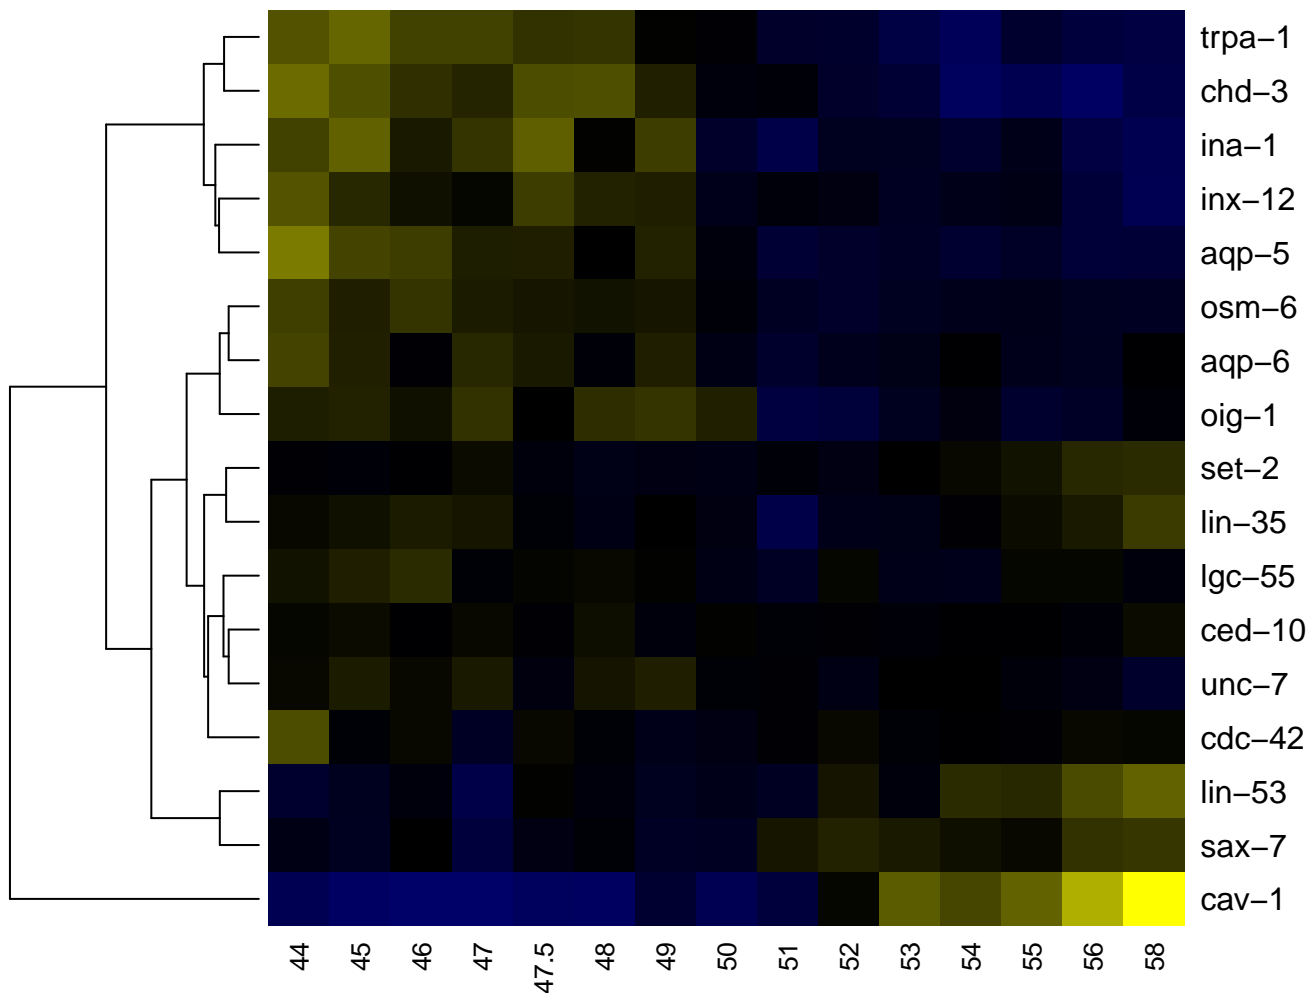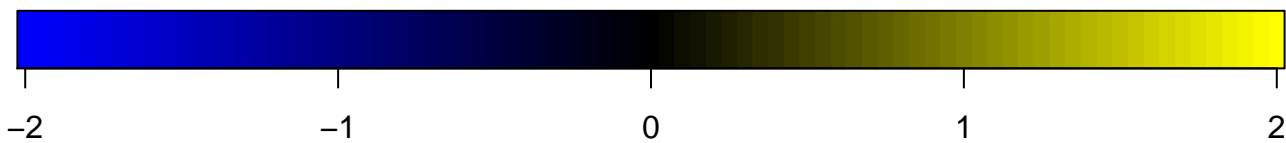

# IL1DR

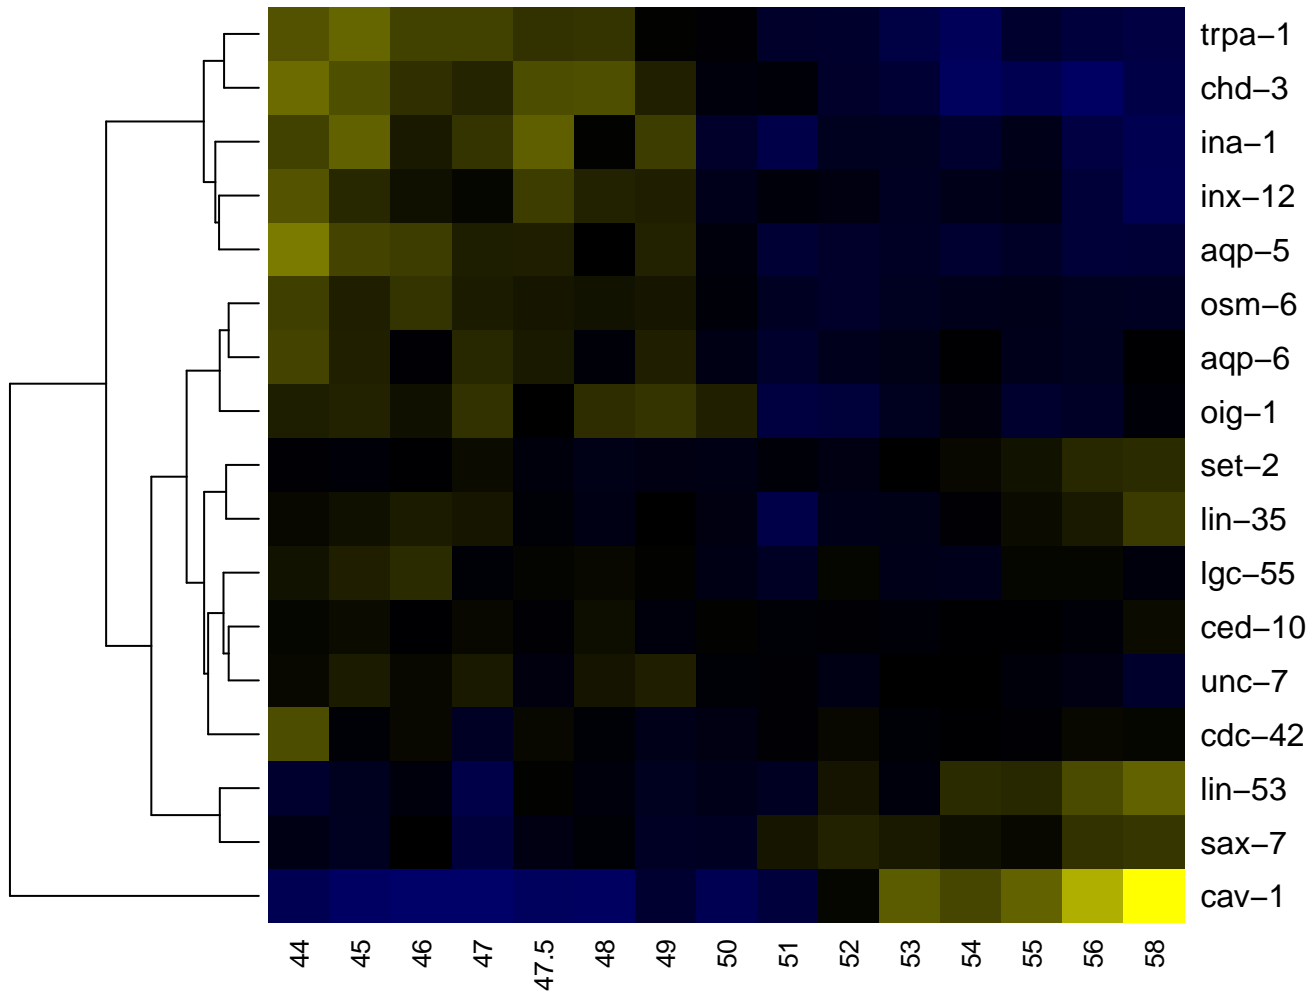

# IL1L

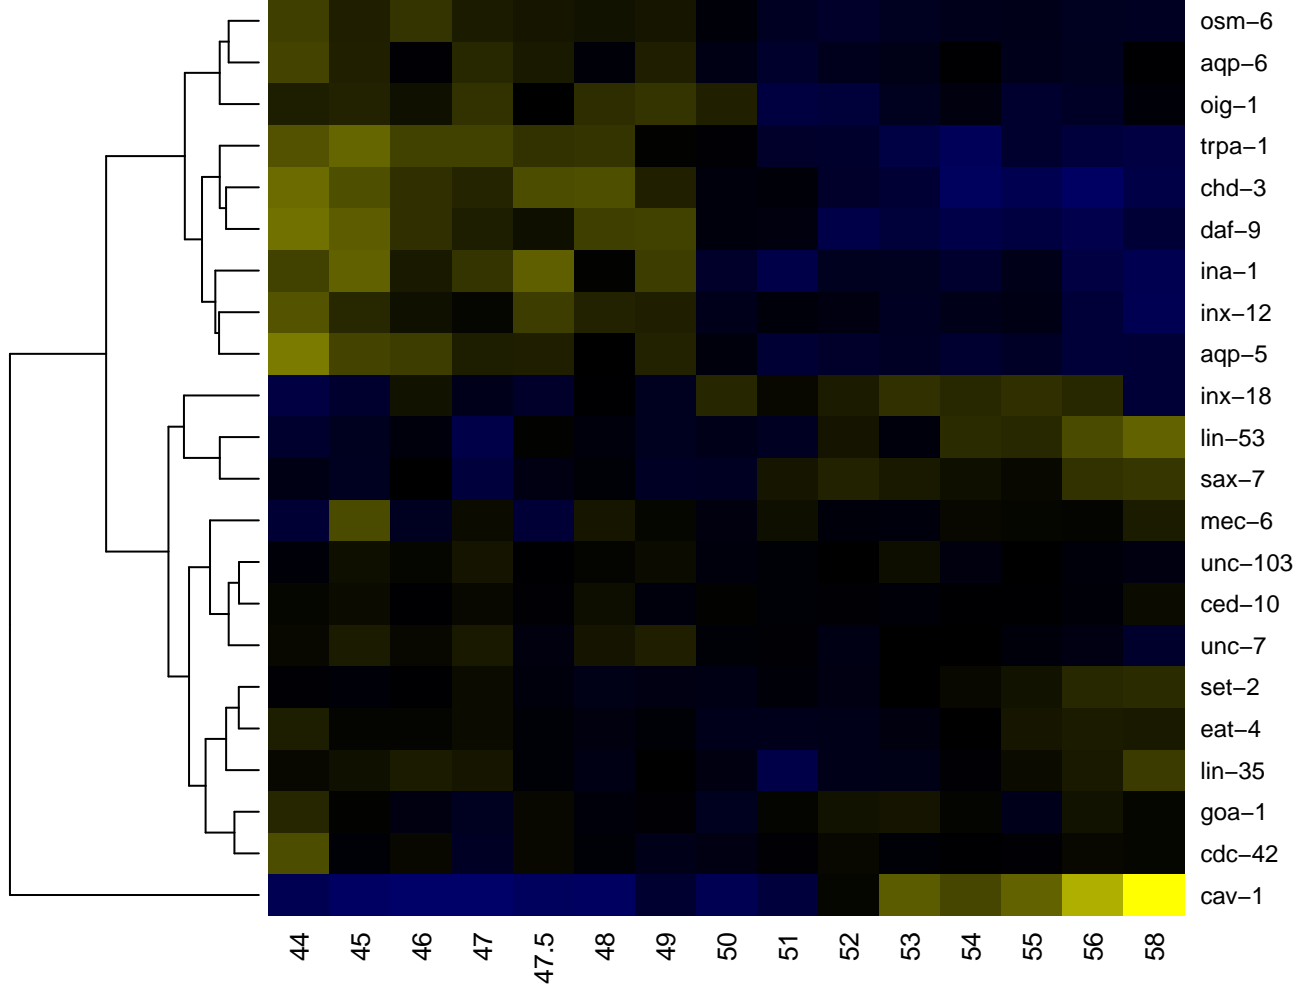

# IL1R

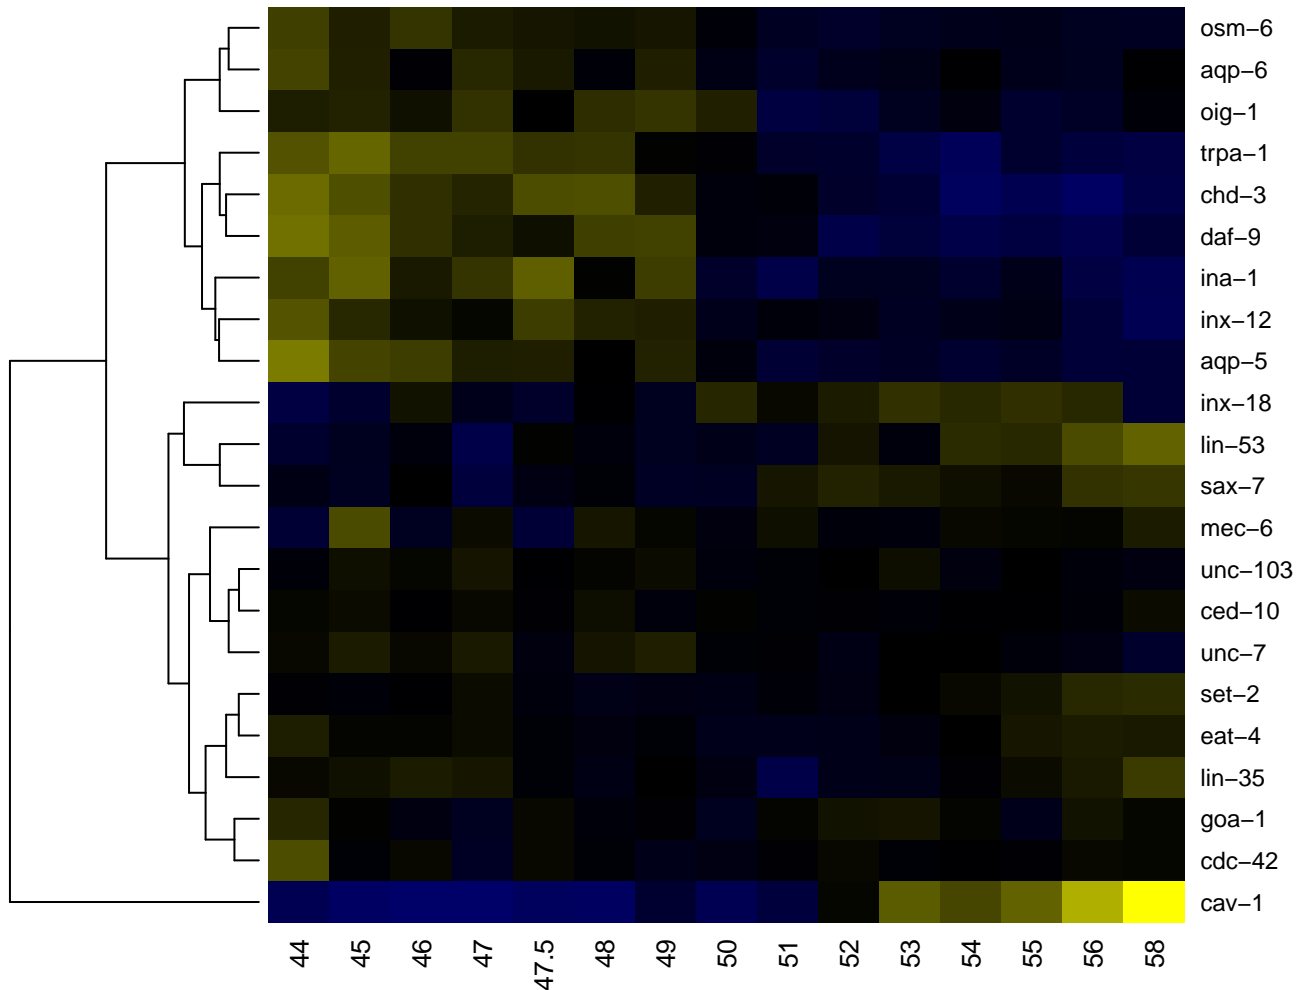

-2

-1

0

1

2



# IL1VL

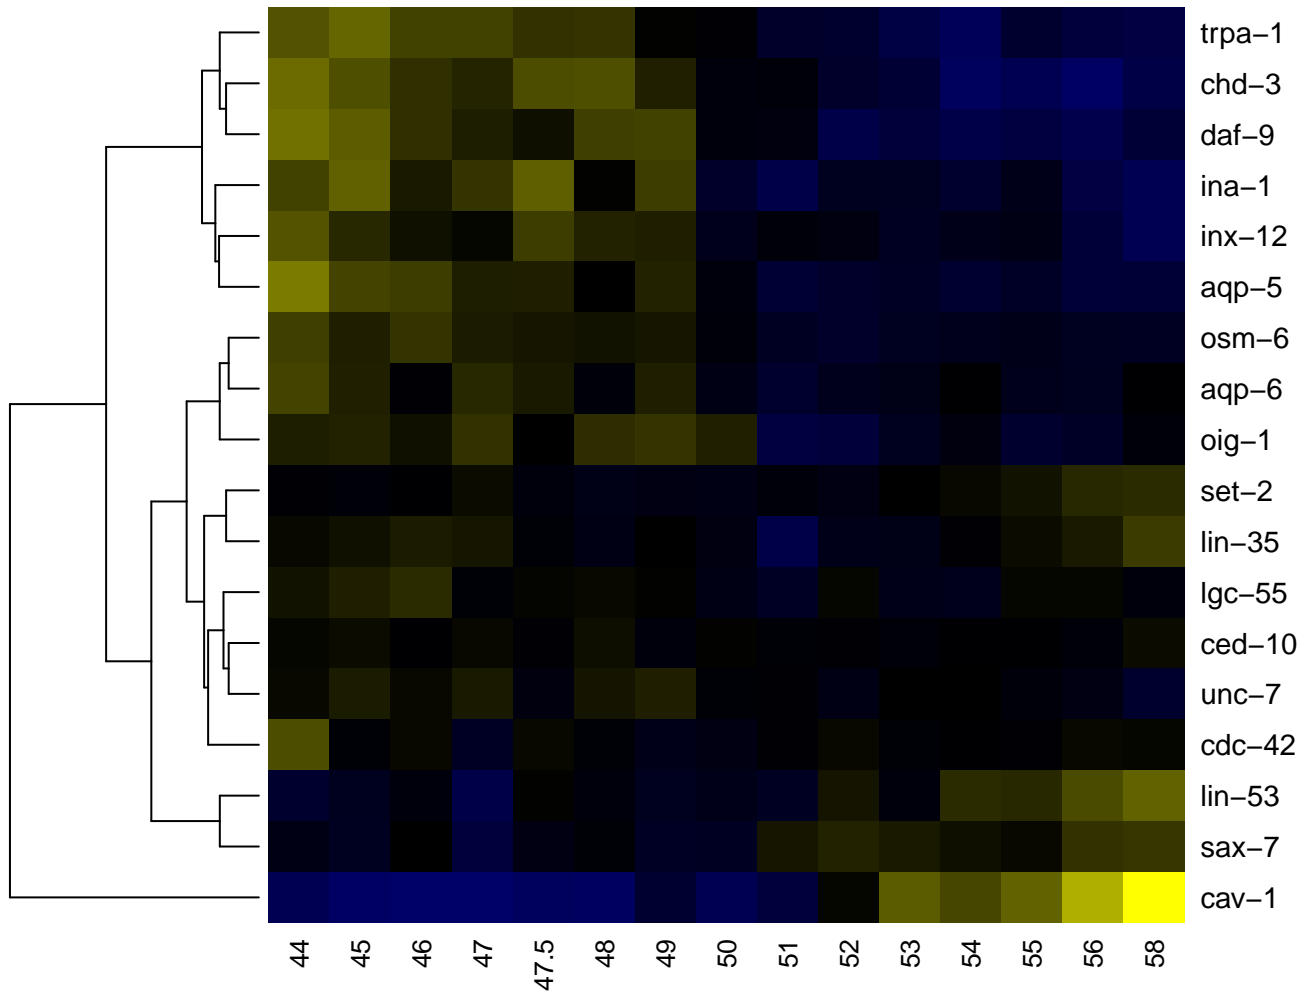

# IL1VR



# IL2 neuron

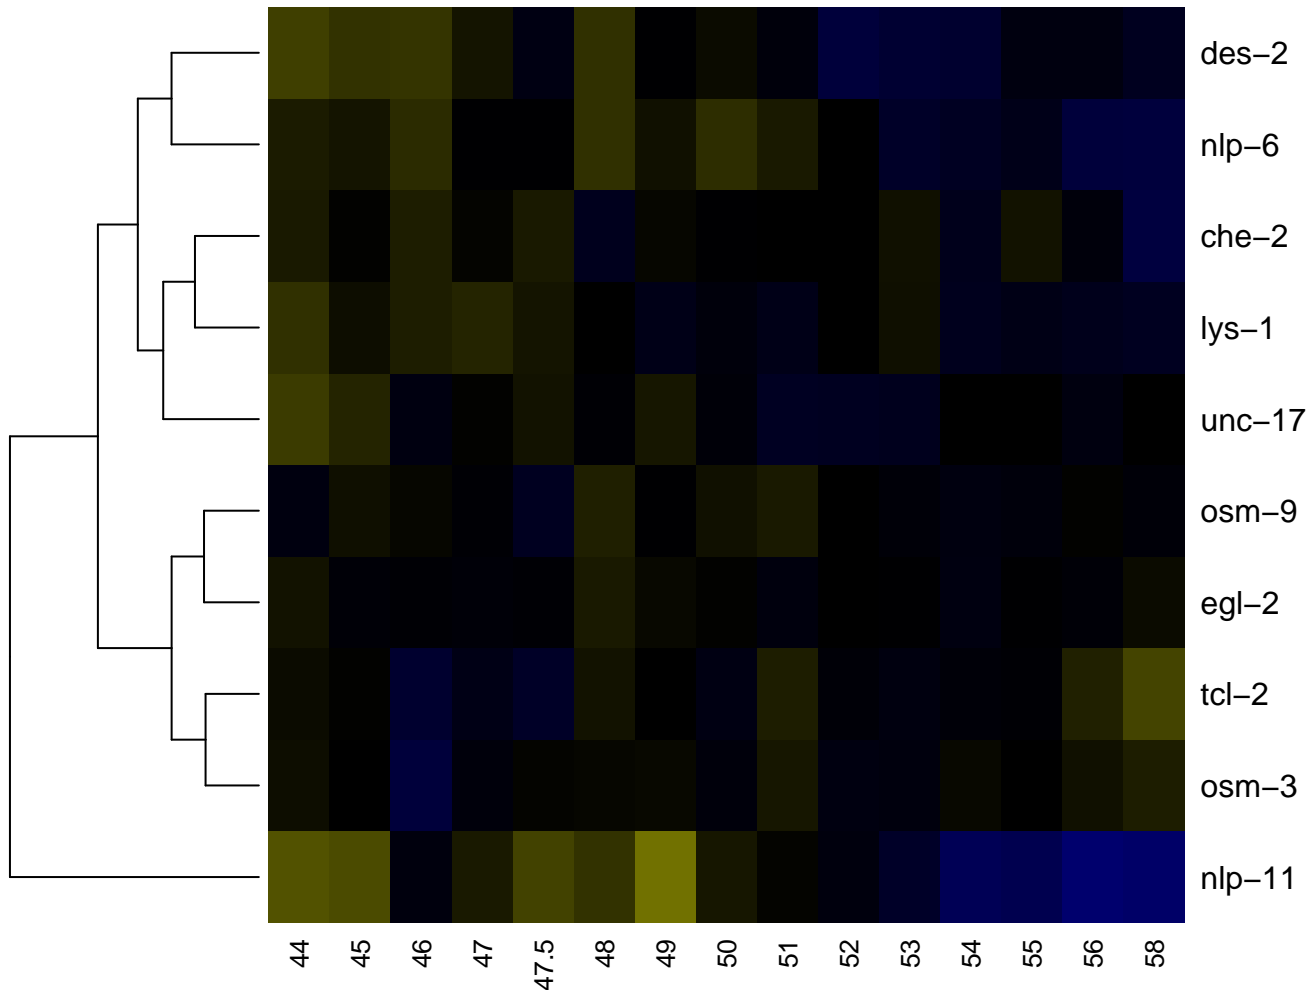

# IL2DL

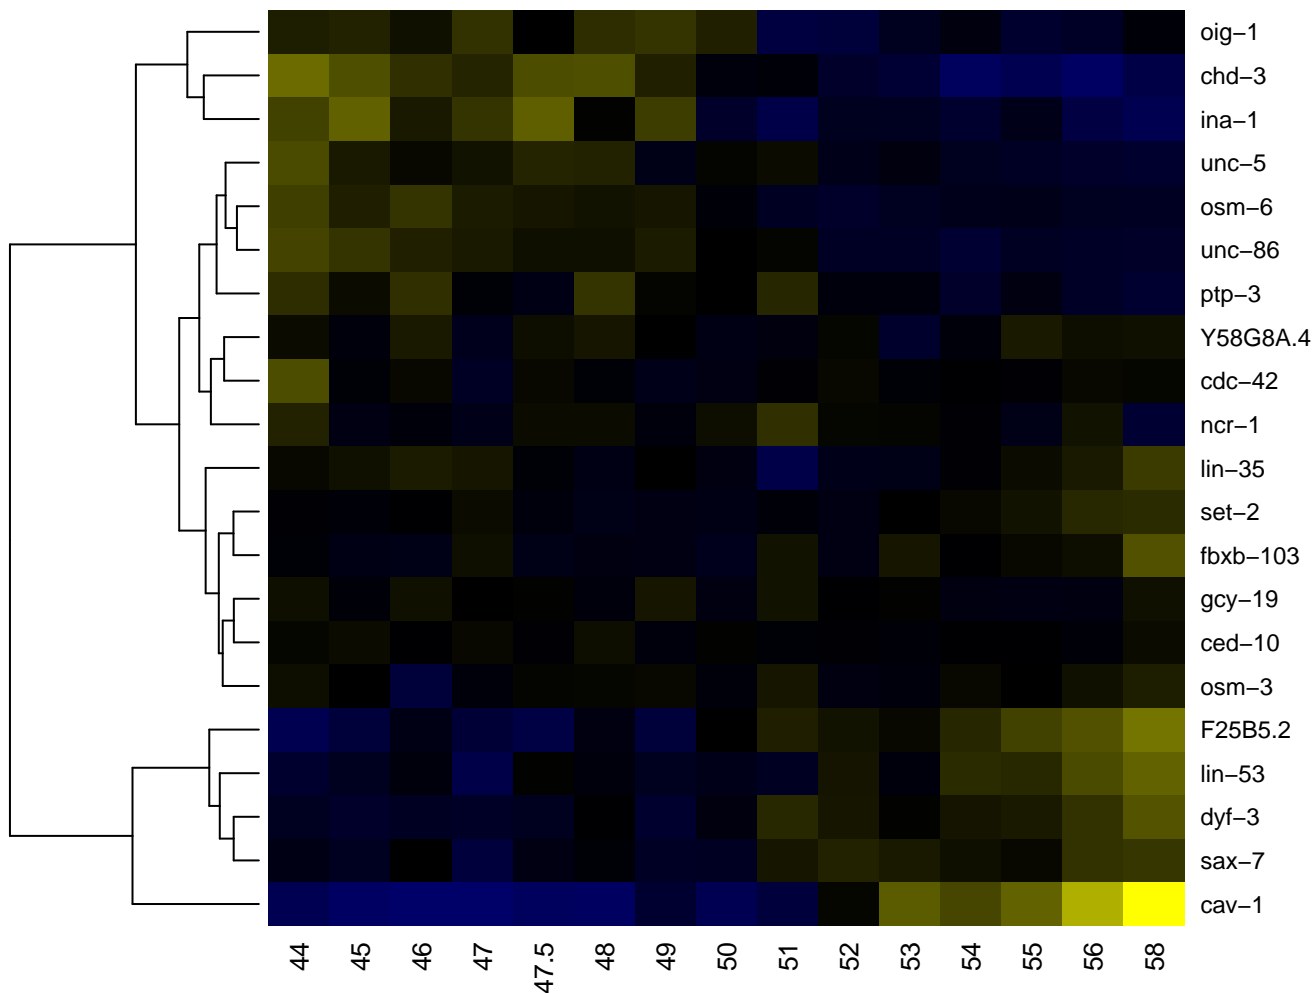

# IL2DR

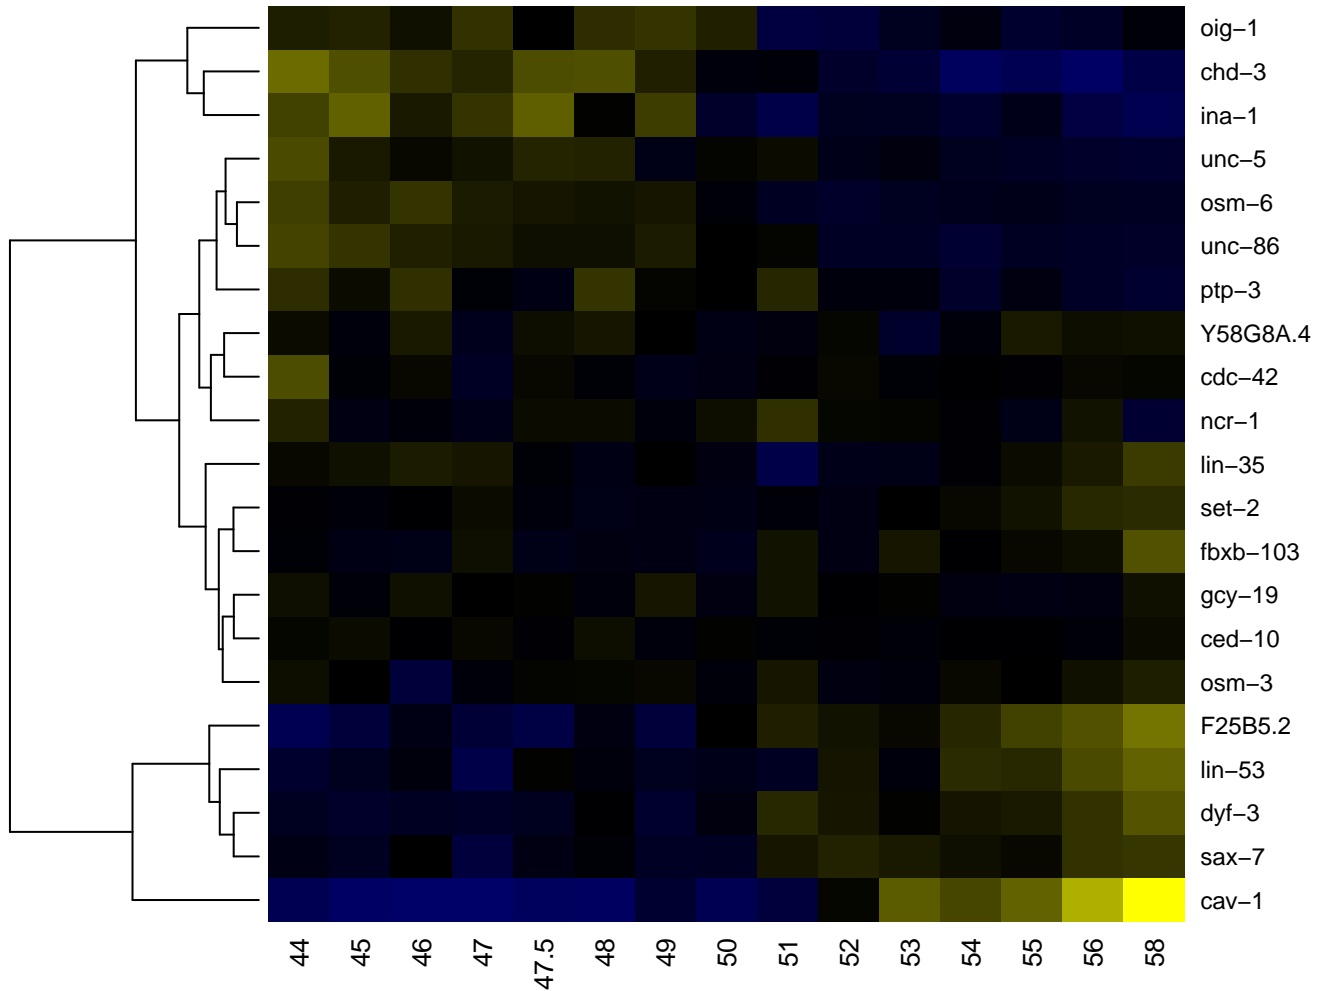

# IL2L

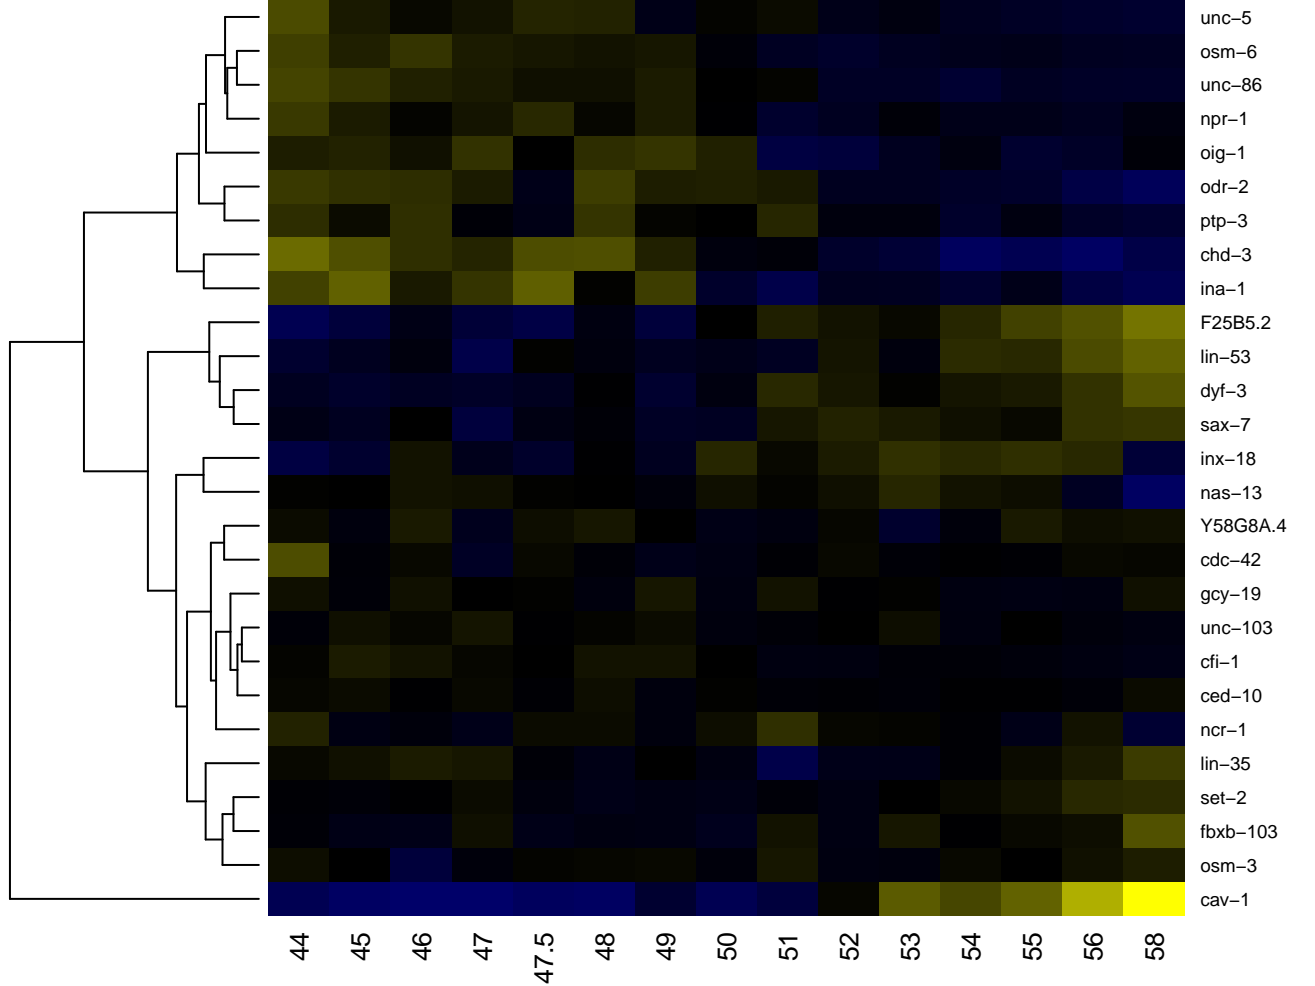

# IL2R

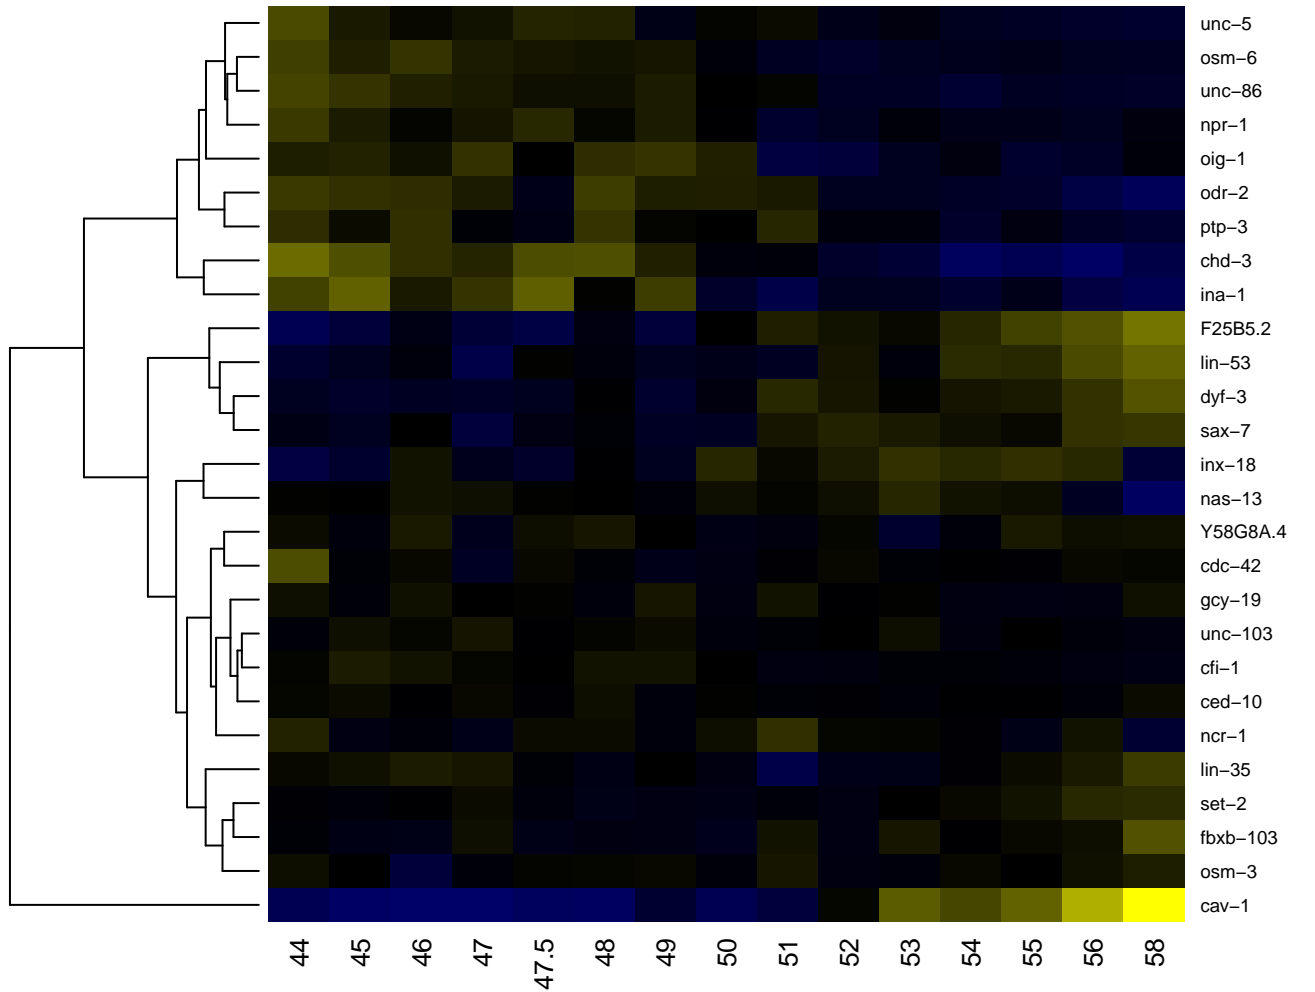

# IL2VL

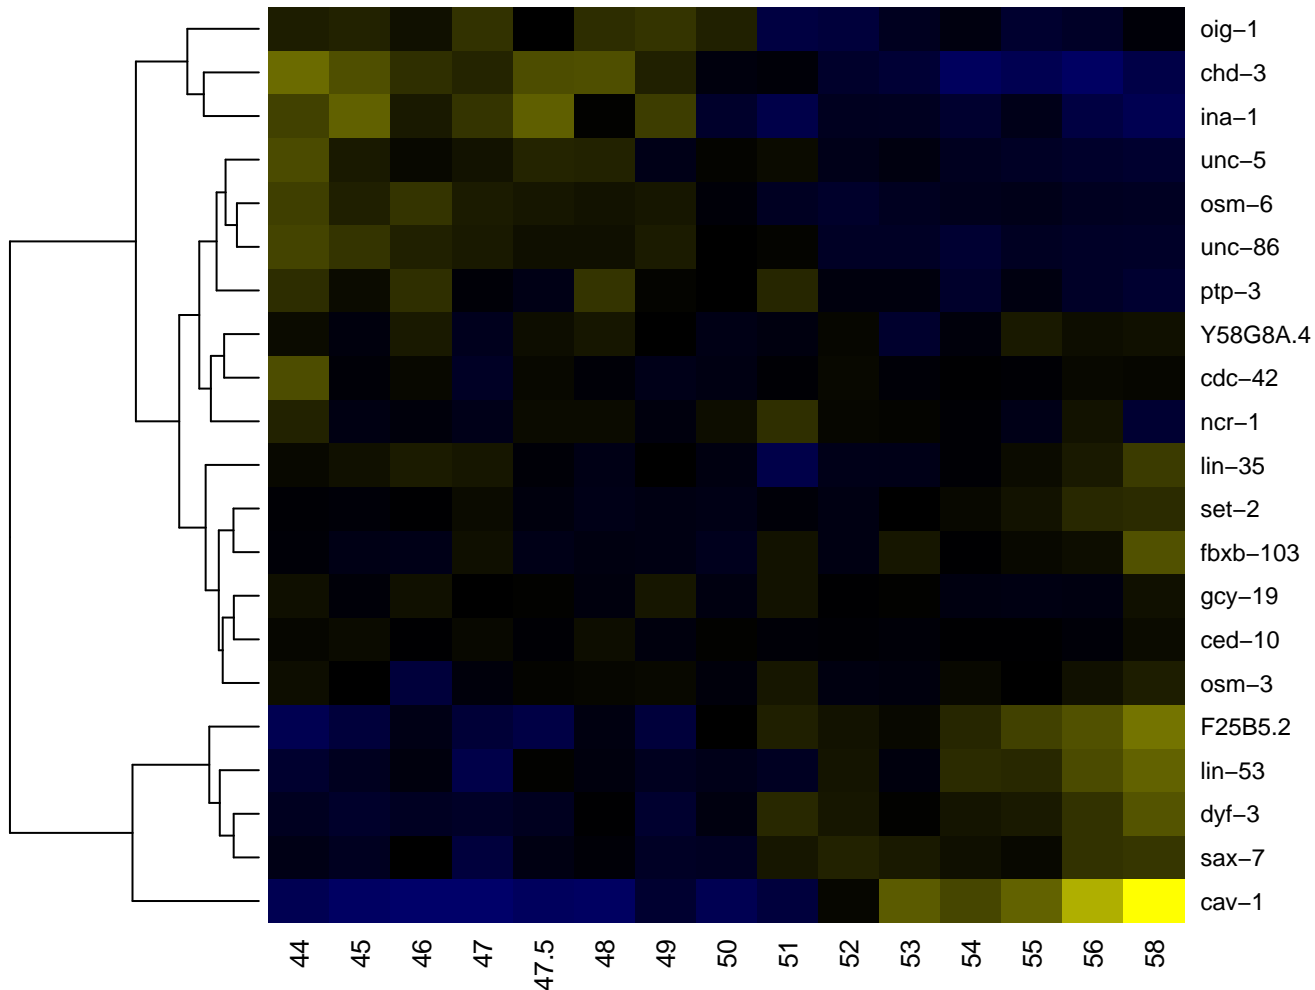



# IL2VR



# ILshDL

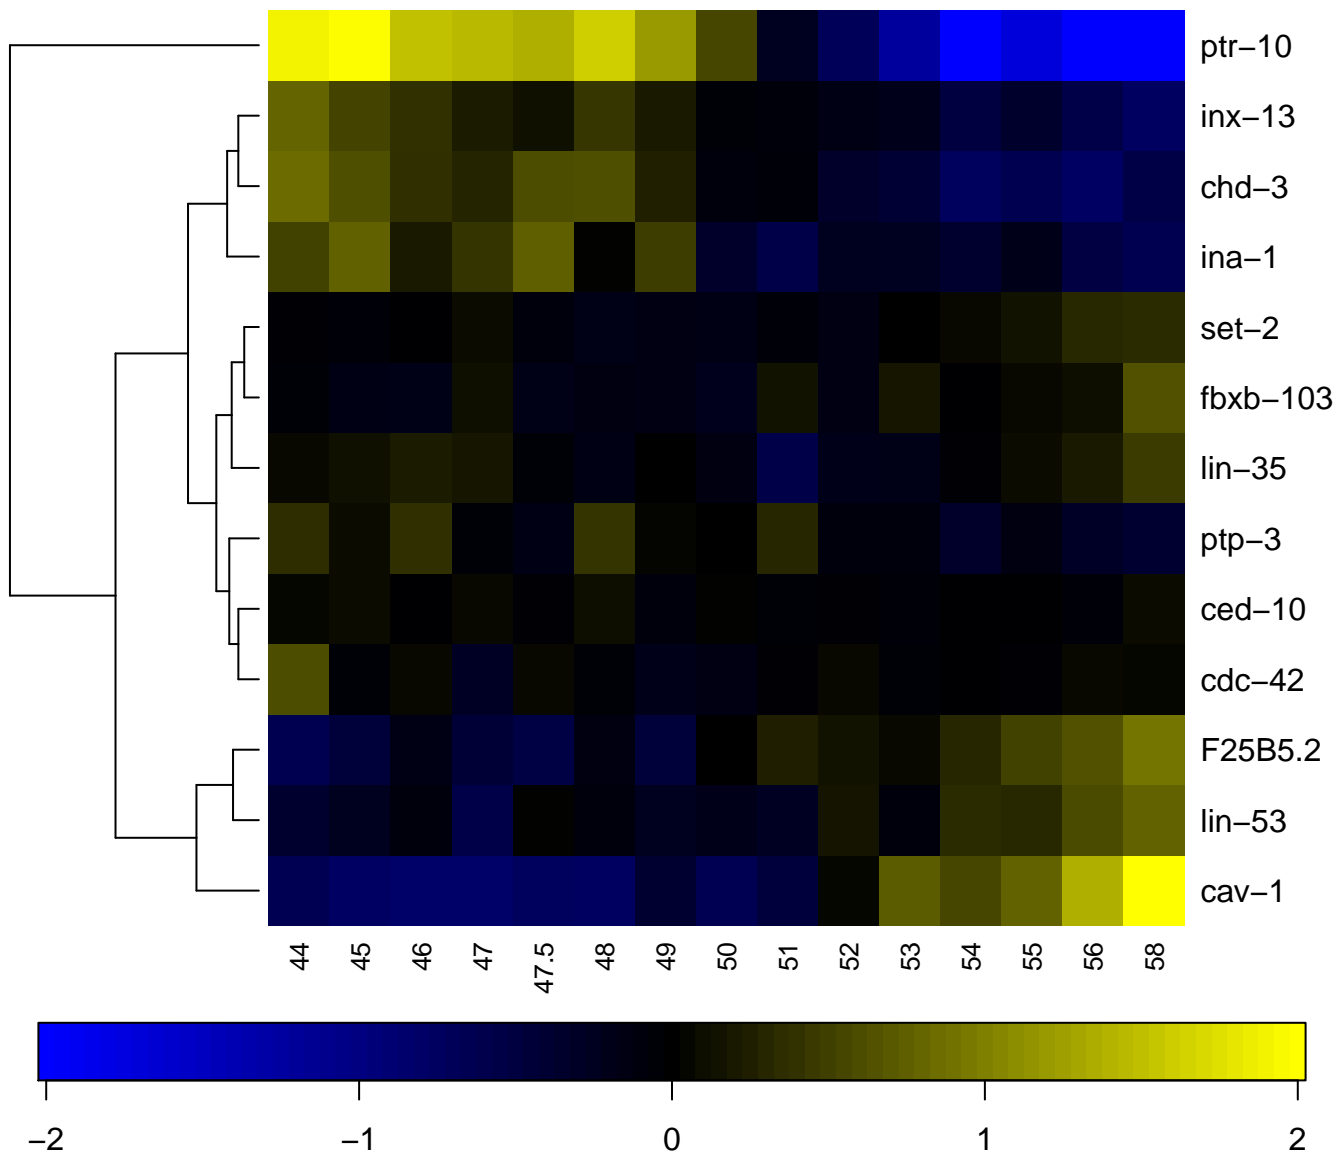



# ILshL

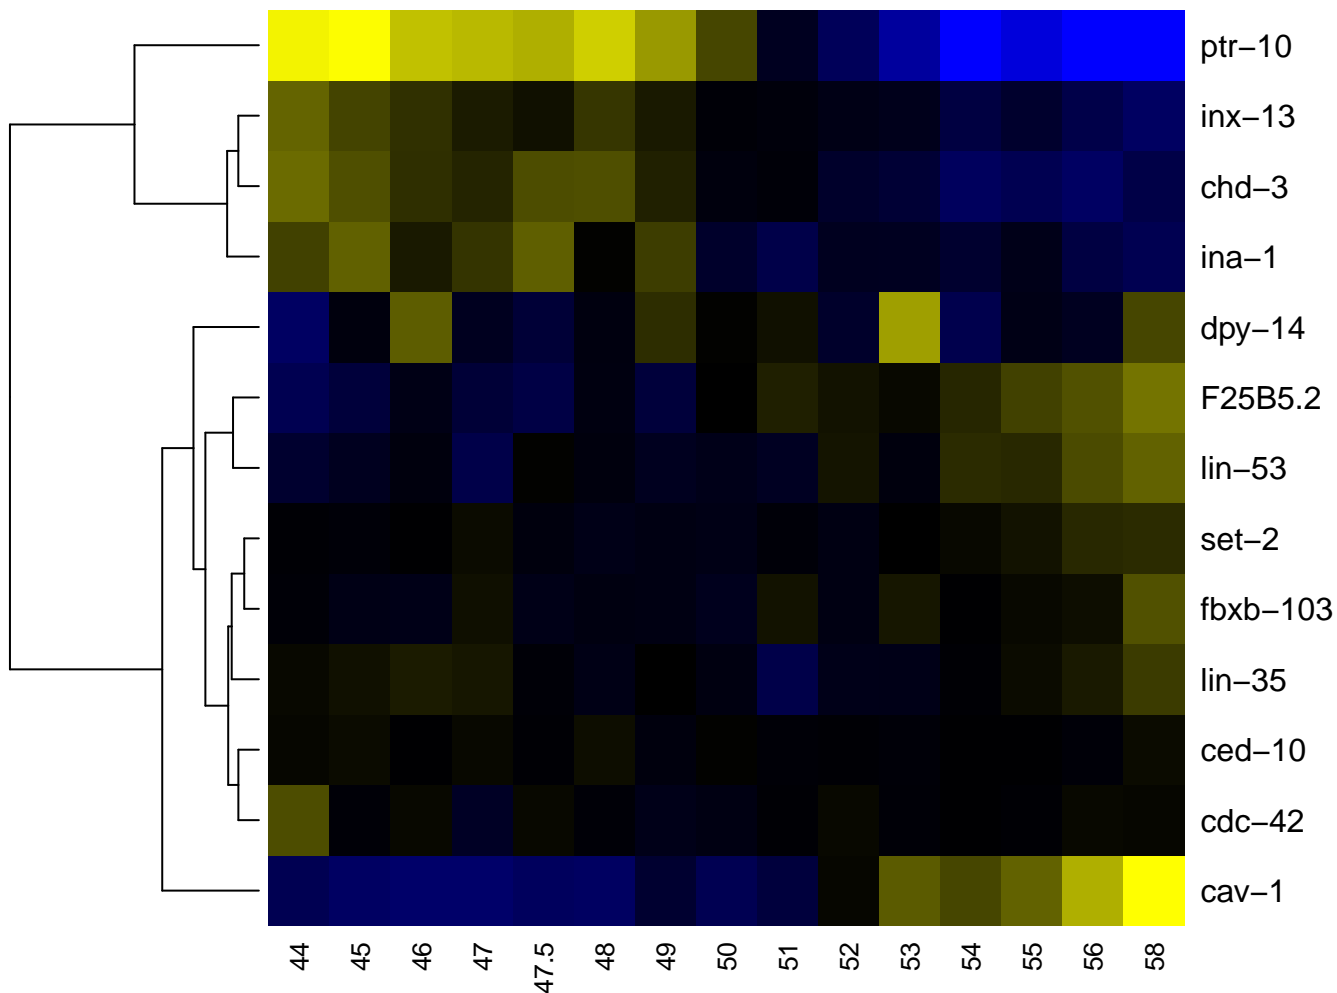

# ILshR

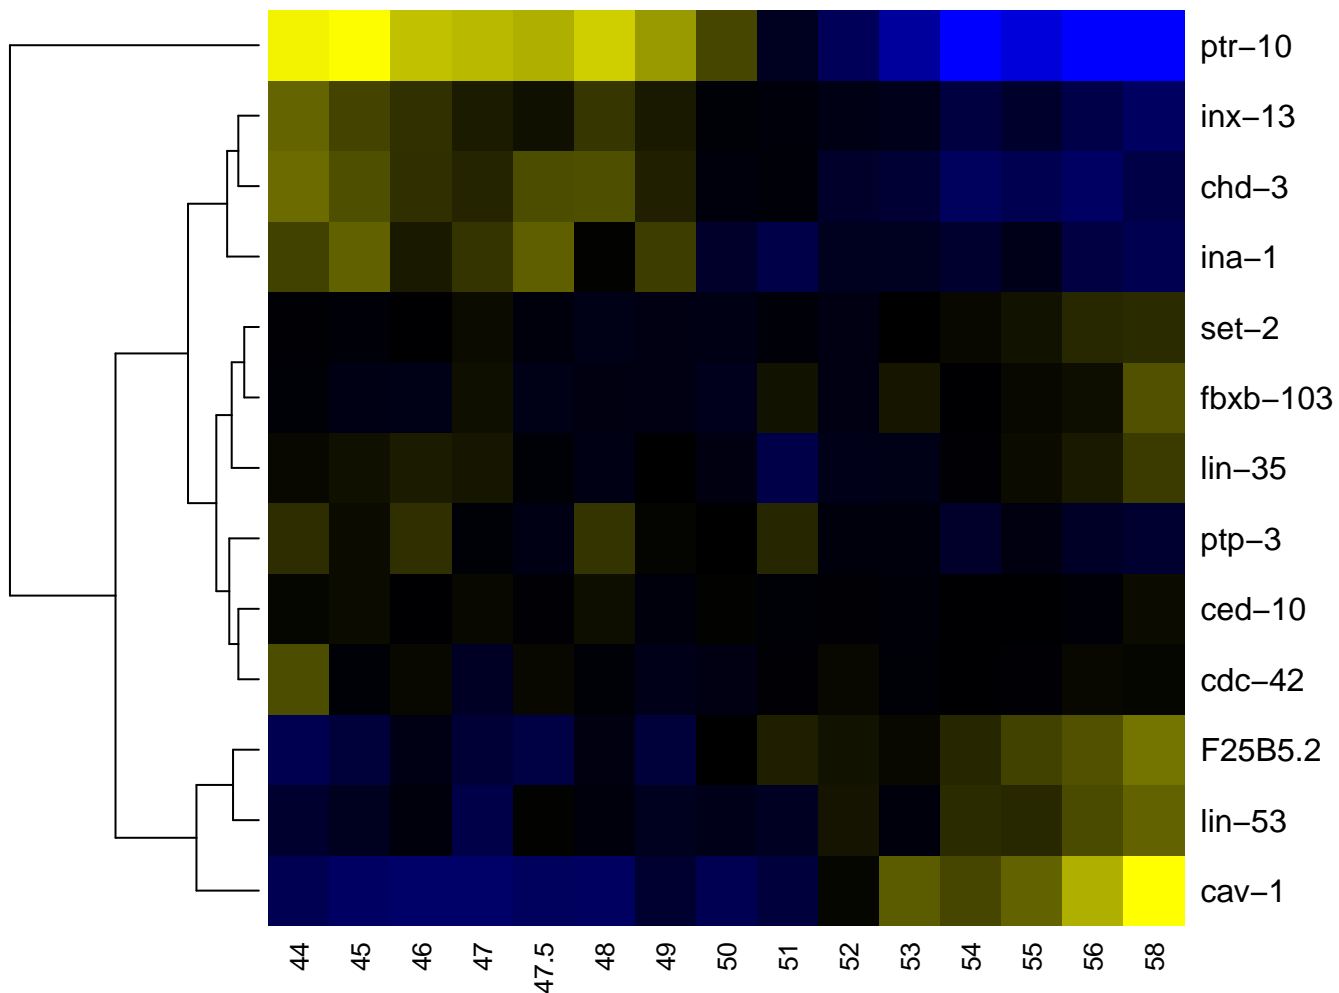



# ILshVR

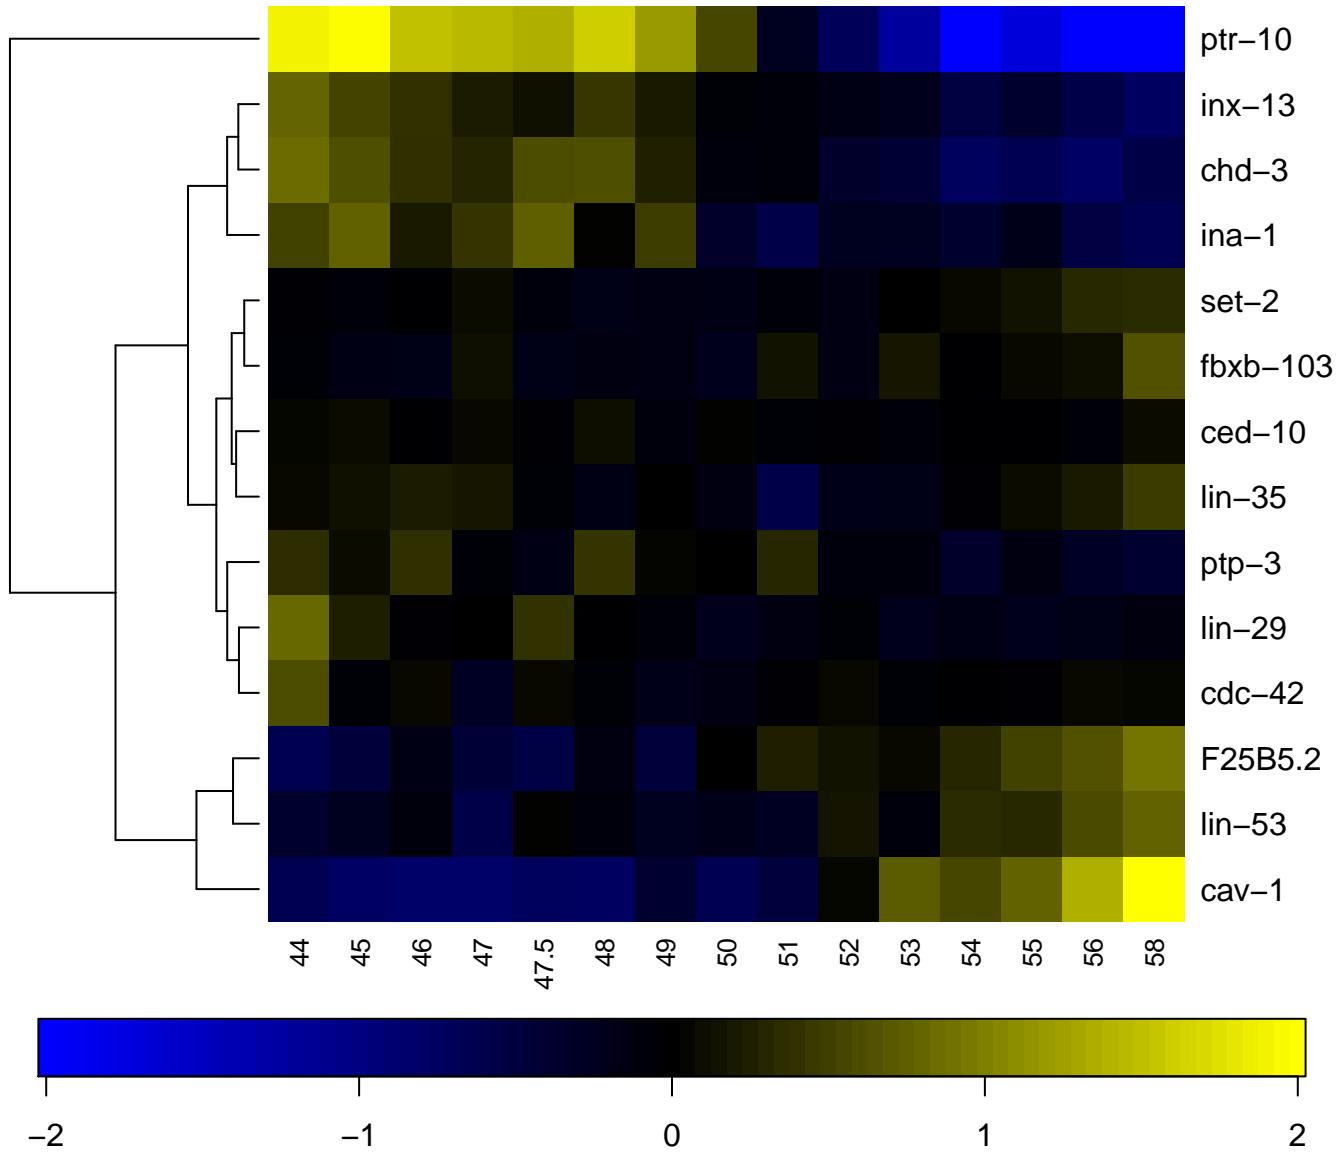

# ILsoDL

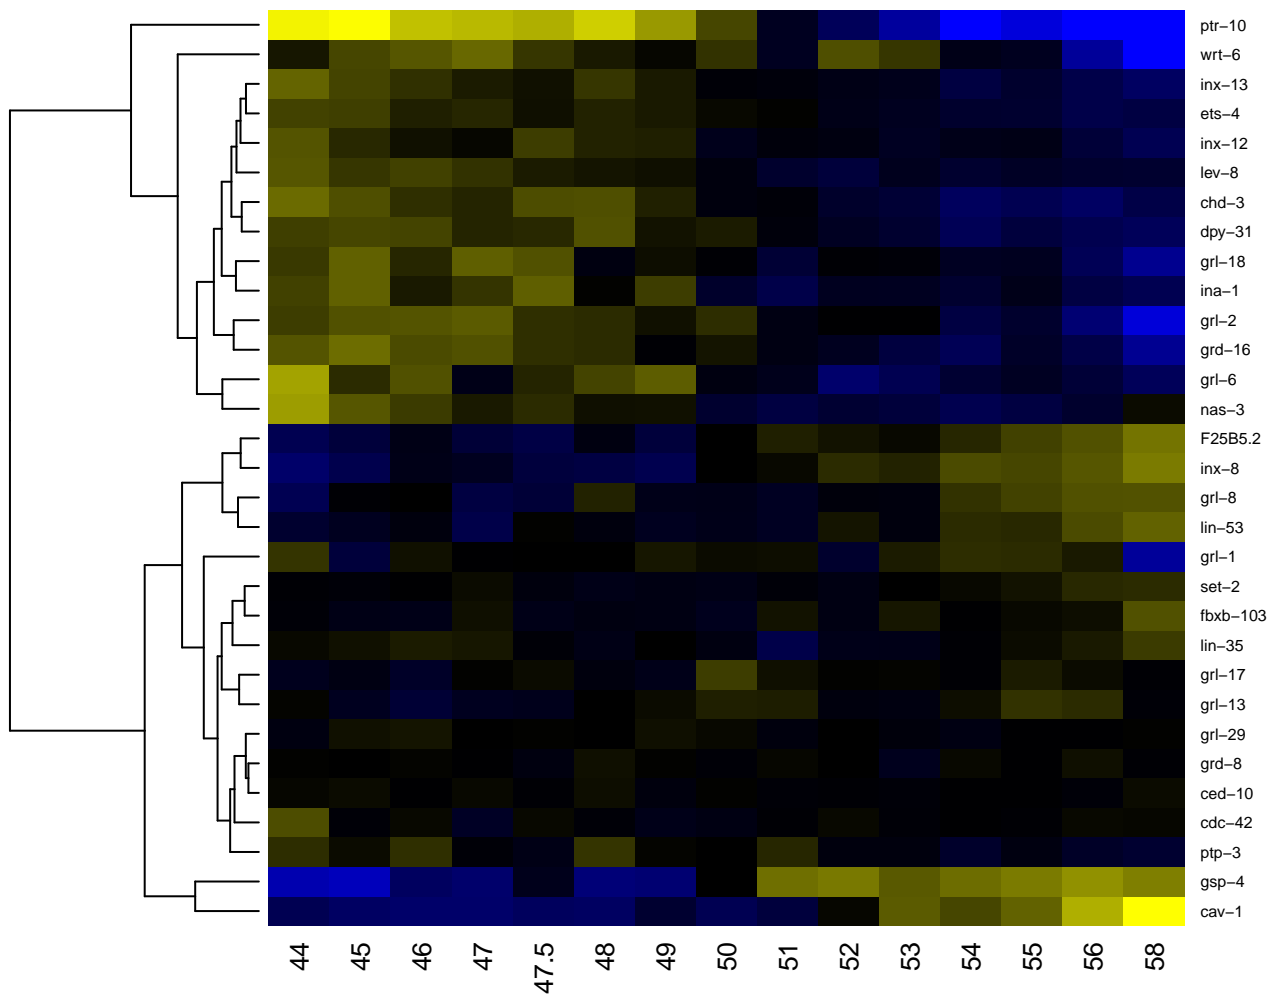

-2

-1

0

1

2



# ILsoDR

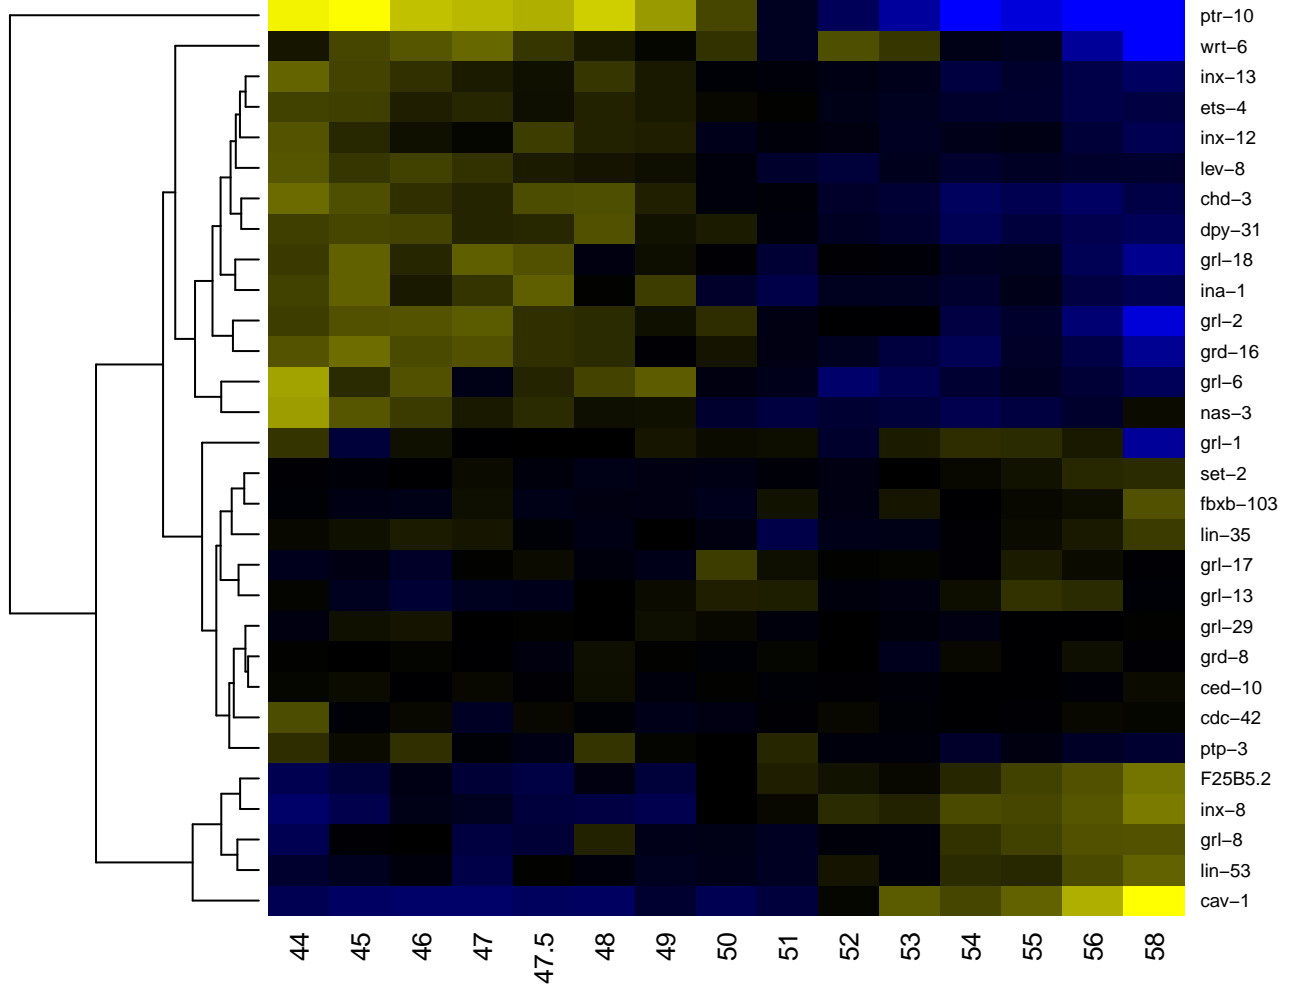

# ILsOL

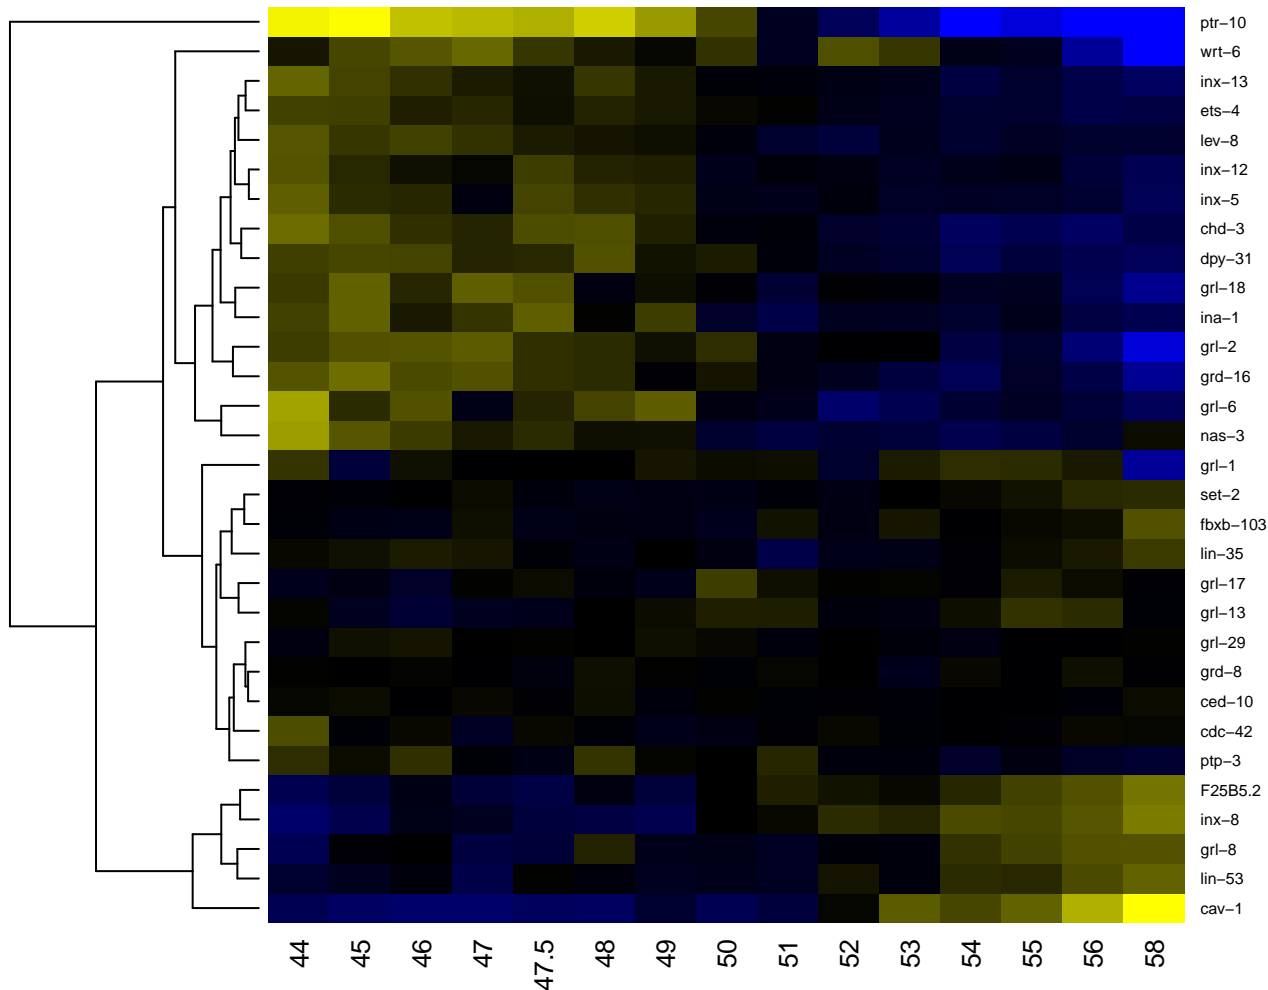

-2

-1

0

1

2

# ILsoR

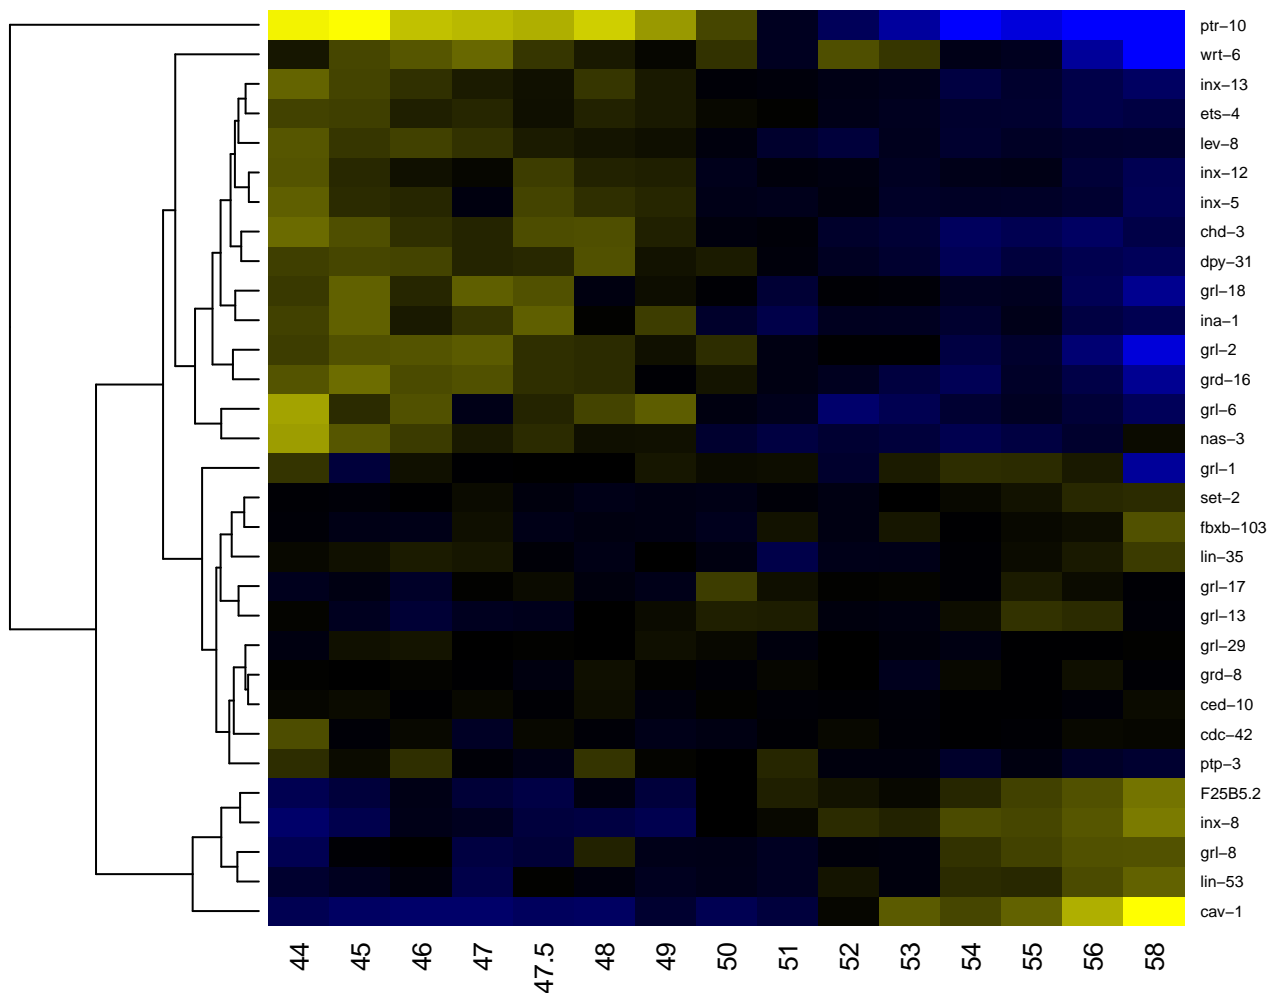

# ILsoVL

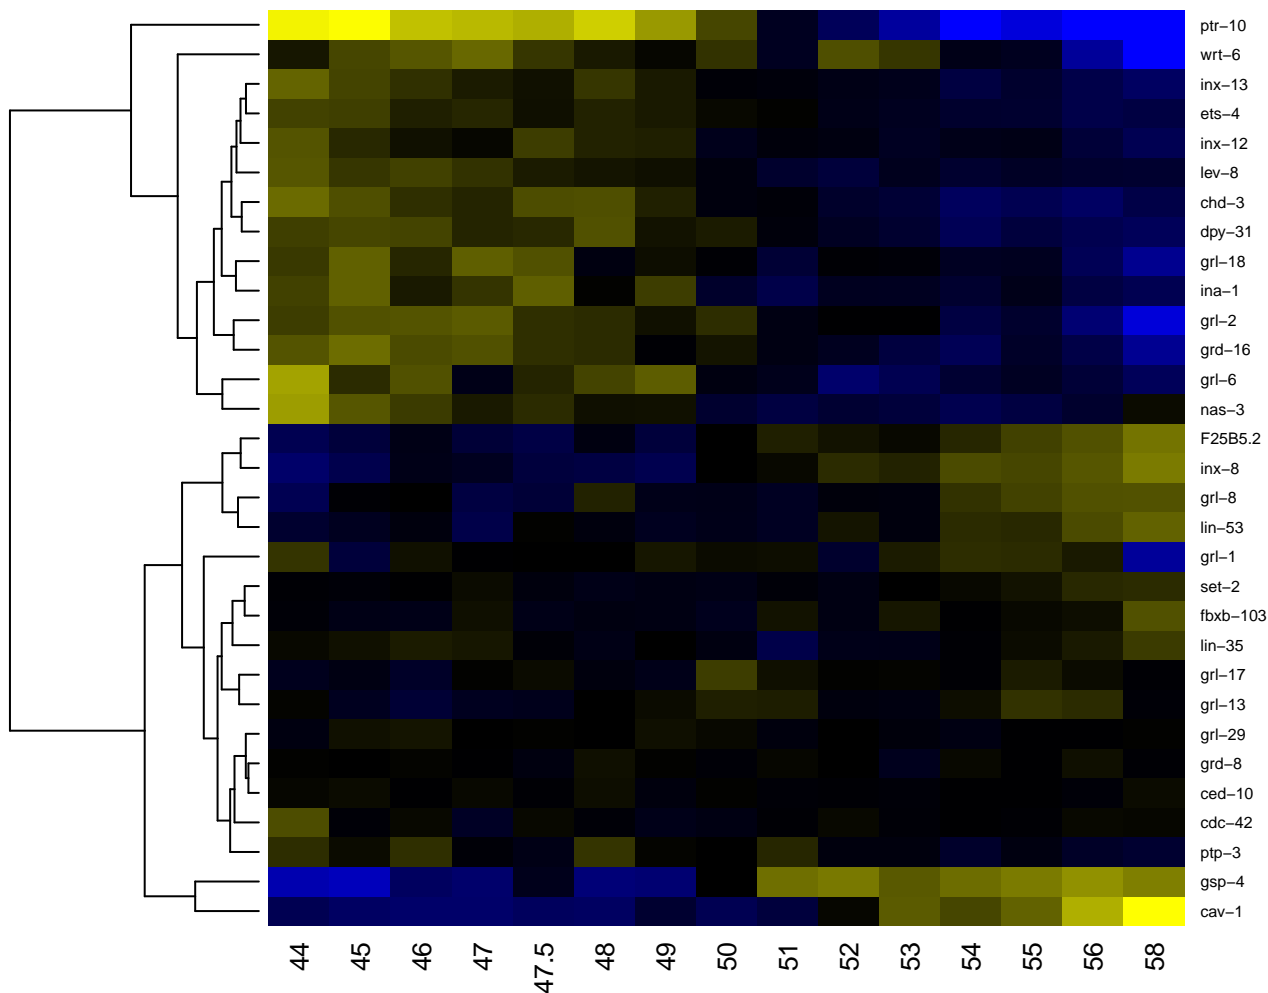

# ILsoVR



# inner labial neuron

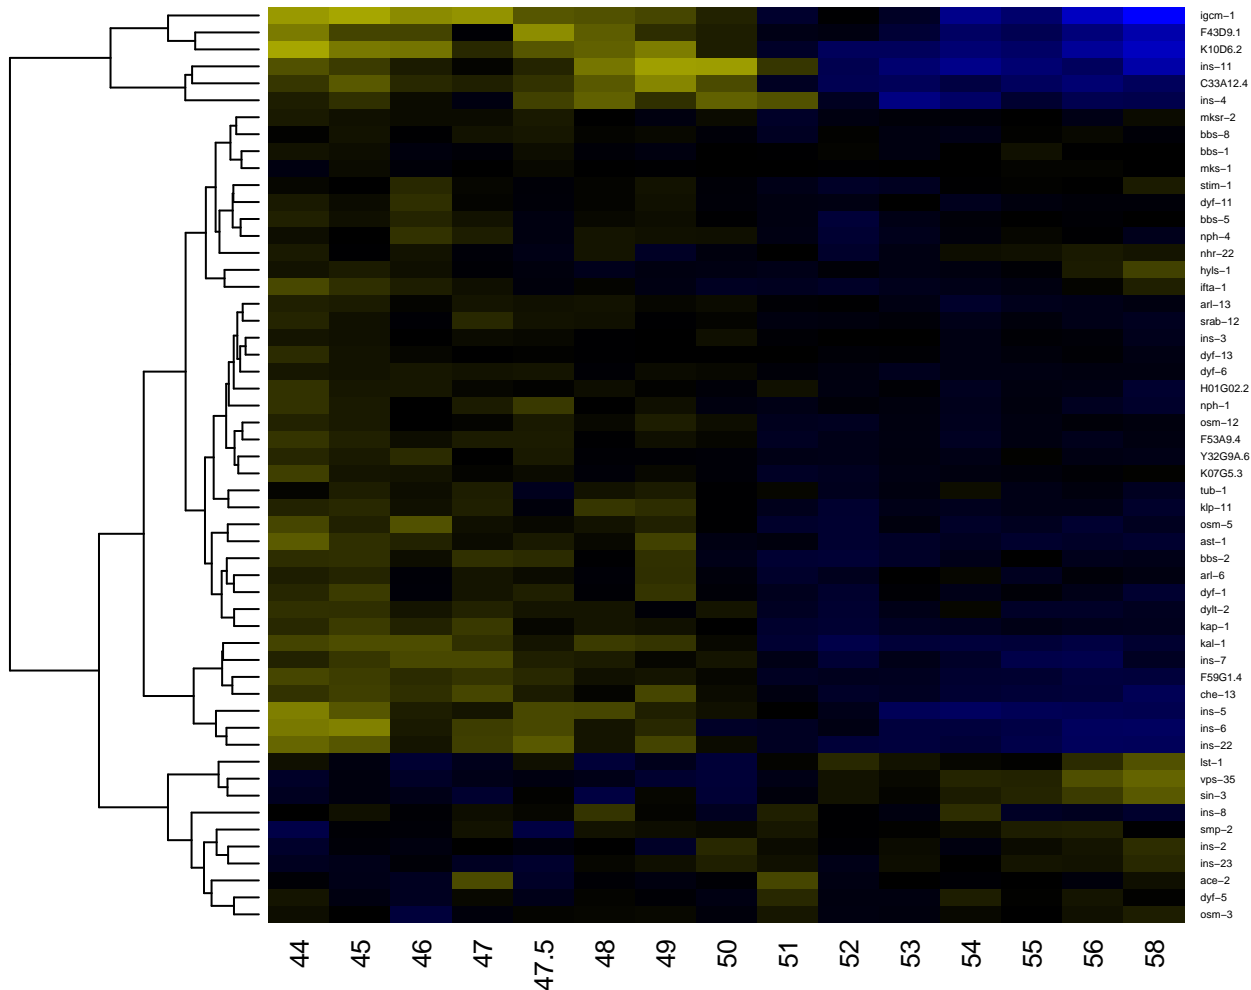

# int1DL

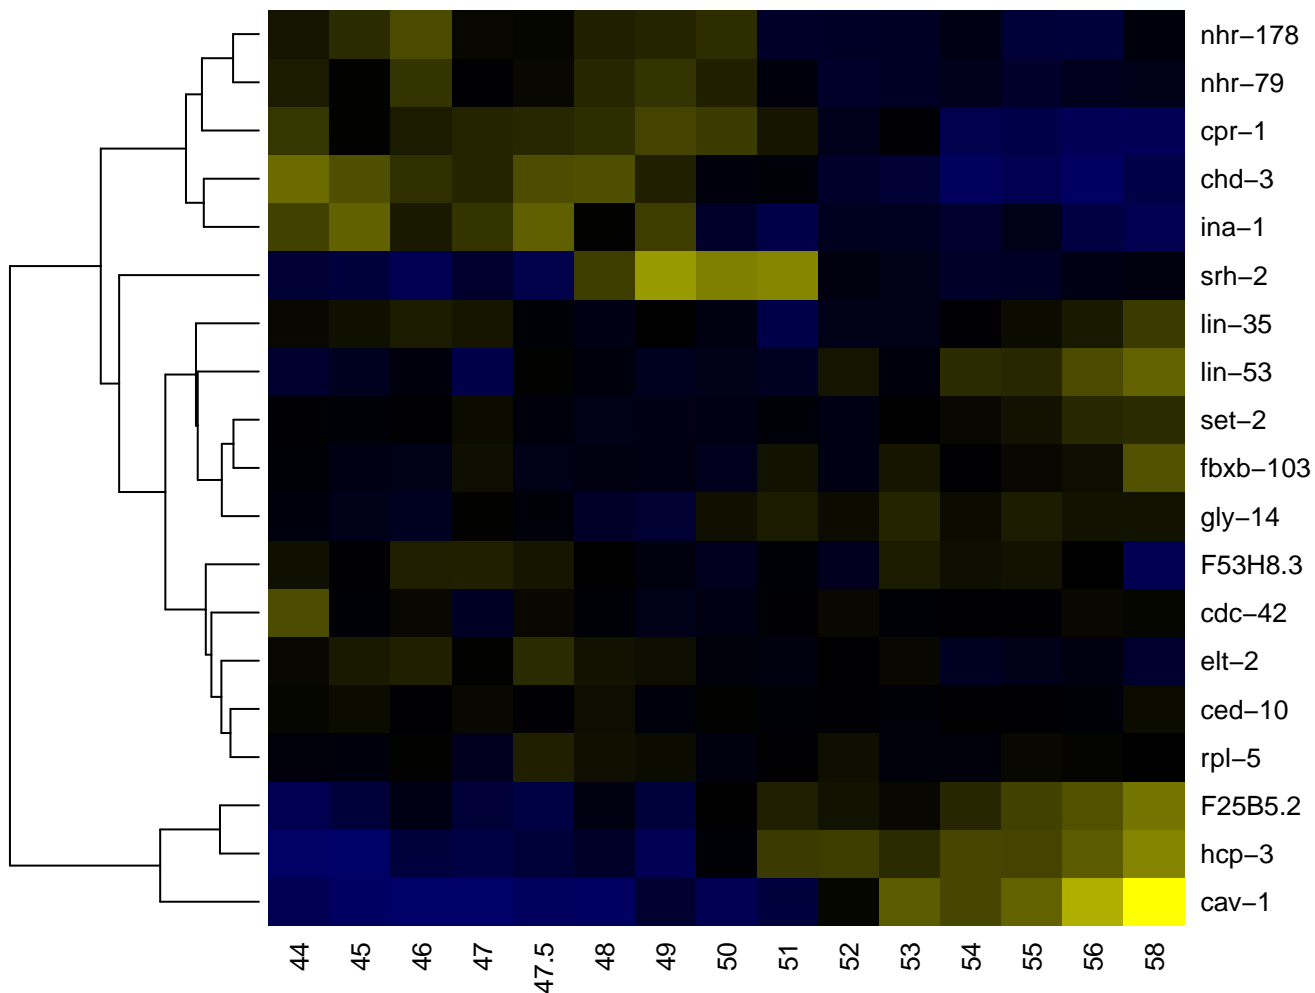

# int1DR





# int1VL



# int1VR



# int2D

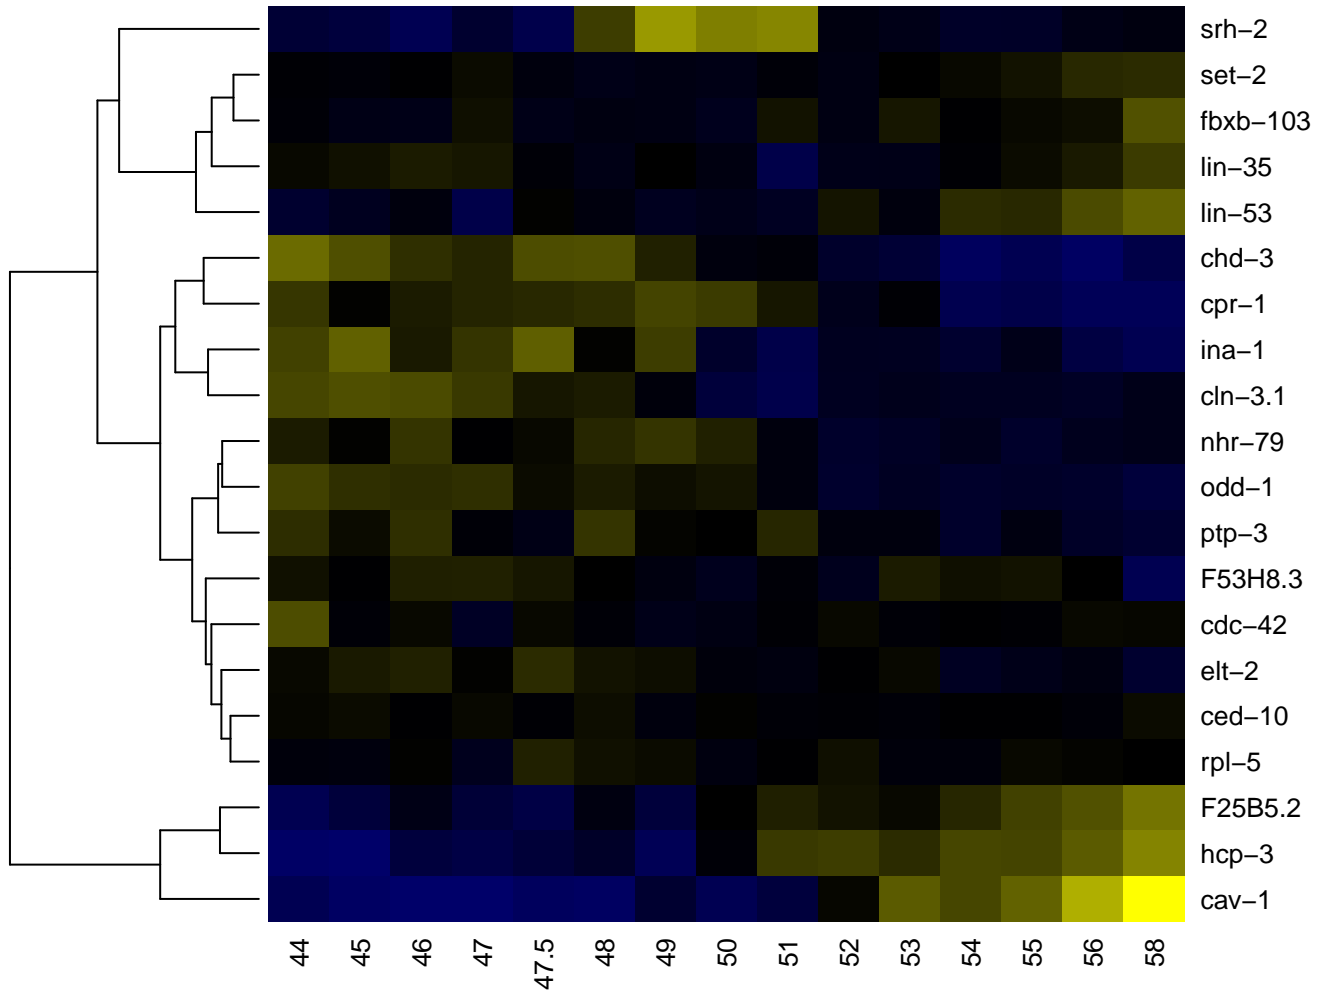

# int2V

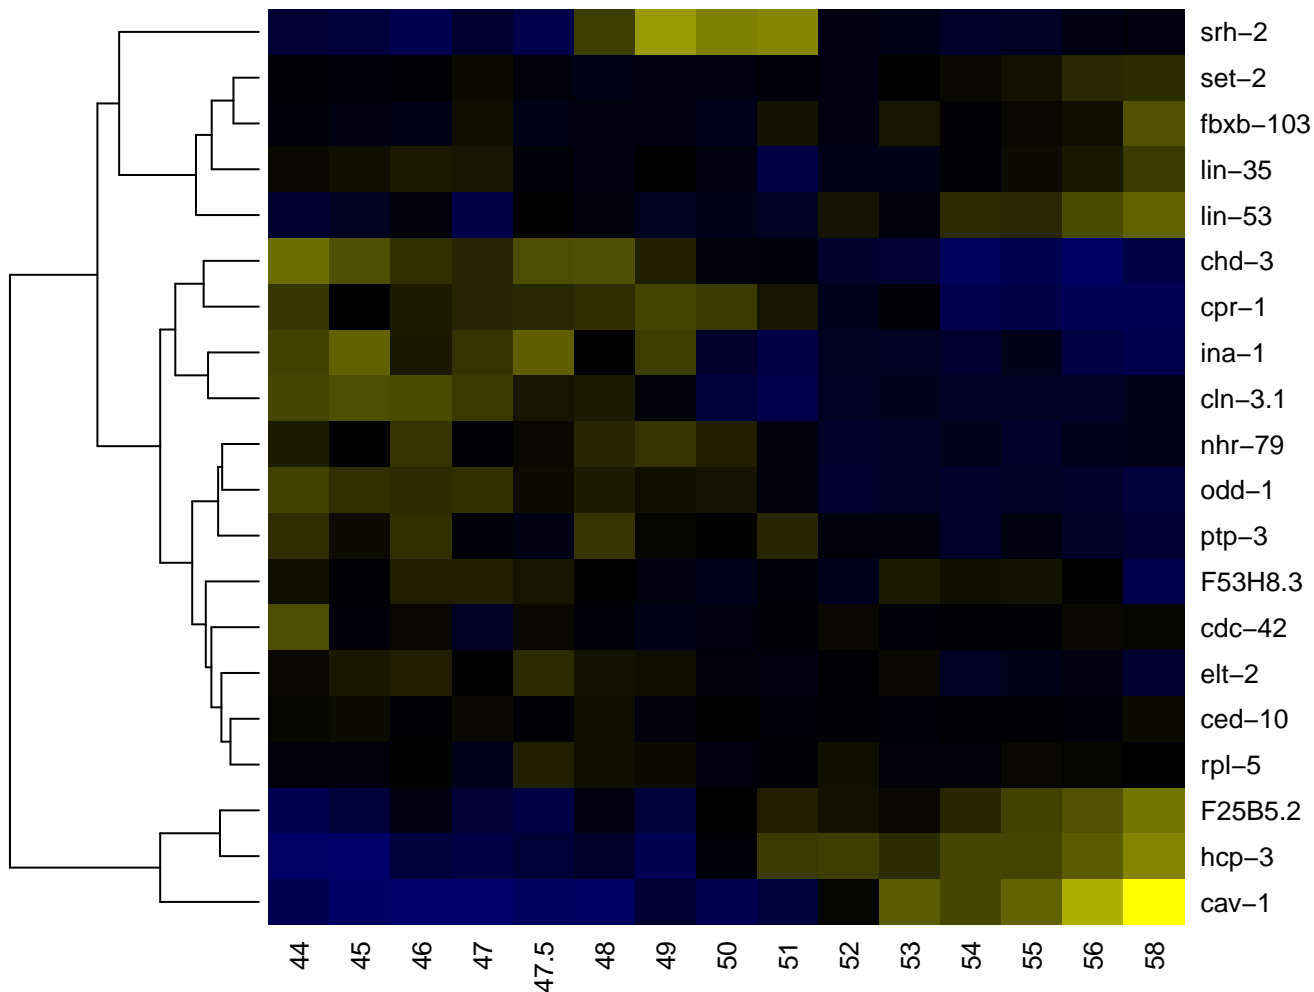

# int3D

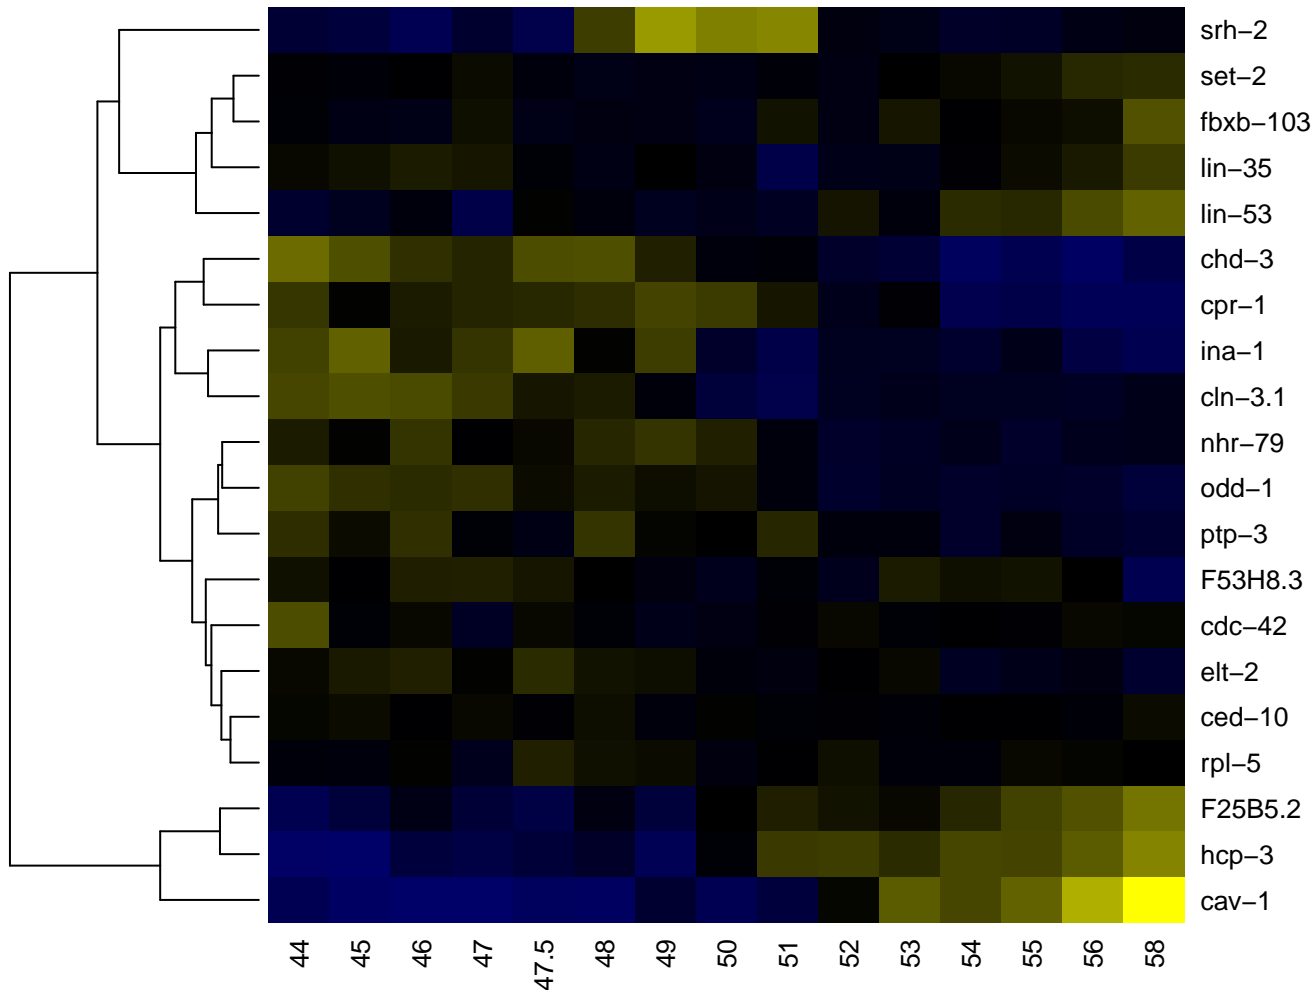

# int3V

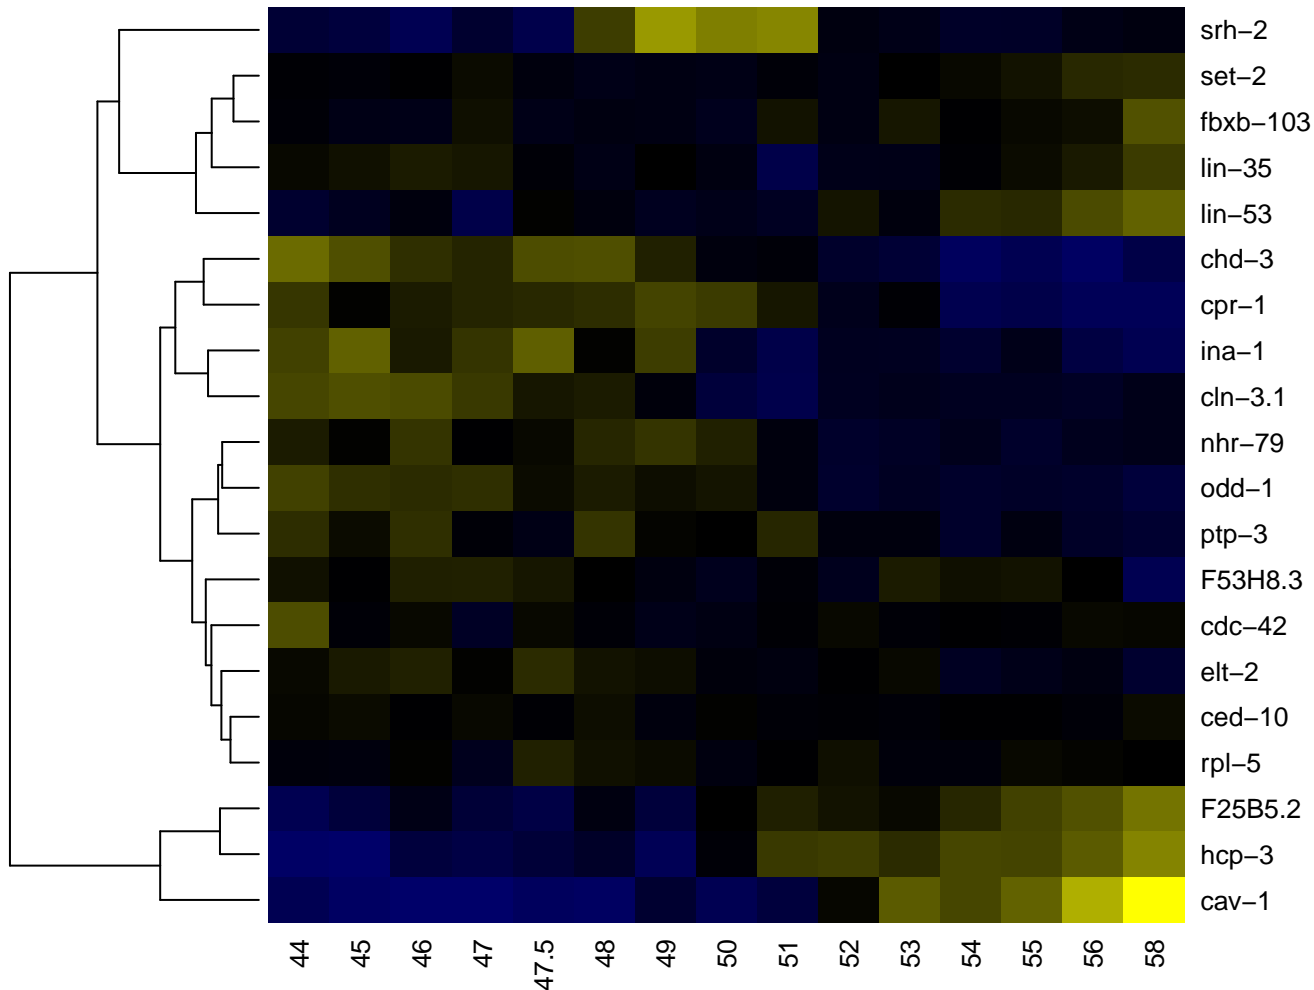

# int4D



# int4V

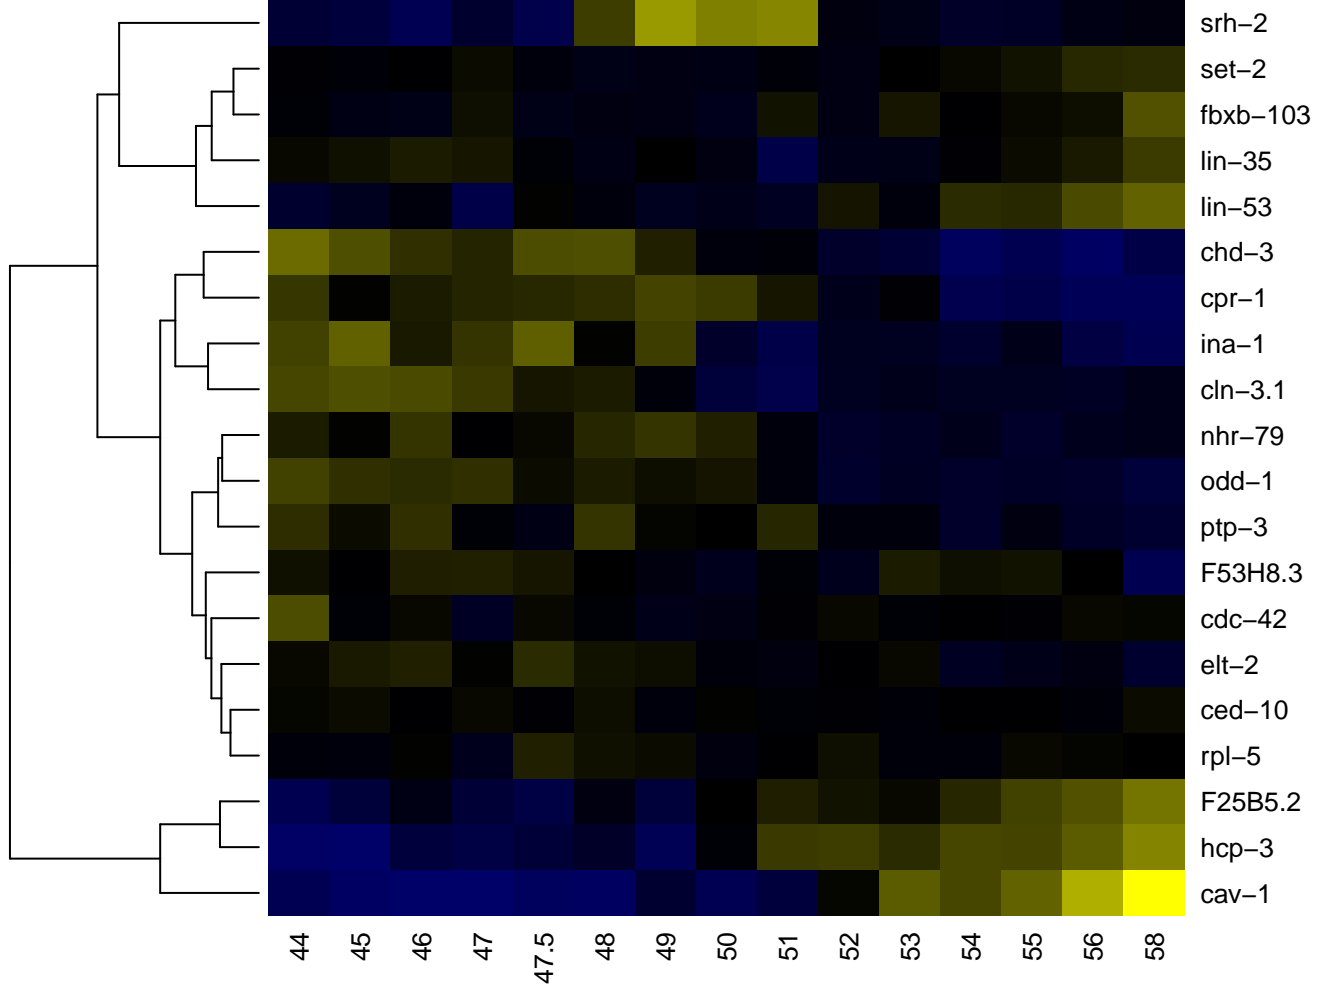



# int5L

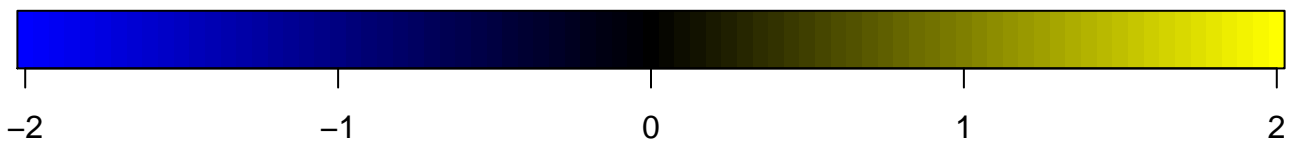

# int5R



# int6L



# int6R

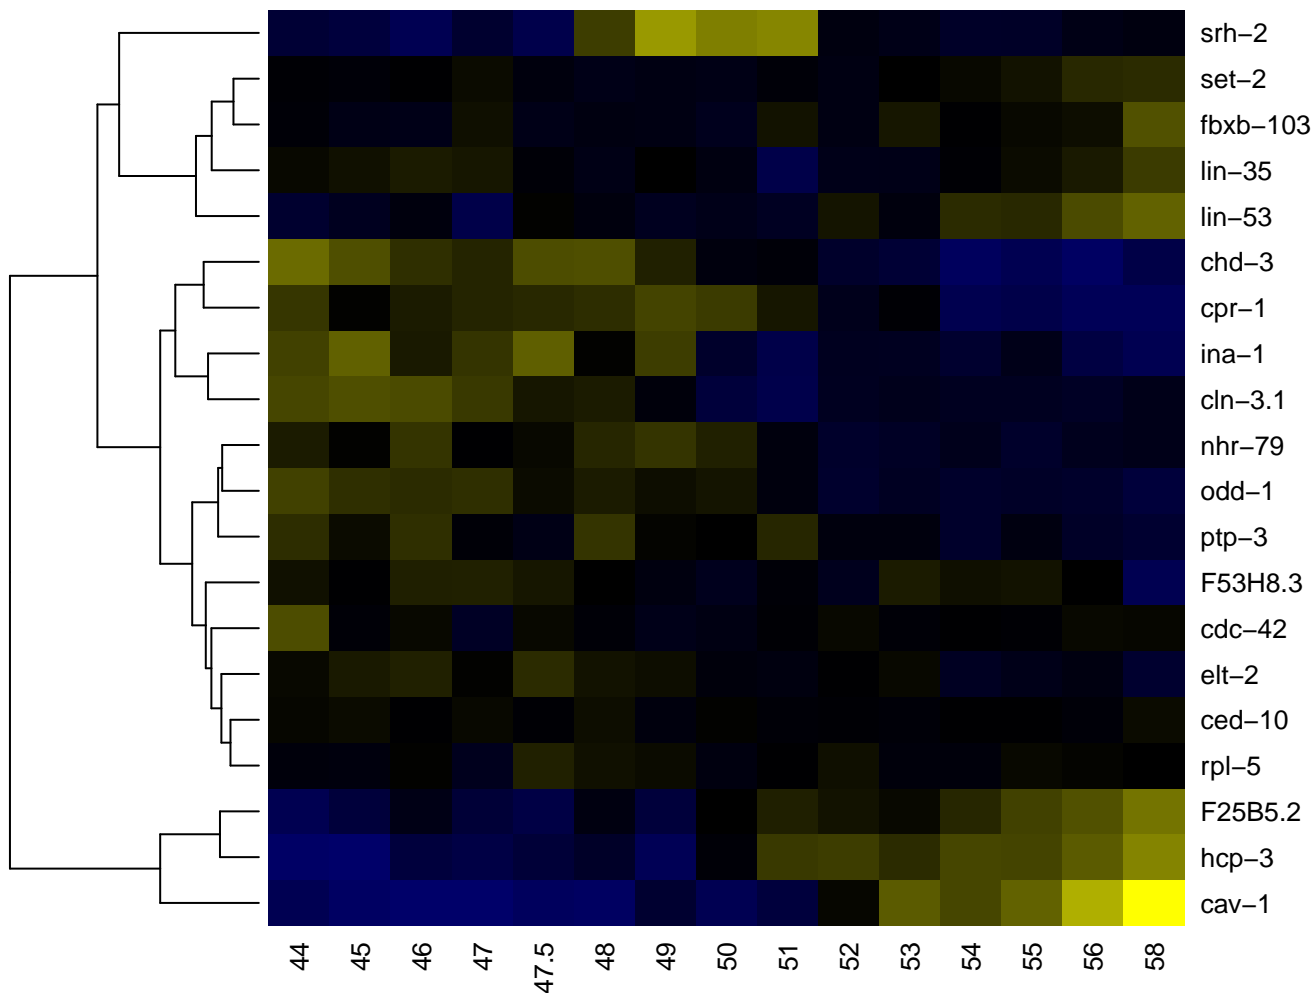

# int7L

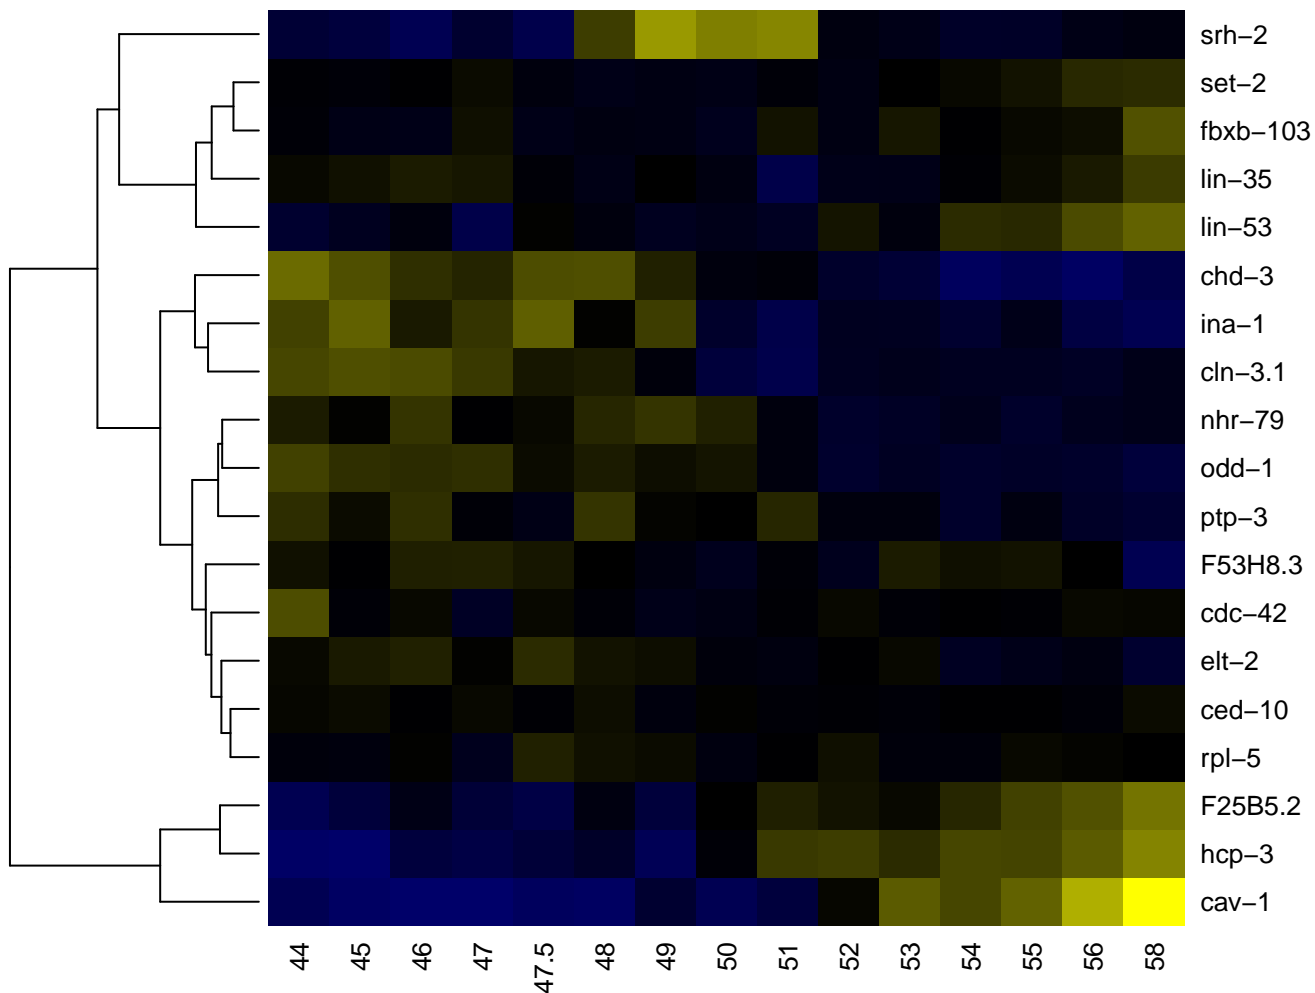

# int7R

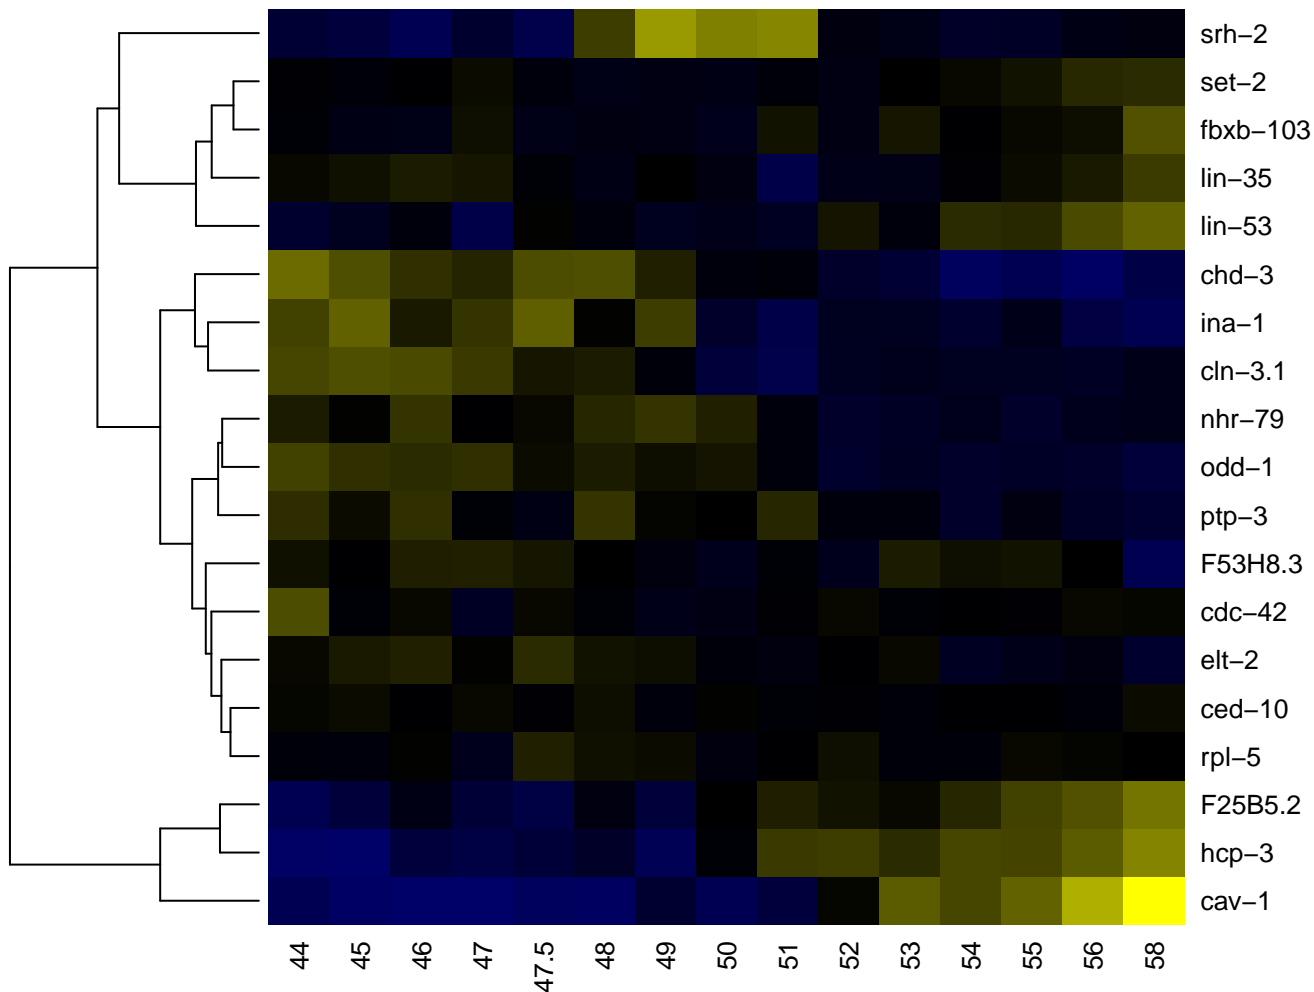

# int8L

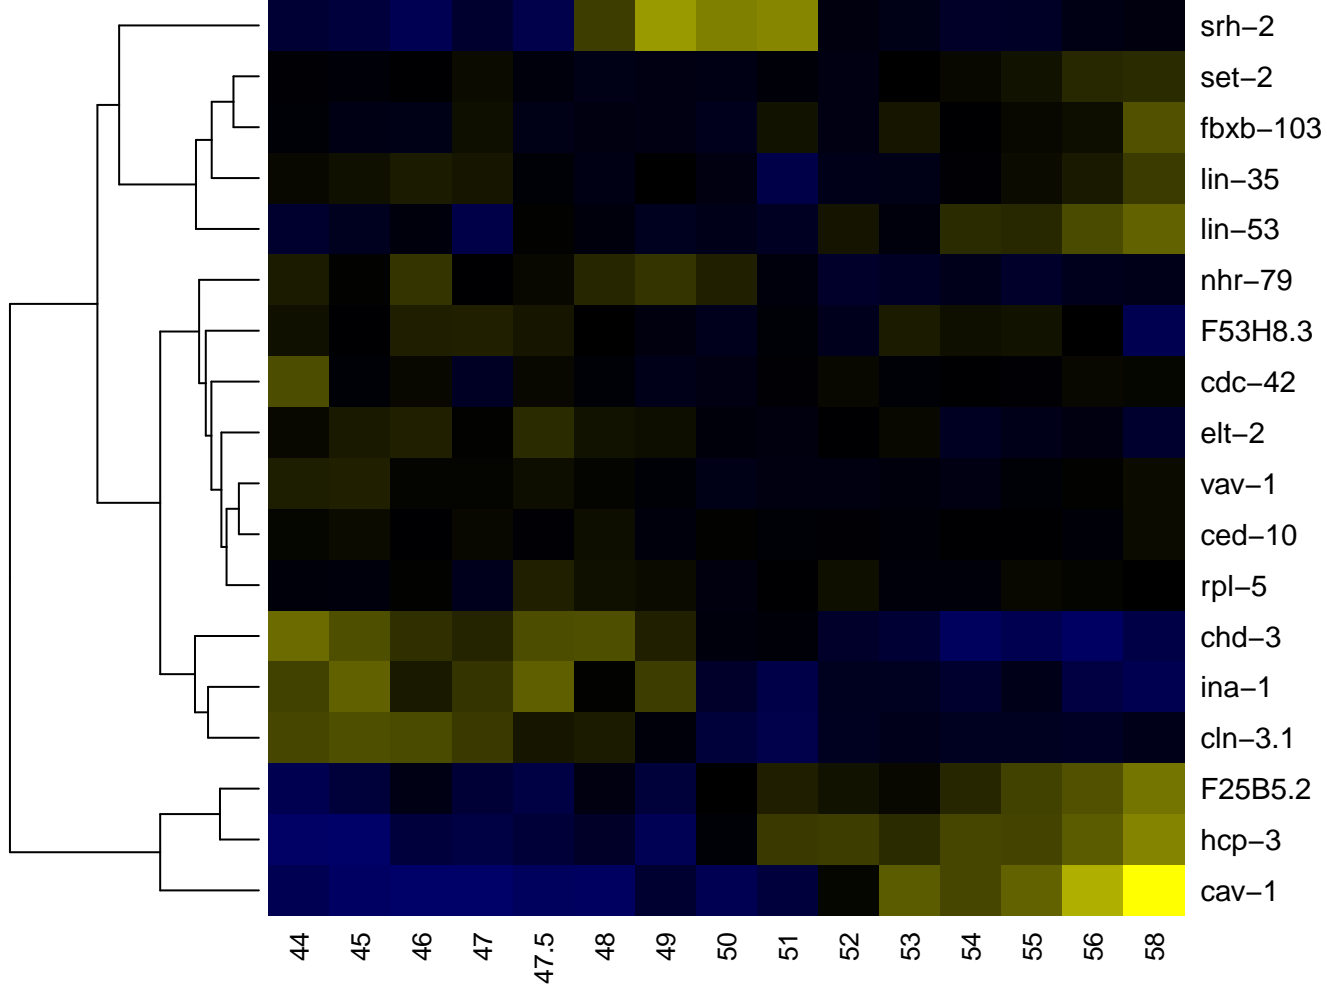

# int8R

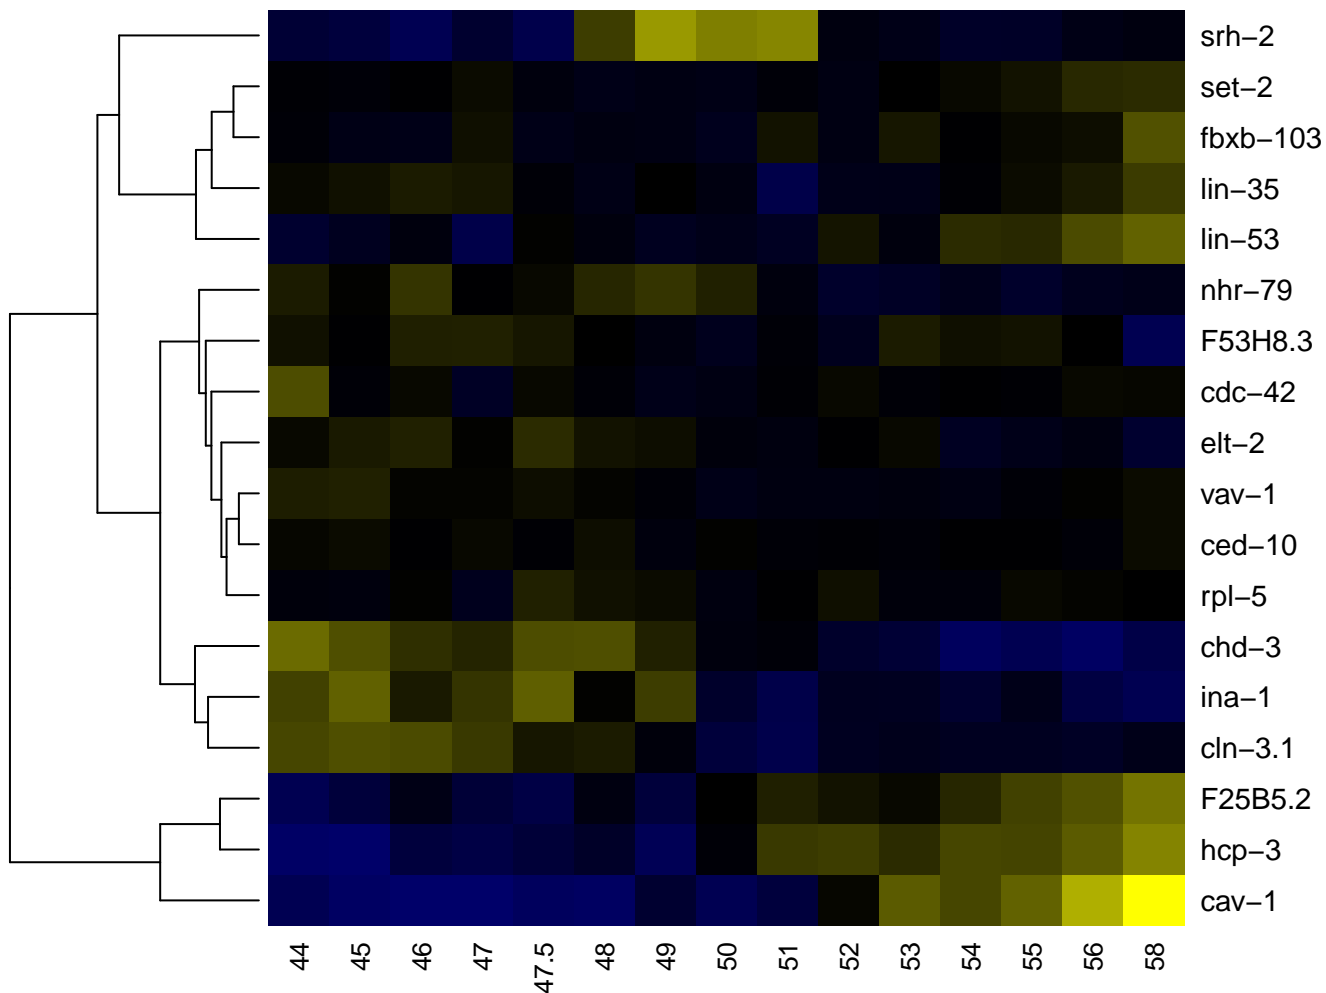



# int9L

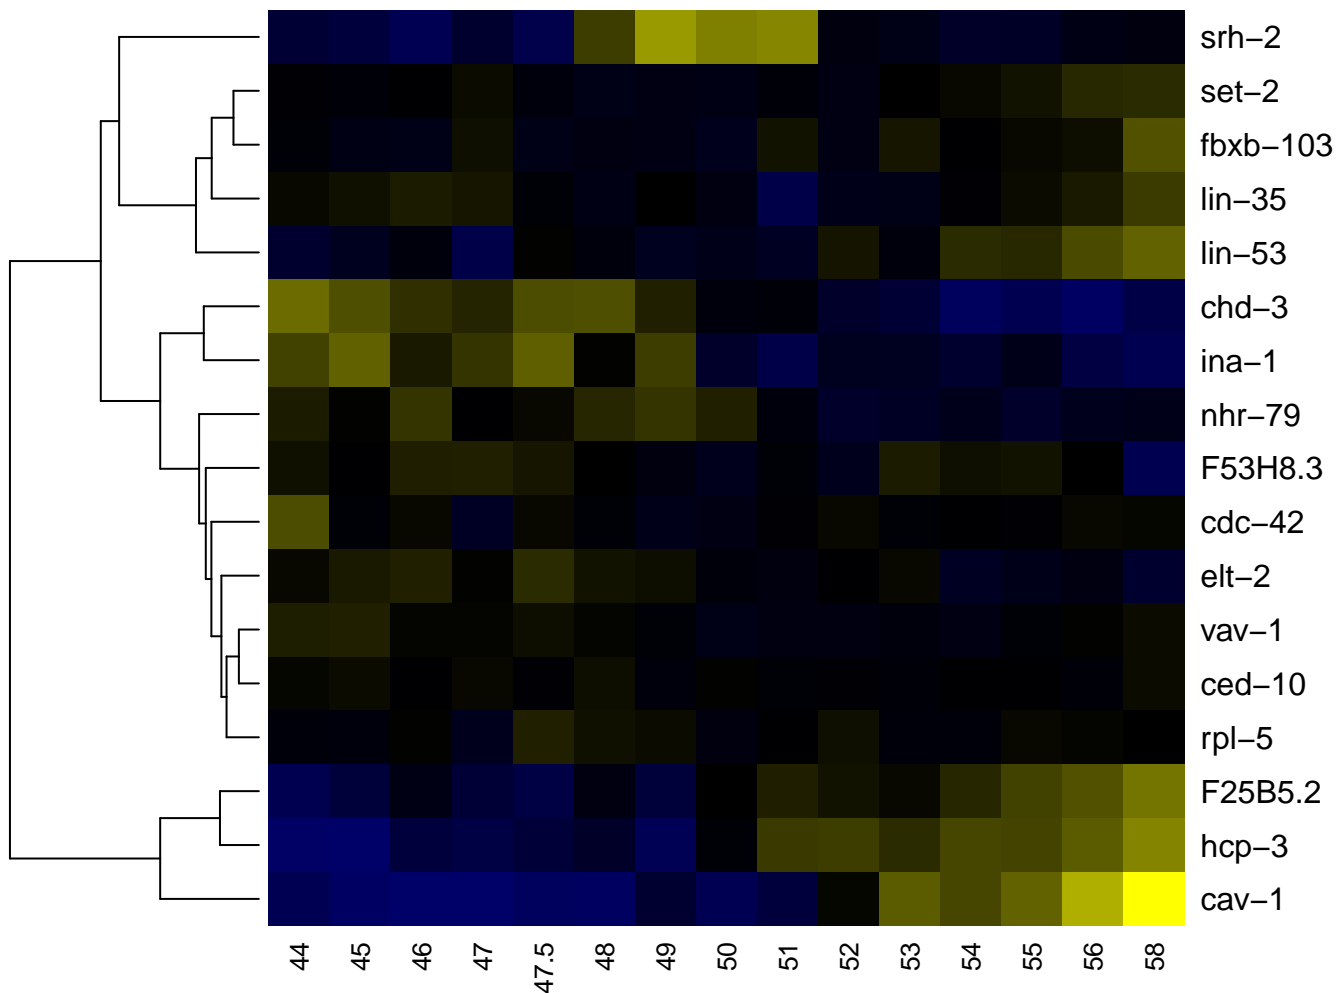

# int9R

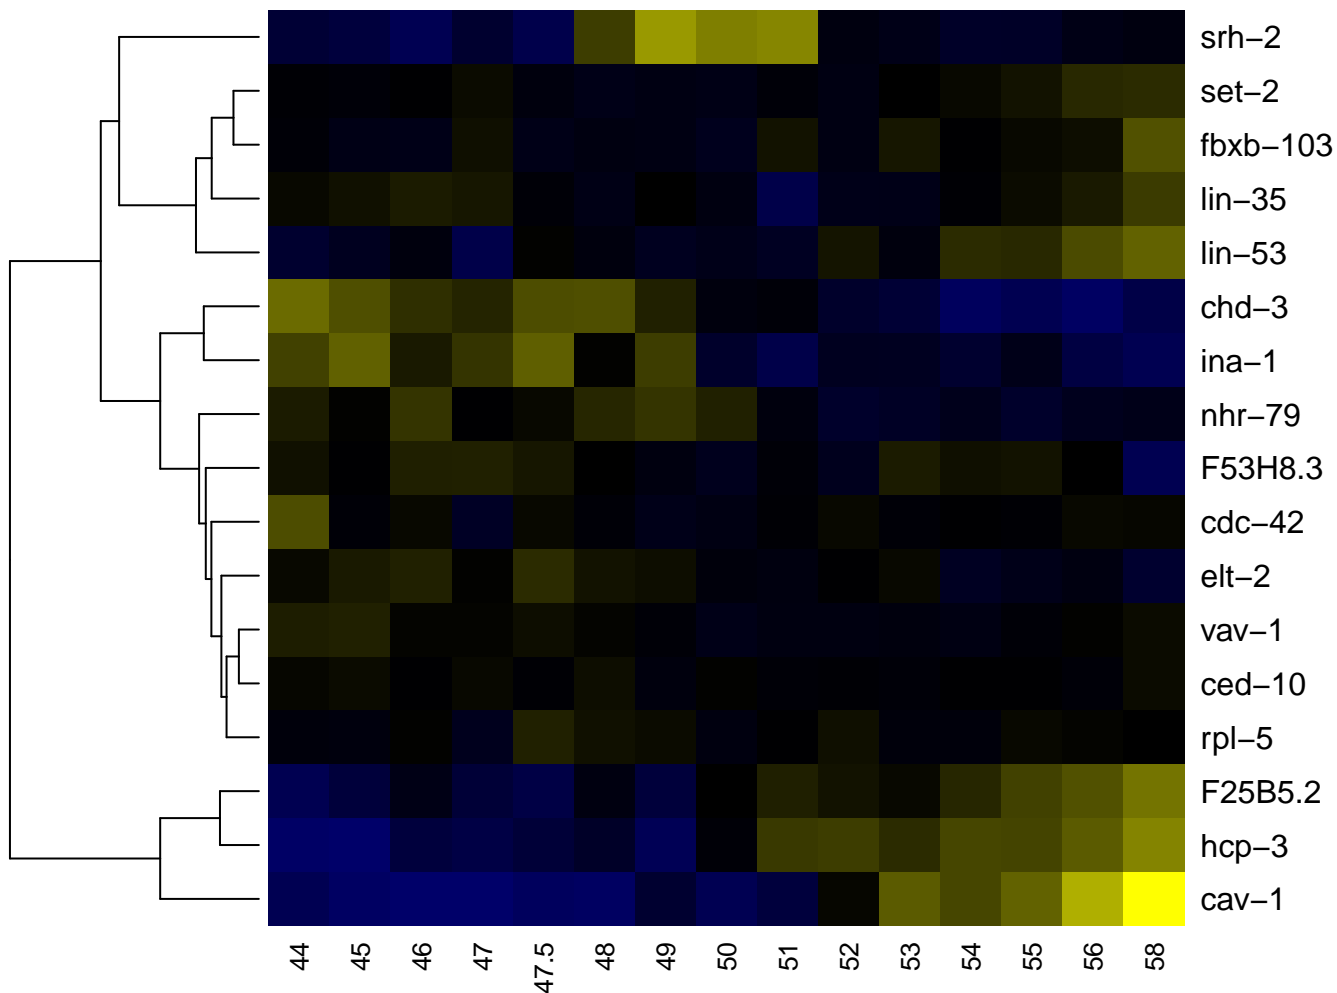

# interneuron

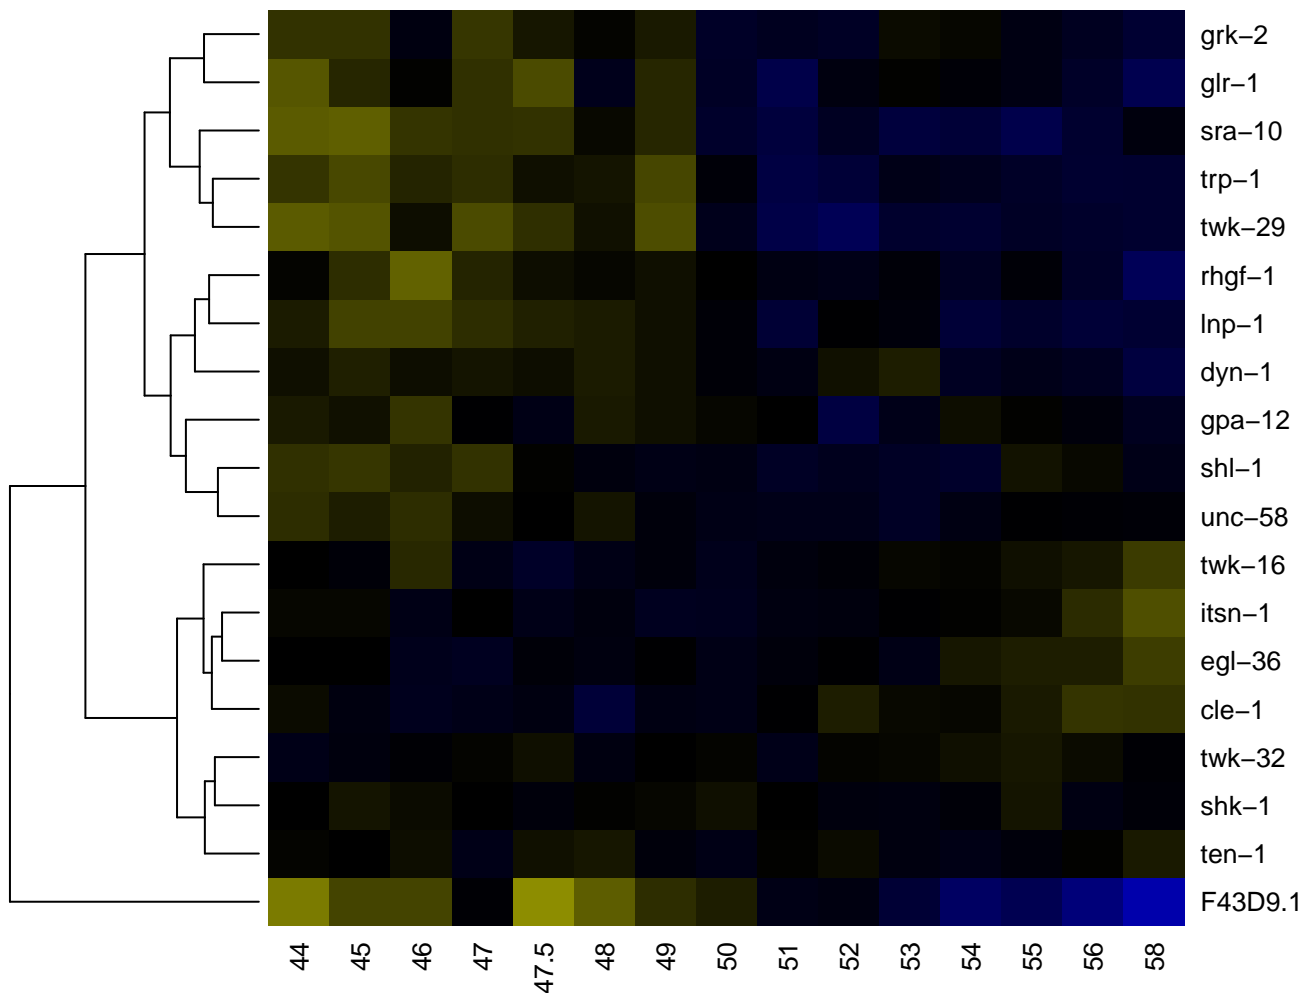

-2

-1

0

1

2

# intestinal cell

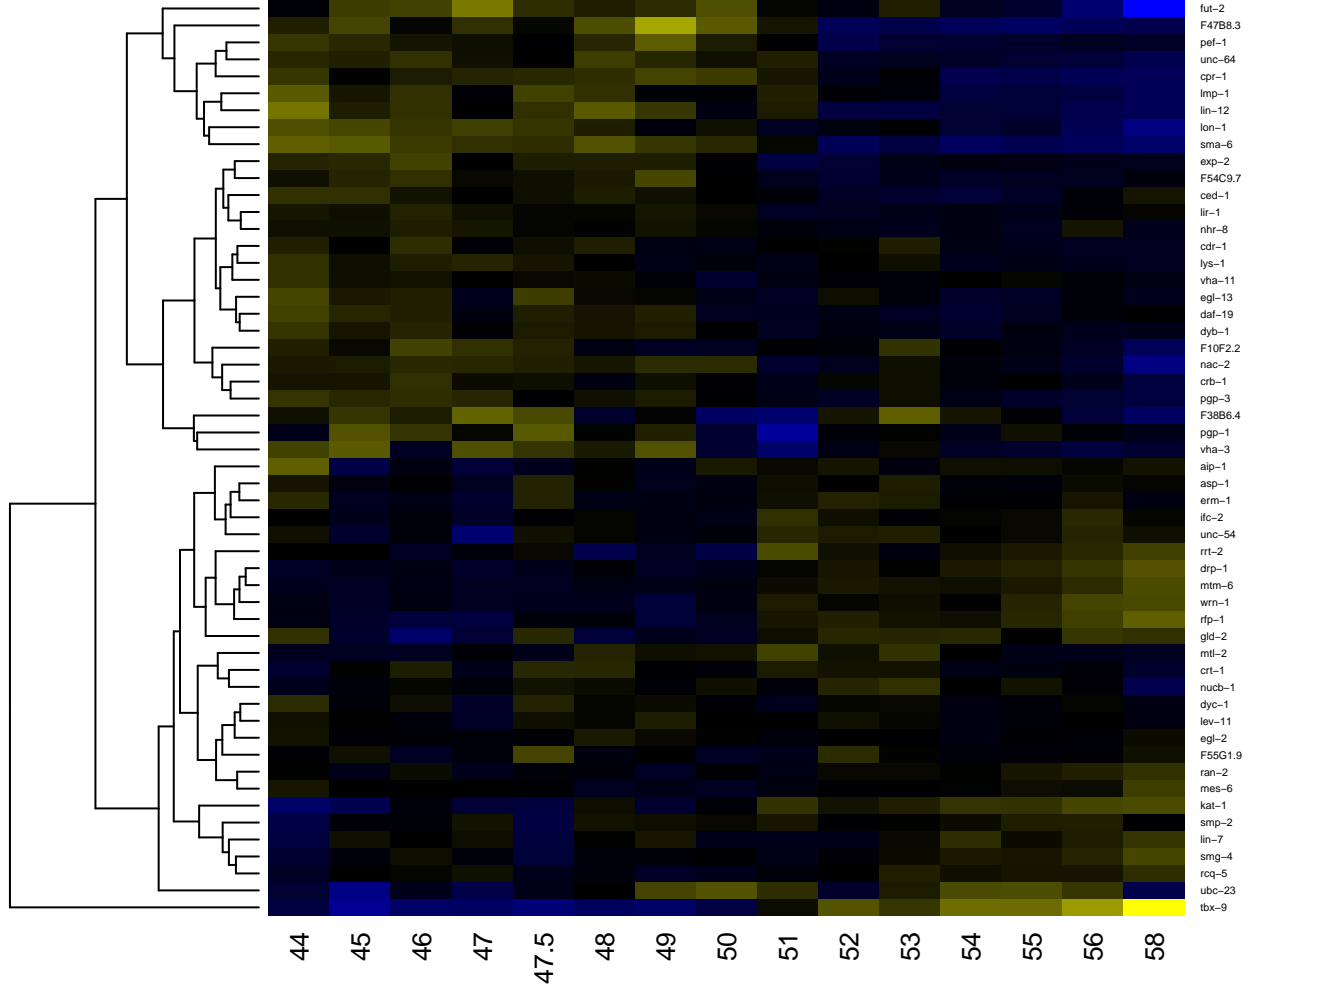

# intestinal muscle

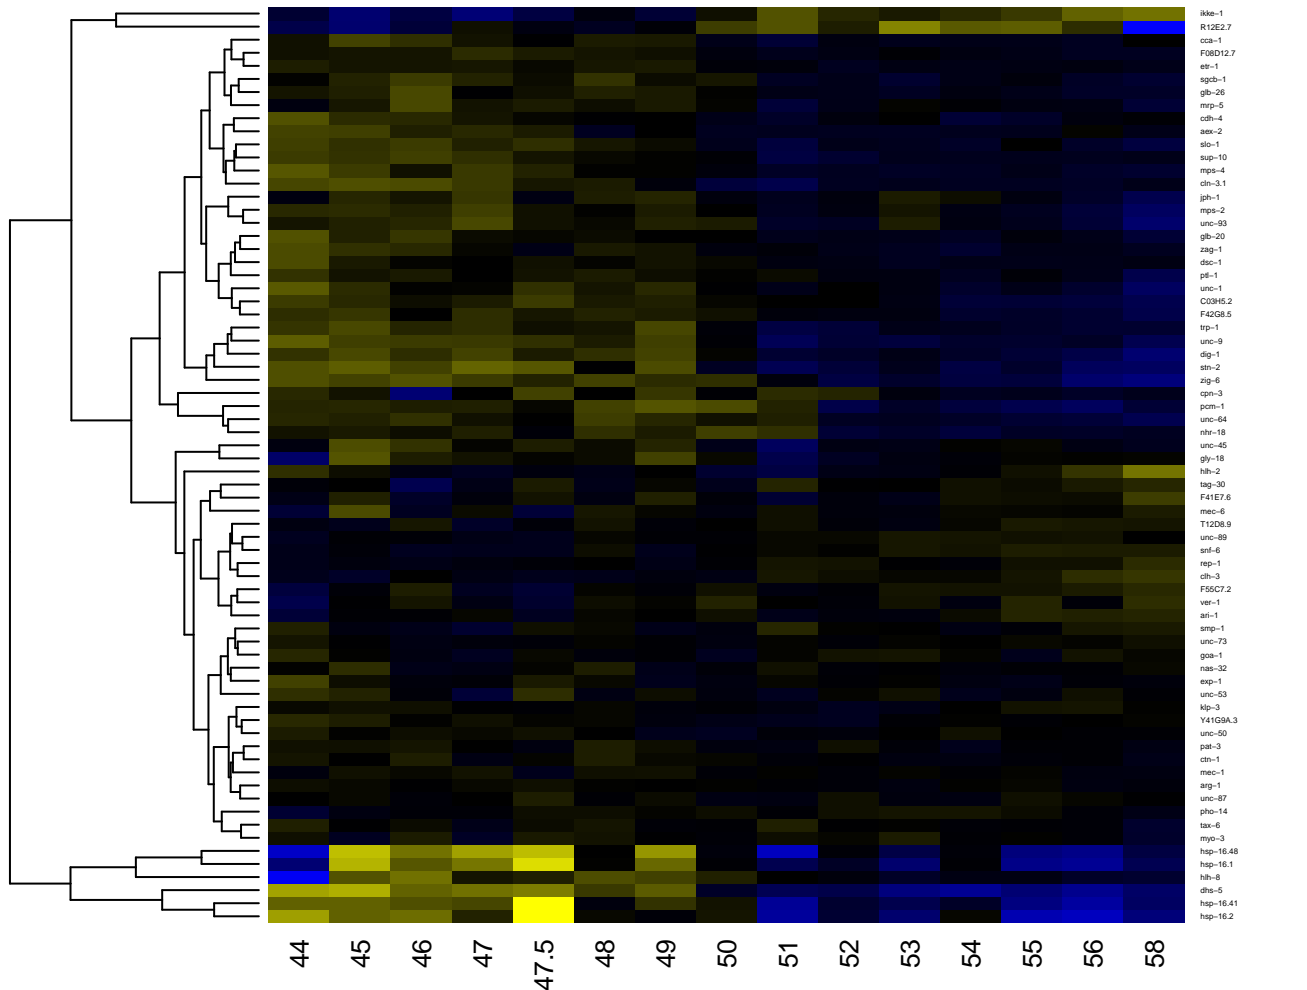

# intestine

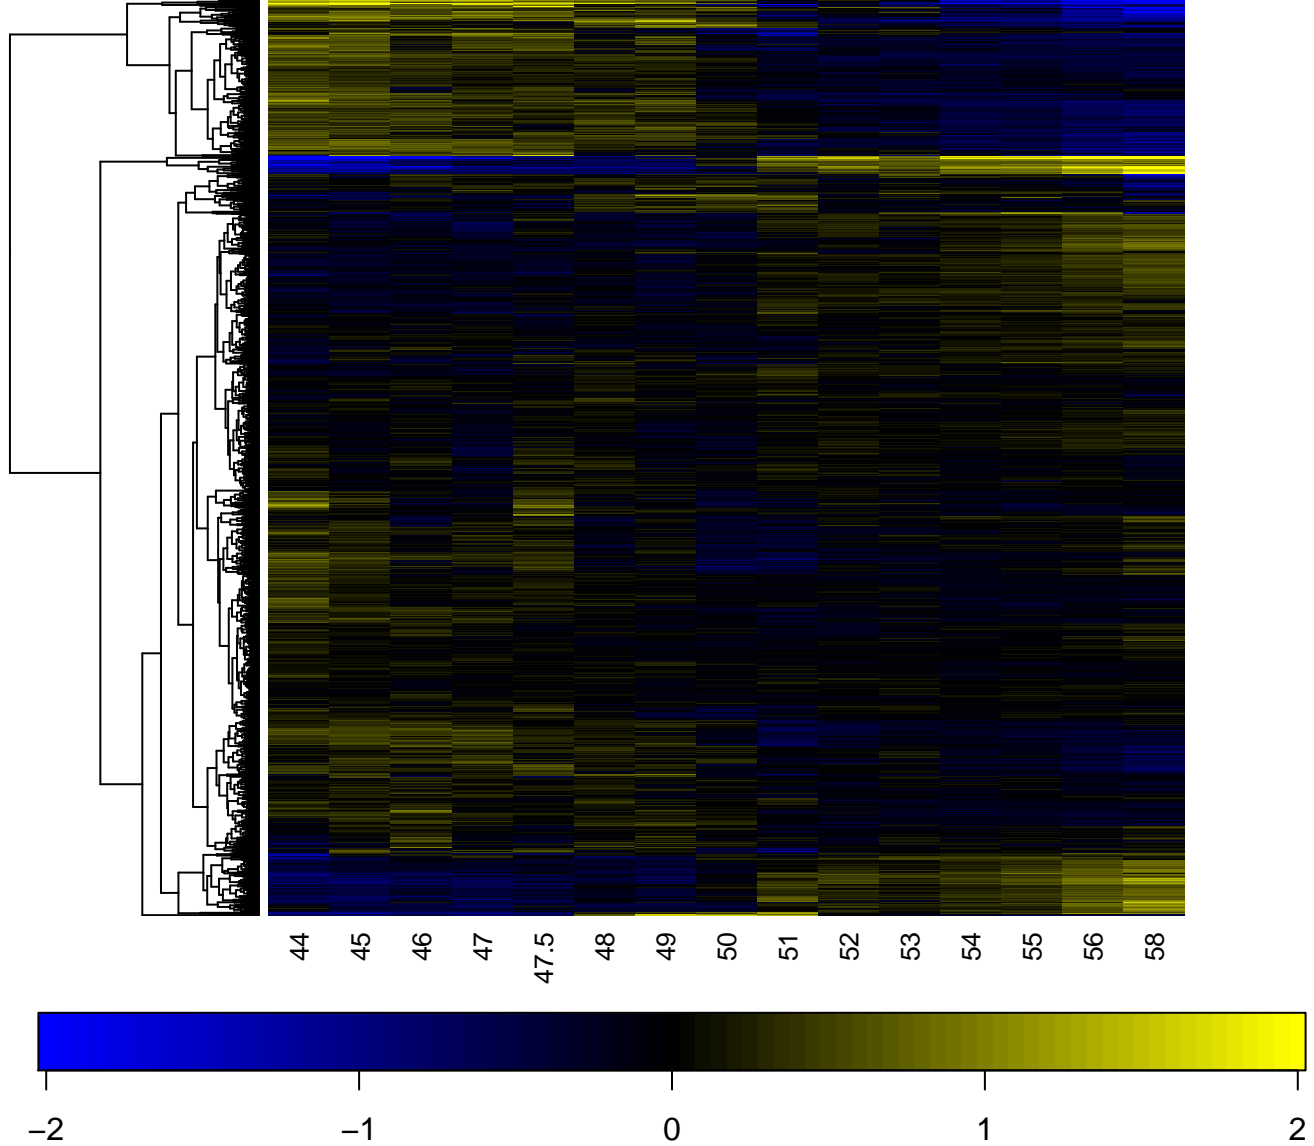

# isthmus

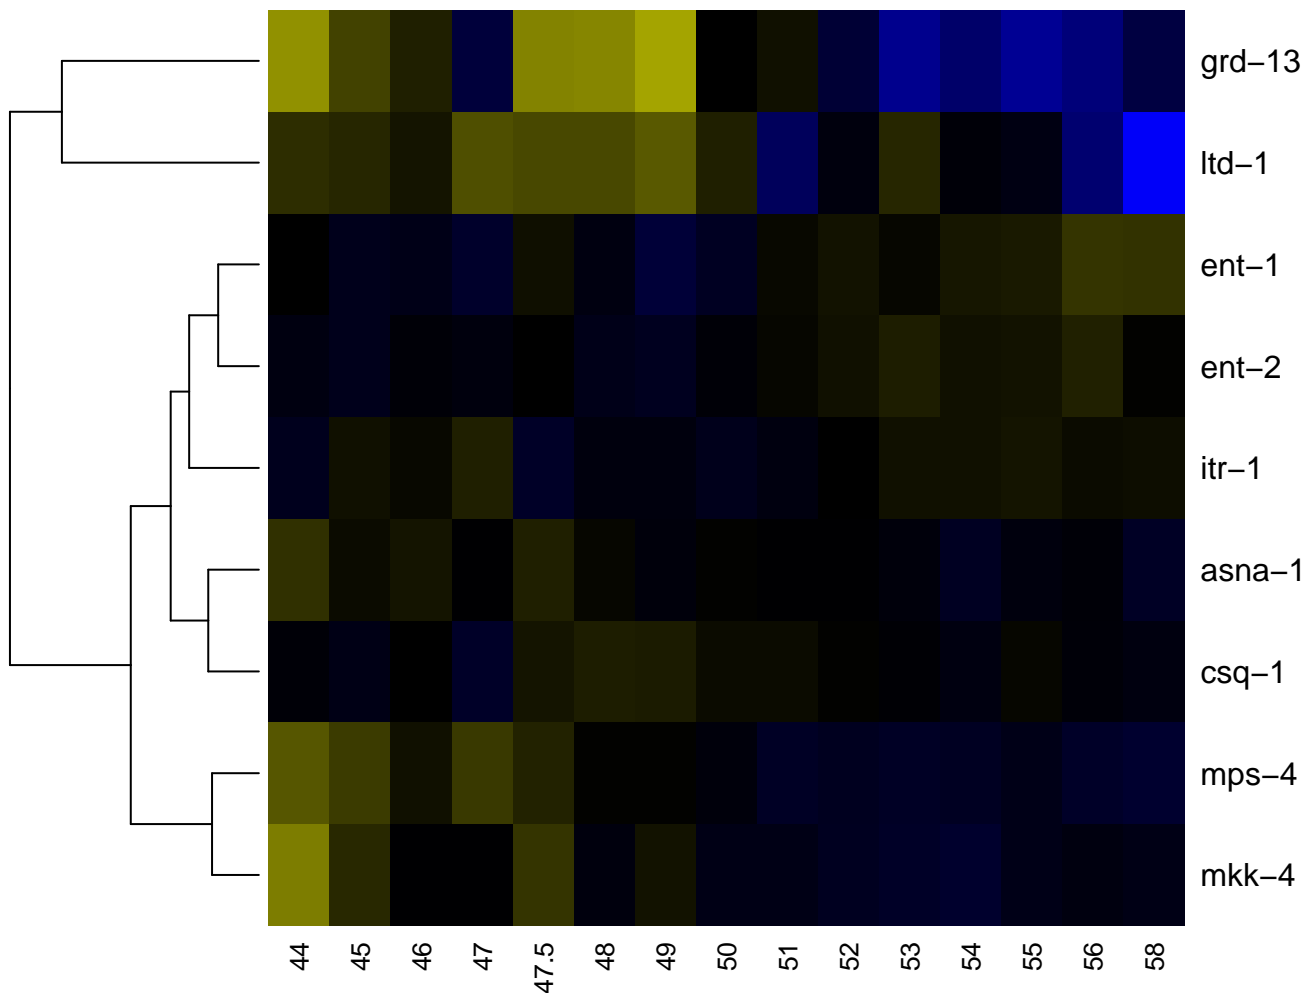

# K' cell

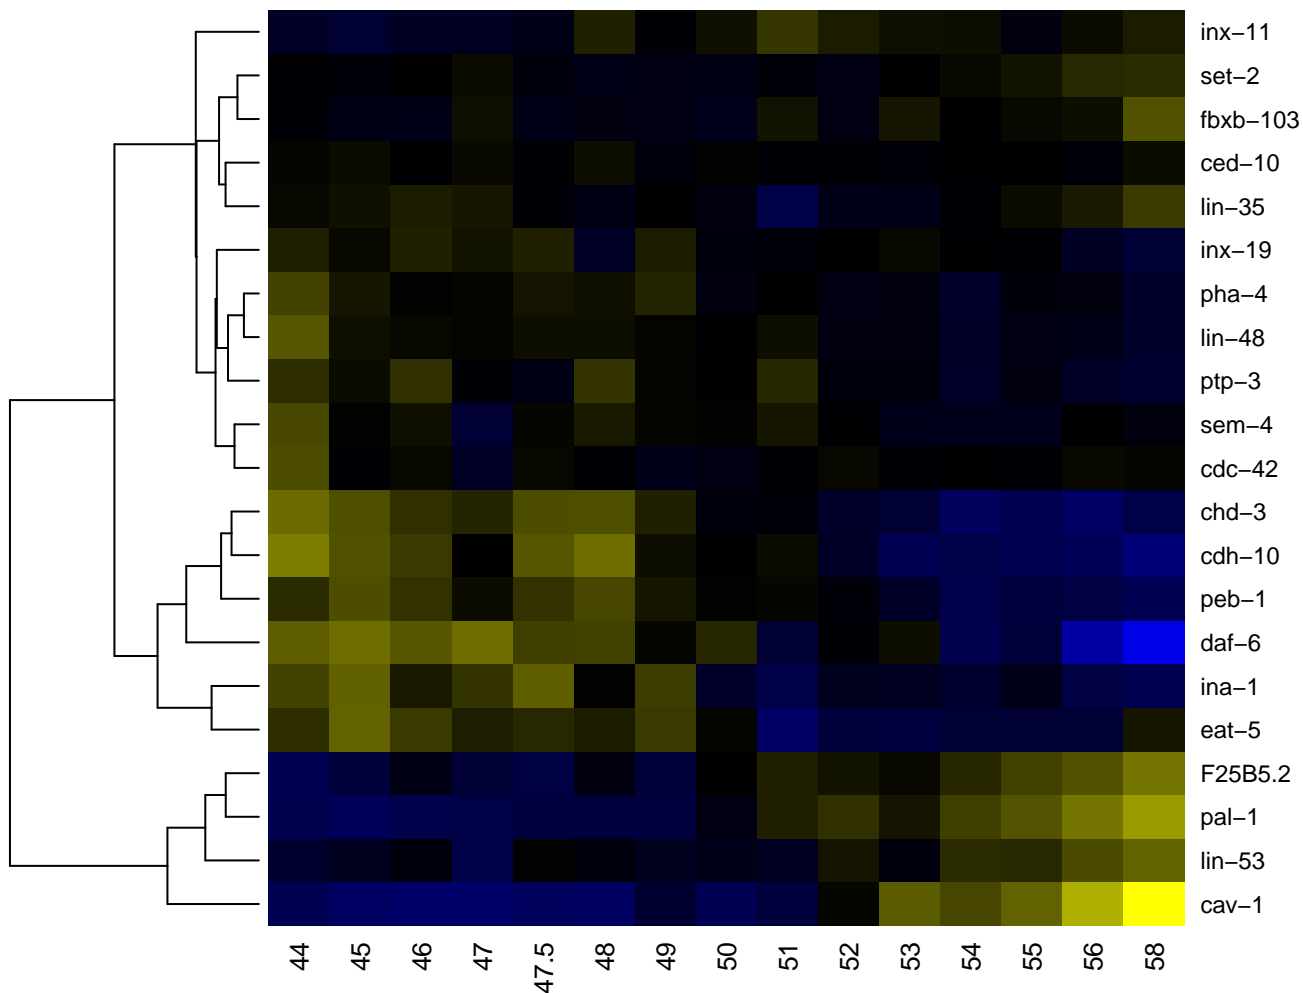



# K cell

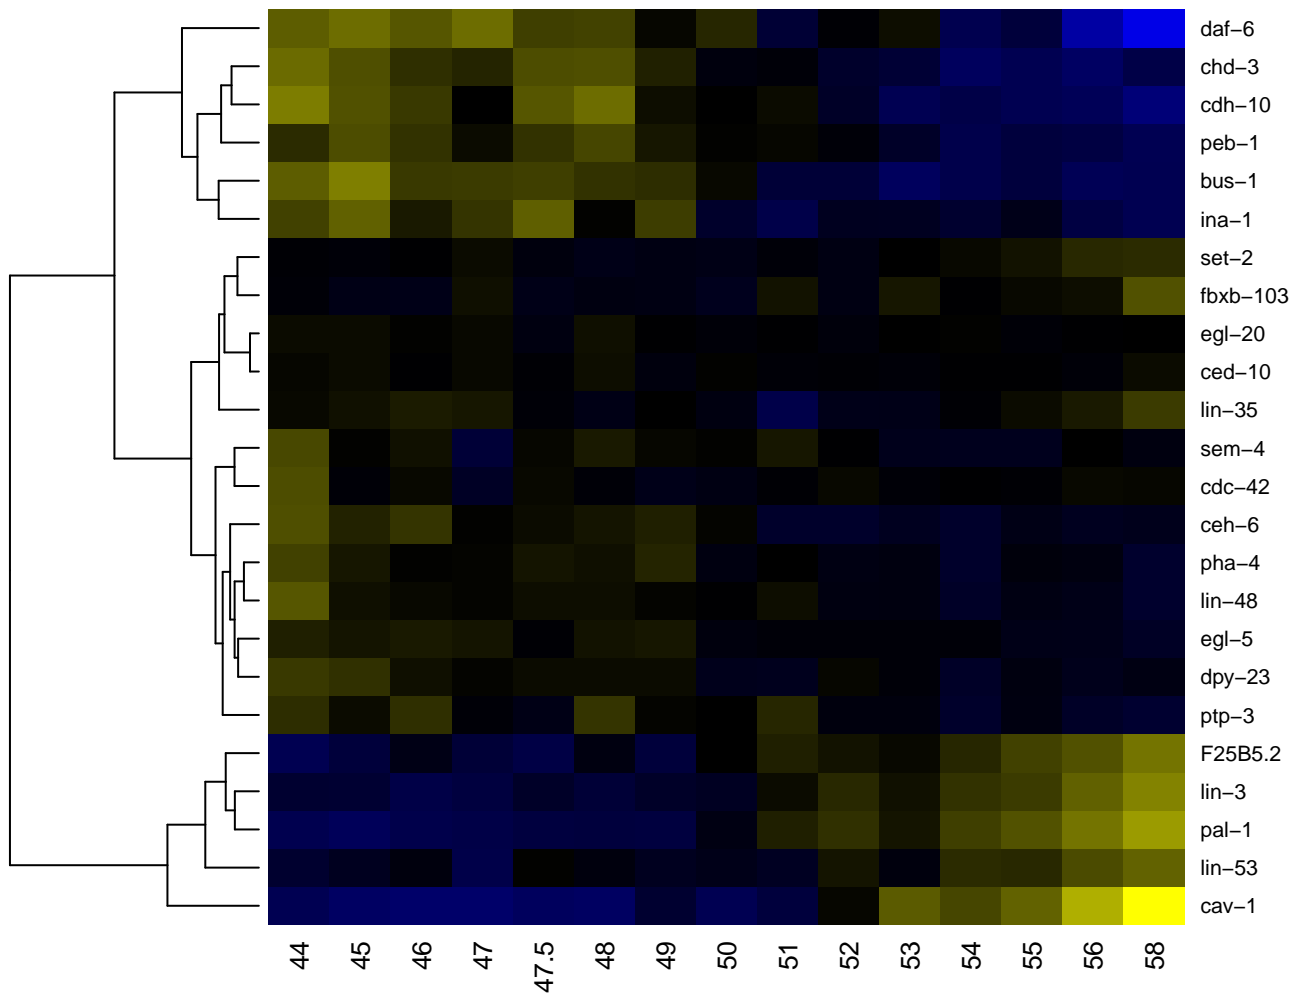

# labial sensillum

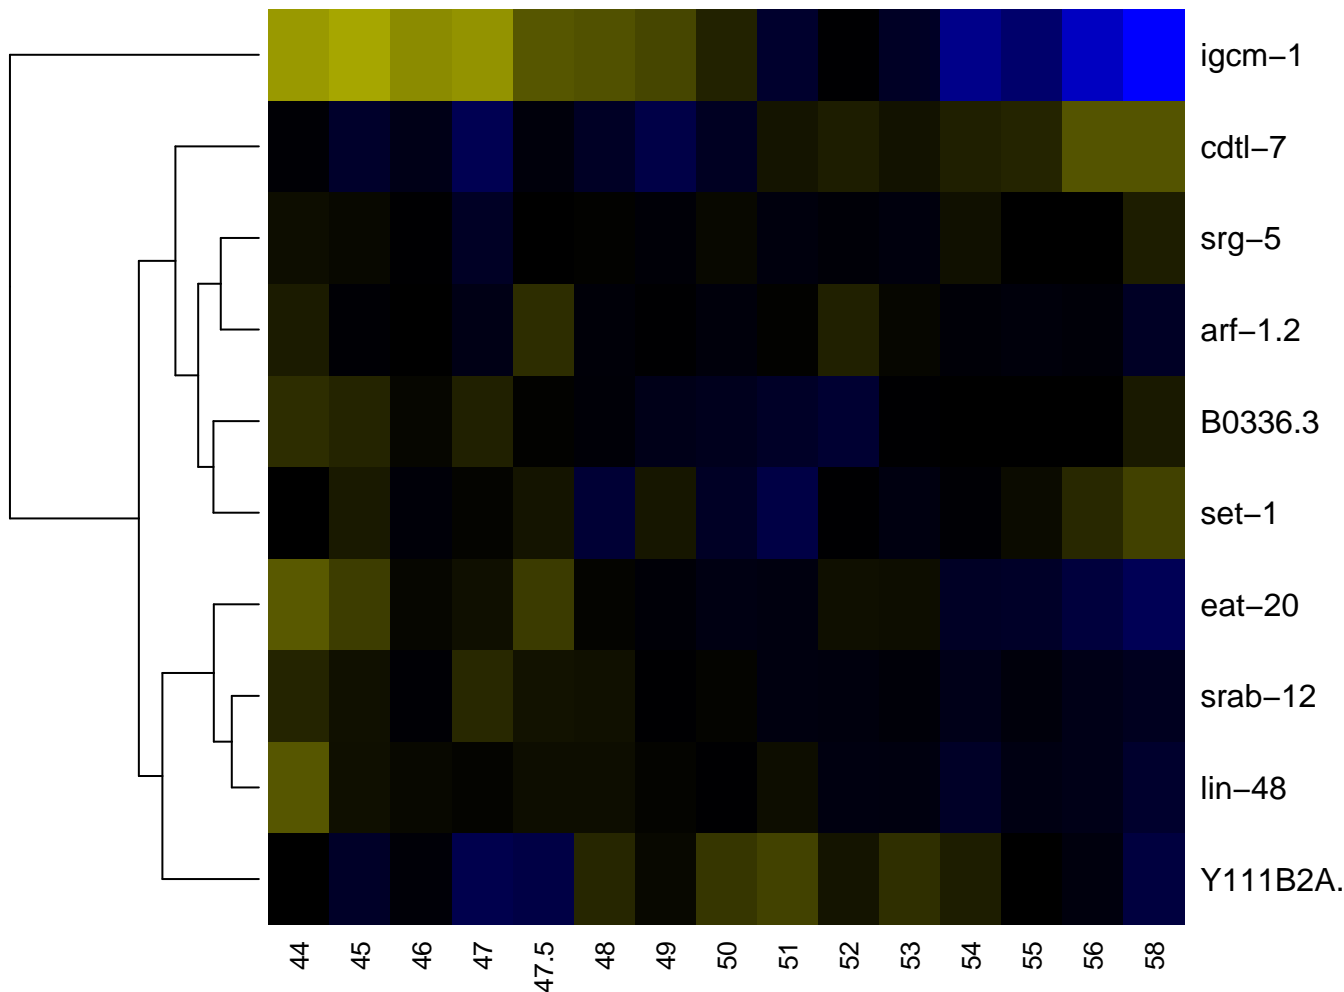

-2

-1

0

1

2

# lateral ganglion

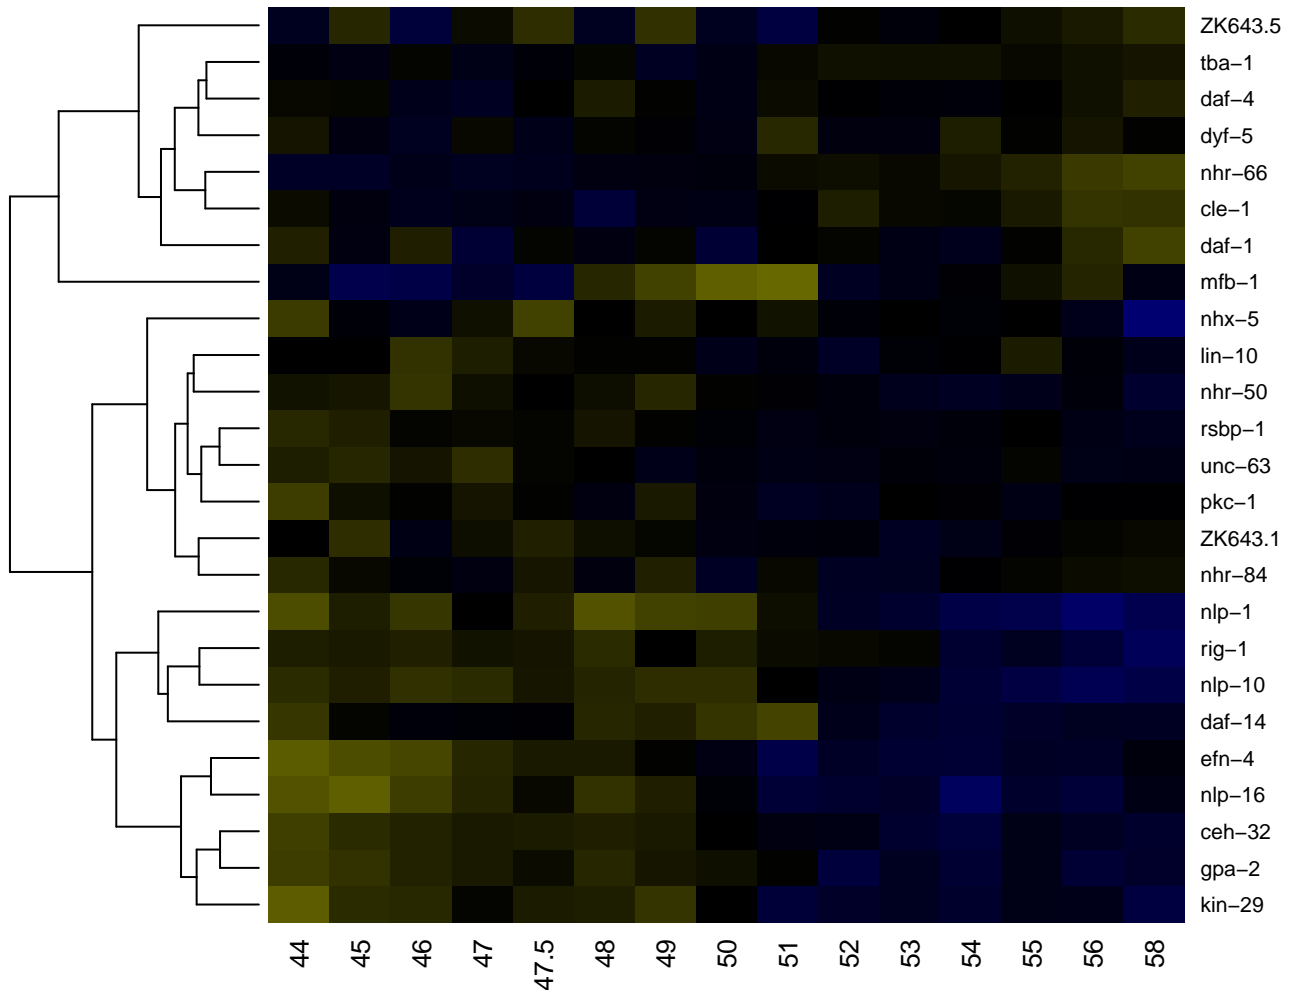

# lateral nerve cord

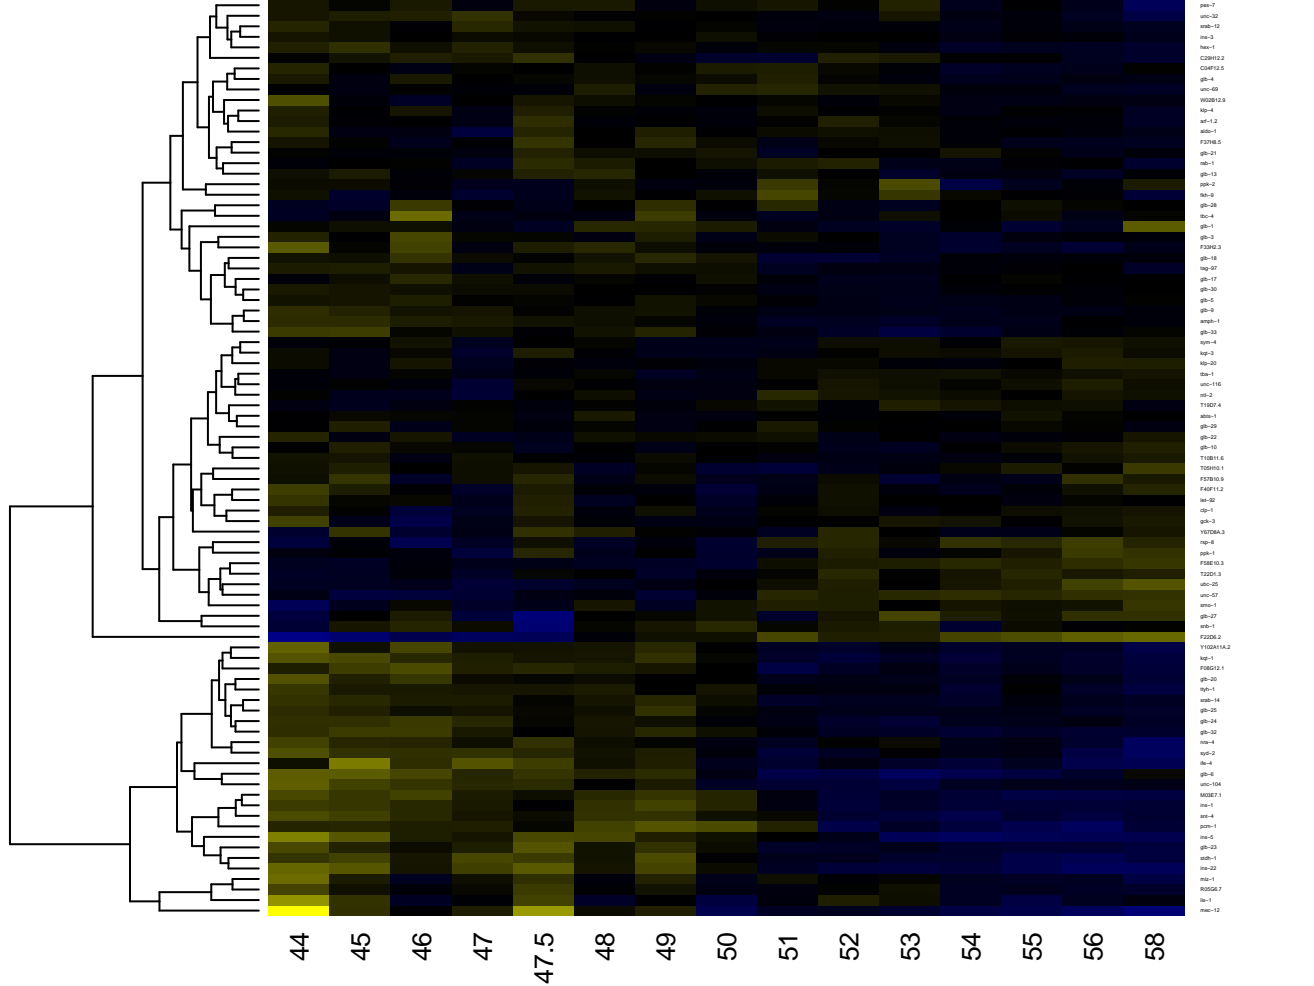

# linker cell

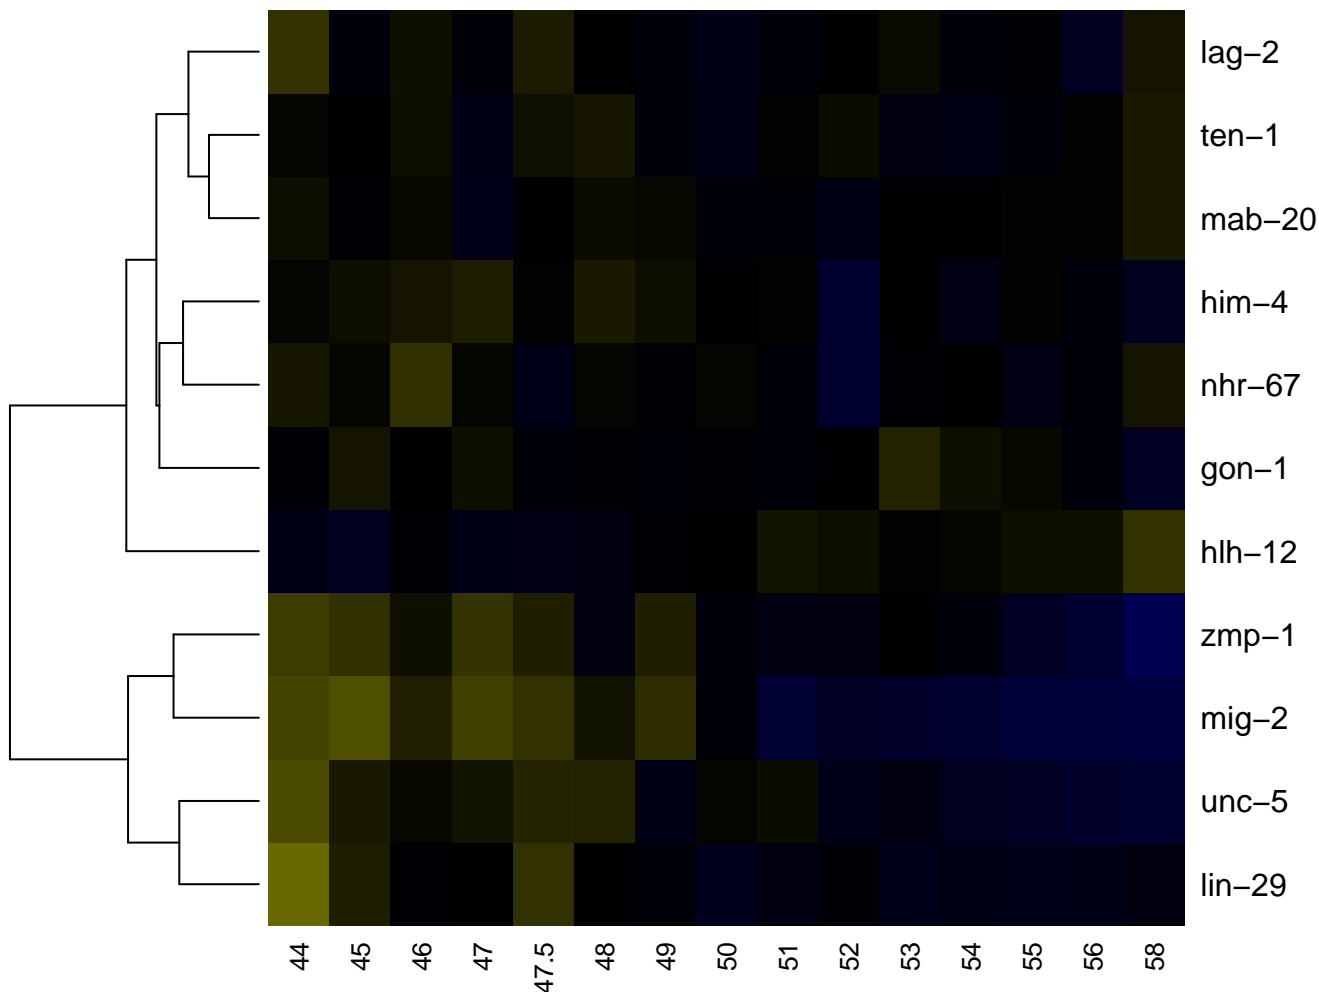

# LUAL

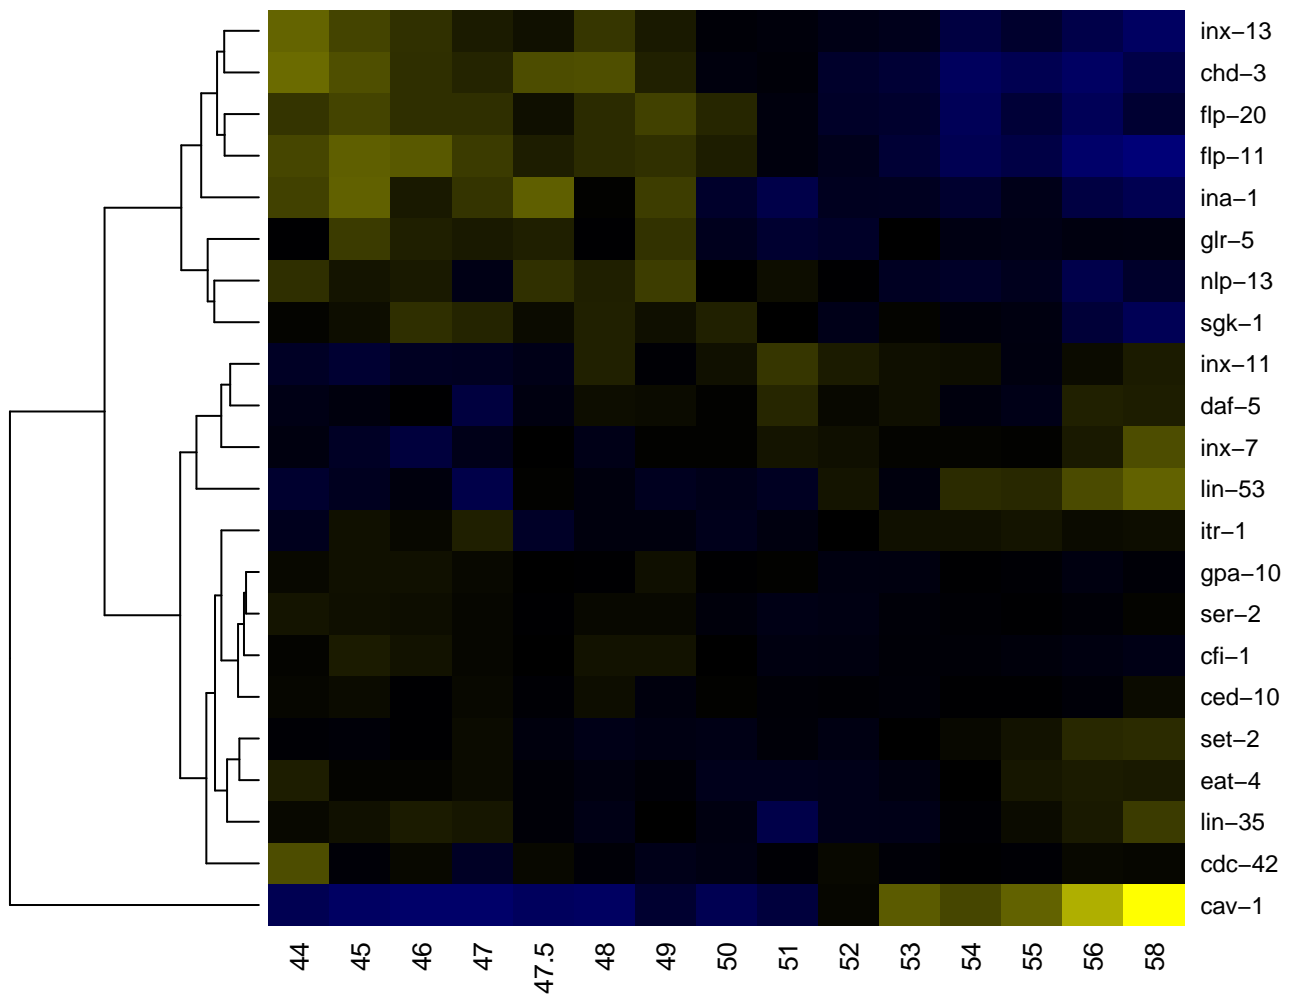

# LUAR



# lumbar ganglion

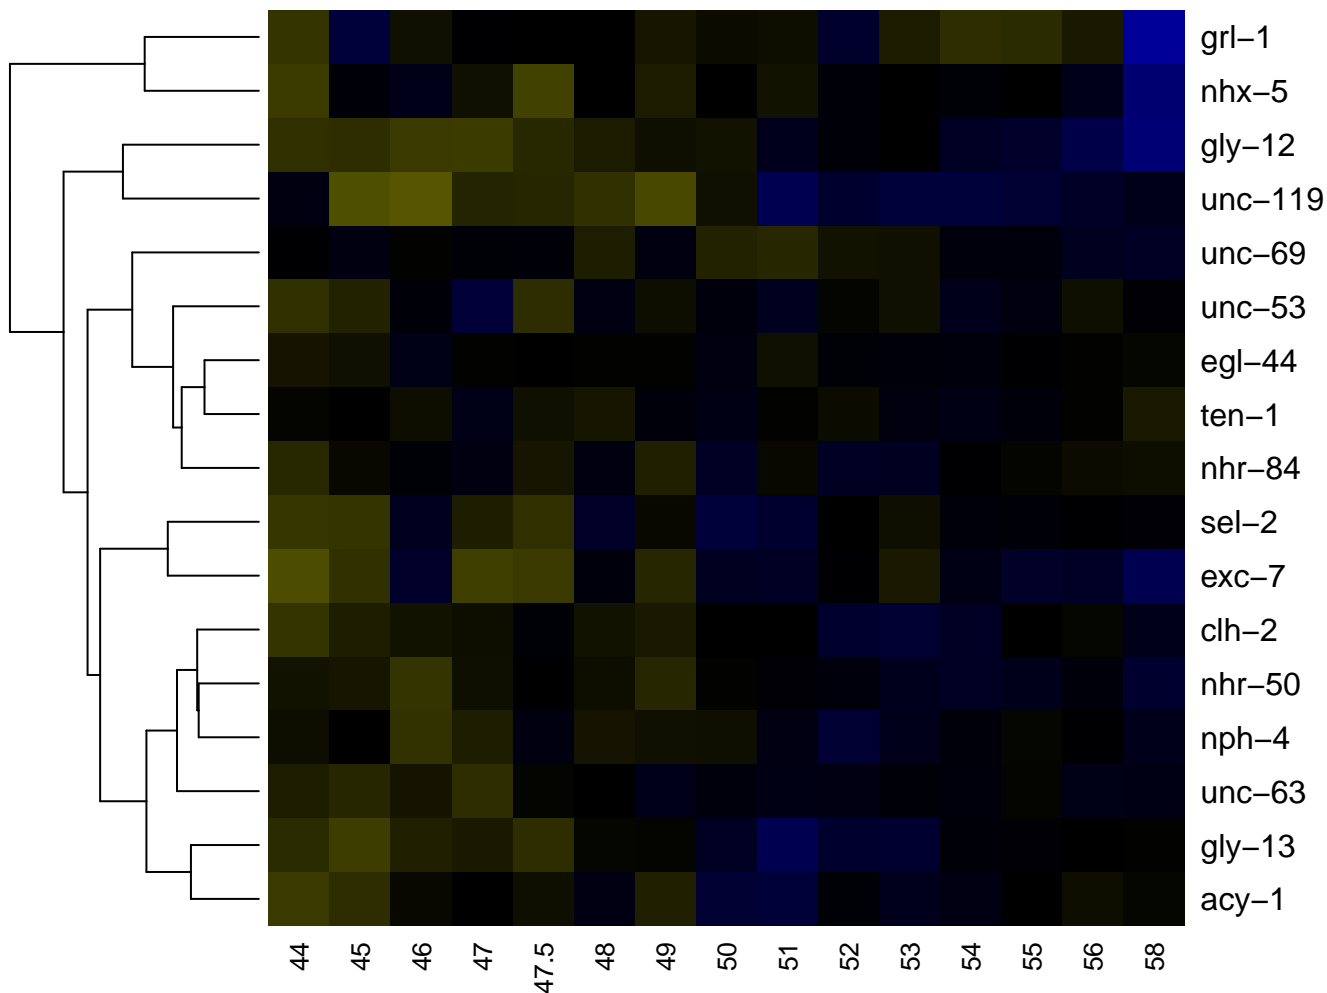



# M cell

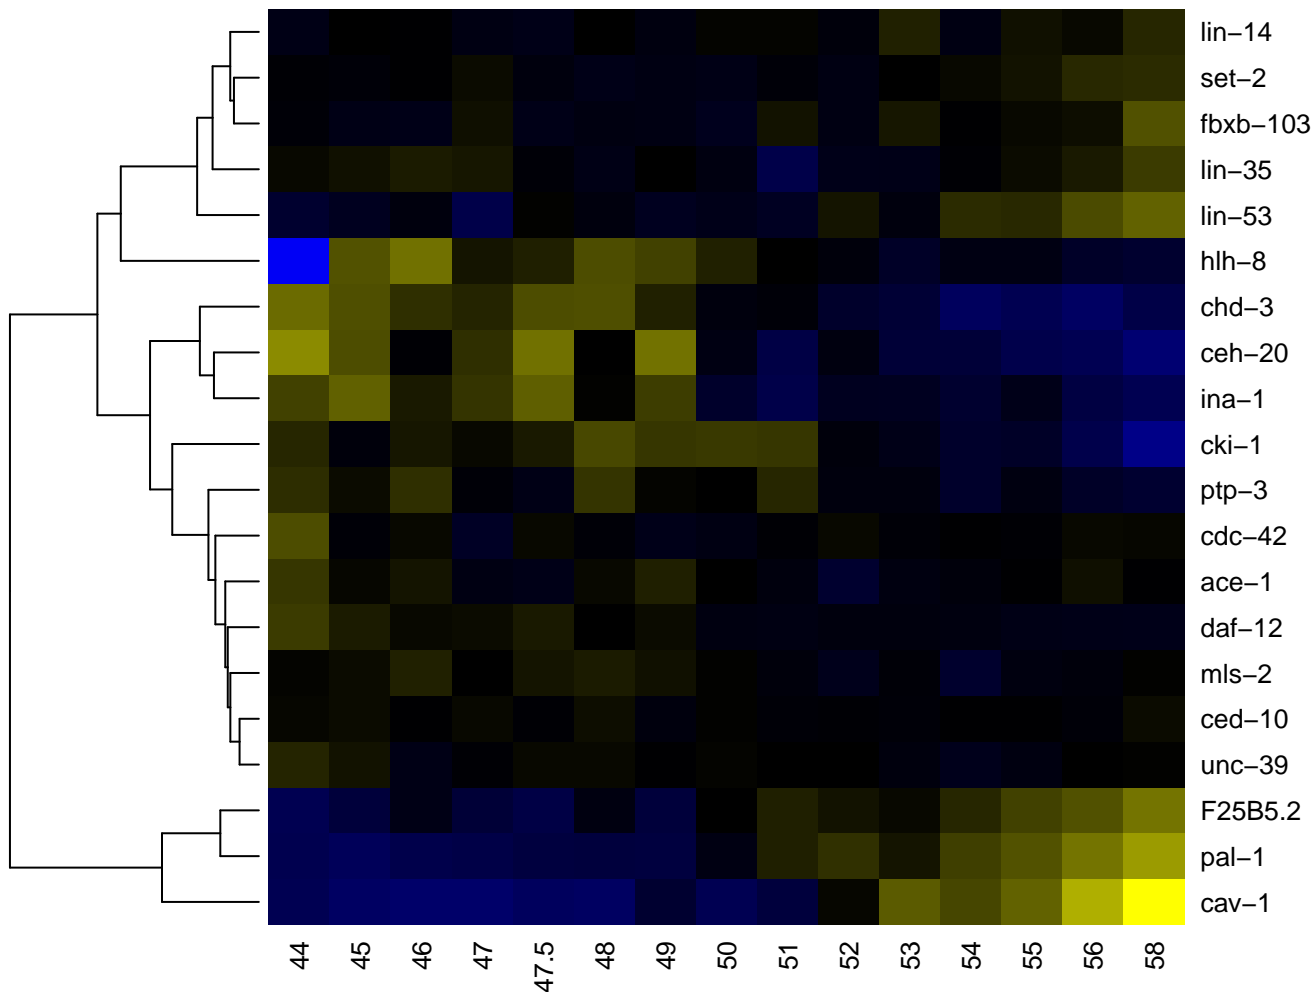



# M.dlp

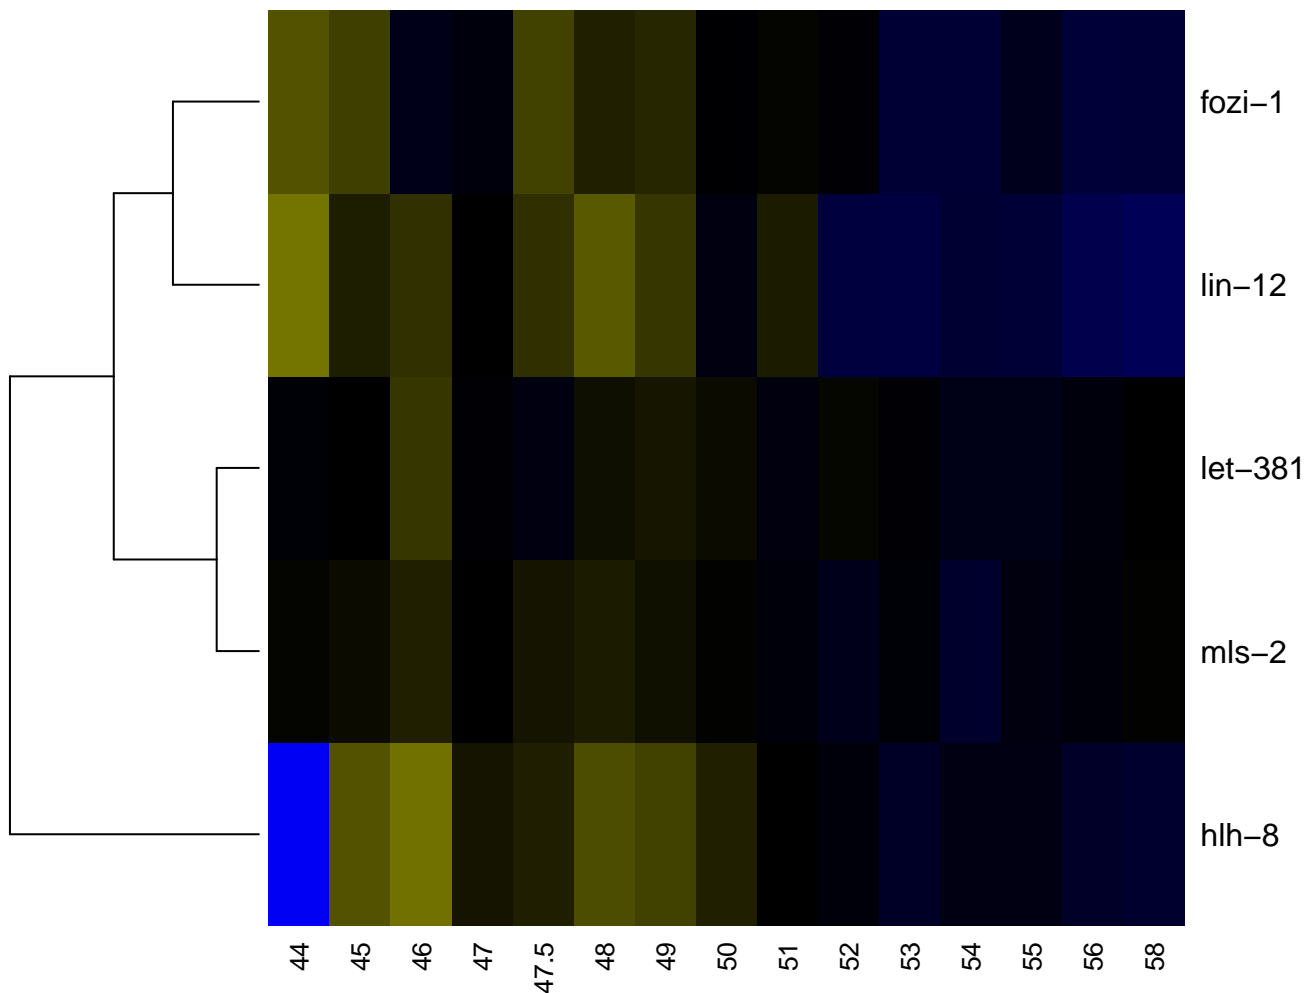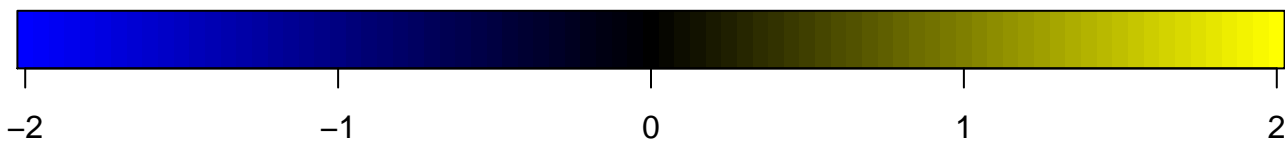

# M.drp

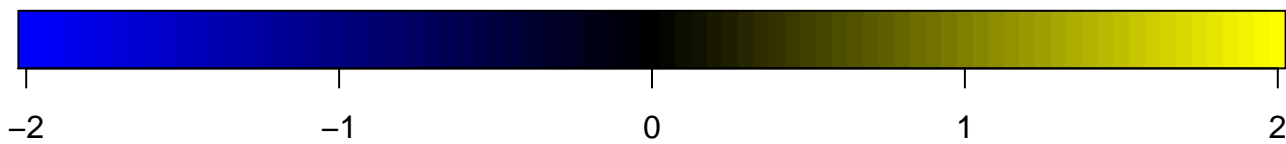



# M1

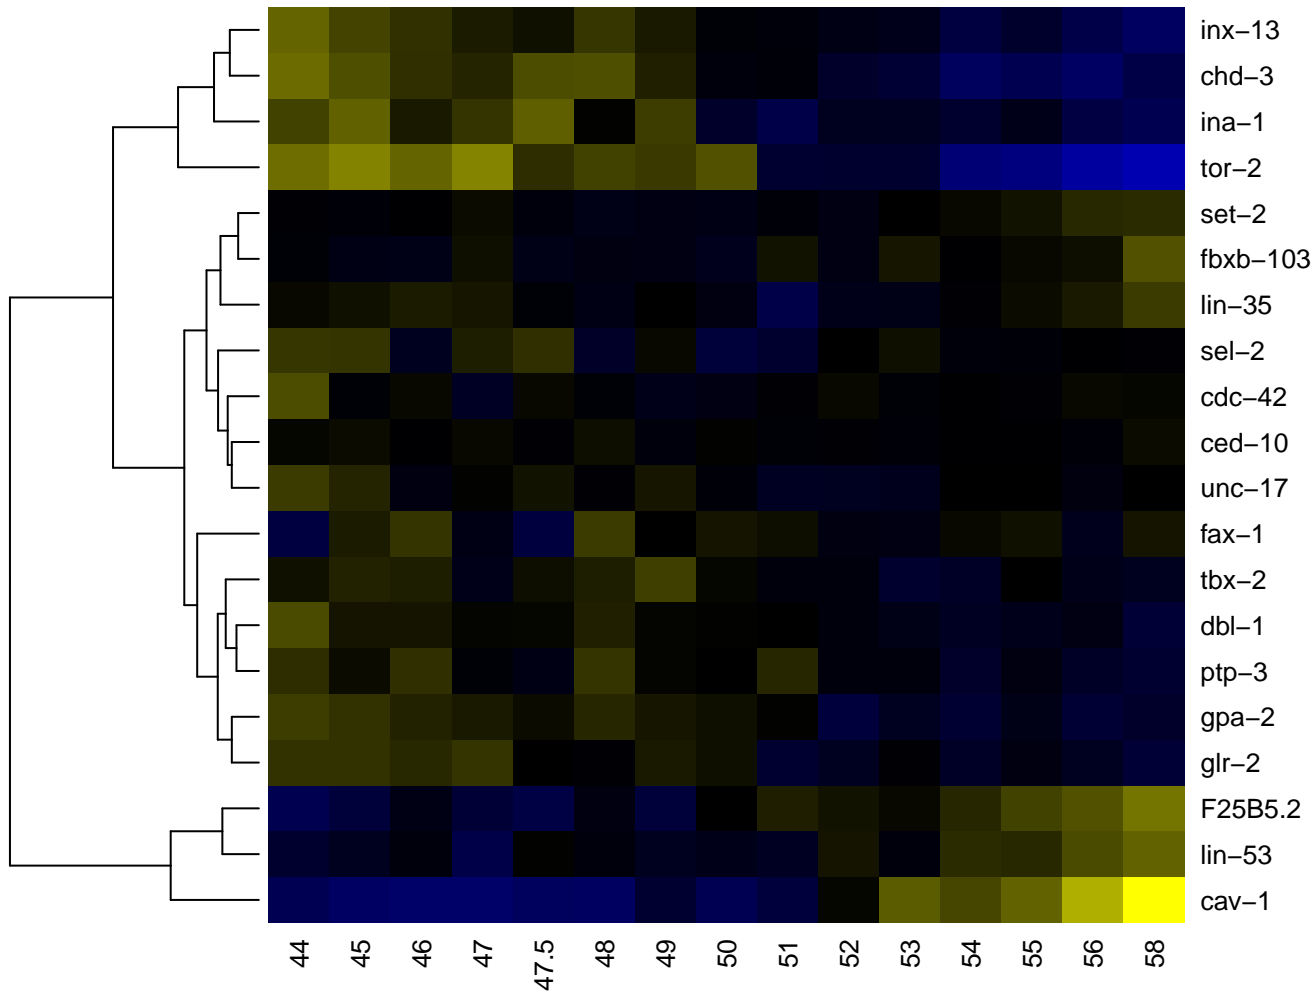

# m2L

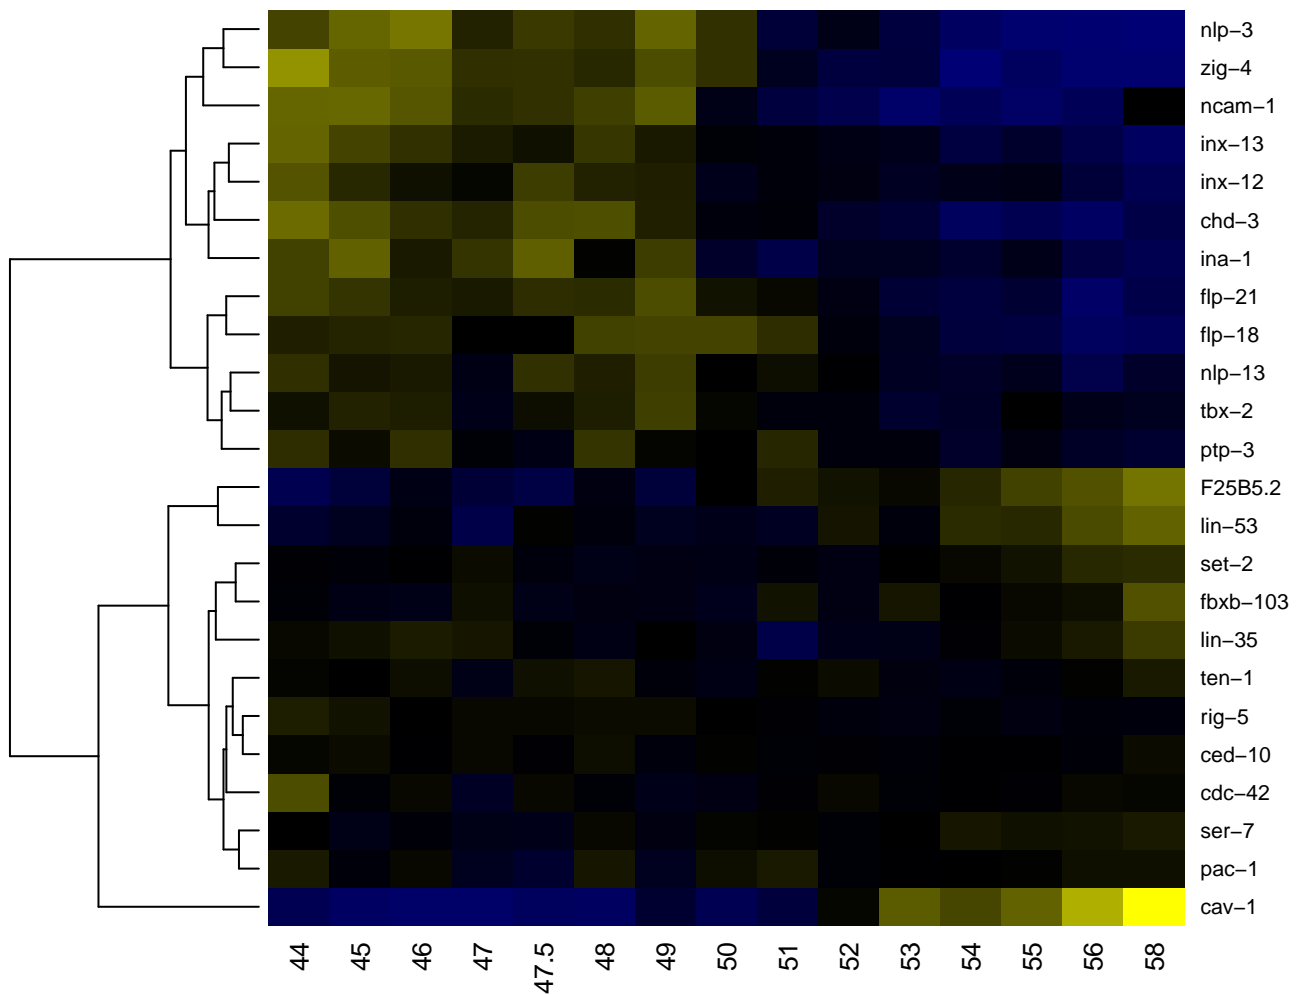

# m2R





# M3 neuron

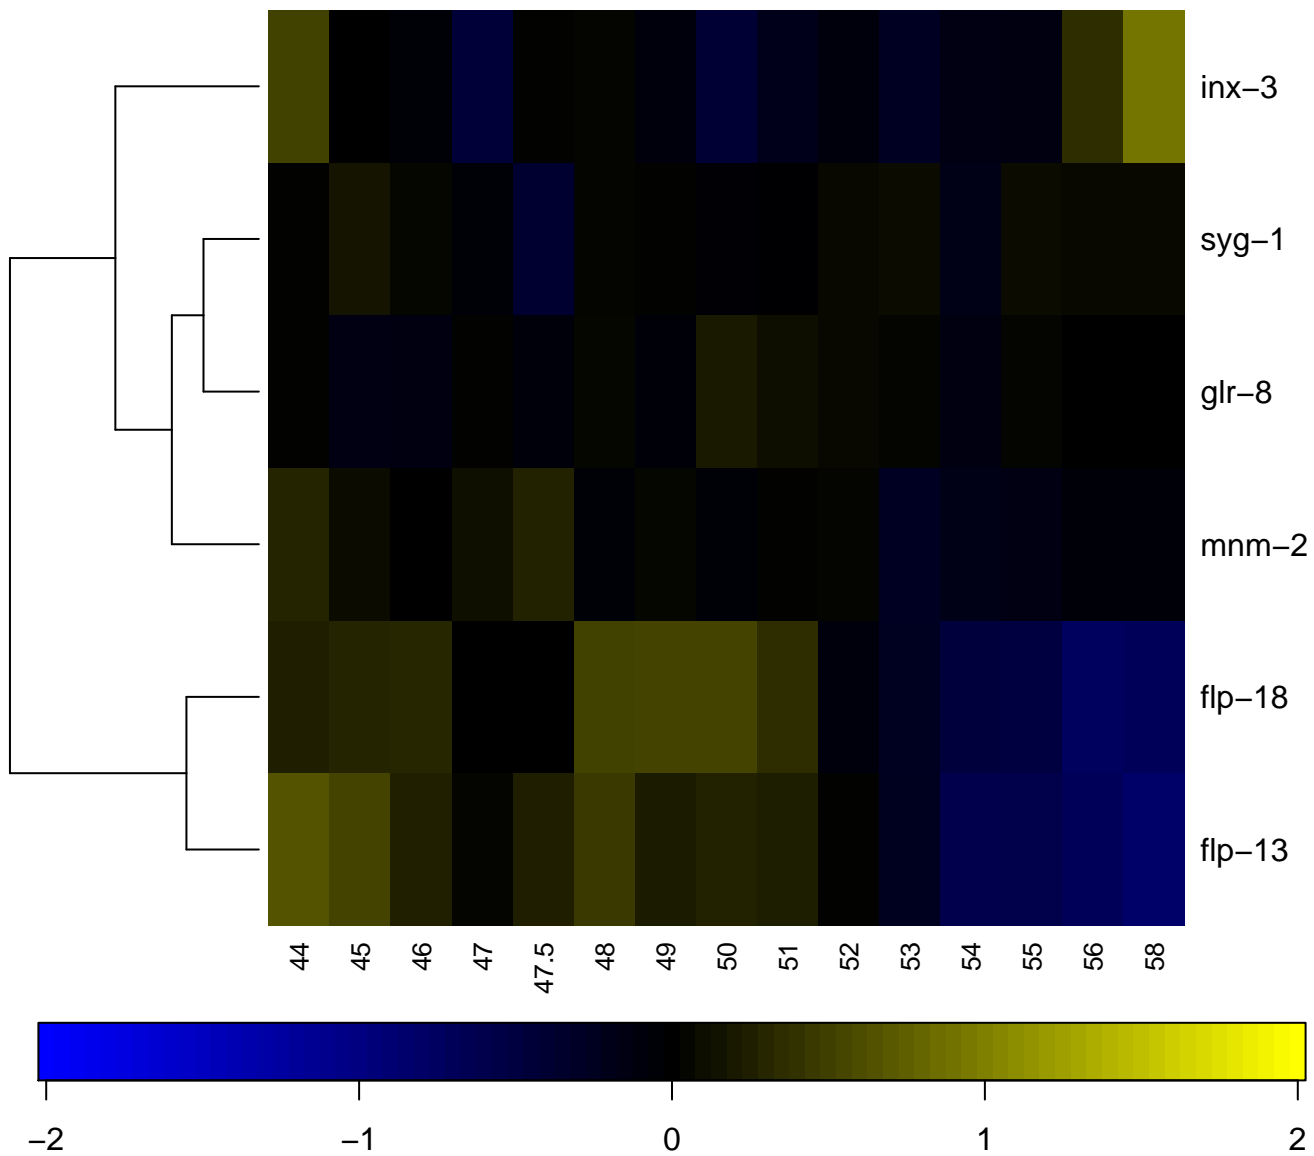

# m3L

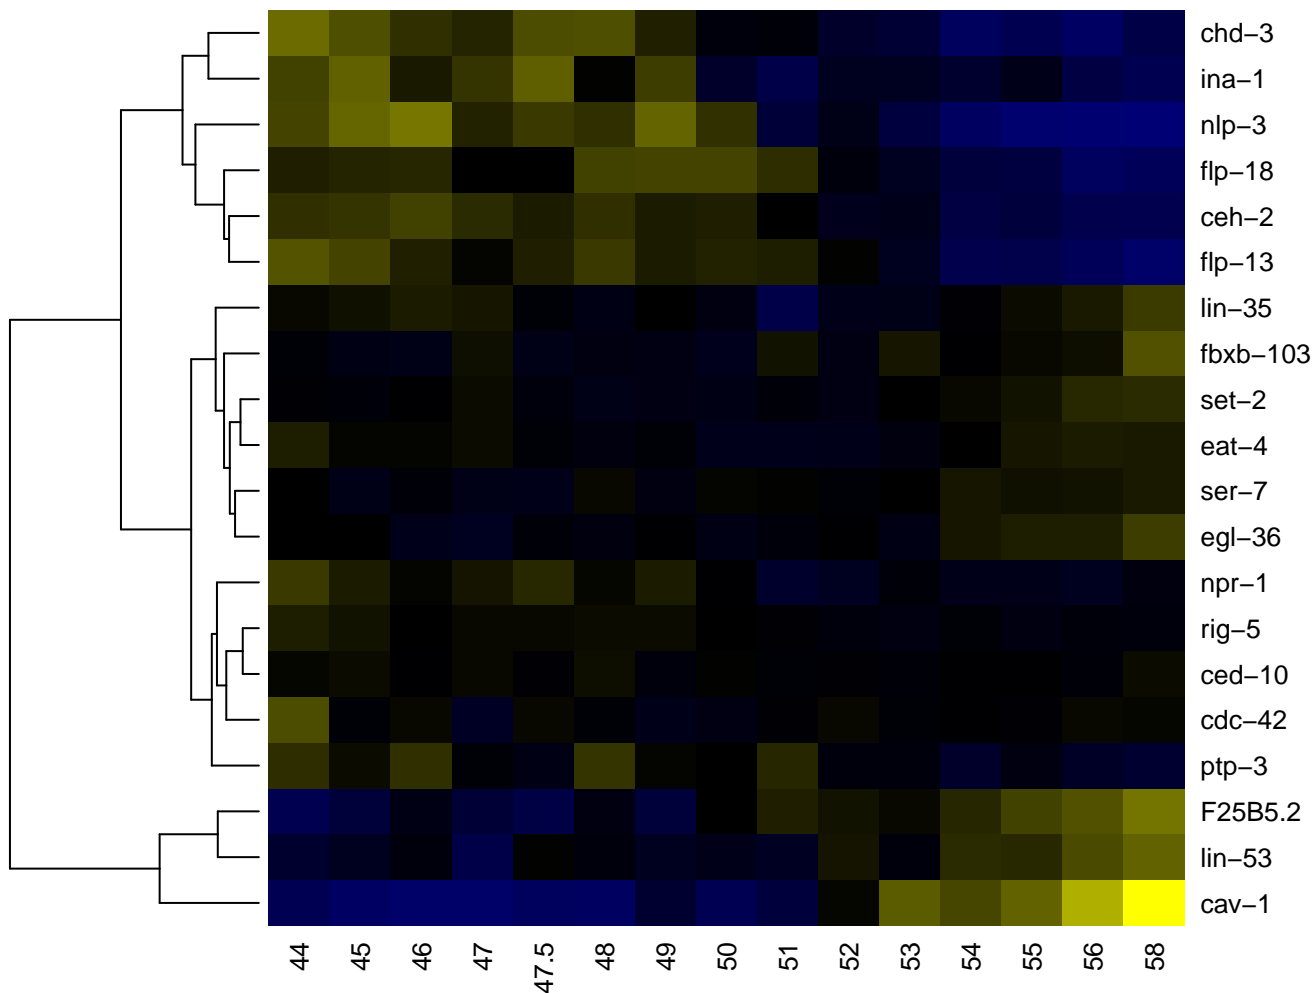

# m3R

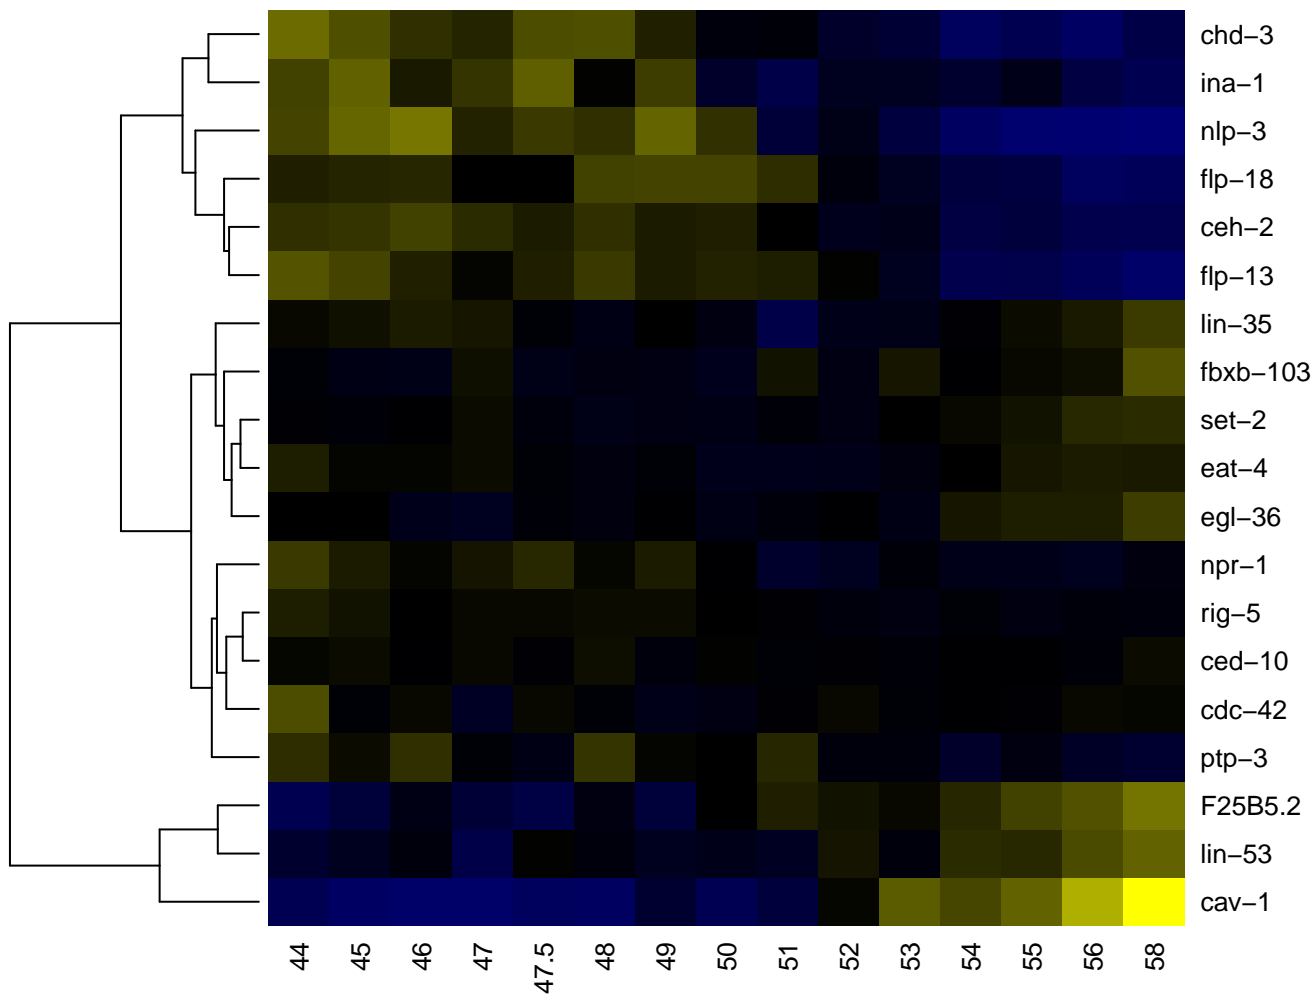

# M4

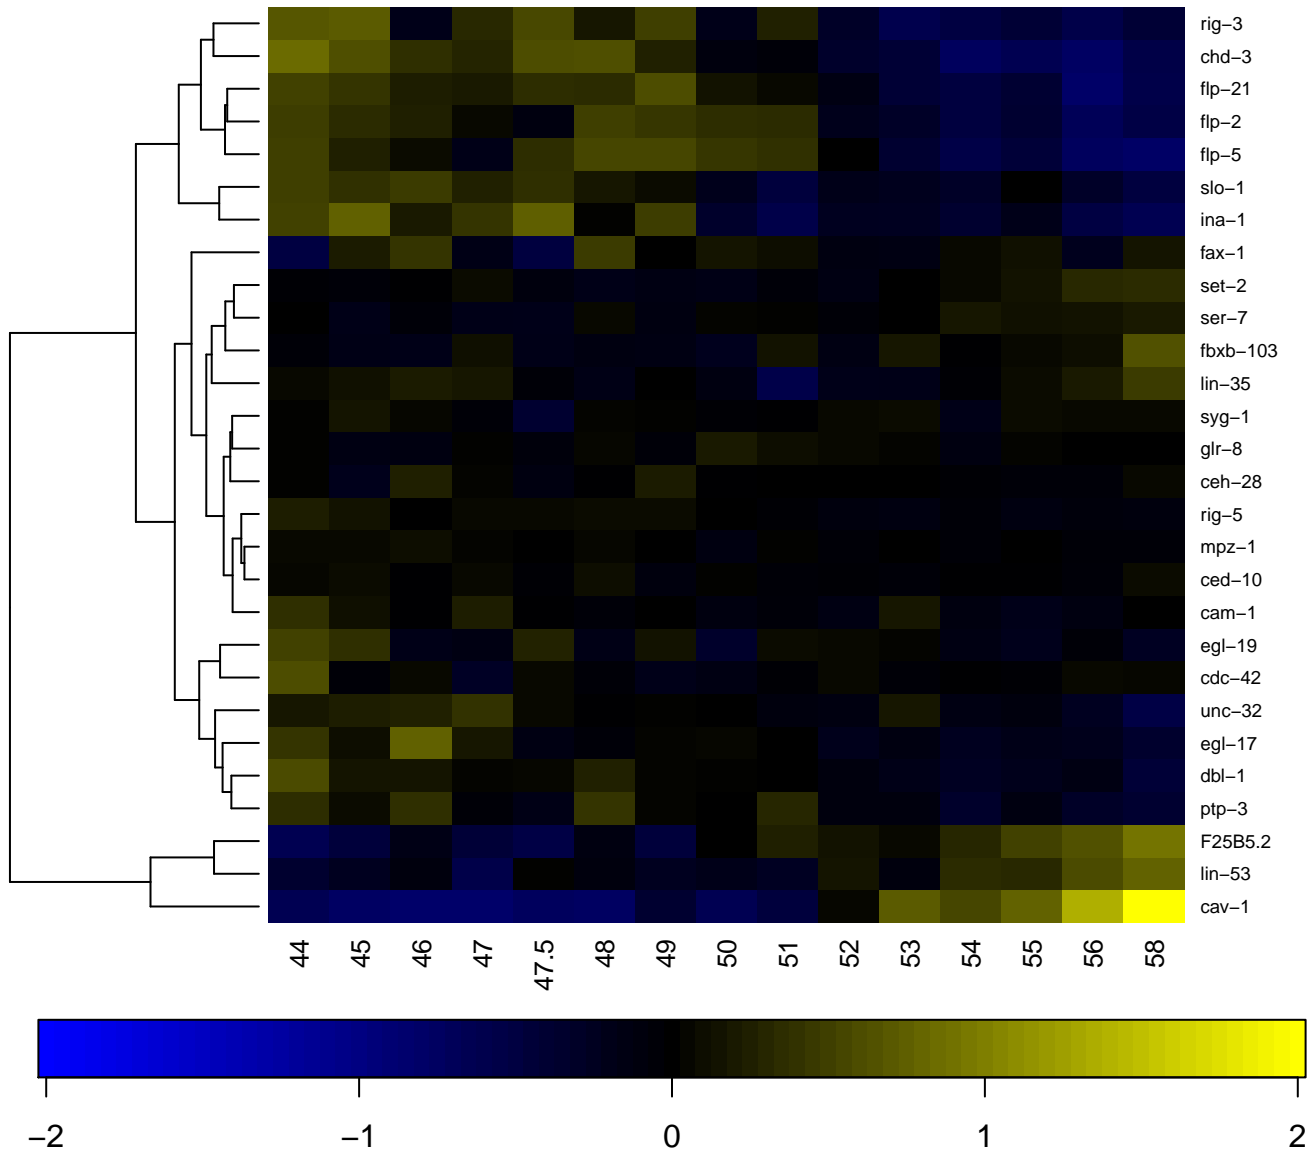

# M5

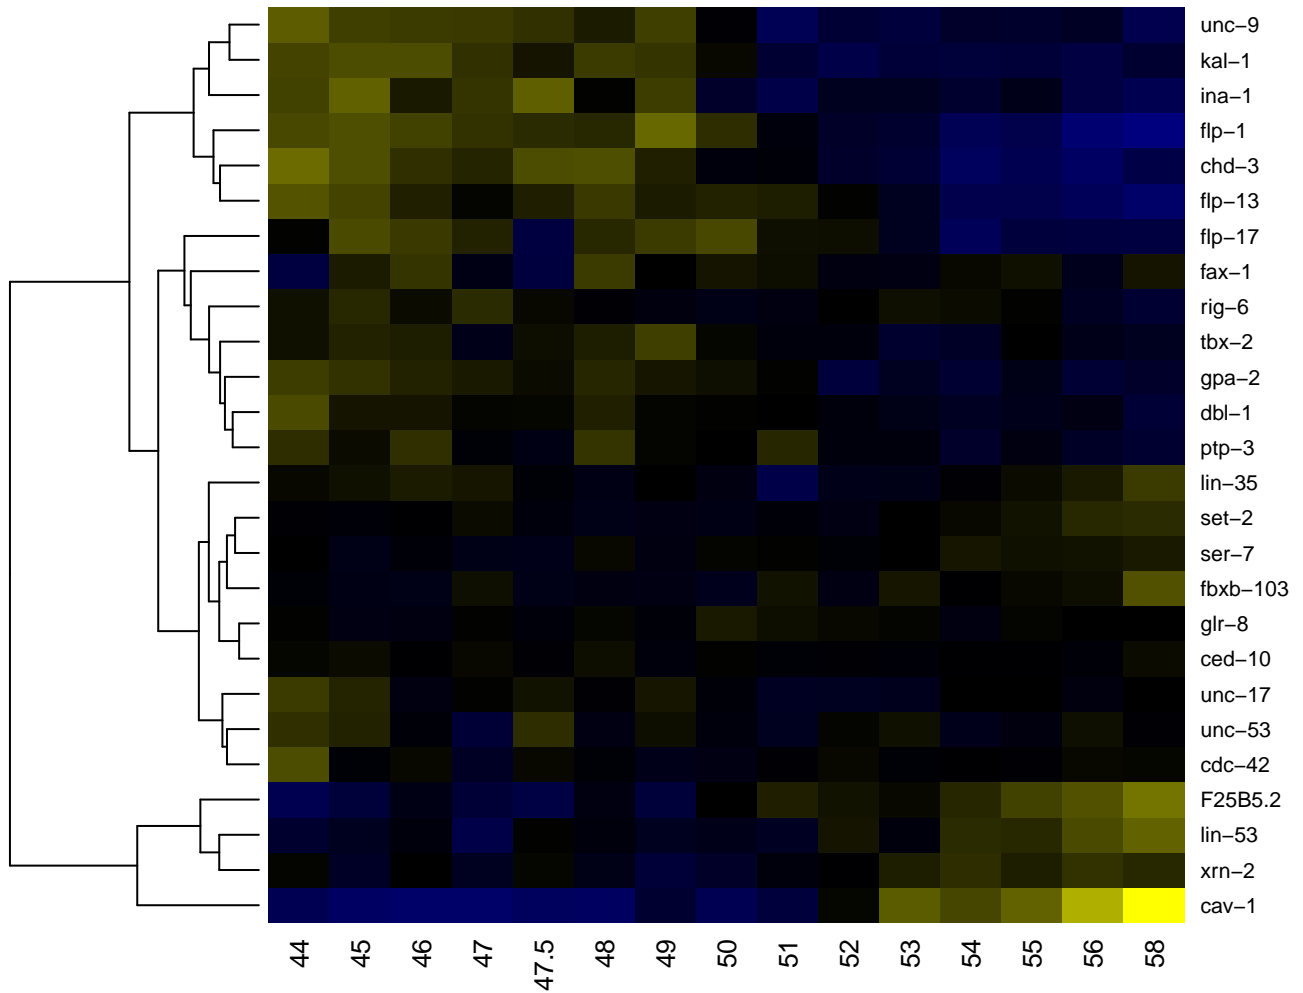

# male-specific

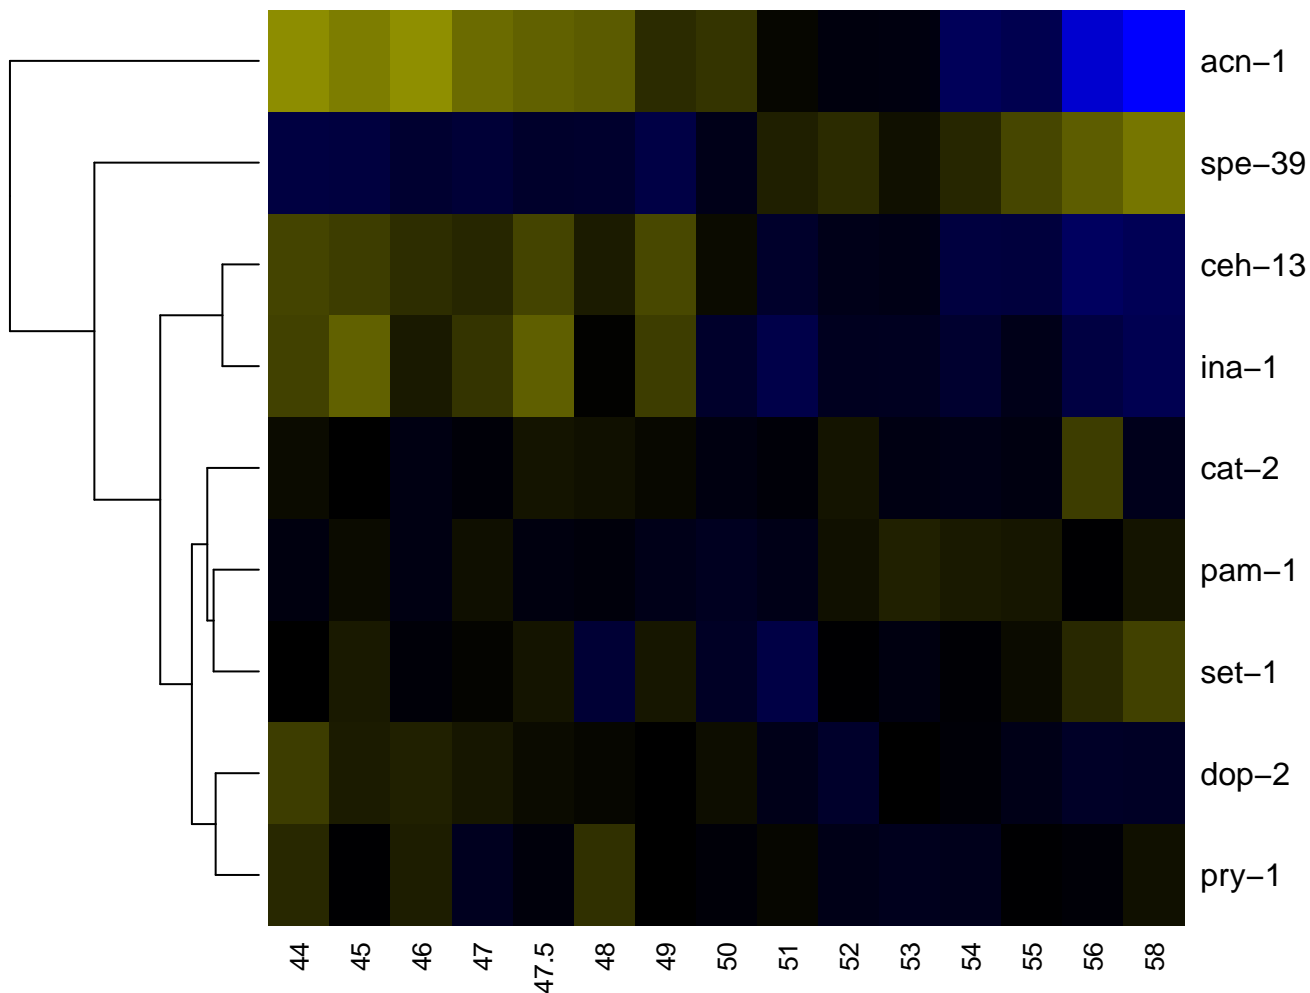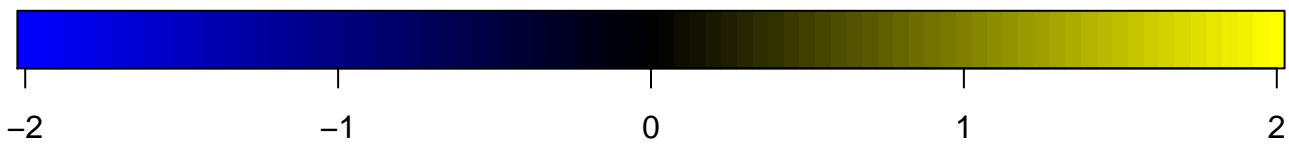

# male gonad

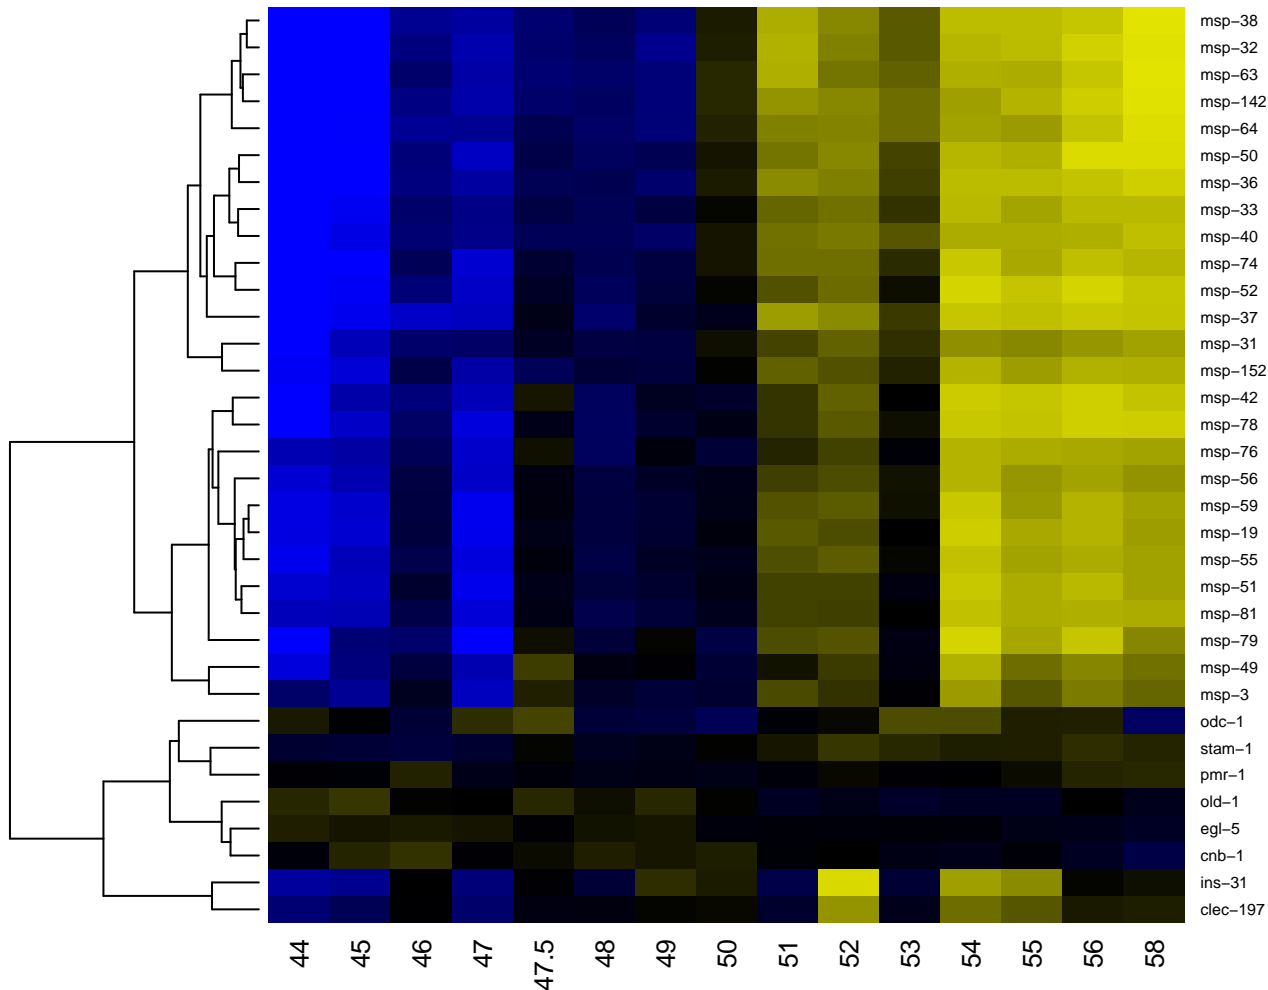

# marginal cell

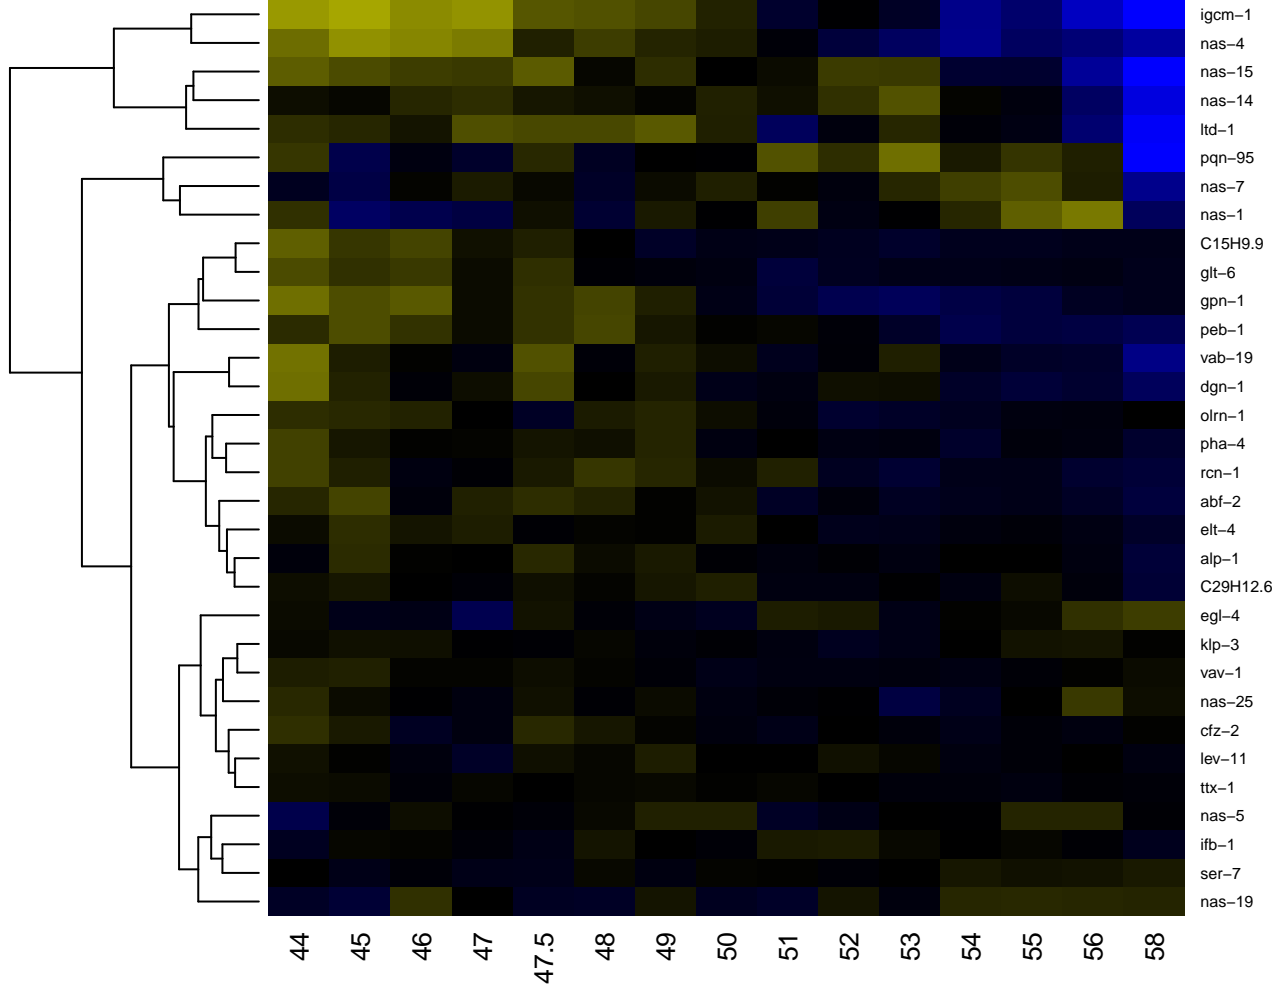



# mc1

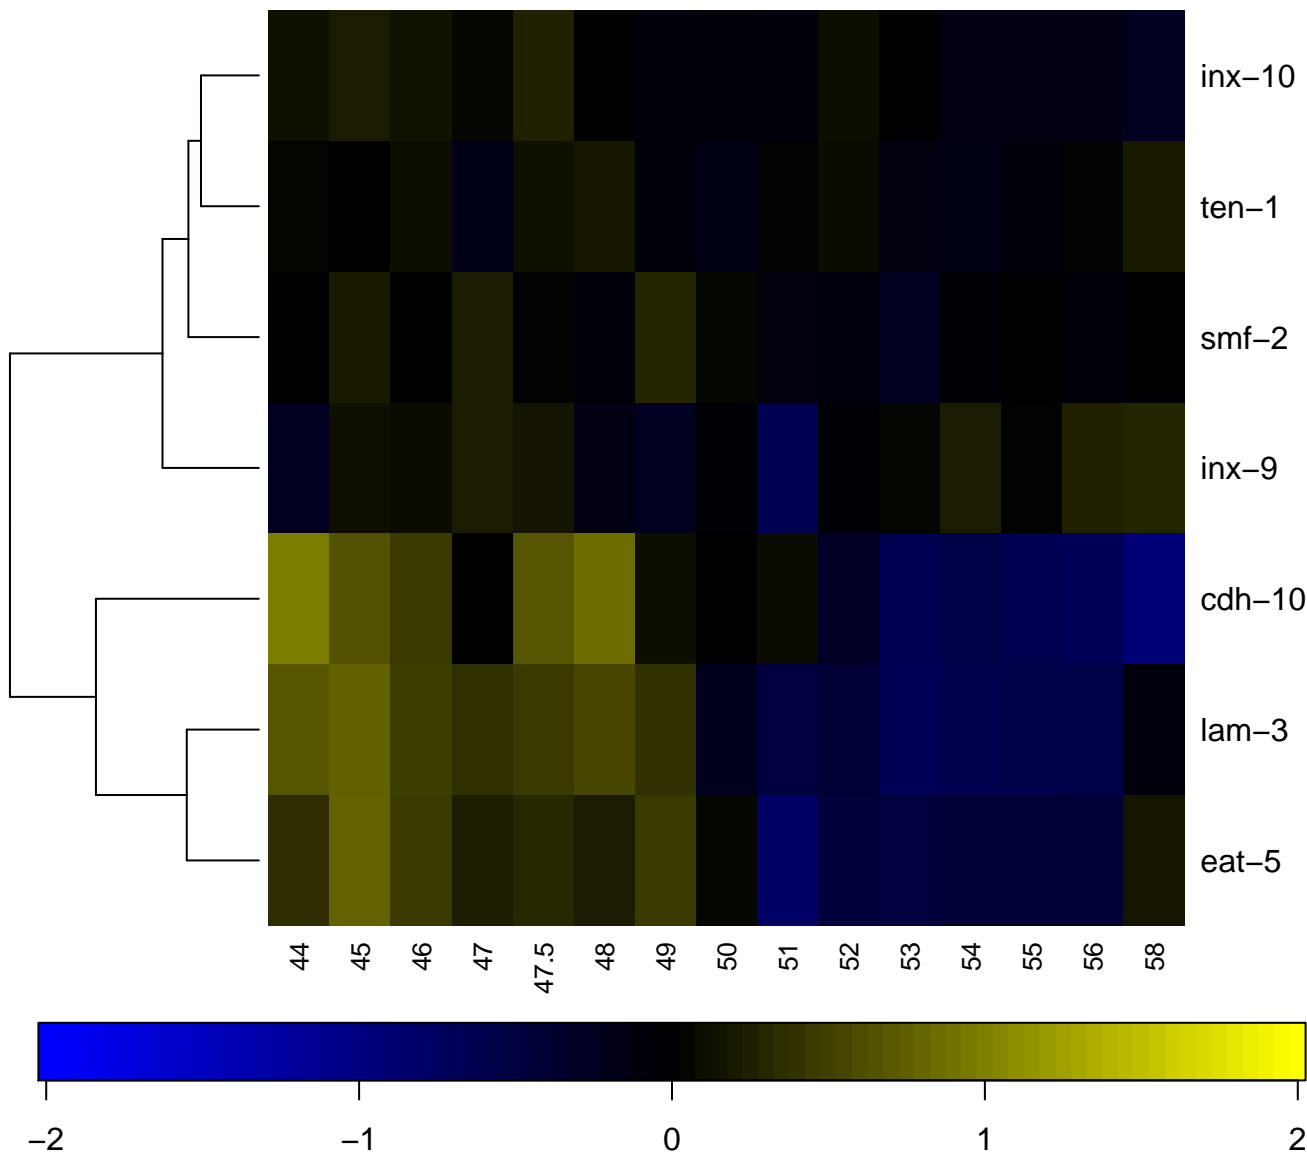

# mc1DL



# mc1DR



# mc1V



# mc2

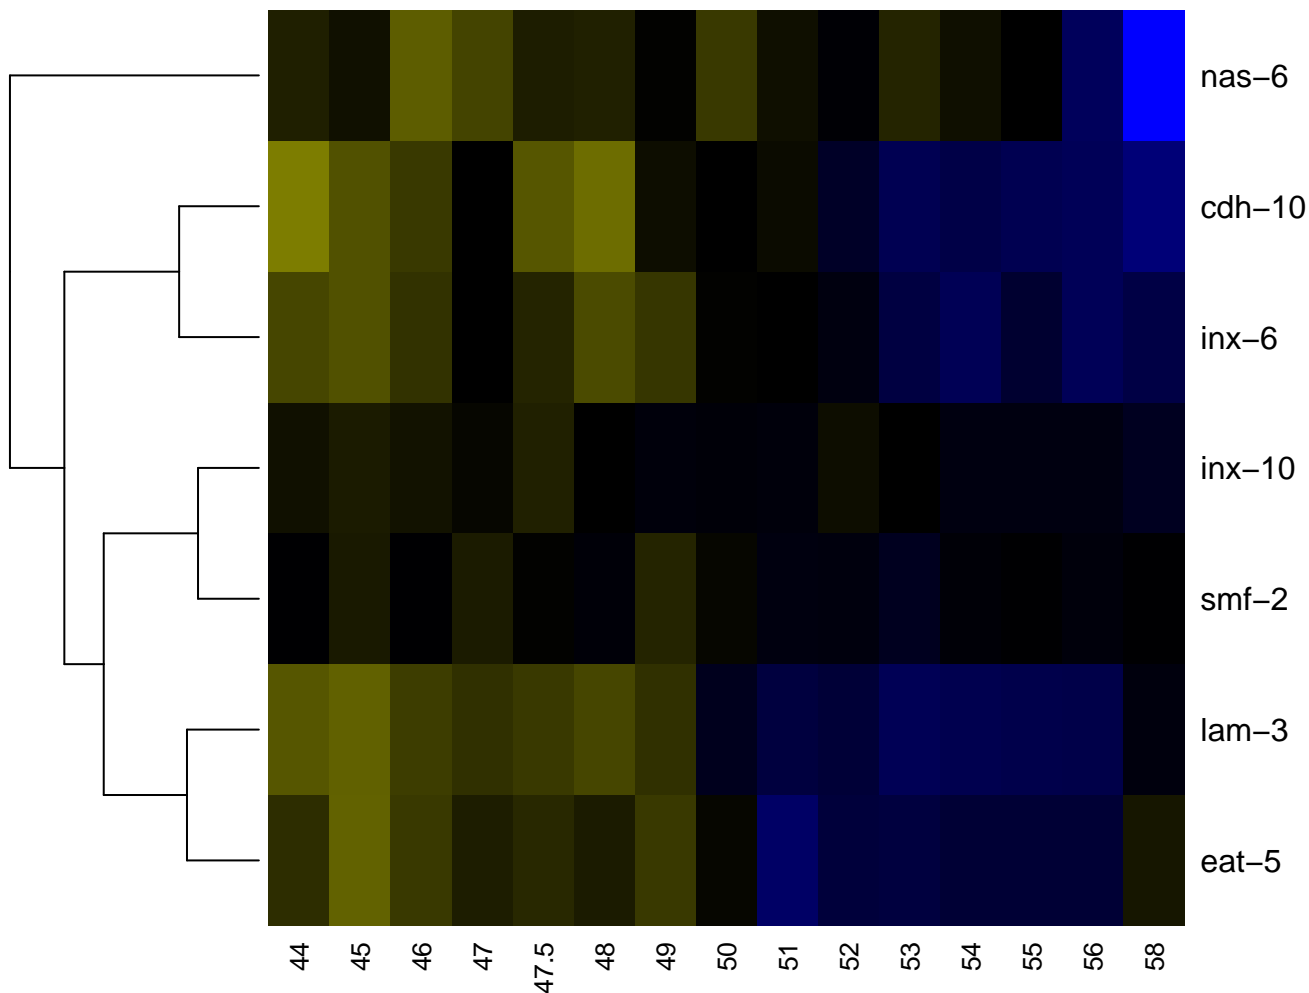

-2

-1

0

1

2

# mc2DL

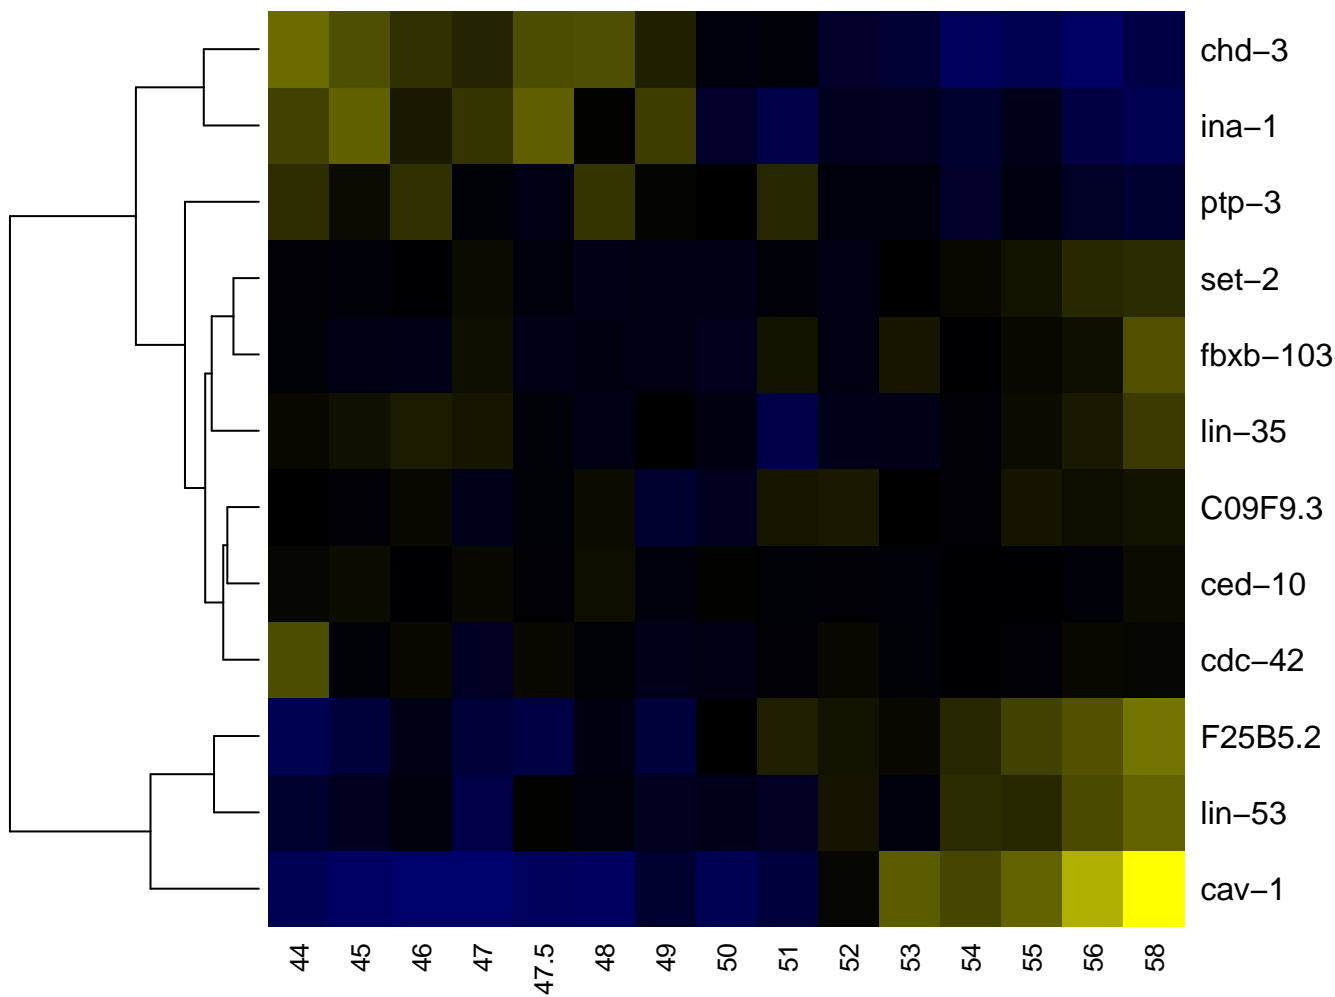

-2

-1

0

1

2

# mc2DR



# mc2V



-2

-1

0

1

2



# mc3DL



# mc3DR



# mc3V

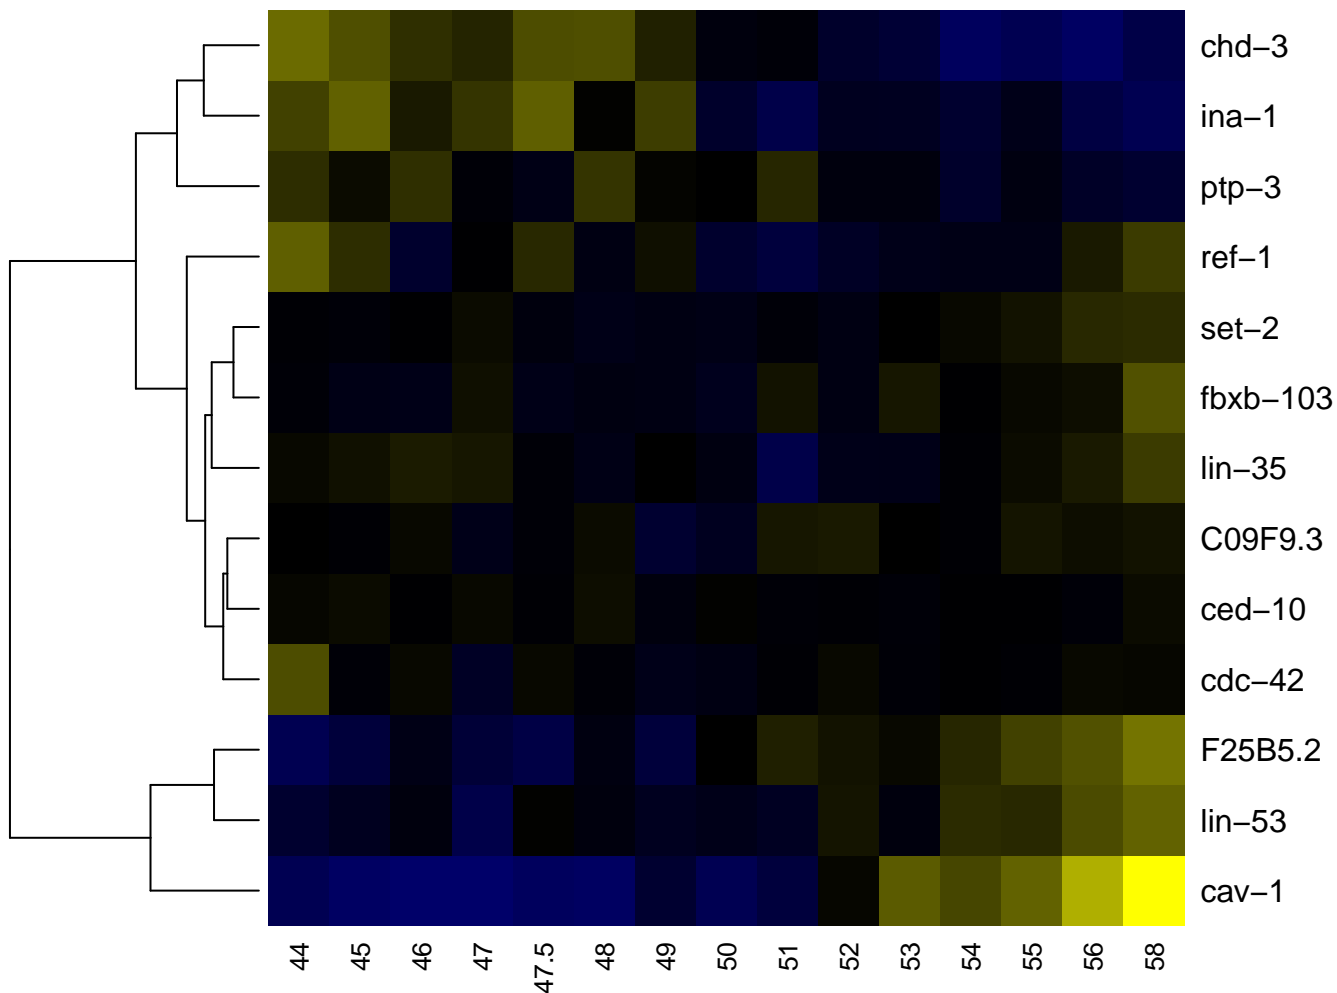

# MCL

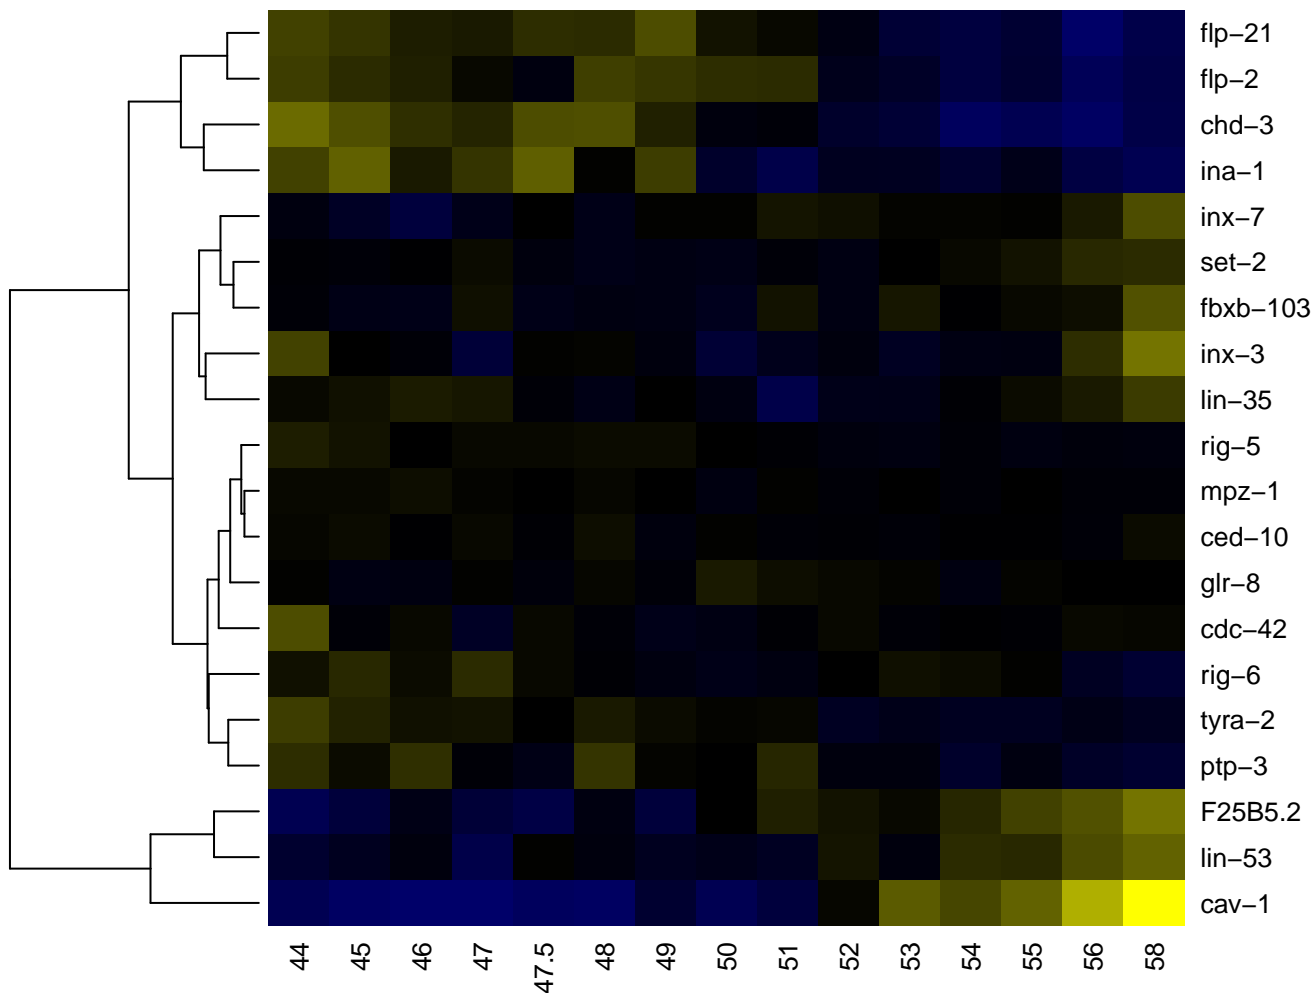

# MCR

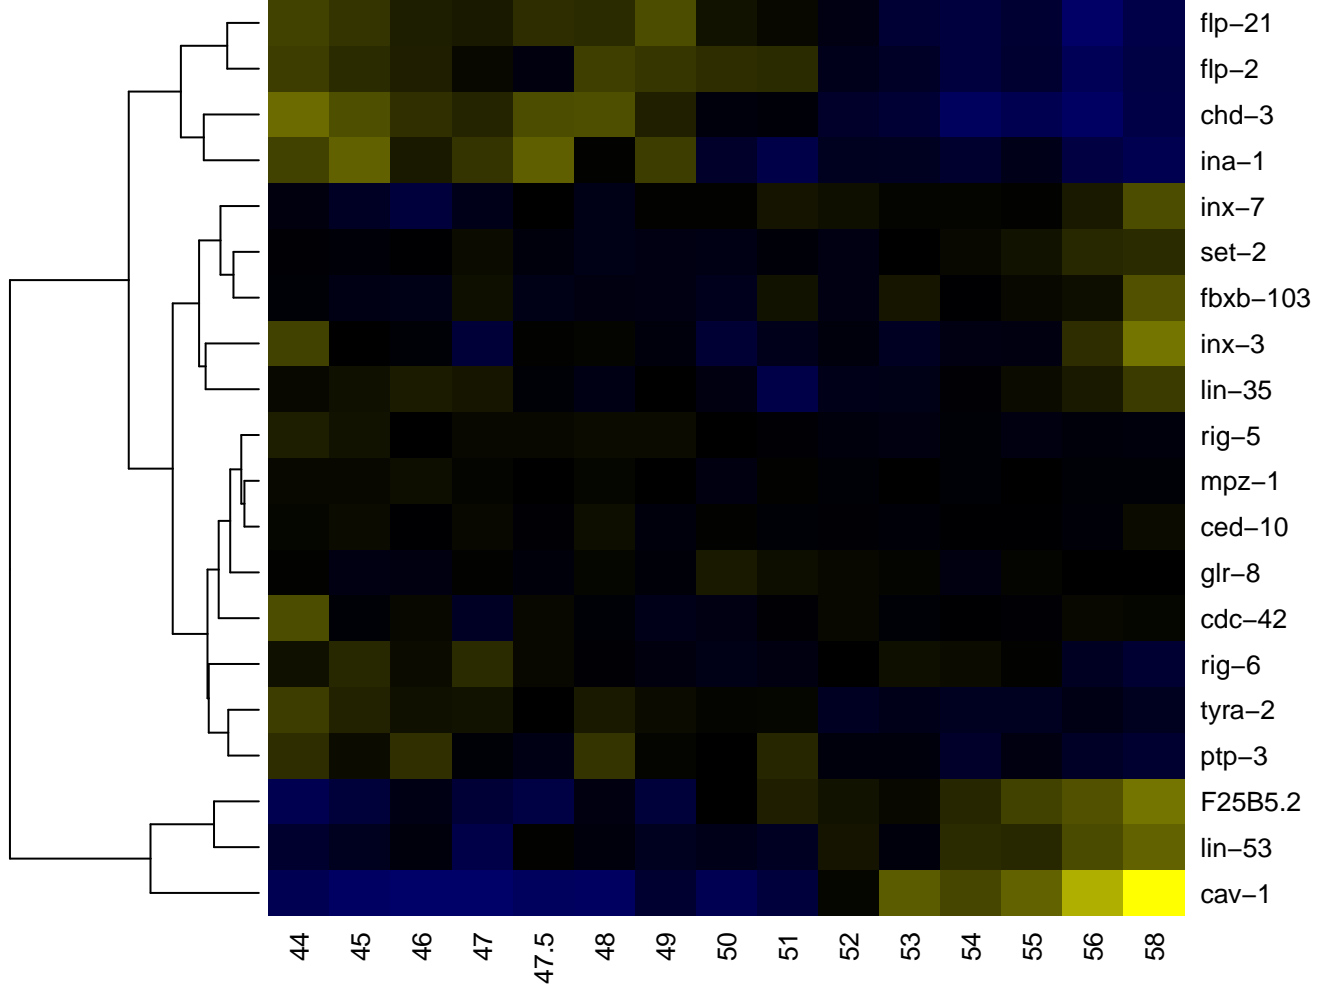

# metacarpus

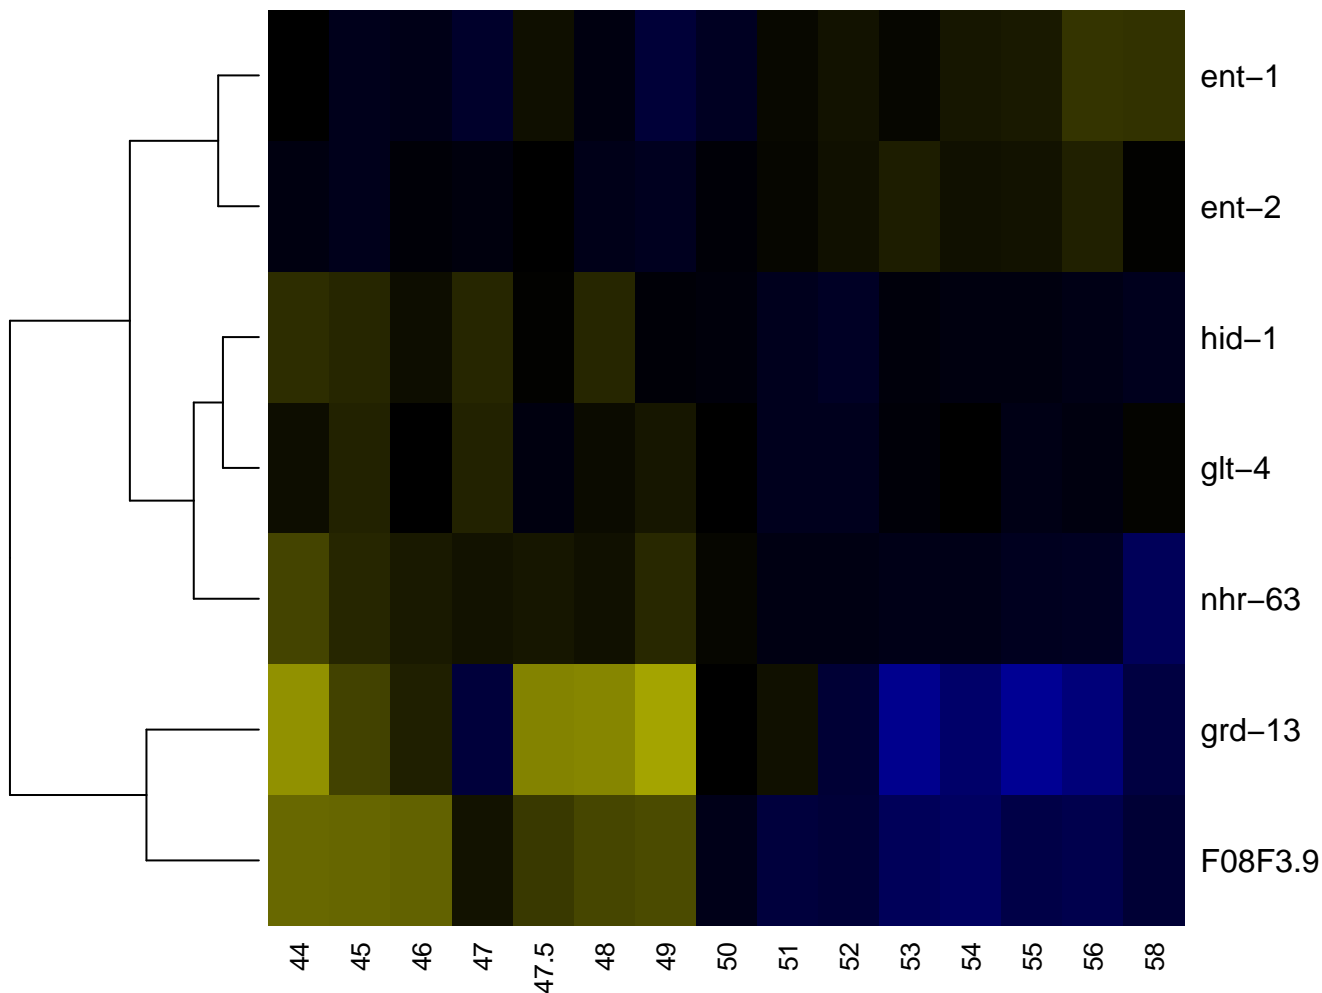

-2

-1

0

1

2

# motor neuron

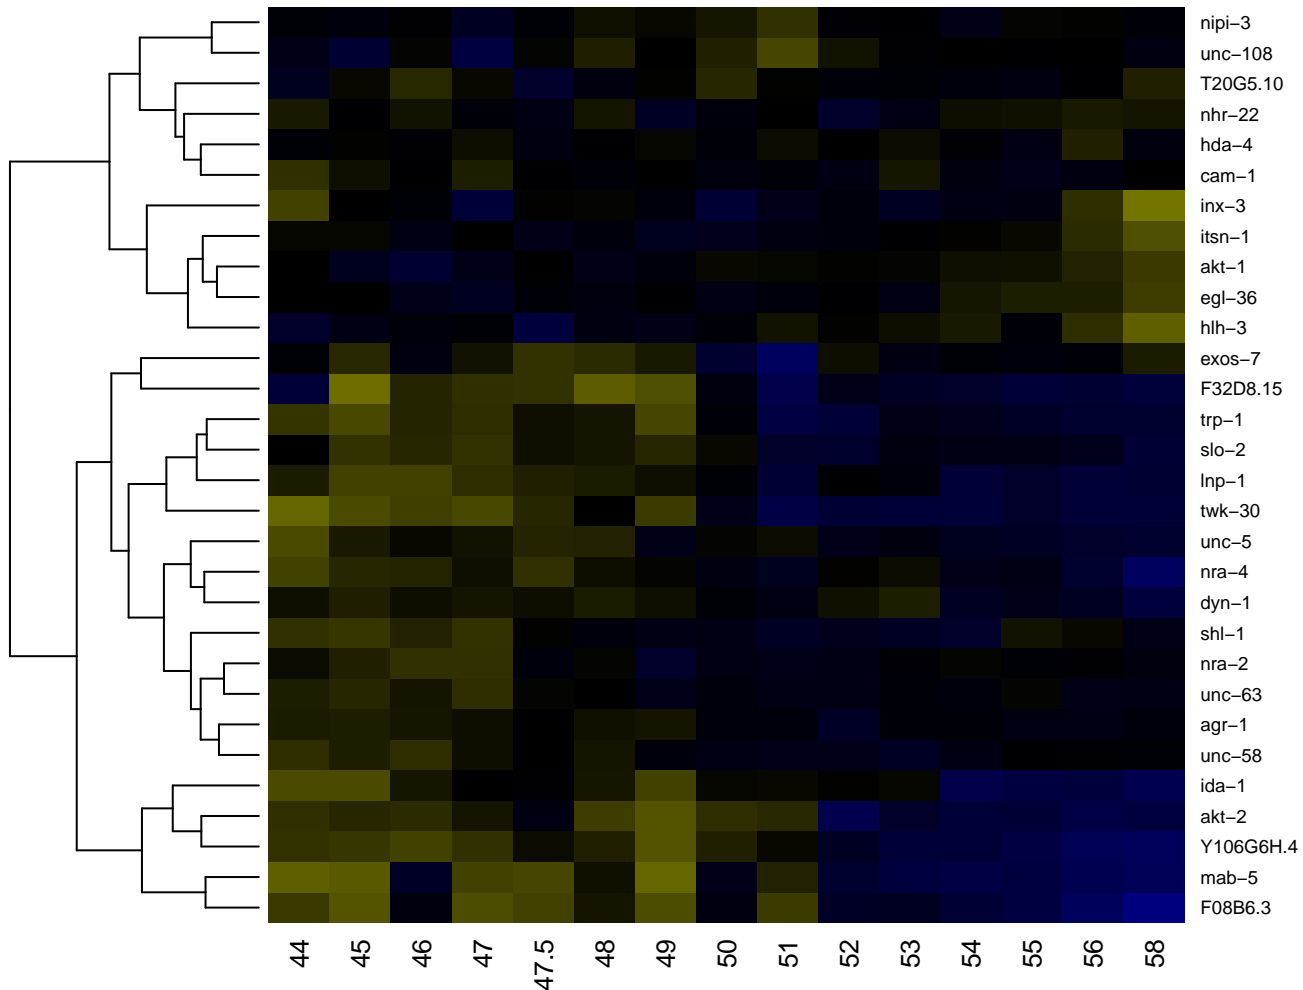

# MS

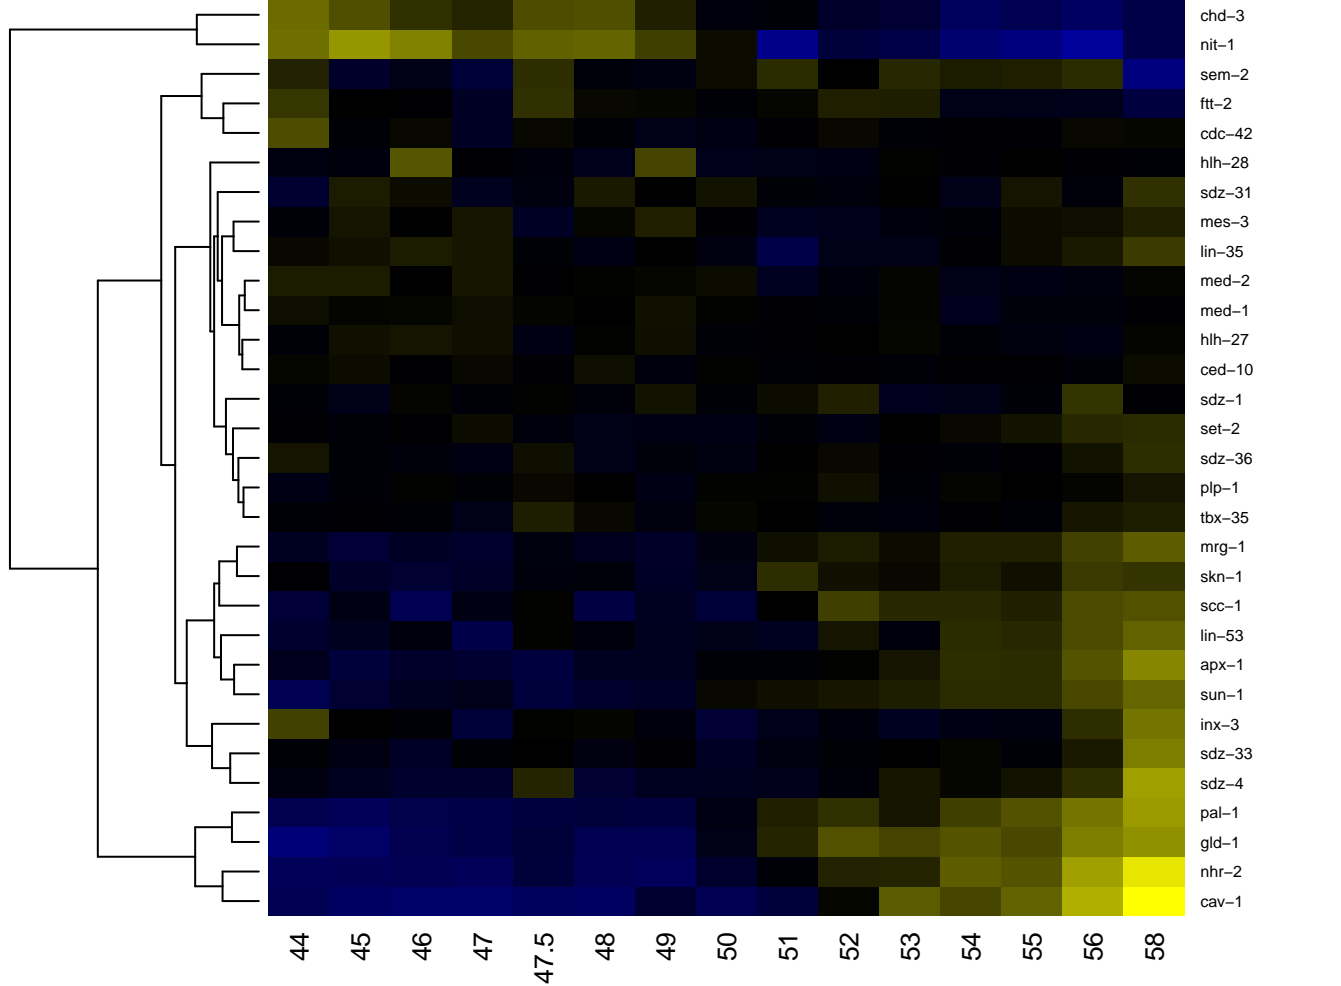



# MSa

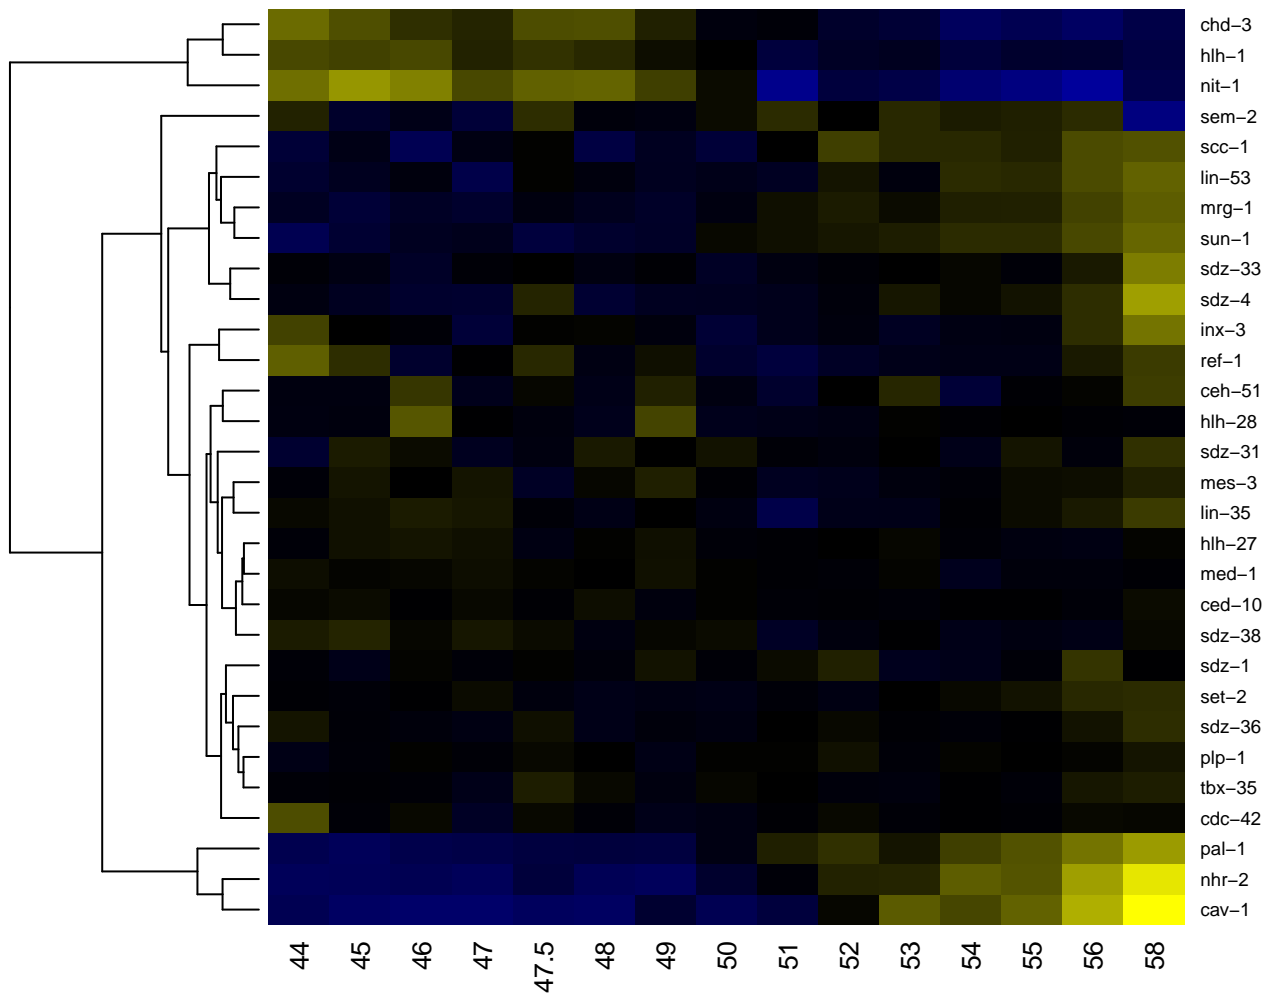

# MSaa

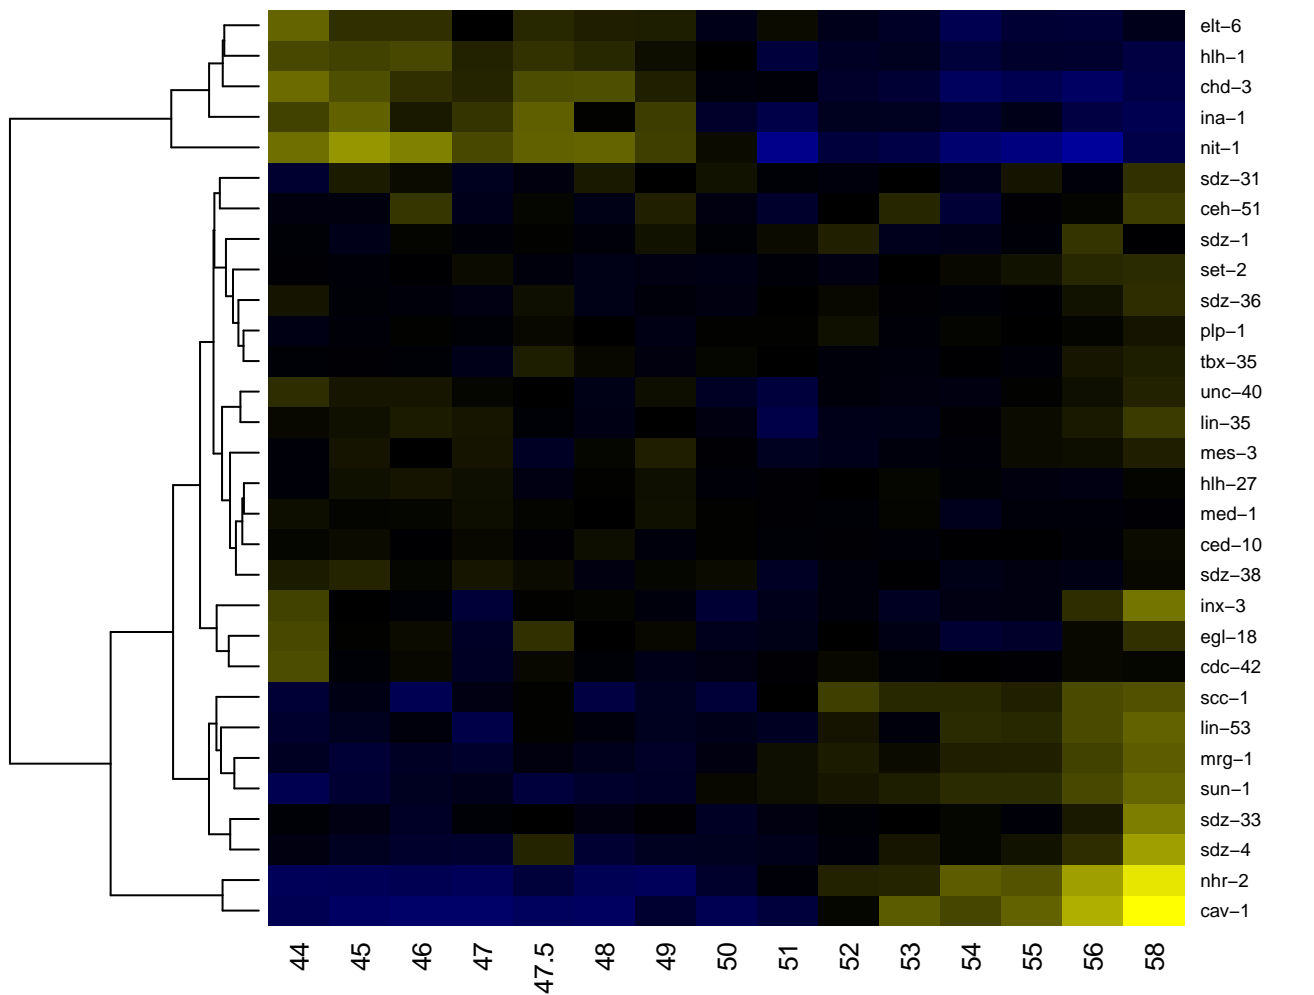

-2

-1

0

1

2

# MSaaa

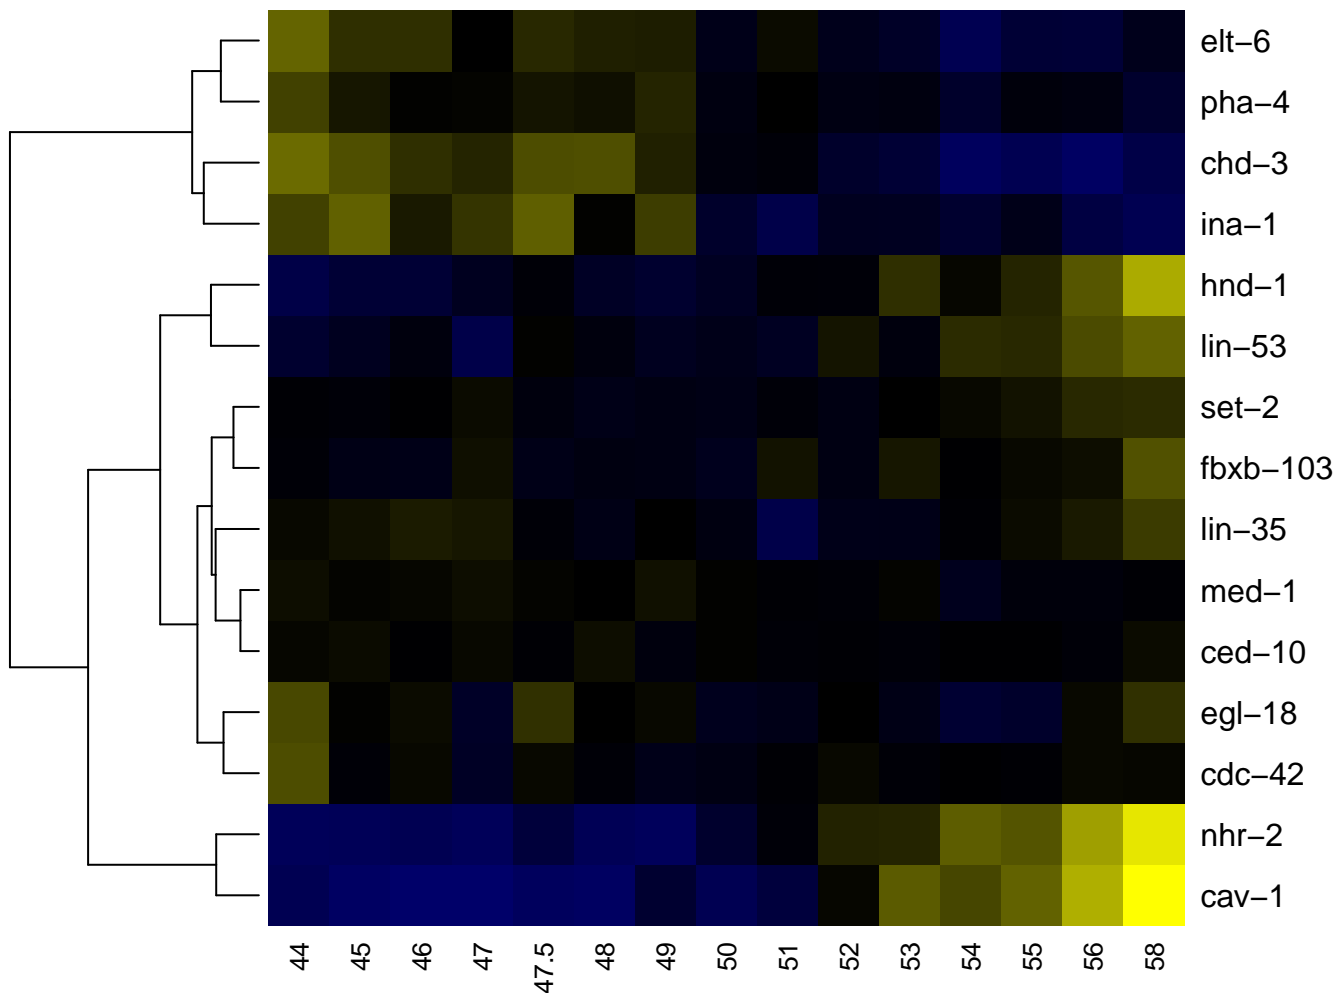

# MSaaaa

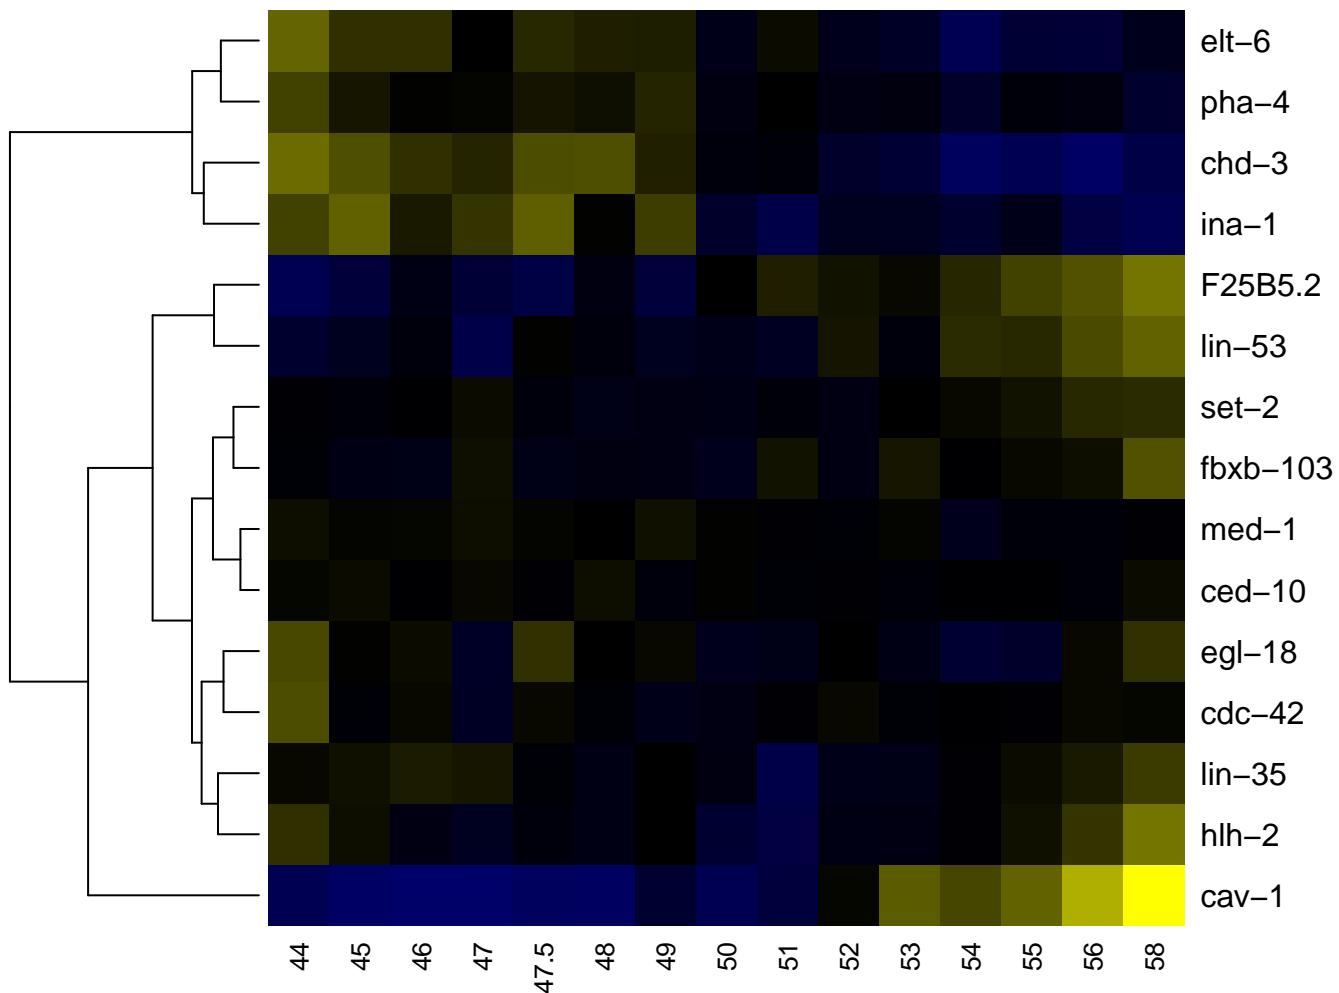

# MSaaaaa

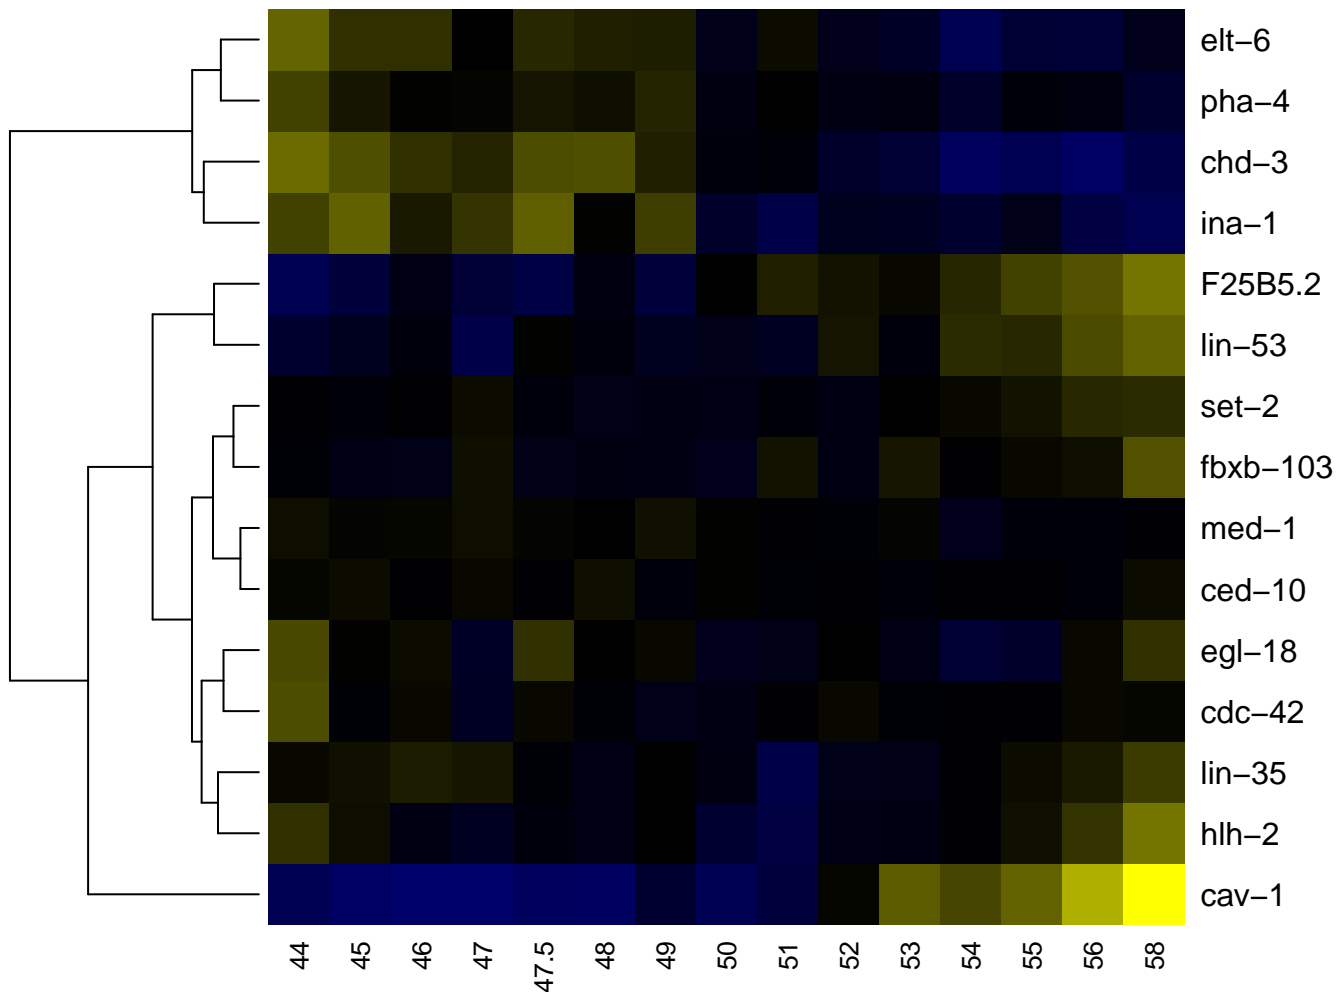

# MSaaaaaa

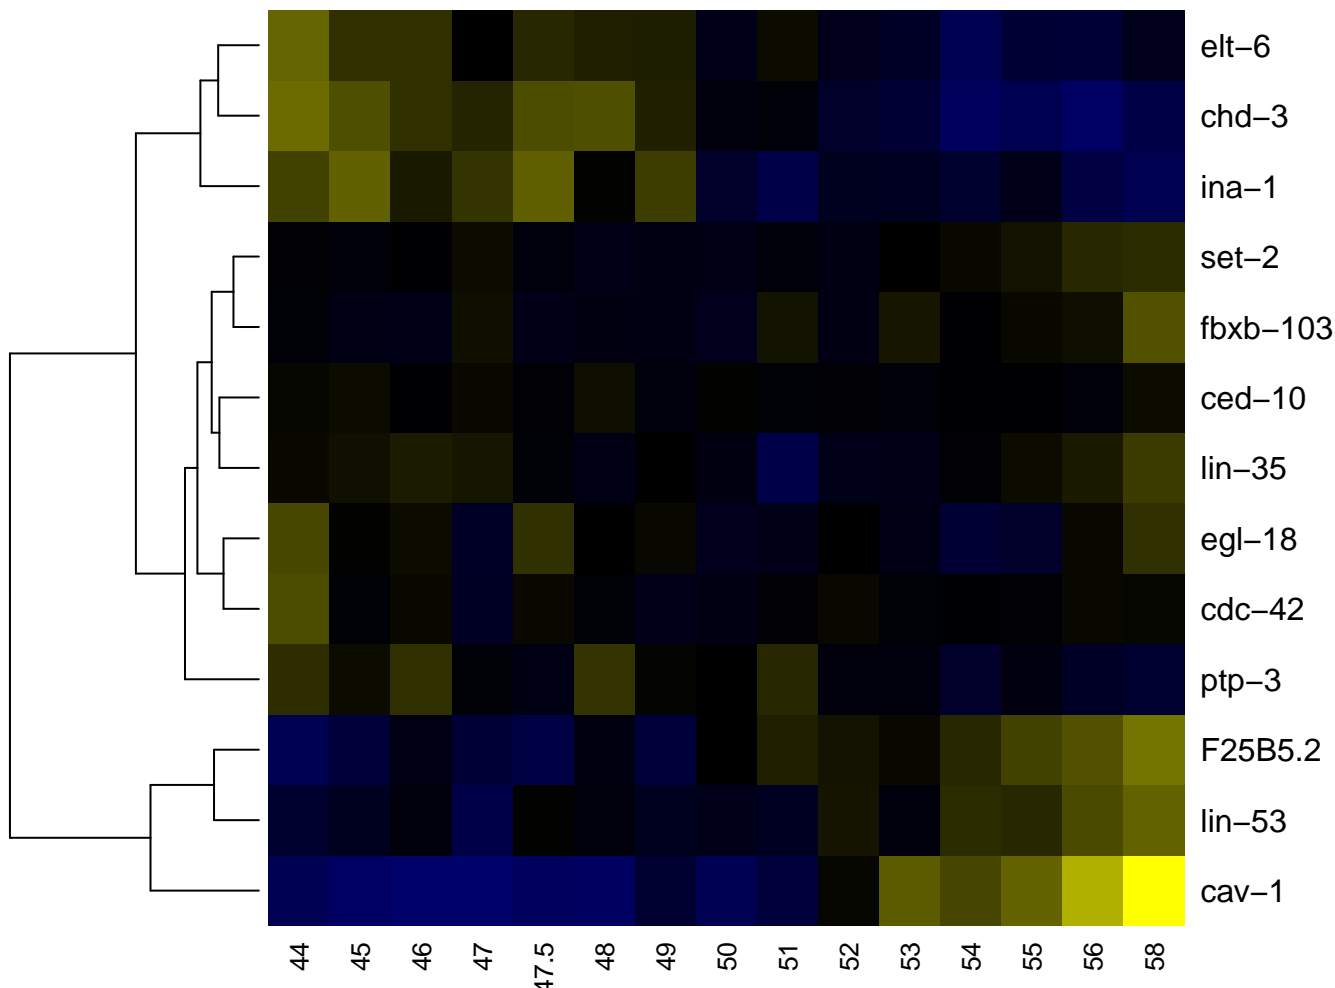

# MSaaaaap

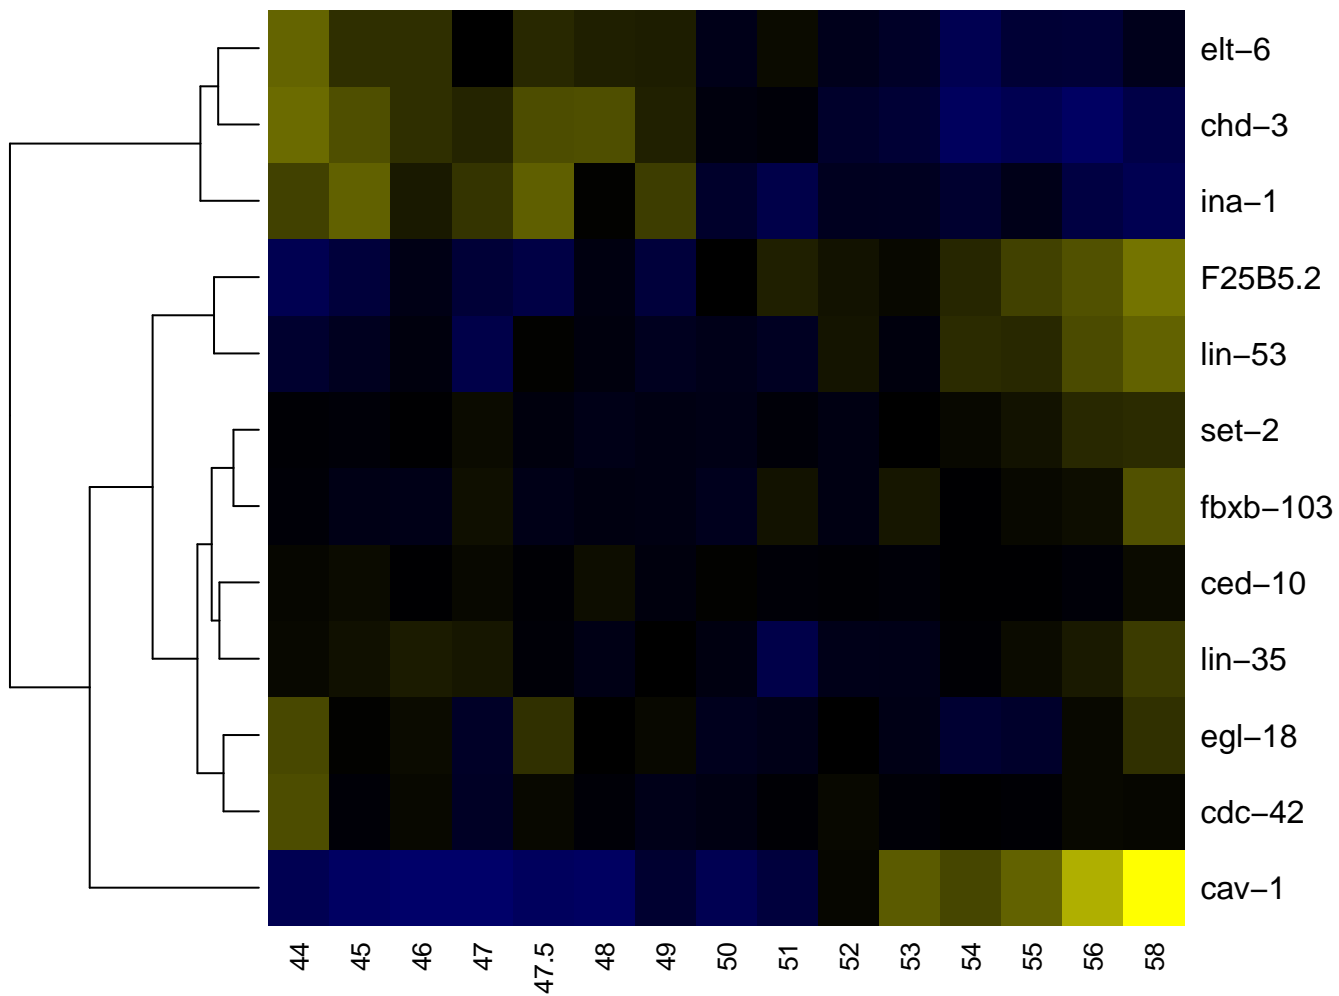

# MSaaaapa

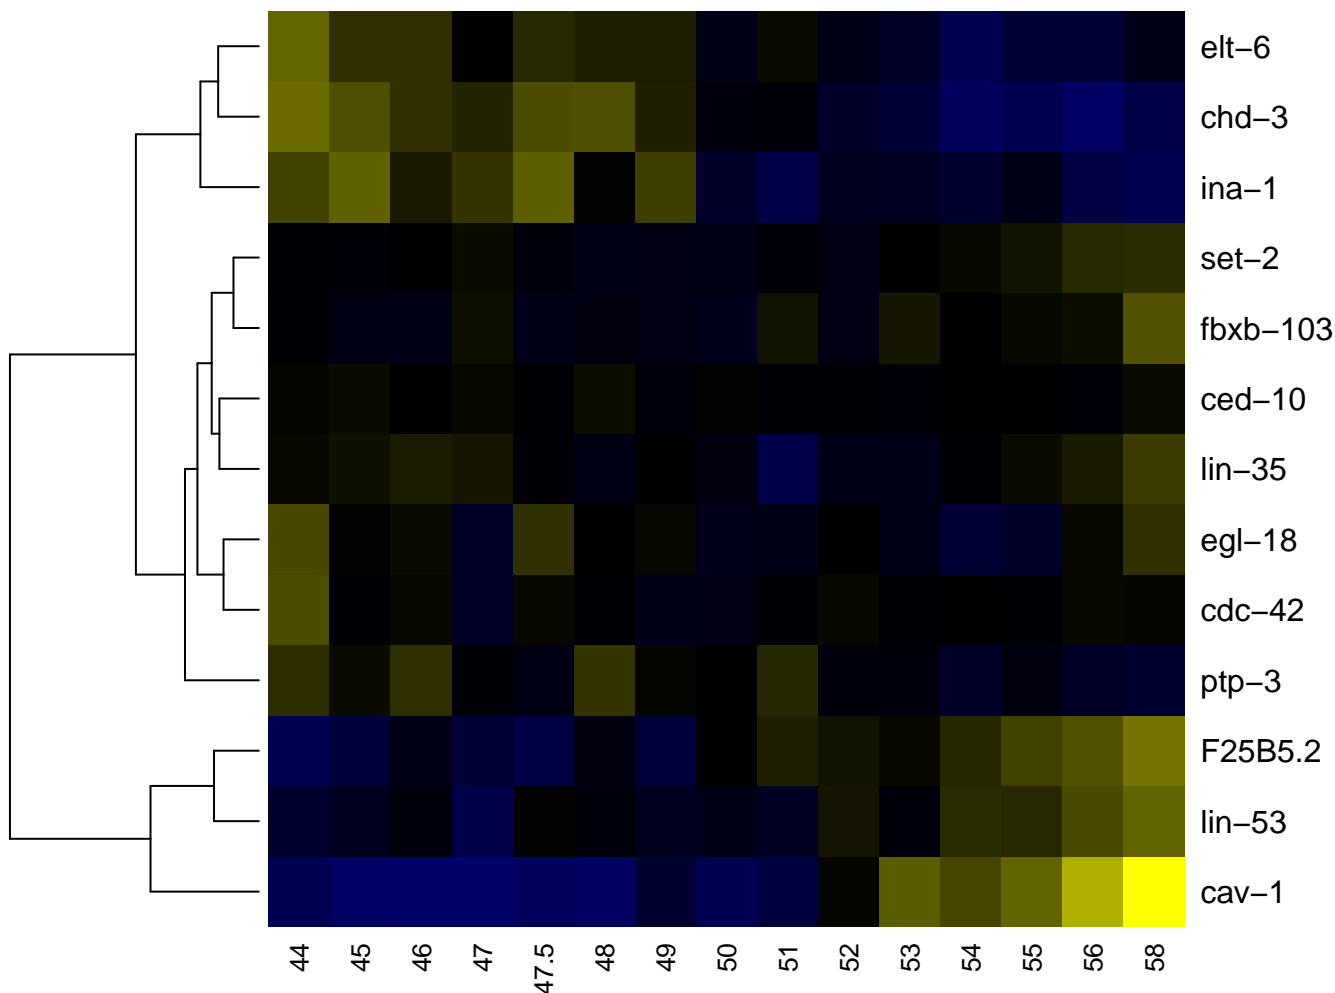



# MSaaaap

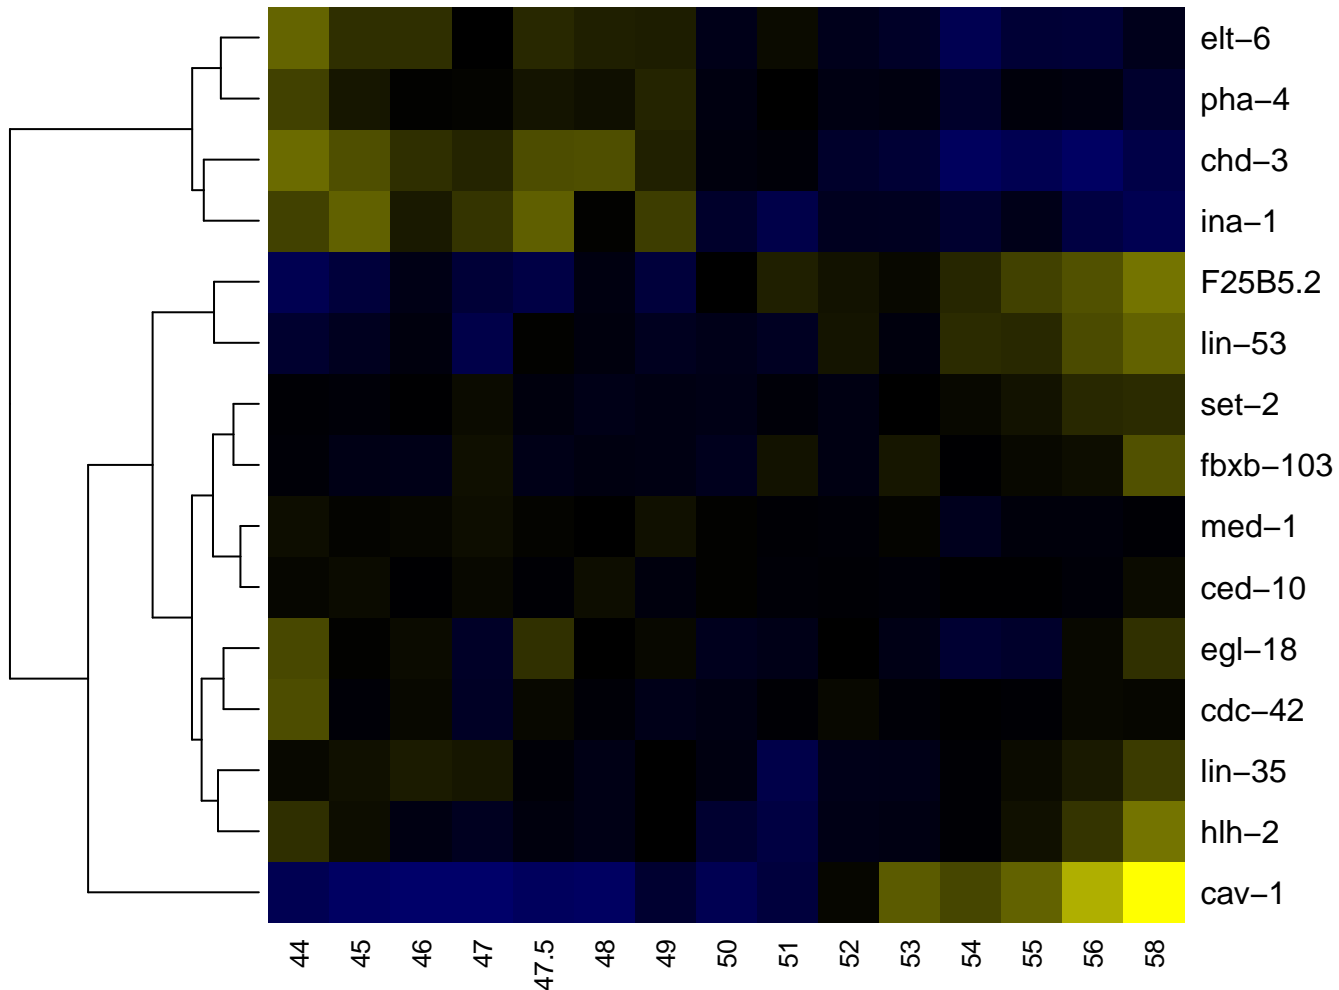

# MSaaaapa

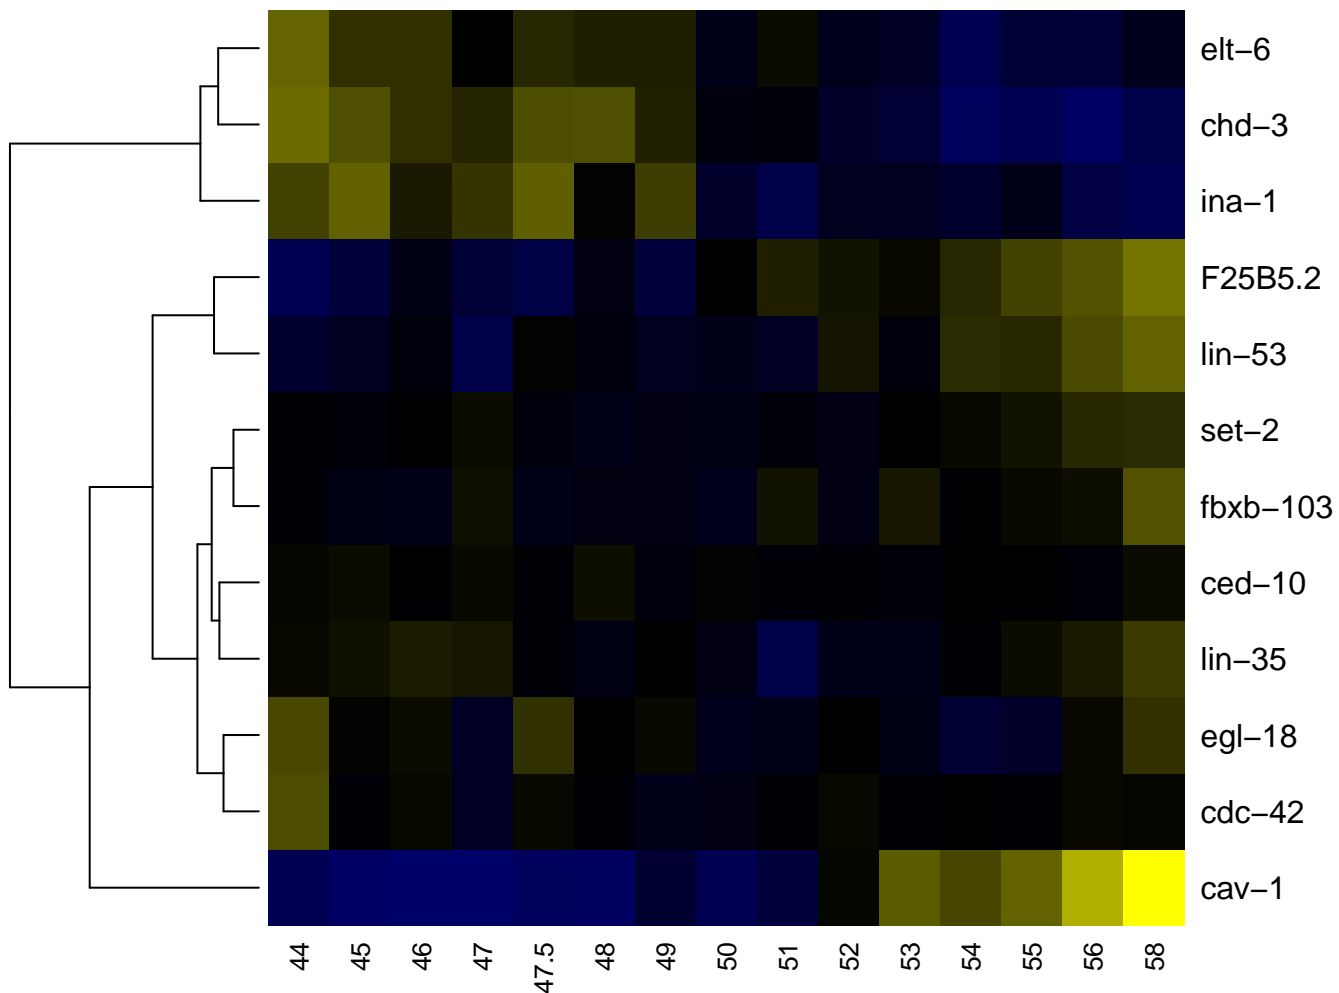

# MSaaaapp

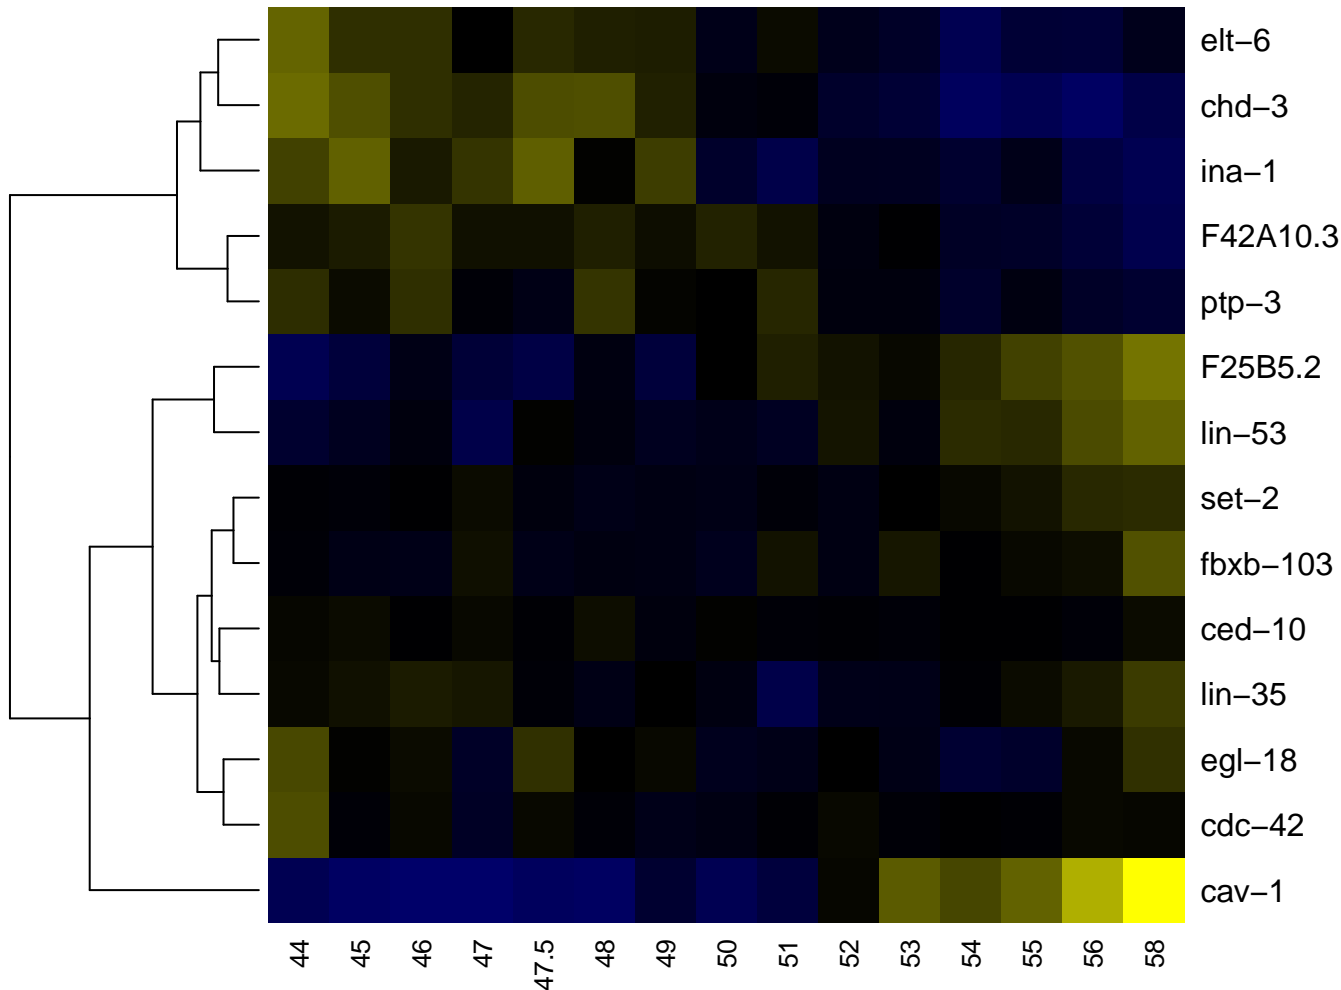

# MSaaaappa



# MSaaap



-2

-1

0

1

2

# MSaaapa

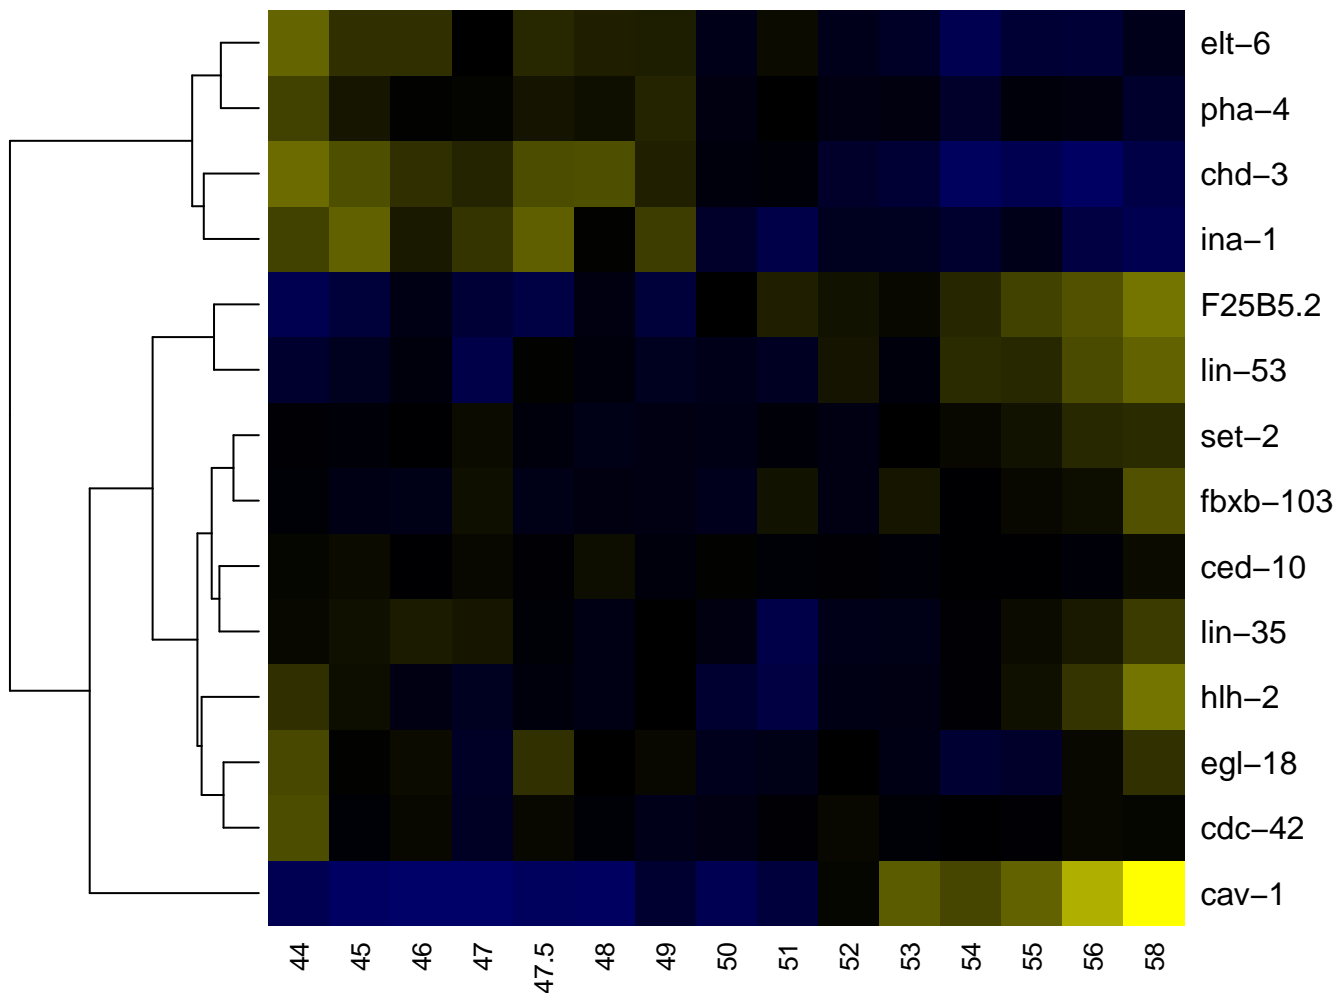

# MSaaapaa

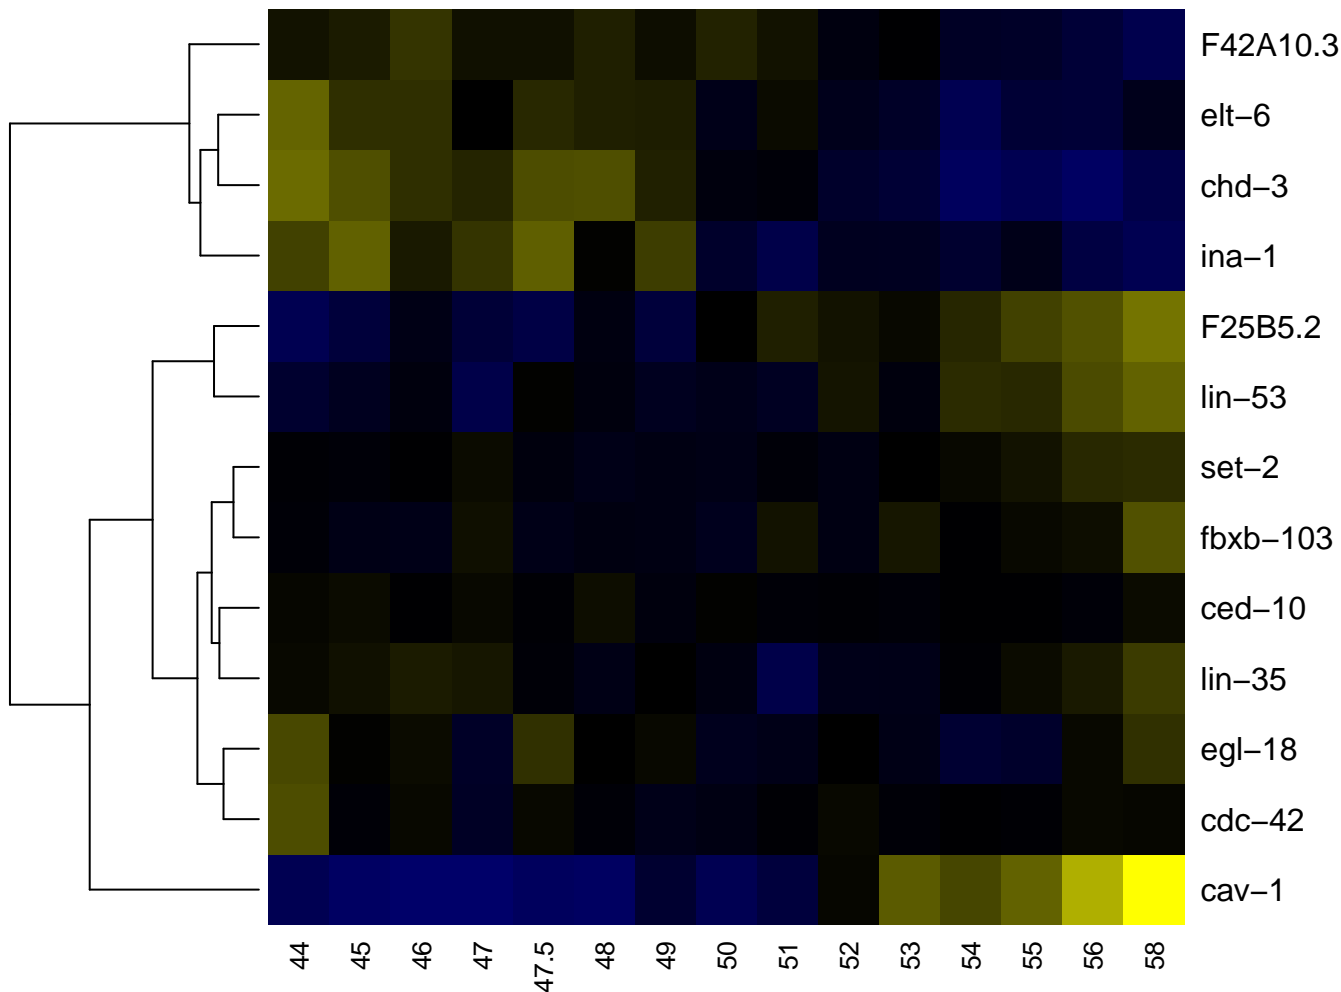





# MSaaapp





# MSaap

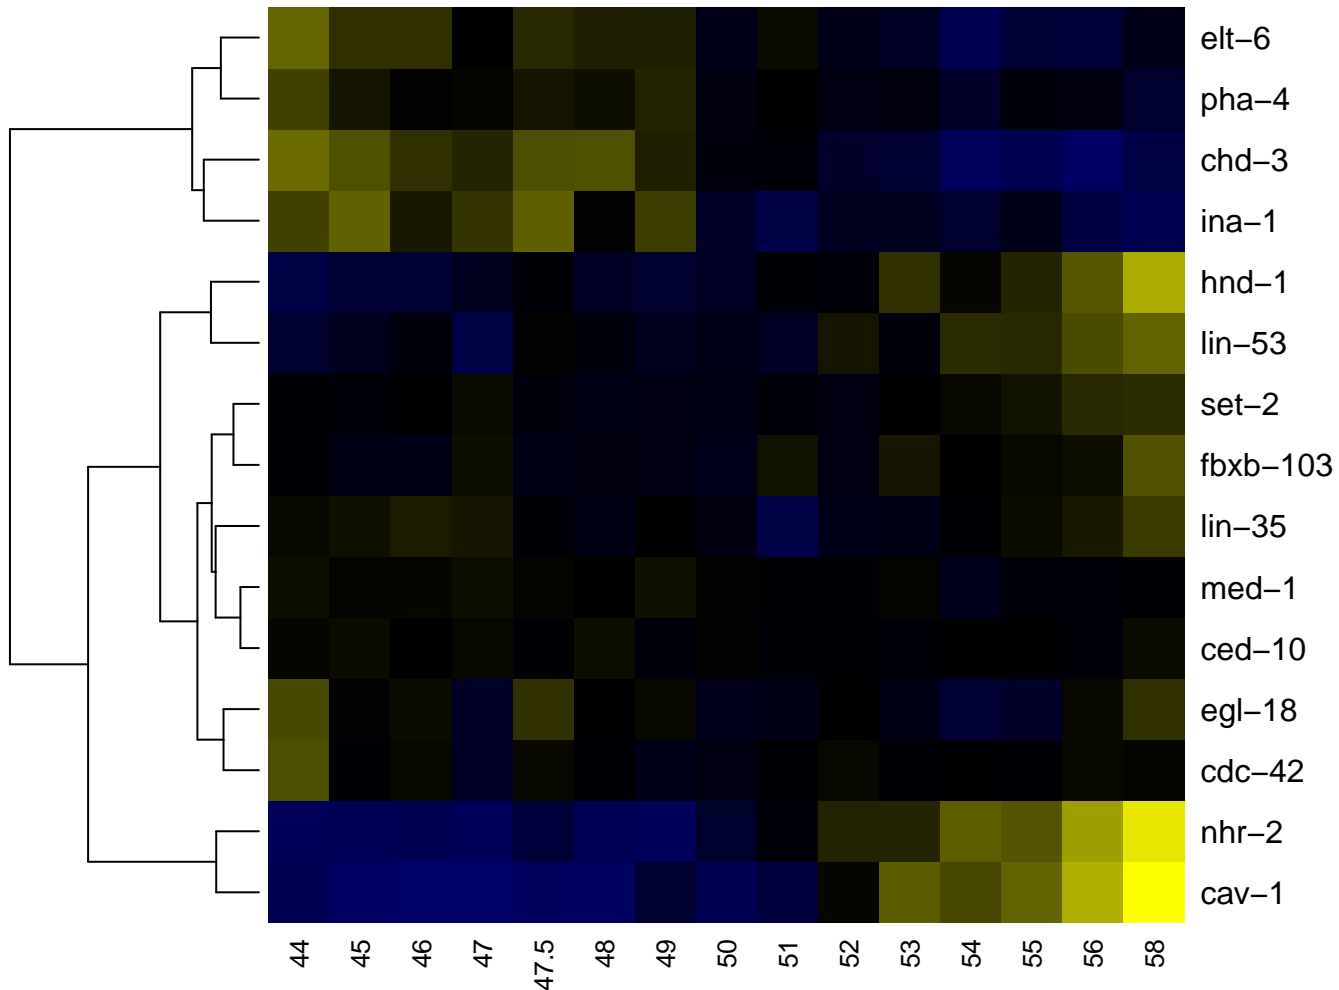

# MSaapa



# MSaapaa



# MSaapaaa



# MSaapaap

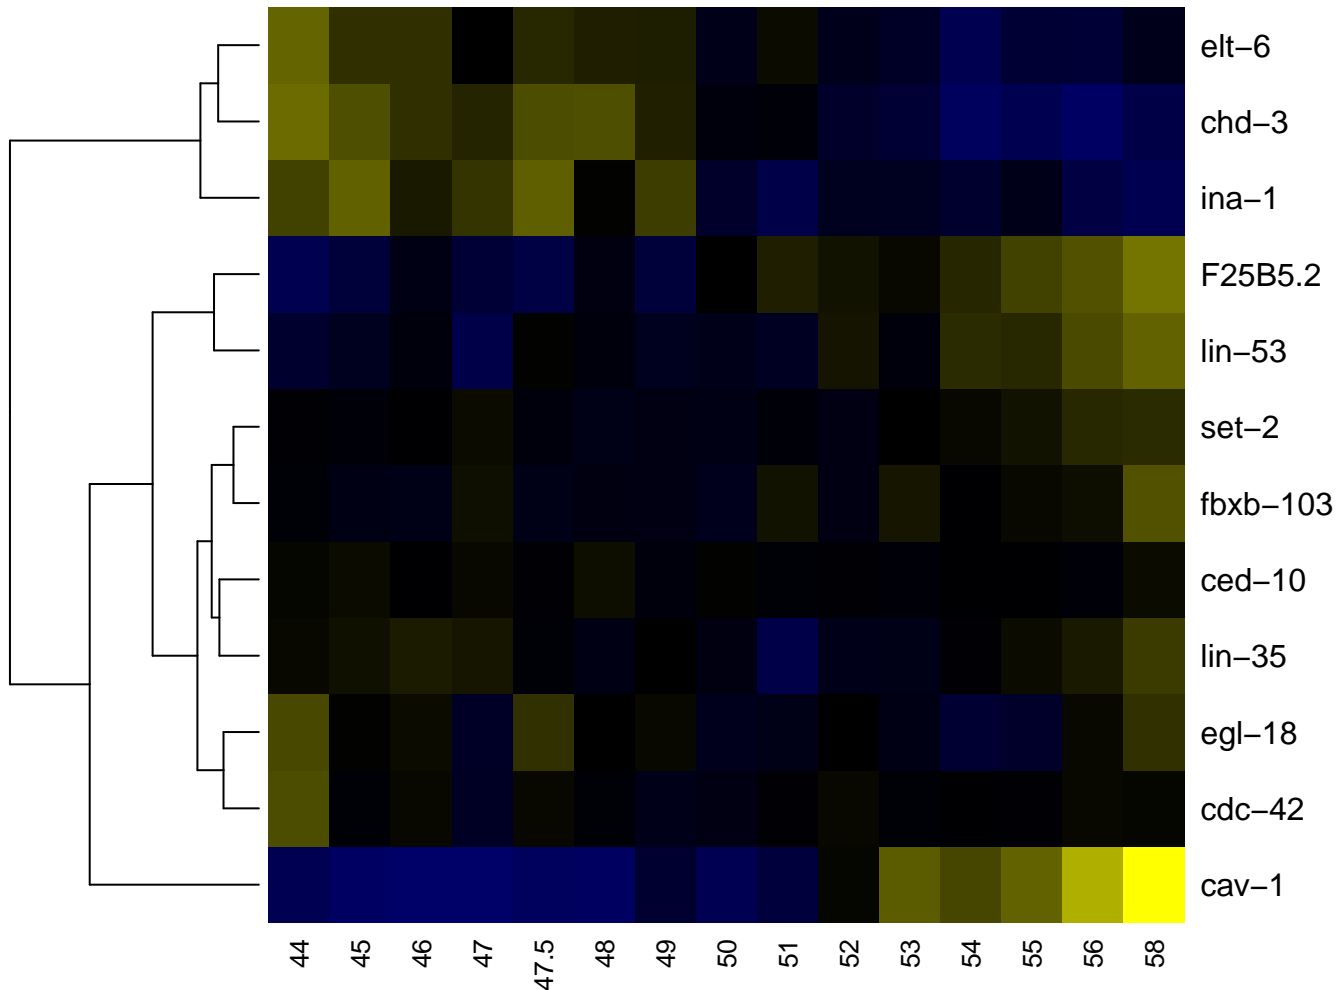

# MSaapaapa

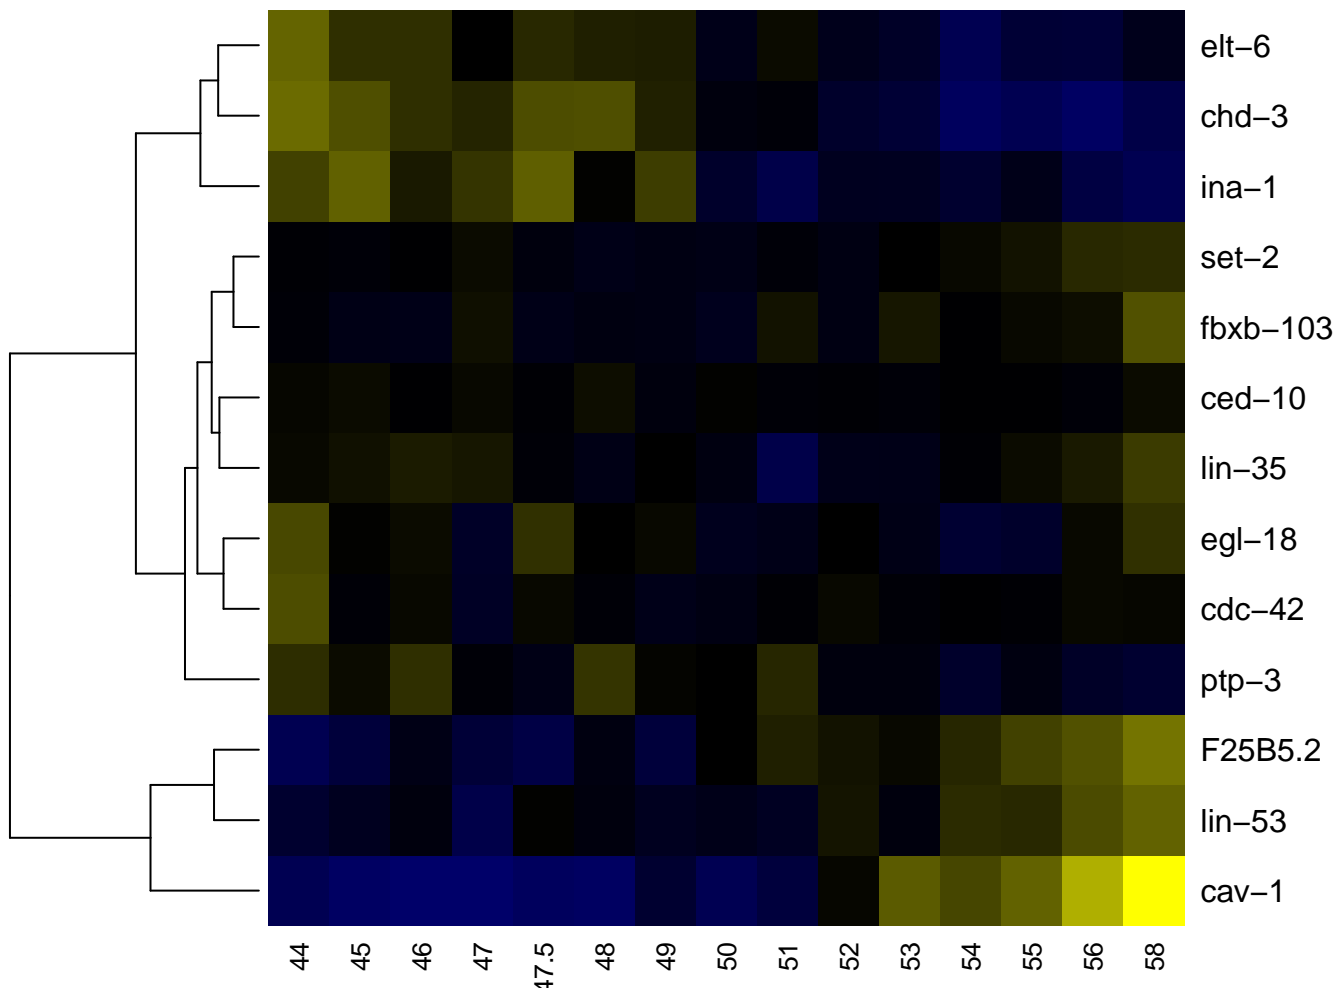



# MSaapaapap

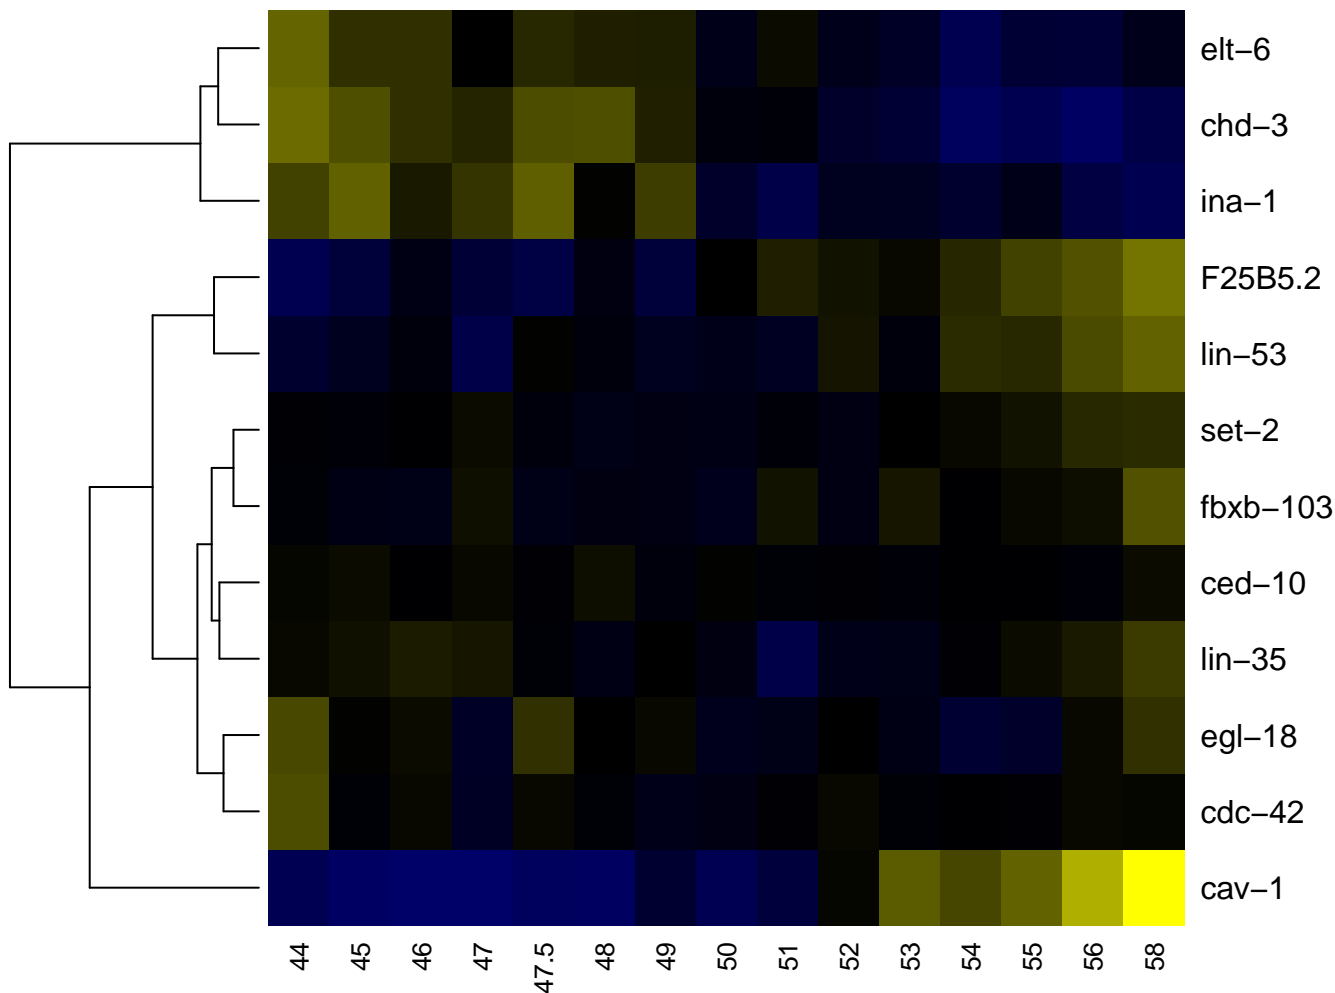

# MSaapap



-2

-1

0

1

2



# MSaapapap



# MSaapapp

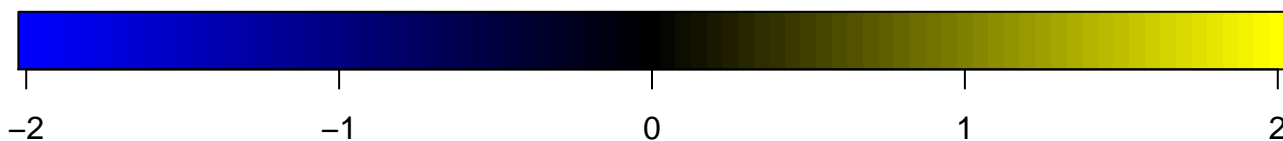

# MSaapp



# MSaappa

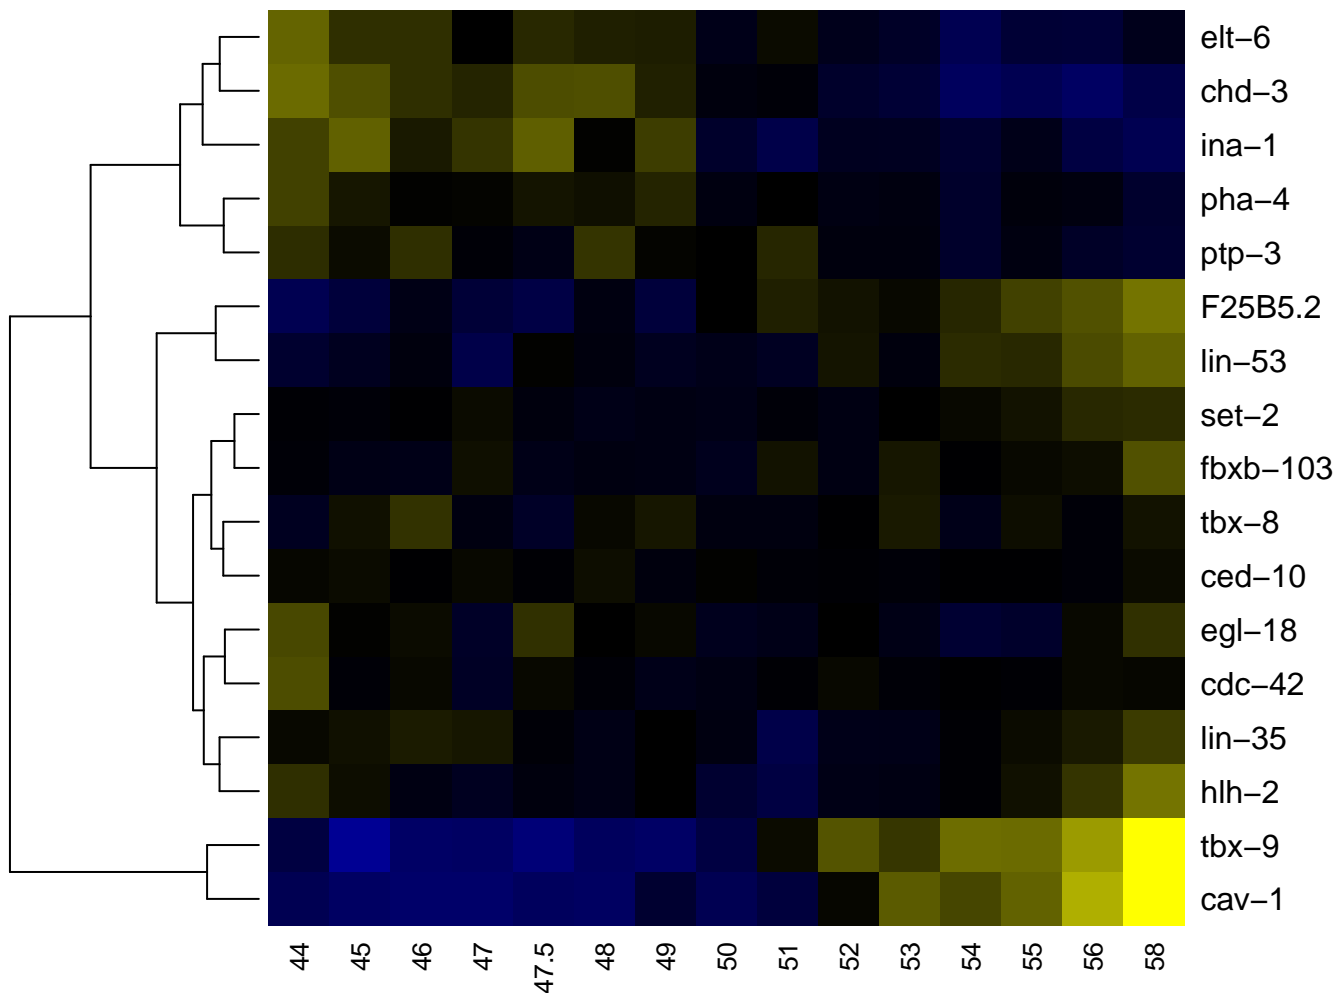

# MSaappp

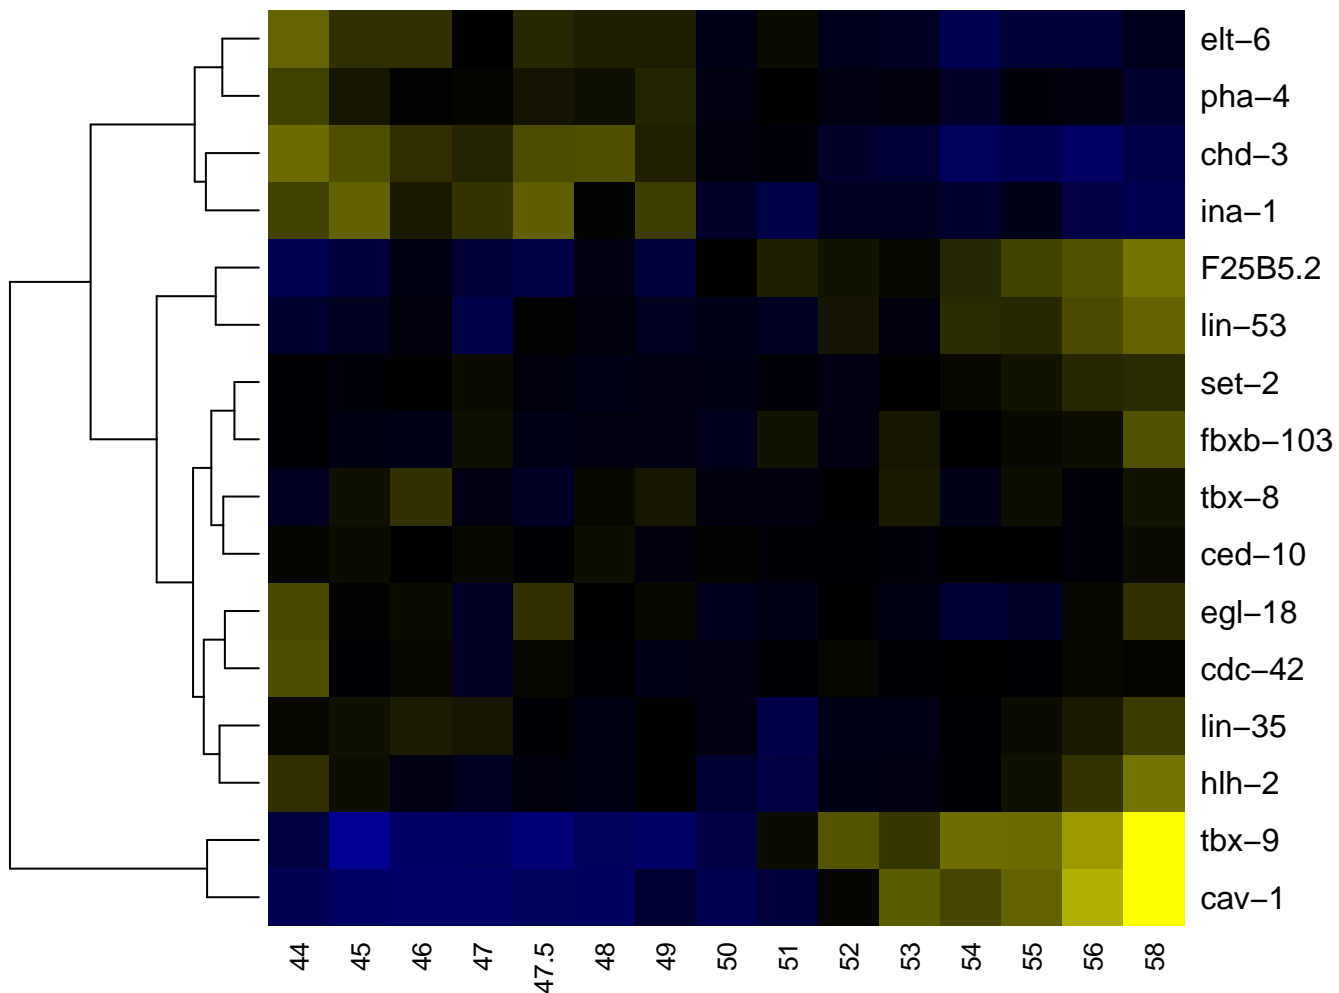



# MSaappa

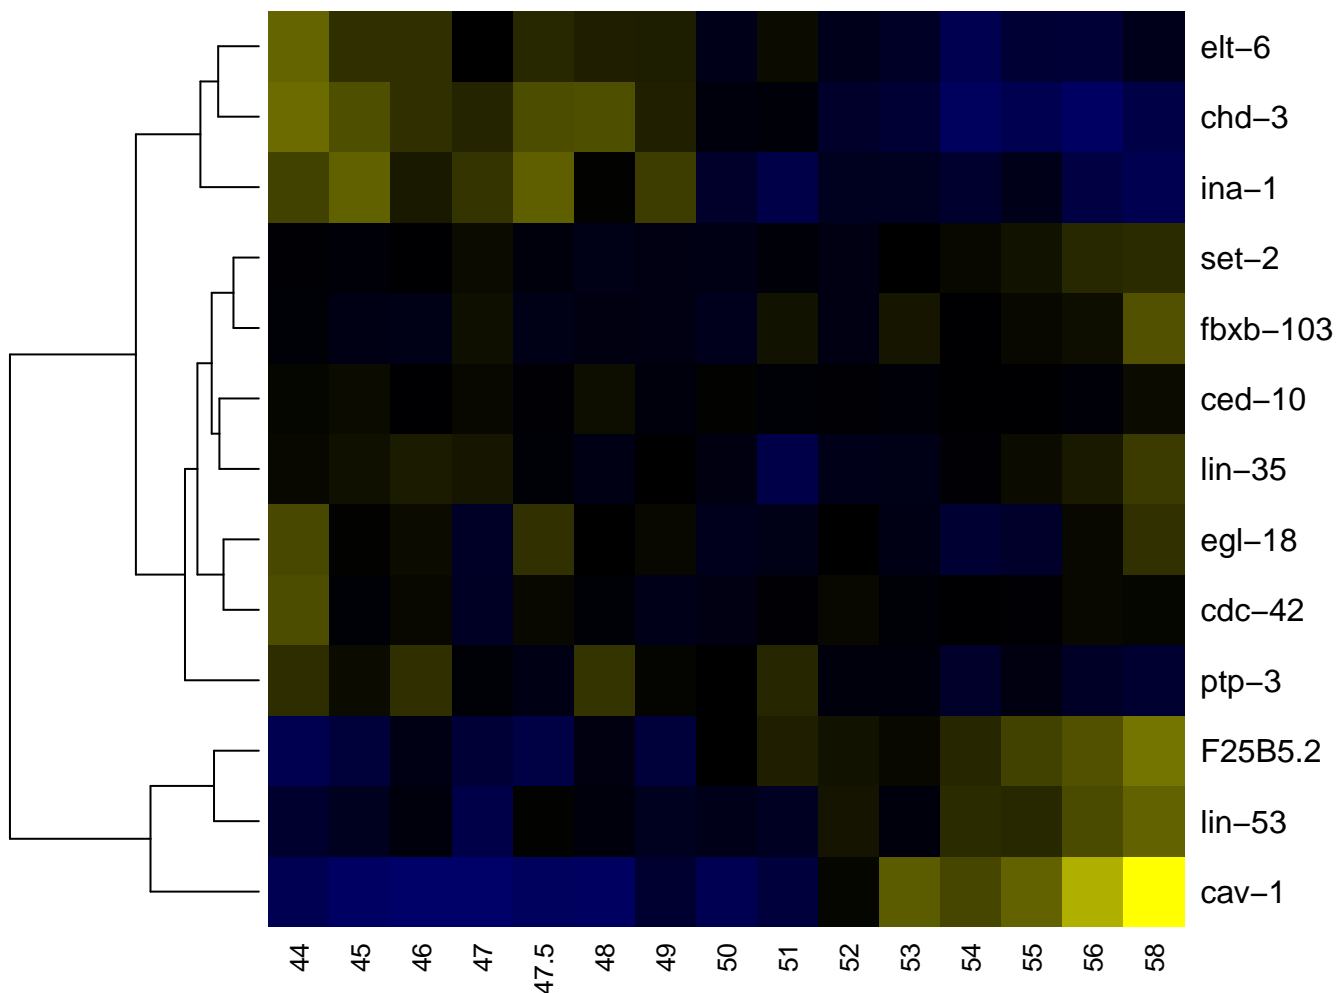

-2

-1

0

1

2

# MSaappaa

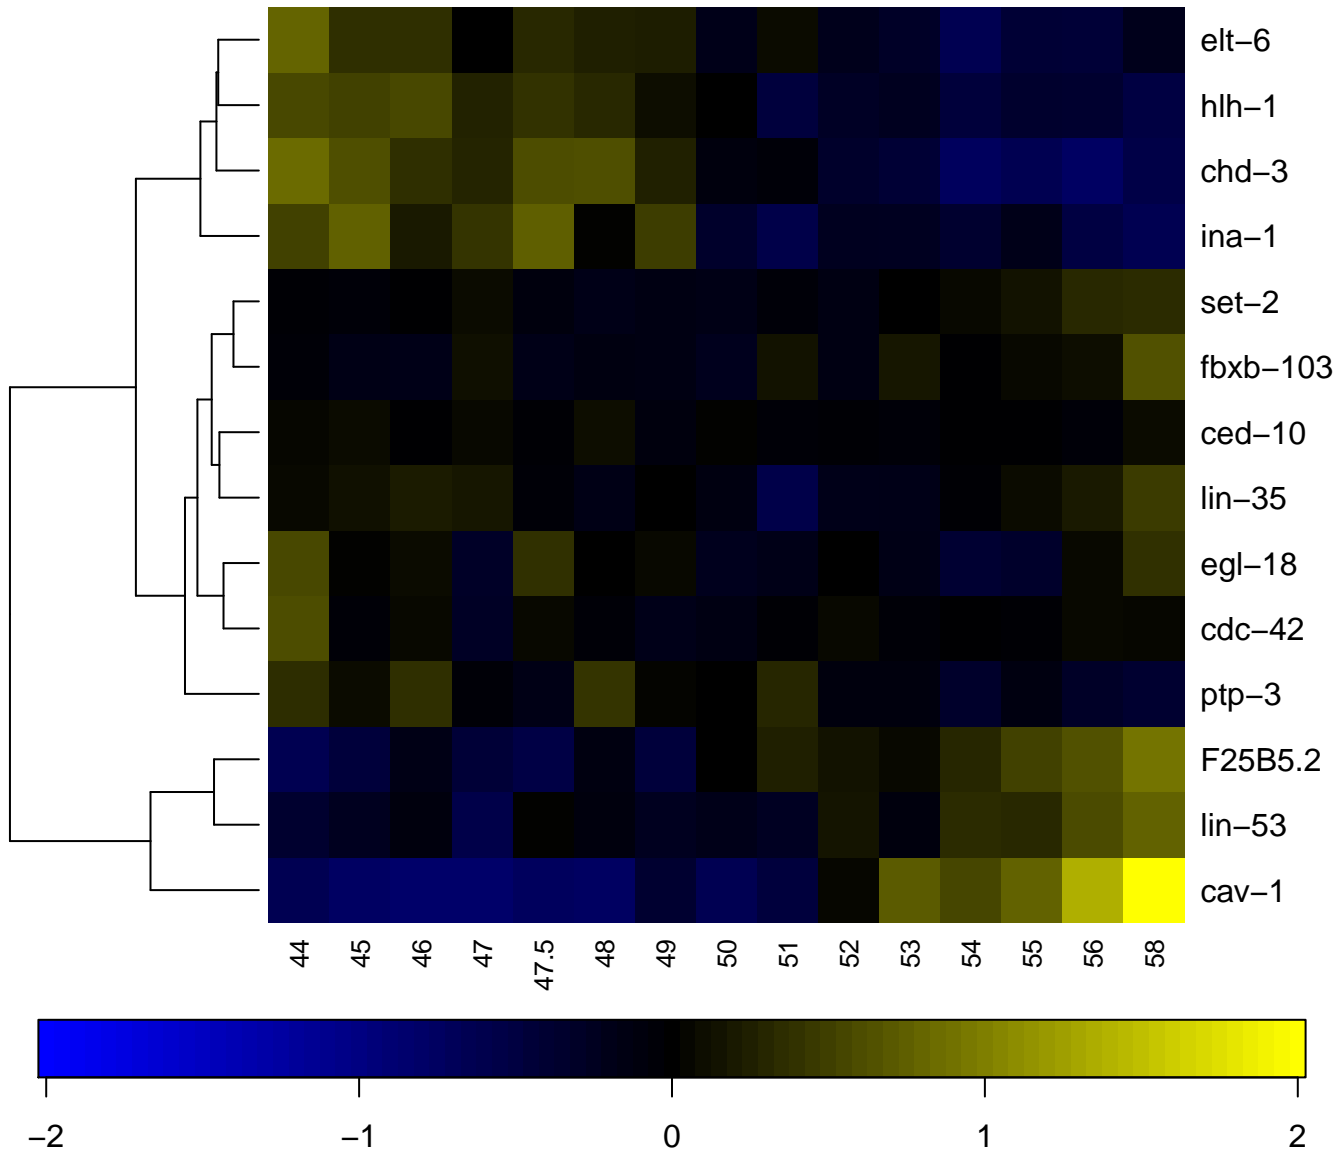

# MSaapppap

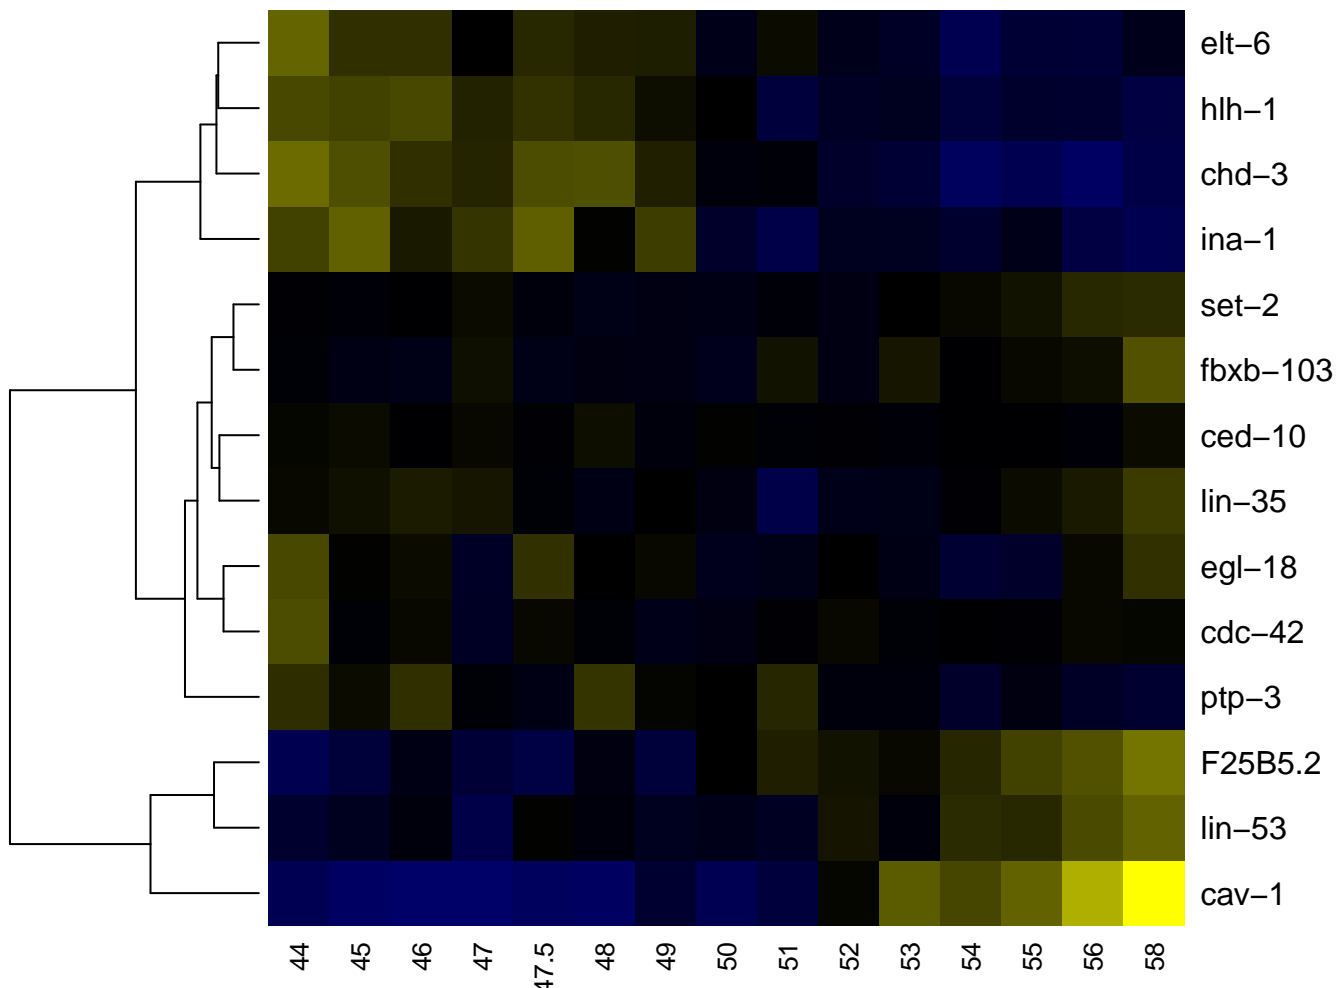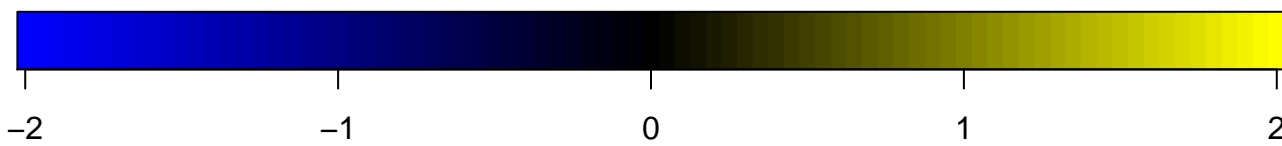

# MSaapppp

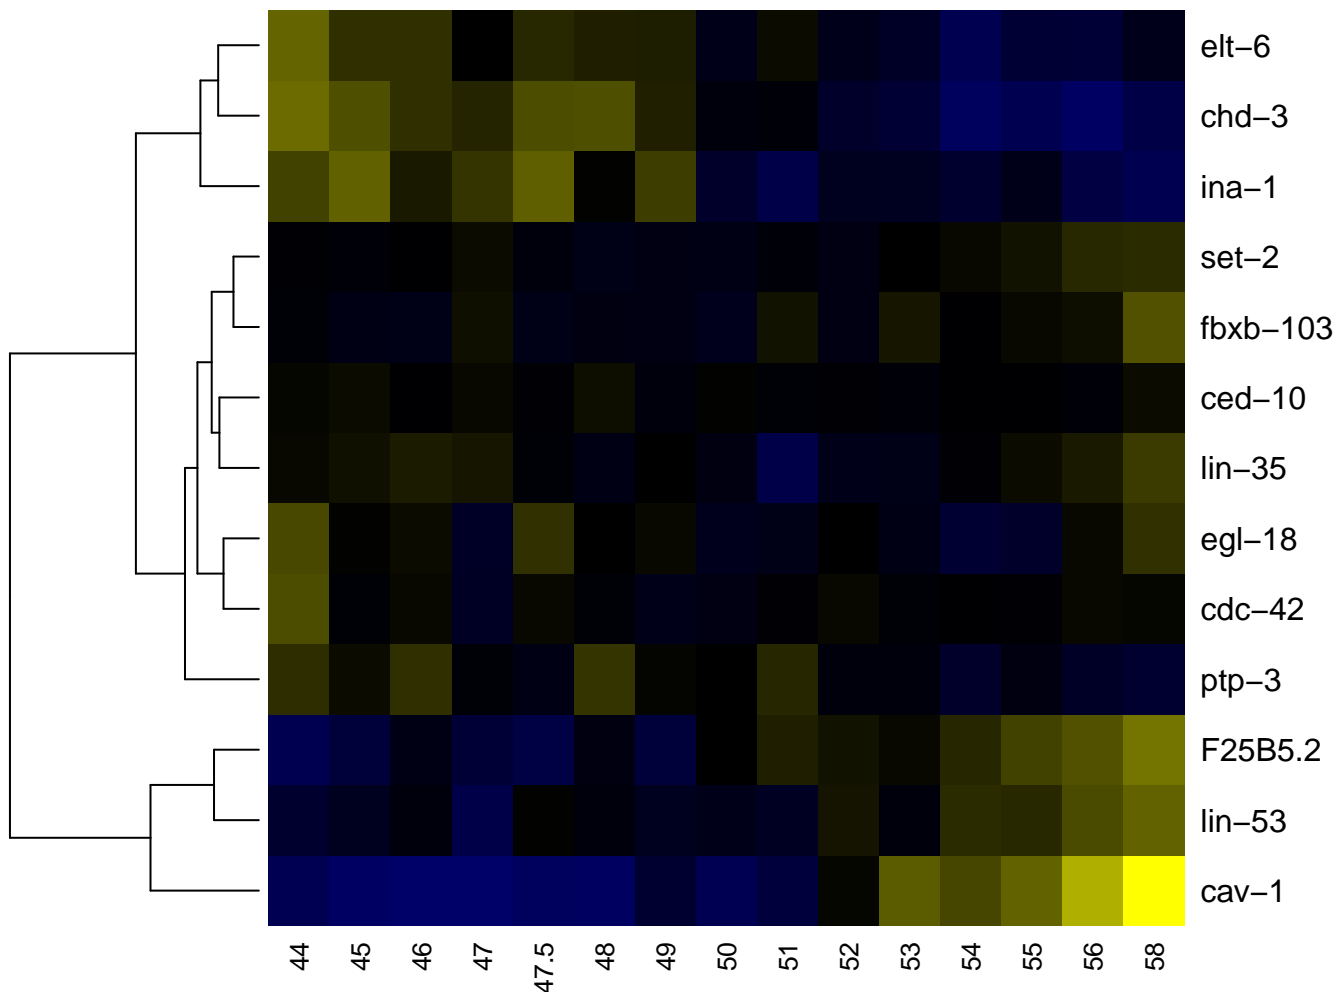



# MSaappppp

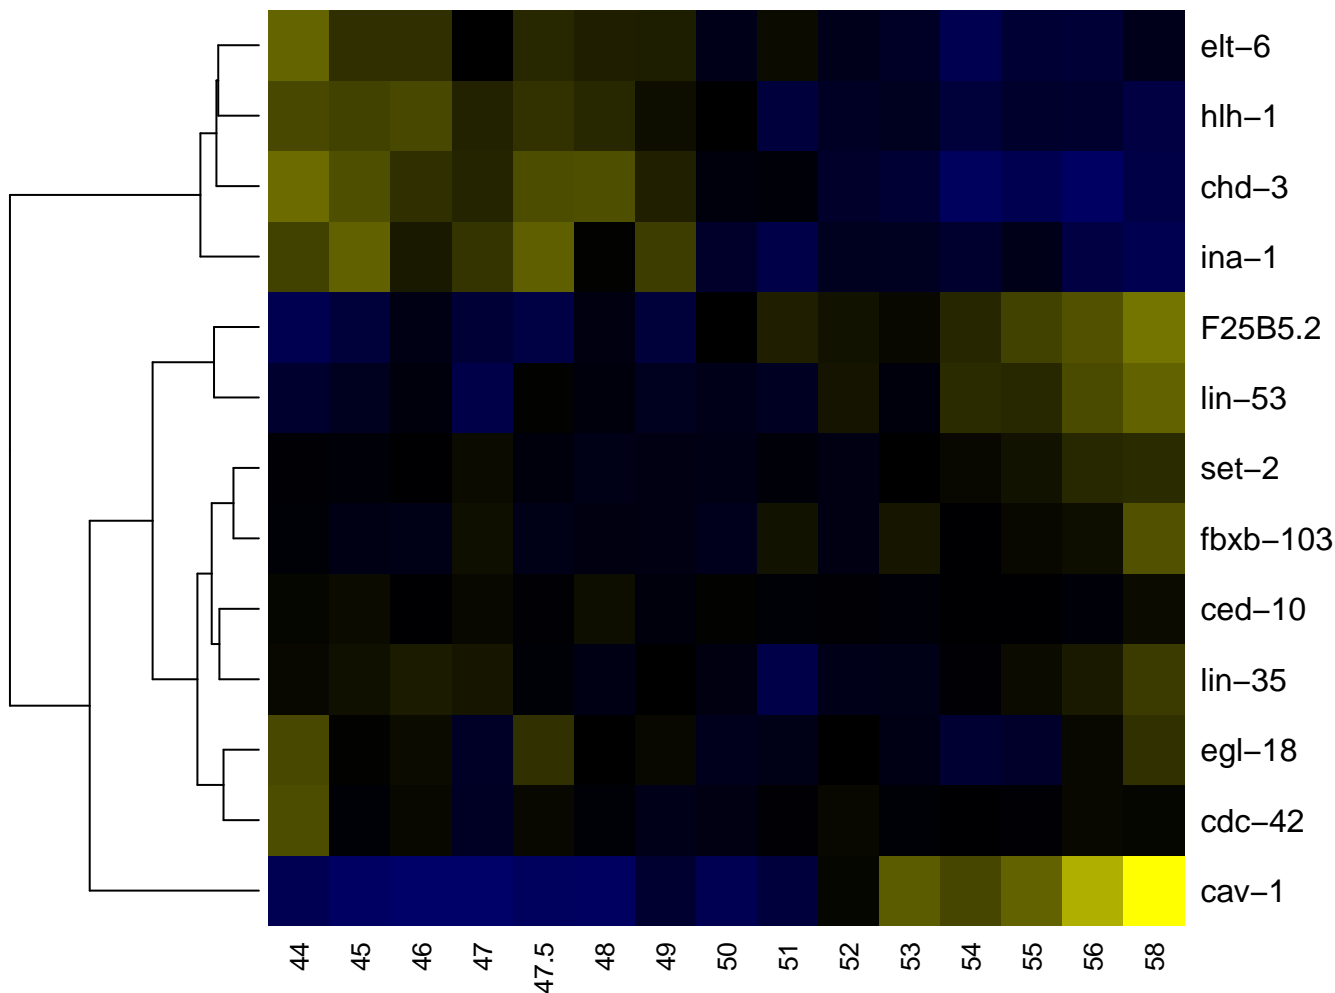

# MSap

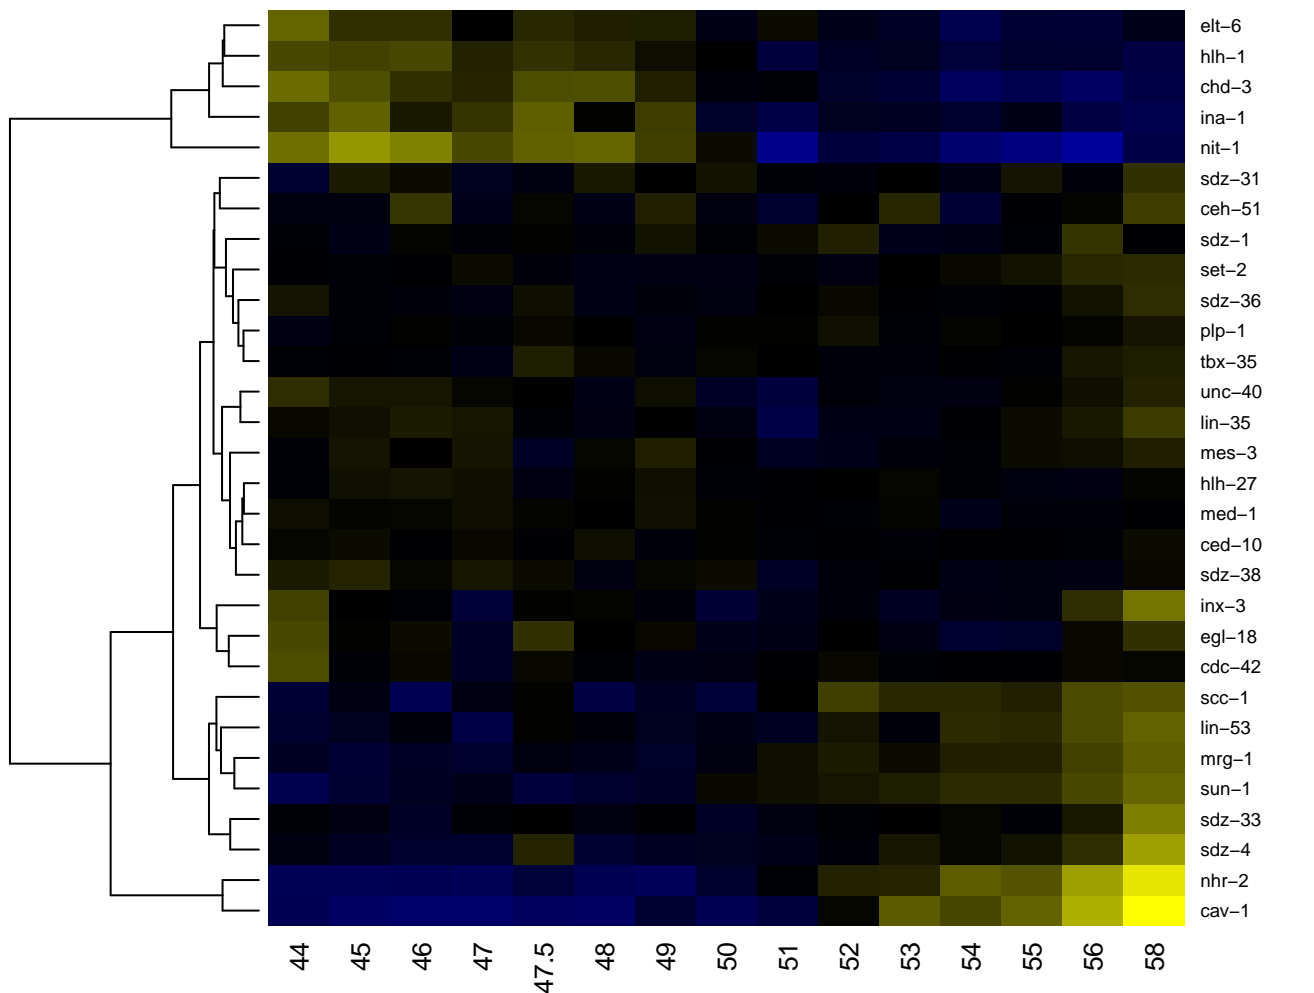

# MSapa

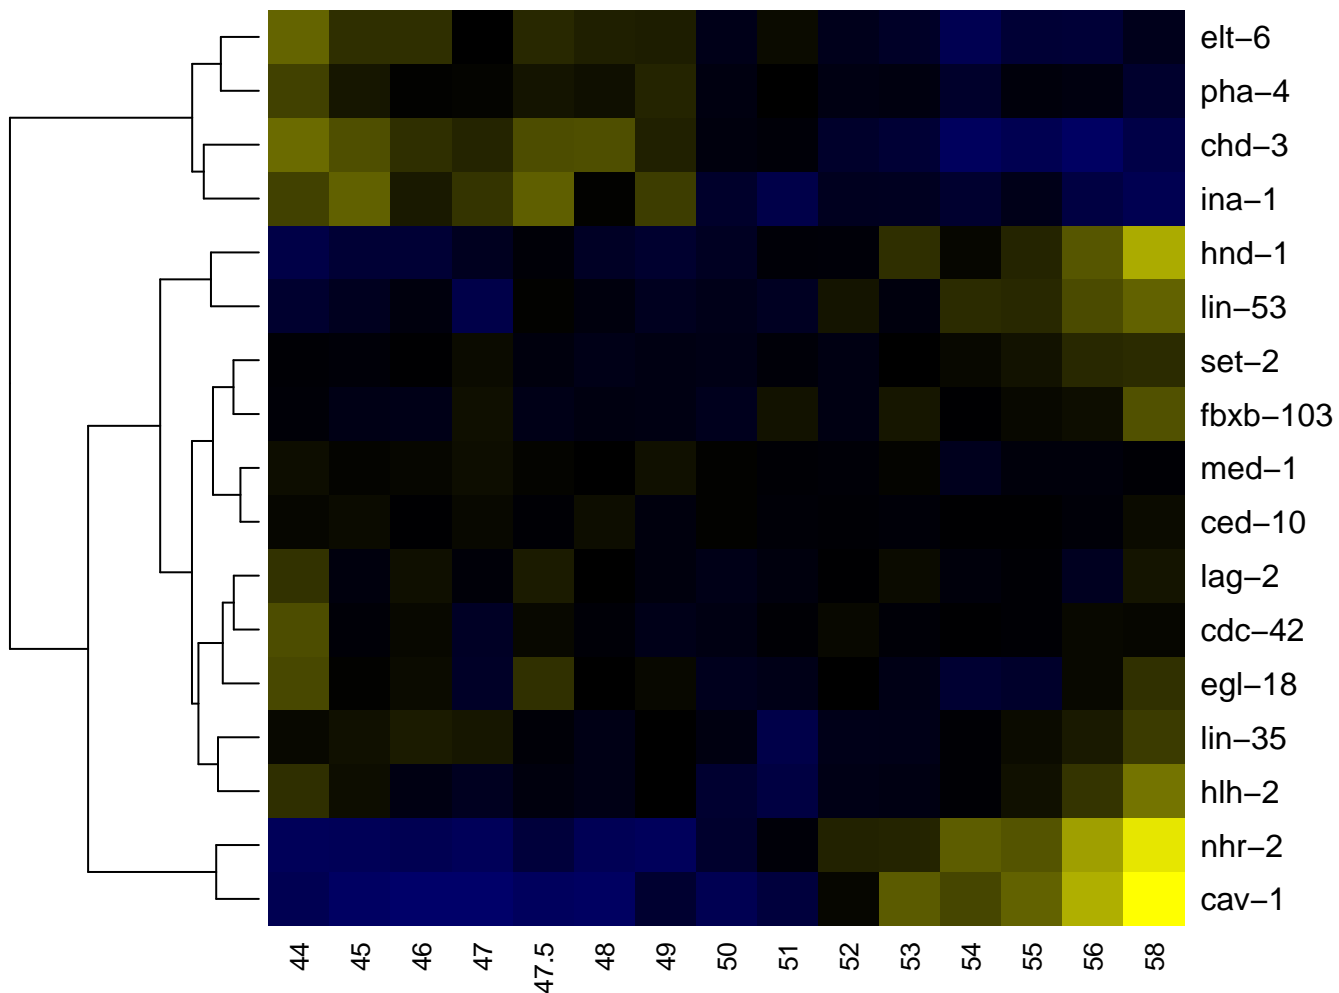



# MSapaa

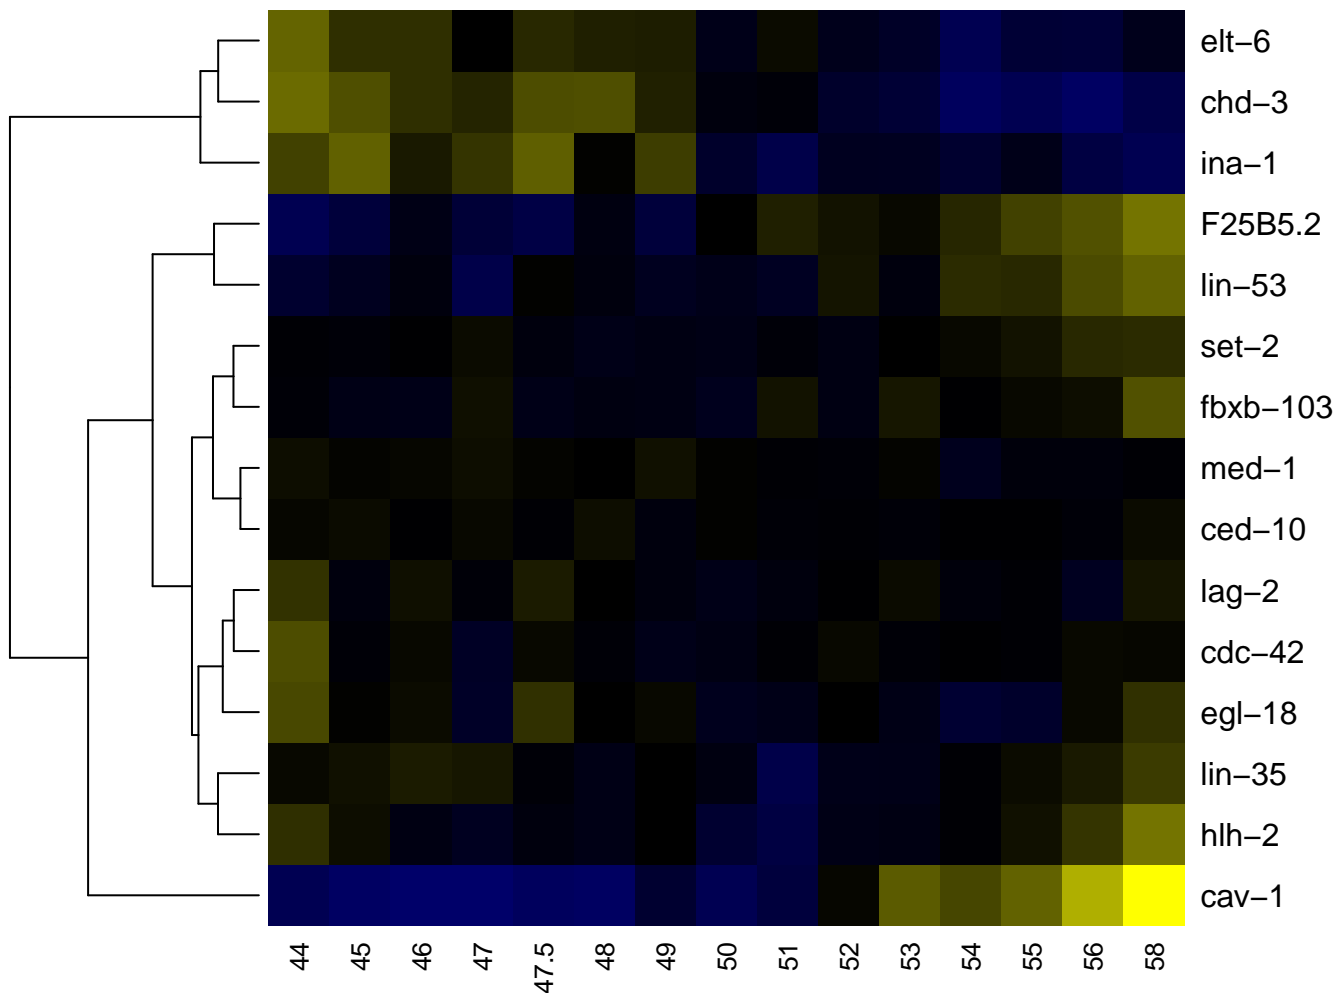

-2

-1

0

1

2

# MSapaaa

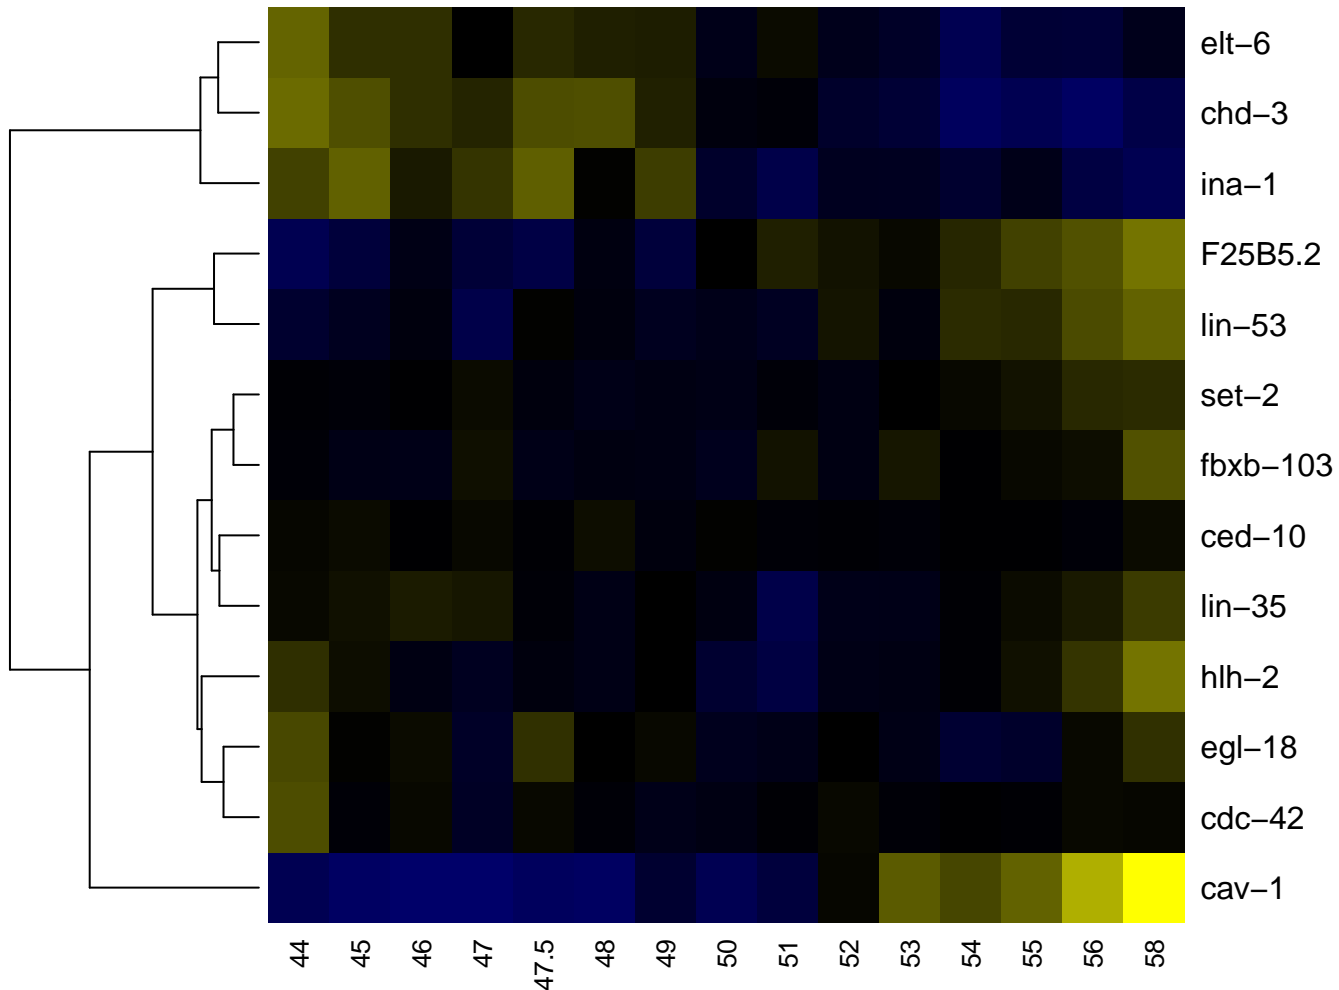





# MSapaap

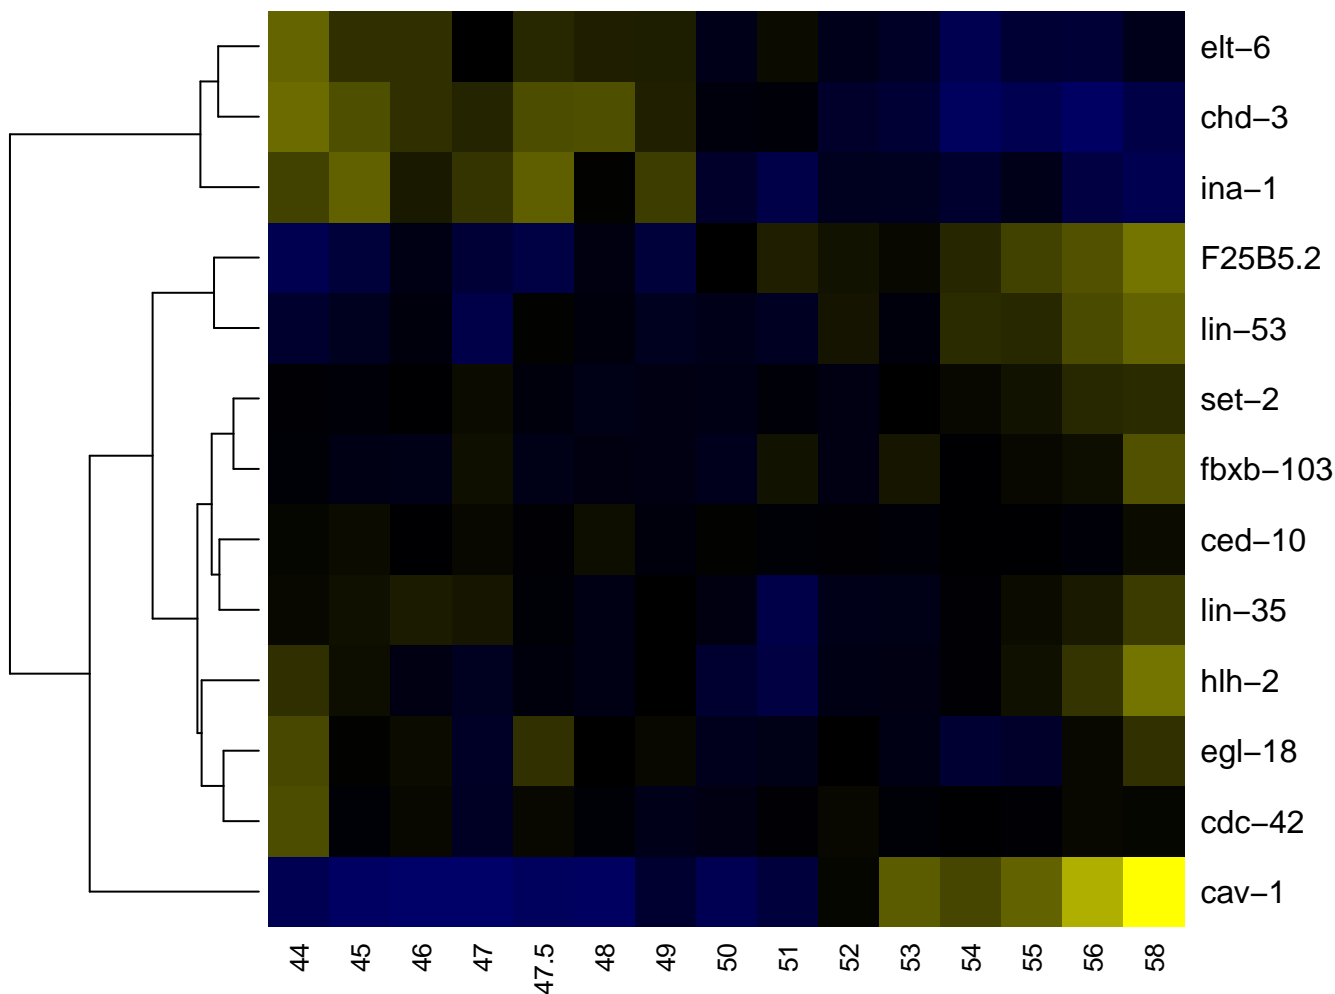

# MSapaapa

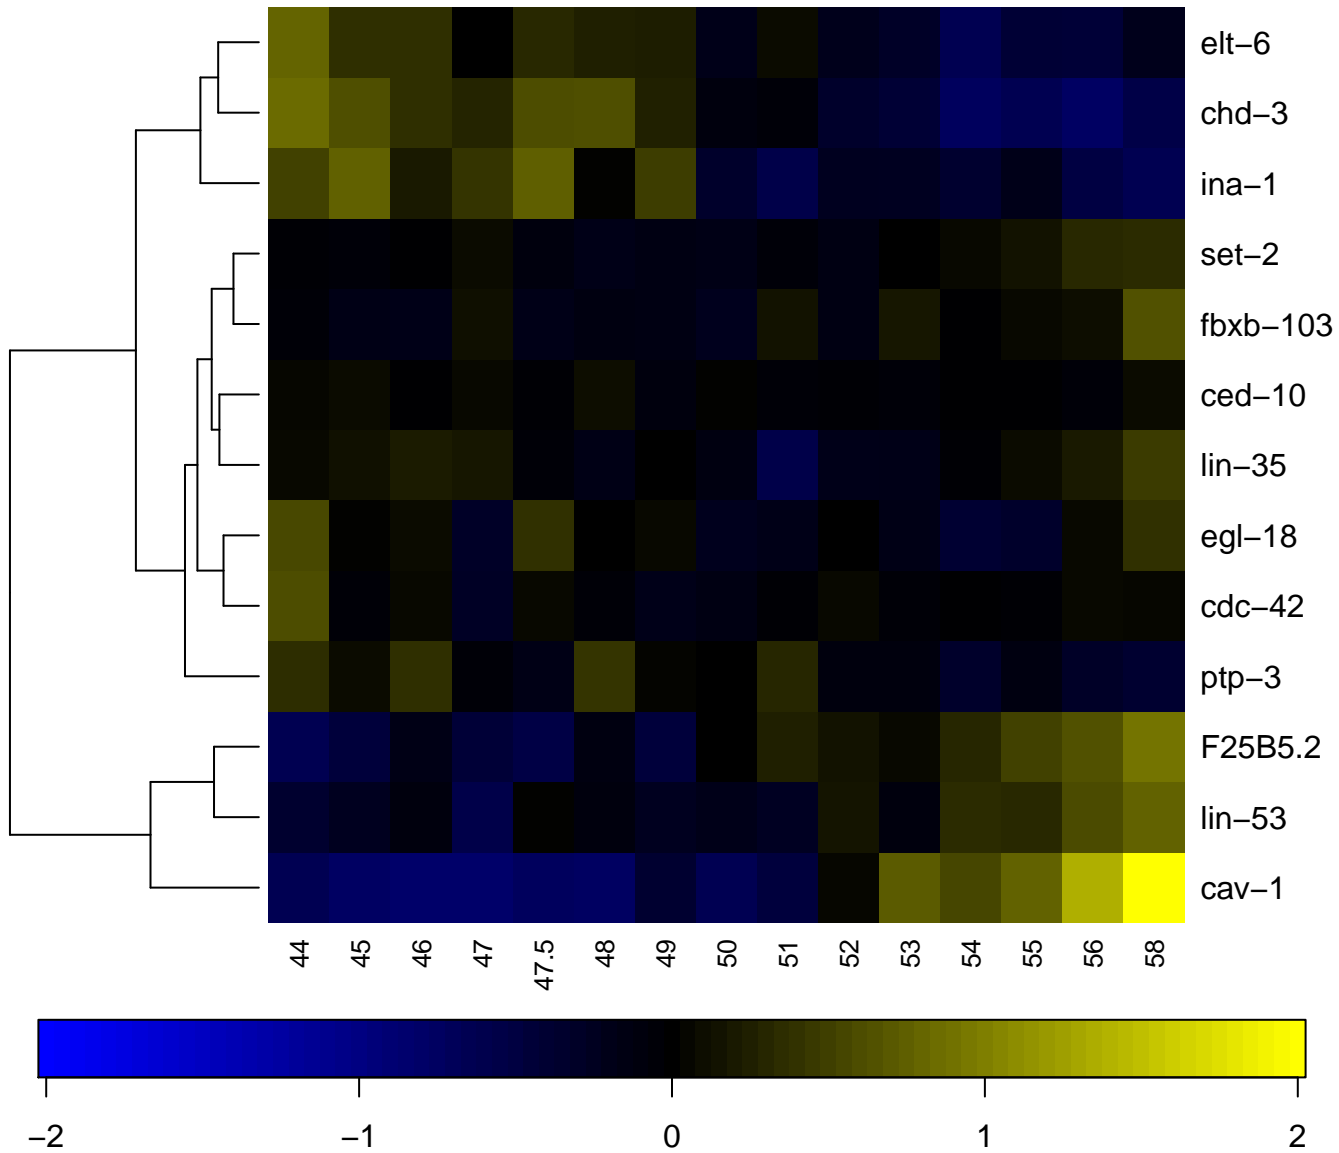

# MSapap

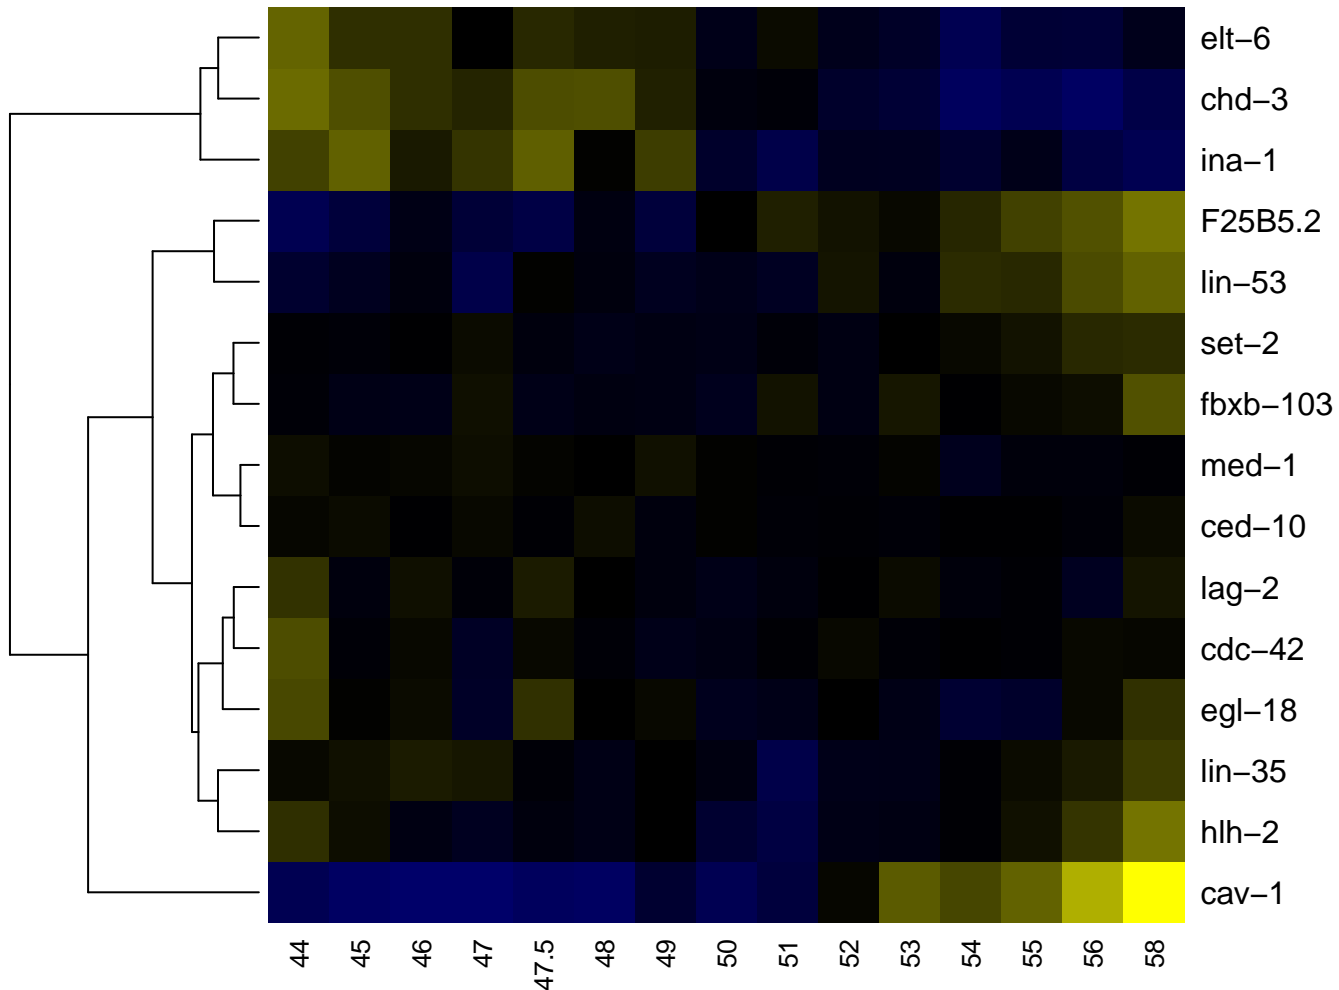

# MSapapa







# MSapapap

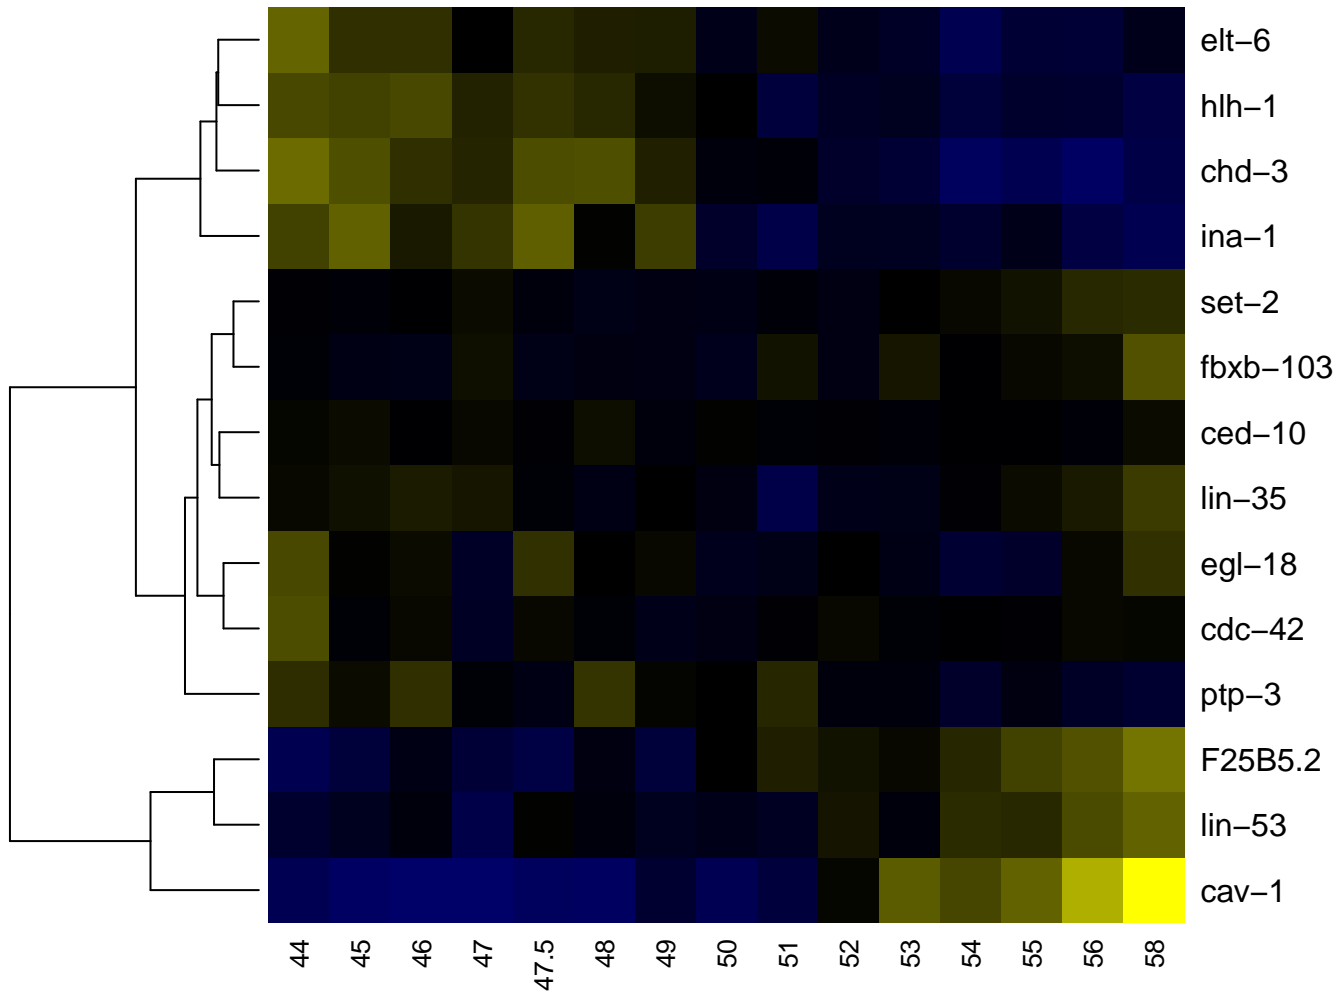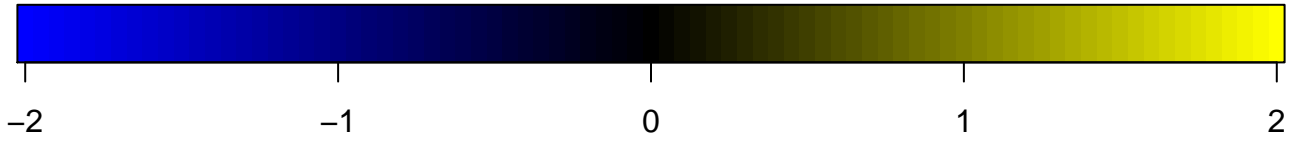

# MSapapp

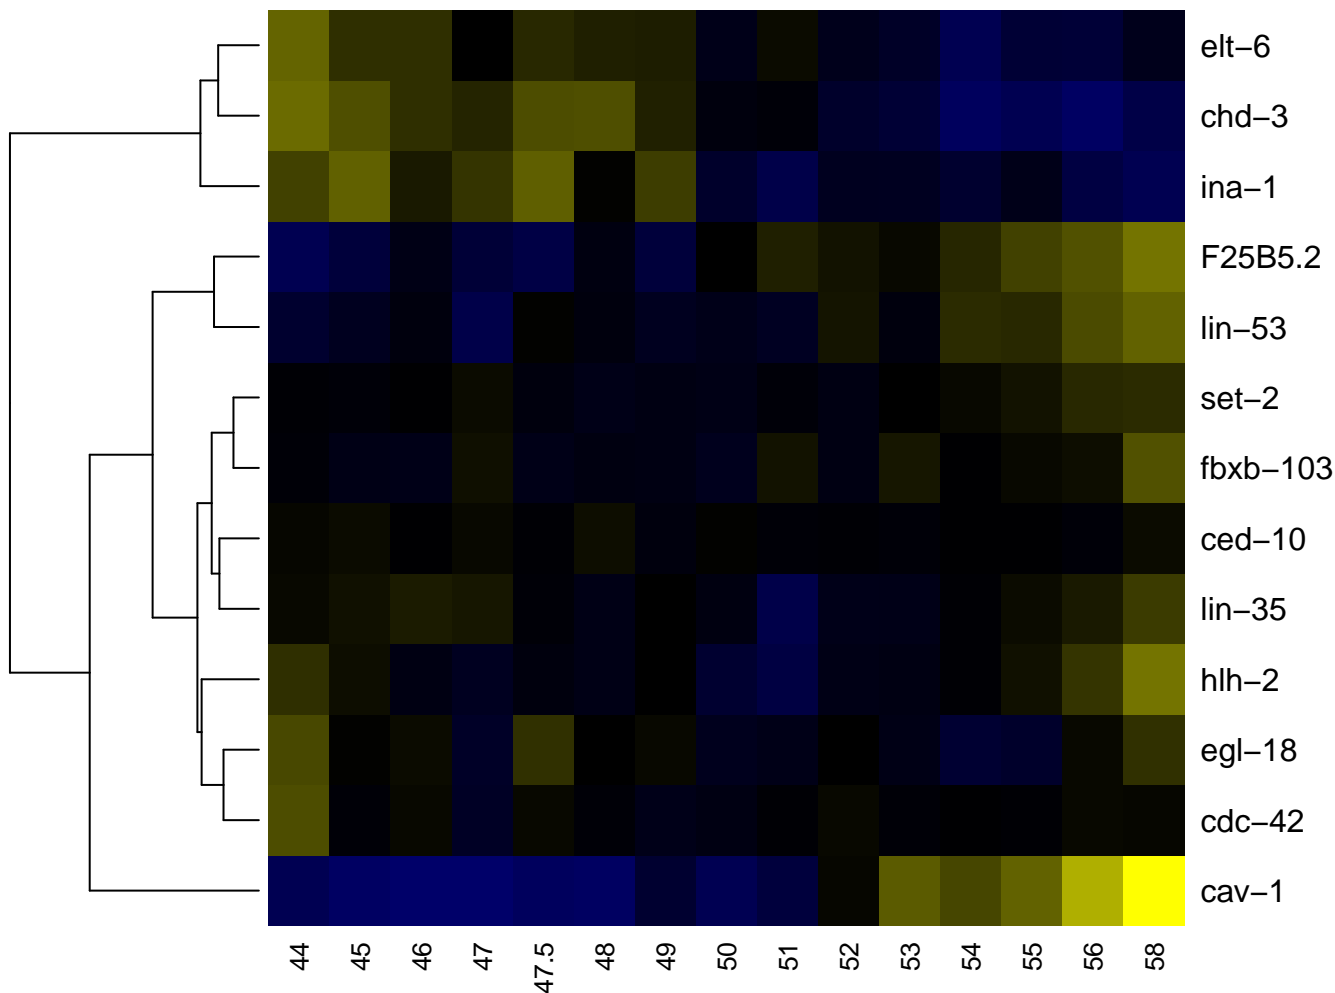

# MSapappa

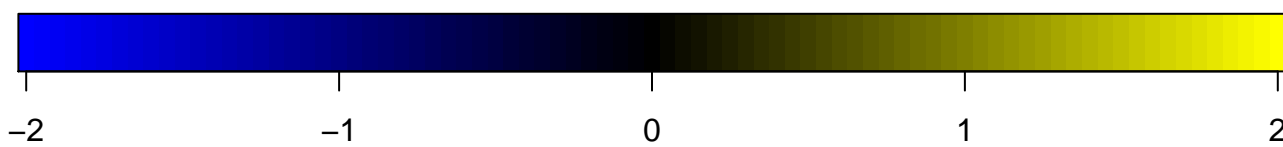

# MSapappp

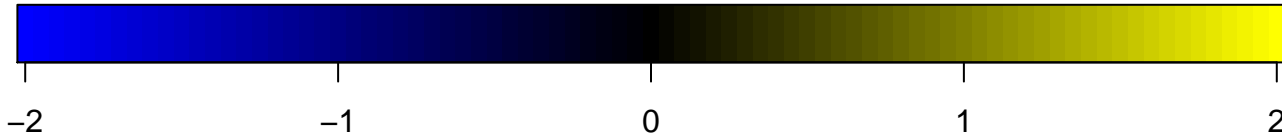

# MSapp

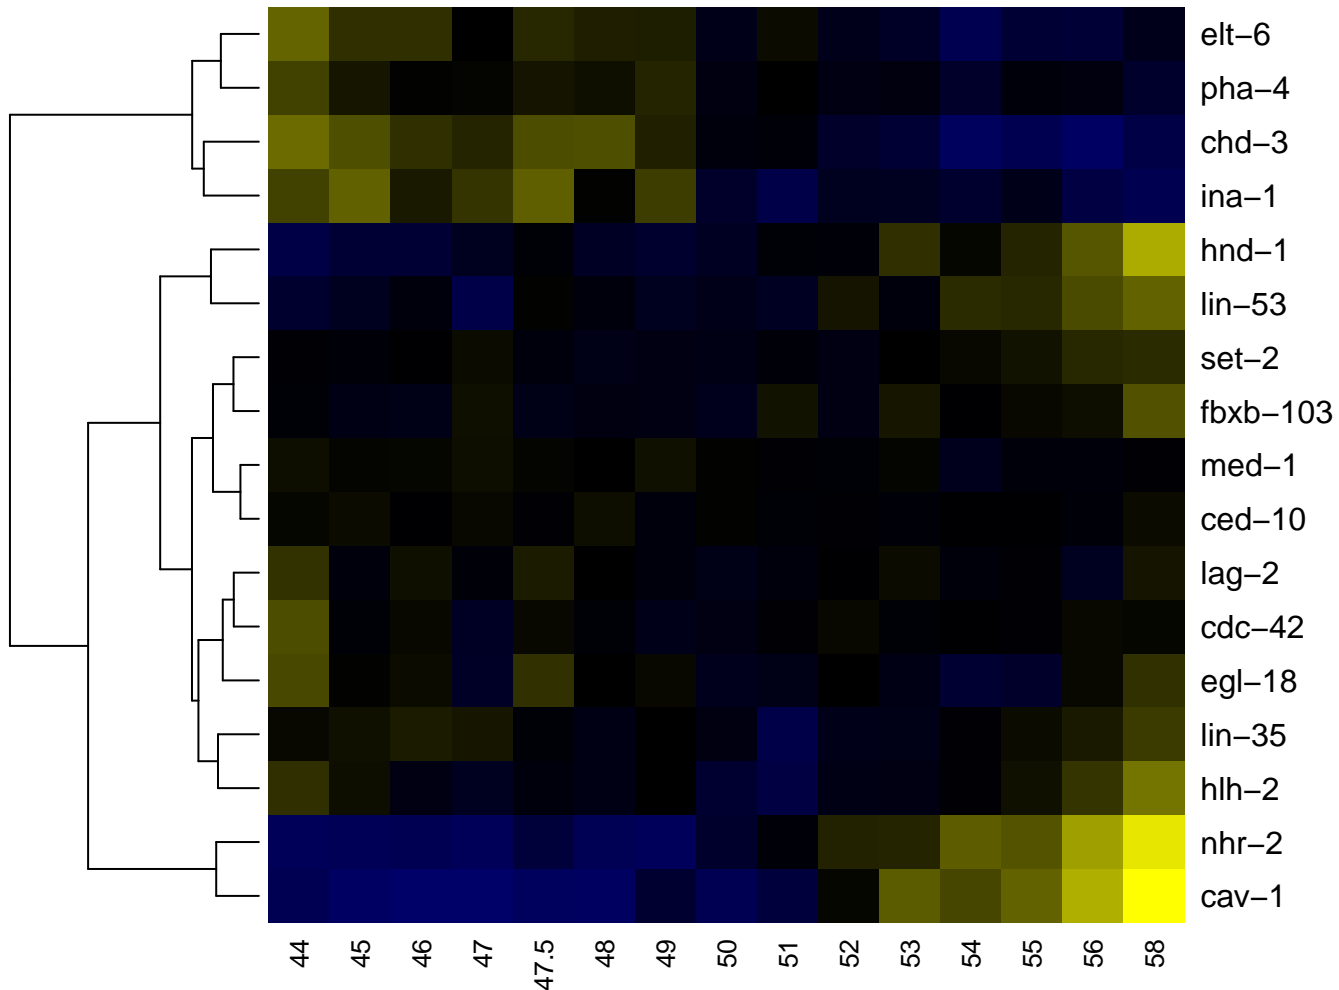

# MSappa



# MSappaa





# MSappap

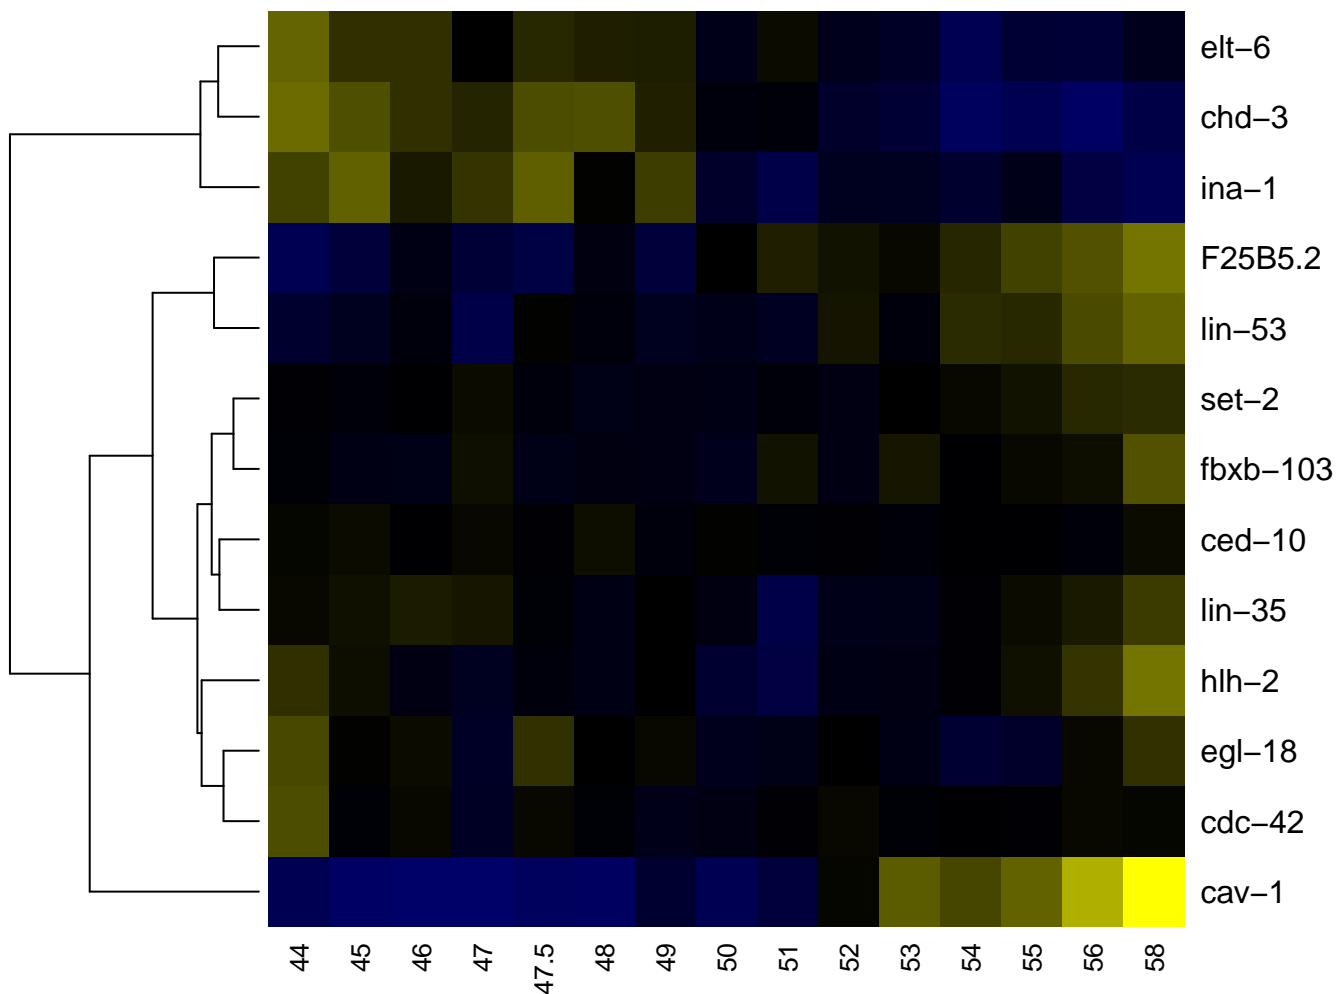

# MSappapa

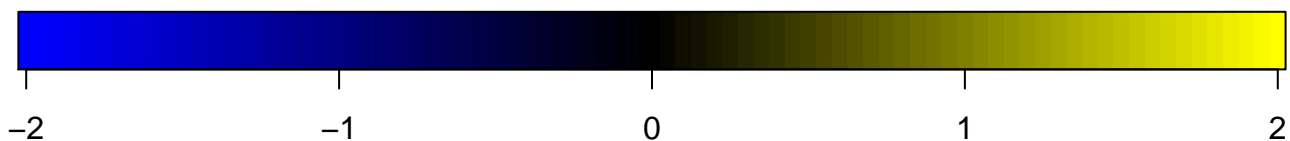

# MSappapp



# MSappp



# MSappa



# MSappaa



# MSappap



# MSapppp





# MSapppppa







# MSpa

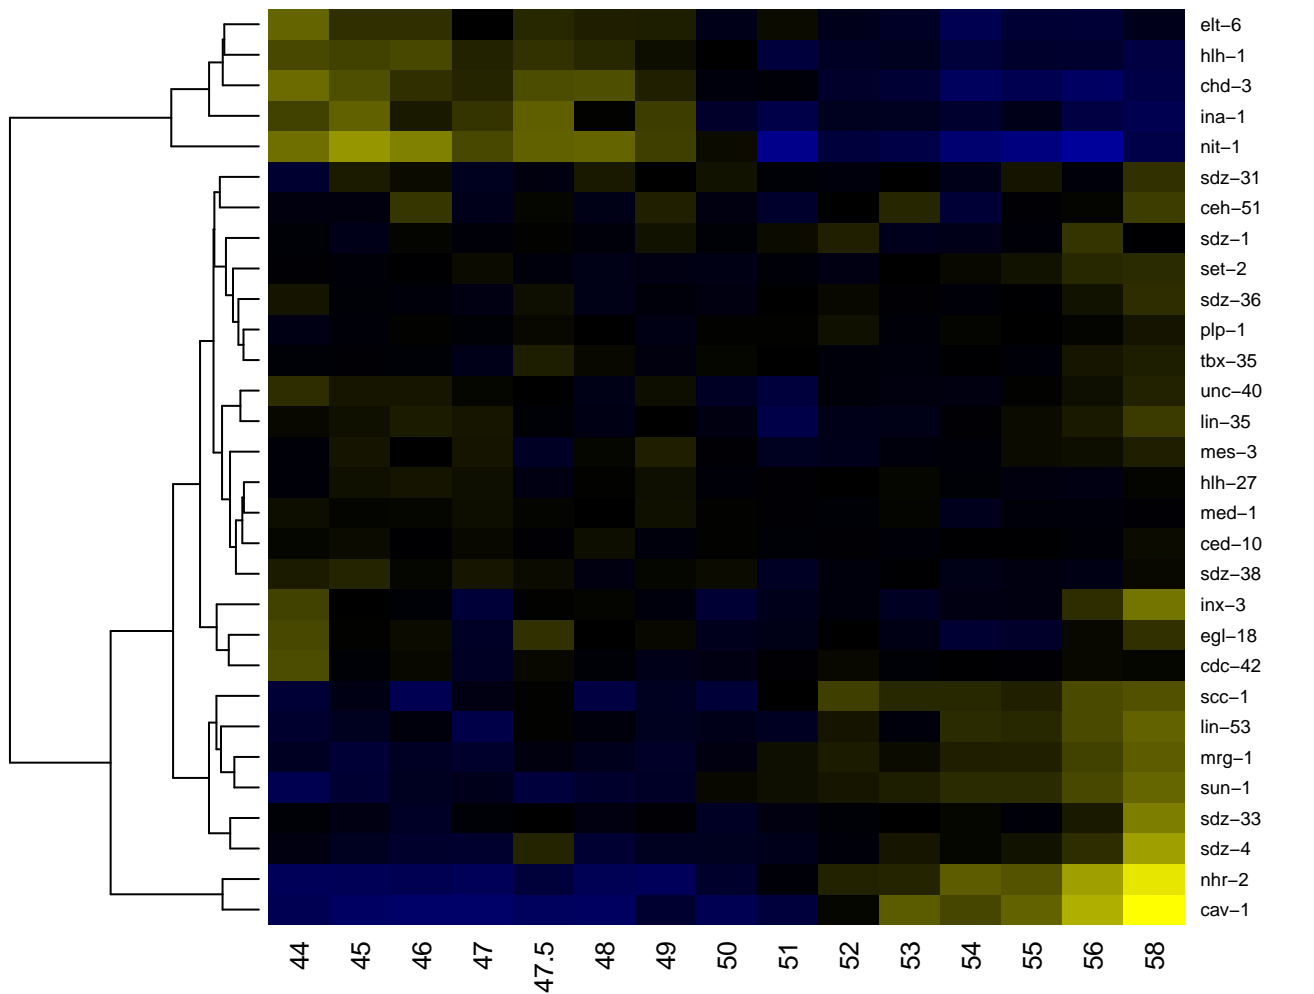

-2

-1

0

1

2

# MSpaa



# MSpaaa



# MSpaaaa

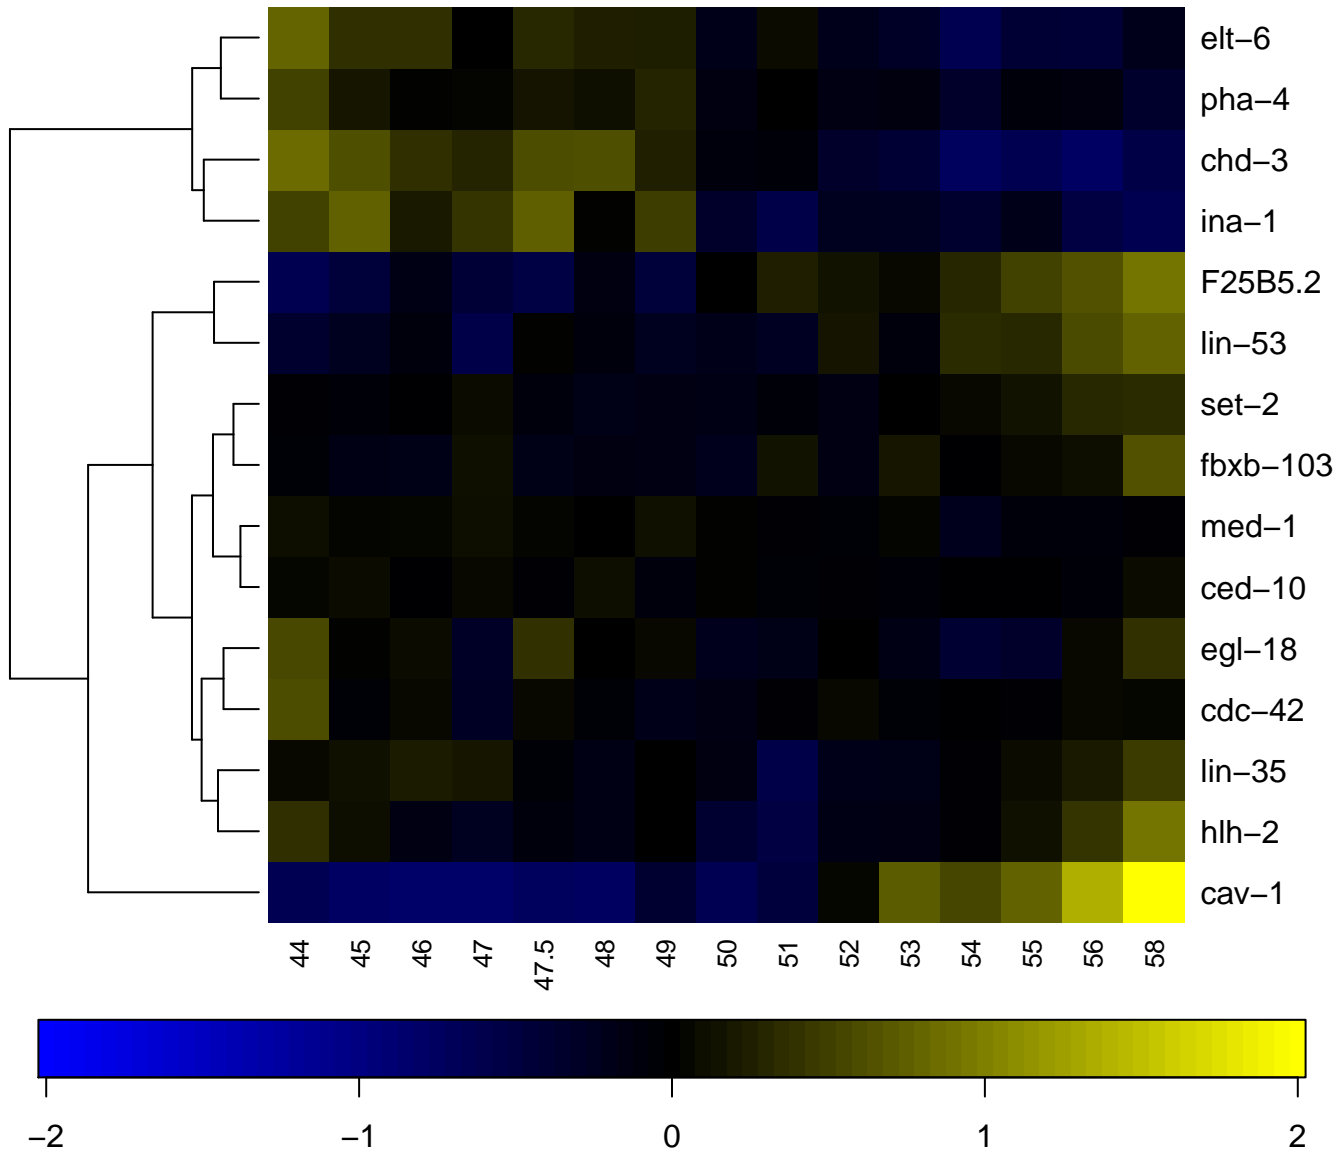

# MSpaaaaa





# MSpaaaaap

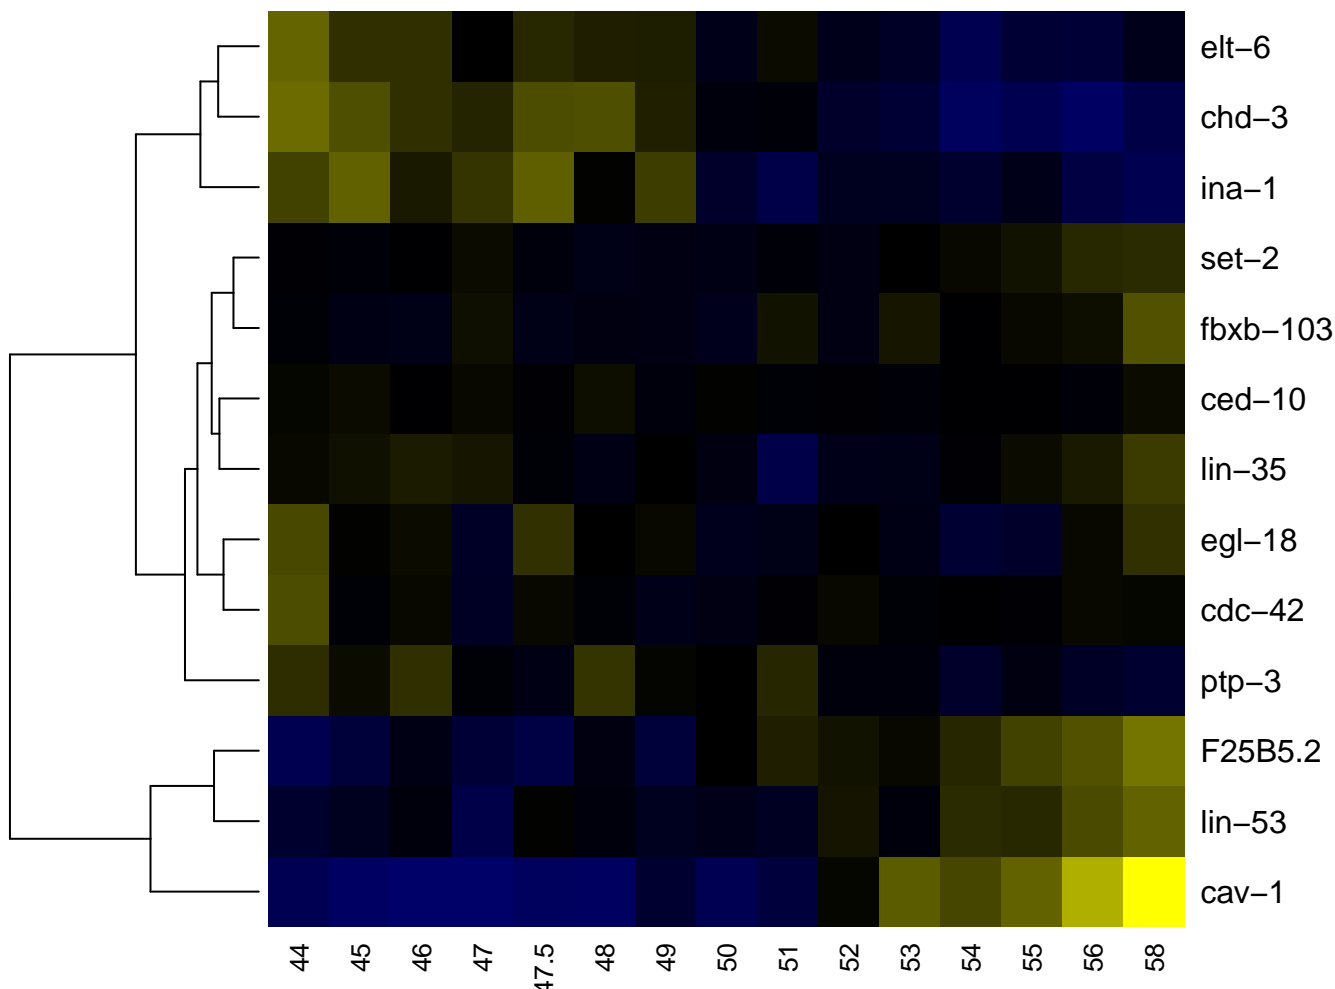



# MSpaaap





# MSpaaapp

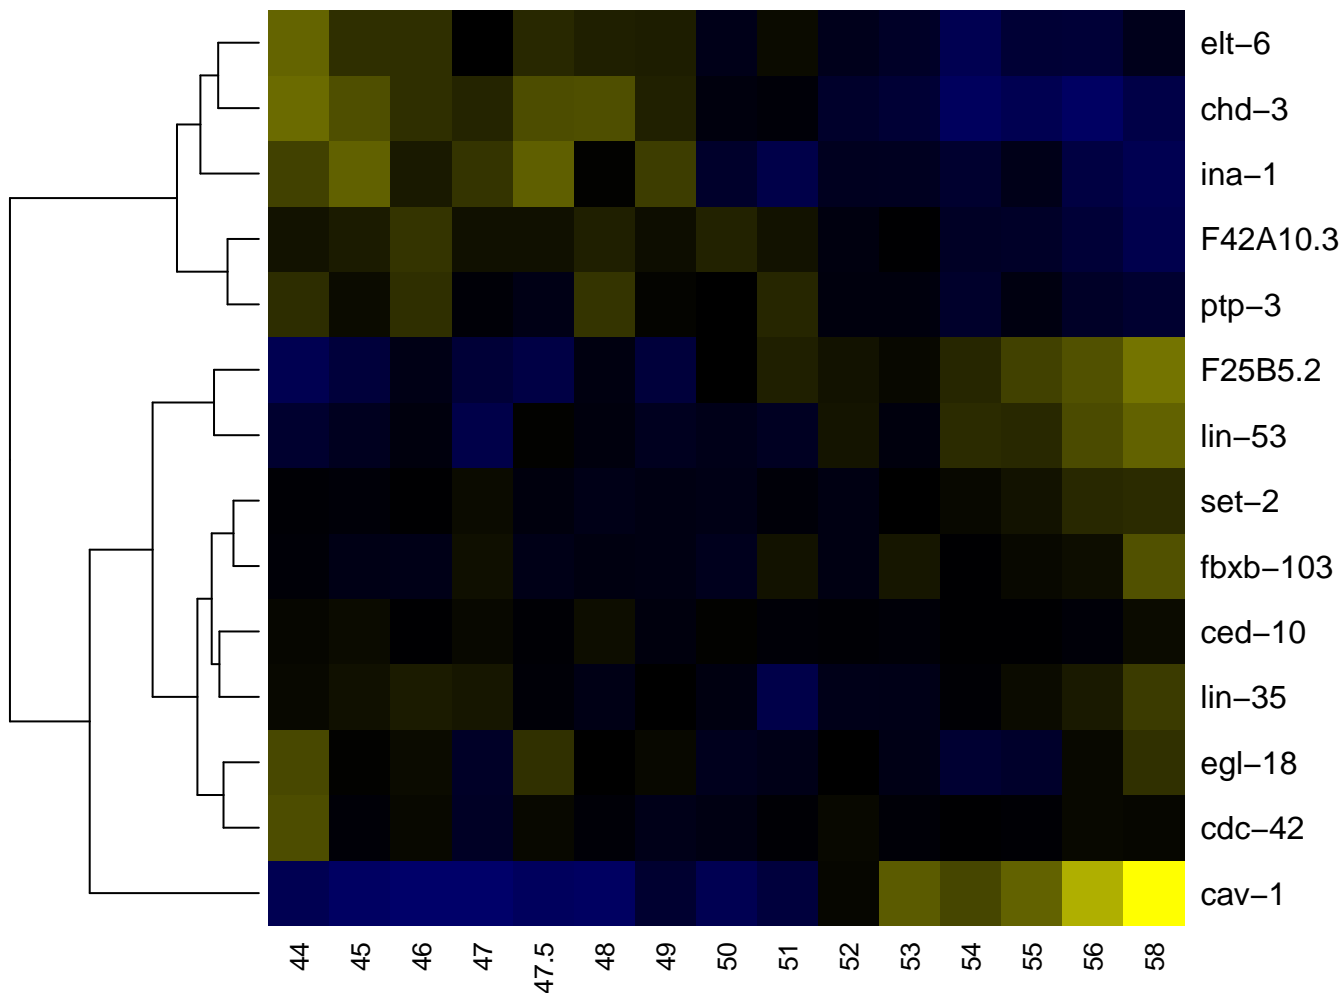

# MSpaap



# MSpaapa

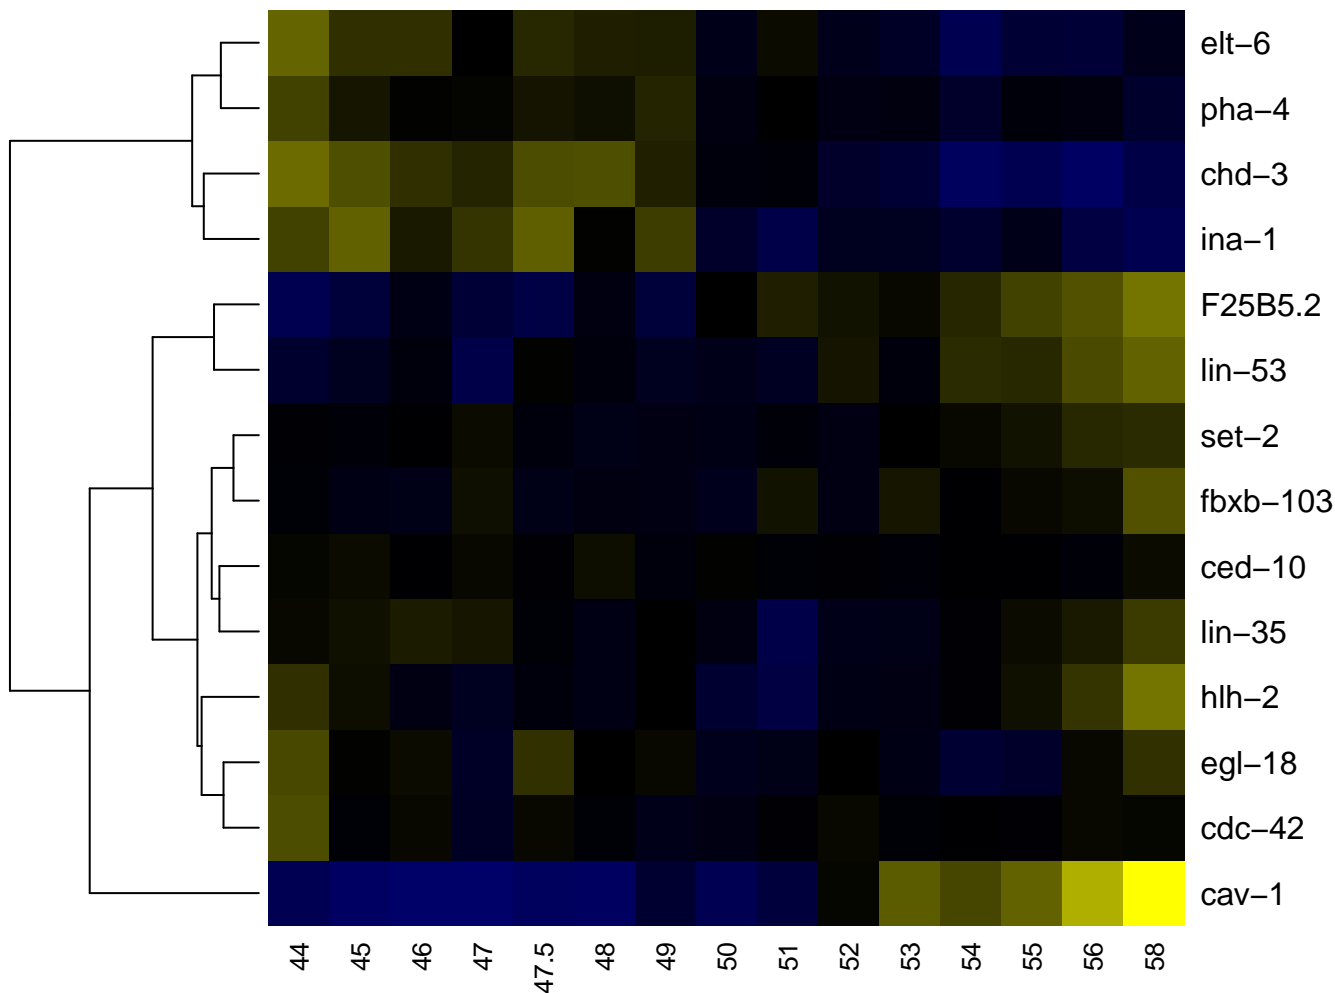

-2

-1

0

1

2







# MSpaapap



# MSpaapp



# MSpap



# MSpapa



# MSpapaa

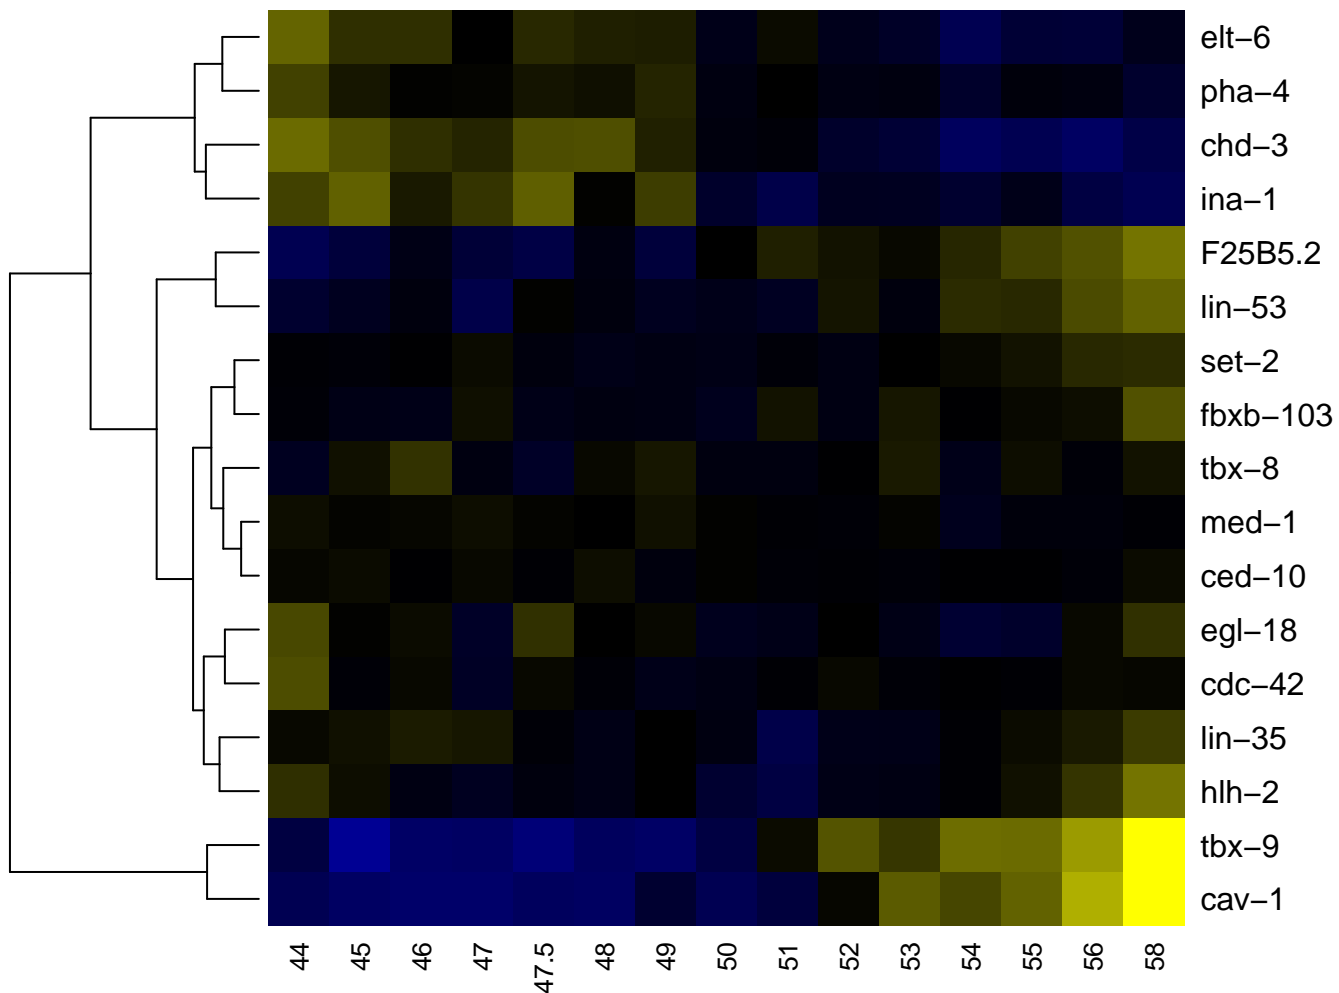

# MSpapaaa

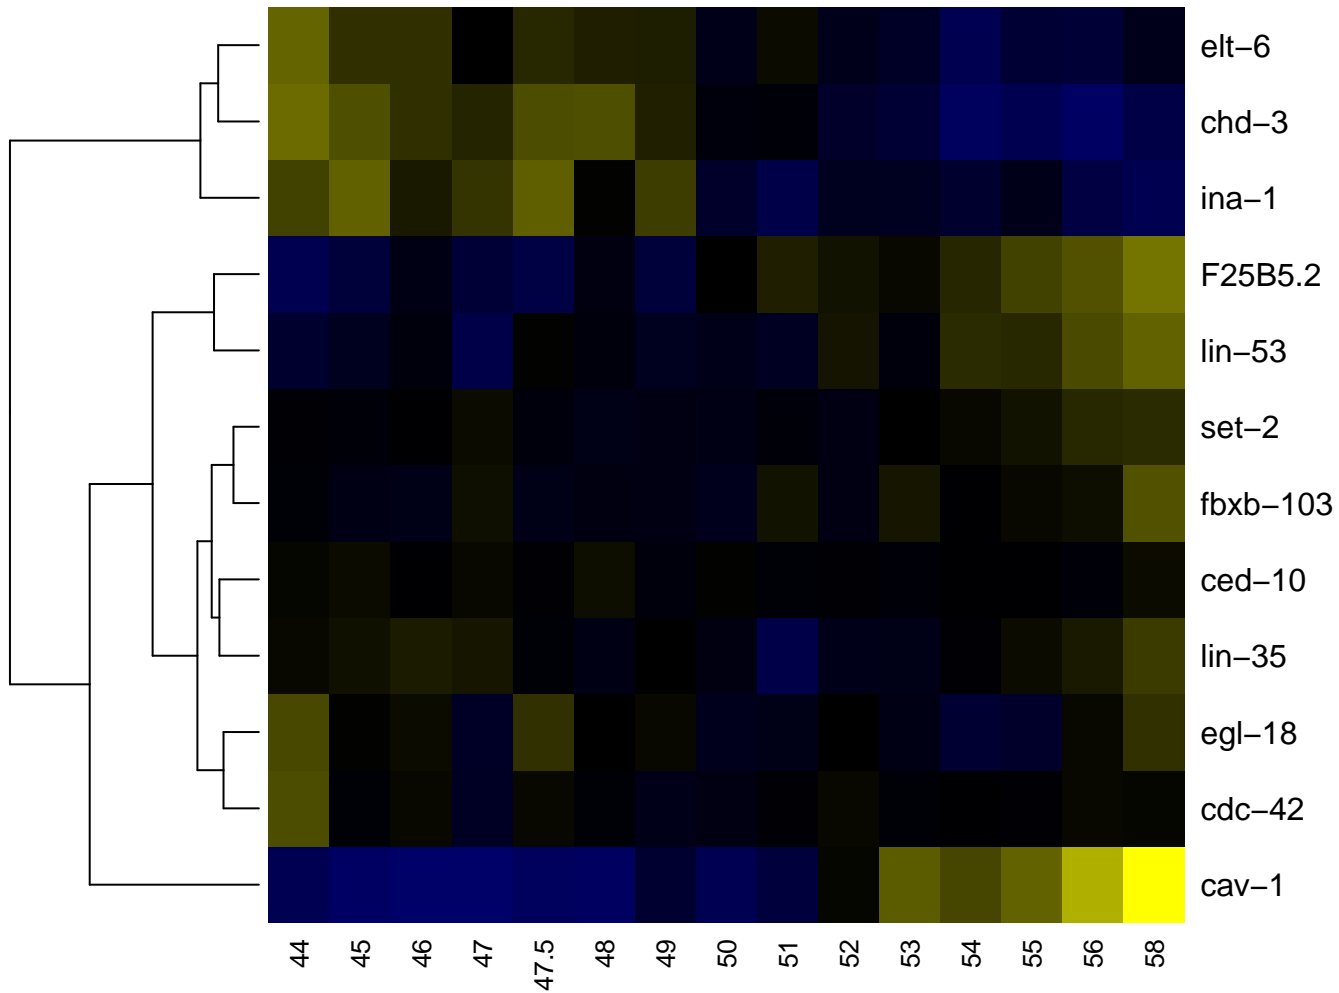

# MSpapaap





# MSpapaapa

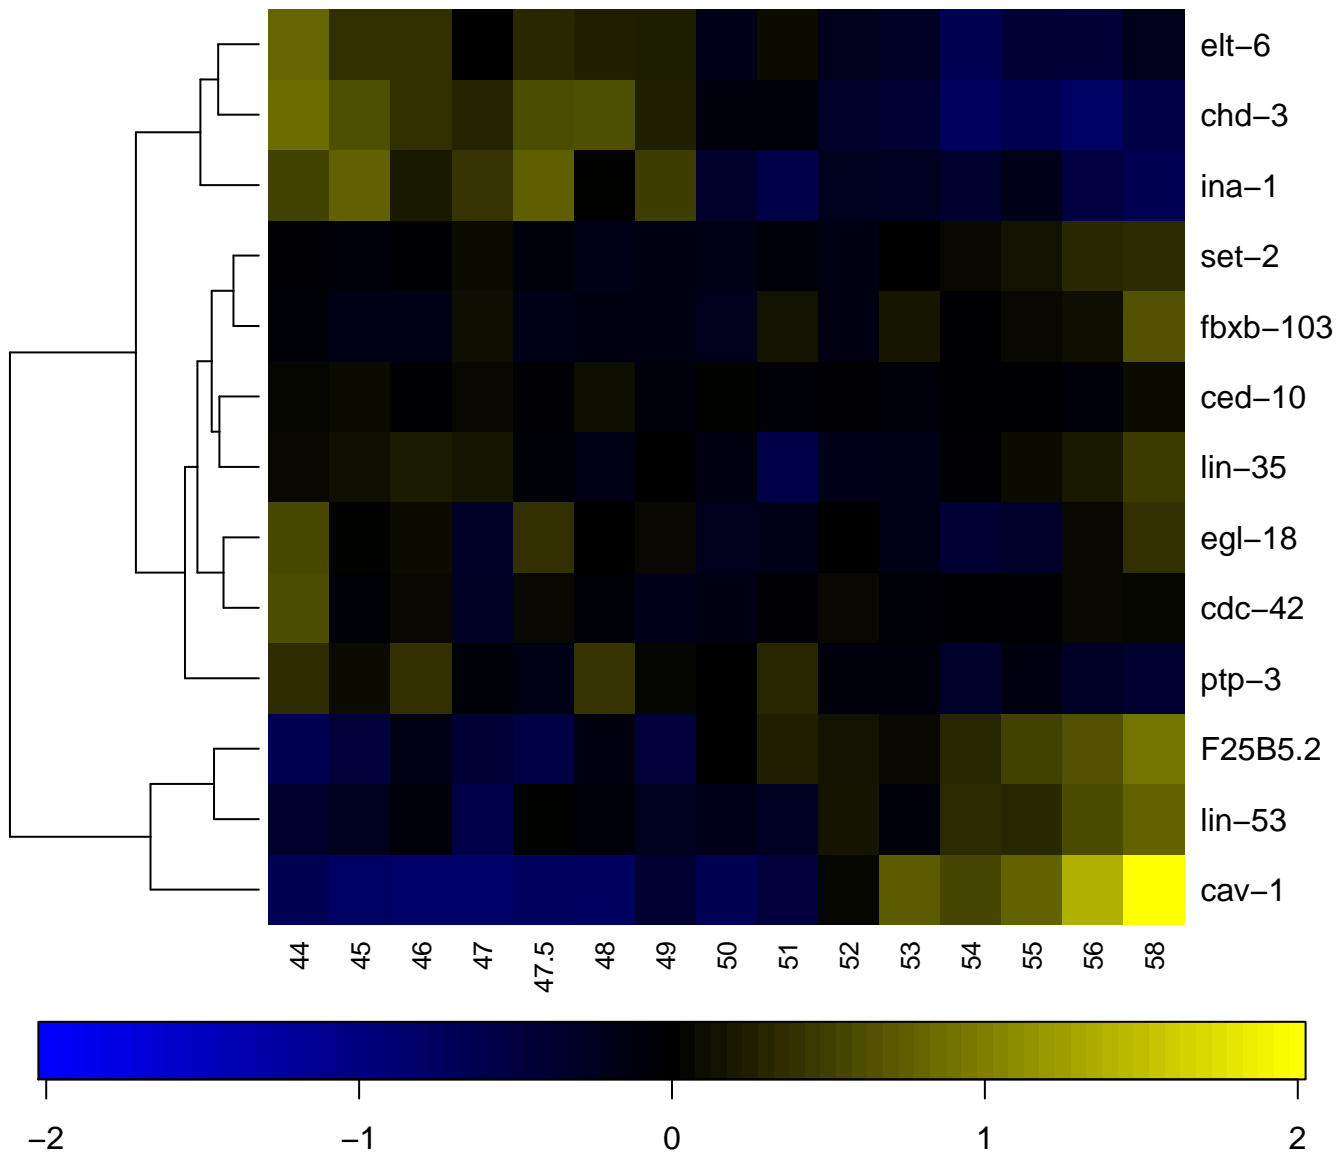

# MSpapaapap



# MSpapap



# MSpapapa

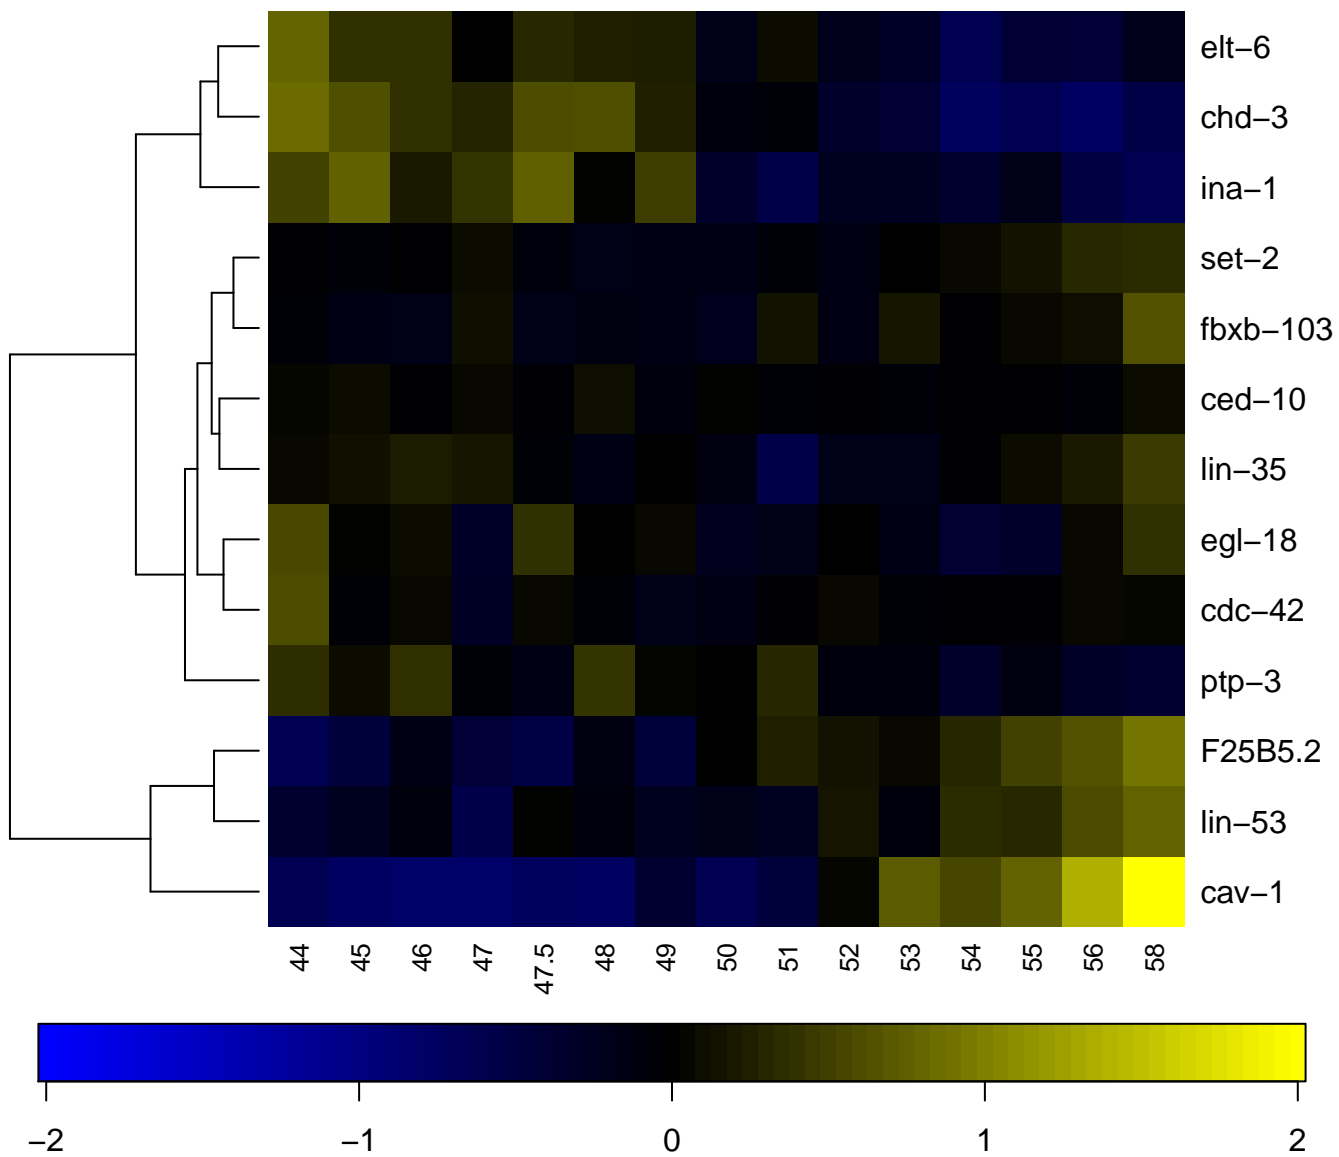

# MSpapapap

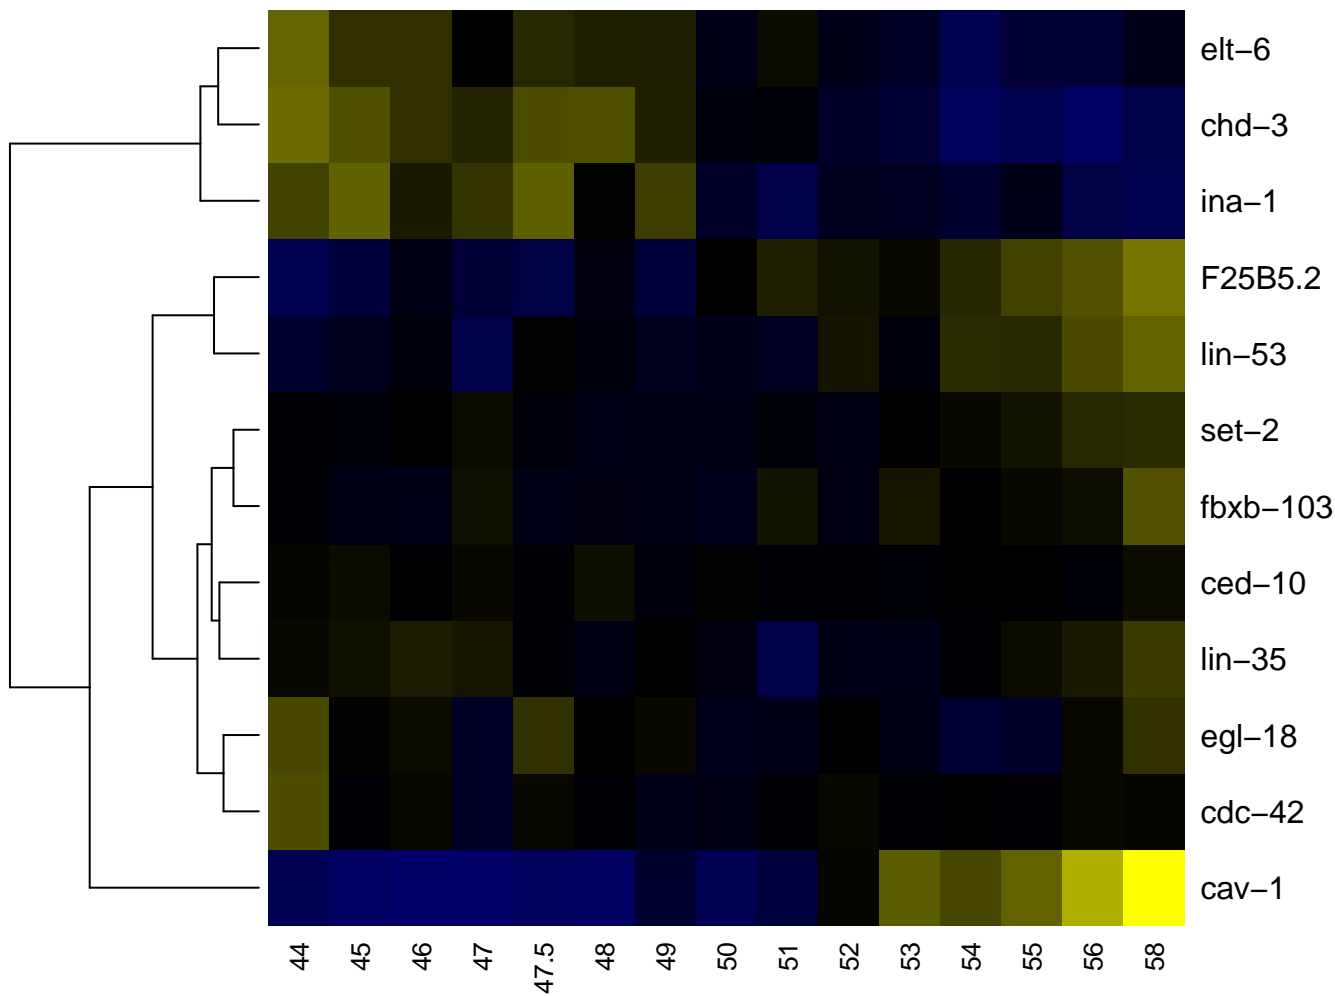

# MSpapapp

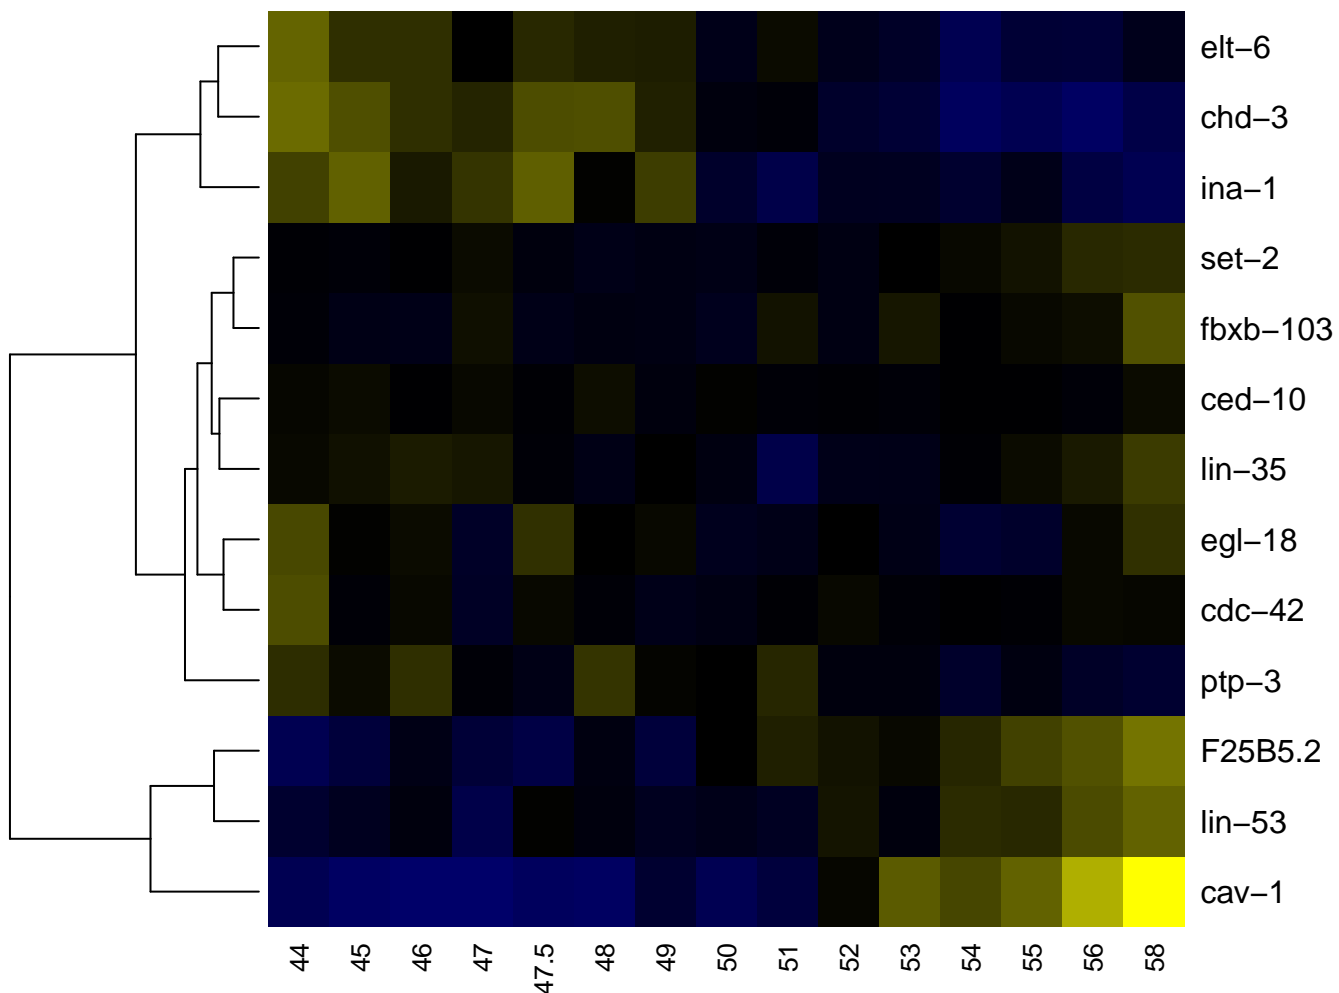

-2

-1

0

1

2

# MSpapp



# MSpappa

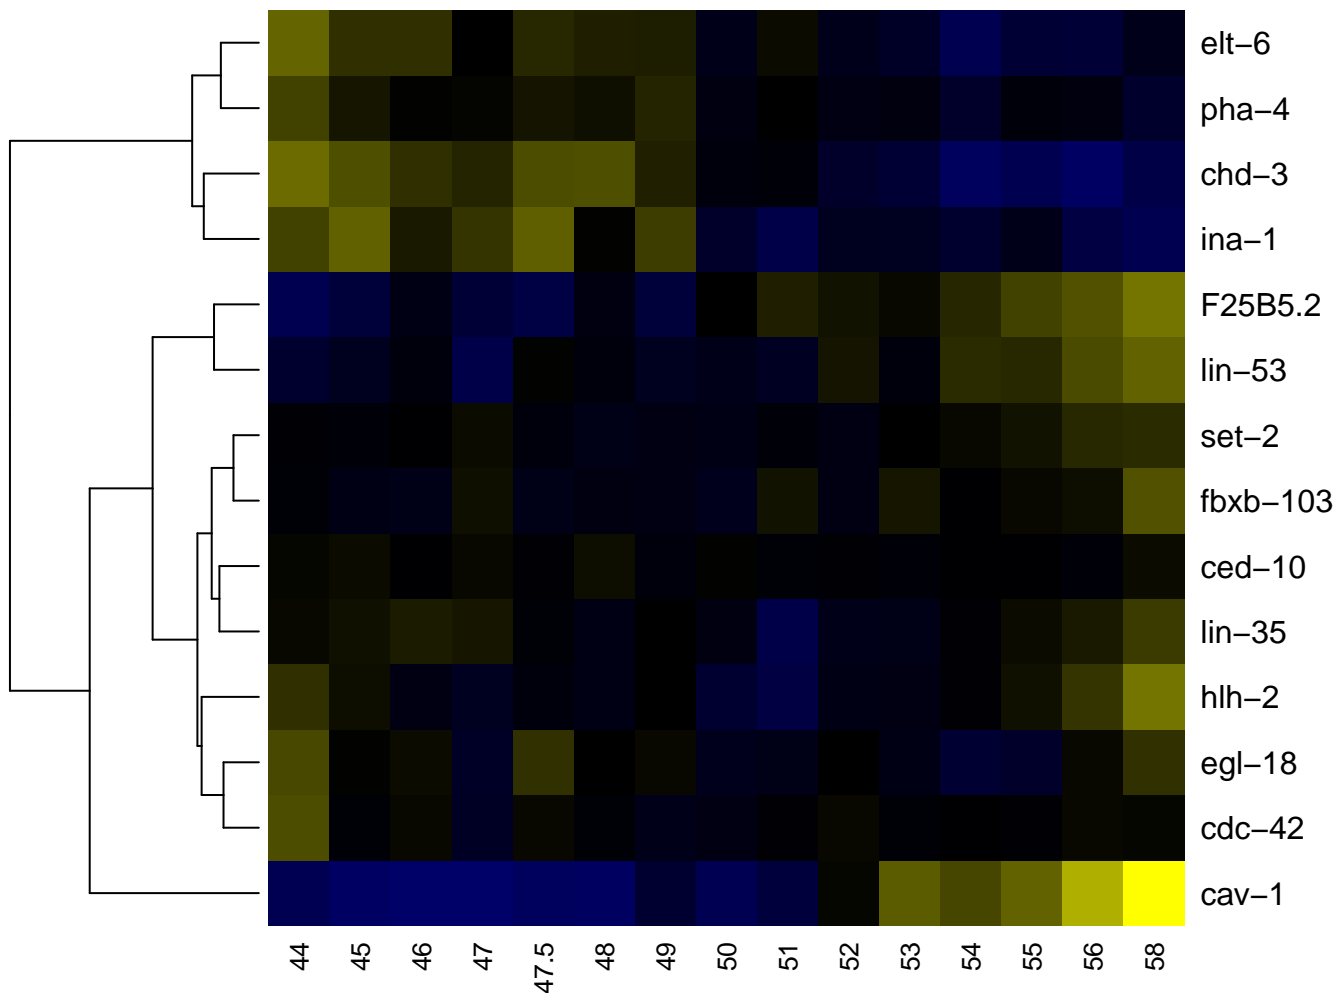



# MSpappaa



# MSpappap



# MSpappp



# MSpapppa





# MSpappap

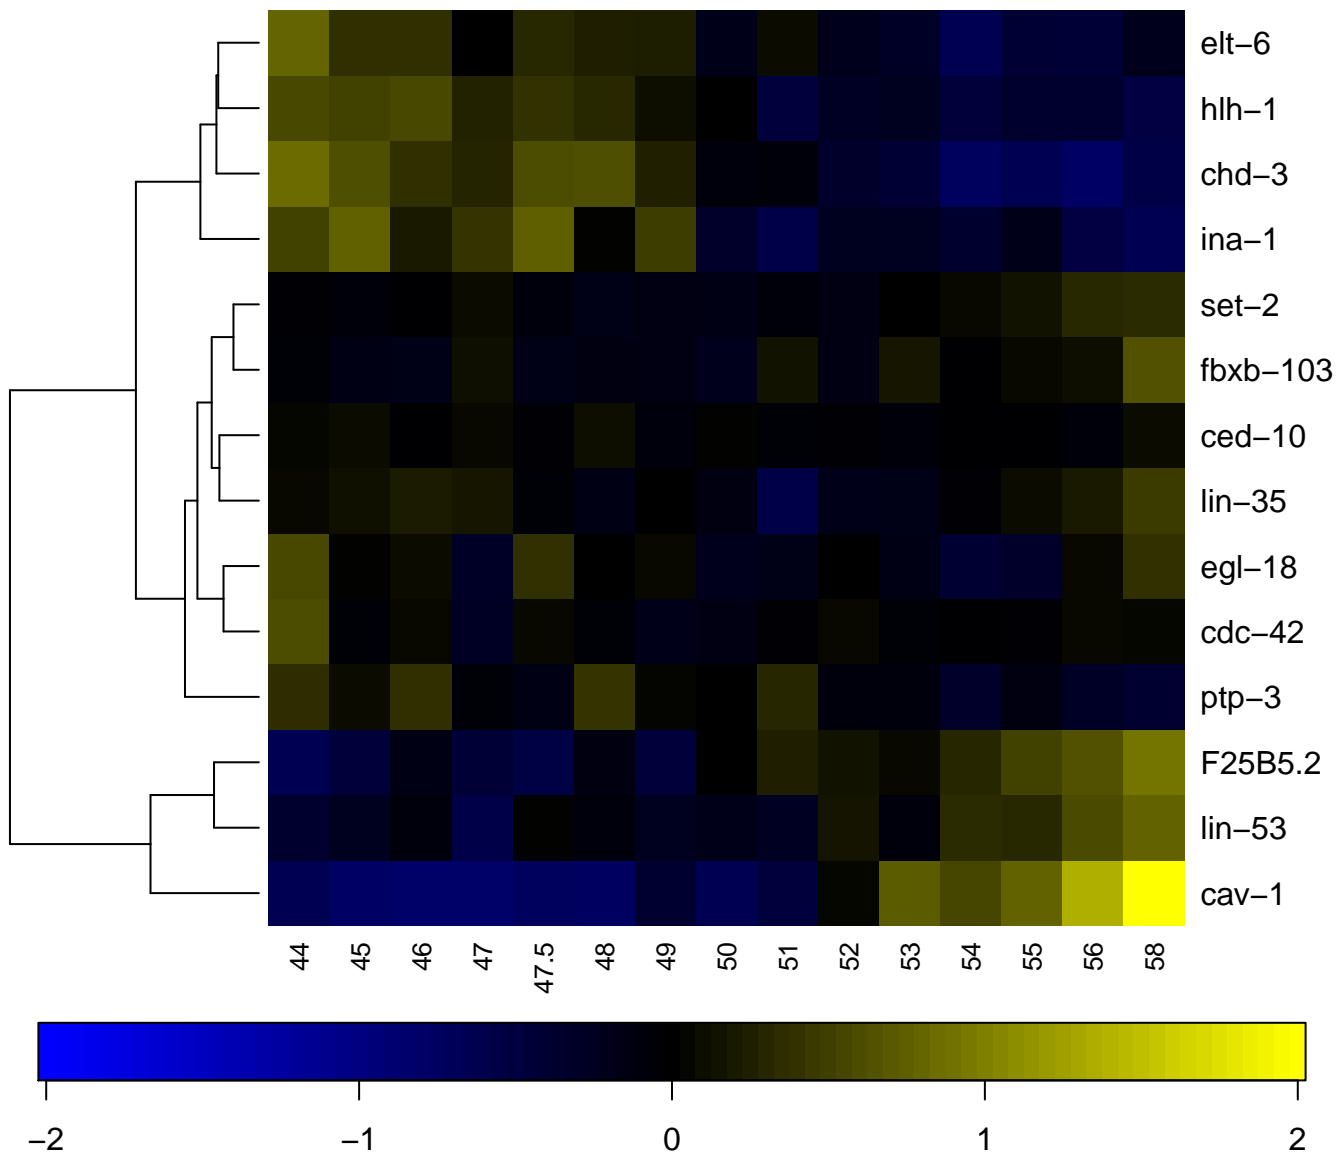

# MSpapppp

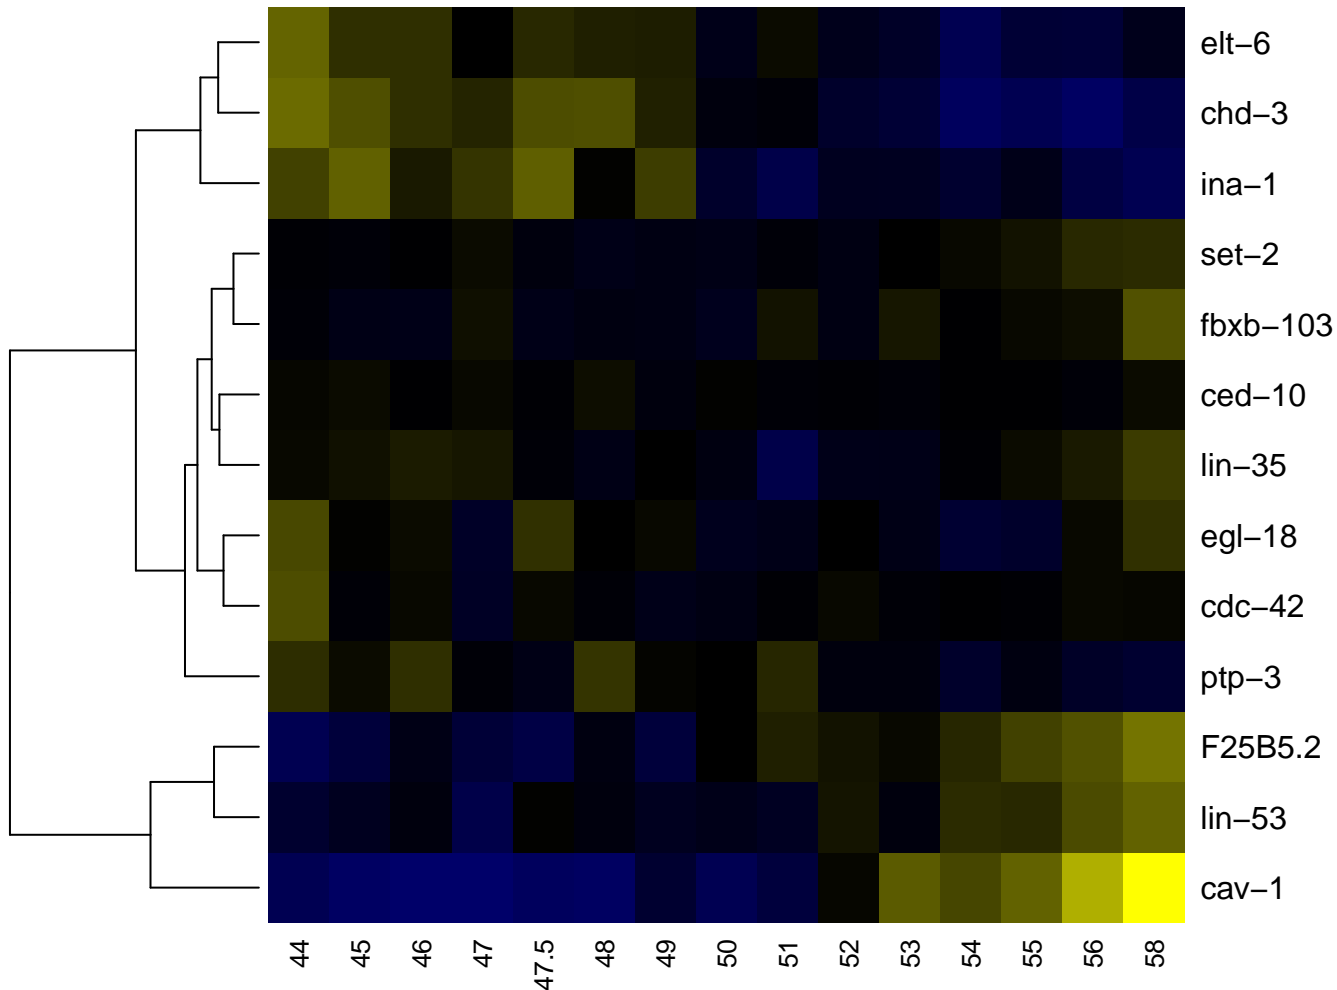

# MSpappppa





# MSpappppp



# MSpp

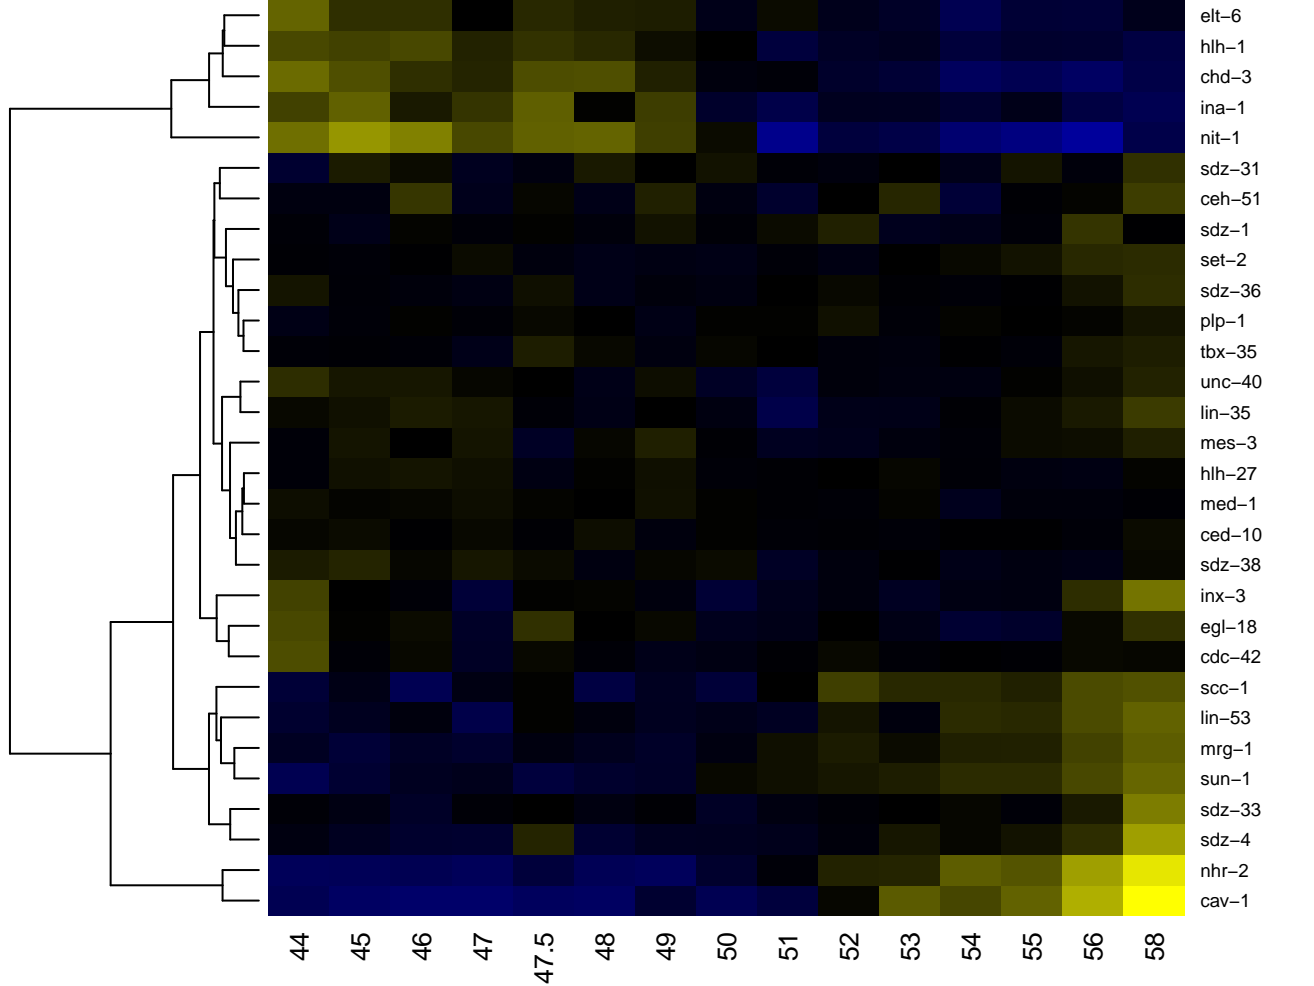

-2

-1

0

1

2

# MSppa

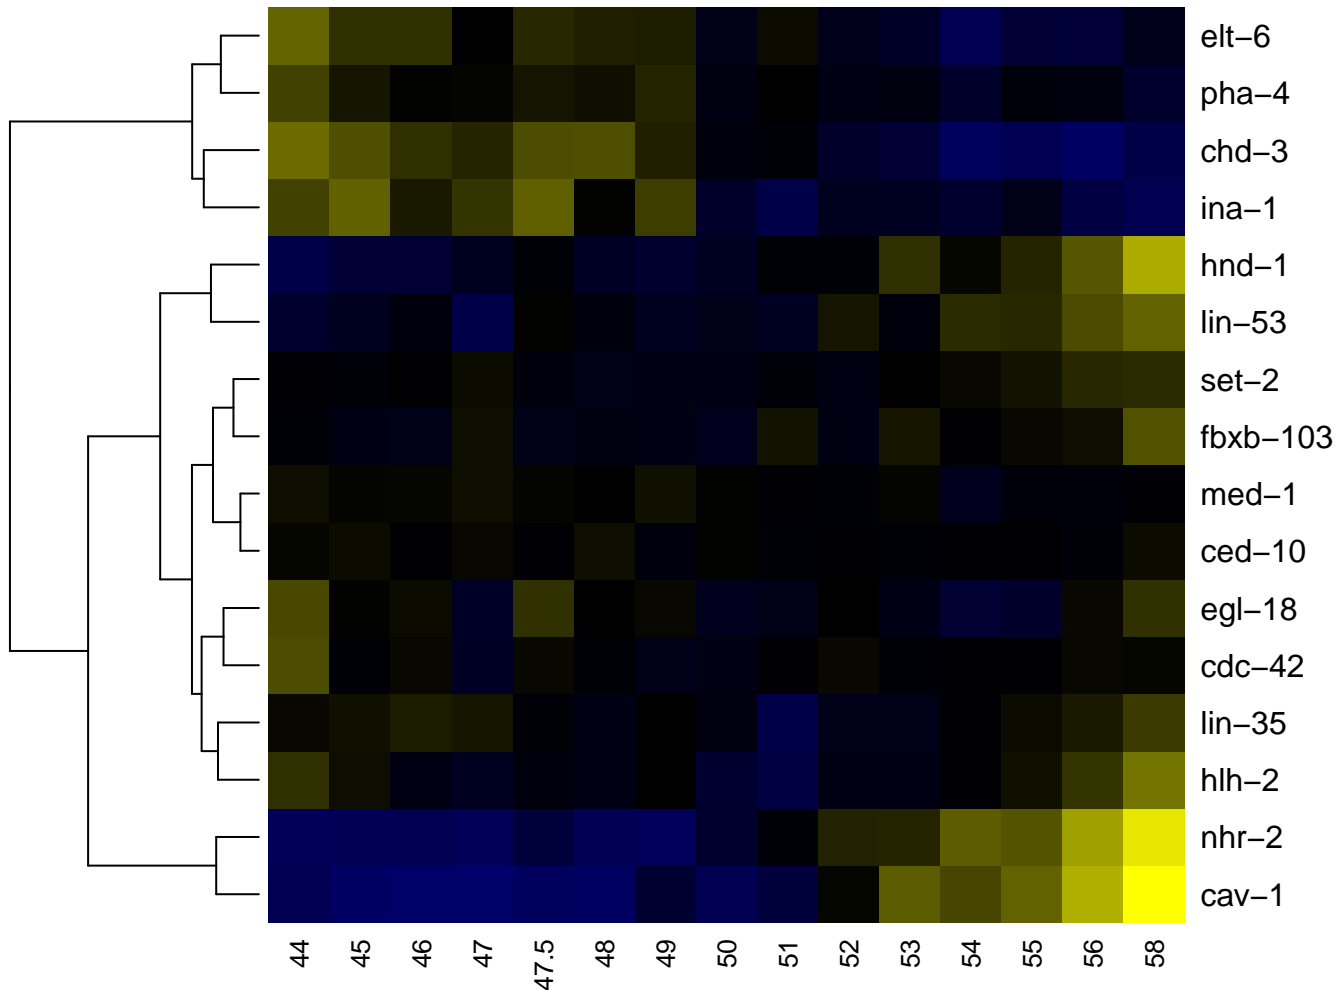

# MSppaa

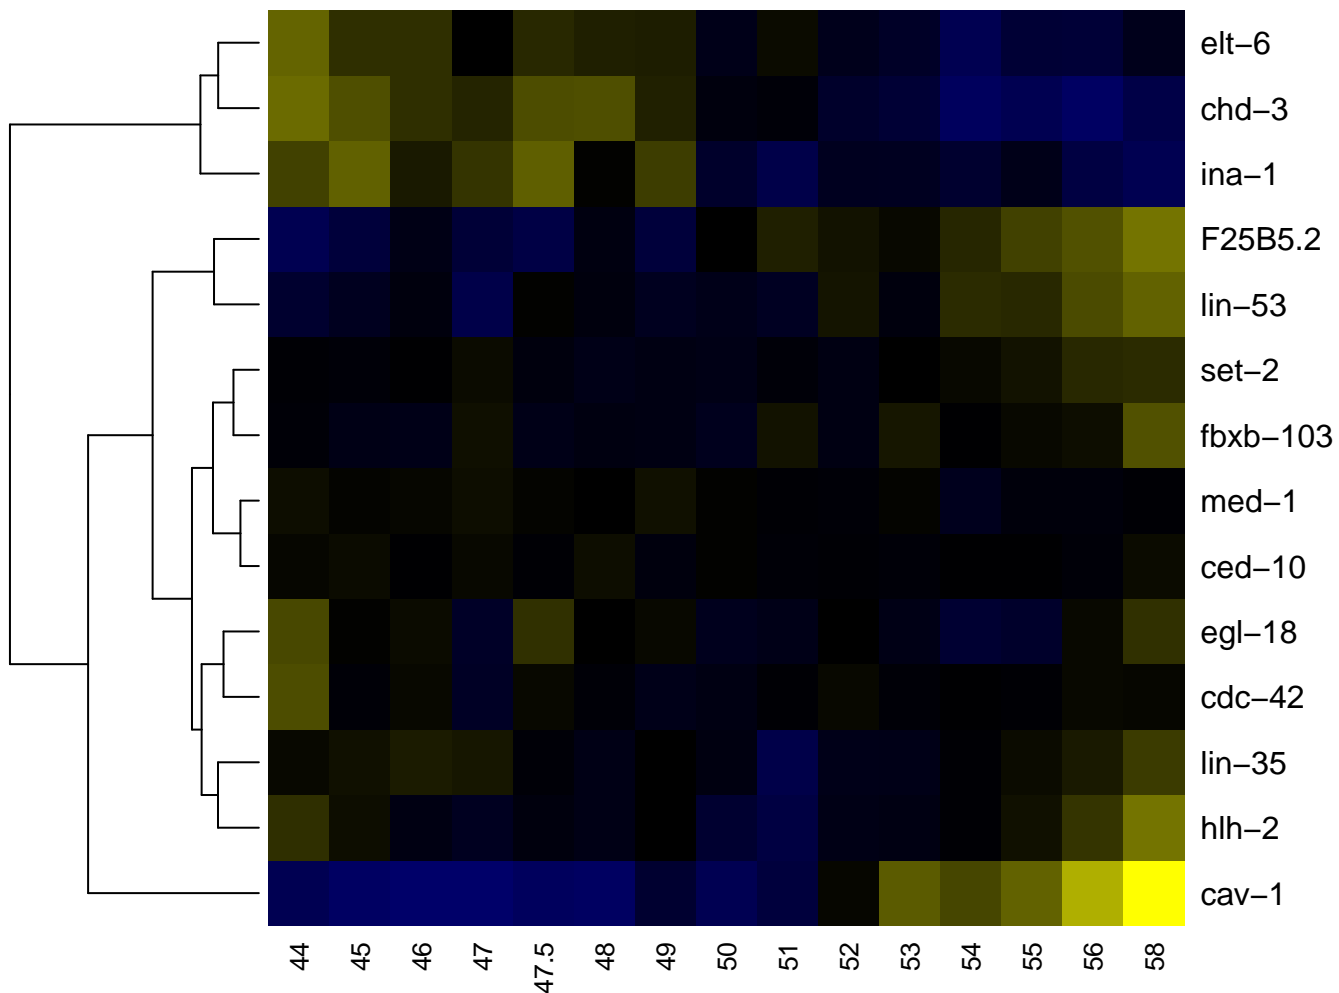

# MSppaaa



-2

-1

0

1

2



# MSppaaap

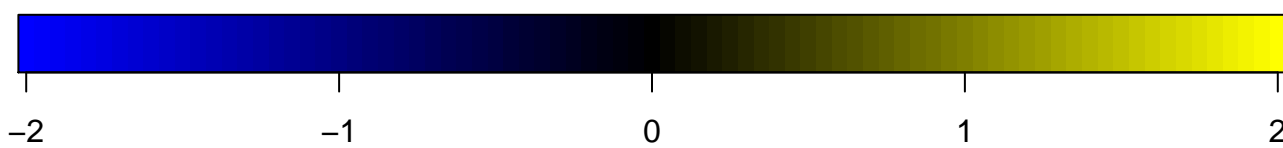

# MSppaap

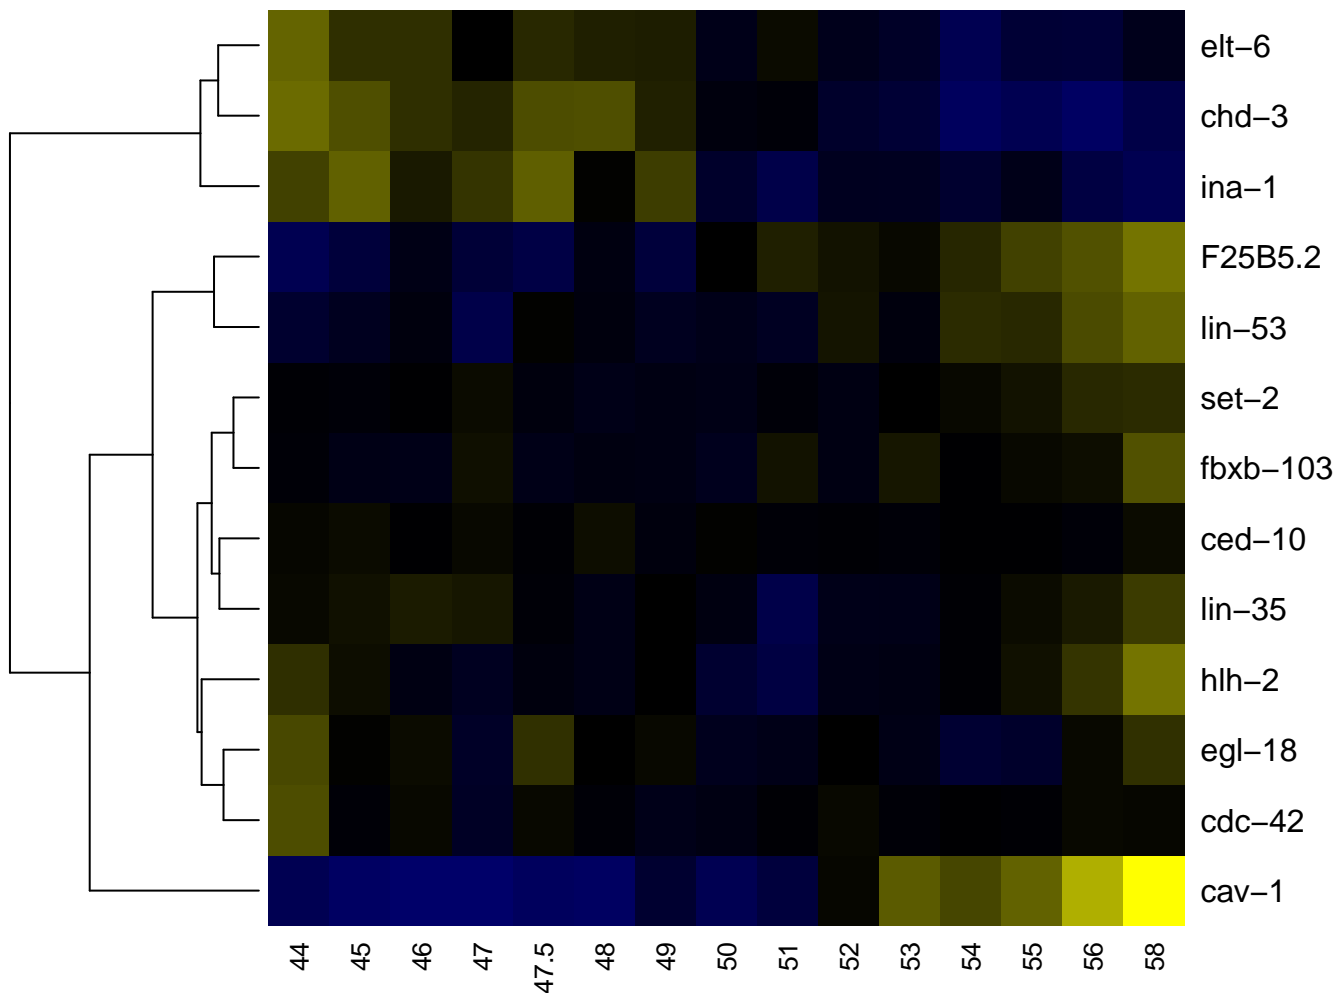



# MSppaapa



# MSppap



# MSppapa



# MSppapaa



# MSppapap



# MSppapp

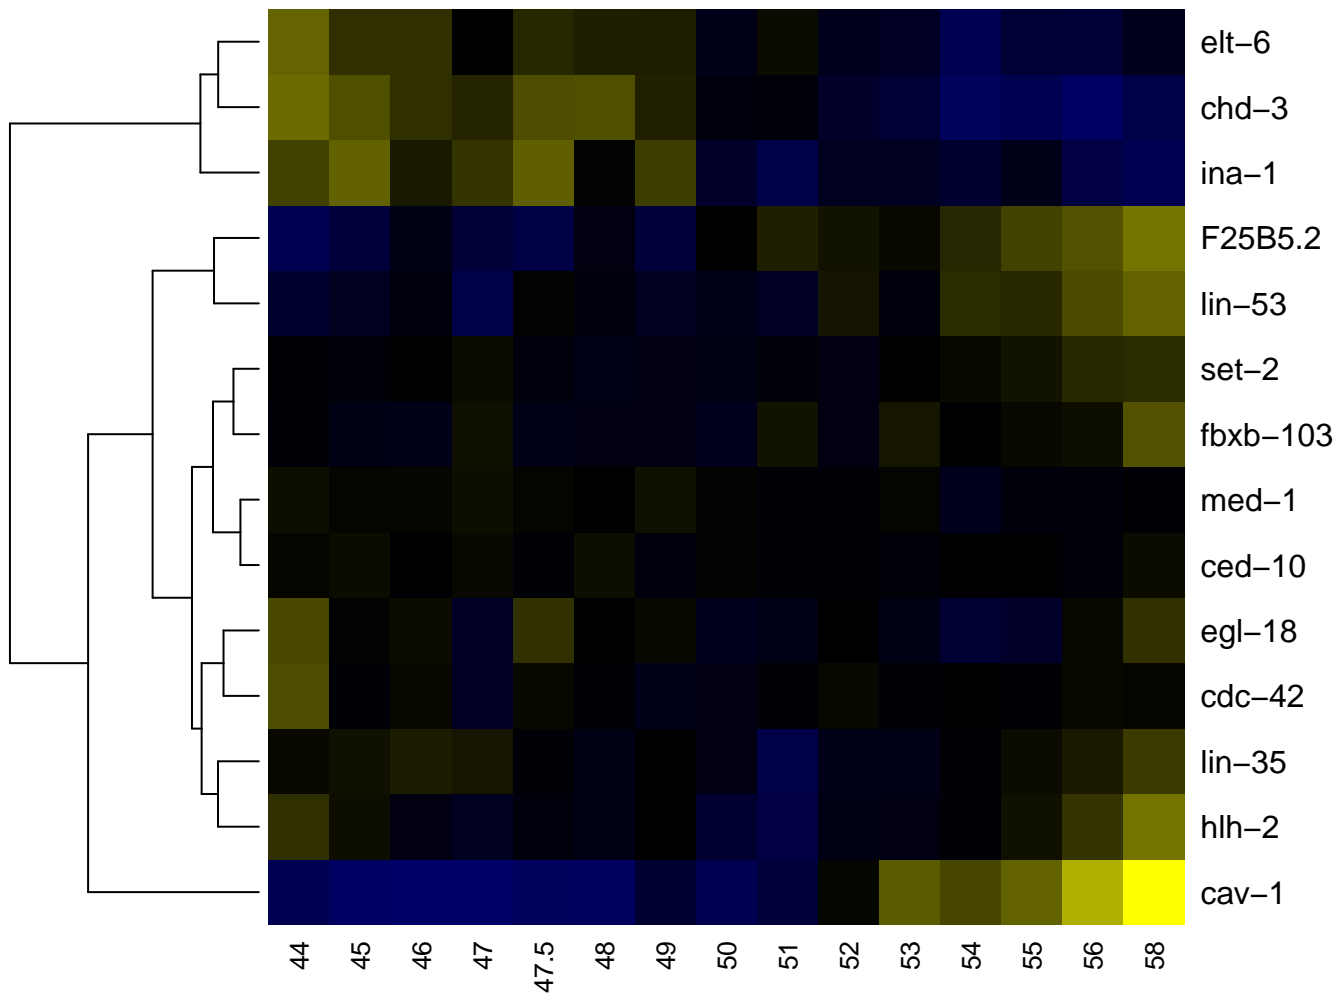



# MSppappp





# MSppp

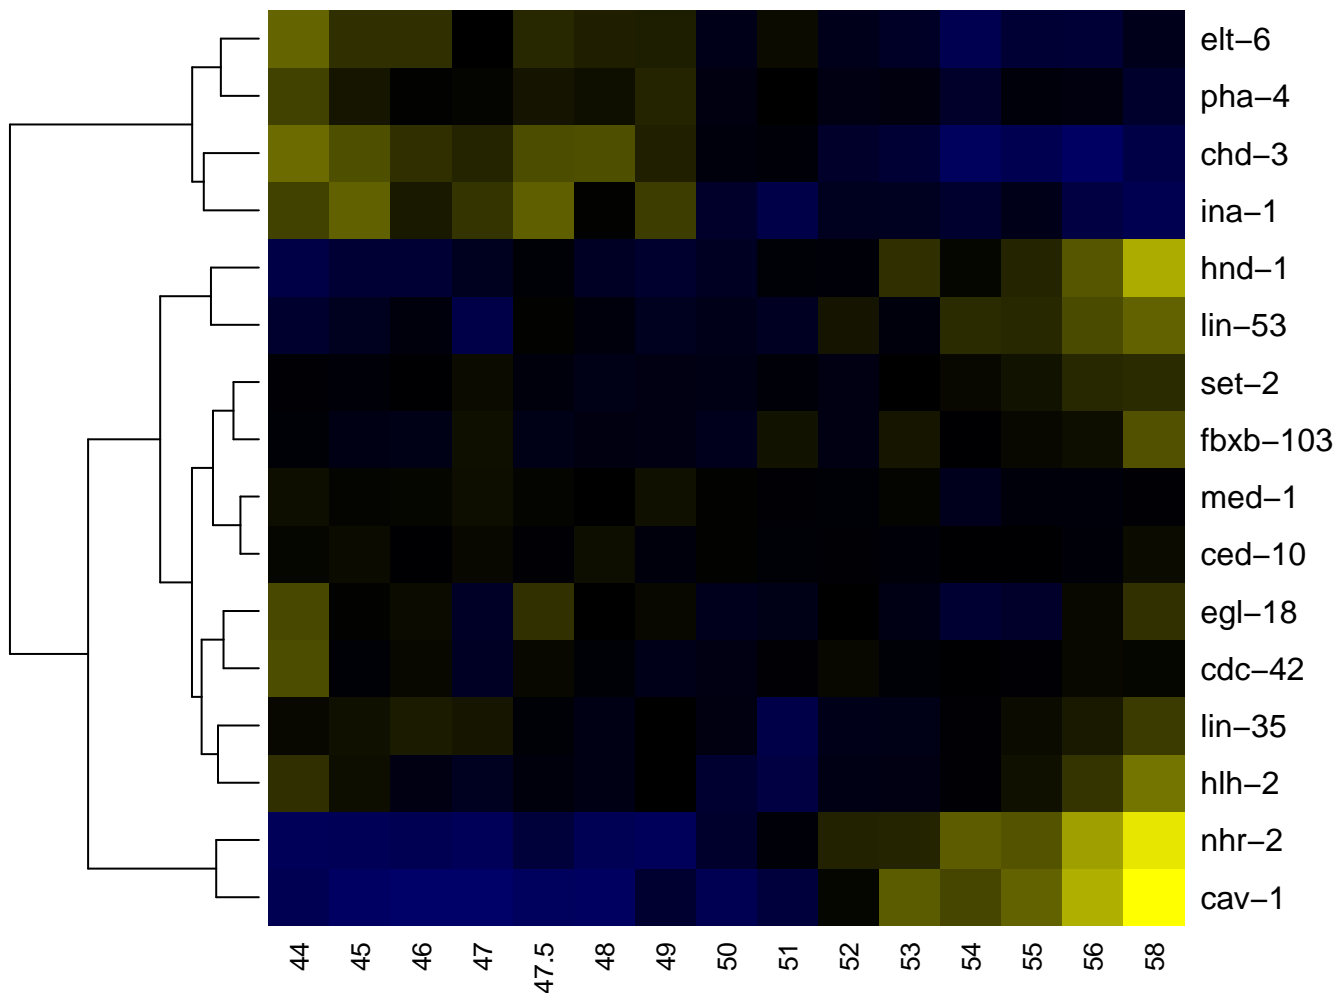

# MSpppa

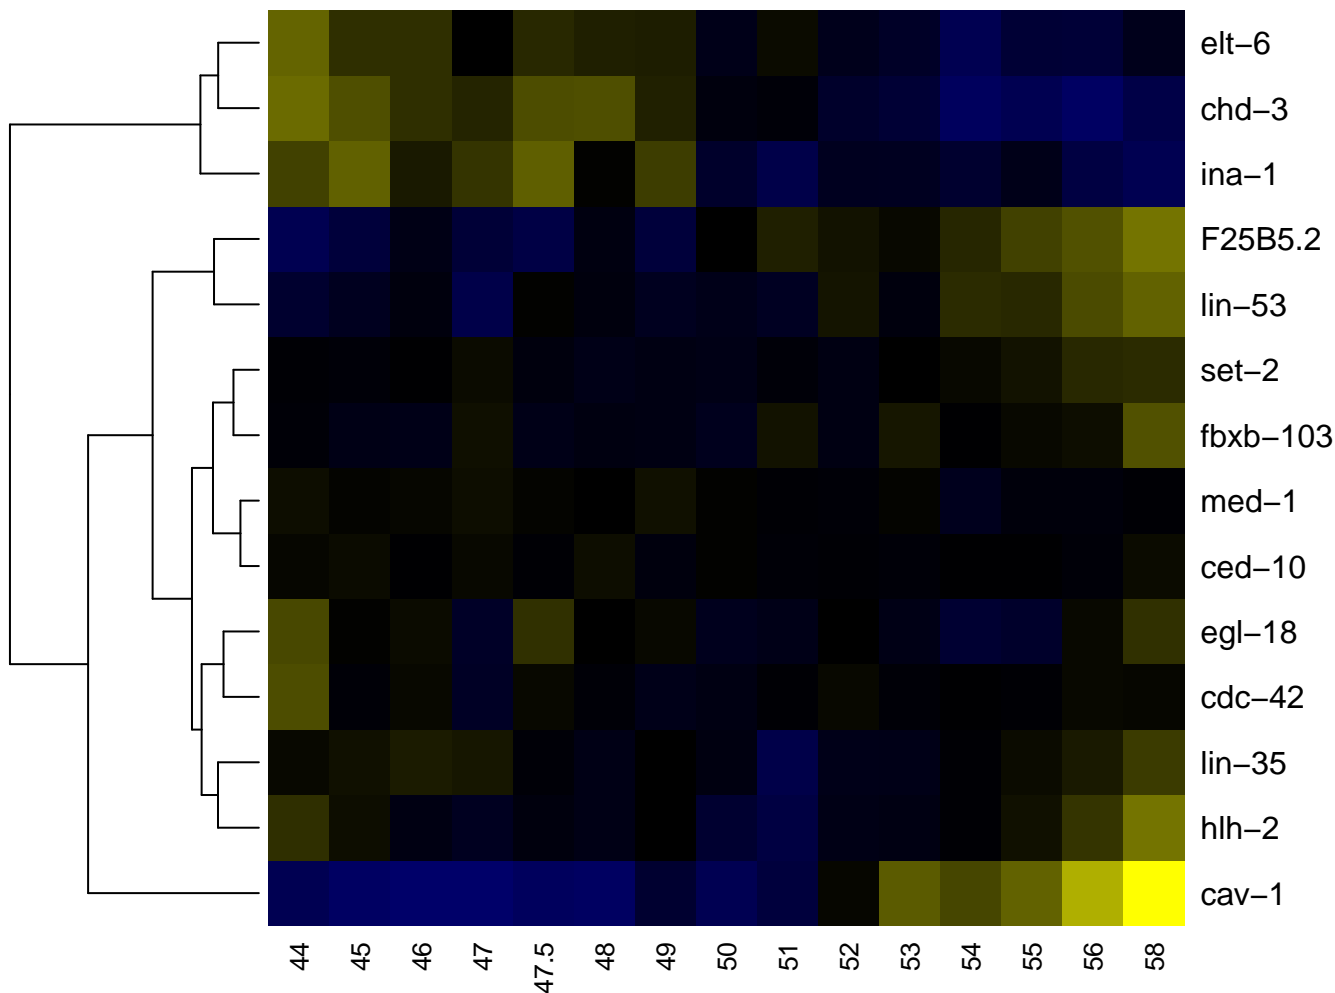

# MSpppaa



# MSpppaaa

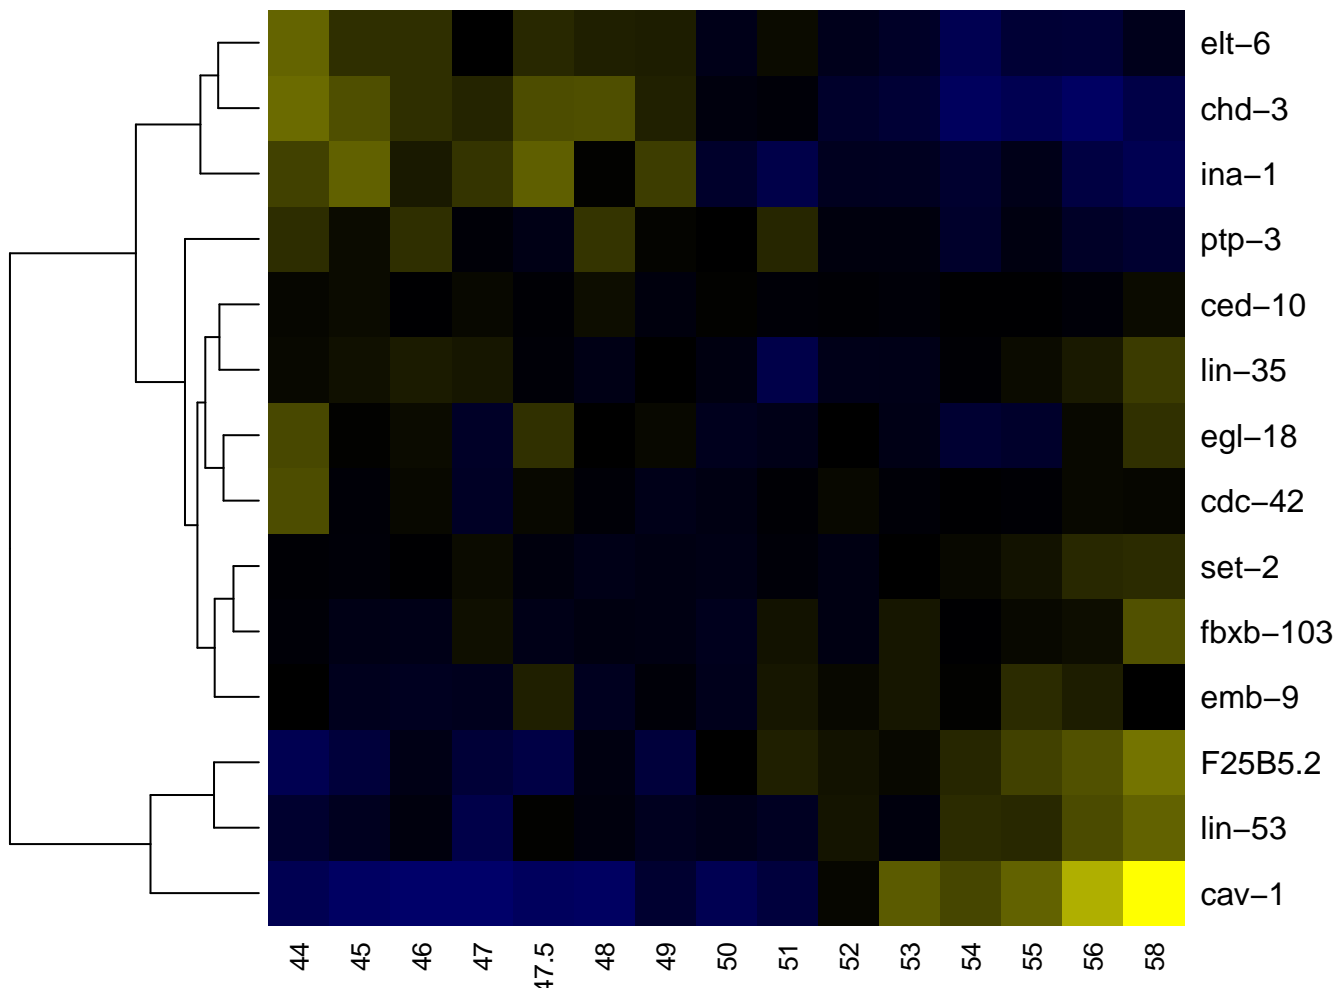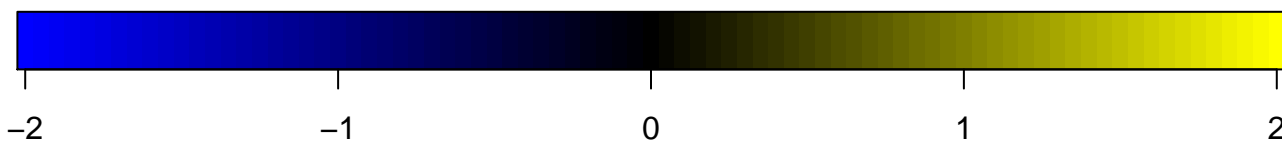

# MSpppap

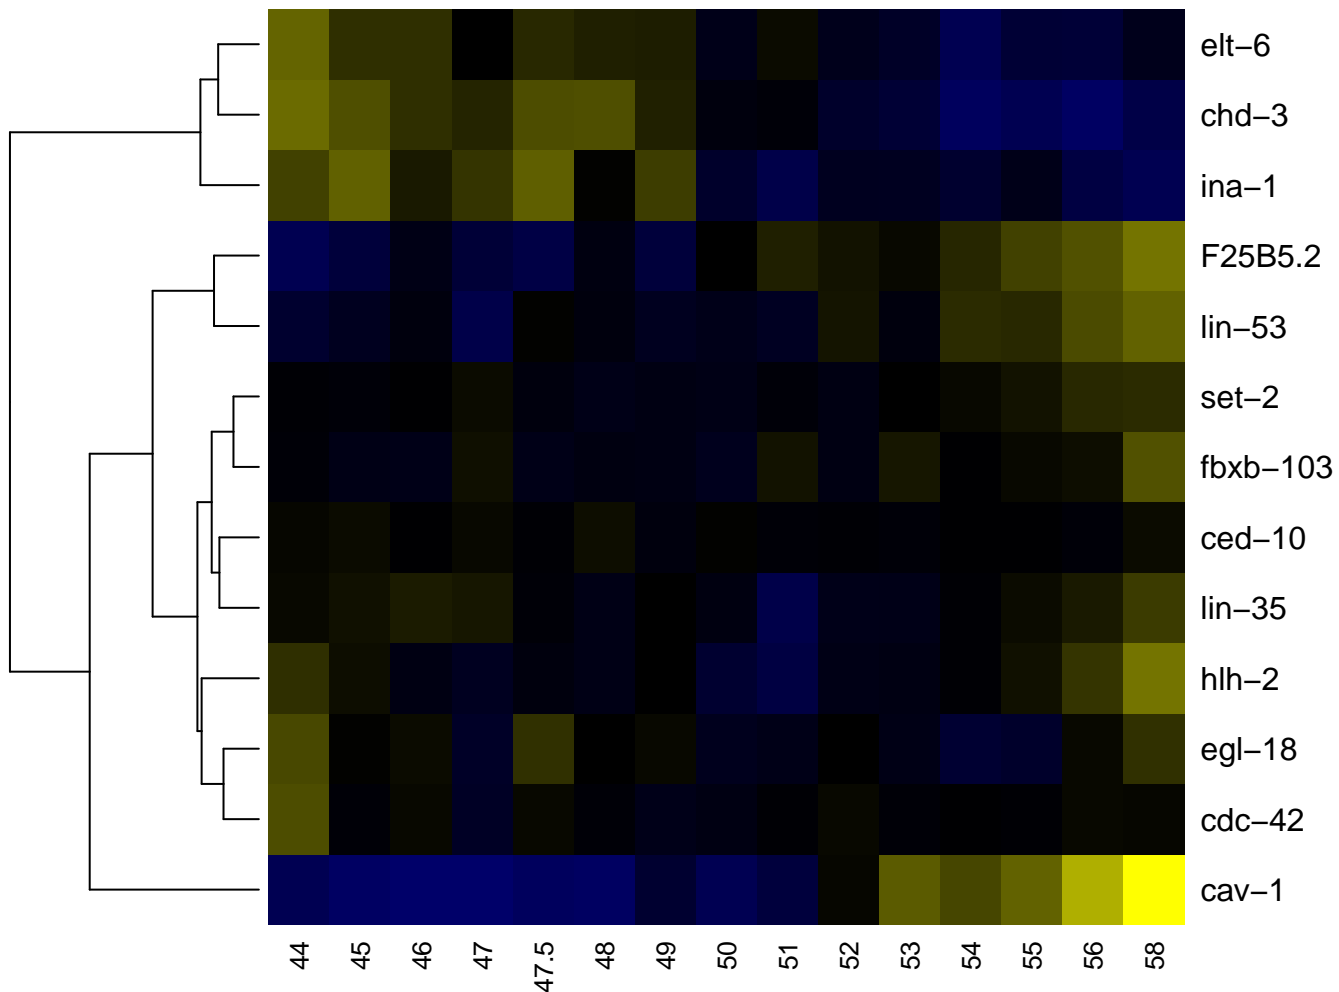

# MSpppapa



# MSpppapp



# MSpppp





# MSppppa



# MSppppaa

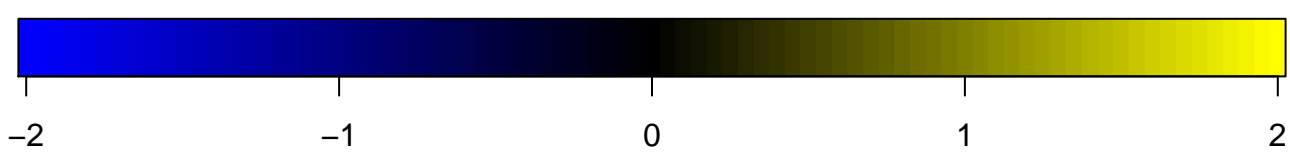



# MSppppp



# MSpppppa

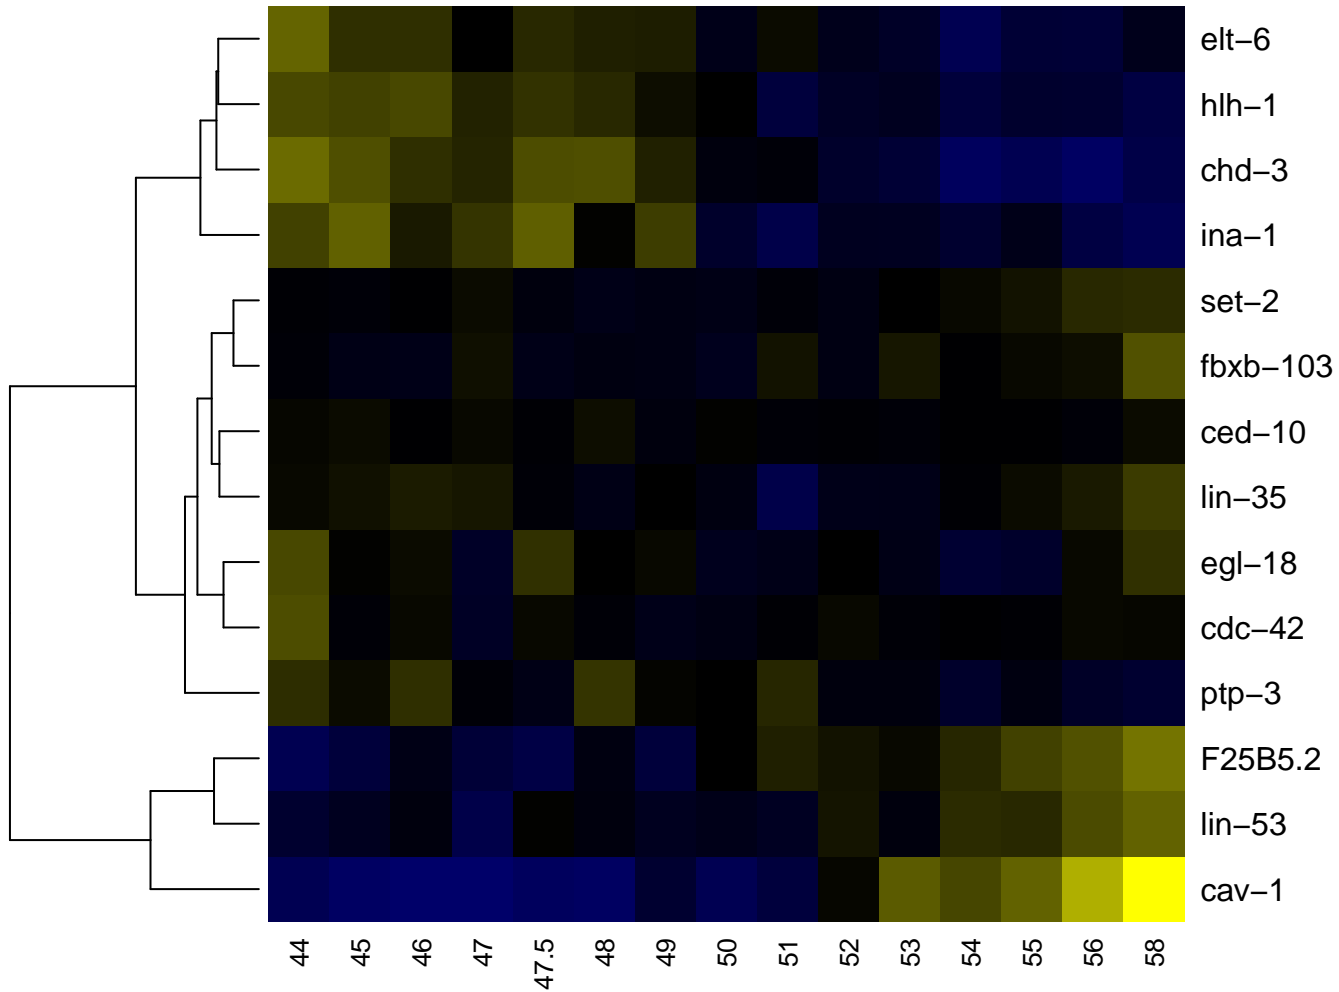

-2

-1

0

1

2

# MSpppppp

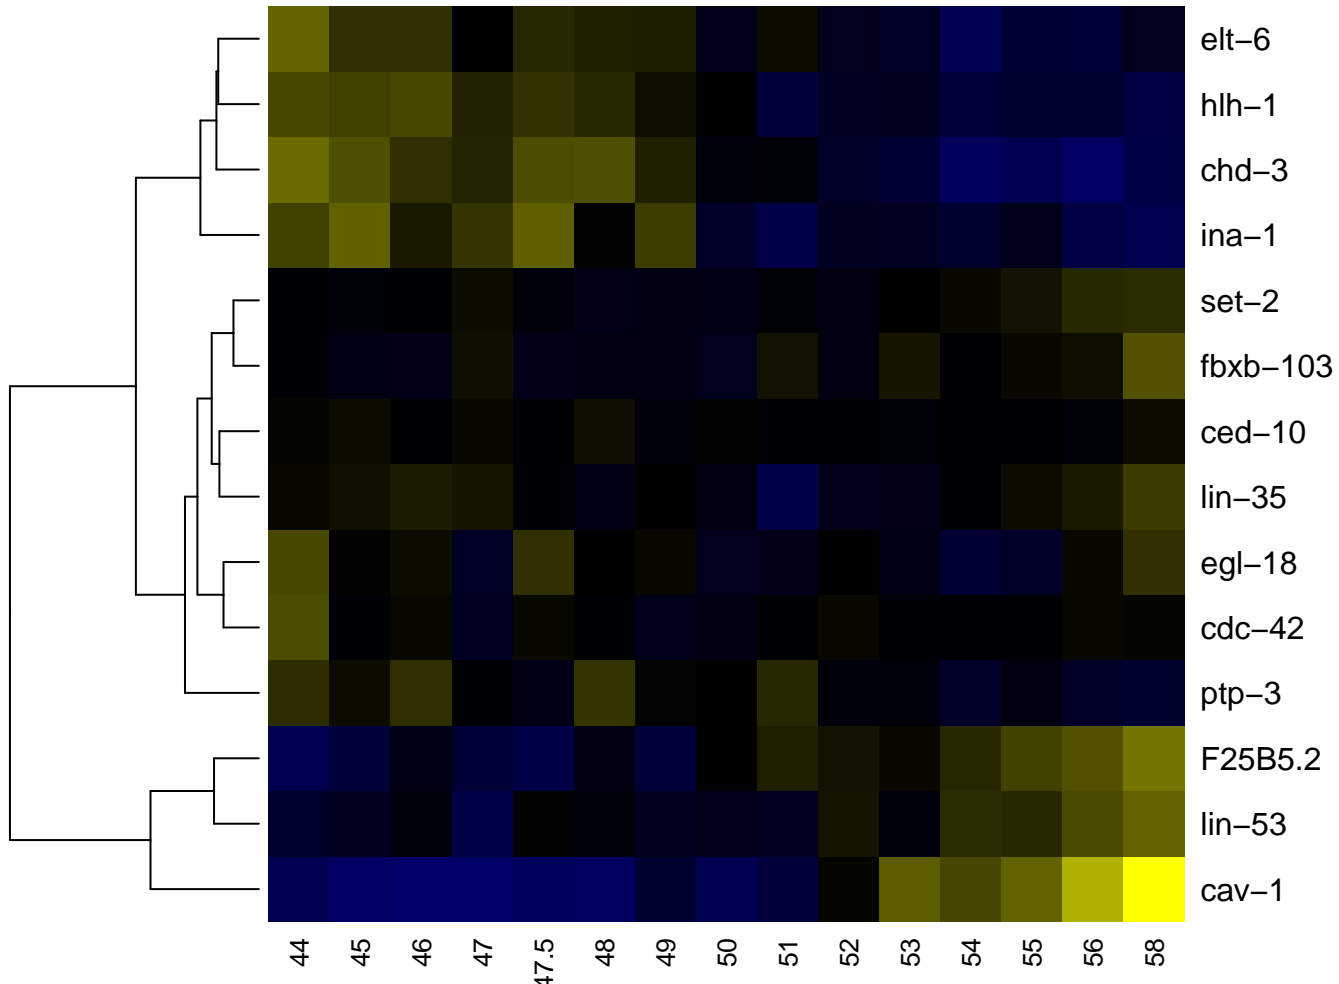

# mu\_int\_L

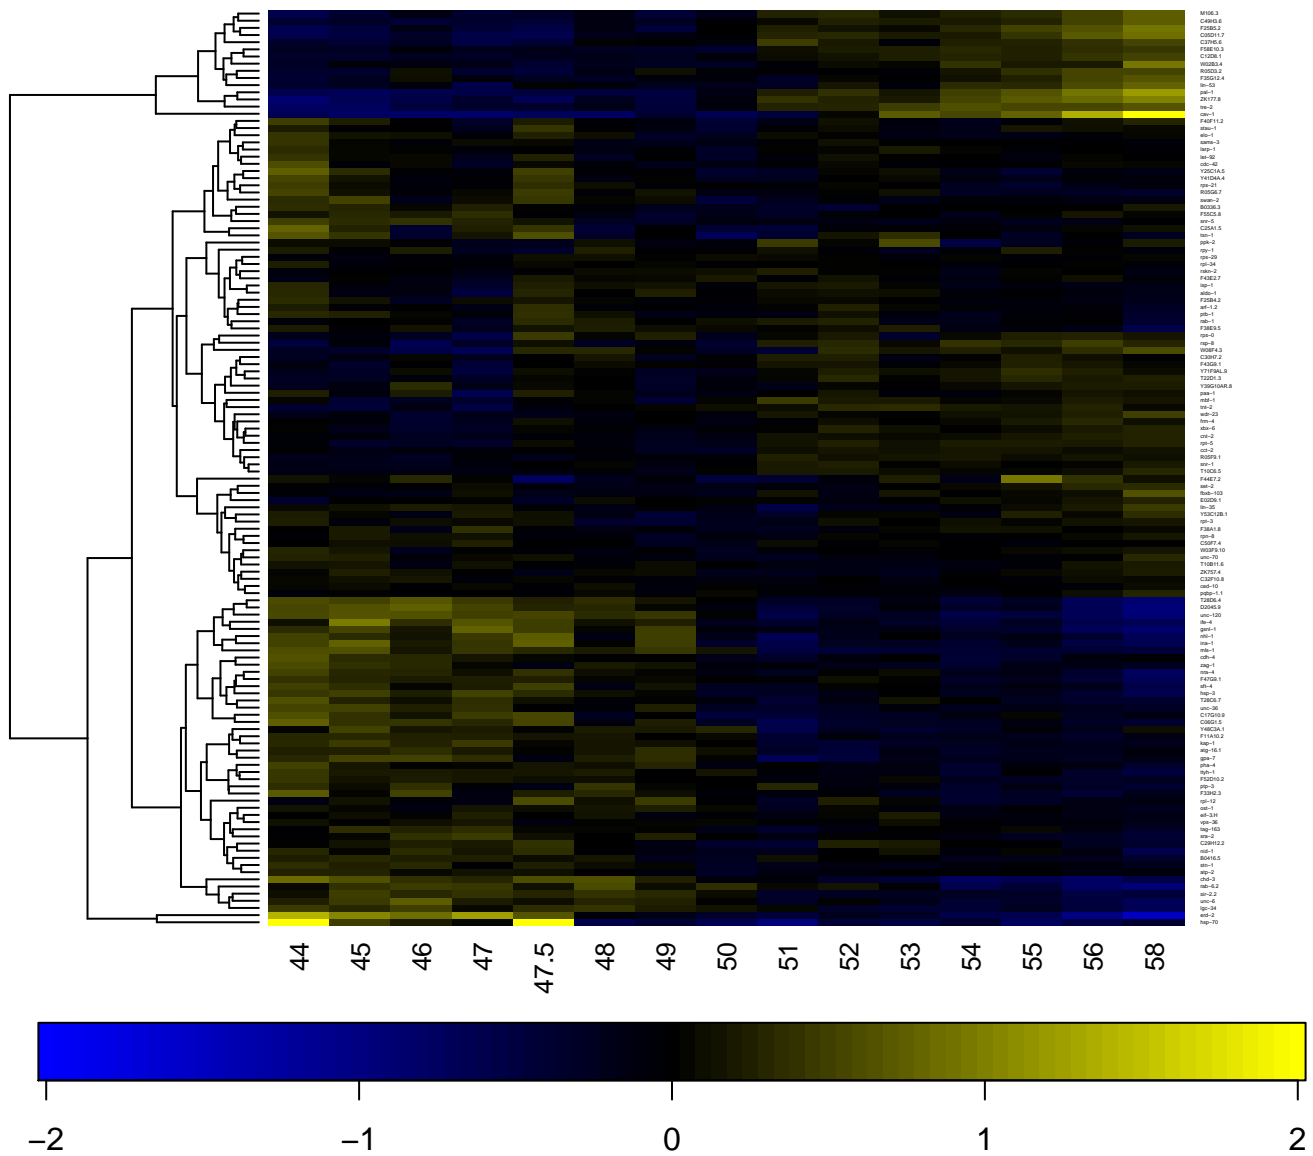

# mu\_int\_R

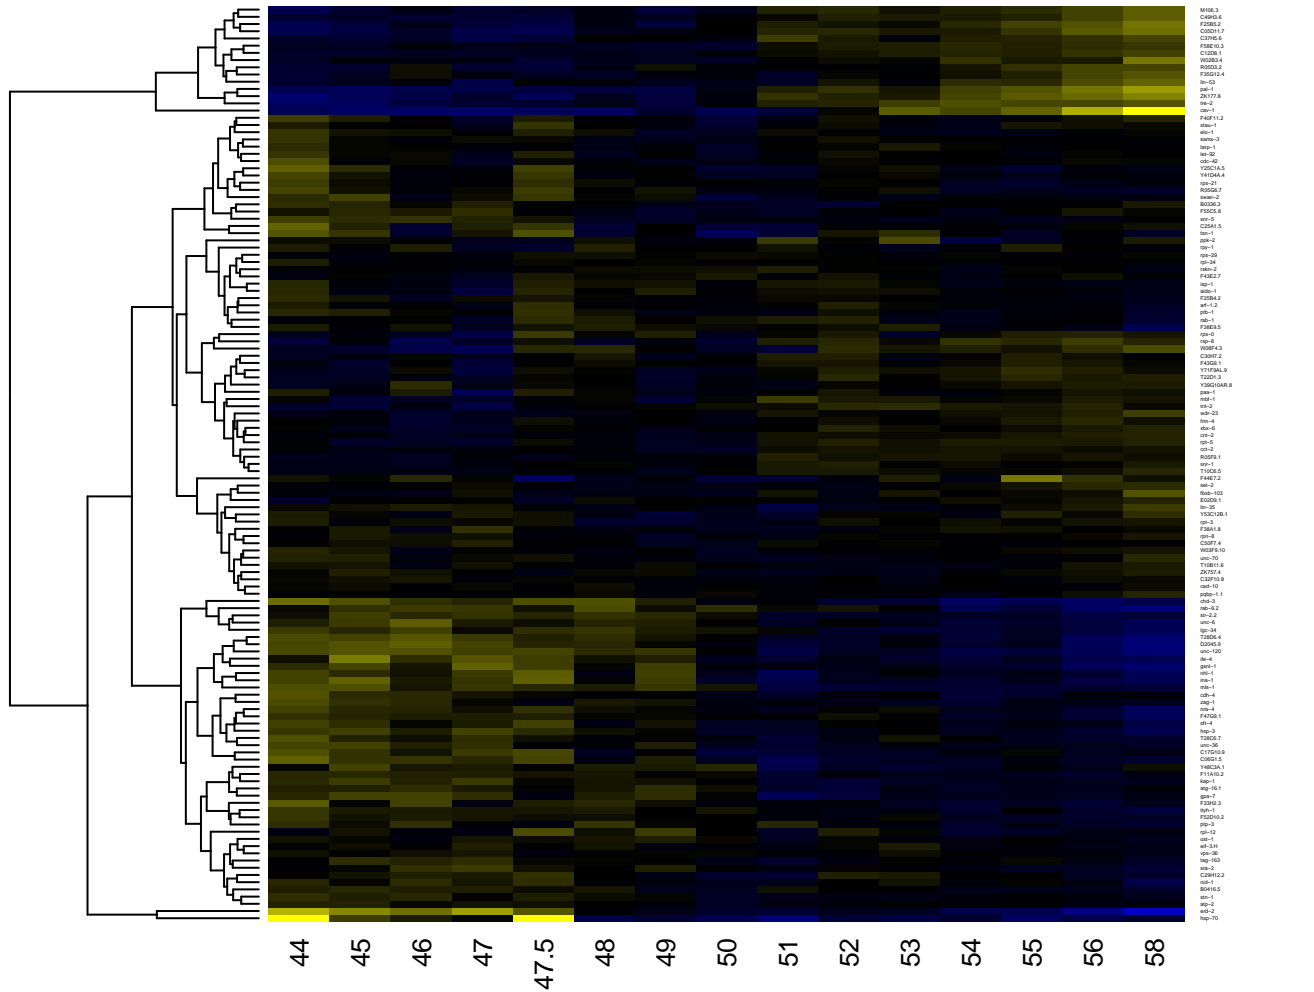

-2

-1

0

1

2





# nerve ring

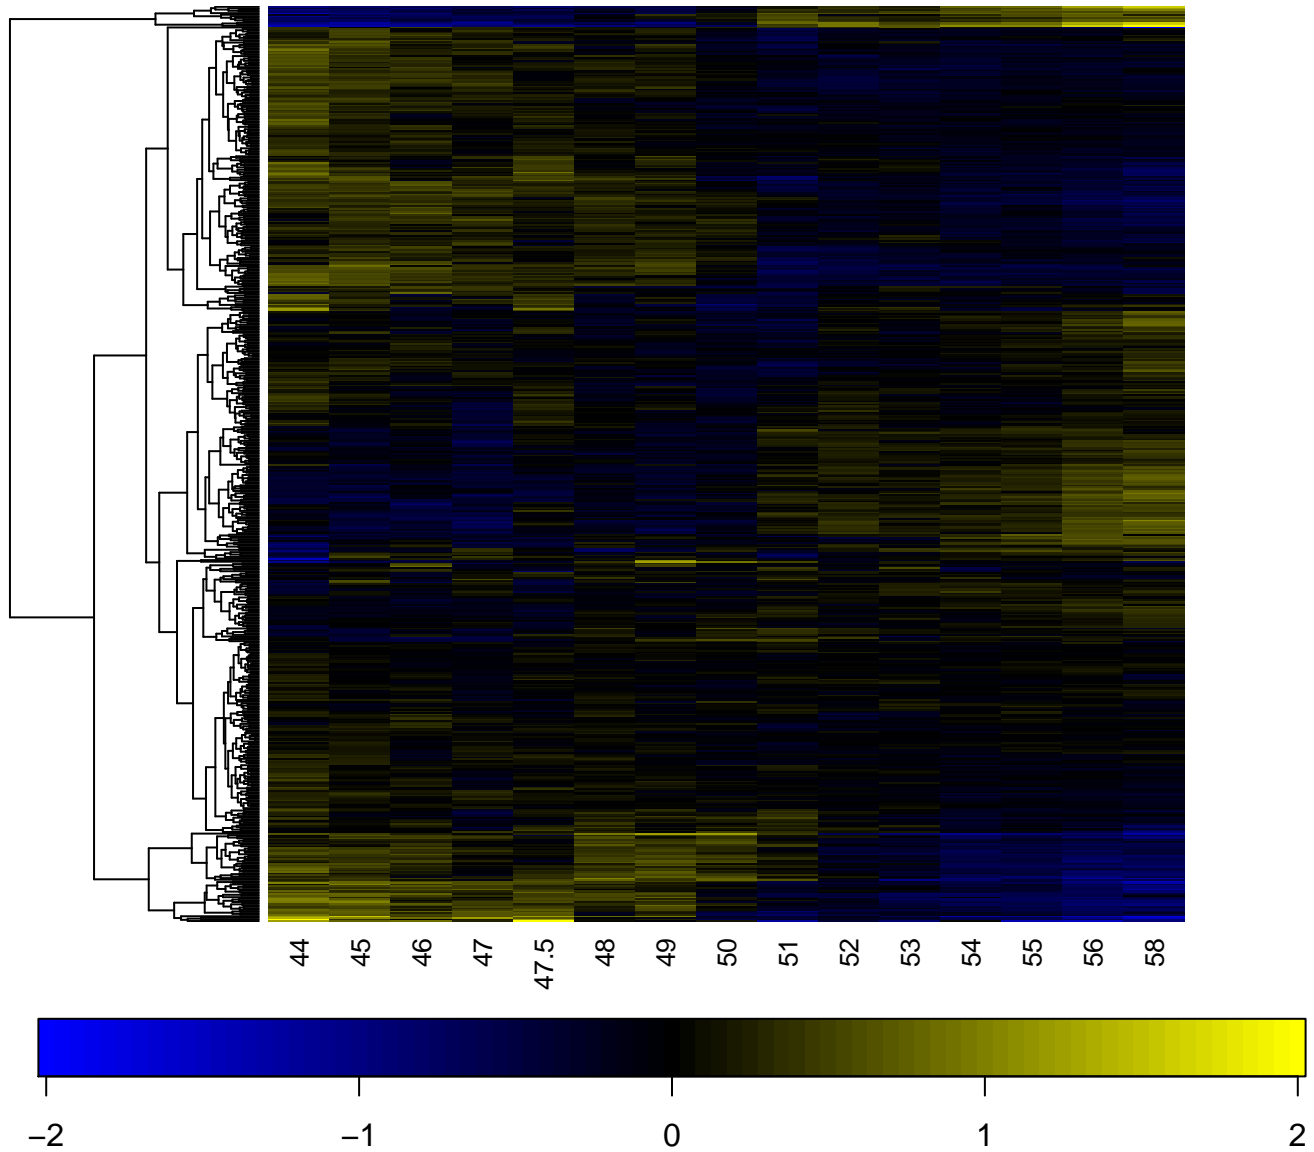

# nervous system

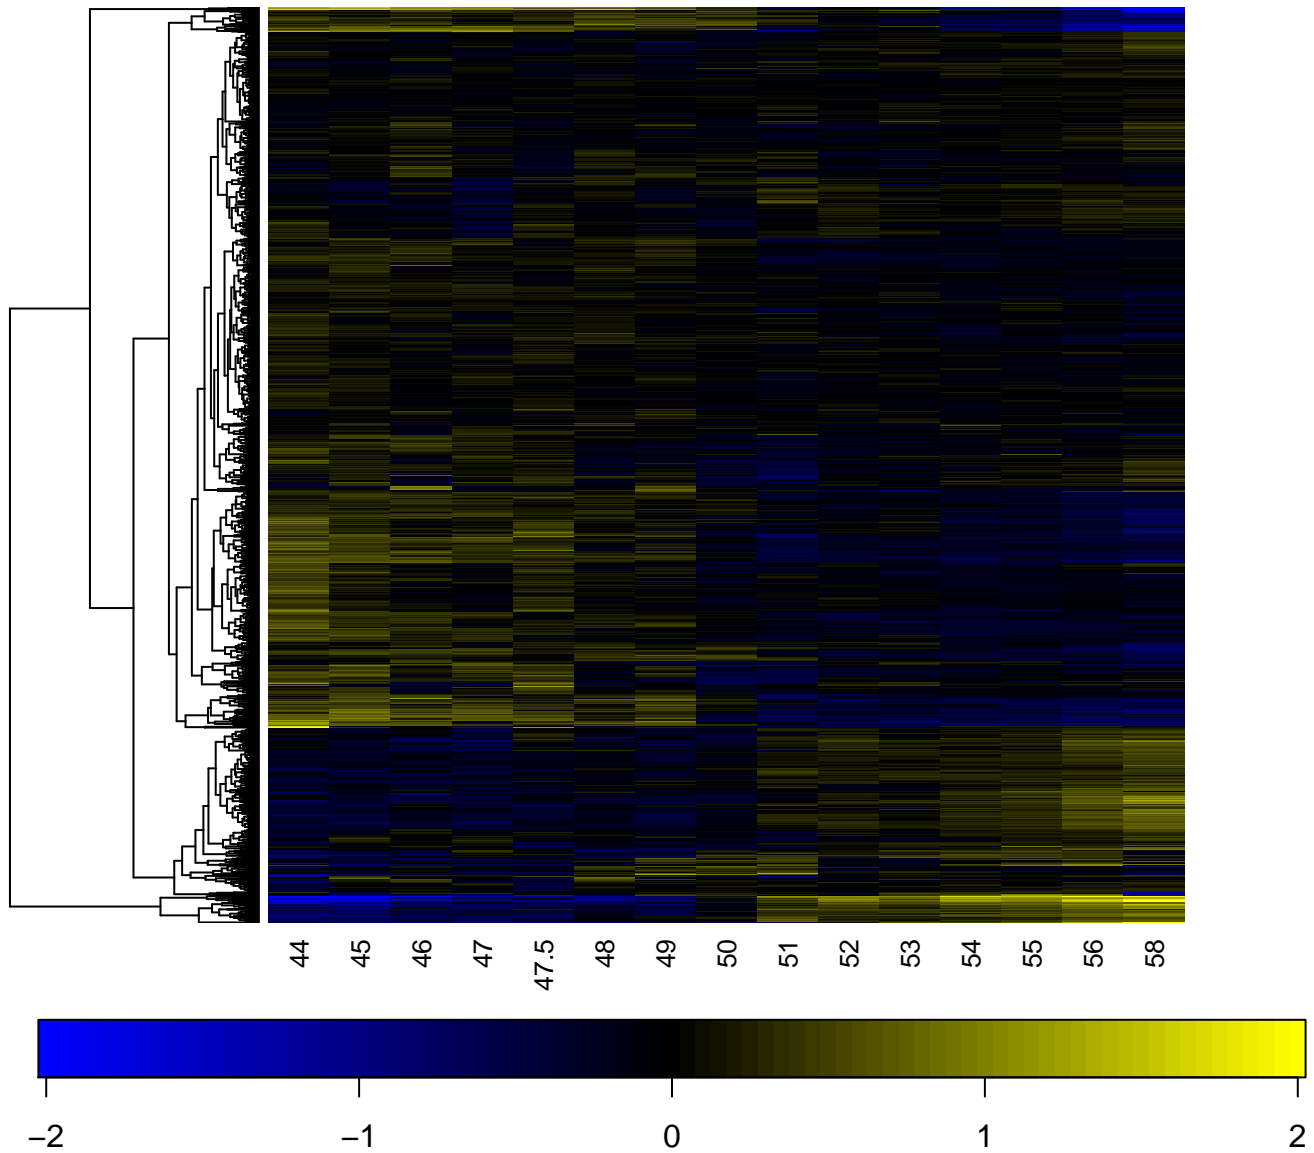

# neuron

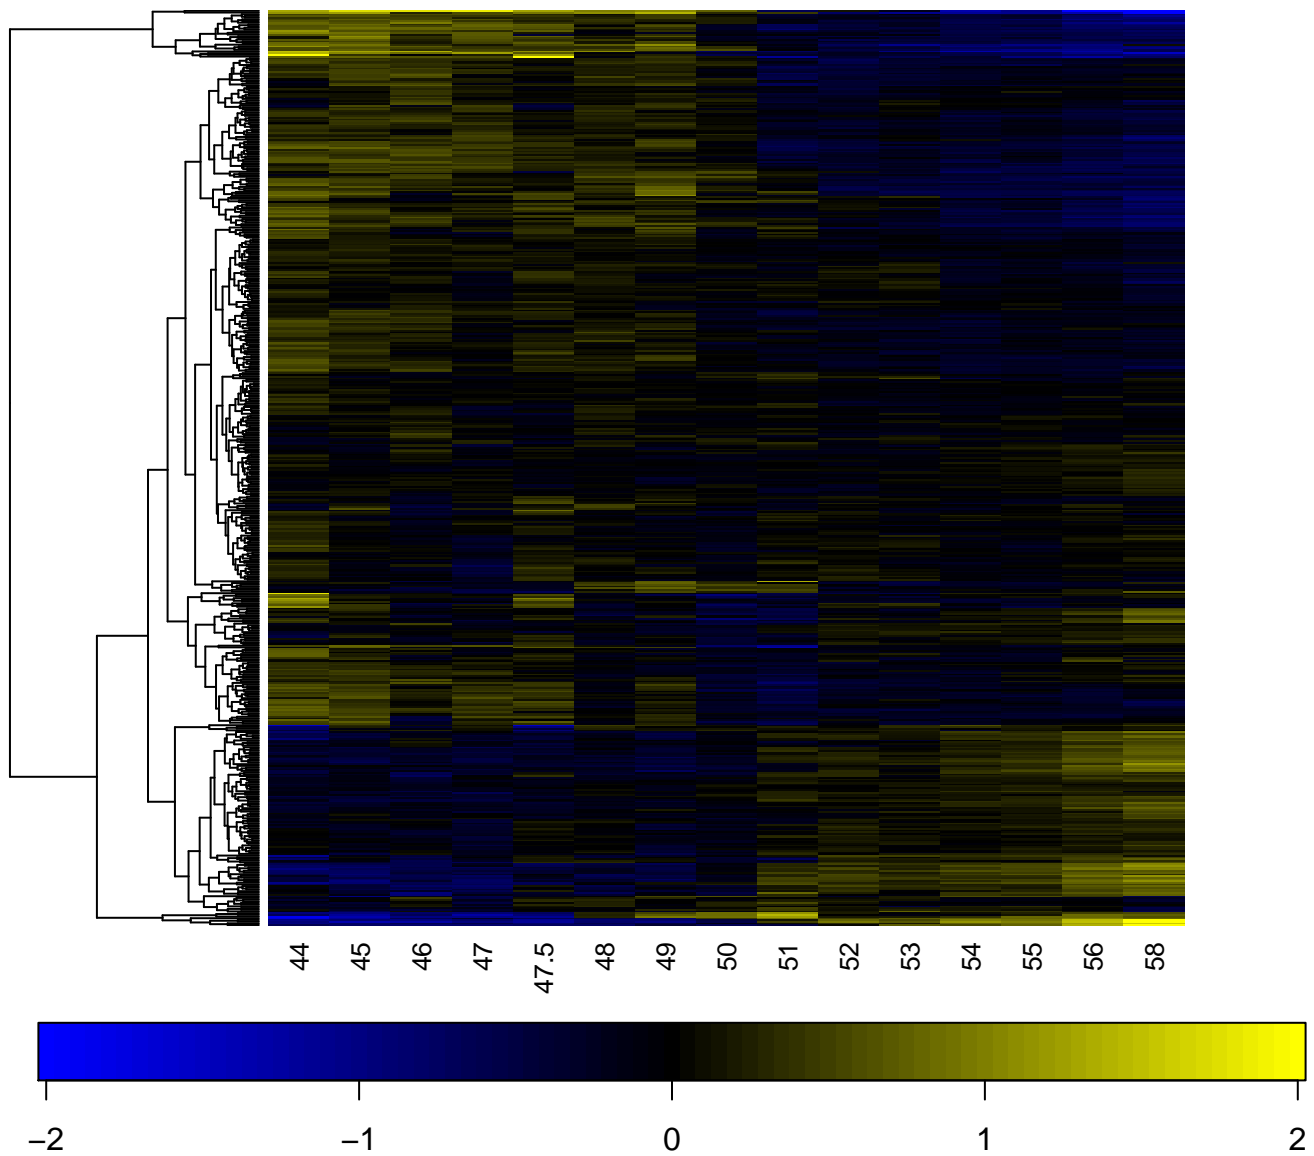

# neuronal sheath cell

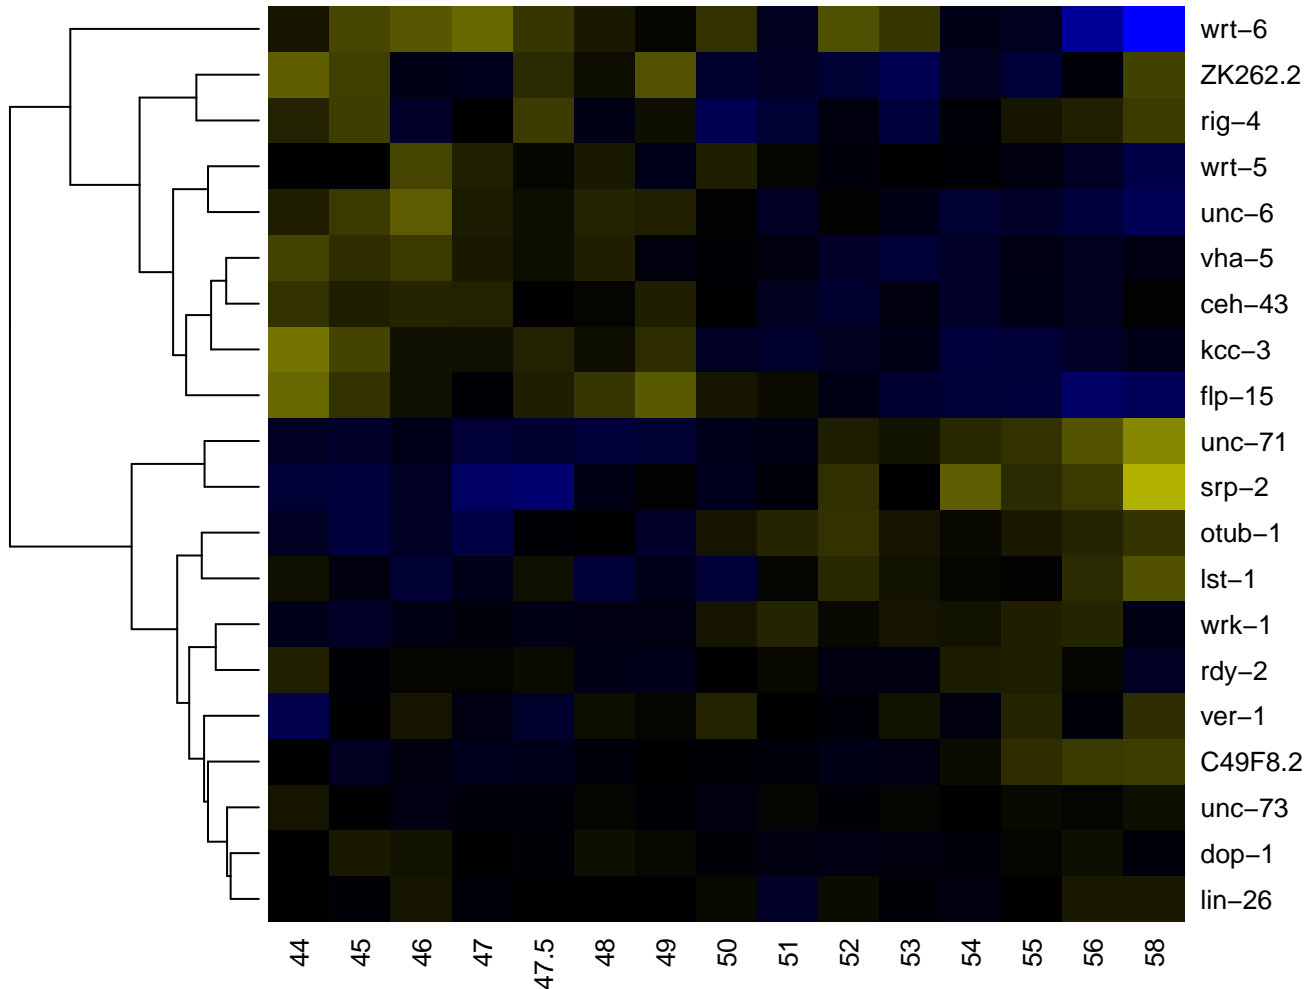

# NSML

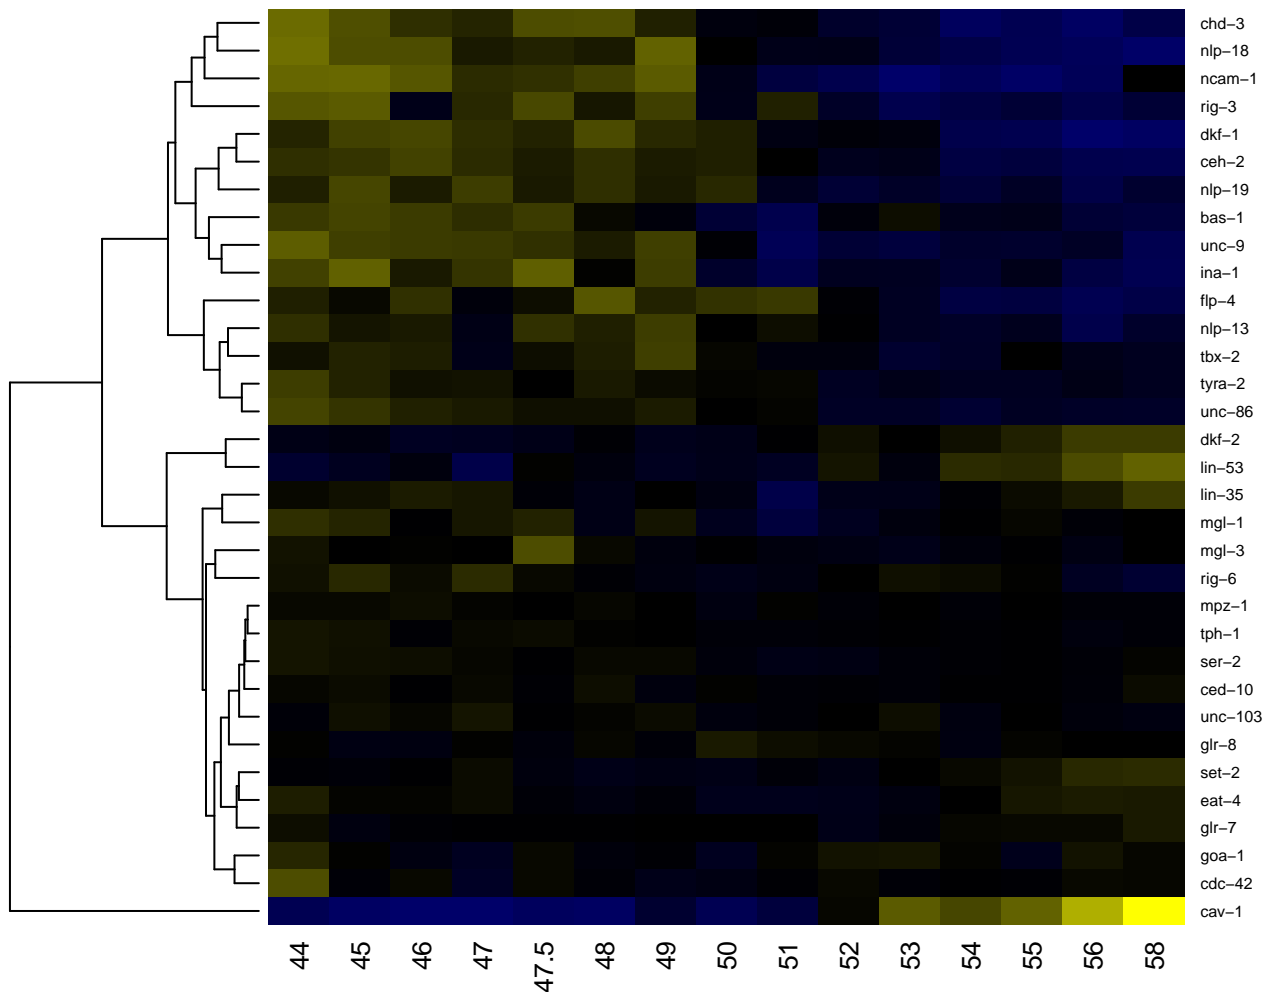

# NSMR

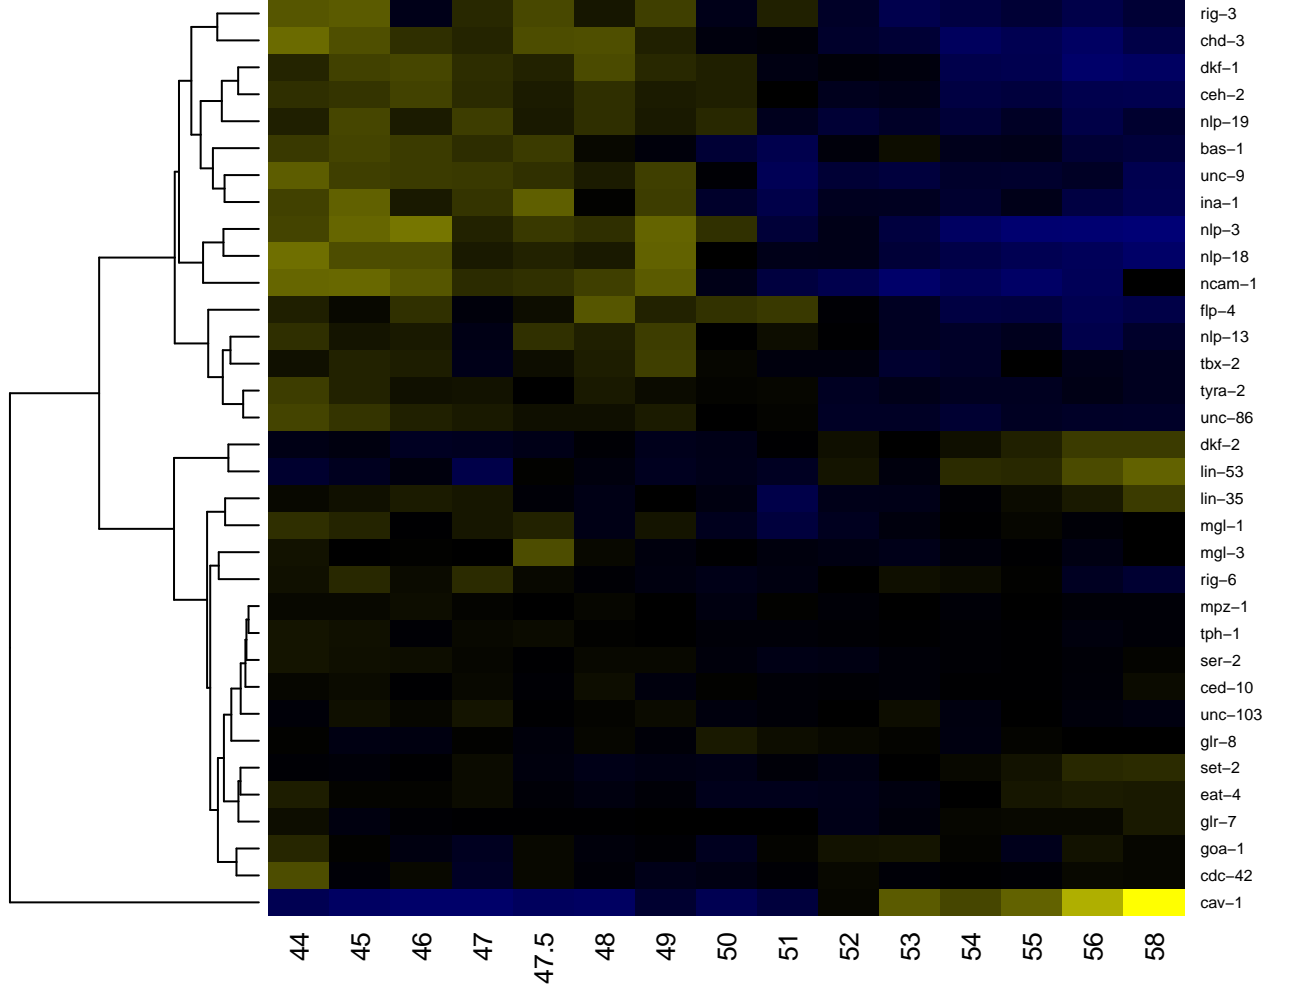

-2

-1

0

1

2

# OLLL

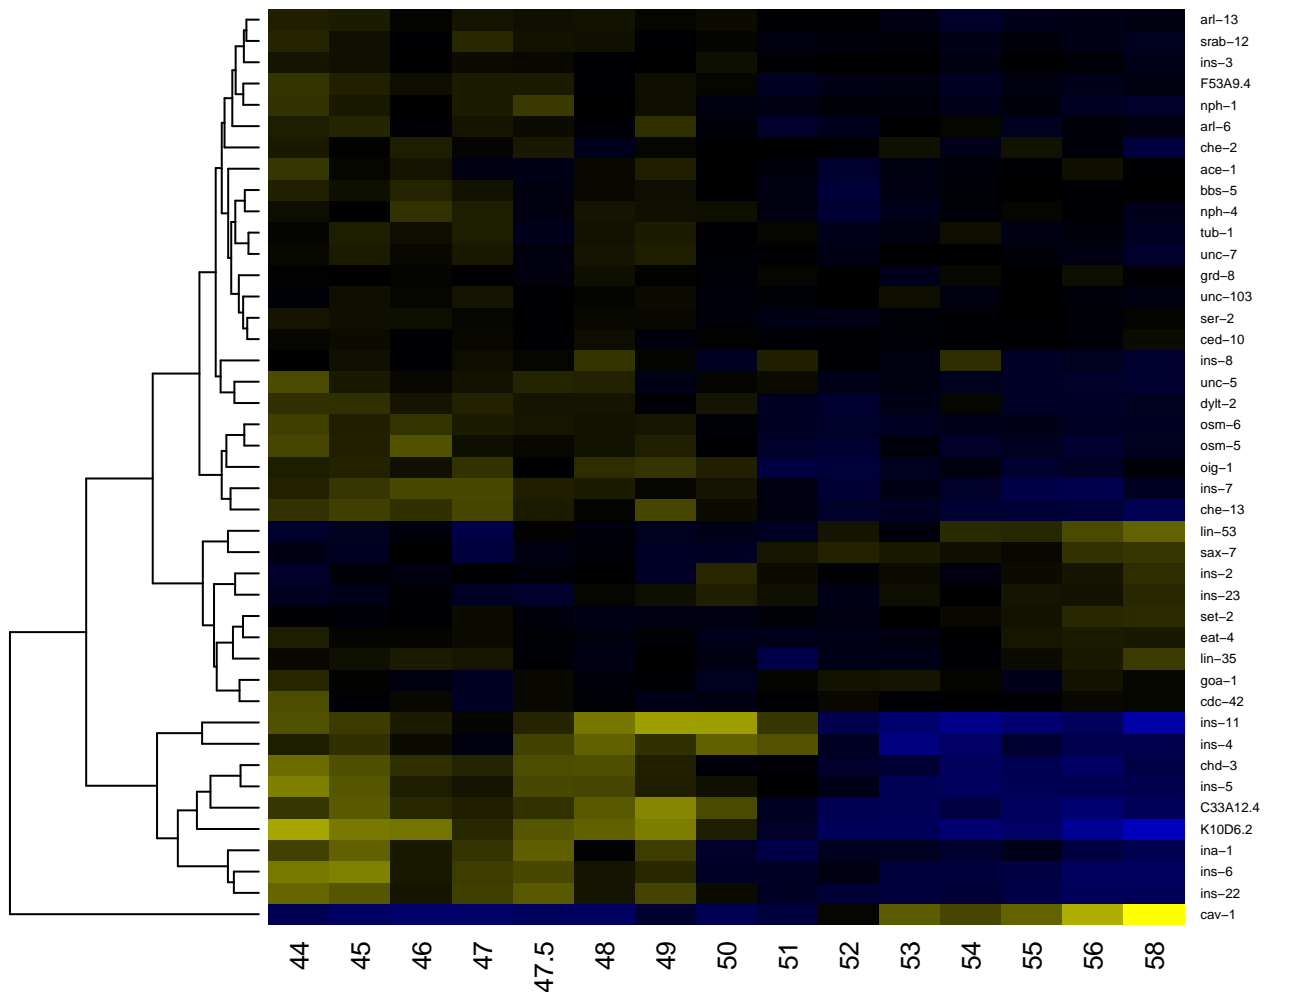



# OLLR

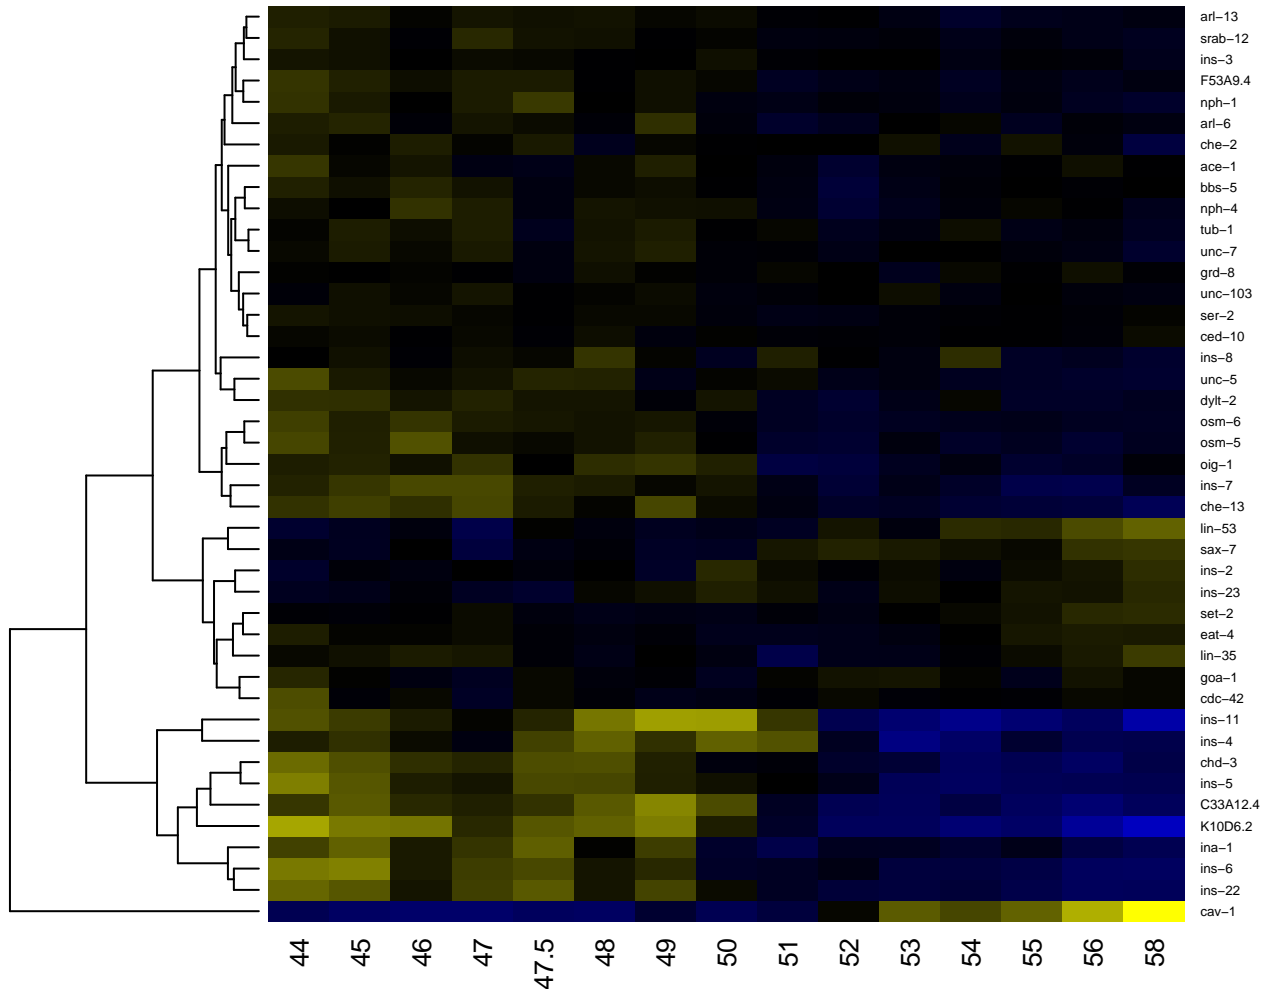





# OLLsol

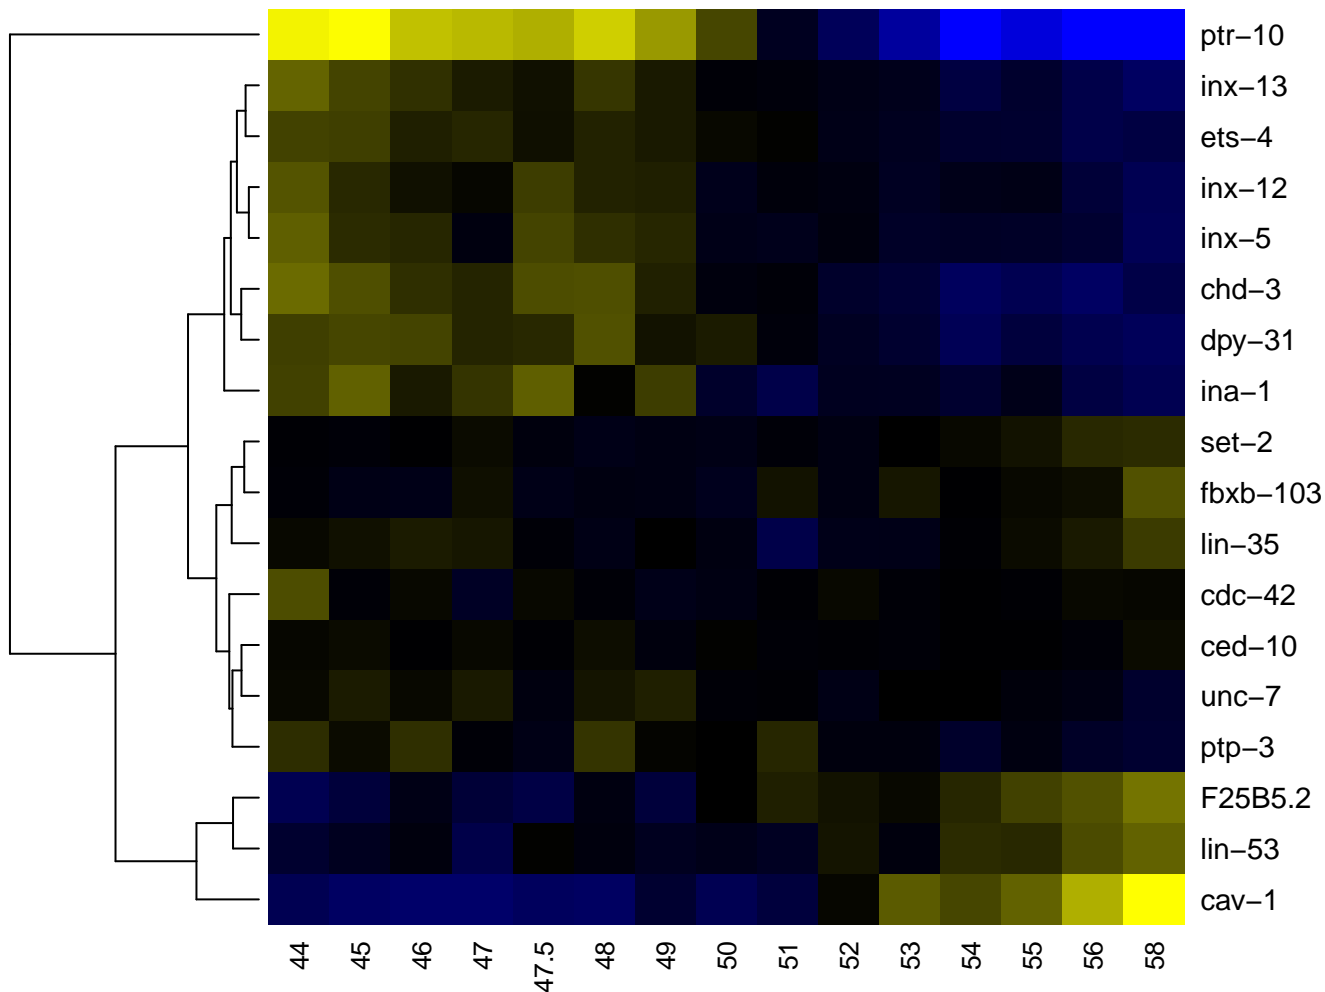

-2

-1

0

1

2

# OLLsoR

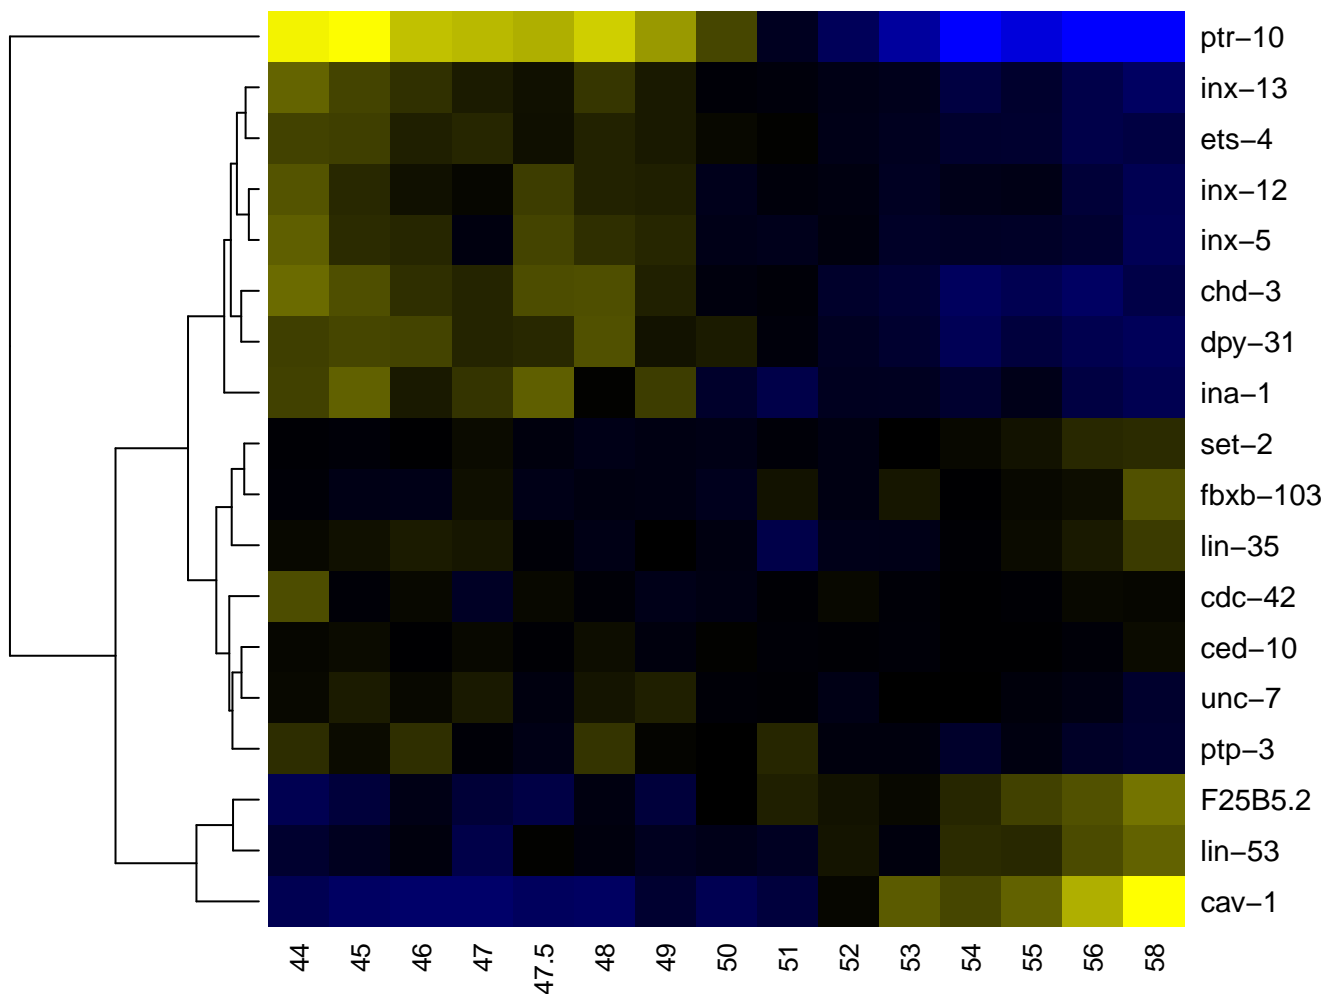

-2

-1

0

1

2

# OLQDL

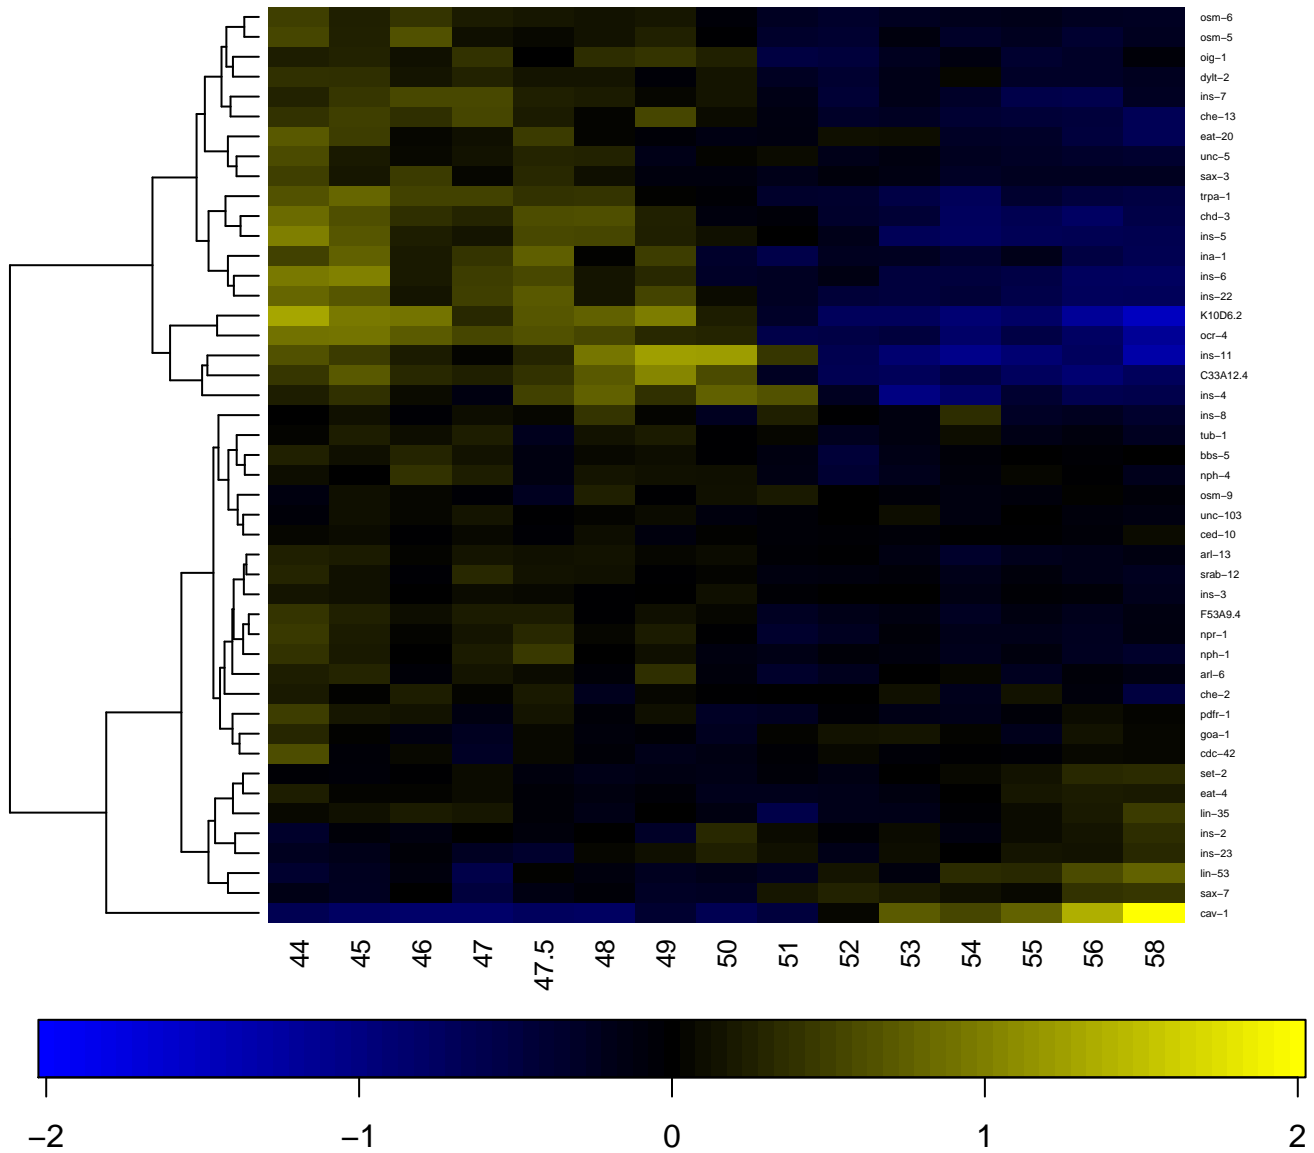

# OLQDR













# OLQsoDL

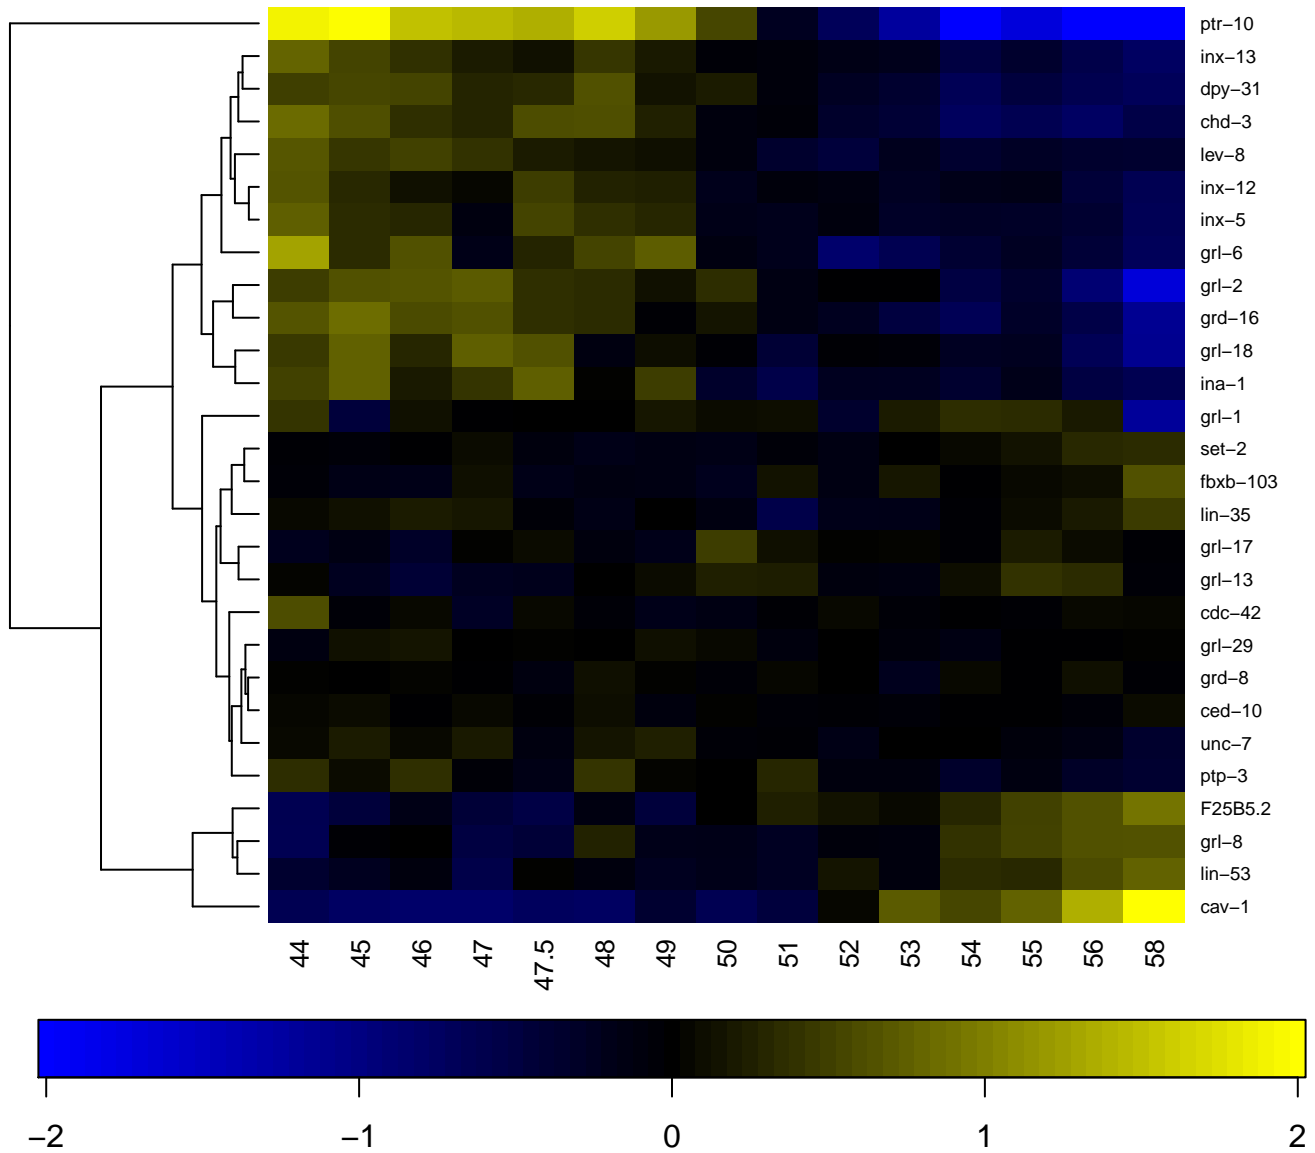



# OLQsoVL

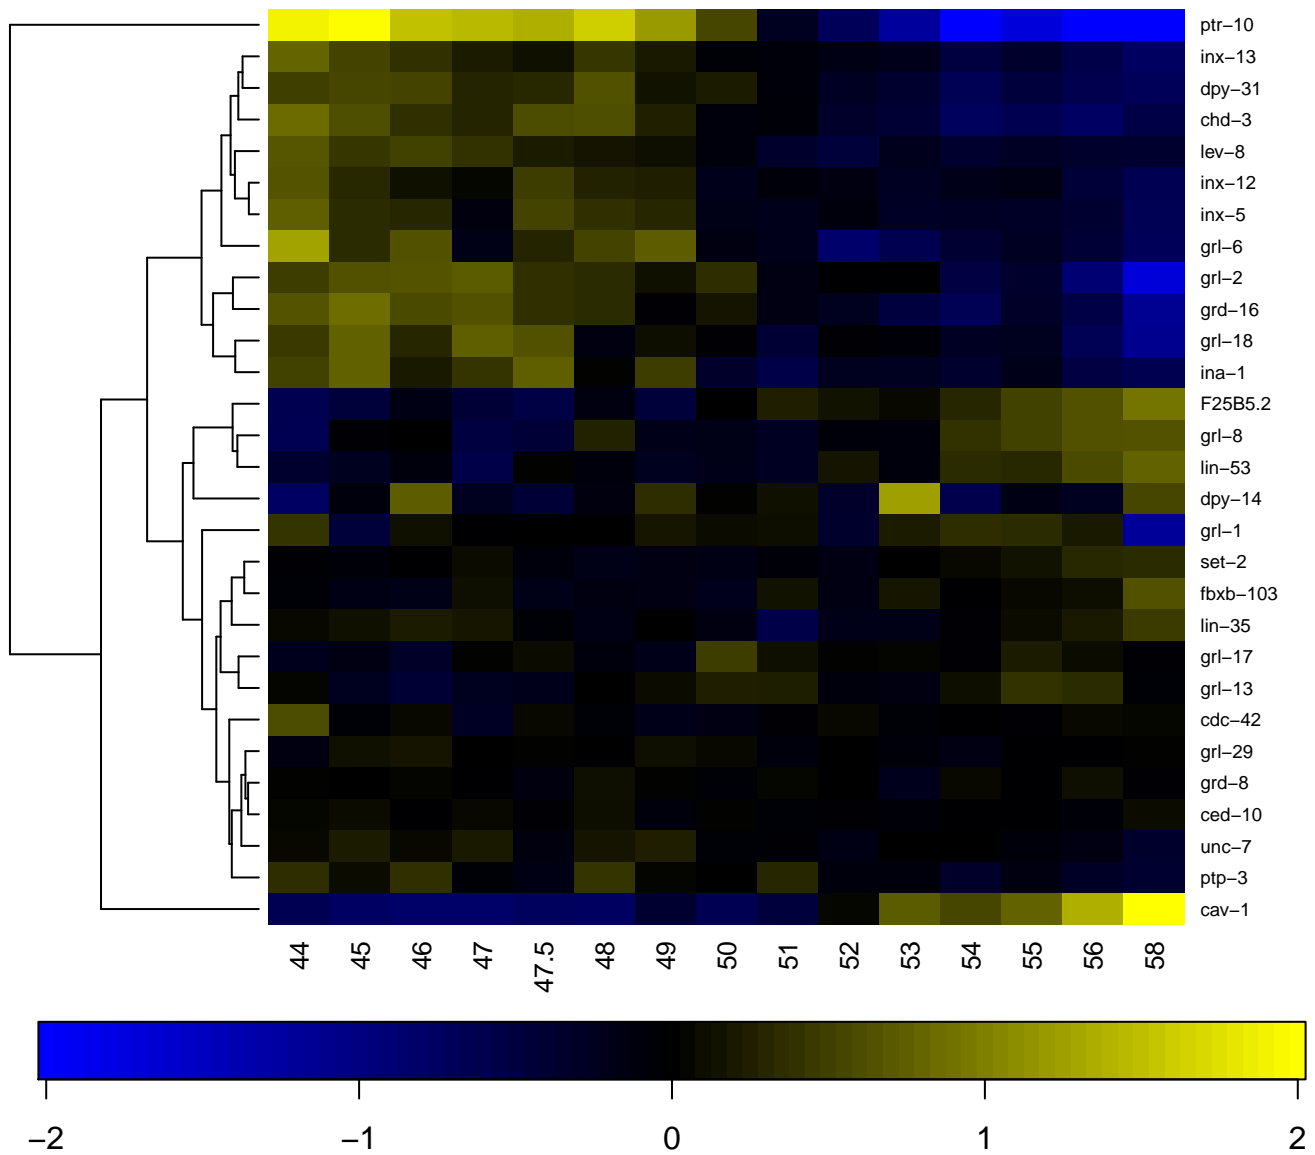

# OLQsoVR



# OLQVL









# outer labial neuron

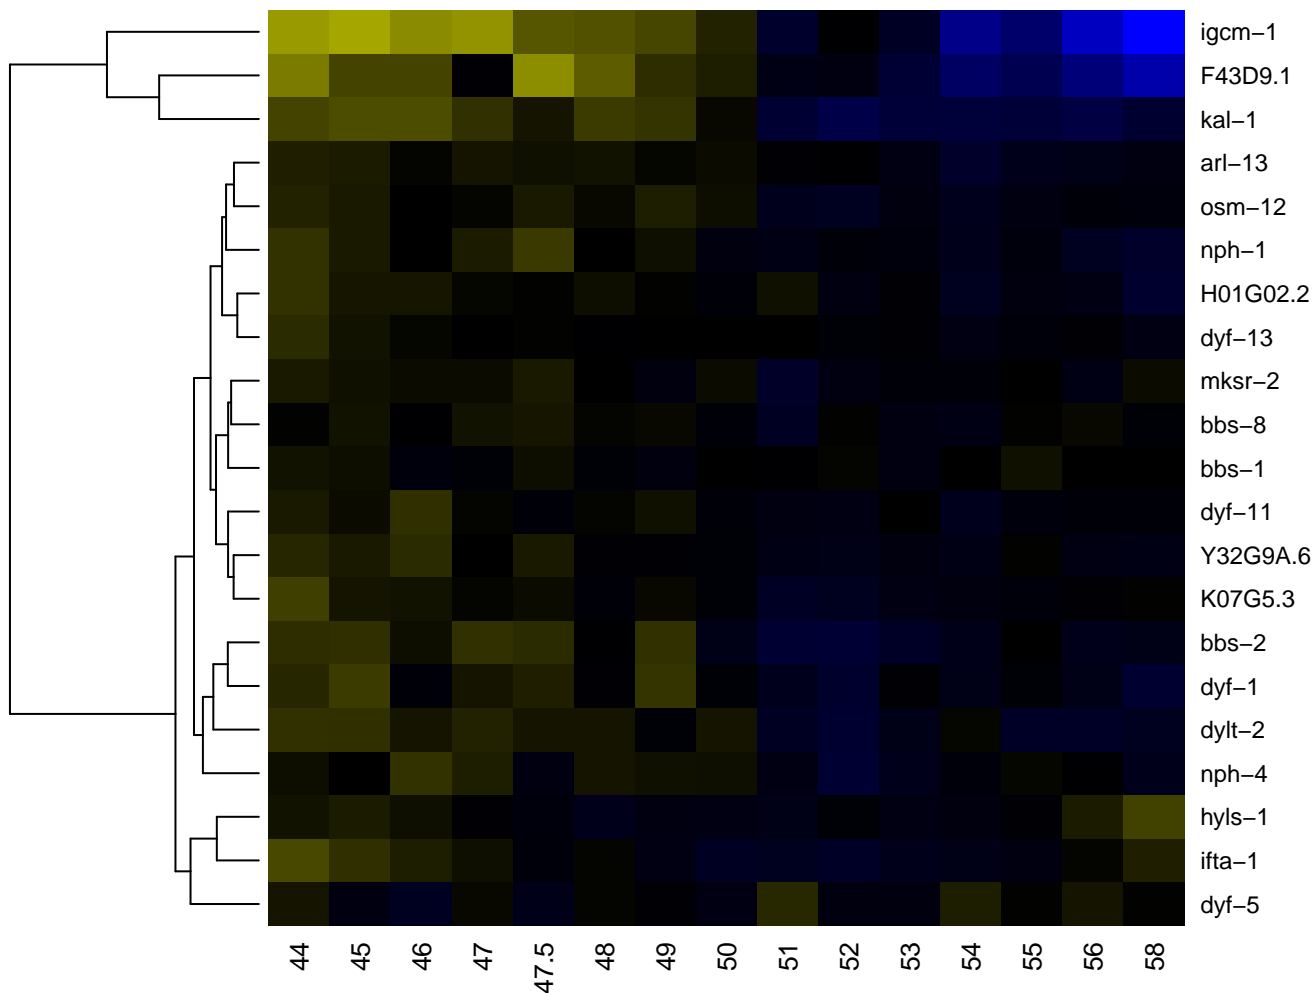

# P0

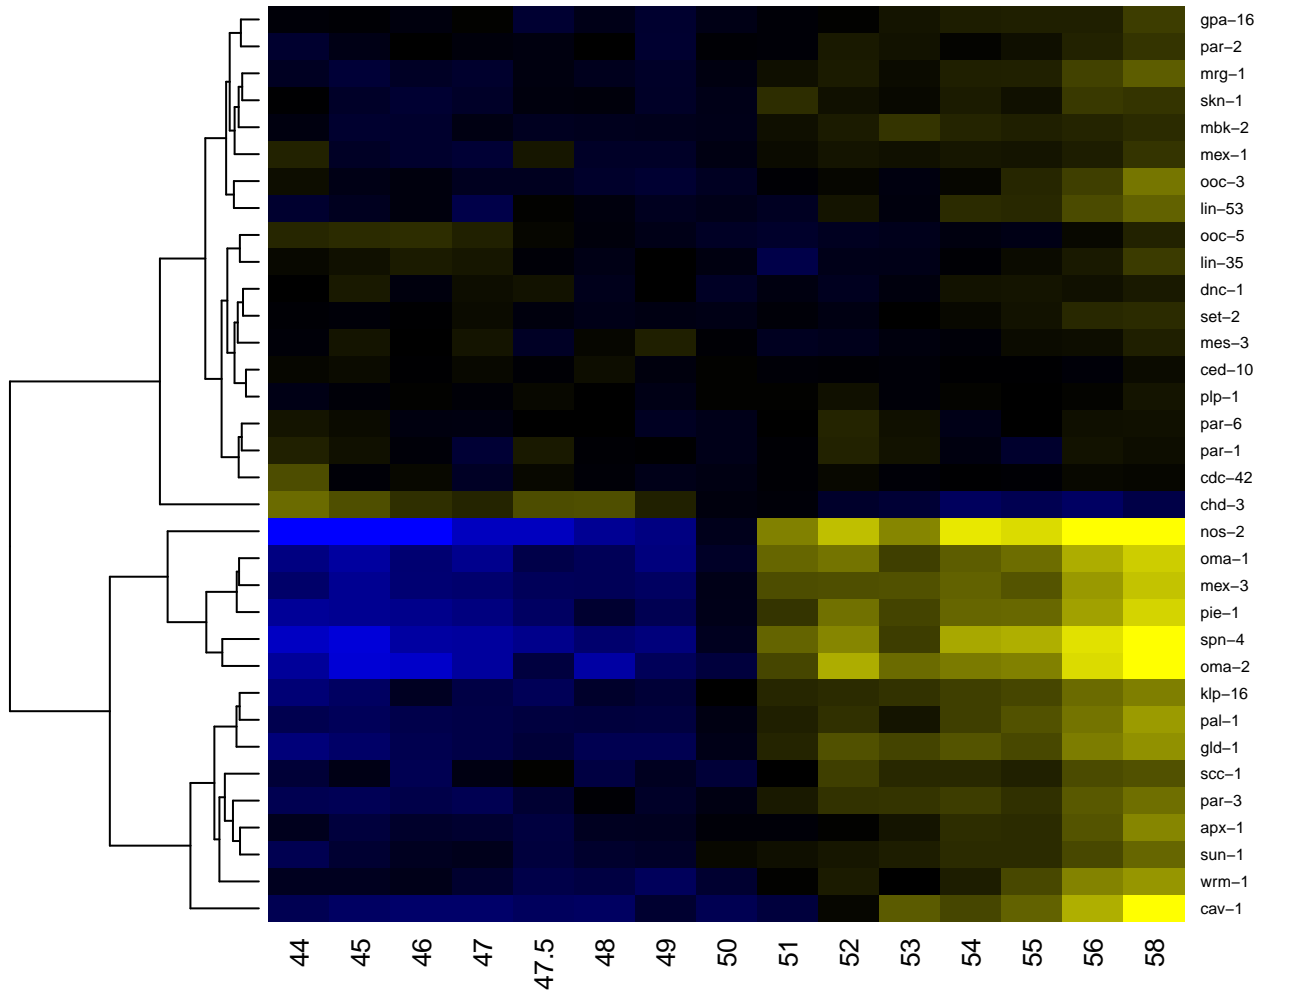

-2

-1

0

1

2

# P1

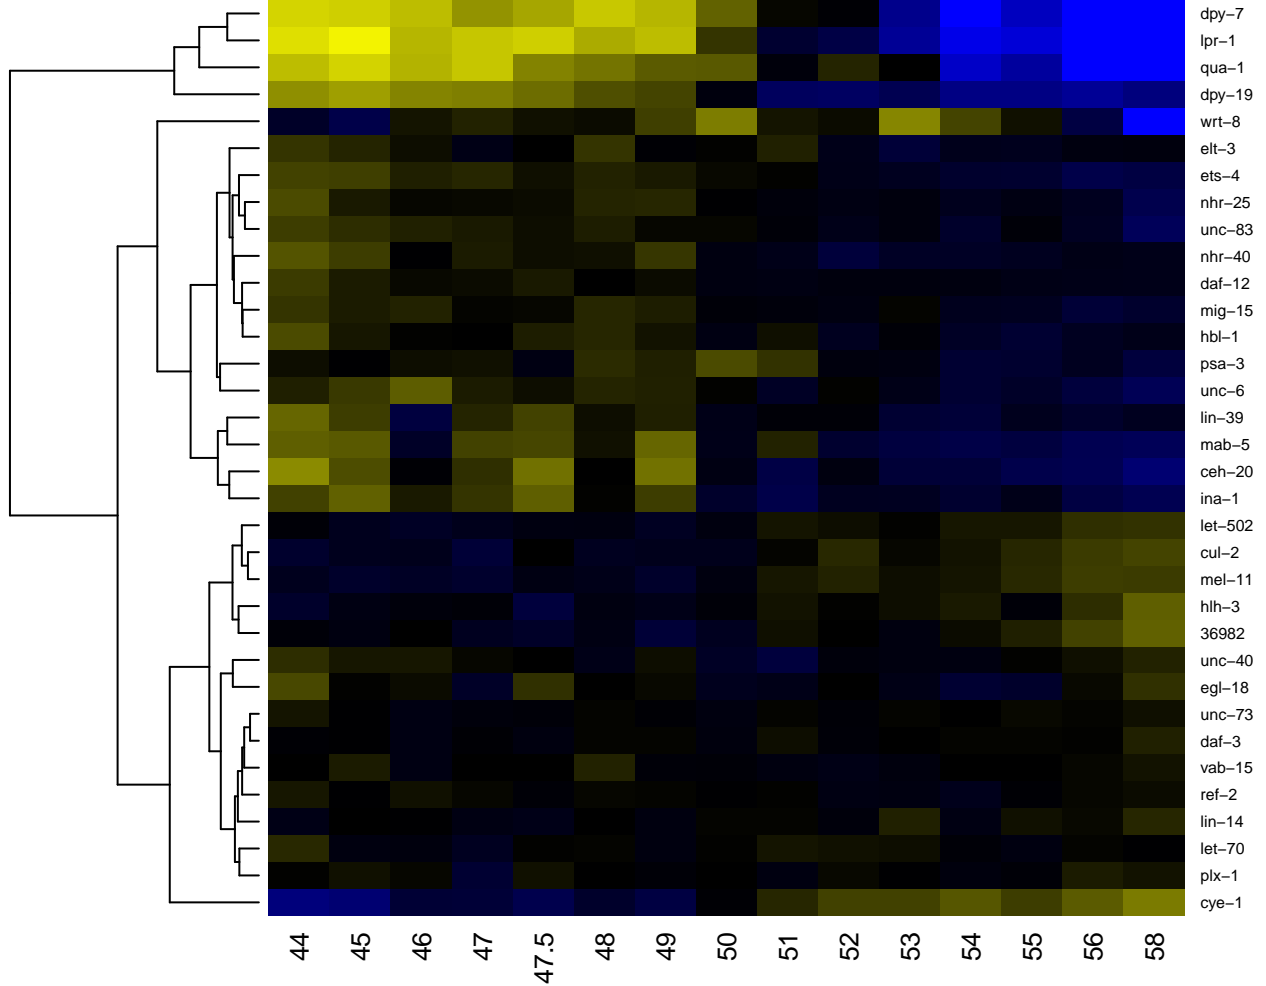

# P1.p

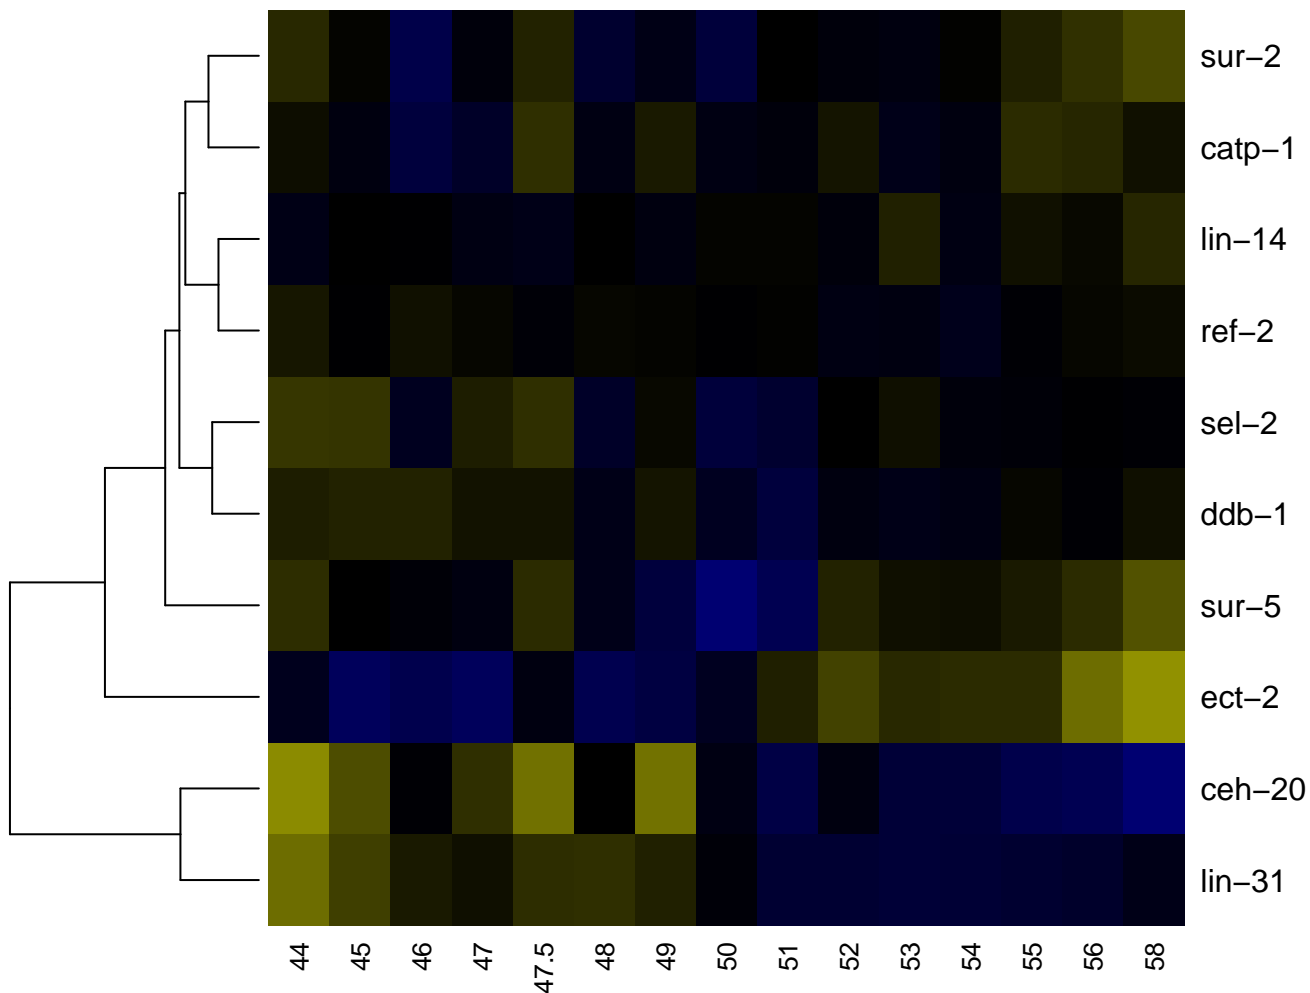

-2

-1

0

1

2

# P10

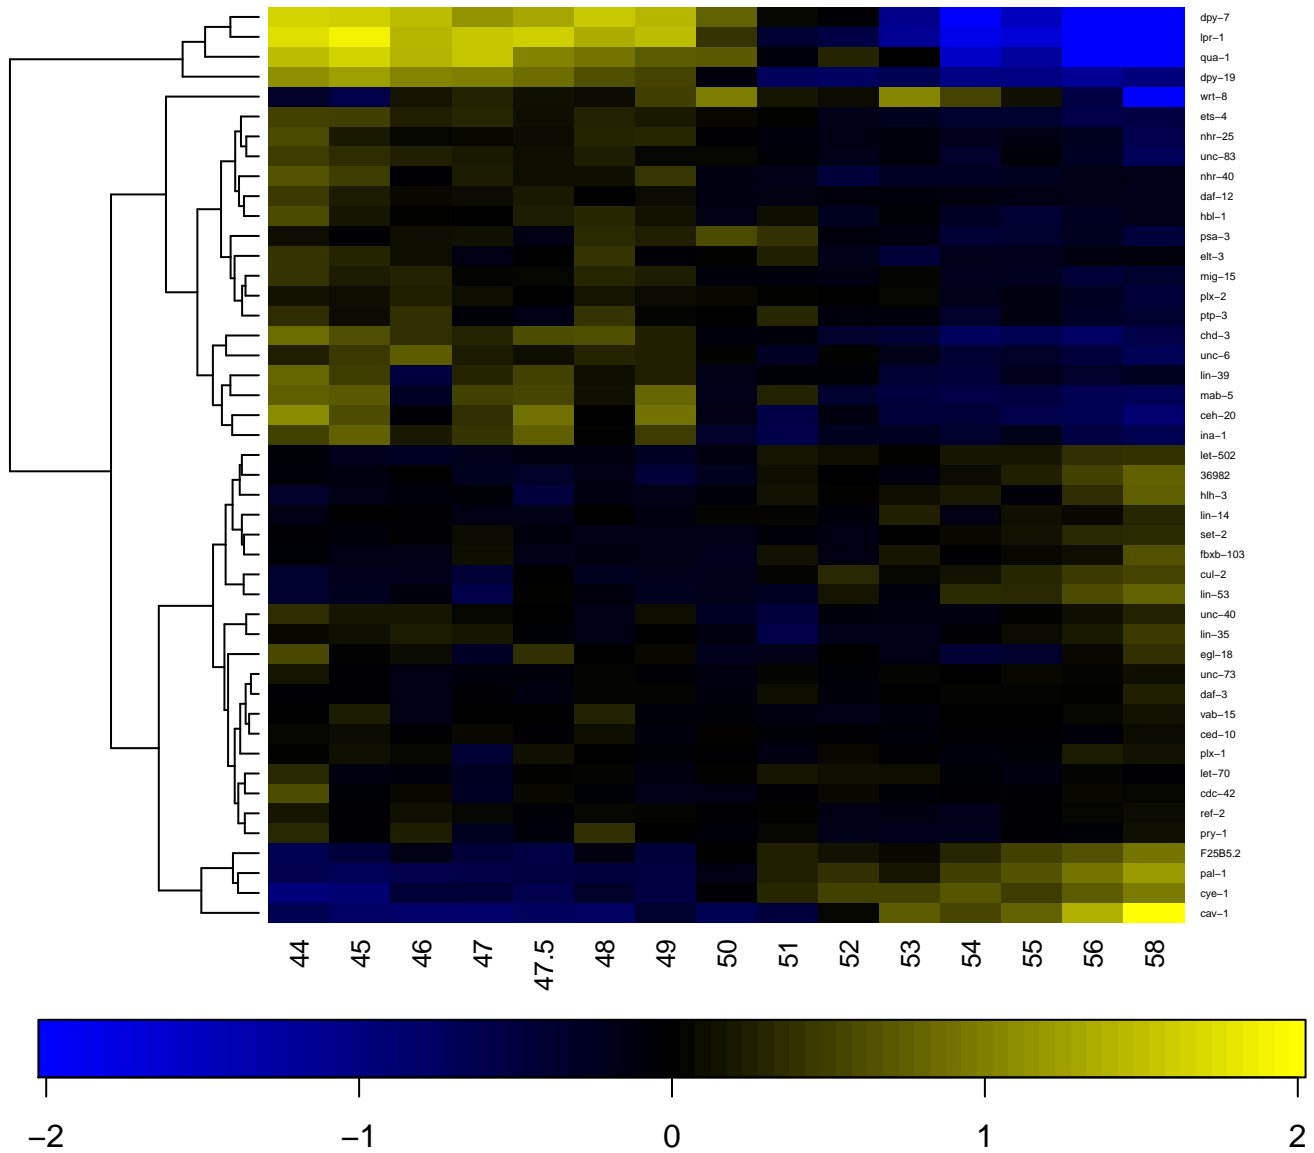

# P10.p

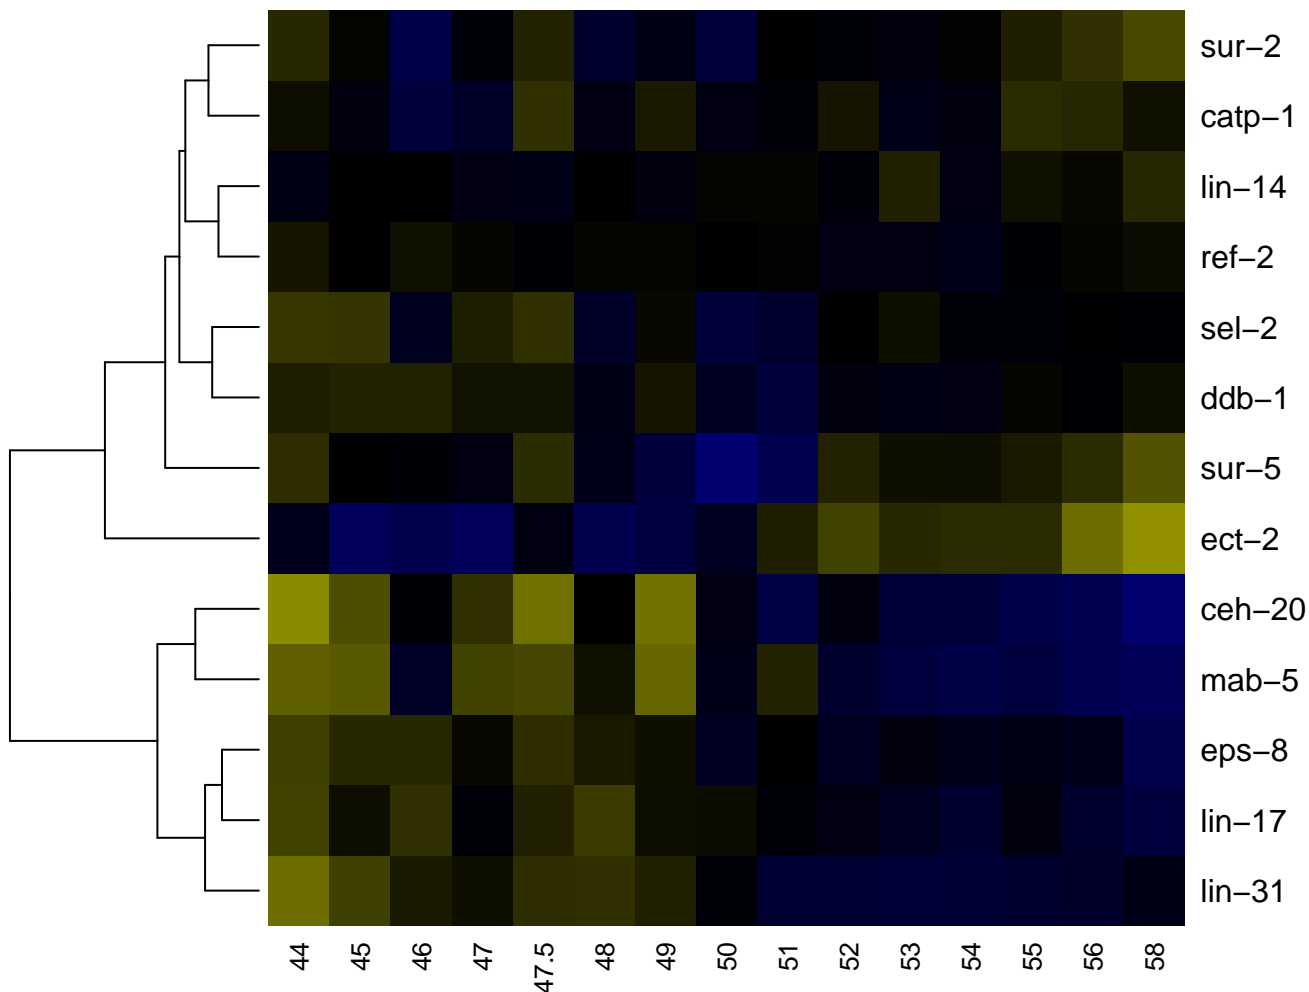



# P11

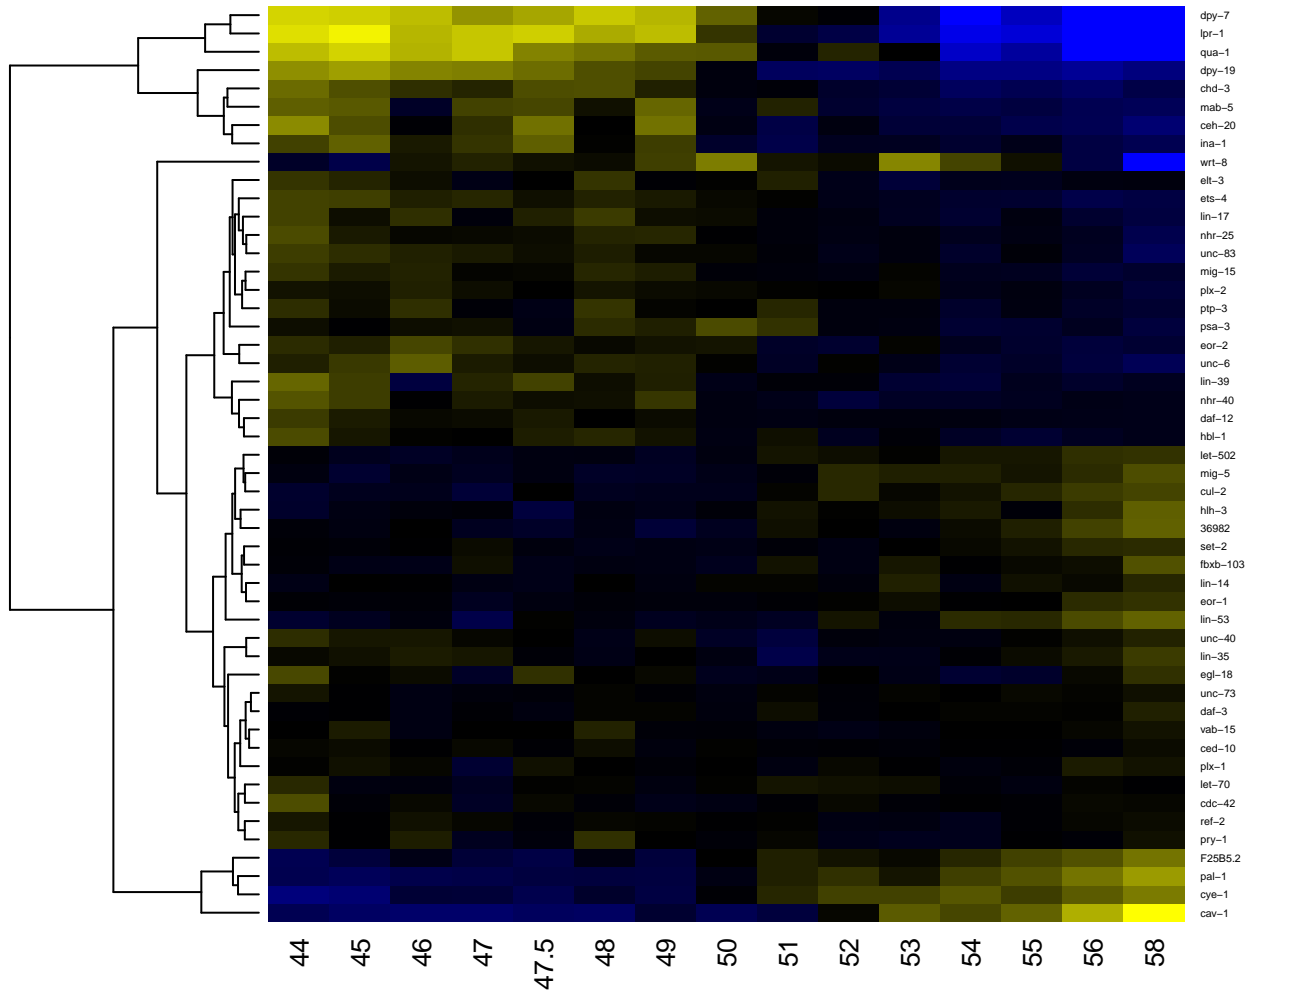

# P11.a

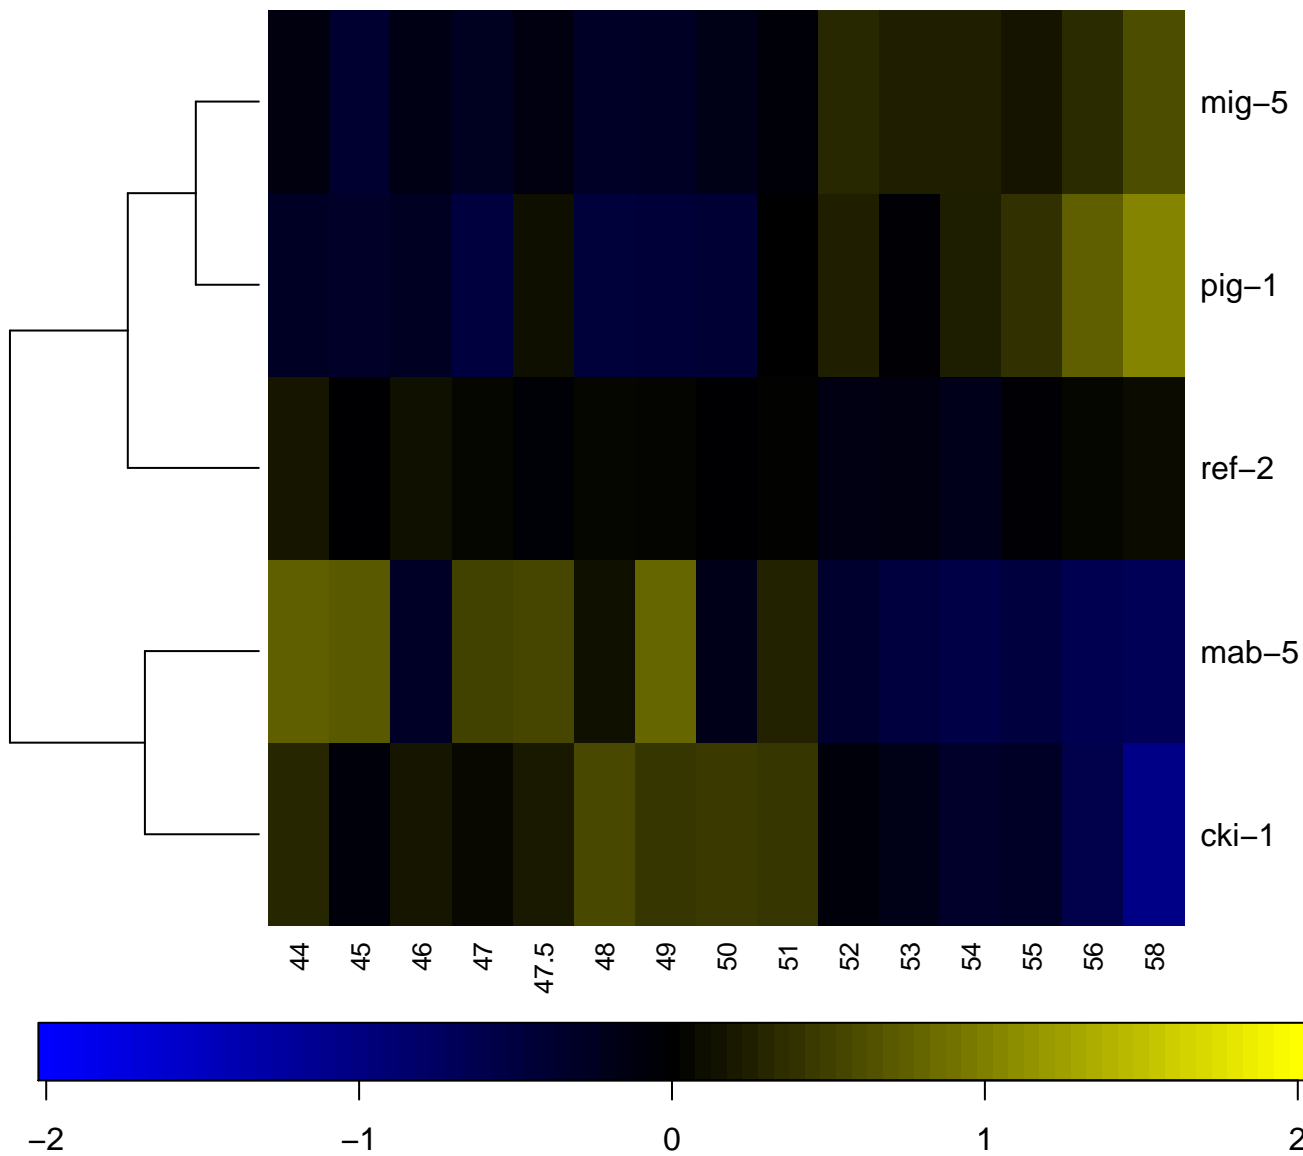

# P11.p

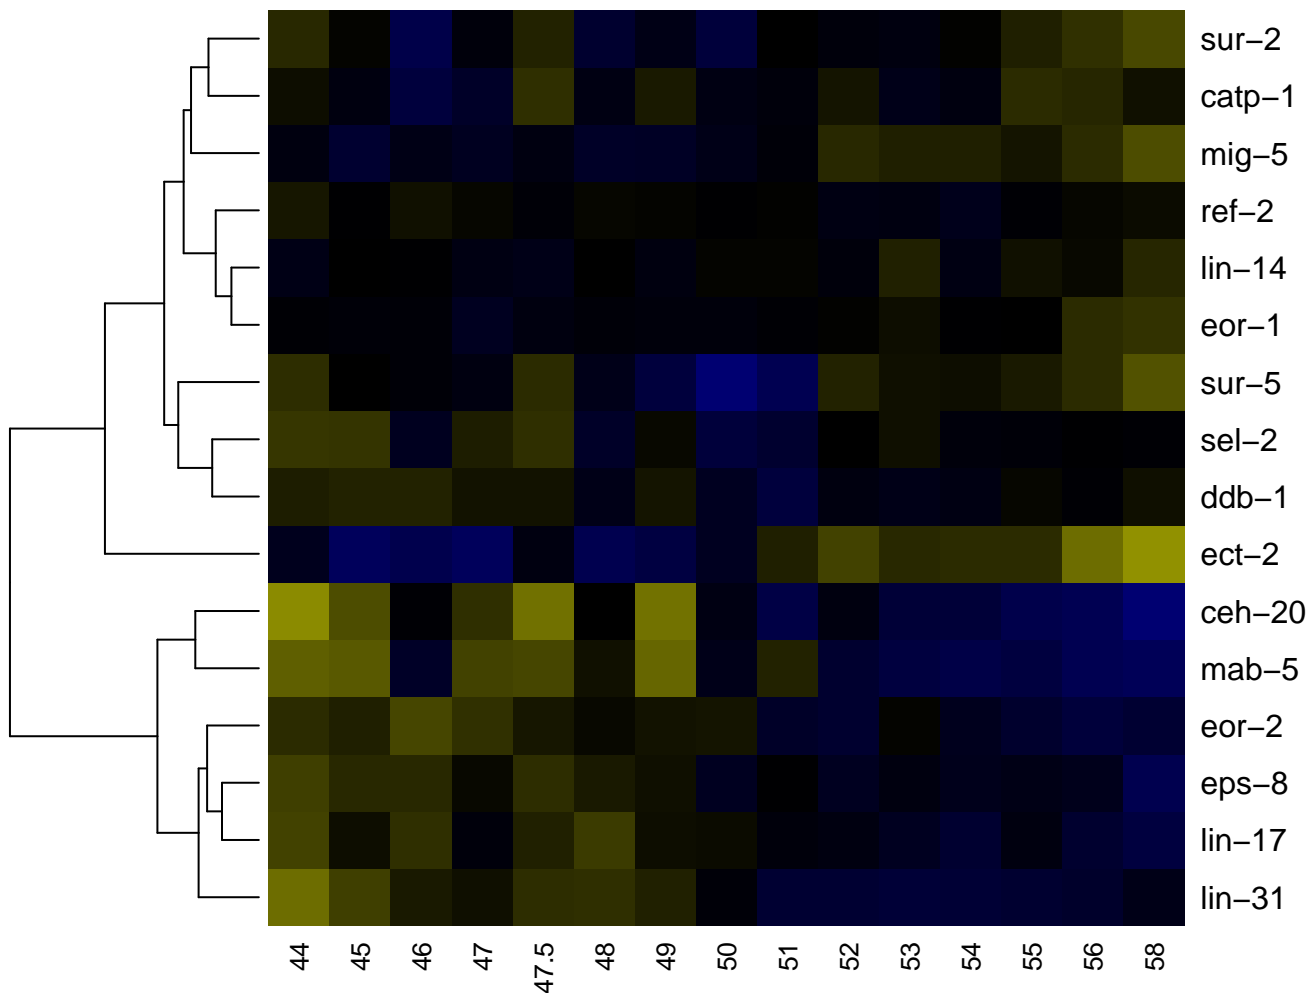

# P12

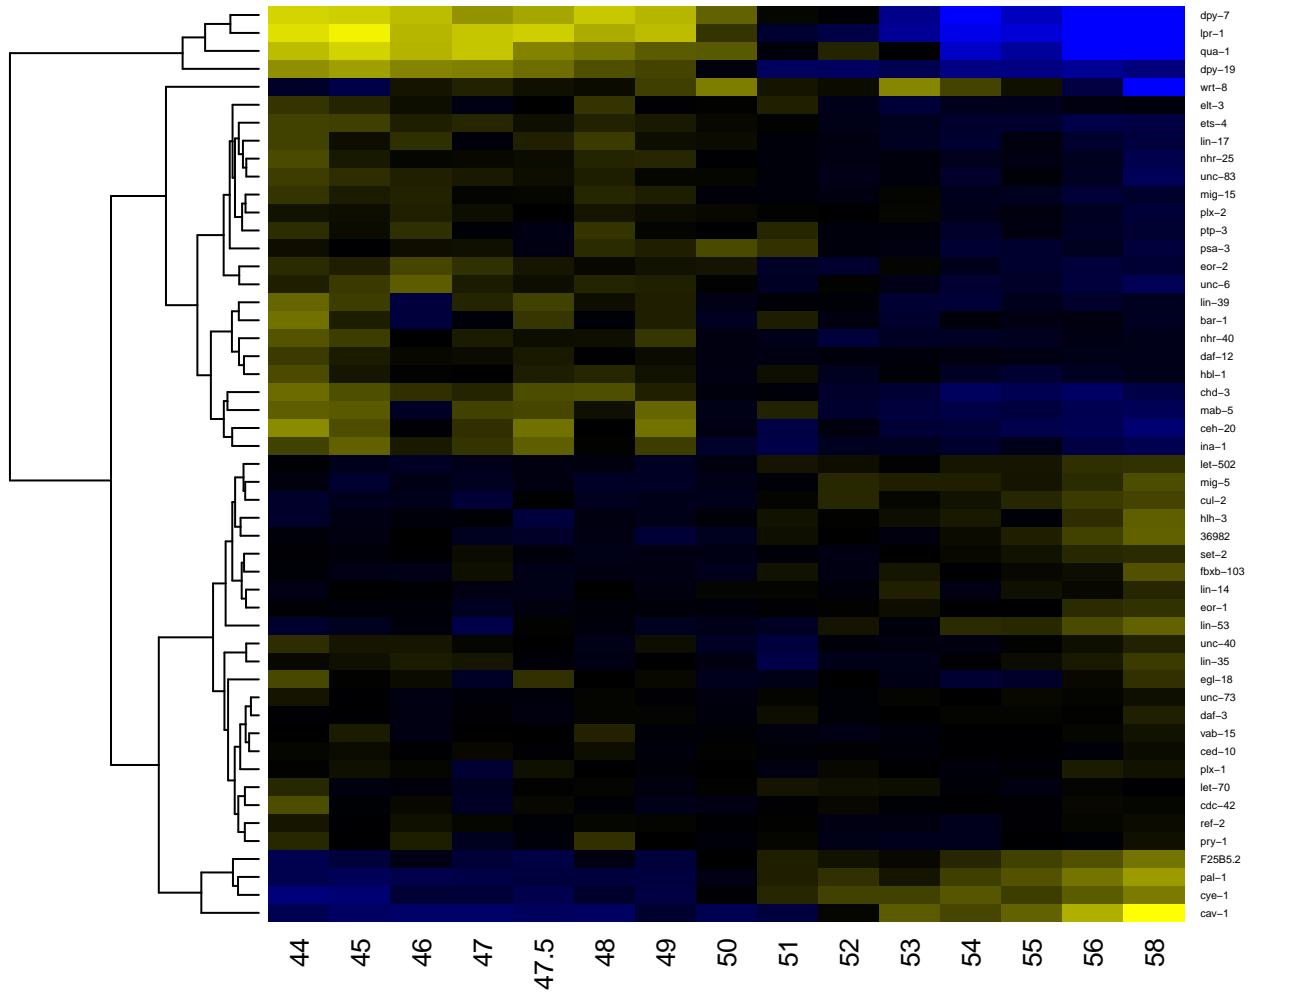

# P12.a

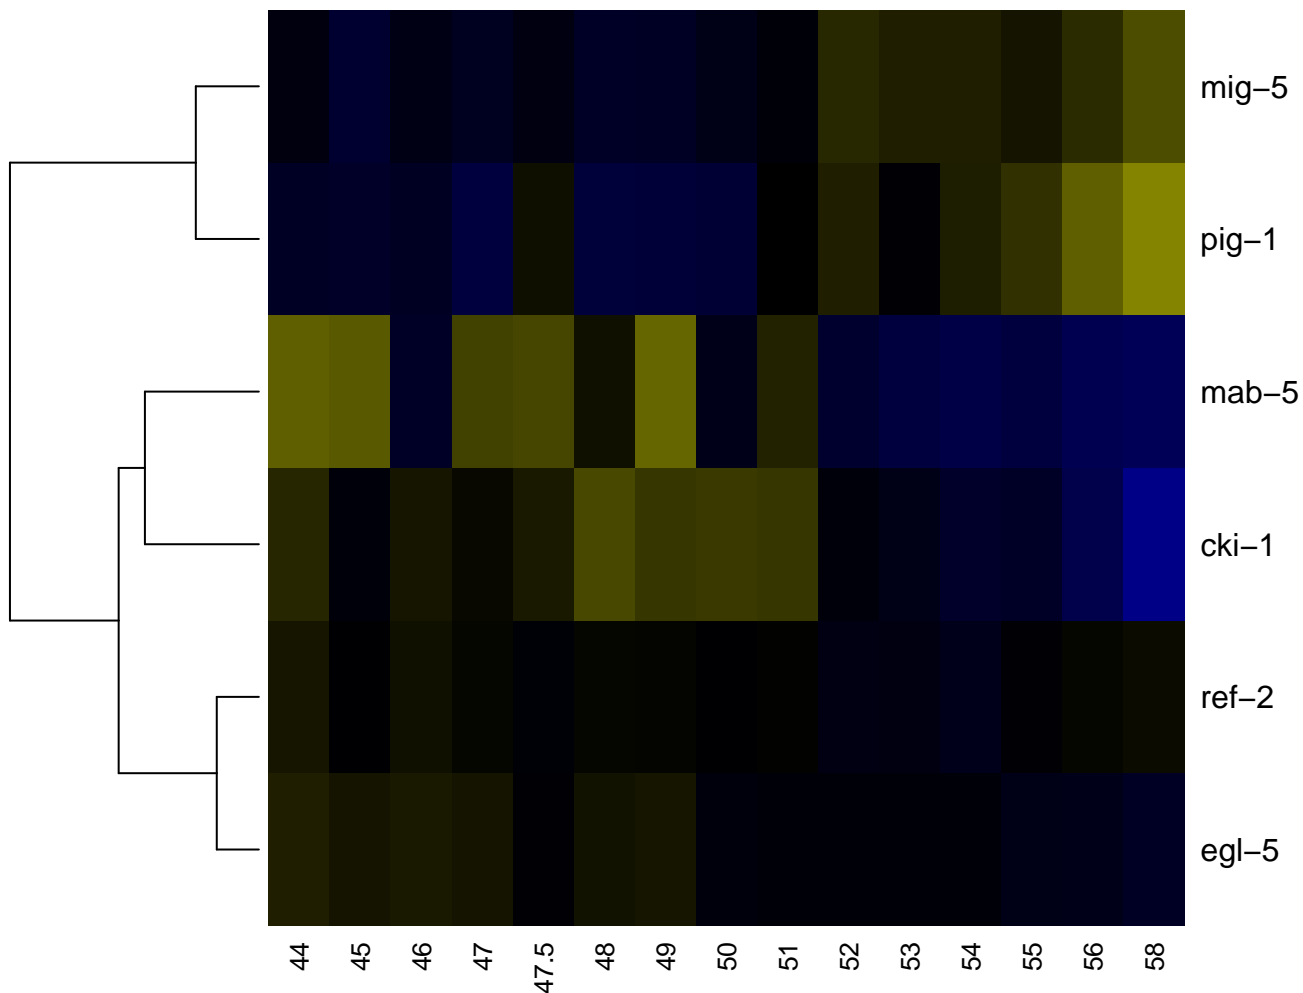

-2

-1

0

1

2

# P12.p

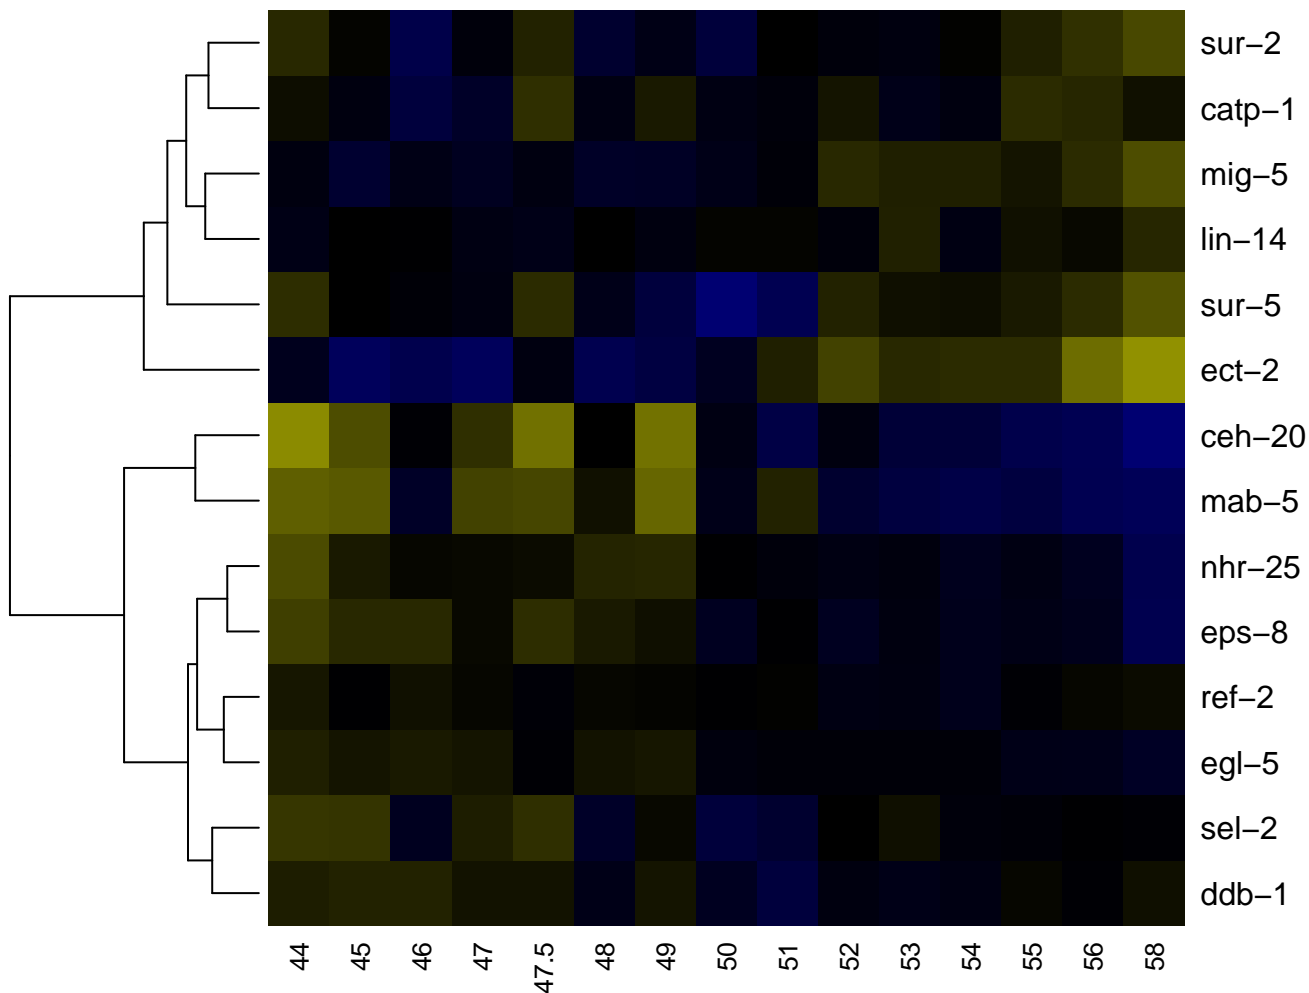

# P2

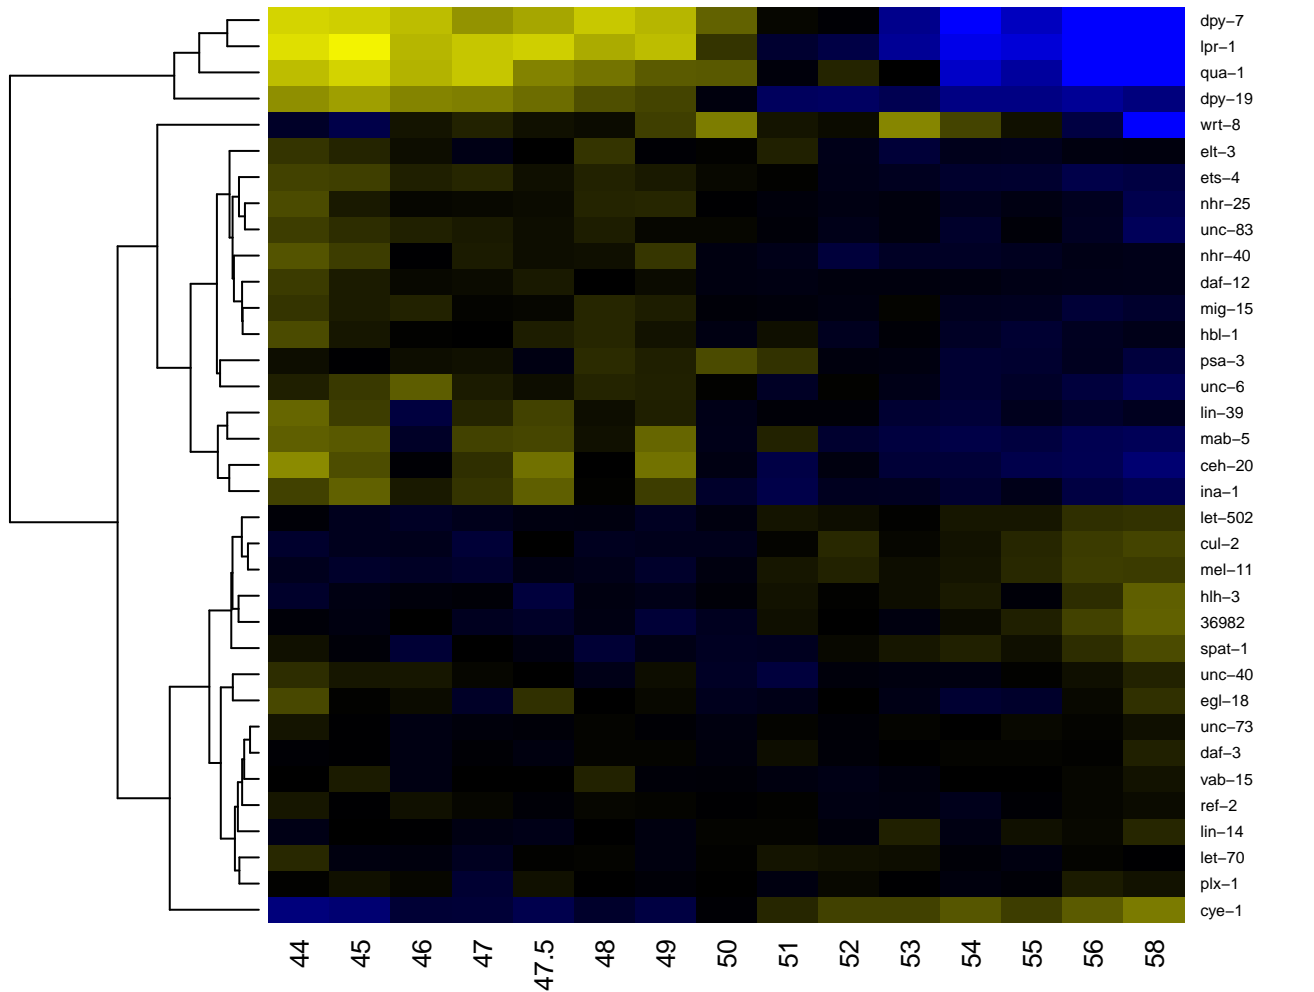

# P2.p

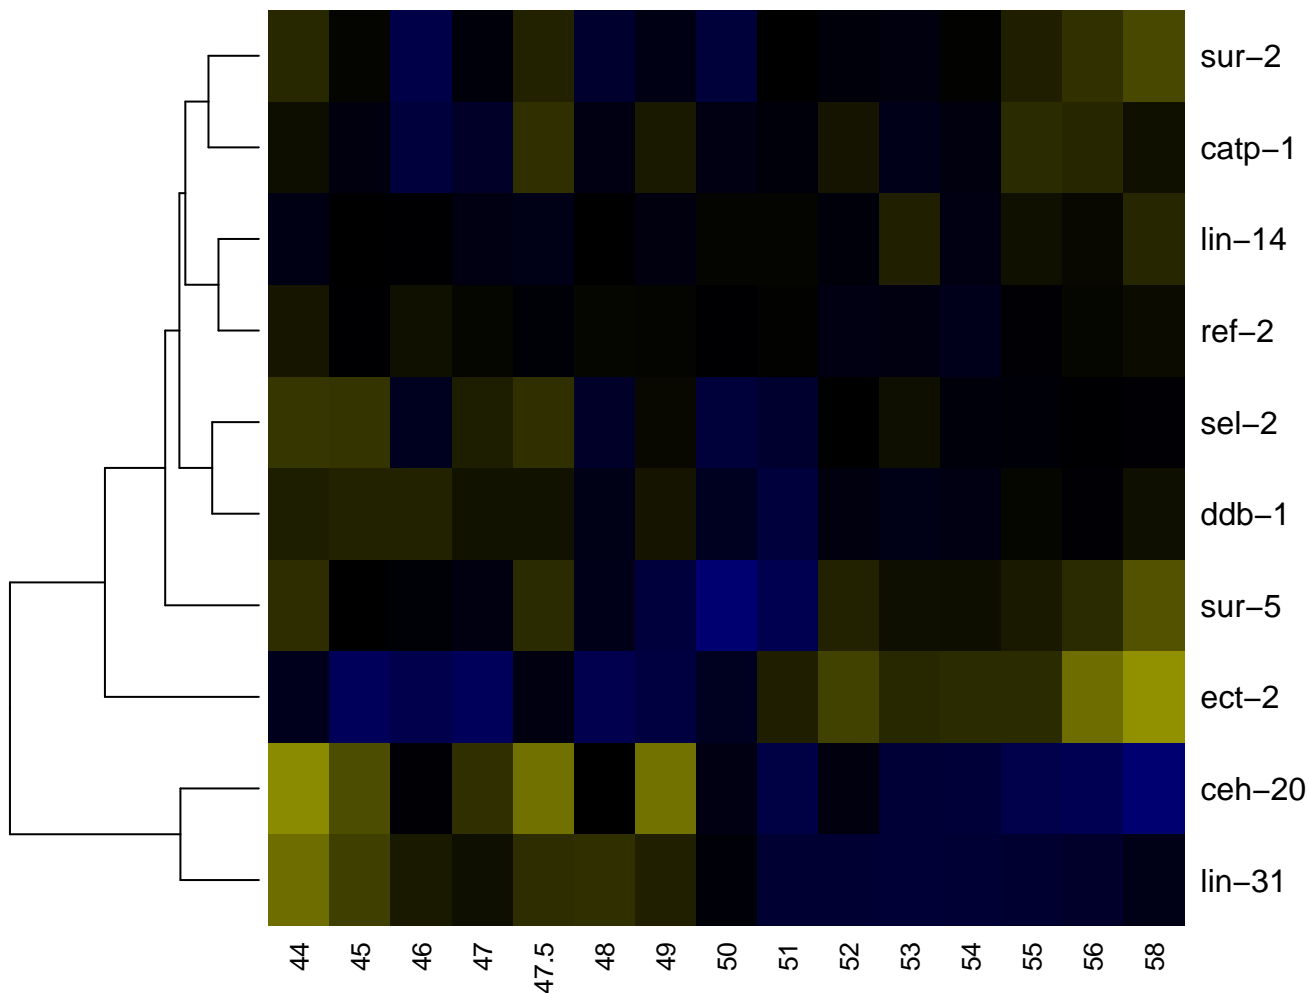

-2

-1

0

1

2



# P3

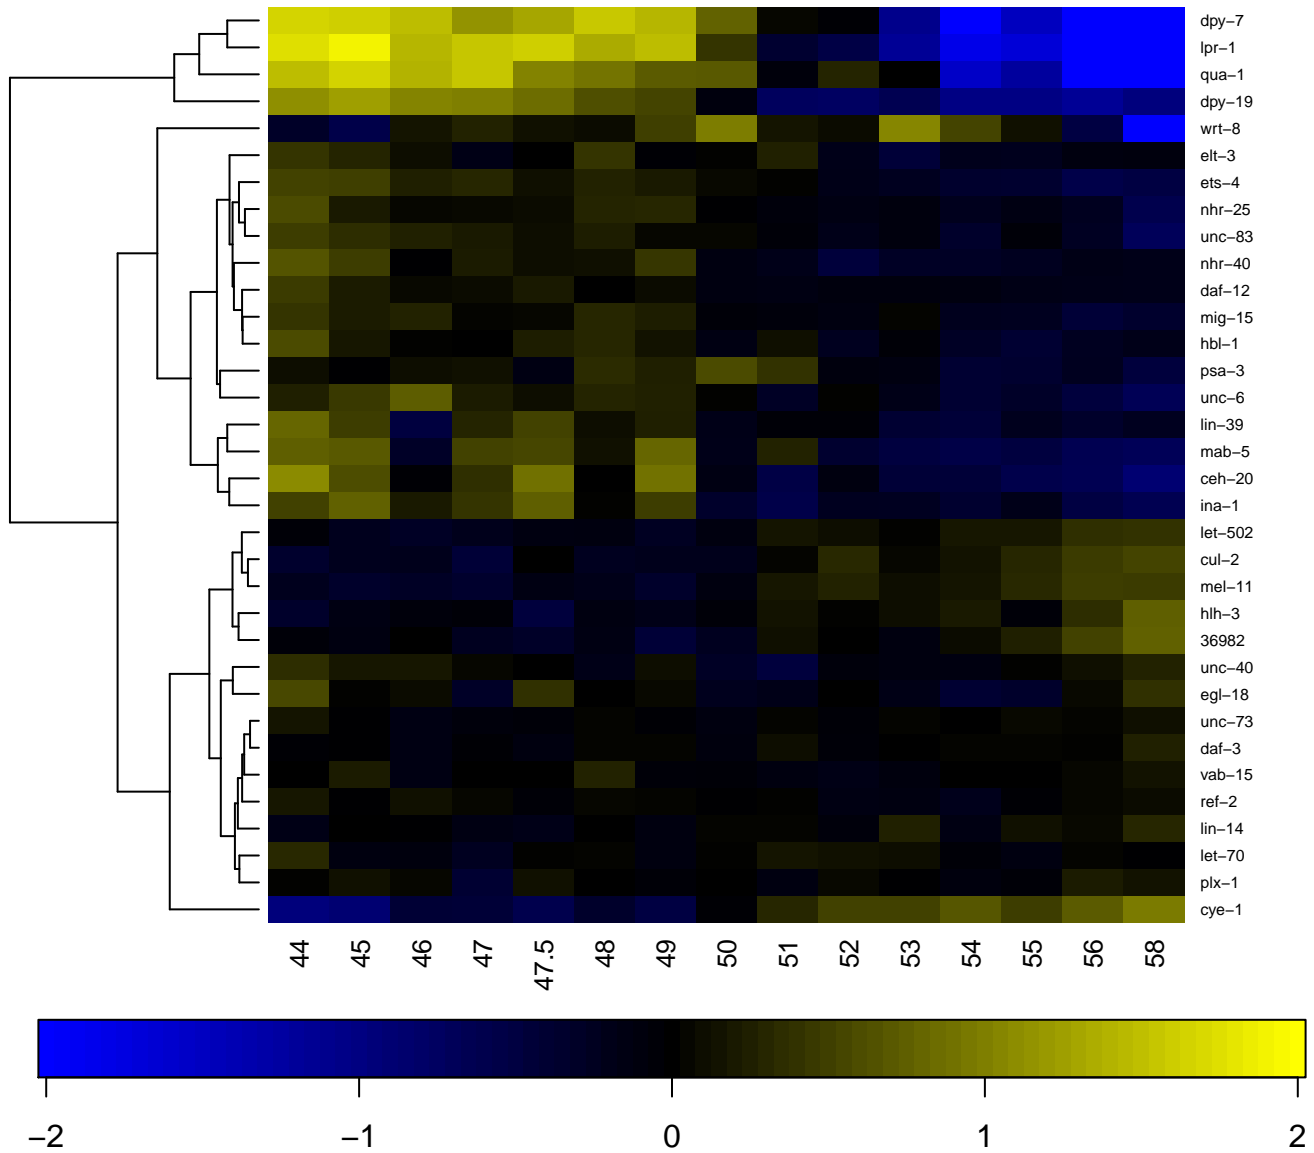

# P3.p

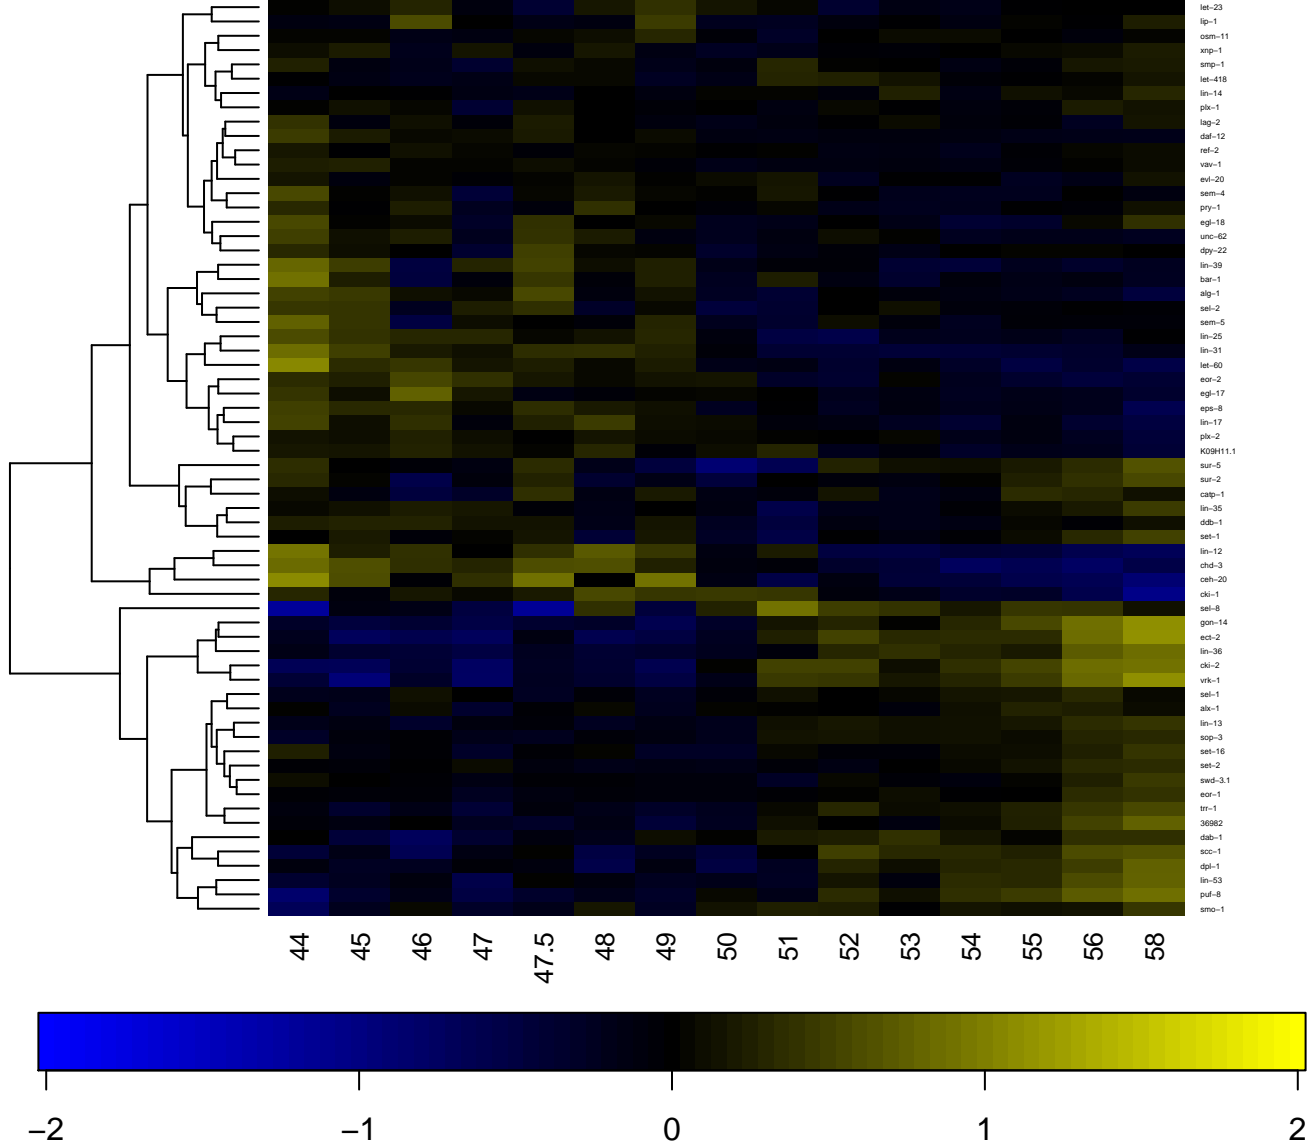

# P4

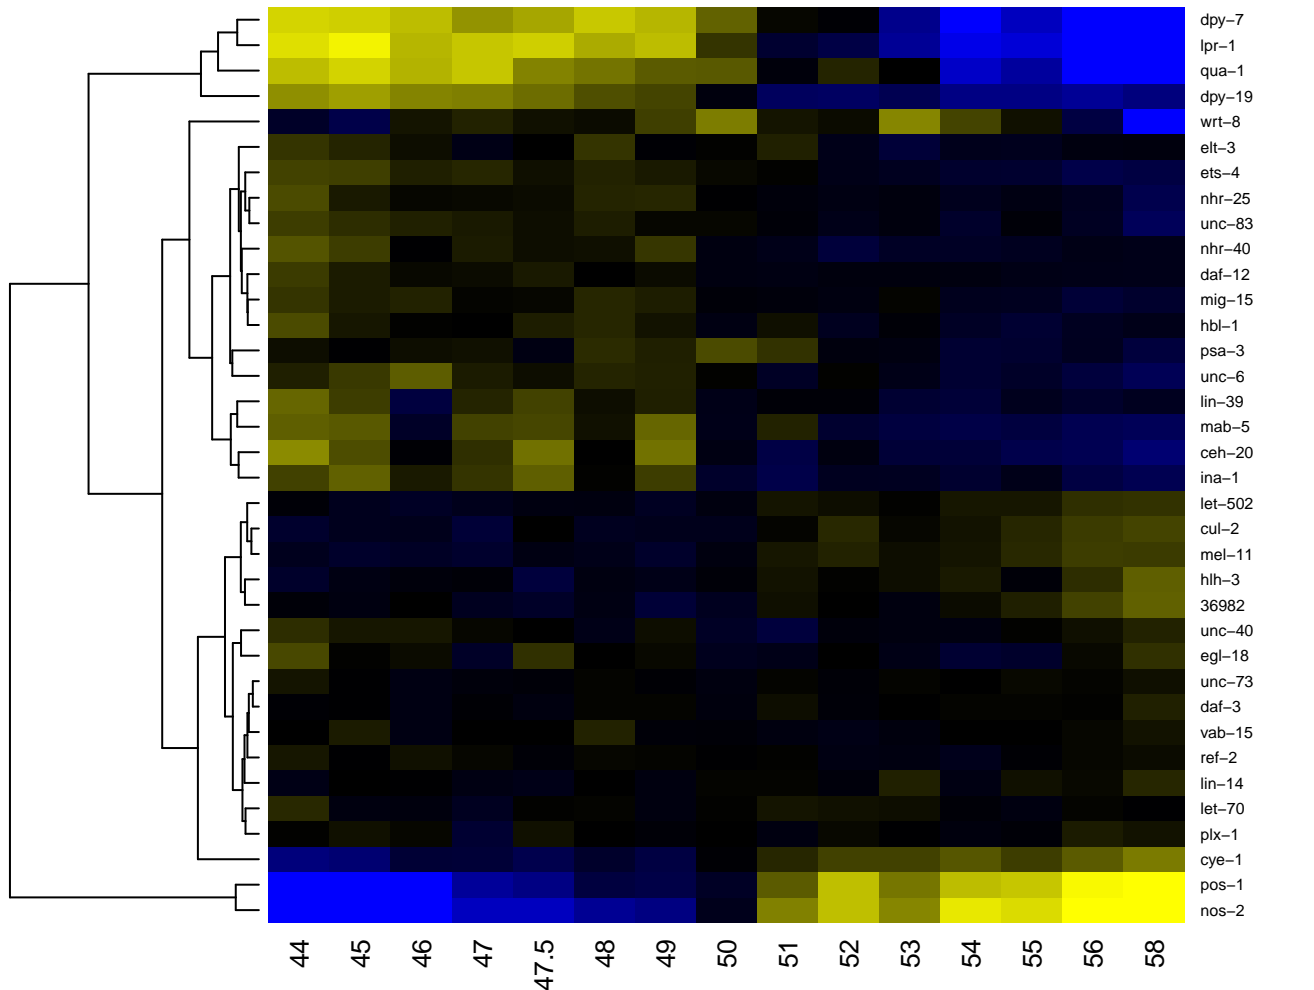

# P4.p



# P5

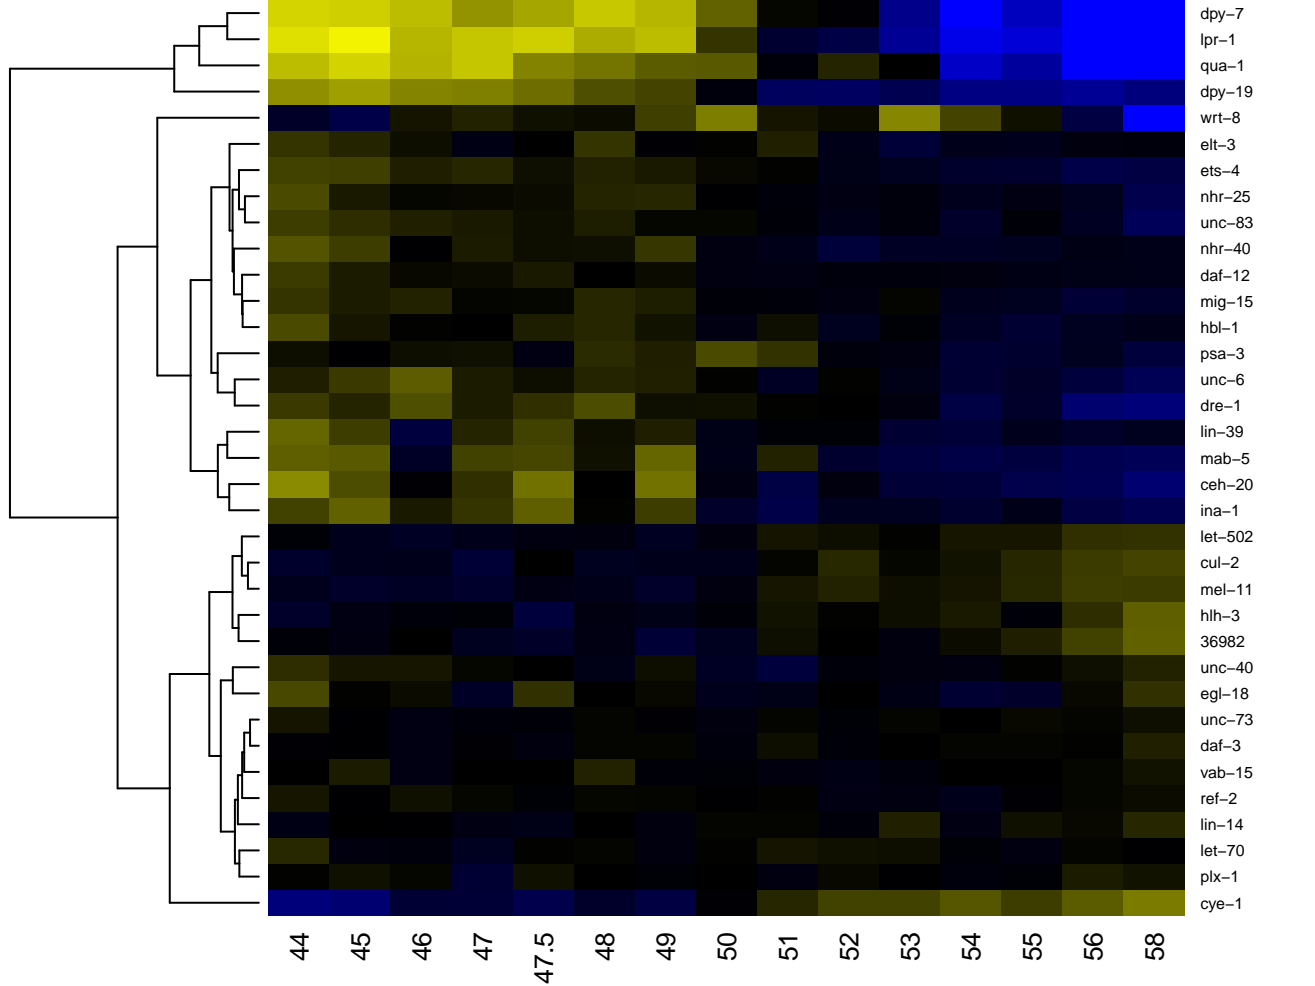

# P5.p

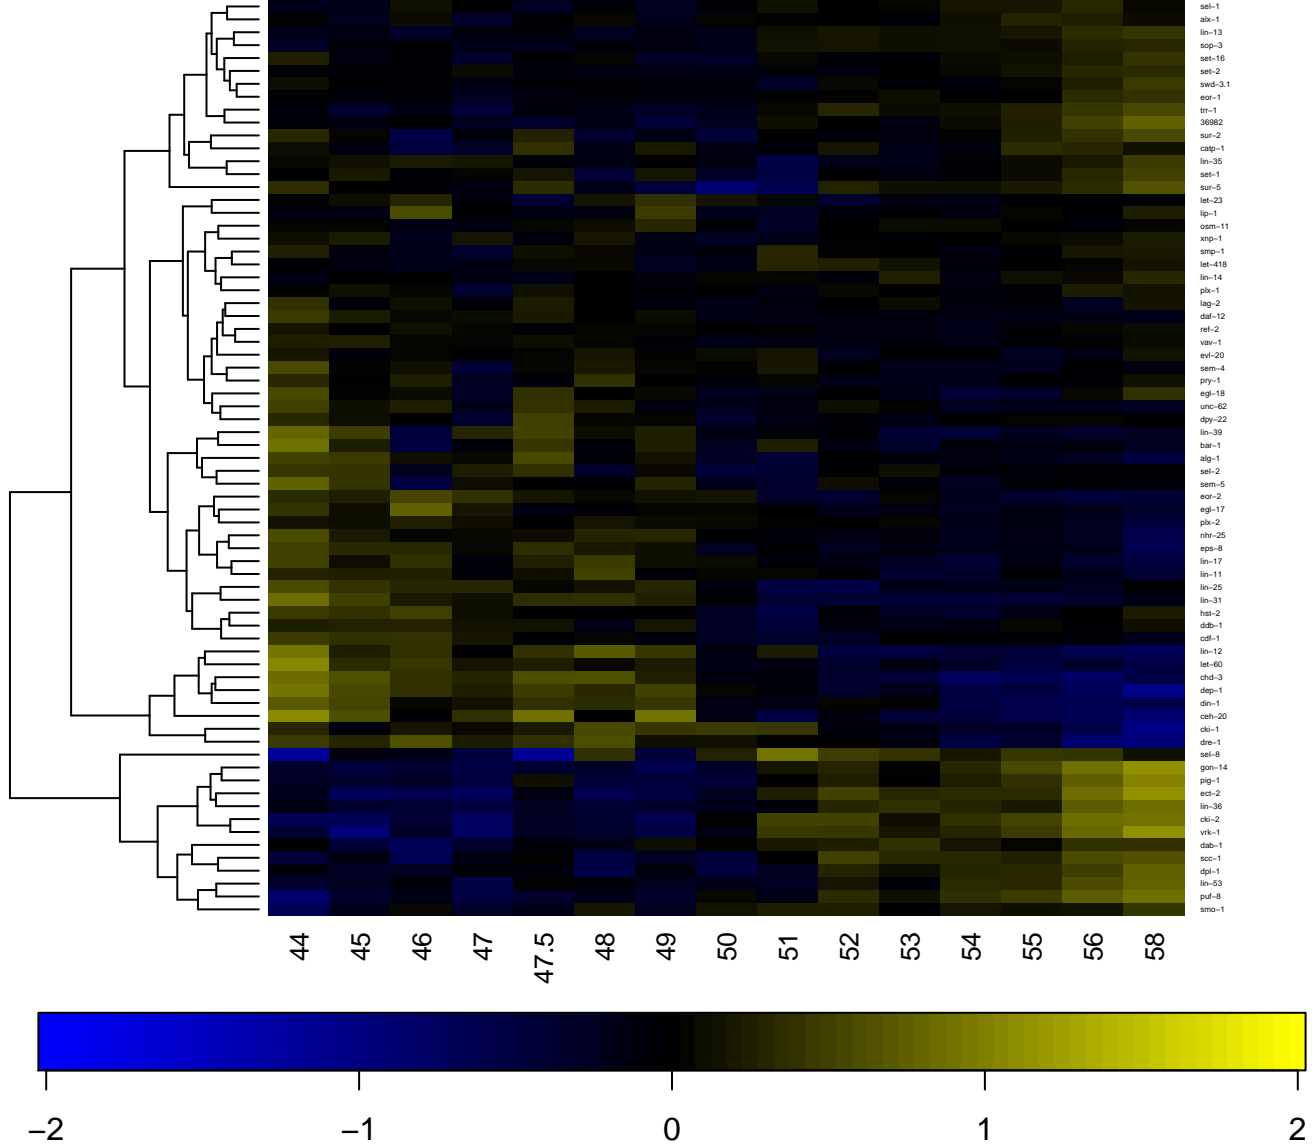



# P5.paa

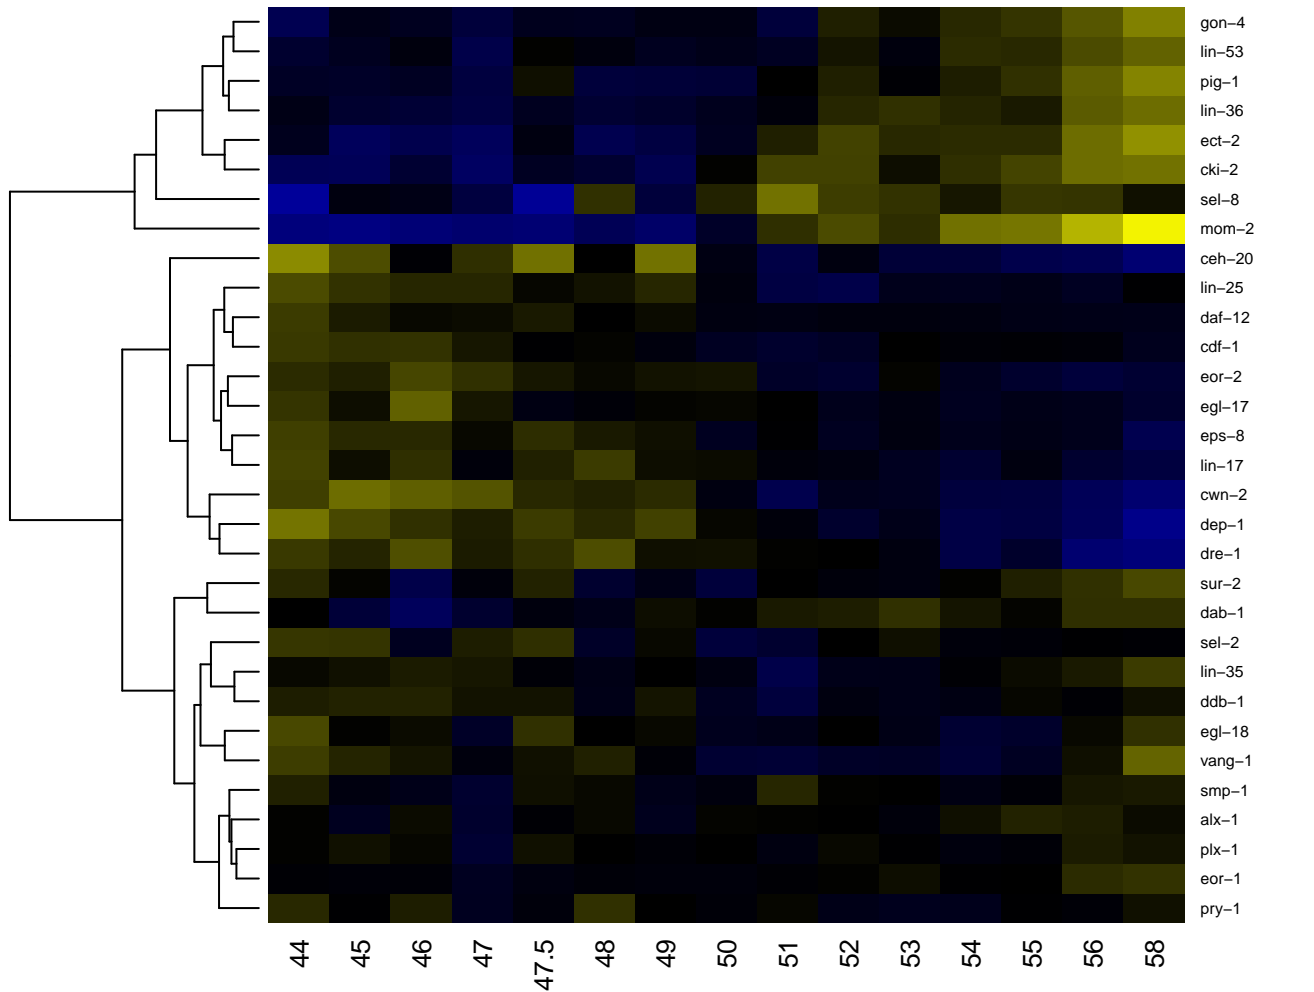



# P5.pap

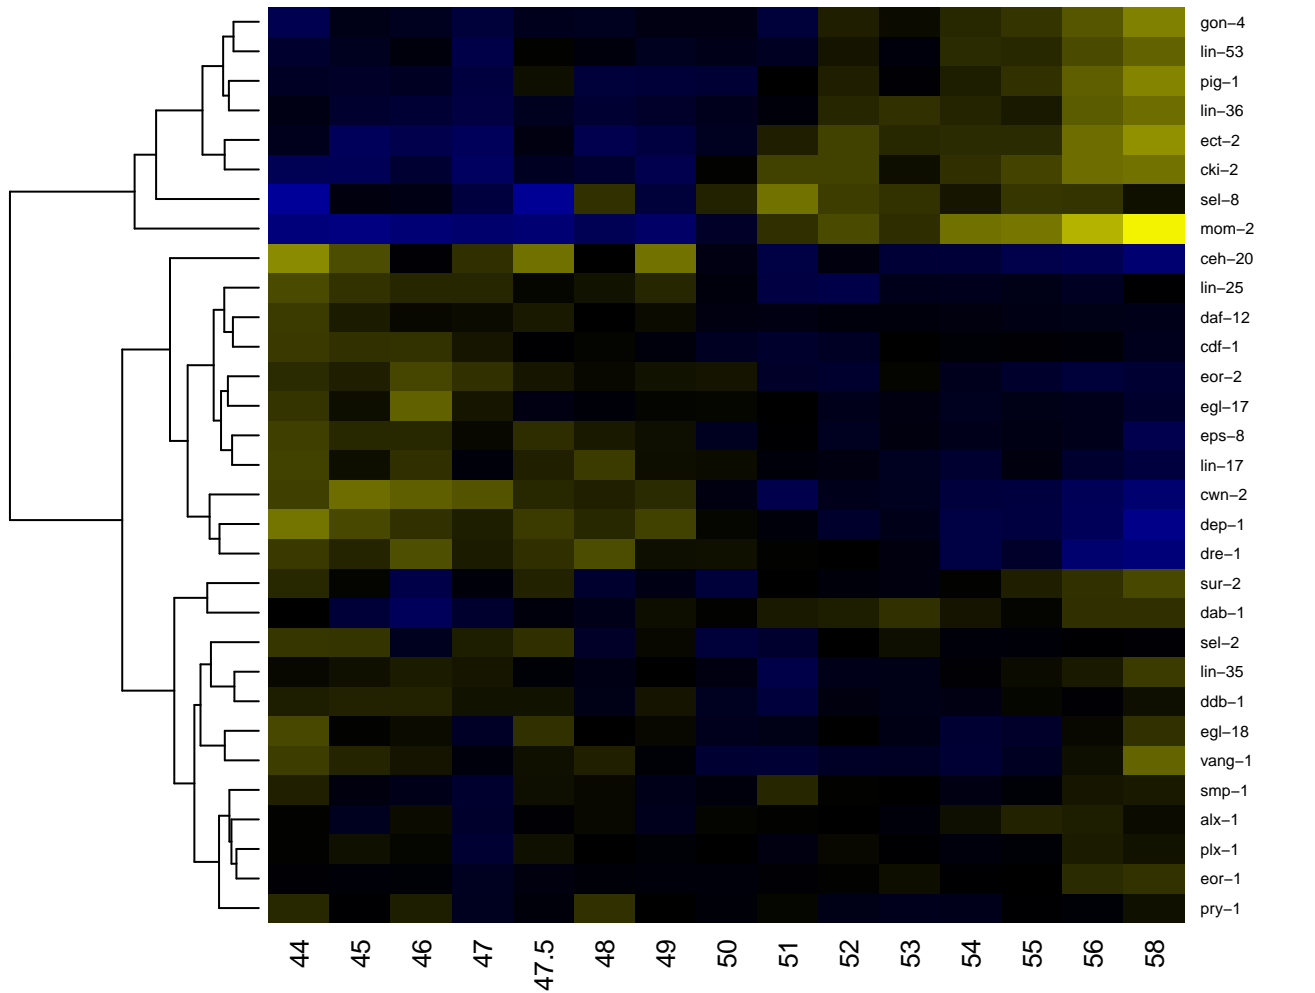

# P5.pp

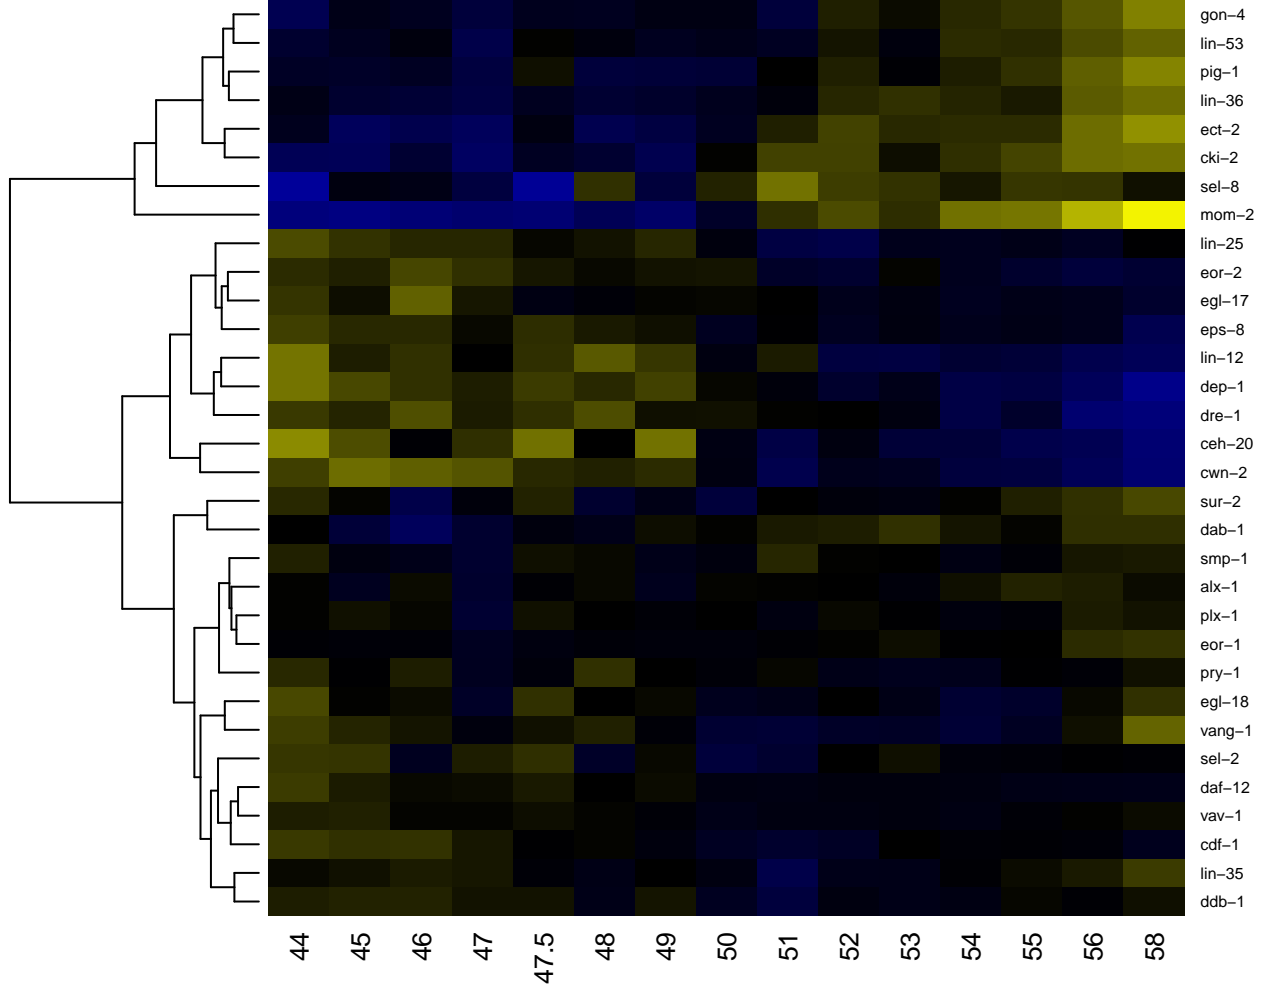

# P5.ppa

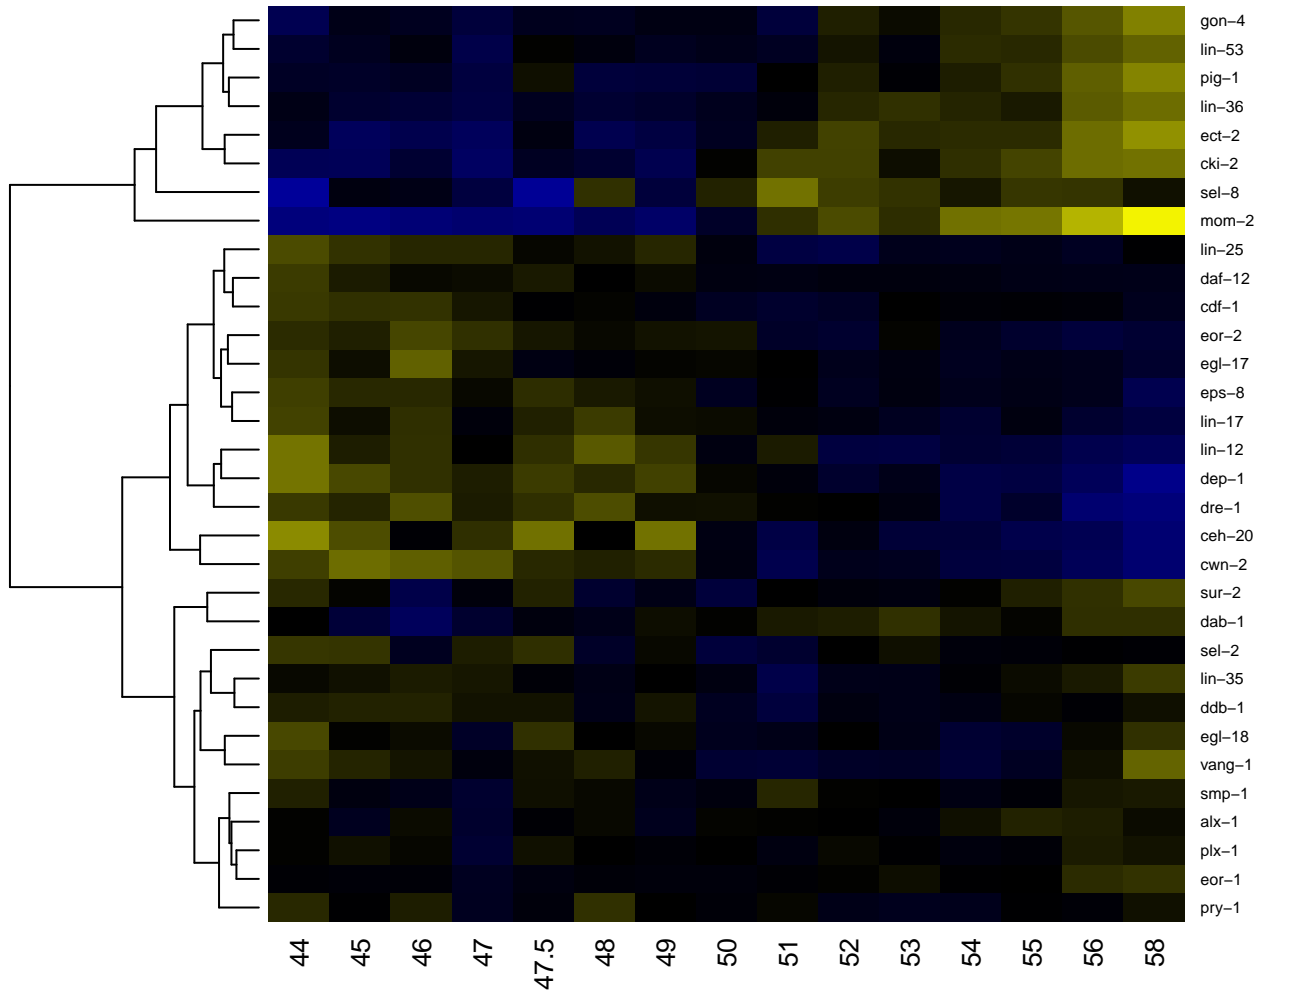

-2

-1

0

1

2

# P6

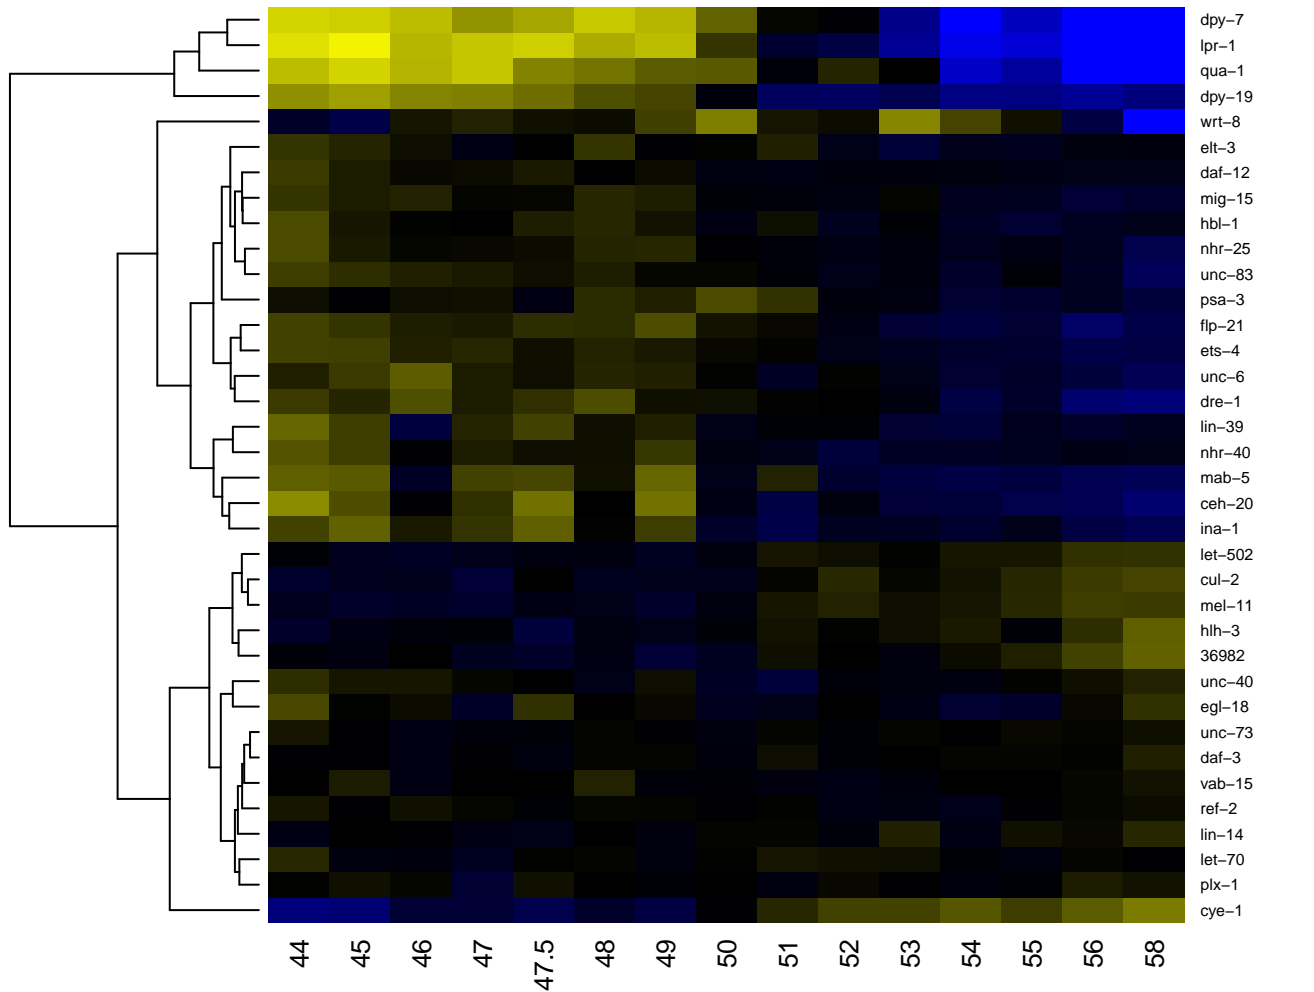

# P6.p

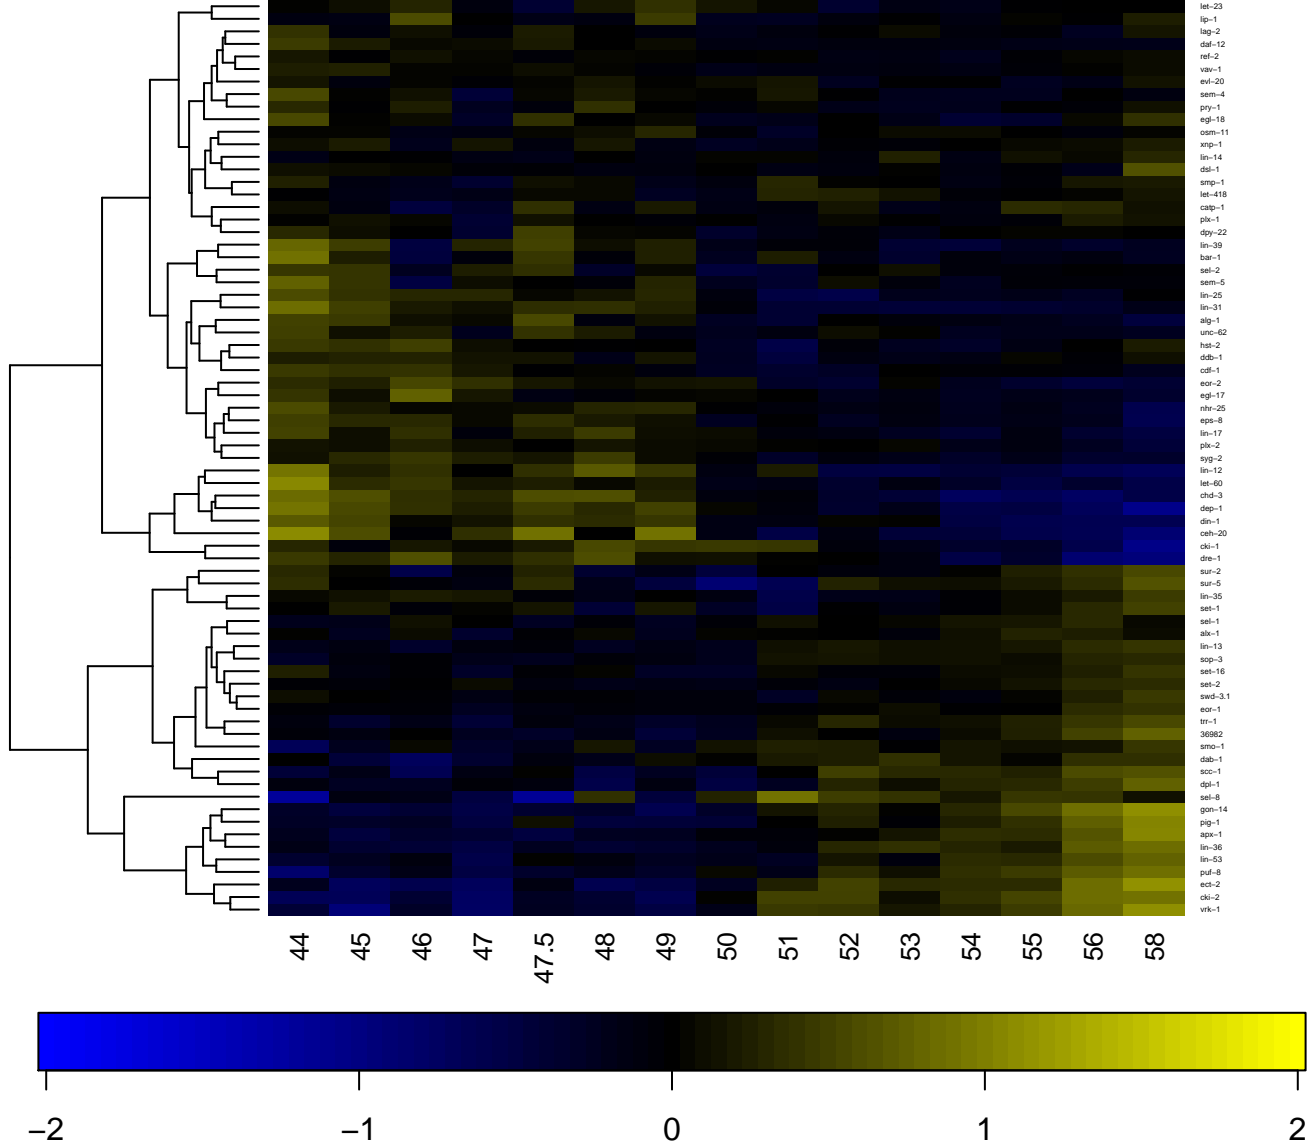

# P6.pa

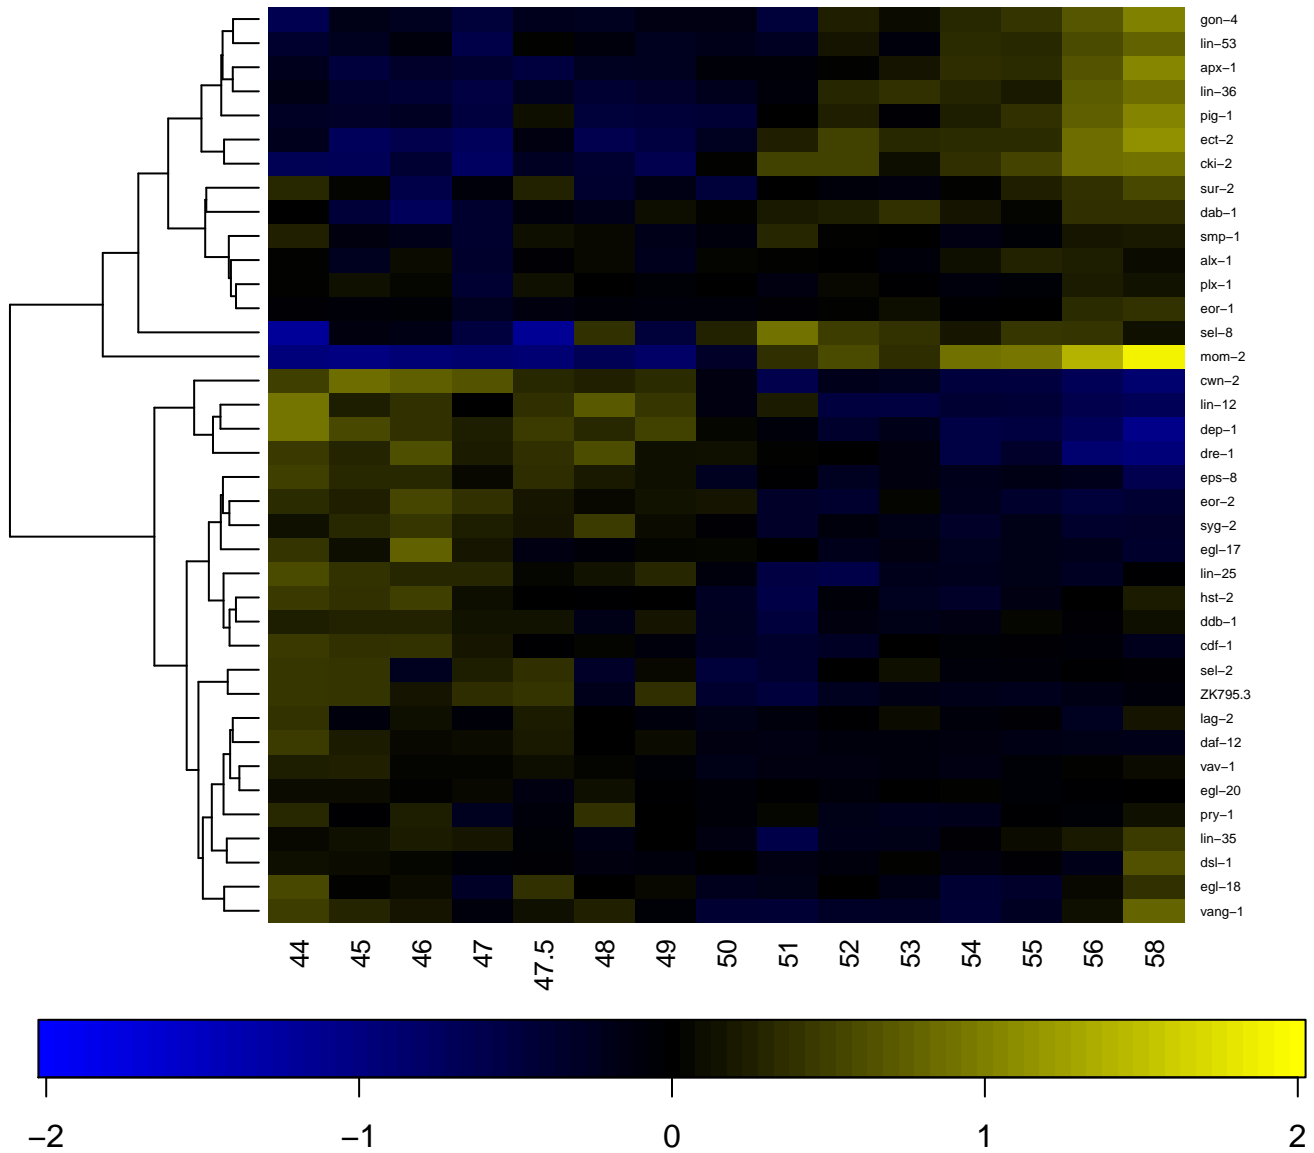

# P6.paa

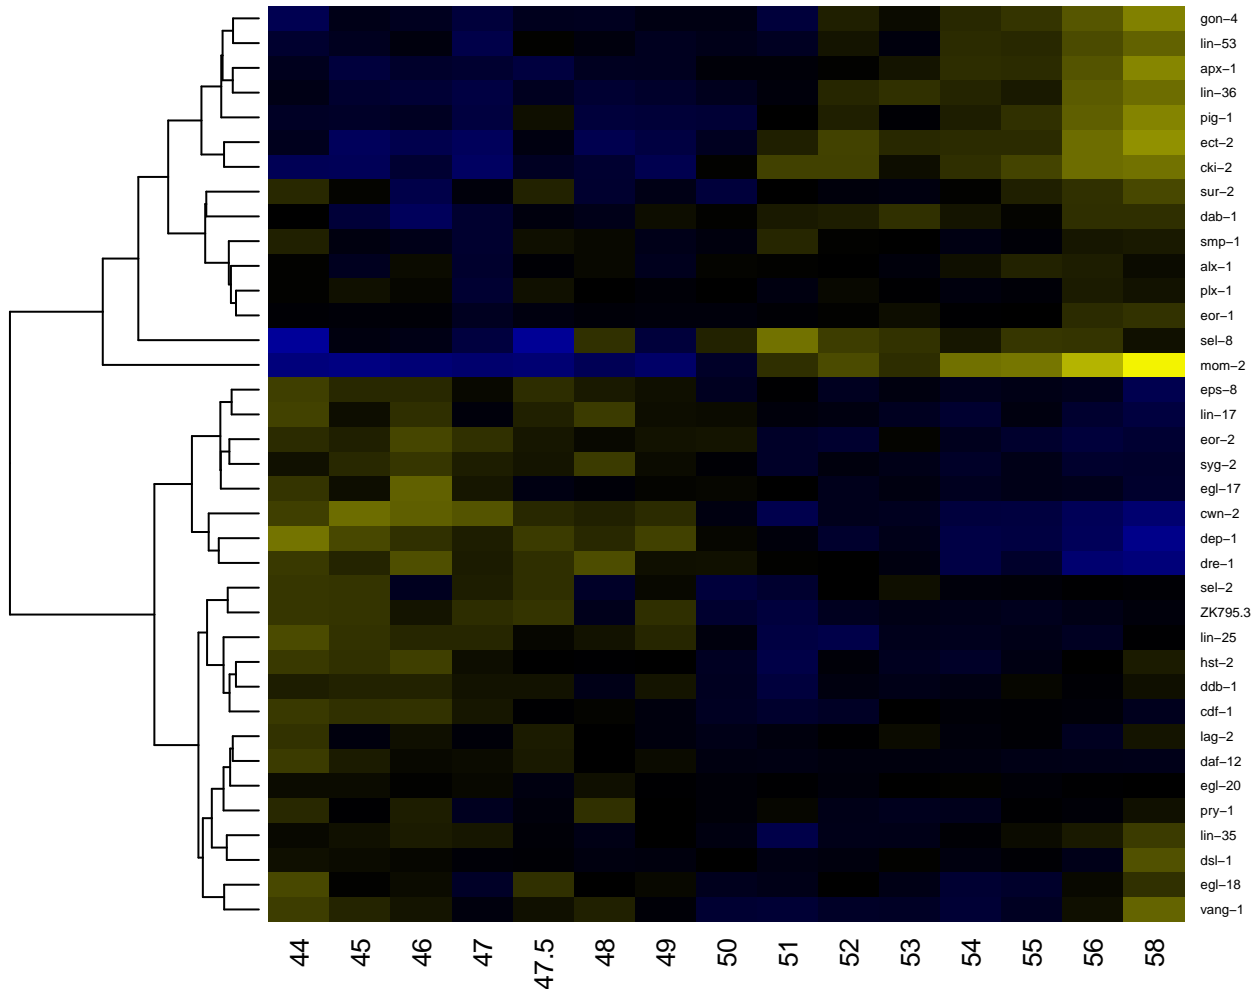

# P6.pap

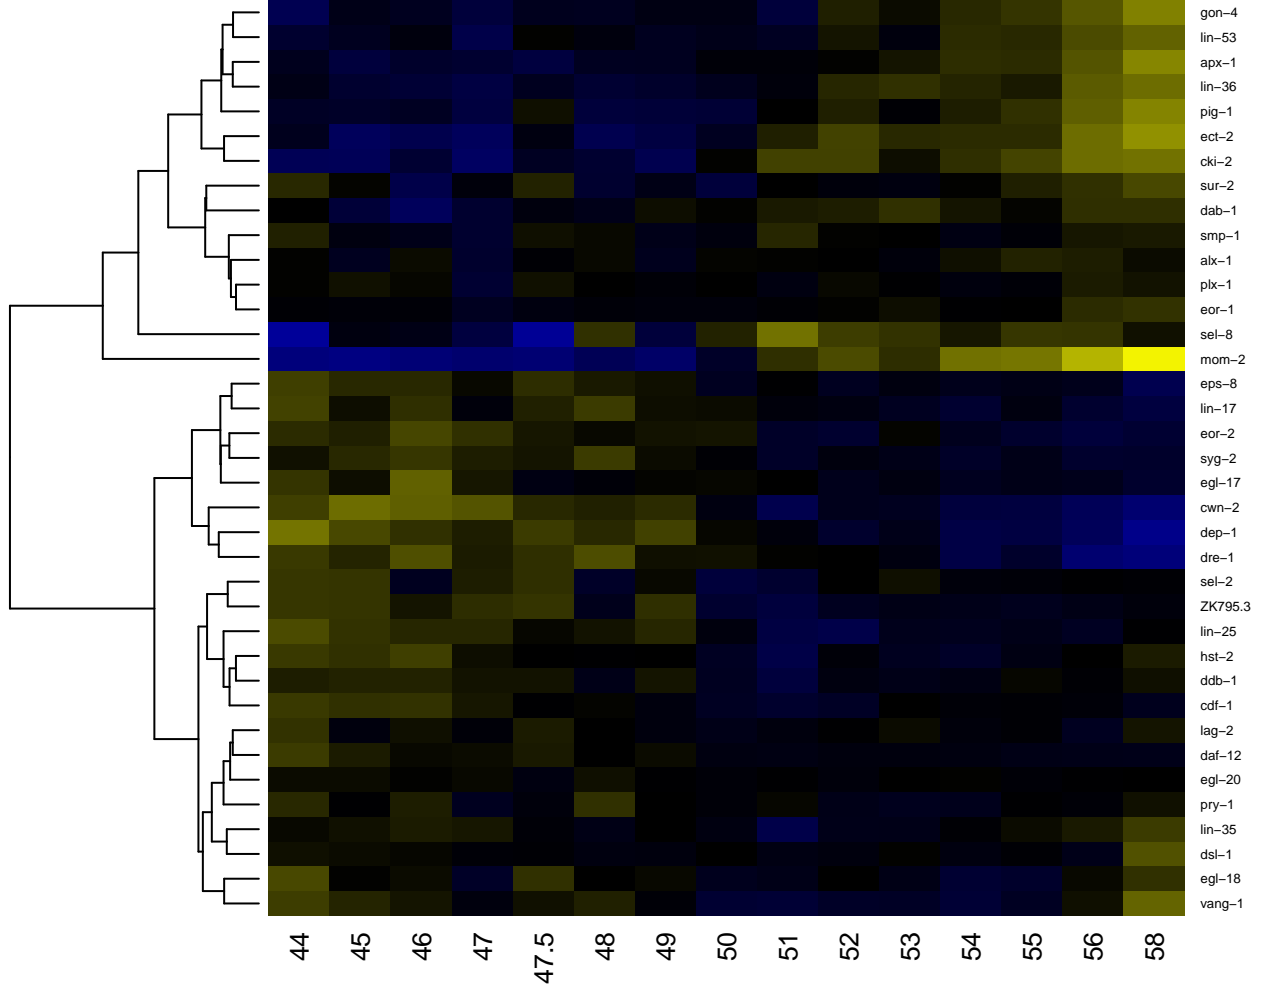



# P6.pp

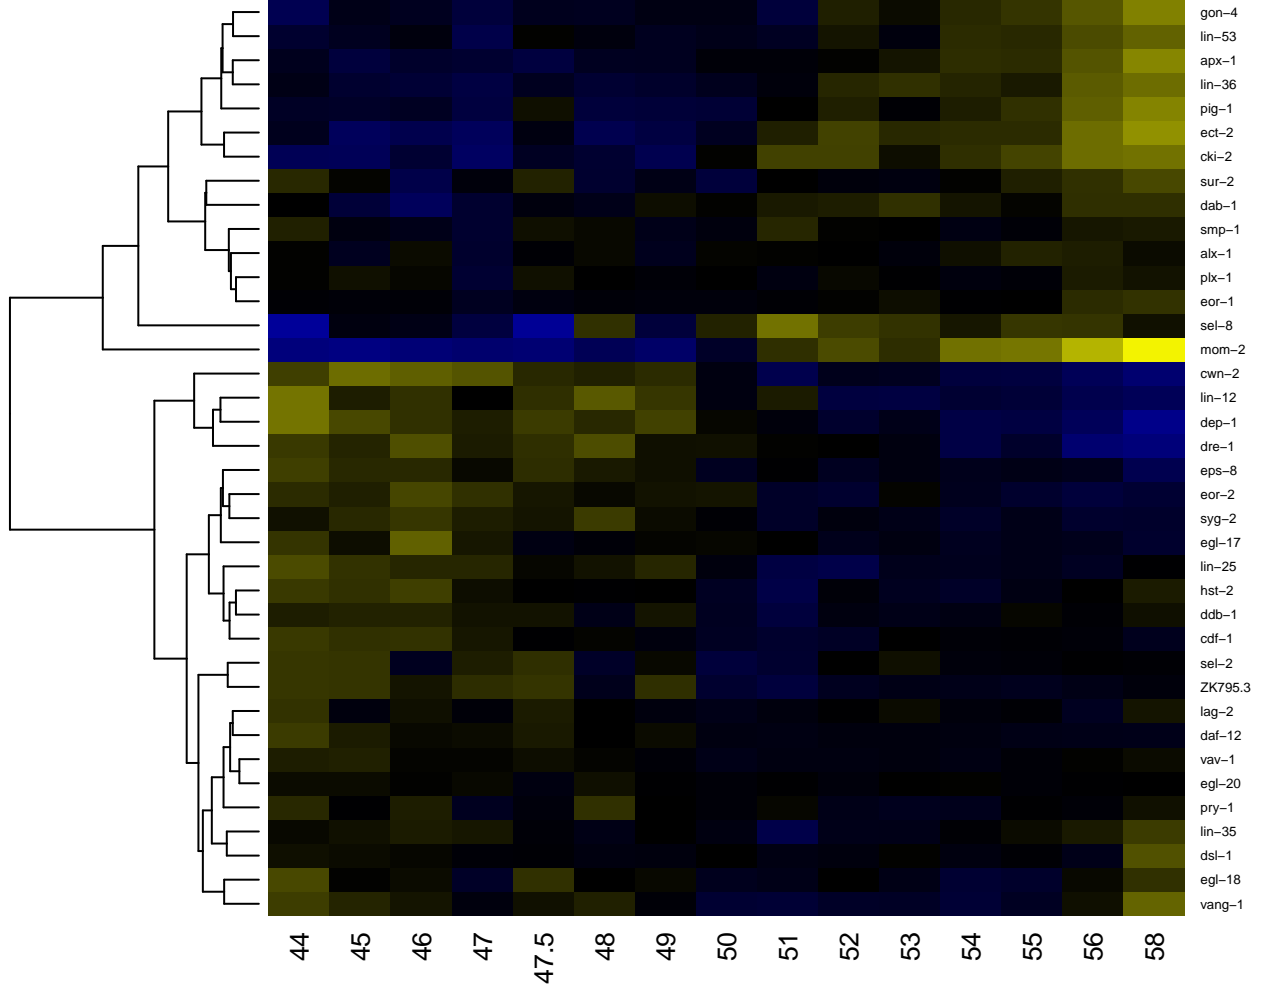

# P6.ppa

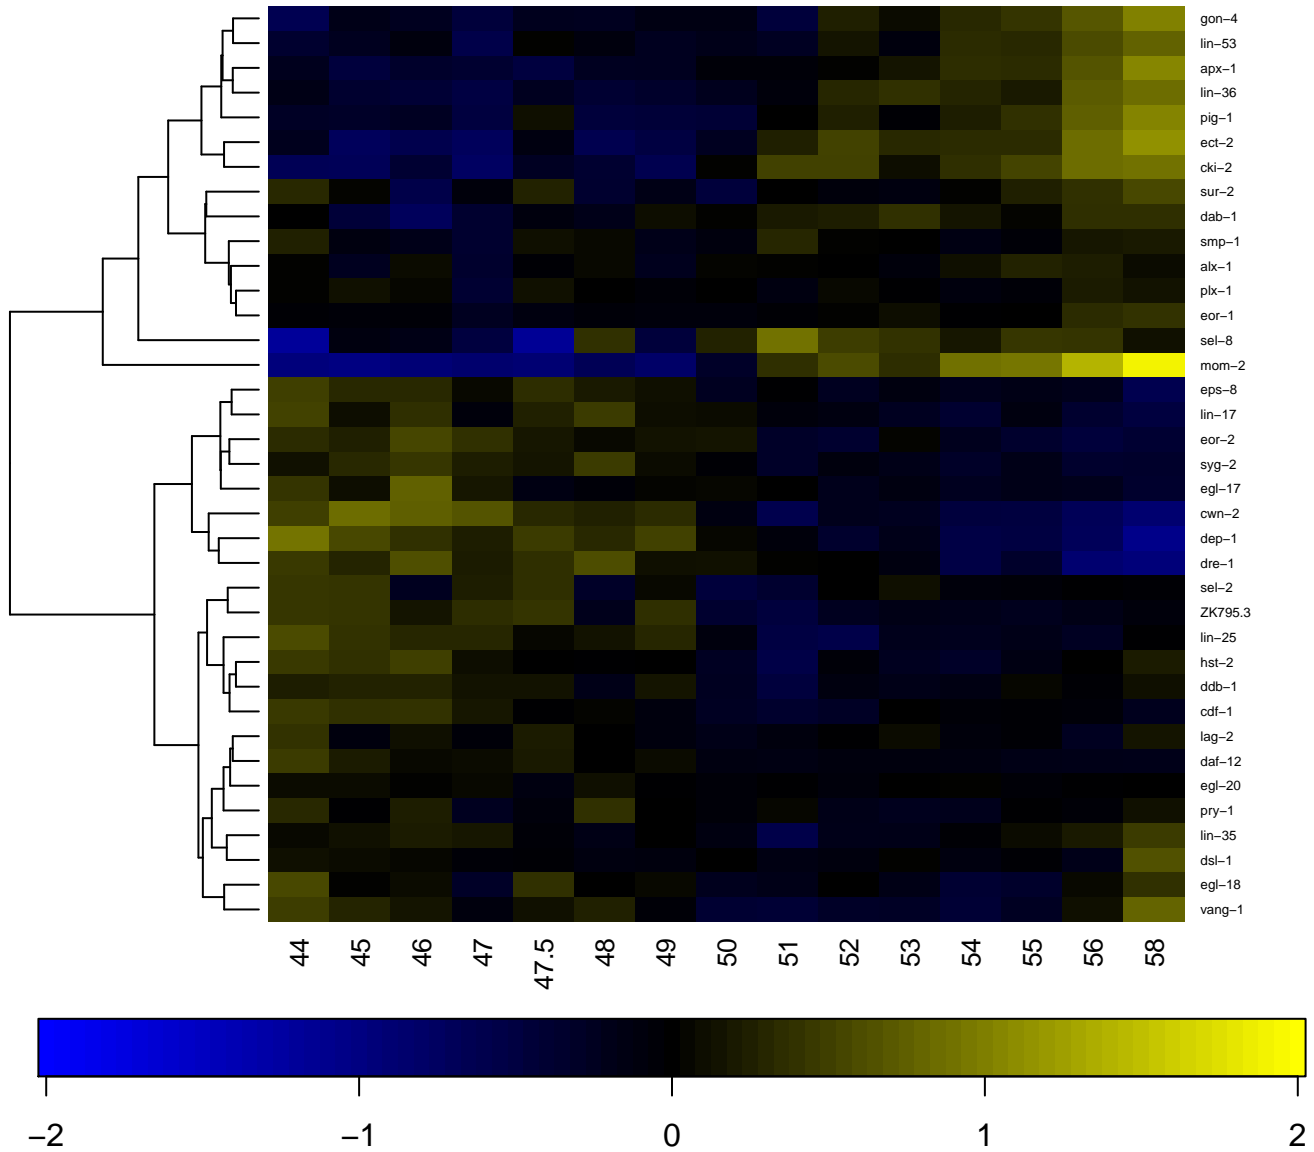

# P6.ppp

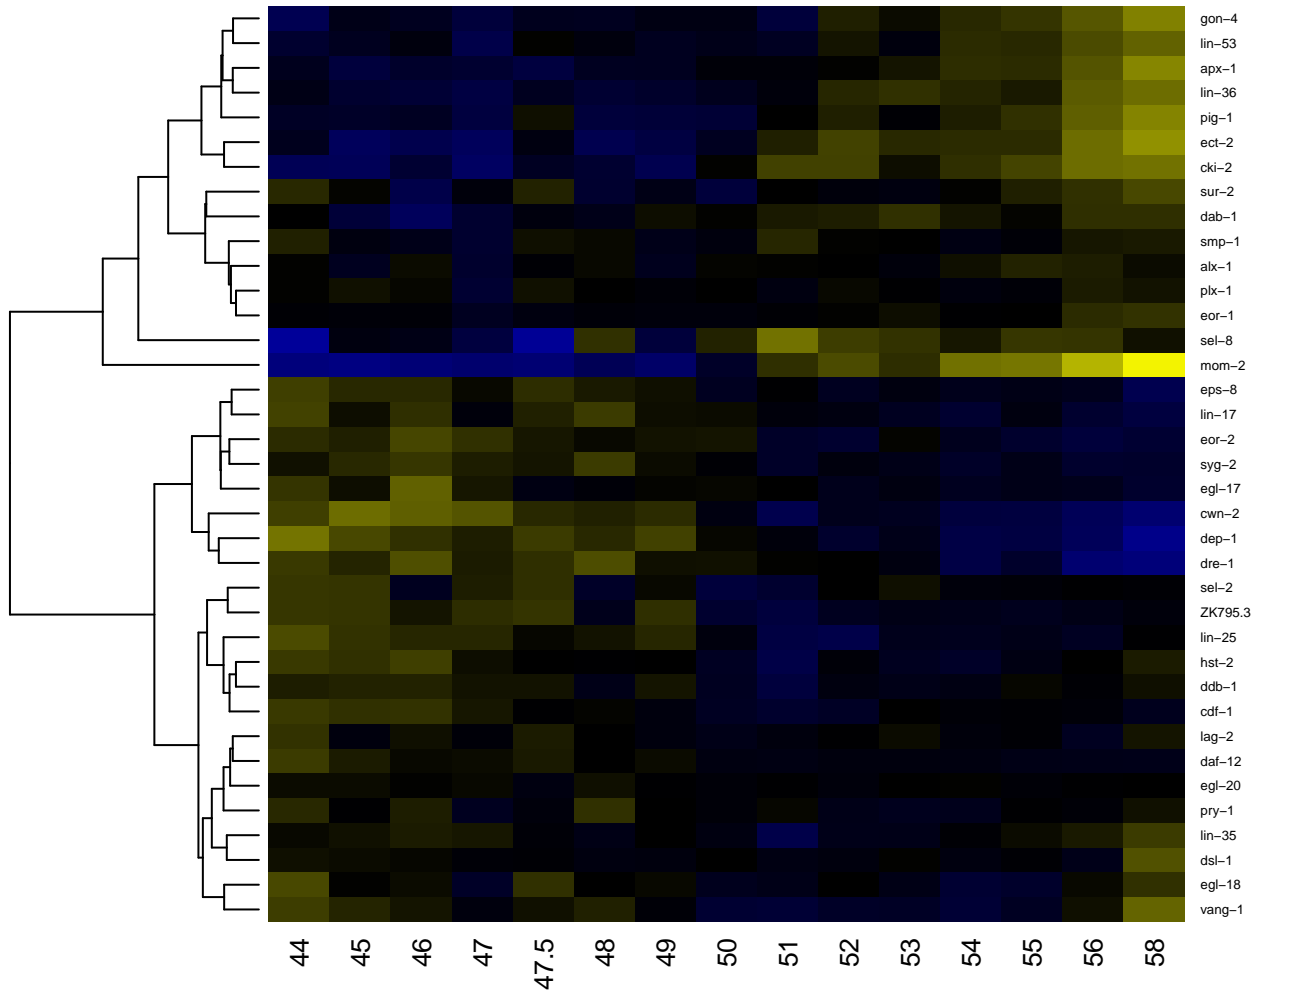

# P7

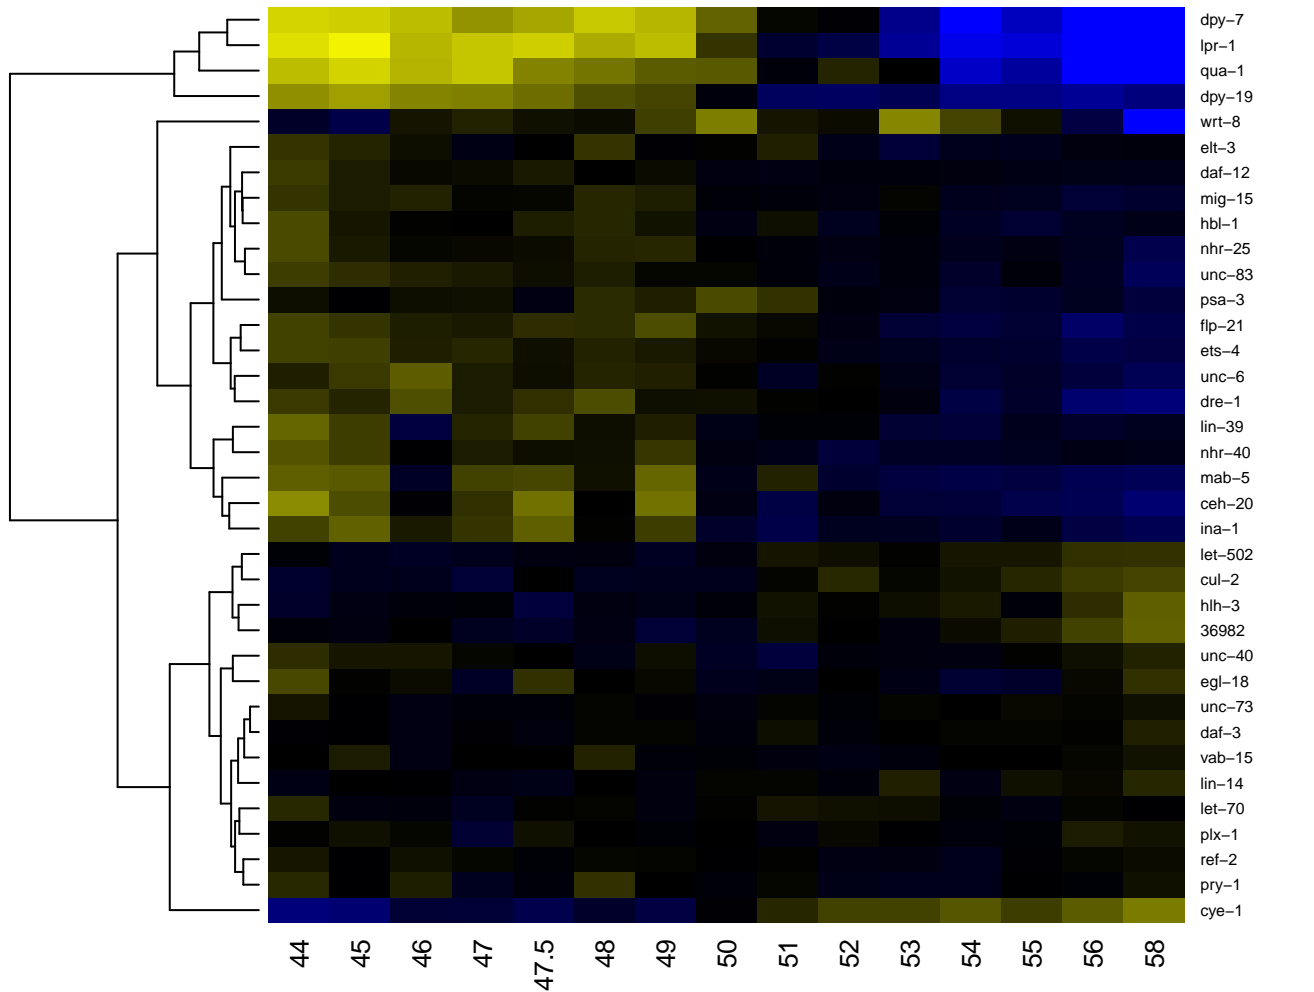

# P7.p

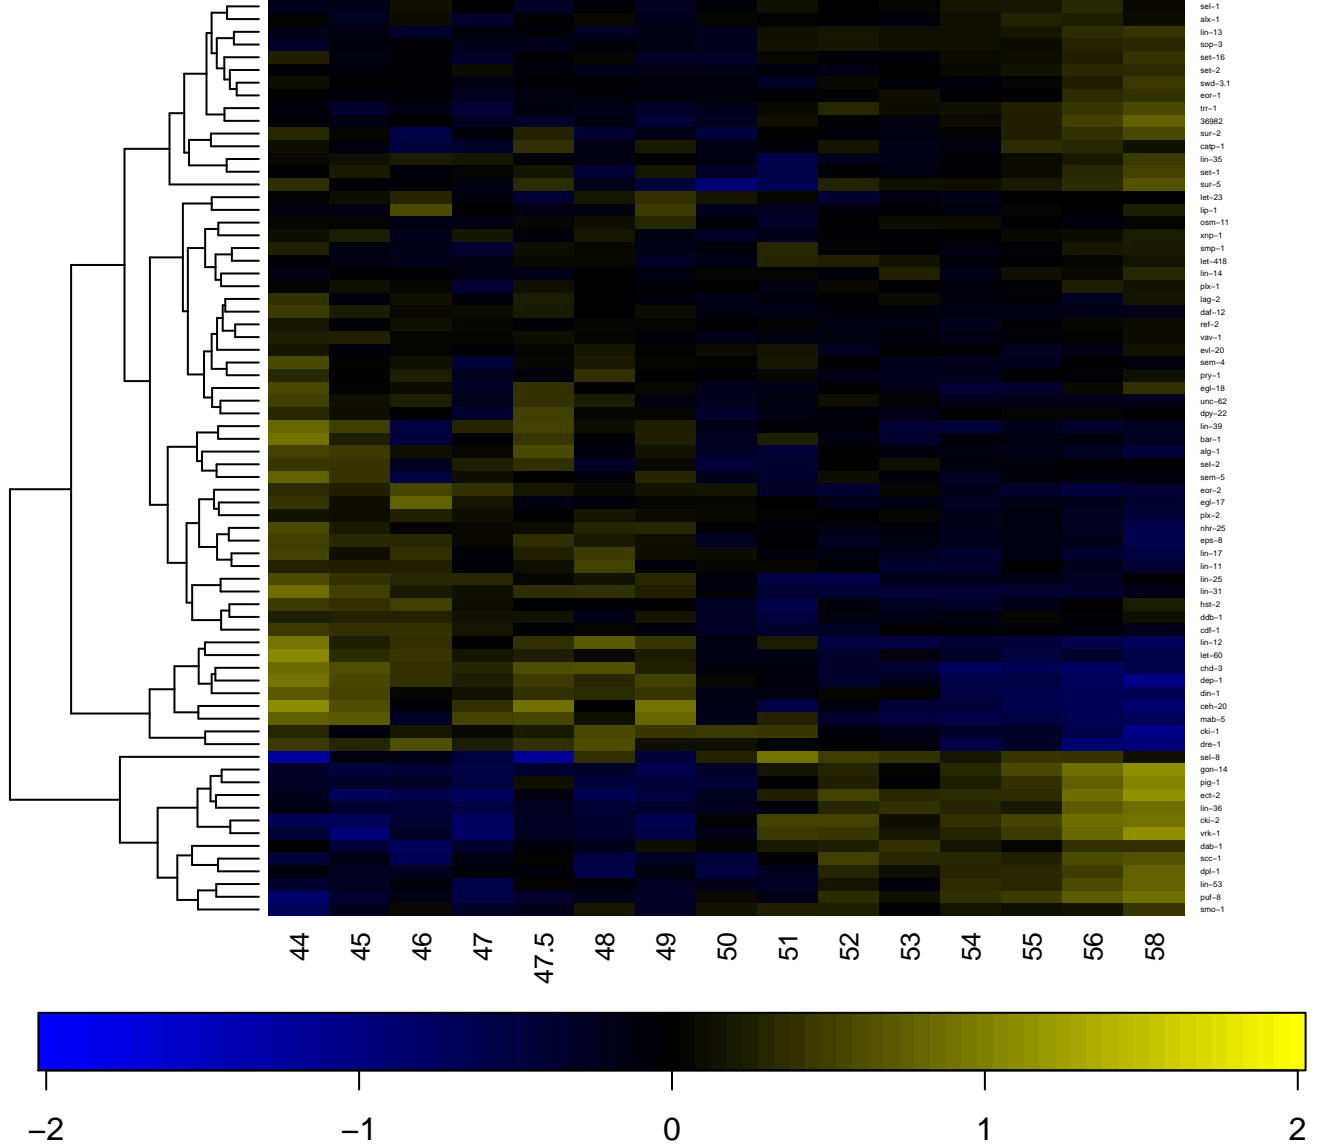

# P7.pa

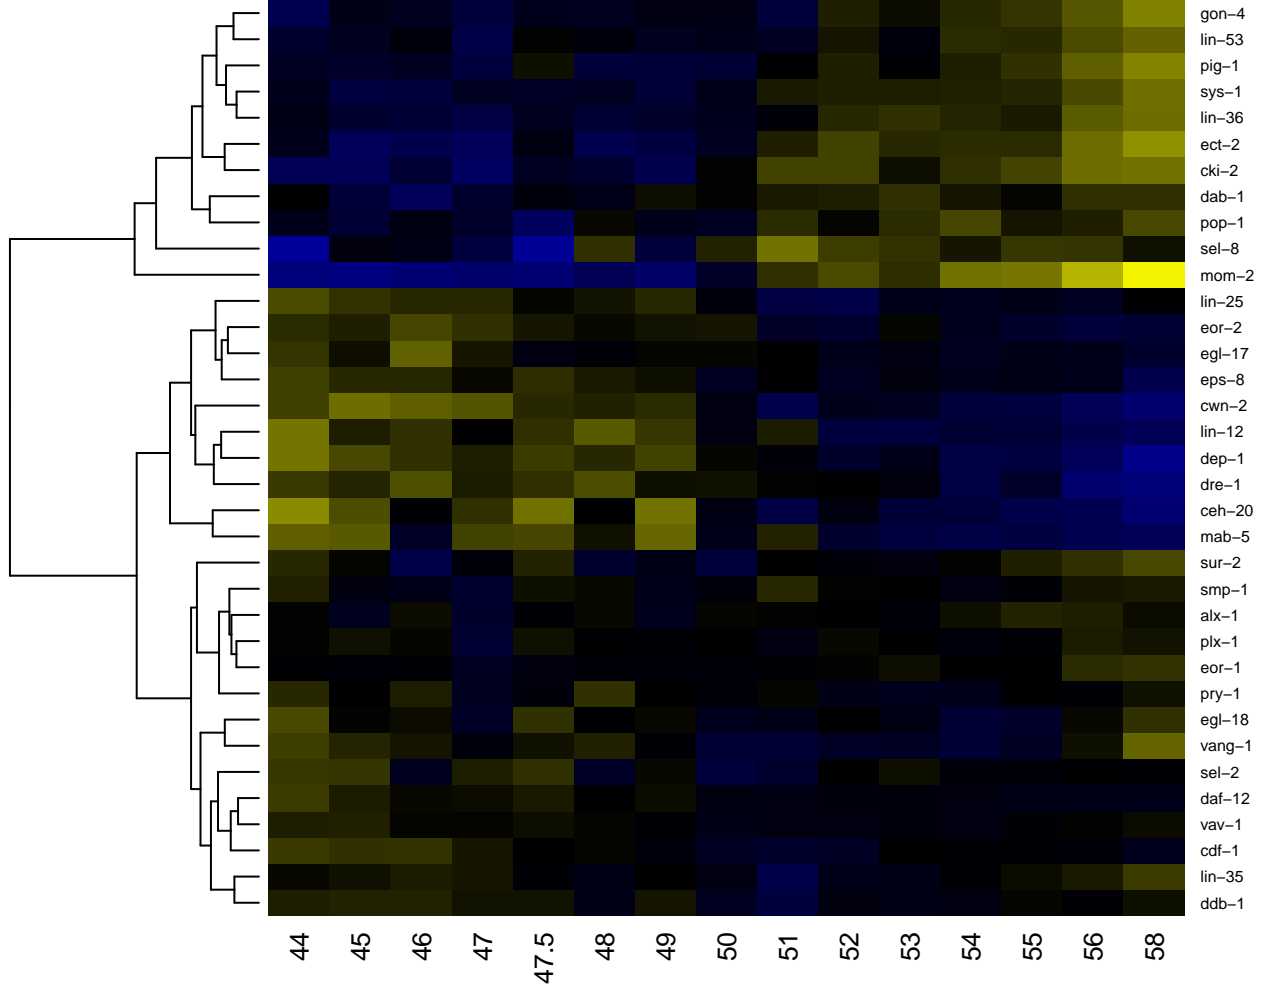



# P7.pp





# P7.ppa

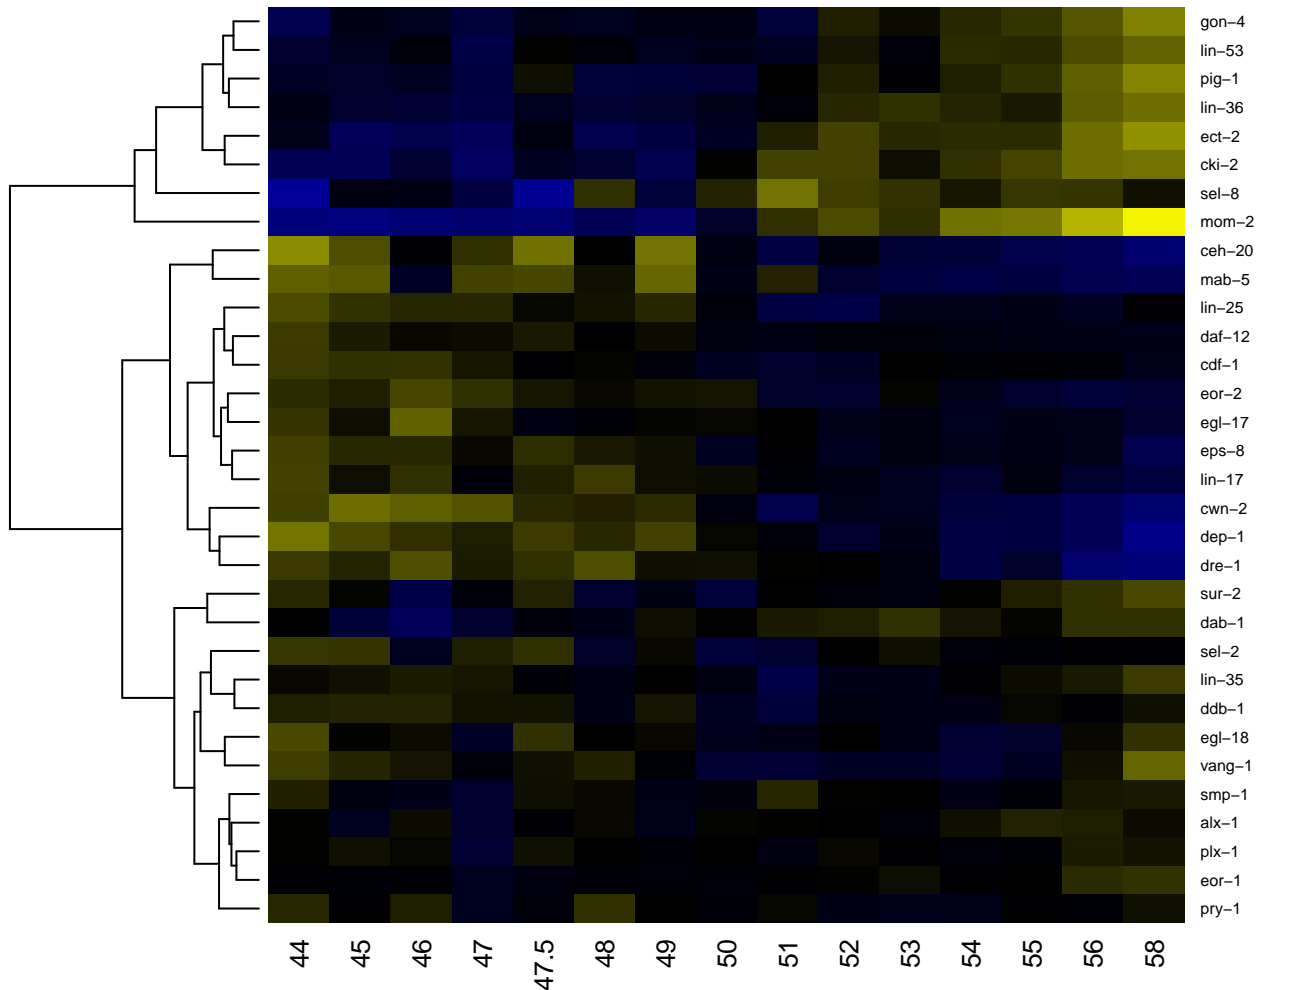

# P7.ppp

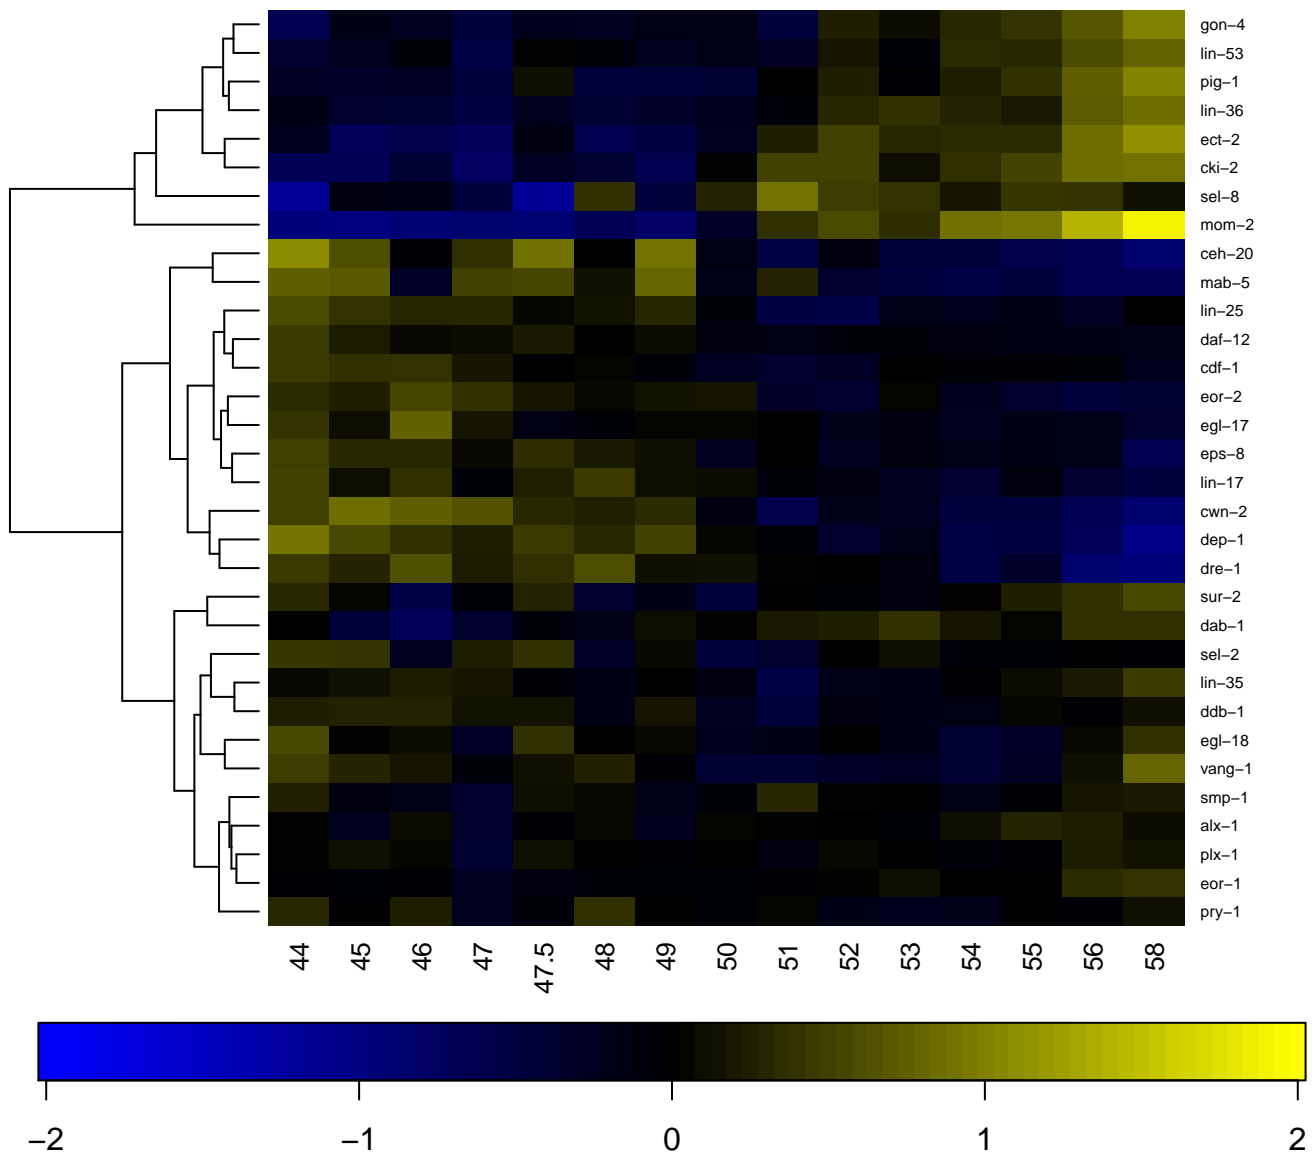

# P8

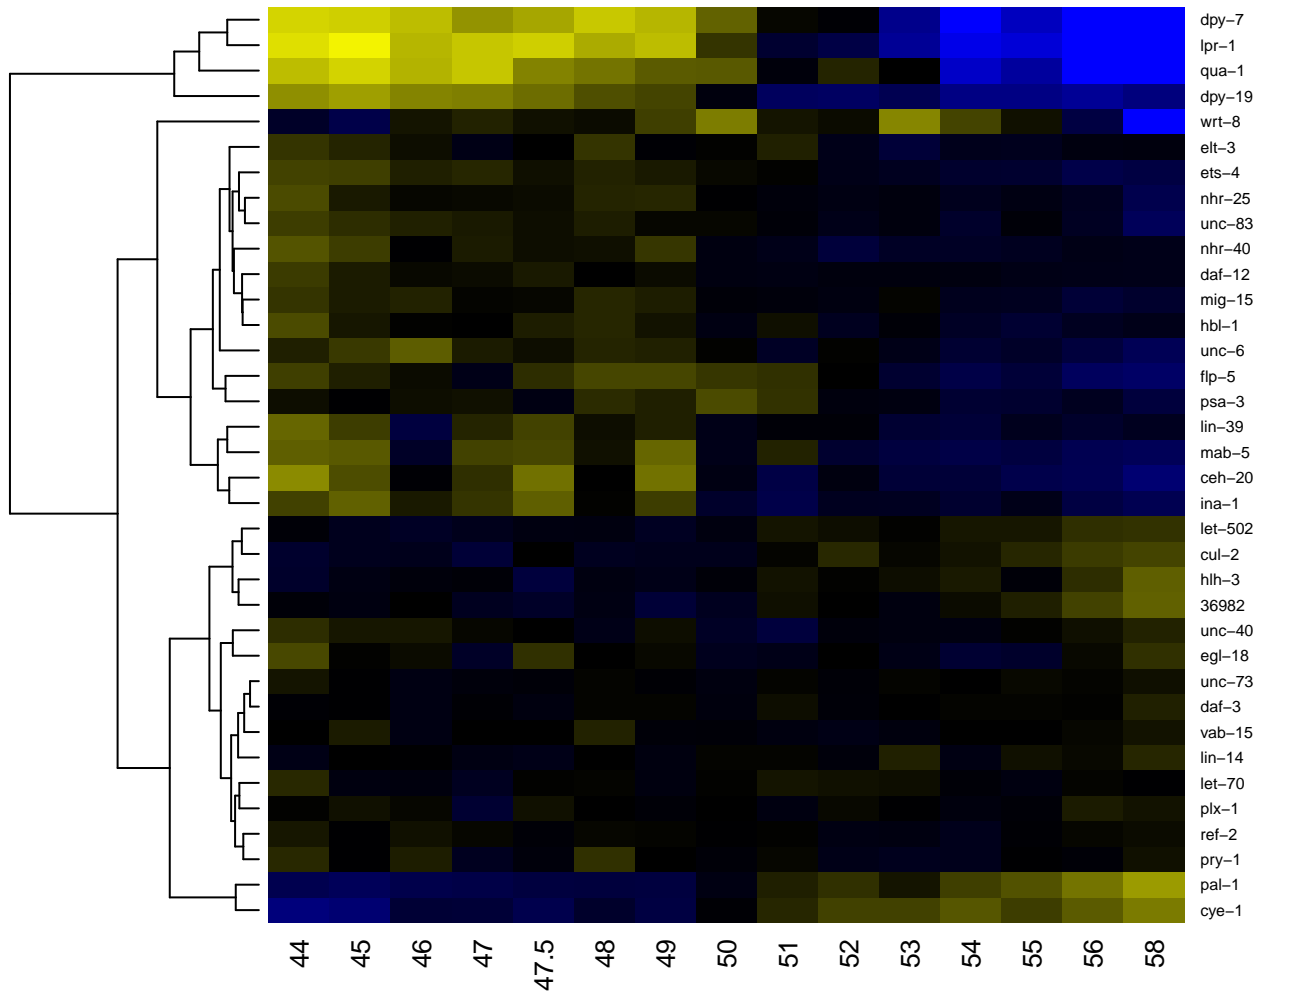

-2

-1

0

1

2

# P8.p

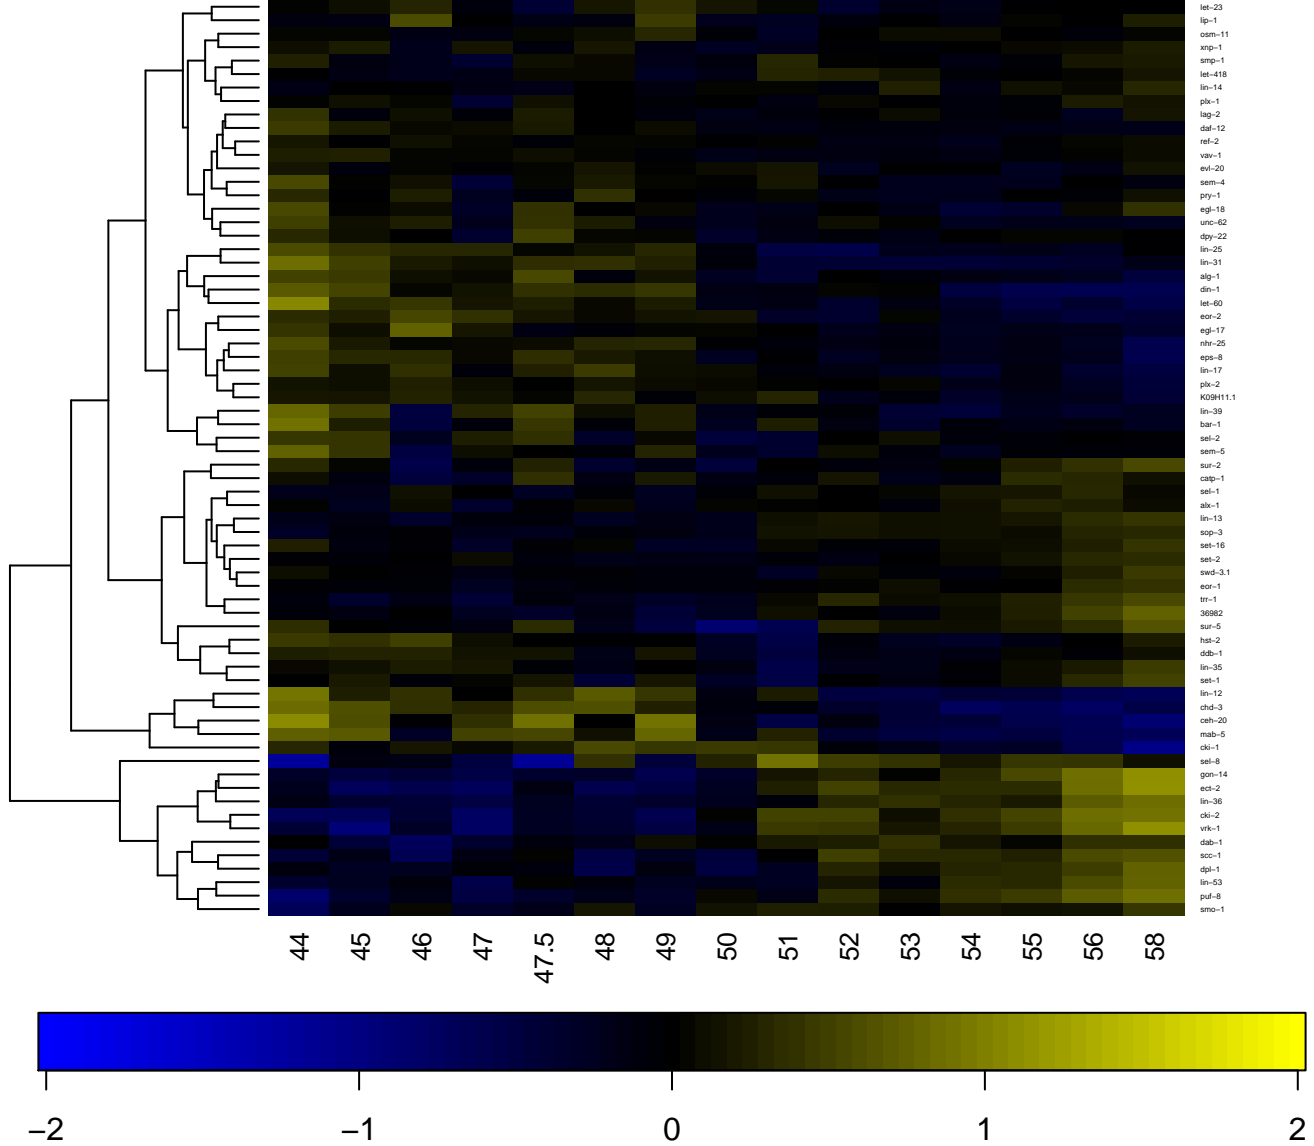

# P9

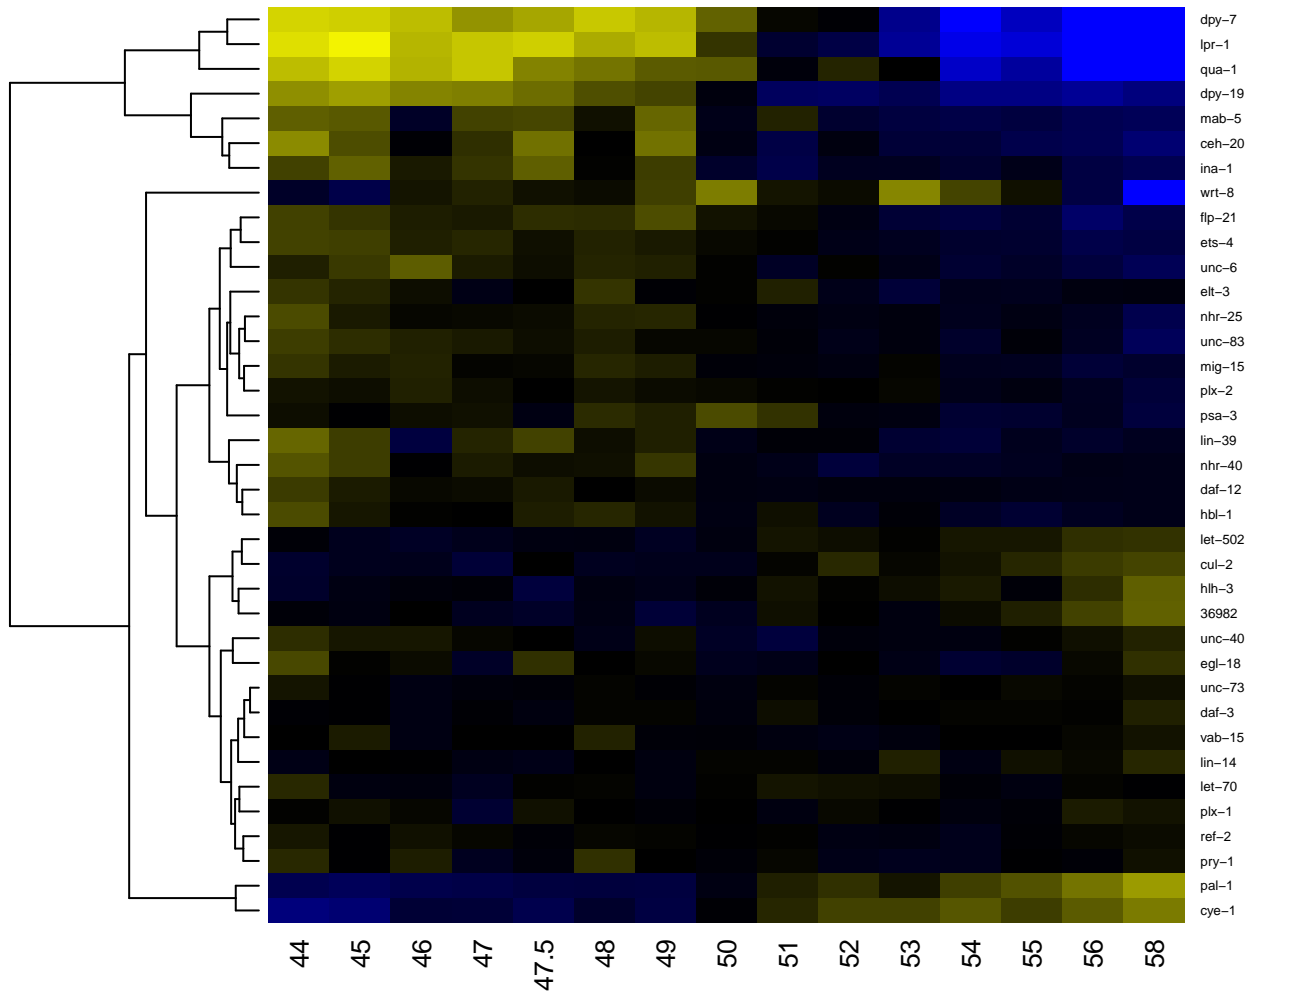

# P9.p

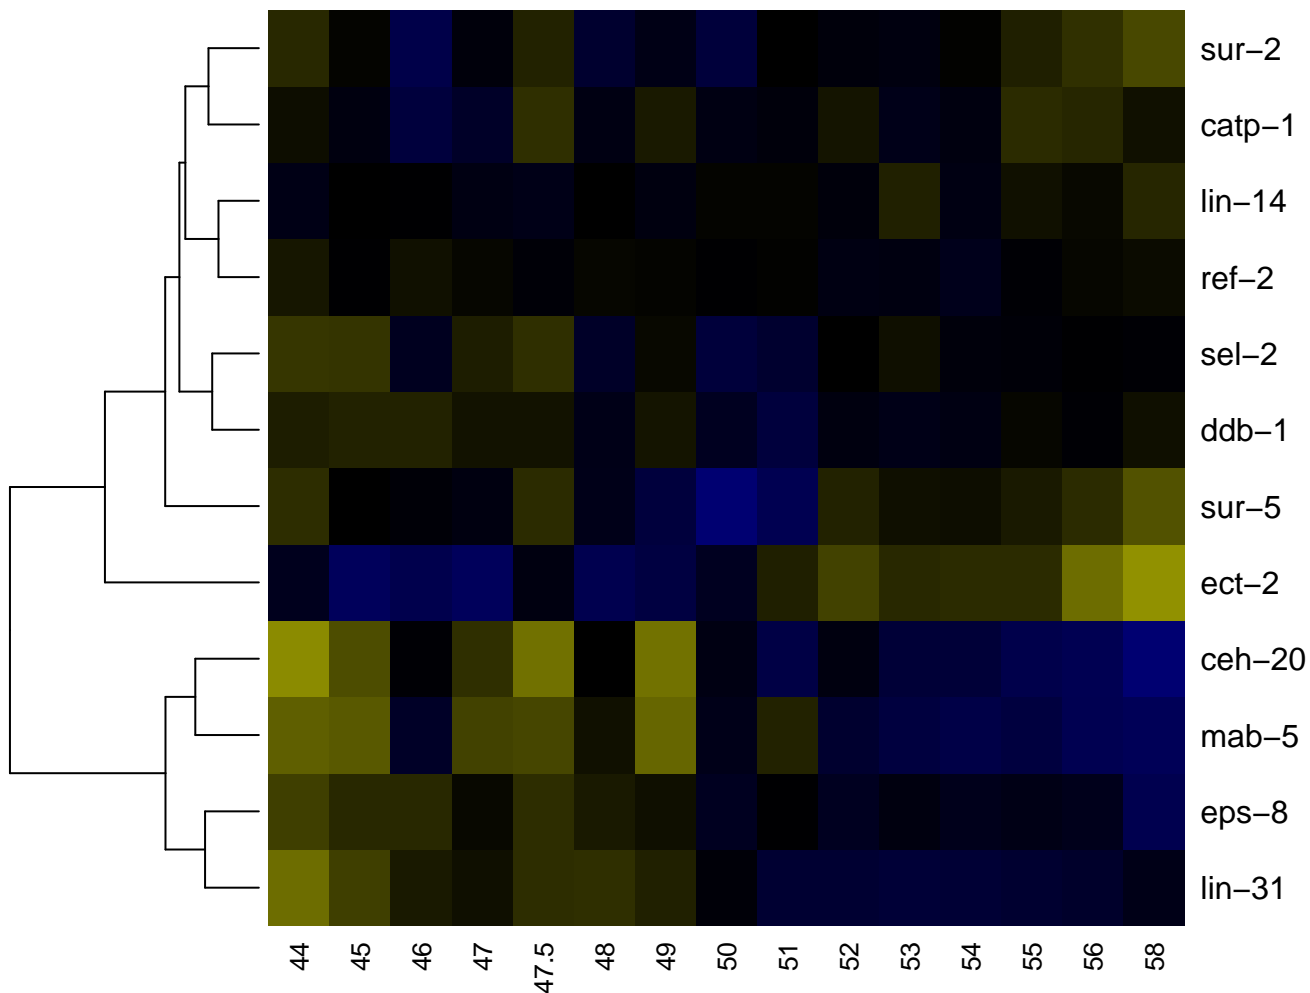

# PCAL

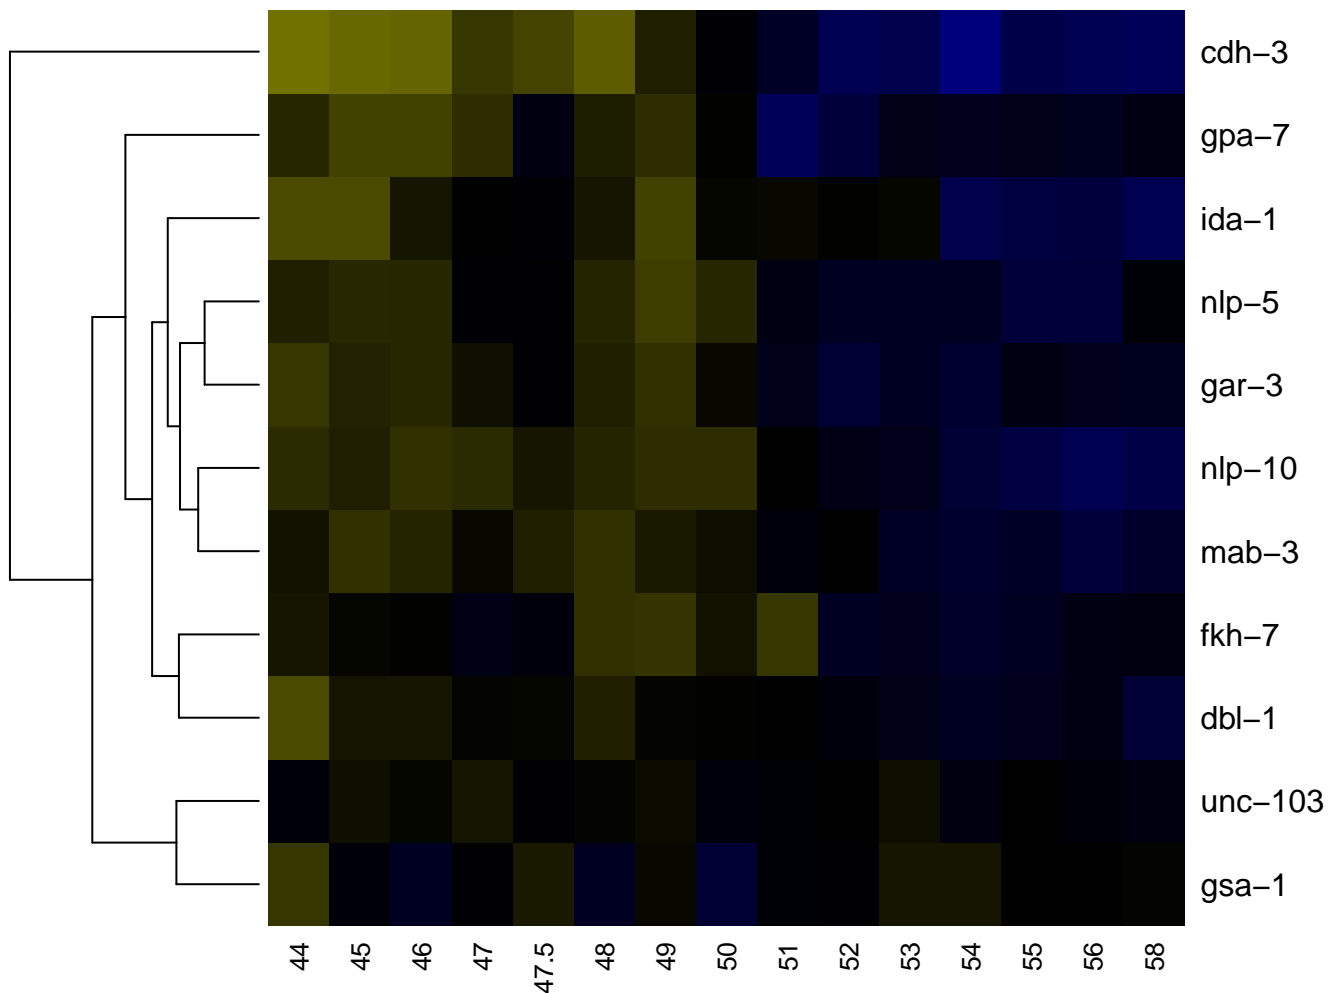

# PCAR

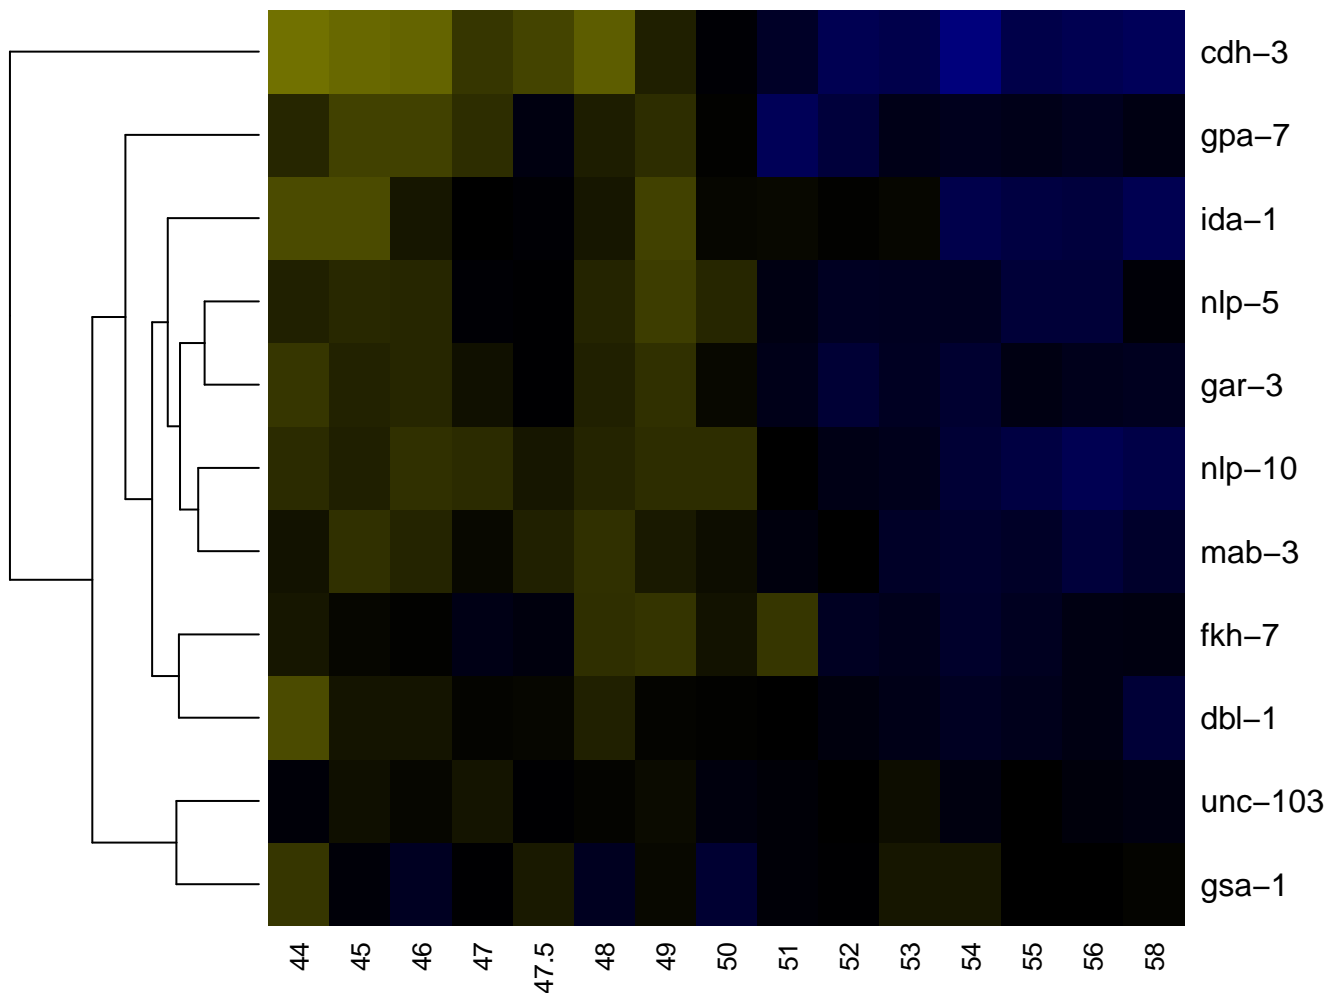



# PCBL

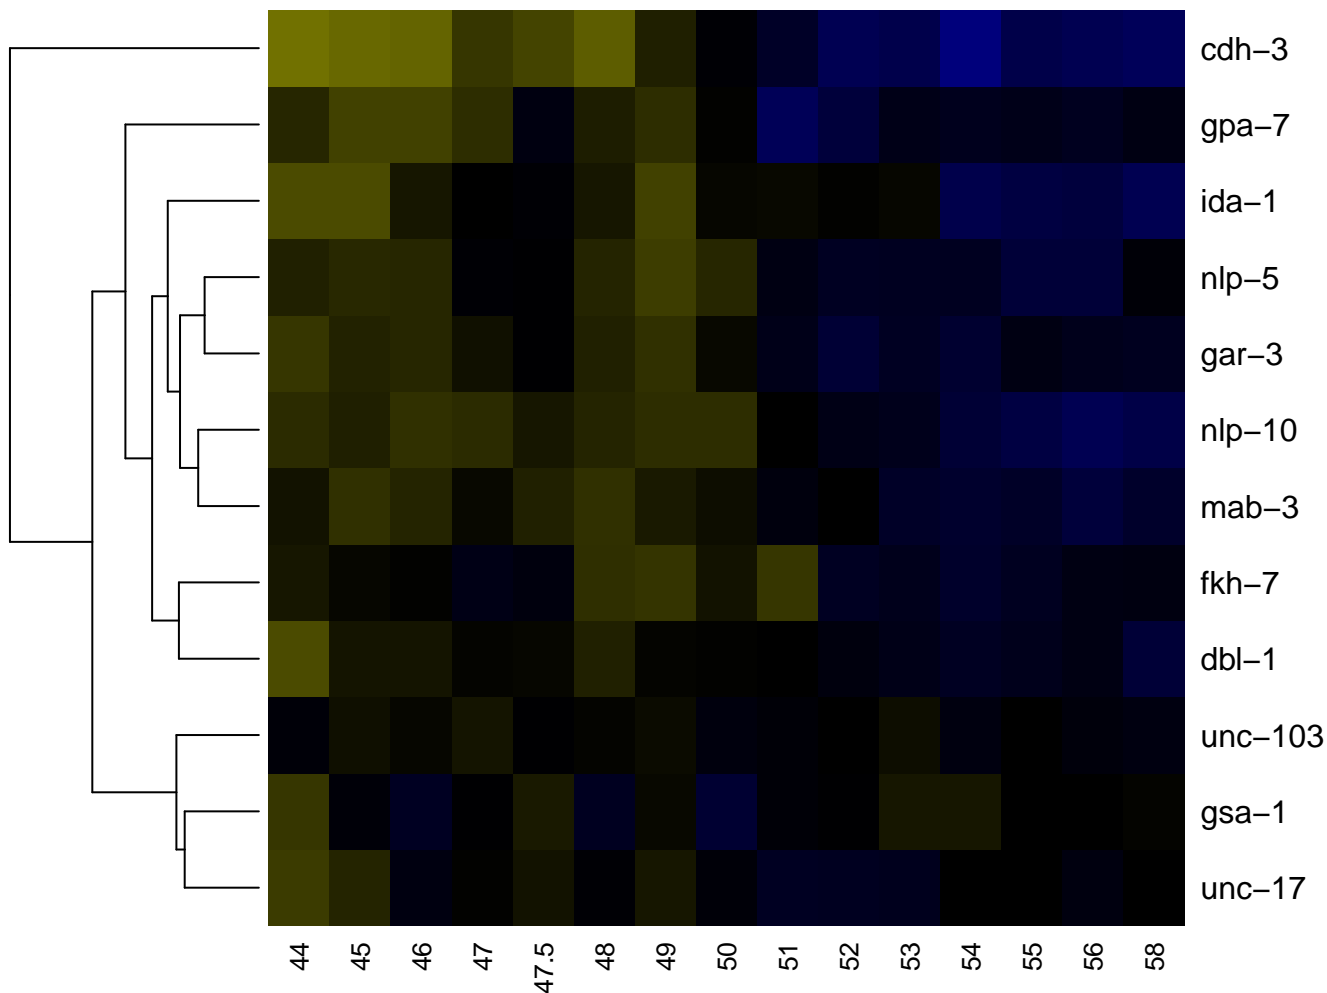

# PCBR



# PCCL

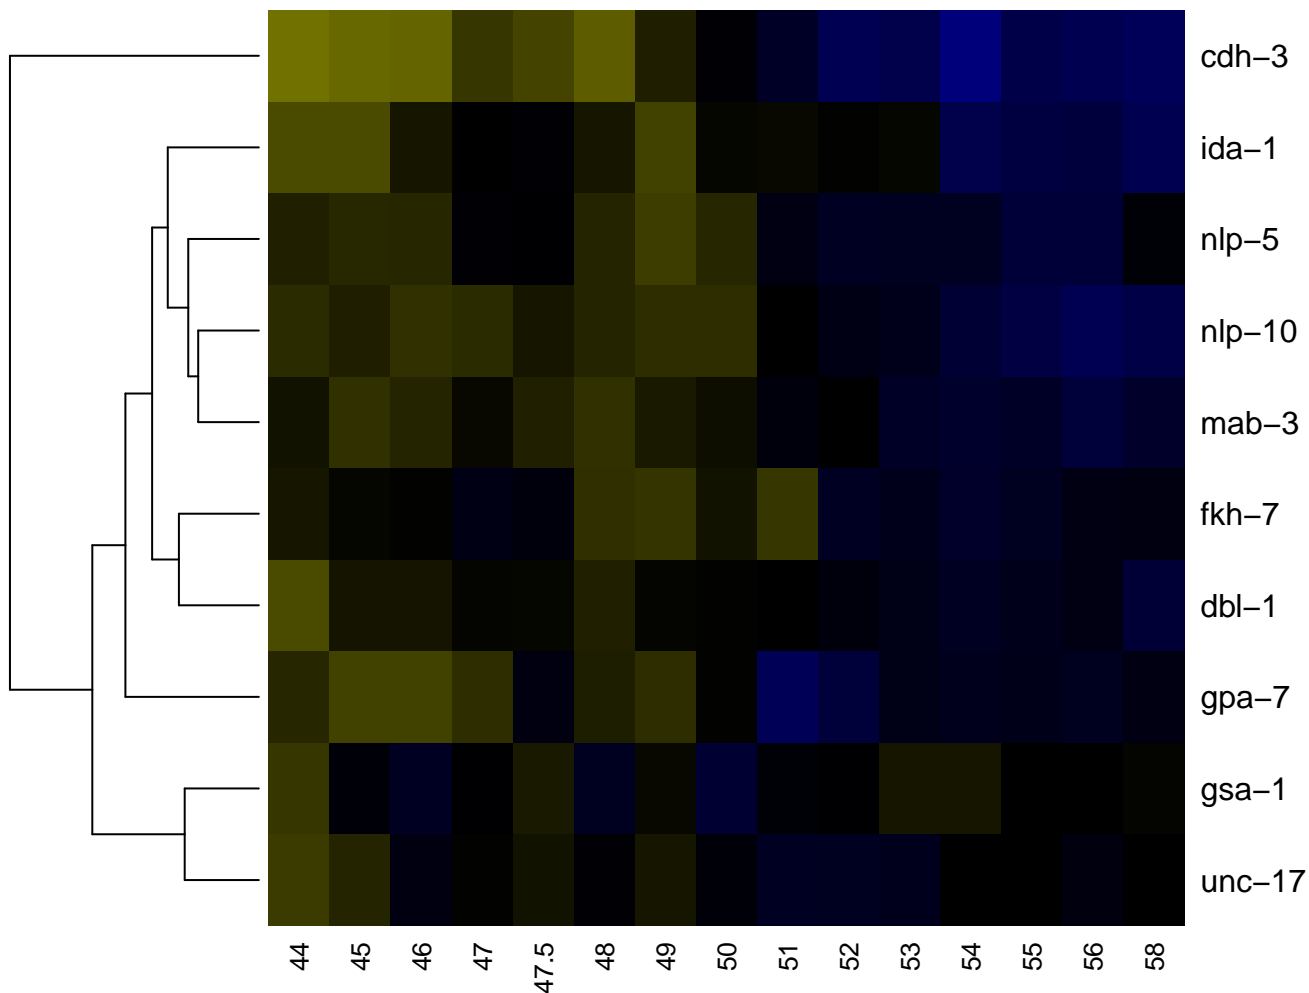

# PCCR



# PDA

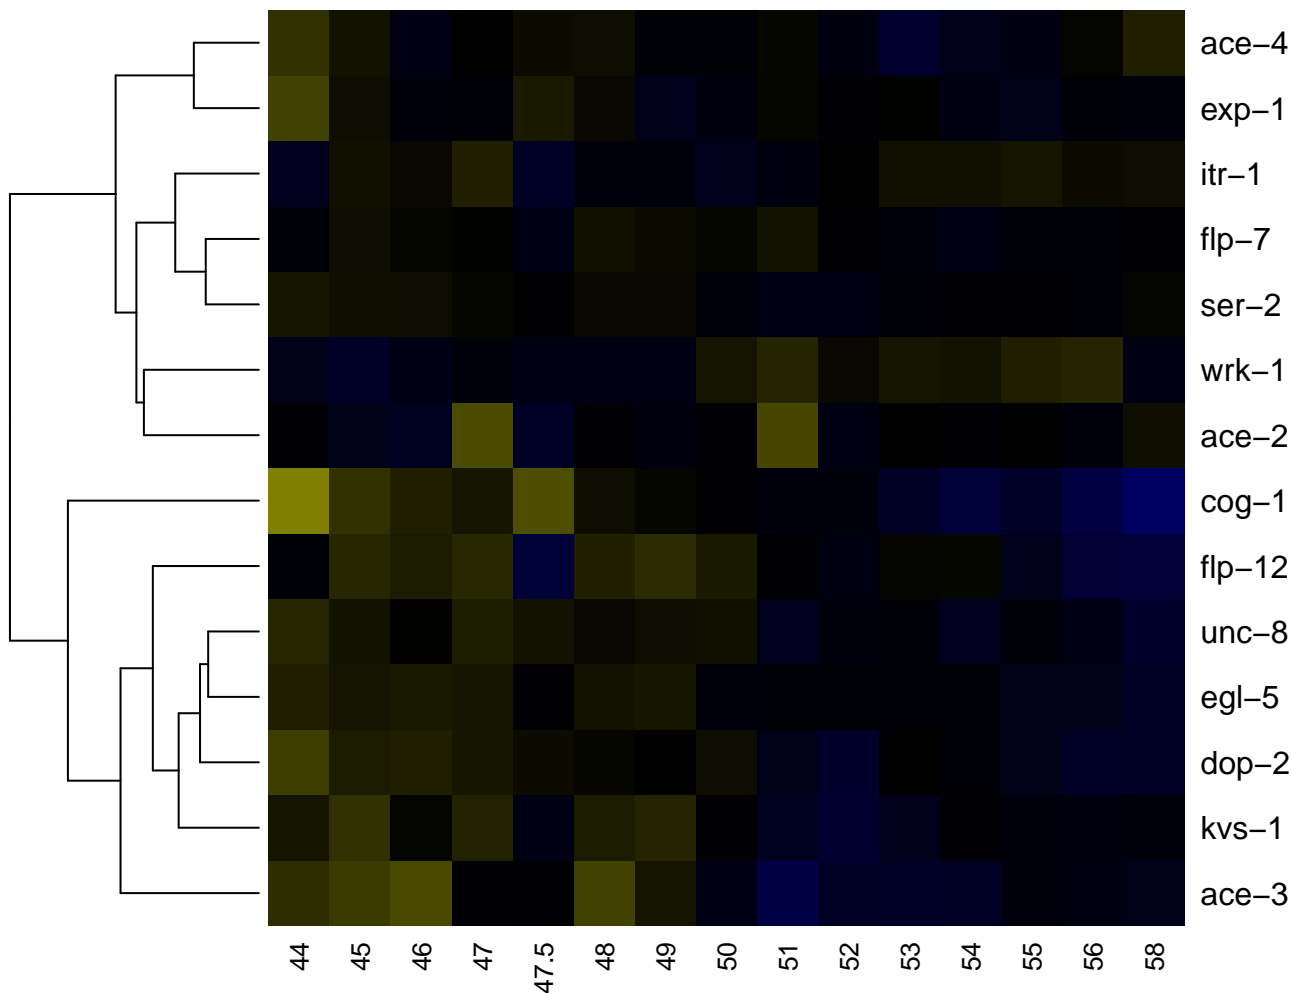

# PDC

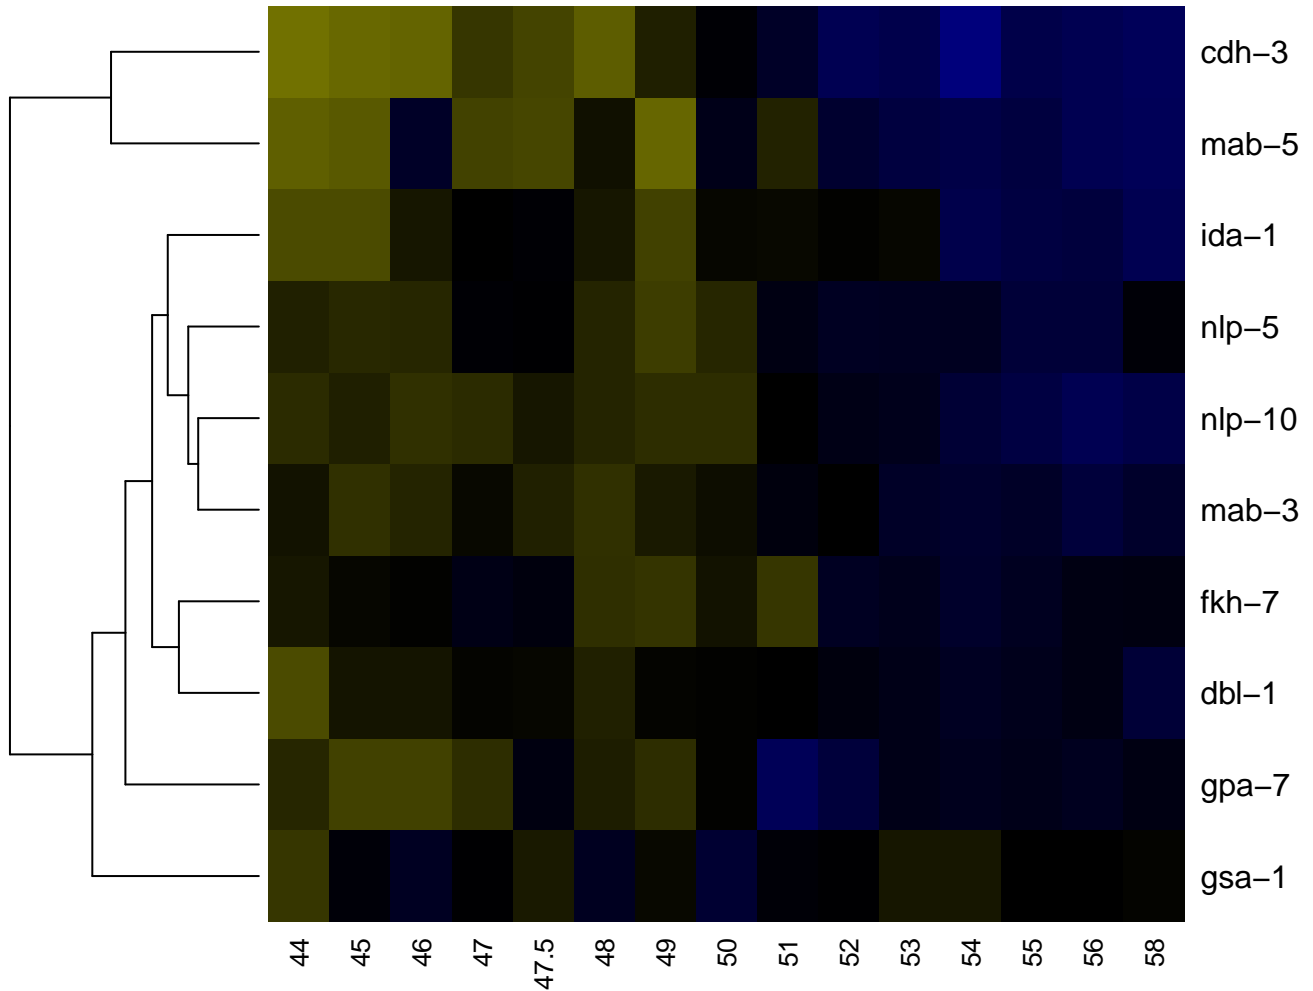



# PDER

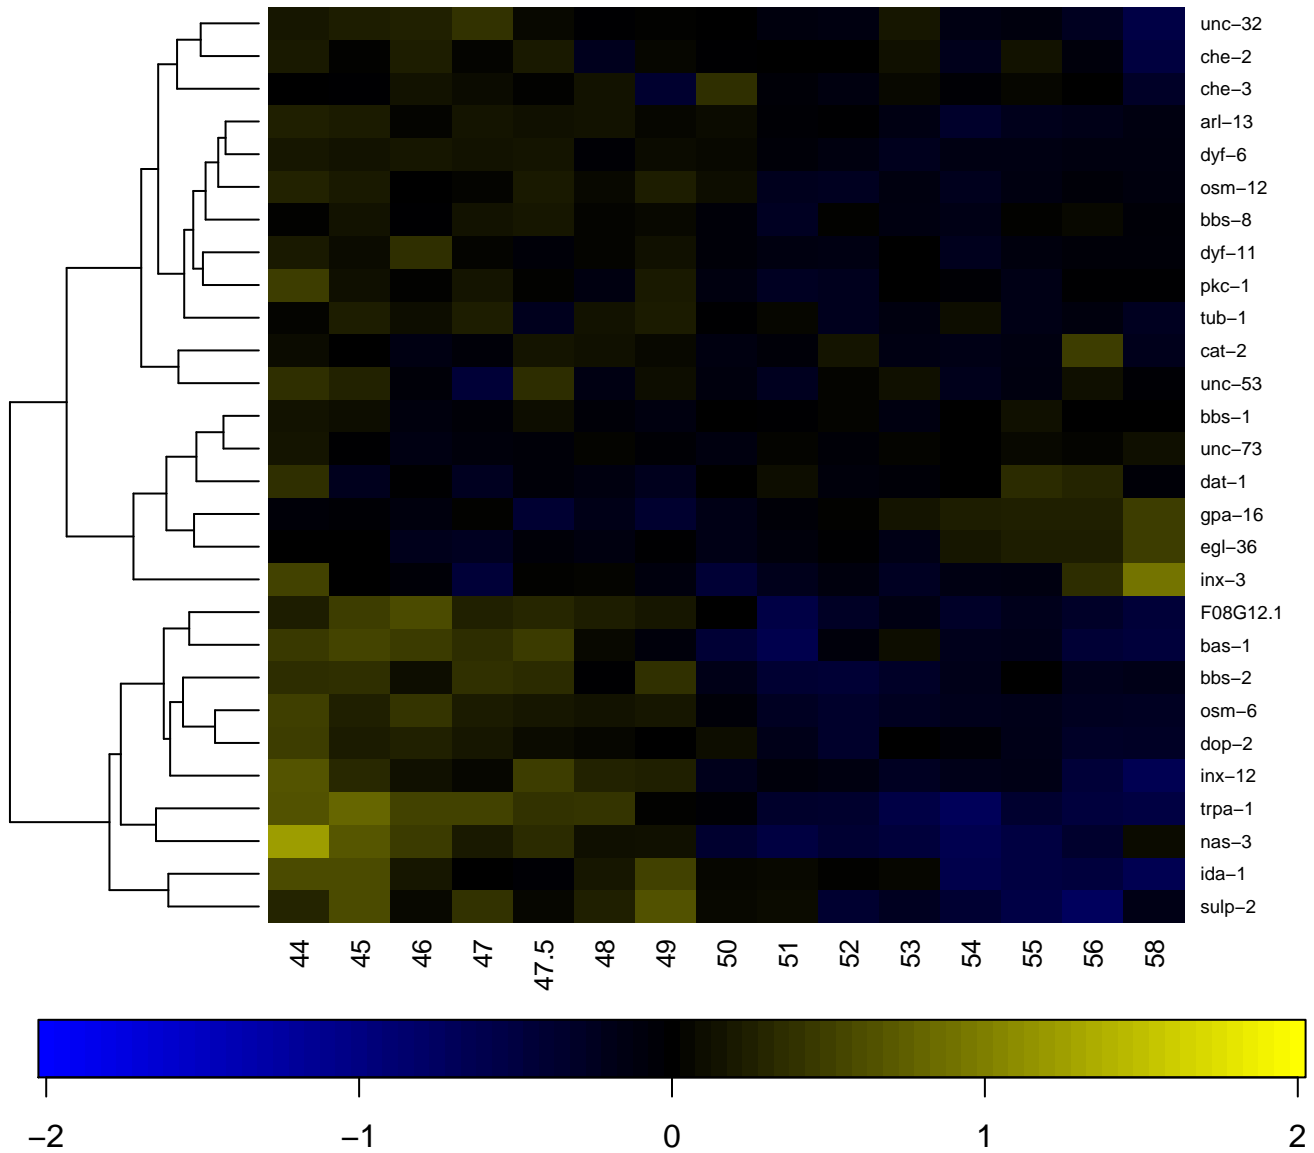



# PDEsol

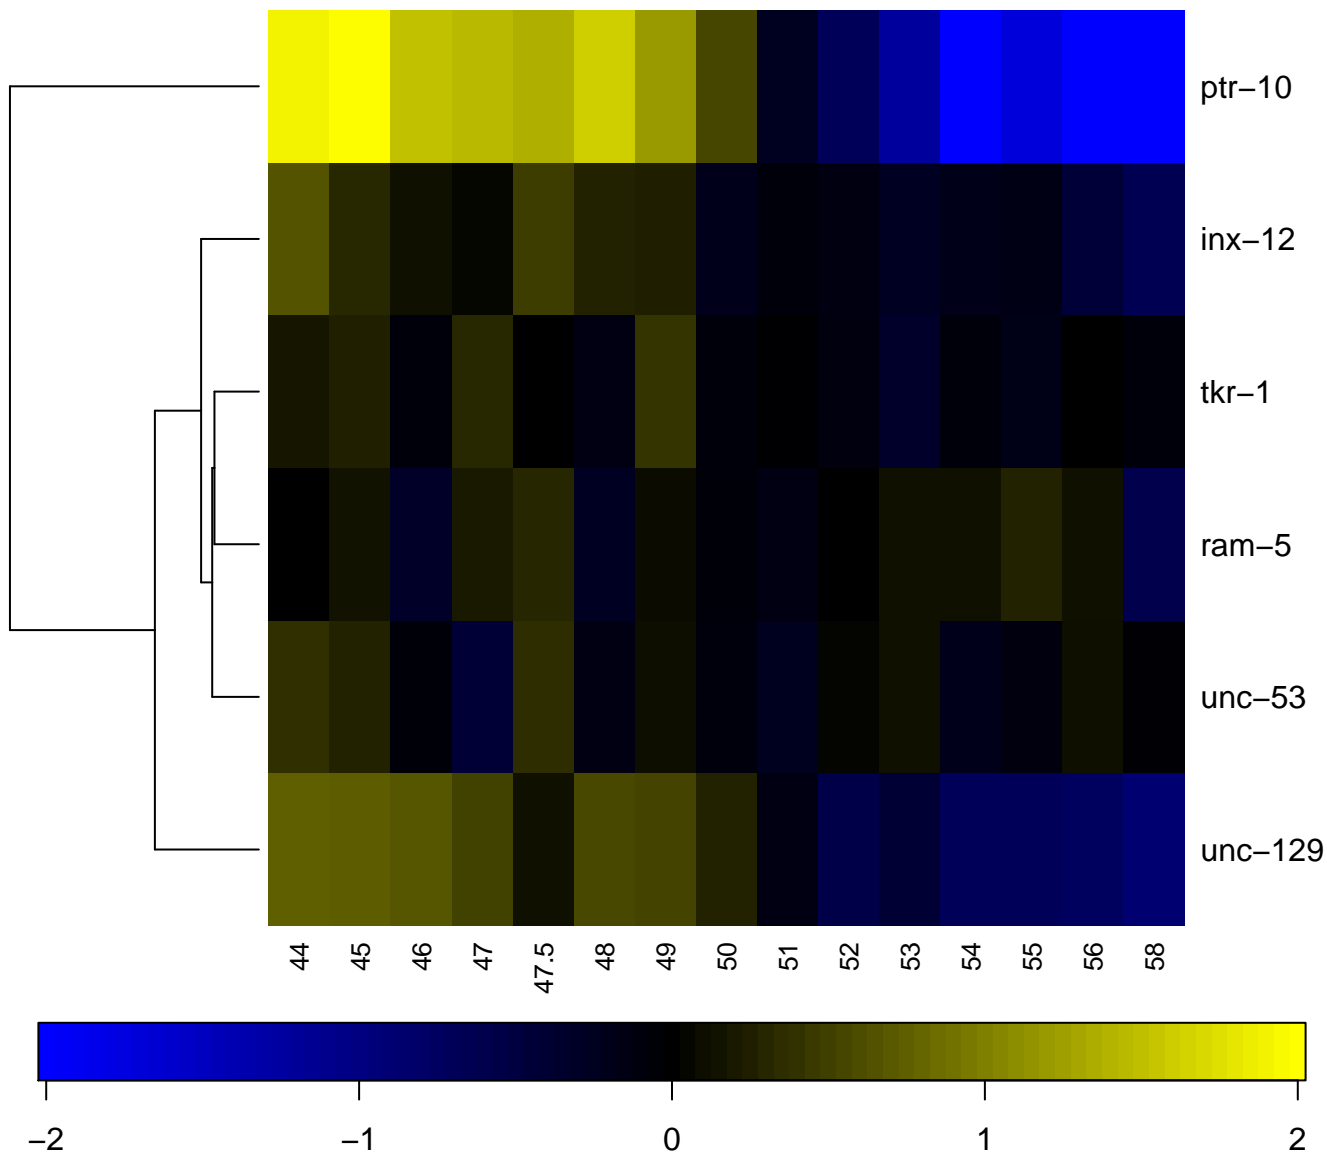

# PDEsoR

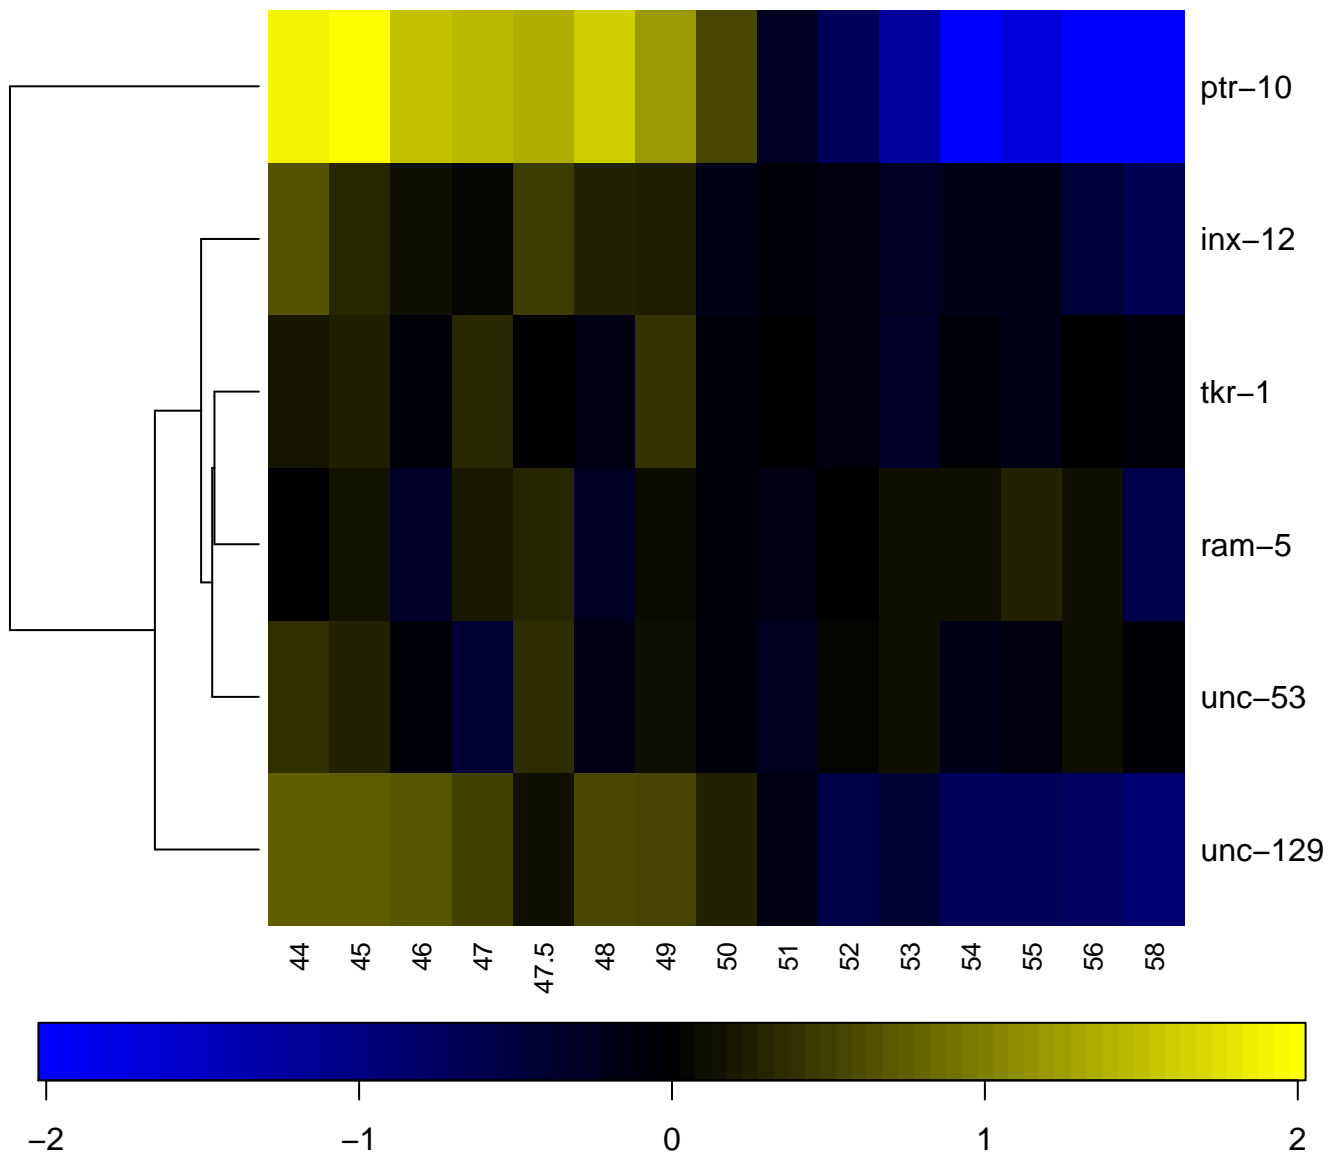

# PGA



# PHAL

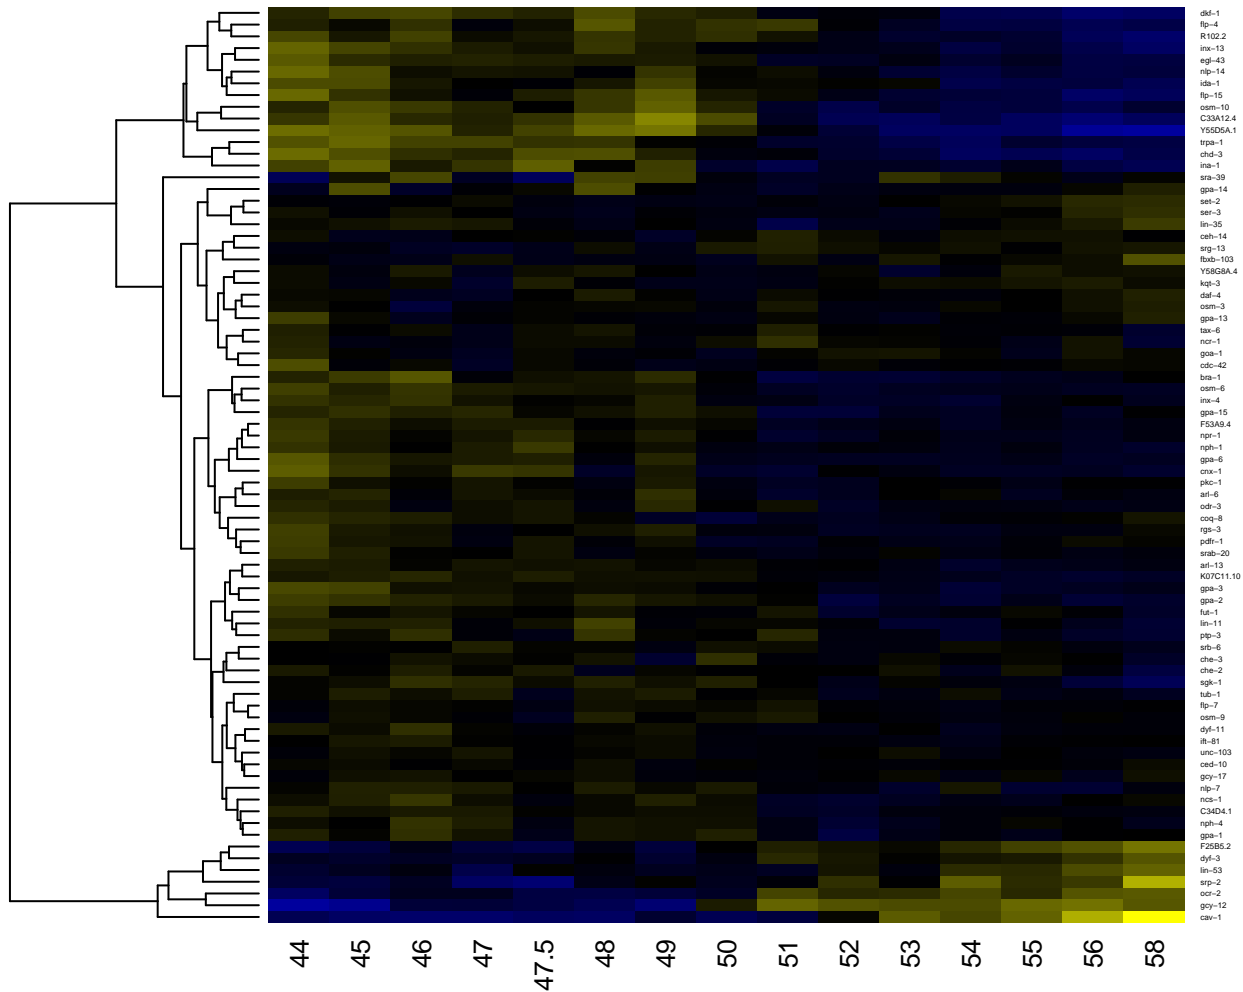

# PHAR

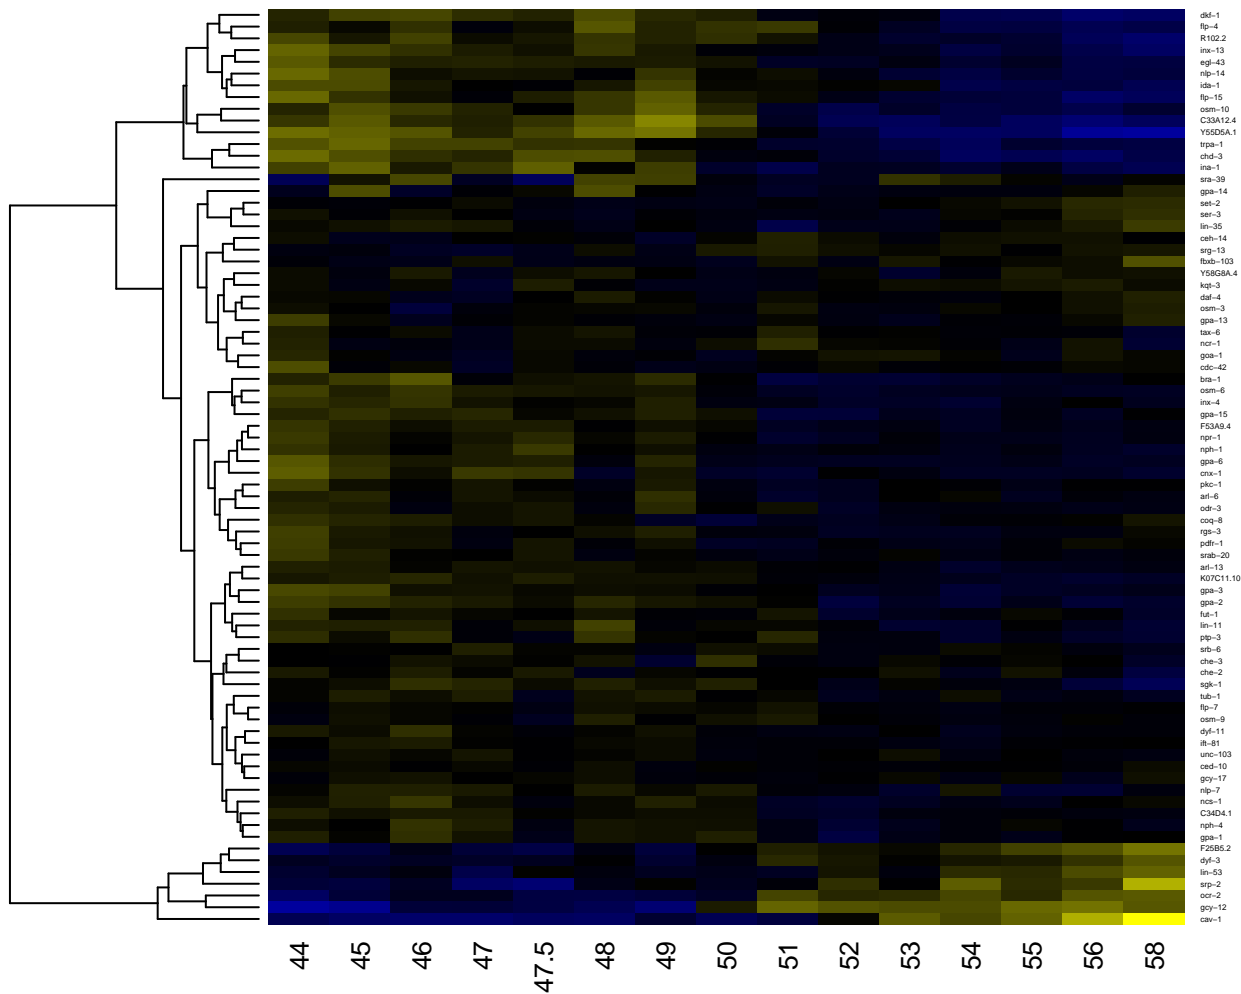



# pharyngeal cell

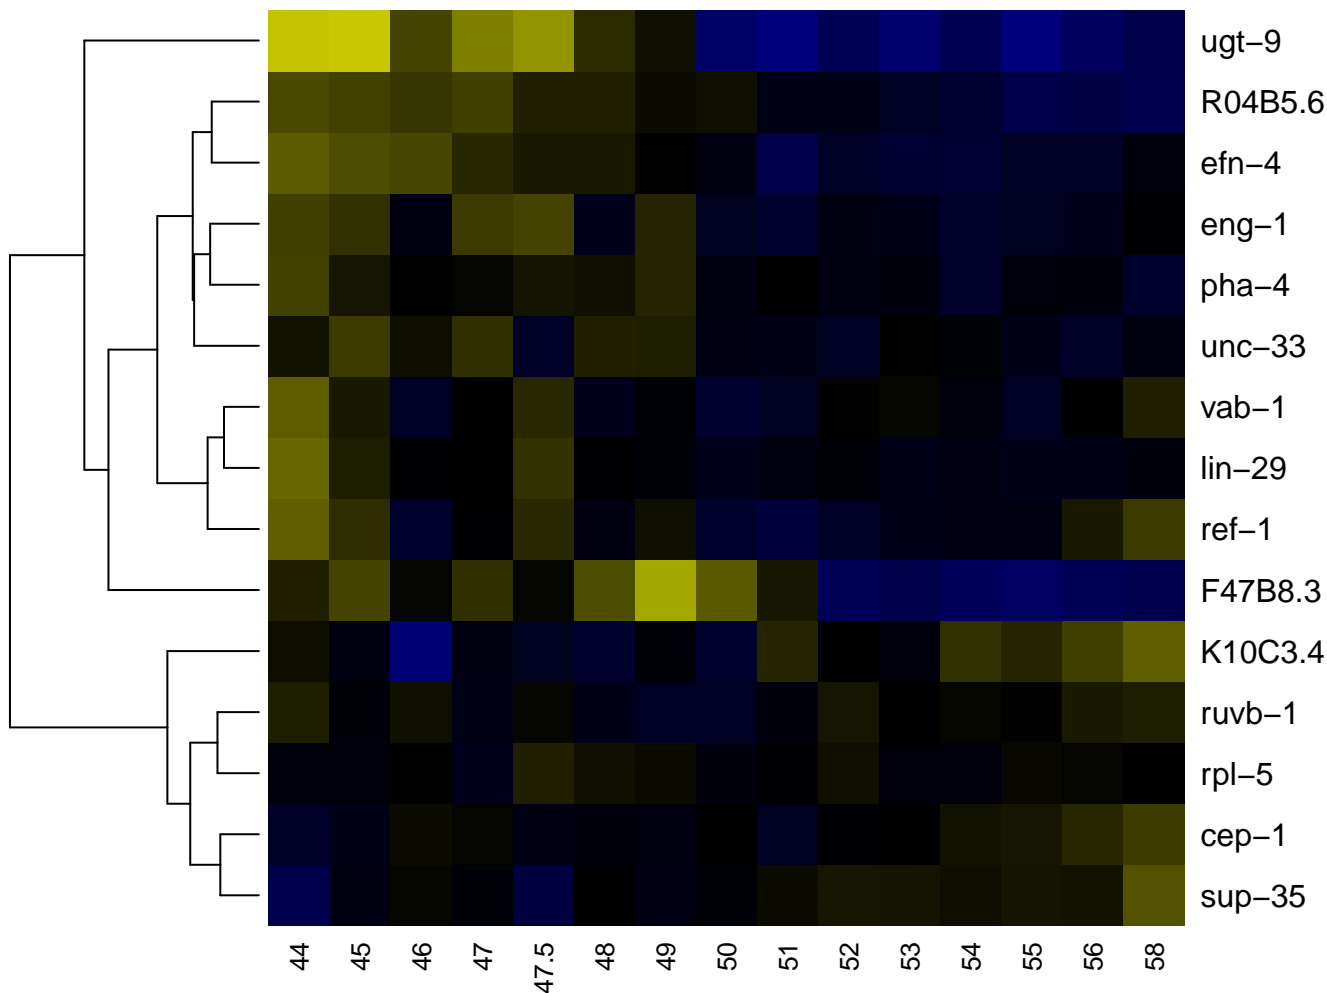





# Pharyngeal gland cell

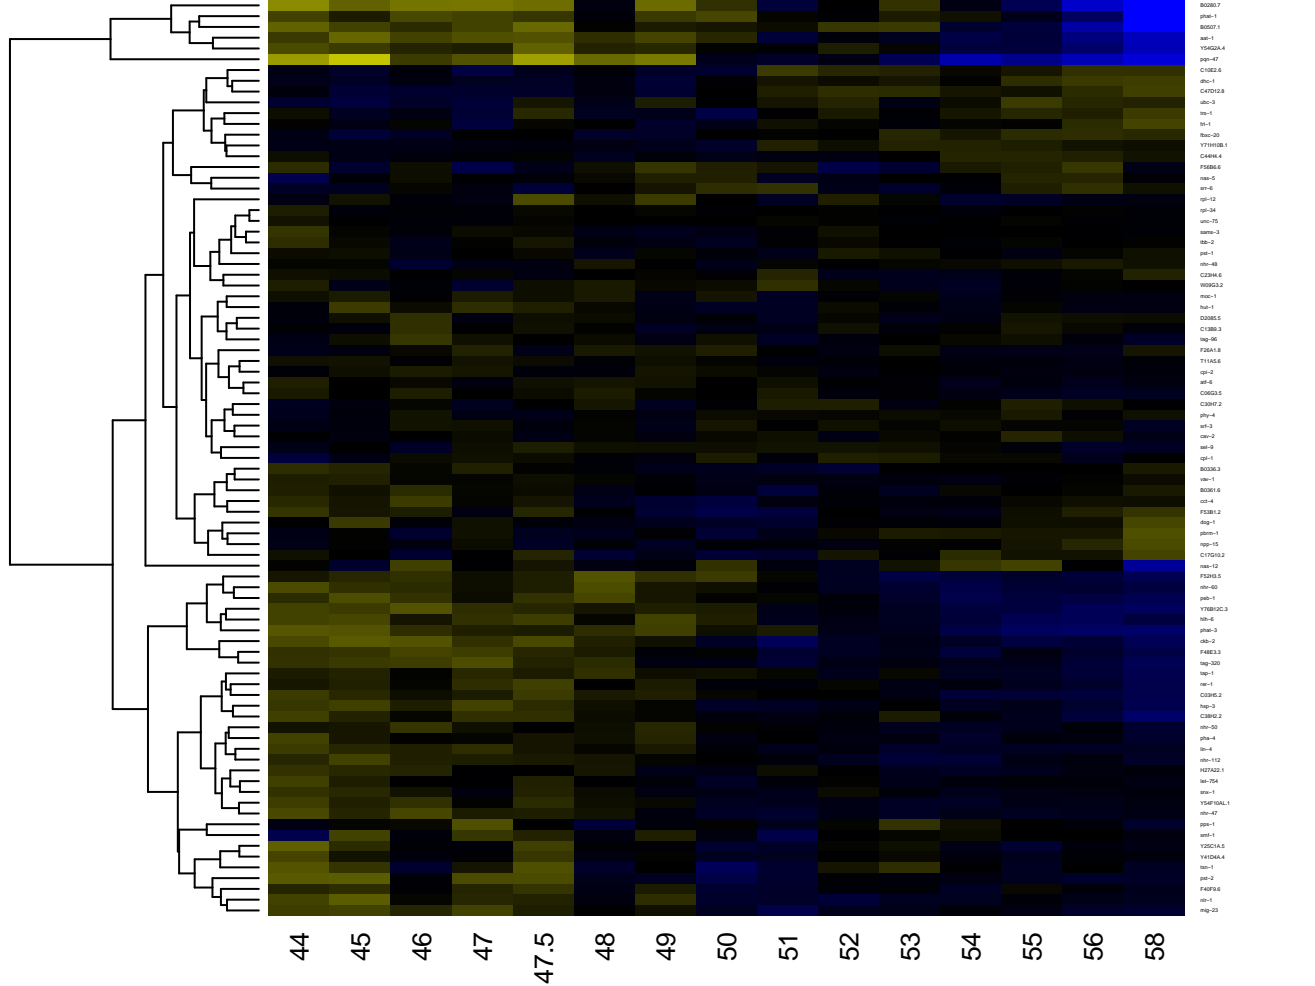

# pharyngeal muscle cell

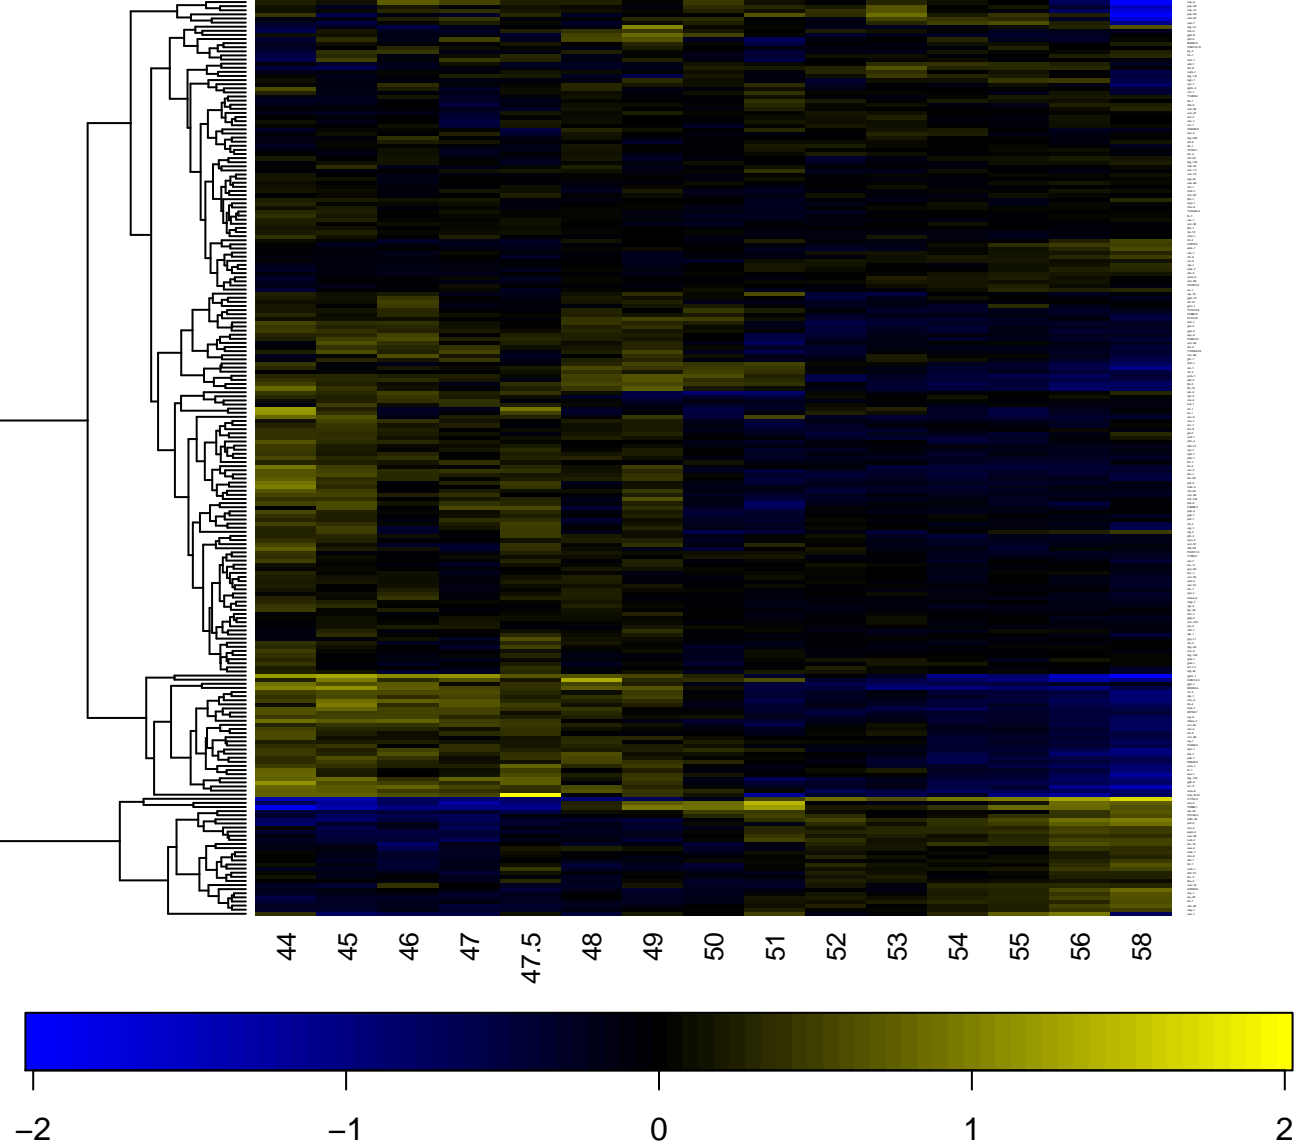



# pharynx

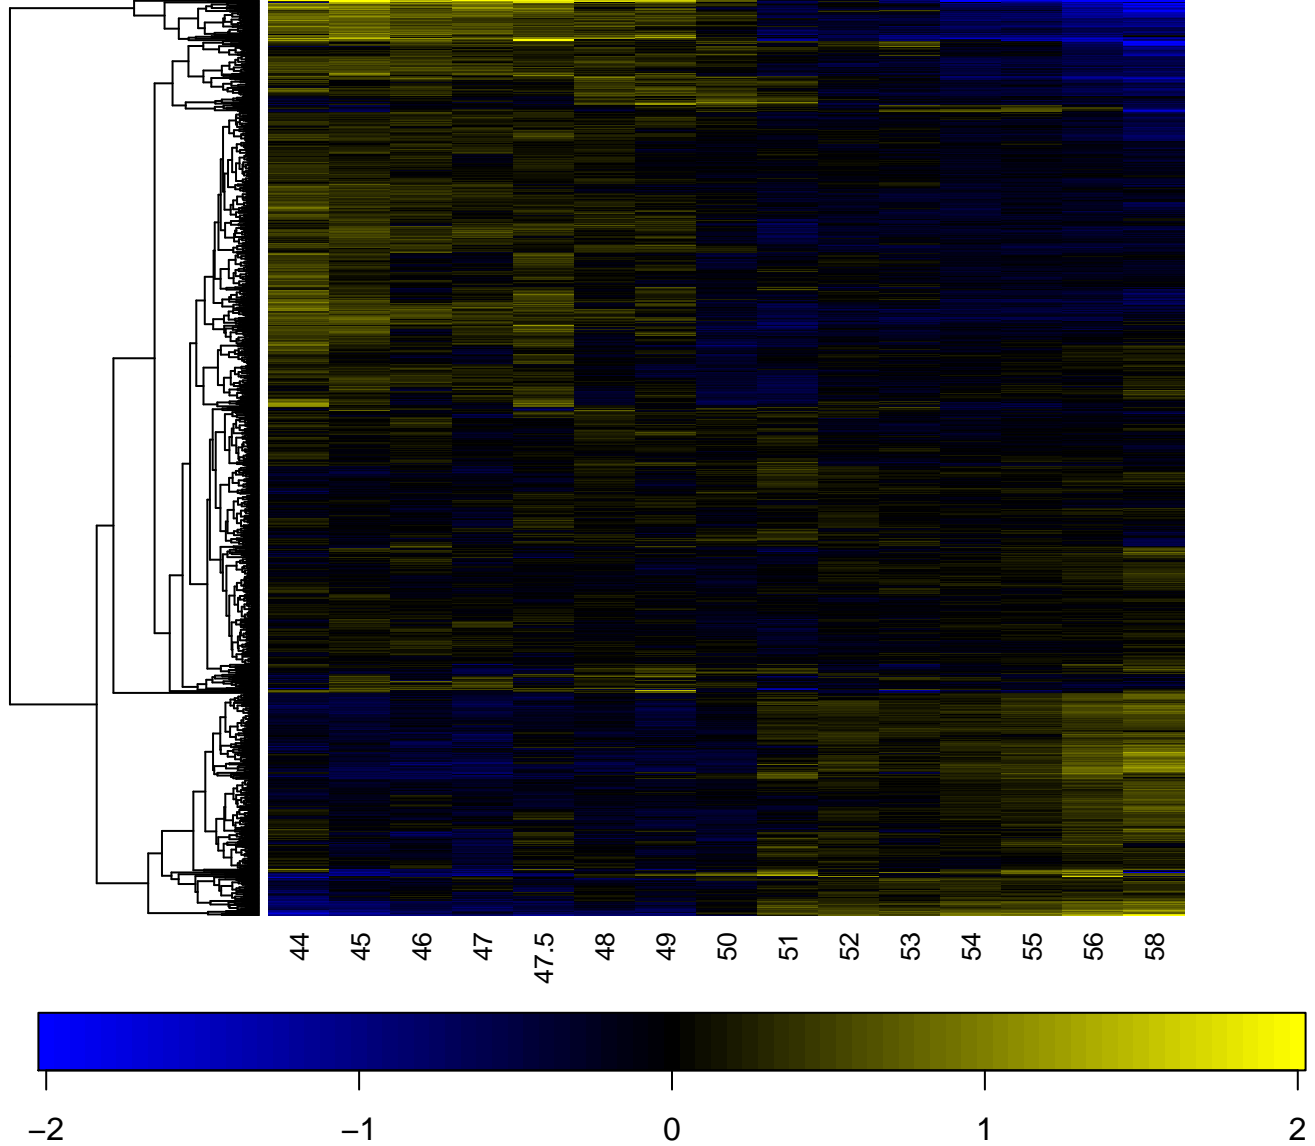

# phasmid neuron

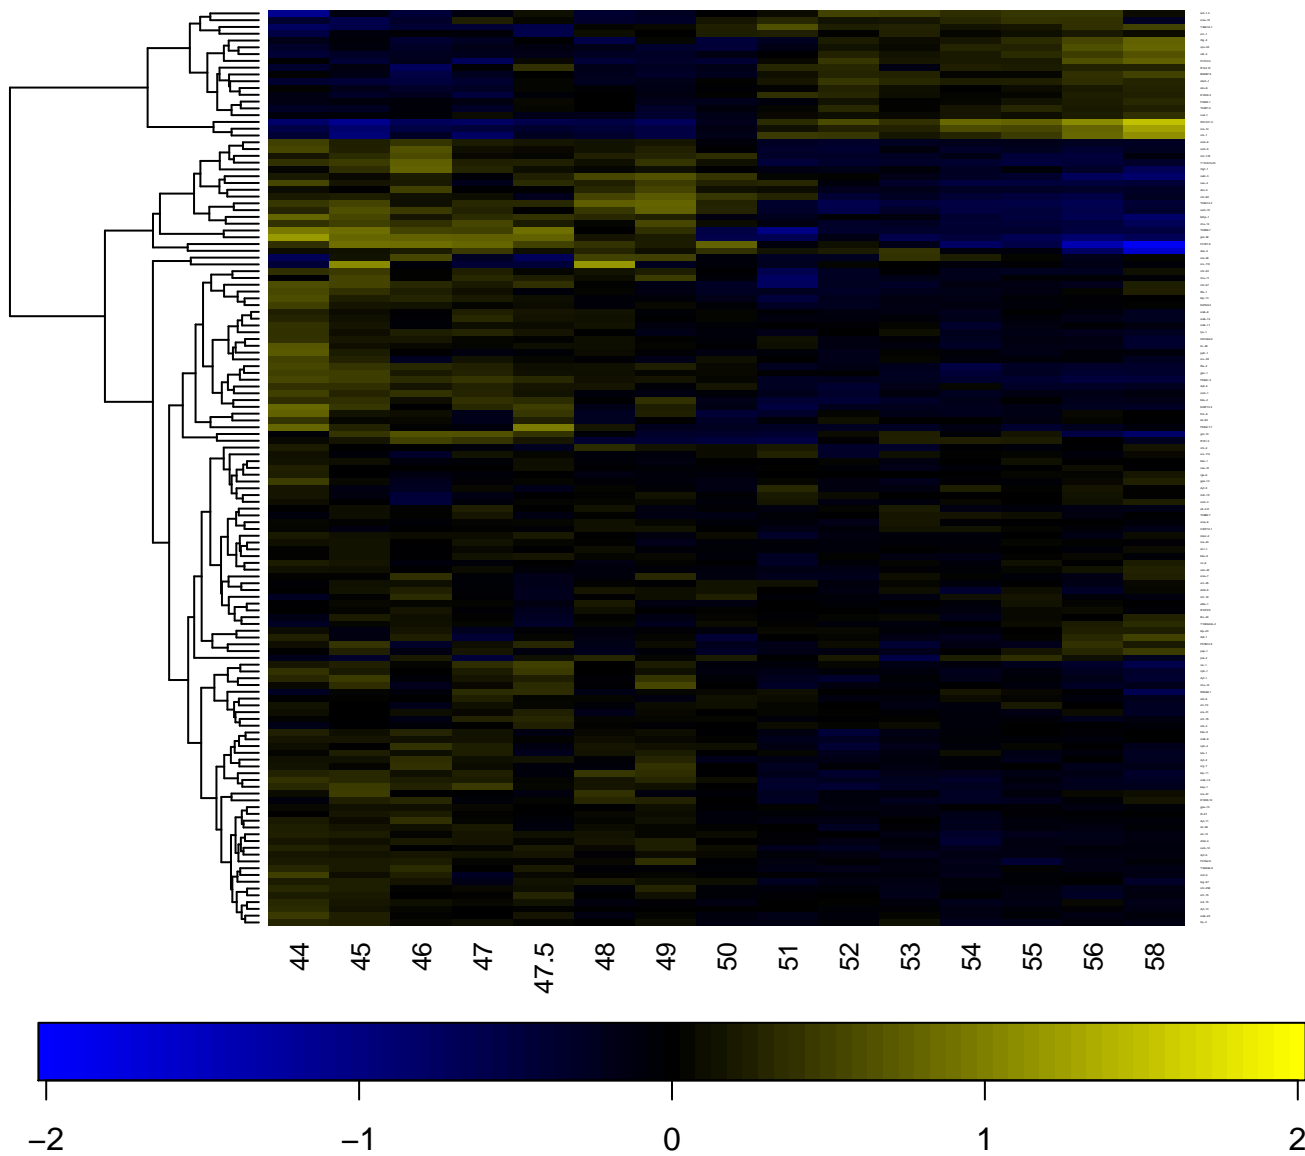

# PHBL

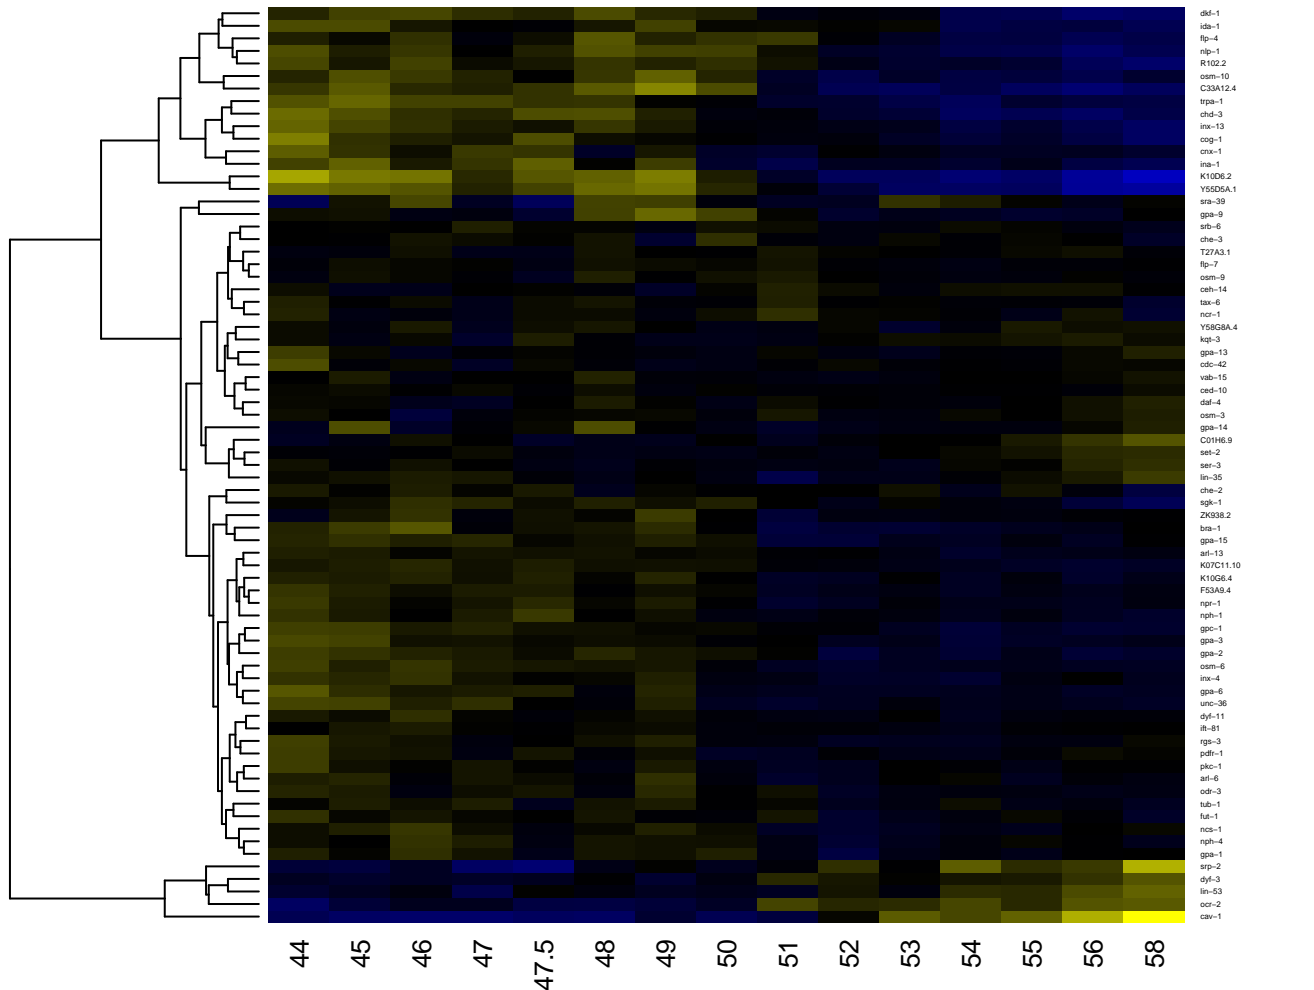

dkf-1  
ida-1  
fp-4  
nlp-1  
R102.2  
osm-10  
C33A12.4  
trpa-1  
chd-3  
inx-13  
cog-1  
cux-1  
ina-1  
K1026.2  
Y55DA.1  
sra-39  
gaa-9  
srb-6  
che-3  
T27A3.1  
fp-7  
osm-9  
ceh-14  
tax-6  
ncr-1  
Y58GA.4  
kqt-3  
gaa-13  
cdt-42  
vab-15  
ced-10  
daf-4  
osm-3  
gaa-14  
C01H6.9  
set-2  
set-3  
lin-35  
che-2  
sgk-1  
ZK938.2  
bra-1  
gaa-15  
arl-13  
K07C11.10  
K1026.4  
F53A2.4  
npr-1  
nph-1  
gpc-1  
gaa-3  
gaa-2  
osm-6  
inx-4  
gaa-6  
unc-36  
dyf-11  
rgs-3  
pdf-1  
gpc-1  
arl-6  
odi-3  
tub-1  
faj-1  
ncc-1  
nph-4  
gaa-1  
srp-2  
dyf-3  
lin-53  
ocr-2  
cav-1



# PHBR

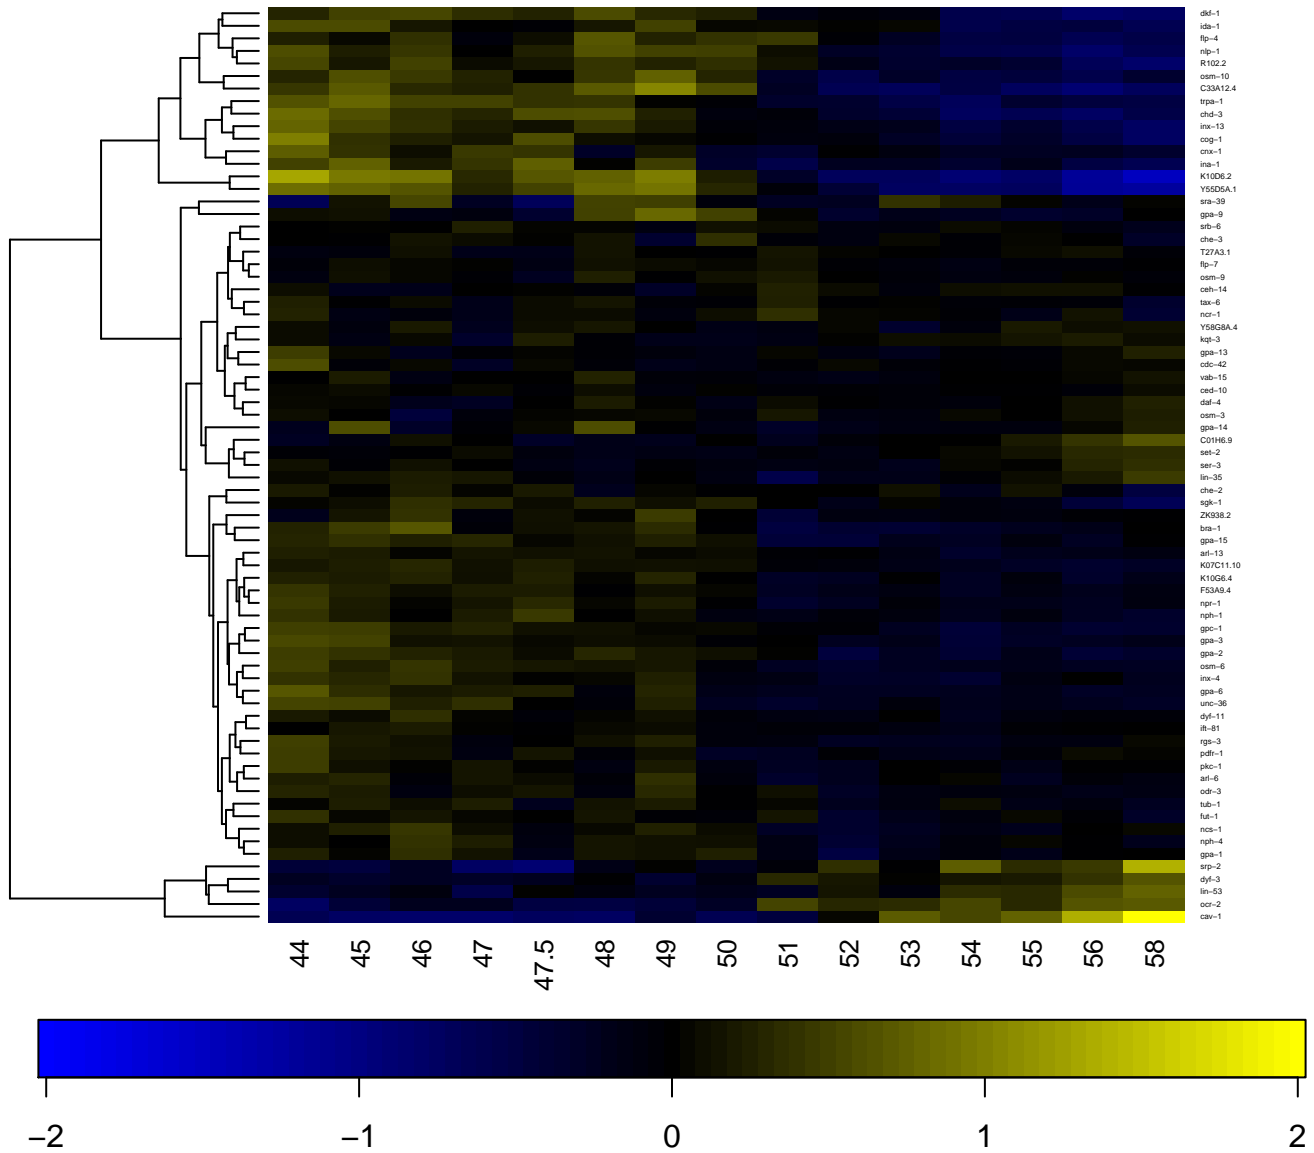

# PHCL

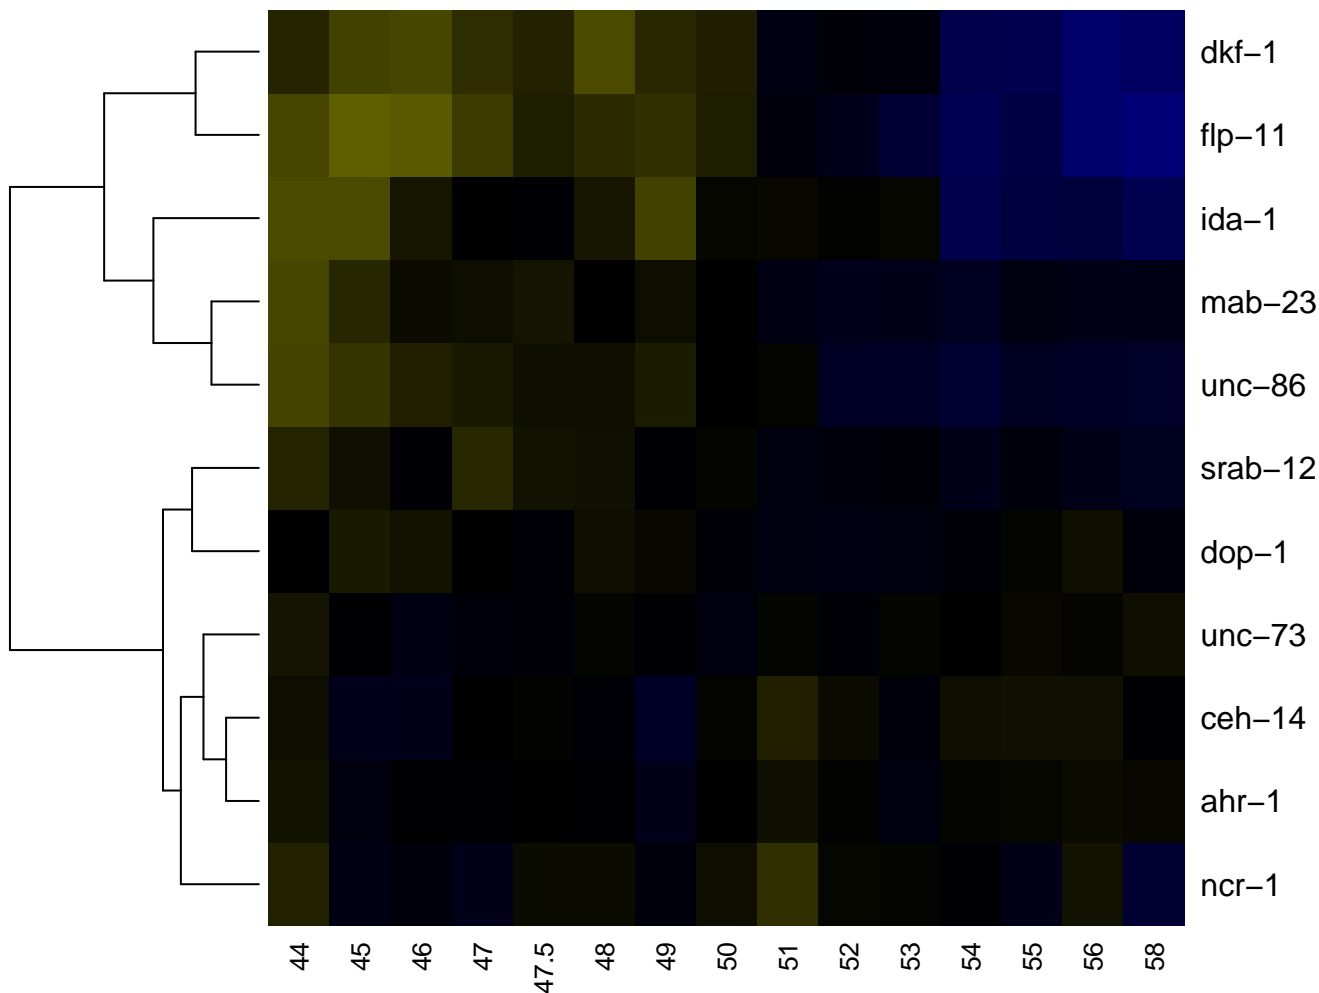



# PHCR



# PHshL

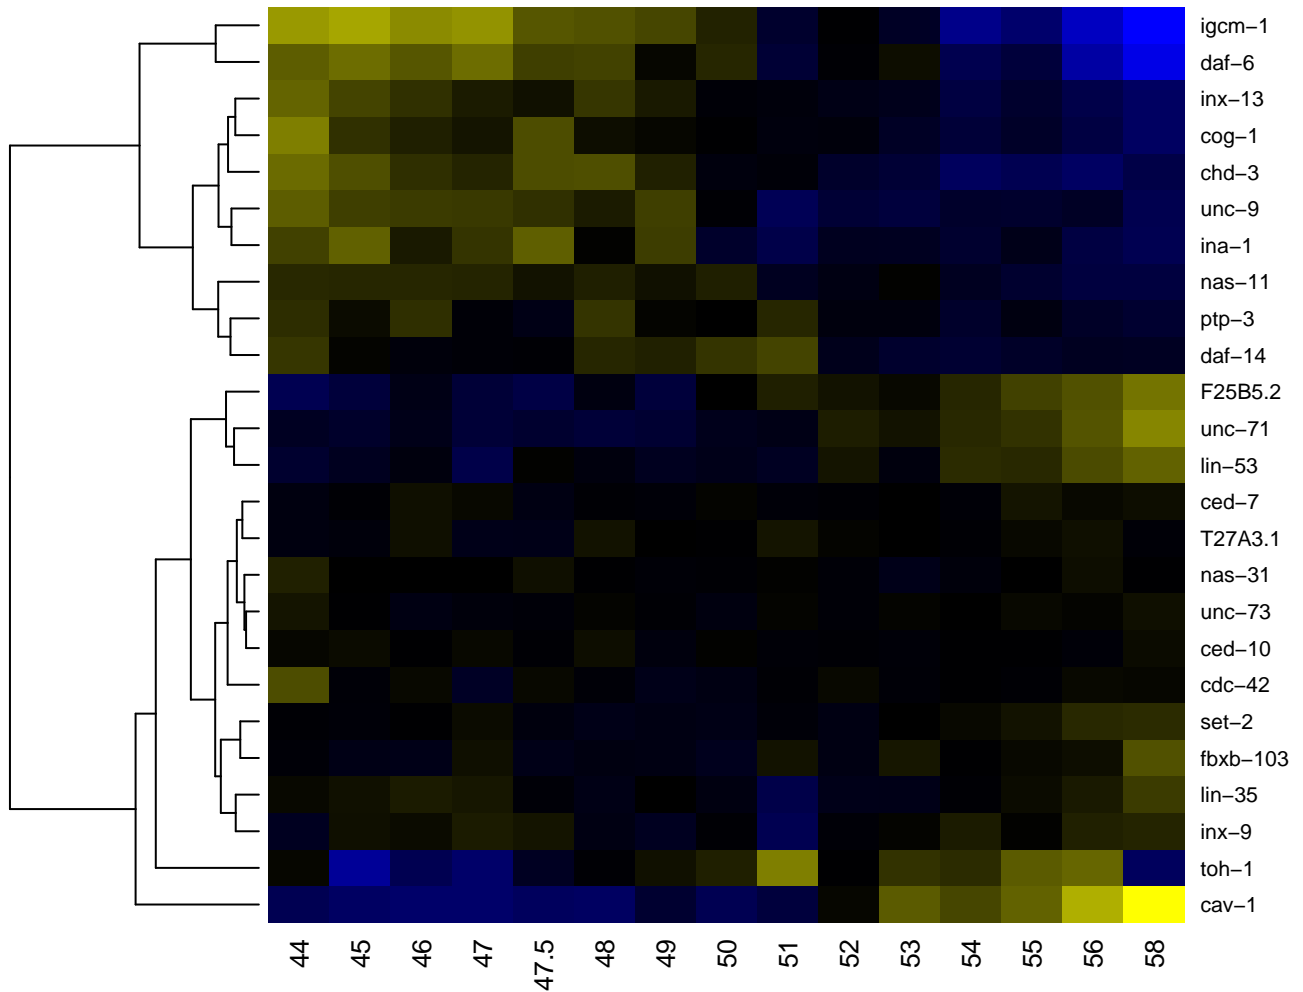

# PHshR

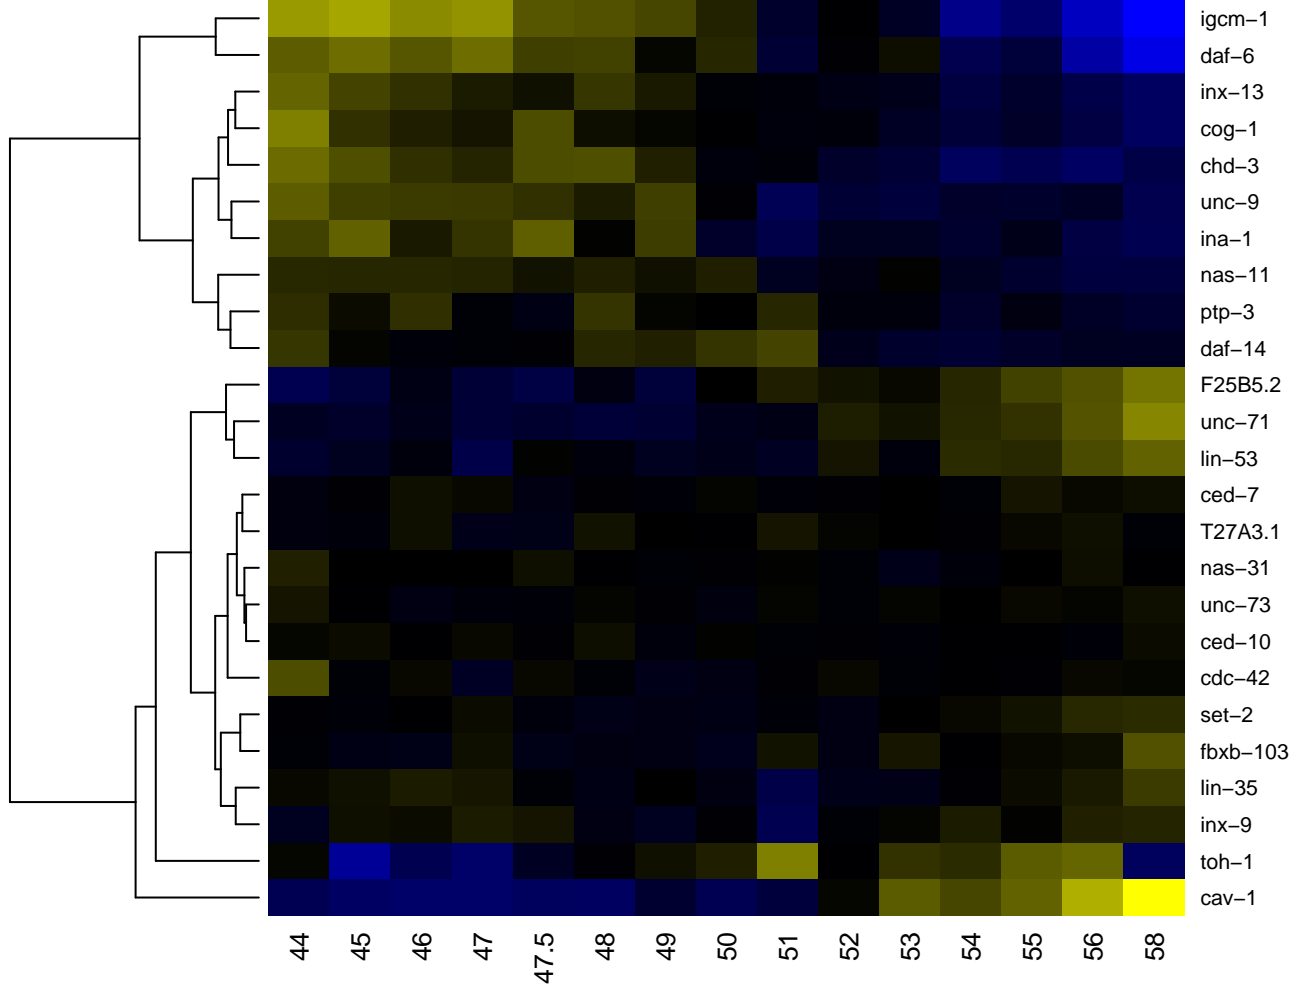

-2

-1

0

1

2

# PHso1L

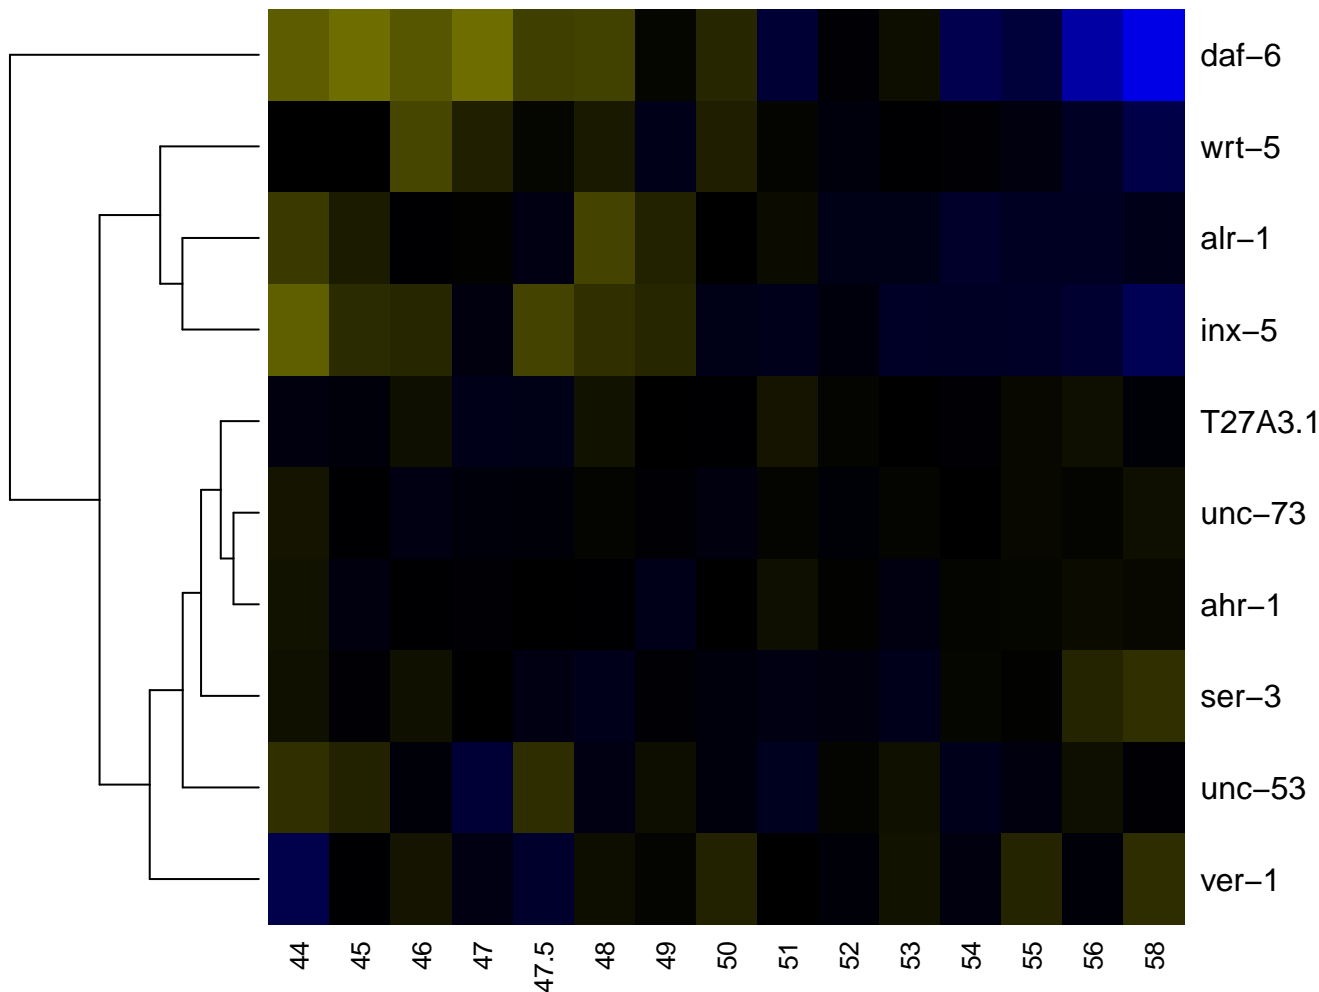

# PHso1R

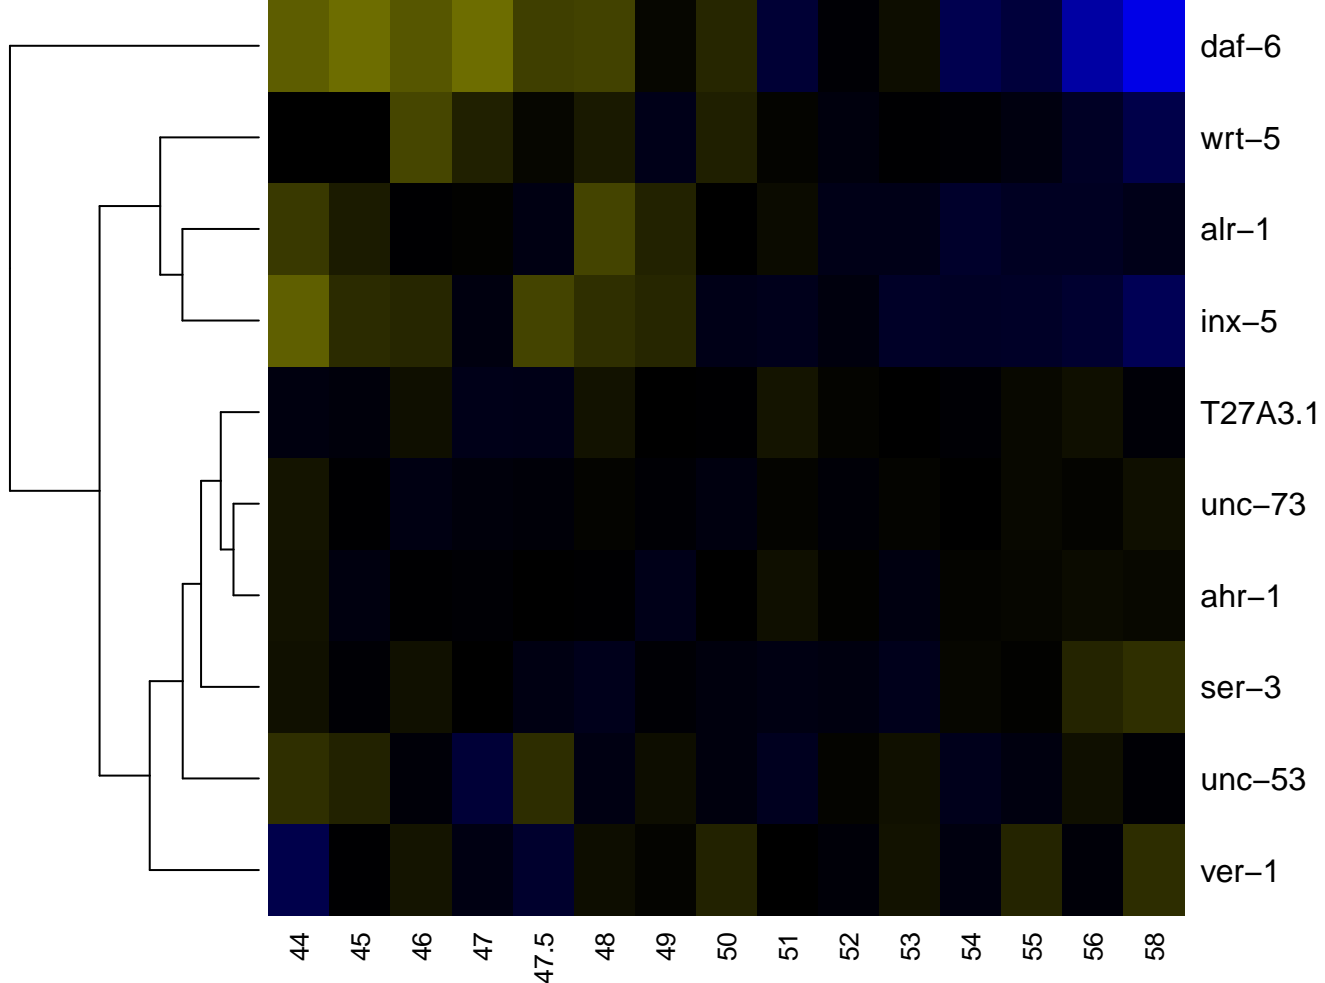

# PHso2L



# PHso2R

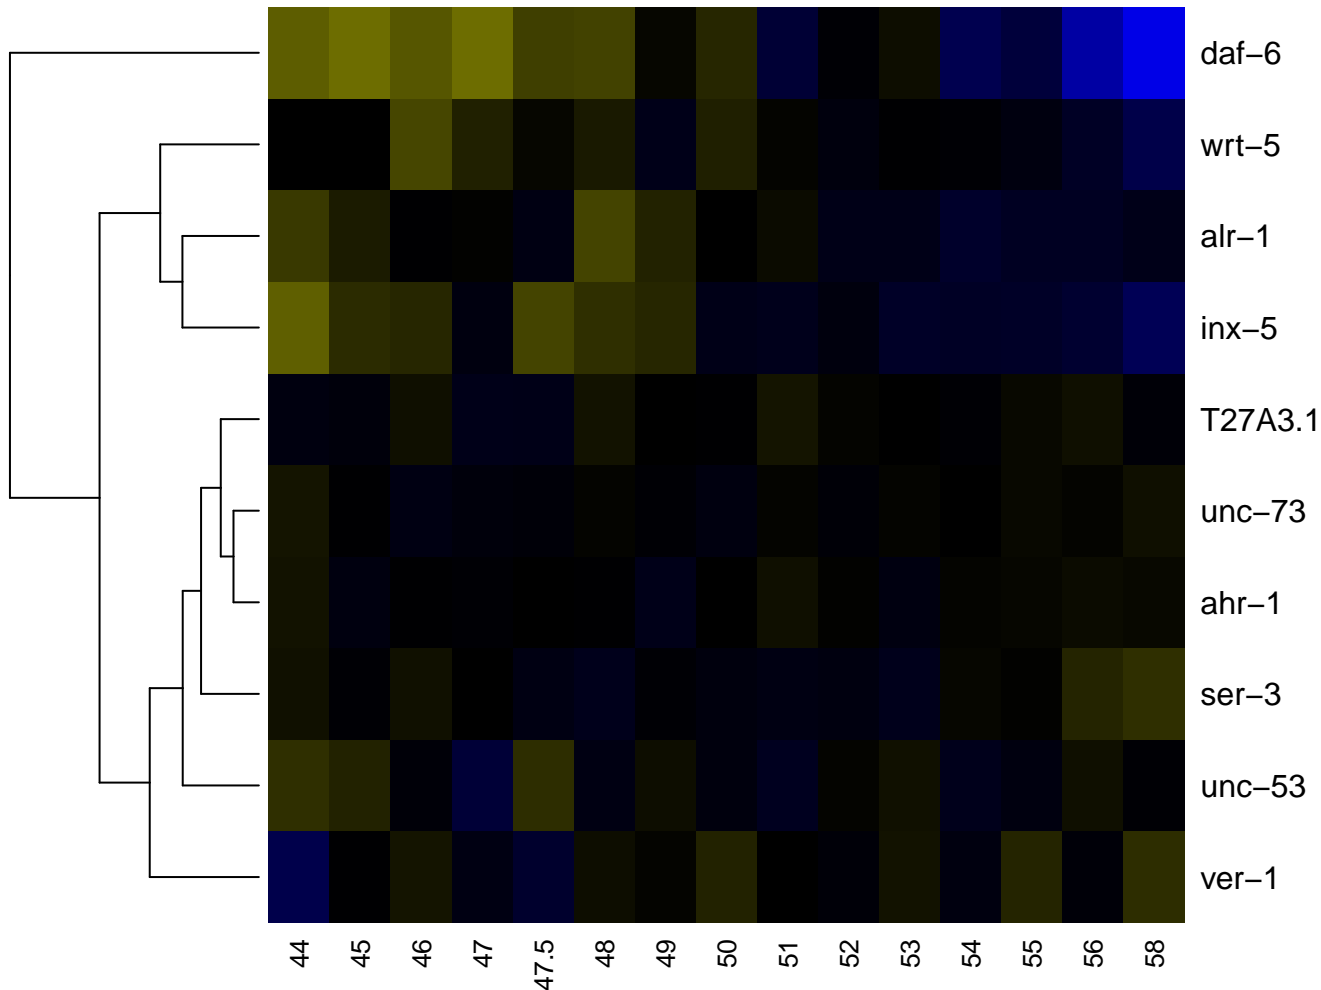

# PLML

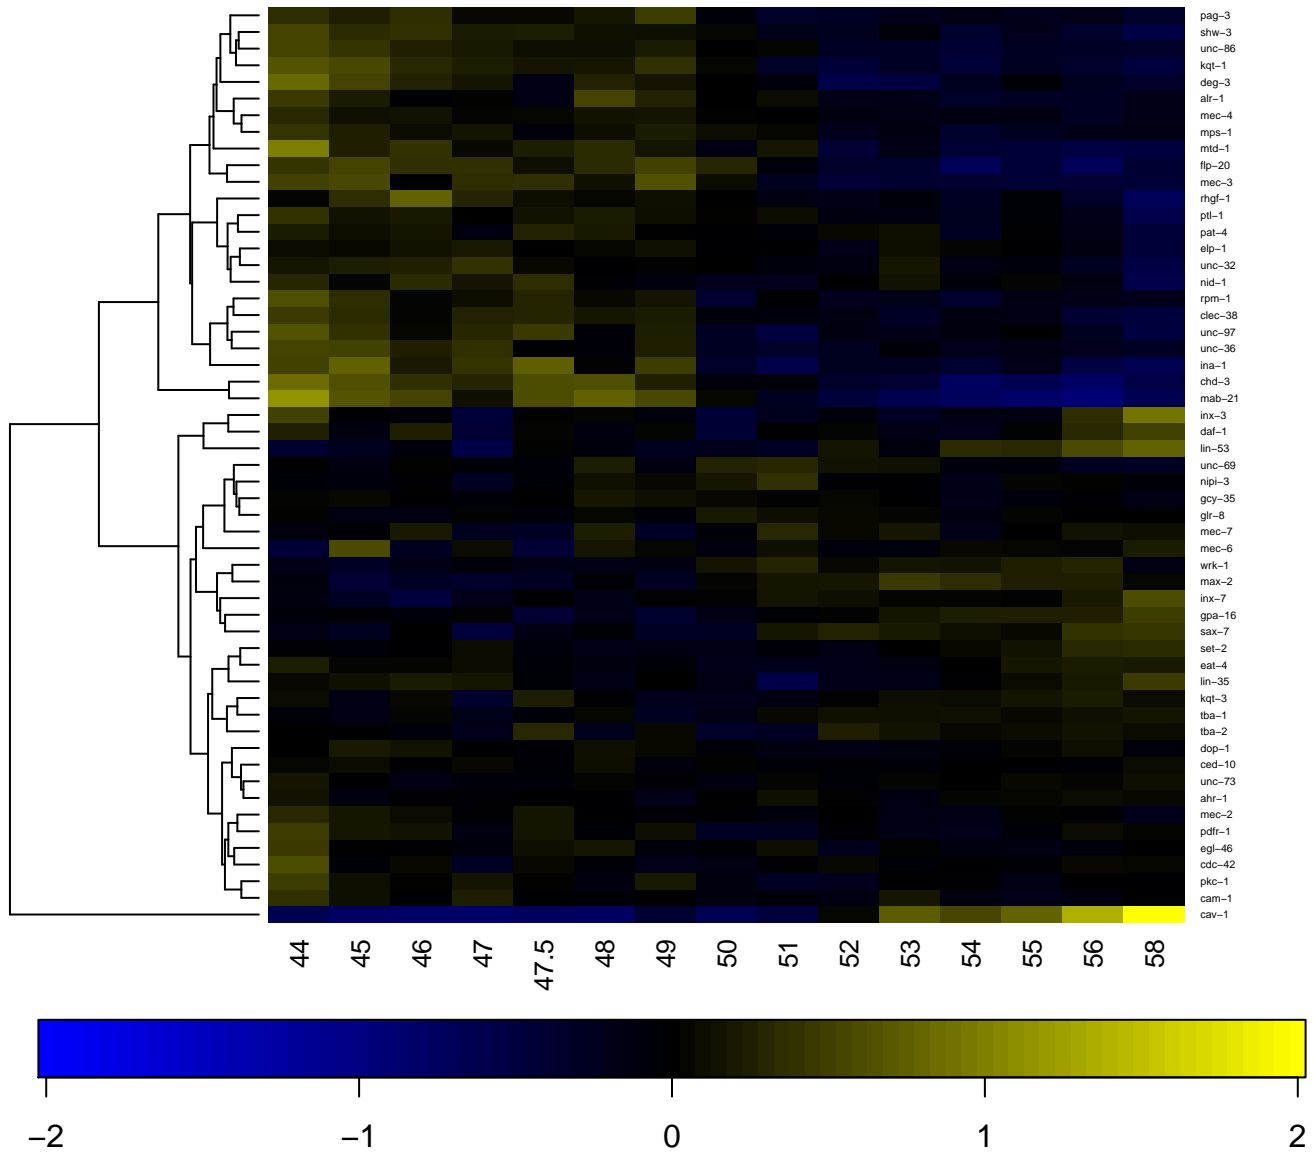



# PLMR



# PLNL

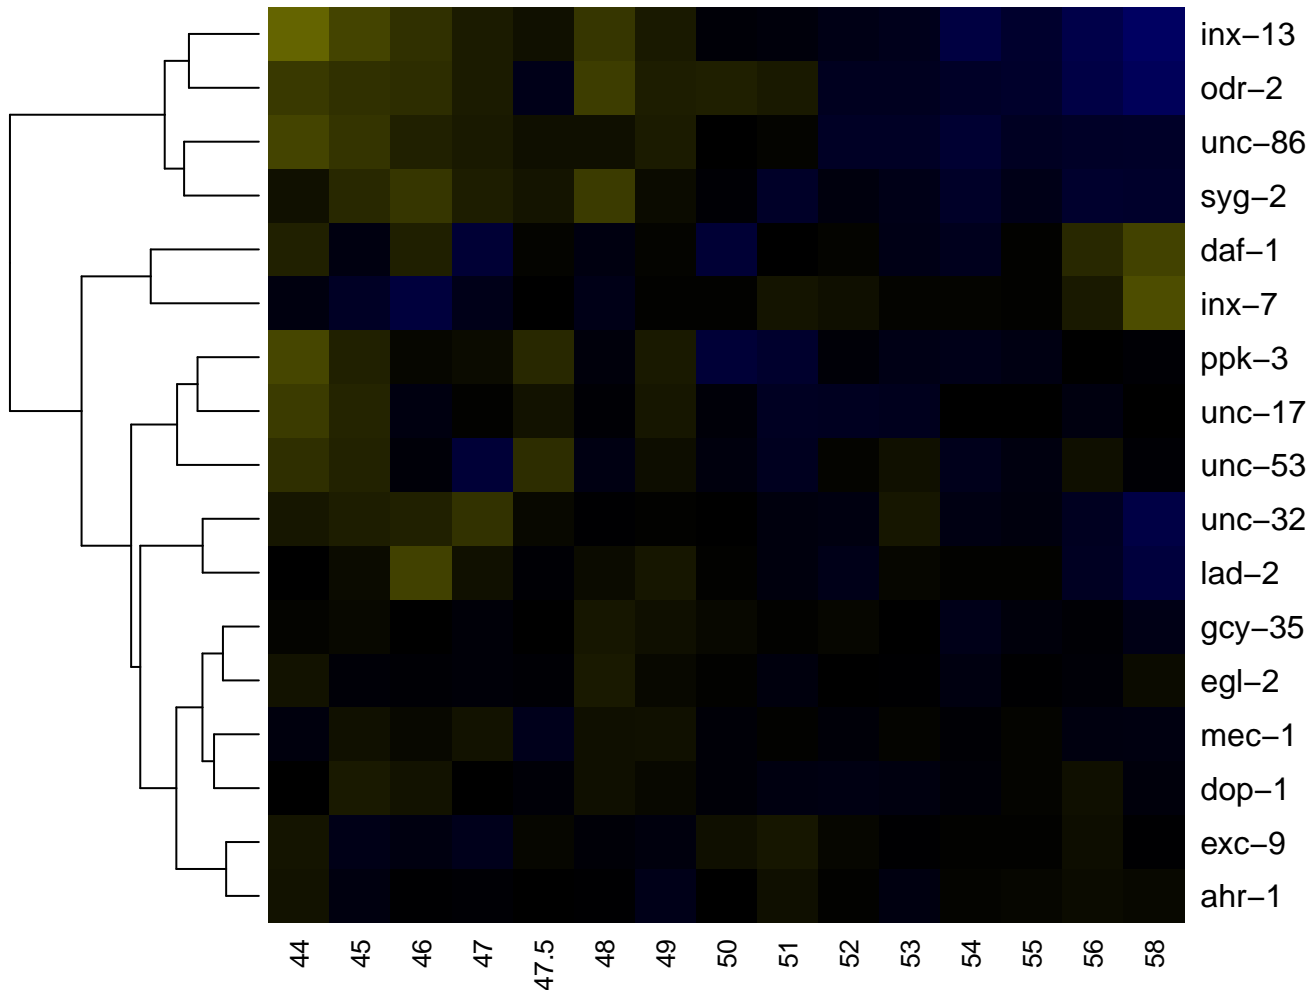

# PLNR

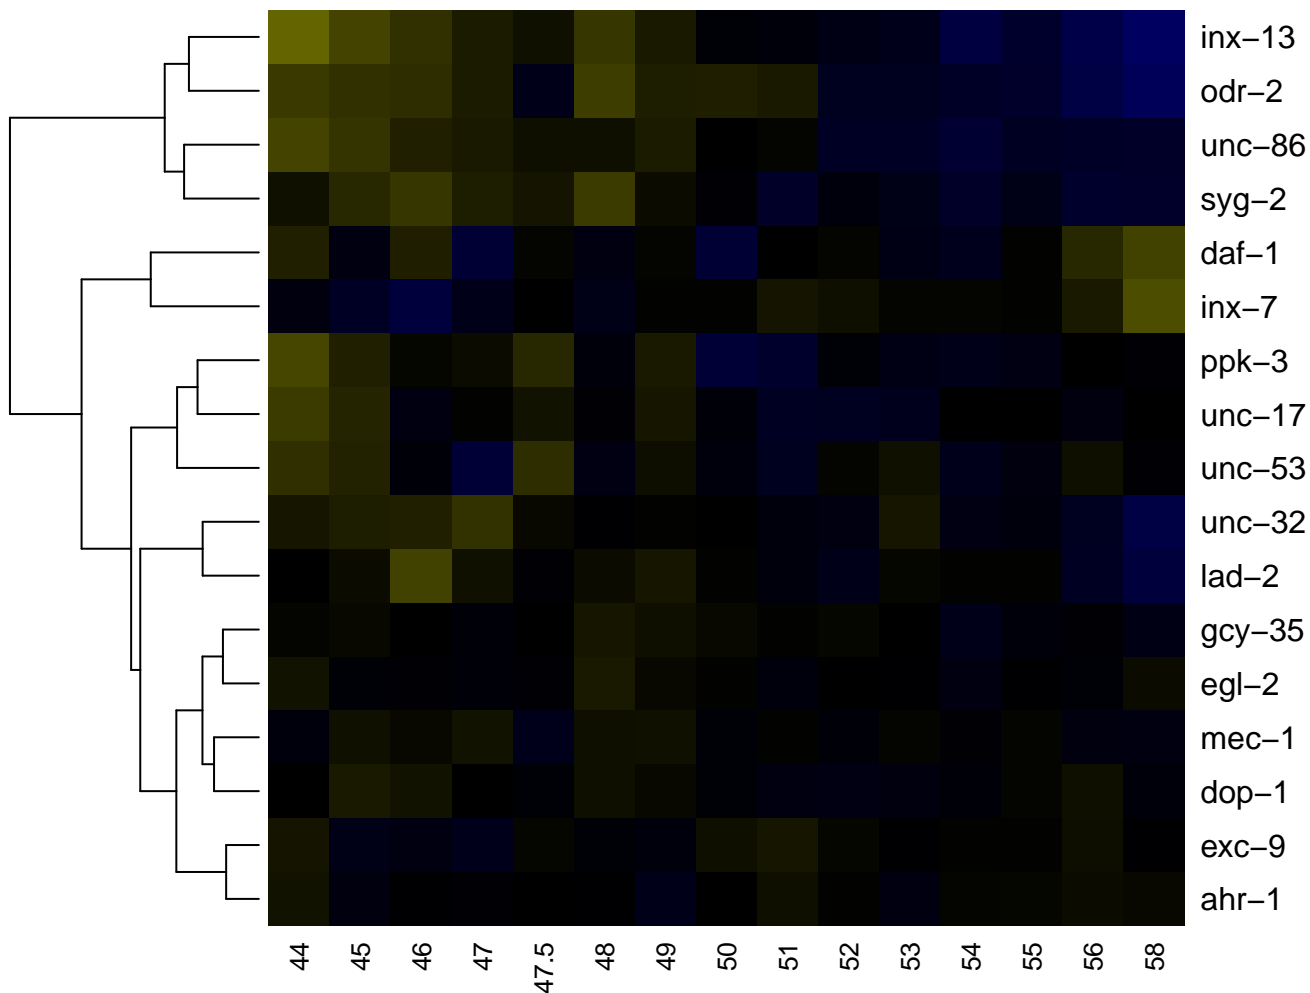

-2

-1

0

1

2

# pm1

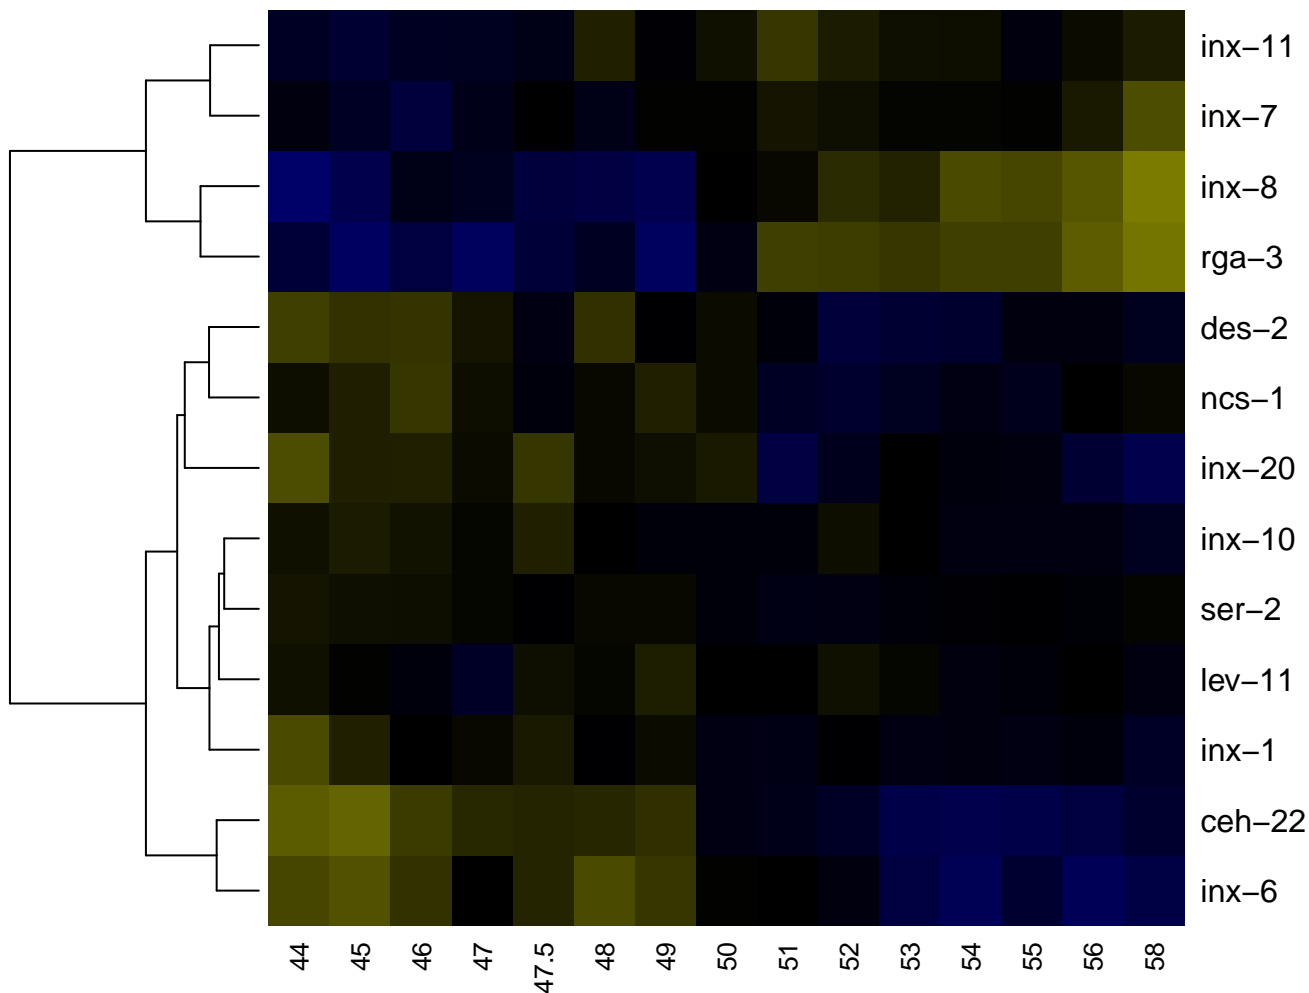

# pm1DL



# pm1DR



# pm1L



# pm1R







# pm1VR



# pm2

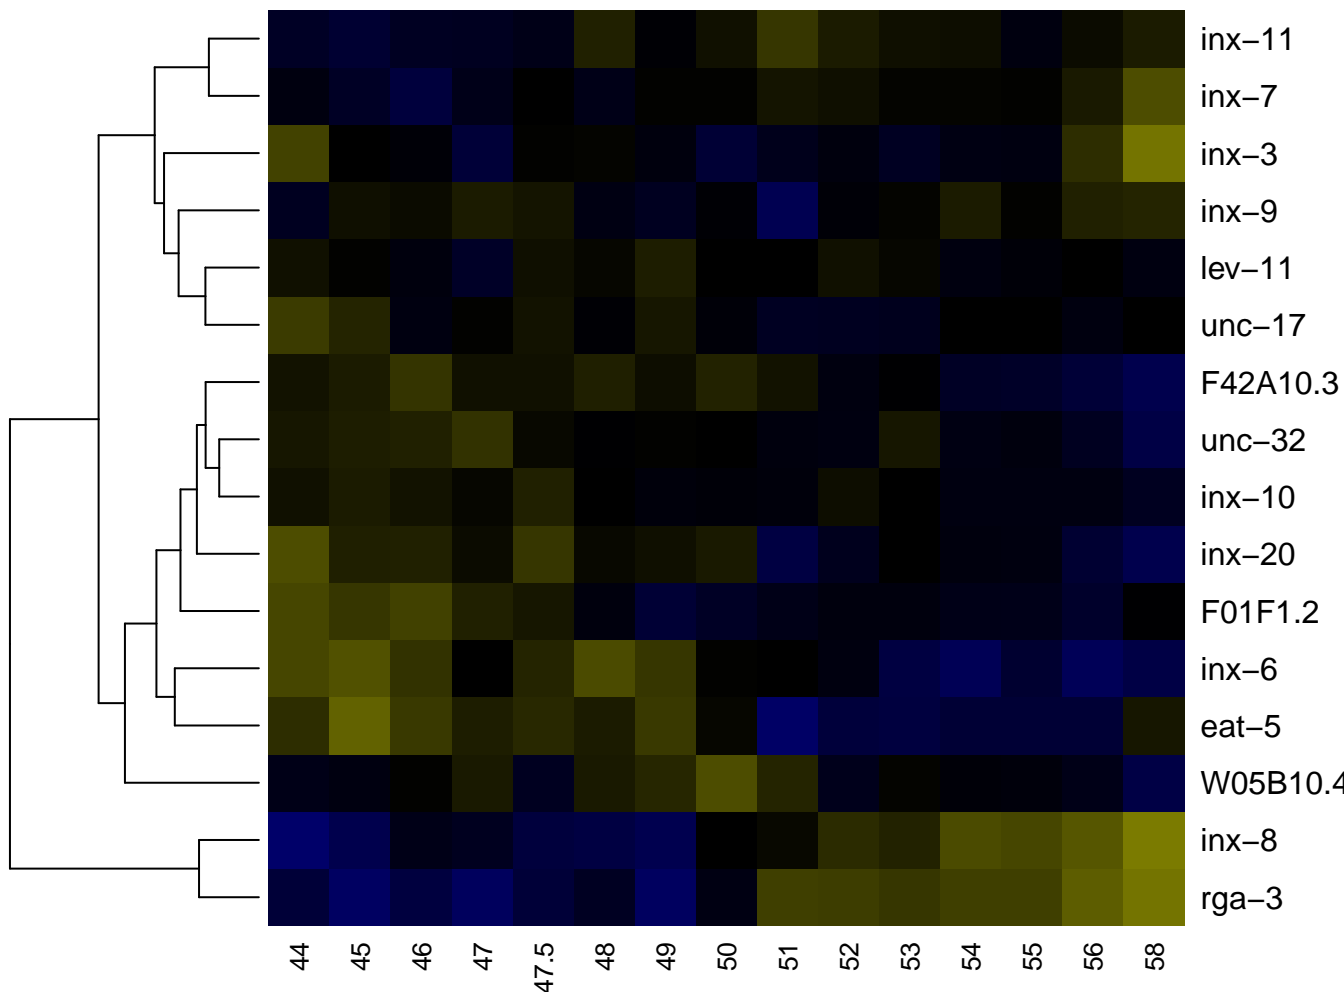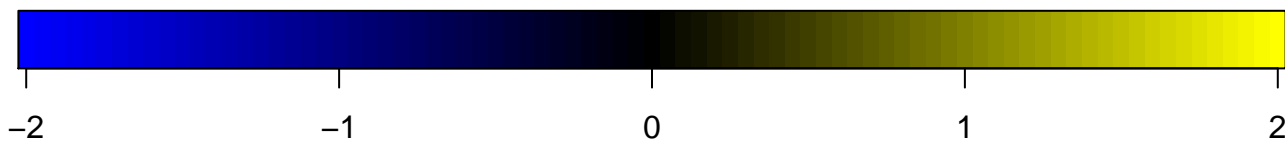





# pm2L

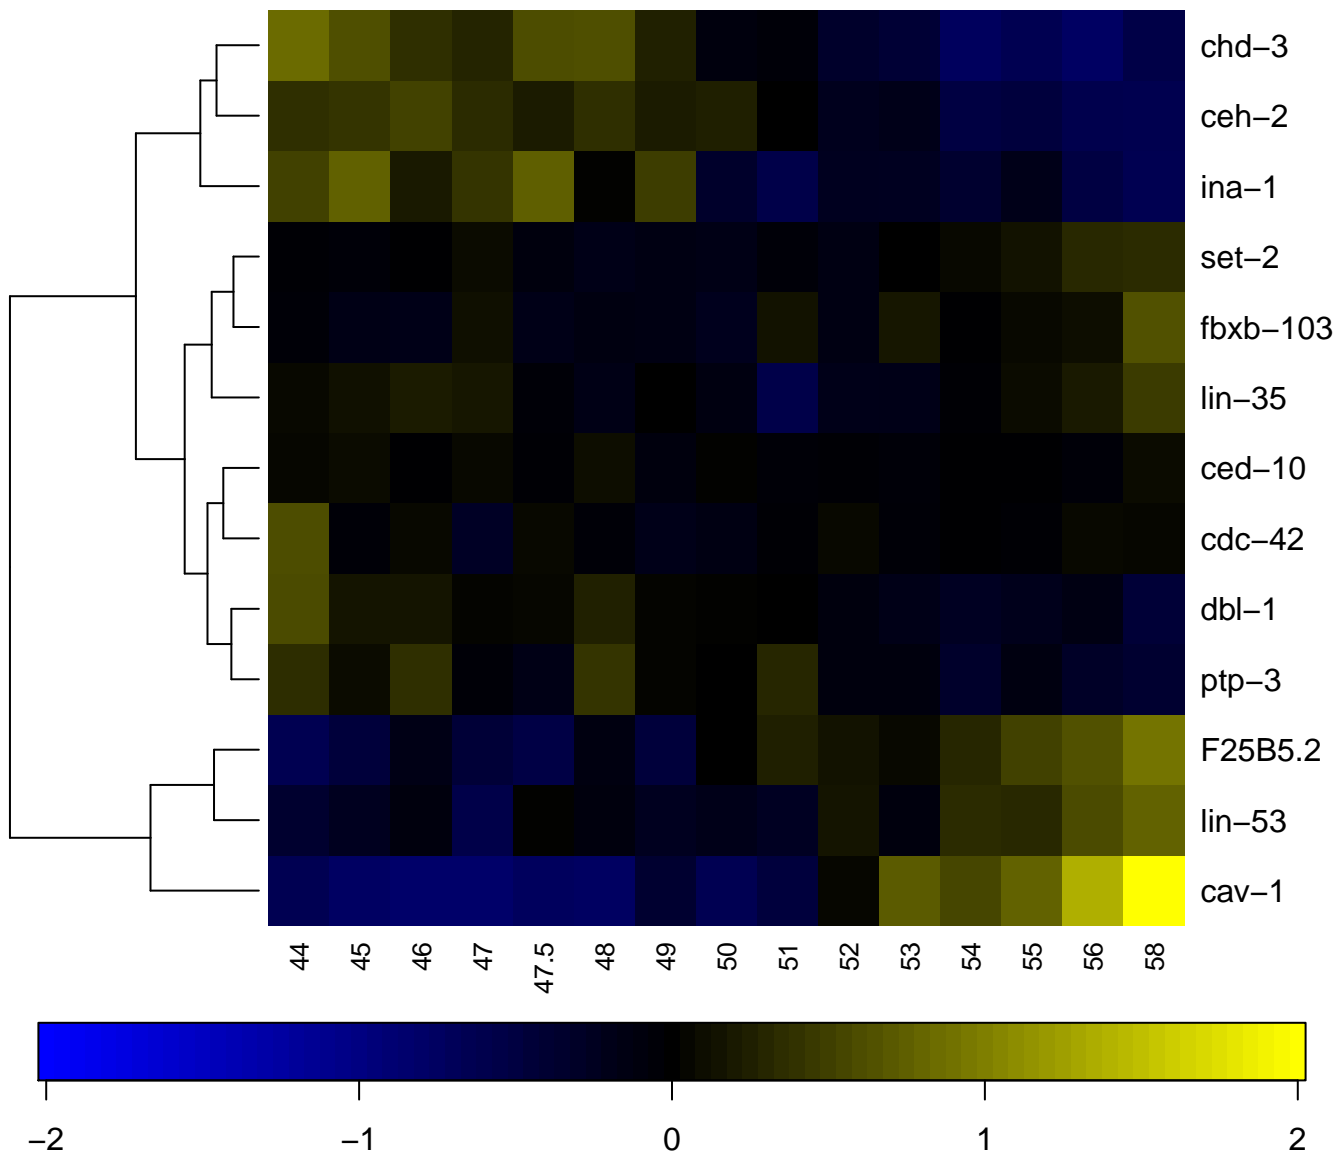

# pm2R

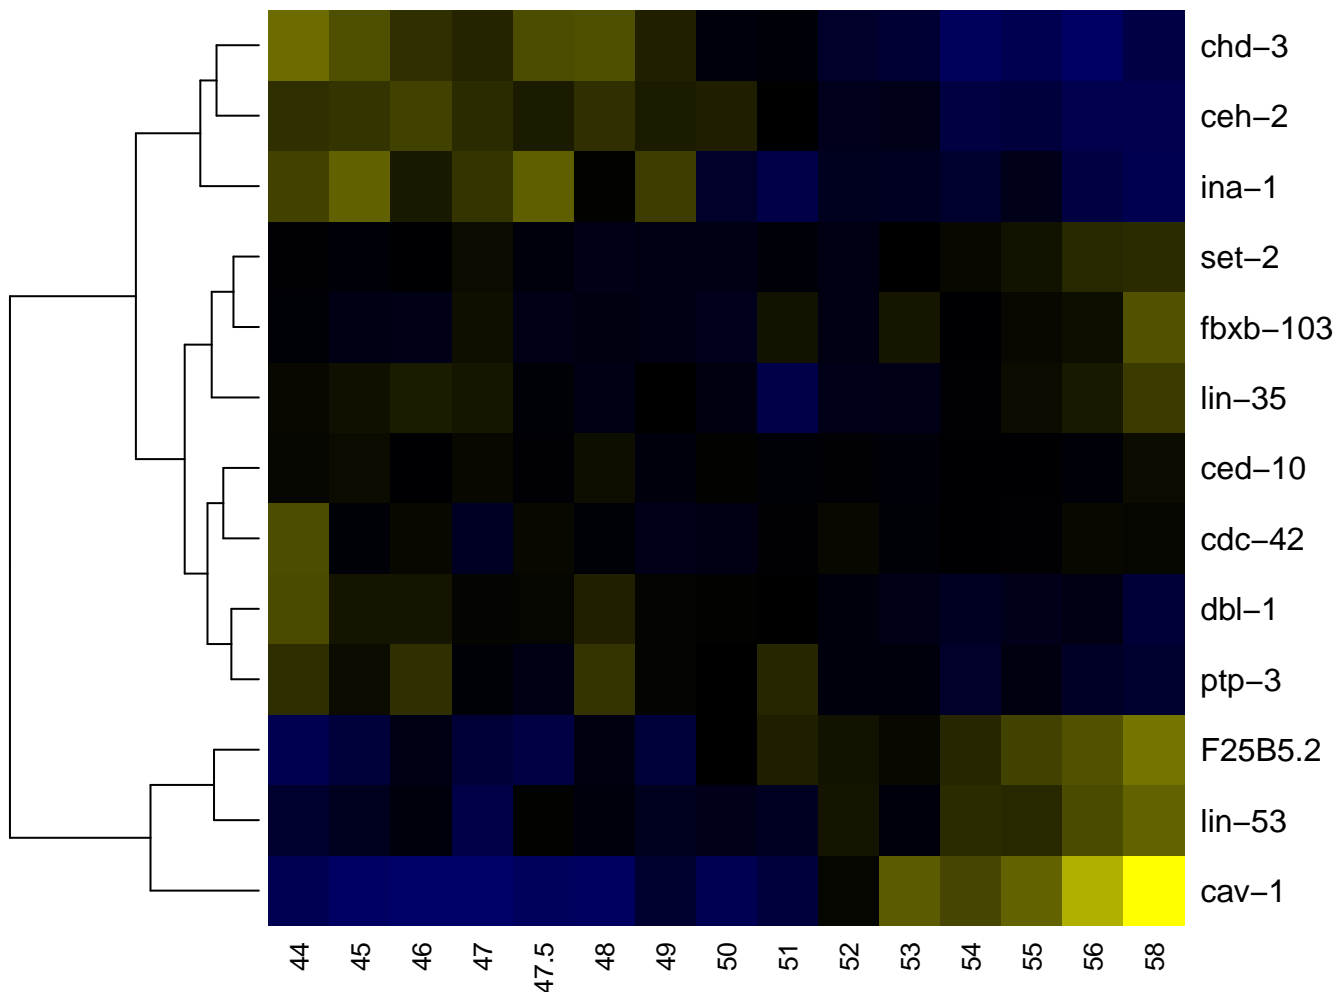







# pm3

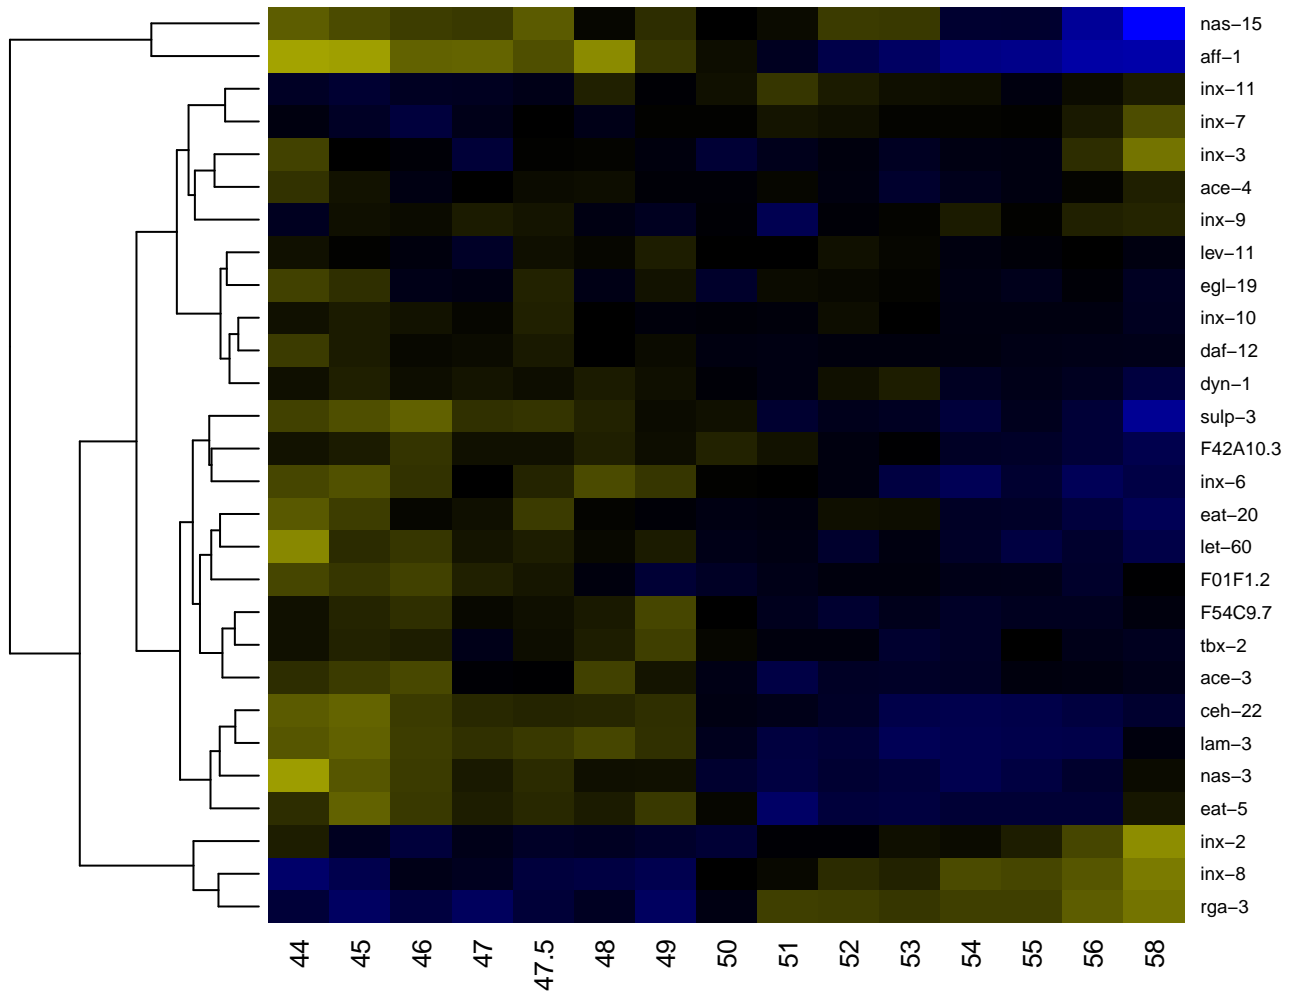

# pm3DL



# pm3DR



# pm3L

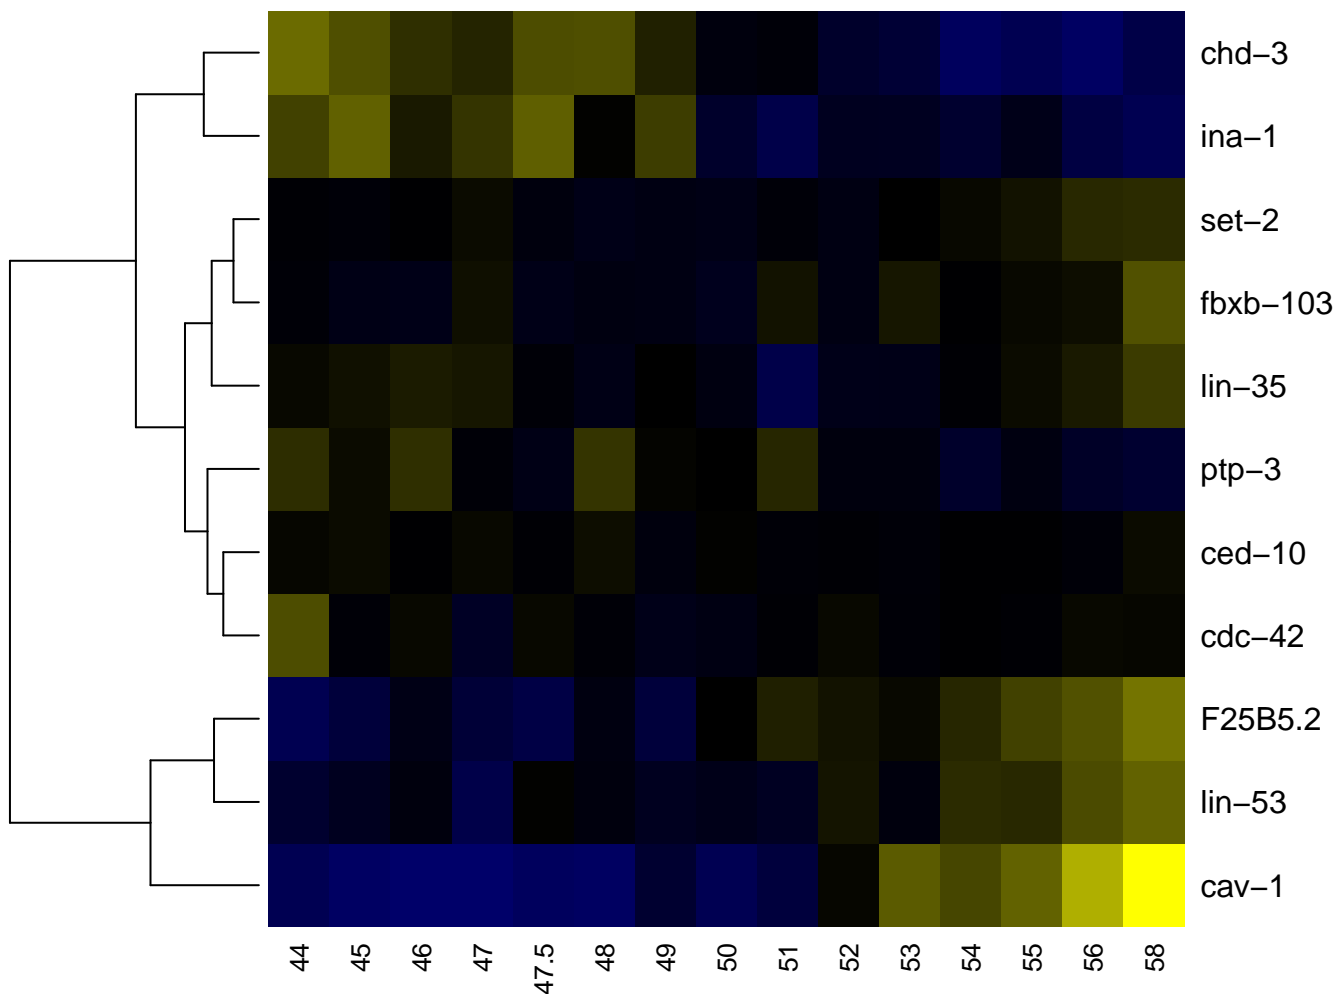

# pm3R



# pm3VL



# pm3VR





# pm4

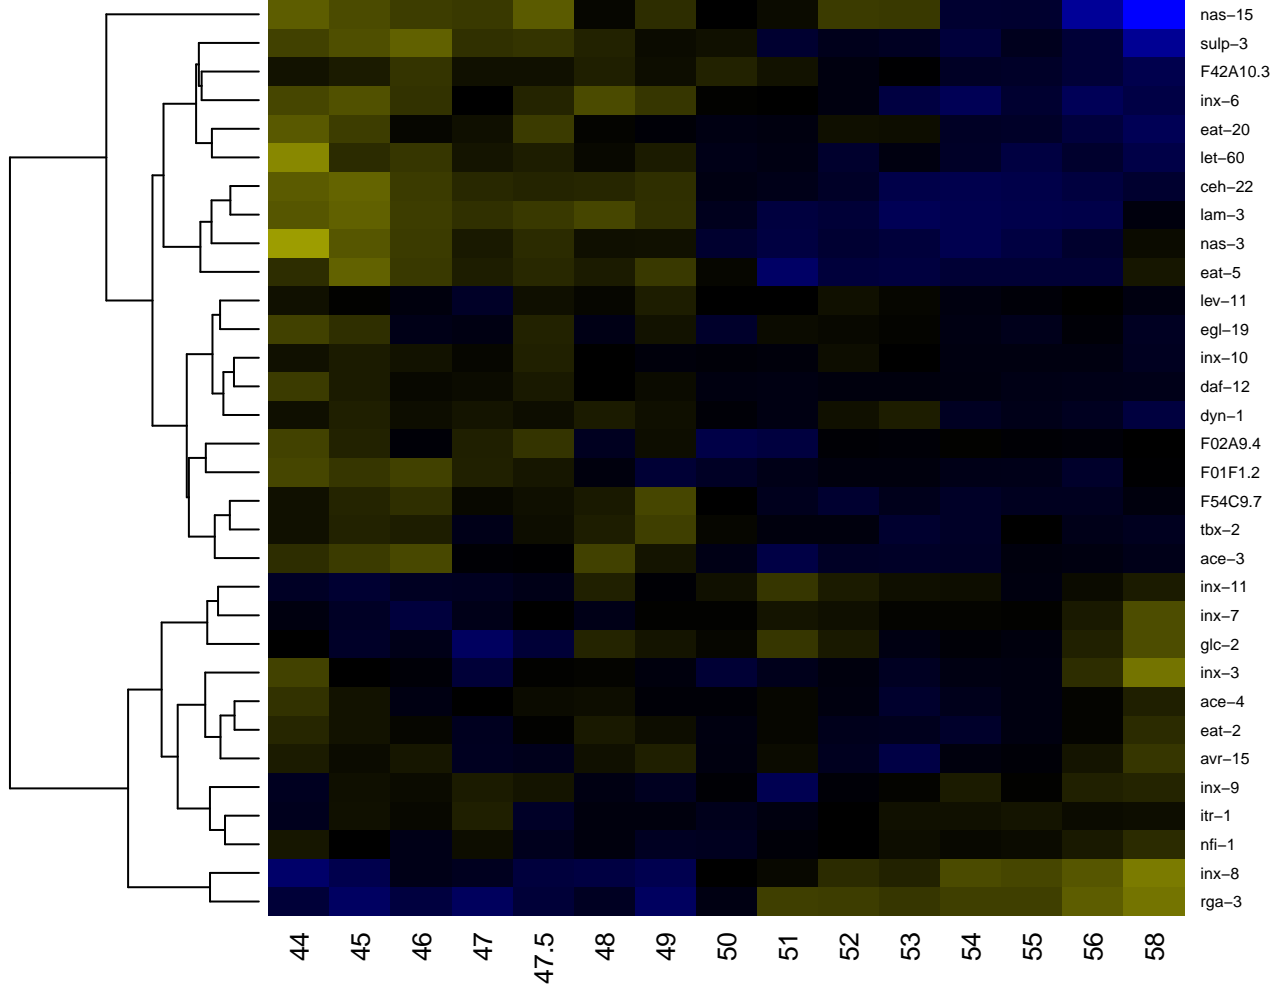

# pm4DL



# pm4DR



# pm4L



# pm4R



# pm4VL



# pm4VR



# pm5

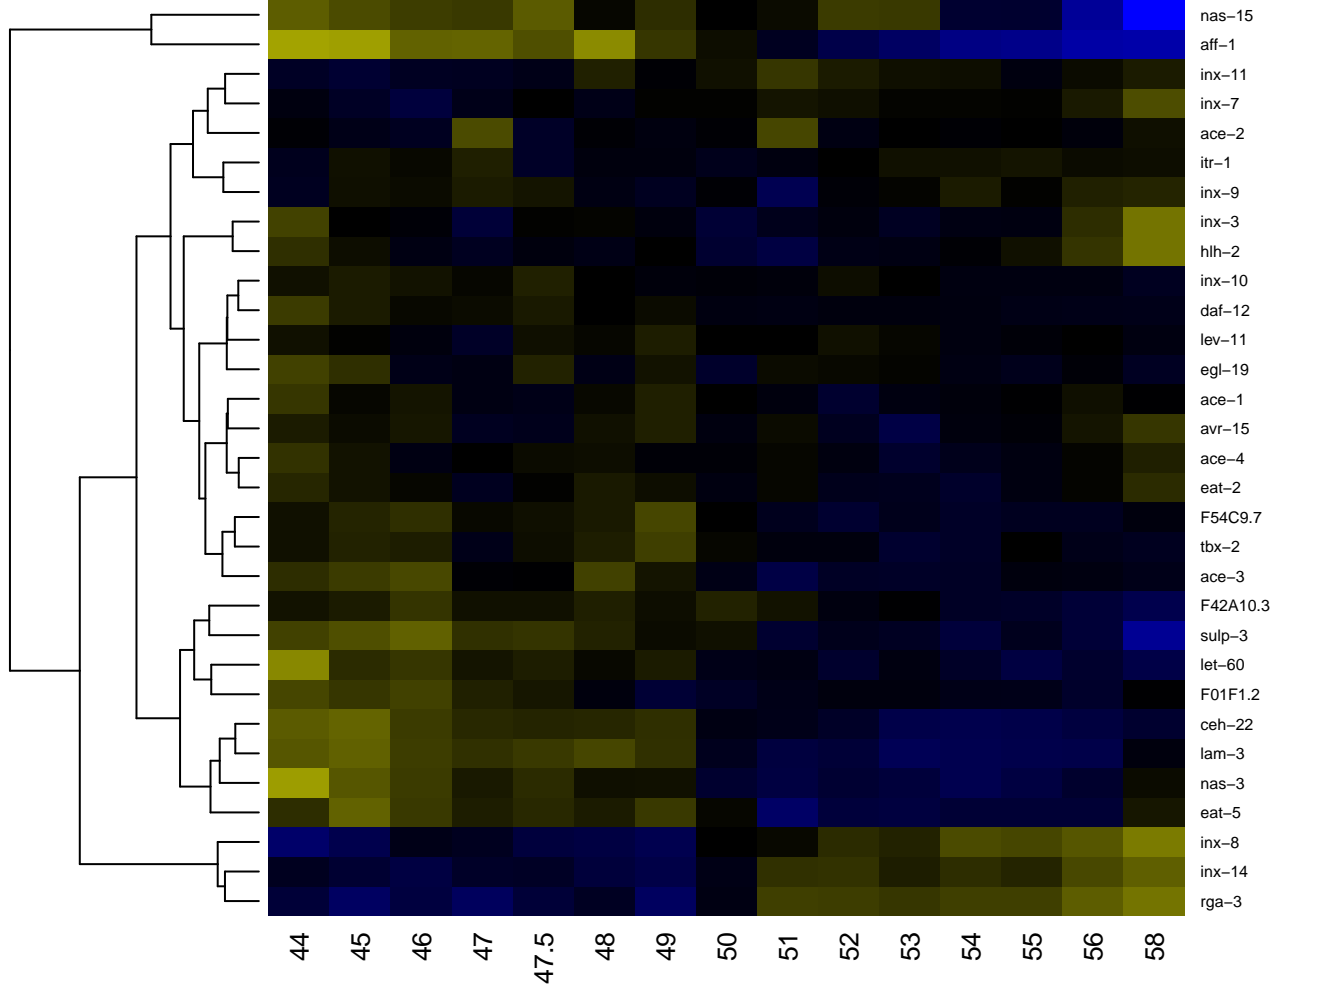



# pm5DL



# pm5DR



# pm5L



# pm5R



# pm5VL



# pm5VR



# pm6

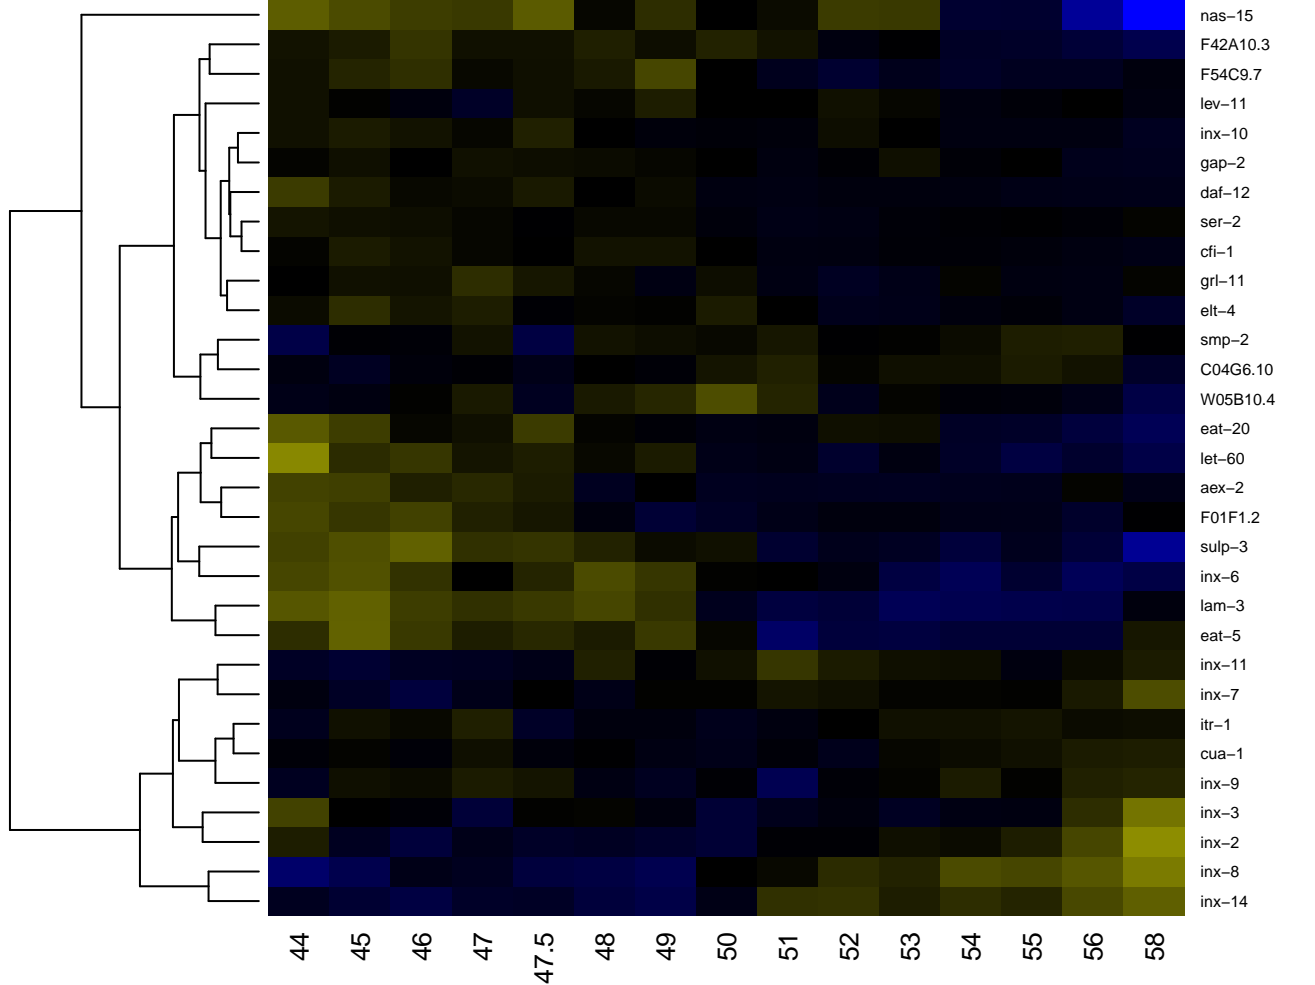

# pm6D





# pm6VL

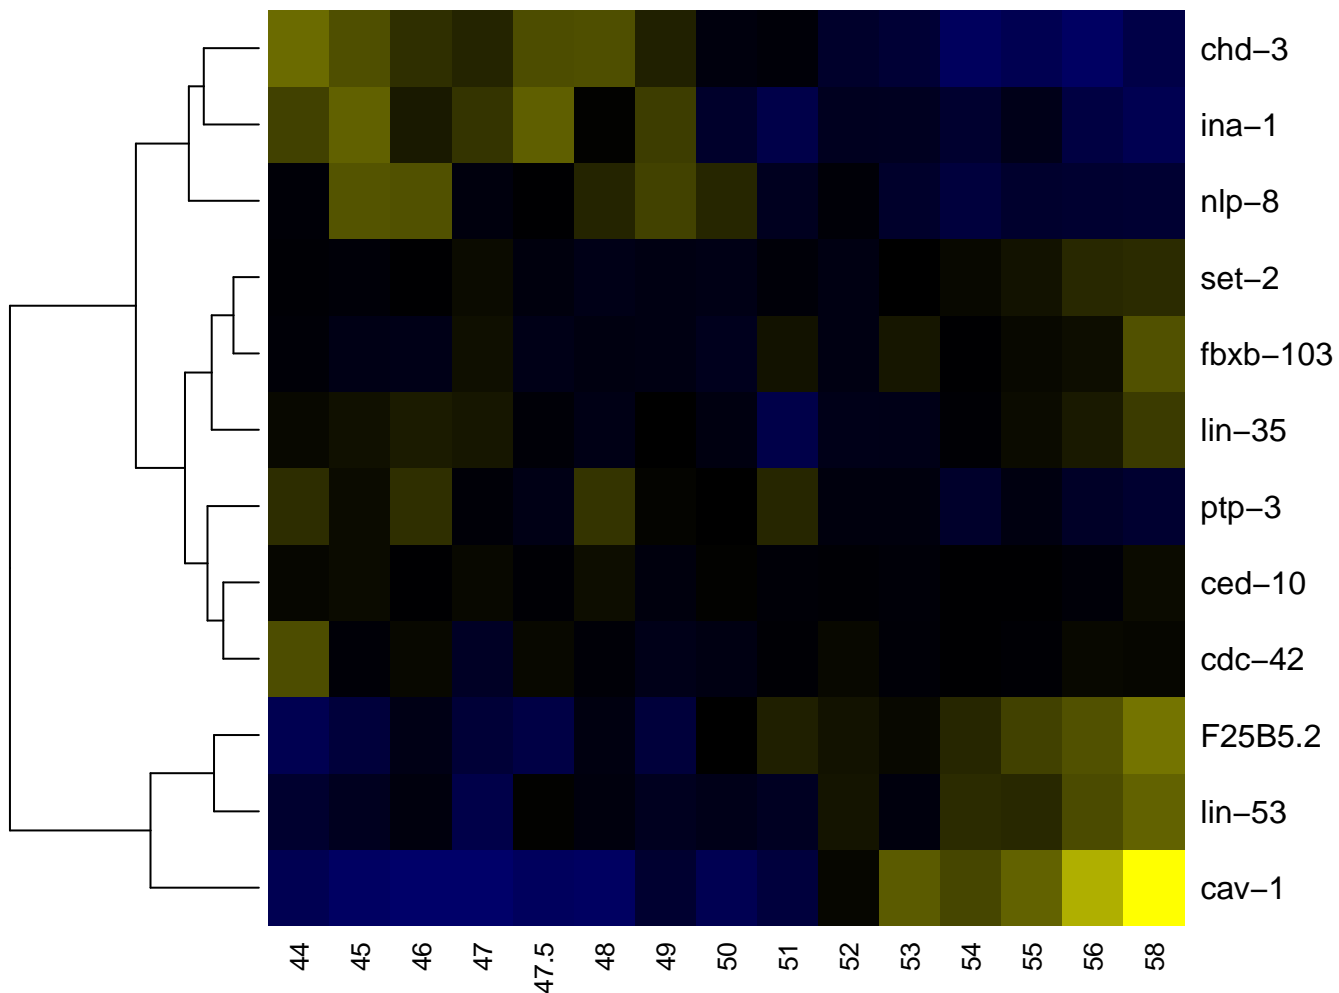

# pm6VR

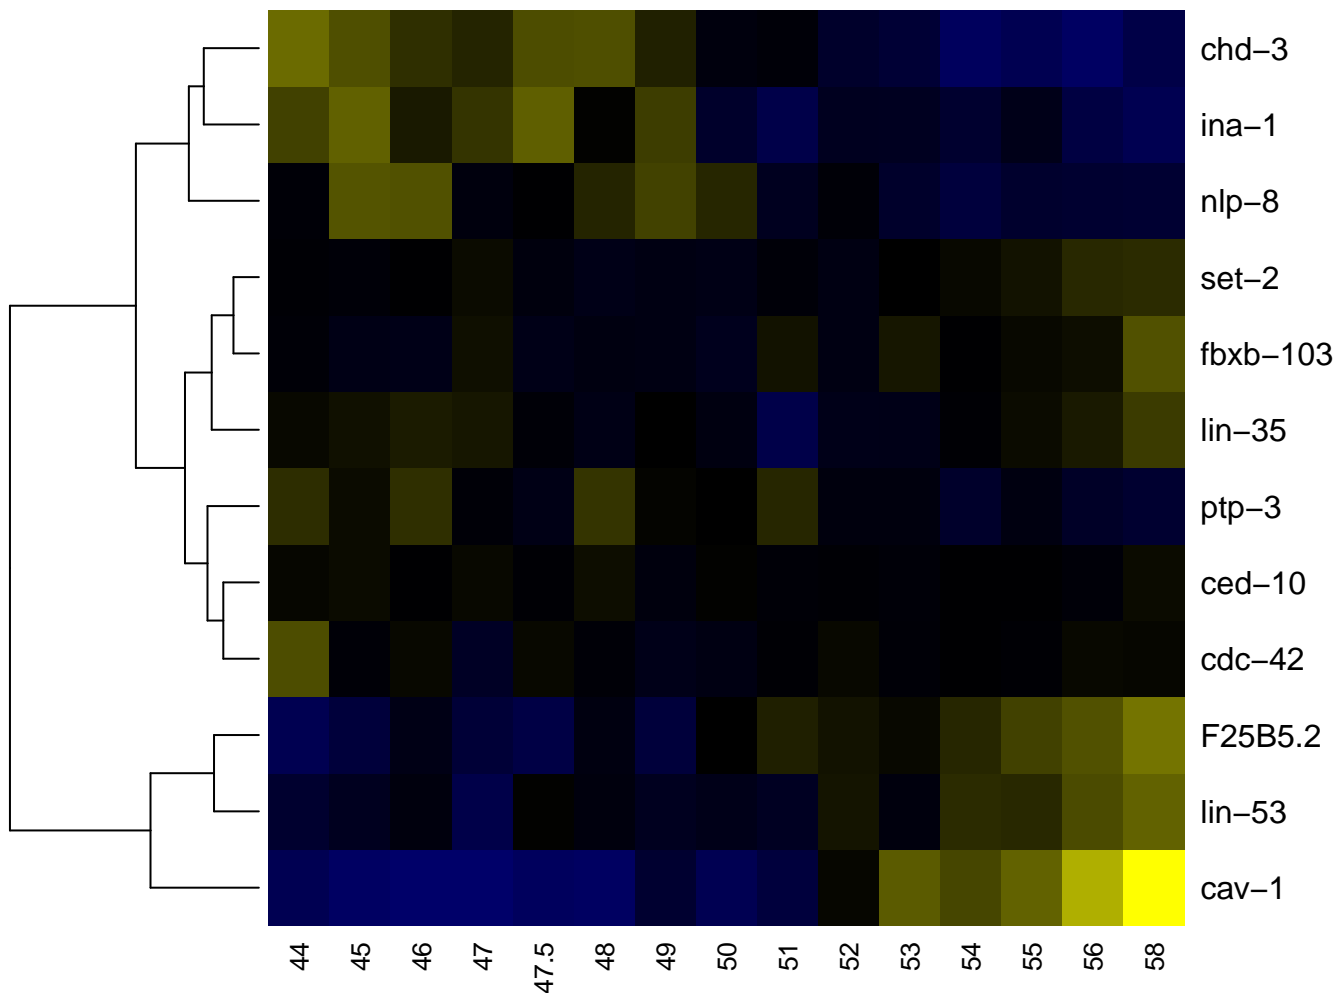

# pm7

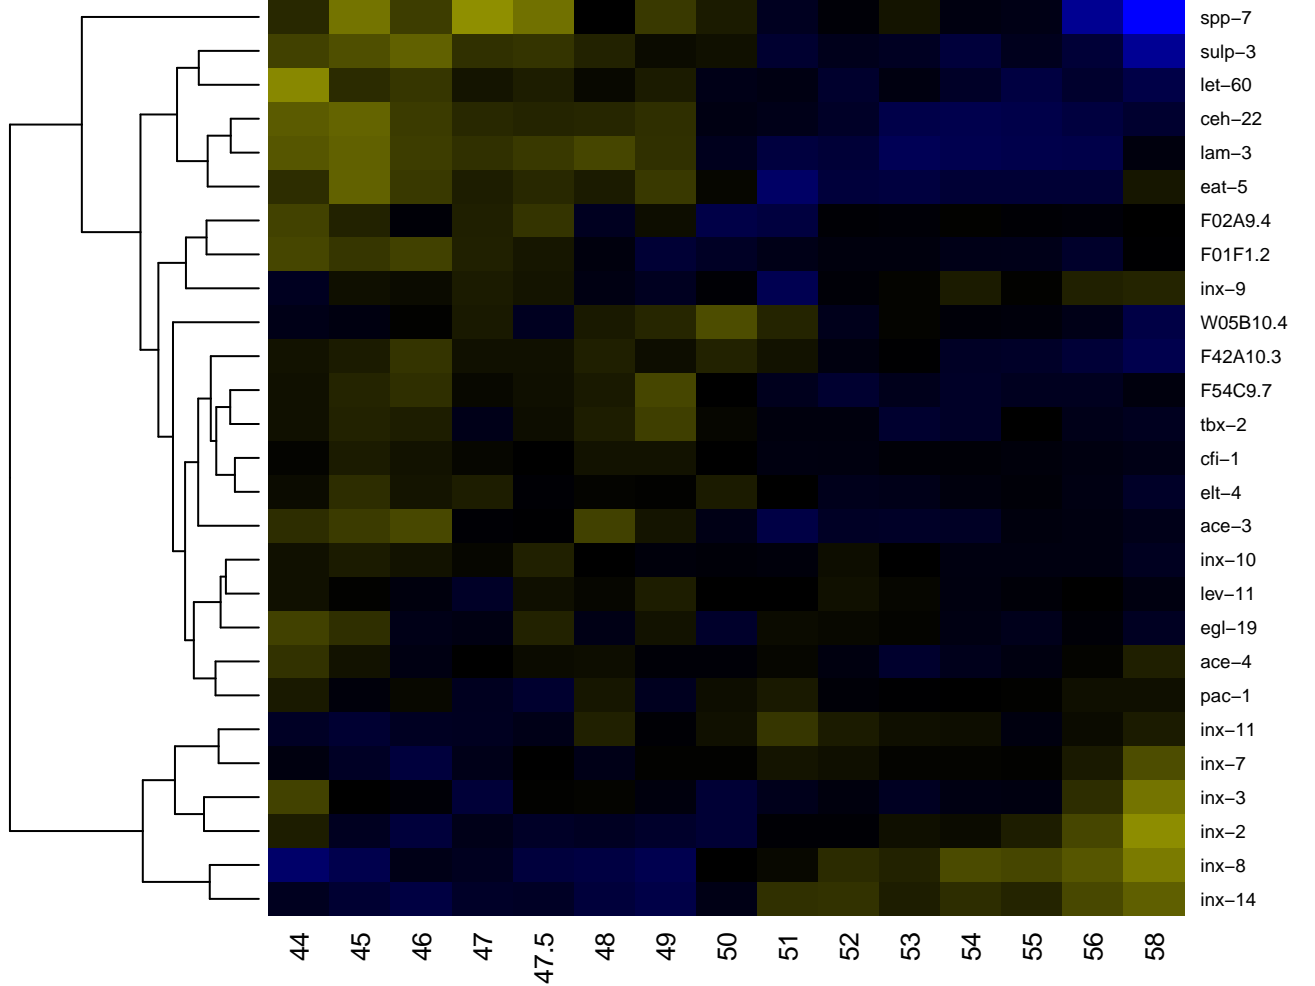

# pm7D



# pm7VL



# pm7VR



# pm8

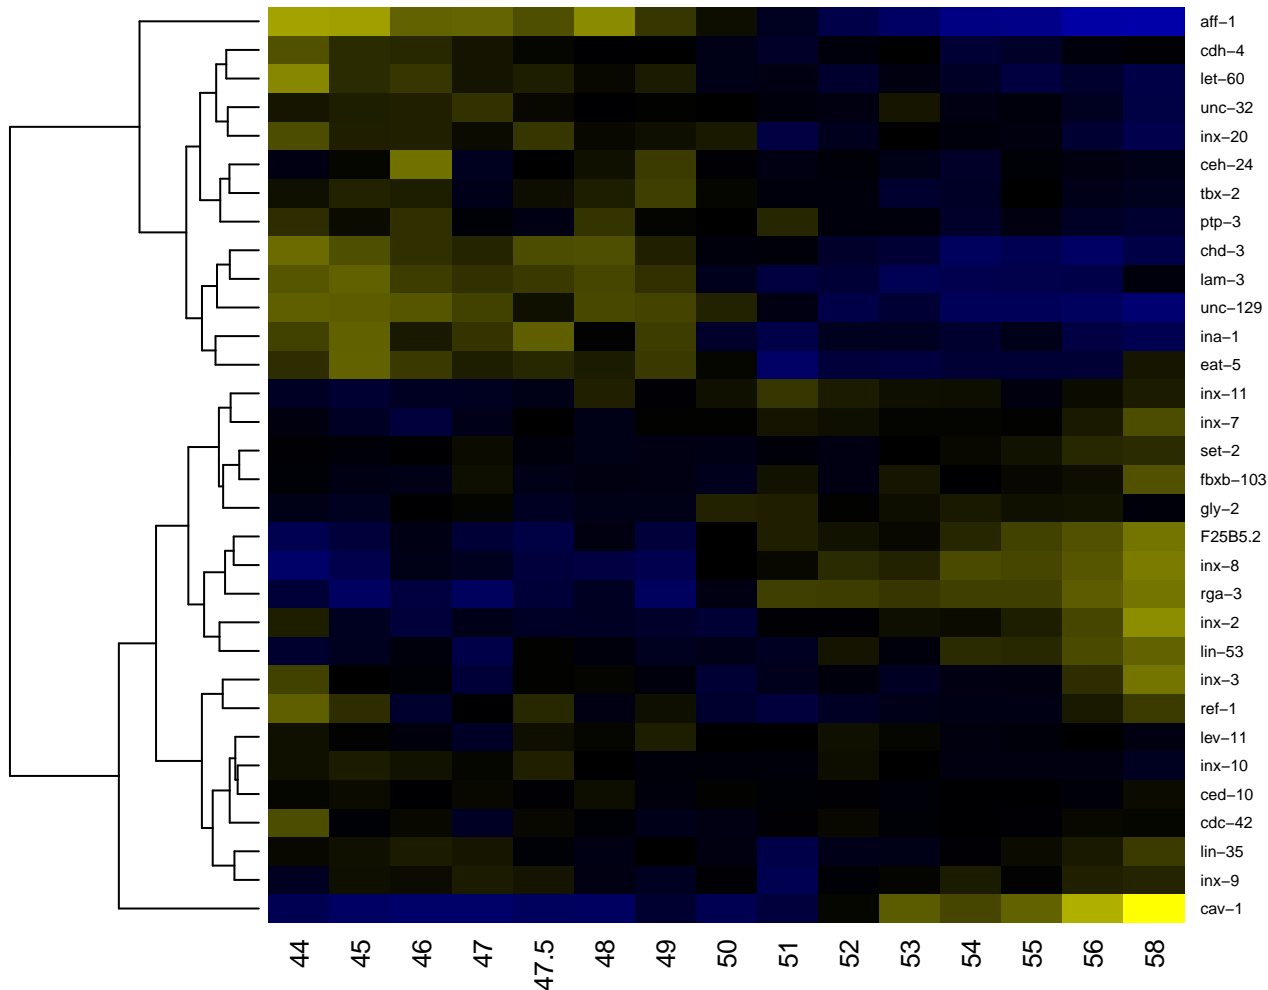





# posterior oblique muscle

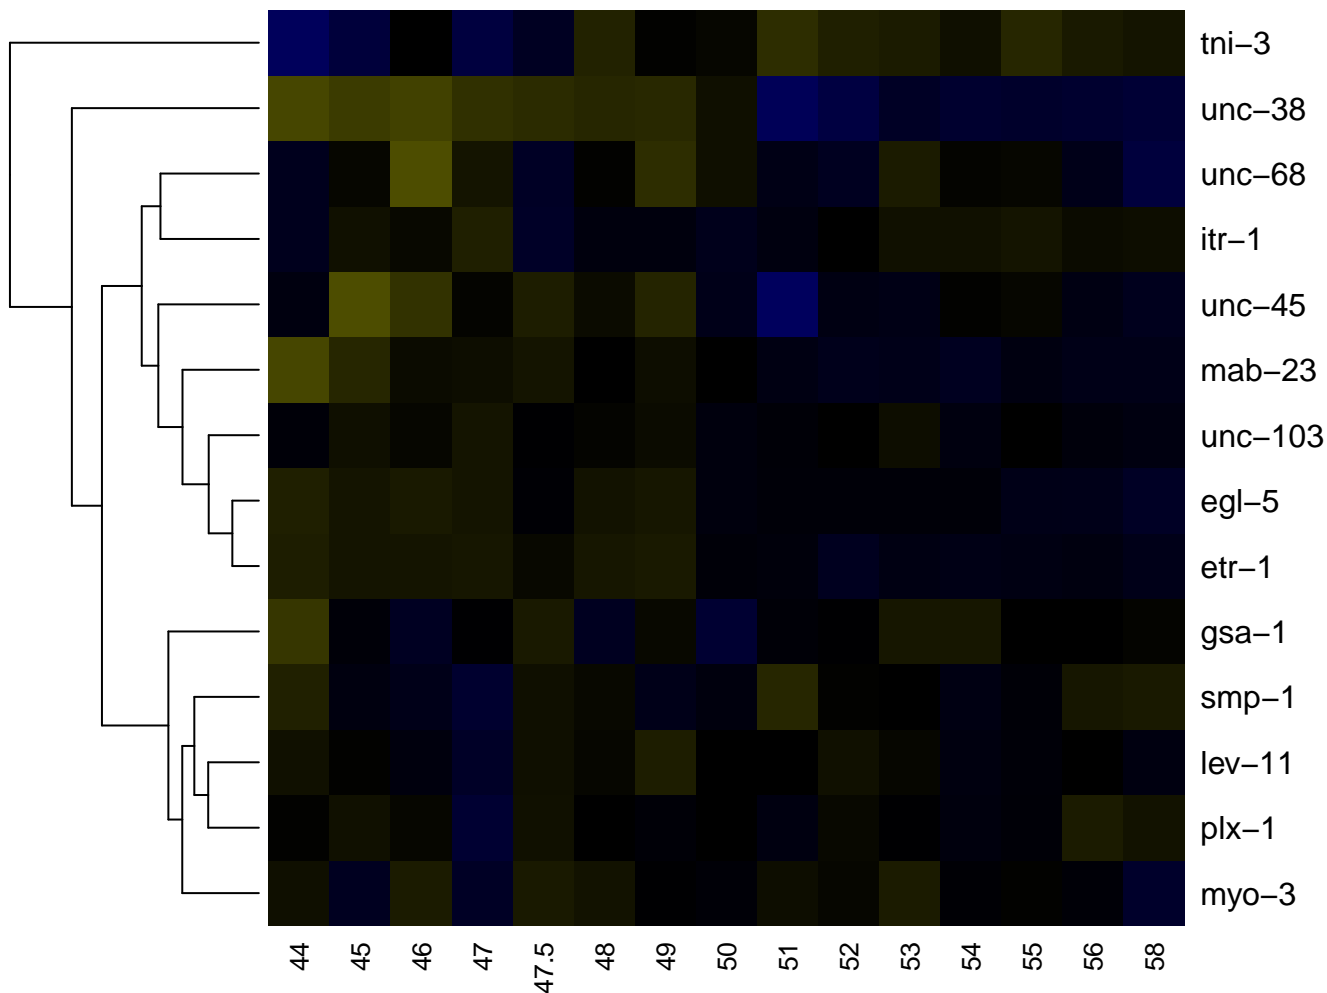

# PQR

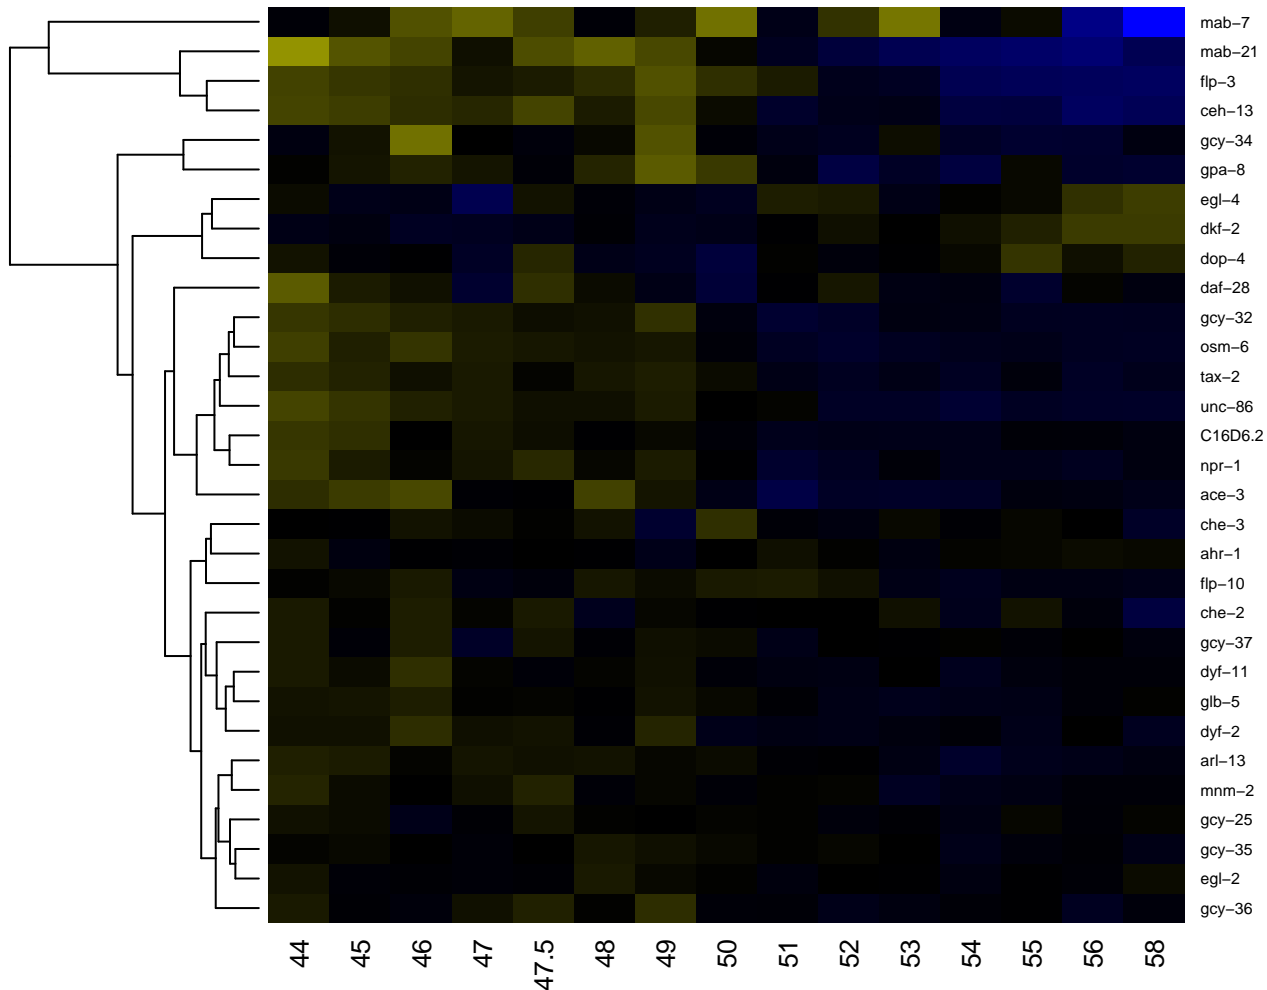

# preanal ganglion

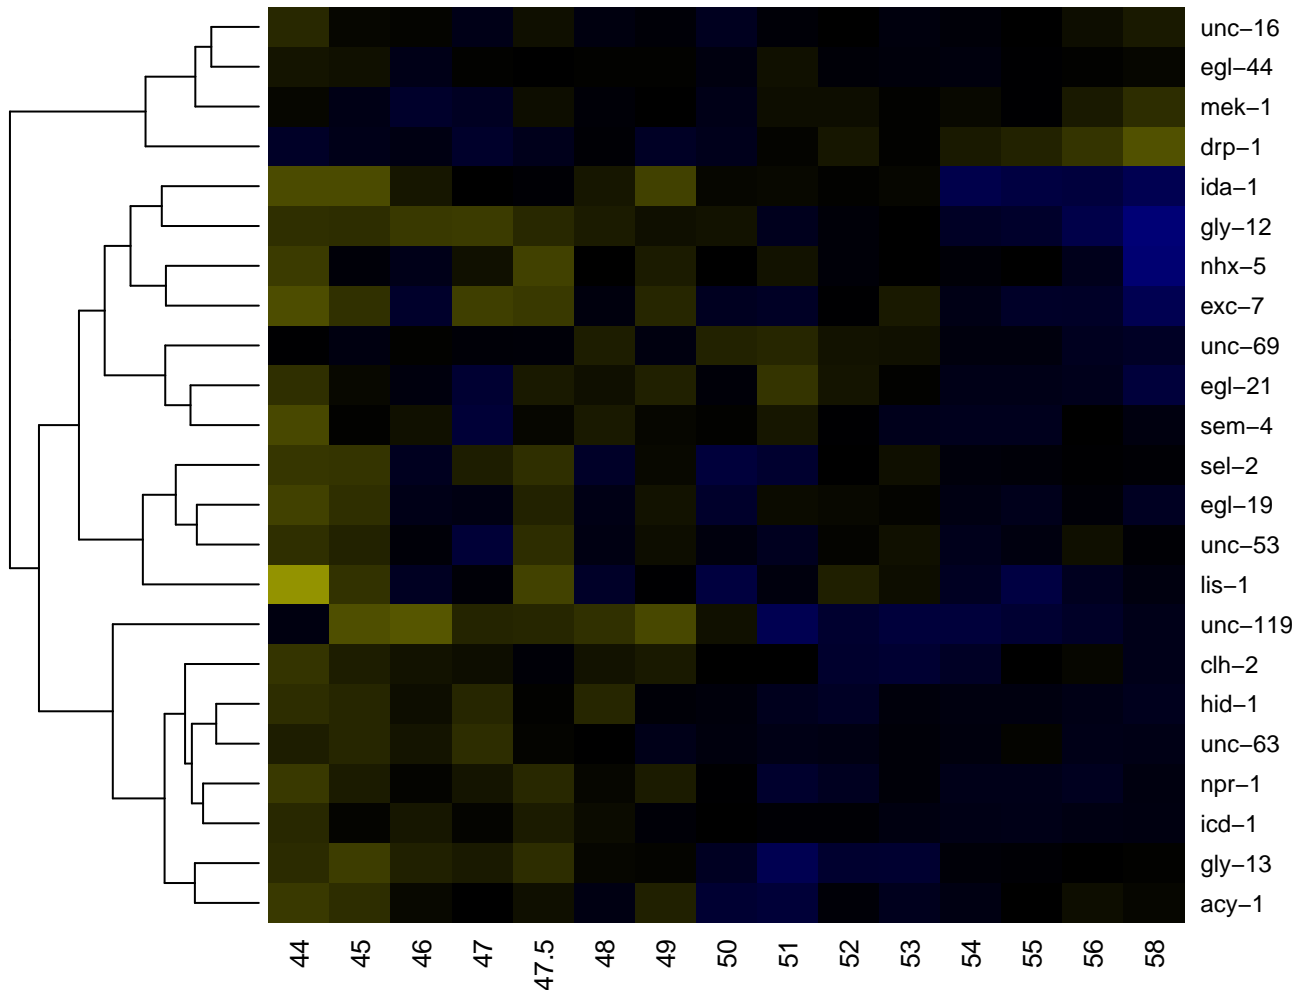



# Psub1

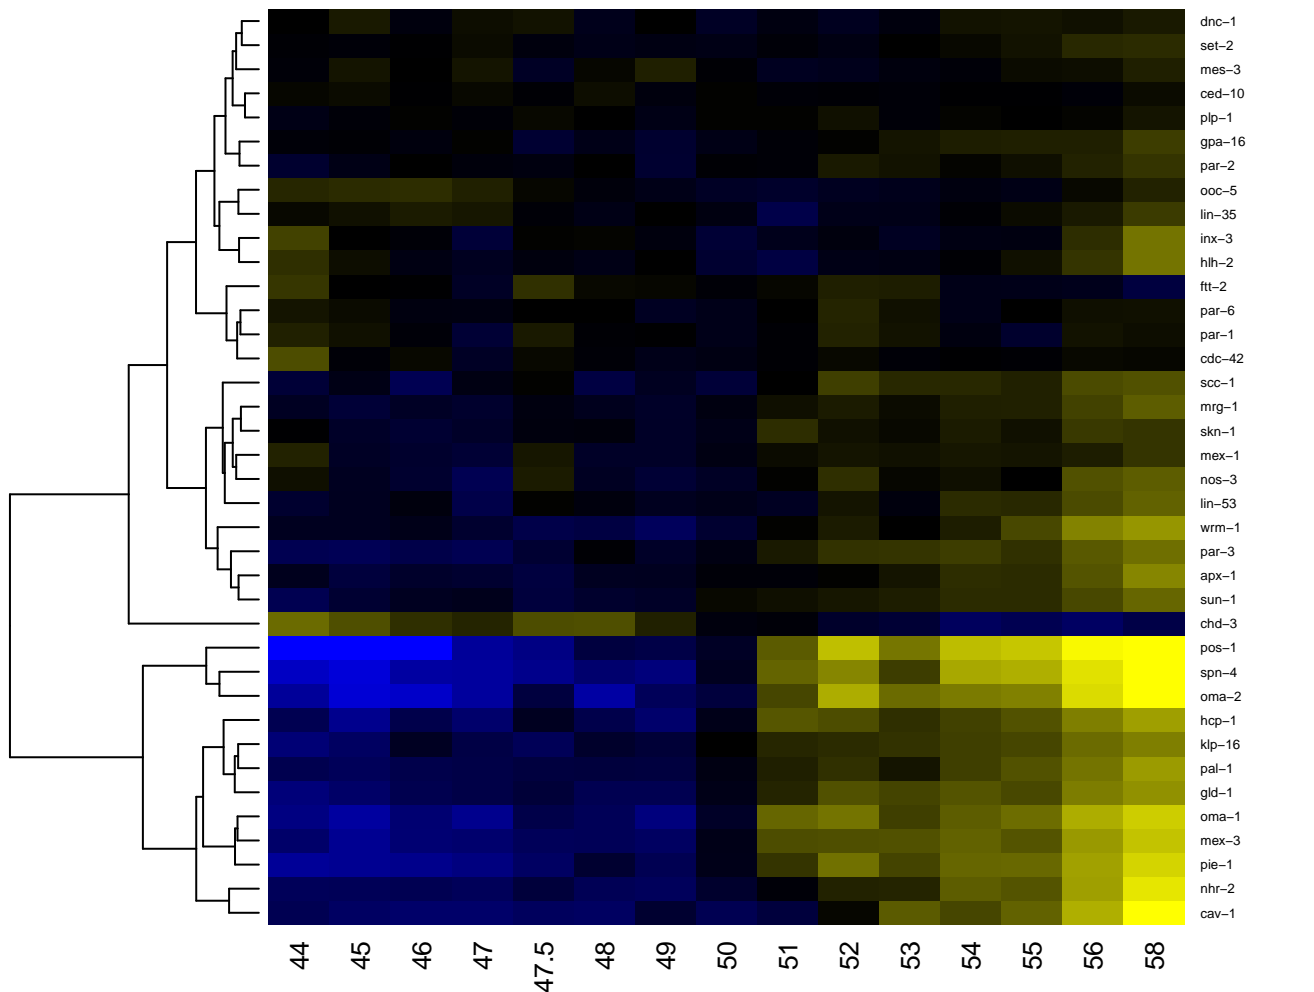

-2

-1

0

1

2

# Psub2

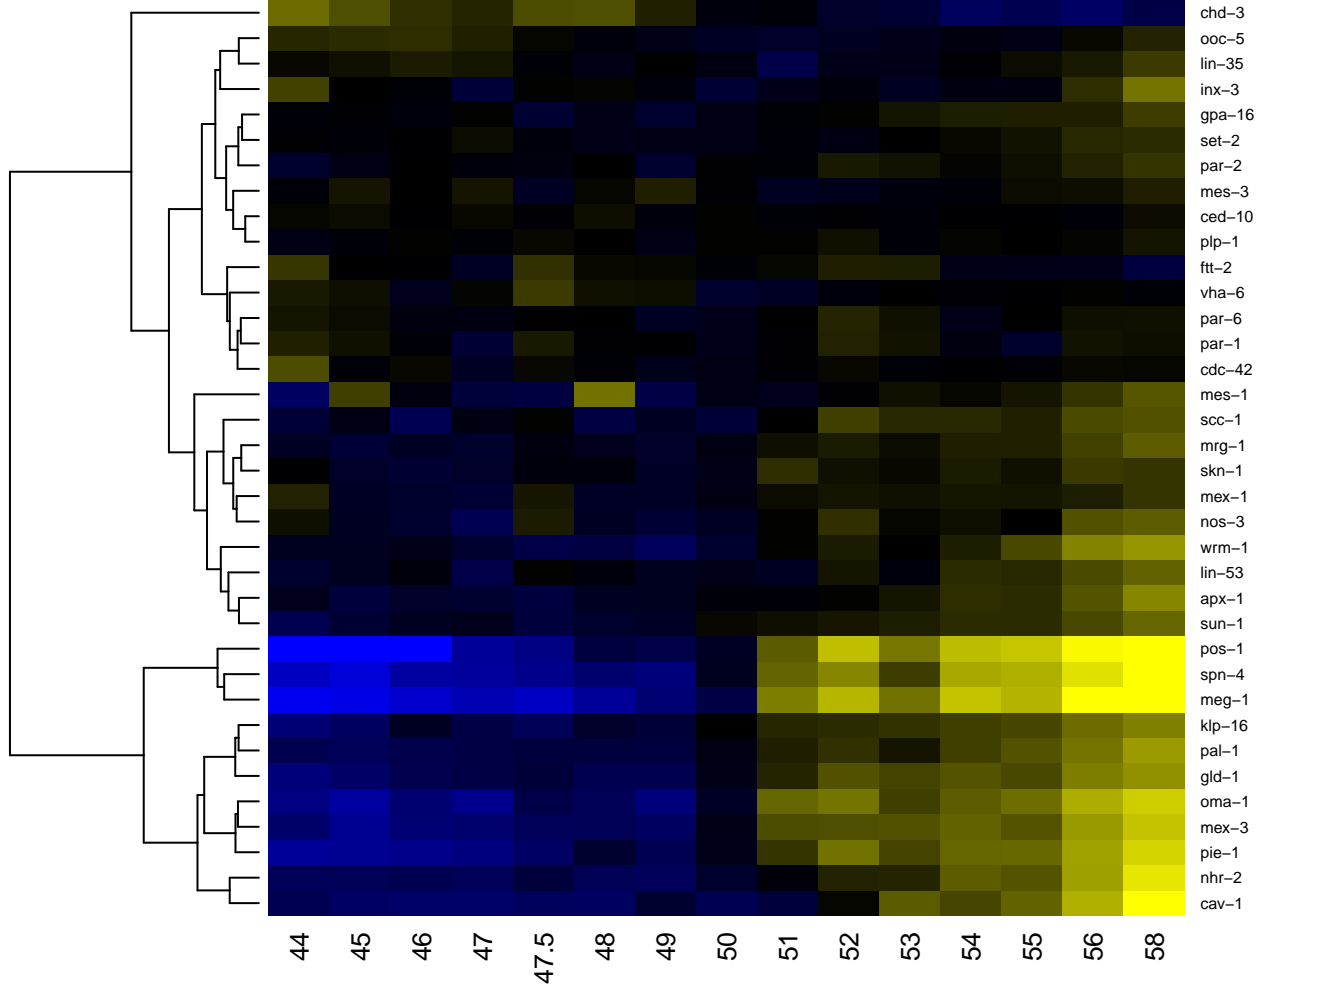

# Psub3

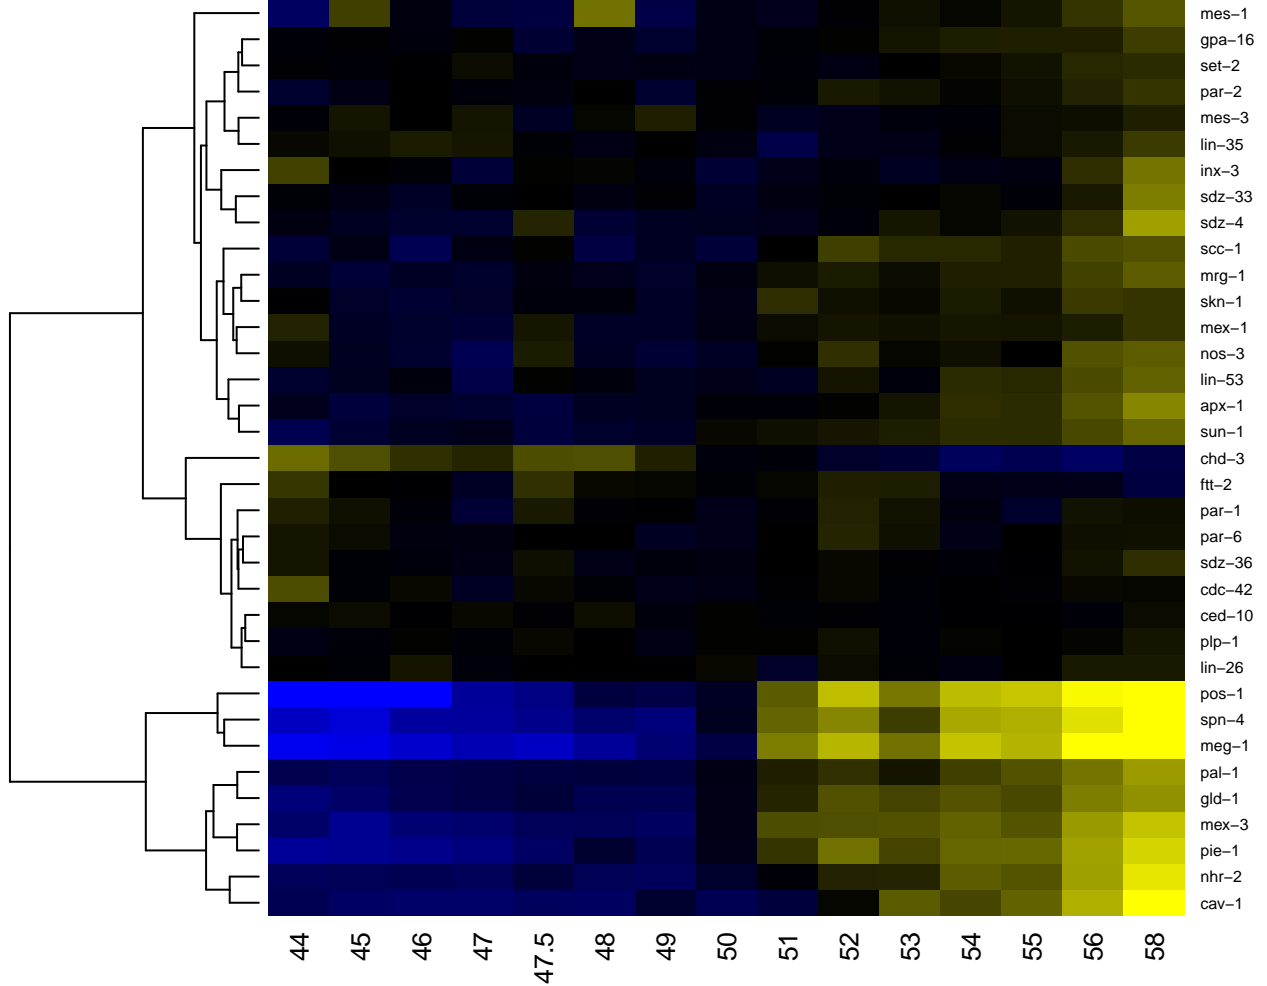

-2

-1

0

1

2

# Psub4

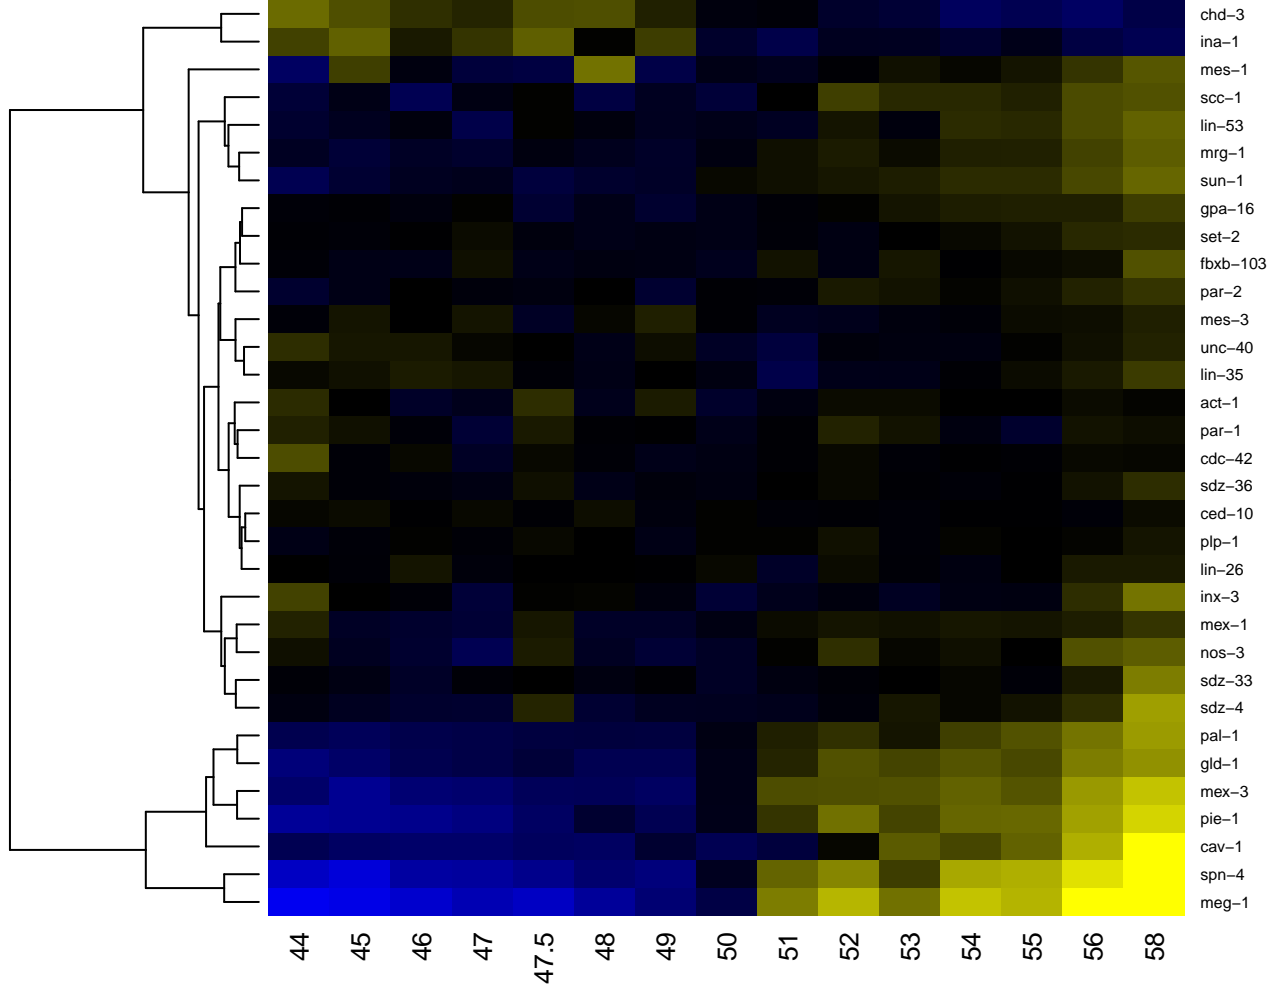



# PVCL

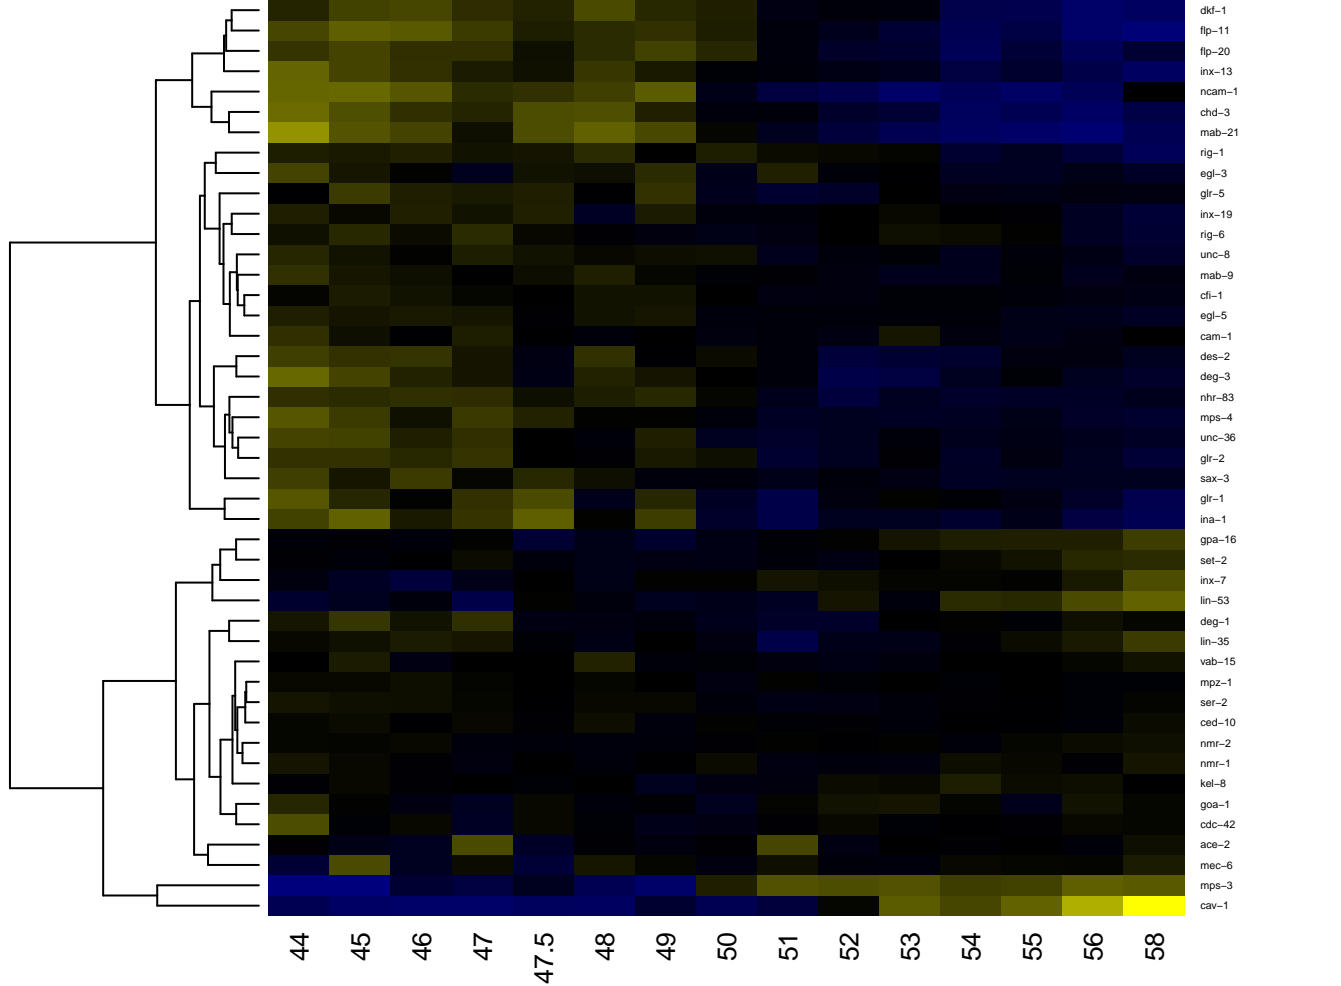

-2

-1

0

1

2

# PVCR



-2

-1

0

1

2

# PVDL

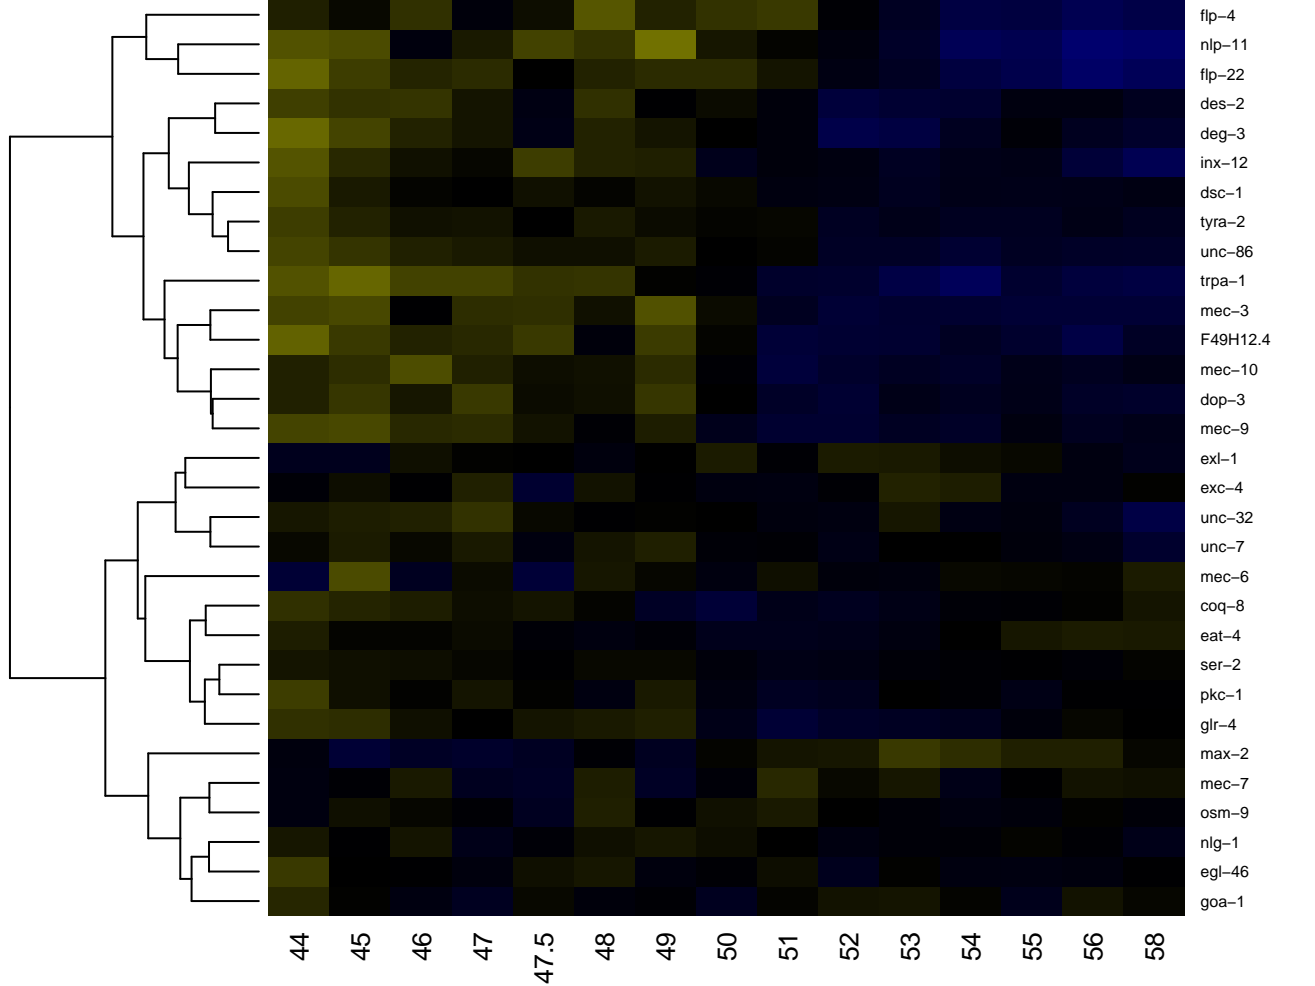

# PVDR

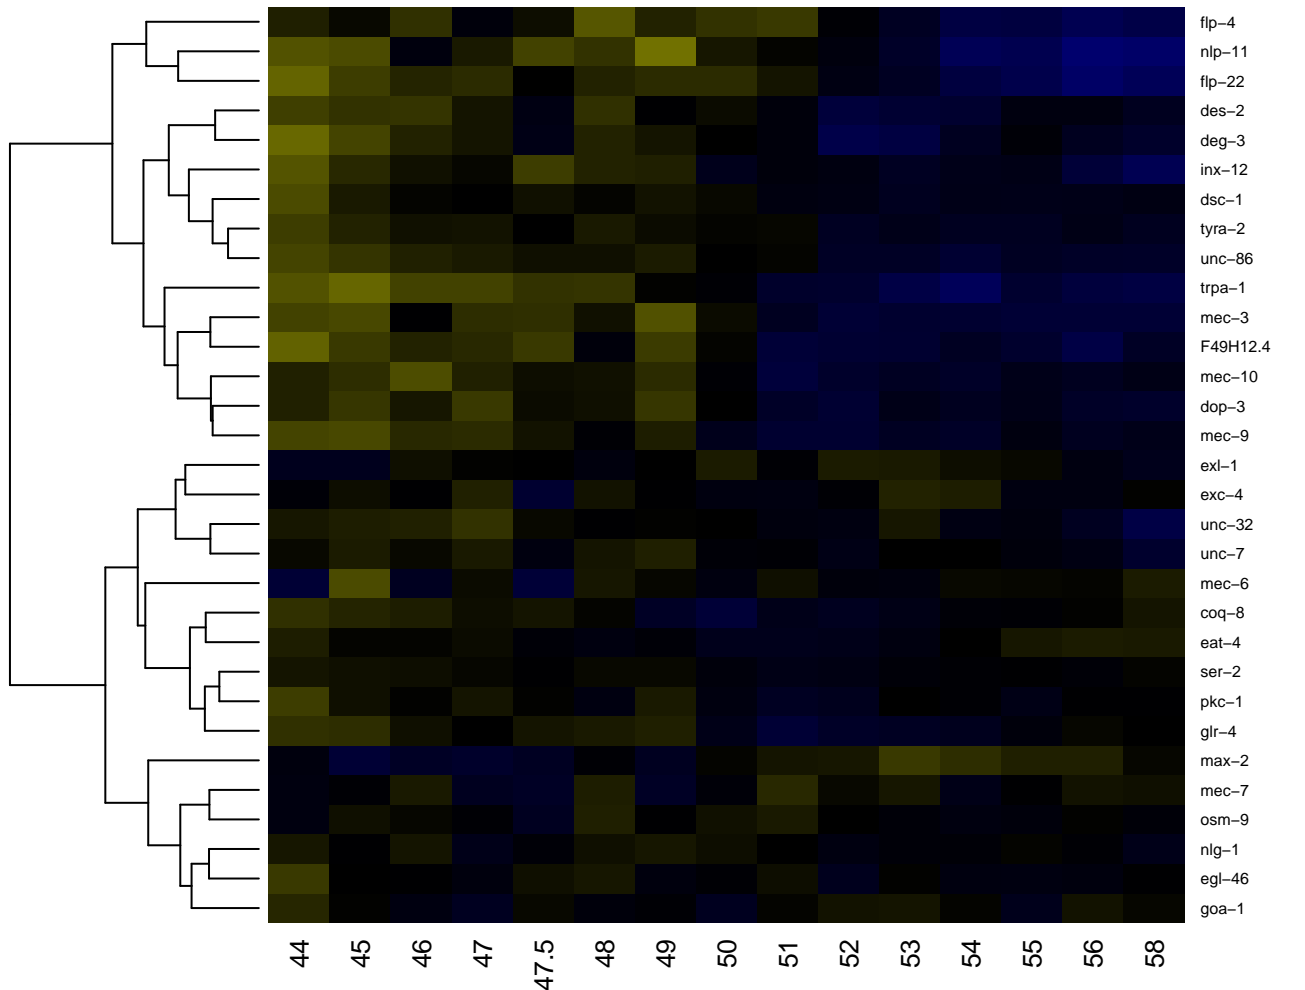

# PVM

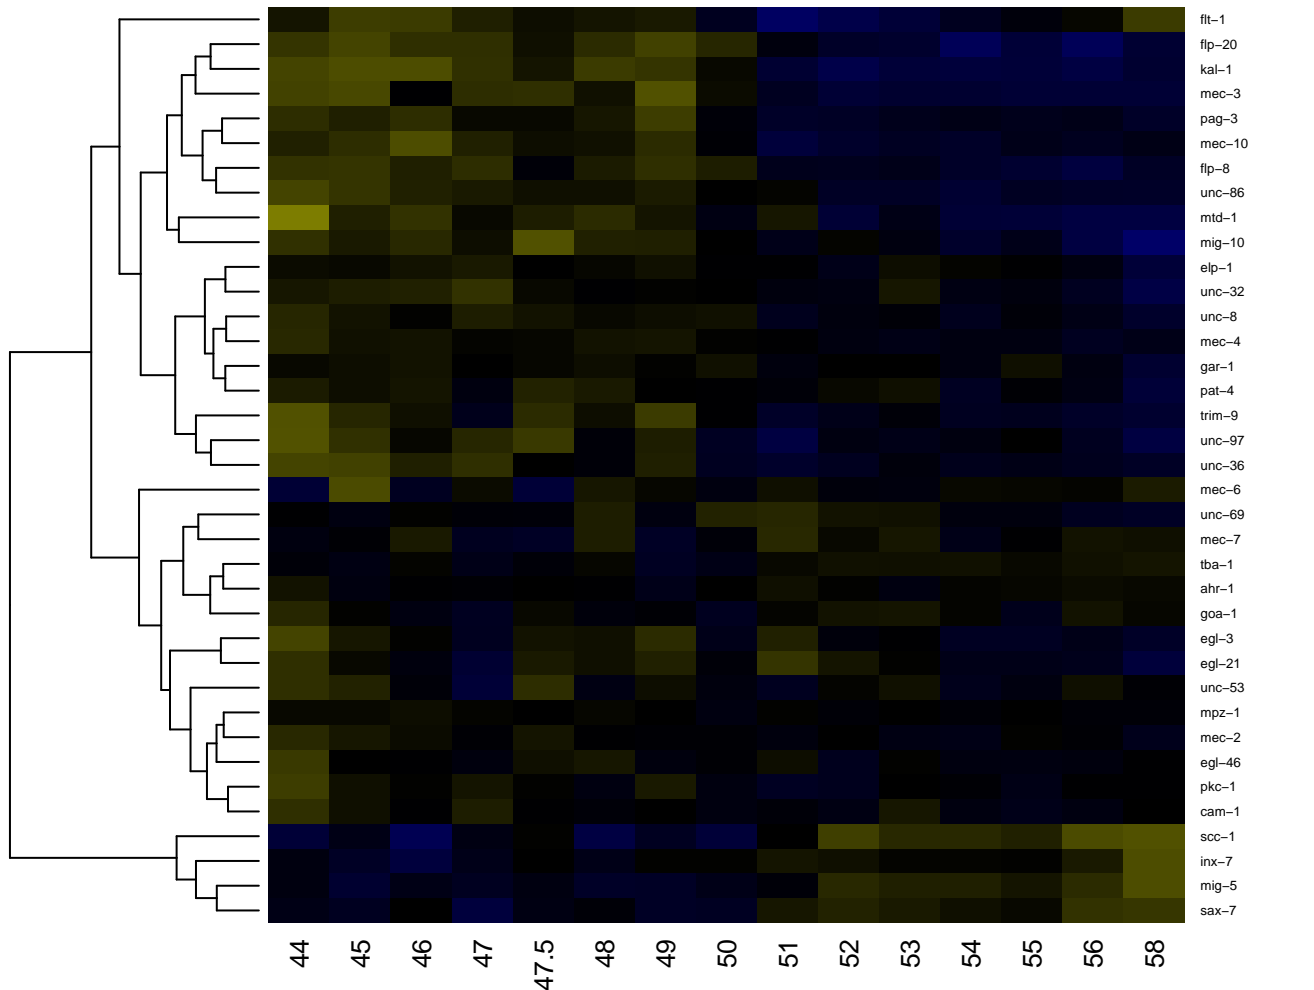

-2

-1

0

1

2

# PVPL

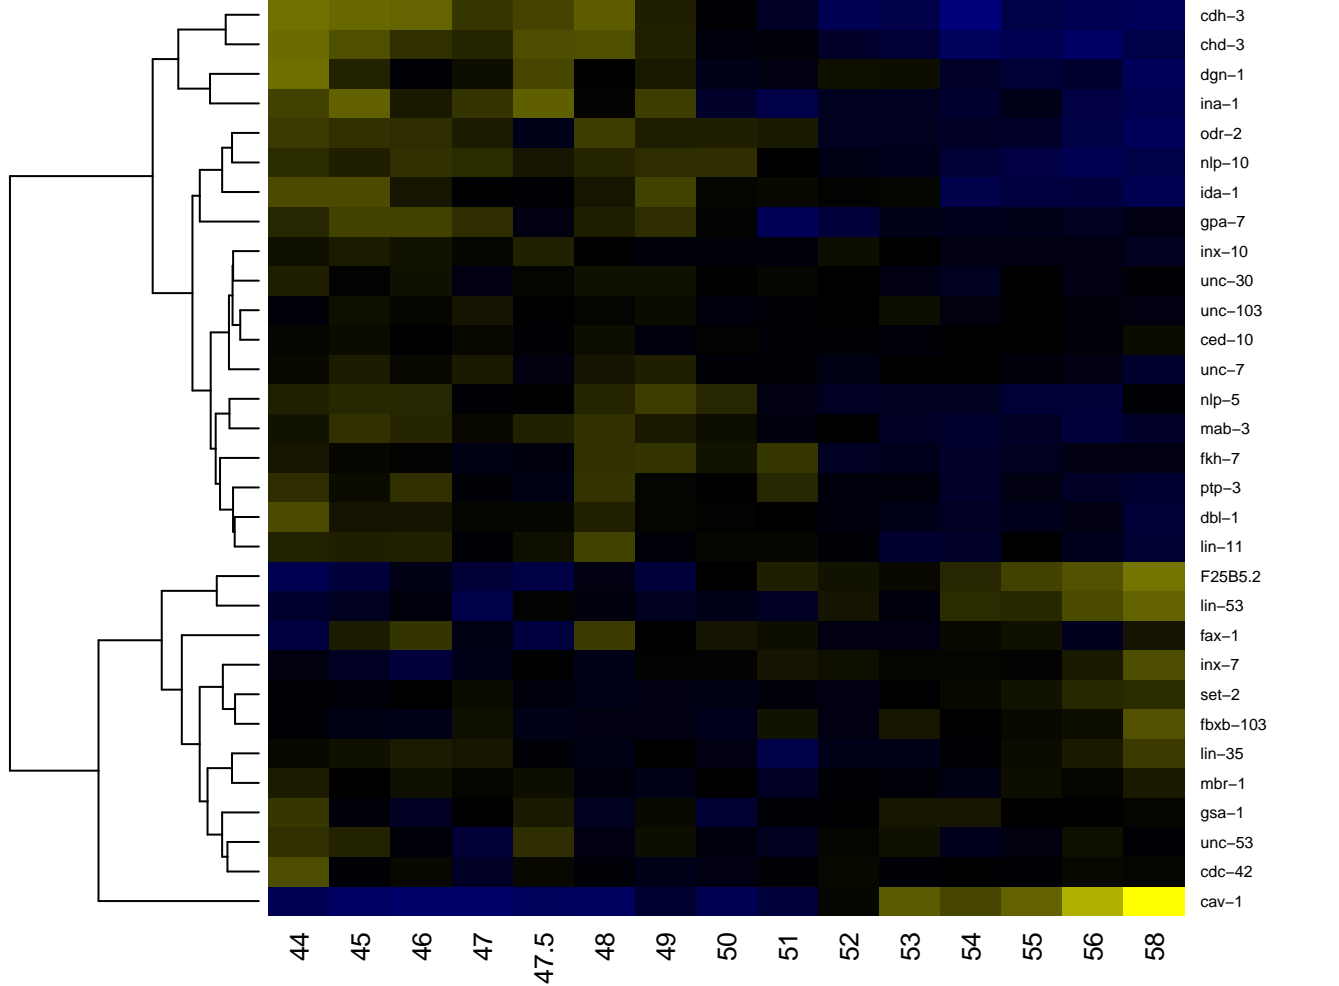

# PVPR

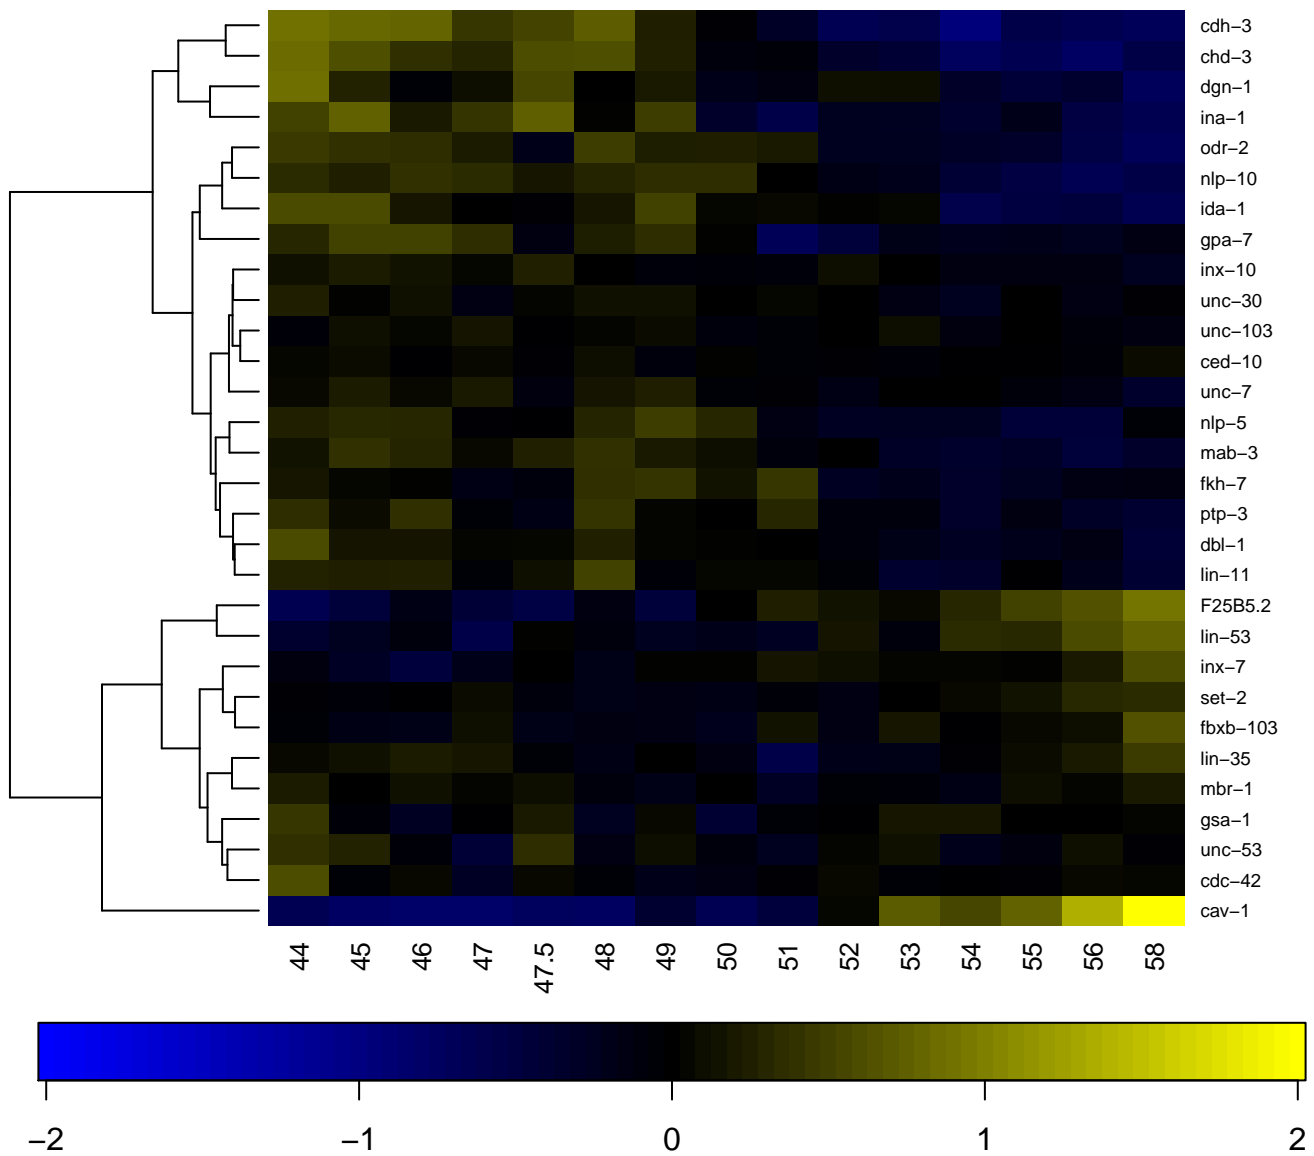

# PVQL

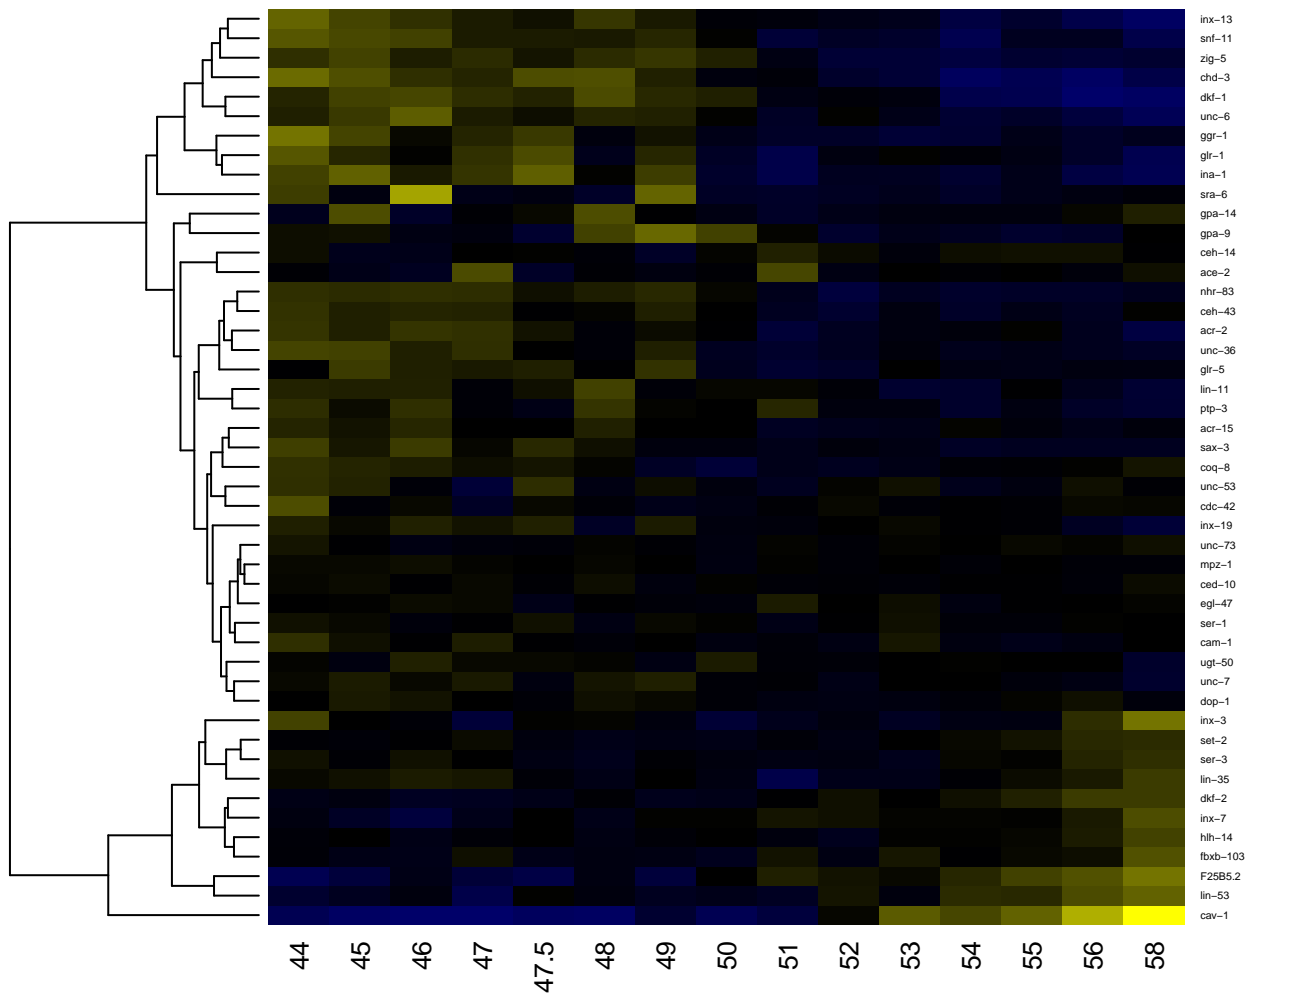

-2

-1

0

1

2





# PVR

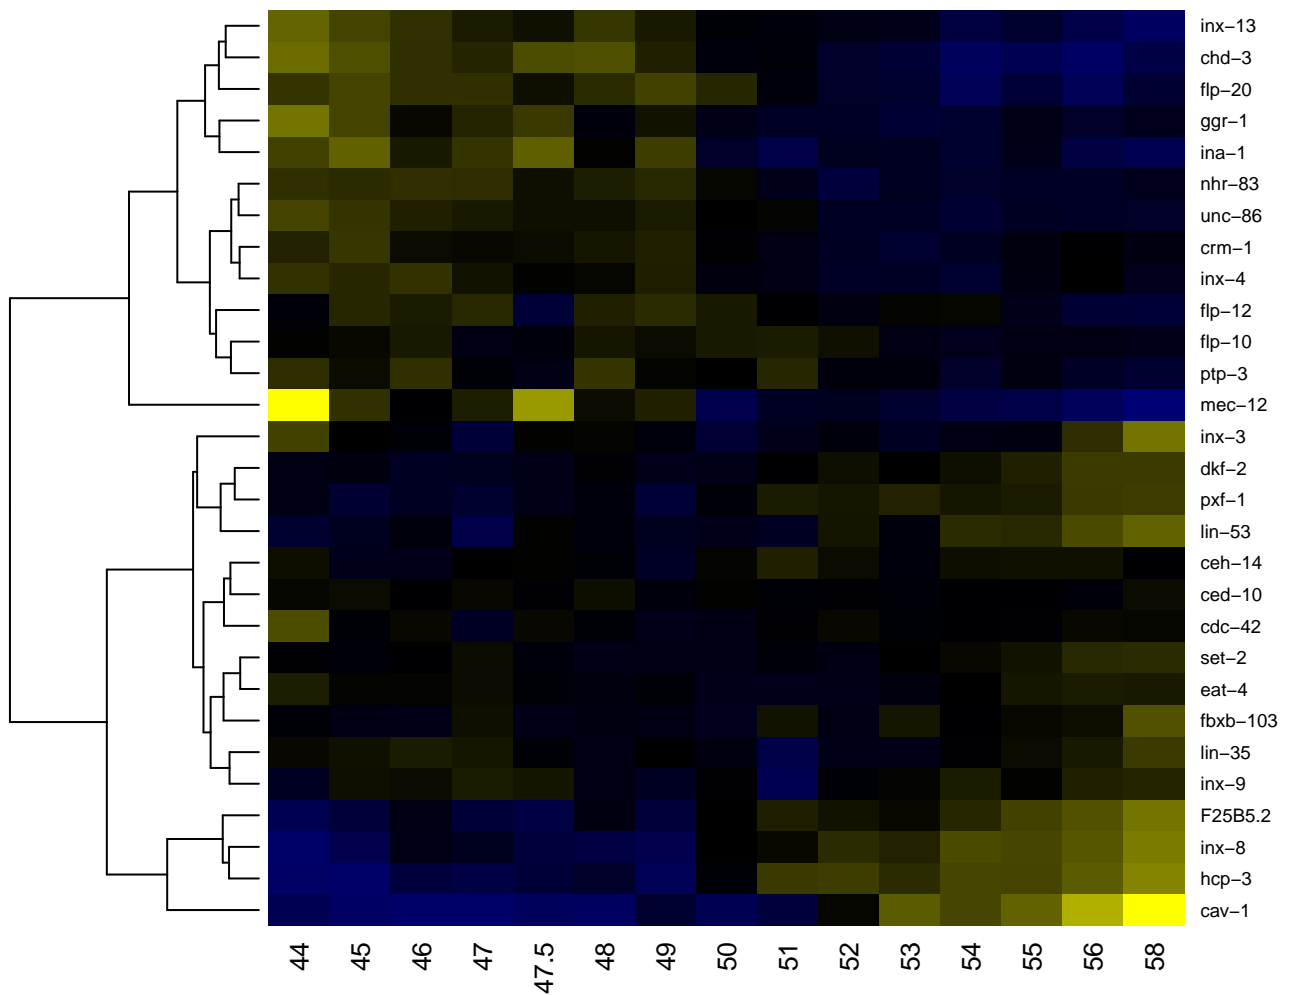

-2

-1

0

1

2

# PVT

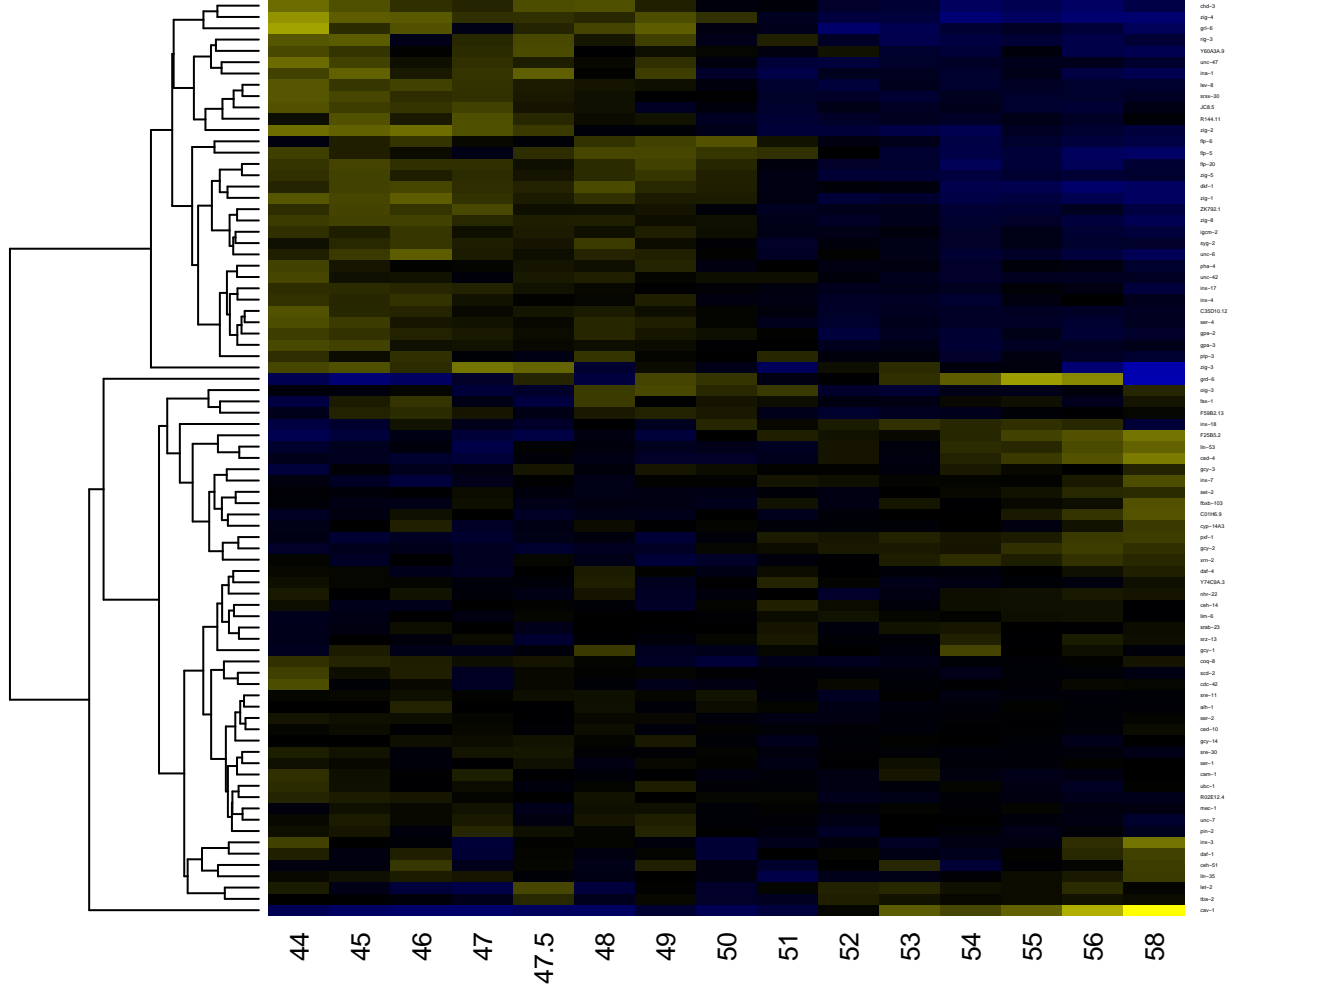

# PVV

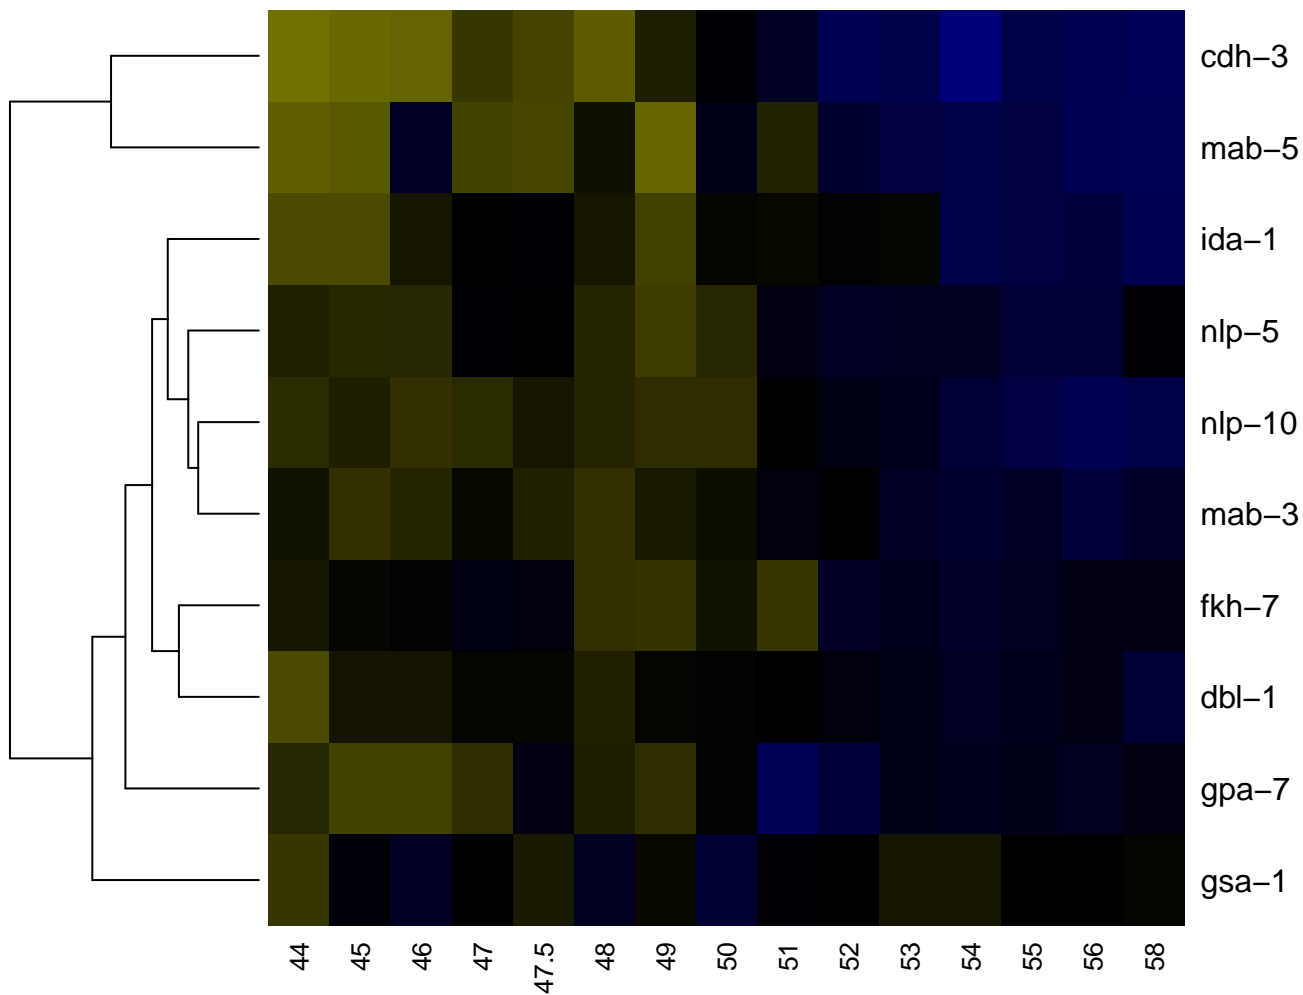

# PVWL

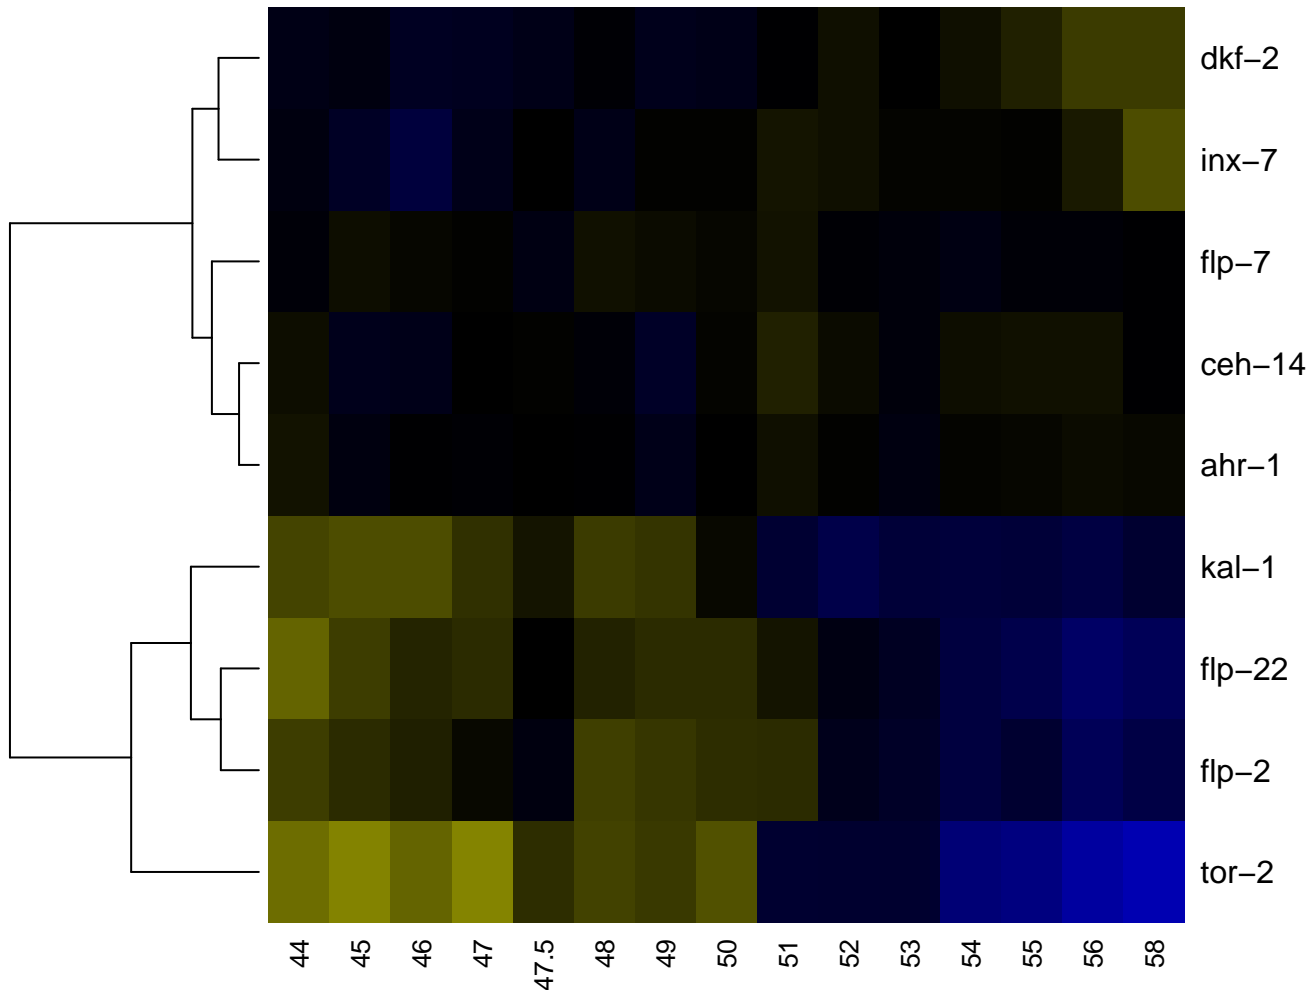

# PVWR

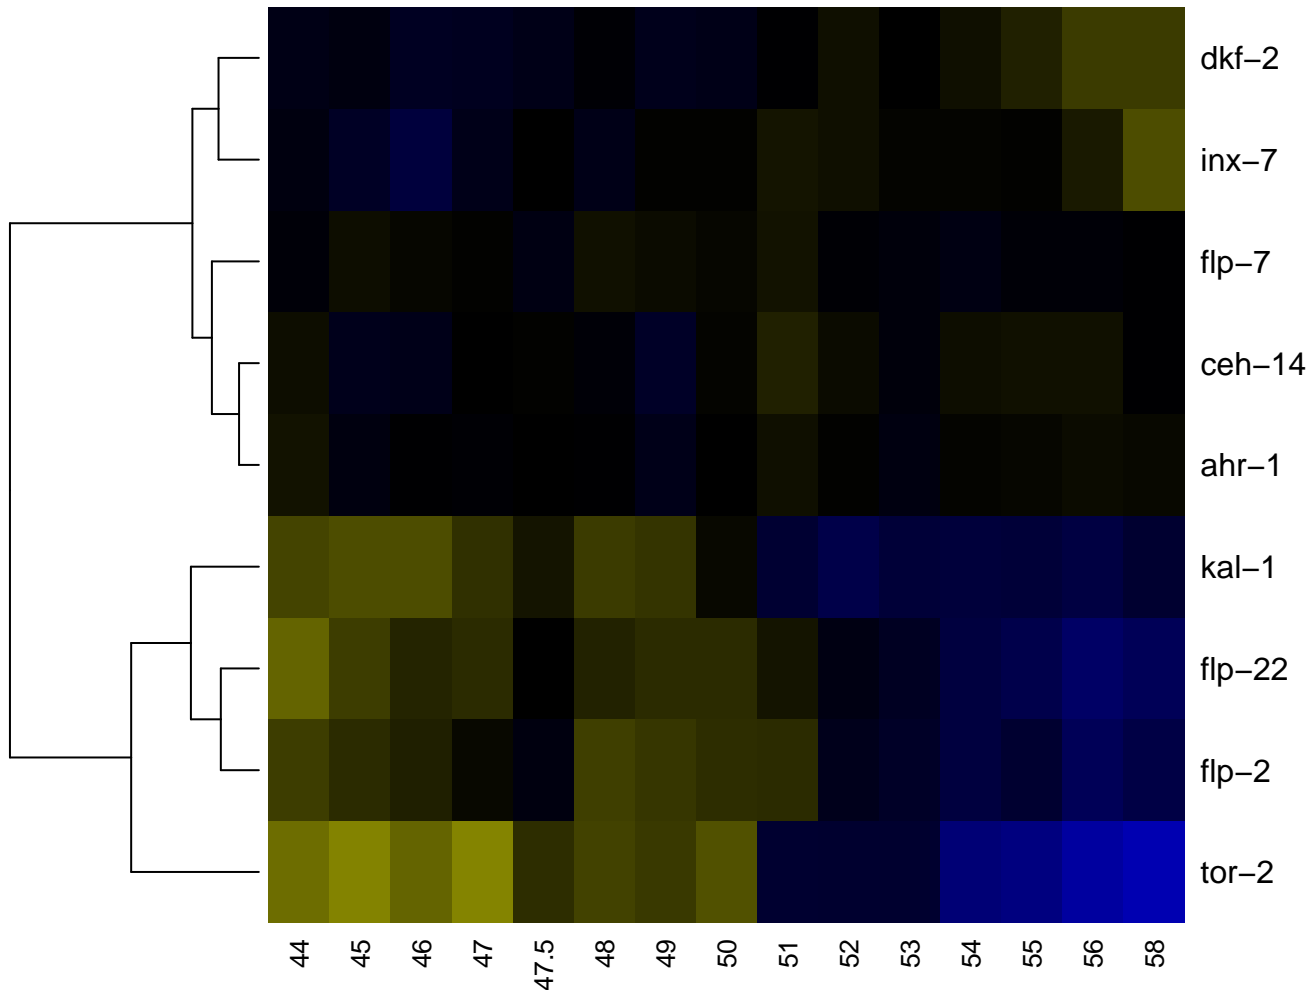

# PVX

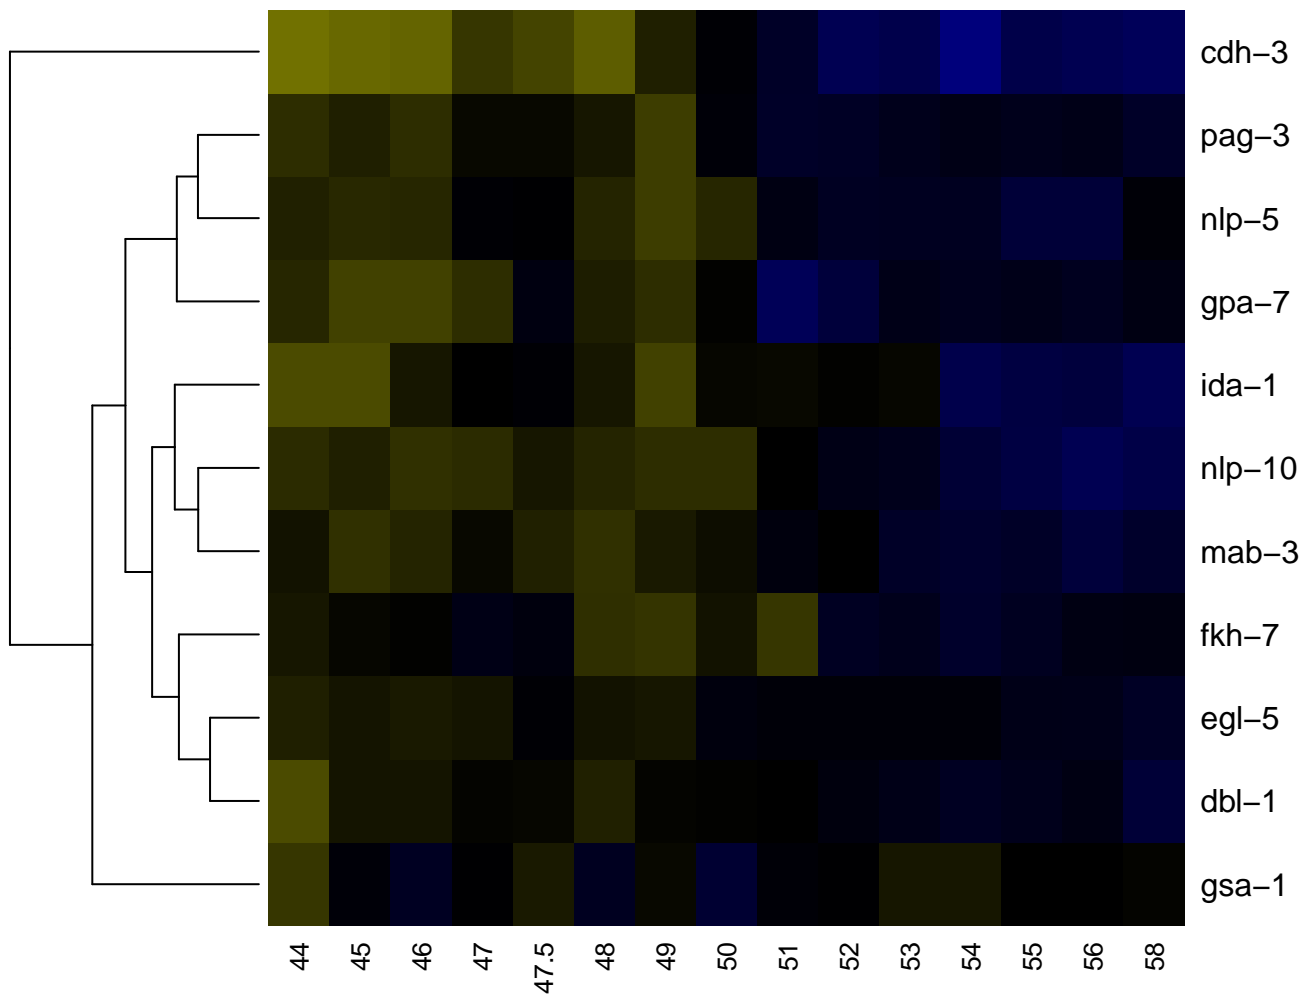

# PVY





# PVZ

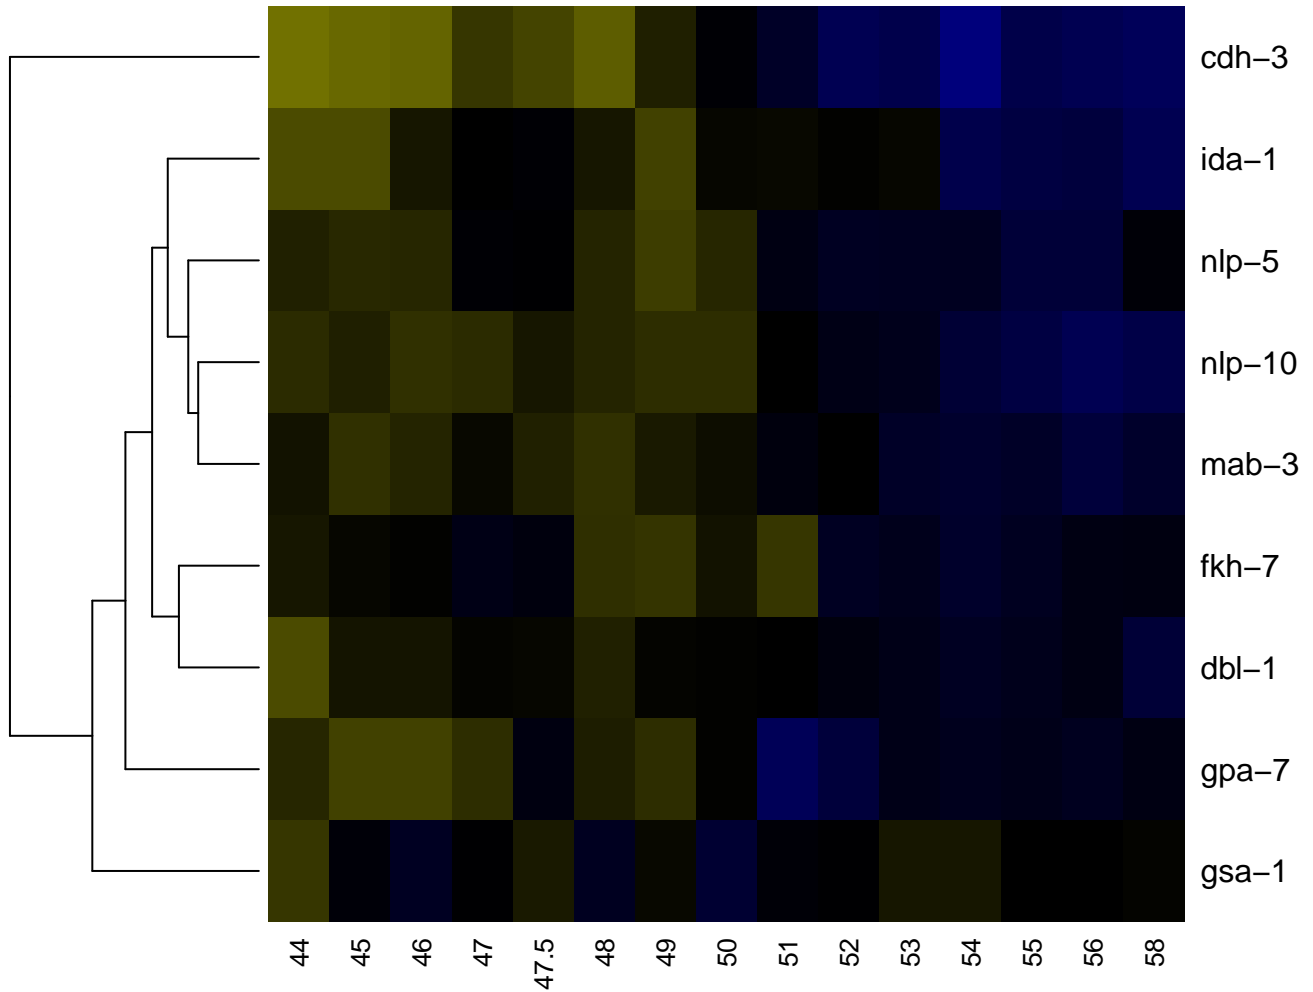

# QL

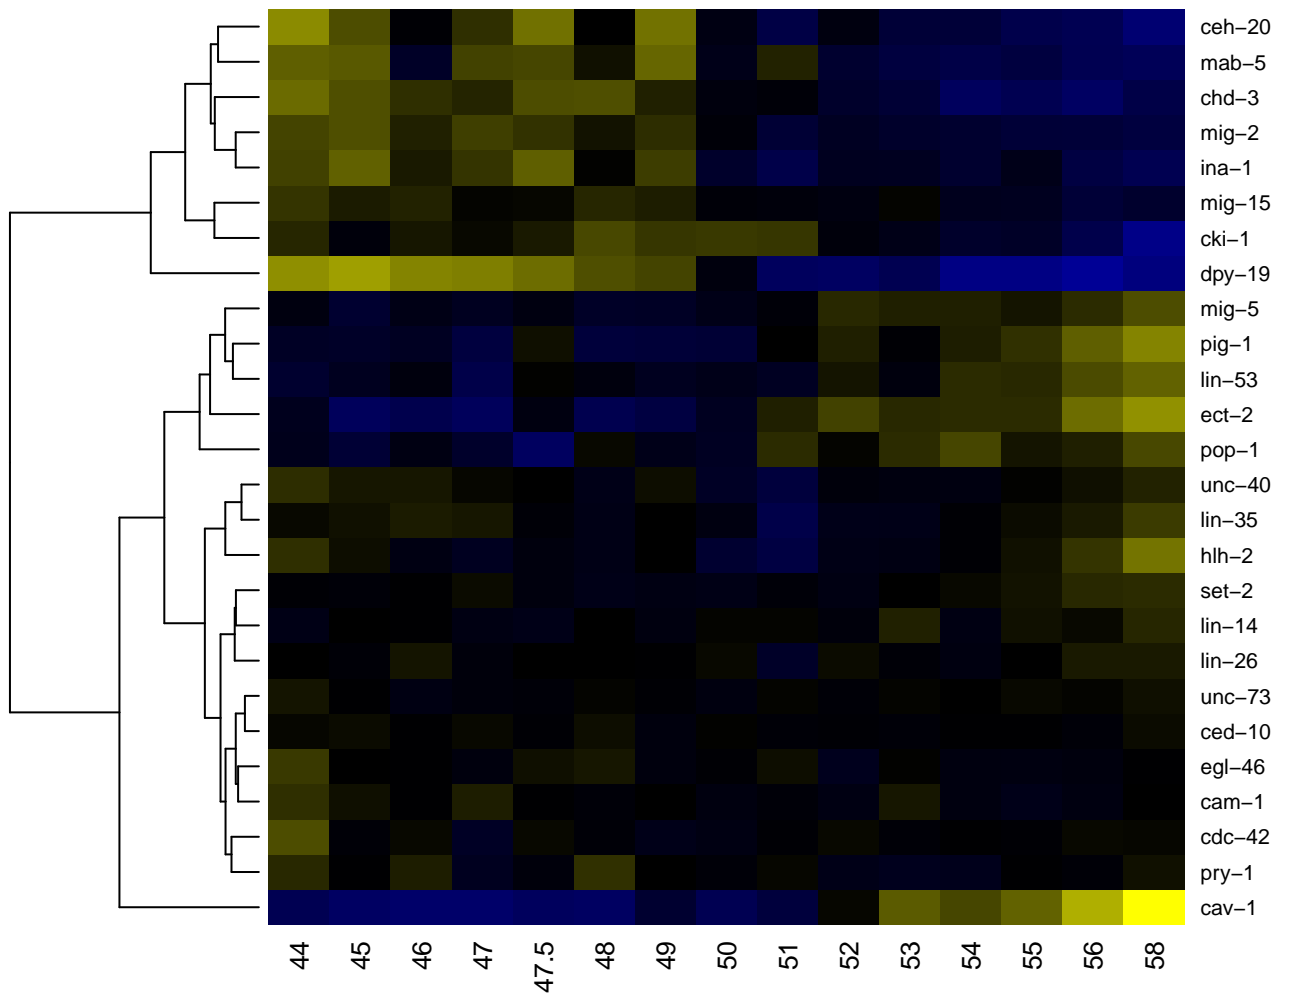

-2

-1

0

1

2

# QL.a

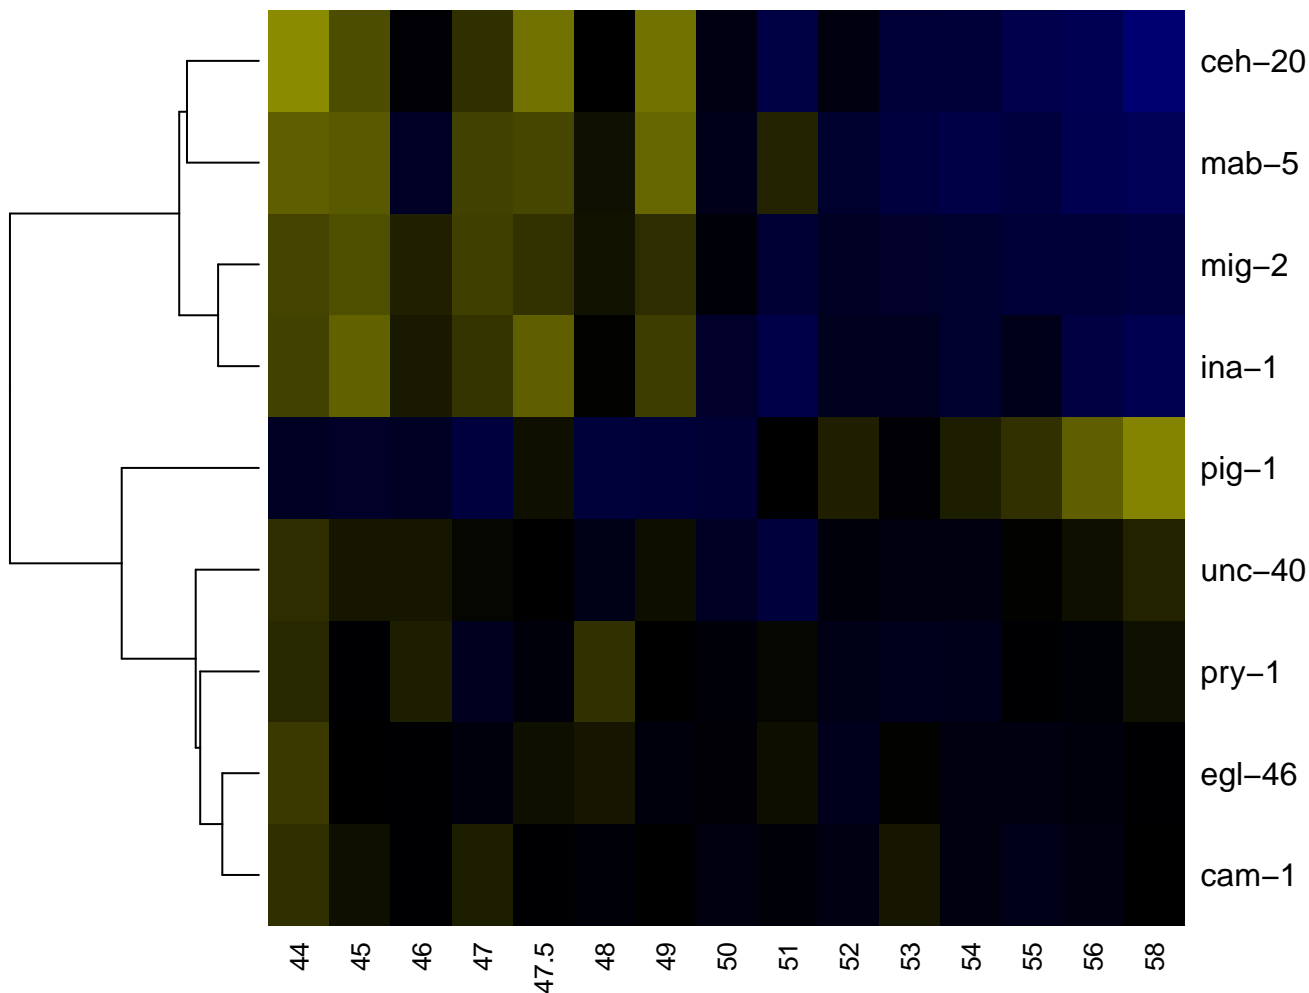

-2

-1

0

1

2



# QL.p



-2

-1

0

1

2

# QL.pa

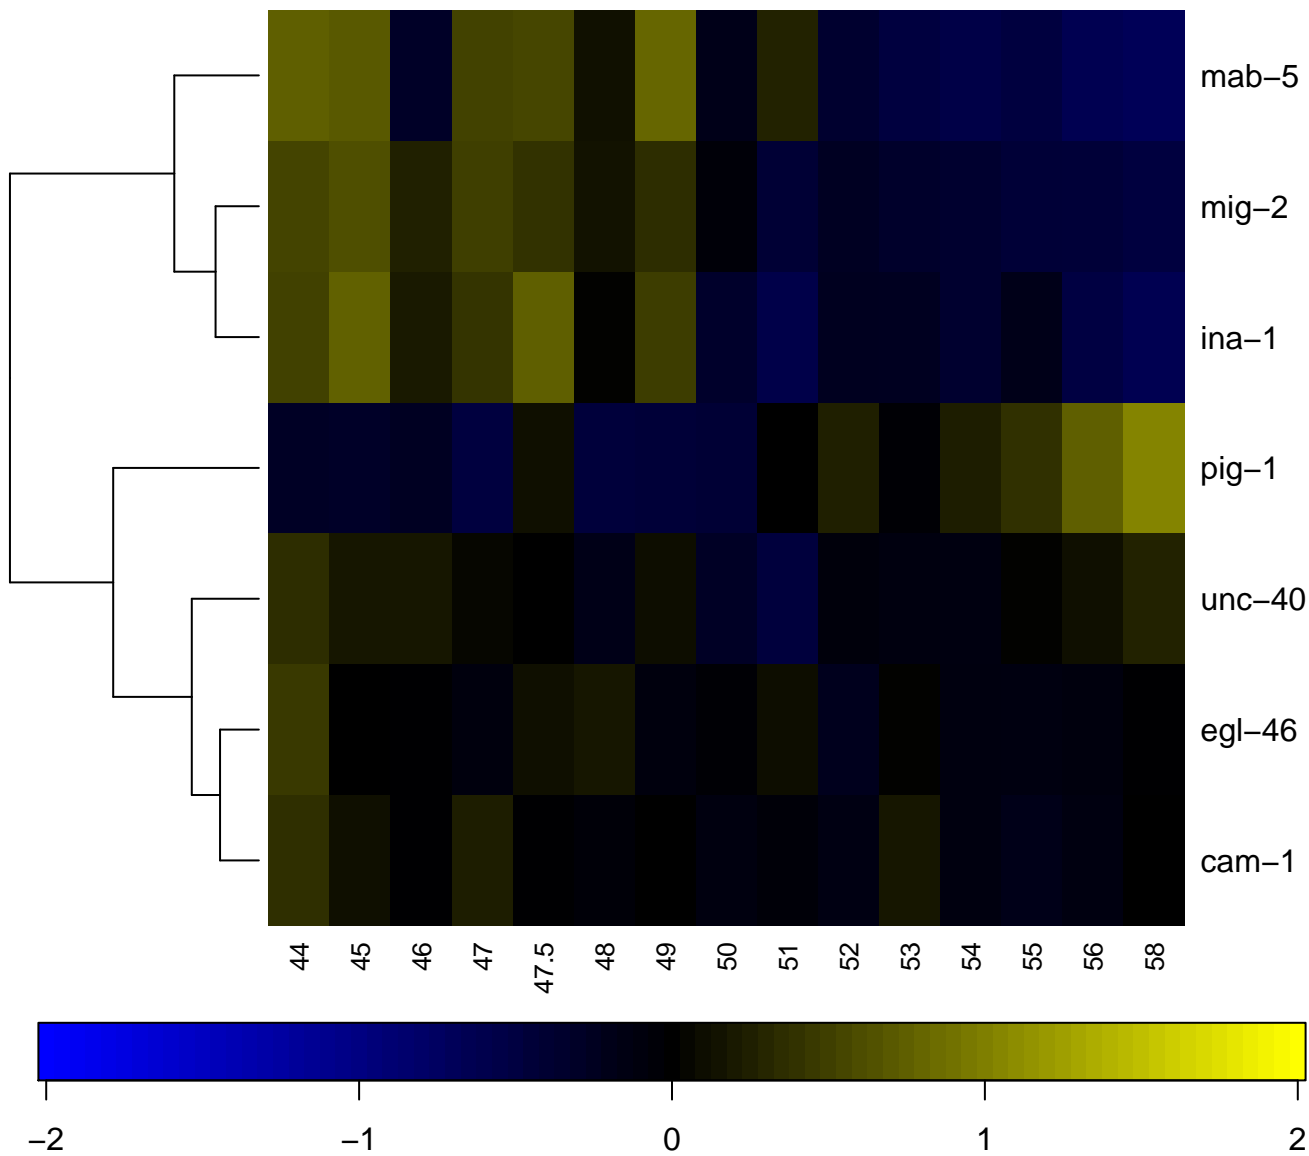

# QL.pp







# QR.a

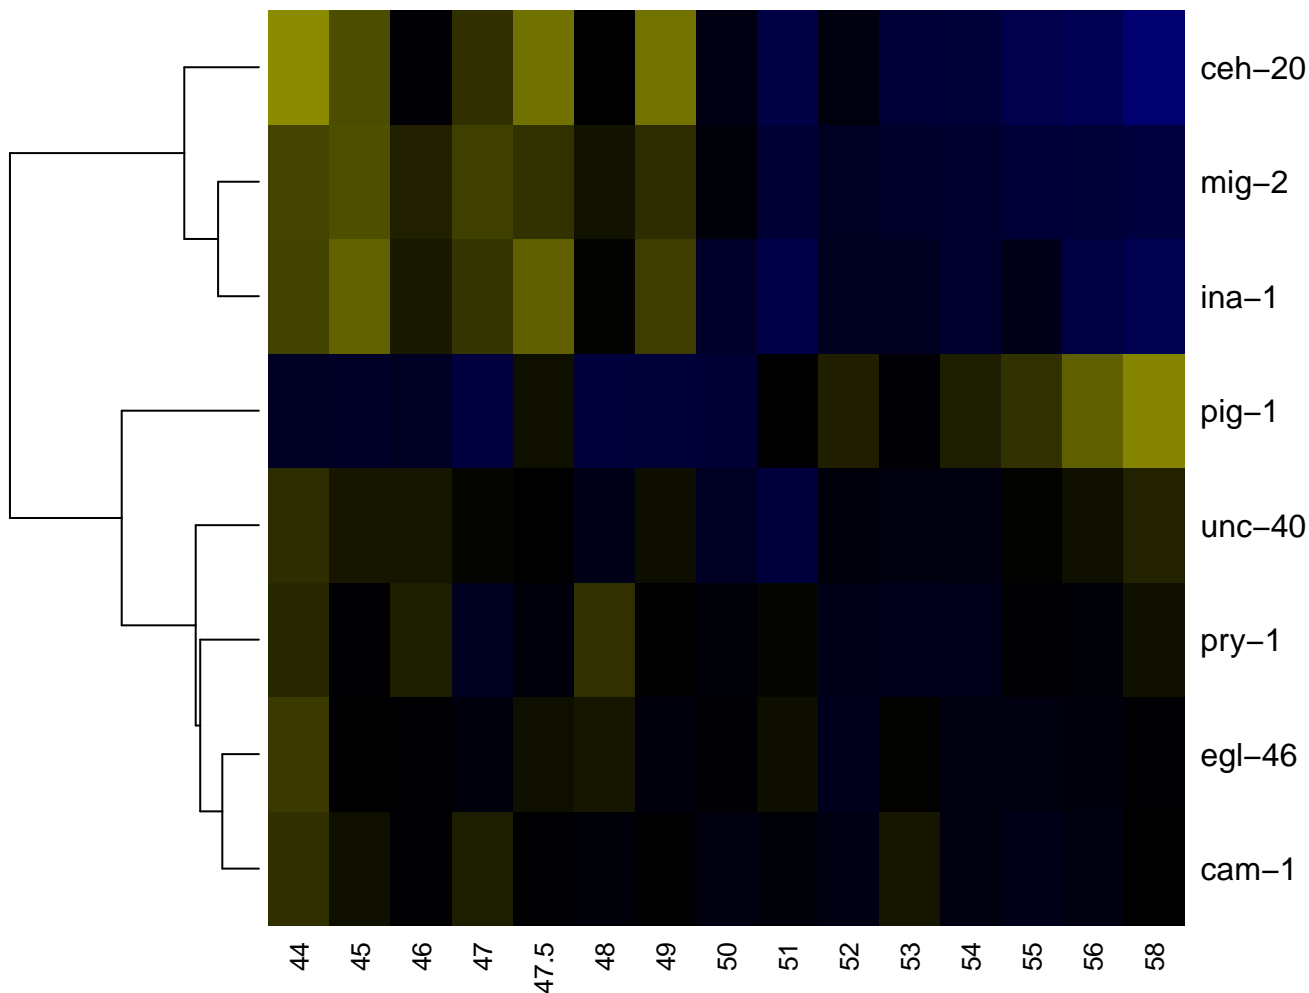



# QR.p

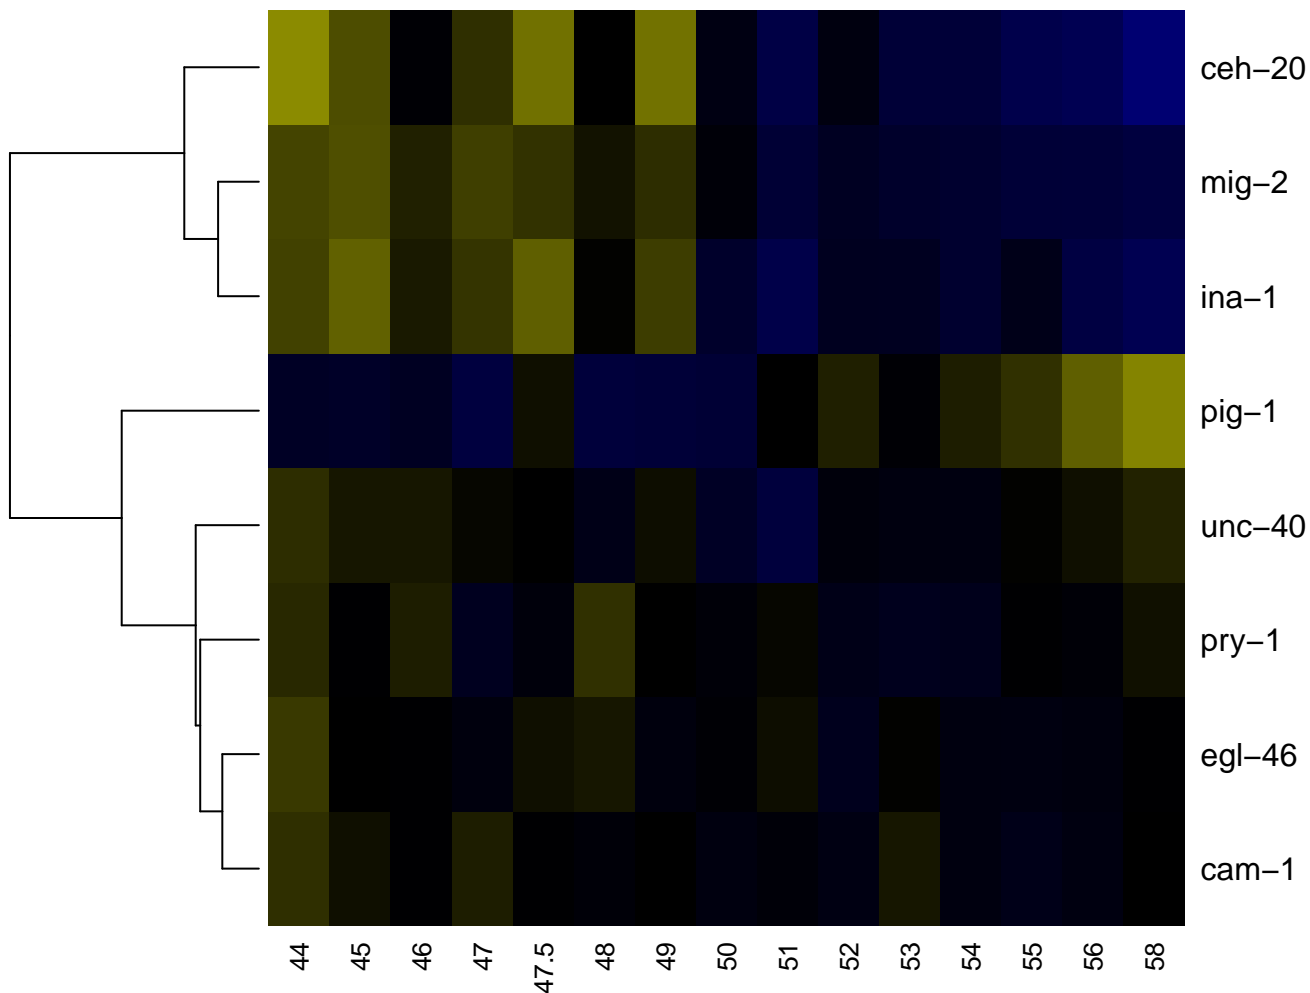







# R1AL

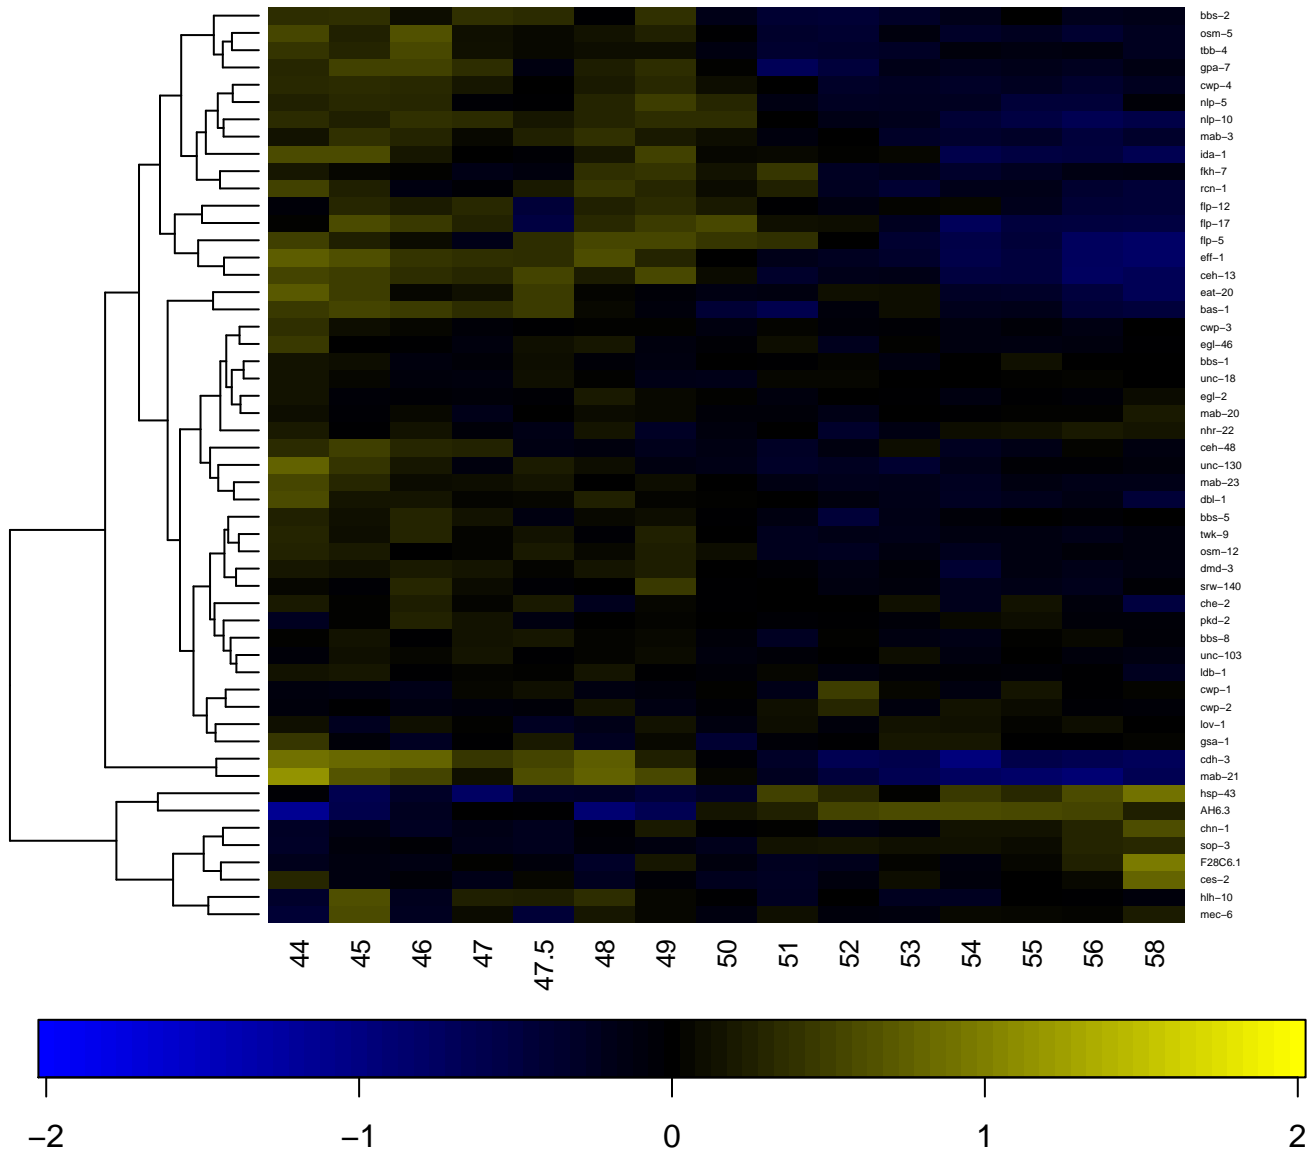

# R1AR

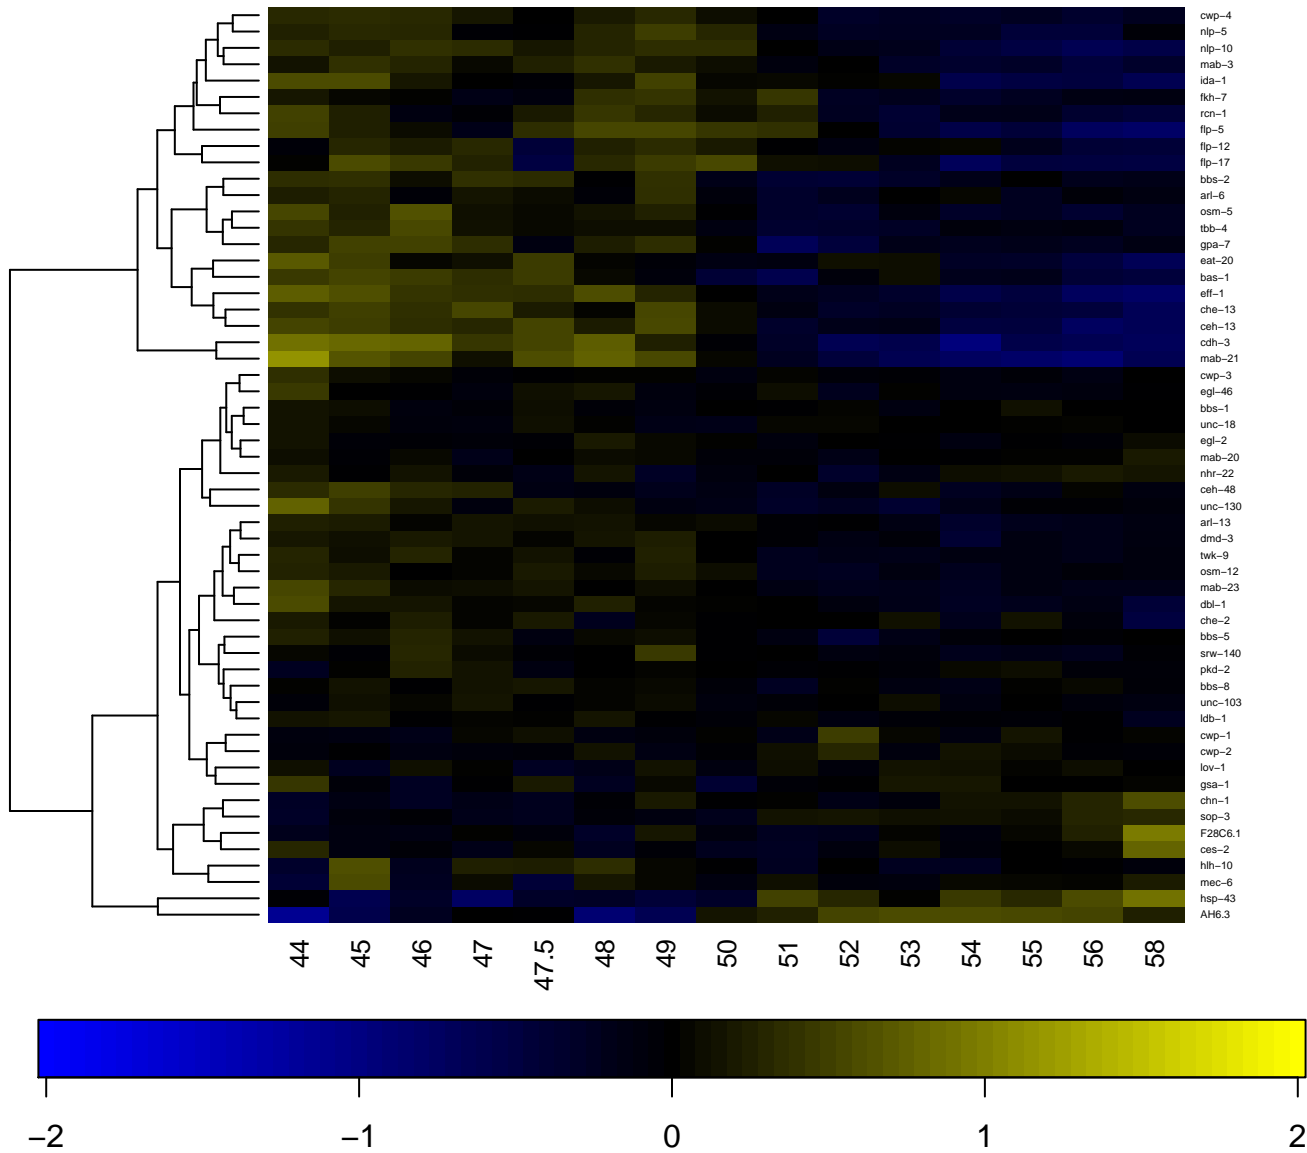



# R1BL

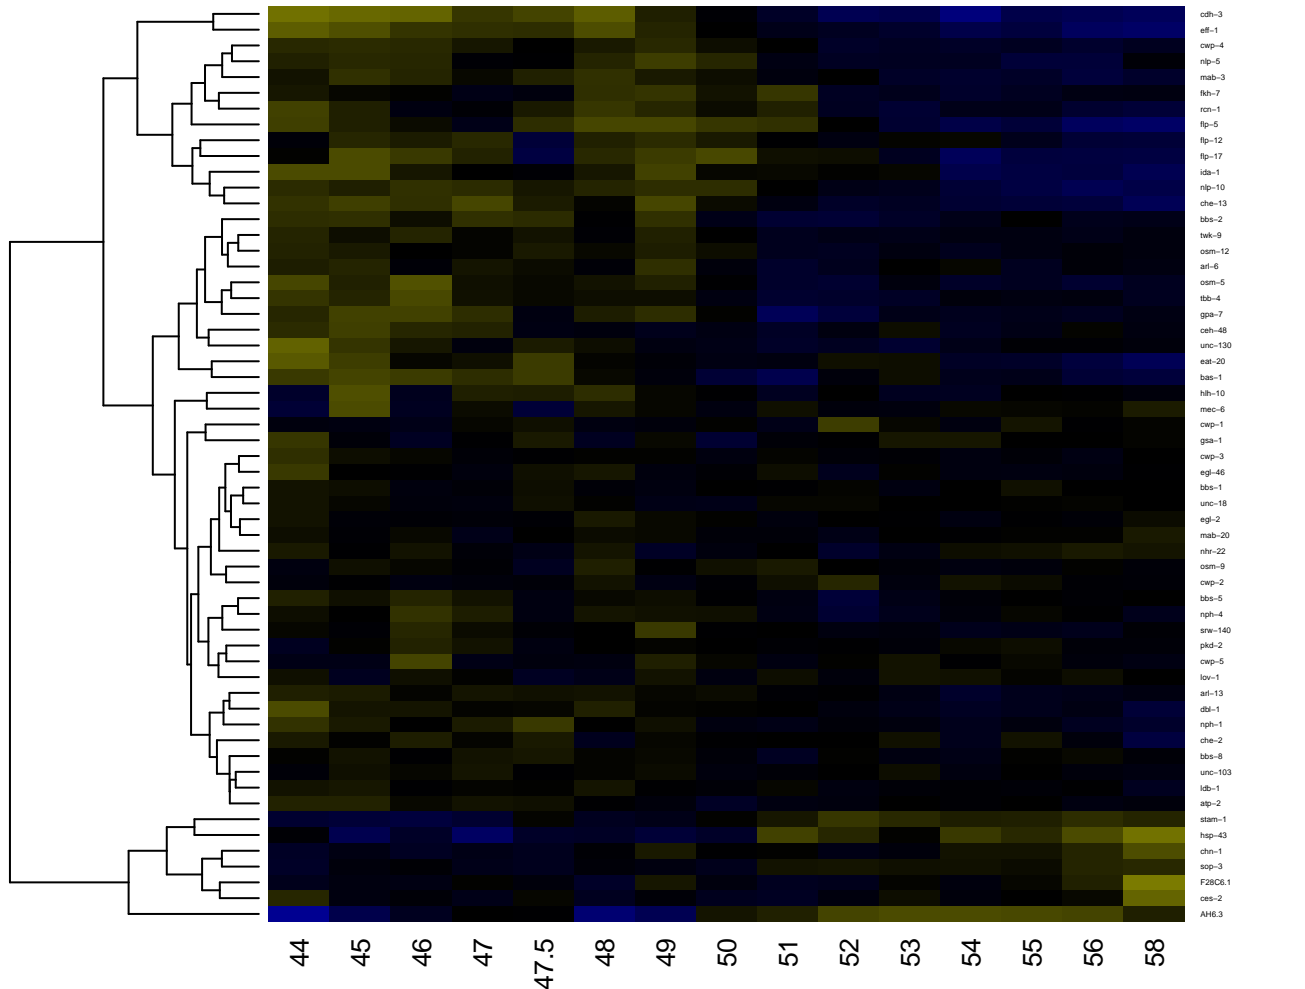

-2

-1

0

1

2

# R1BR



# R1stL

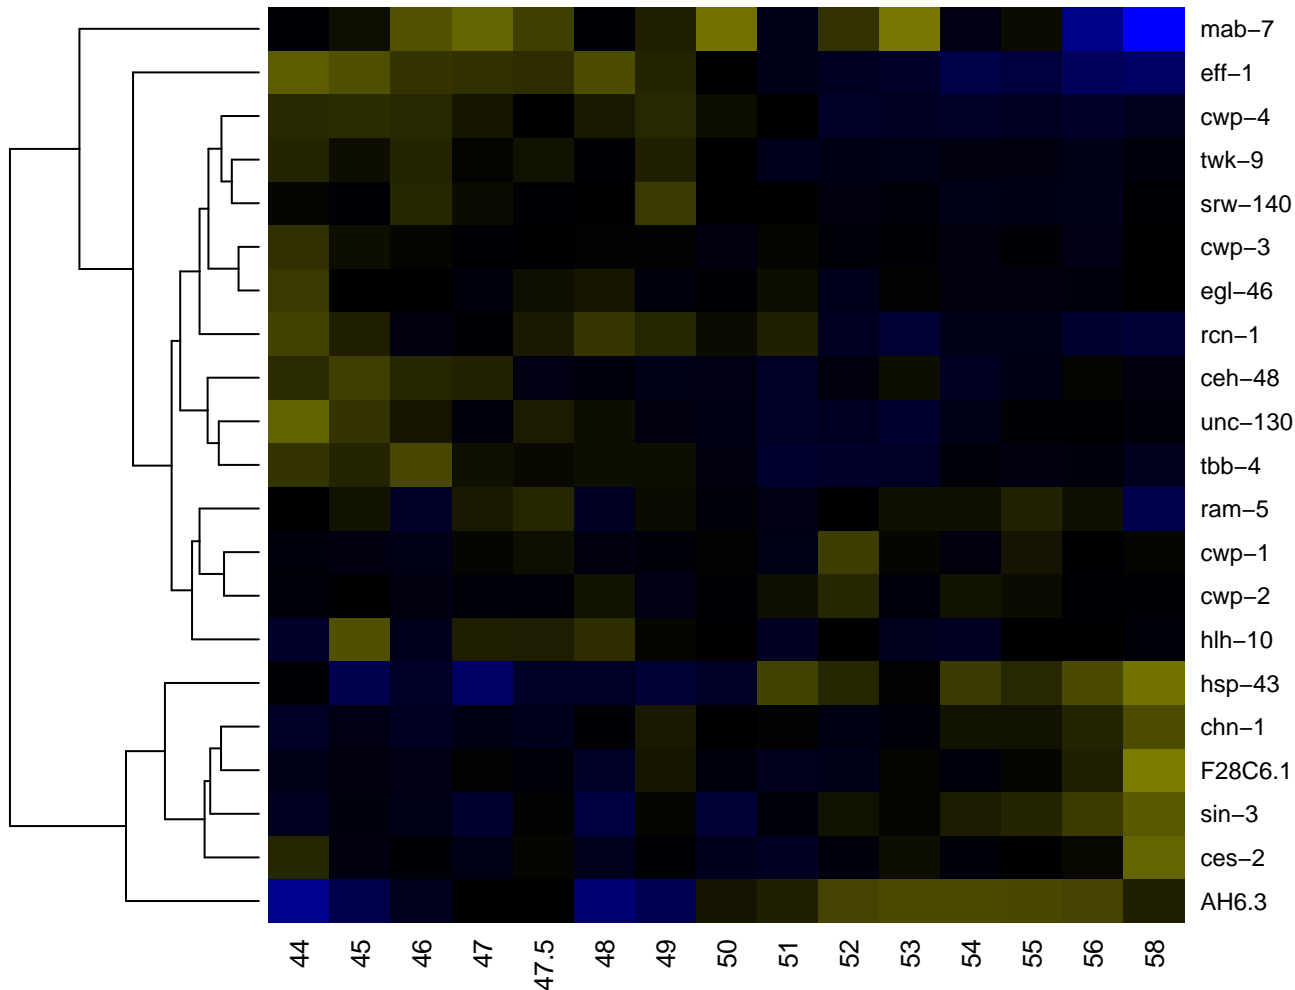

# R1stR

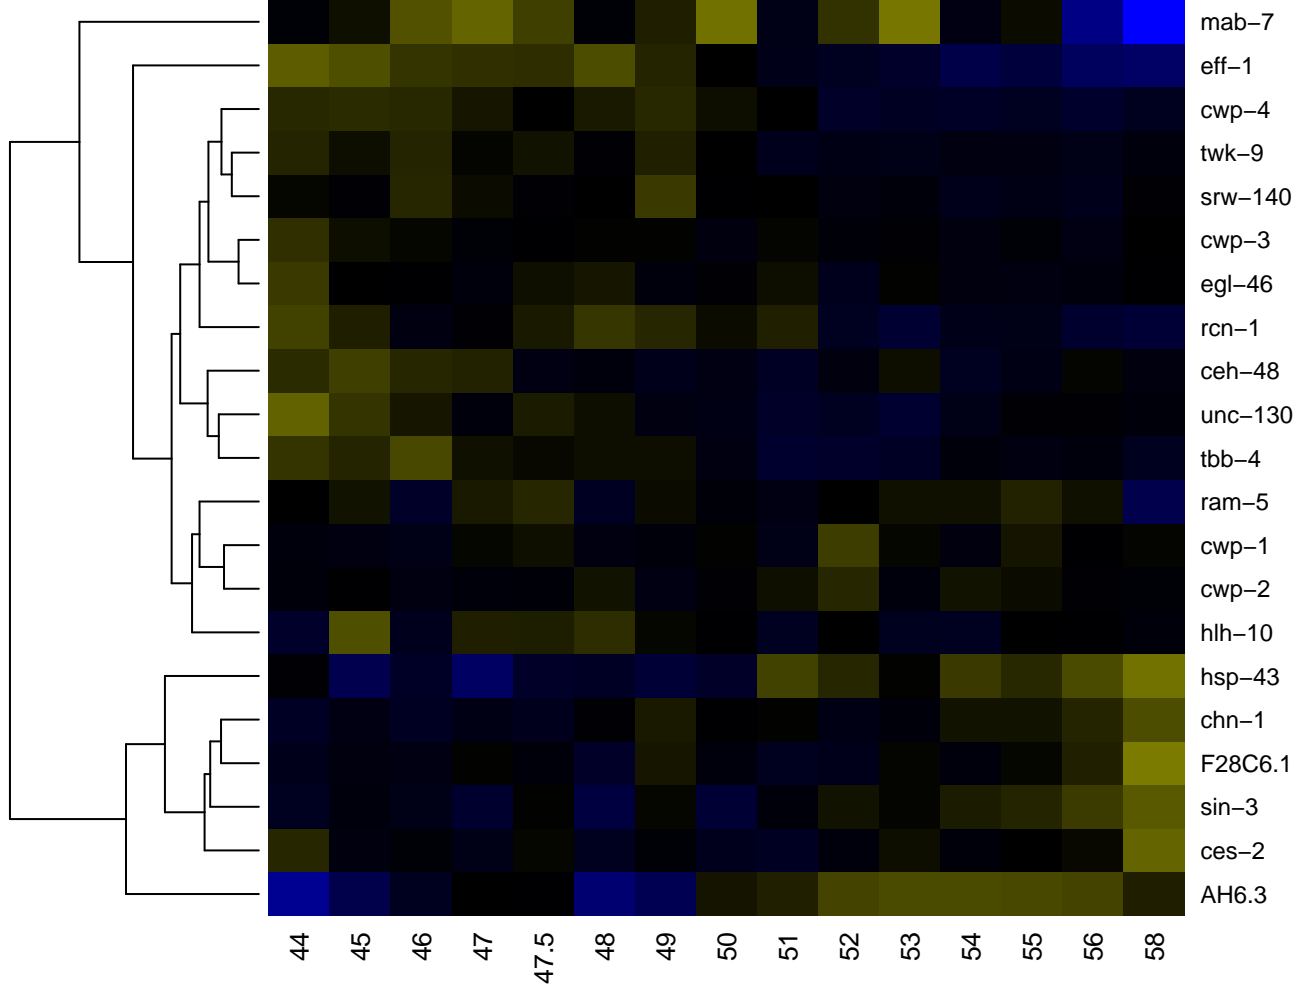



# R2AL

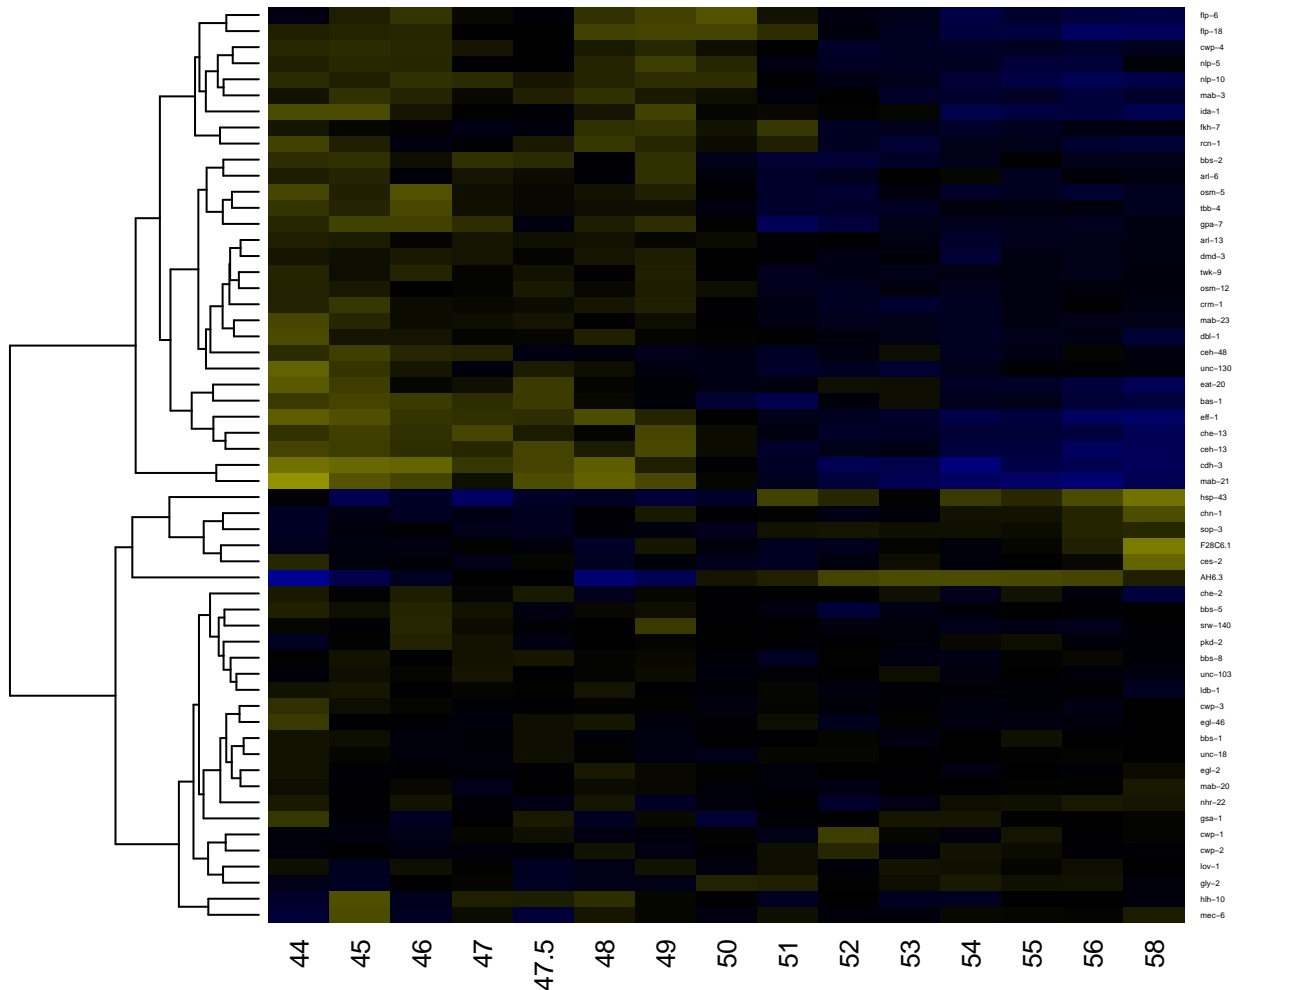

-2

-1

0

1

2

# R2AR

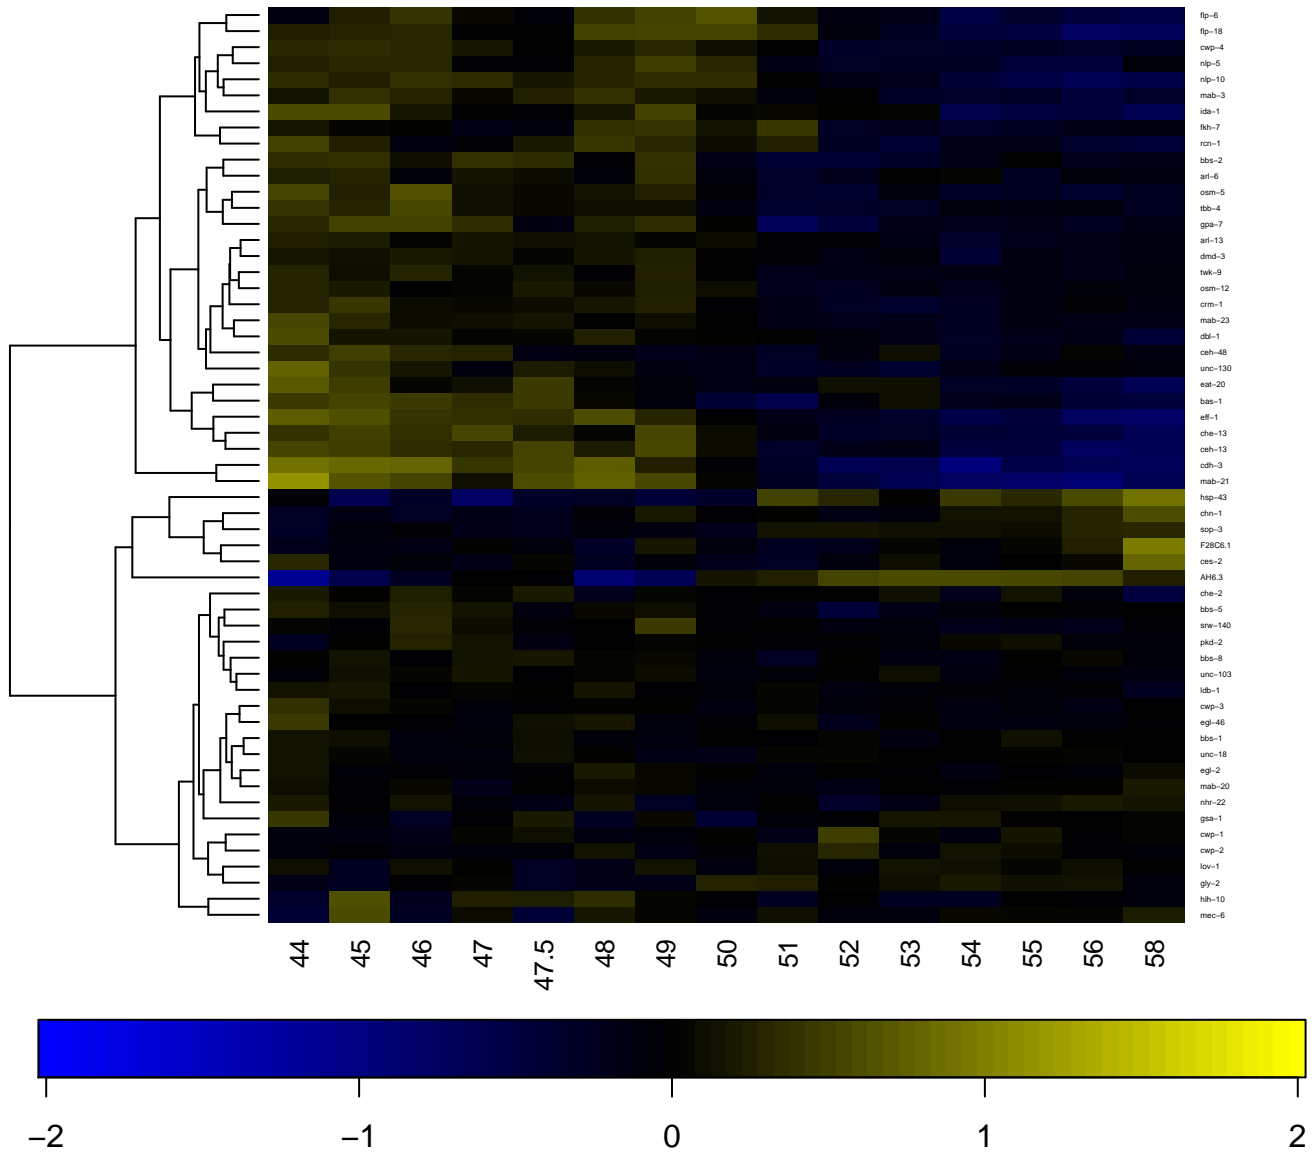

# R2BL

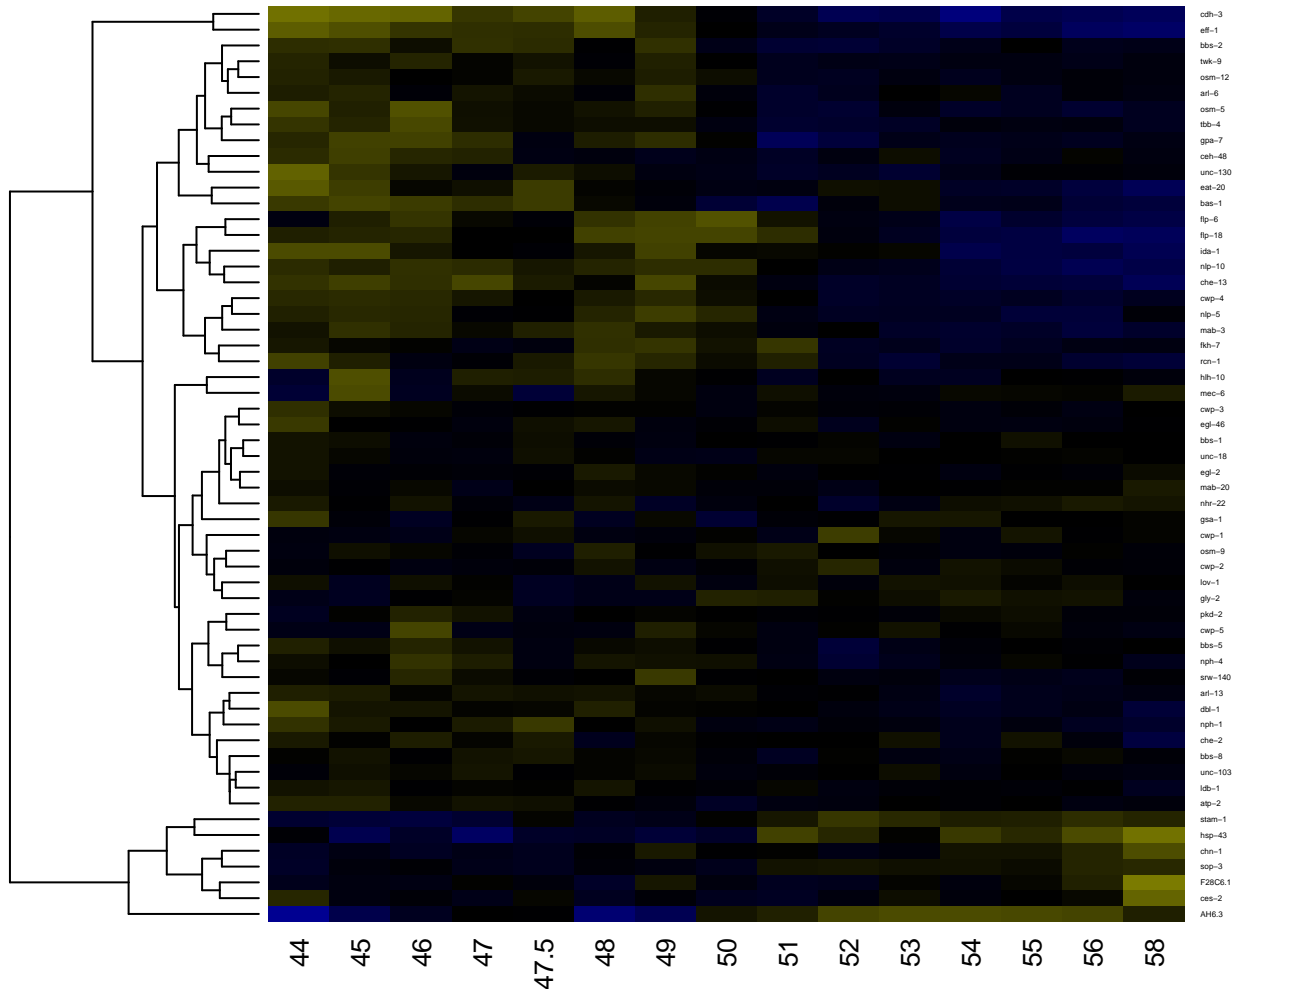



# R2BR

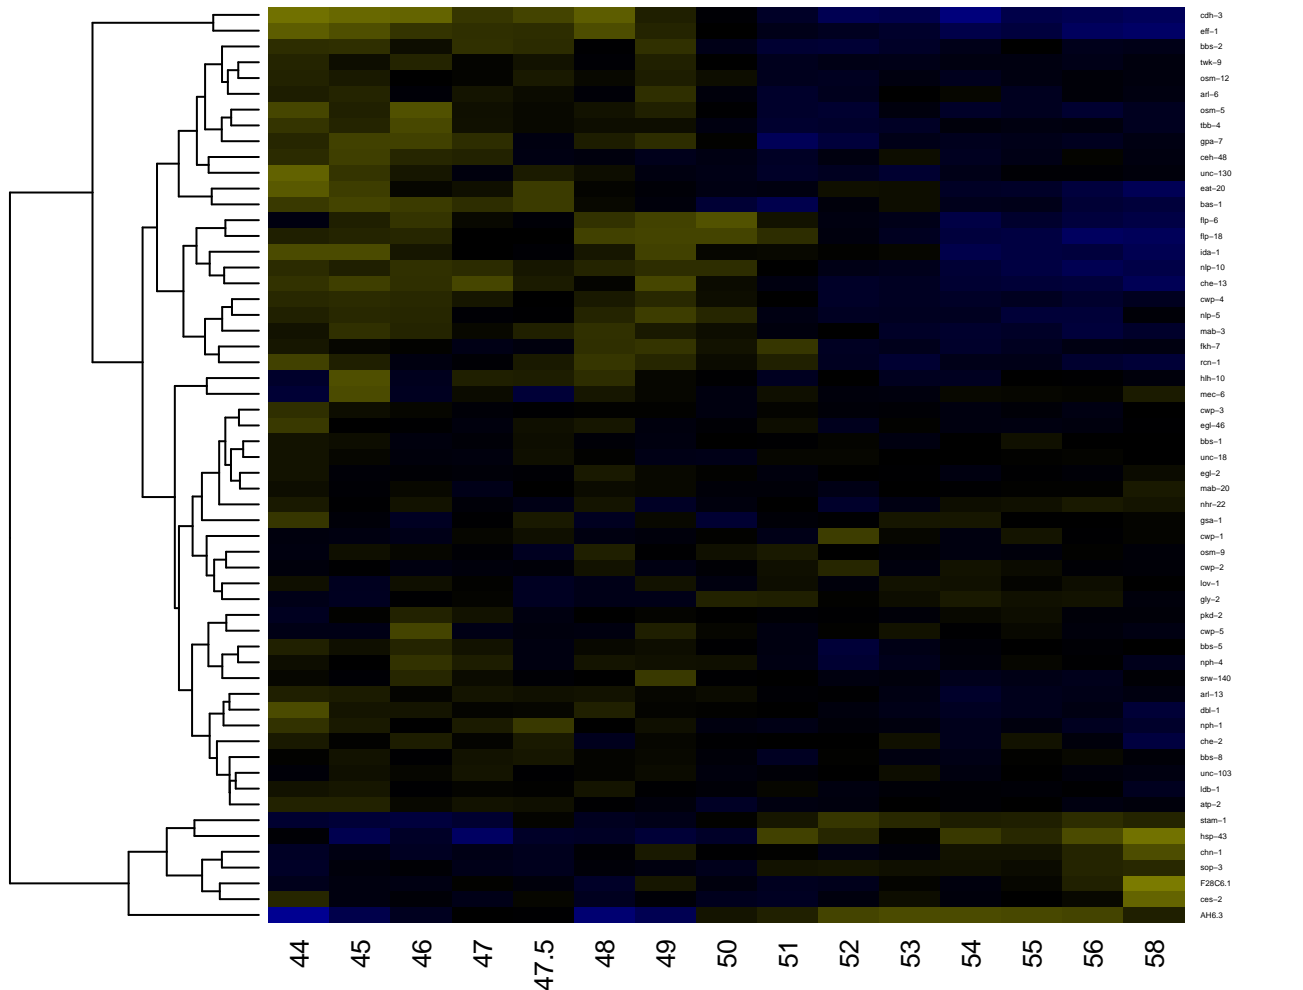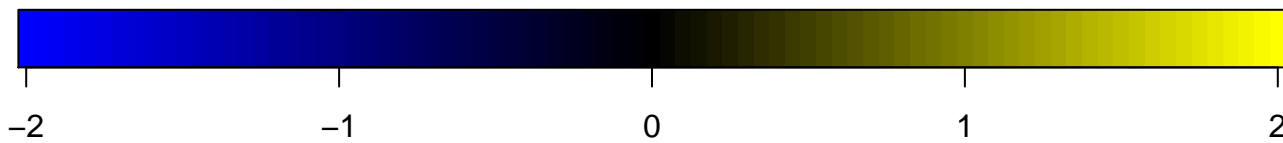

# R2stL



# R2stR

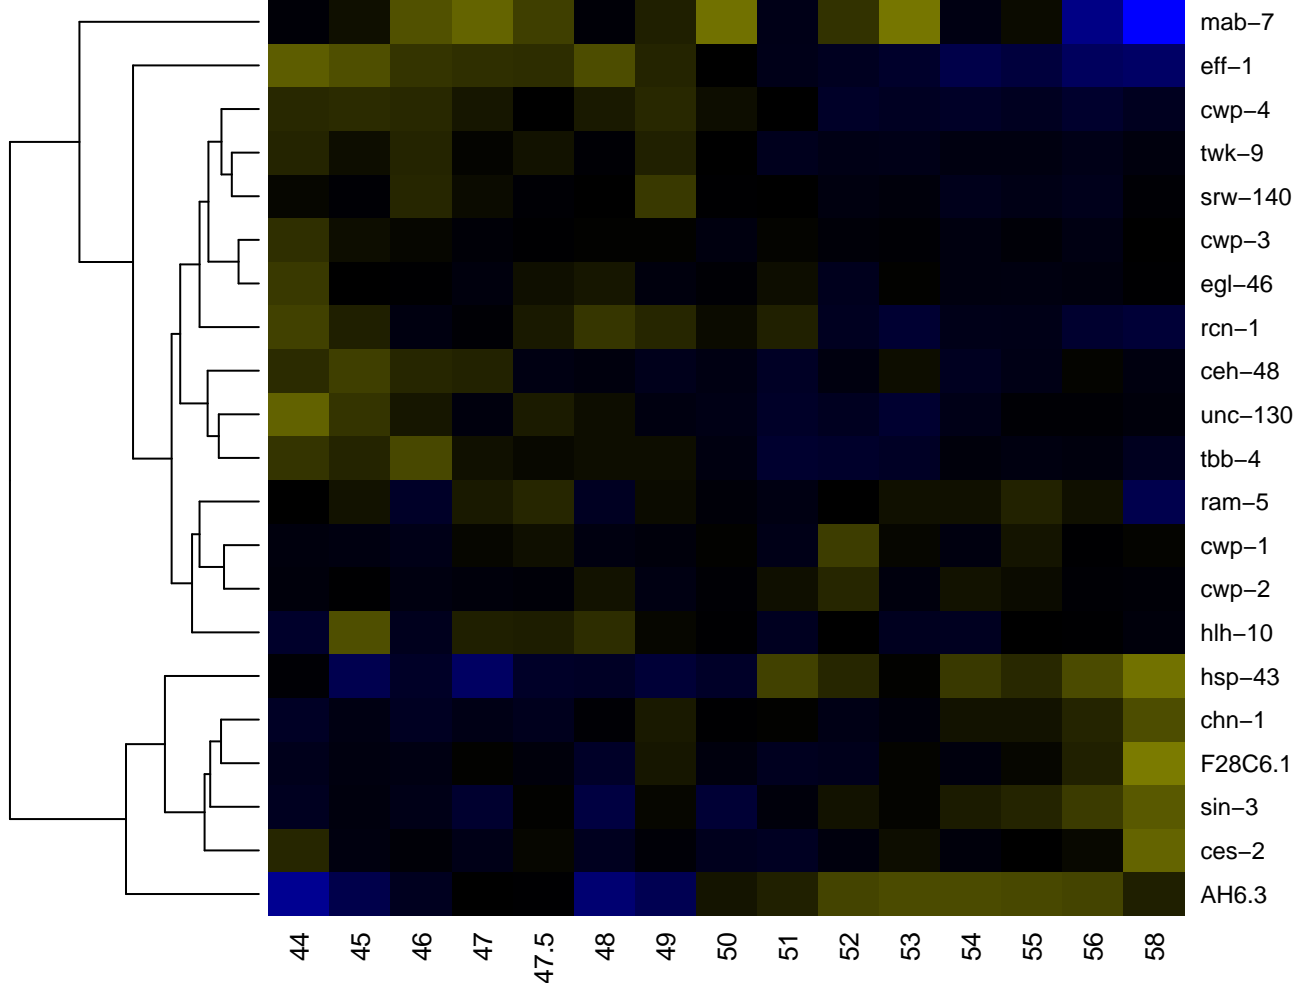



# R3AL

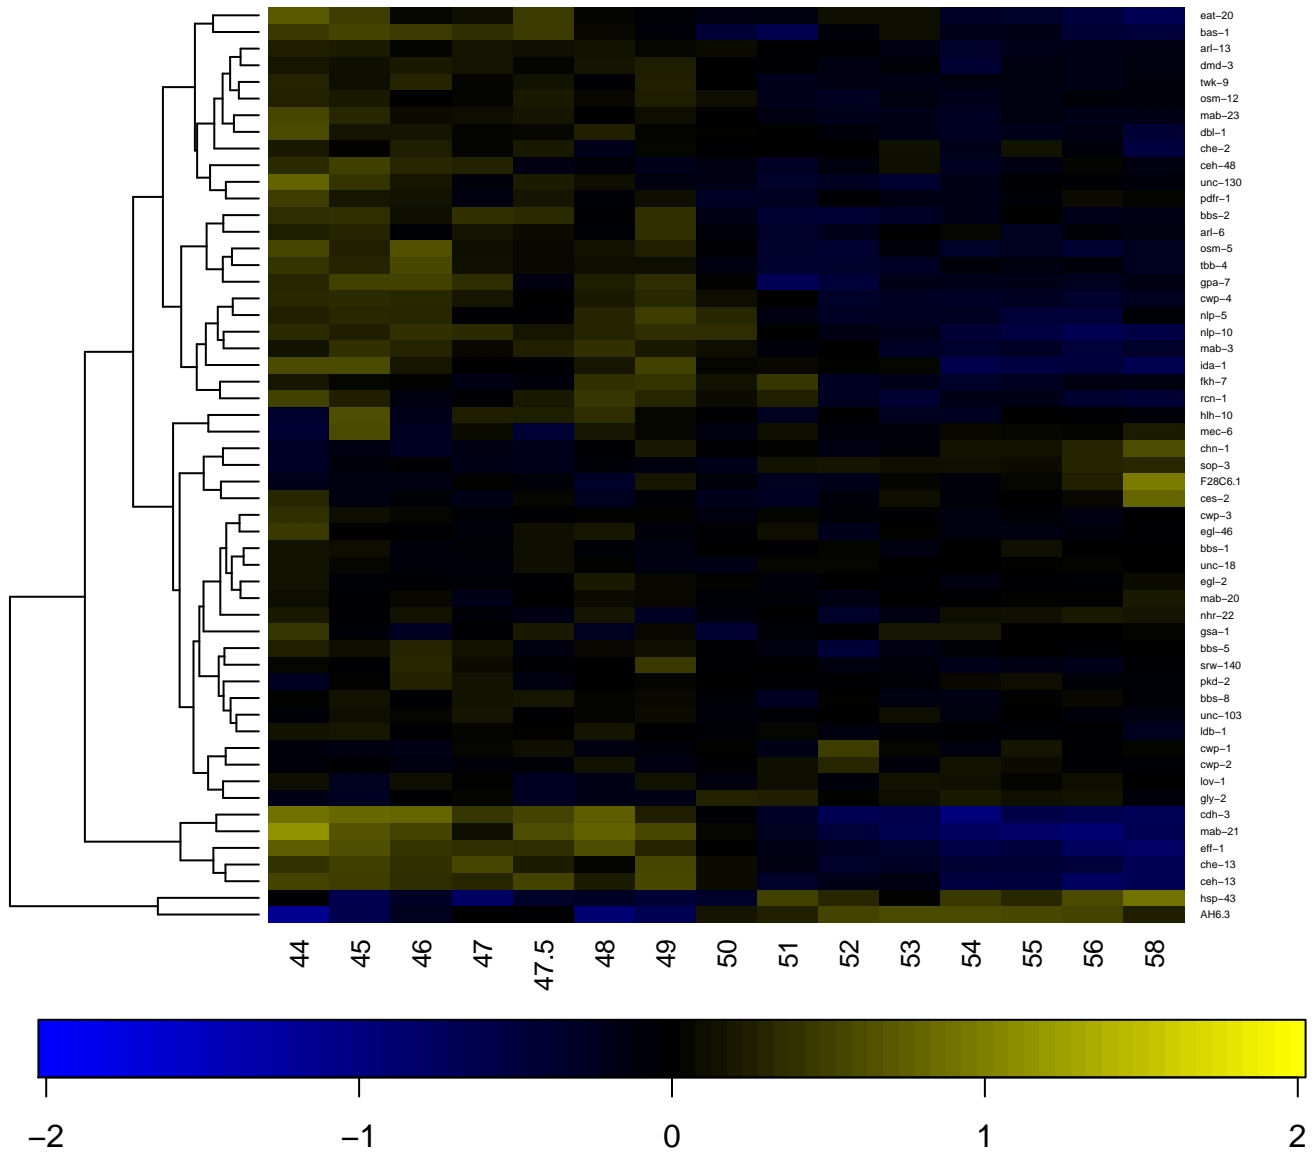

# R3AR

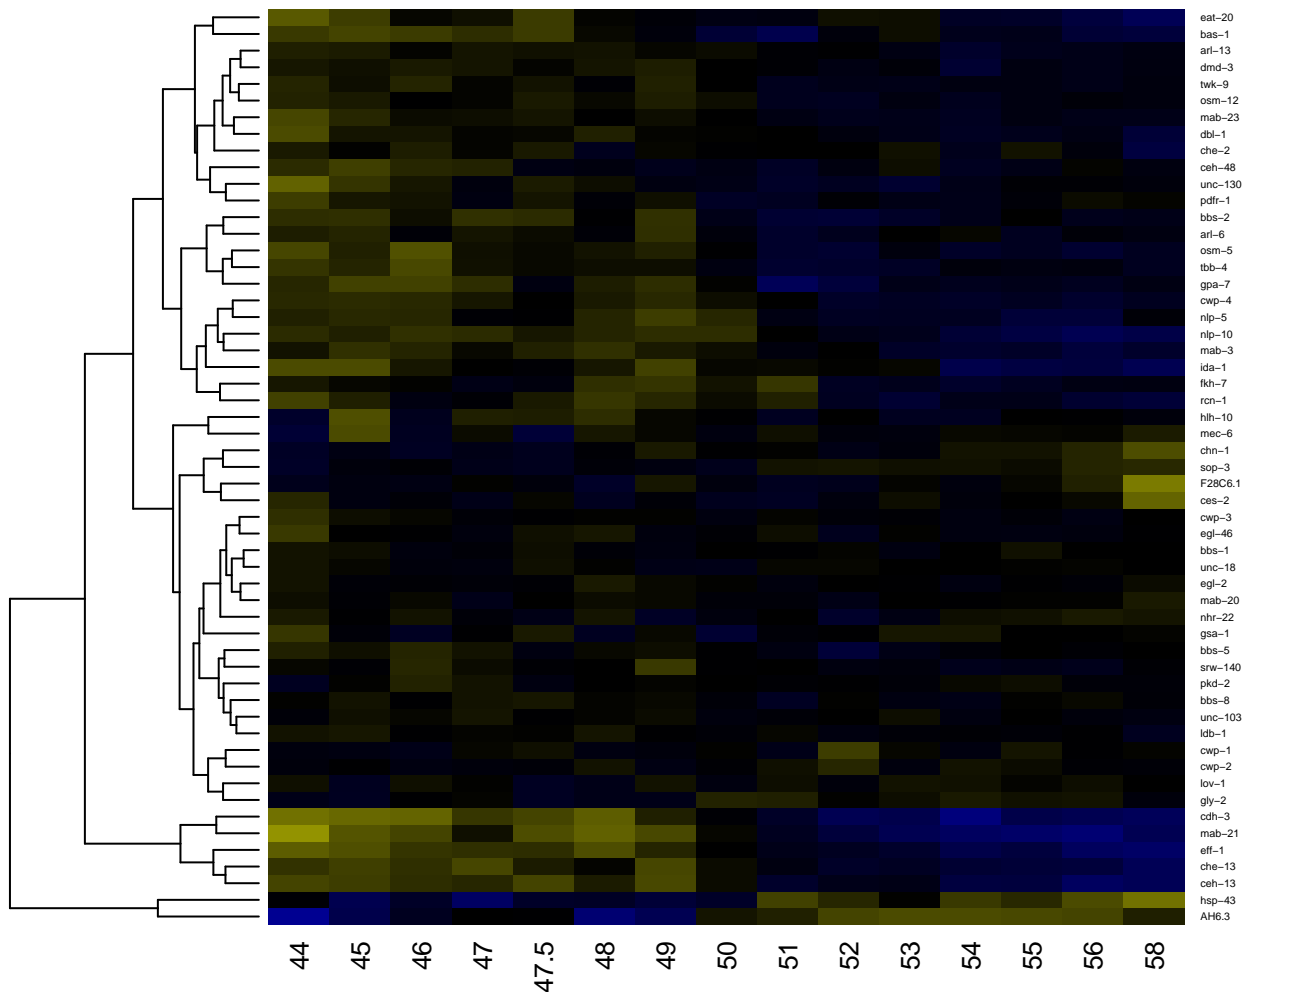

# R3BL

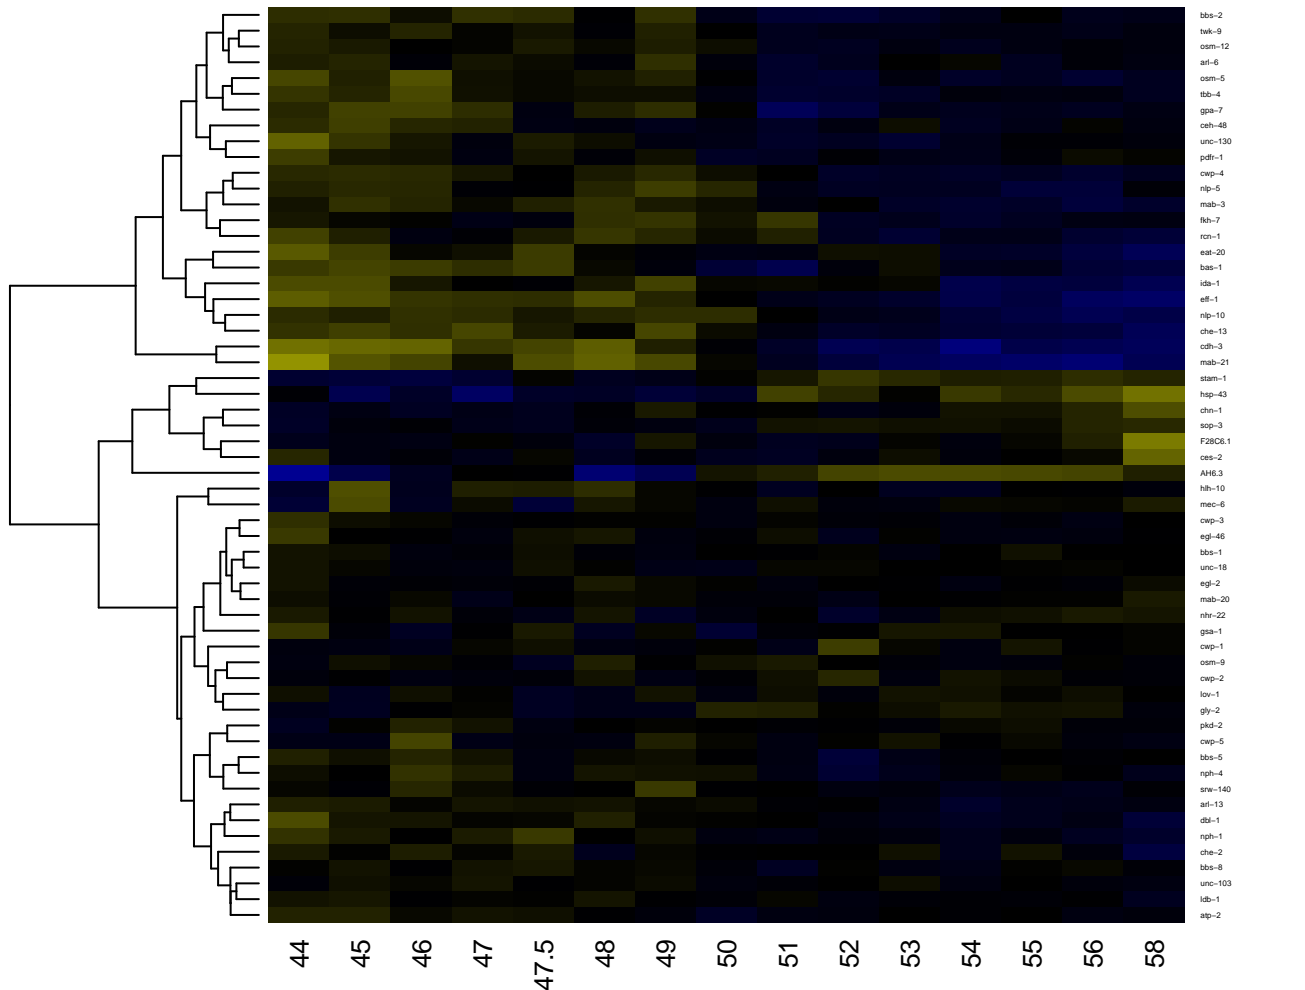

-2

-1

0

1

2

# R3BR



-2

-1

0

1

2



# R3stL

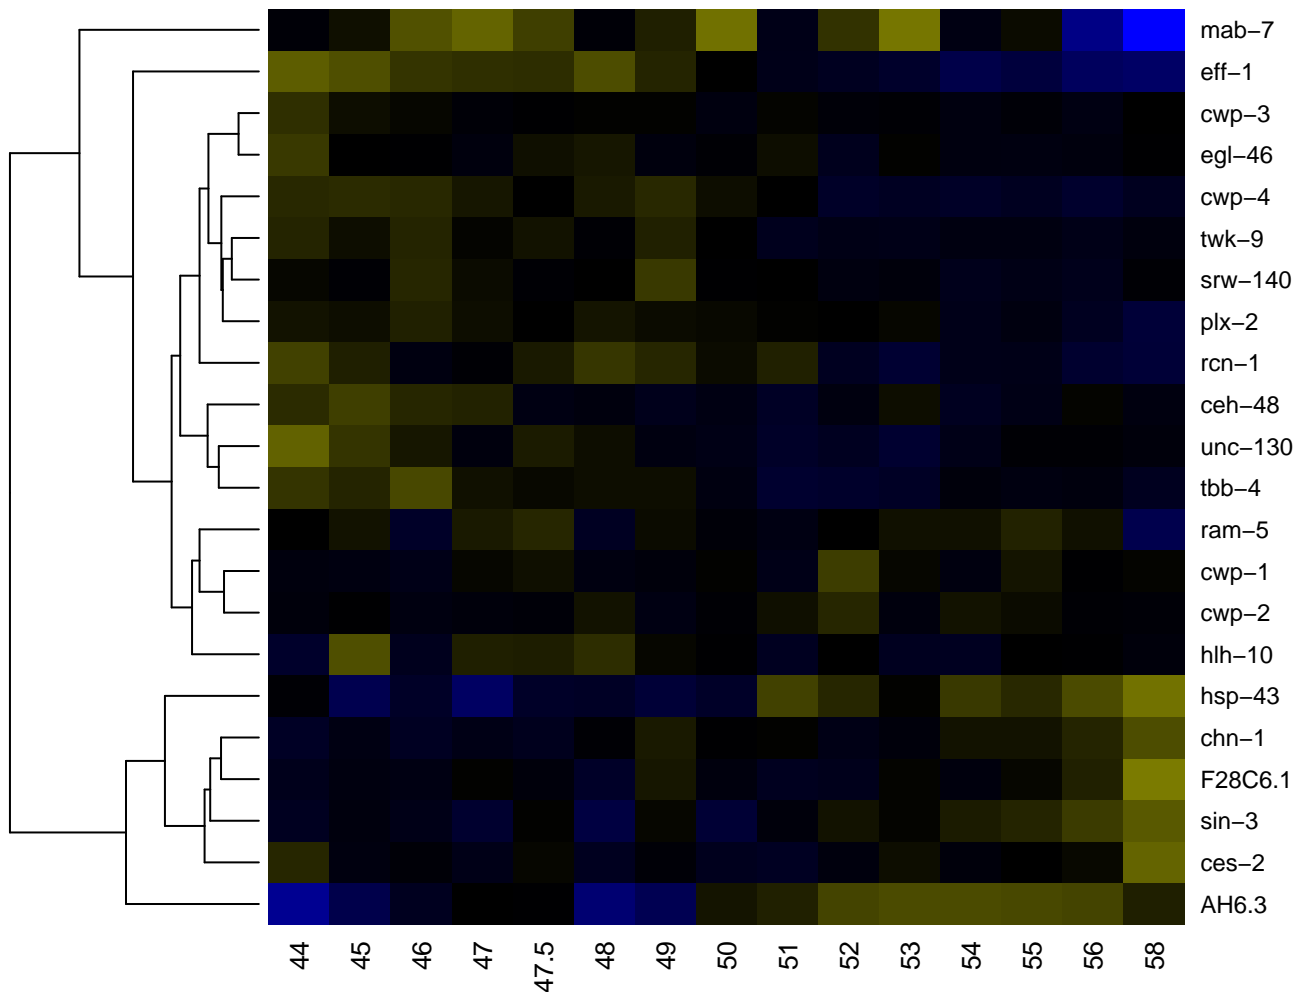

# R3stR

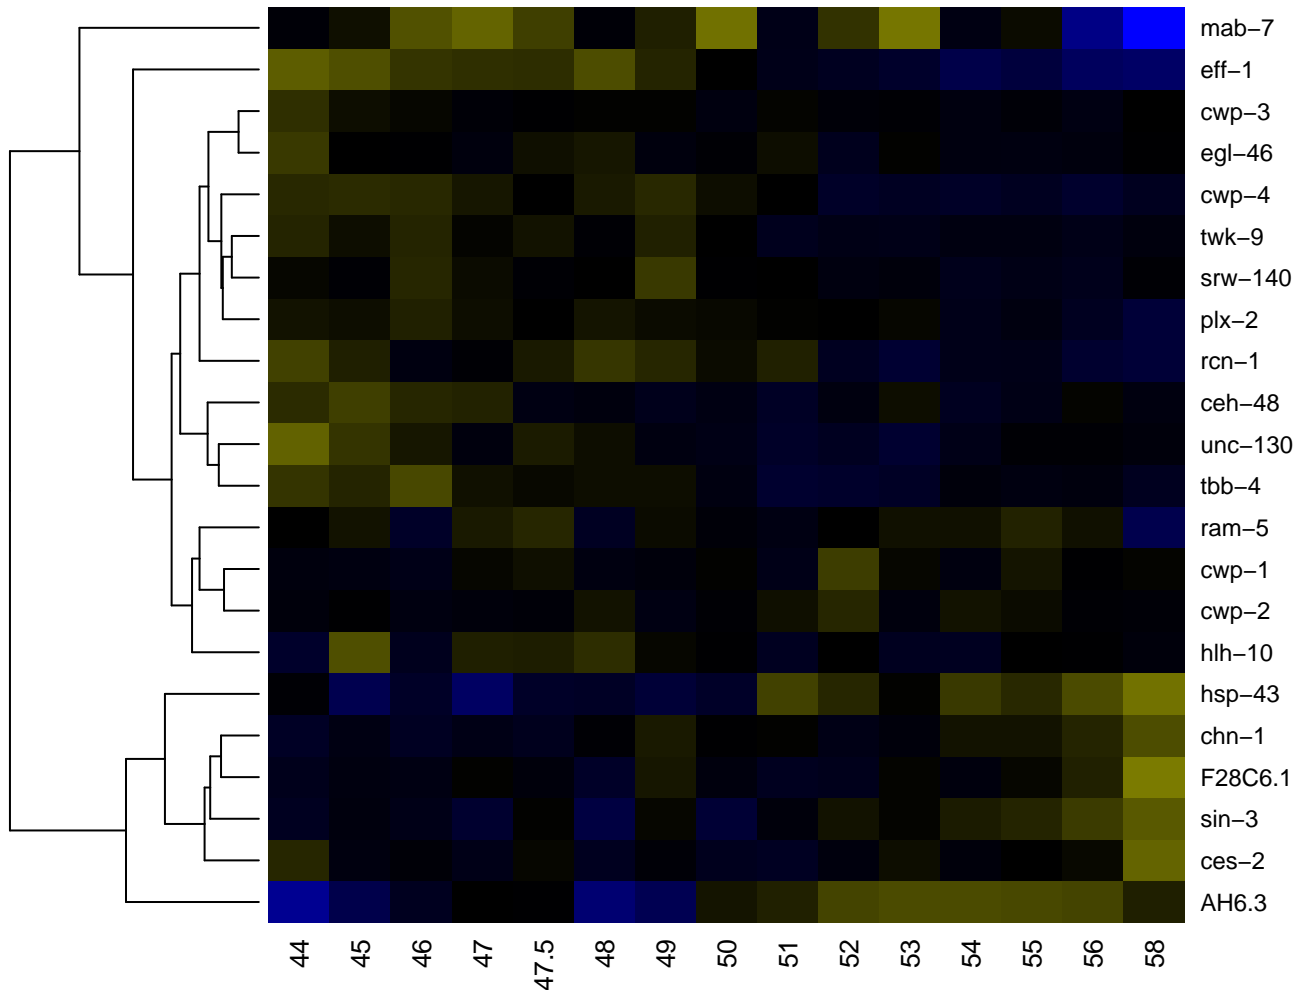



# R4AL

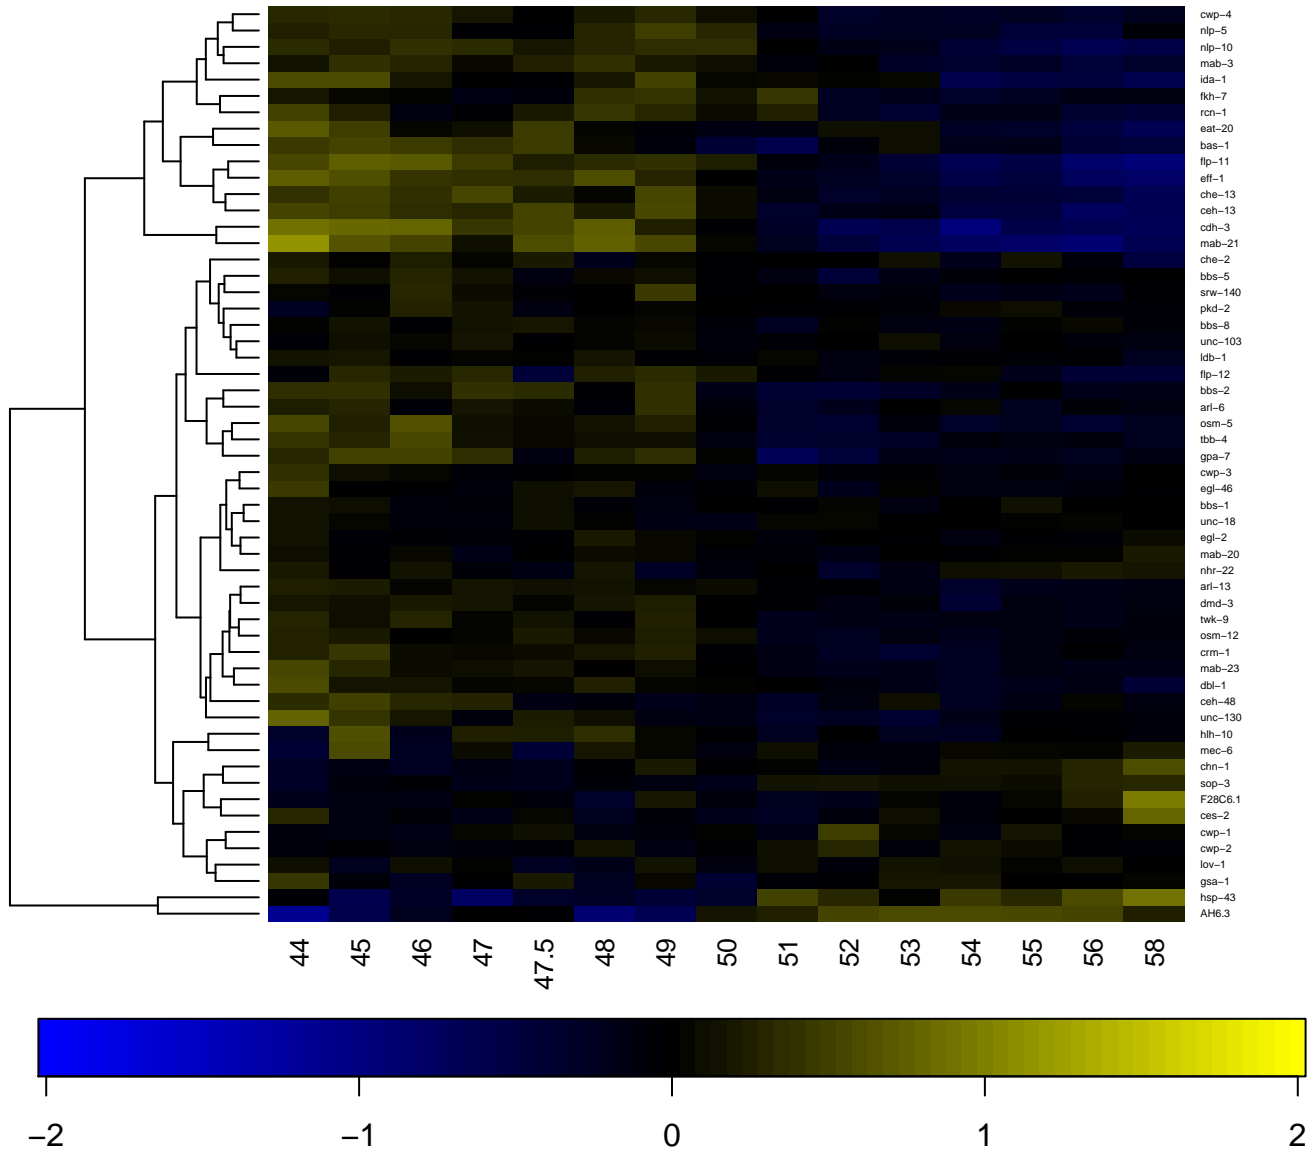

# R4AR

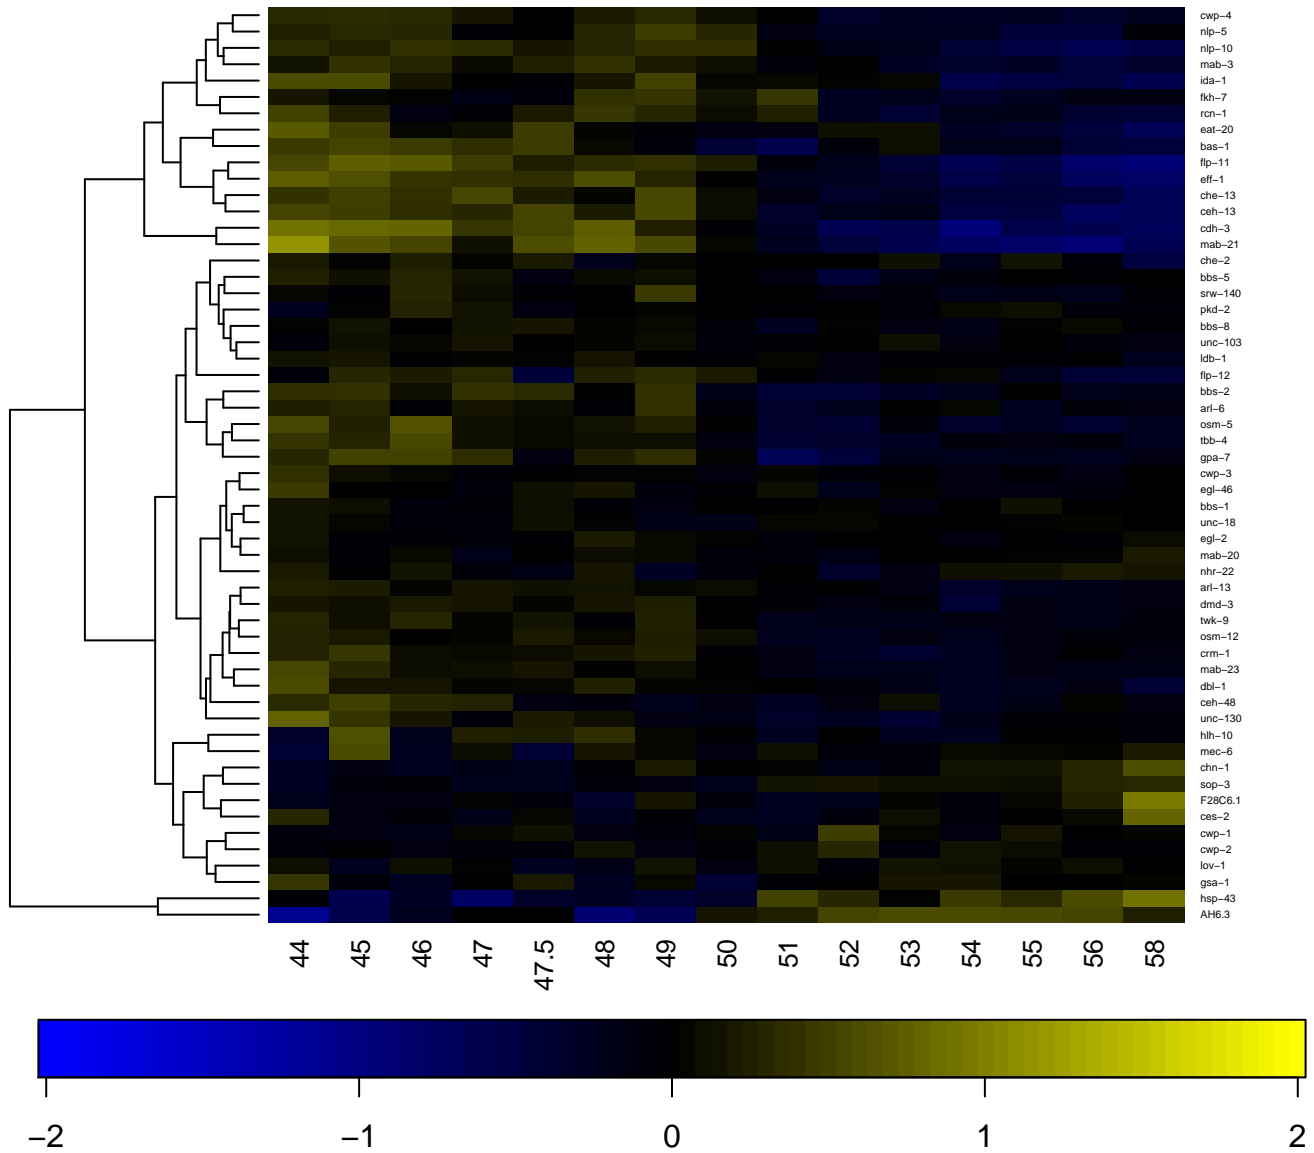

# R4BL

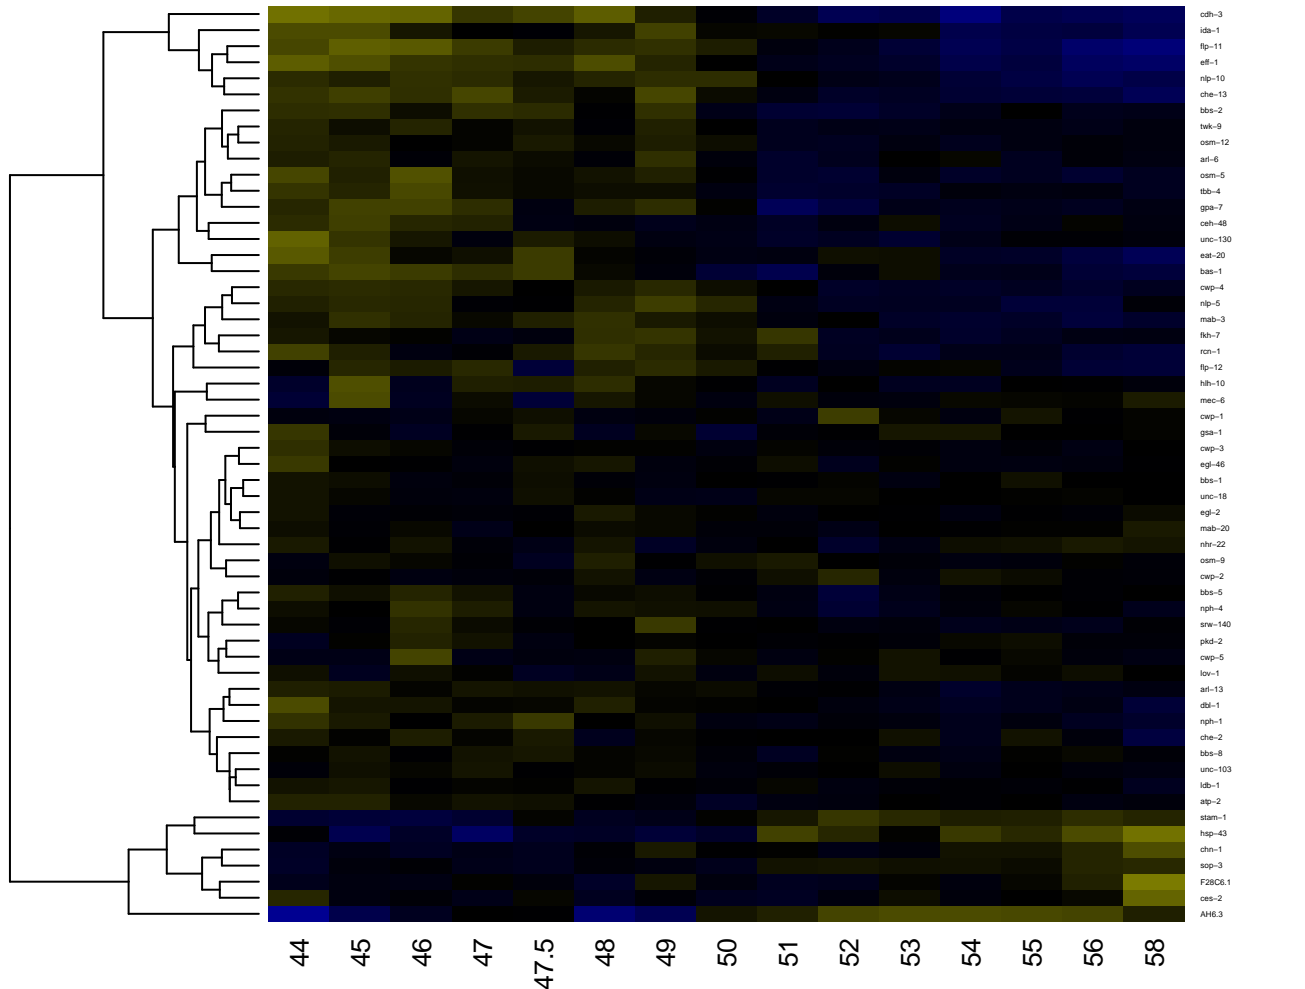

-2

-1

0

1

2

# R4BR

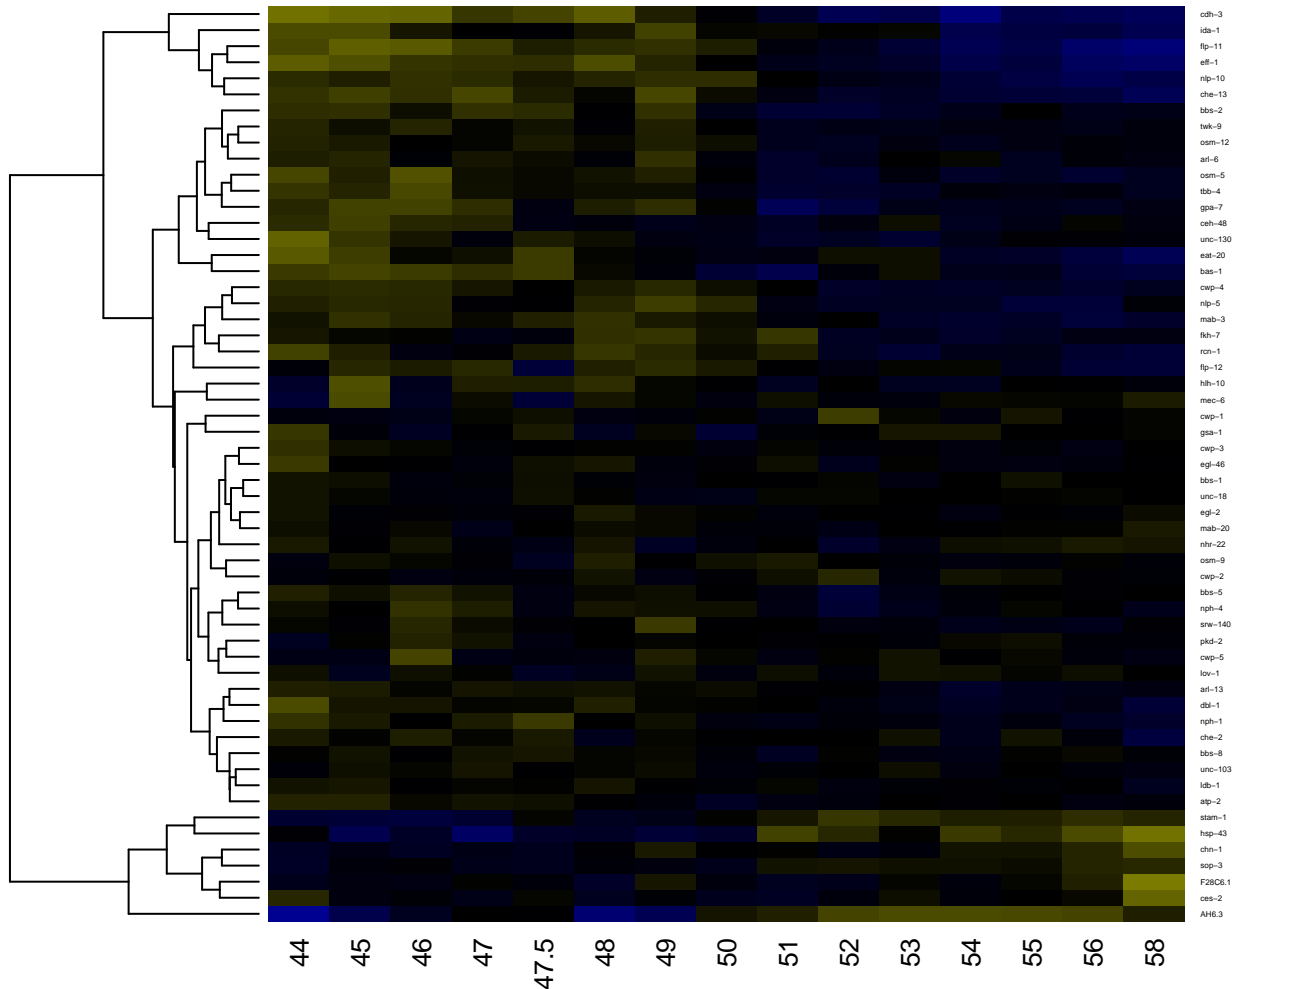

-2

-1

0

1

2

# R4stL





# R4stR





# R5AL

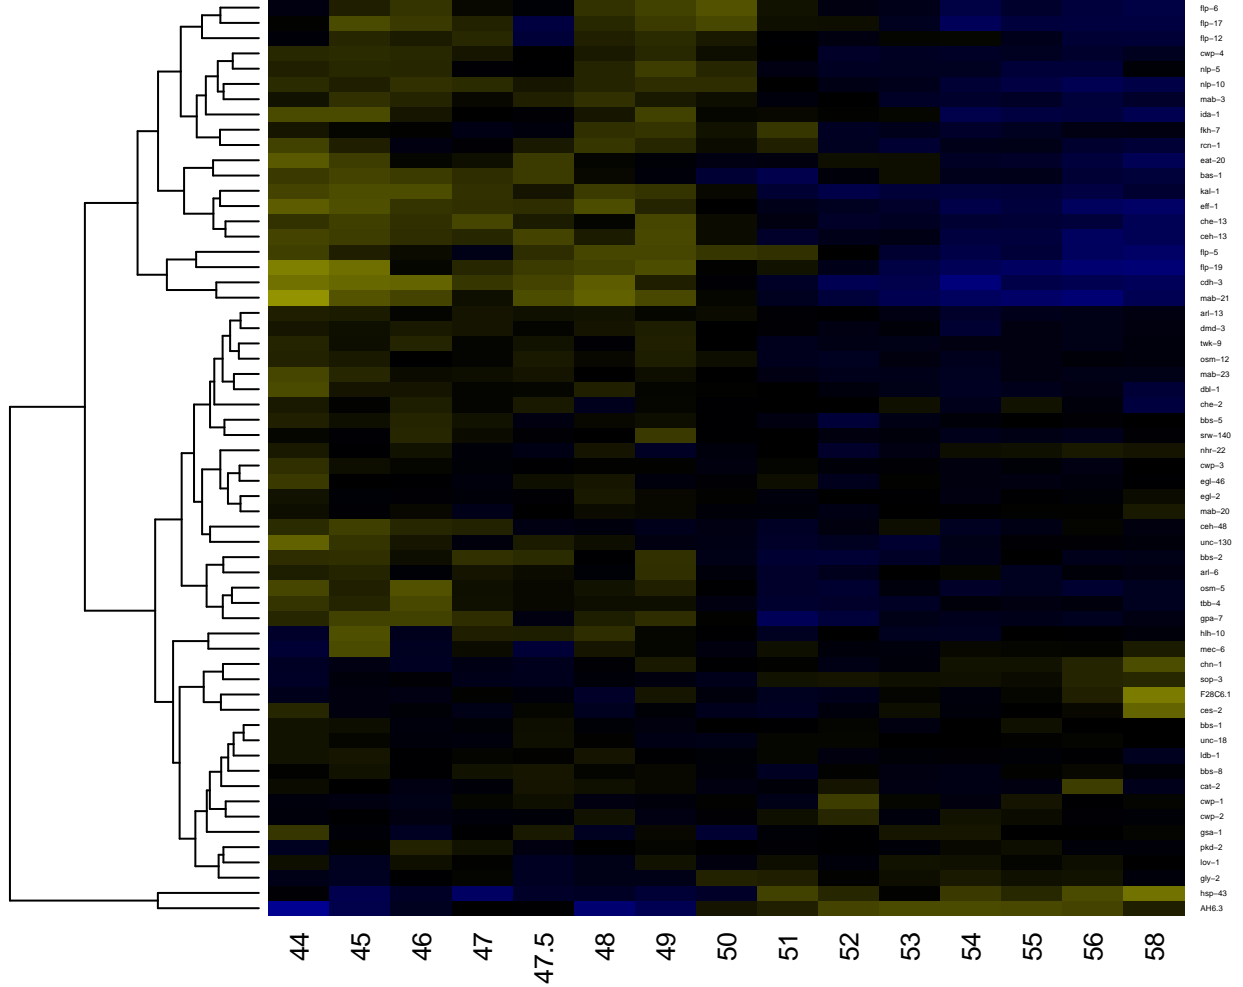

# R5AR

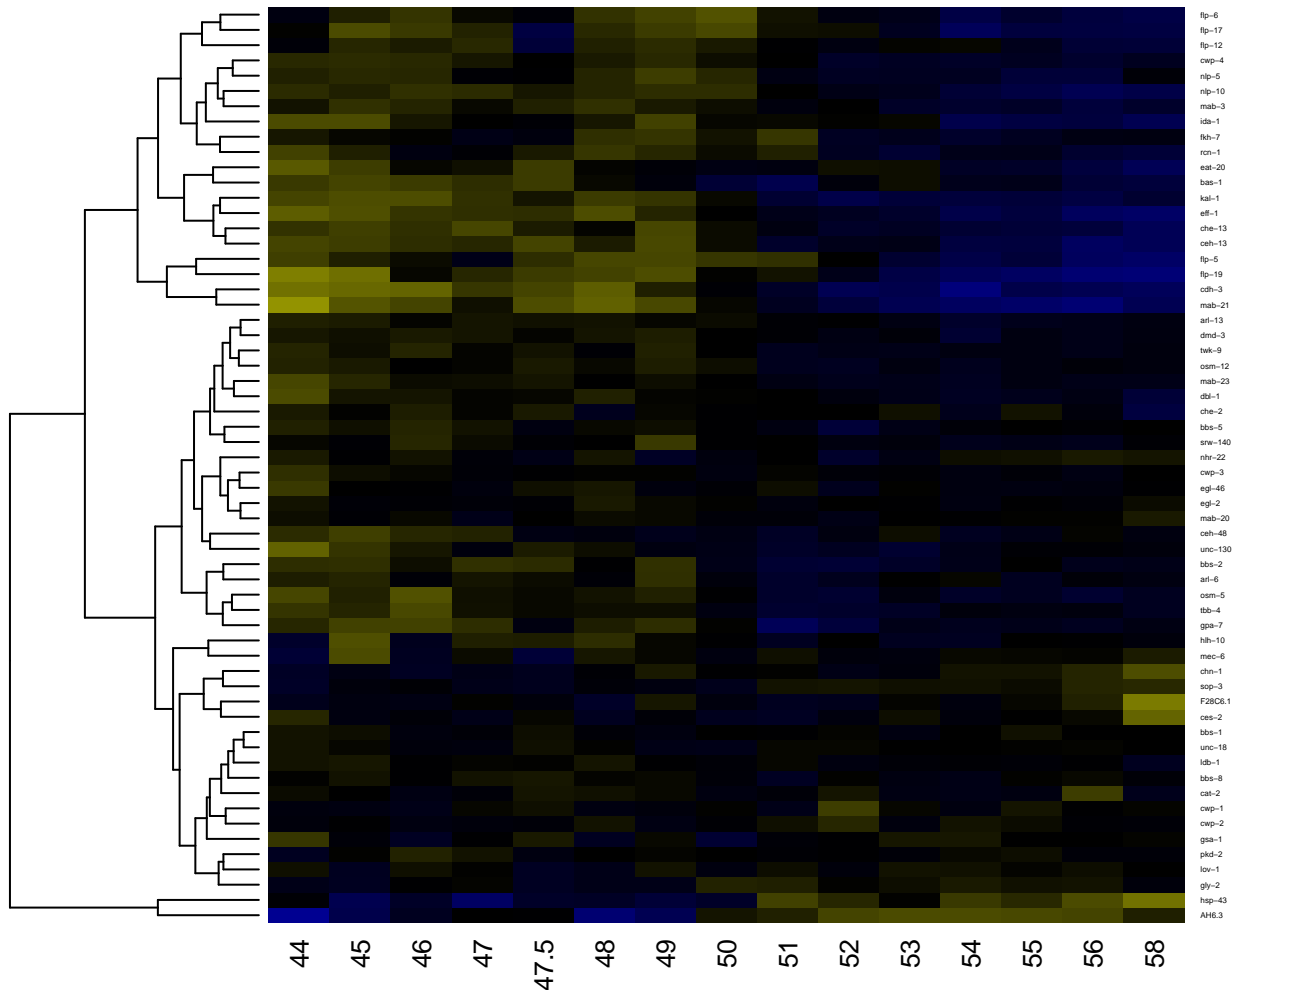

-2

-1

0

1

2

# R5BL

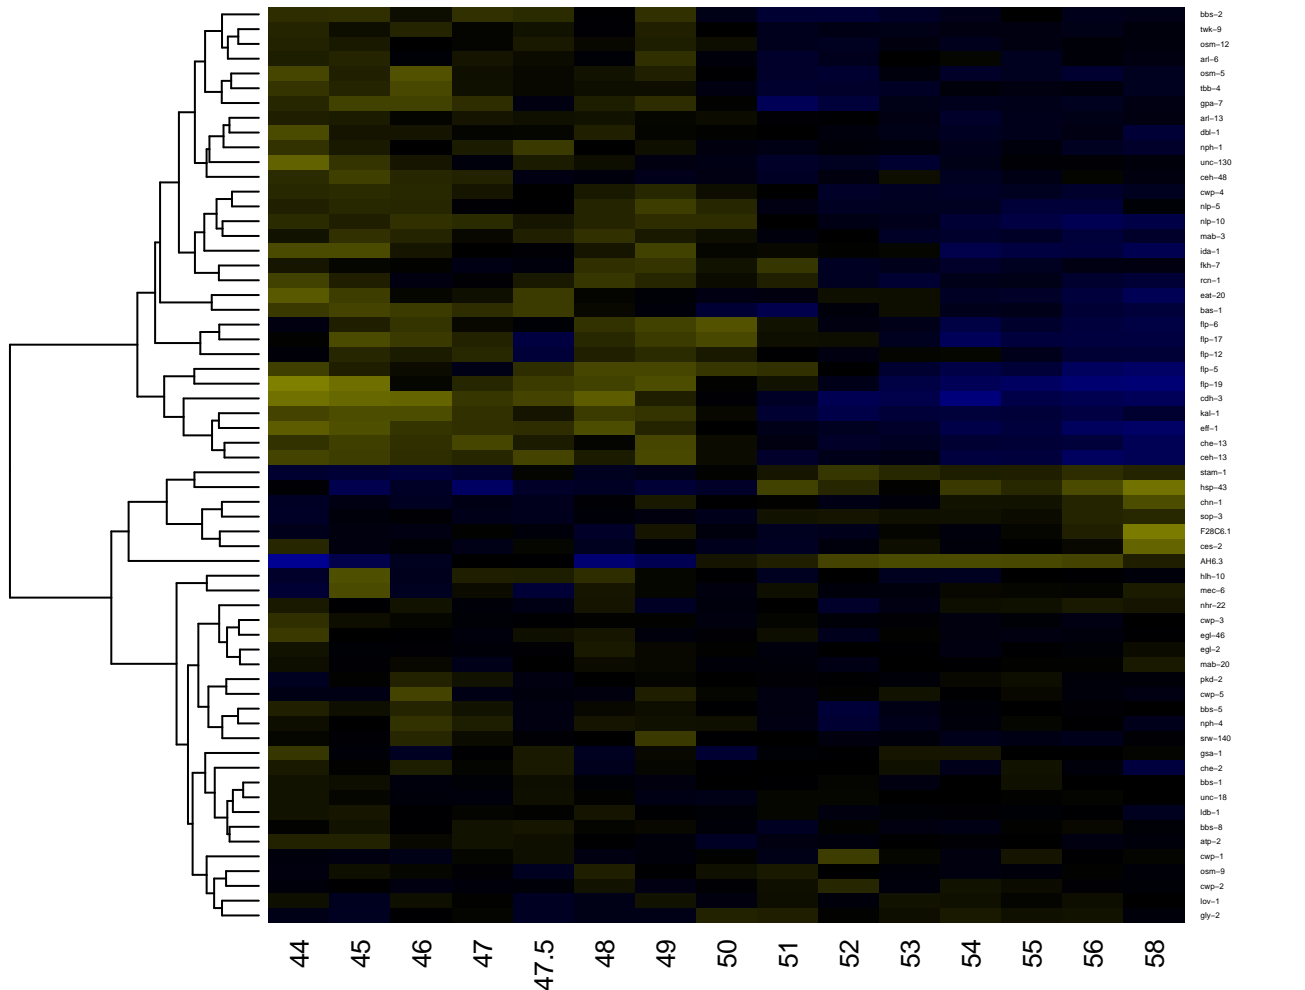

-2

-1

0

1

2

# R5BR



# R5stL

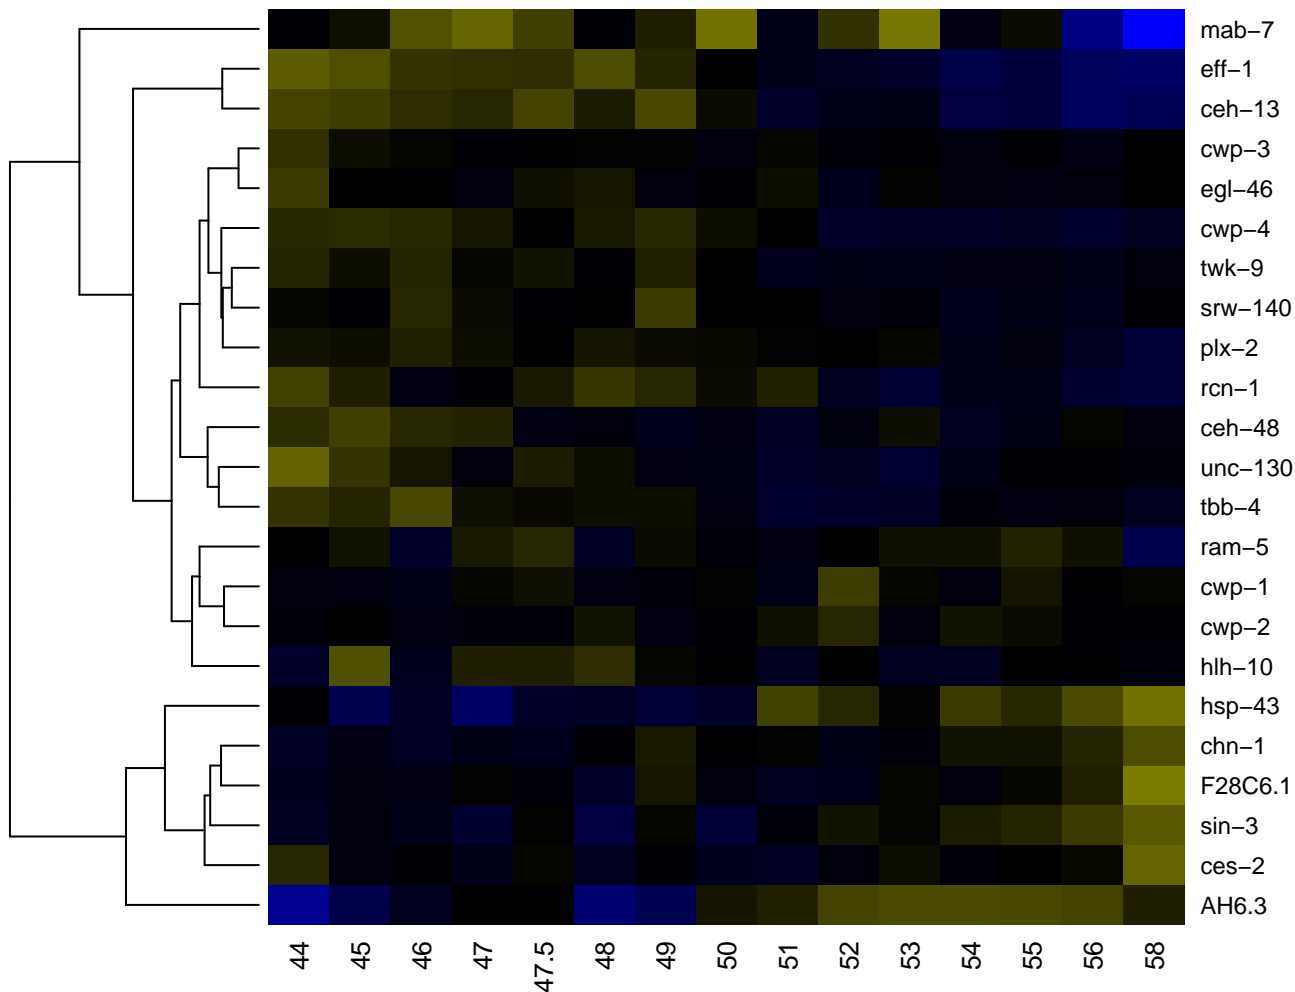

# R5stR

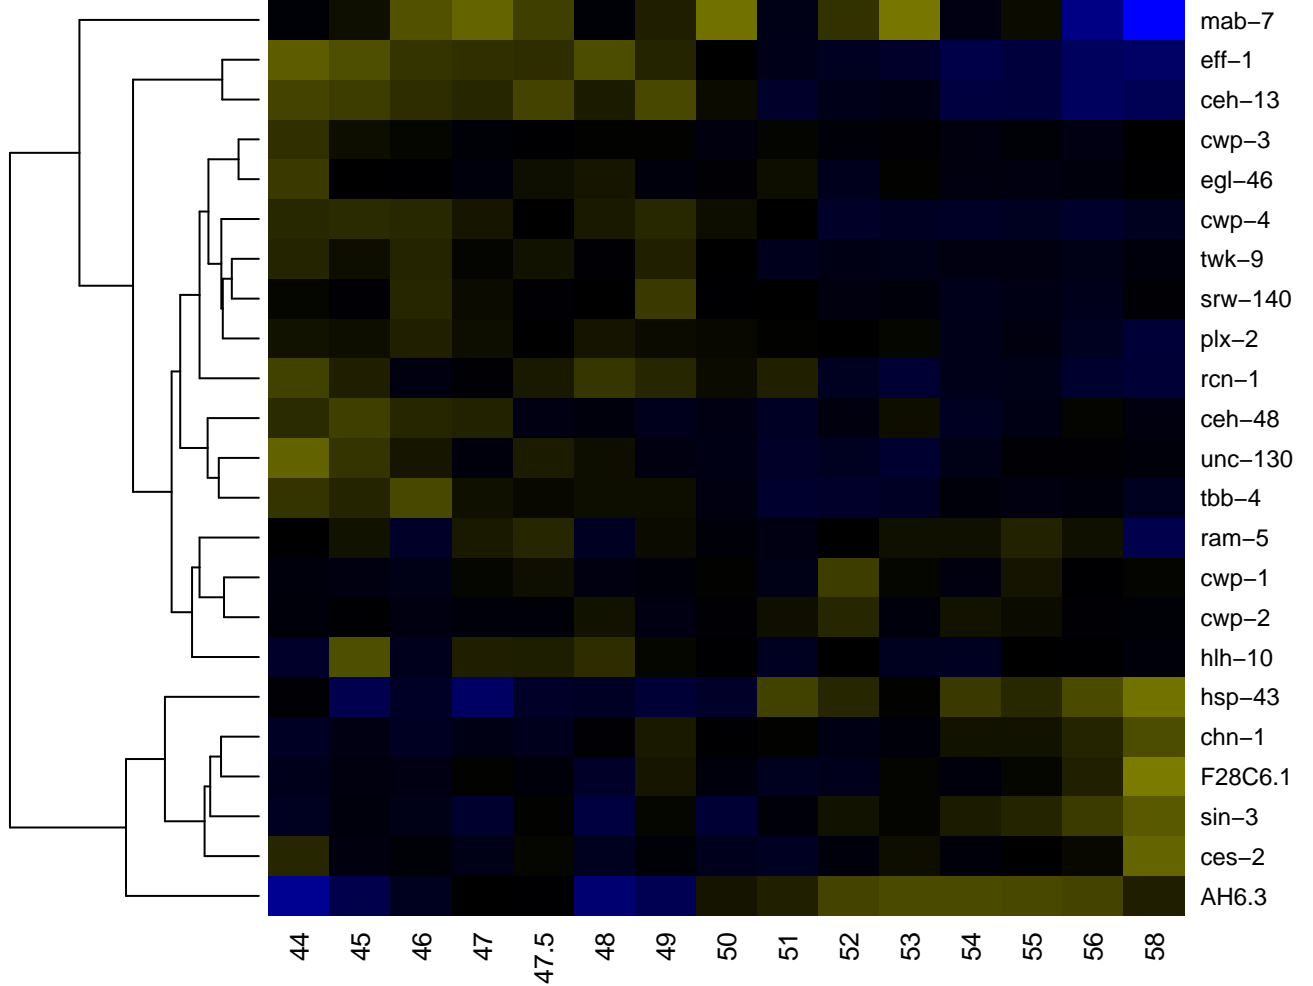





# R6\_hyp

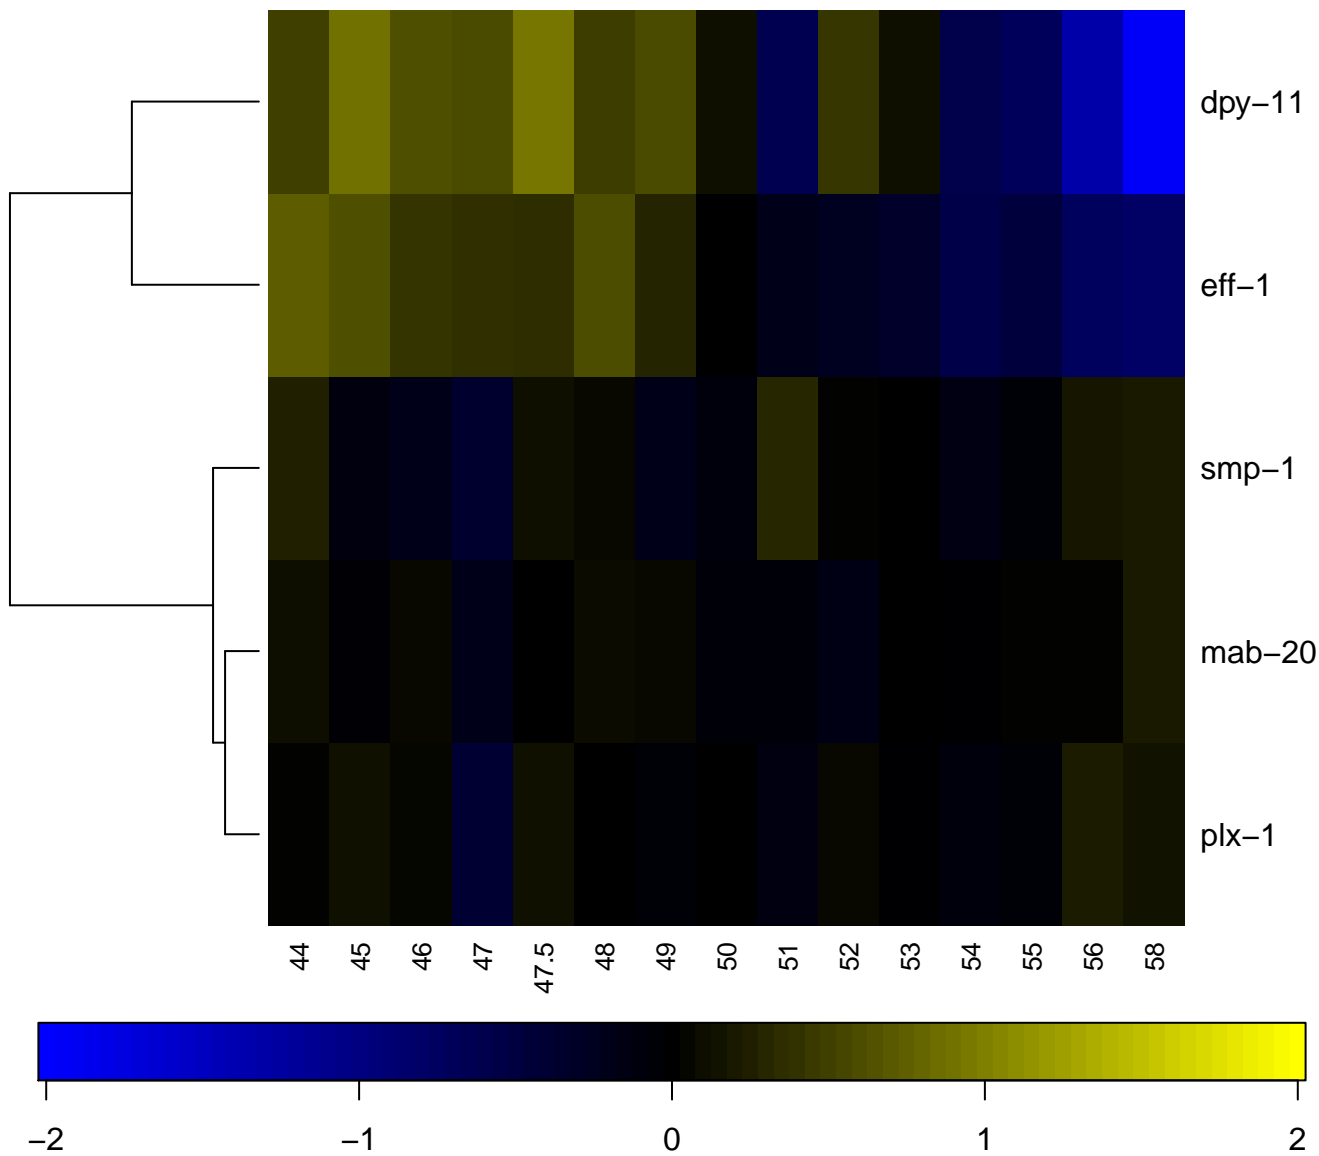

# R6AL

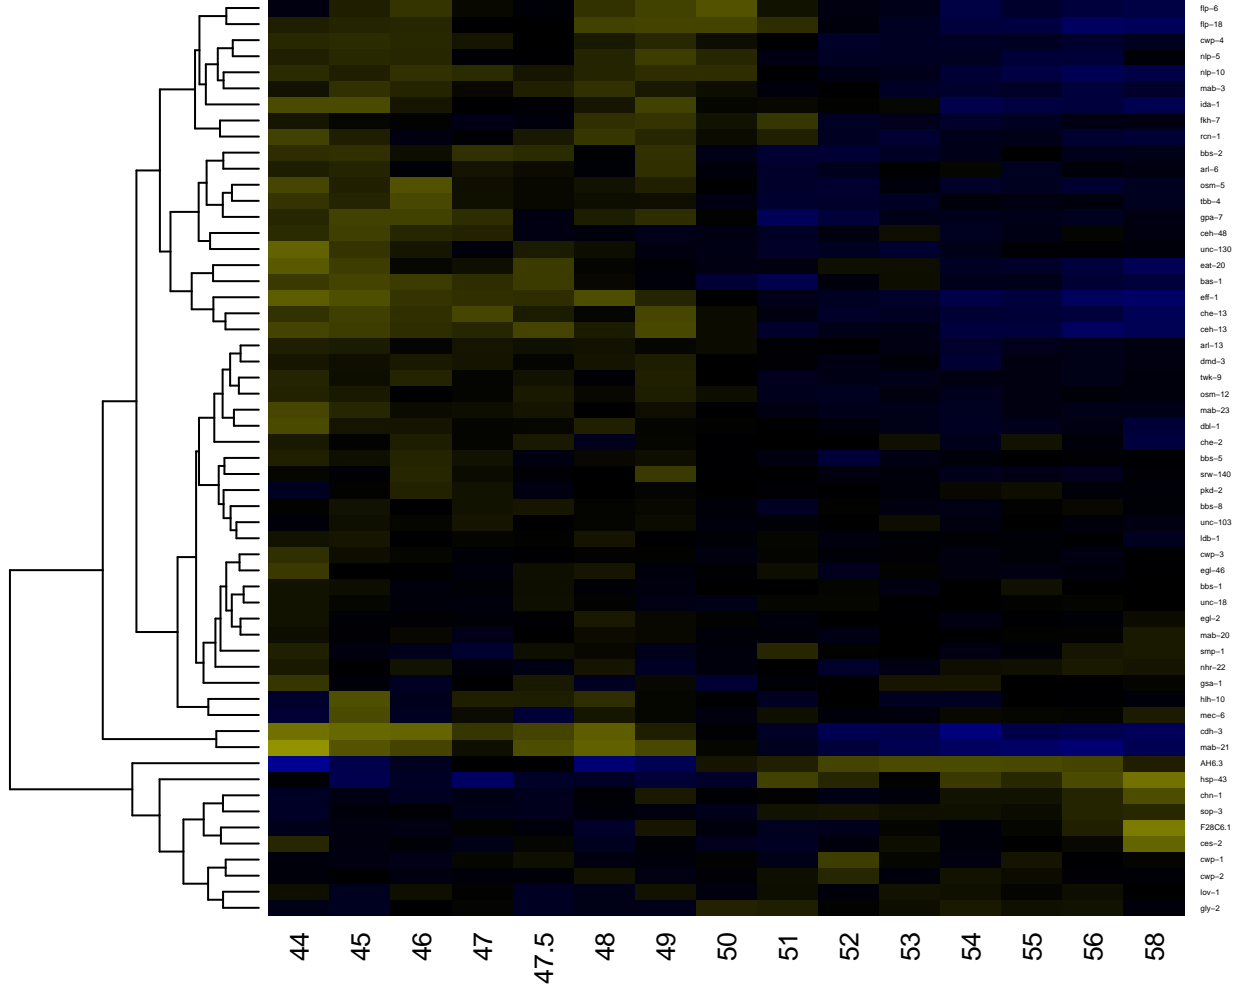

# R6AR

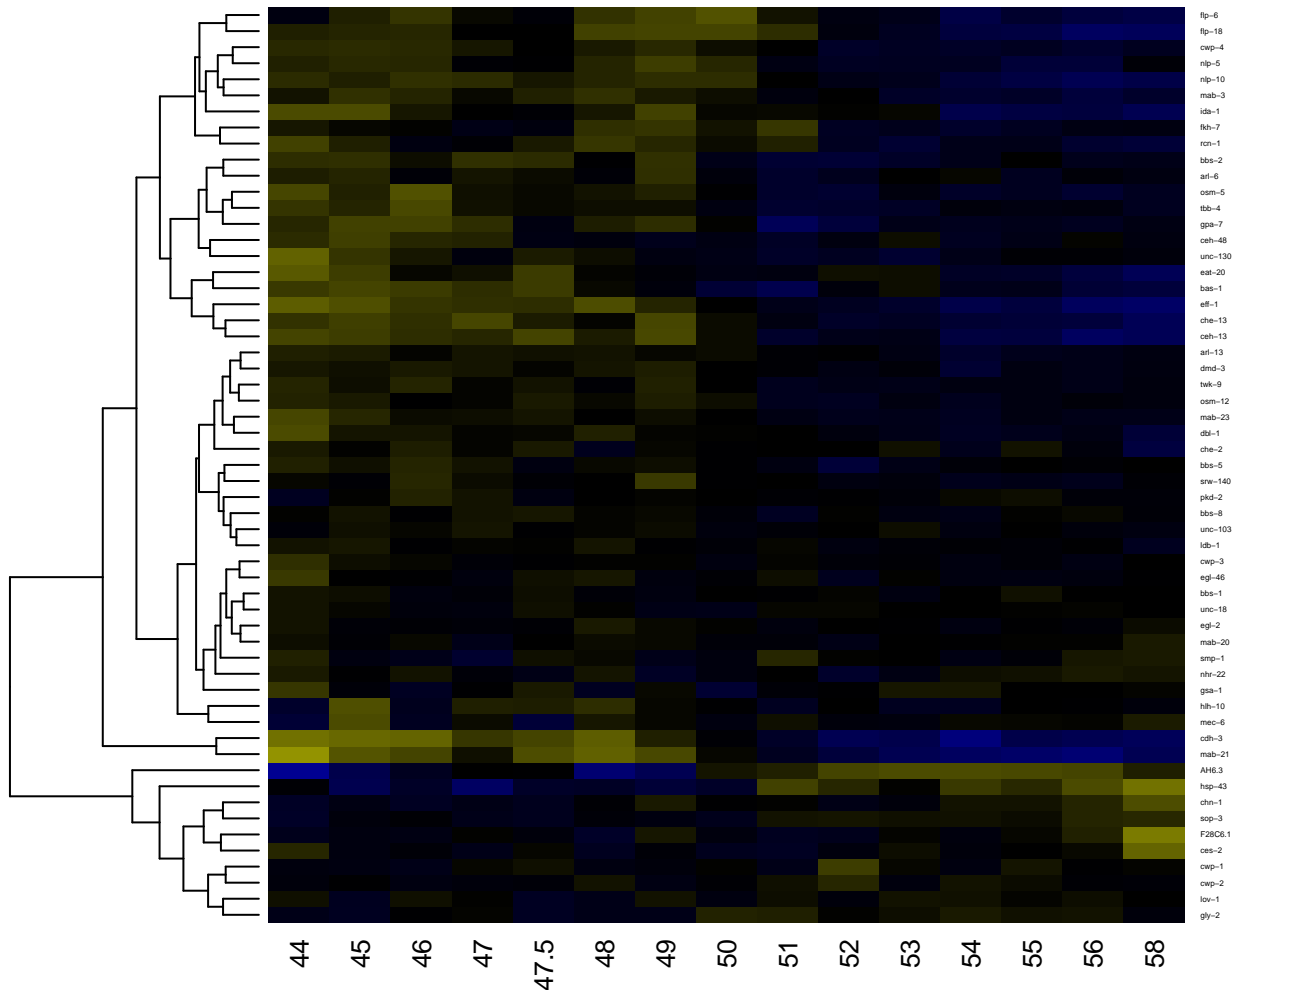

# R6BL

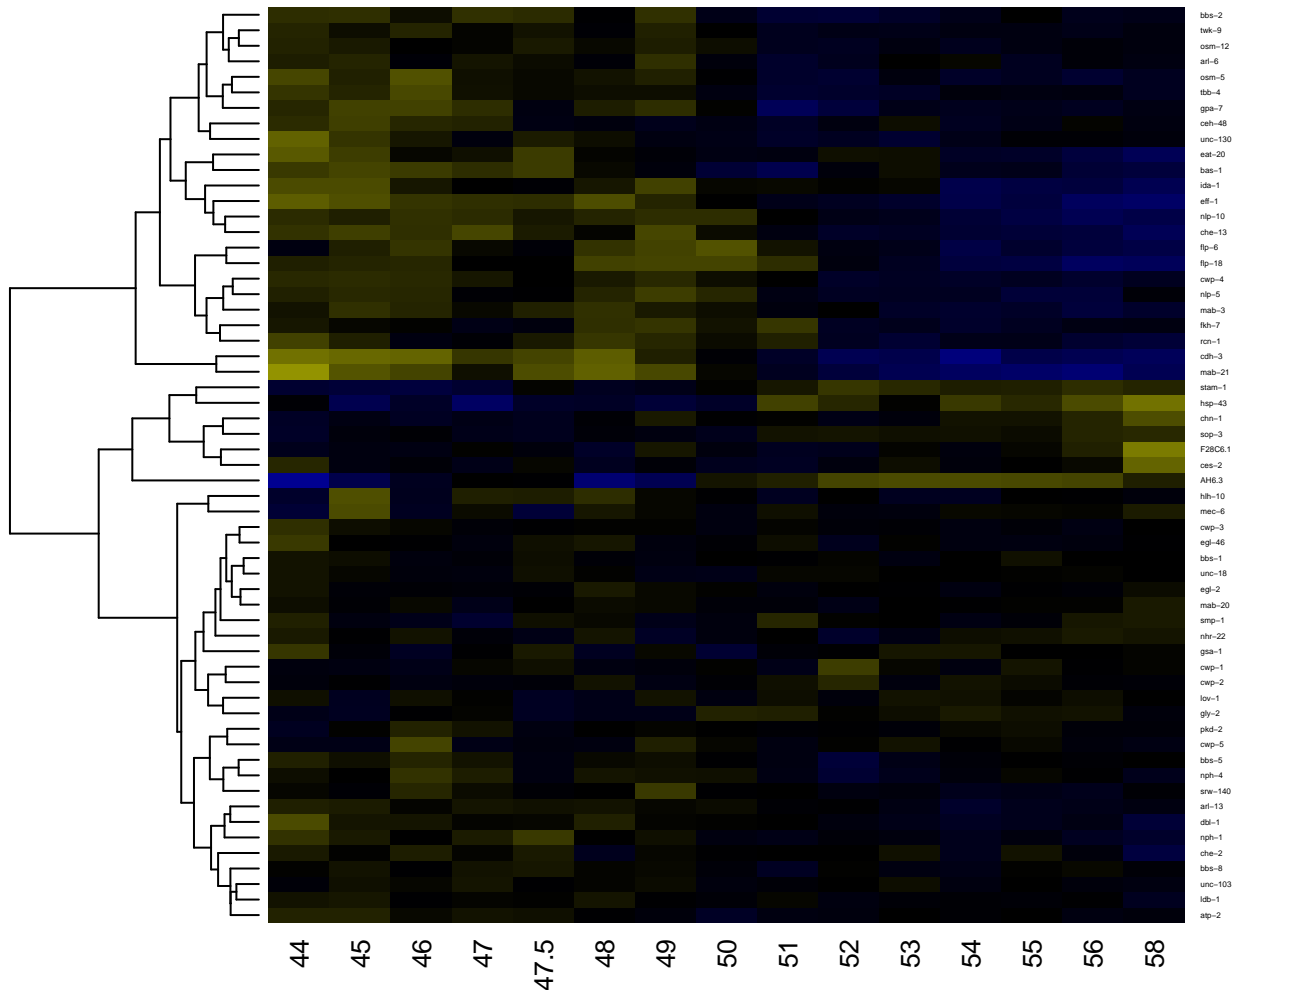

-2

-1

0

1

2

# R6BR



# R6stL

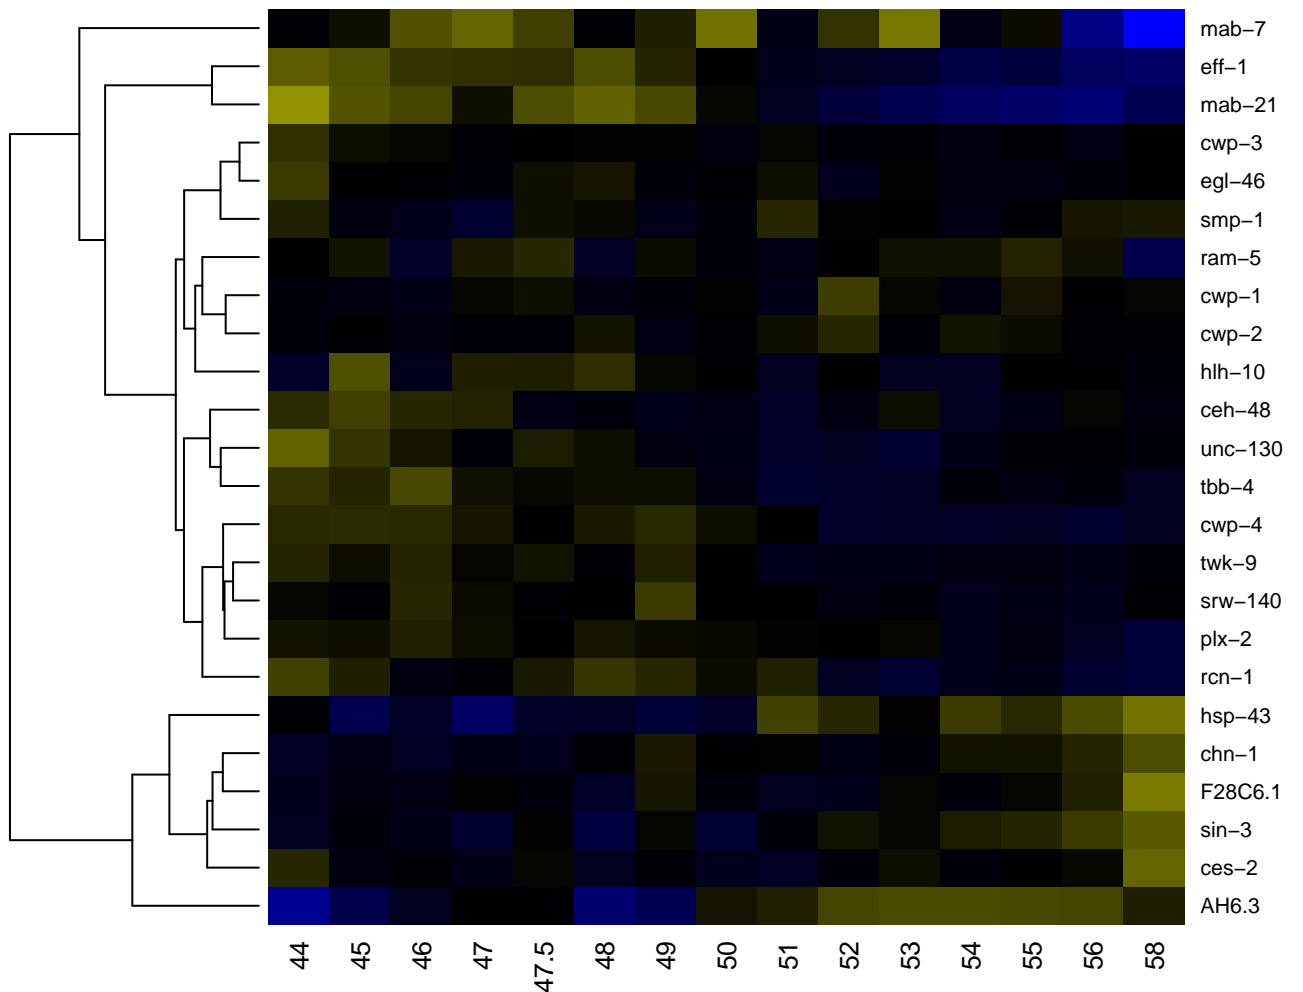

# R6stR

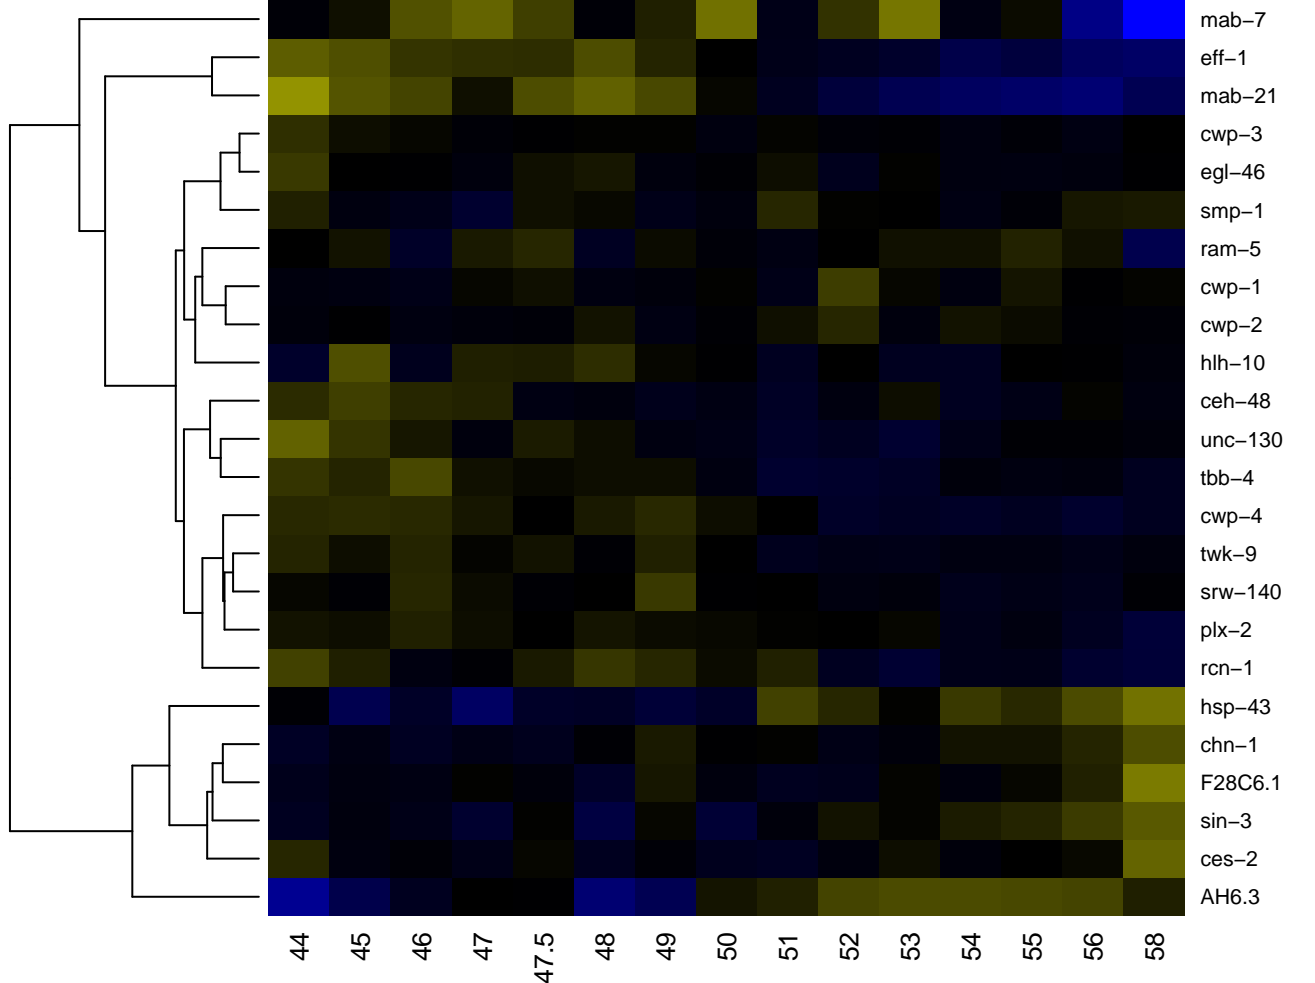





# R7AL

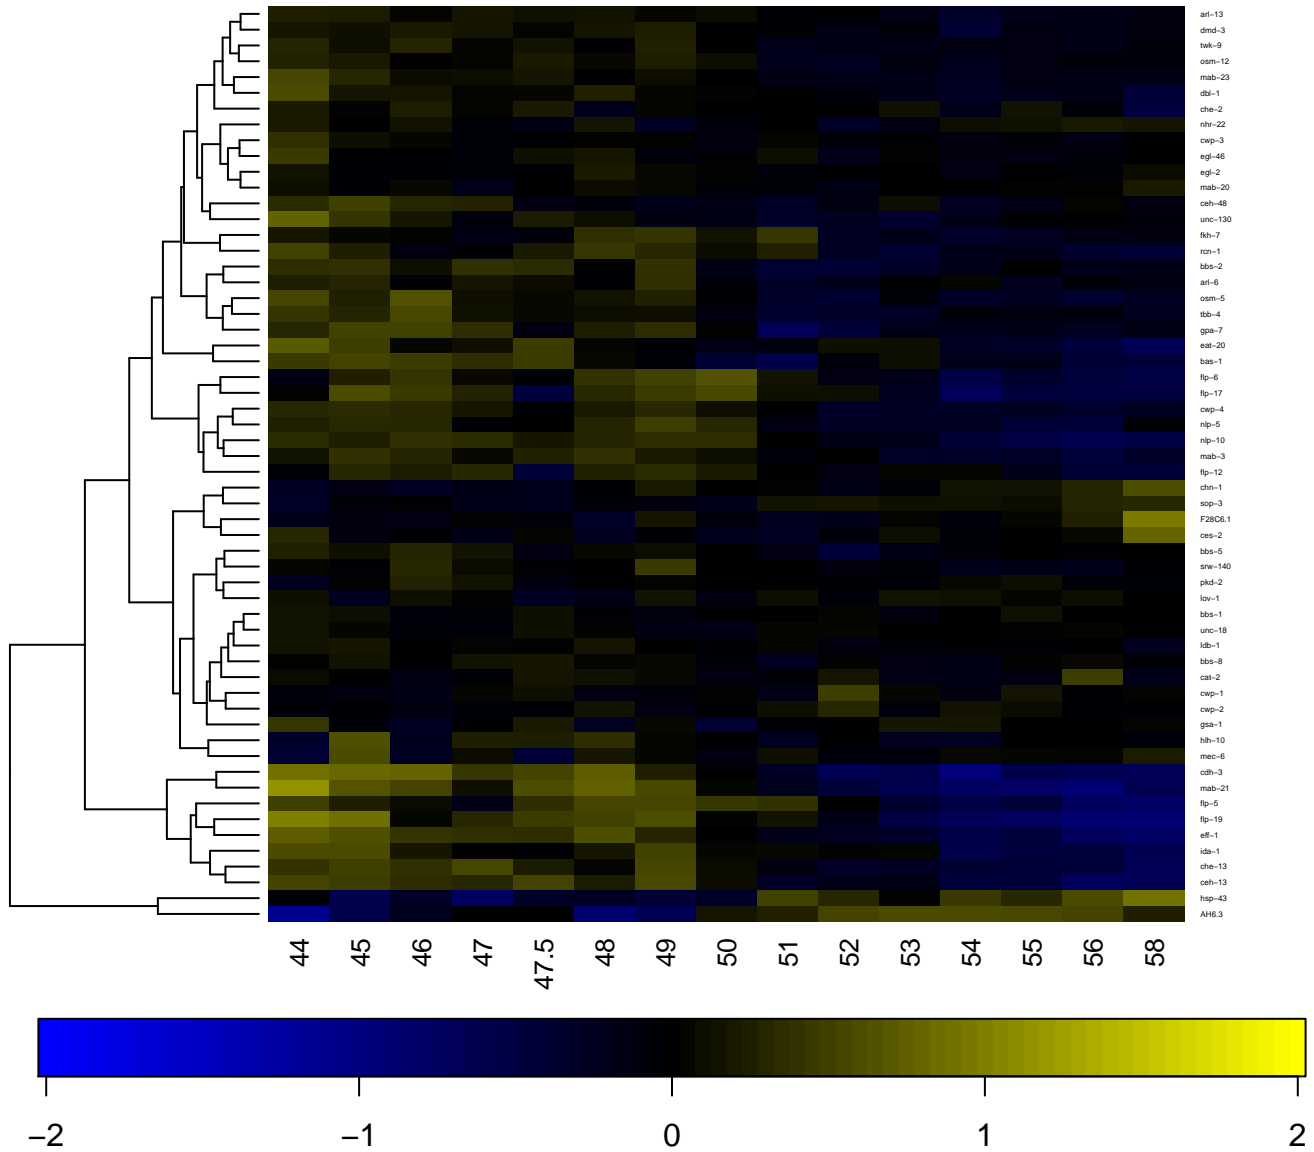

# R7AR

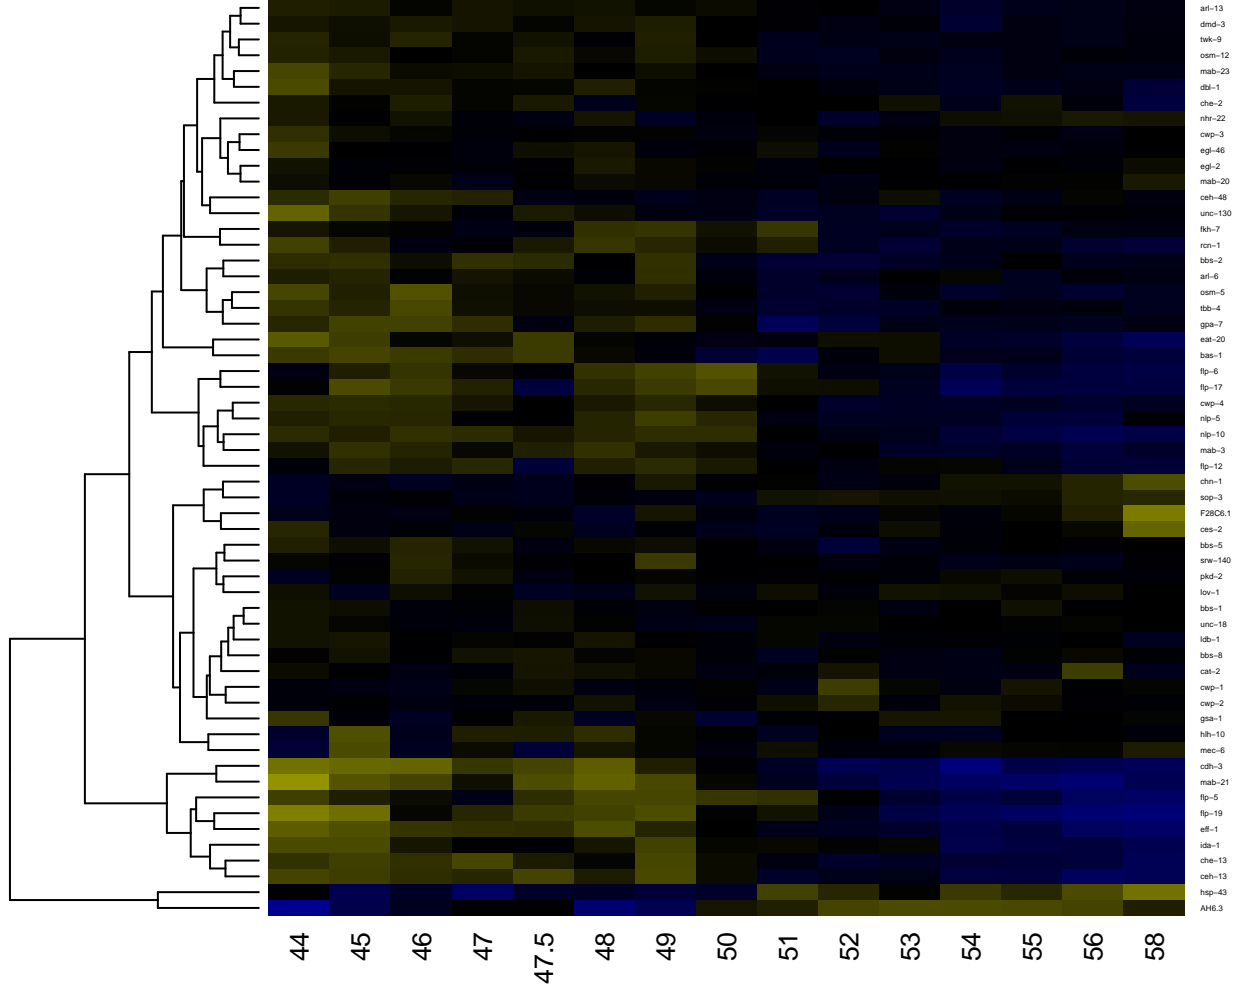

# R7BL

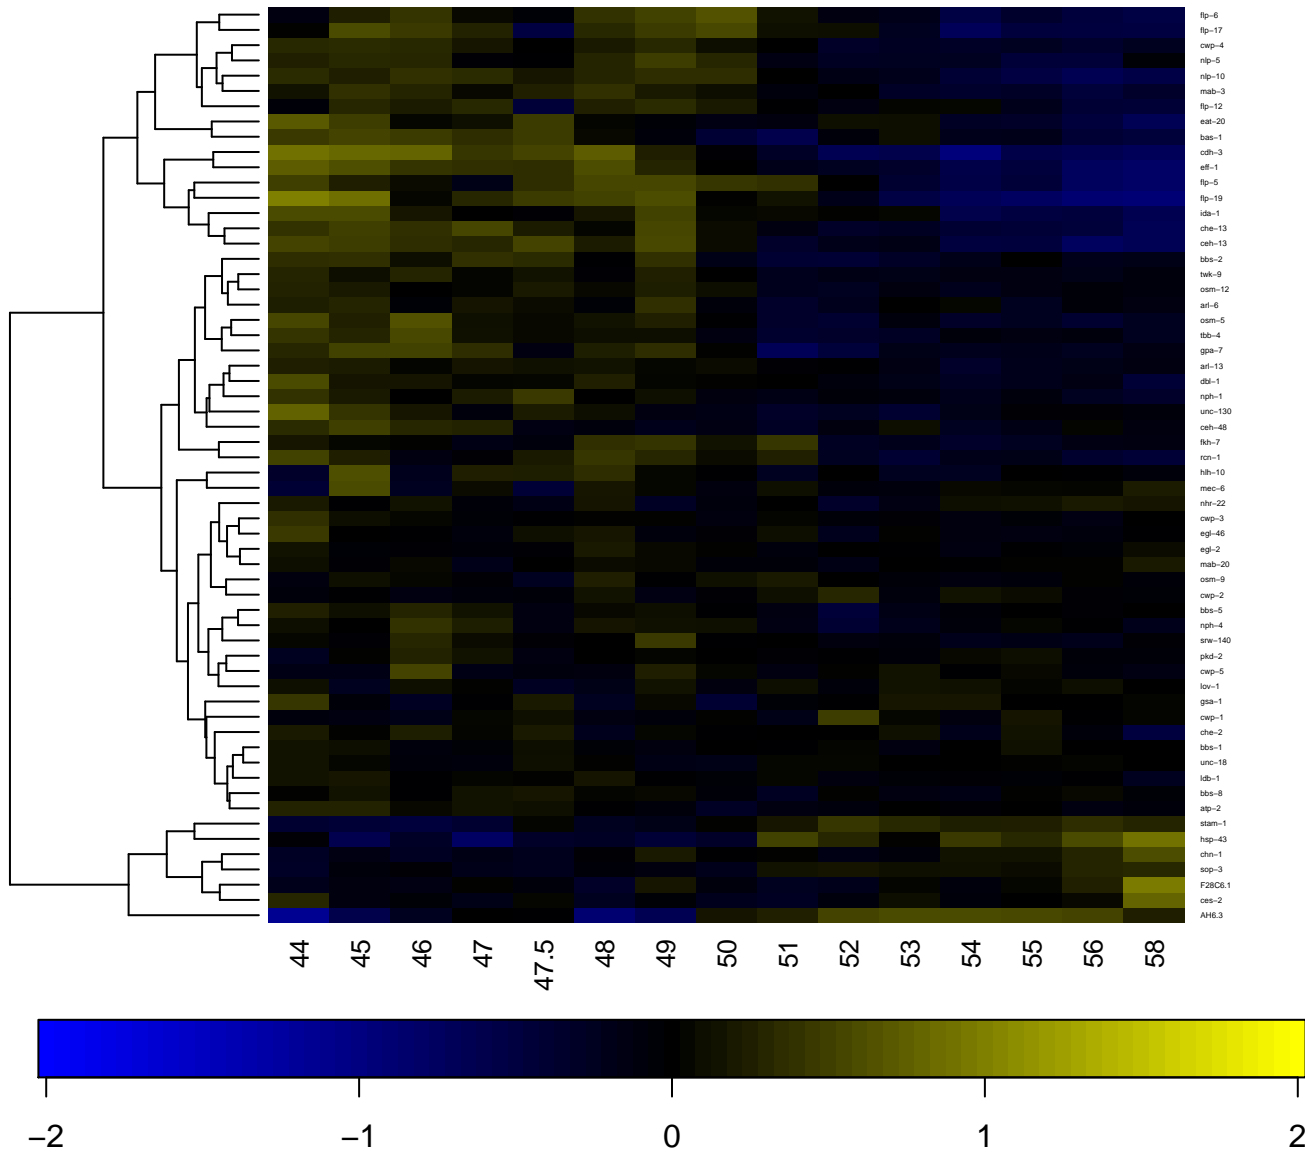

# R7BR

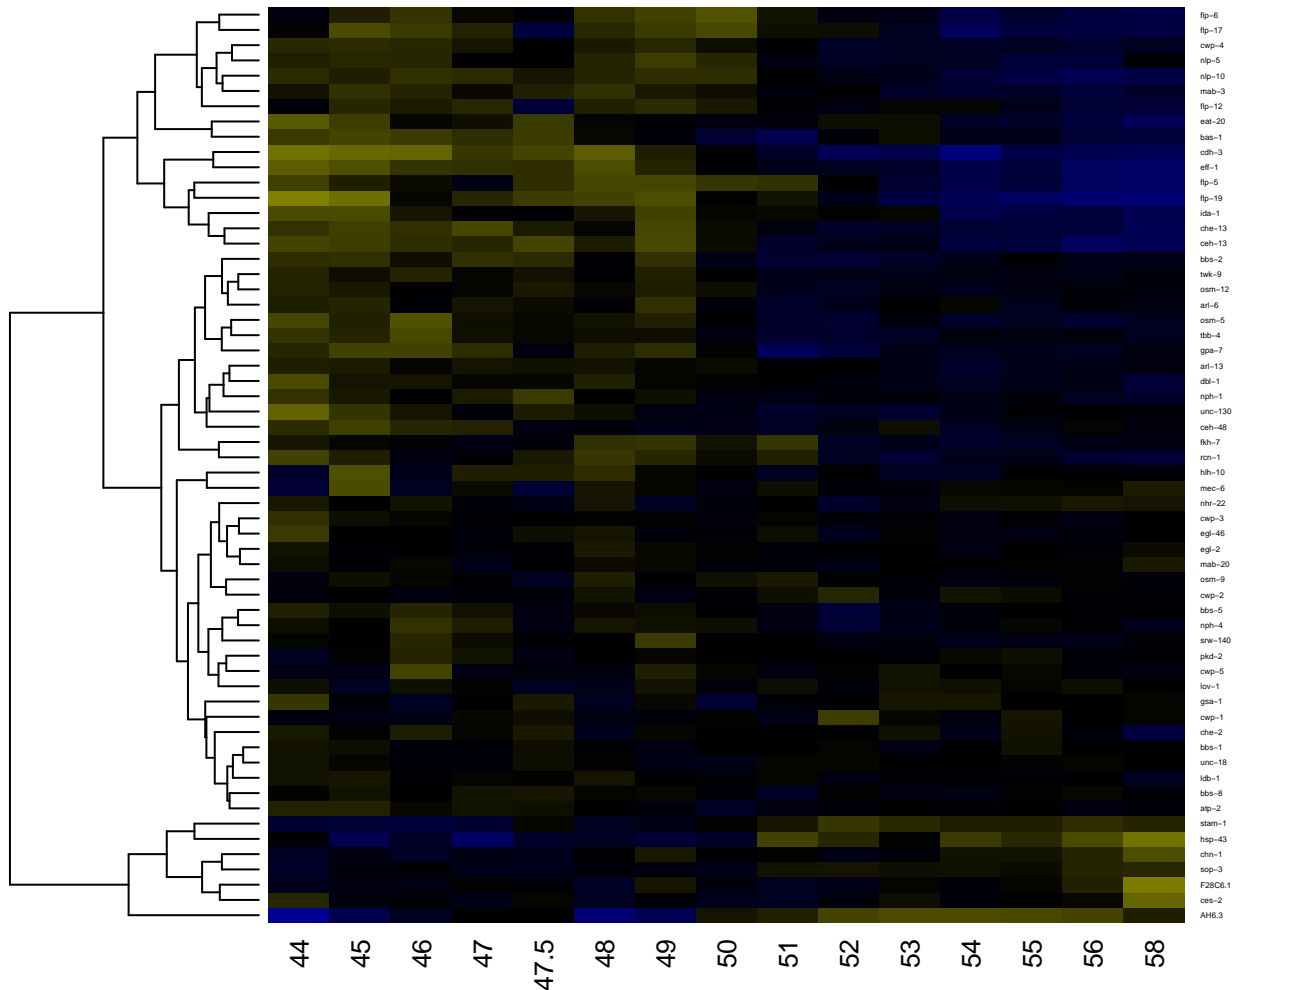

# R7stL



# R7stR

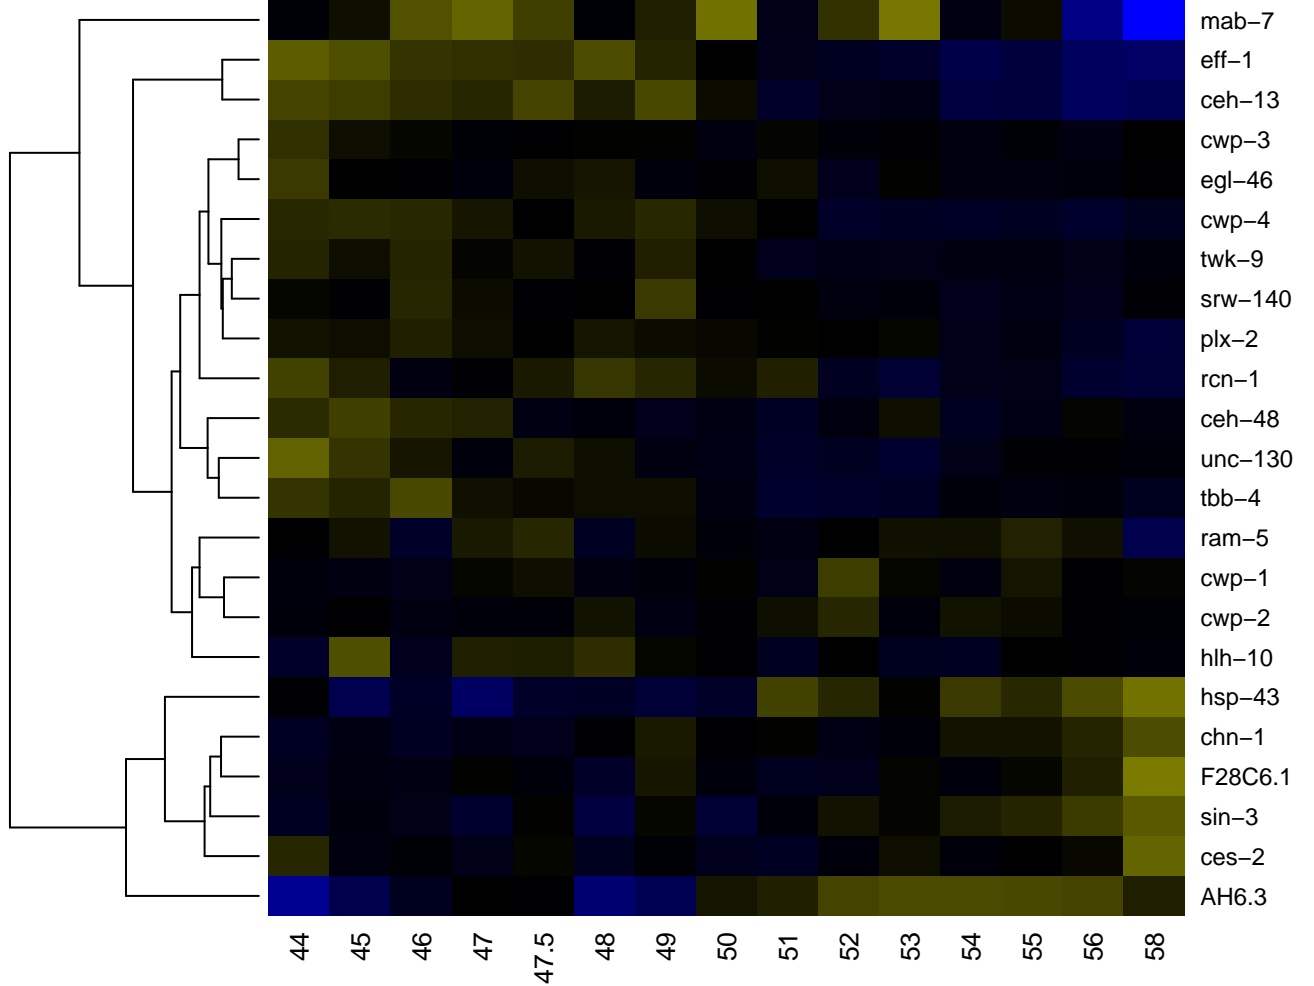







# R8AL

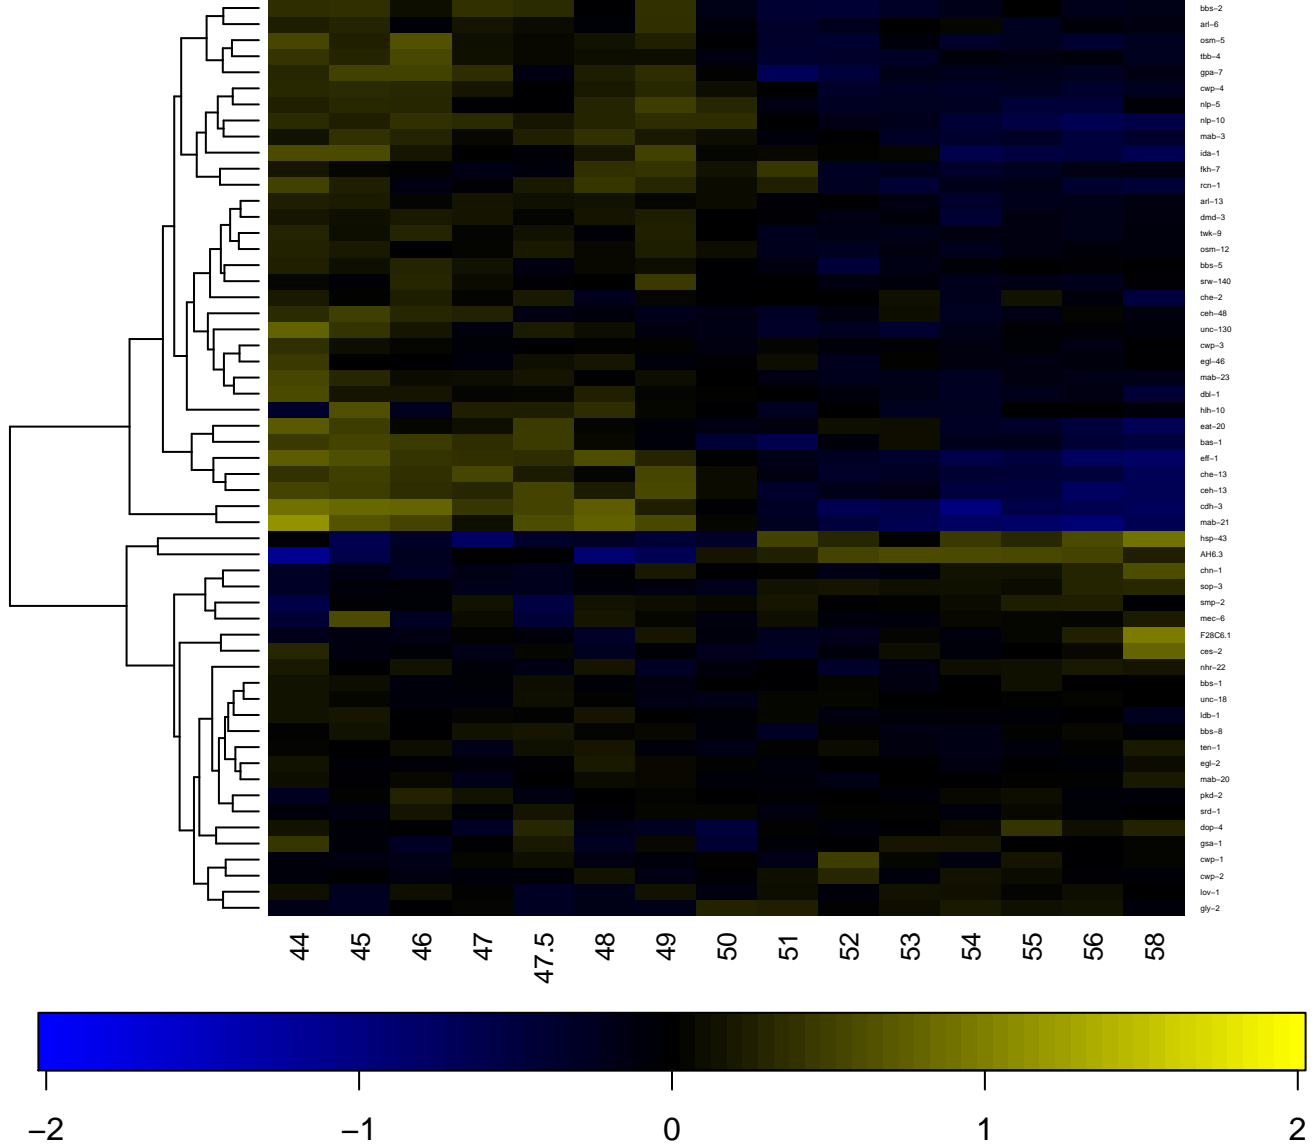

# R8AR

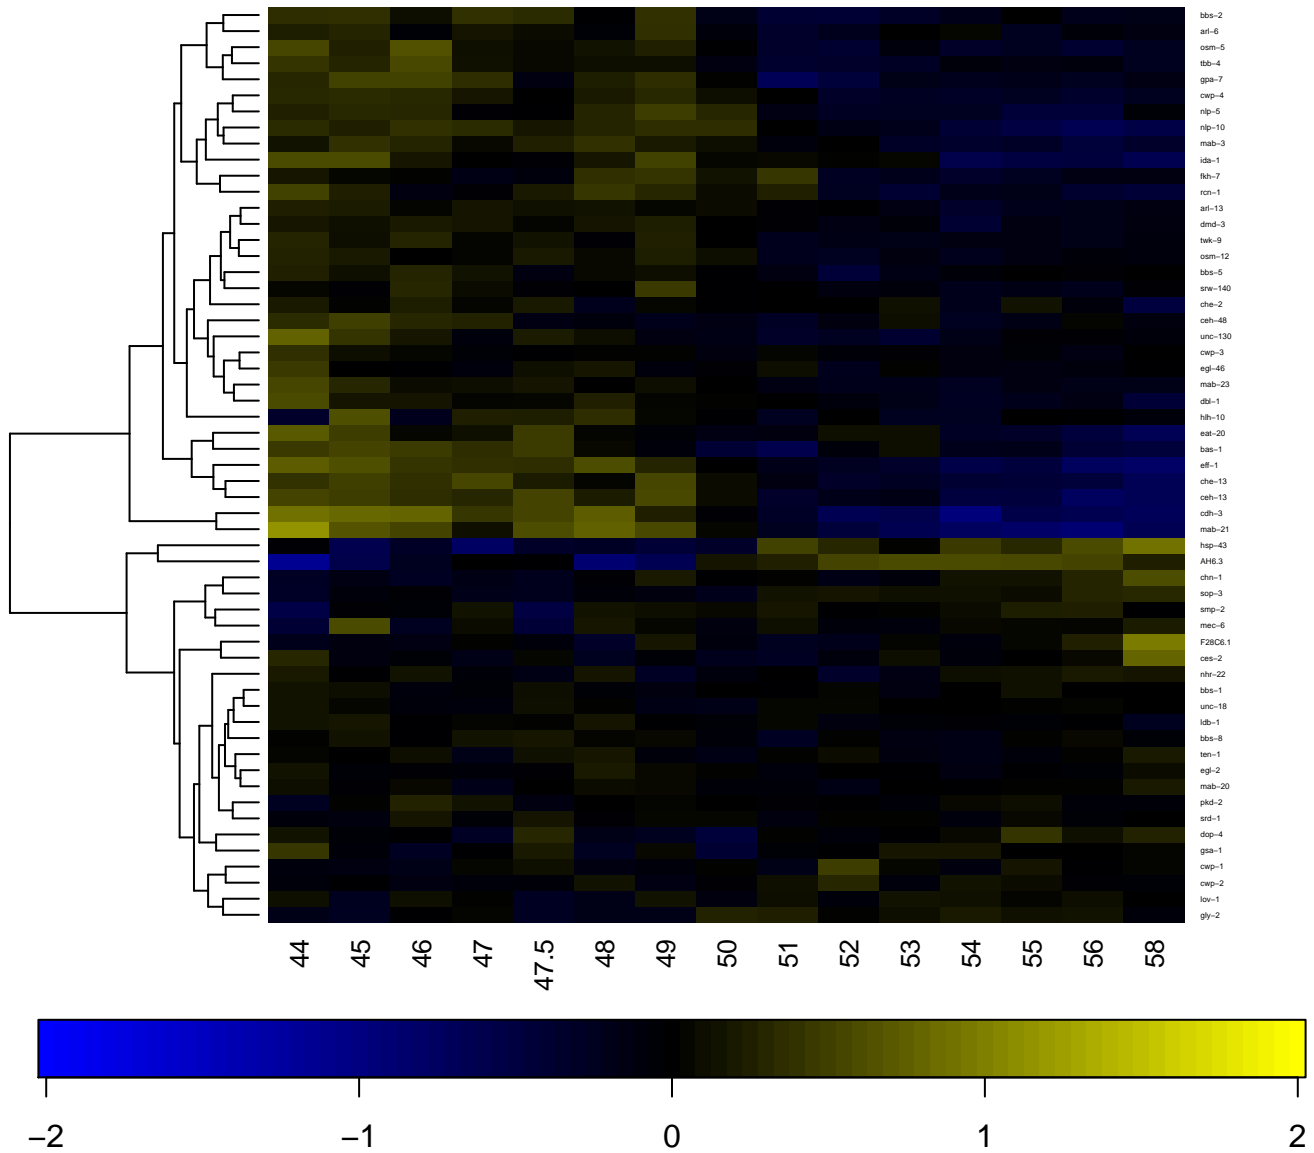

# R8BL

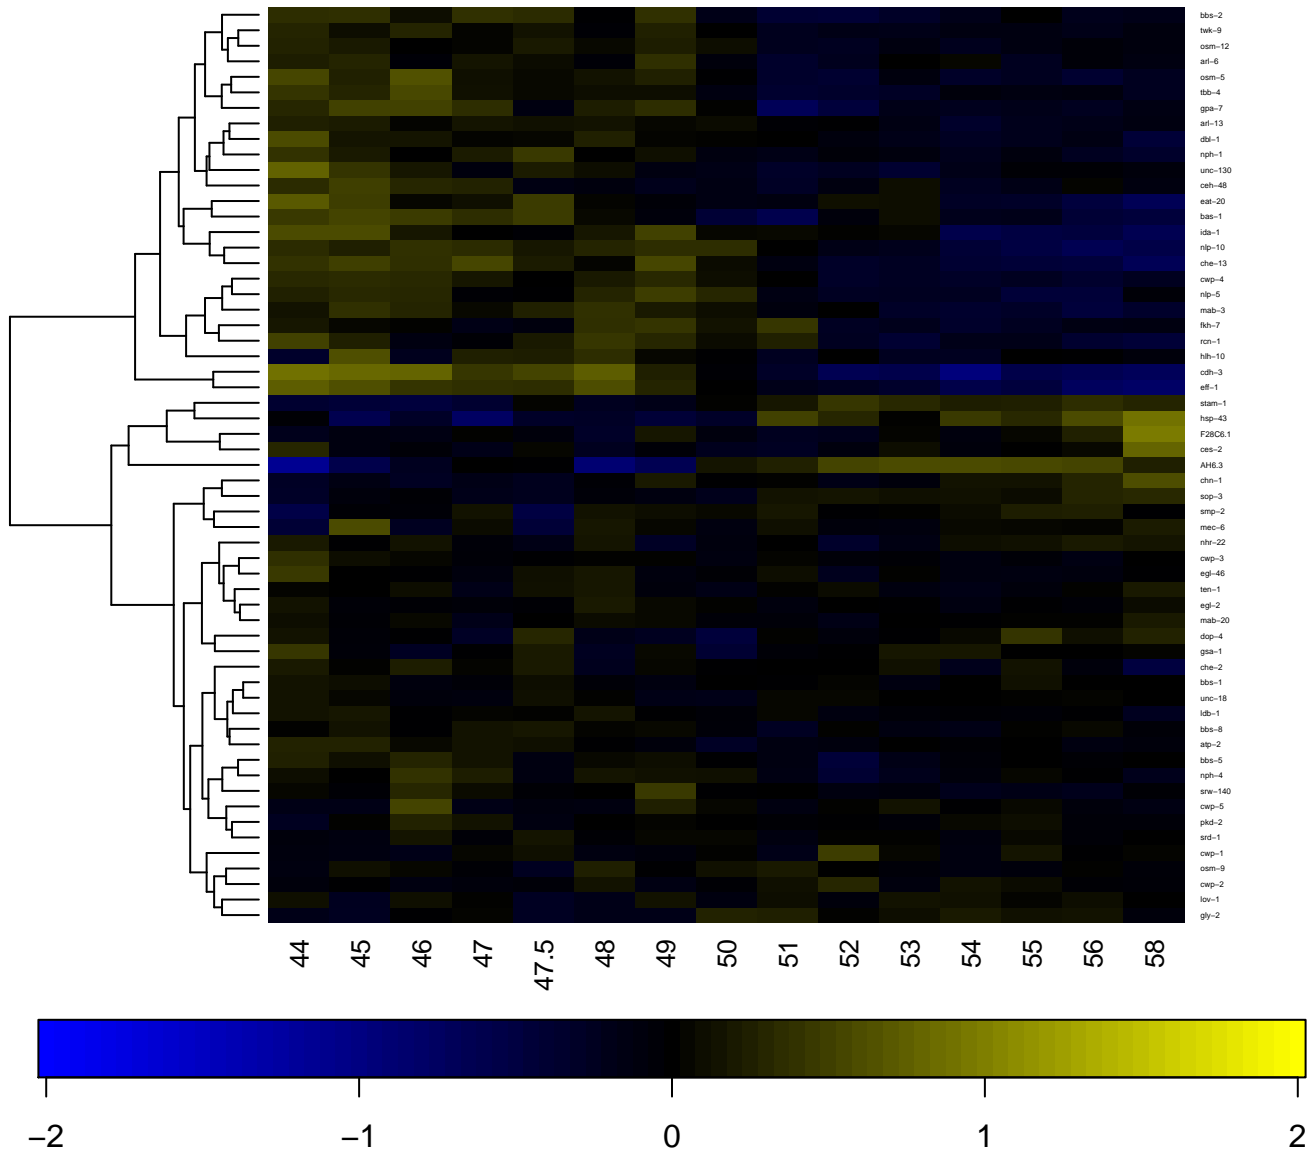

# R8BR



# R8stL

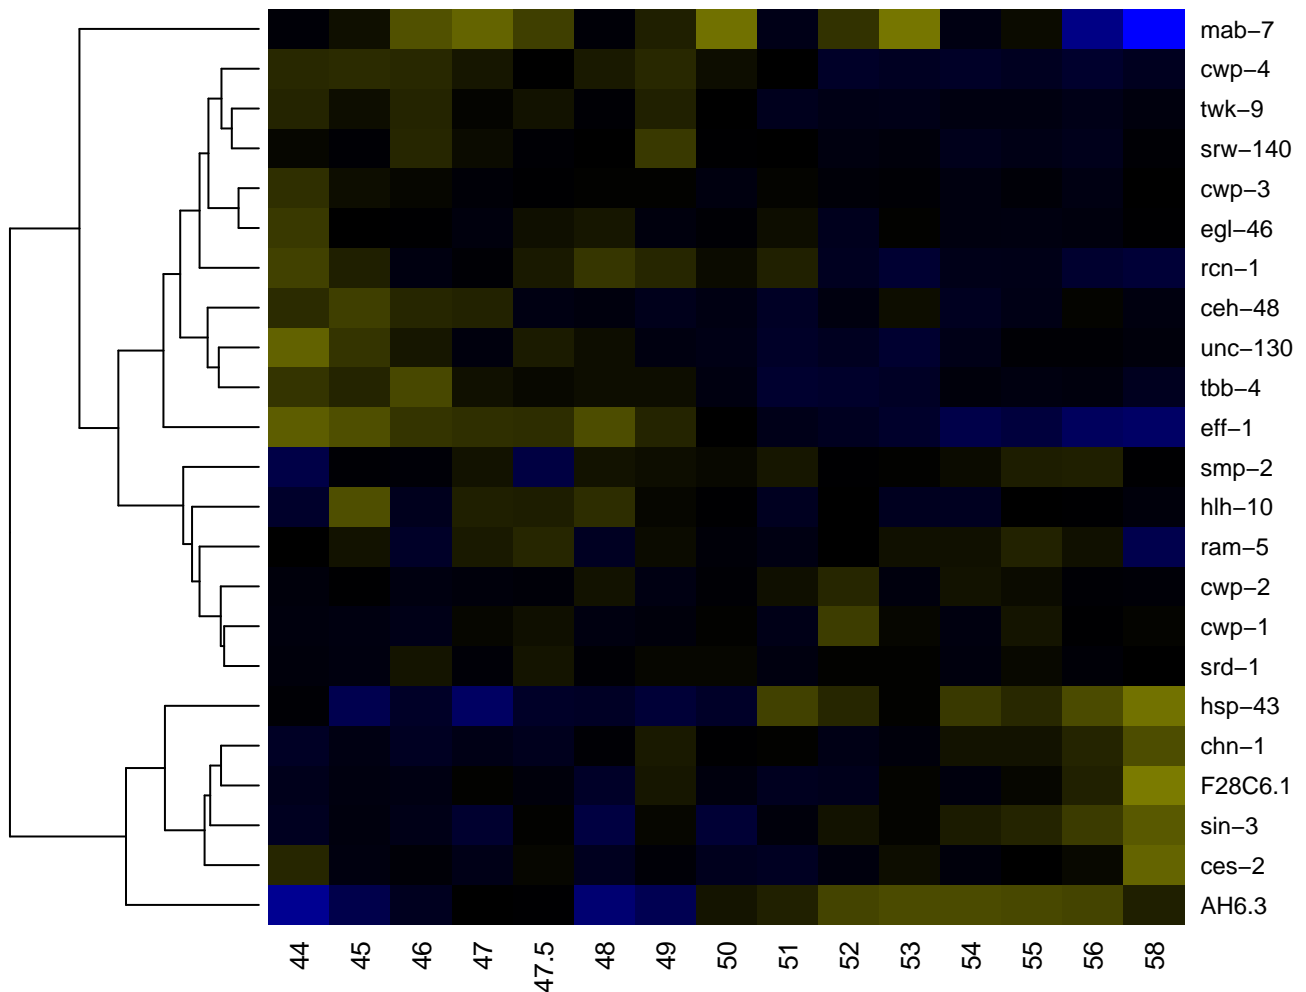

# R8stR

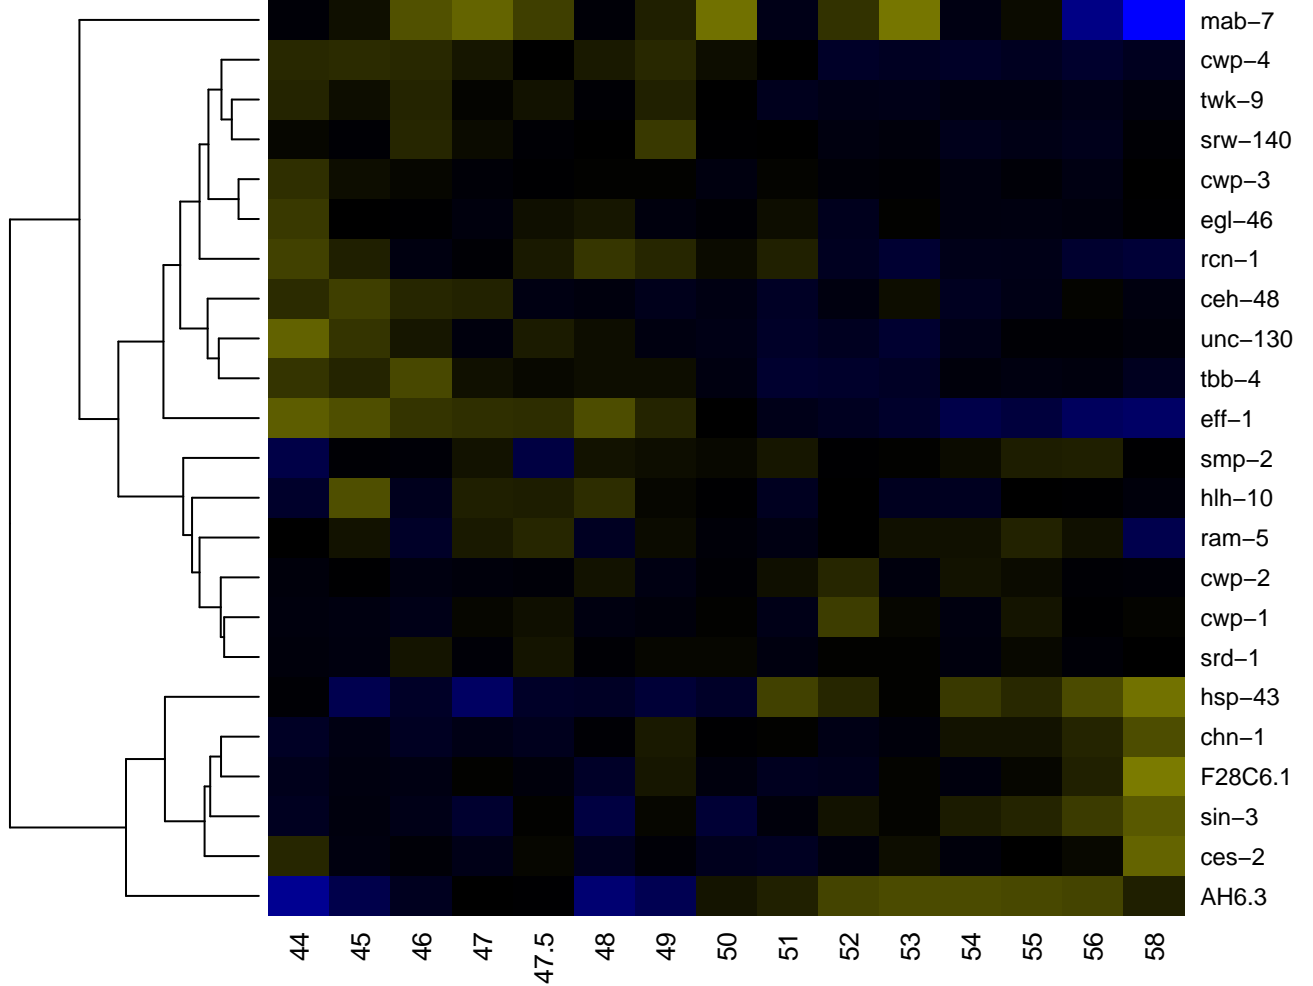







# R9AL

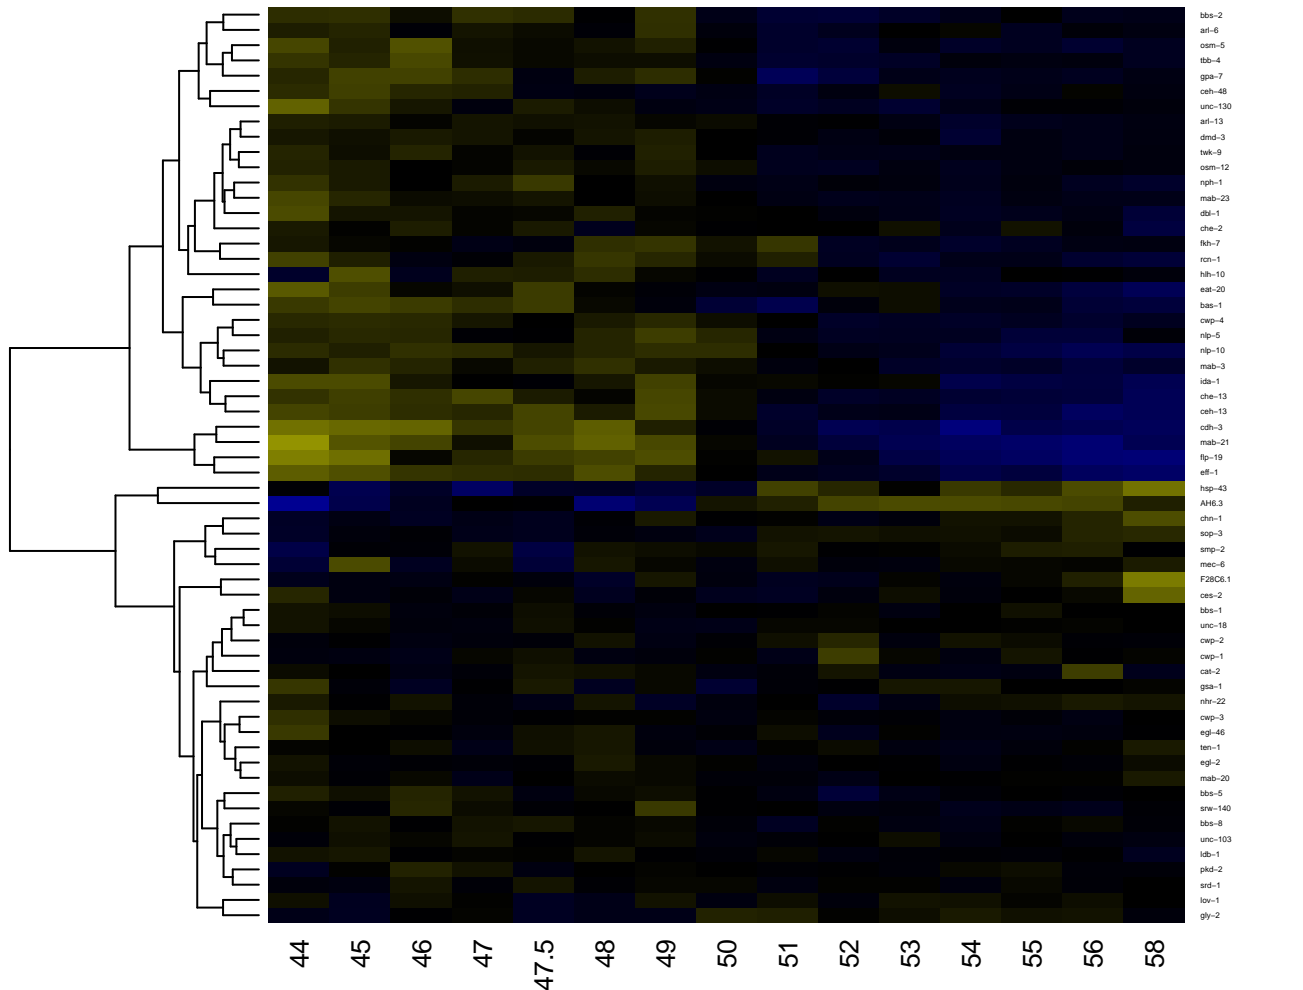

# R9AR



-2

-1

0

1

2

# R9BL

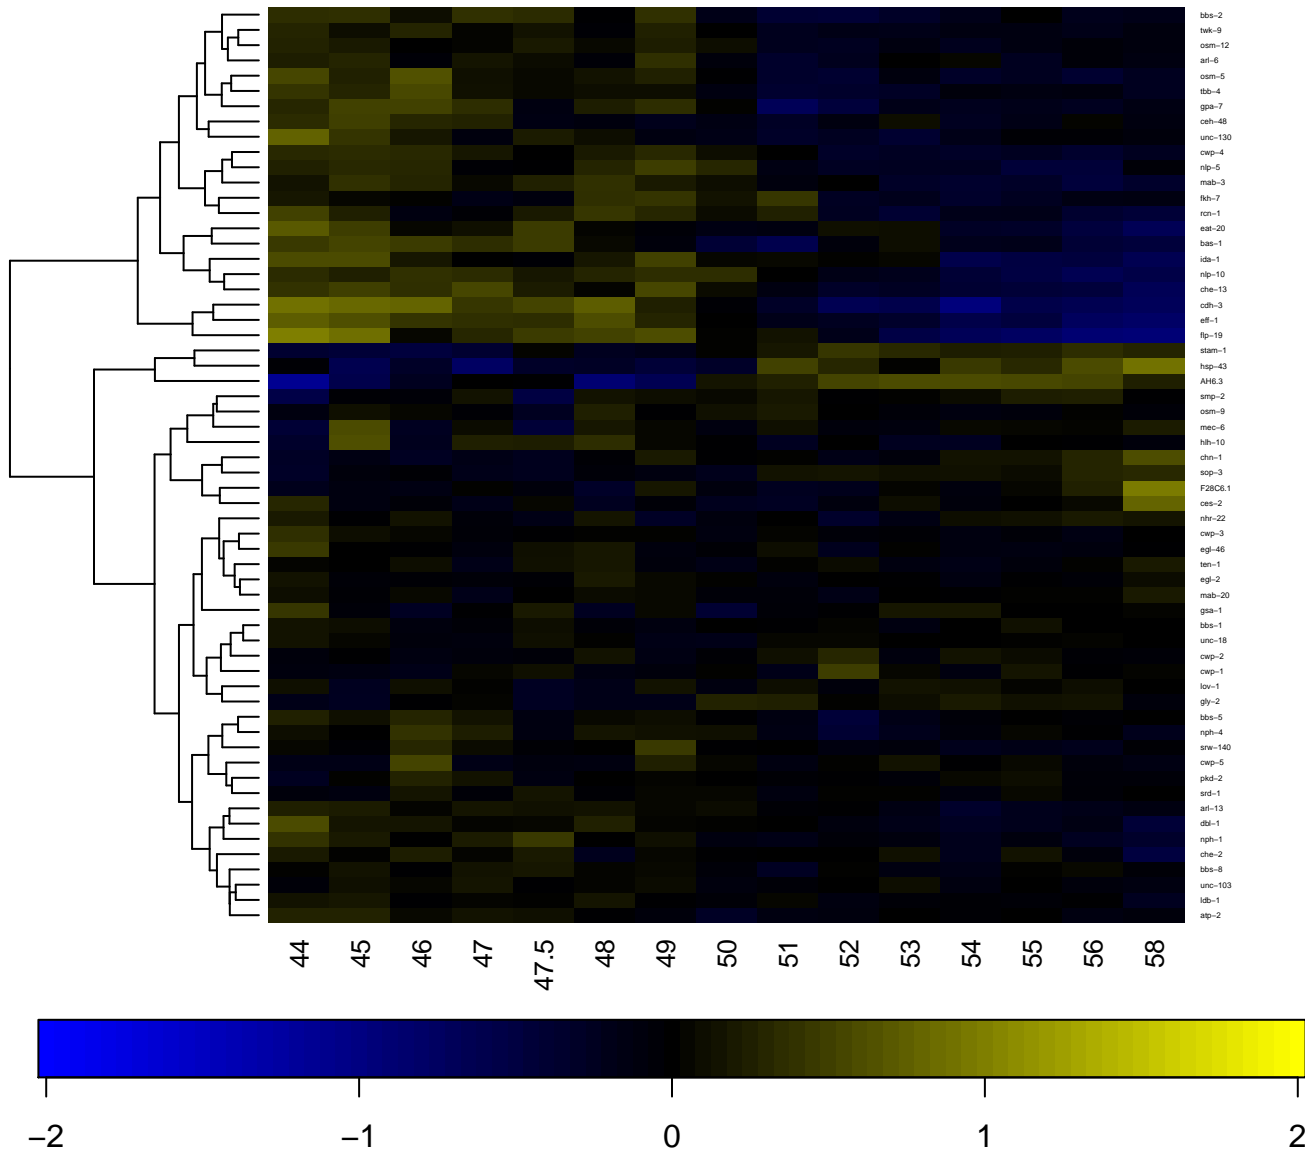

# R9BR

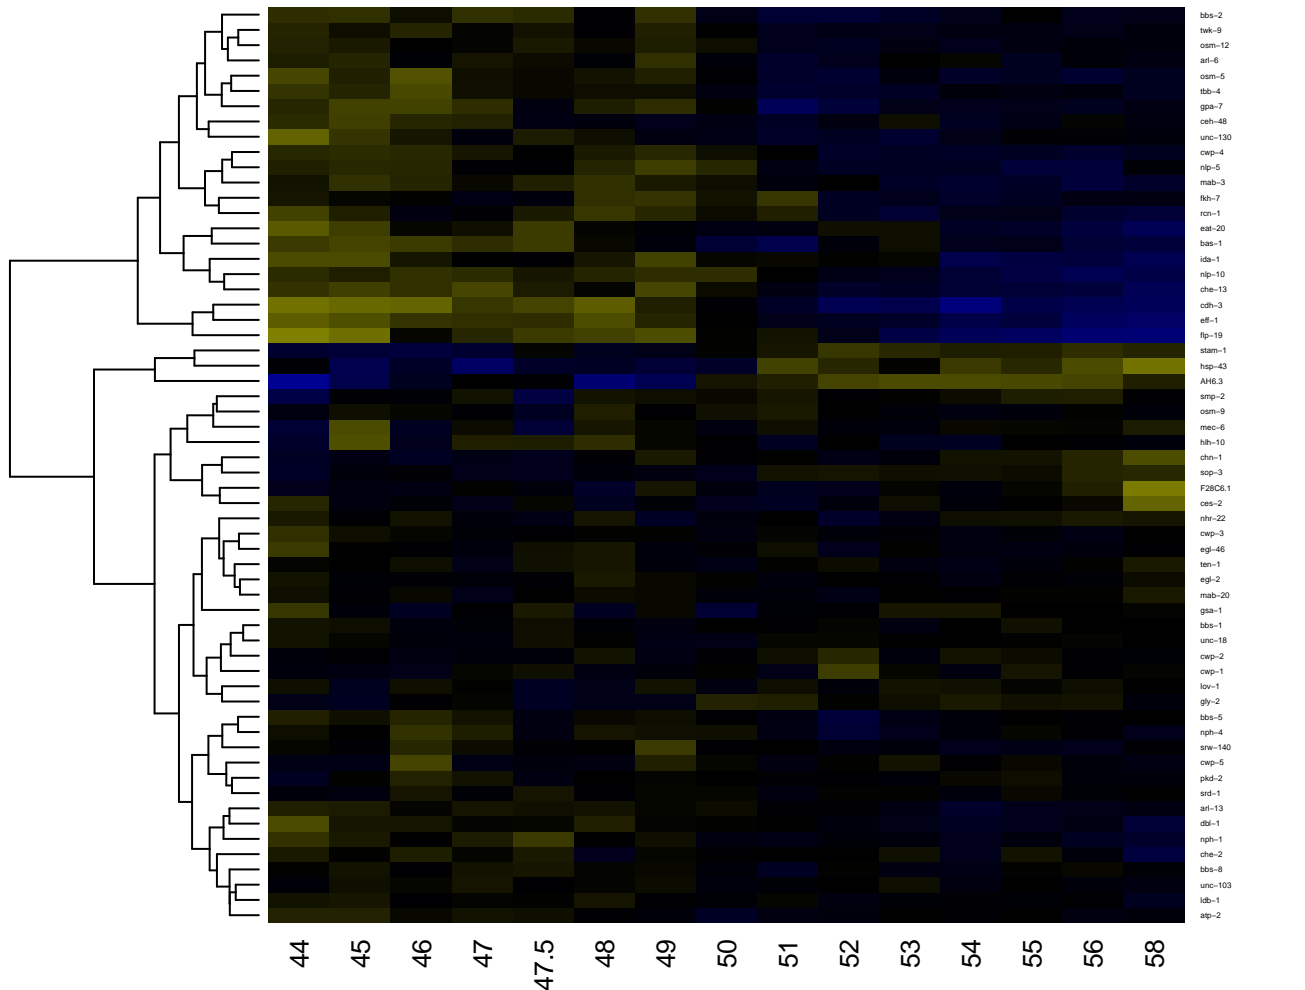

-2

-1

0

1

2

# R9stL

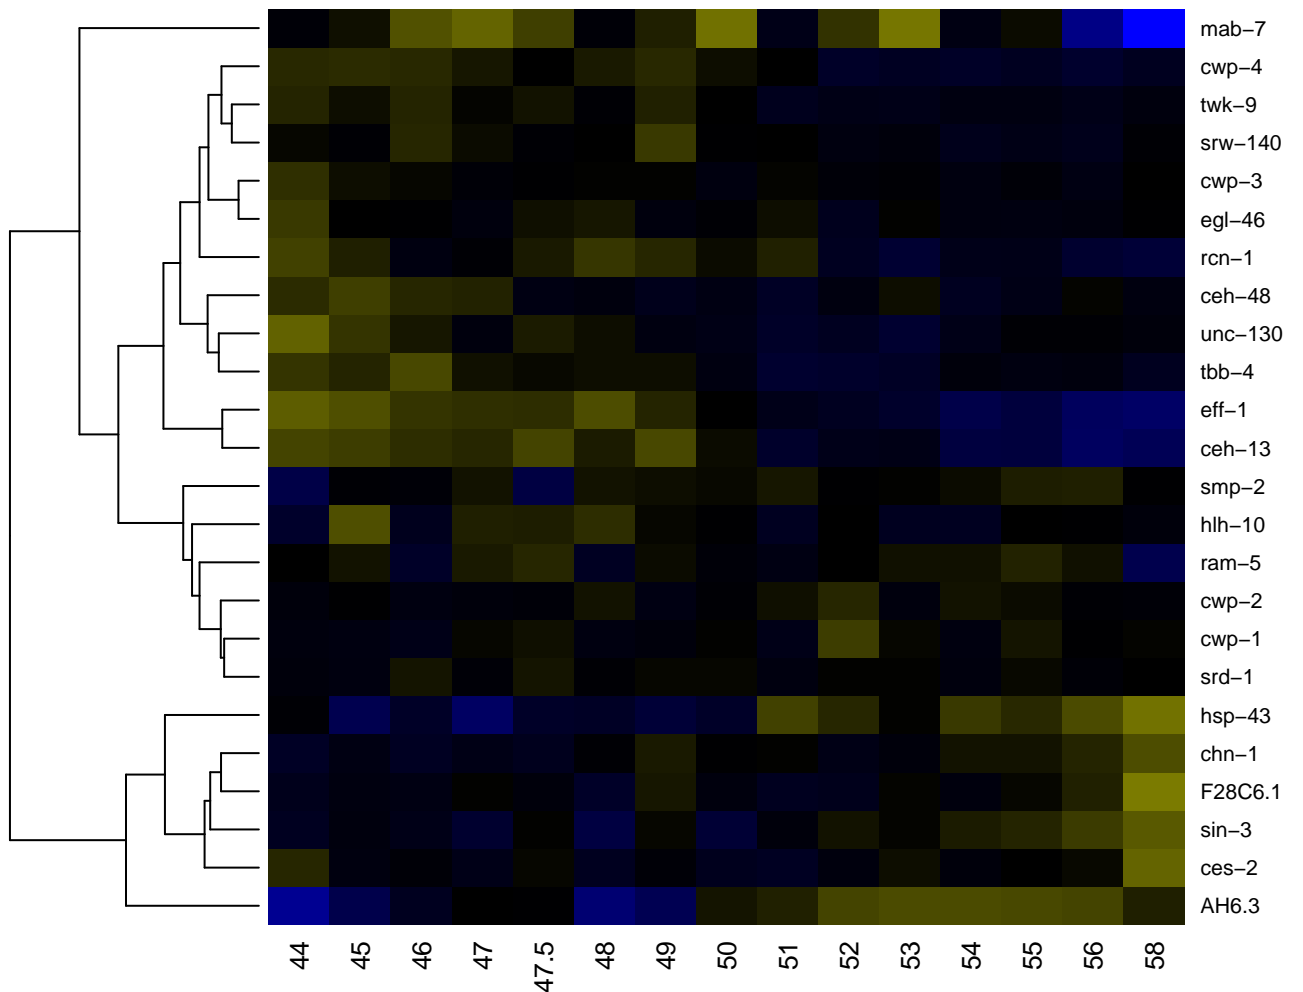

# R9stR

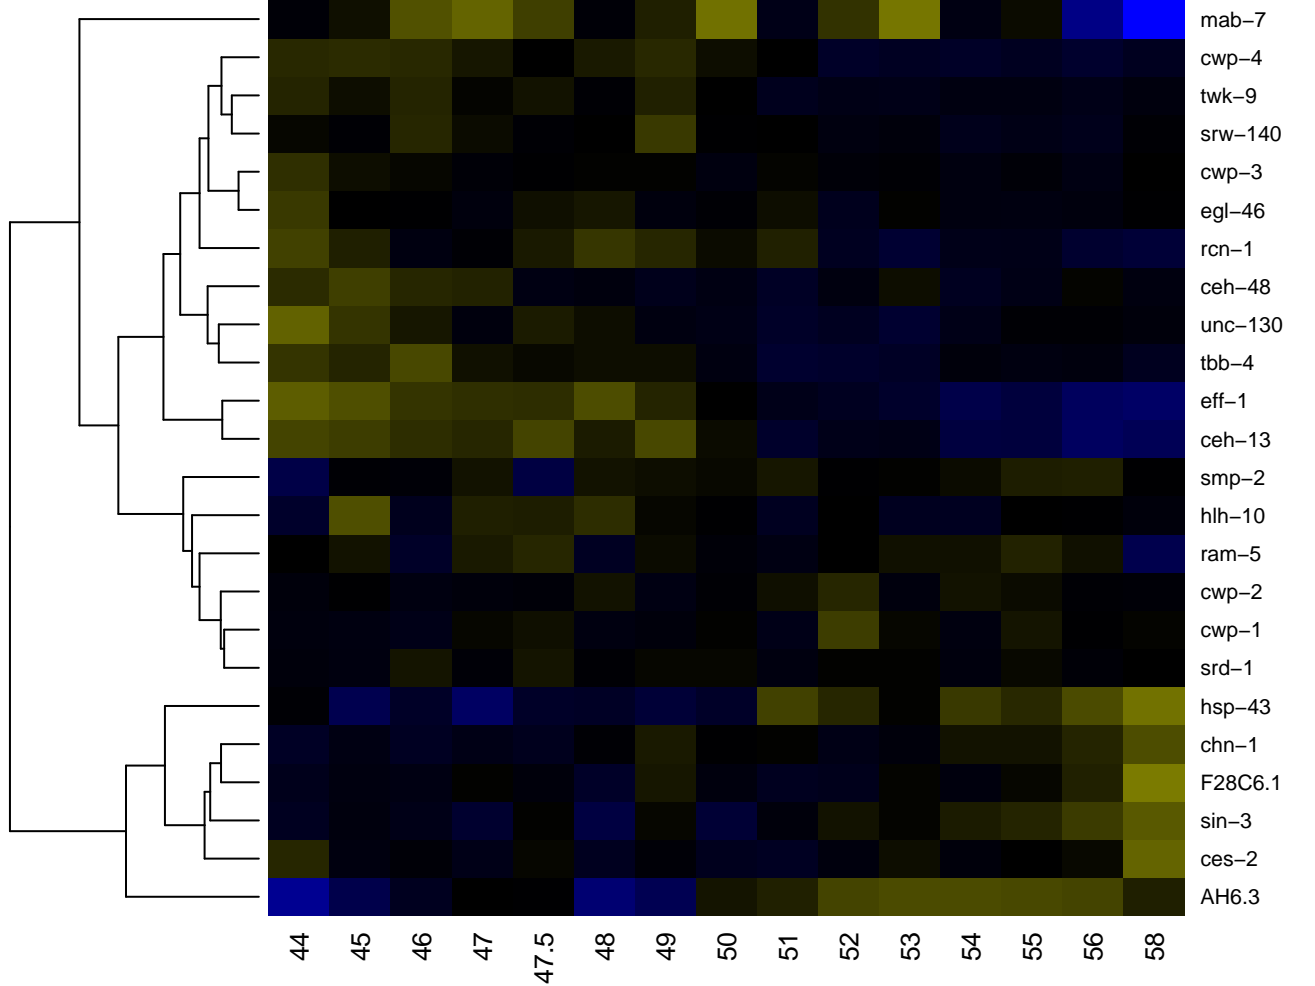

# ray

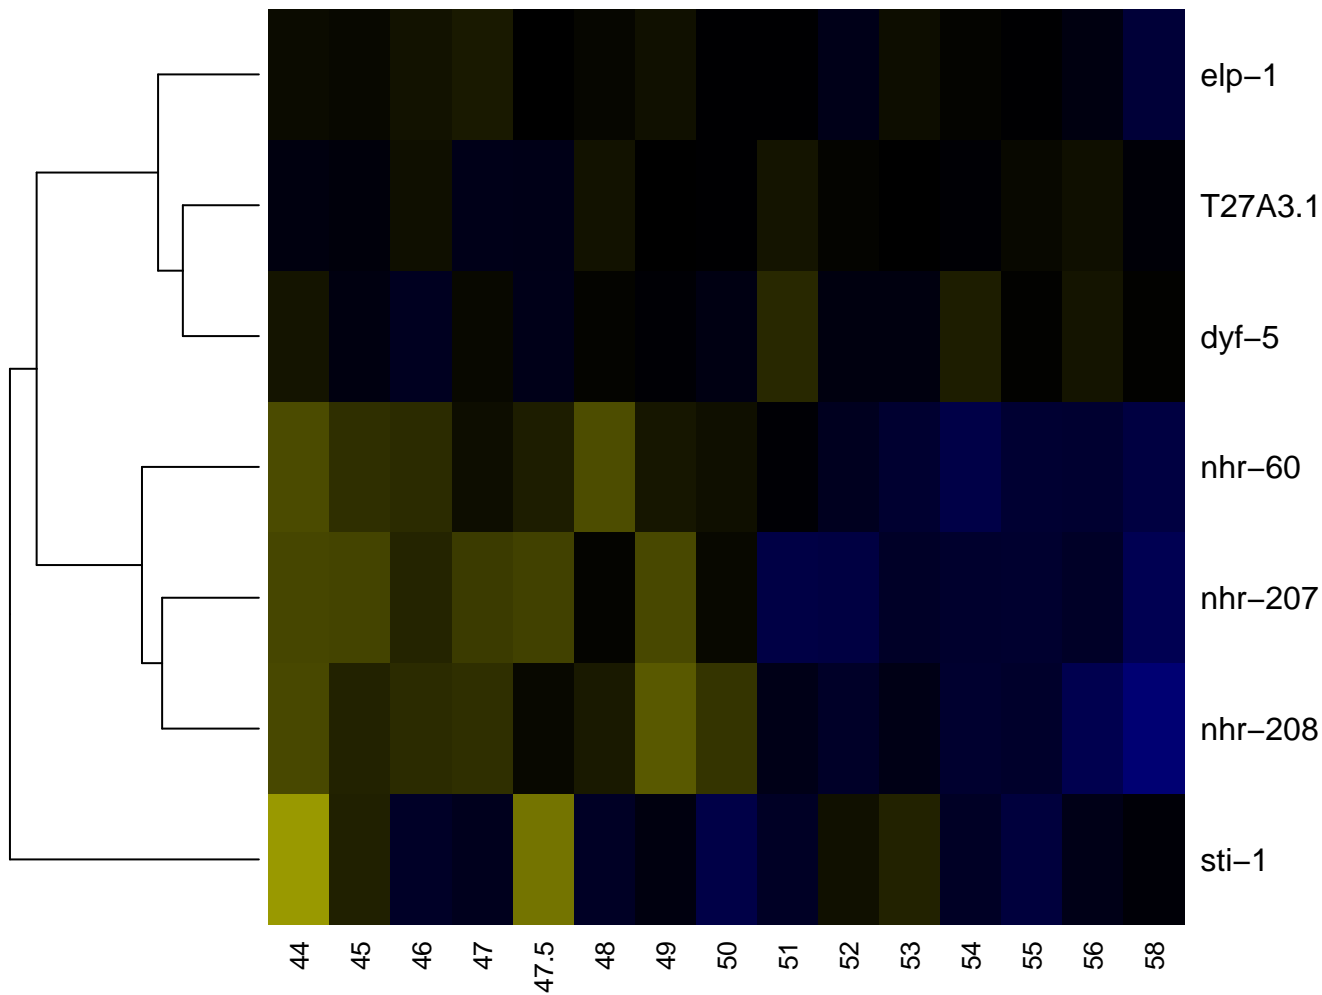



# rect\_D

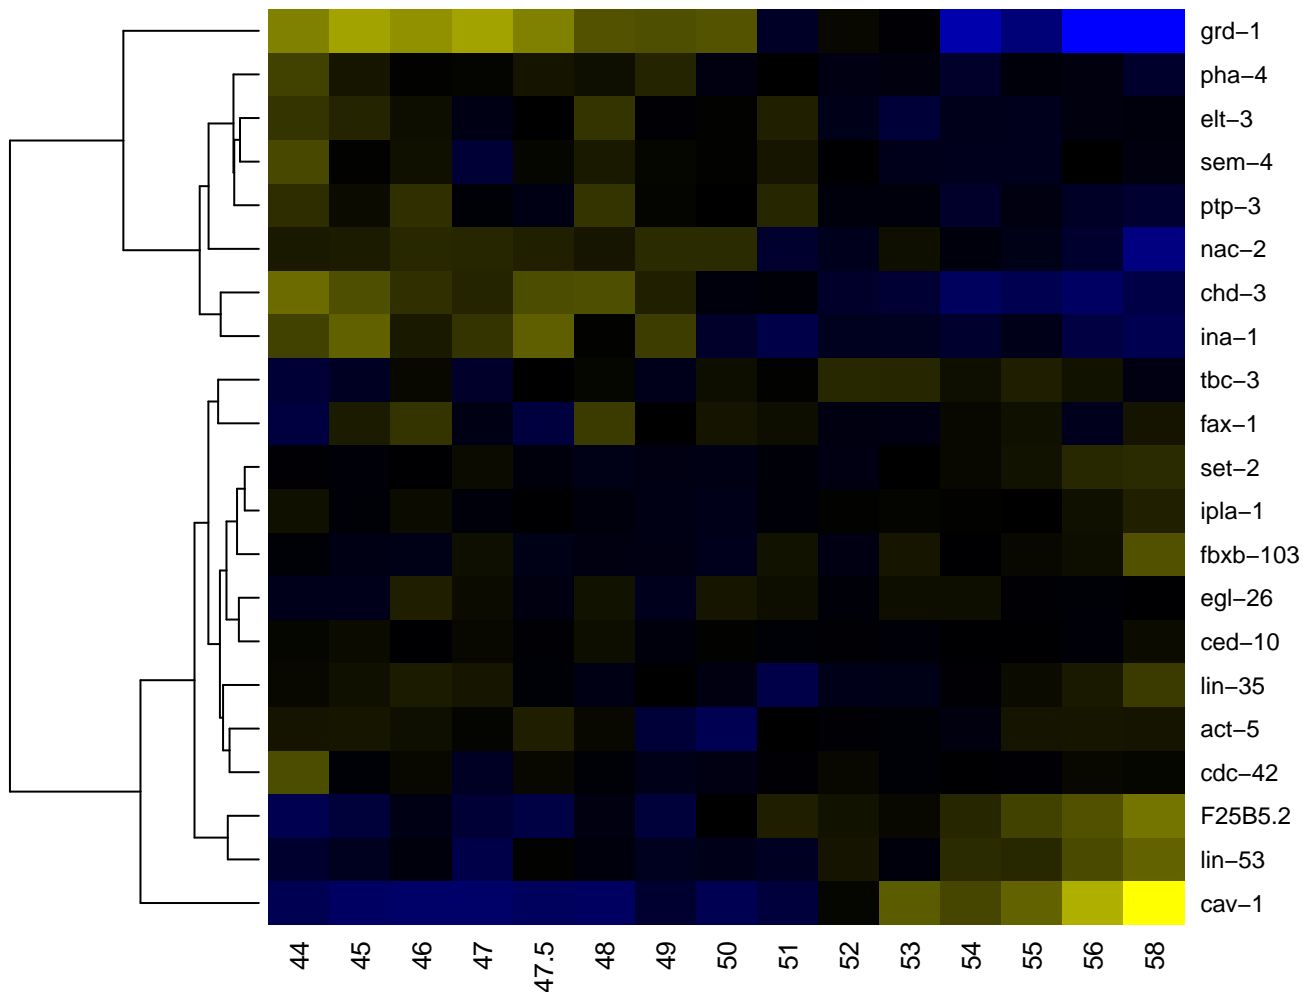

# rect\_VL

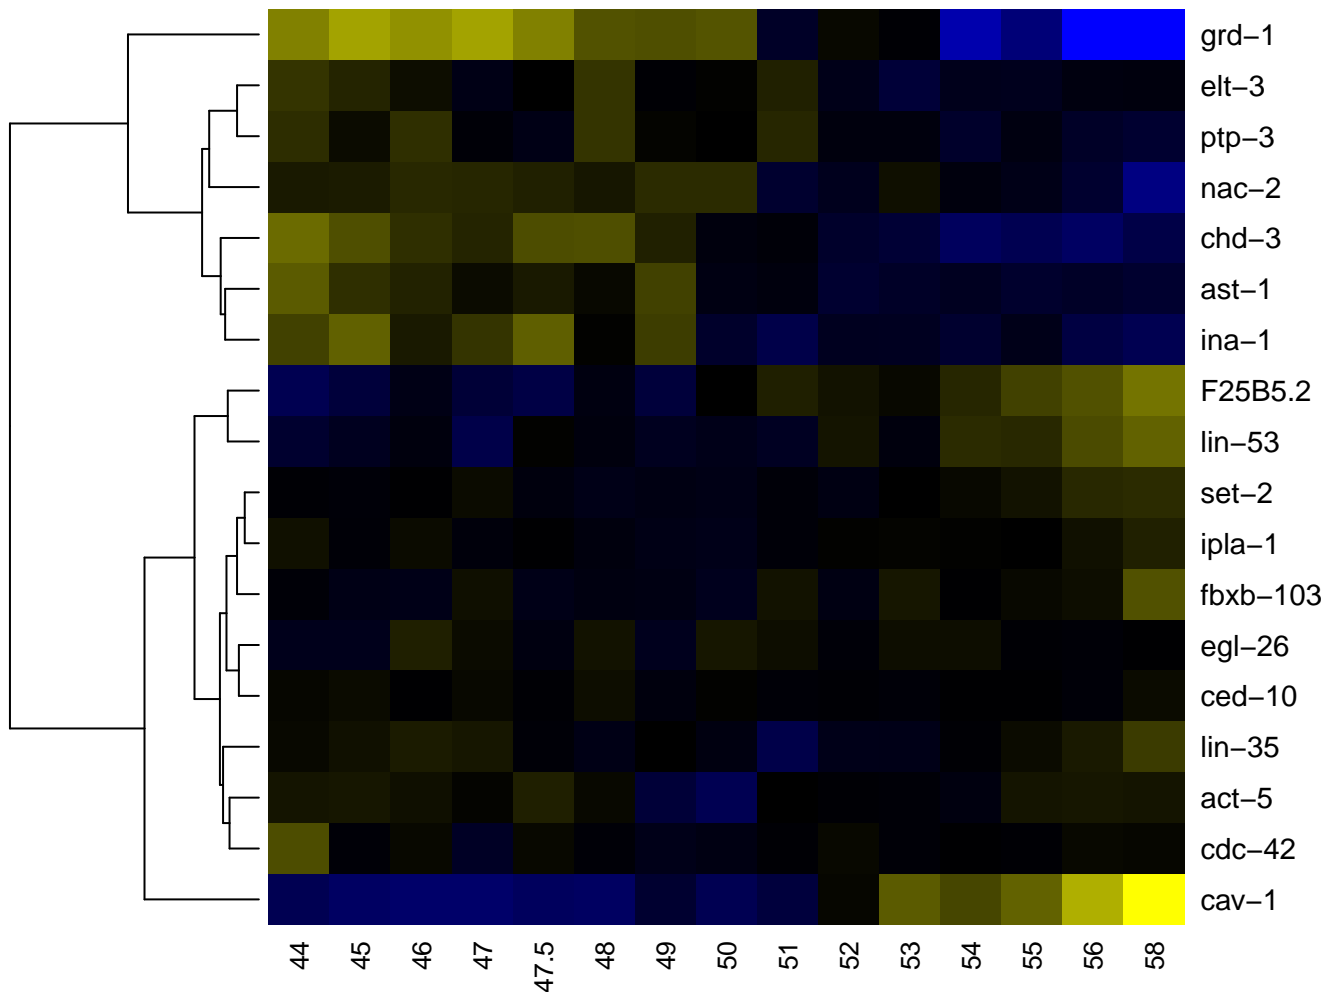

# rect\_VR

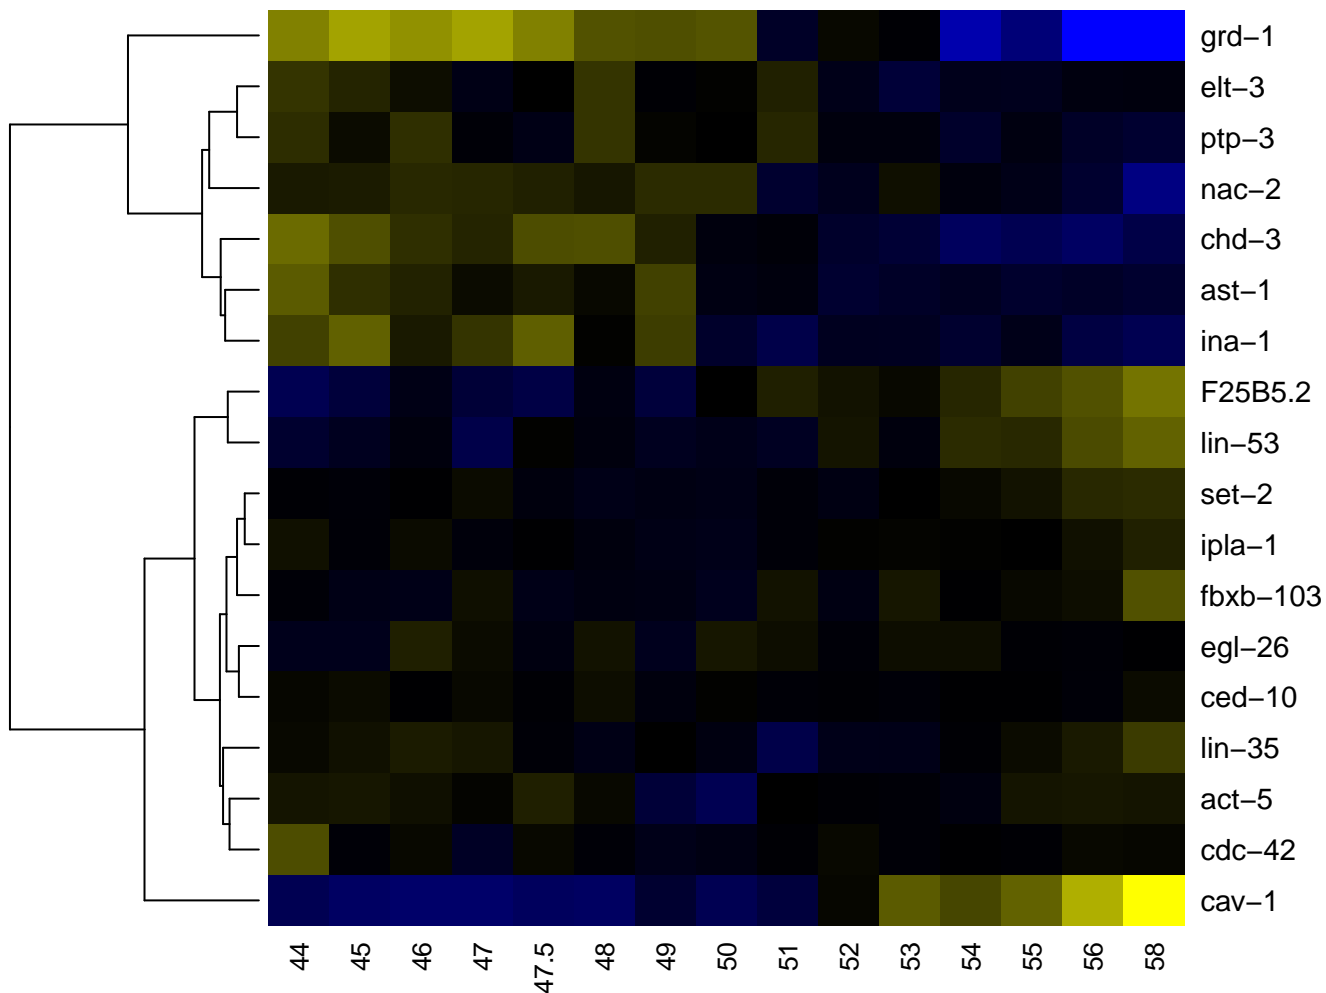

# rectal epithelium

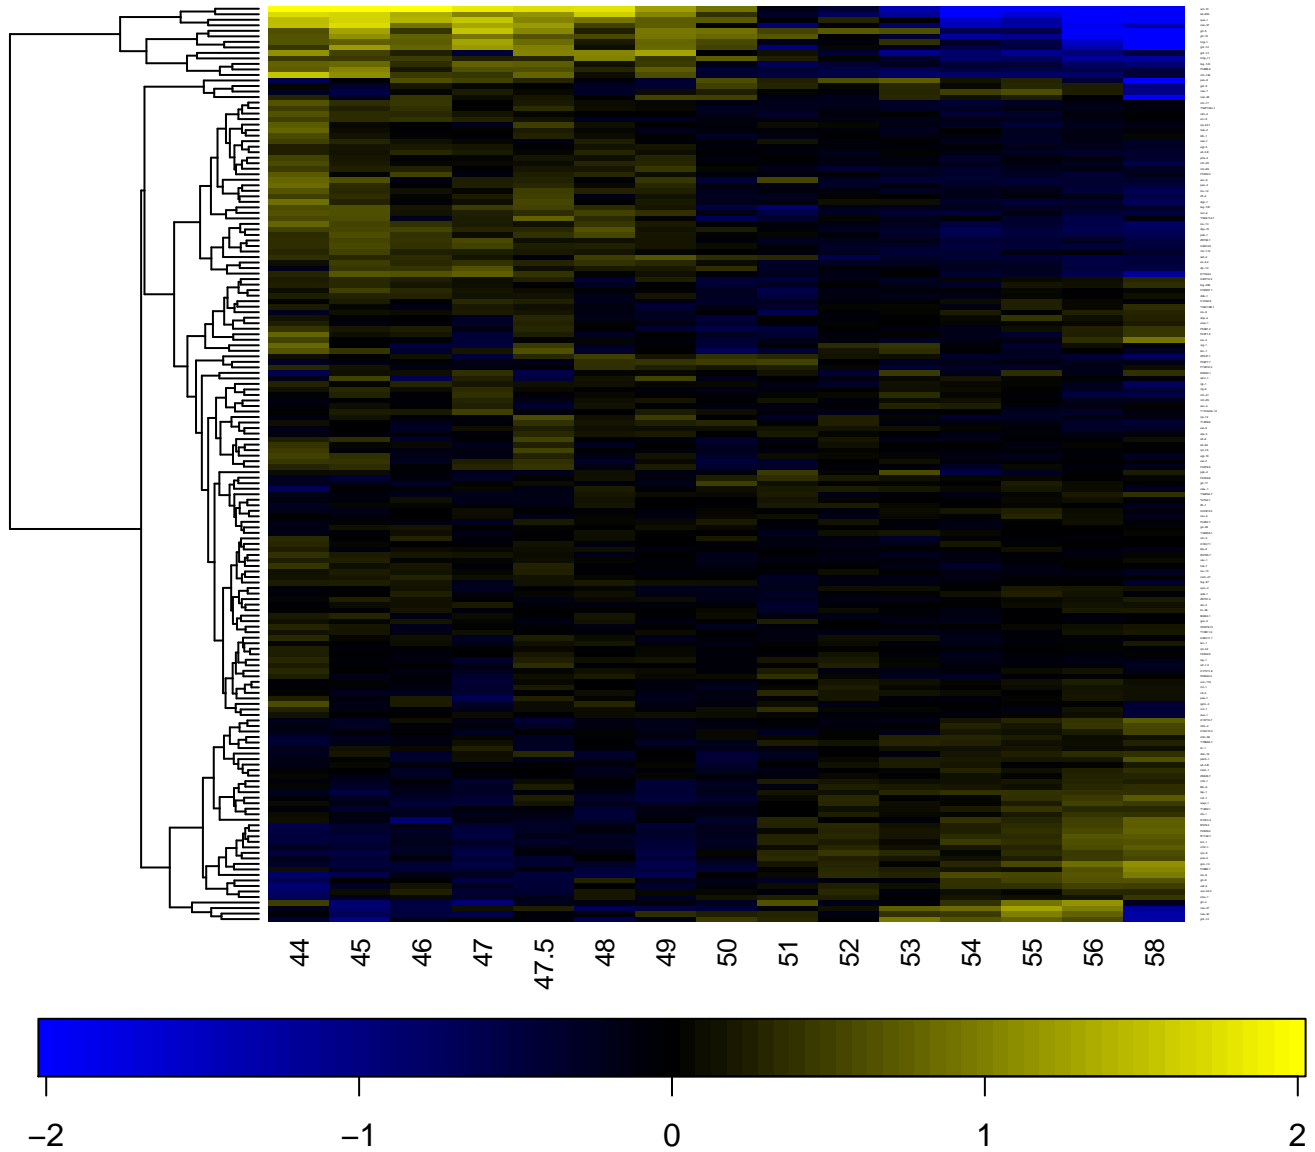

# rectal gland cell

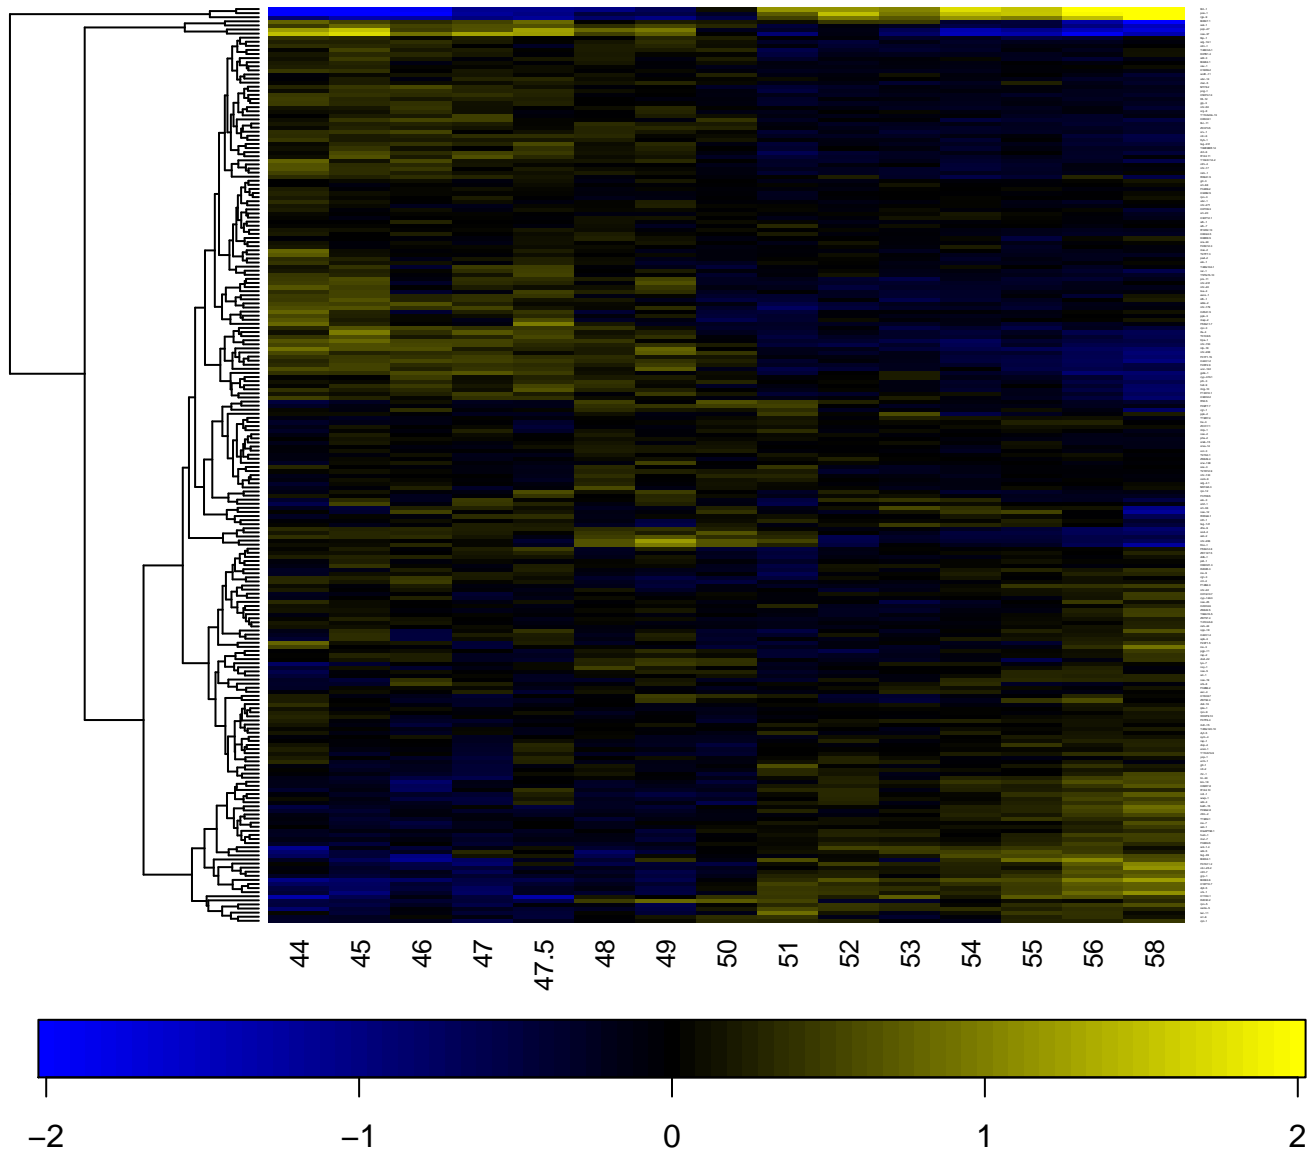

# rectal muscle

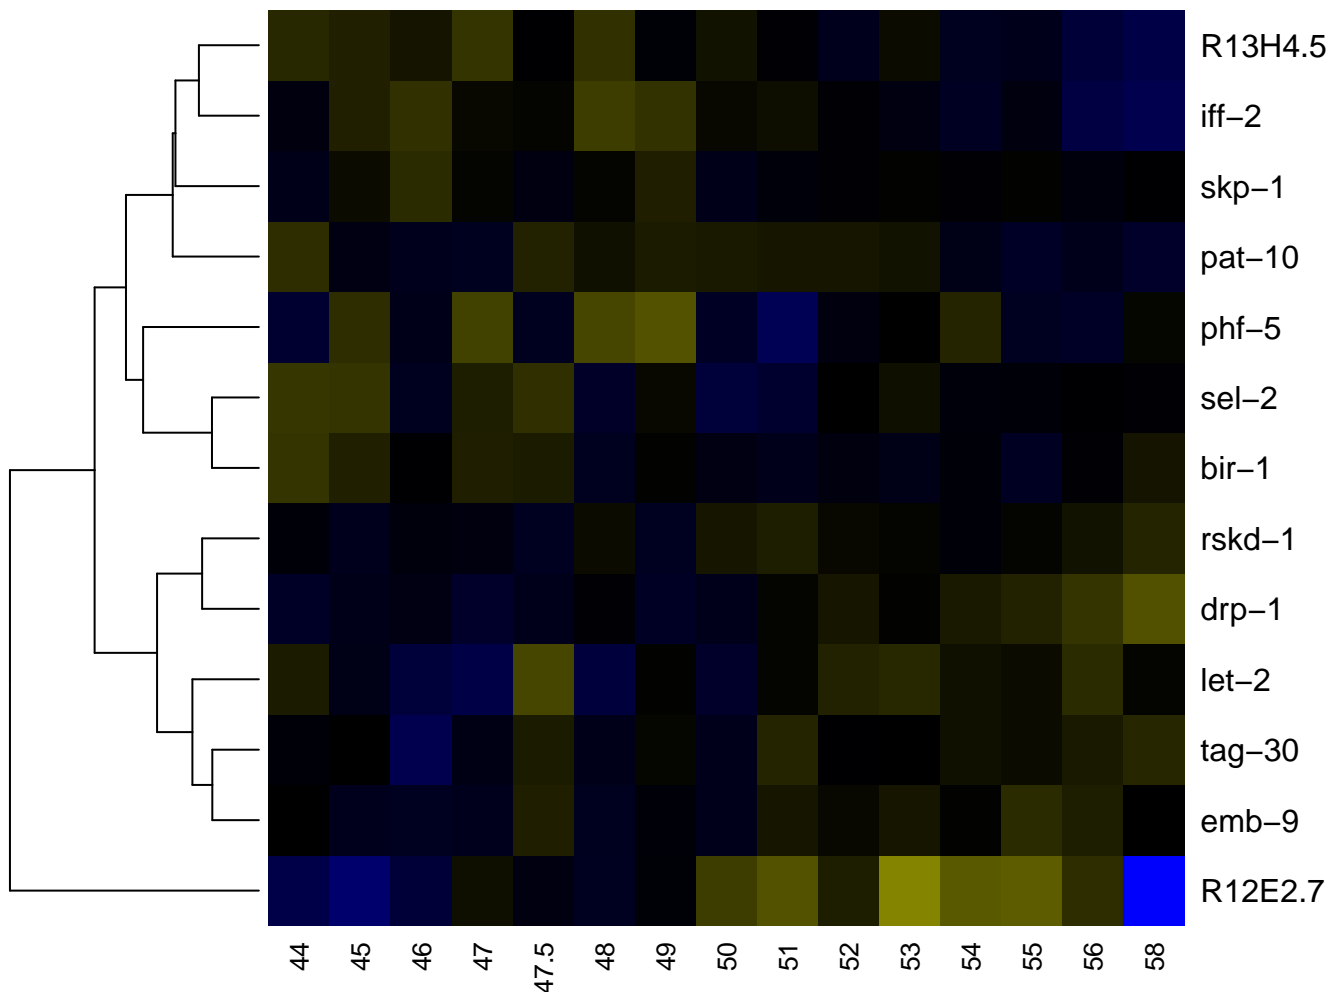

# rectum

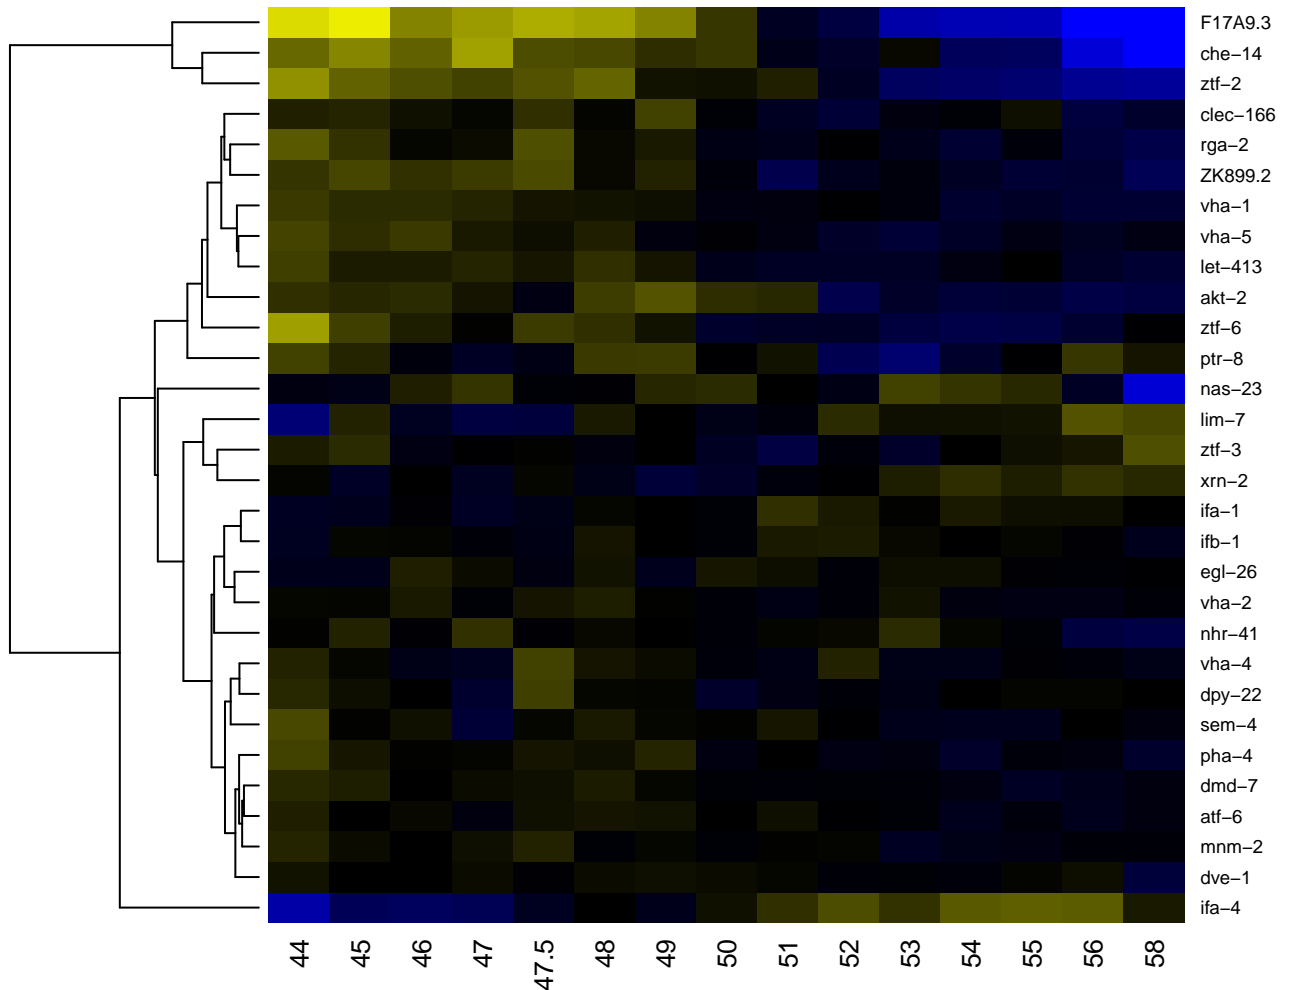

# reproductive system

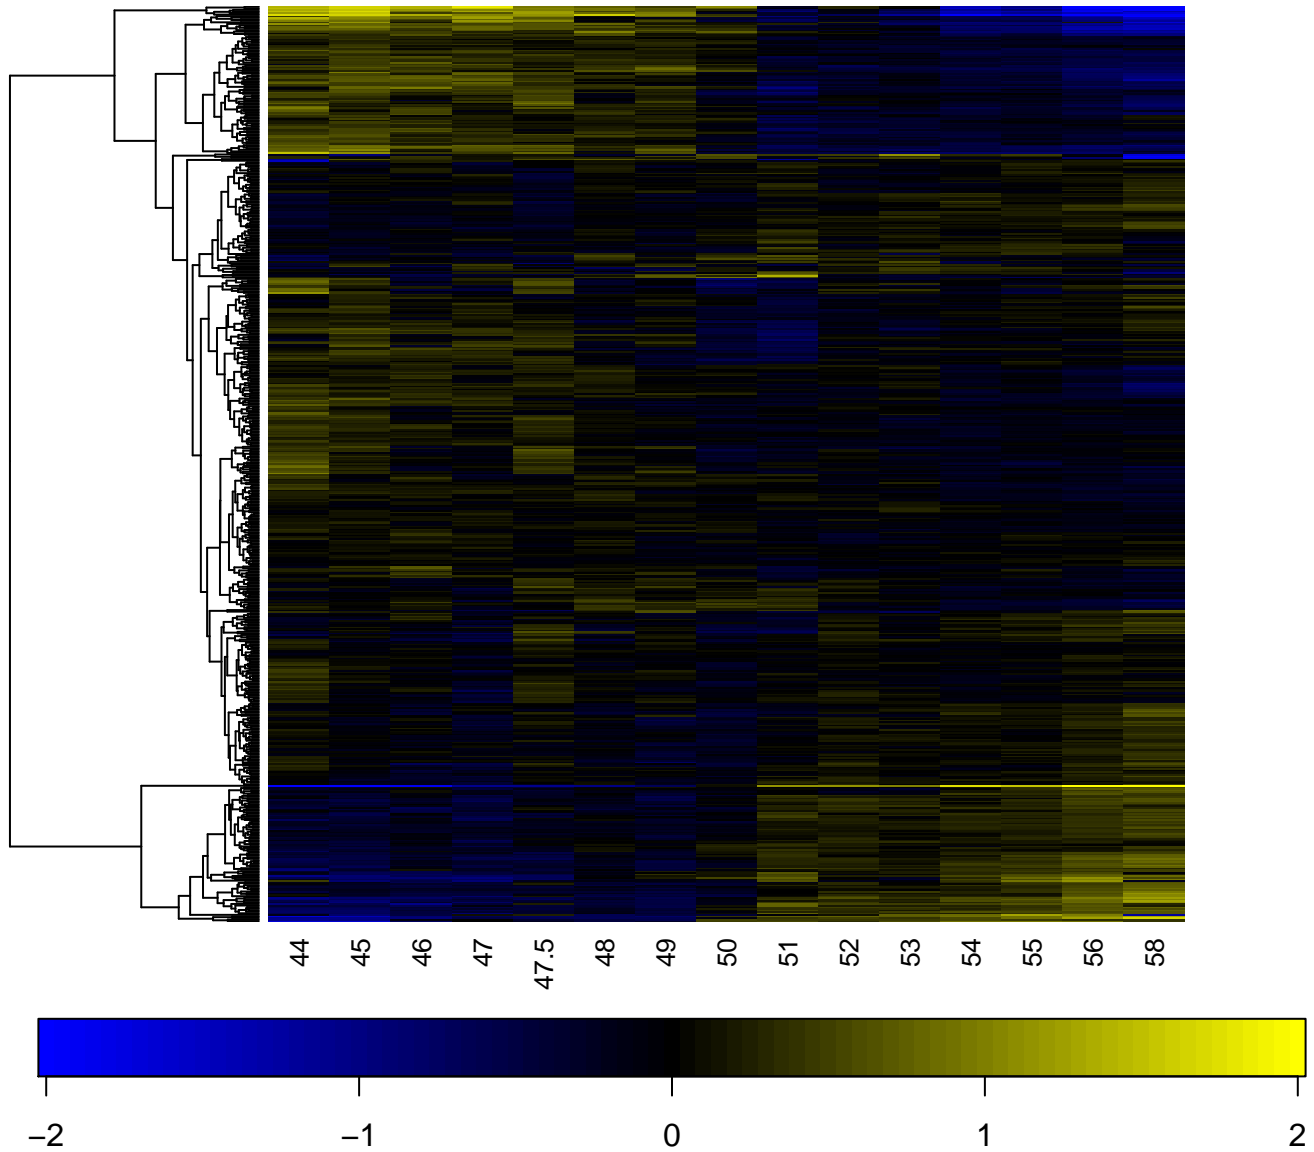



# retrovesicular ganglion

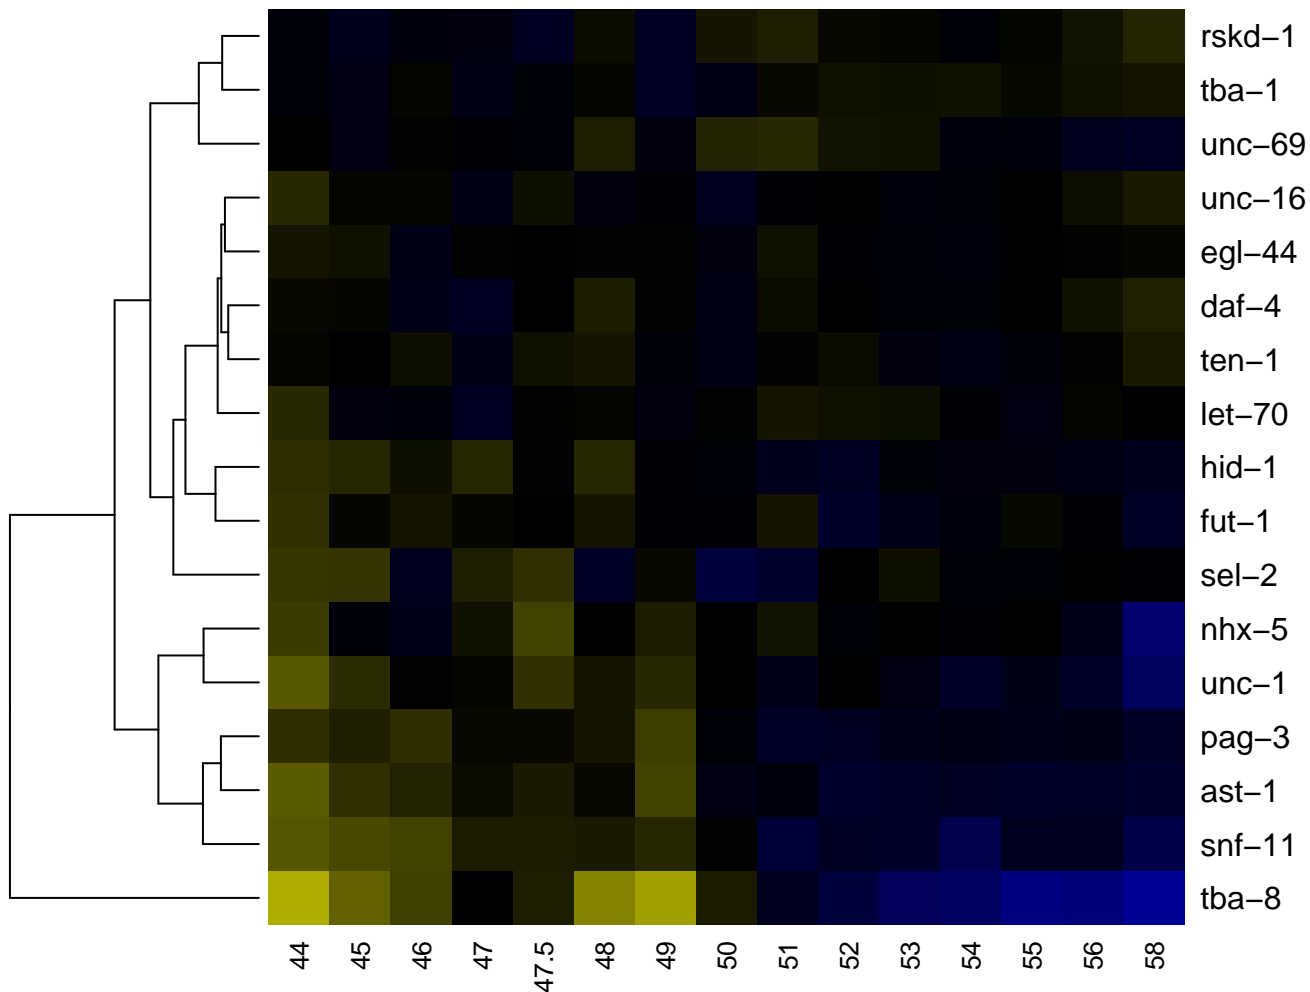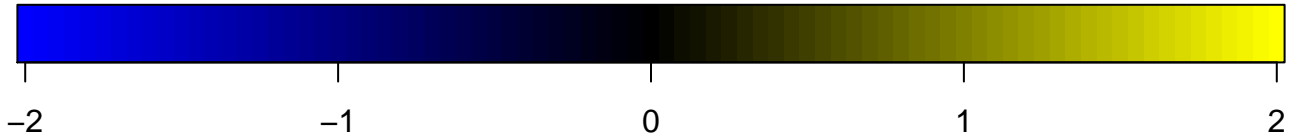

# retrovesicular ganglion neuron

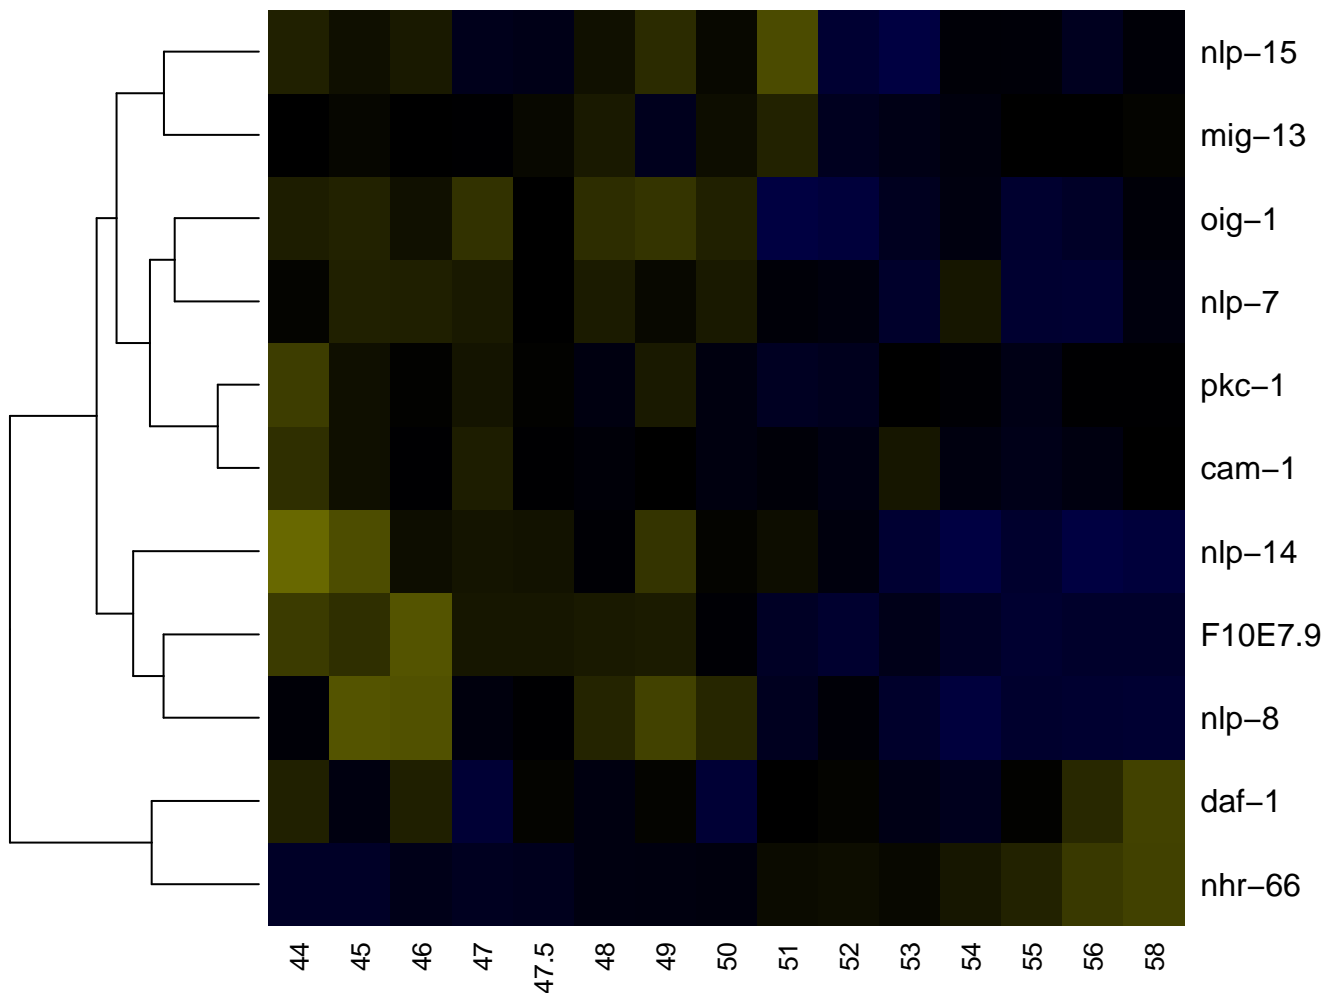

# RIAL

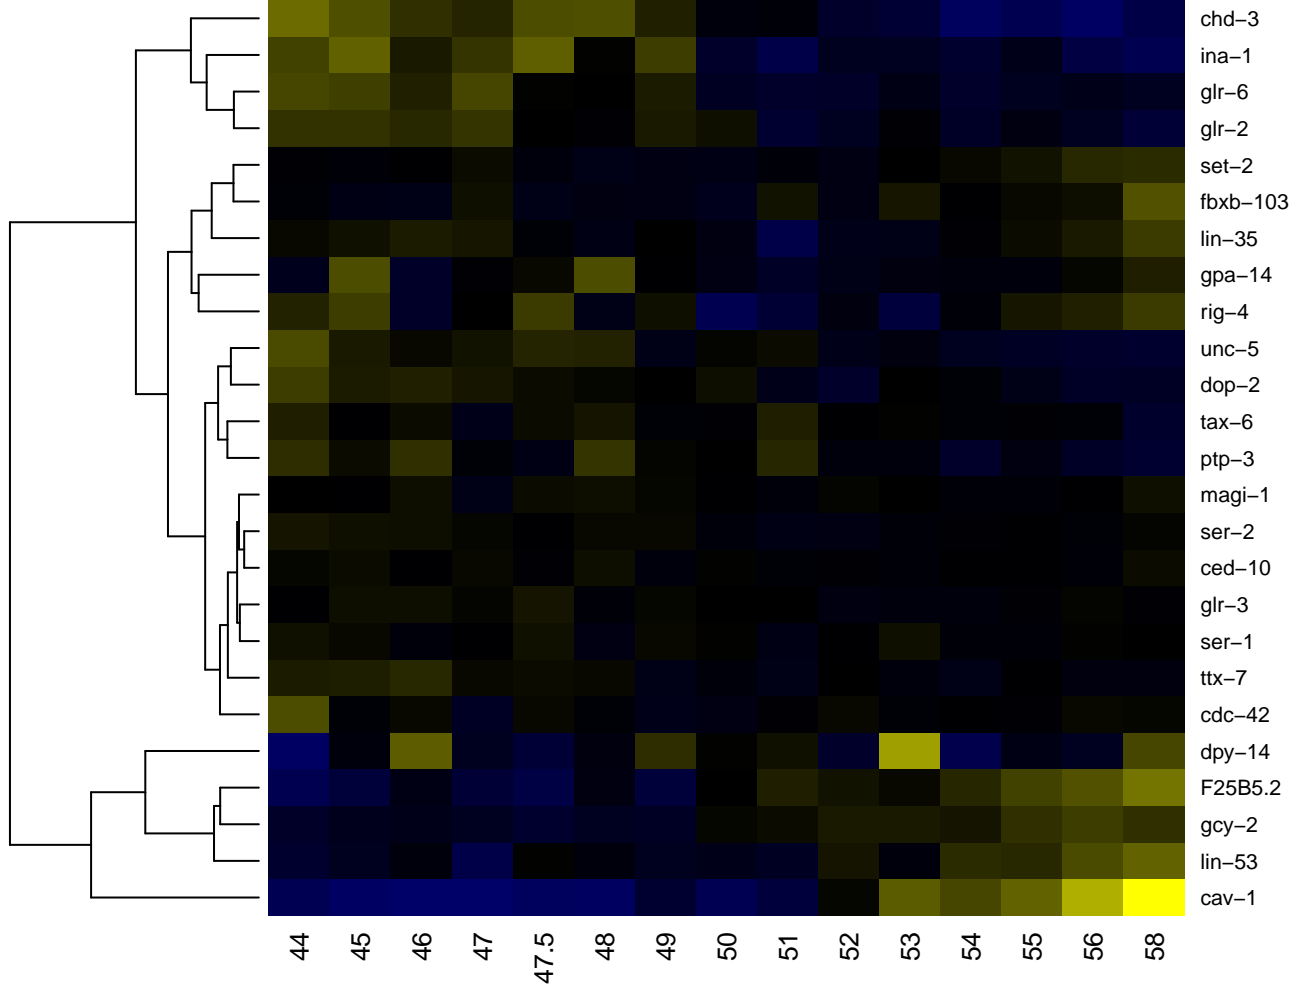

# RIAR

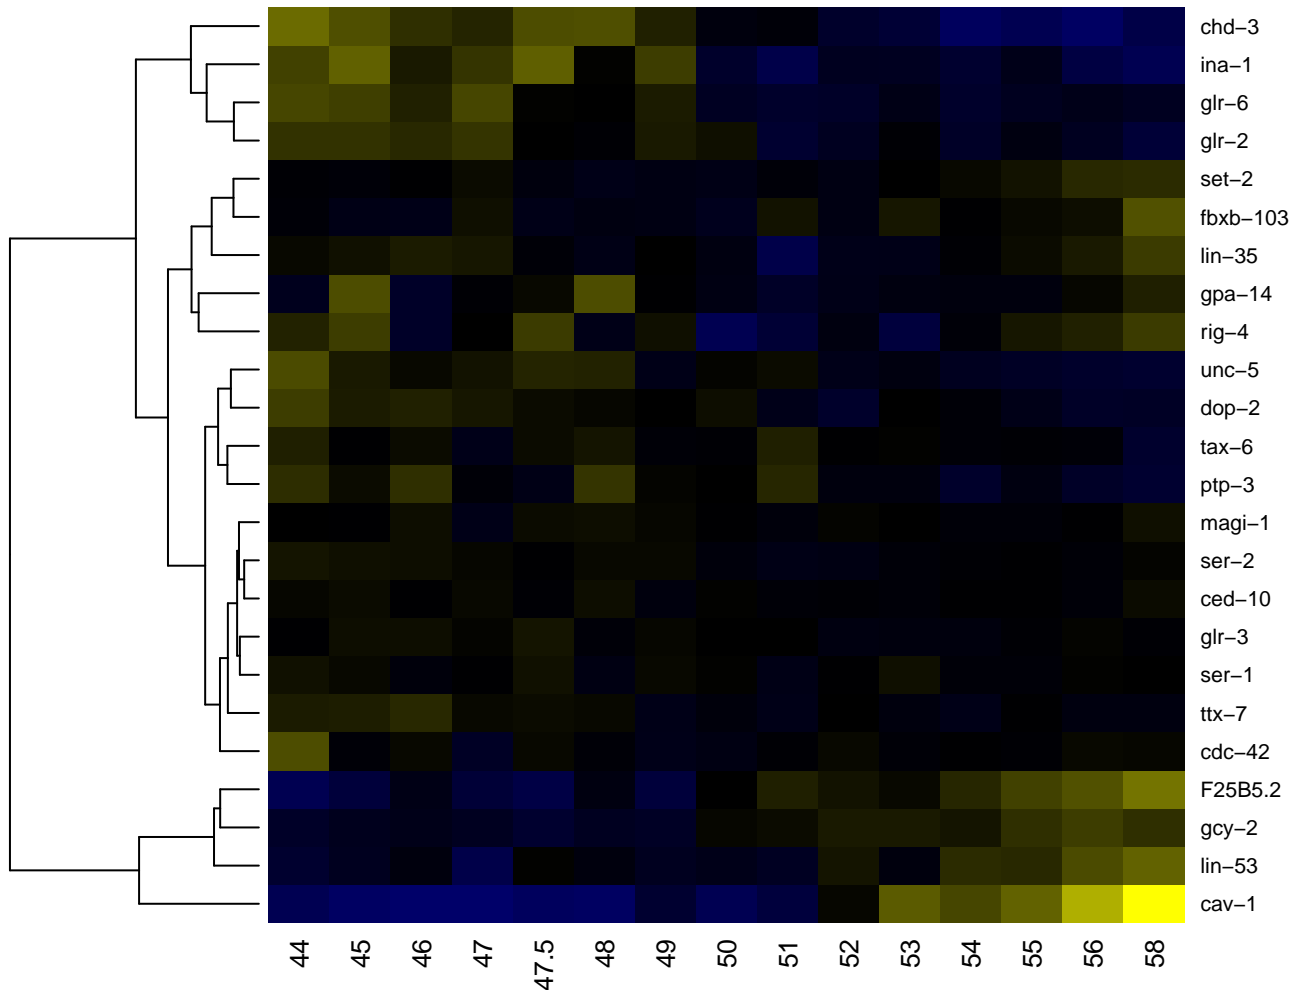

# RIBL

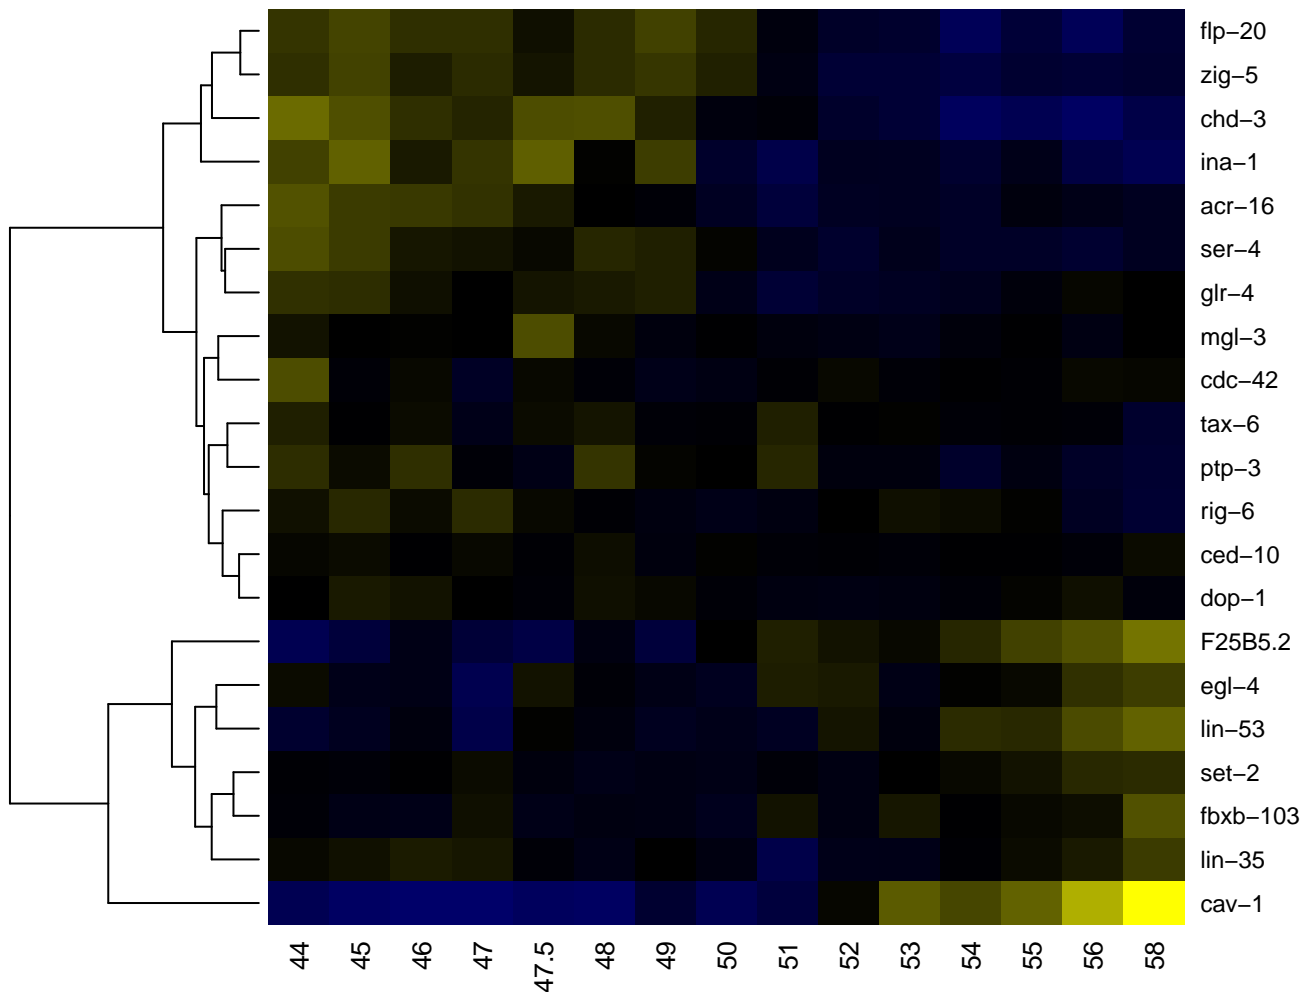

# RIBR



# RICL

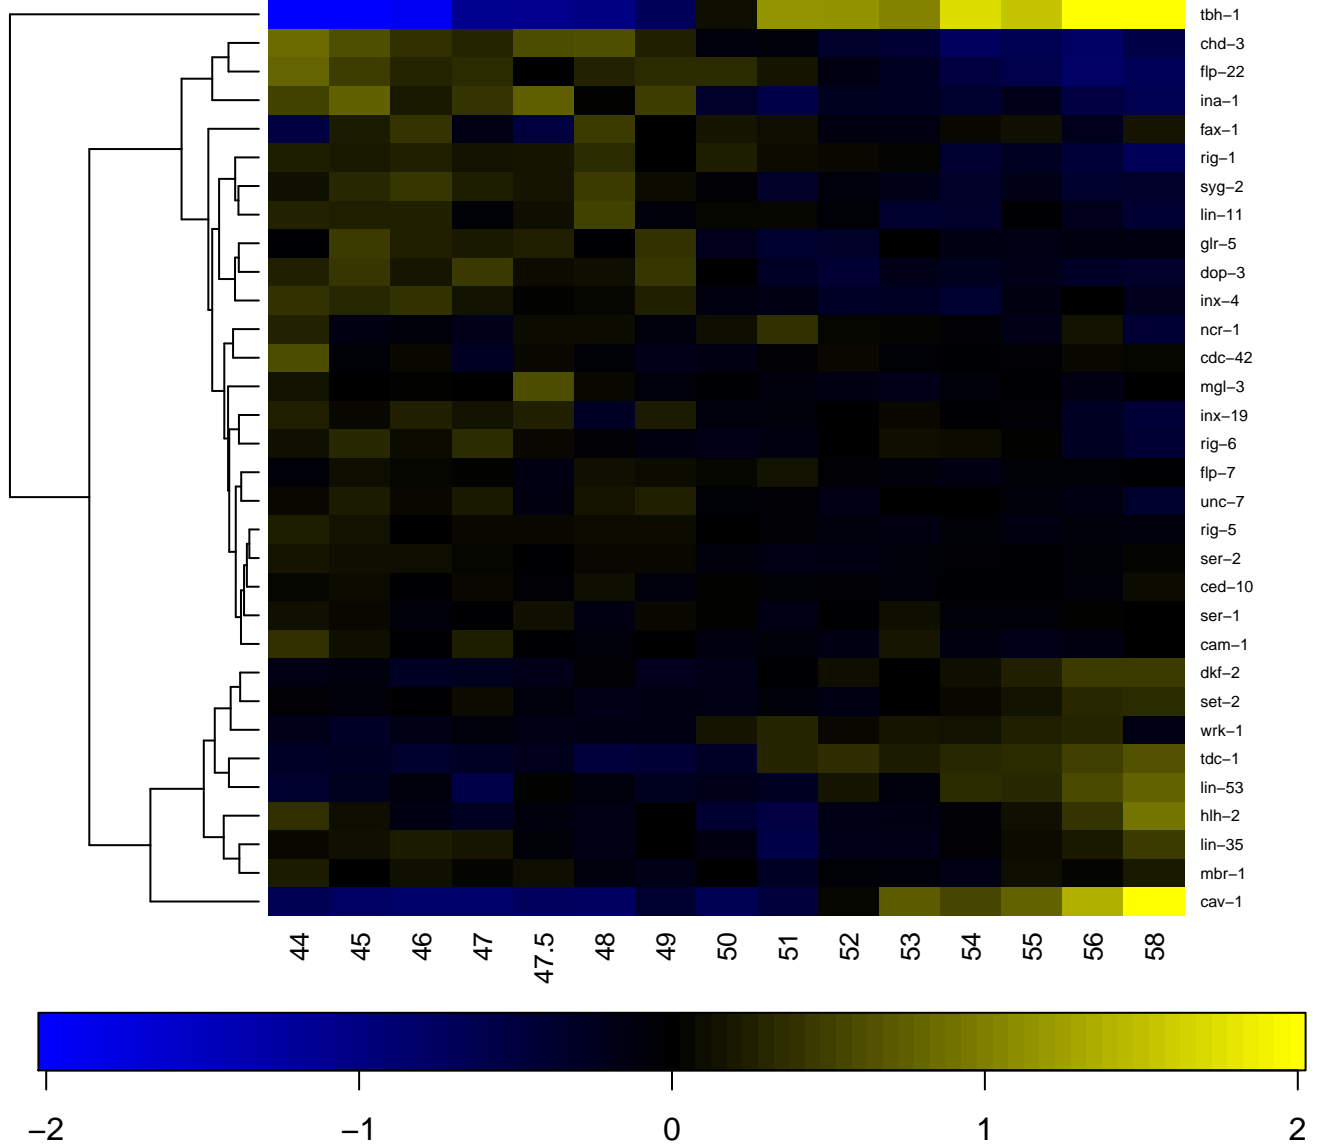

# RICR





# RID

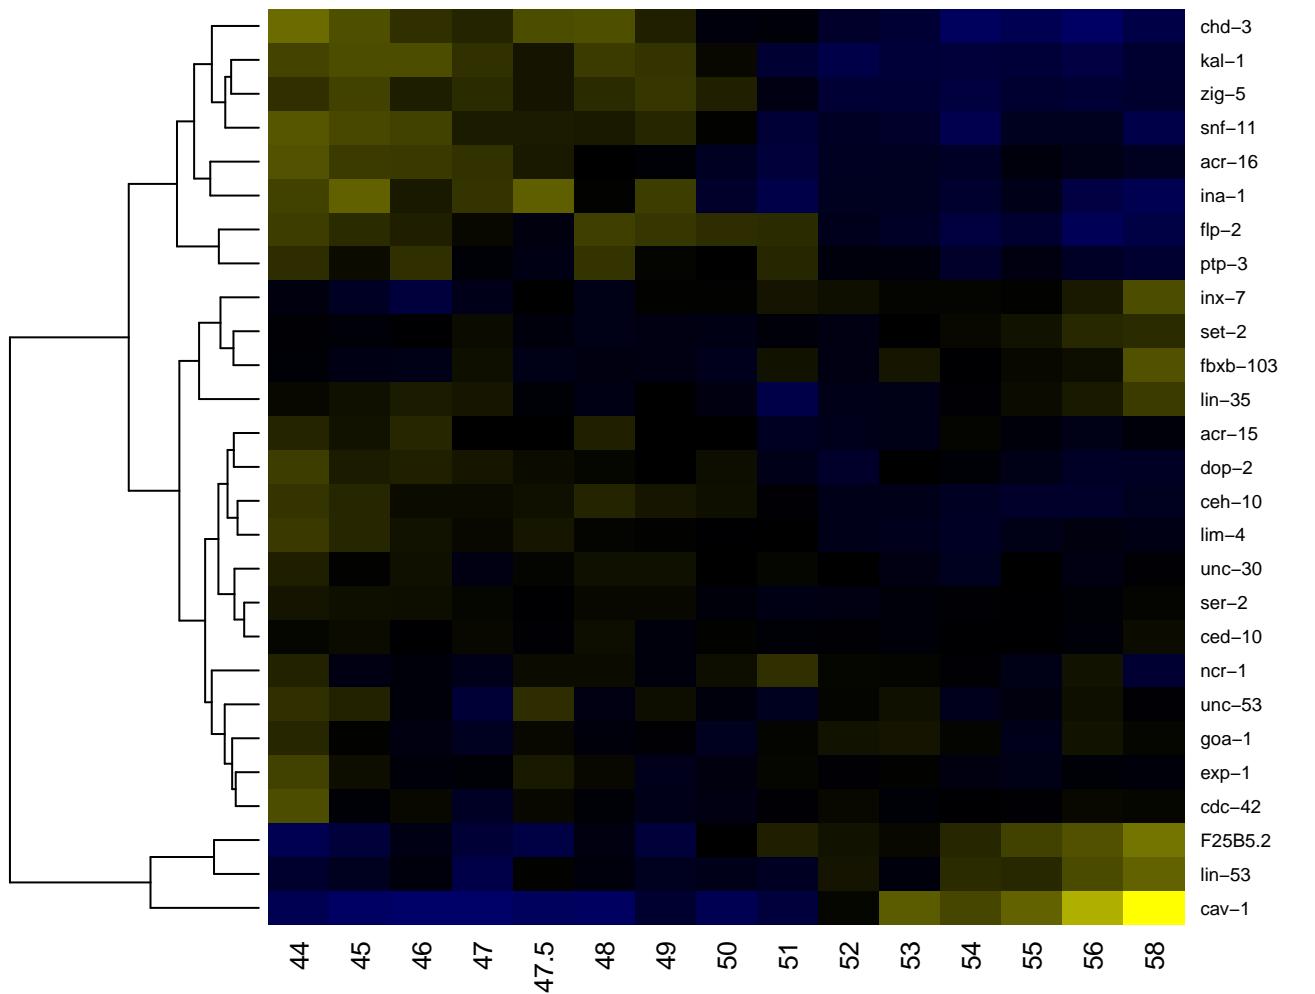

-2

-1

0

1

2

# RIFL

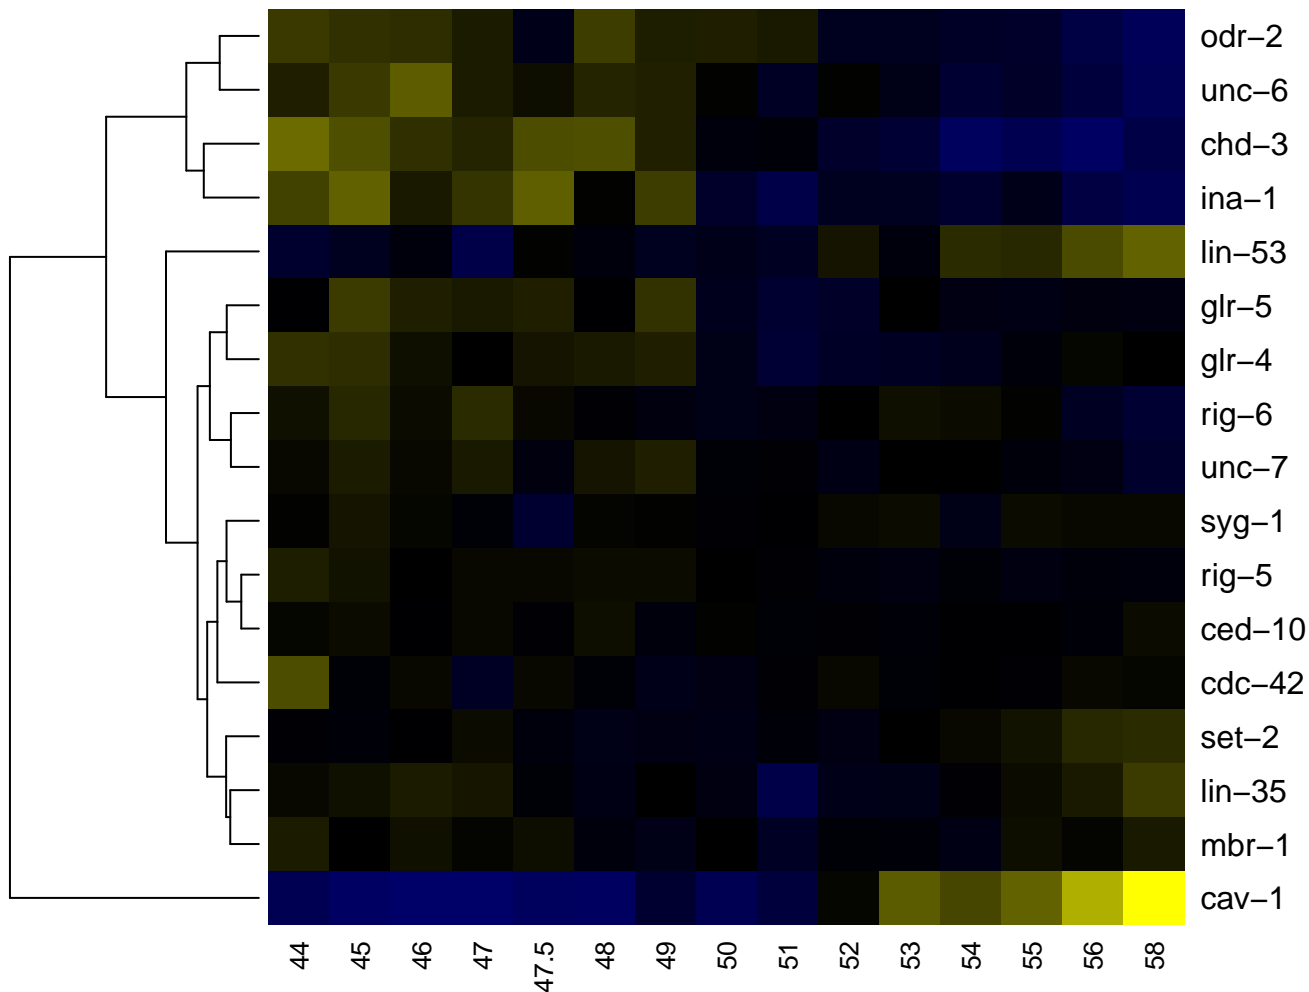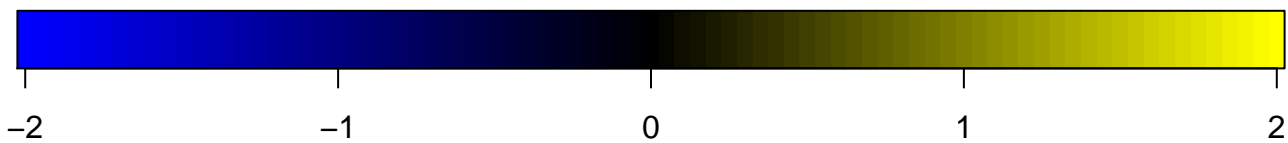

# RIFR

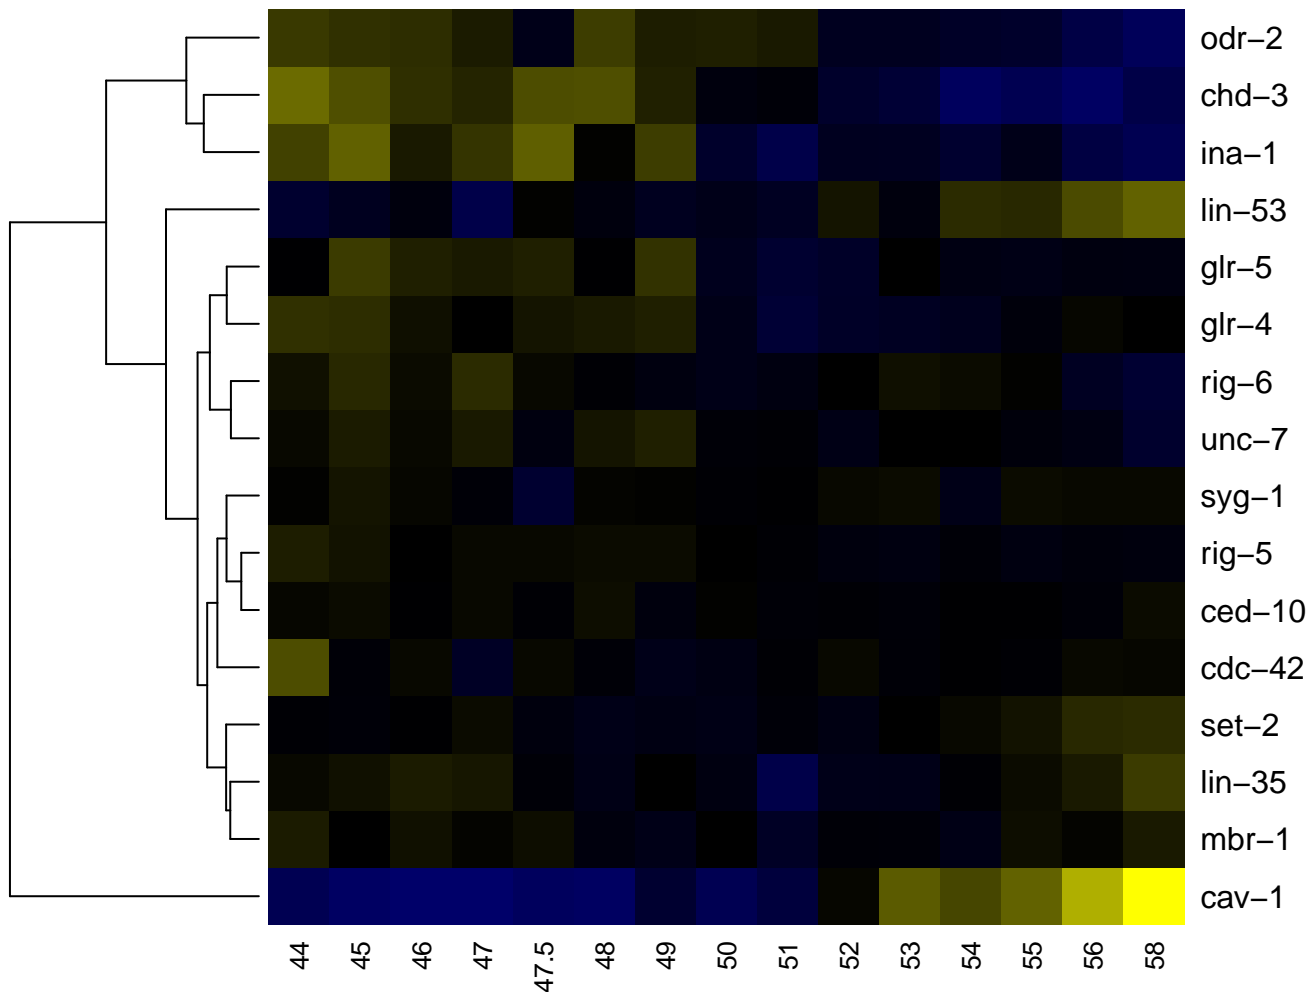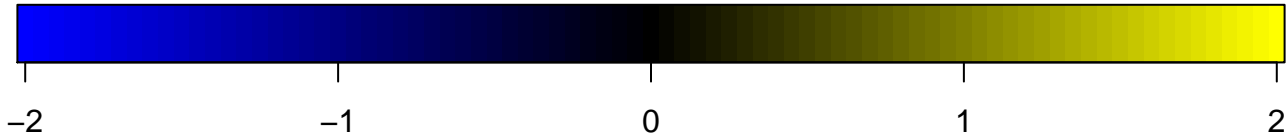

# RIGL

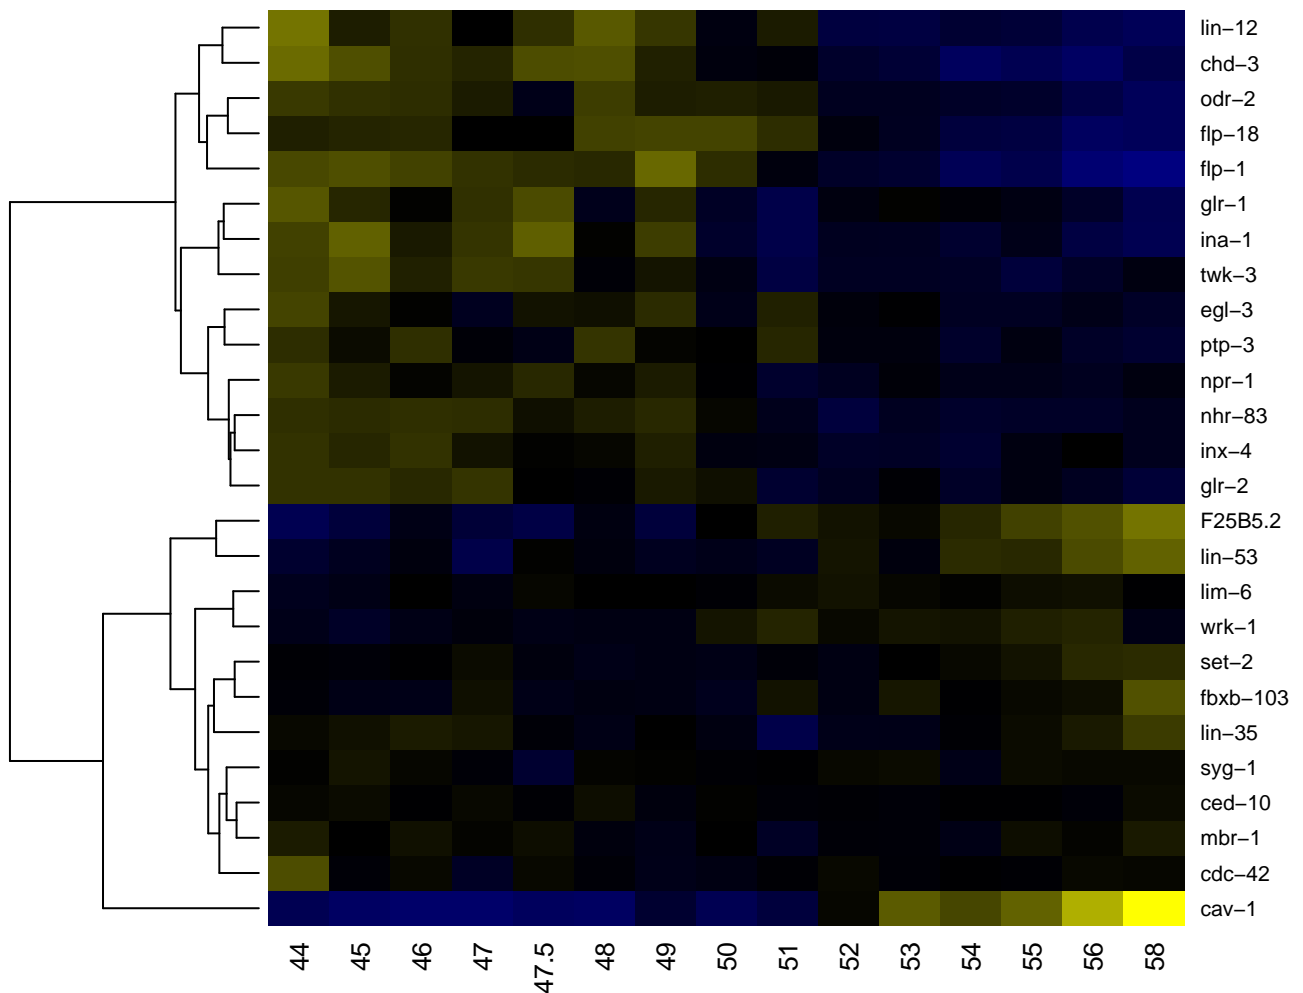

# RIGR

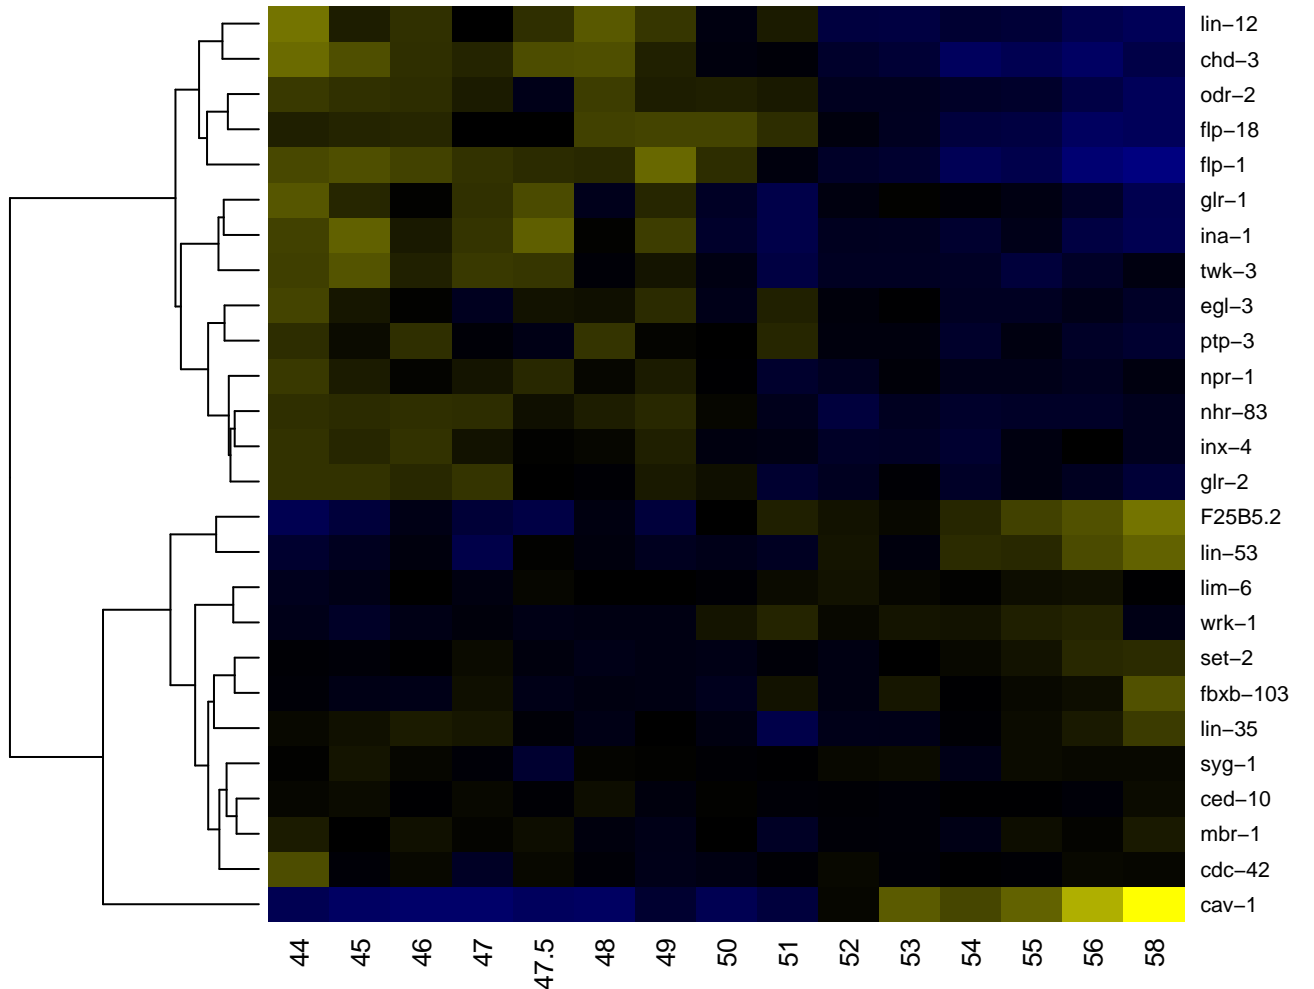

-2

-1

0

1

2

# RIH

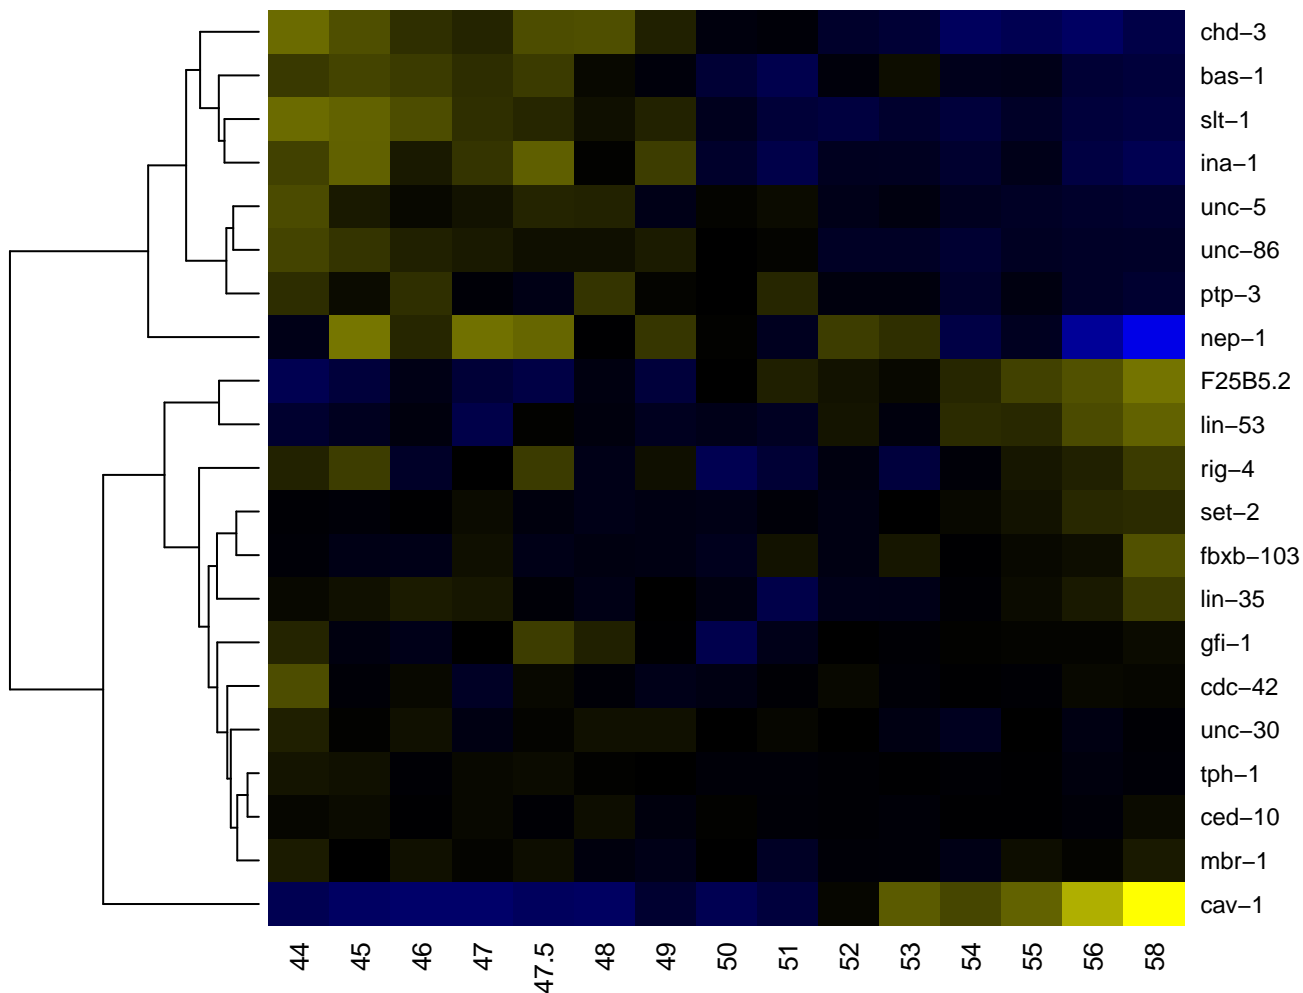

# RIML

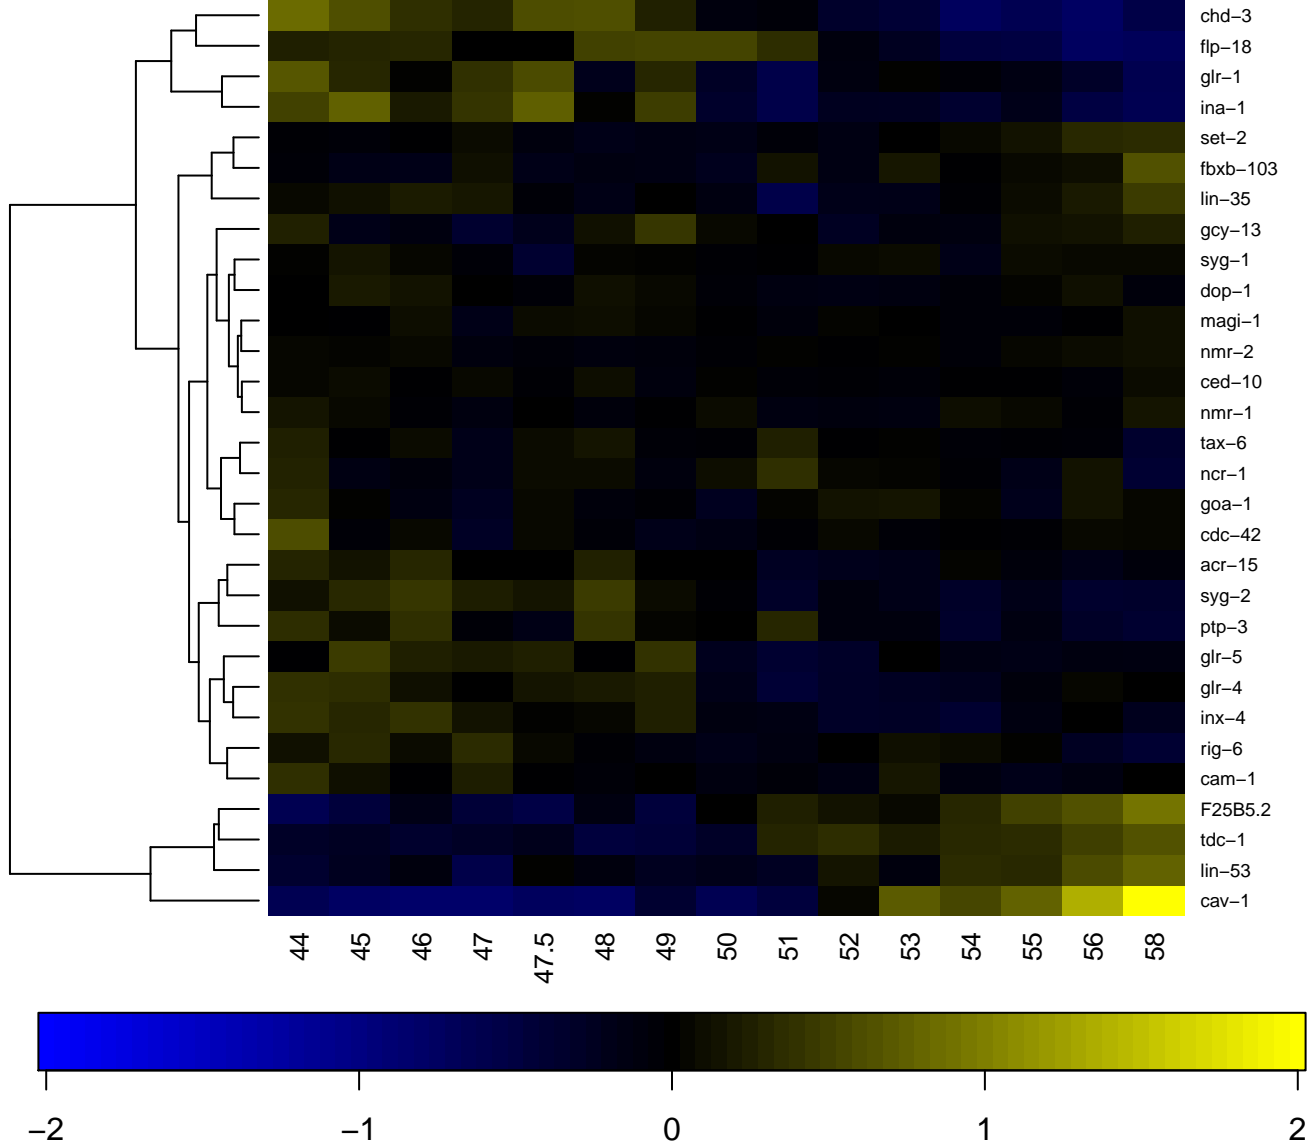

# RIMR

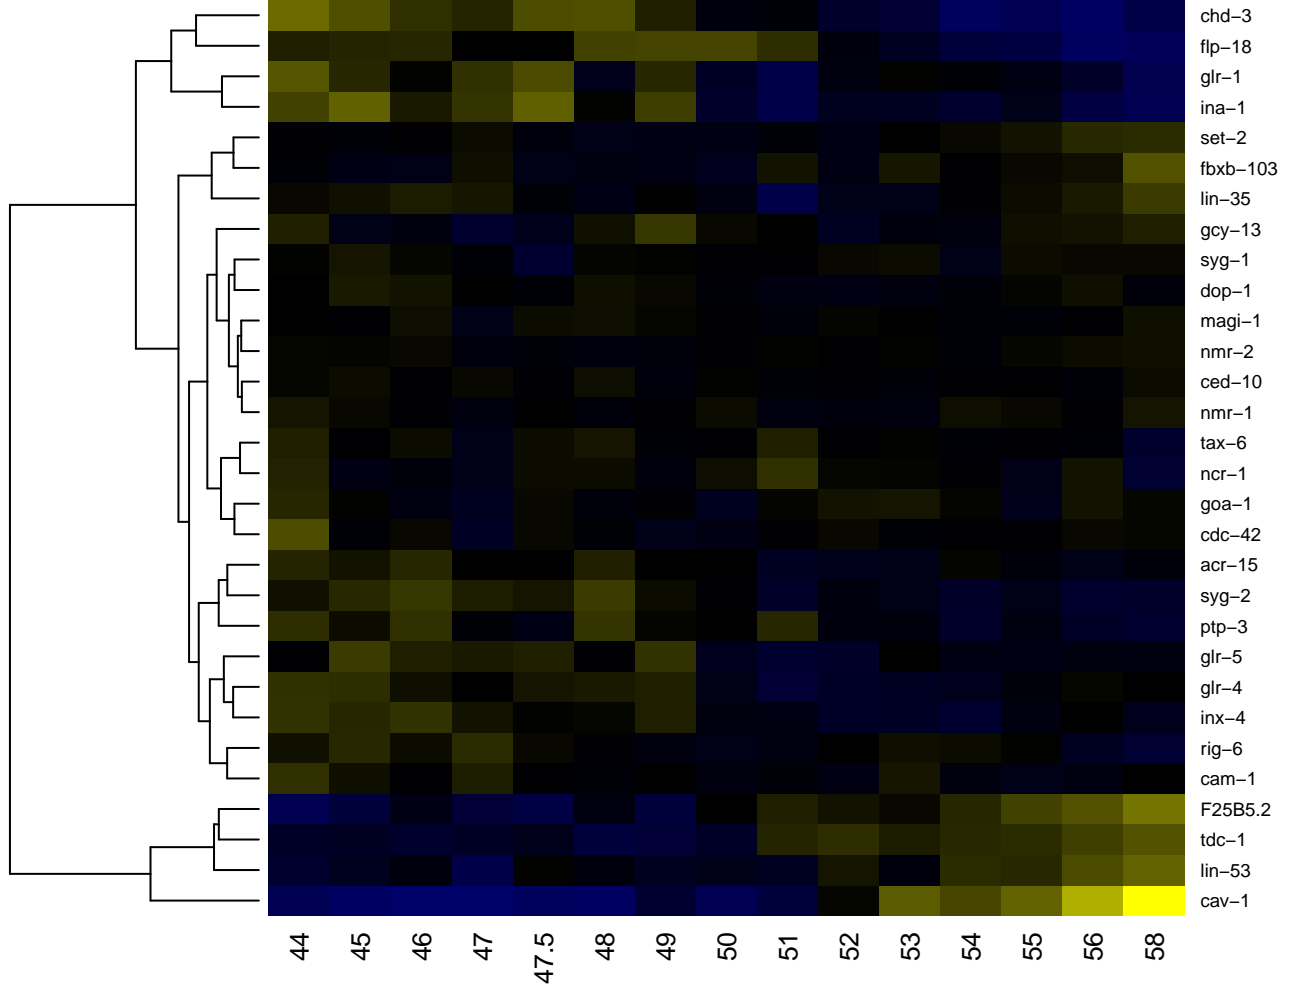



# RIPL

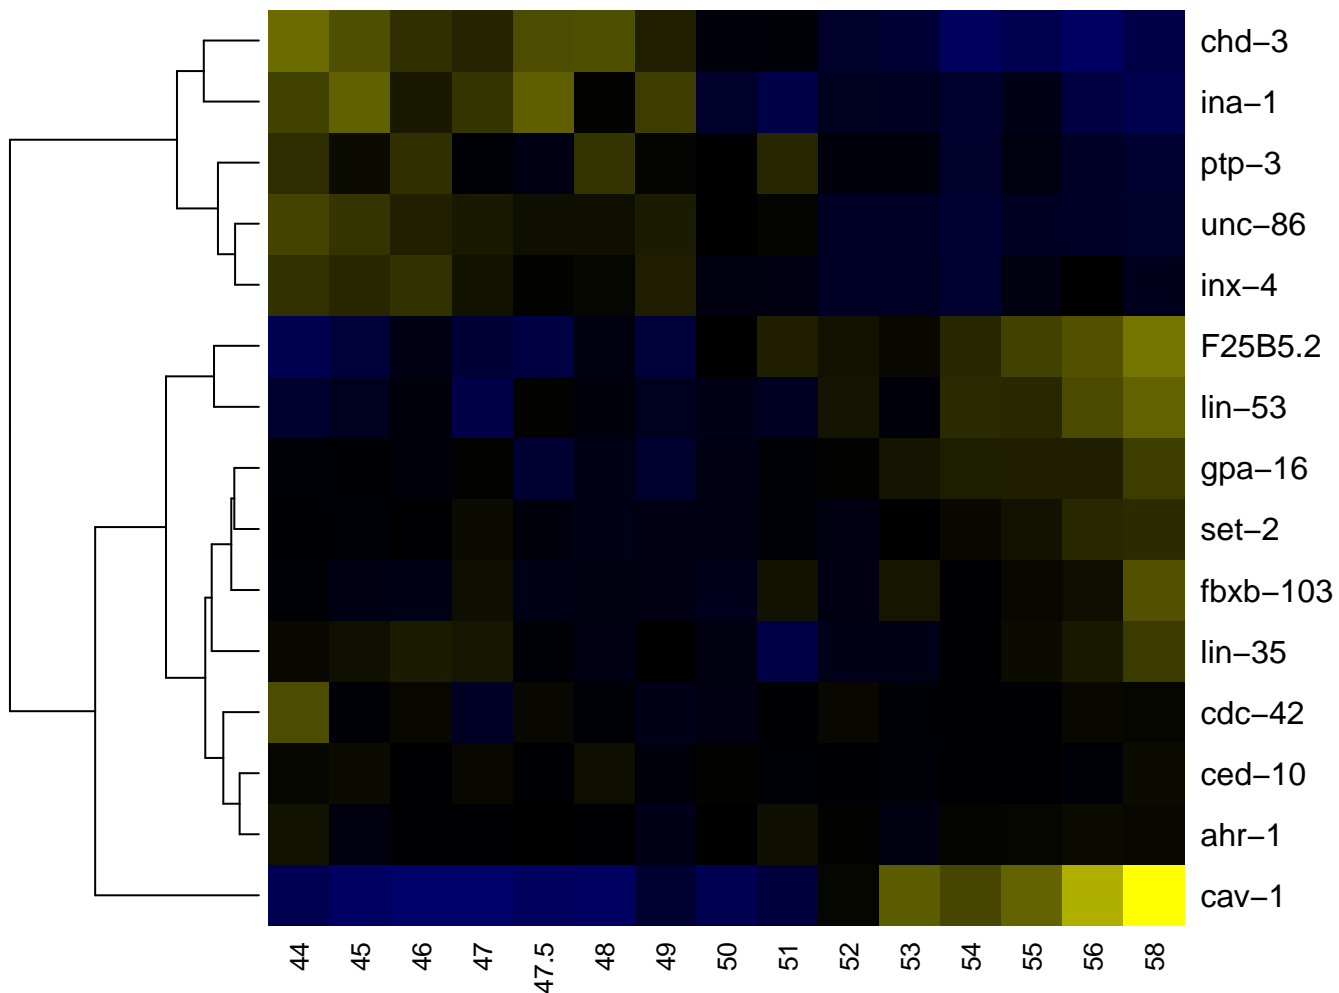

# RIPR



# RIR

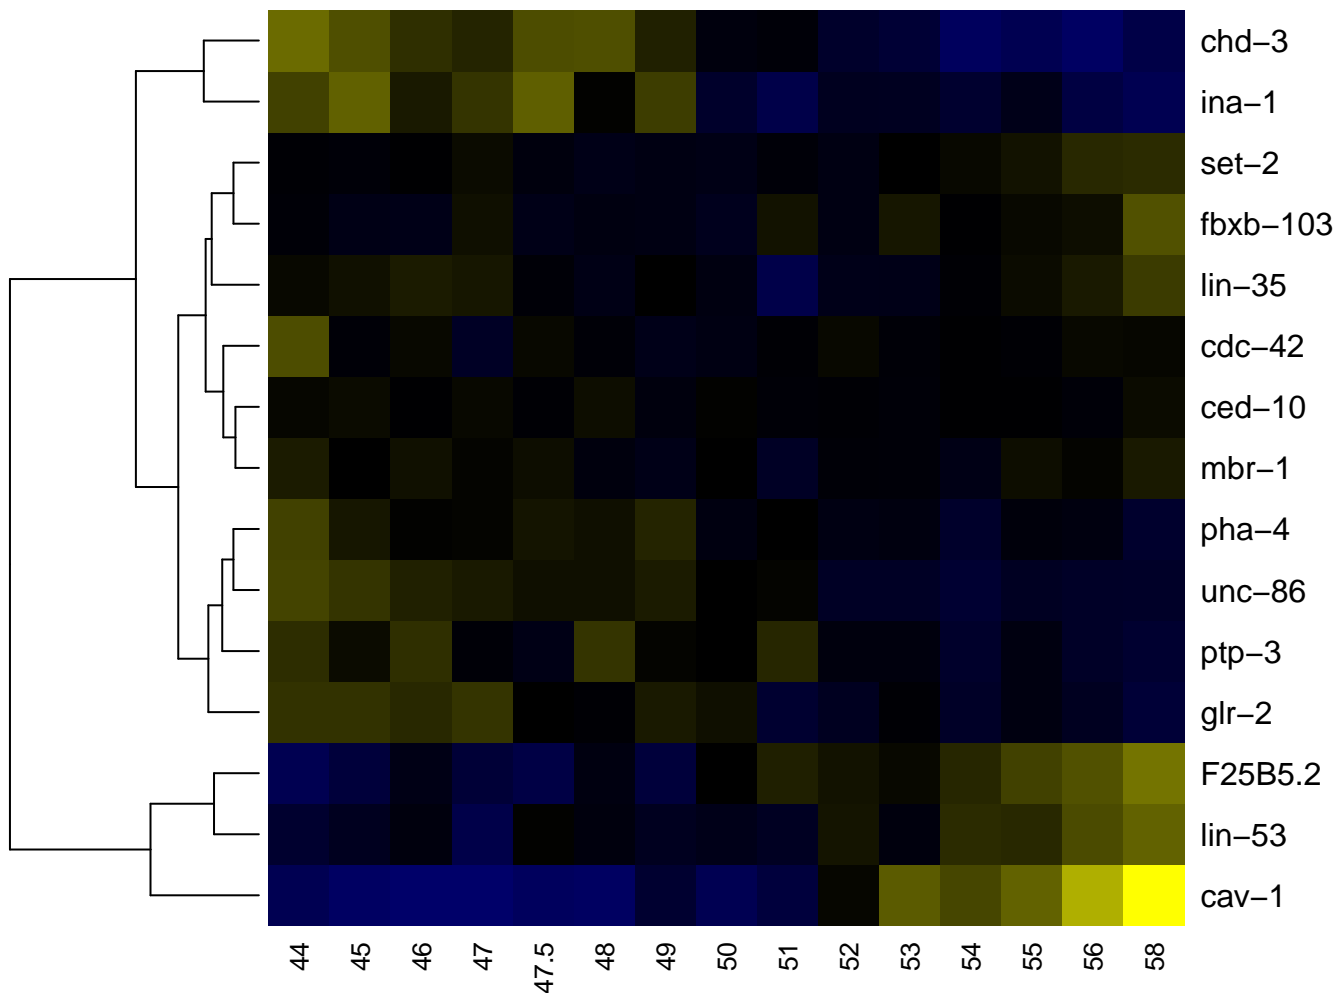

# RIS

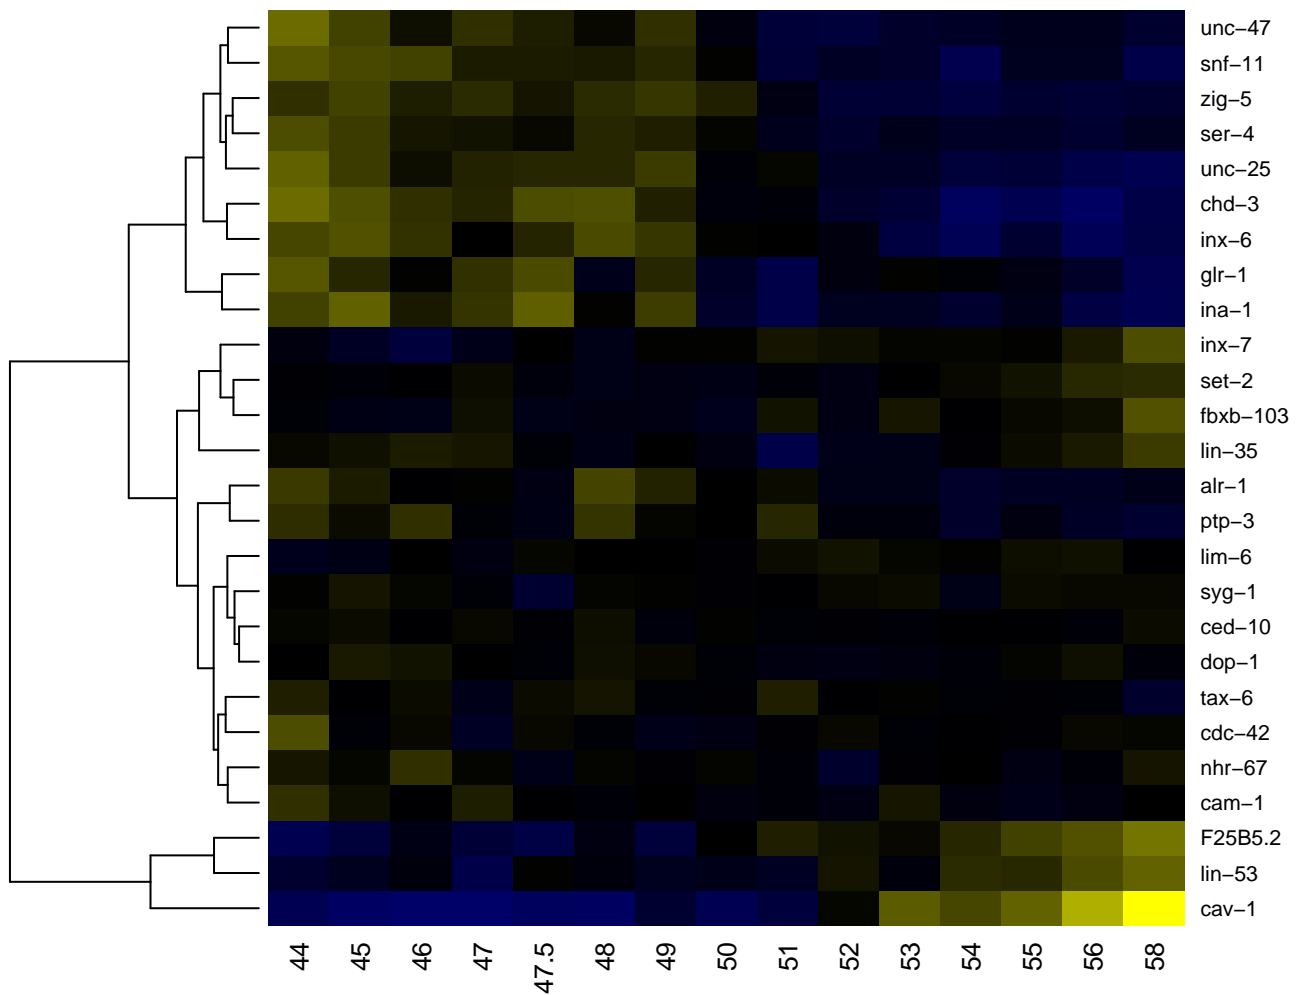

# RIVL

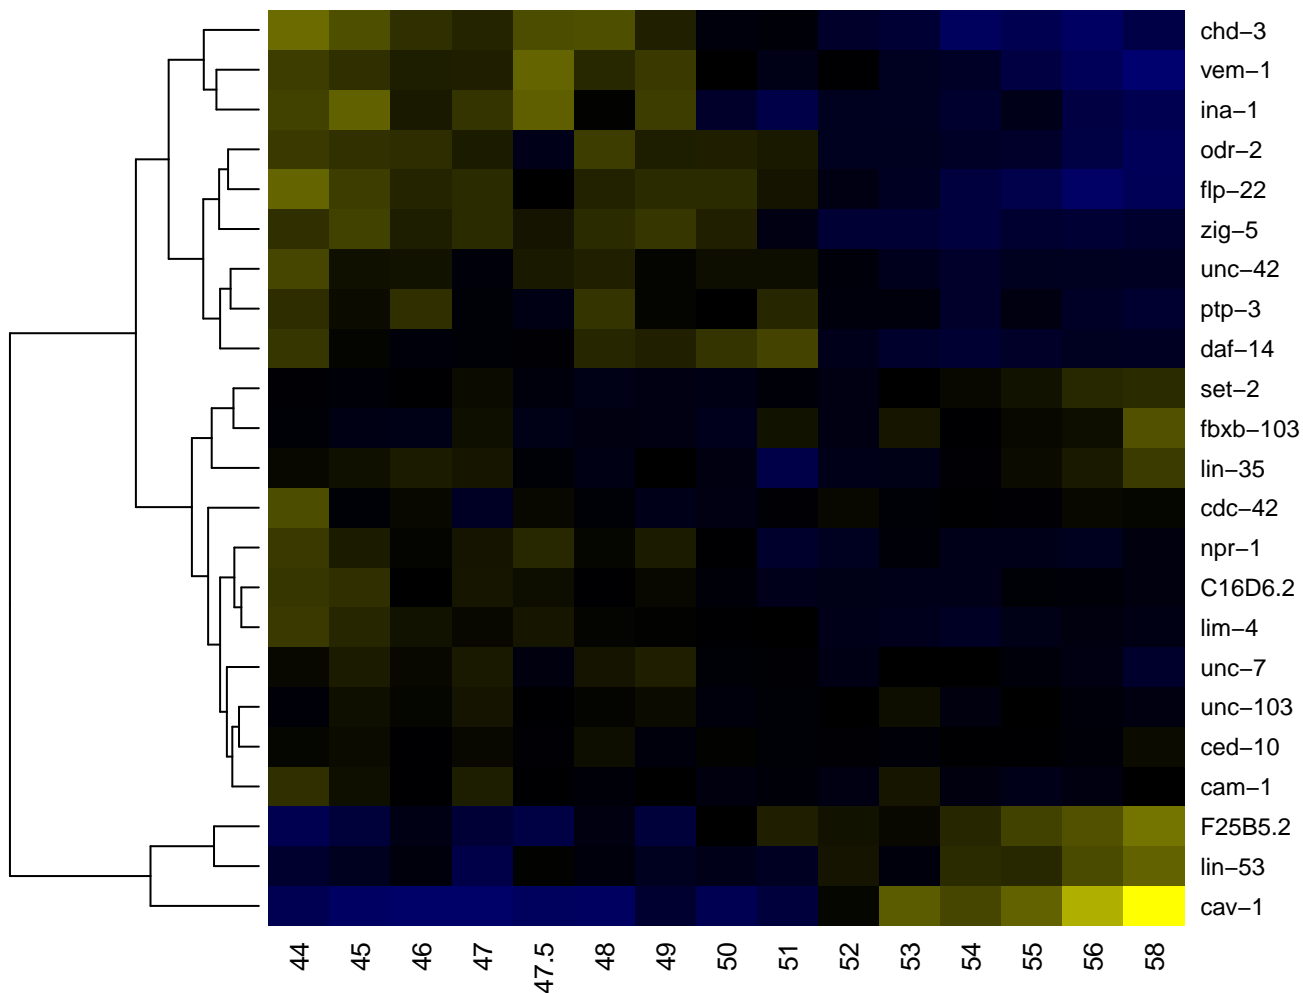

# RIVR

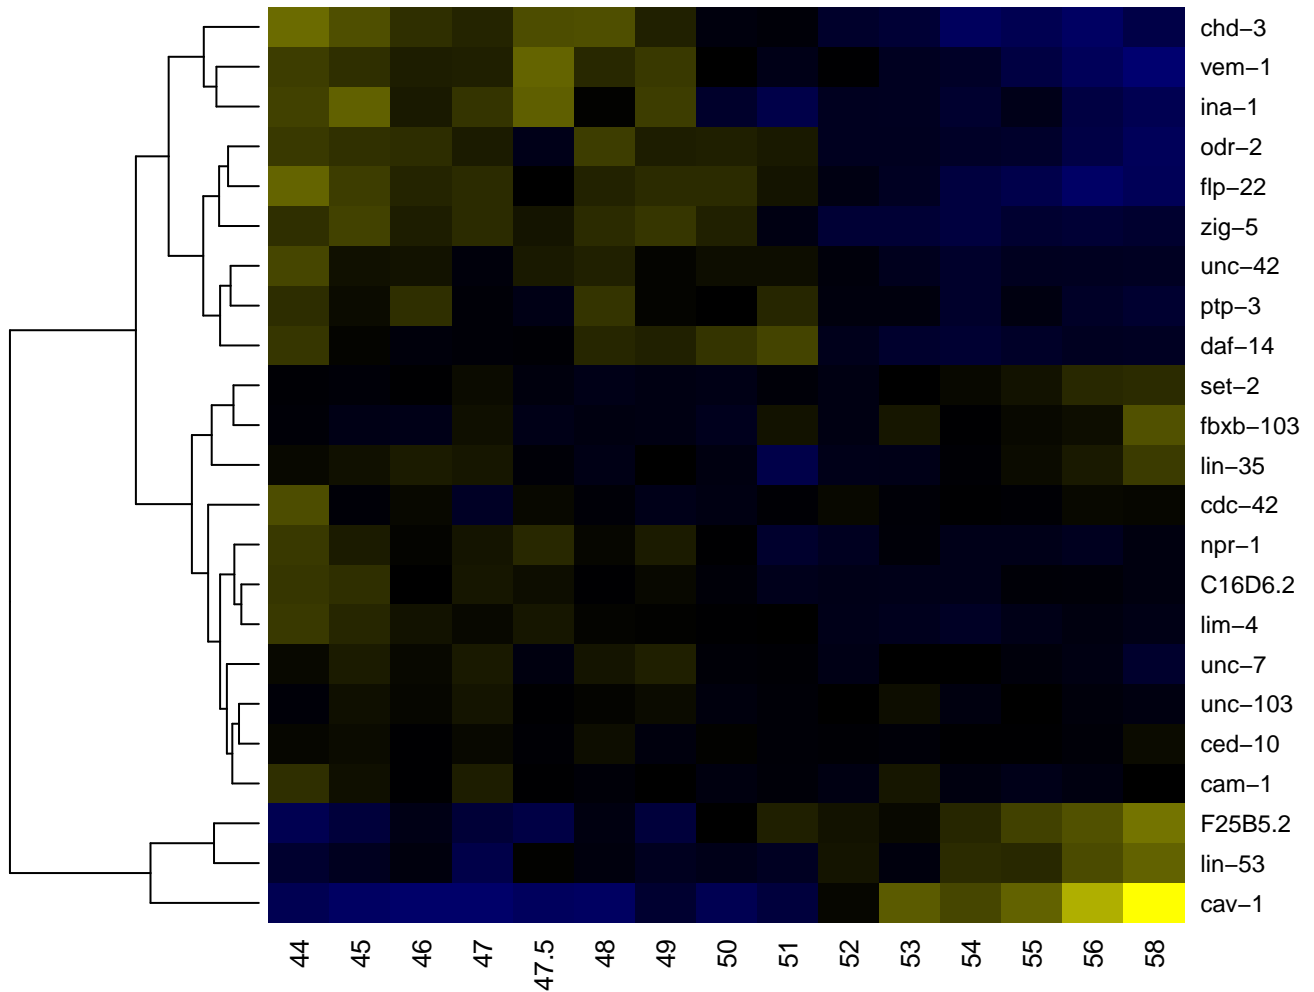

# RMDDL

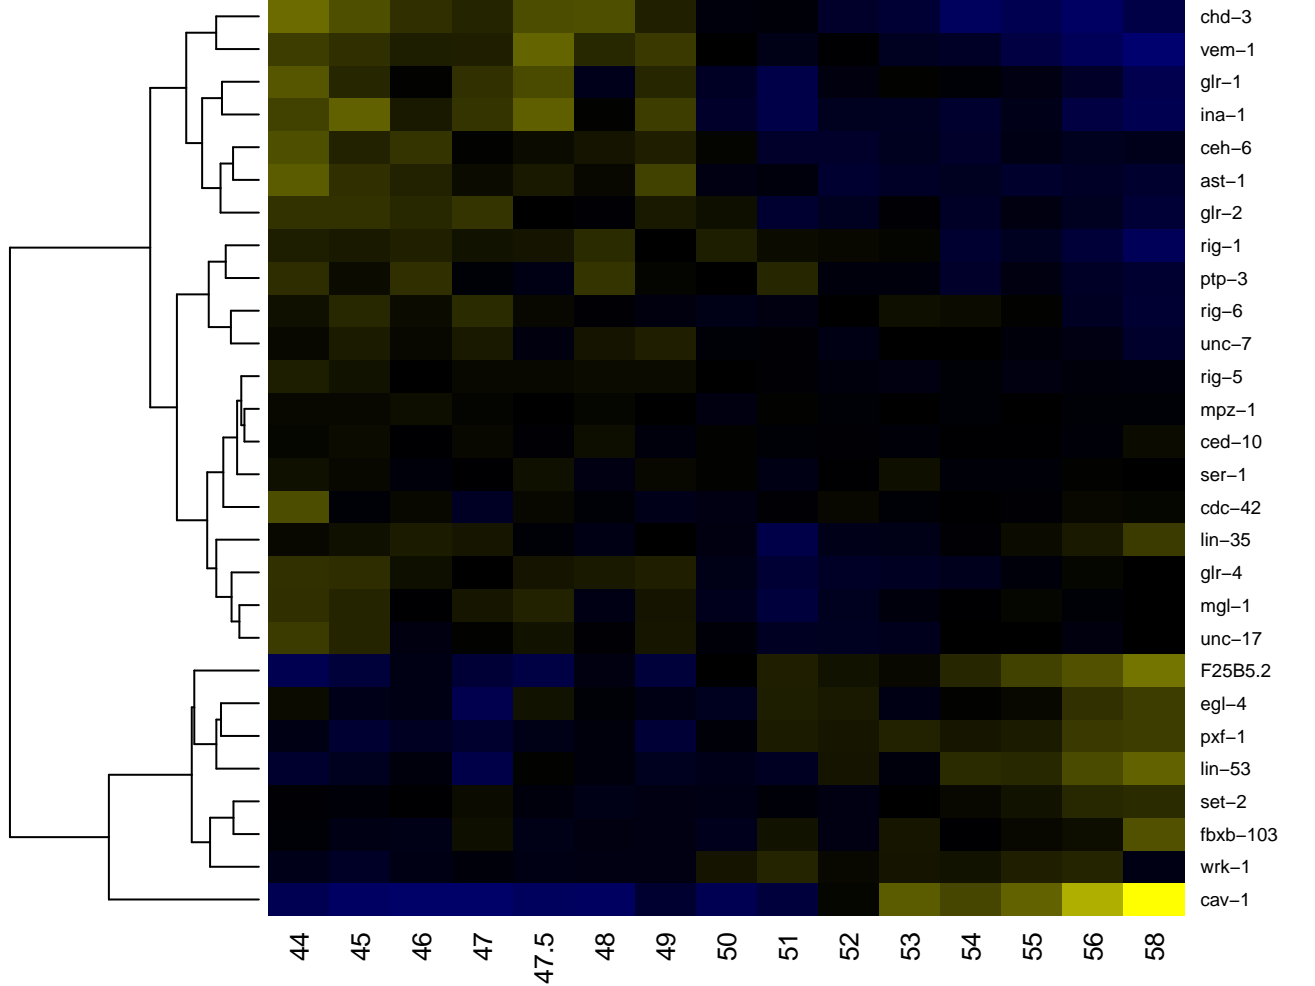

# RMDDR

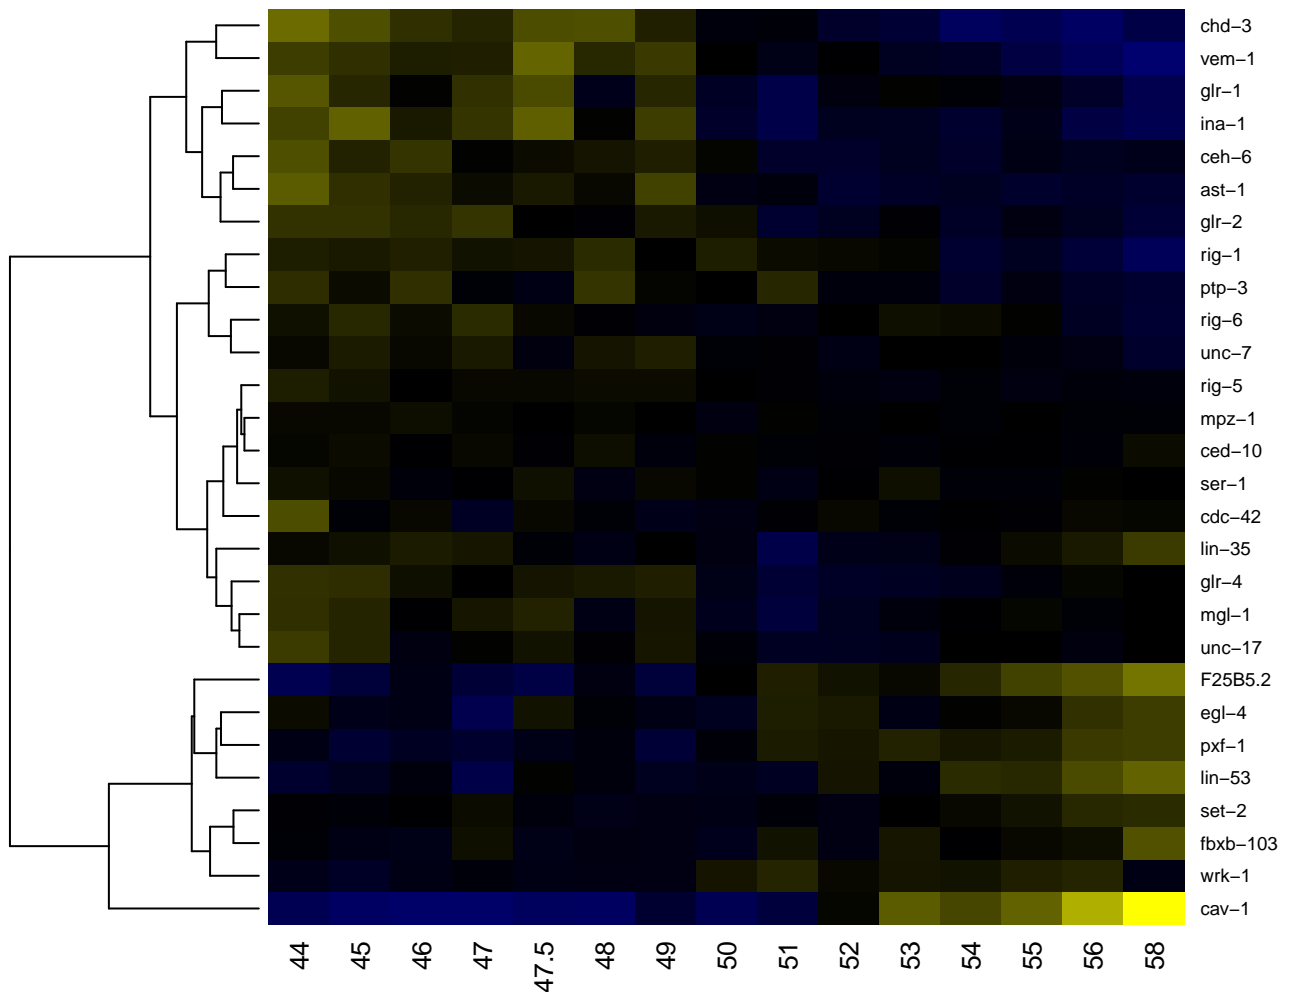



# RMDL

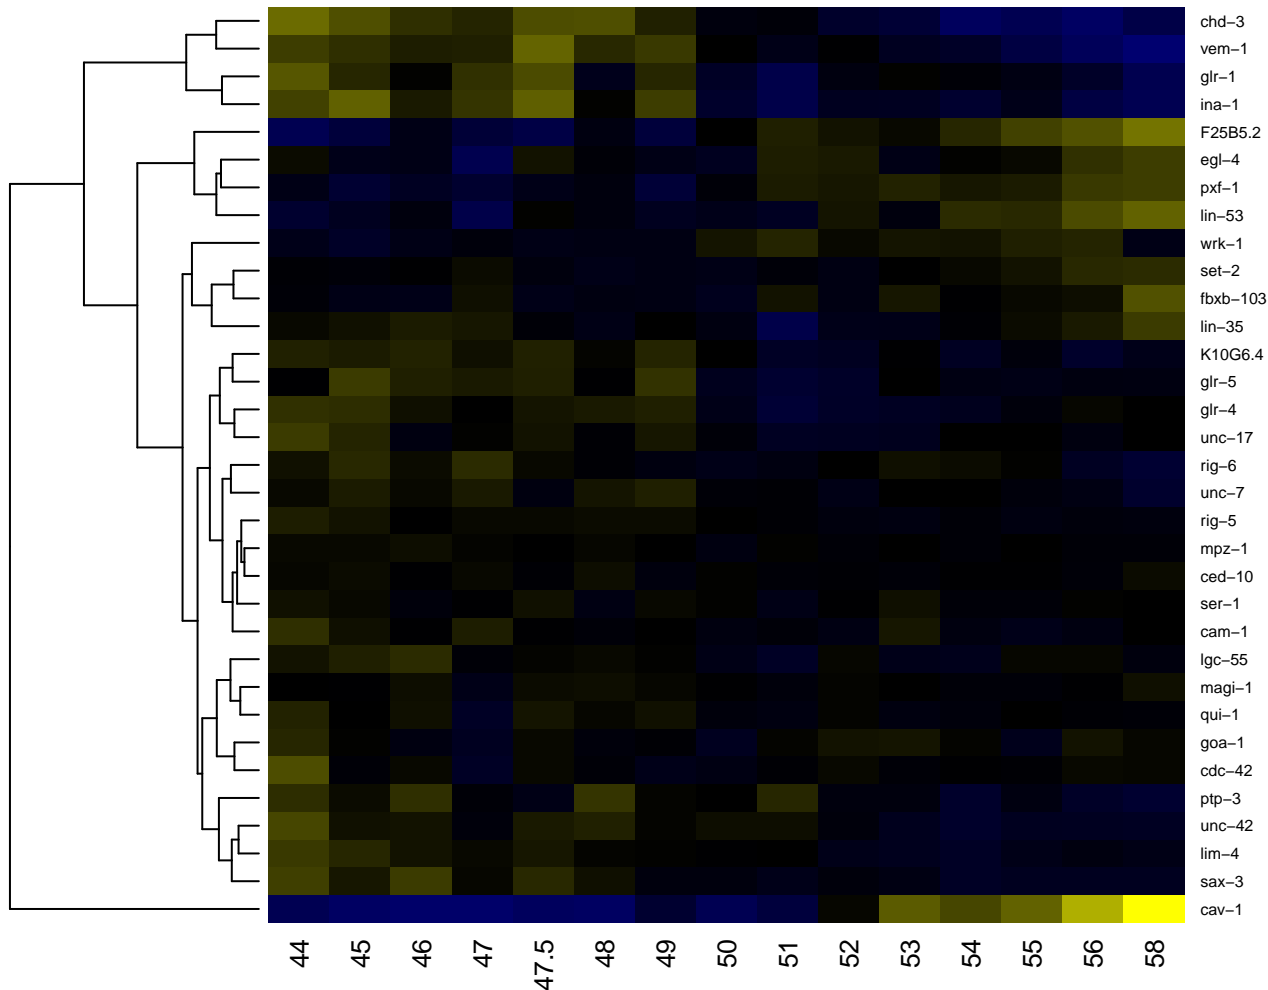

# RMDR

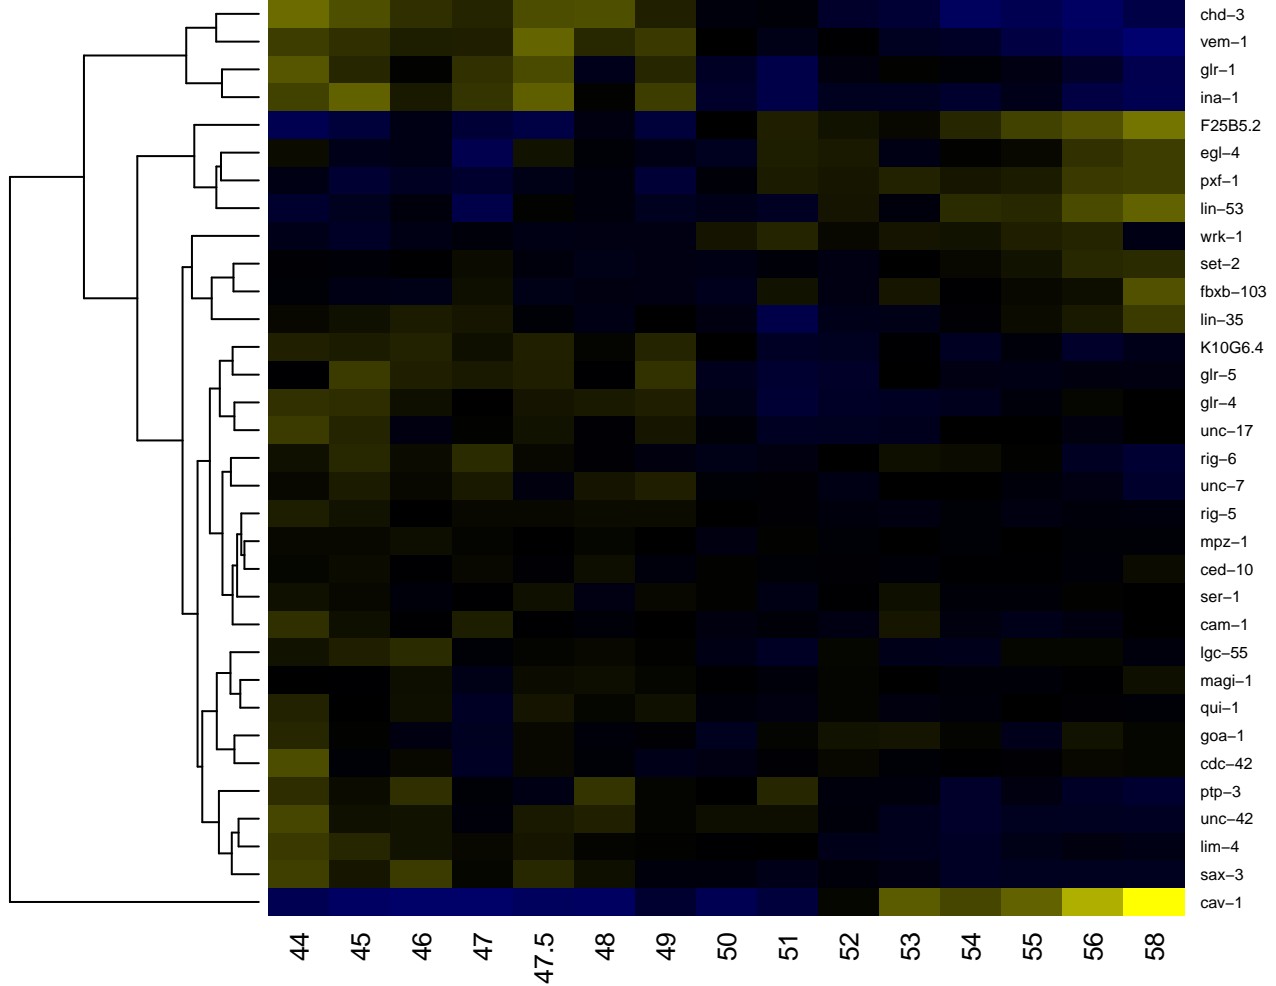

# RMDVL

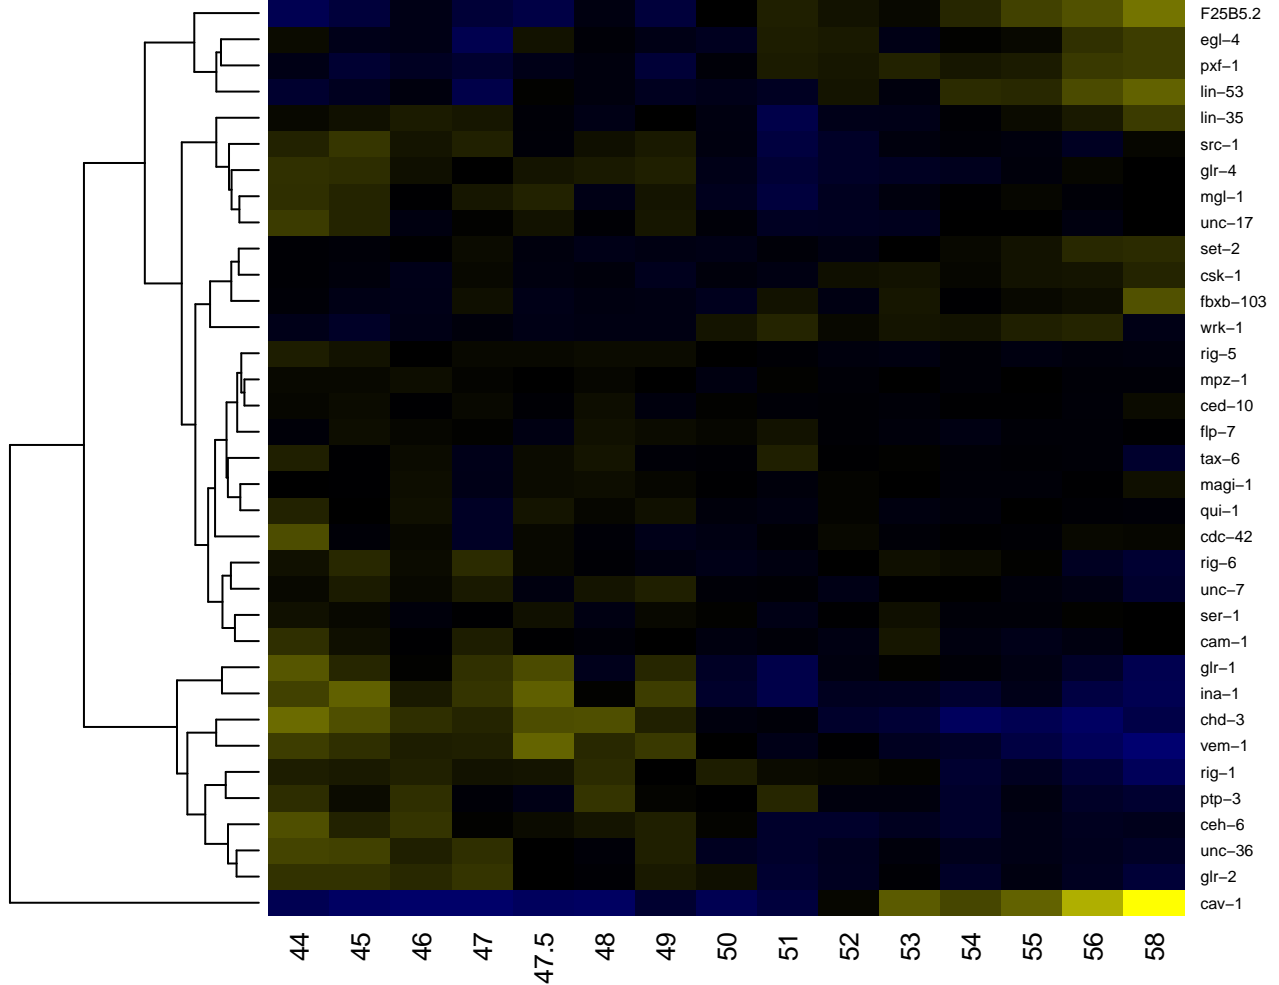

# RMDVR

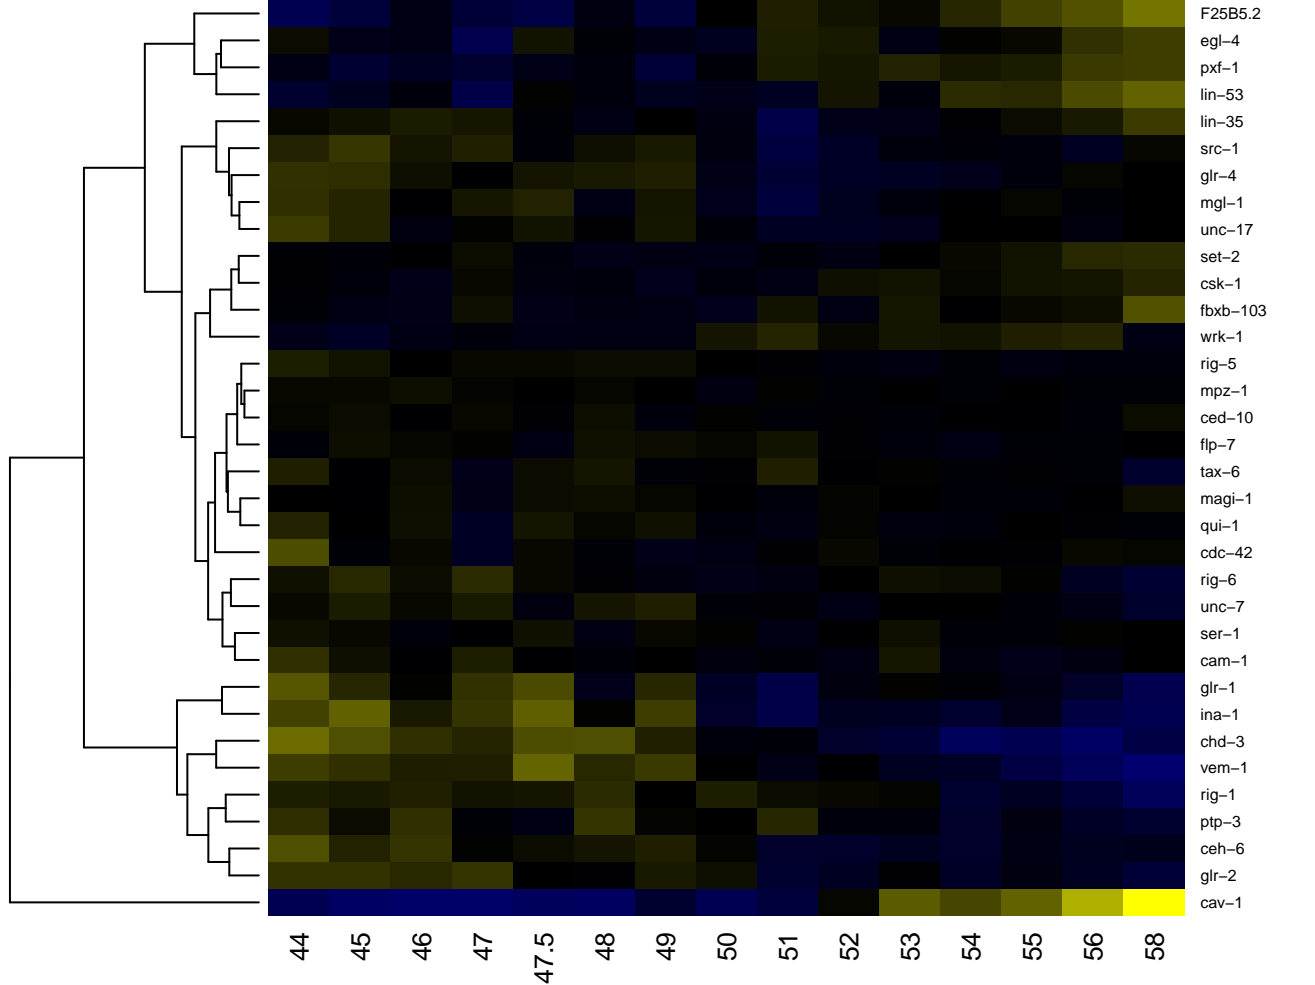

-2

-1

0

1

2



# RMEL

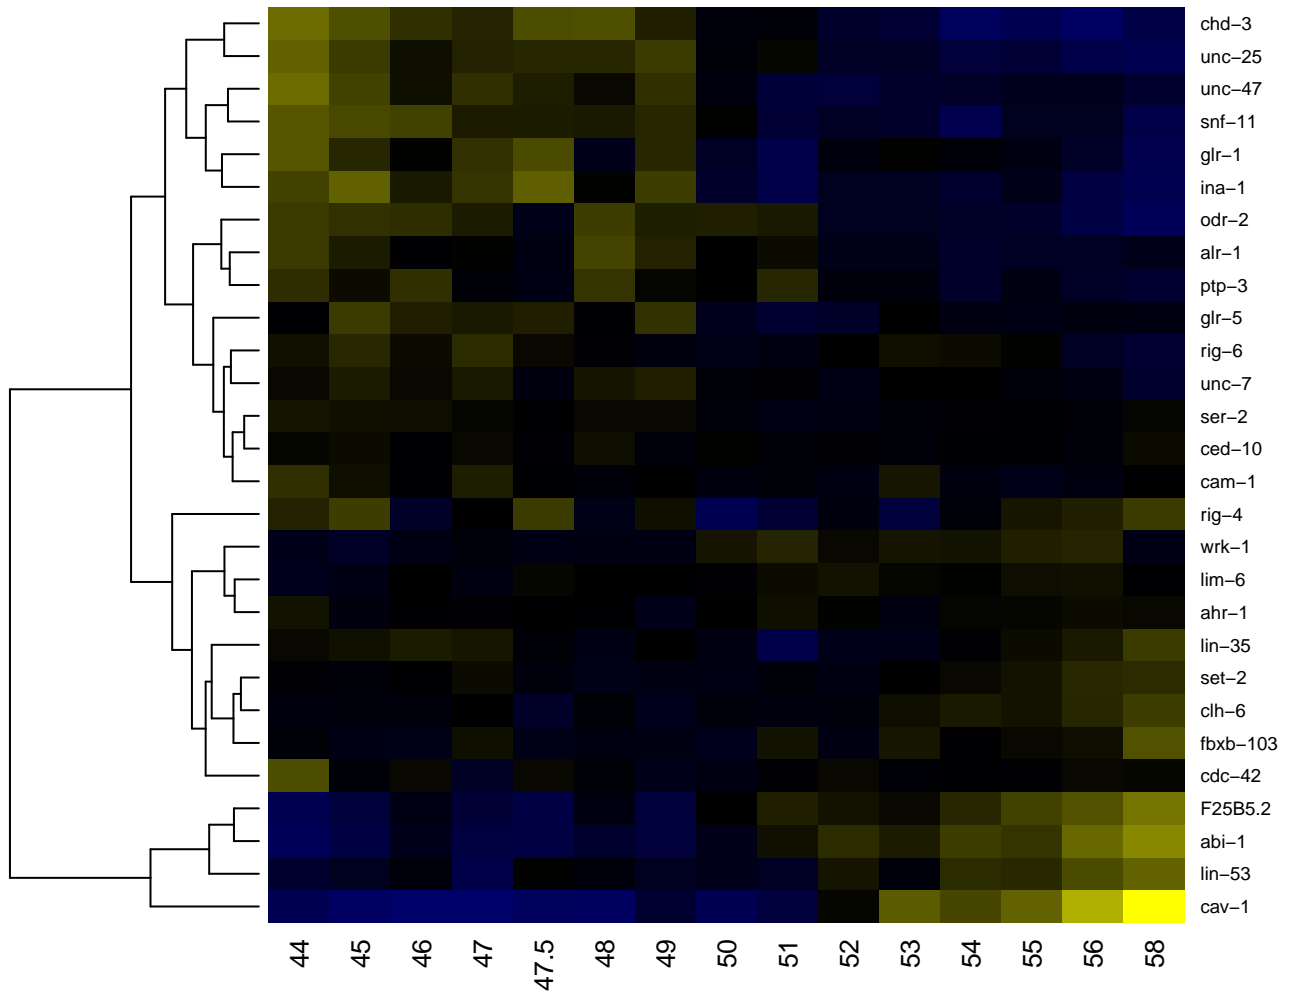

# RMER

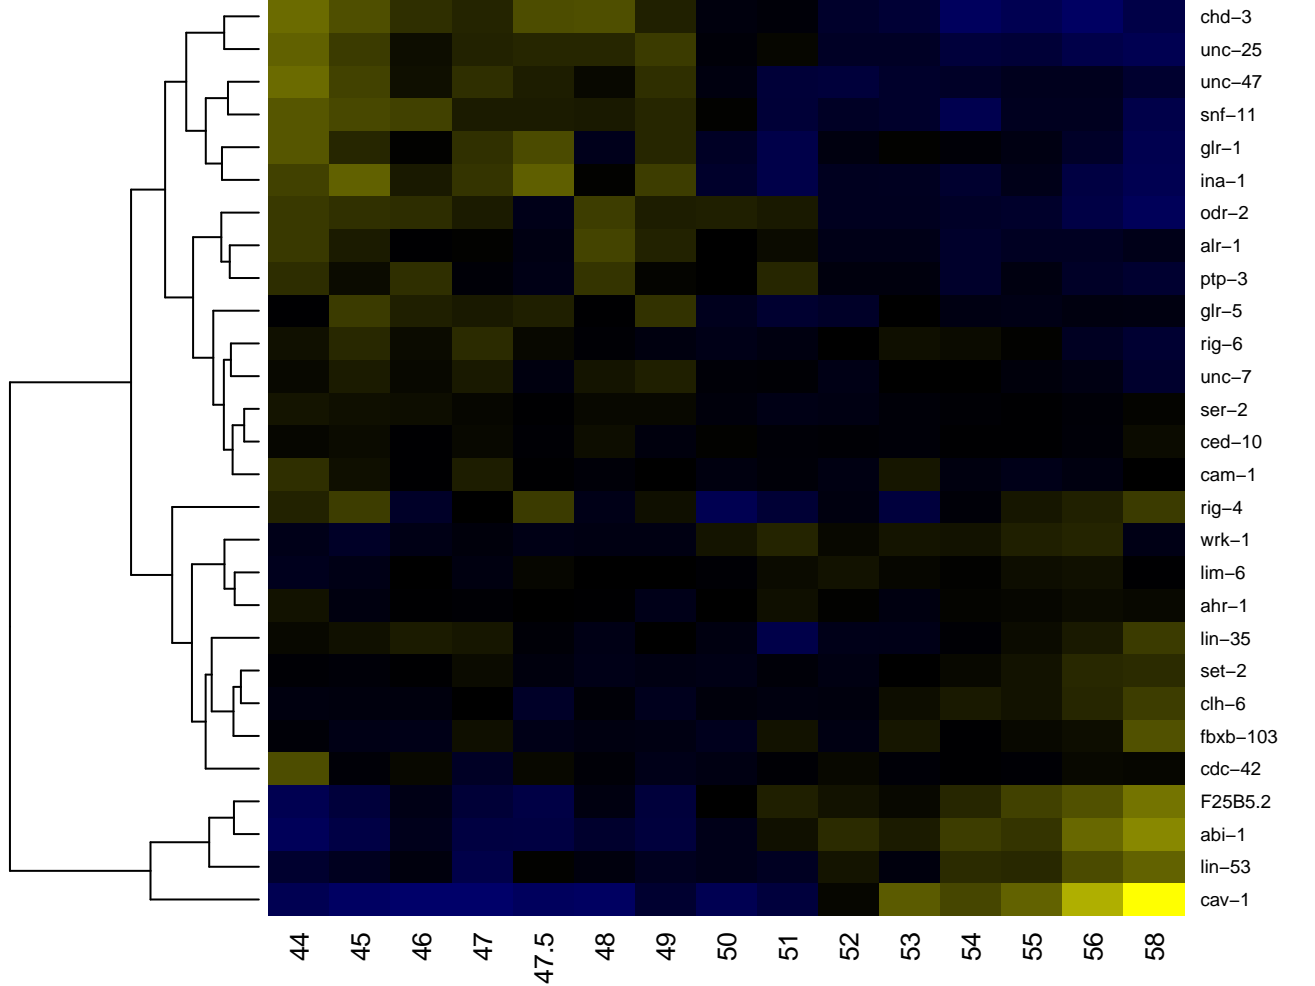

# RMEV

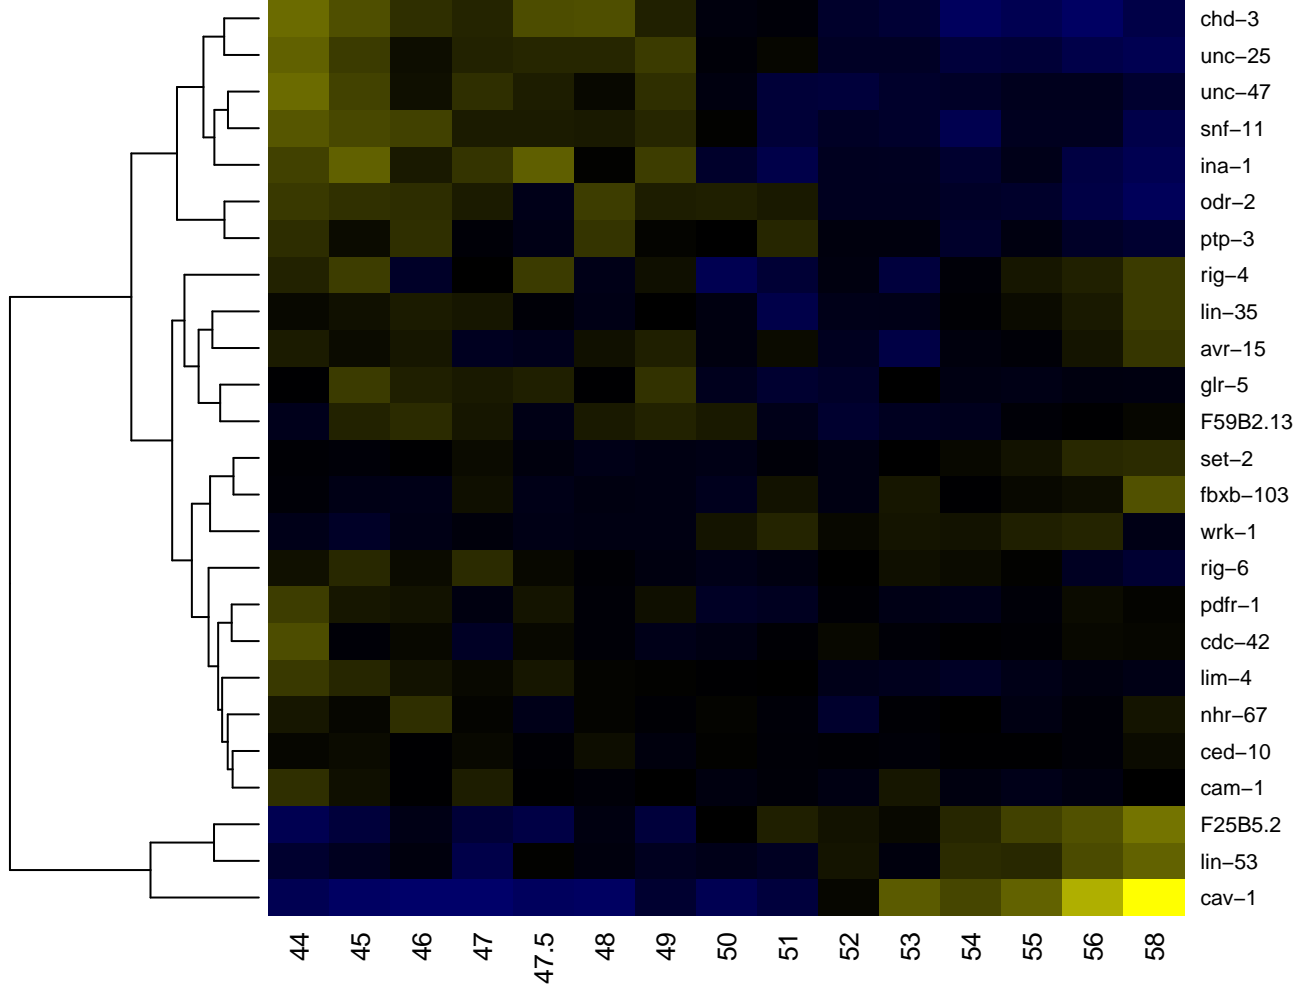



# RMGL

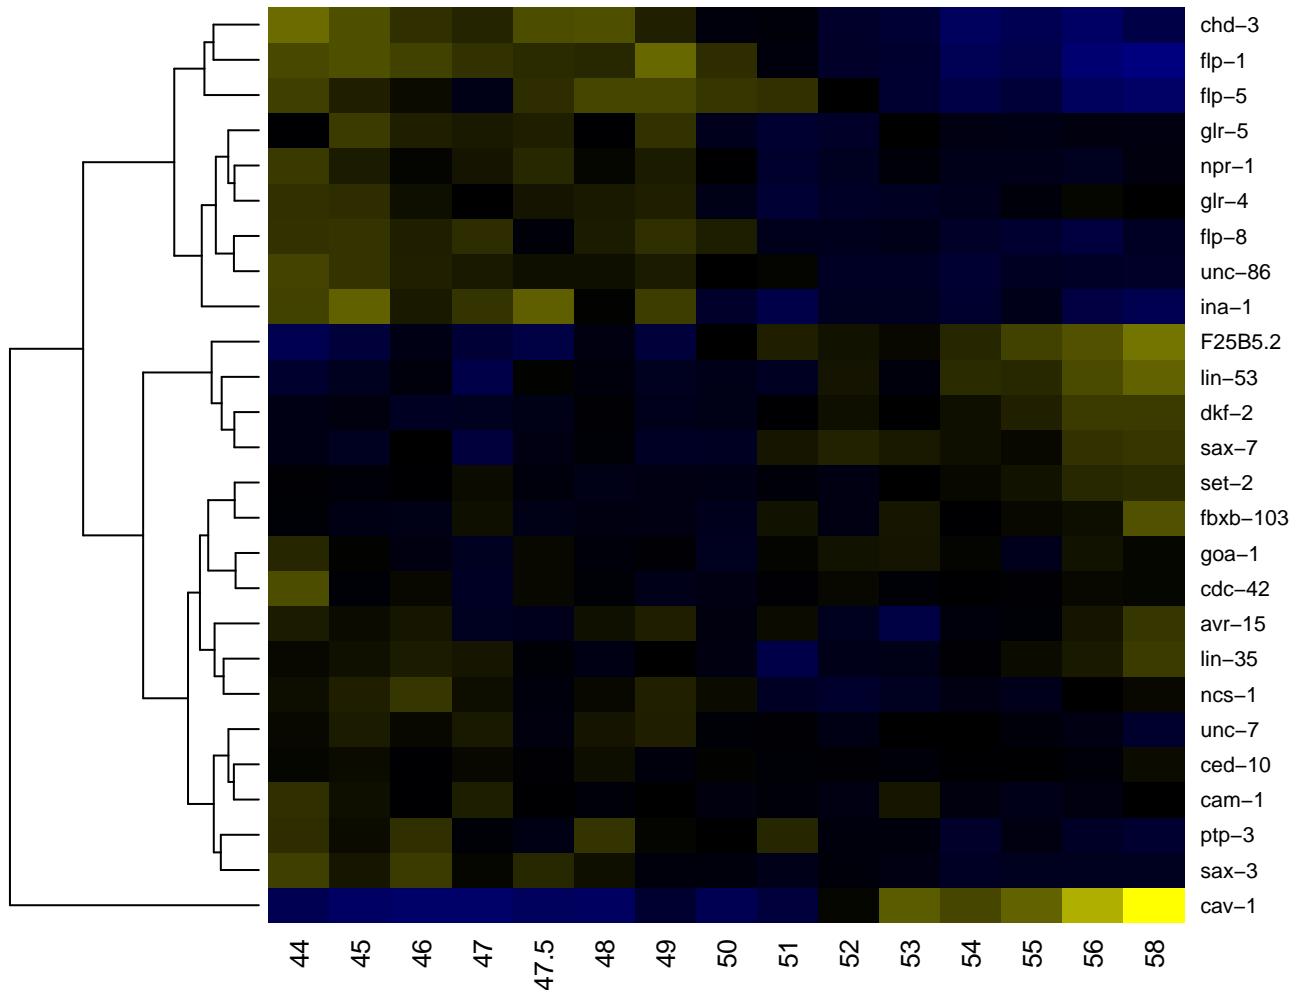

-2

-1

0

1

2

# RMGR



-2

-1

0

1

2

# SAADL

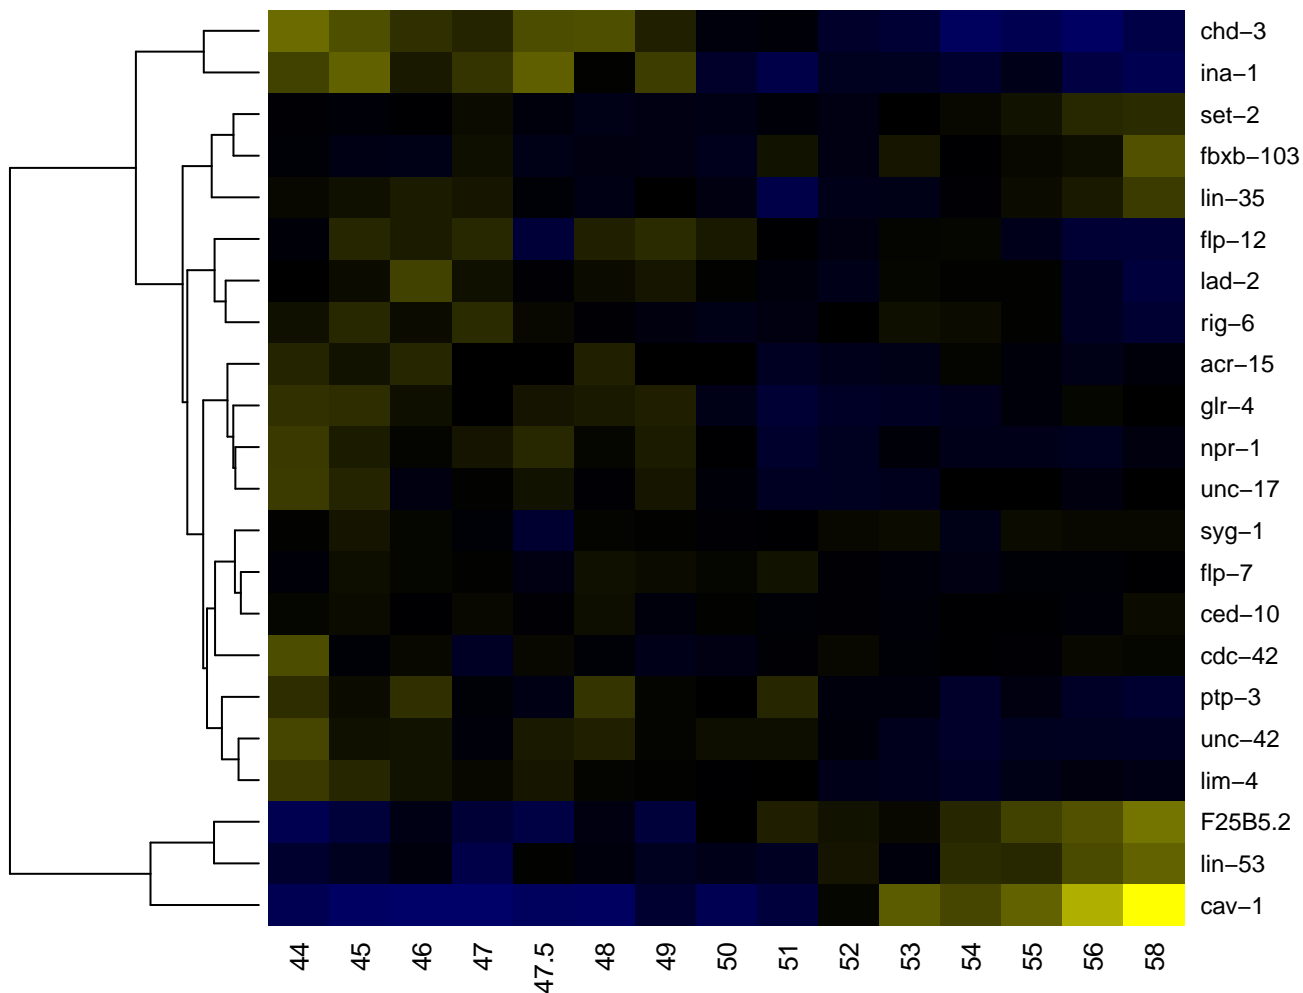

# SAADR



# SAAVL

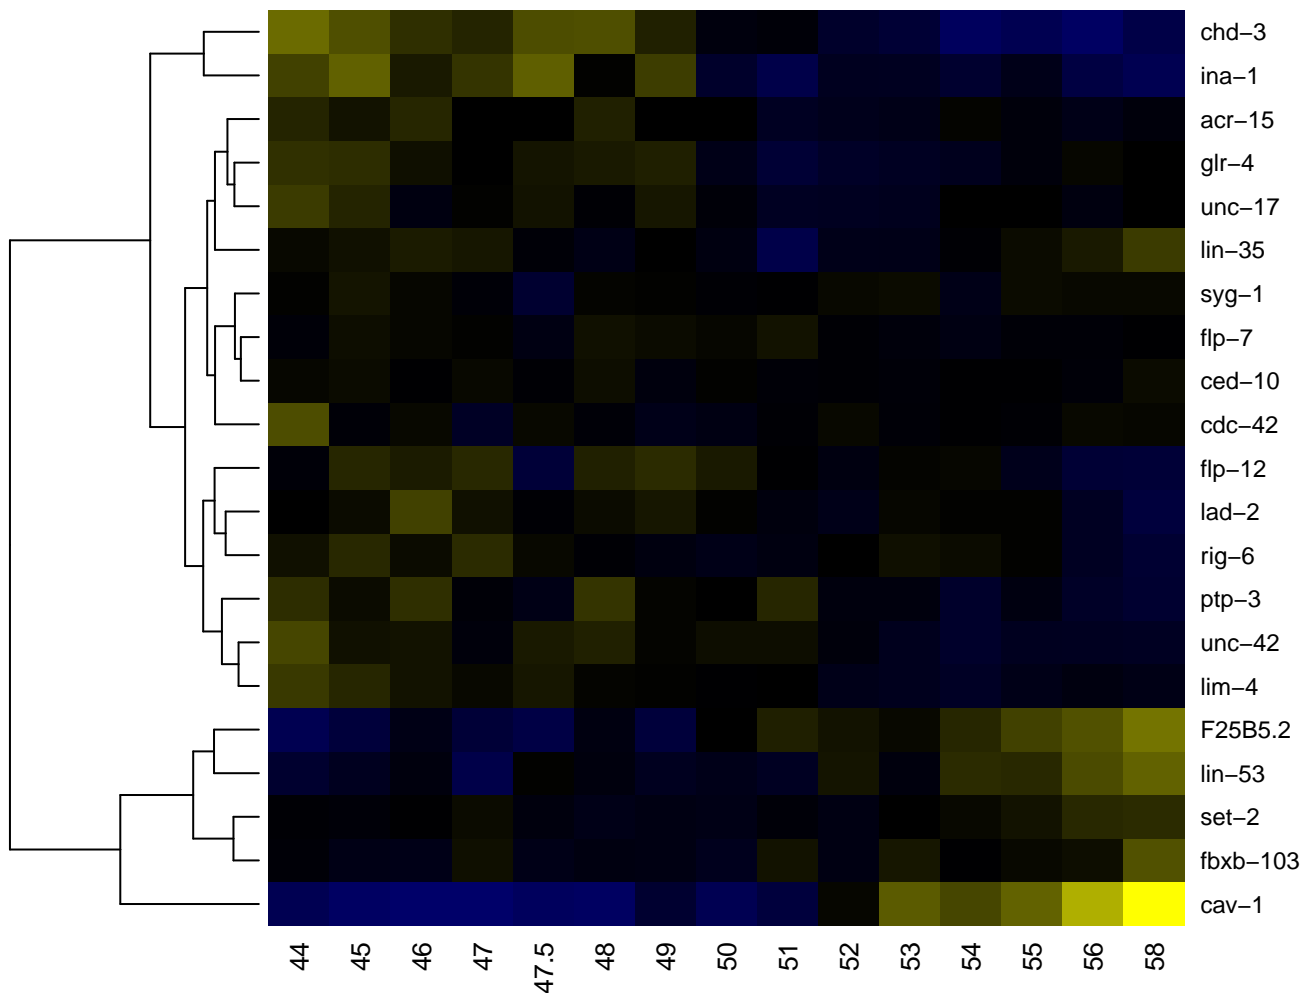

# SAAVR



# SABD

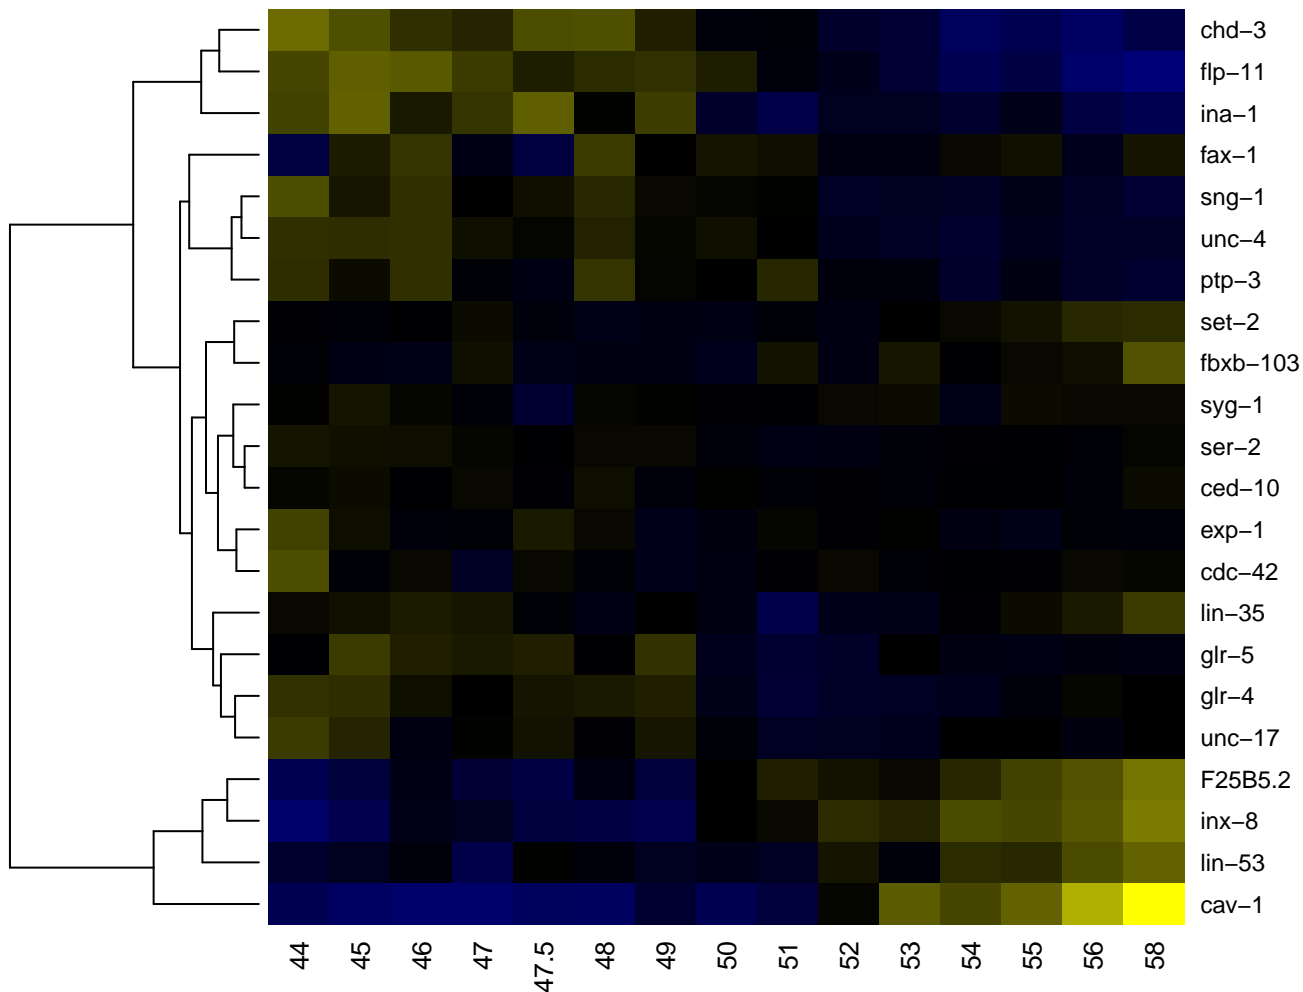

-2

-1

0

1

2

# SABVL

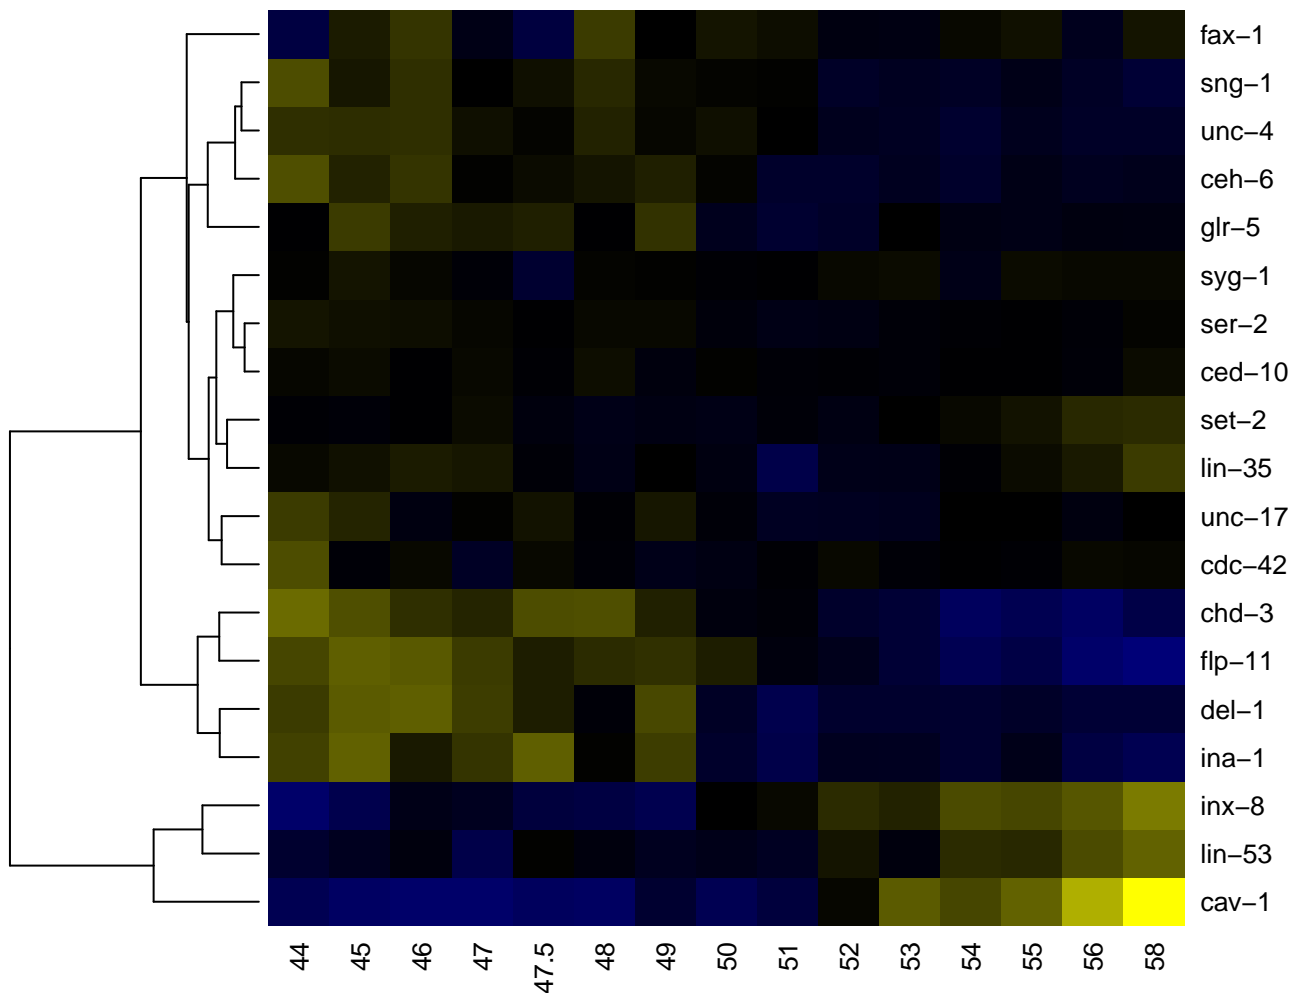





# SDQL

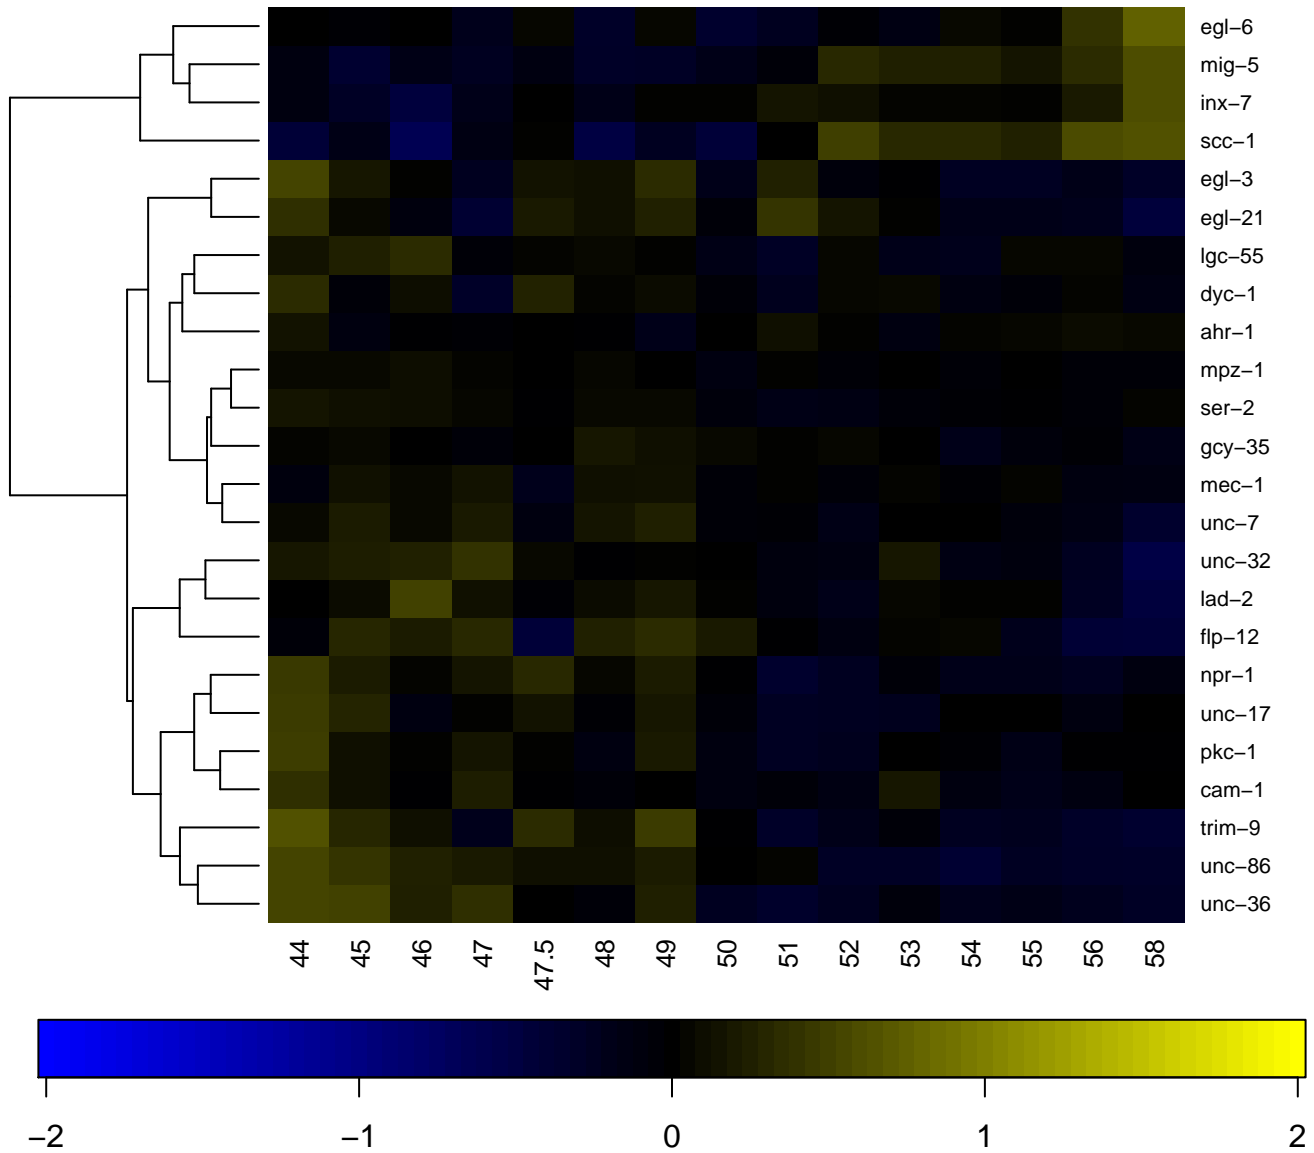



# seam cell

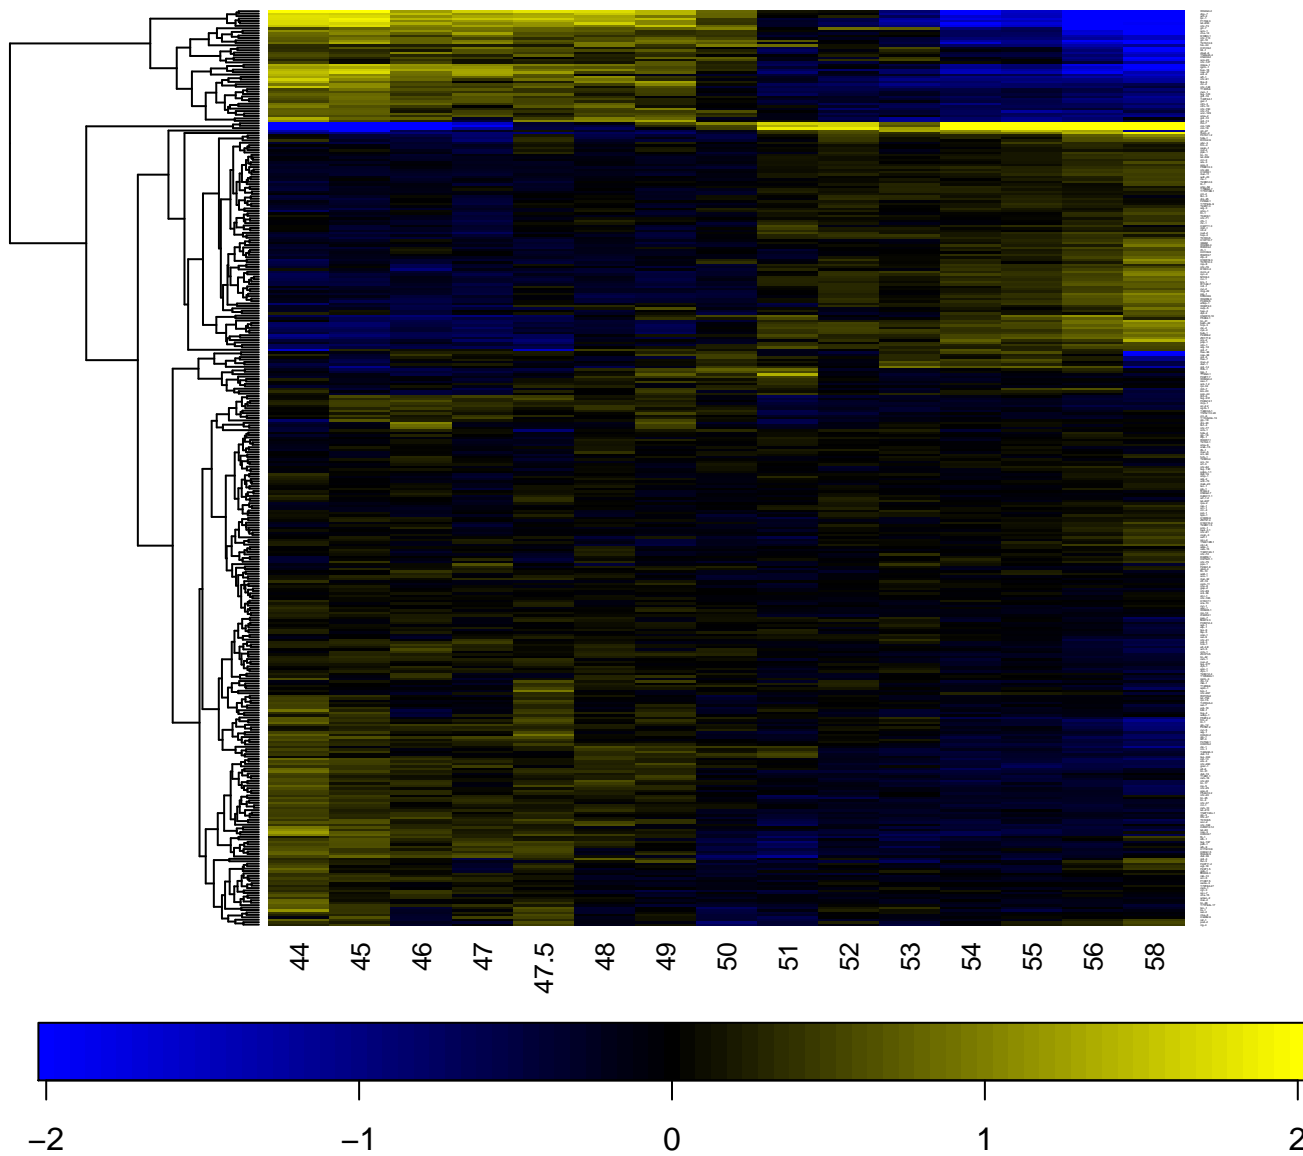



# SIADL

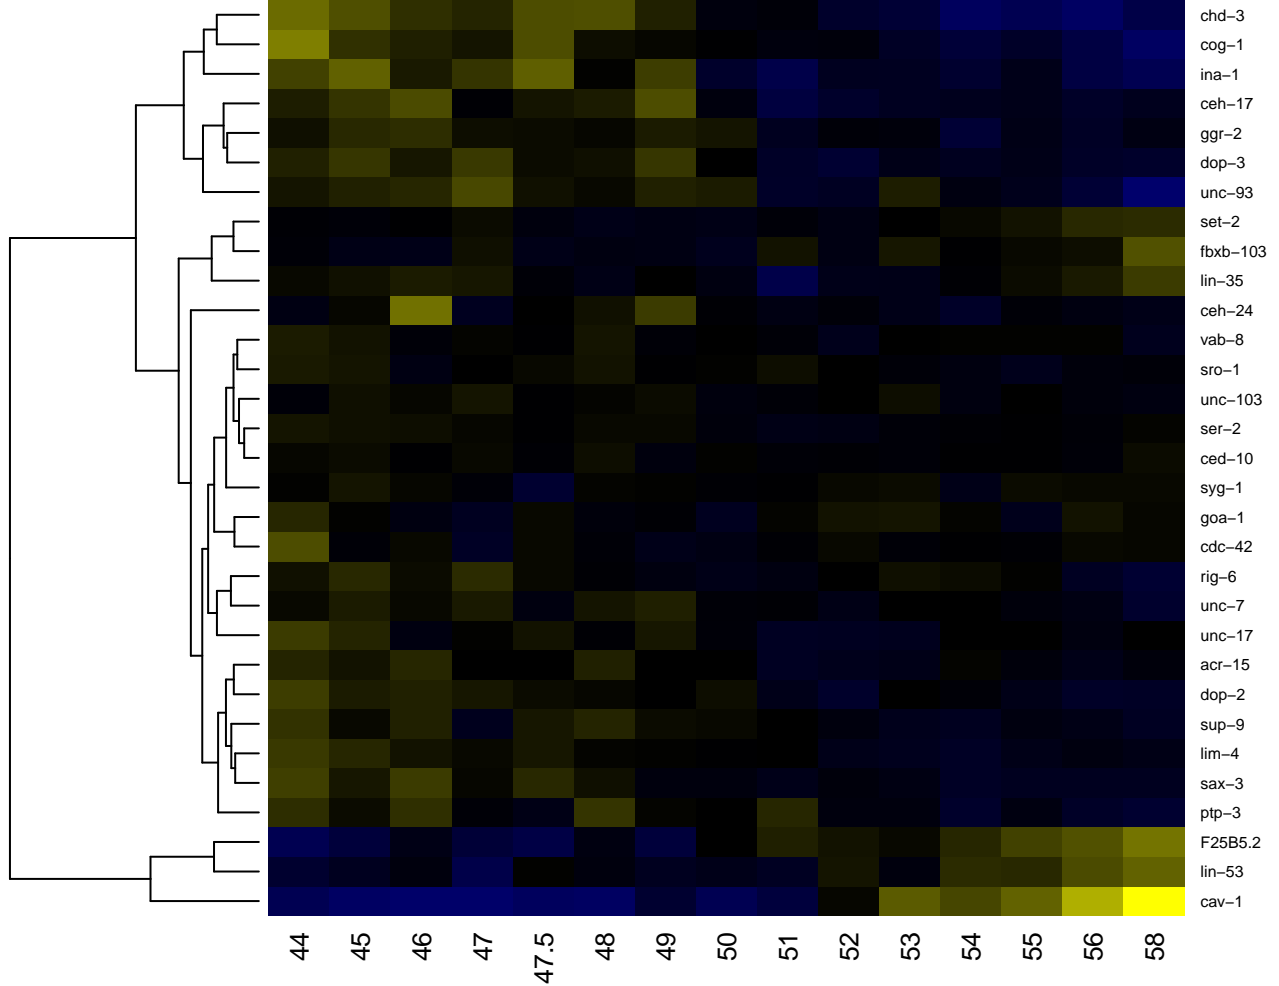

# SIADR

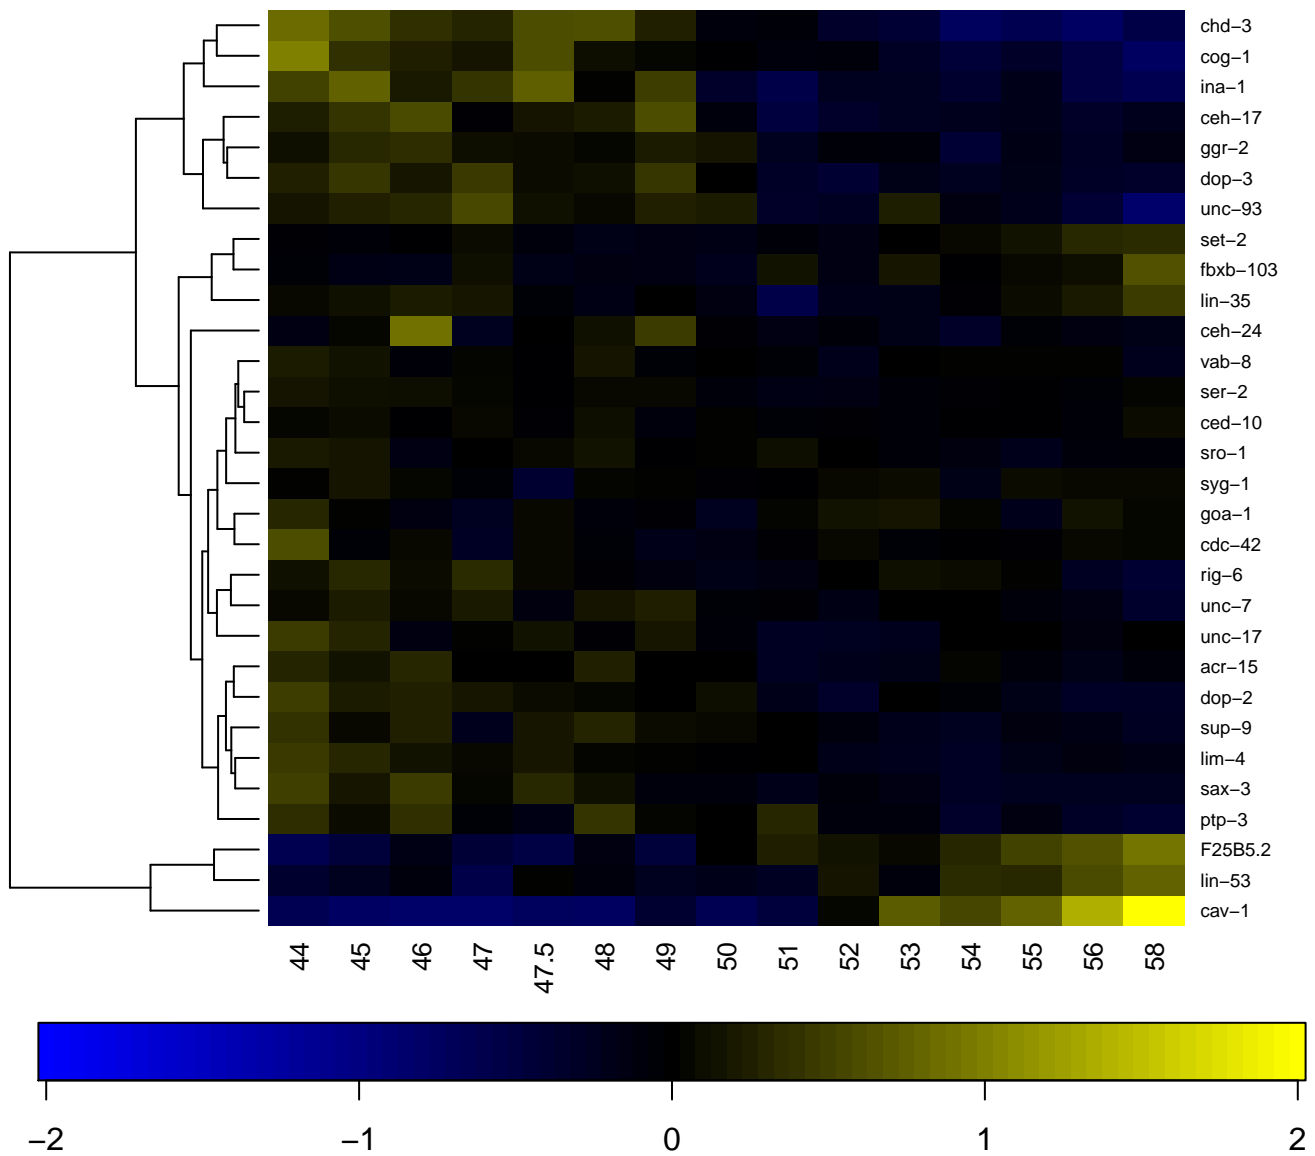

# SI AVL

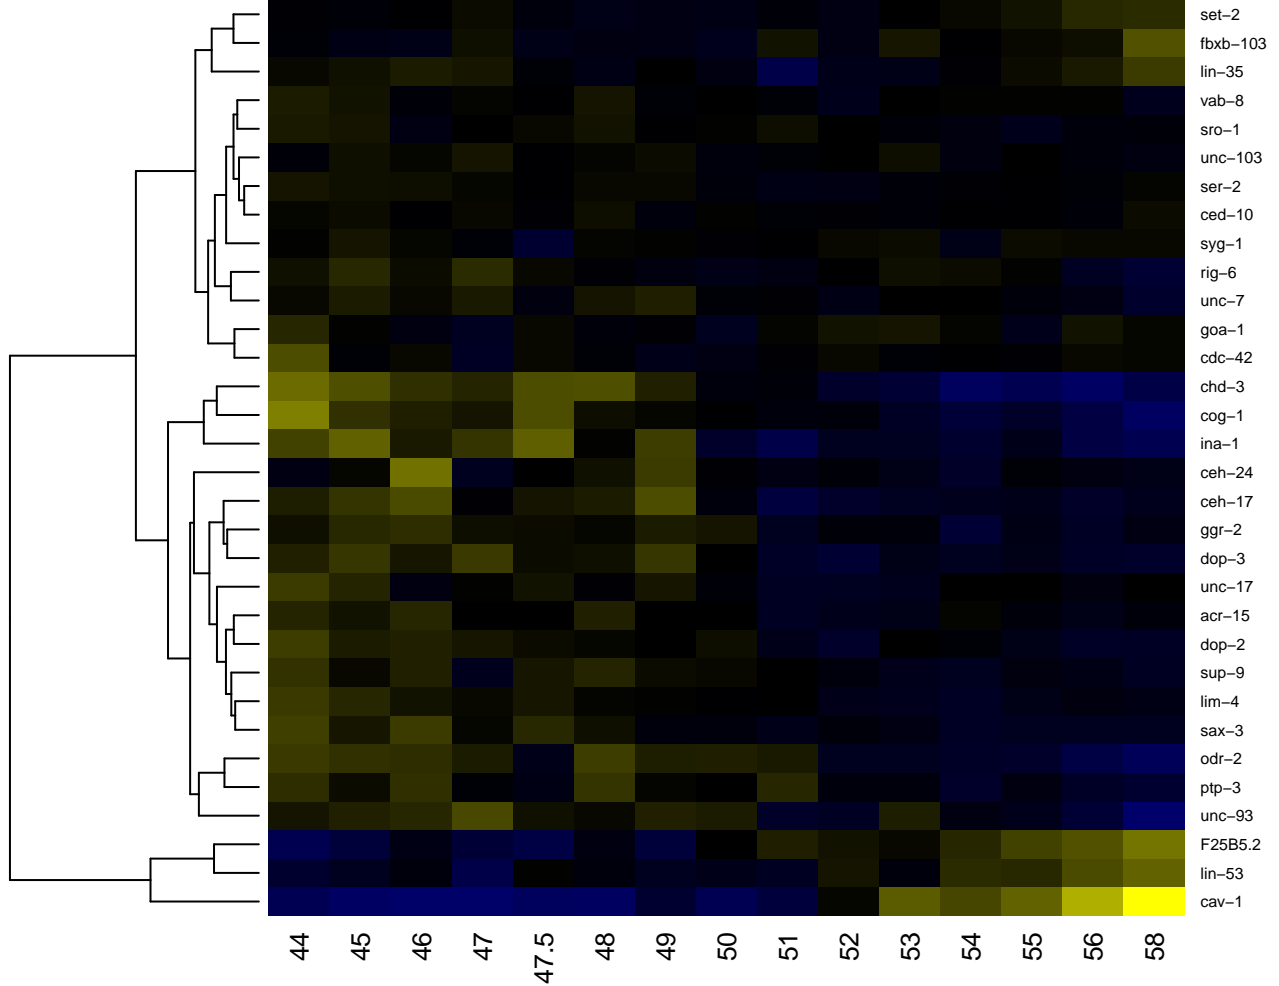



# SIAVR



-2

-1

0

1

2

# SIBDL

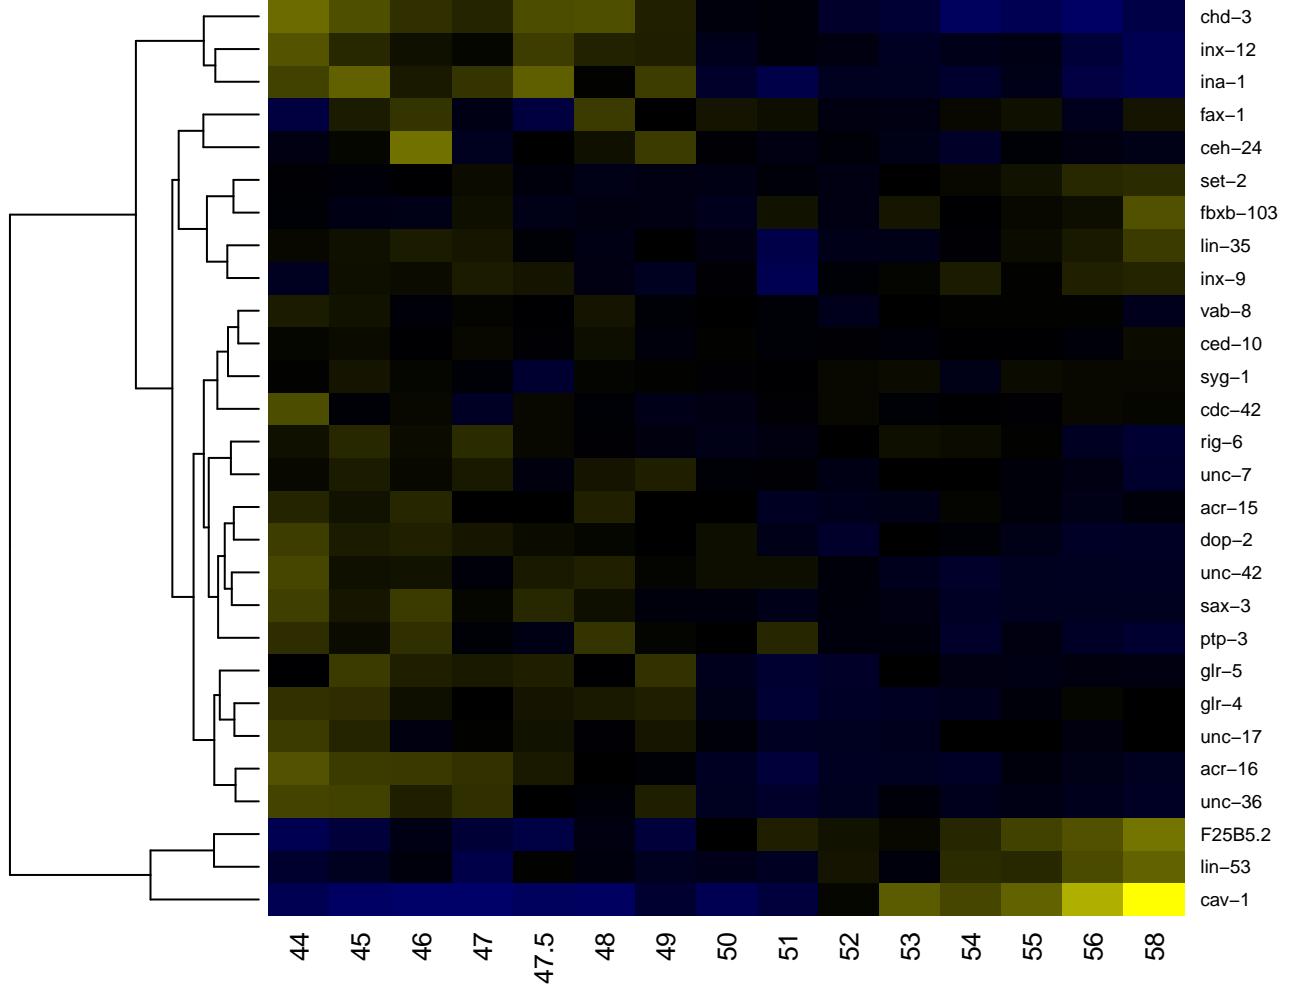



# SIBVL

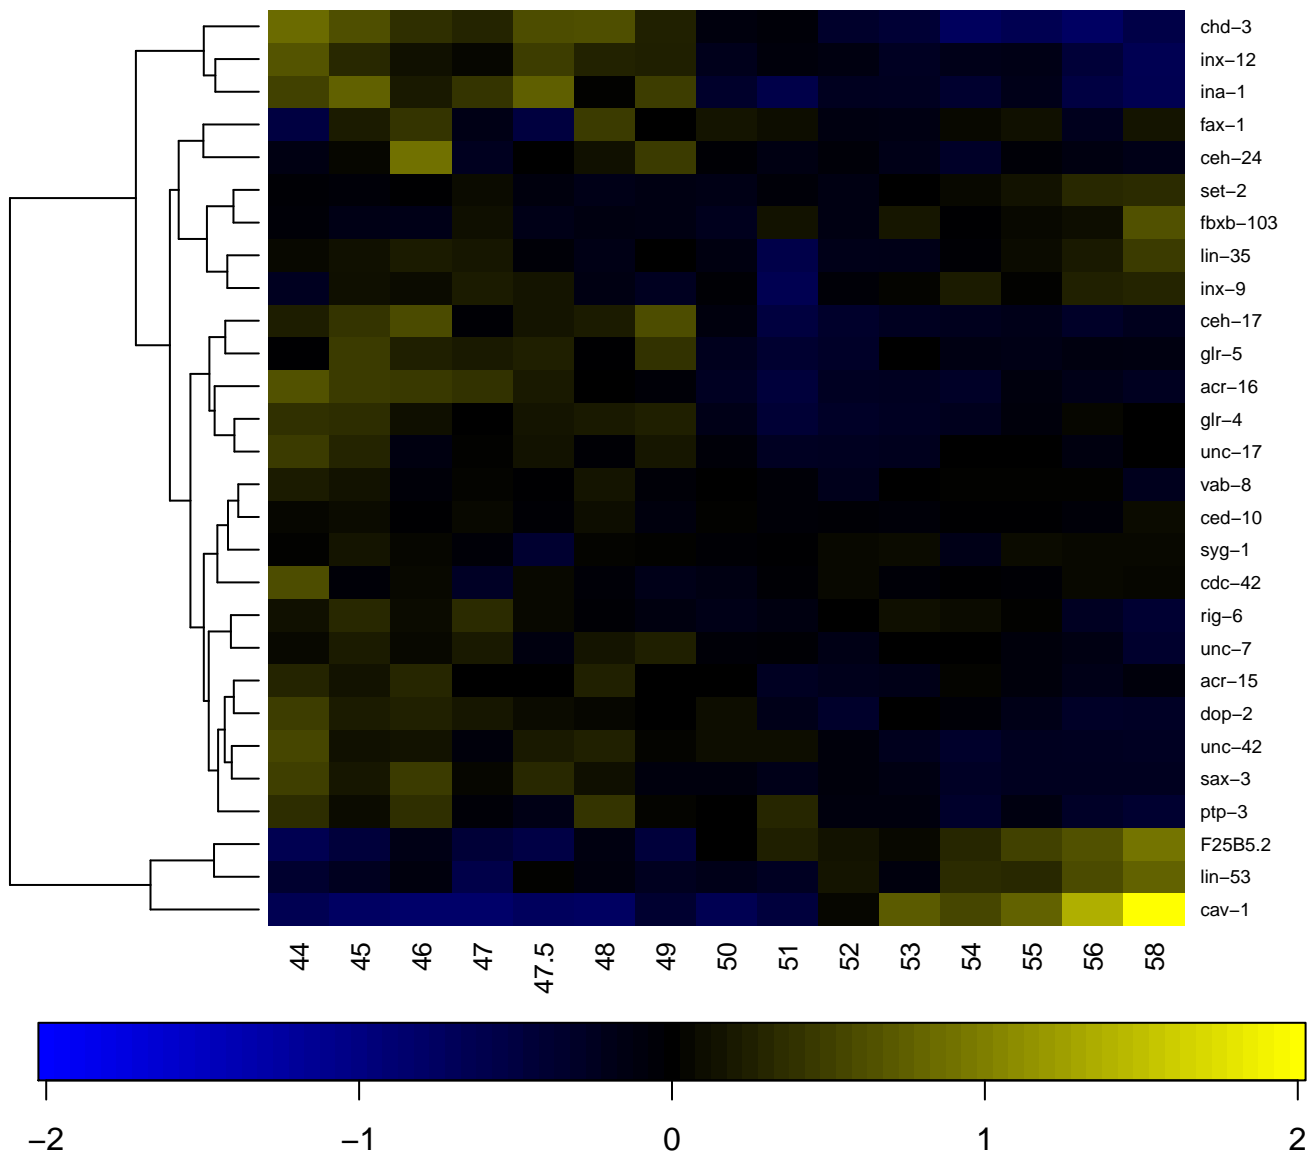

# SIBVR

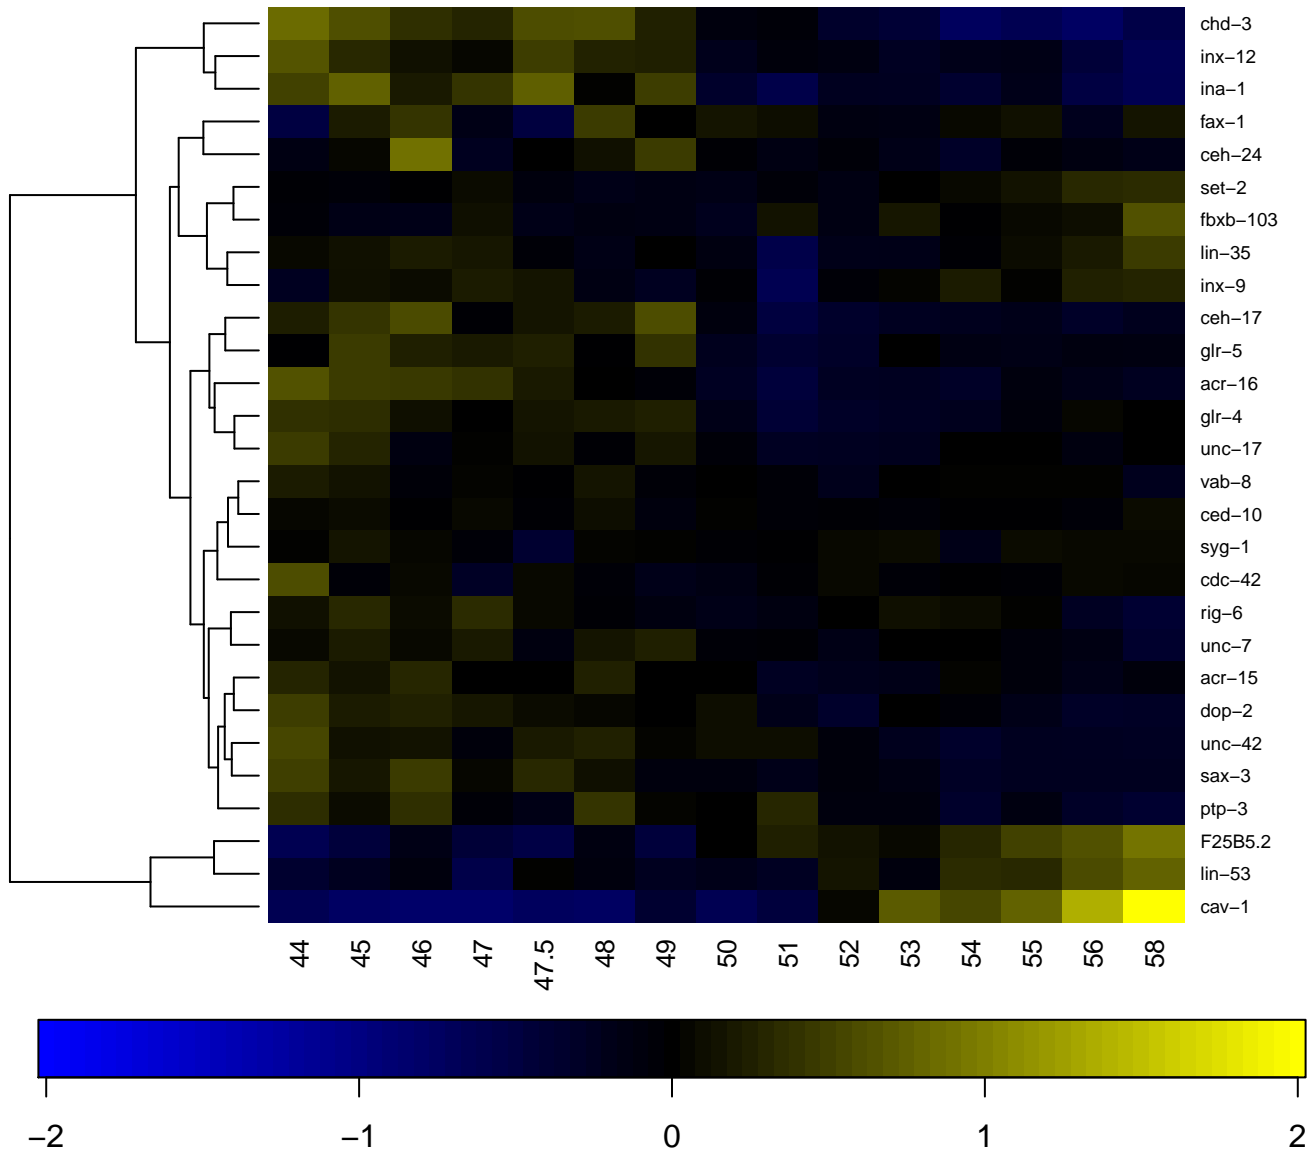

# SMBDL

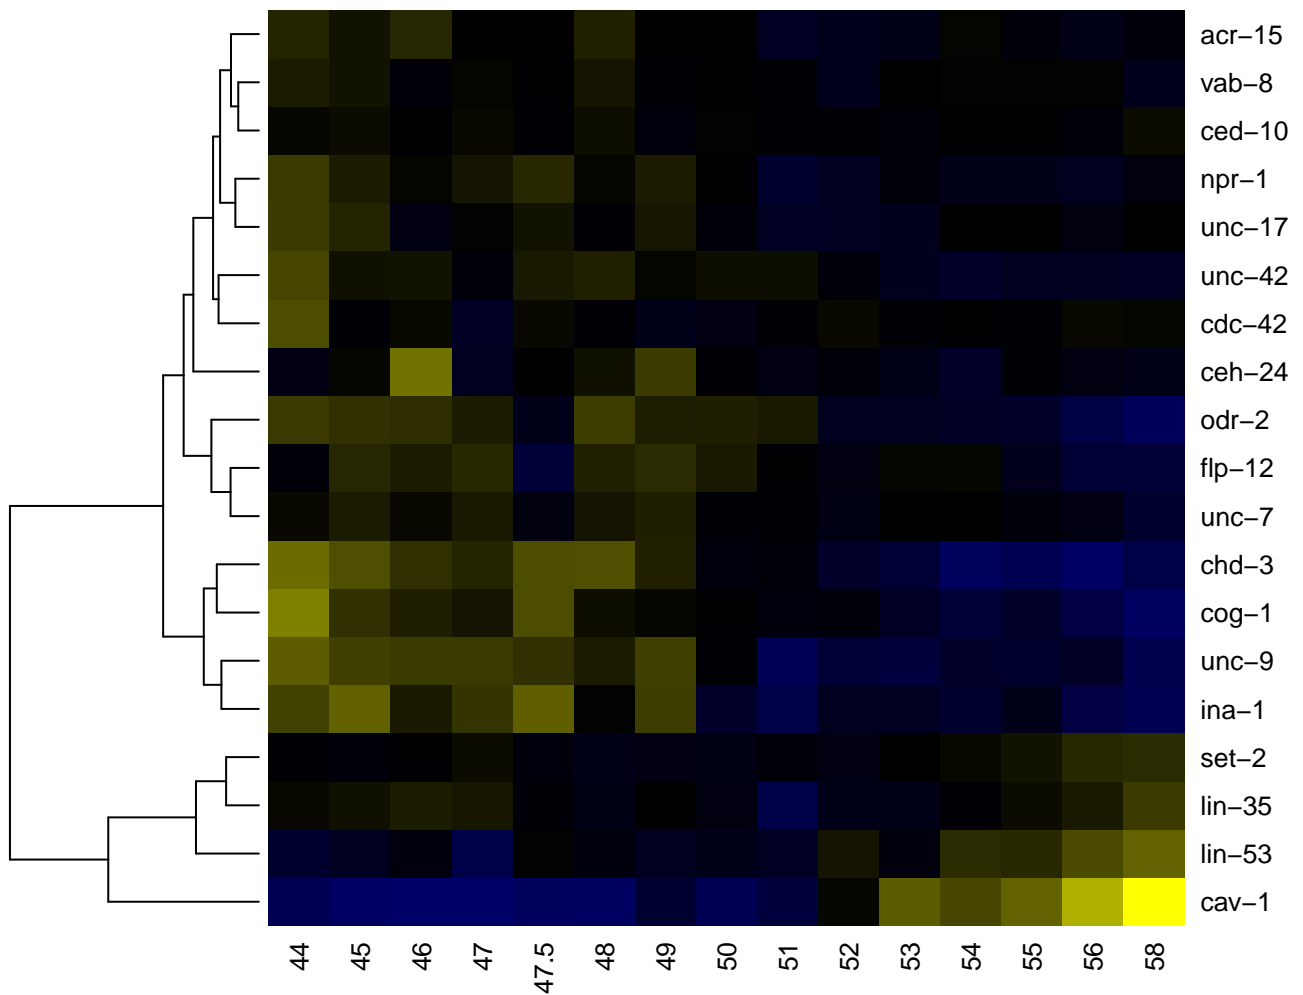

-2

-1

0

1

2

# SMBDR



-2

-1

0

1

2

# SMBVL

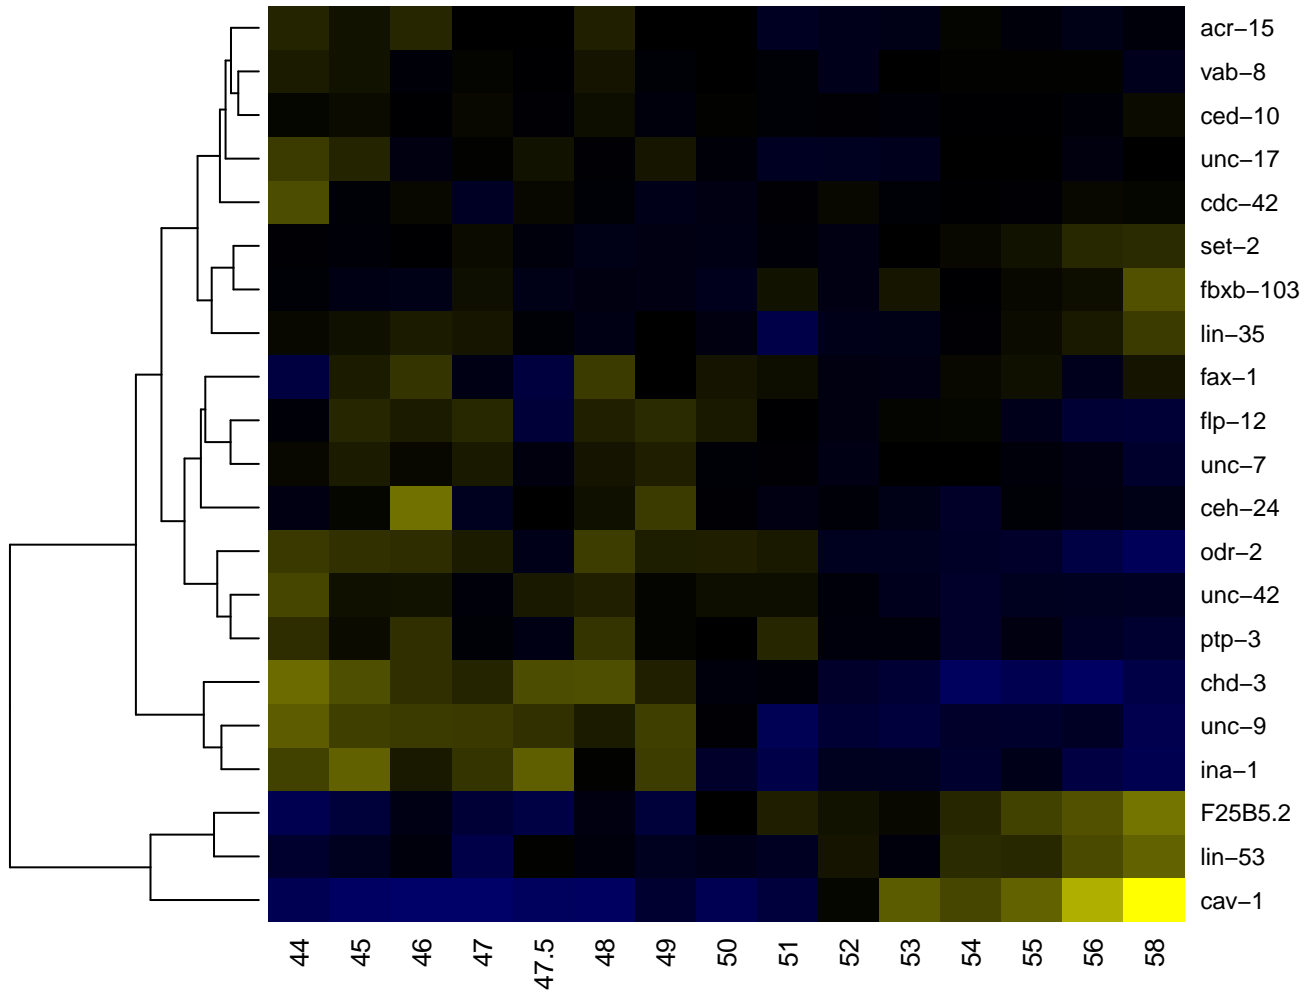



# SMBVR

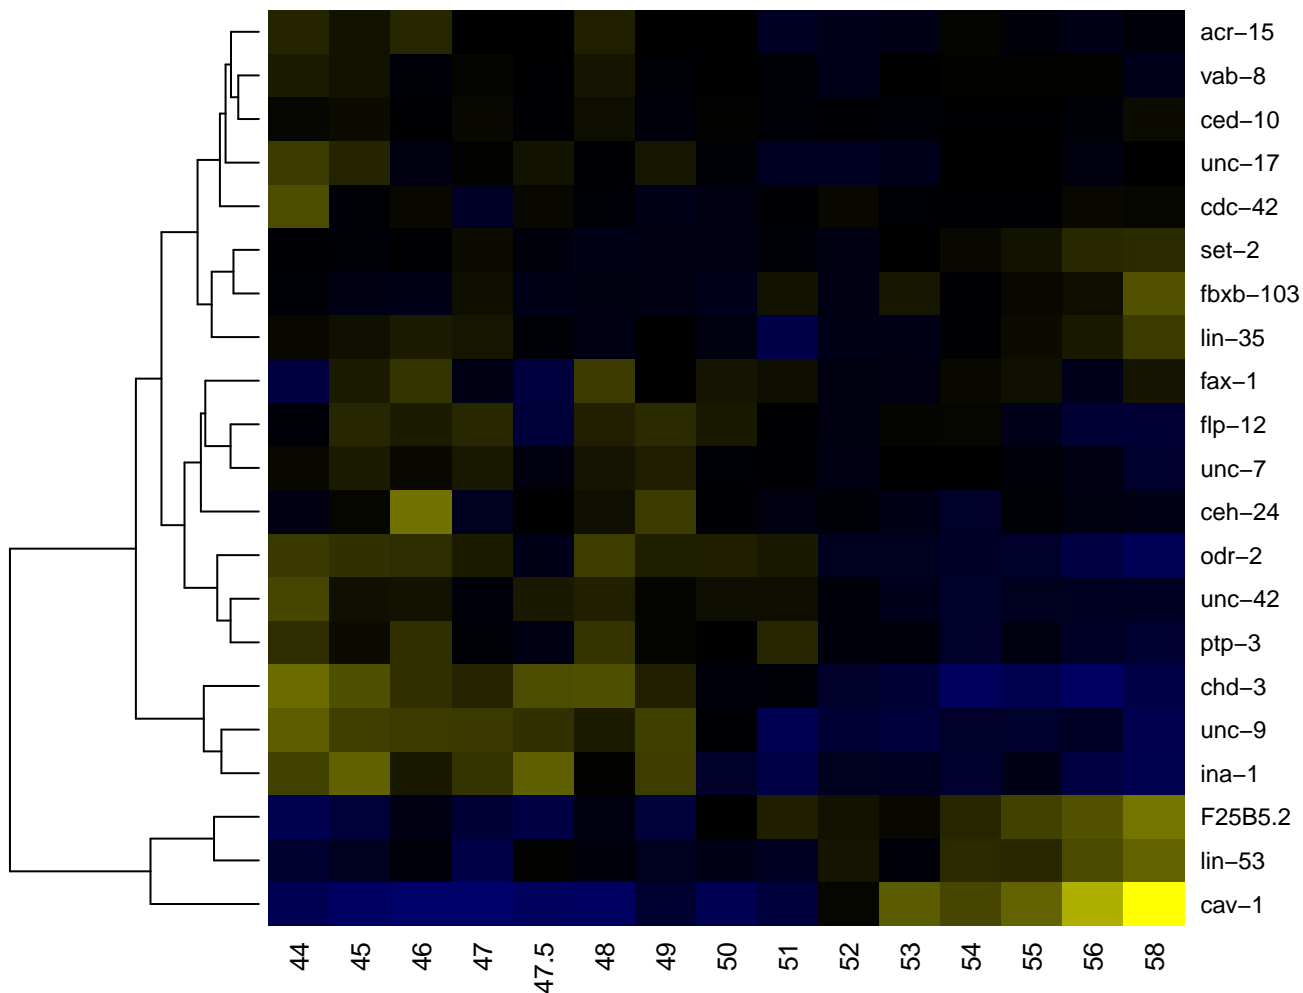

# SMDDL

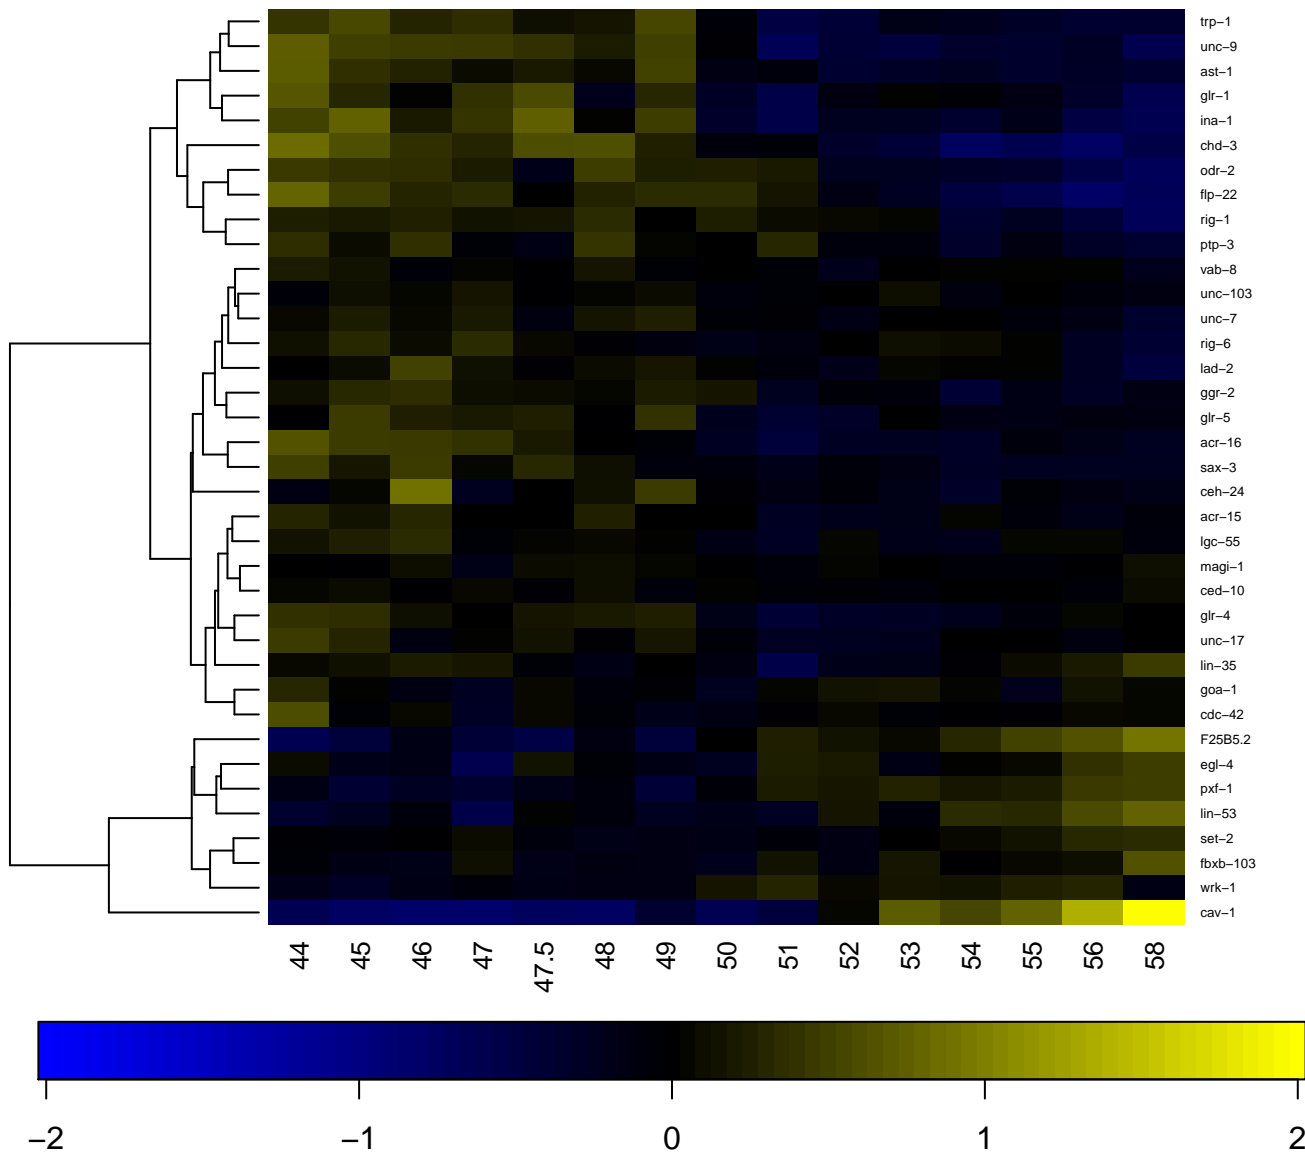

# SMDDR

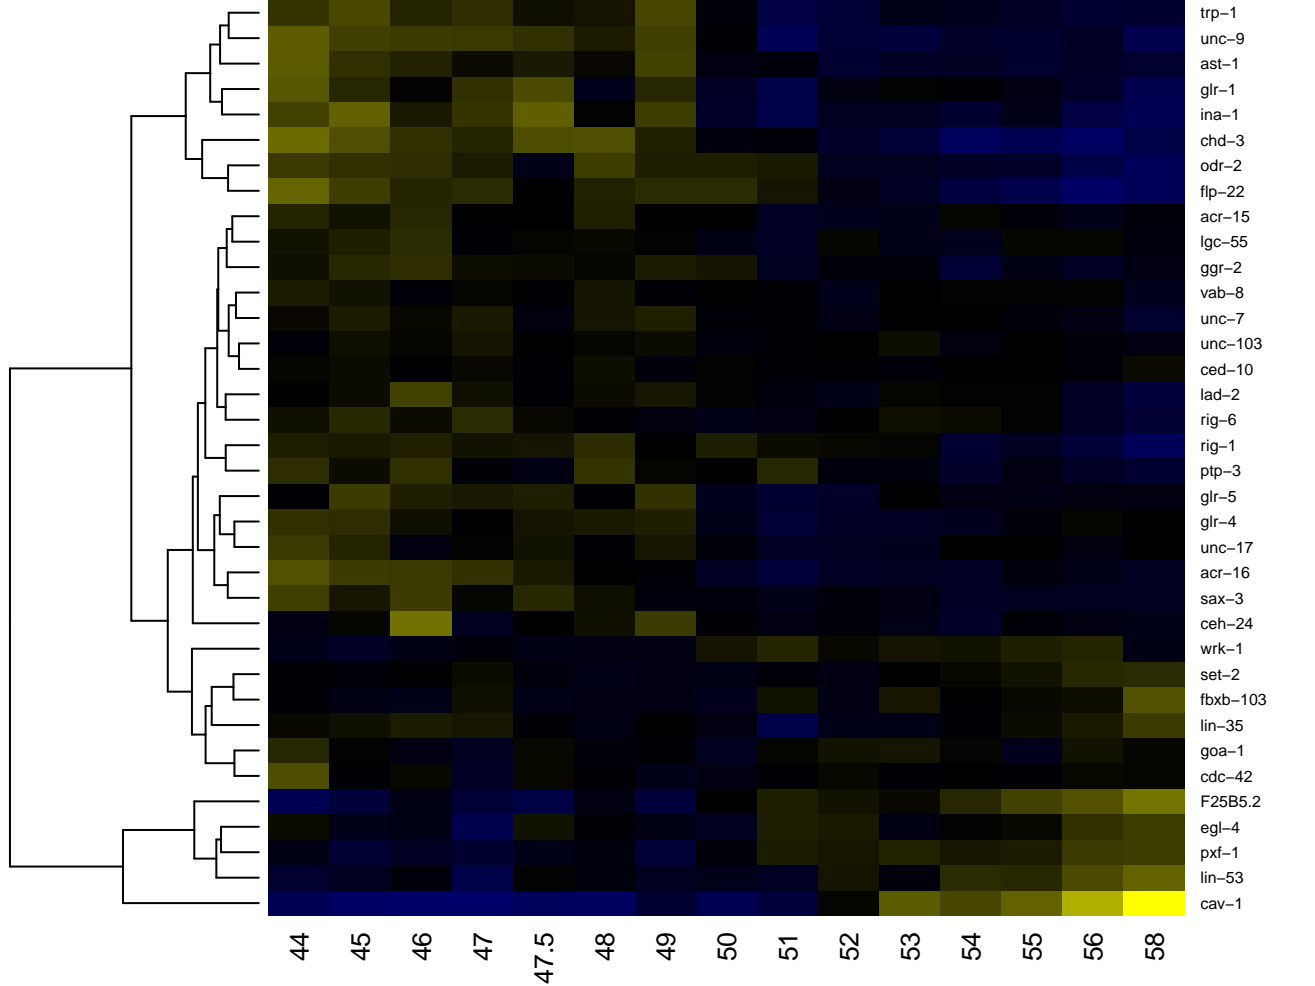

-2

-1

0

1

2

# SMDVL

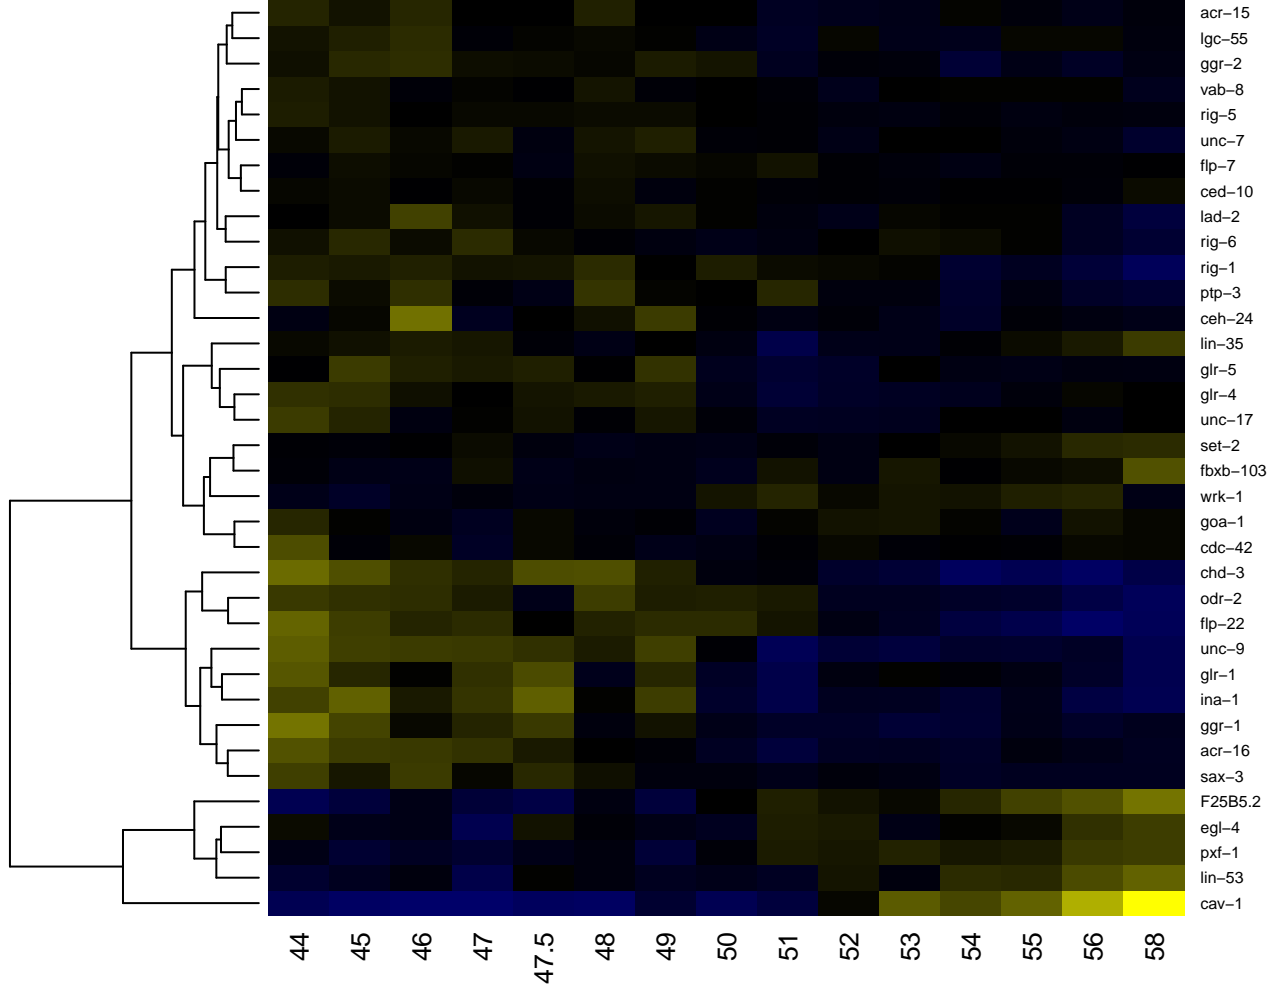

# SMDVR

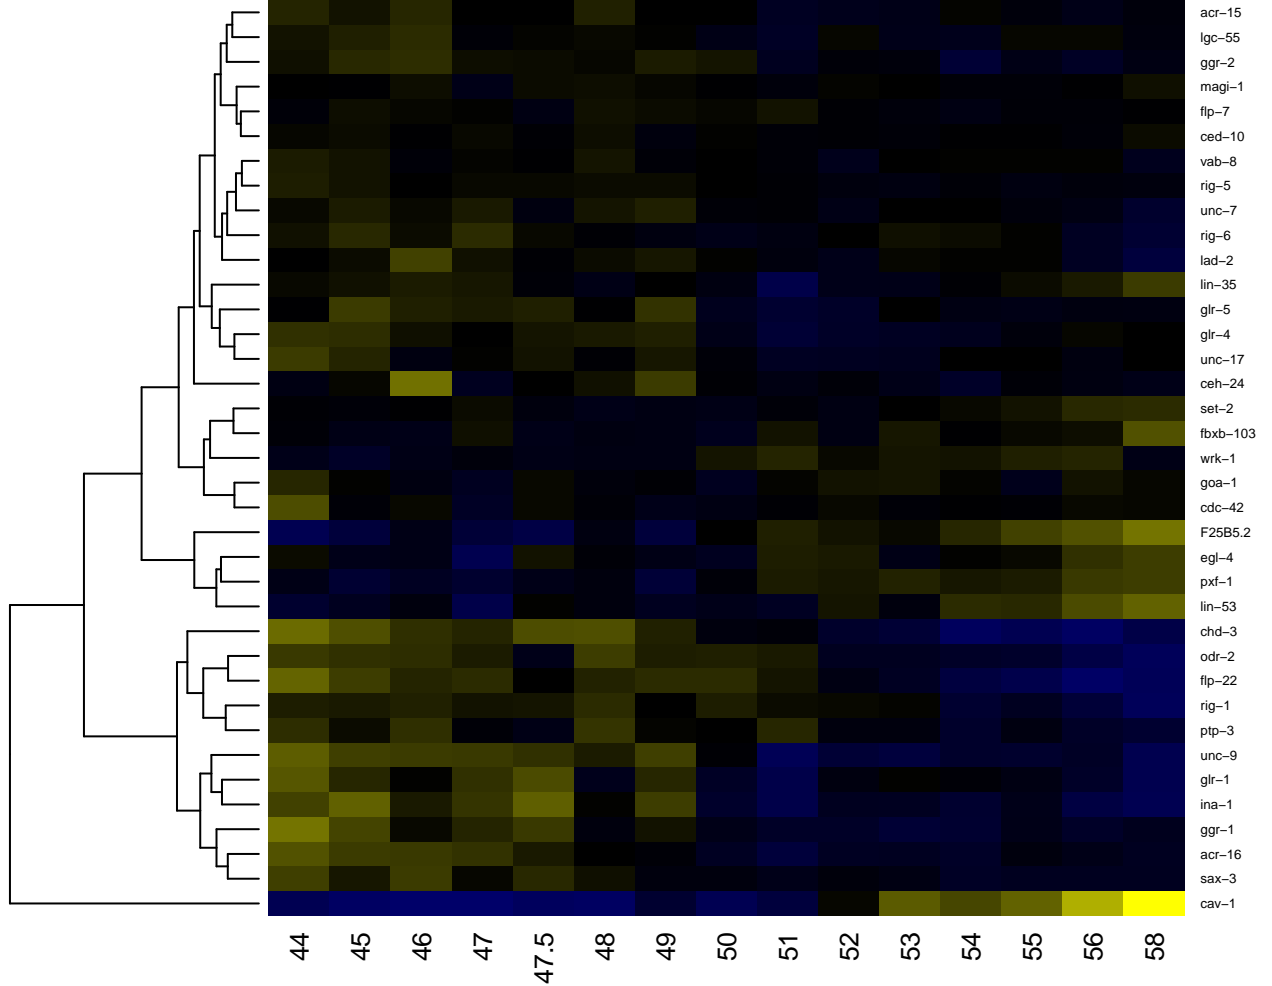

-2

-1

0

1

2

# socket cell

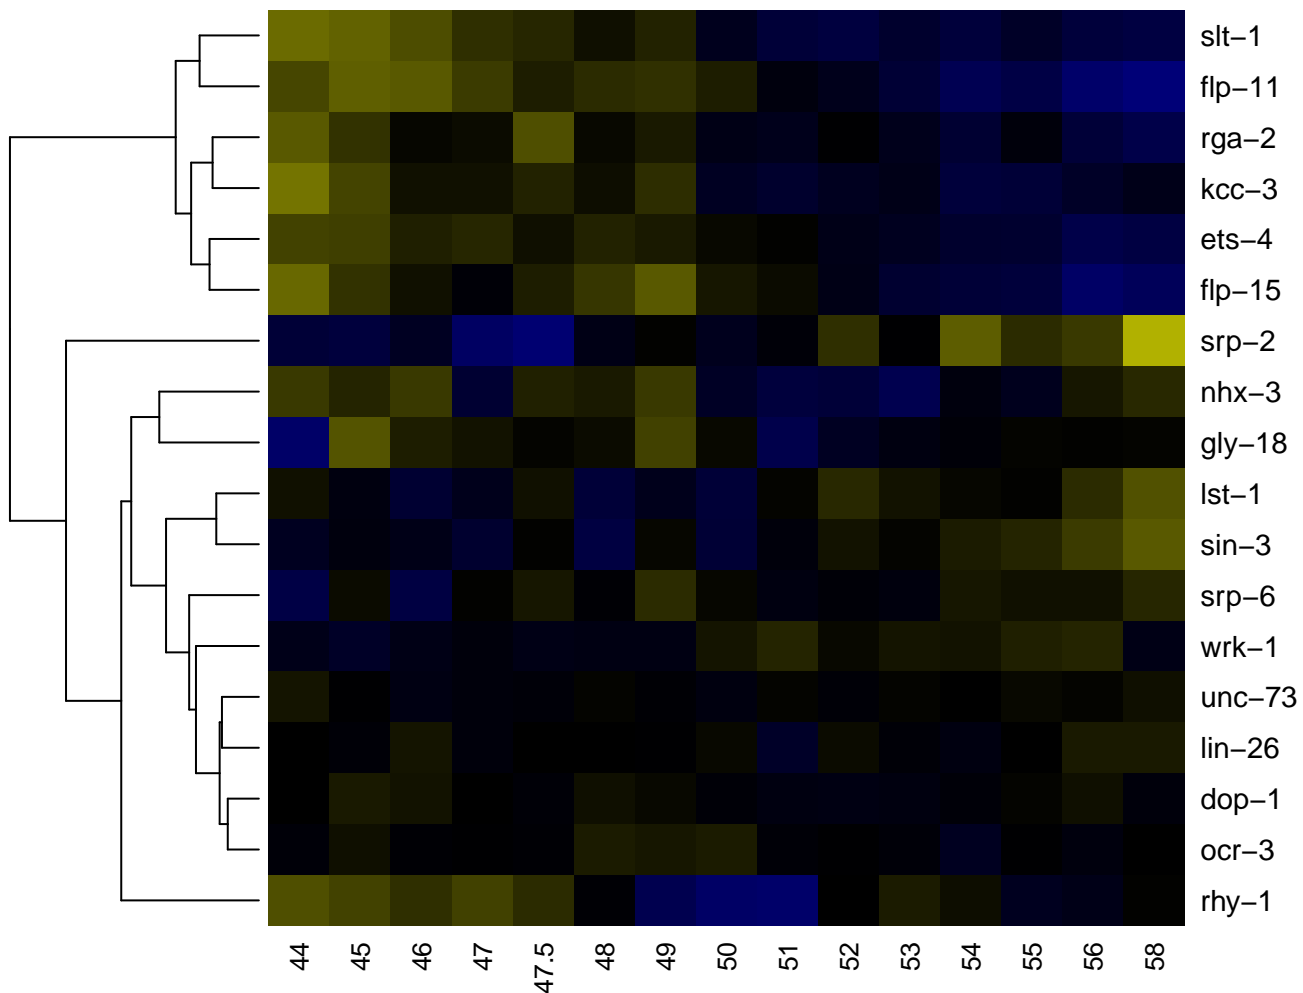

# somatic neuron

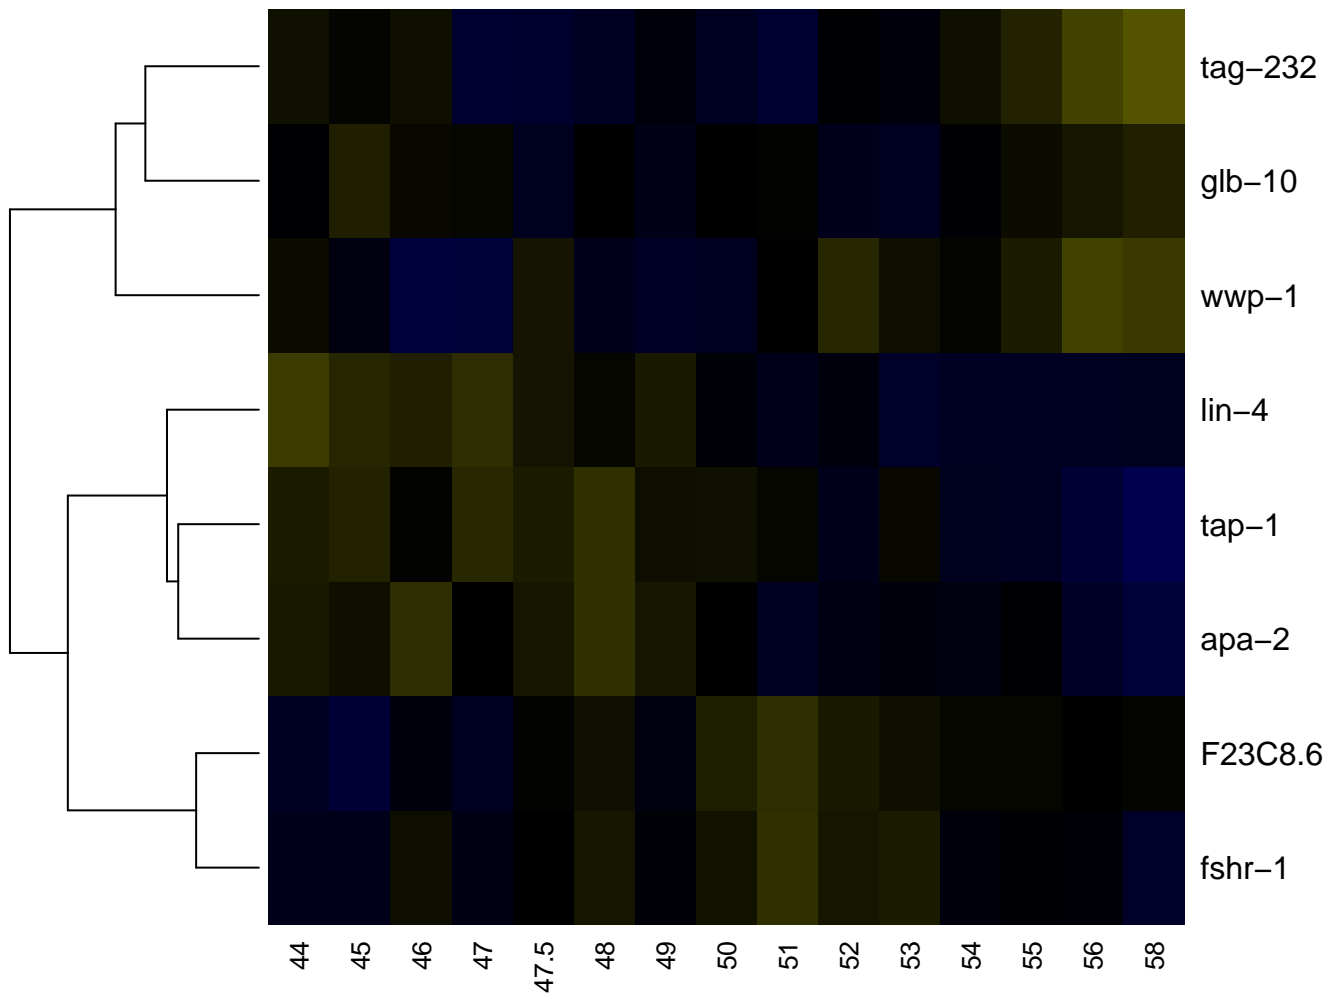

-2

-1

0

1

2

# SPCL



-2

-1

0

1

2



# SPCR



# SPDL

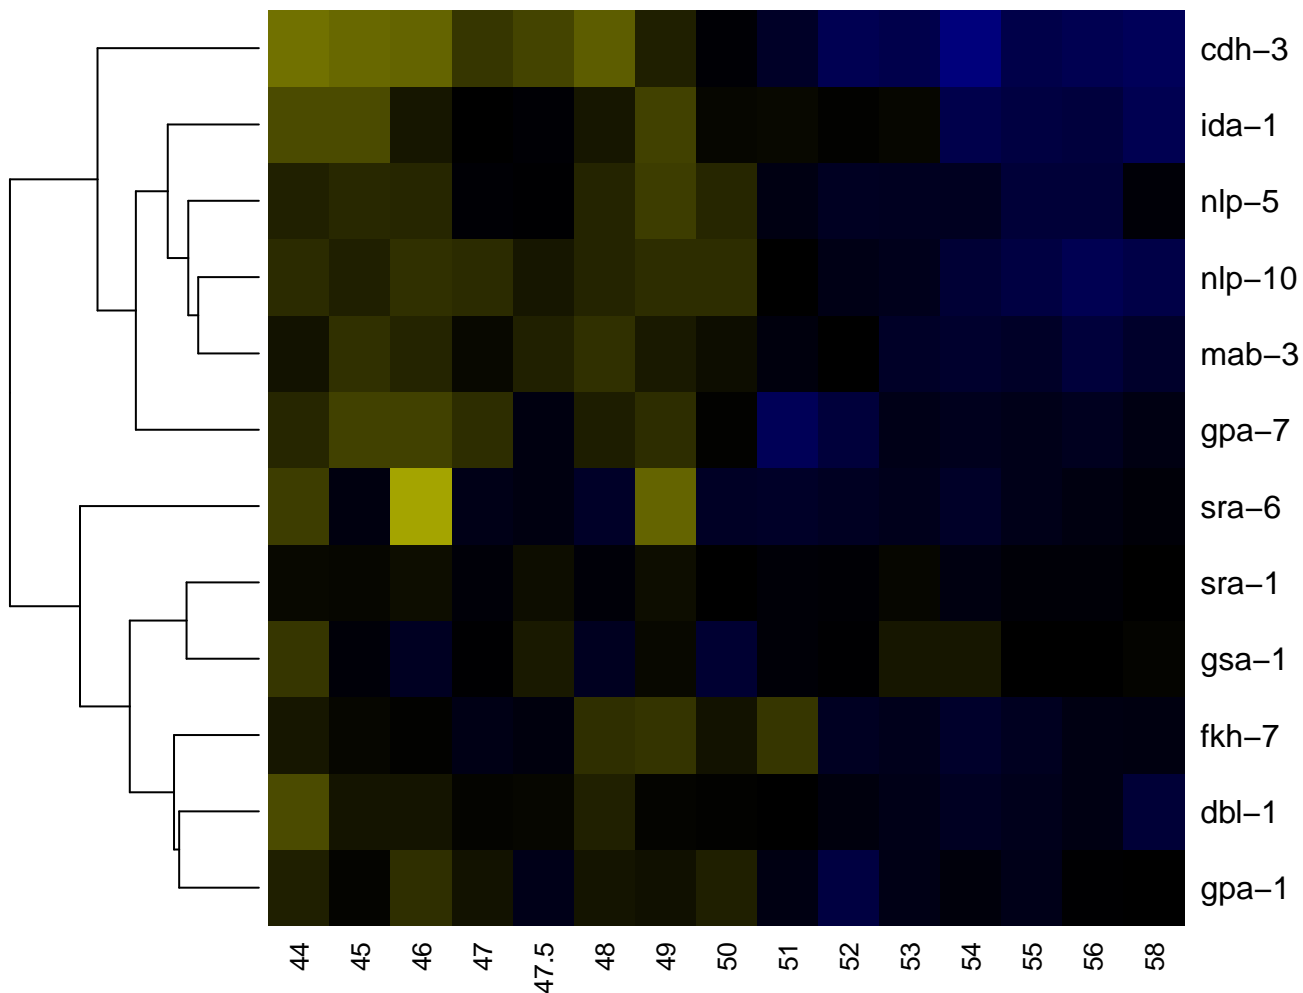

# SPDR



# sperm

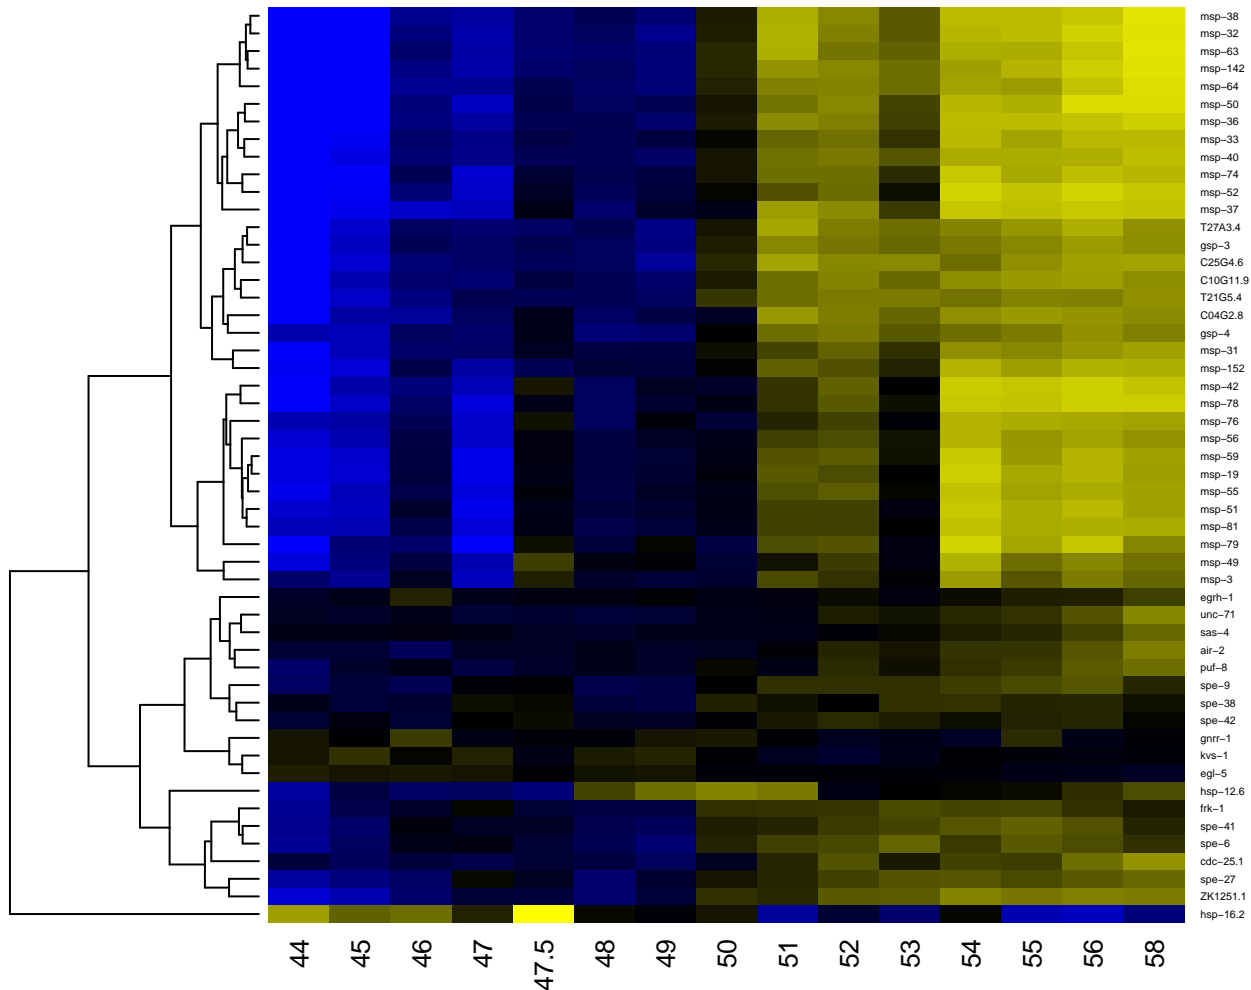

-2

-1

0

1

2

# spermatheca

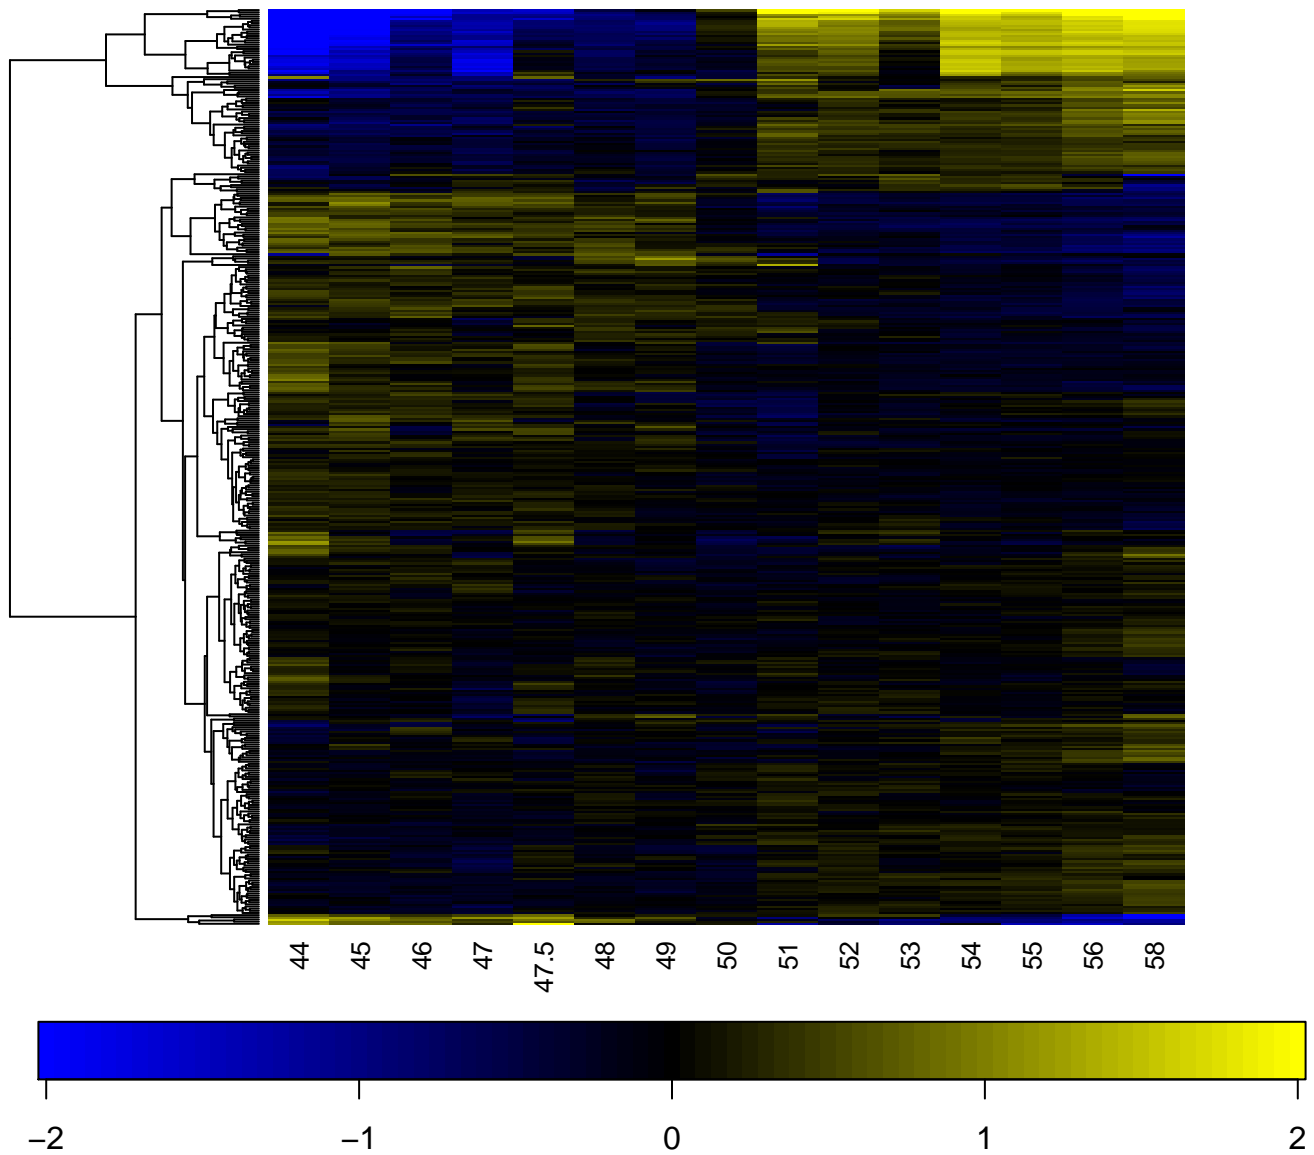

# spermathecal-uterine junction

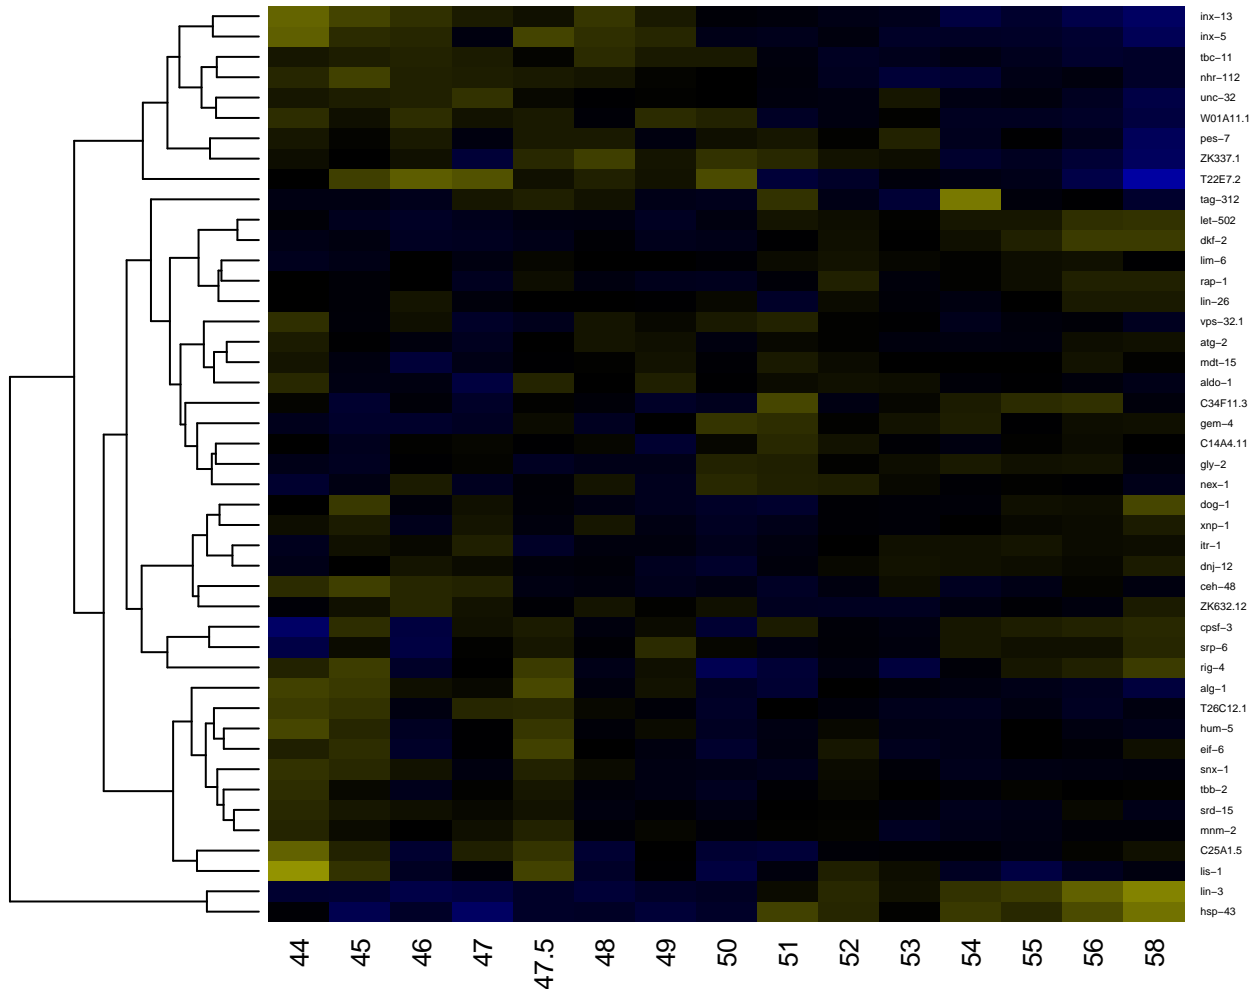

# spermatid

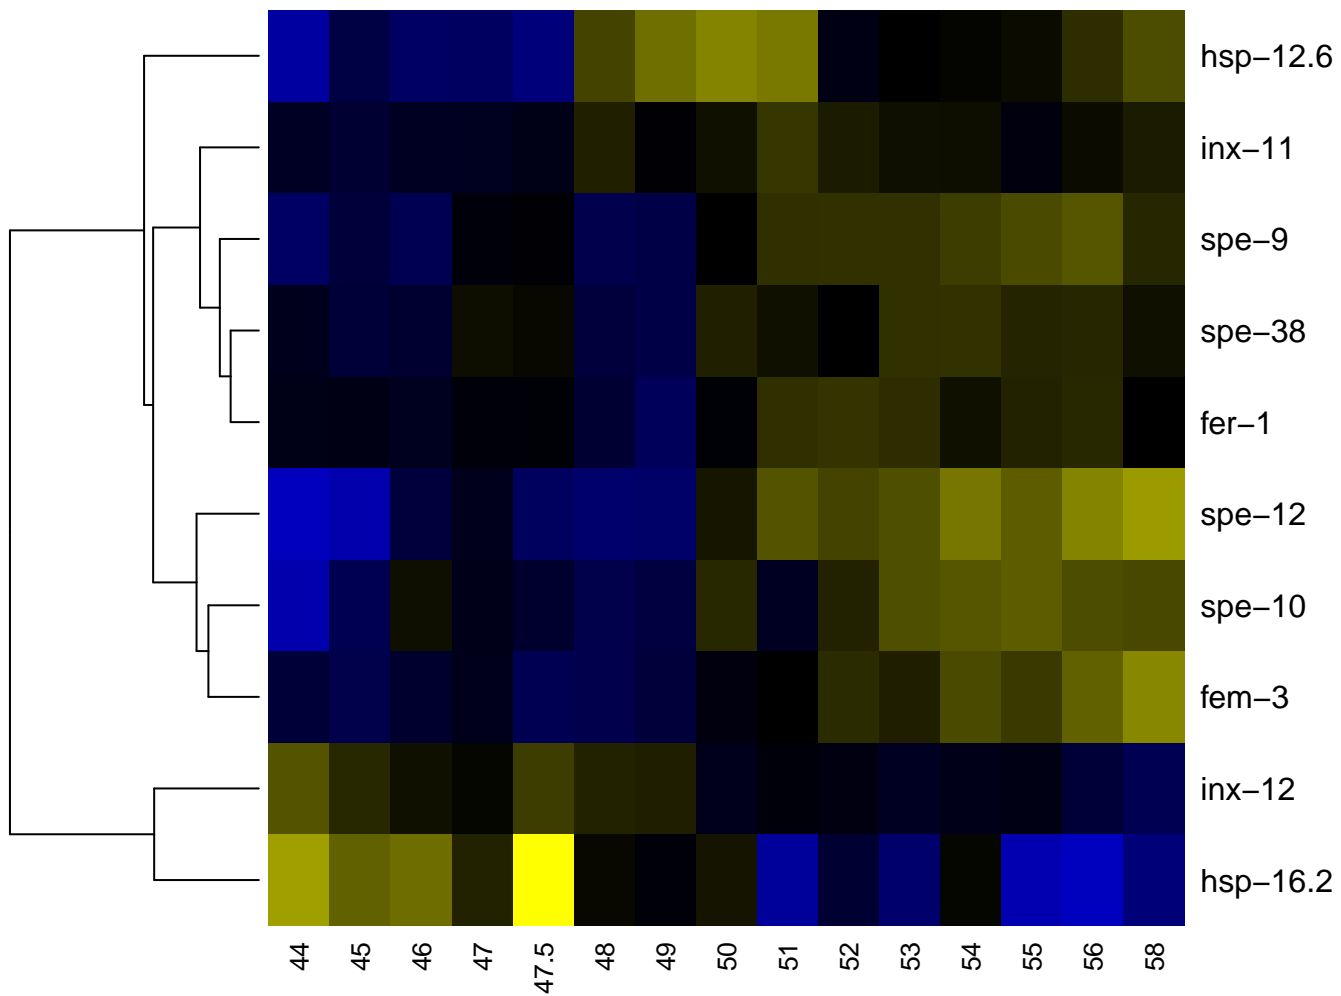

# spermatocyte

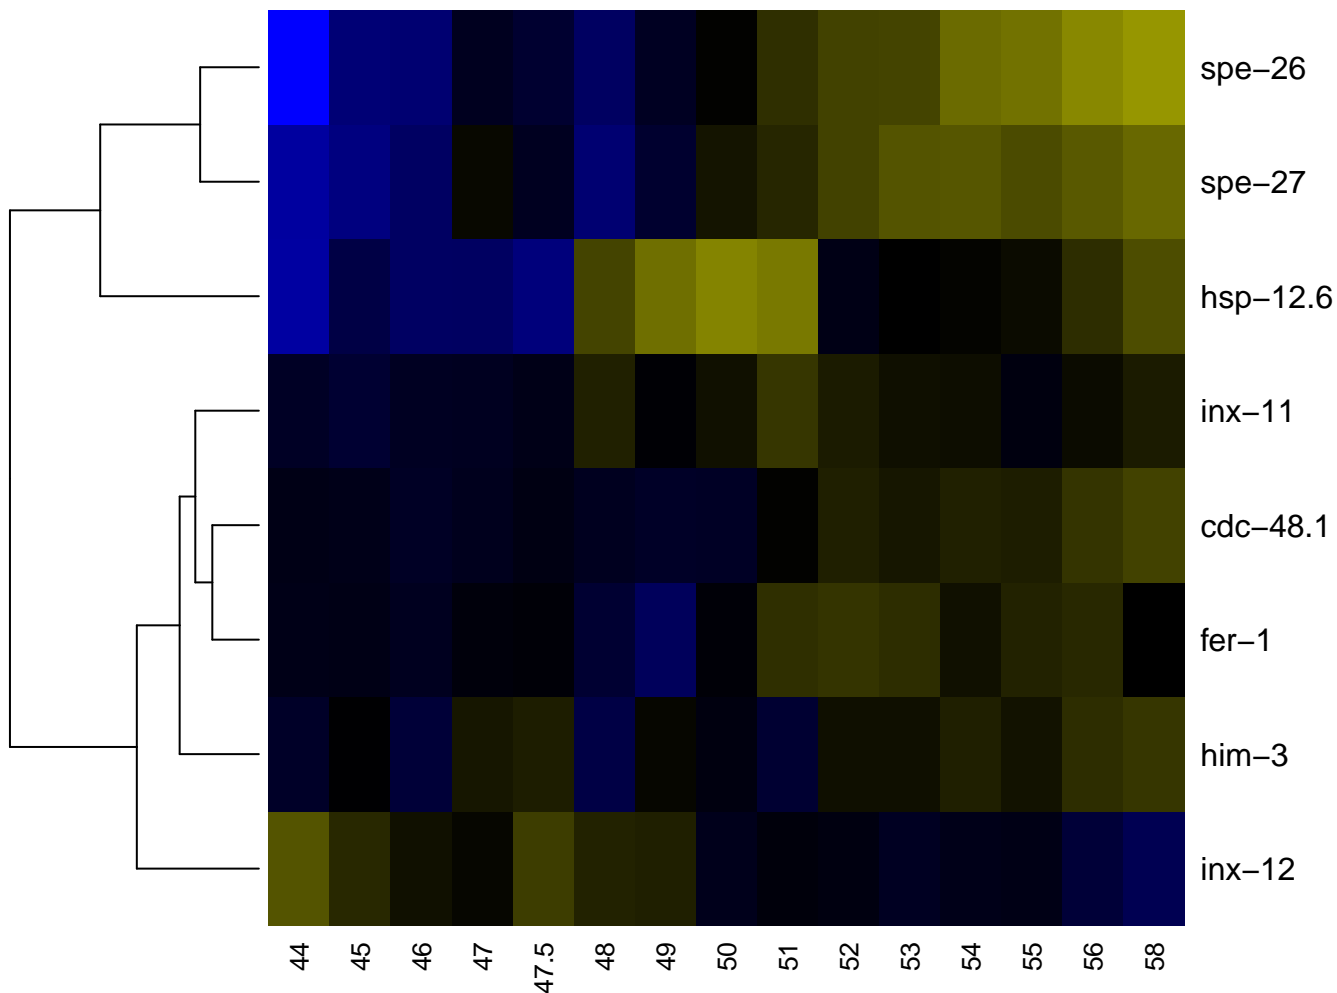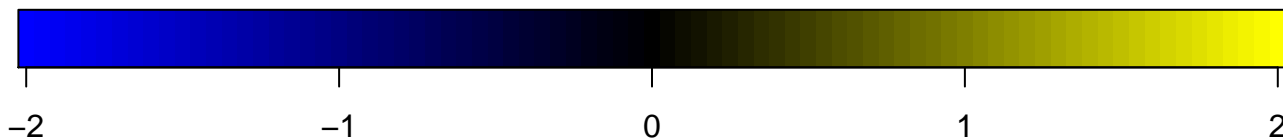



# spicule protractor muscle

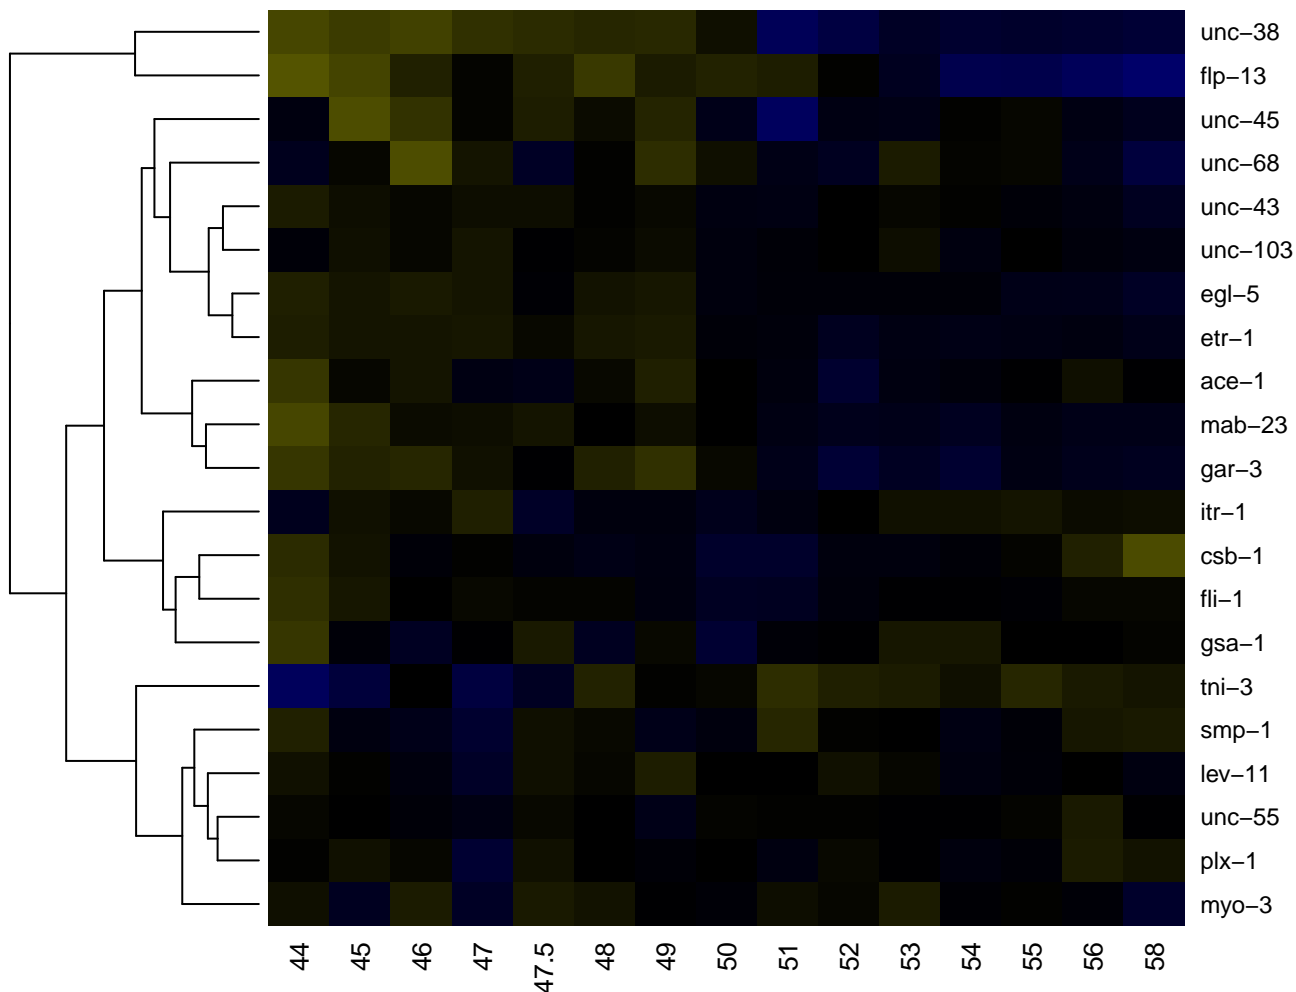

# spicule retractor muscle

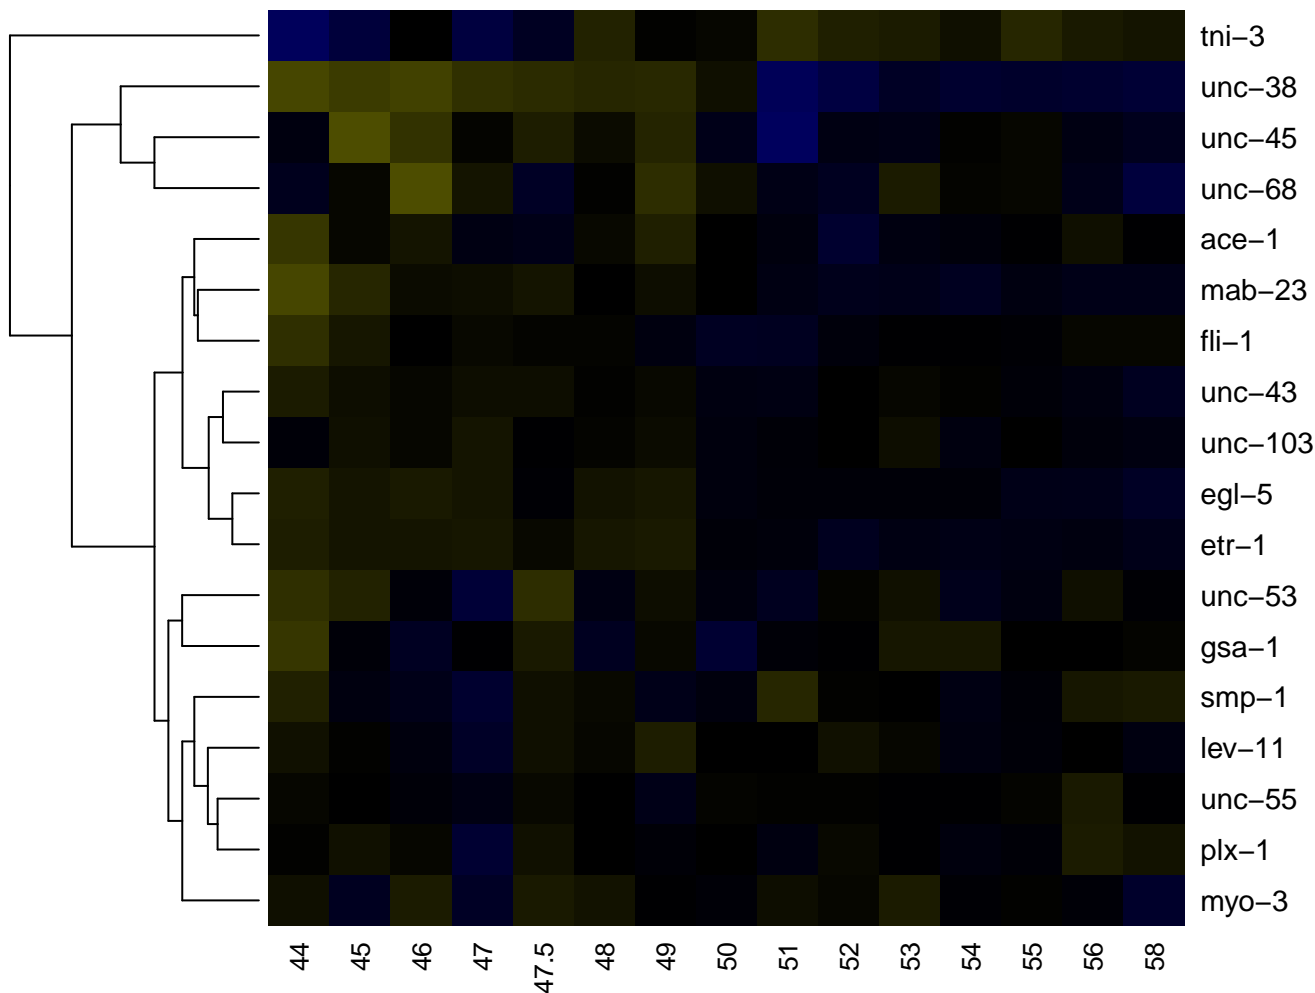

# spike precursor left

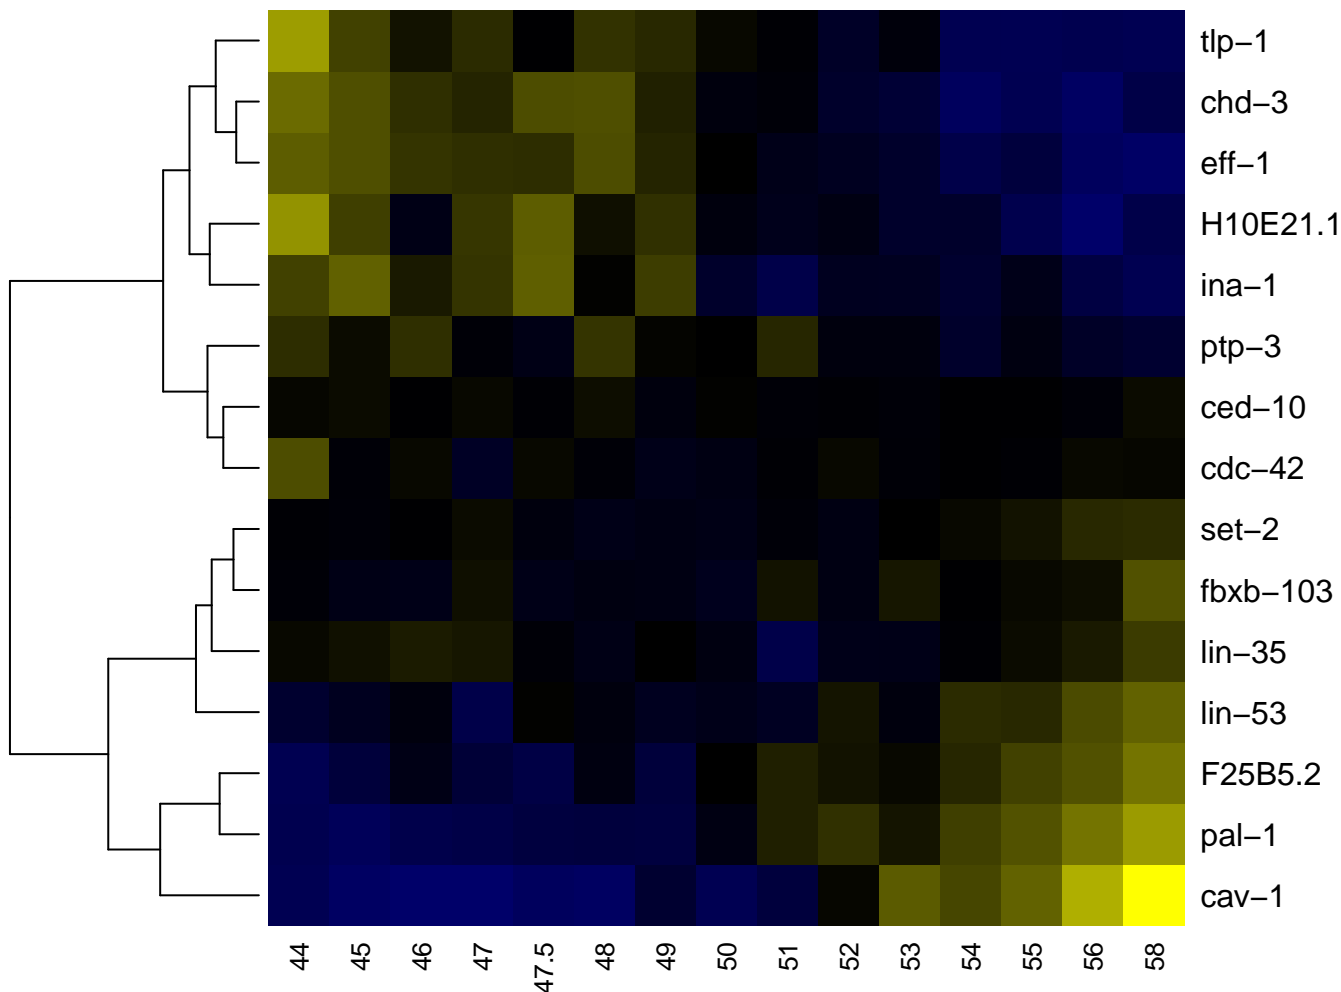

# spike precursor right



# SPVL

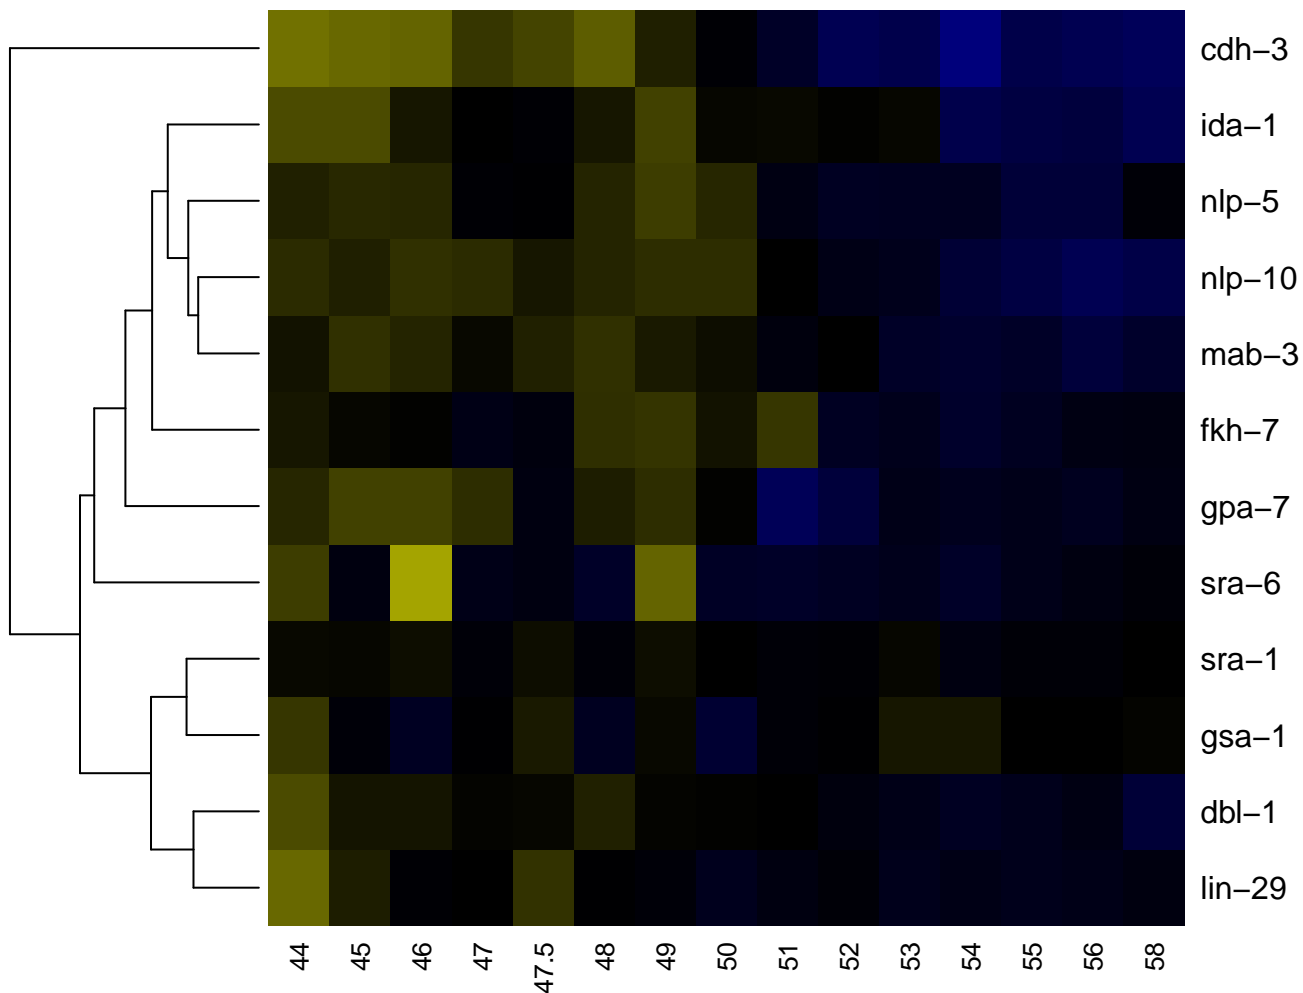

# SPVR



tail

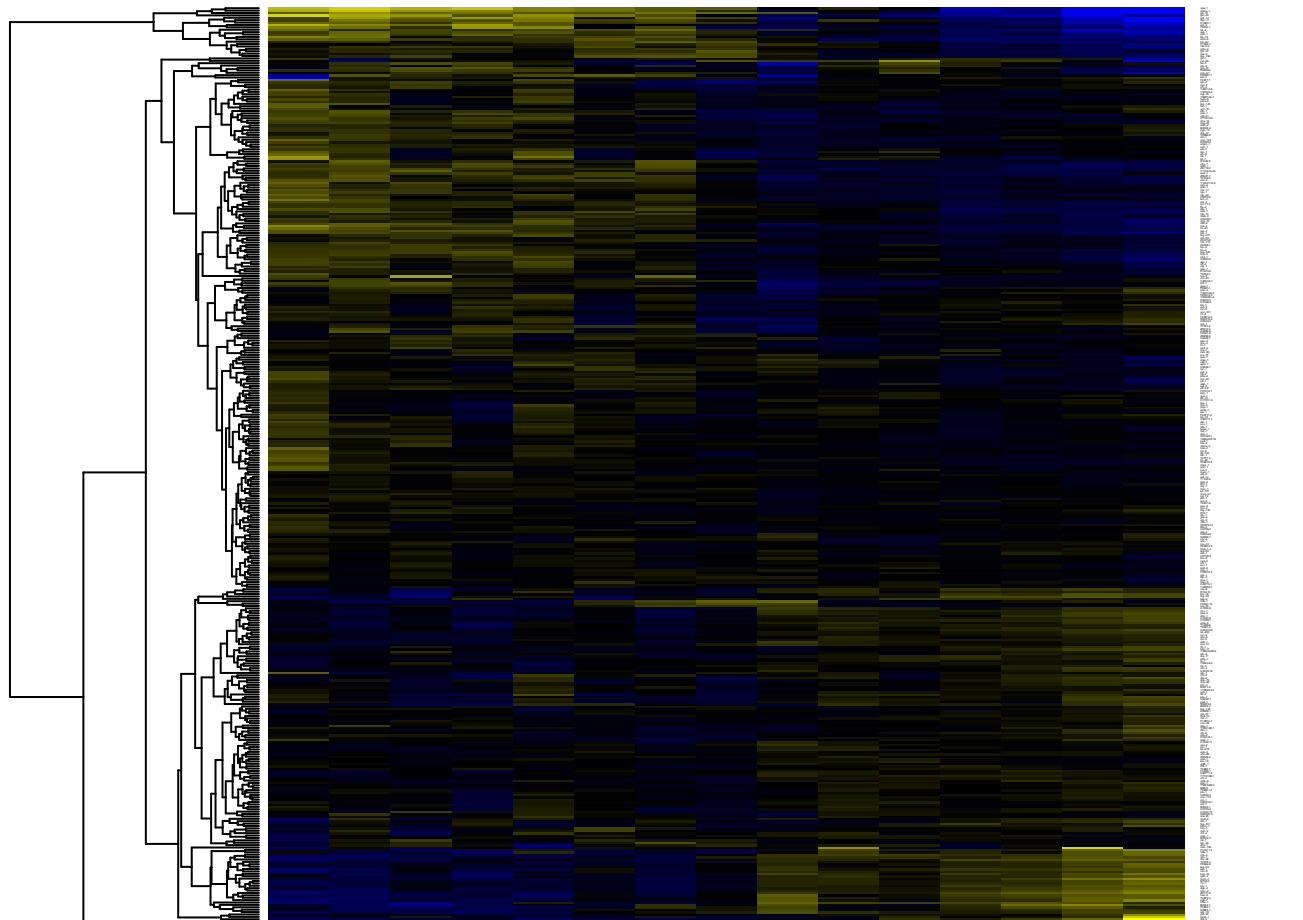

44  
45  
46  
47  
47.5  
48  
49  
50  
51  
52  
53  
54  
55  
56  
58



# tail neuron

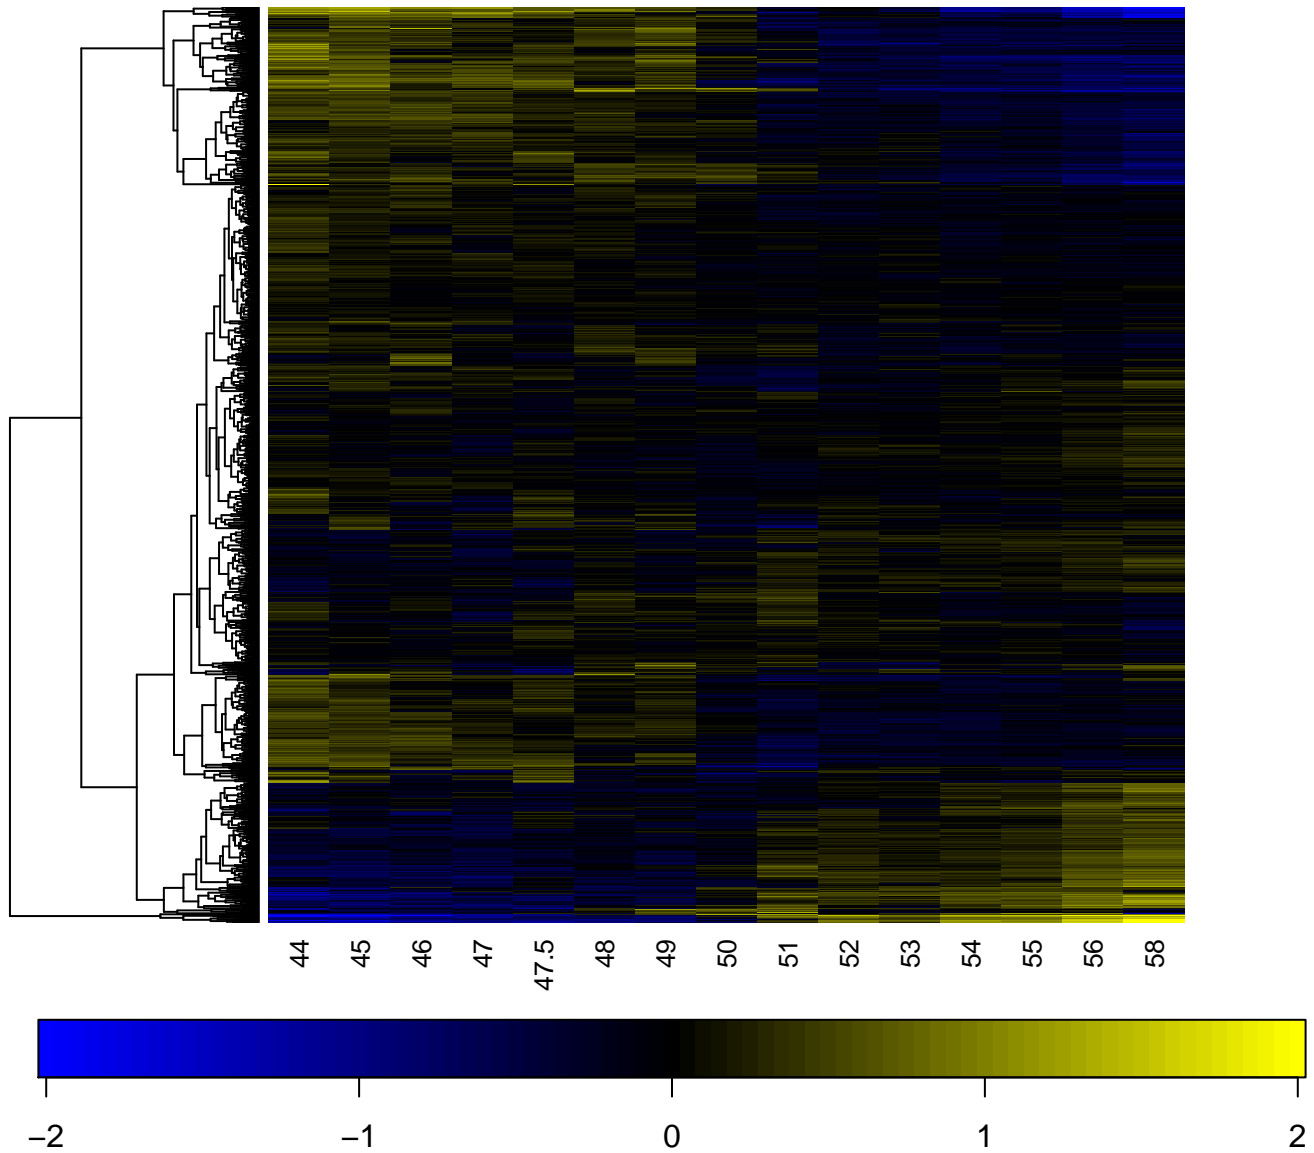



# terminal bulb

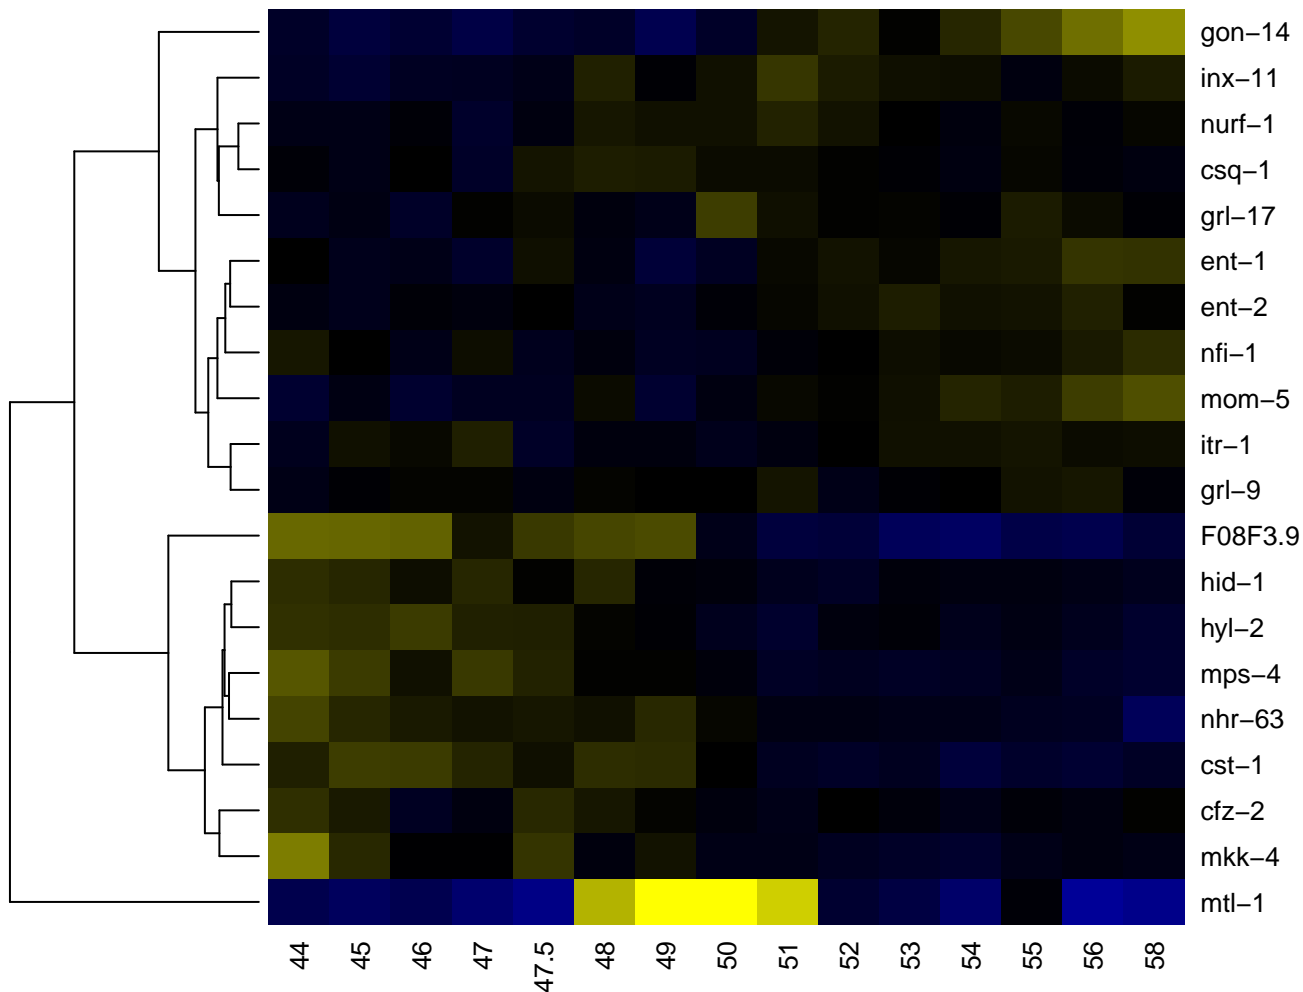

# TL

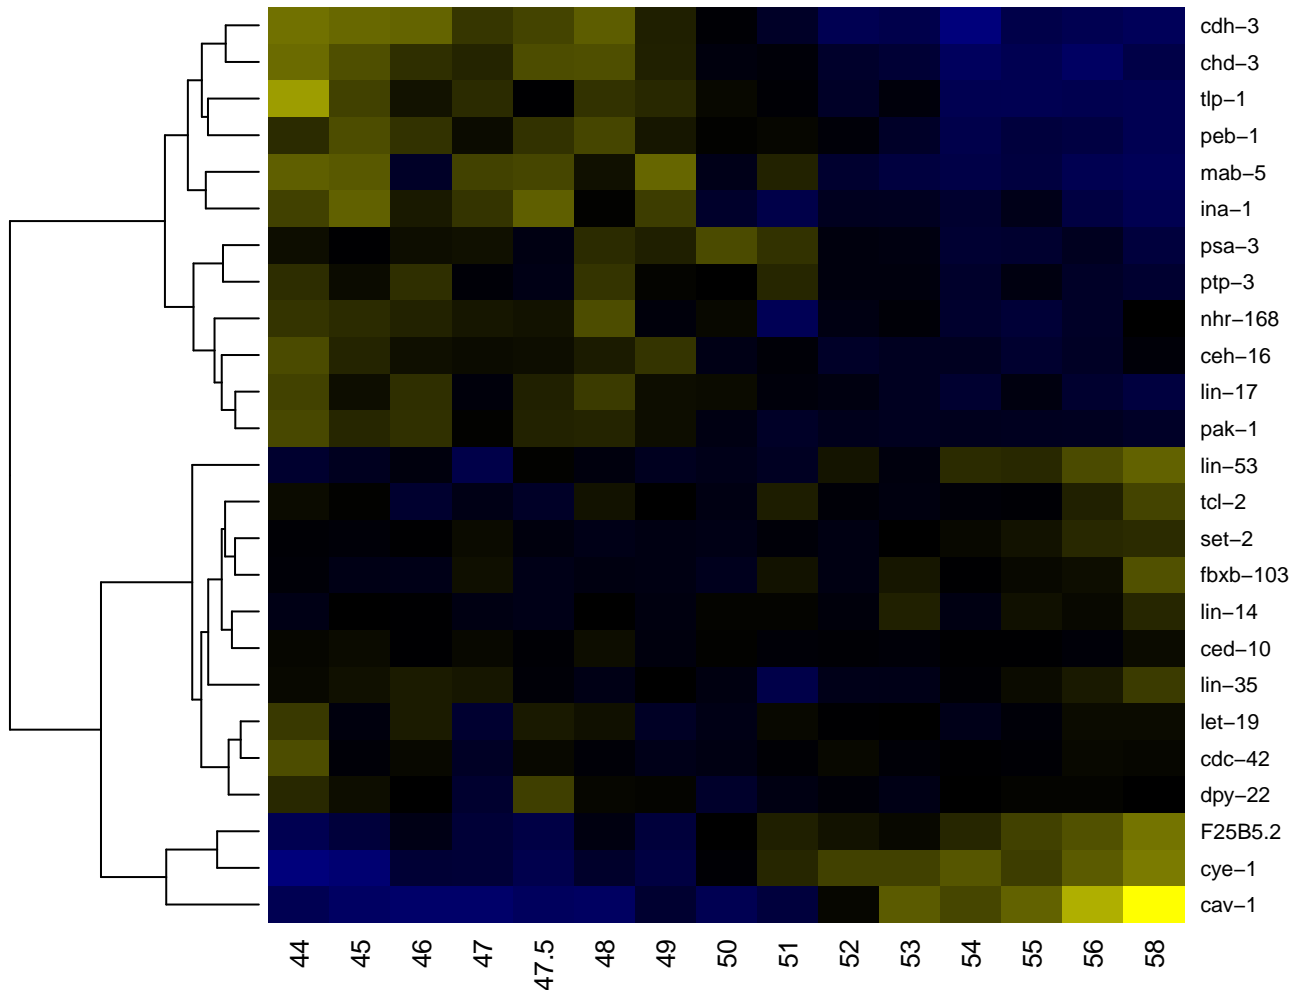

# TL.a

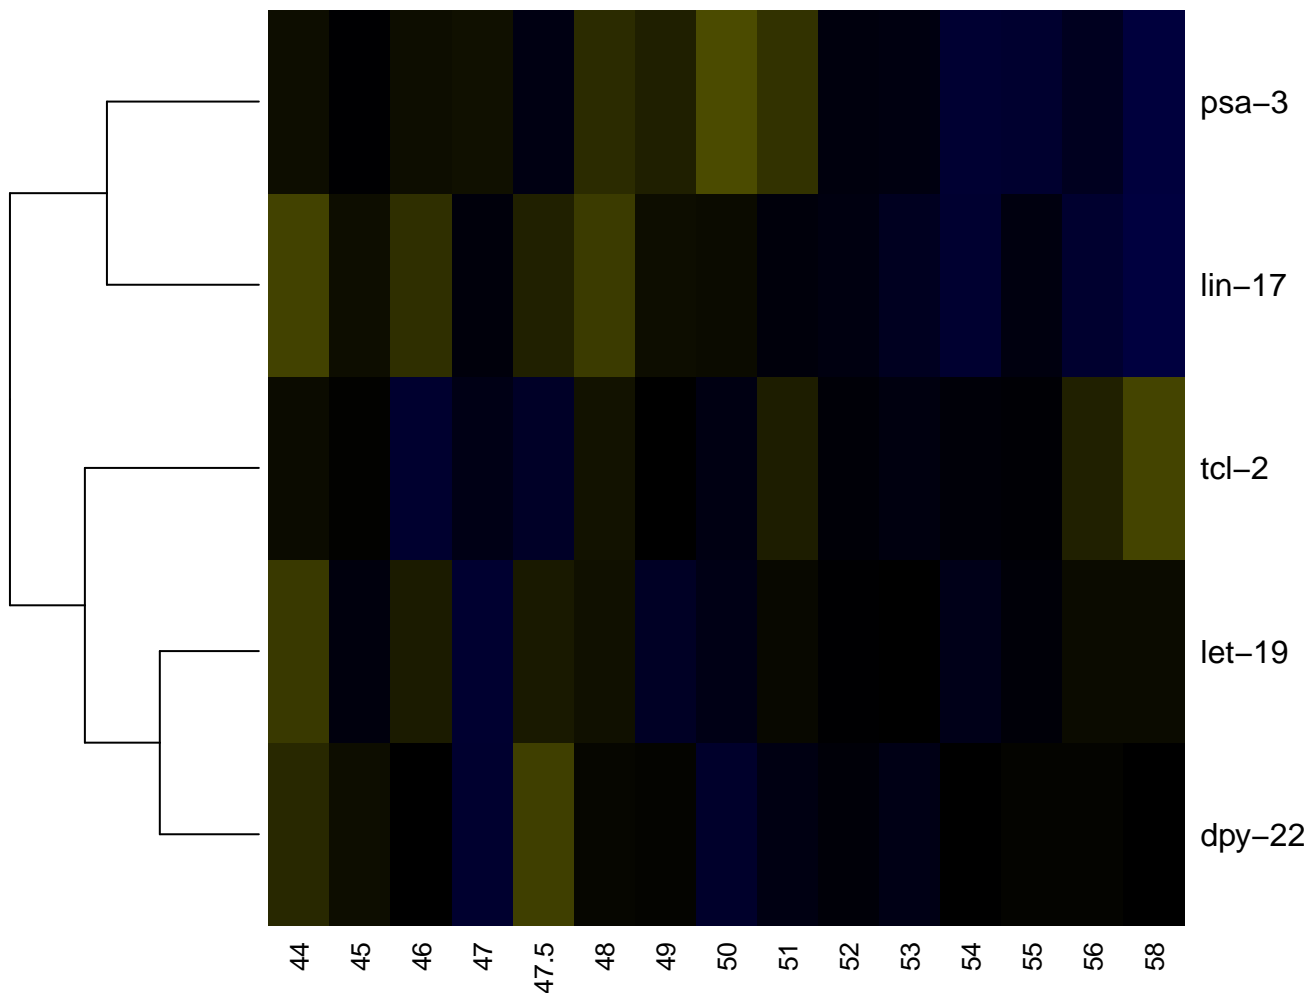

-2

-1

0

1

2

# TL.p

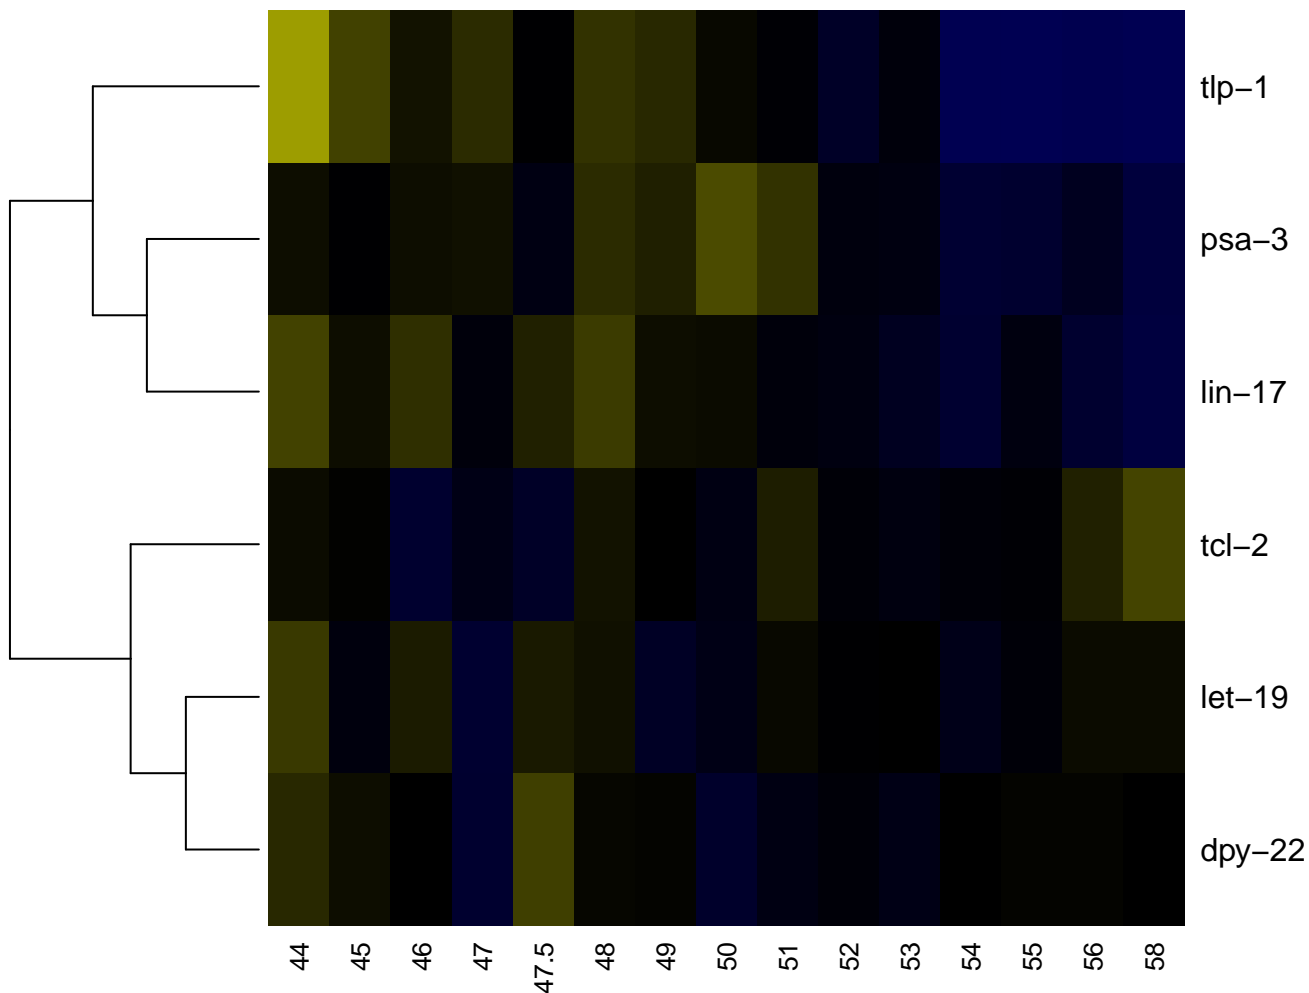

-2

-1

0

1

2

# touch receptor neuron

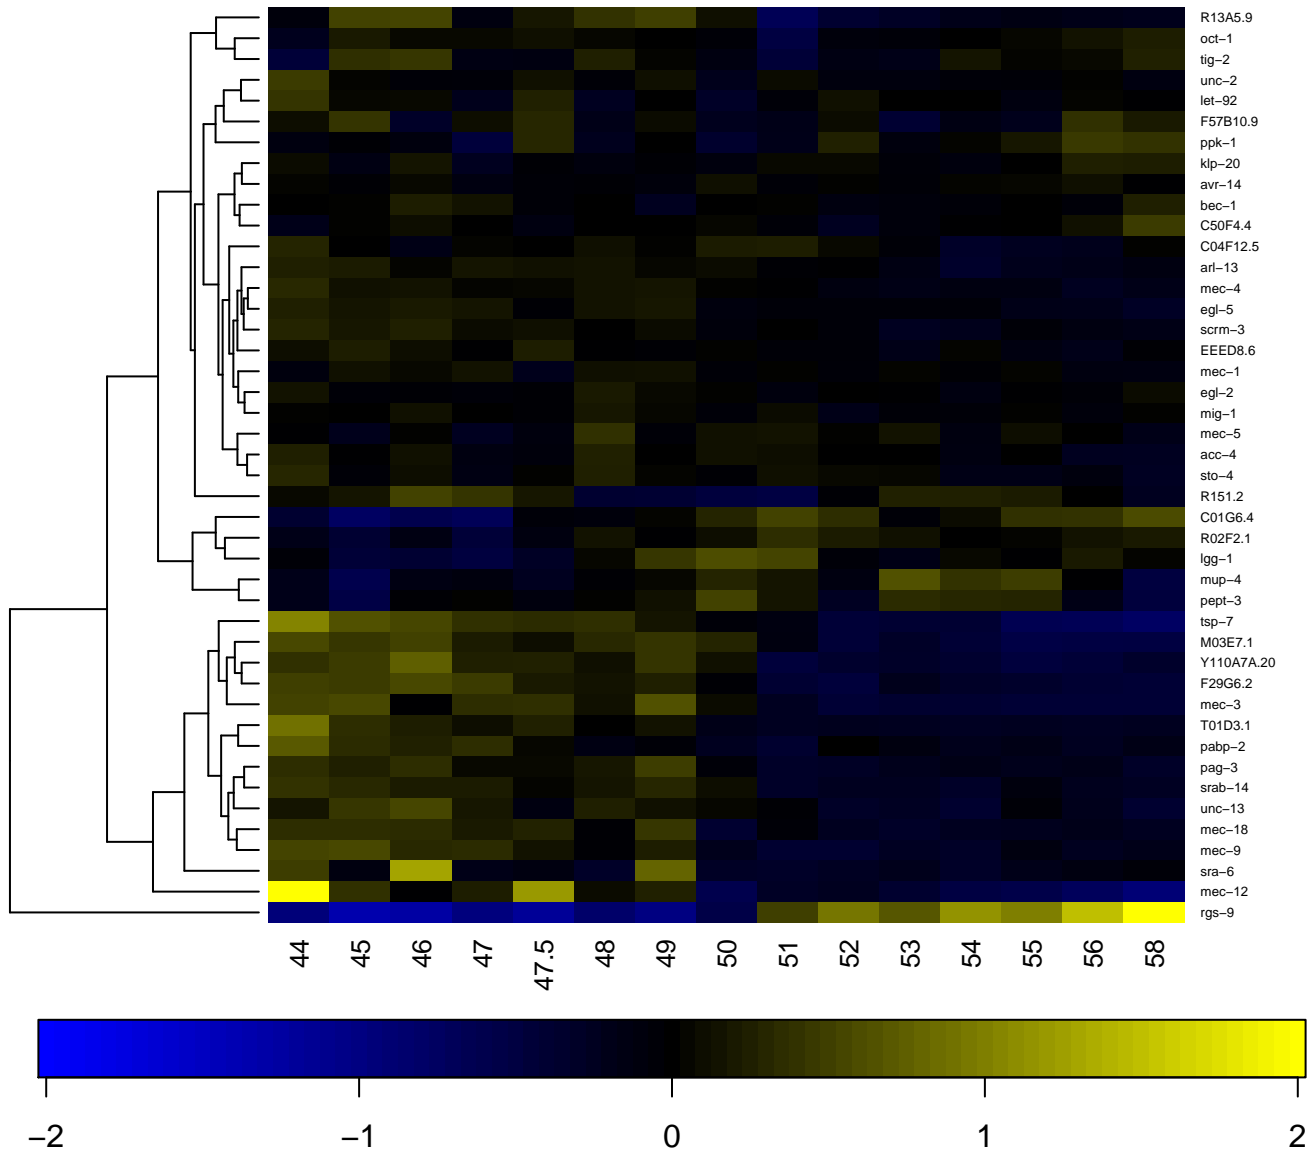

# TR

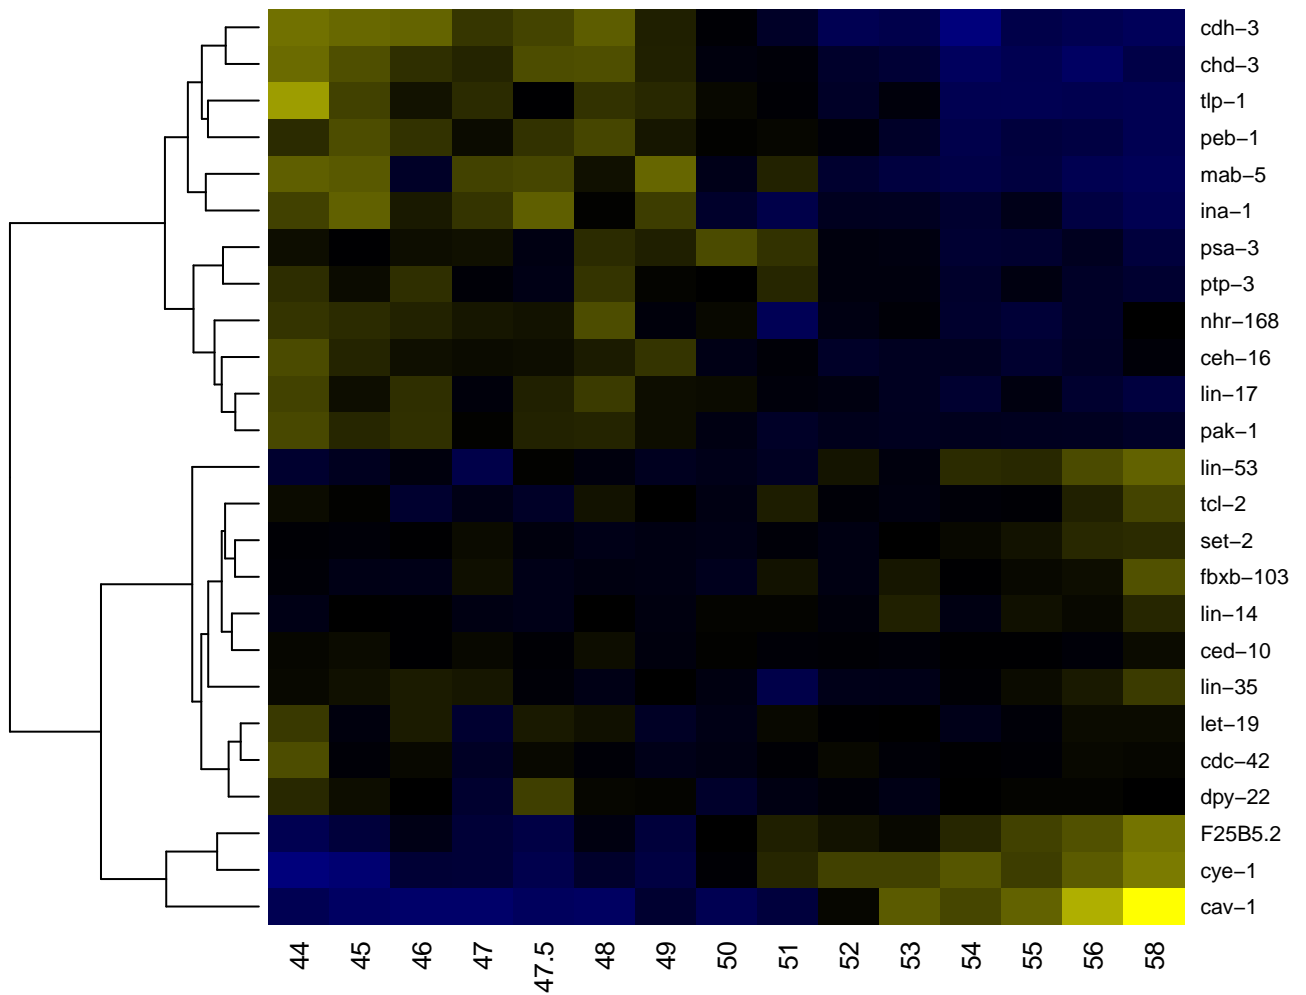

-2

-1

0

1

2

# TR.a



-2

-1

0

1

2

# TR.p



-2

-1

0

1

2



# U cell

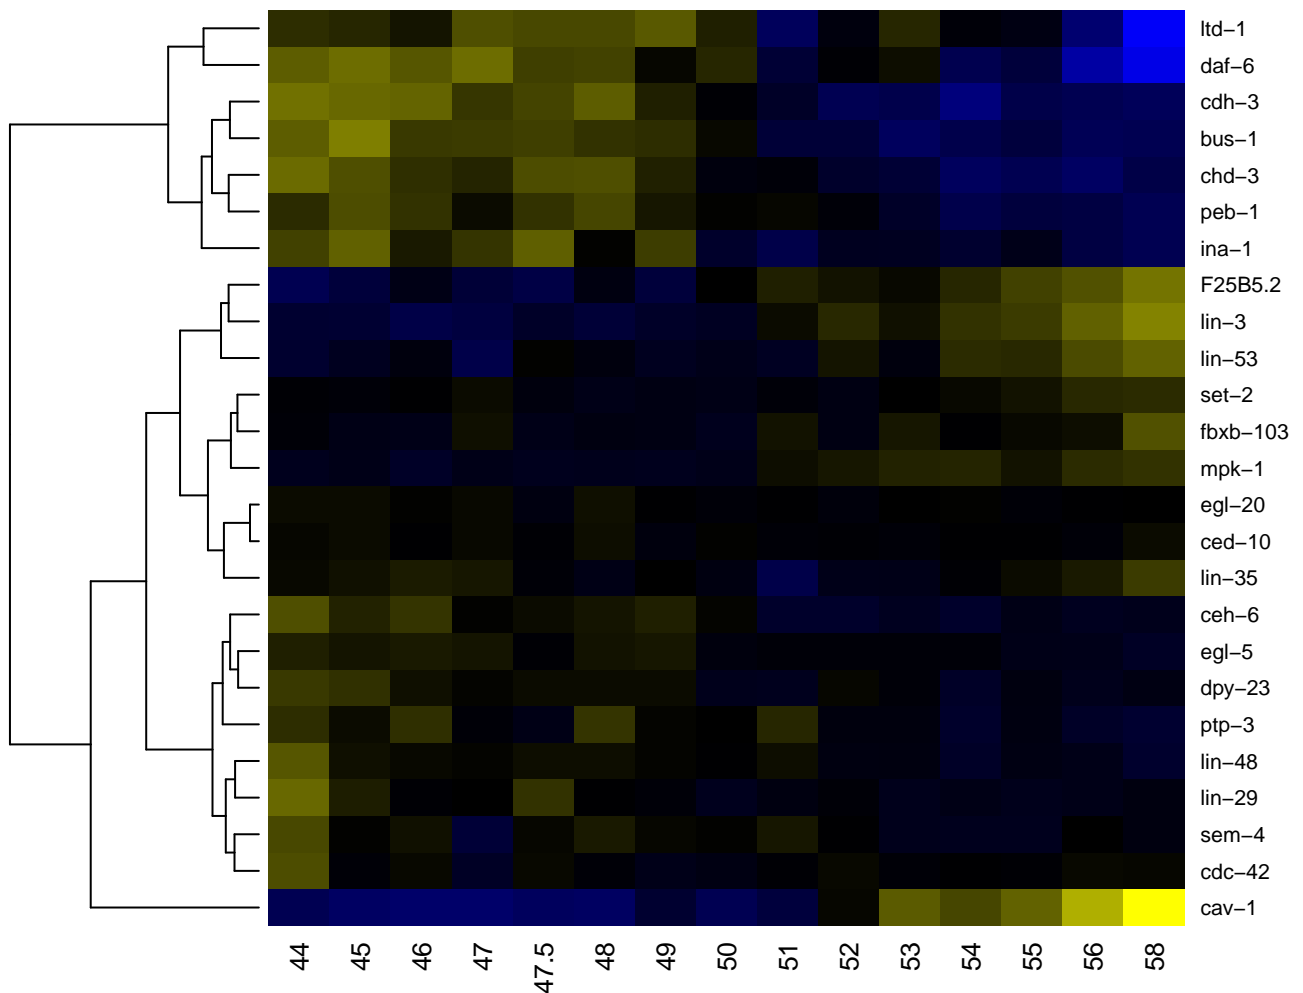

# URADL

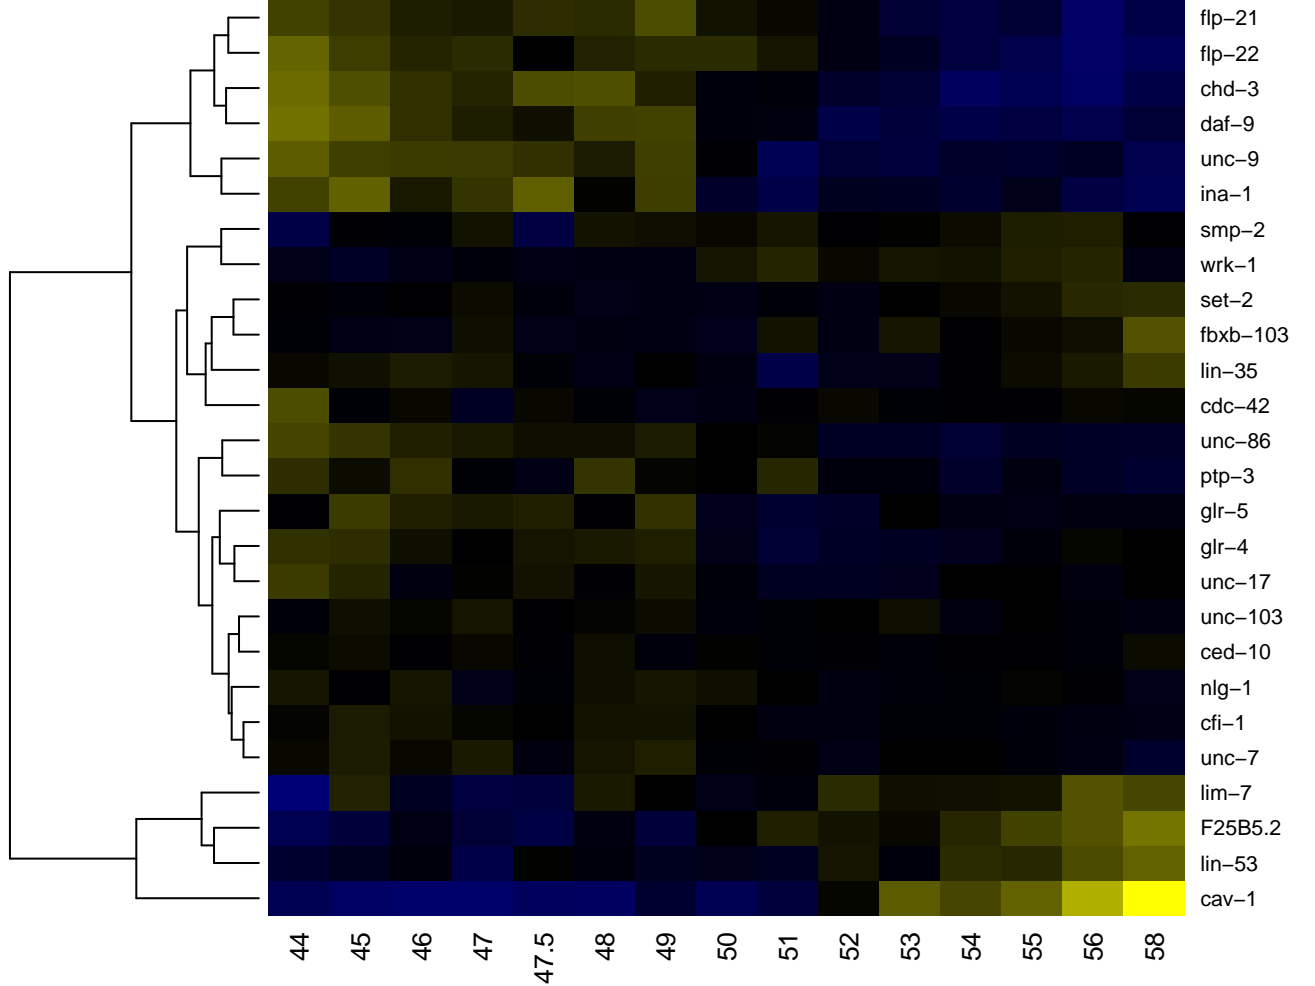

# URADR

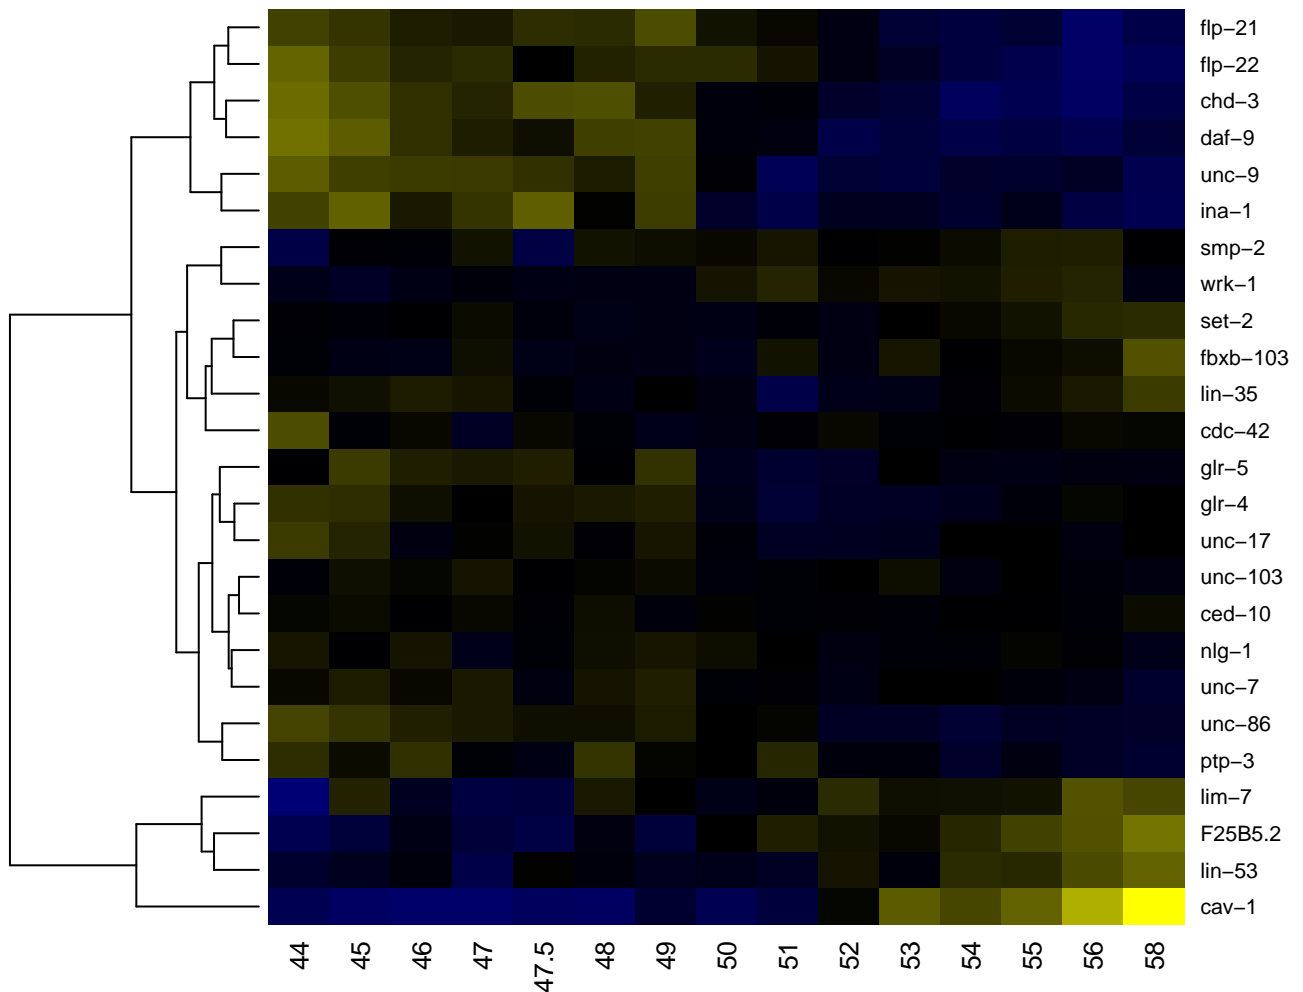

# URAVL

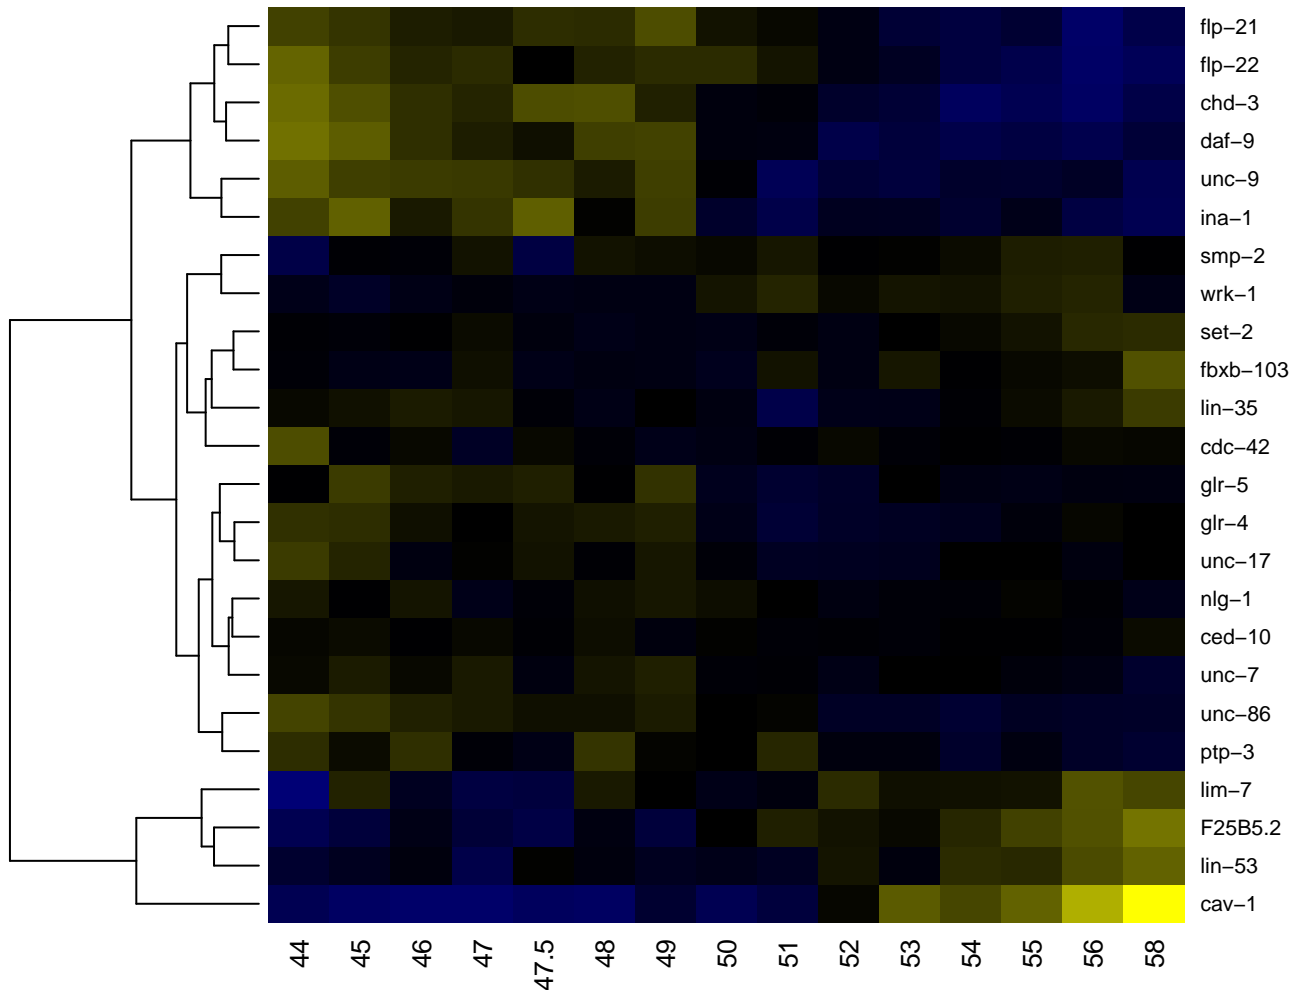

# URAVR

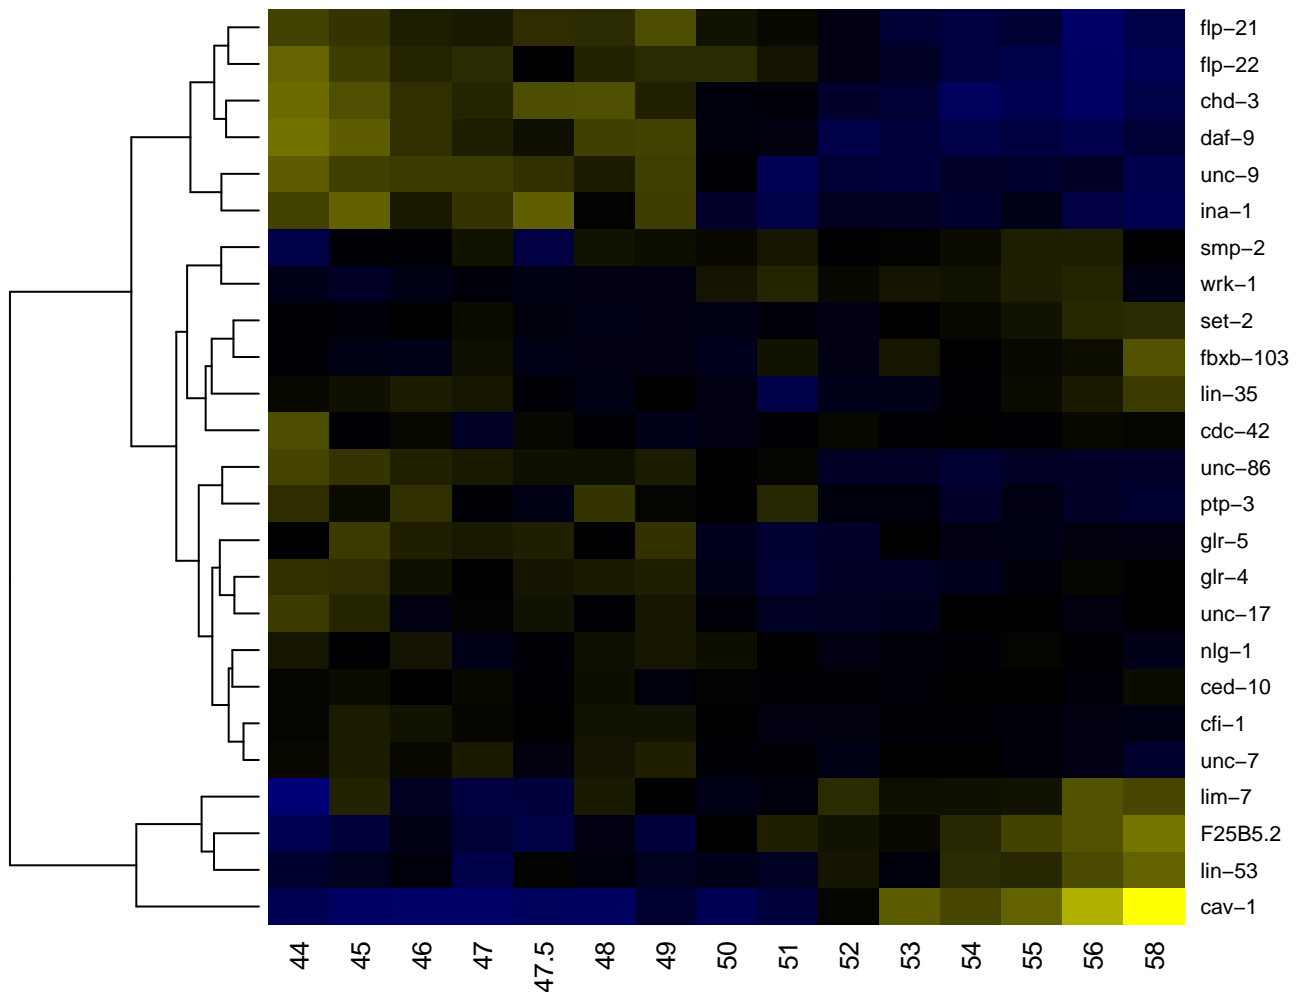

# URBL

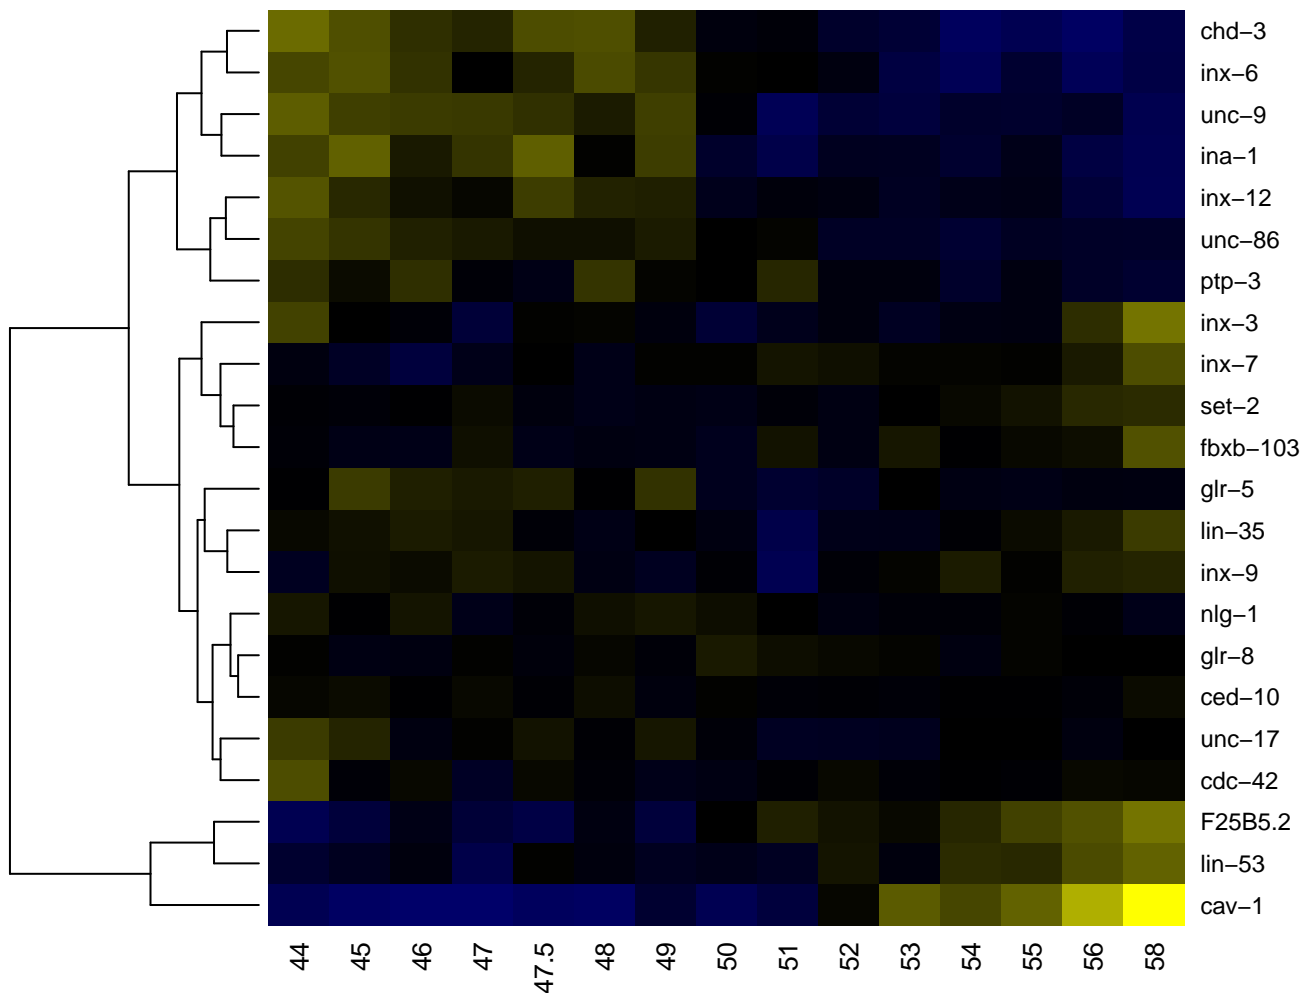

-2

-1

0

1

2

# URBR

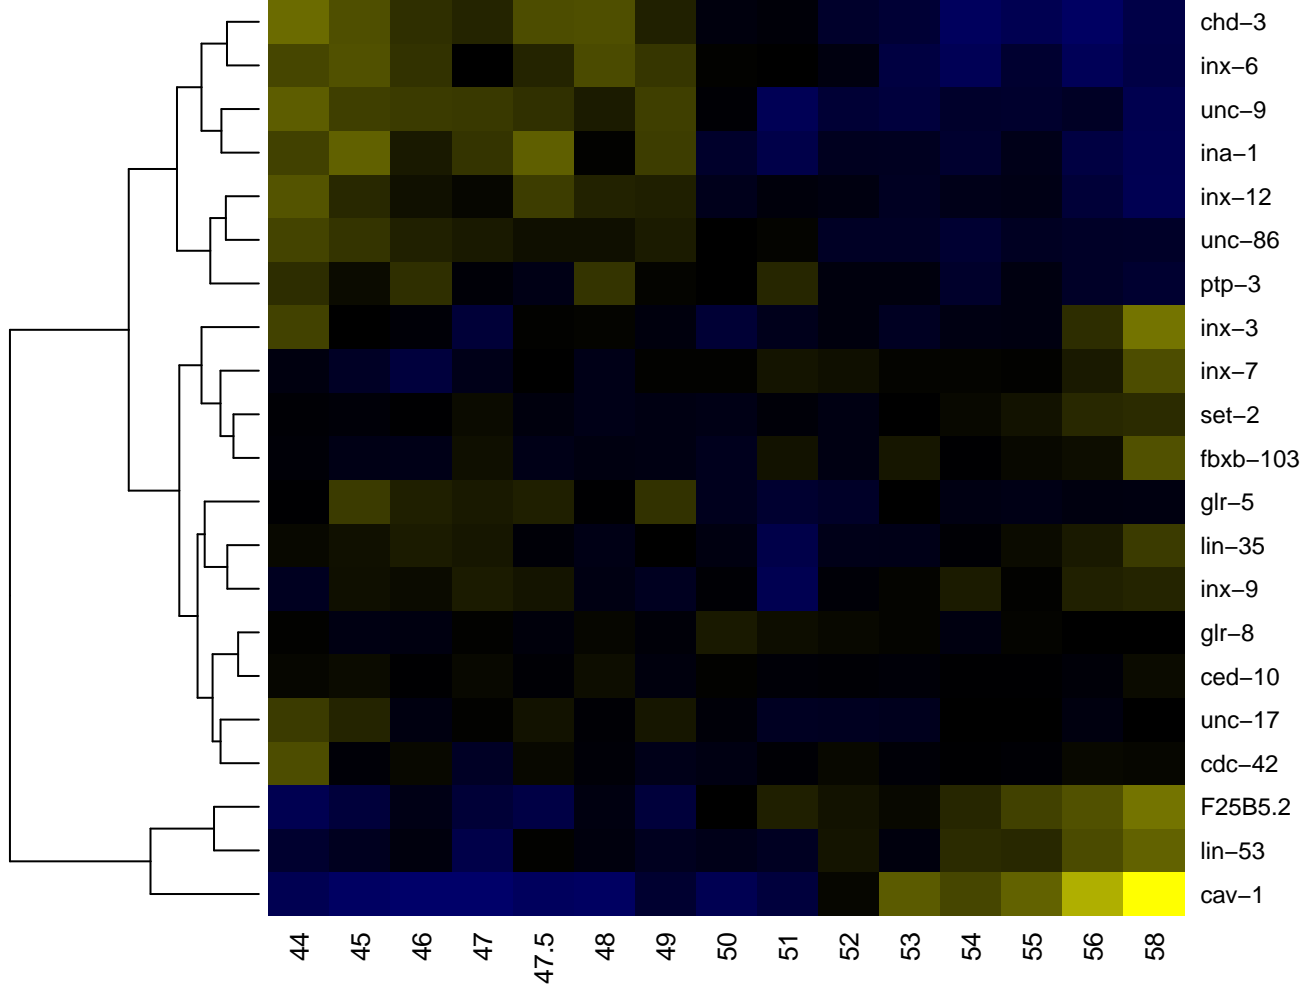

# URXL

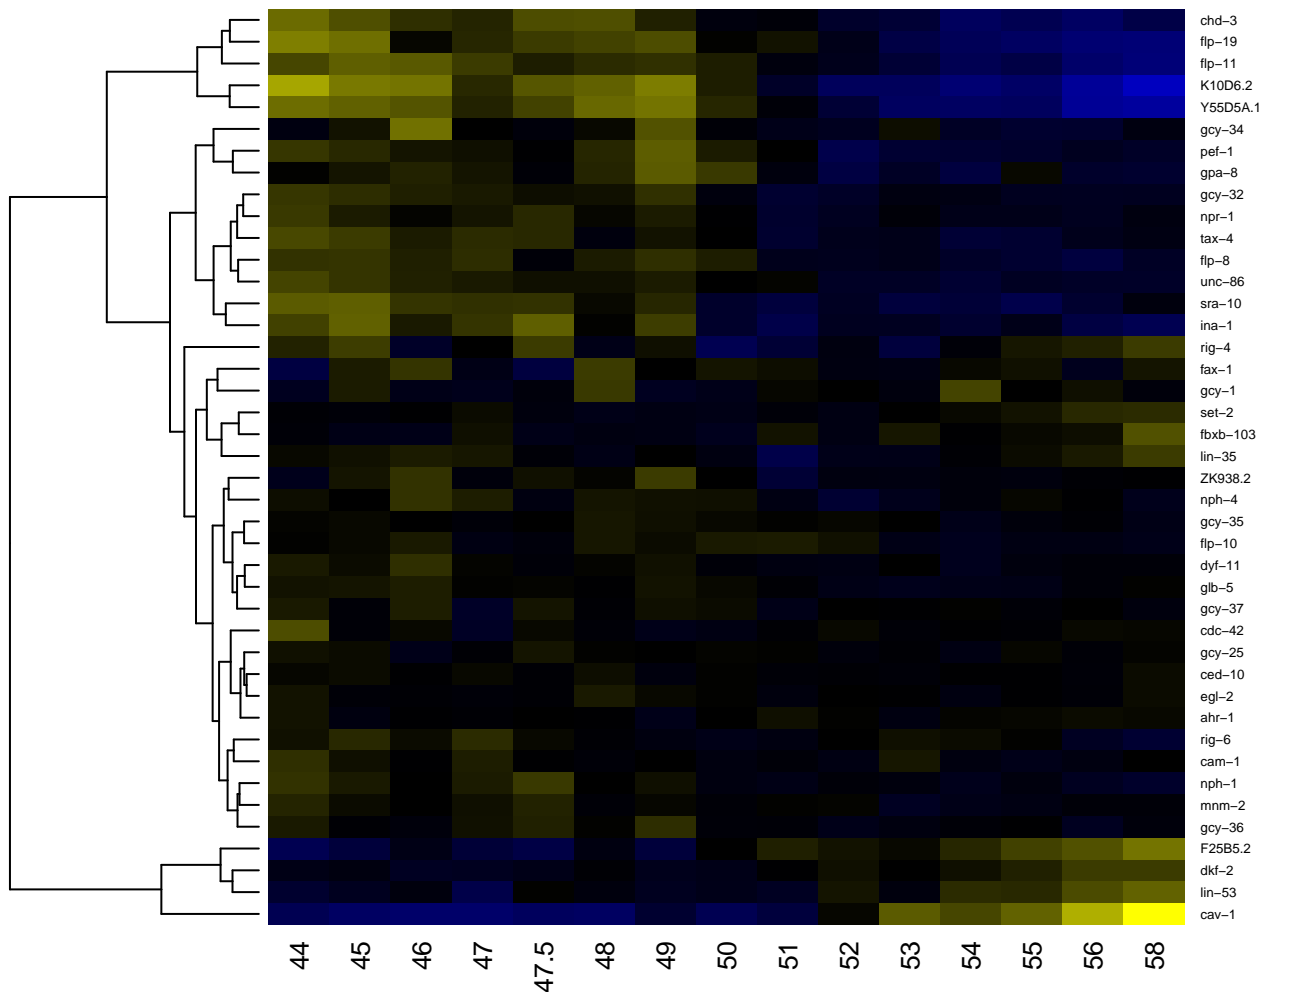



# URXR

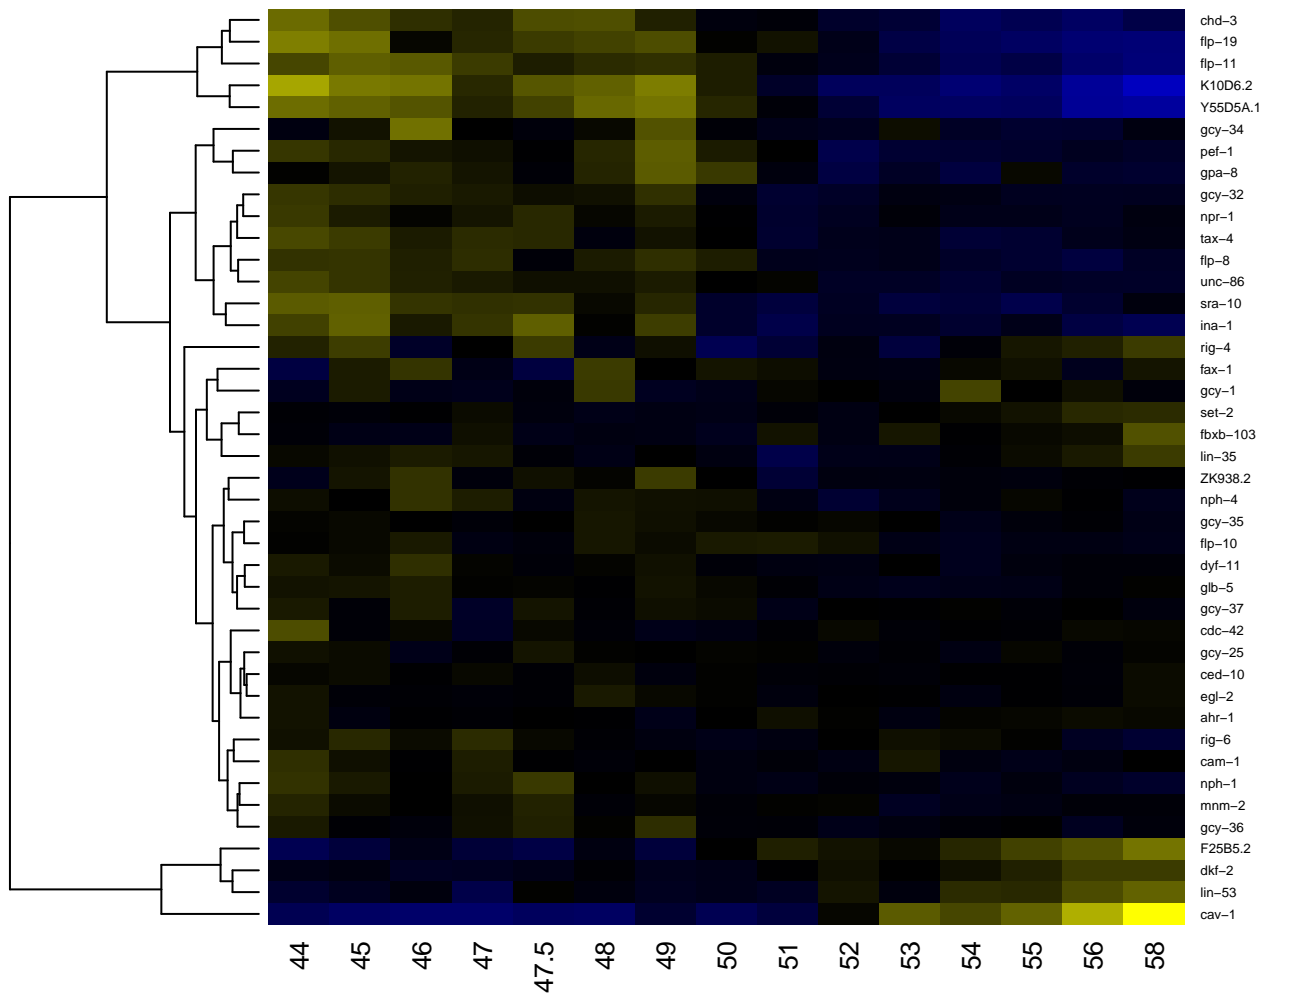





# URYVL

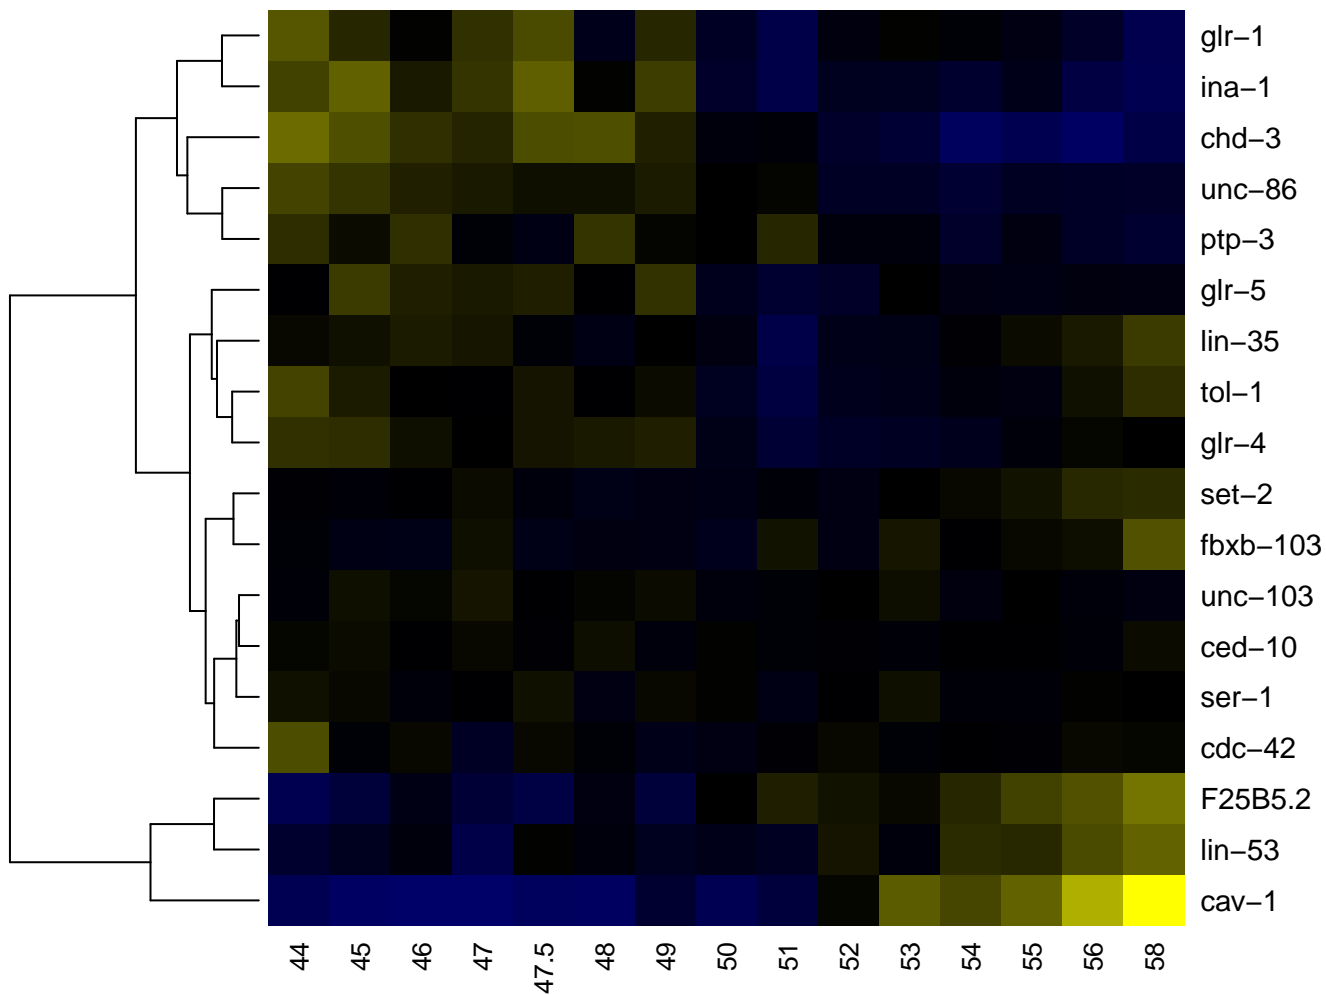

# URYVR



ut1

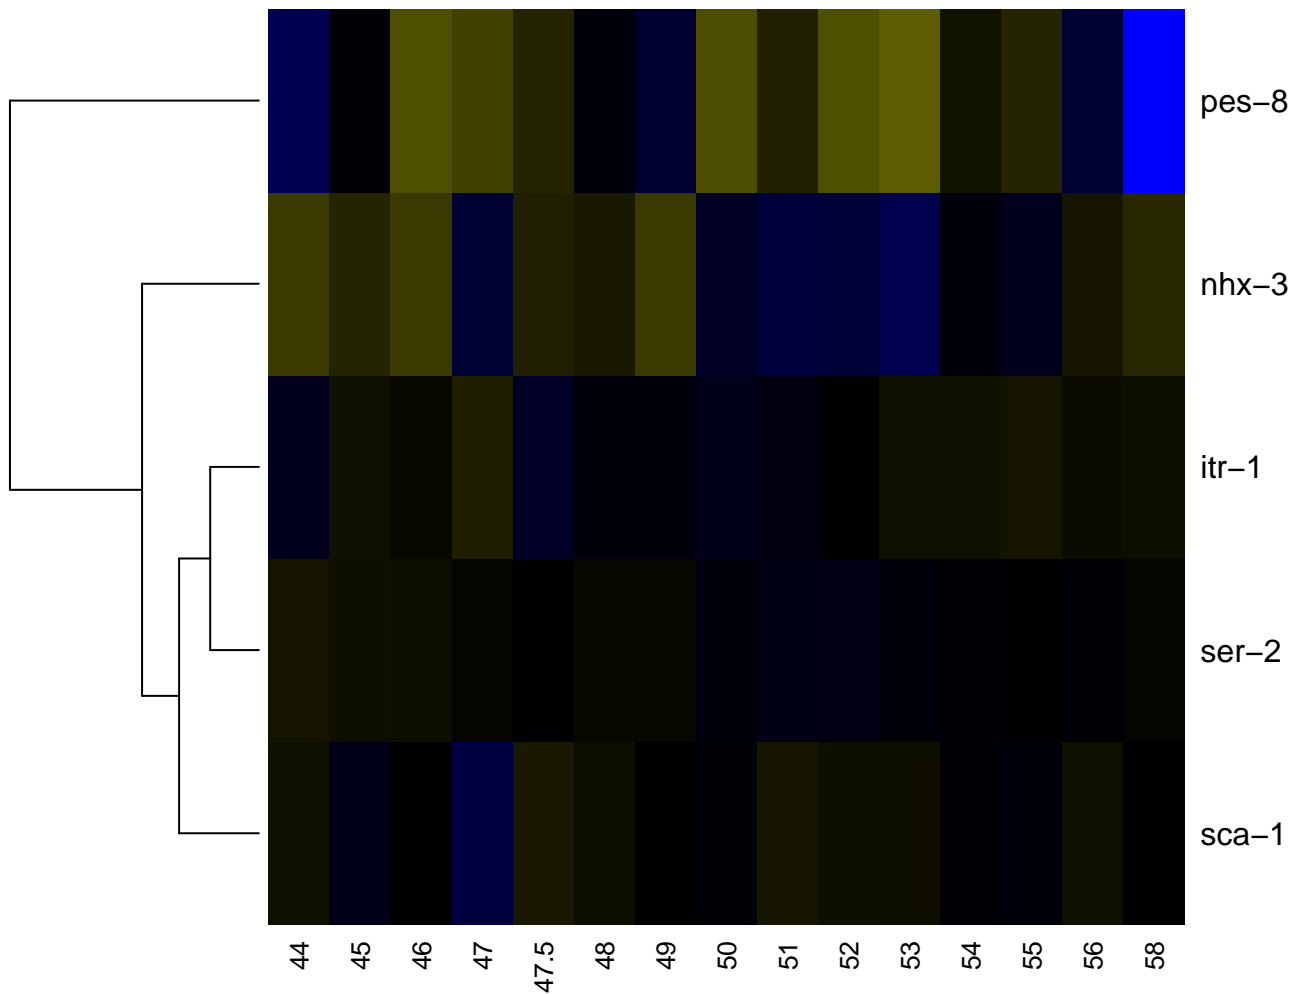

-2

-1

0

1

2

# ut2

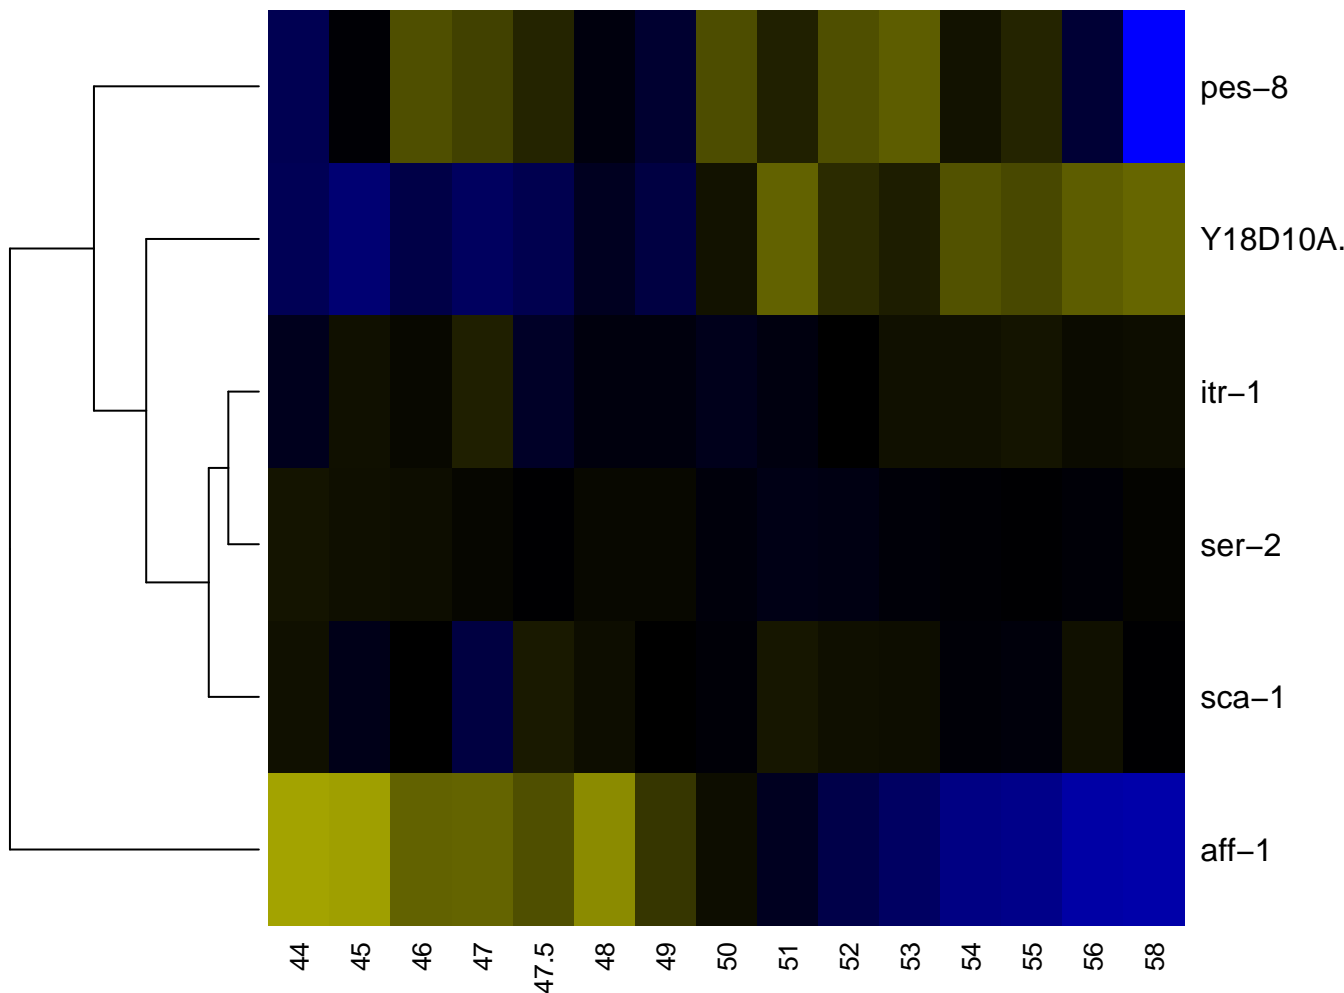

-2

-1

0

1

2

# uterine muscle

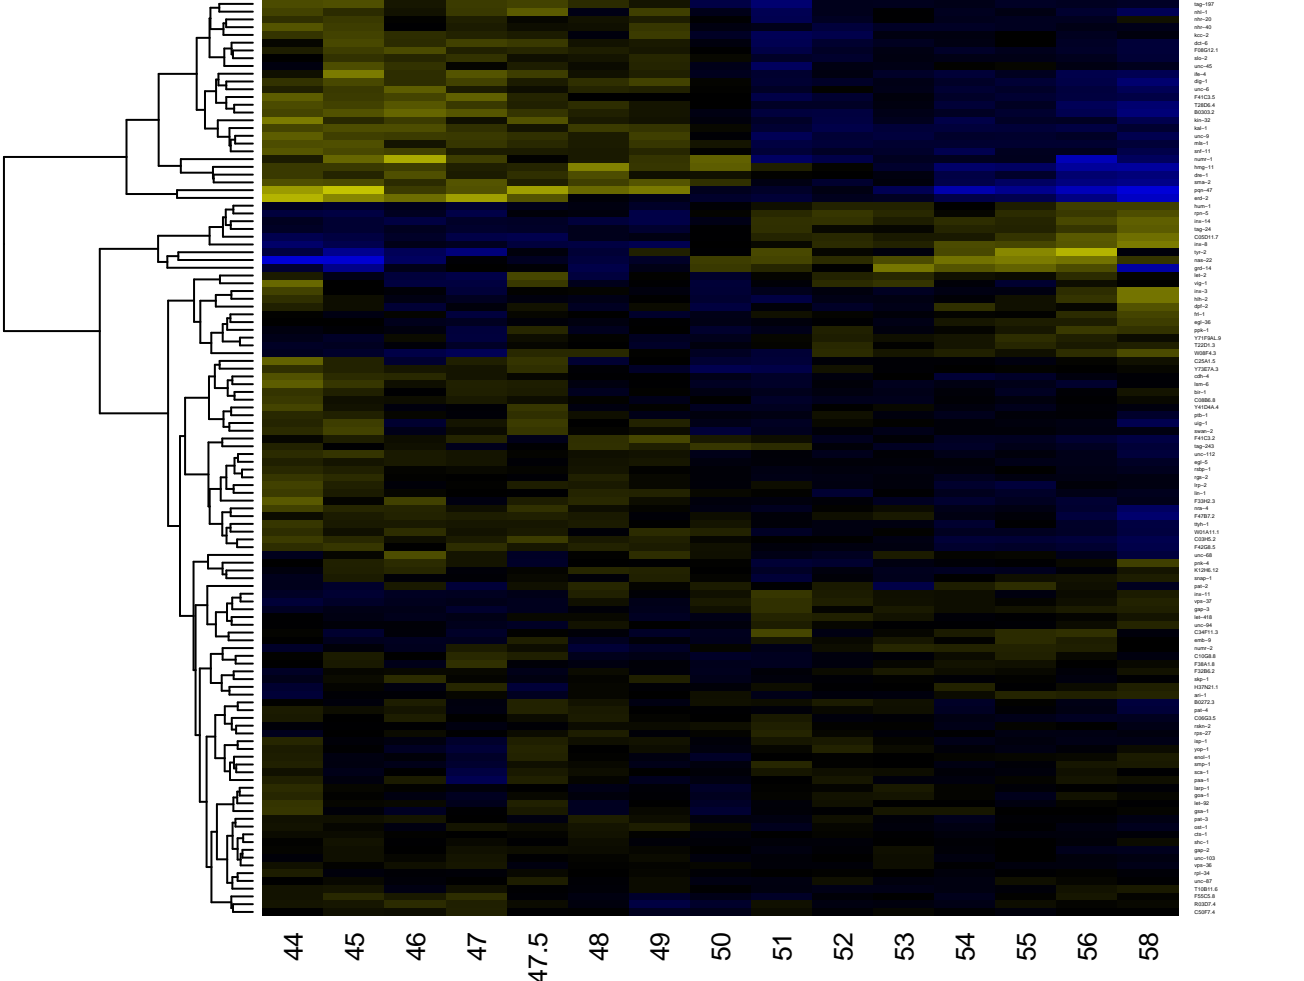

- hsp-107
- mtl-1
- mtl-2
- mtl-3
- mtl-4
- mtl-5
- mtl-6
- mtl-7
- mtl-8
- mtl-9
- mtl-10
- mtl-11
- mtl-12
- mtl-13
- mtl-14
- mtl-15
- mtl-16
- mtl-17
- mtl-18
- mtl-19
- mtl-20
- mtl-21
- mtl-22
- mtl-23
- mtl-24
- mtl-25
- mtl-26
- mtl-27
- mtl-28
- mtl-29
- mtl-30
- mtl-31
- mtl-32
- mtl-33
- mtl-34
- mtl-35
- mtl-36
- mtl-37
- mtl-38
- mtl-39
- mtl-40
- mtl-41
- mtl-42
- mtl-43
- mtl-44
- mtl-45
- mtl-46
- mtl-47
- mtl-48
- mtl-49
- mtl-50
- mtl-51
- mtl-52
- mtl-53
- mtl-54
- mtl-55
- mtl-56
- mtl-57
- mtl-58
- mtl-59
- mtl-60
- mtl-61
- mtl-62
- mtl-63
- mtl-64
- mtl-65
- mtl-66
- mtl-67
- mtl-68
- mtl-69
- mtl-70
- mtl-71
- mtl-72
- mtl-73
- mtl-74
- mtl-75
- mtl-76
- mtl-77
- mtl-78
- mtl-79
- mtl-80
- mtl-81
- mtl-82
- mtl-83
- mtl-84
- mtl-85
- mtl-86
- mtl-87
- mtl-88
- mtl-89
- mtl-90
- mtl-91
- mtl-92
- mtl-93
- mtl-94
- mtl-95
- mtl-96
- mtl-97
- mtl-98
- mtl-99
- mtl-100





# uterine seam cell

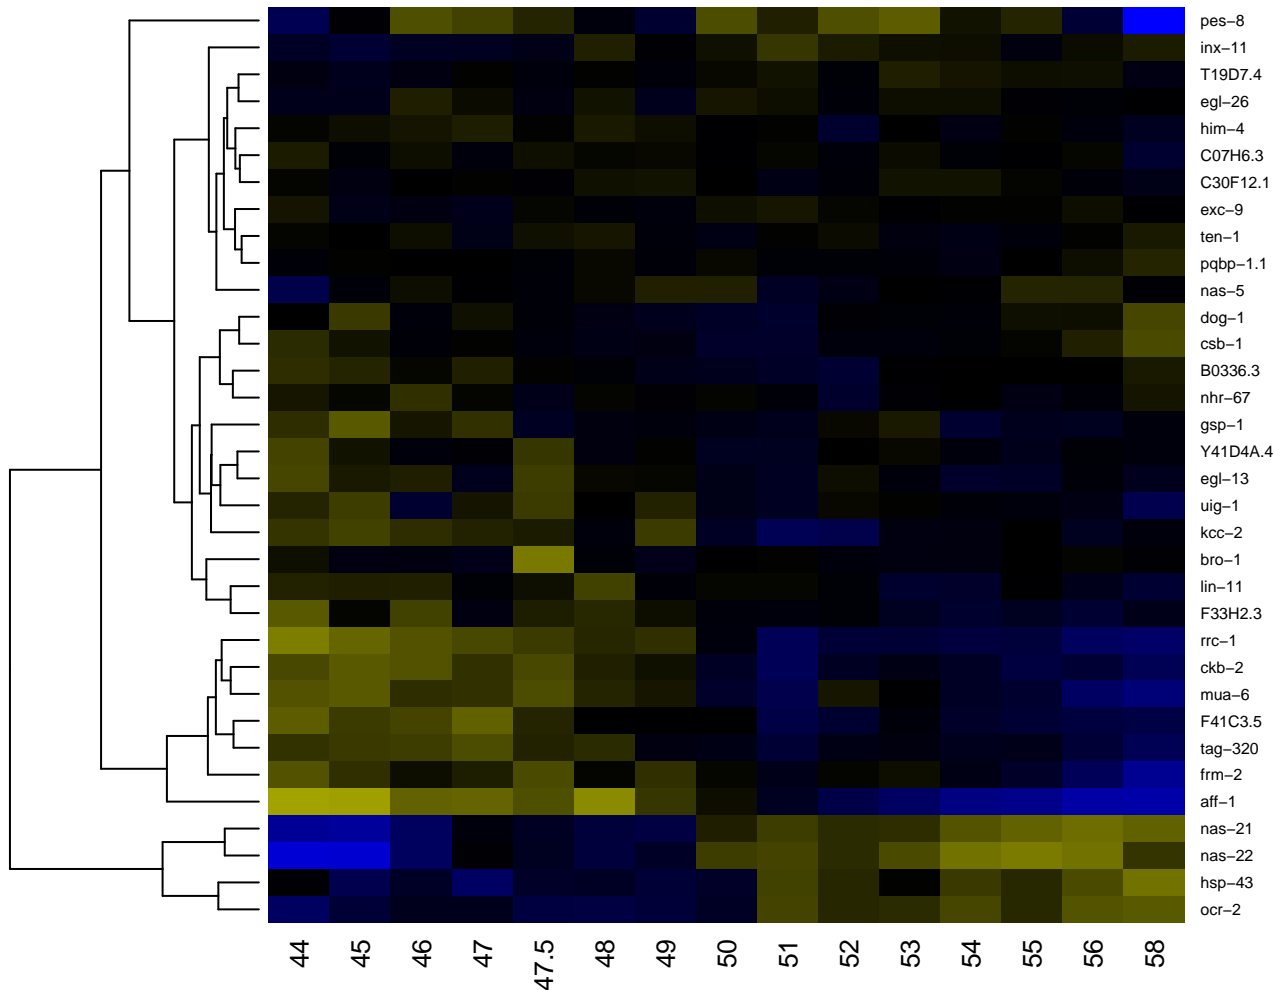

# uterine toroidal epithelial cell

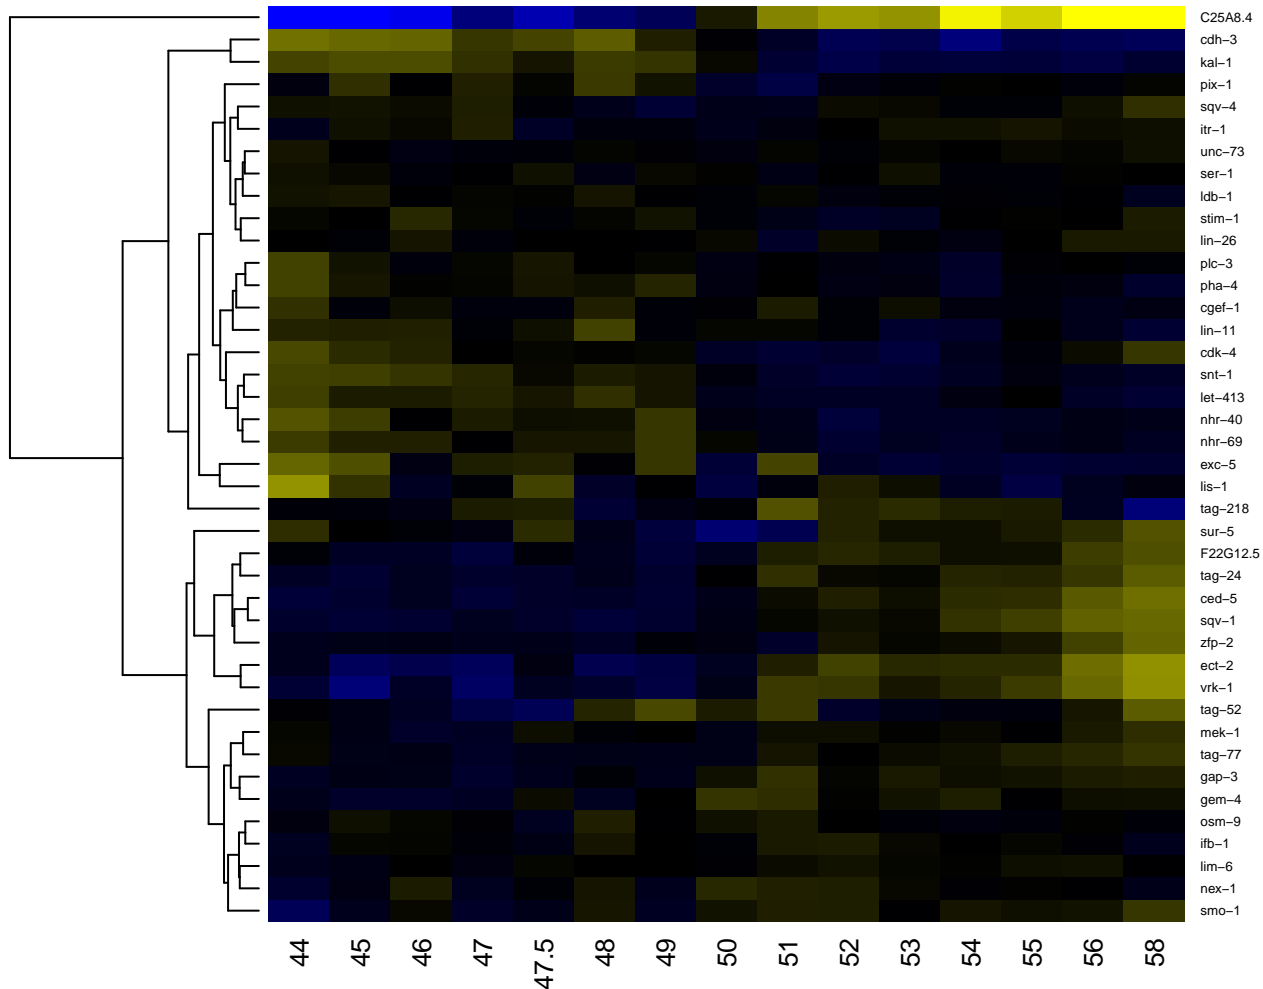

# uterus

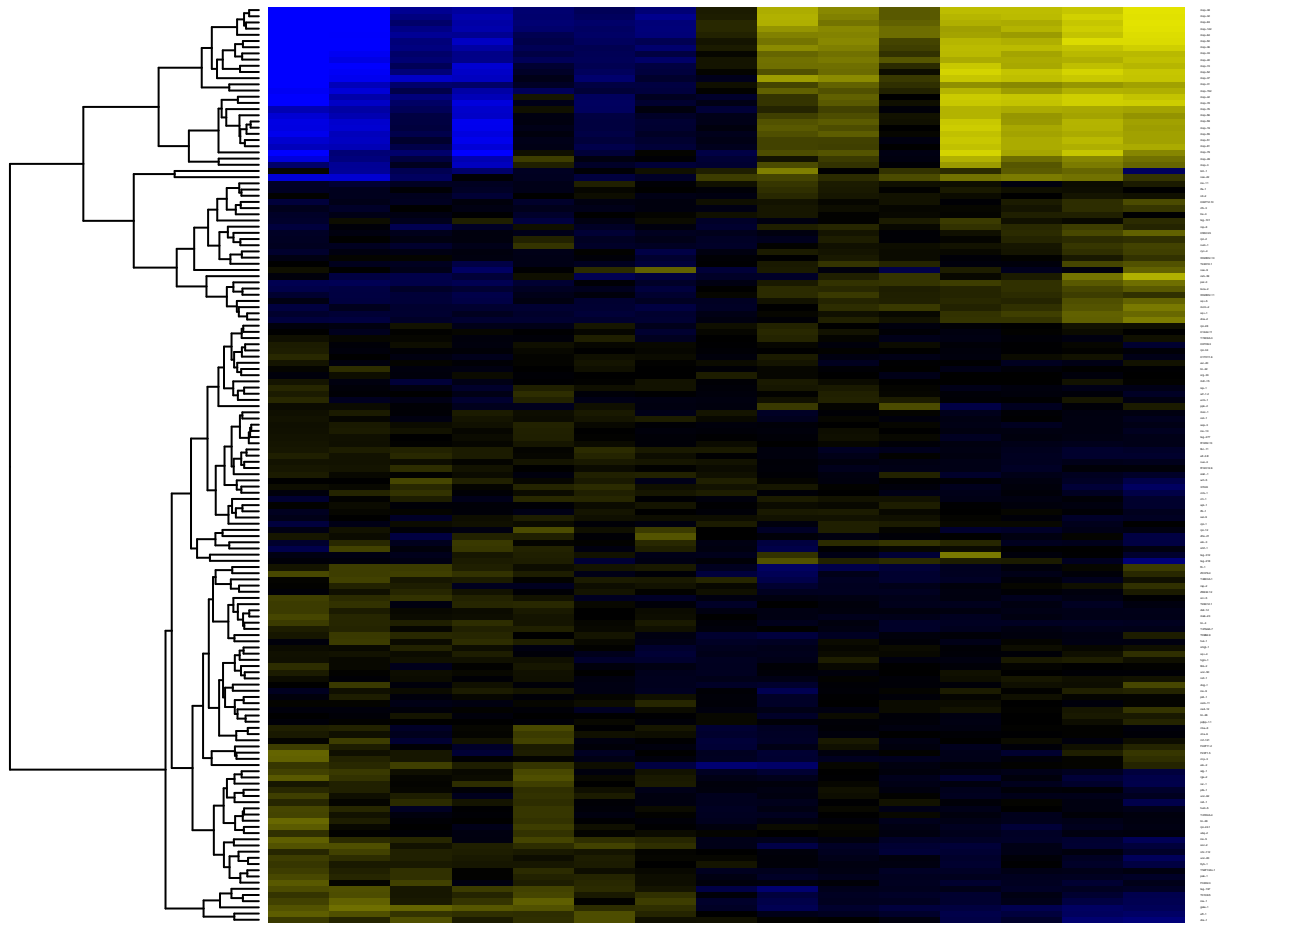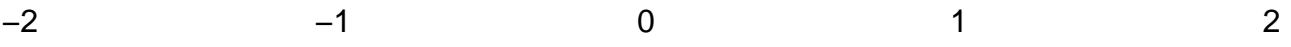

# uv1

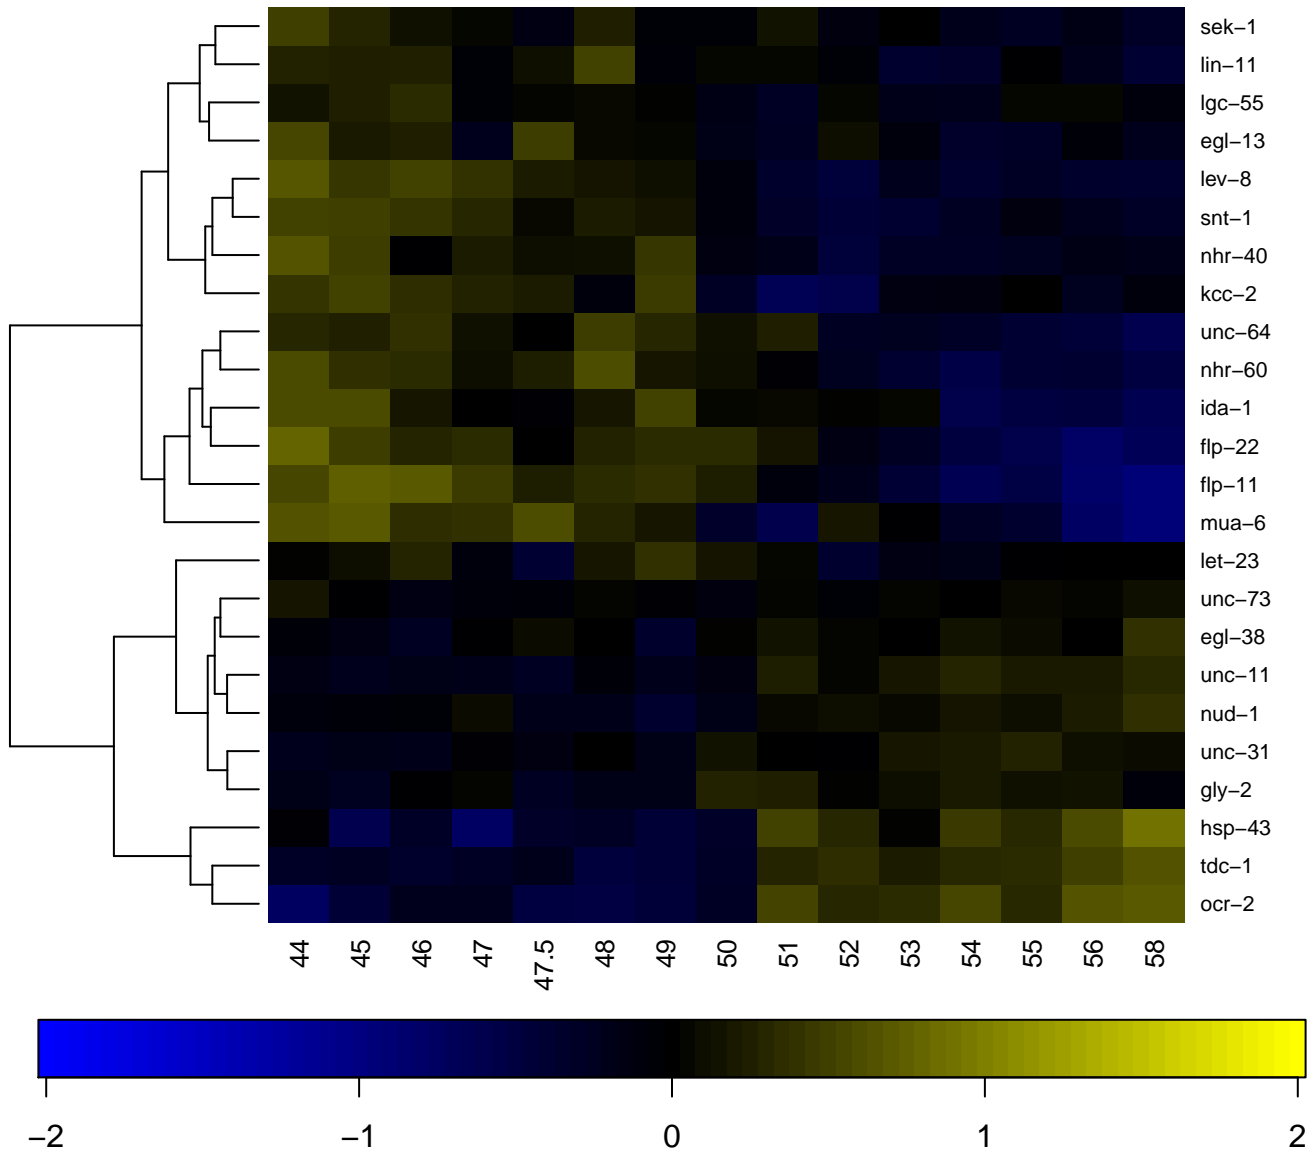

# uv2

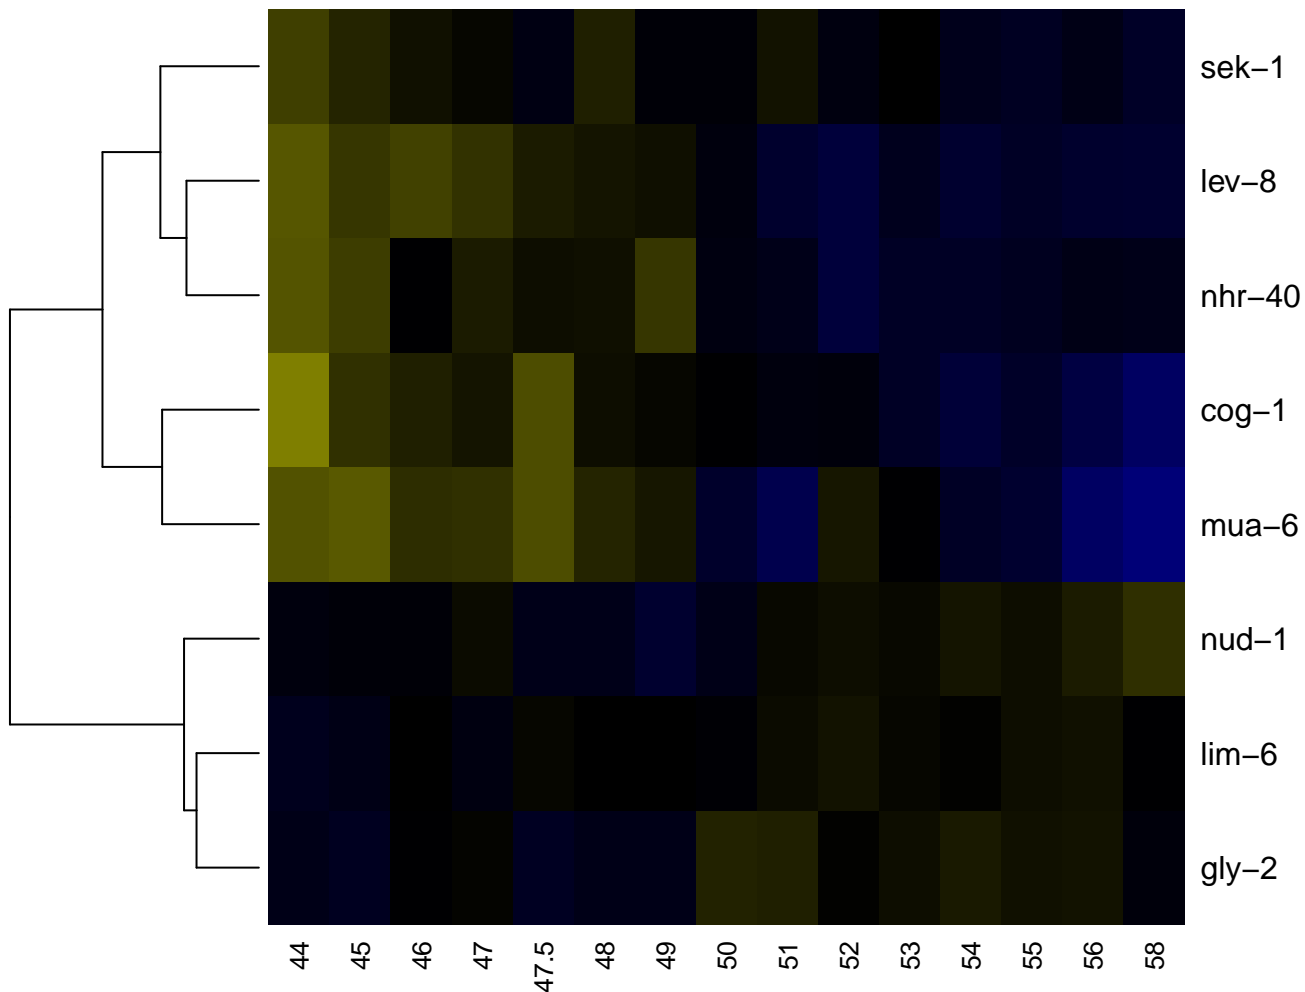

# uv3

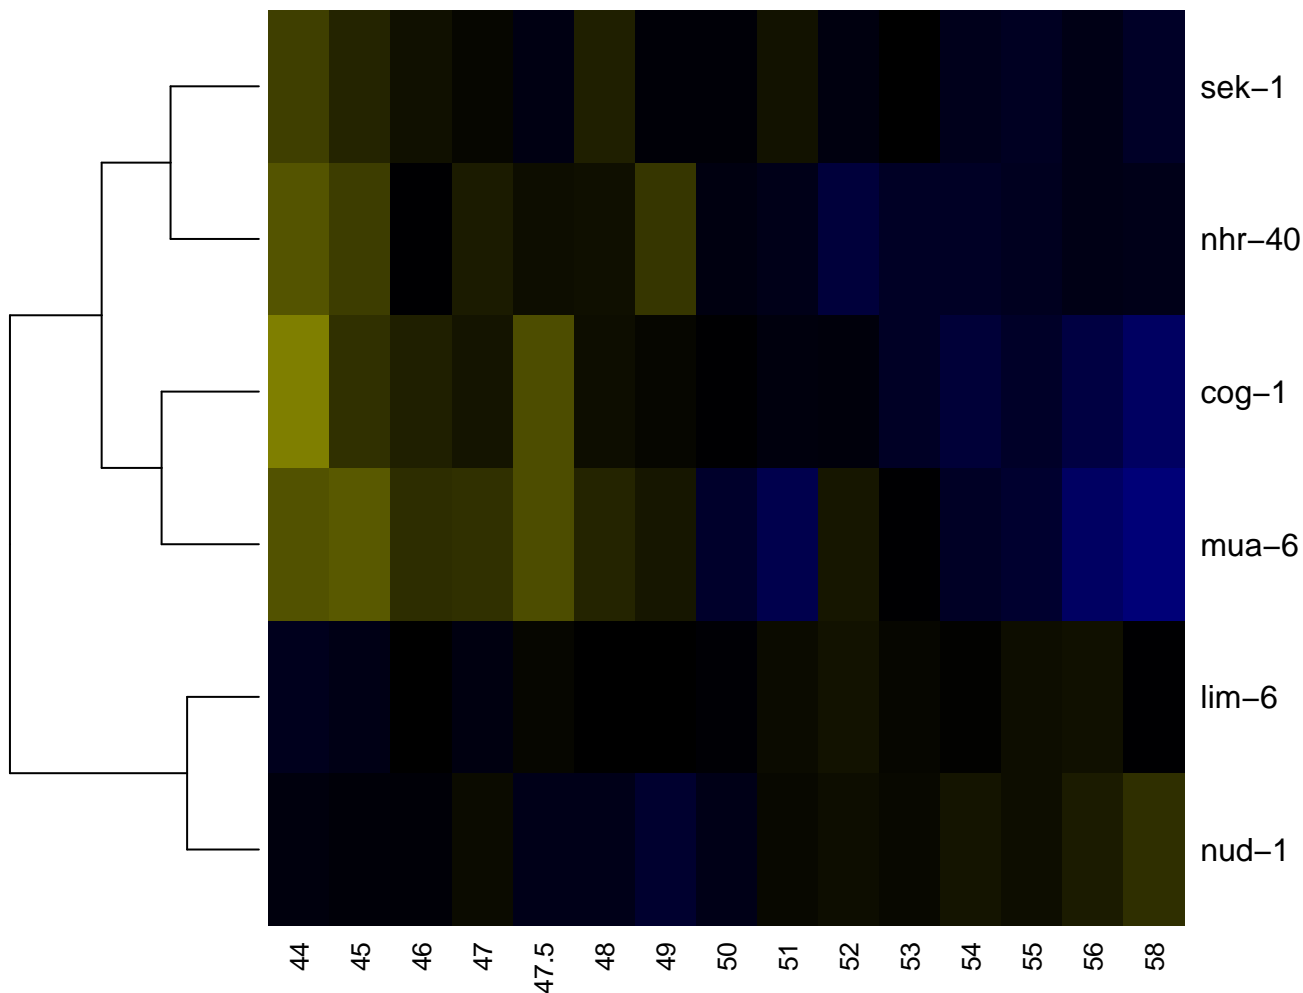

# V1L

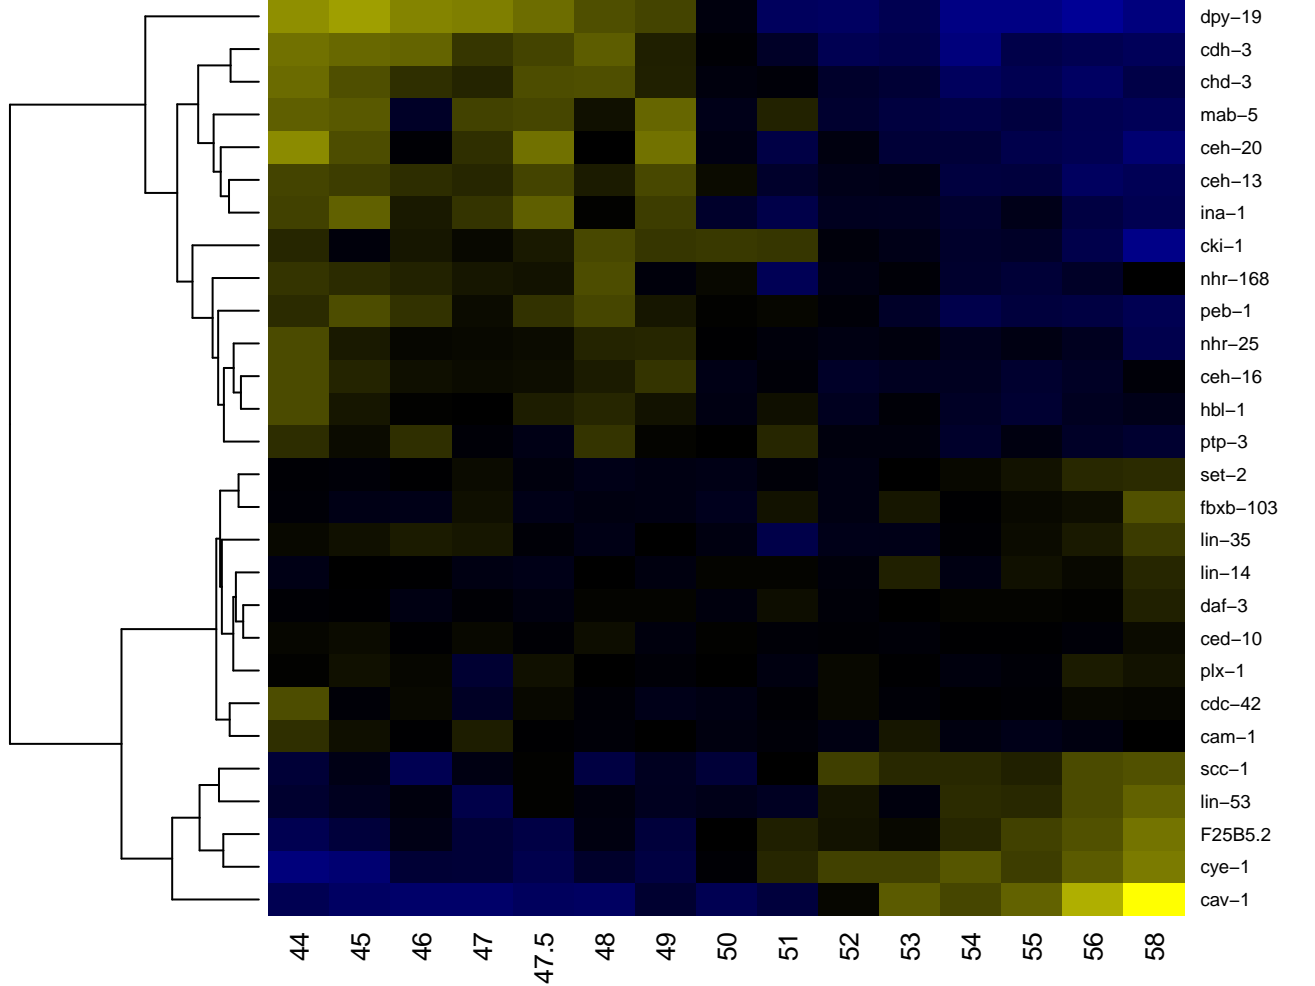

# V1R

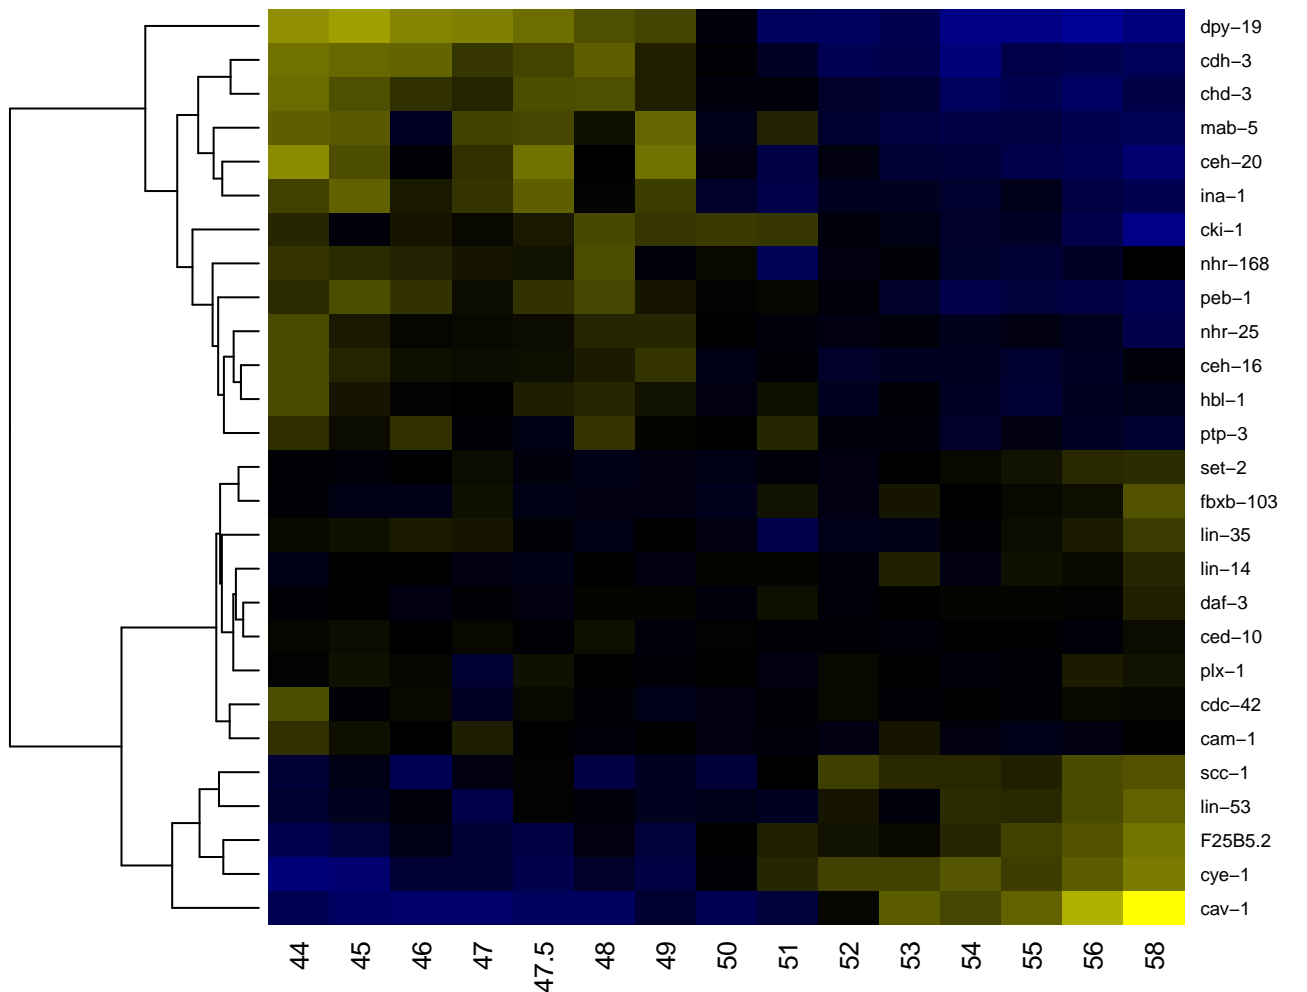



# V2L

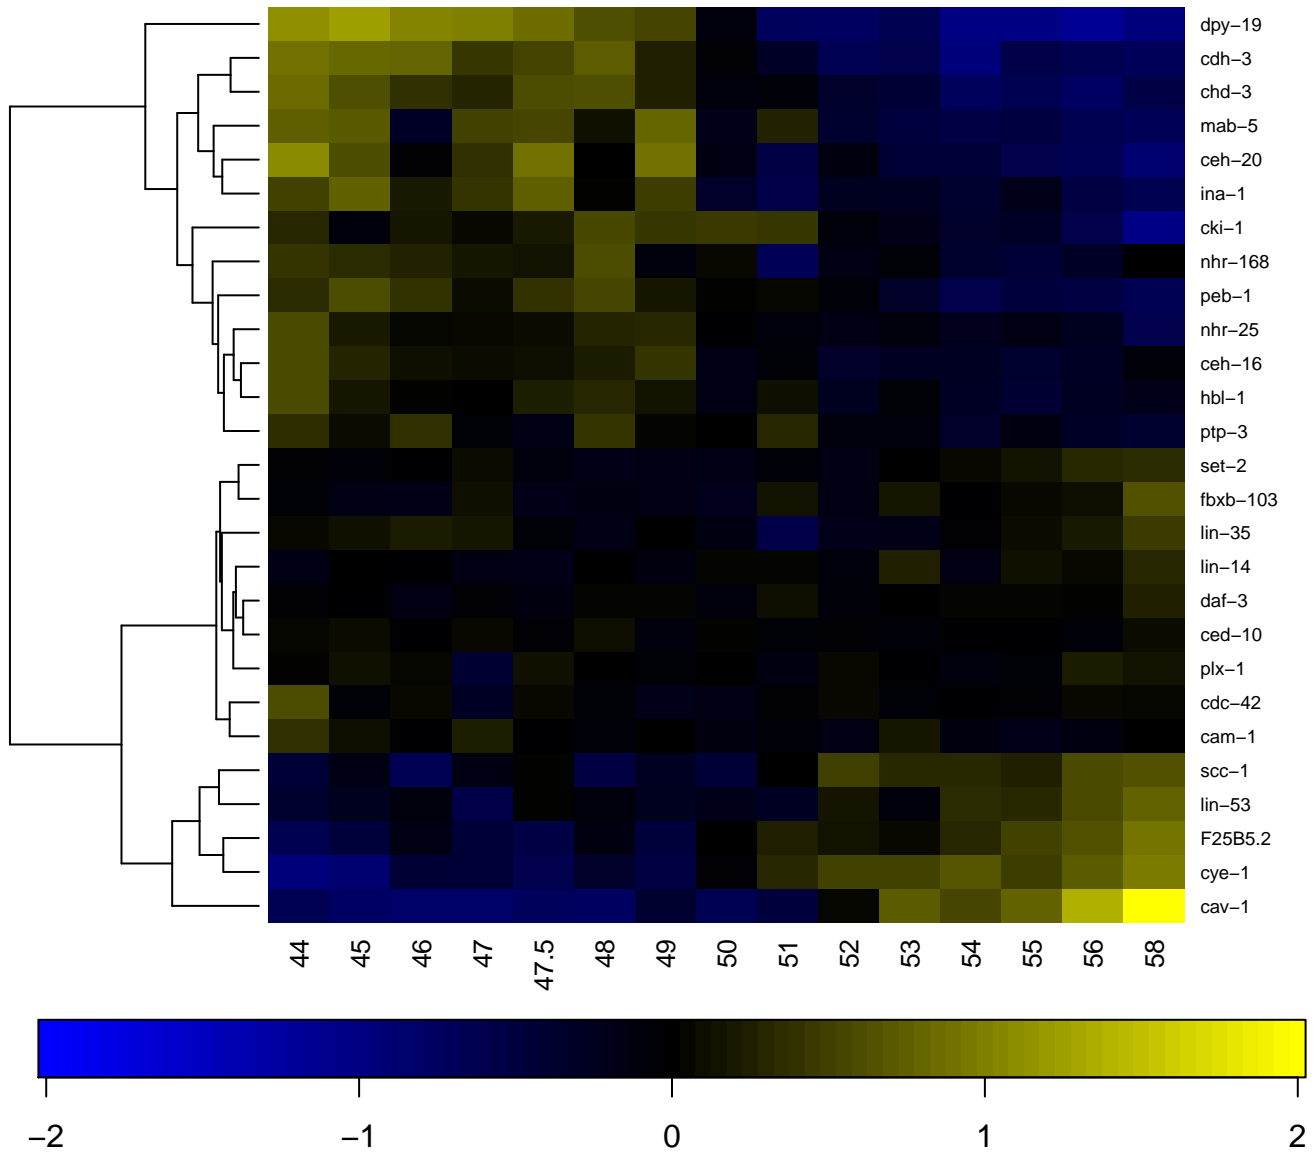





# V3R

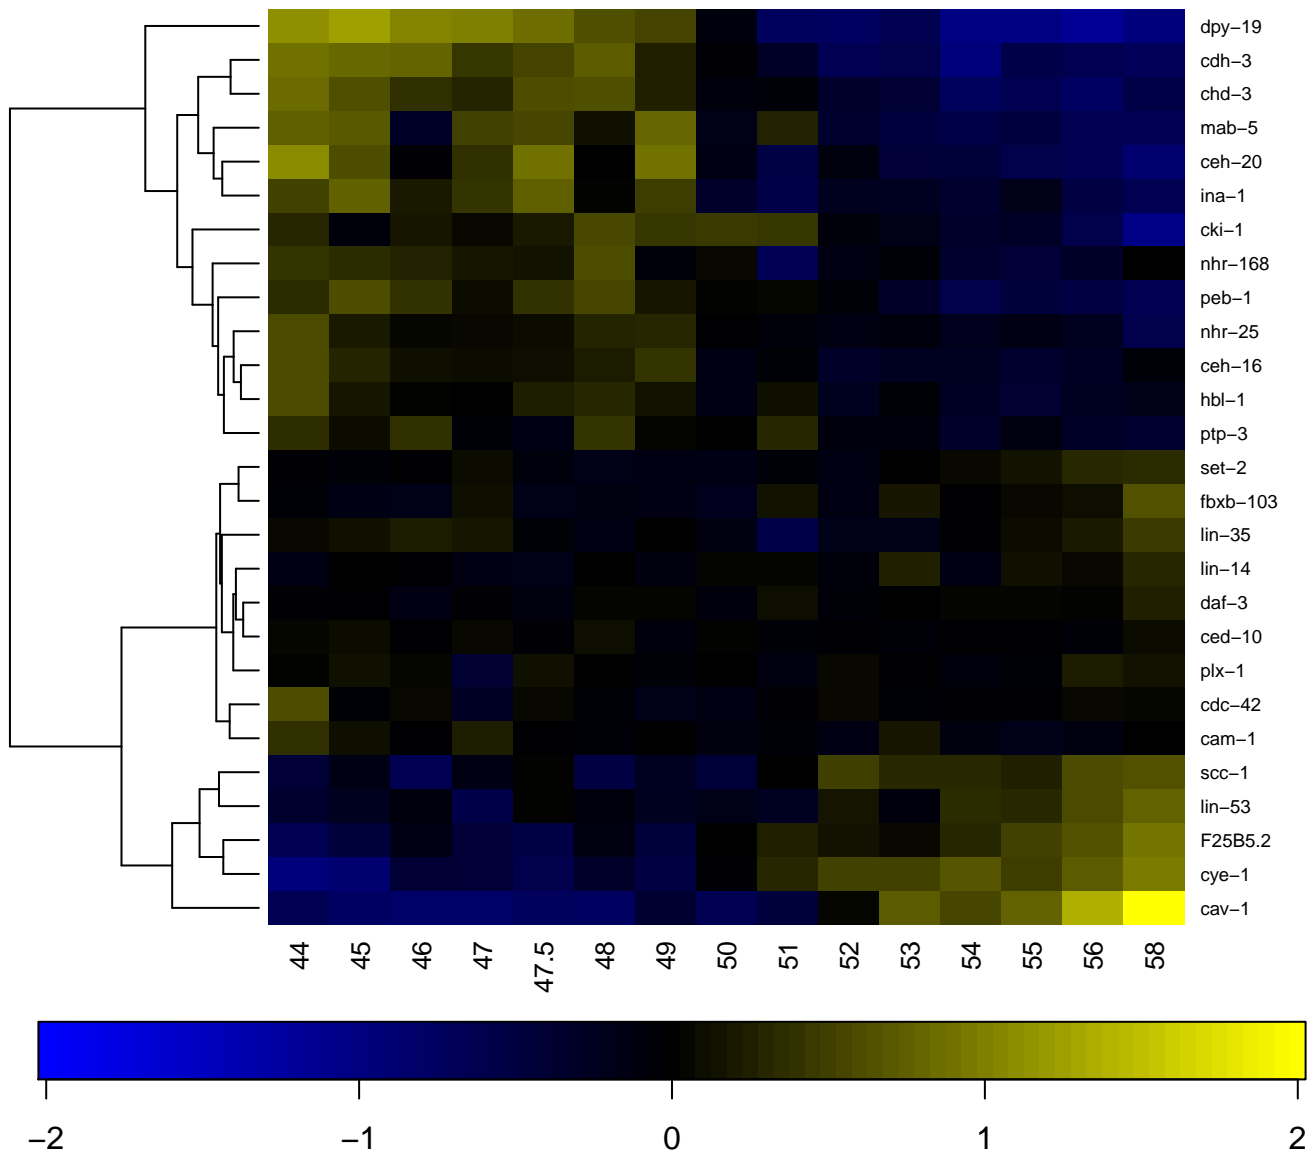

# V4L

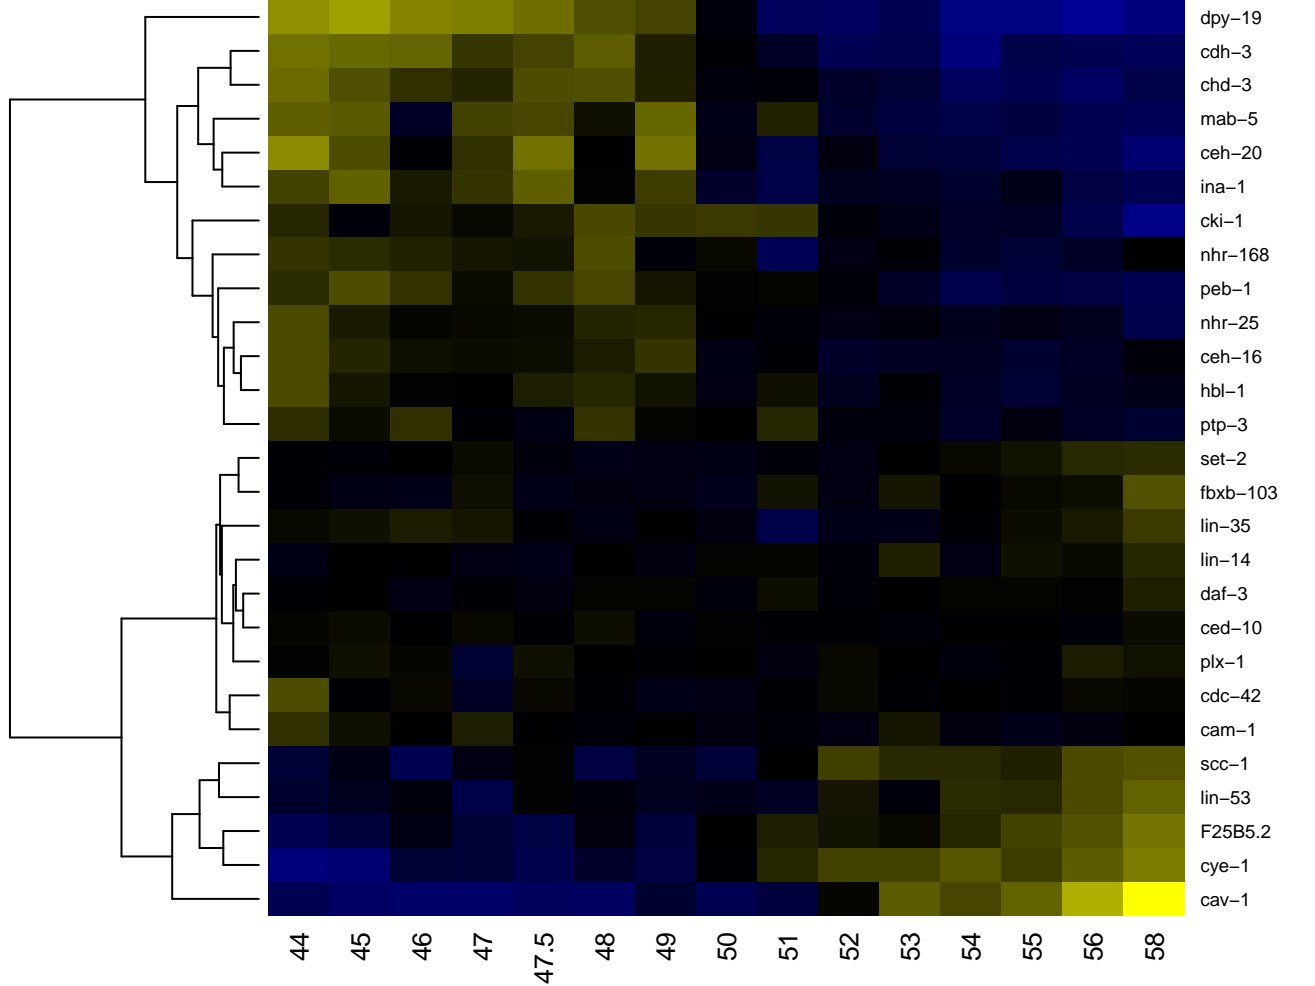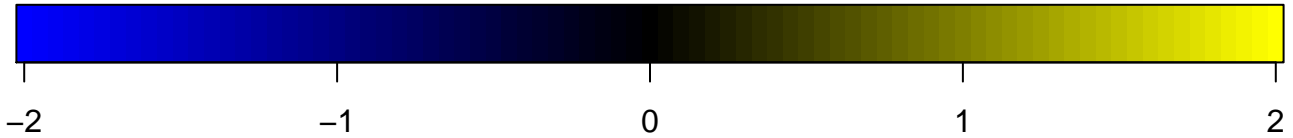

# V4R

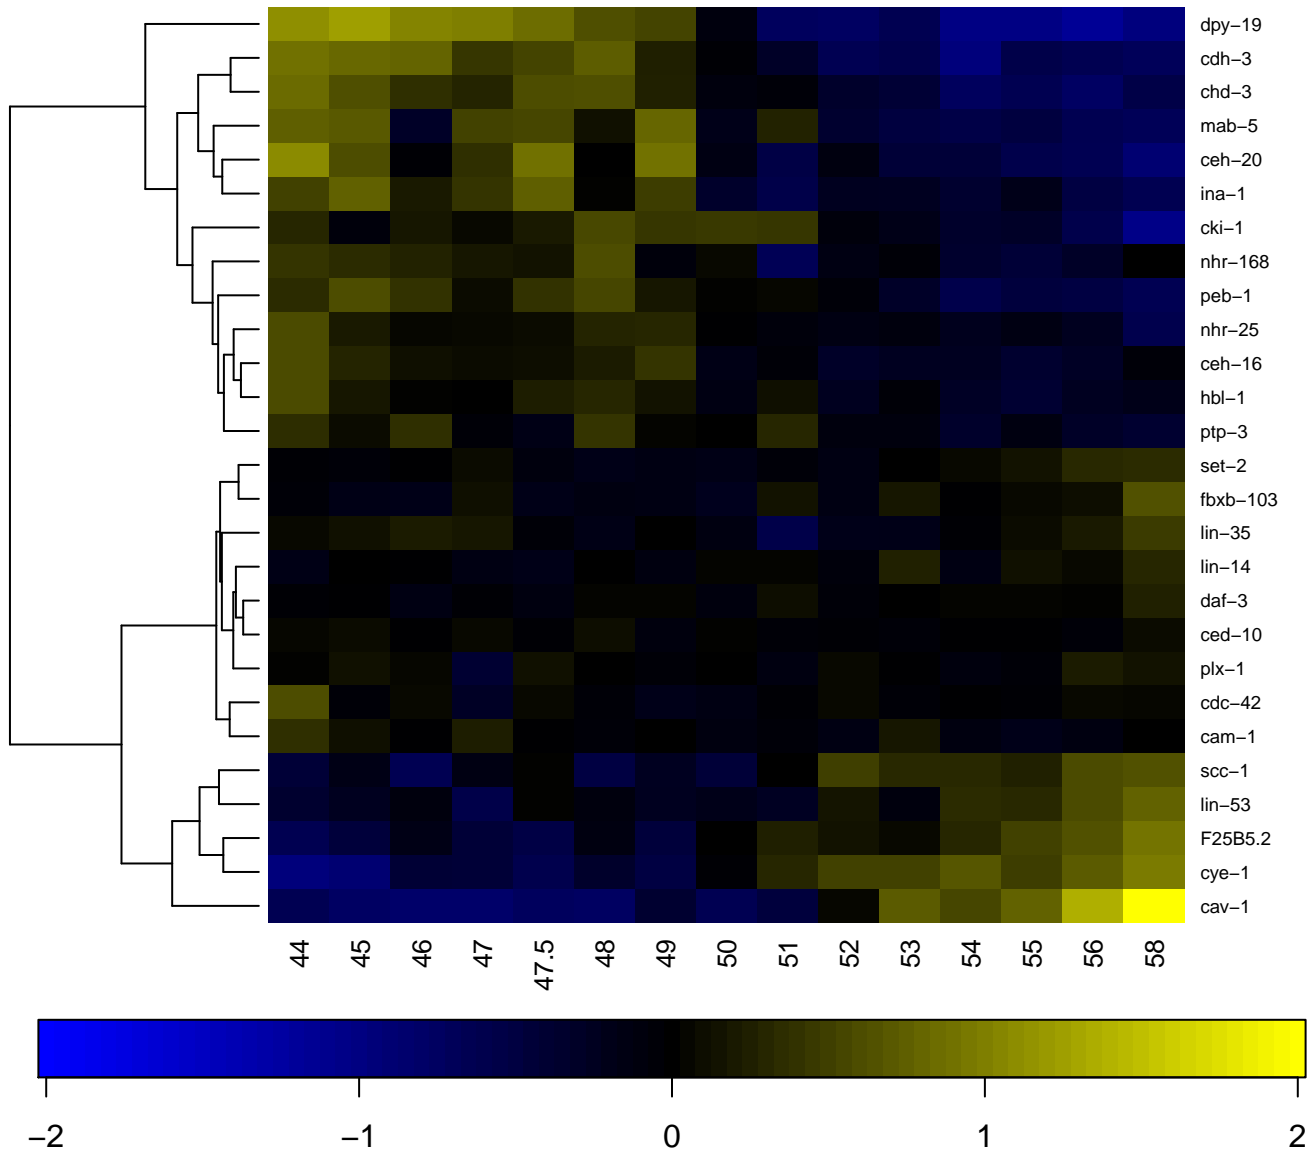

# V5L

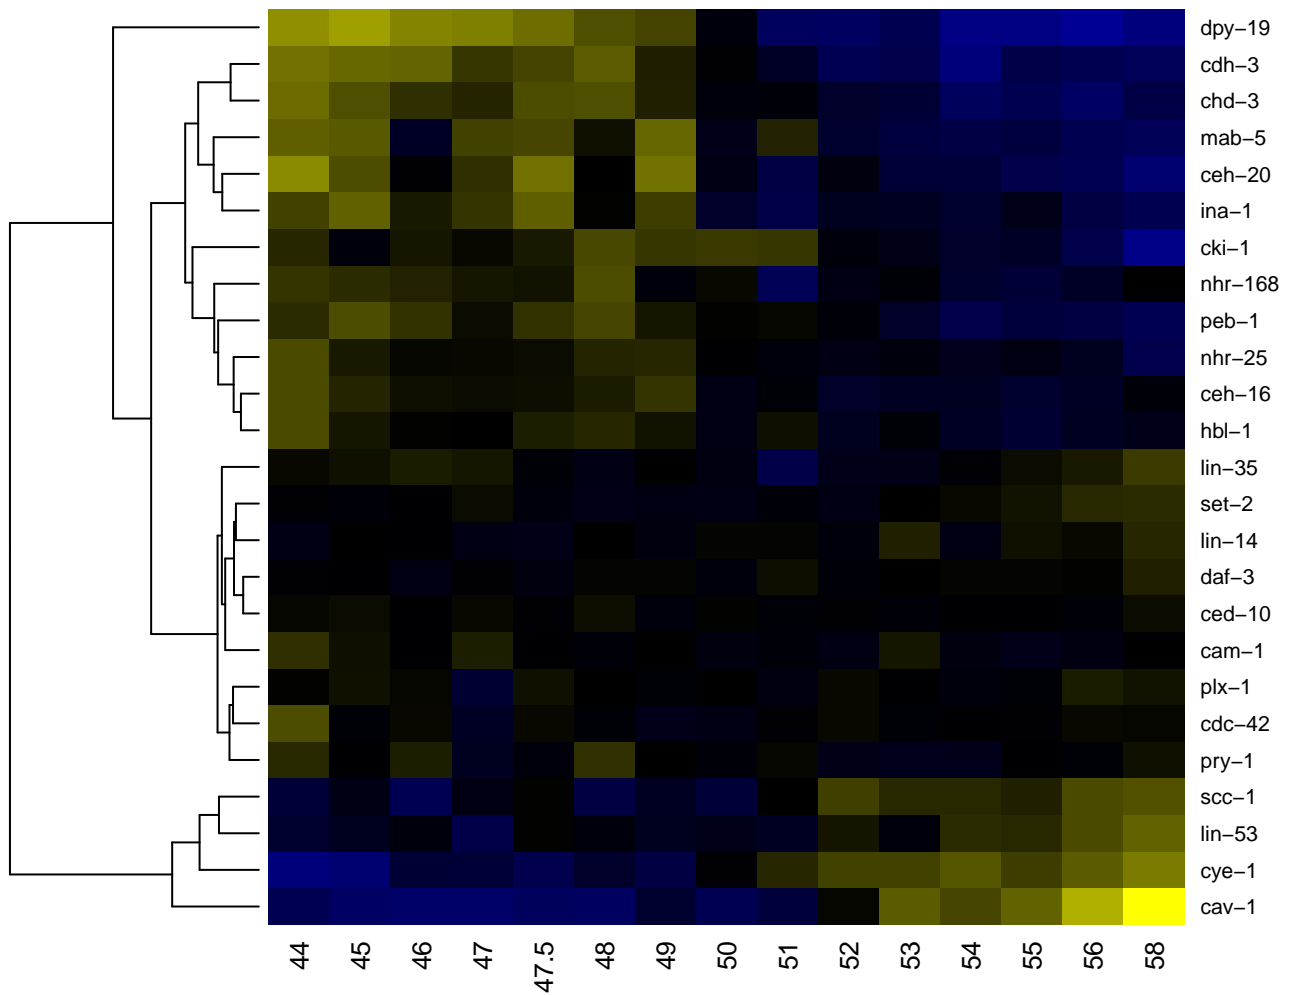

# V5R

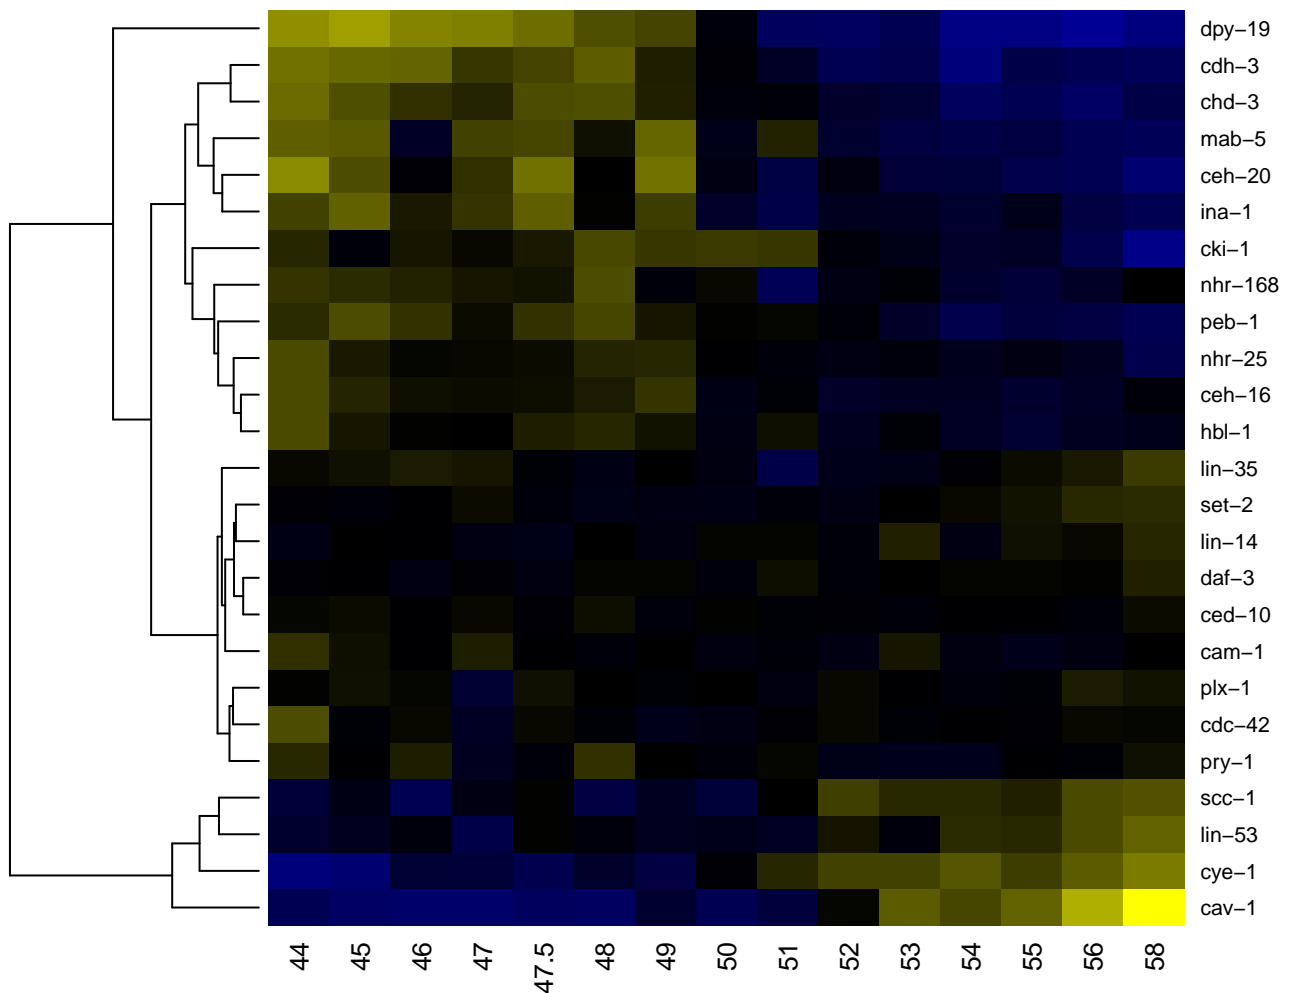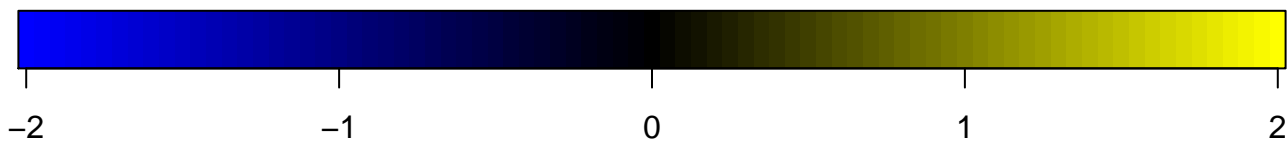



# V6L

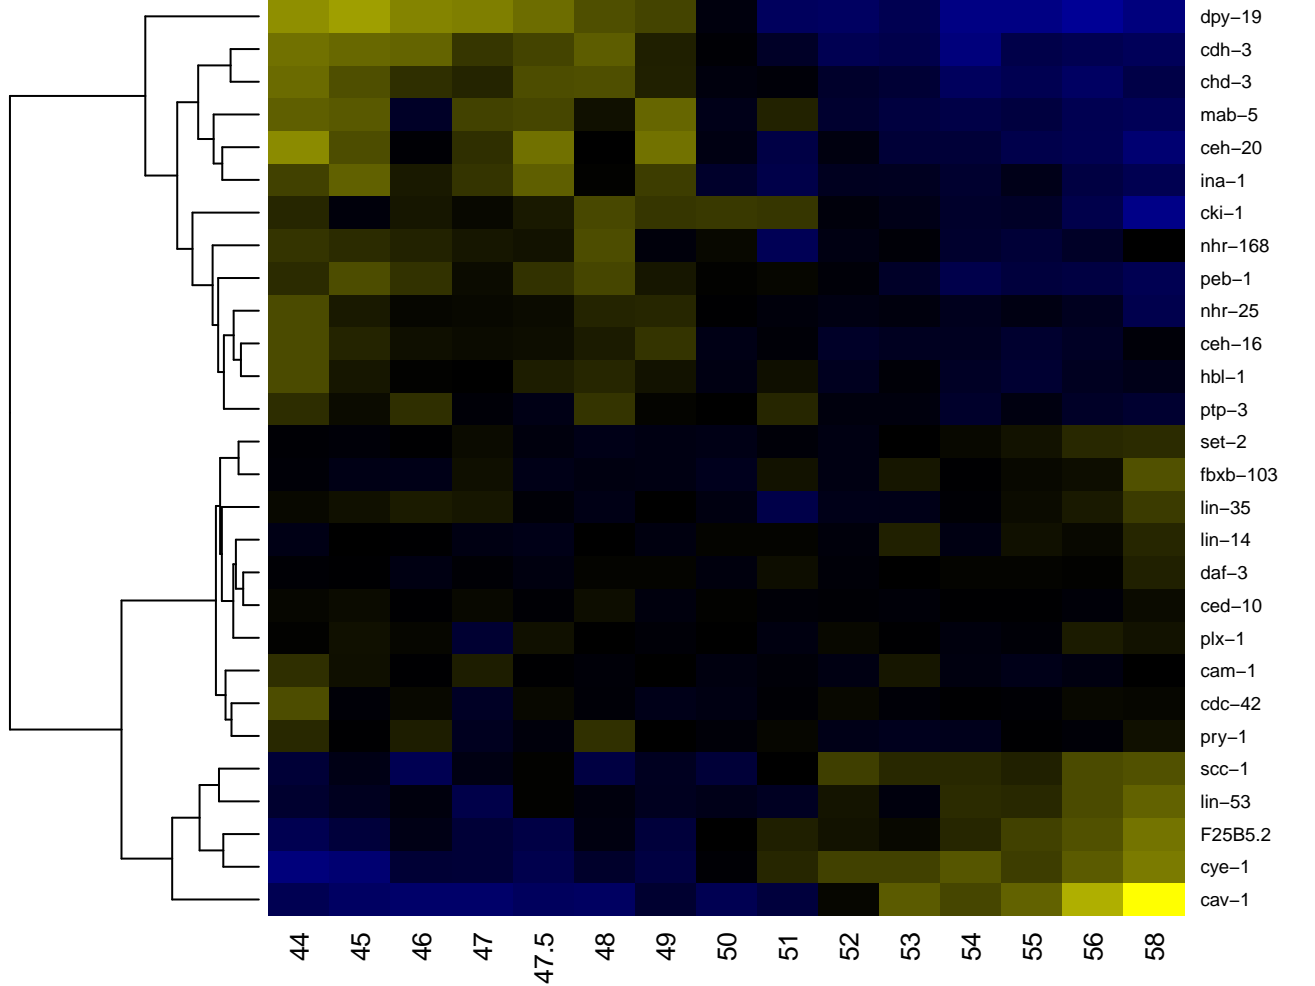

# V6R

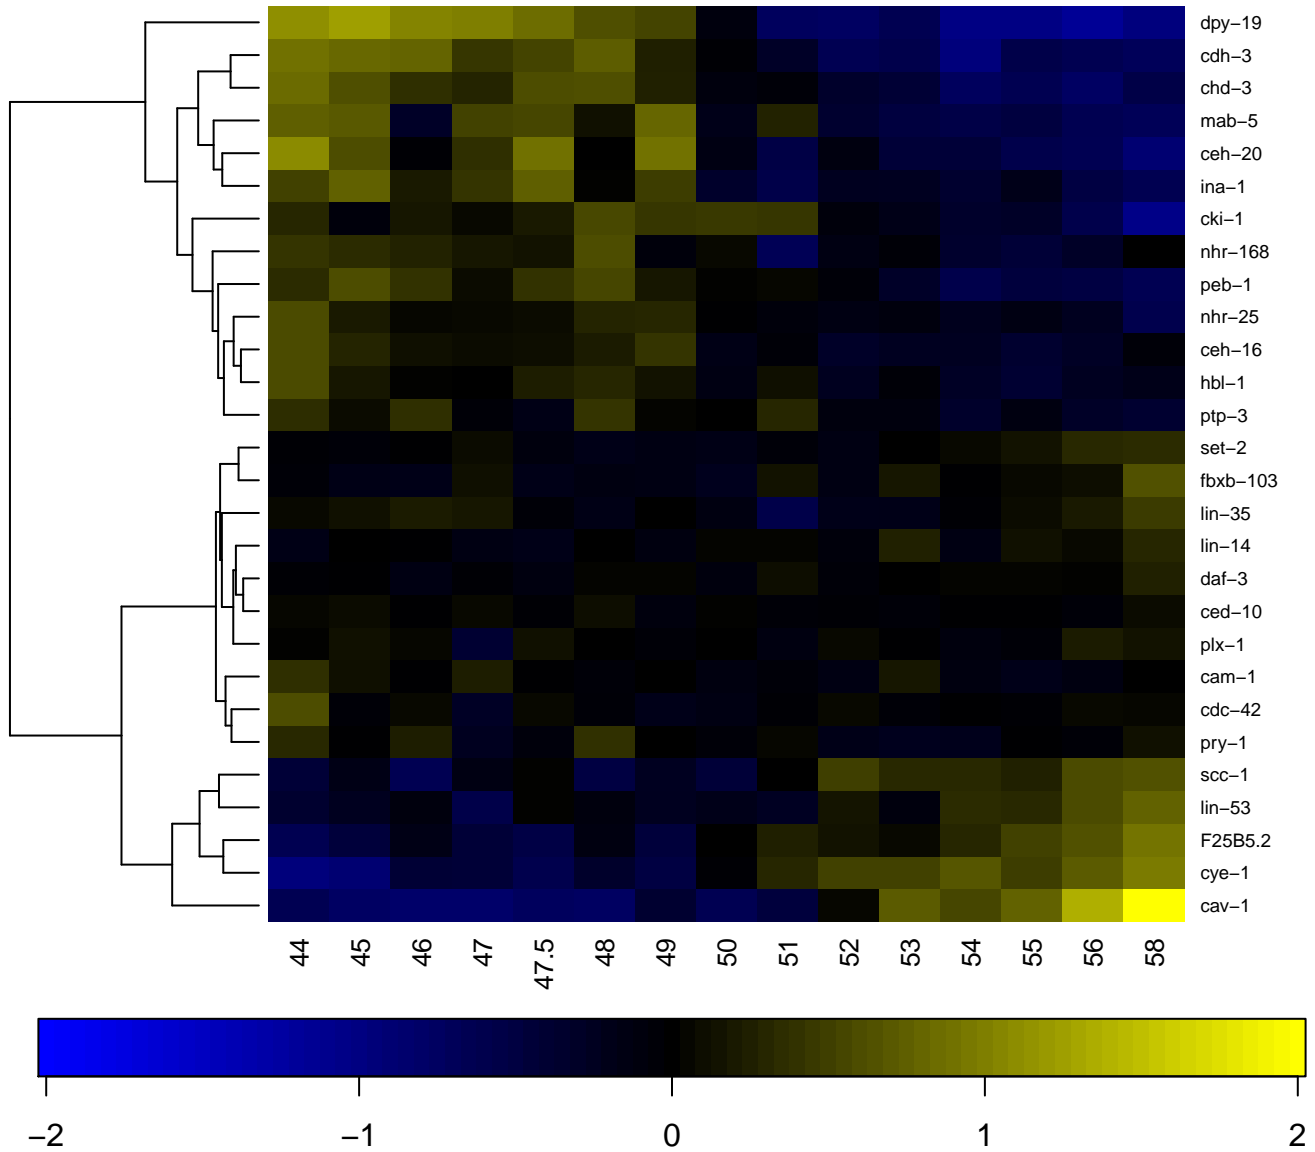

# VA neuron

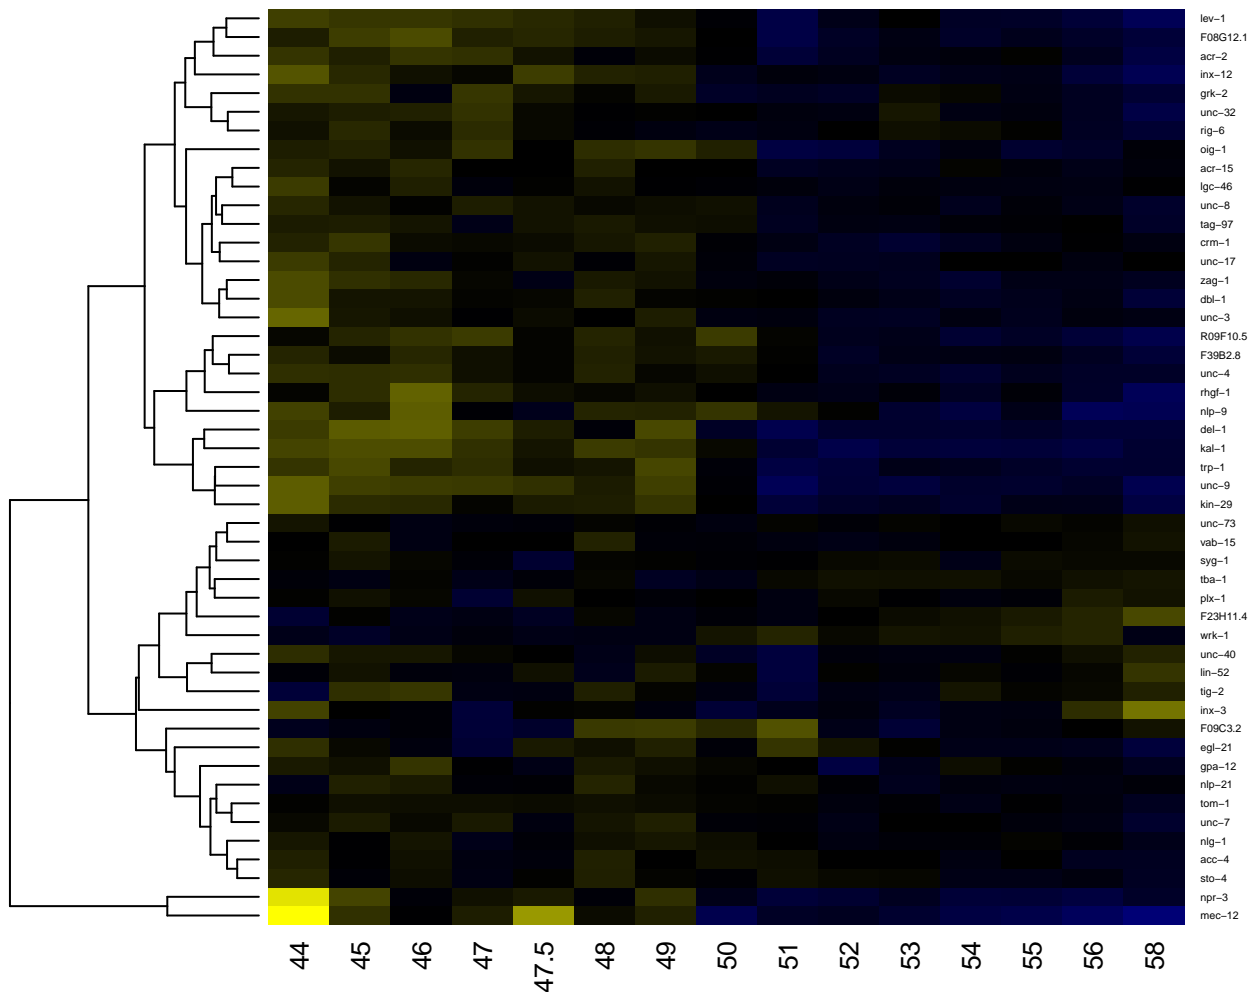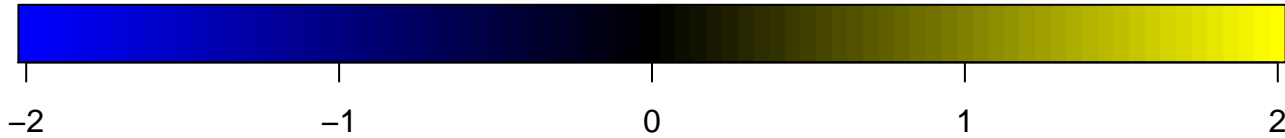

# VA11

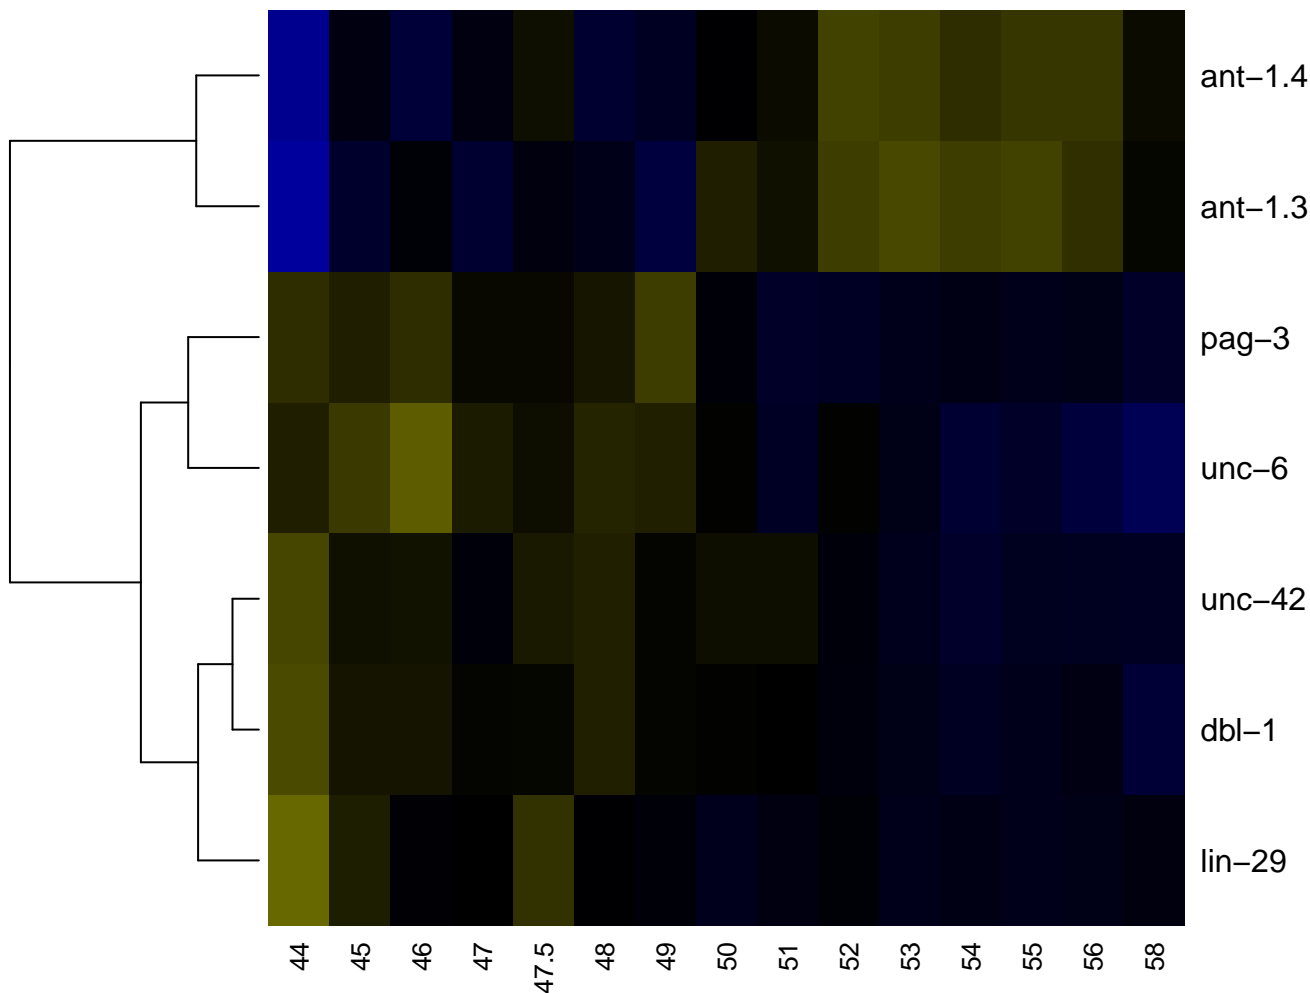

# VA12

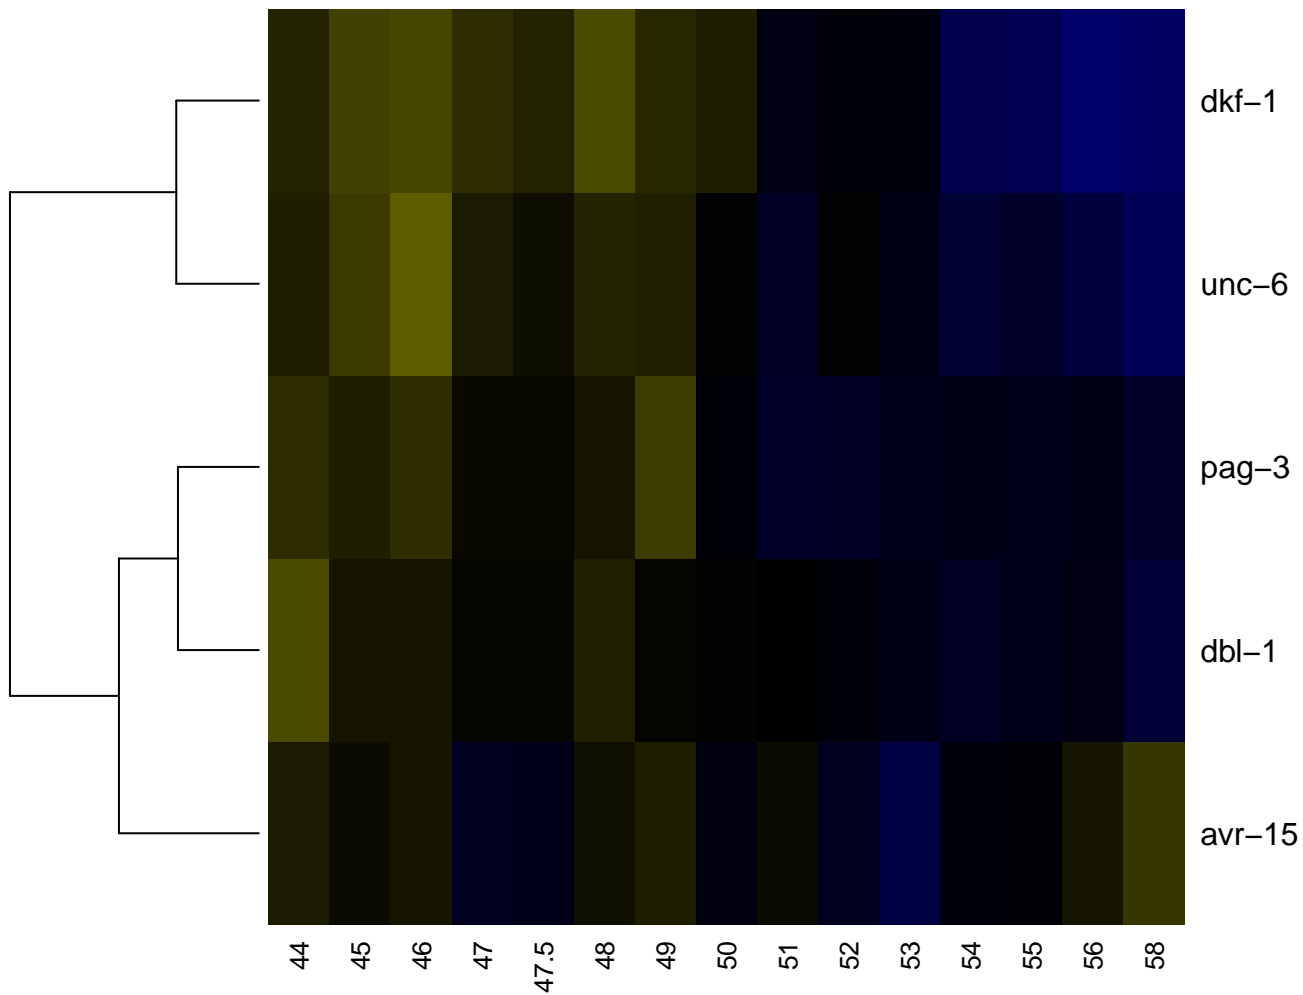

-2

-1

0

1

2

# VA2

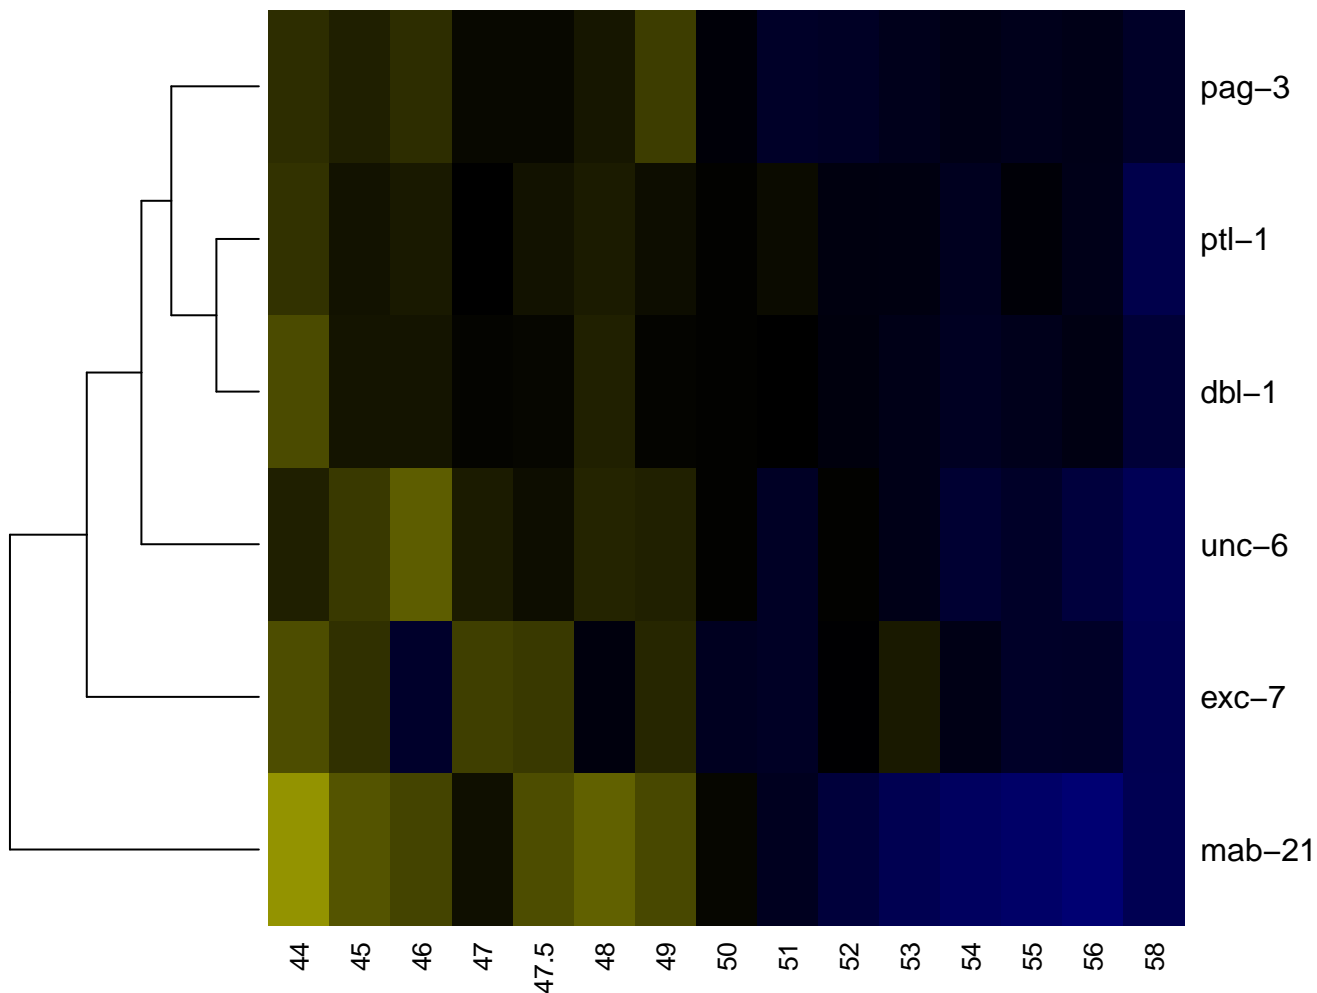

# vas deferens

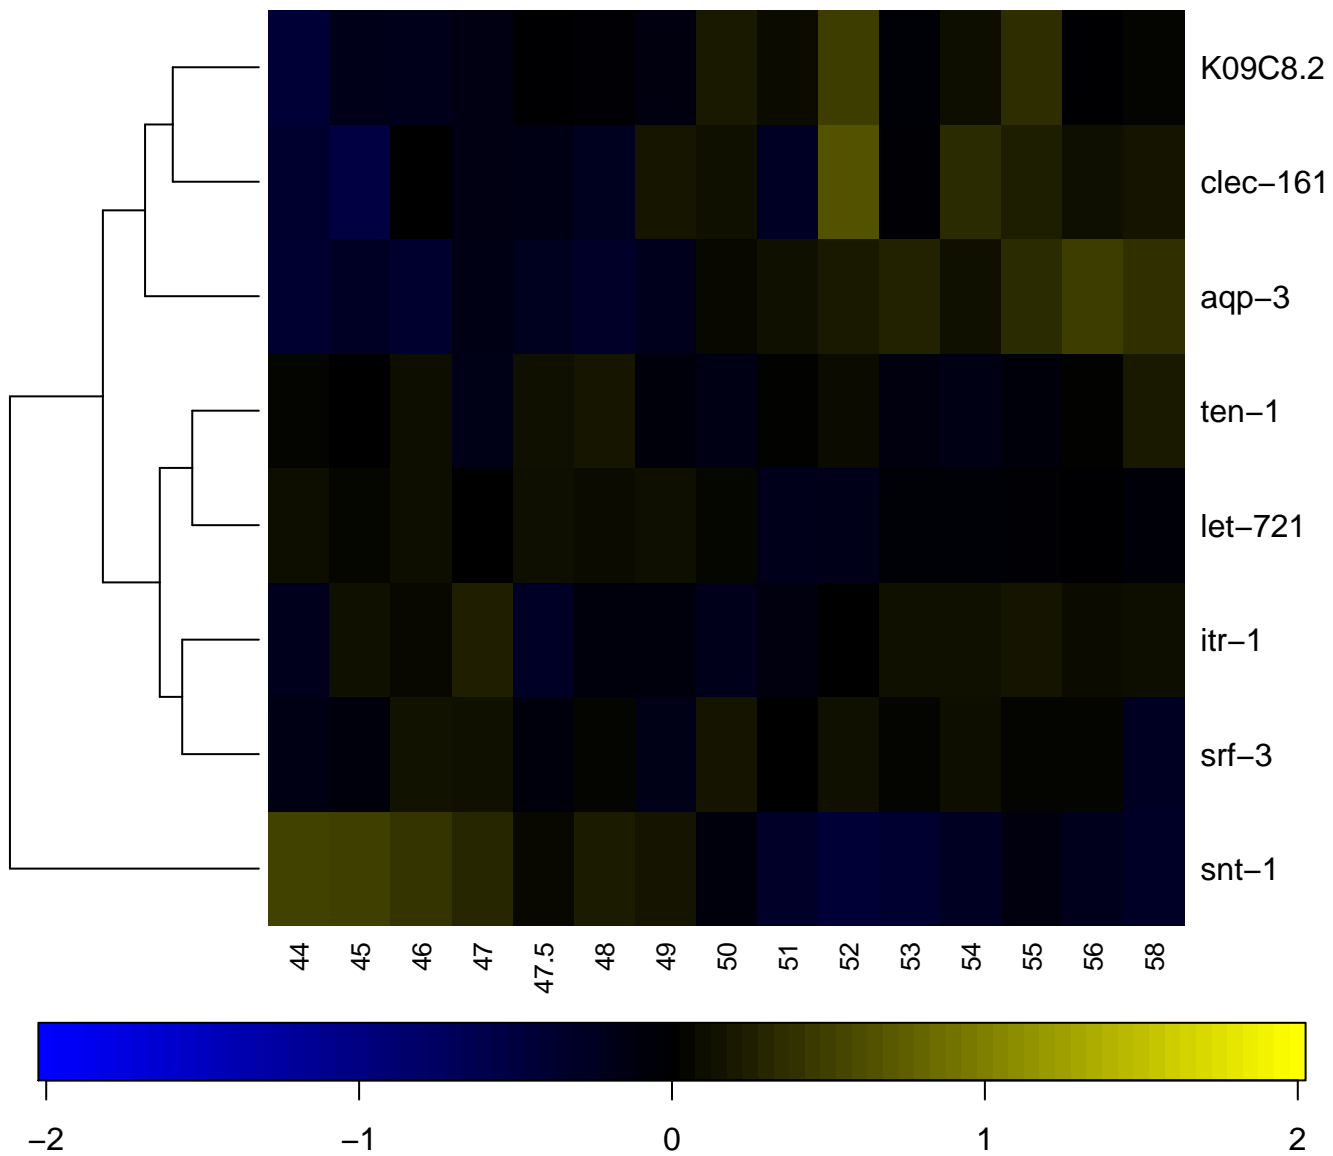

# VB neuron

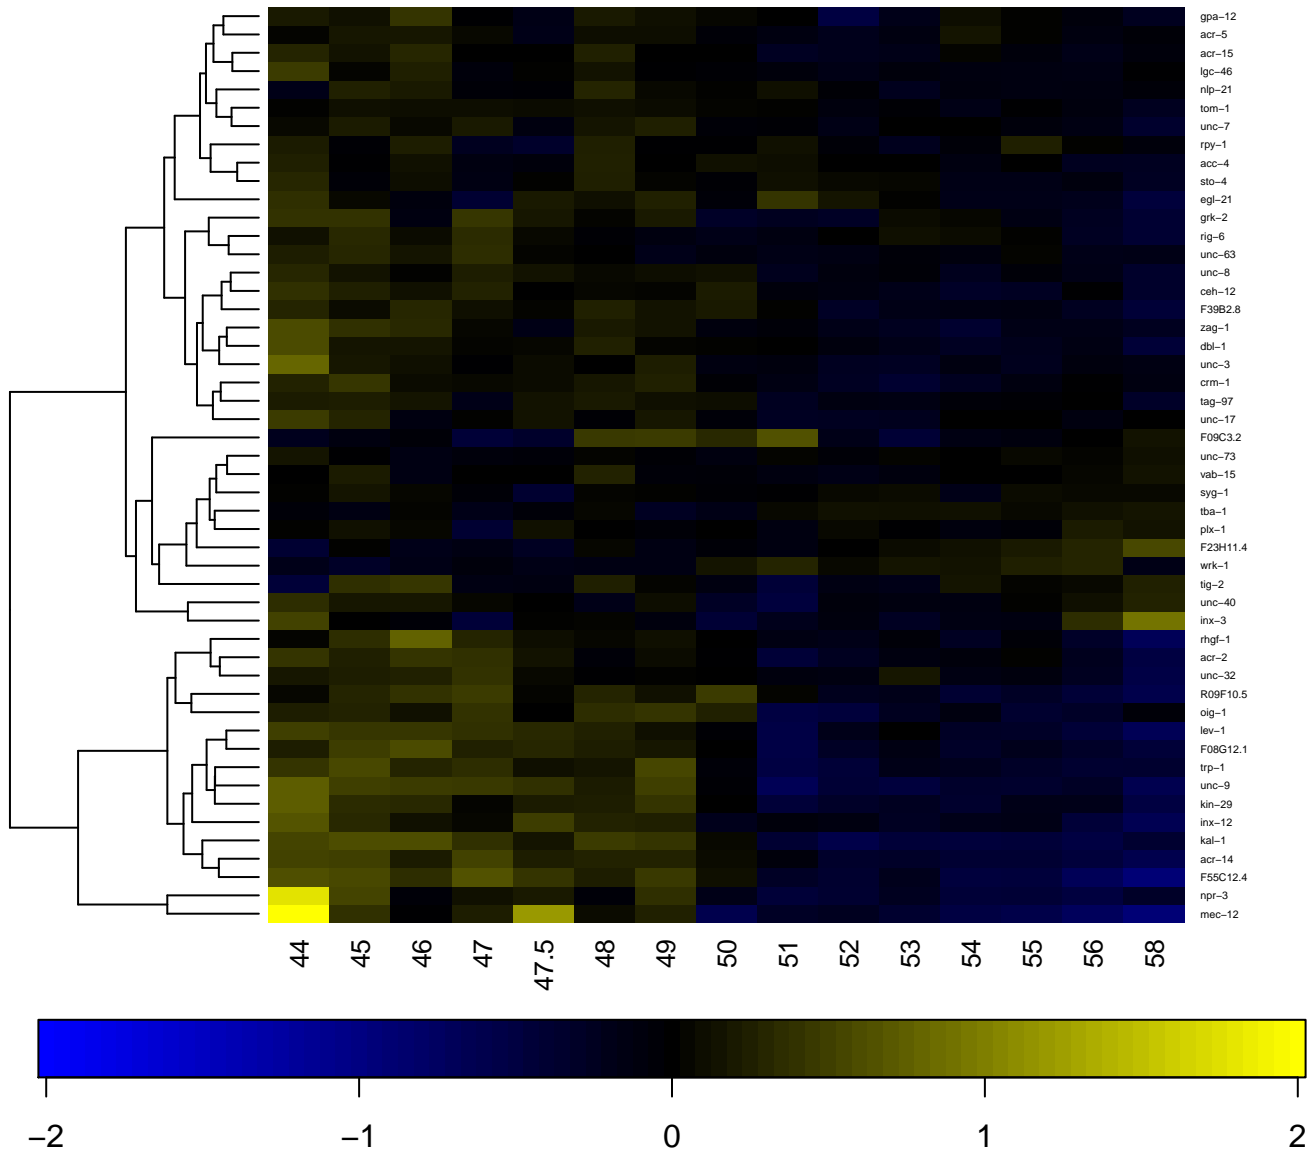







# VC1

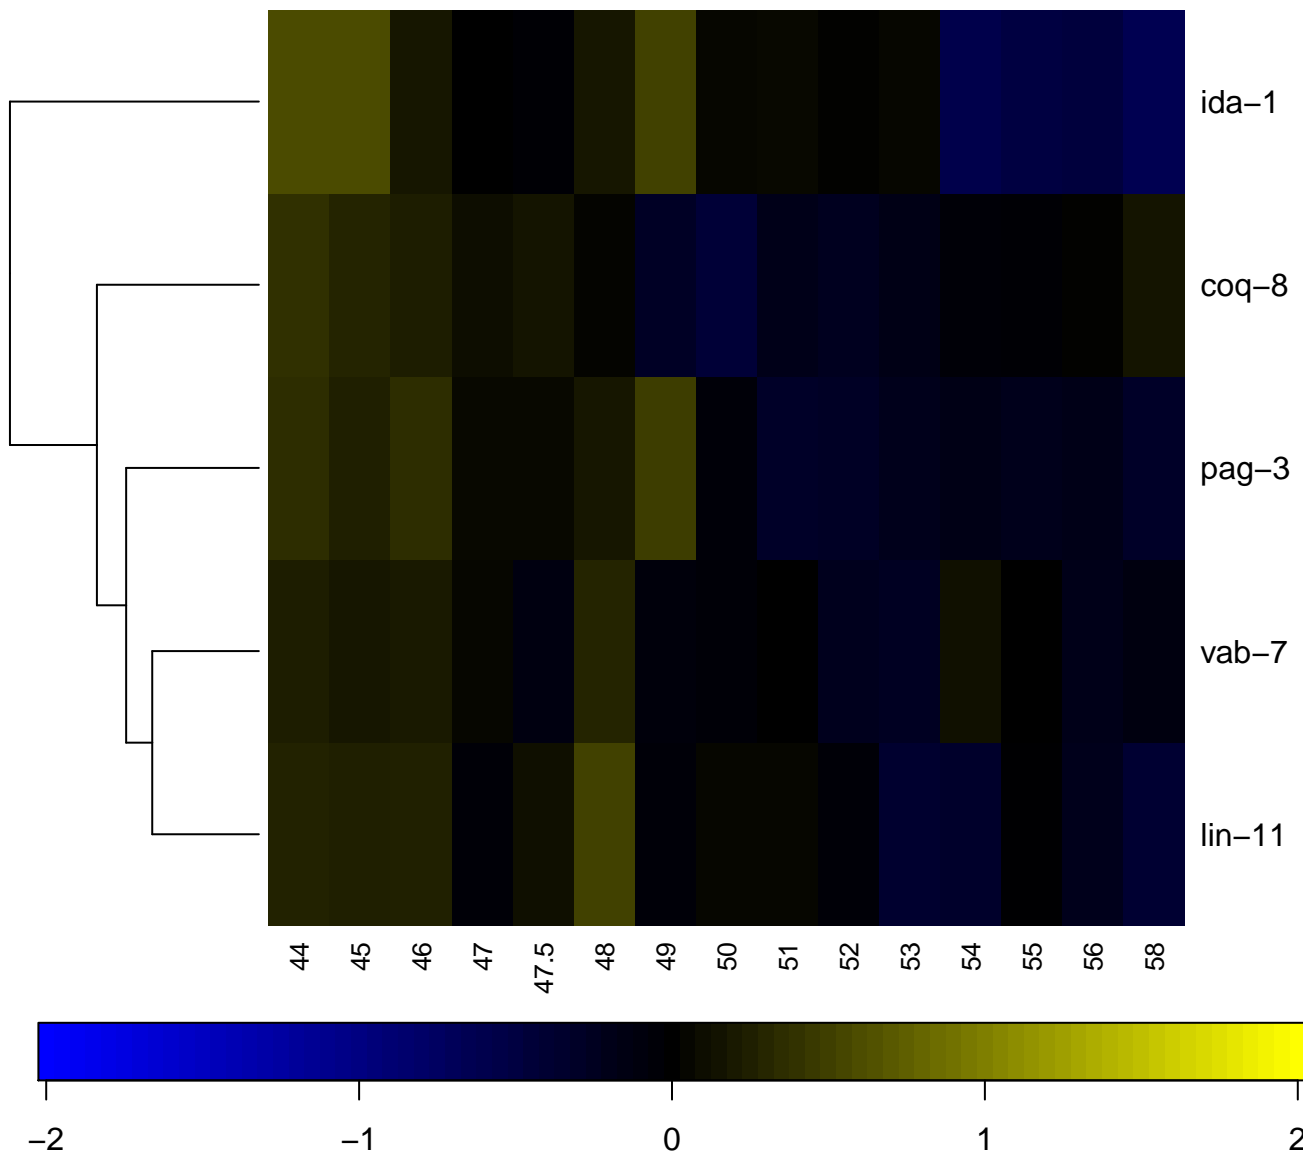

# VC2

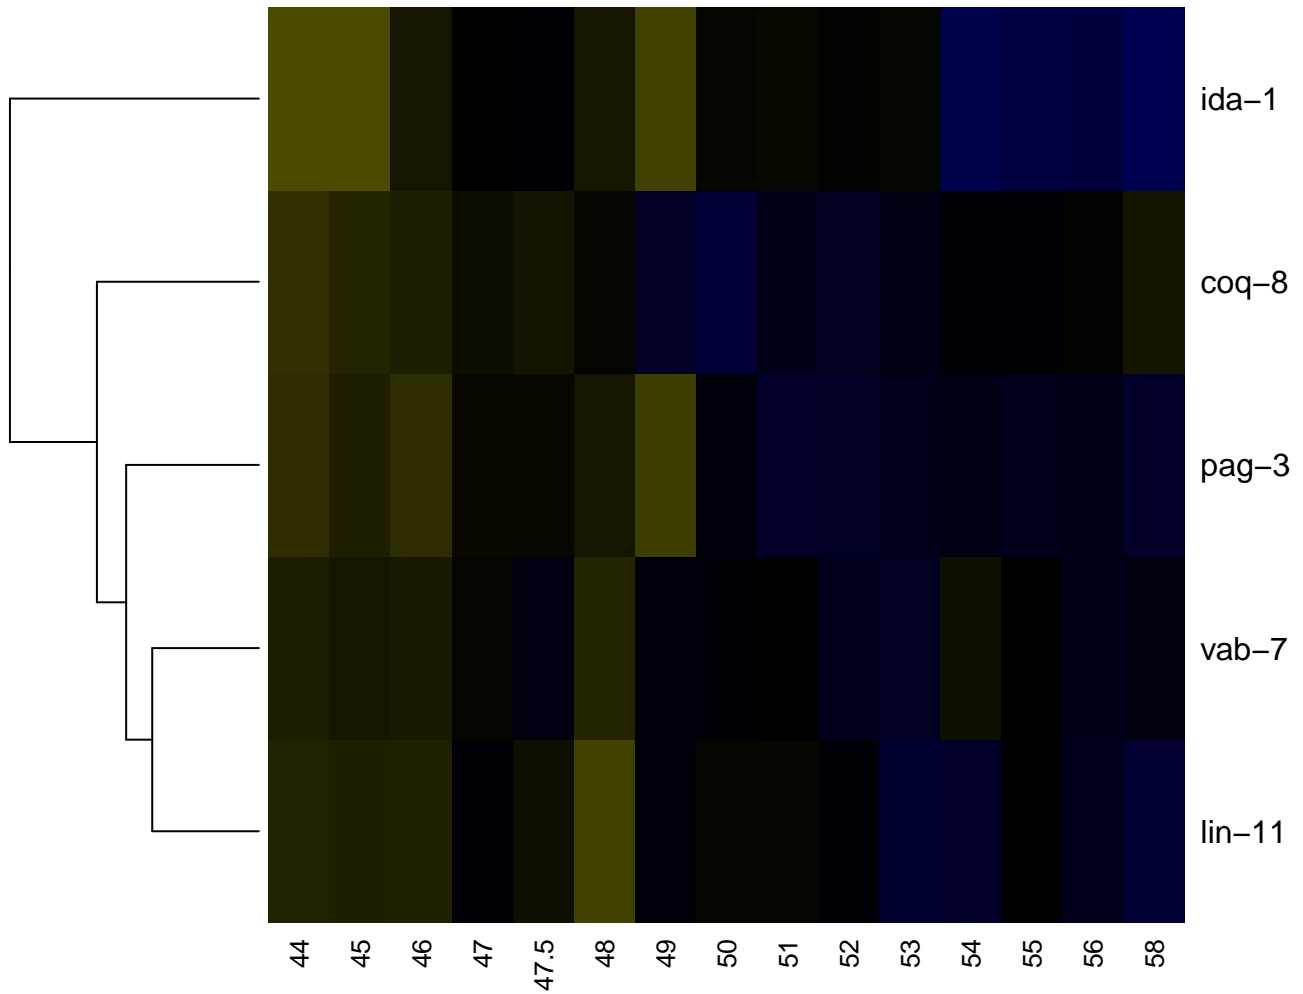

# VC3

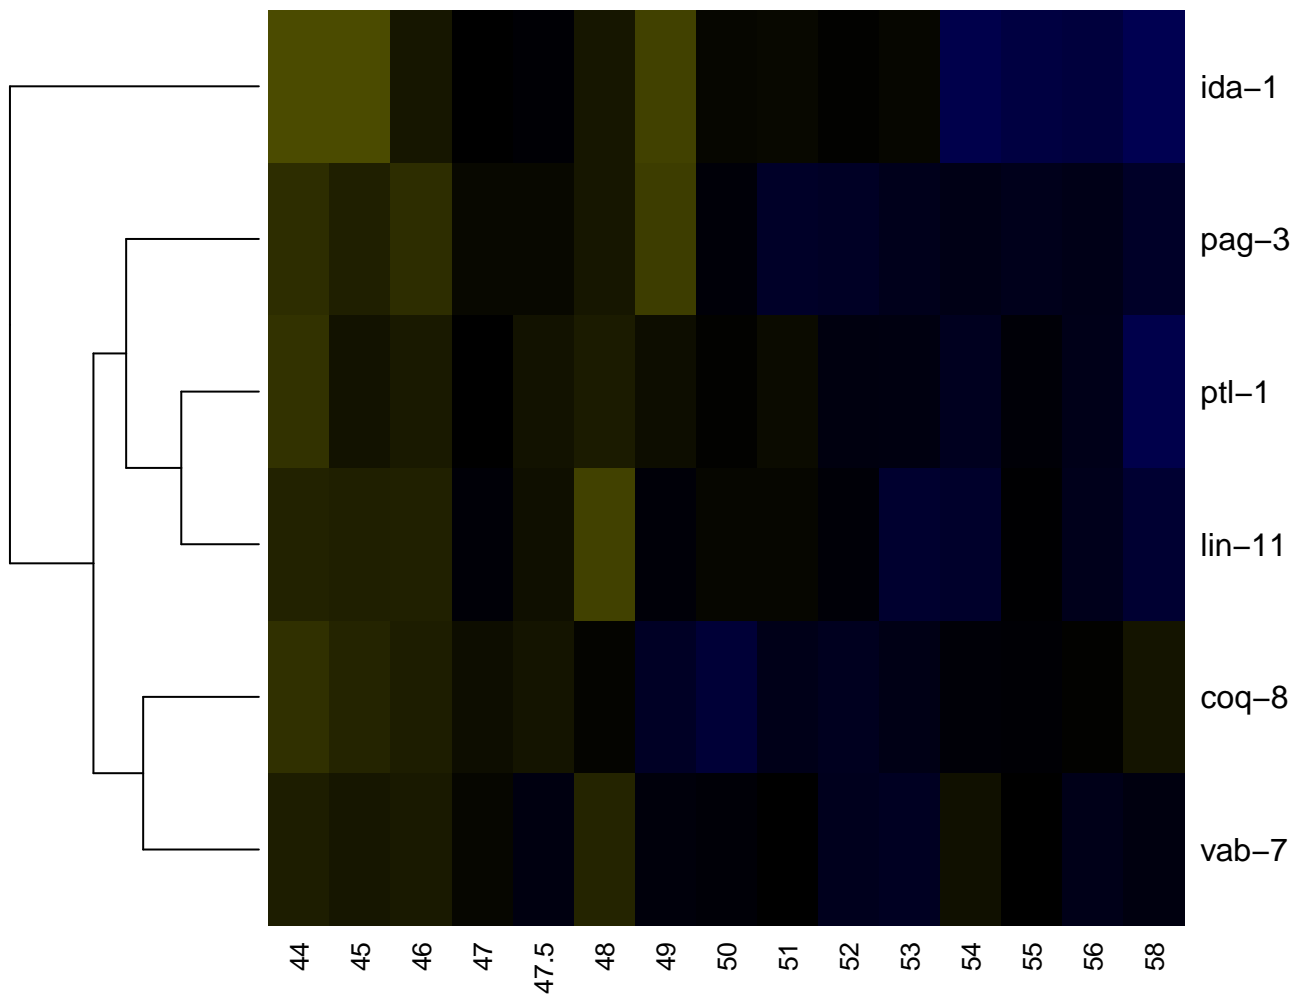

-2

-1

0

1

2

# VC4

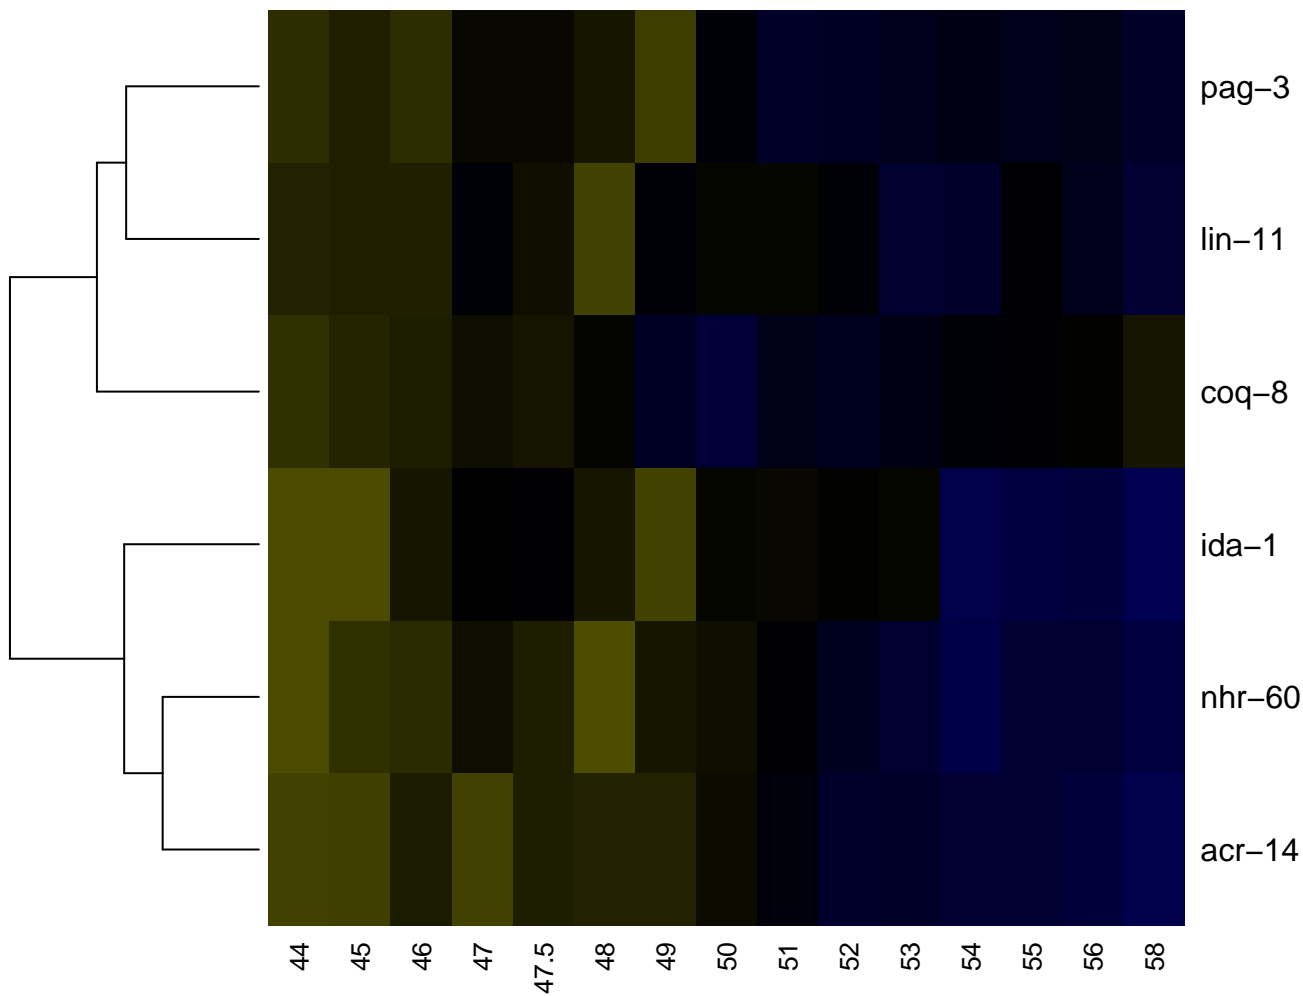

-2

-1

0

1

2

# VC5

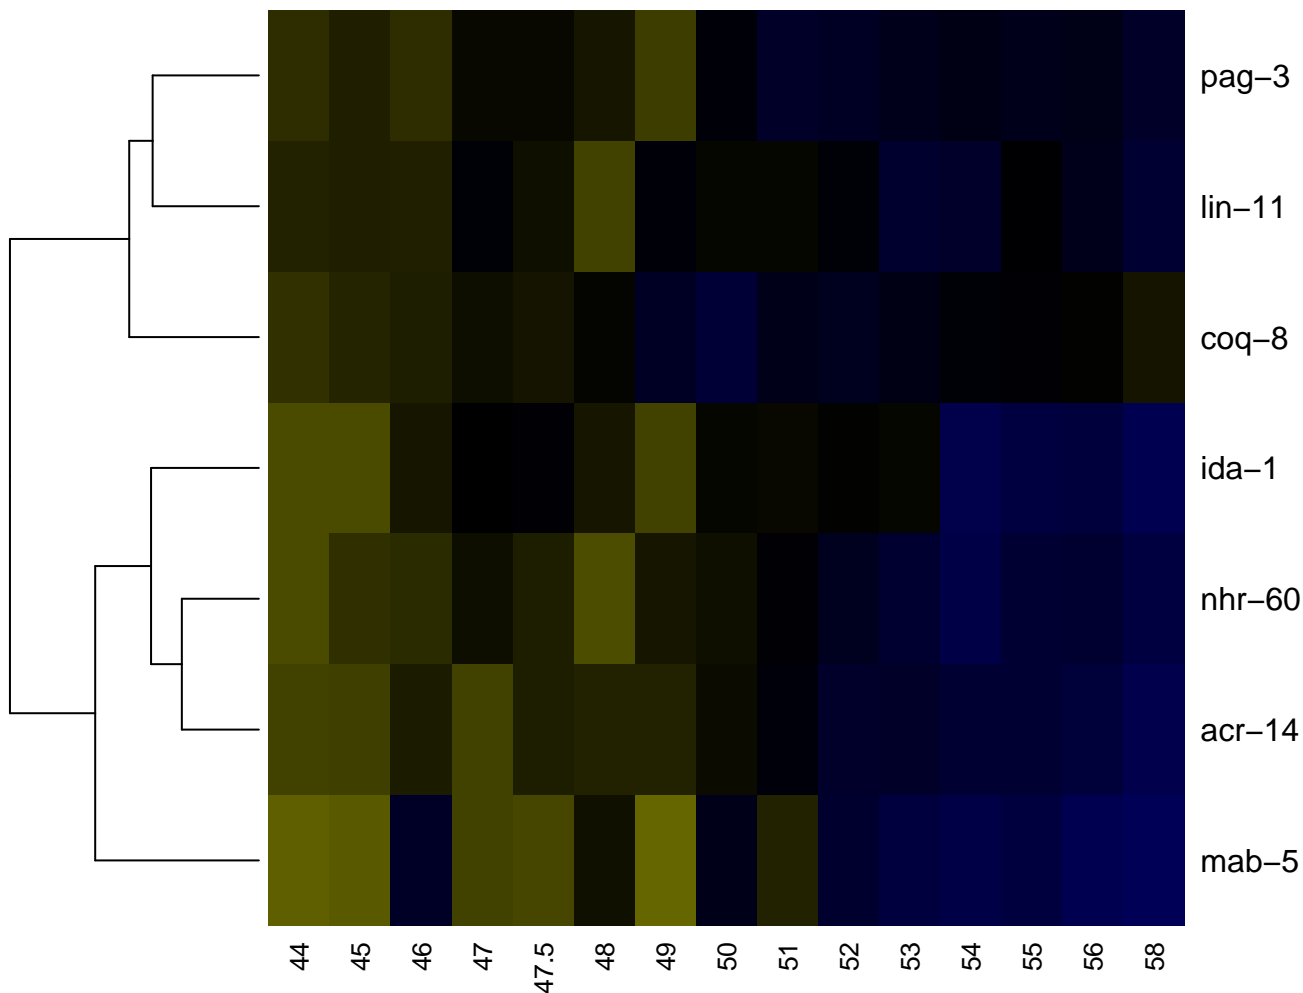

# VC6

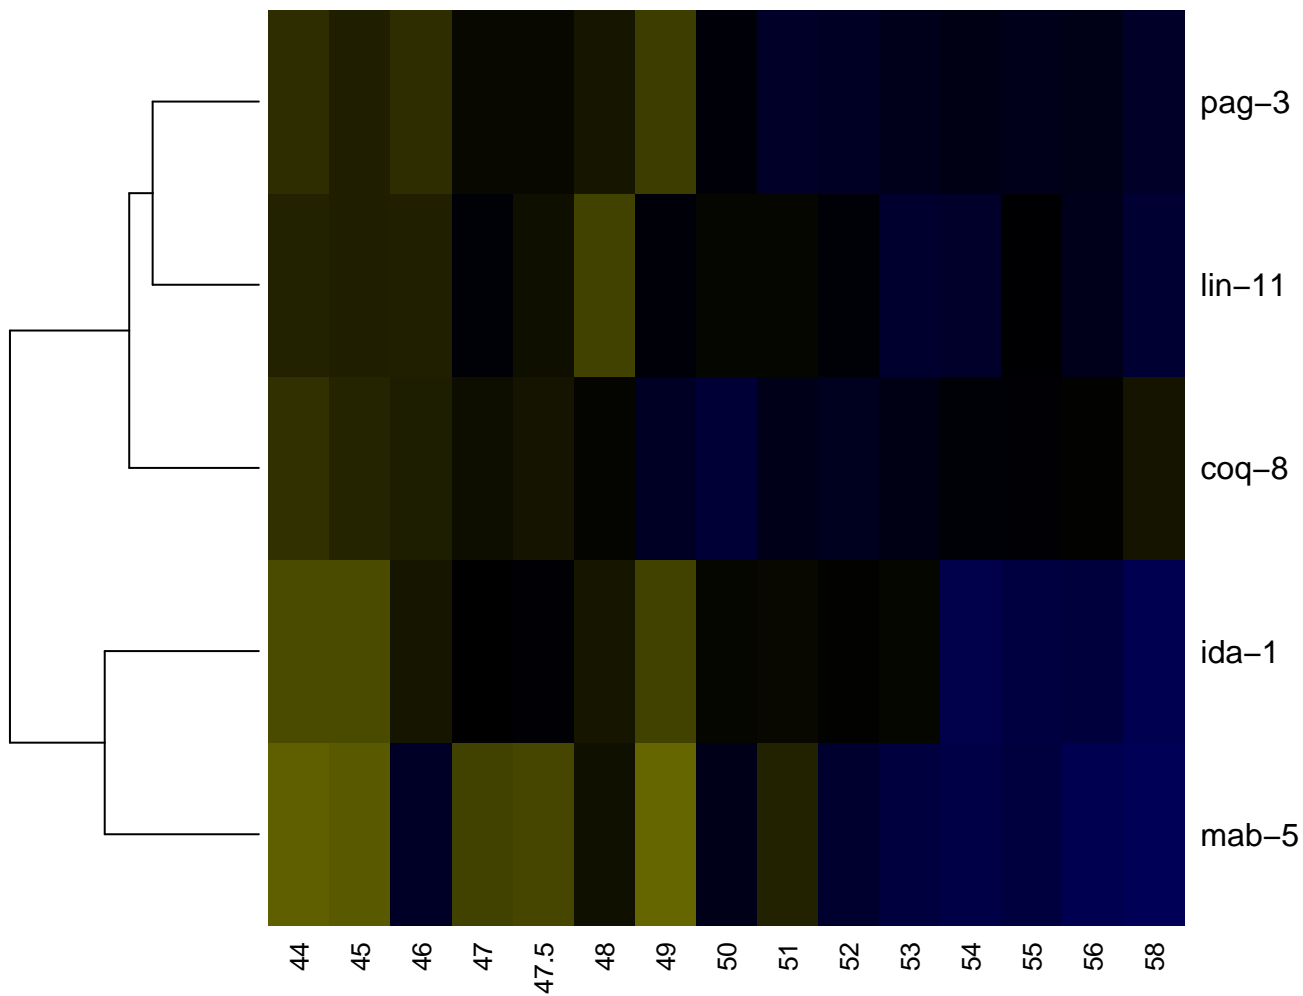



# VD neuron

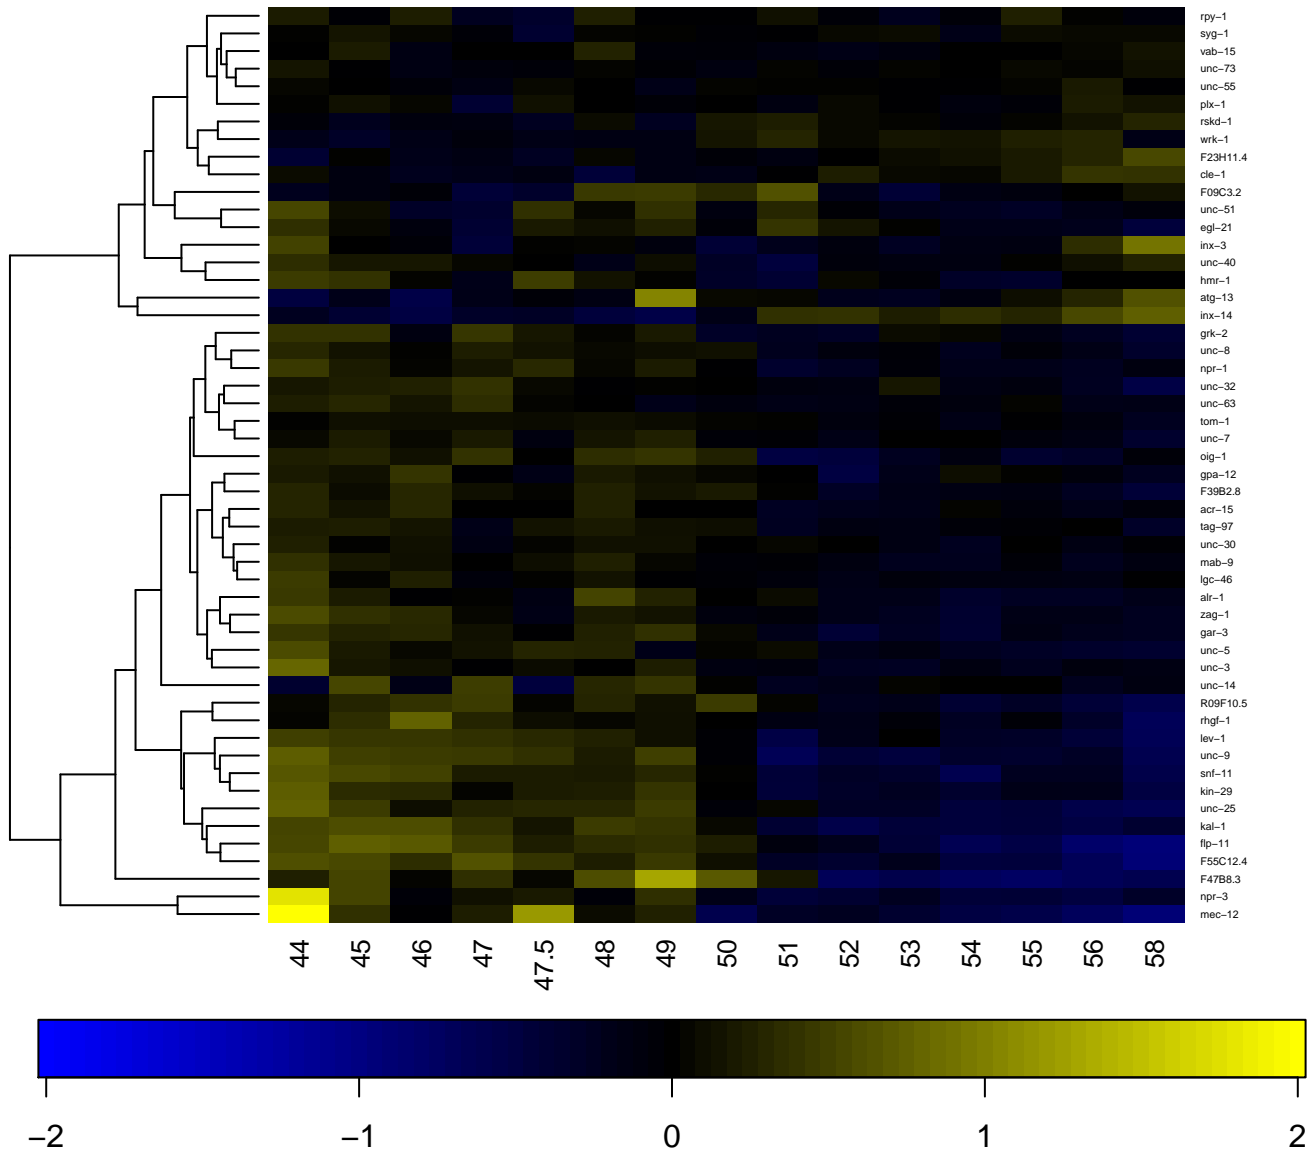

# VD12

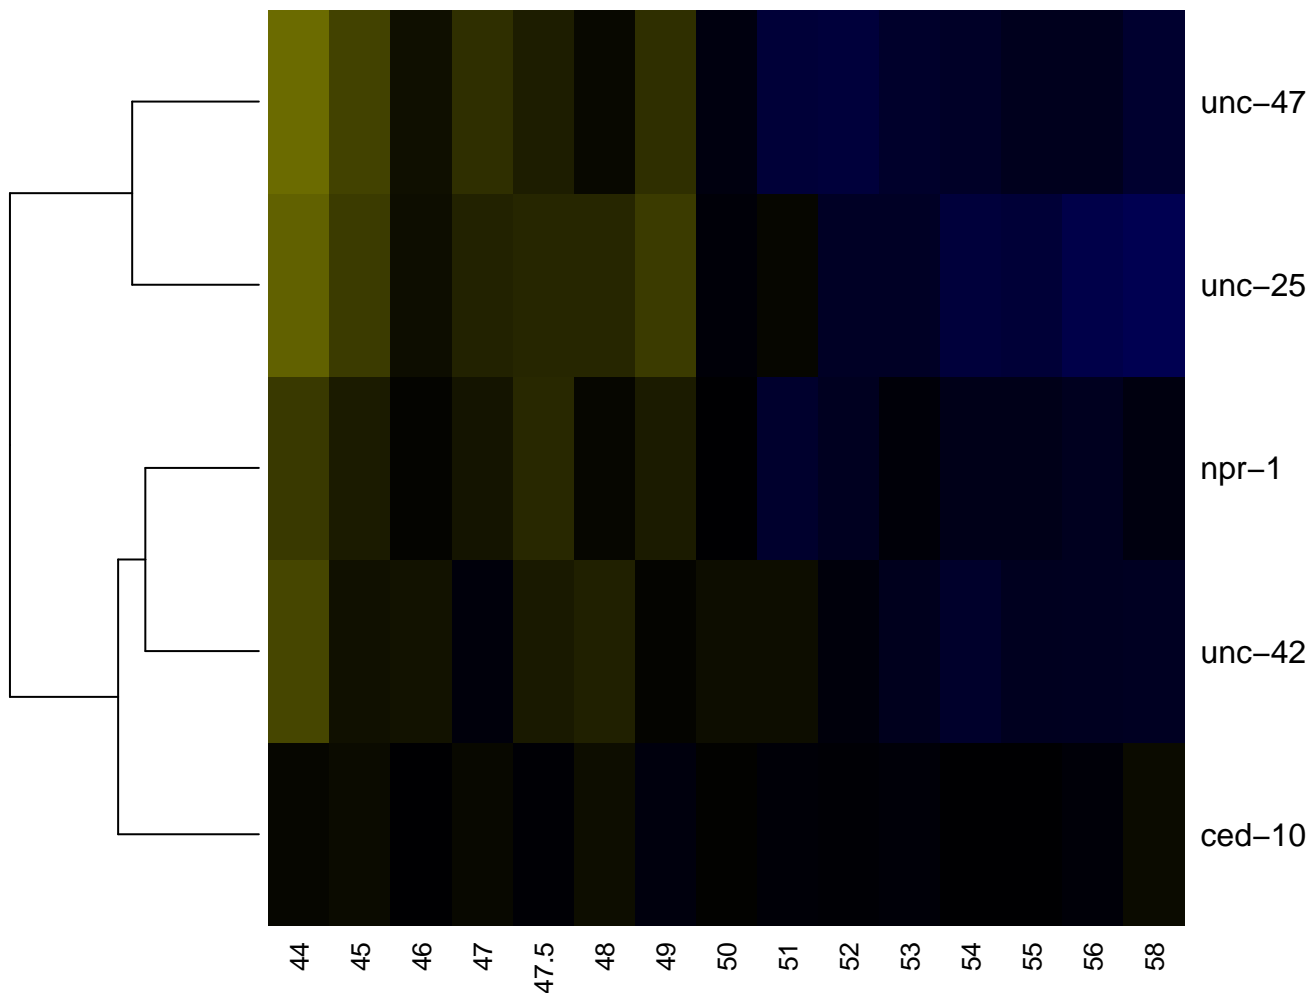

# VD13

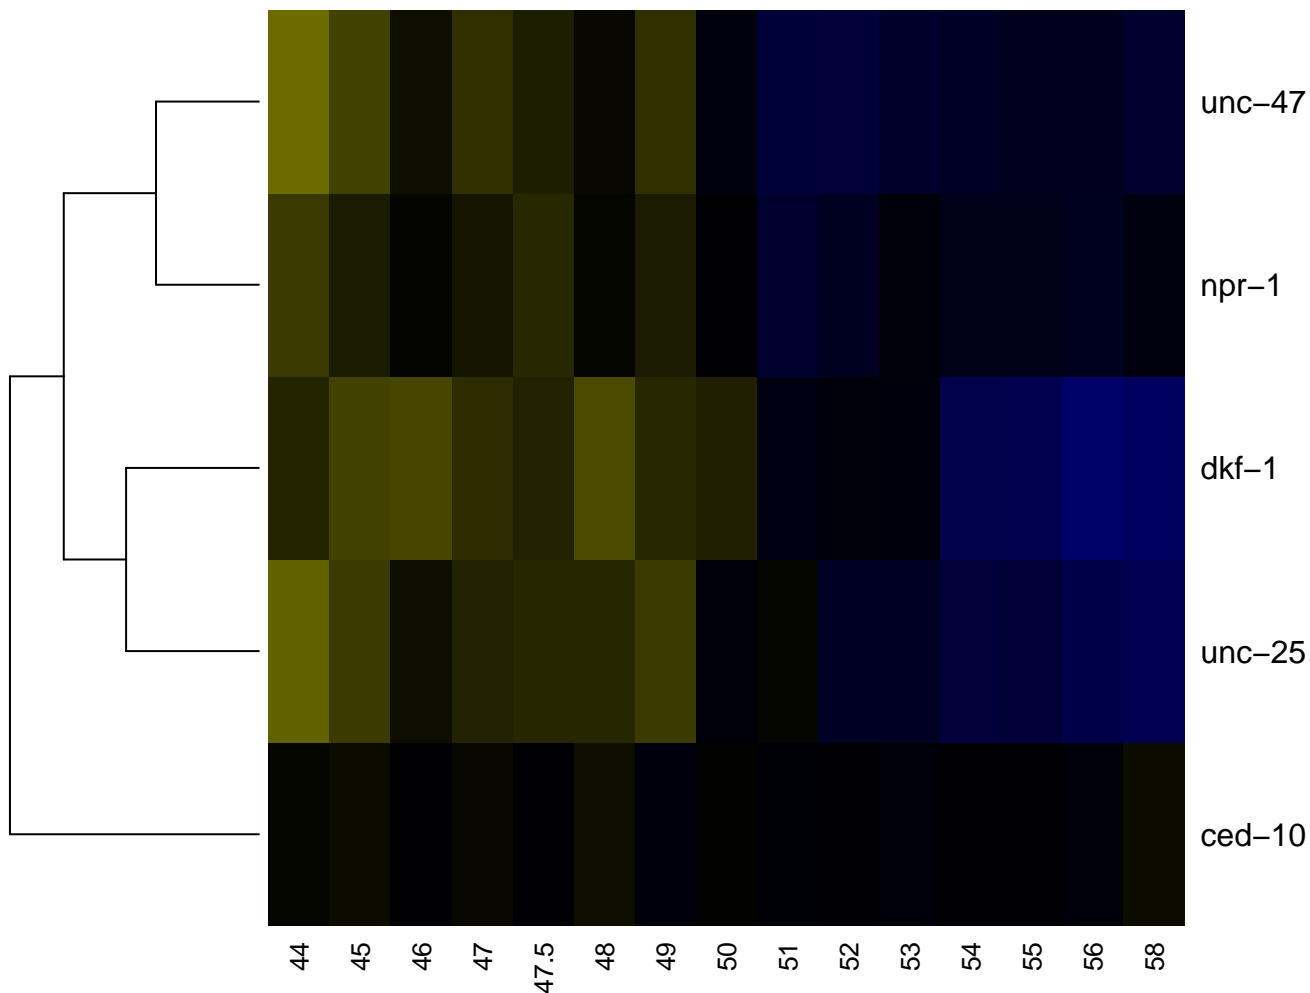

# ventral cord neuron

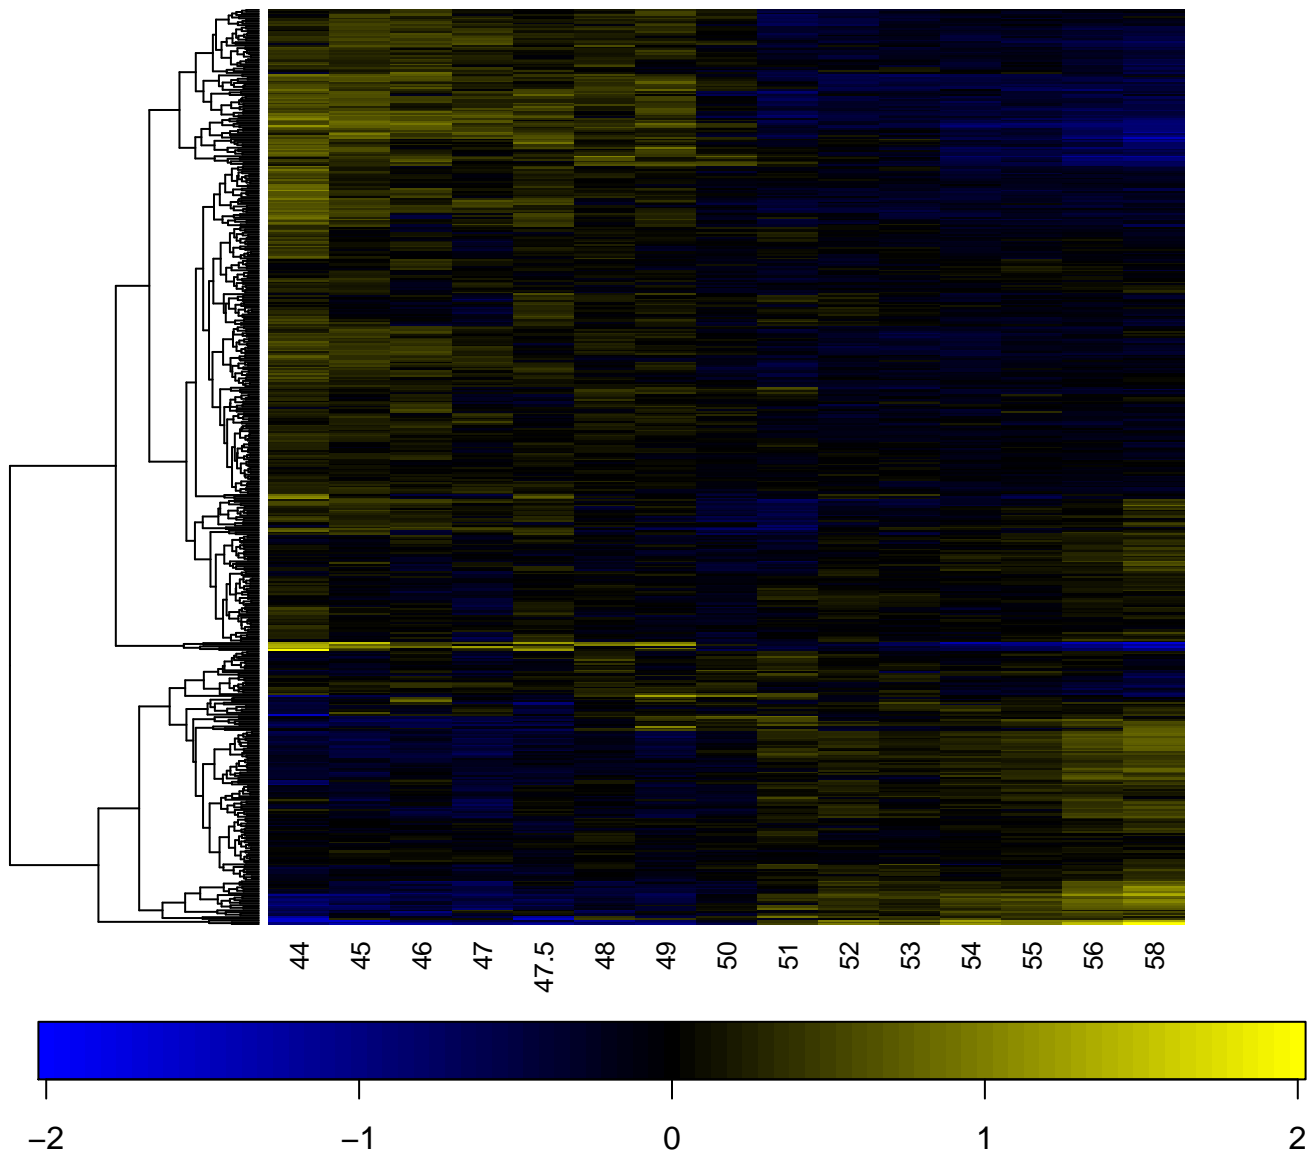

# ventral ganglion

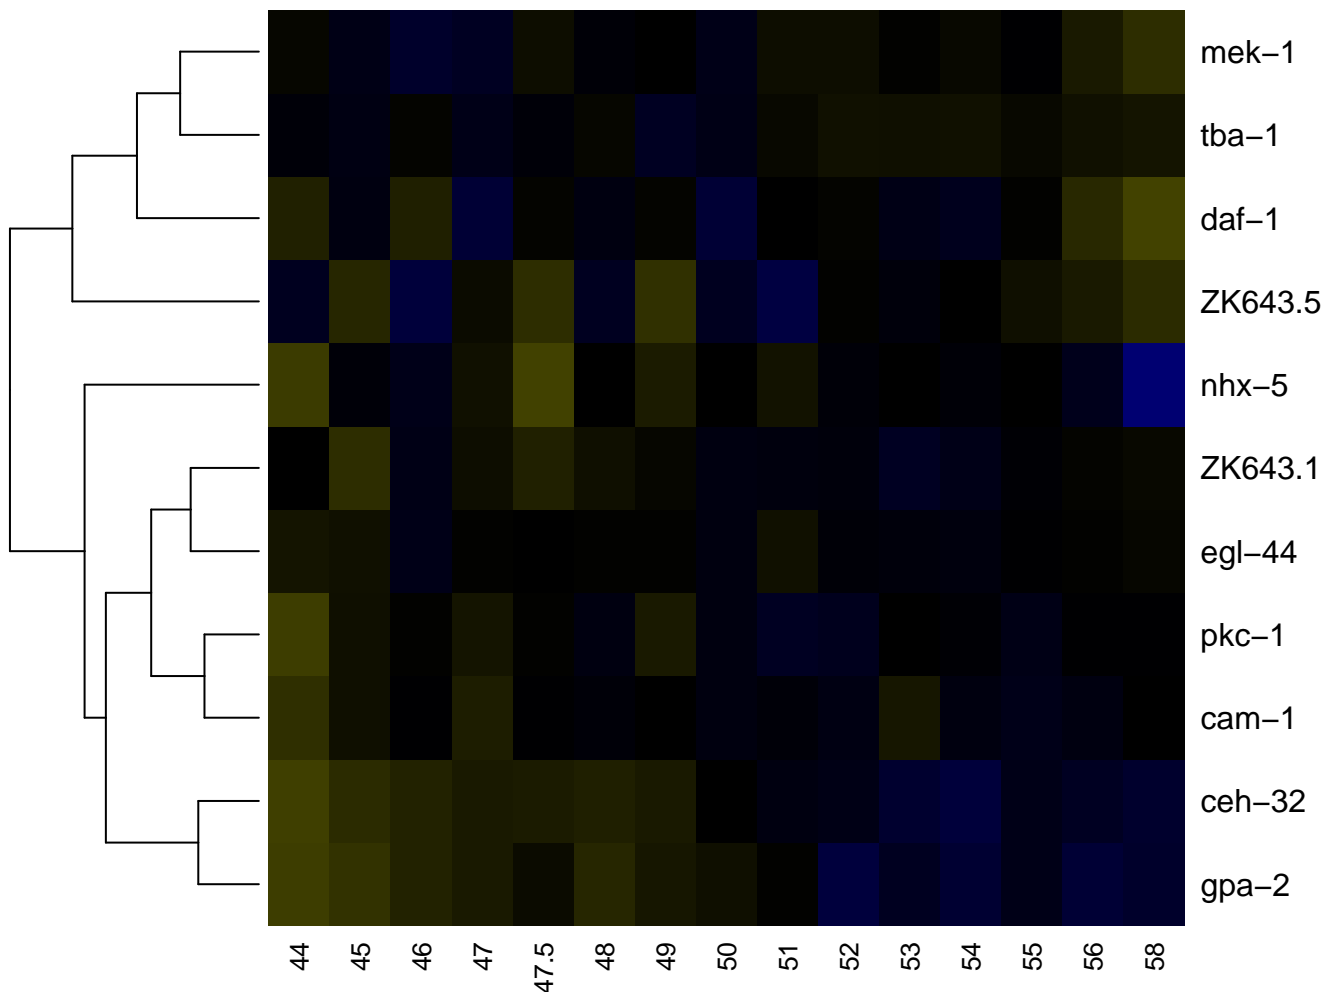

# ventral nerve cord

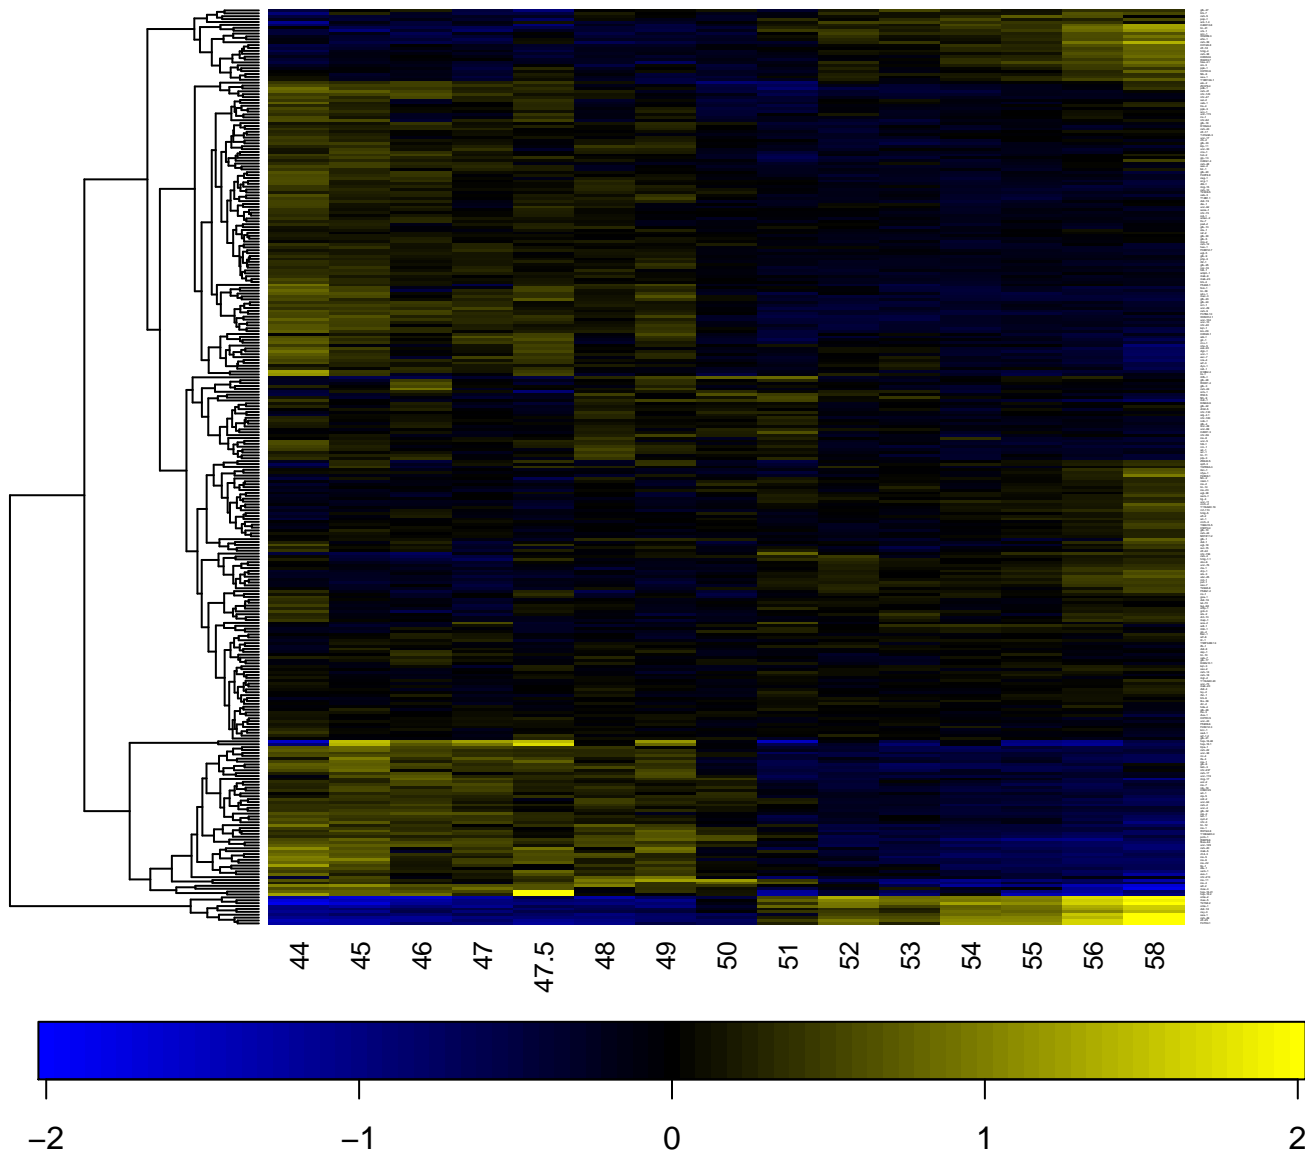

# ventral uterine precursor

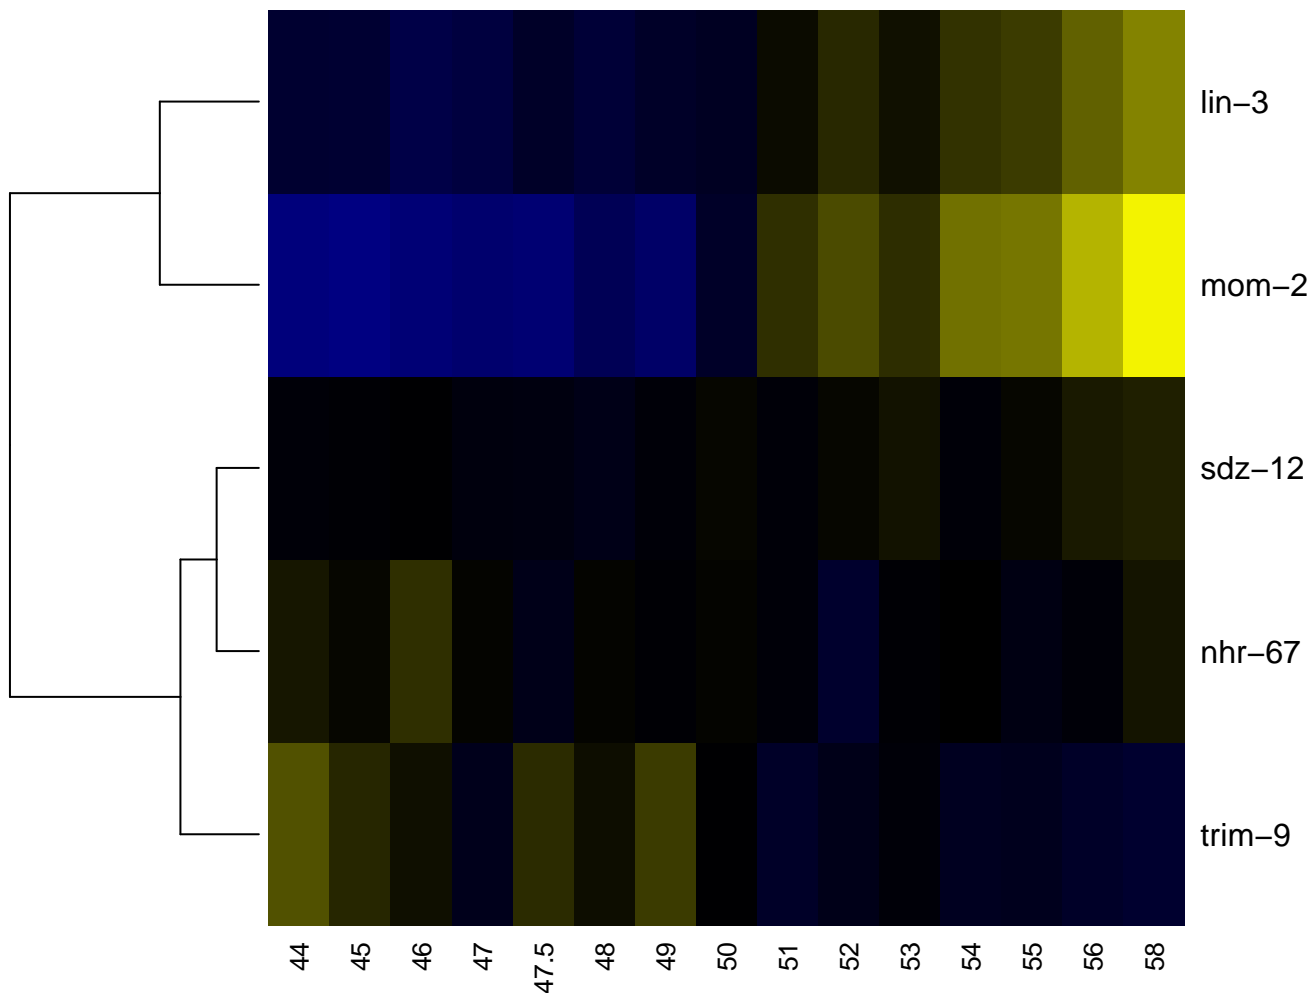

# virL

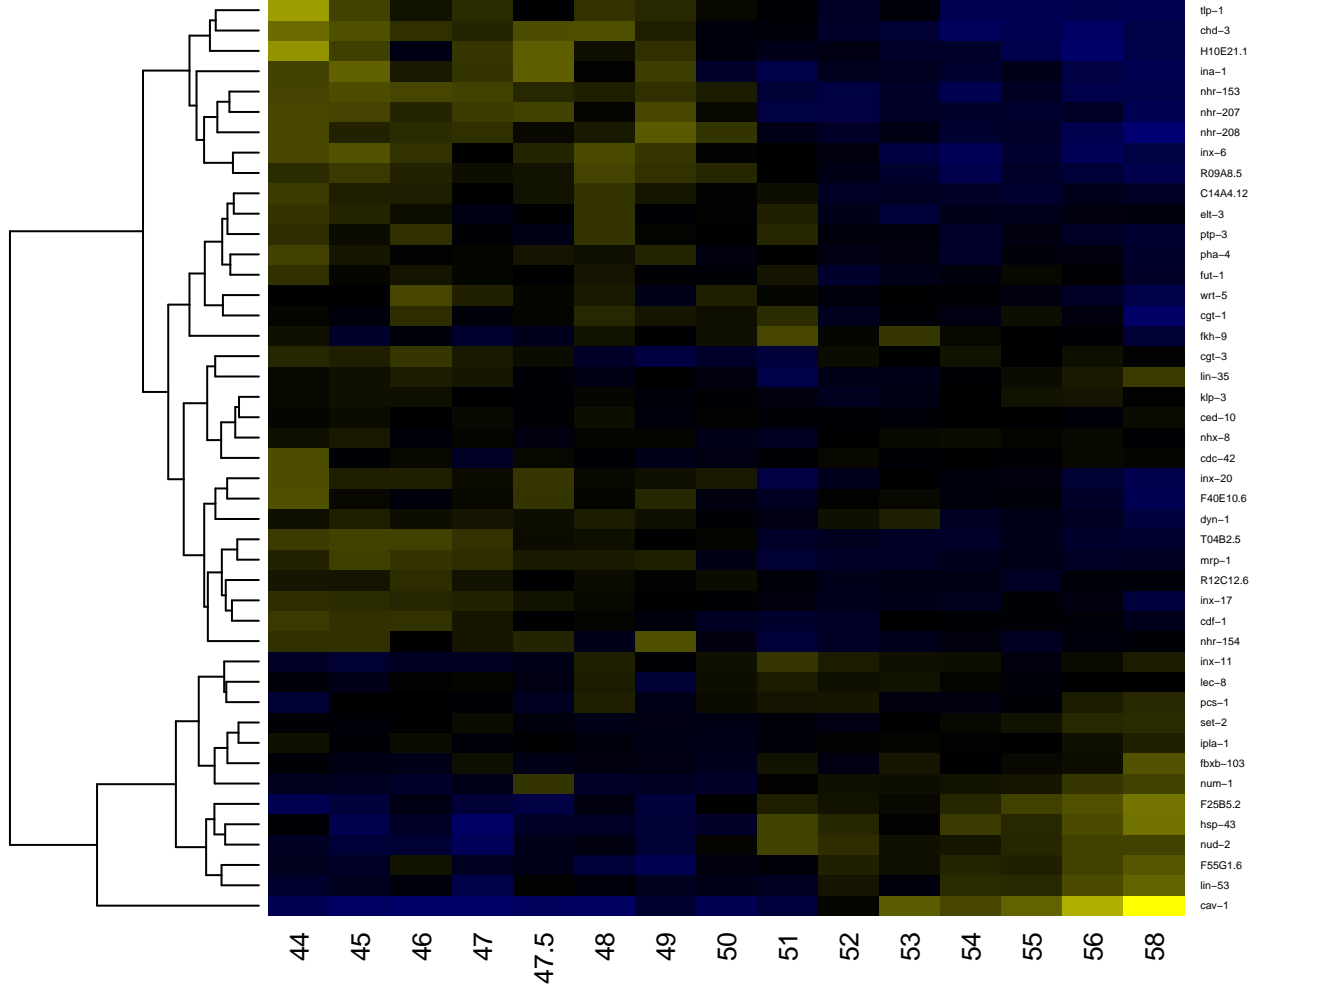

-2

-1

0

1

2



# virR

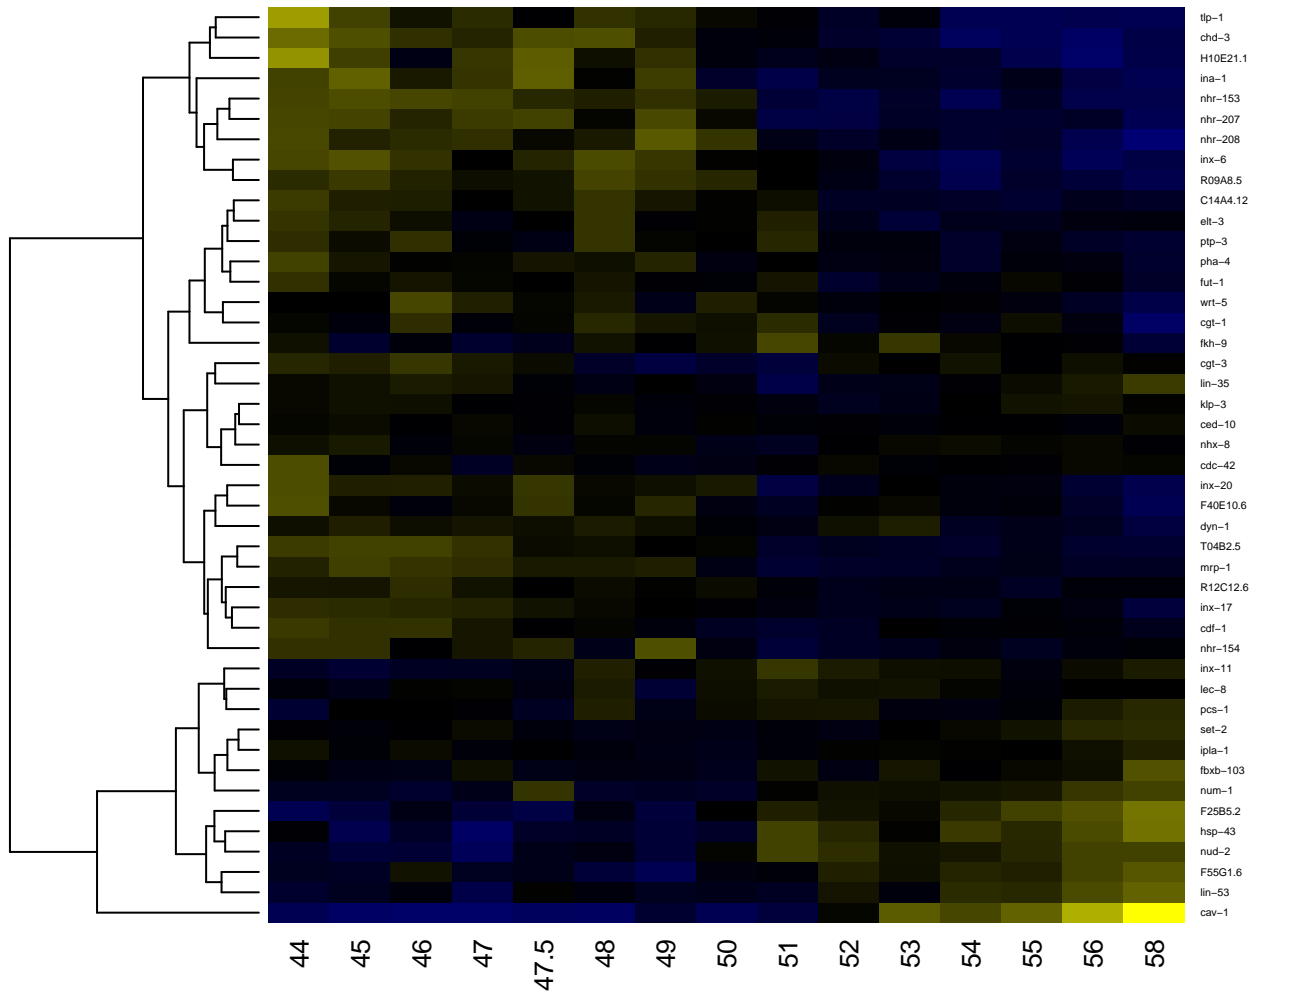

# vm1

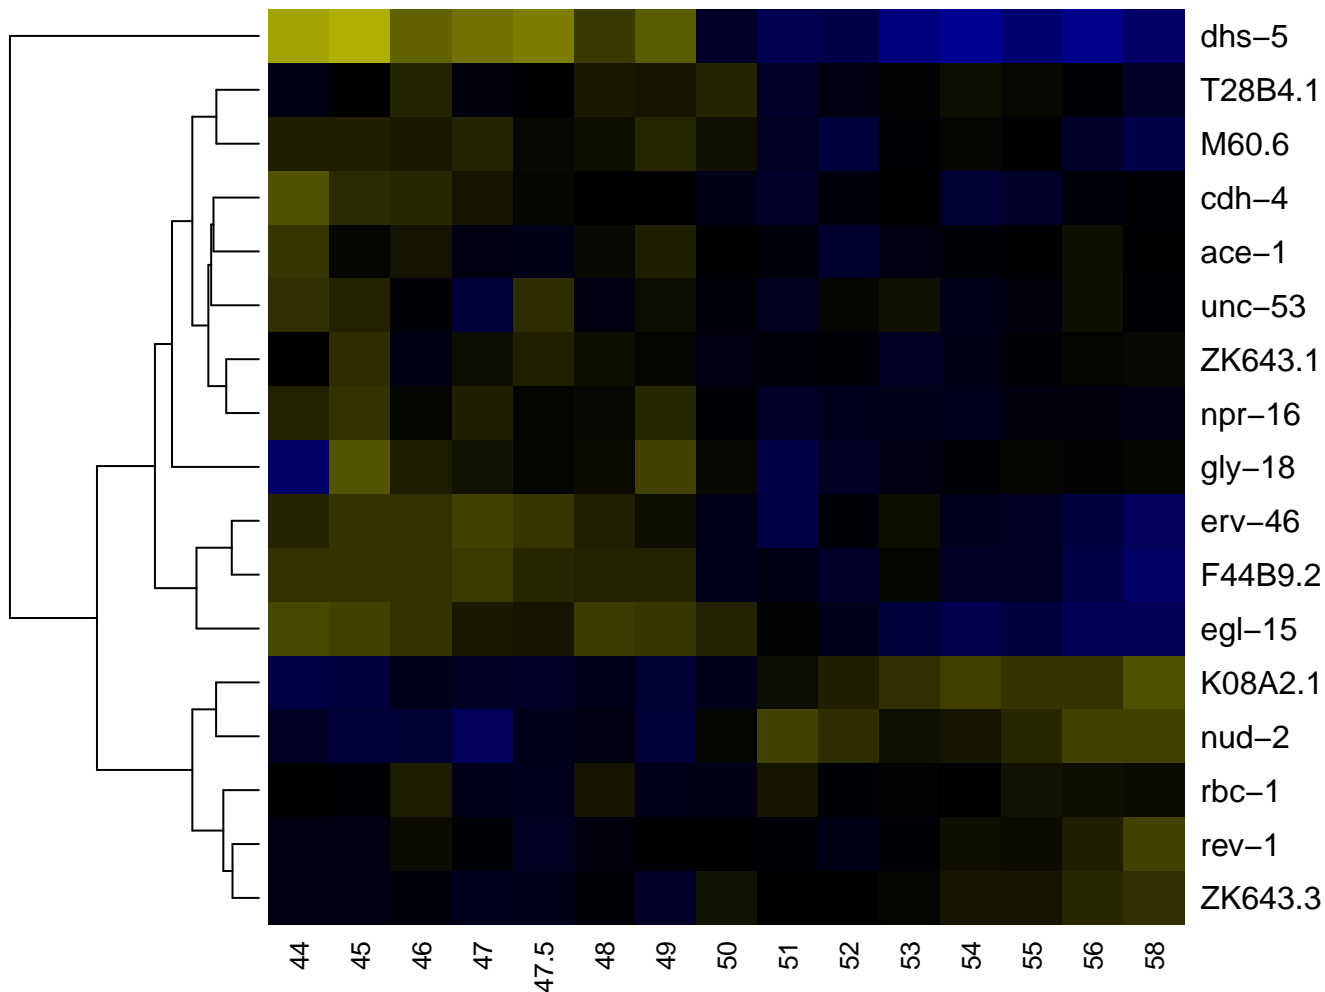

# vpi1



# vpi2DL





# vpi2V



# vpi3D



# vpi3V





# vulA

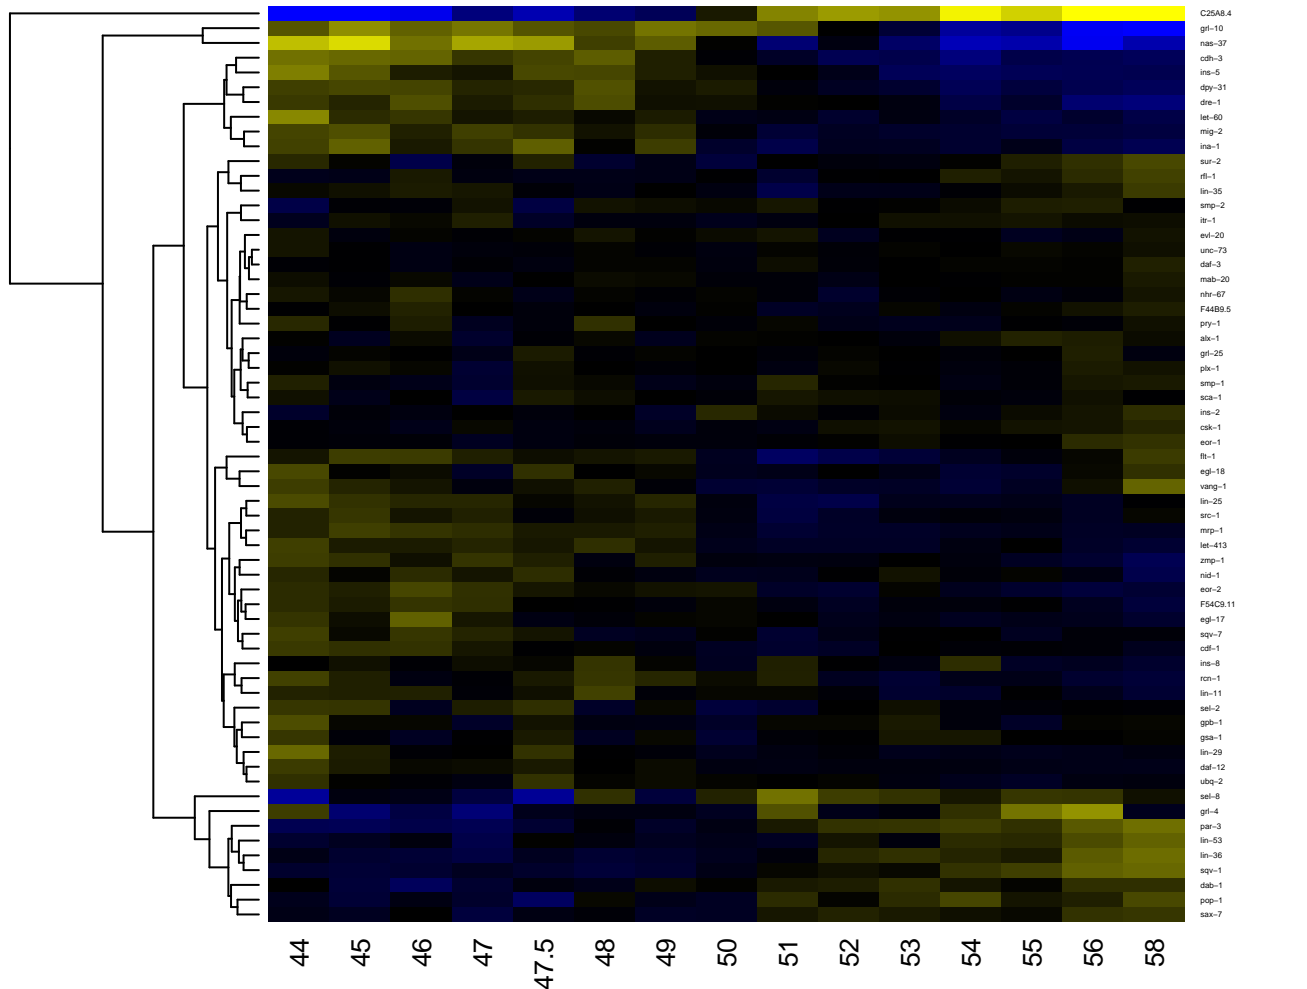

-2

-1

0

1

2

# vulB1

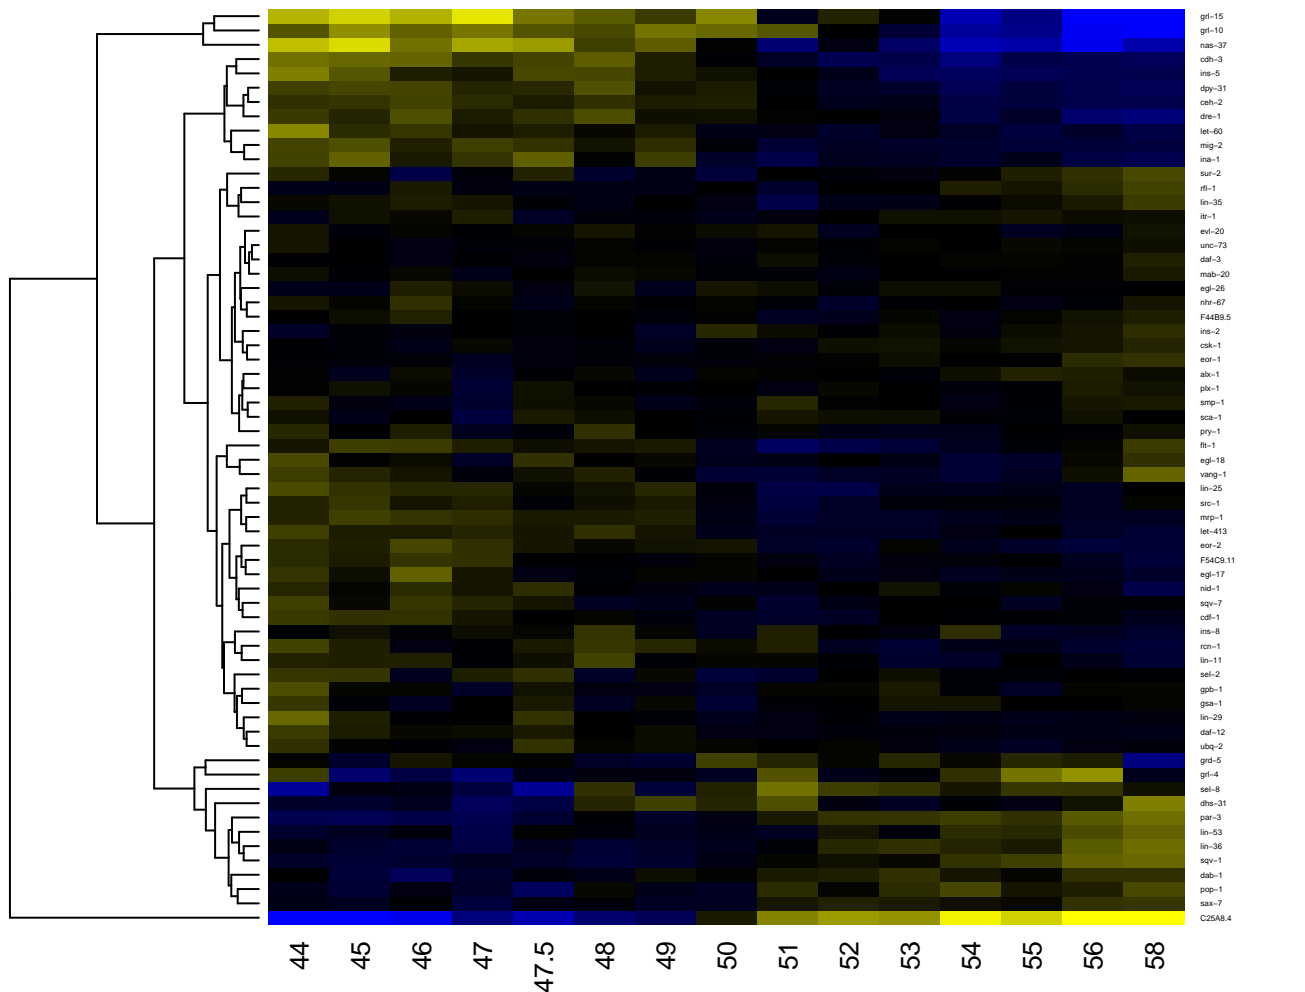

-2

-1

0

1

2

# vulB2

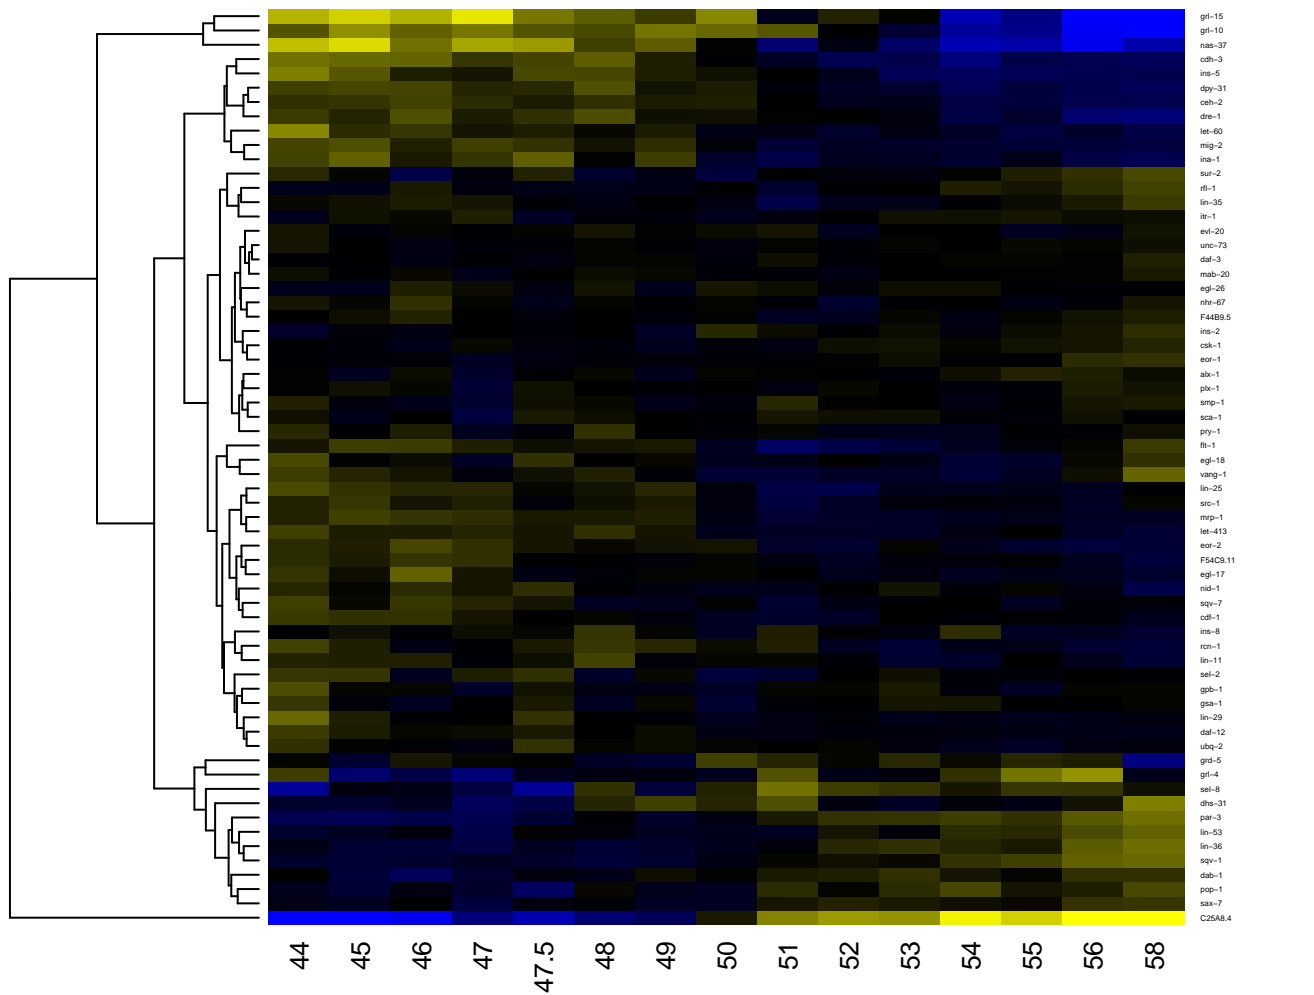

-2

-1

0

1

2

# vulC

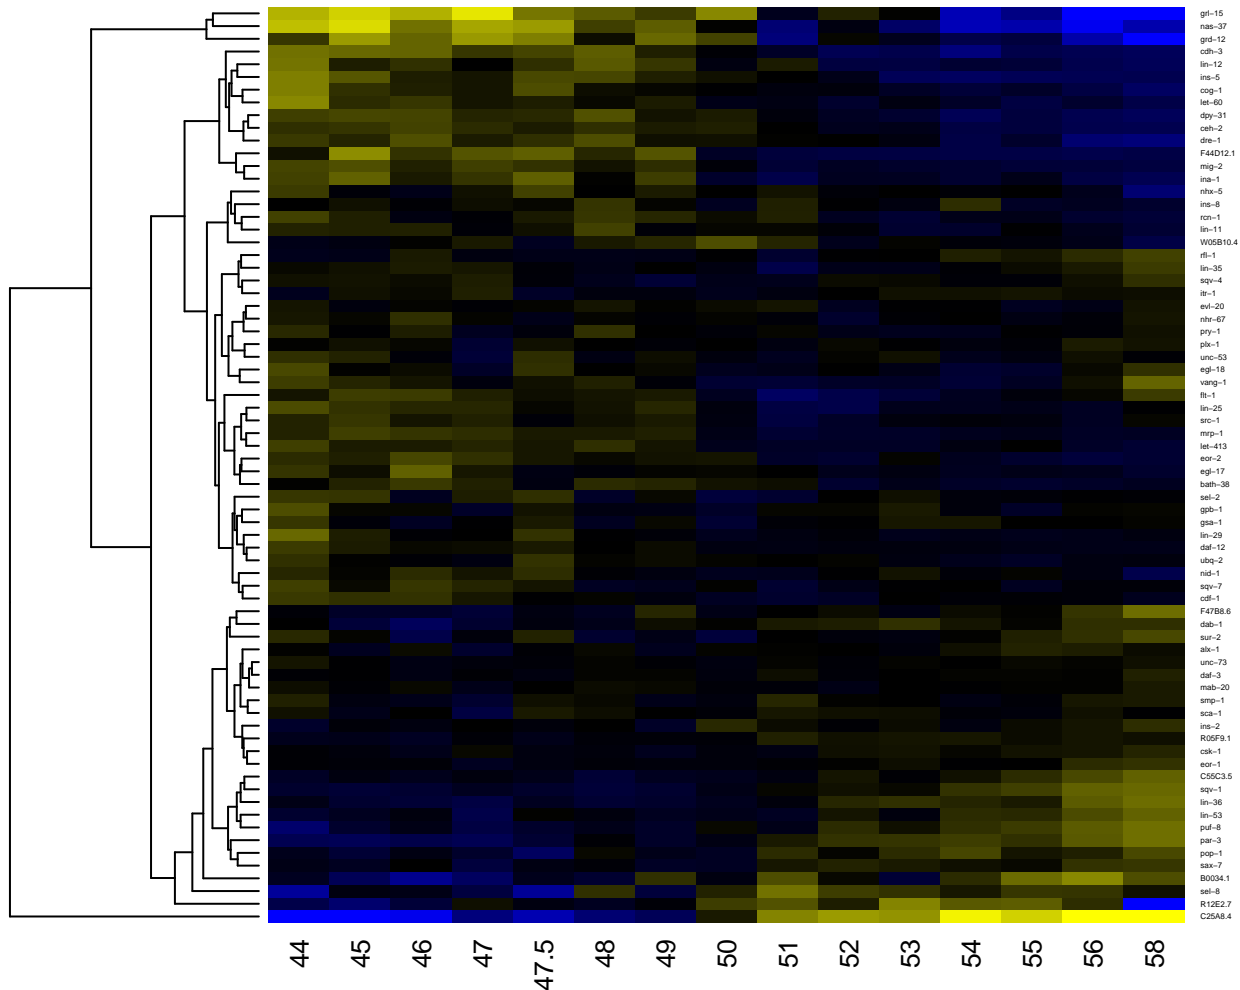

# vulD

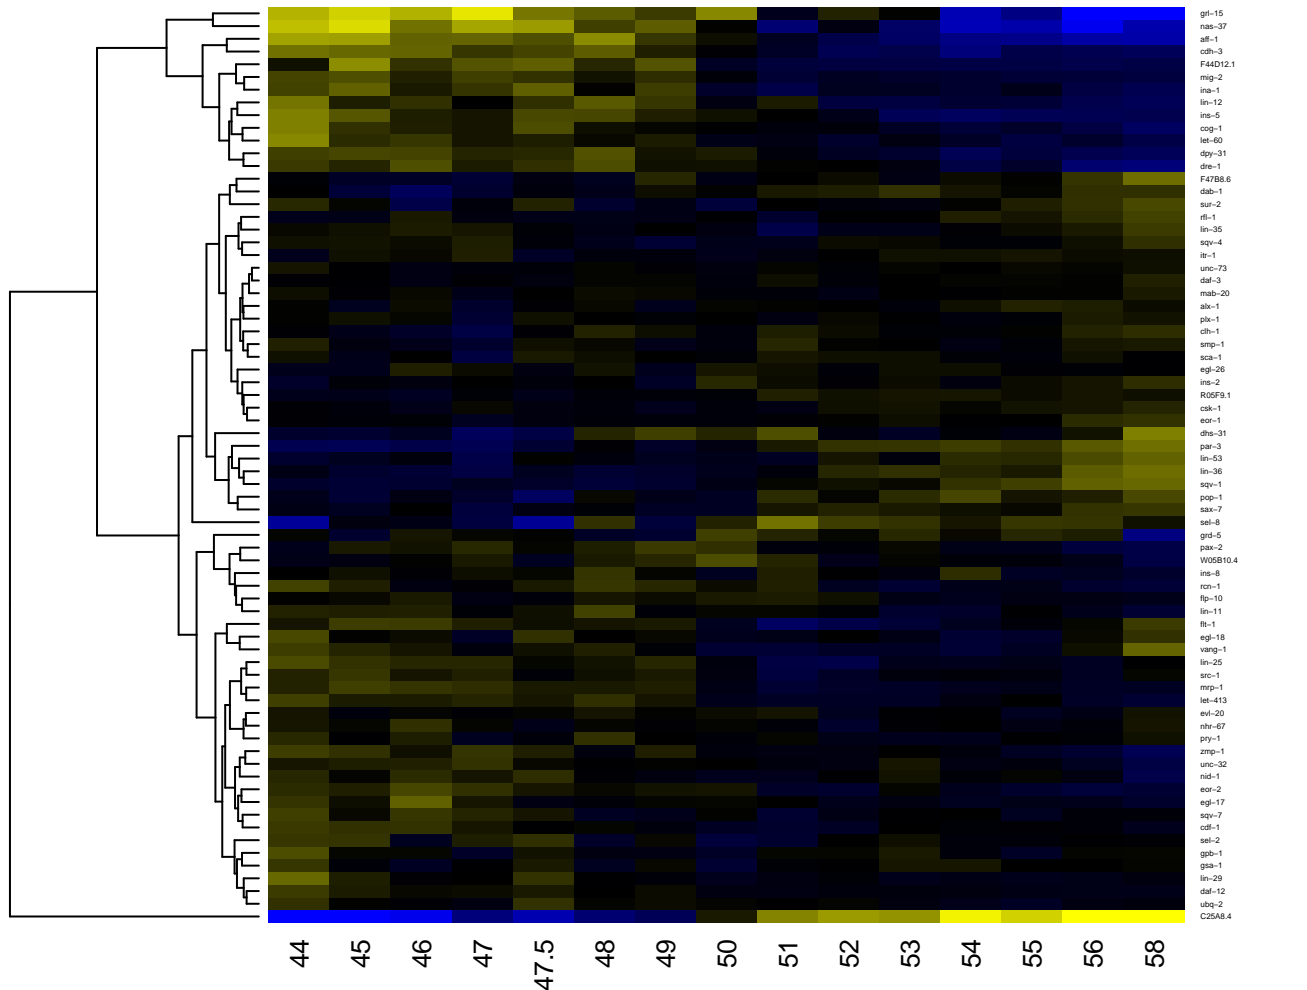

# vulE

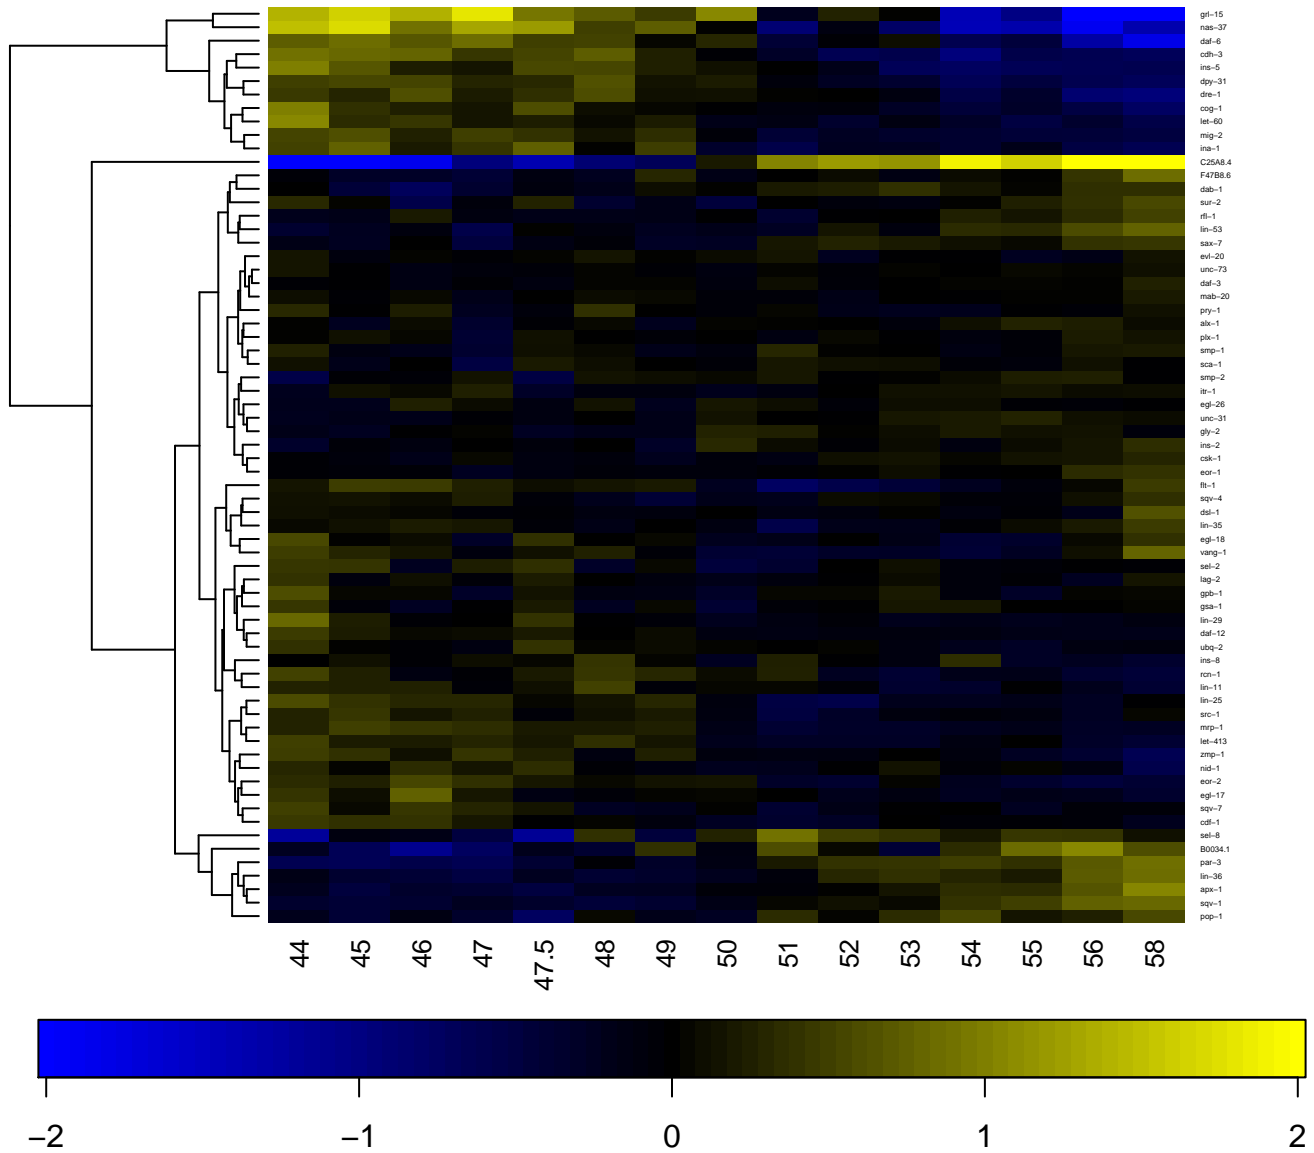

# vulF

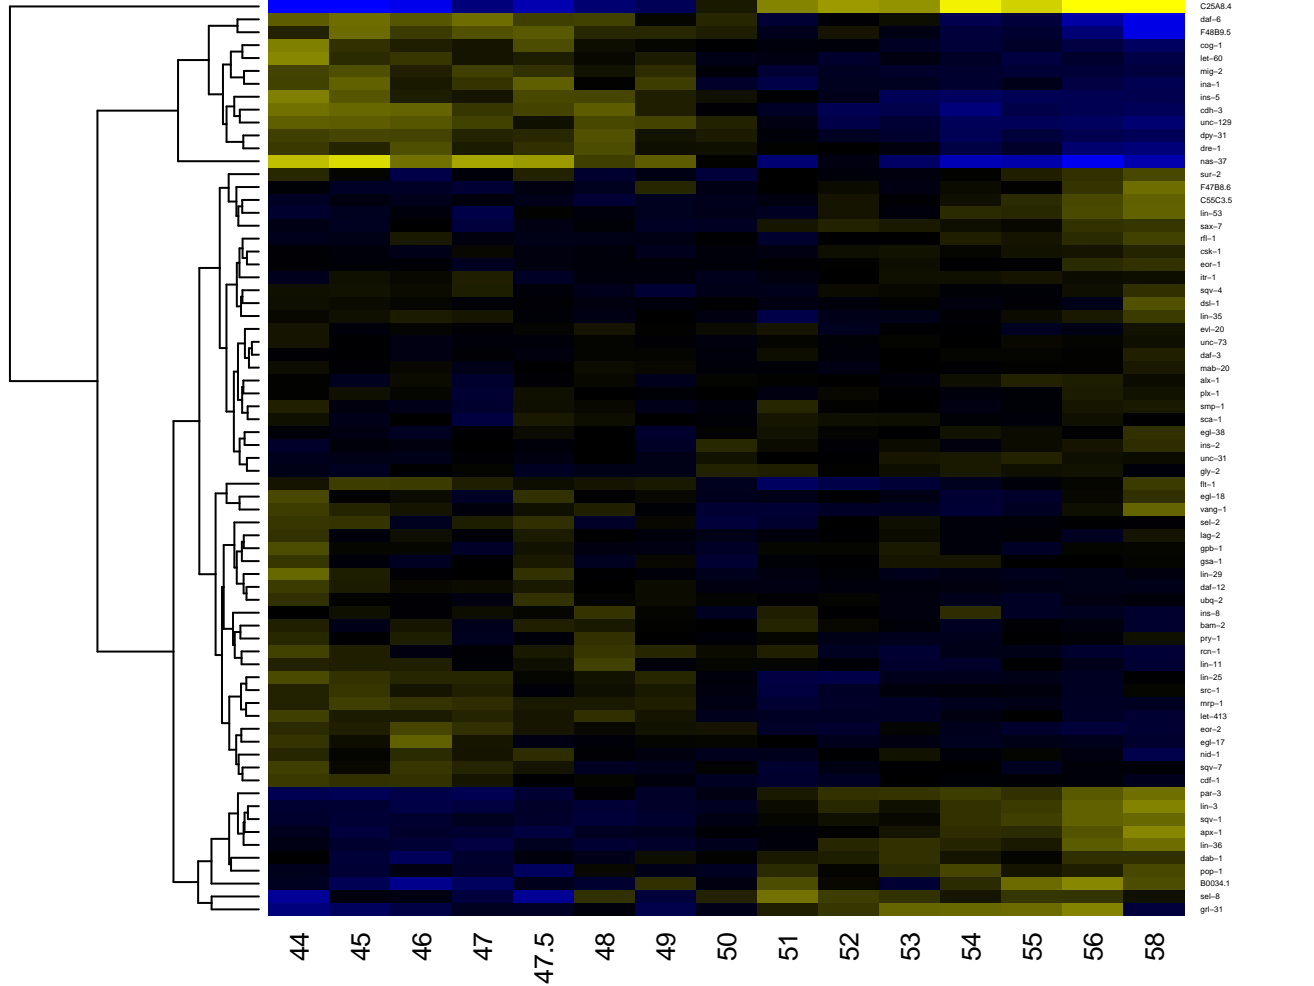

# vulva

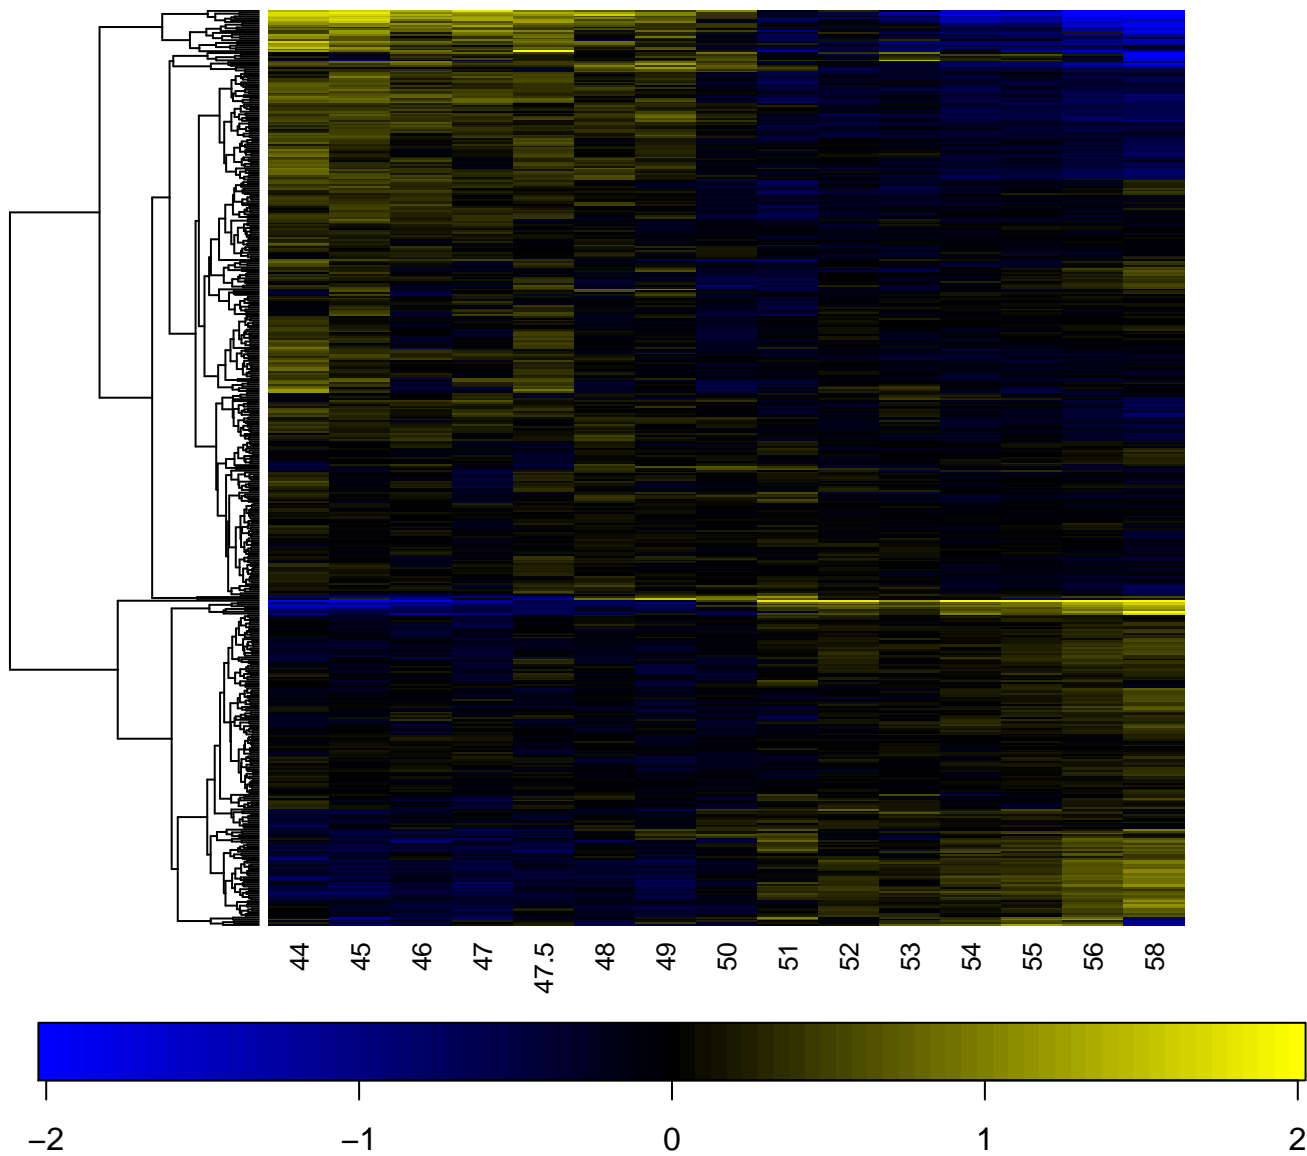



# vulval cell

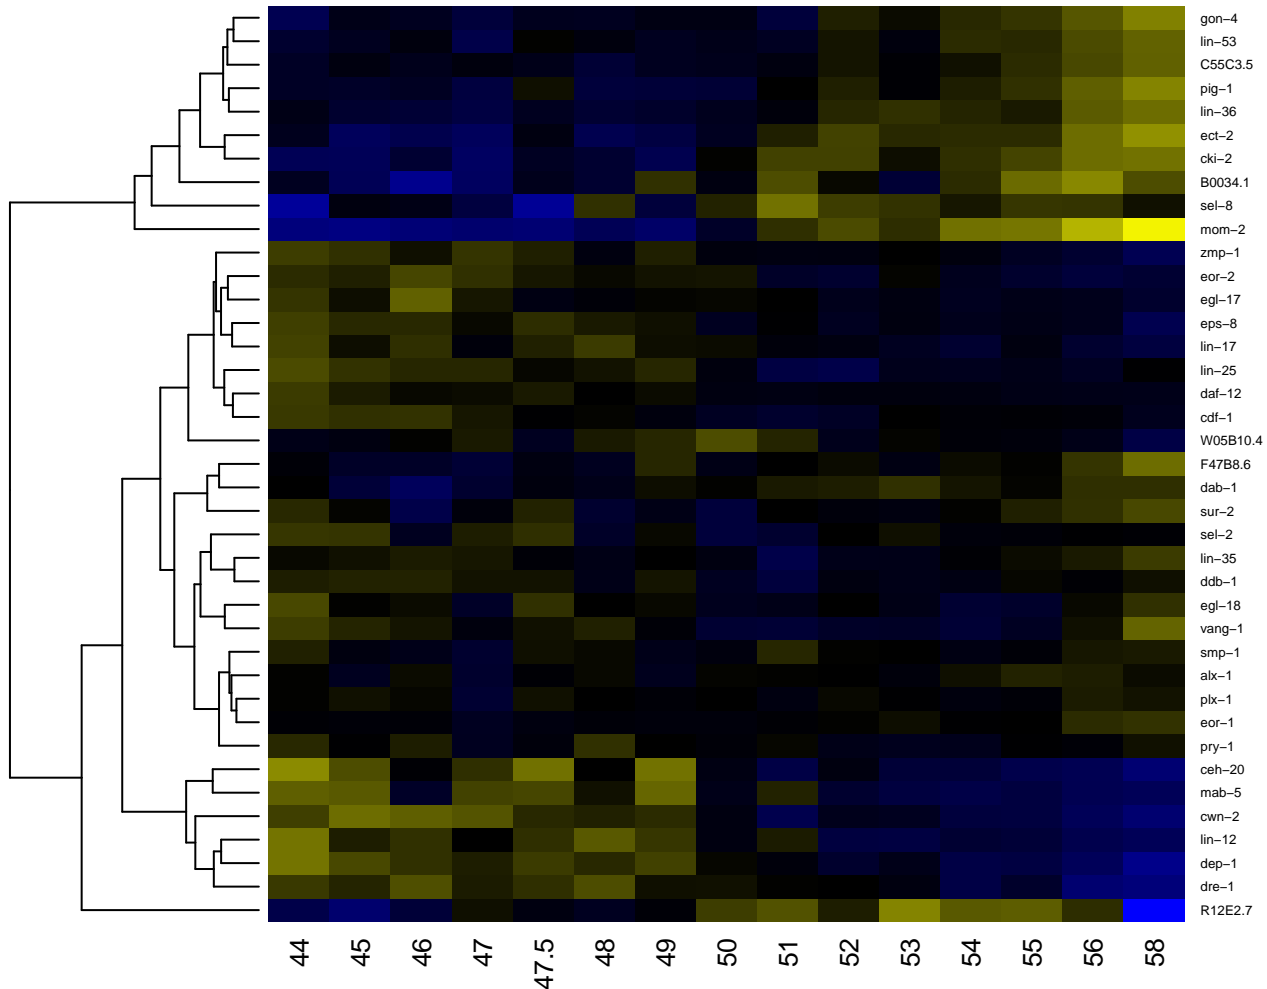

# vulval muscle

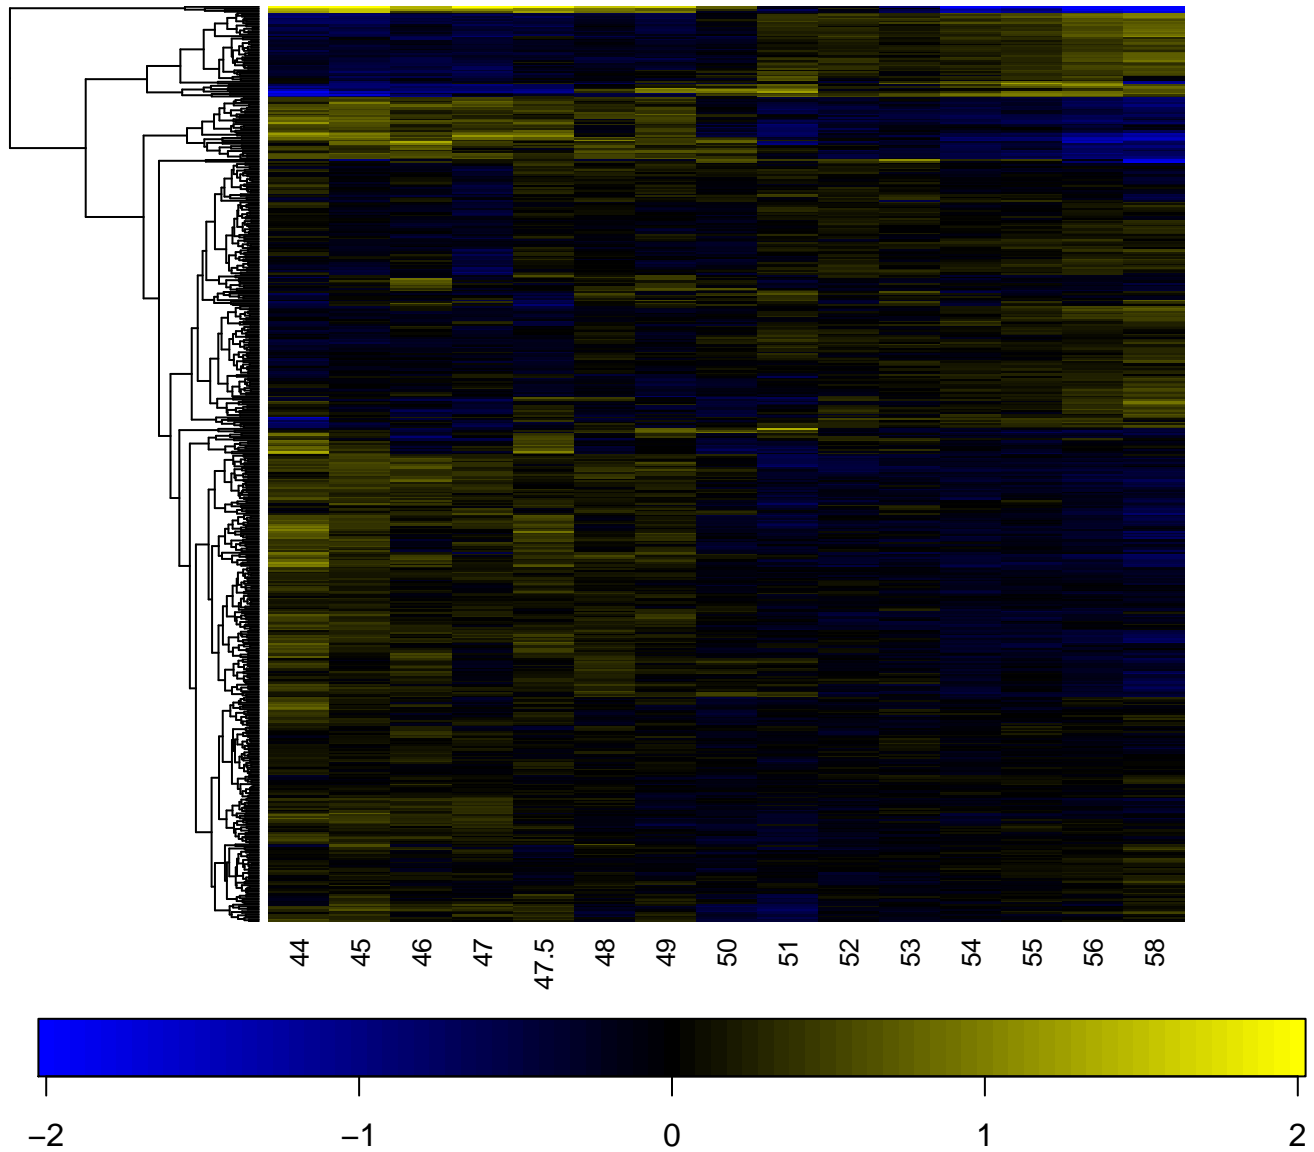

W

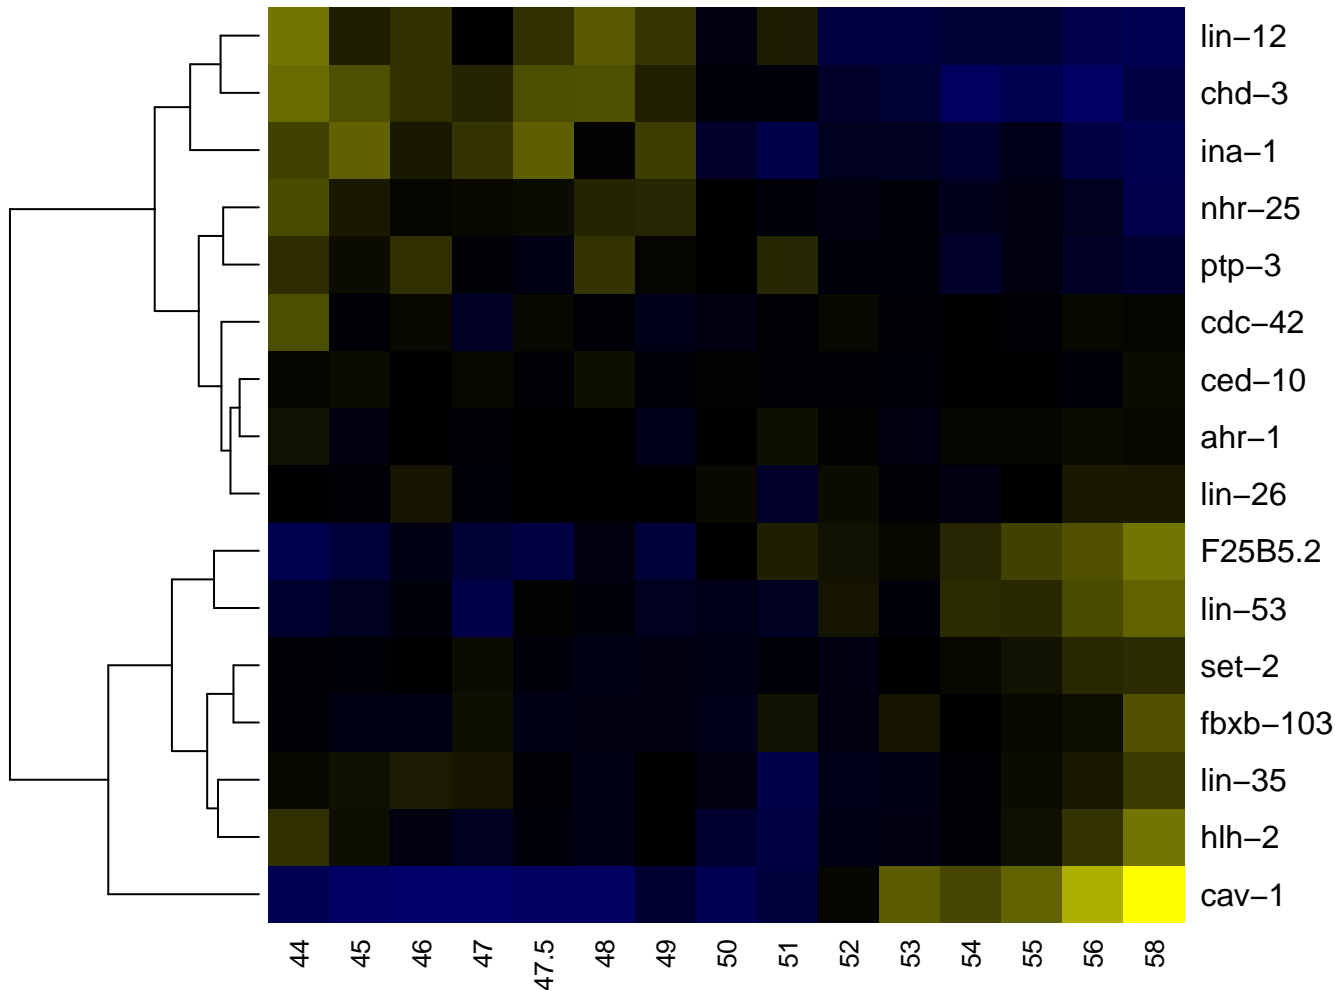

-2

-1

0

1

2

# XXXL

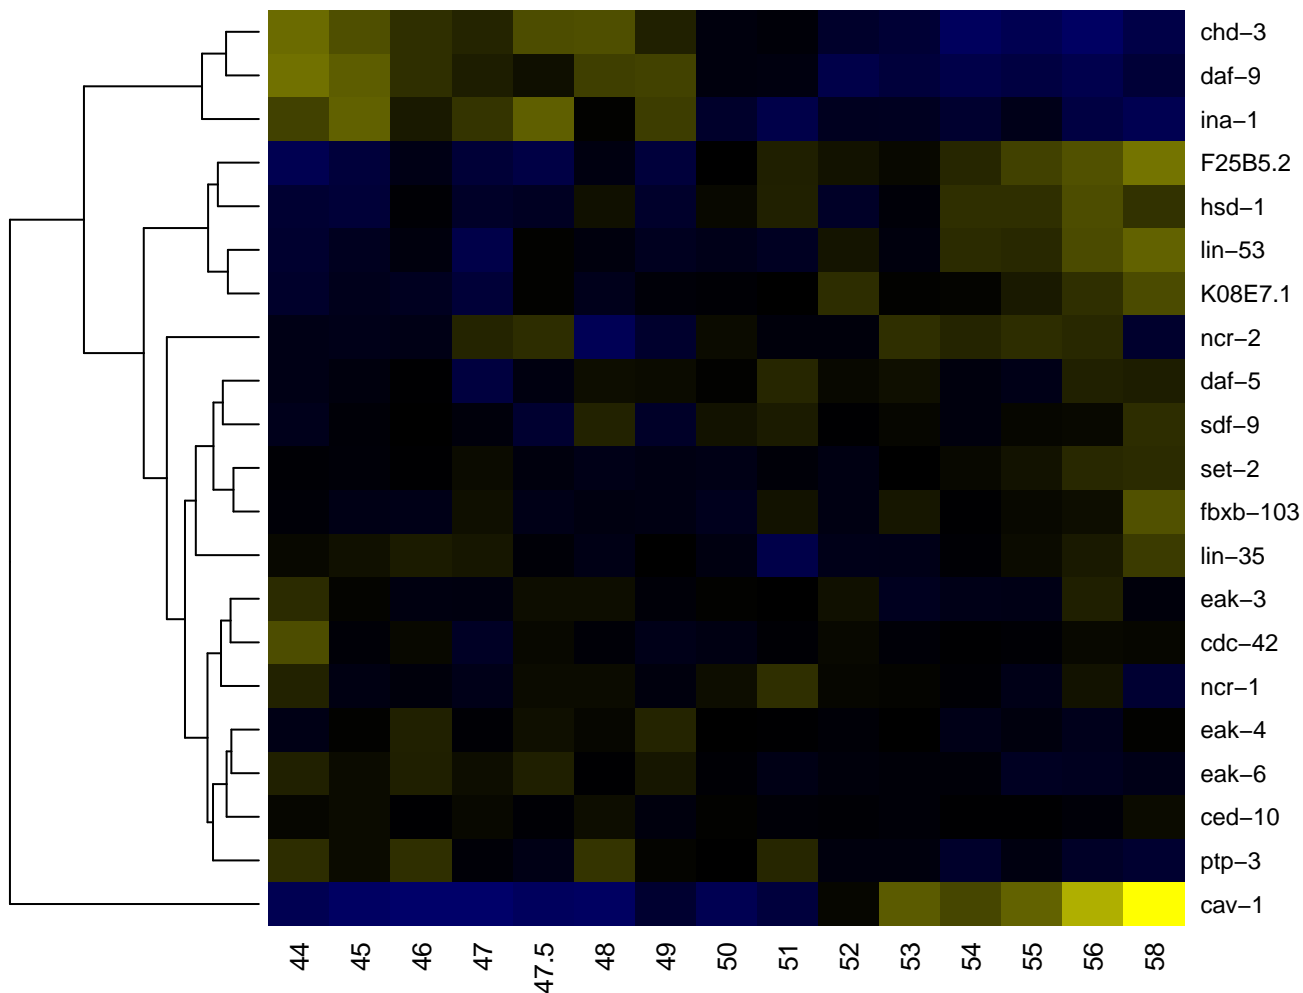

# XXXR

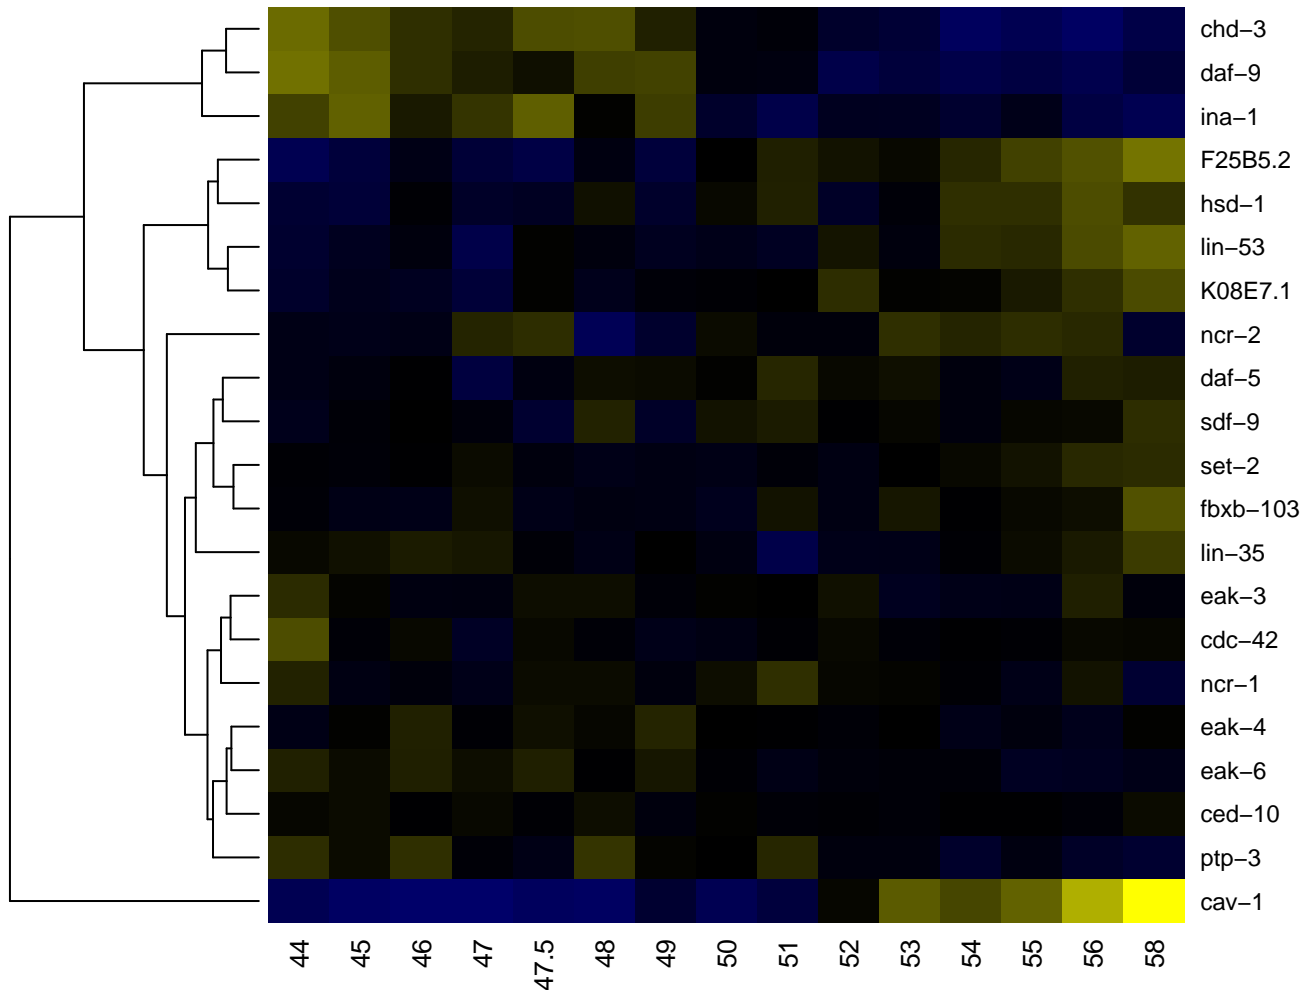

# Y cell

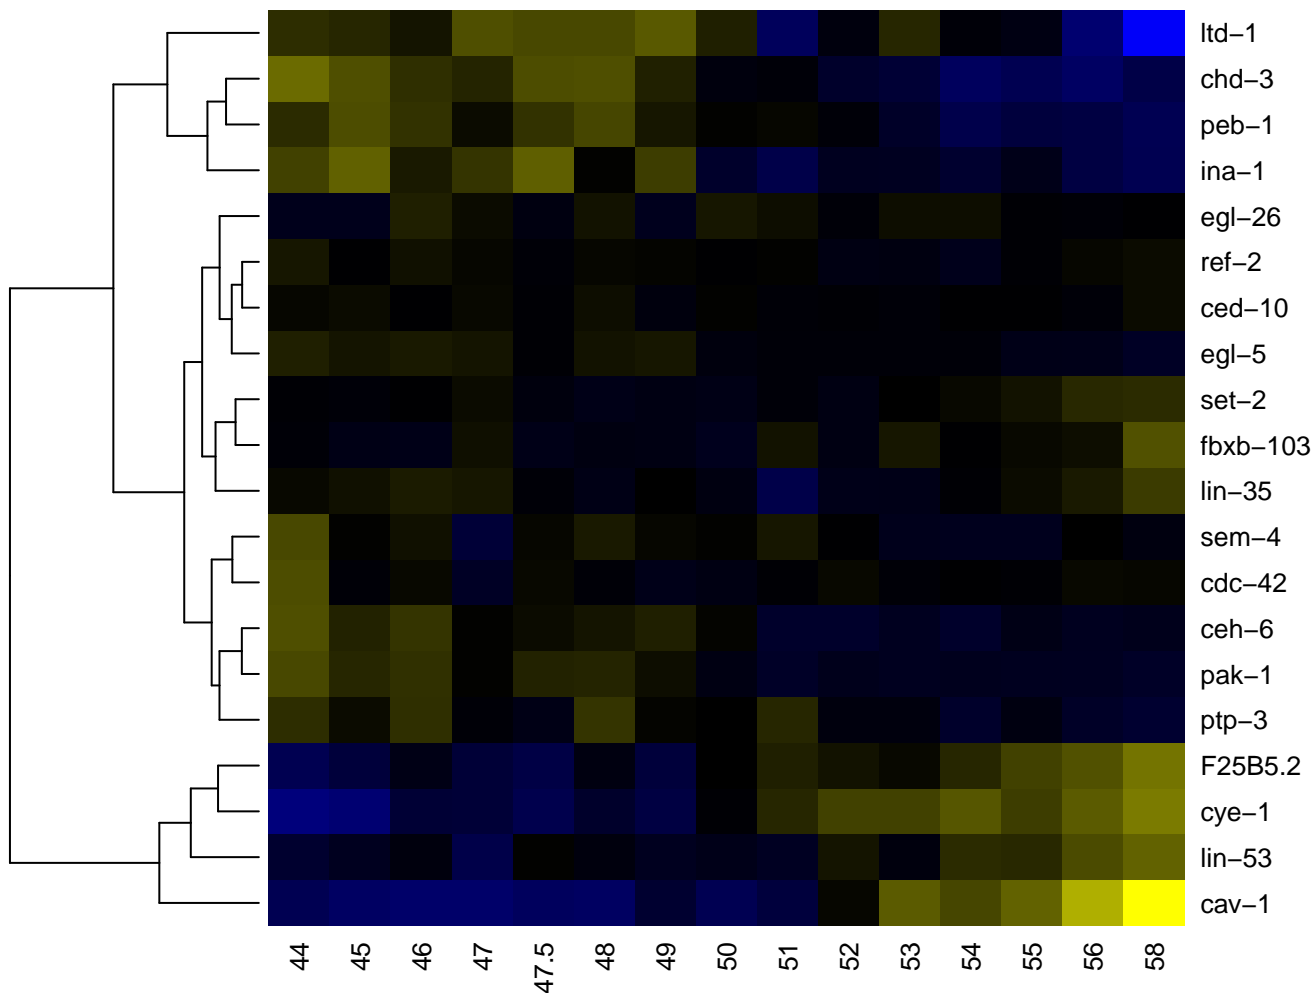

# Z1

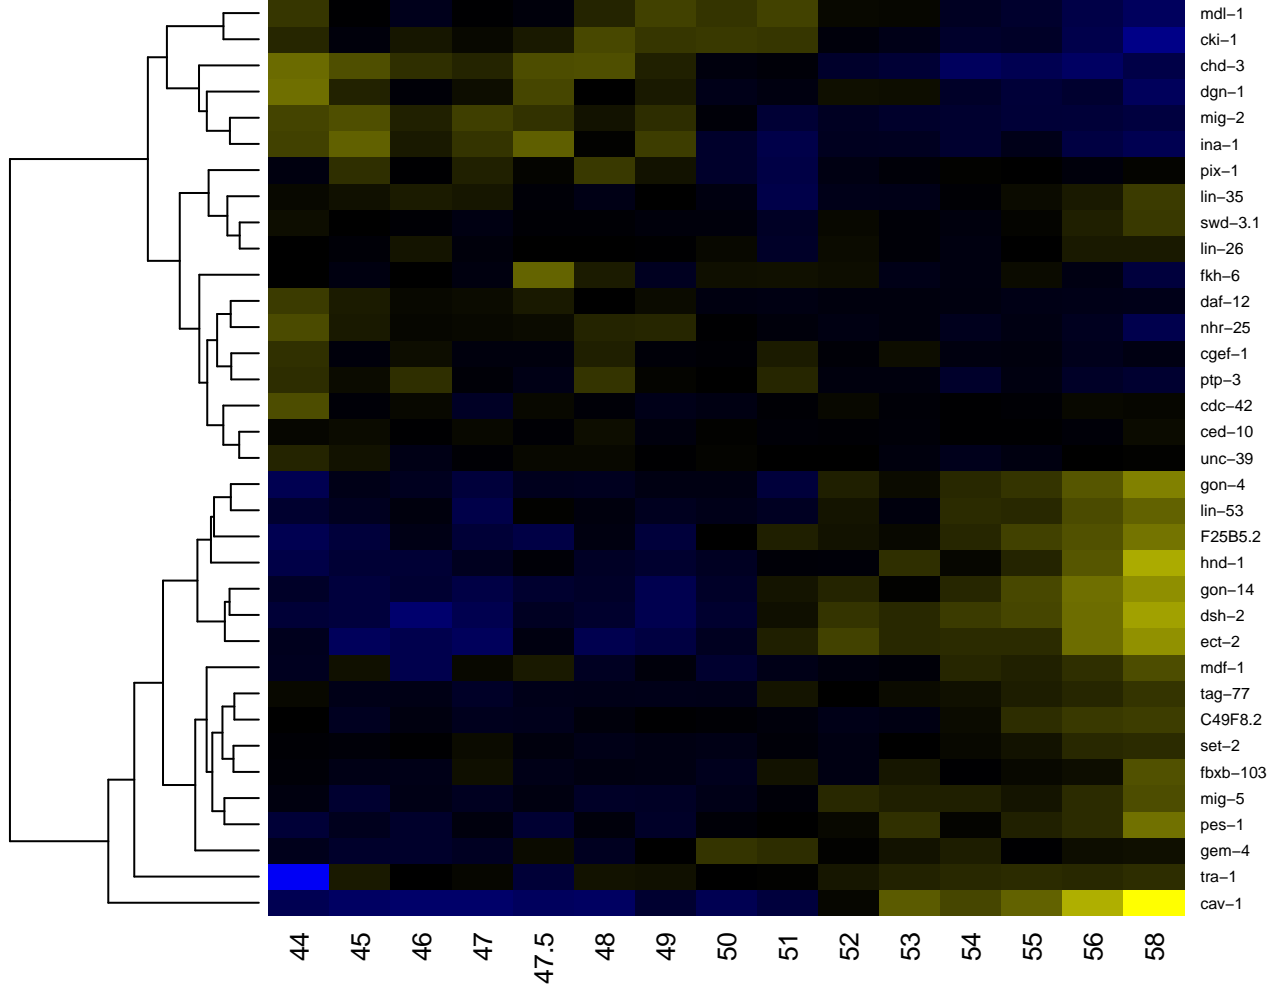

# Z1.ppp

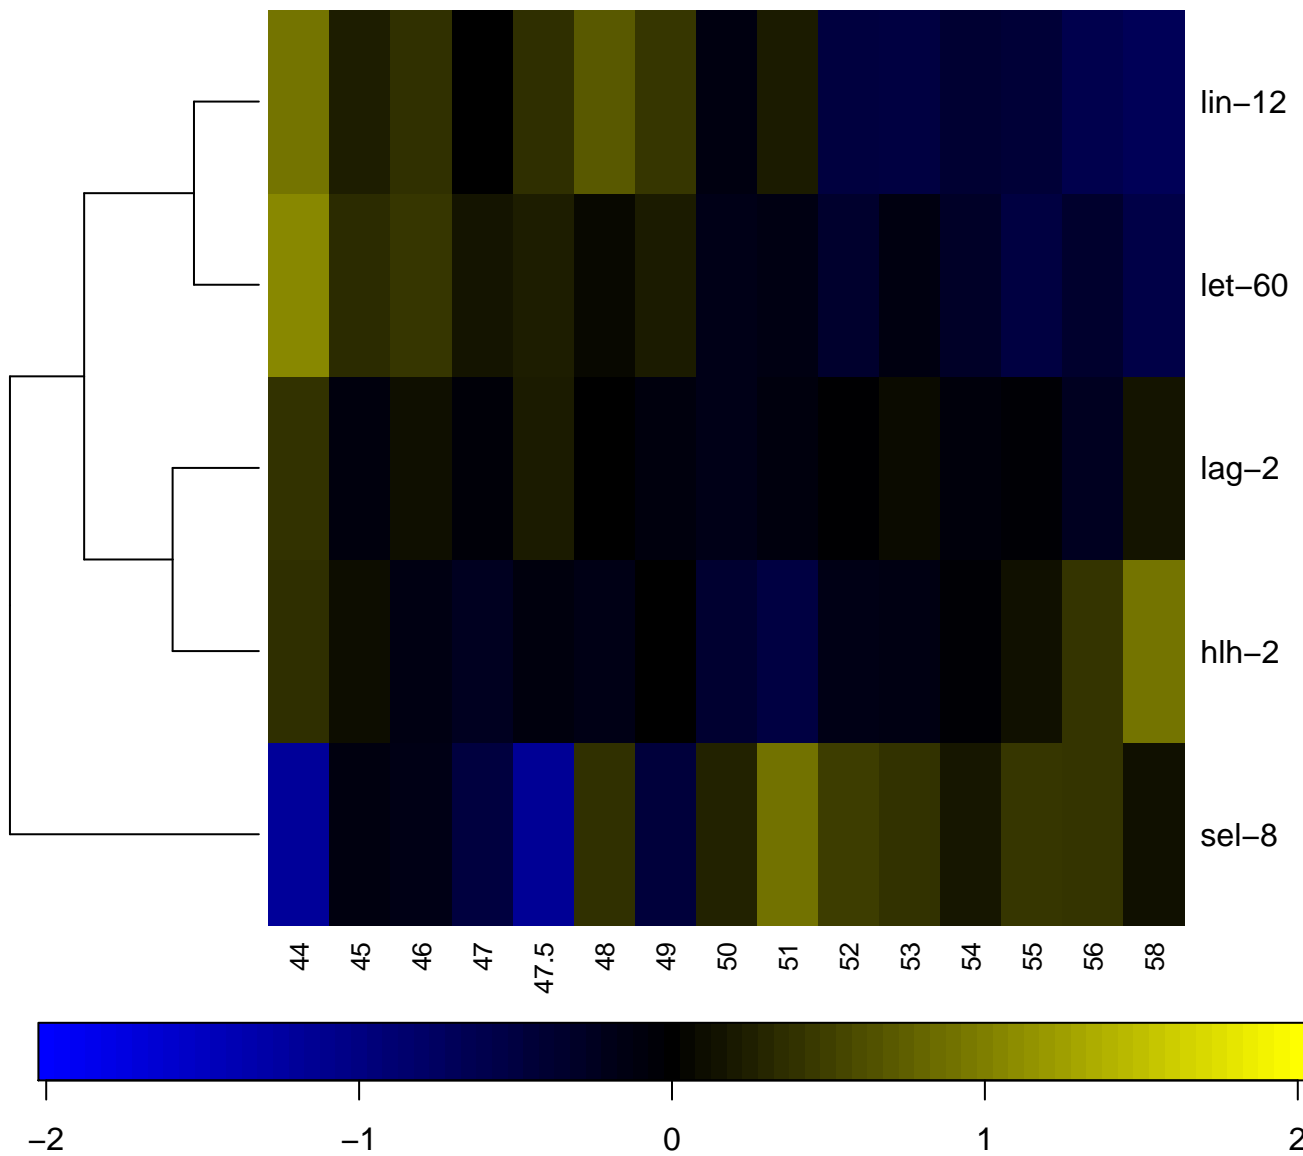



# Z2

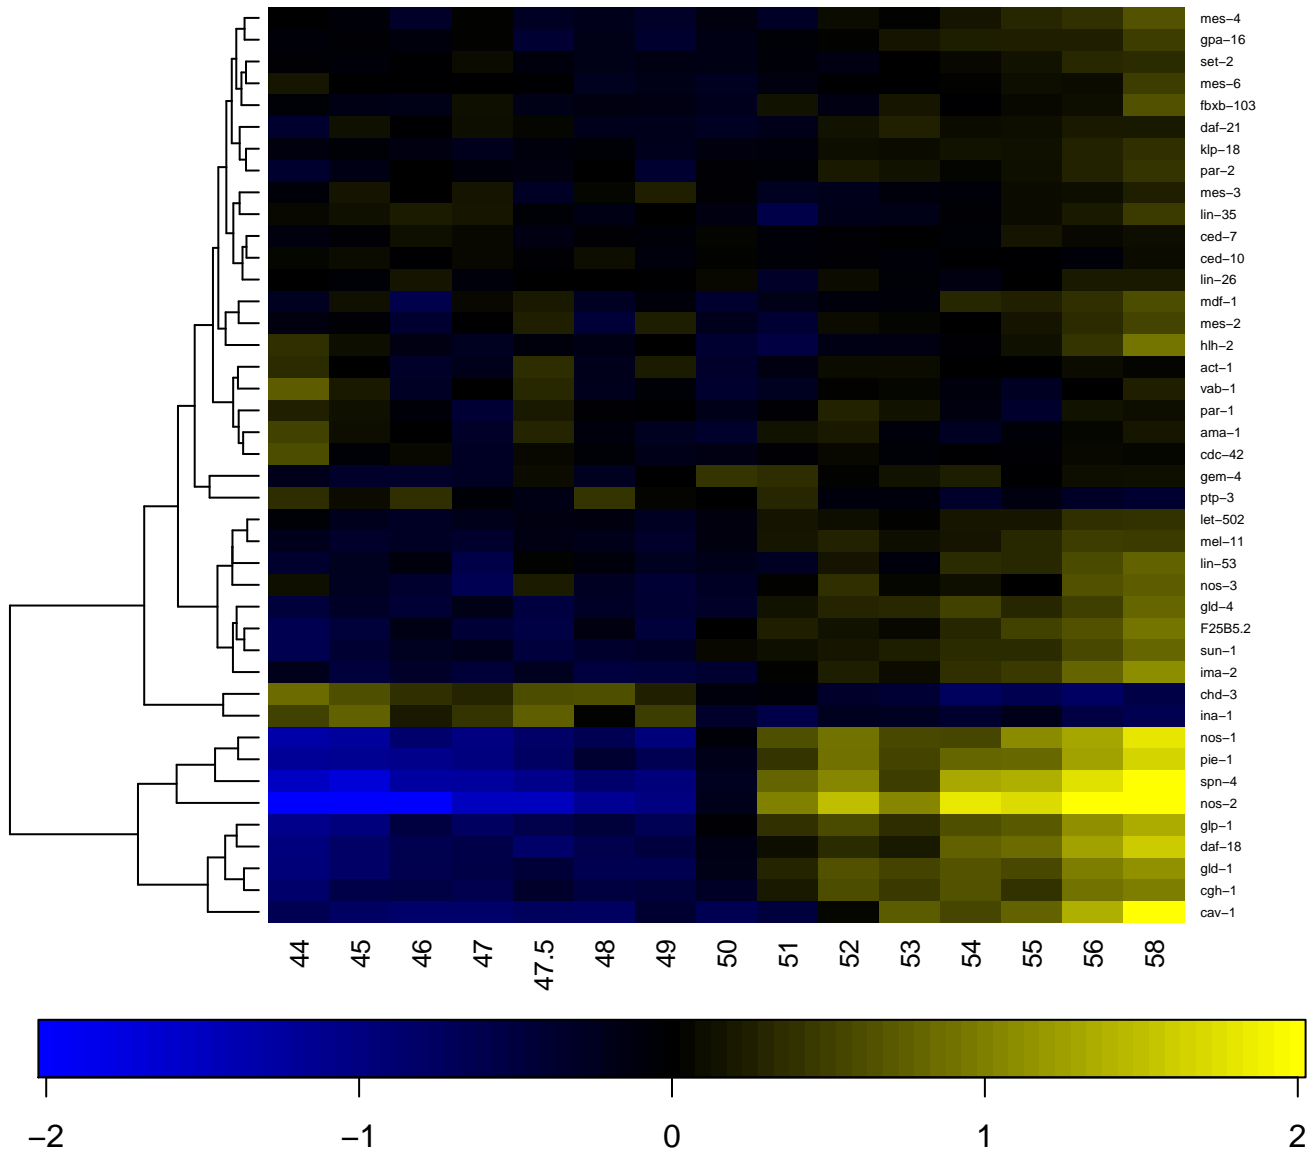

# Z3

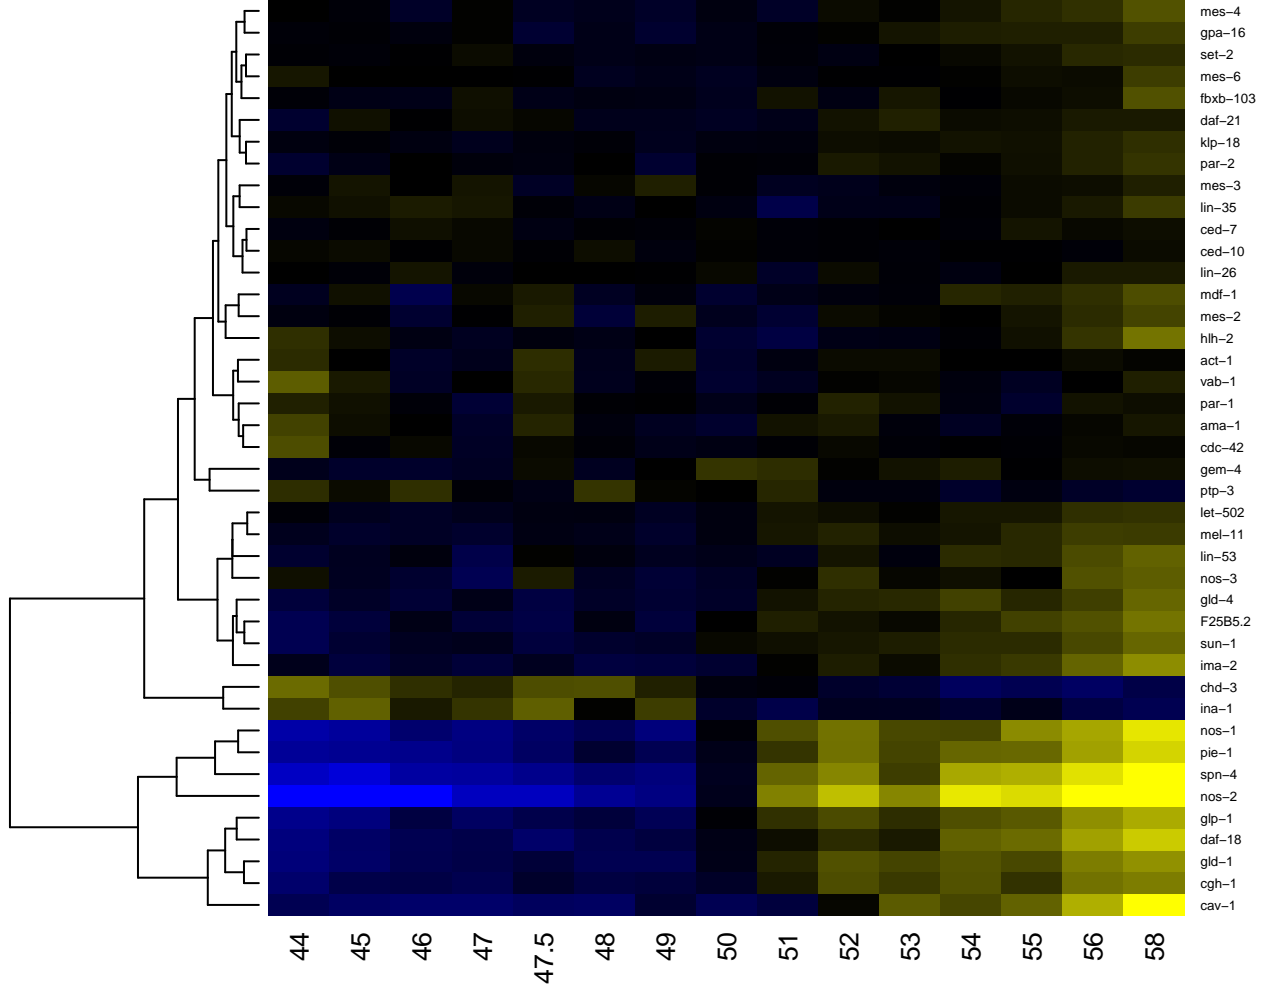

# Z4

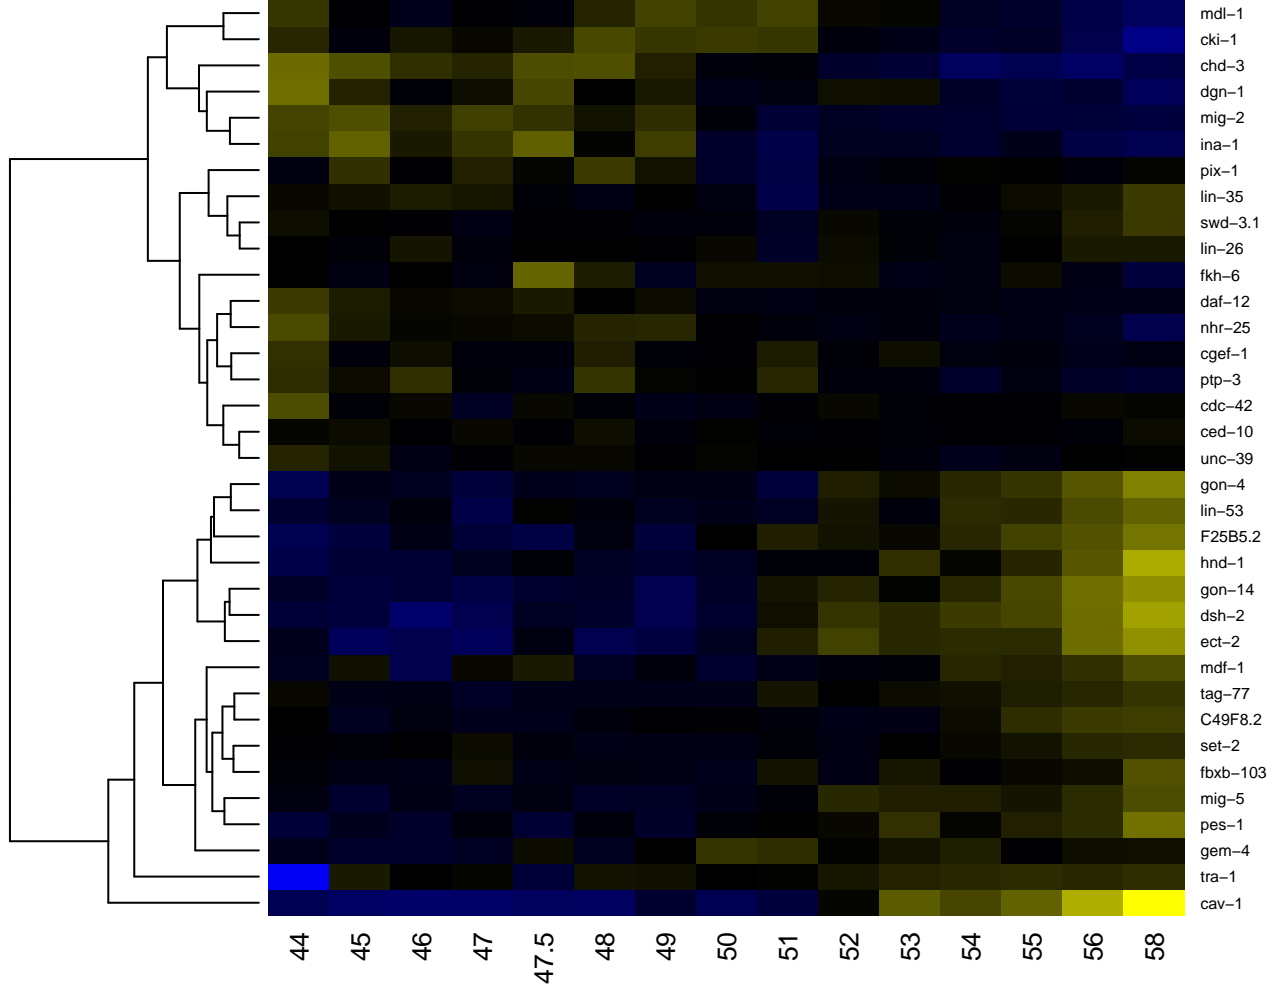



**Supplementary file G | Dynamic gene expression patterns of all KEGG pathways.**

The “heatmap” function of “R” was used to cluster genes of each individual KEGG pathway terms according to their expression pattern. KEGG pathway name is shown per page as figure title. The time in hours is shown on the x-axis. Gene names are shown on the y-axis. The scale bar shows the log<sub>2</sub> ratio with the mean for each time-point. Blue is lower than the mean and yellow is higher than the mean.











# Amino sugar and nucleotide sugar metabolism

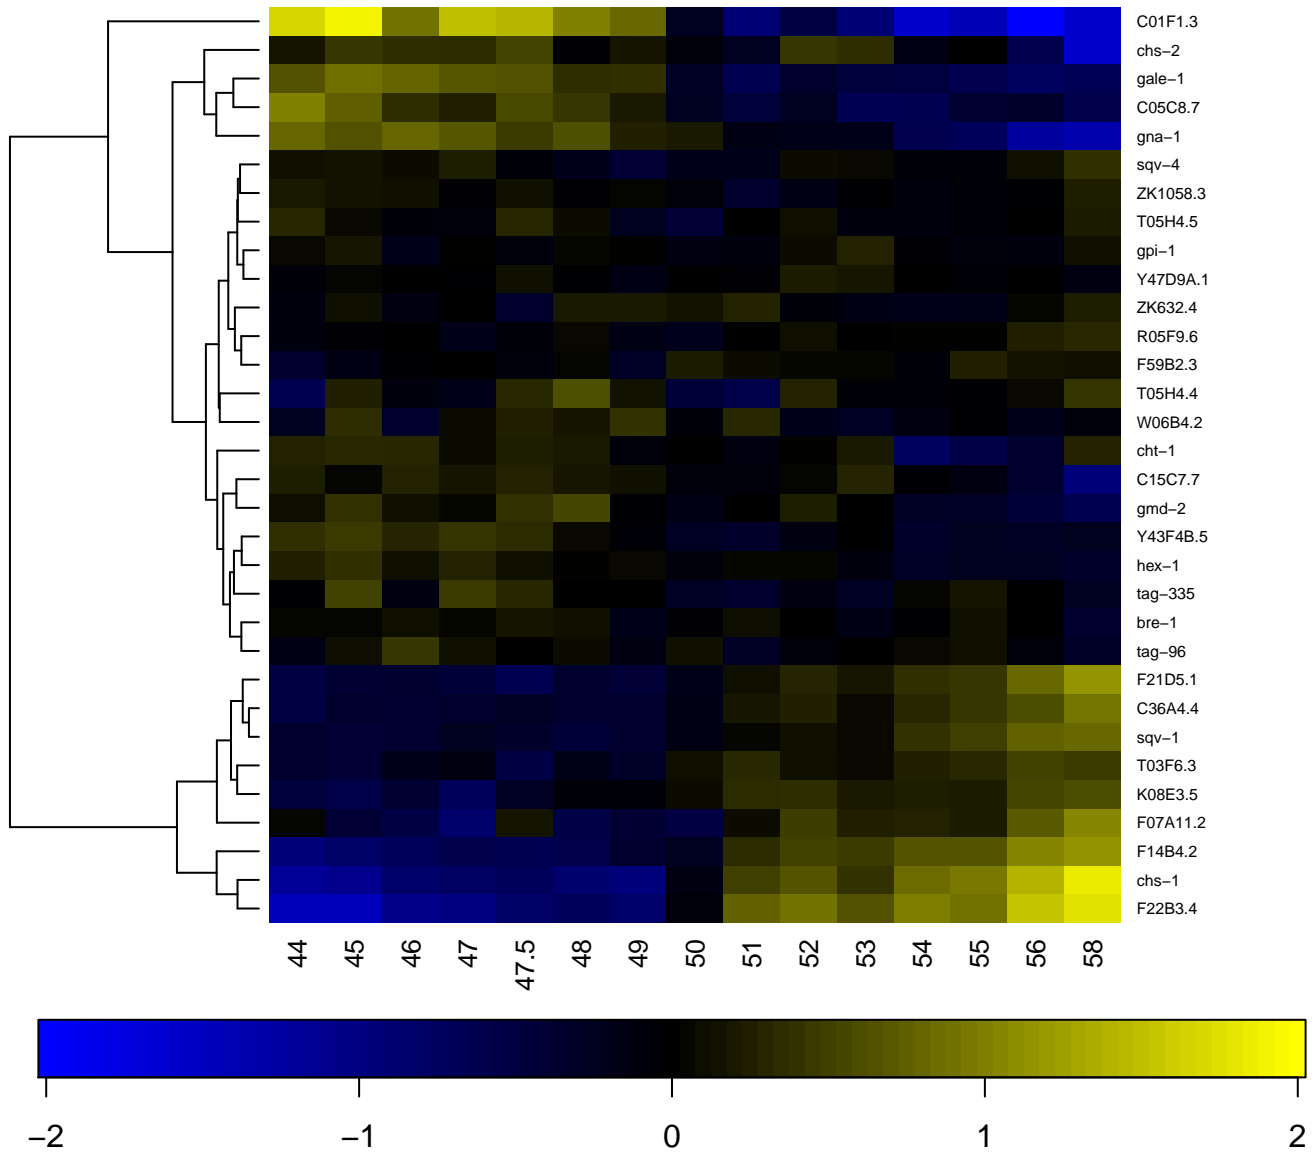

# Aminoacyl-tRNA biosynthesis

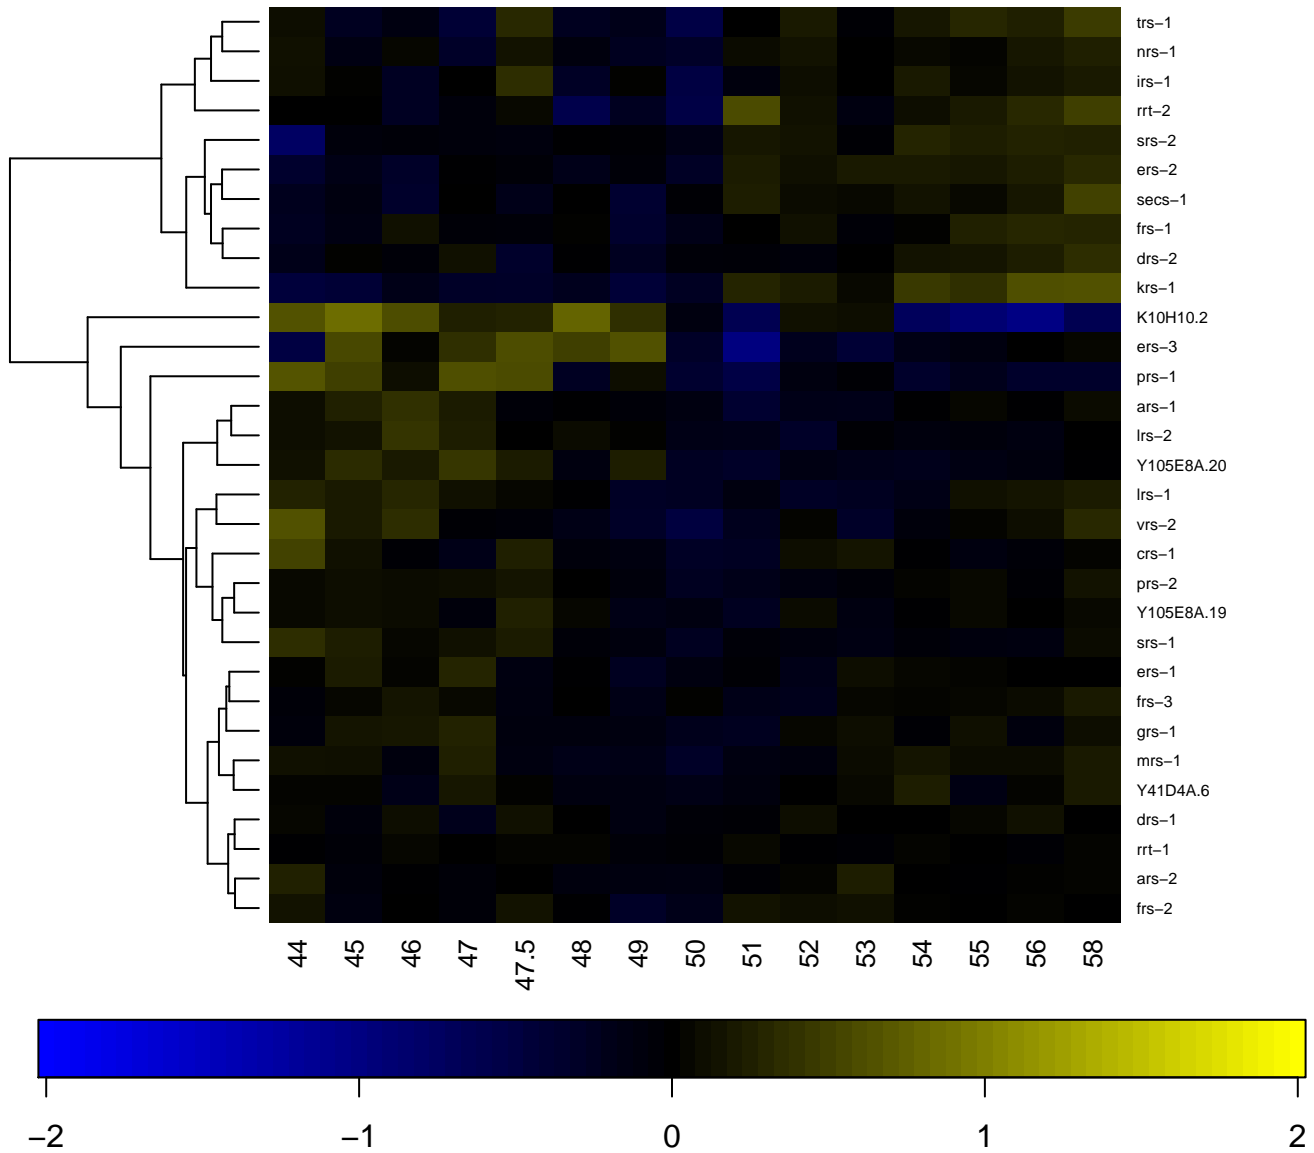



# Arginine and proline metabolism

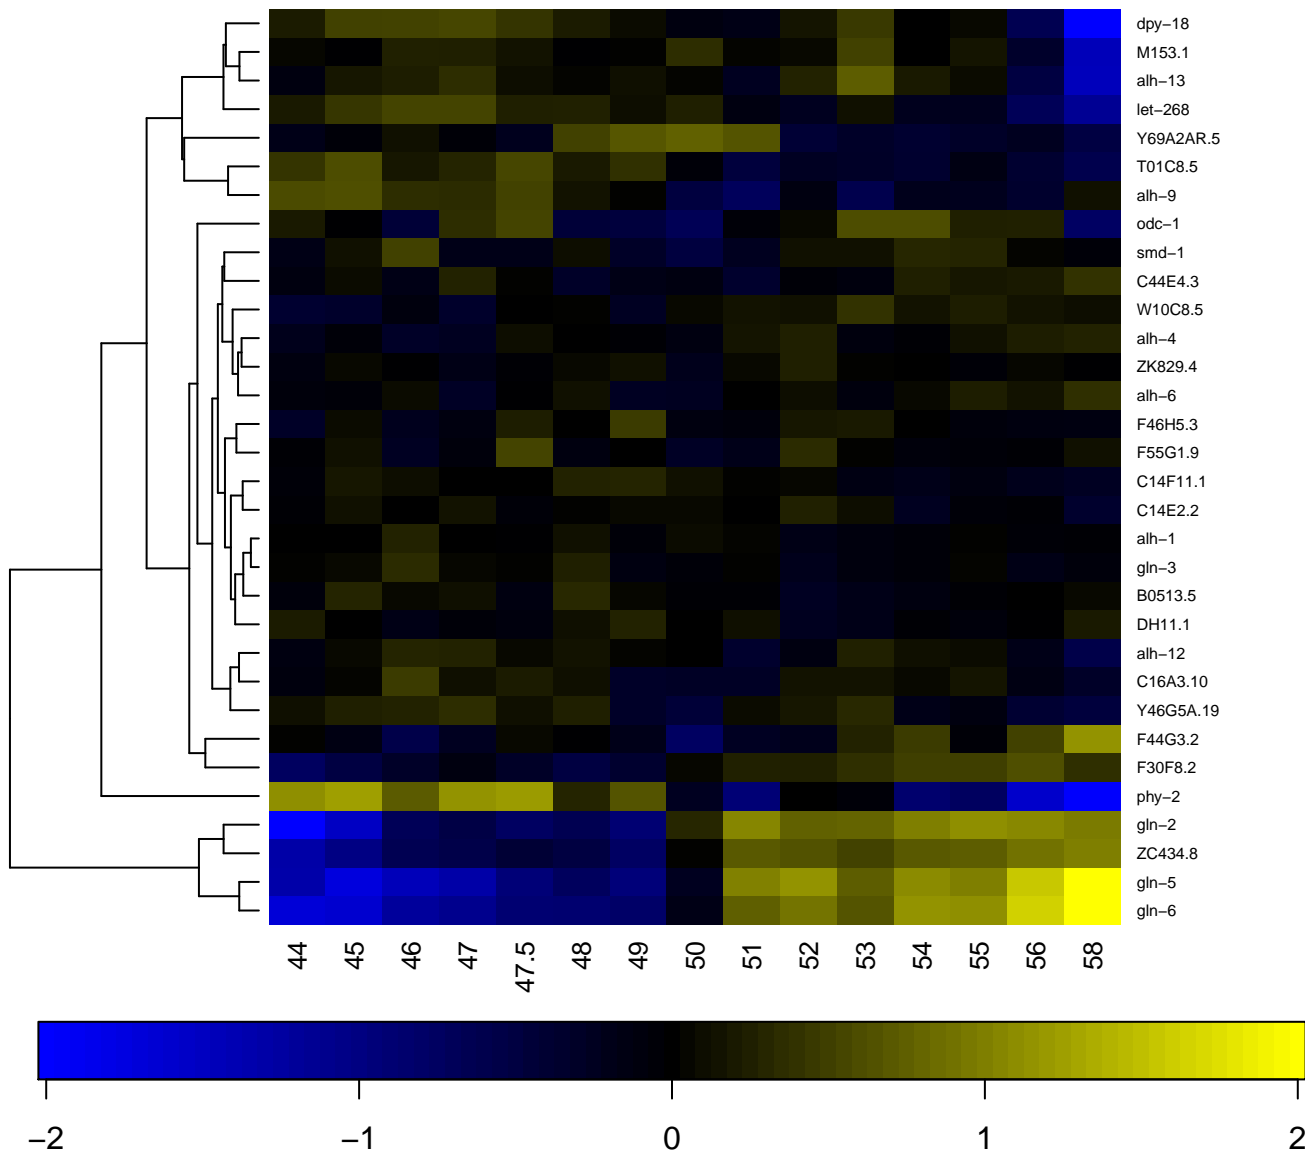

# Ascorbate and aldrate metabolism

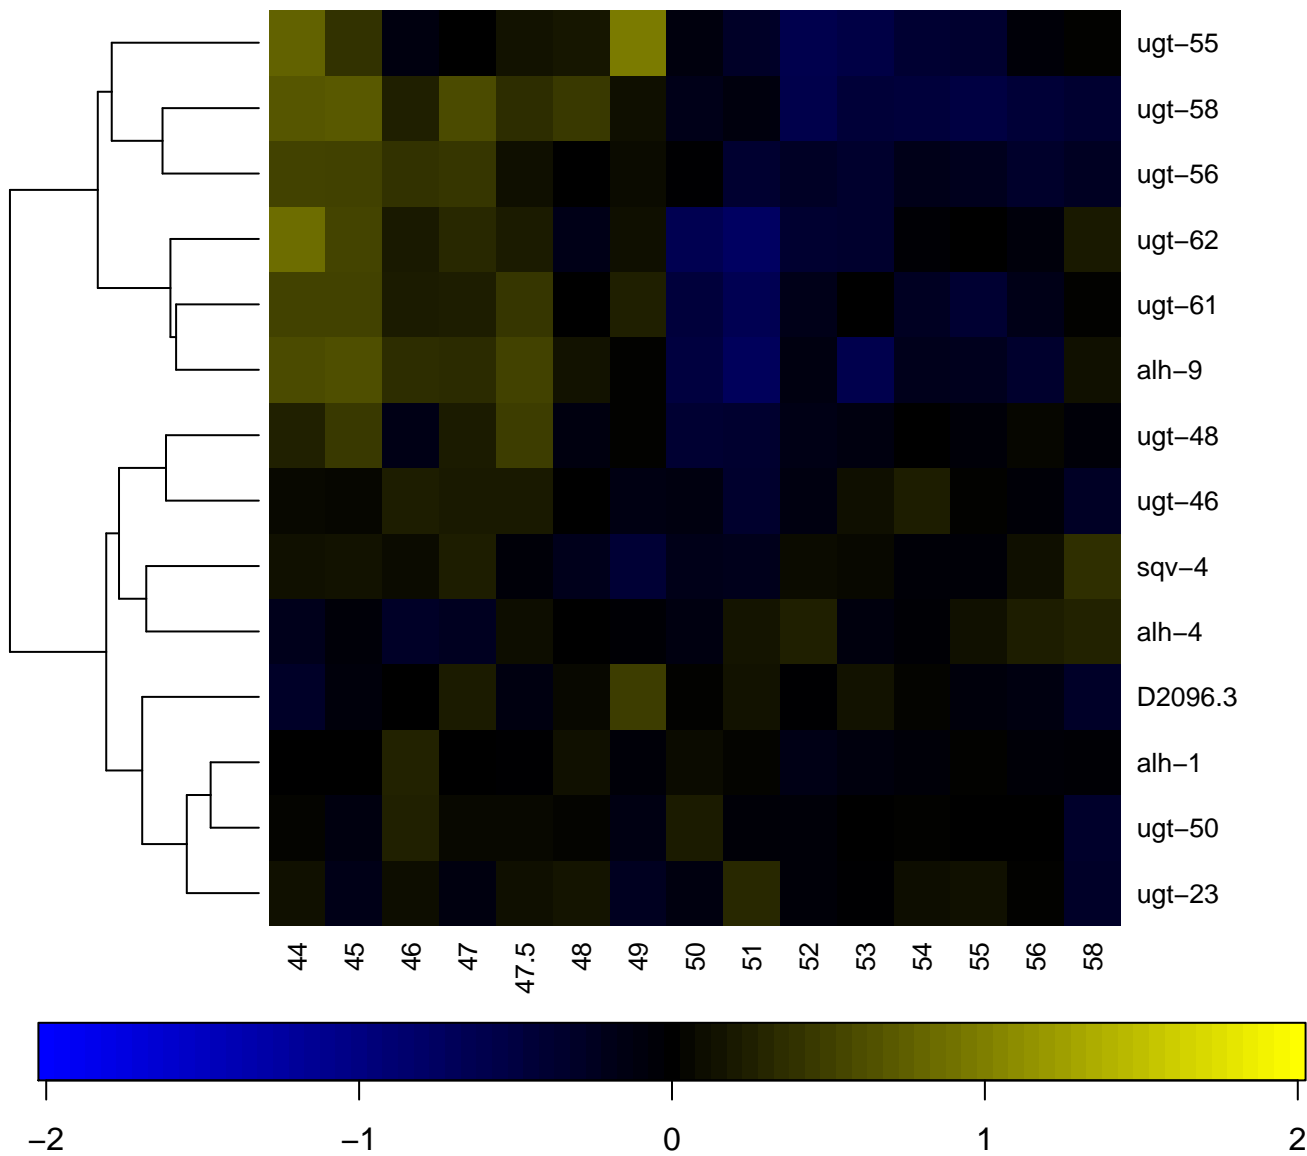

# Basal transcription factors (eukaryotes)

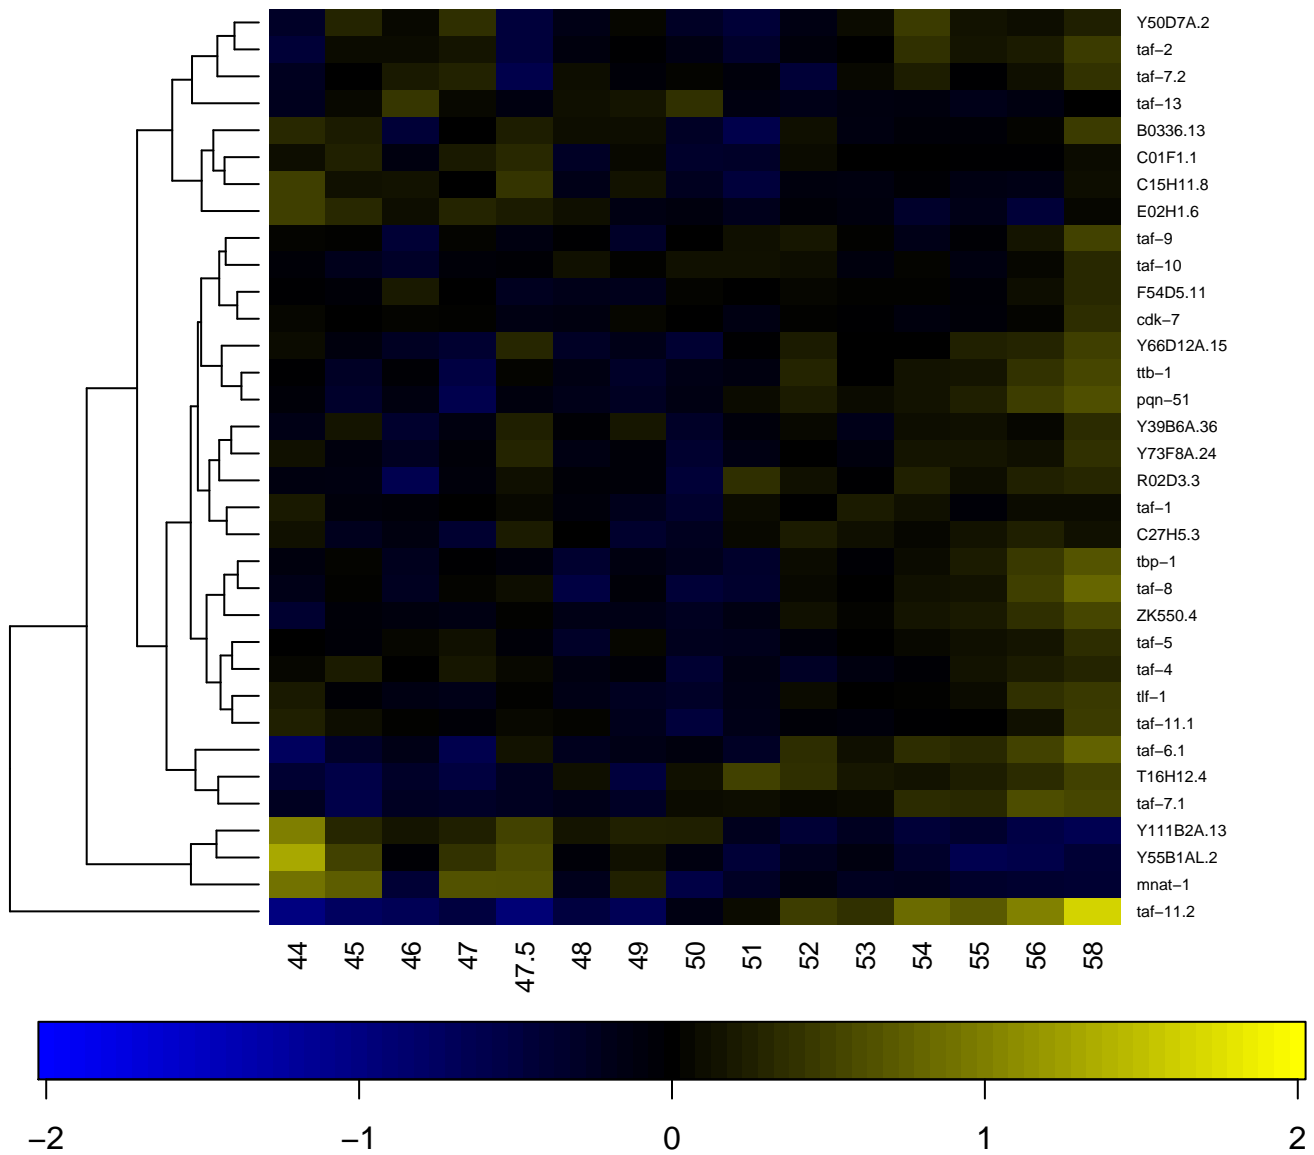

# Base excision repair

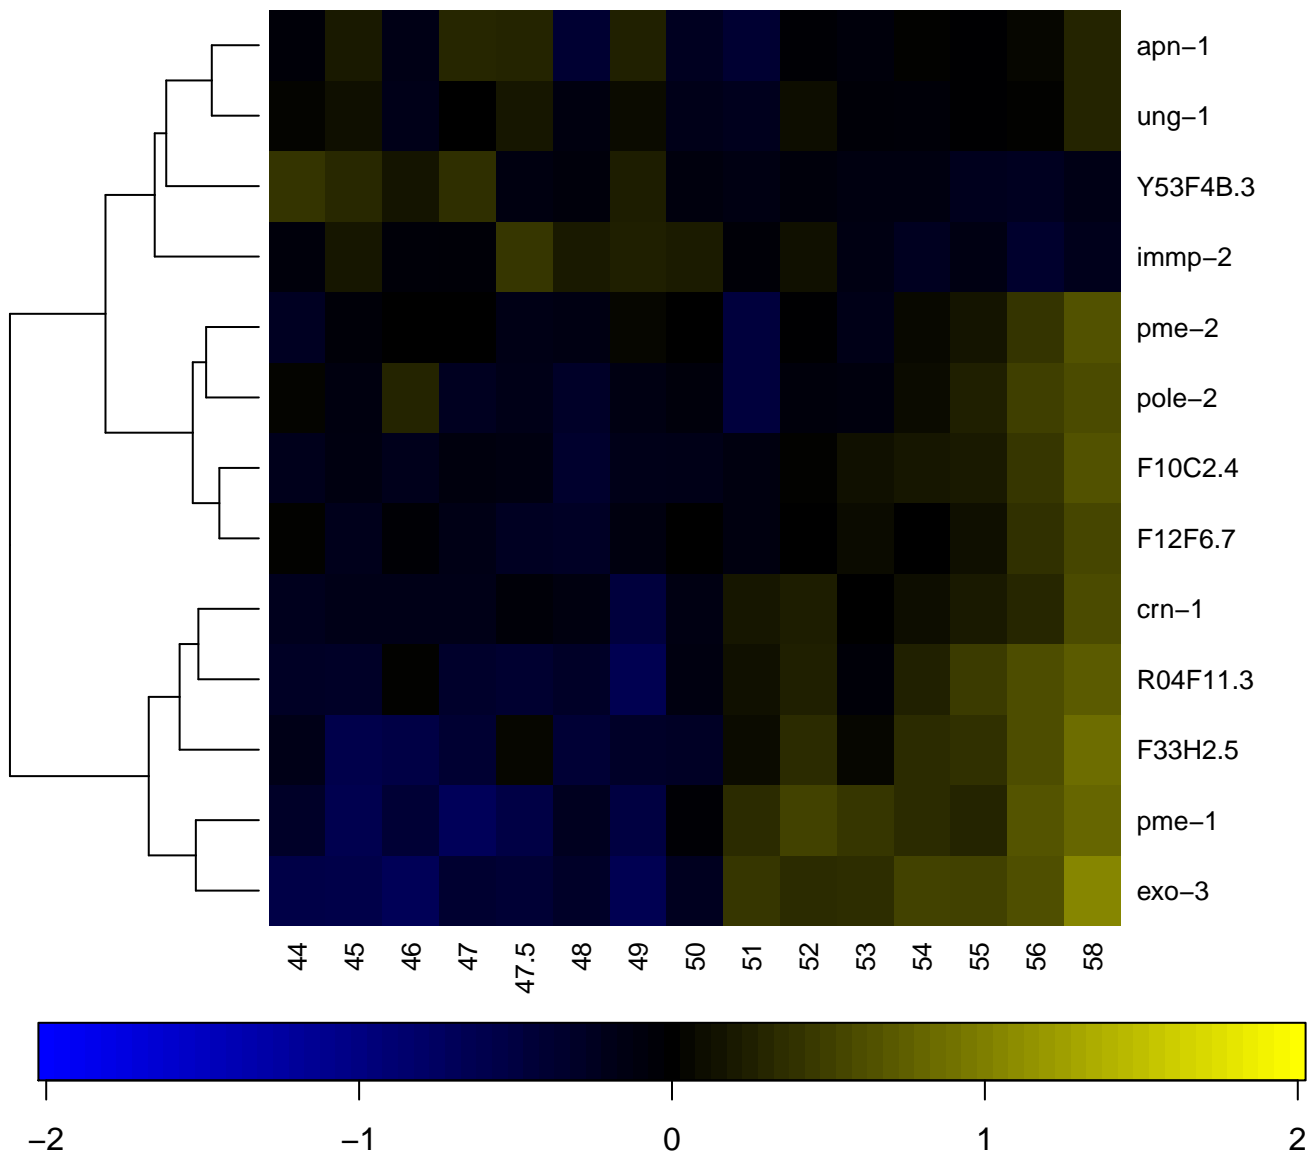



# Biosynthesis of unsaturated fatty acids

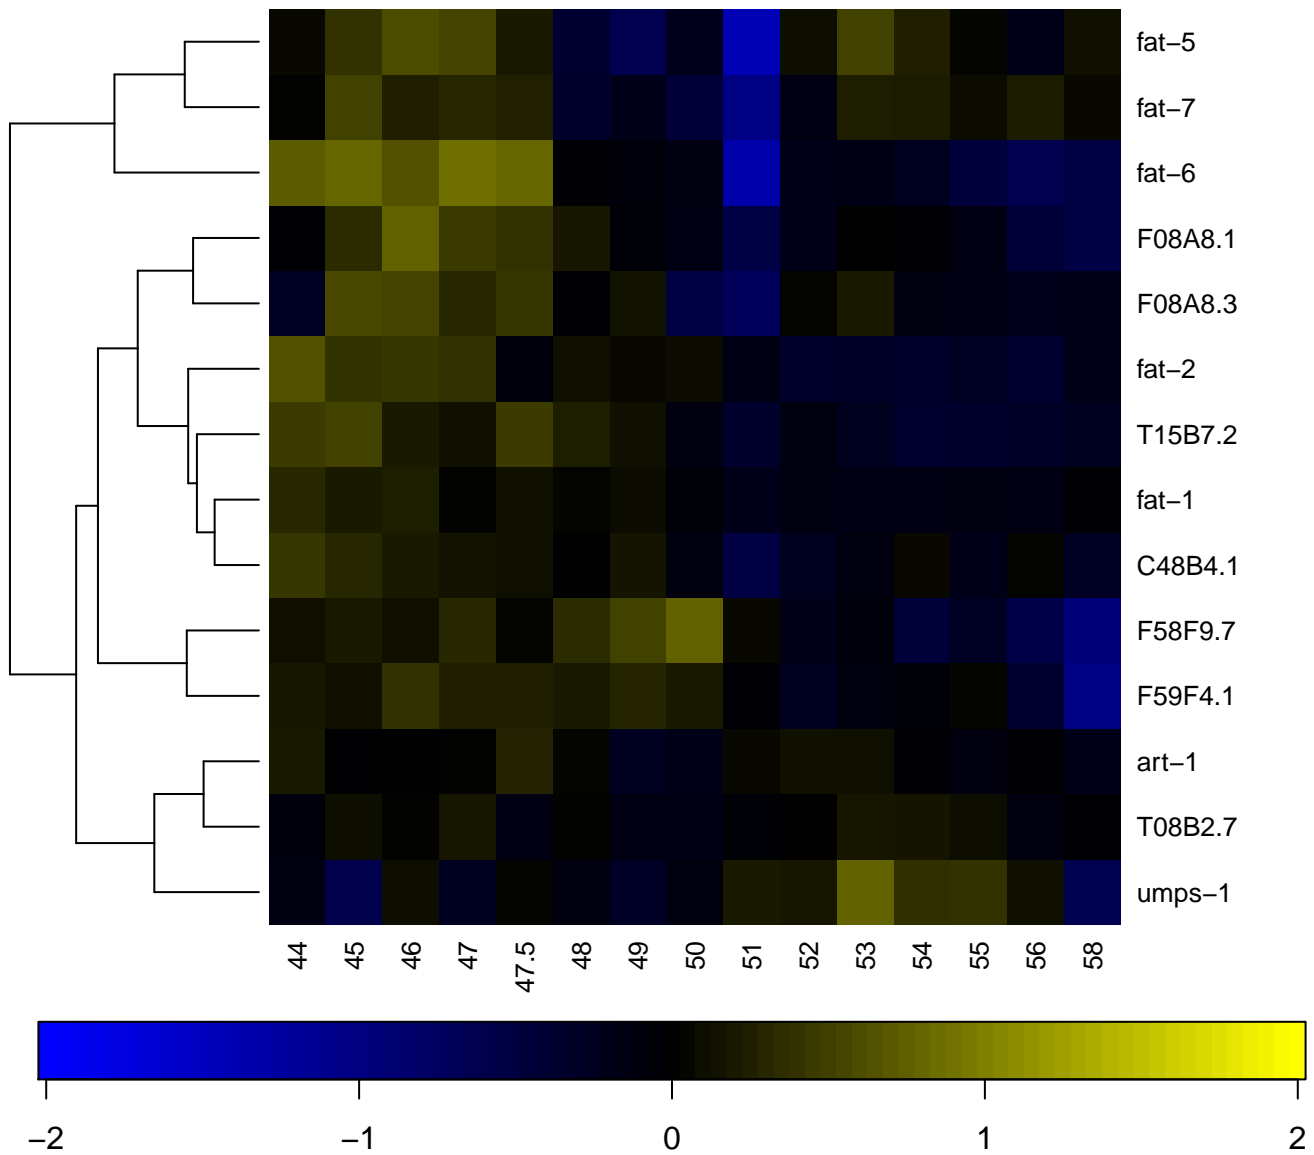



# Calcium signaling pathway

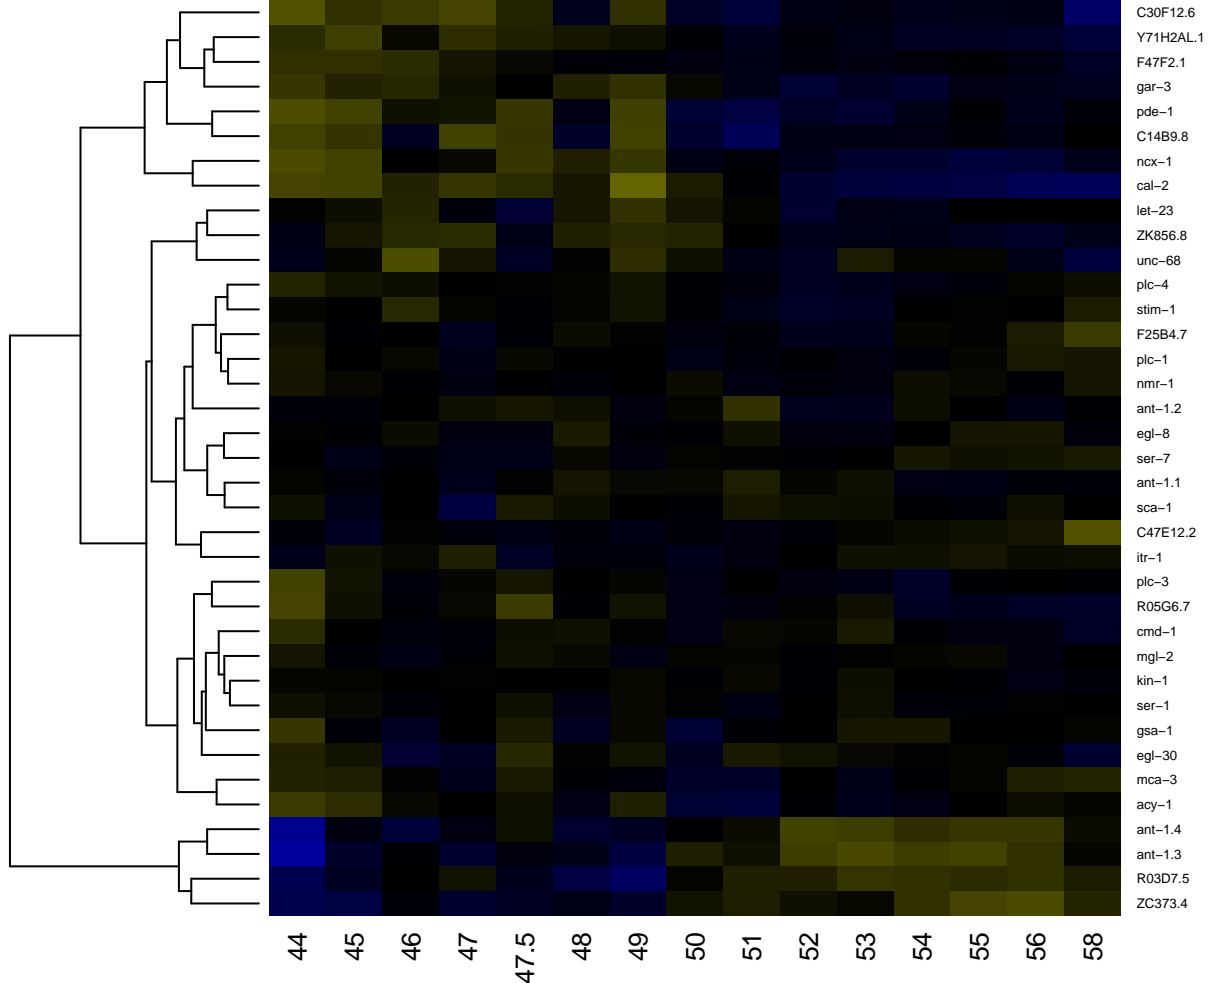

# Circadian rhythm

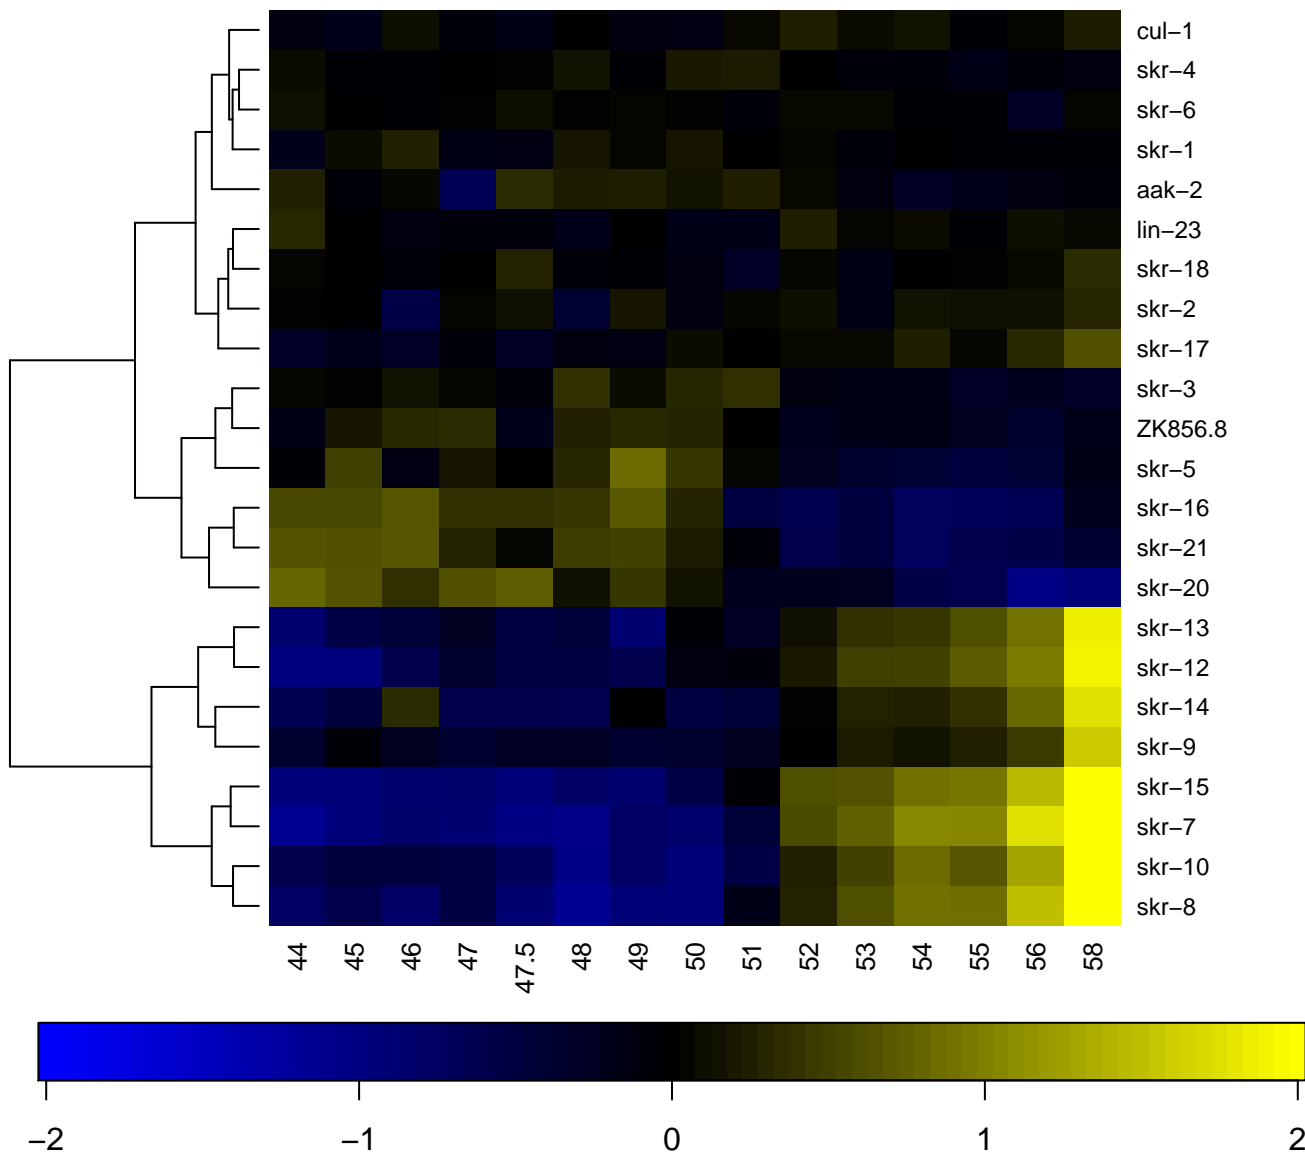

# Citrate cycle (TCA cycle)

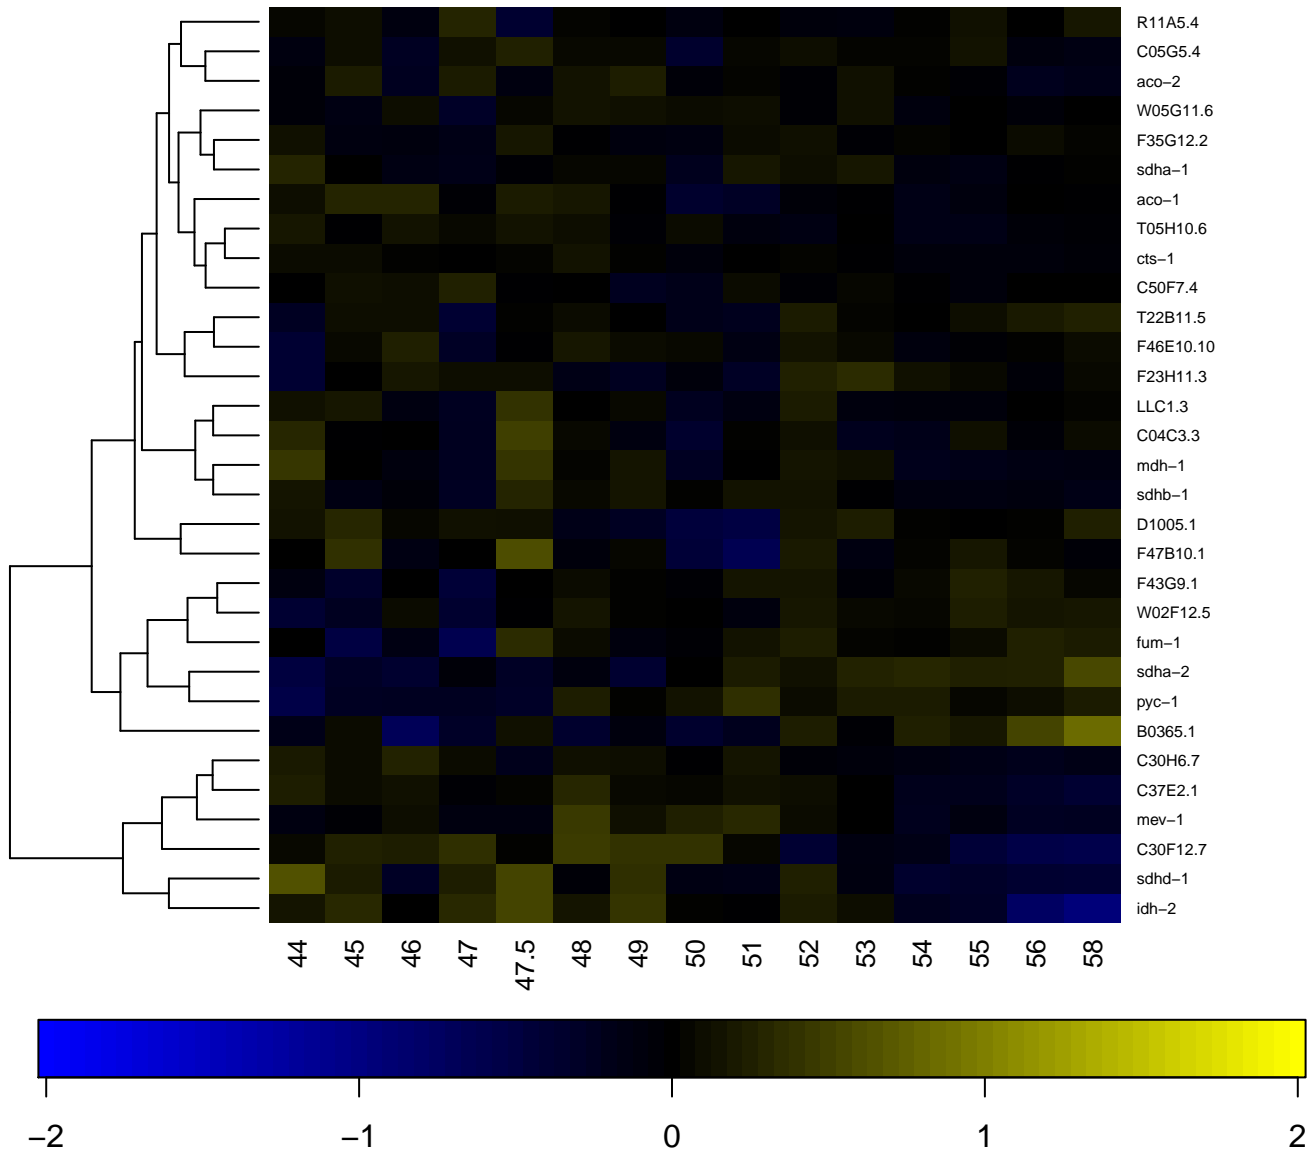

# Cyanoamino acid metabolism

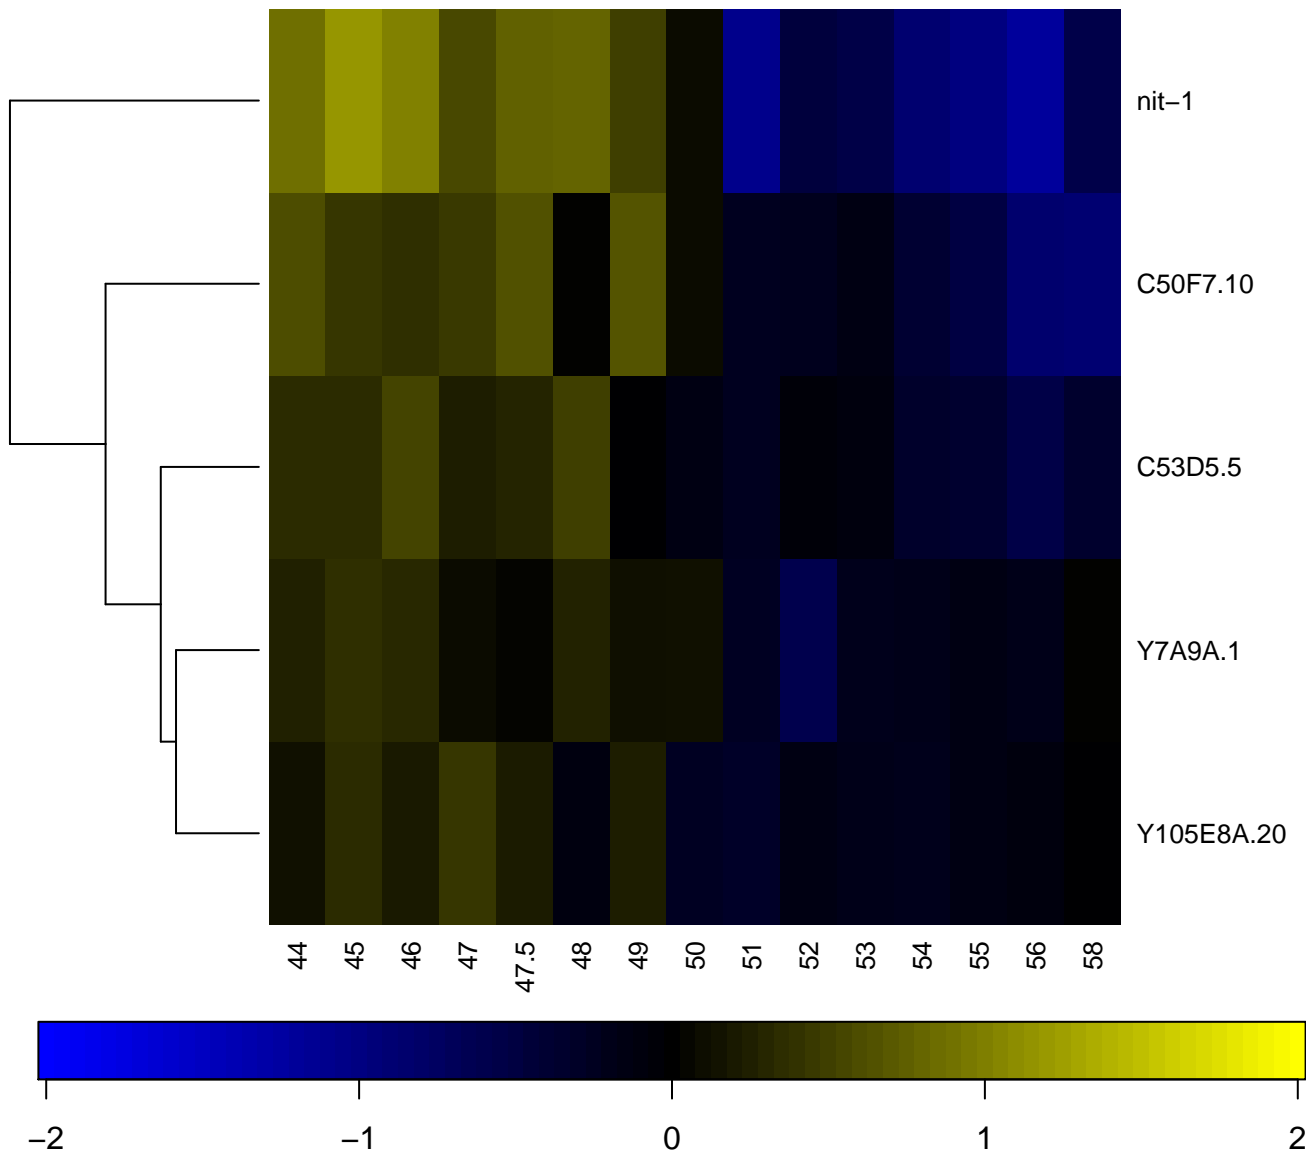

# Cysteine and methionine metabolism

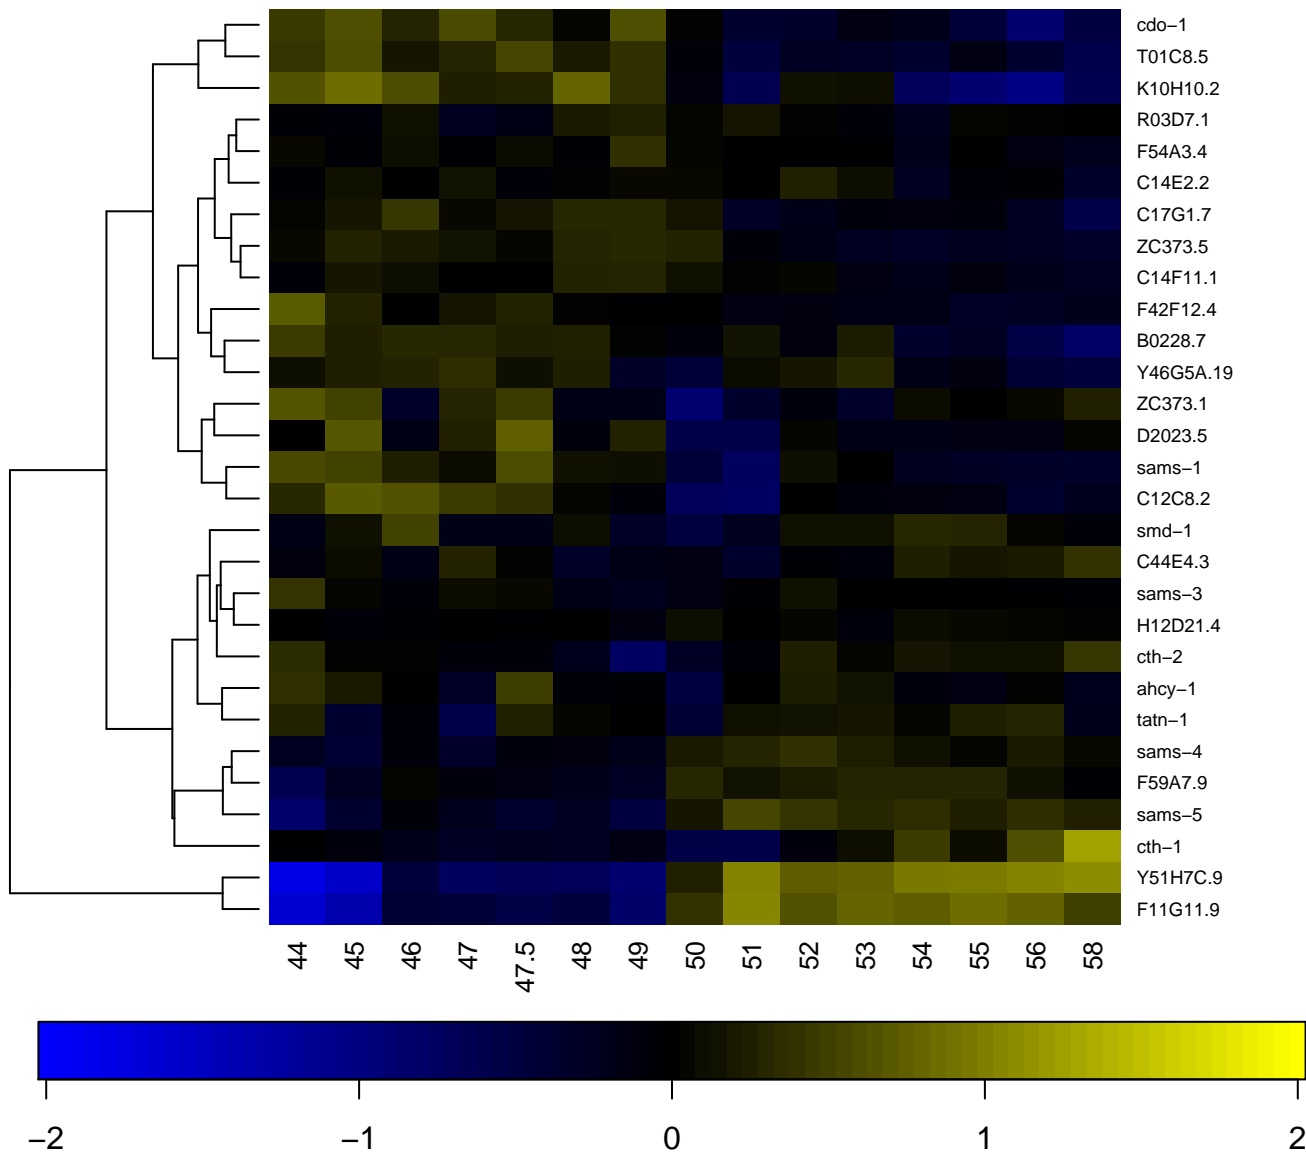

# DNA replication

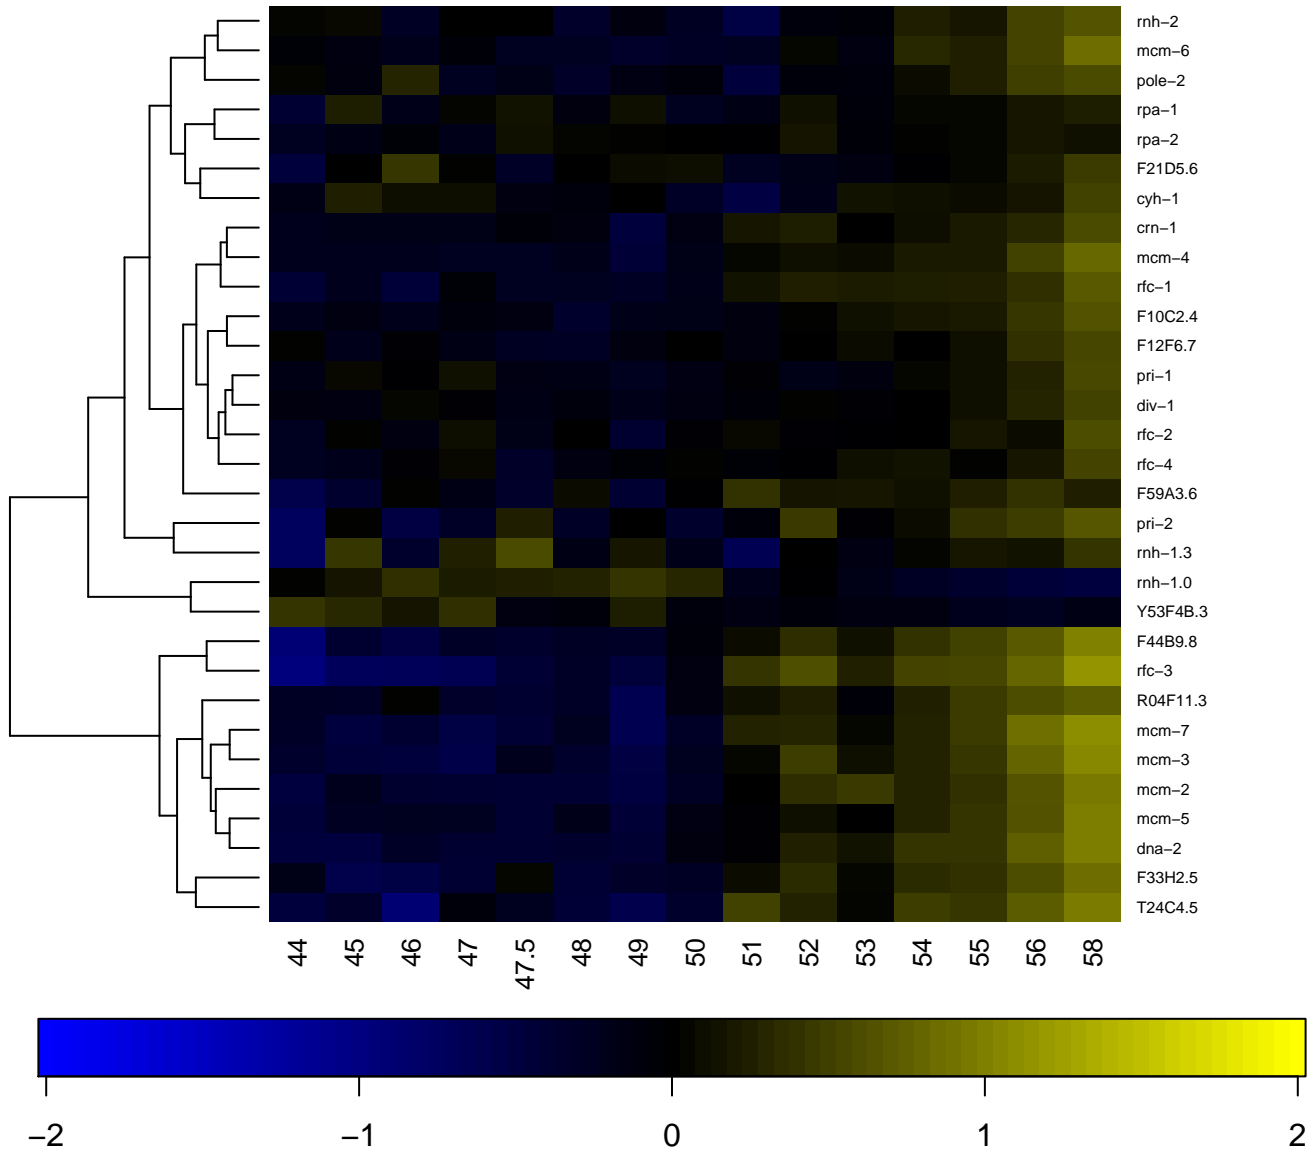





# Drug metabolism – cytochrome P450

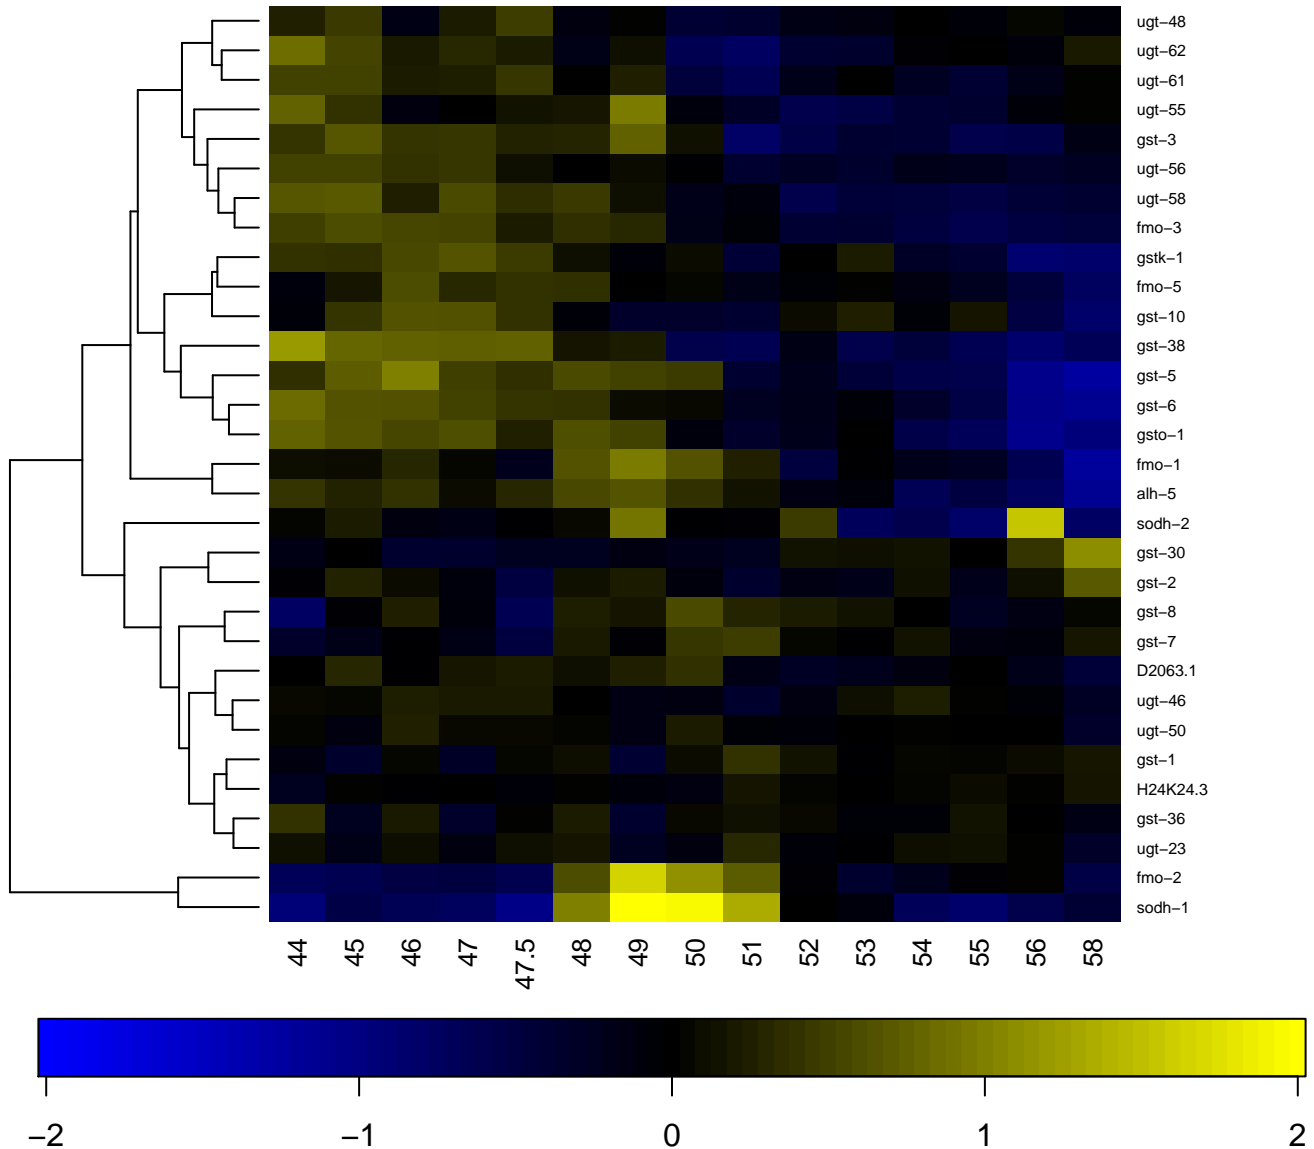

# Drug metabolism – other enzymes

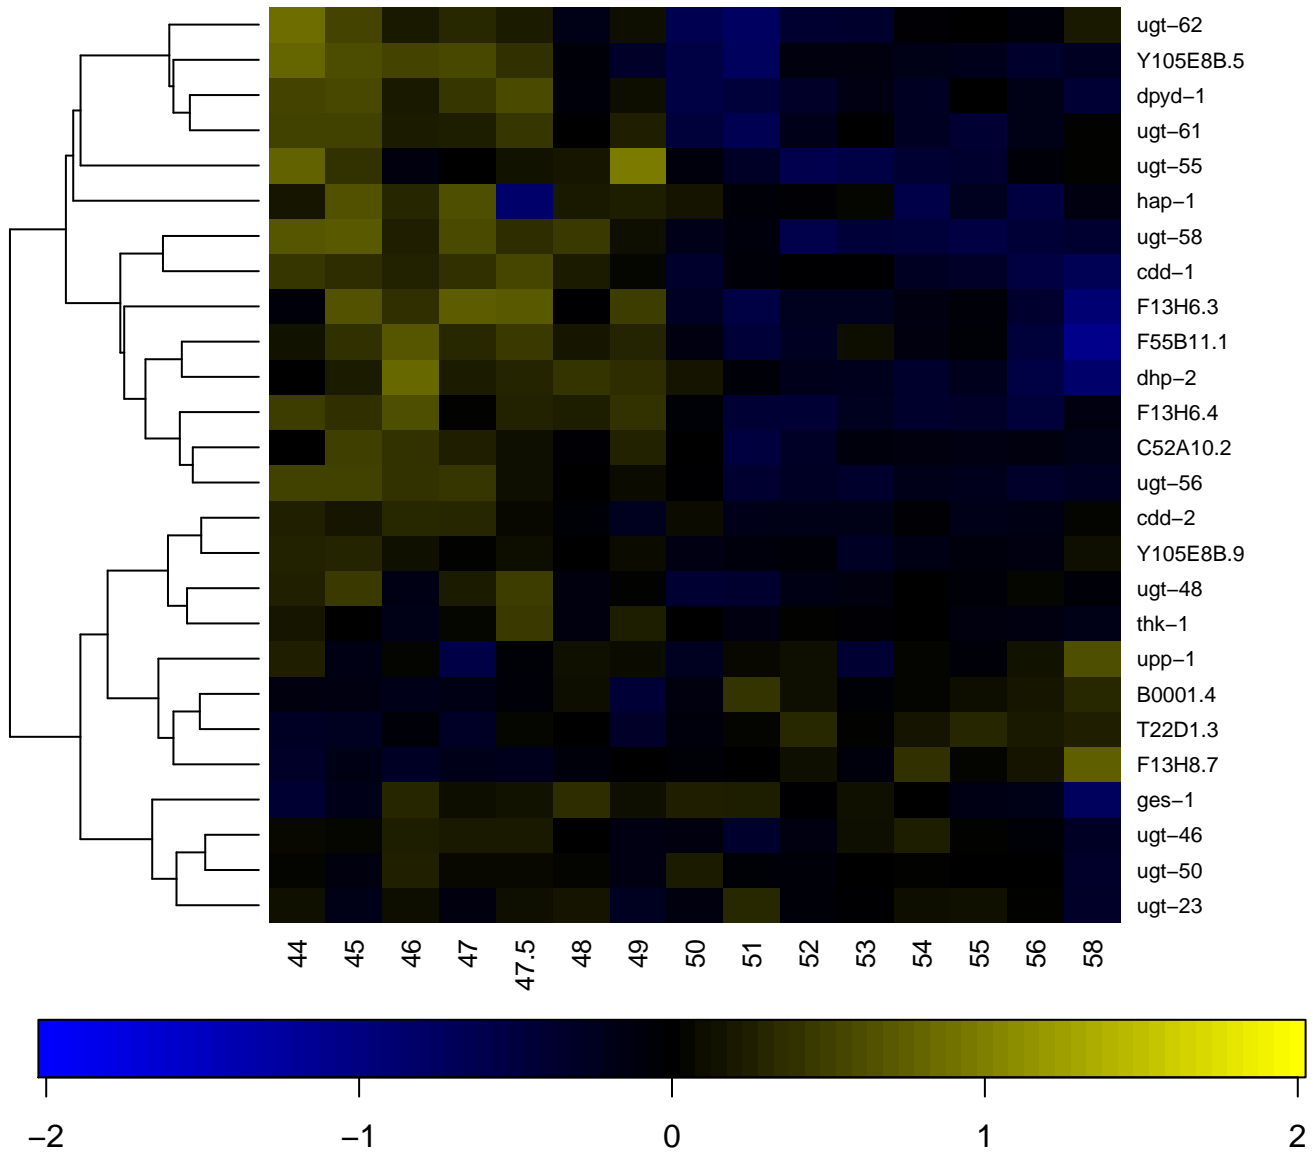

# Endocytosis

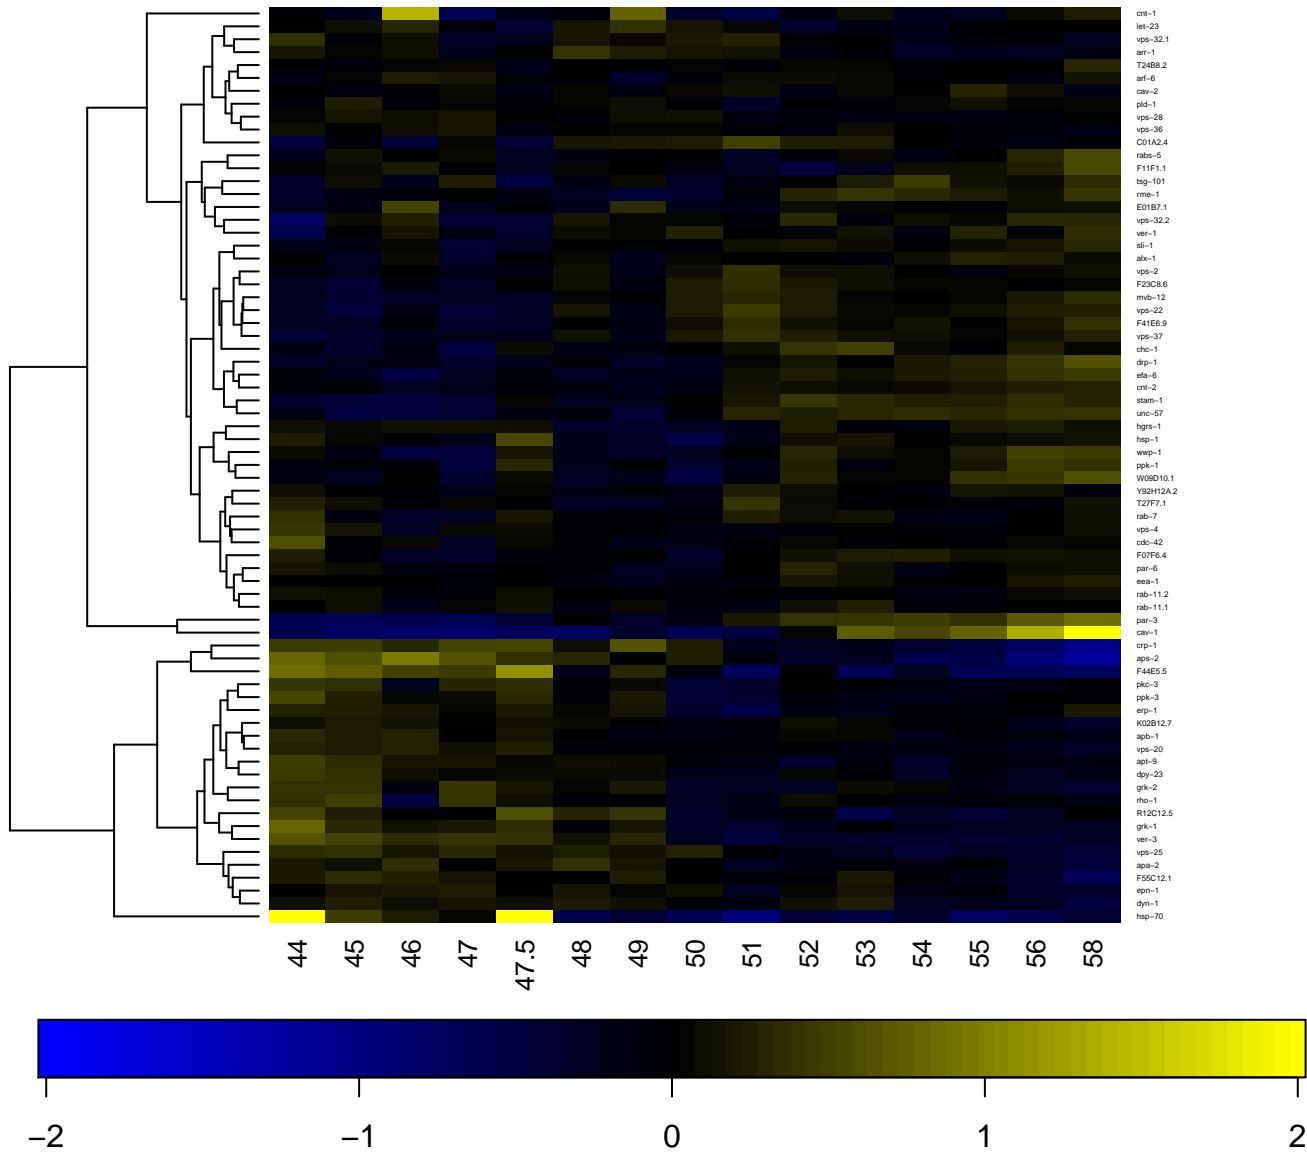

# ERBB signaling pathway

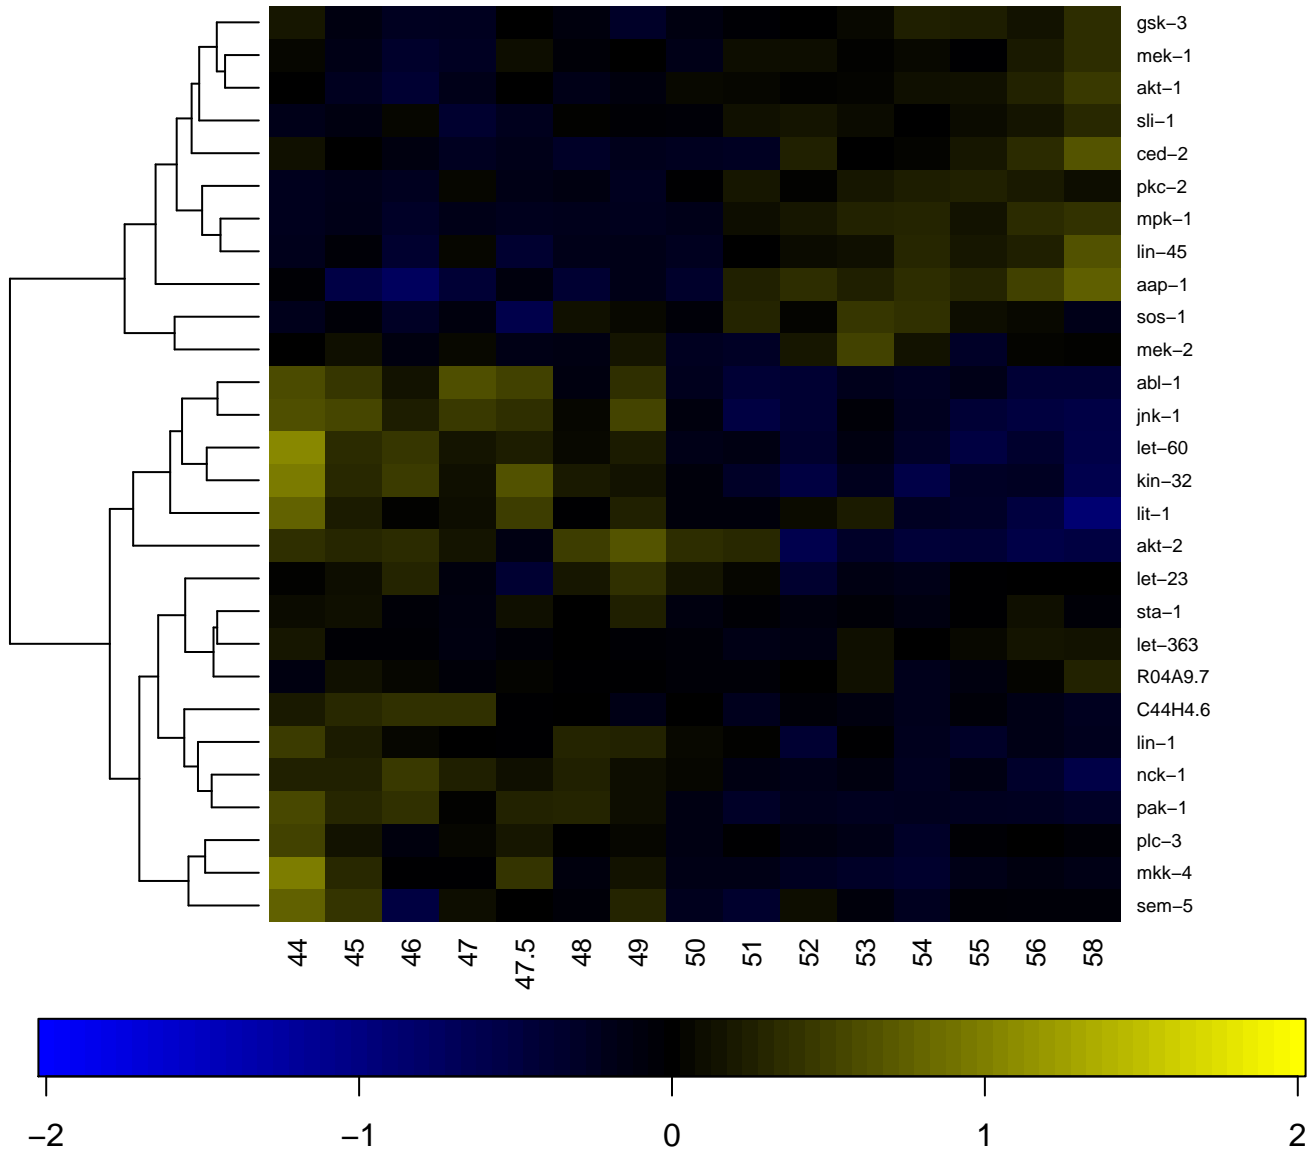



# Fanconi anemia pathway

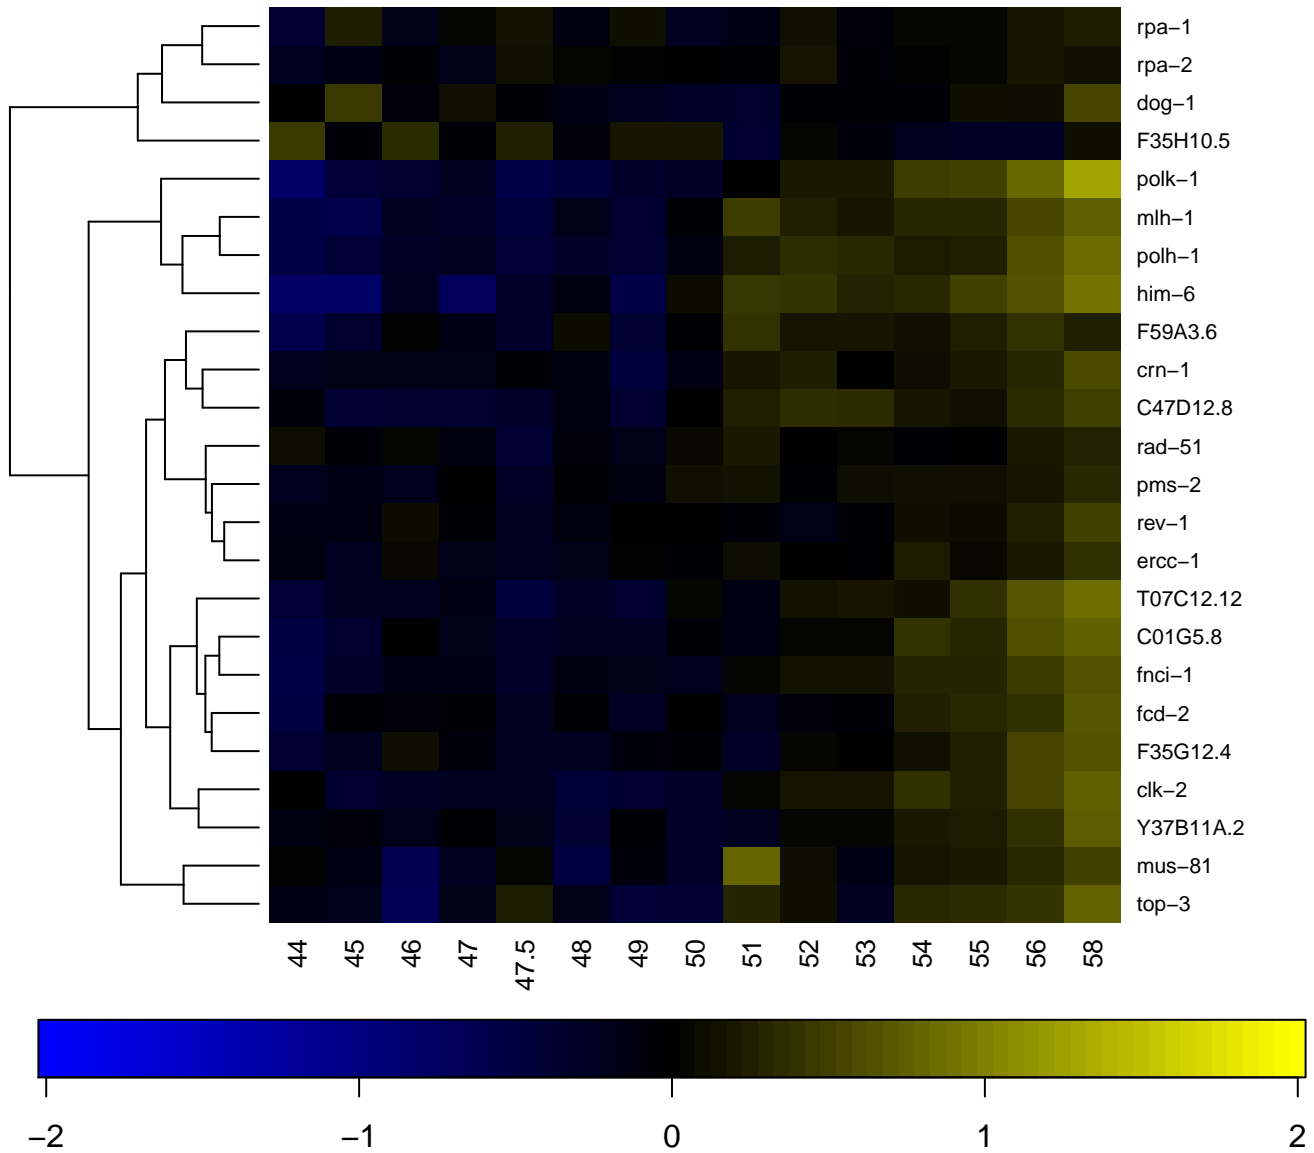

# Fatty acid elongation

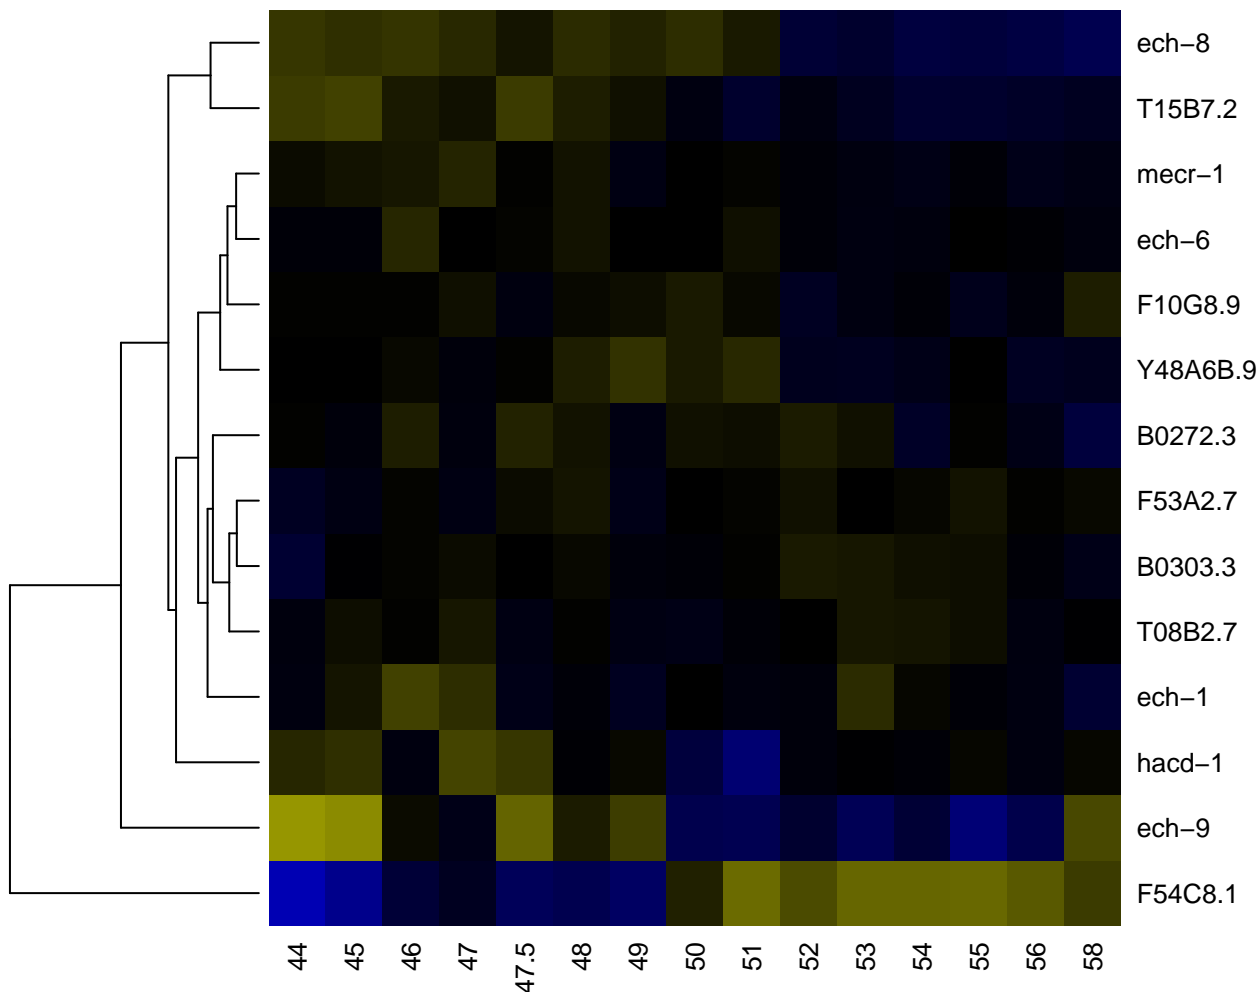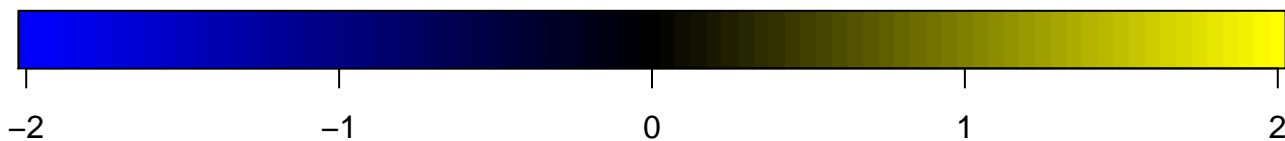



# Fatty acid metabolism

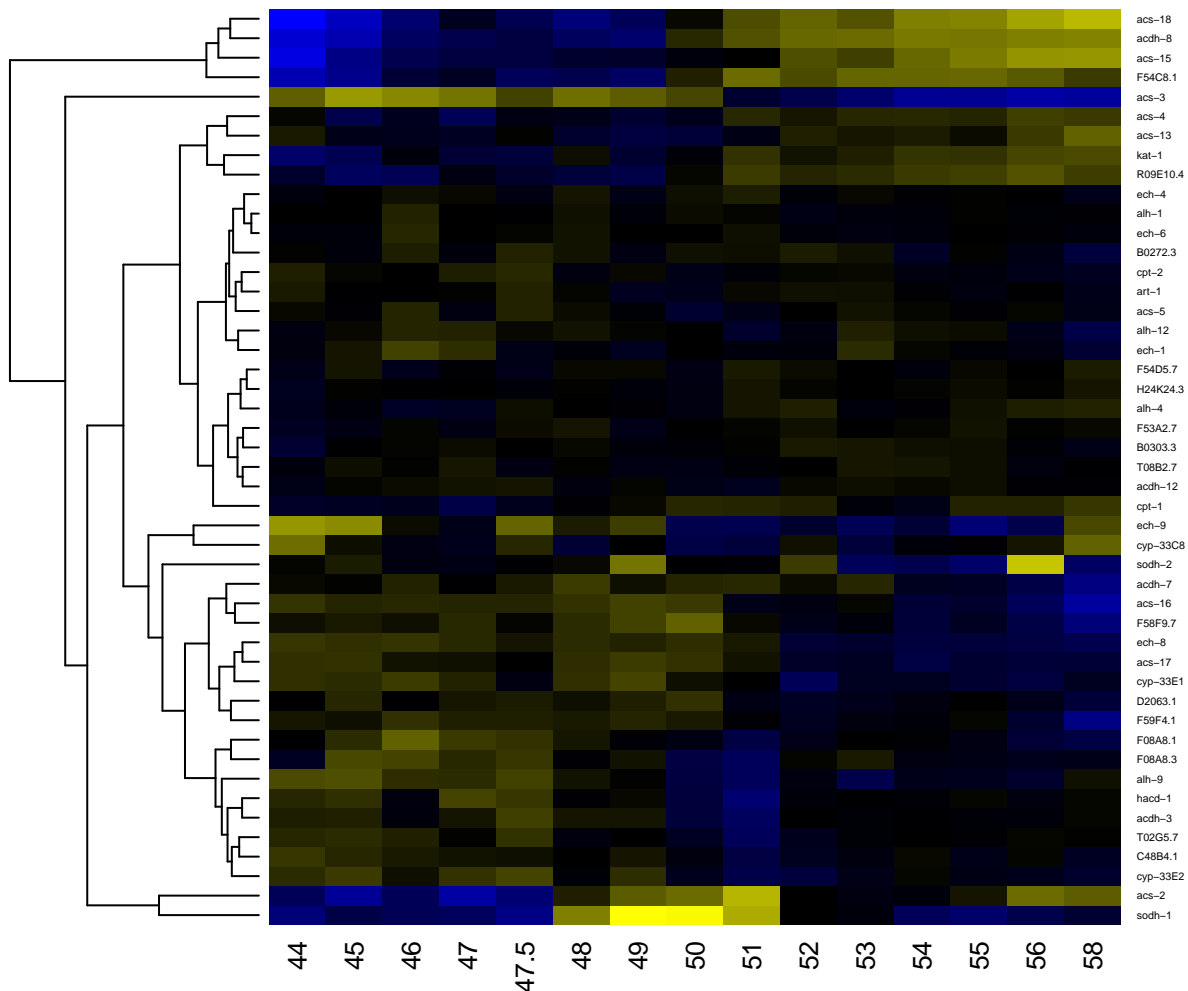



# Fructose and mannose metabolism

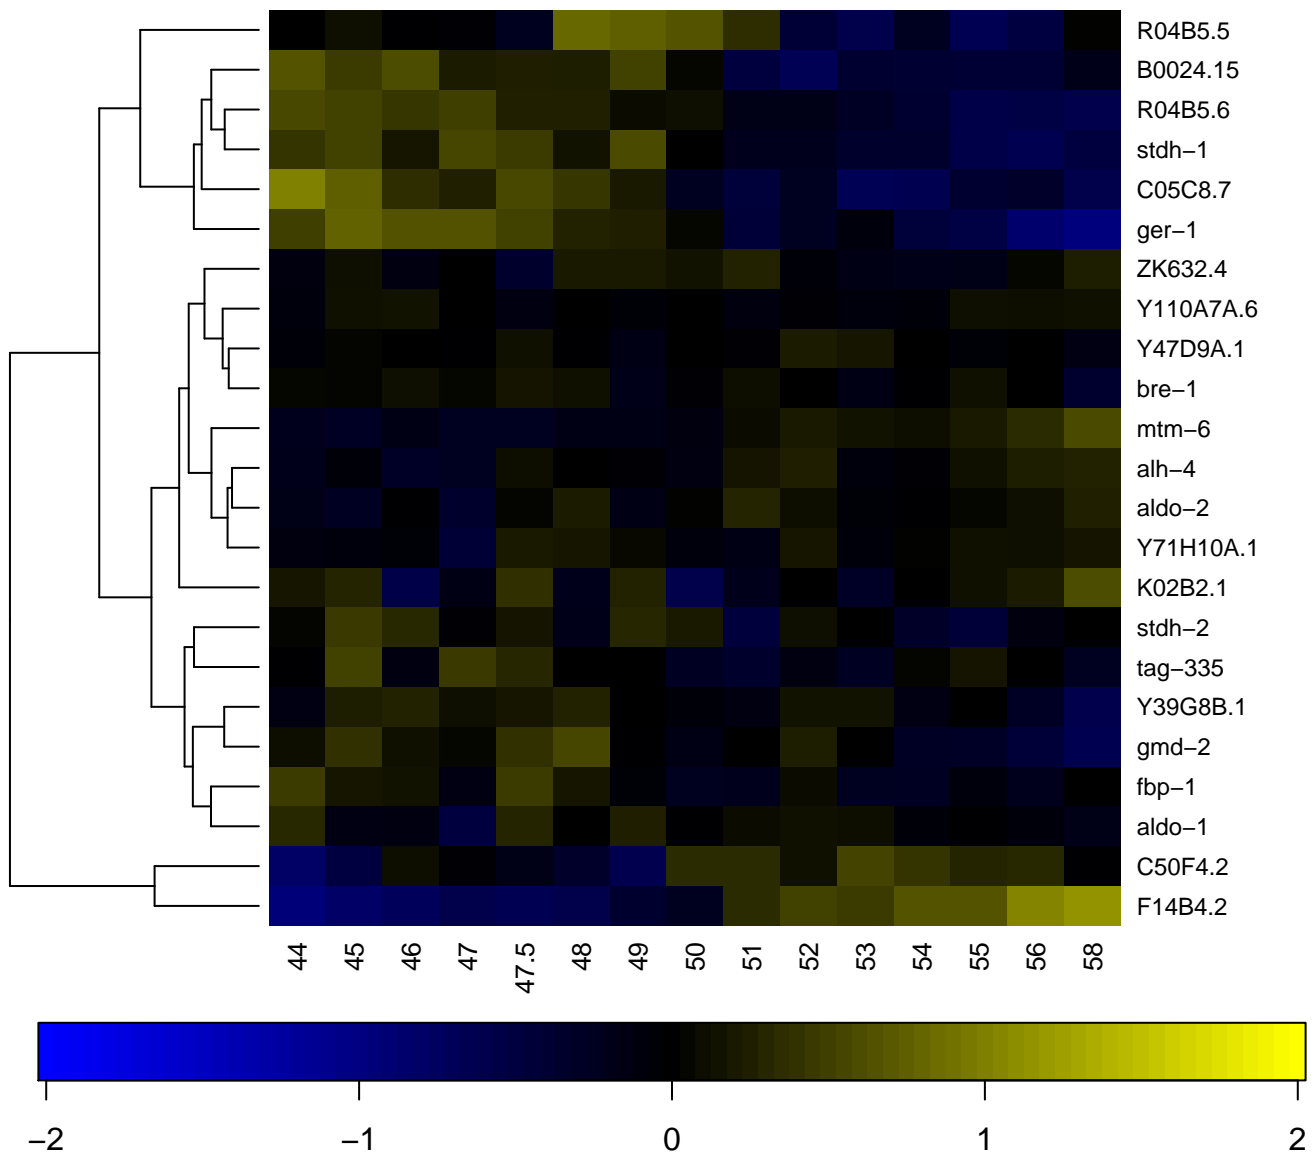





# Glycerolipid metabolism

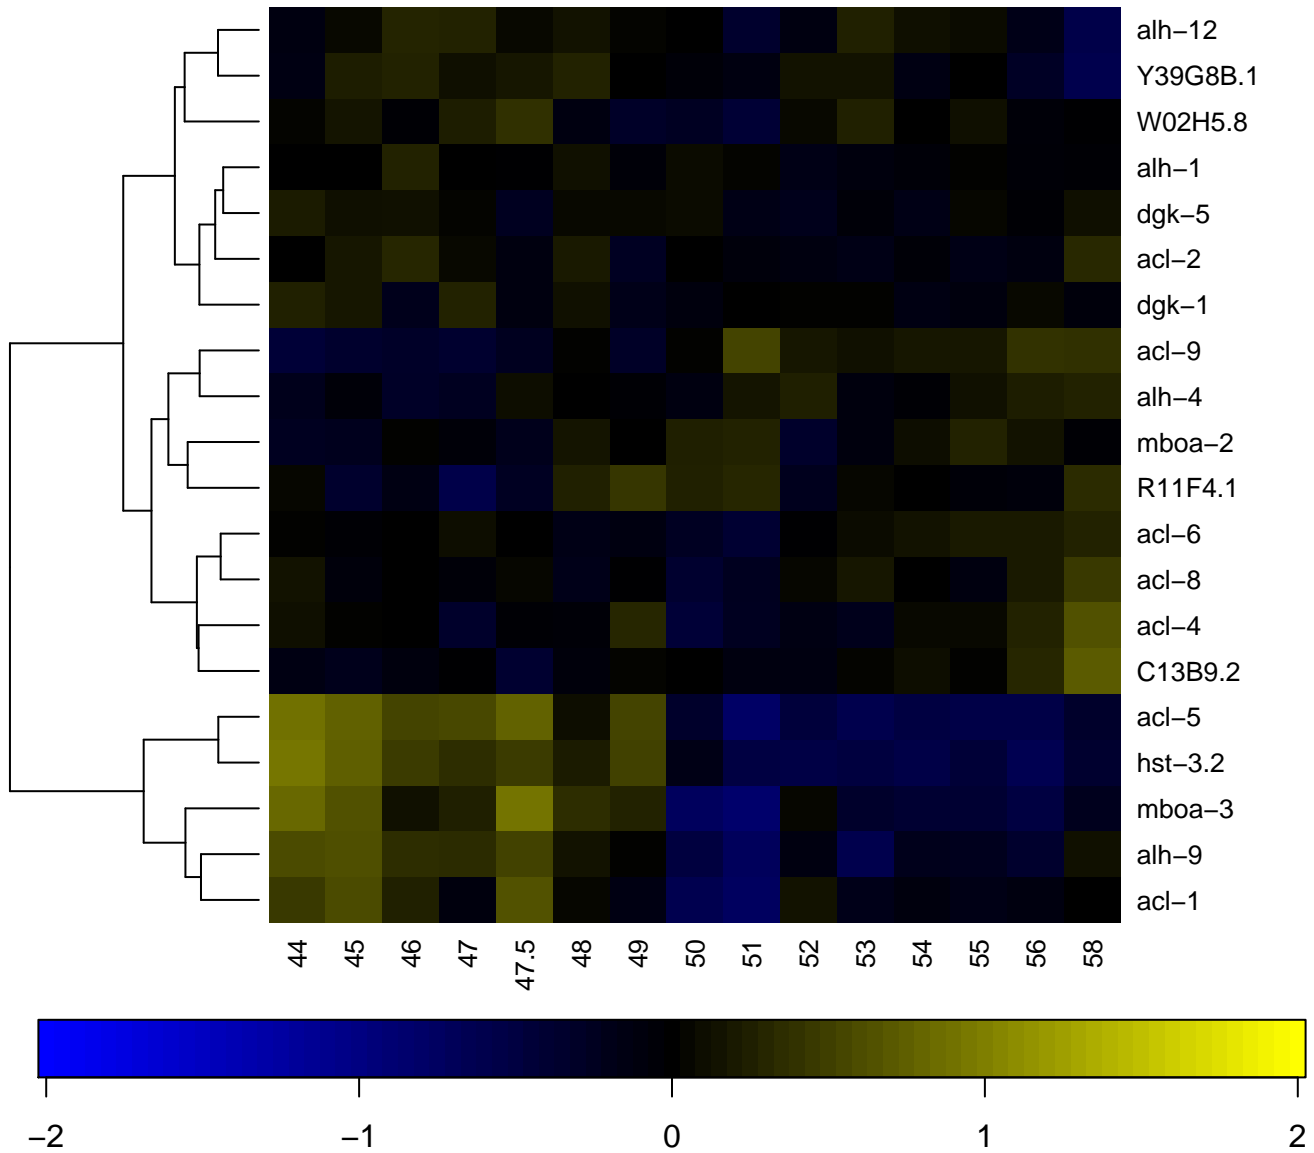

# Glycerophospholipid metabolism

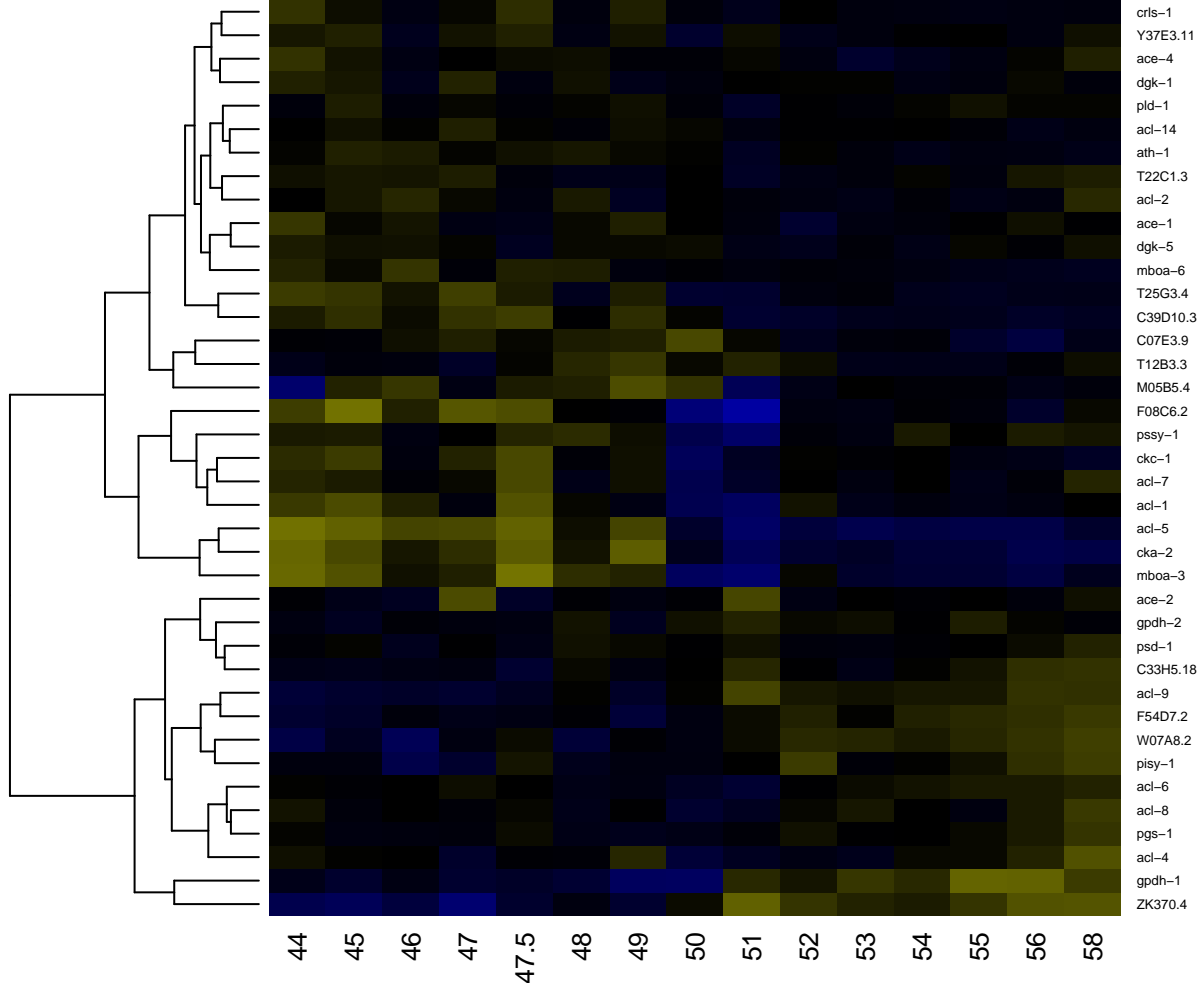

# Glycine, serine and threonine metabolism

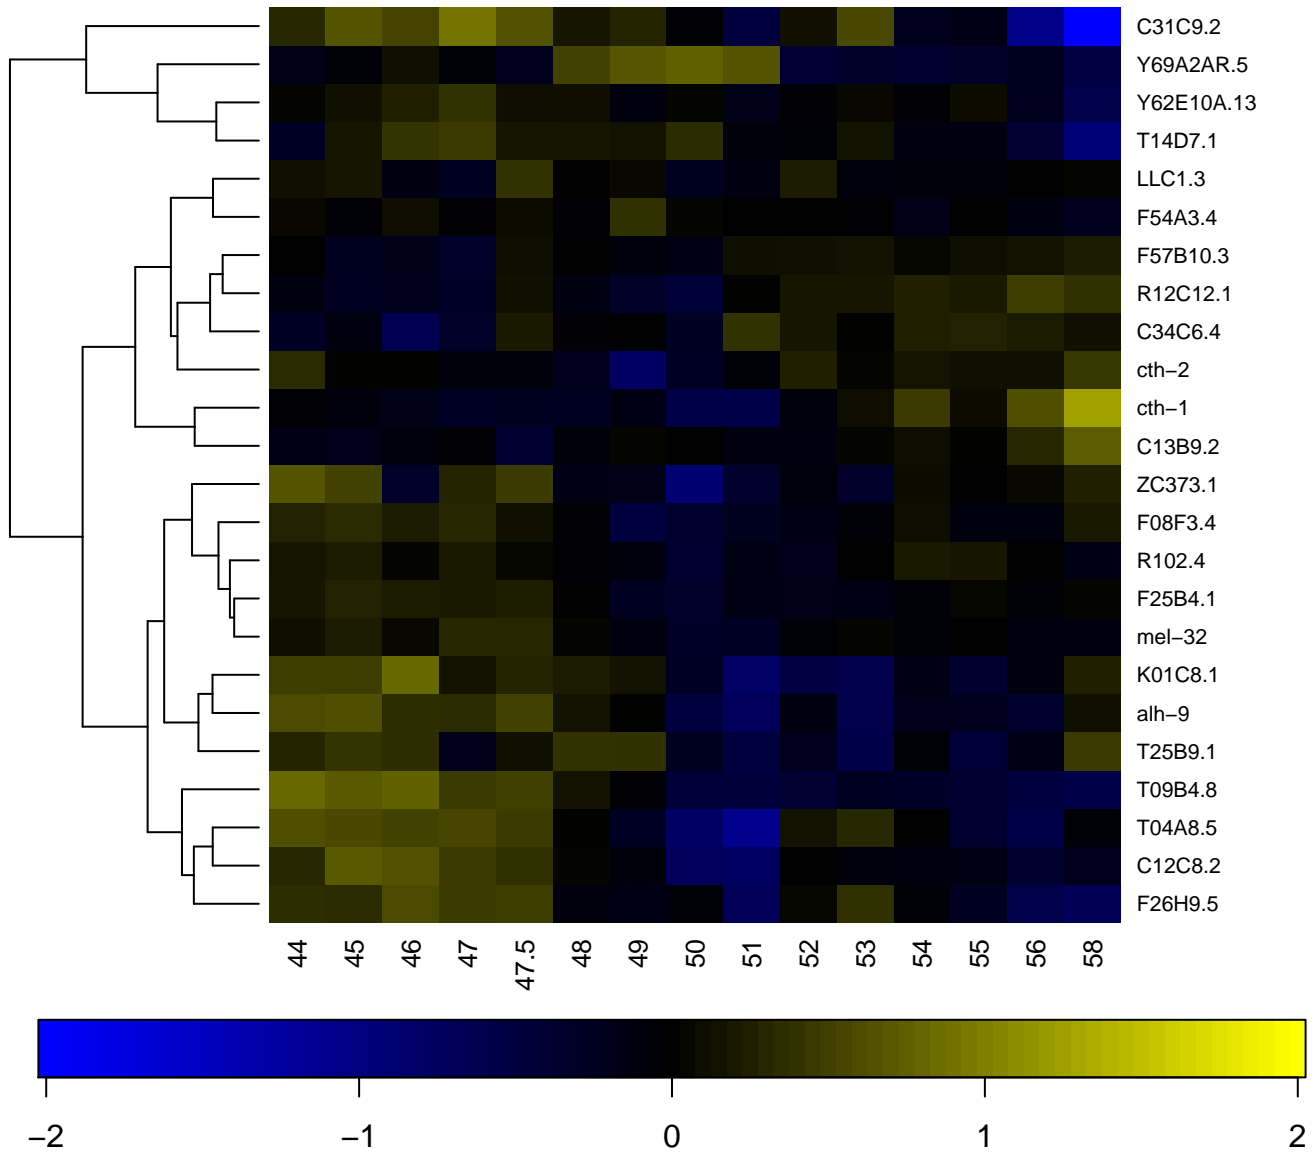



# Glycolyse / Gluconeogenesis

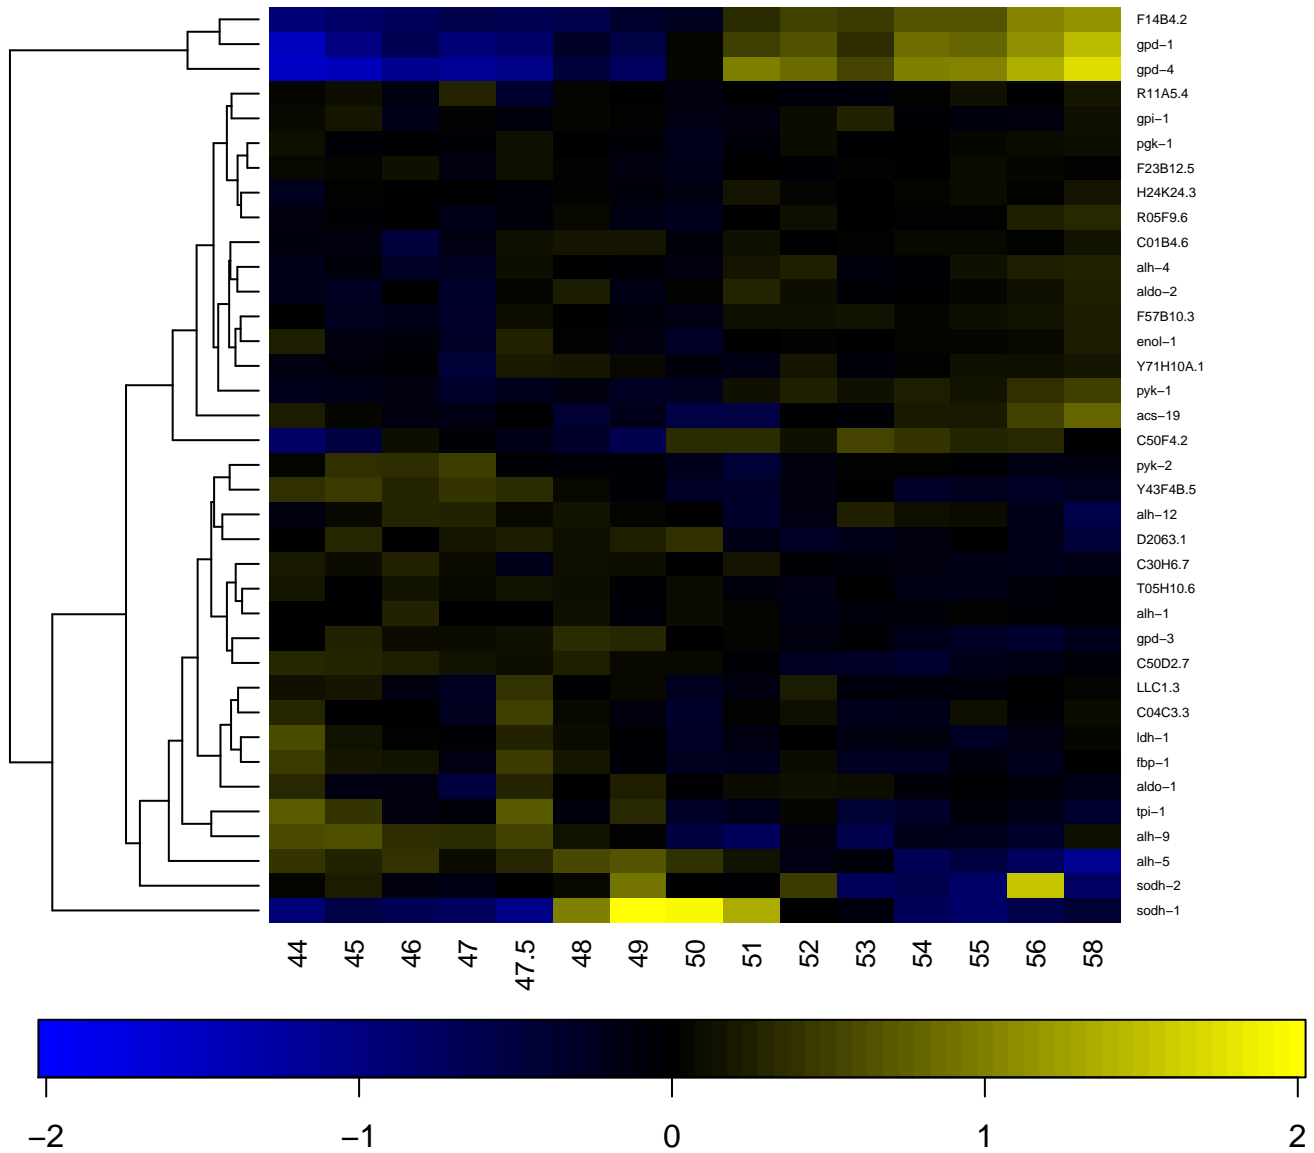

# saminoglycan biosynthesis – chondroitin sulfate / dermatan

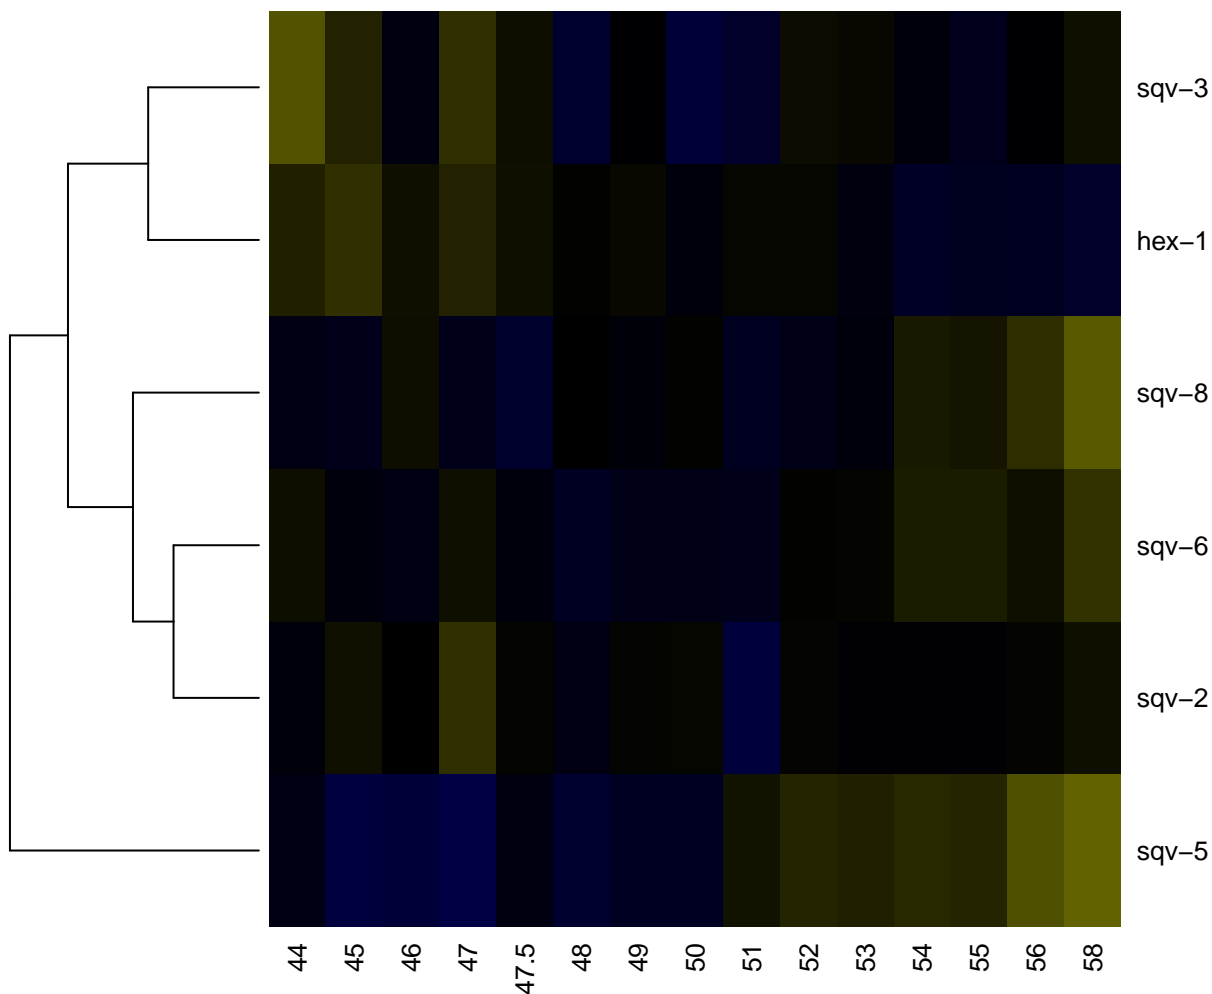

# Glycosaminoglycan biosynthesis – heparan sulfate / heparin

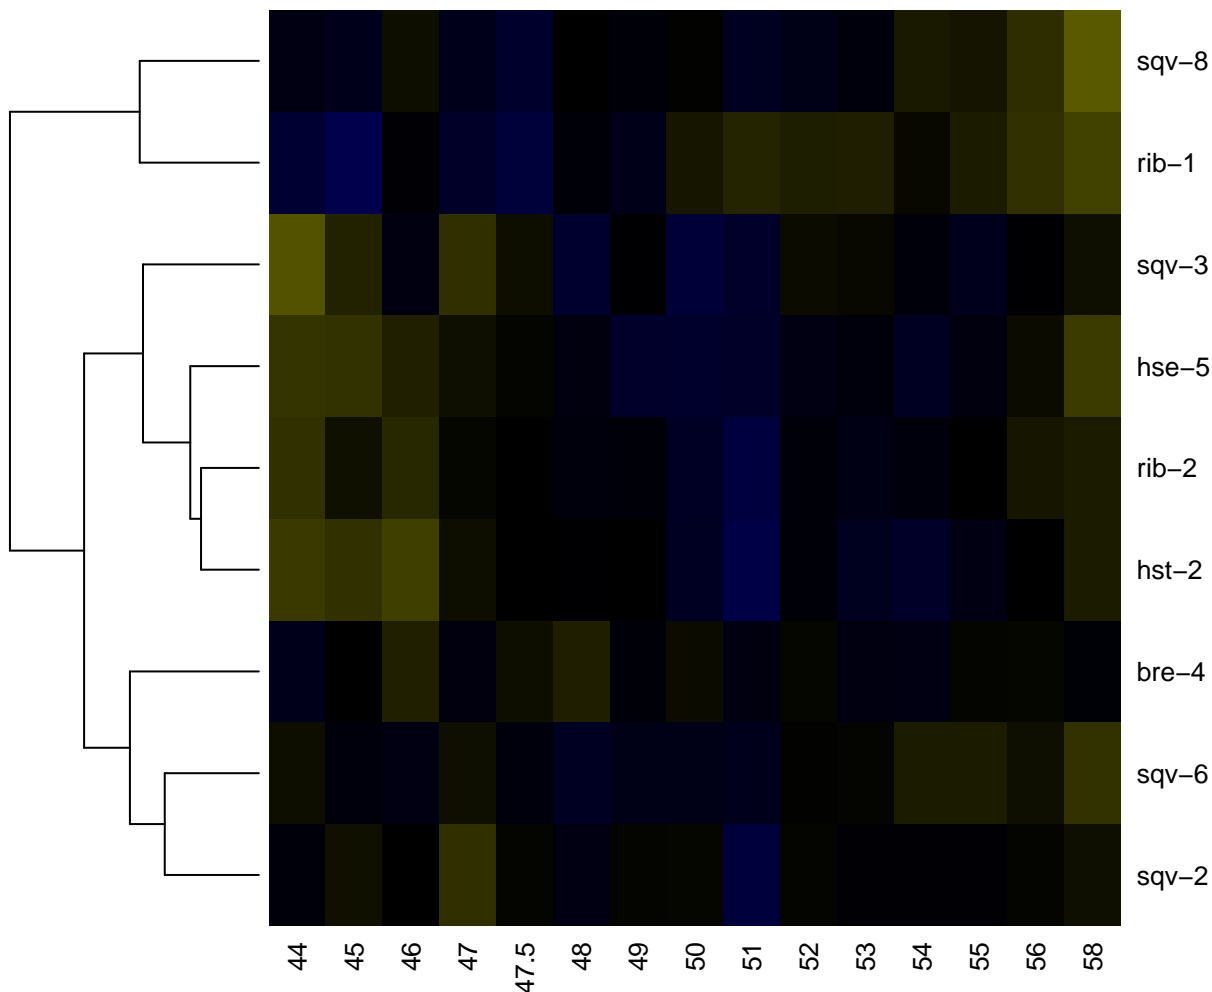

# Glycosylphosphatidylinositol (GPI) – anchor biosynthesis

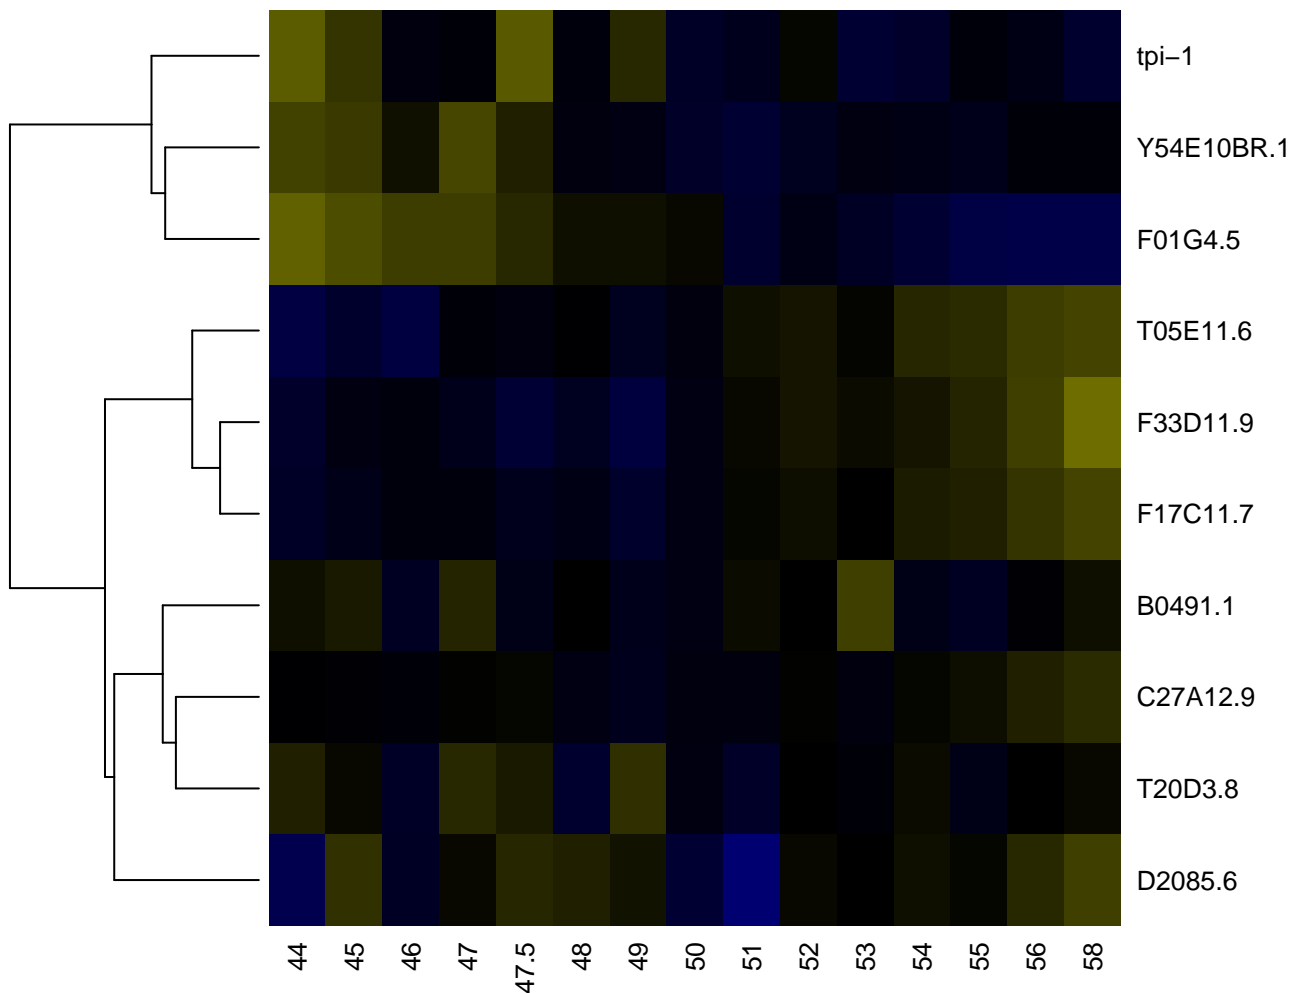

# Glyoxylate and dicarboxylate metabolism

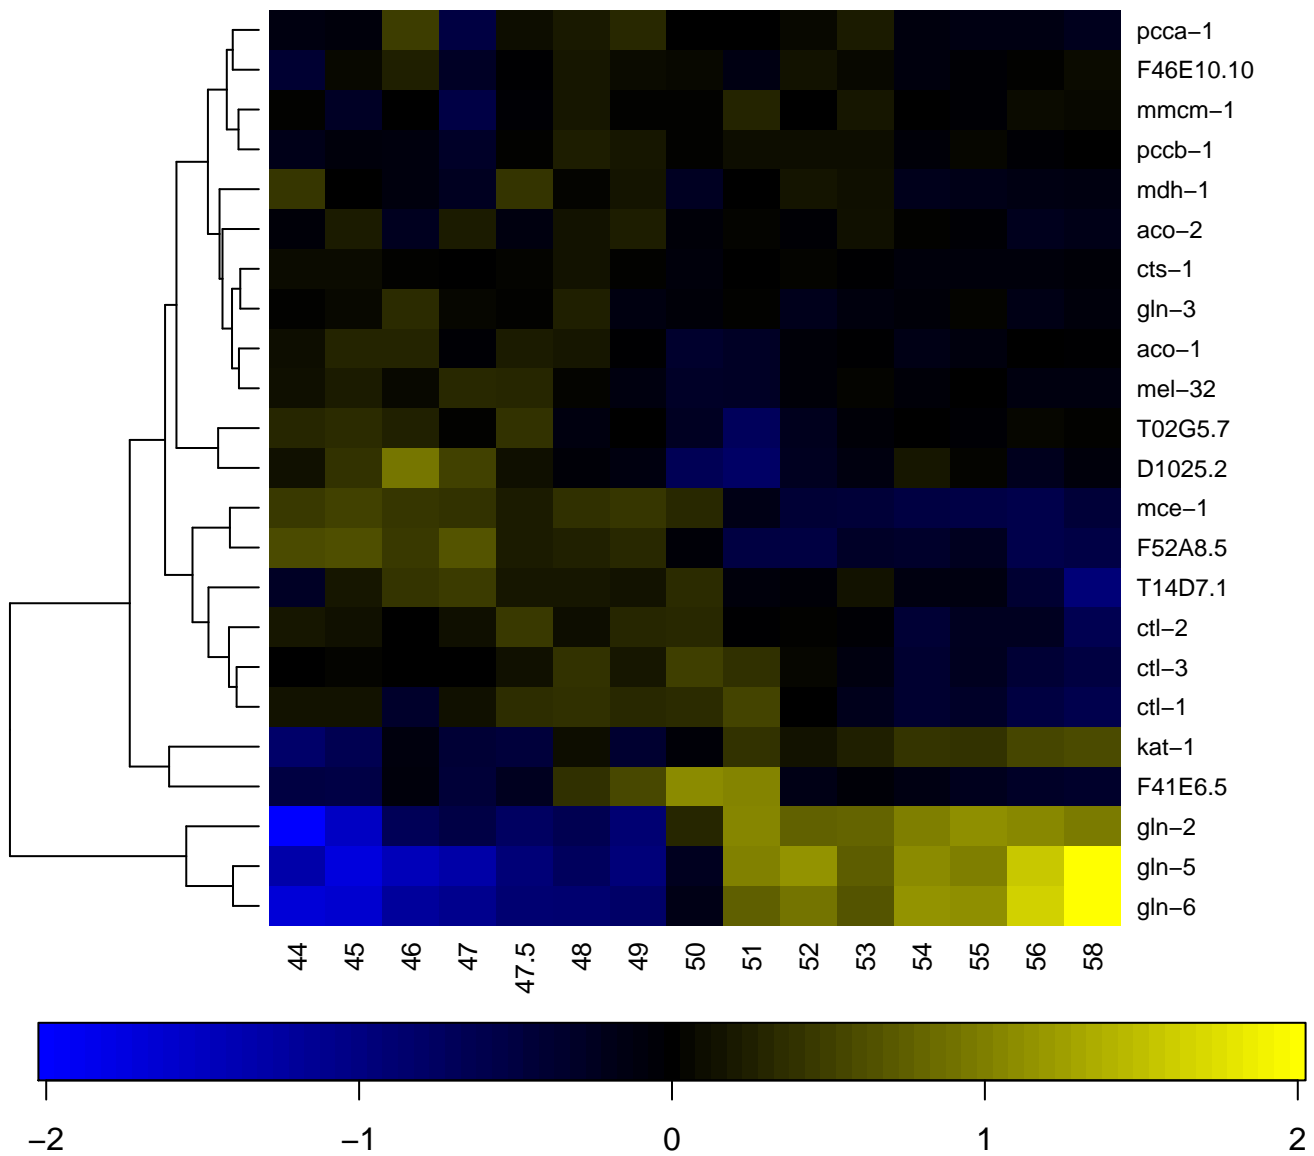





# Histidine metabolism

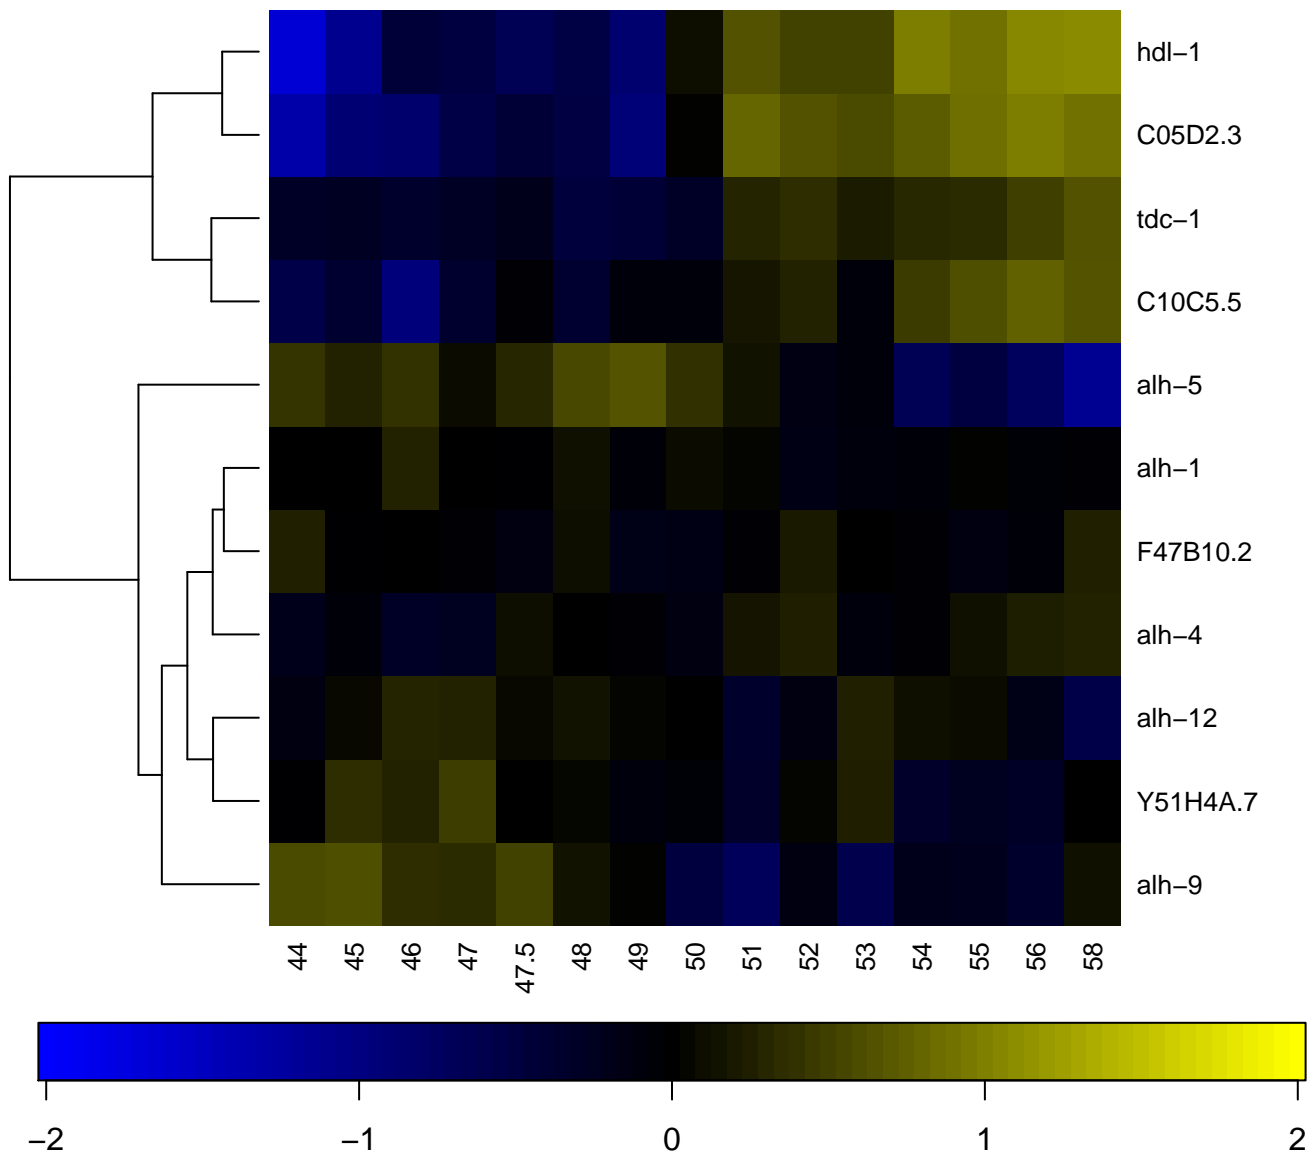



# Homologous recombination

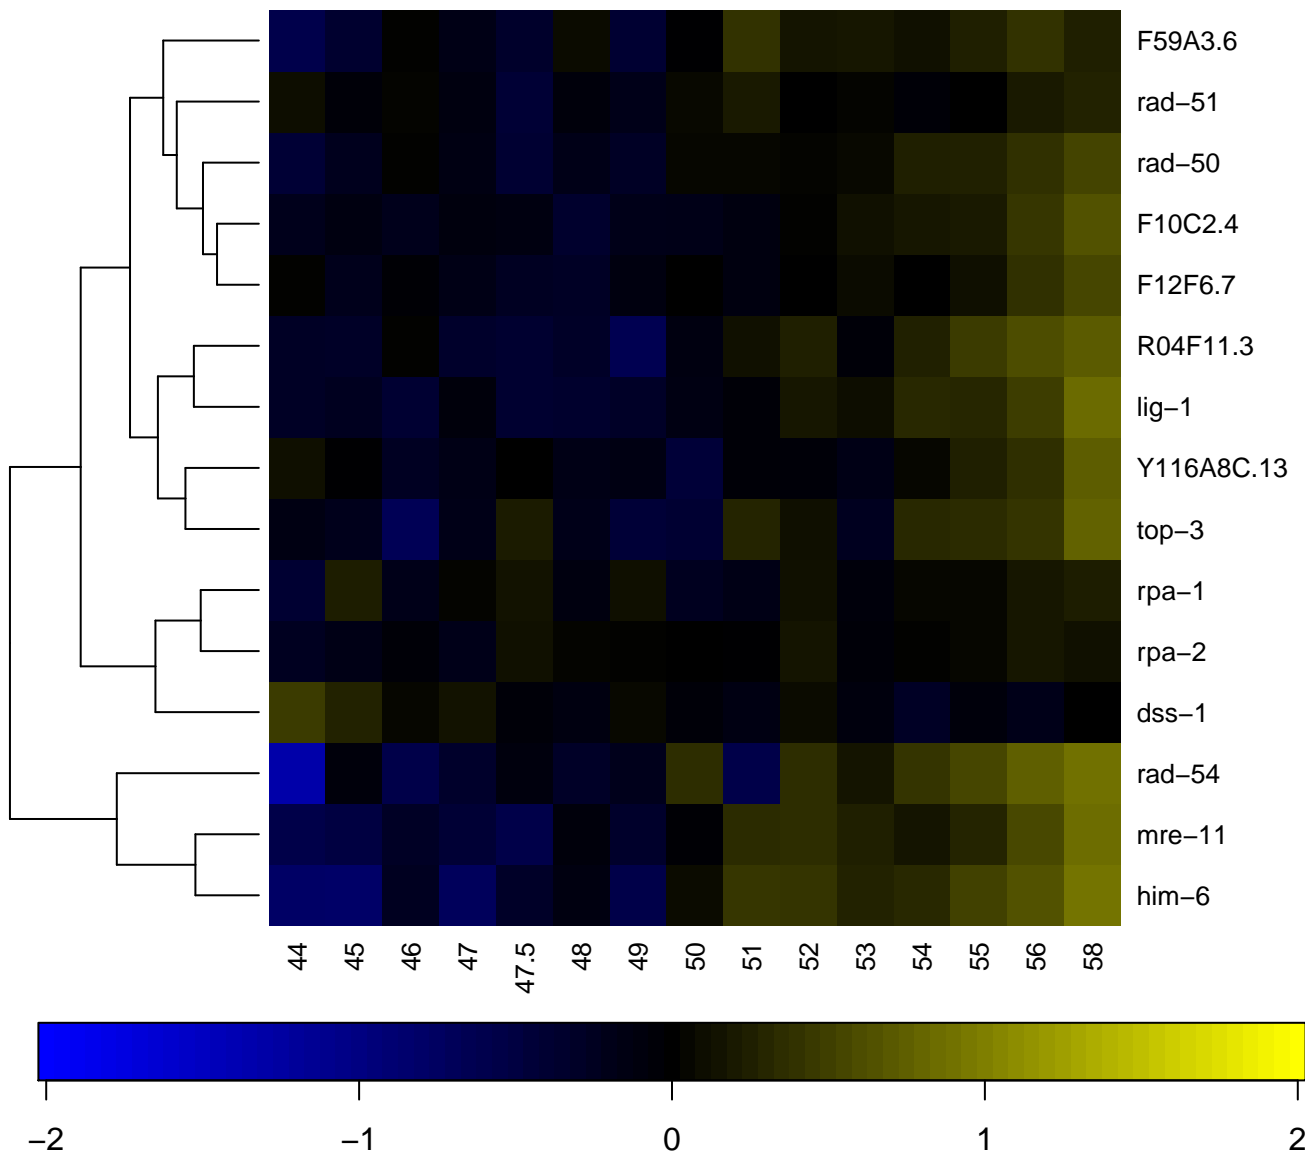

# Inositol phosphate metabolism

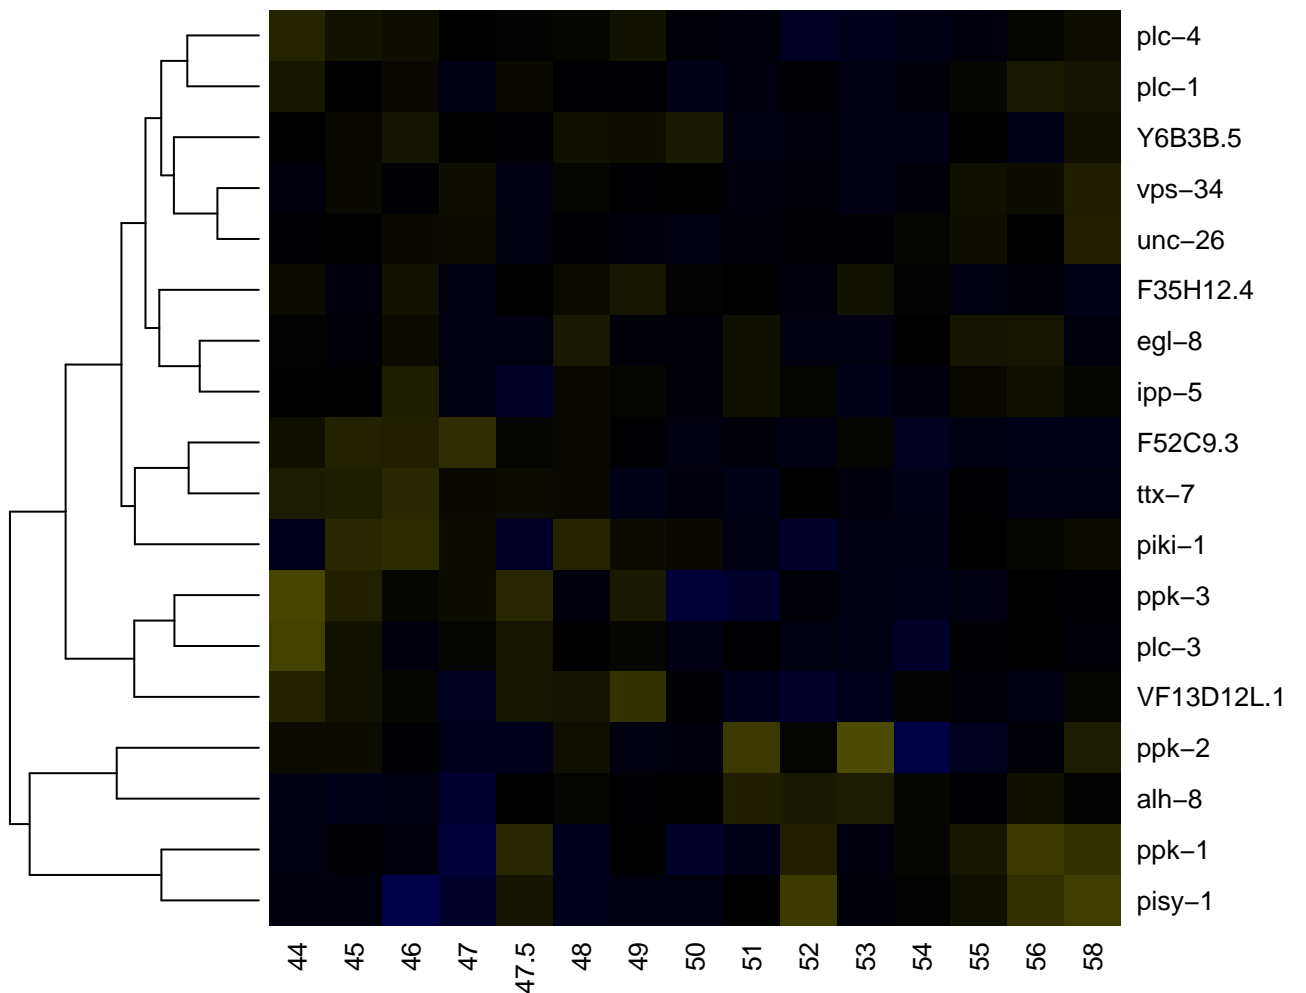



# Lysine degradation

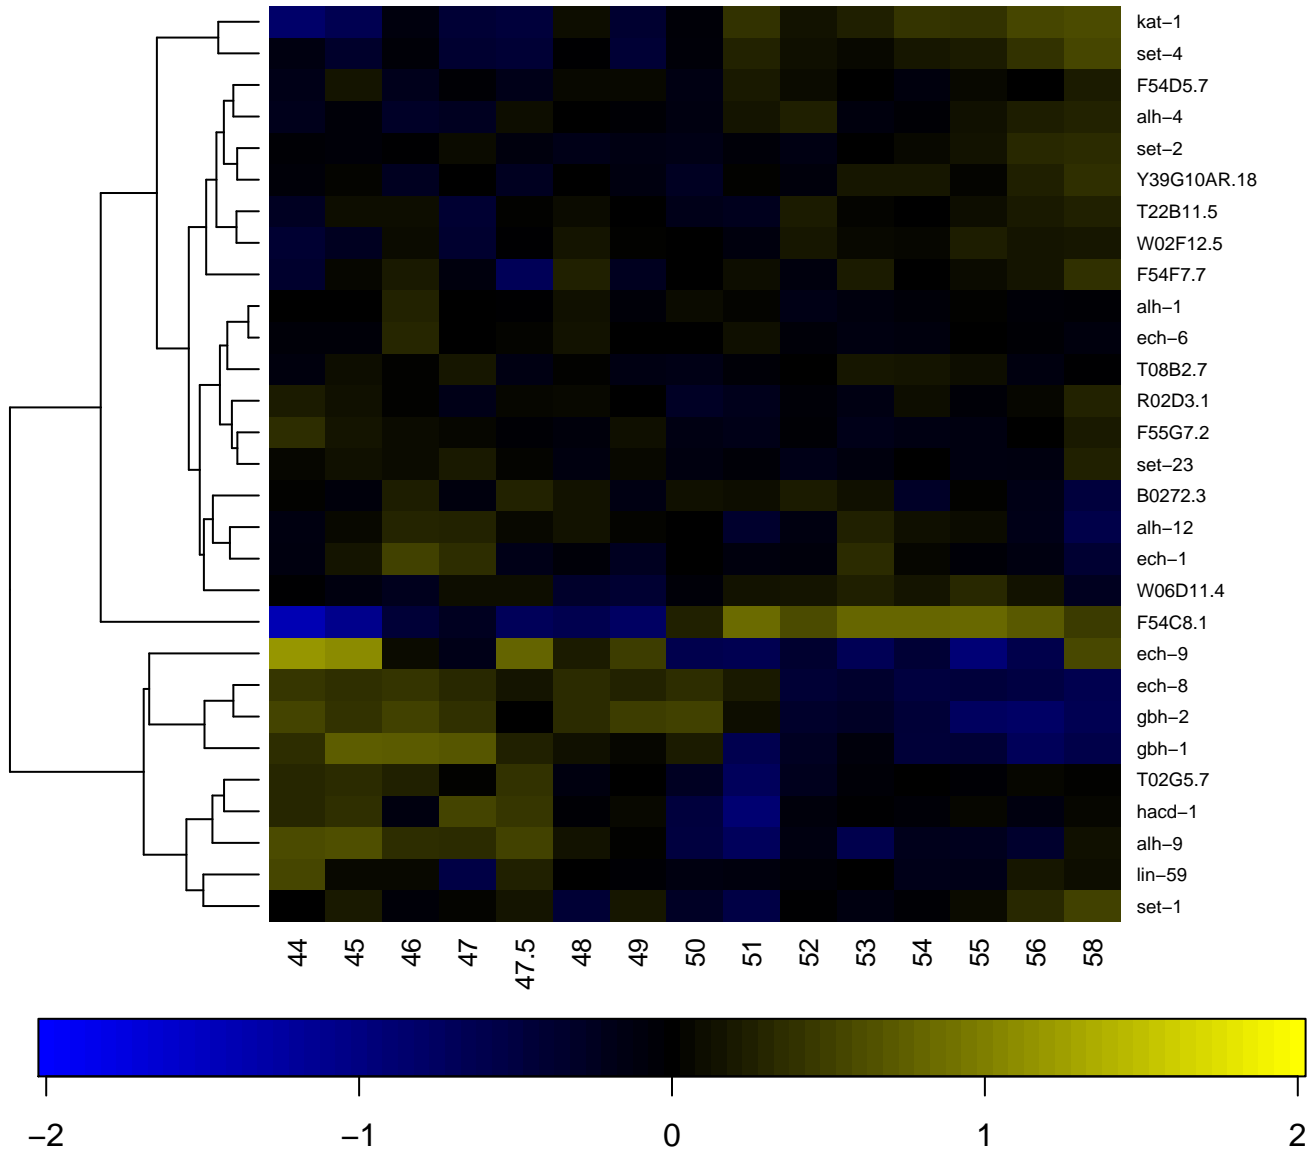

# Lysosome

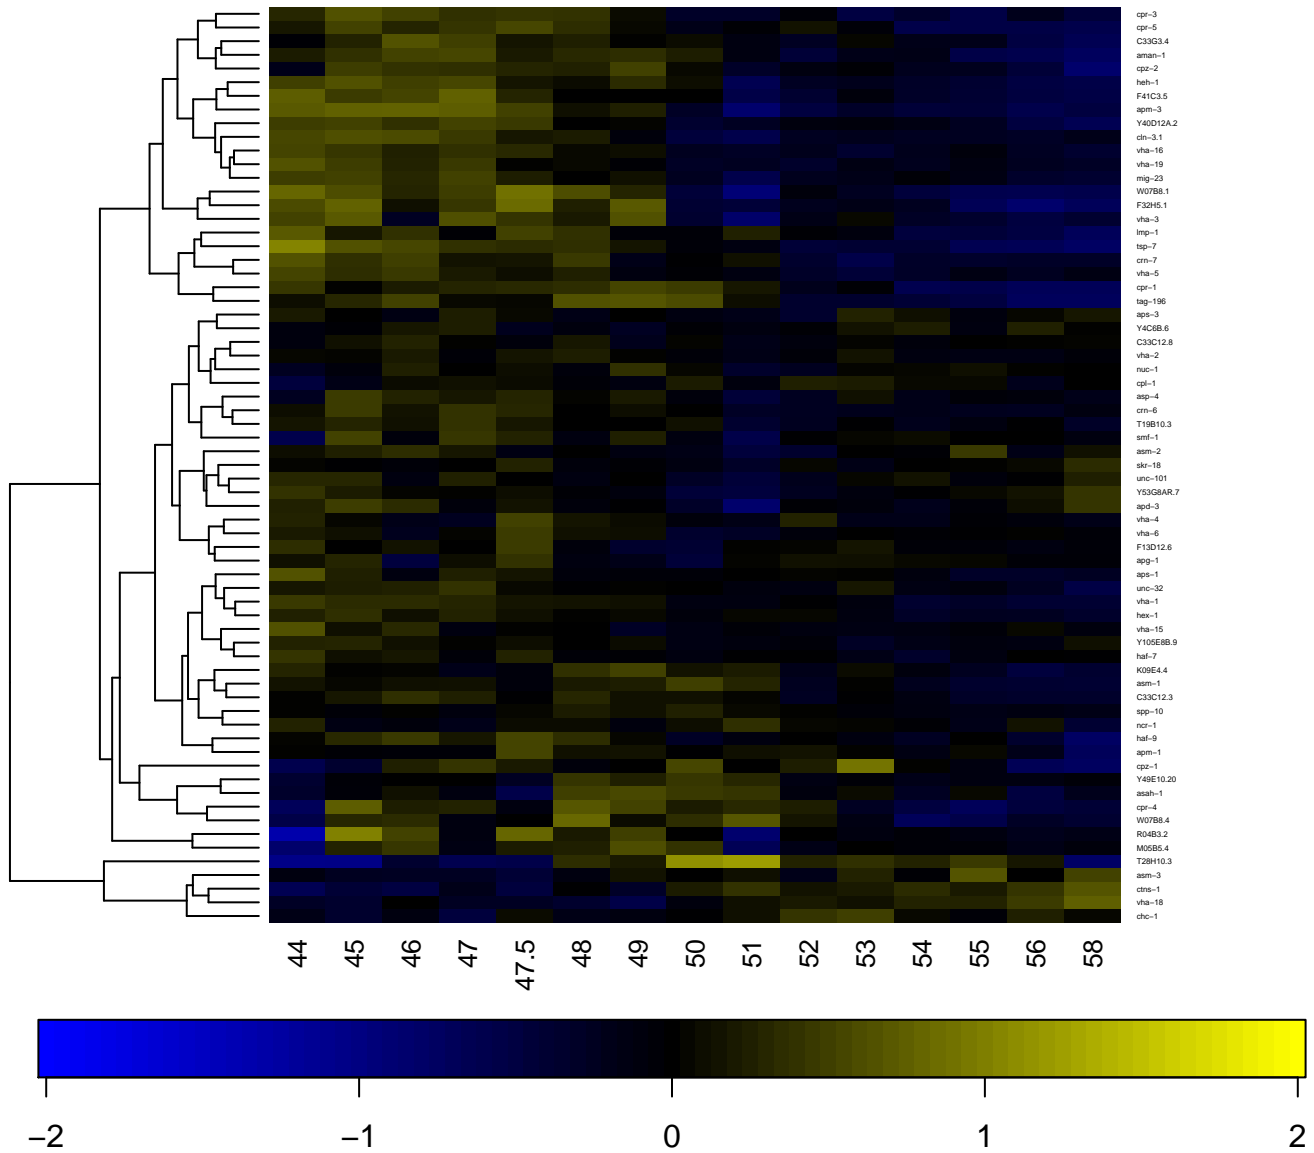

# MAPK signaling pathway

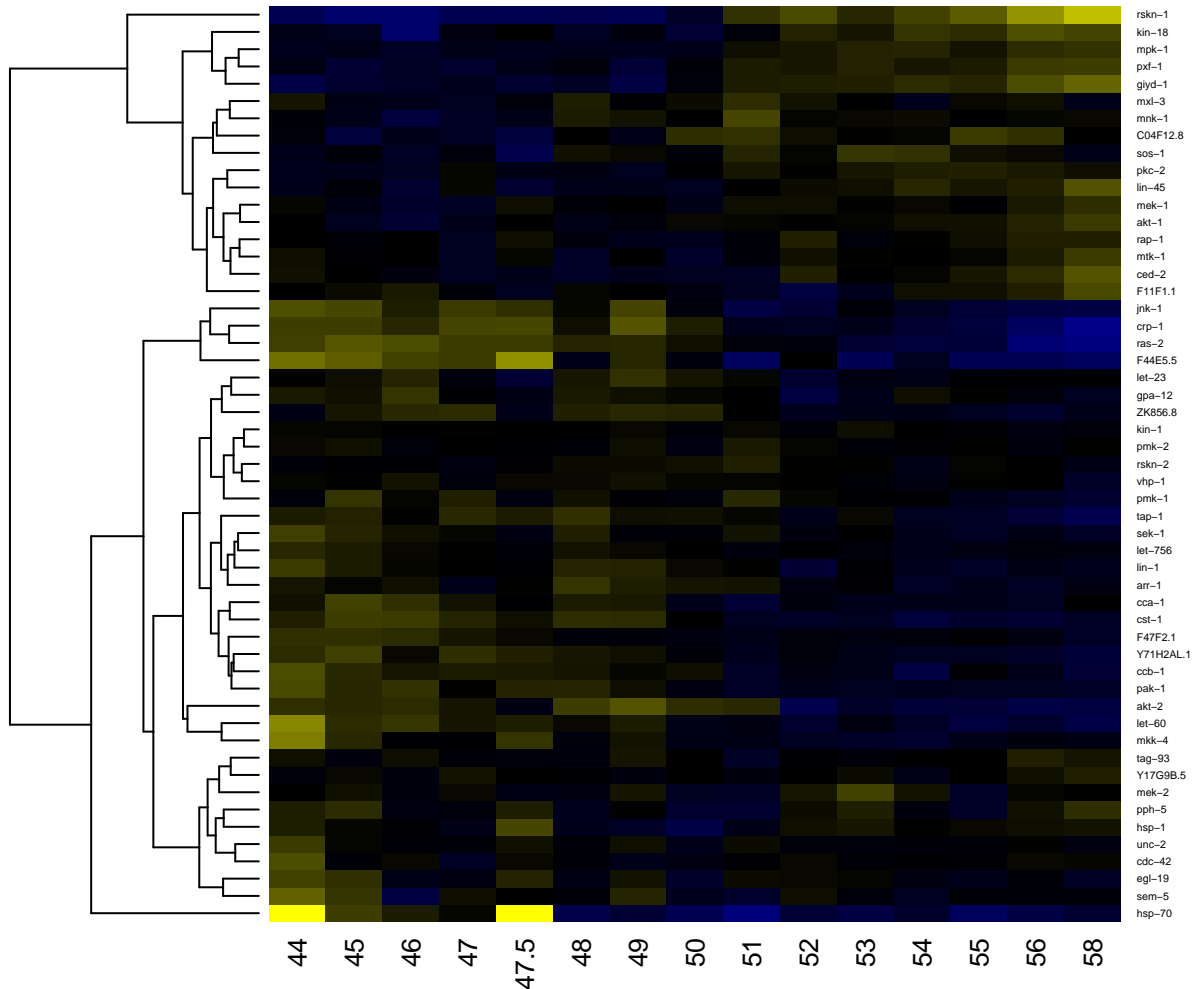

# Metabolism of xenobiotics by cytochrome P450

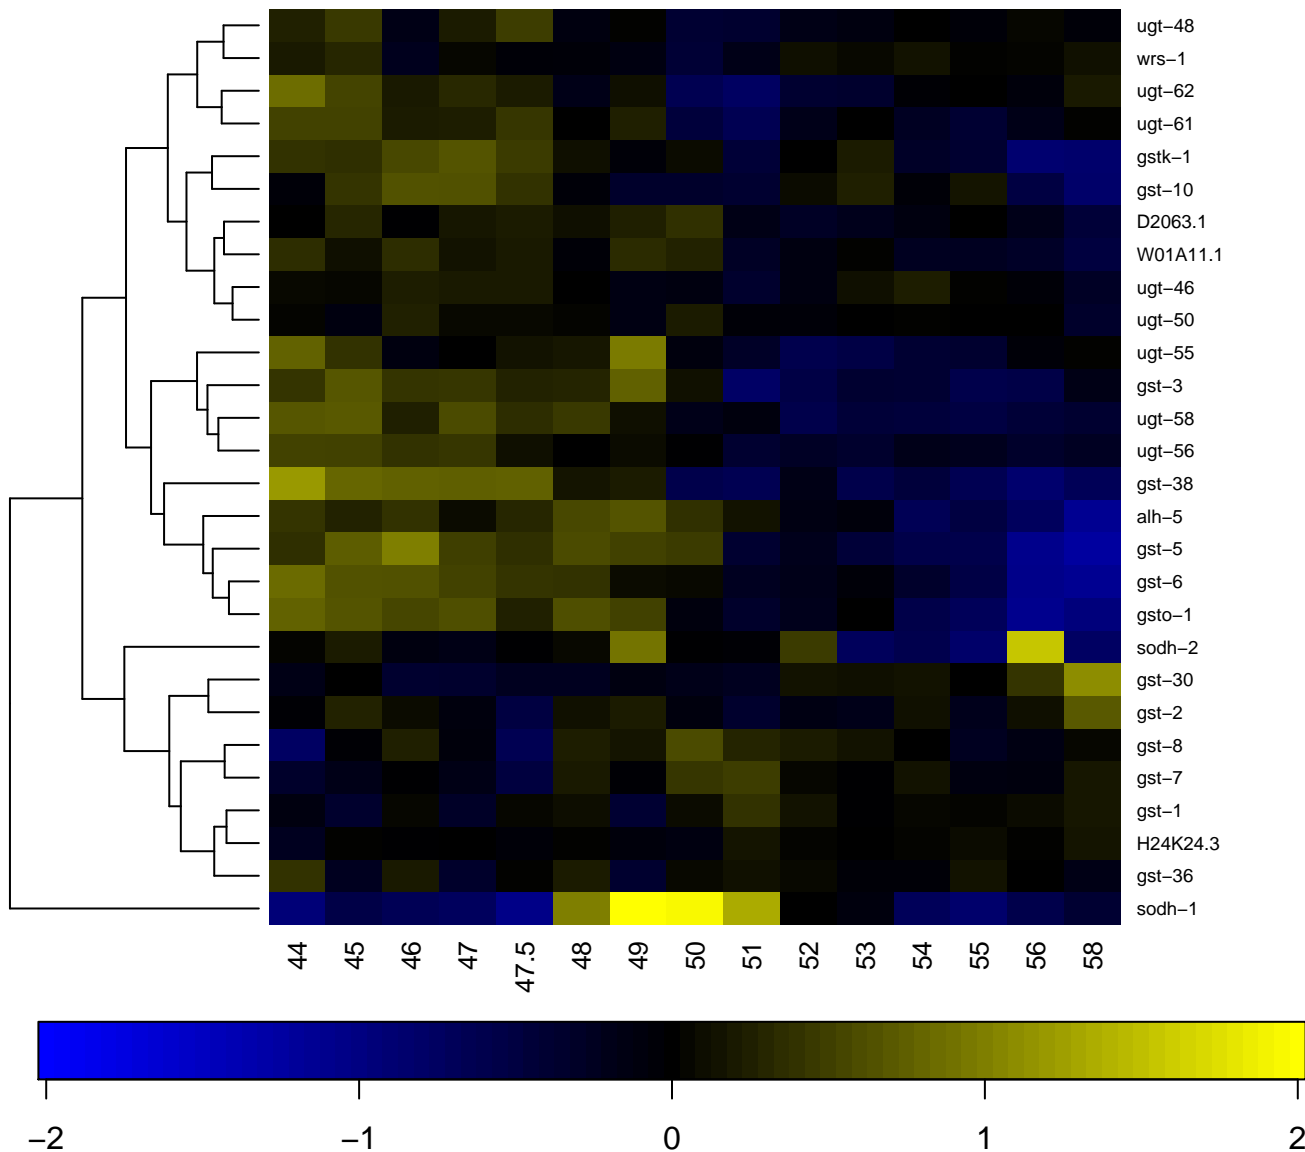

# Mismatch repair

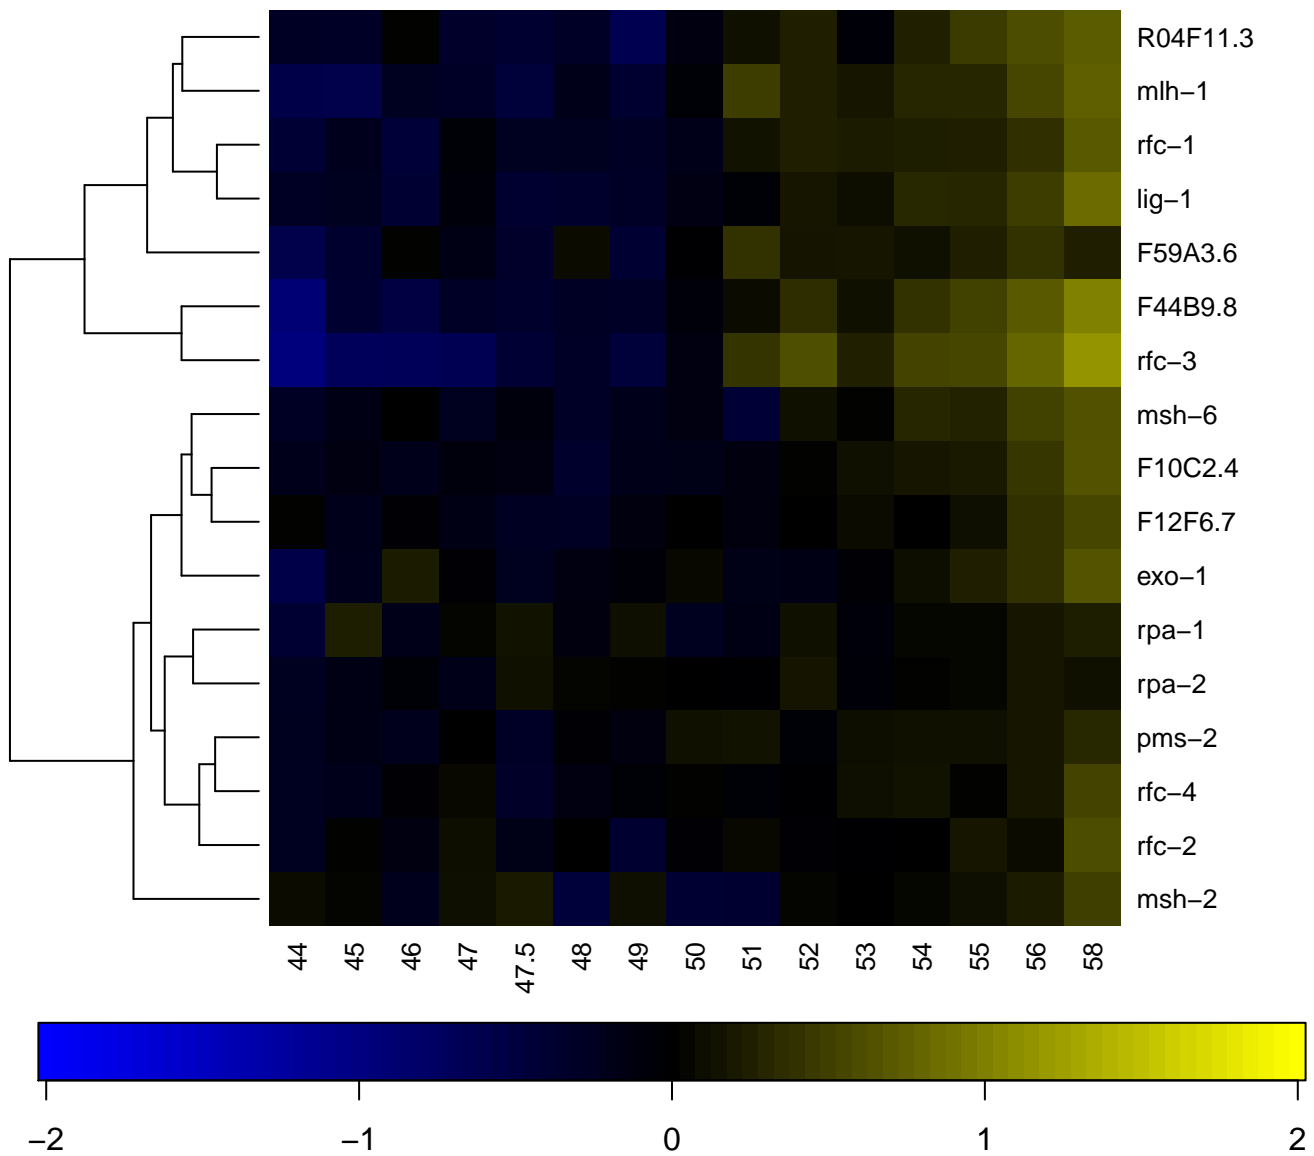



# mRNA surveillance pathway

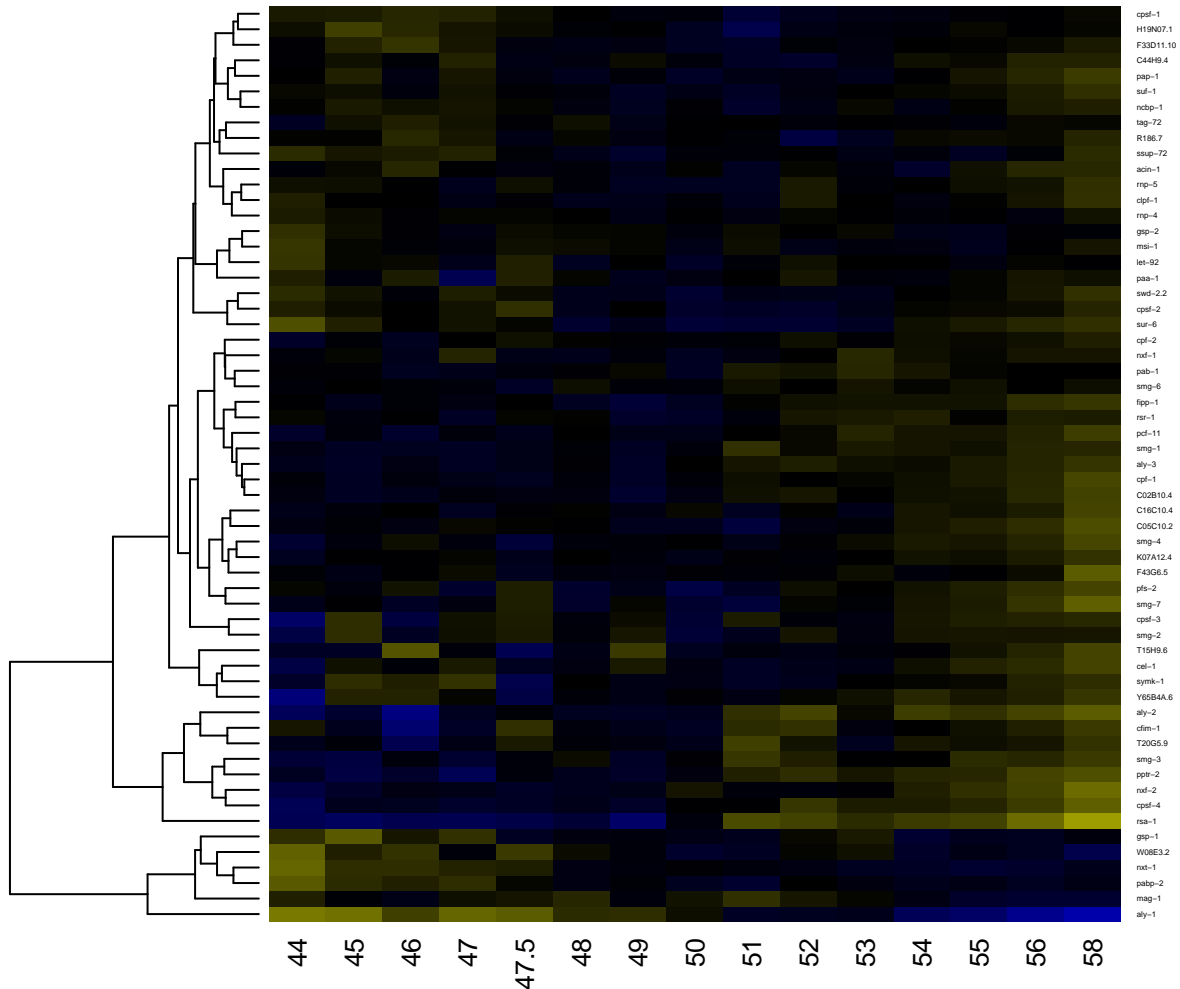





# N-glycan biosynthesis

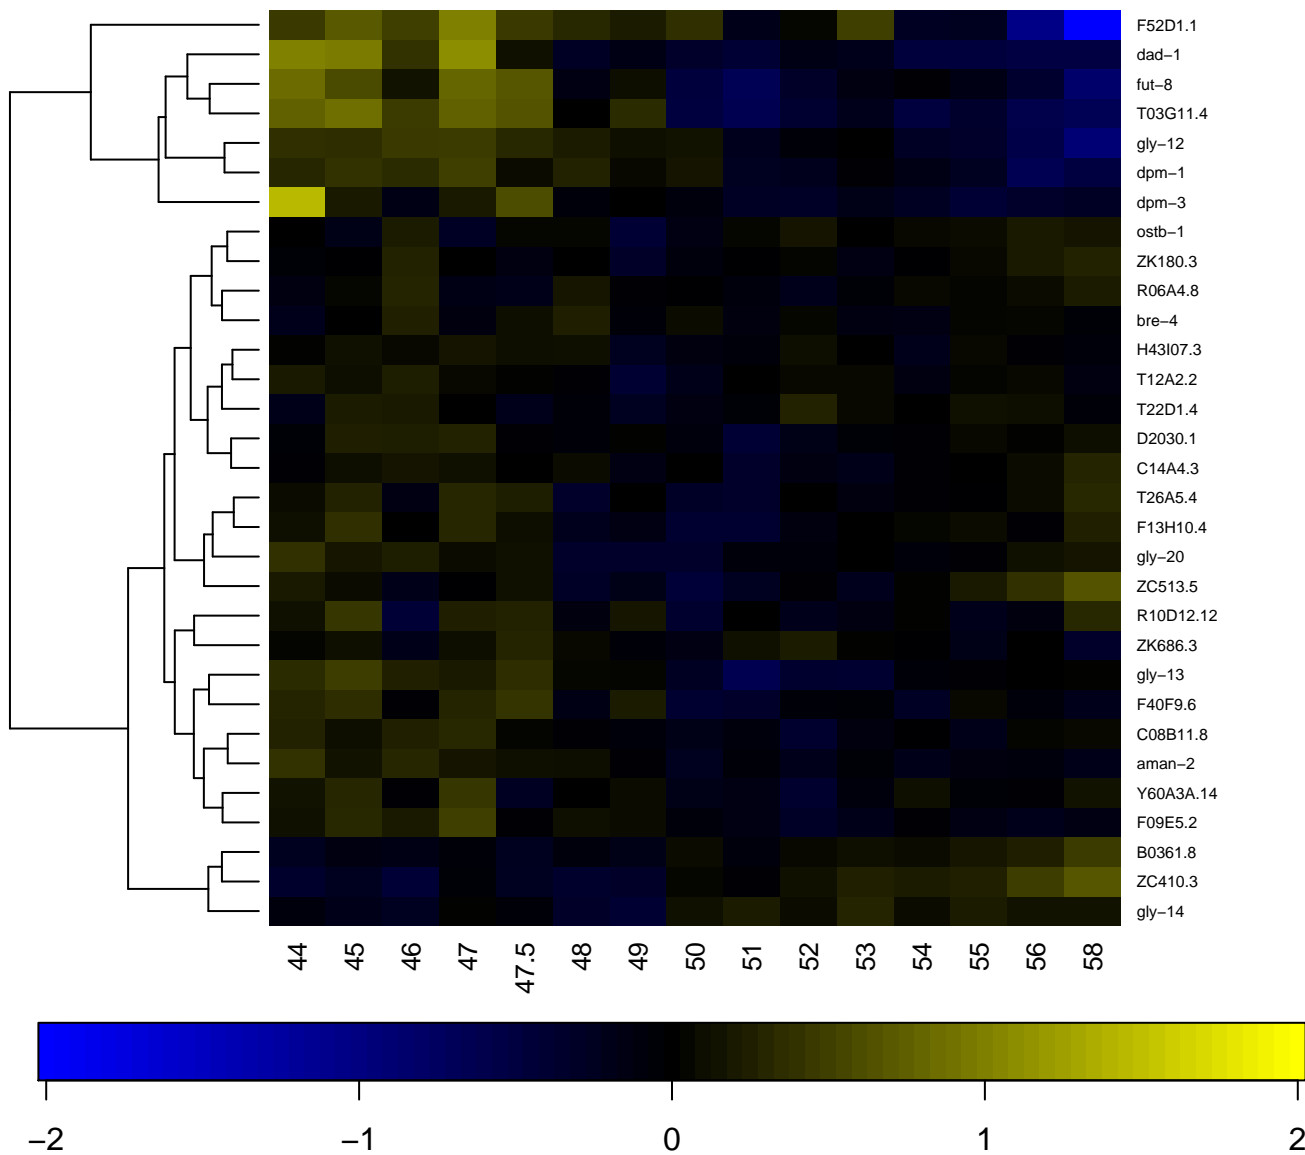





# Nicotinate and nicotinamide metabolism

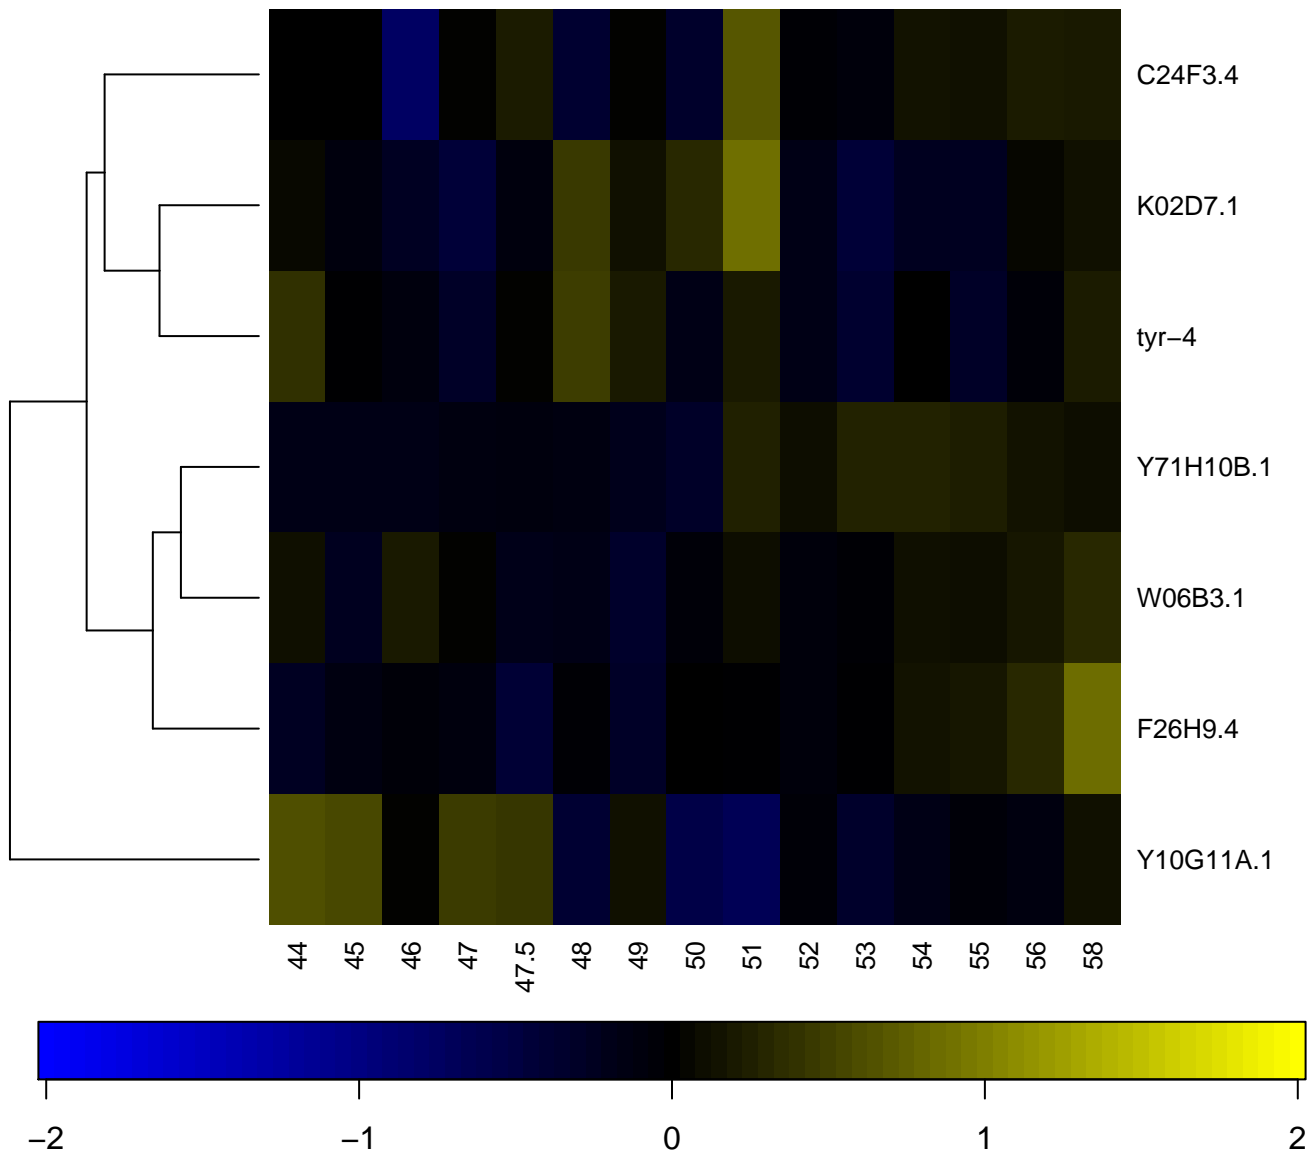







# Nucleotide excision repair

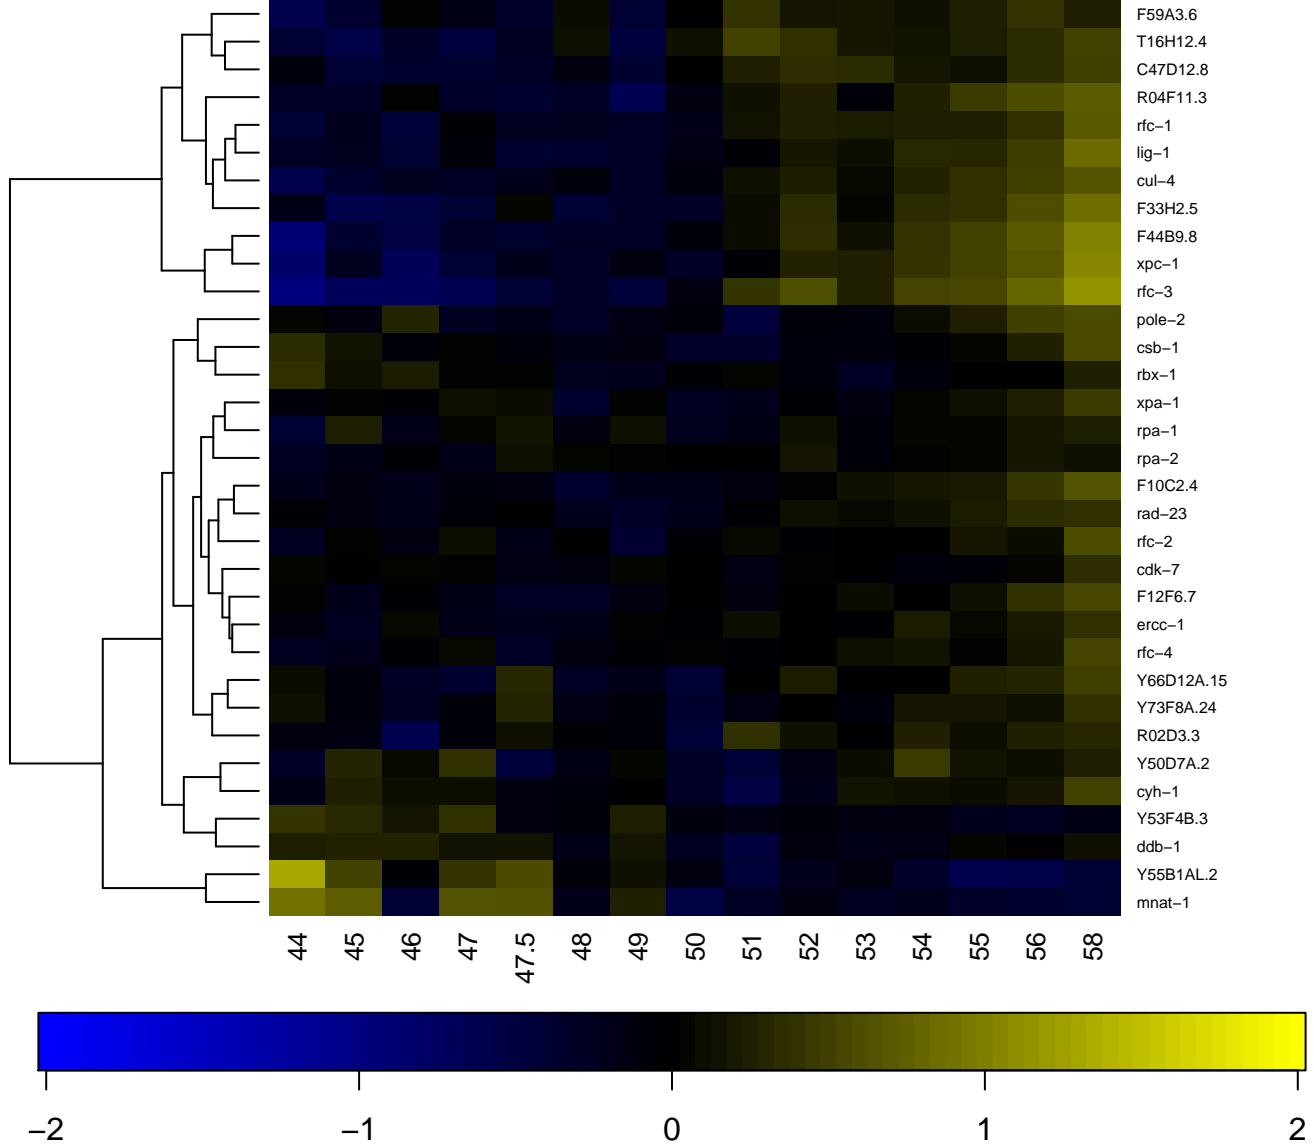





# Oxidative phosphorylation

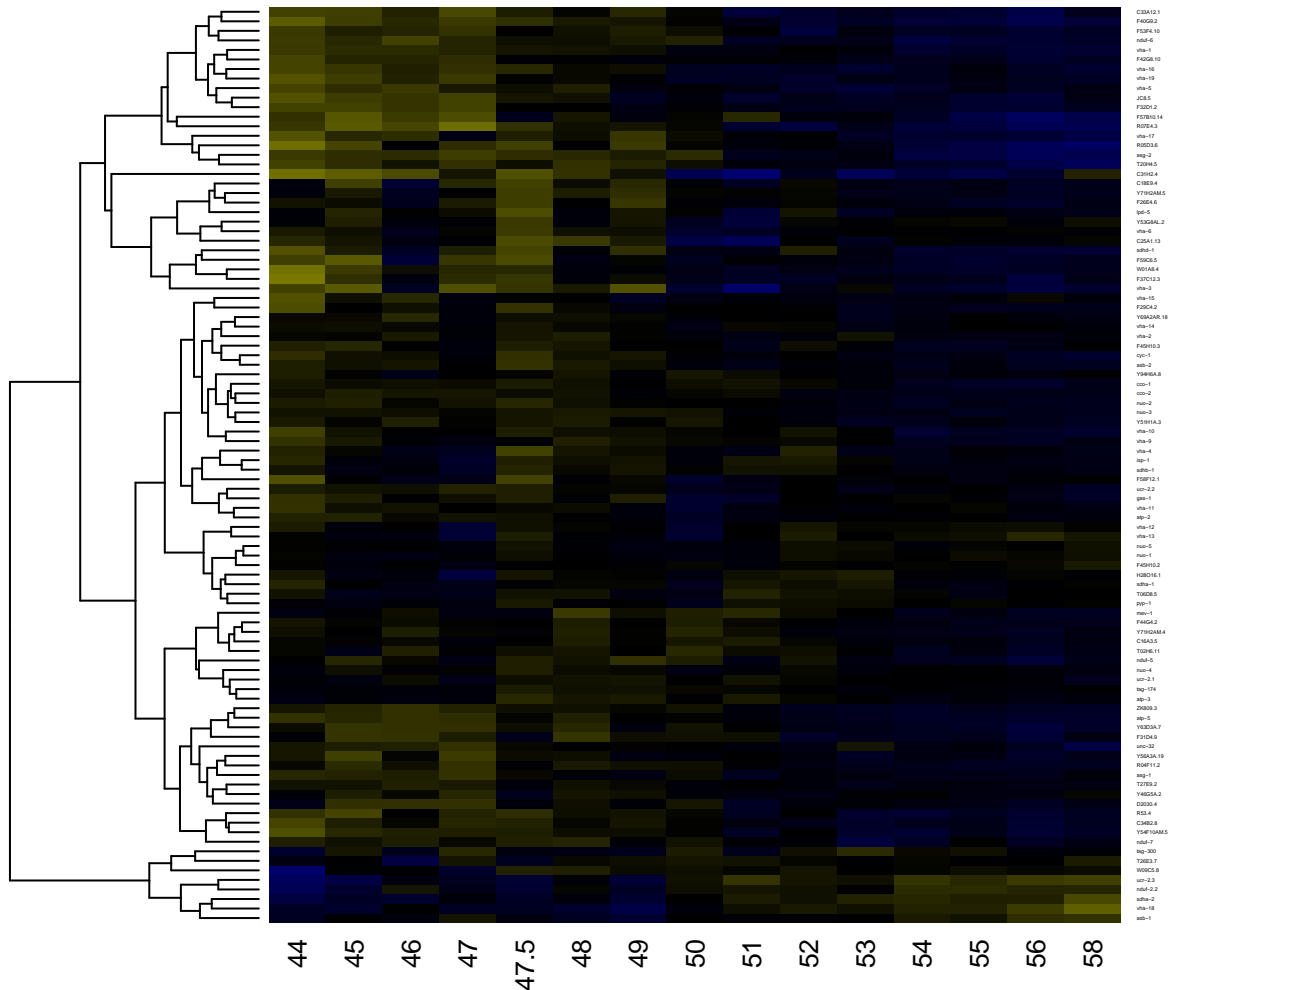

-2

-1

0

1

2



# Pentose and glucuronate interconversions

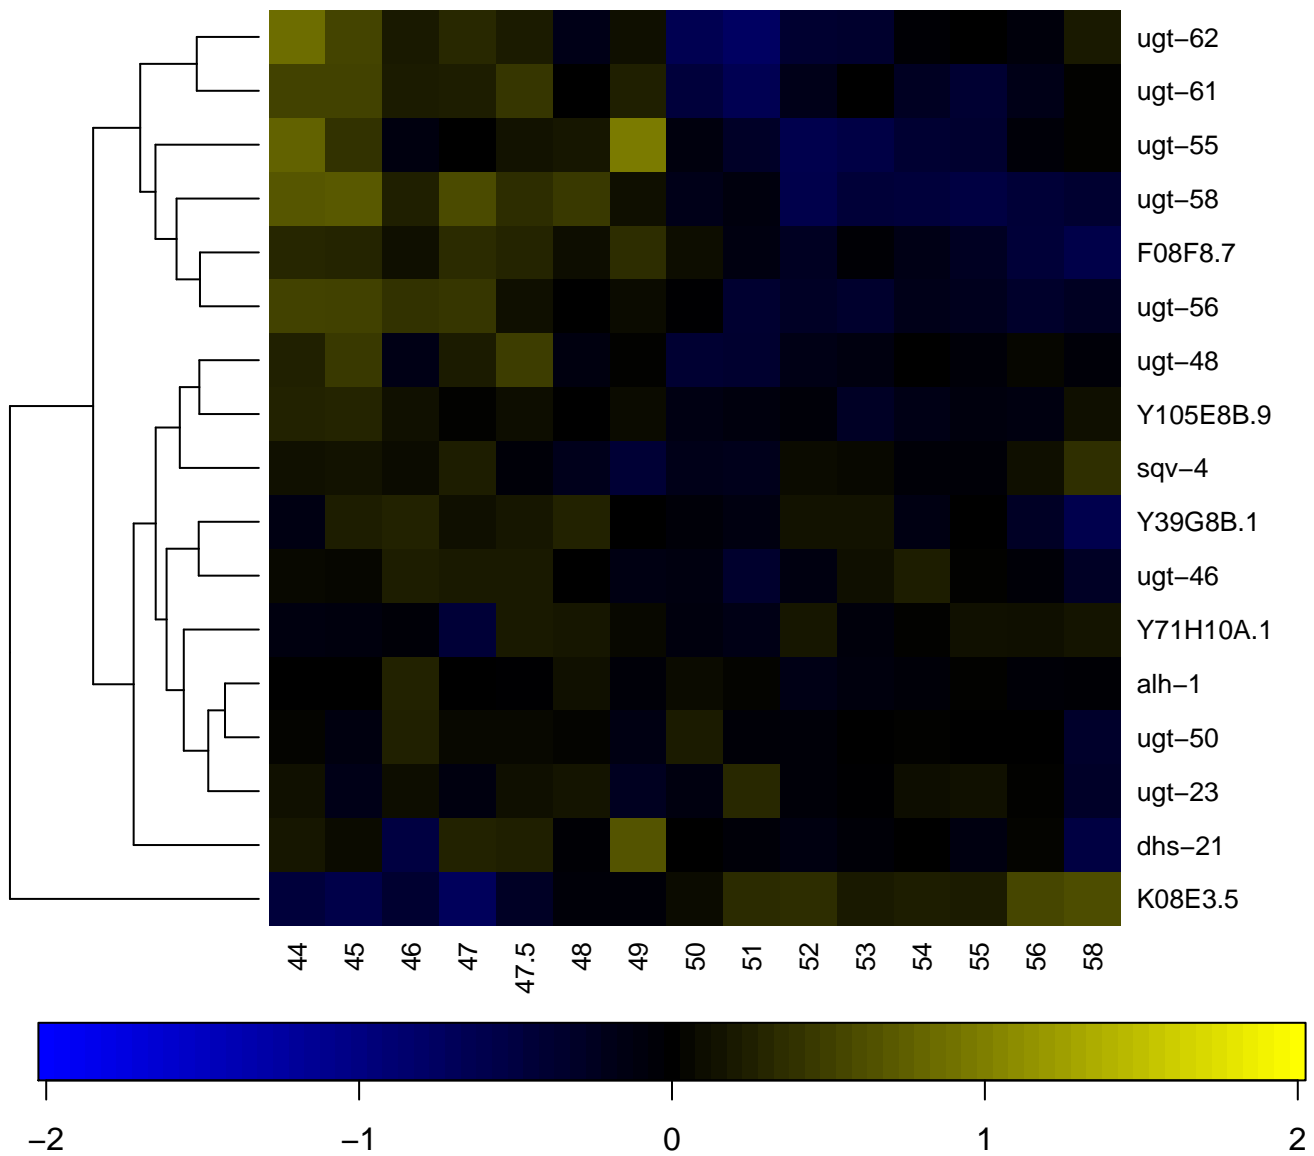





# Peroxisome

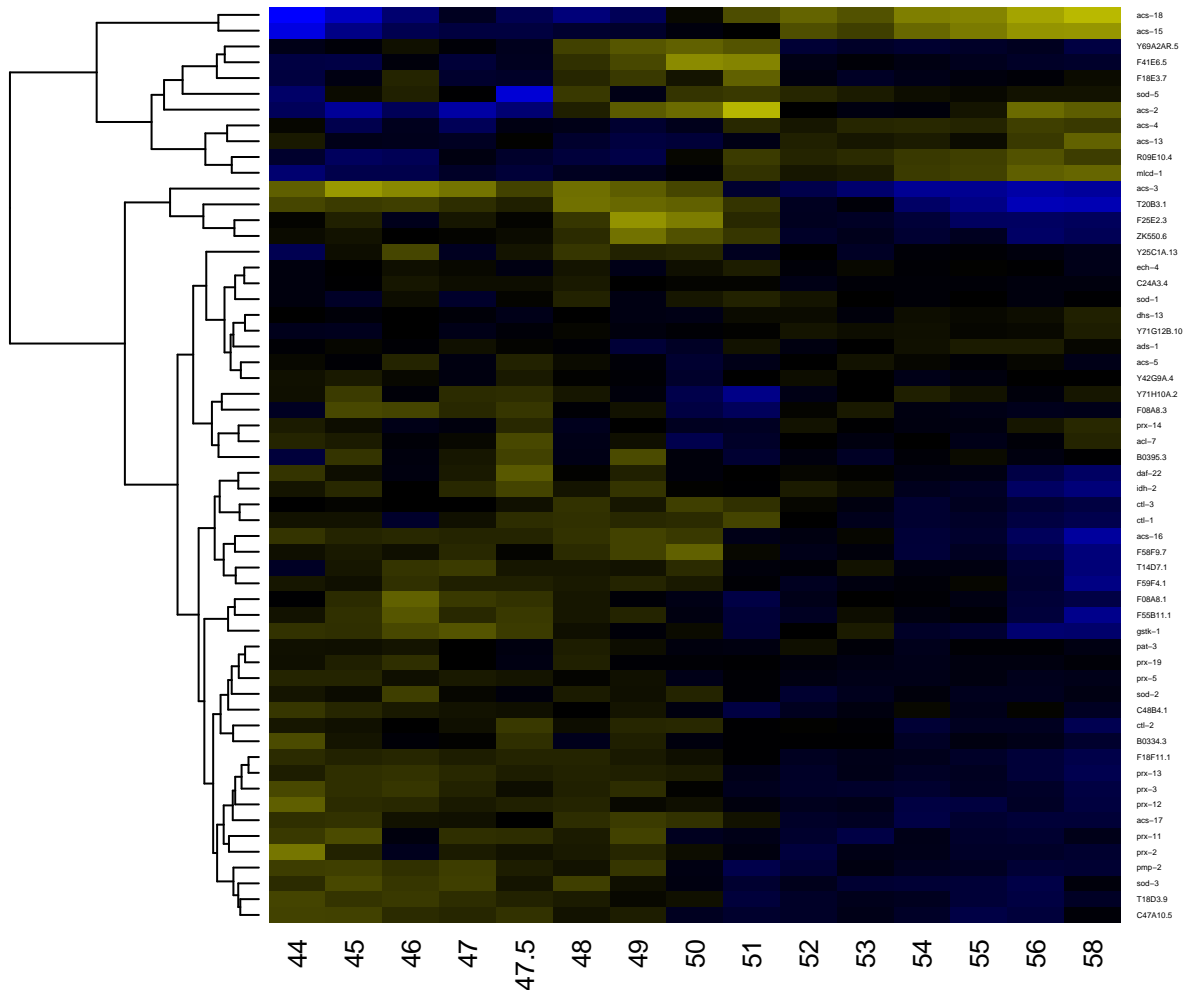

# Phagosome

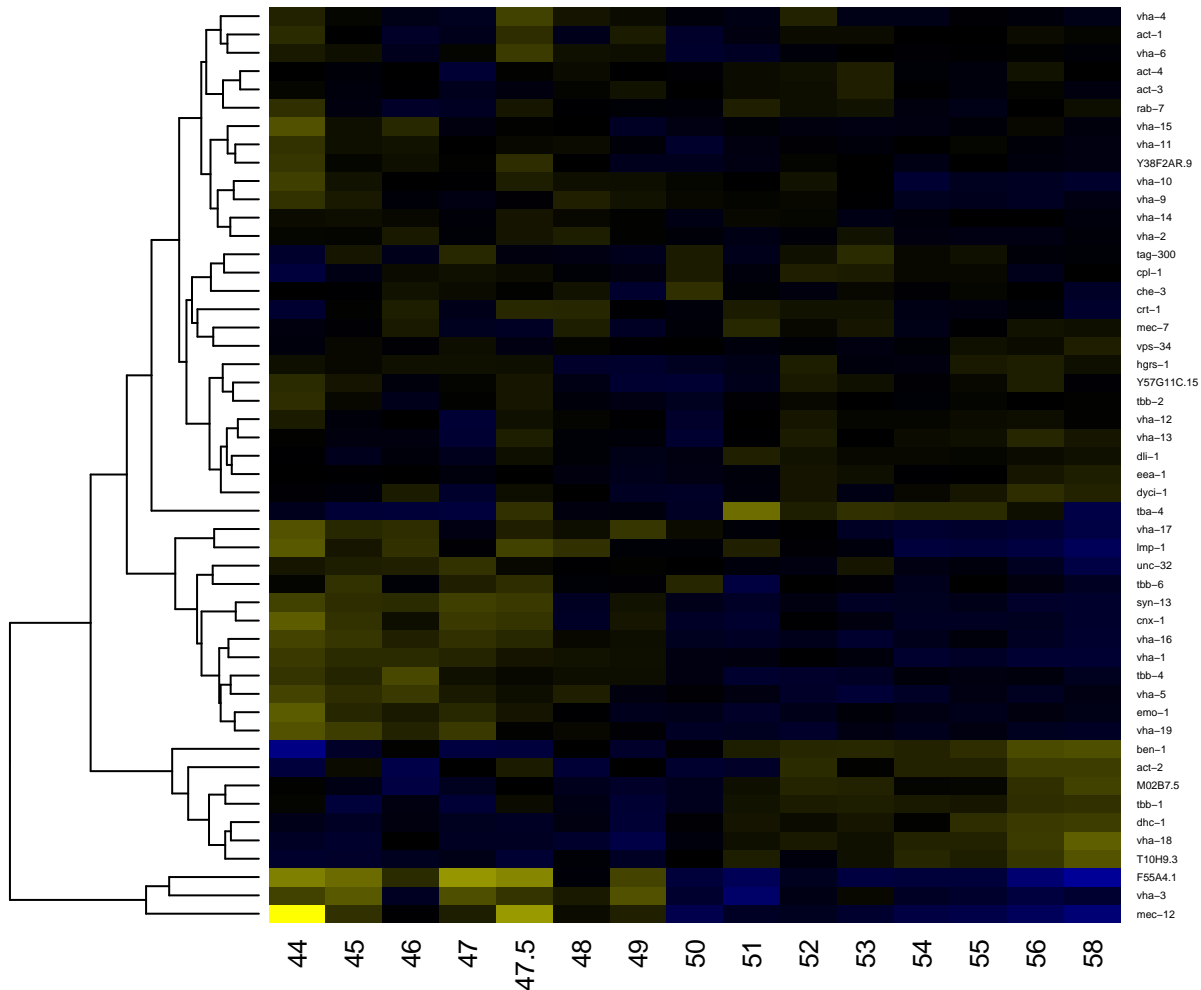

# Phenylalanine metabolism

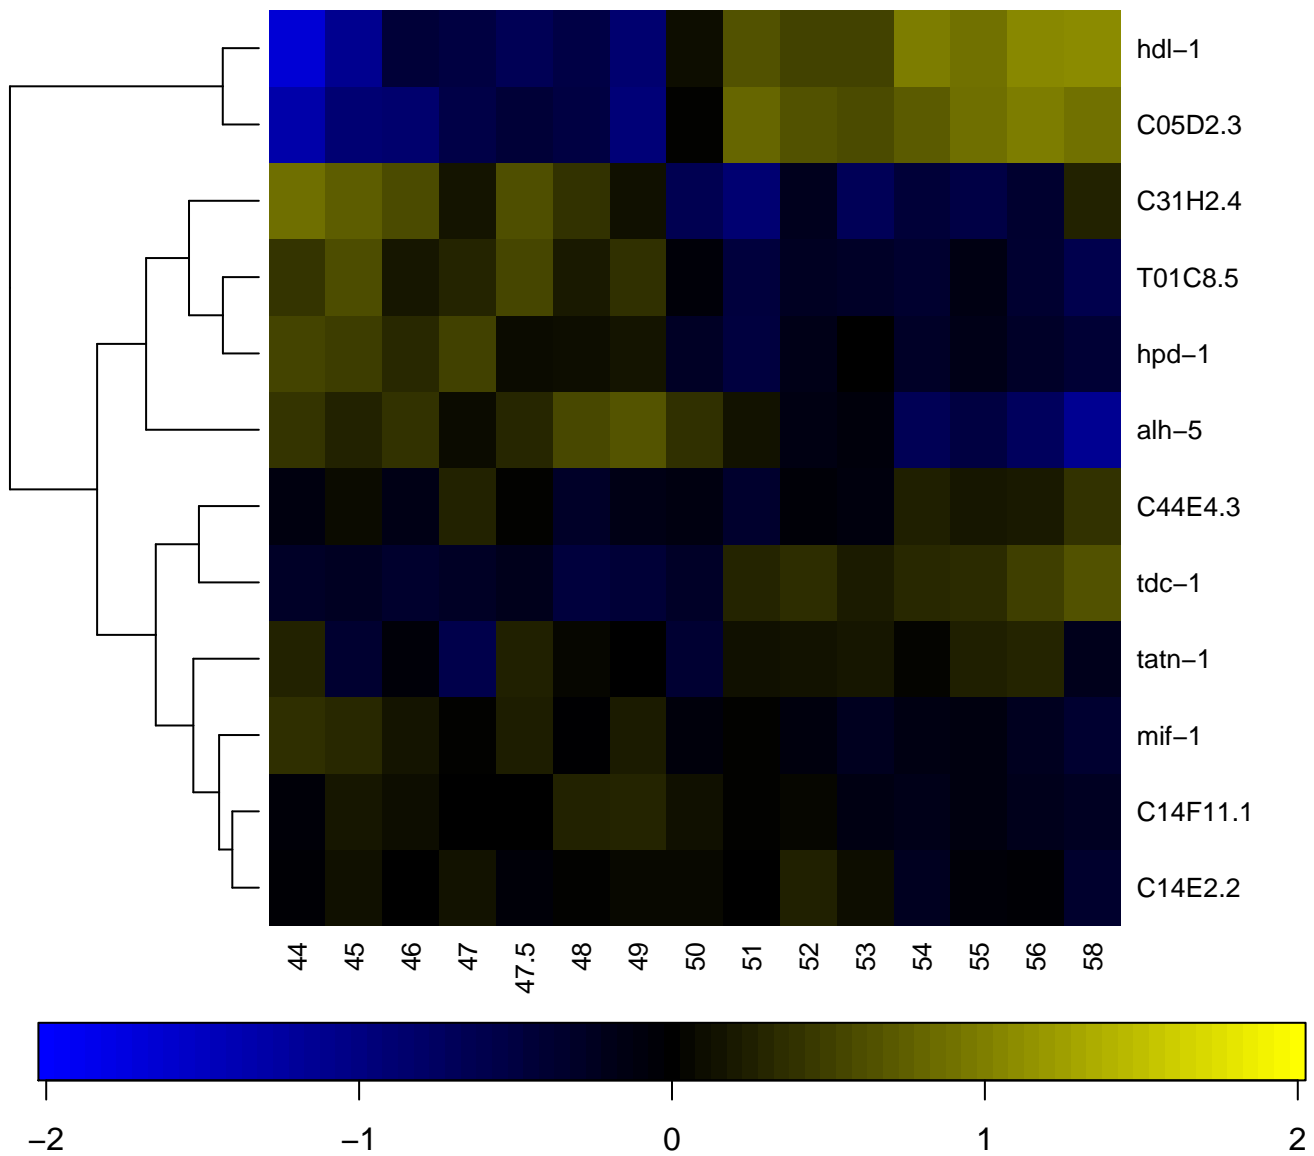

# Phenylalanine, tyrosine and tryptophan biosynthesis

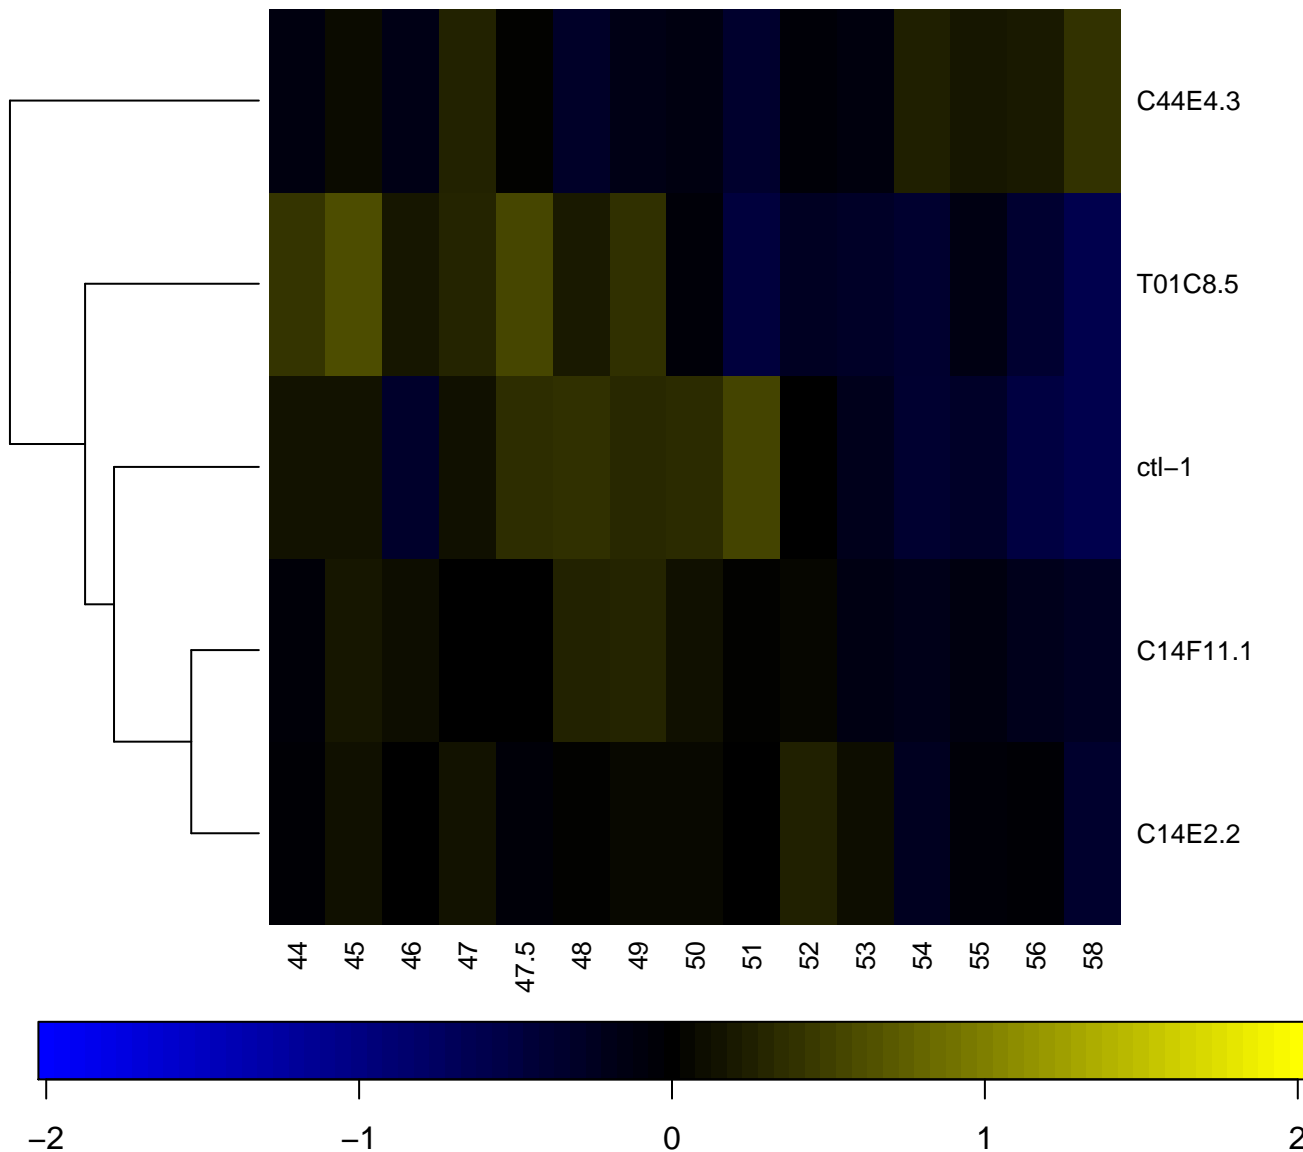



# Porphyrin and chlorophyll metabolism

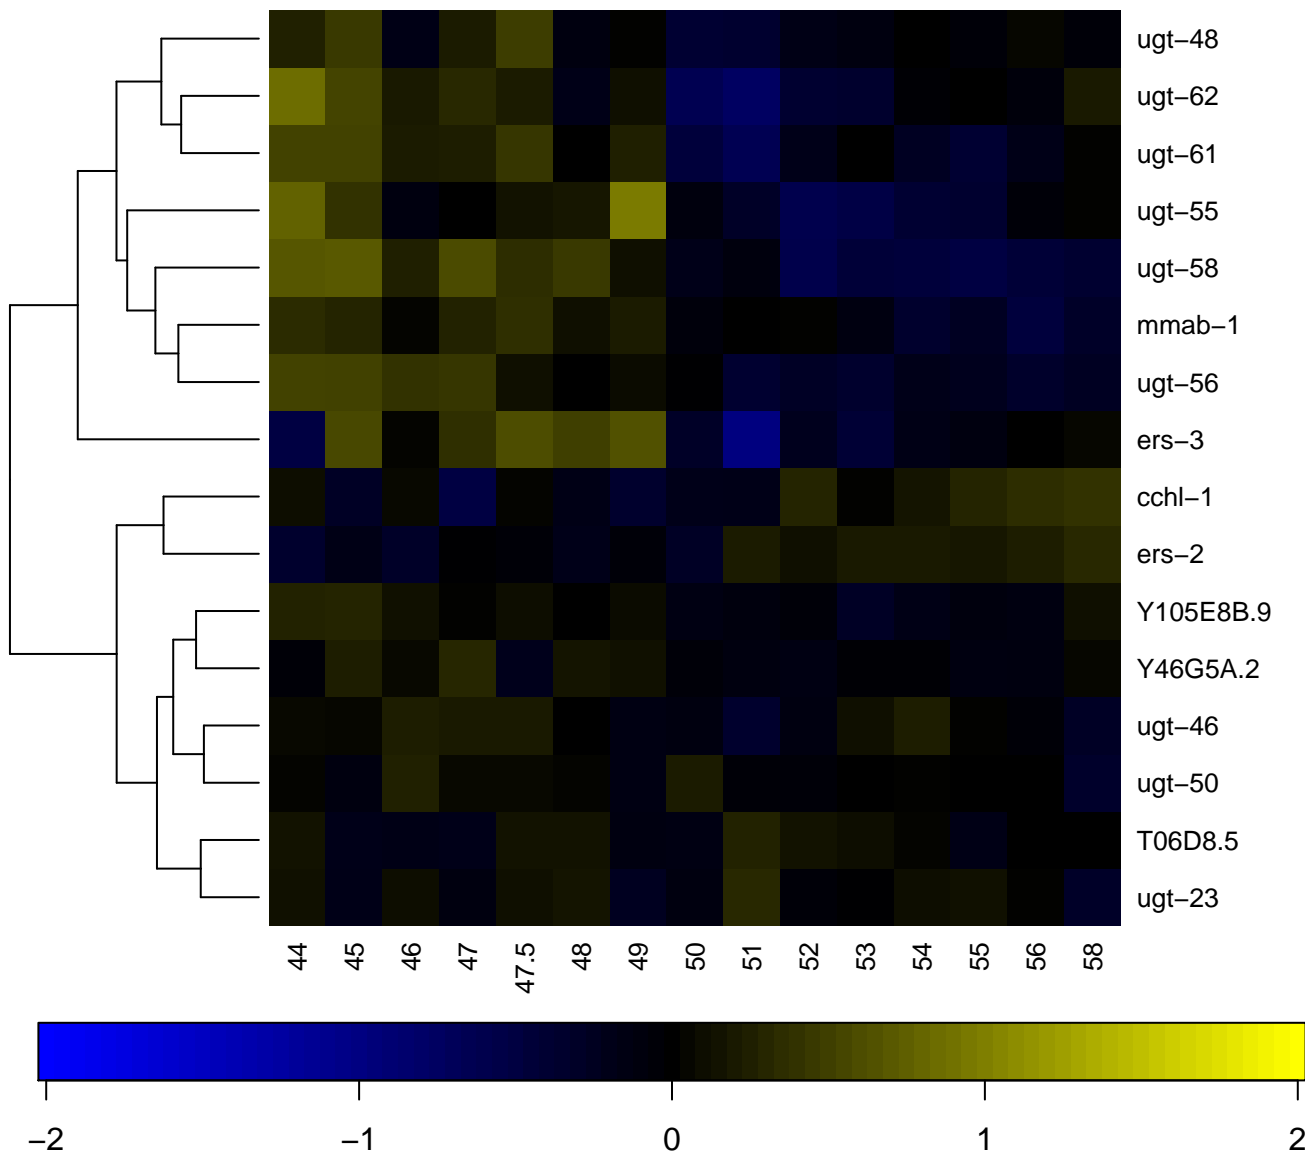

# Progesterone-mediated oocyte maturation

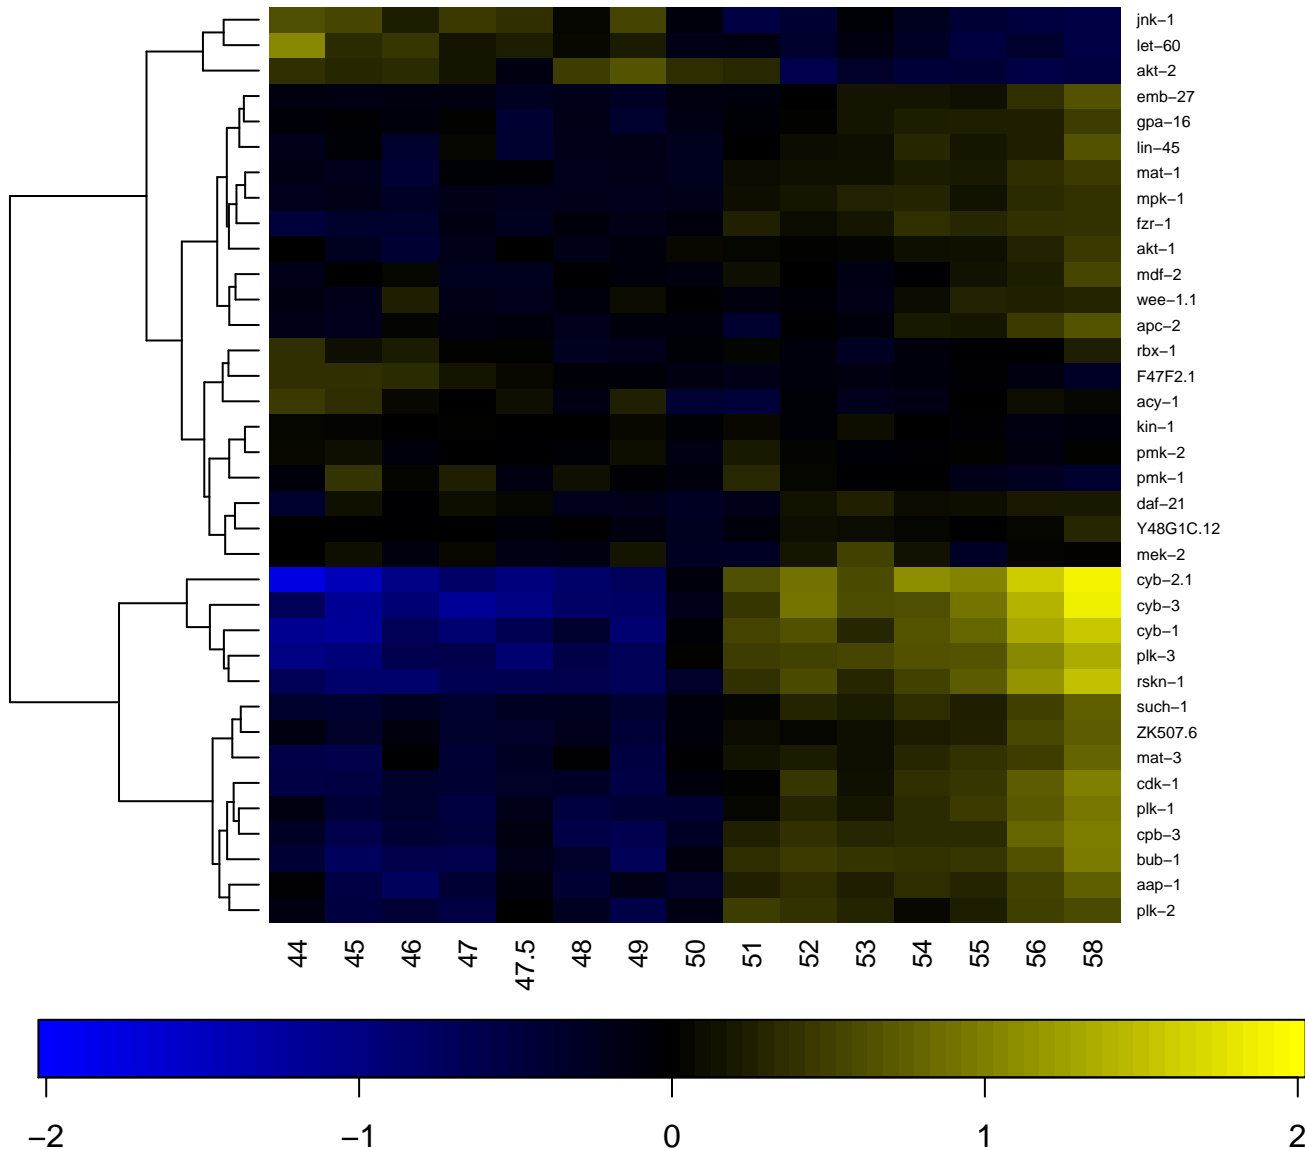





# Proteasome

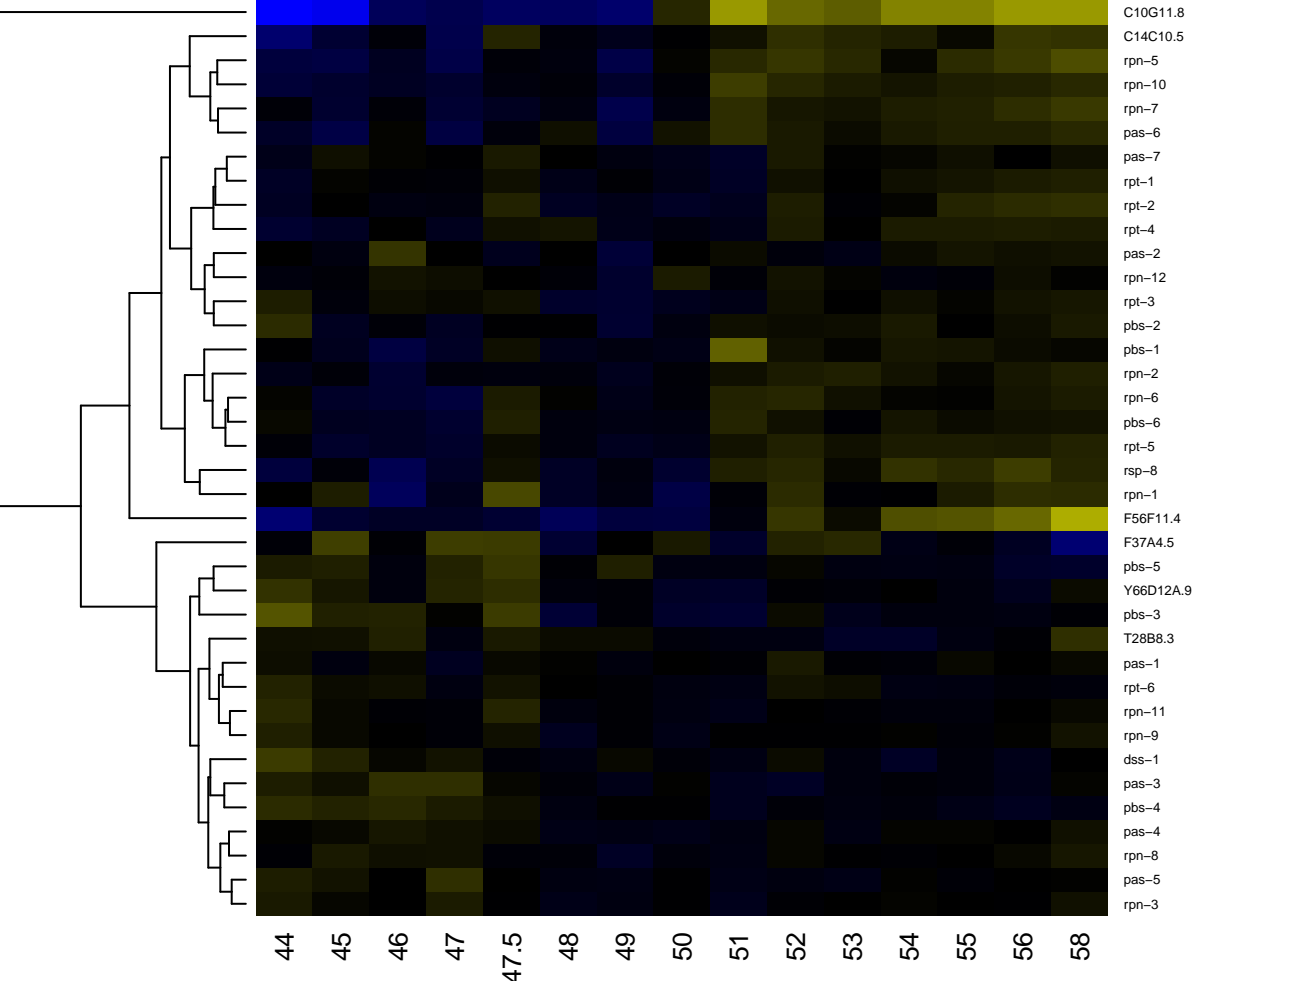



# Protein processing in endoplasmic reticulum

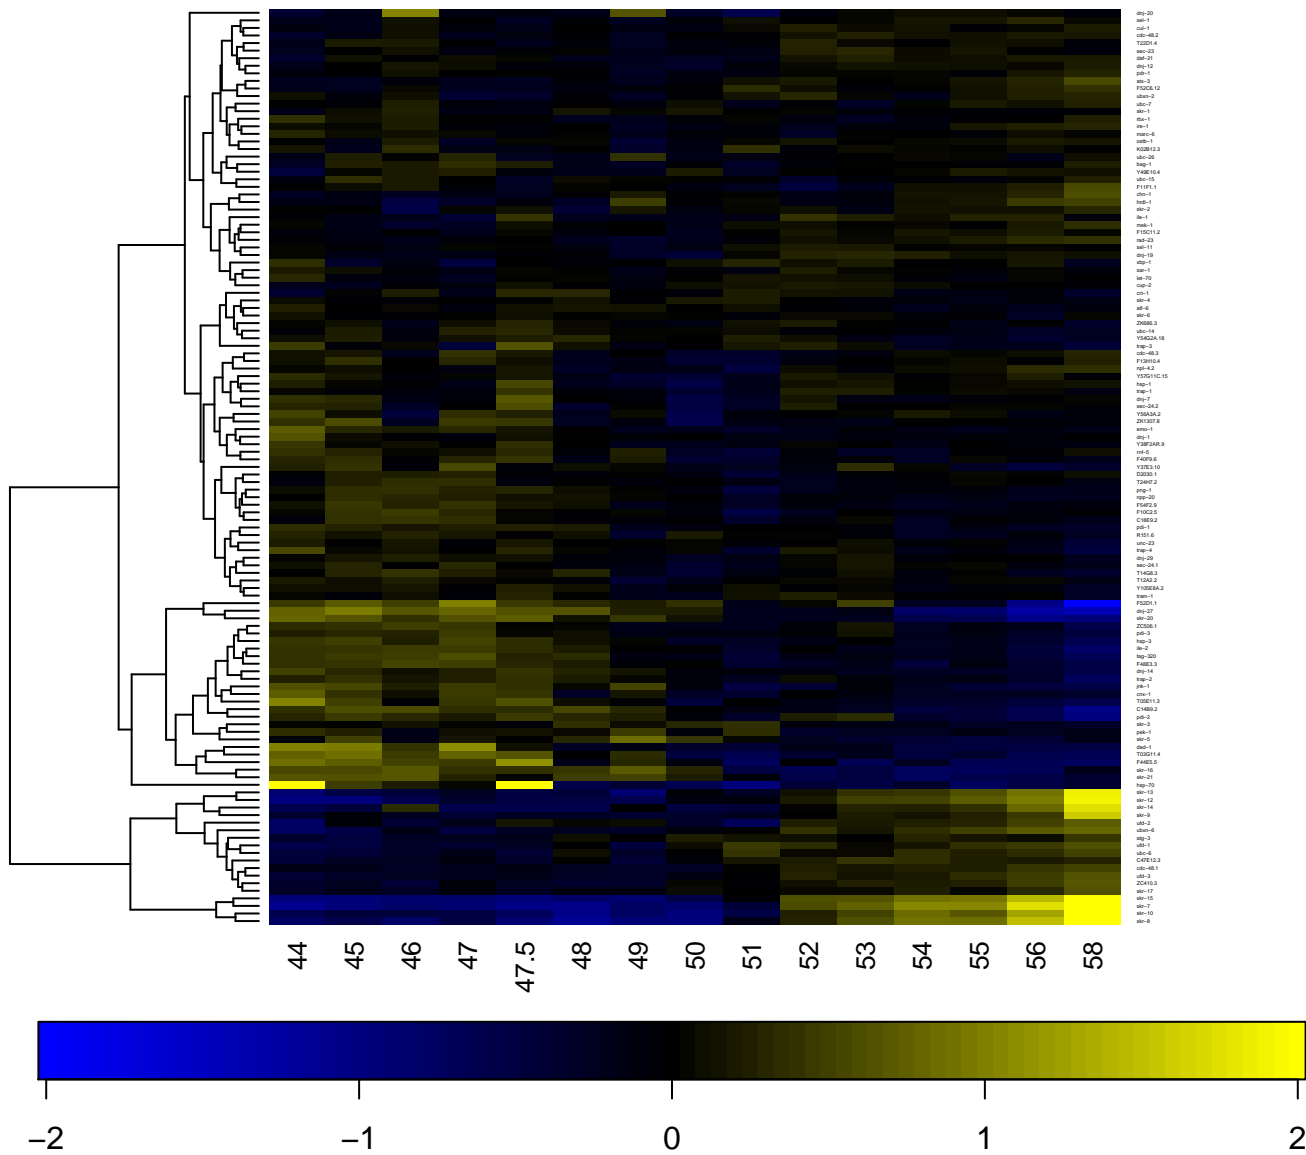

# Purine metabolism

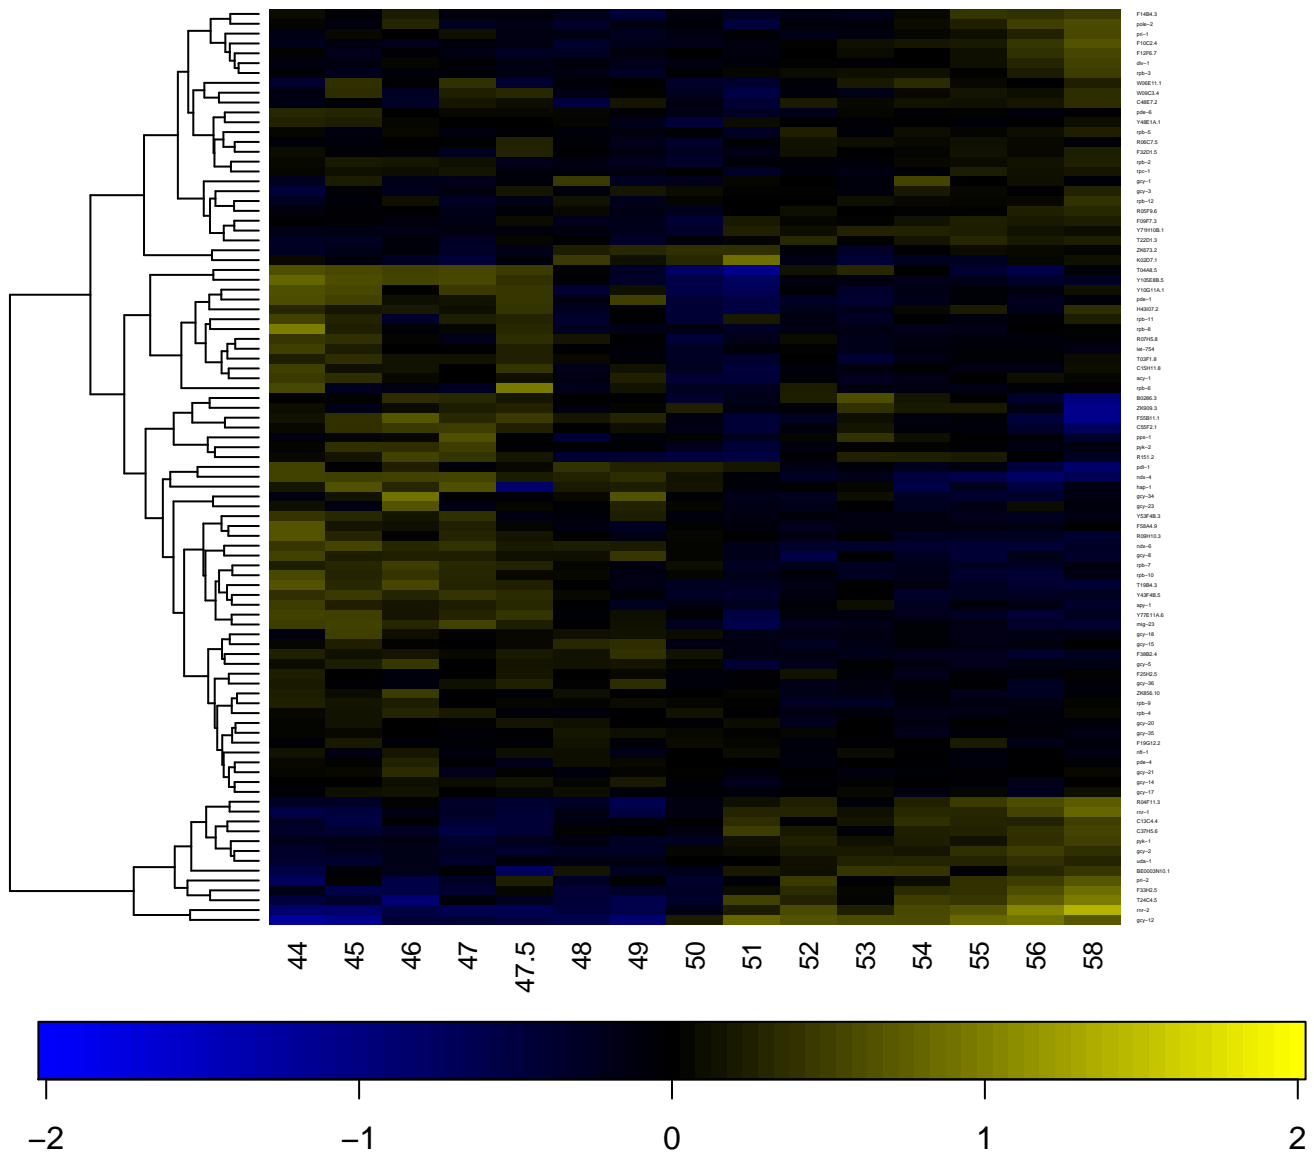

# Pyrimidine metabolism

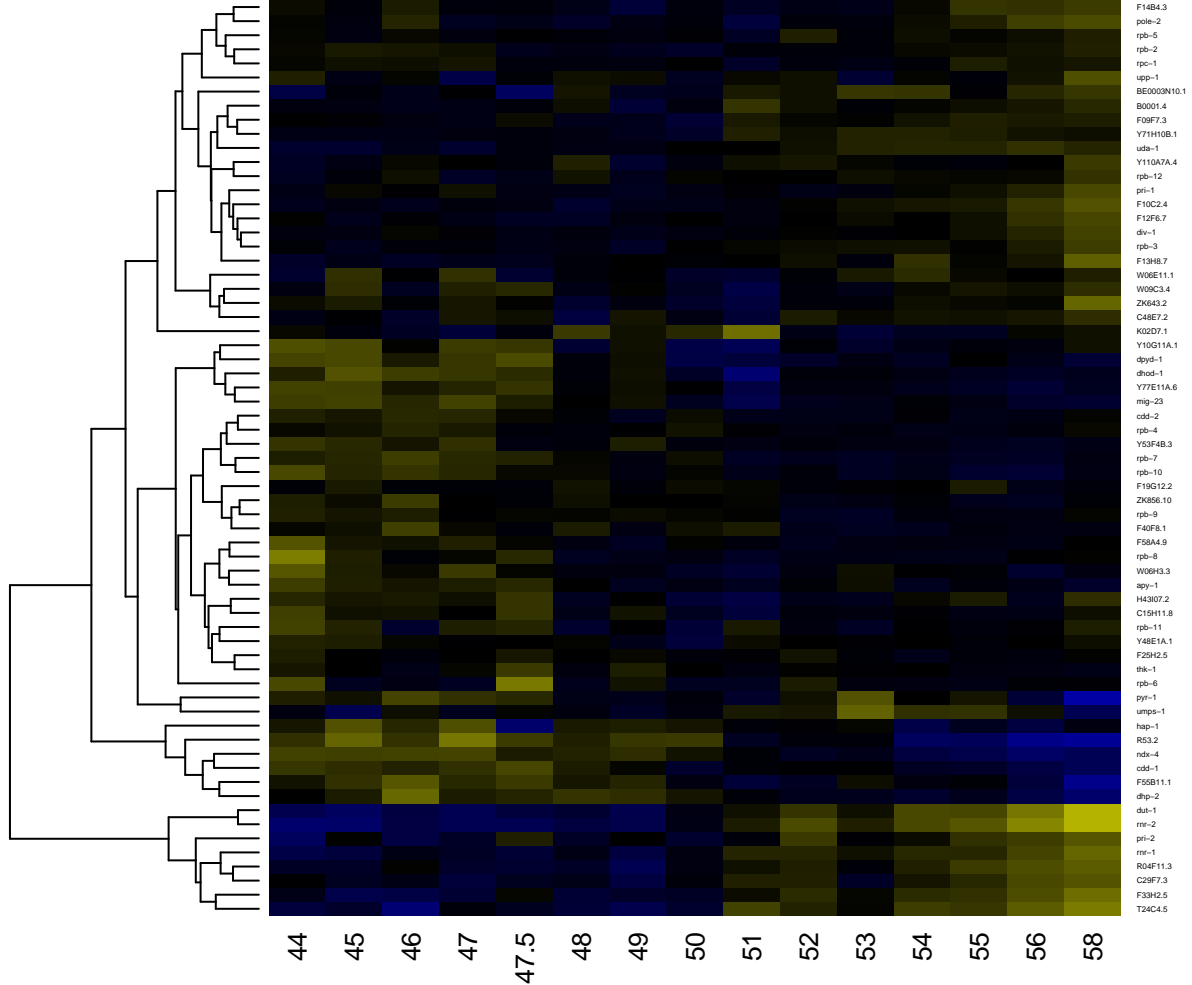

# Pyruvate metabolism

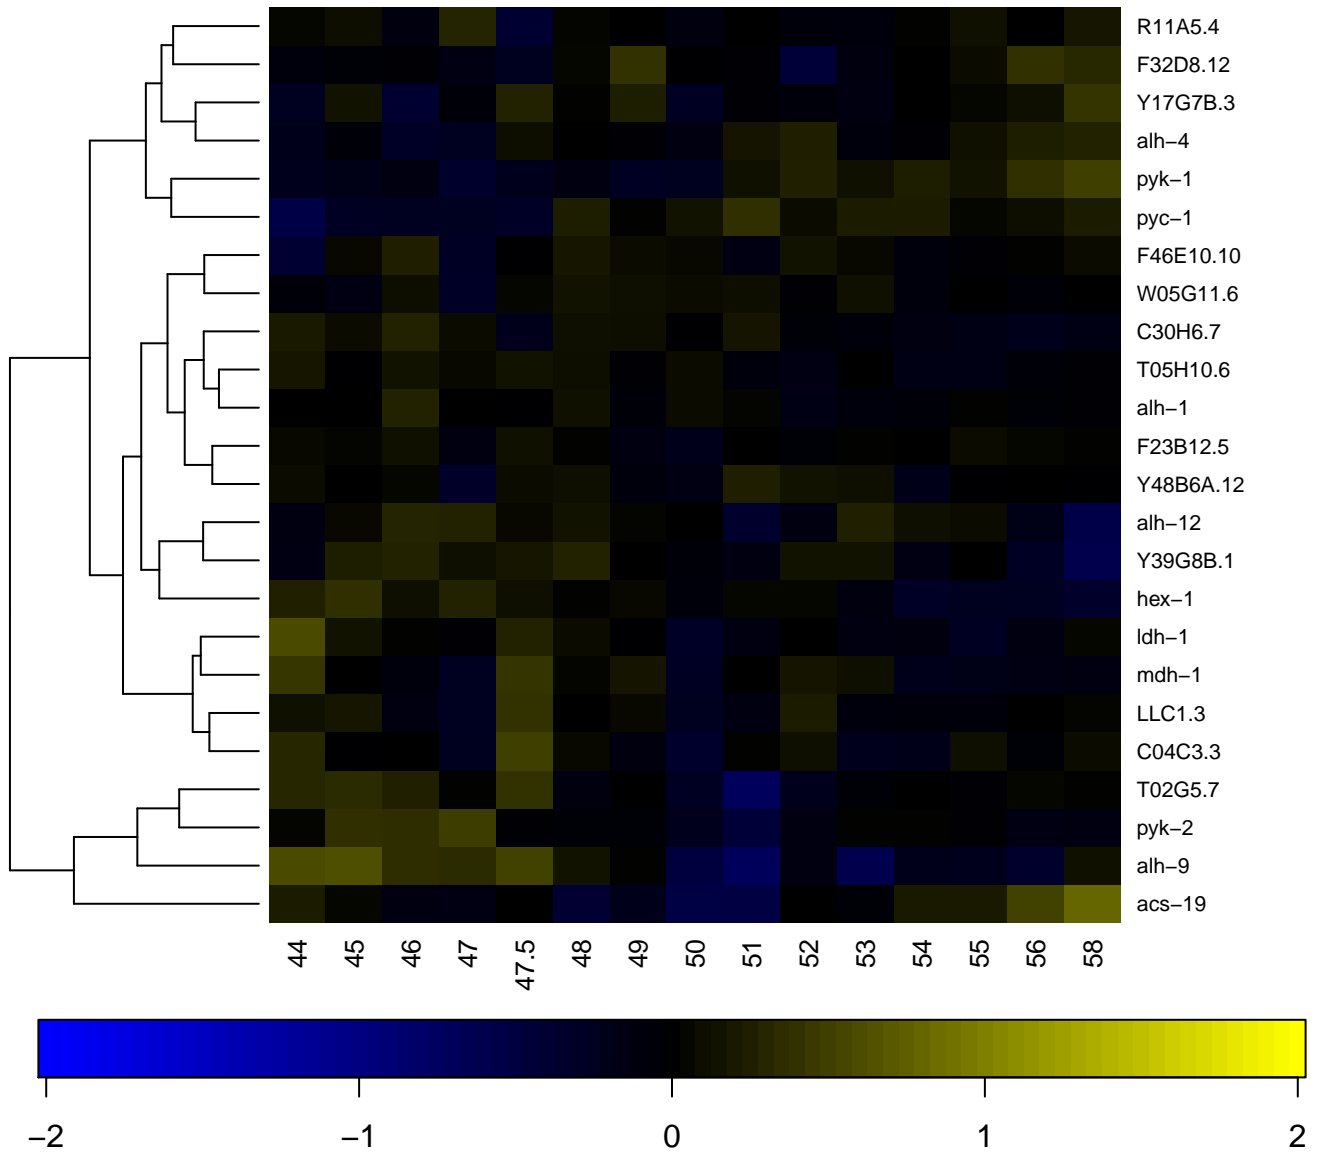



# Retinol metabolism in animal

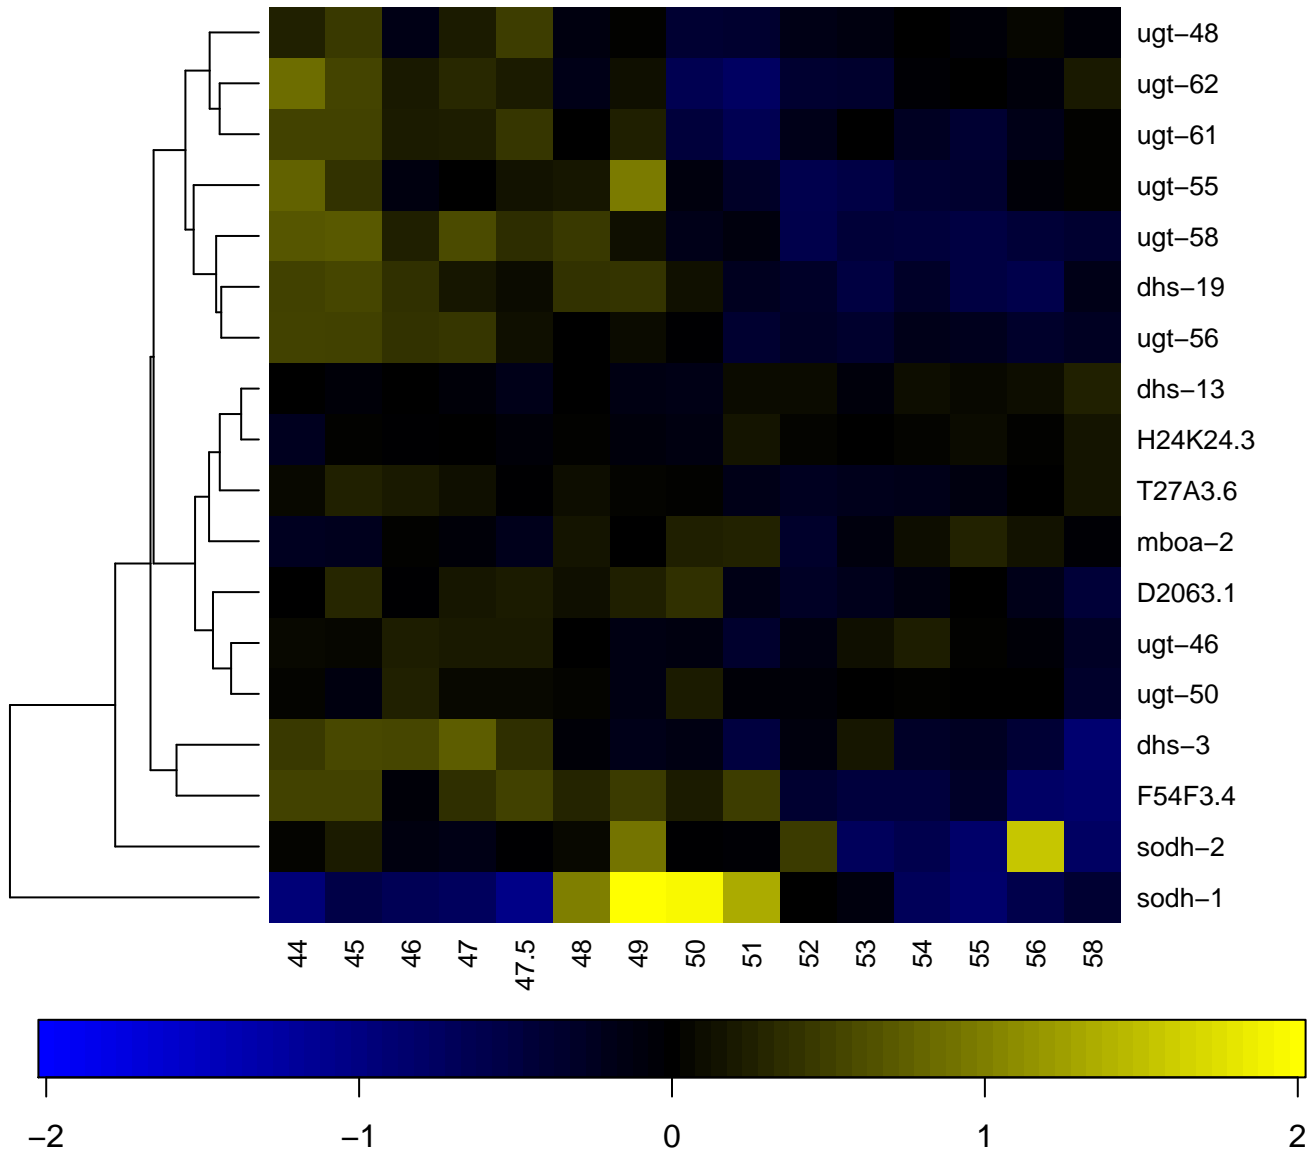







# Ribosome biogenesis in eukaryotes

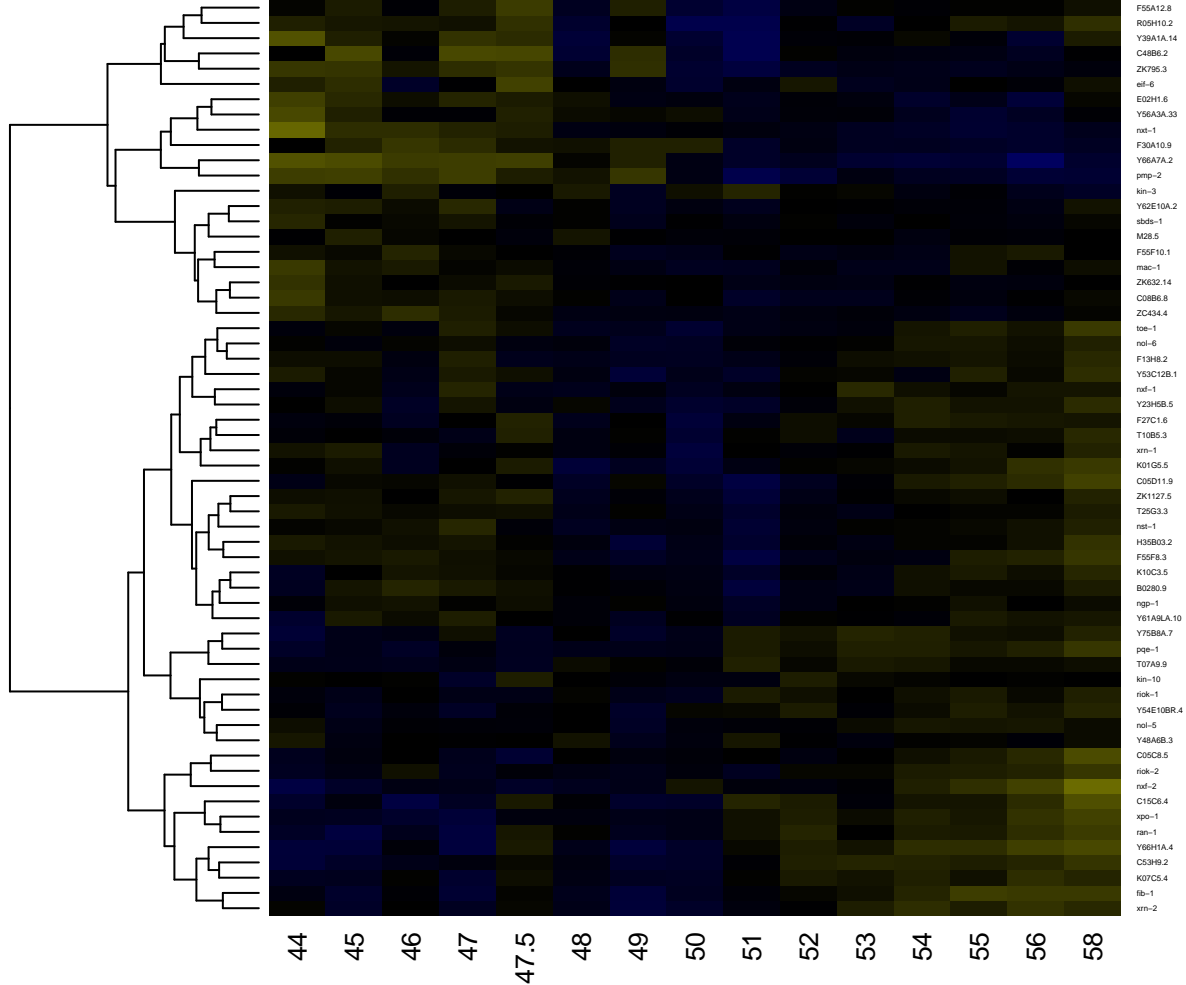

-2

-1

0

1

2

# RNA degradation

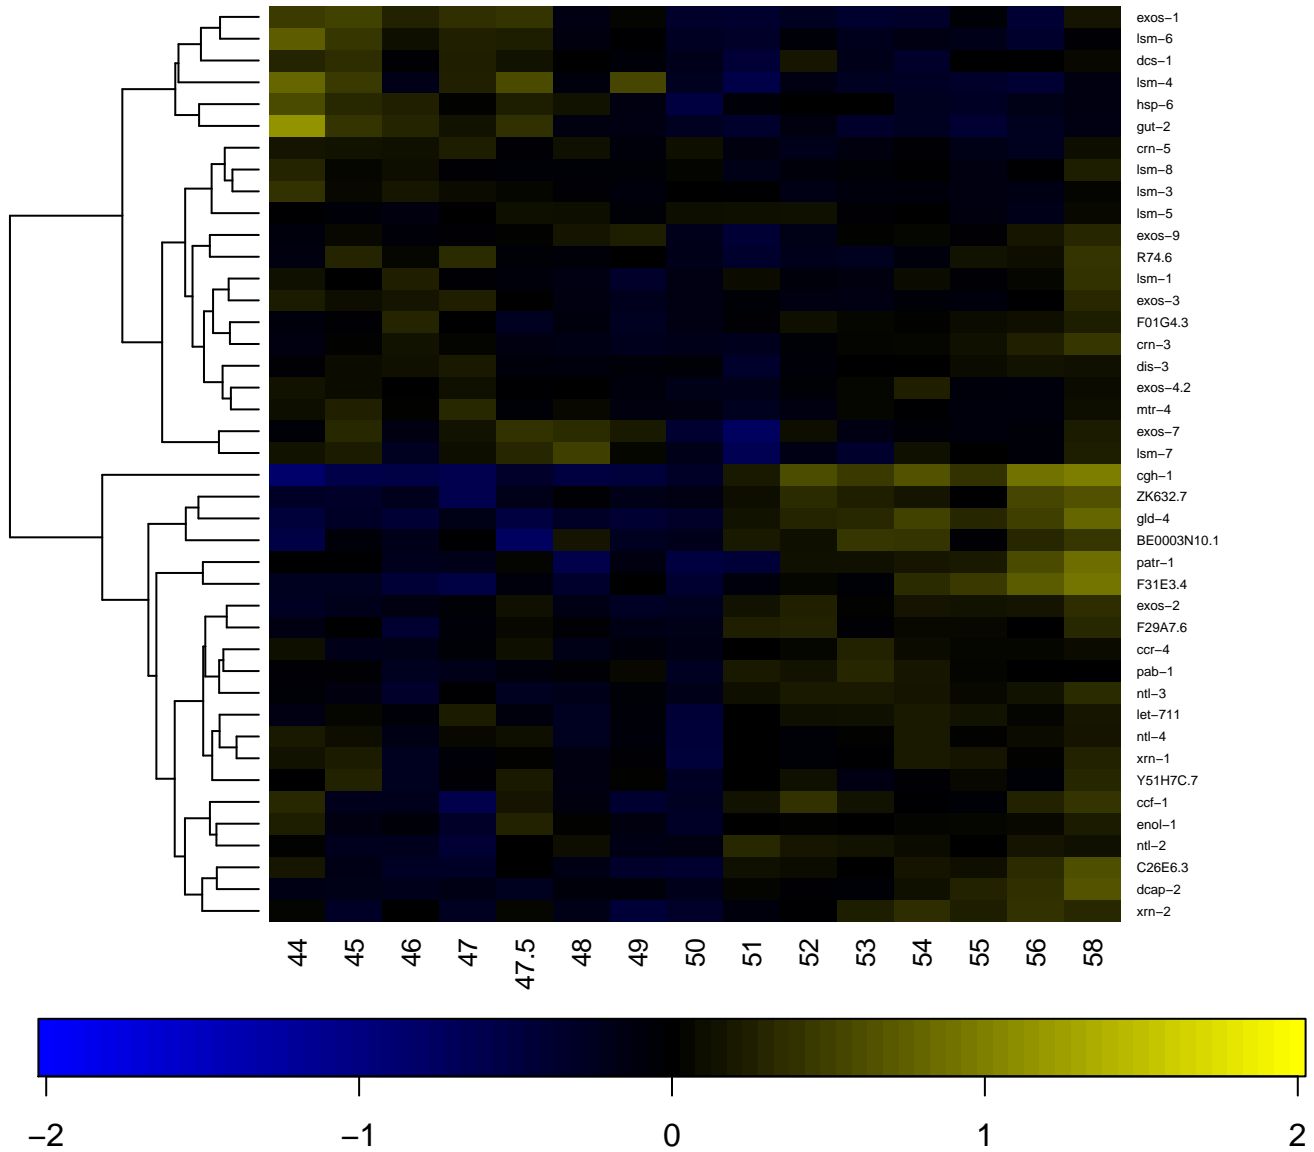

# RNA polymerase

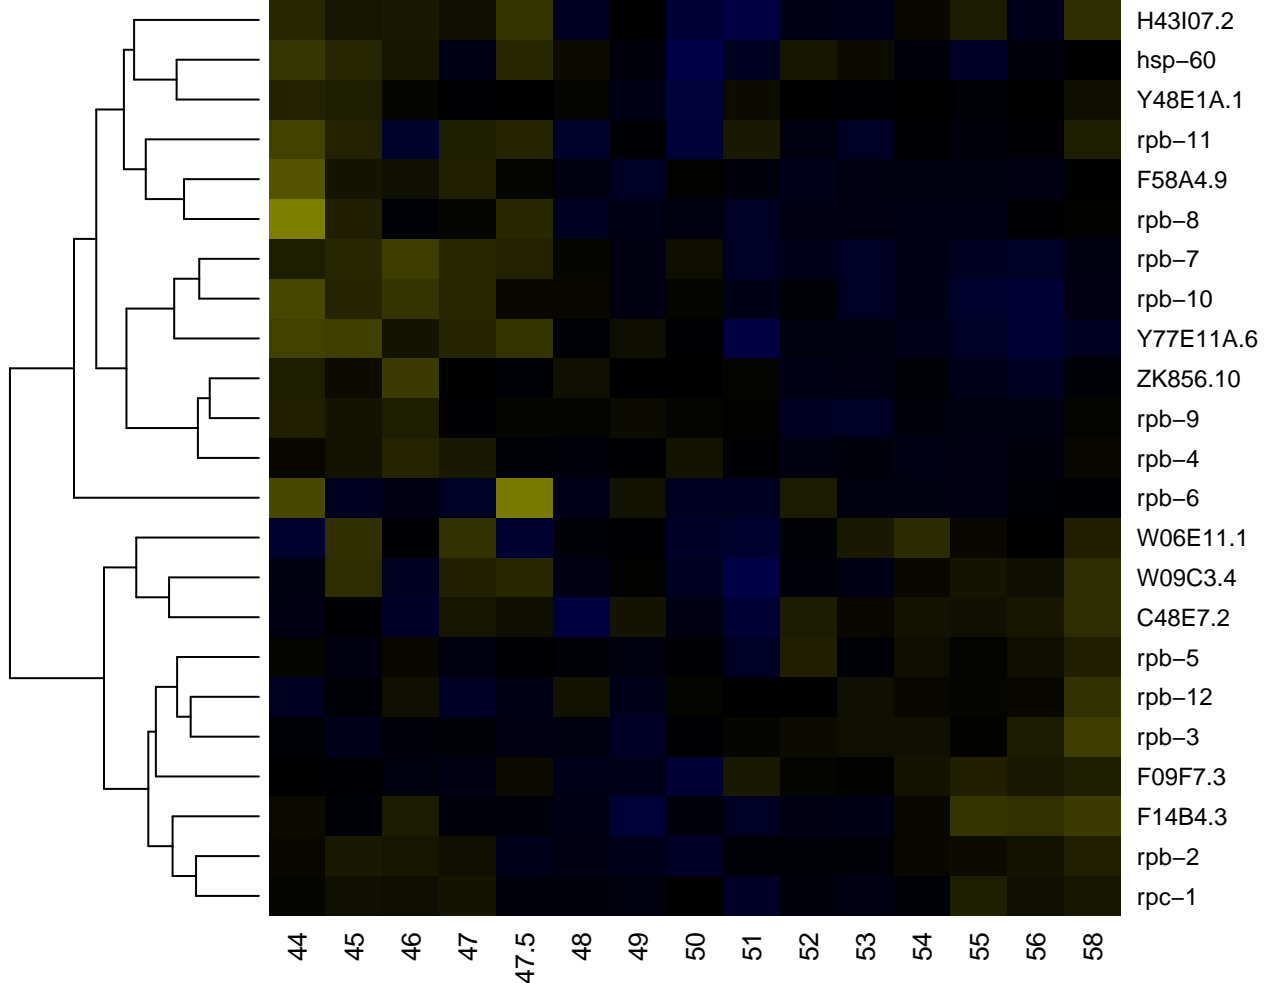

# RNA transport

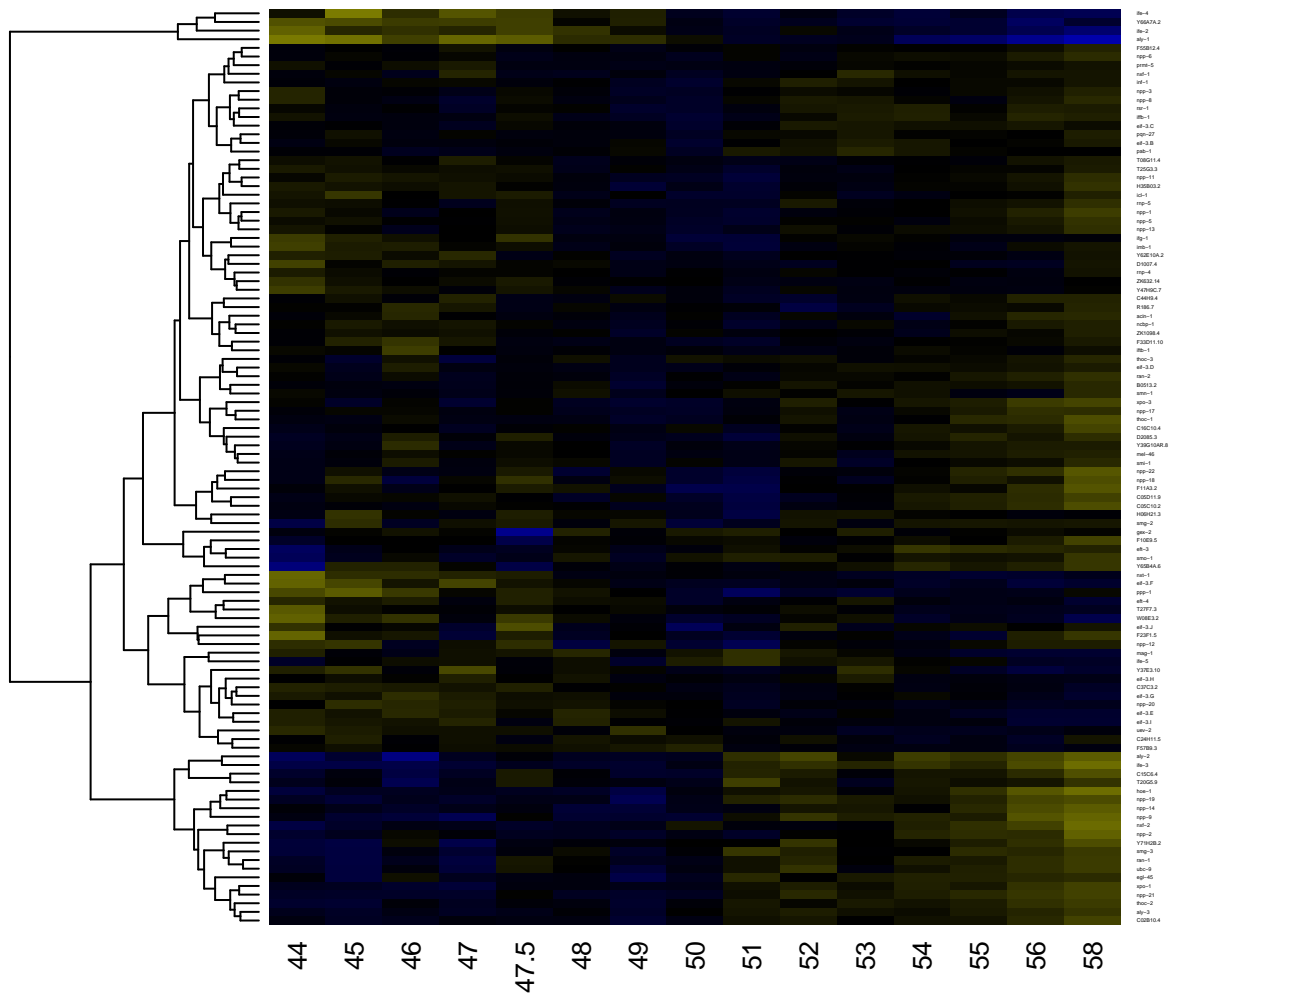

# Selenocompound metabolism

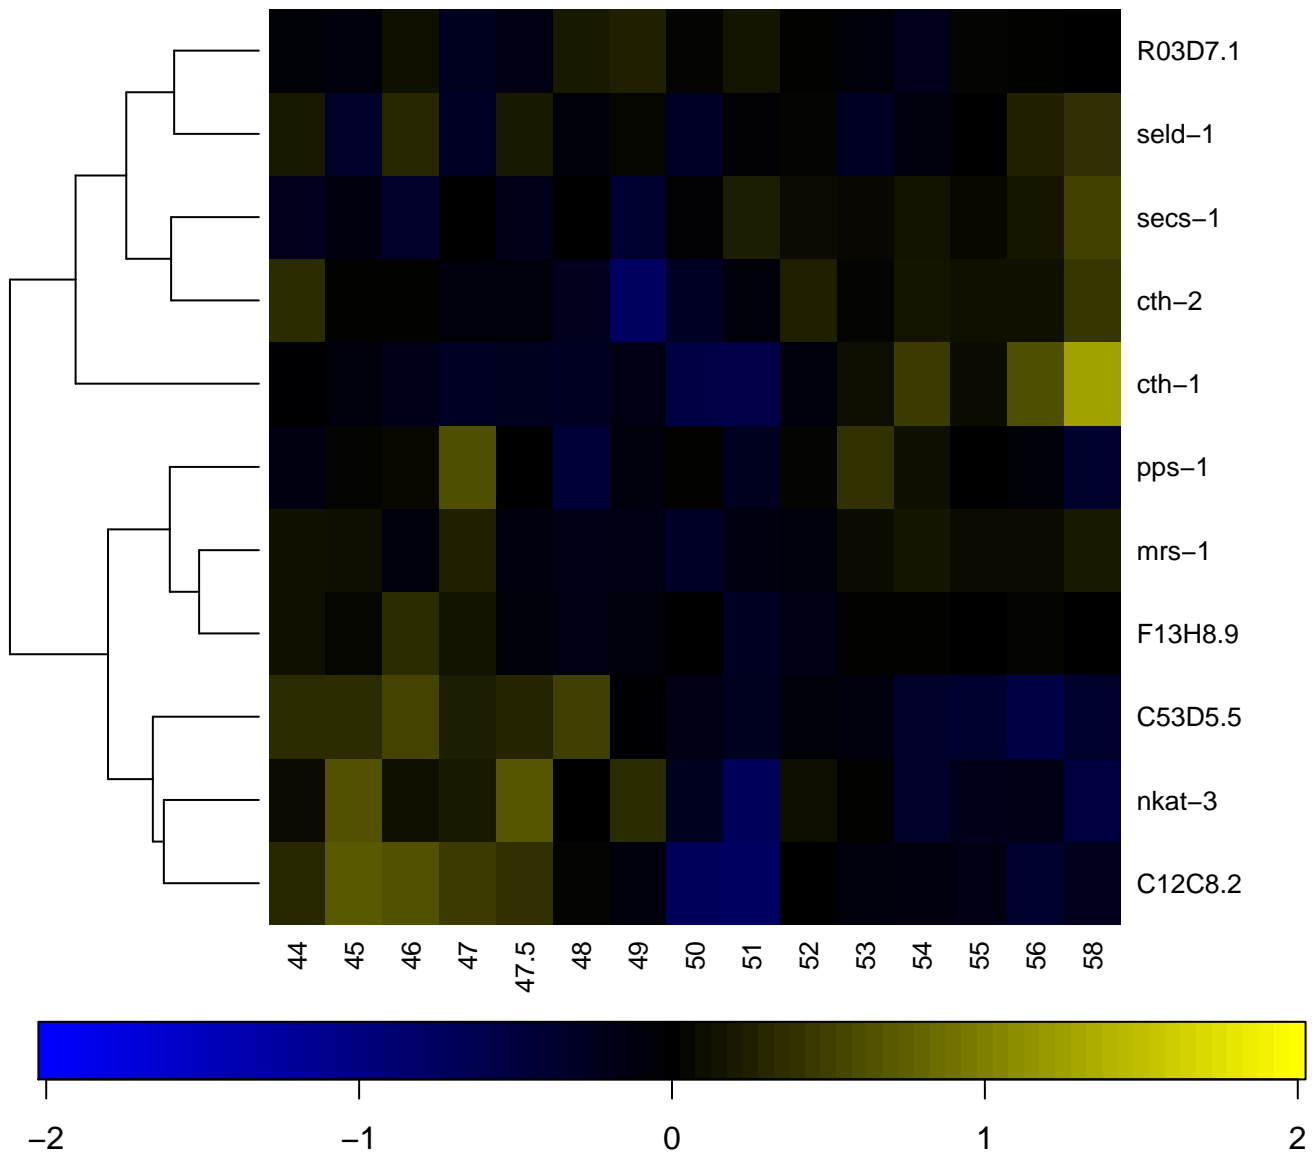

# Snare interactions in vesicular transport

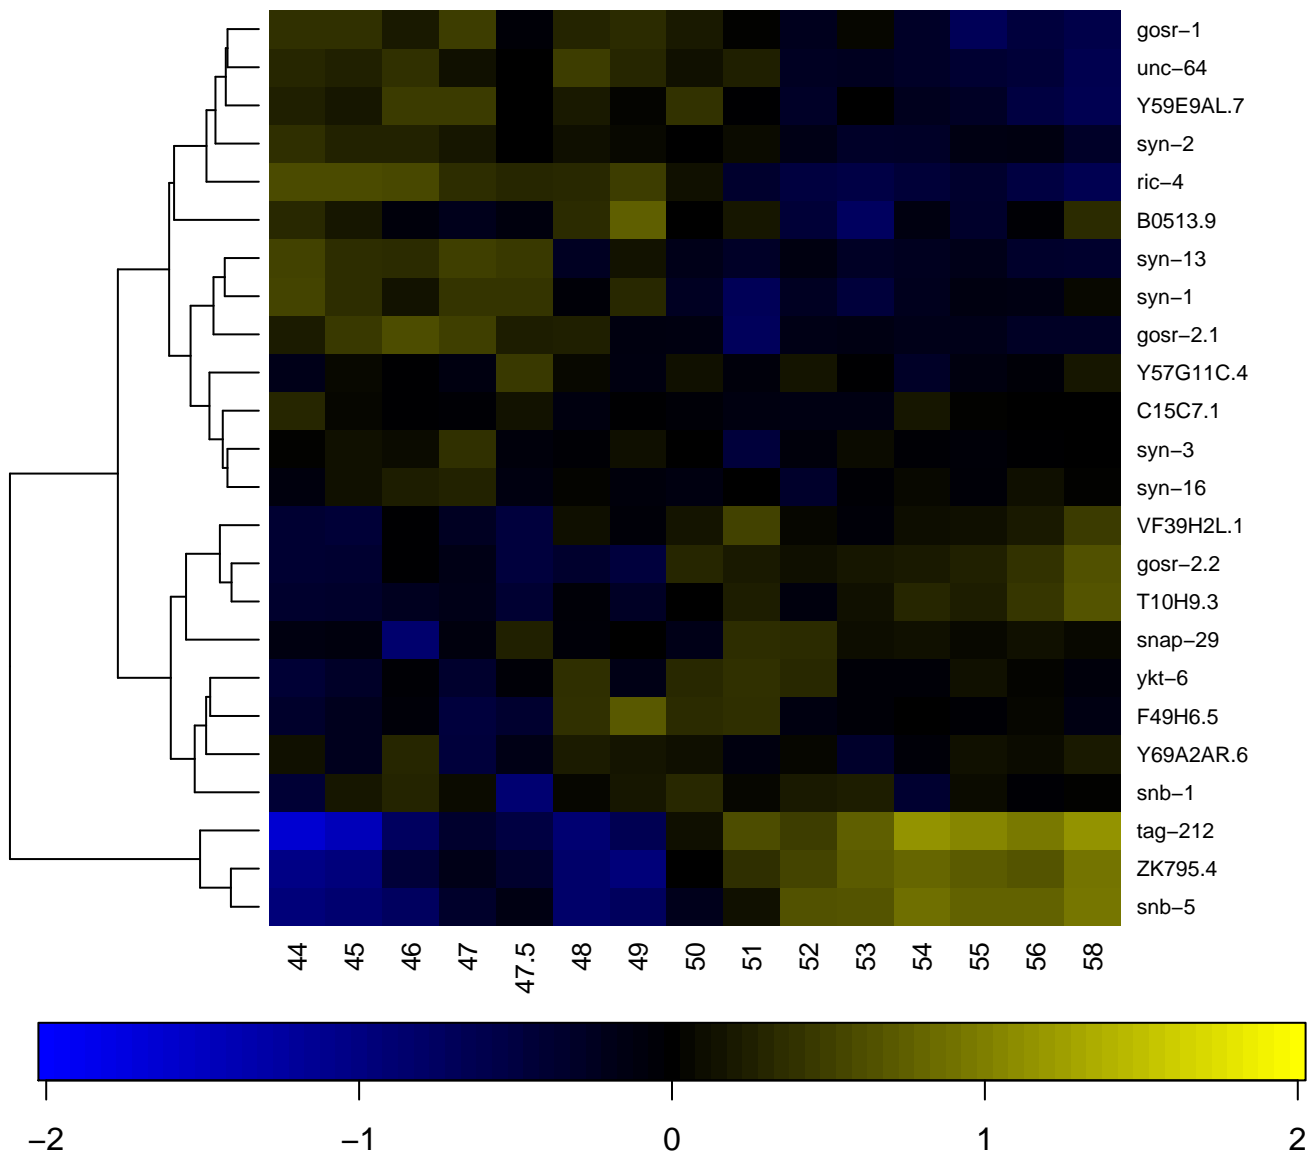



# Spingolipid metabolism

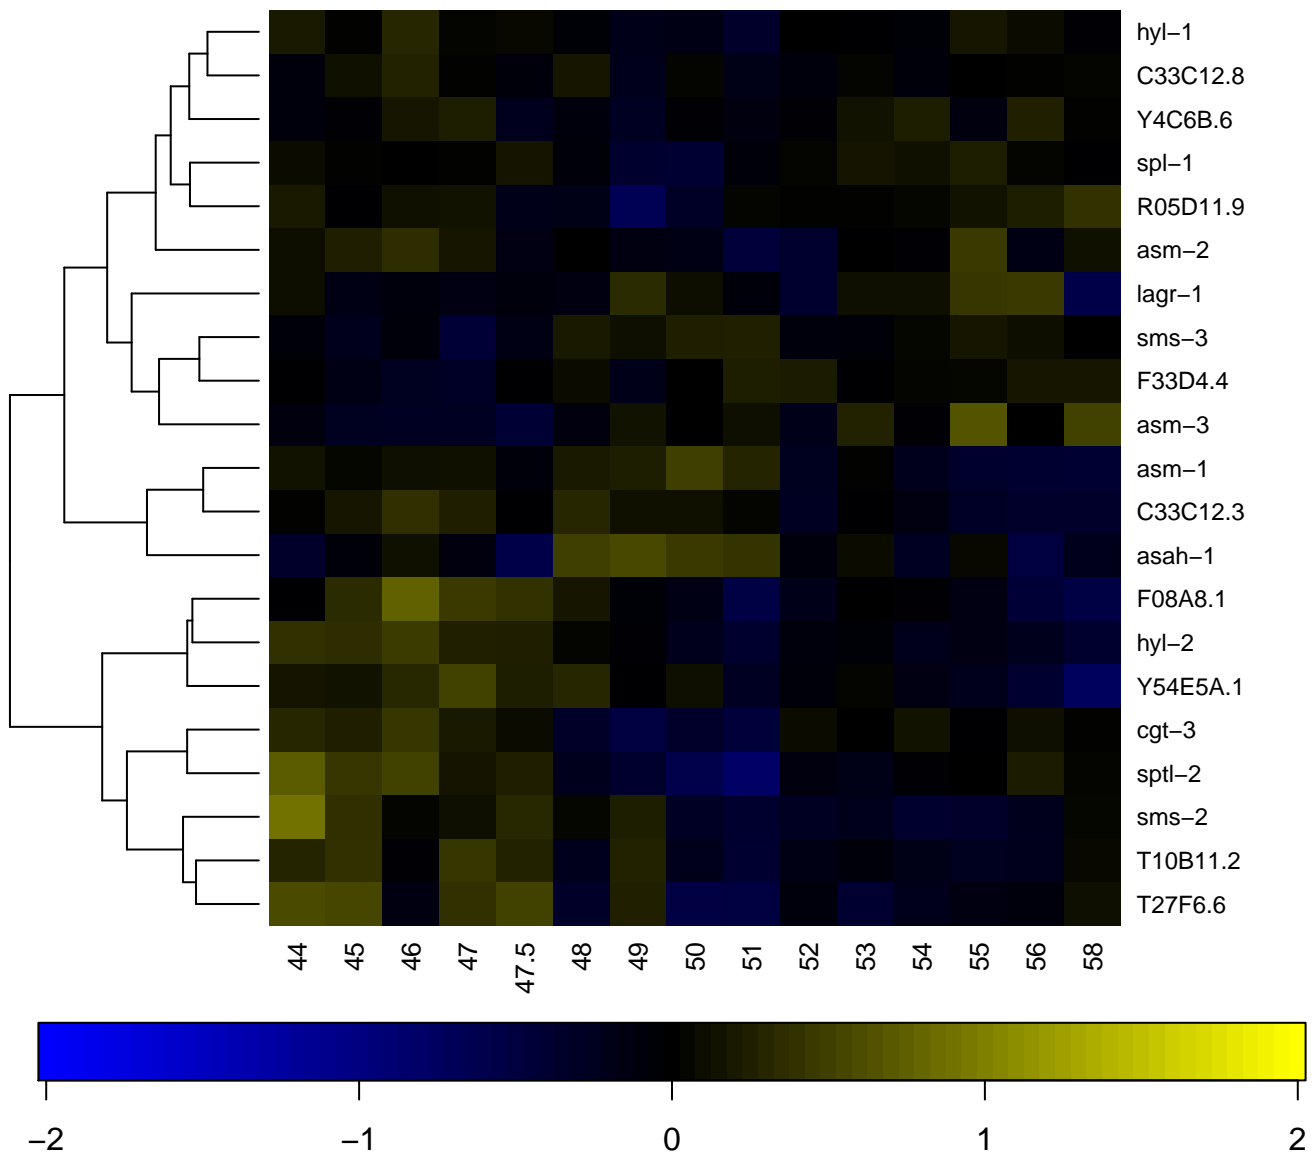

# Spliceosome

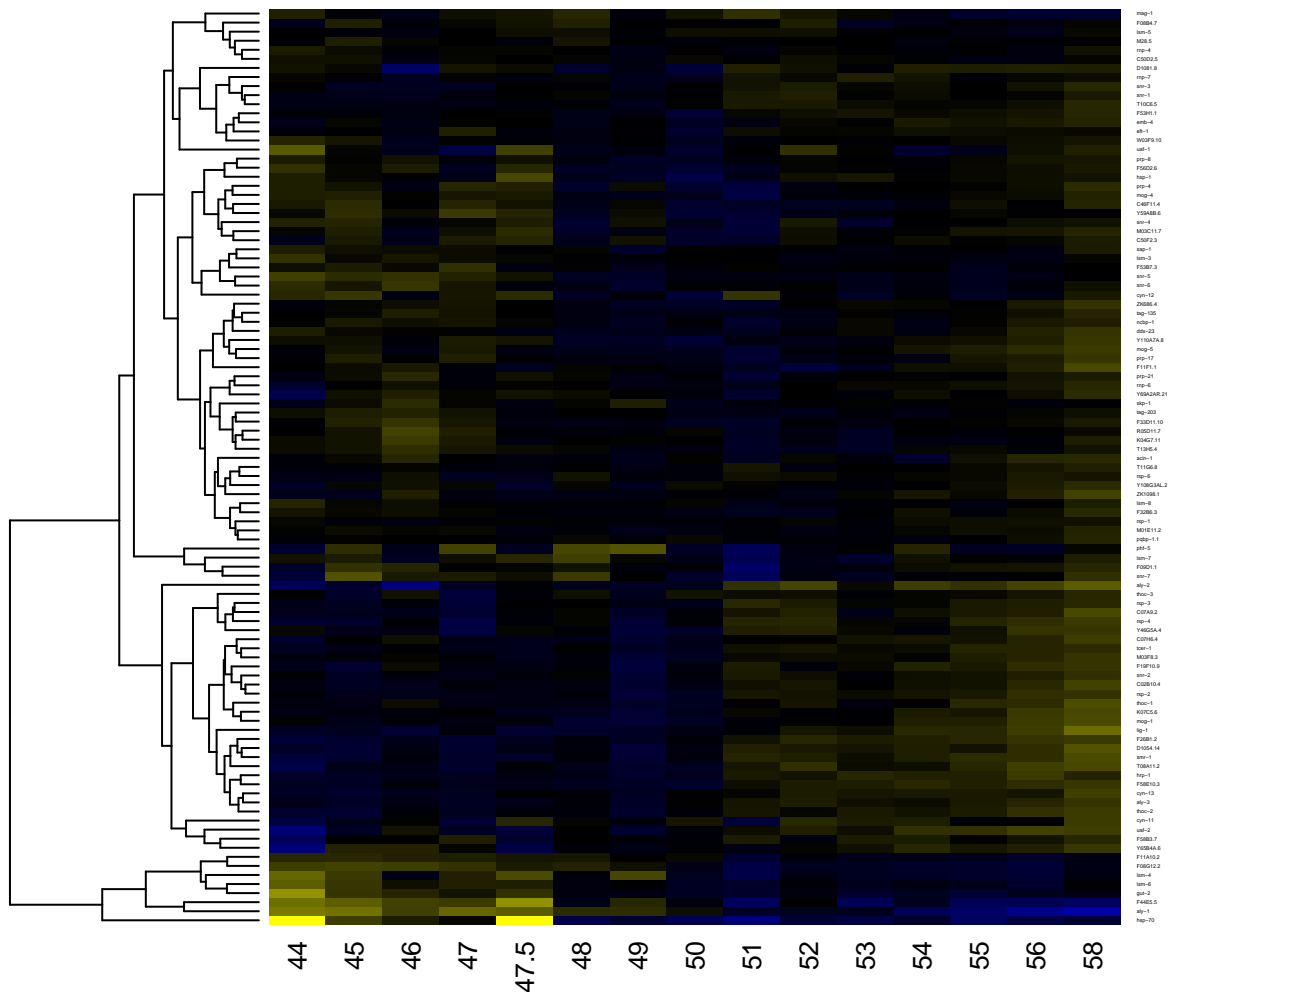

# $\beta$ -alanine metabolism

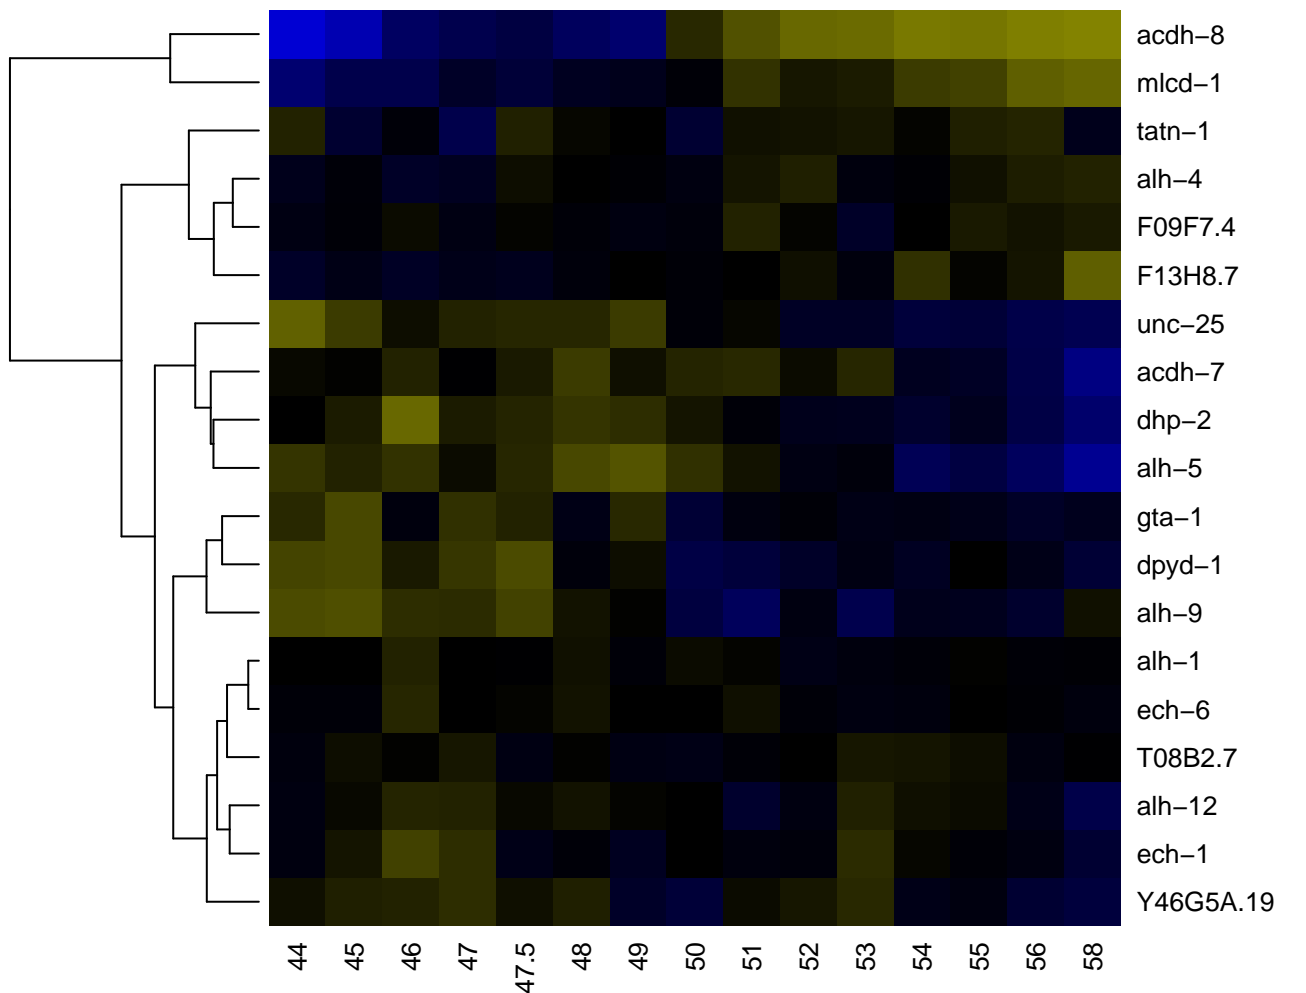

# Starch and sucrose metabolism

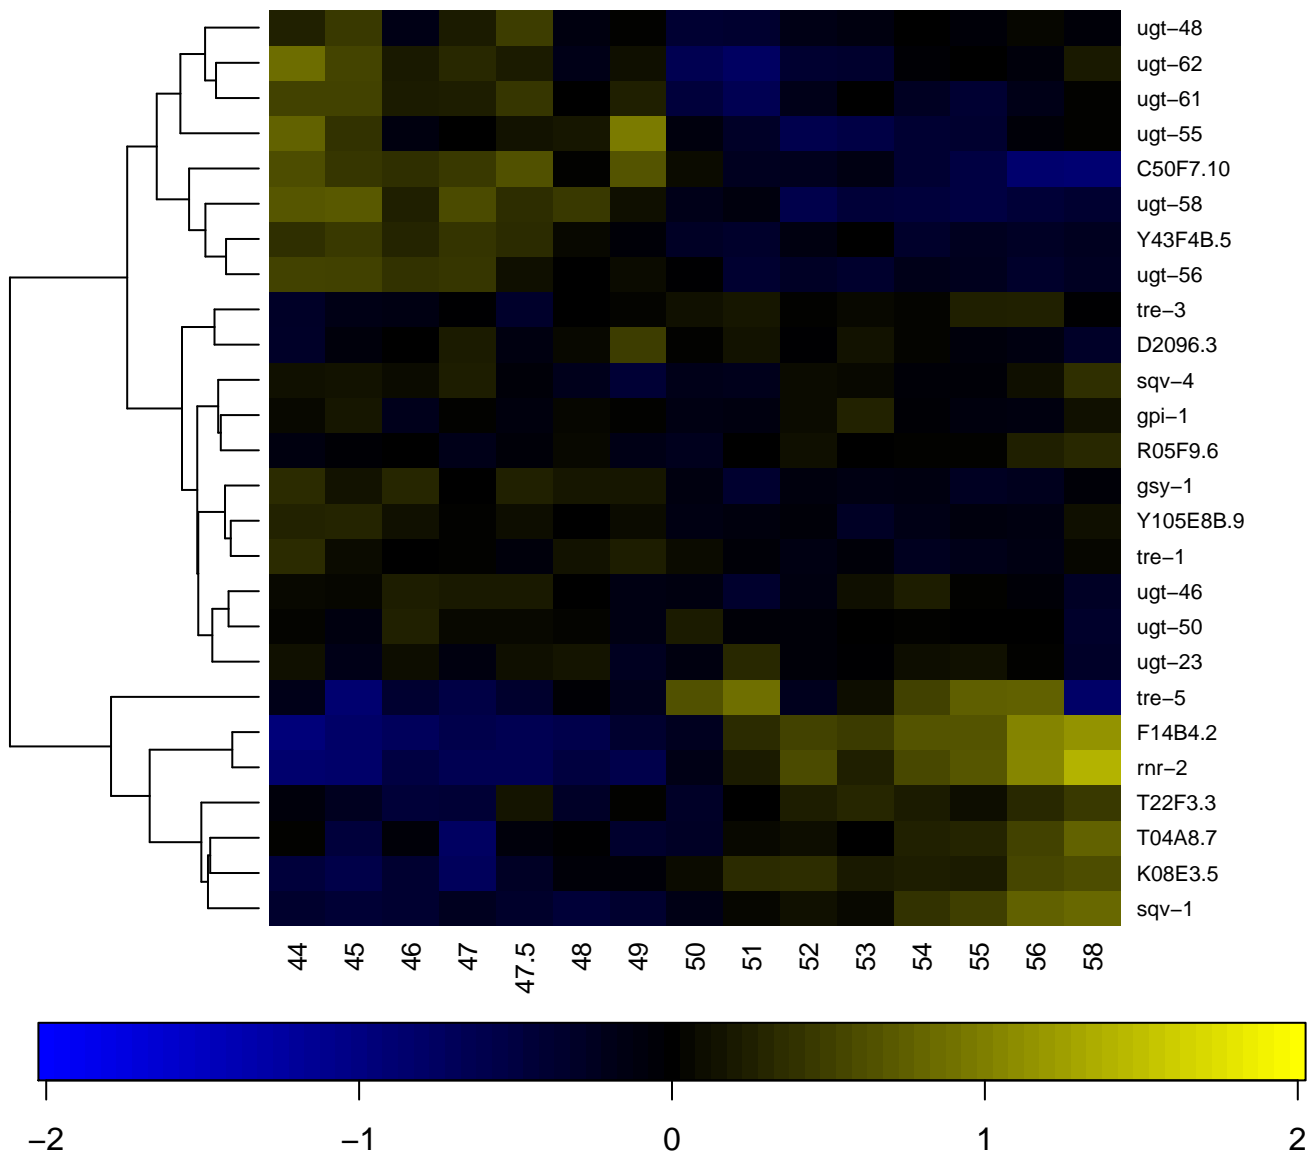







# Terpenoid backbone biosynthesis

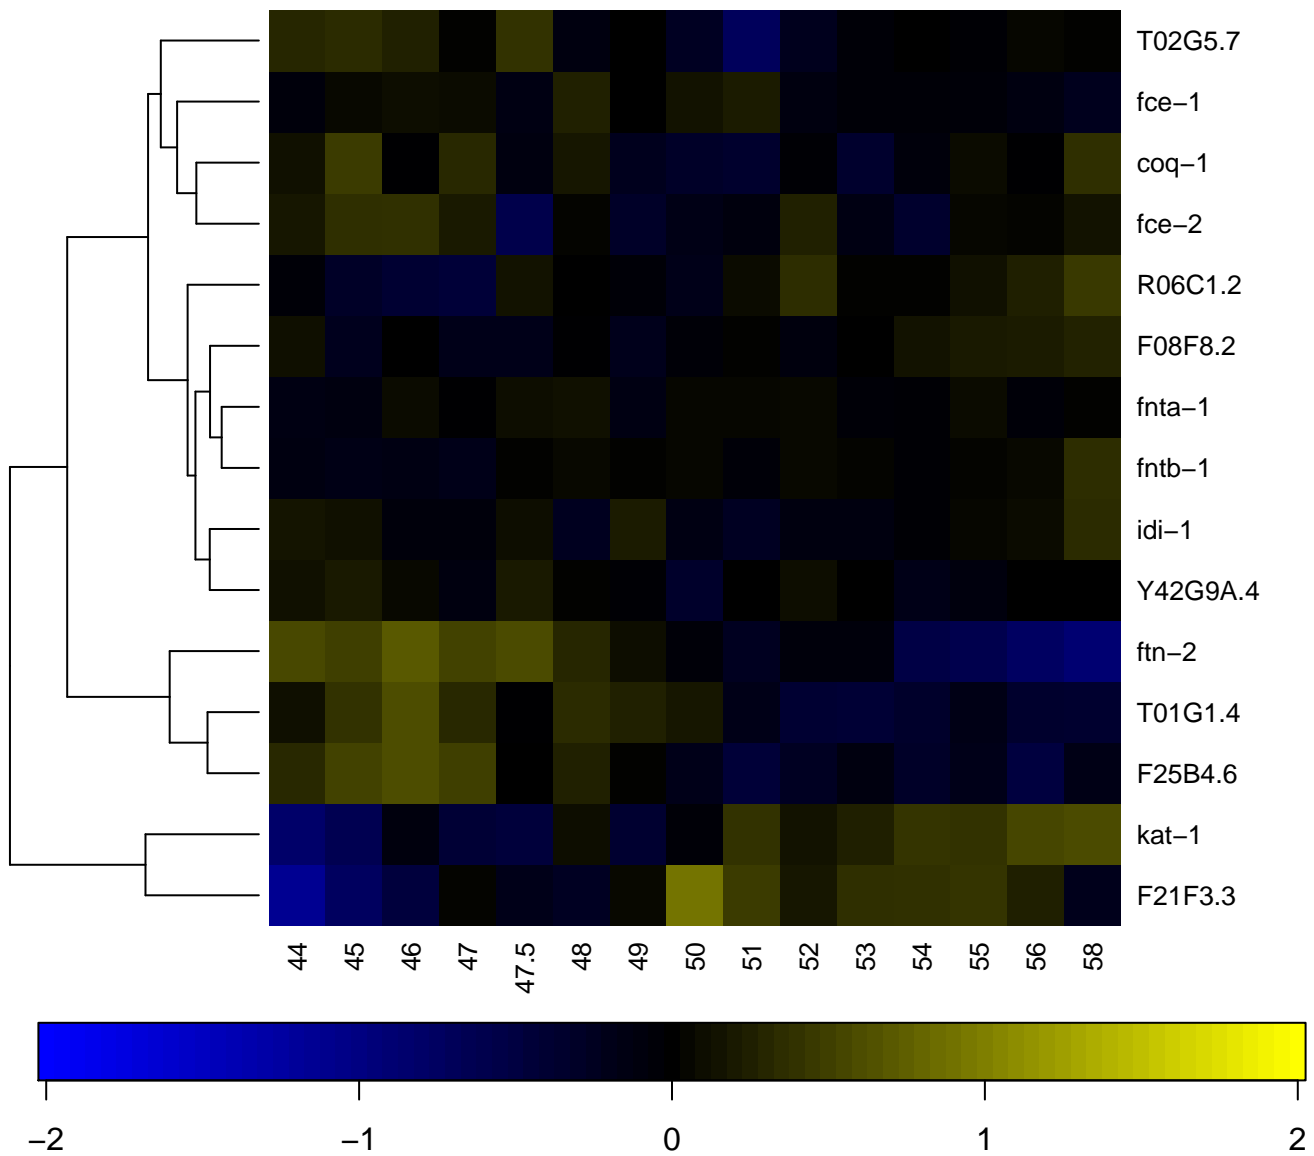



# TGF-beta signaling pathway

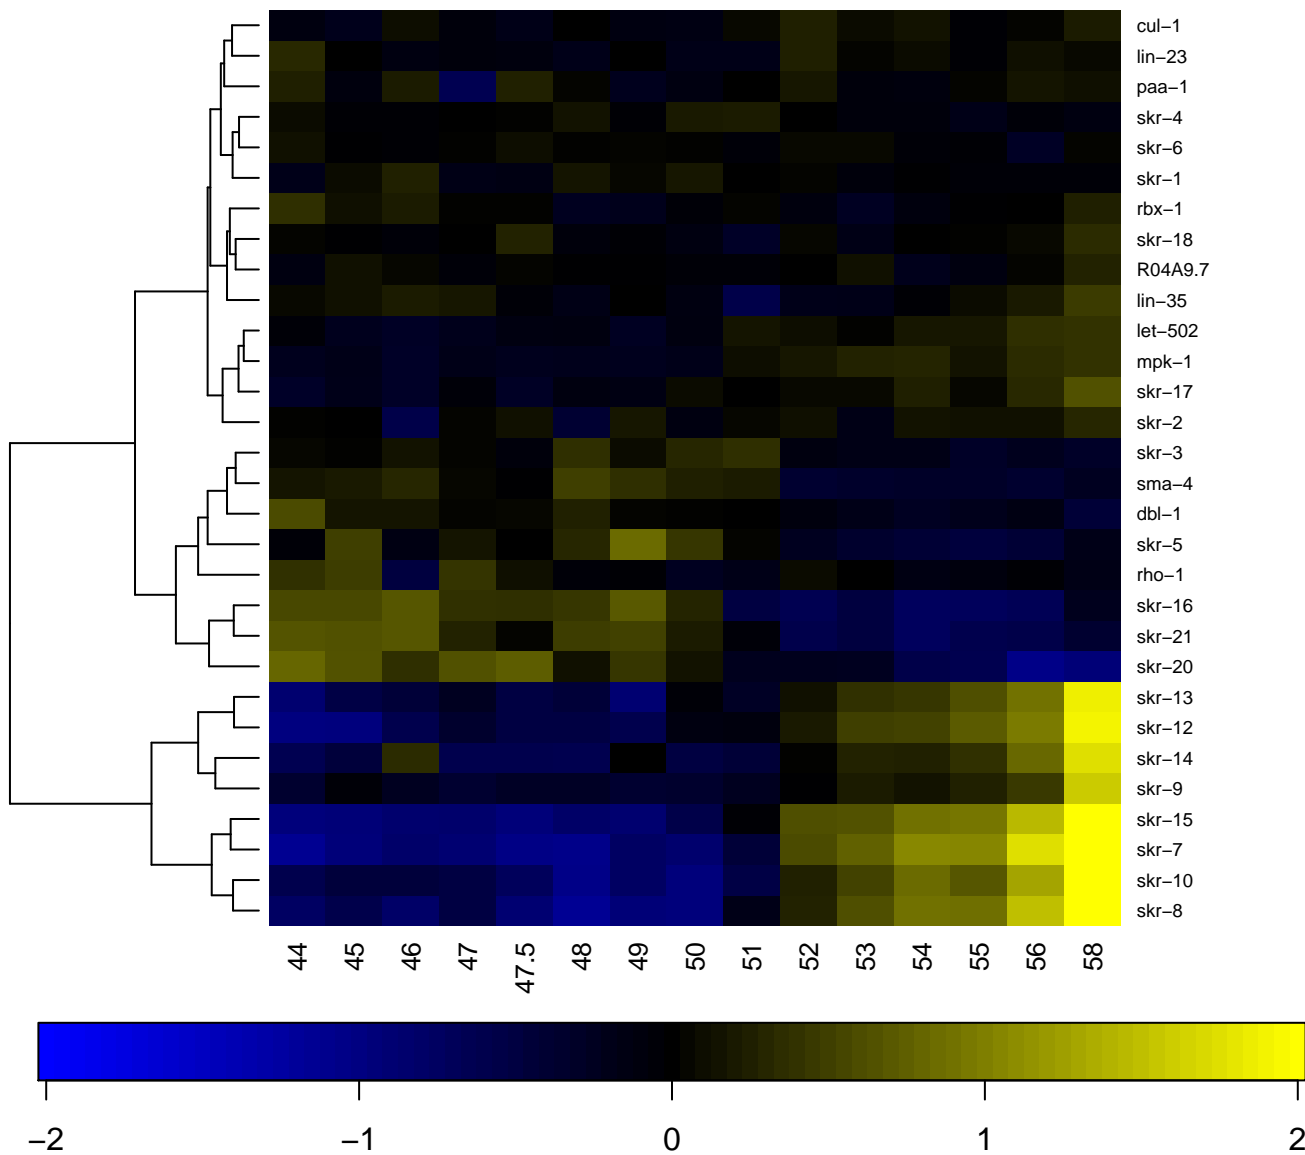

# Tryptophan metabolism

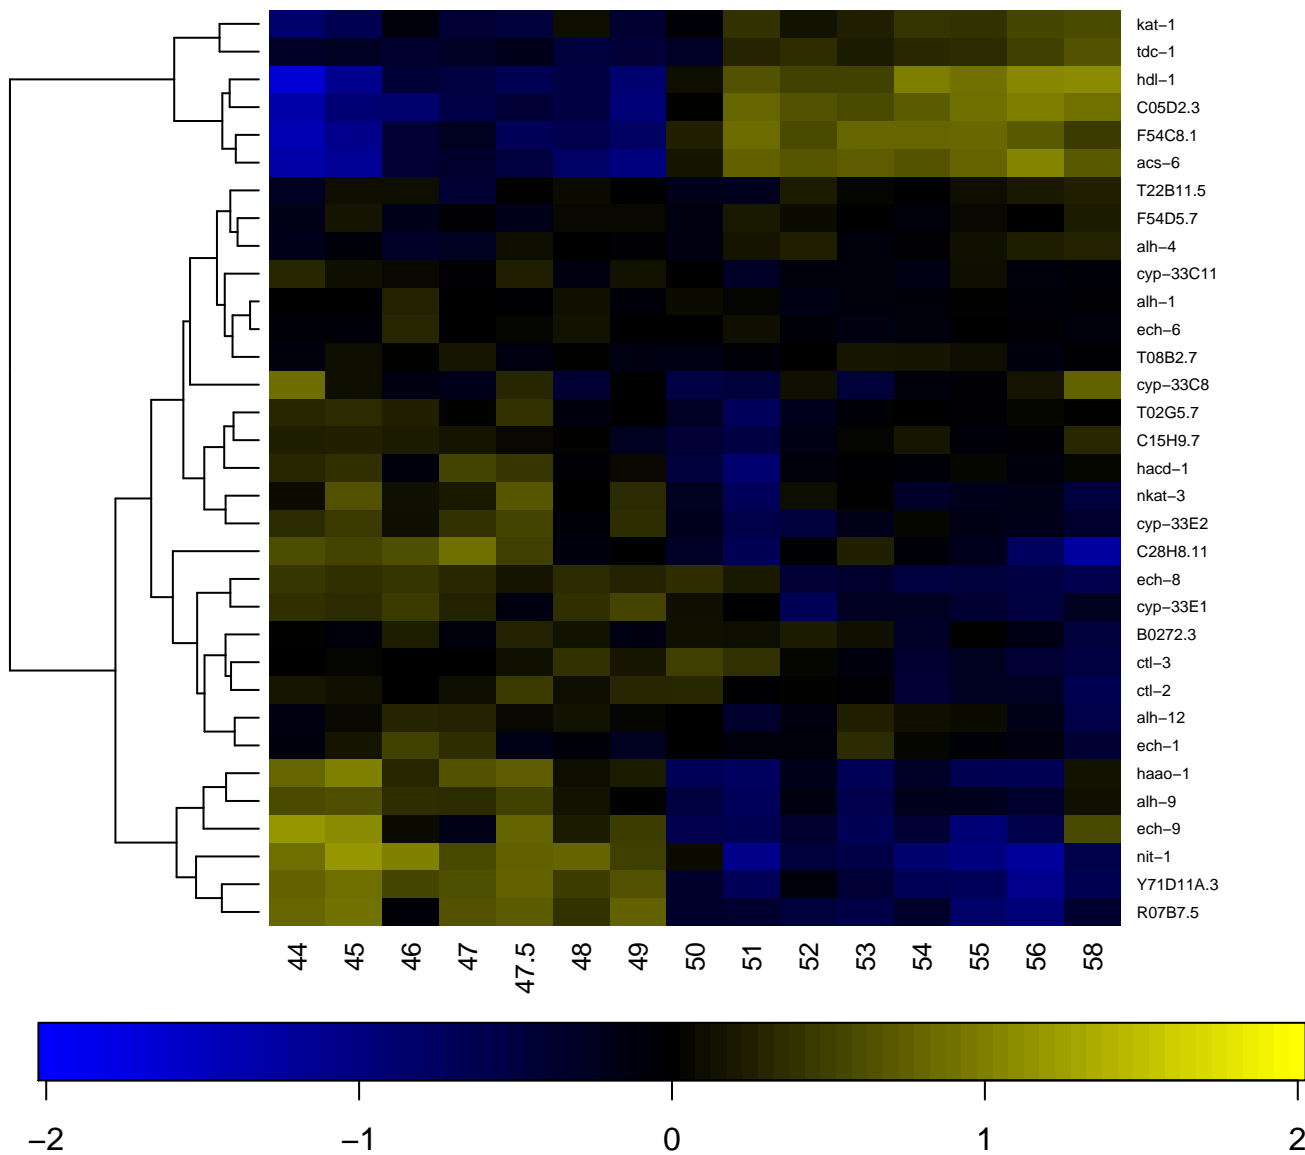

# Tyrosine metabolism

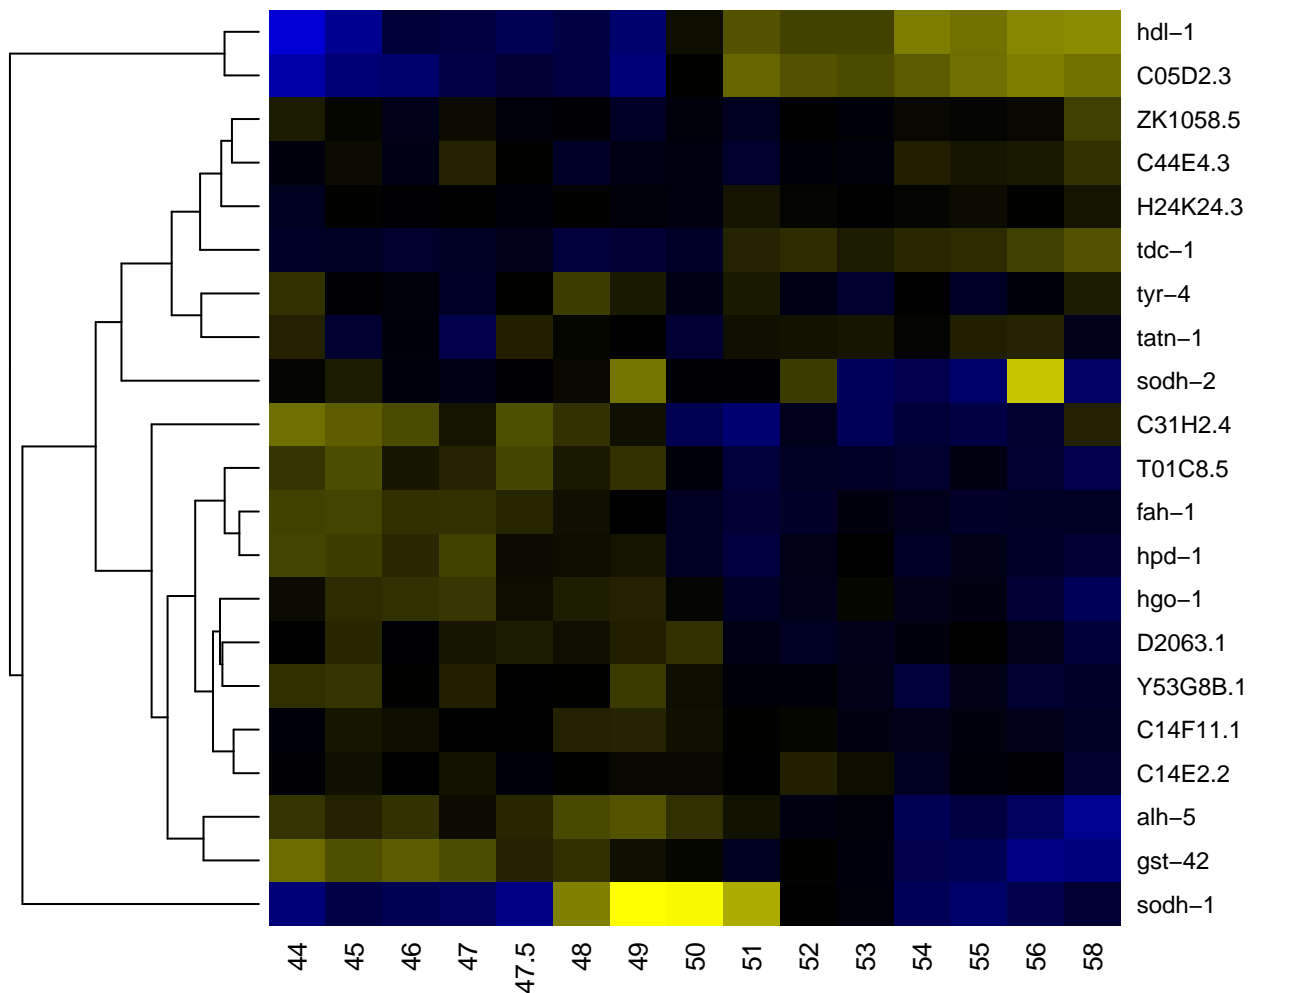

# Ubiquinone and other terpenoid-quinone biosynthesis

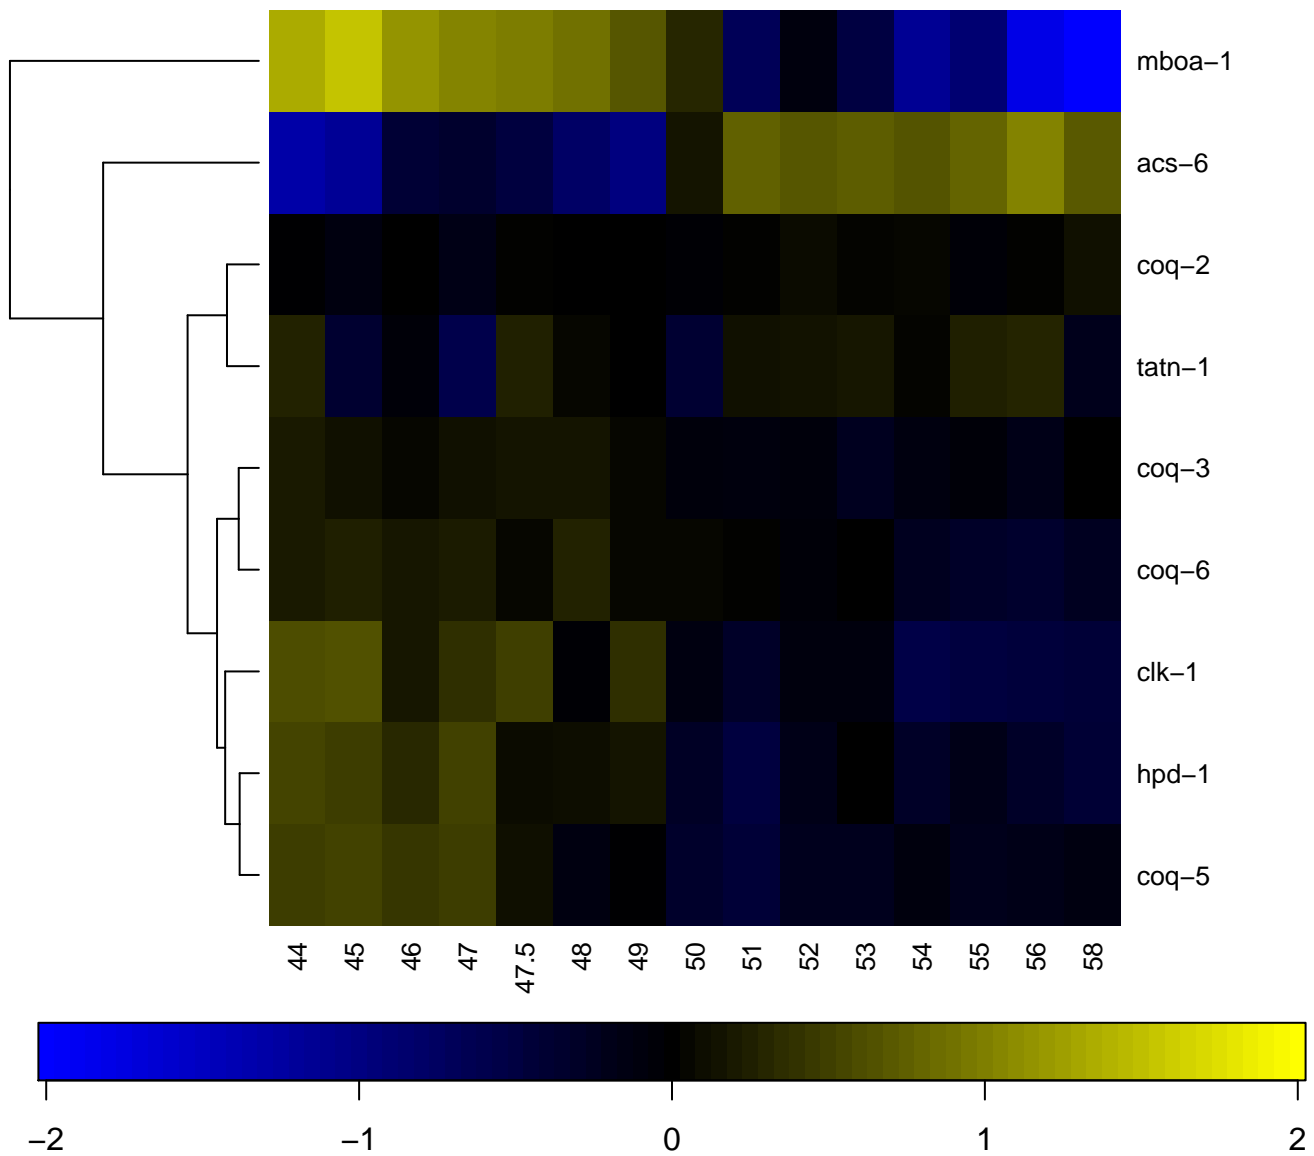

# Ubiquitin mediated proteolysis

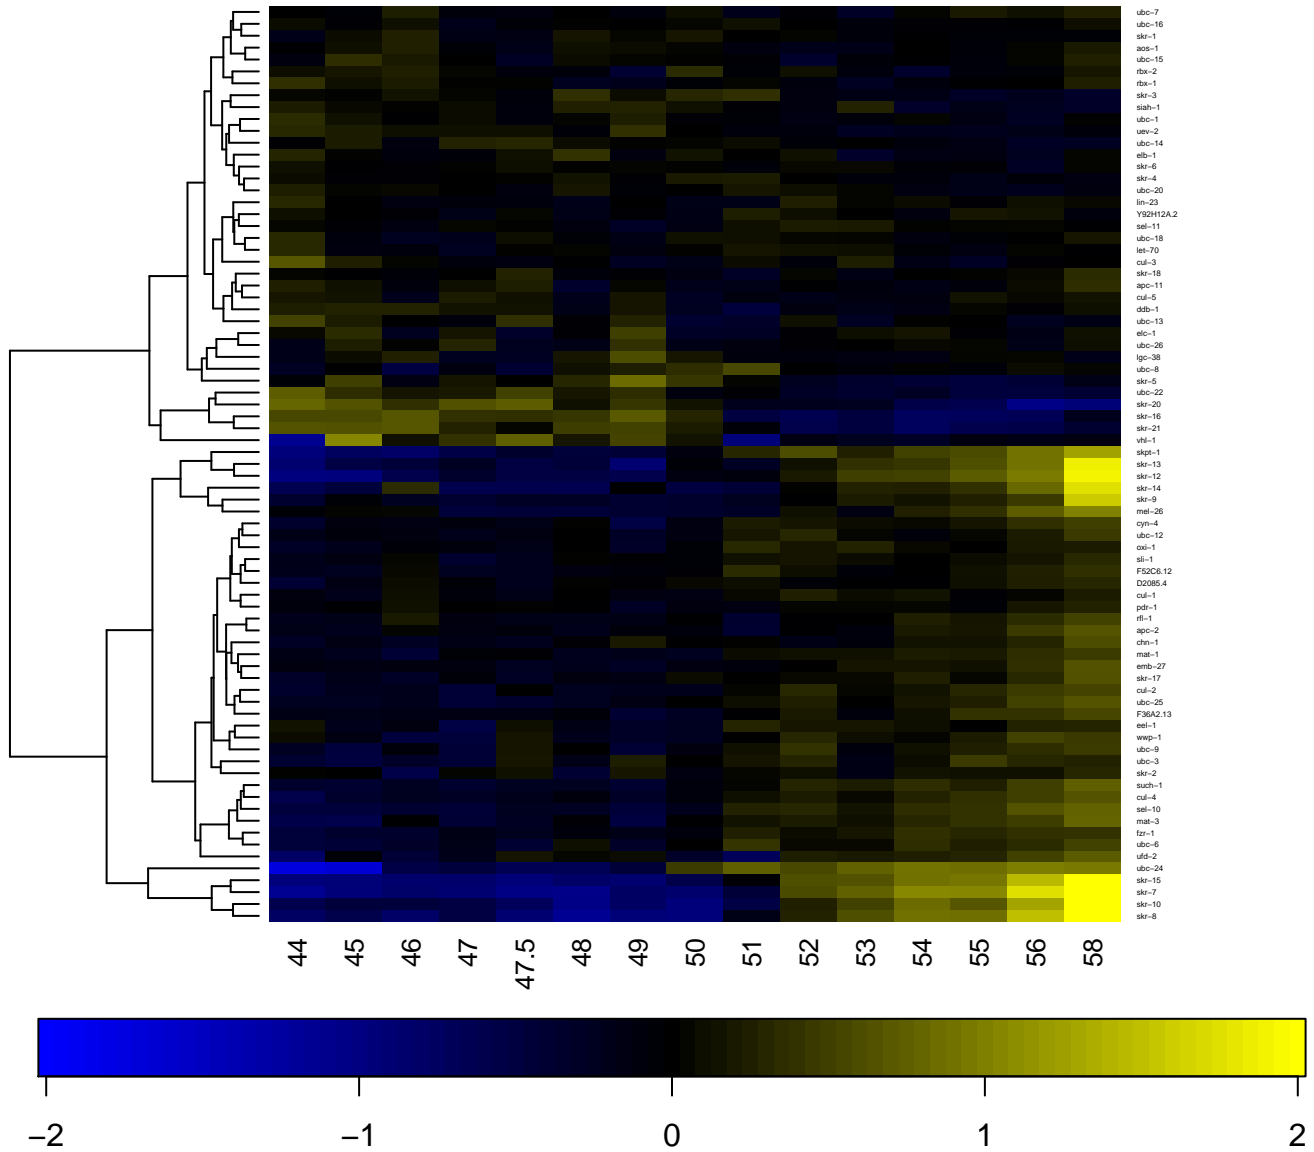

# Valine, leucine and isoleucine degradation

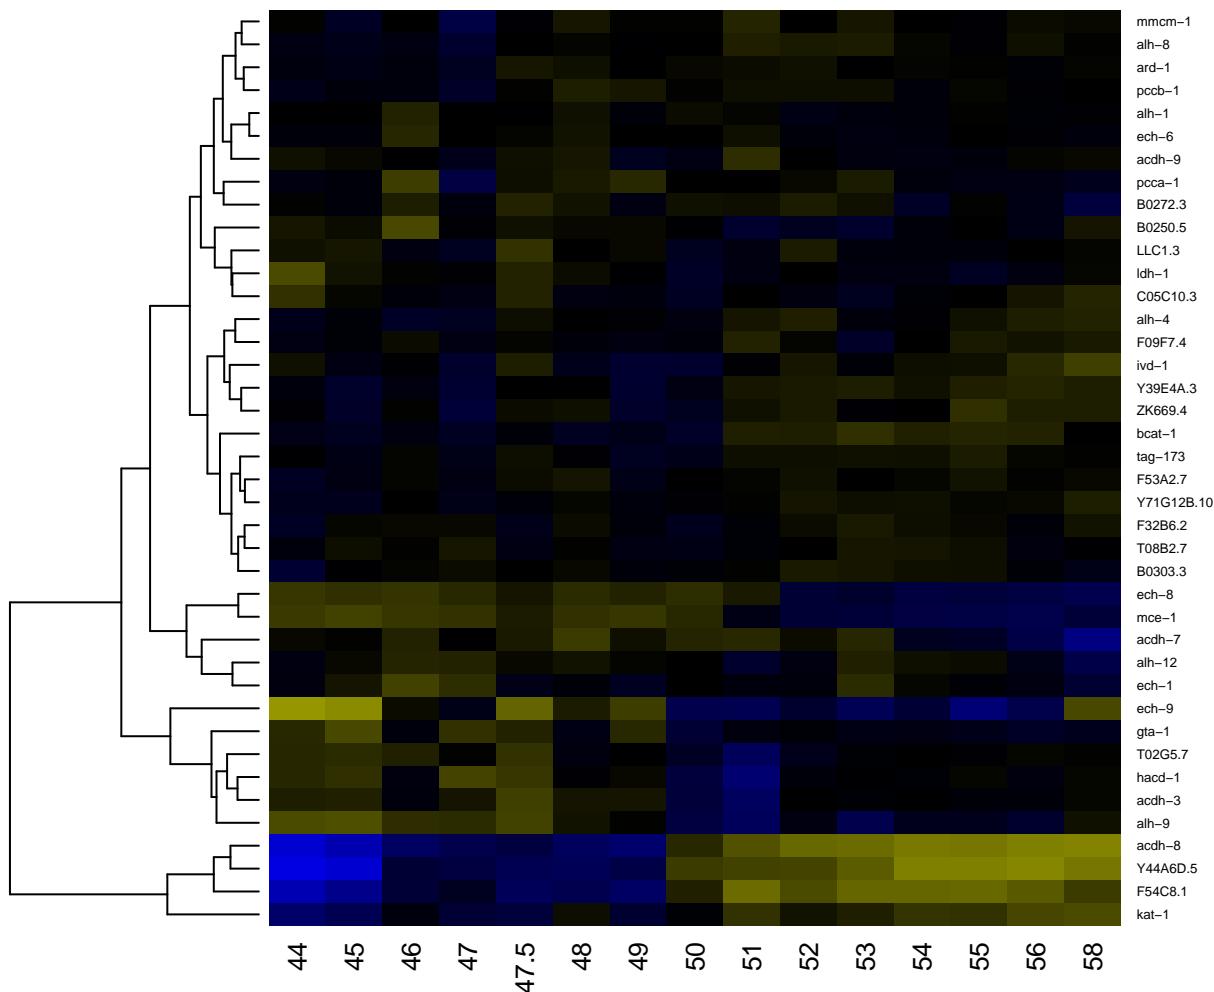

# WNT signaling pathway

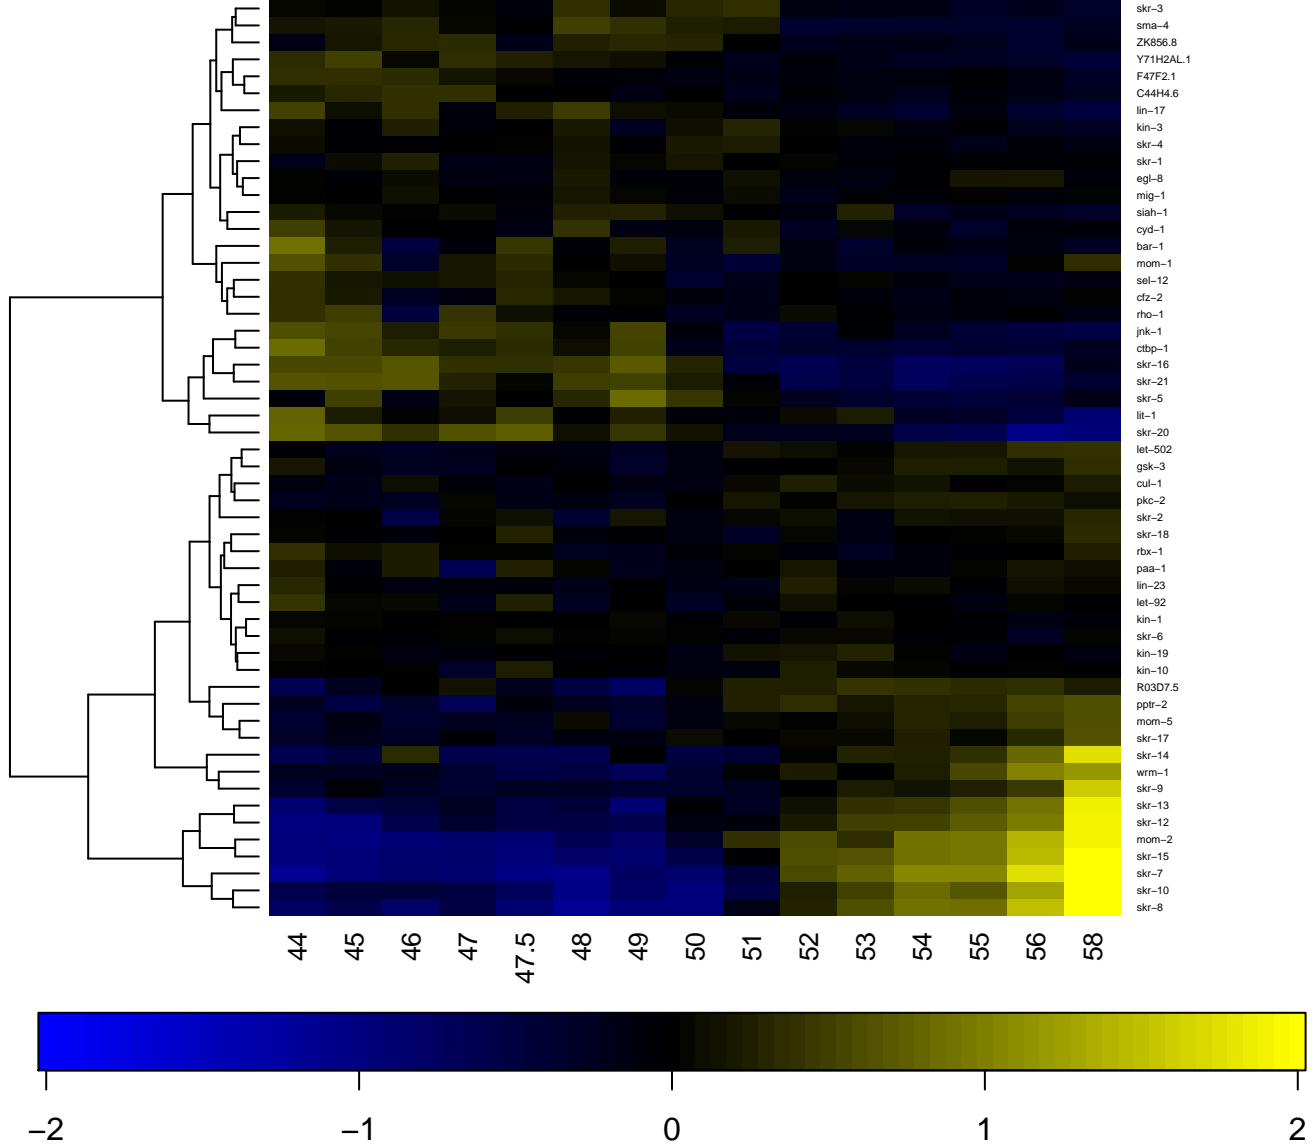

**Supplementary file H. Dynamic gene expression patterns of all Protein Domains.**

The “heatmap” function of “R” was used to cluster genes of each individual Protein Domain according to their expression pattern. Protein Domain name is shown per page as figure title. The time in hours is shown on the *x*-axis. Gene names are shown on the *y*-axis. The scale bar shows the log<sub>2</sub> ratio with the mean for each time-point. Blue is lower than the mean and yellow is higher than the mean.



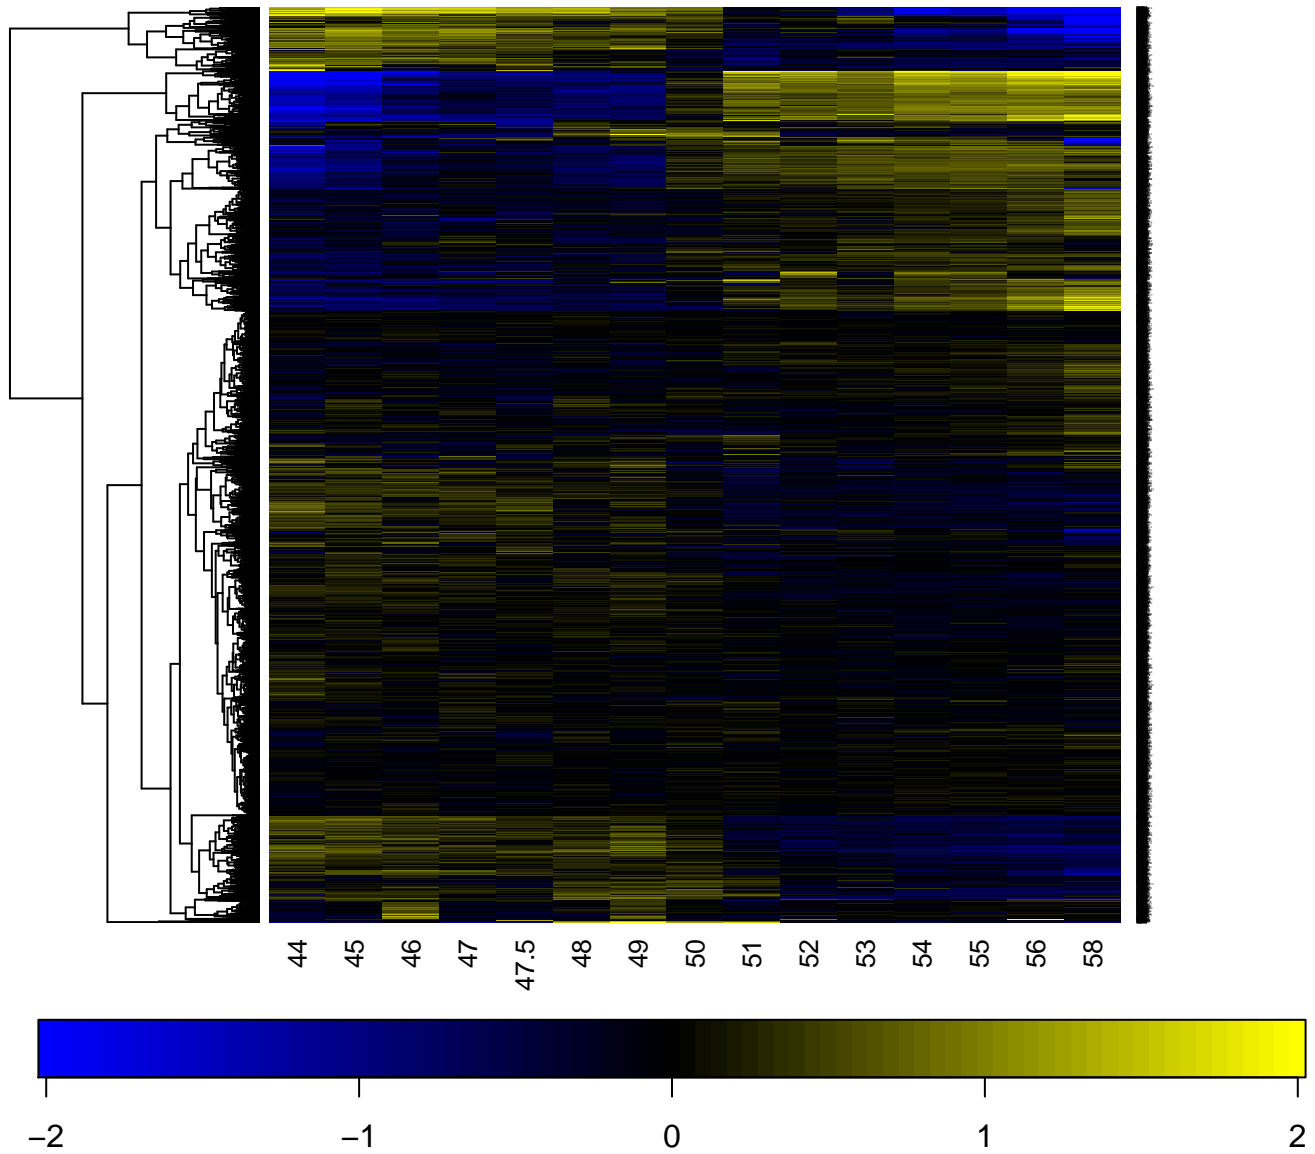







# 1-aminocyclopropane-1-carboxylate synthase

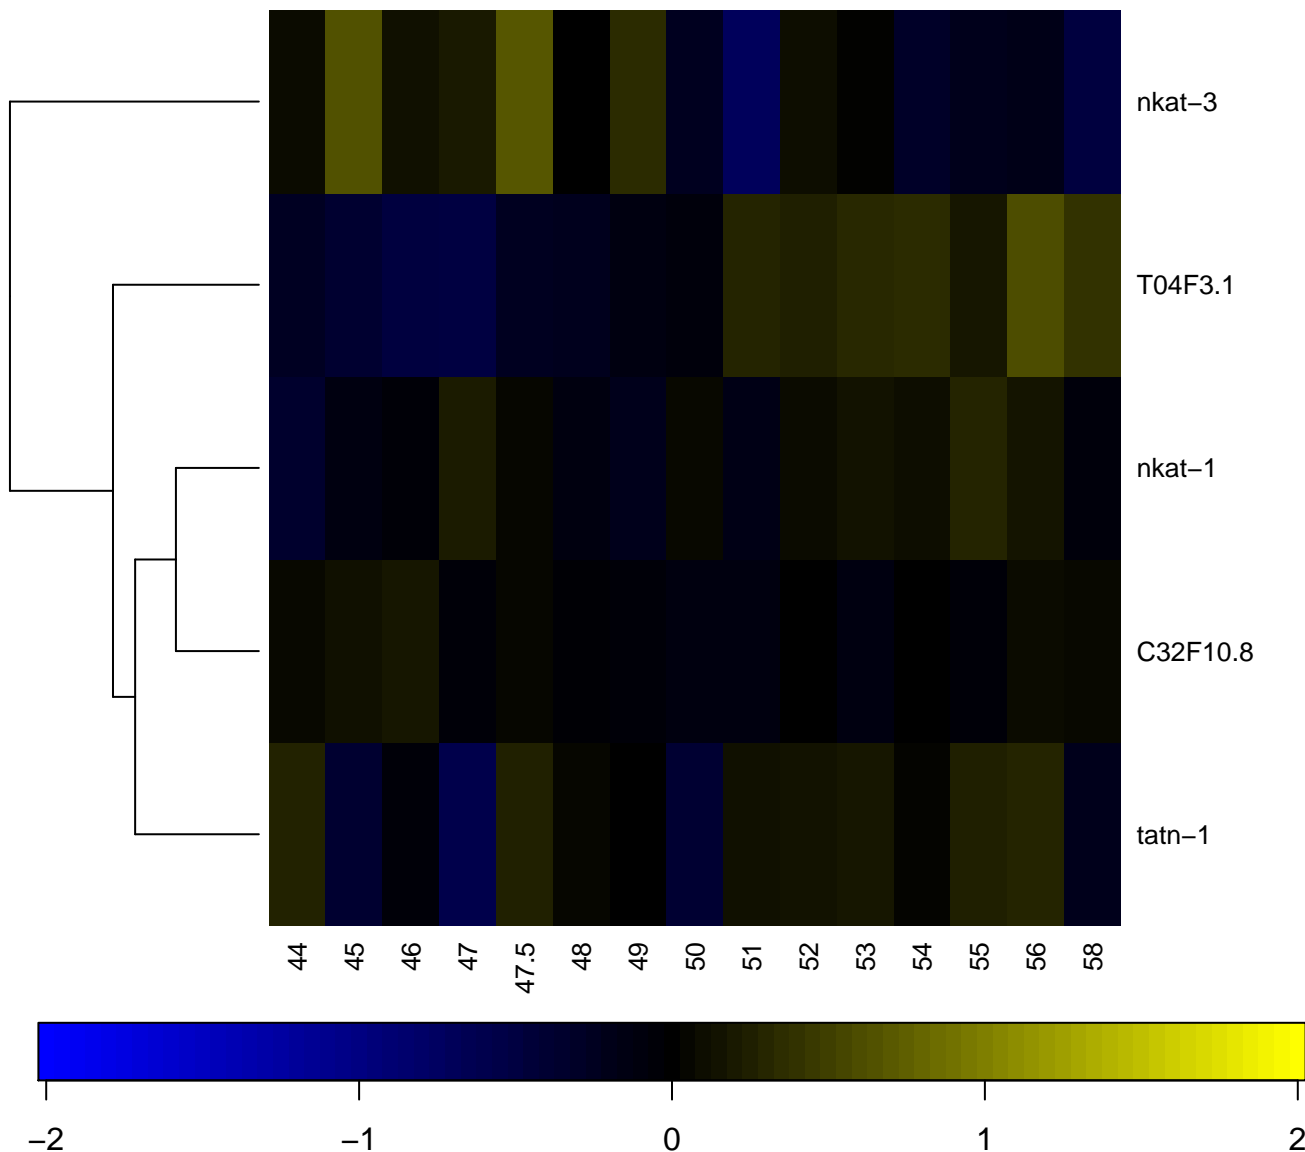



# 2,3-dihydro-2,3-dihydroxybenzoate dehydrogenase



# 26S proteasome subunit P45

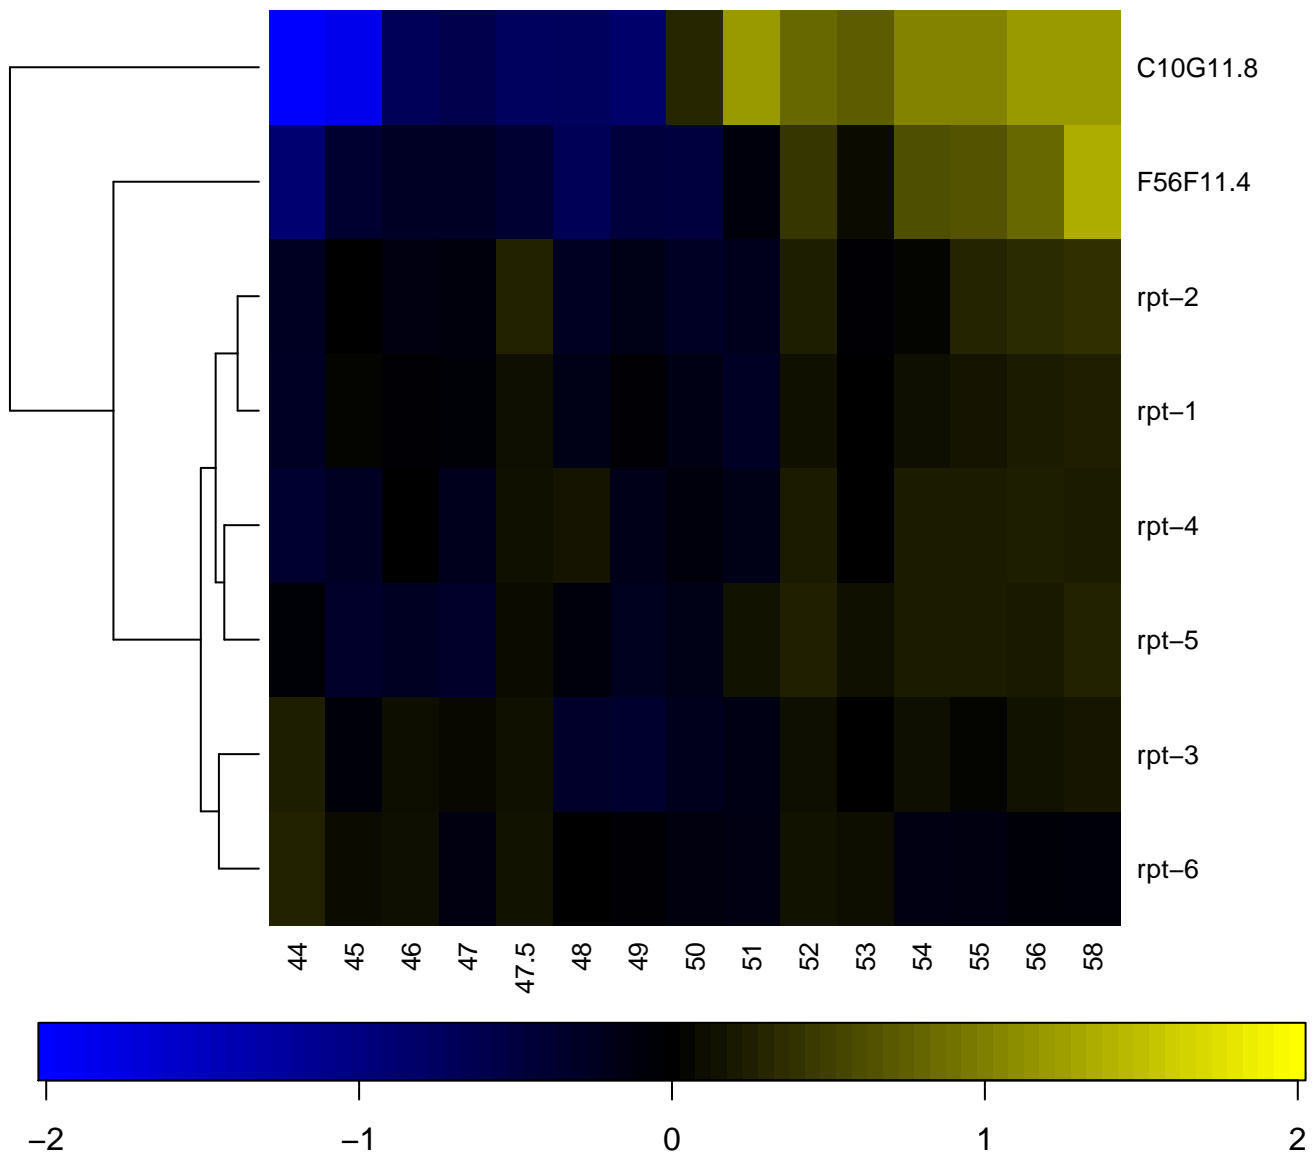









# 3'-5' exonuclease

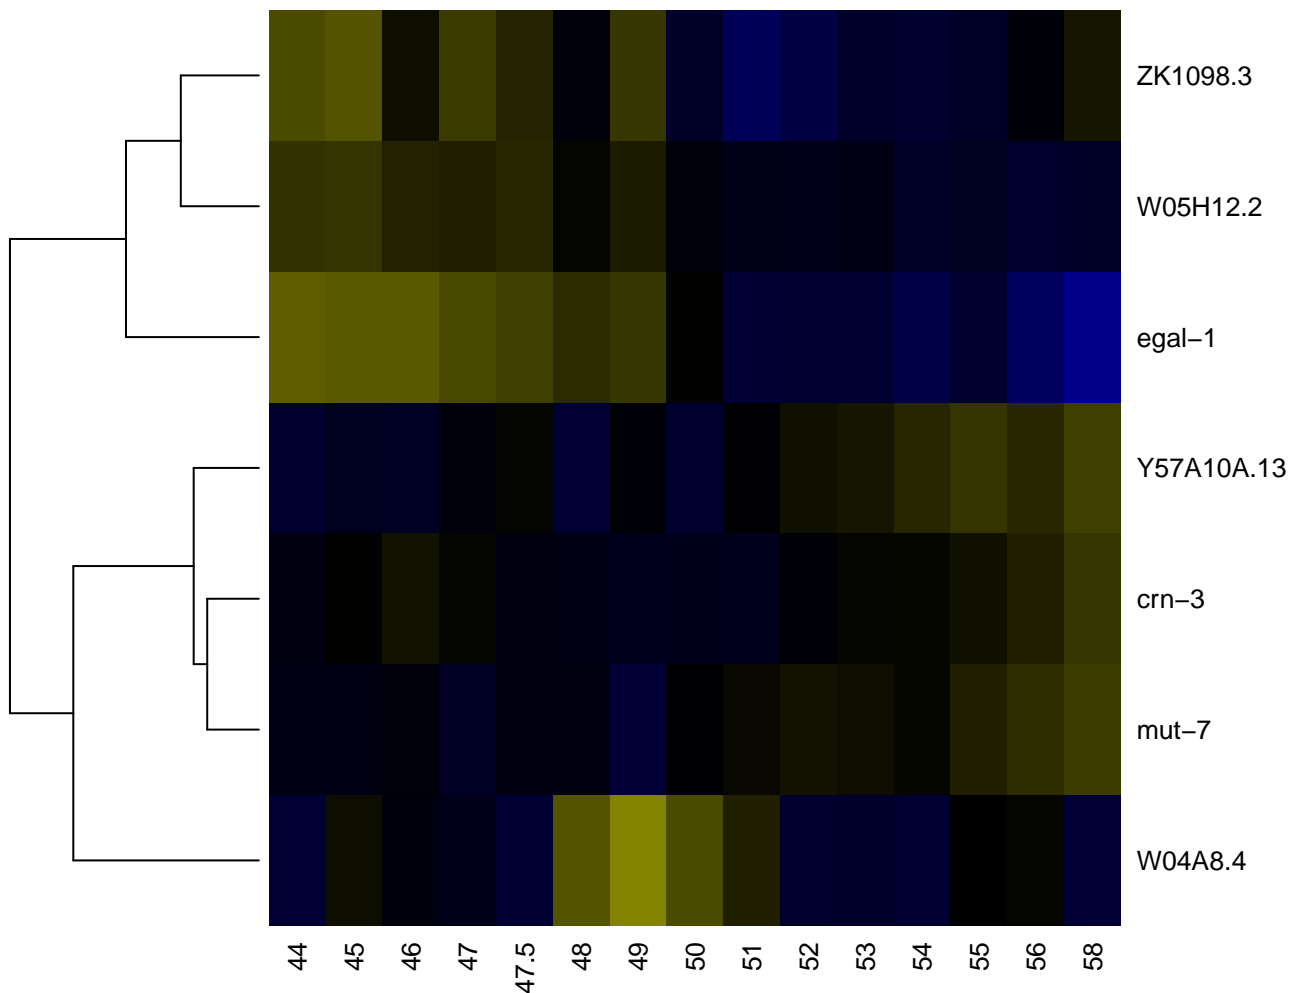

-2

-1

0

1

2

# 3' exoribonuclease family, domain 1

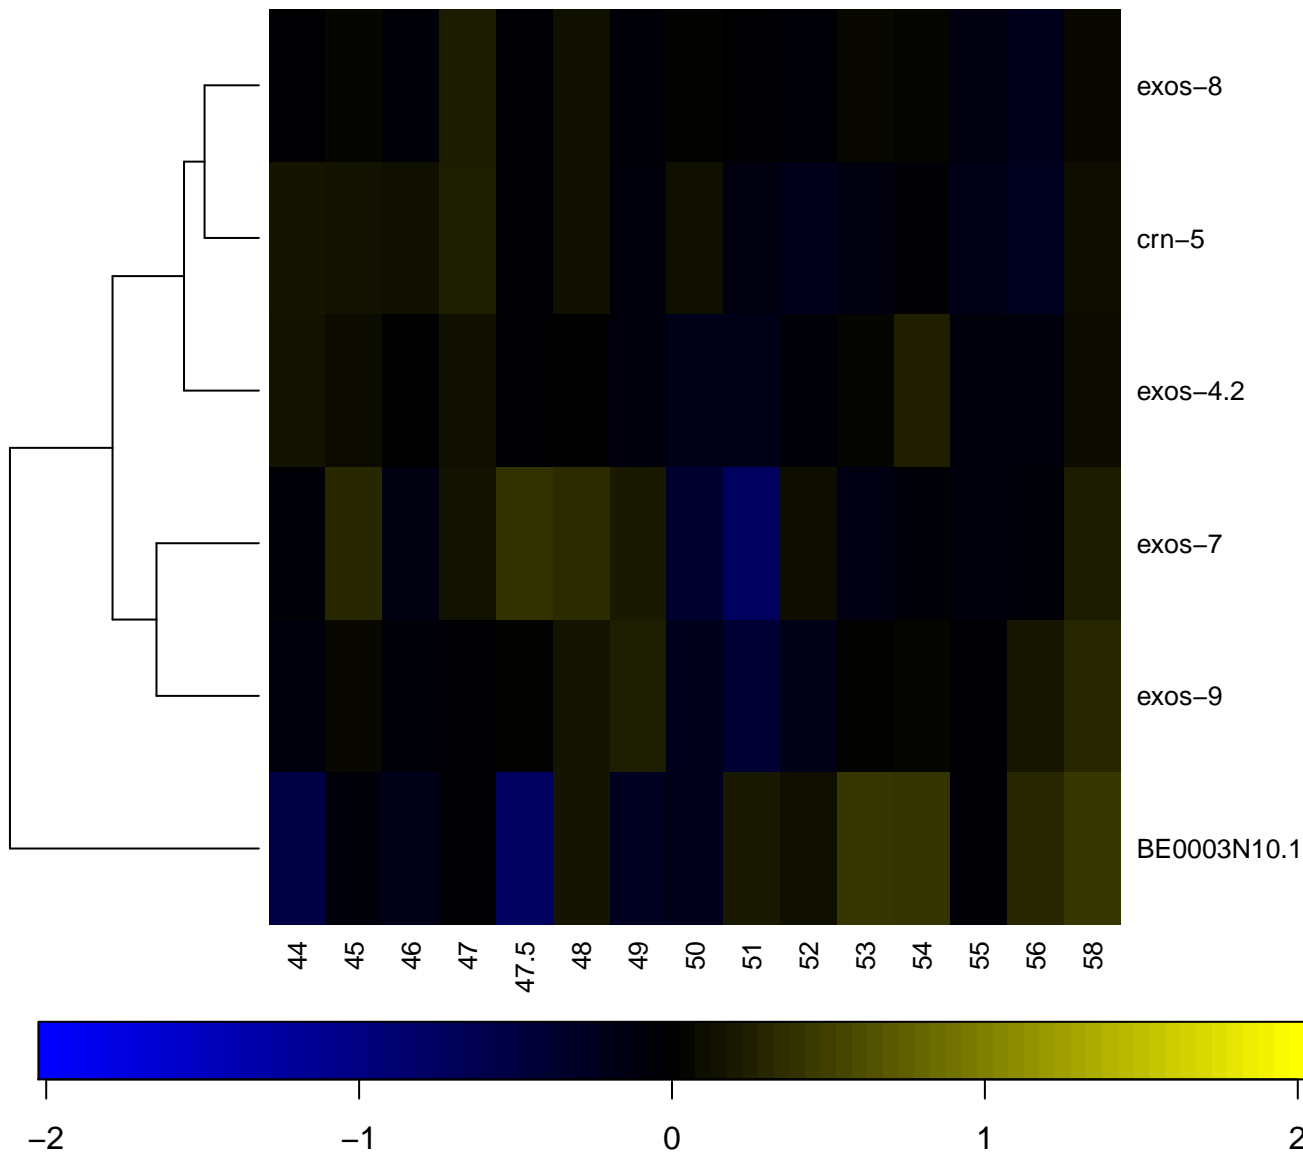



# 3-beta hydroxysteroid dehydrogenase/isomerase

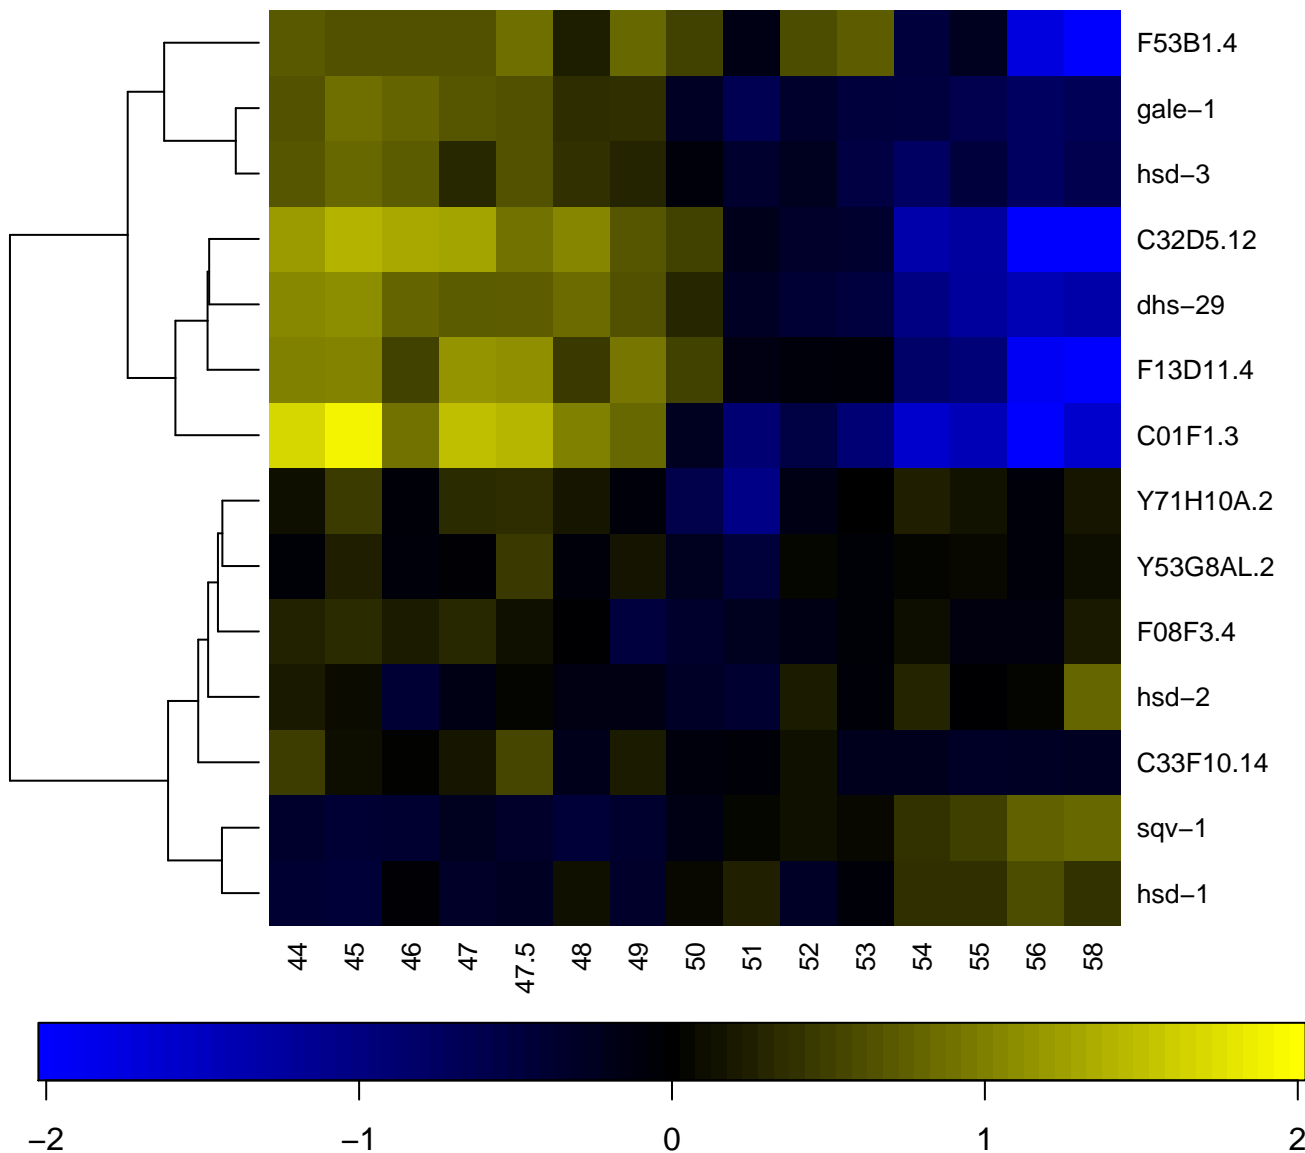





# 3-hydroxyacyl-CoA dehydrogenase, C-terminal

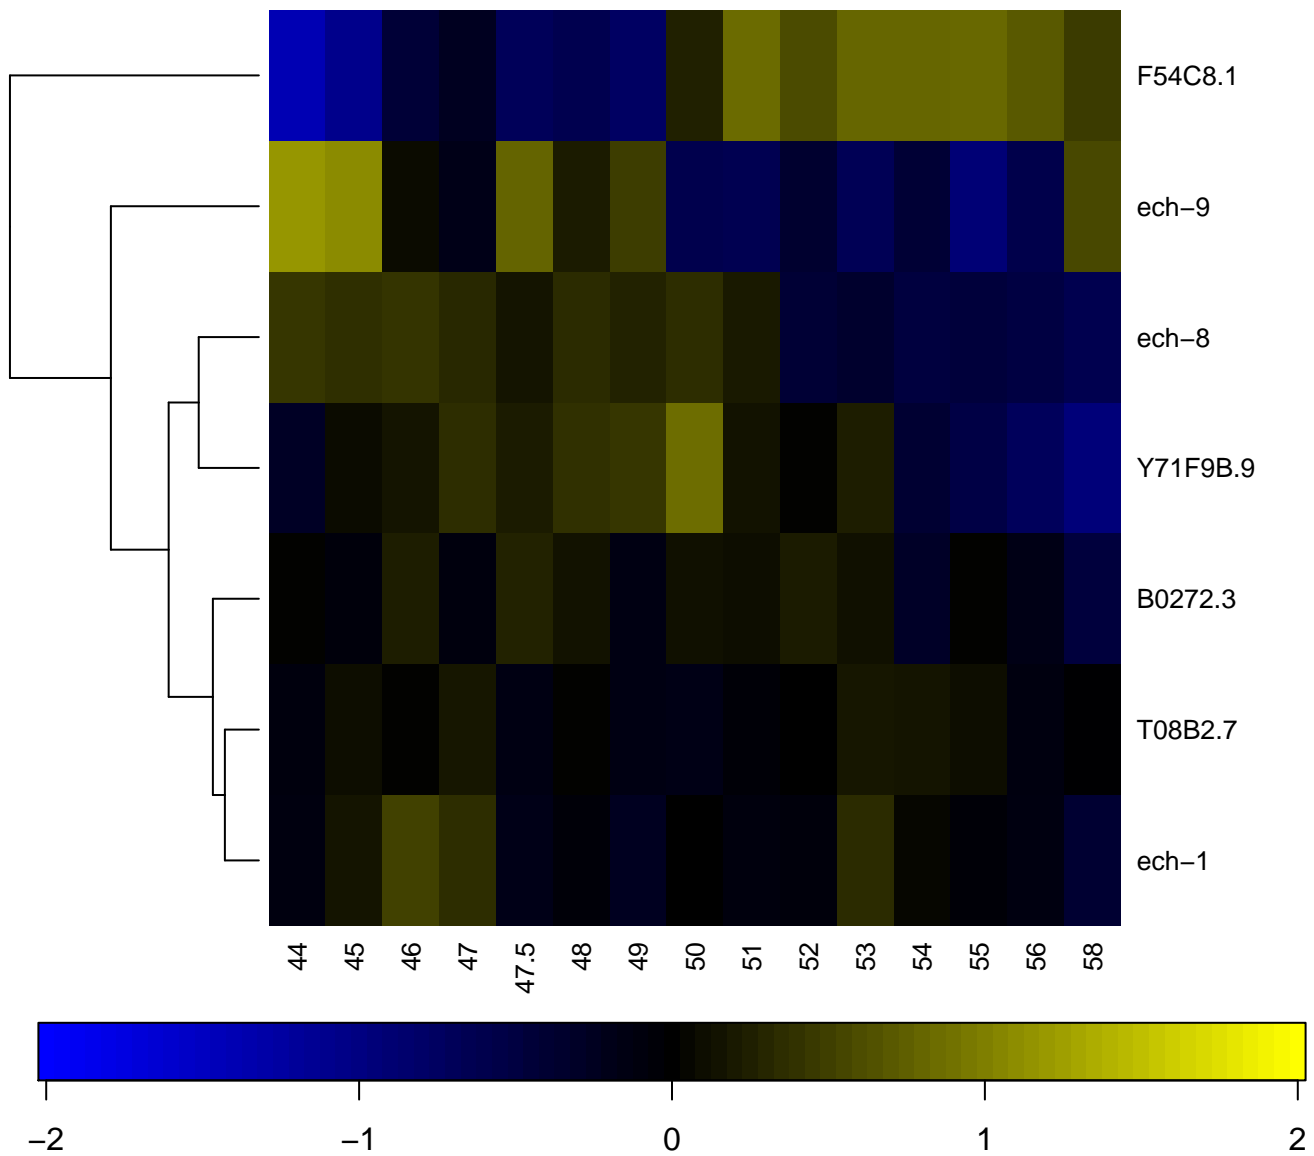

# 3-hydroxyacyl-CoA dehydrogenase, C-terminal domain



# 3-hydroxyacyl-CoA dehydrogenase, NAD binding

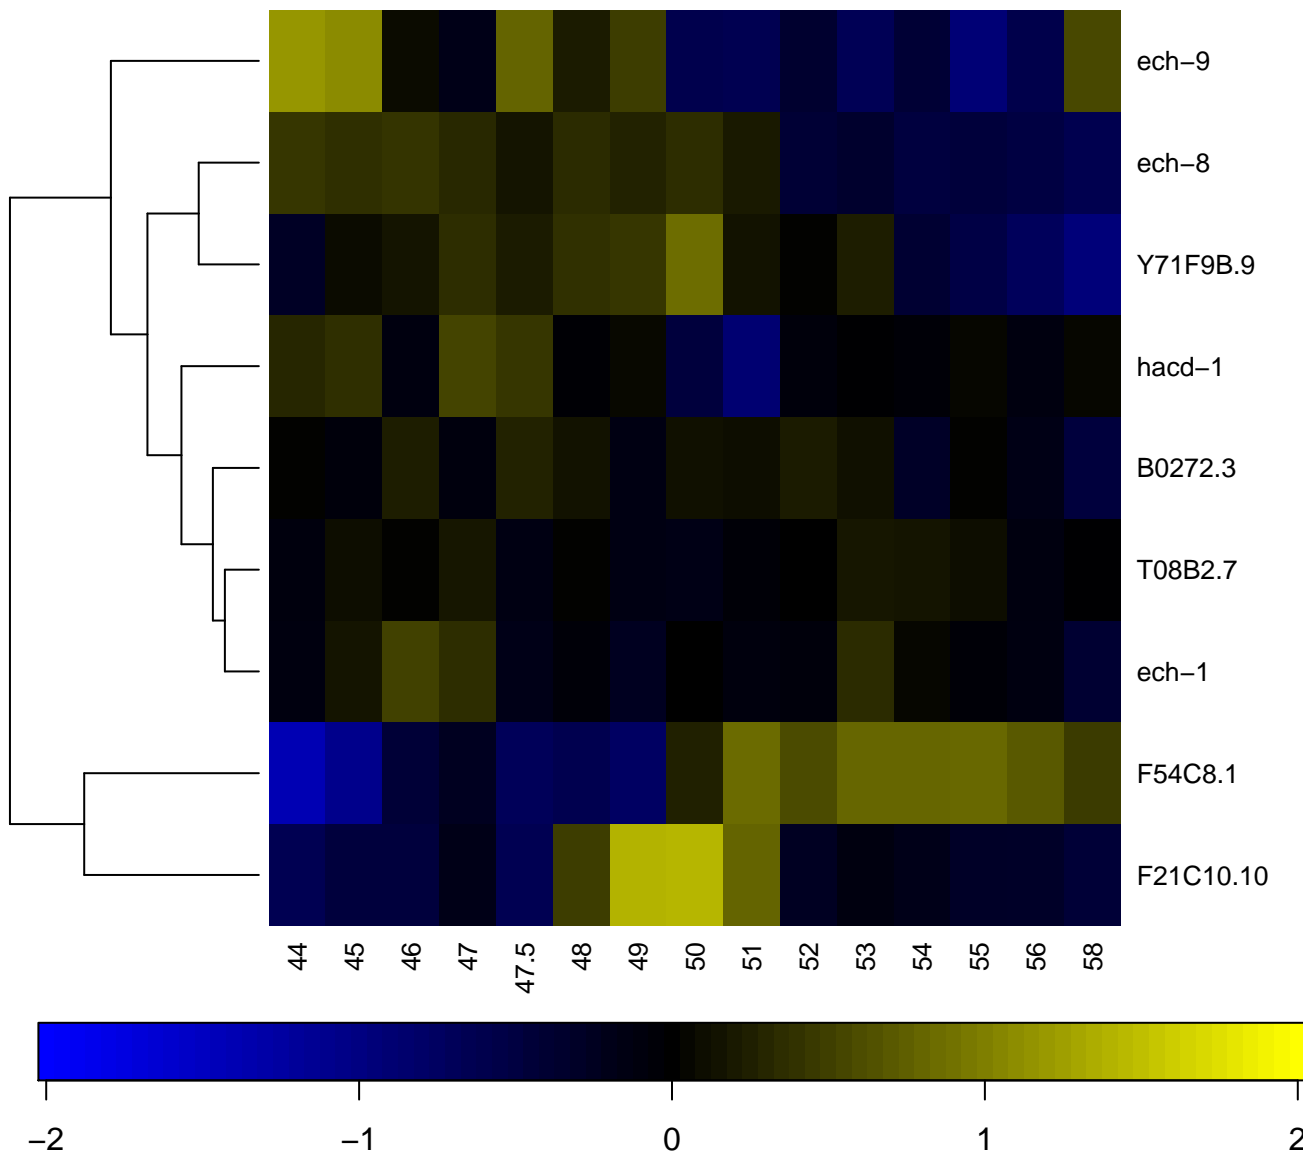

# 3-hydroxyacyl-CoA dehydrogenase, NAD binding domain

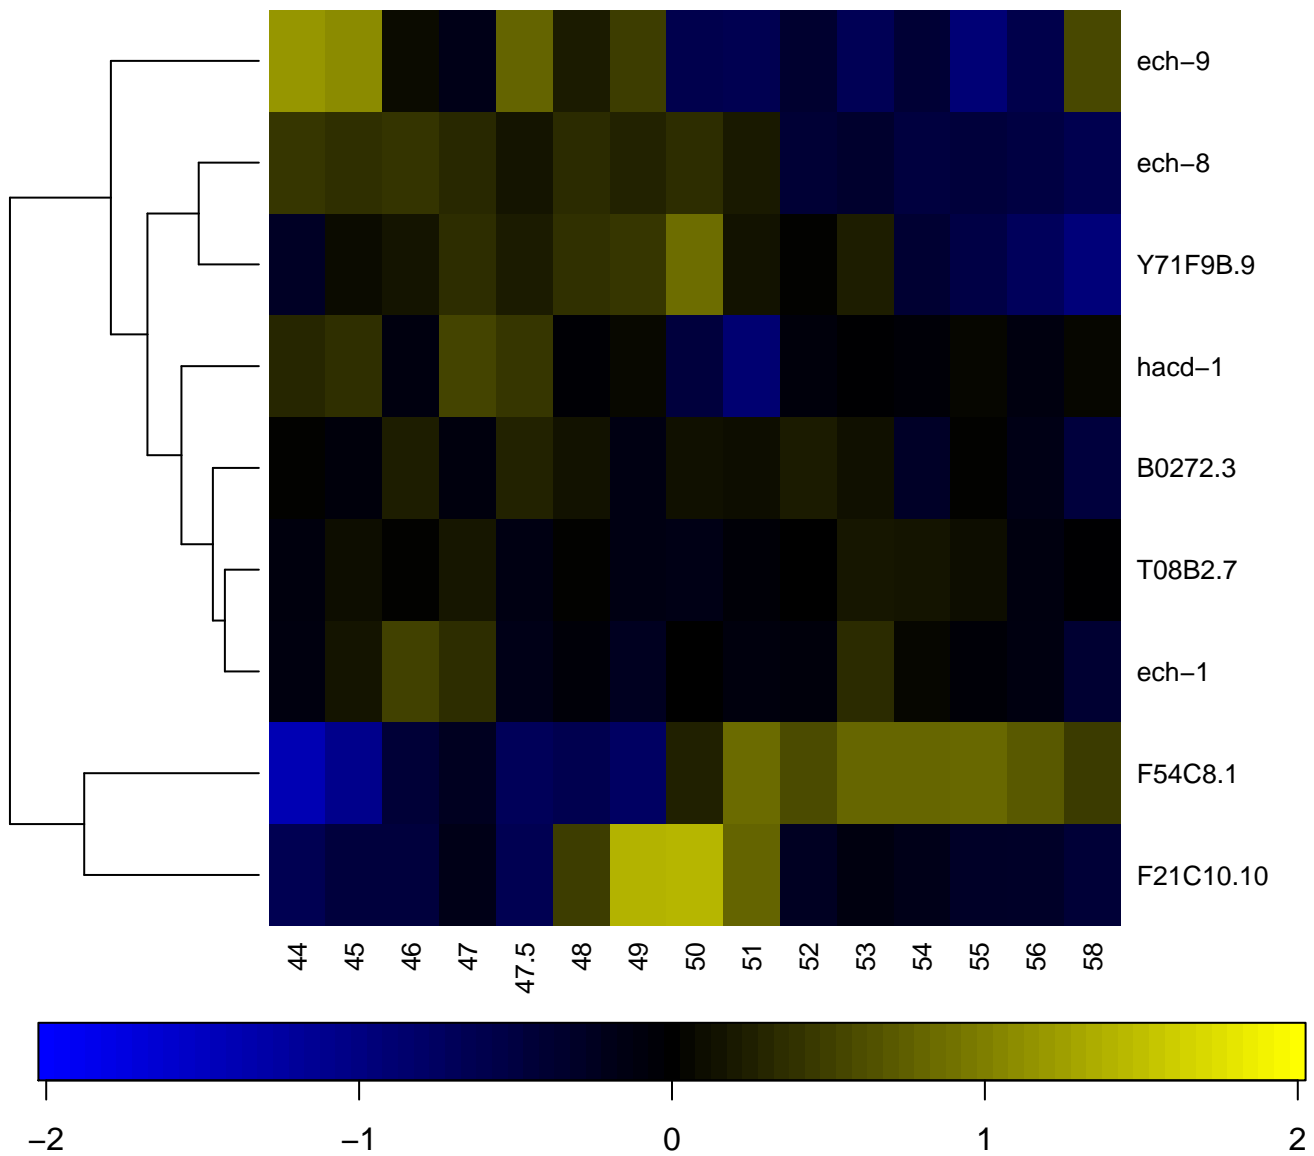

# 7 transmembrane receptor (rhodopsin family)

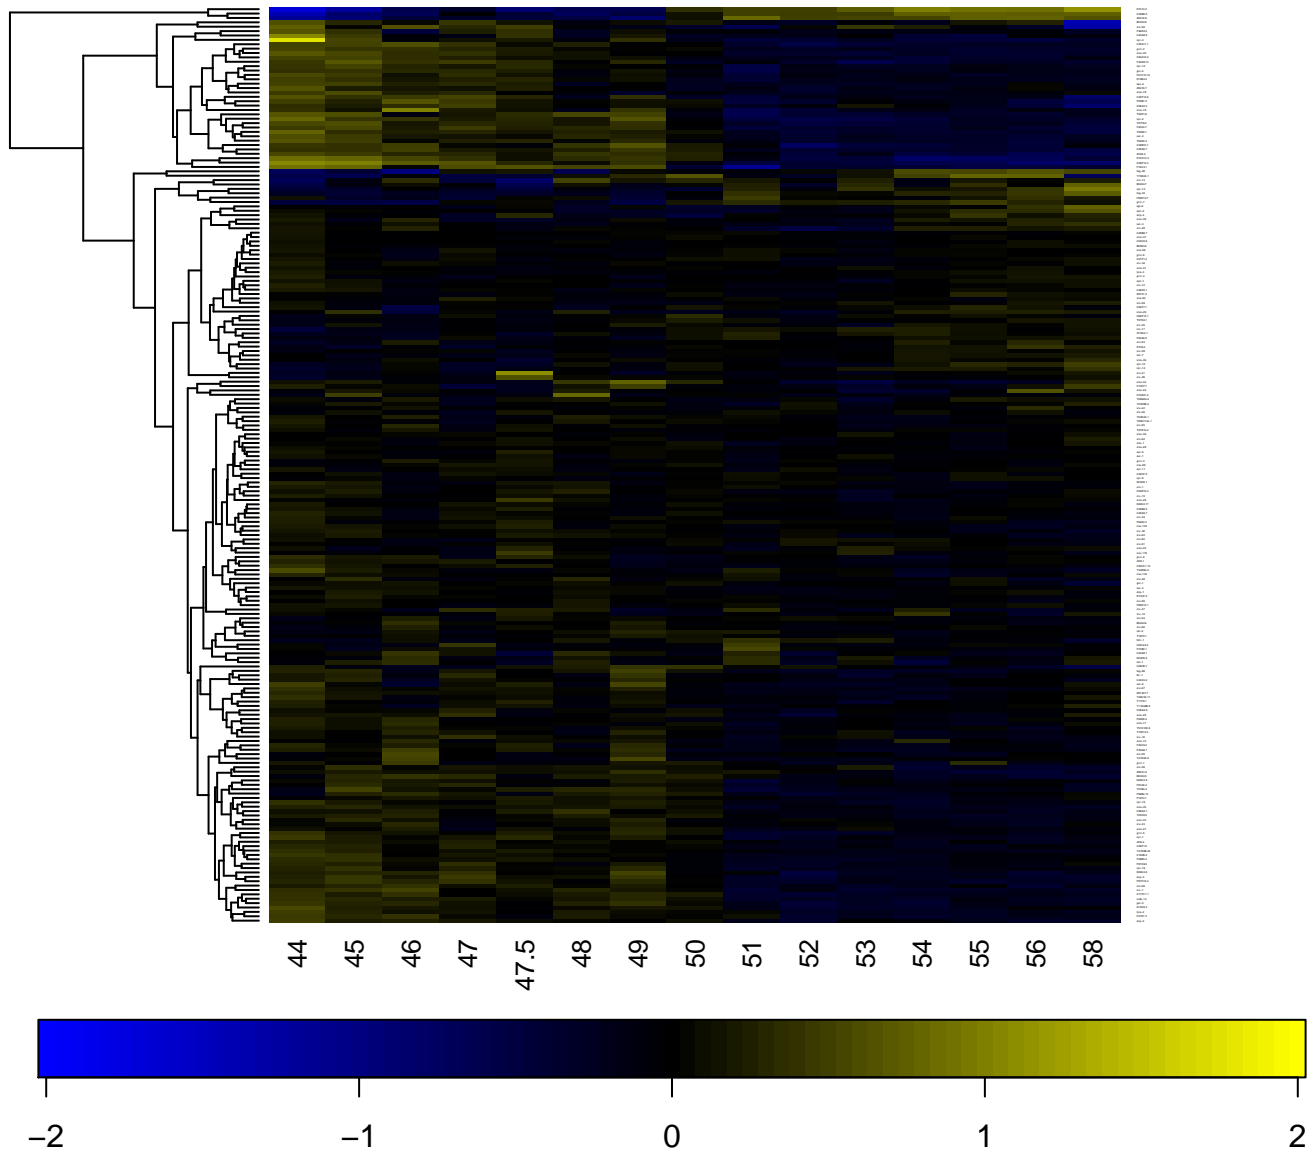





# 7TM GPCR , serpentine receptor class u (Sru), Nematode

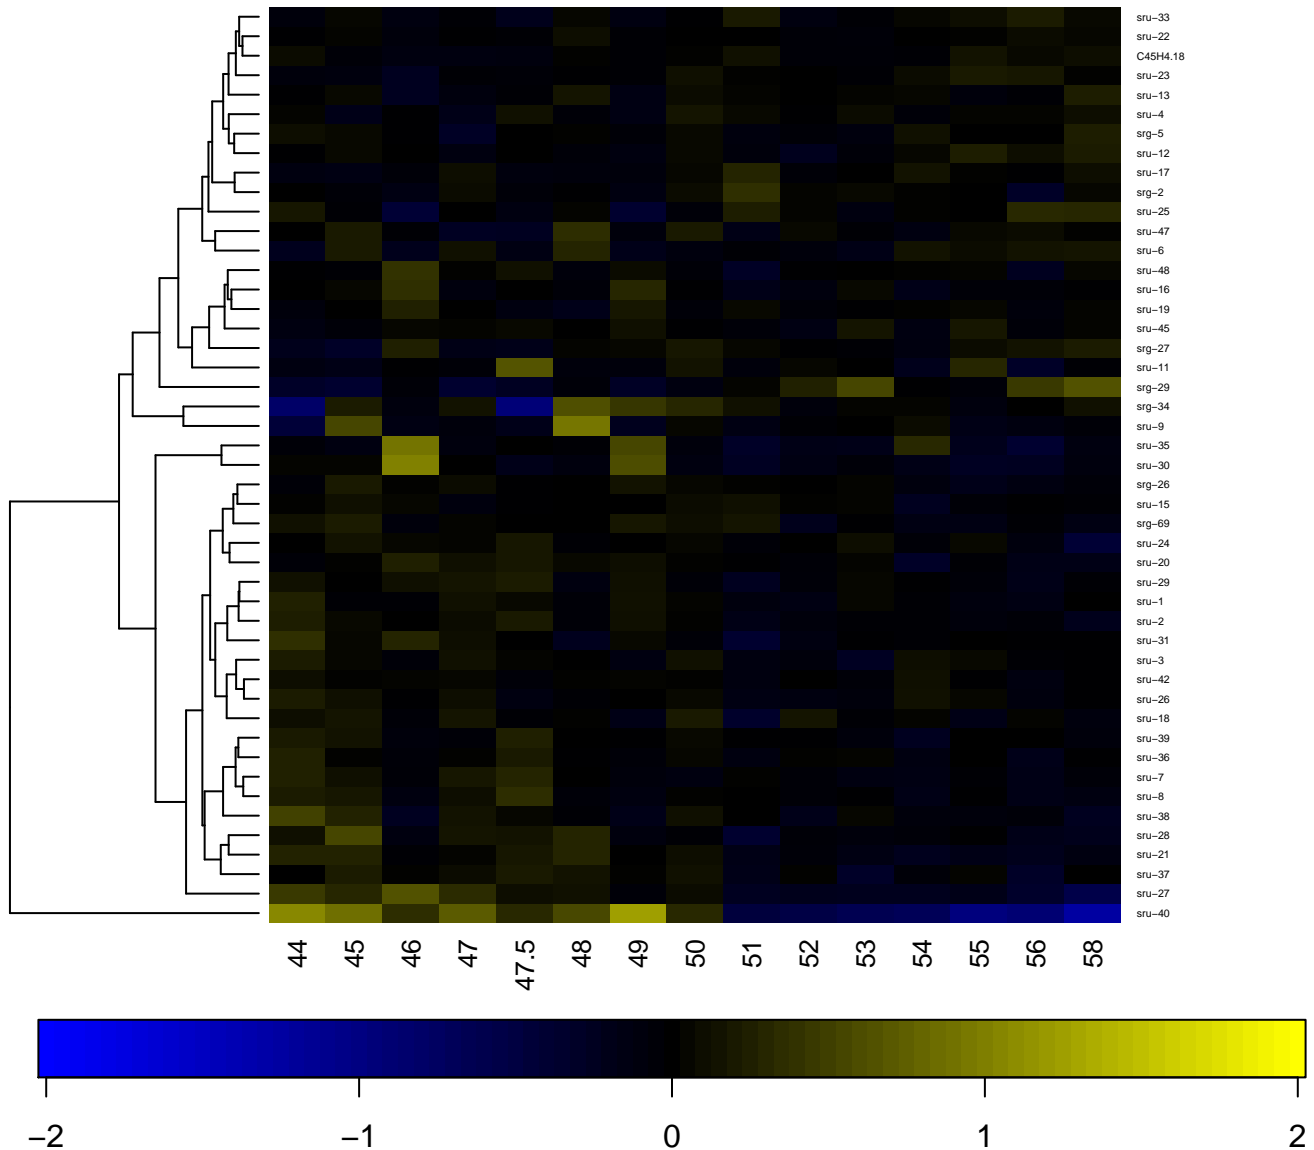



# 7TM GPCR , serpentine receptor class a (Sra), Nematode

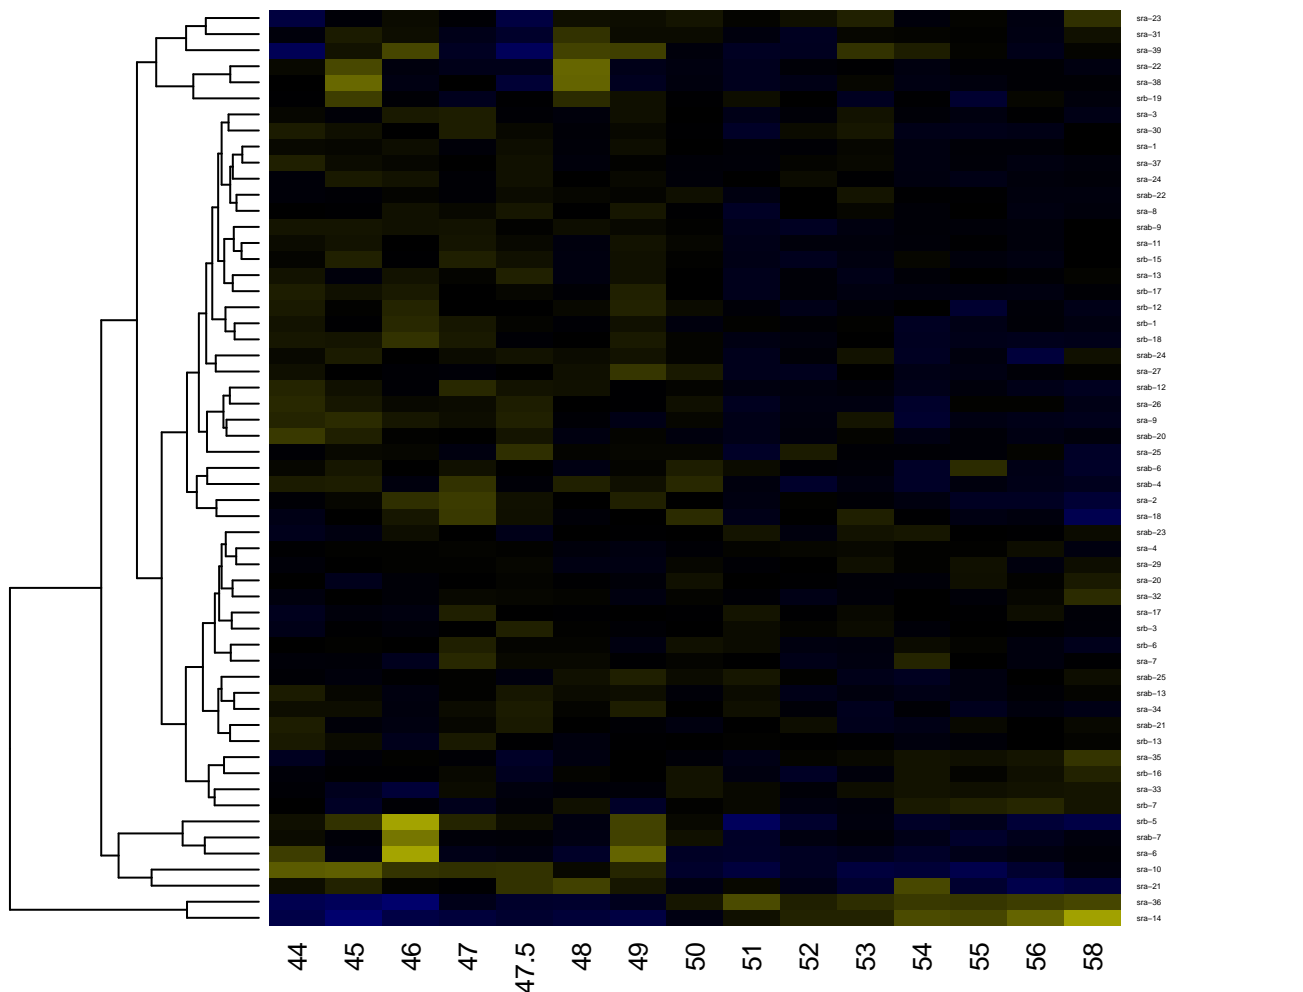

# 7TM GPCR , serpentine receptor class b (Srb), Nematode

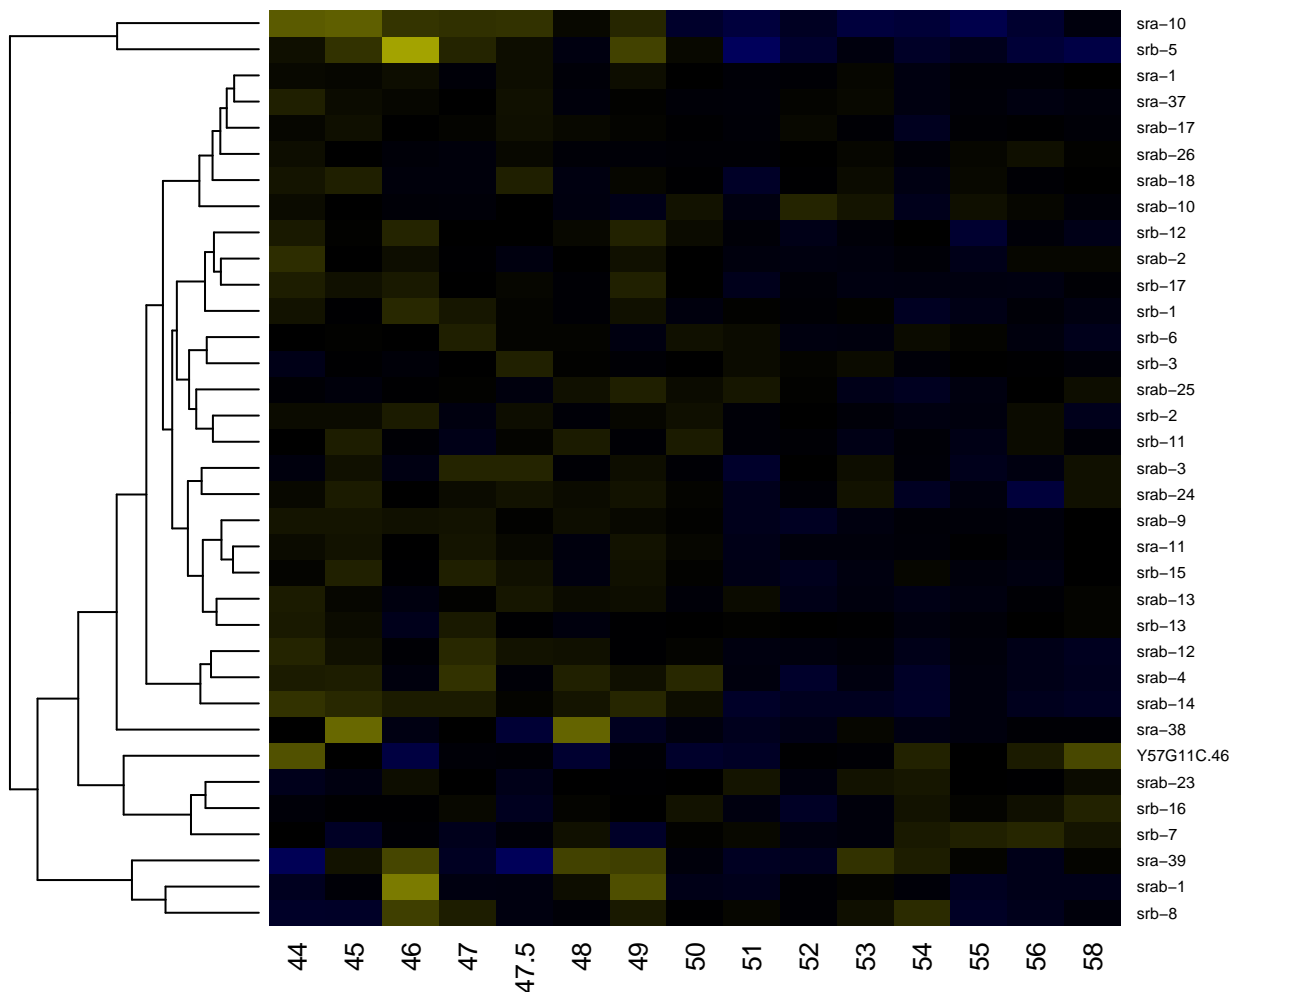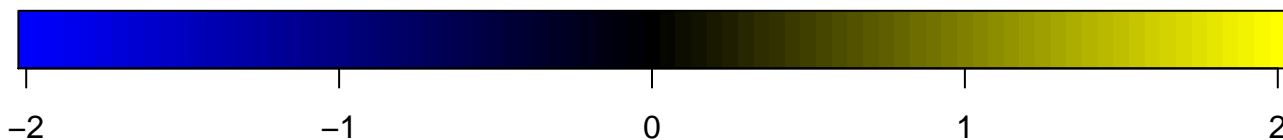

# 7TM GPCR , serpentine receptor class e (Sre), Nematode

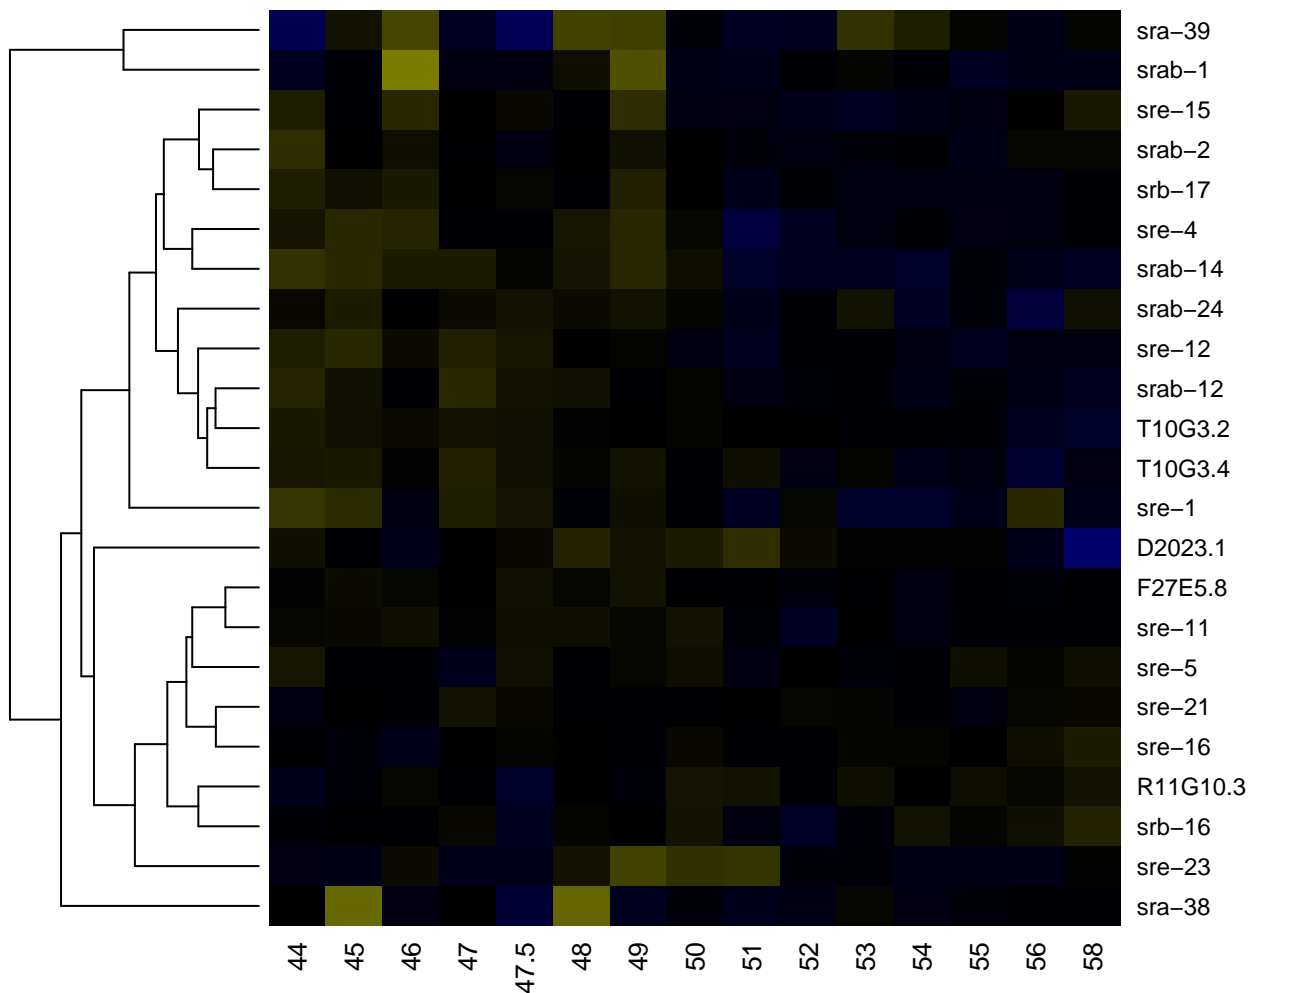

# 7TM GPCR , serpentine receptor class g (Srg), Nematode

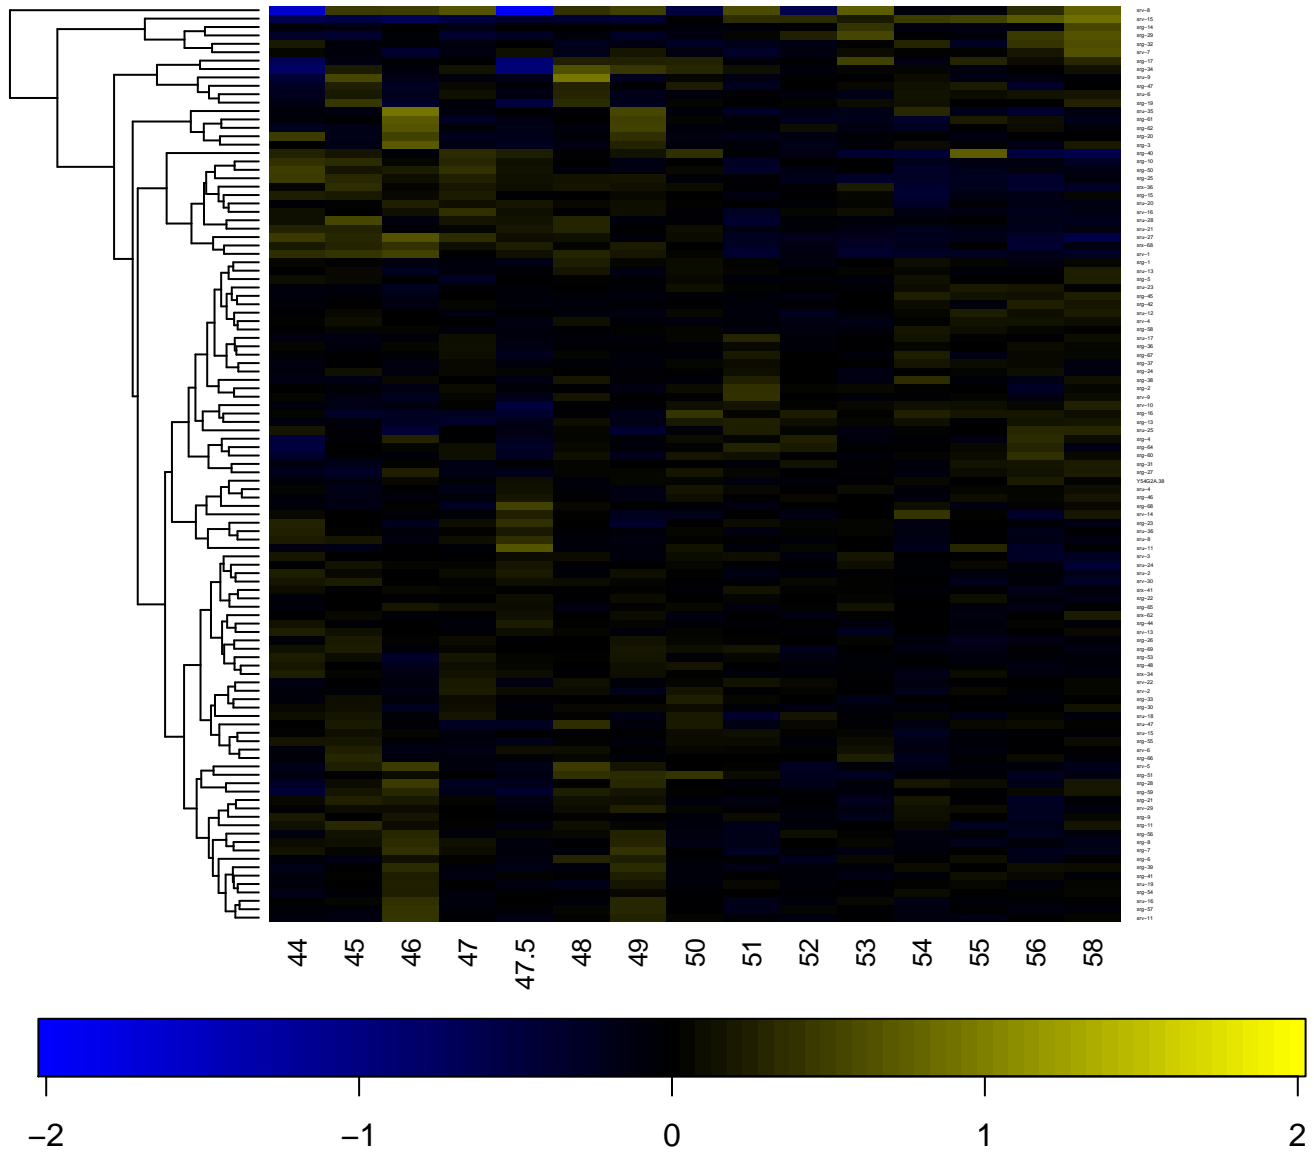





# 7TM GPCR, rhodopsin-like

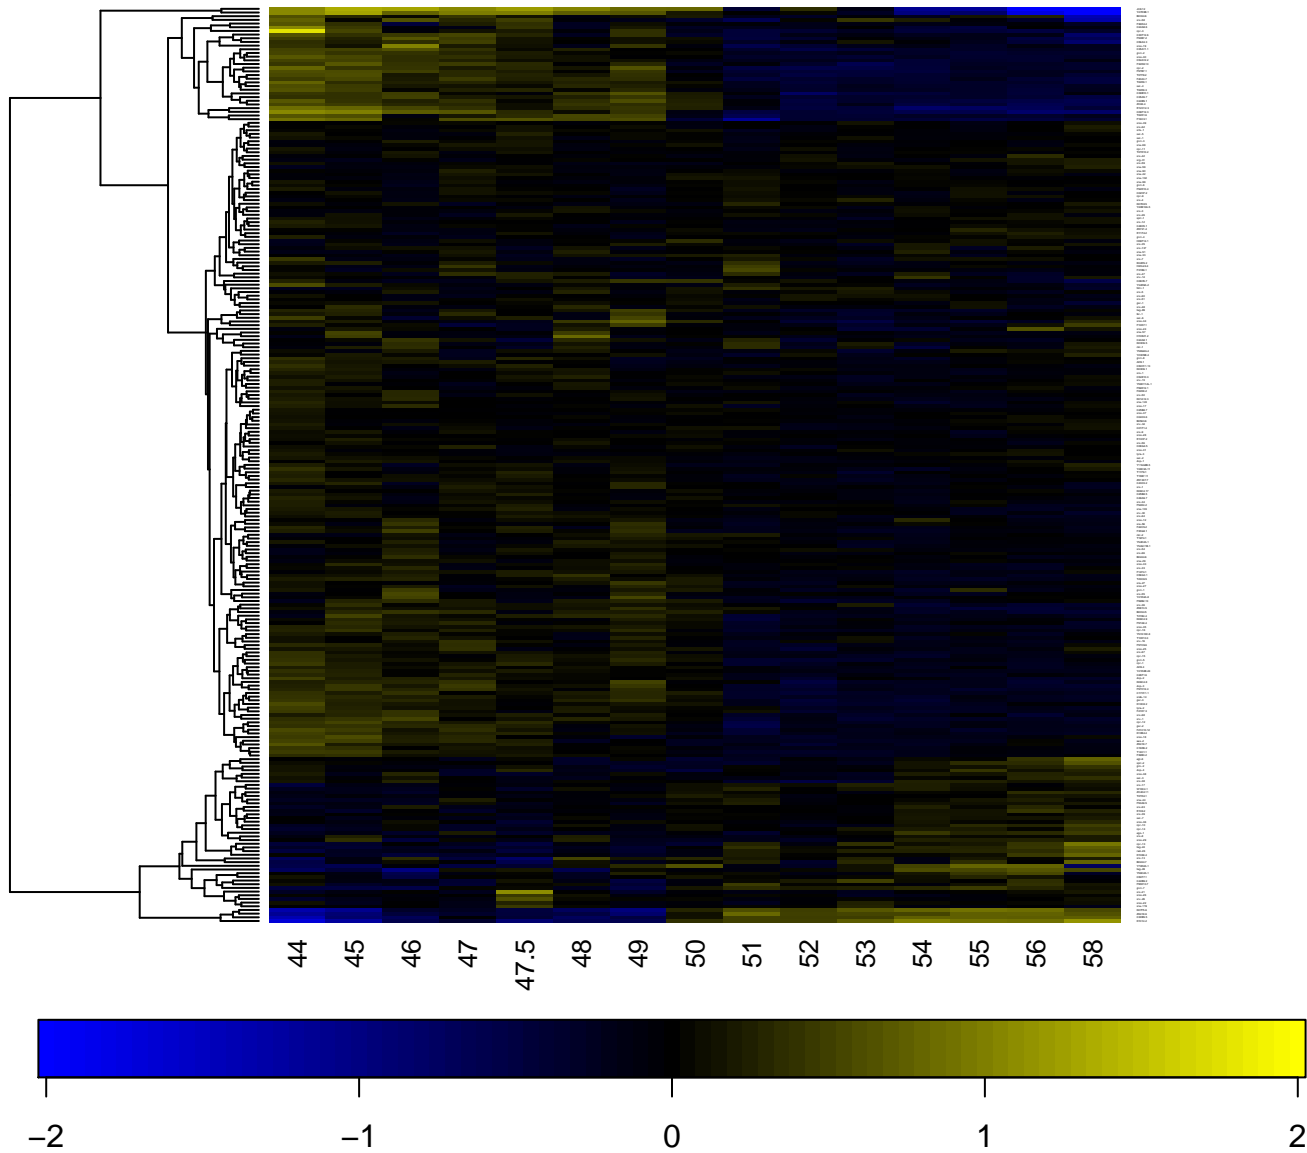

# 7TM GPCR, serpentine chemoreceptor Srbc

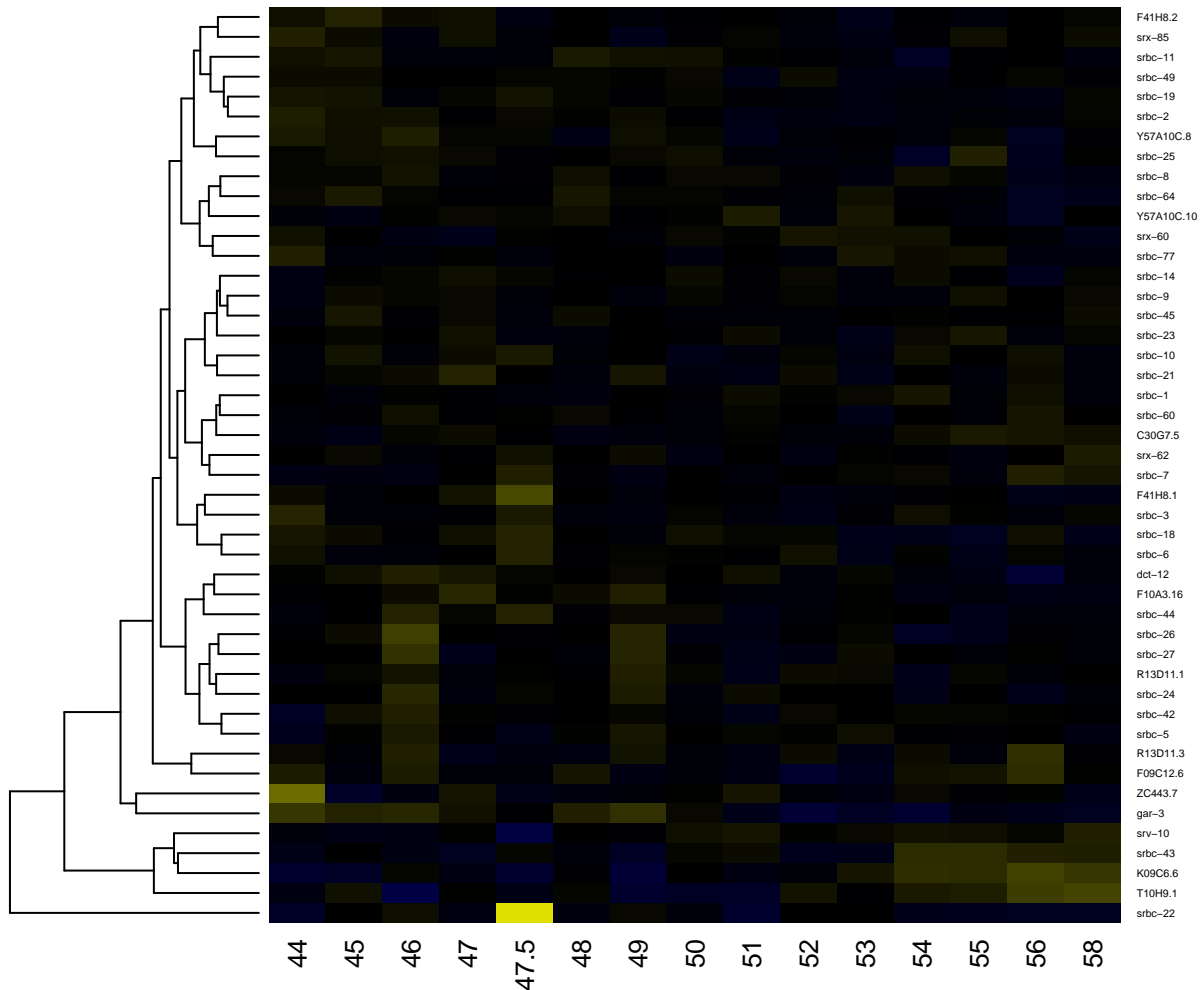



# 7TM GPCR, serpentine chemoreceptor Srd

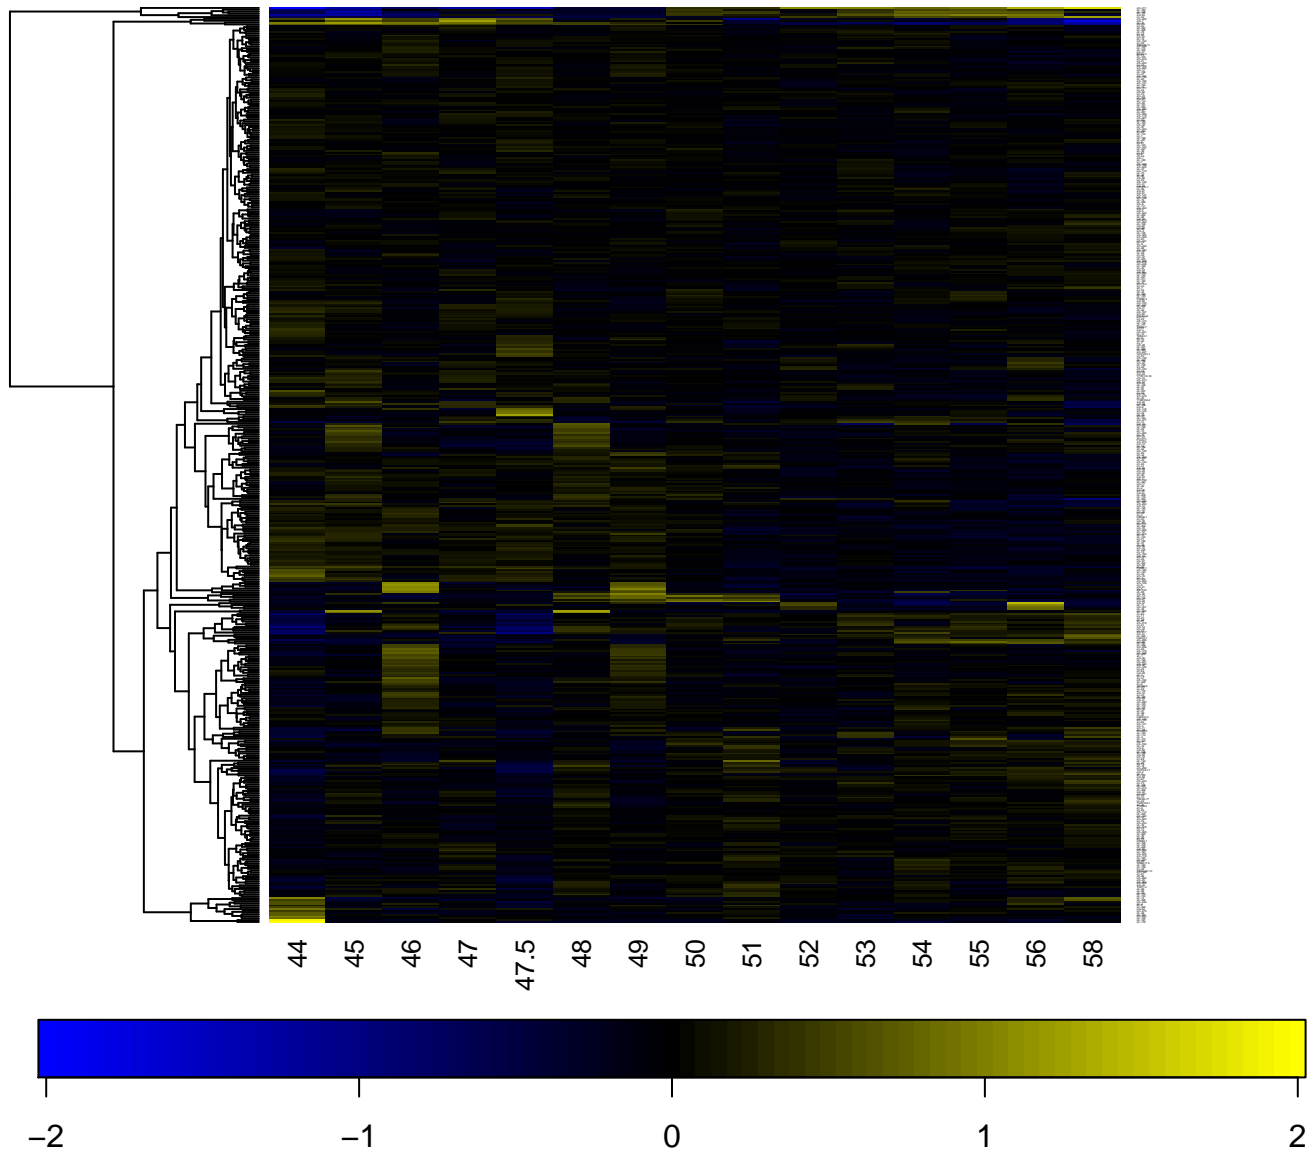

# 7TM GPCR, serpentine chemoreceptor Srh

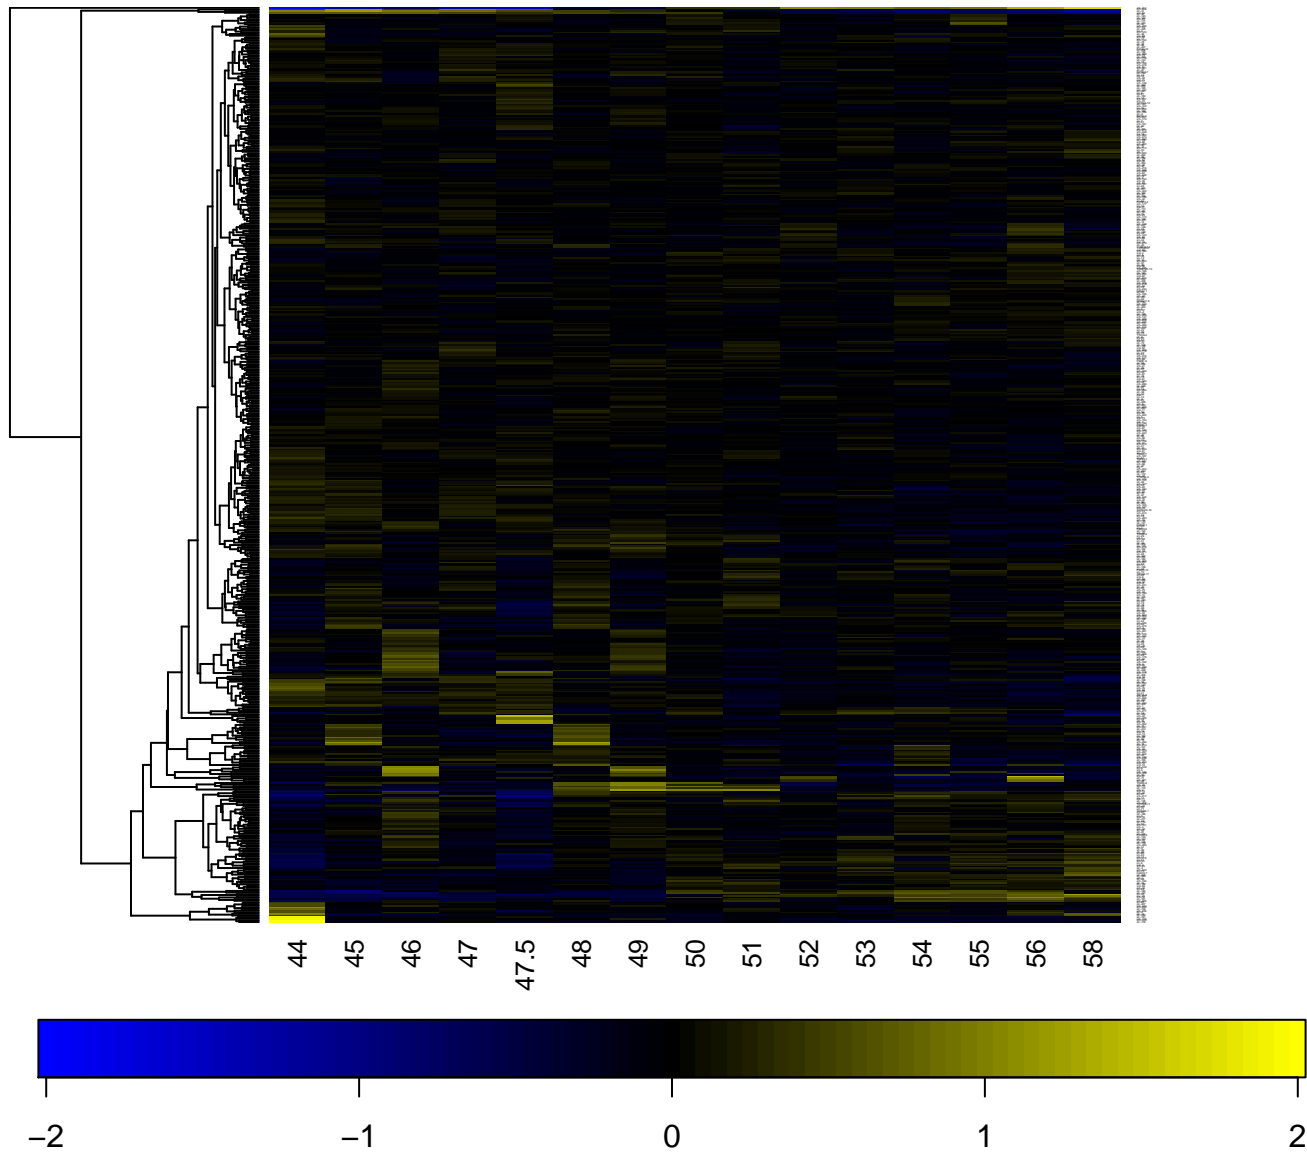

# 7TM GPCR, serpentine chemoreceptor Sri

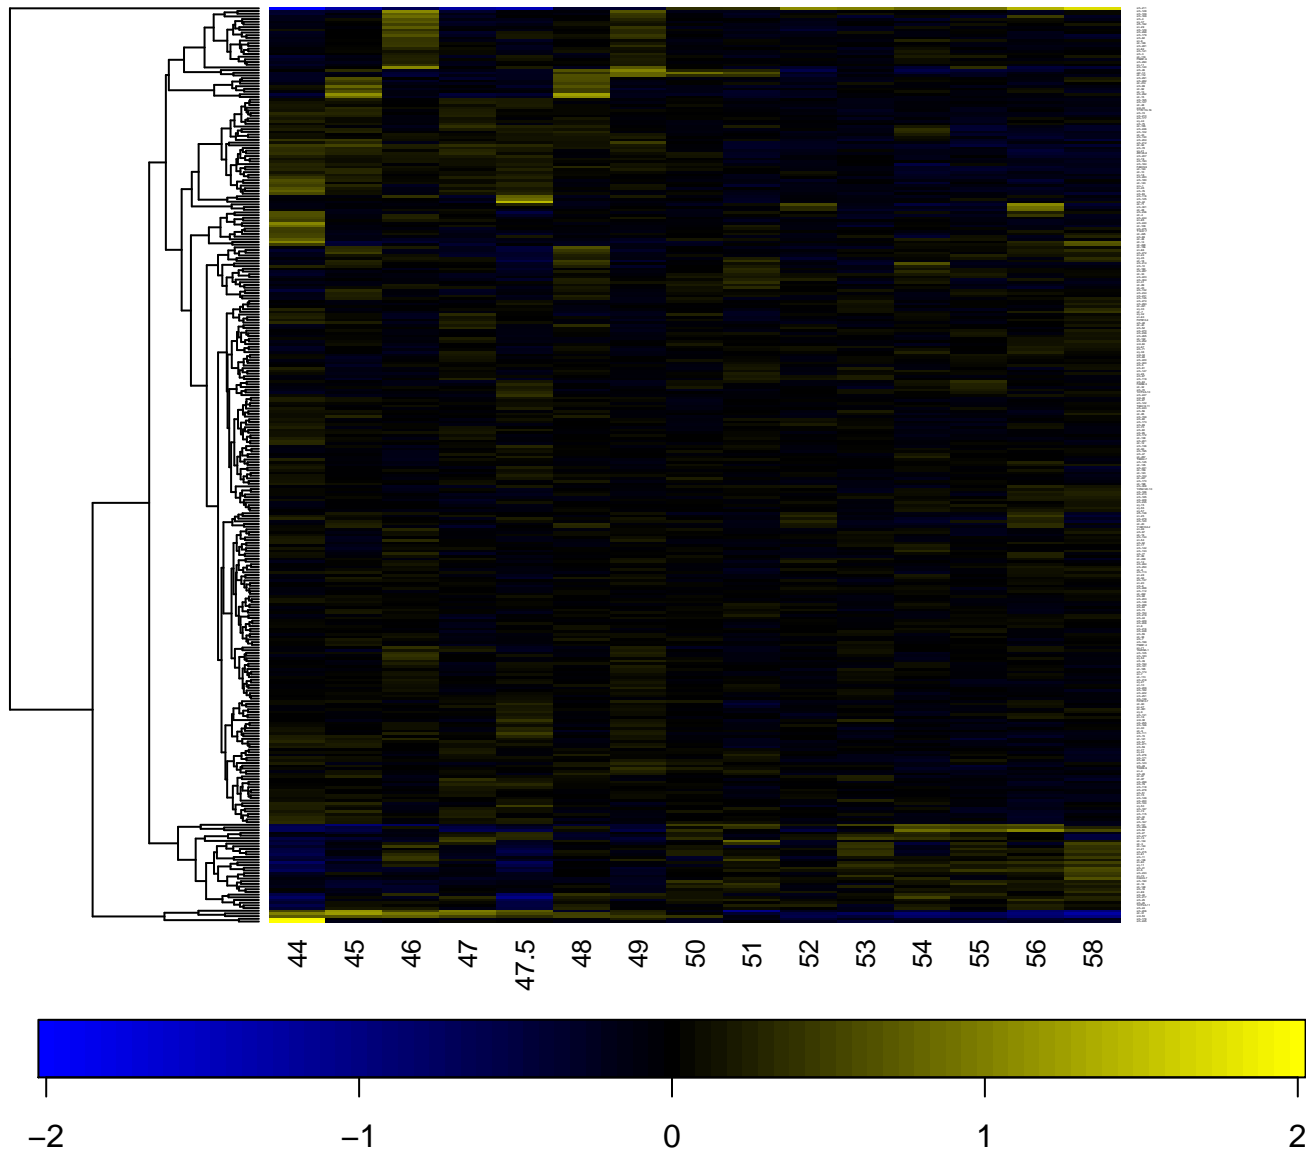

# 7TM GPCR, serpentine chemoreceptor, Srab

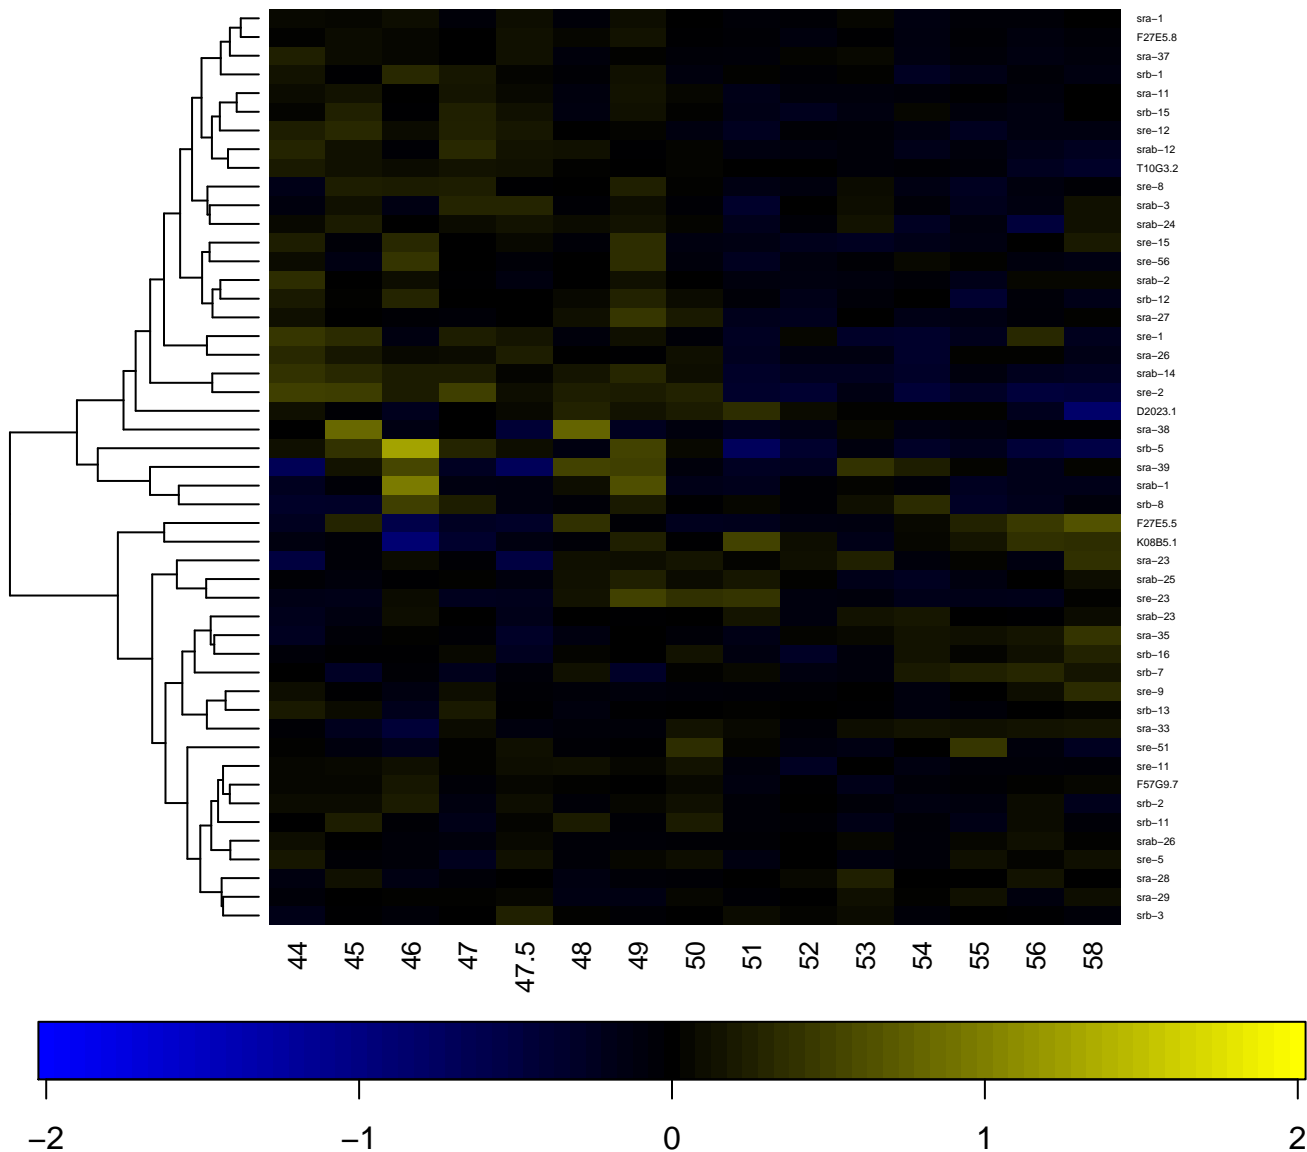

# 7TM GPCR, serpentine receptor class j (Srj), Nematode

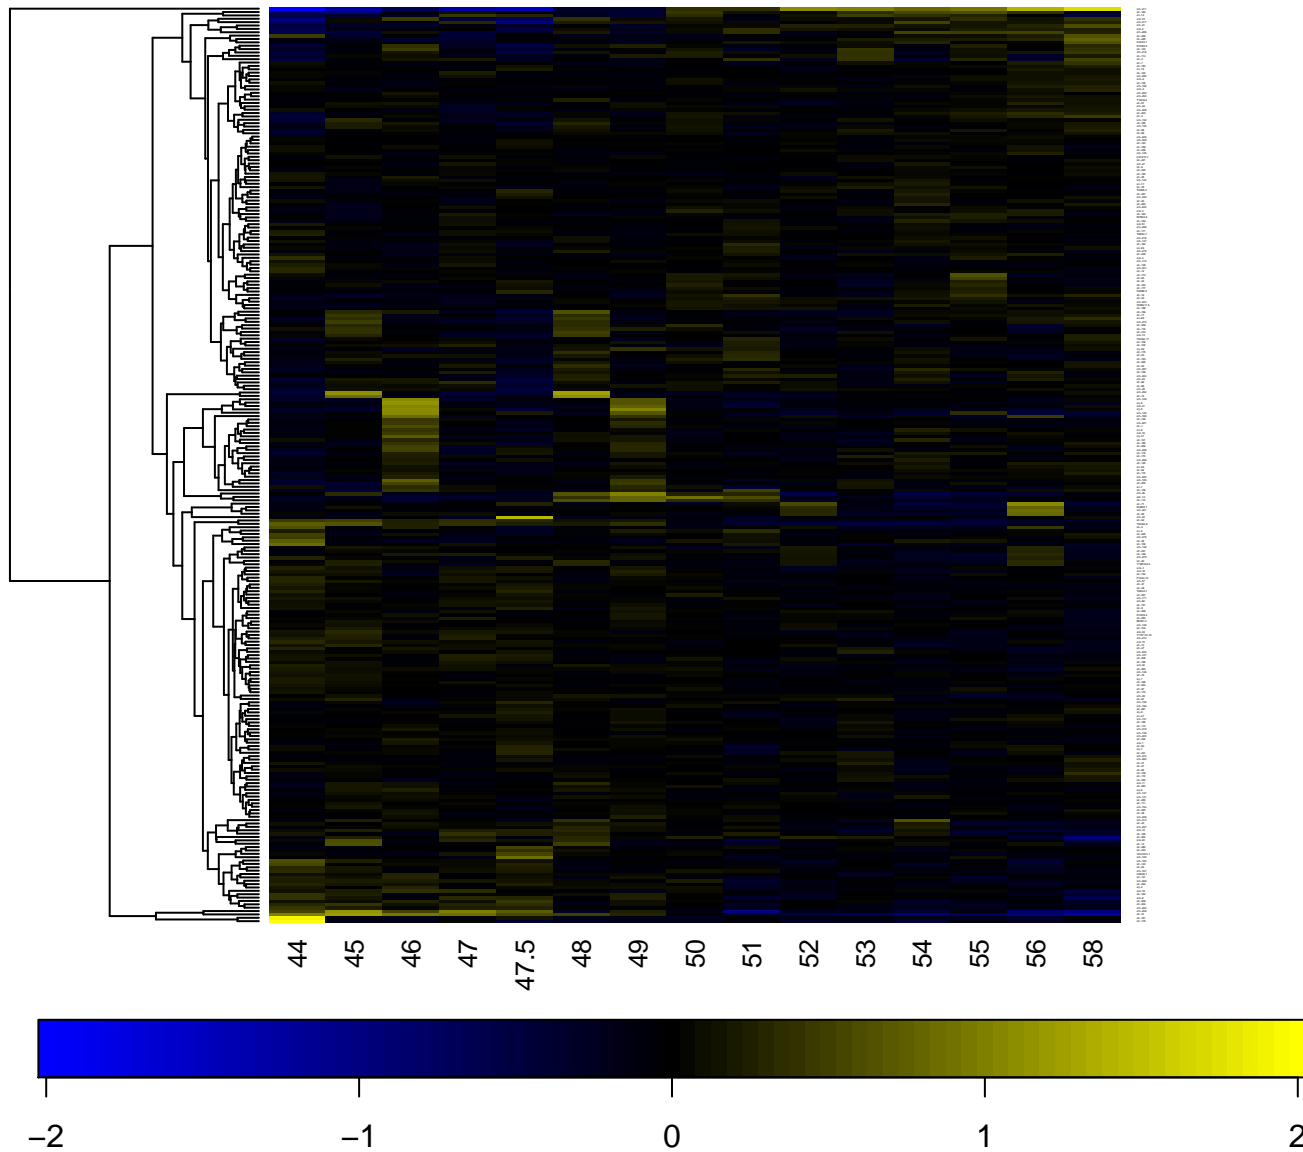

# 7TM GPCR, serpentine receptor class r (Str), Nematode

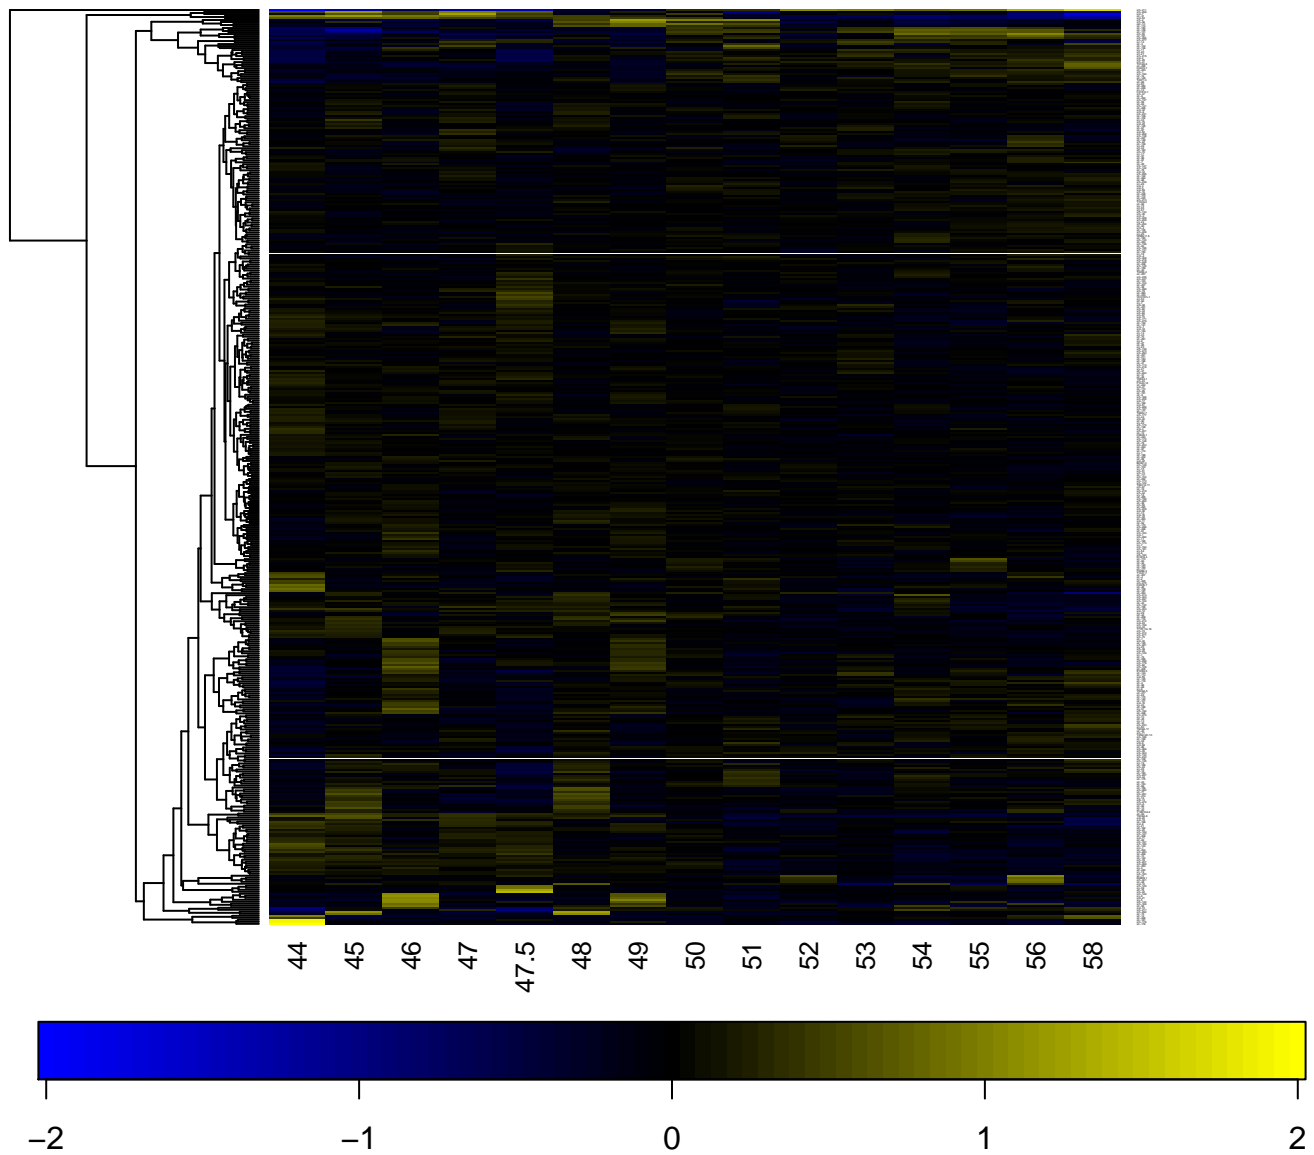

# 7TM GPCR, serpentine receptor class sx (Srsx)

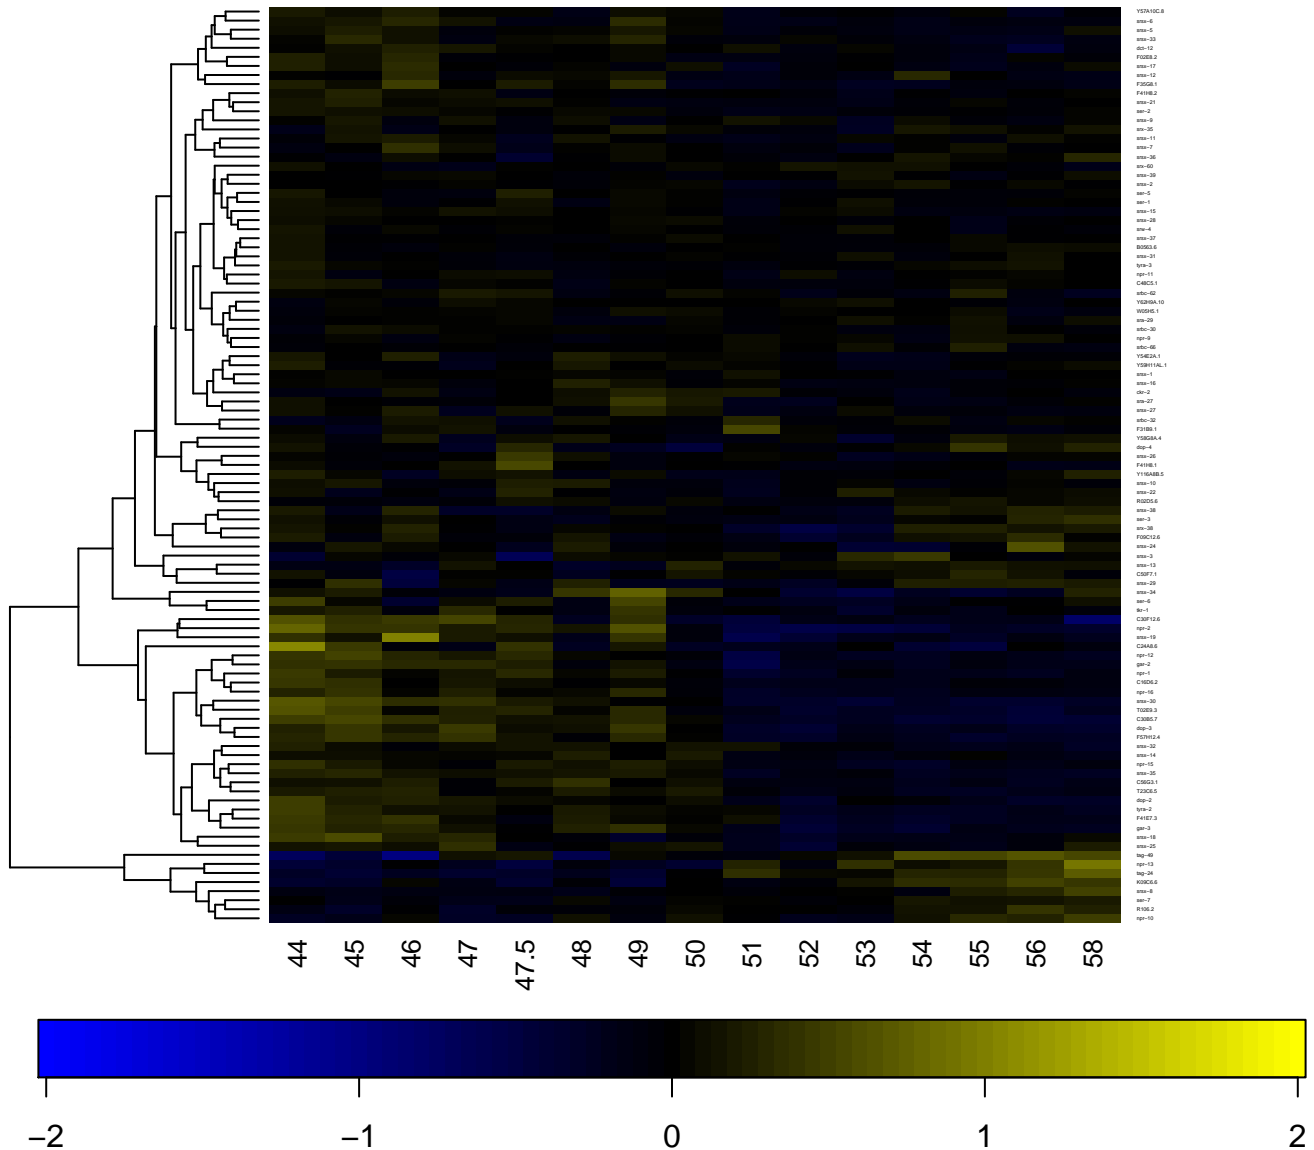

# 7TM GPCR, serpentine receptor class v (Srv), Nematode

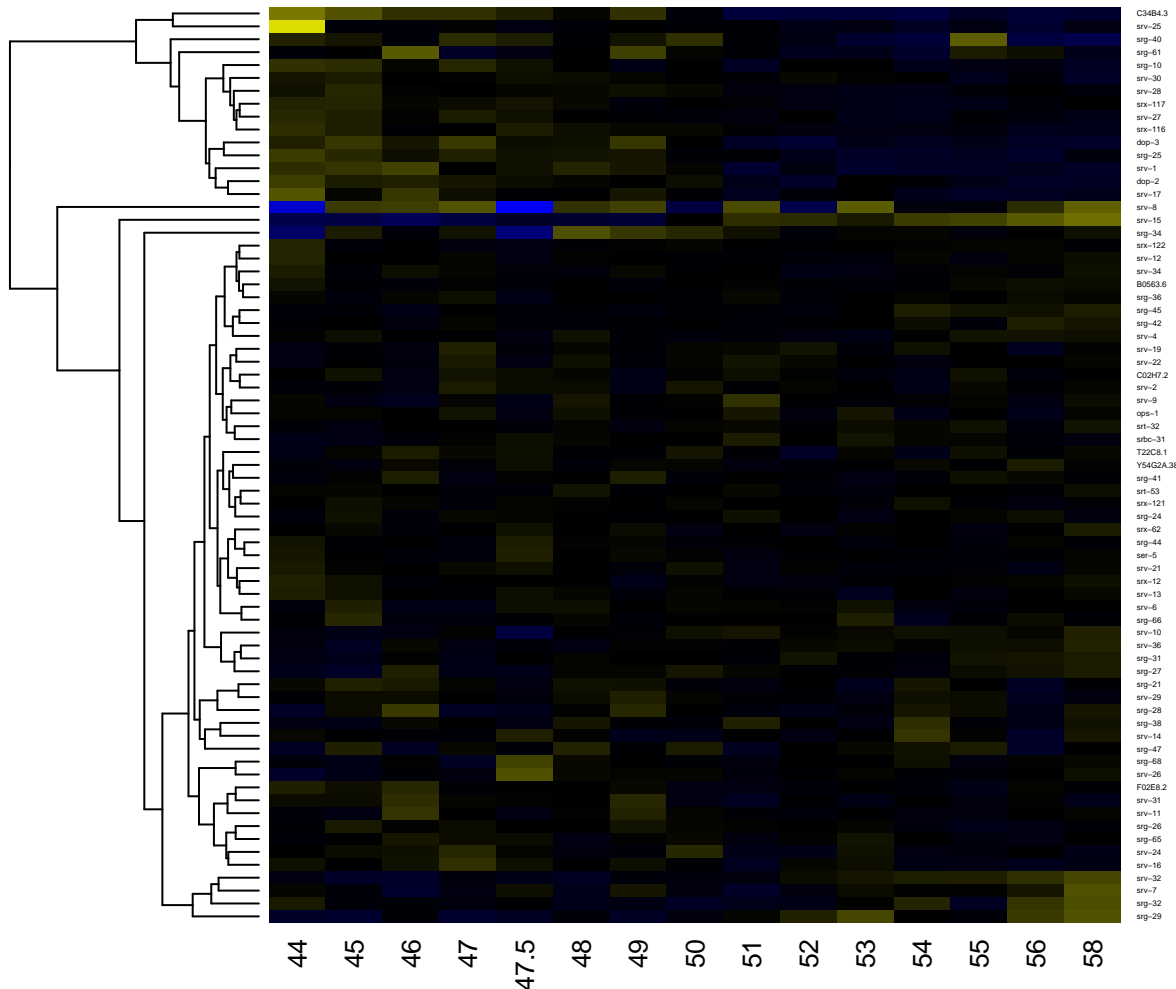



# 7TM GPCR, serpentine receptor class w (Srw)

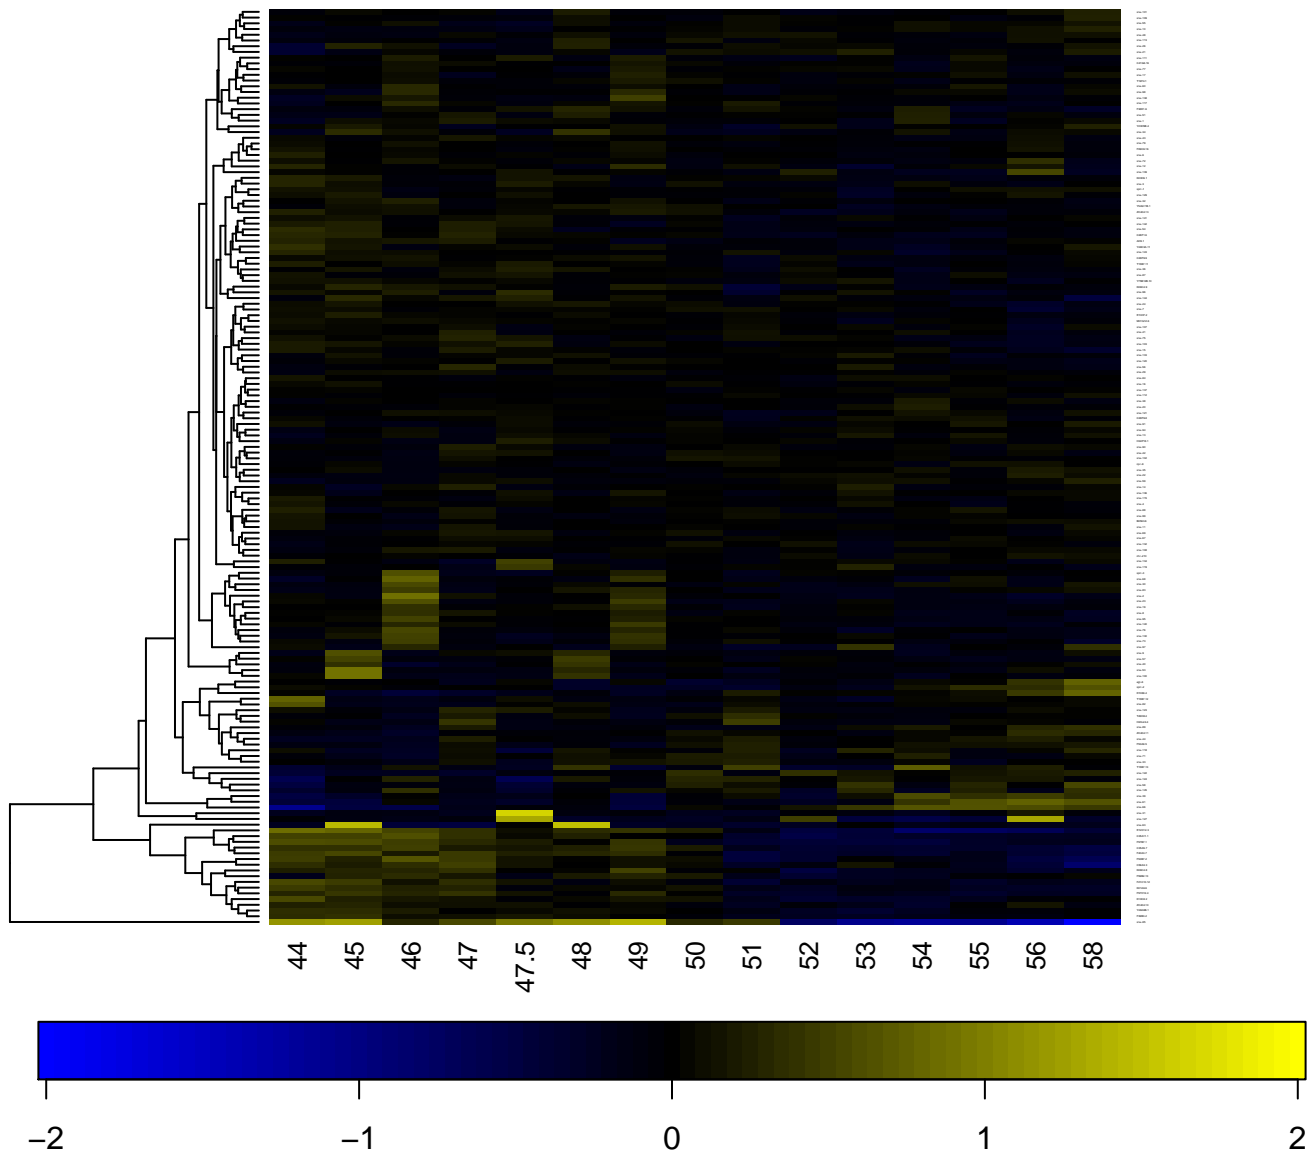

# 7TM GPCR, serpentine receptor class x (Srx)

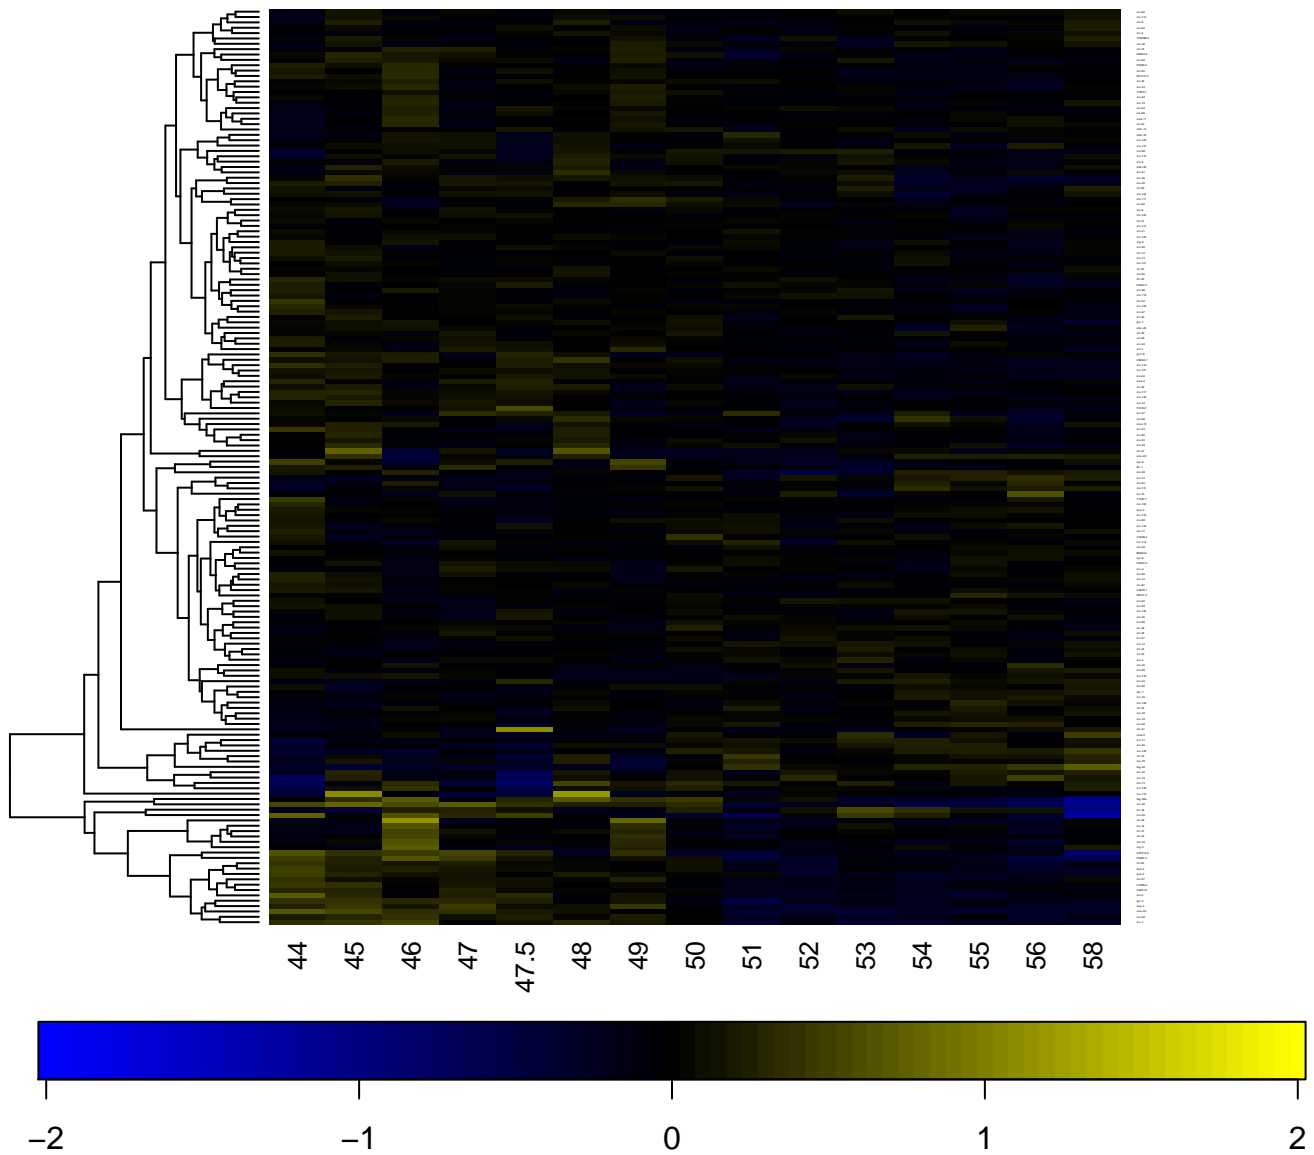

# 7TM GPCR, serpentine receptor class z (Srz), Nematode

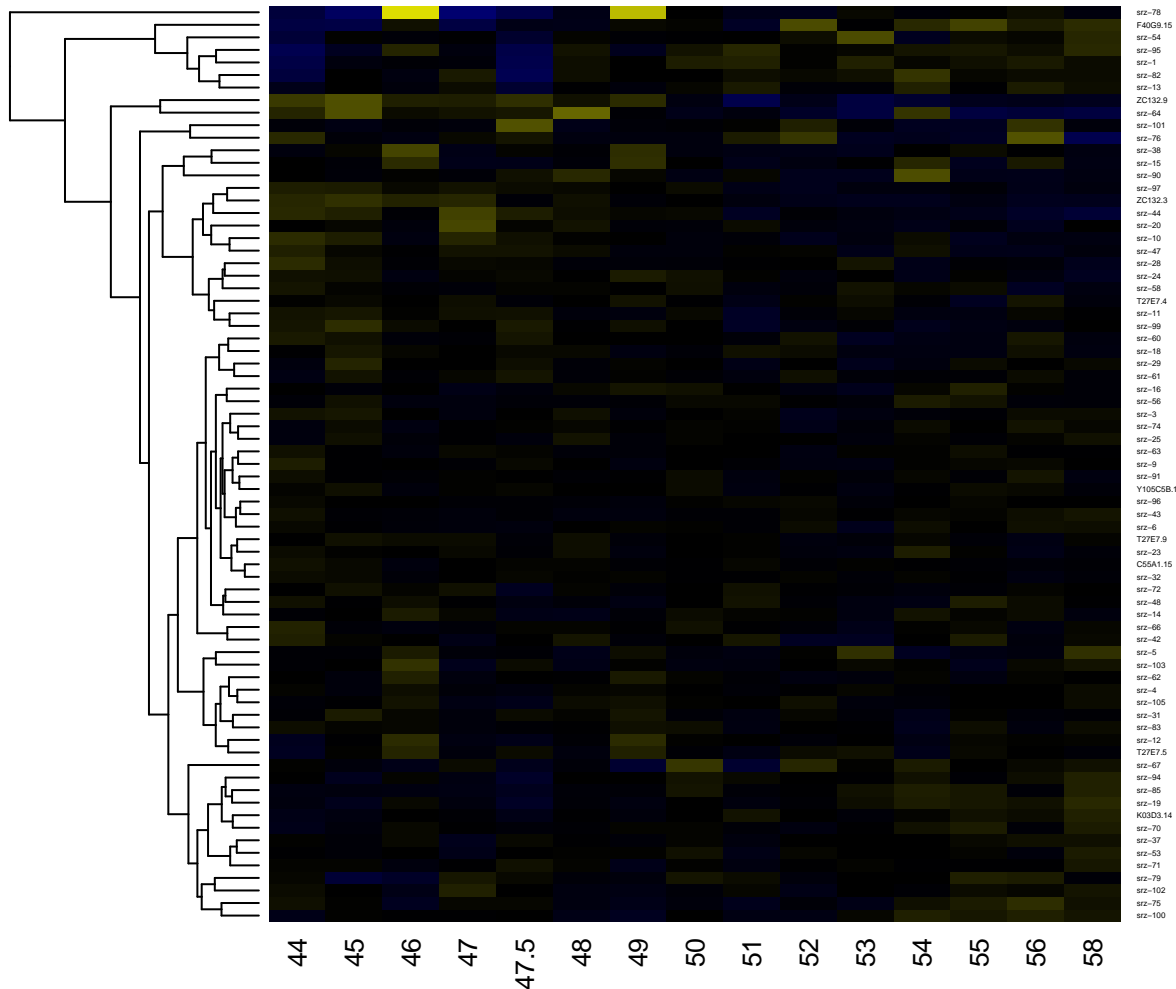

# AAA domain (Cdc48 subfamily)

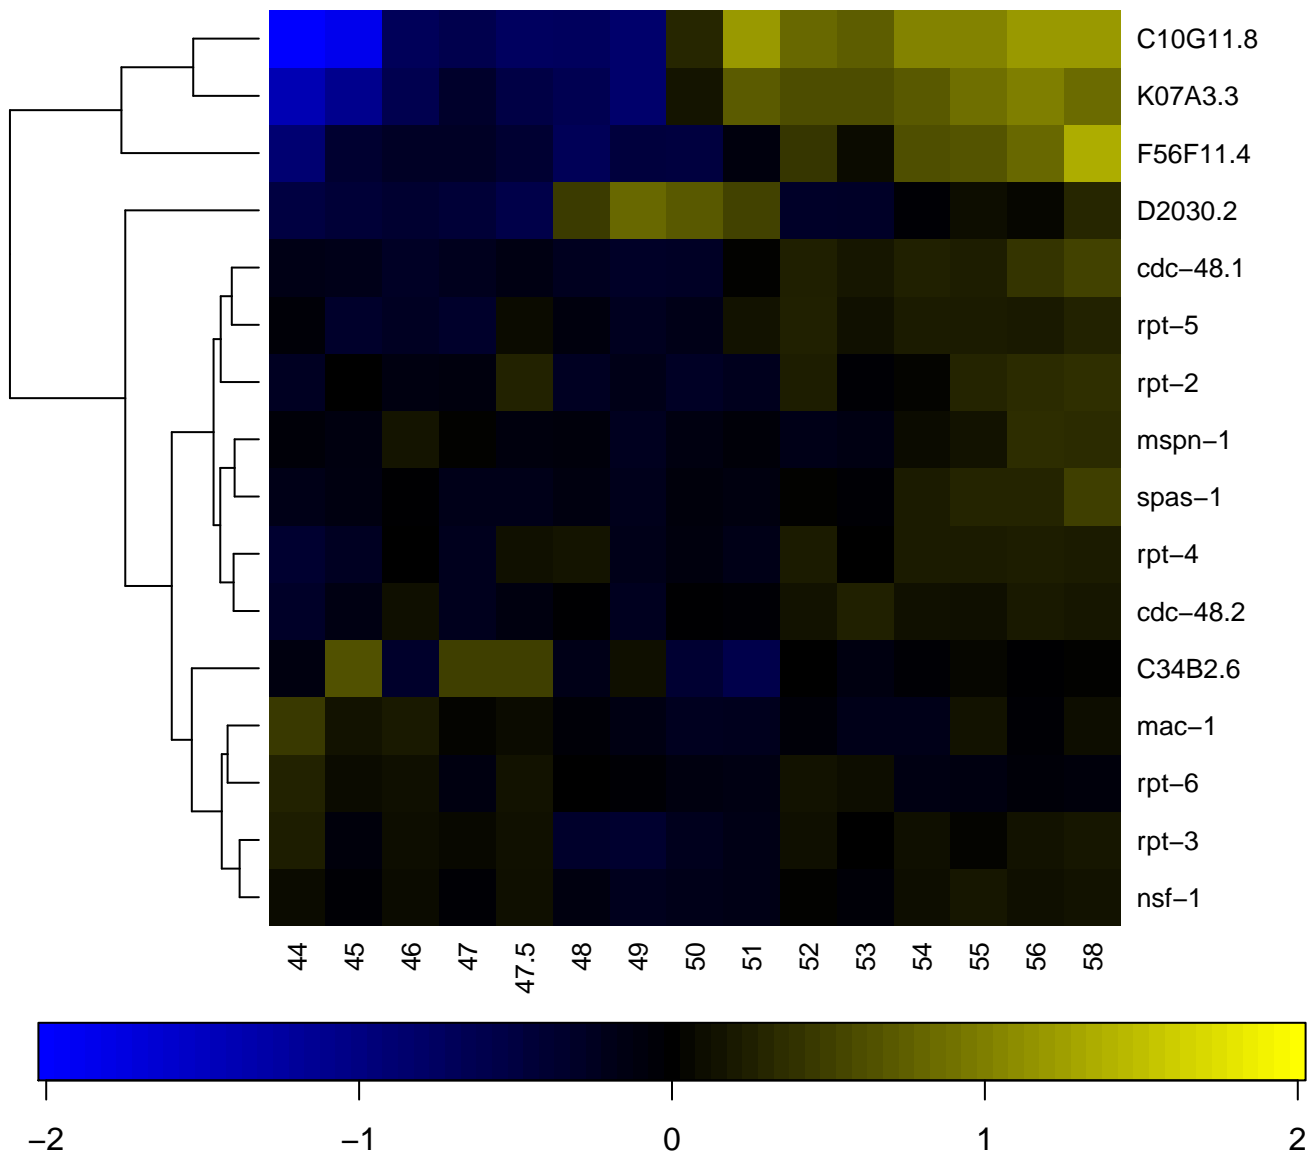

# AAA domain (dynein-related subfamily)

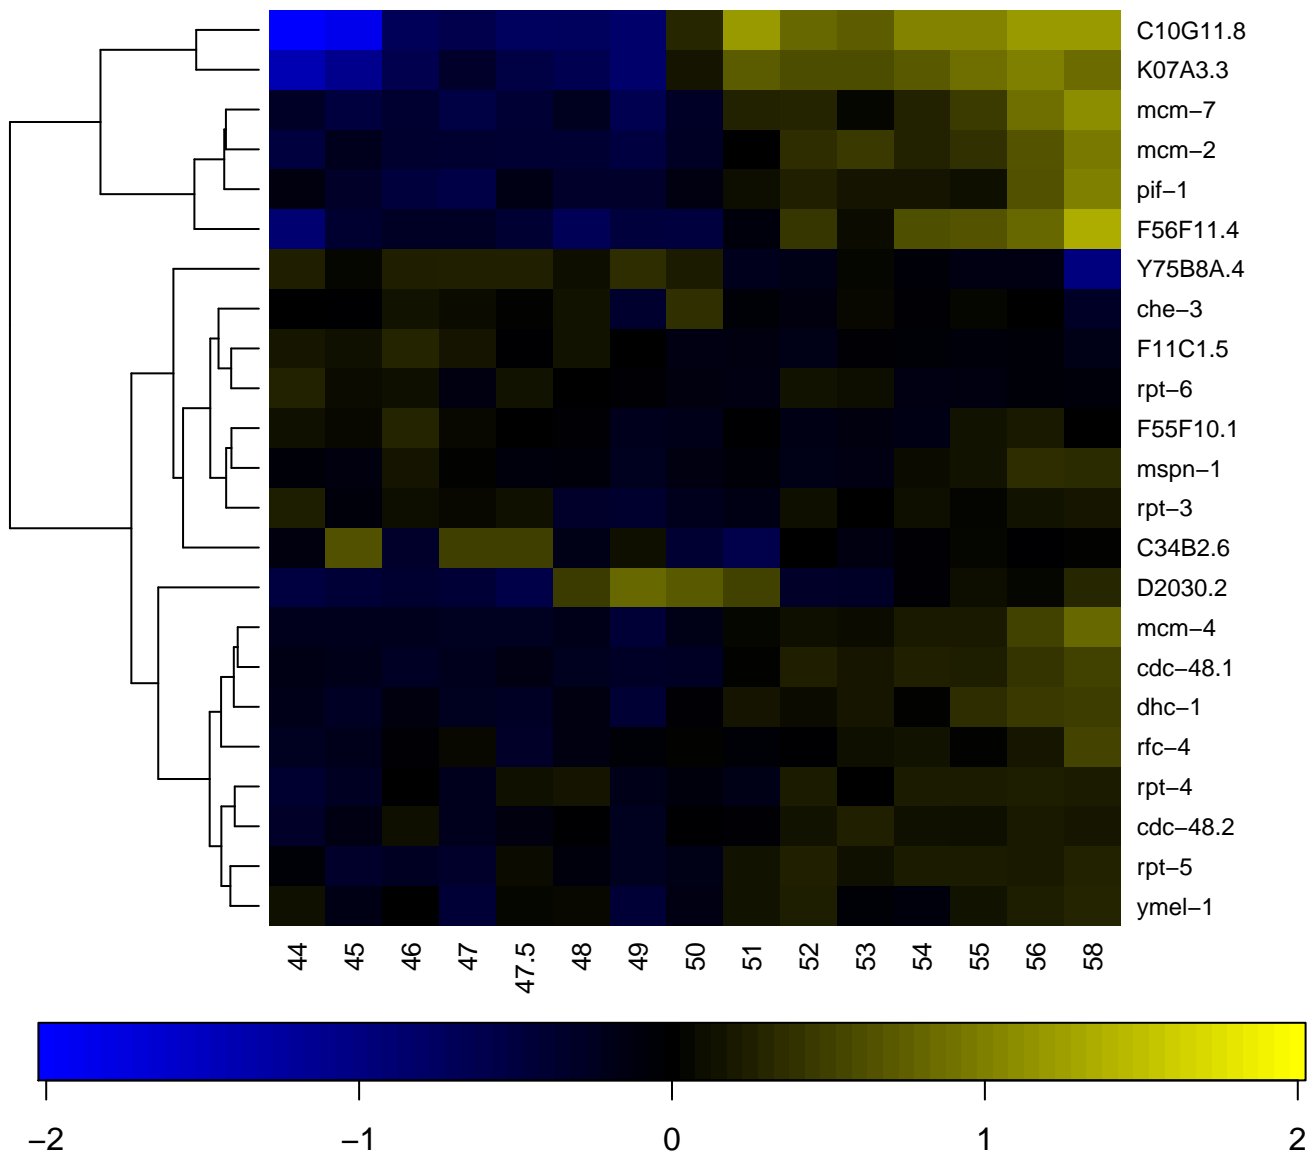

# AB-hydrolase-associated lipase region



# ab-hydrolase associated lipase region







# ABC transporter

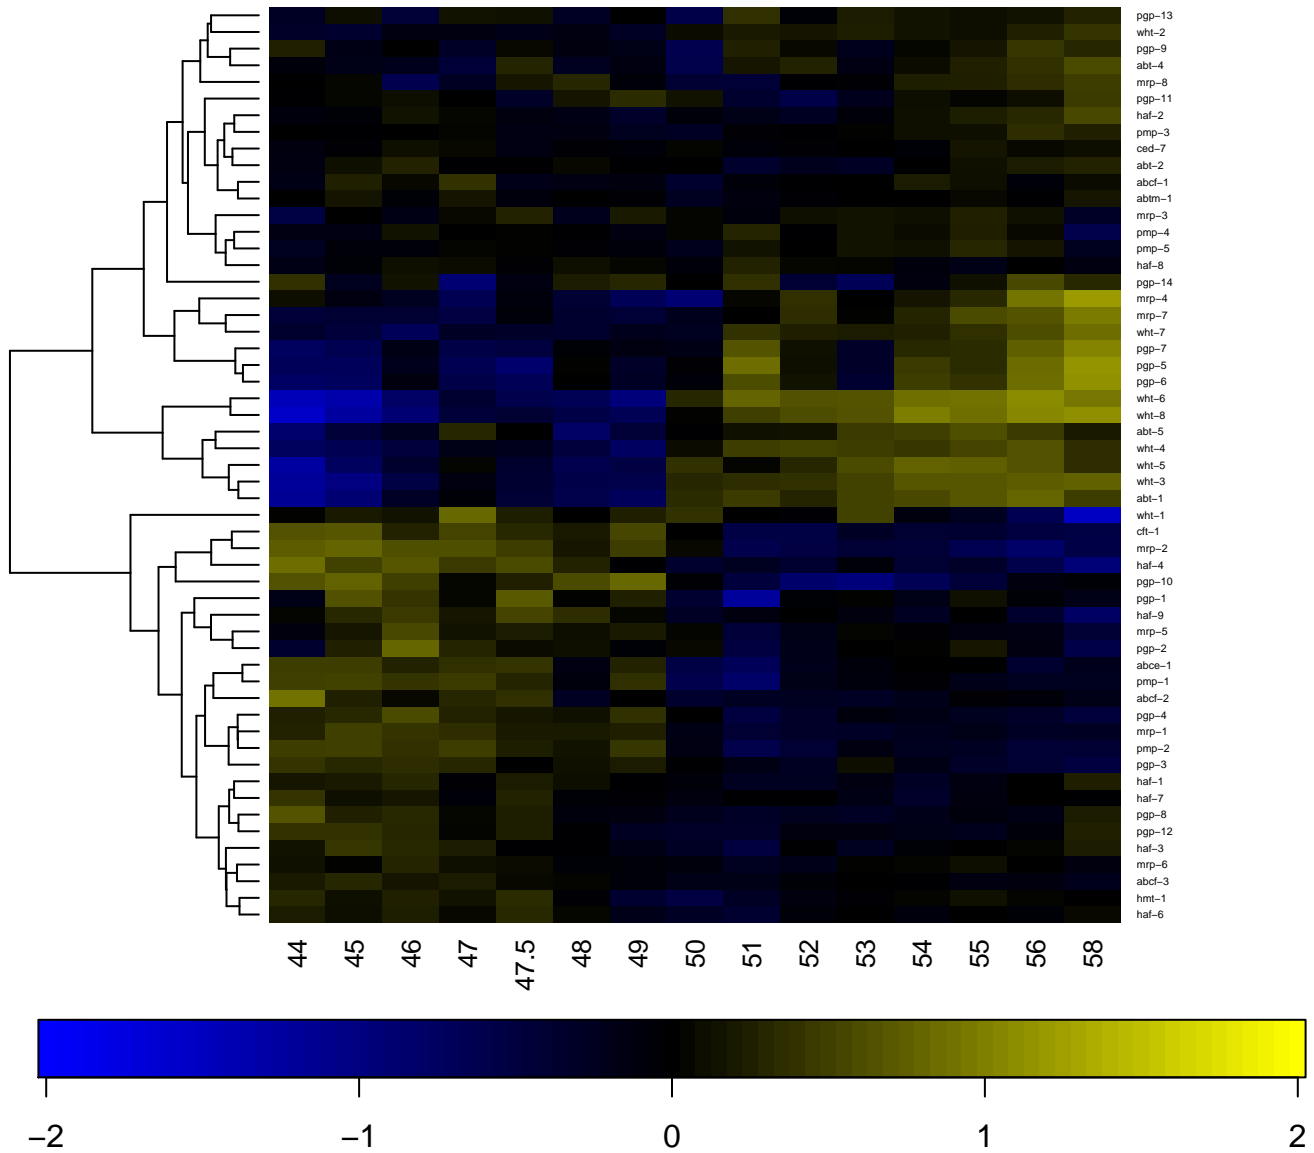

# ABC transporter-like

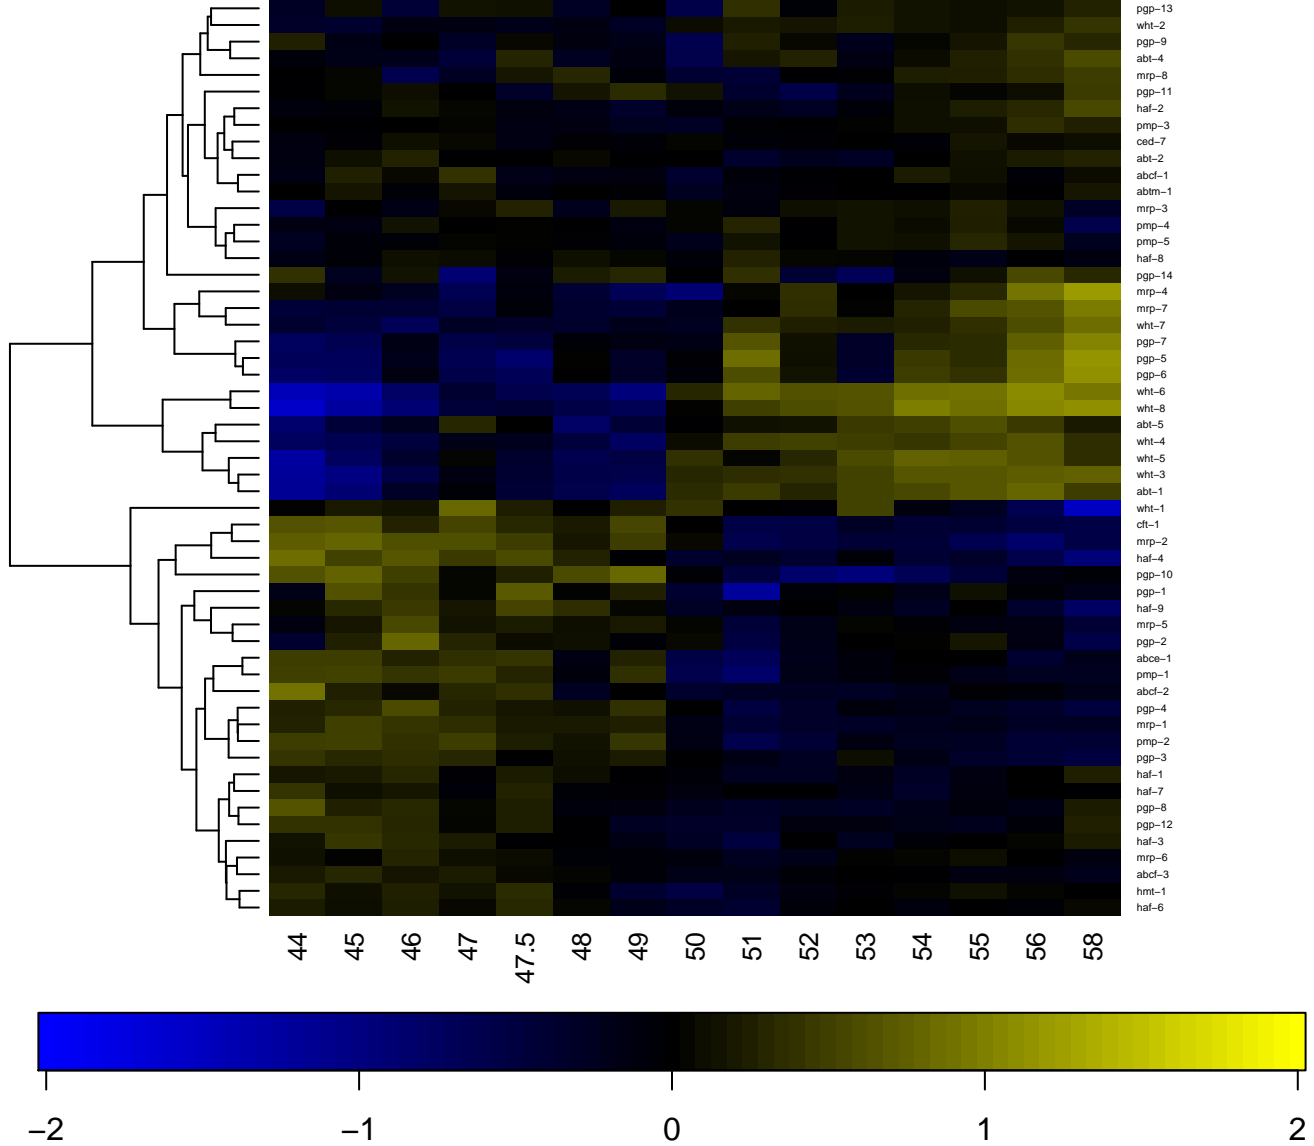







# ABC transporter, conserved site

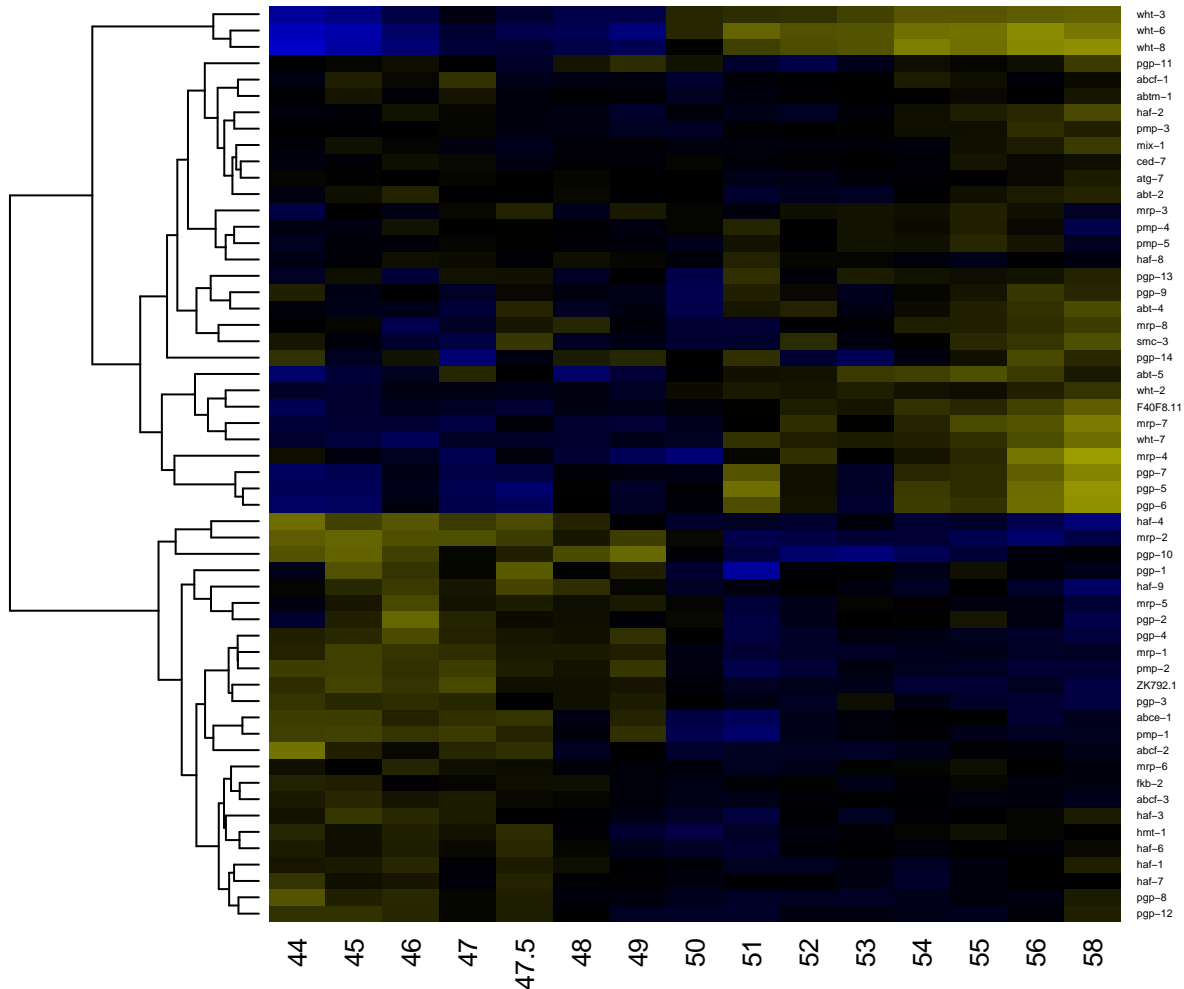

wht-3  
wht-6  
wht-8  
pgp-11  
abcf-1  
abtm-1  
haf-2  
pmp-3  
mix-1  
ced-7  
atg-7  
abt-2  
mrp-3  
pmp-4  
pmp-5  
haf-8  
pgp-13  
pgp-9  
abt-4  
mrp-8  
smc-3  
pgp-14  
abt-5  
wht-2  
F40F8.11  
mrp-7  
wht-7  
mrp-4  
pgp-7  
pgp-5  
pgp-6  
haf-4  
mrp-2  
pgp-10  
pgp-1  
haf-9  
mrp-5  
pgp-2  
pgp-4  
mrp-1  
pmp-2  
ZK792.1  
pgp-3  
abce-1  
pmp-1  
abcf-2  
mrp-6  
fkb-2  
abcf-3  
haf-3  
hmt-1  
haf-6  
haf-1  
haf-7  
pgp-8  
pgp-12



# ABC transporter, N-terminal

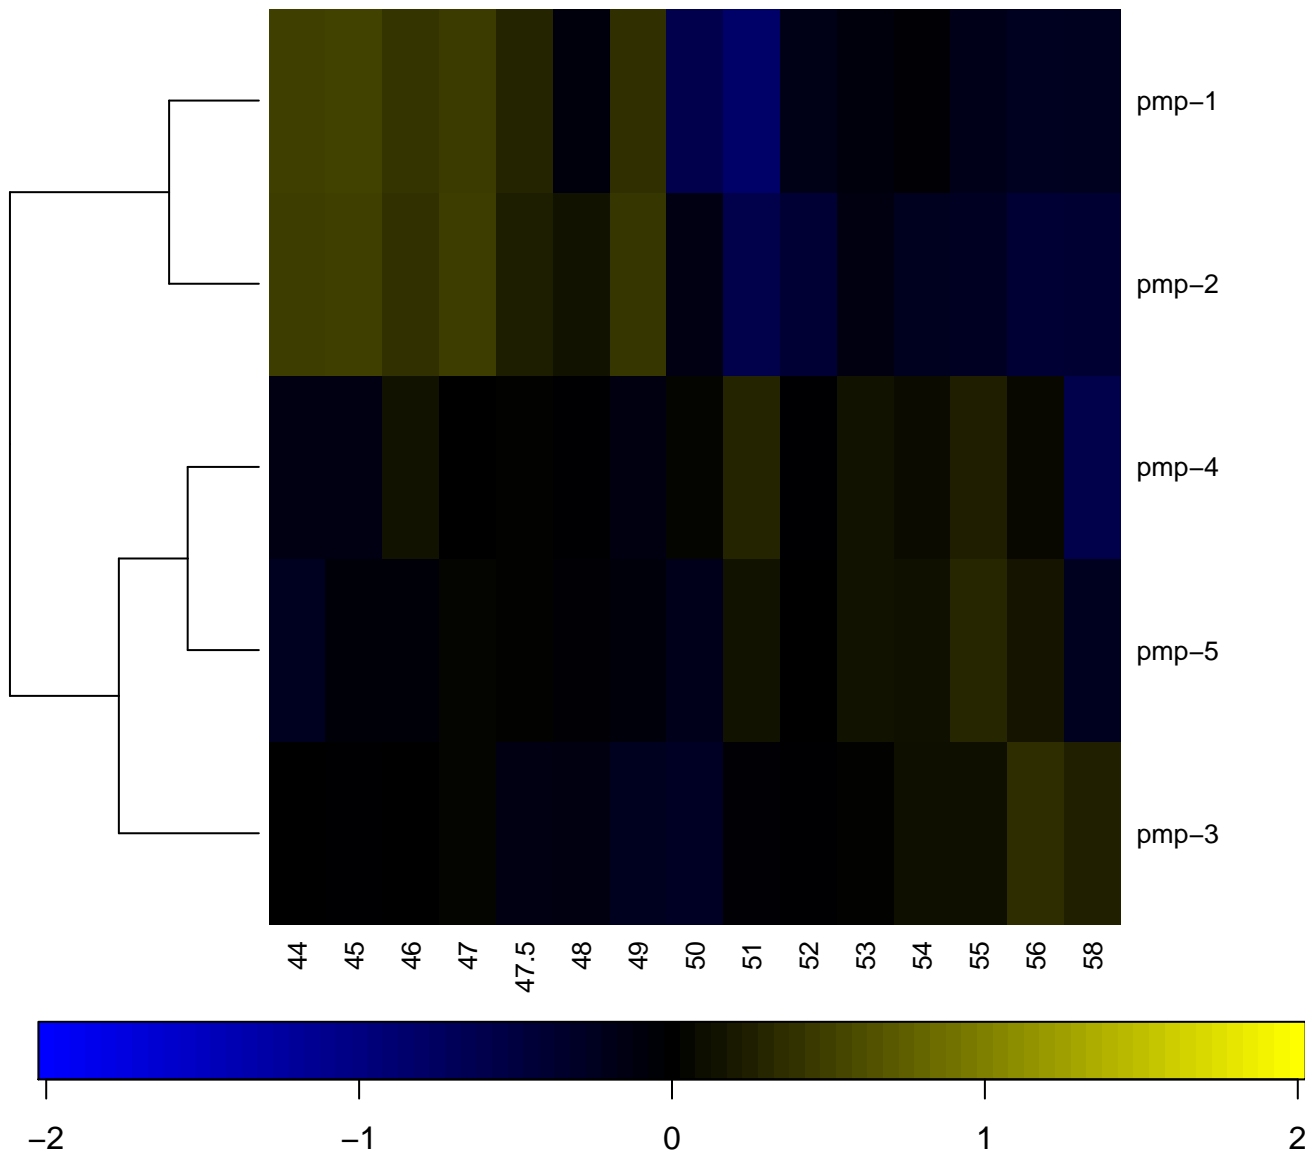







# Actin-binding FH2

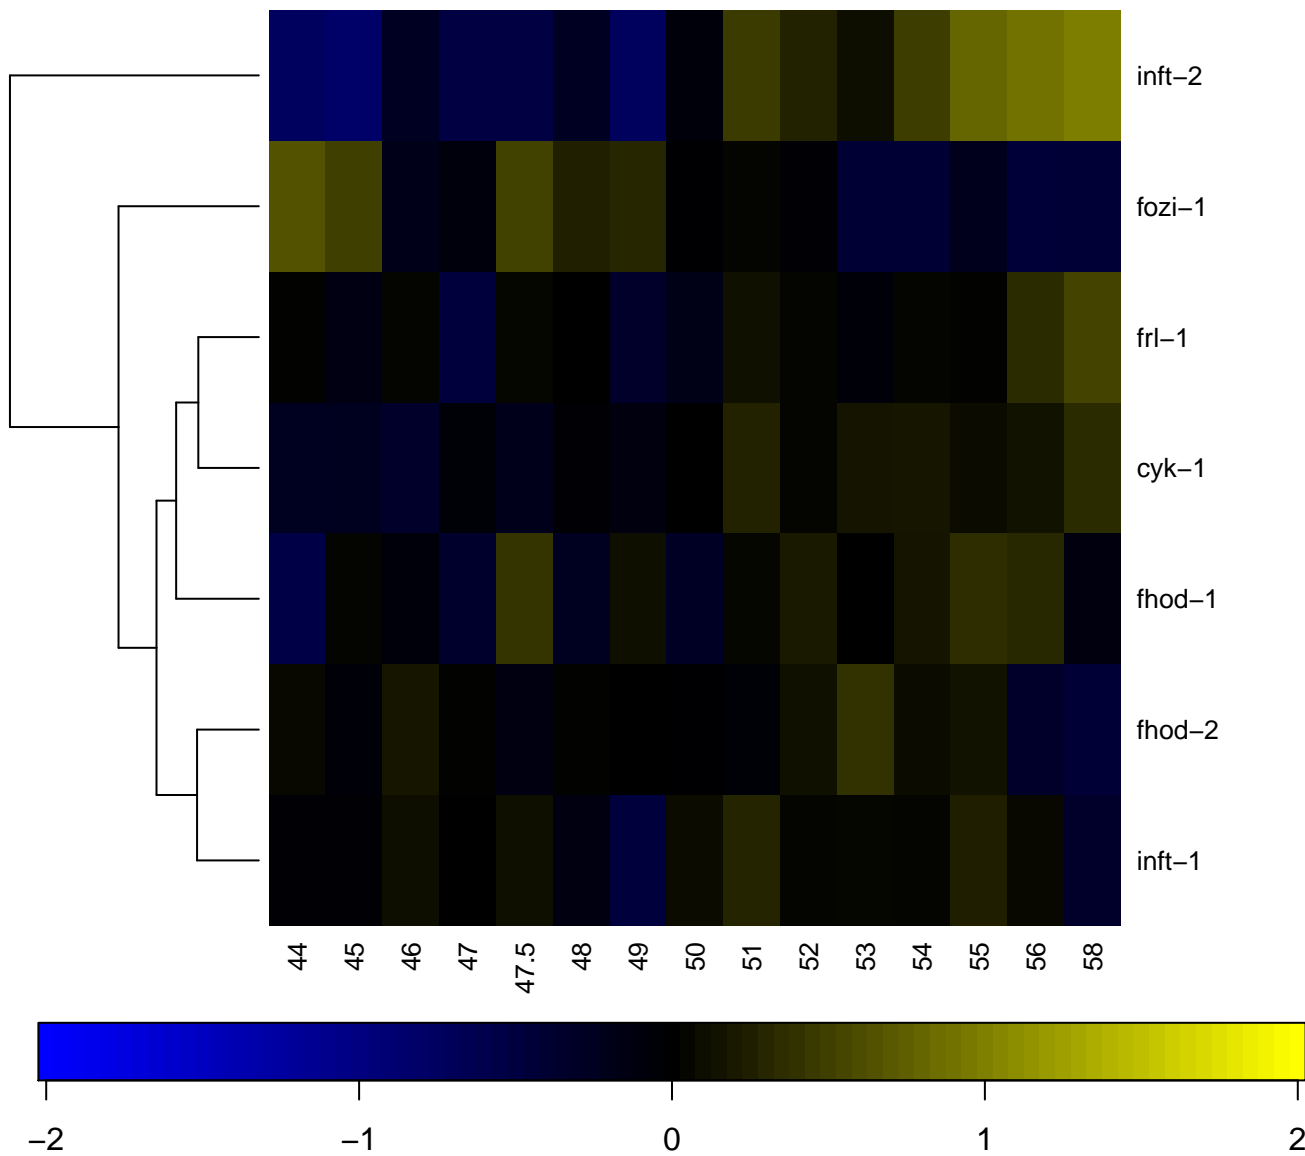





# Actin, conserved site

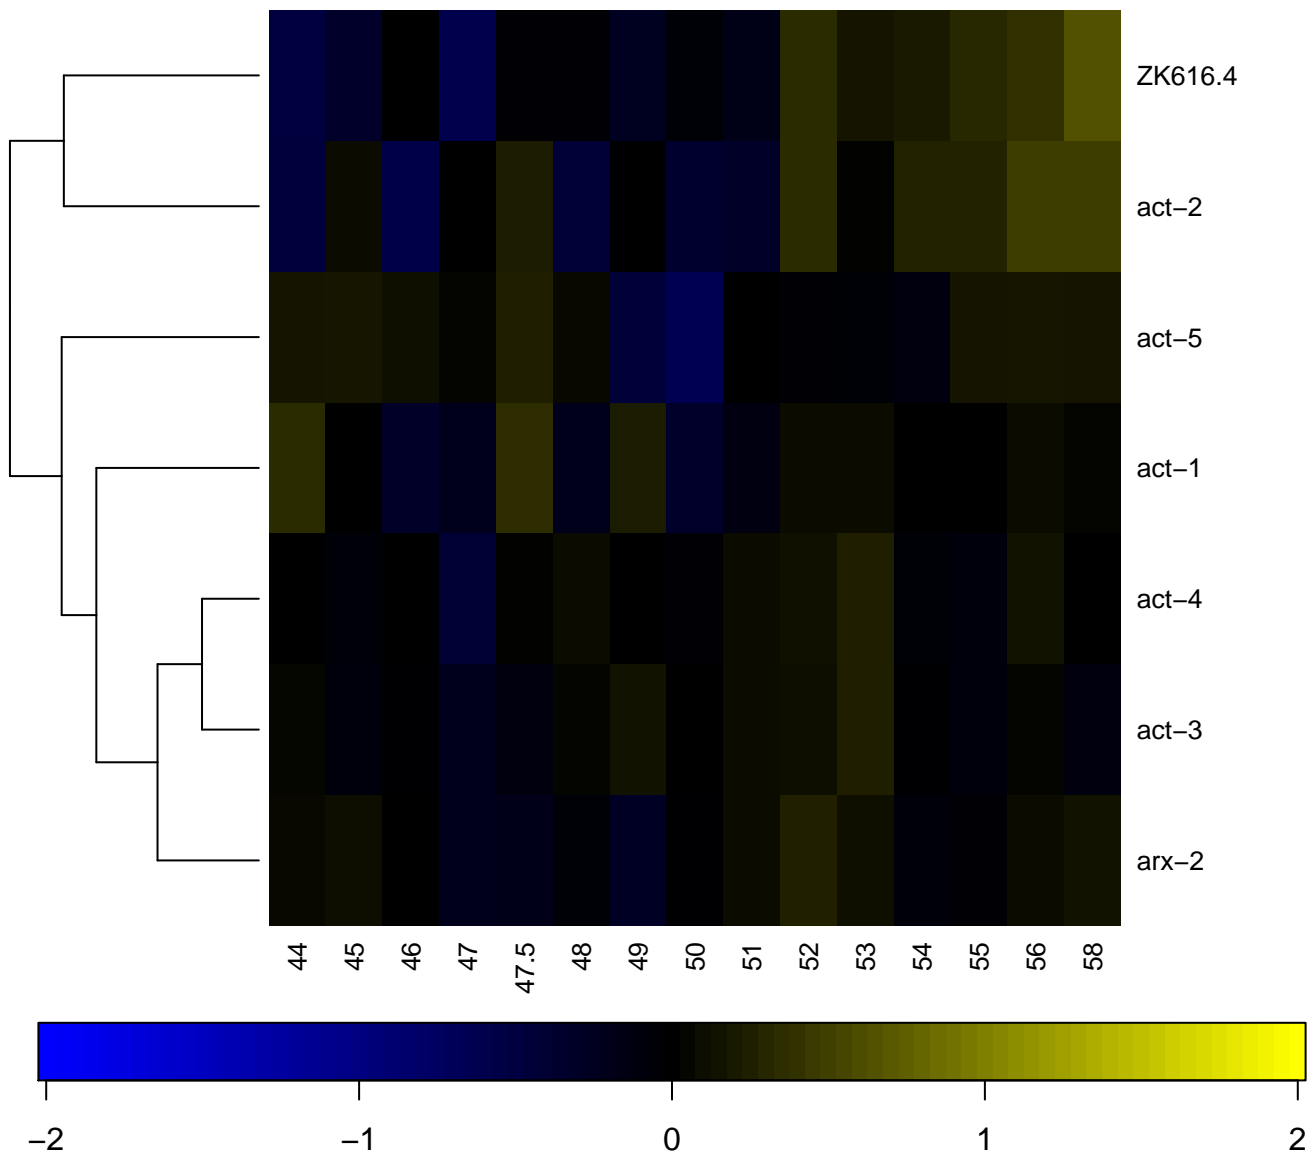

# Actin/actin-like conserved site

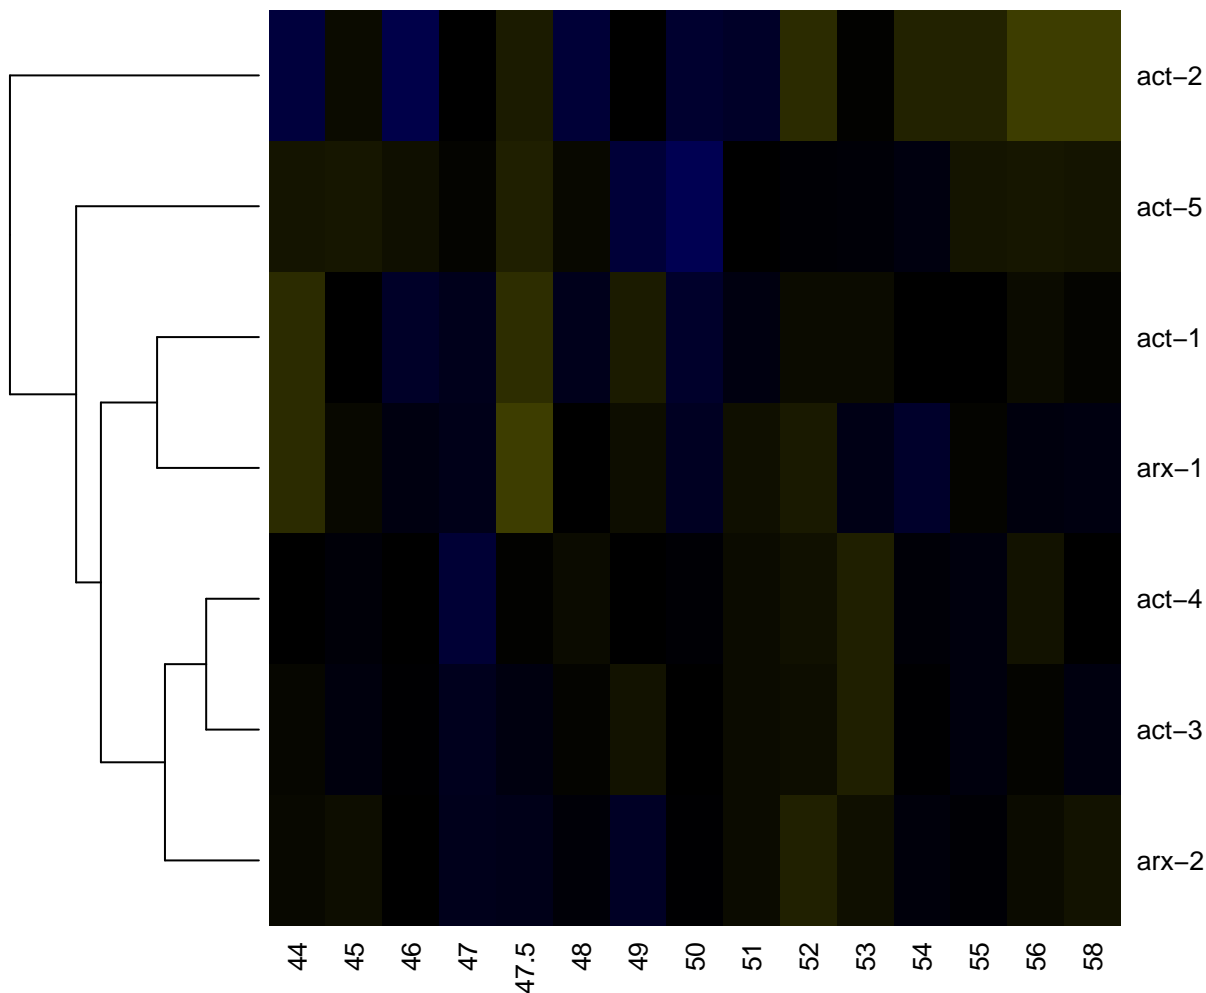

# Actinin-type, actin-binding, conserved site

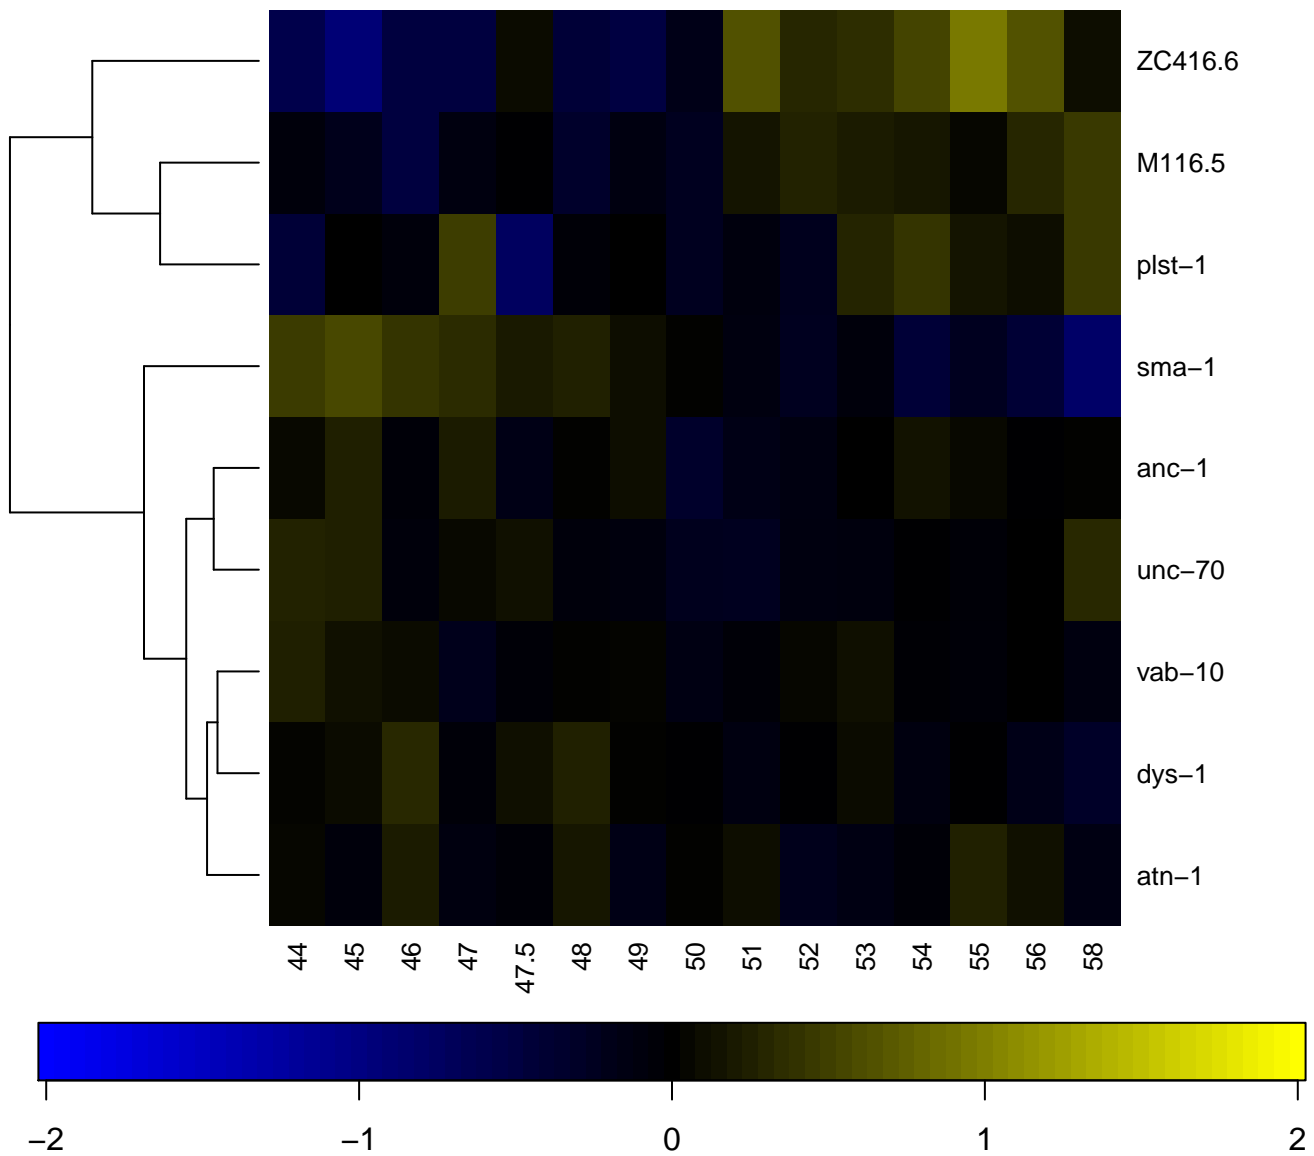





# Acyl-CoA-binding protein, ACBP

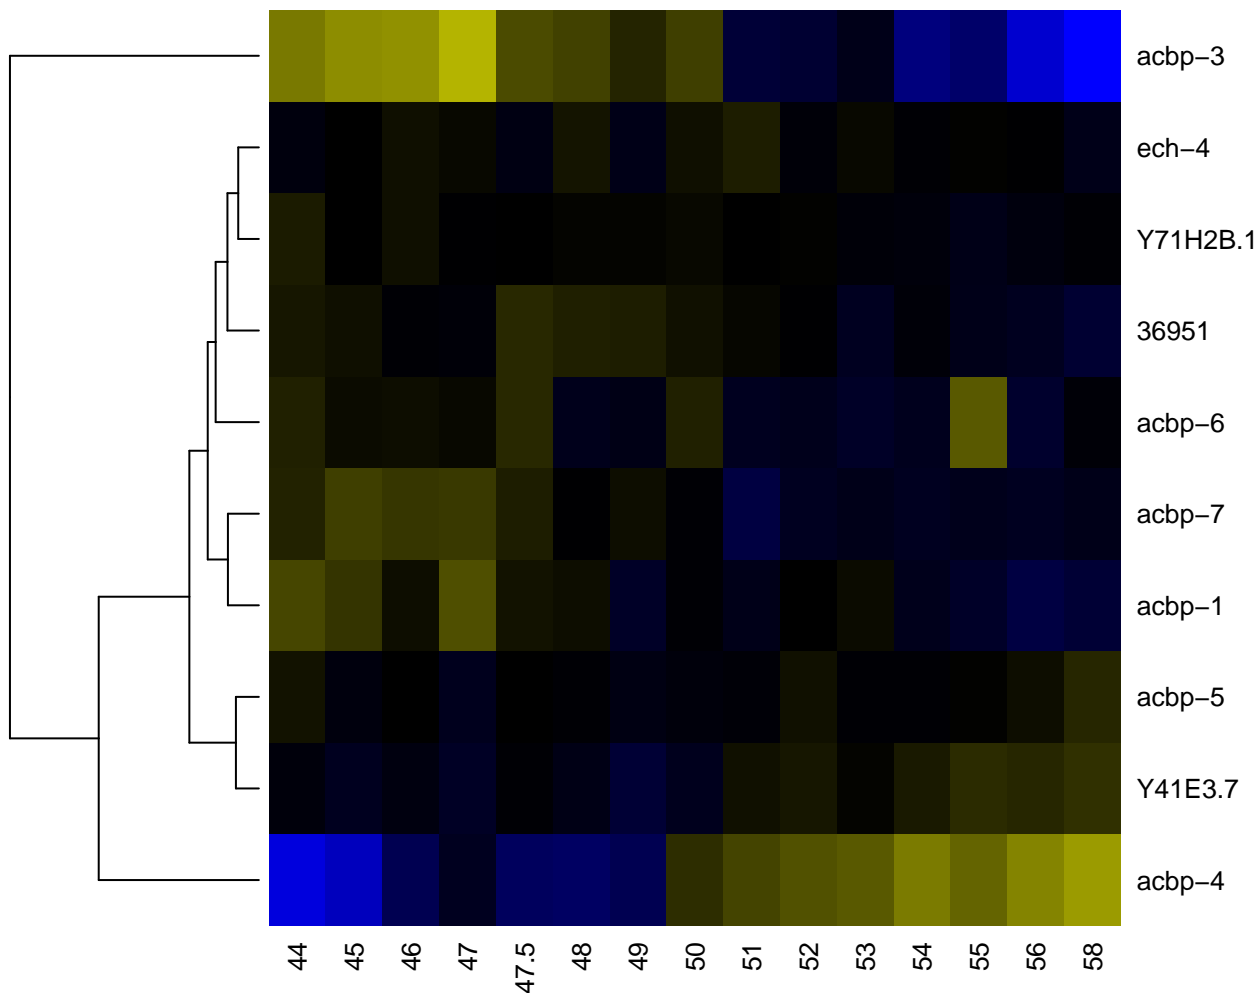





# Acyl-CoA dehydrogenase, middle domain

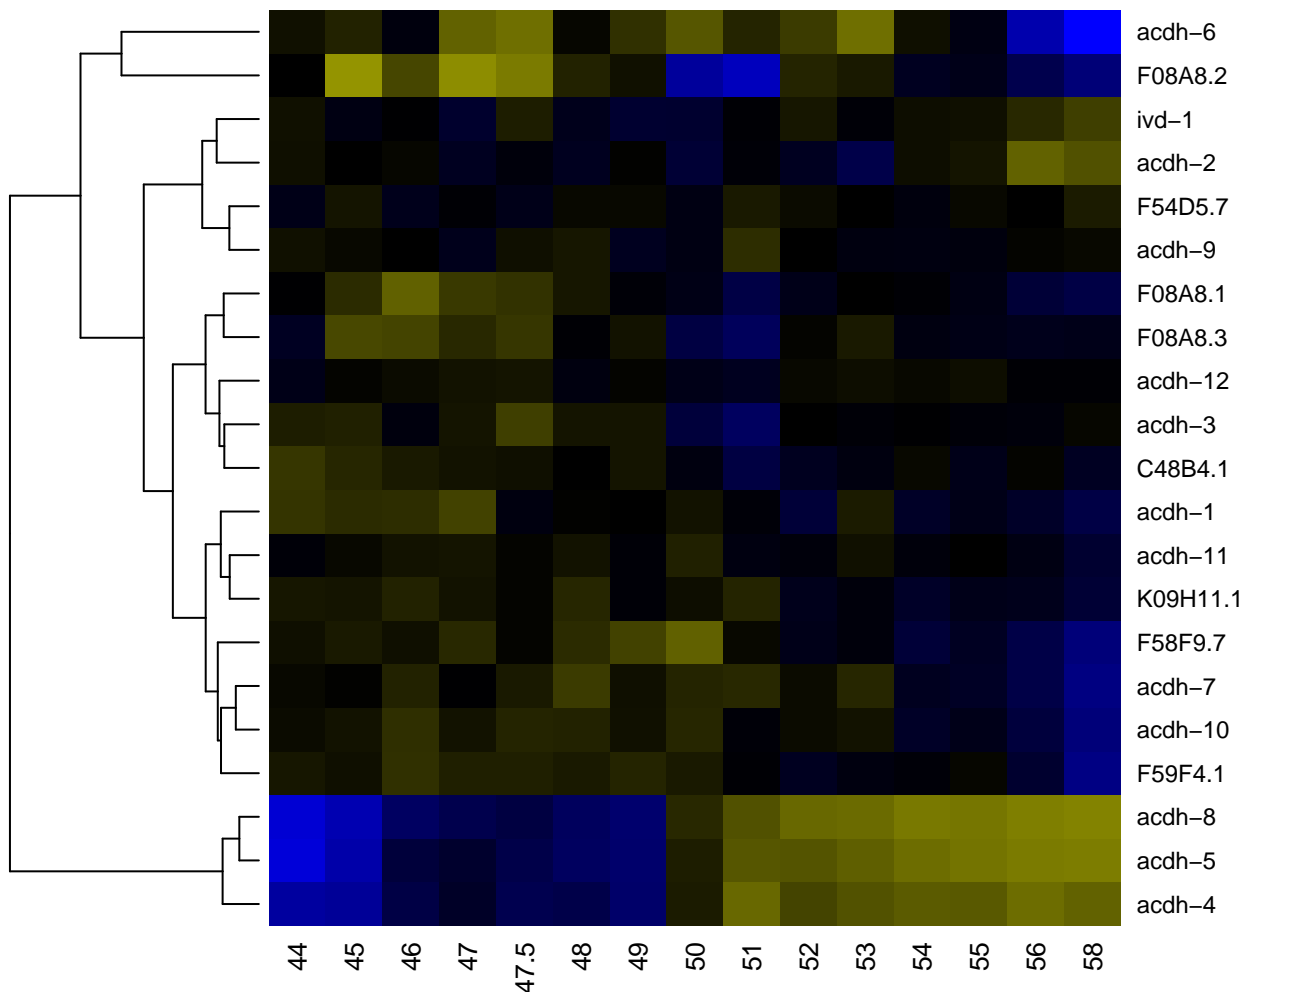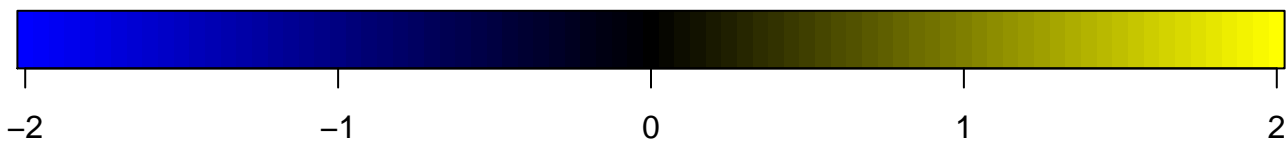







# Acyl-CoA dehydrogenase/oxidase, N-terminal

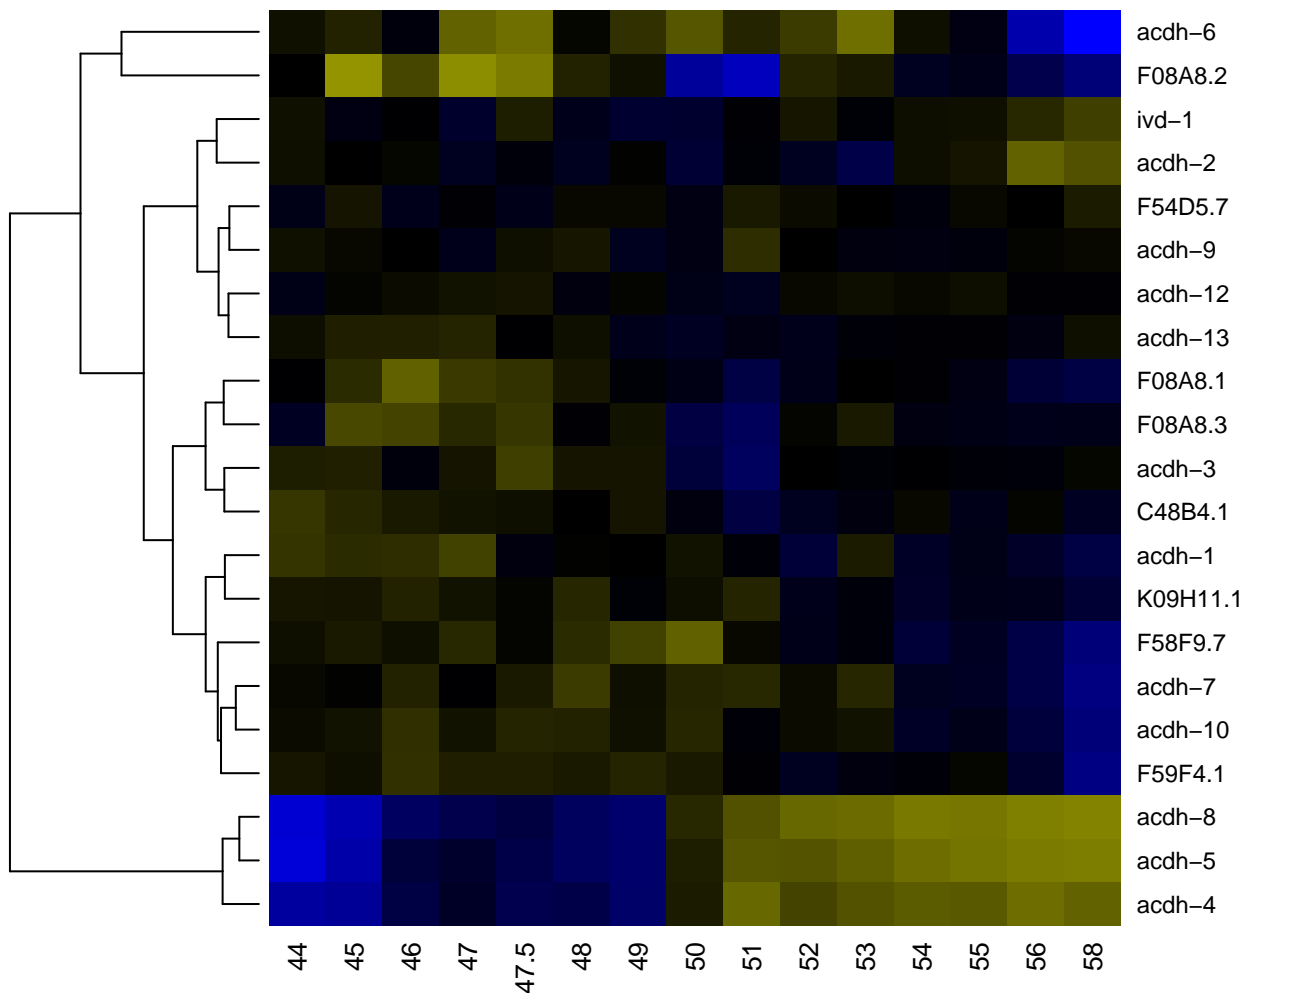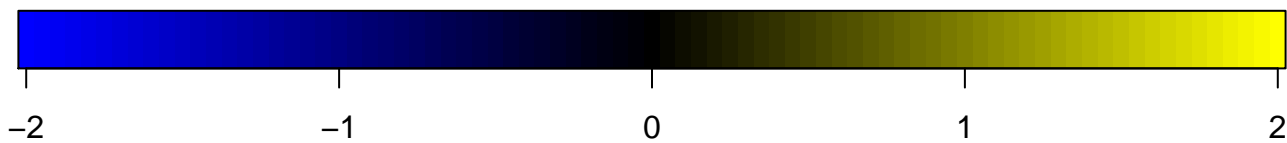



# Acyl-CoA N-acyltransferase

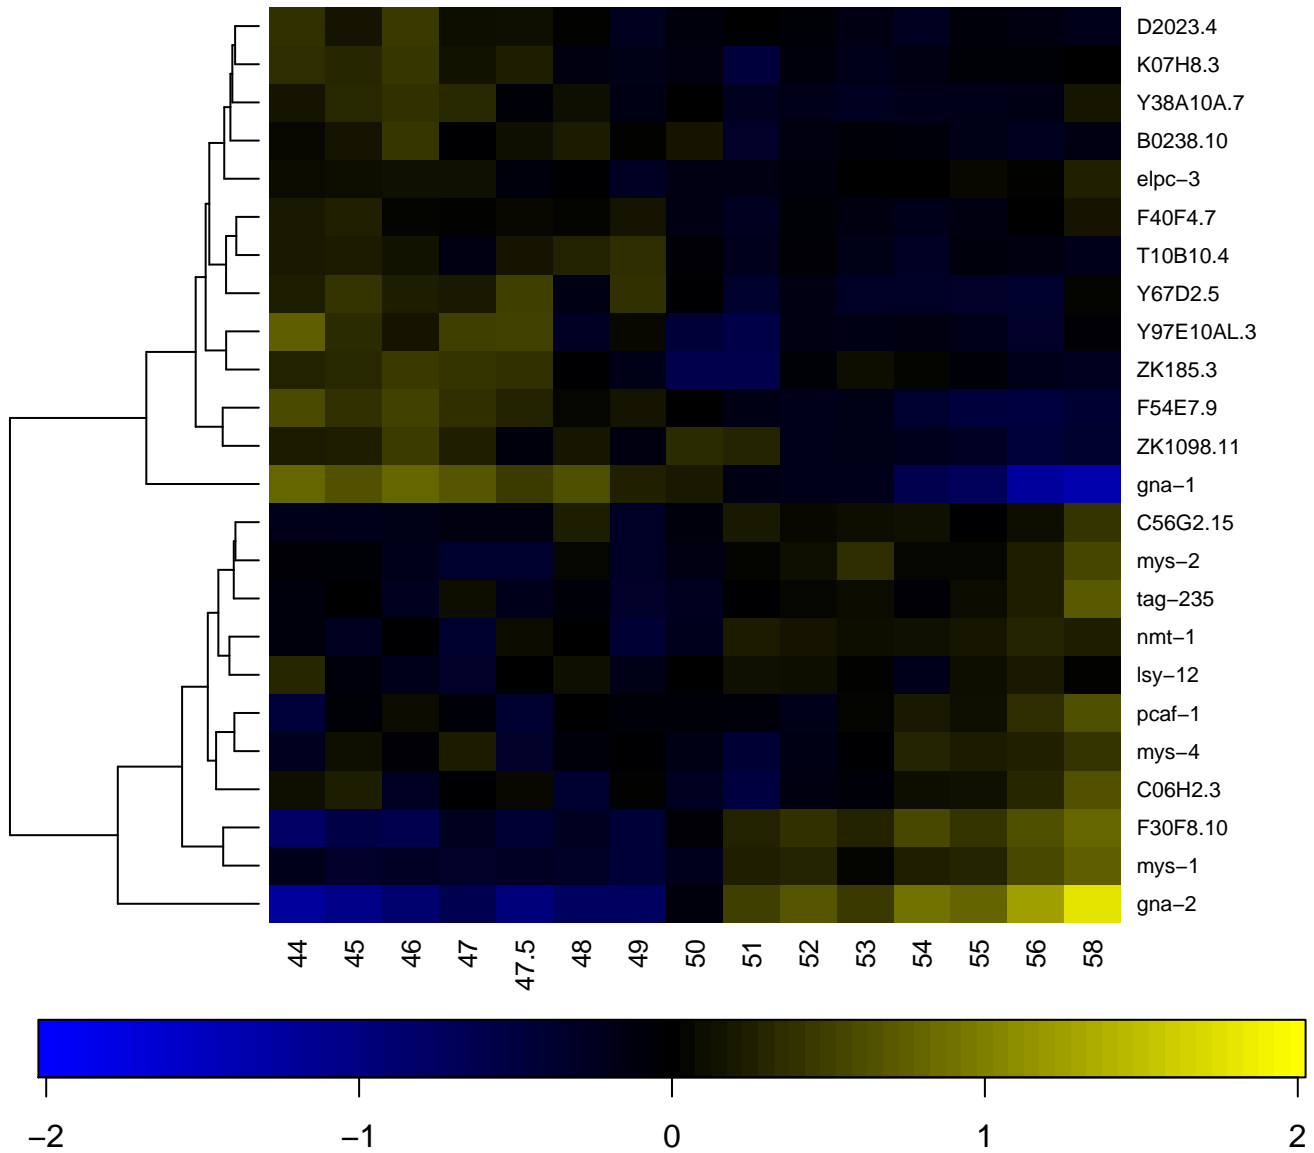

# Acyl-CoA oxidase

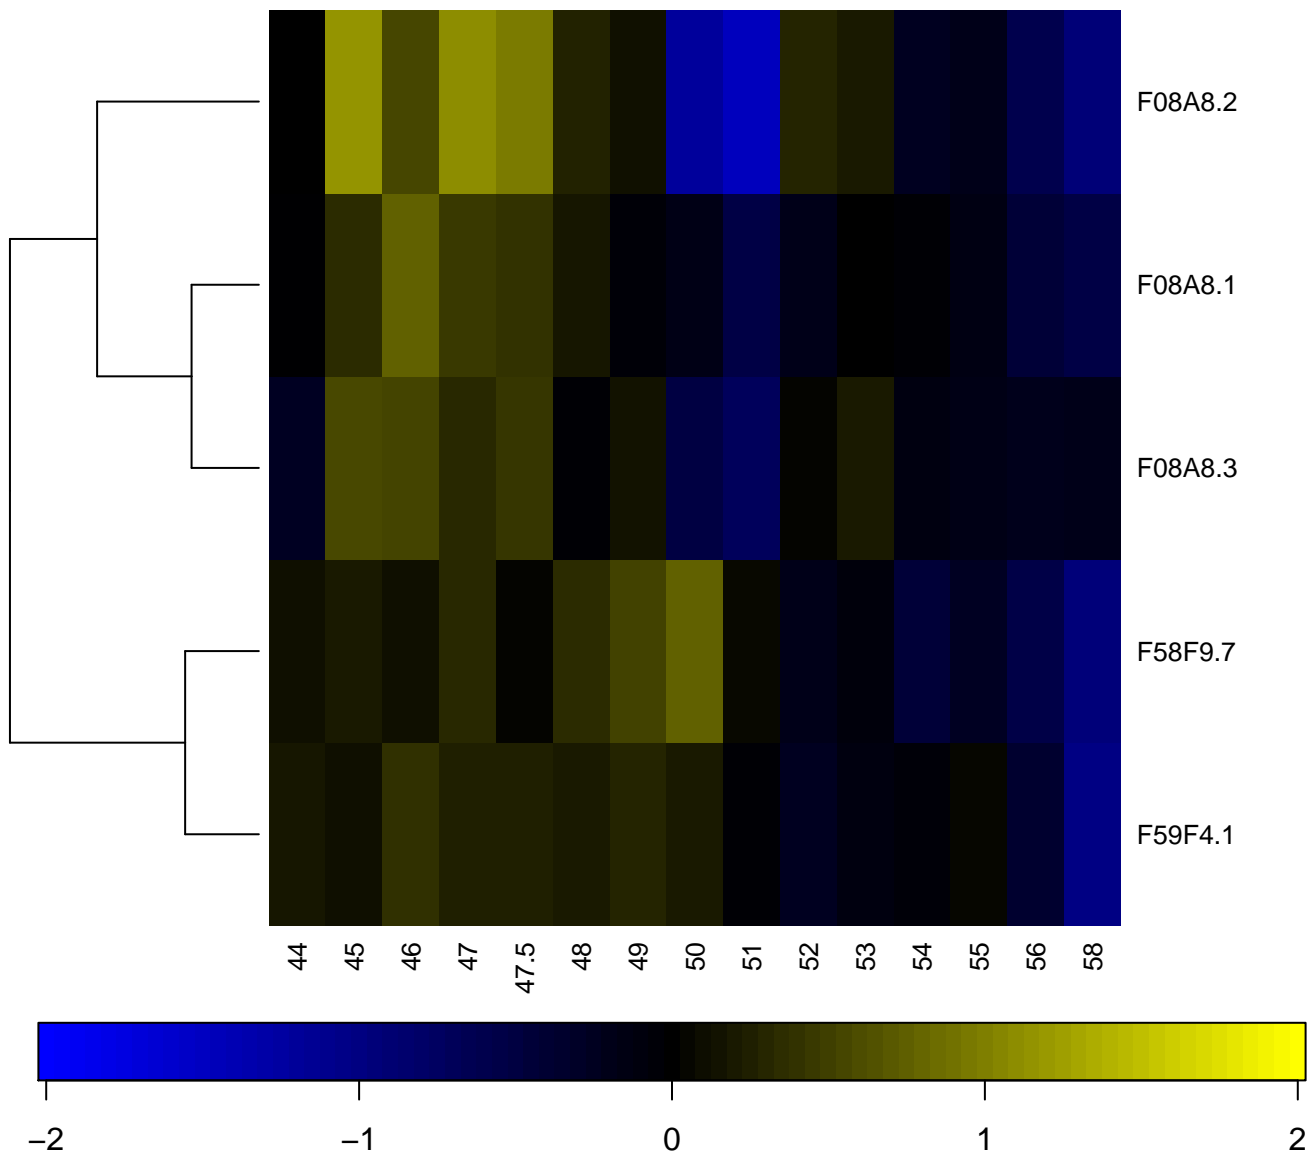

# Acyl-CoA oxidase, C-terminal



# Acyl-CoA oxidase/dehydrogenase, central domain

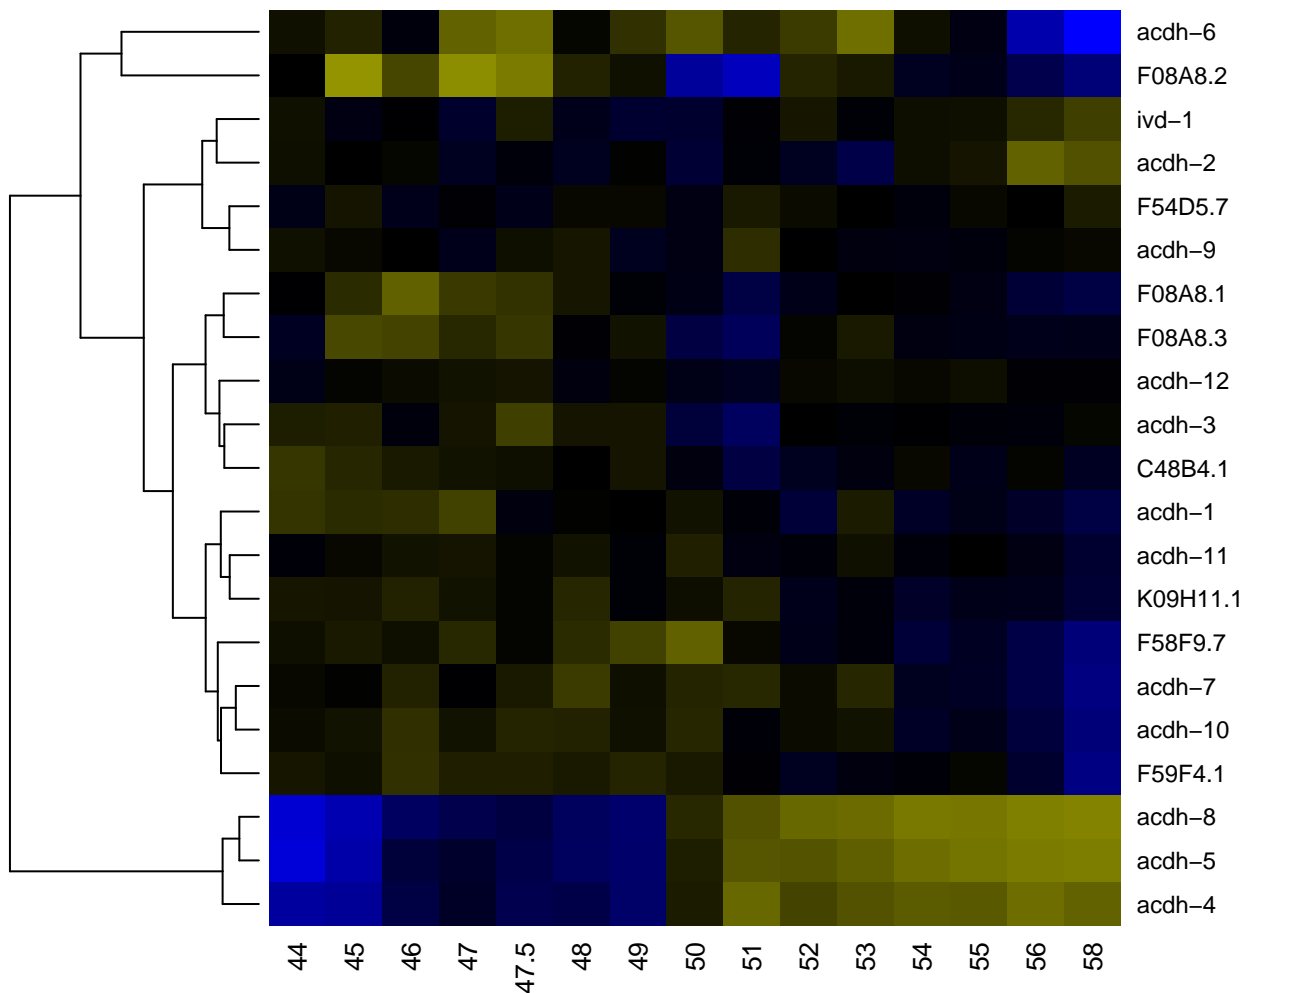







# Acyl CoA binding protein

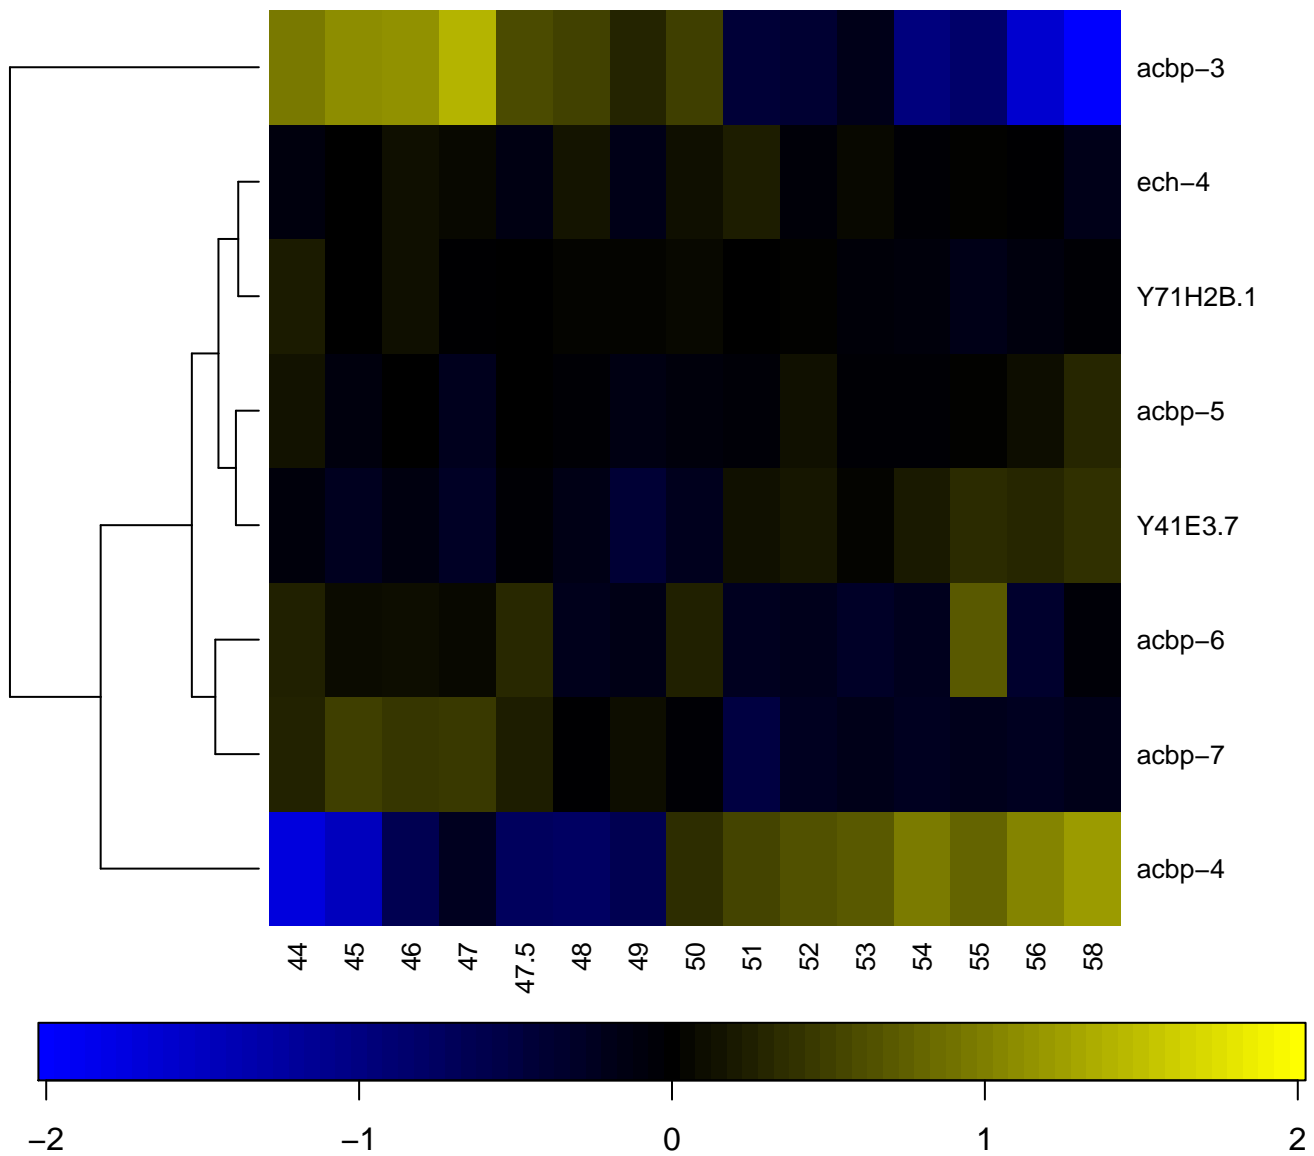



# Acyltransferase

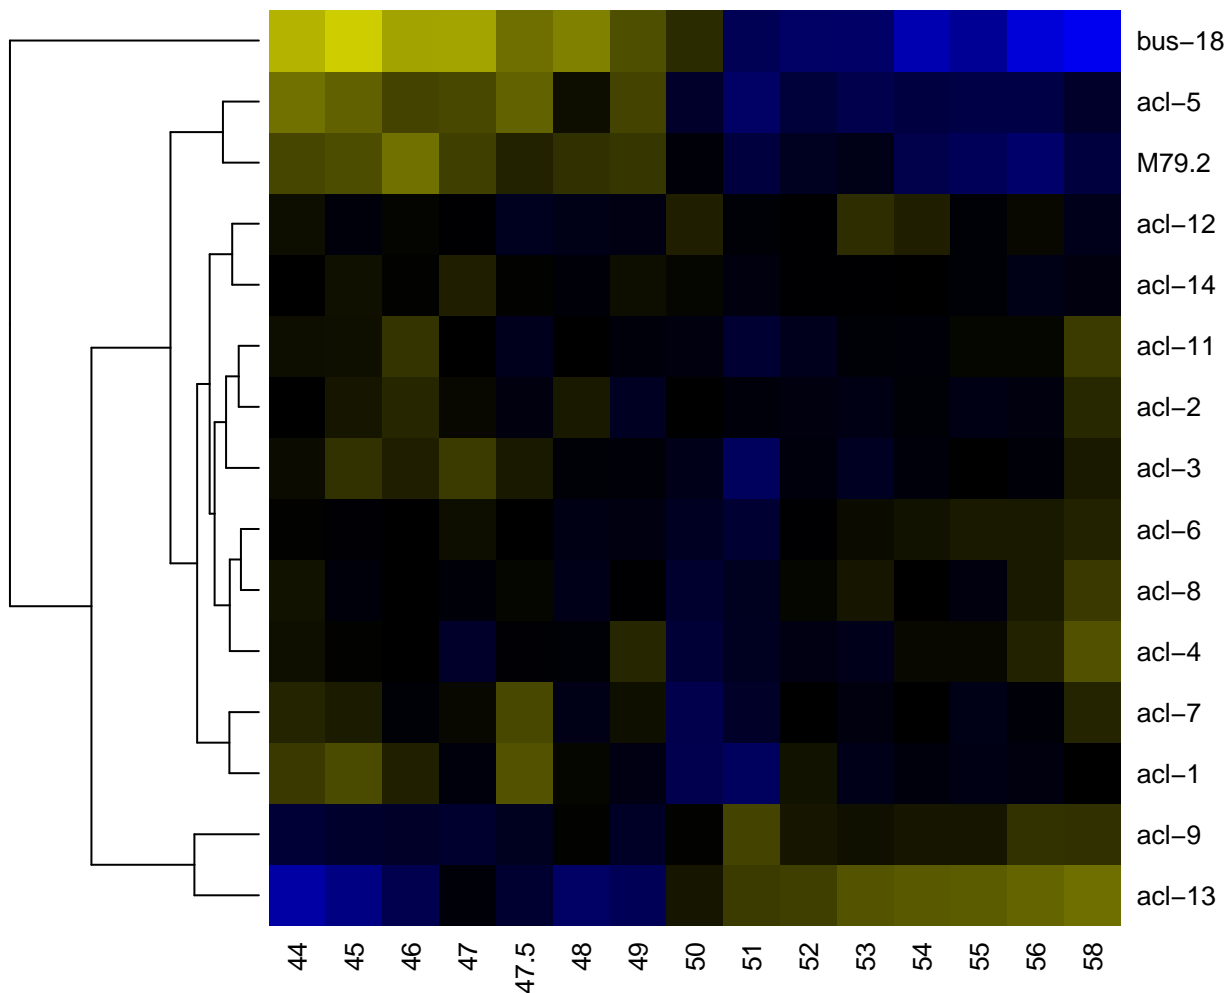

# Acyltransferase 3

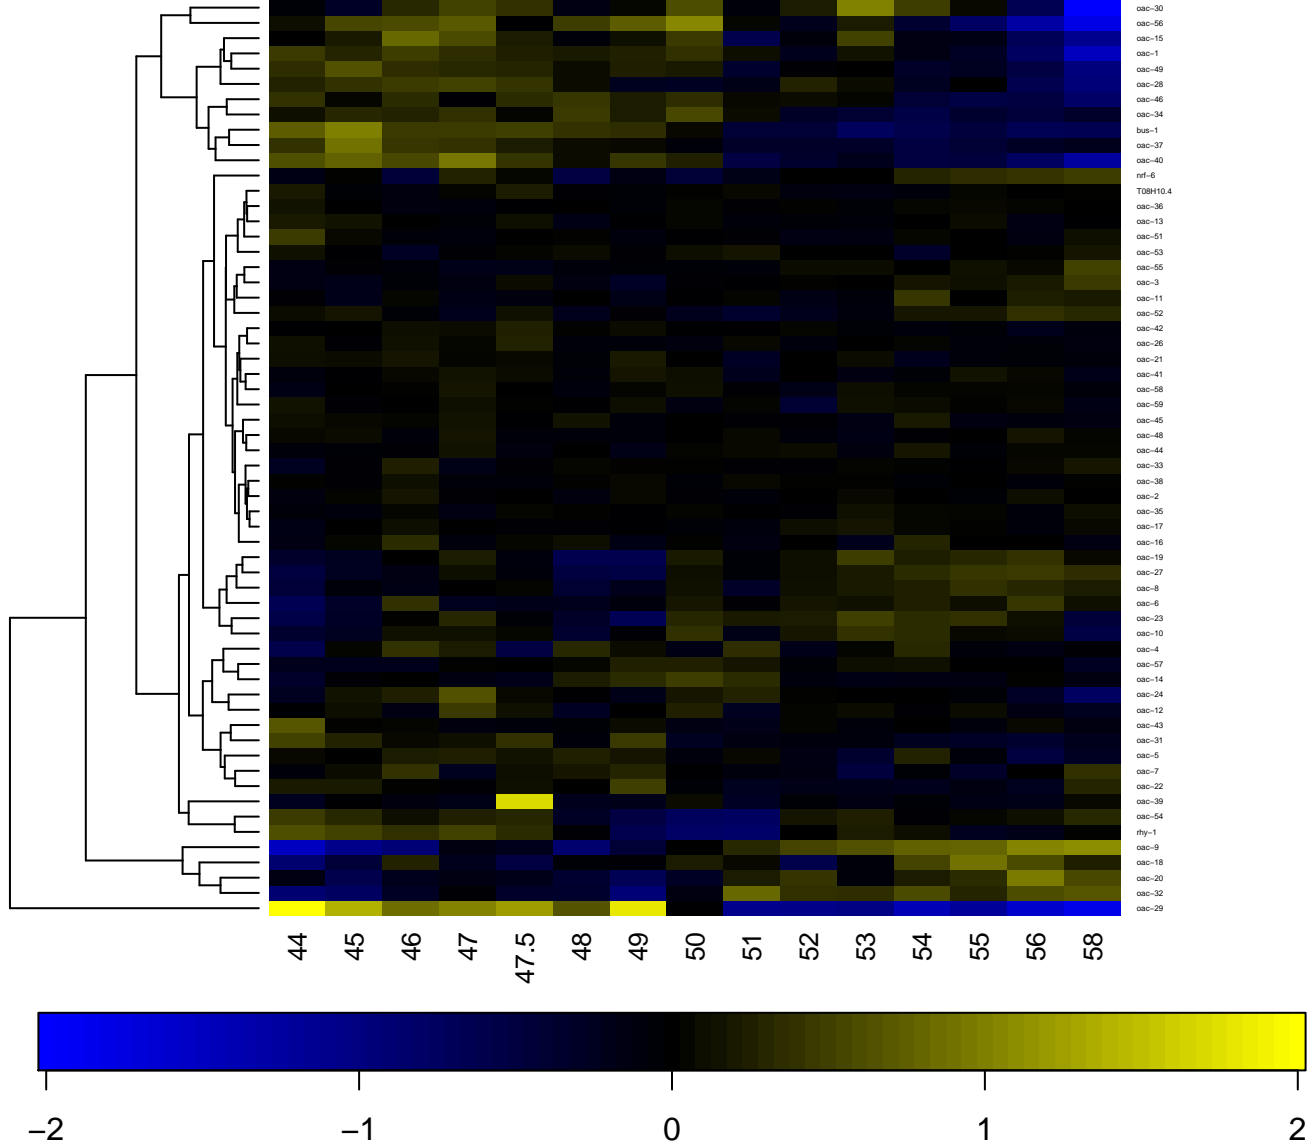

# Acyltransferase ChoActase/COT/CPT

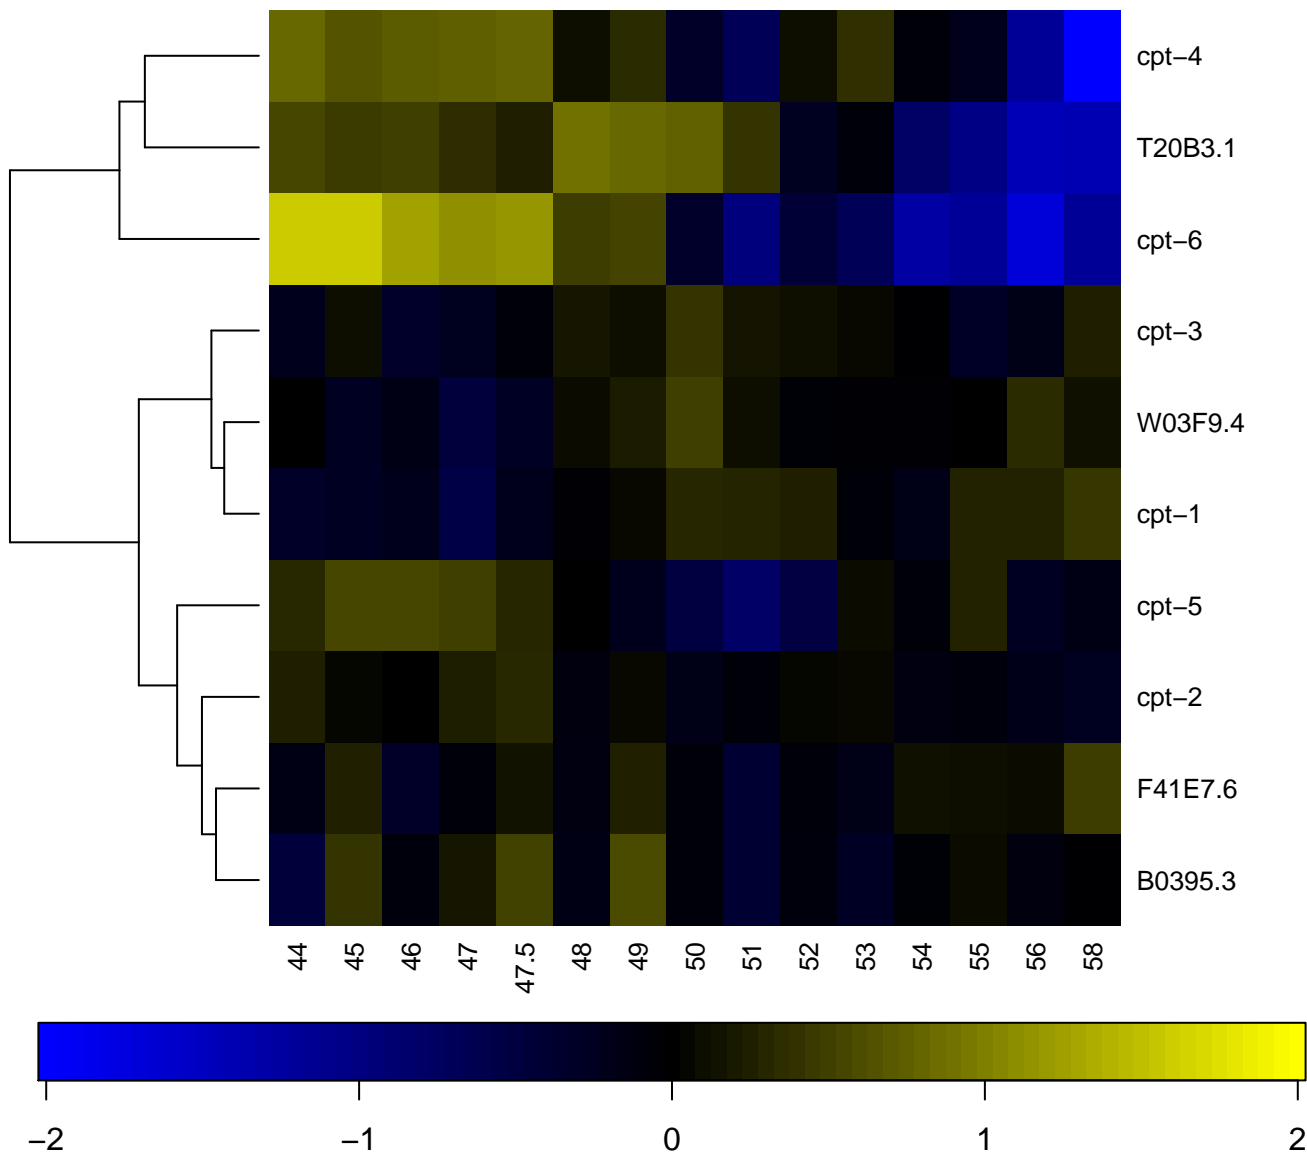

# Acyltransferase family





# Adenine nucleotide translocator 1

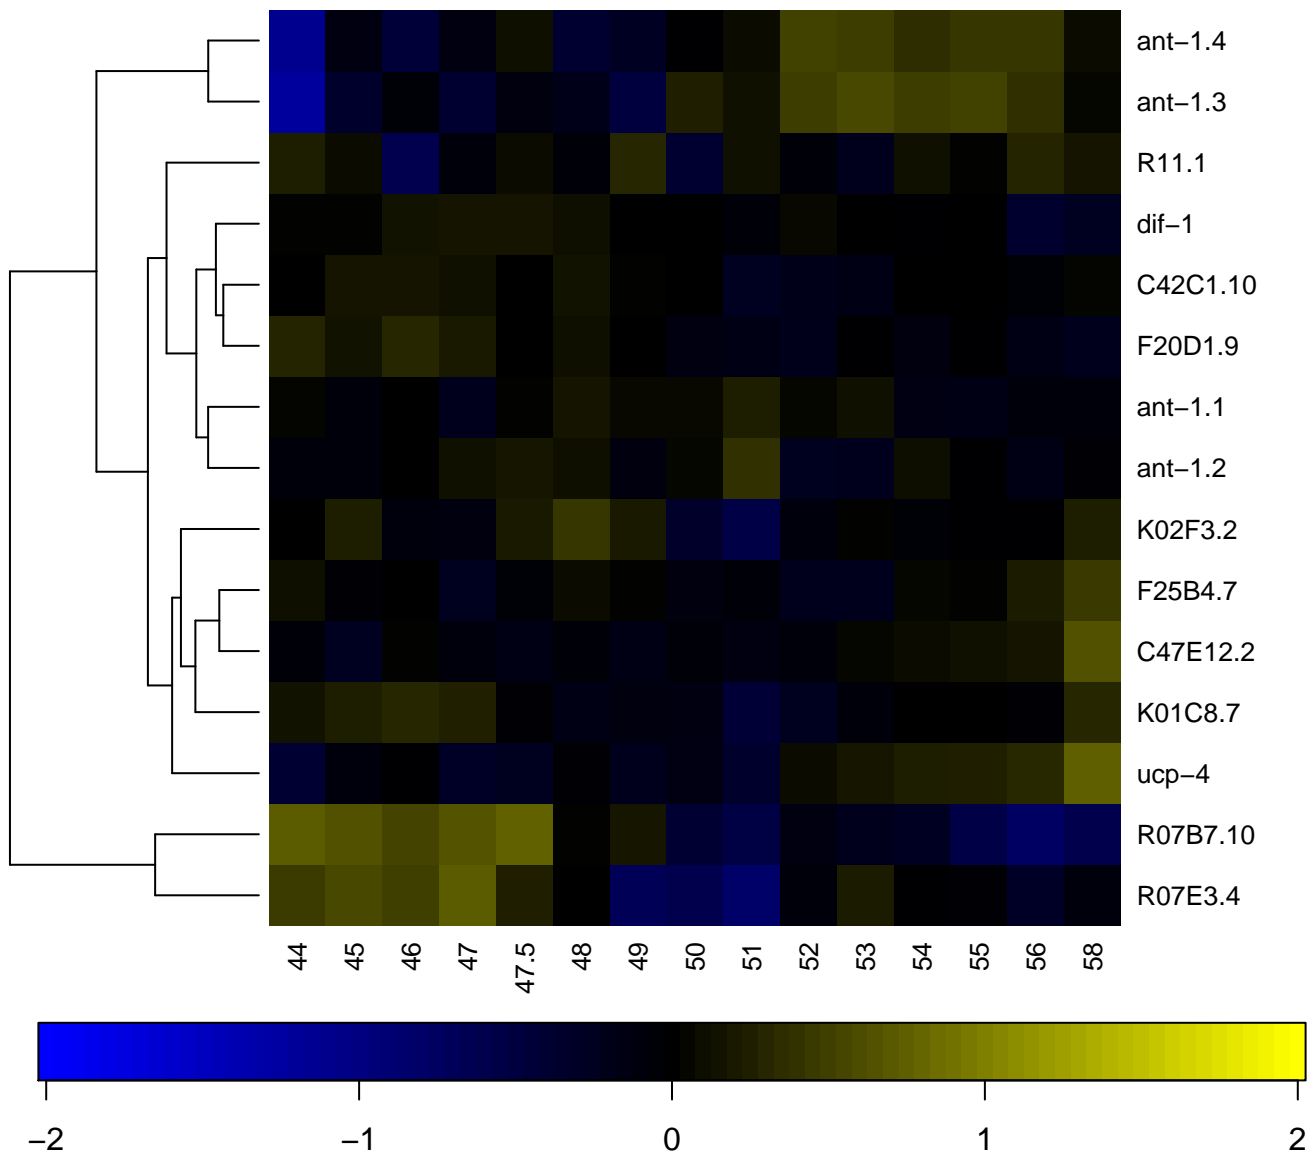

# Adenylate and Guanylate cyclase catalytic domain

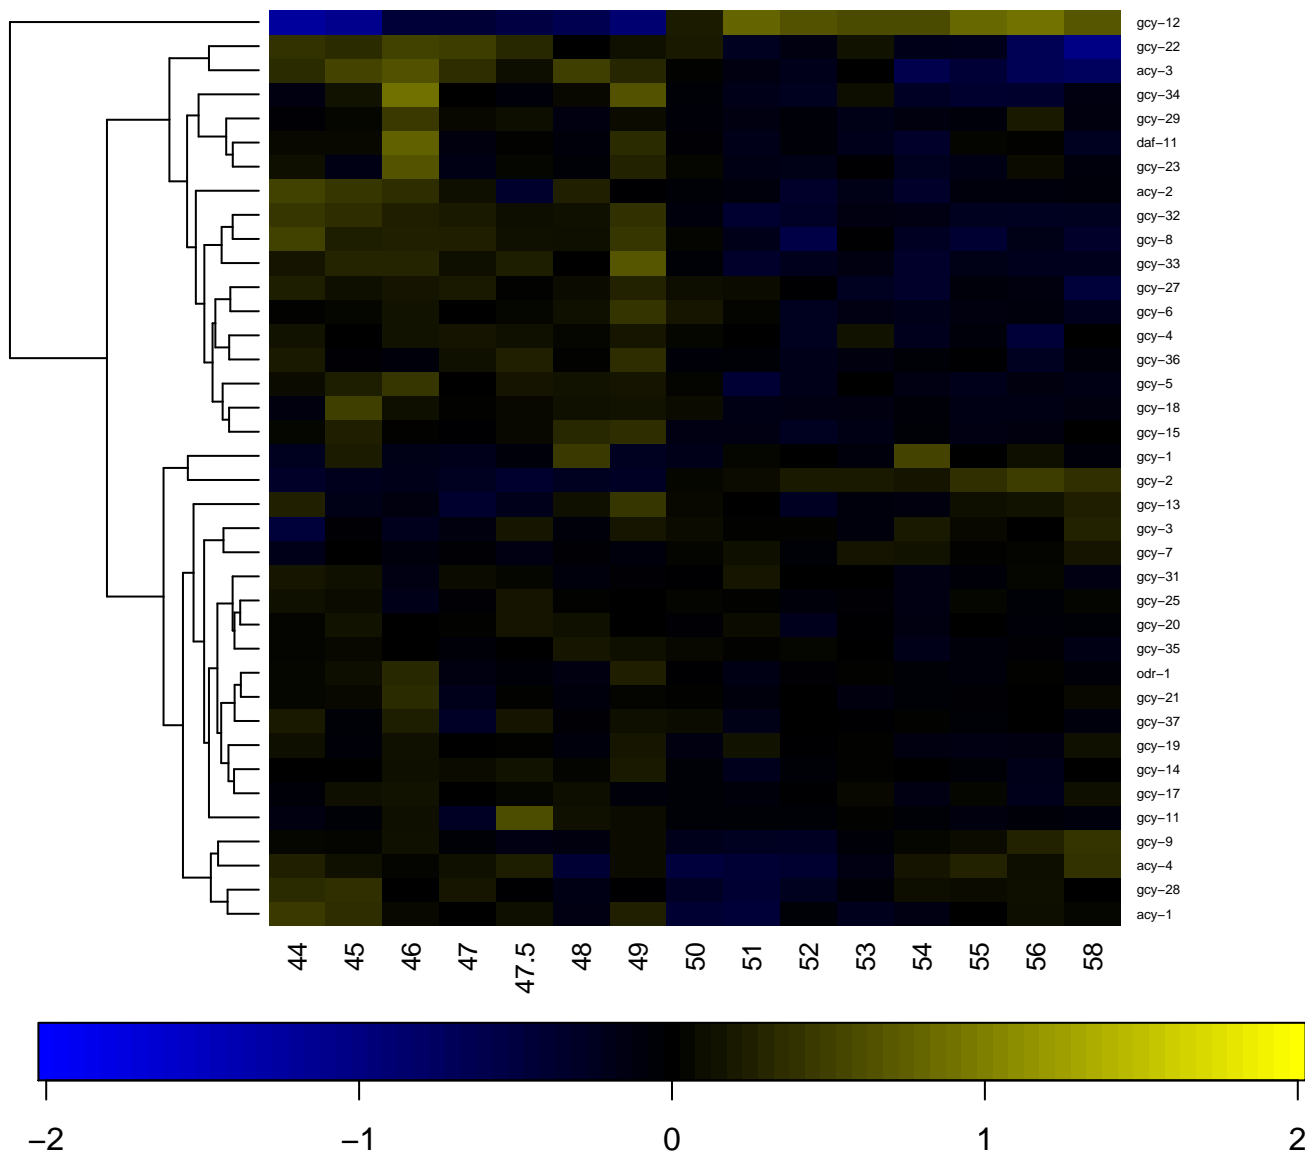

# Adenylate kinase





# Adenylyl cyclase class-3/4/guanylyl cyclase



# Adenylyl cyclase class-3/4/guanylyl cyclase, conserved sites

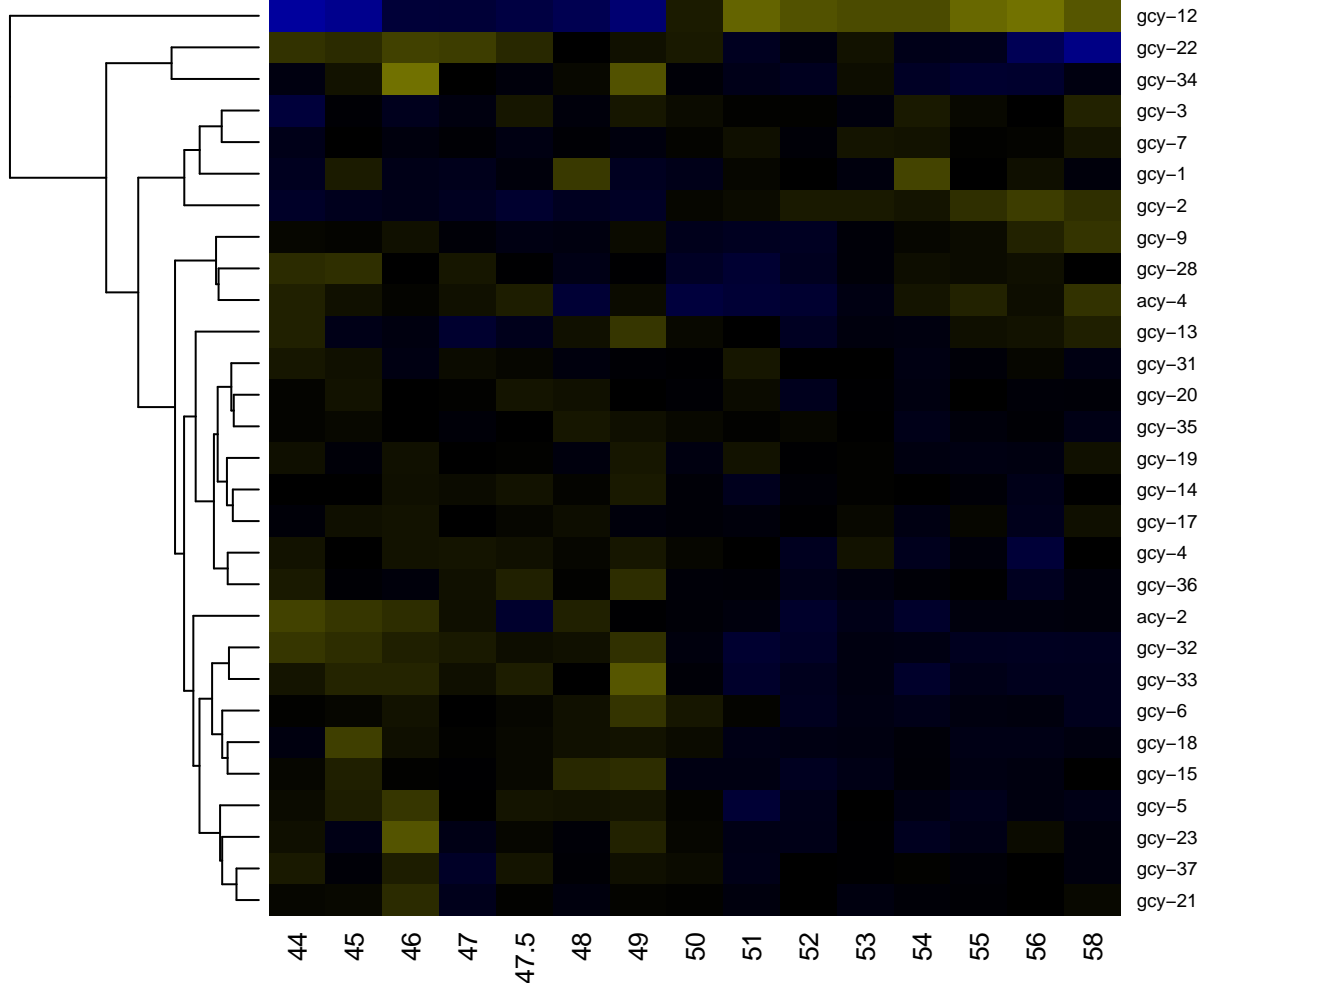

# ADP-ribosylation factor

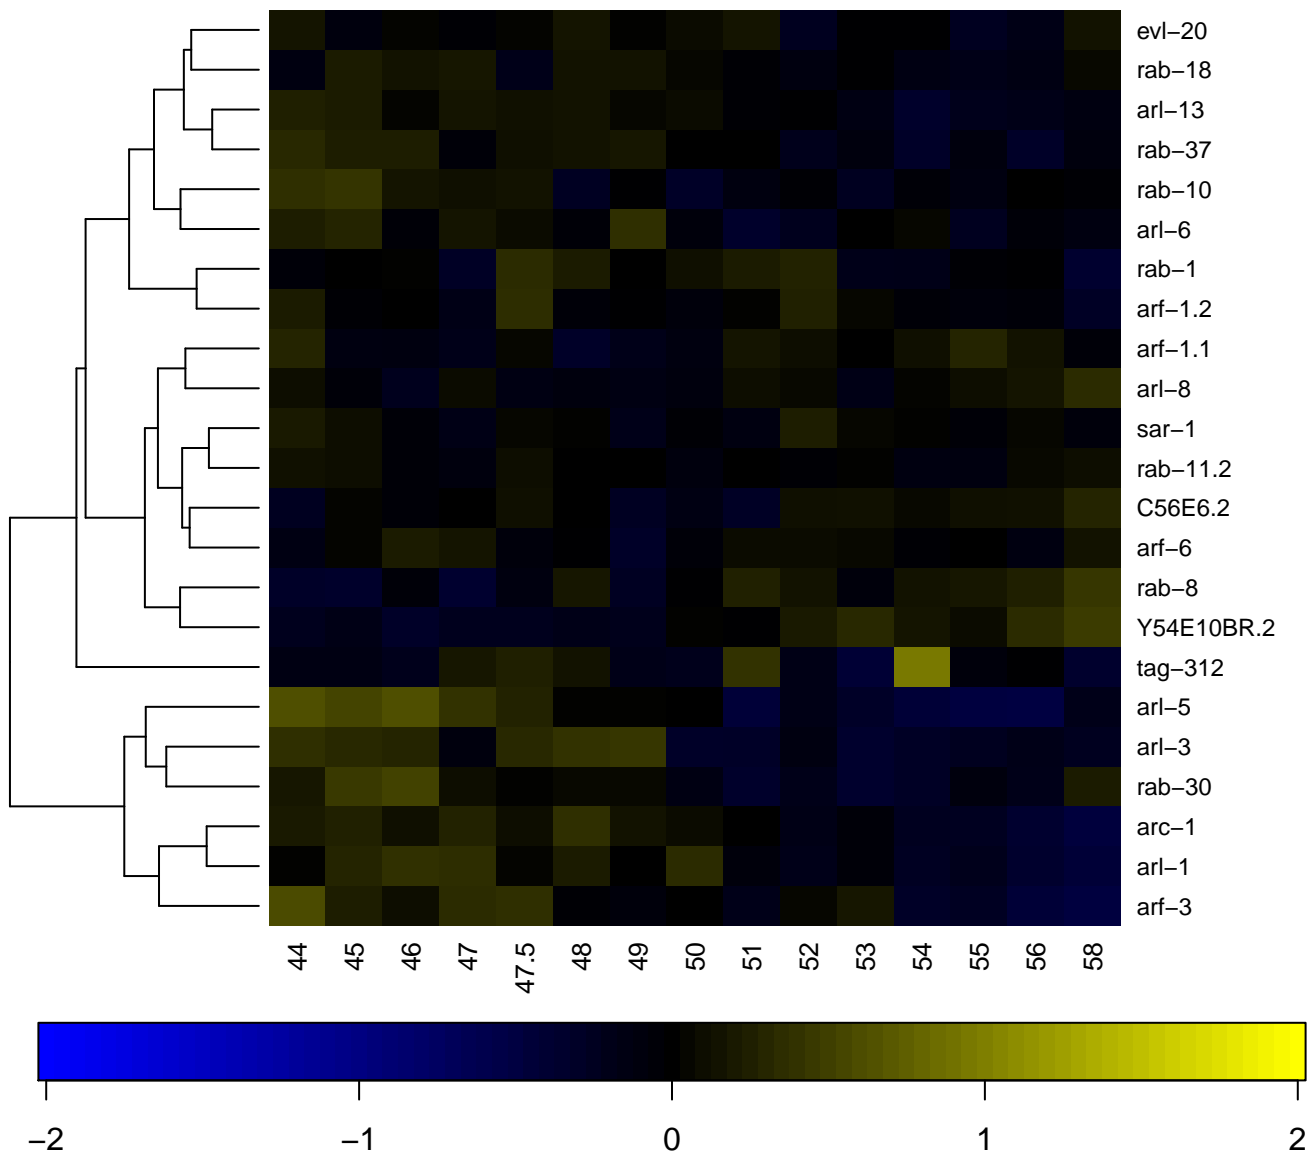

# ADP-ribosylation factor family

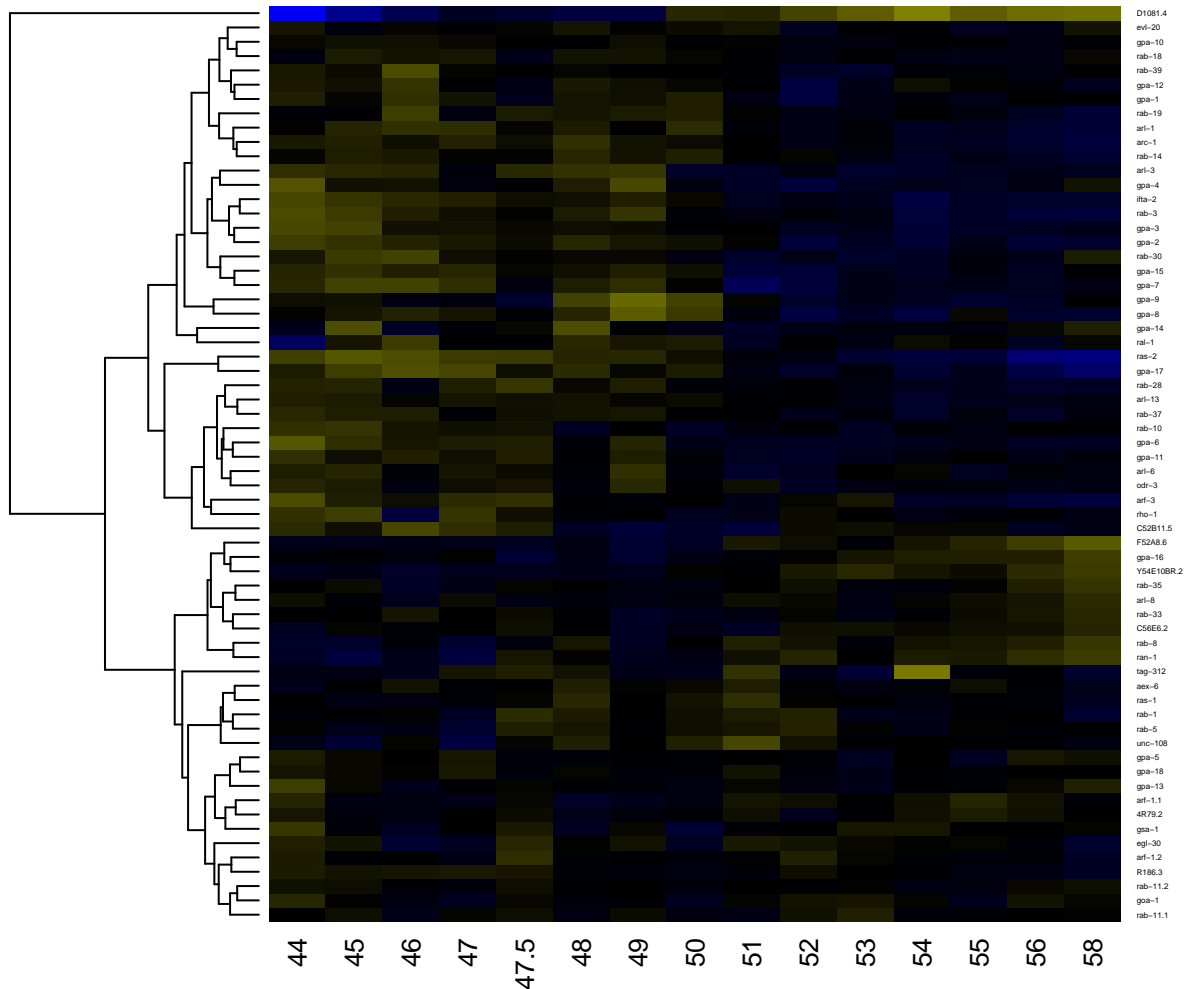

# AGC-kinase, C-terminal

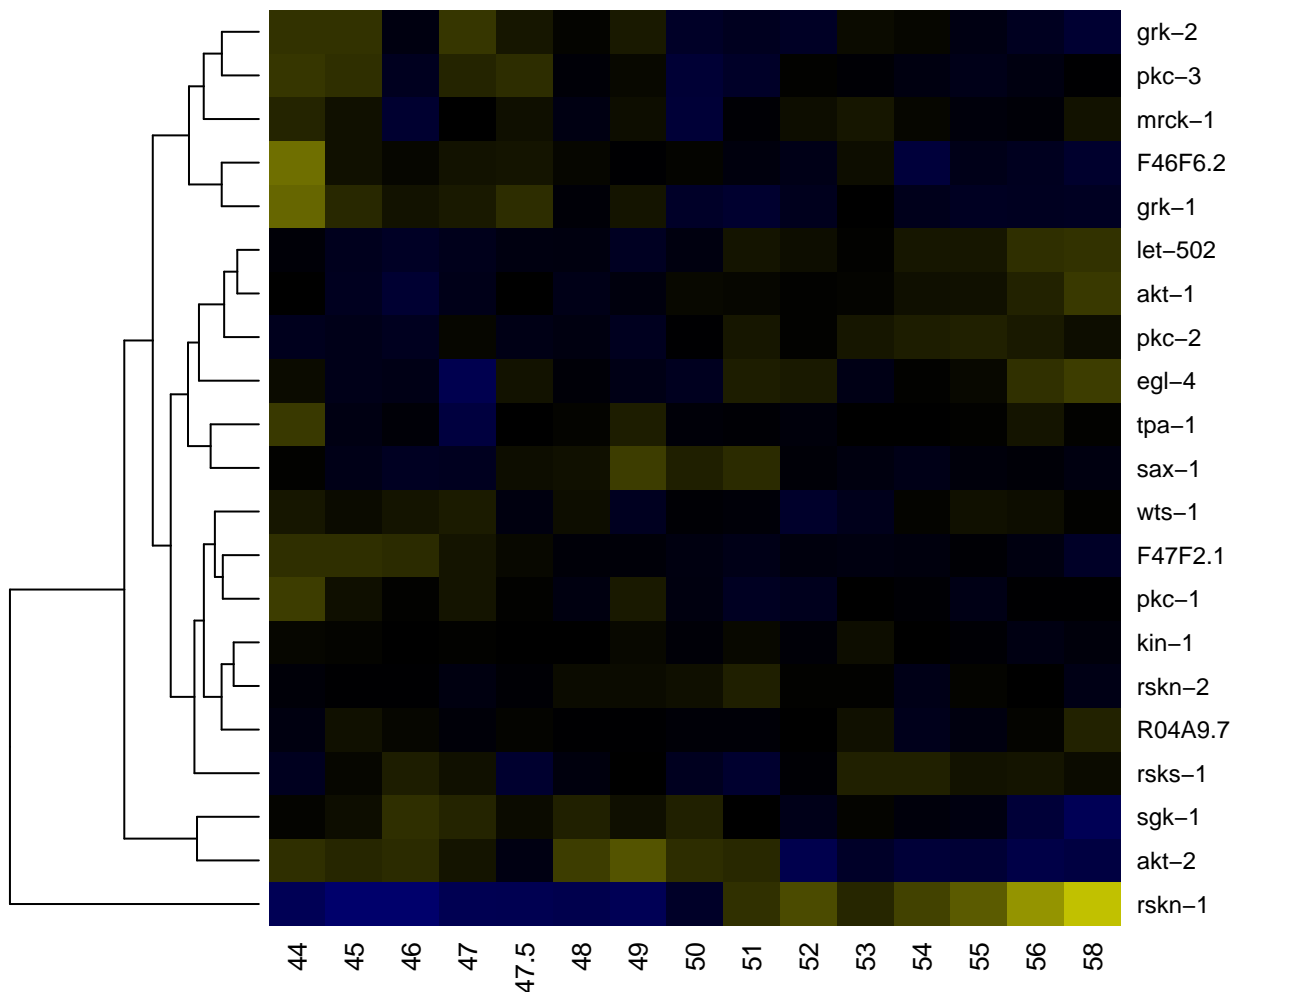

# AhpC/TSA family

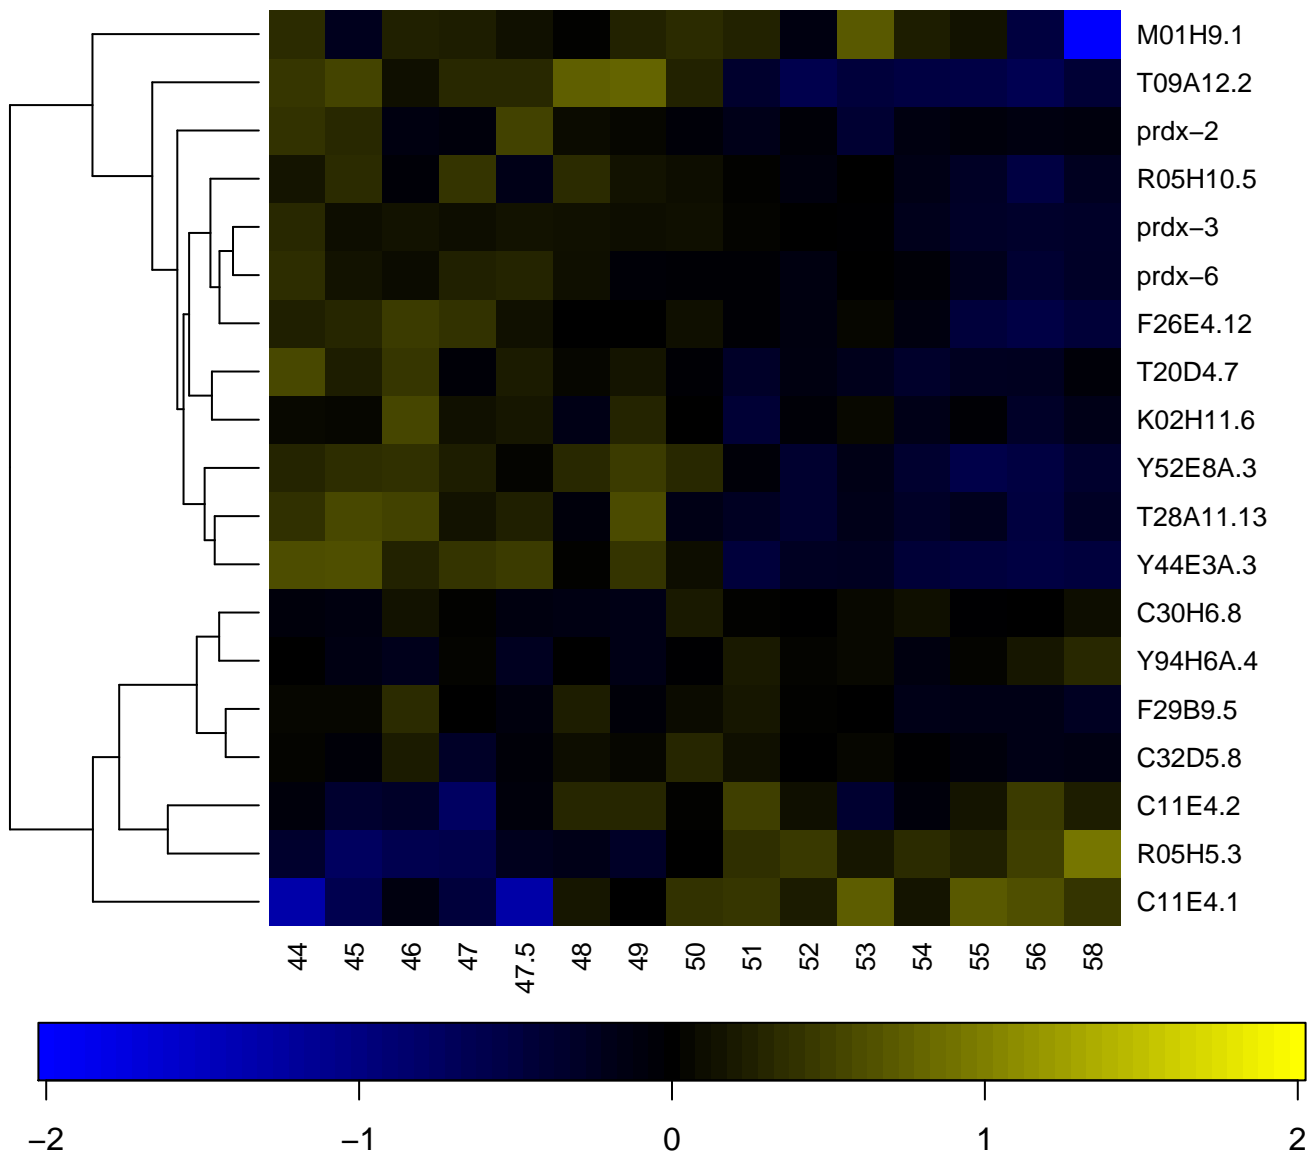











# Alcohol dehydrogenase, C-terminal

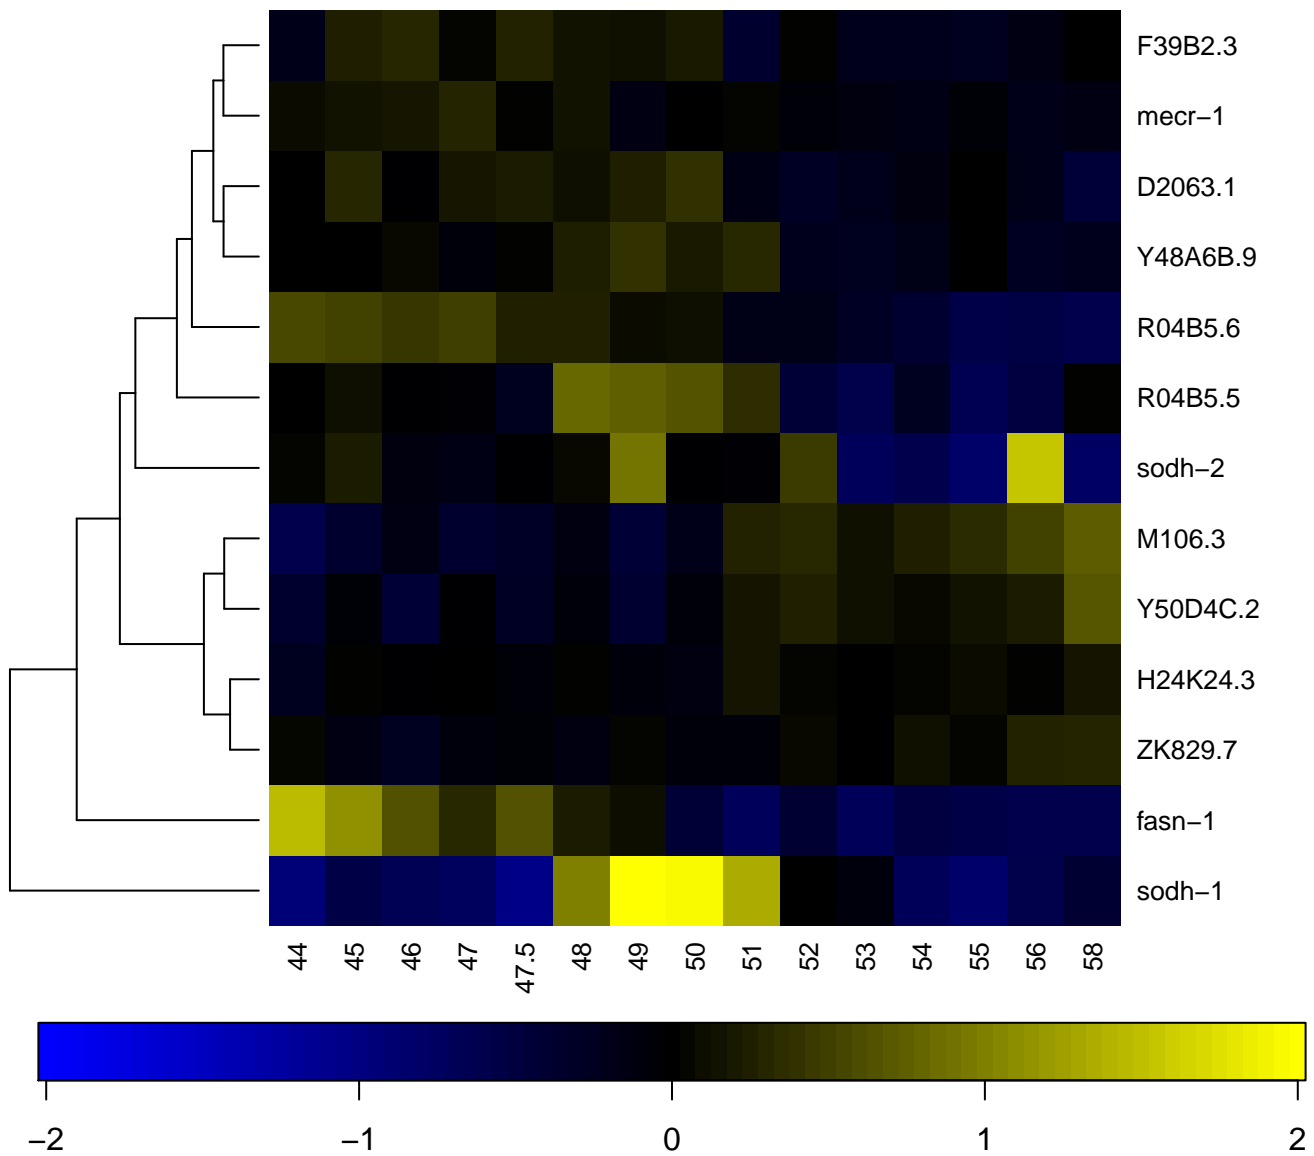





# Aldehyde dehydrogenase family

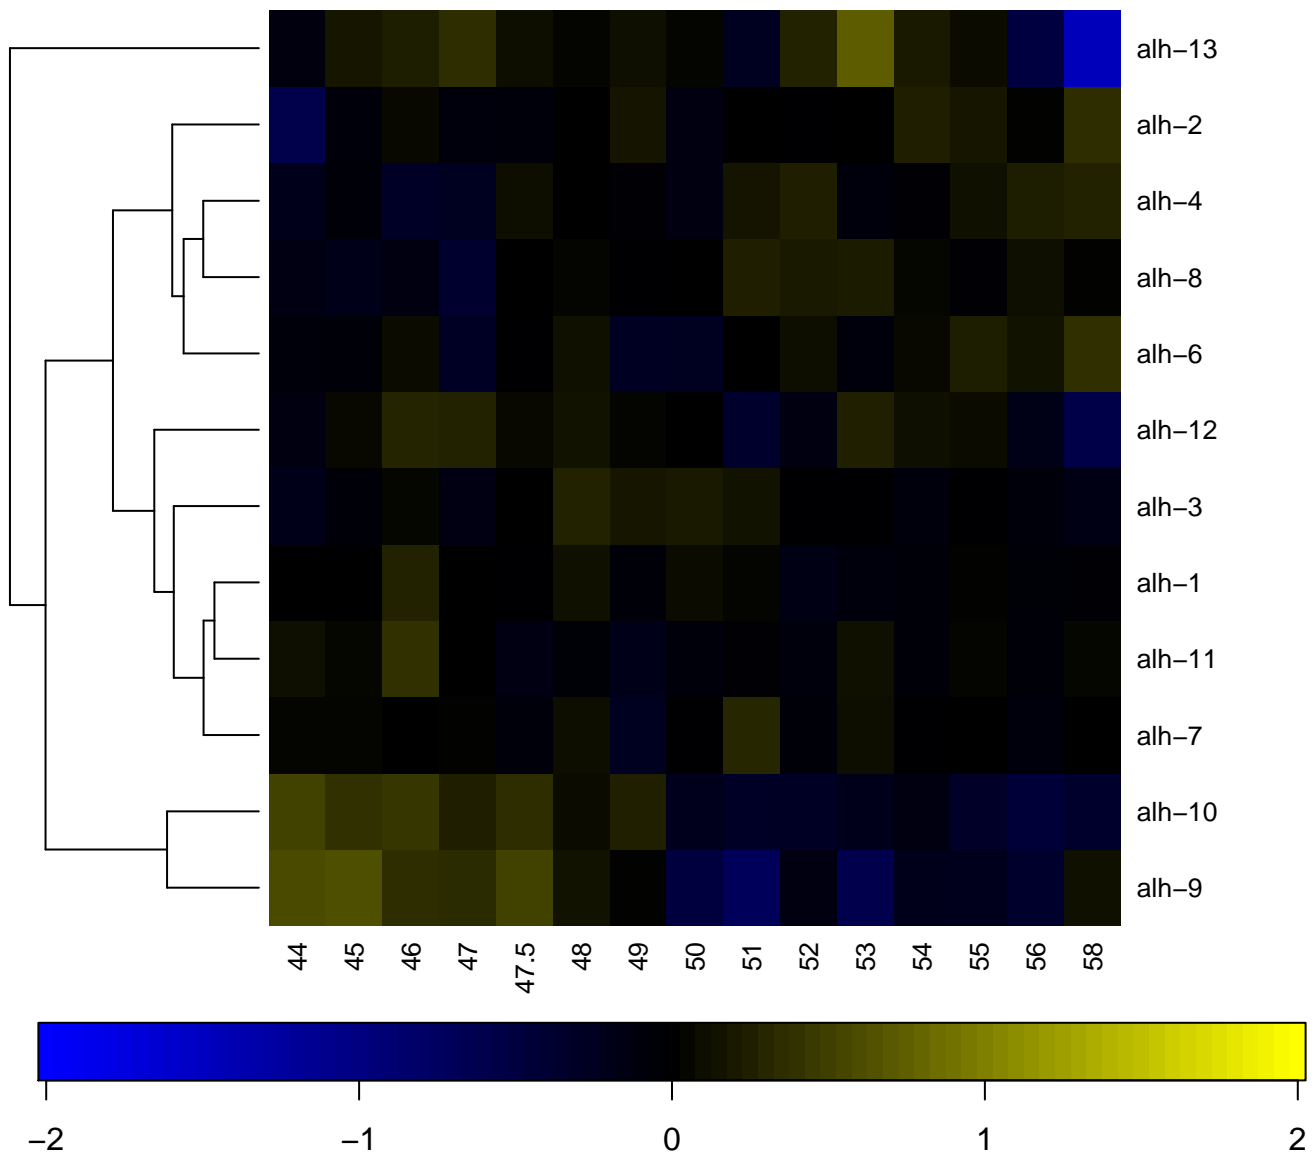

# Aldehyde dehydrogenase, C-terminal

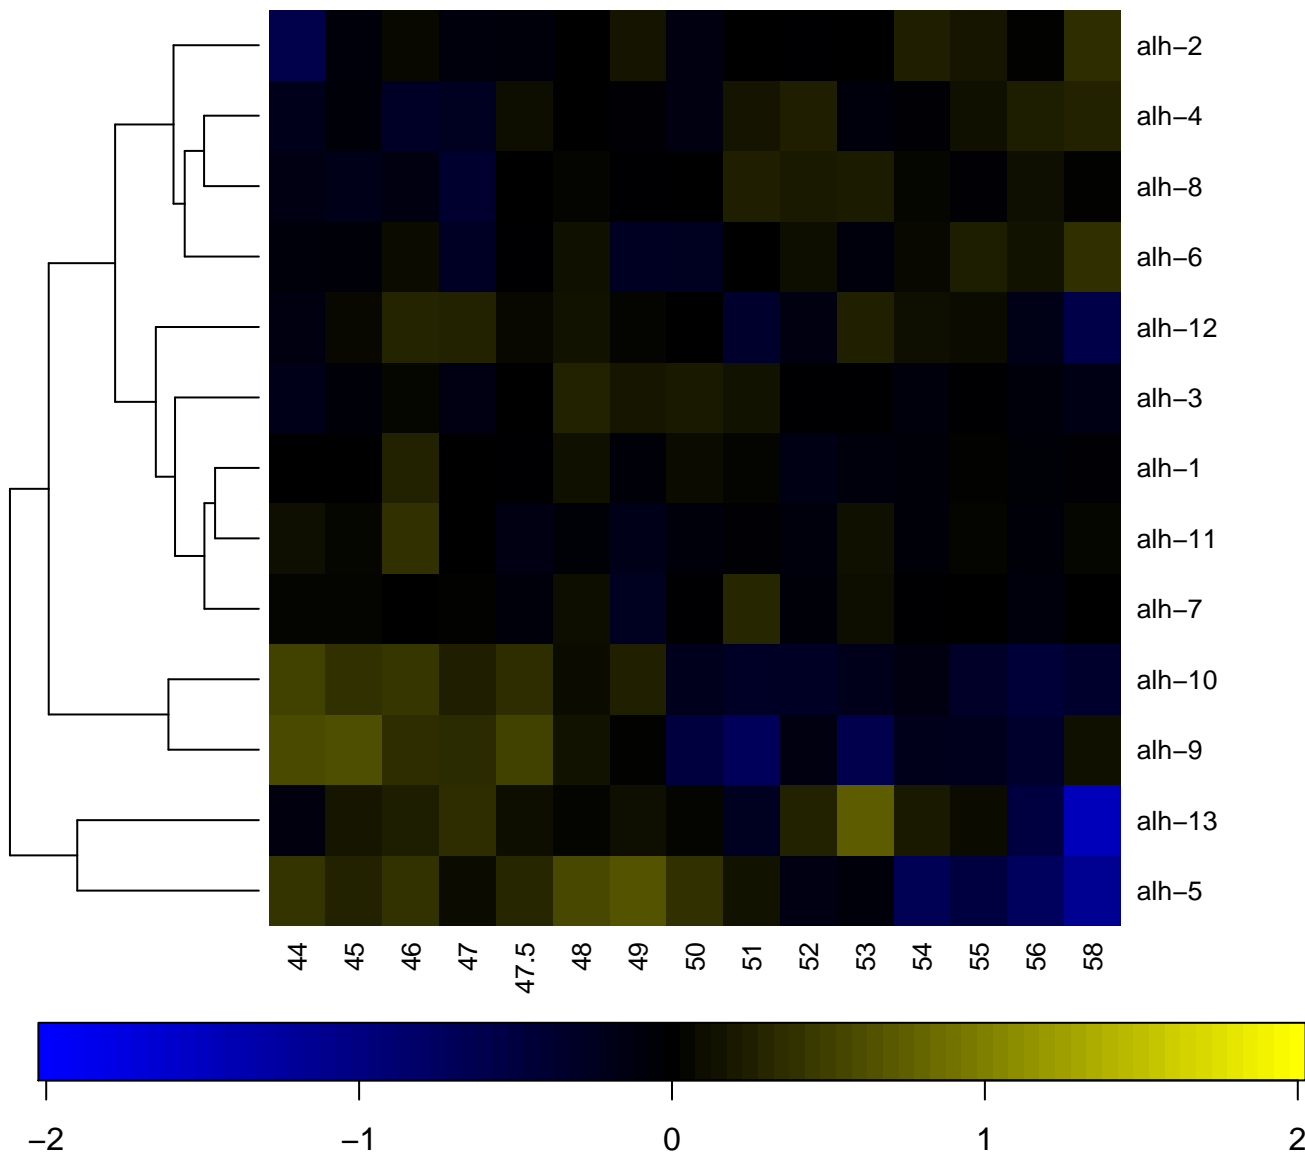

# Aldehyde dehydrogenase, conserved site

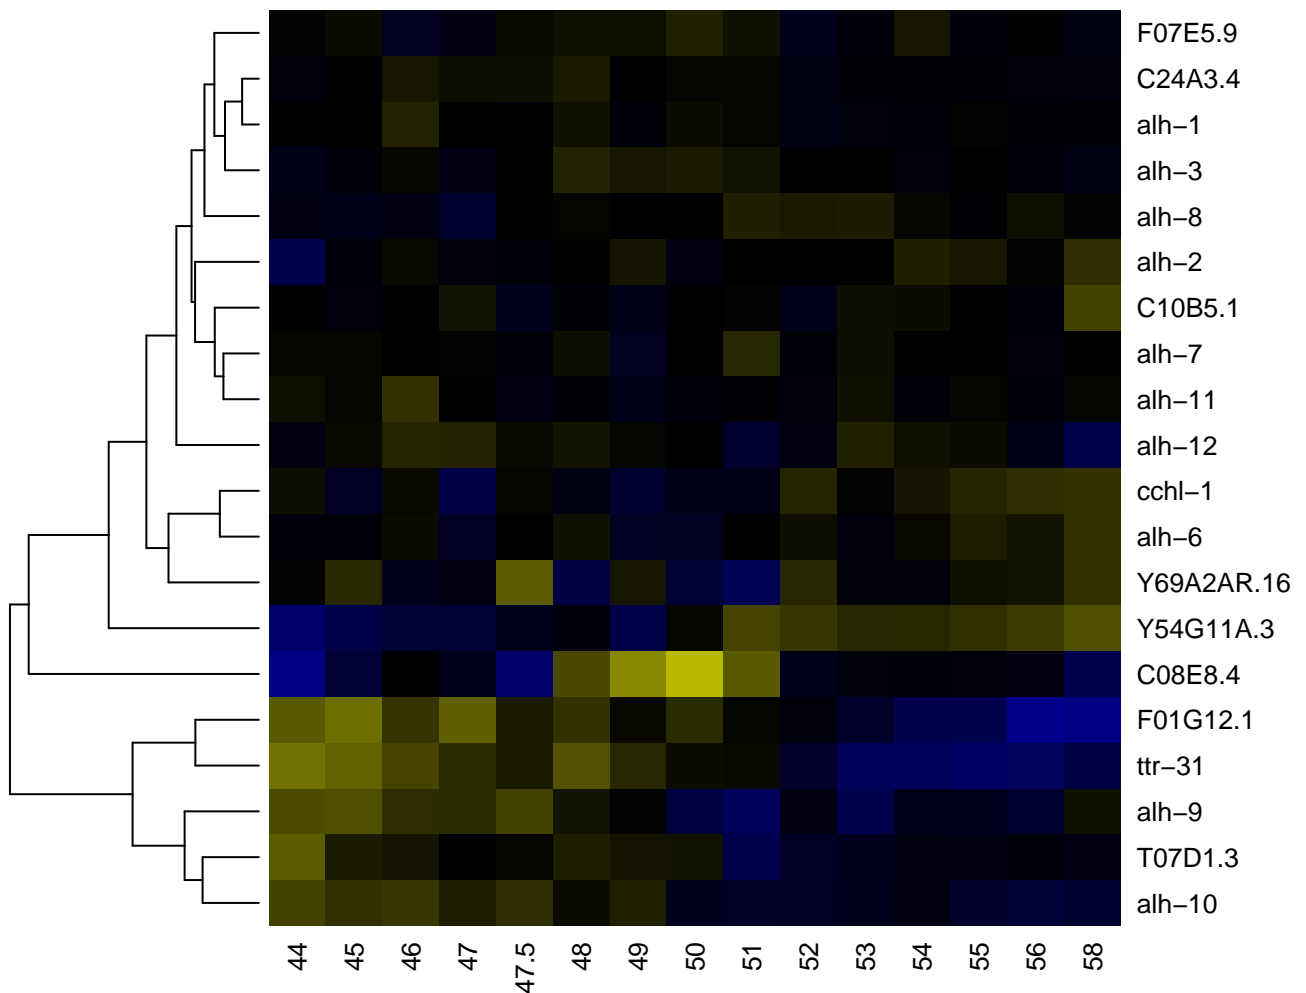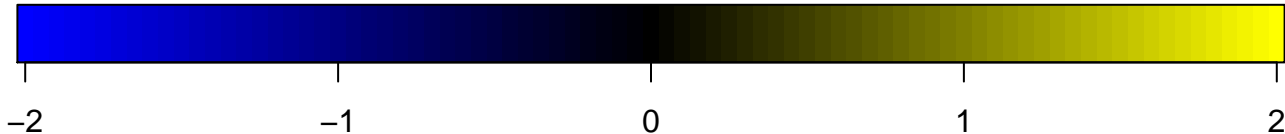





# Aldo/keto reductase

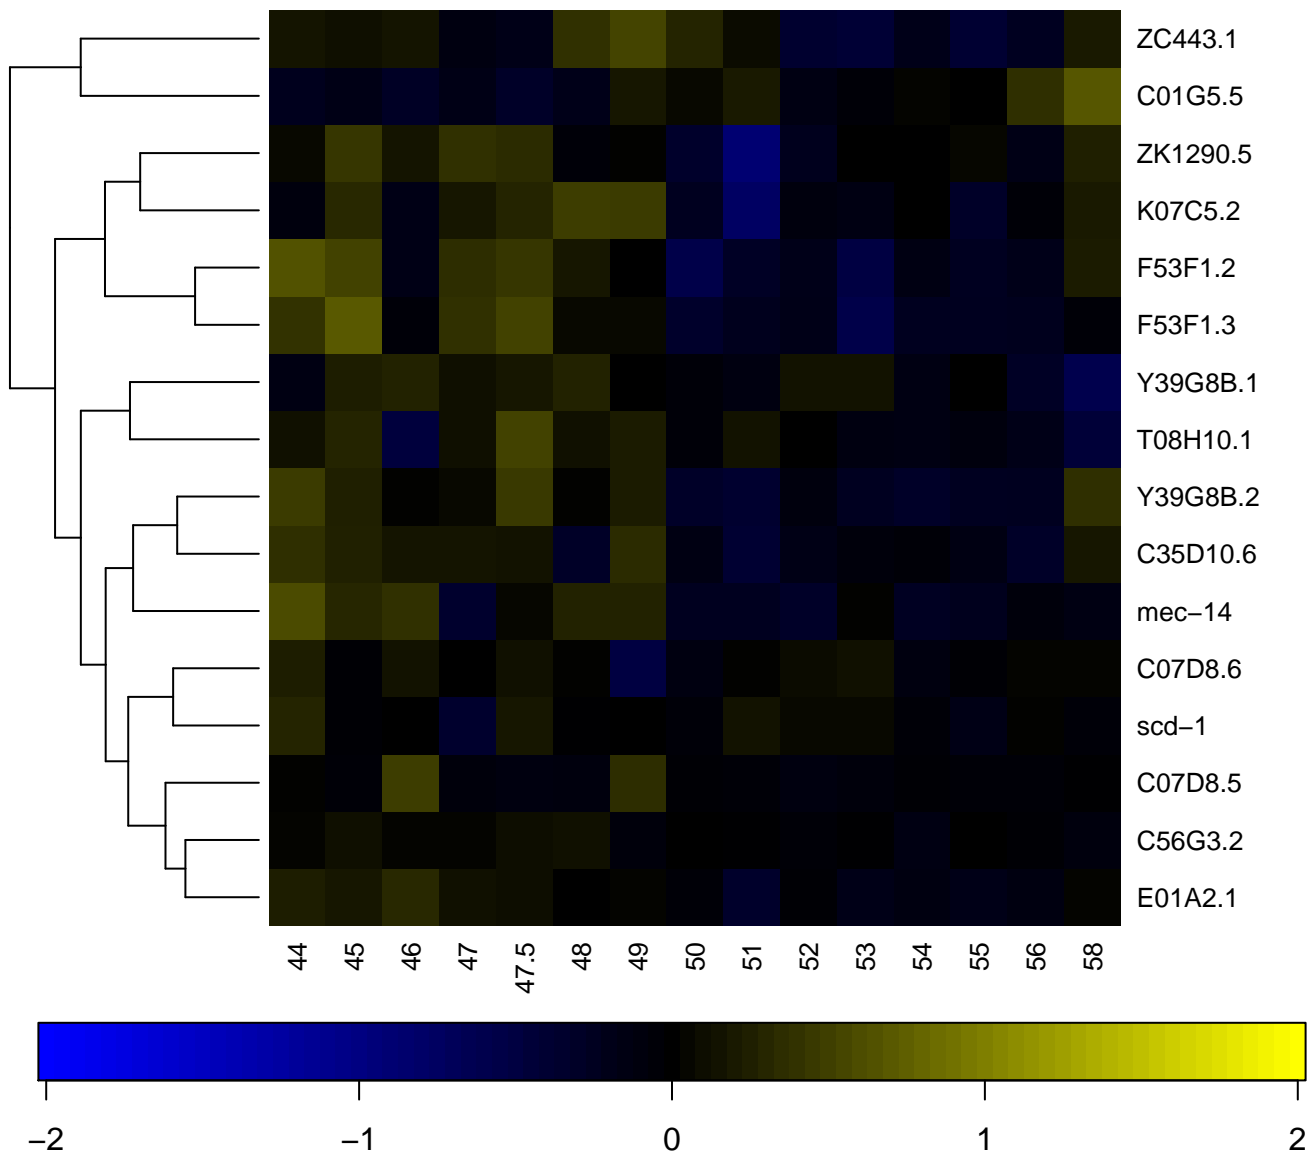

# Aldo/keto reductase family

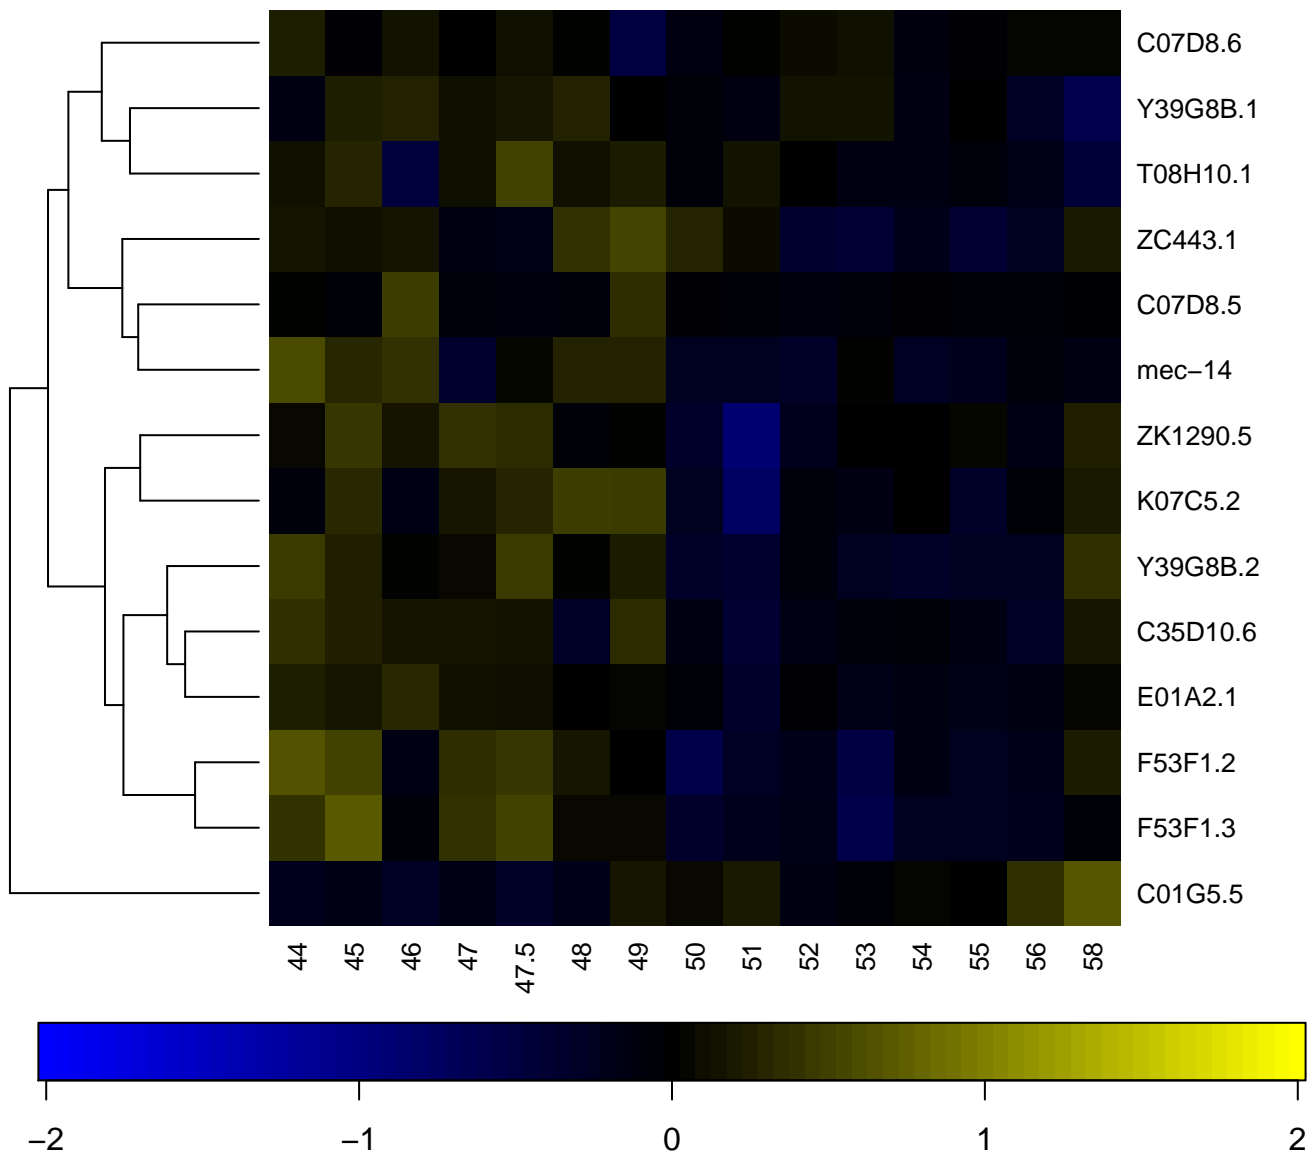







# Alkaline phosphatase-like, alpha/beta/alpha

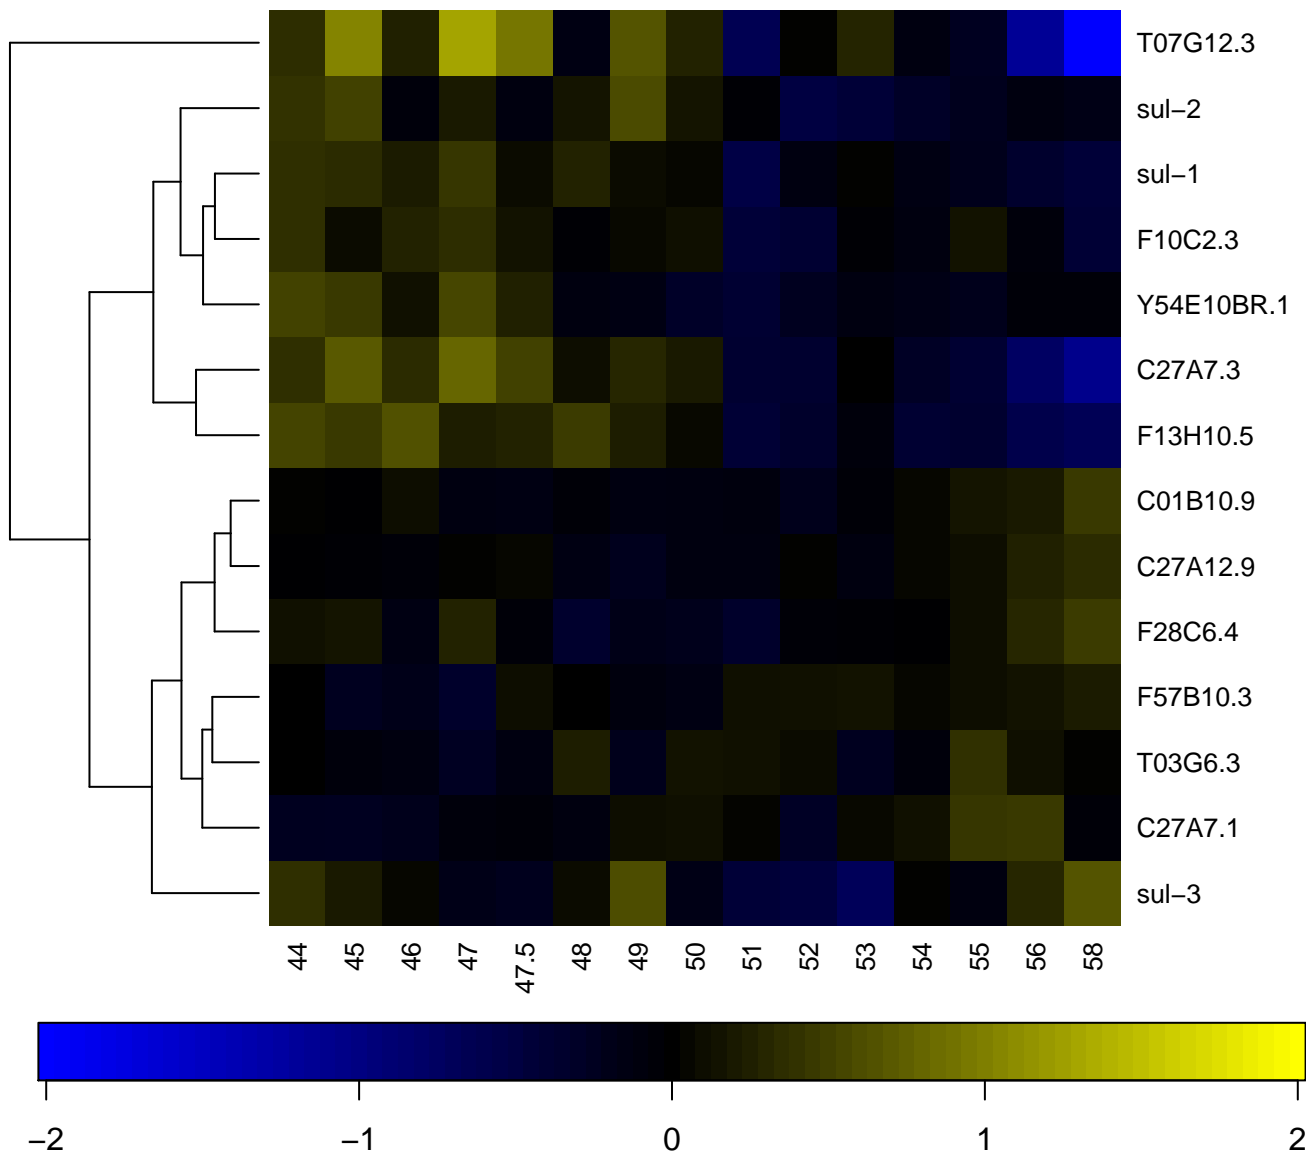

# hydroperoxide reductase/ Thiol specific antioxidant/ Mal a

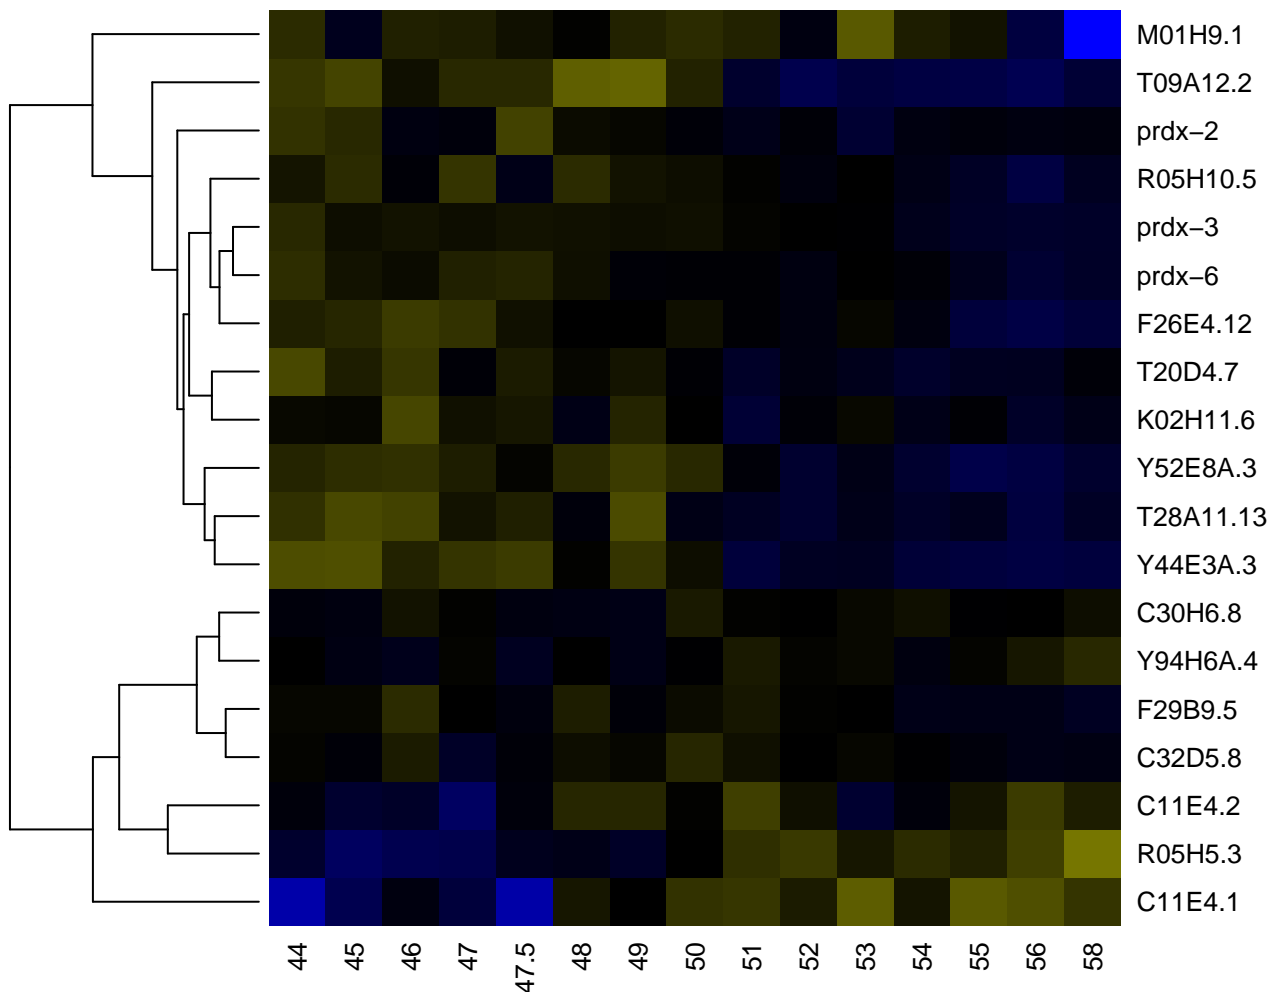



# Allergen V5/Tpx-1 related

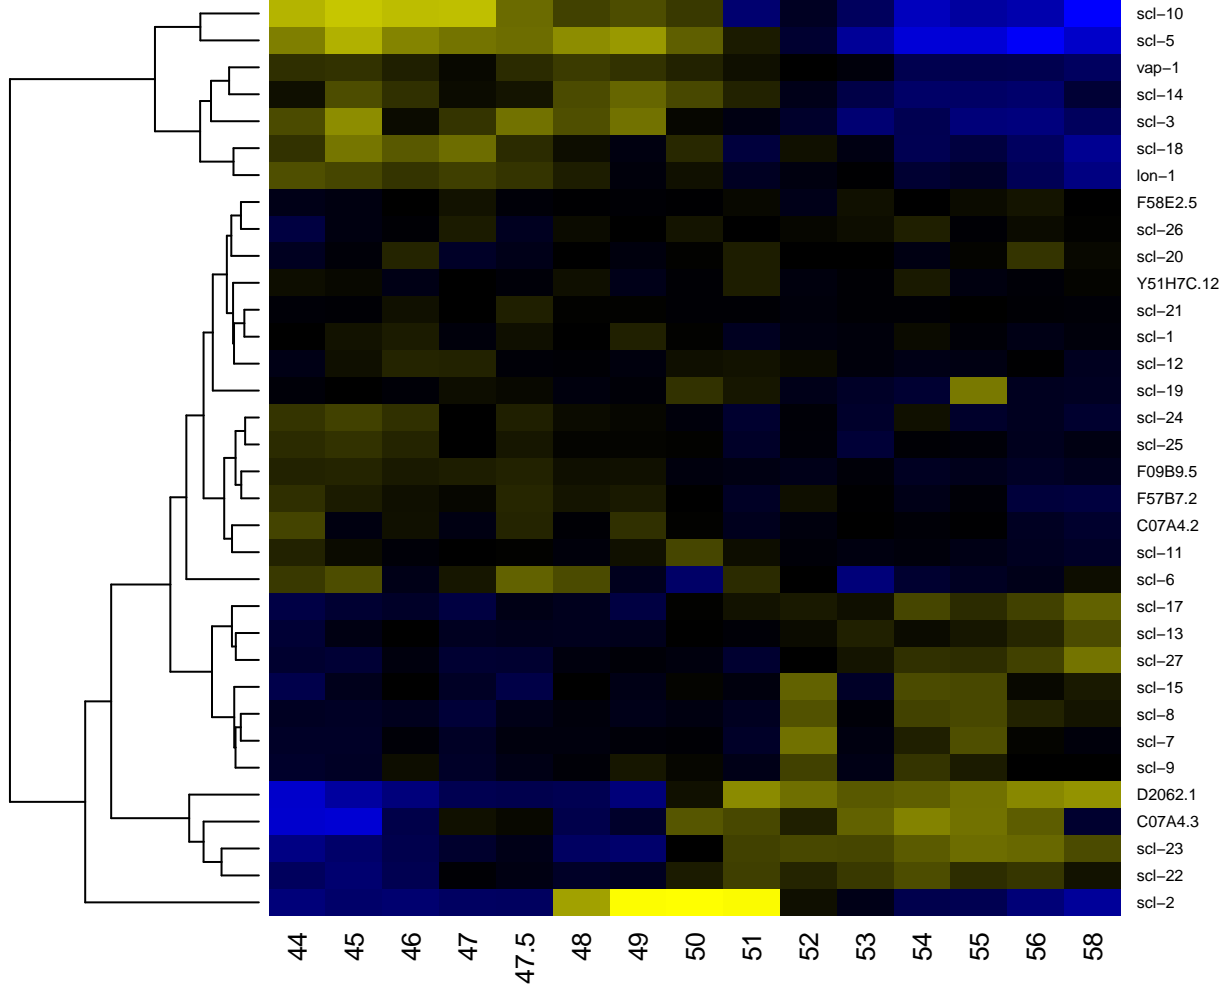

-2

-1

0

1

2

# Allergen V5/Tpx-1 related, conserved site

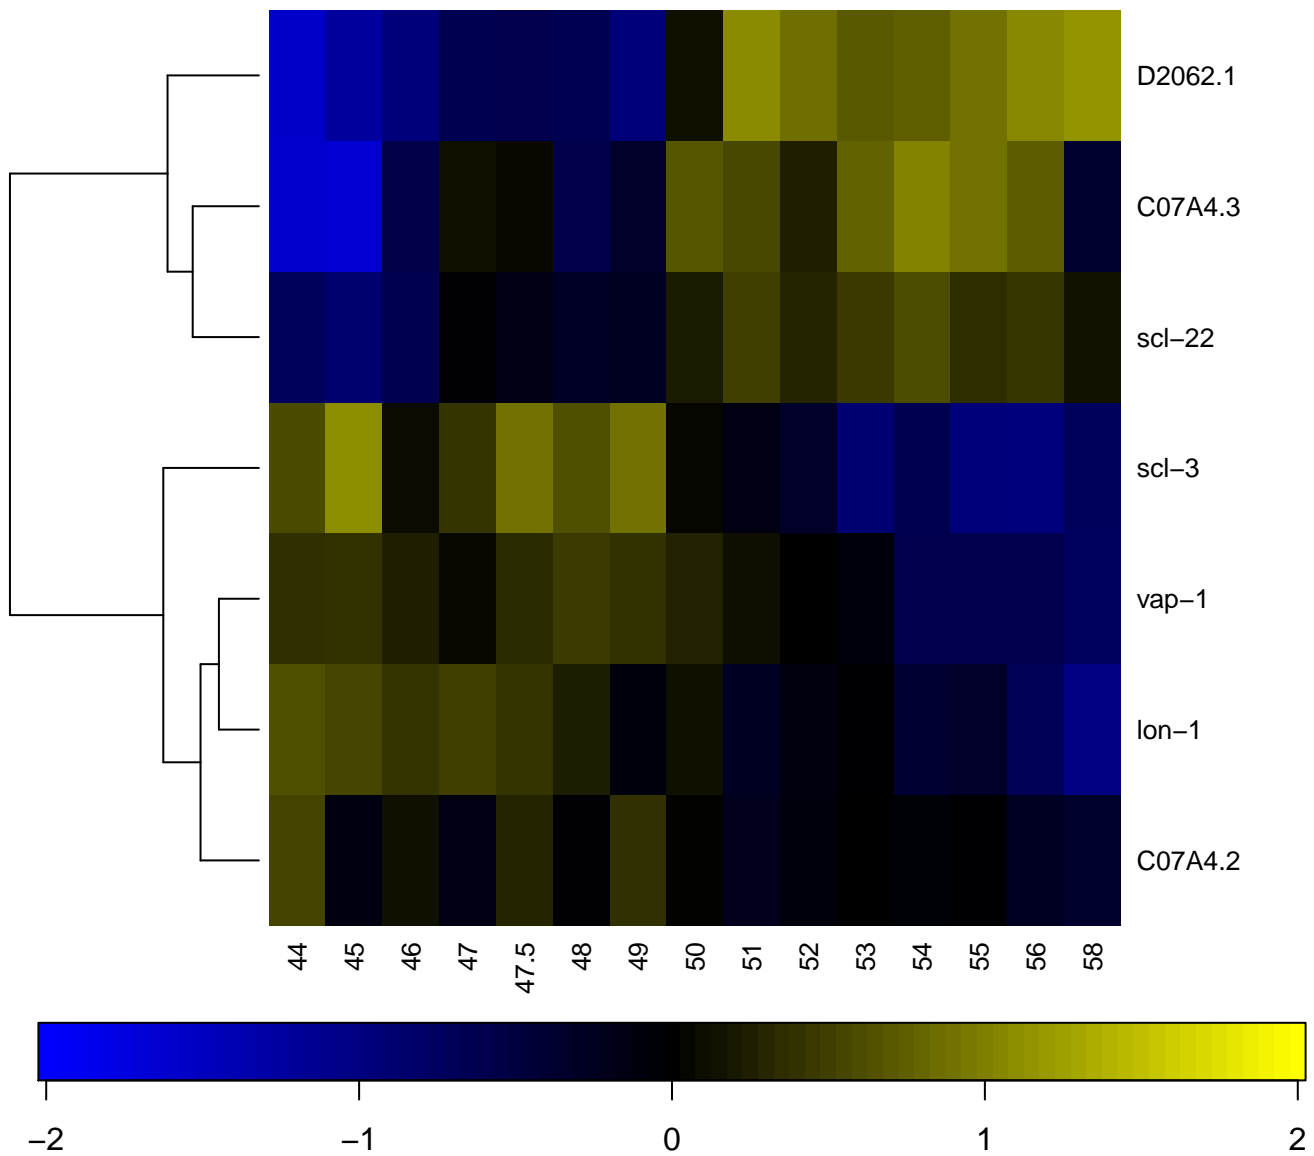

# Alpha crystallin/Heat shock protein

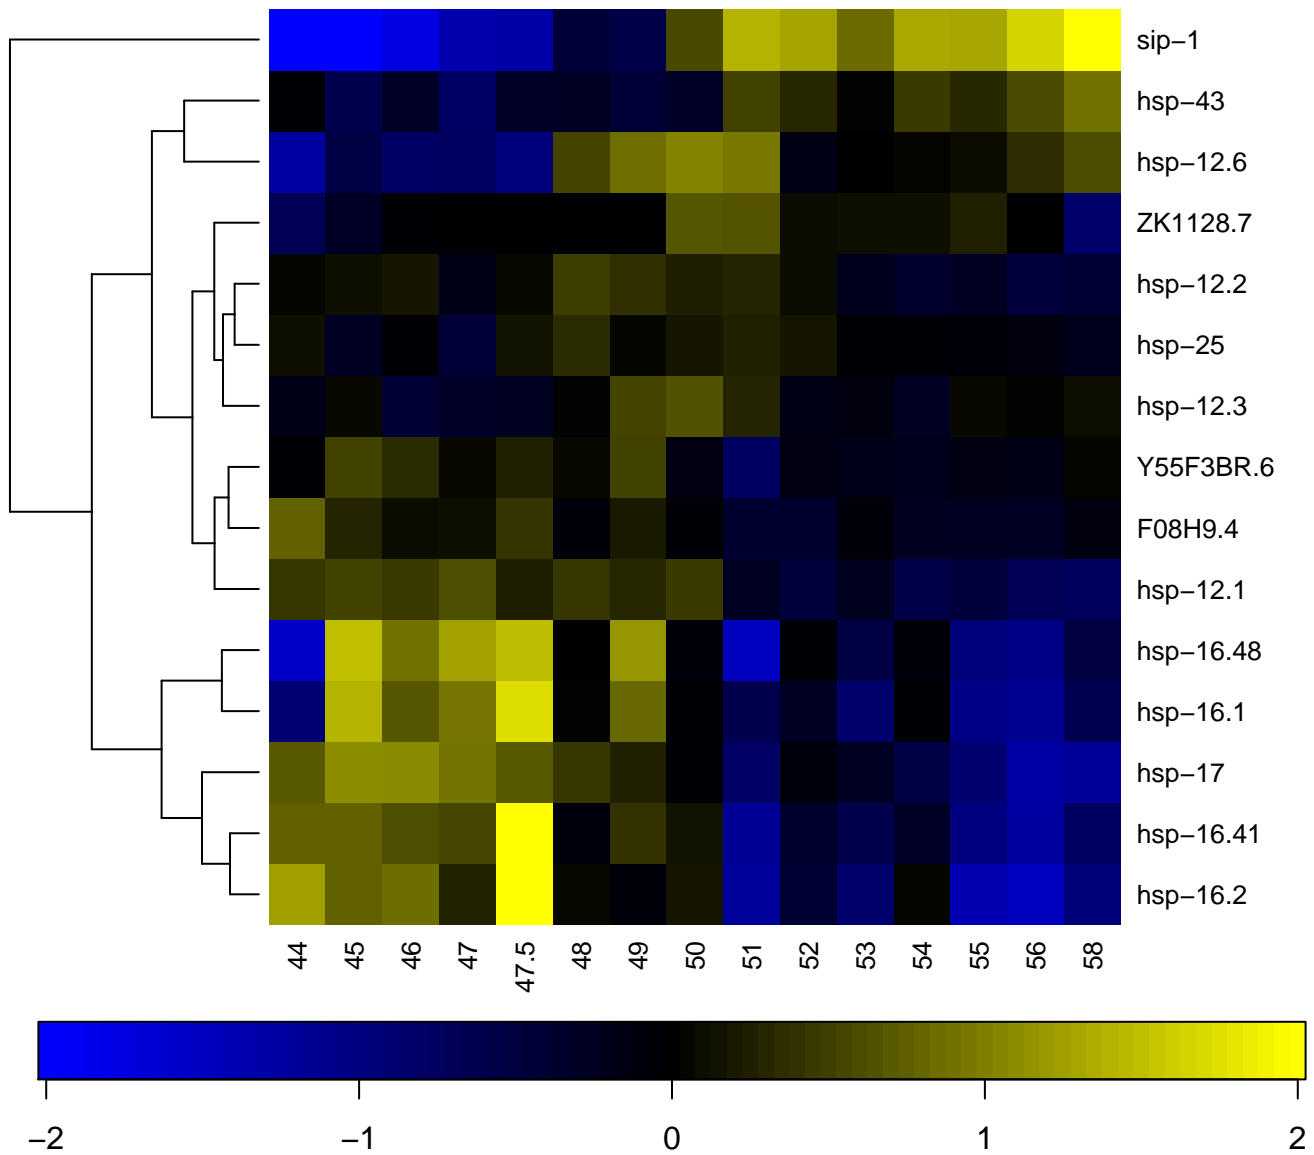

# Alpha tubulin

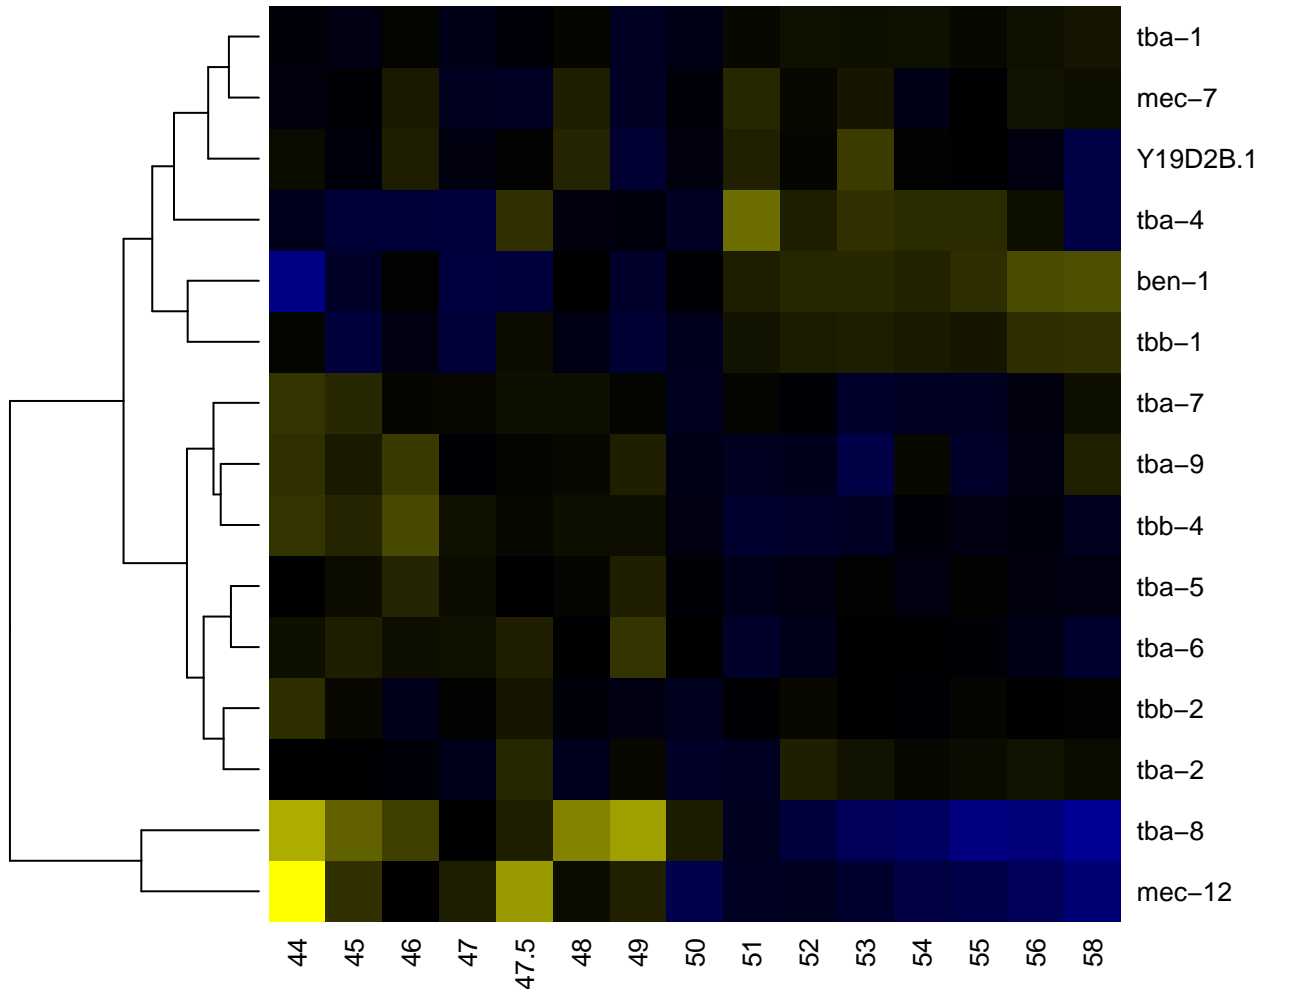

# alpha/beta hydrolase fold

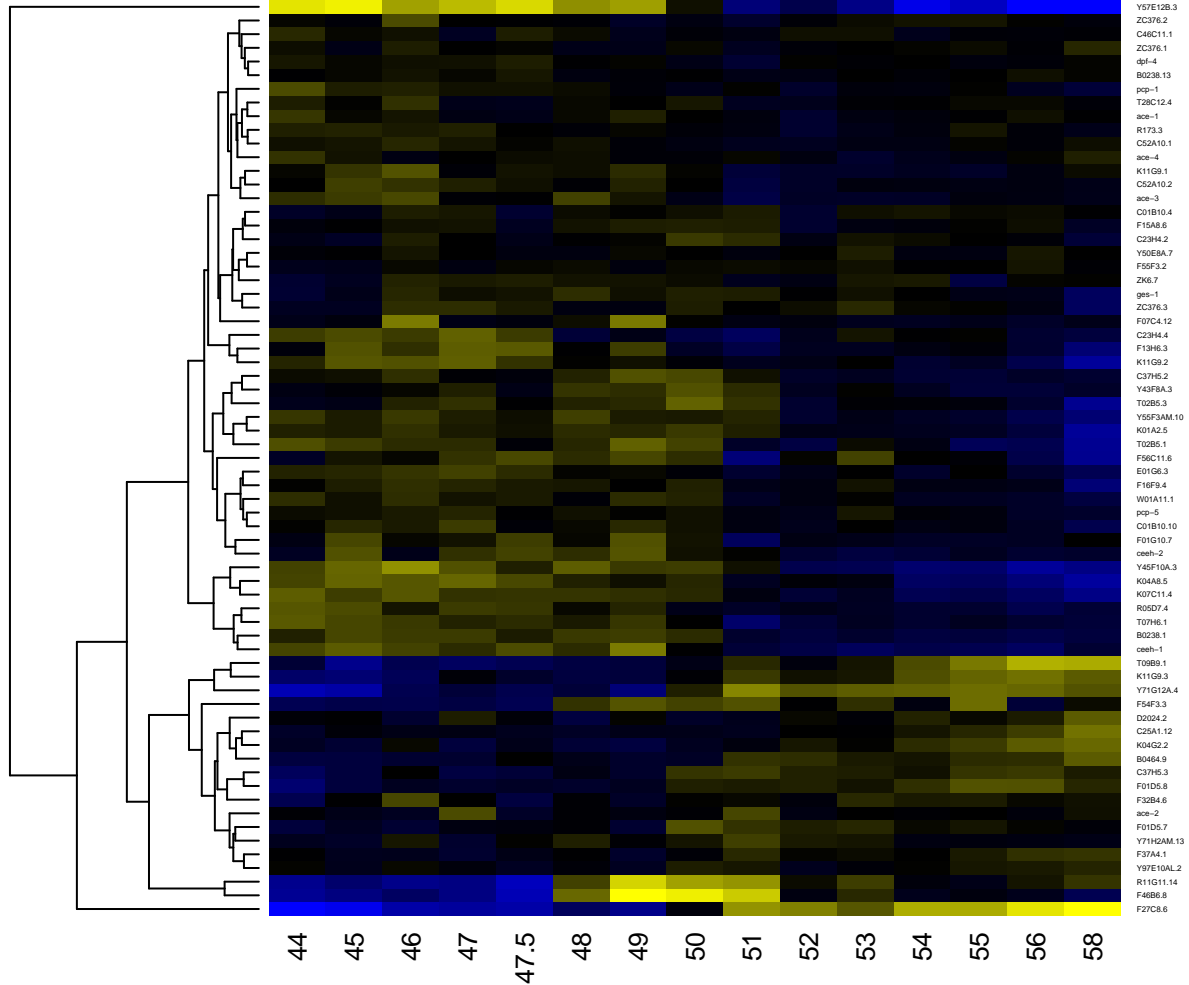













# Amidohydrolase 1

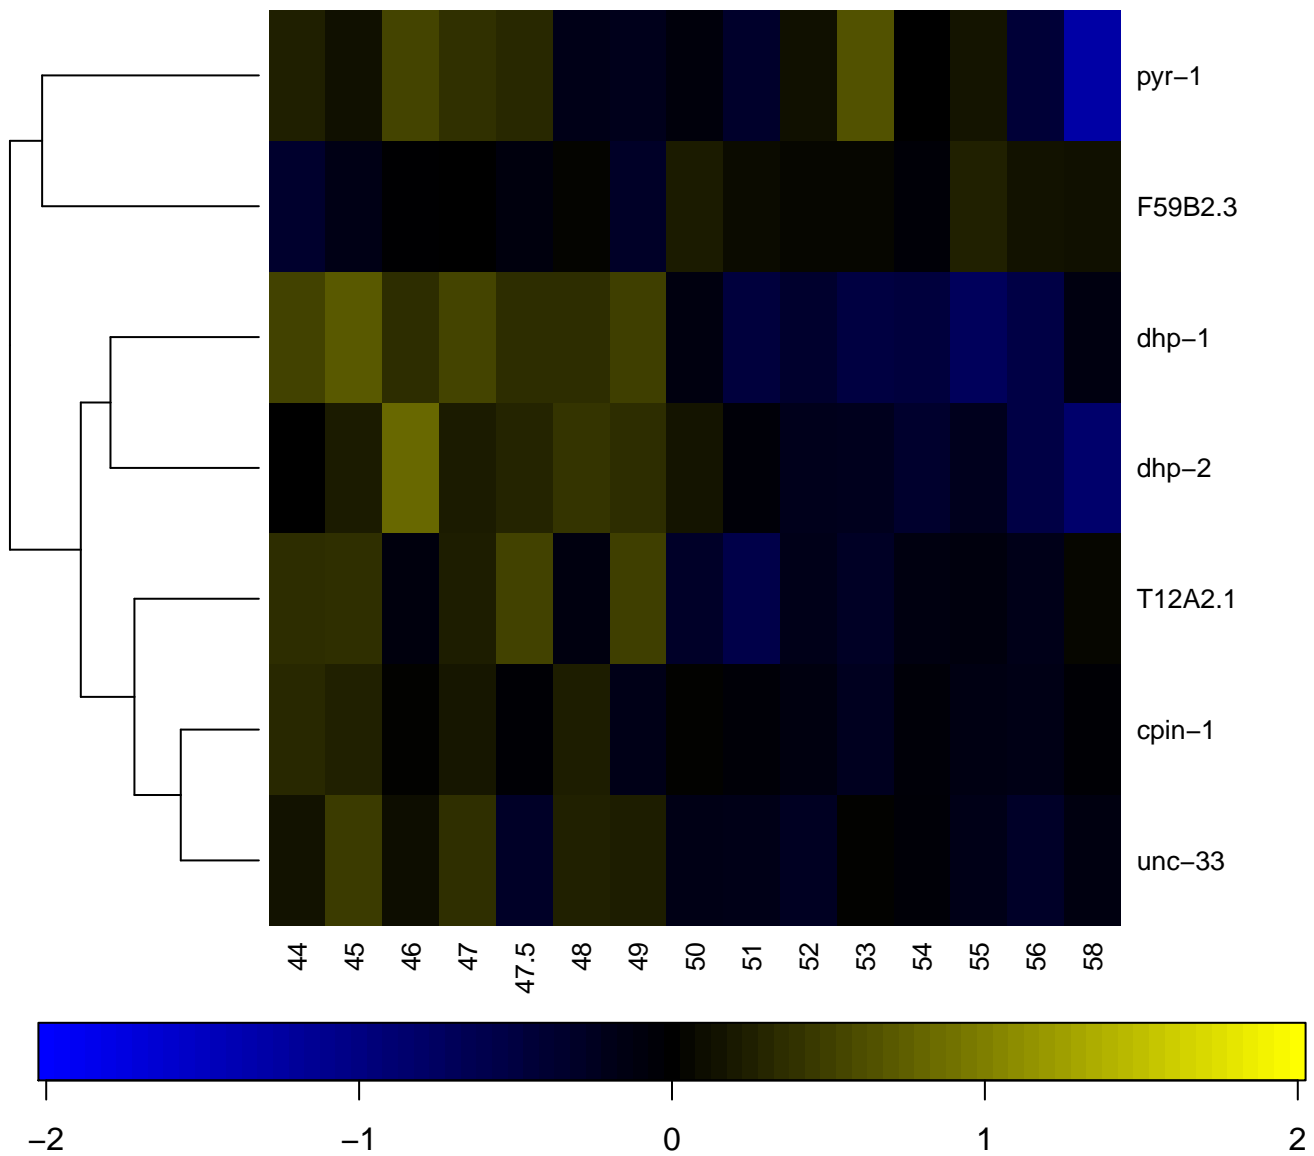

# Amidohydrolase family

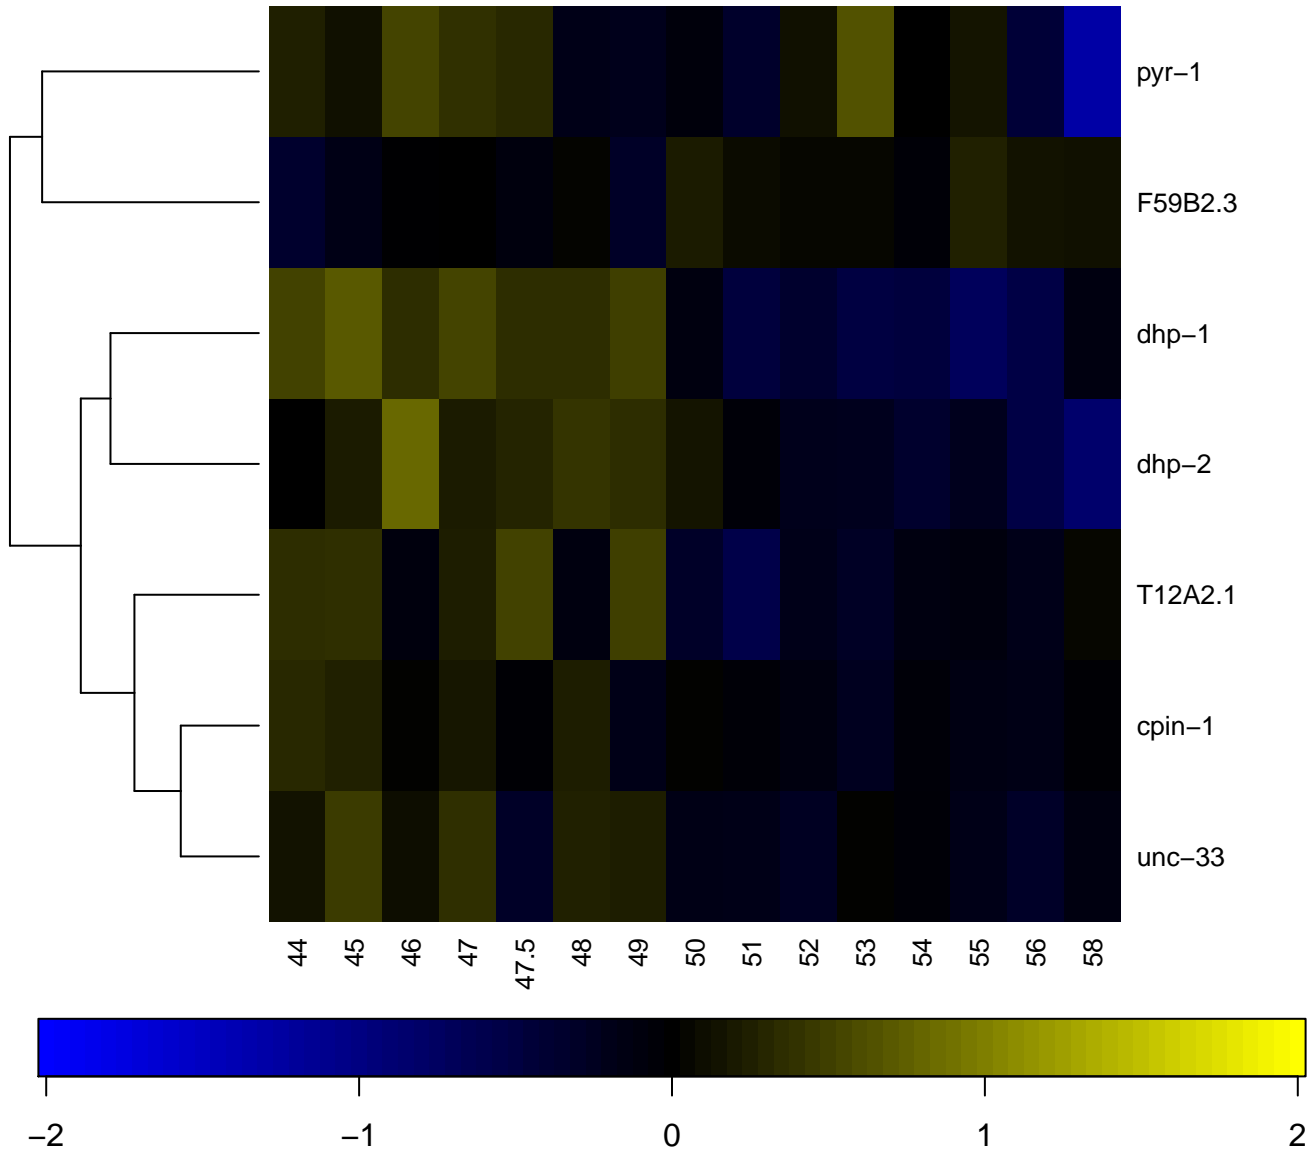



# Amine oxidase

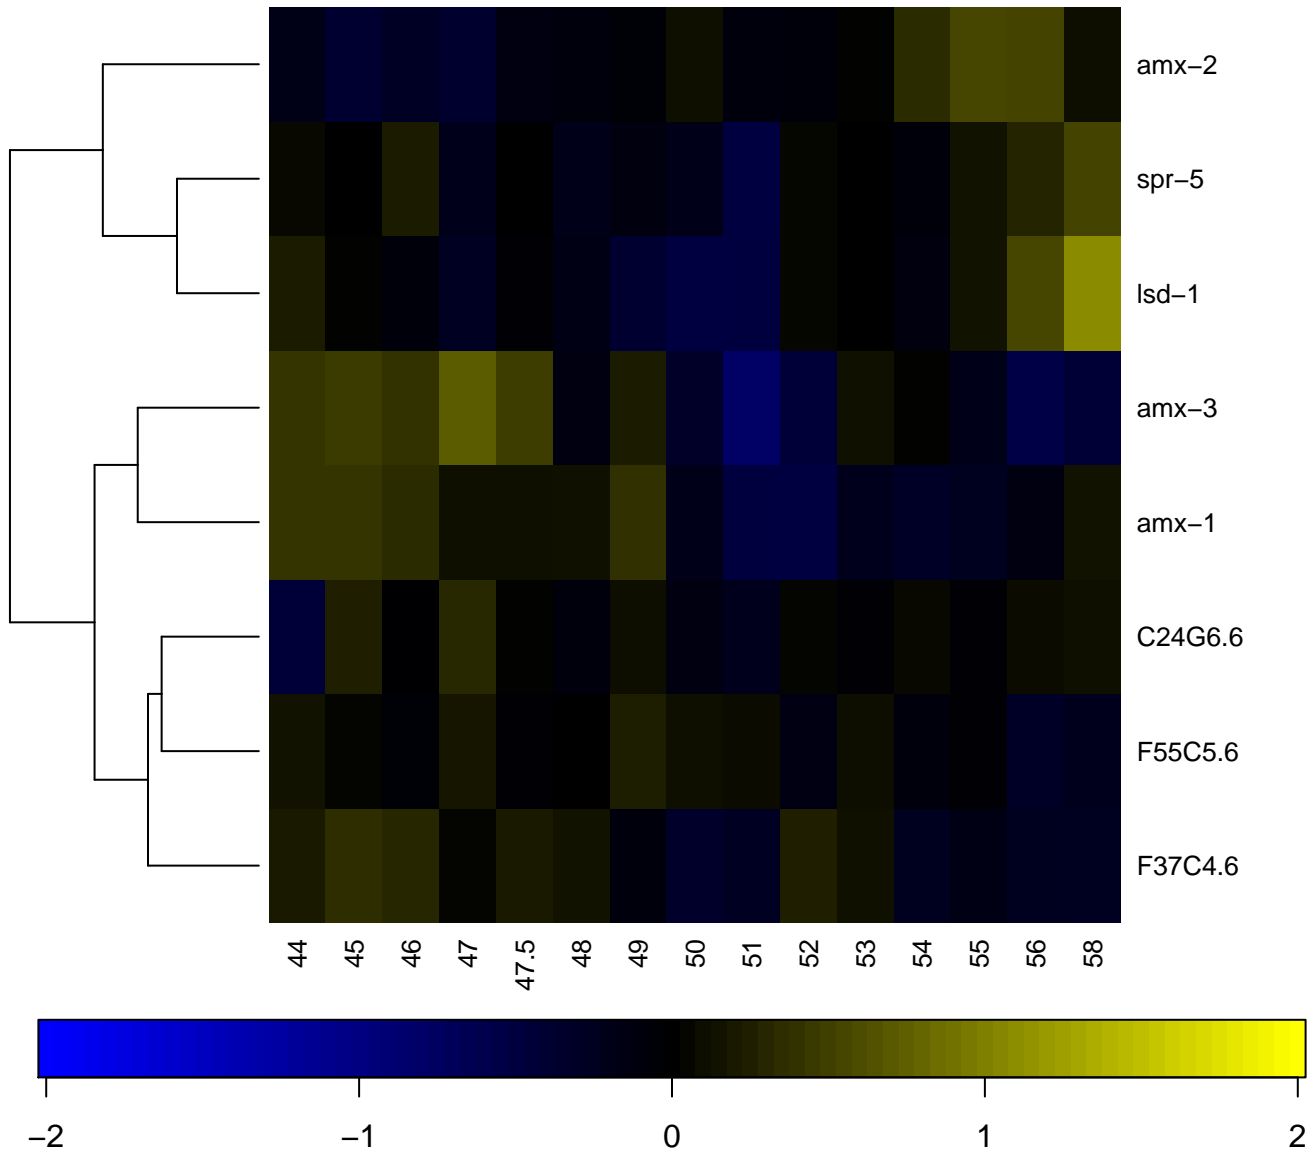







# Amino acid transporter, transmembrane

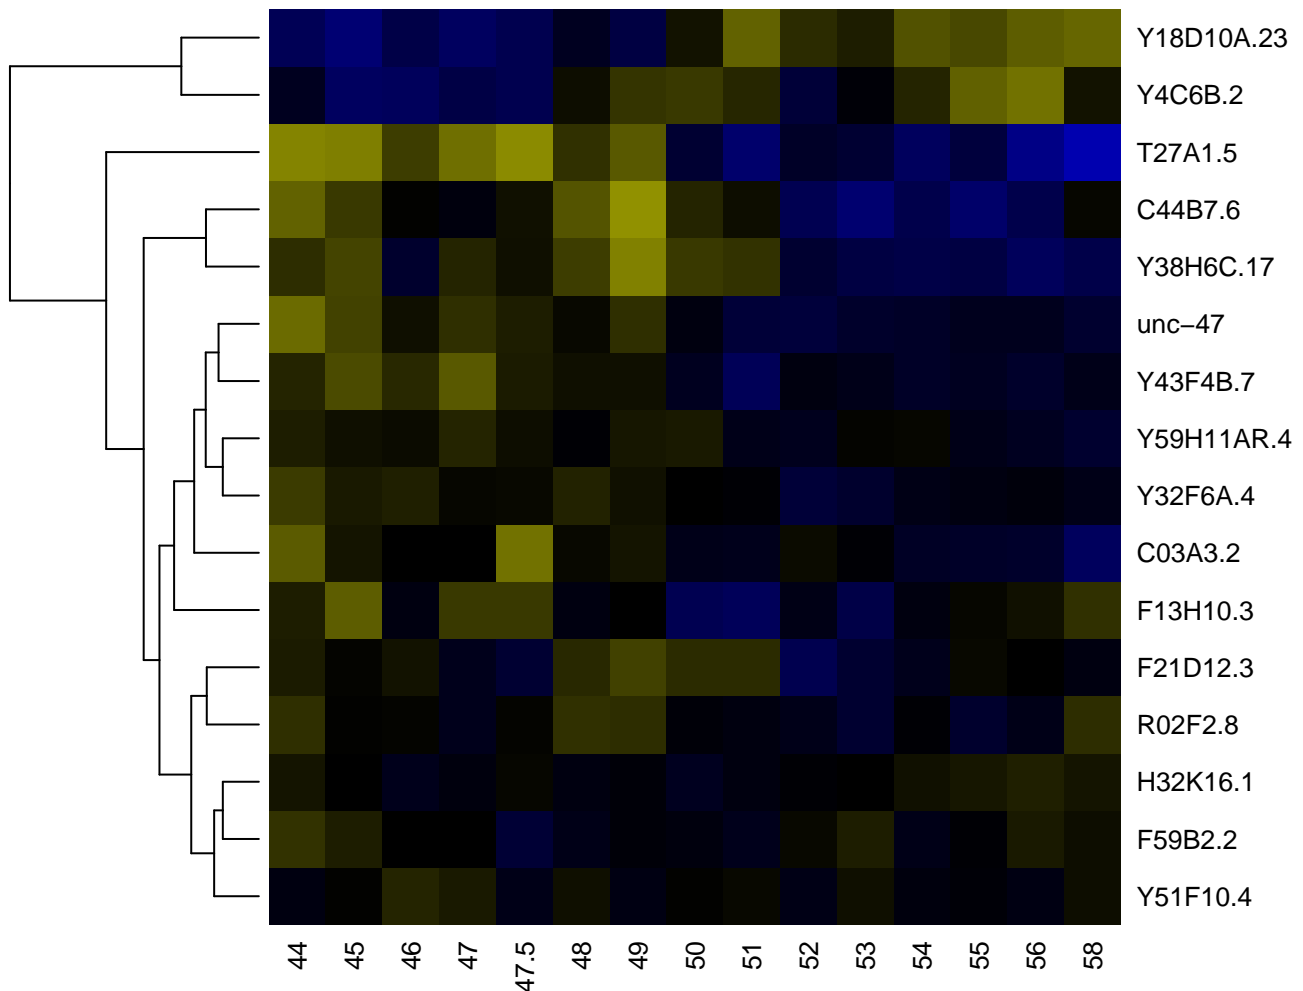





# Aminoacyl-tRNA synthetase, class I, conserved site

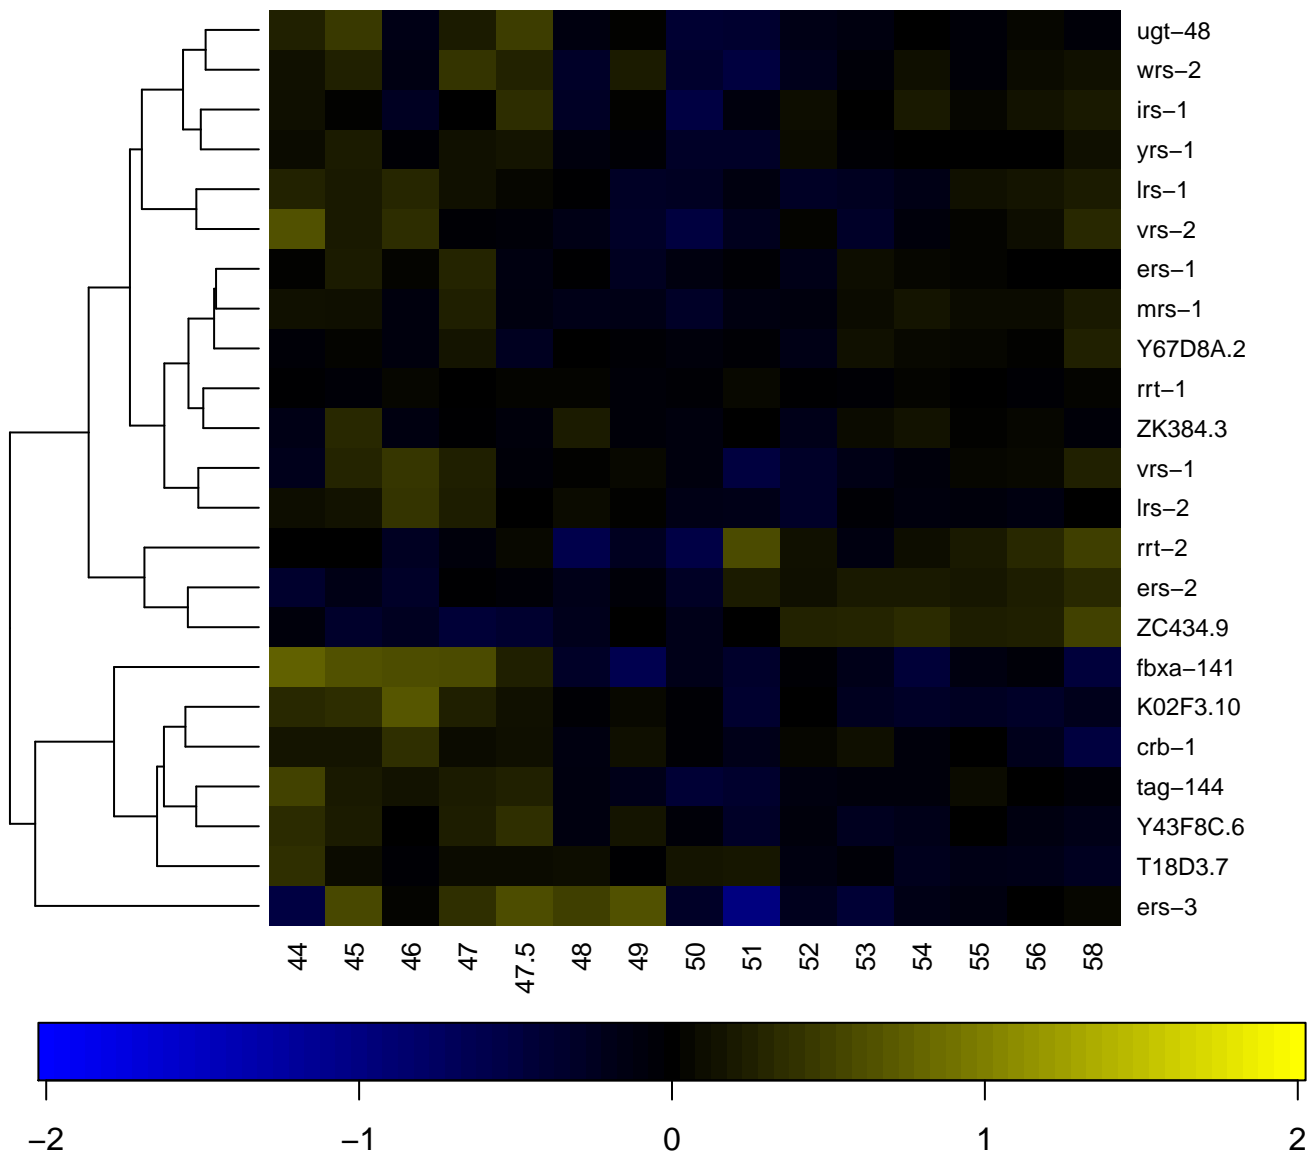







# inoacyl-tRNA synthetase, class II (G/ H/ P/ S), conserved do

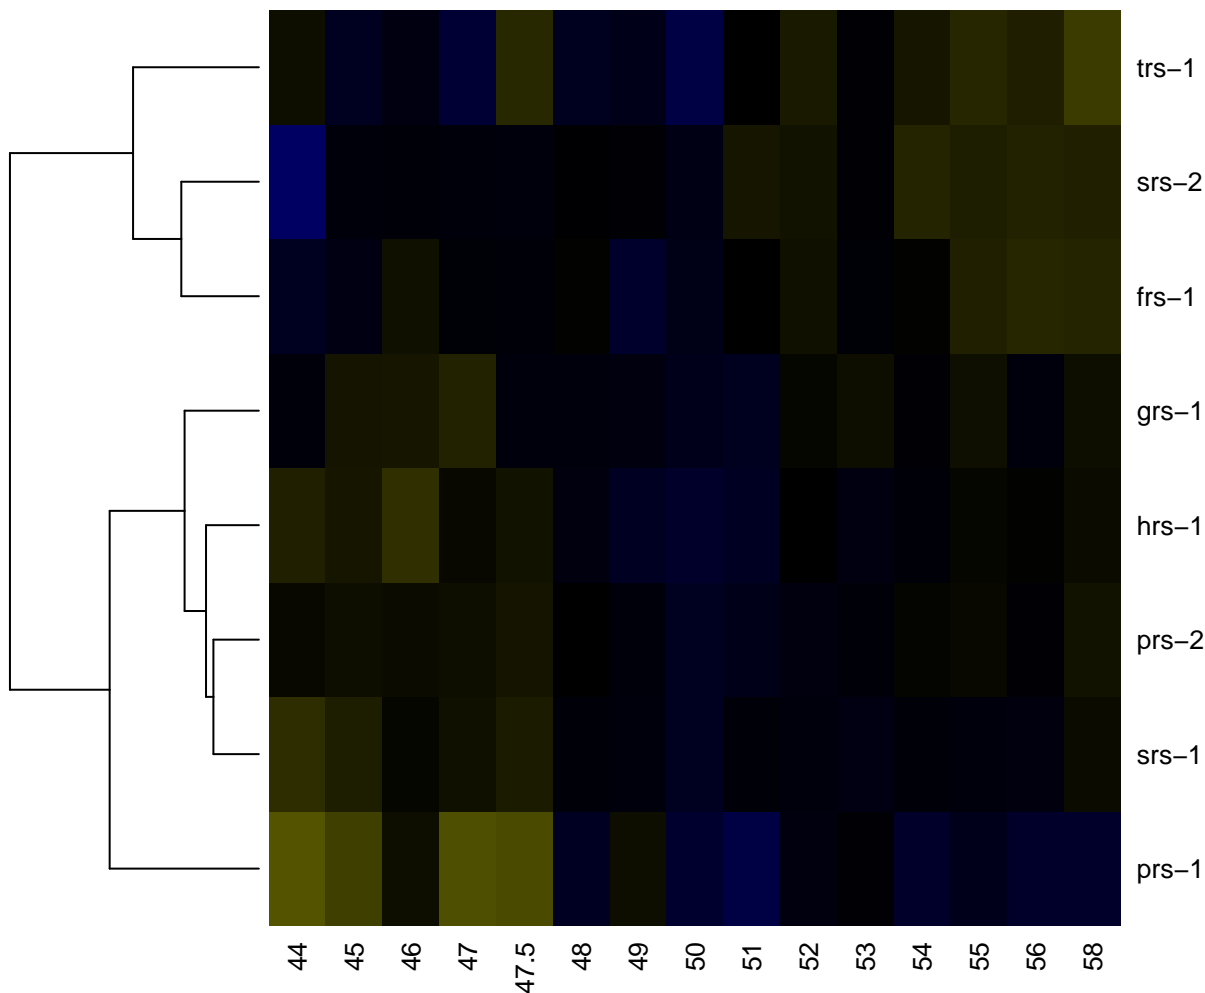



# Aminoglycoside phosphotransferase

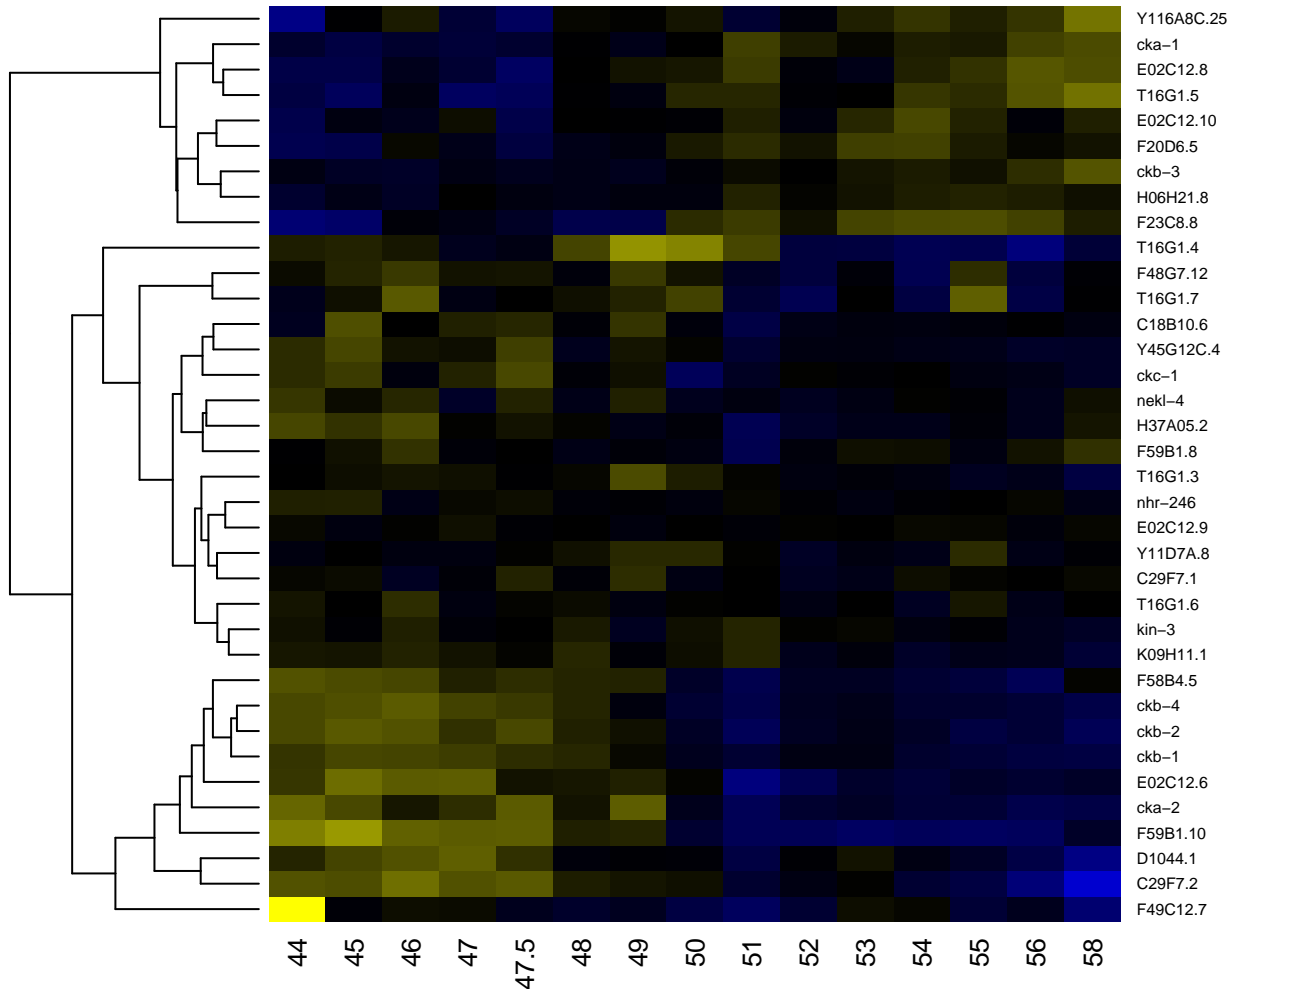

# Aminotransferase class-V

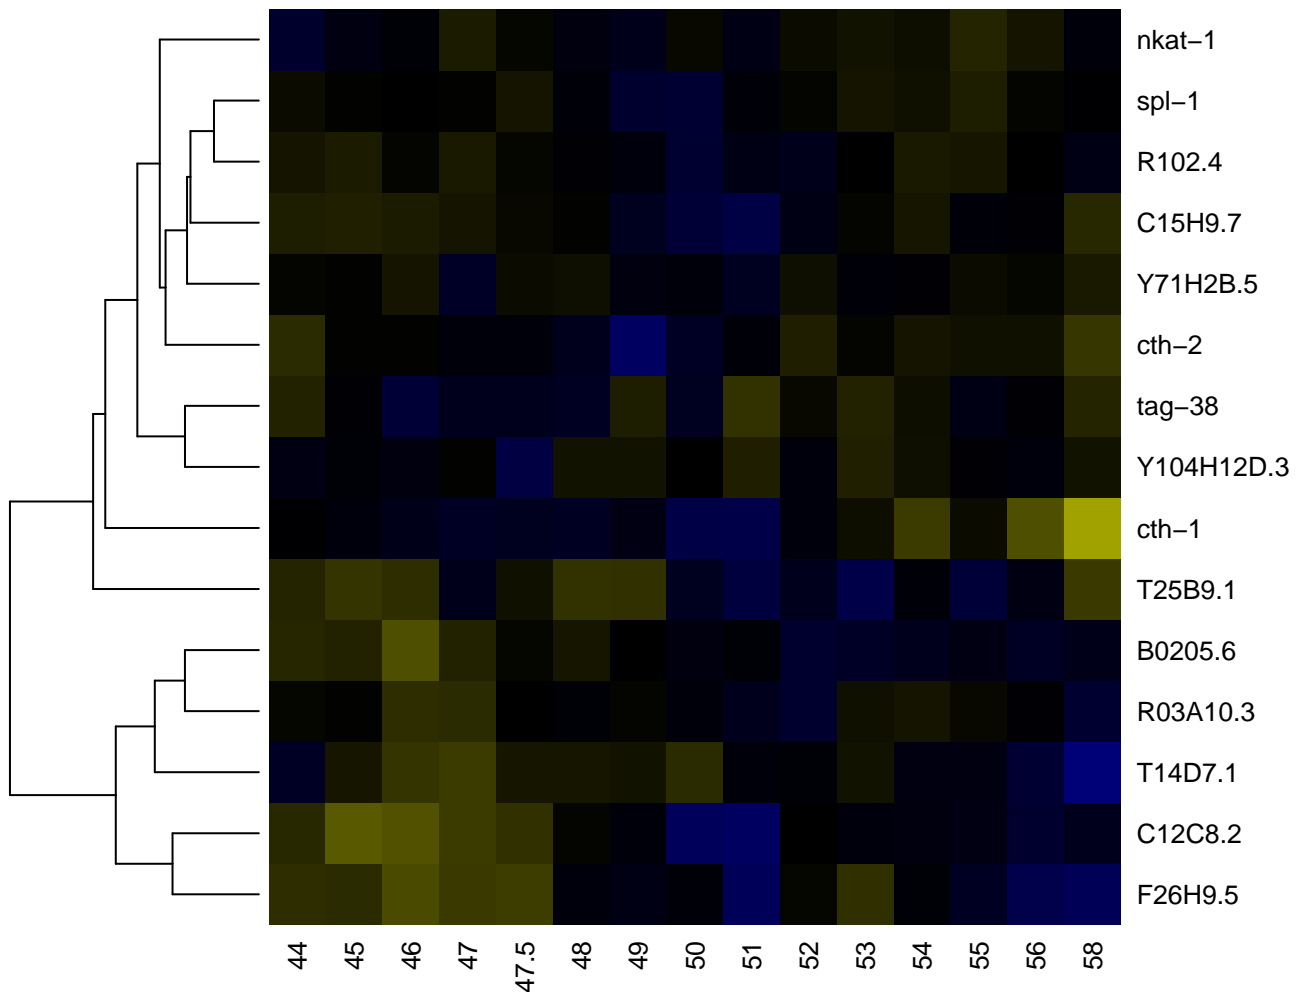





# Aminotransferase, class V/Cysteine desulfurase





# Ammonium transporter

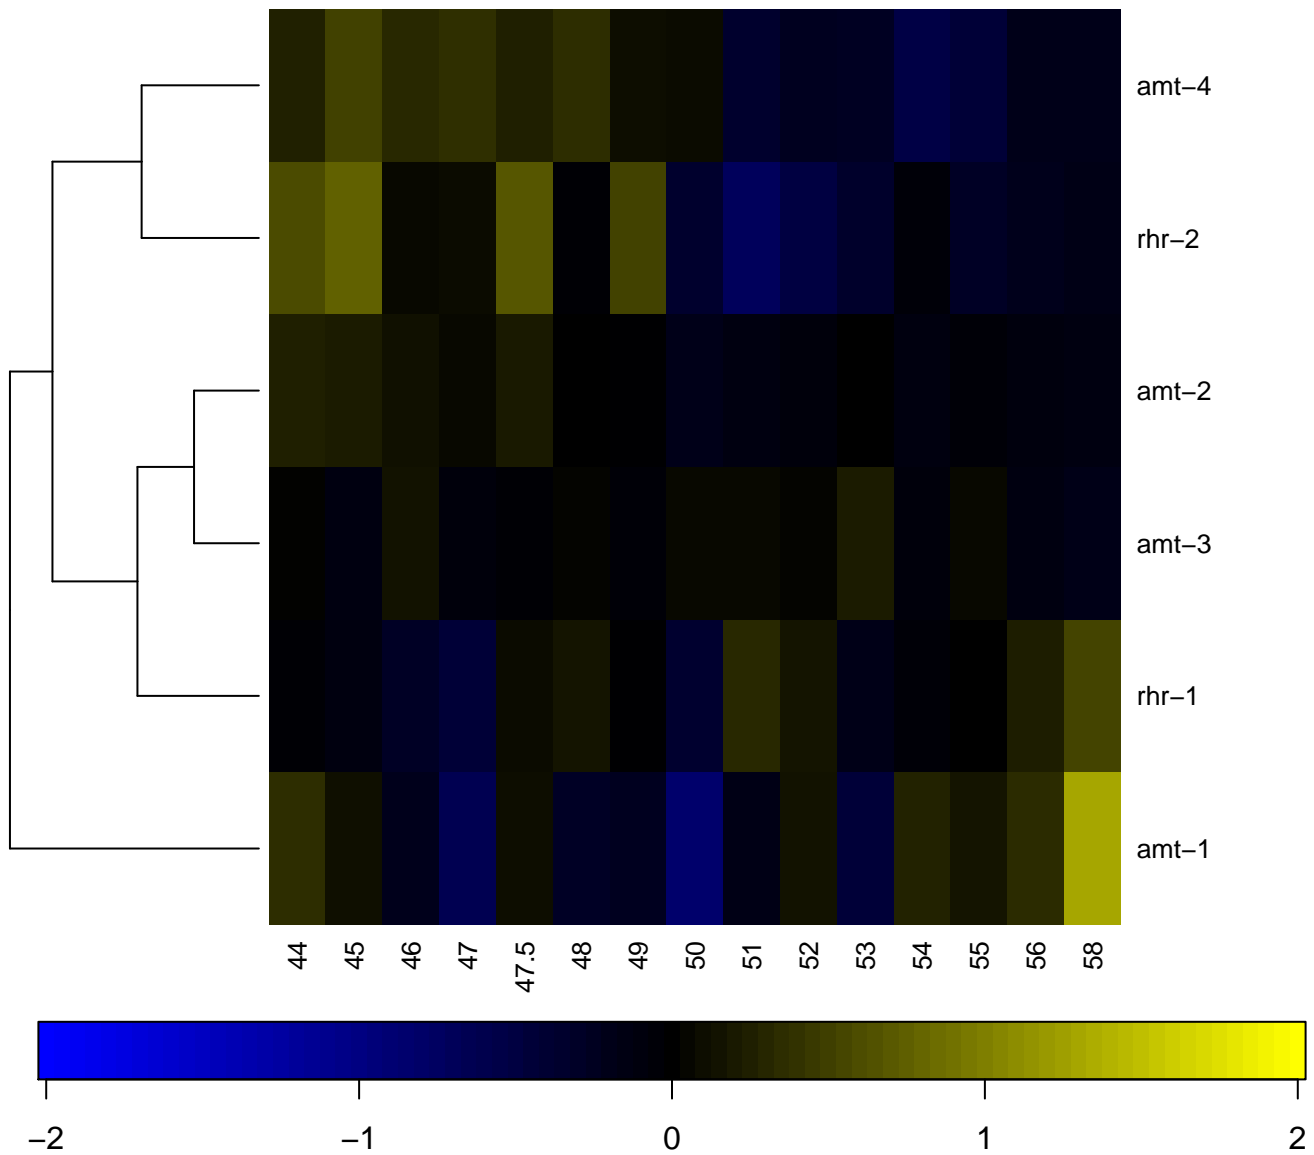

# Ammonium Transporter Family

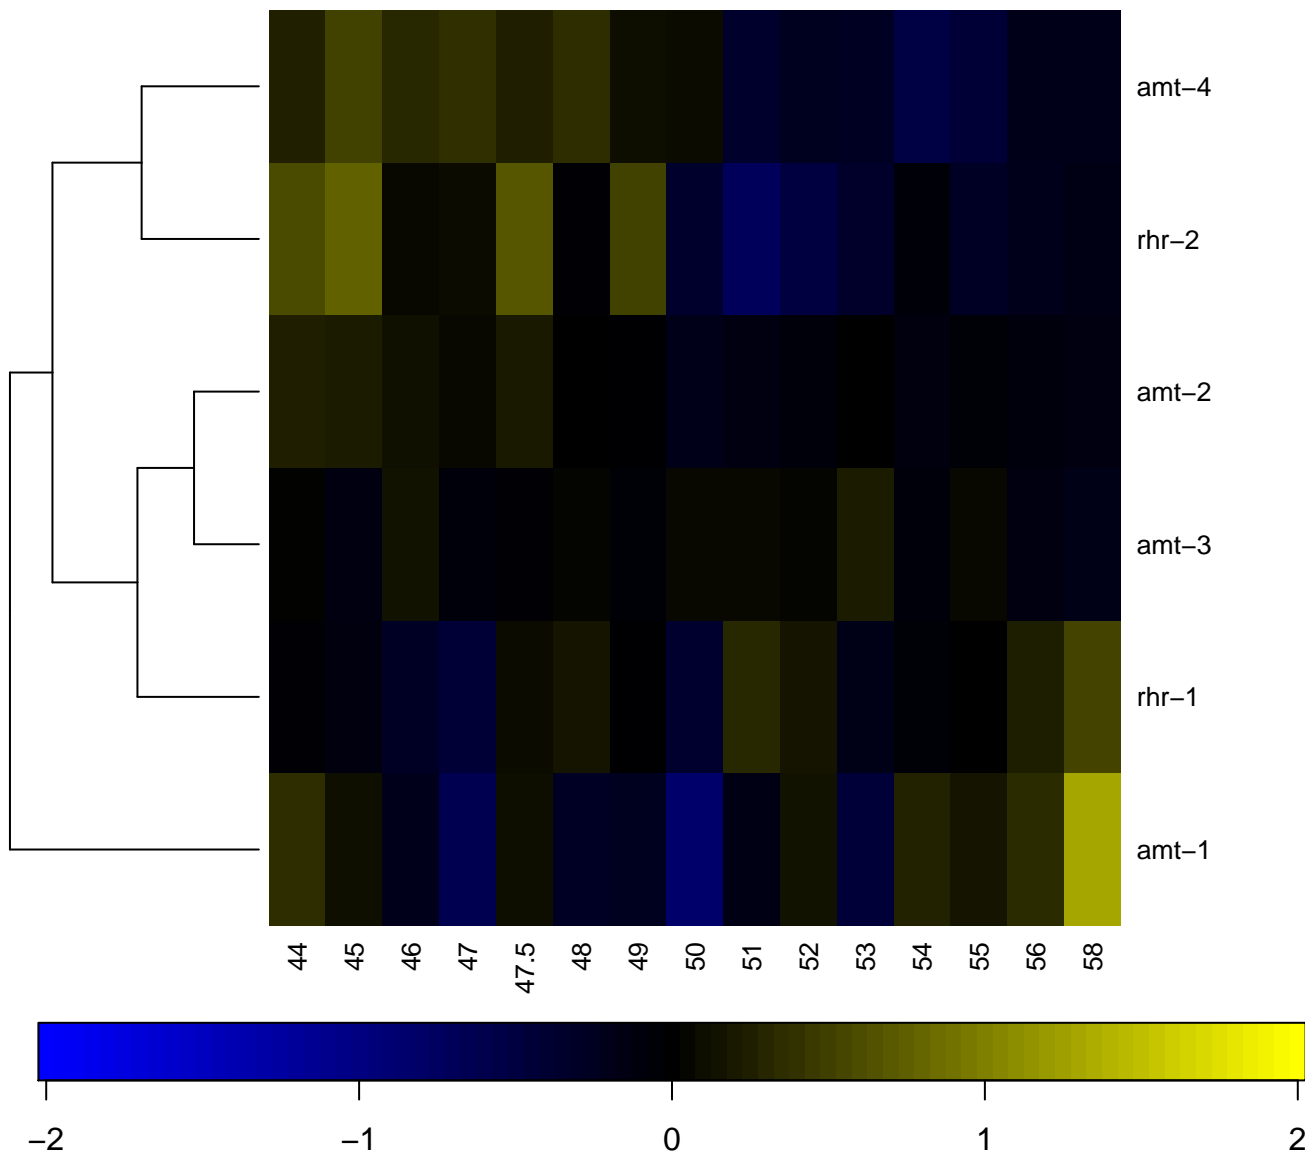



# AMP-binding enzyme

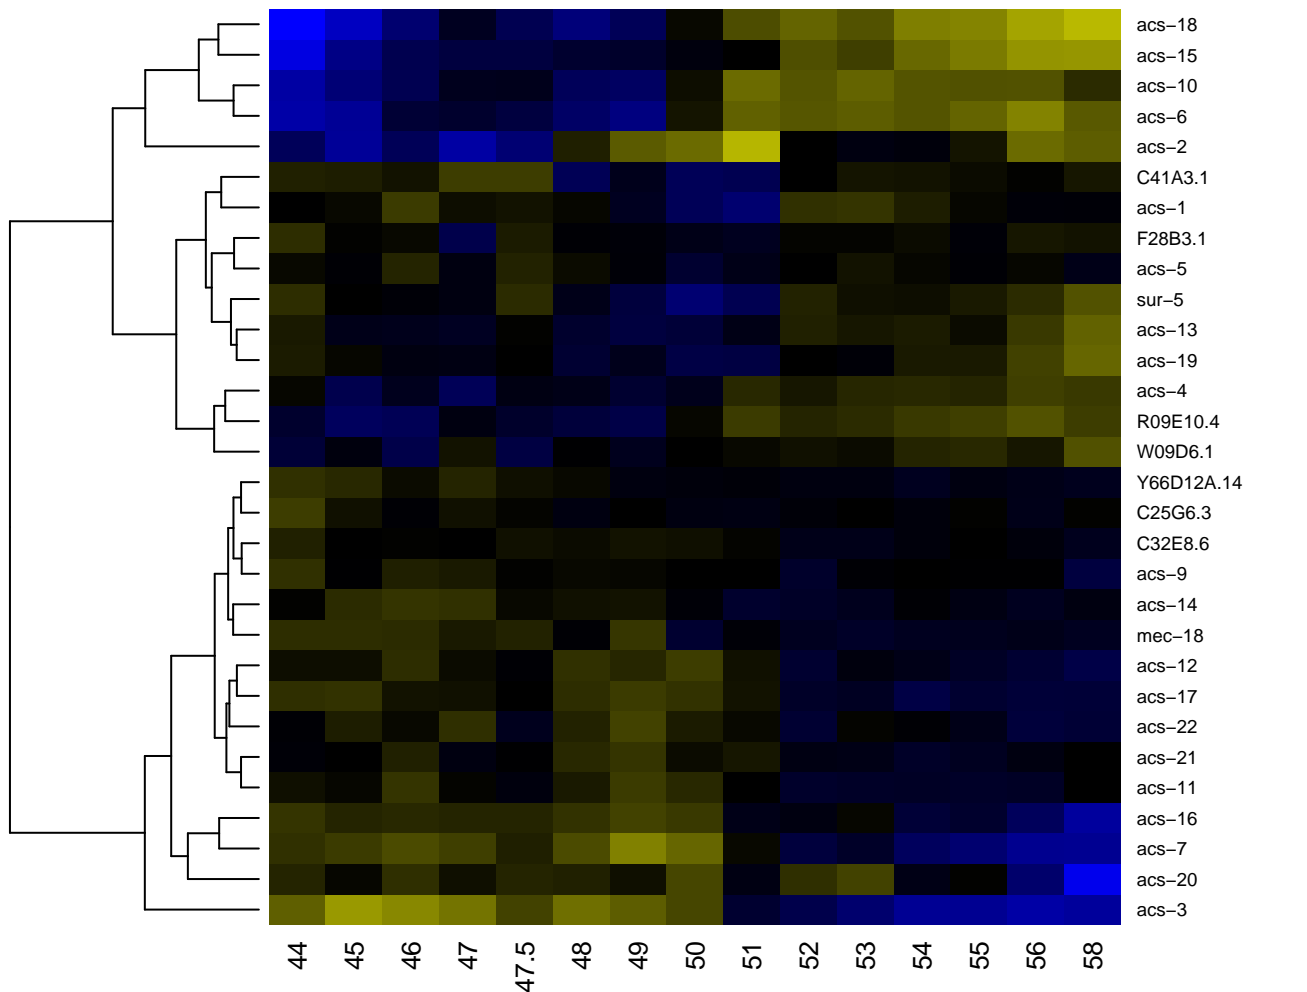

# AMP-binding, conserved site

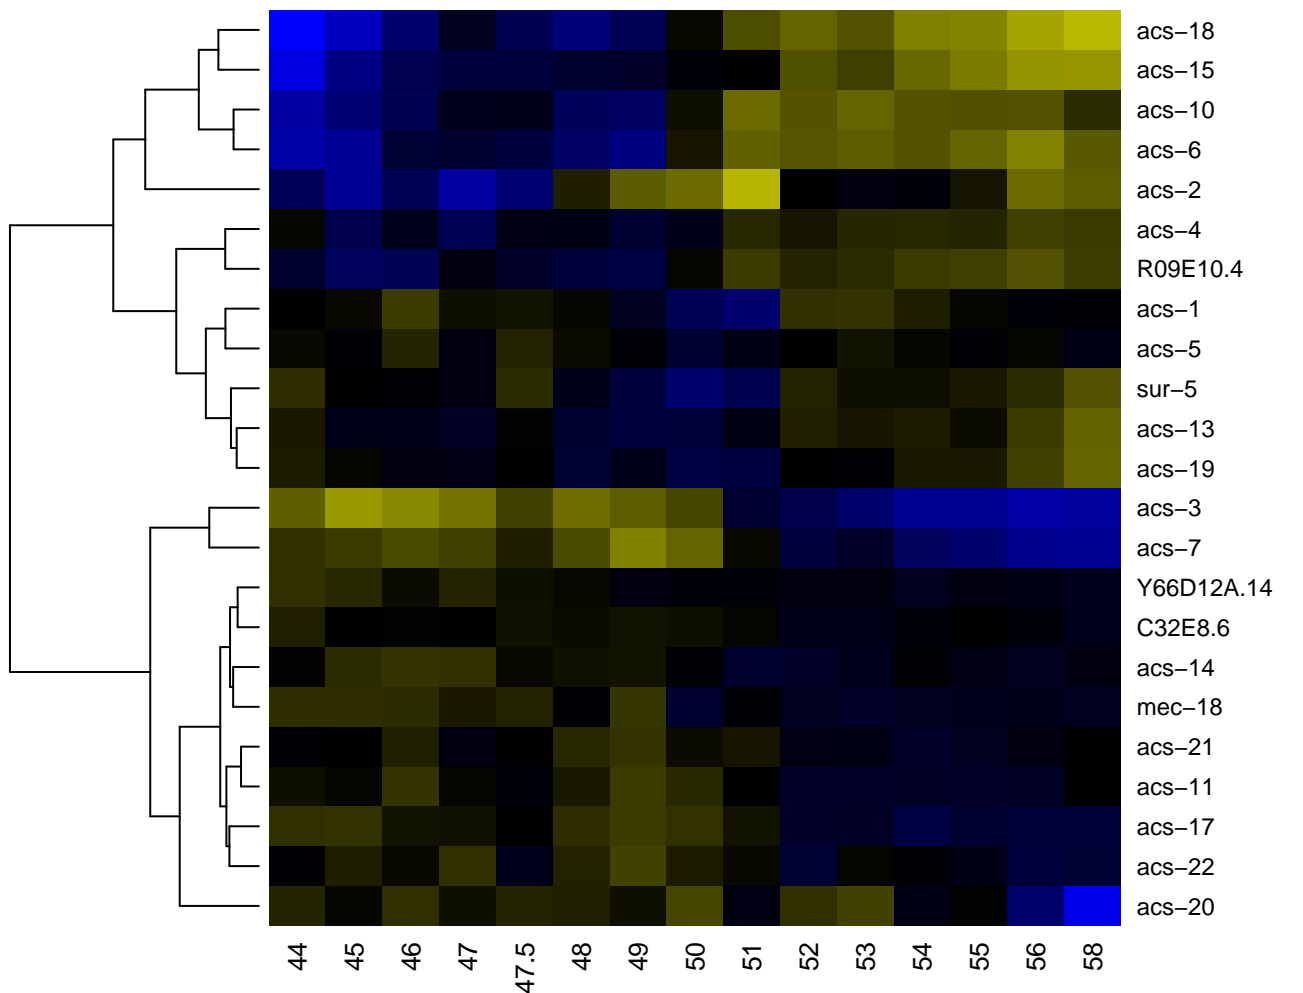

# AMP-dependent synthetase/ligase





# Ankyrin repeat

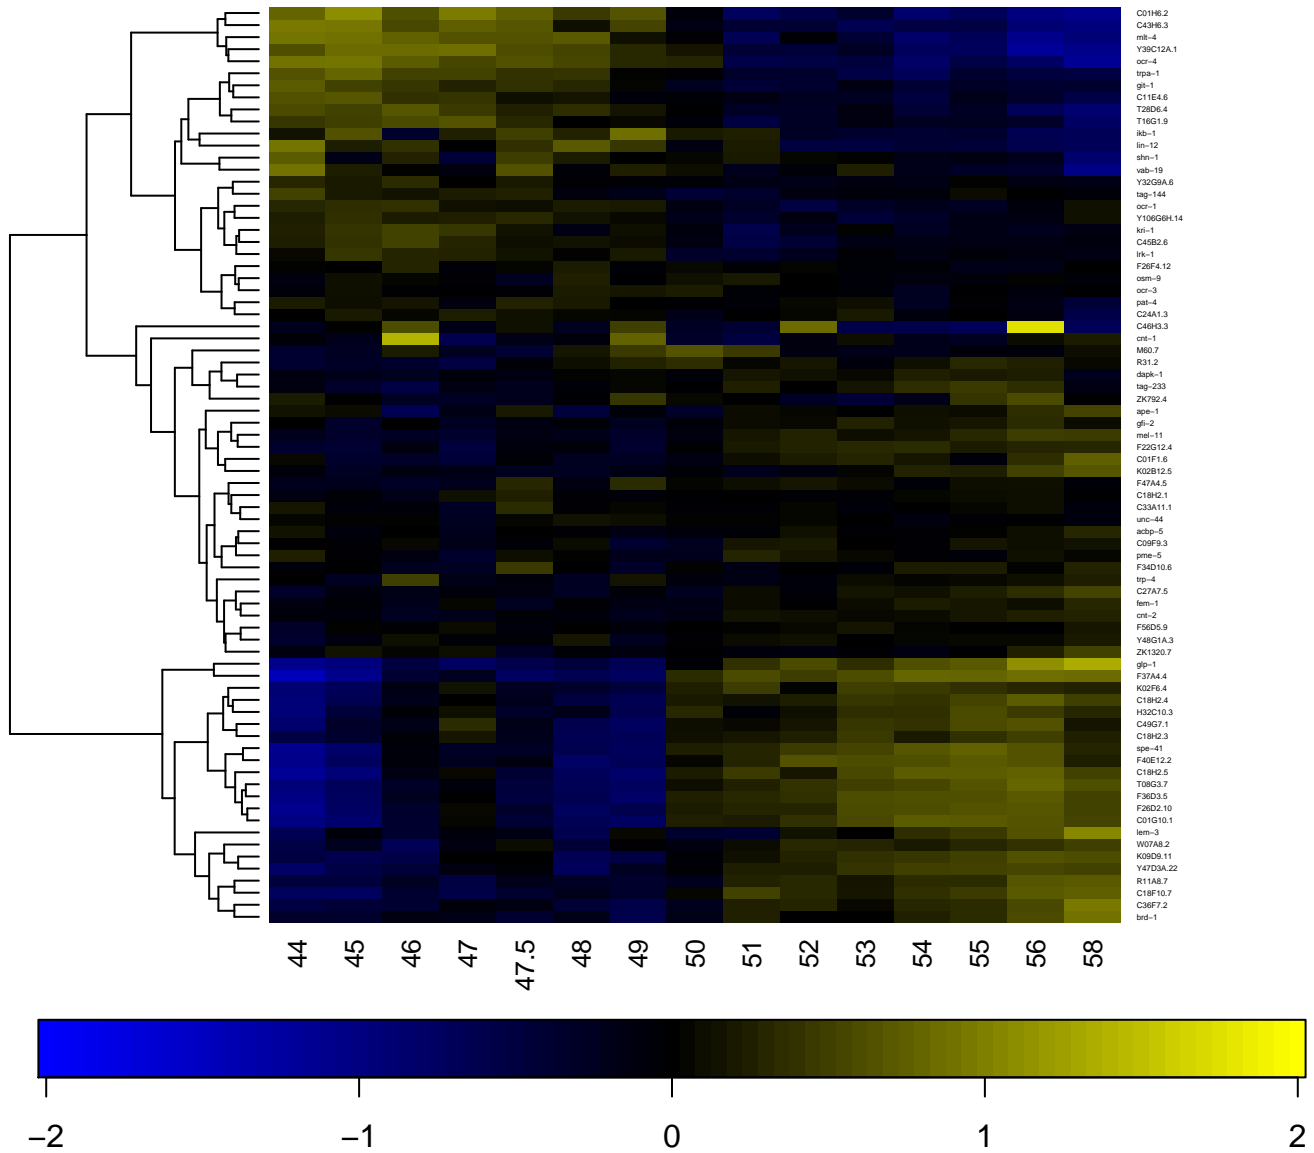

# Ankyrin repeat-containing domain

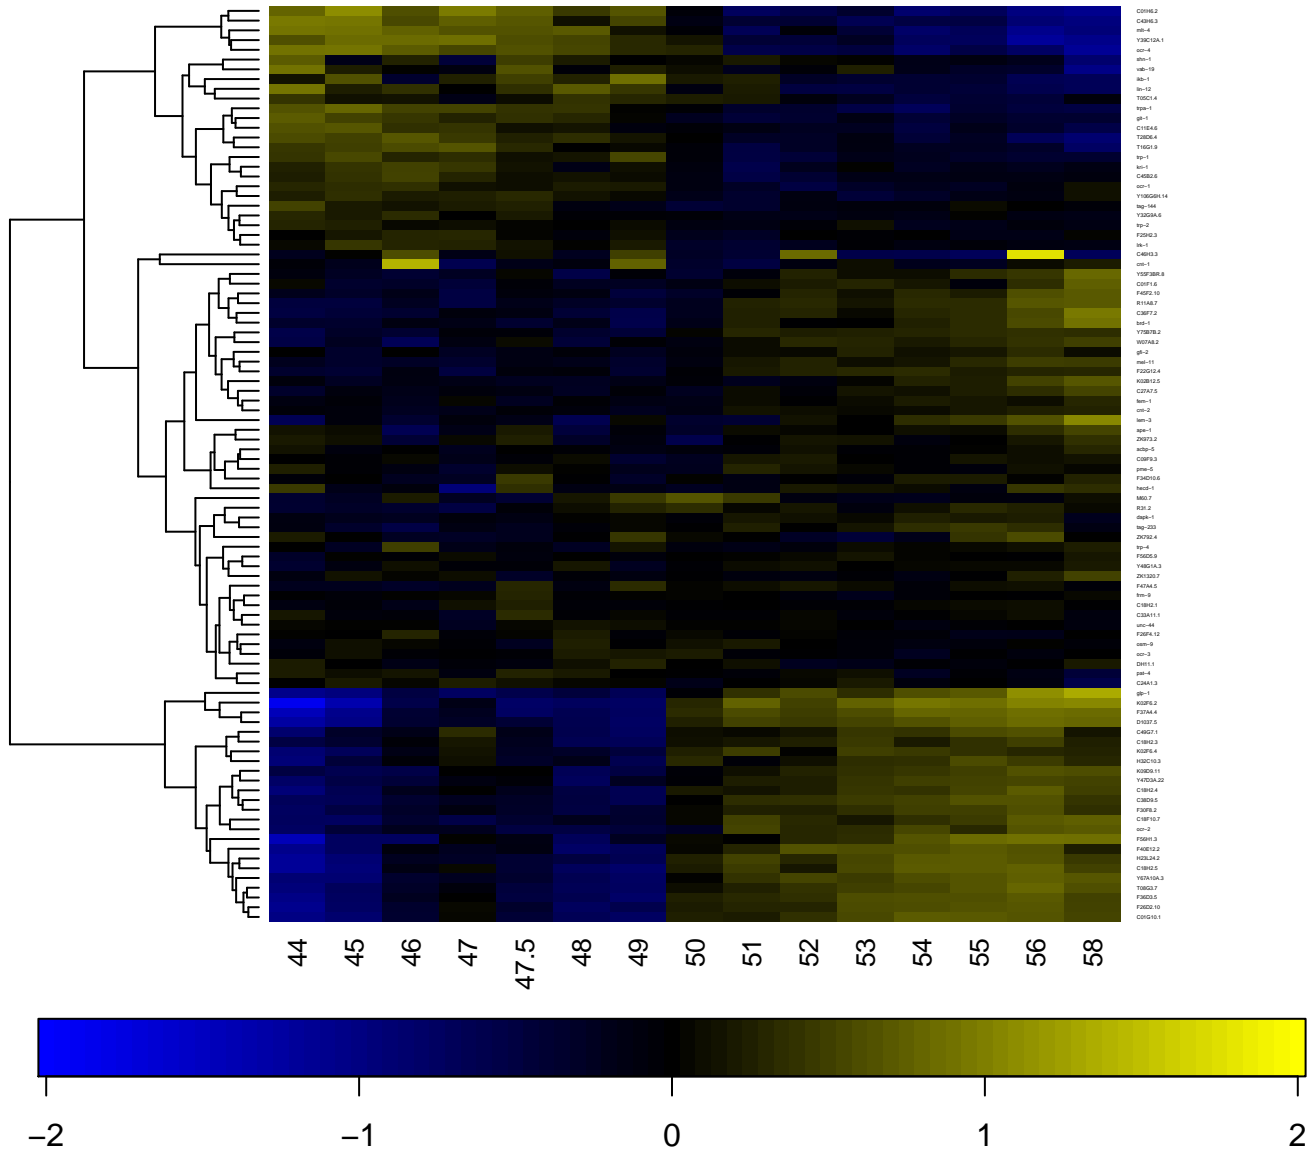



















# ARF/SAR superfamily

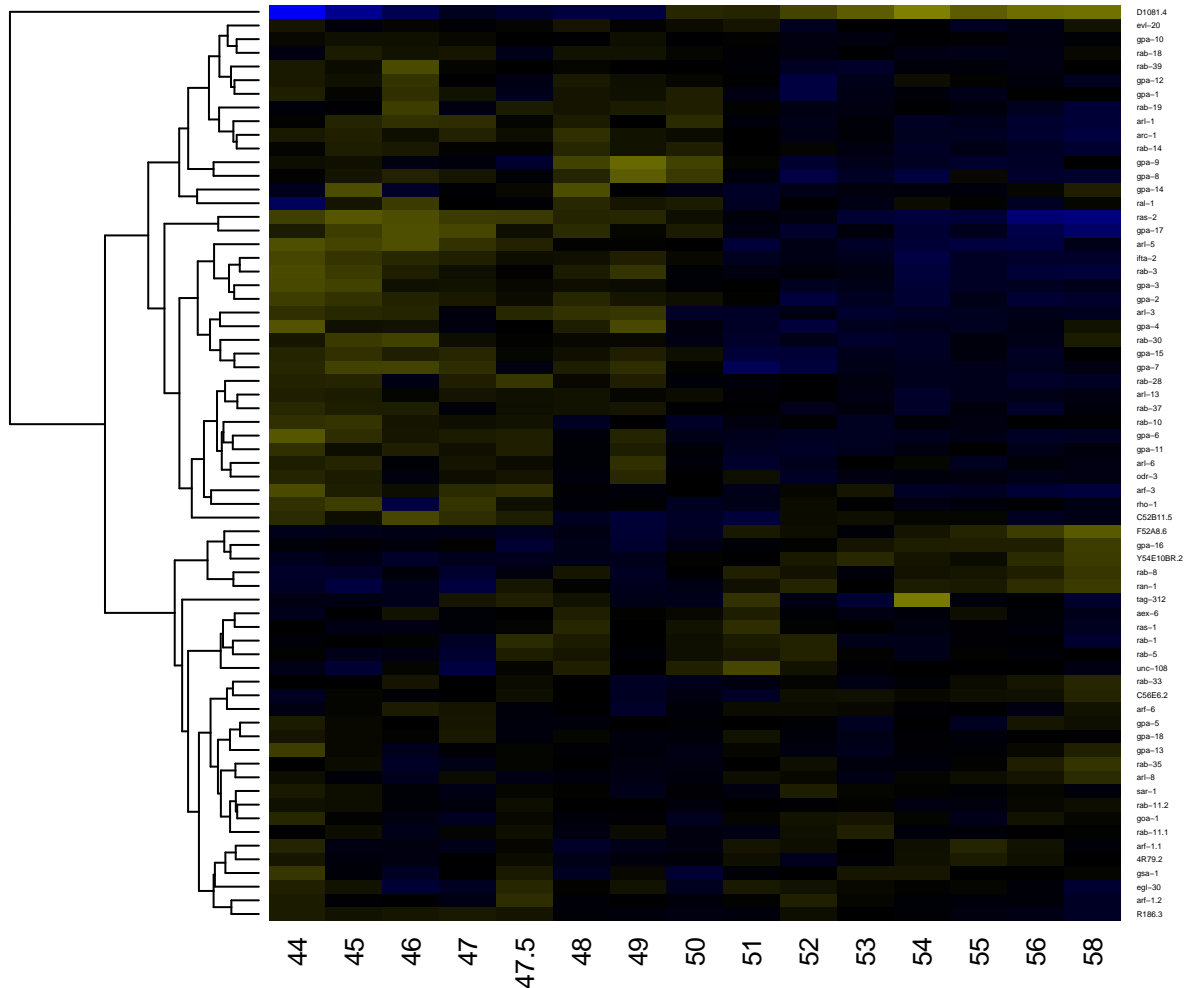





# Argonaute/Dicer protein, PAZ

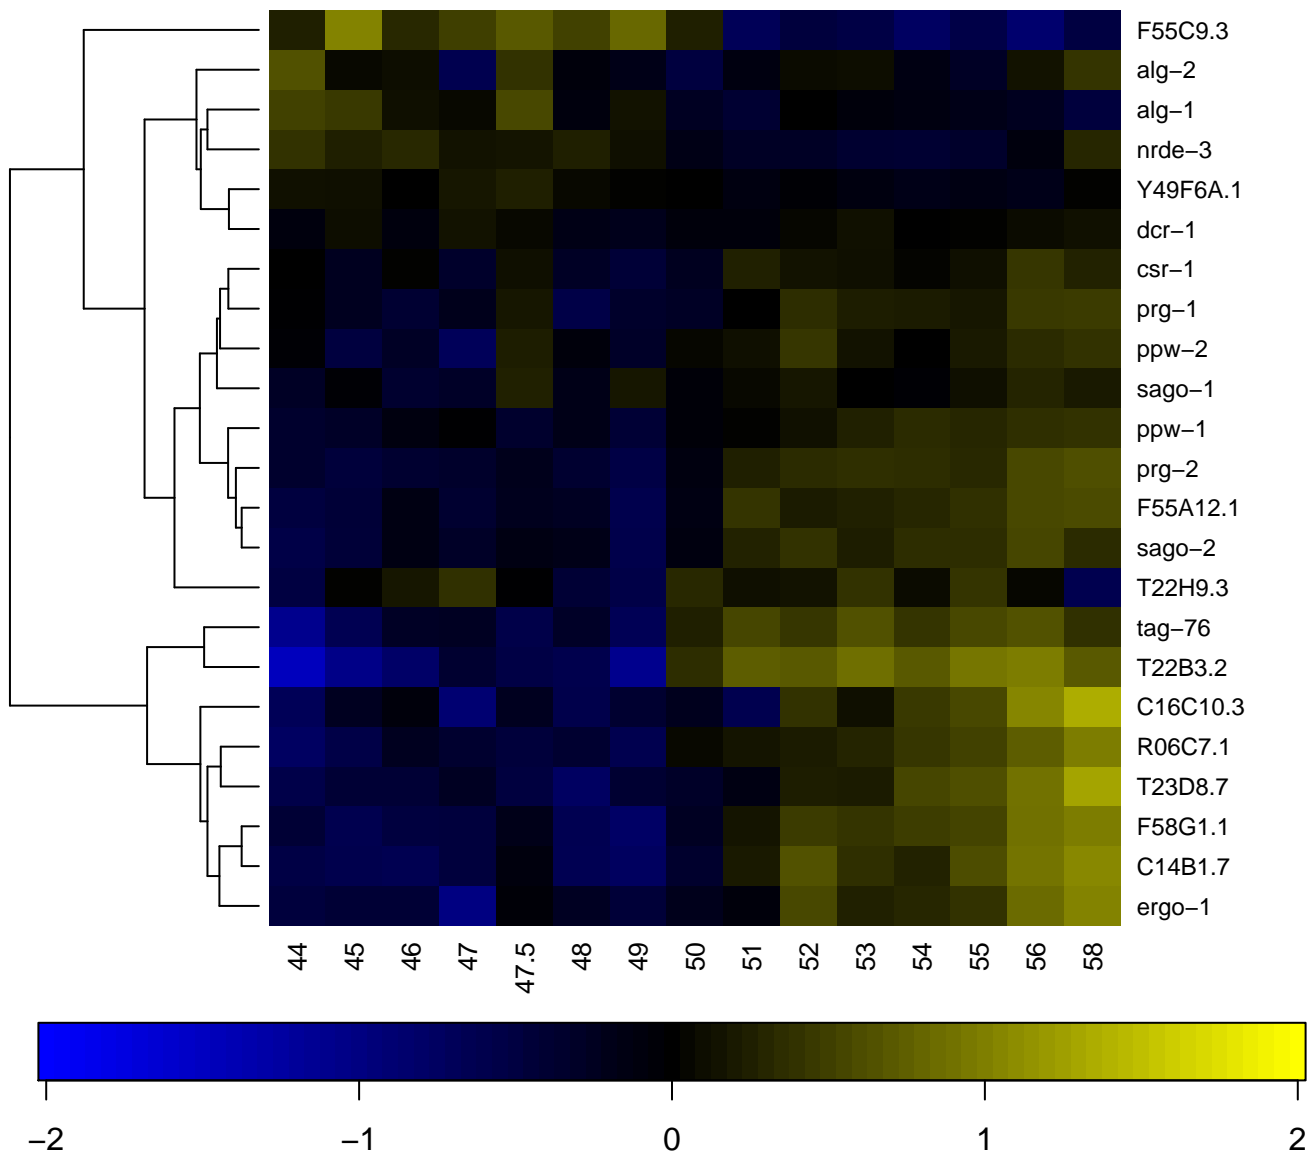





# Armadillo

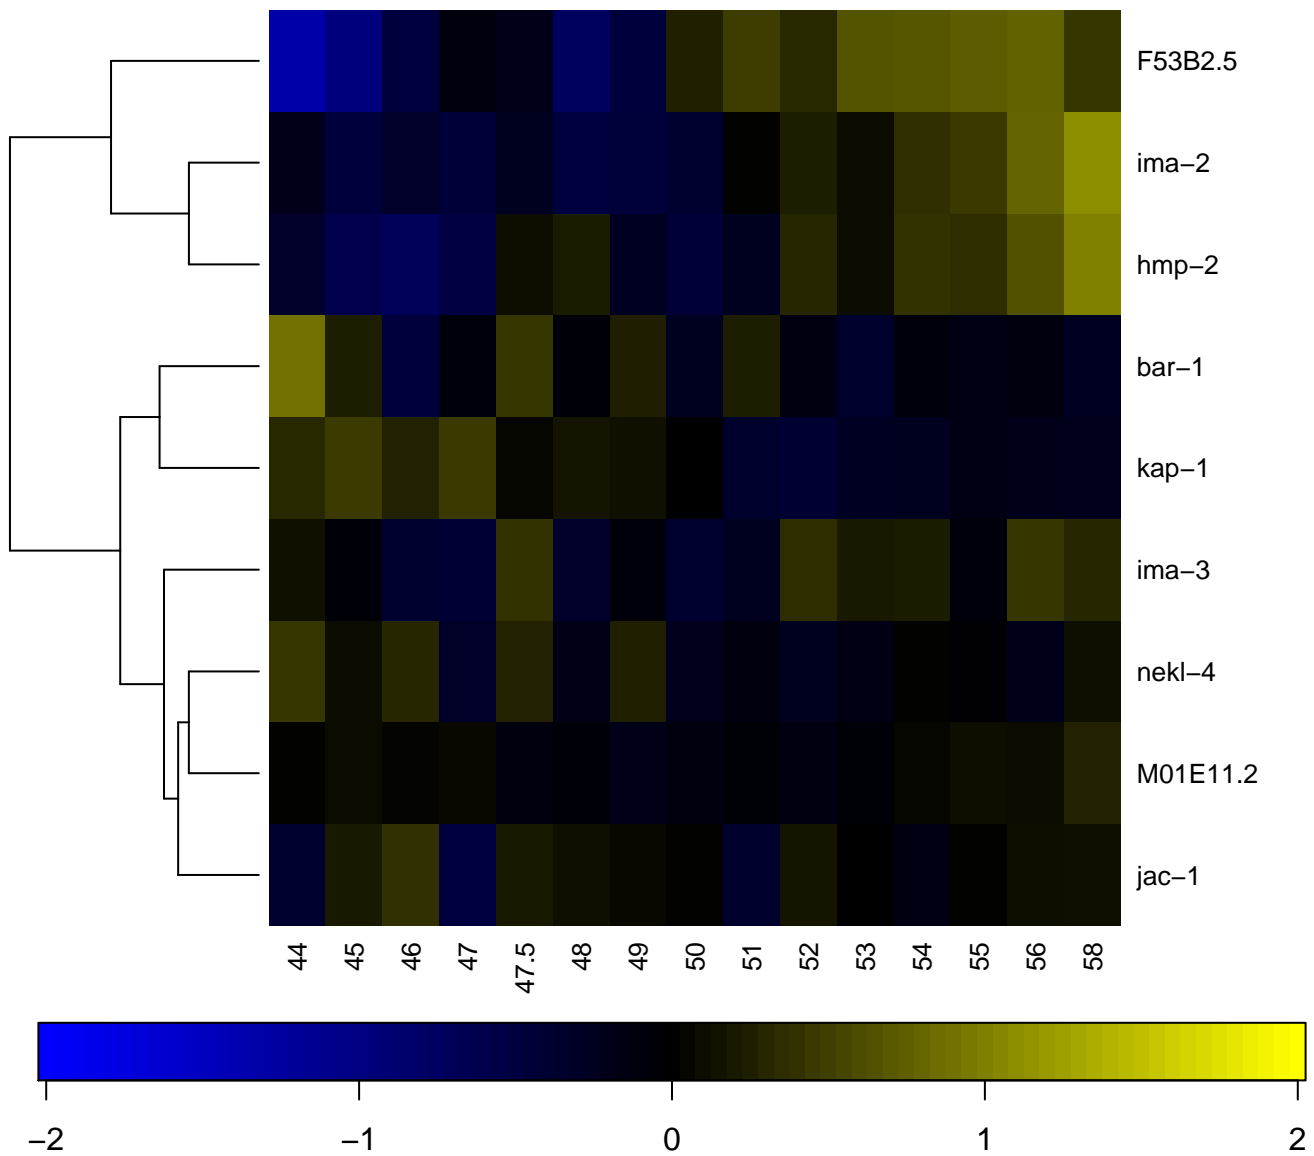

# Armadillo-like helical

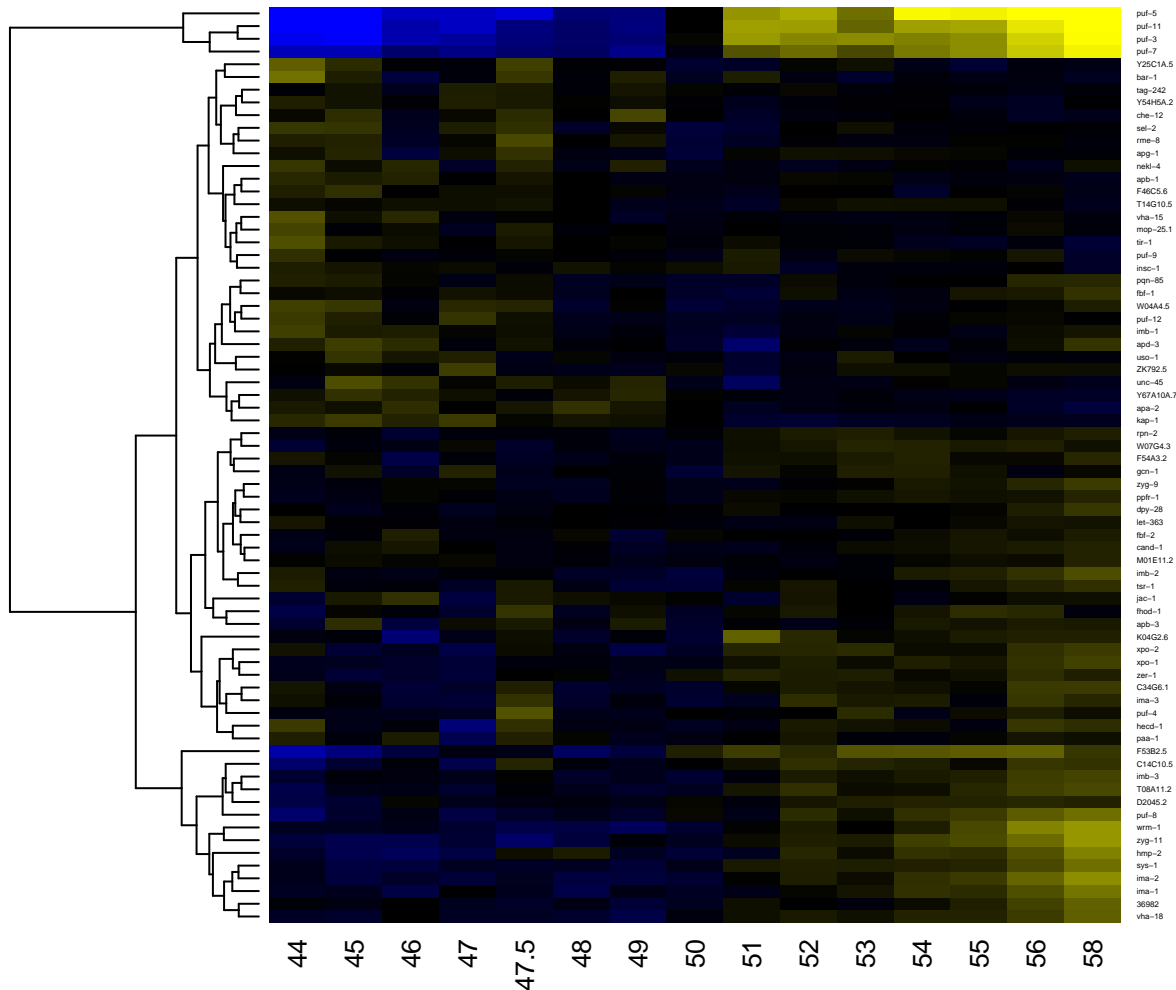

# Armadillo/beta-catenin-like repeat

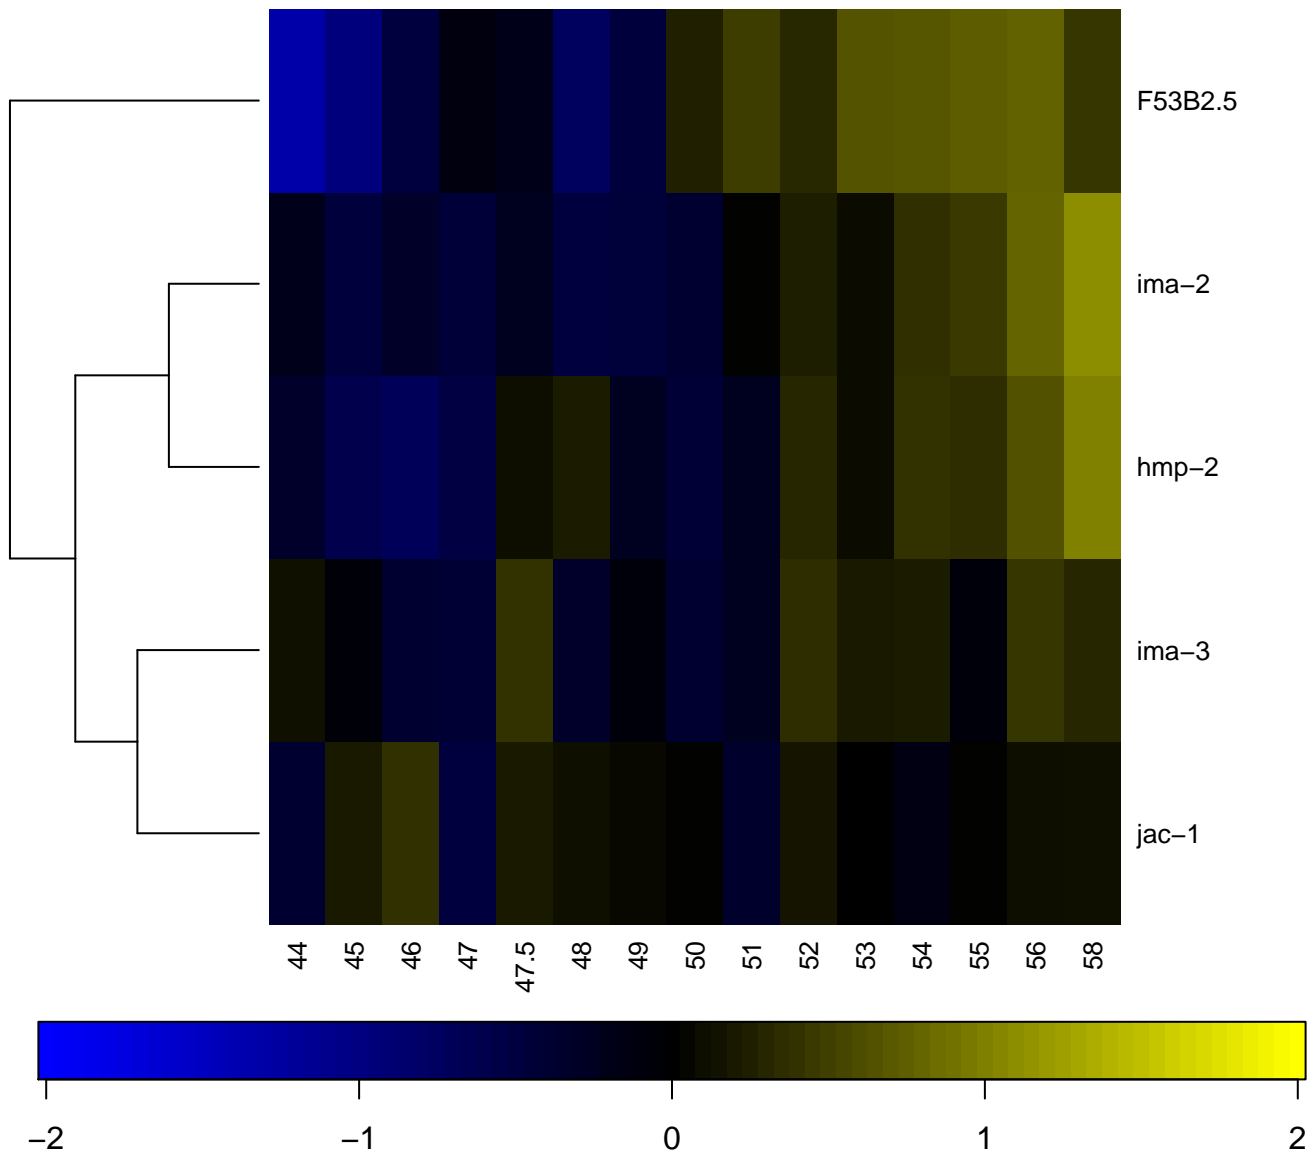







# Arrestin-like, C-terminal

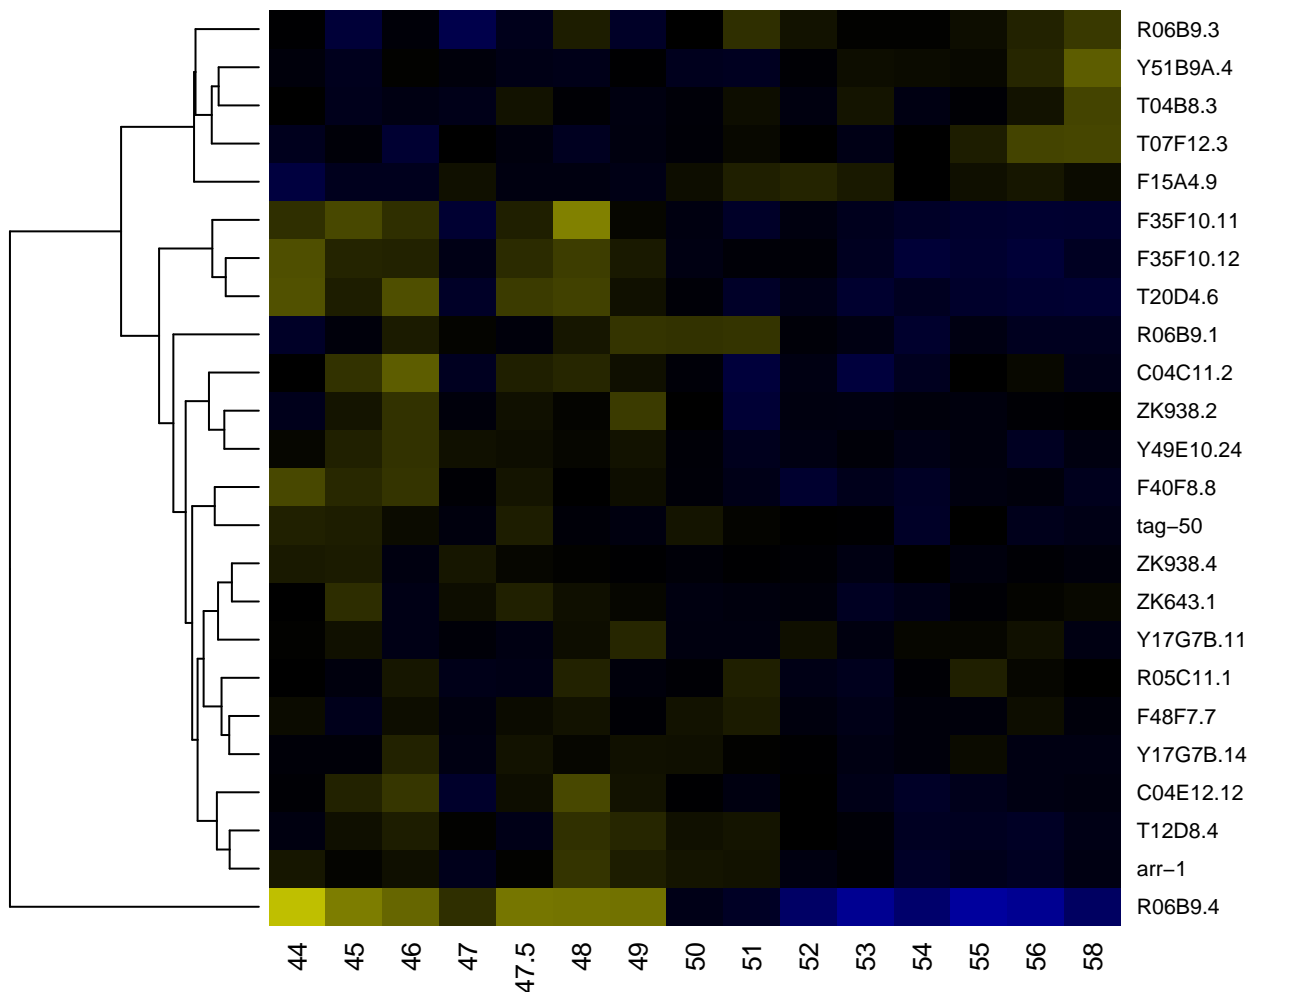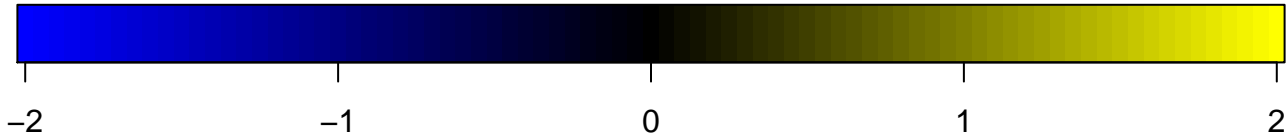

# Arrestin-like, N-terminal

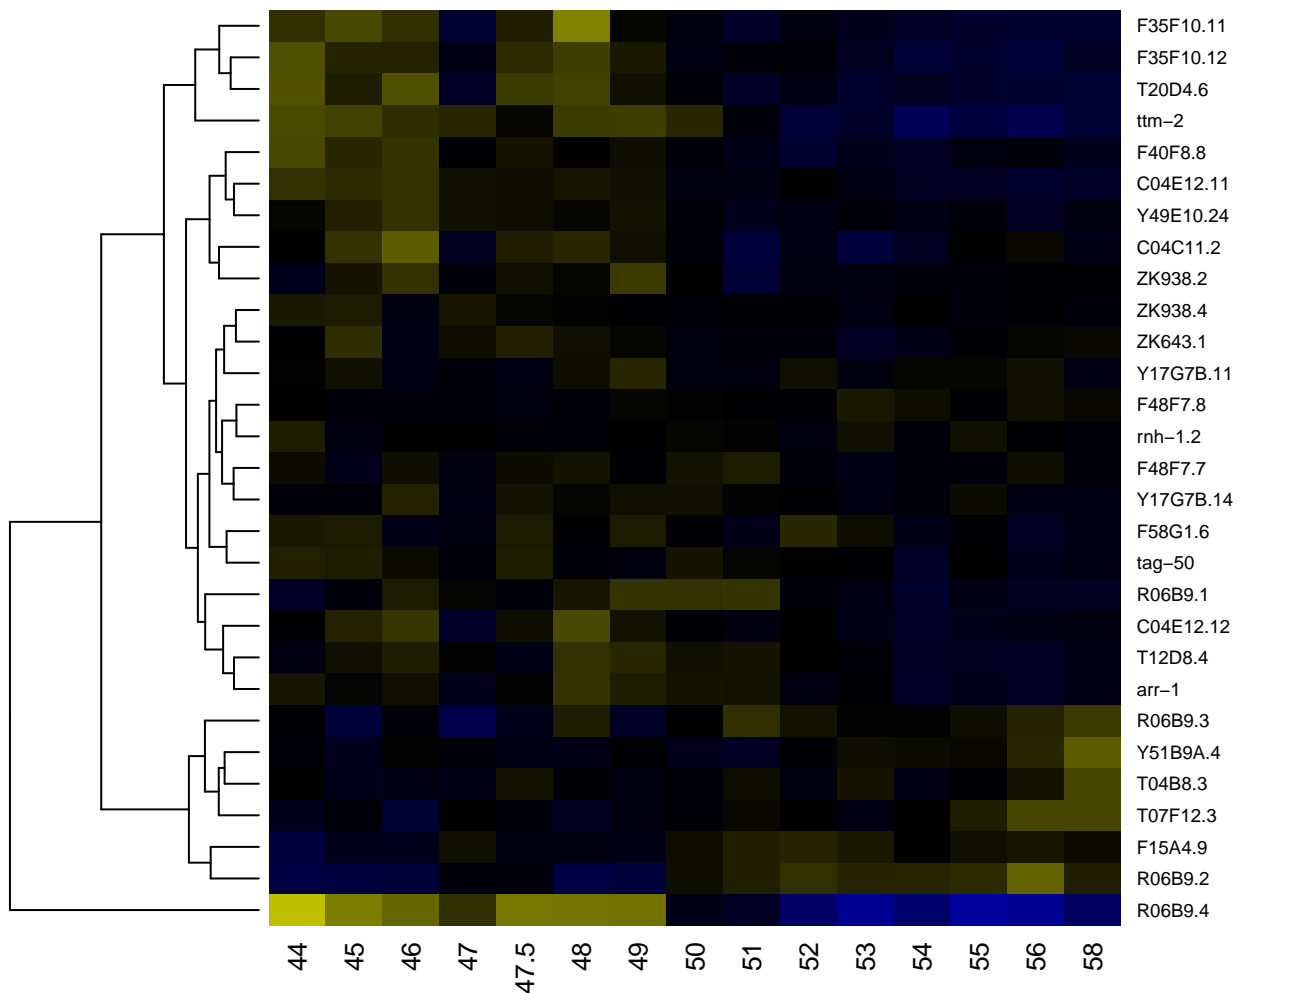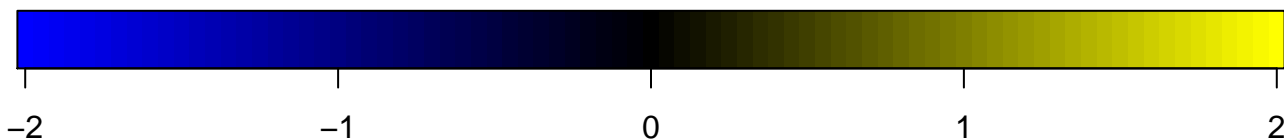

# Arrestin (or S-antigen), C-terminal domain

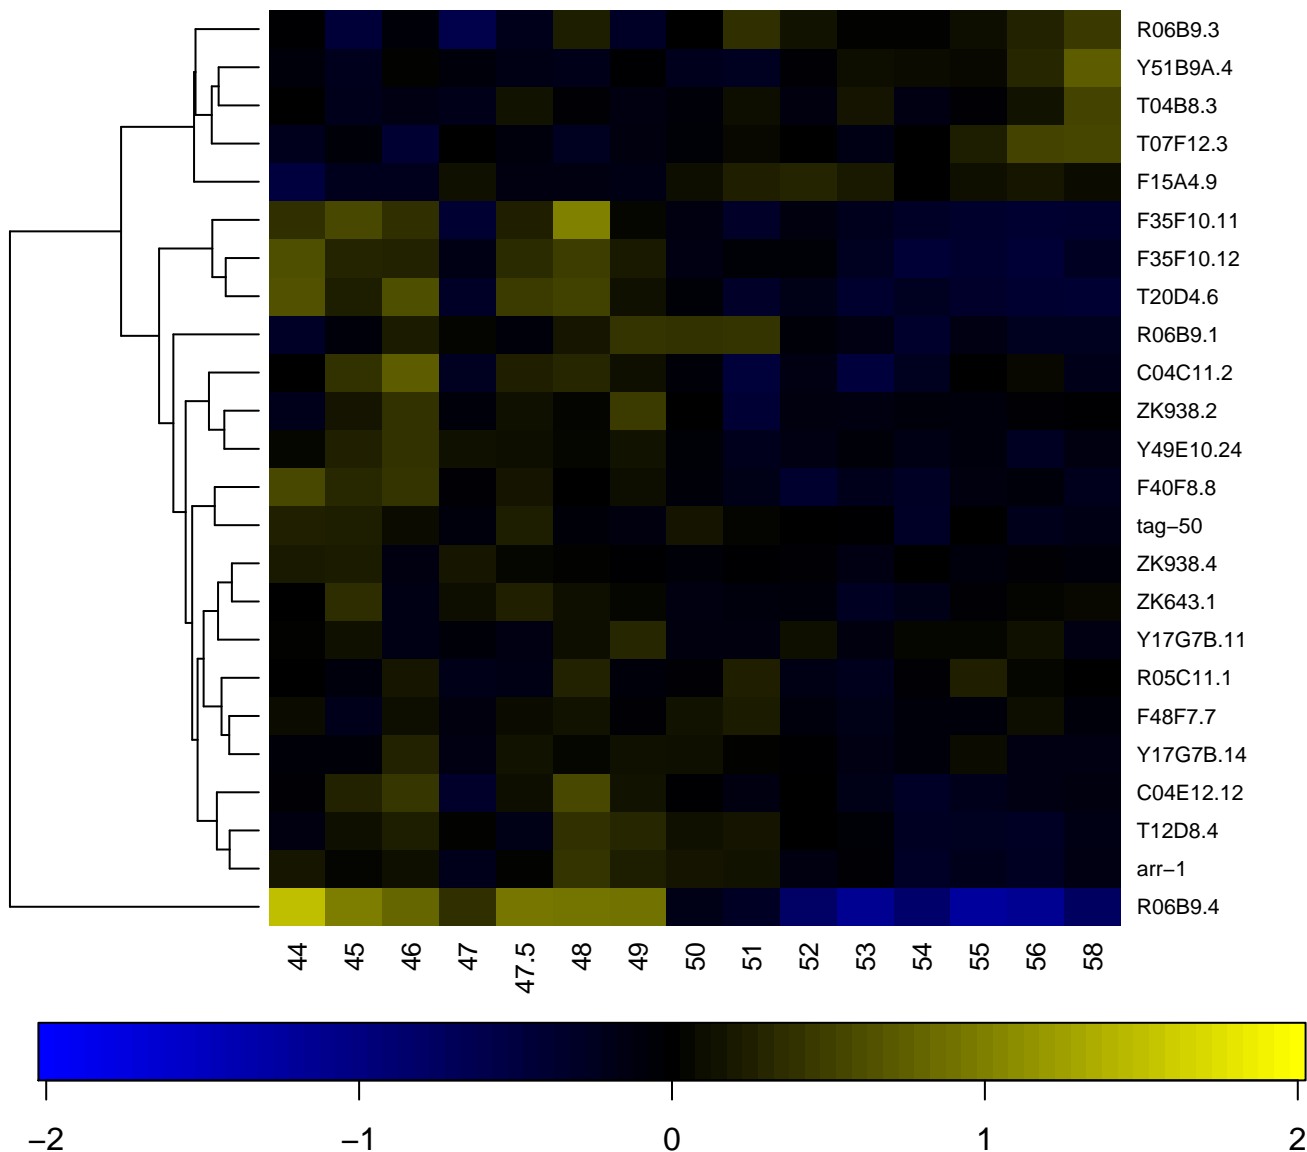

# Arrestin (or S-antigen), N-terminal domain

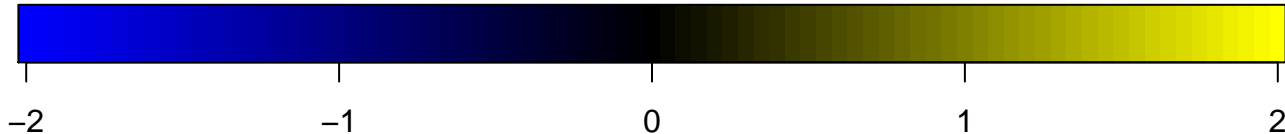

# Arrestin, C-terminal

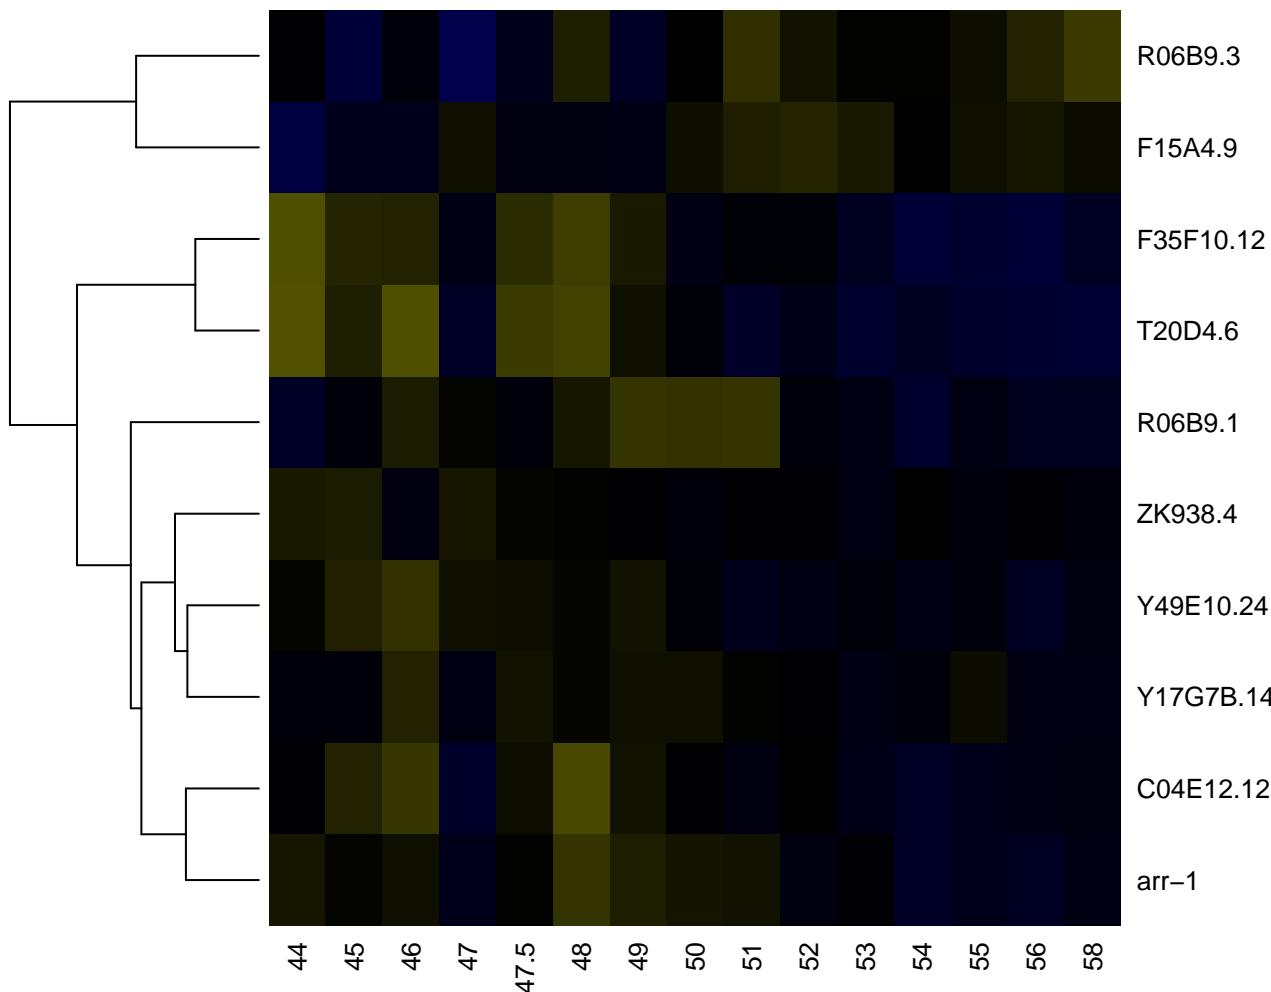

# Asparagine synthase

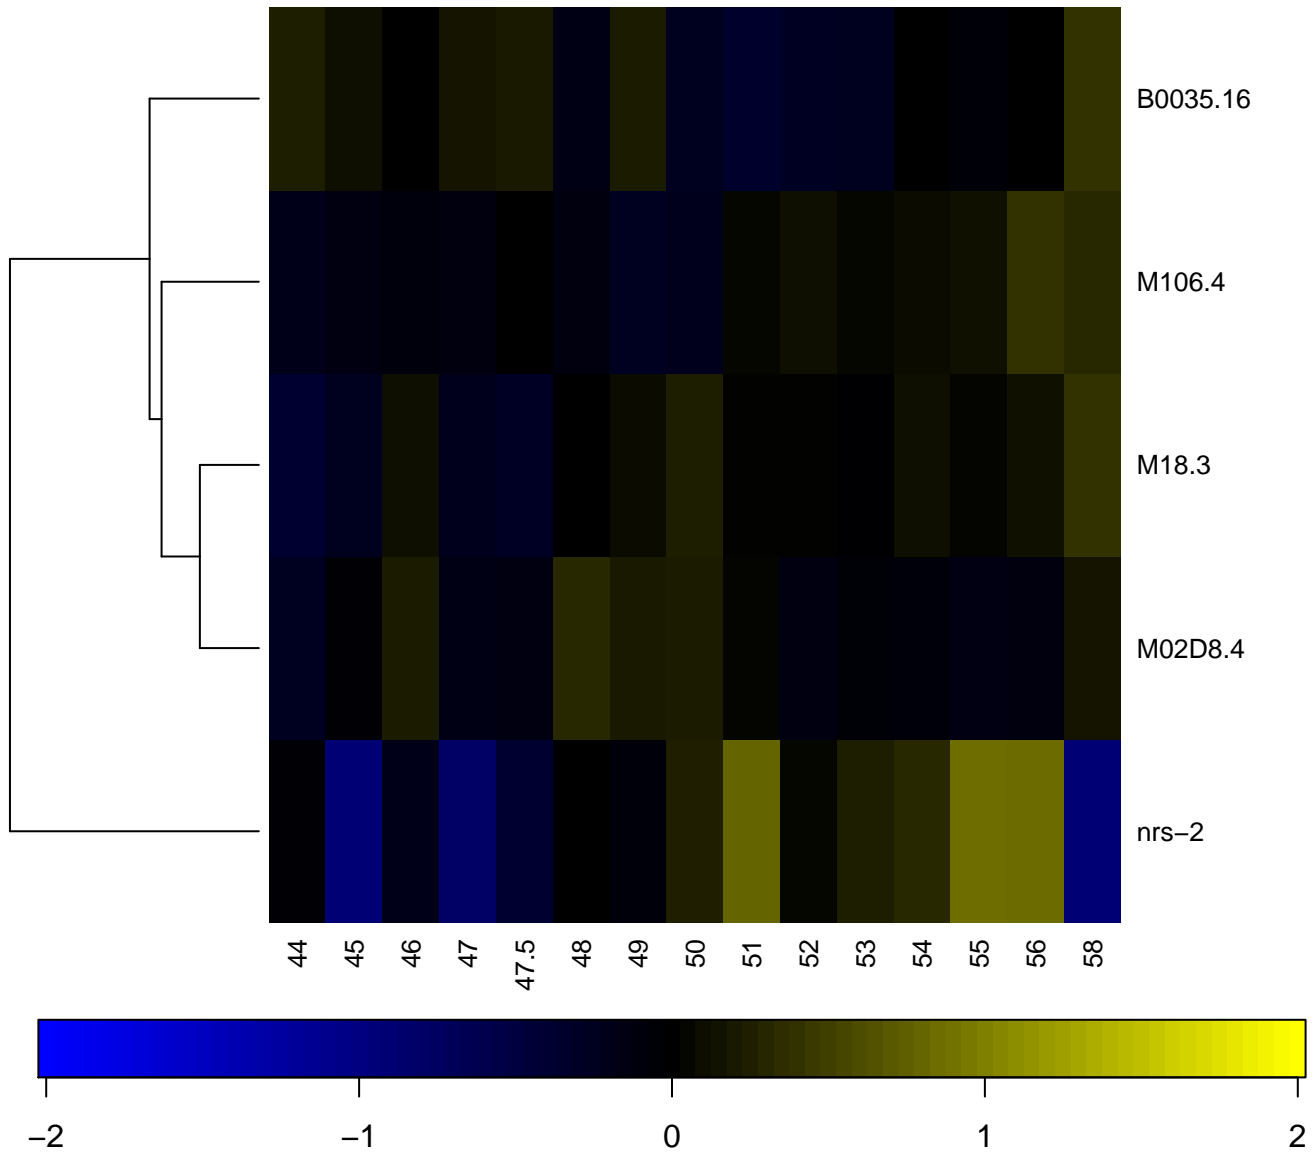

# Aspartate/other aminotransferase

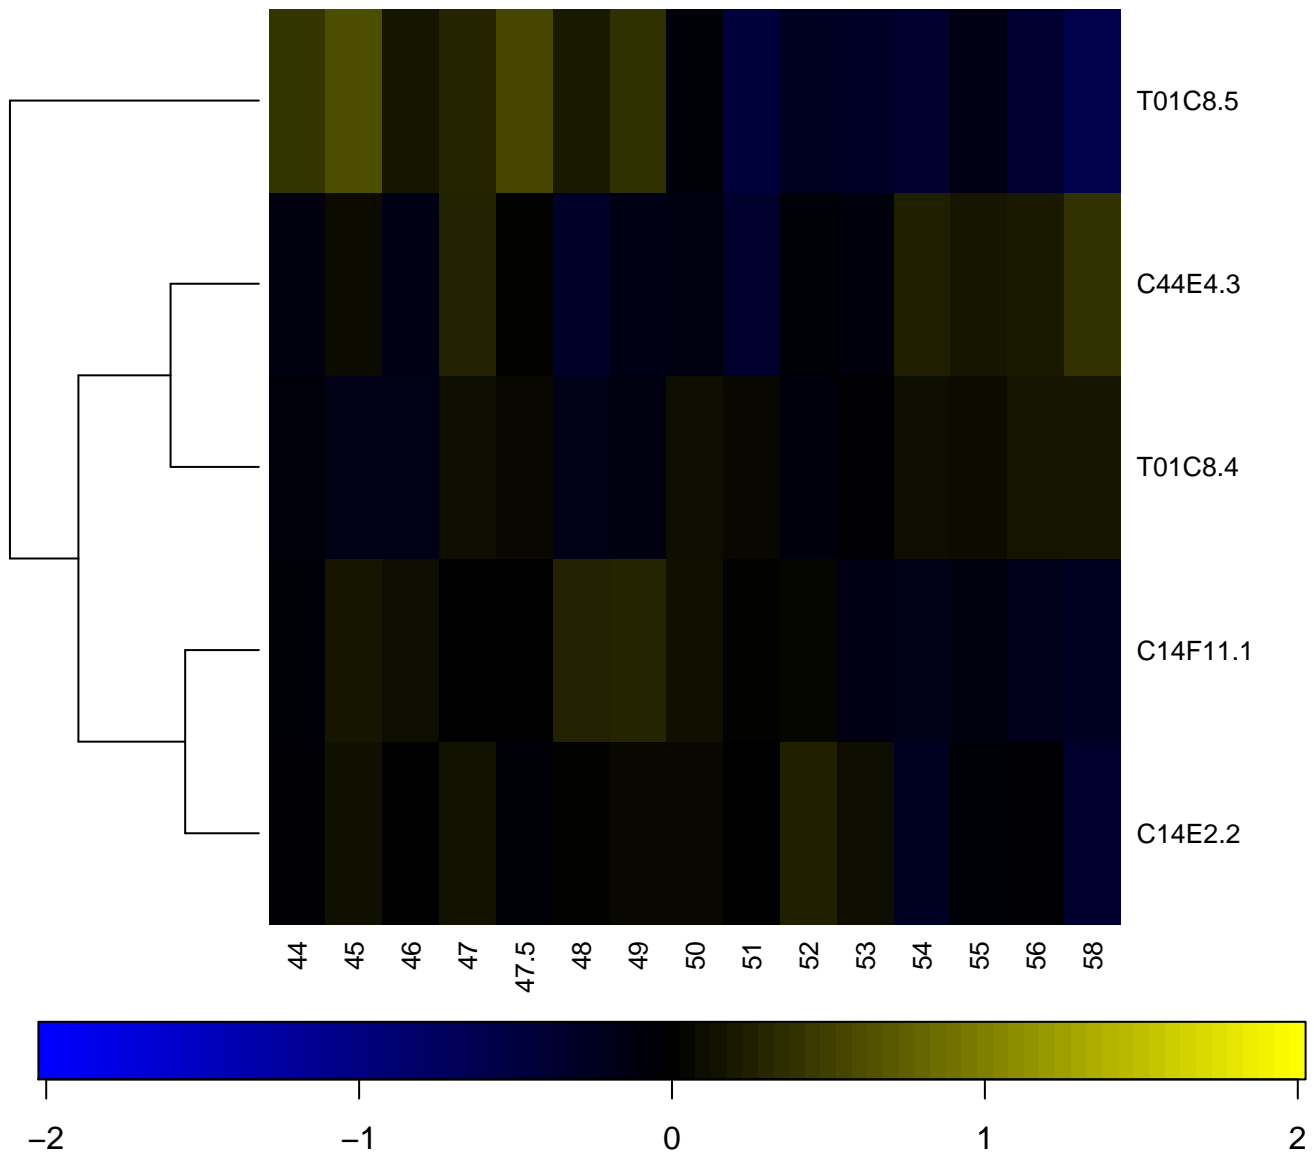

# Aspartyl/Asparaginyl-tRNA synthetase, class IIb

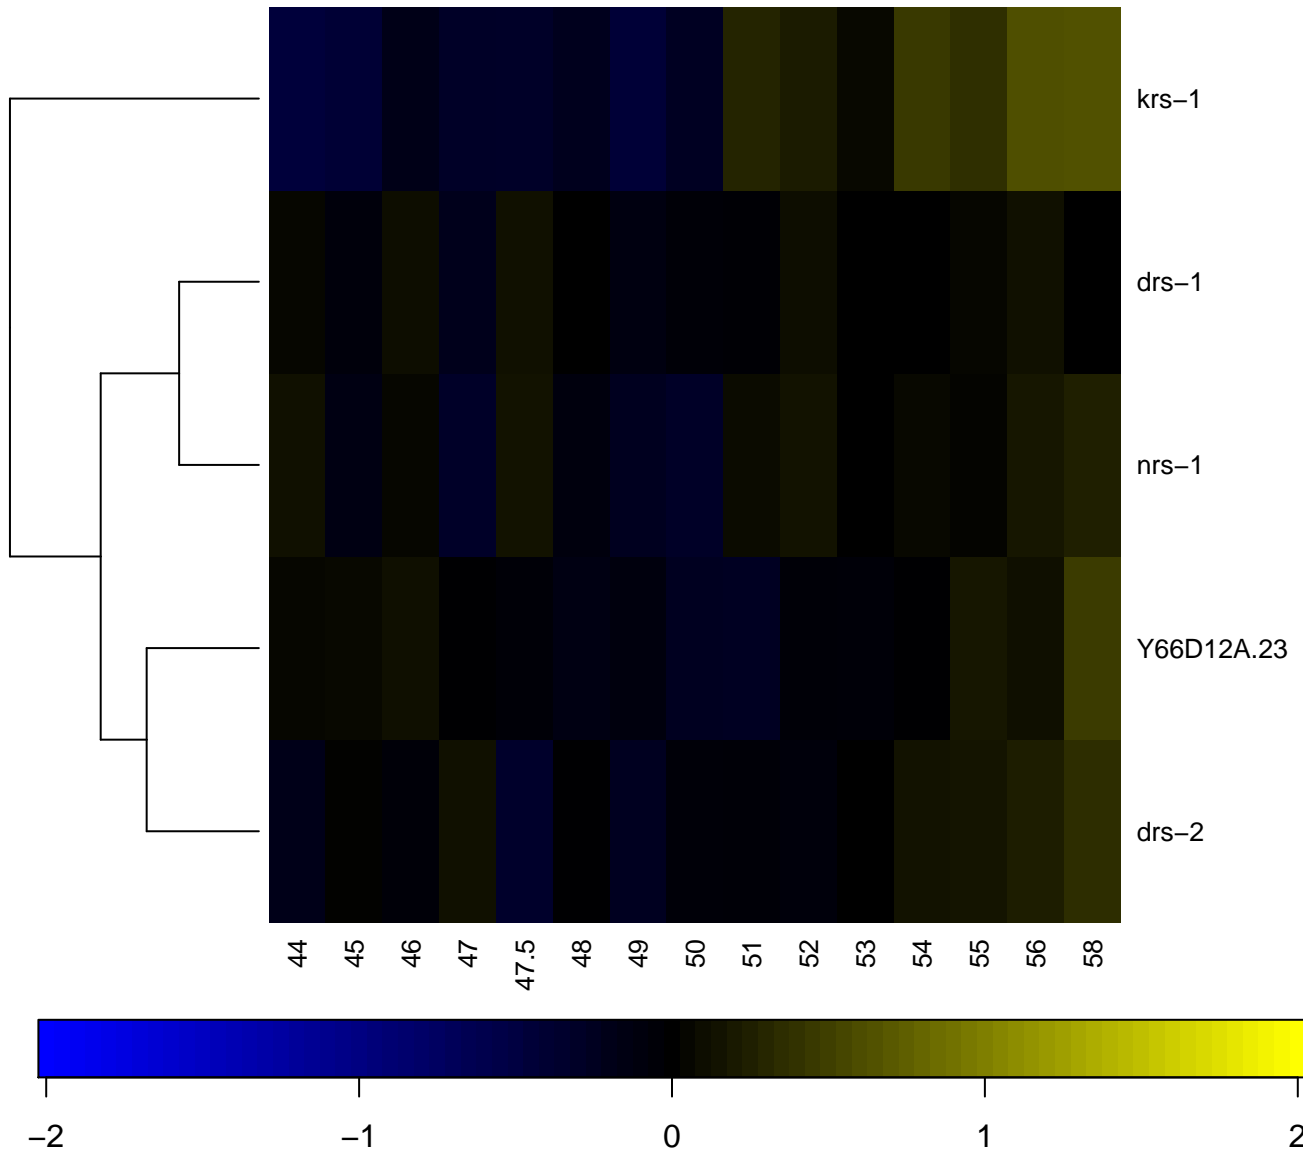



# Astacin (Peptidase family M12A)

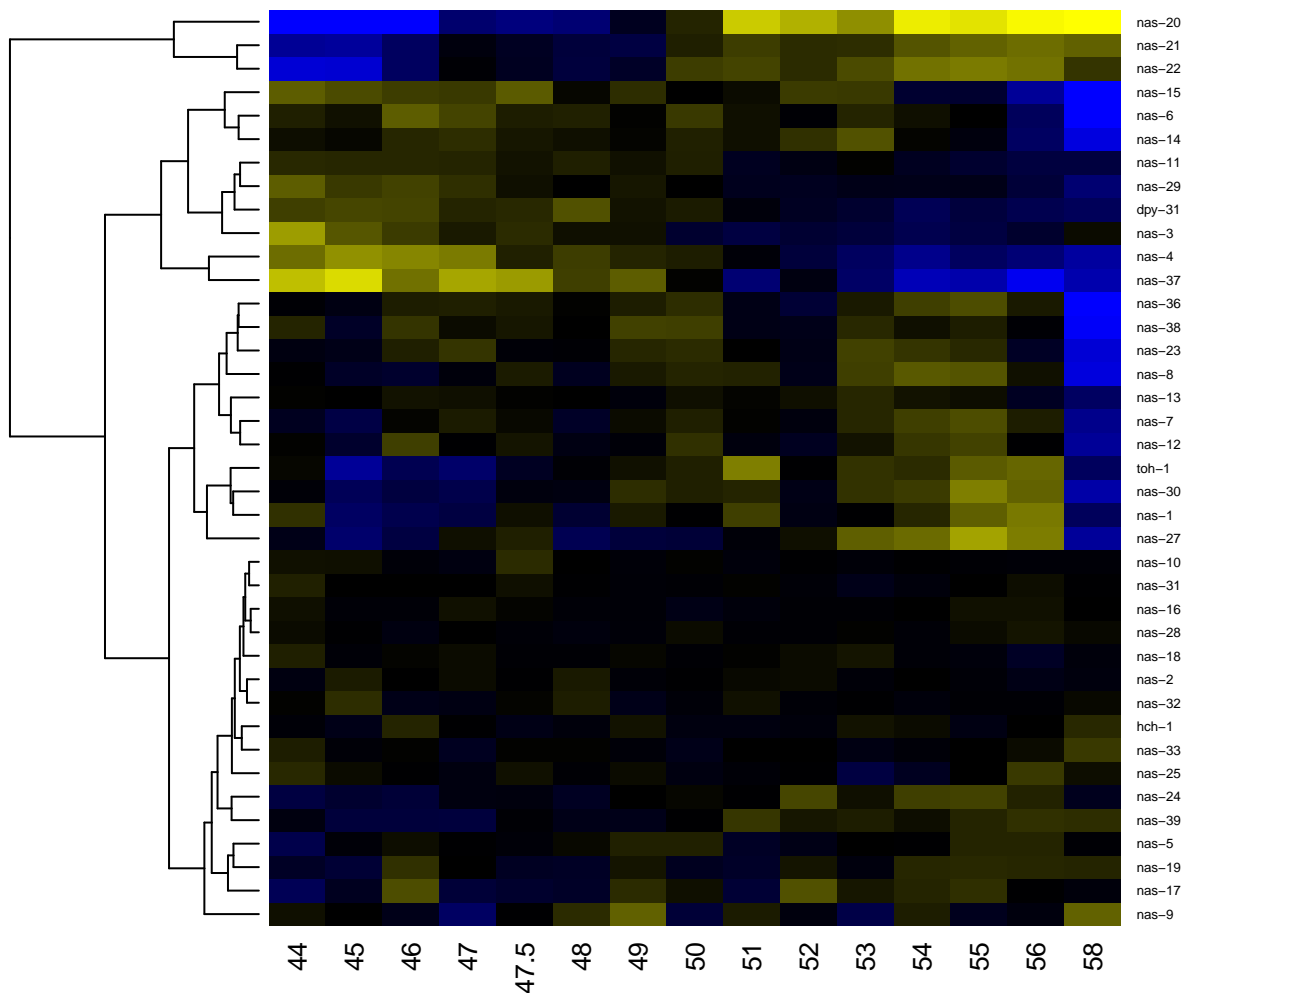



# ATP-grasp domain

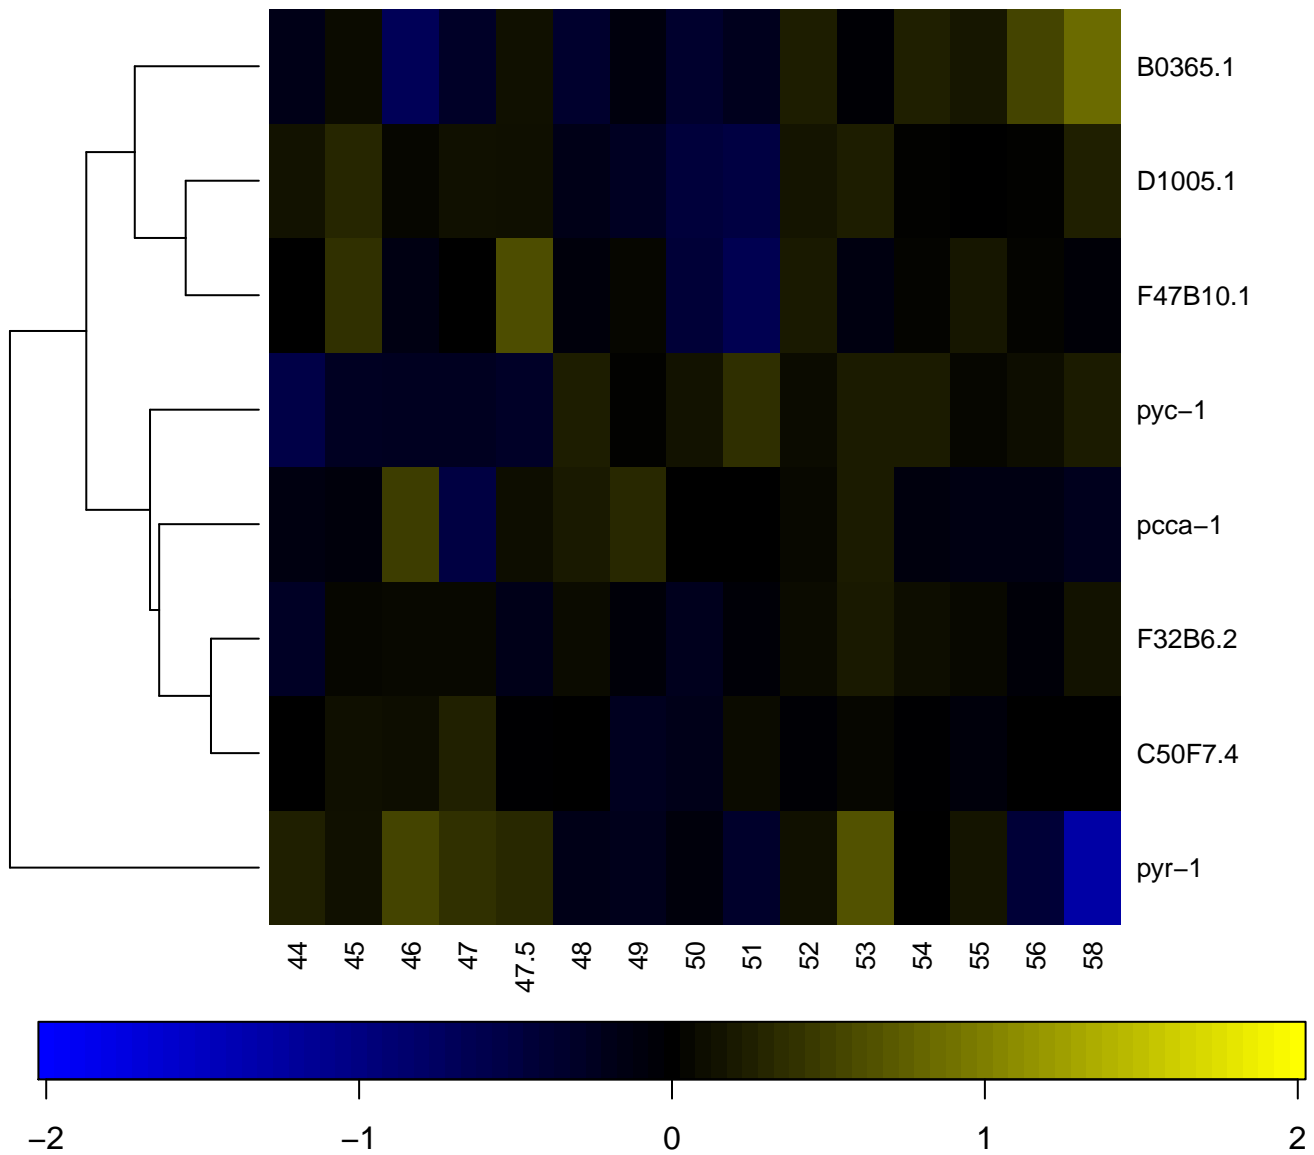









# ATP synthase subunit C

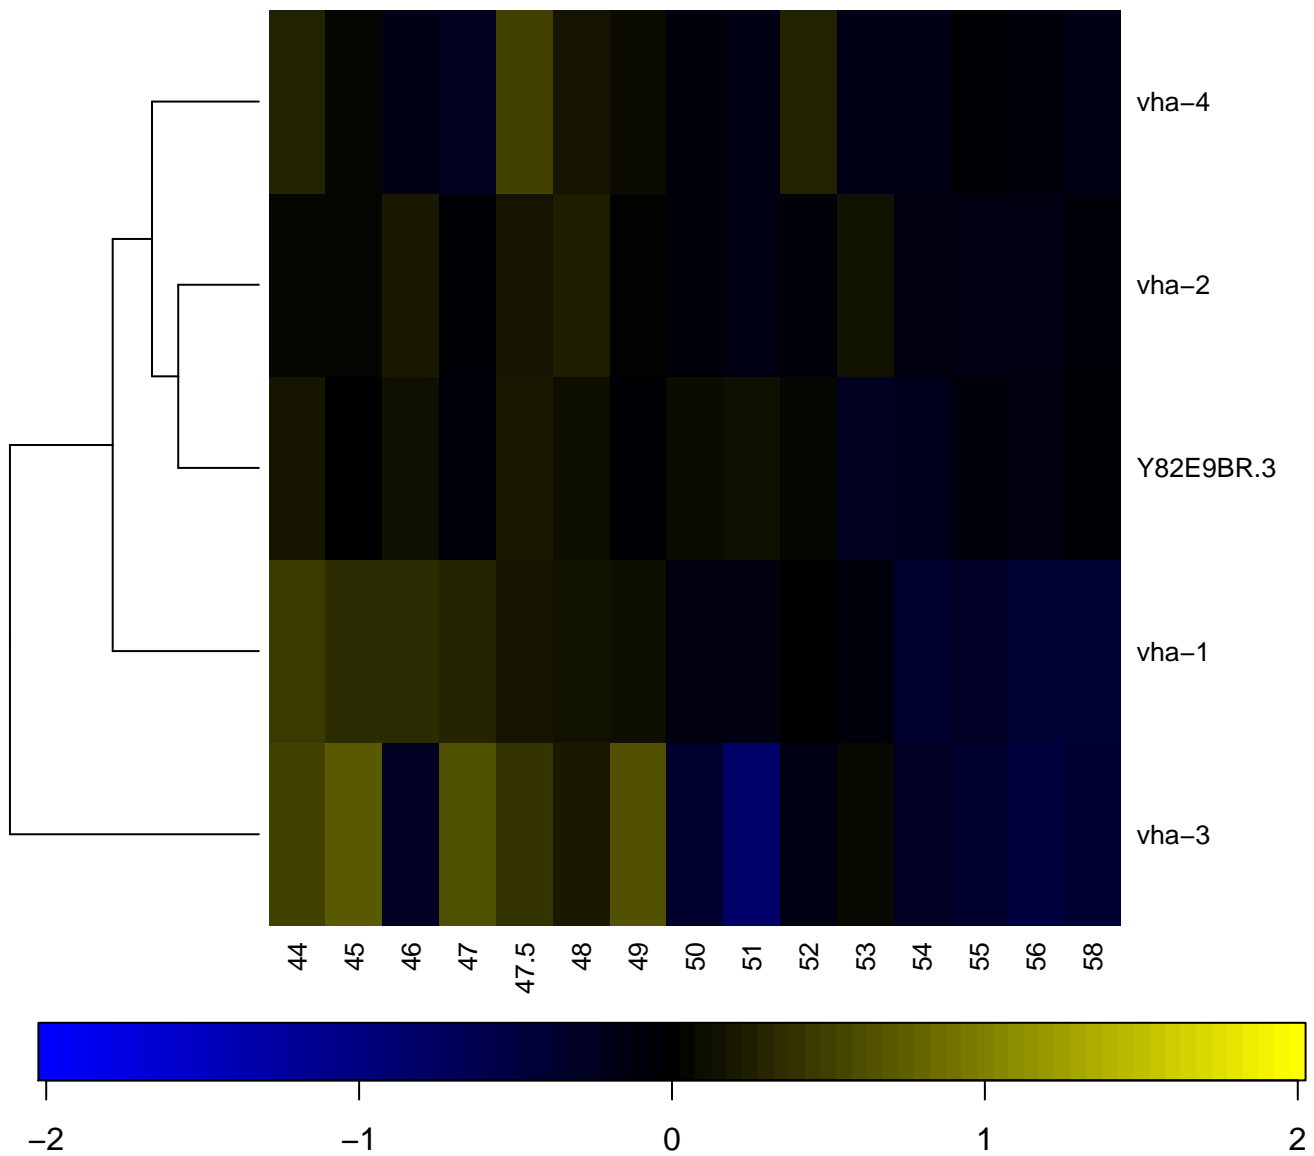













# ATPase family associated with various cellular activities (AA

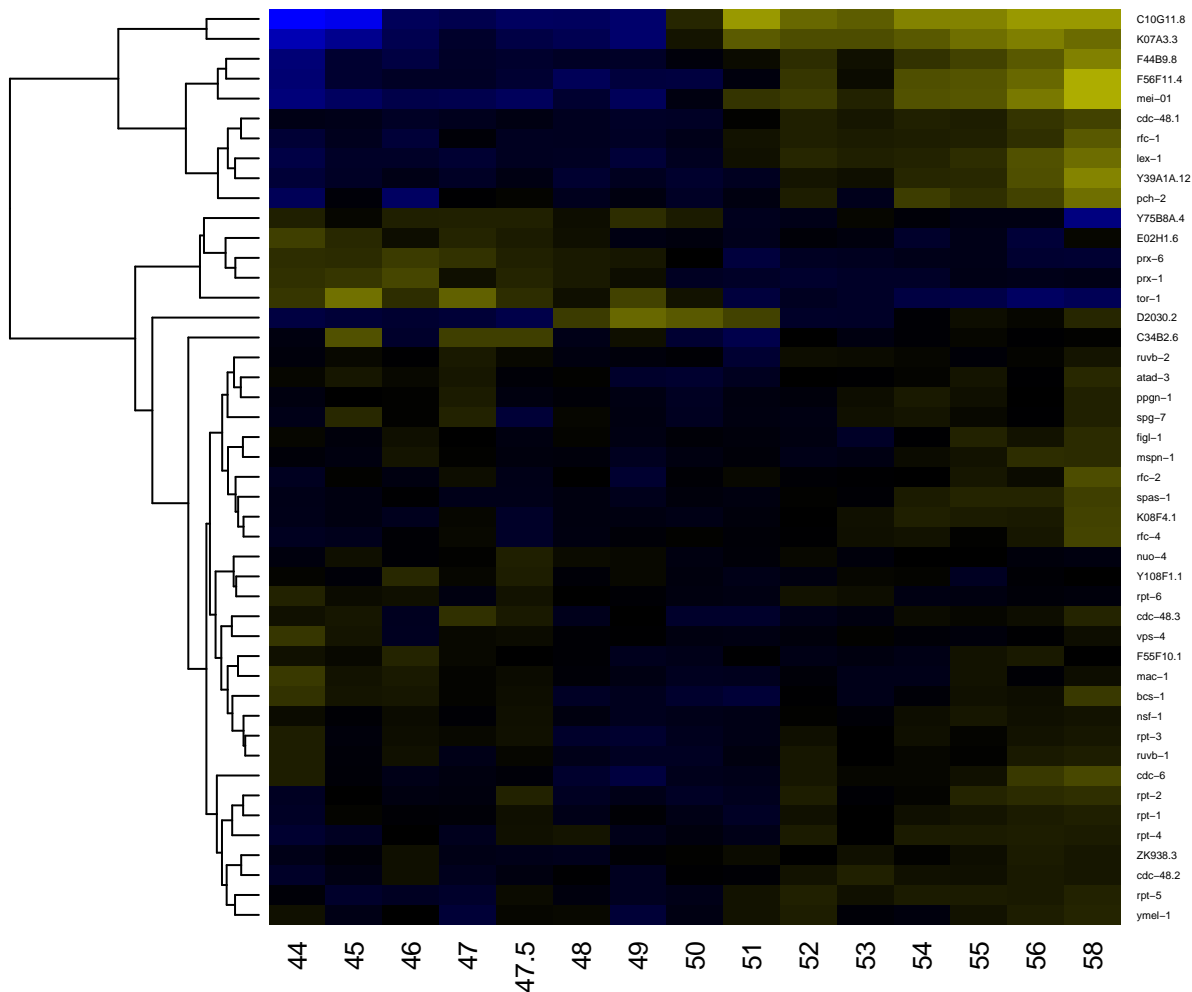

# ATPase, AAA-2



# ATPase, AAA-5

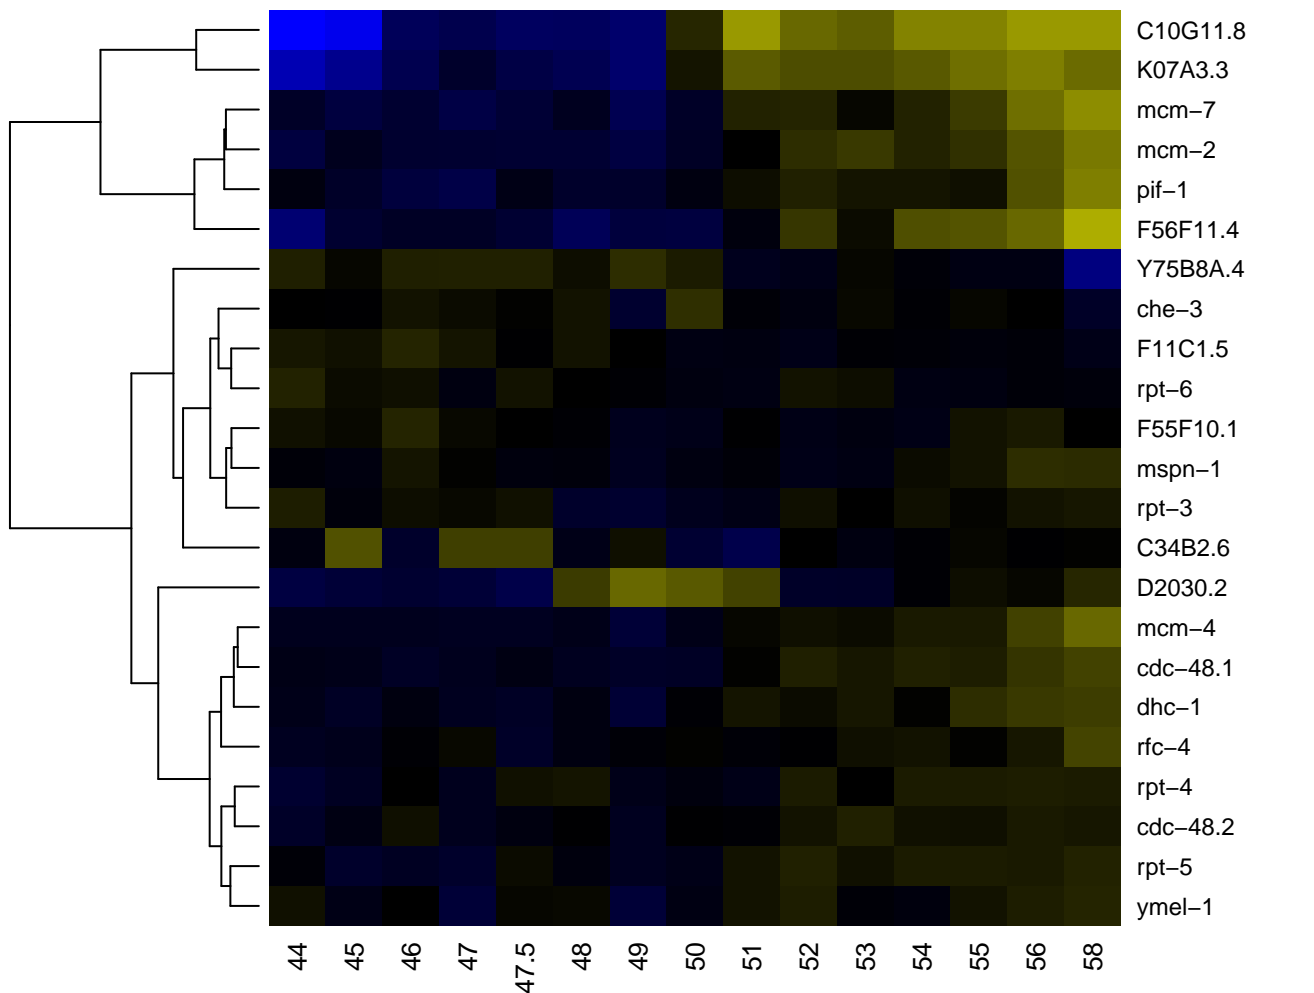



# ATPase, AAA-type, conserved site

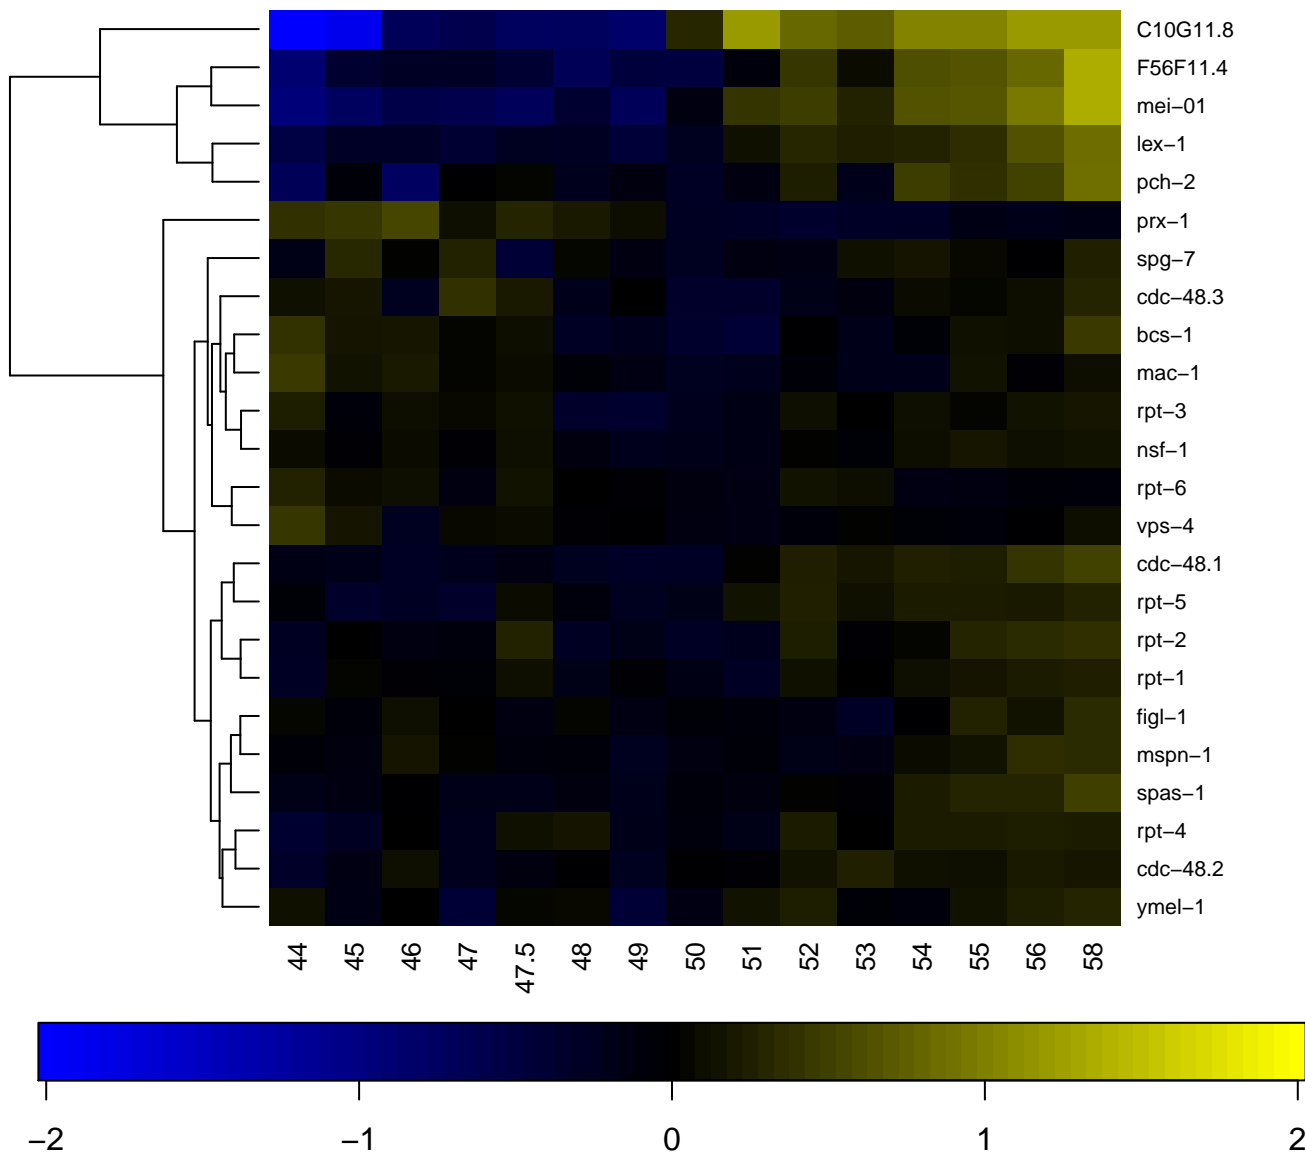

# ATPase, AAA-type, core

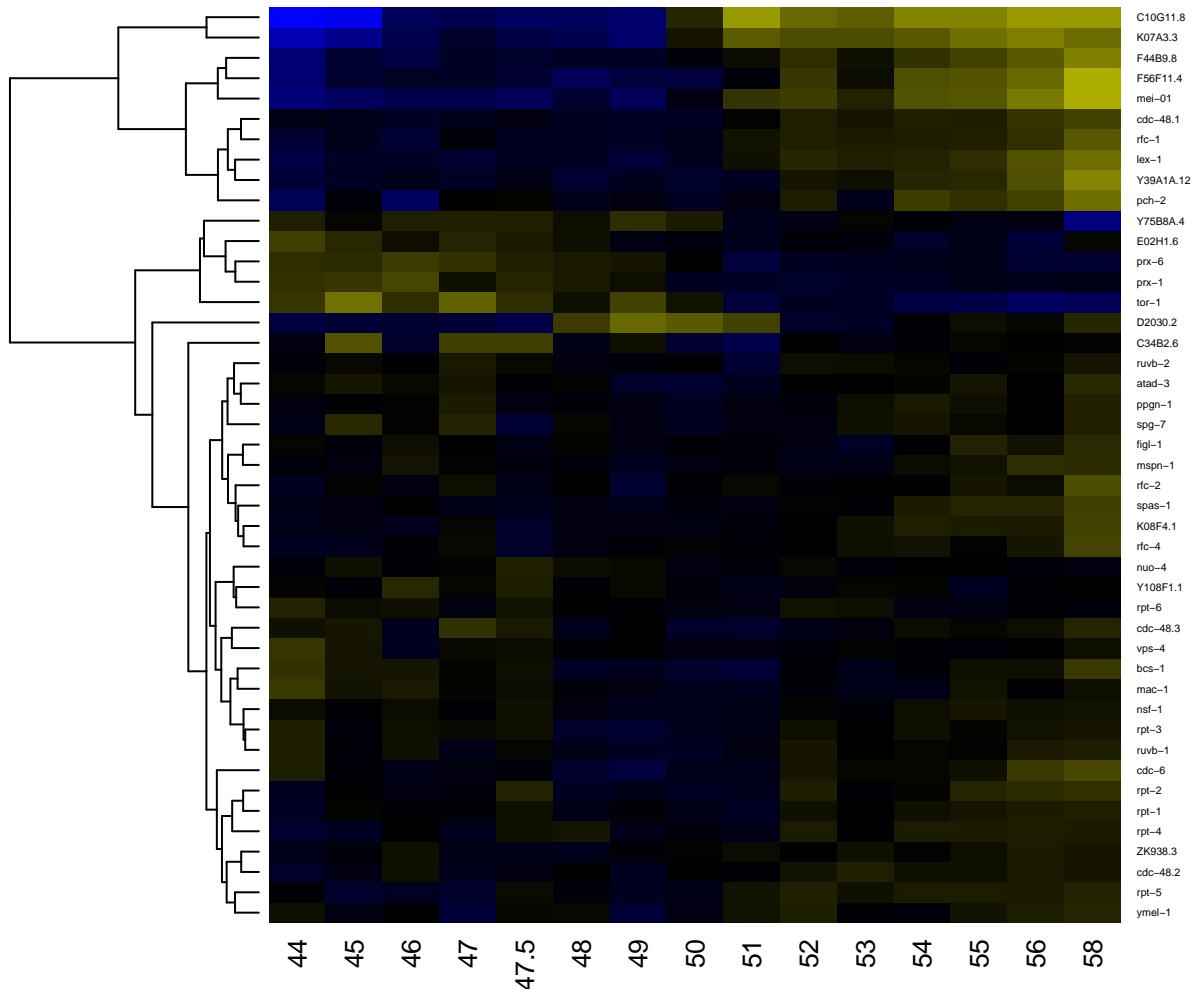

# ATPase, AAA+ type, core

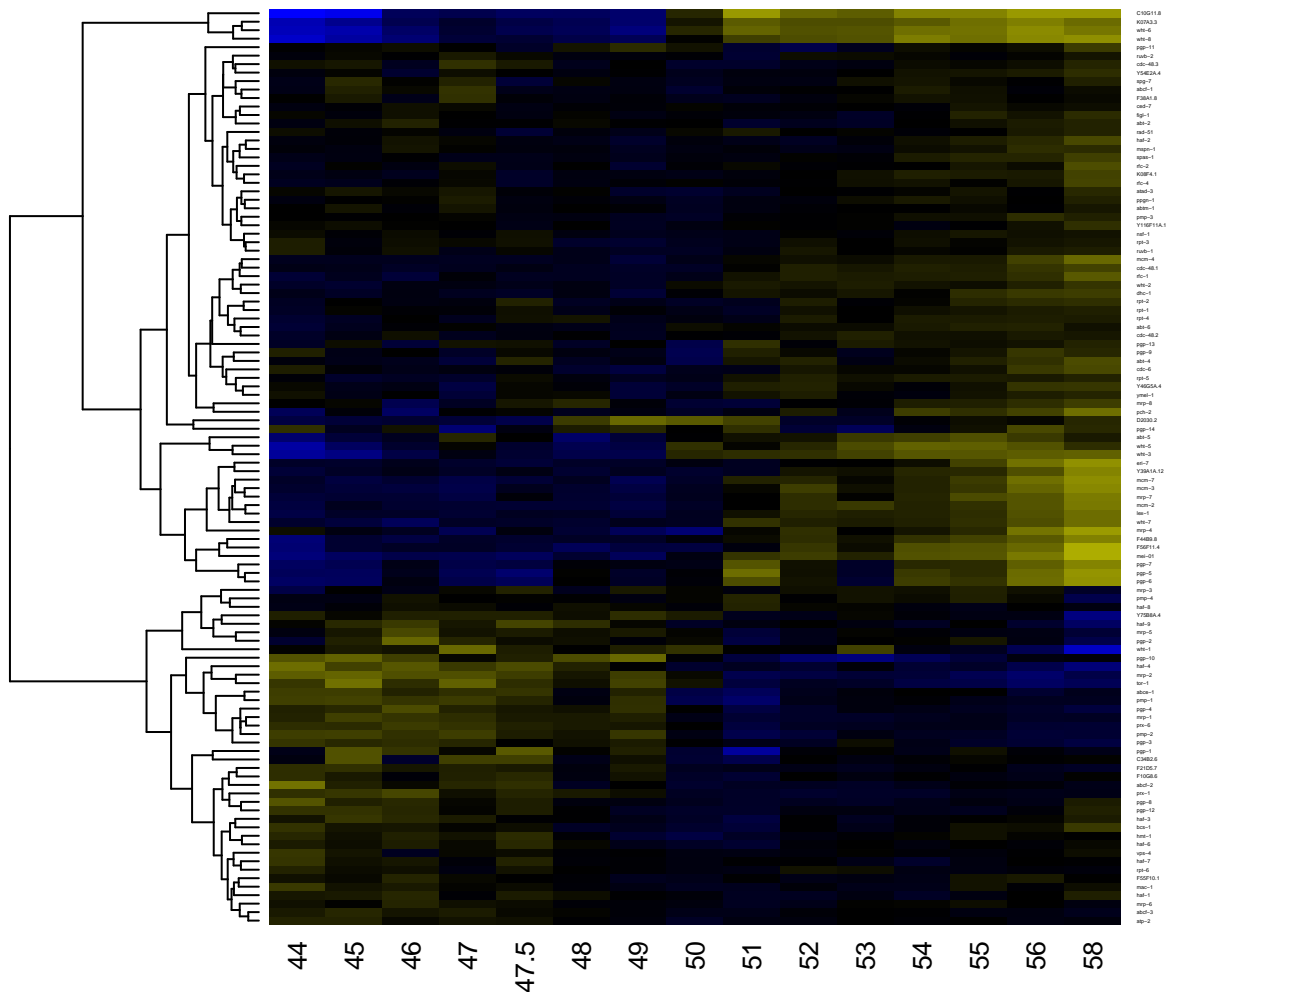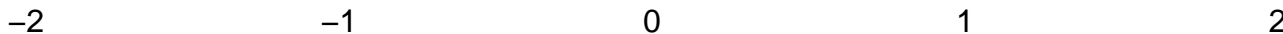



# Pase, alpha/beta subunit, nucleotide-binding domain, active

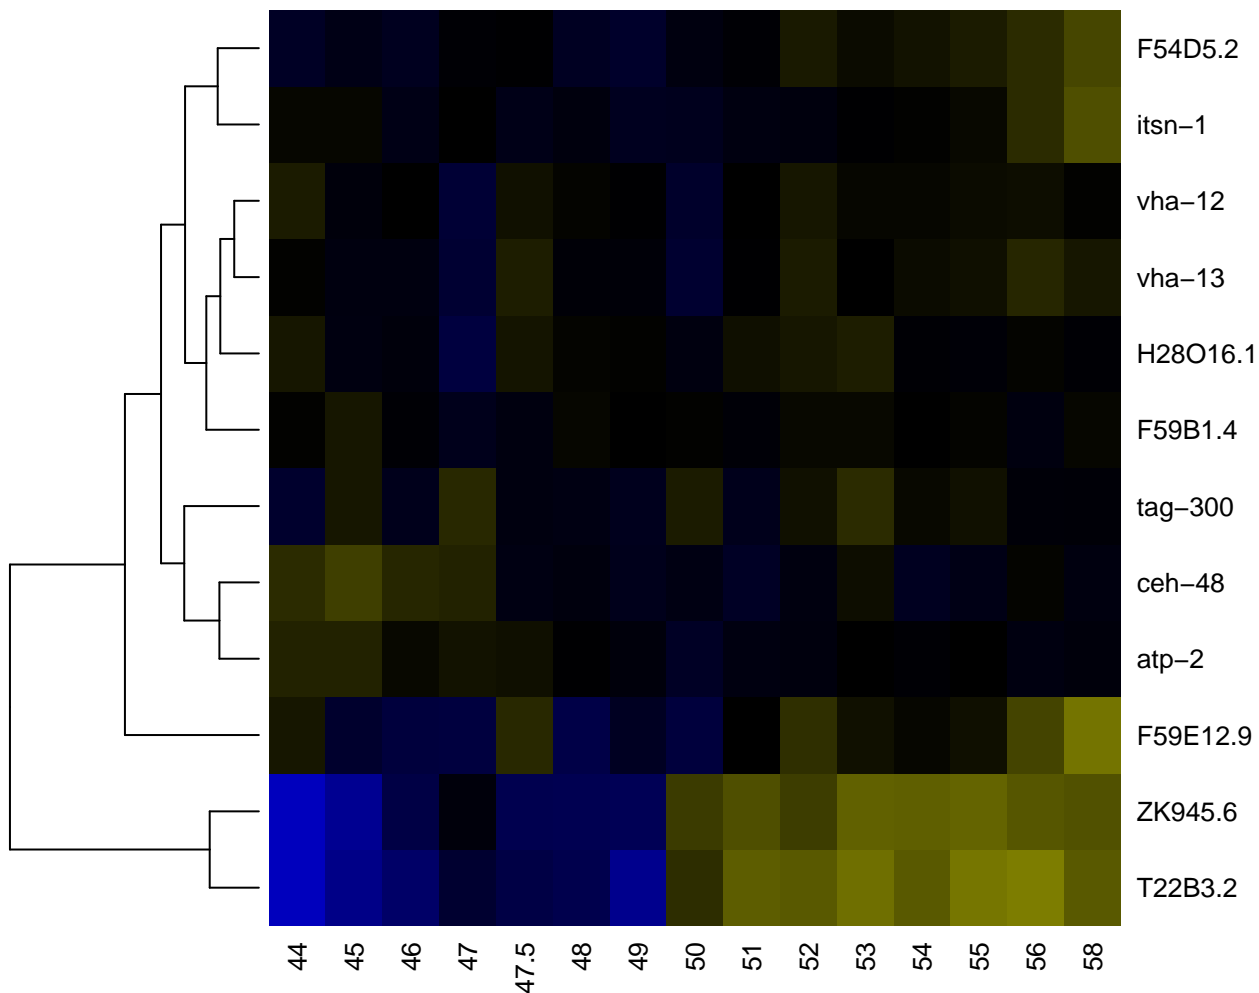

# ATPase, F0/V0 complex, subunit C

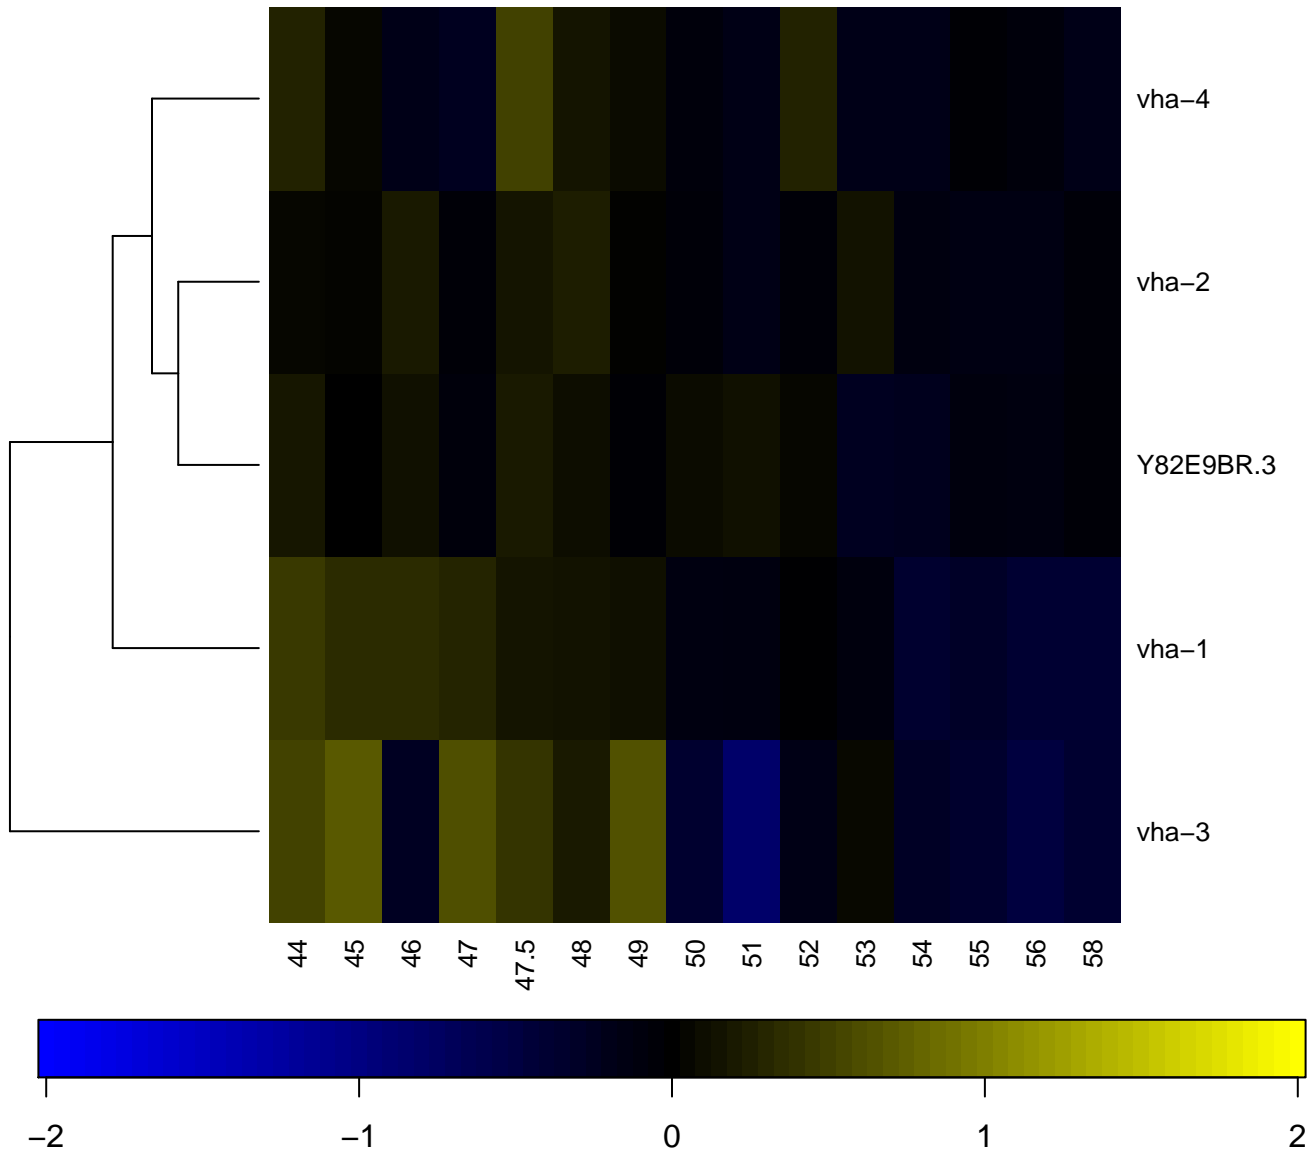

# ATPase, F1/V1/A1 complex, alpha/beta subunit, N-termina

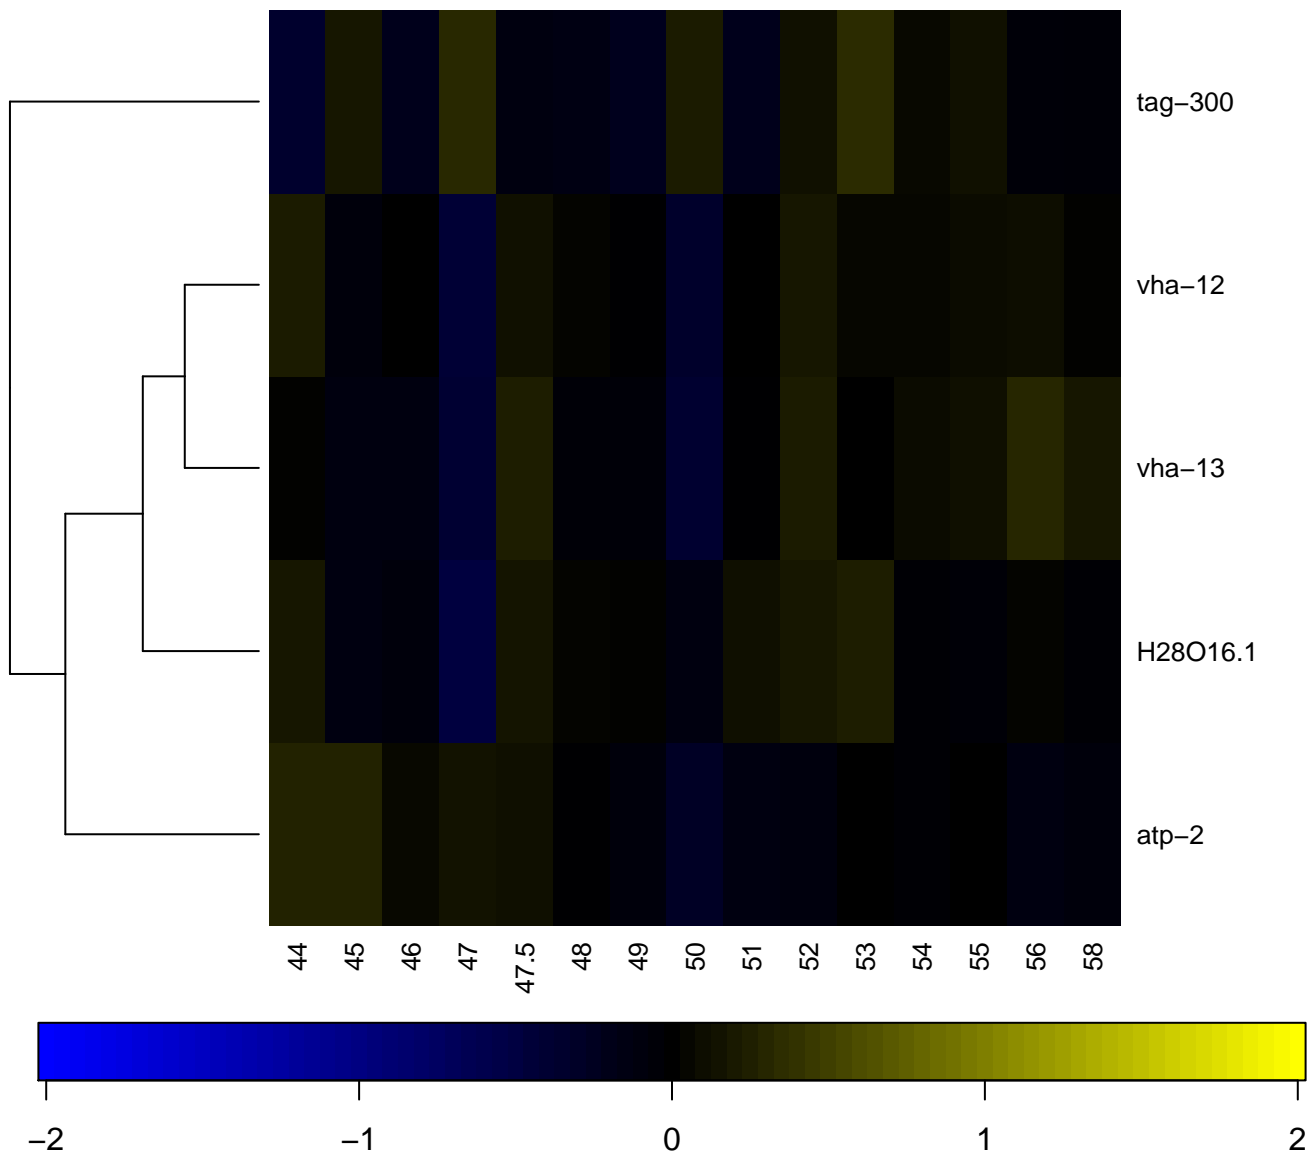

# ATPase, P-type cation-transporter, C-terminal

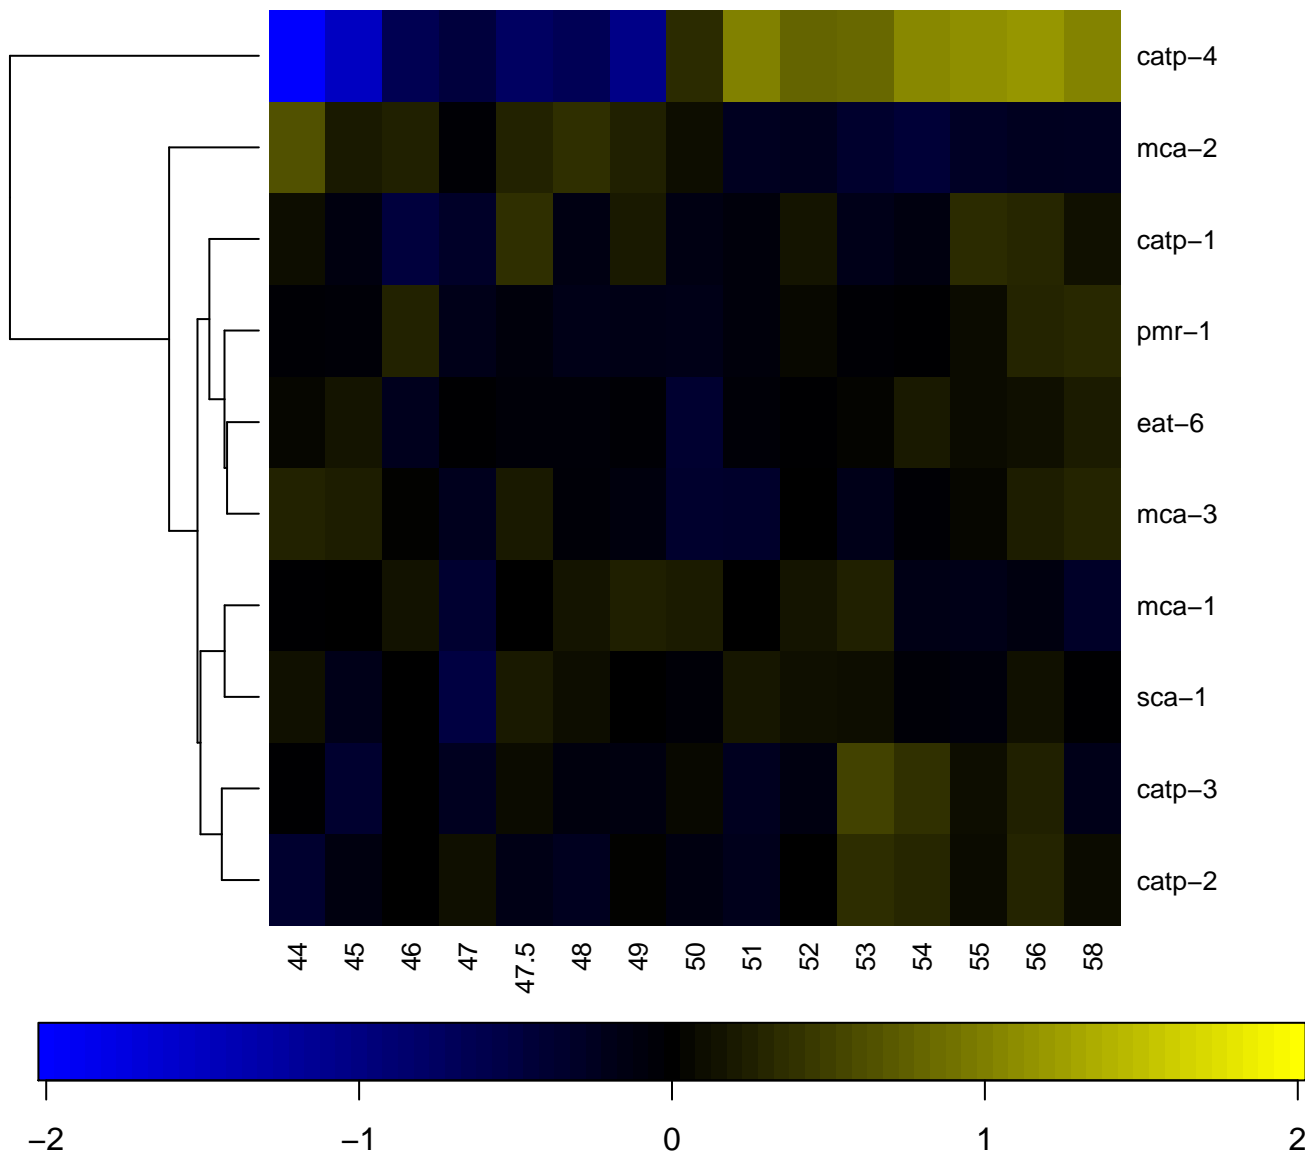



# ATPase, P-type cation-transporter, N-terminal

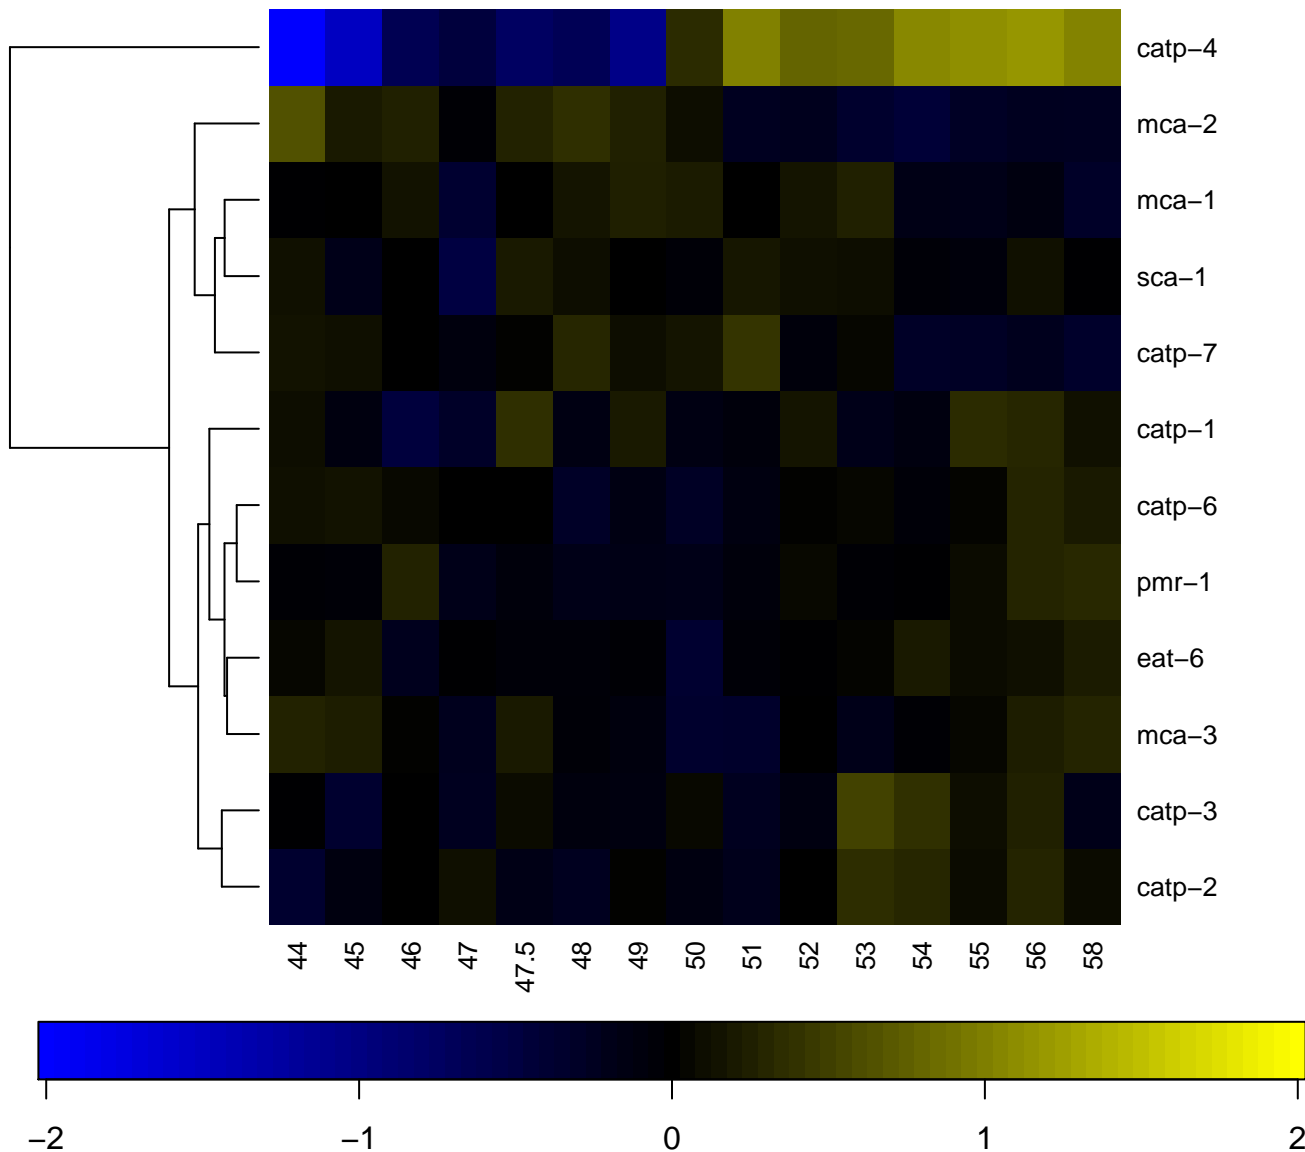



# ATPase, P-type phosphorylation site

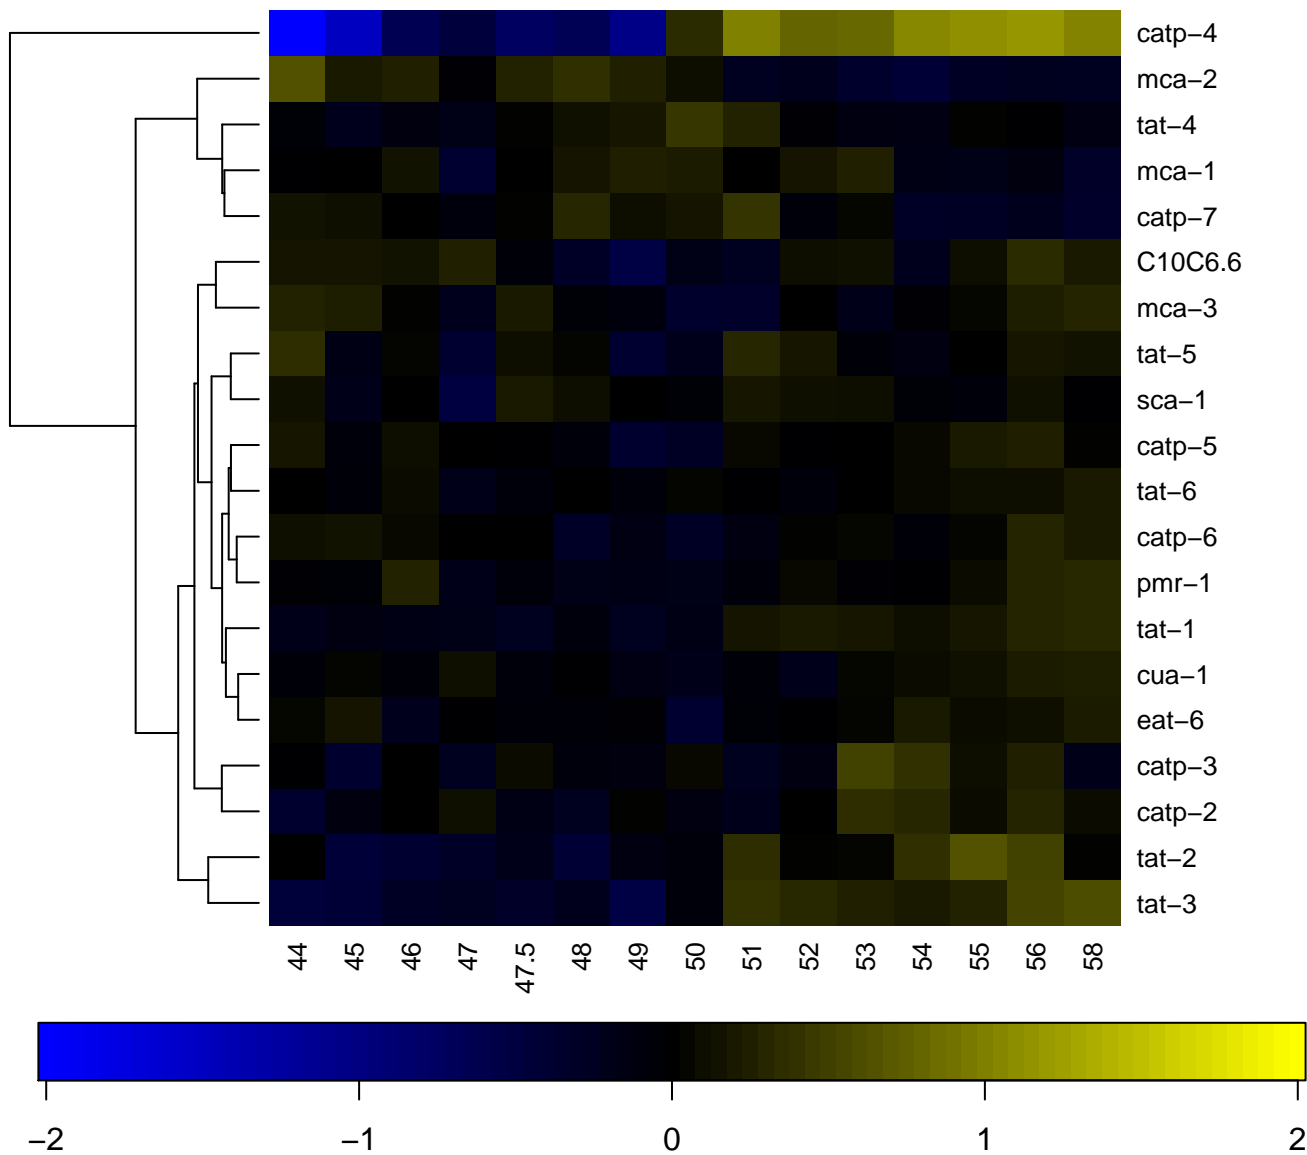

# ATPase, P-type, ATPase-associated domain

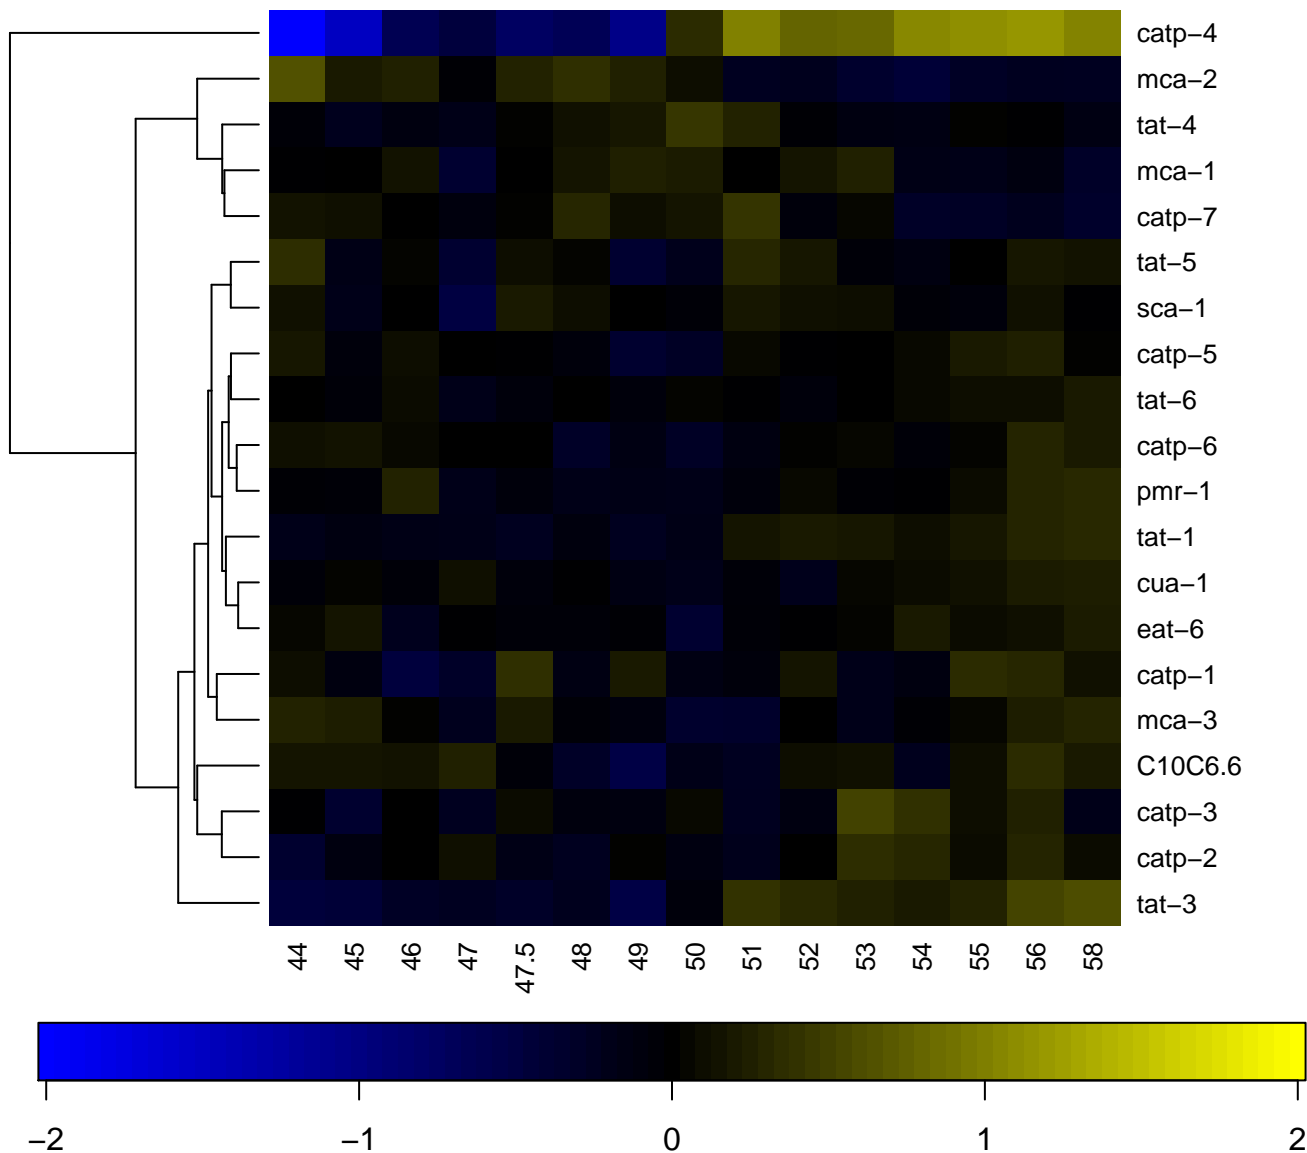



# ATPase, P-type, K/Mg/Cd/Cu/Zn/Na/Ca/Na/H-transporter

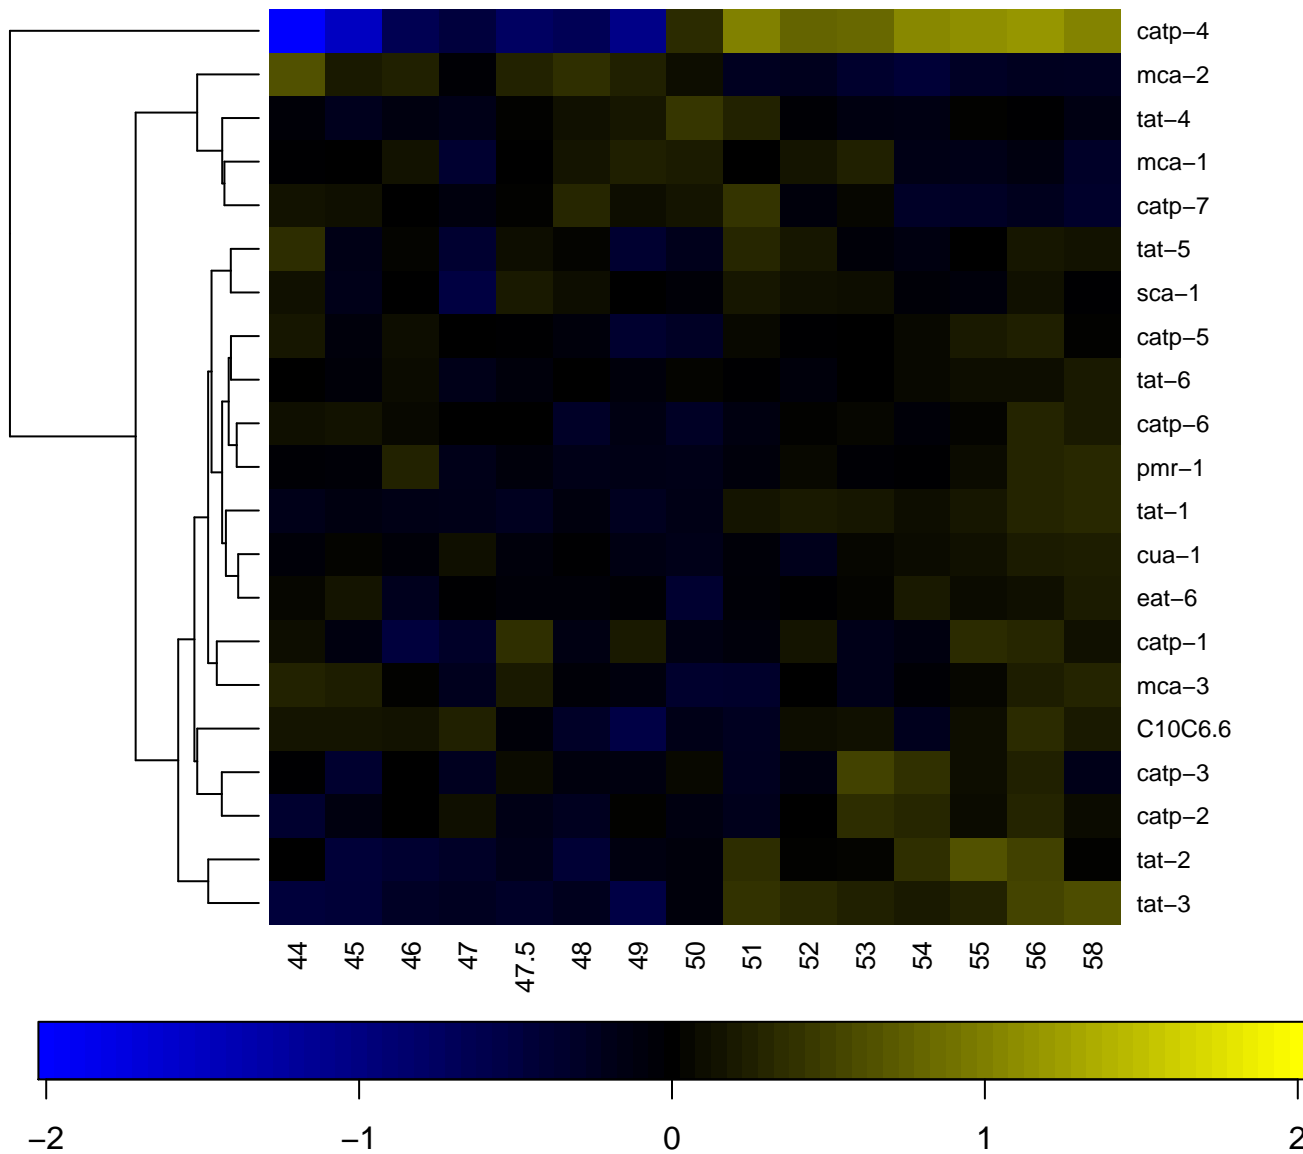

# ATPase, P-type, phospholipid-translocating, flippase















# Band 4.1 domain

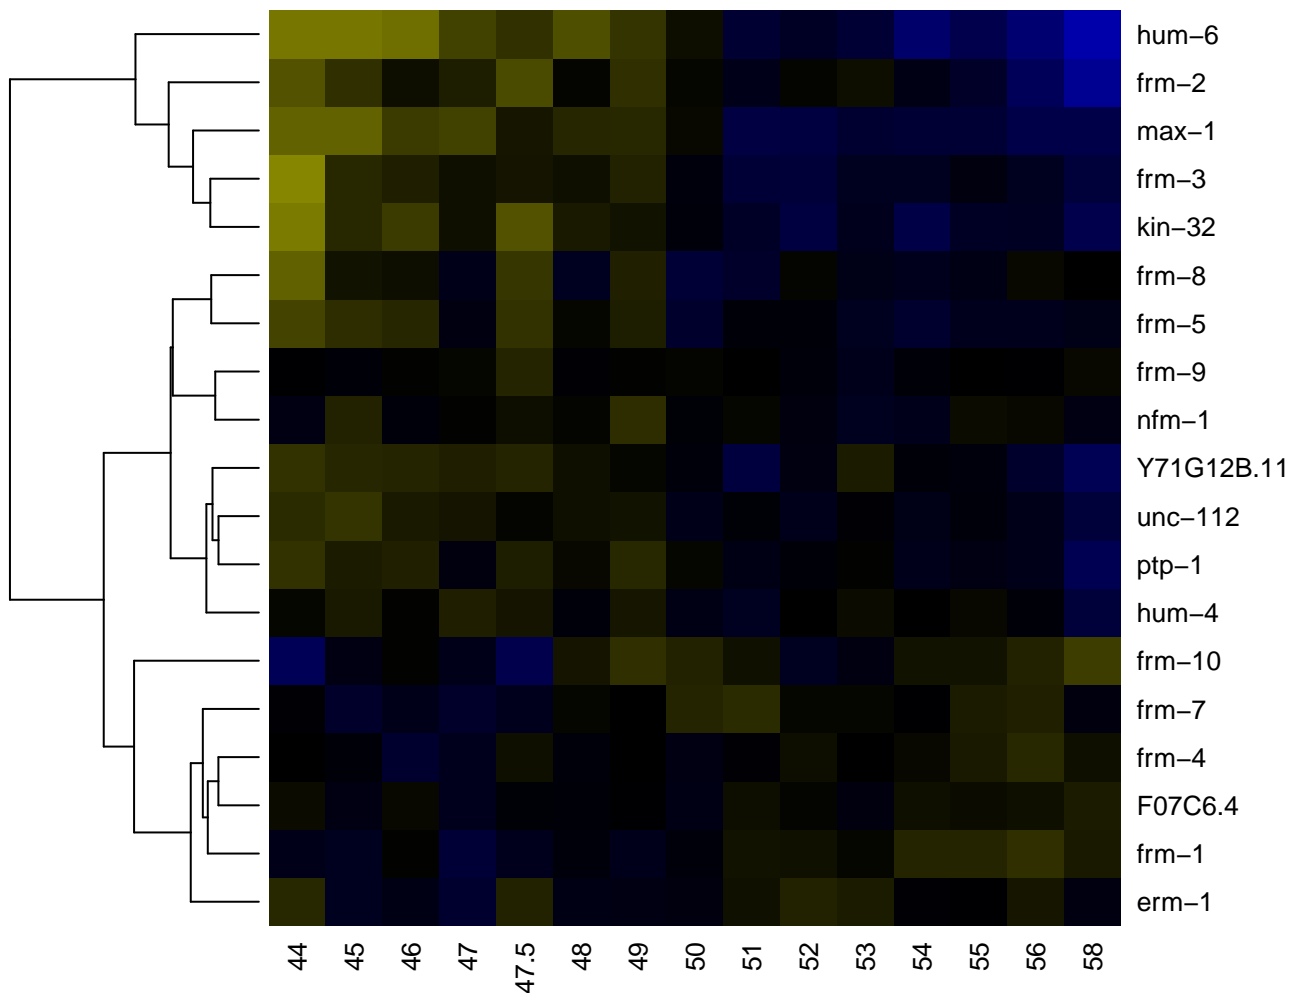





# Band 7/stomatin-like, conserved site

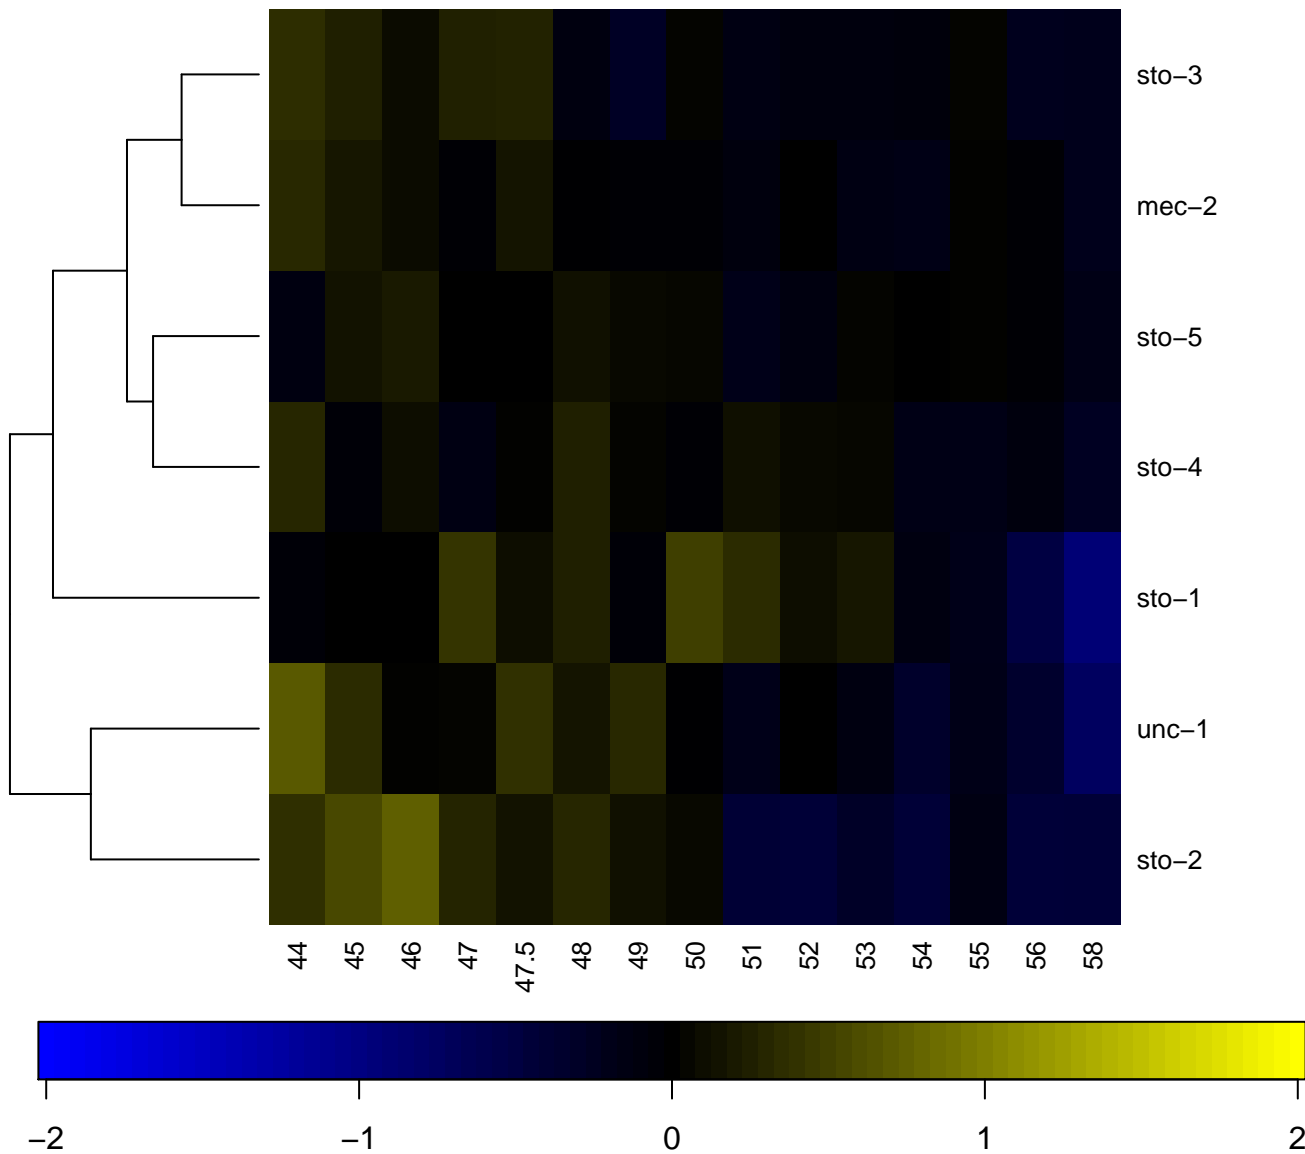



# BAR

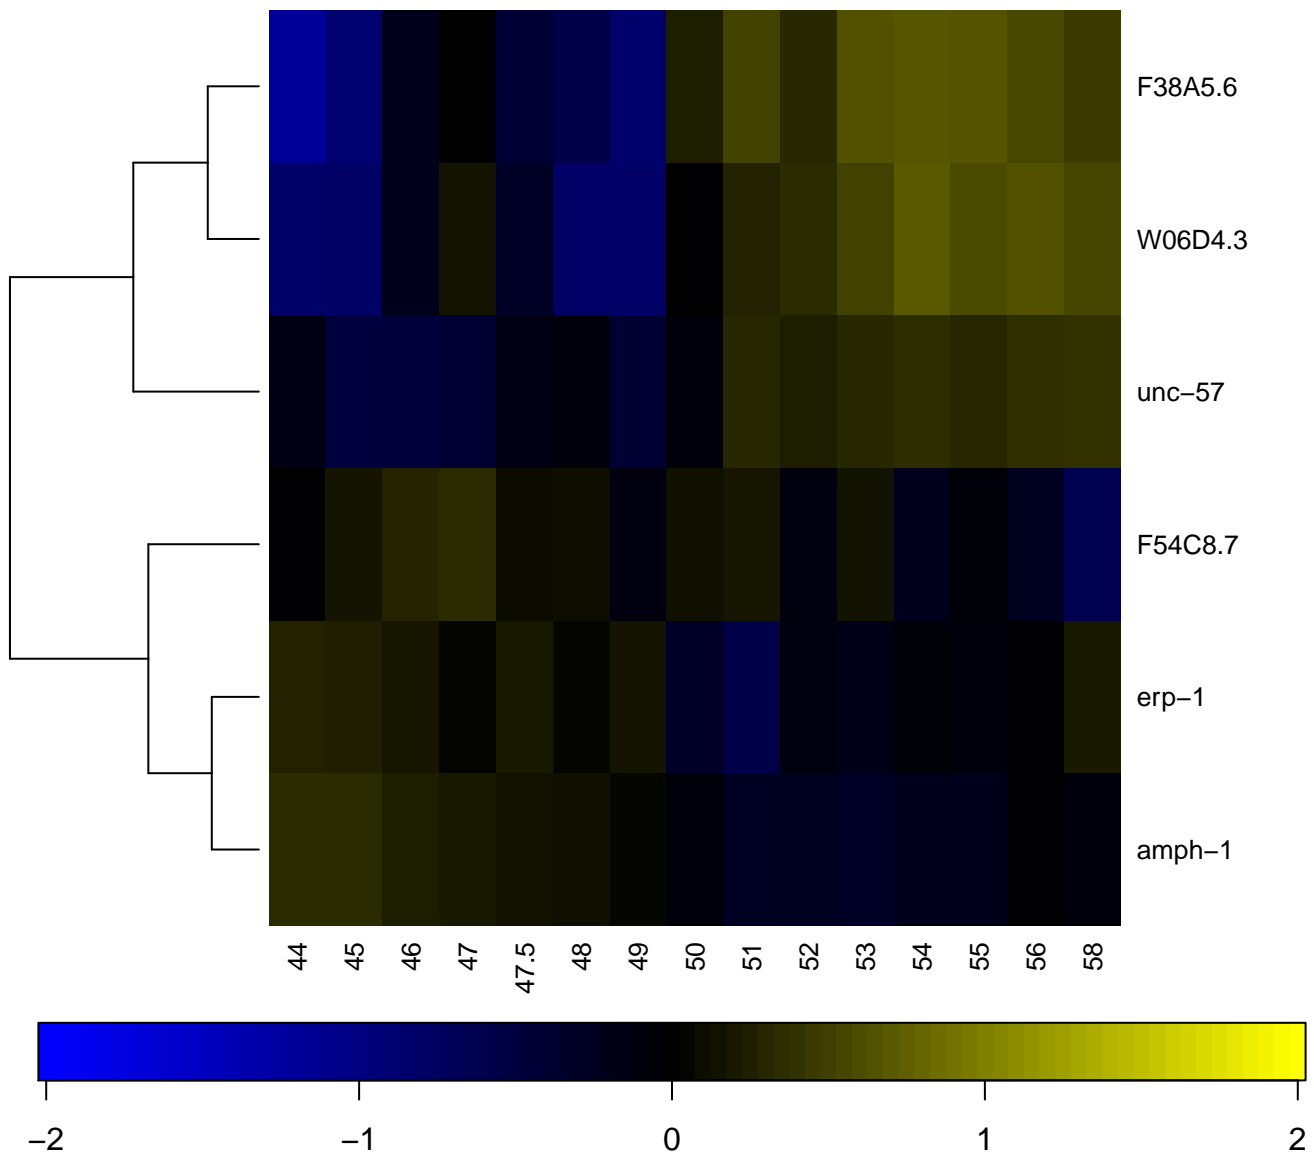

# BAR domain



# Basic-leucine zipper (bZIP) transcription factor

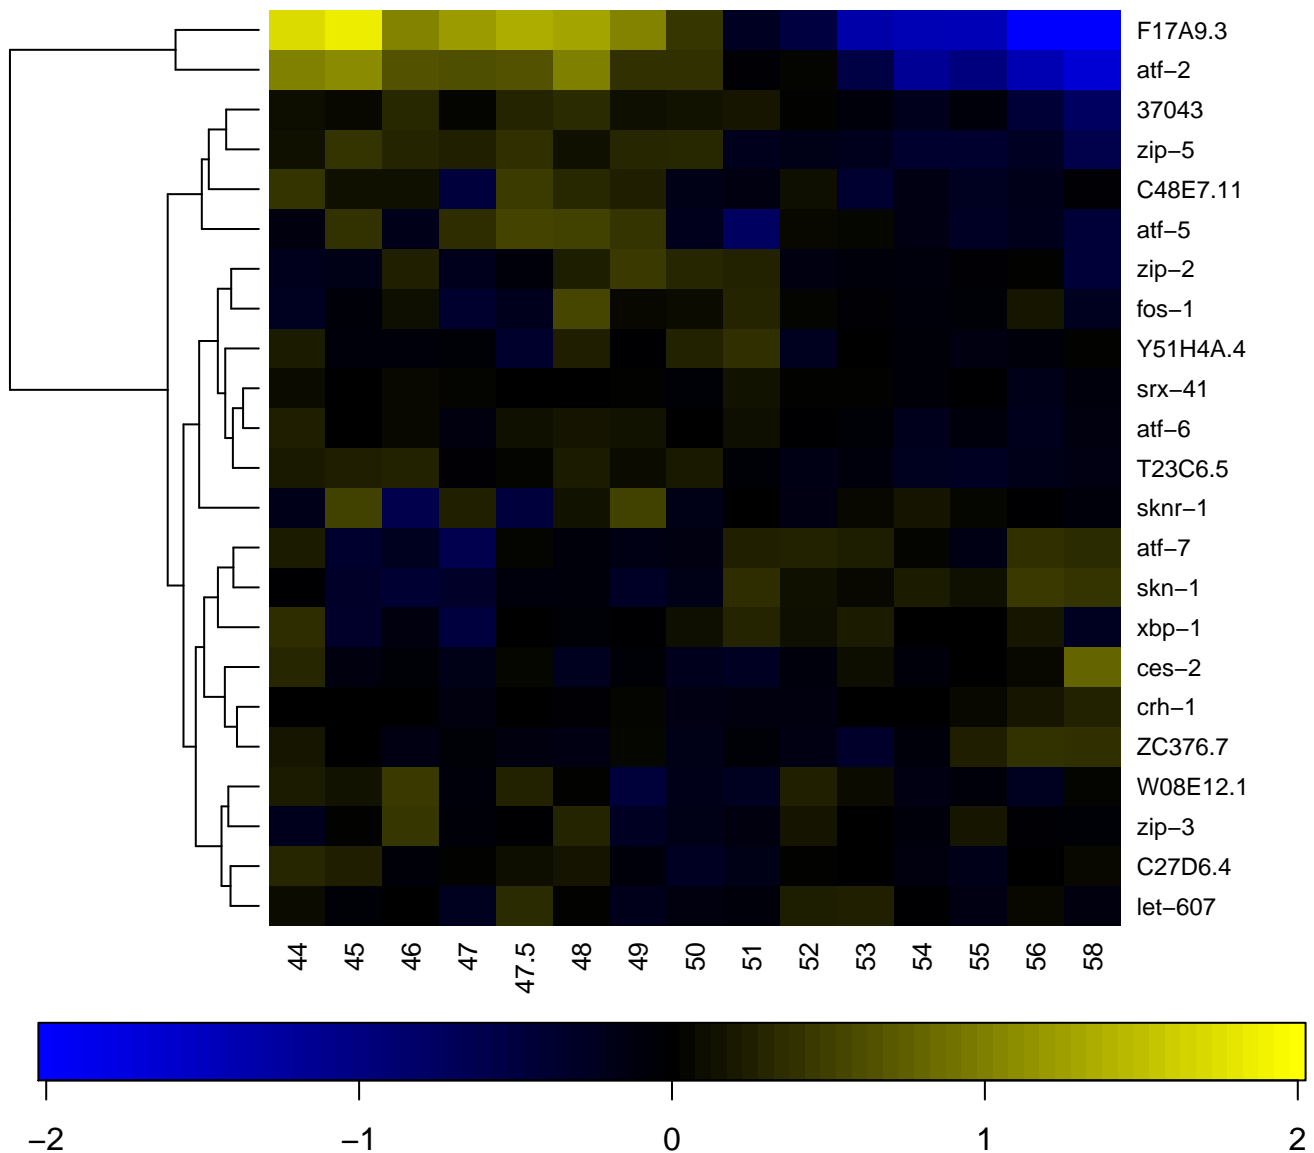

# Basic leucine zipper

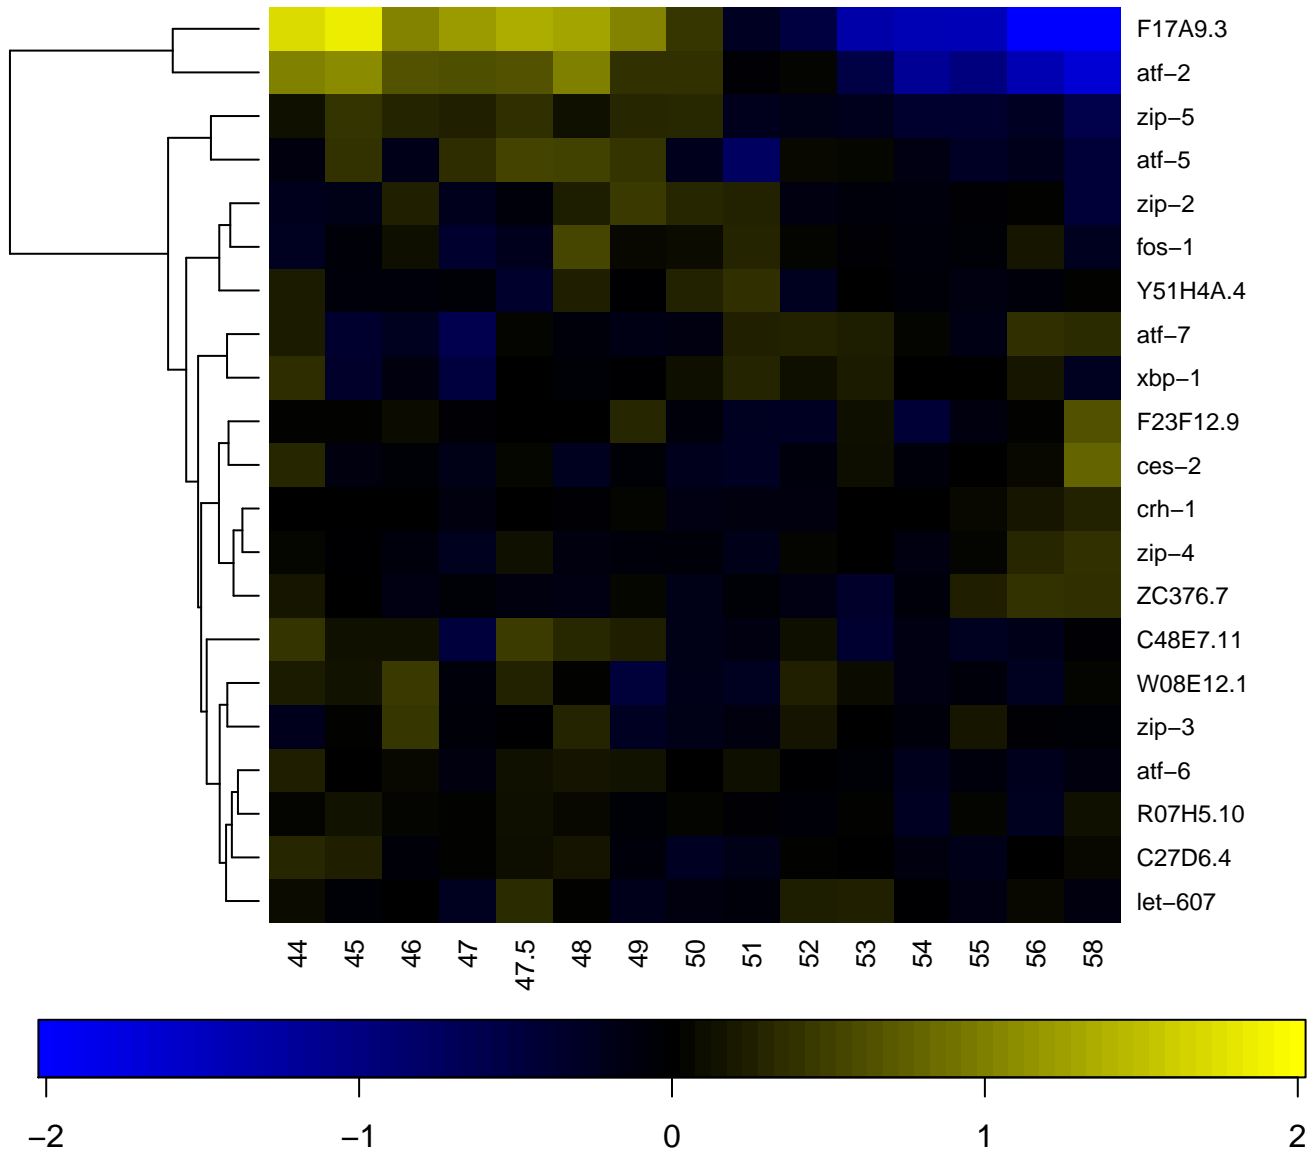

# Basic region leucine zipper

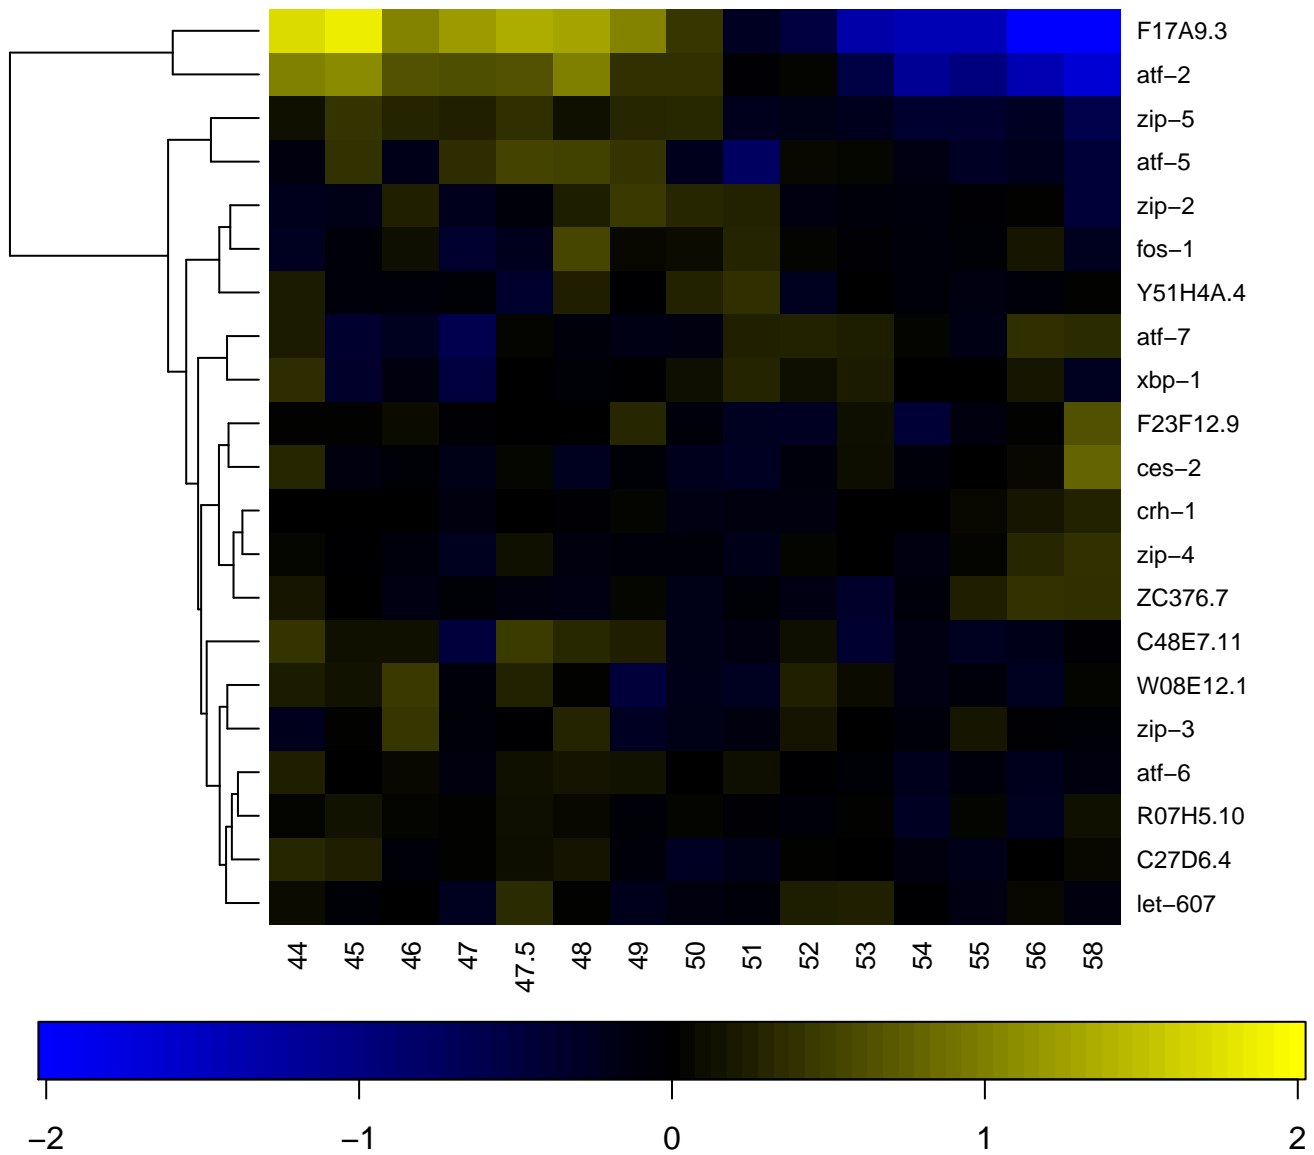

# BED zinc finger

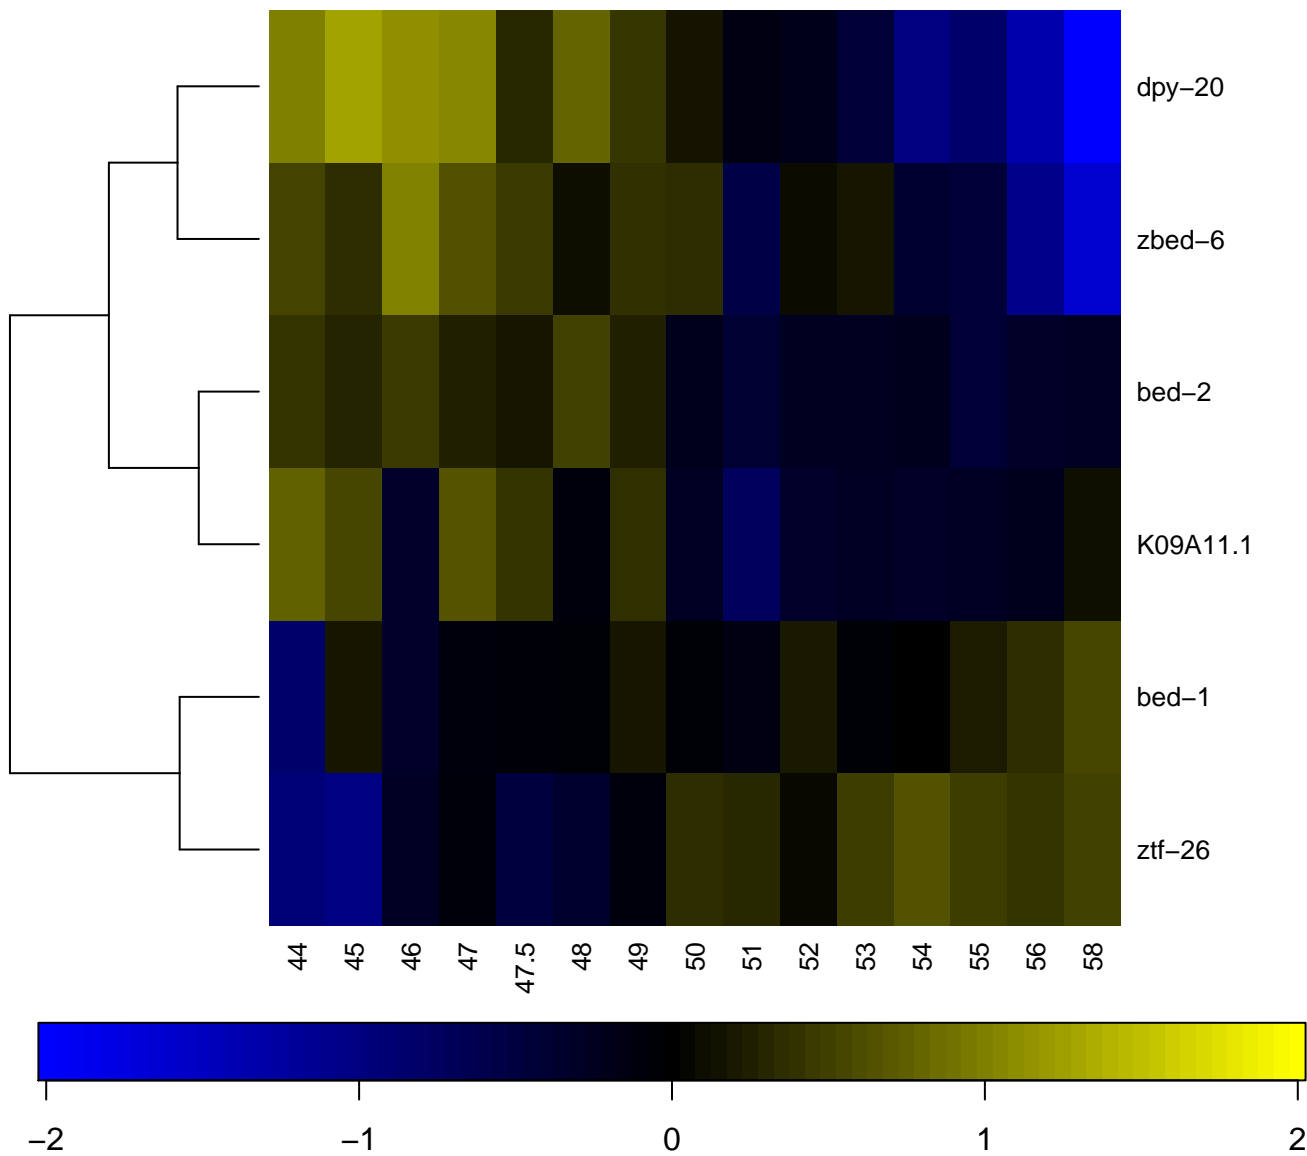









# Beta-grasp fold, ferredoxin-type

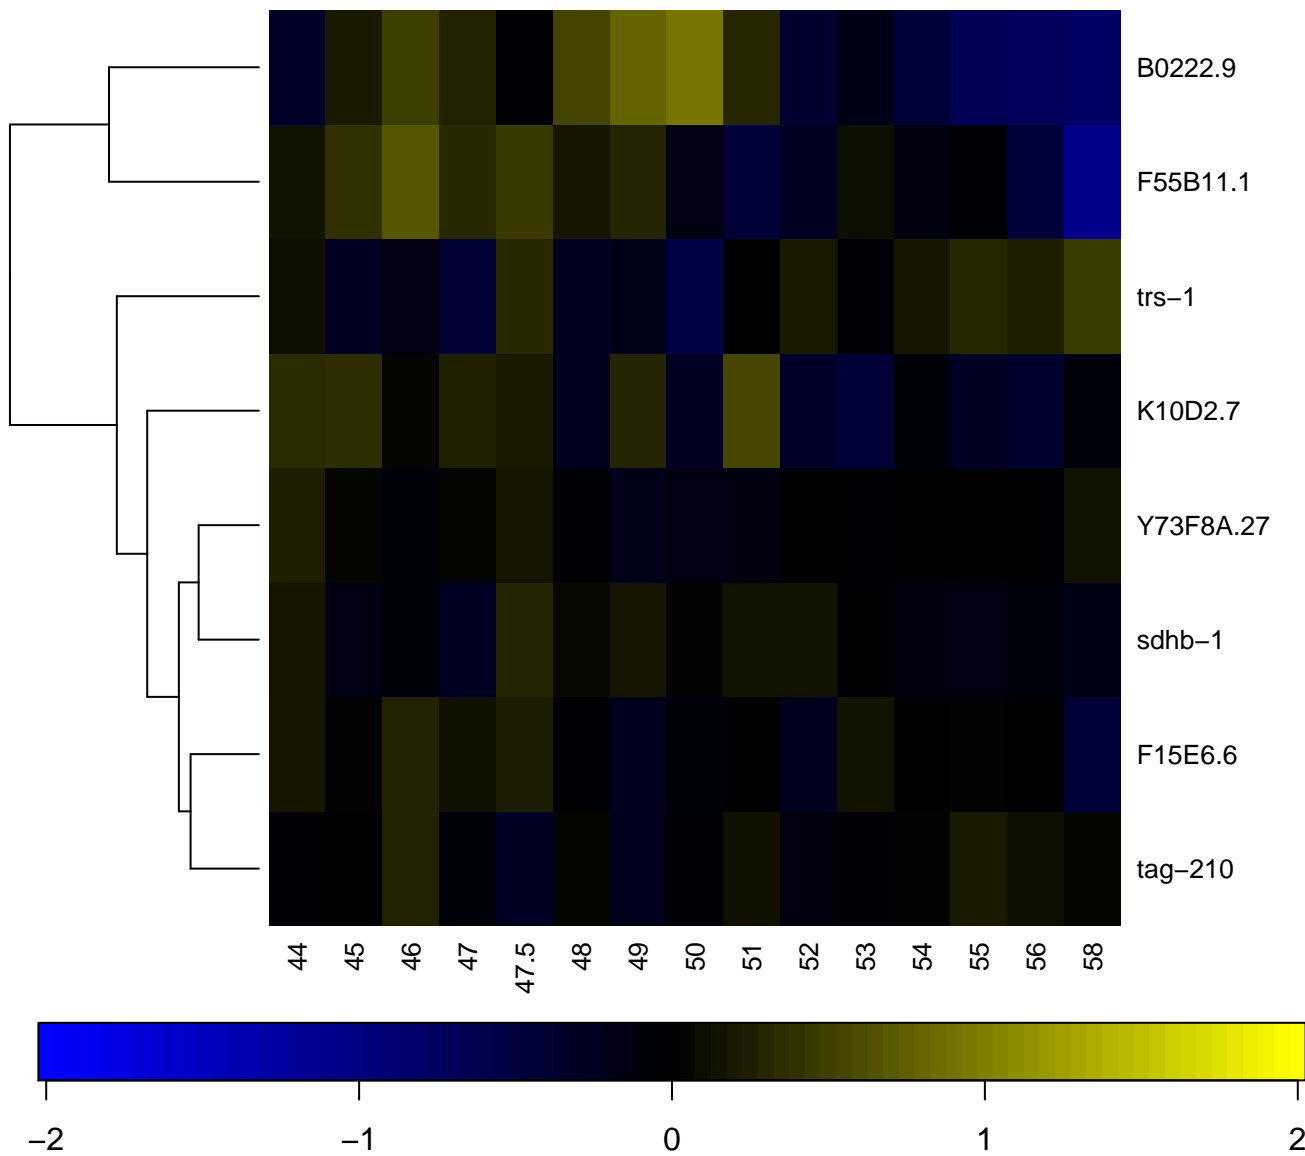





# Beta-lactamase

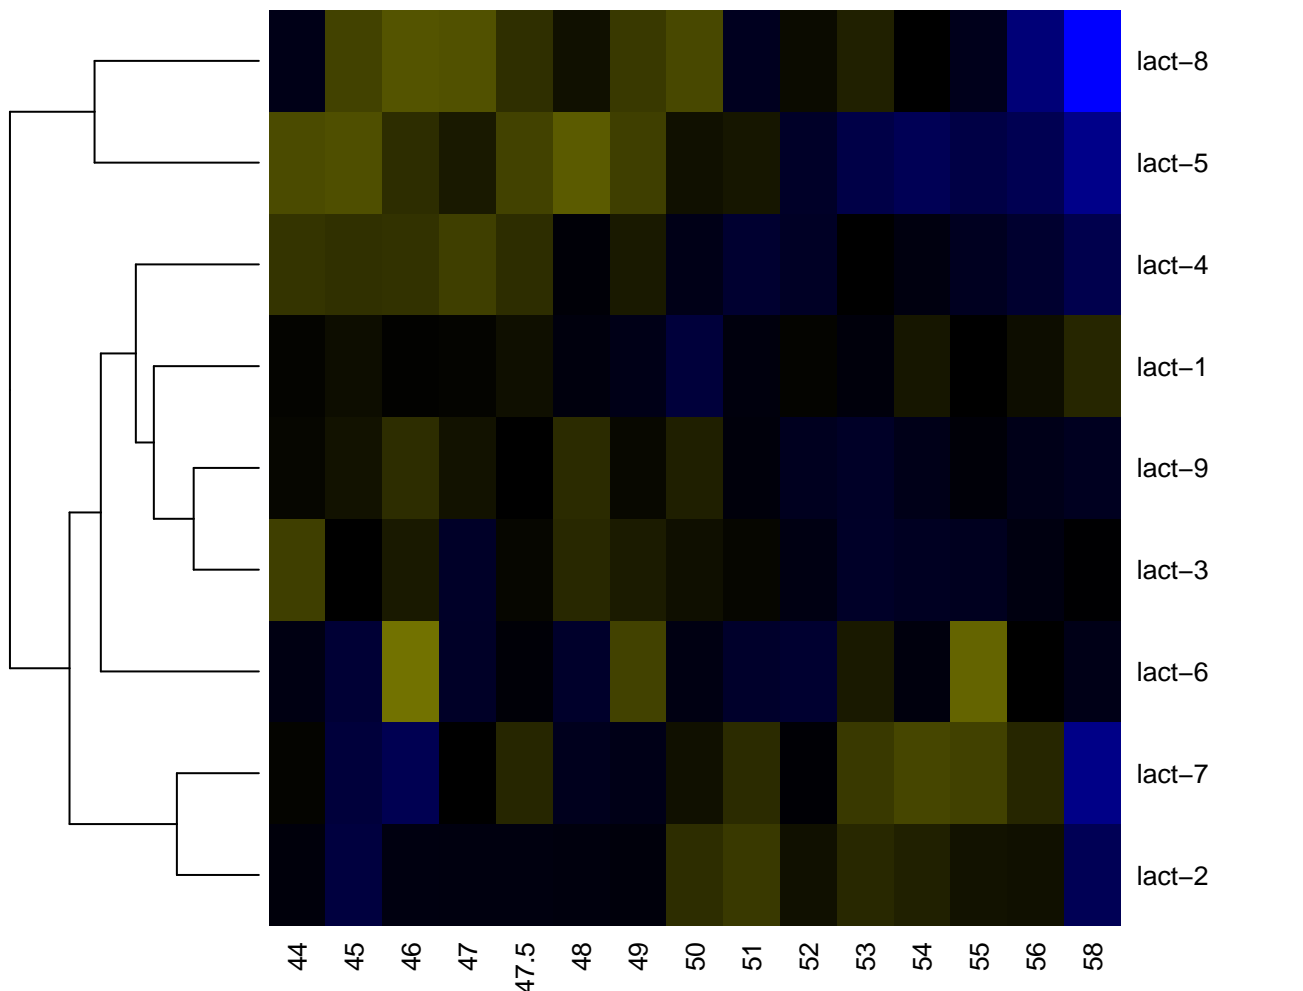



# Beta-lactamase-related

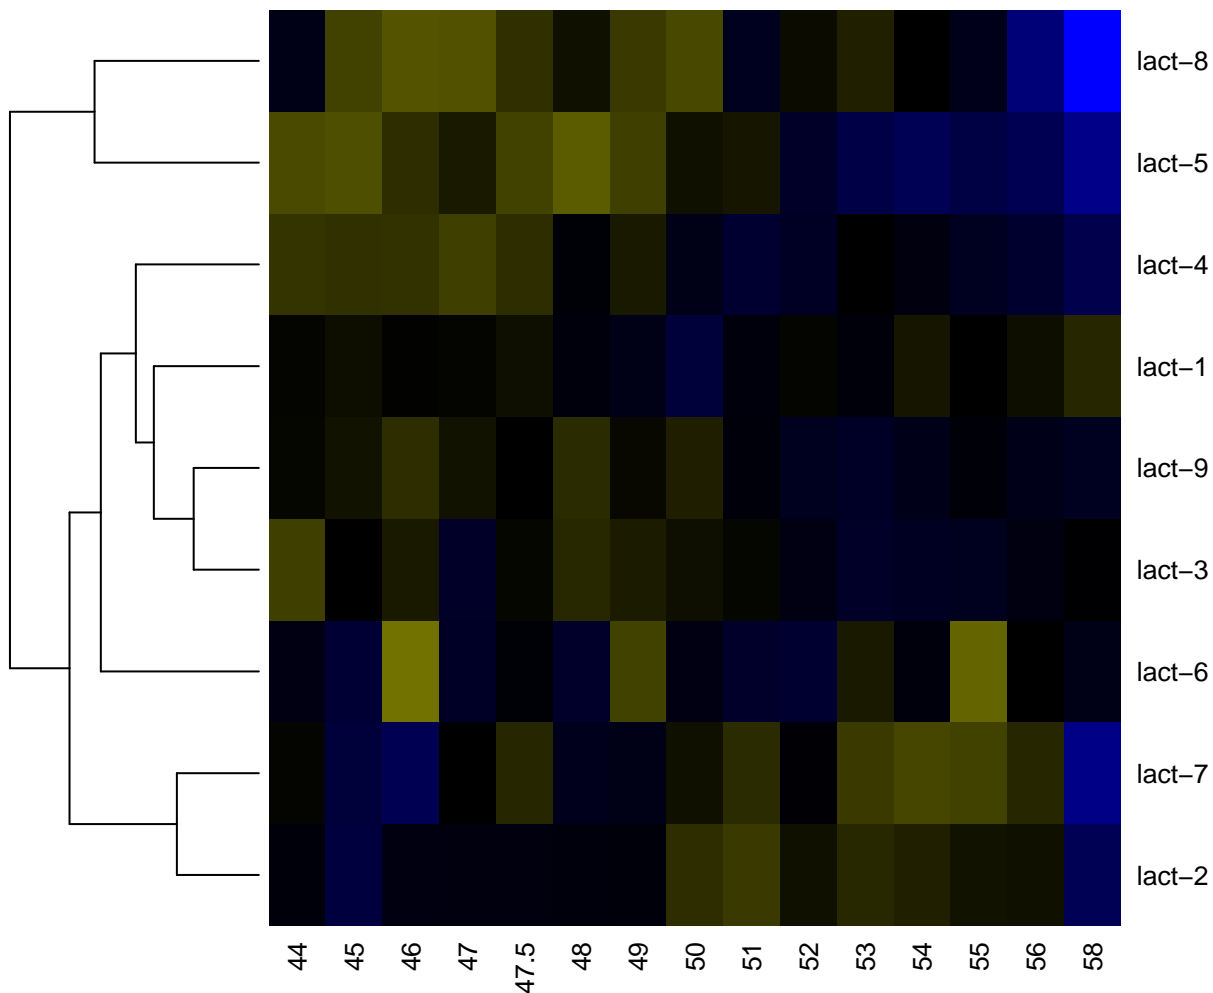

# Beta tubulin

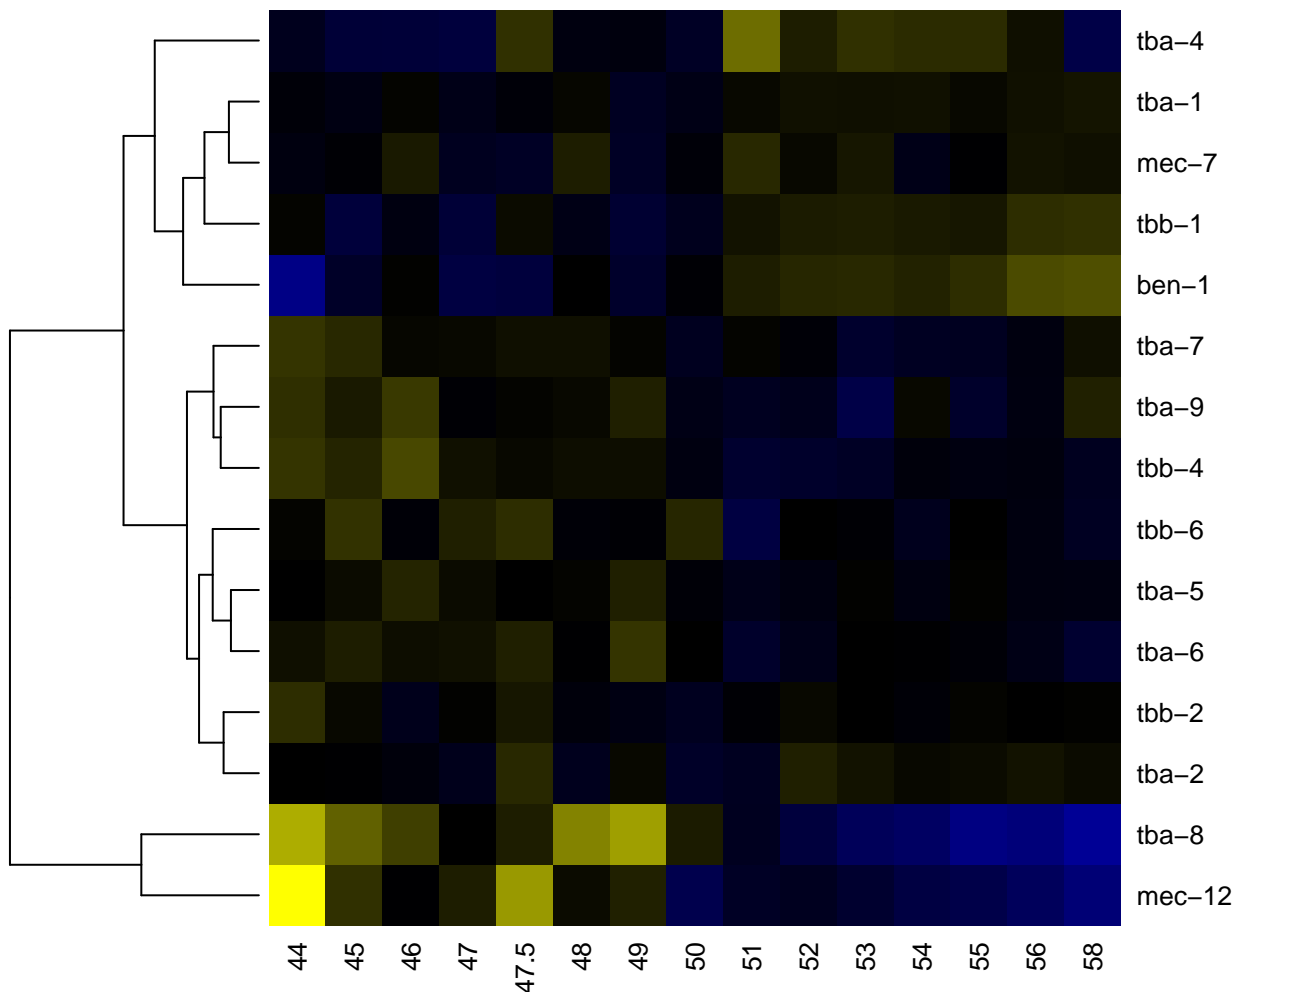



# Beta tubulin, autoregulation binding site

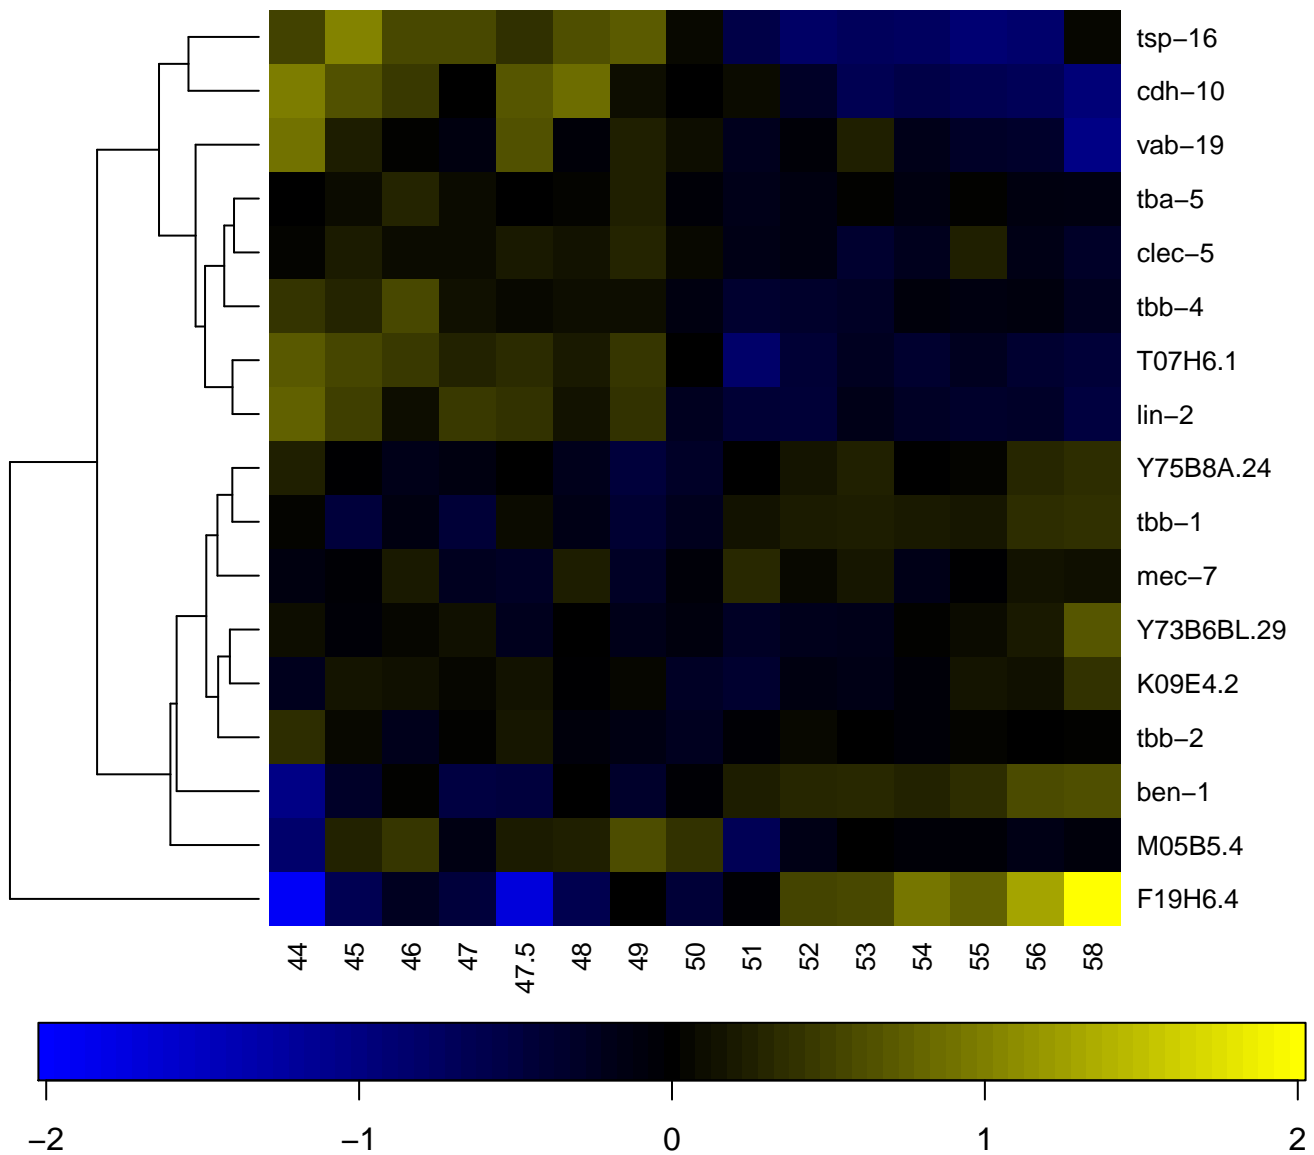









# BRCA1 C Terminus (BRCT) domain

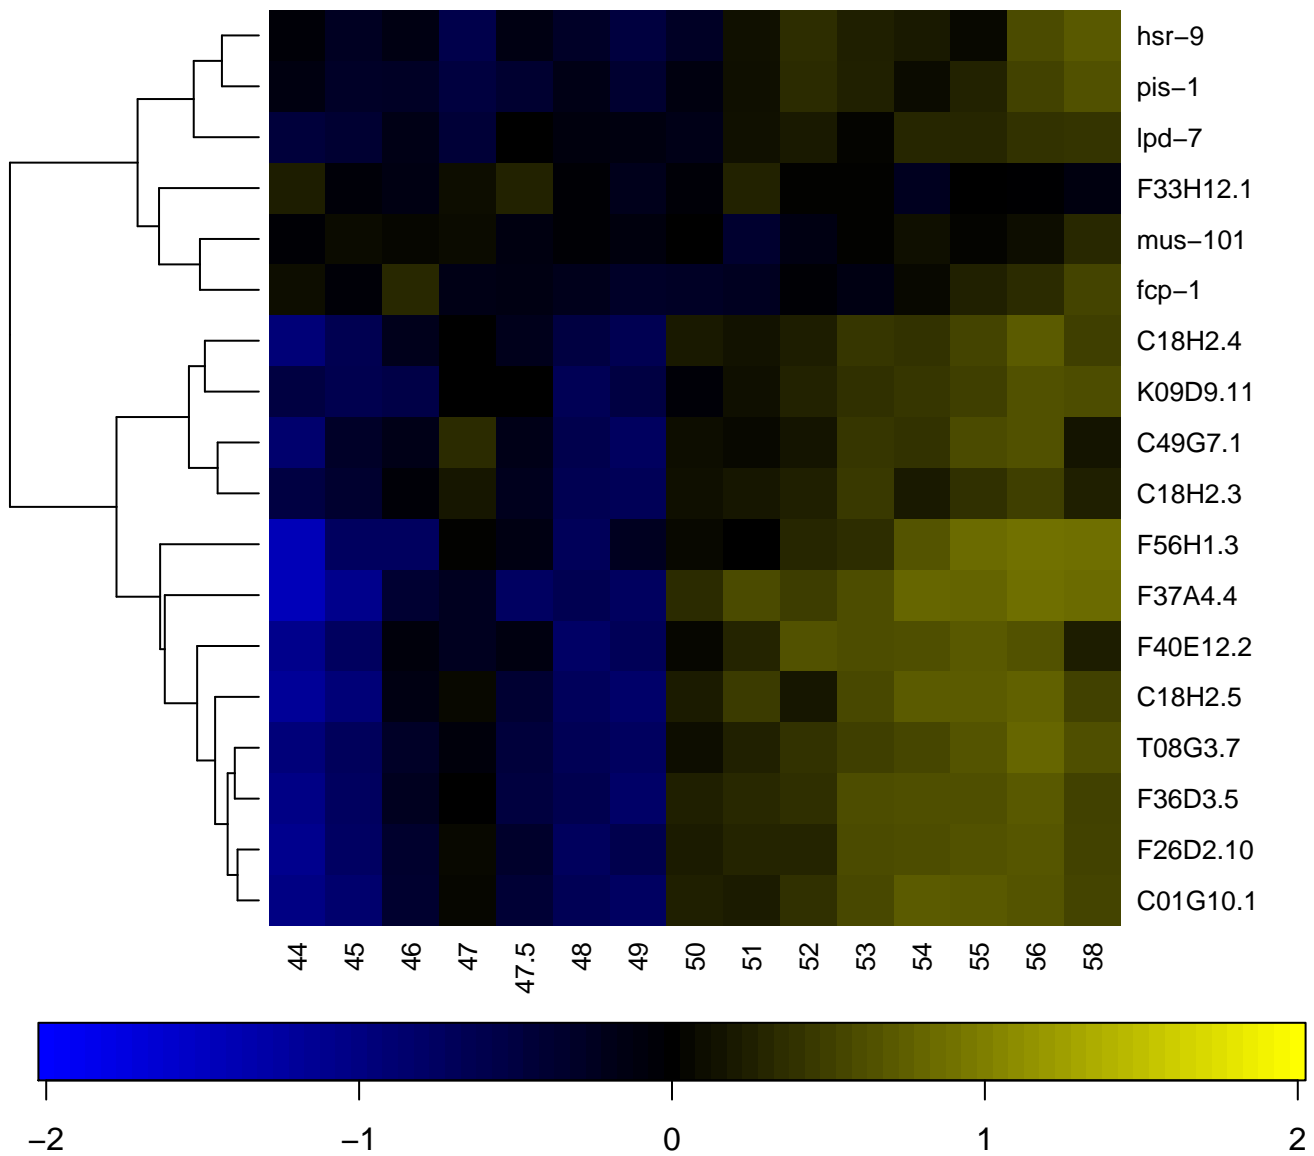

# BRCT

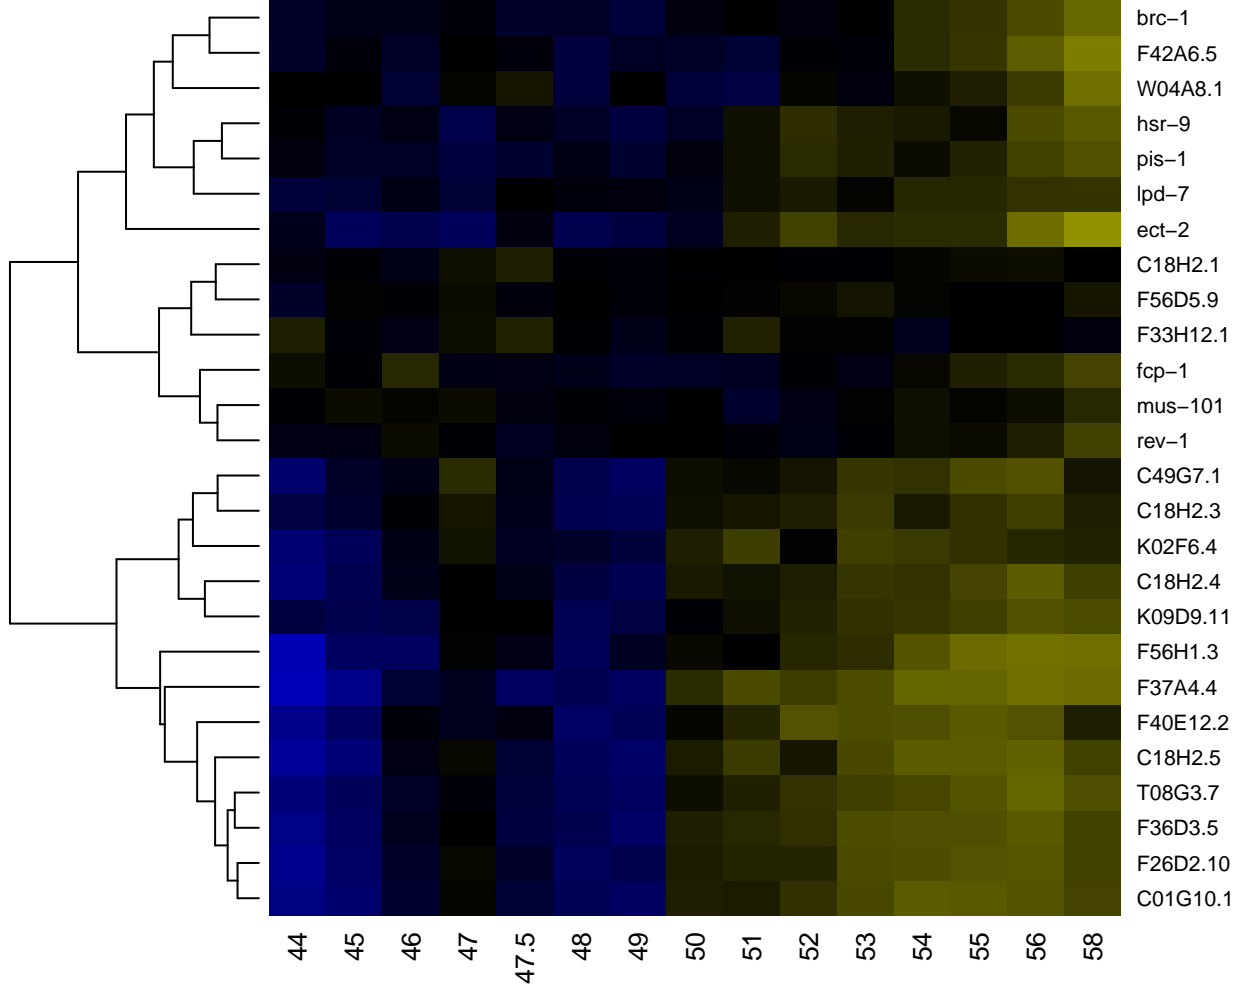











# BTB/Kelch-associated

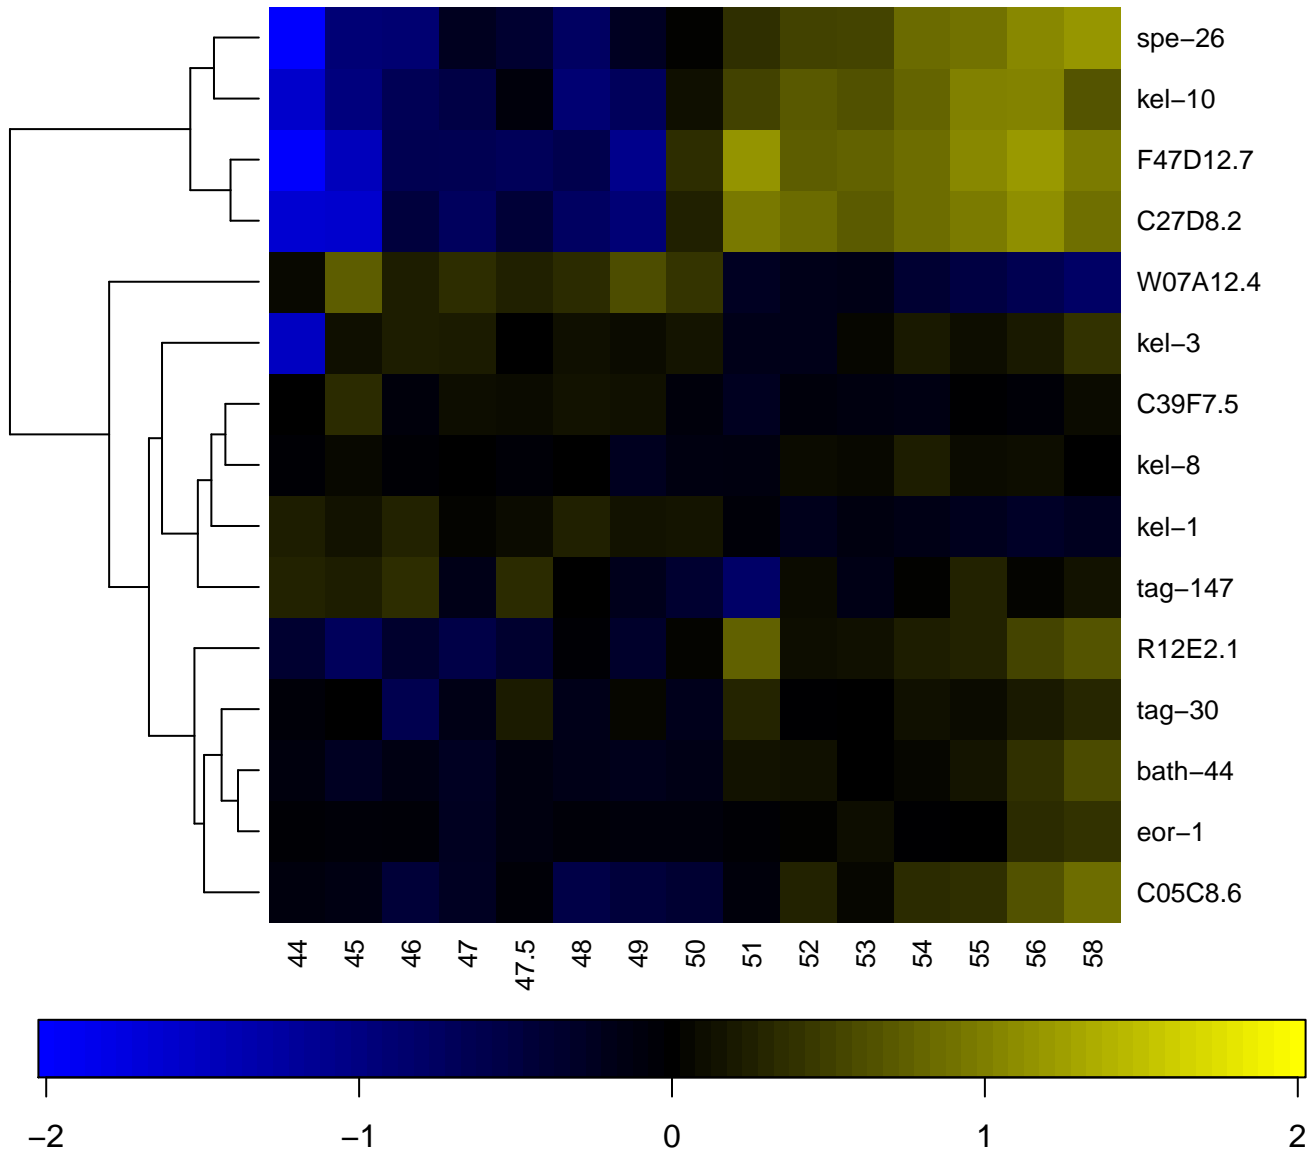

# BTB/POZ

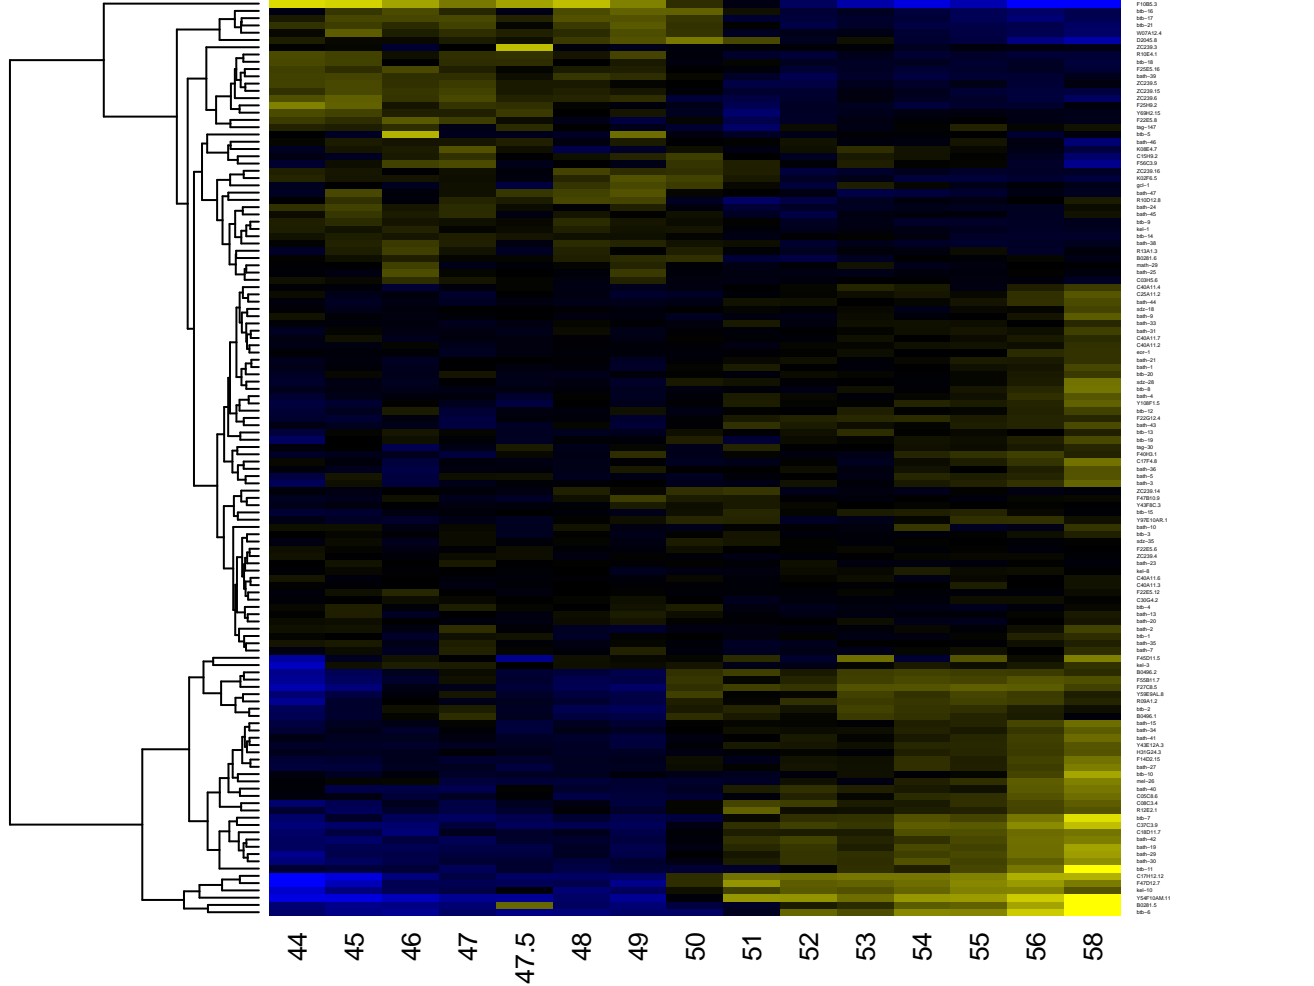



# BTB/POZ domain

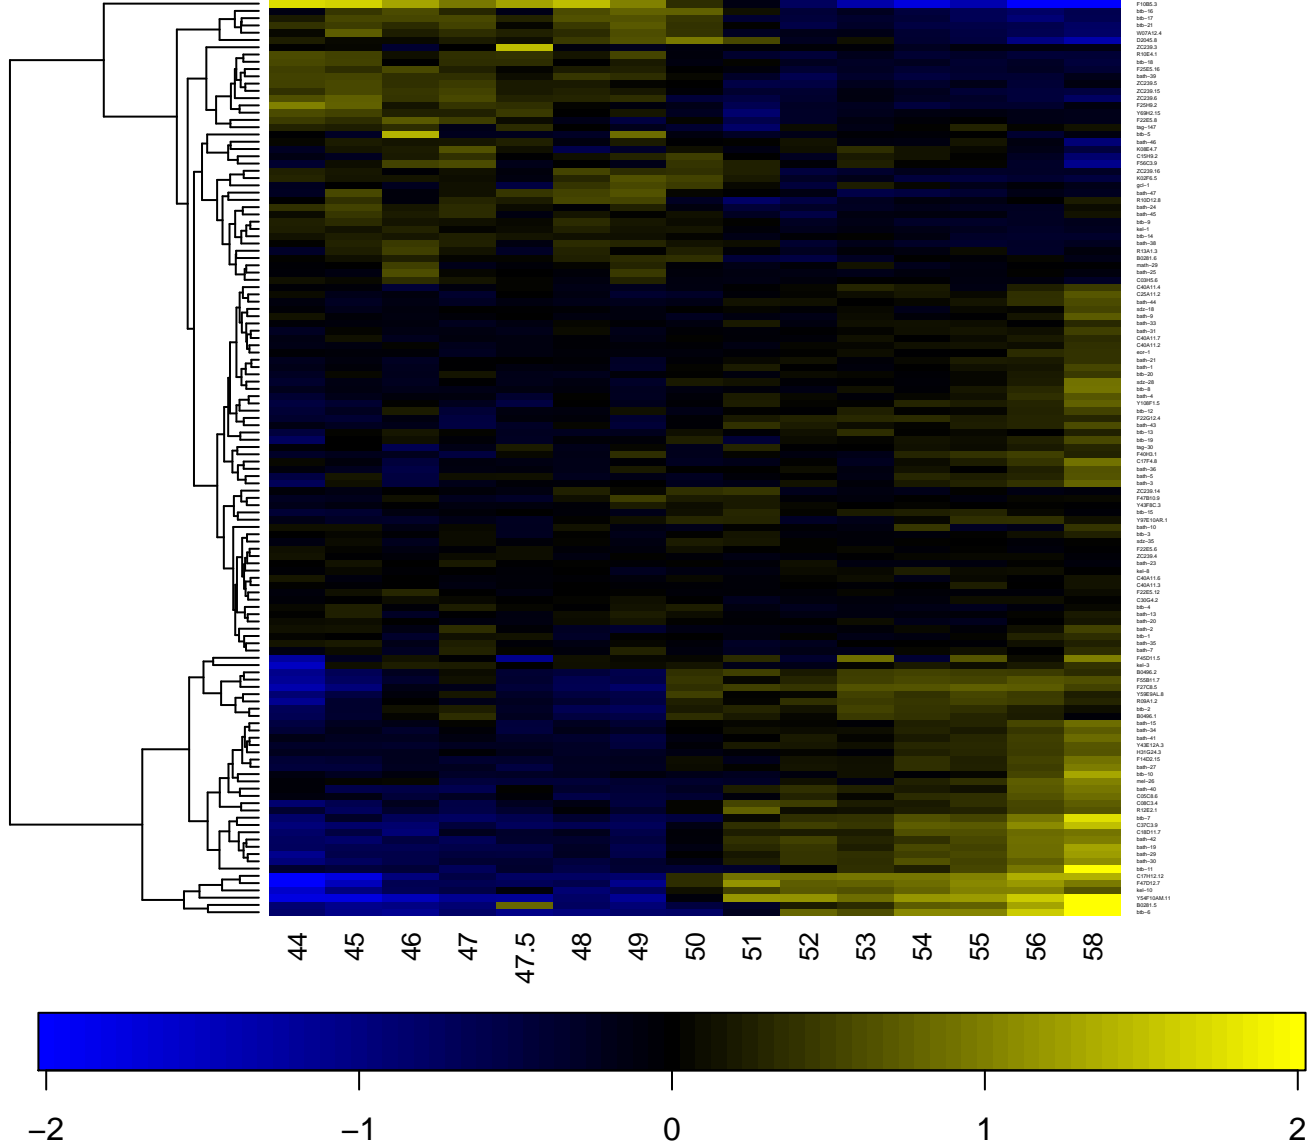

# BTB/POZ fold

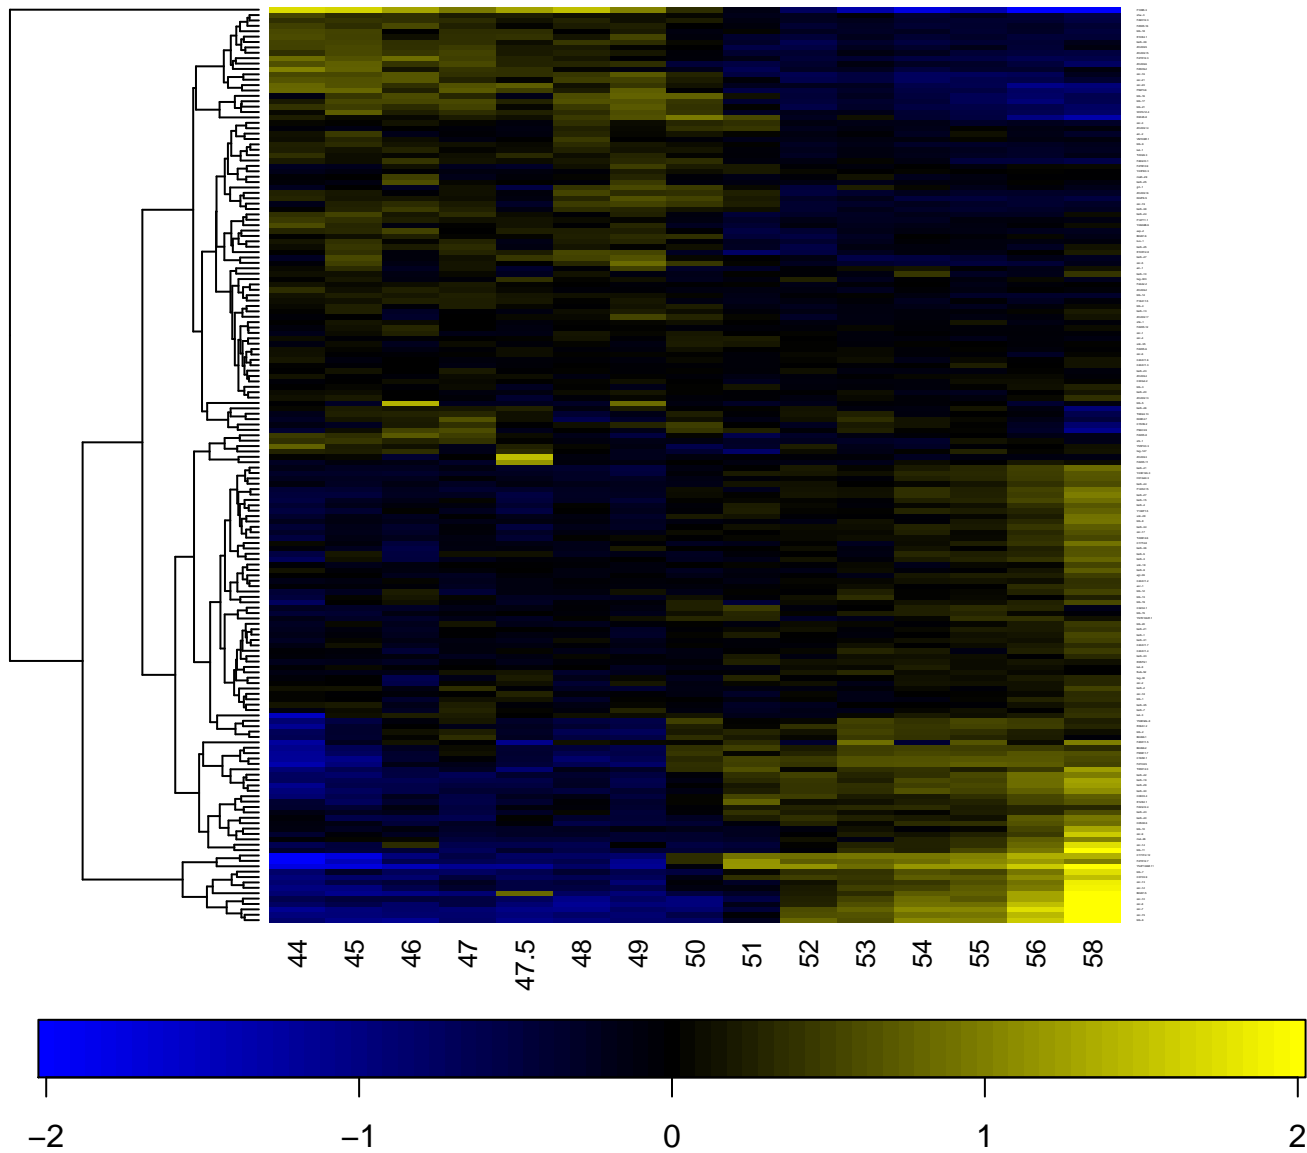



# bZIP transcription factor

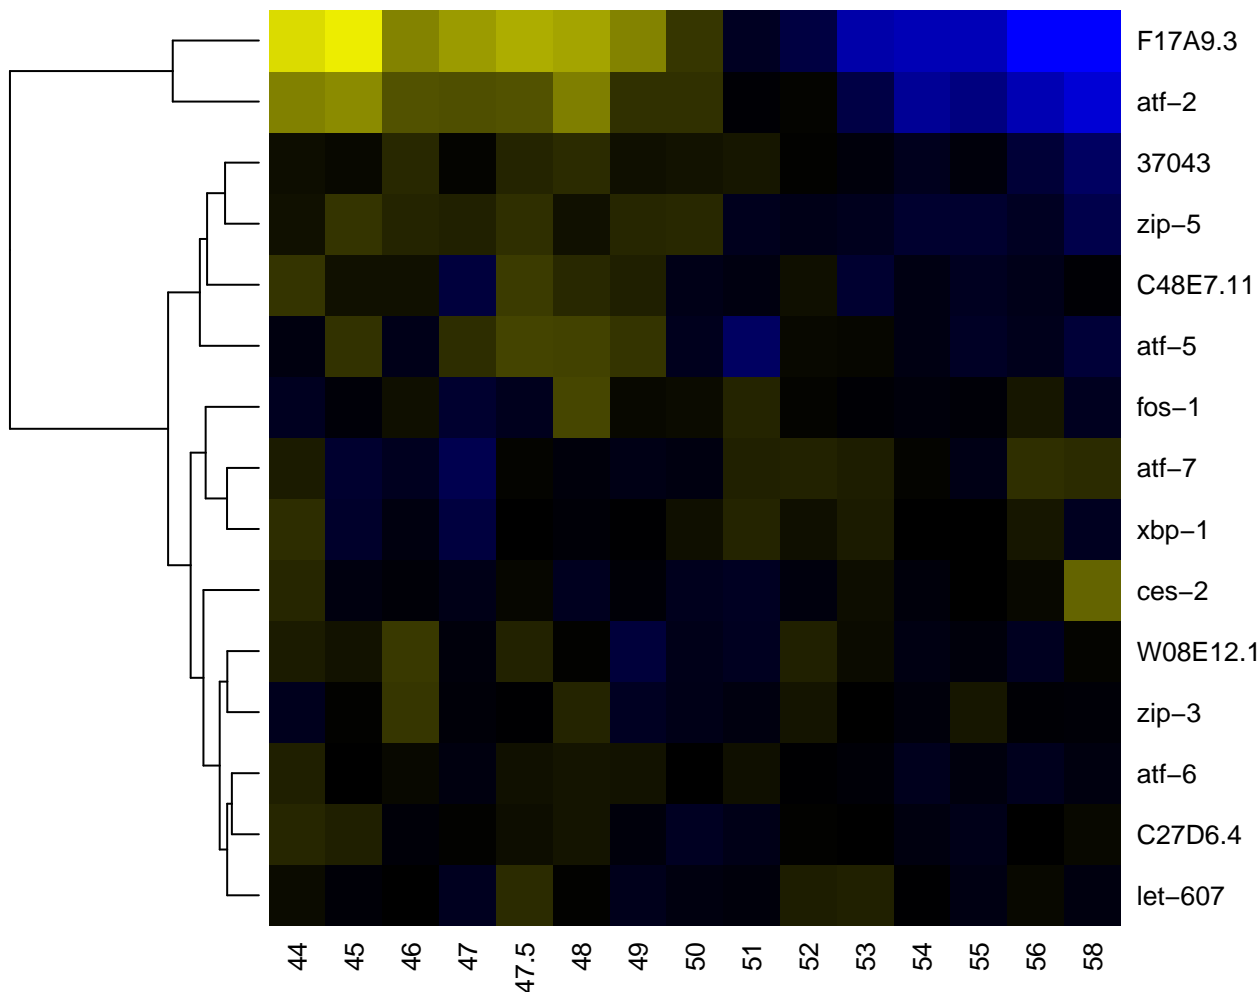

# bZIP transcription factor, bZIP-1

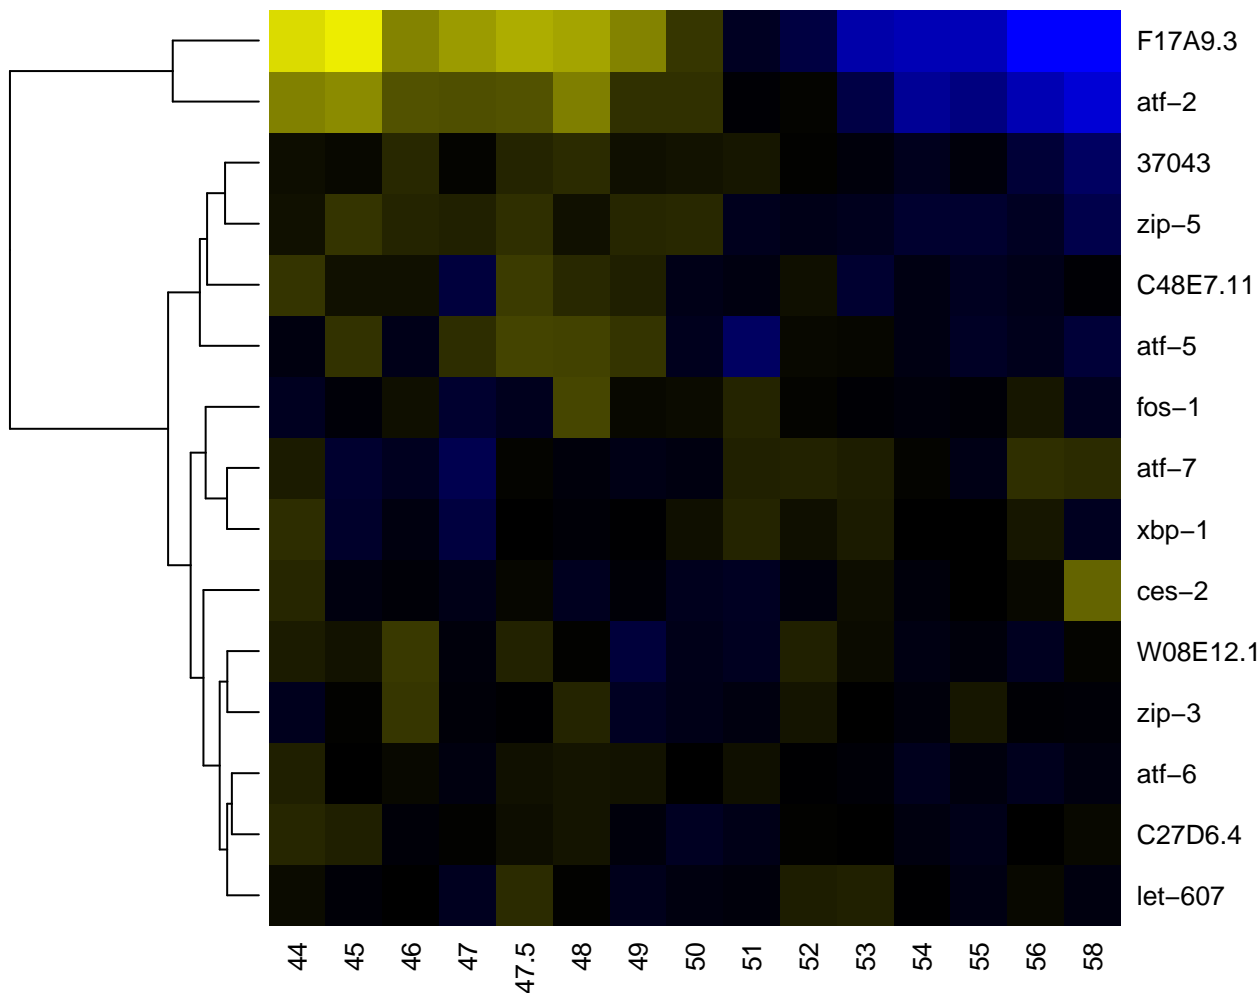

# C-type lectin

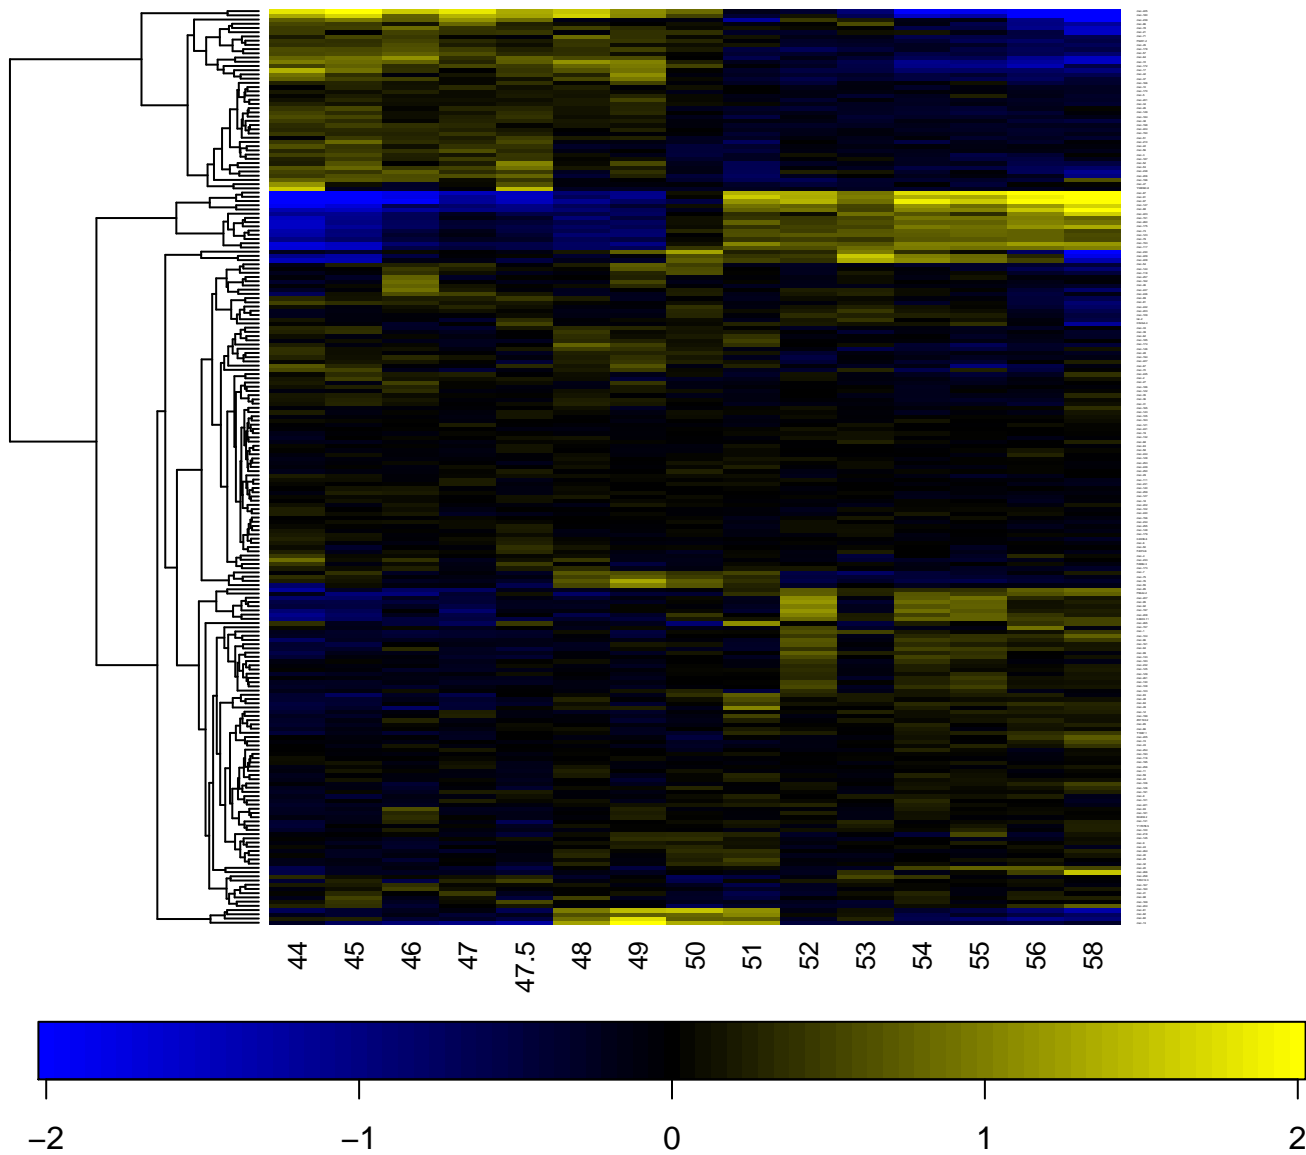

# C-type lectin-like

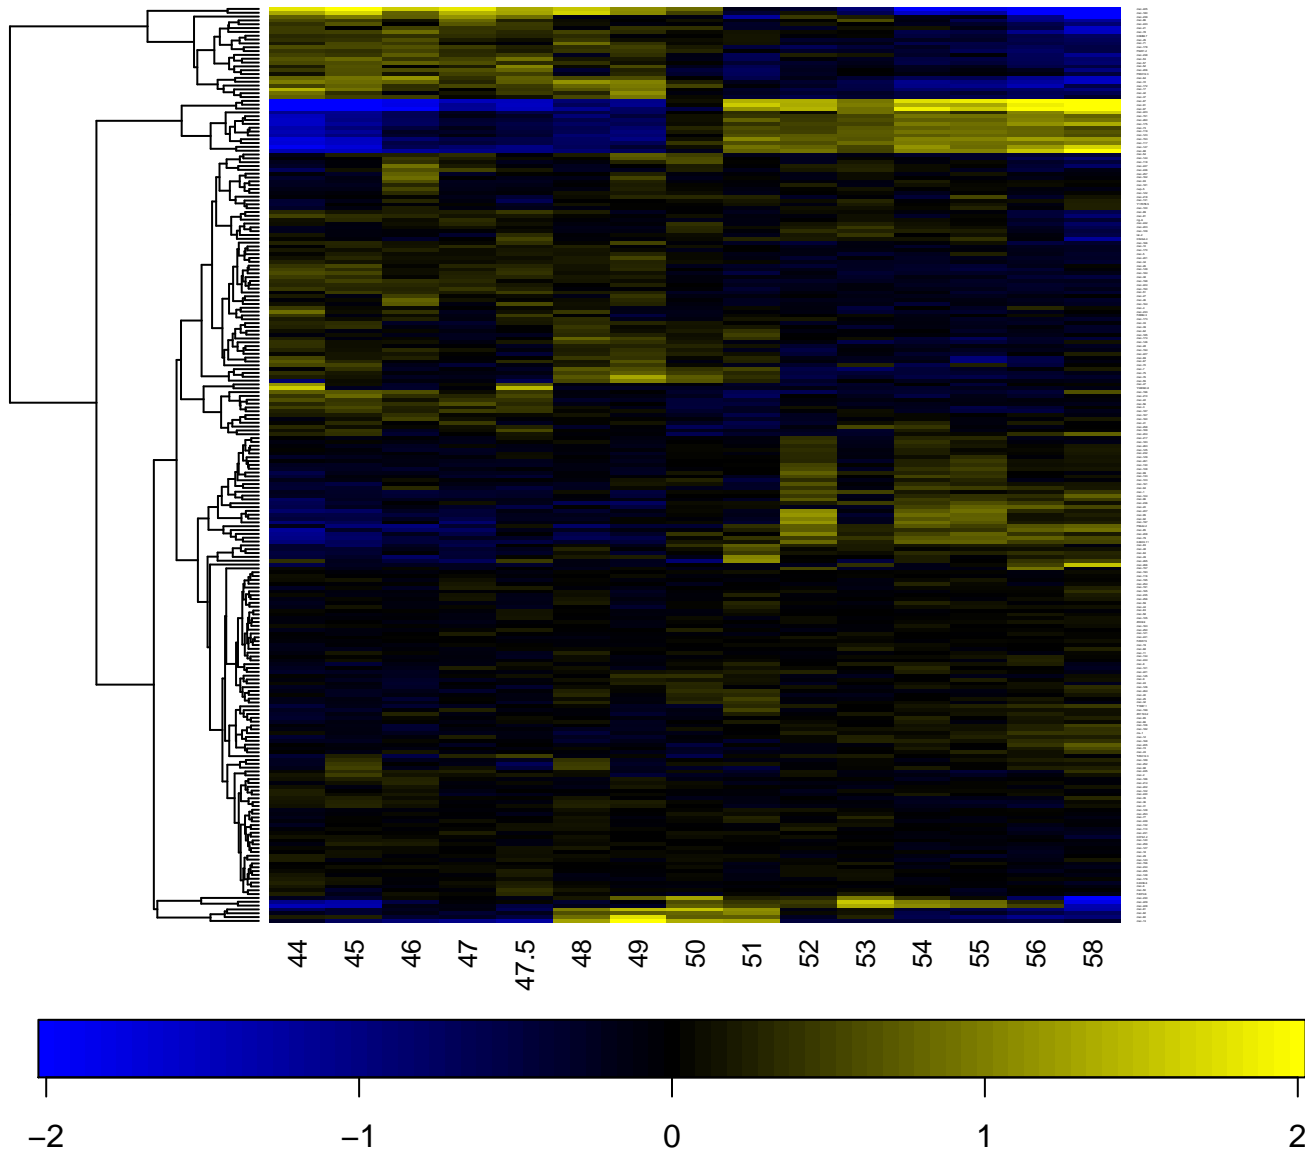

# C-type lectin, conserved site

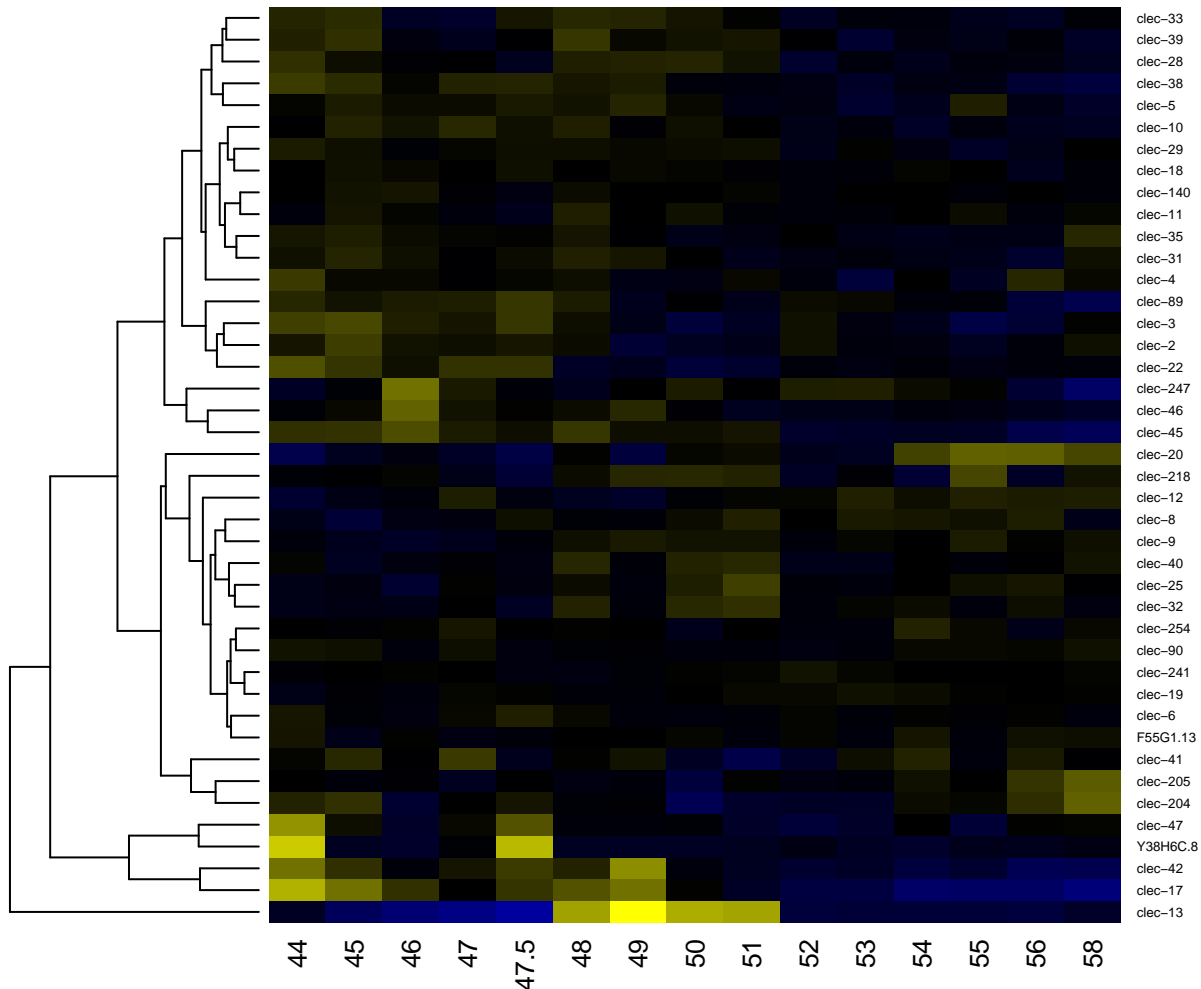

-2

-1

0

1

2

# C. elegans Sre G protein-coupled chemoreceptor

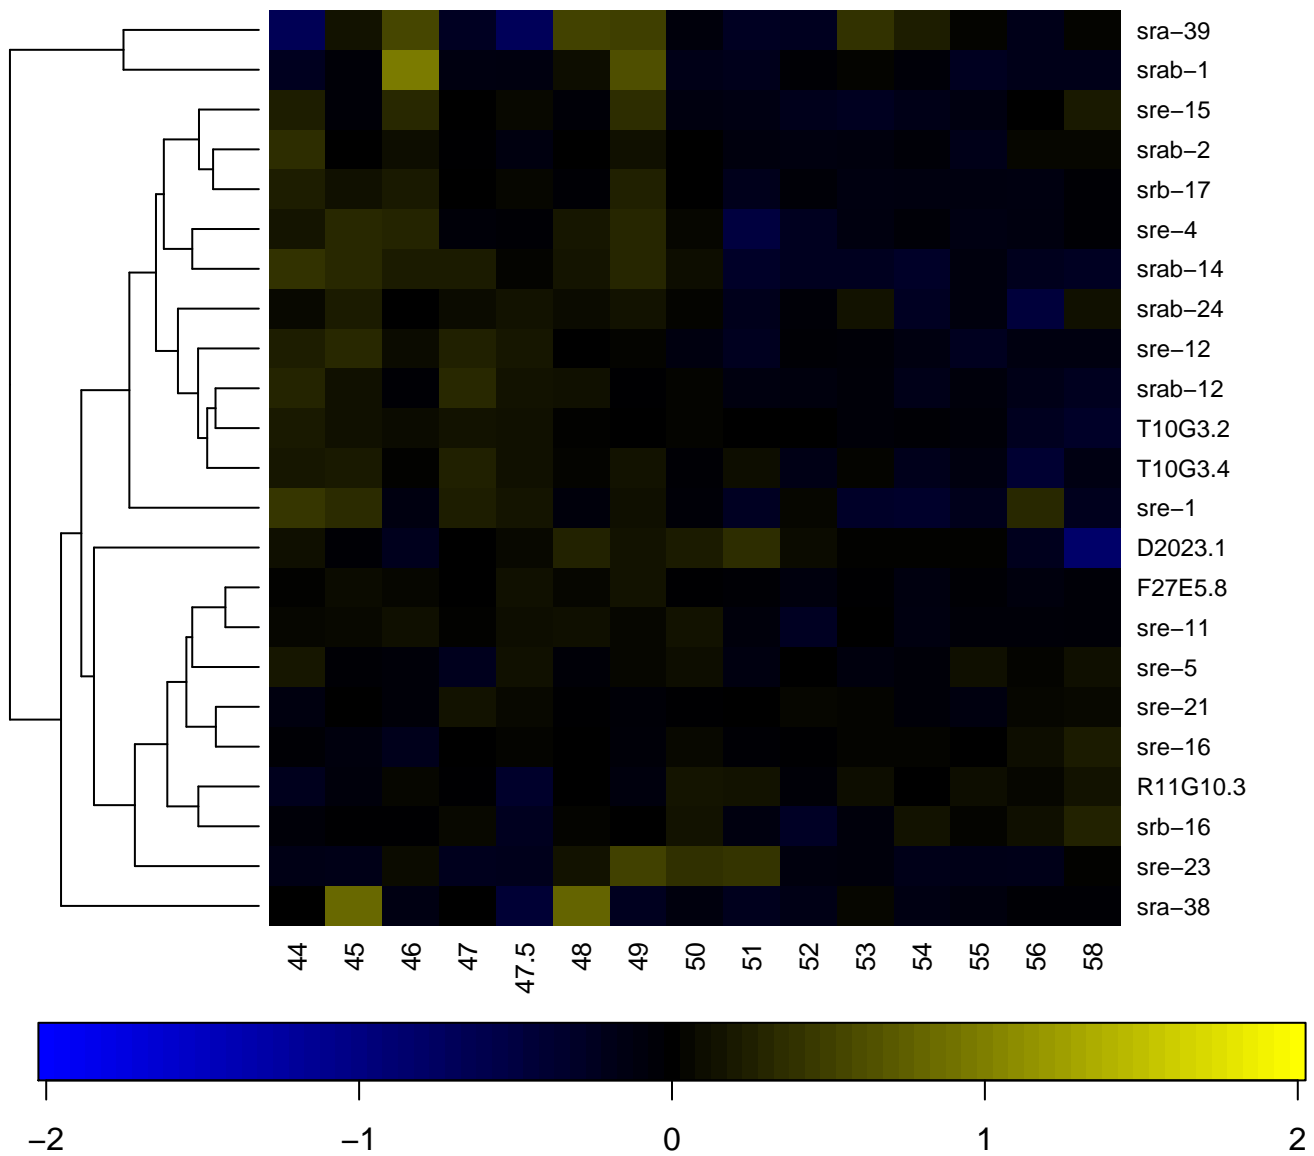

# C2 calcium-dependent membrane targeting

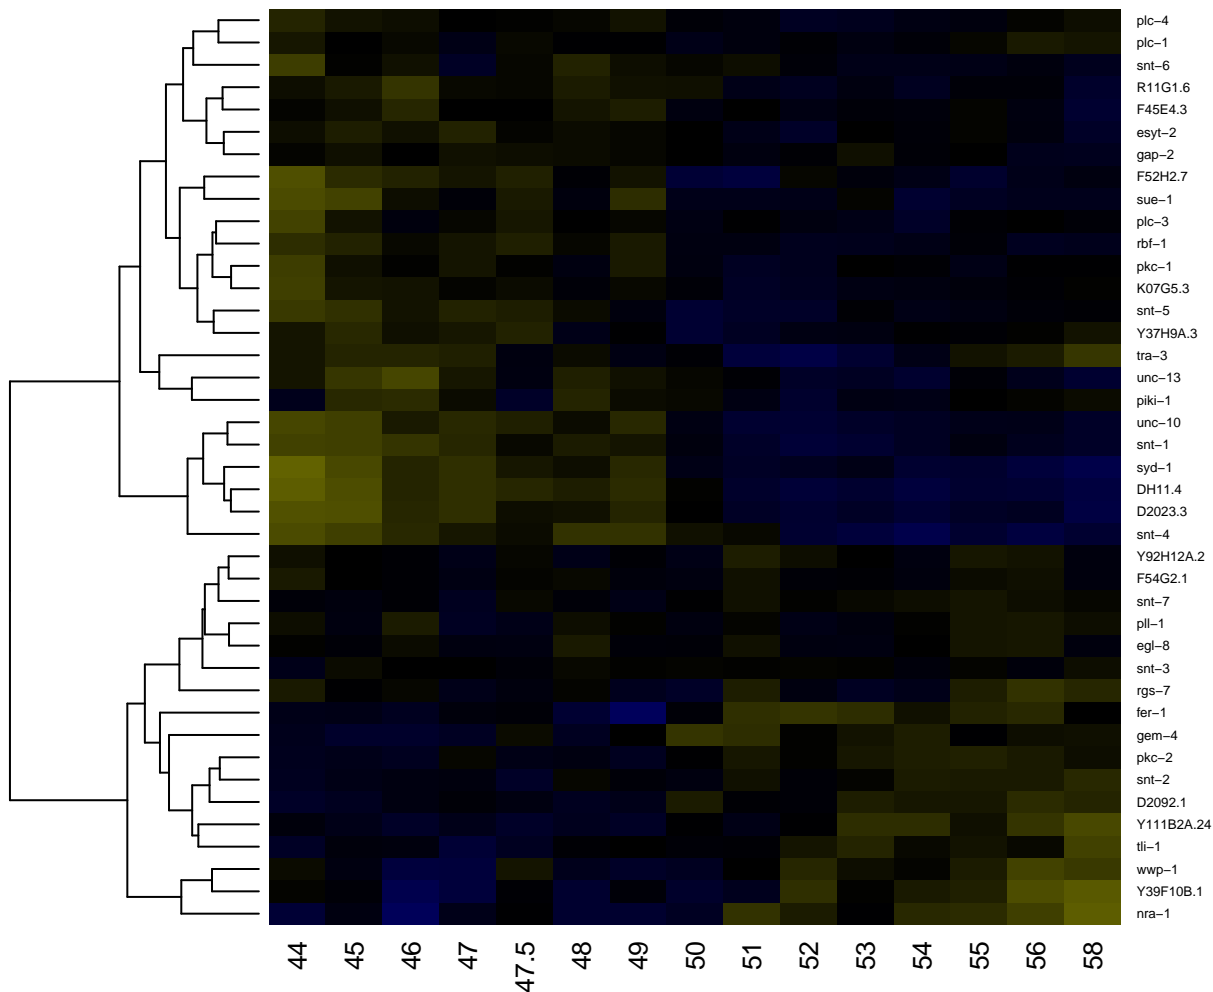

# C2 domain

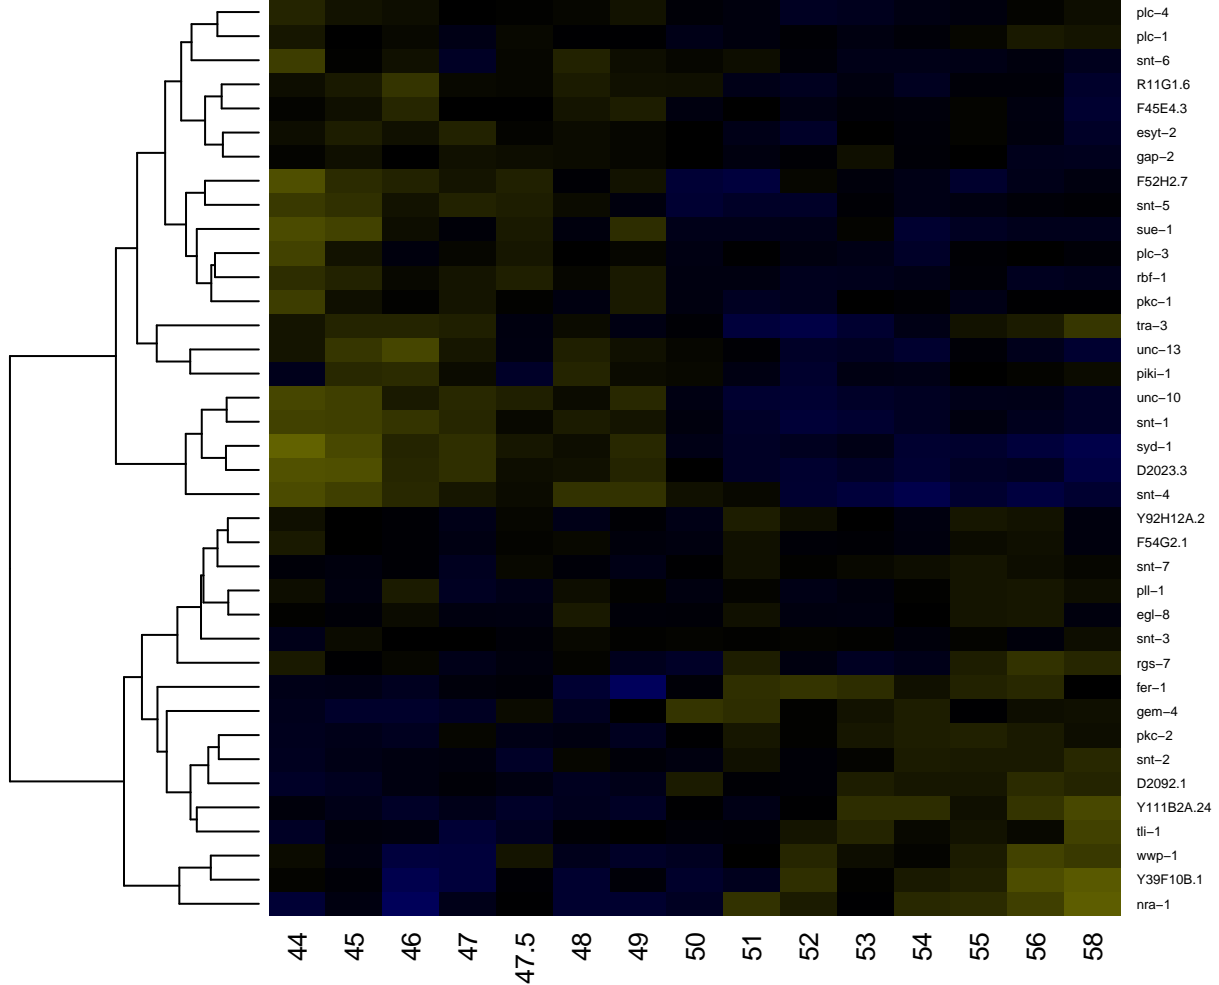



# C2 region

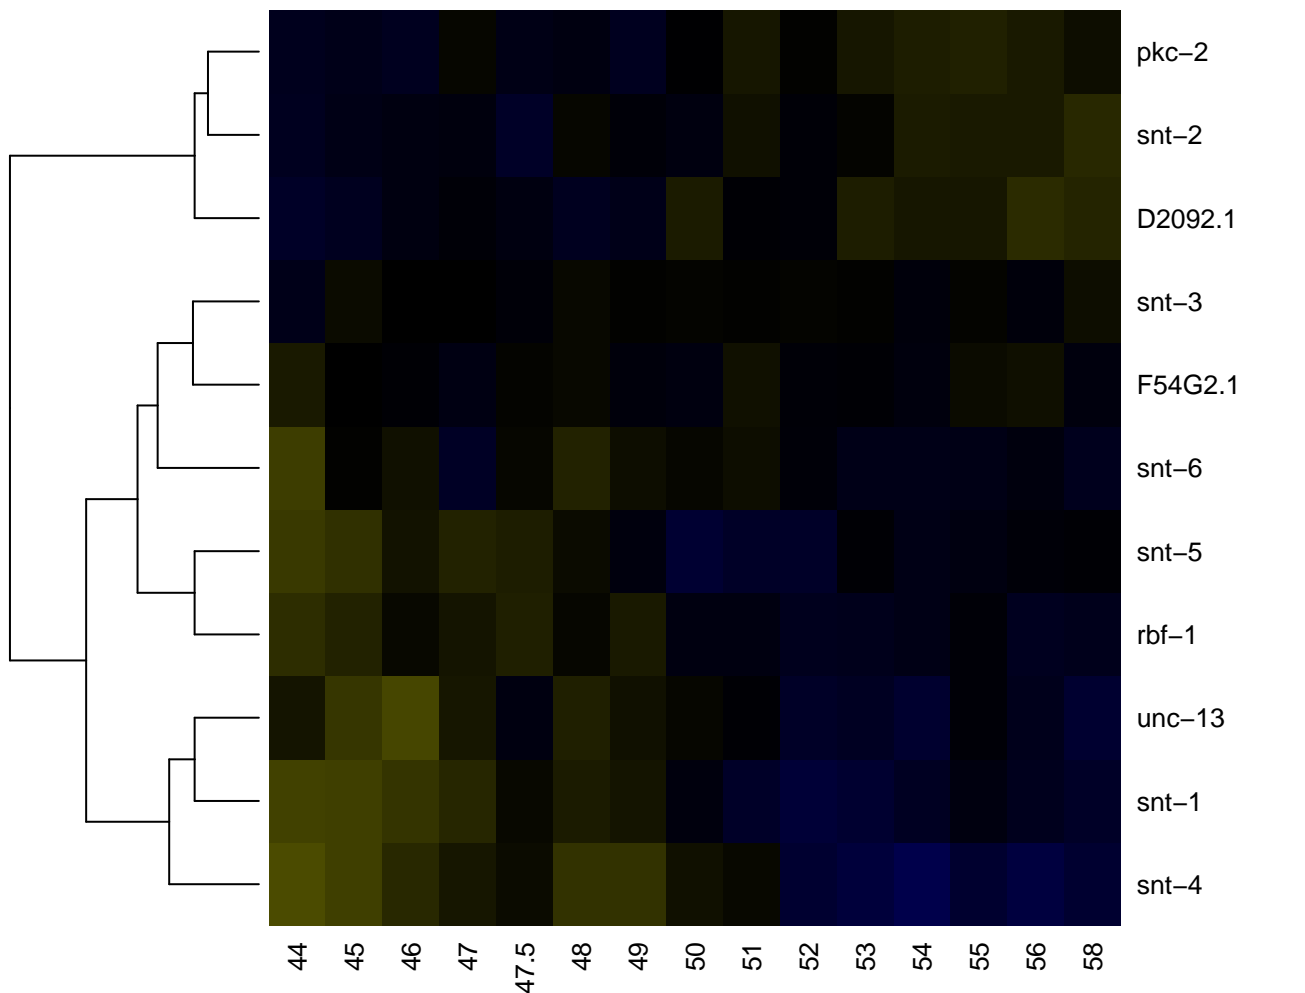



# Cadherin

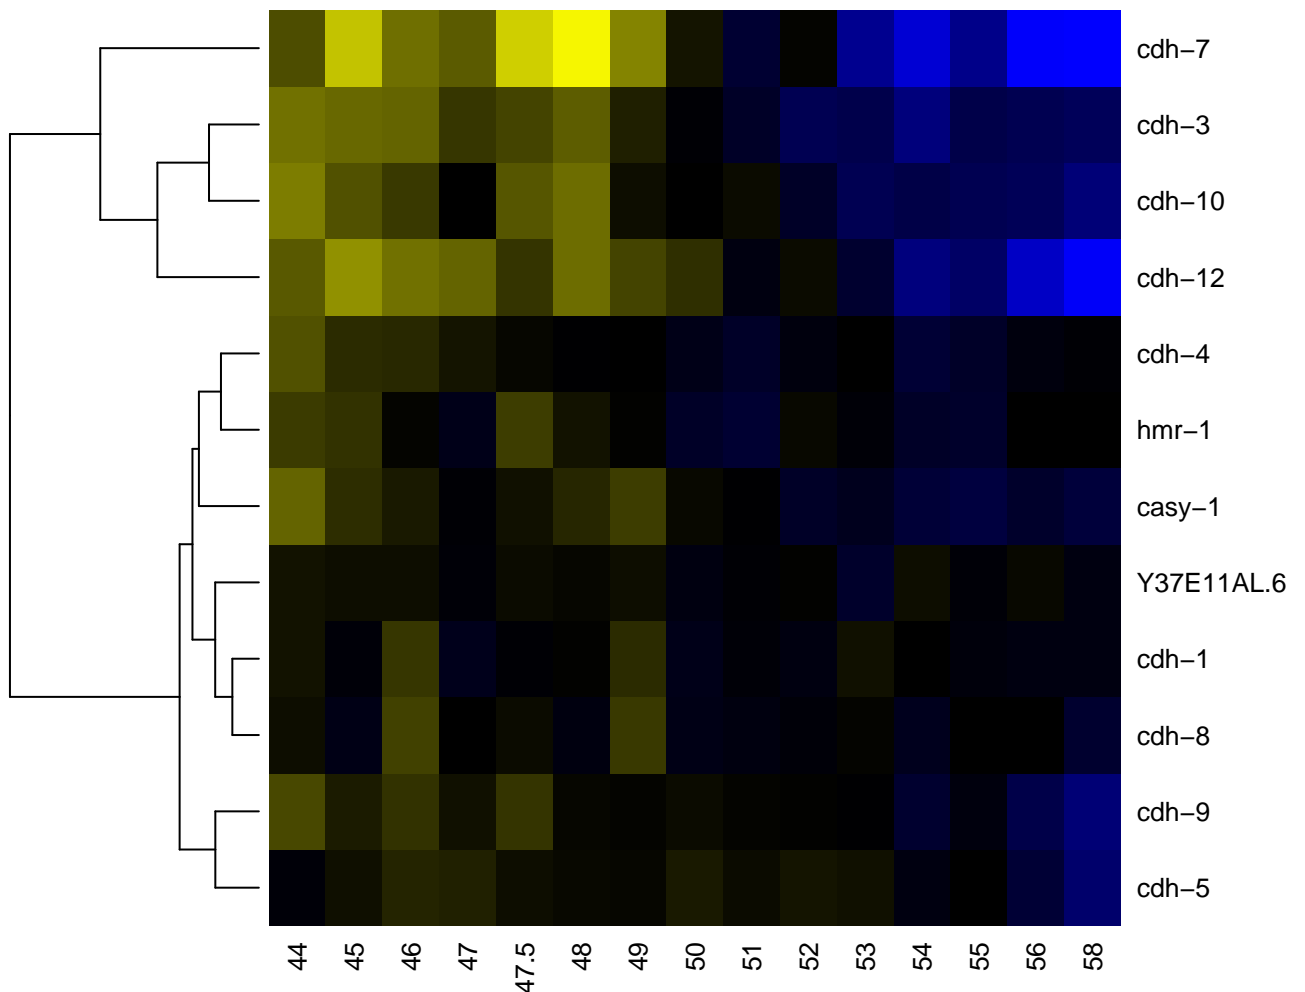









# Caenorhabditis elegans protein of unknown function (DUF8

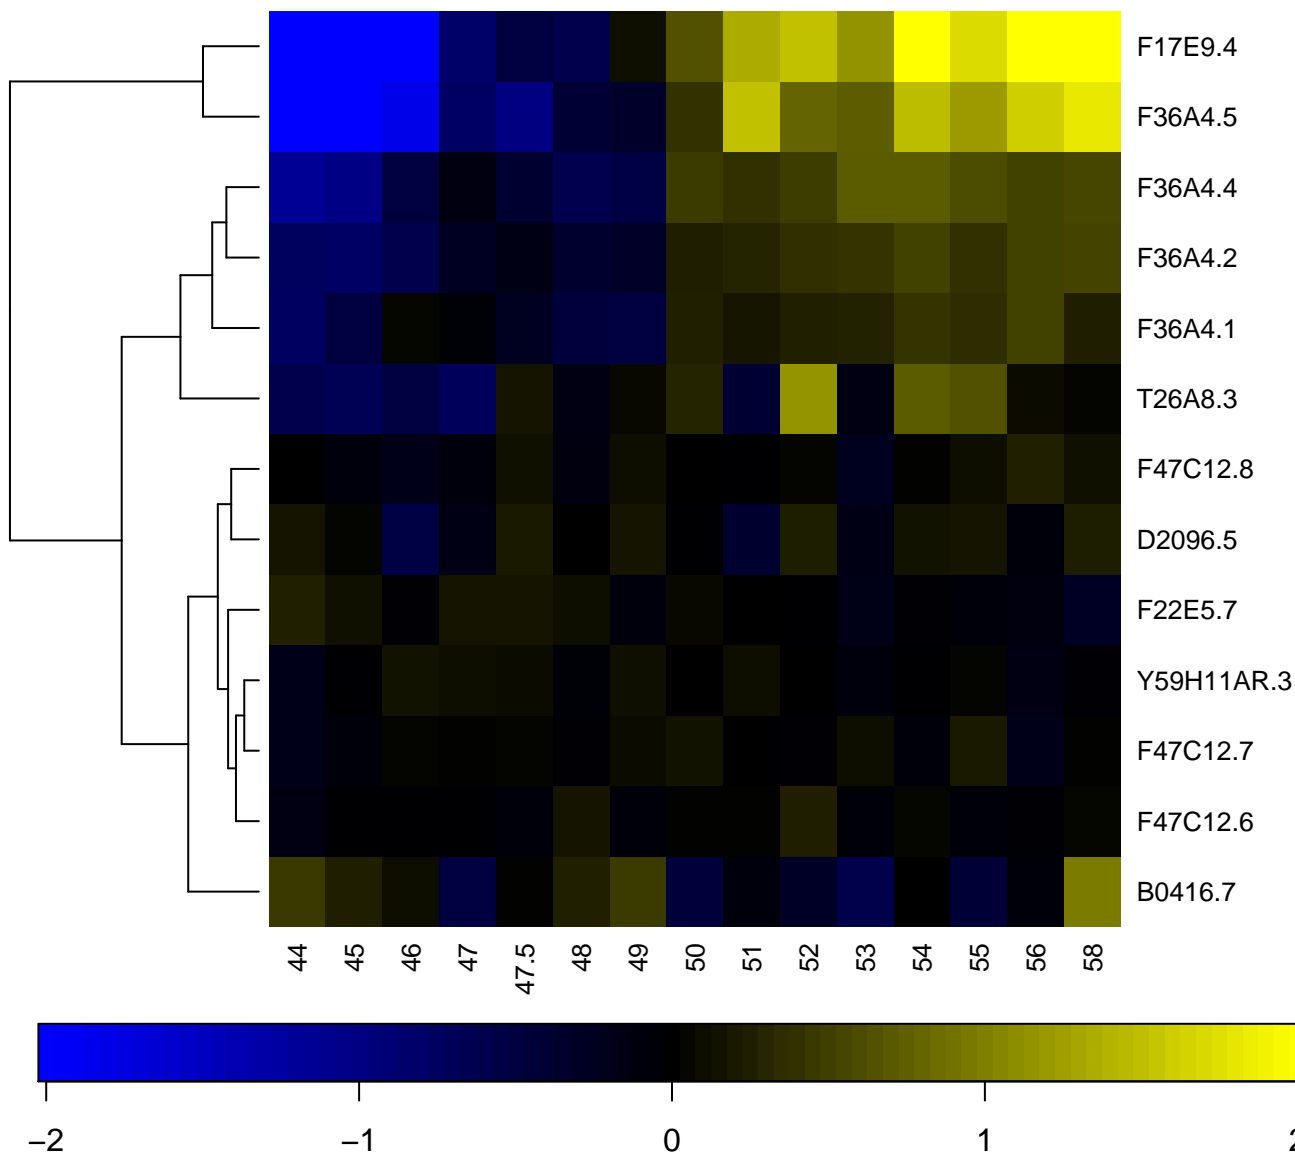



# Caenorhabditis elegans protein of unknown function (DUF9

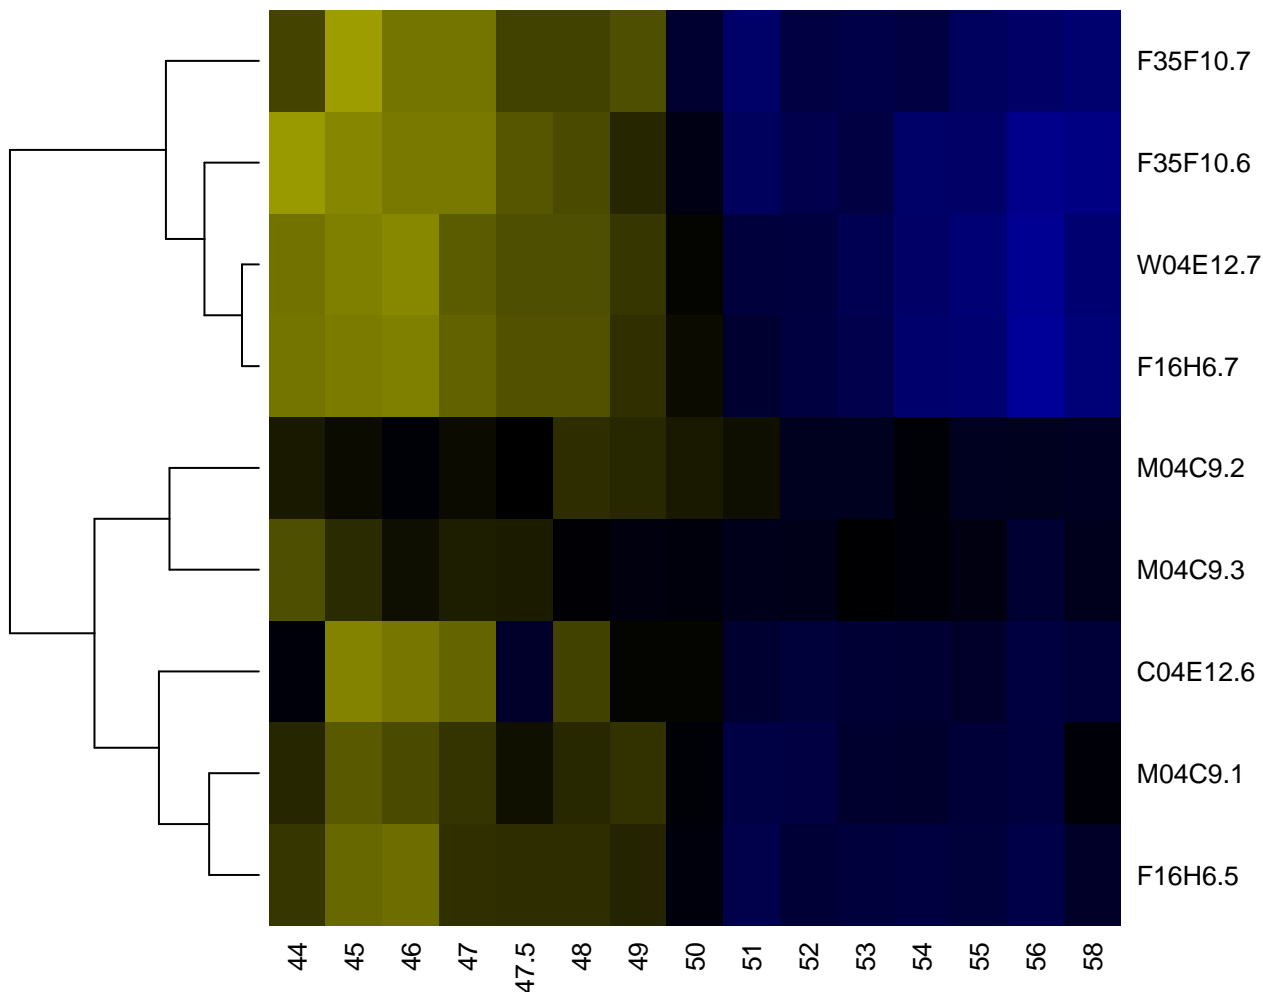

# Caenorhabditis protein of unknown function, DUF267

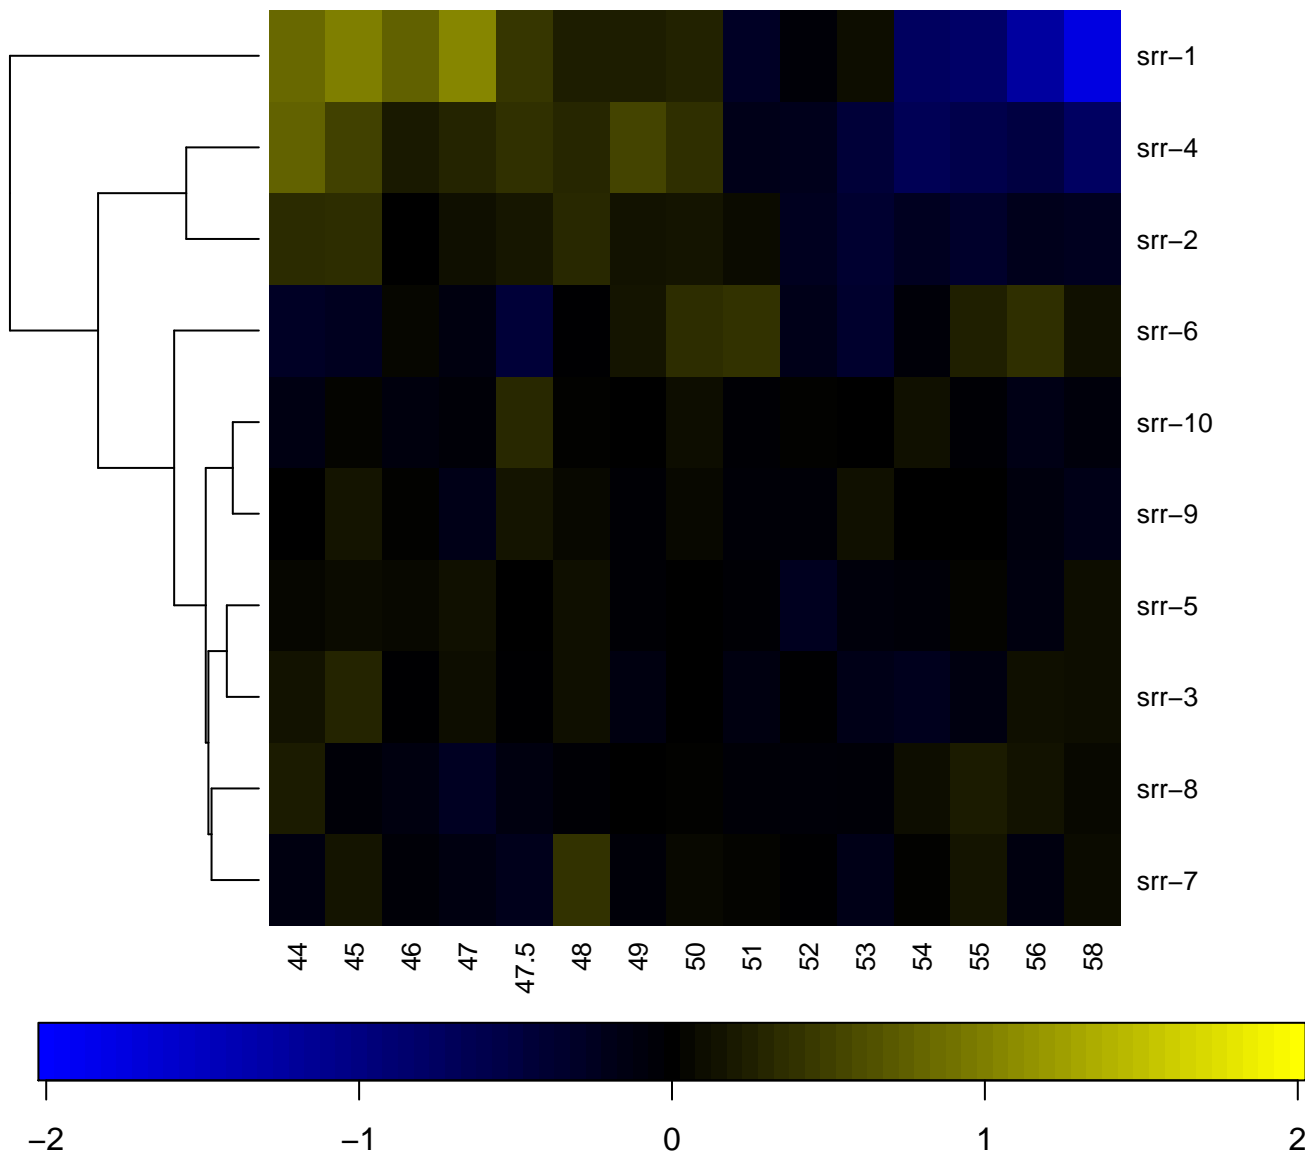

# Caenorhabditis protein of unknown function, DUF282

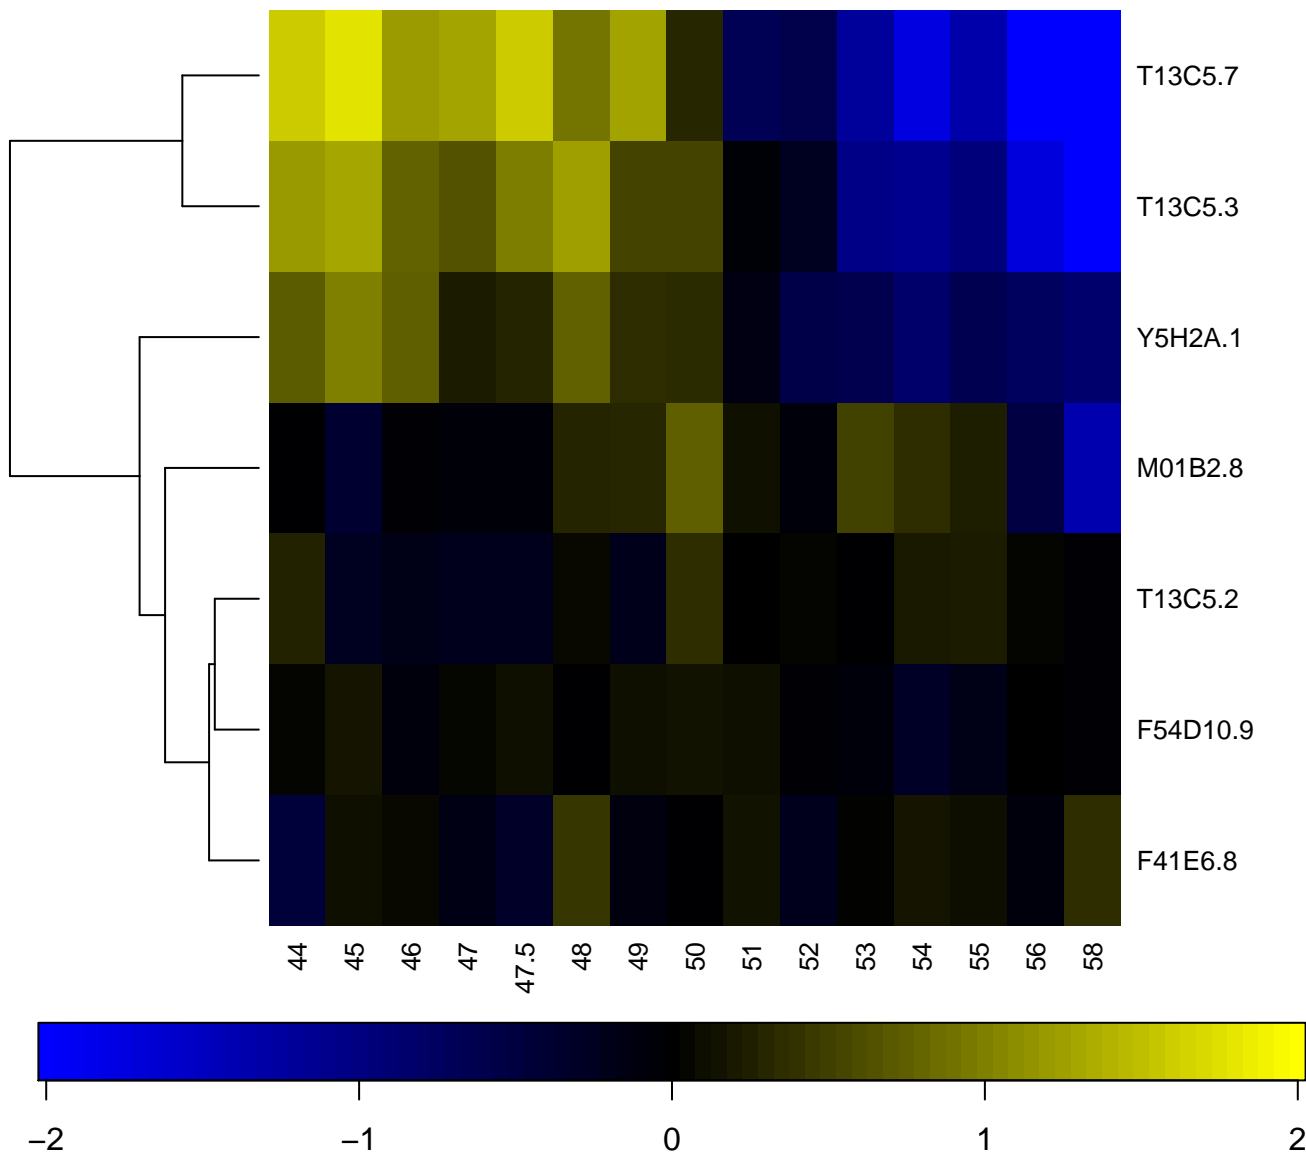

# Caenorhabditis serpentine receptor-like protein, class xa

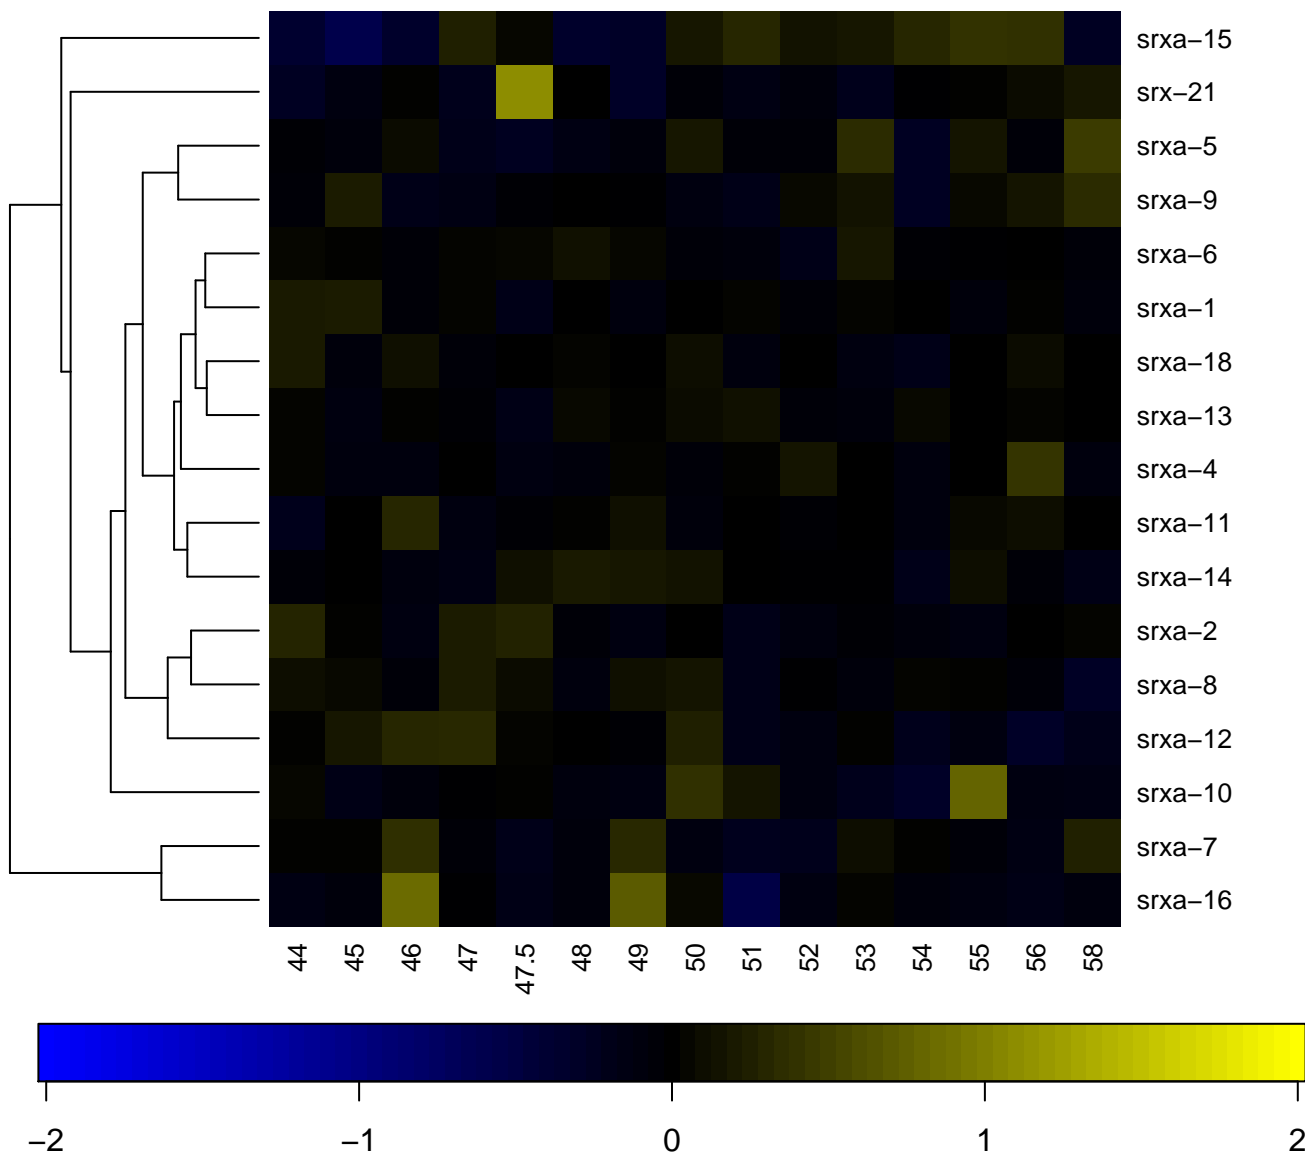

# Calcineurin-like phosphoesterase

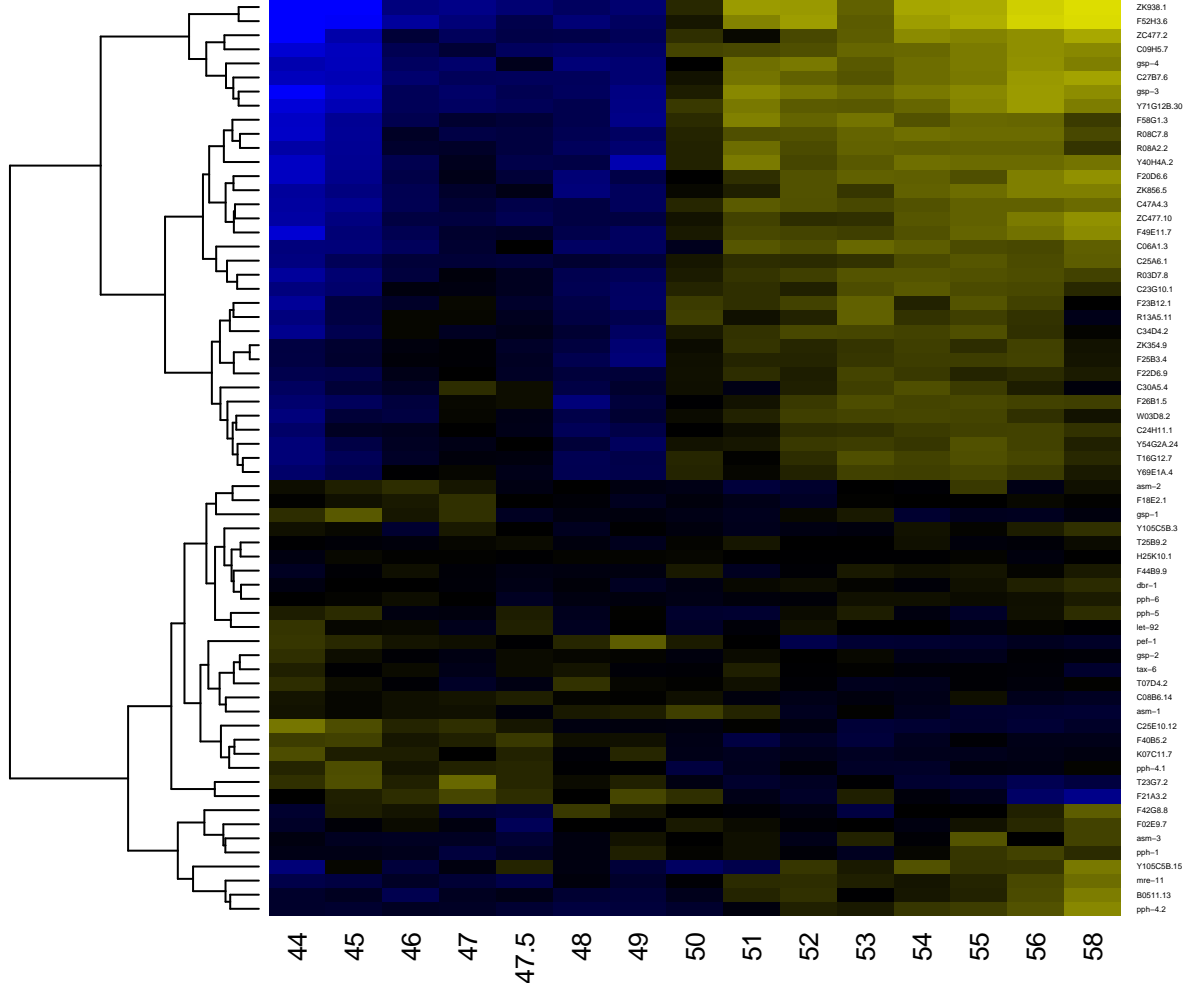

# Calcium-binding EF-hand

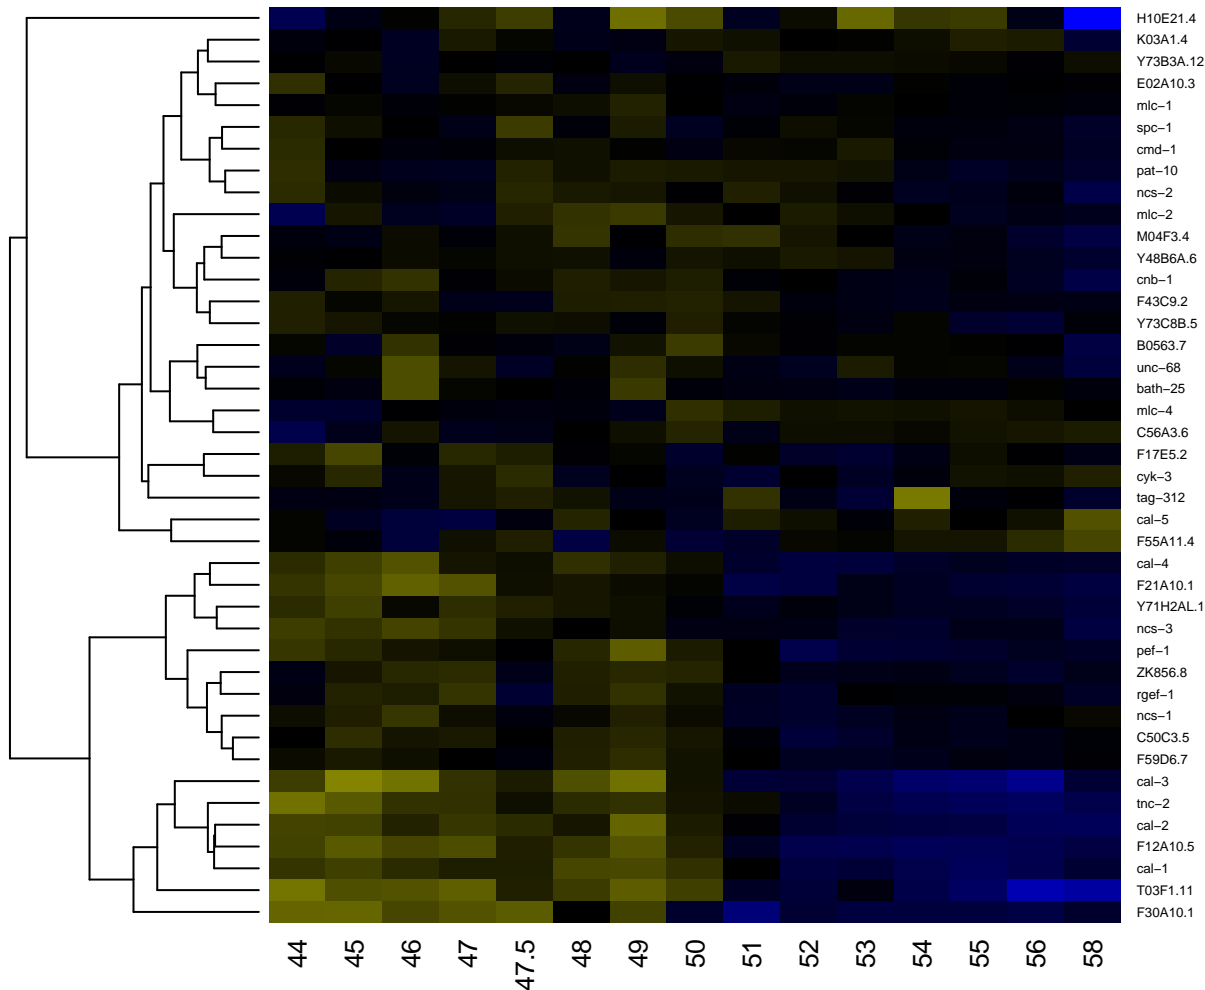

# Calcium-binding EGF domain

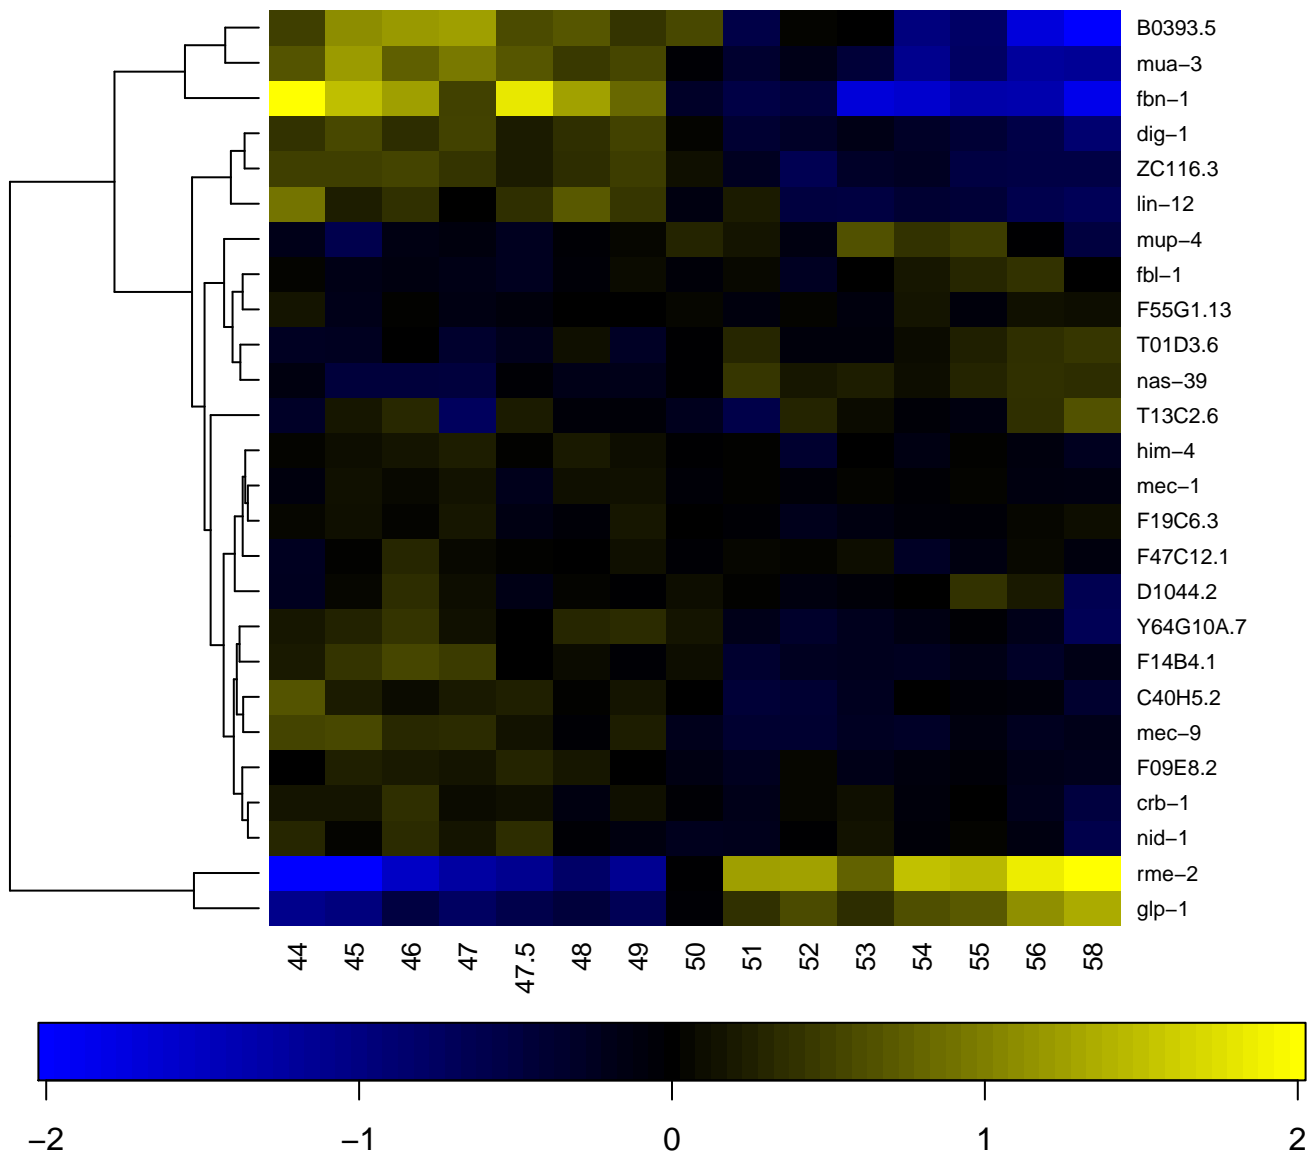

# Calcium/calmodulin-dependent protein kinase-like

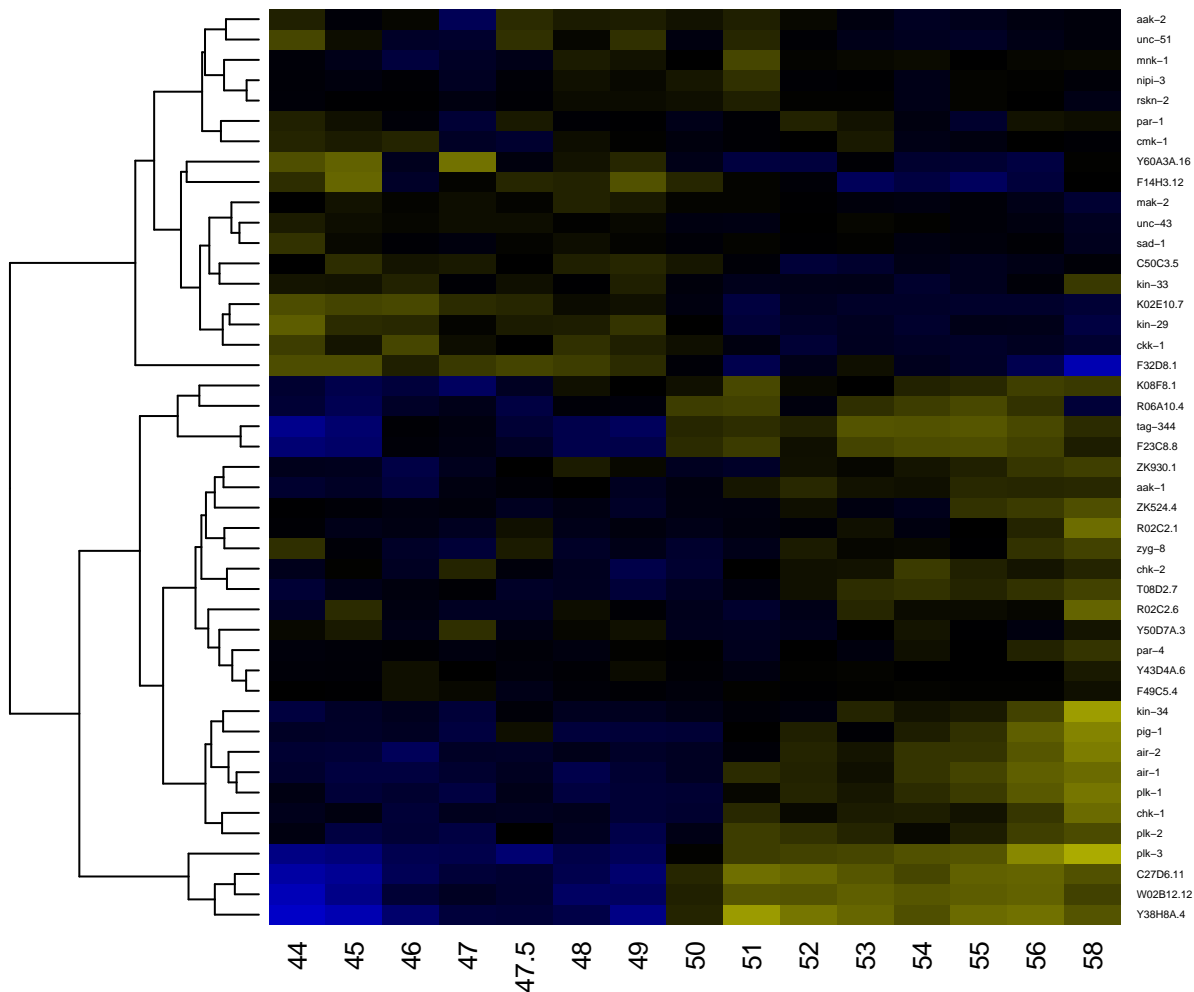



# Calpain family cysteine protease

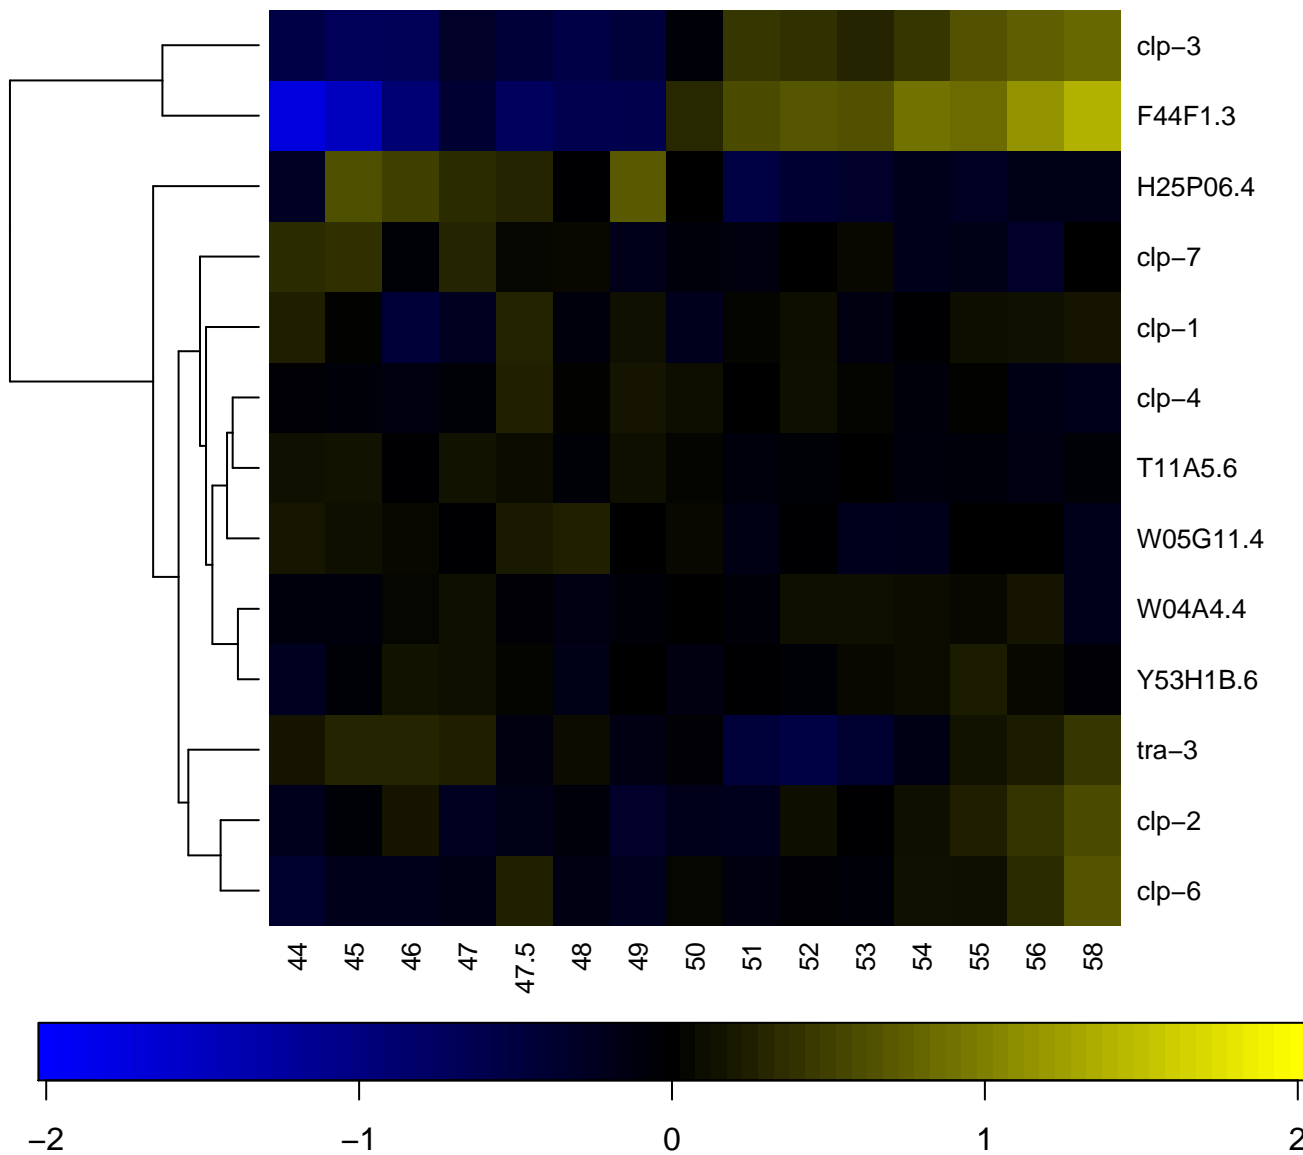

# Calpain large subunit, domain III

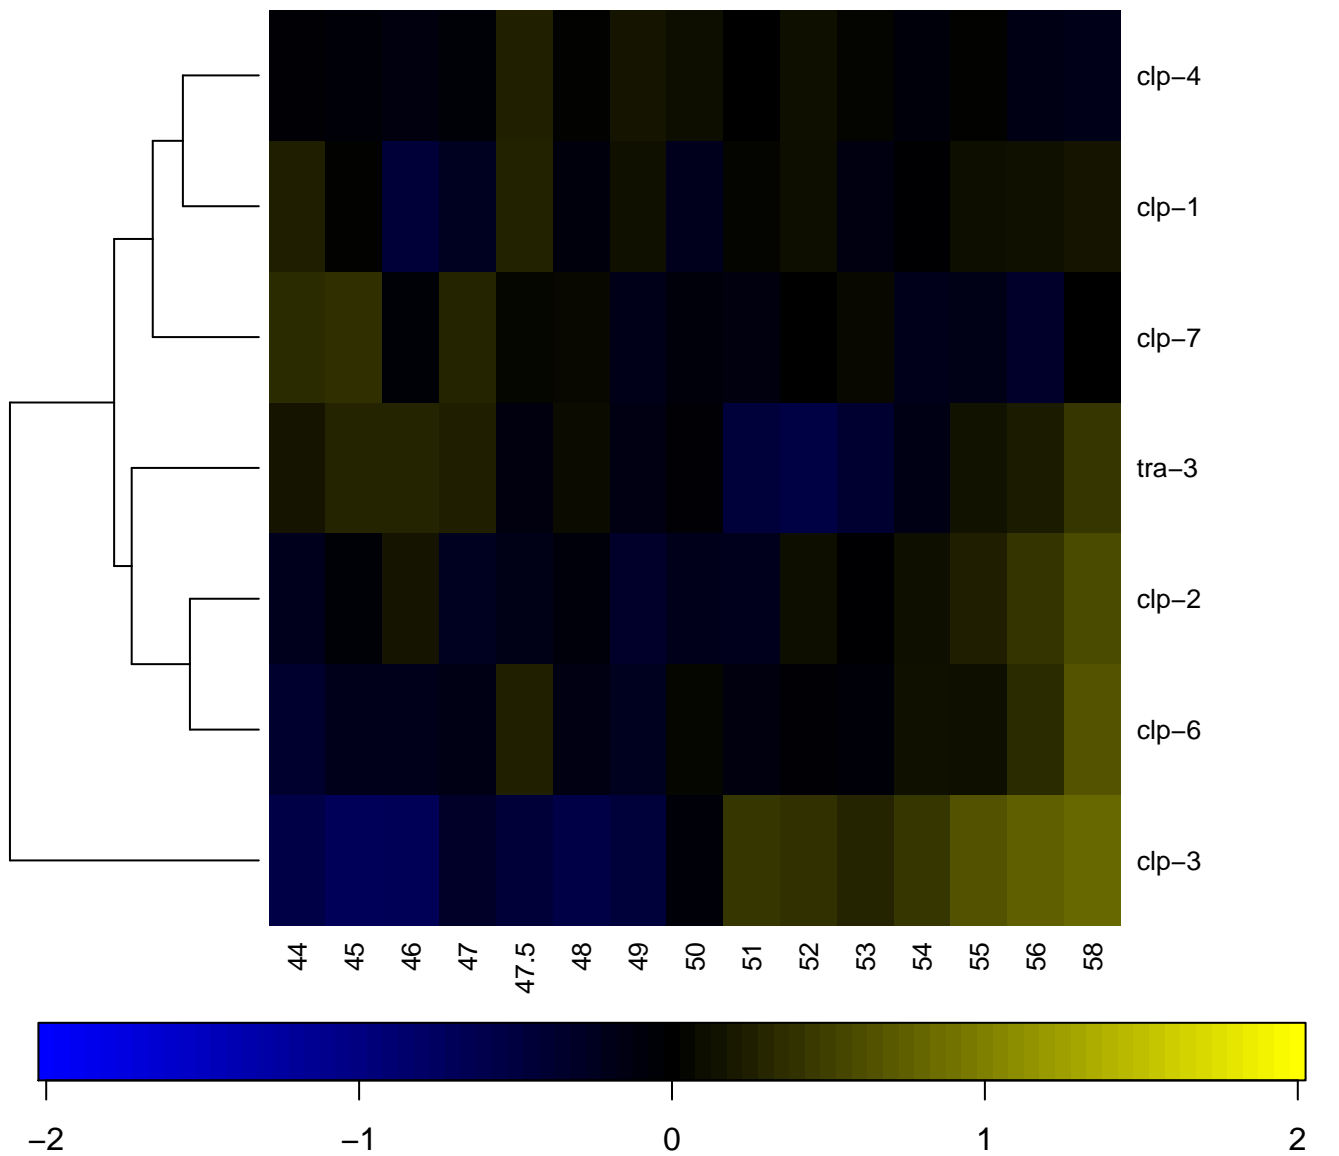



# Calponin family repeat

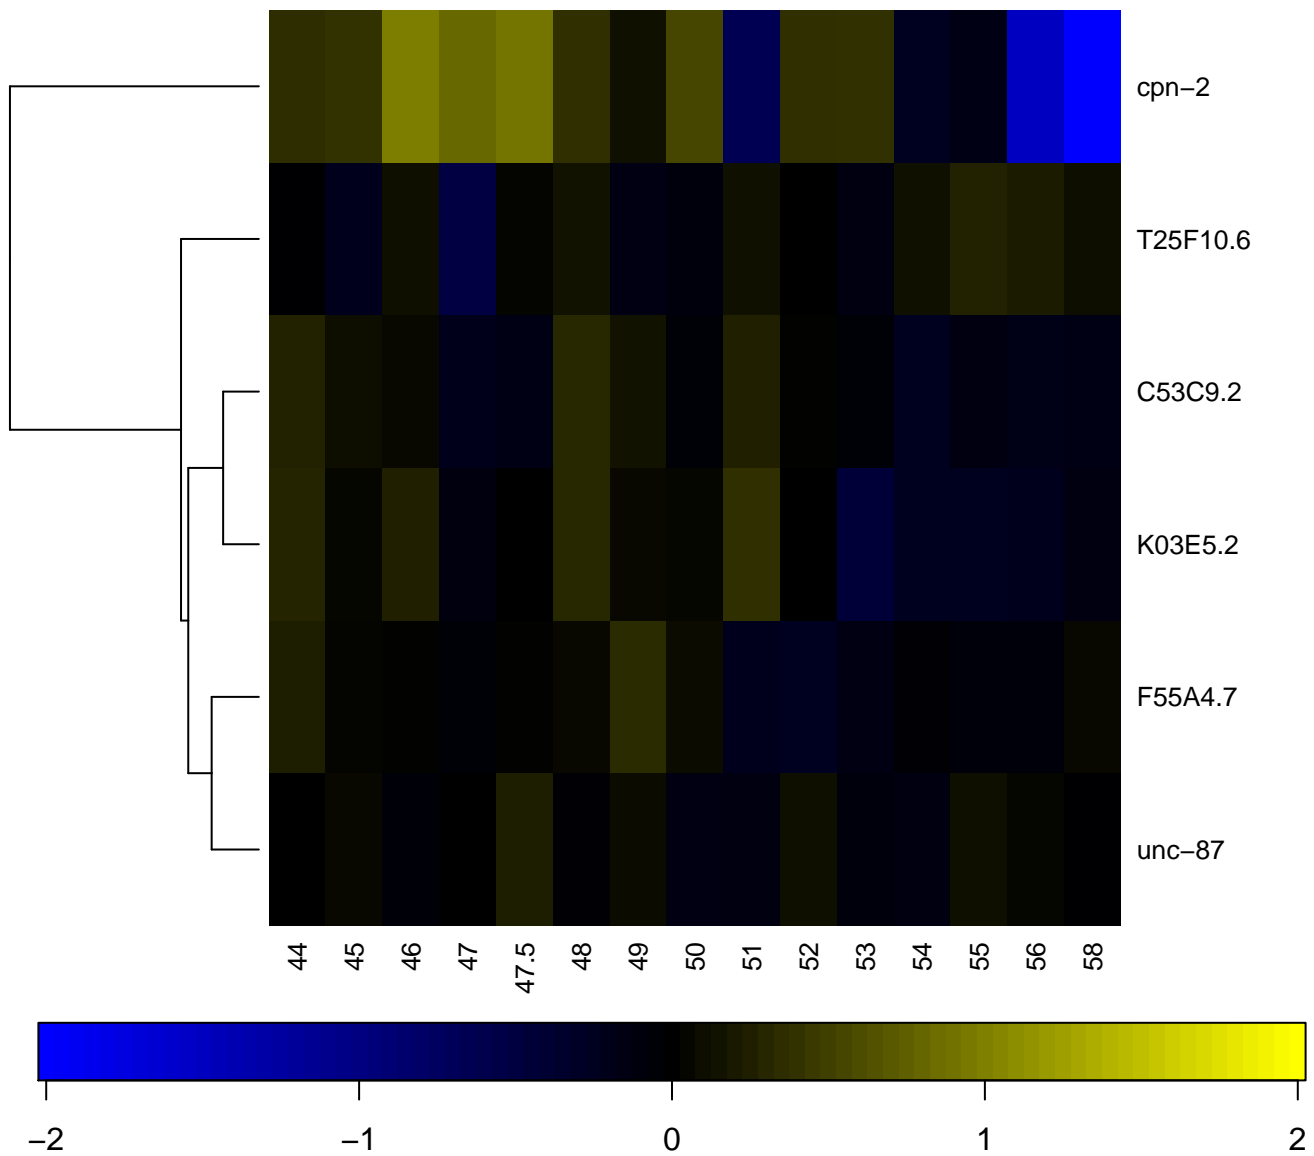

# Calponin homology (CH) domain

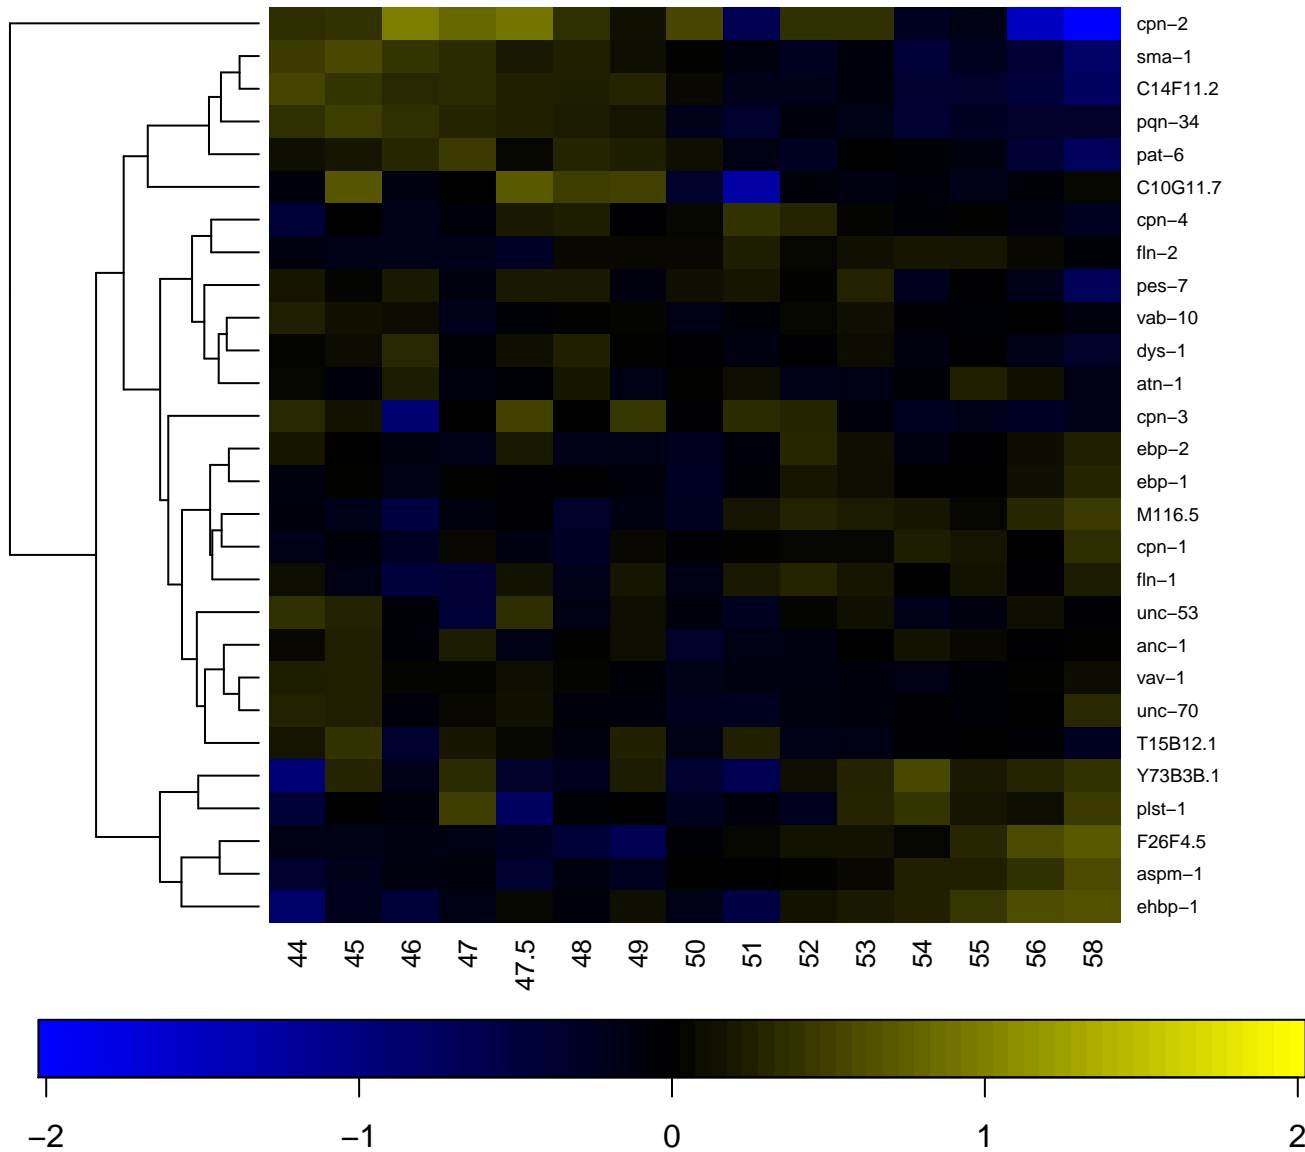





# CAMSAP CH domain

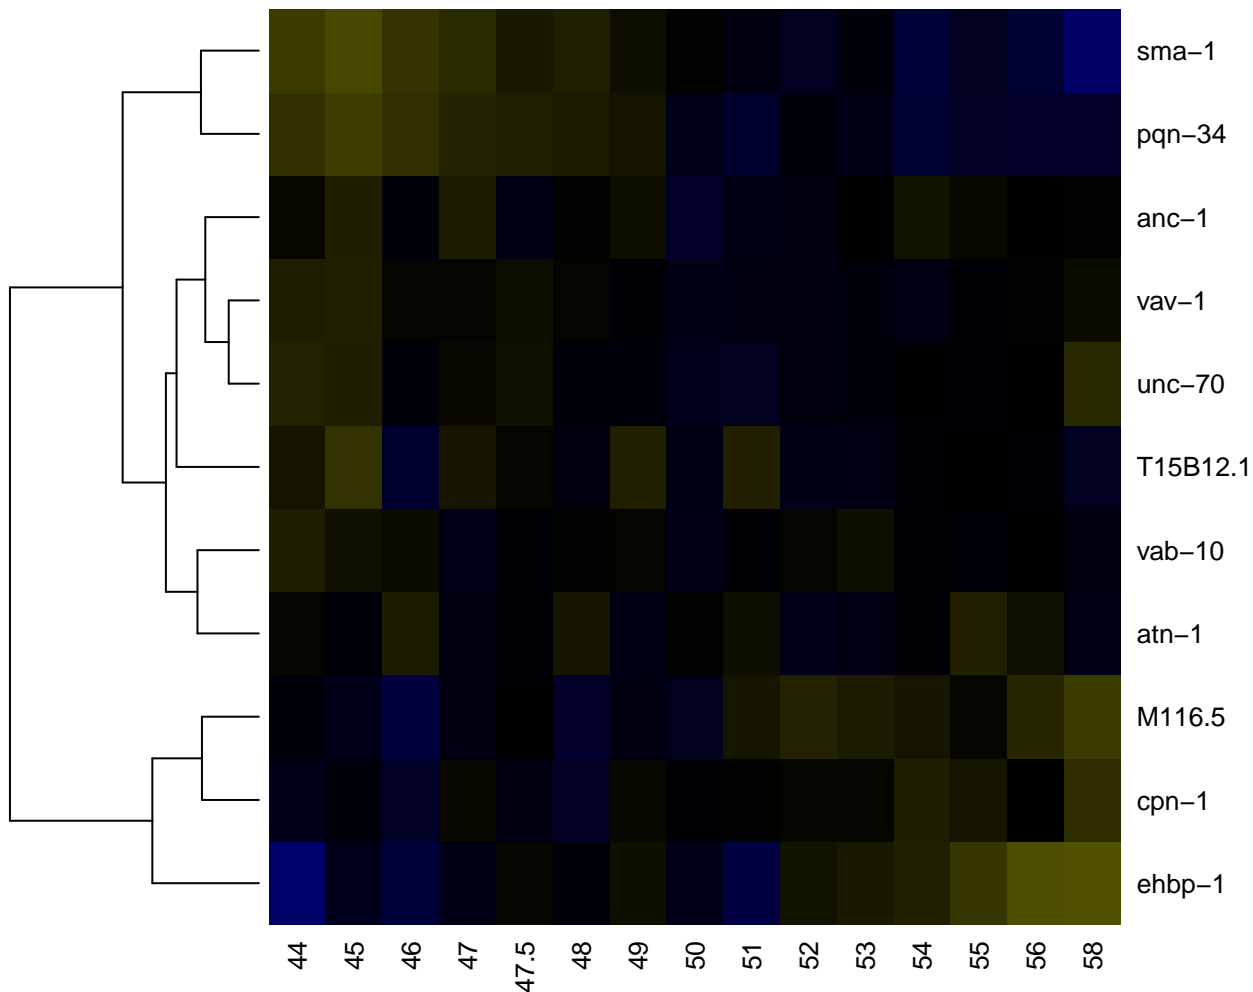









# Carbamoyl phosphate synthase, large subunit, N-termina

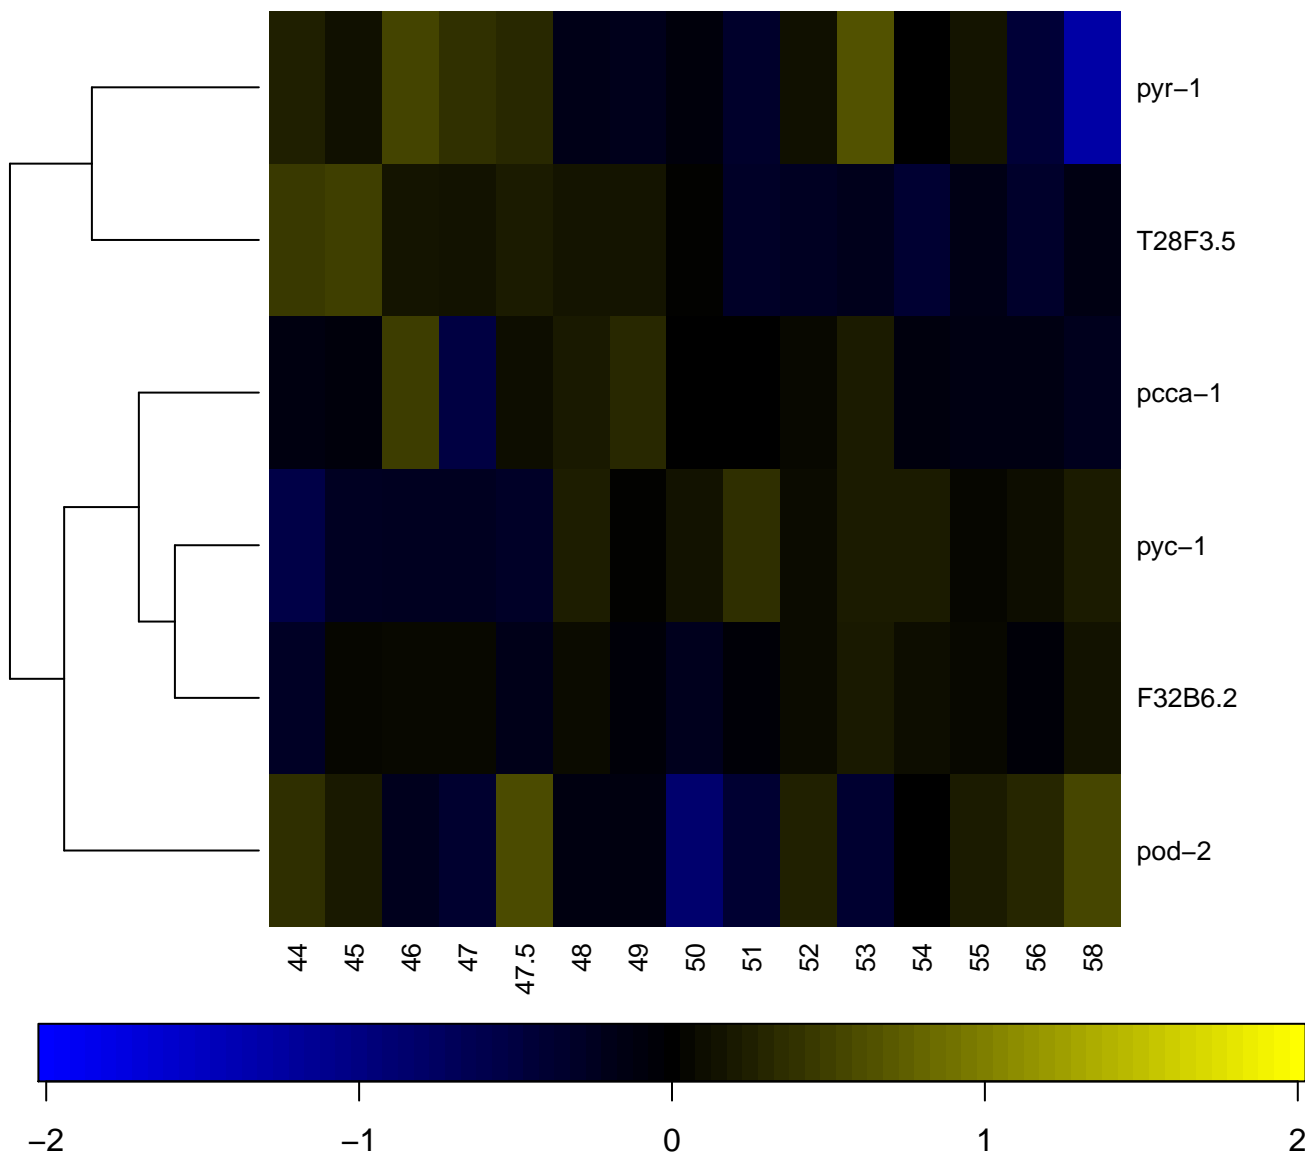

# Carbamoyl phosphate synthetase, large subunit, ATP-binding

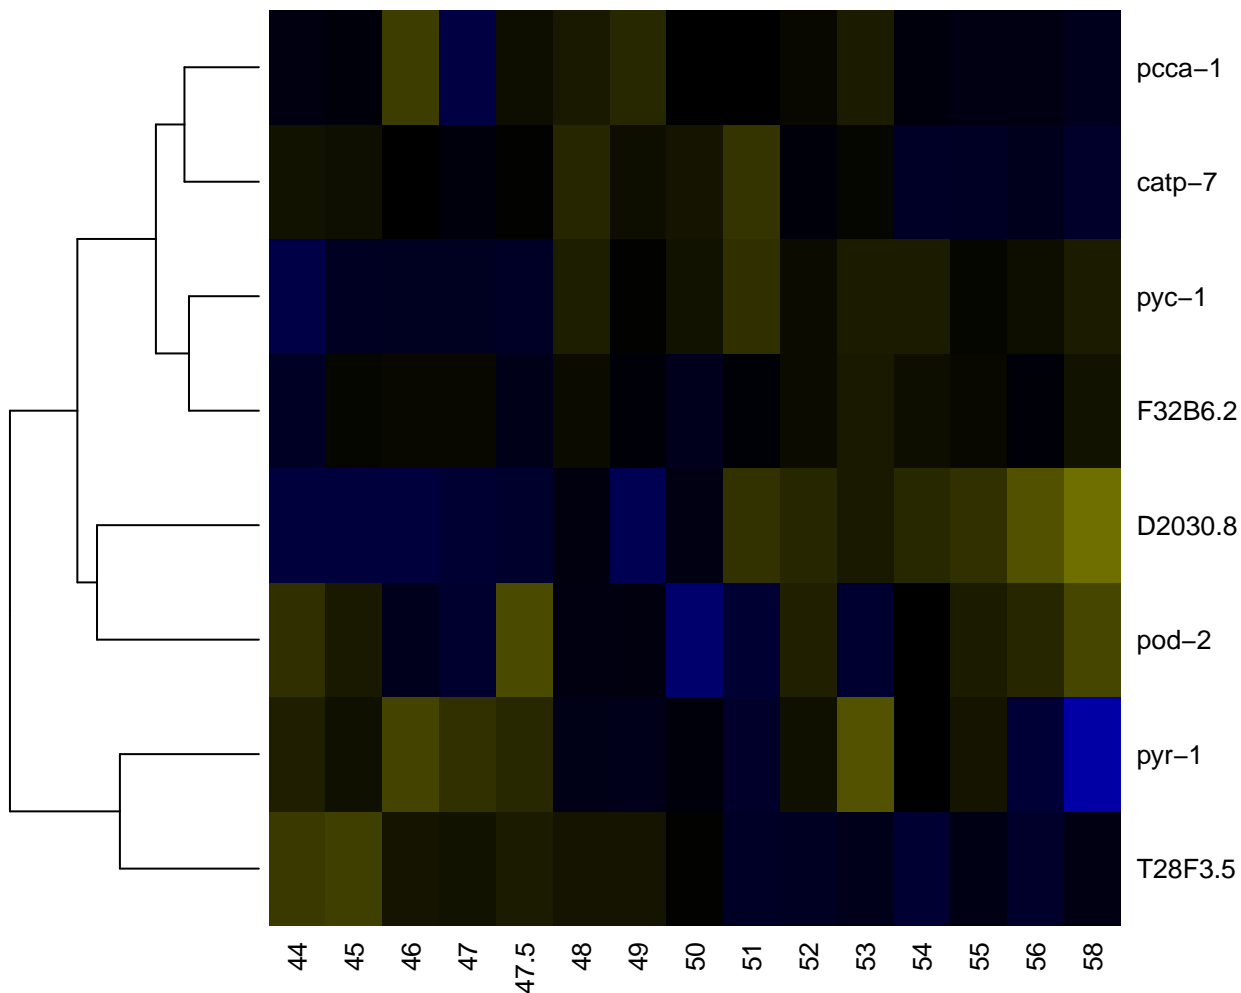





# Carboxylesterase

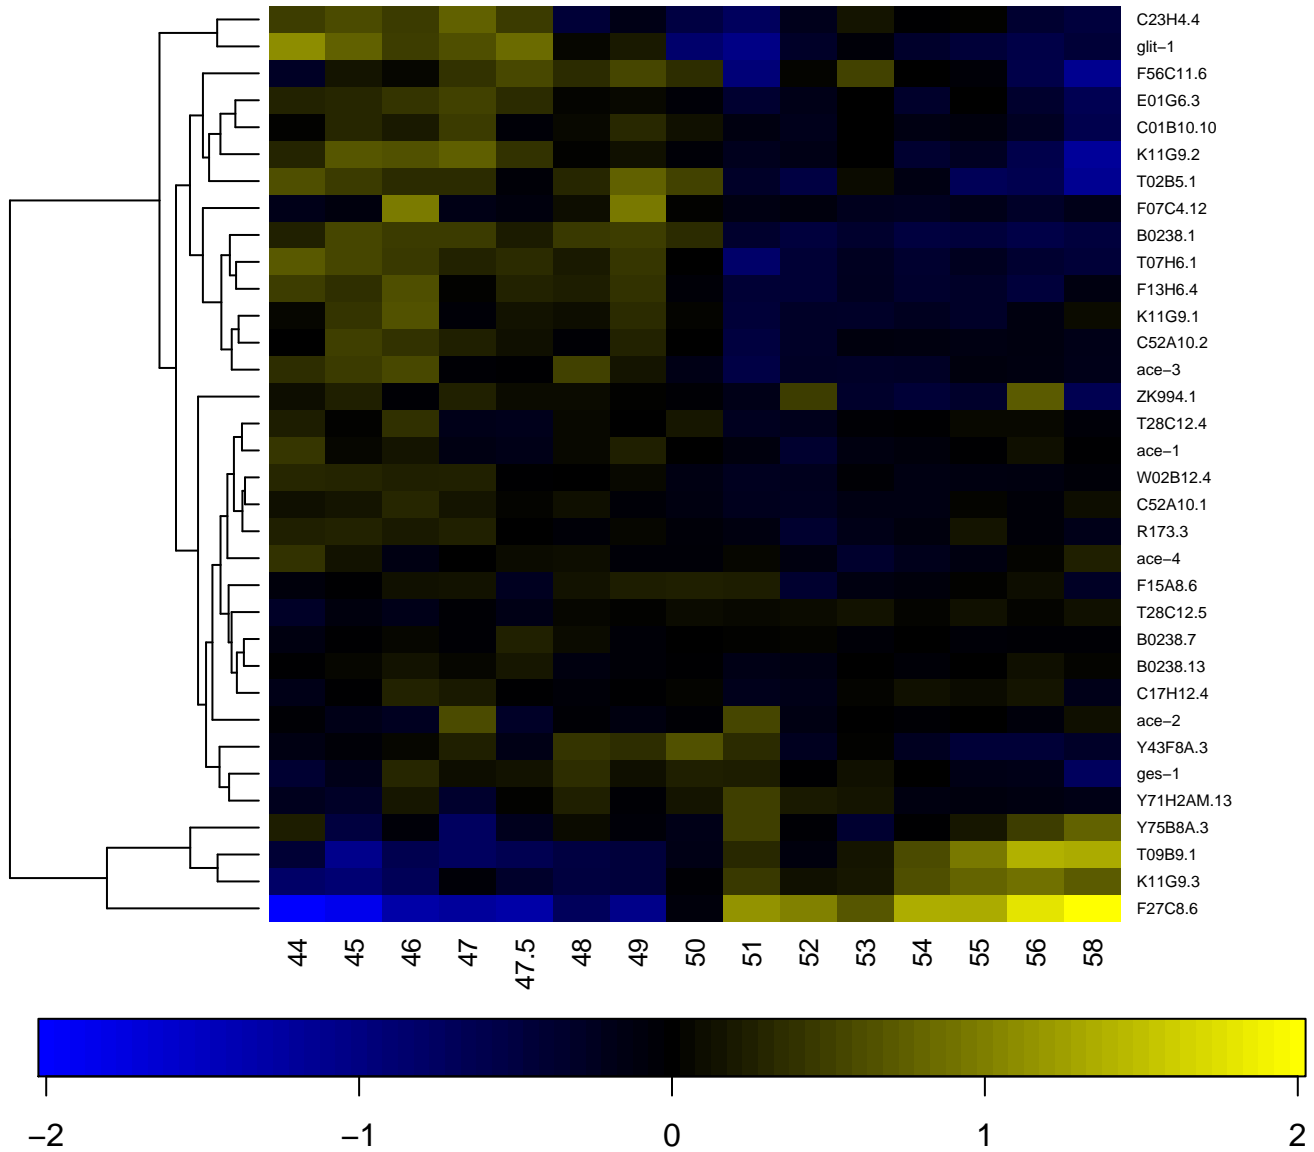





# Carboxylesterase type B, conserved site

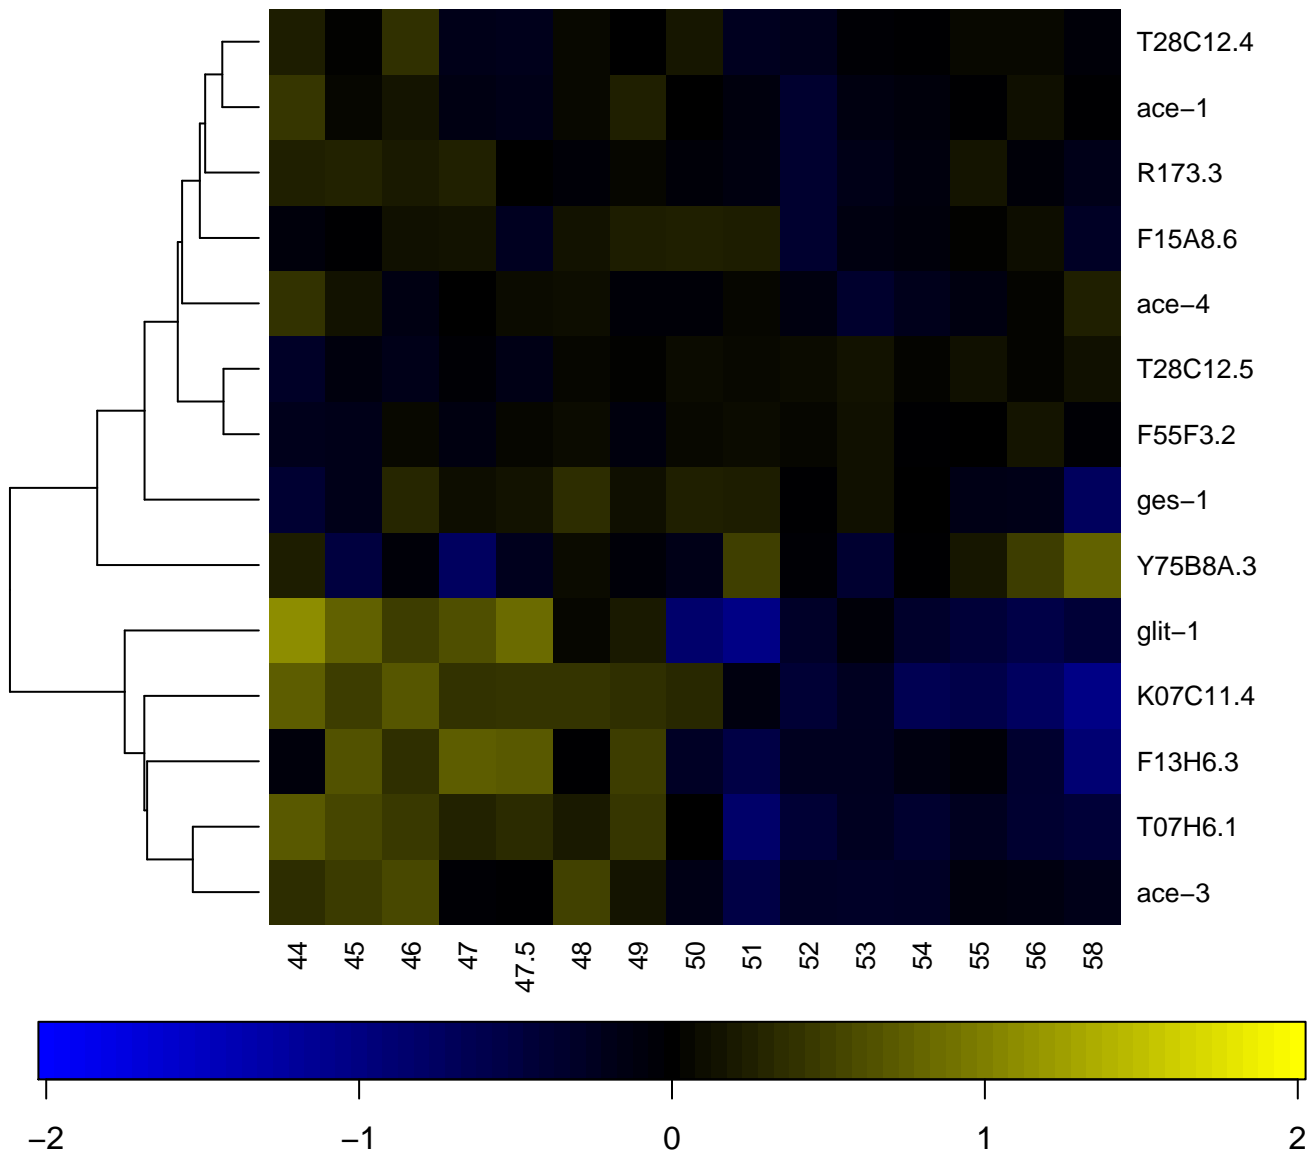

# Carboxylesterase, type B

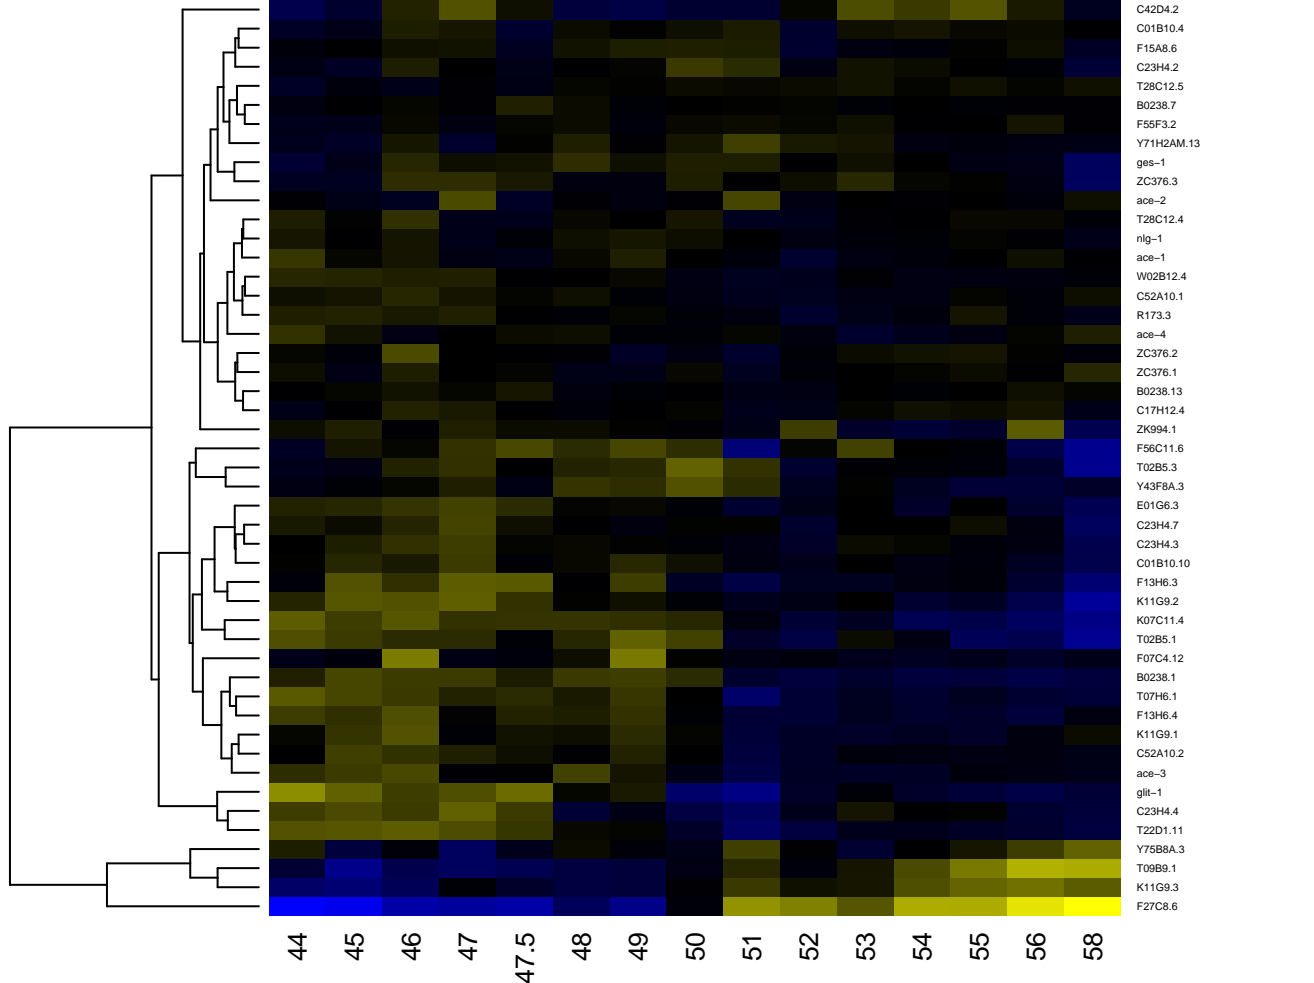



# Caspase domain

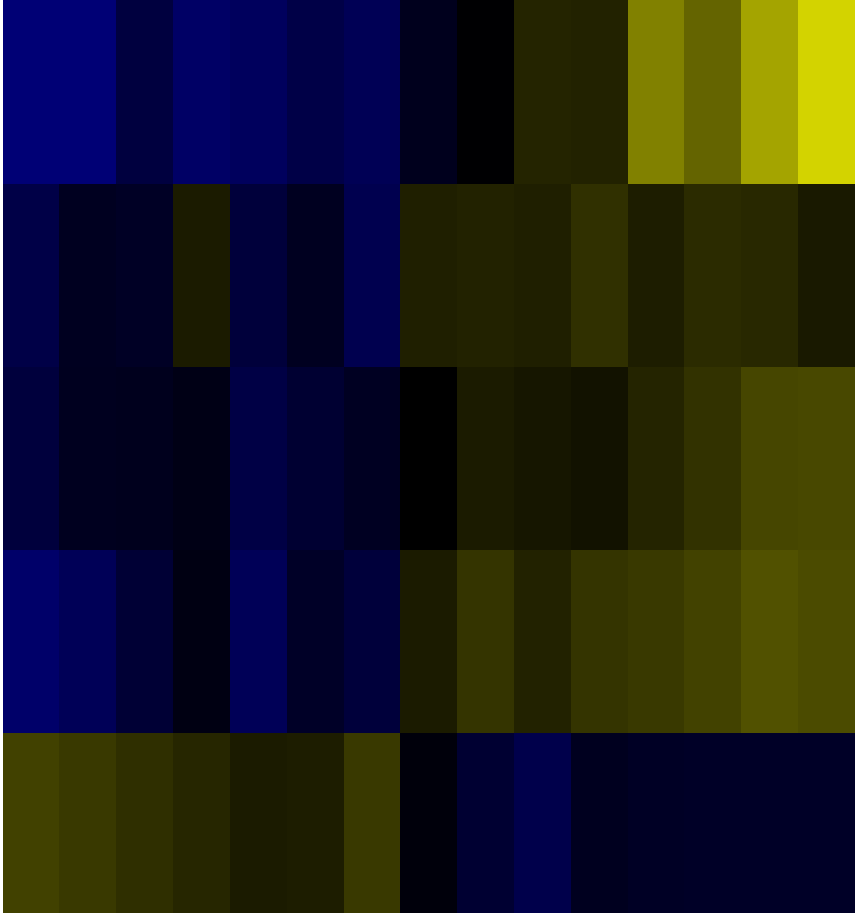

ced-3

csp-3

csp-1

csp-2

F22D3.6

44 45 46 47 47.5 48 49 50 51 52 53 54 55 56 58

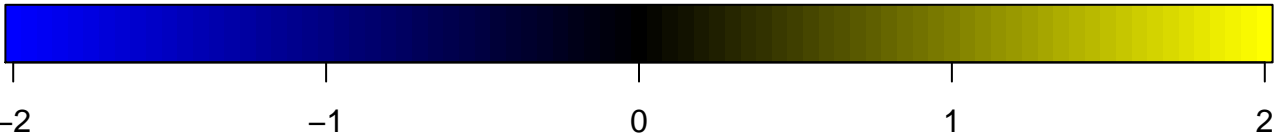





# Cation efflux protein

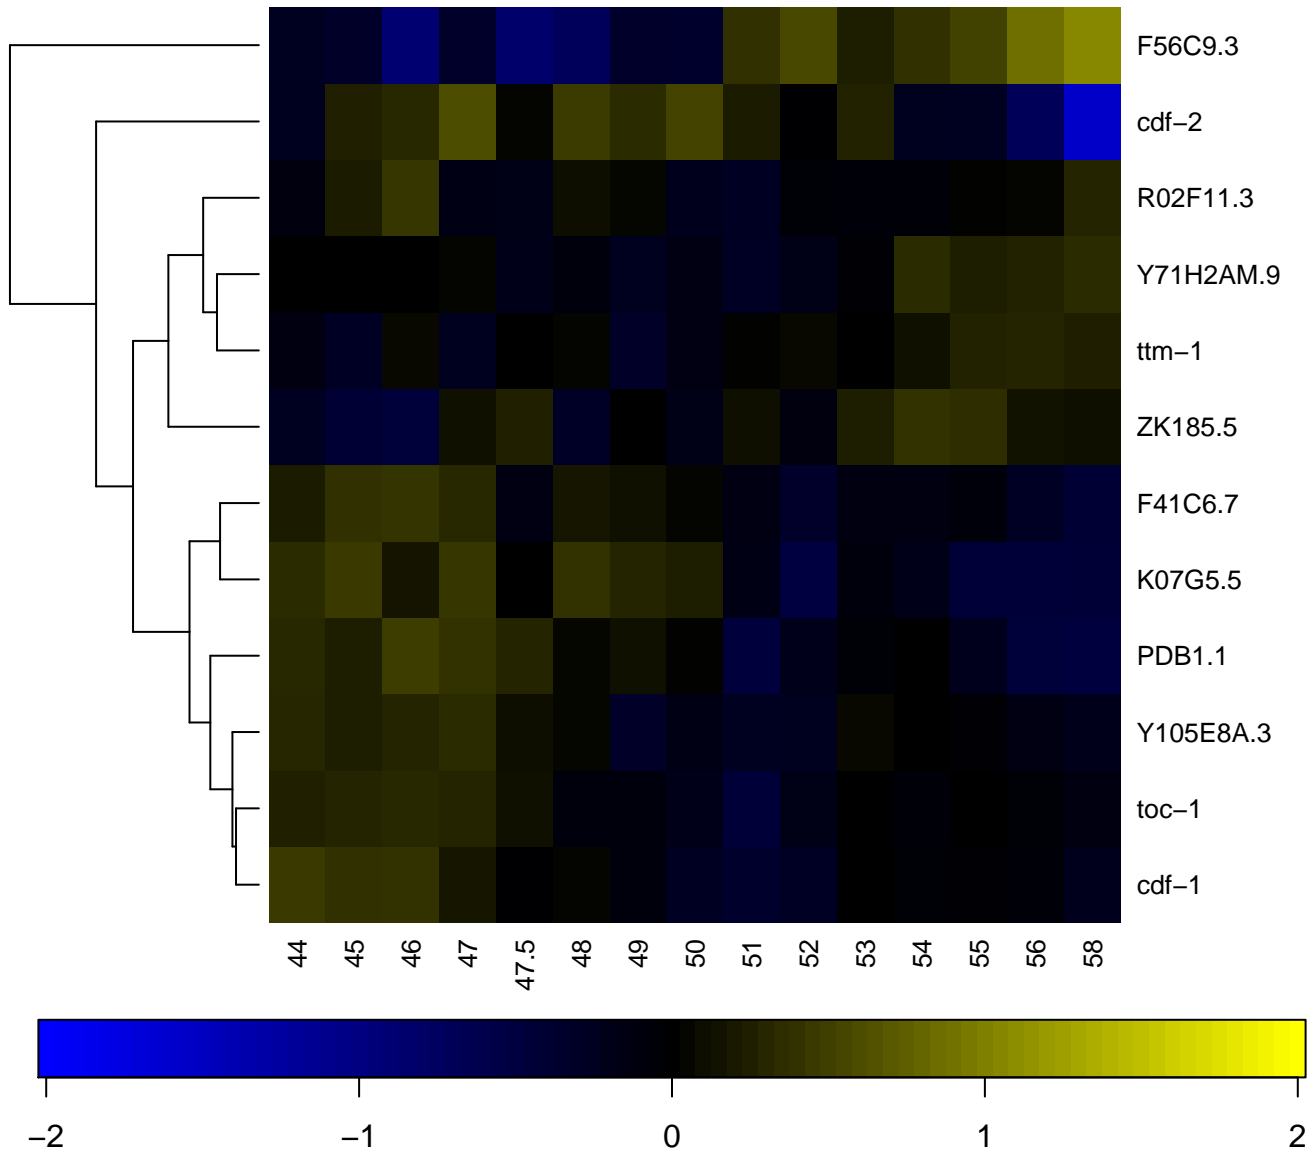





# Cation transporting ATPase, C-terminus

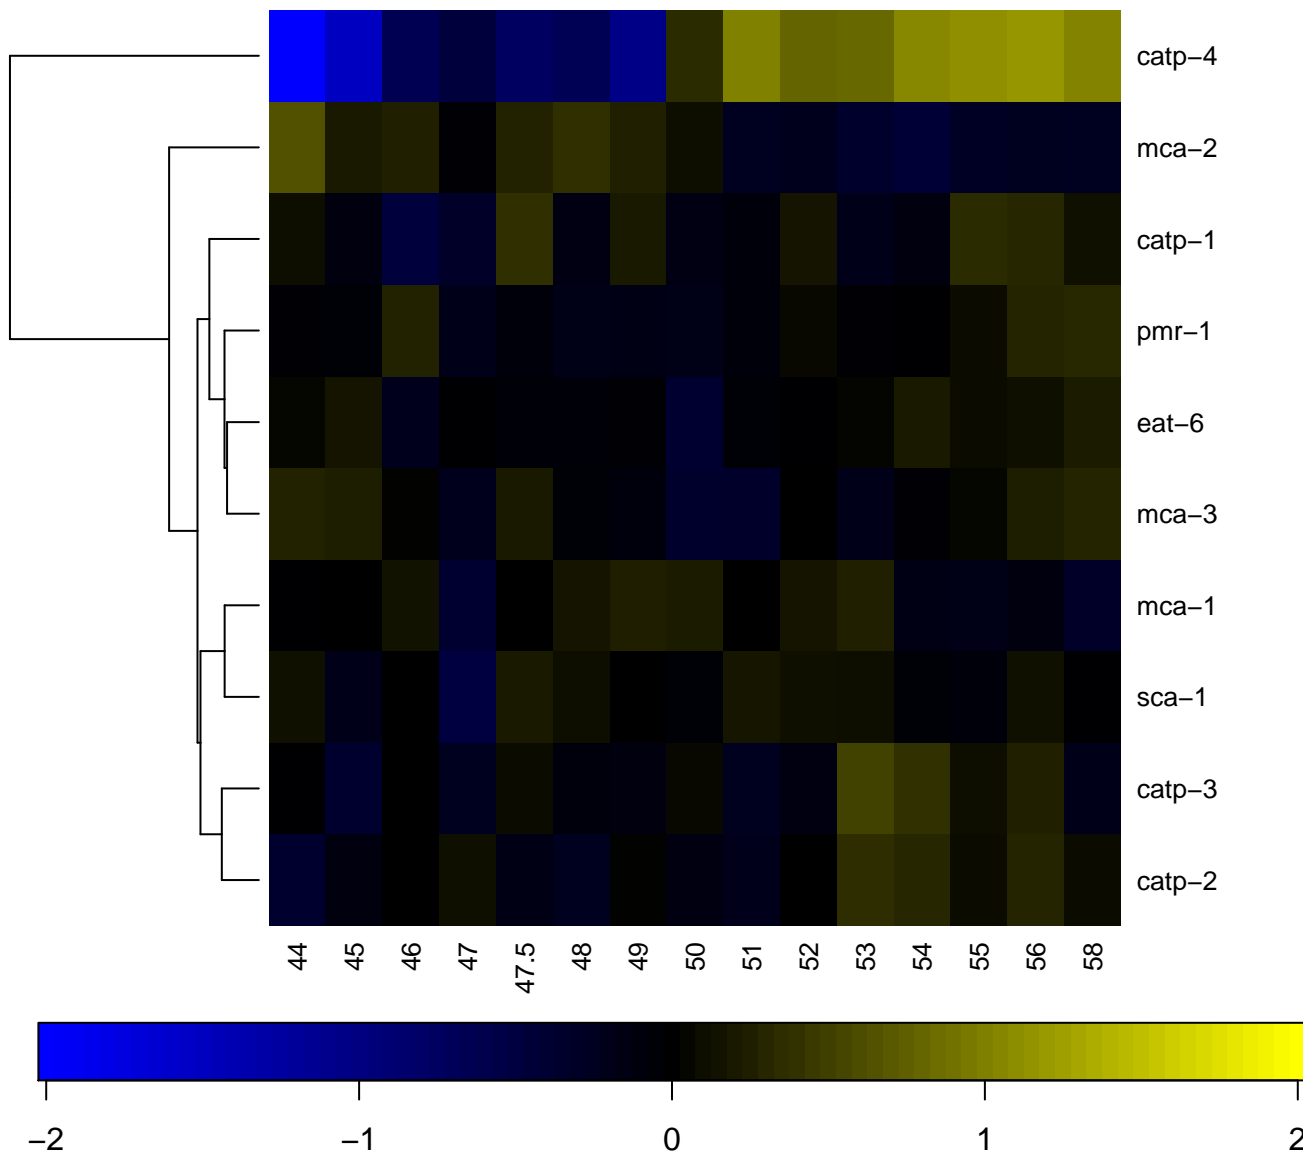







# CC domain

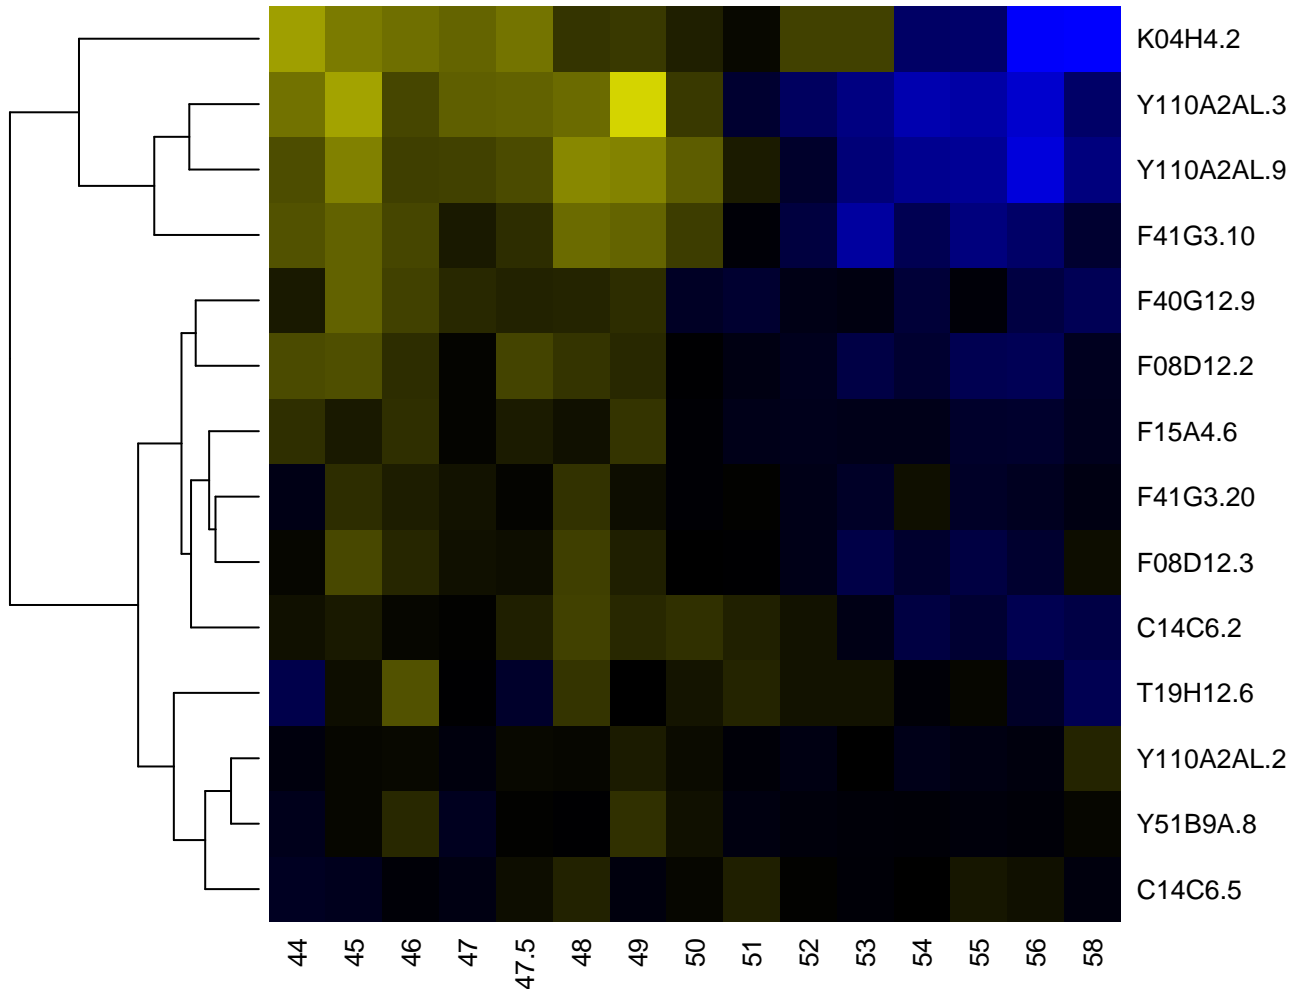



# CD36 family

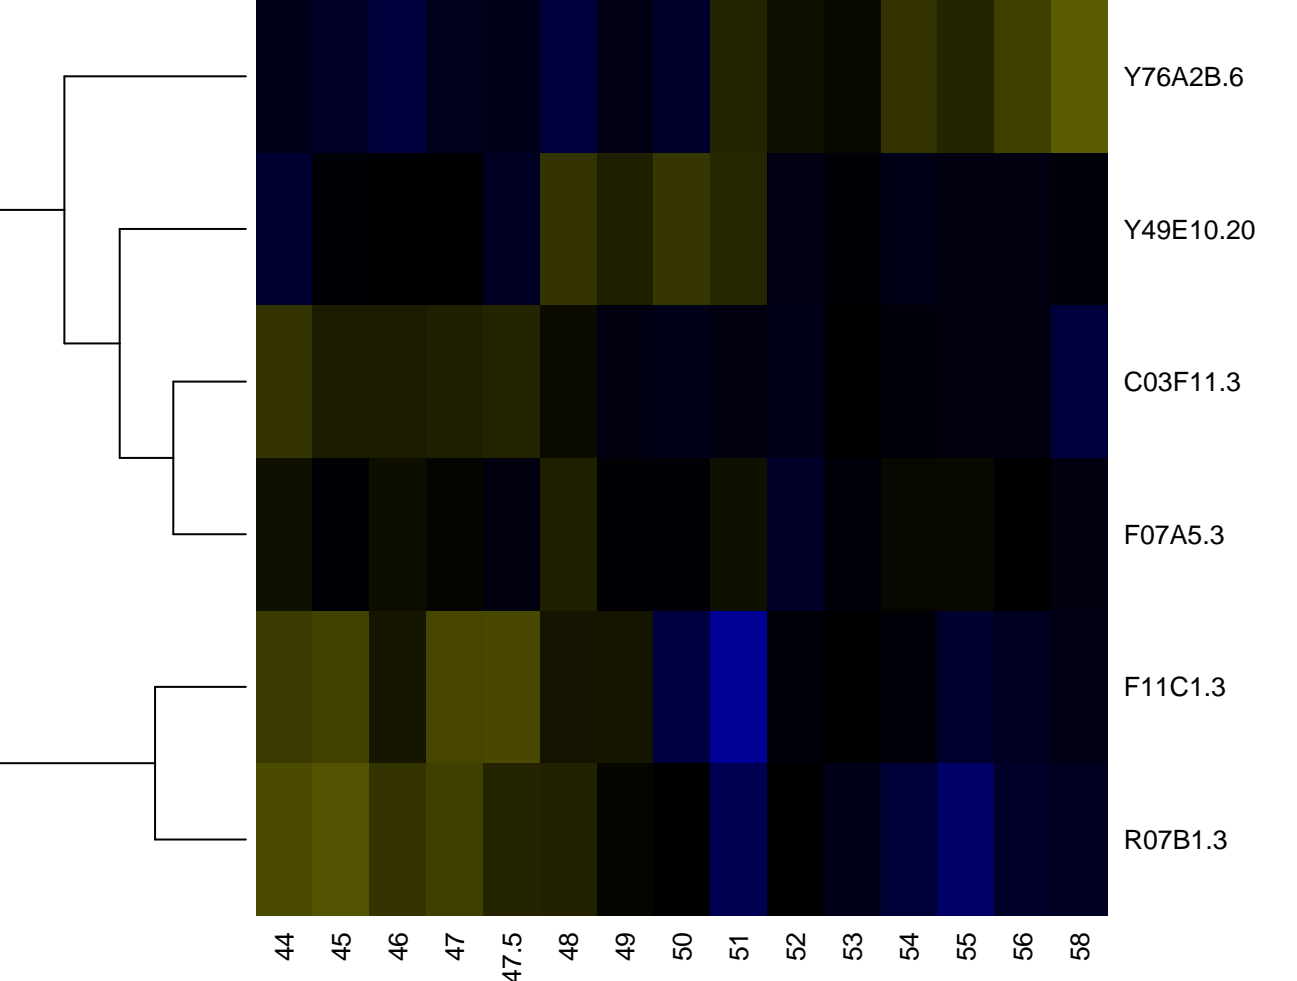



# CDP-alcohol phosphatidyltransferase

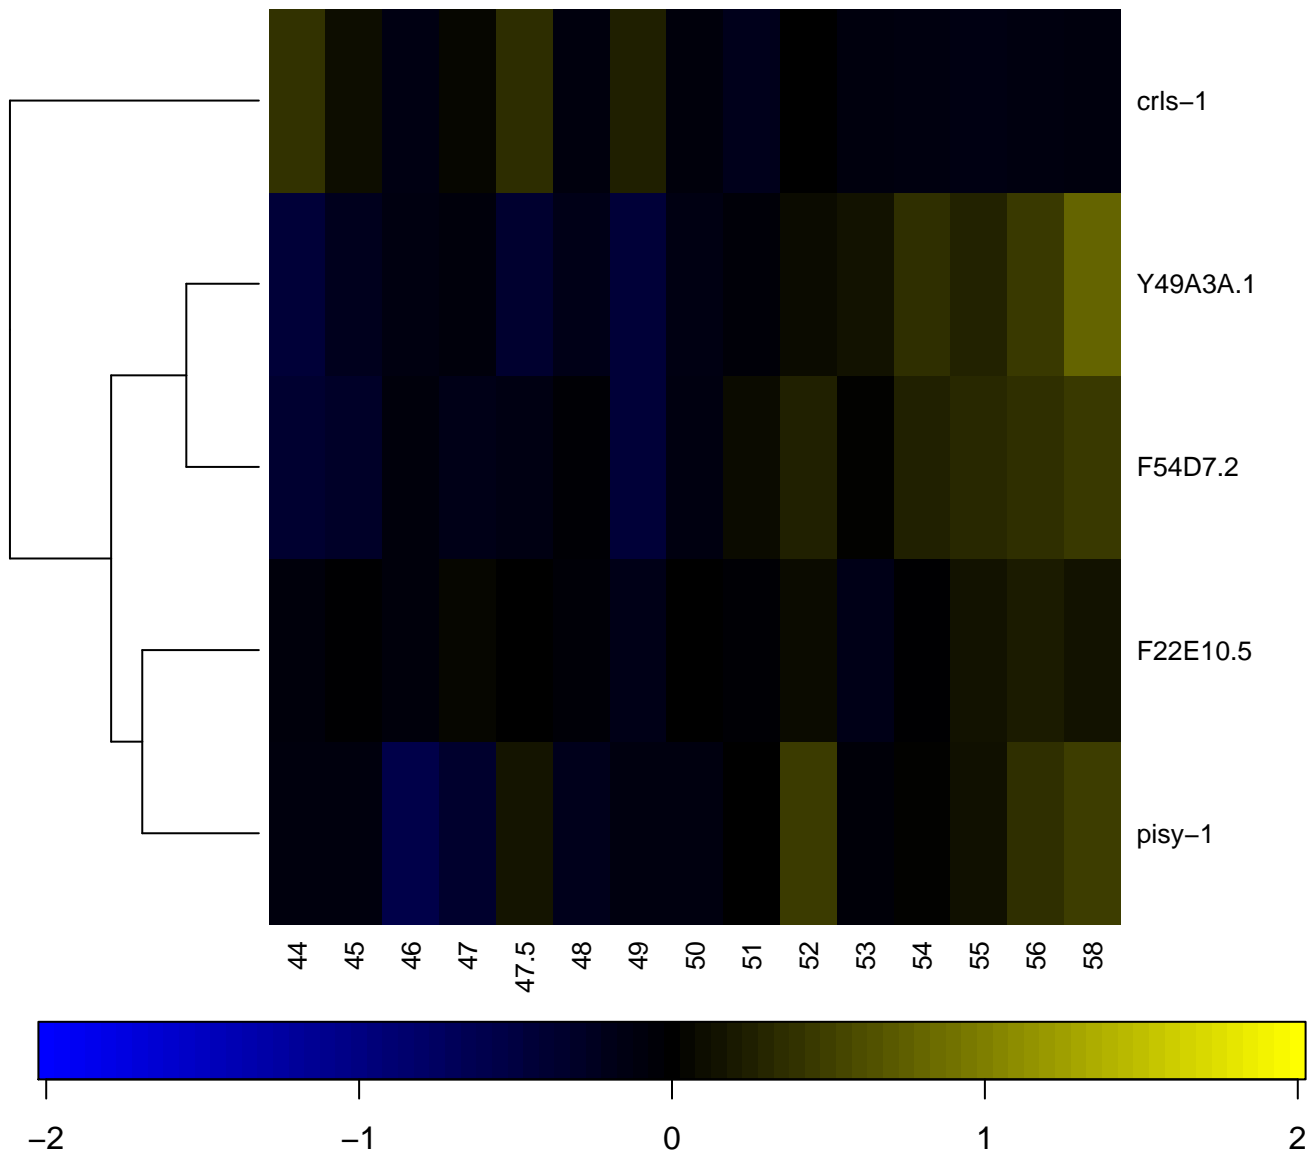



# Cell surface receptor IPT/TIG

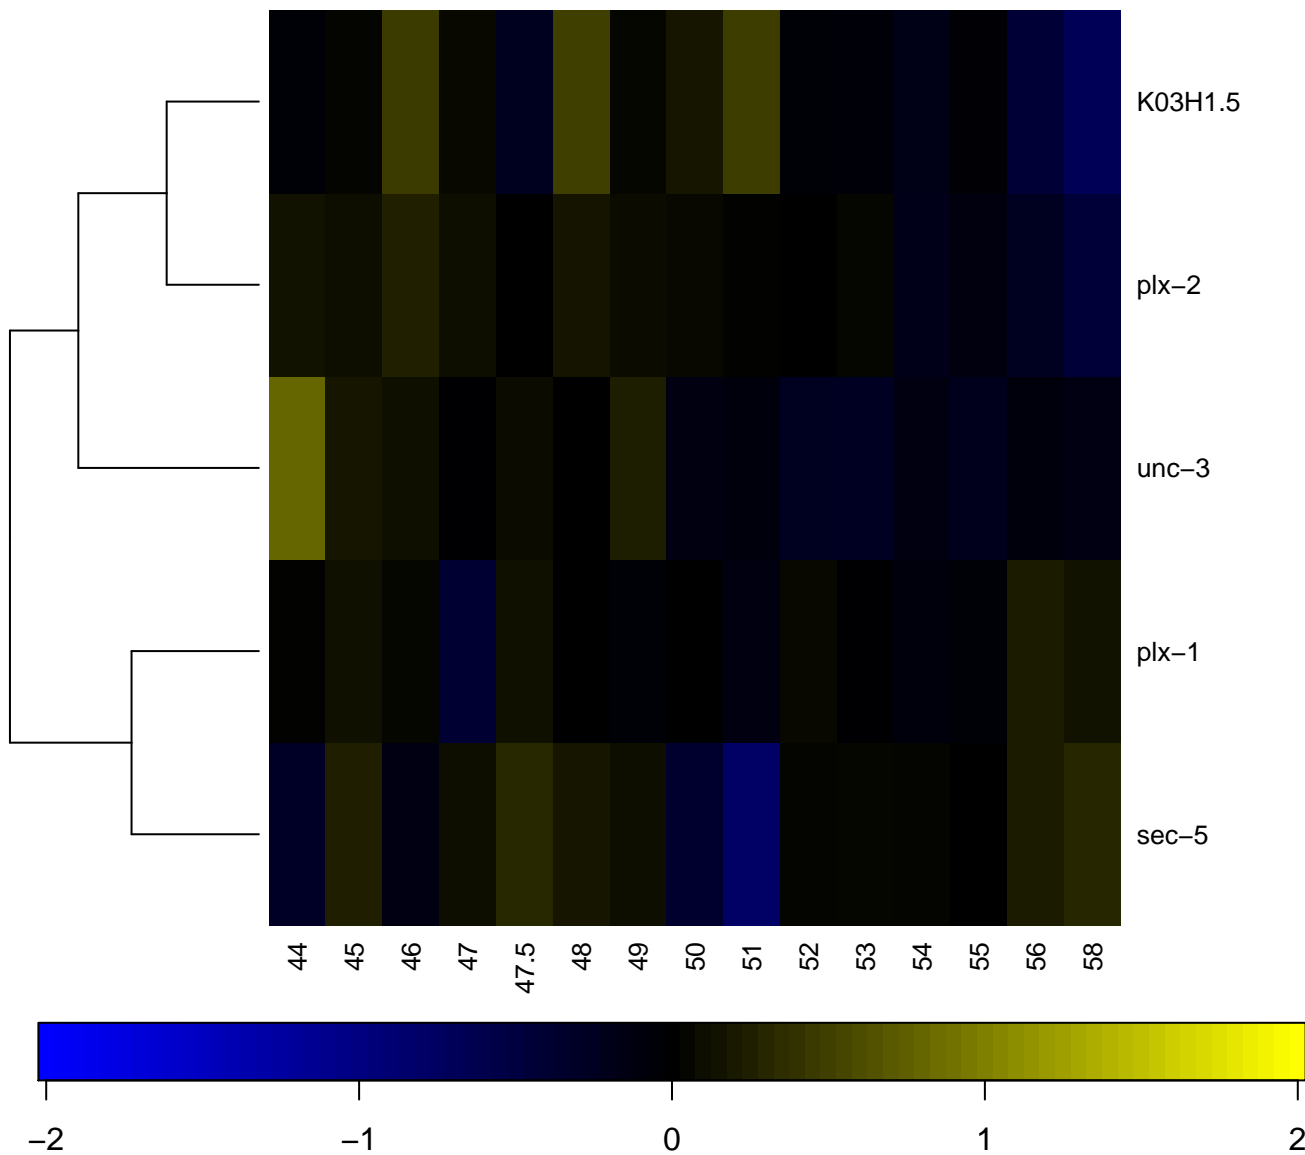

# Cellular retinaldehyde-binding/triple function, C-terminal

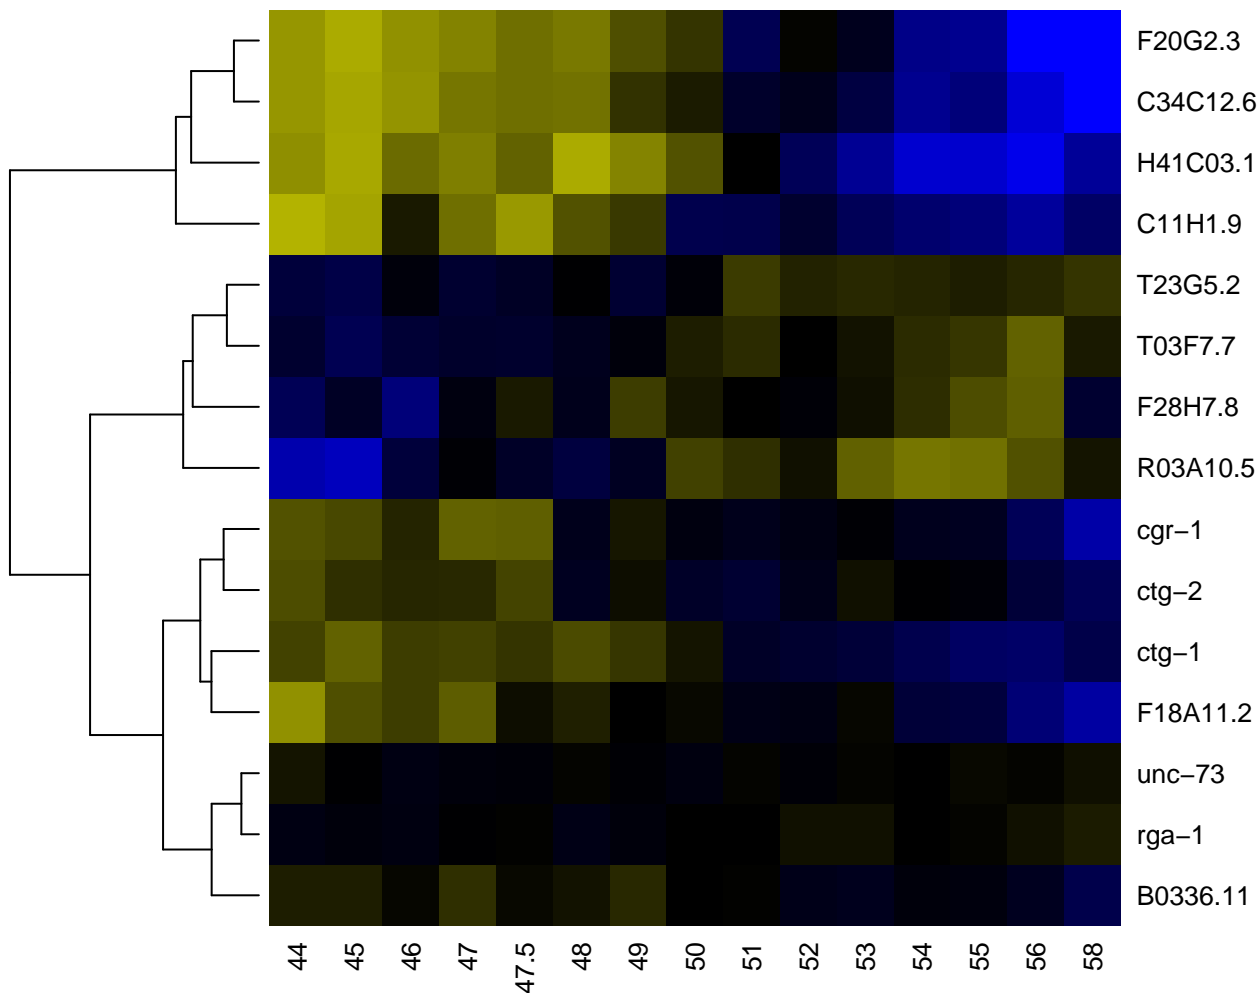

# CEO family (DUF1632)

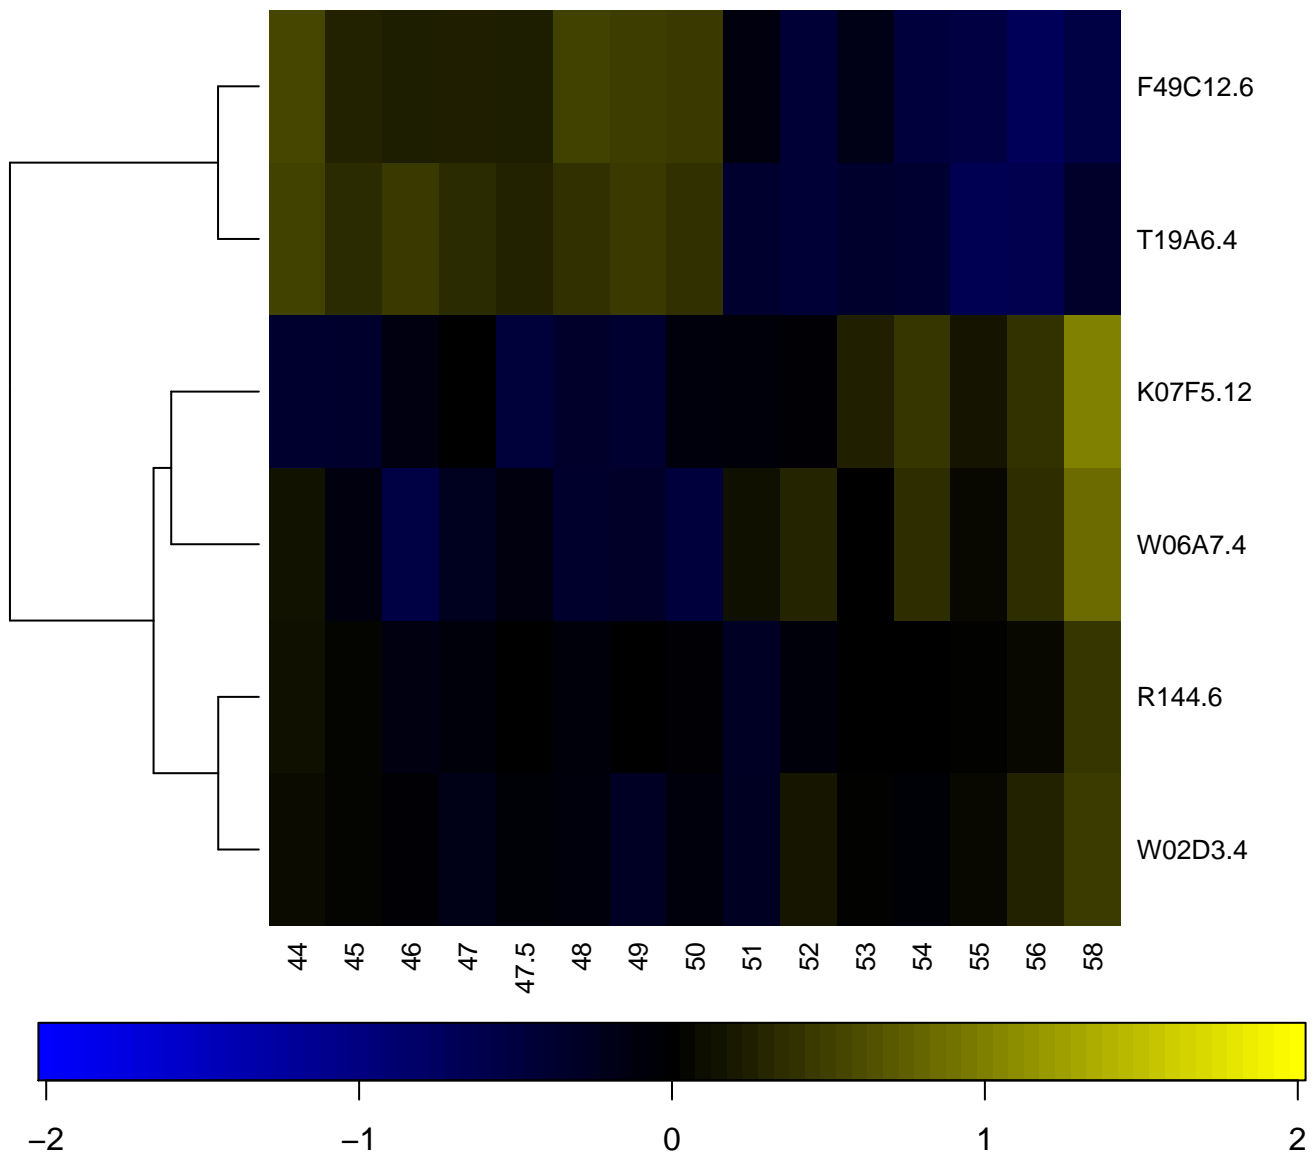









# Chaperonin Cpn60/TCP-1

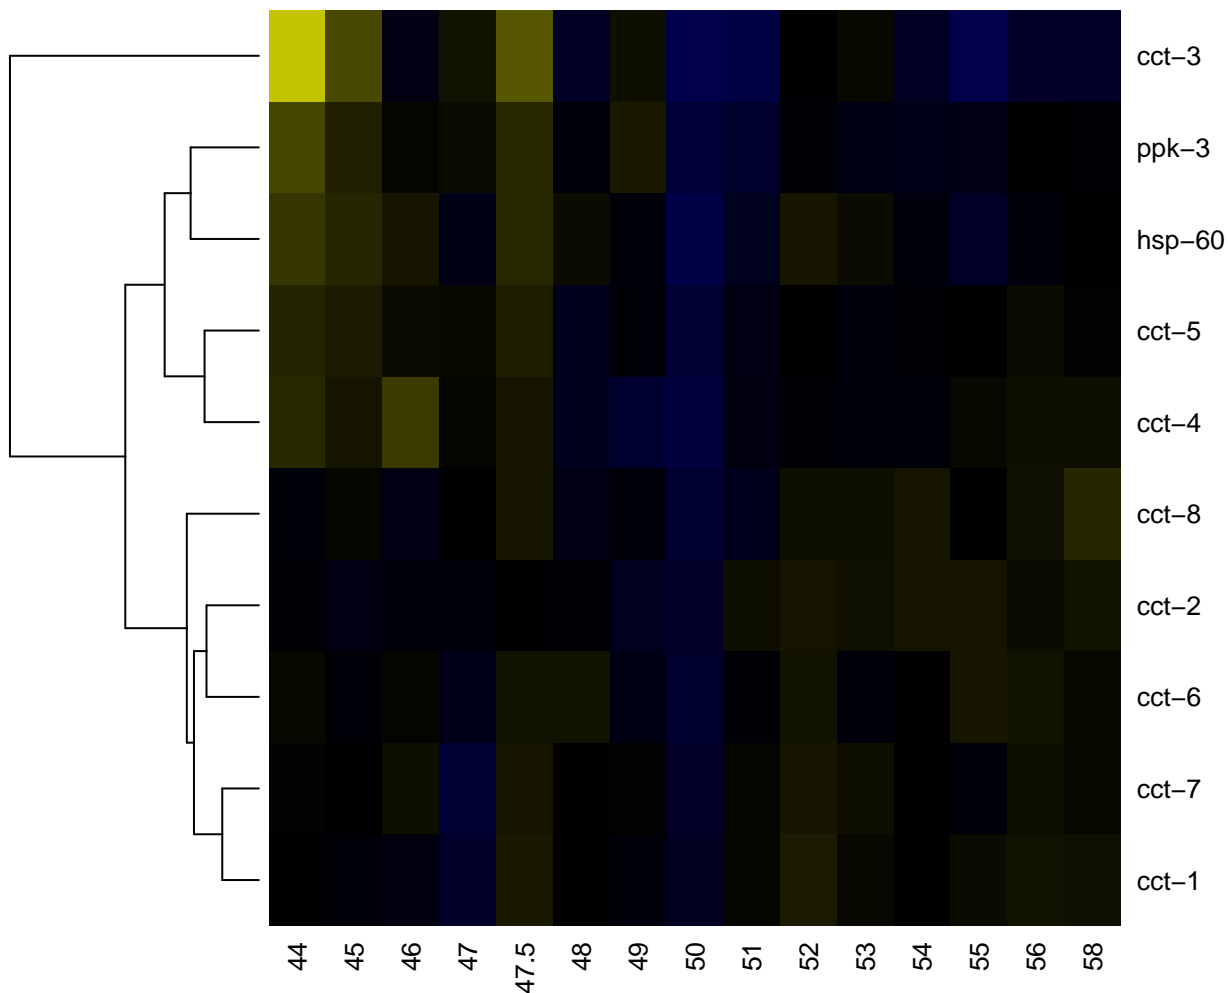









# Chitin binding protein, peritrophin-A

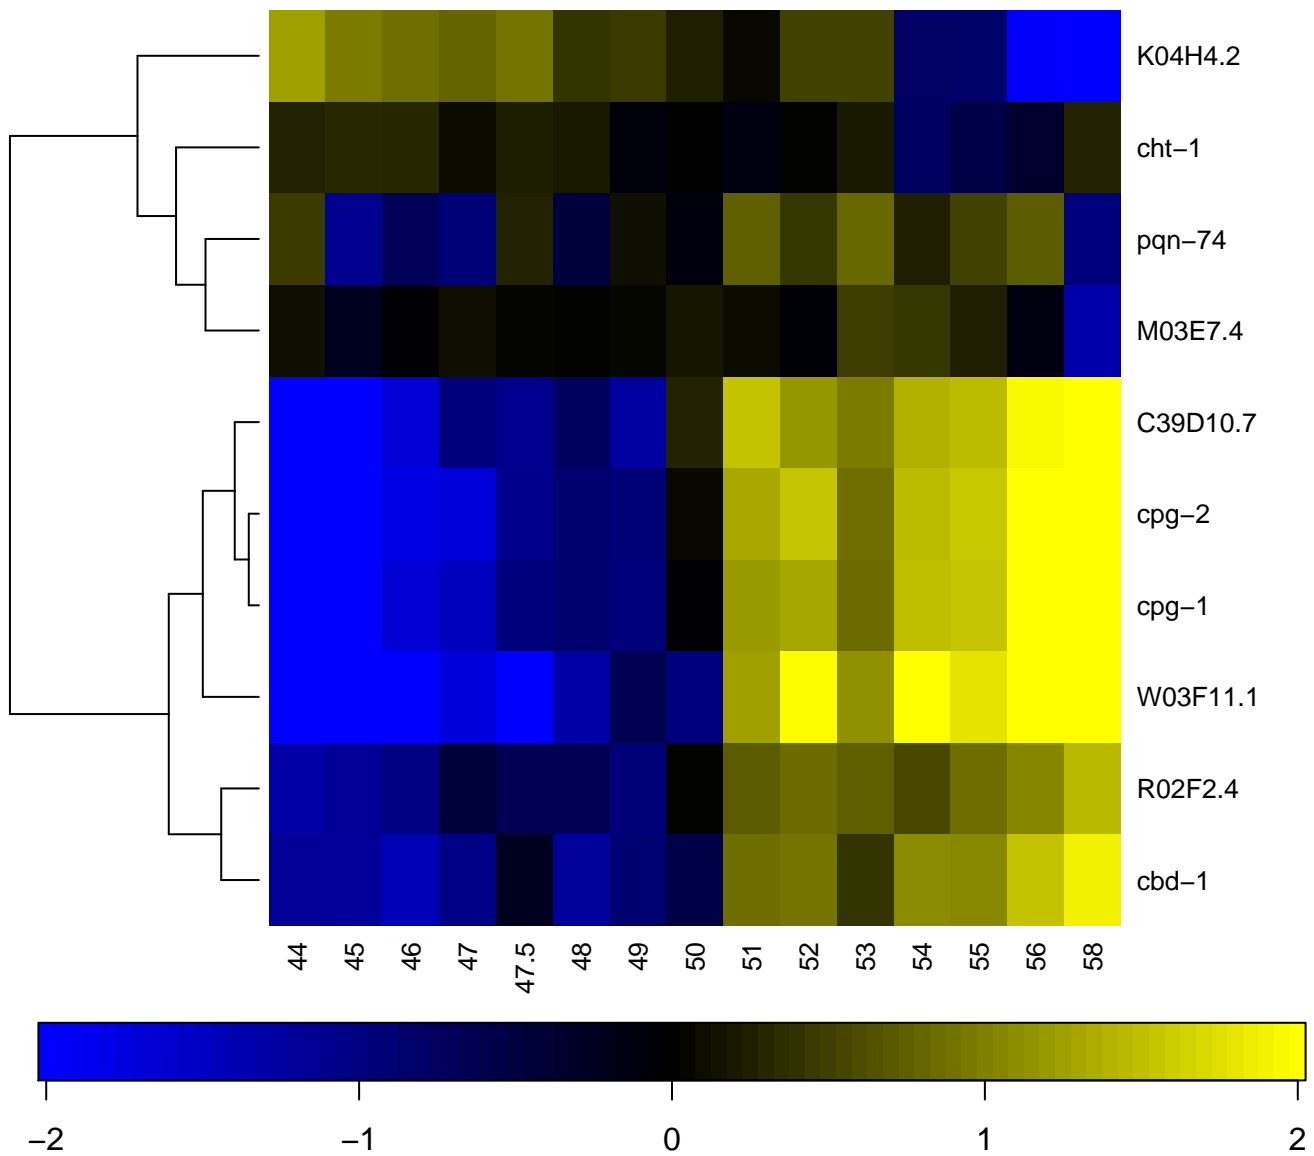



# CHK kinase-like

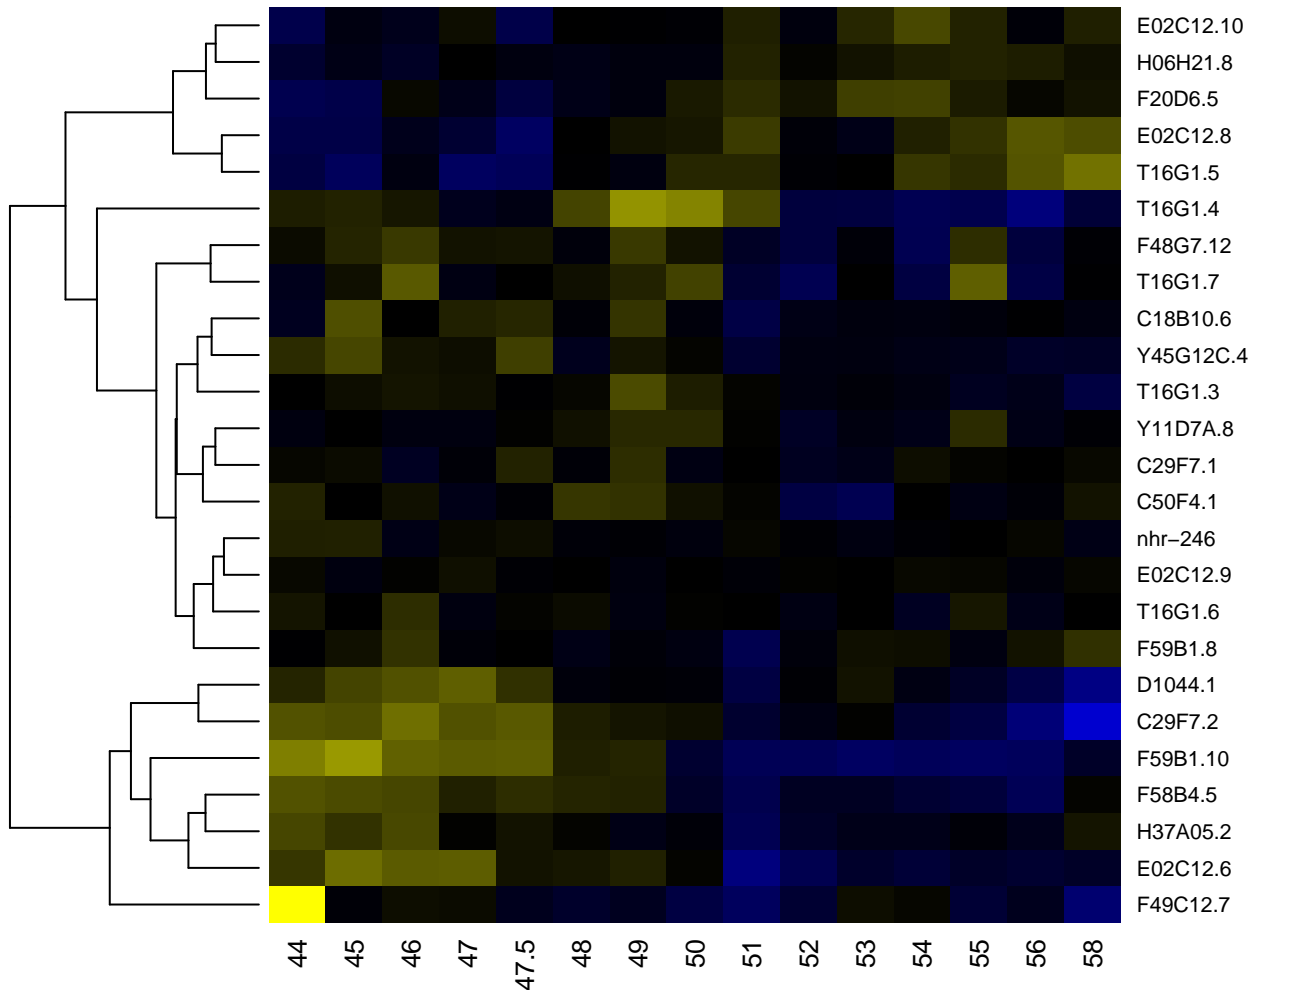















# CLASP N terminal

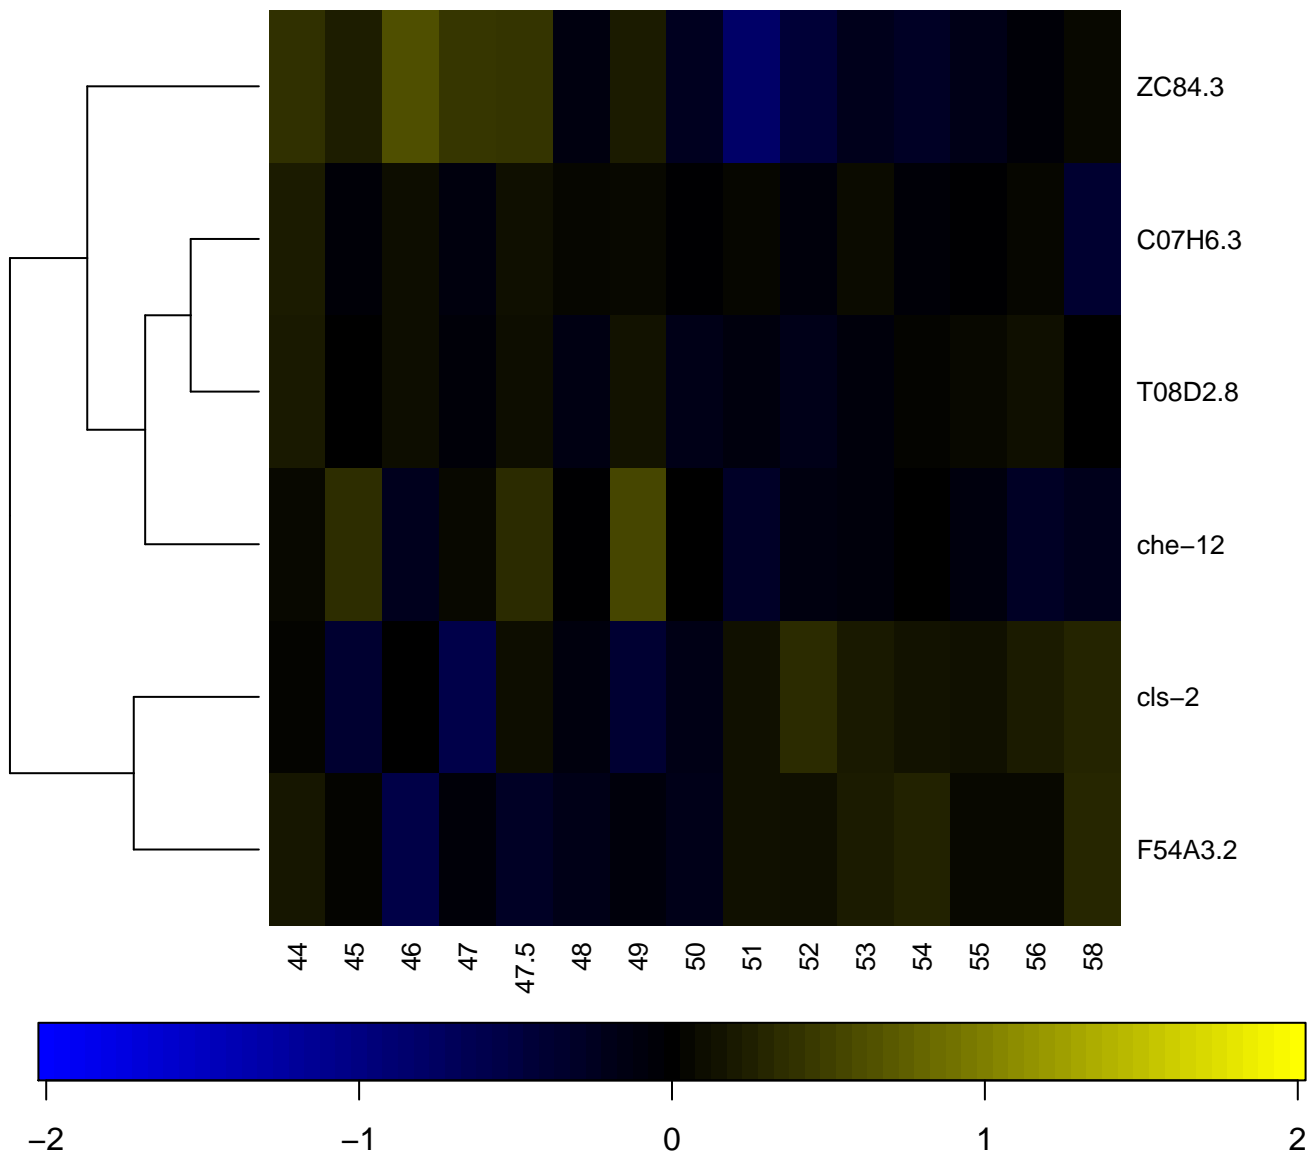













# CNH domain

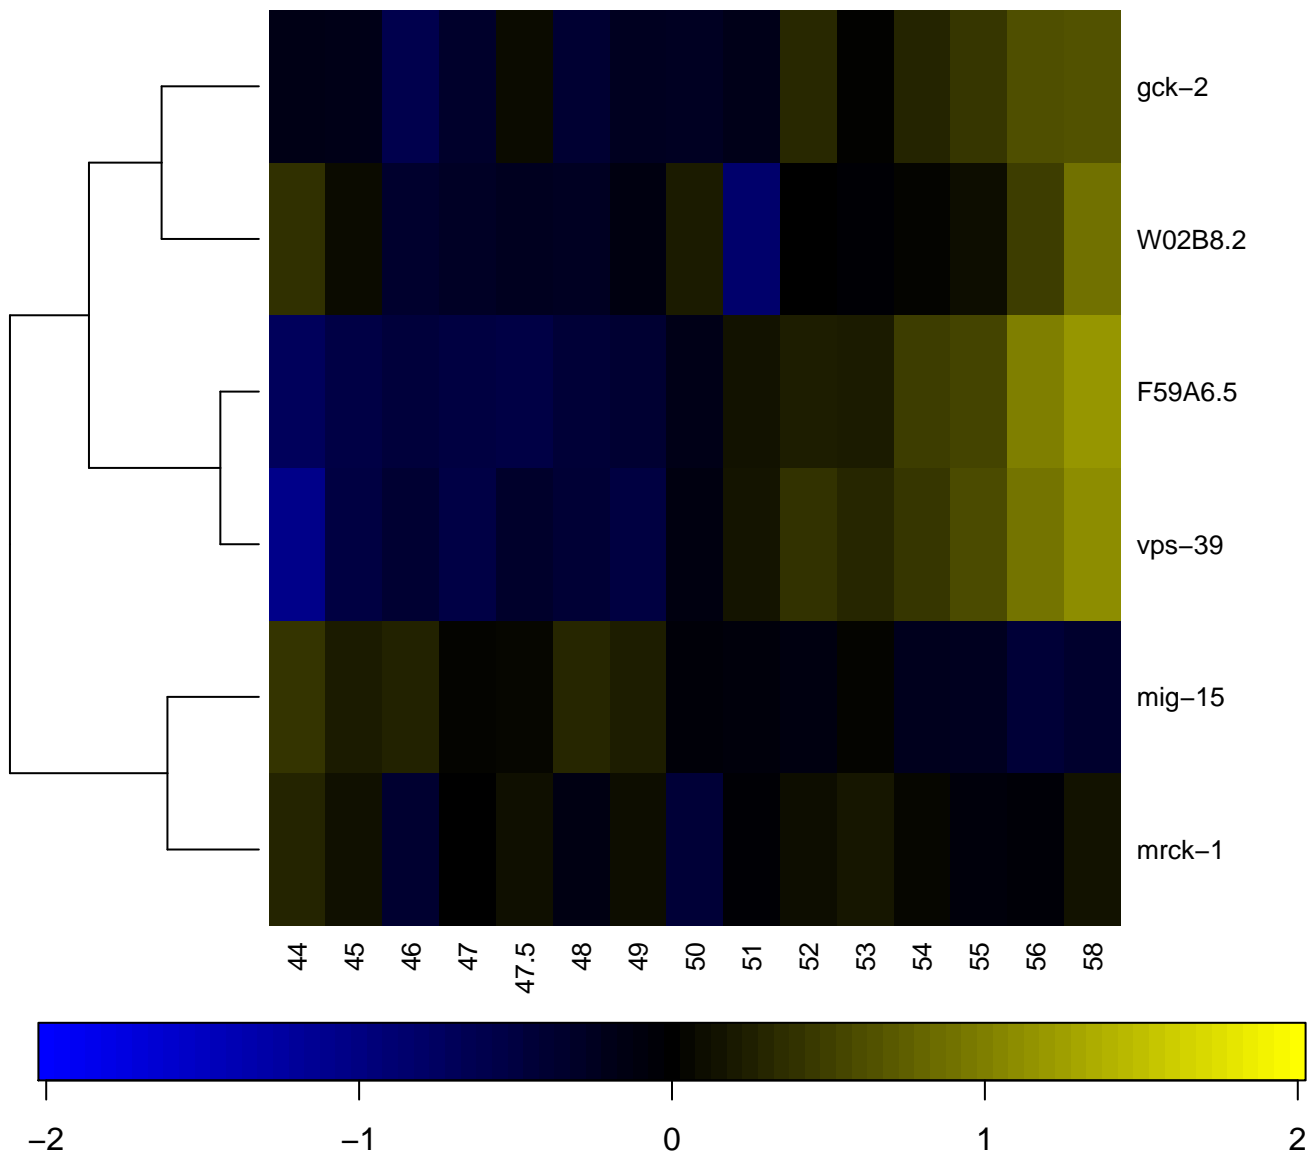

# CoA-ligase

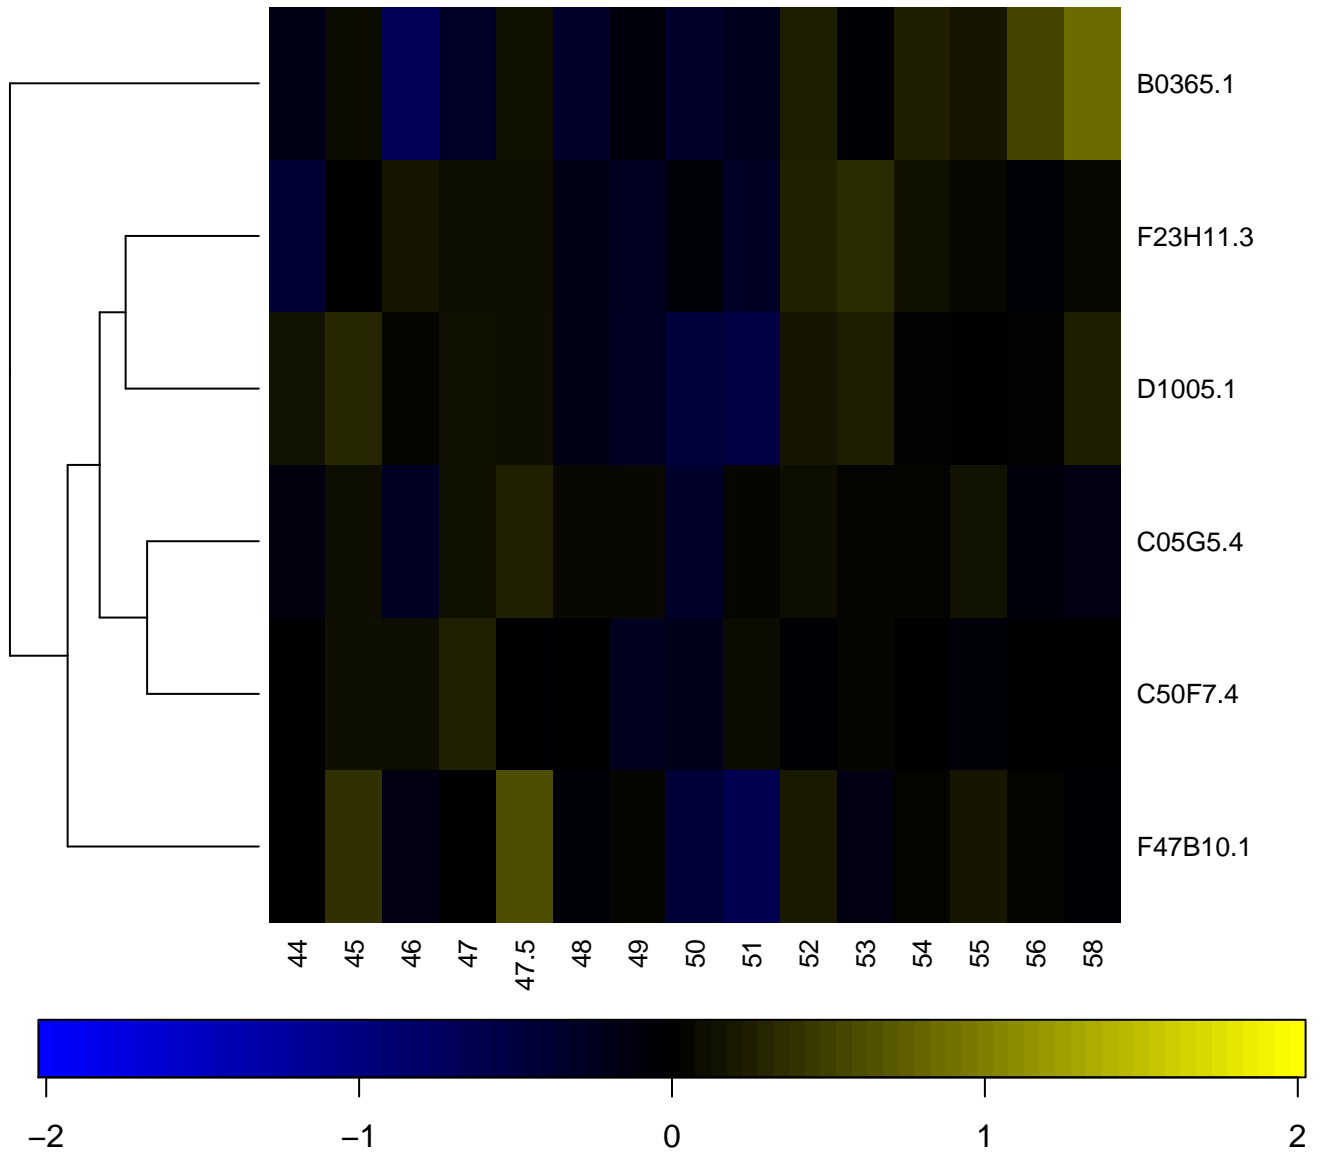

# Coactivator CBP, KIX

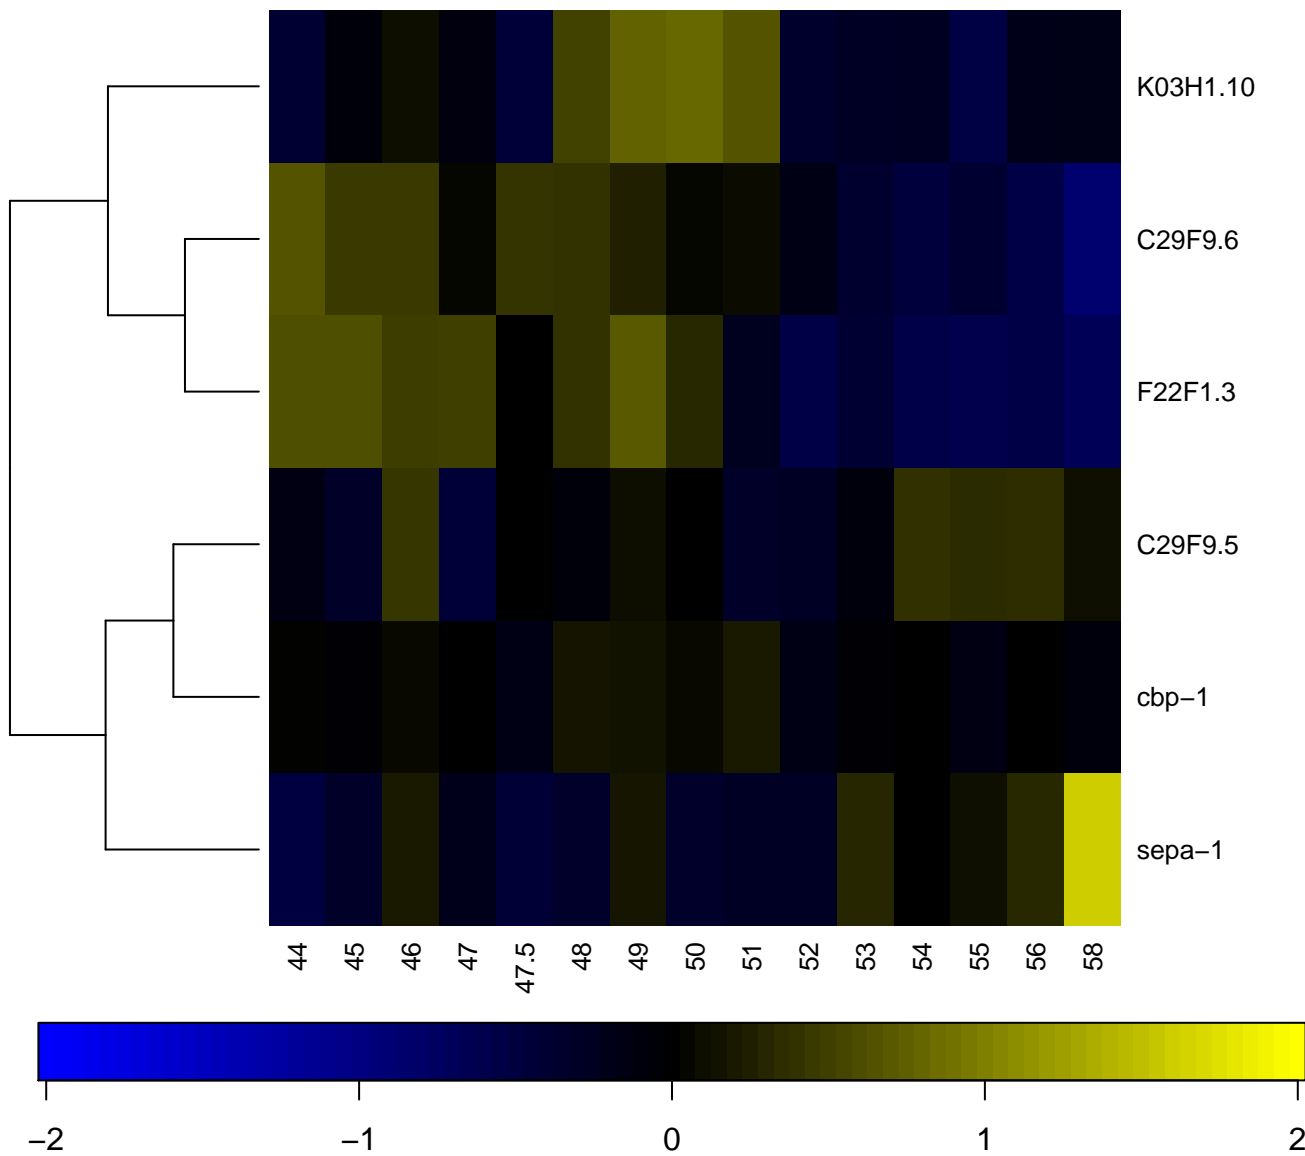

# CobQ/CobB/MinD/ParA nucleotide binding domain

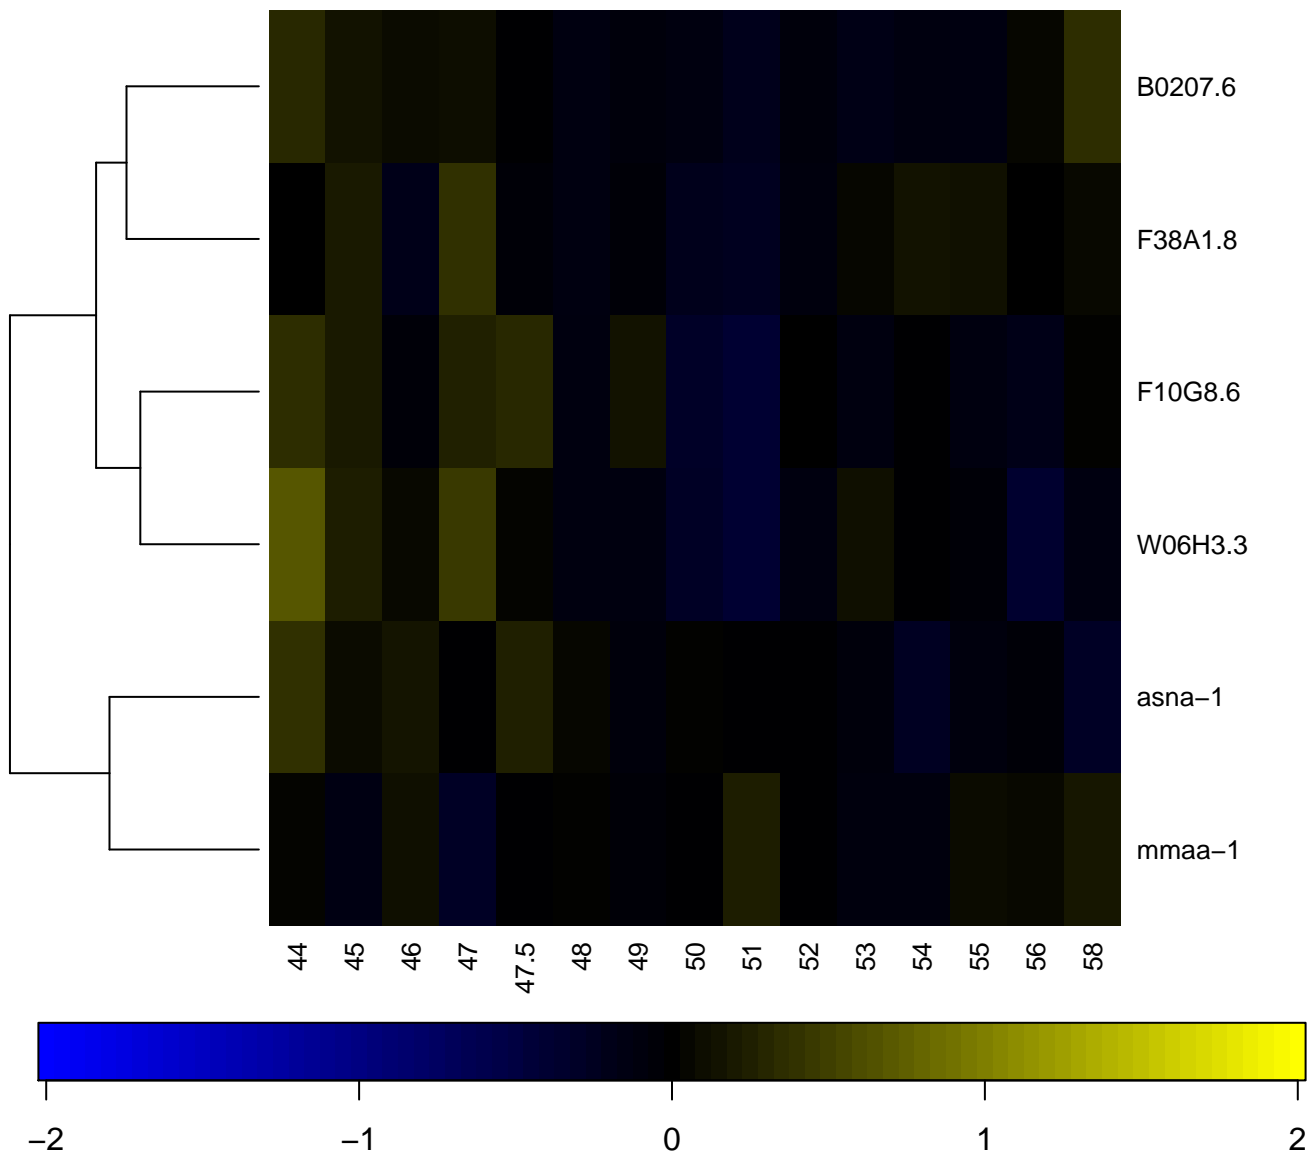





# Cold-shock protein, DNA-binding

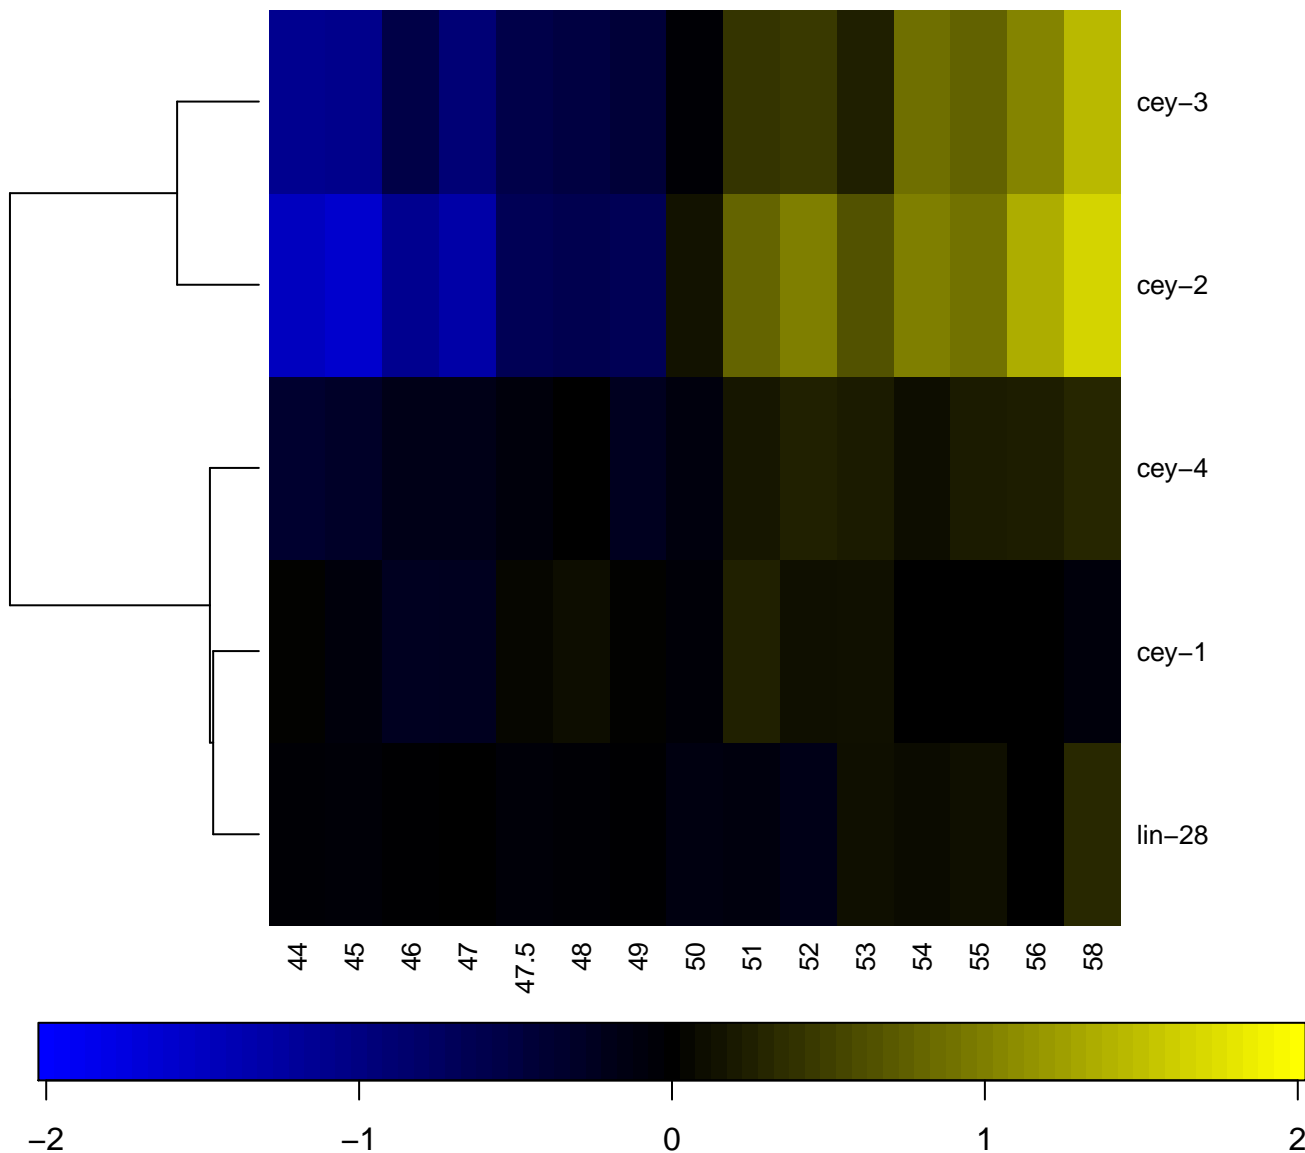

# Cold shock protein

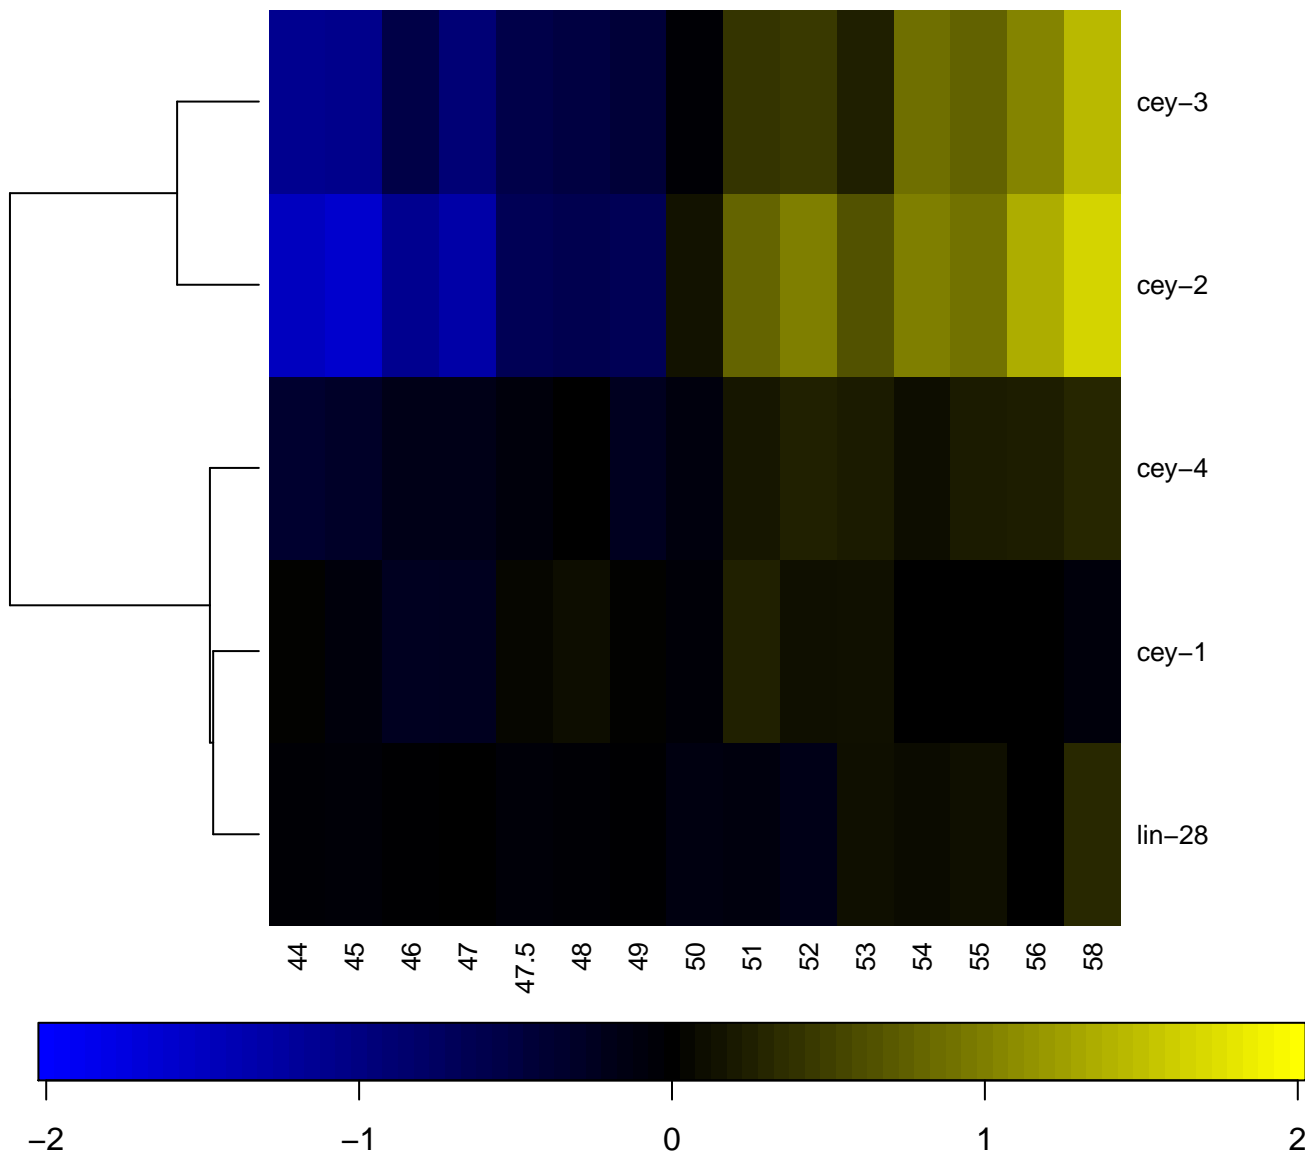







# Complement control module

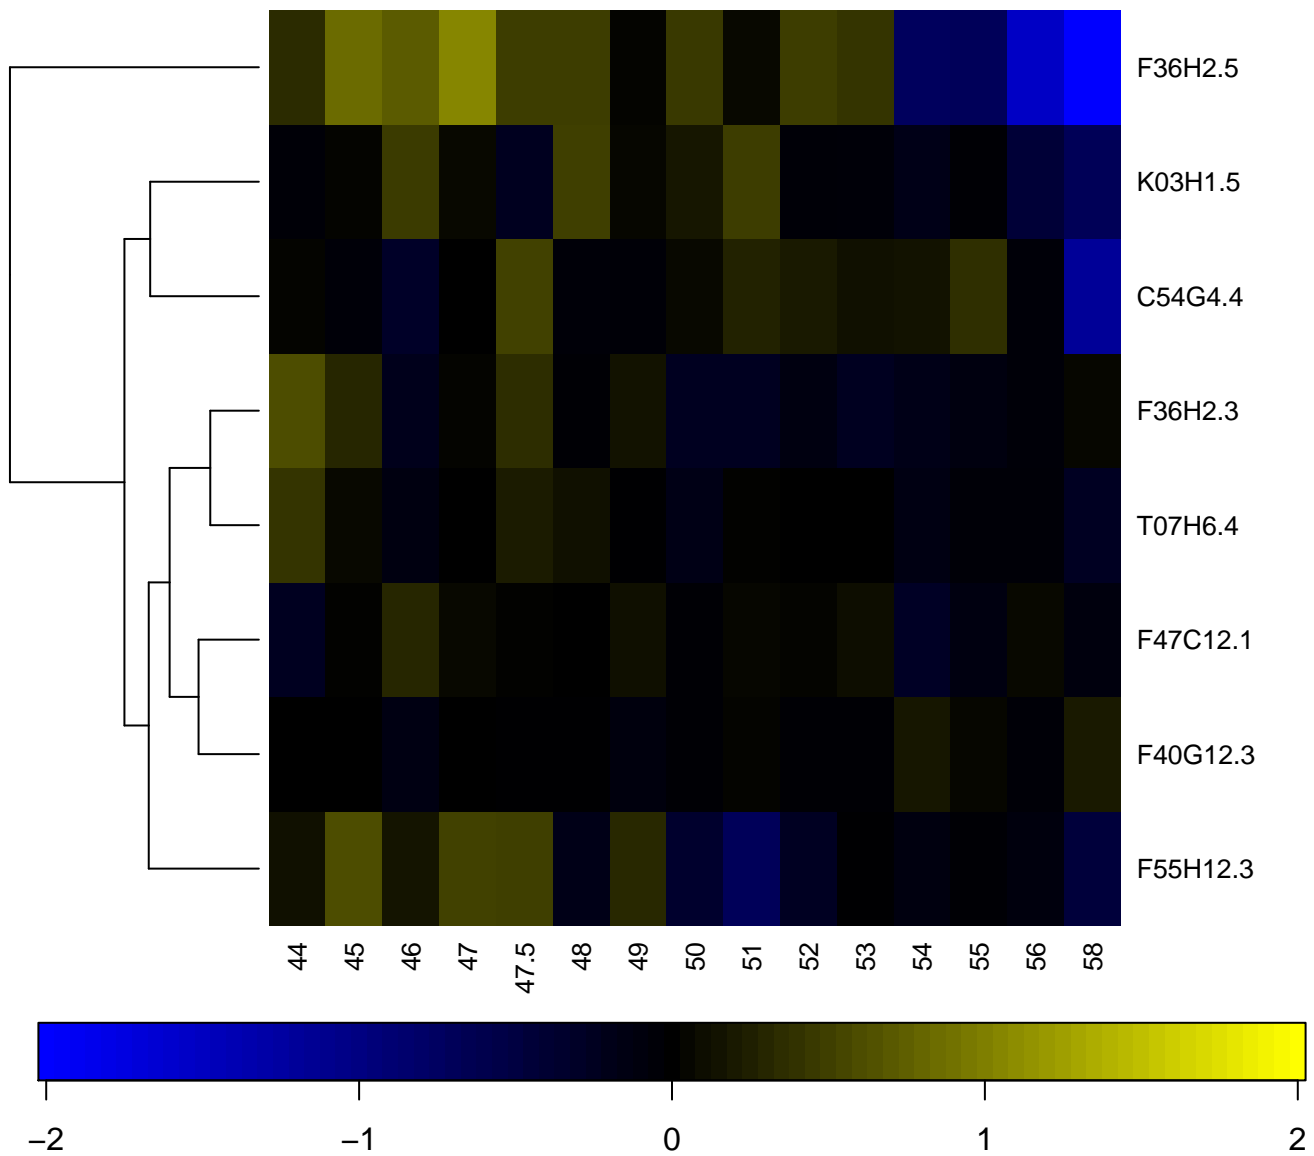

# Concanavalin A-like lectin/glucanase, subgroup

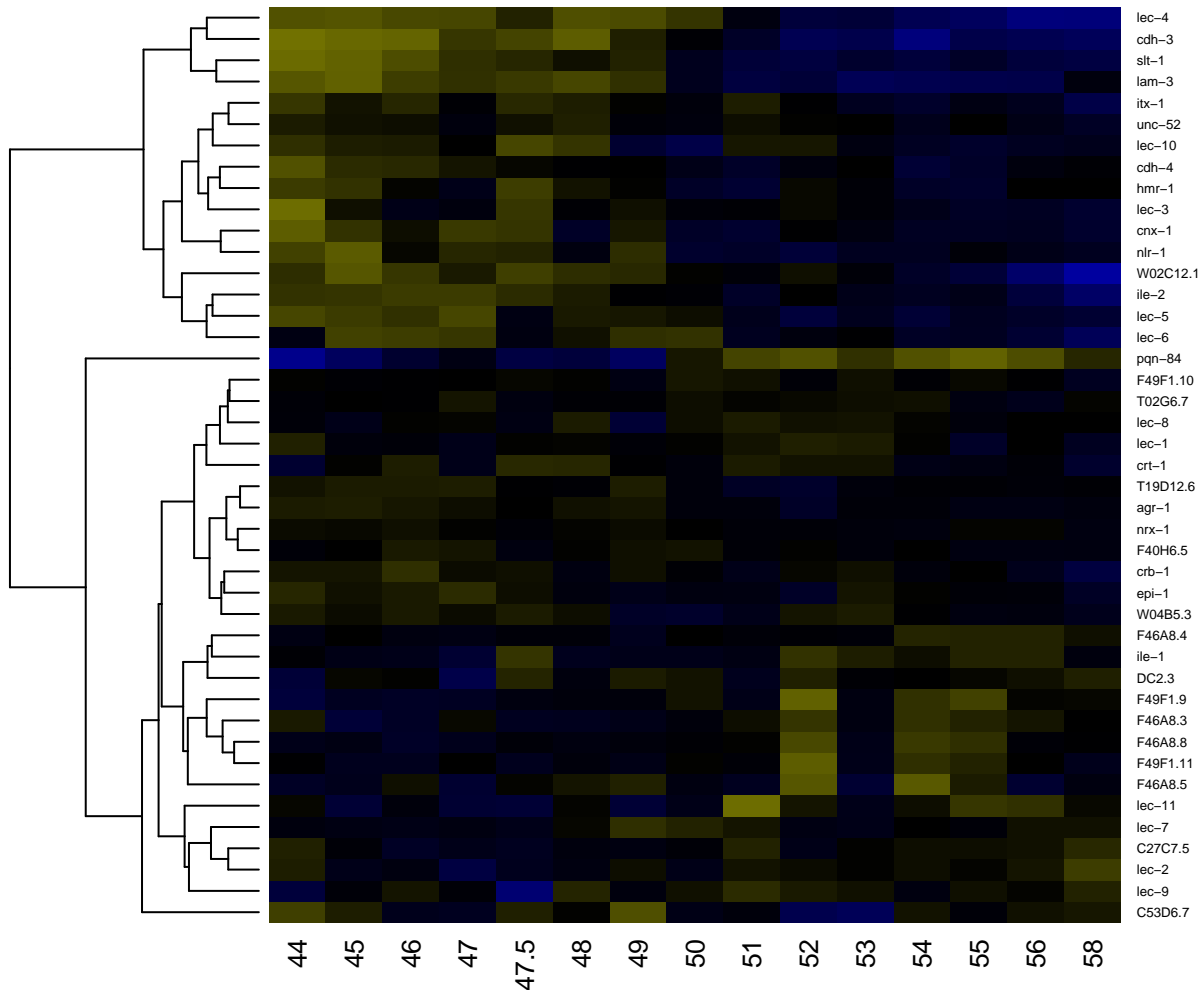



# Conserved hypothetical protein CHP02464

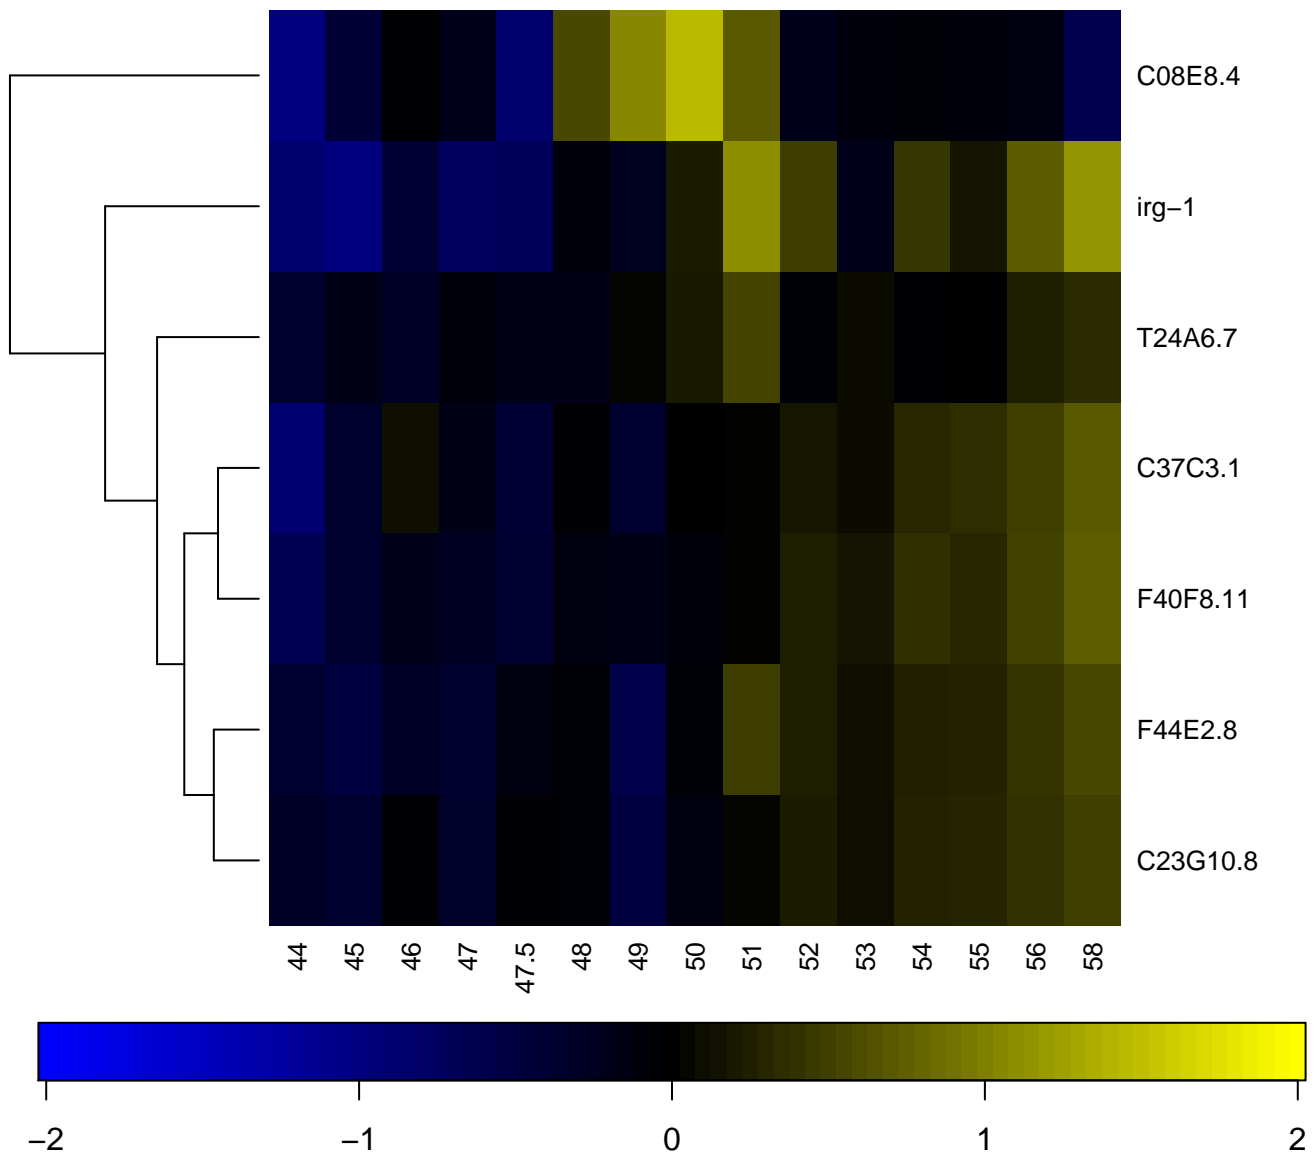

# Copine

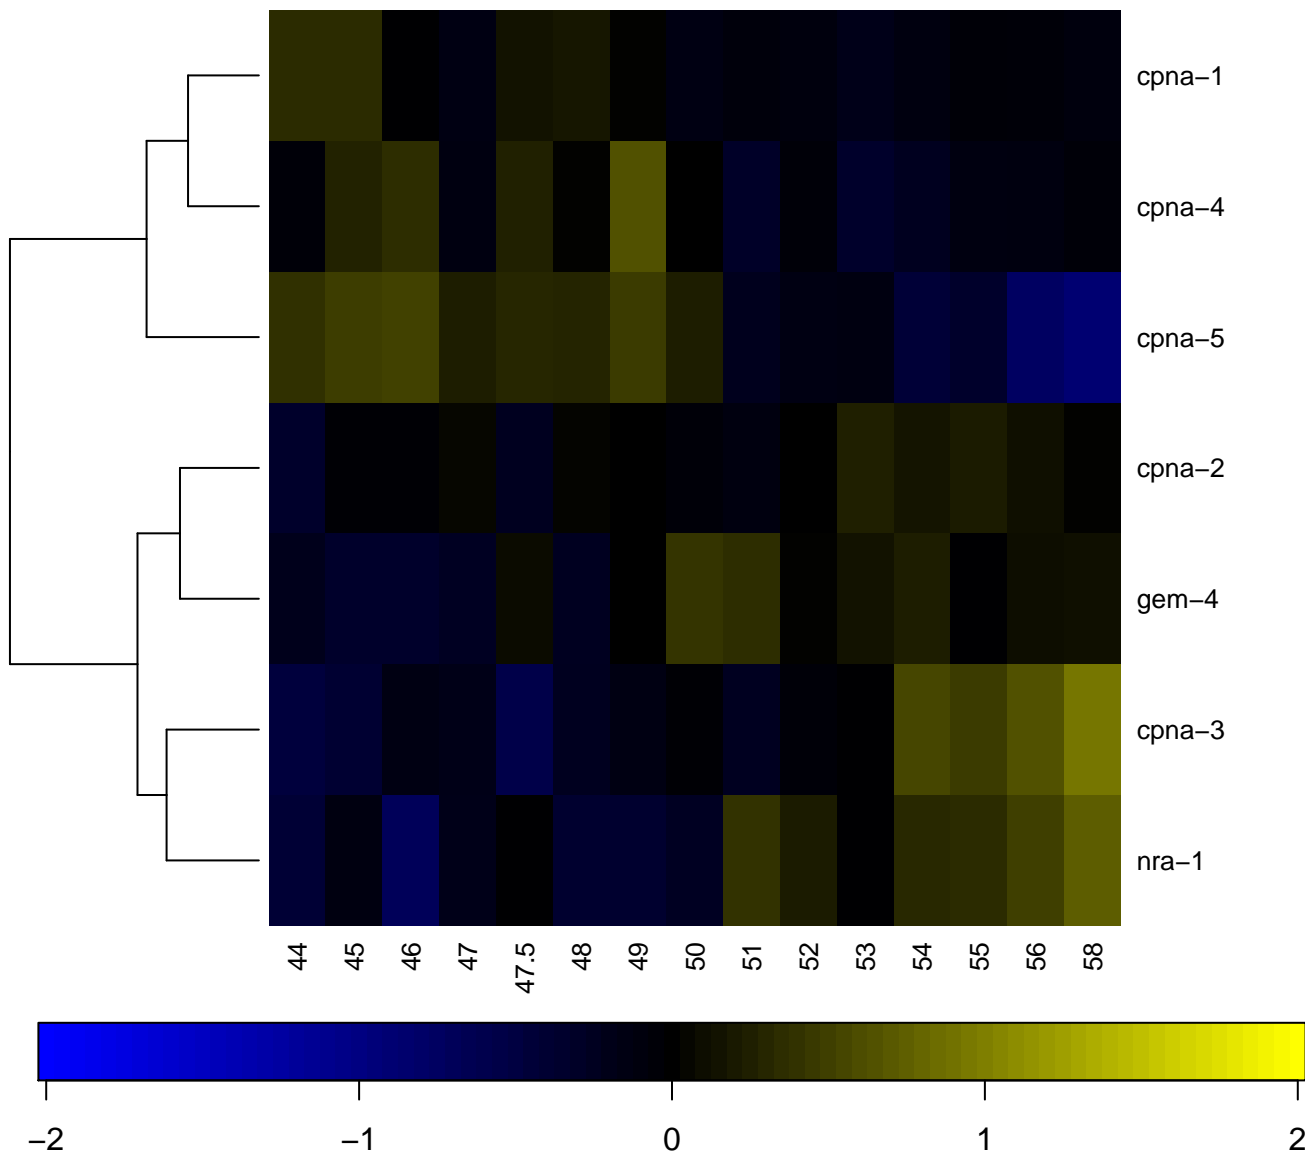



# Core-2/I-Branching enzyme

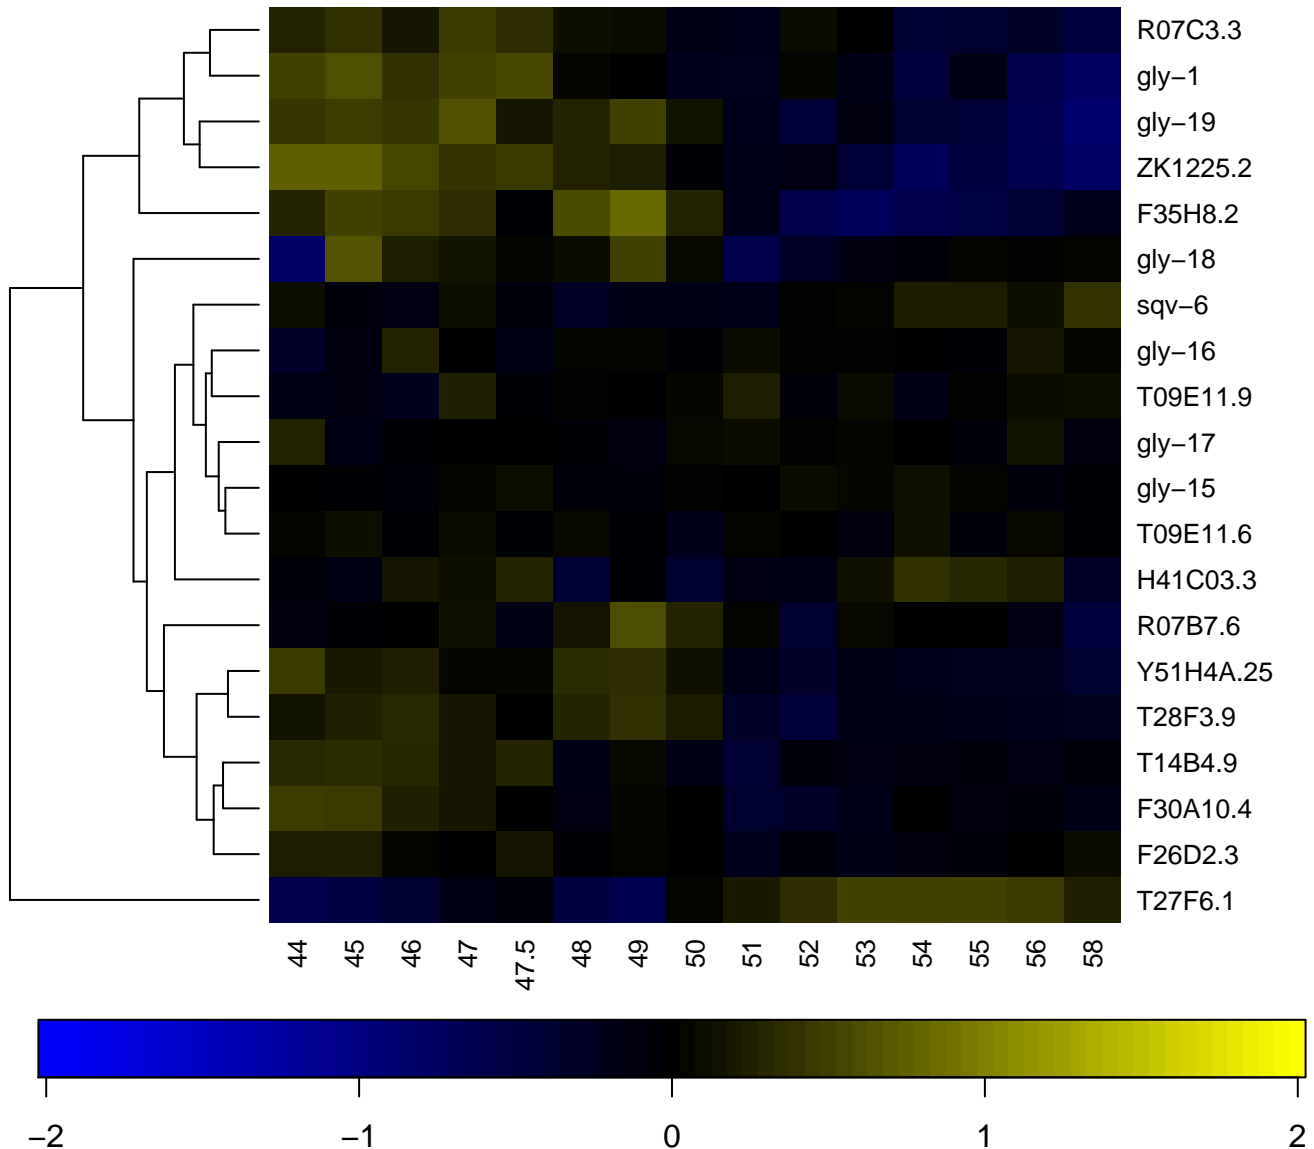

# Core histone H2A/H2B/H3/H4

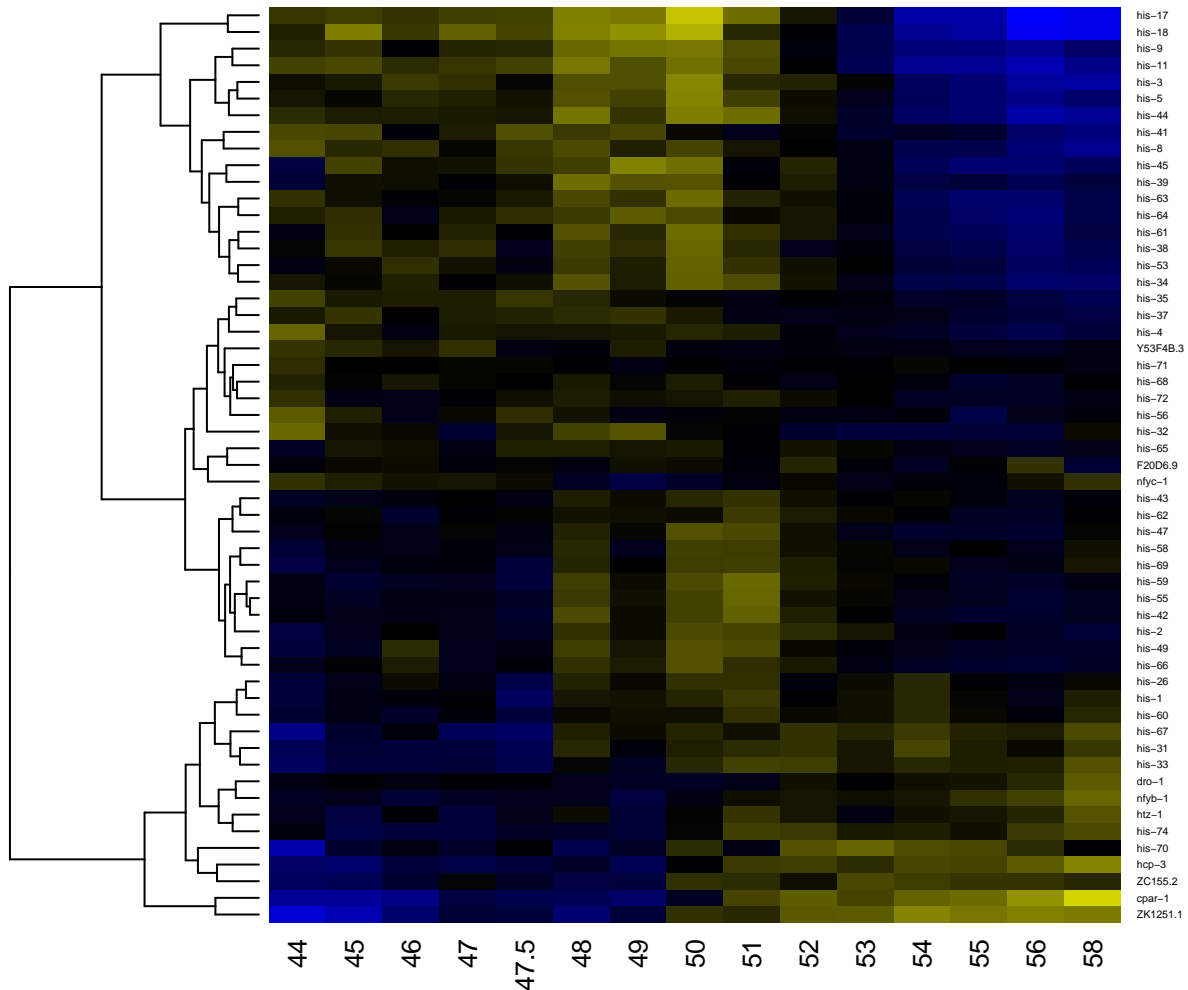





# Crotonase, core

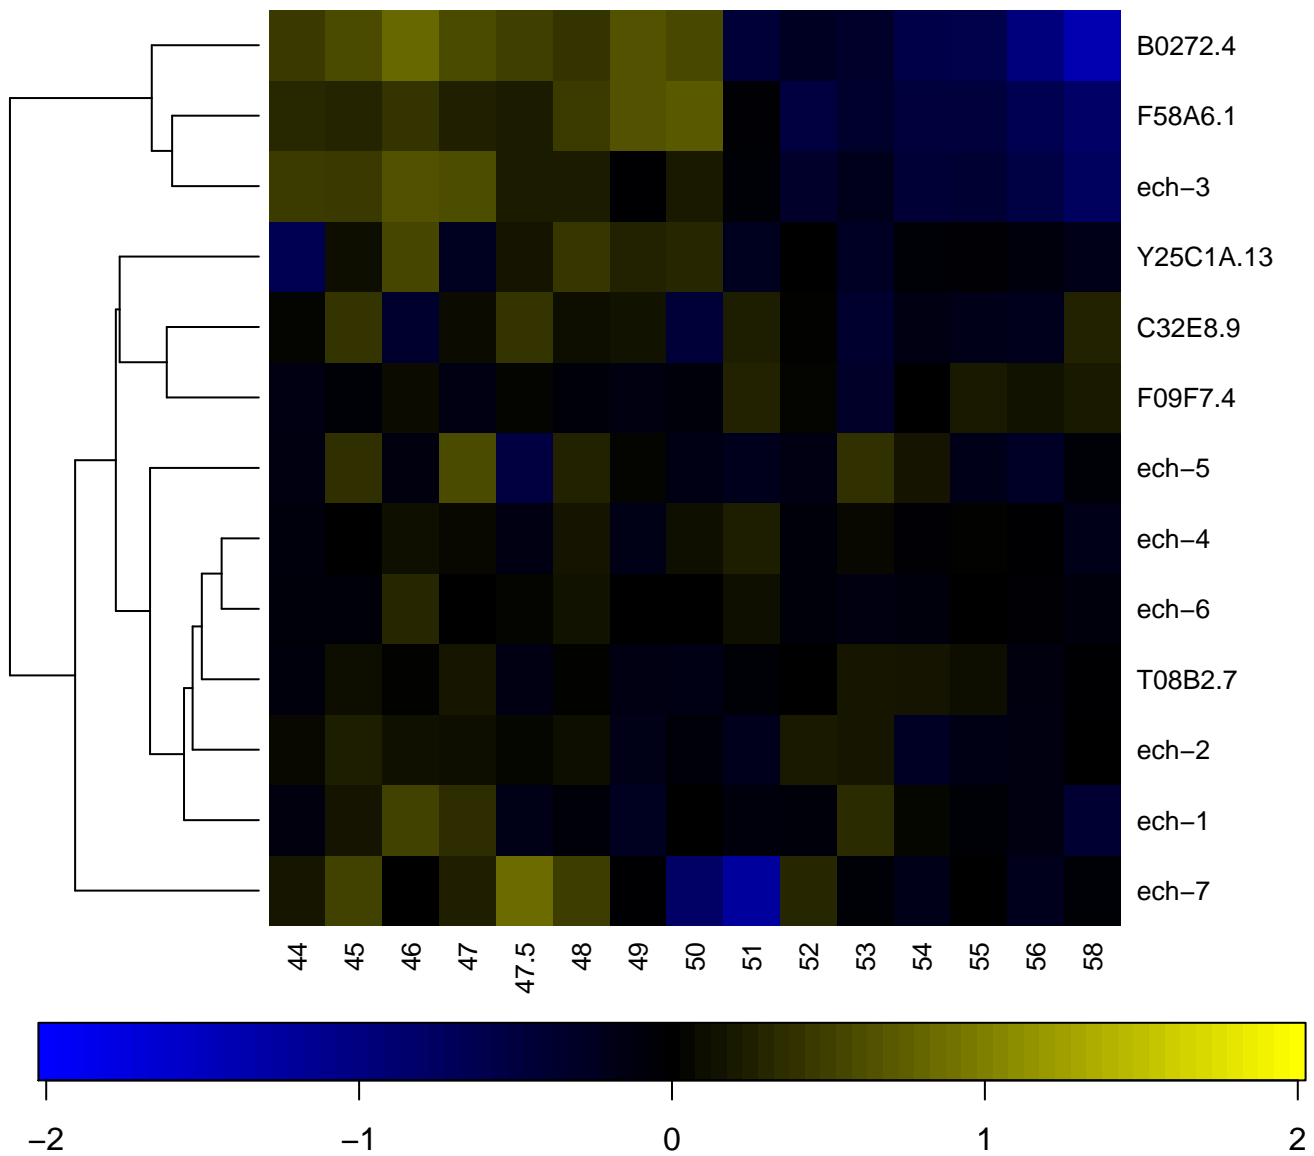





# CTLH, C-terminal LisH motif

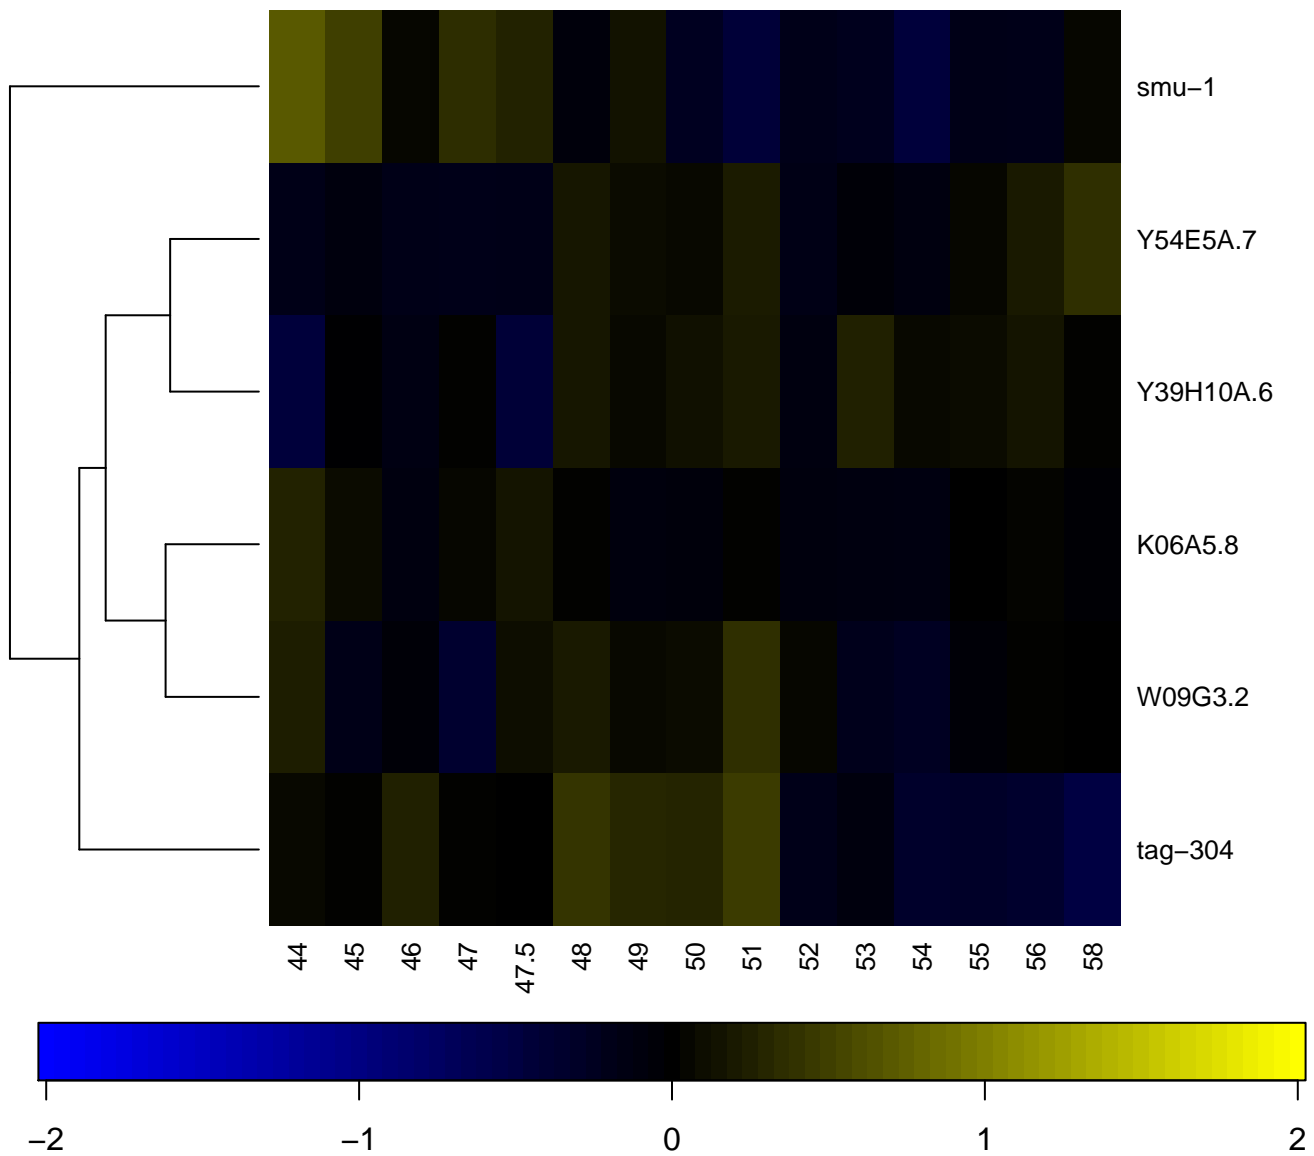



# Ctr copper transporter family

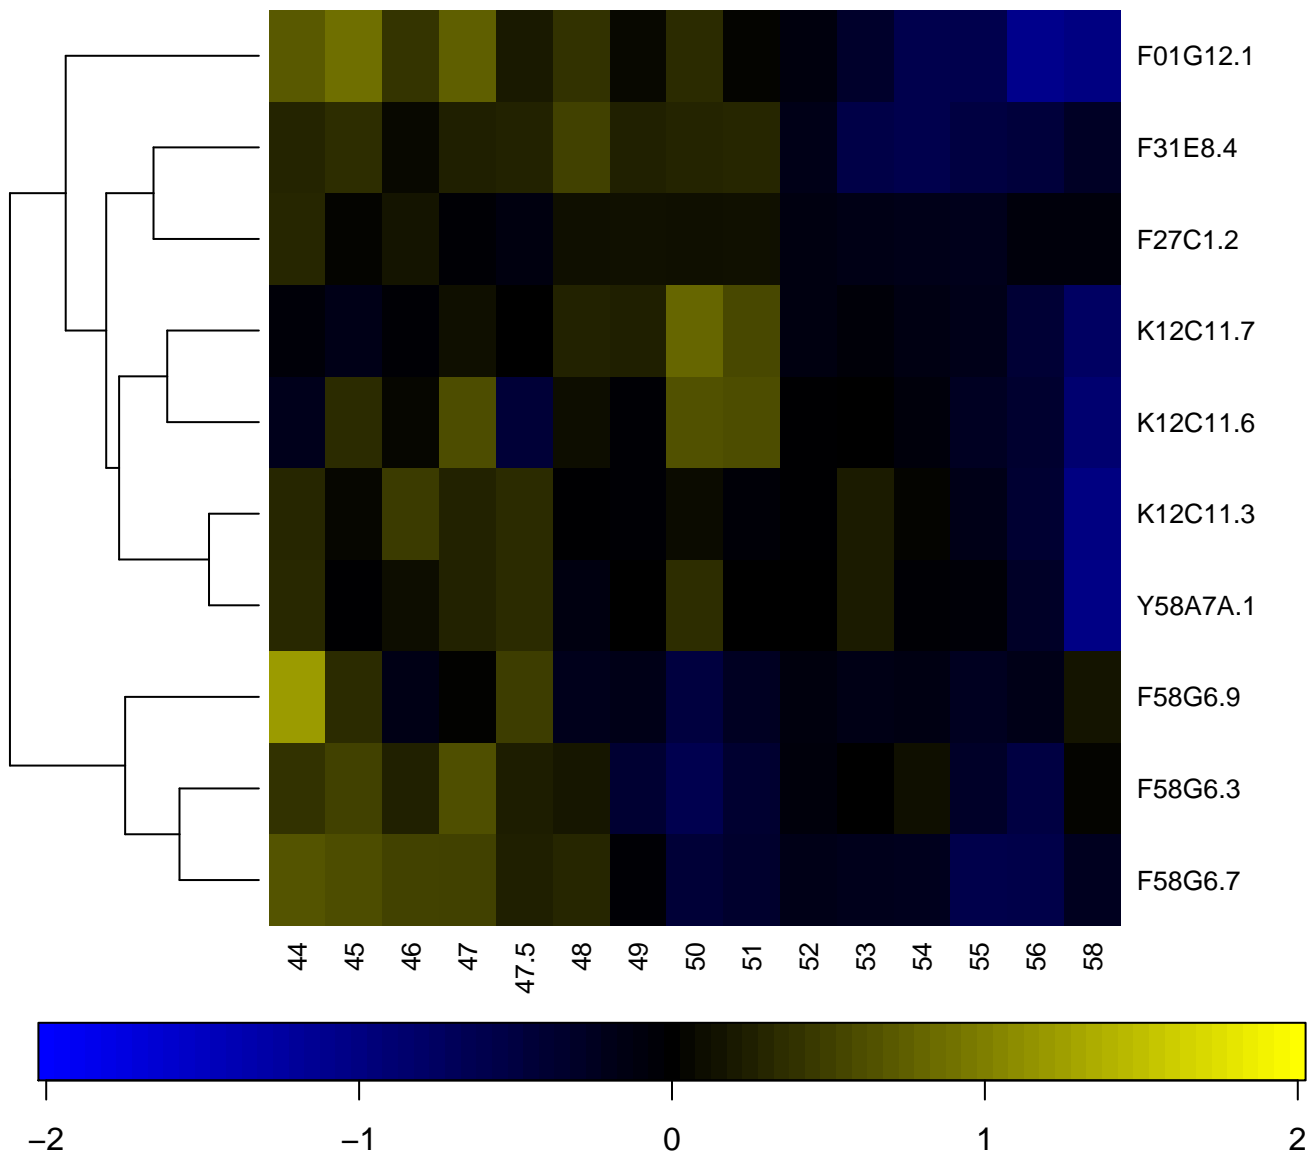

# CUB

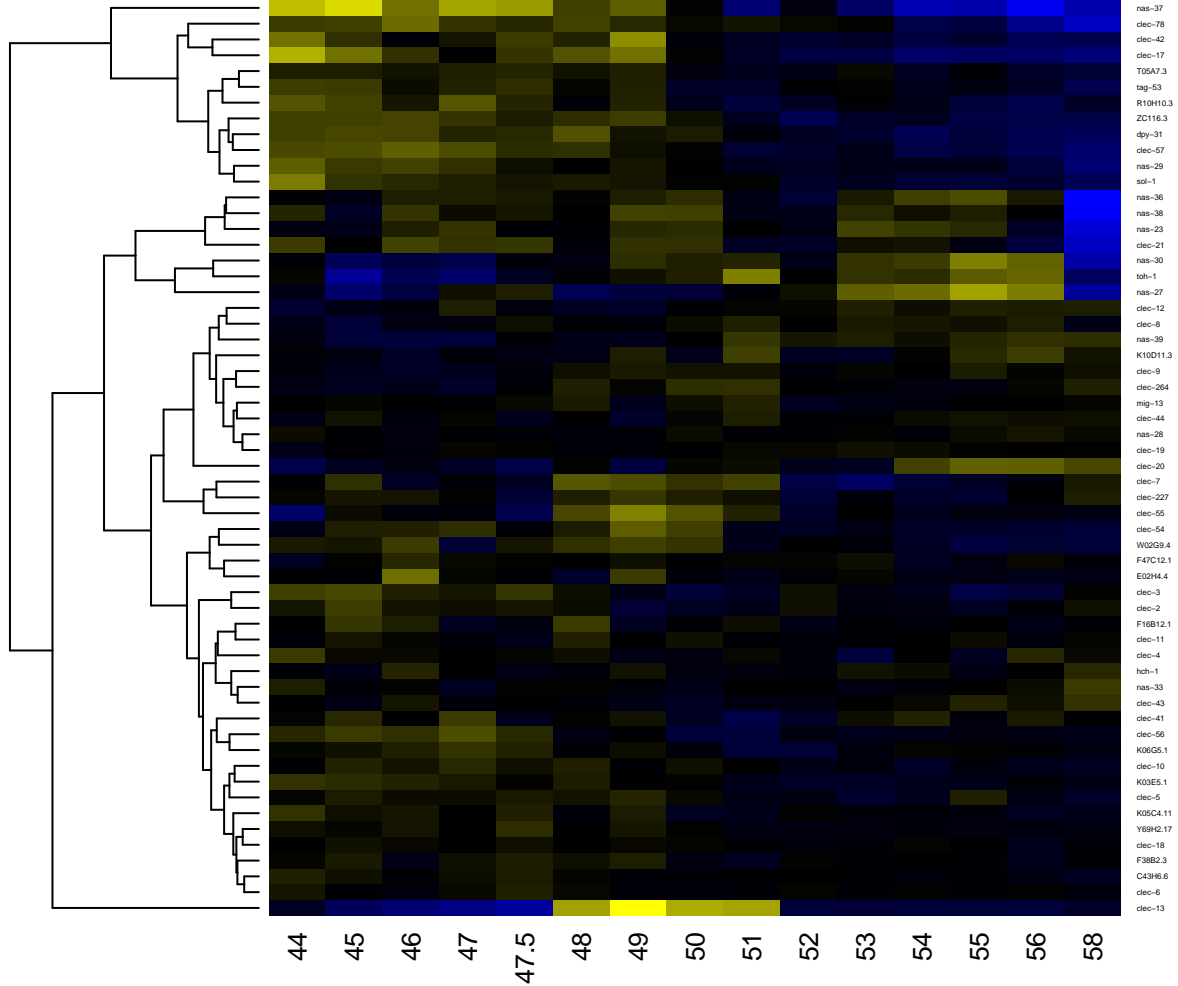

# CUB-like domain

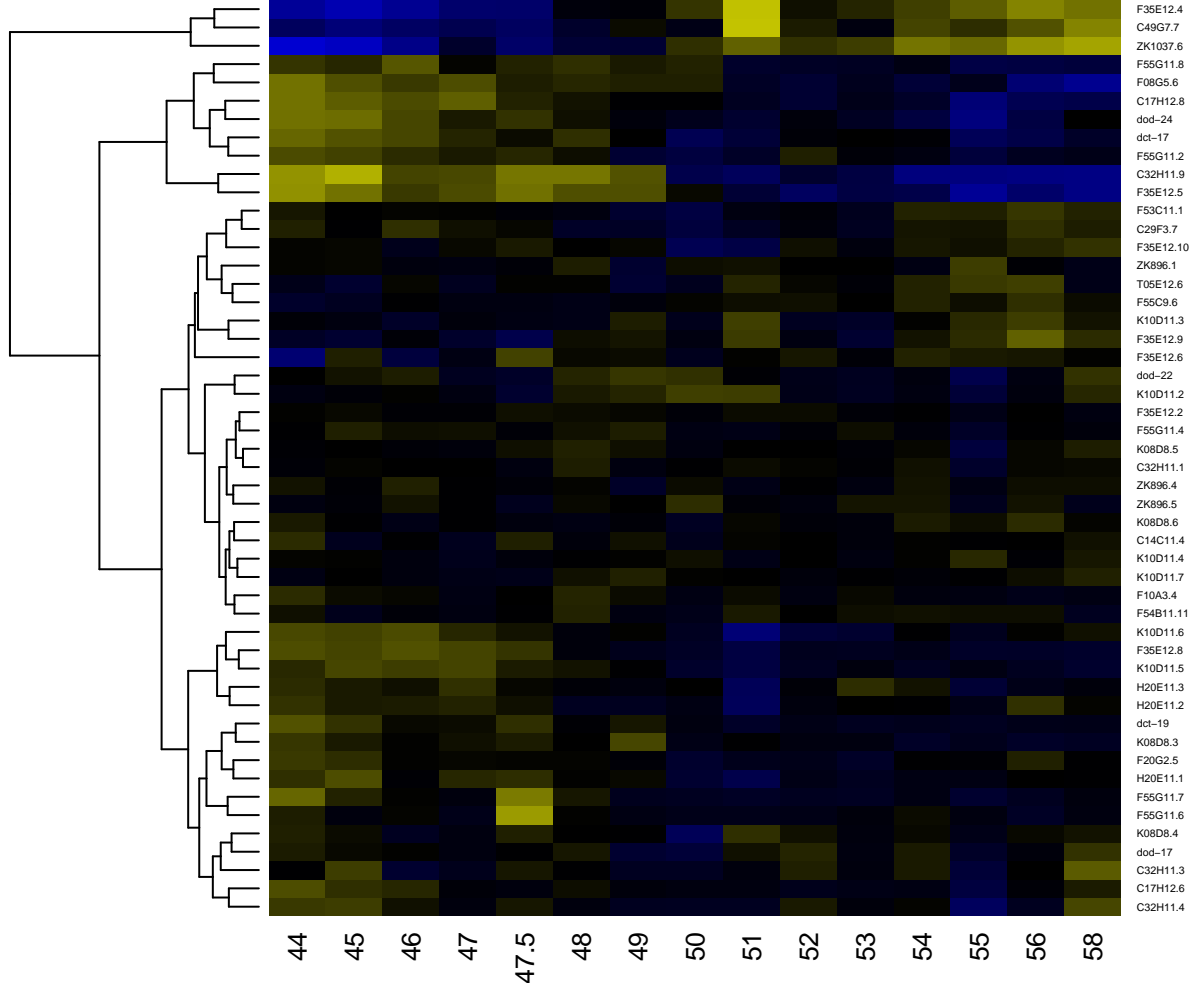

# CUB domain

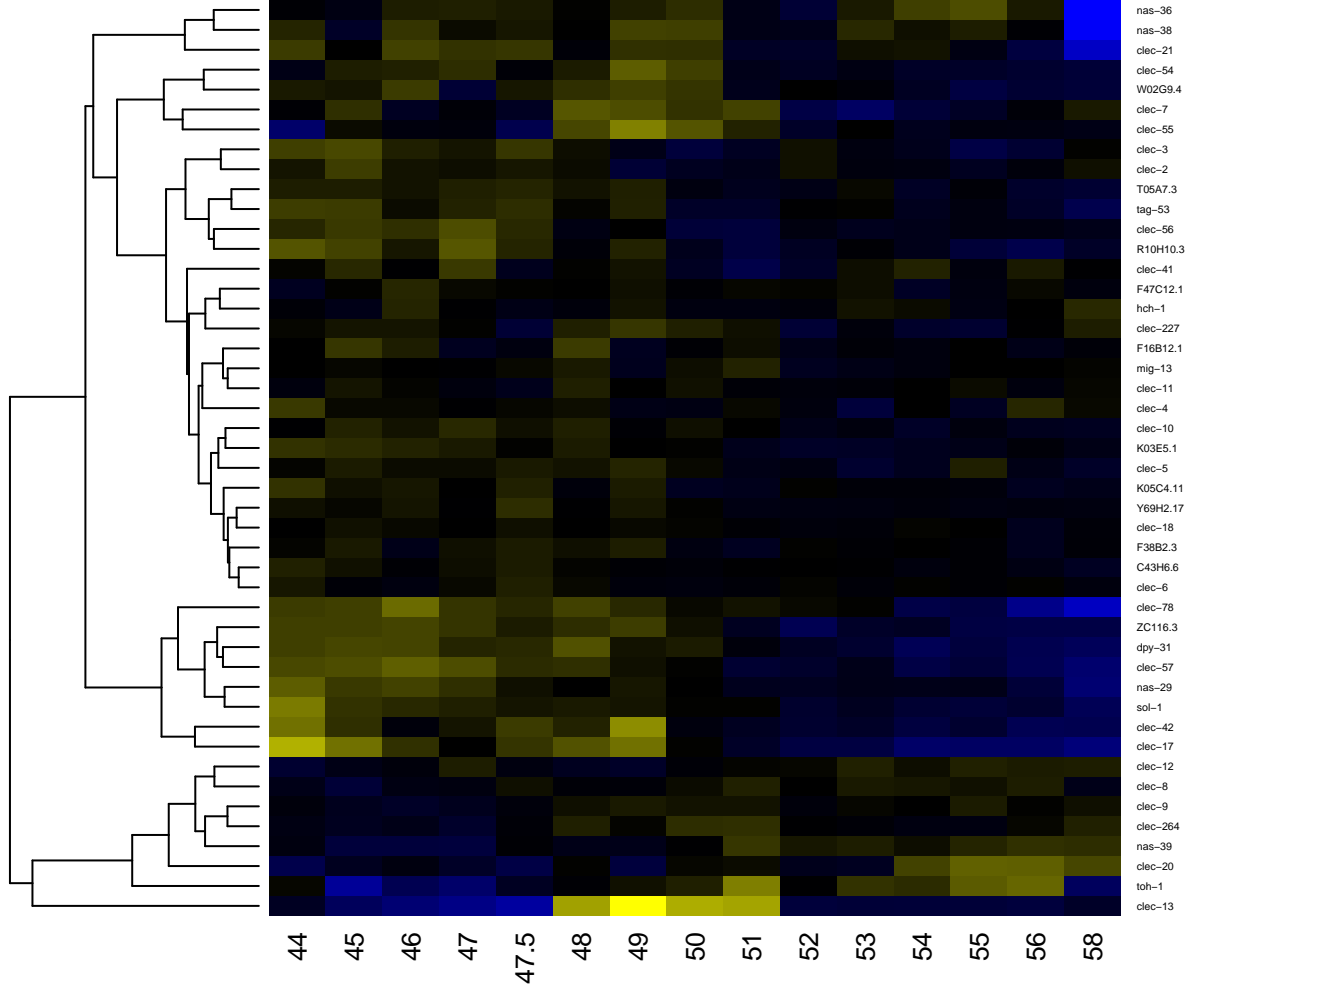















# Cupredoxin

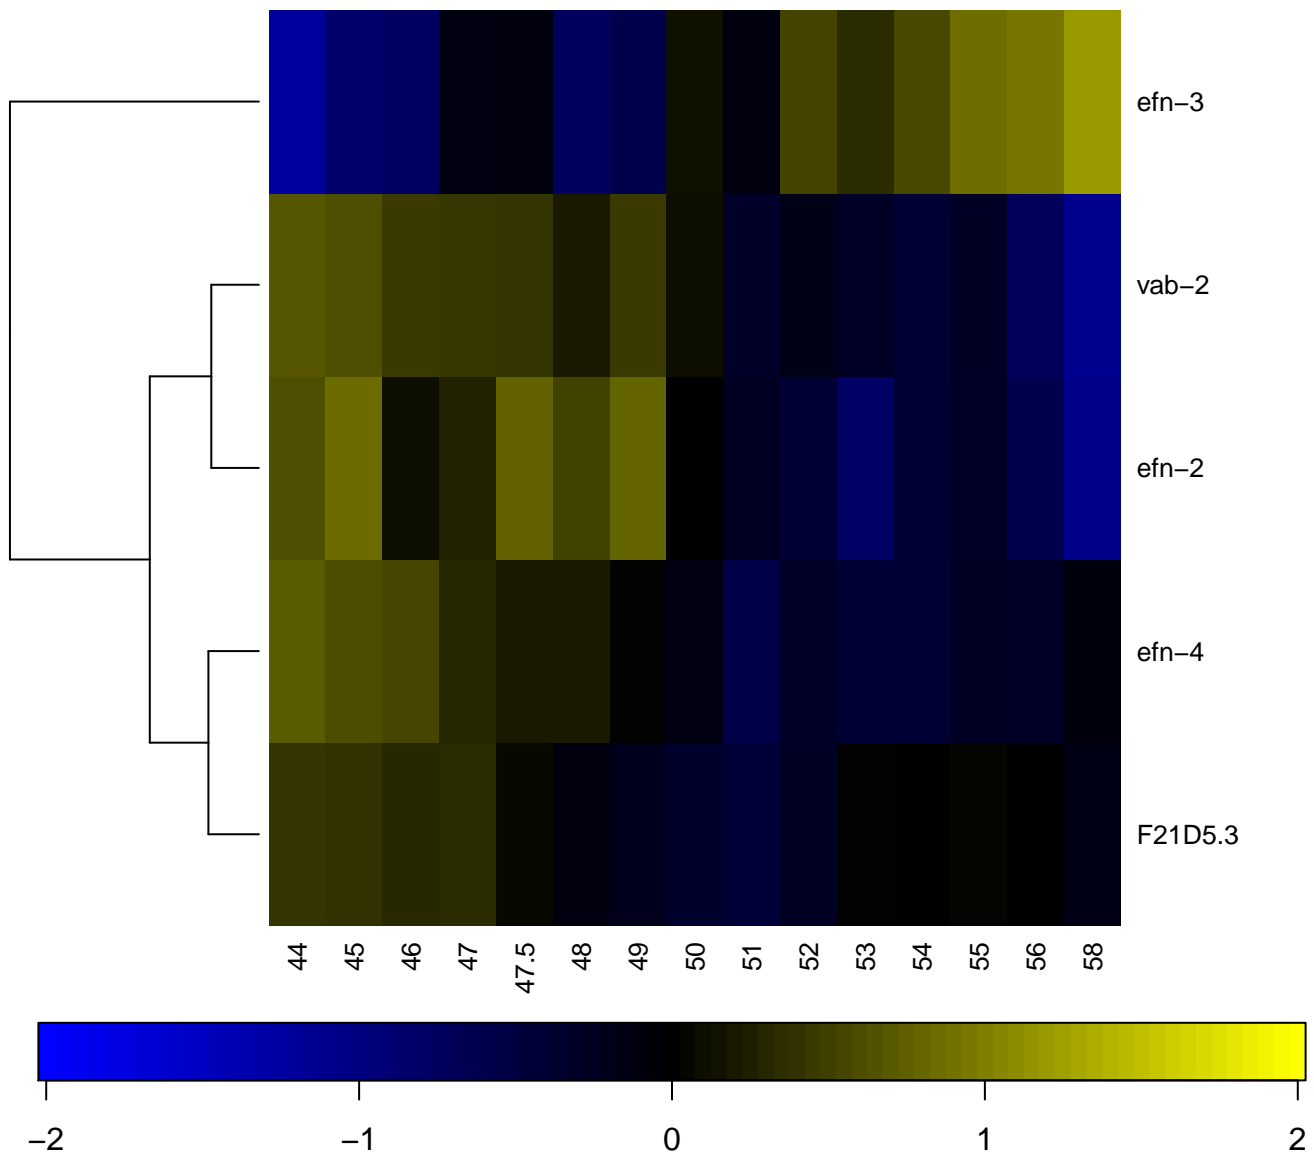

# CUT domain

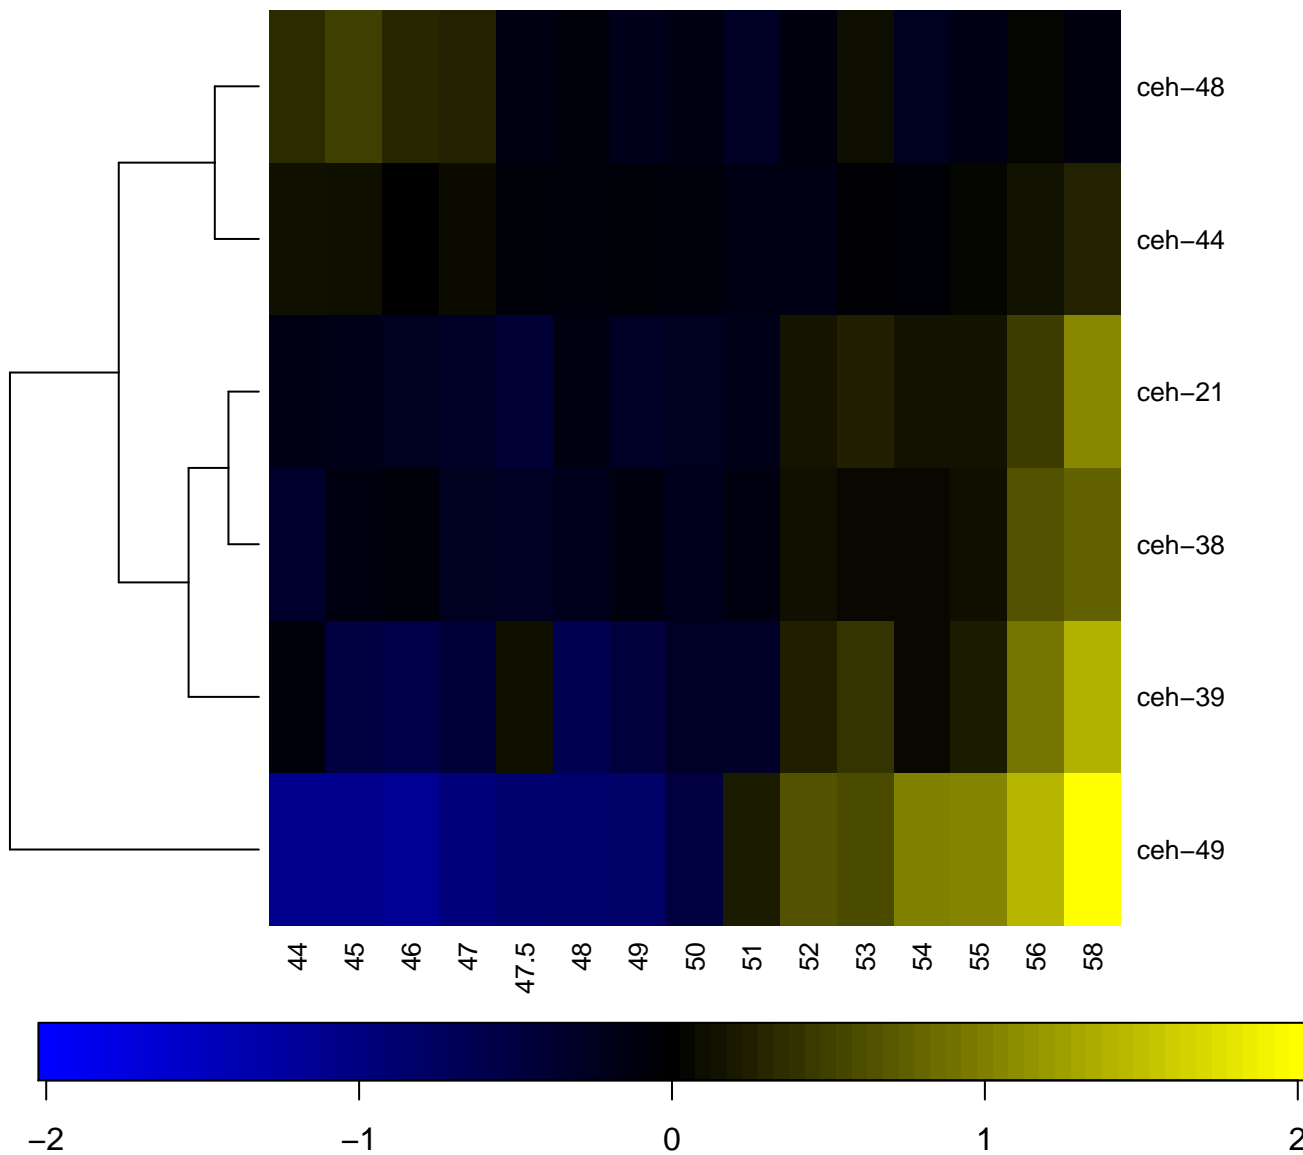

# CX module

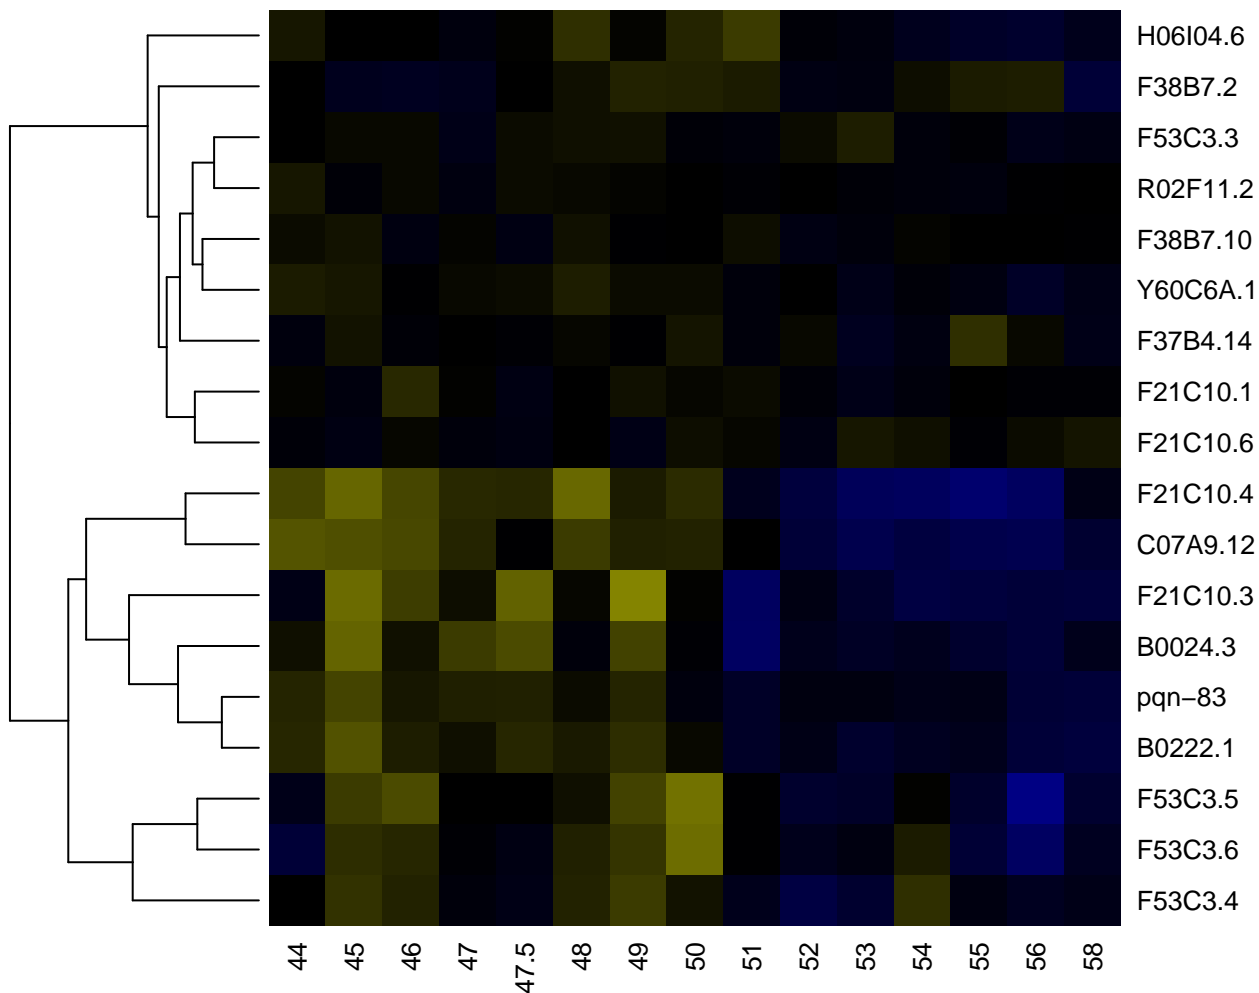











# Cyclin-related

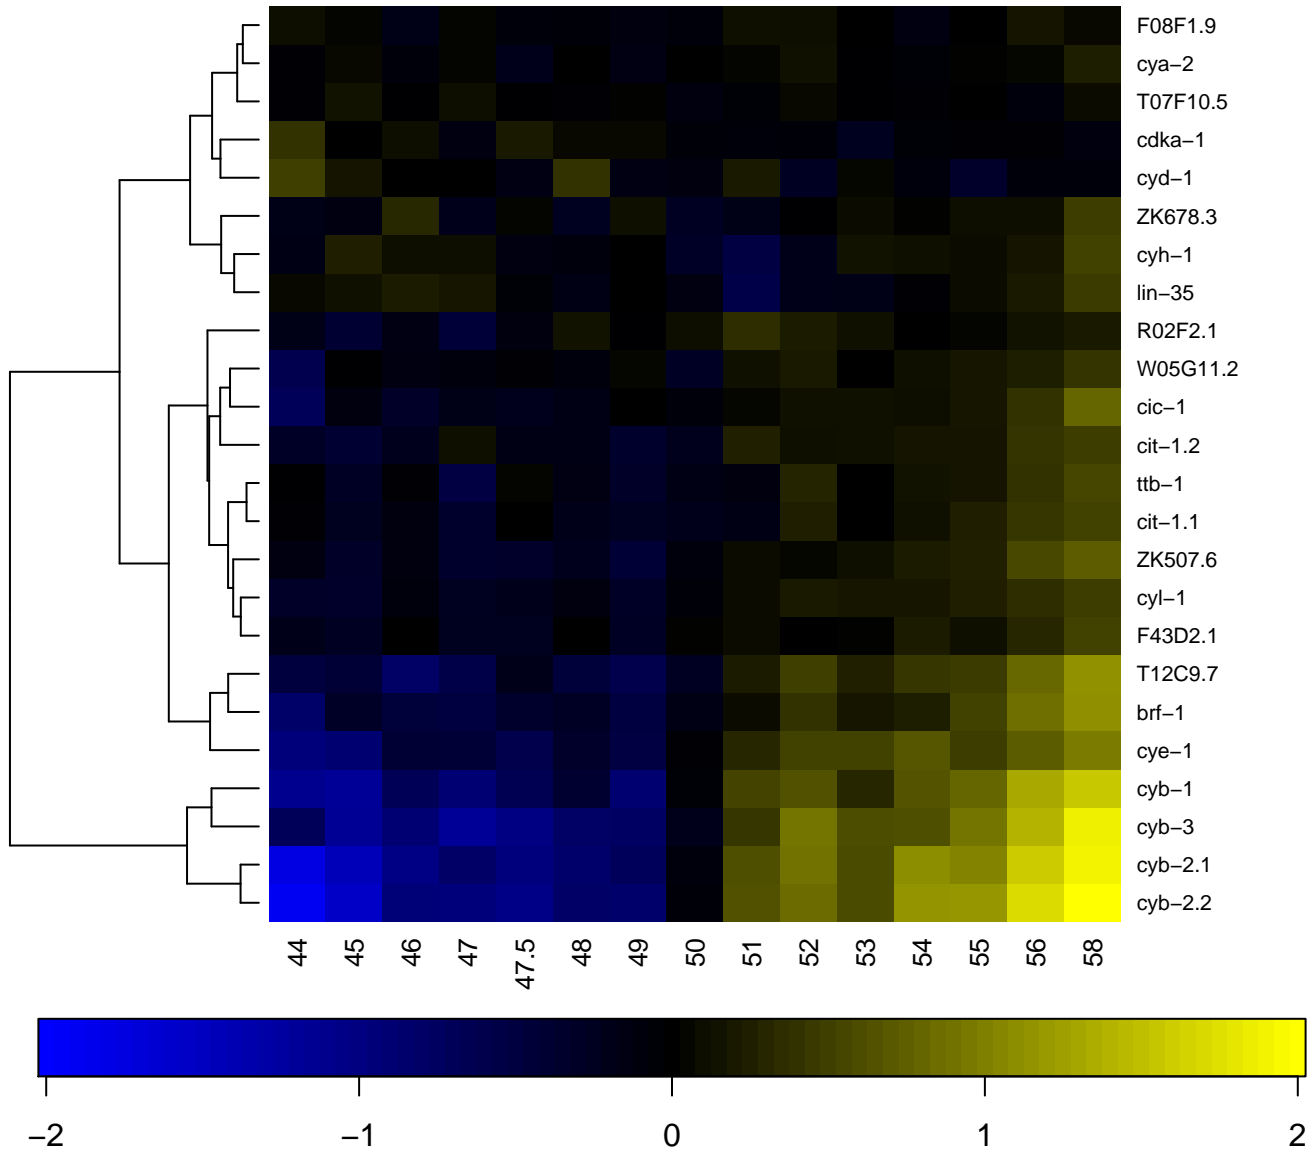

# Cyclin, C-terminal

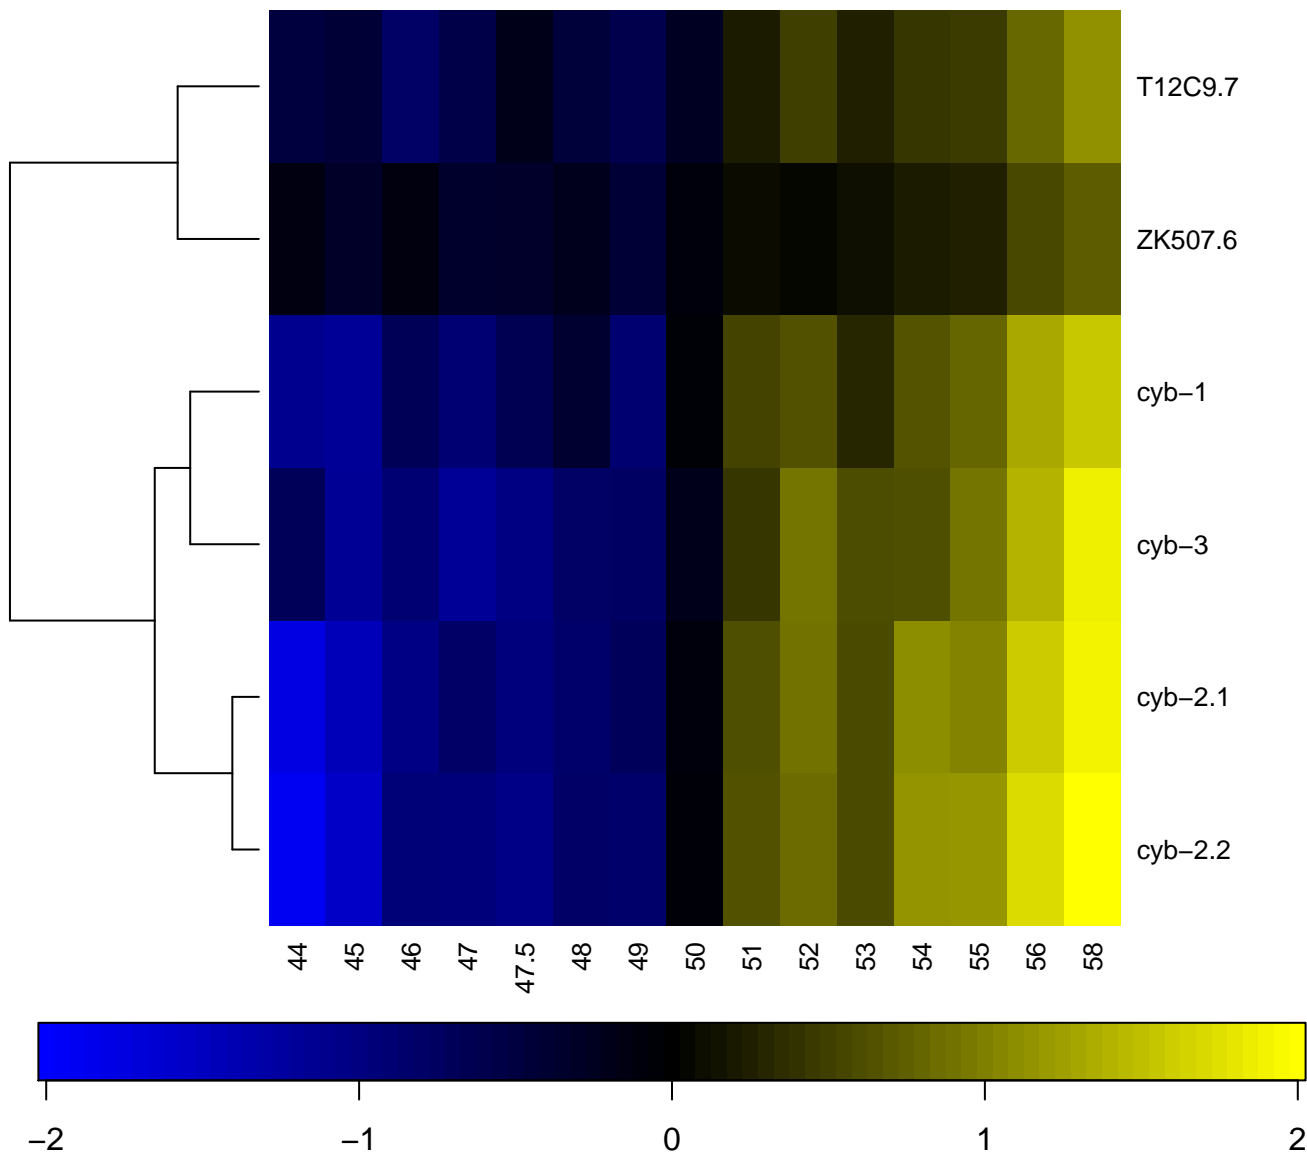



# Cyclin, N-terminal

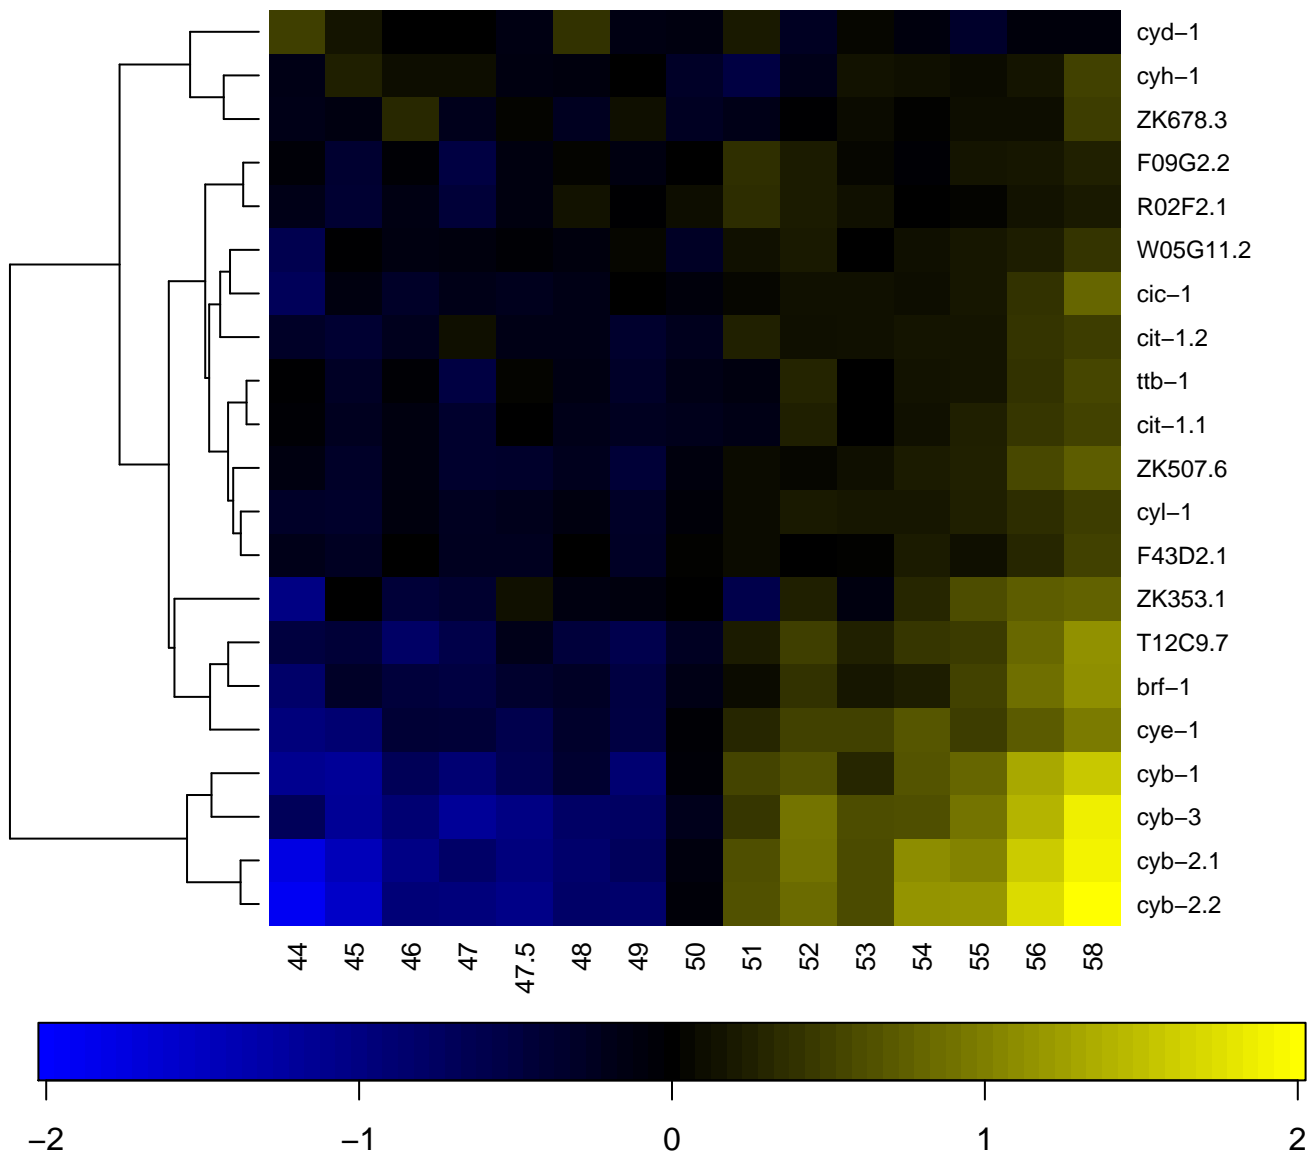





# Cyclophilin type peptidyl–prolyl cis–trans isomerase/CLD

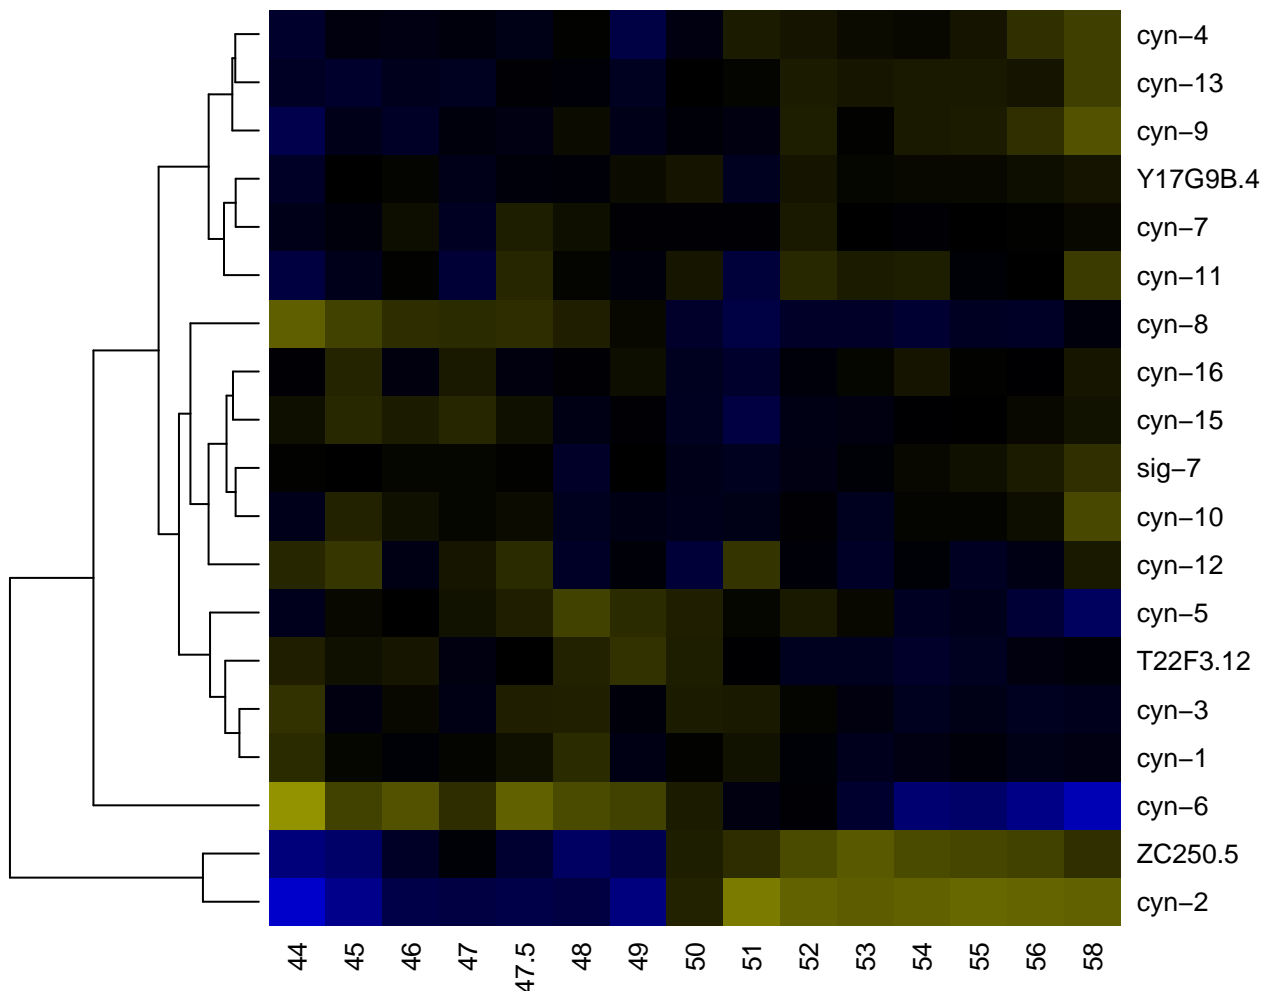



# Cyclopropane-fatty-acyl-phospholipid/mycolic acid synthase

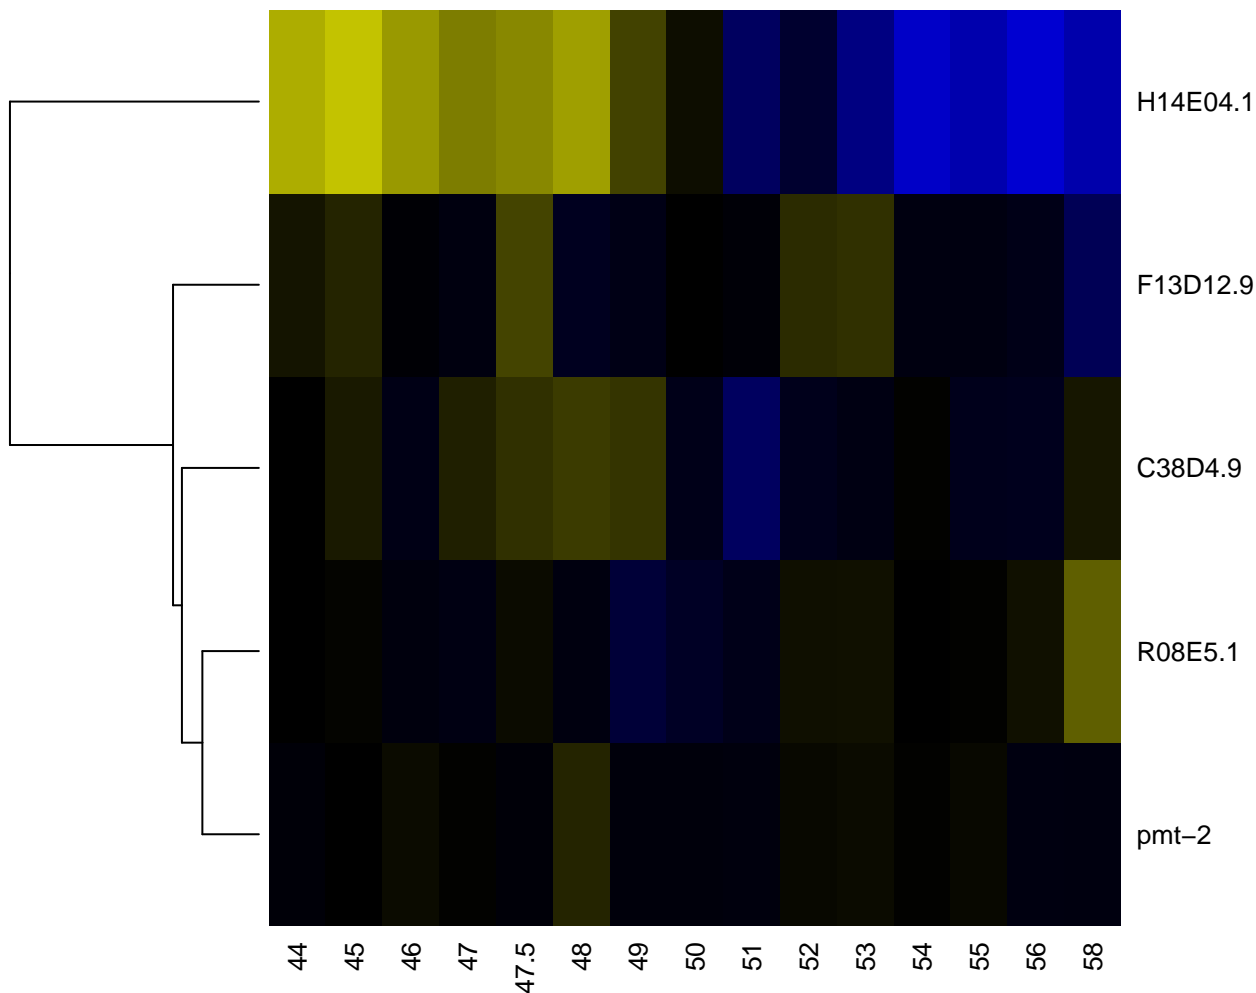

# Cys/Met metabolism PLP-dependent enzyme

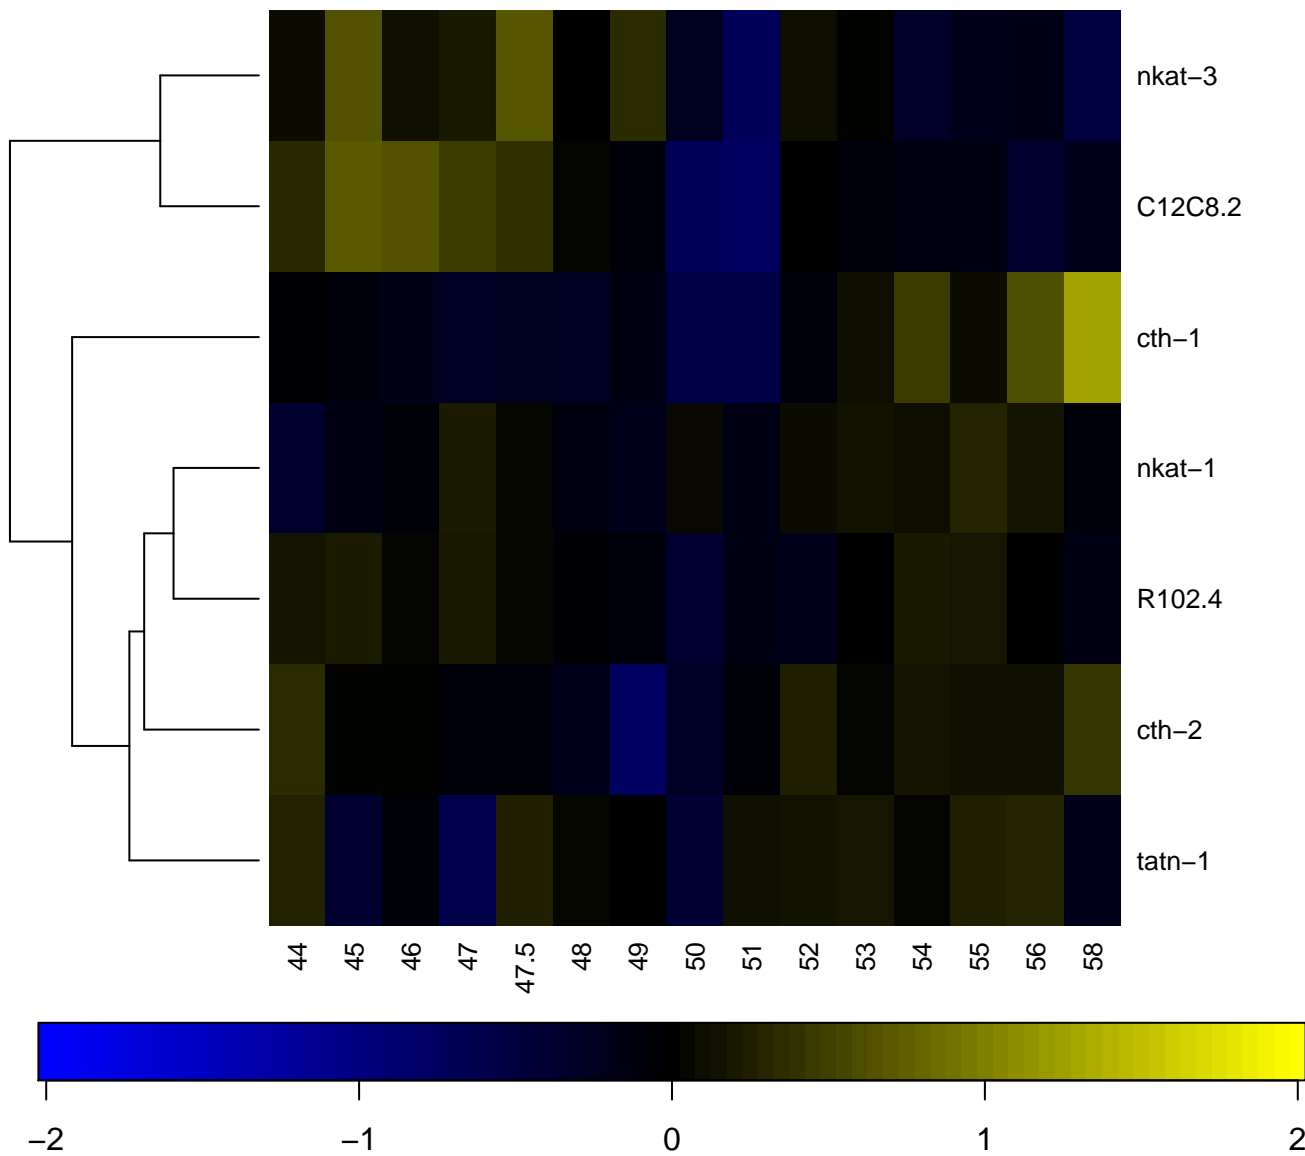

# Cys/Met metabolism, pyridoxal phosphate–dependent enzyme

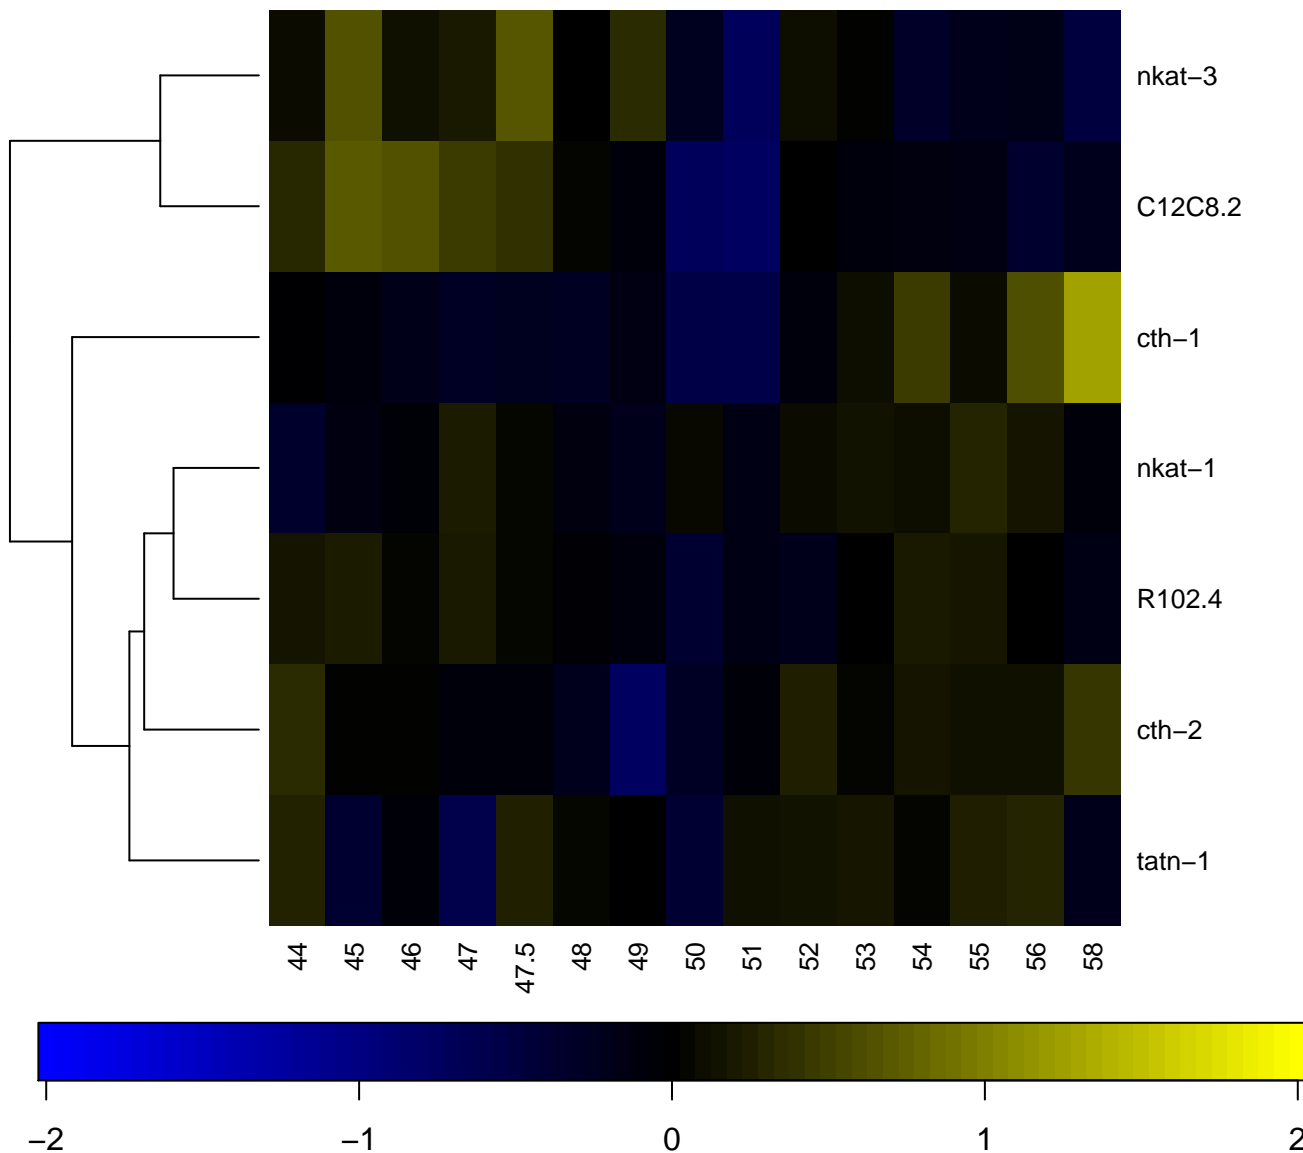



# Cysteine-rich flanking region, C-terminal domain

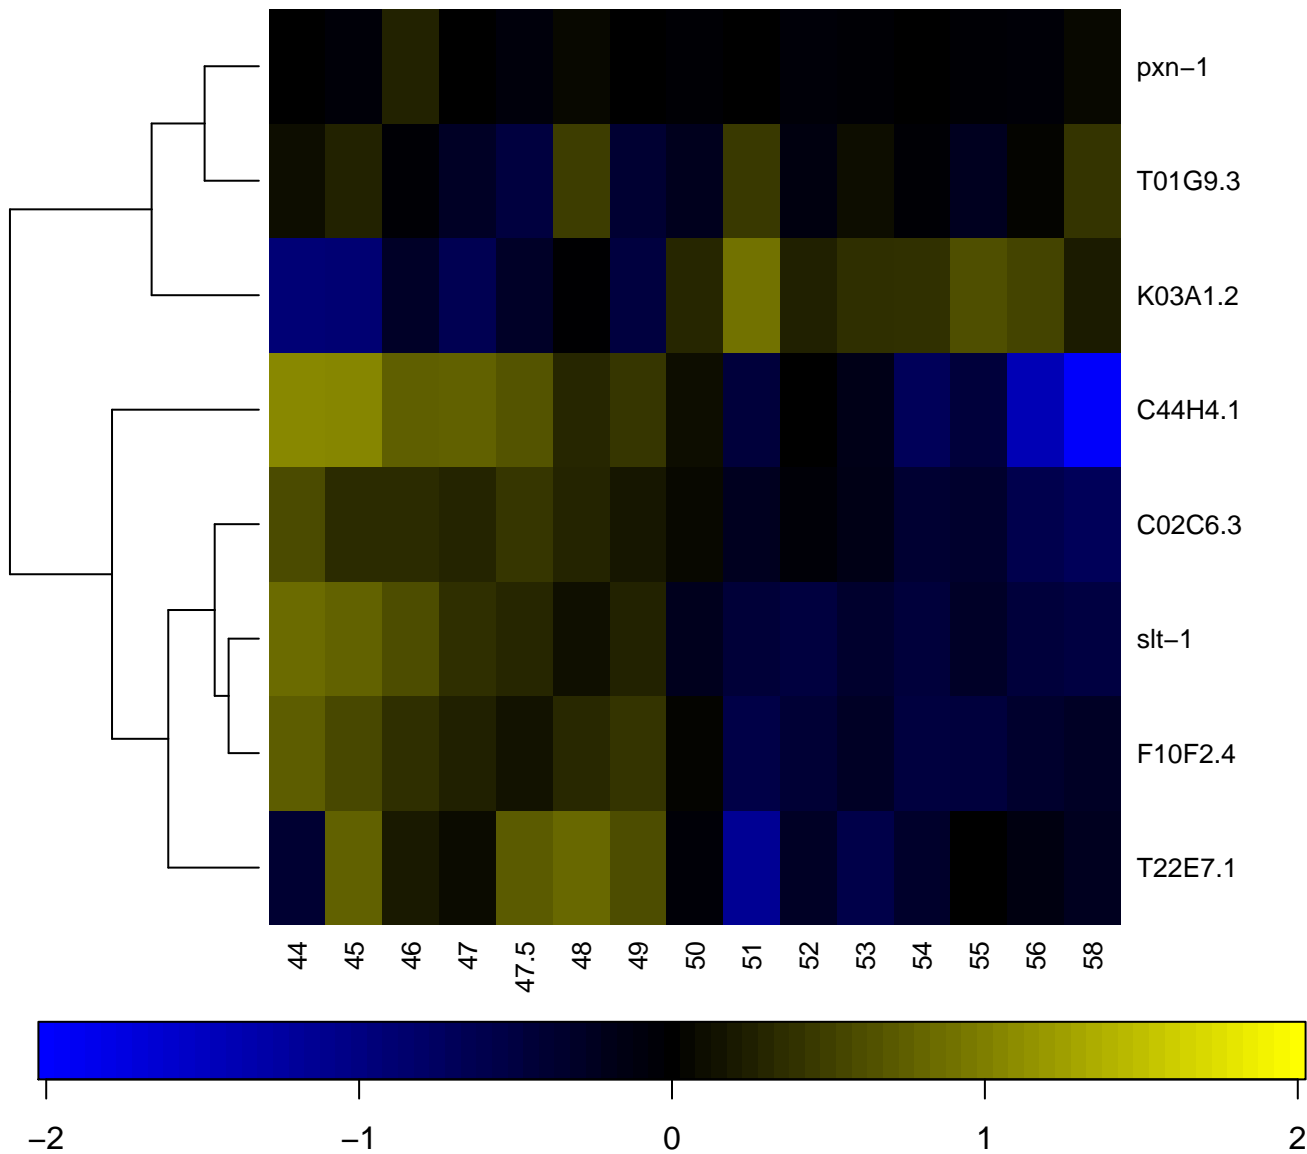



# Cysteine-rich repeat

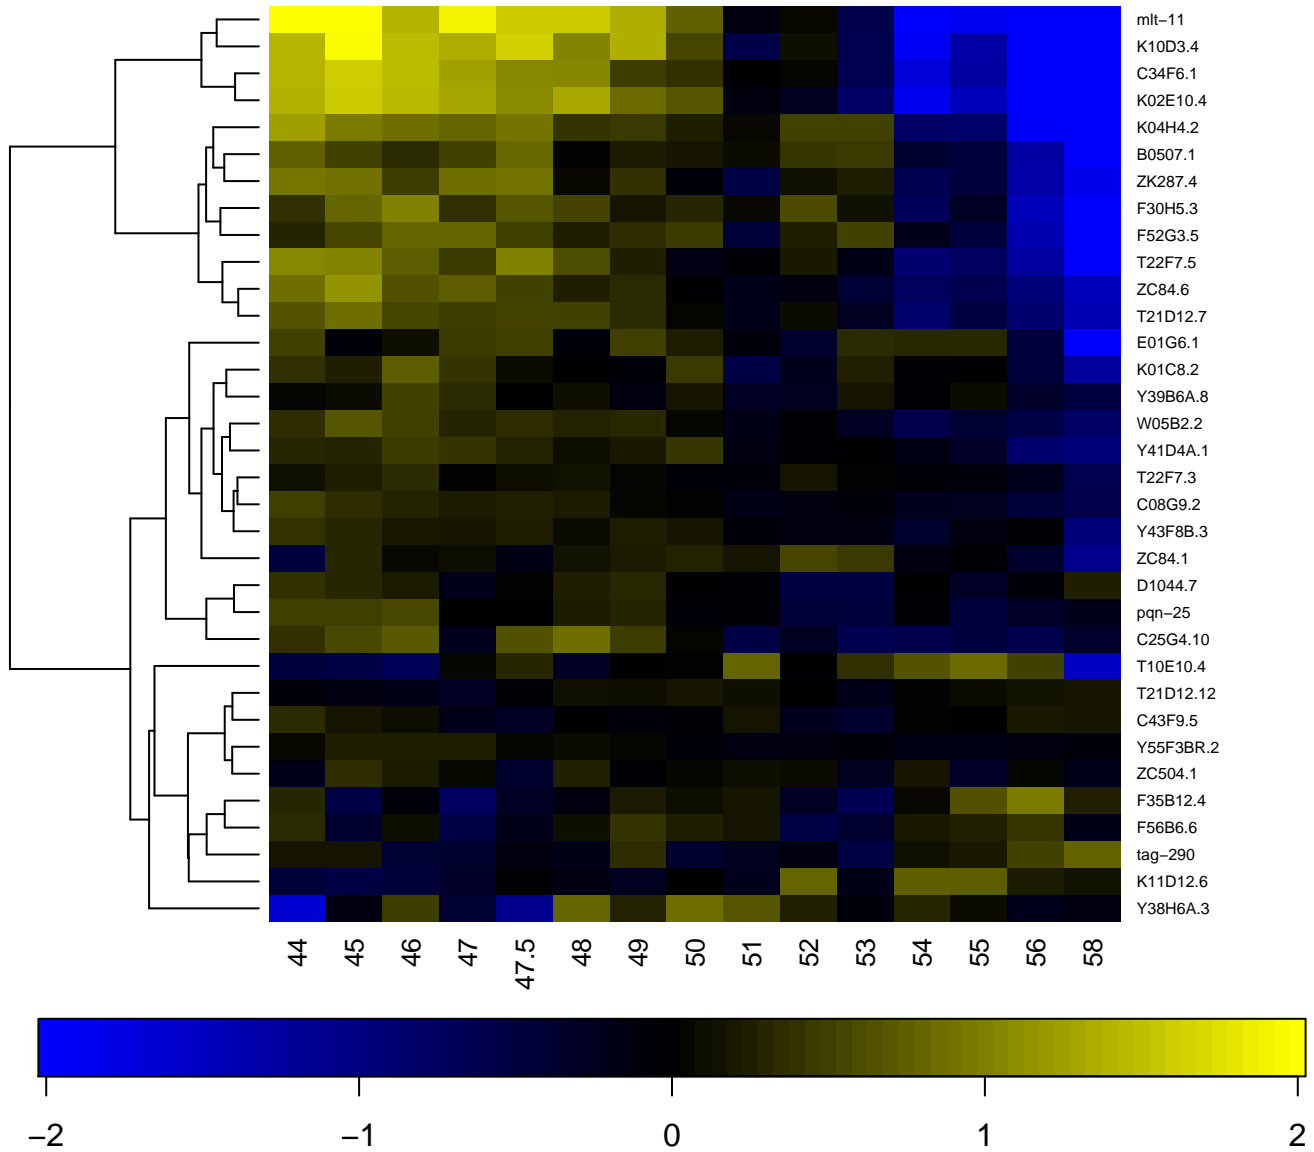

# Cysteine-rich secretory protein family

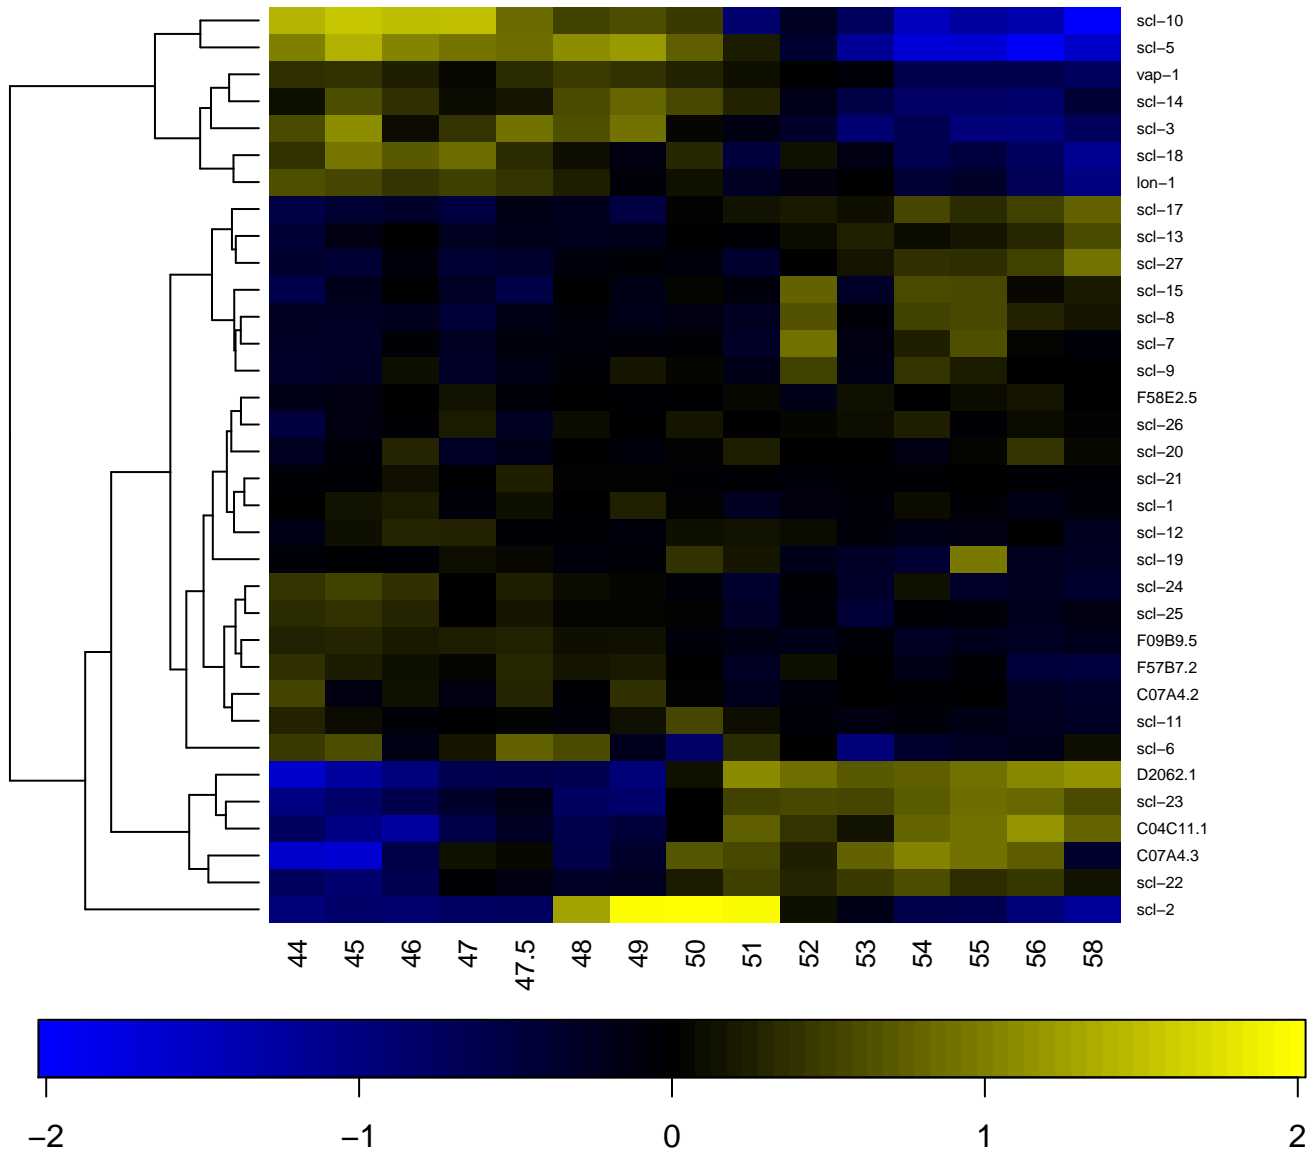

# Cytidine and deoxycytidylate deaminase zinc-binding region

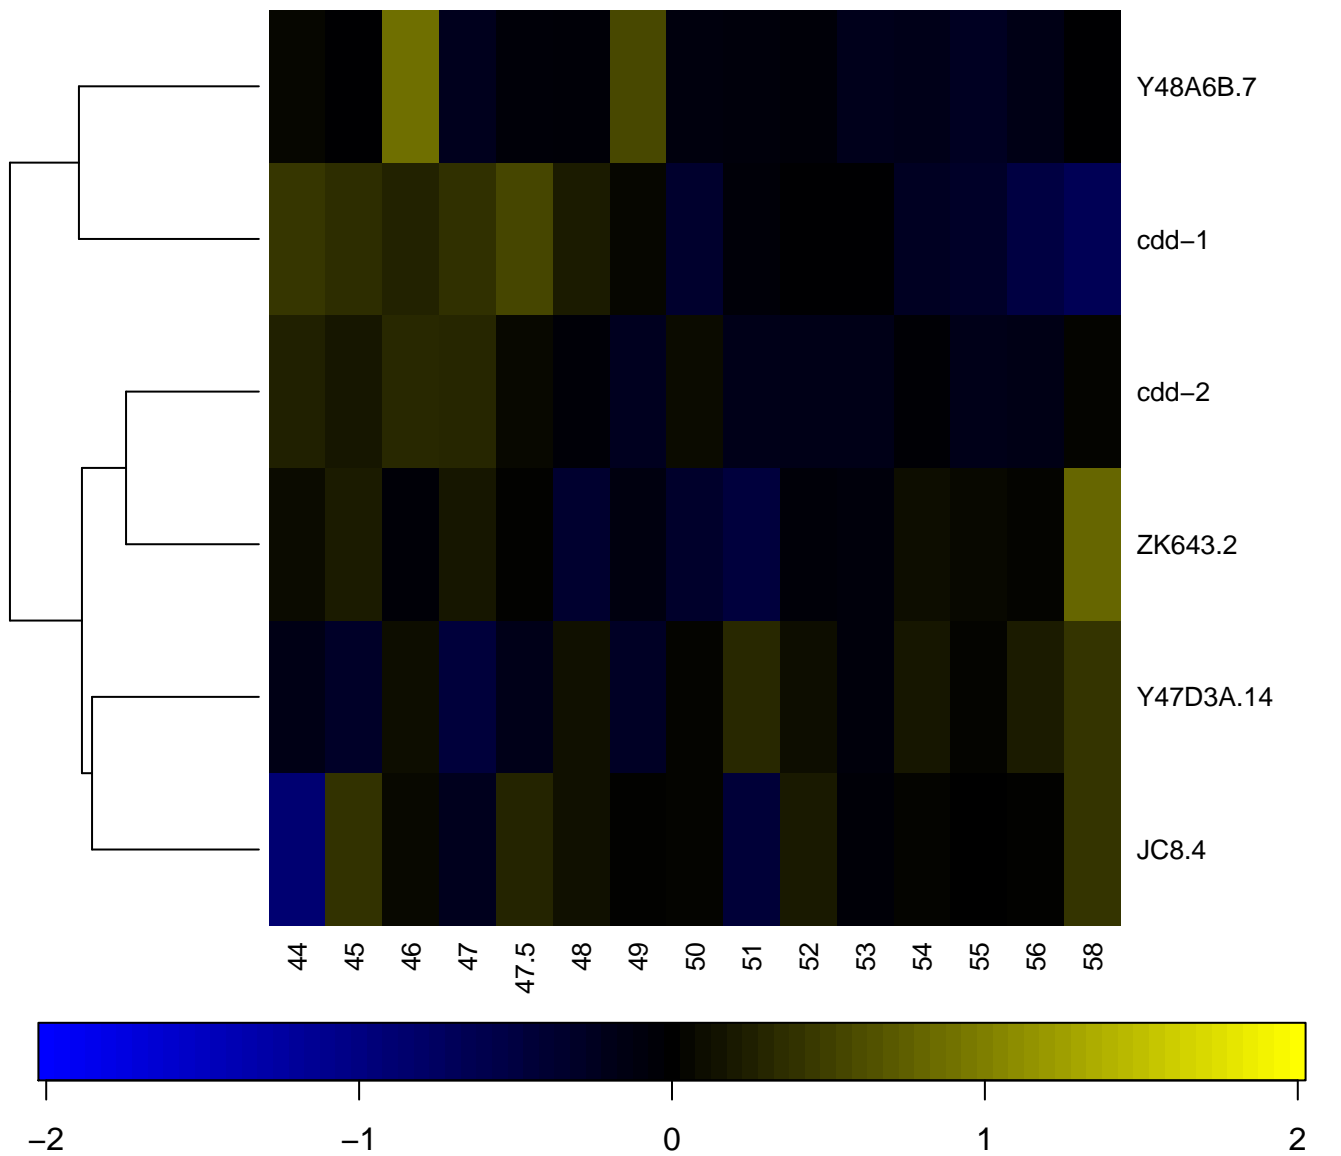

# Cytidyltransferase-related

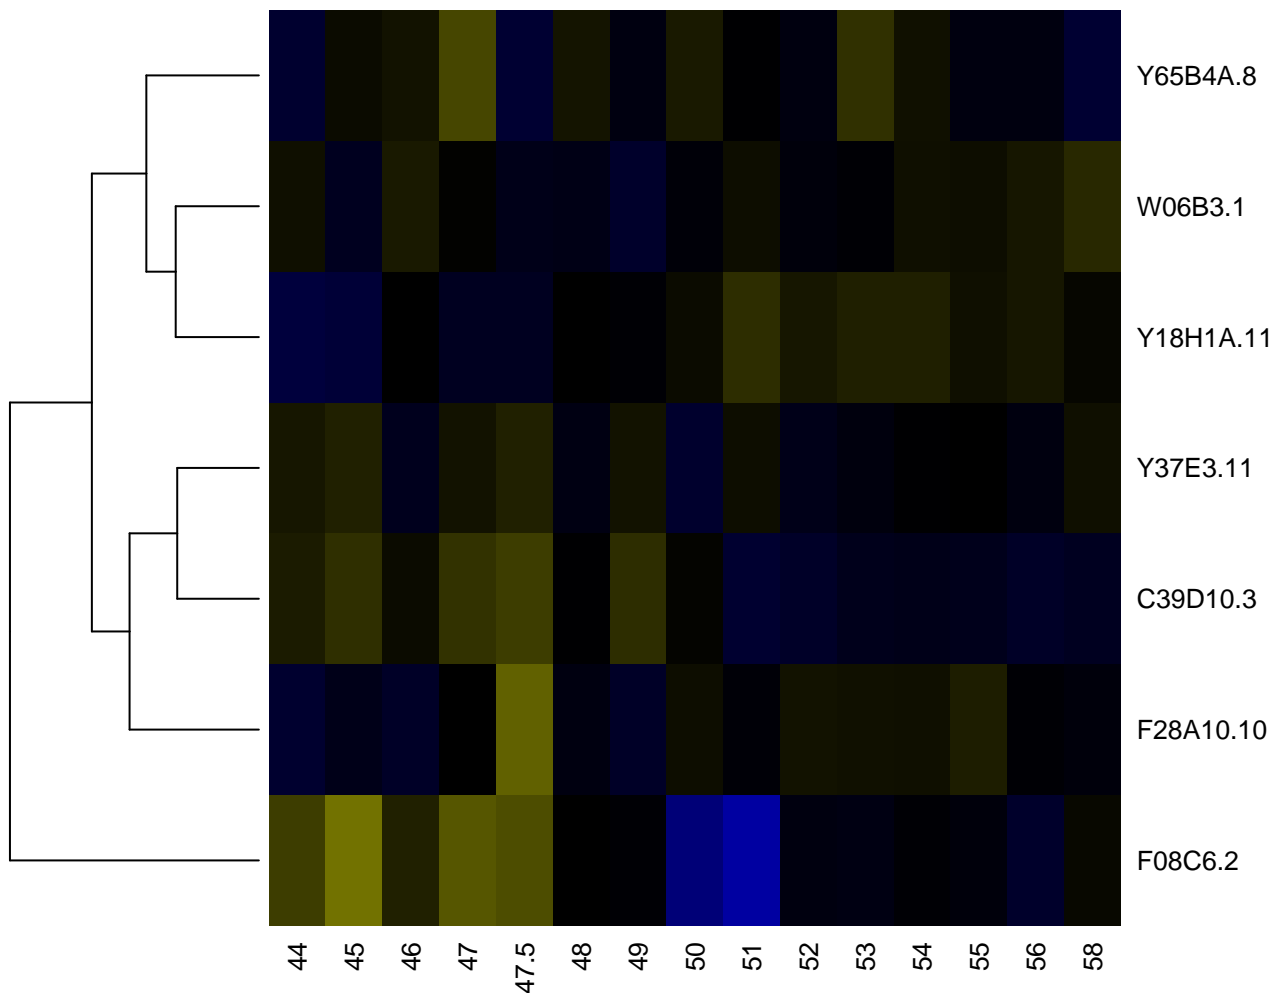

-2

-1

0

1

2

# Cytidylyltransferase

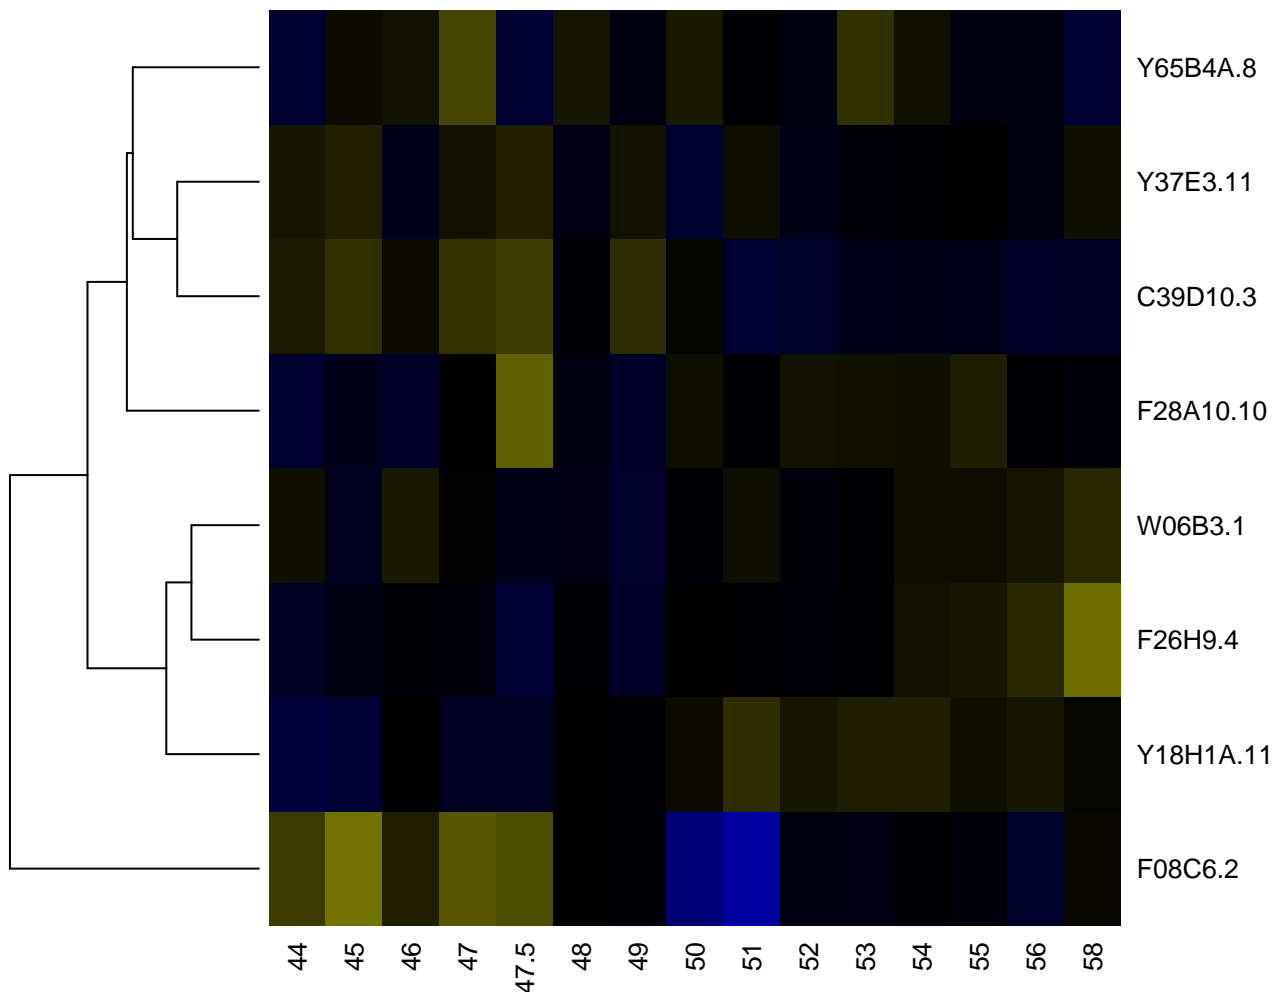



# Cytochrome b5-like Heme/Steroid binding domain

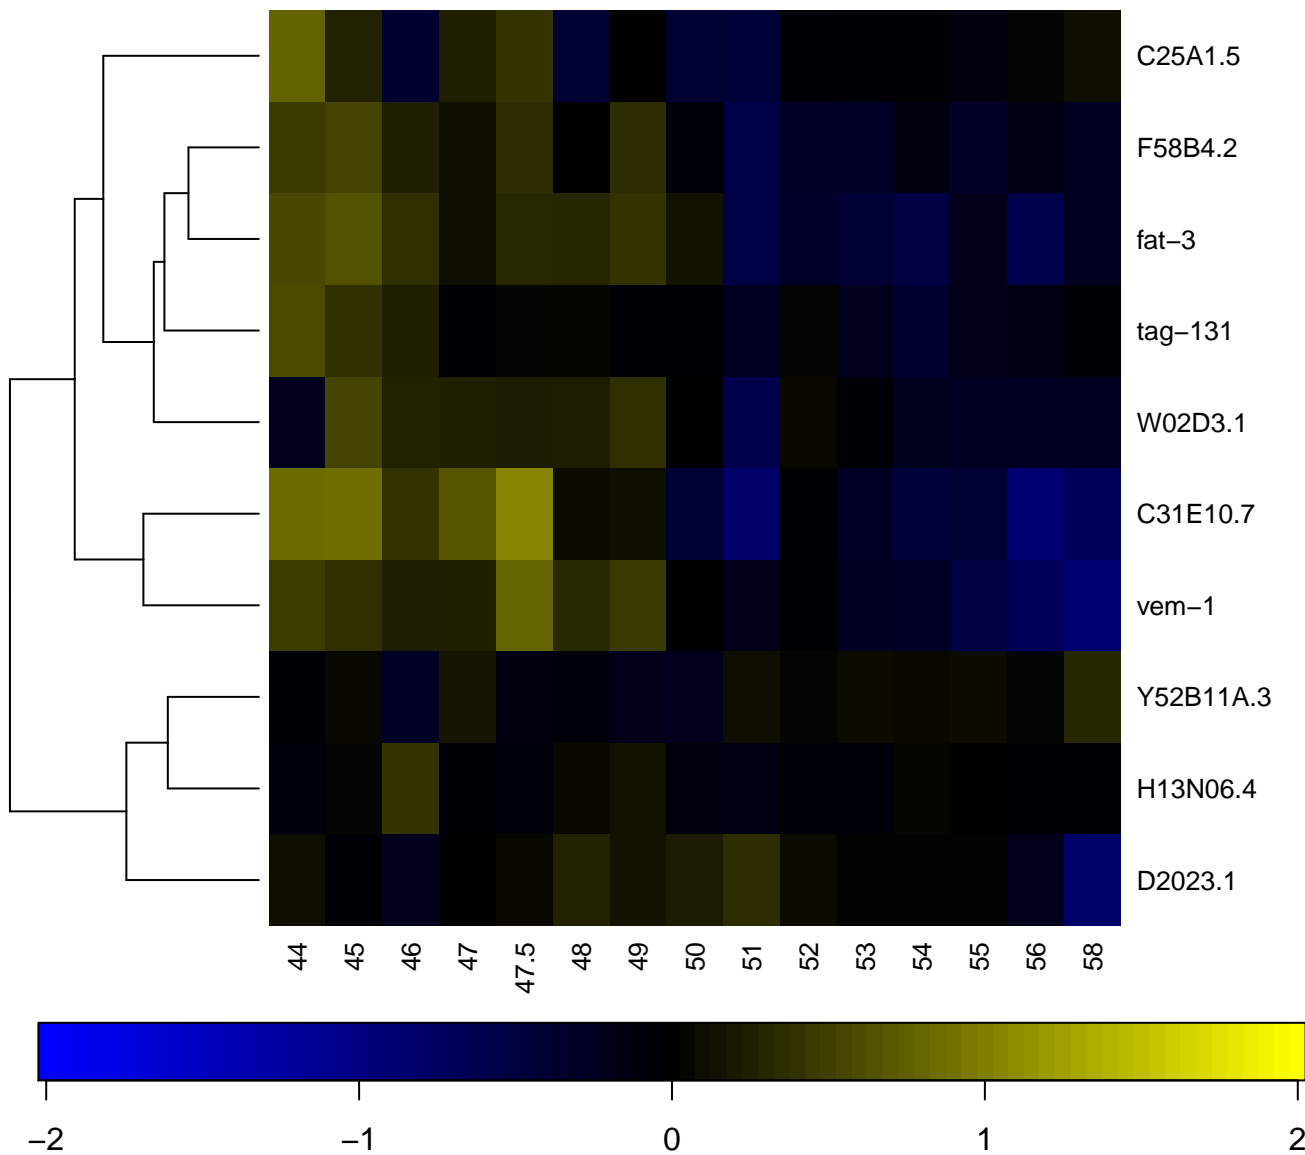

# Cytochrome b5, heme-binding site

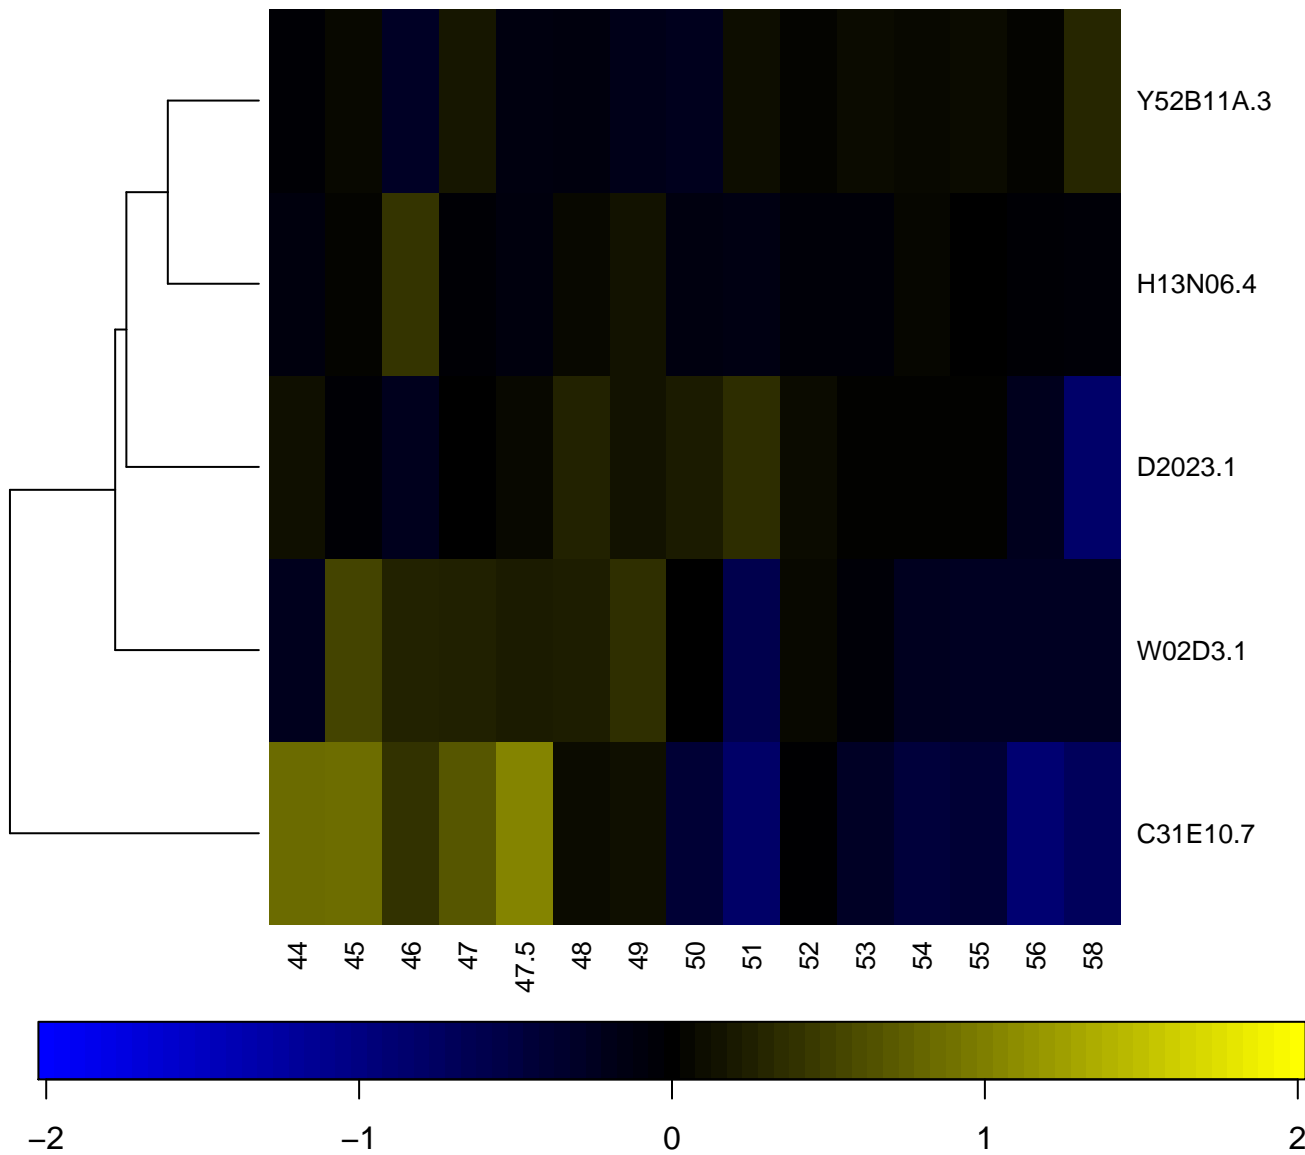



# Cytochrome b561, eukaryote

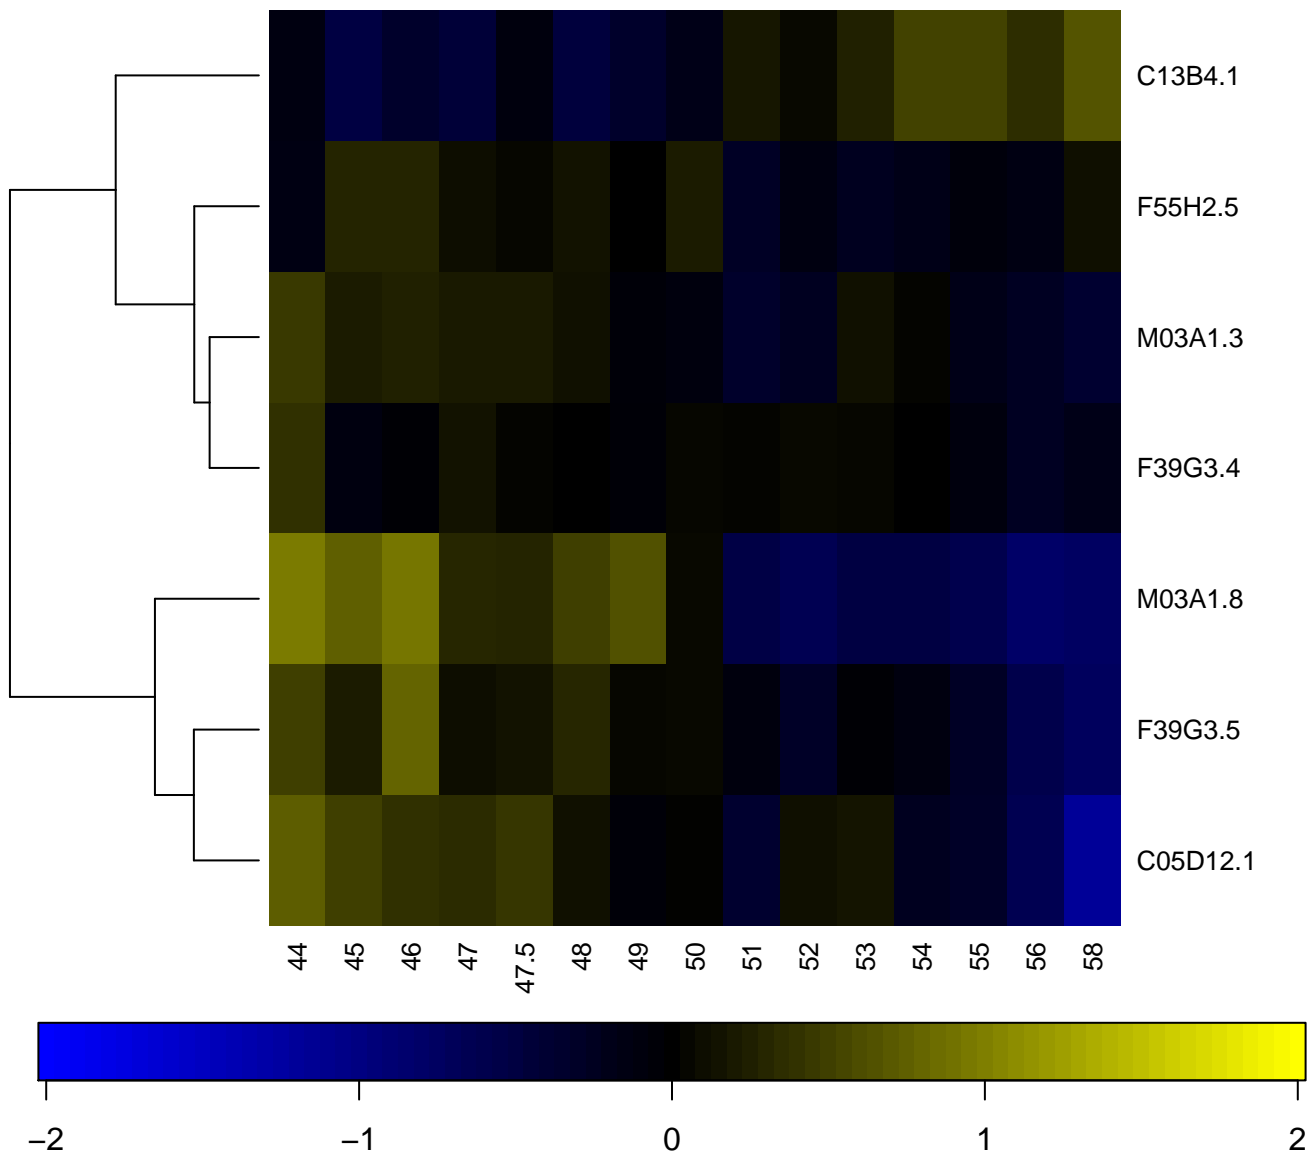

# Cytochrome b561/ferric reductase transmembrane

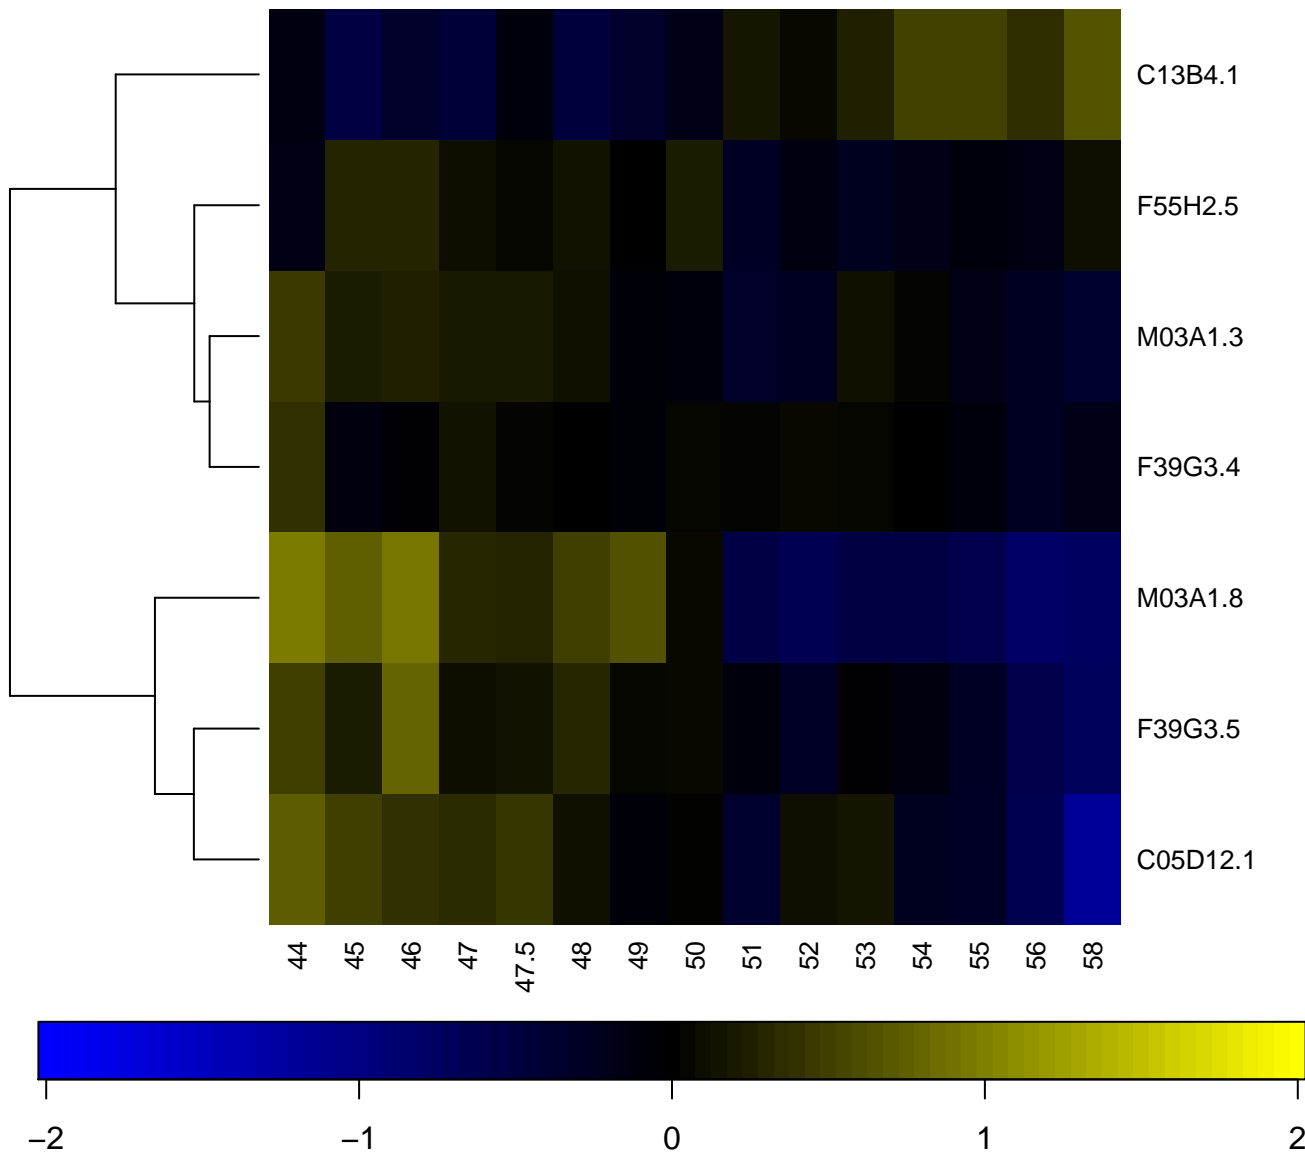

# Cytochrome P450

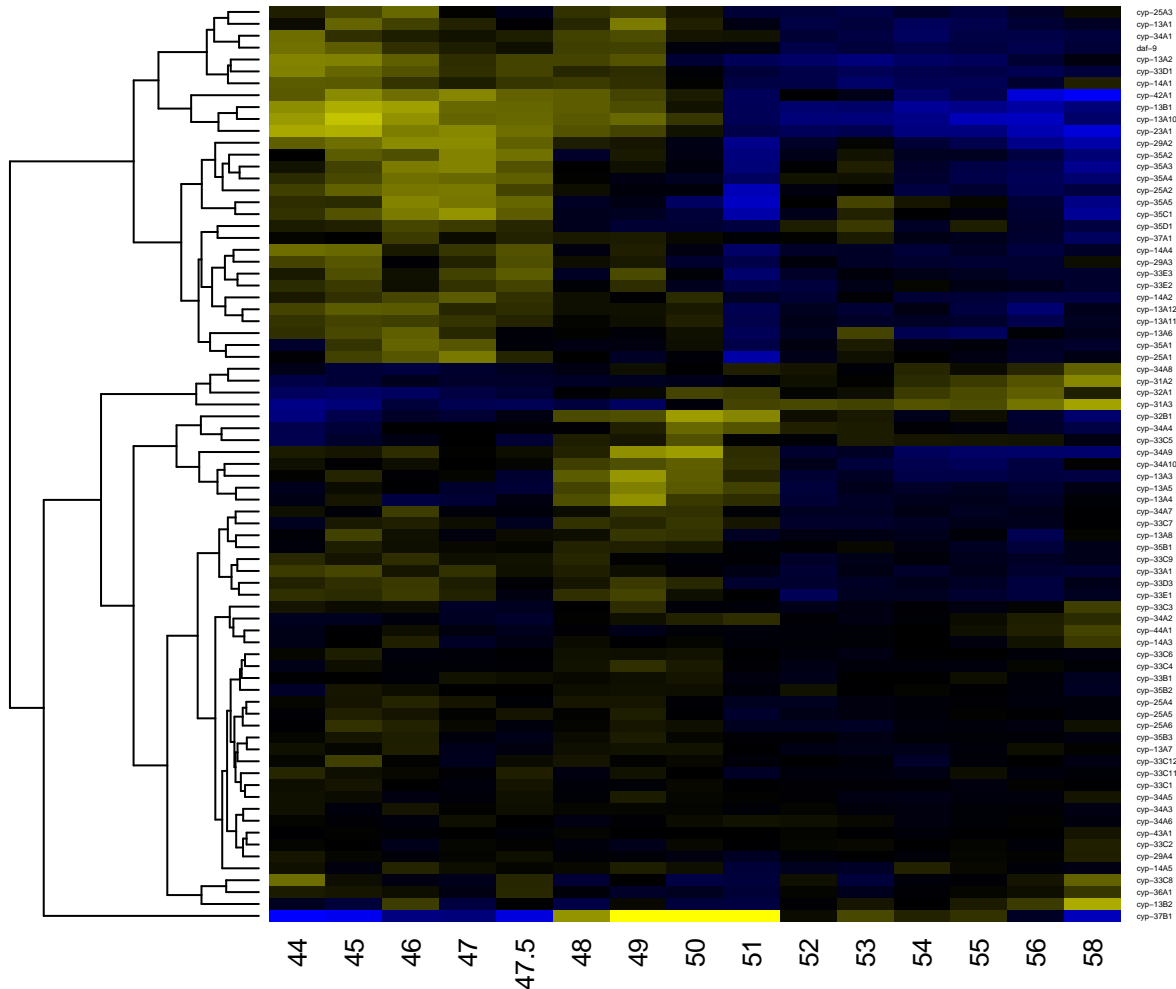

cyp-25A3  
cyp-13A1  
cyp-34A1  
dab-9  
cyp-13A2  
cyp-33D1  
cyp-14A1  
cyp-42A1  
cyp-13B1  
cyp-13A10  
cyp-23A1  
cyp-29A2  
cyp-35C2  
cyp-35A3  
cyp-35A4  
cyp-25A2  
cyp-35A6  
cyp-35C1  
cyp-35D1  
cyp-37A1  
cyp-14A4  
cyp-29A3  
cyp-33E3  
cyp-33E2  
cyp-14A2  
cyp-13A12  
cyp-13A11  
cyp-13A6  
cyp-35A1  
cyp-25A1  
cyp-34A8  
cyp-31A2  
cyp-32A1  
cyp-31A3  
cyp-32B1  
cyp-34A4  
cyp-33C5  
cyp-34A9  
cyp-34A10  
cyp-13A3  
cyp-13A5  
cyp-13A4  
cyp-34A7  
cyp-33C7  
cyp-13A8  
cyp-35B1  
cyp-33C9  
cyp-33A1  
cyp-33D3  
cyp-33E1  
cyp-33C3  
cyp-34A2  
cyp-44A1  
cyp-14A3  
cyp-33C6  
cyp-33C4  
cyp-33B1  
cyp-35B2  
cyp-25A4  
cyp-25A5  
cyp-25A6  
cyp-35B3  
cyp-13A7  
cyp-33C12  
cyp-33C11  
cyp-33C1  
cyp-34A5  
cyp-34A3  
cyp-34A6  
cyp-43A1  
cyp-33C2  
cyp-29A4  
cyp-14A5  
cyp-33C8  
cyp-36A1  
cyp-13B2  
cyp-37B1



# Cytochrome P450, B-class

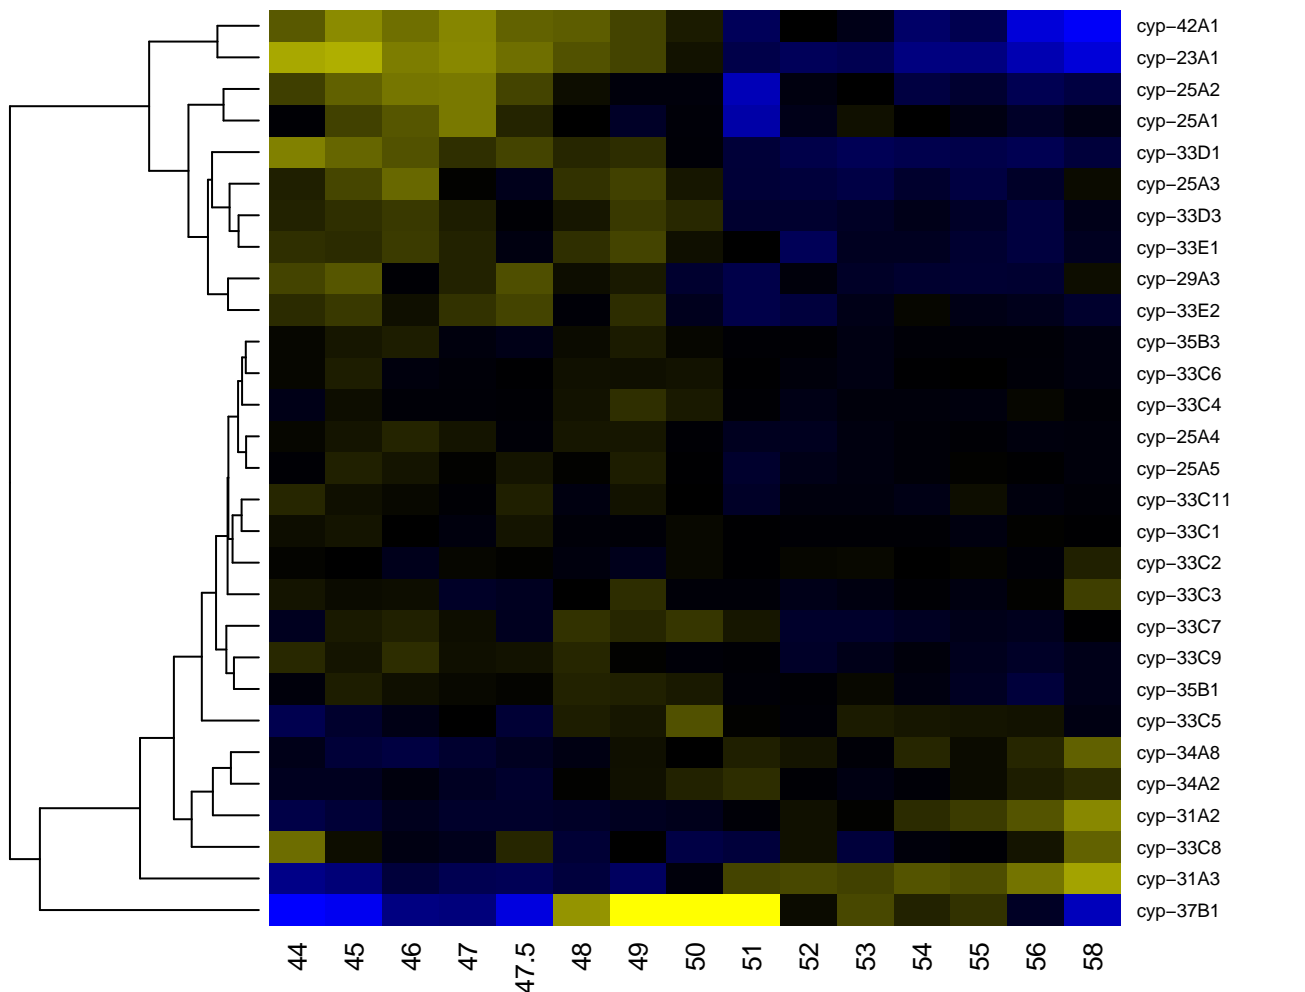

# Cytochrome P450, conserved site

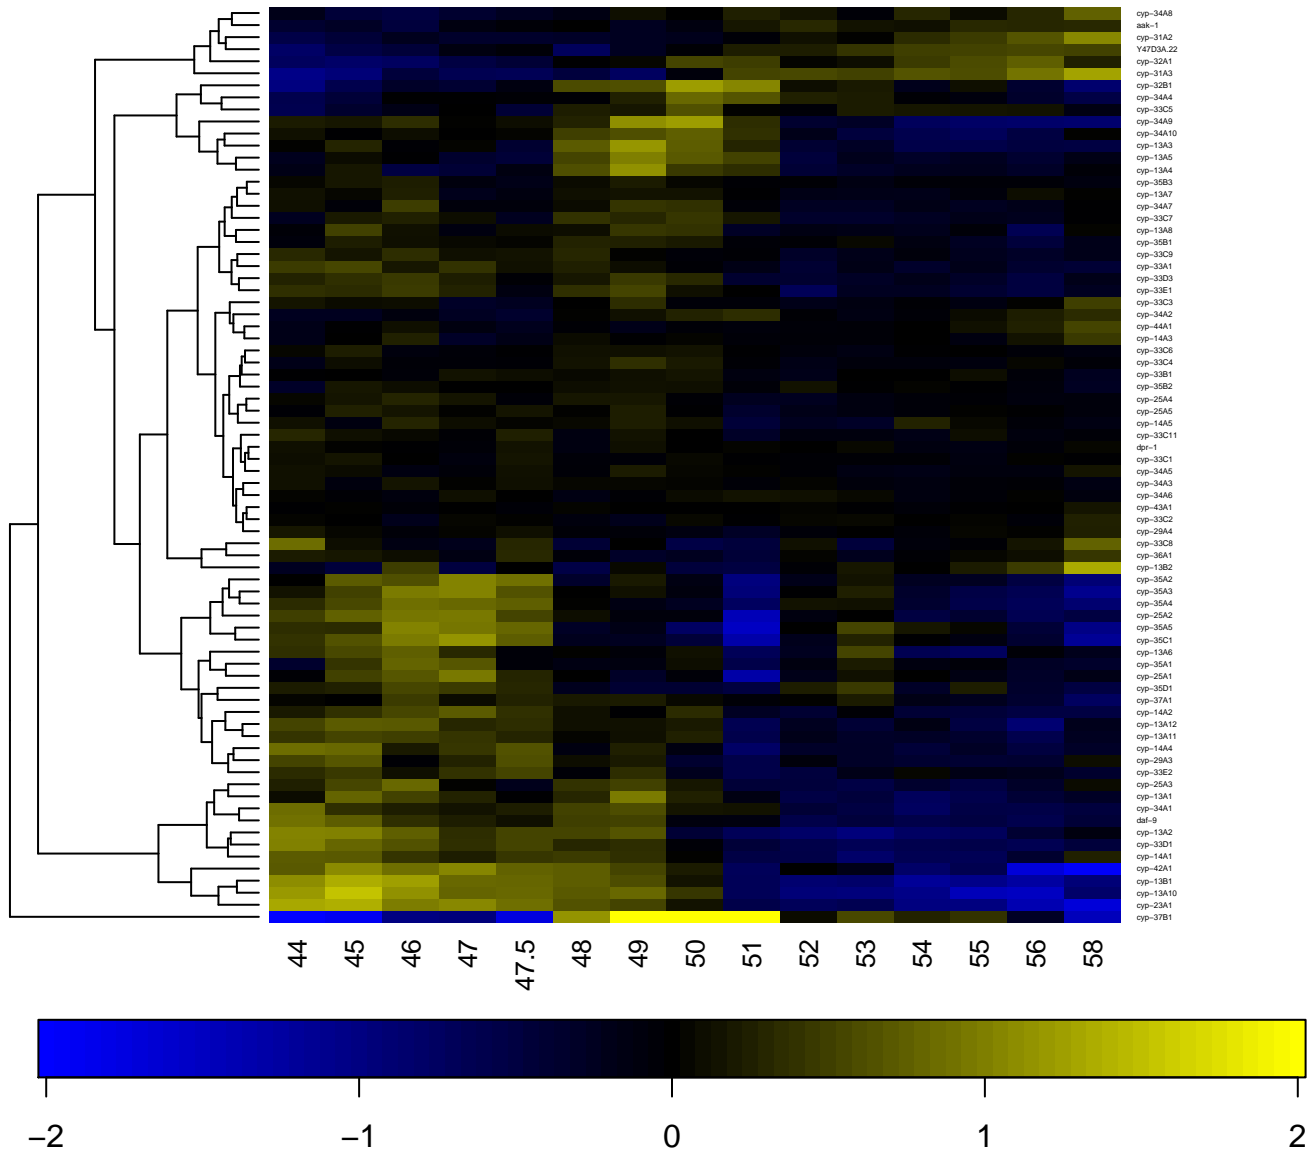

# Cytochrome P450, E-class, group I

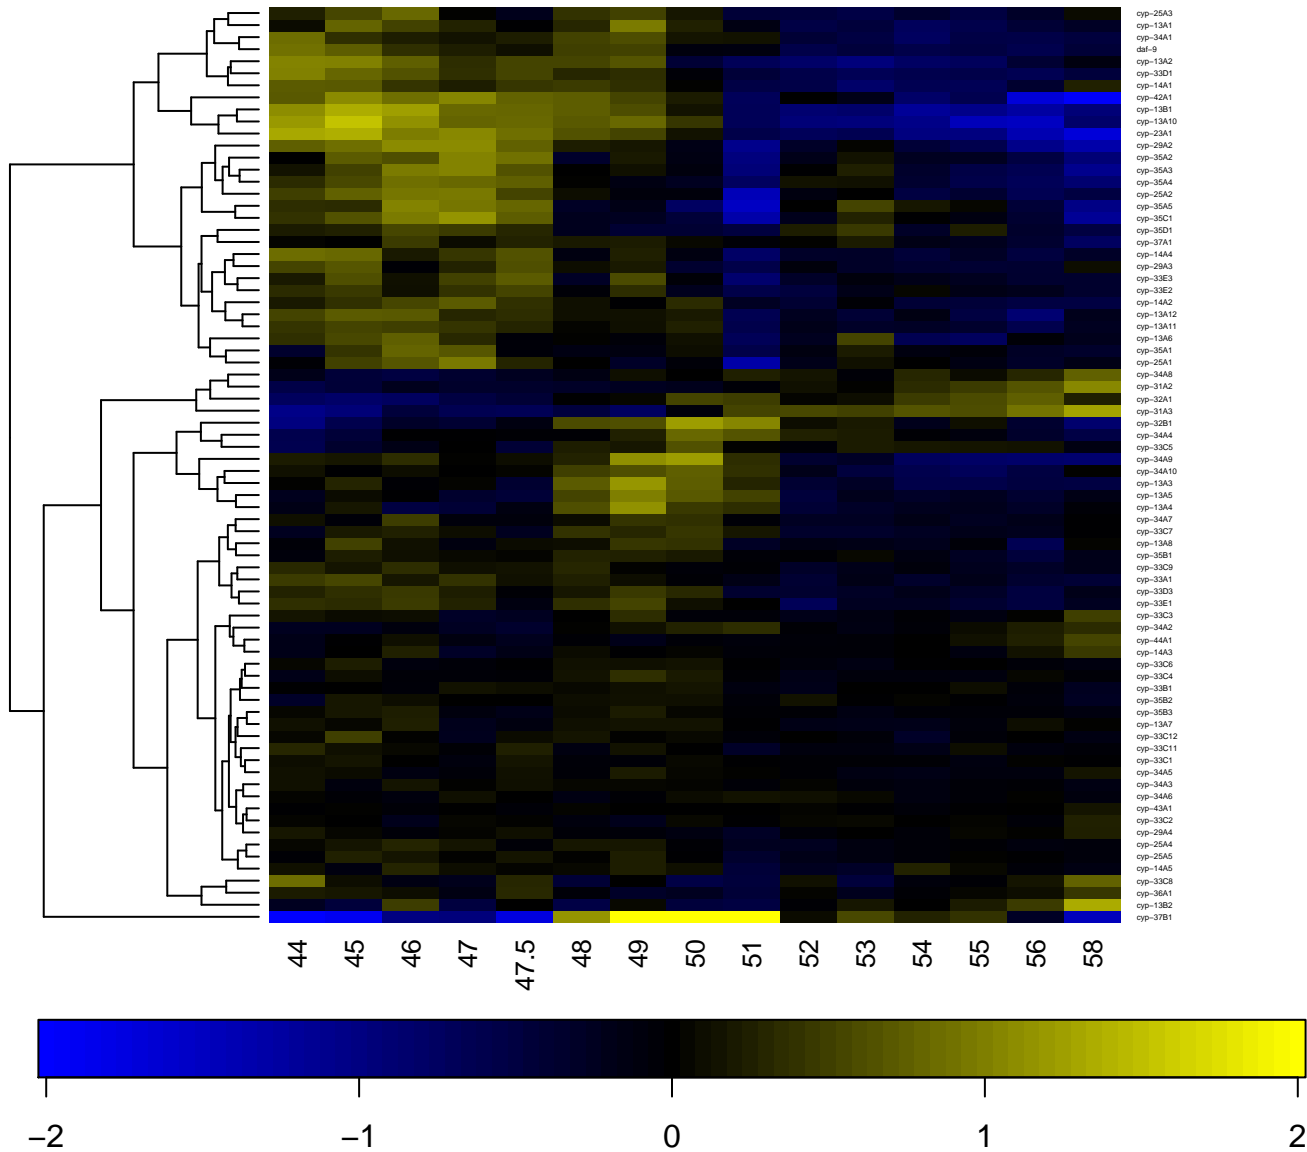

# Cytochrome P450, E-class, group II

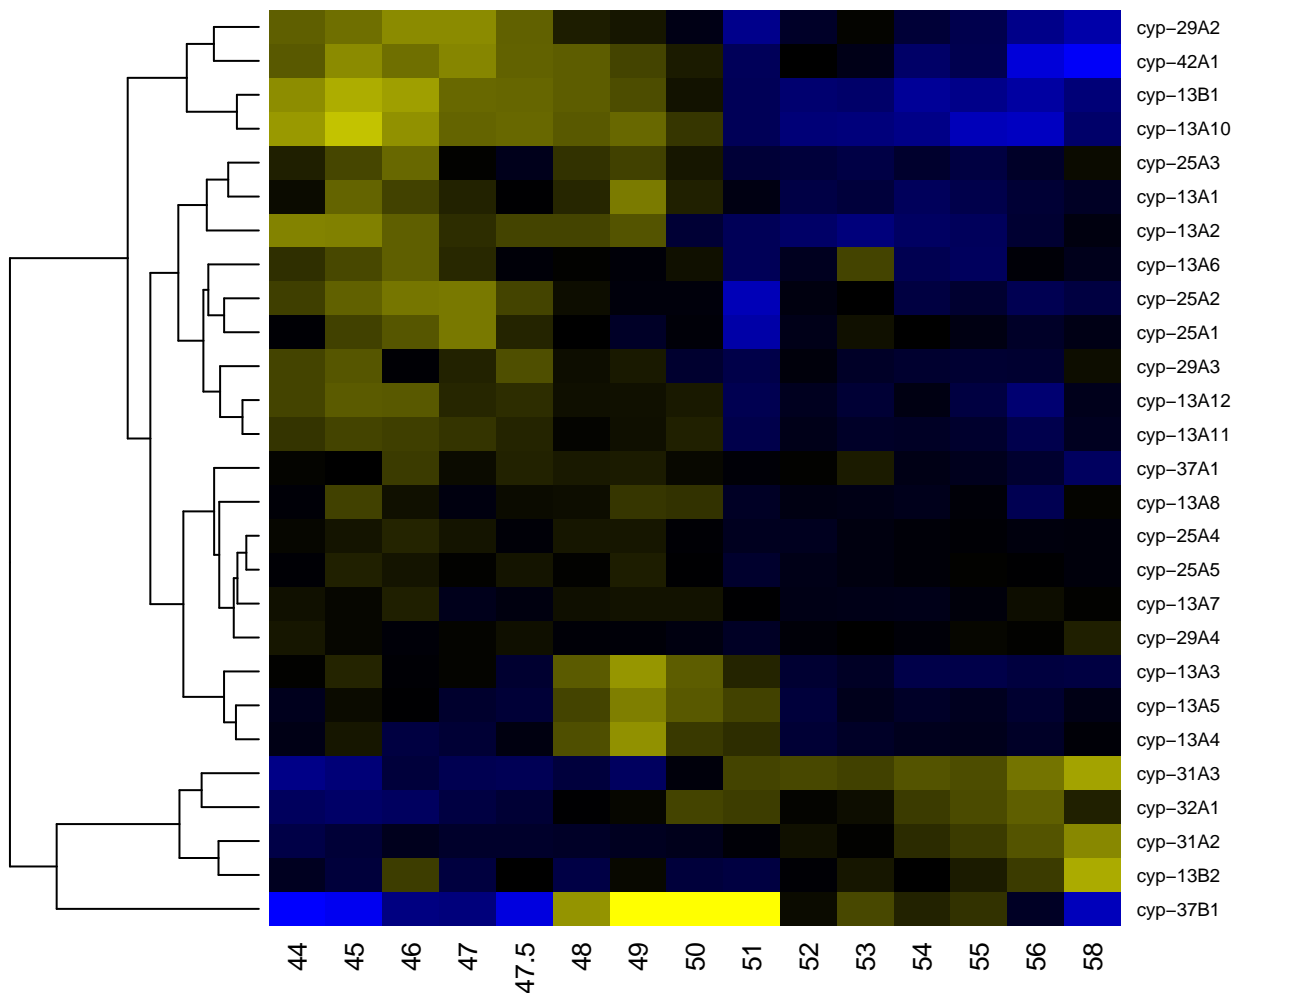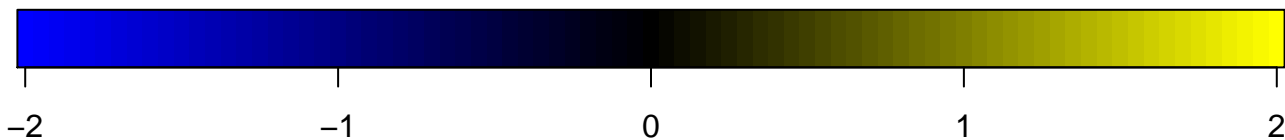

# Cytochrome P450, E-class, group IV

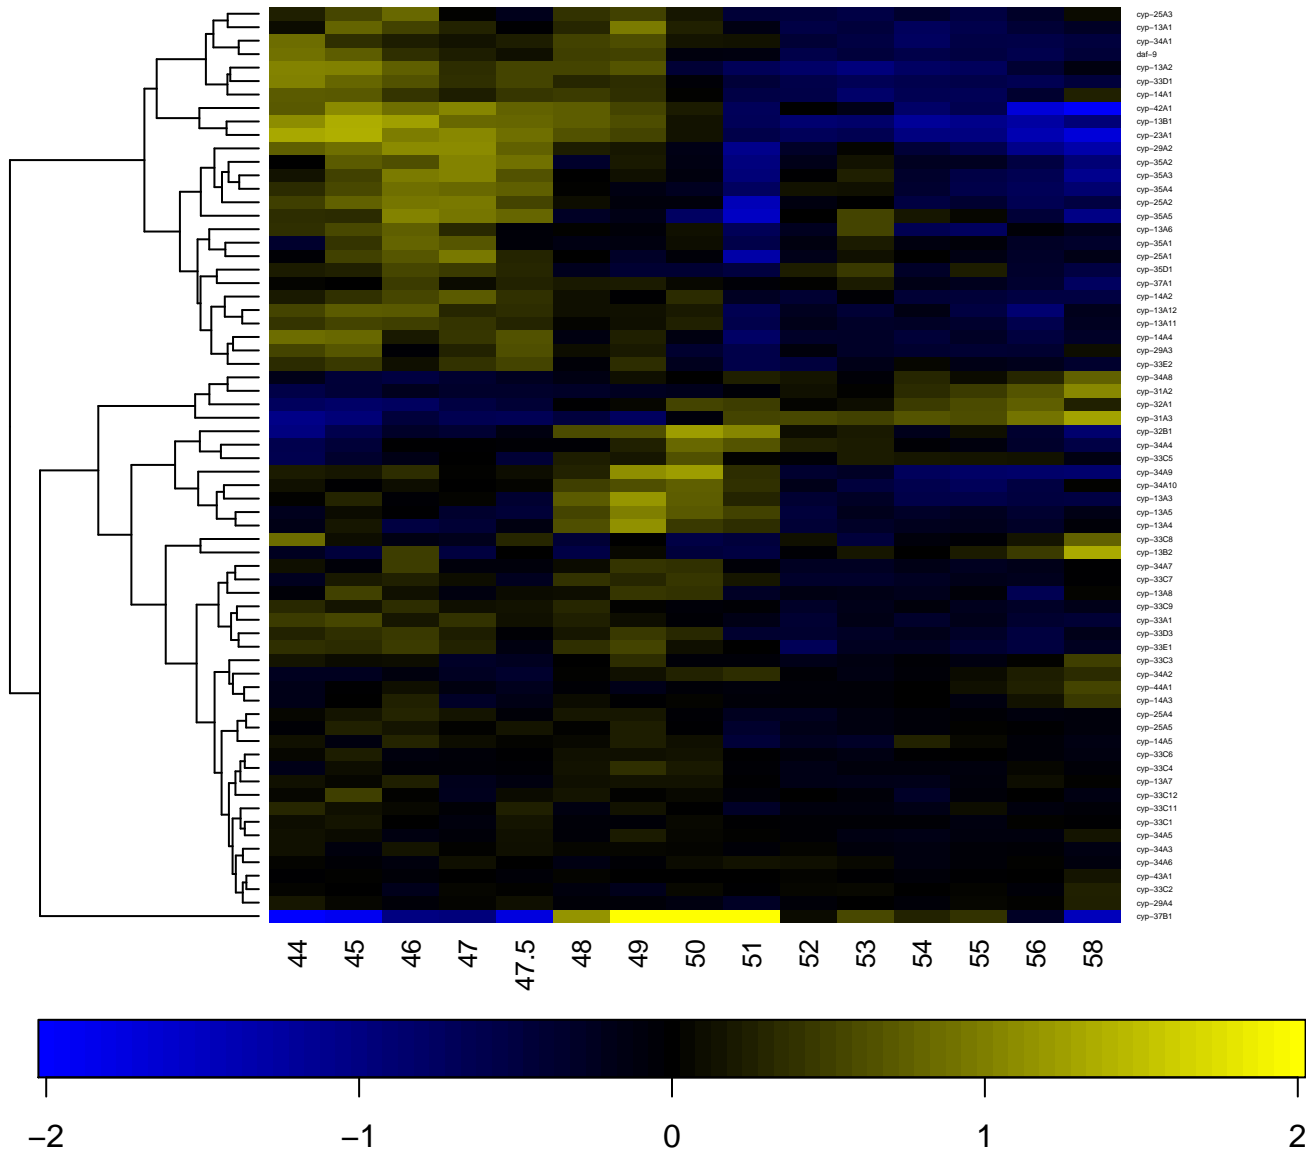



# Cytoskeleton-associated protein, CAP-Gly

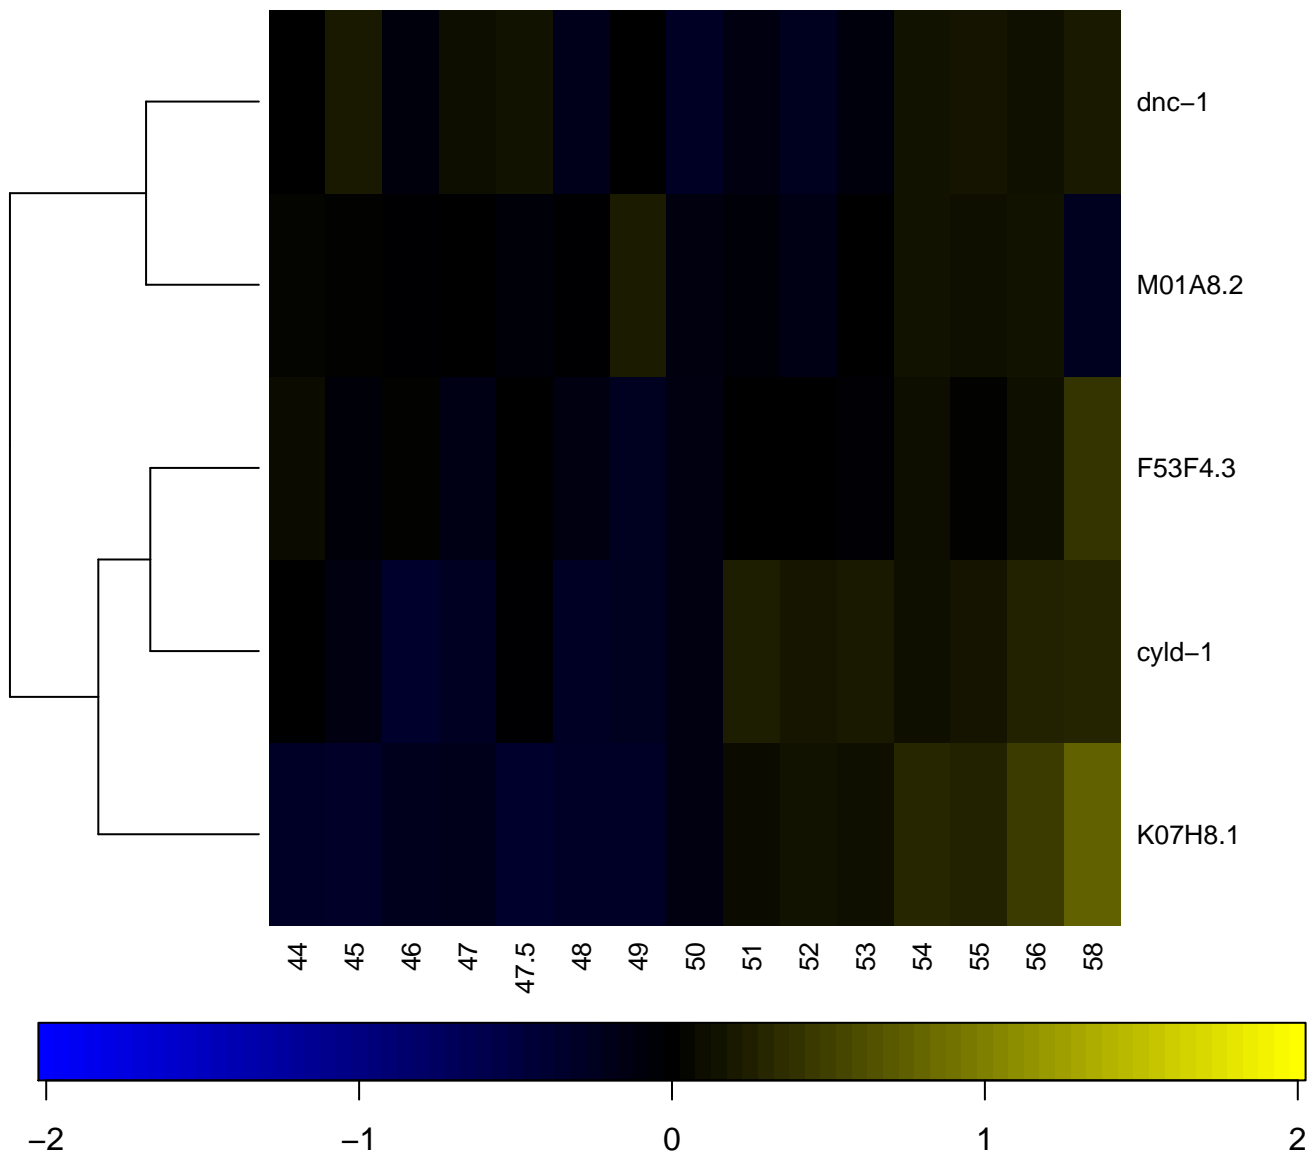



# Cytosolic motility protein

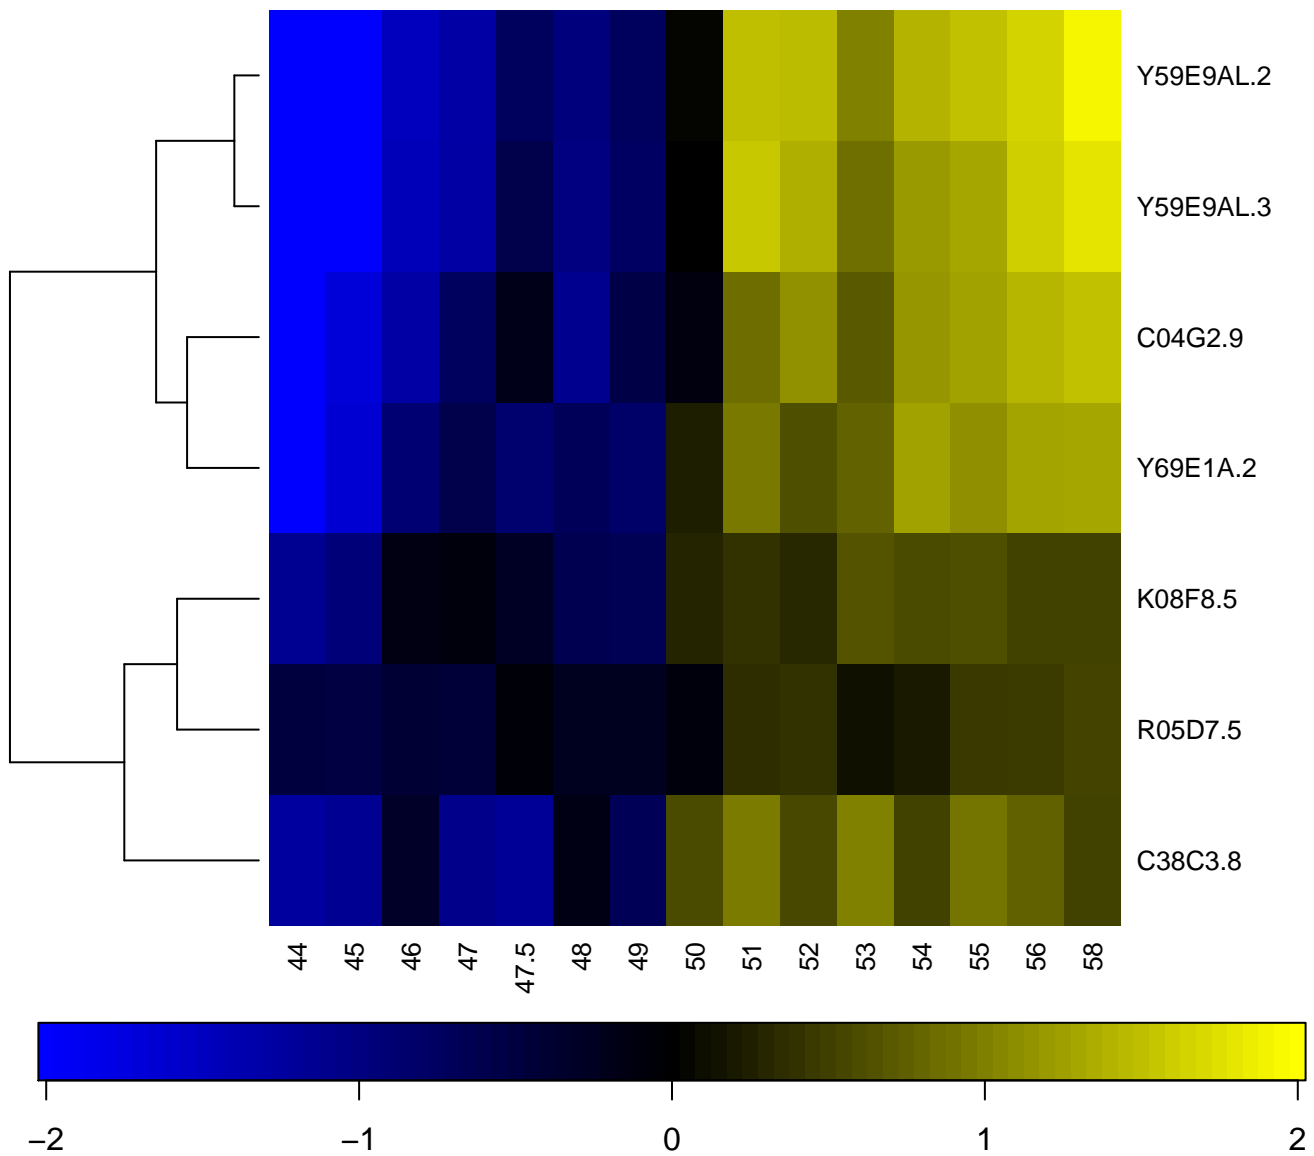

















# DEAD-like helicase, N-terminal

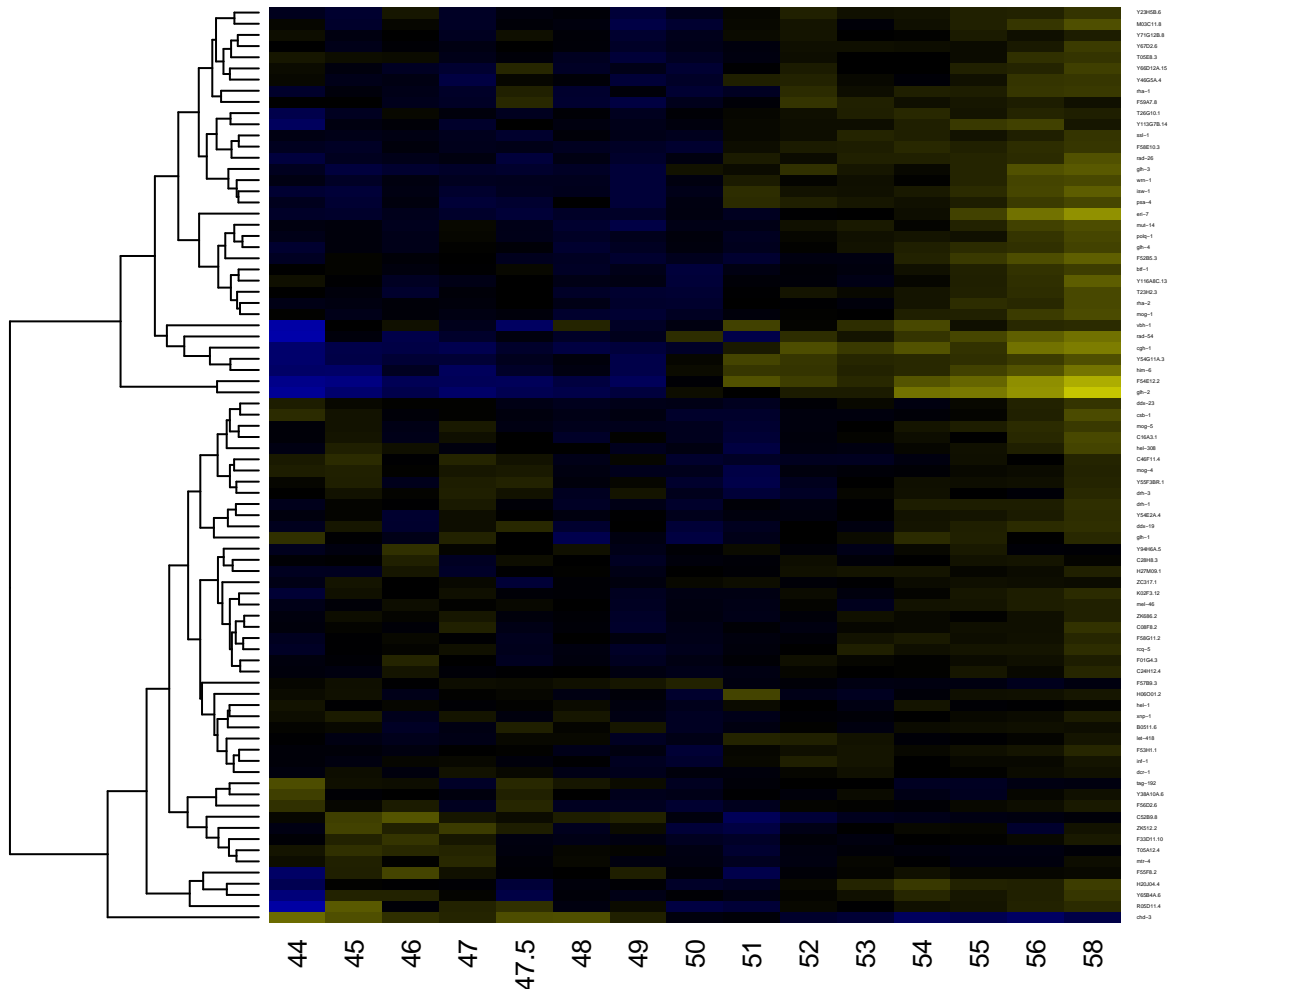

-2

-1

0

1

2

# DEAD/DEAH box helicase

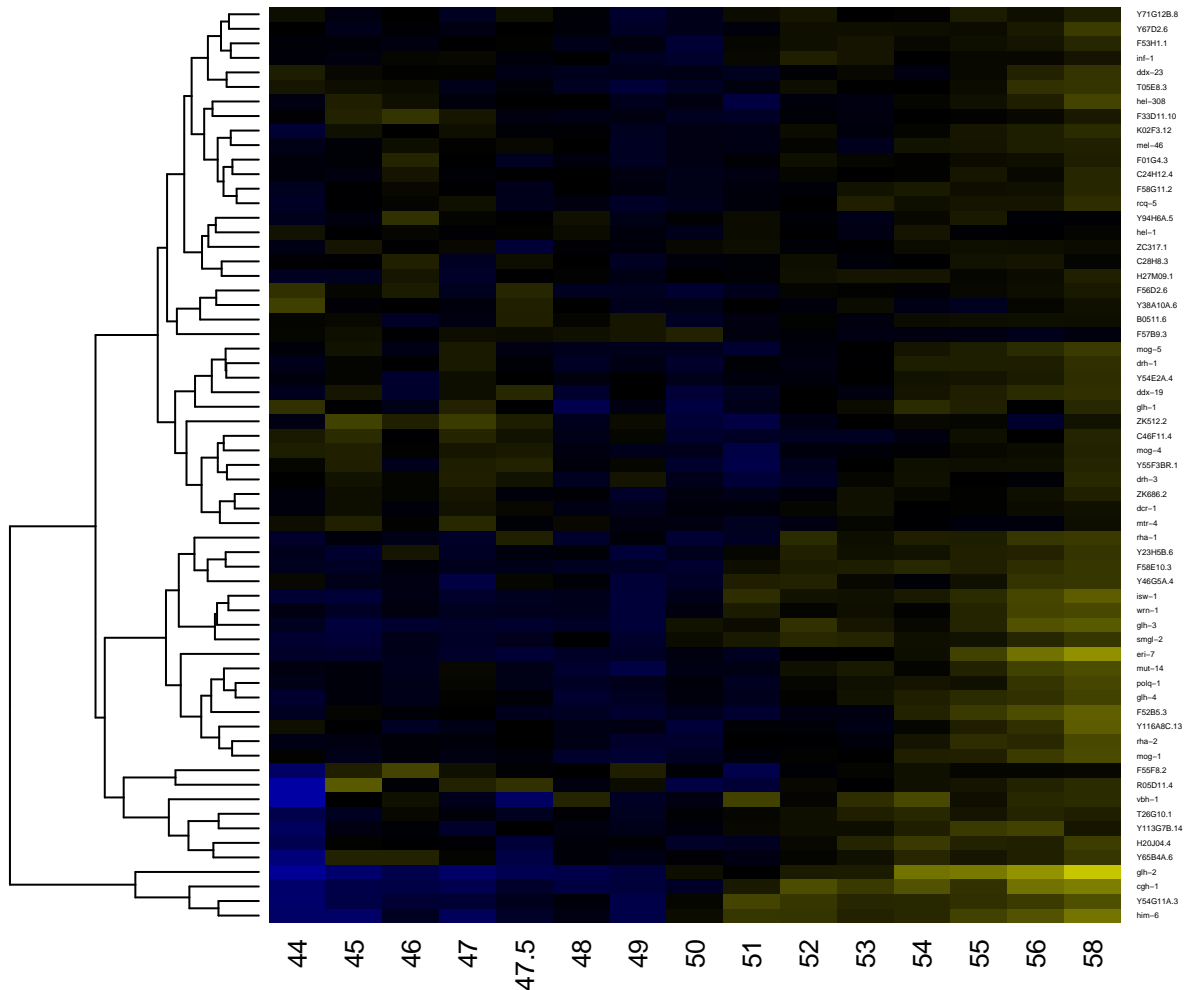



# DEAD2

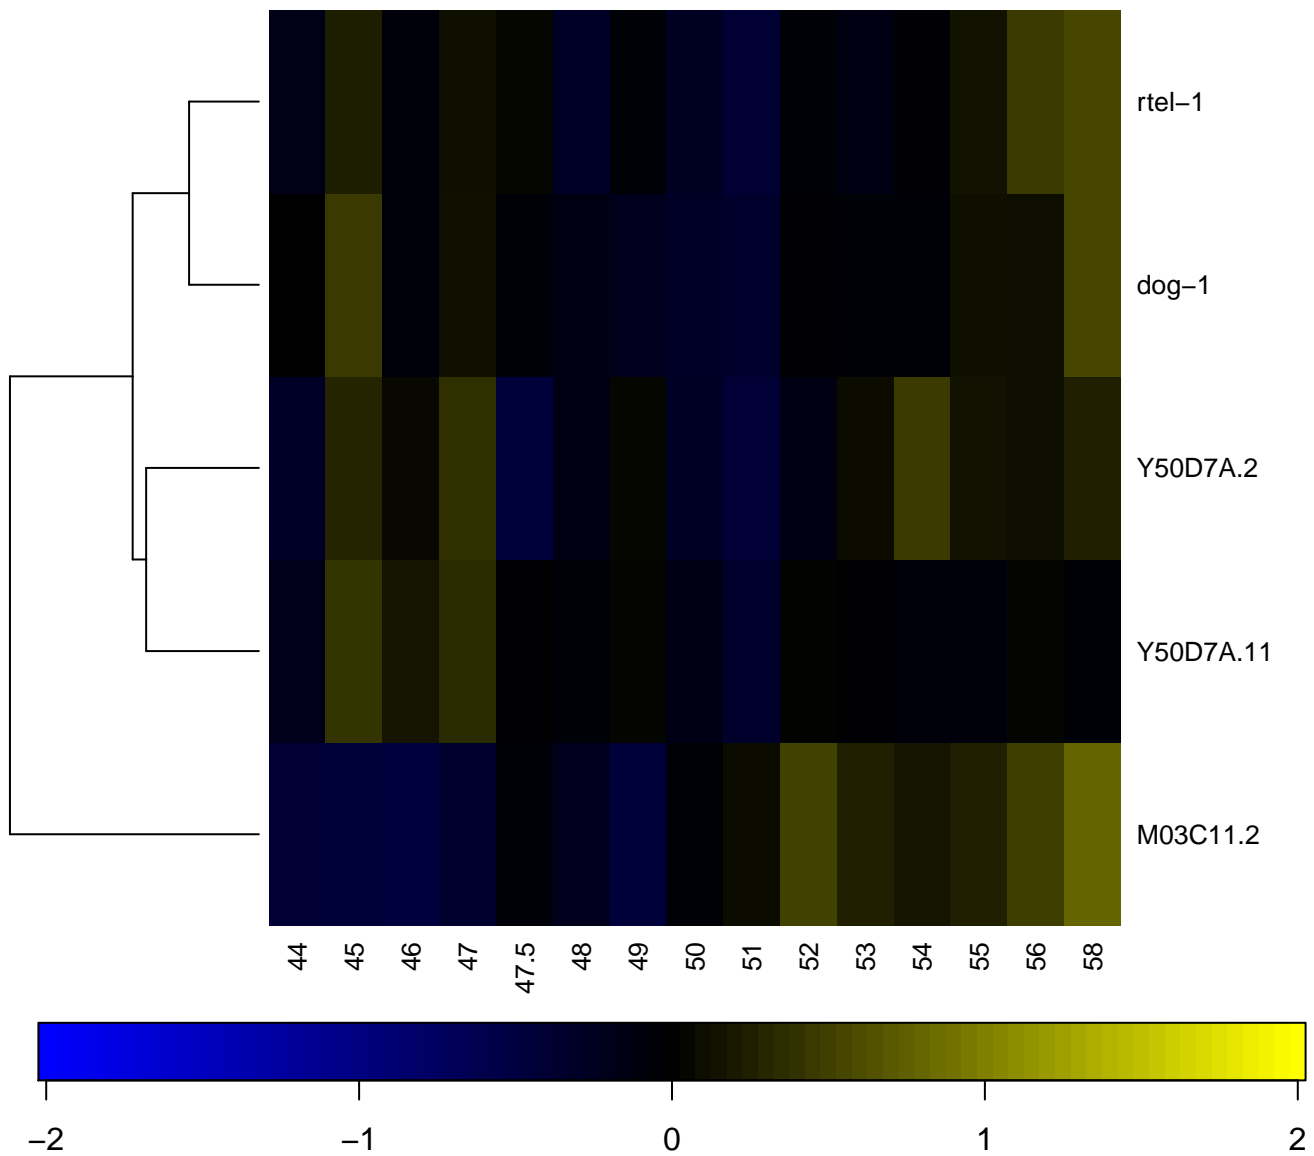



# DEATH-like

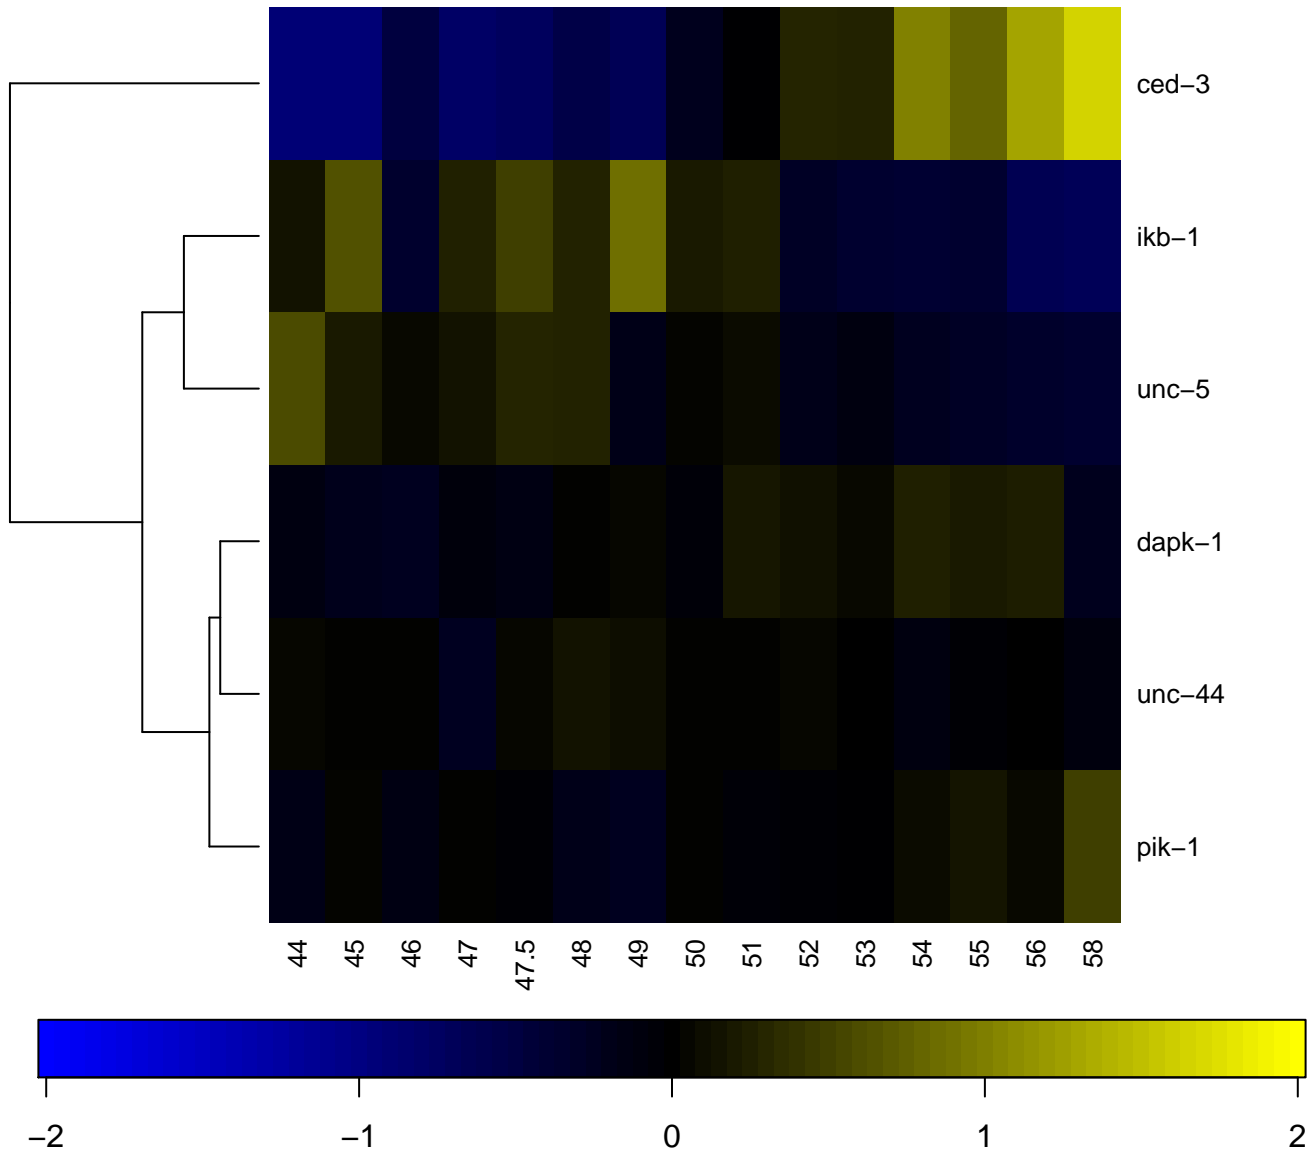





# Degenerin

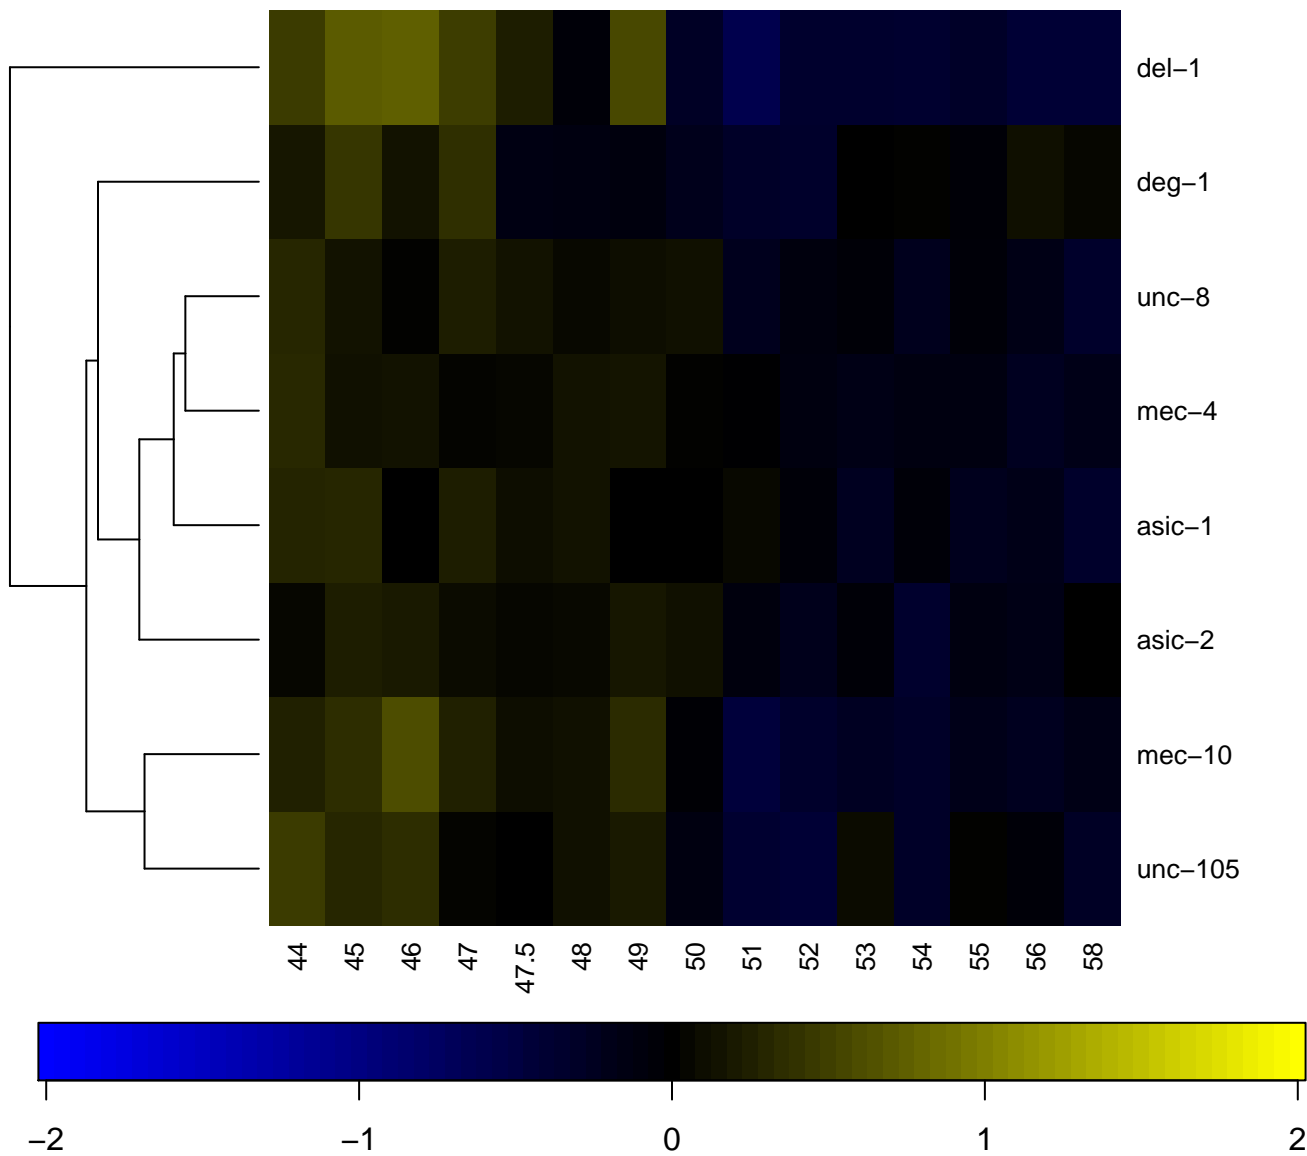

# DegT/DnrJ/EryC1/StrS aminotransferase

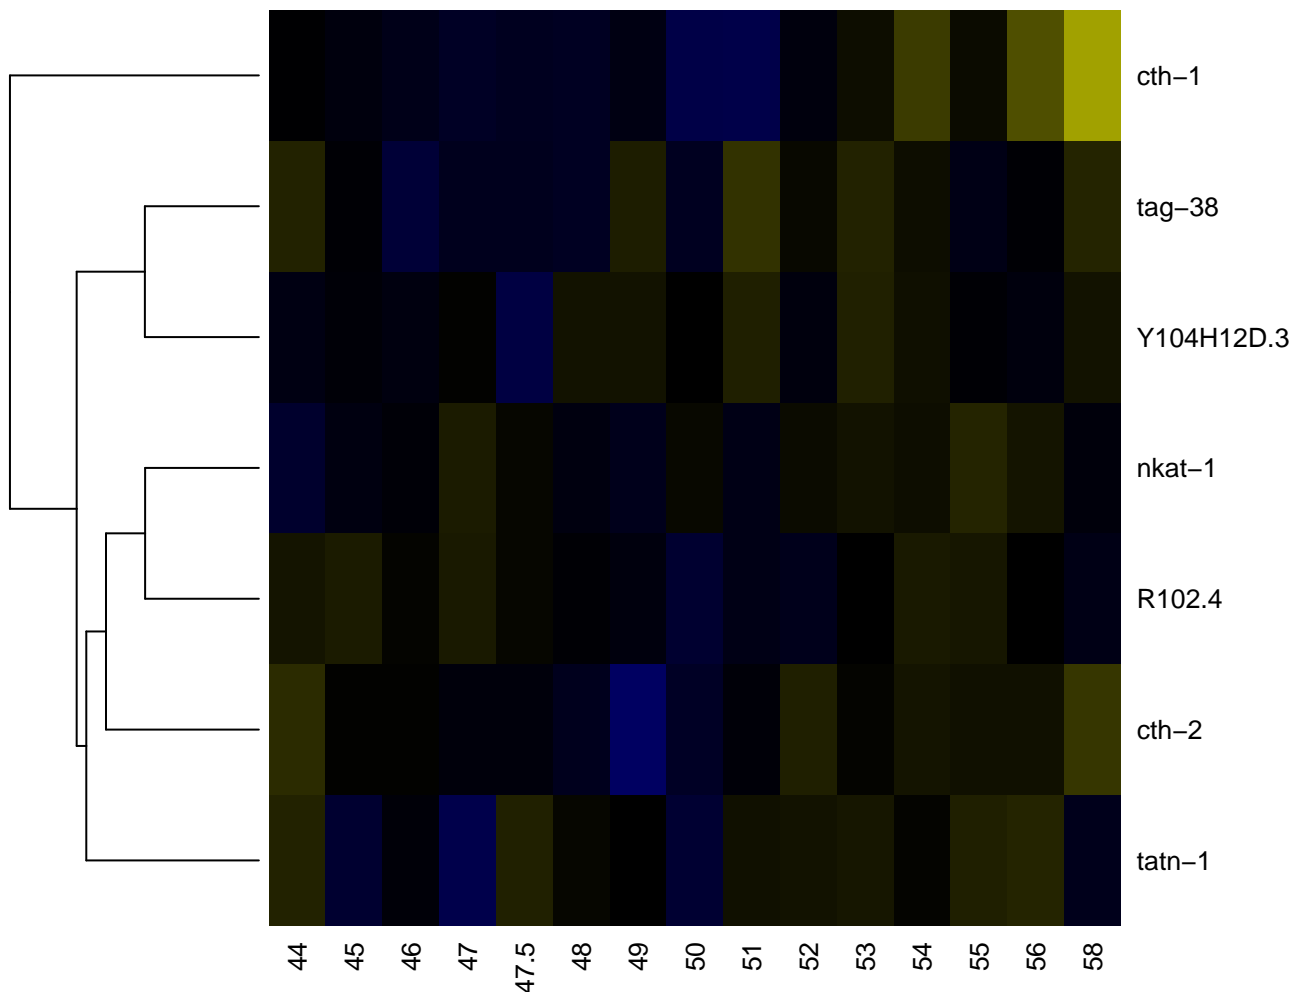

# DegT/DnrJ/EryC1/StrS aminotransferase family

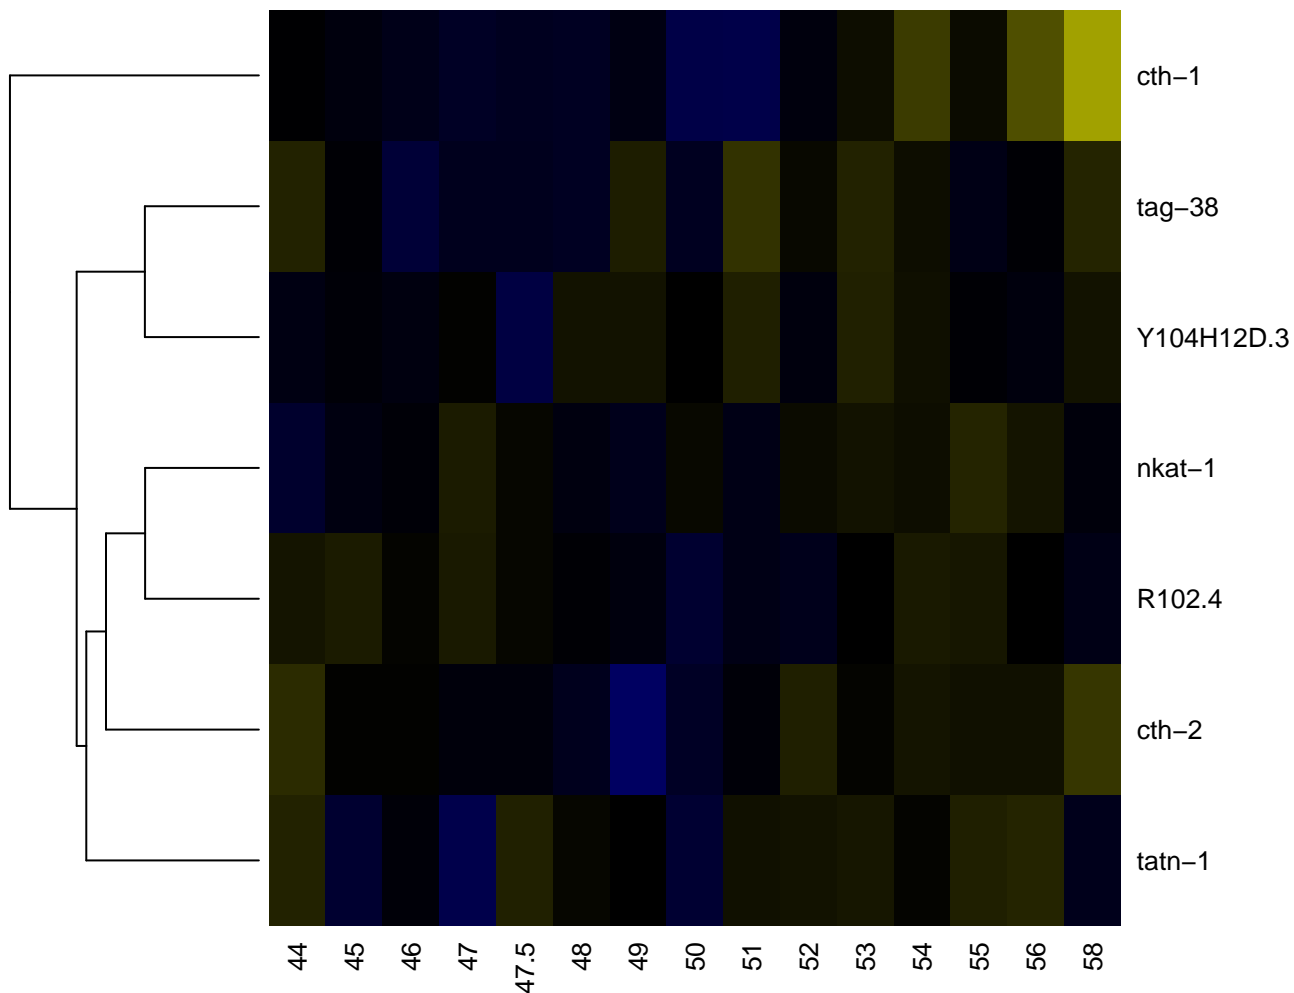







# Delayed-early response protein/equilibrative nucleoside transp

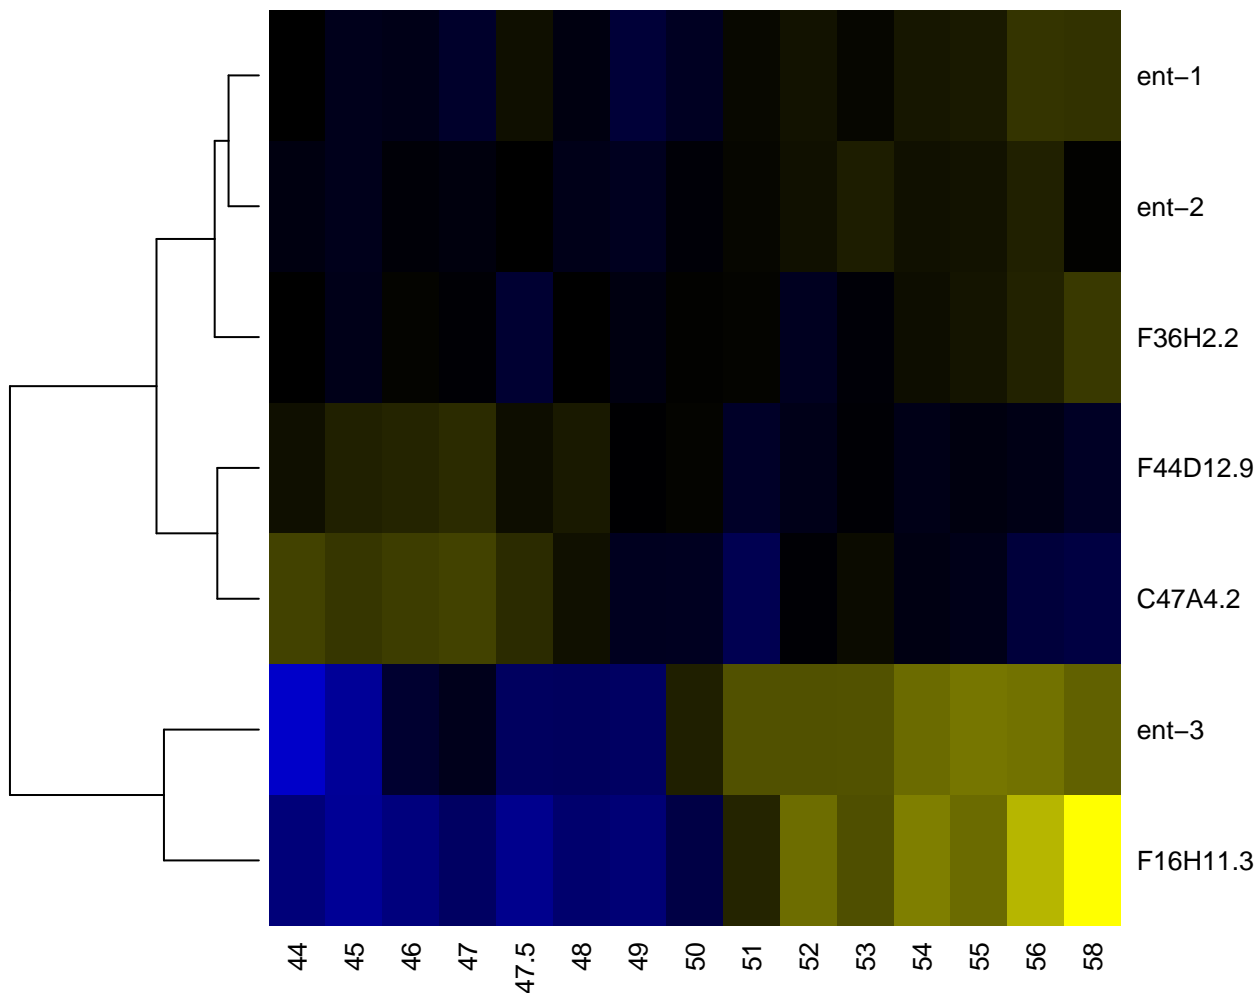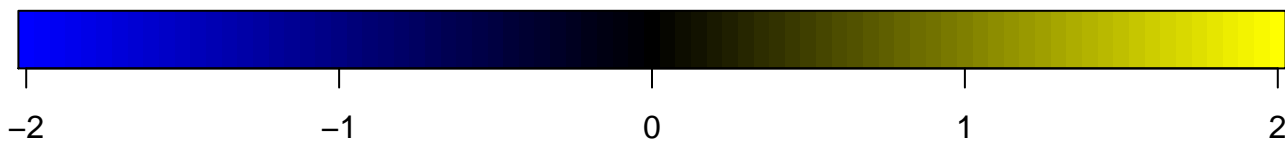



# Delta serrate ligand

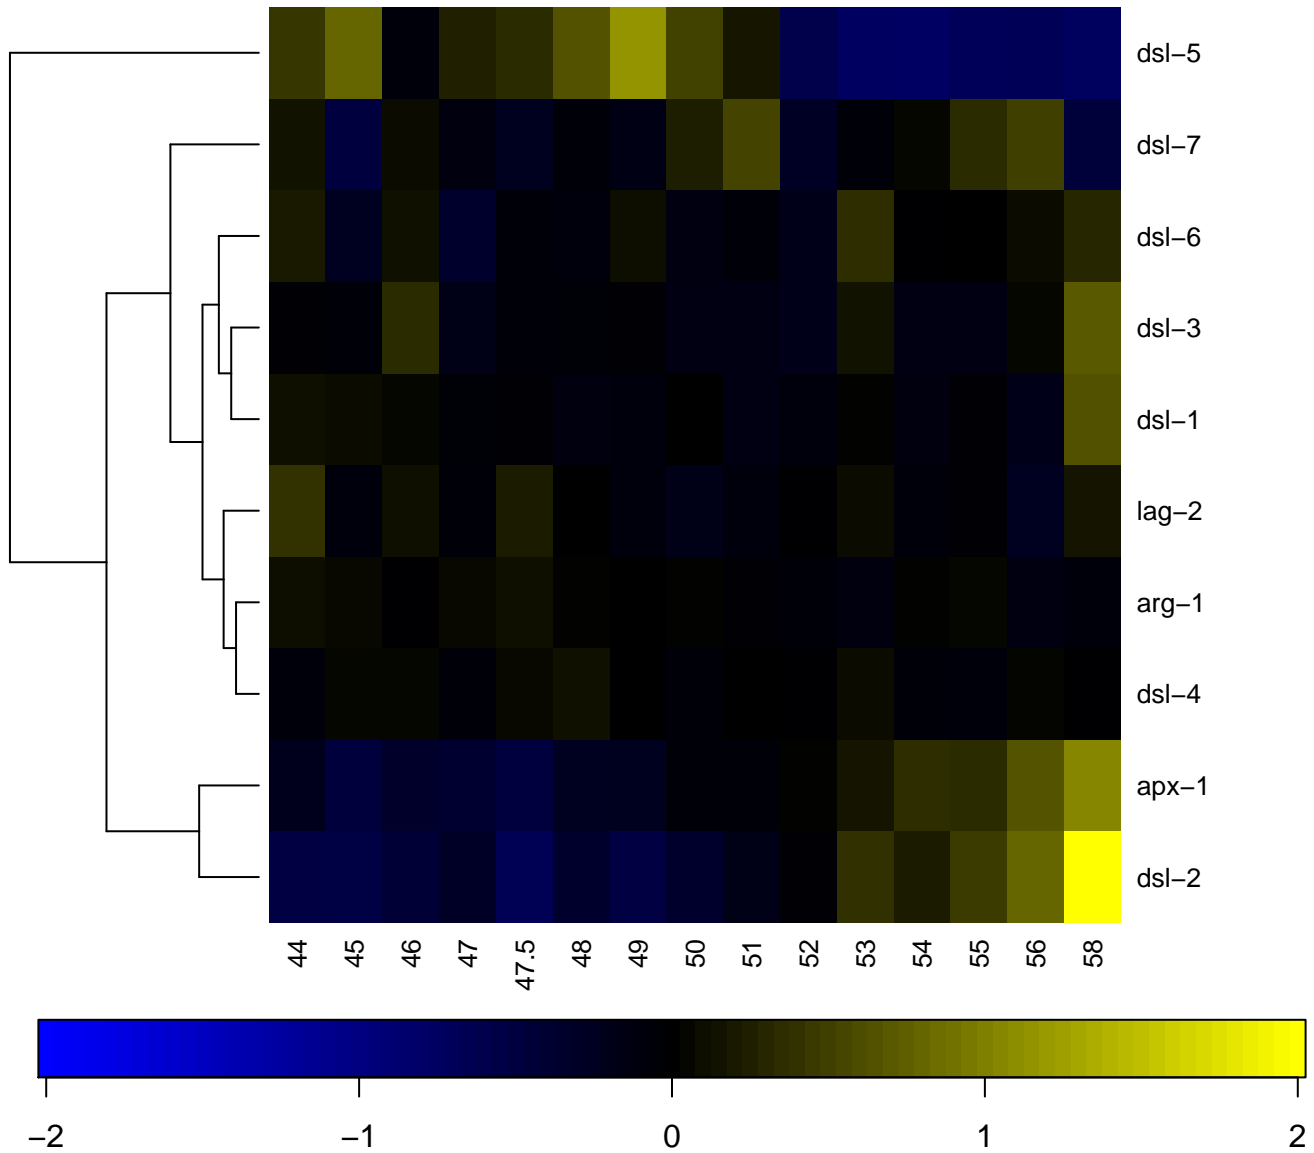

# Delta tubulin

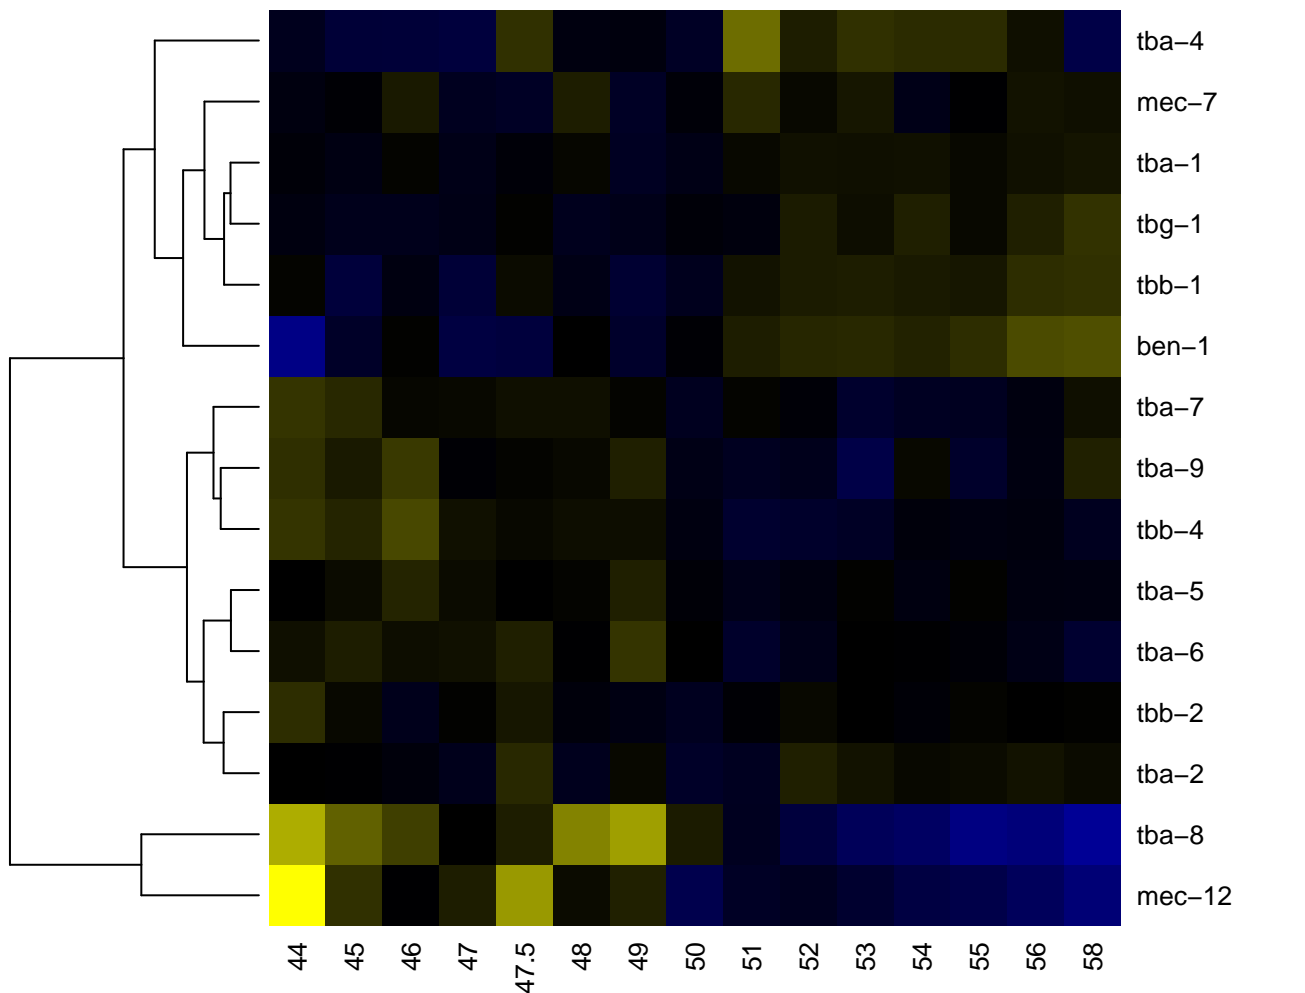









# DEP domain

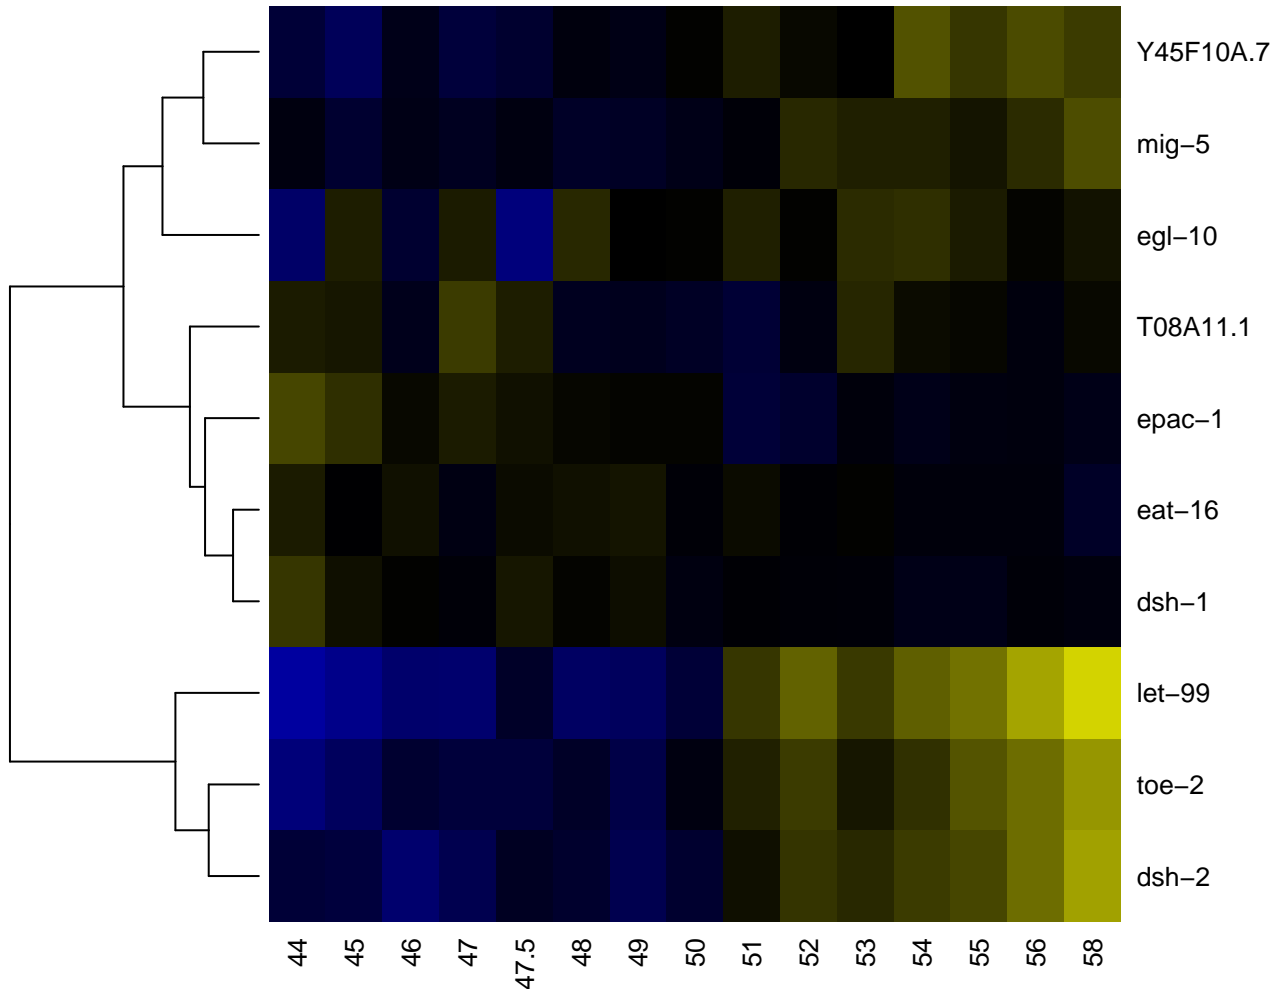

# Destabilase

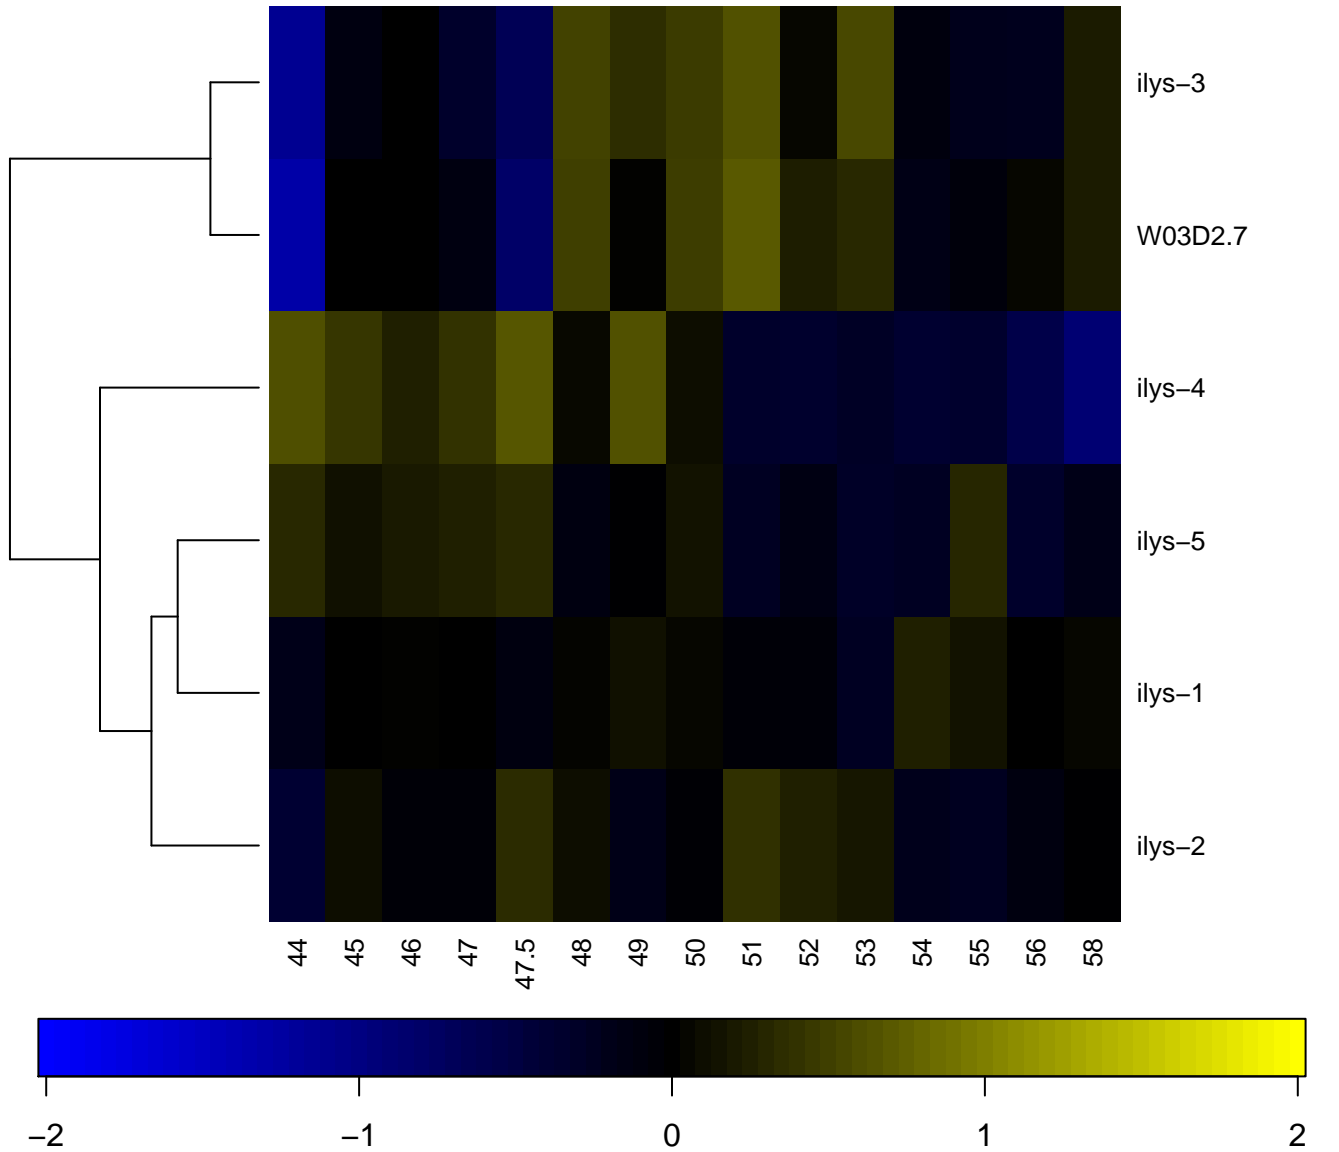



# DHHC zinc finger domain

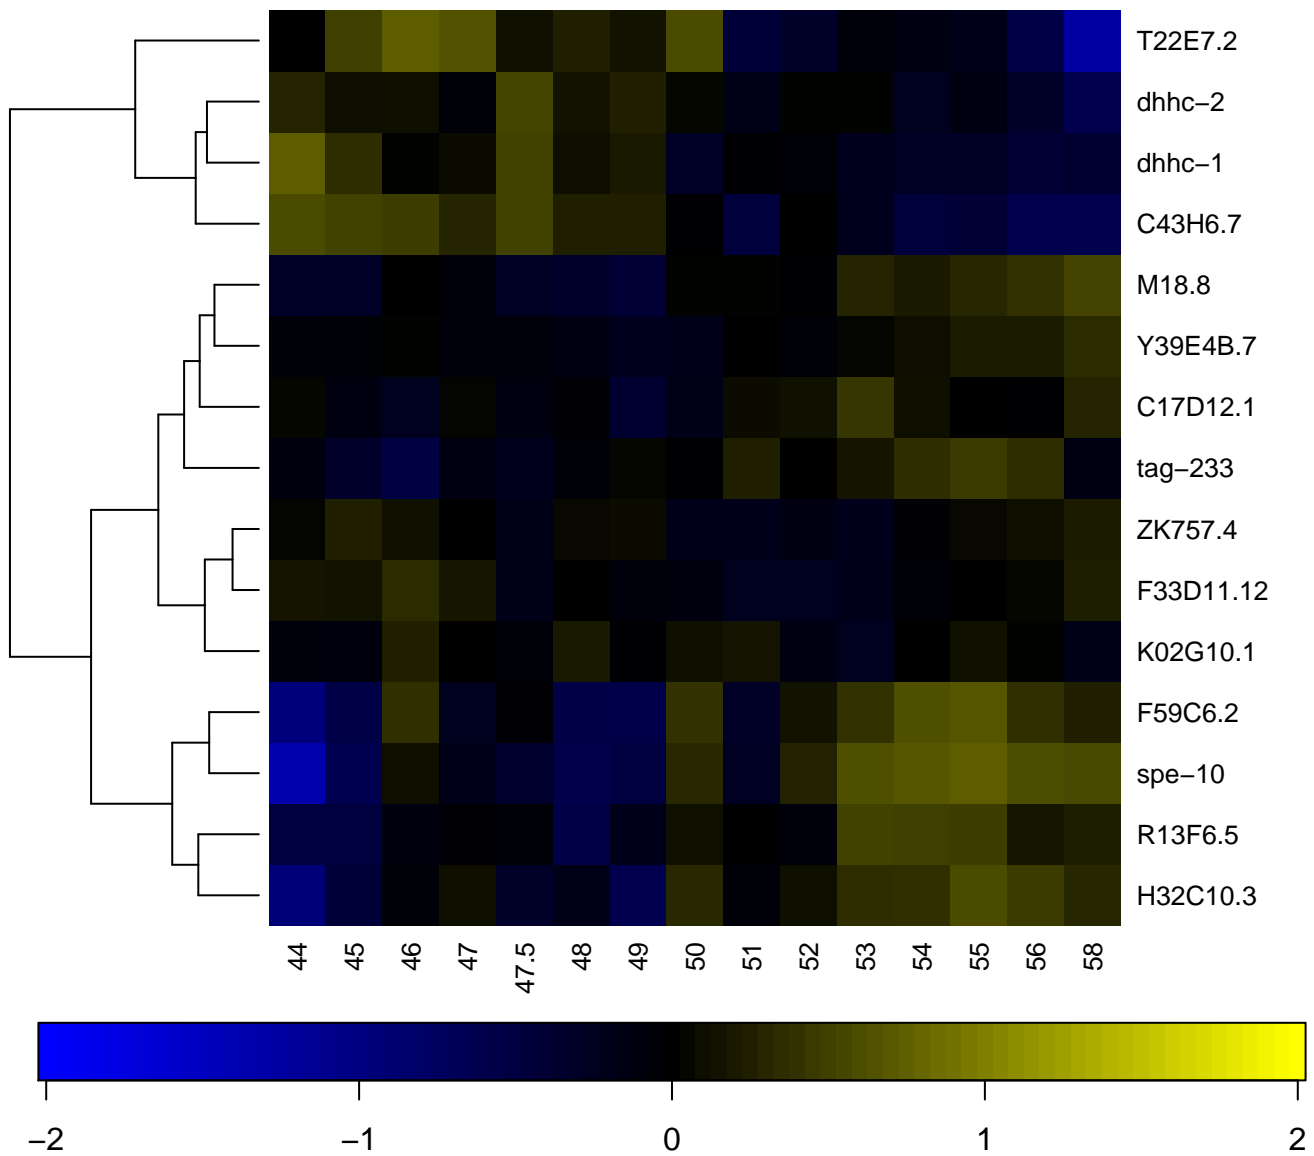





















# DM DNA-binding



# DM DNA binding domain

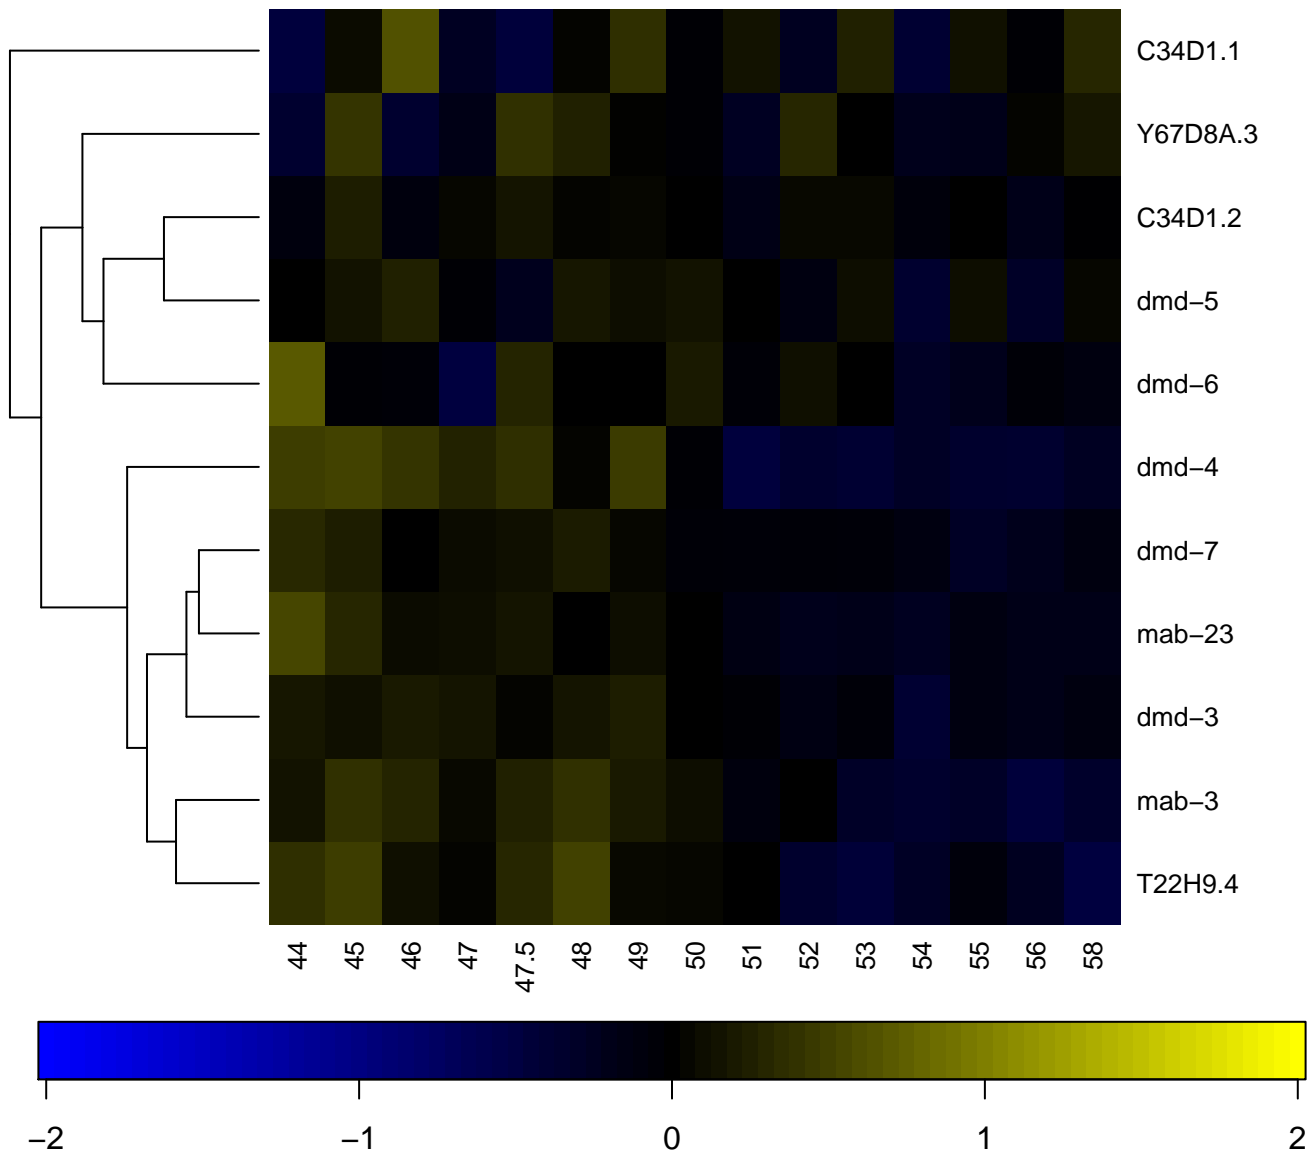

# DNA-binding HORMA

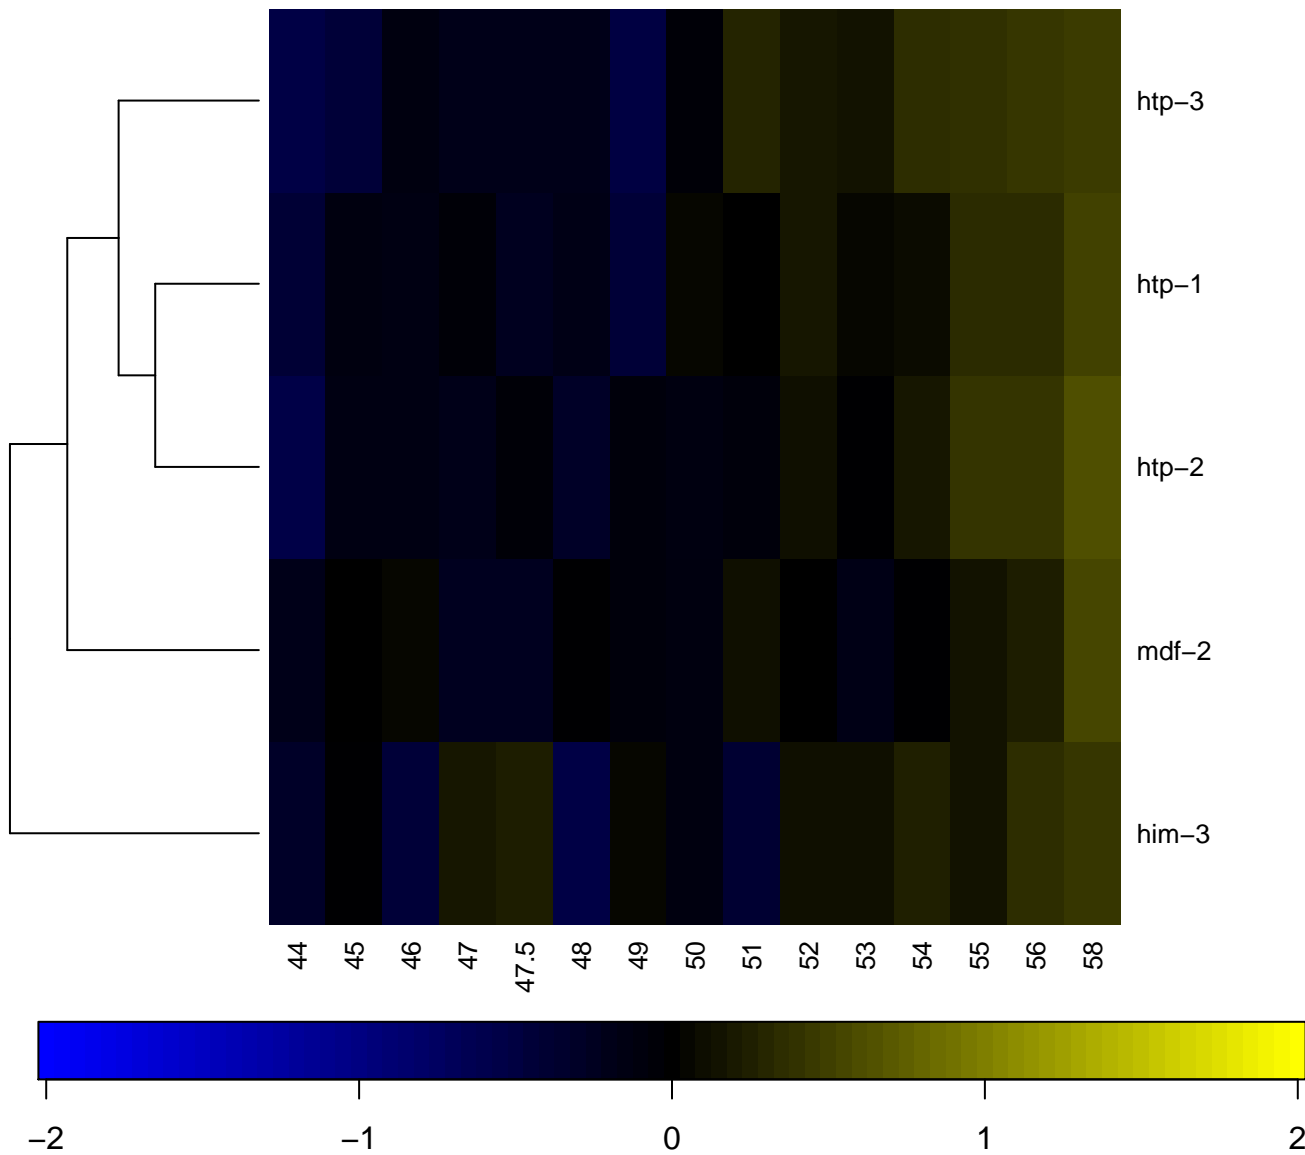

# DNA-binding SAP

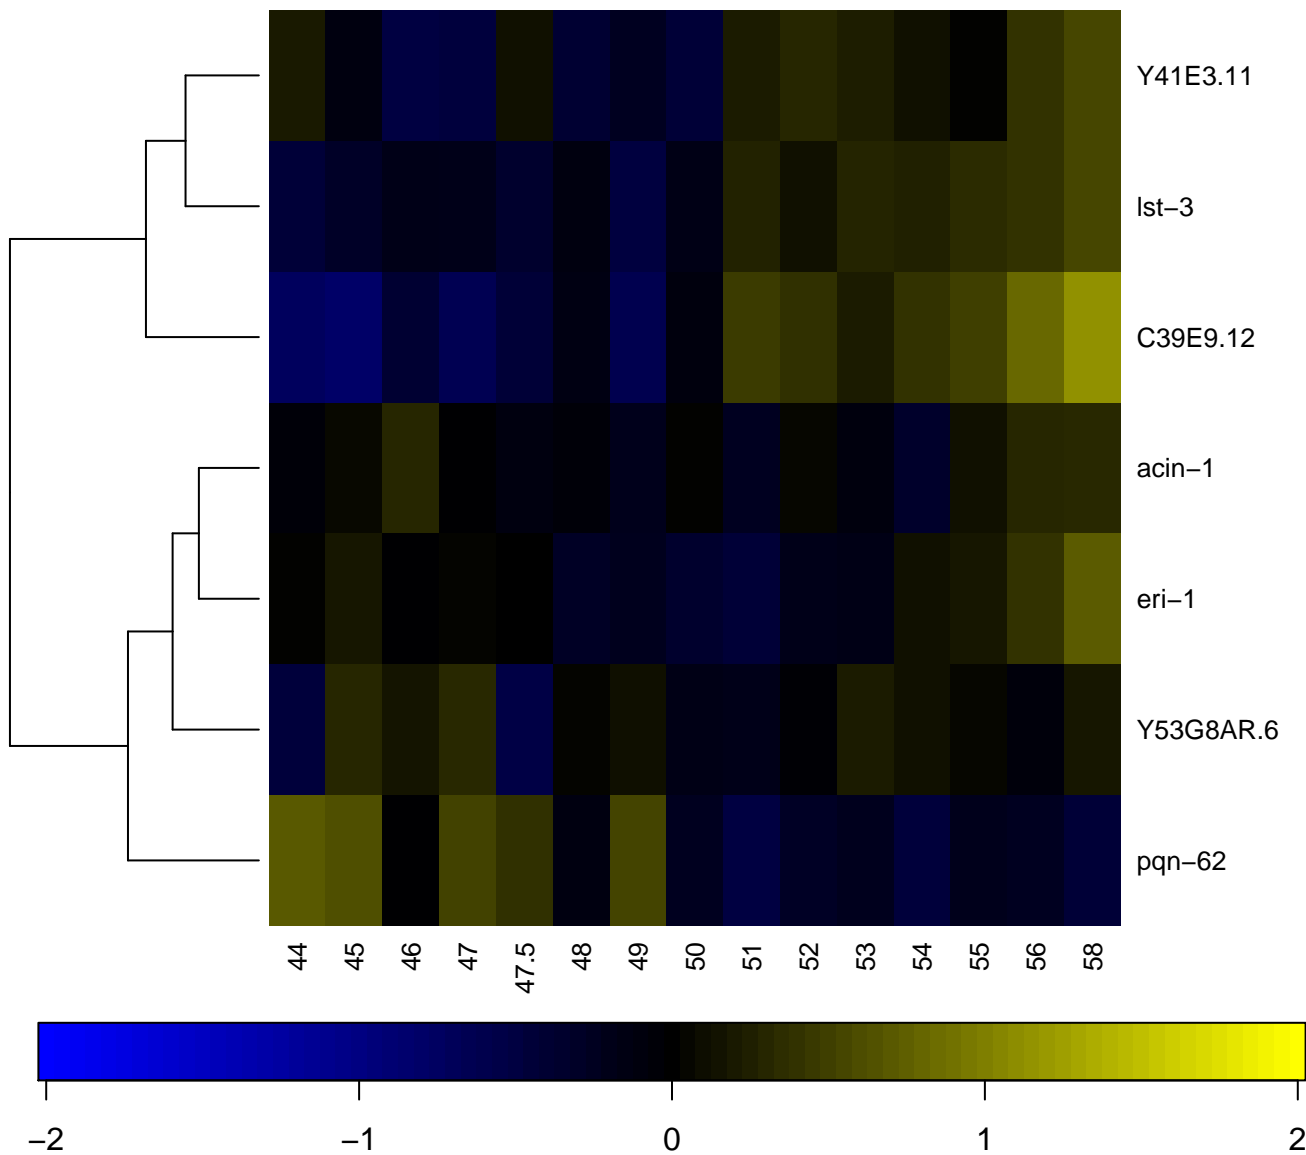

# DNA-dependent ATPase MCM

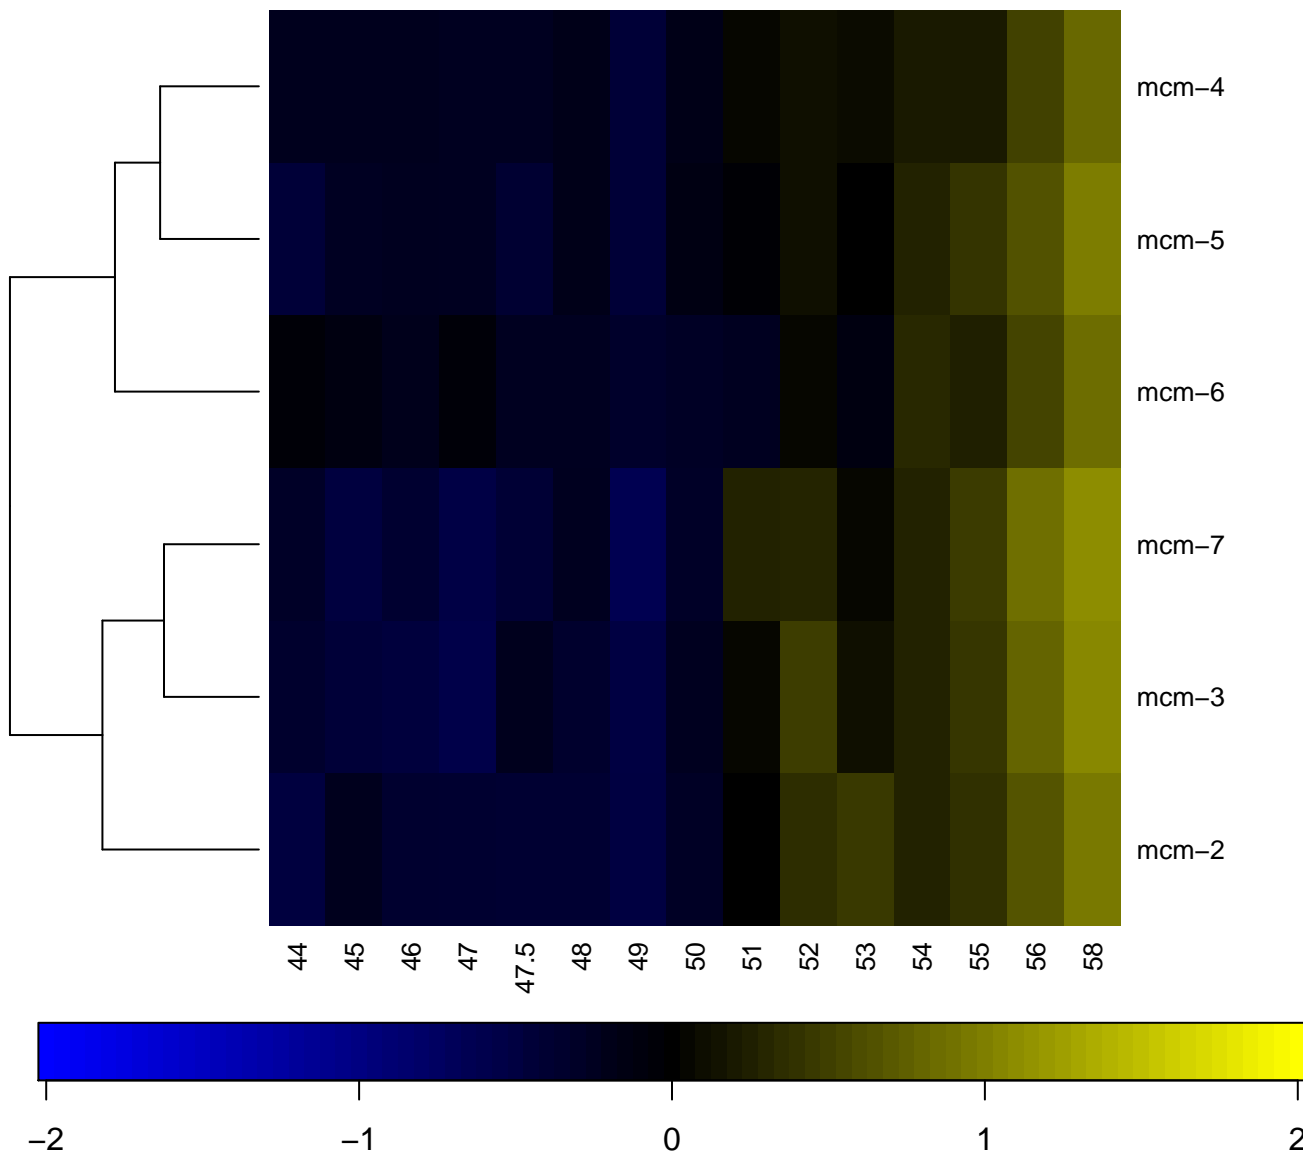







# DNA helicase, Holliday junction RuvB type, N-terminal

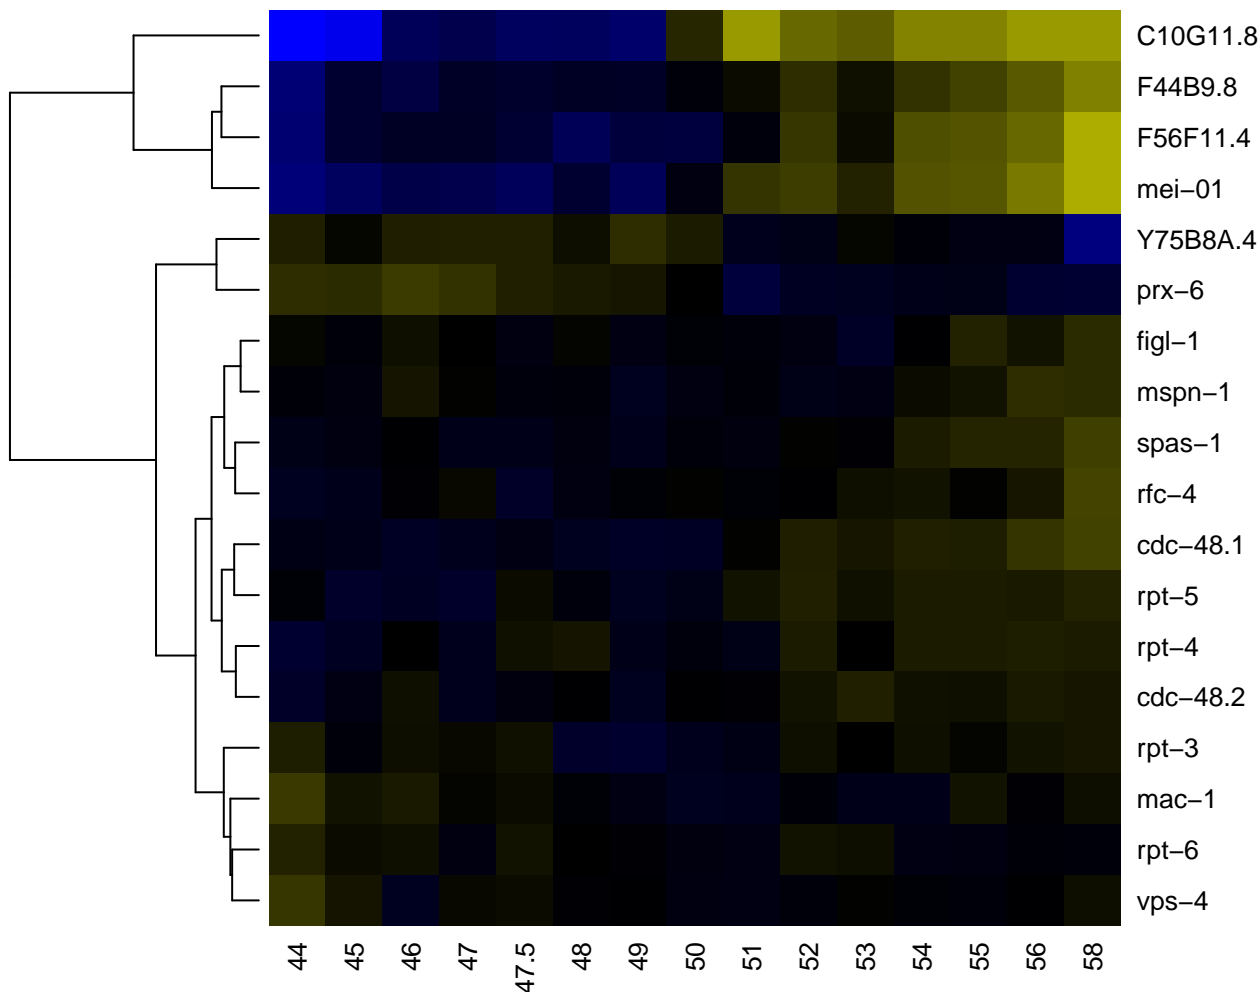





# DNA polymerase, family B

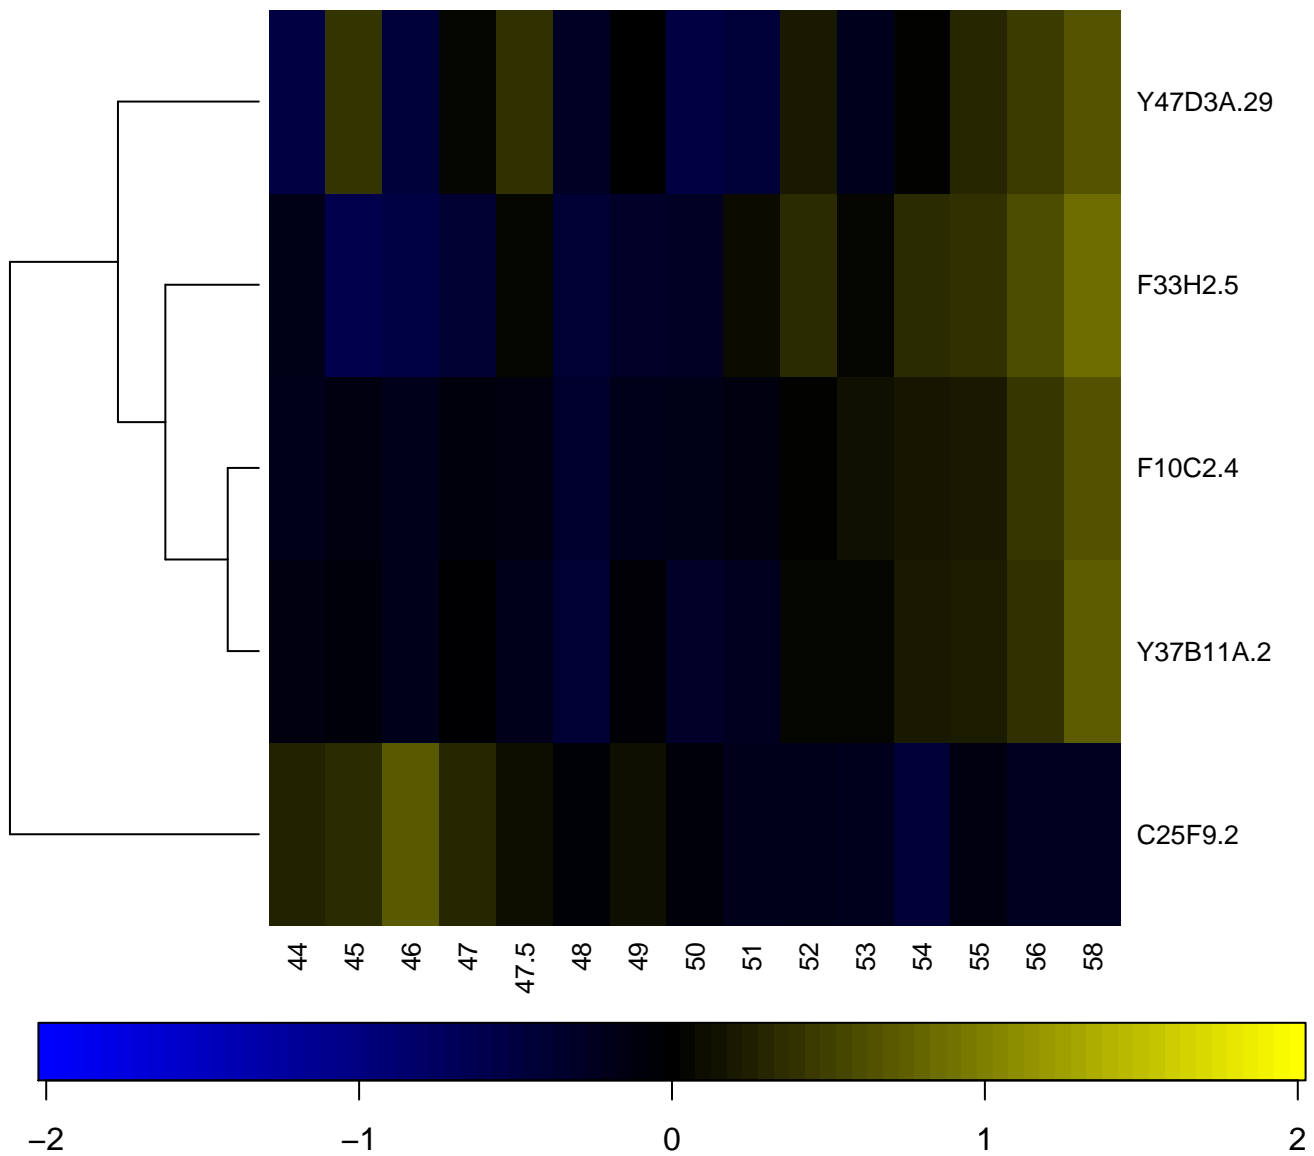

# 5'UTR RNA helicase, ATP-dependent, DEAH-box type, conserved

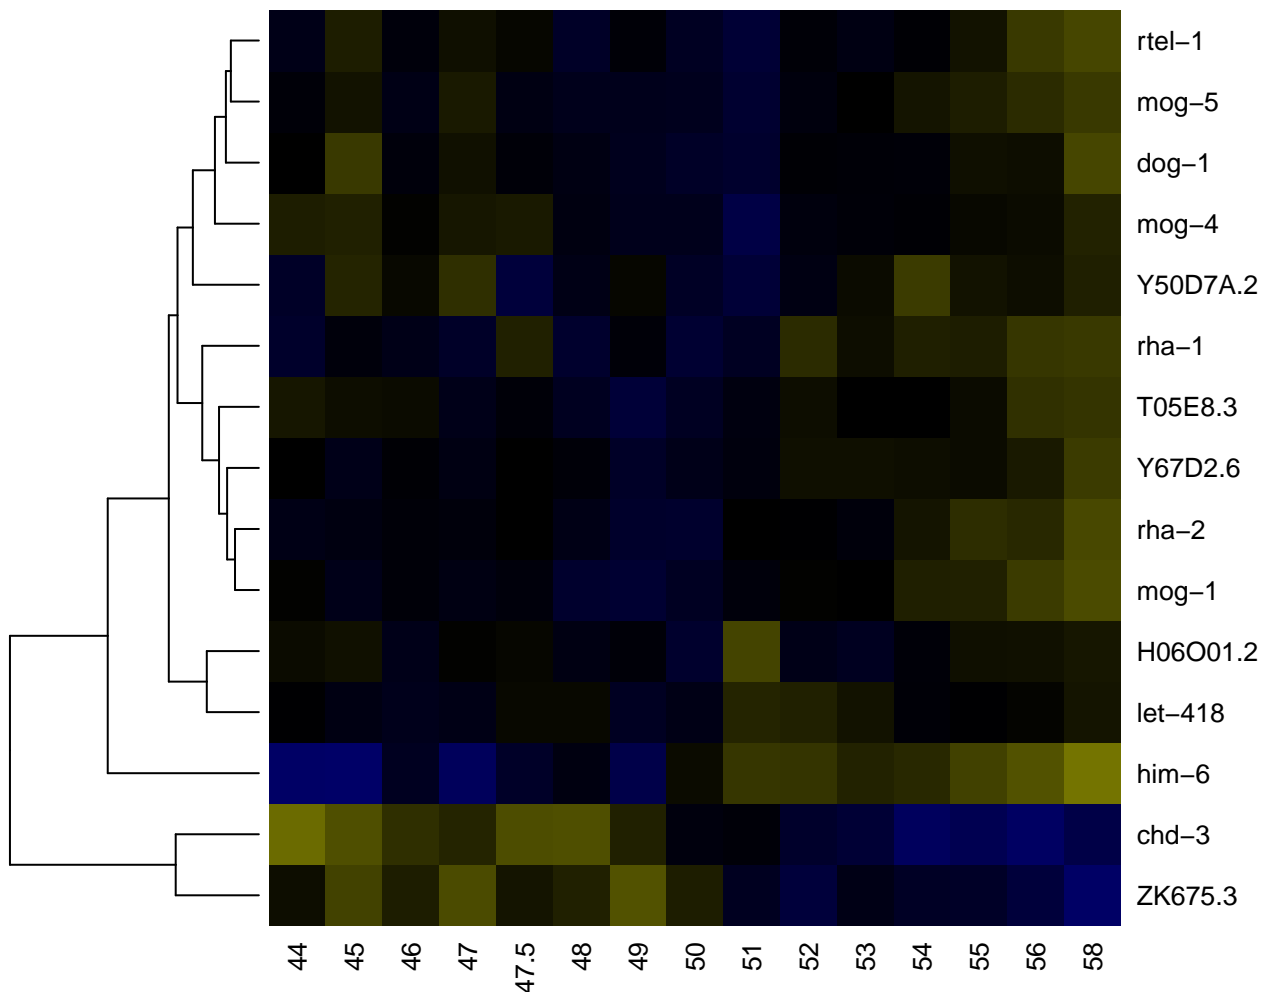

# DNA/RNA helicase, C-terminal

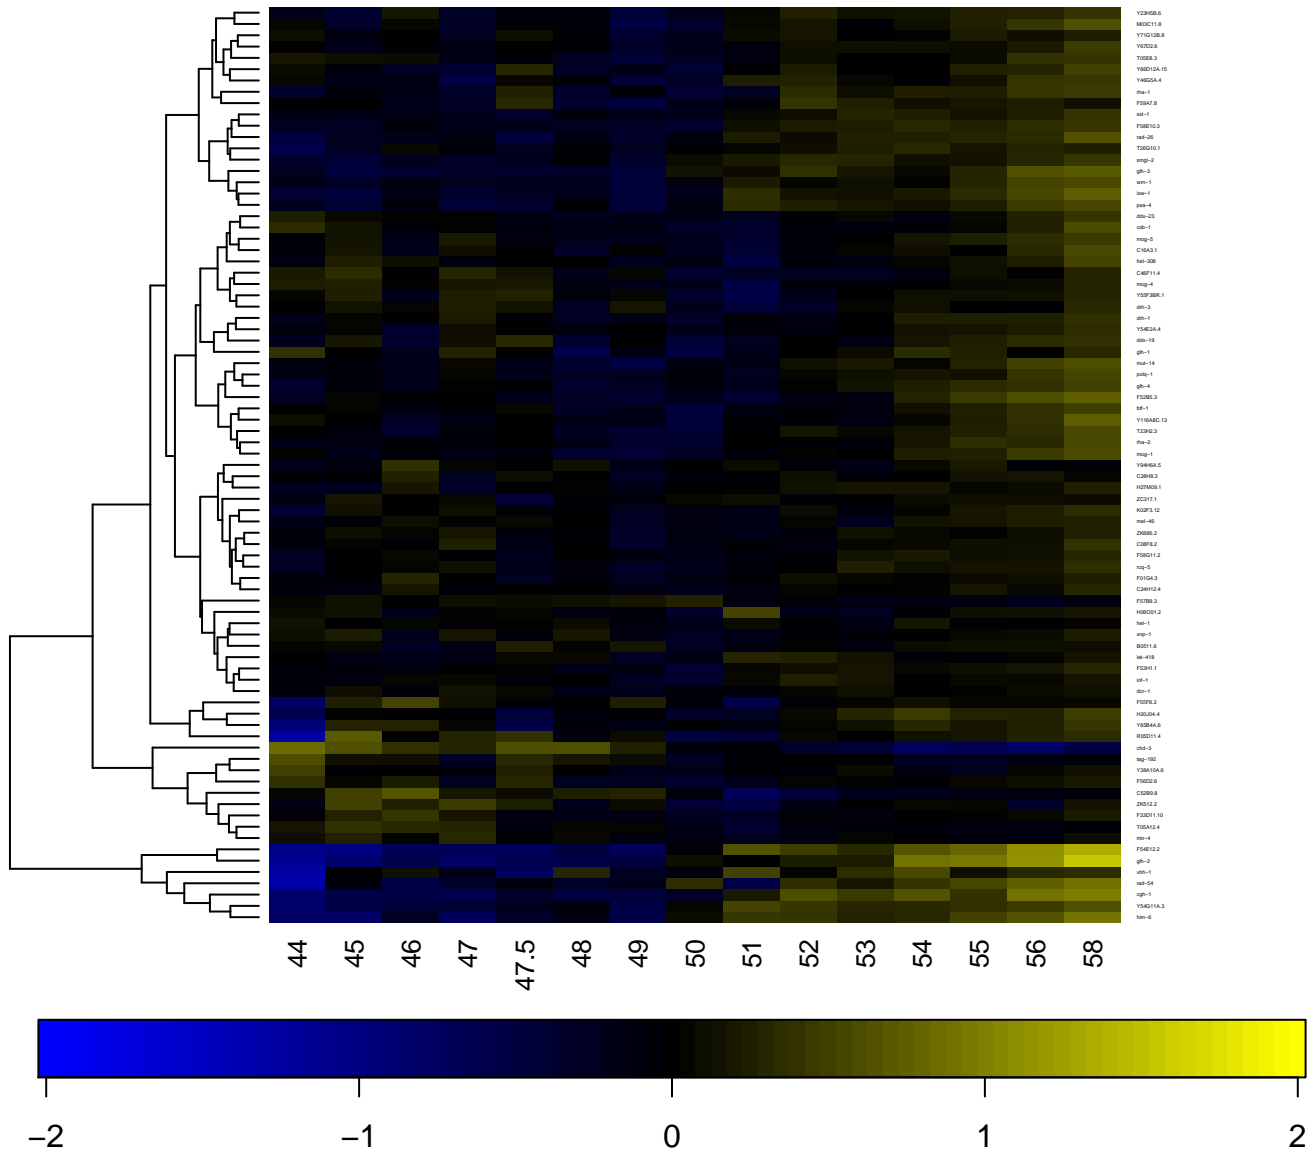

# DNA/RNA helicase, DEAD/DEAH box type, N-terminal



-2

-1

0

1

2





# DnaJ domain

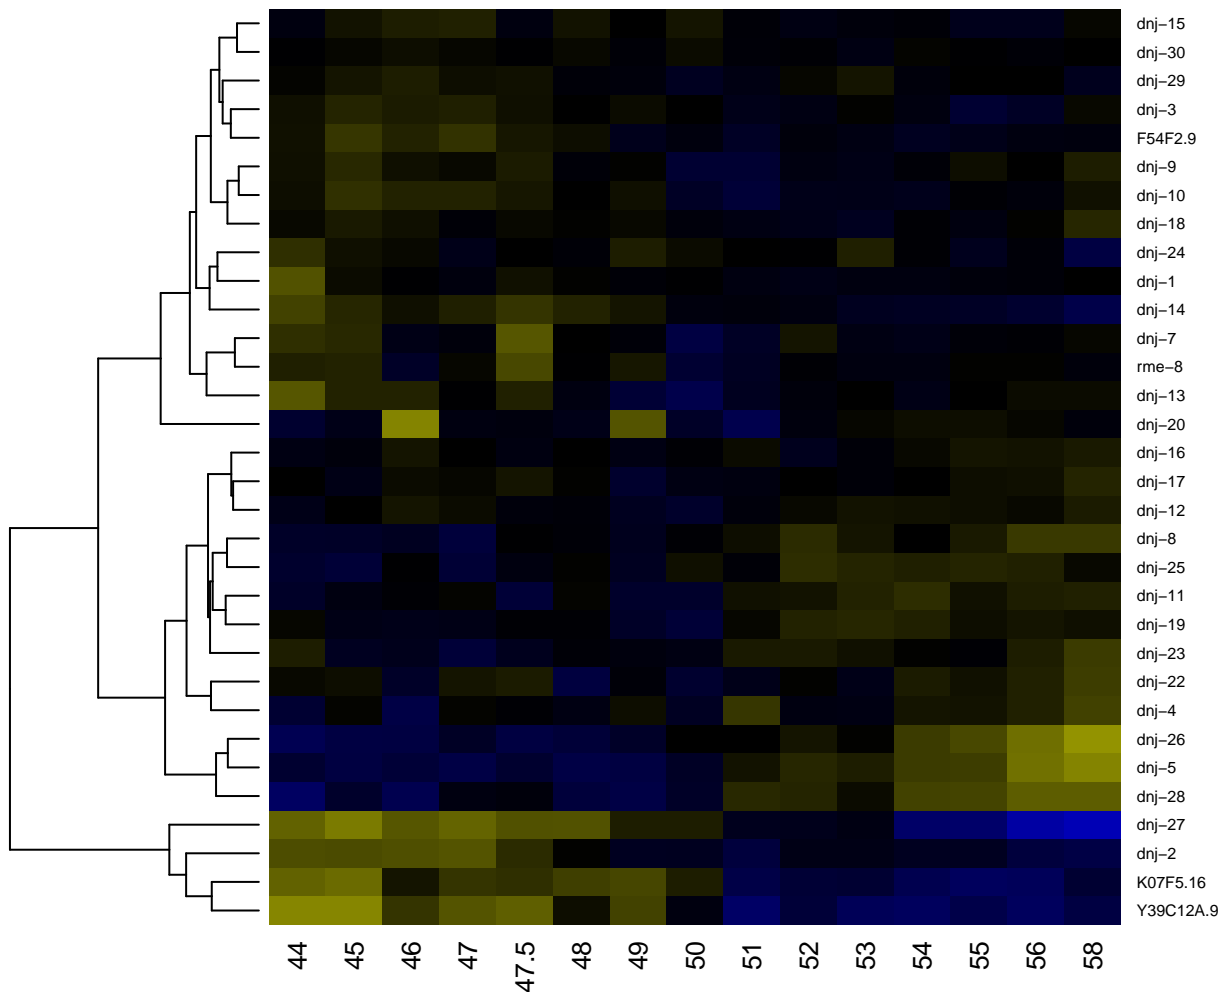

-2

-1

0

1

2



# Domain of unknown function MD, *Caenorhabditis elegans*

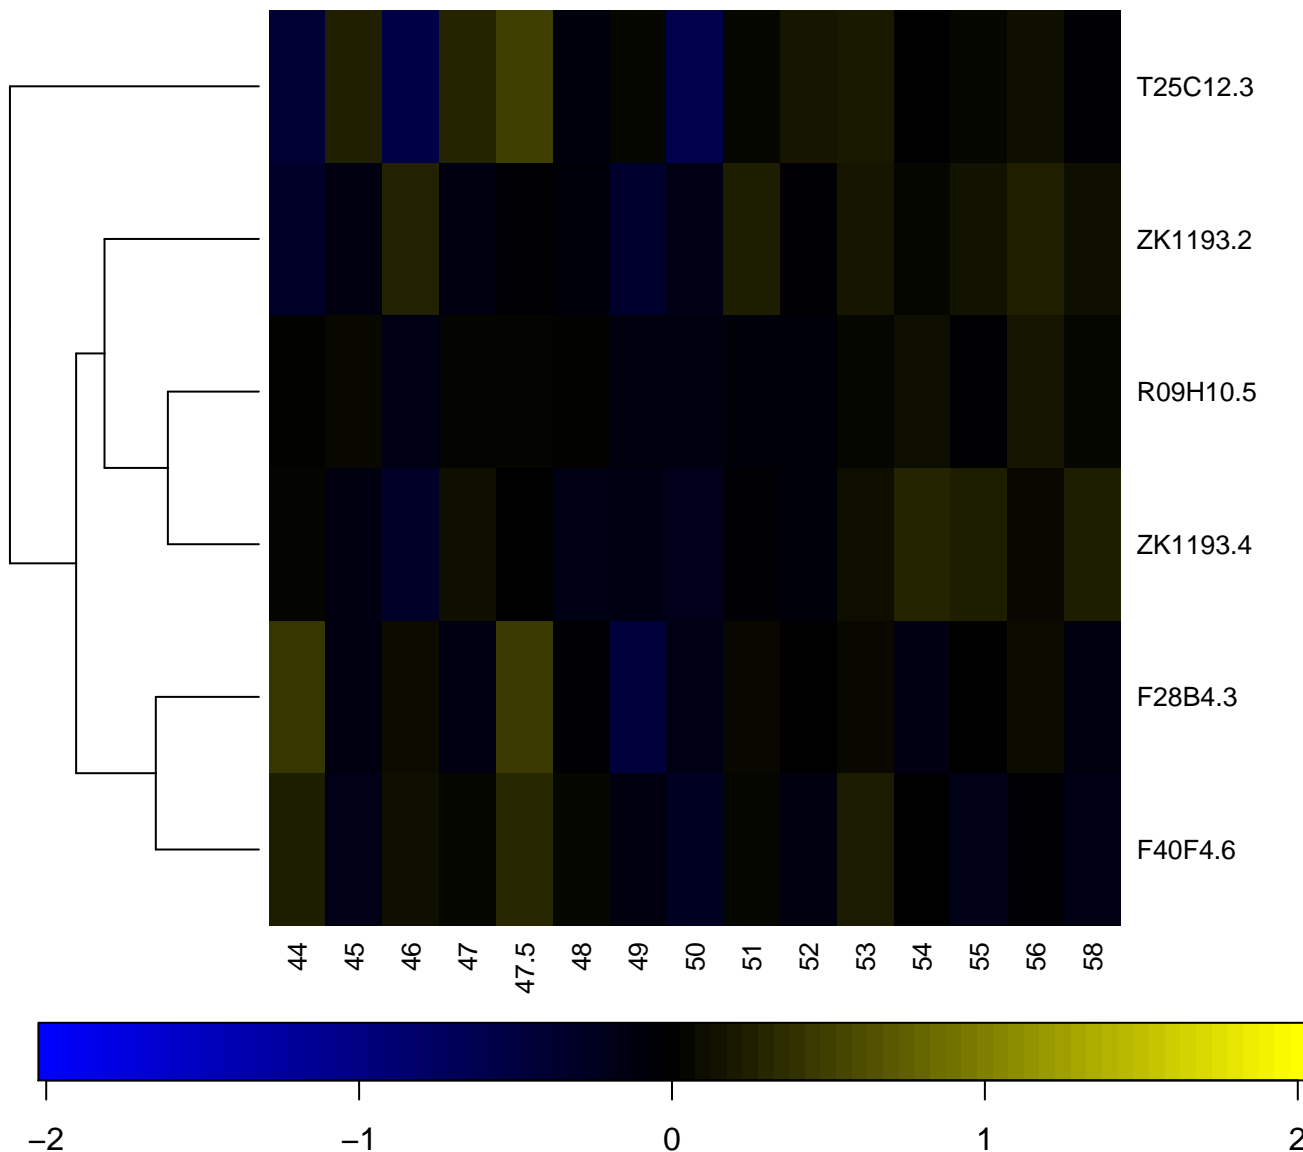

# Domain of unknown function

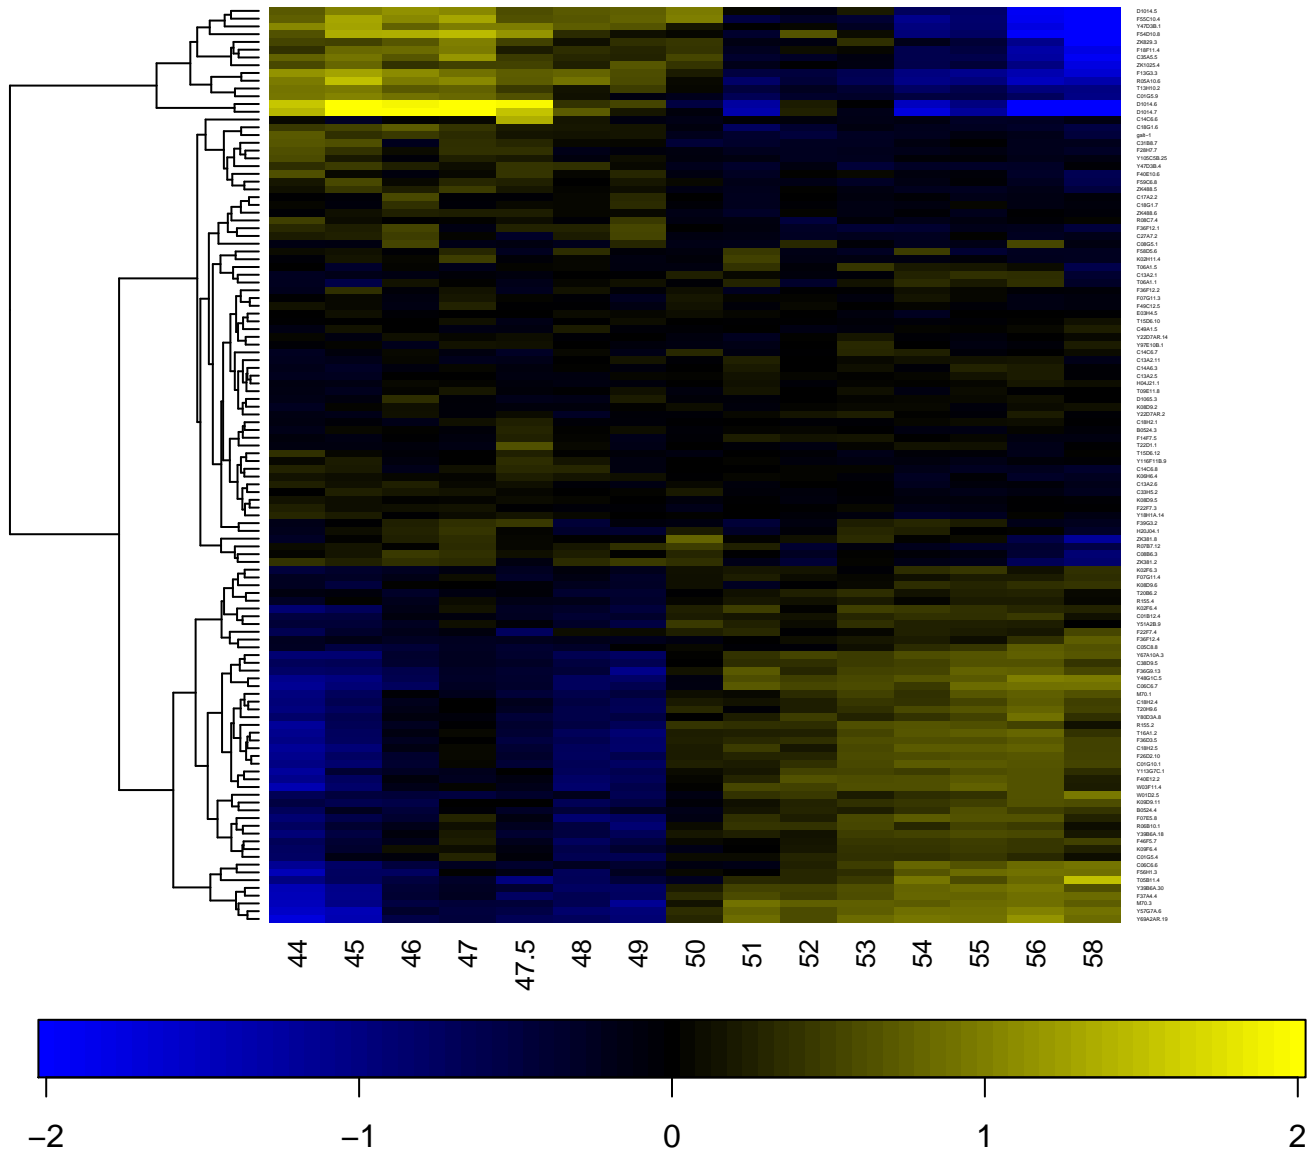









# Domain of unknown function (DUF1794)

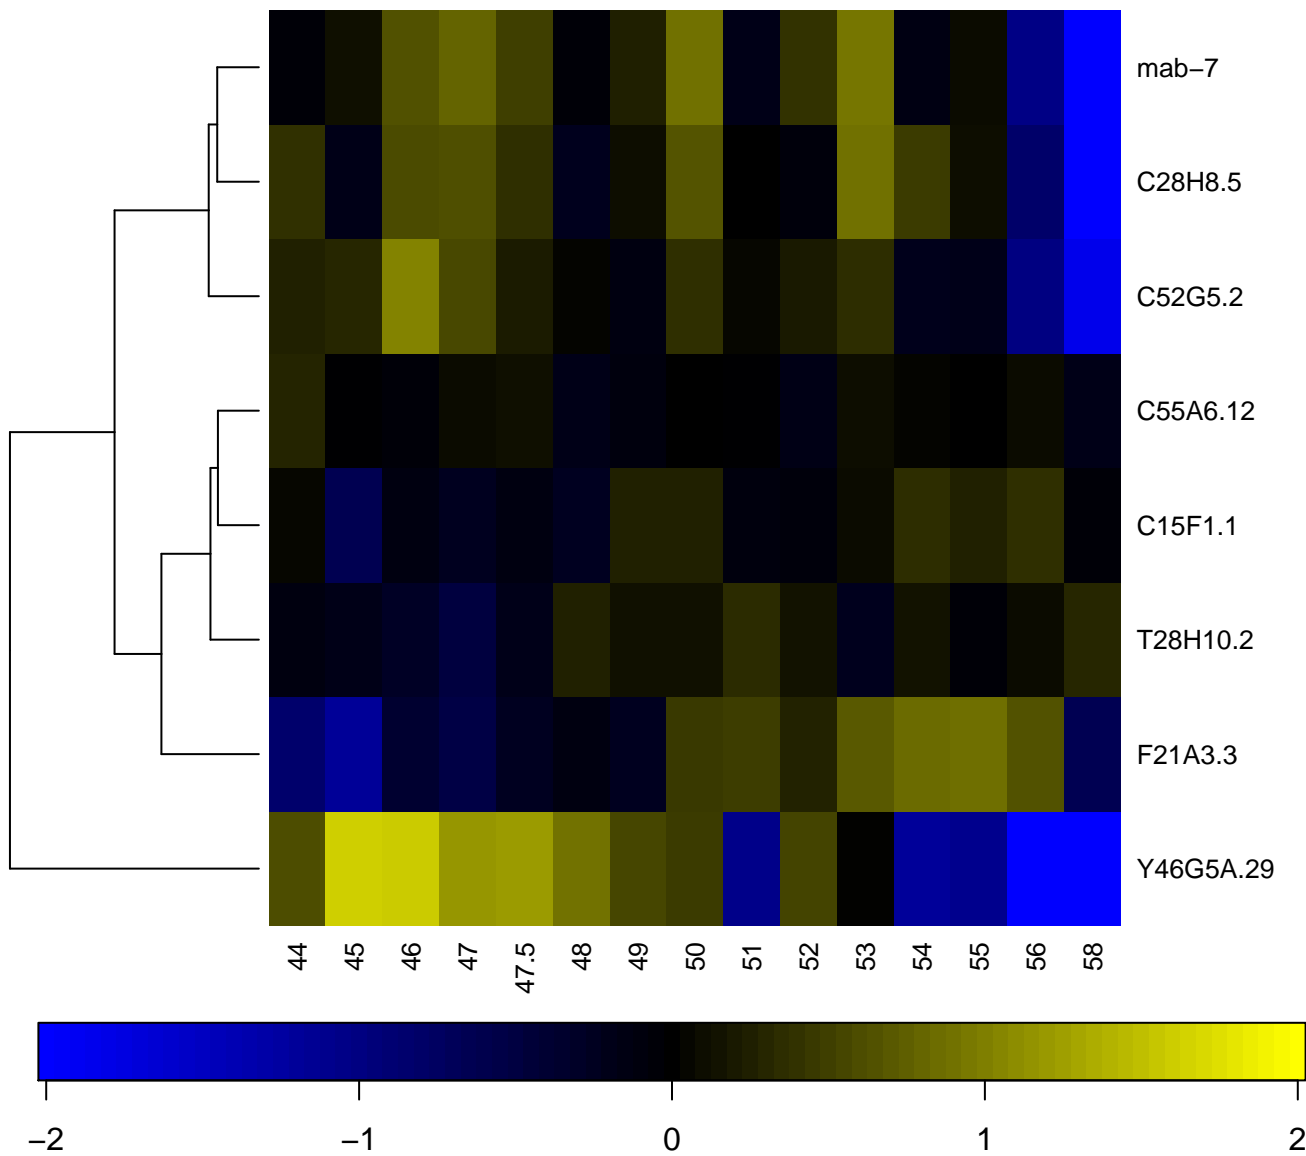







# Domain of unknown function (DUF316)

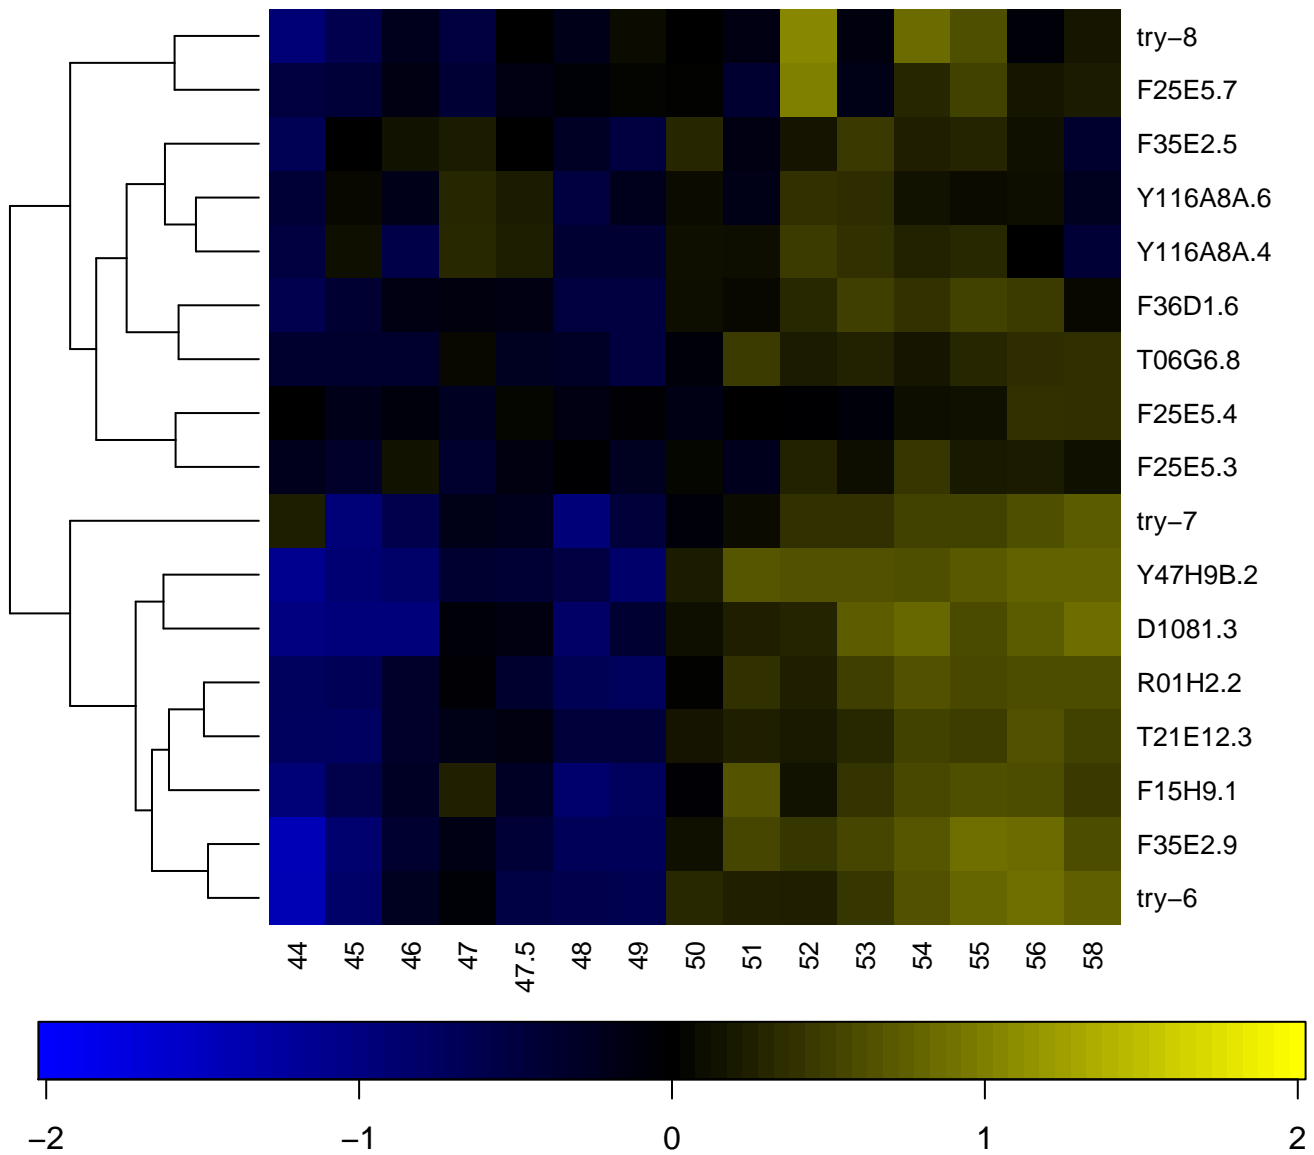

# Domain of unknown function (DUF3557)

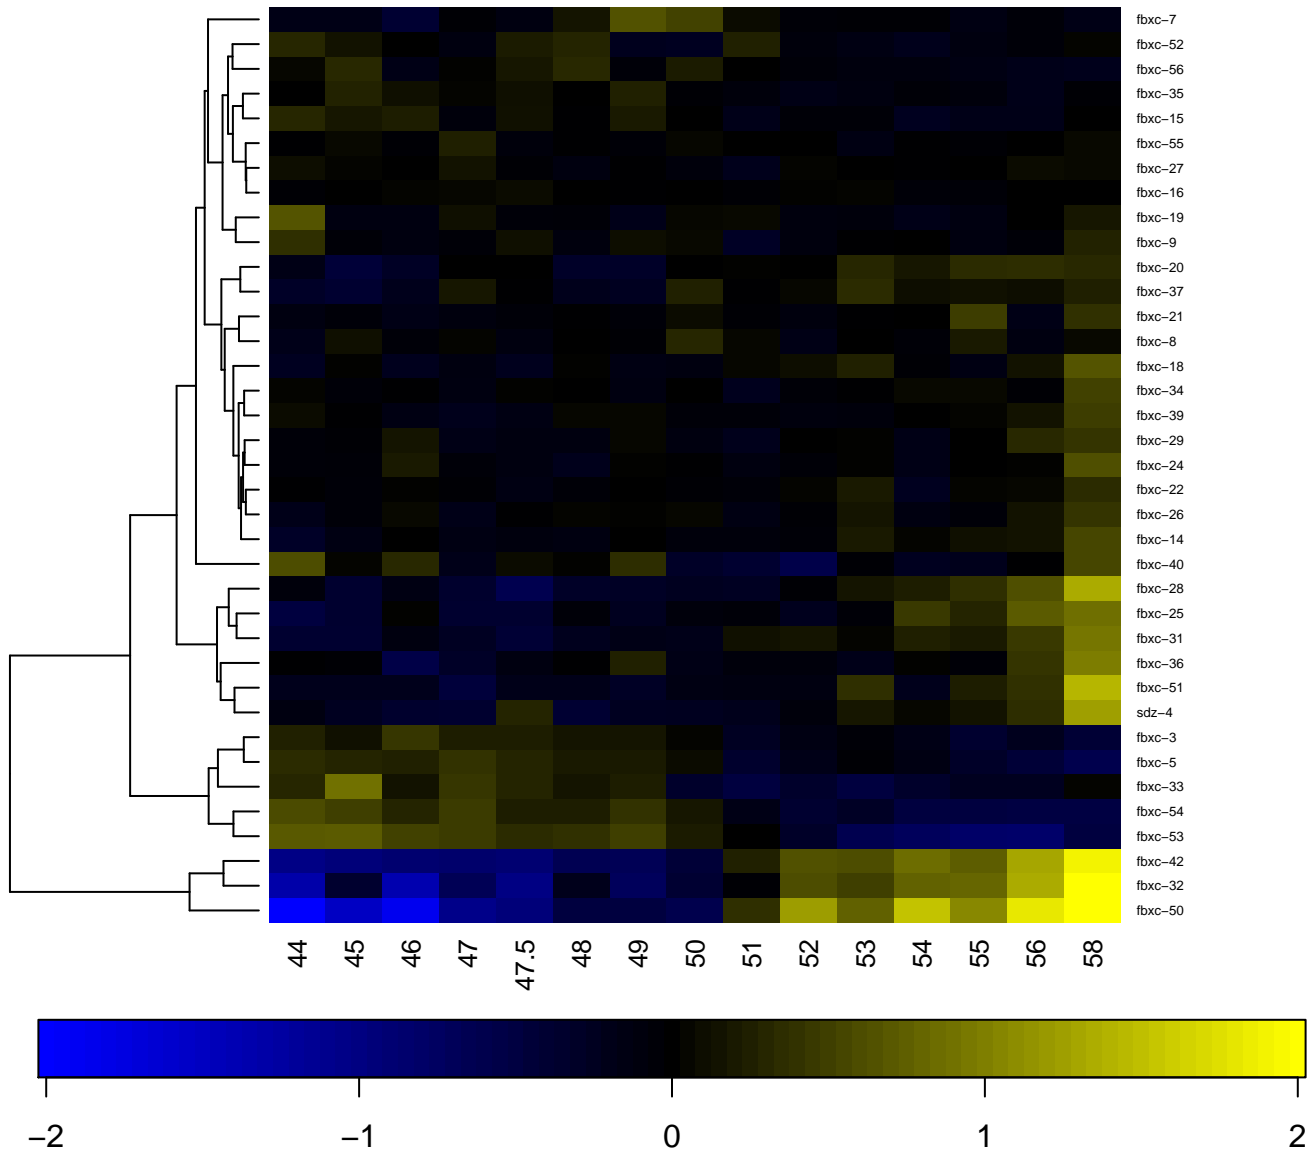

# Domain of unknown function (DUF545)

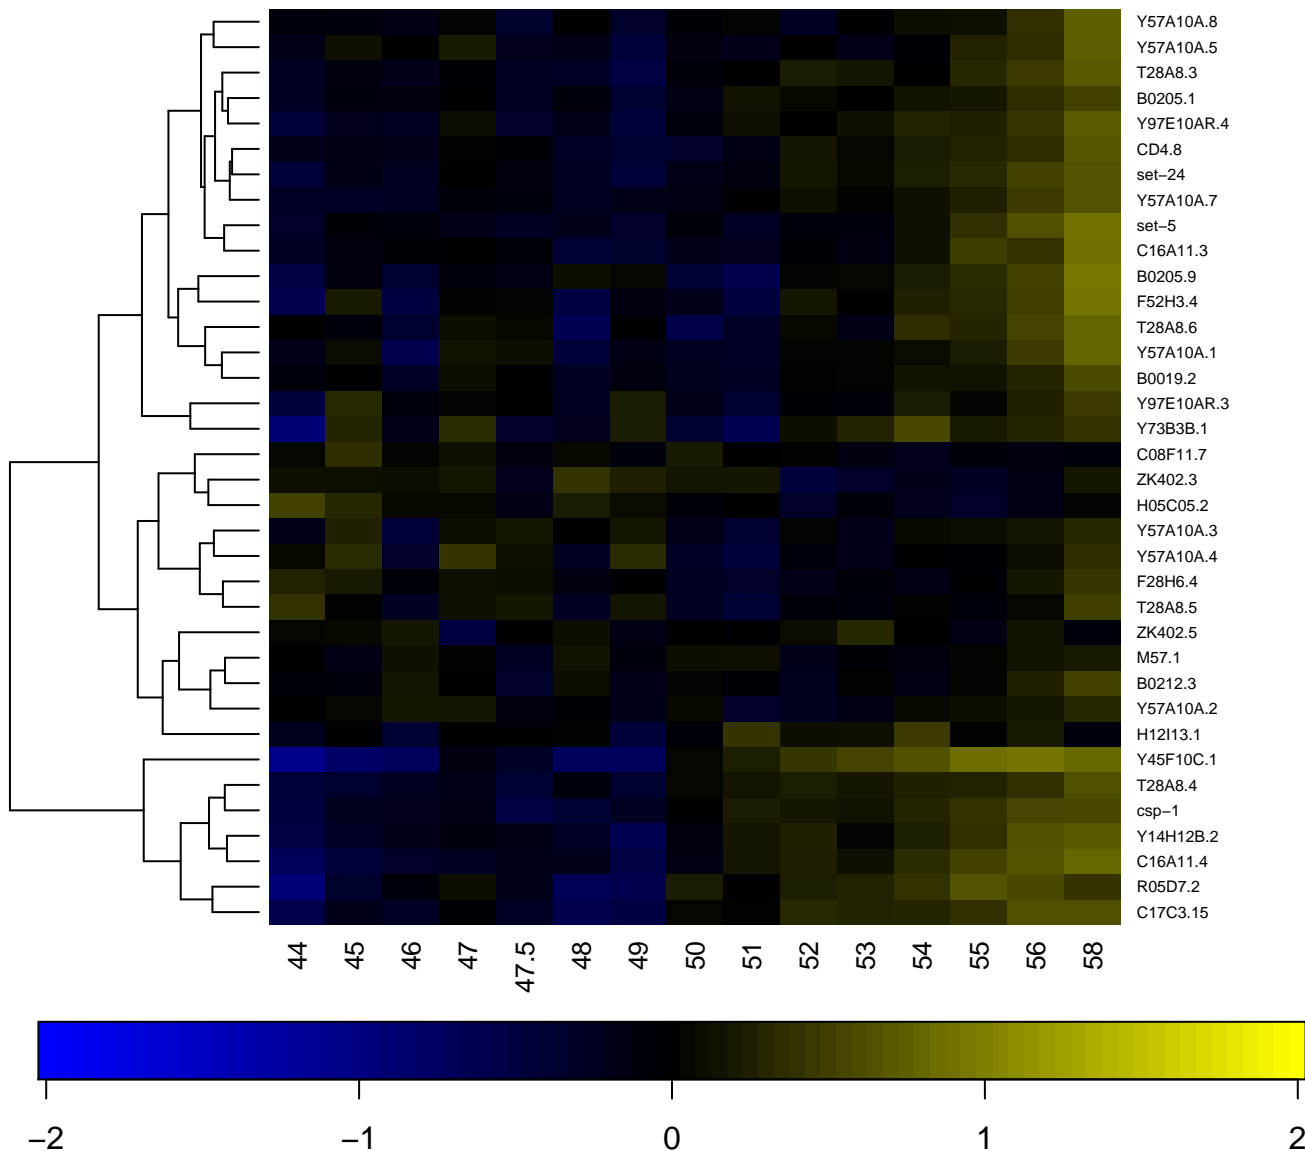

# Domain of unknown function (DUF750)

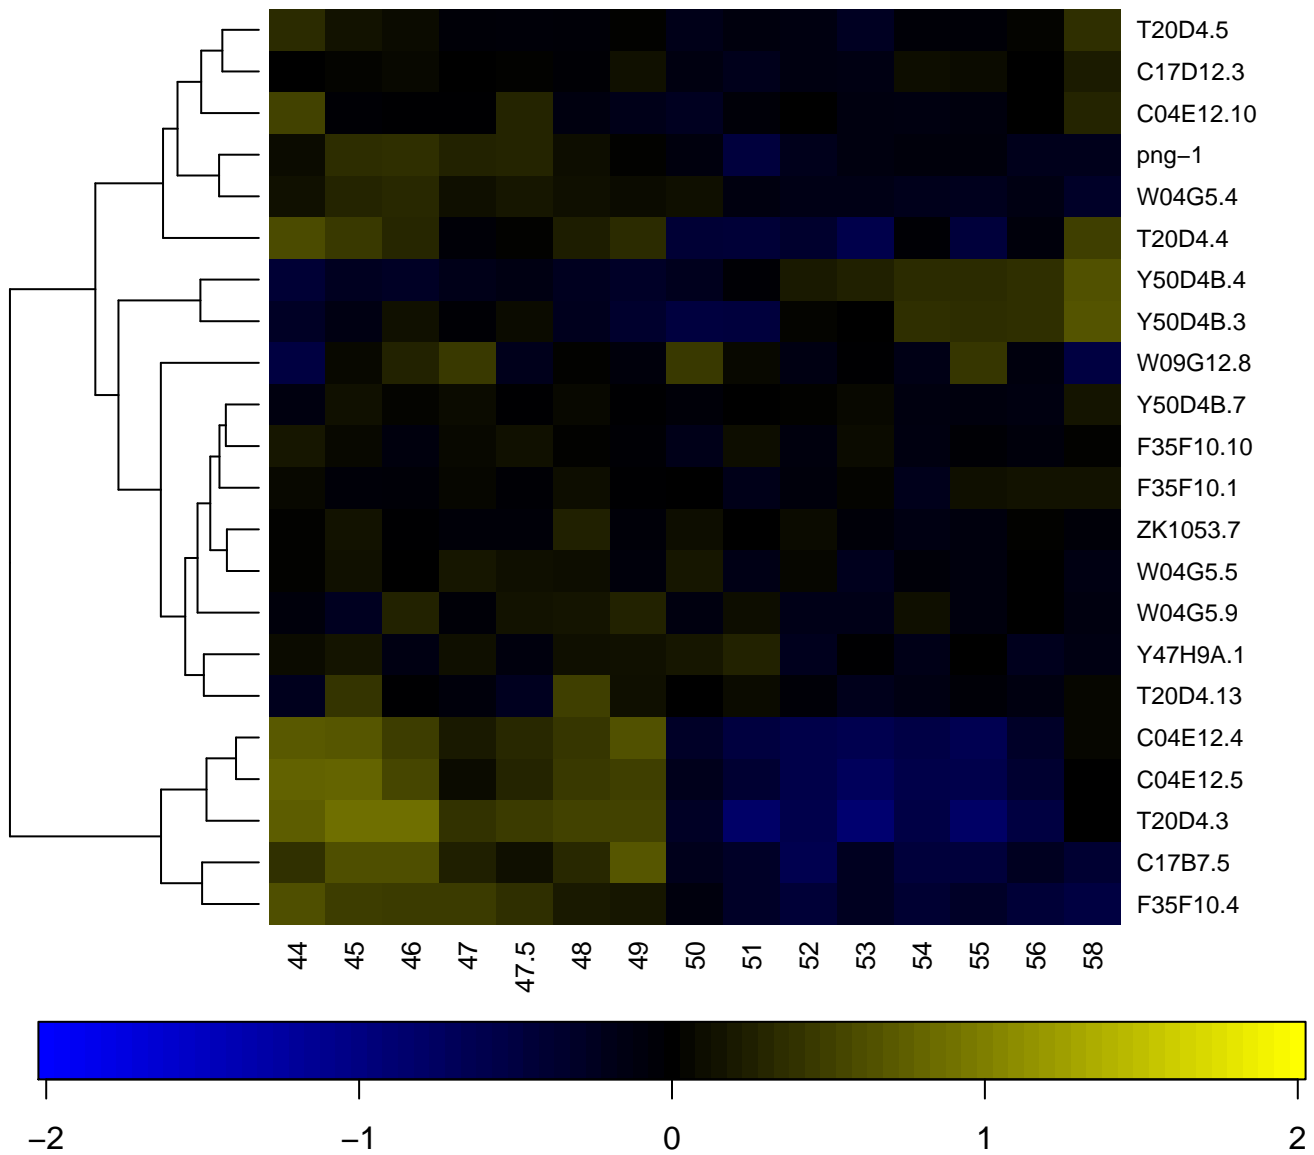



# Domain of unknown function DUF148

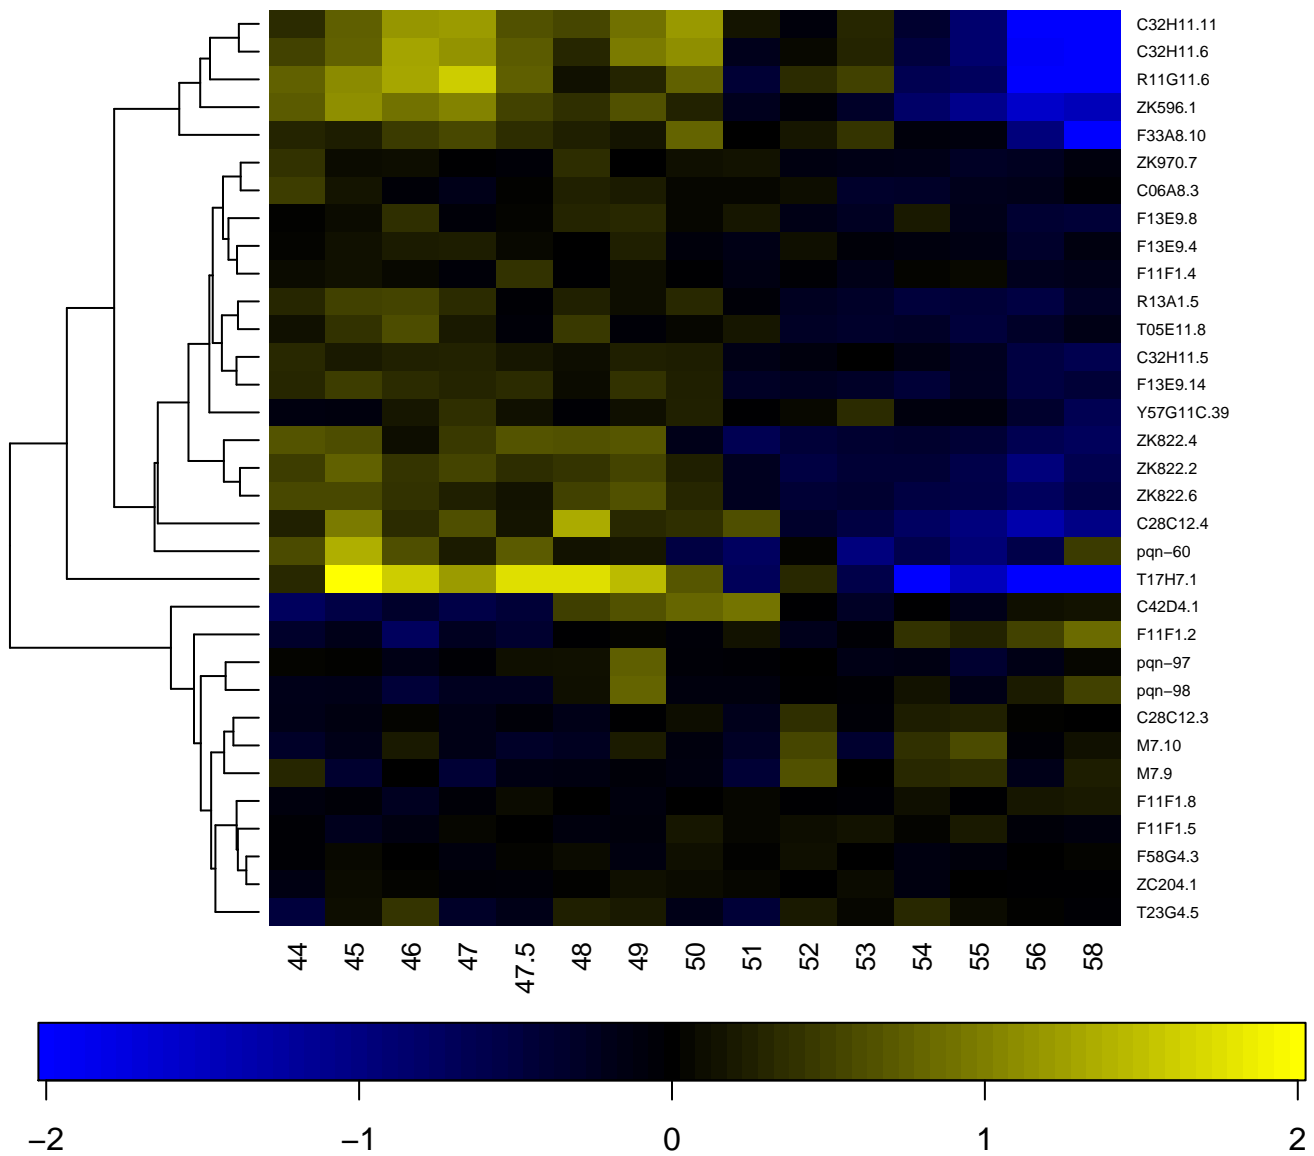



# Domain of unknown function DUF1785

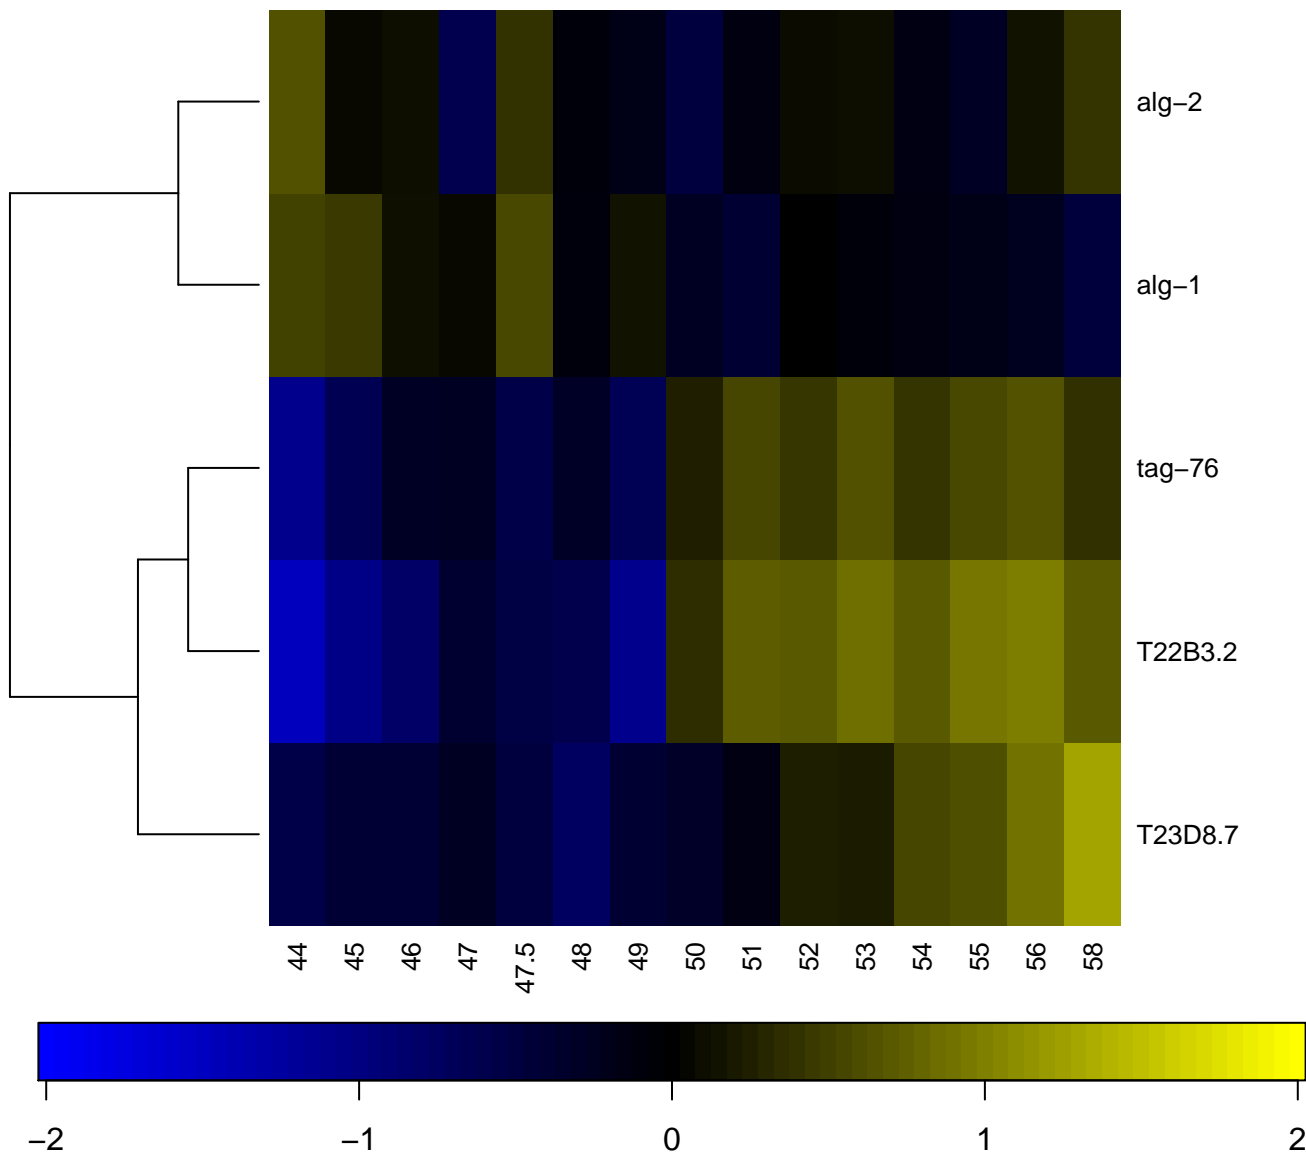

# Domain of unknown function DUF1794

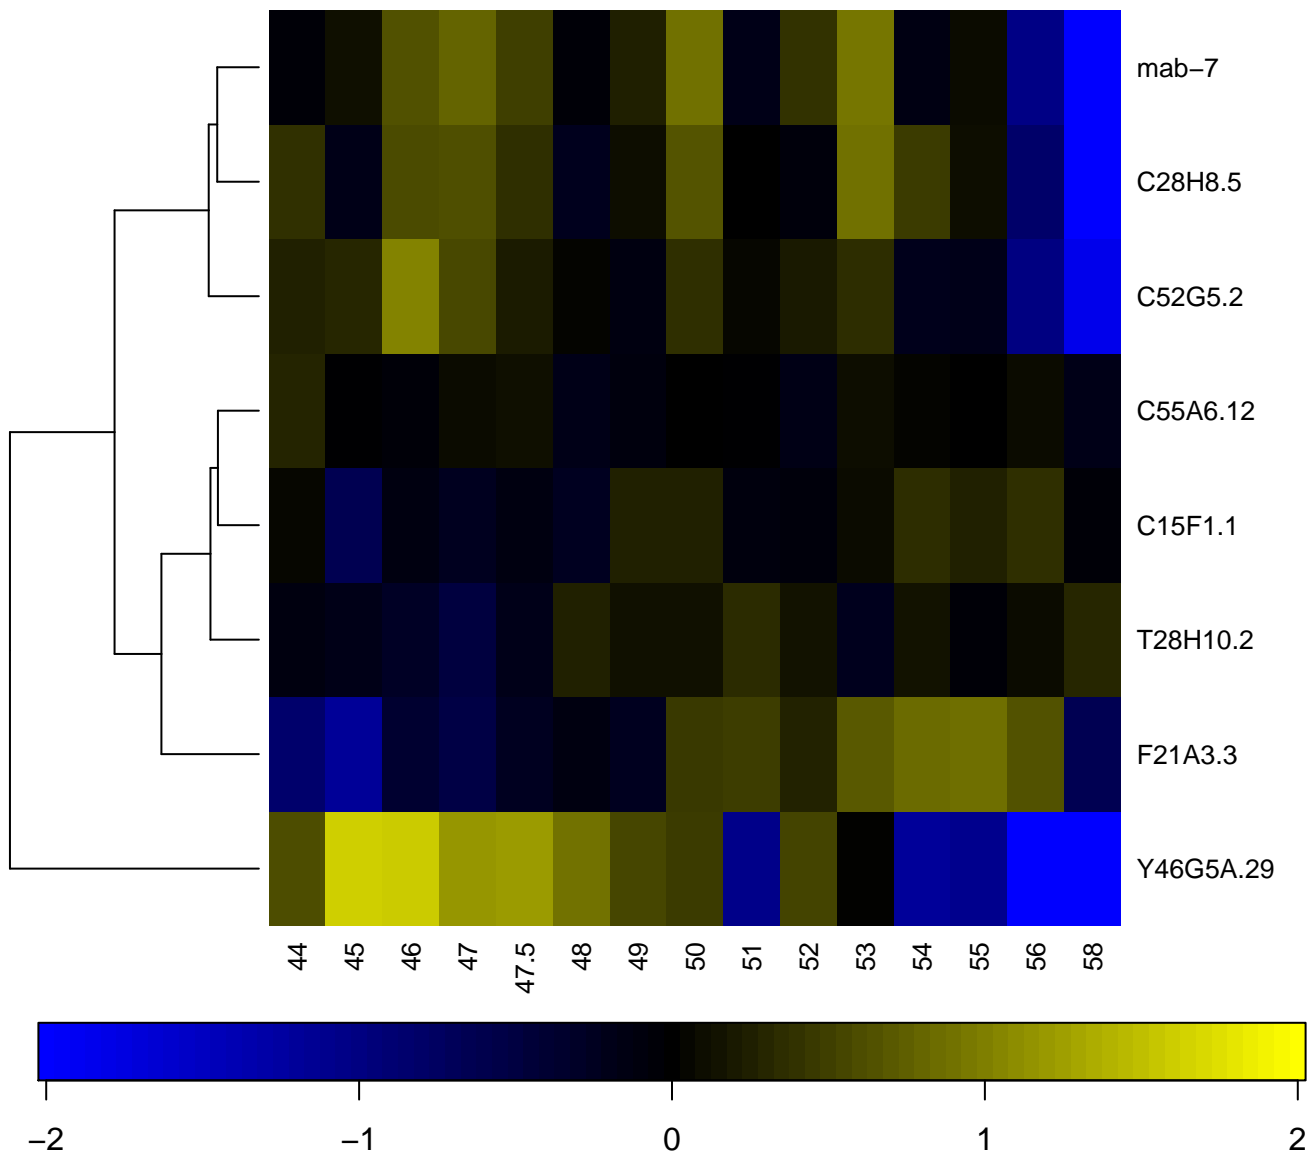

# Domain of unknown function DUF19

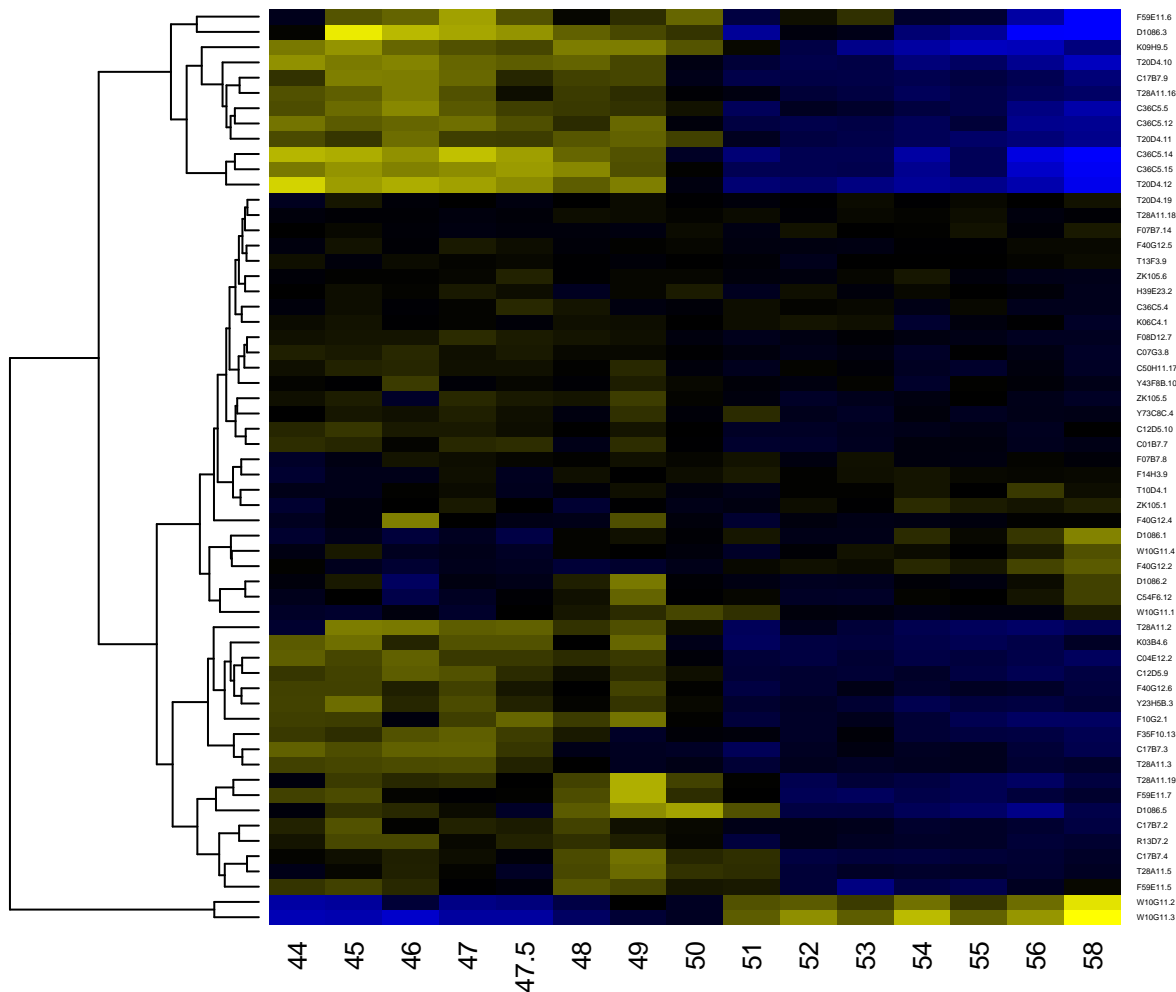

# Domain of unknown function DUF21

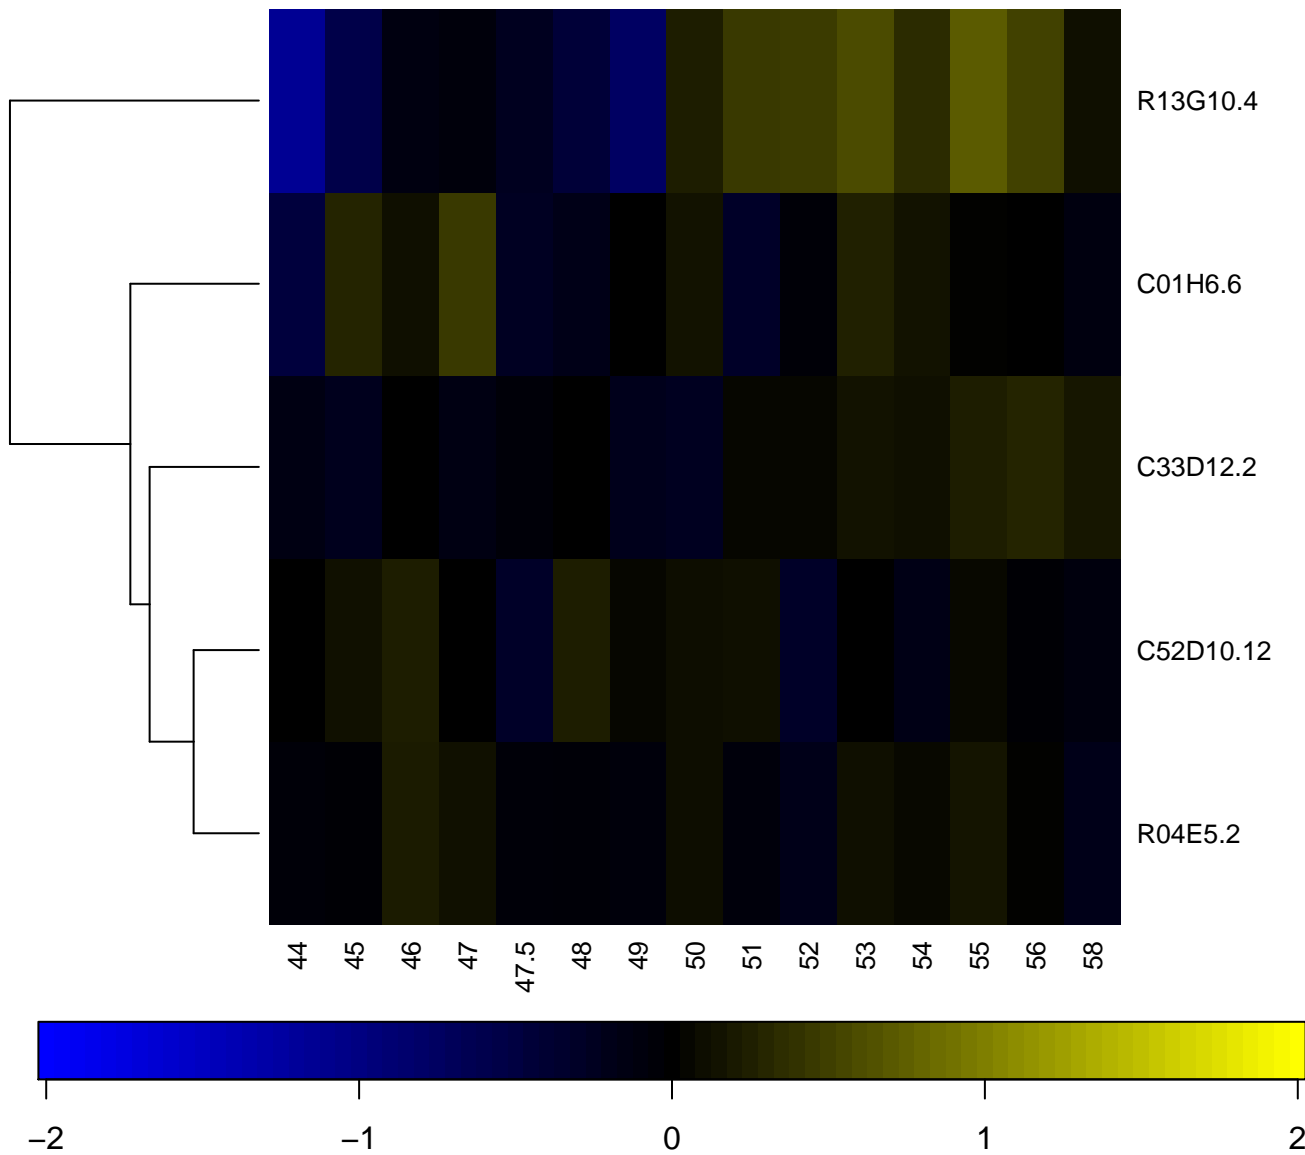



# DOMON

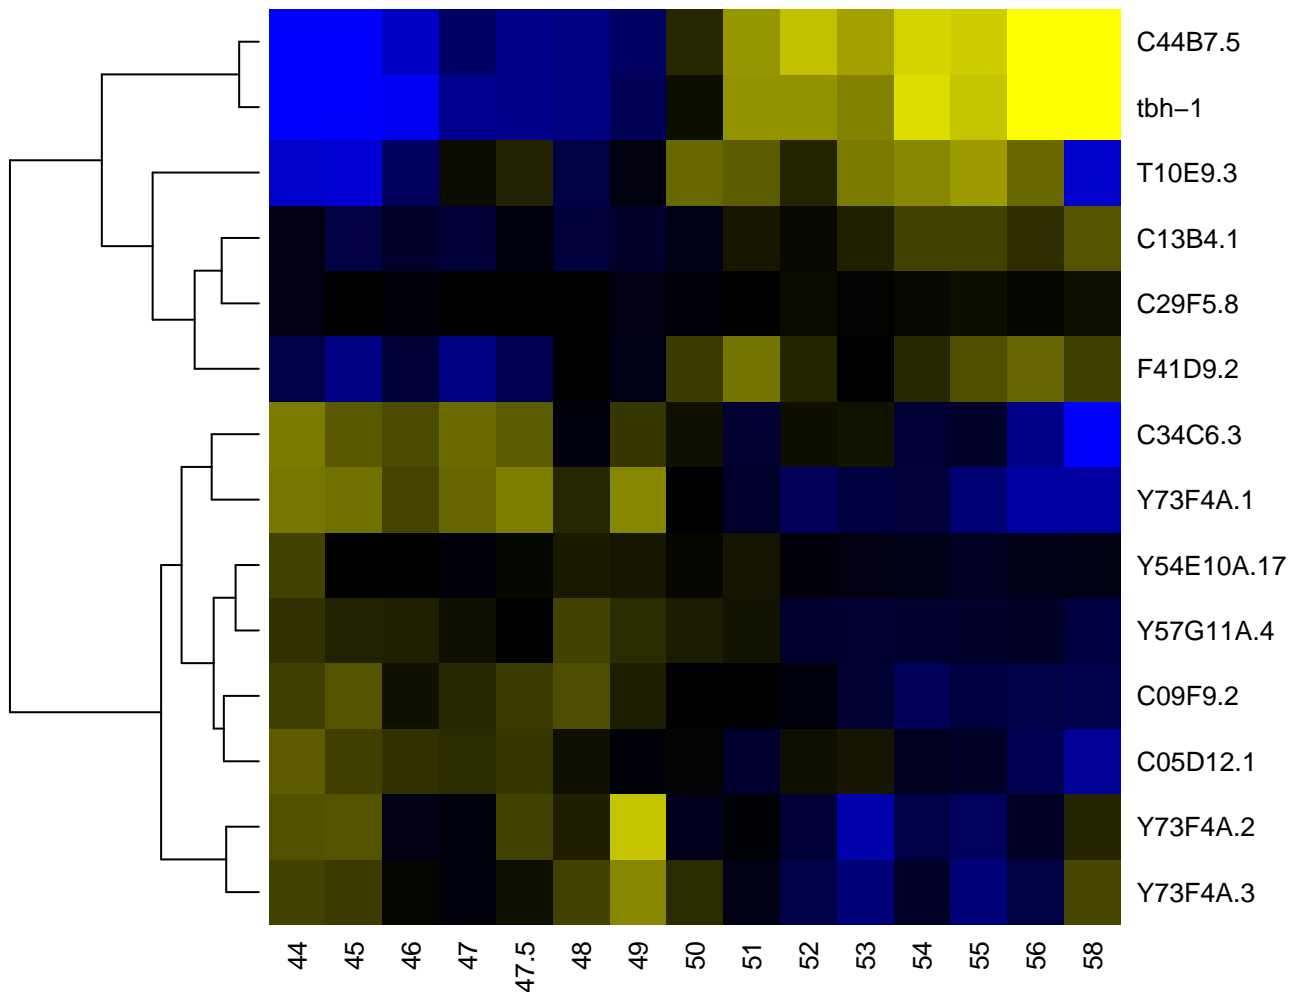



# DOMON domain



# DOMON related

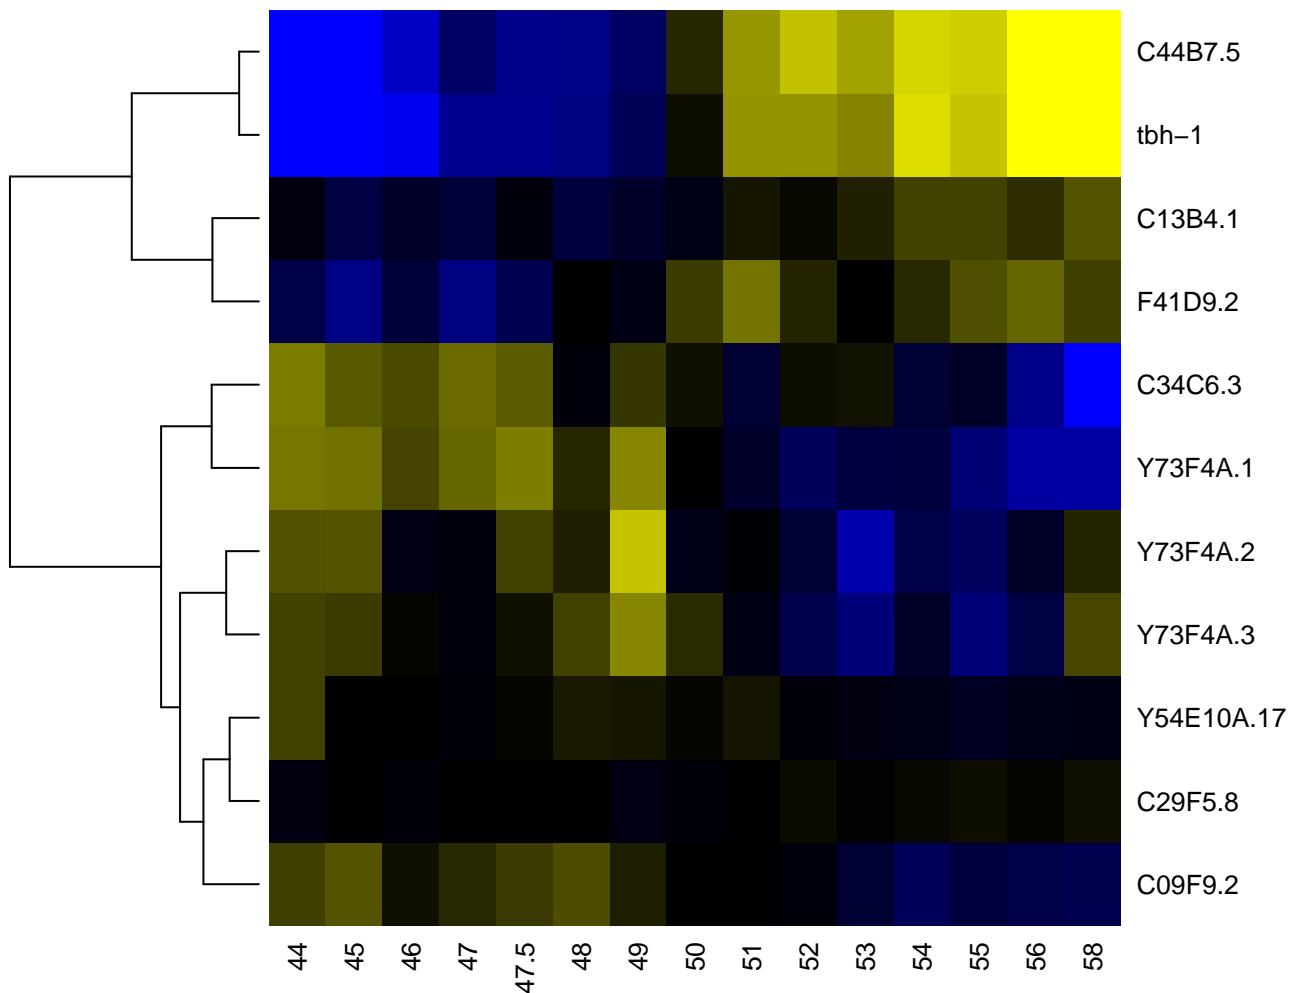







# Doublecortin

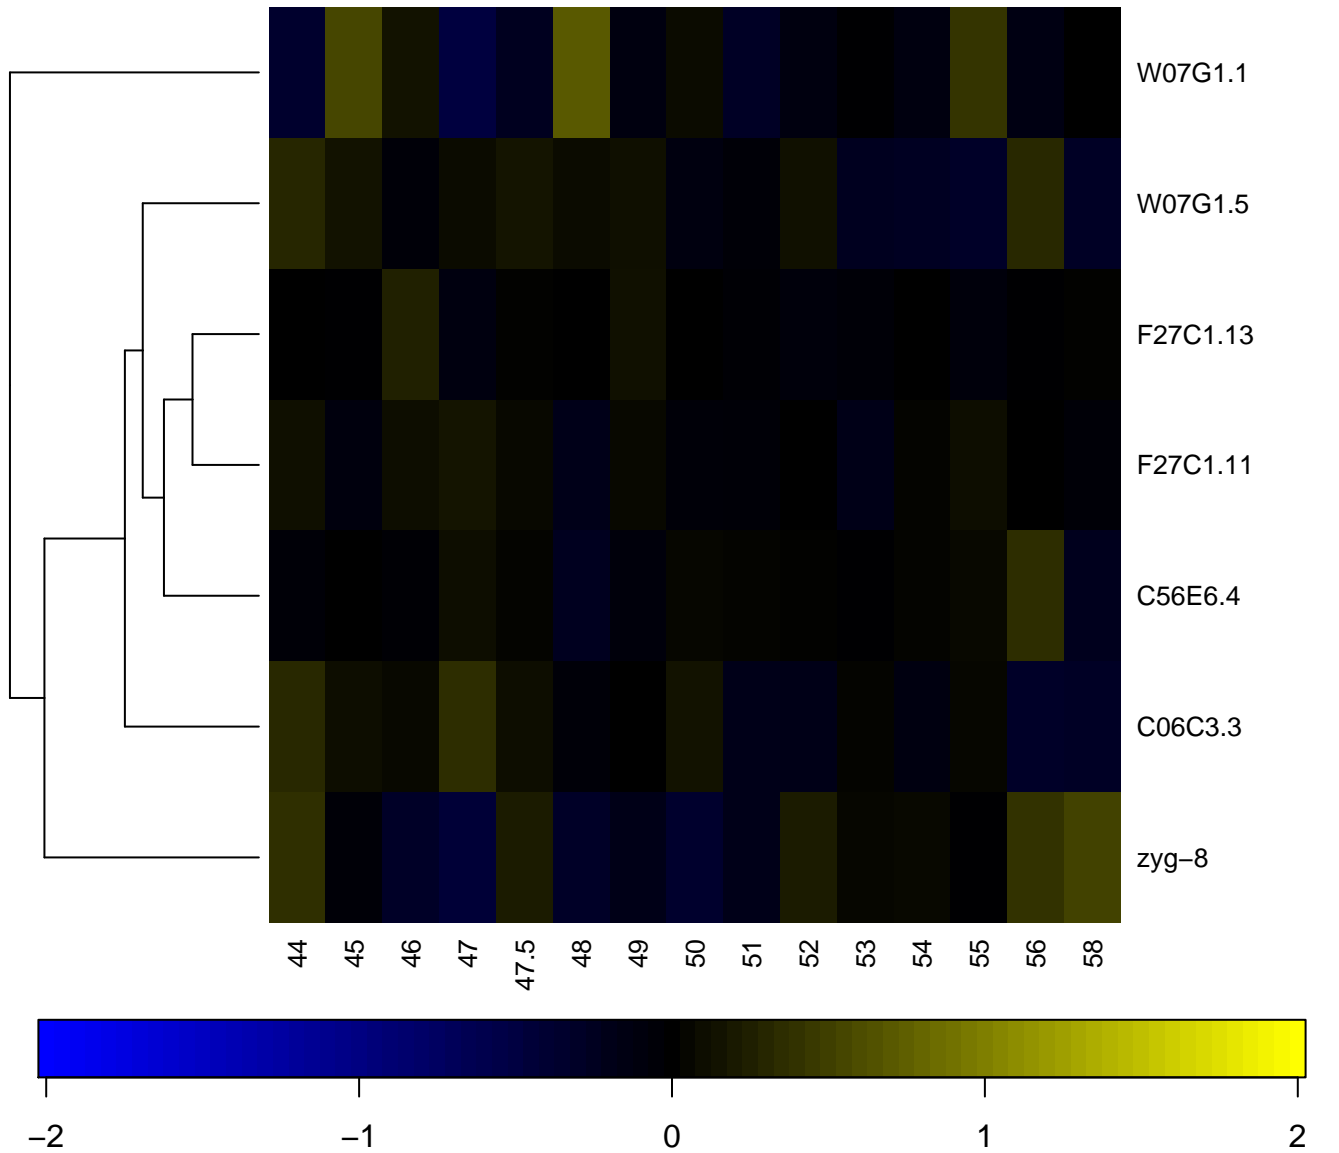







# Dual specificity phosphatase, catalytic domain

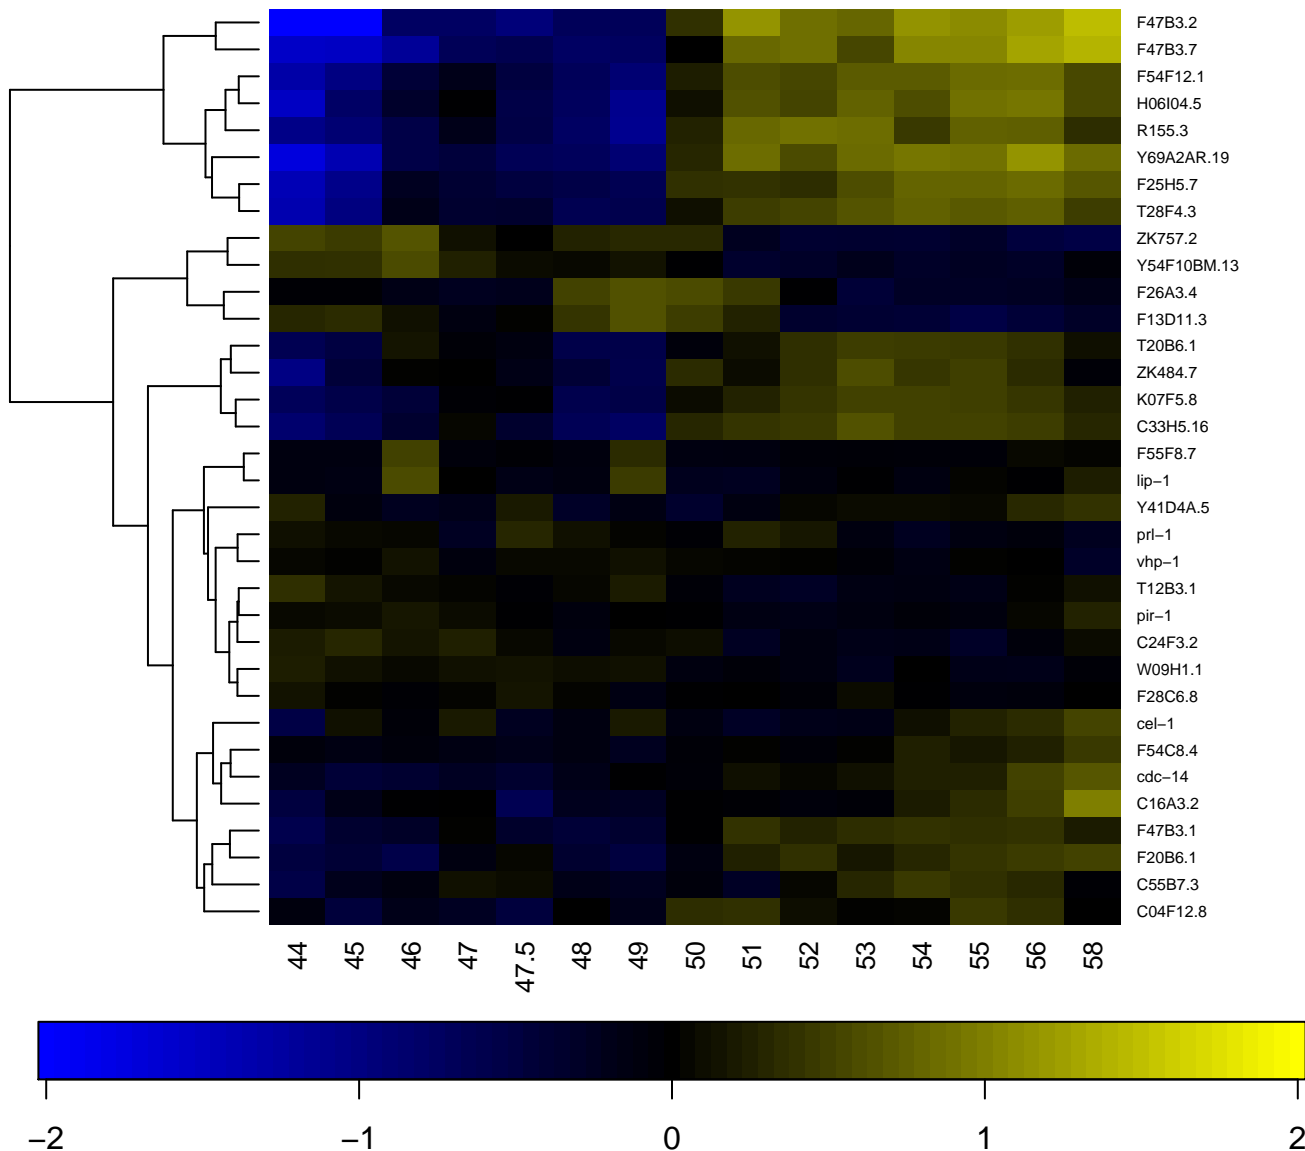

# Dual specificity phosphatase, subgroup, catalytic domain

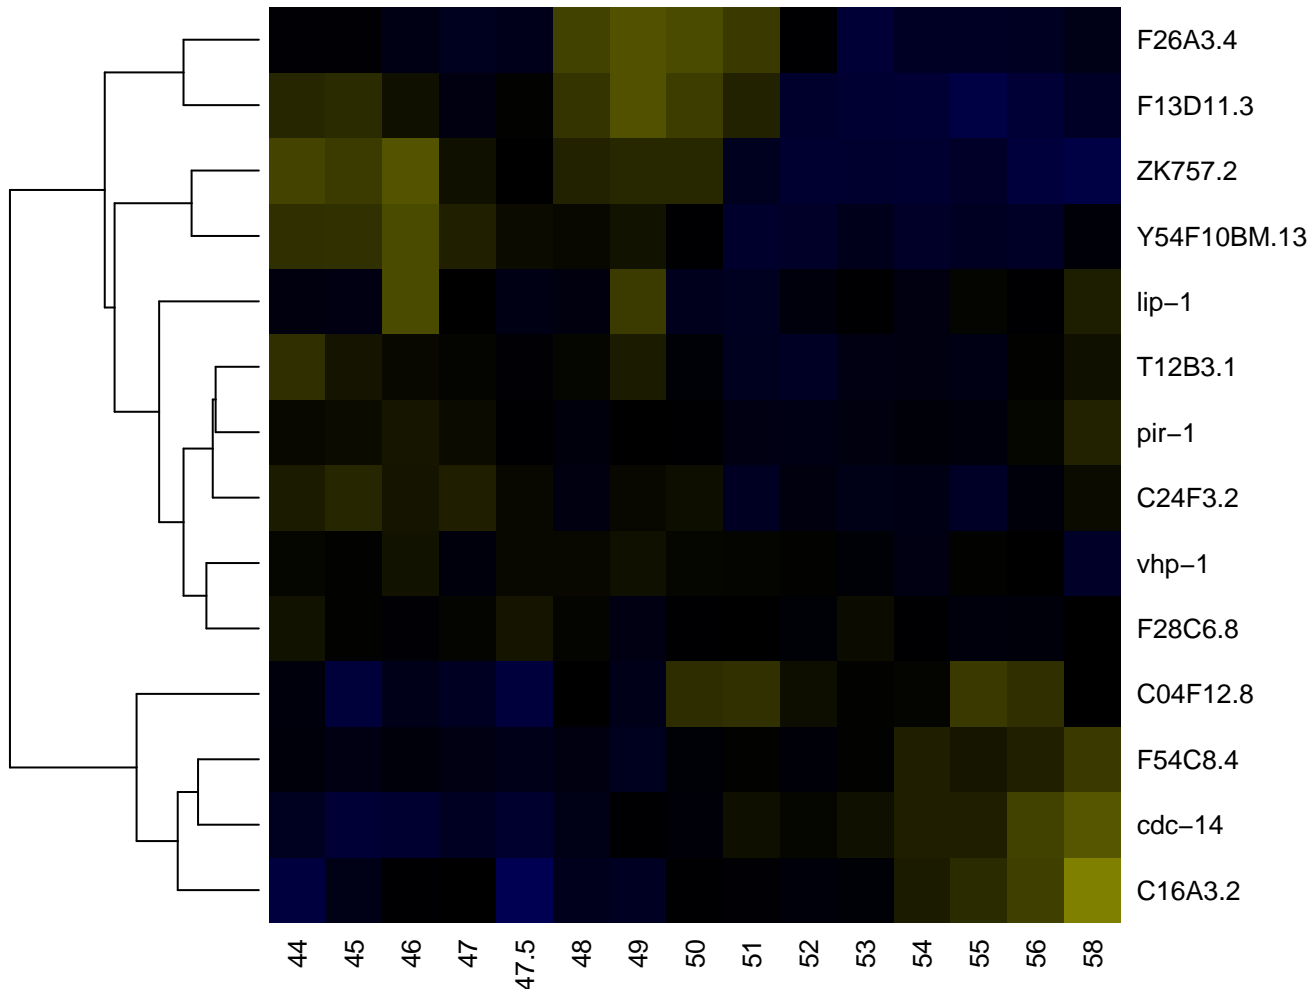









# Dynamin, GTPase domain

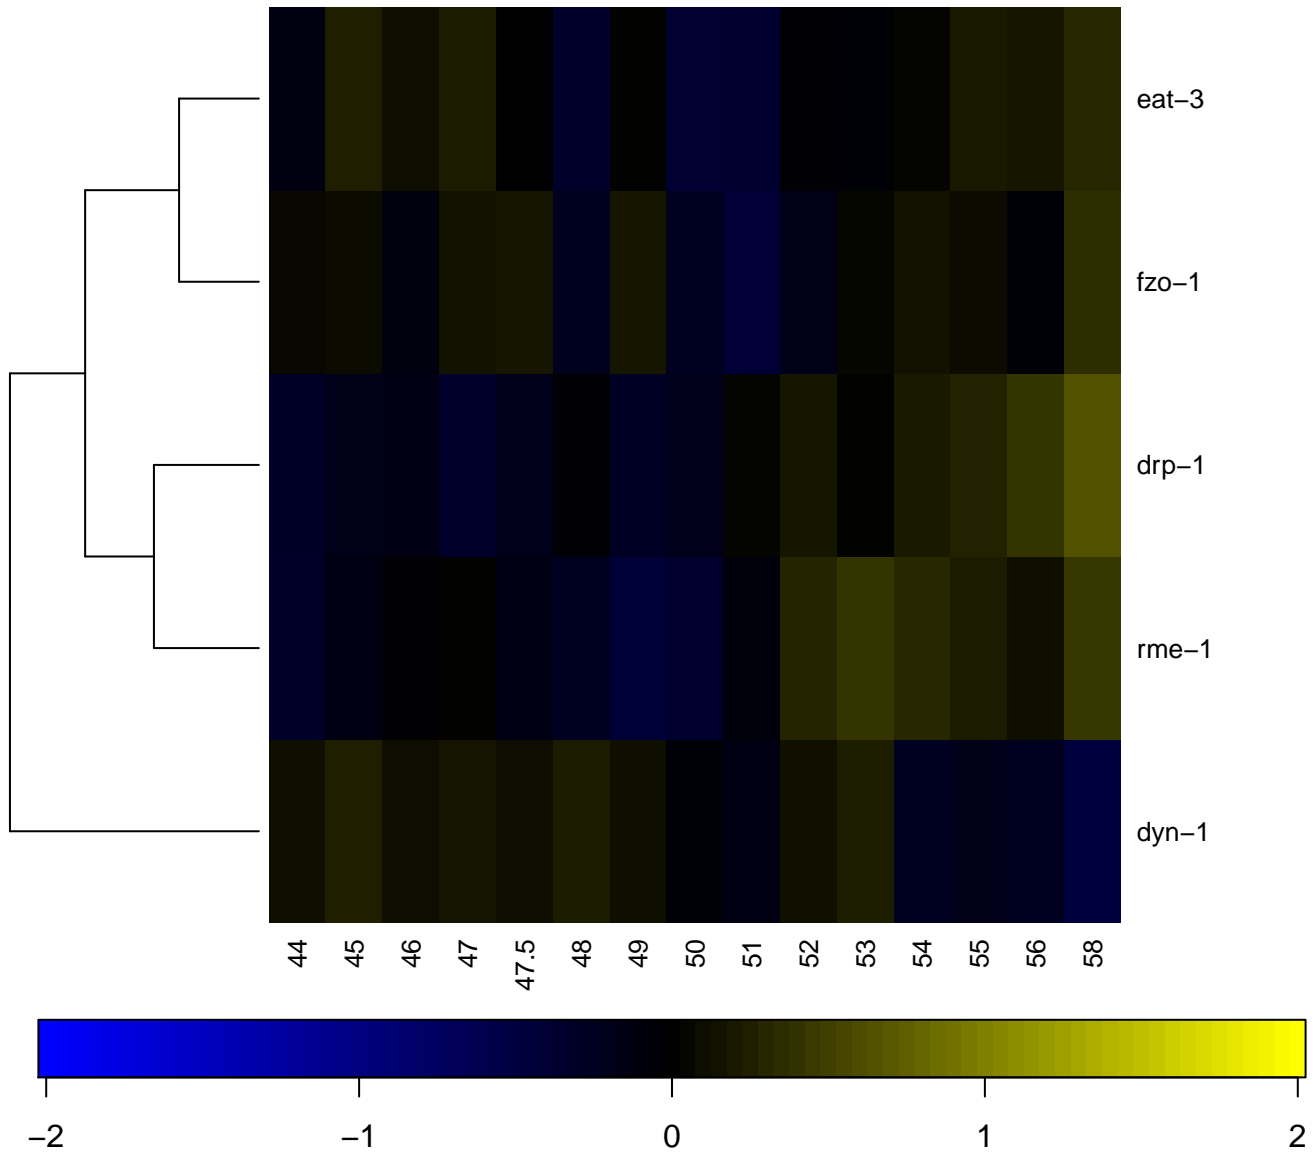

# Dynein light chain, type 1/2

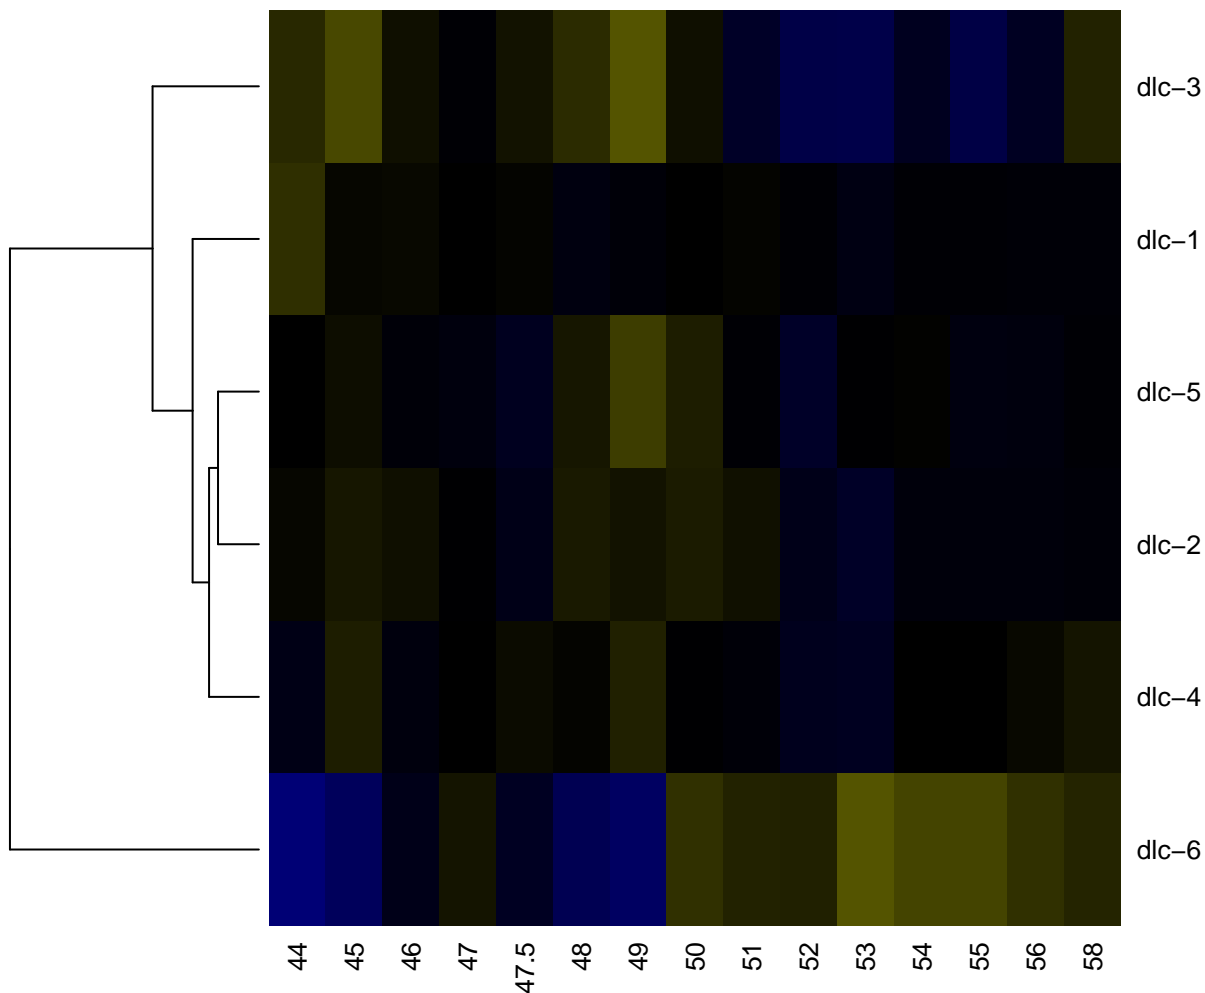



# E1-E2 ATPase

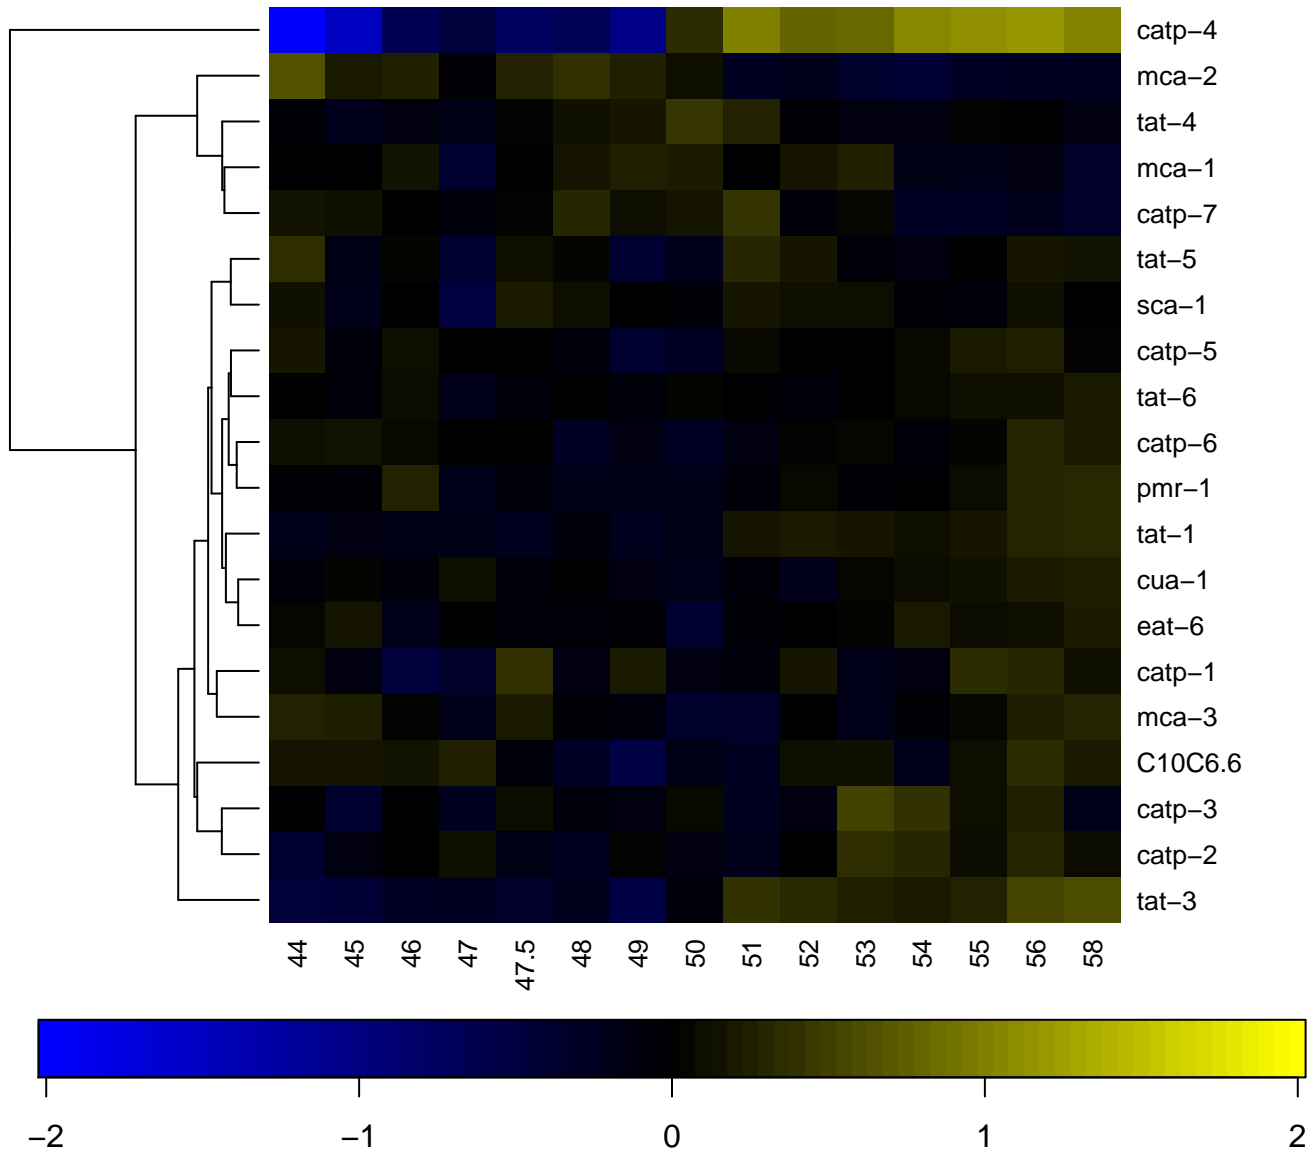

# EamA-like transporter family

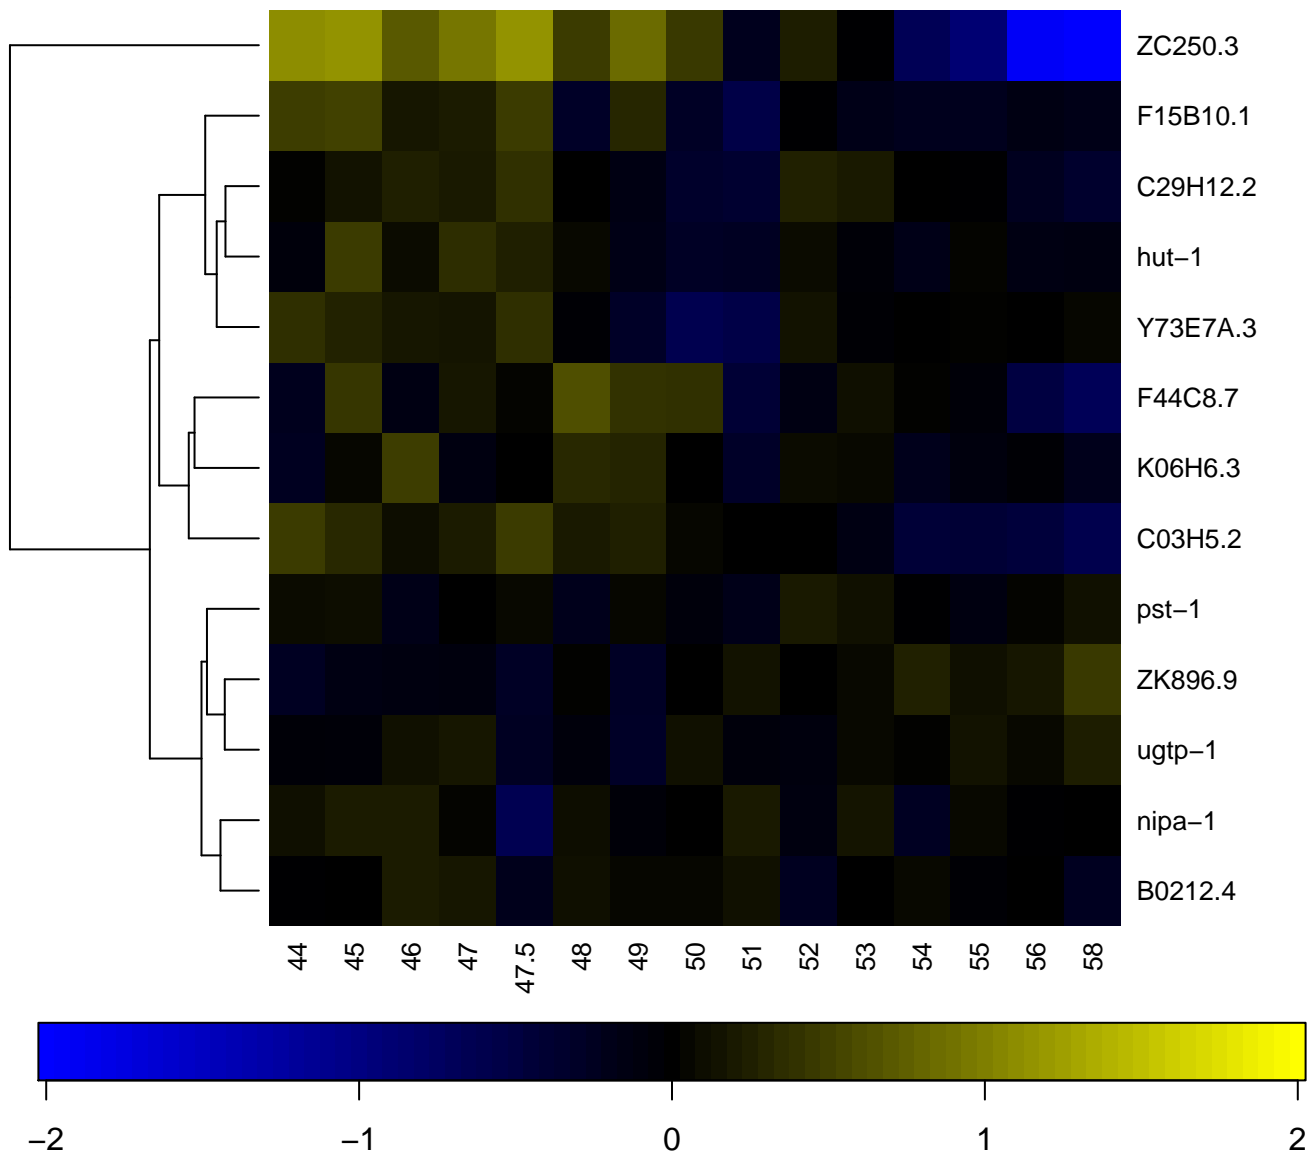

# EB domain

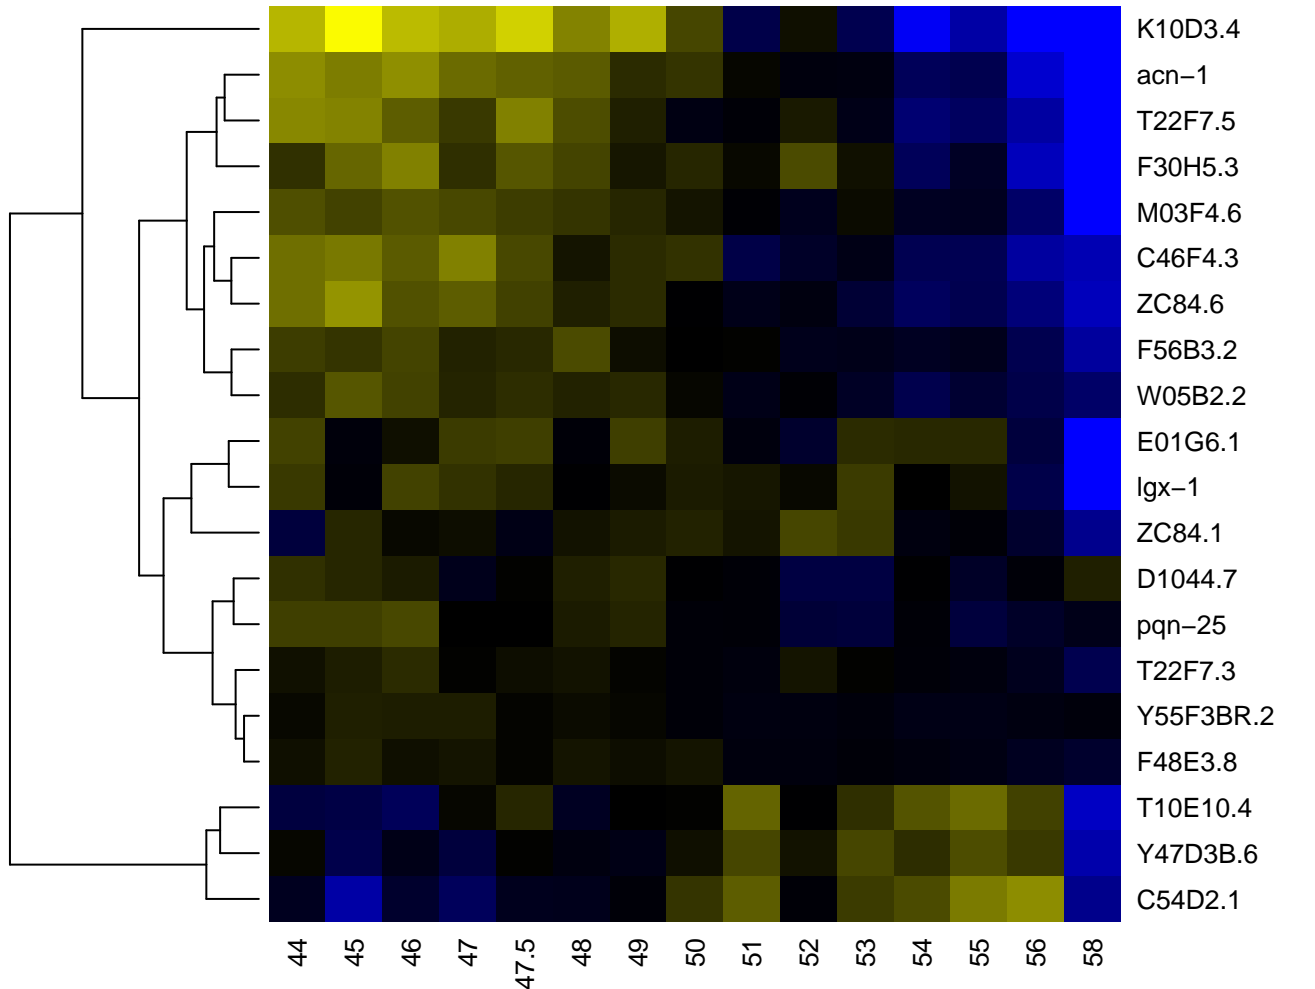

# EB module













# EGF

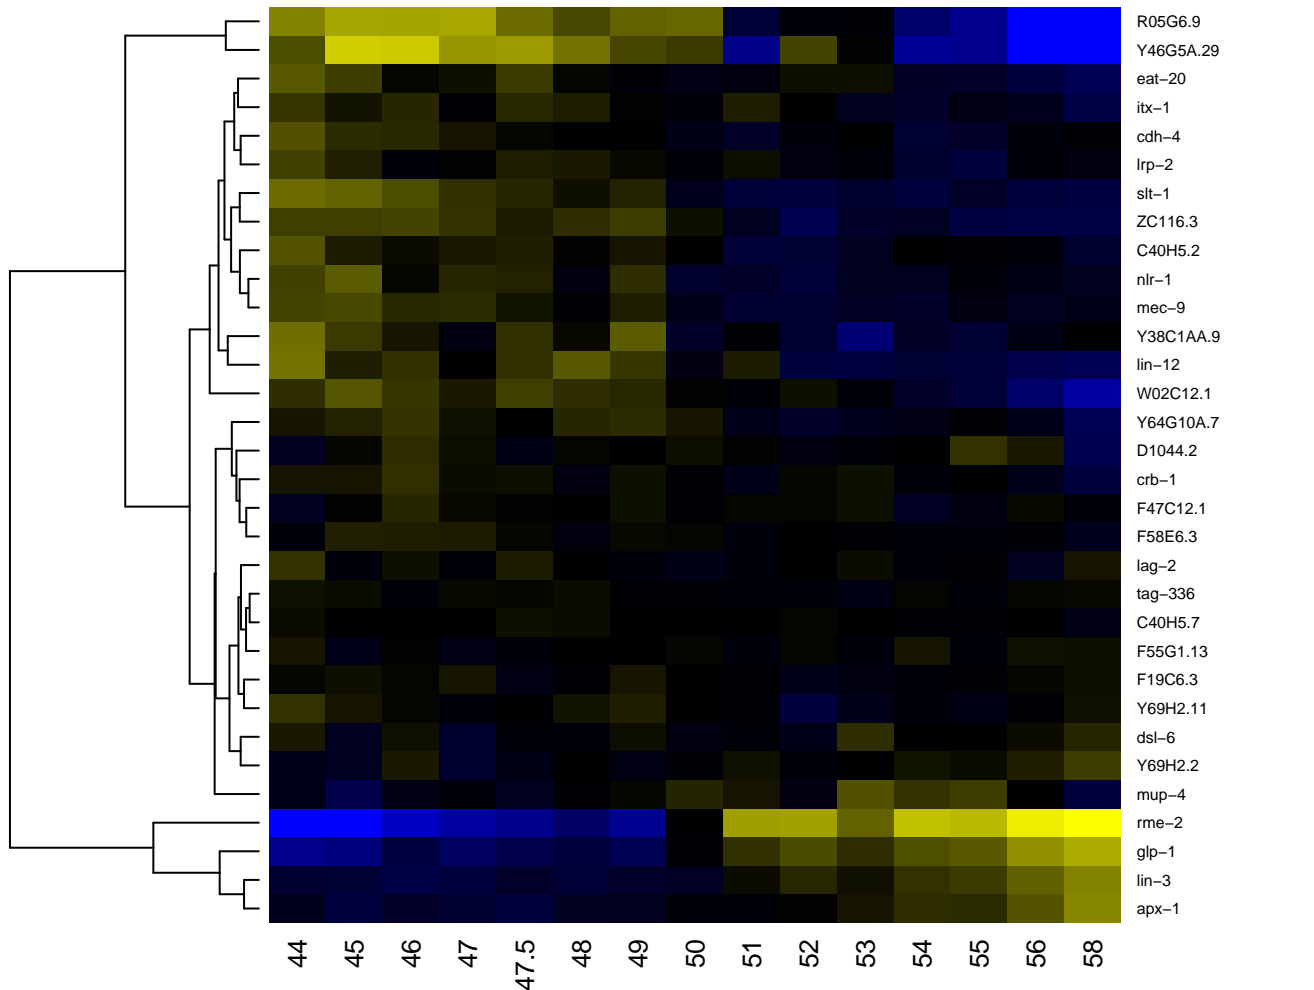

# EGF-like

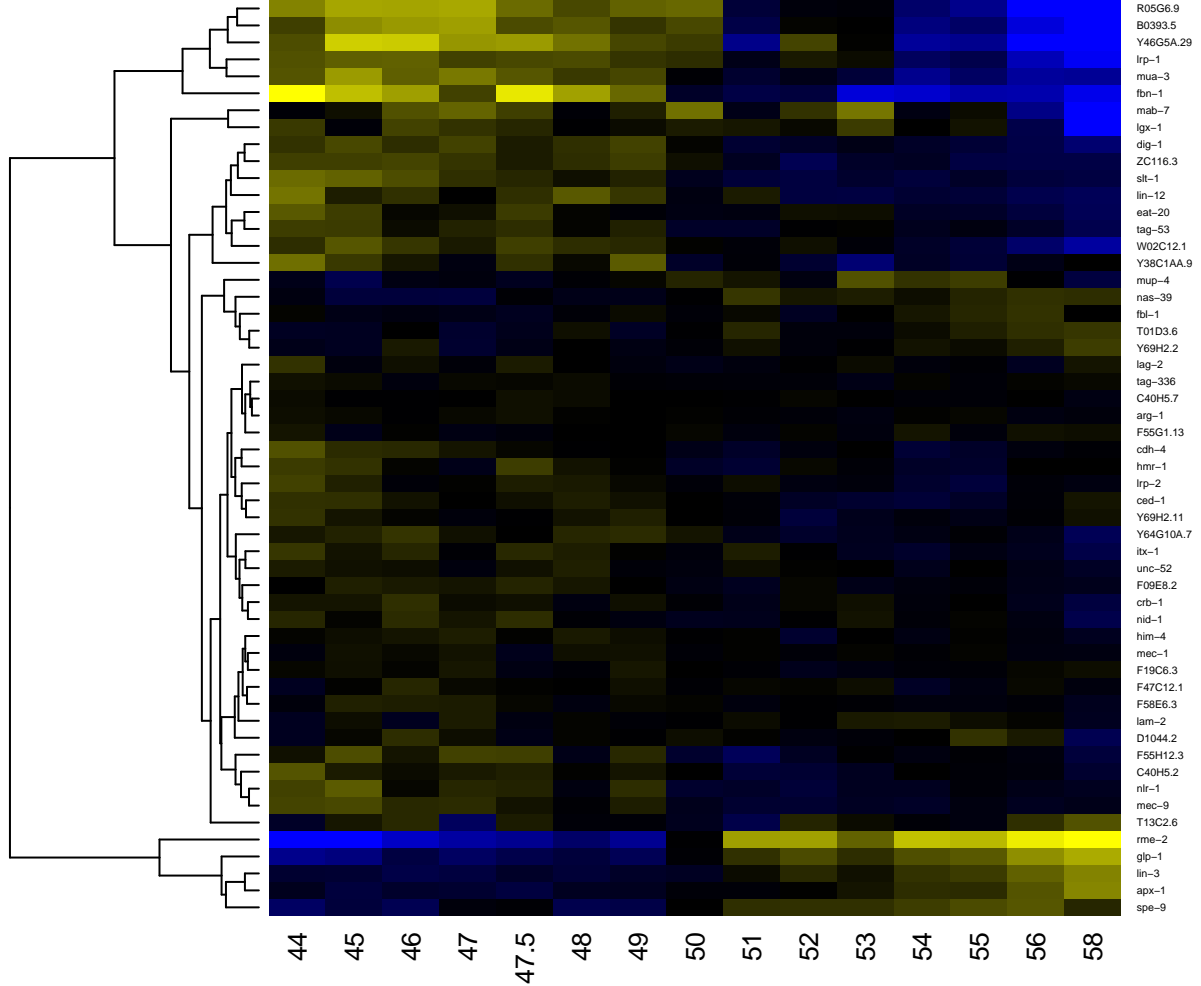

# EGF-like calcium-binding

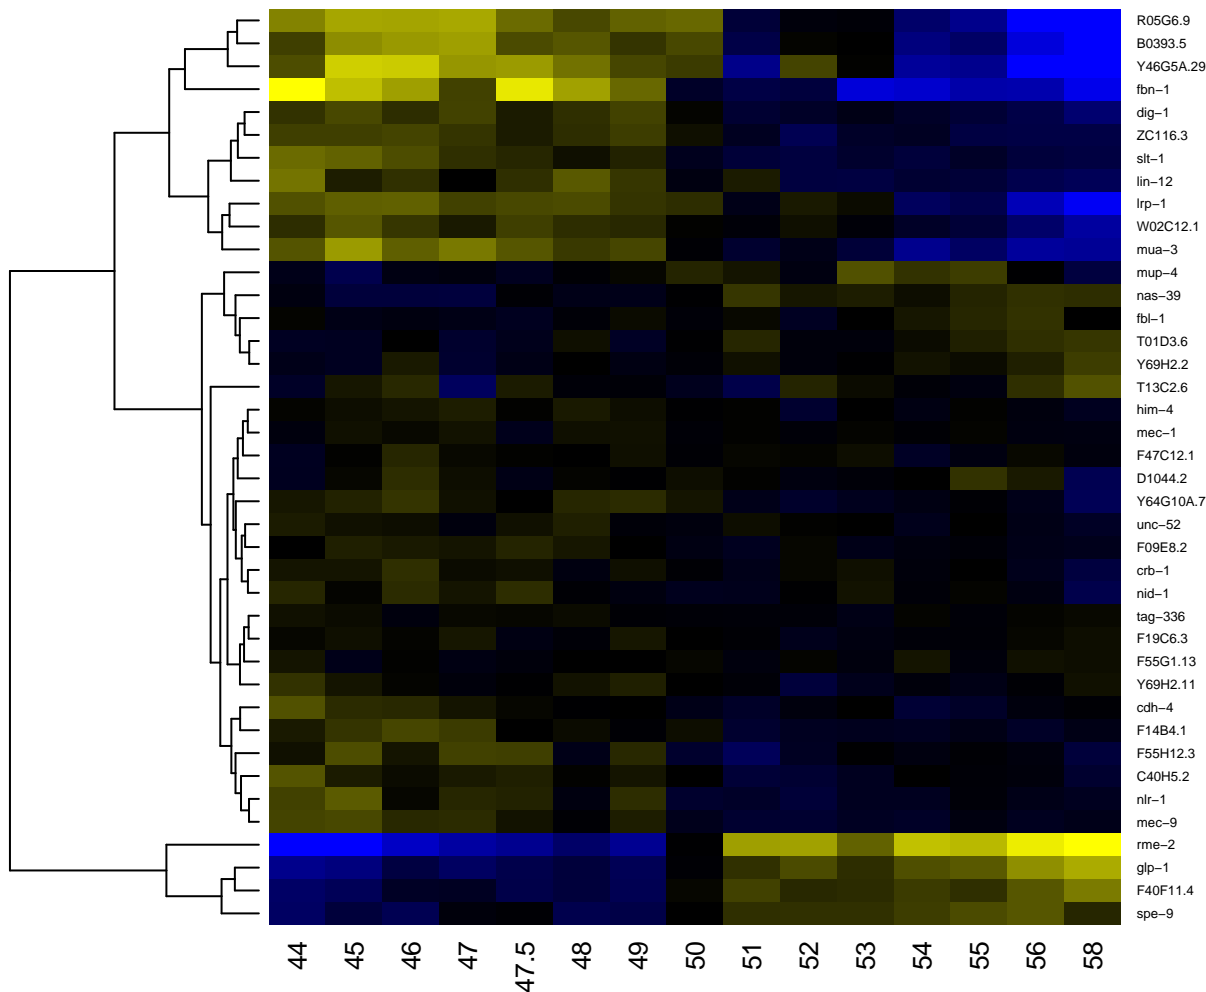

# EGF-like calcium-binding, conserved site

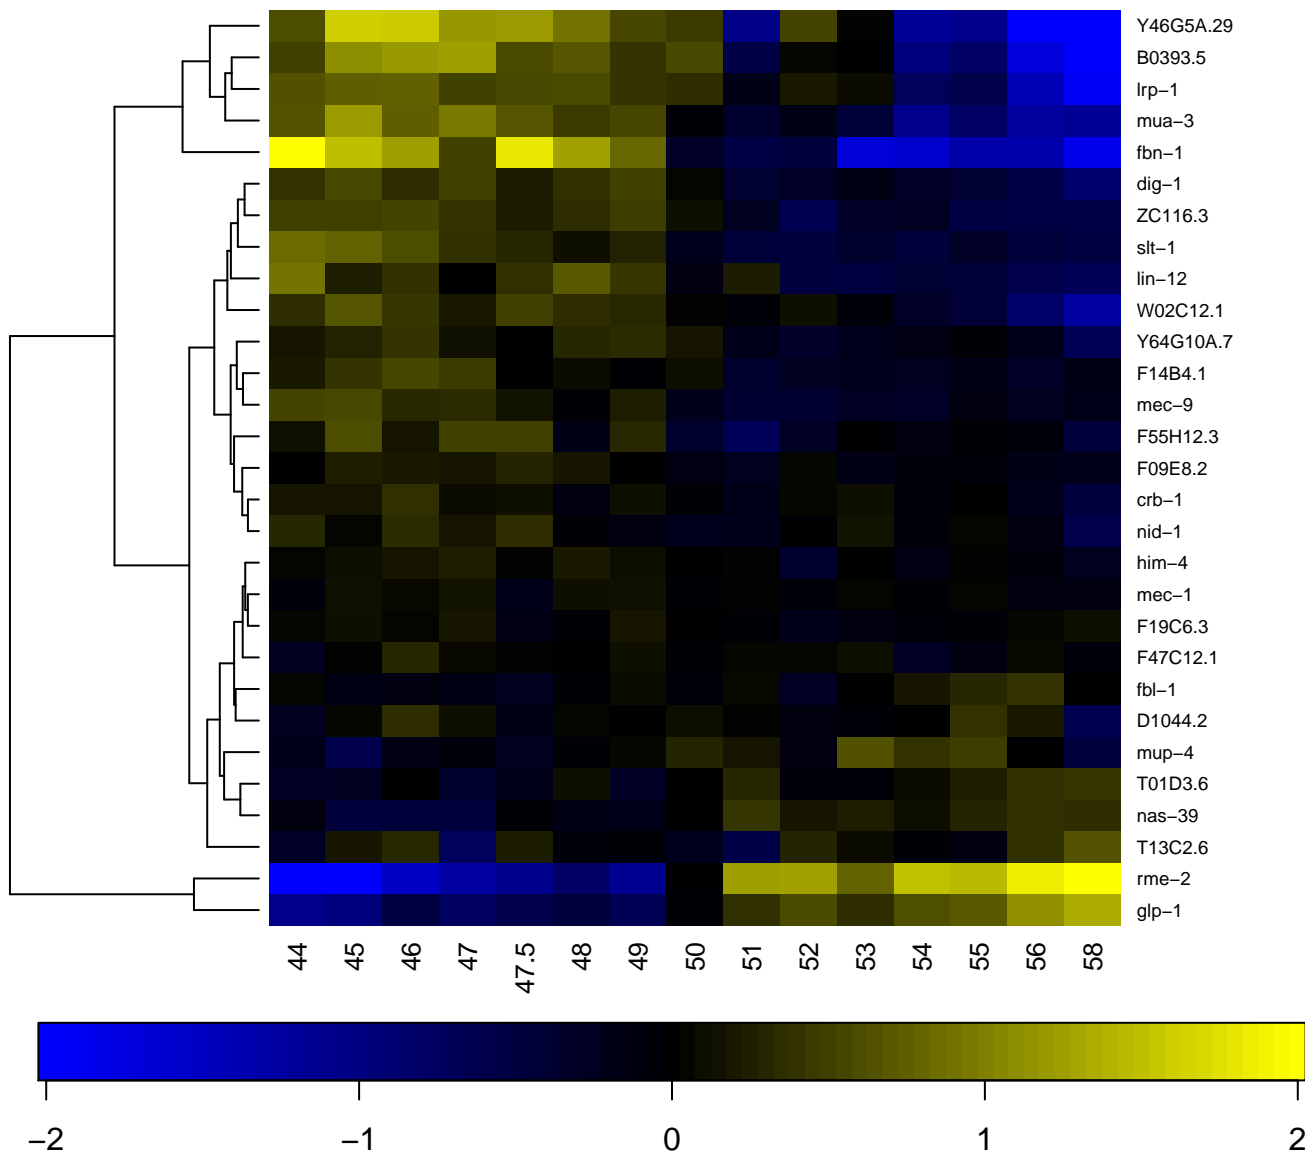

# EGF-like domain

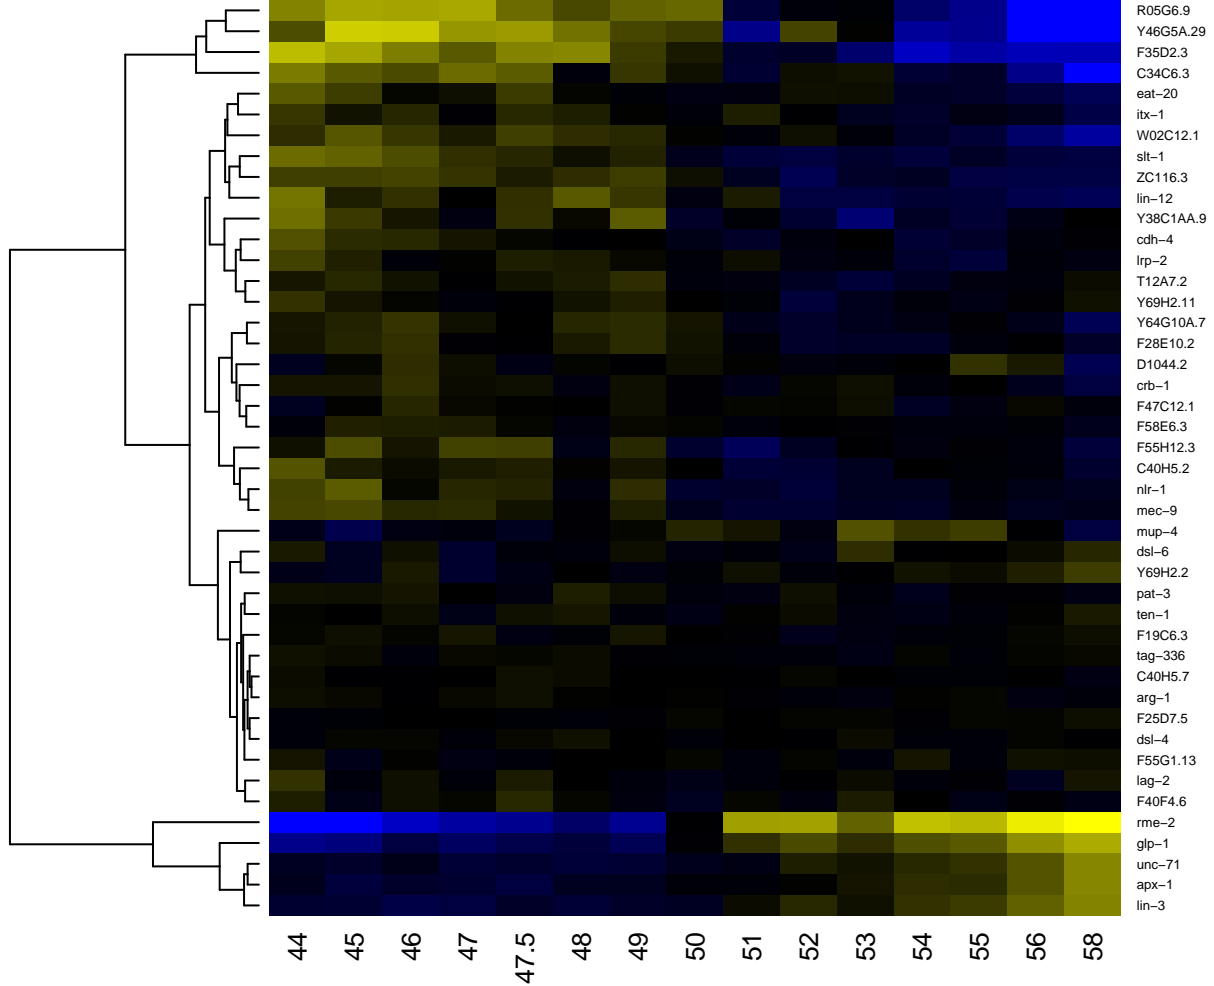

# EGF-like region, conserved site

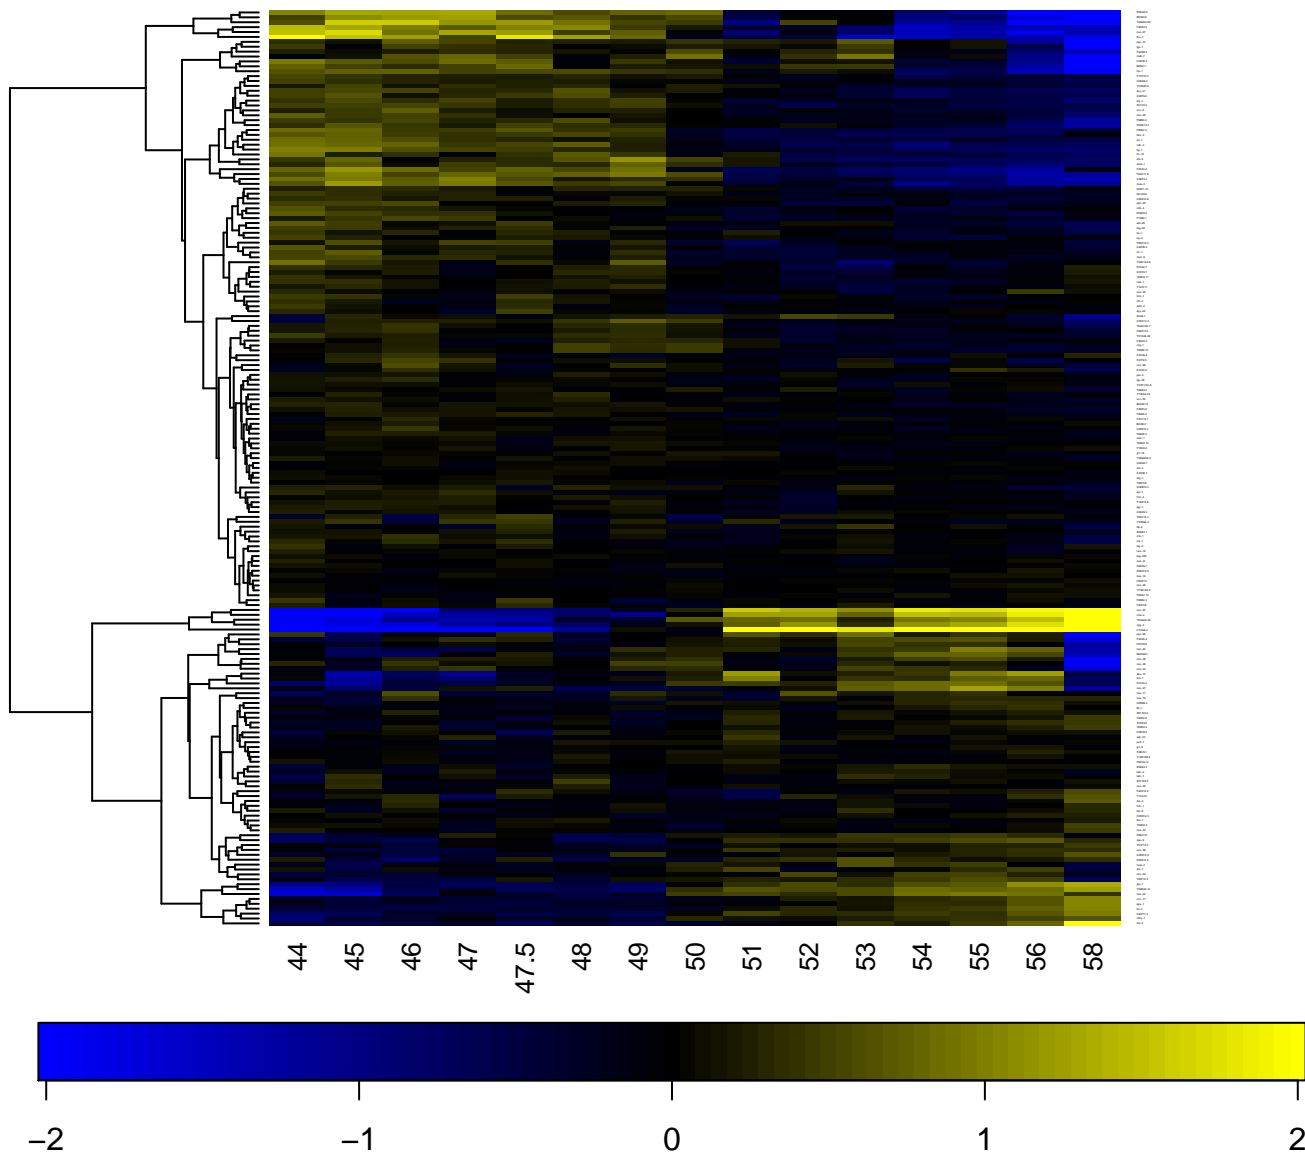

# EGF-like, laminin

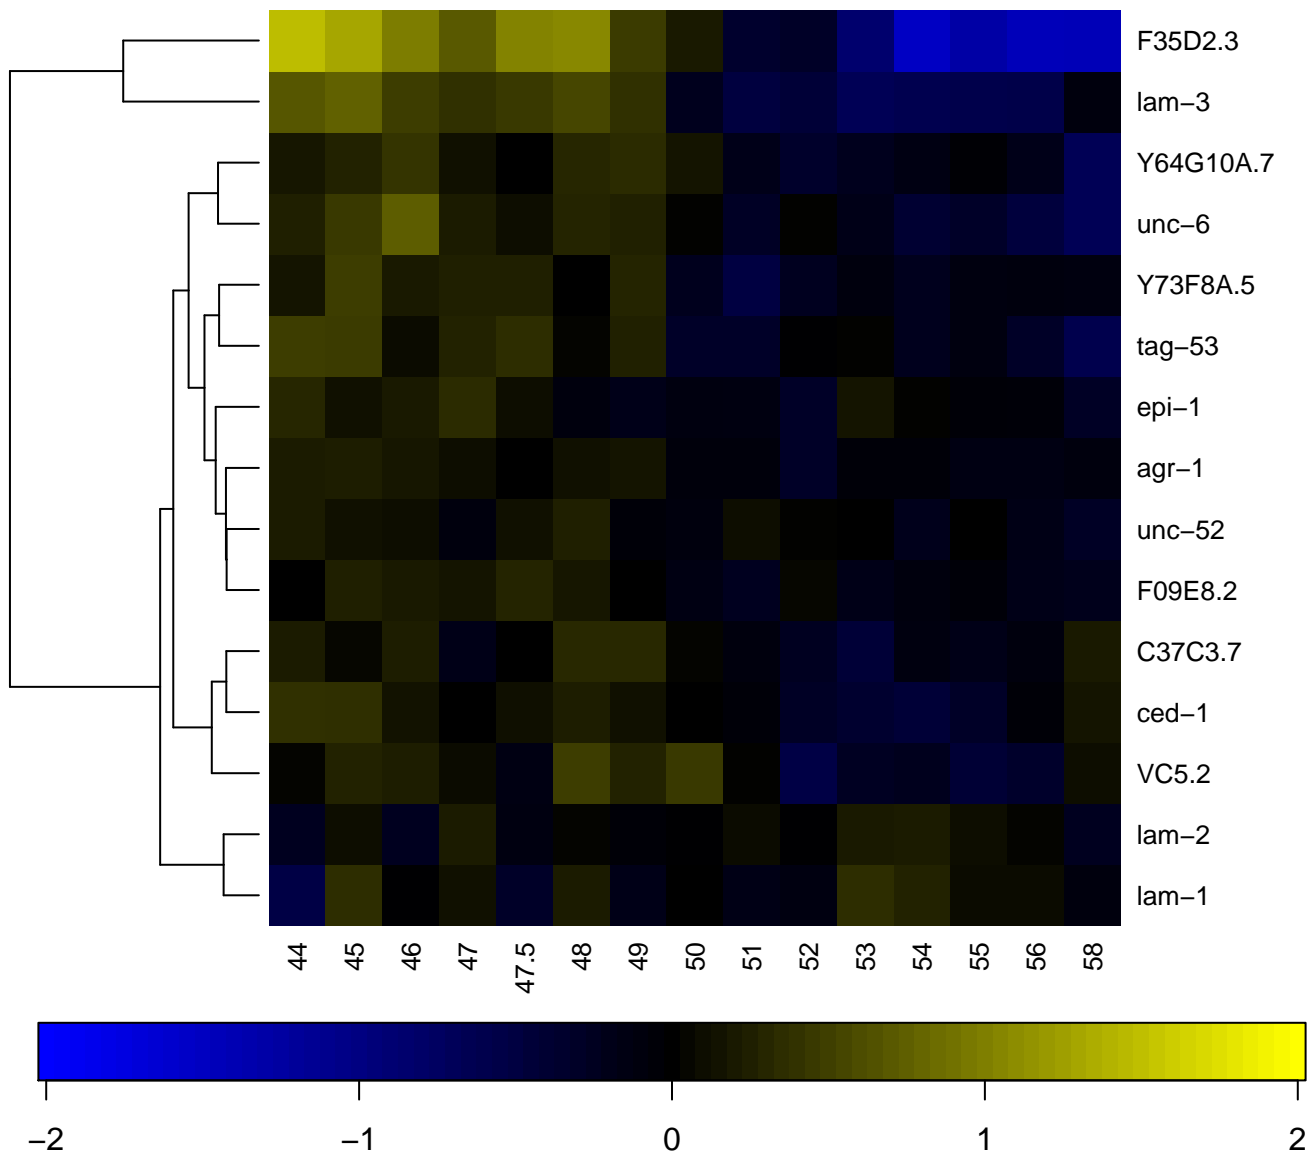

# EGF-type aspartate/asparagine hydroxylation site

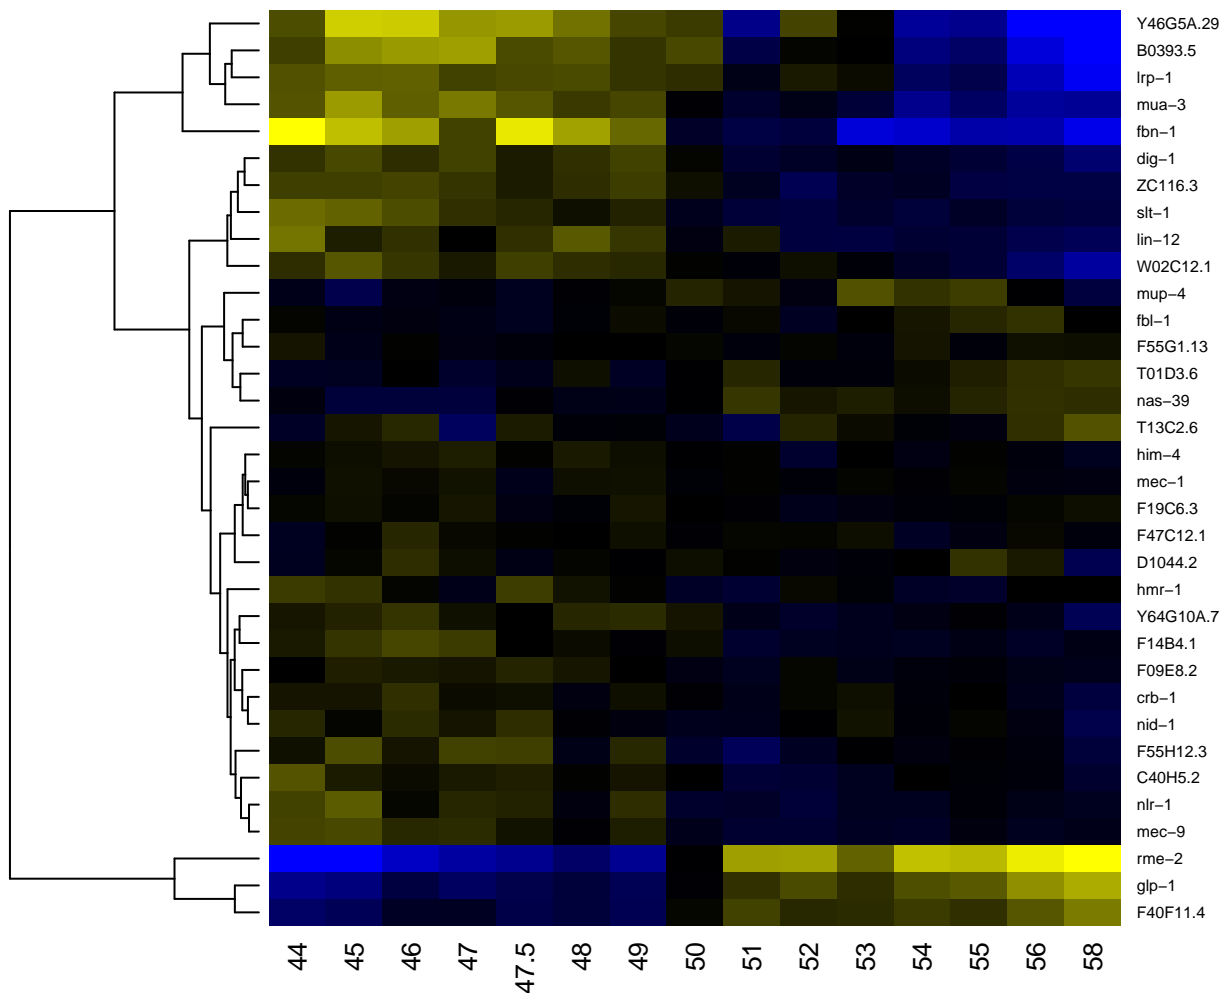



# EGF calcium-binding

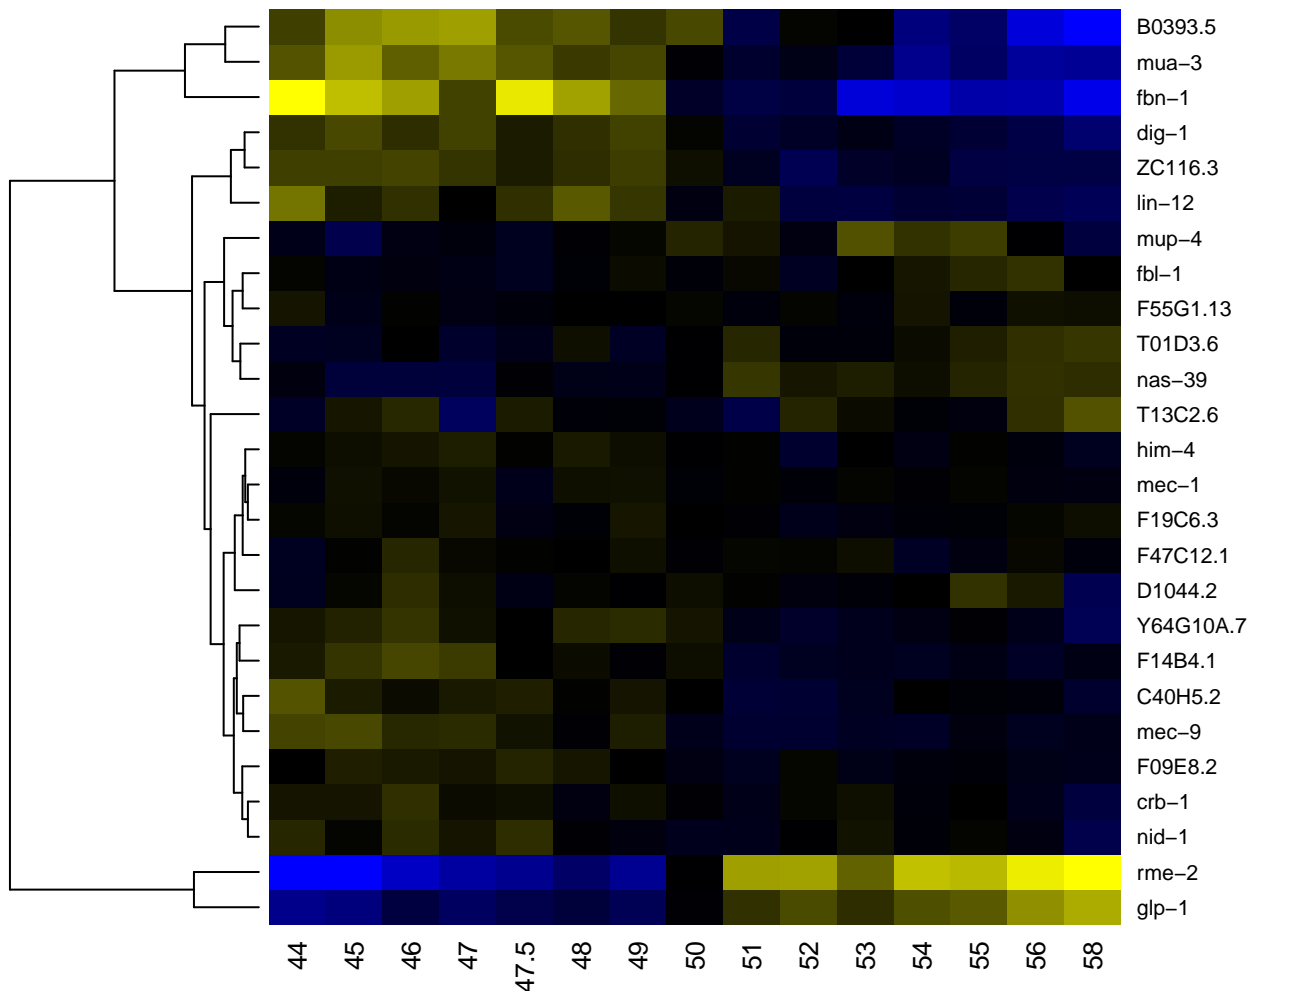



# EGF, extracellular

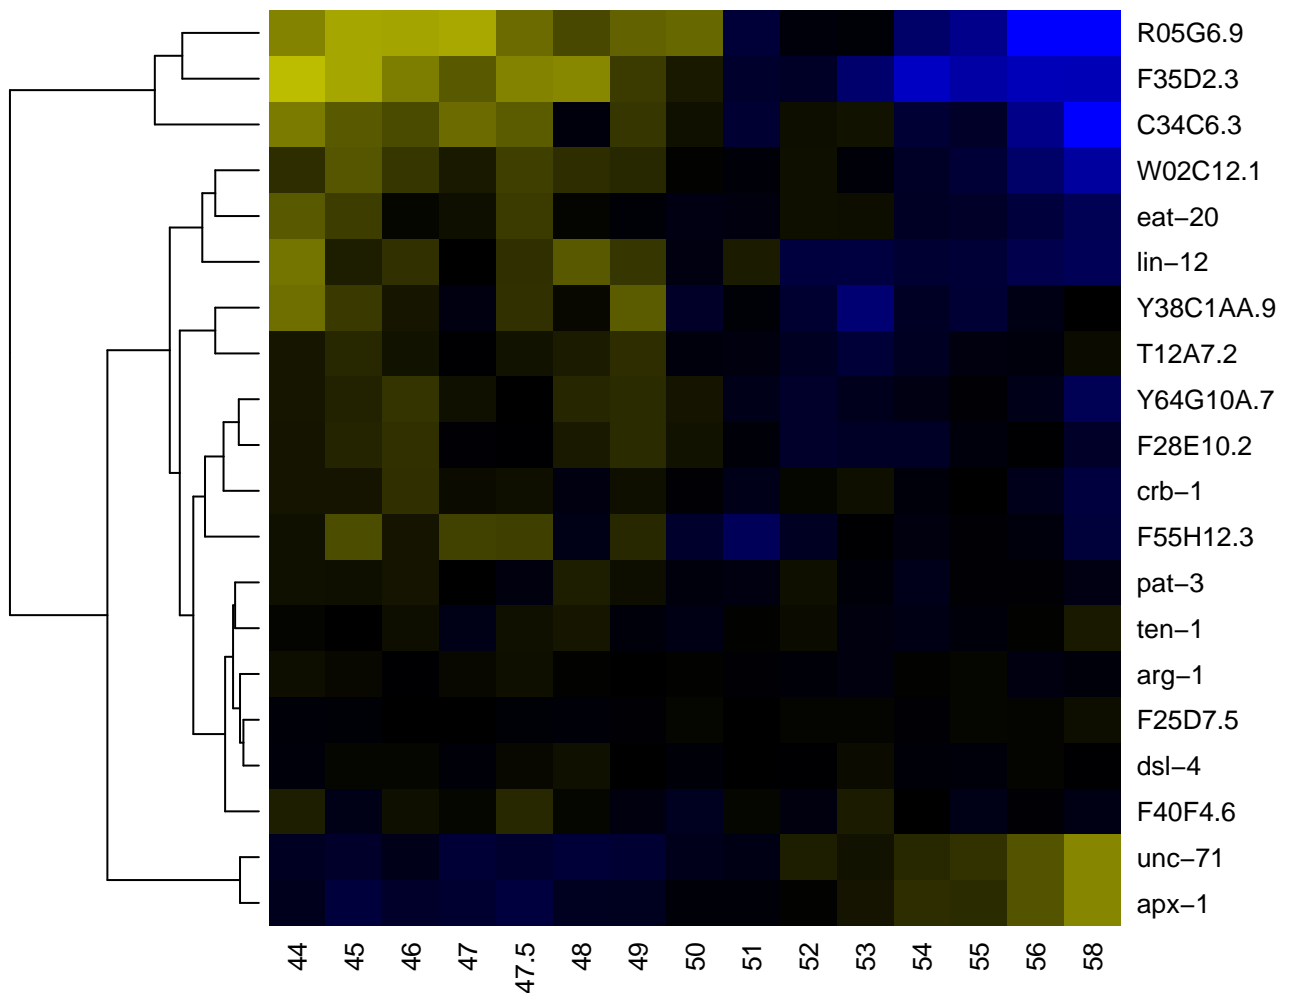







# Elongation factor Tu C-terminal domain

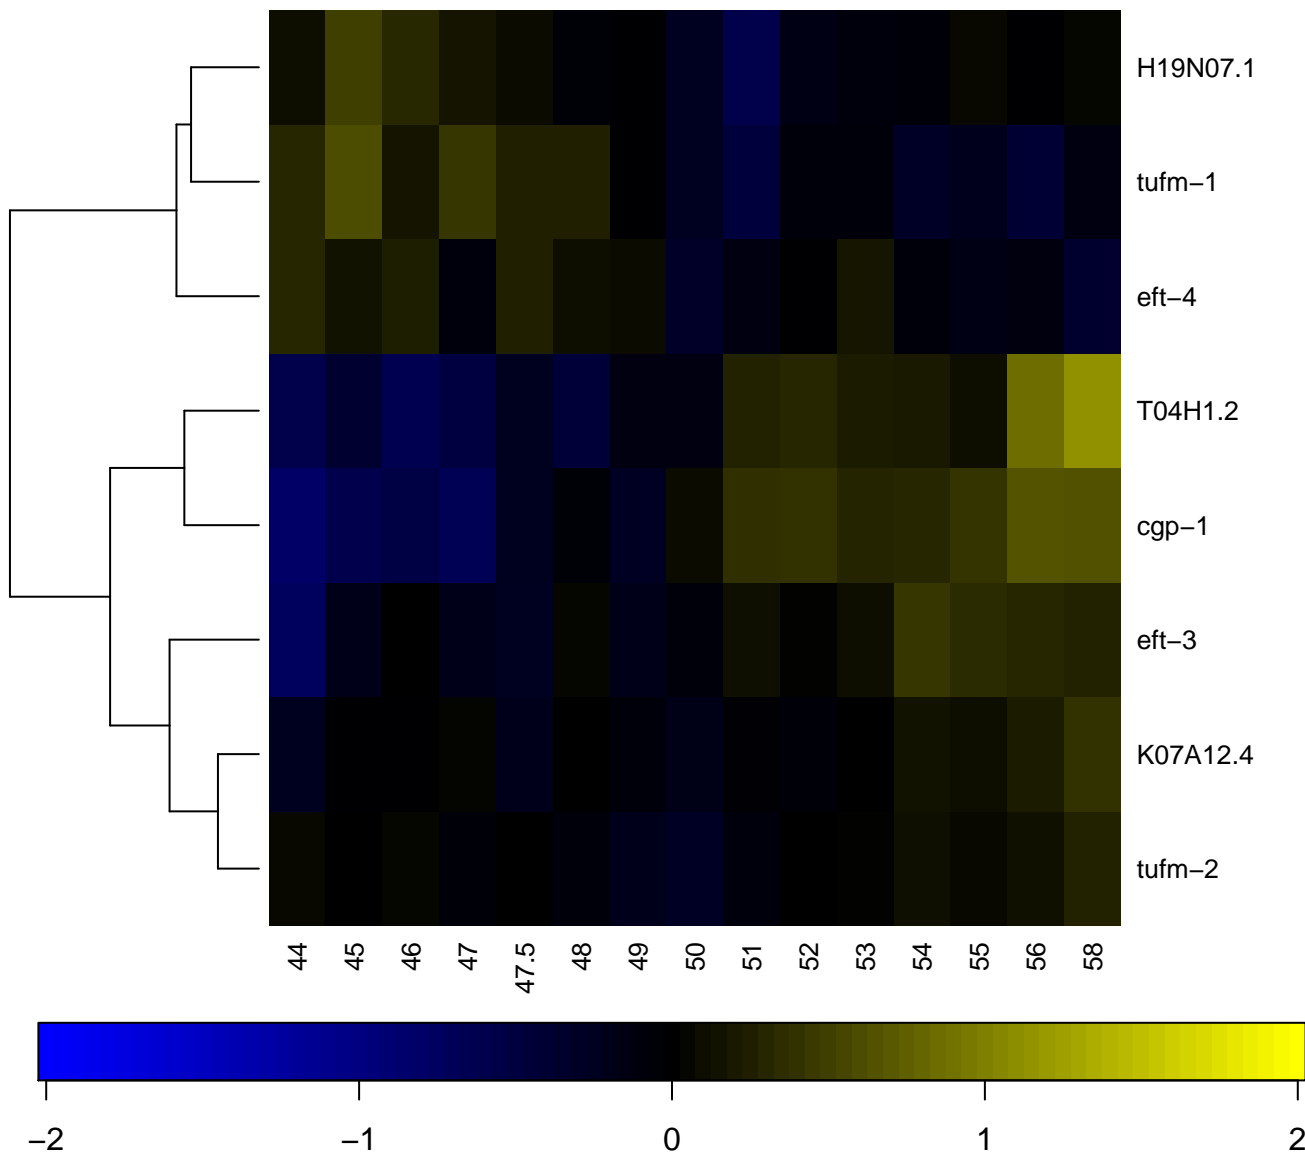

# Elongation factor Tu domain 2

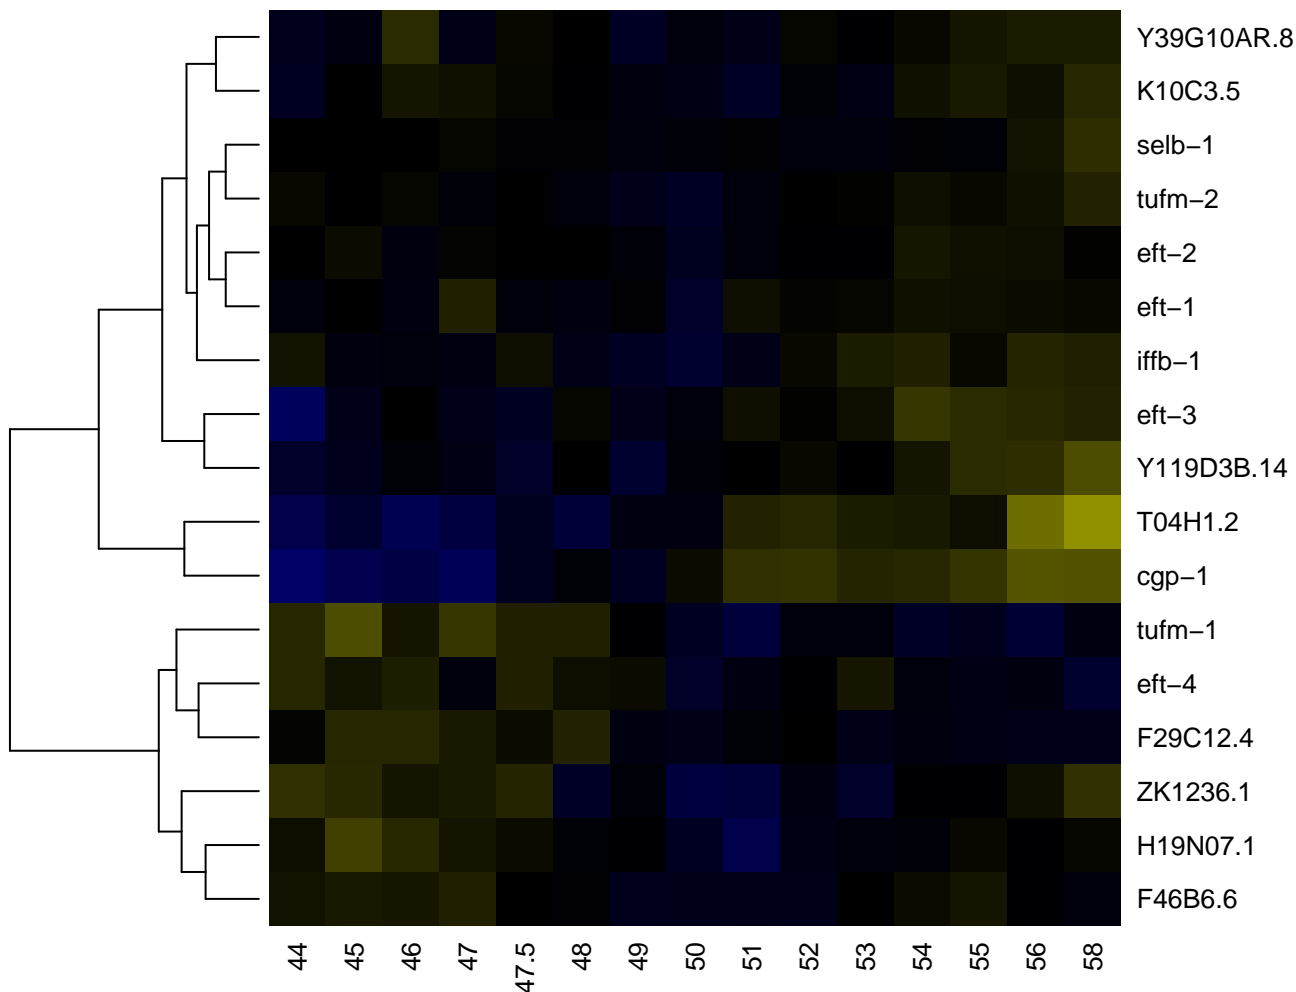



# Elongation factor Tu GTP binding domain

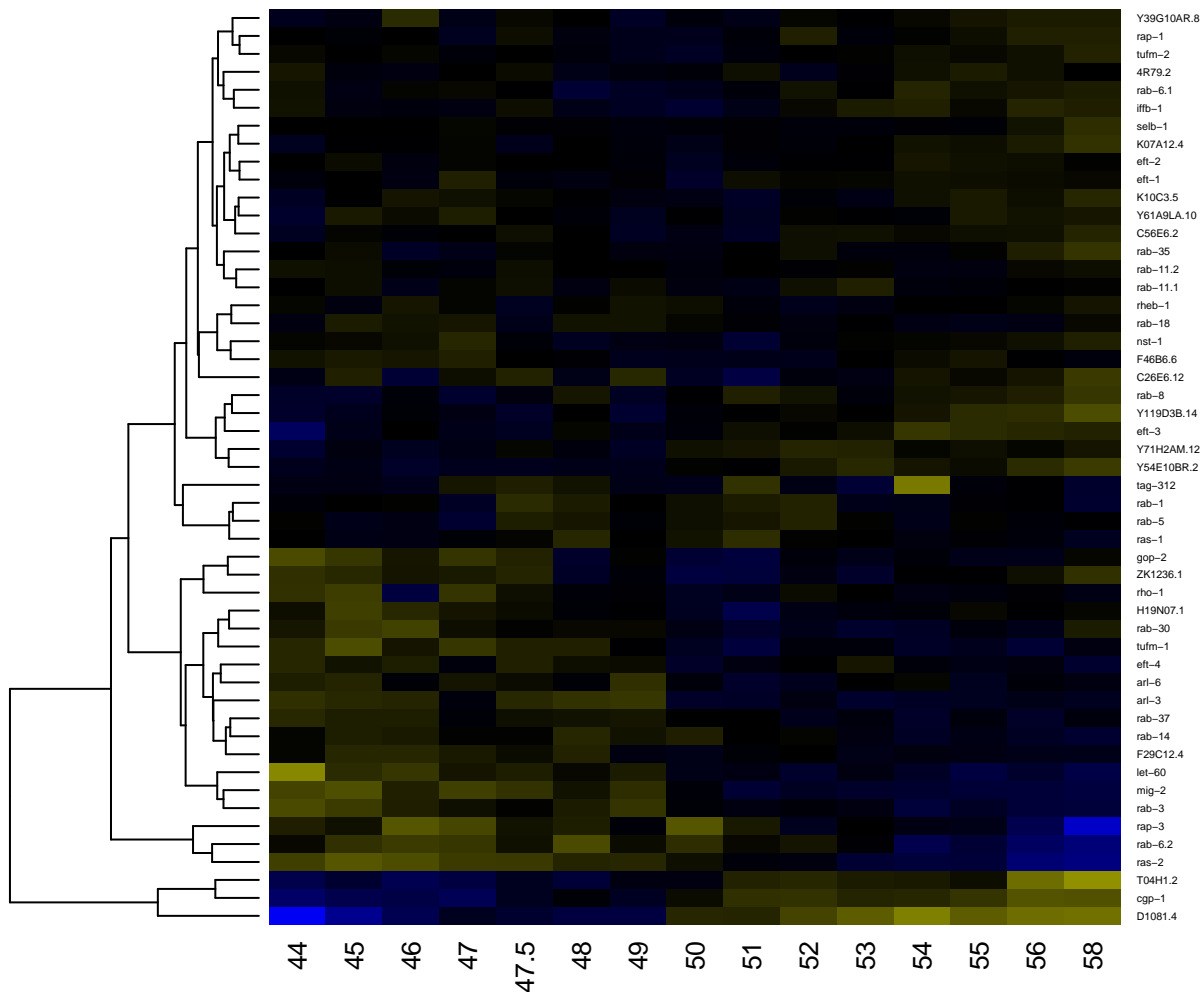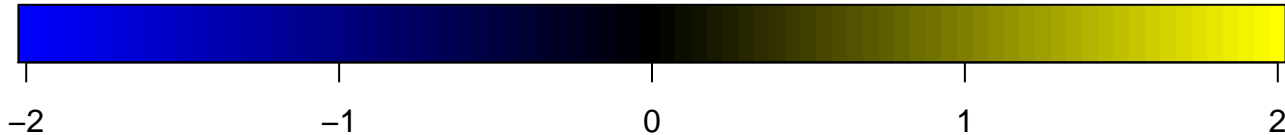







# Endoglin/CD105 antigen

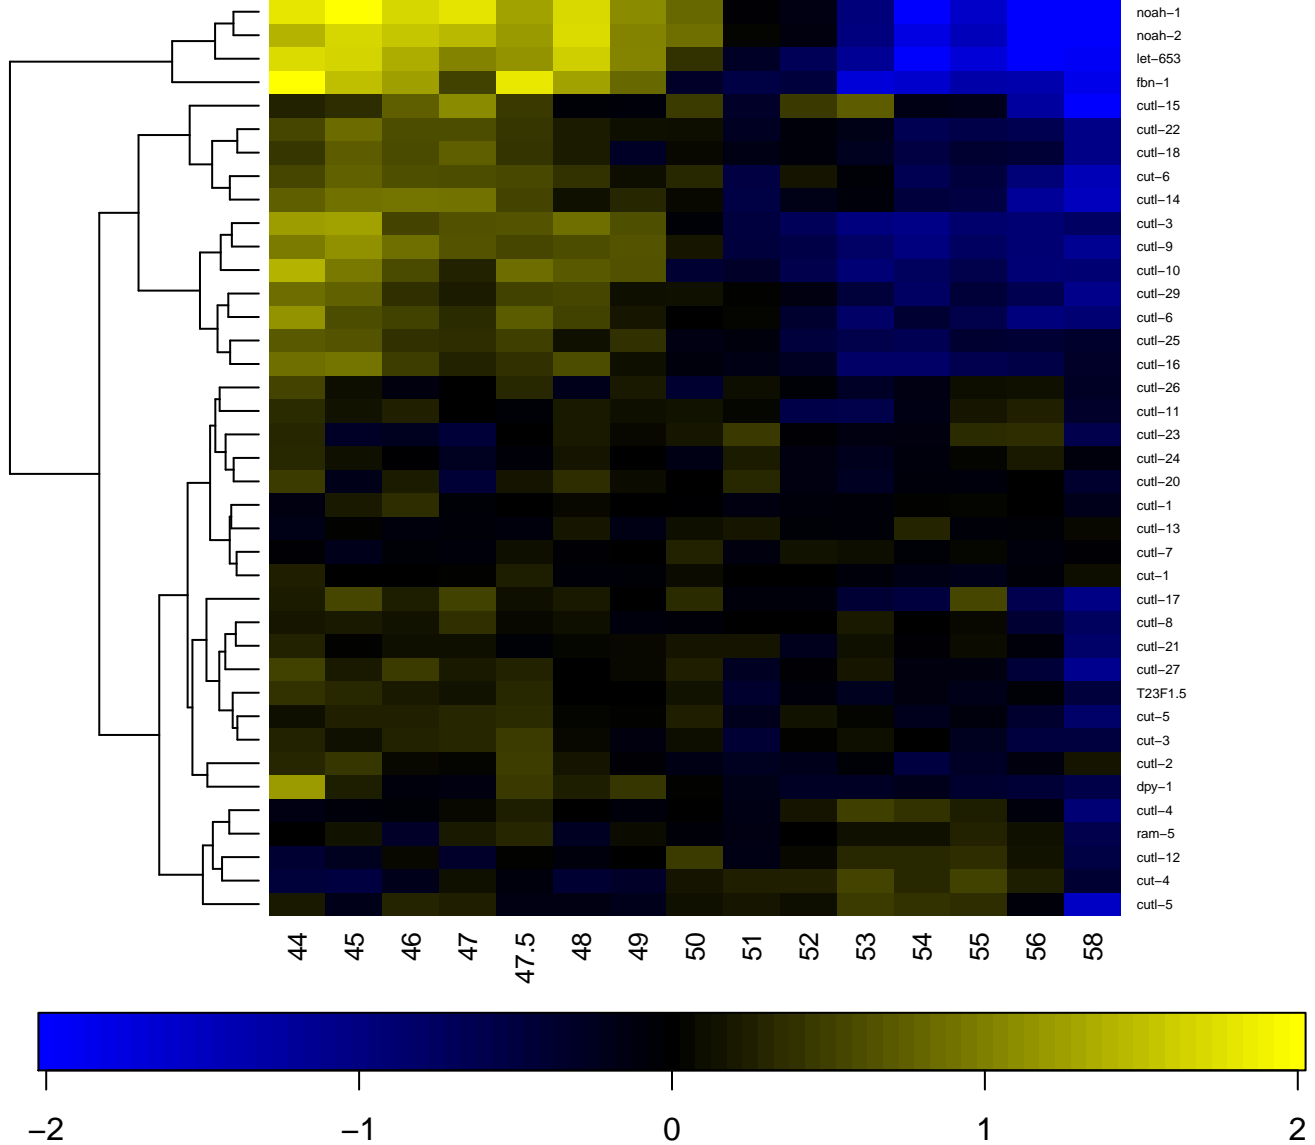





# Enoyl-CoA hydratase/isomerase family





# Enoyl-CoA hydratase/isomerase, conserved site

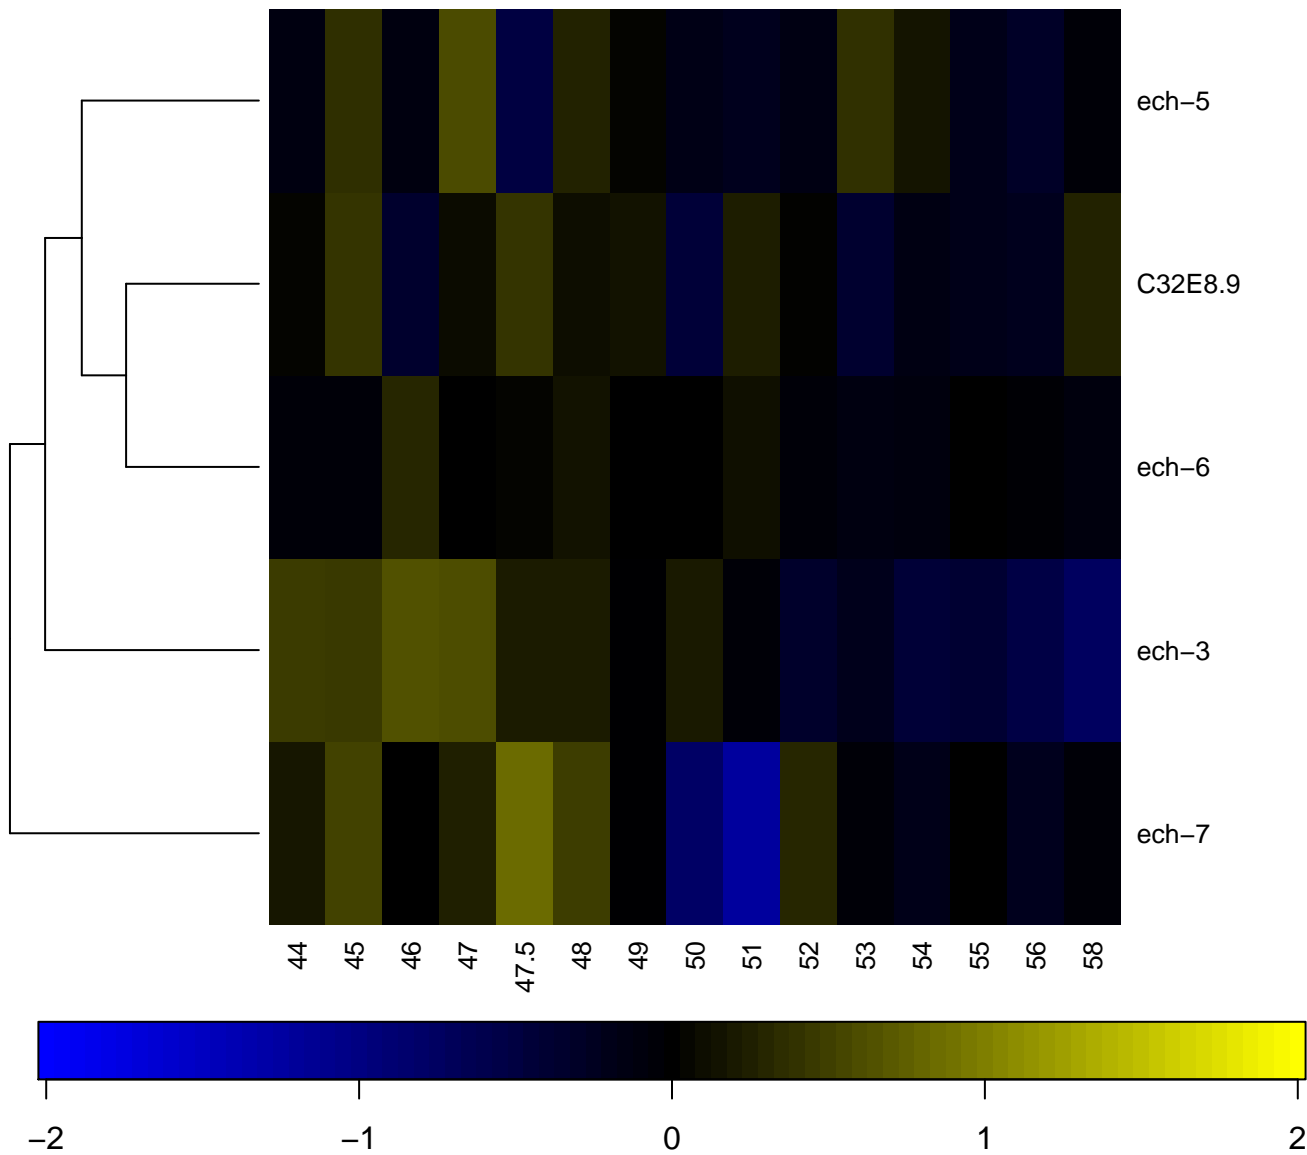



# Epsilon tubulin

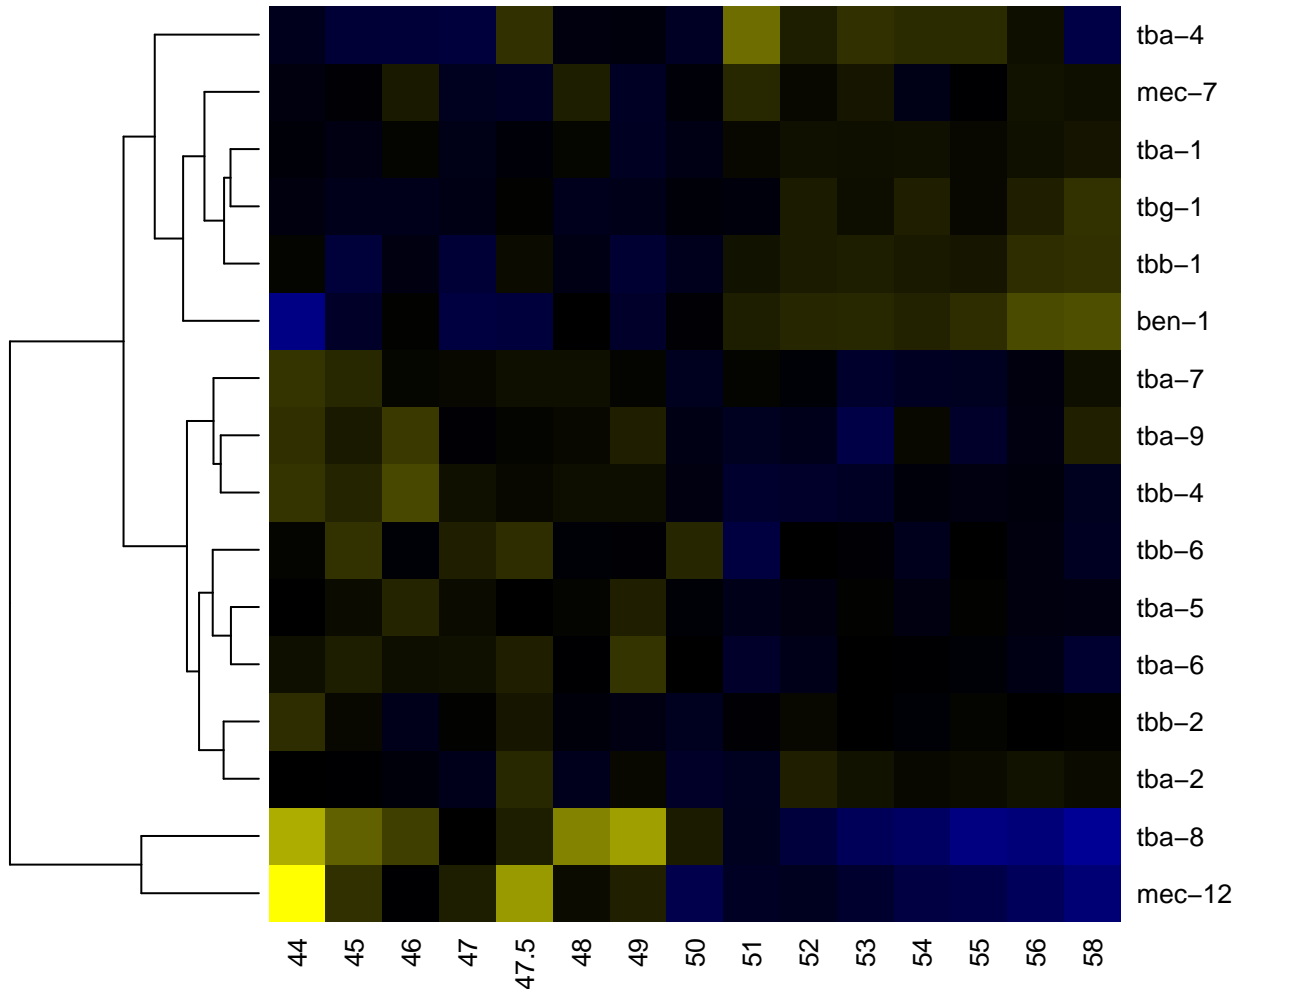







# Eukaryotic-type carbonic anhydrase

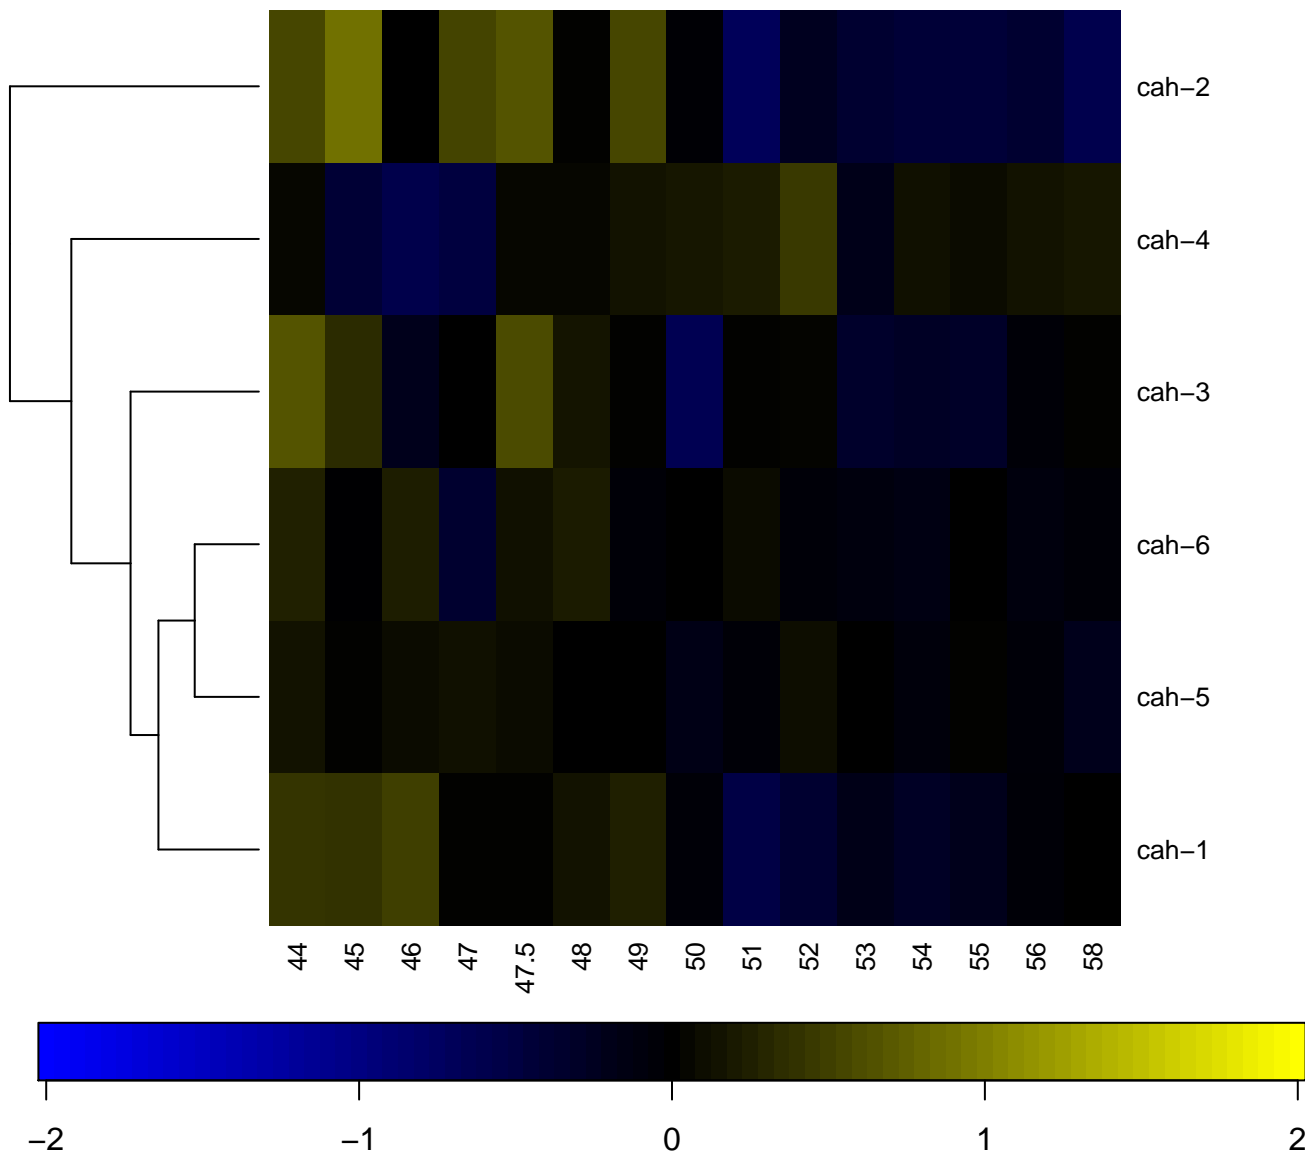





# Eukaryotic cytochrome b561



# Eukaryotic initiation factor 4E

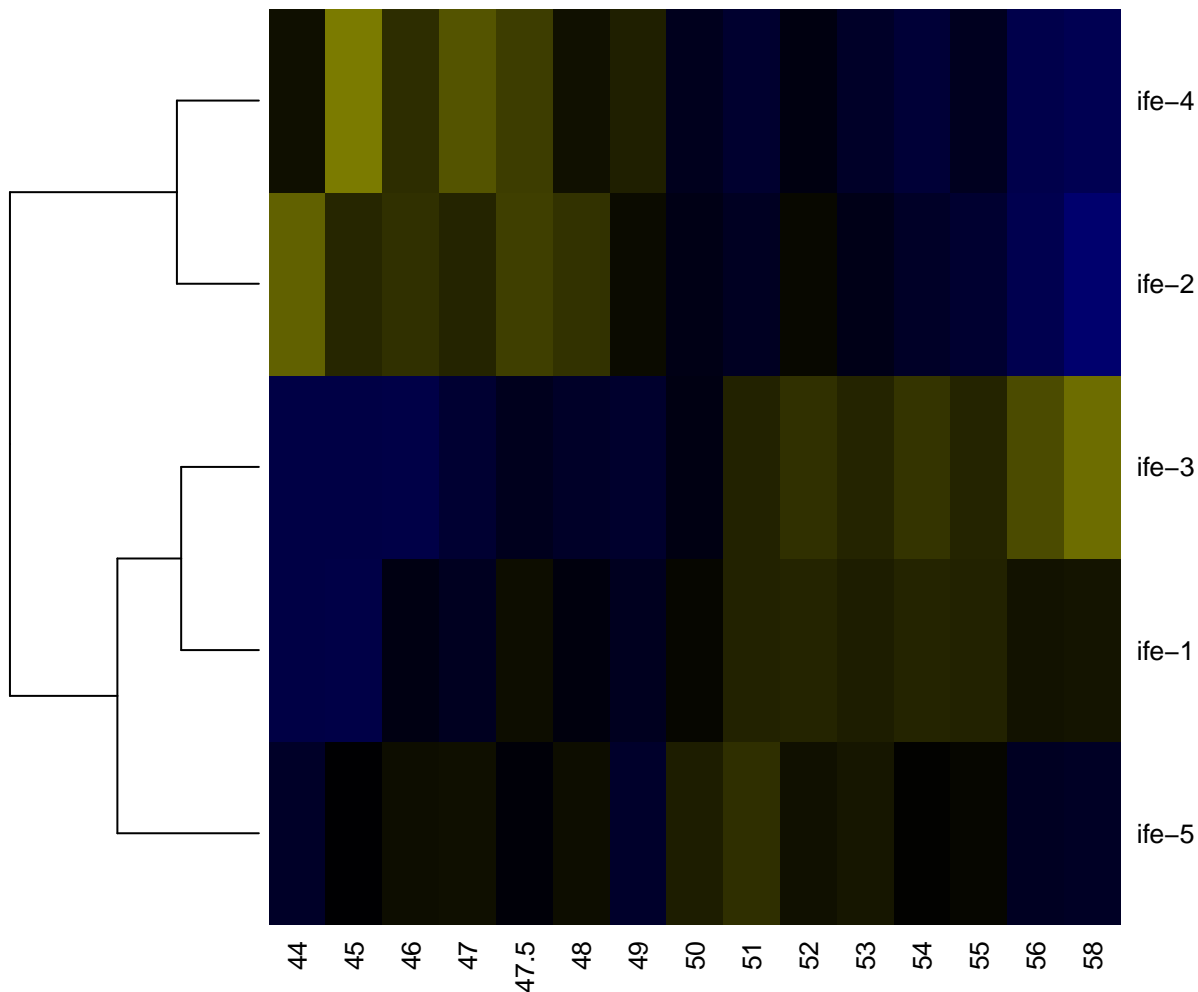

-2

-1

0

1

2



# Eukaryotic translation initiation factor 4E (eIF-4E)

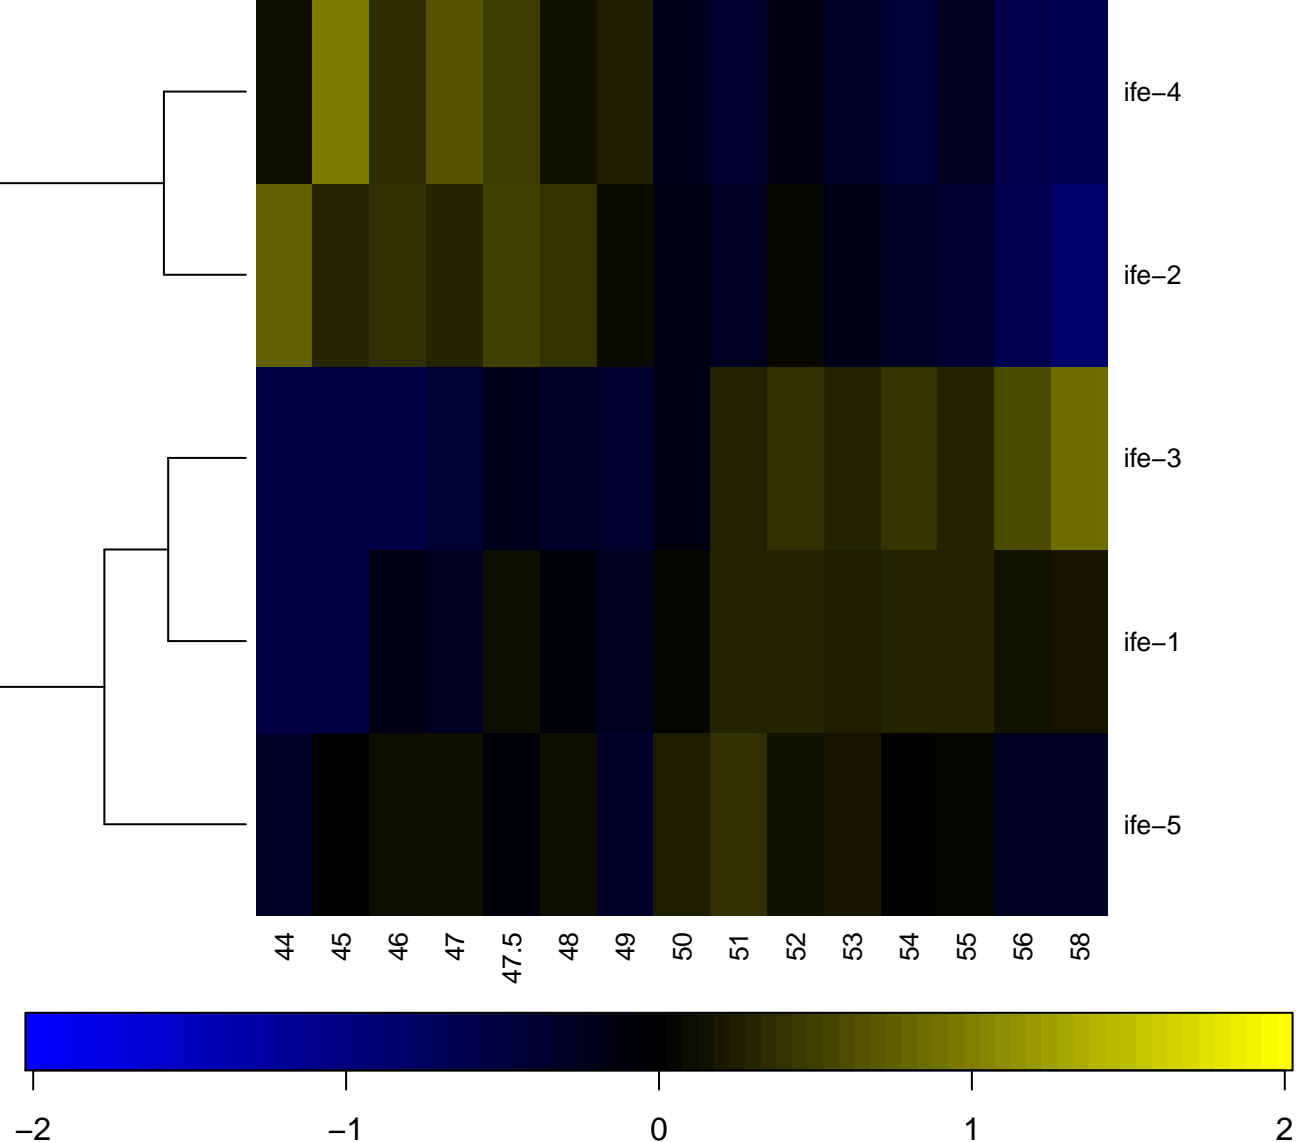

# karyotic translation initiation factor 4E (eIF-4E), conserved

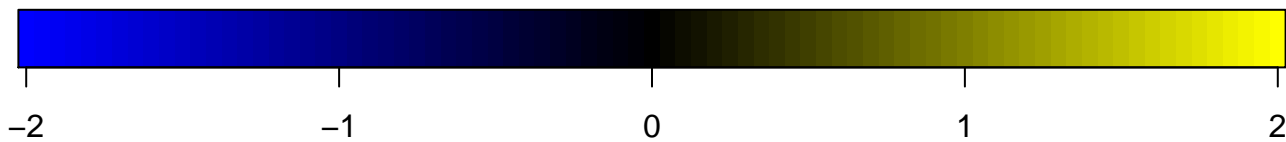













# Extracellular ligand-binding receptor

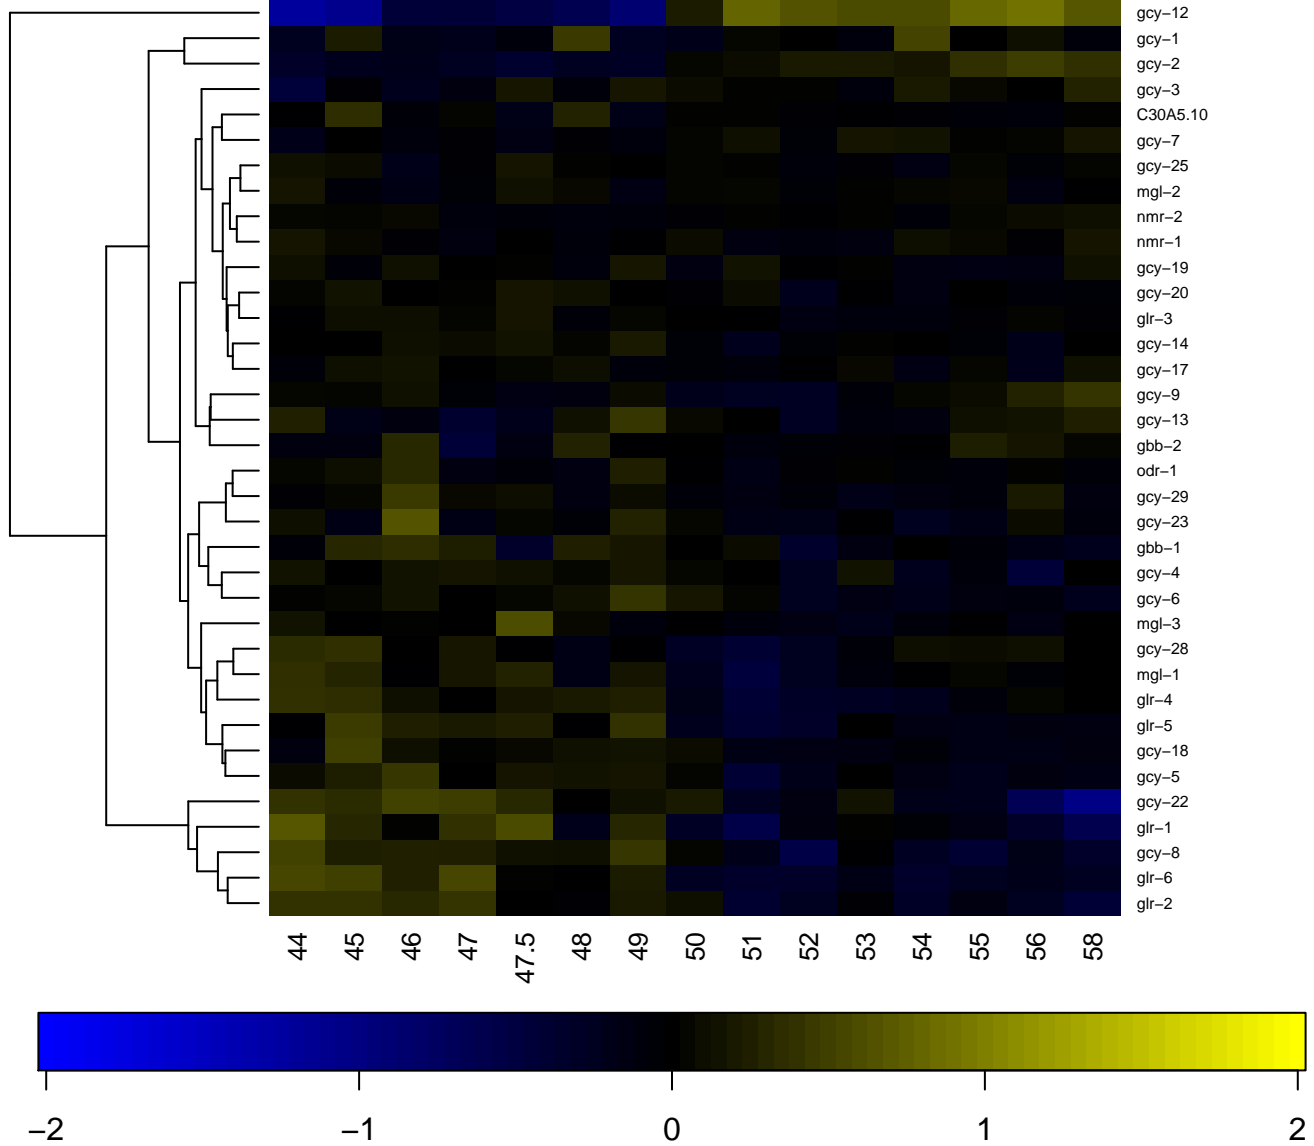

# Extracellular solute-binding protein, family 3

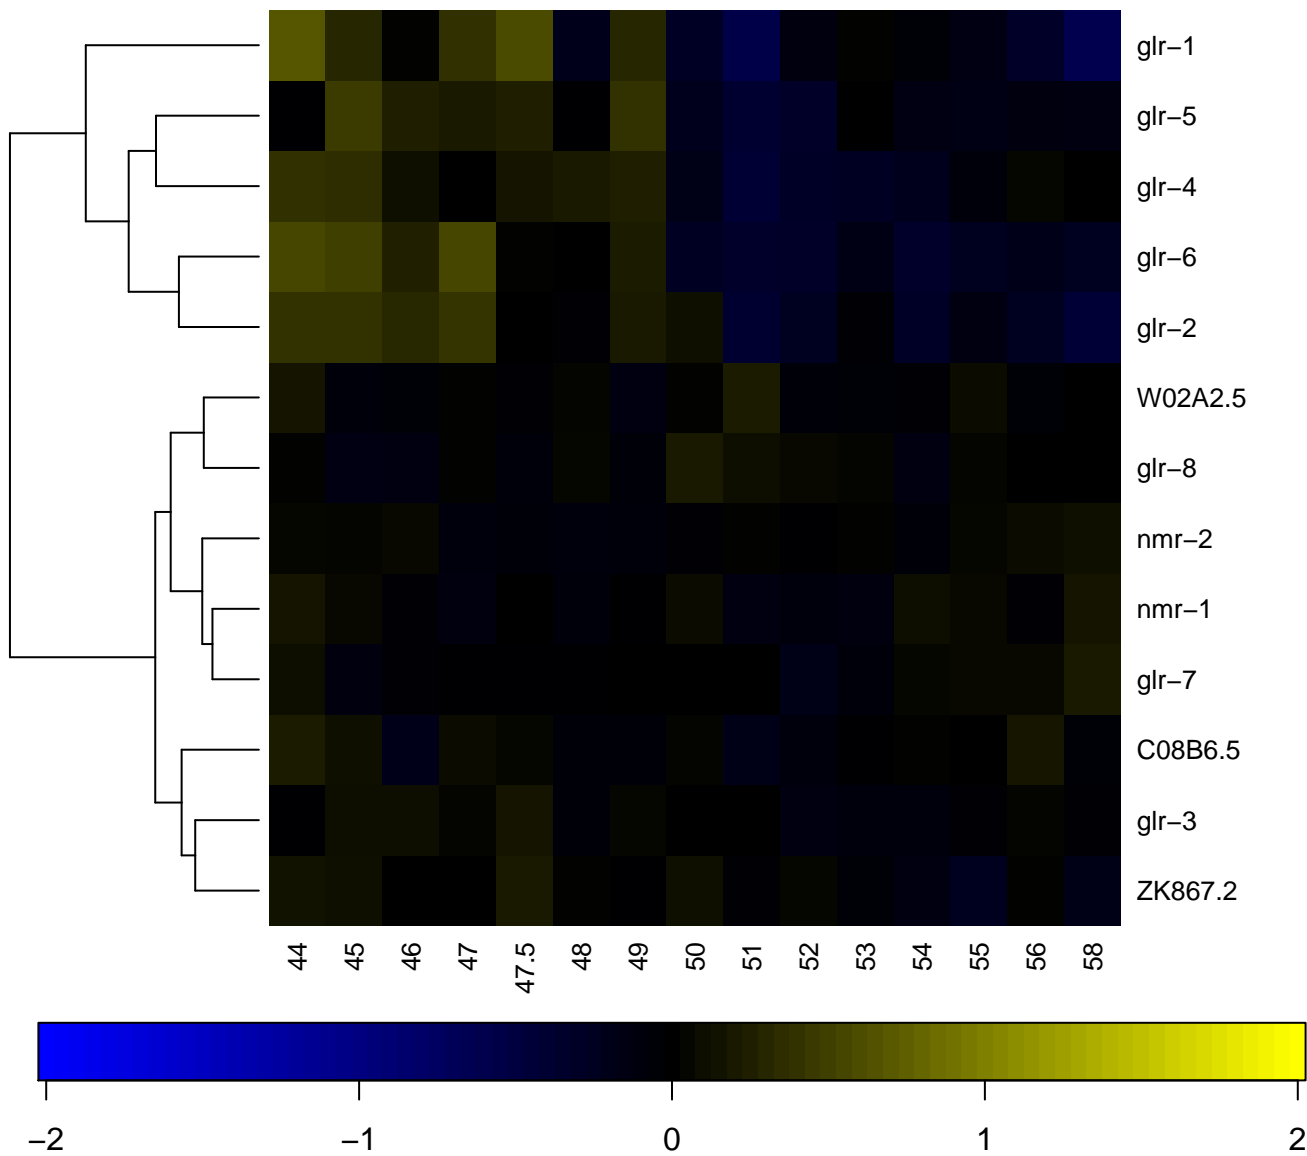



# F-box associated

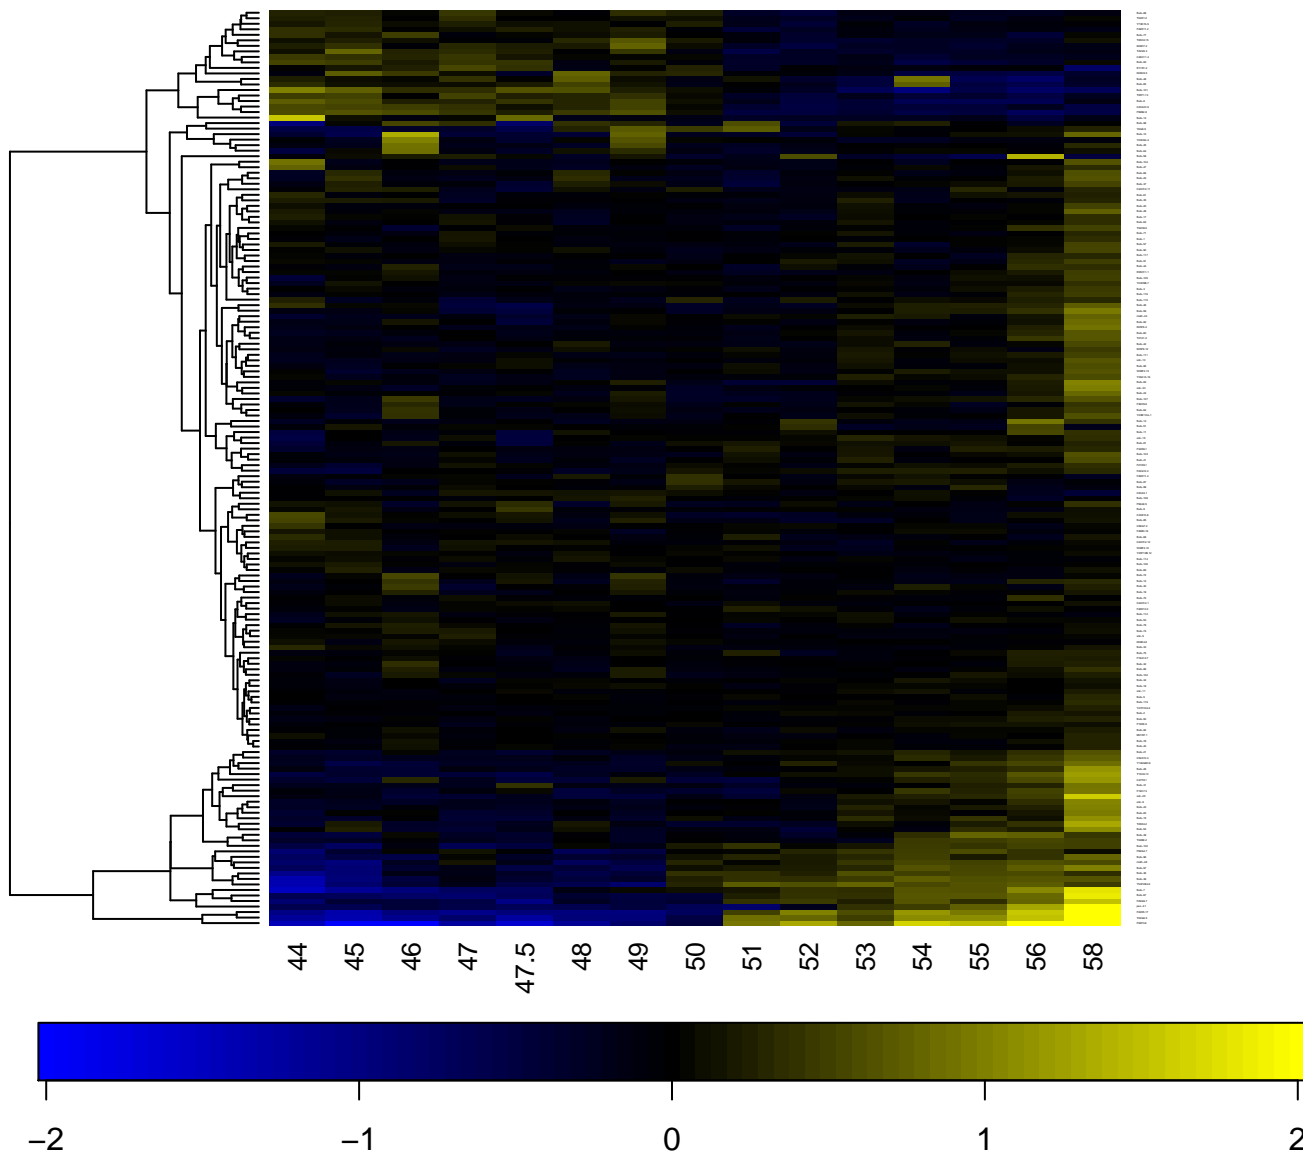

# F-box associated domain, type 2

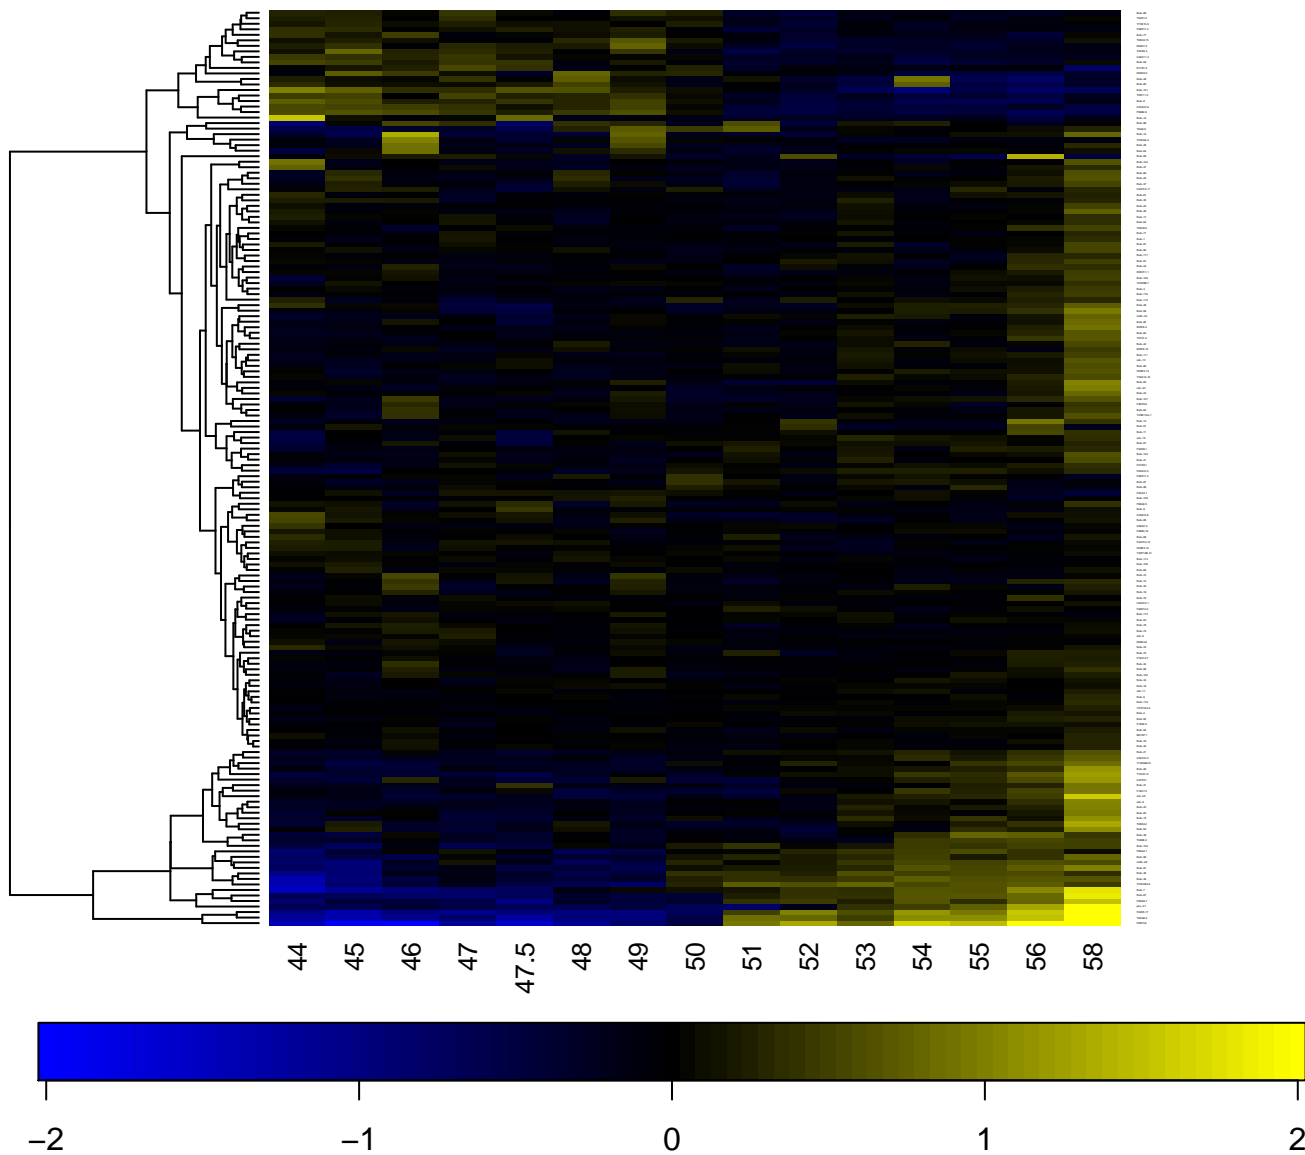

# F-box domain

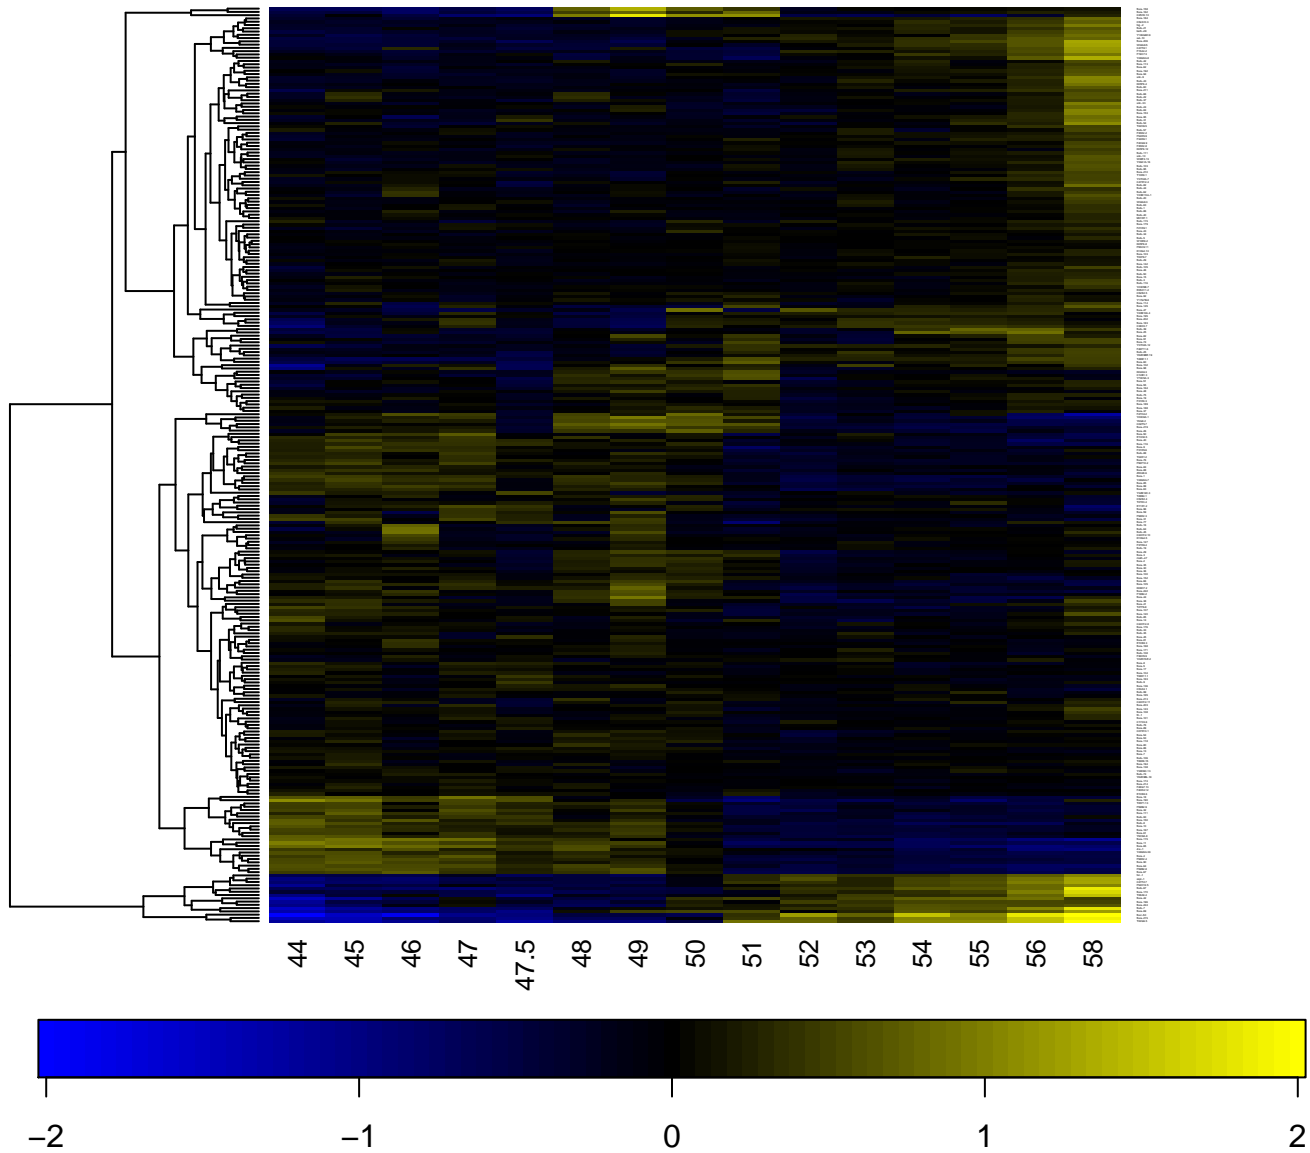





# AD-dependent pyridine nucleotide-disulphide oxidoreduct

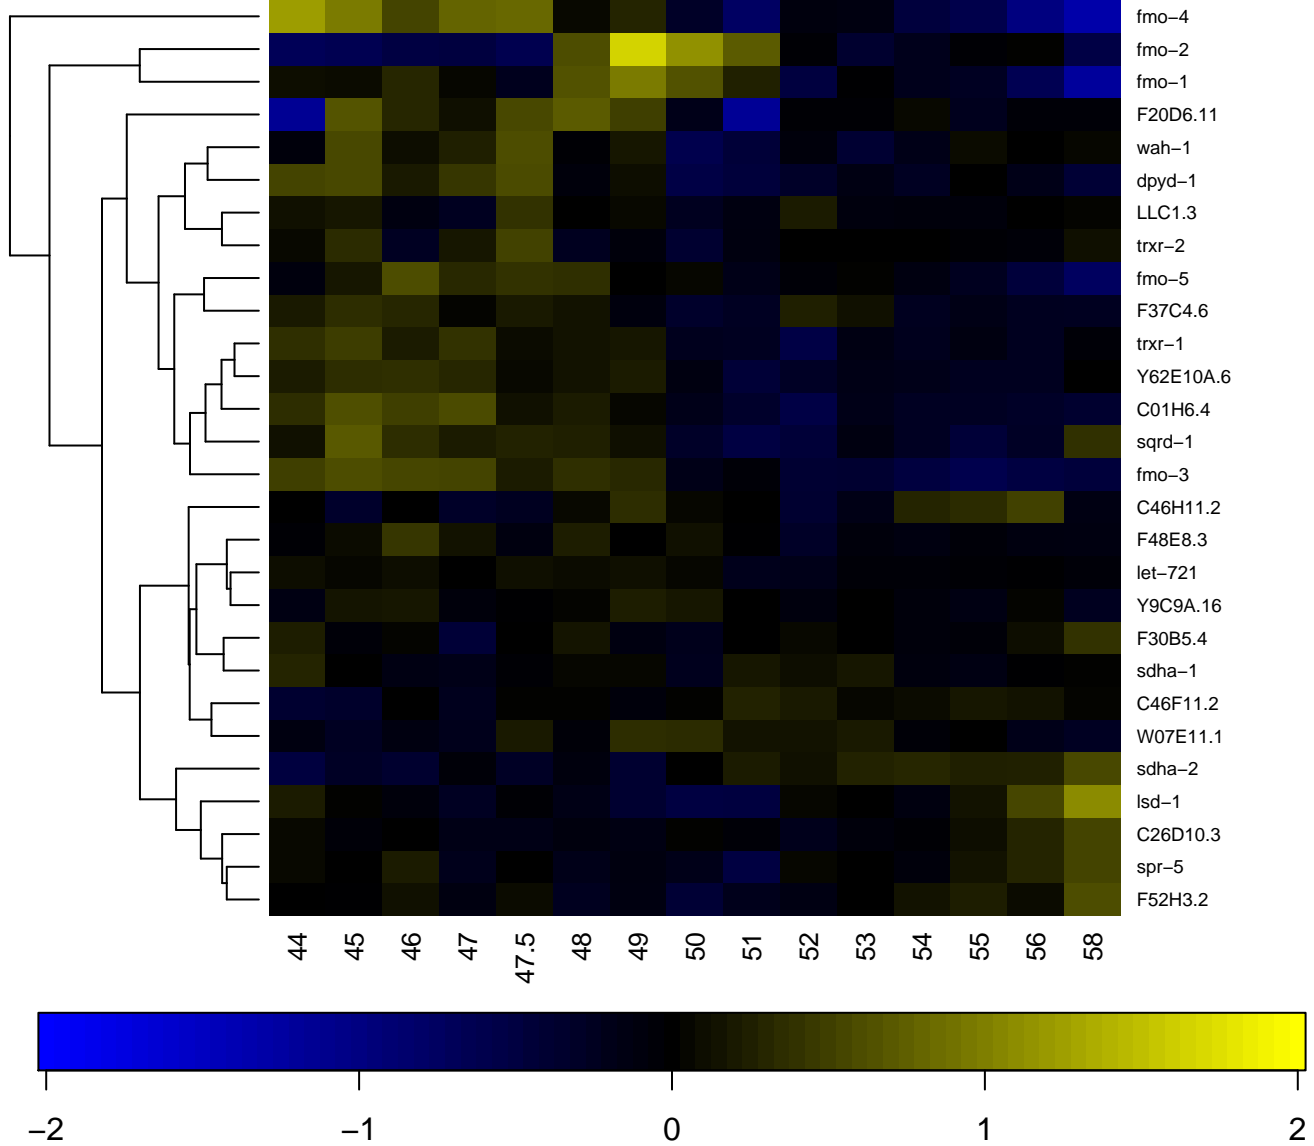

# FAD-linked oxidase, FAD-binding, subdomain 2

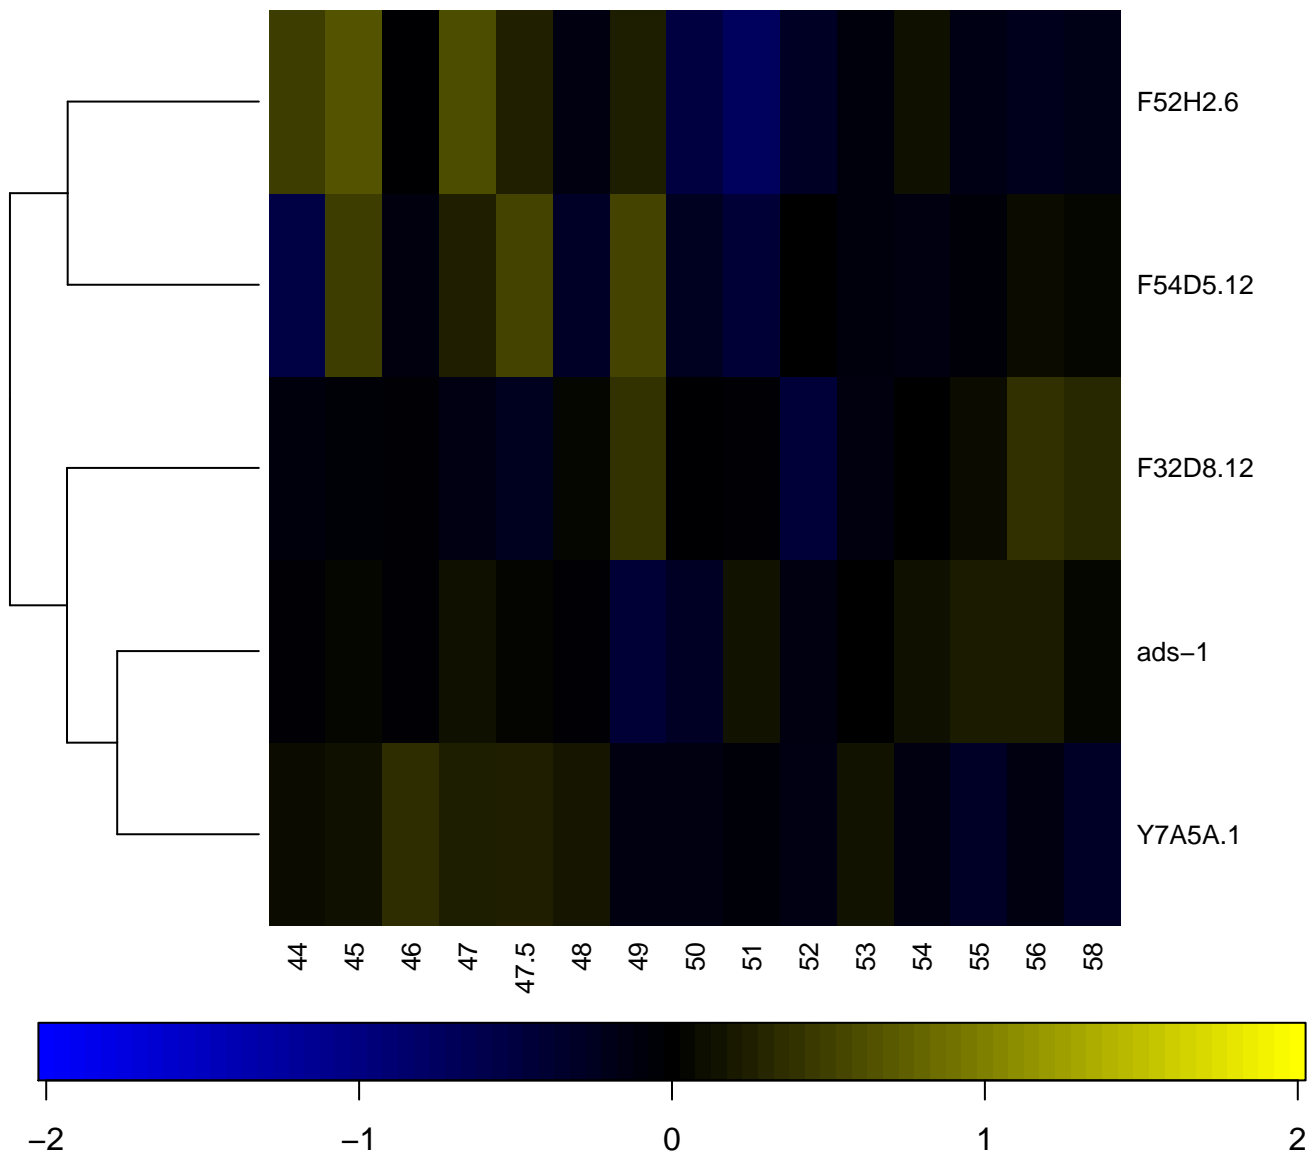



# FAD dependent oxidoreductase

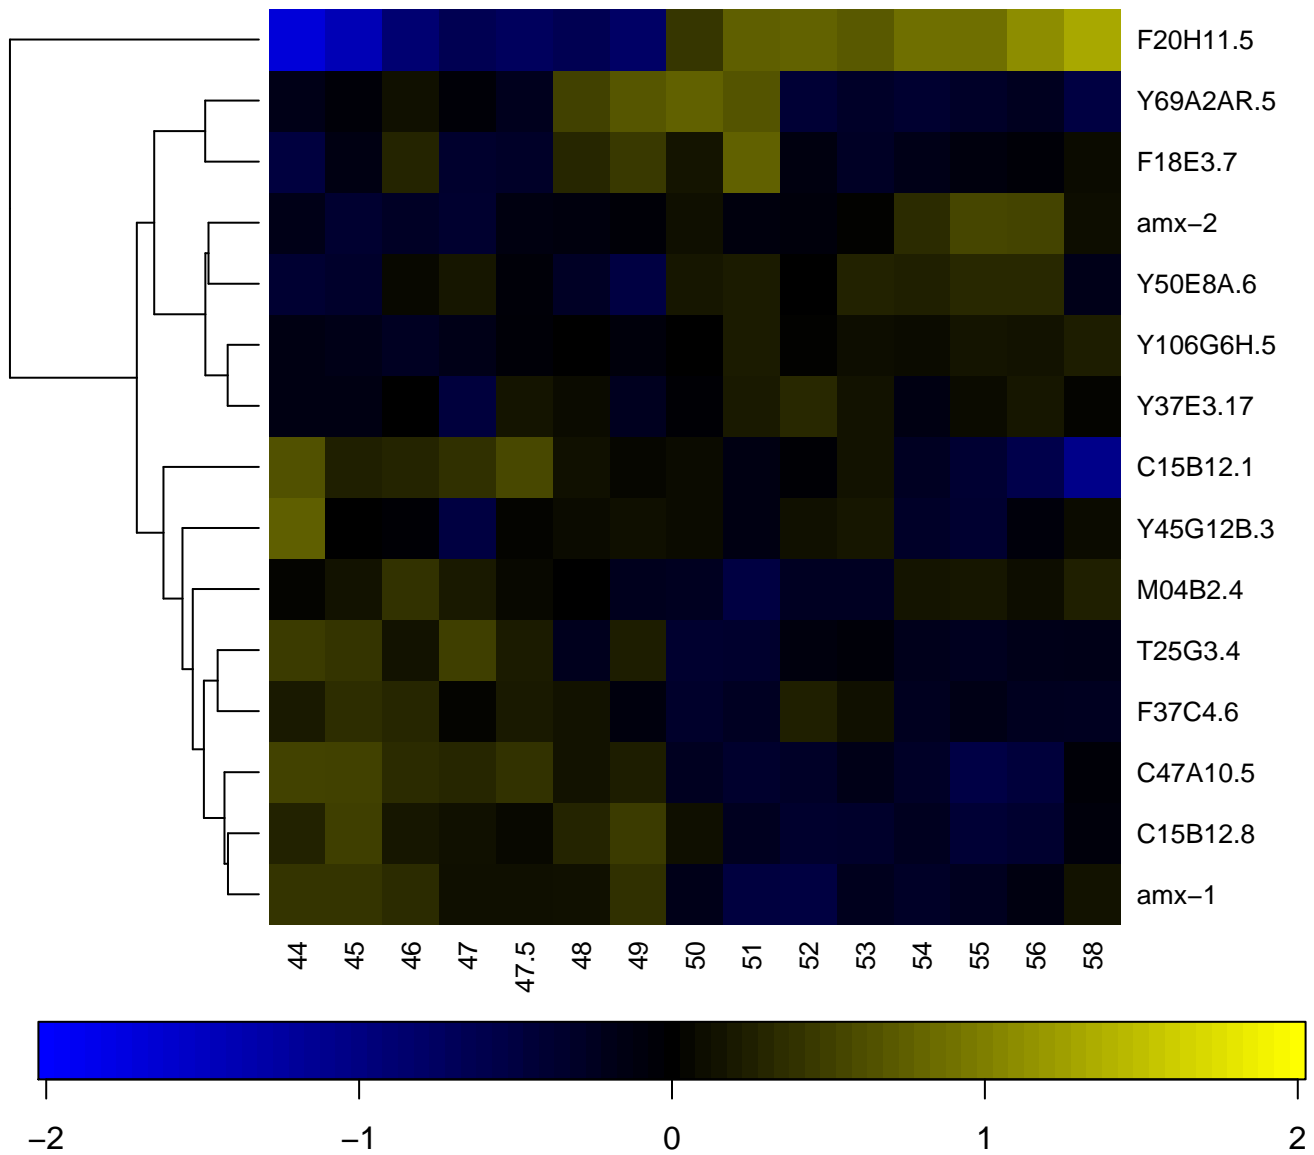















# FERM central domain

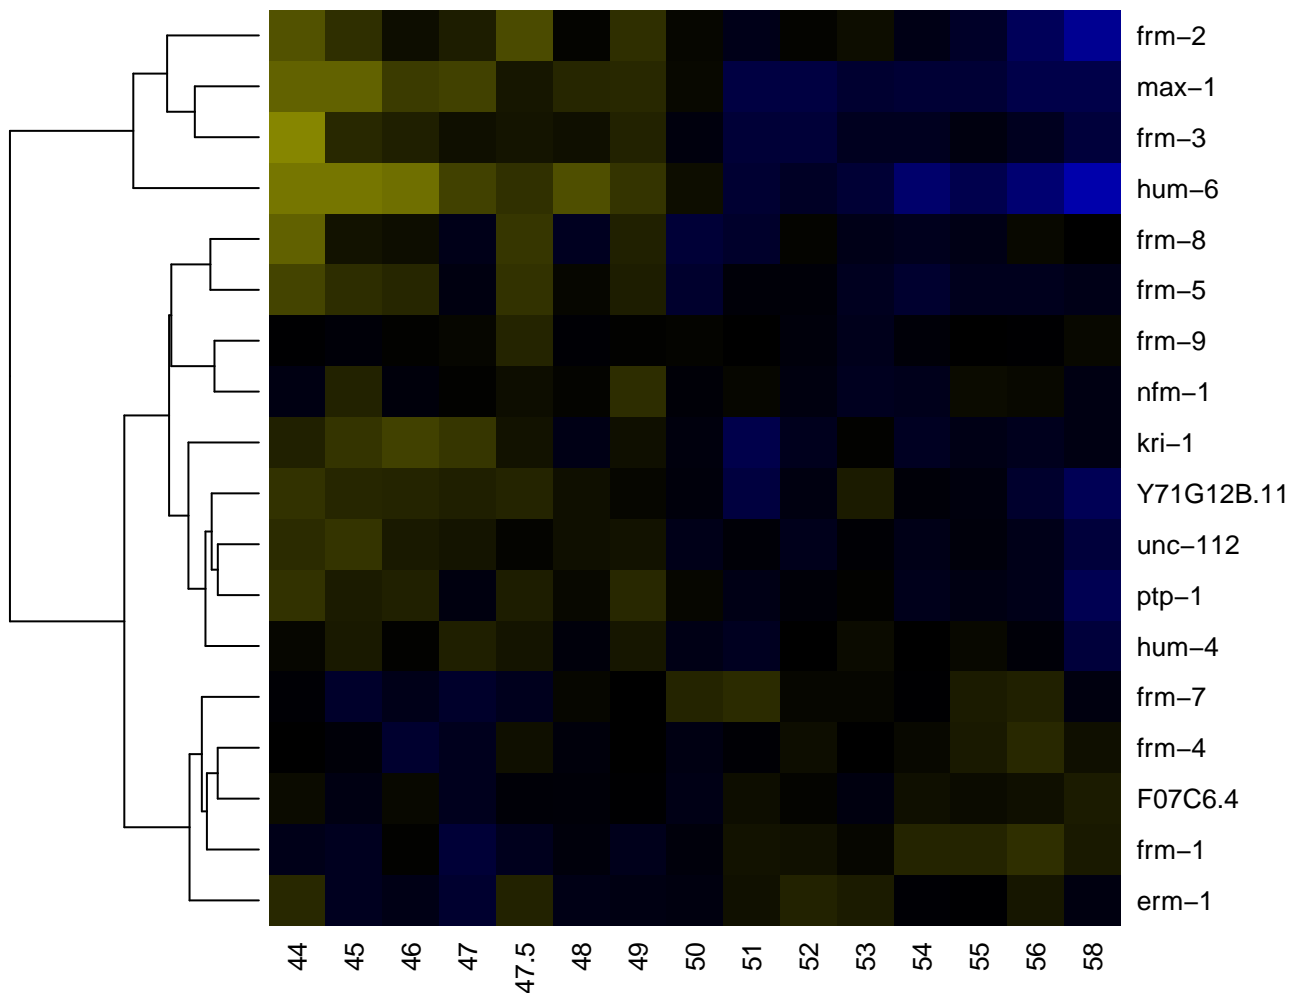











# FERM/acyl-CoA-binding protein, 3-helical bundle

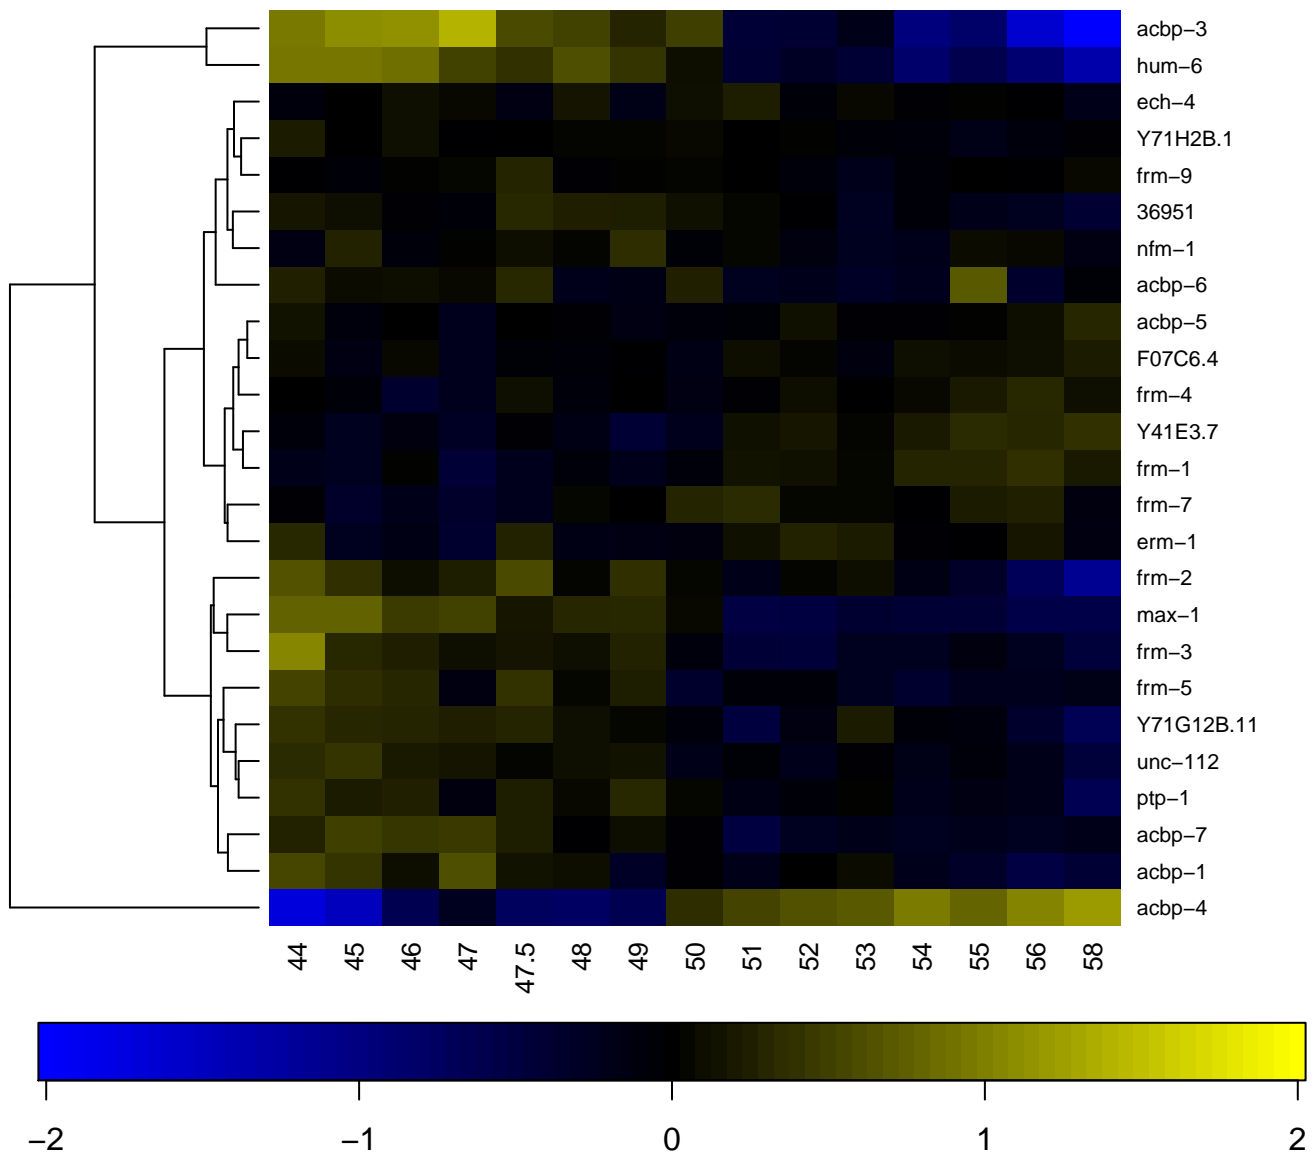

# Ferredoxin

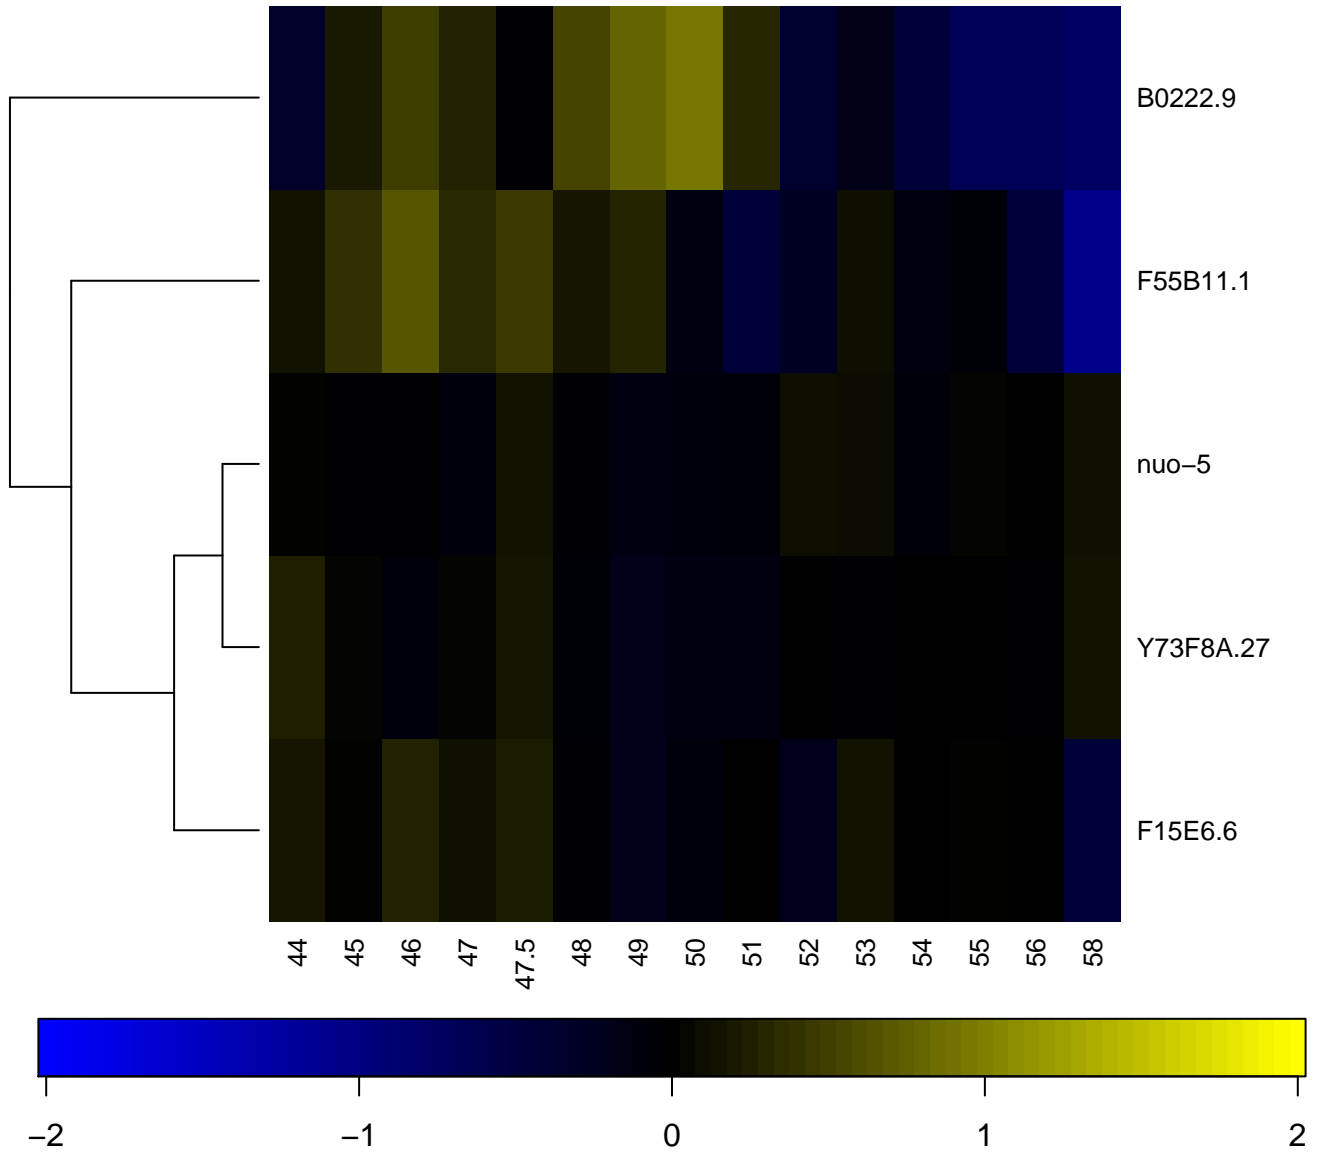

# Ferrous iron transport protein B

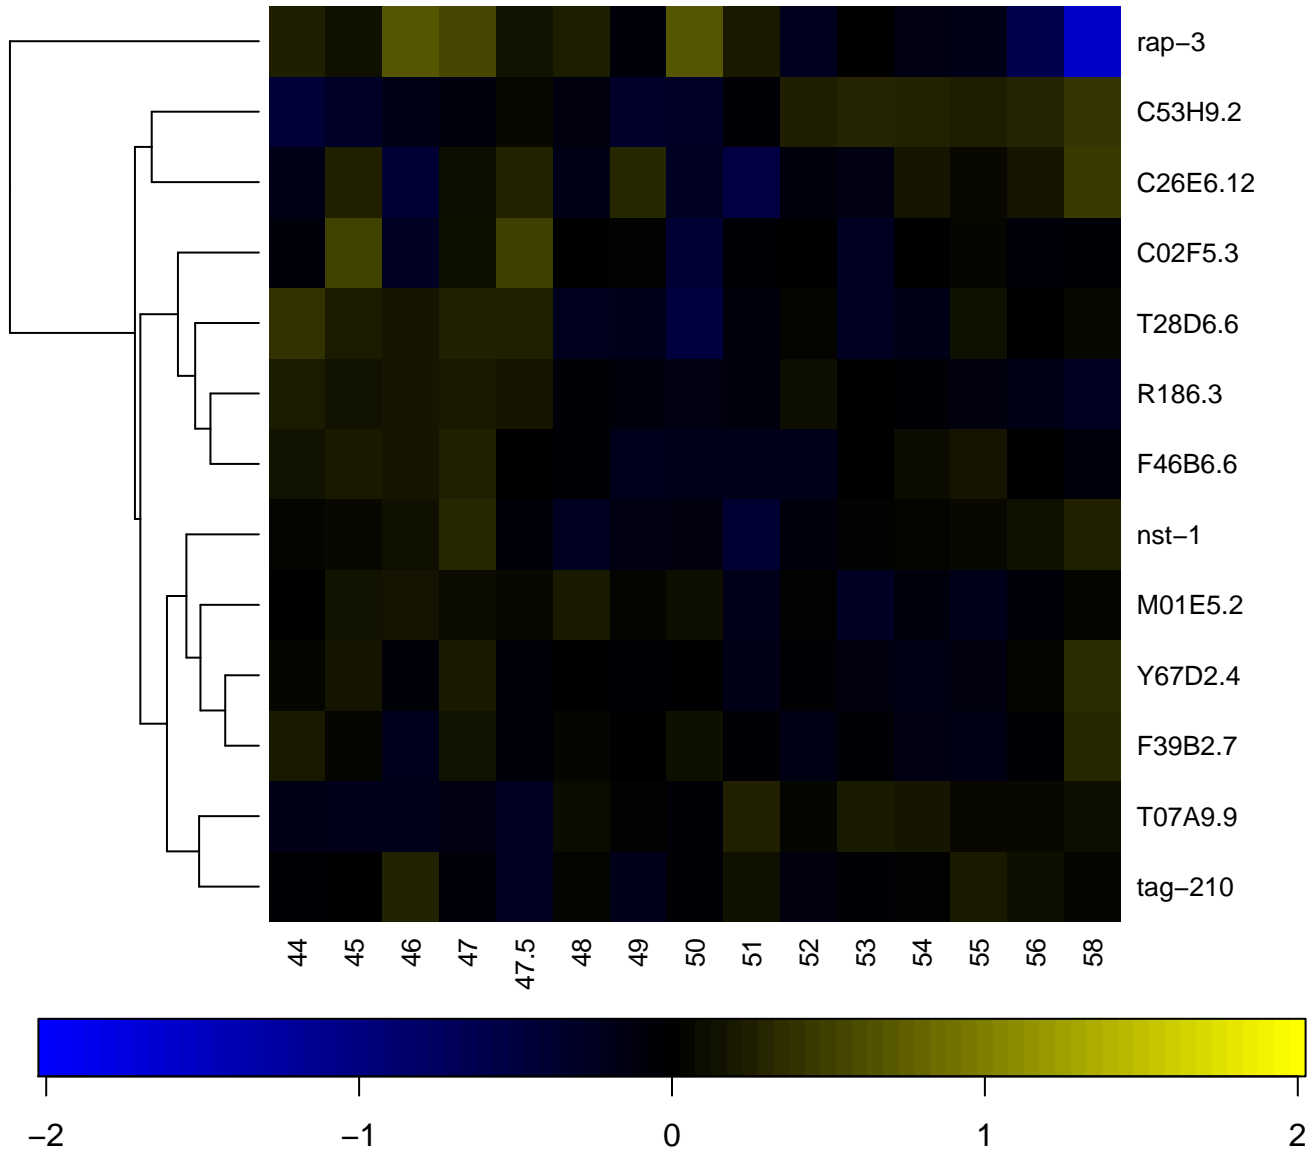















# Fibronectin type III domain

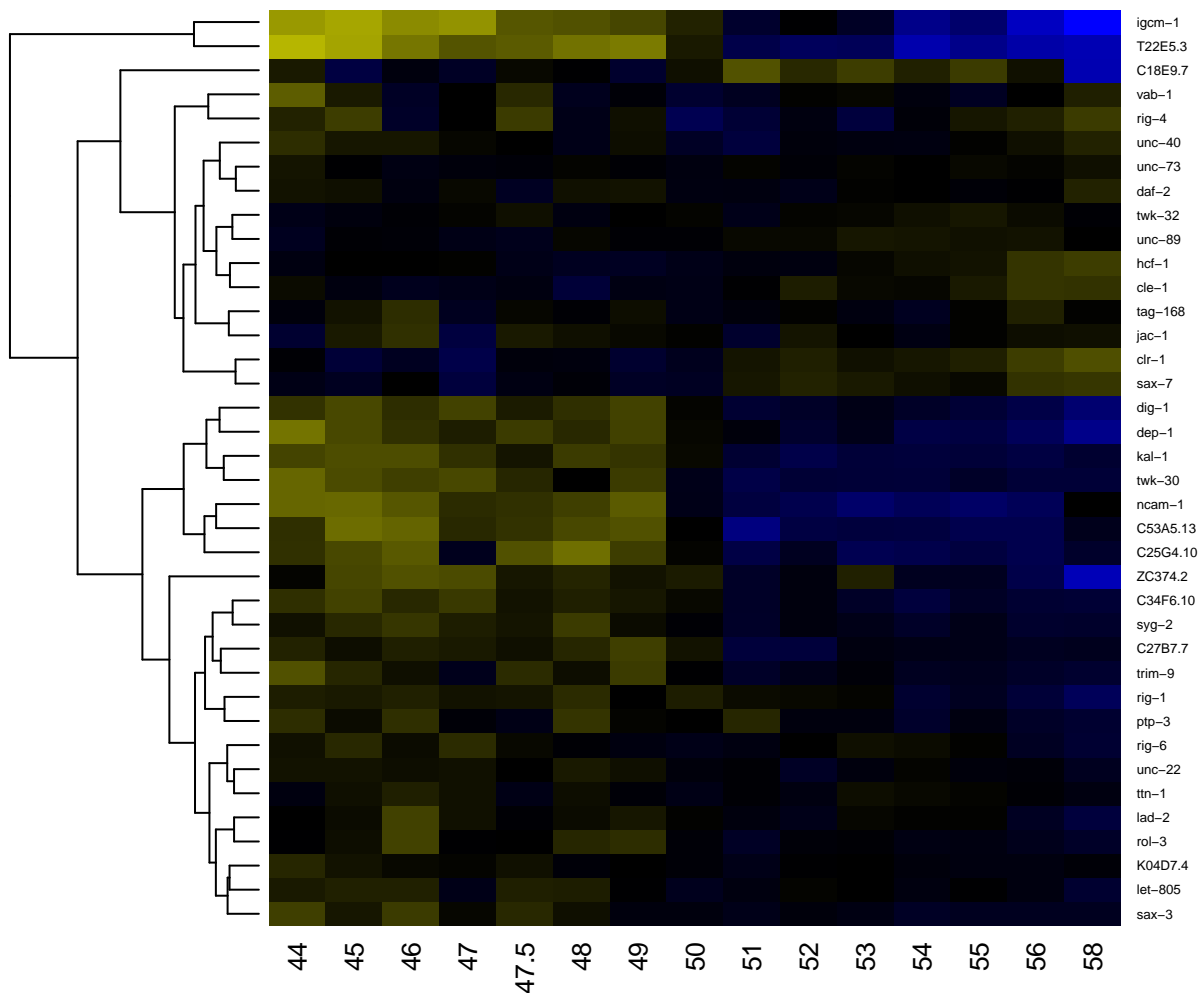

# Fibronectin, type III

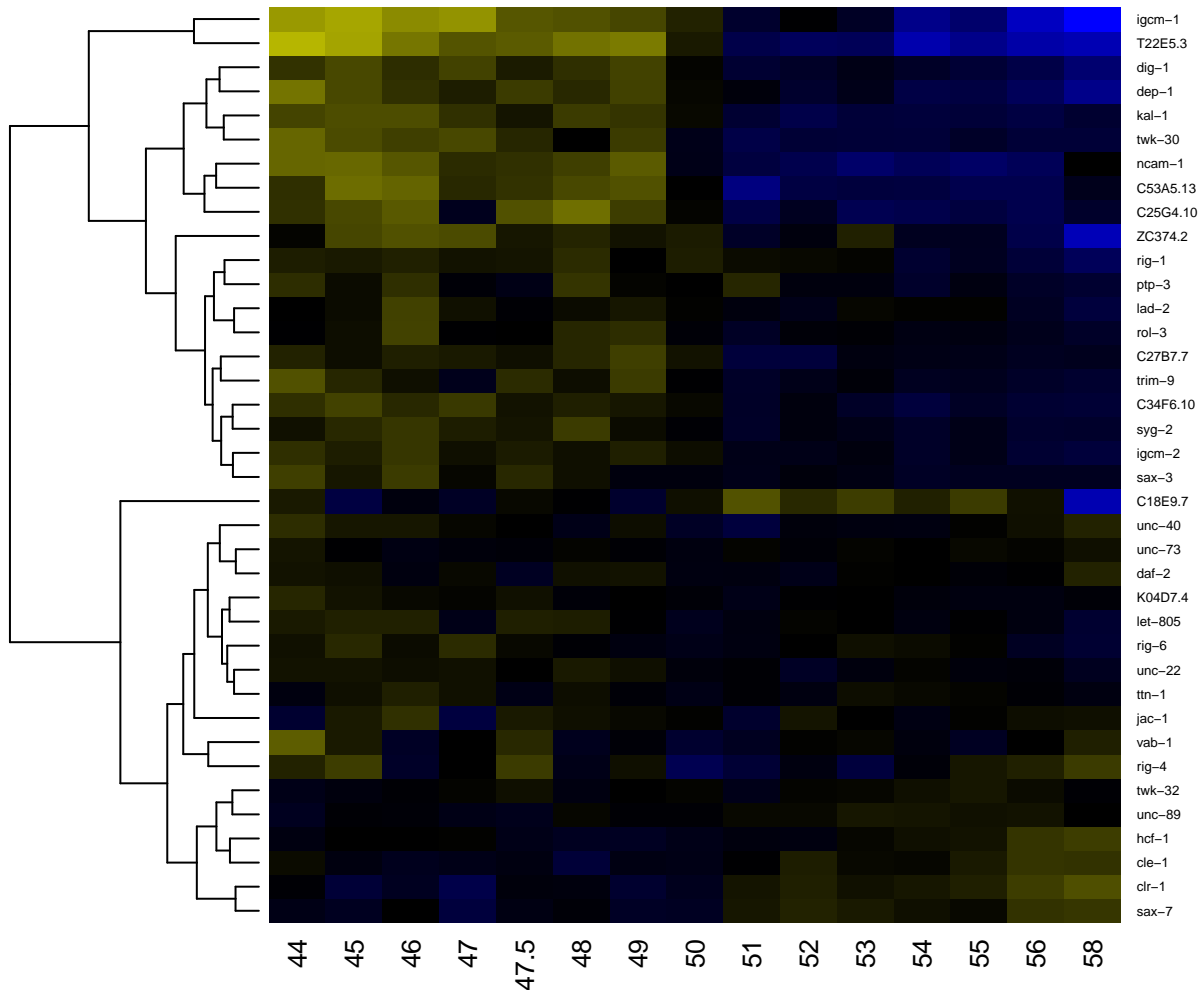







# Flavin-containing monooxygenase FMO

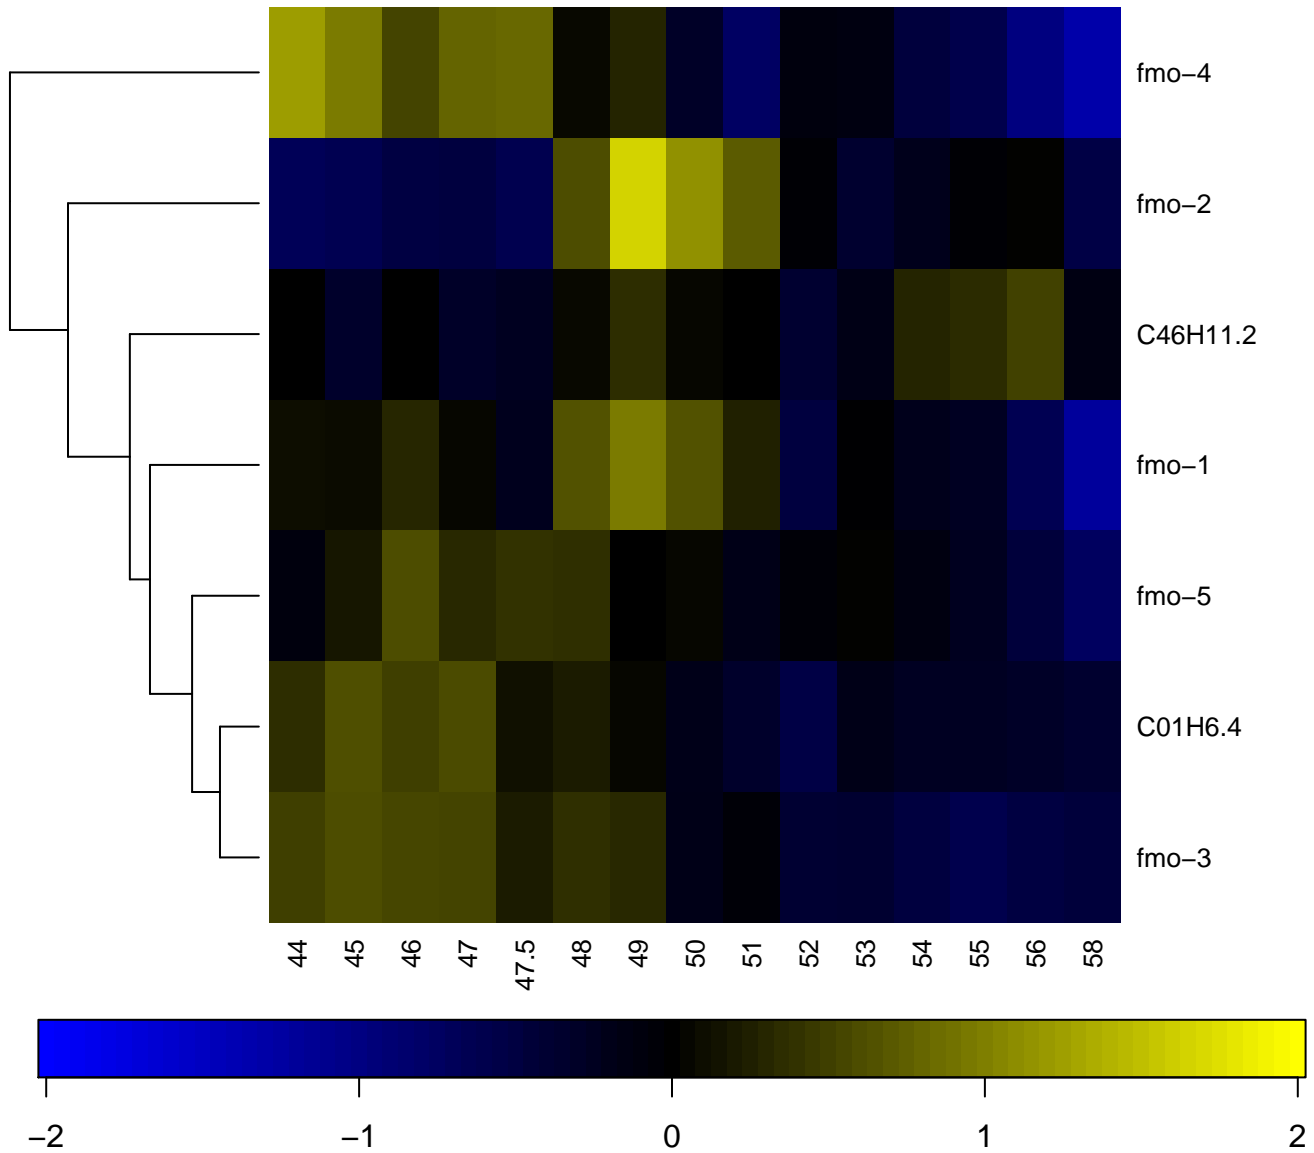

# Flavin containing amine oxidoreductase

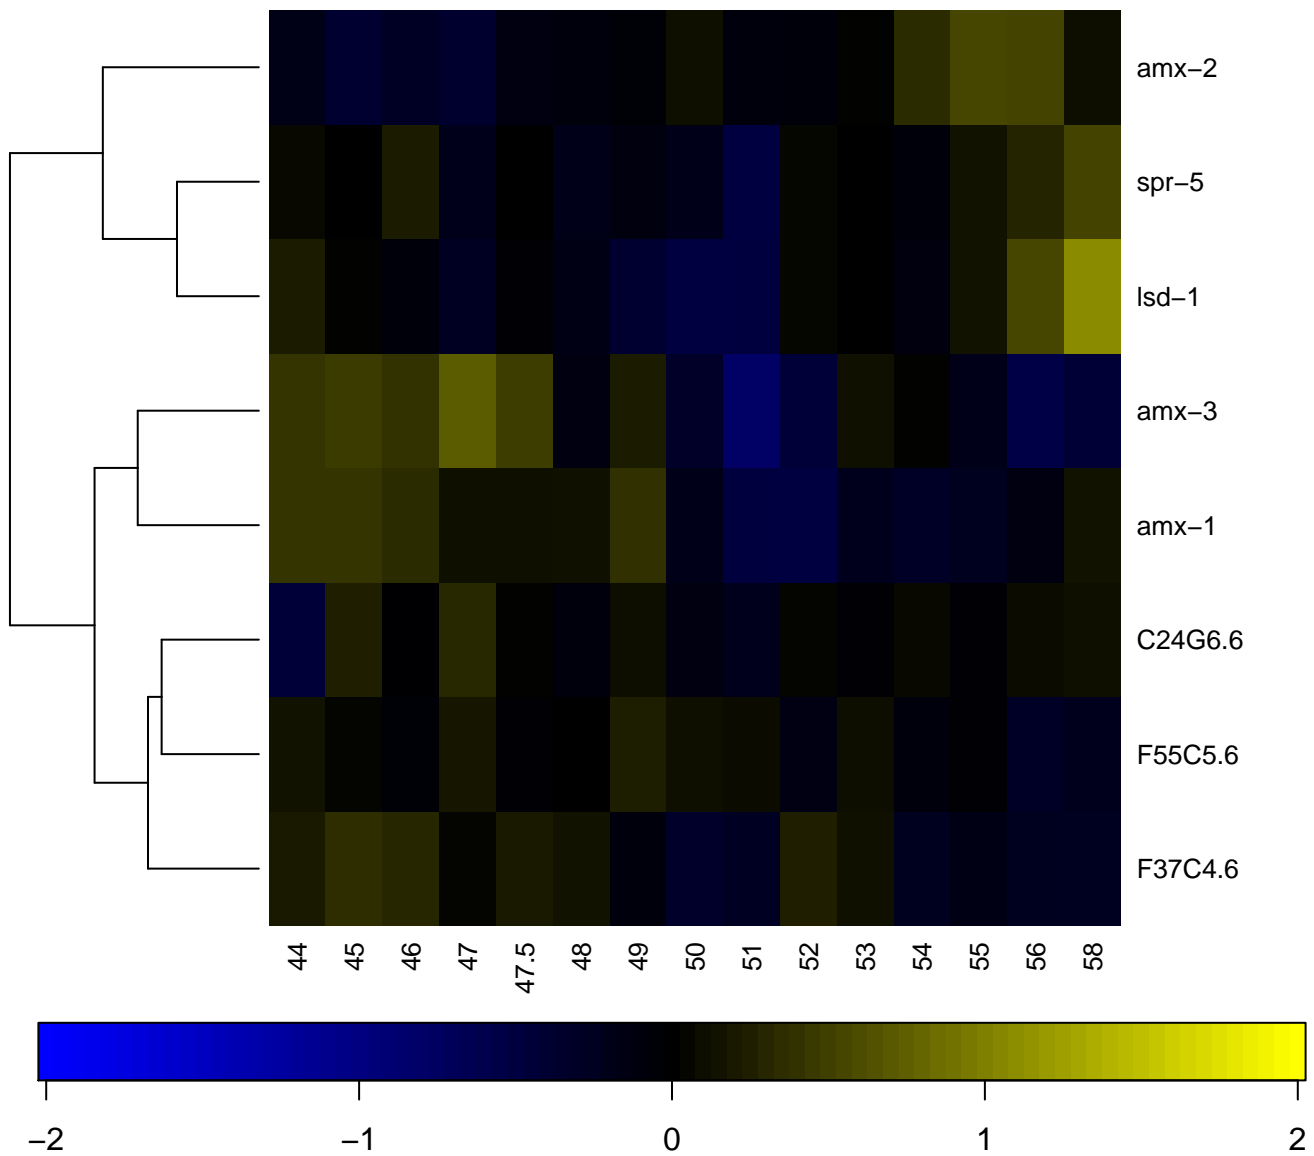



# Flavoprotein pyridine nucleotide cytochrome reductase

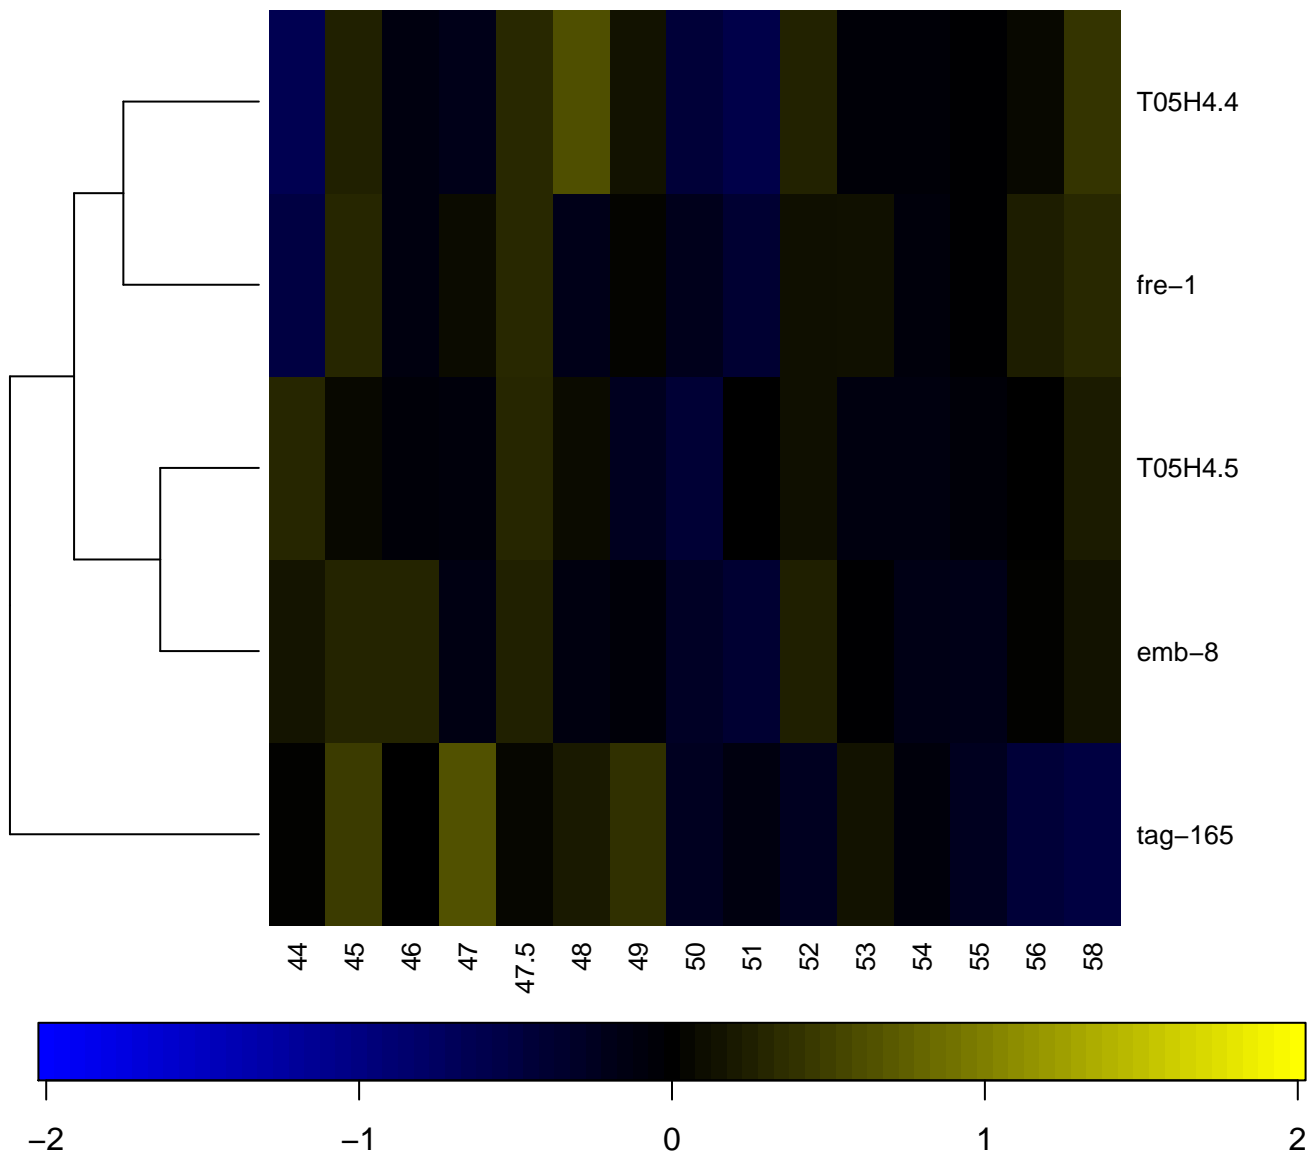



# FMRFamide related peptide family

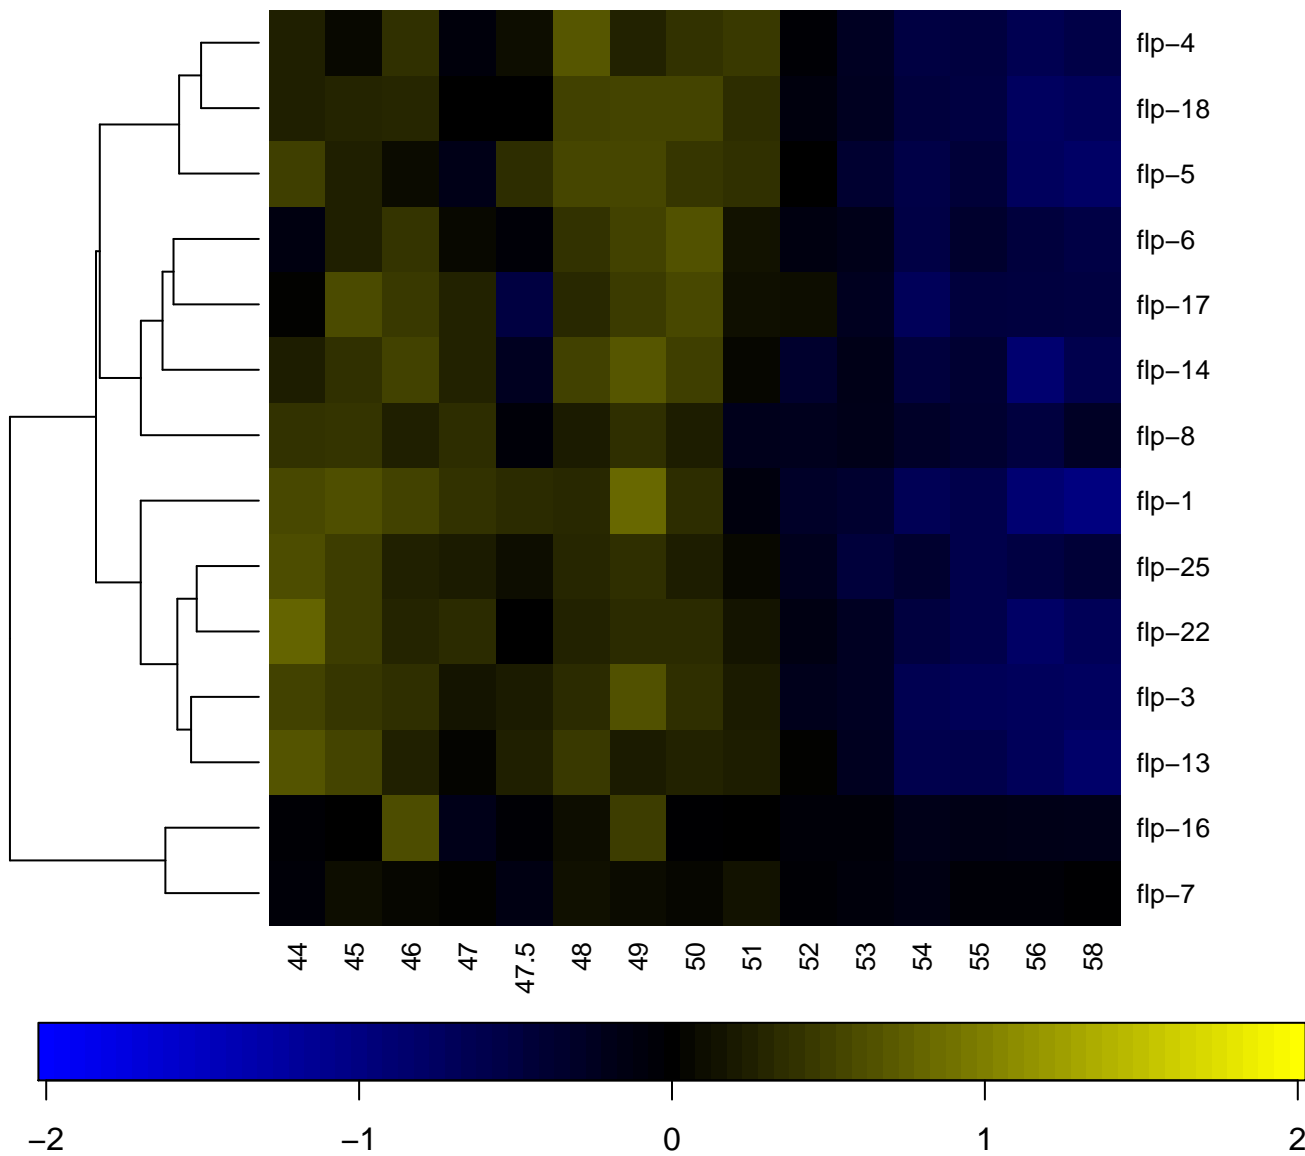

# Fork head domain

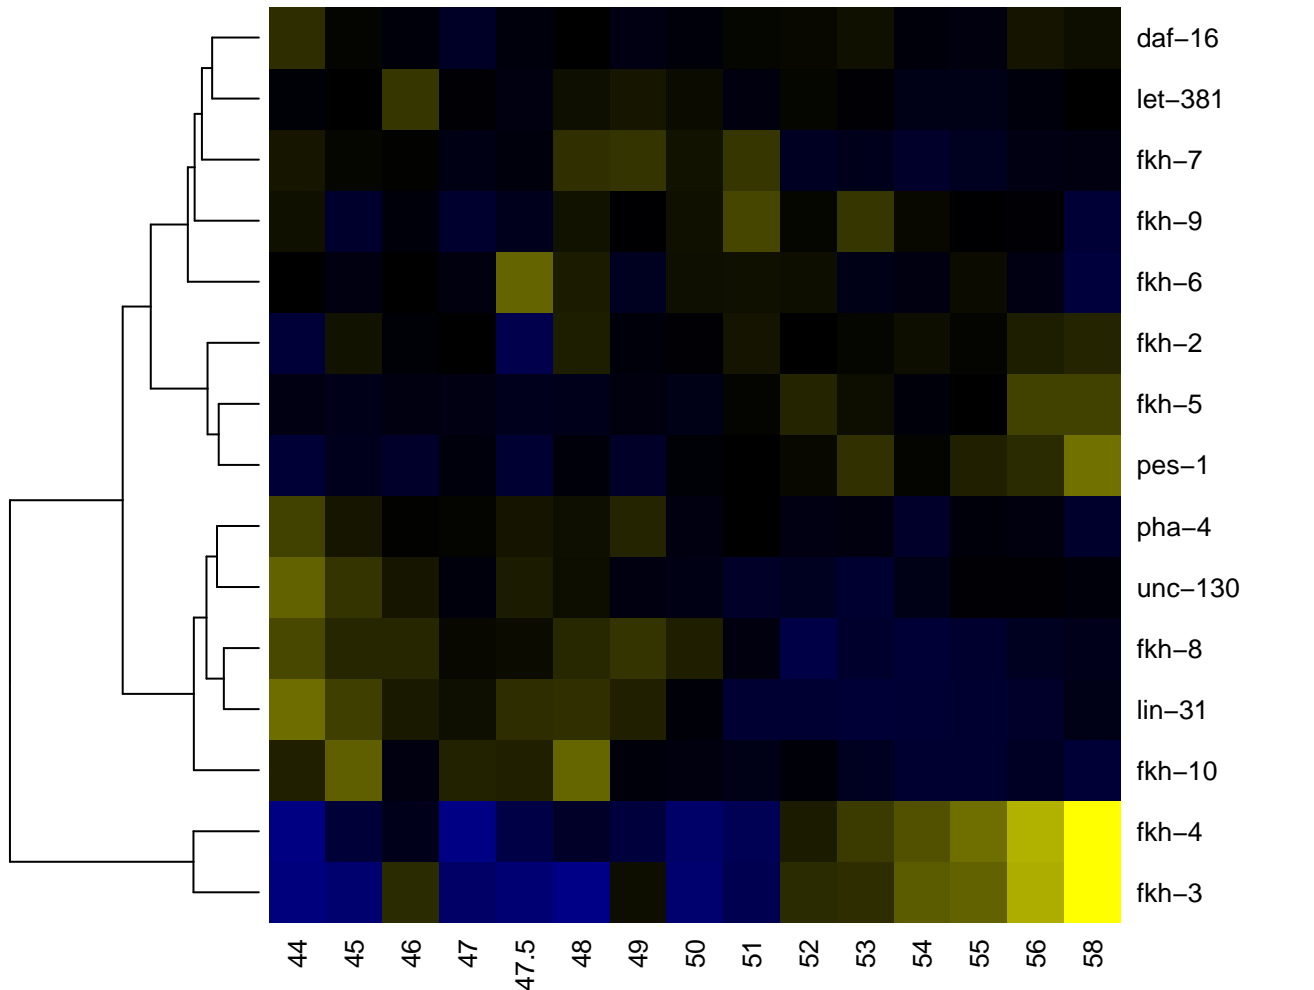

# Forkhead-associated (FHA) domain

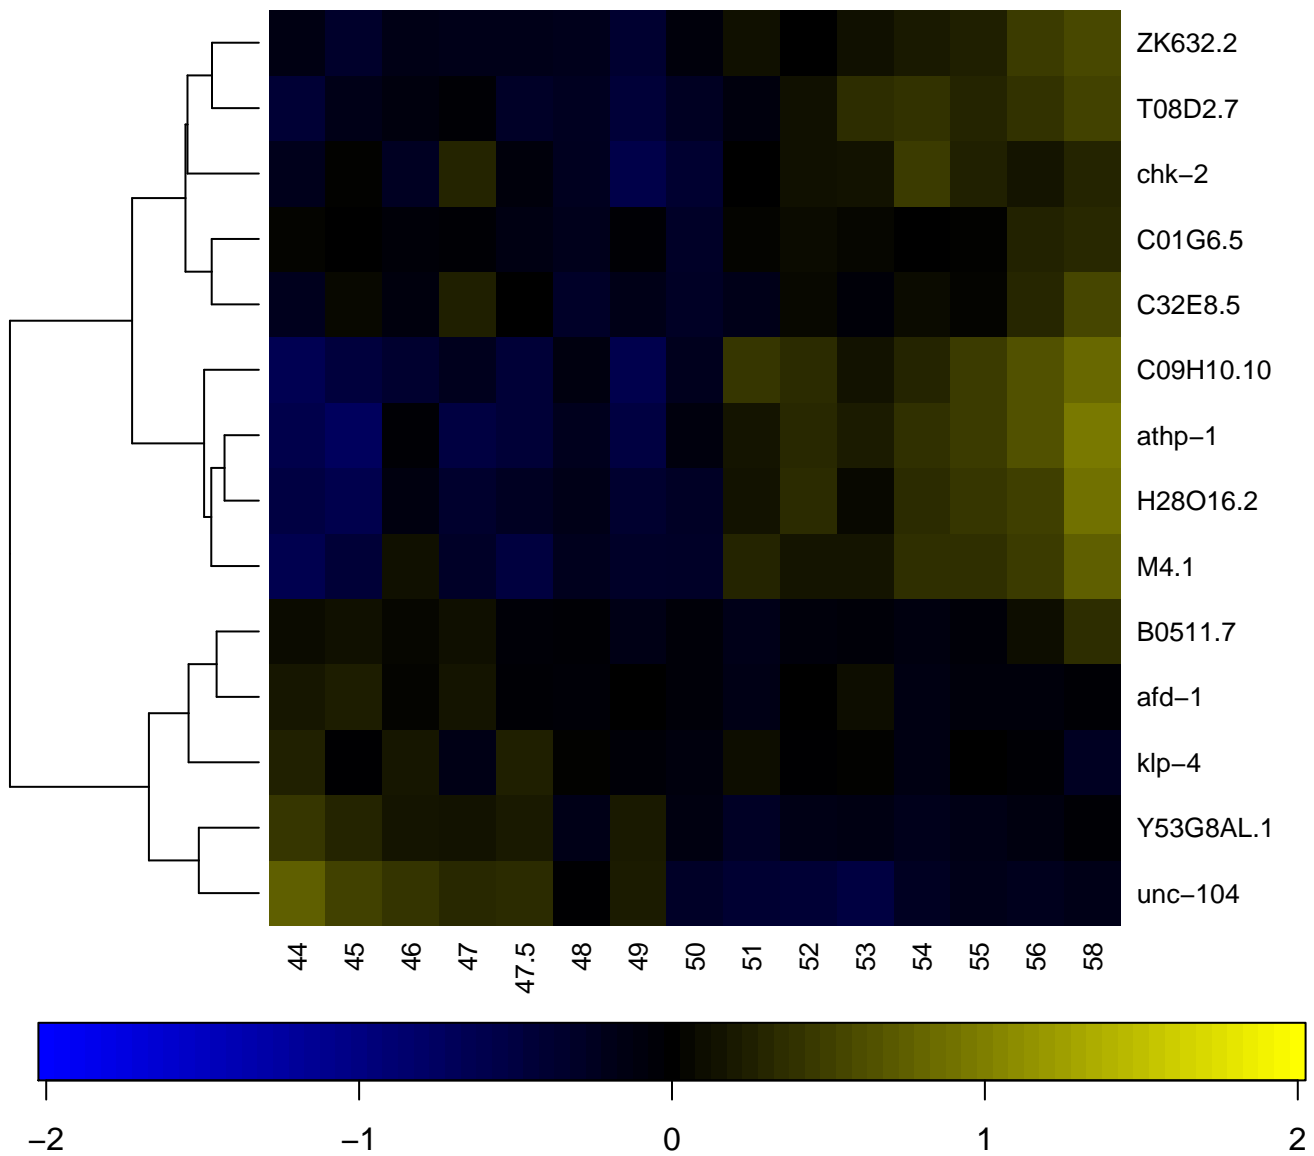





# FR47-like

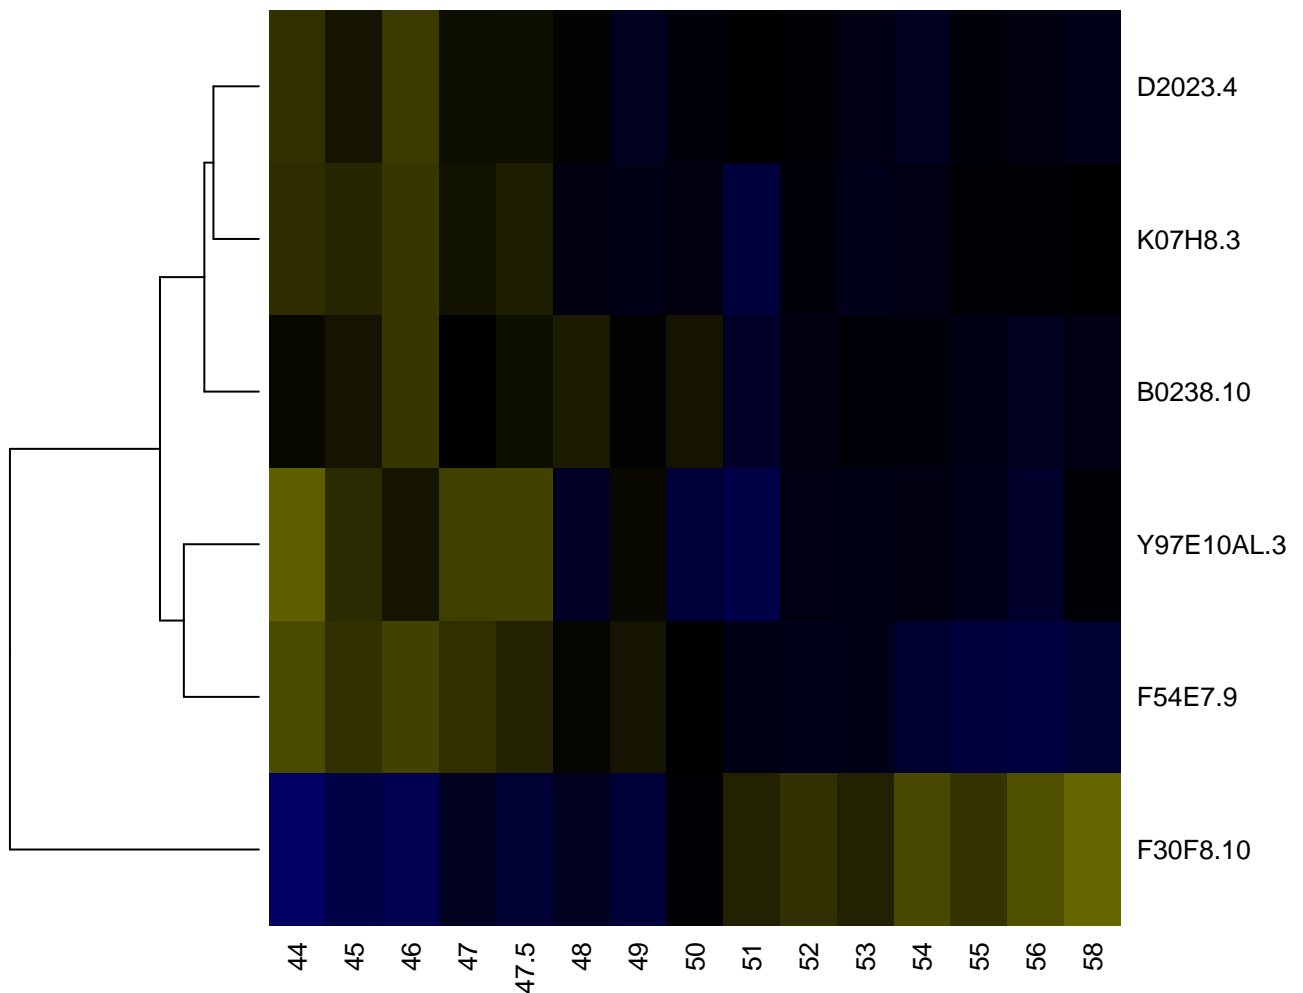

-2

-1

0

1

2





# Frag1/DRAM/Sfk1

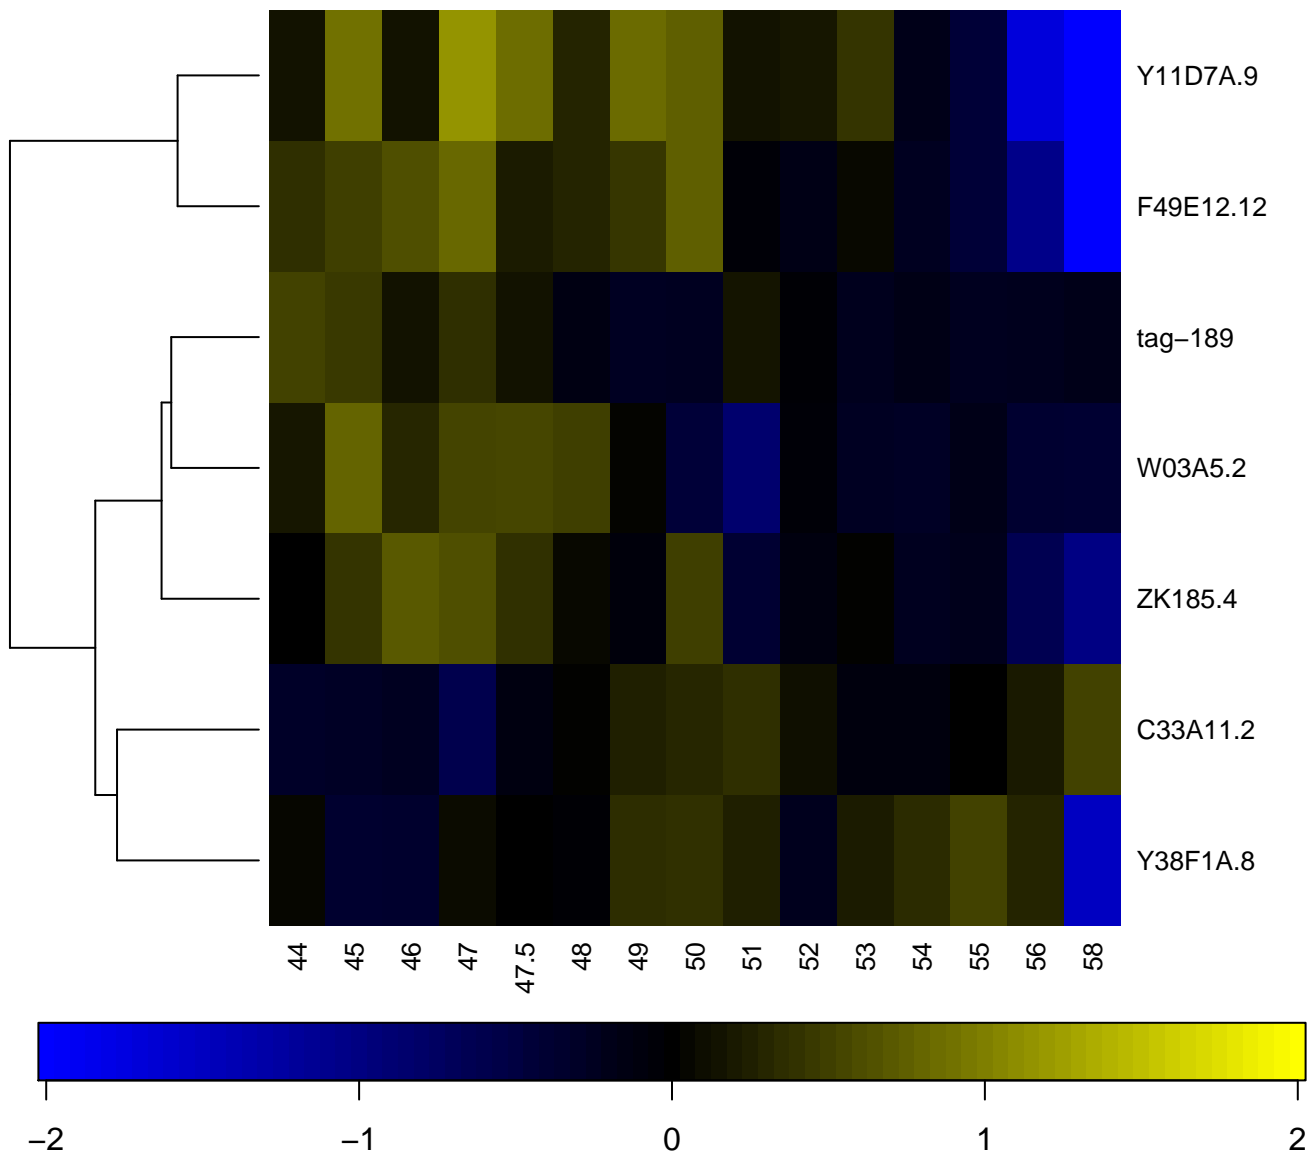



# Fringe-like

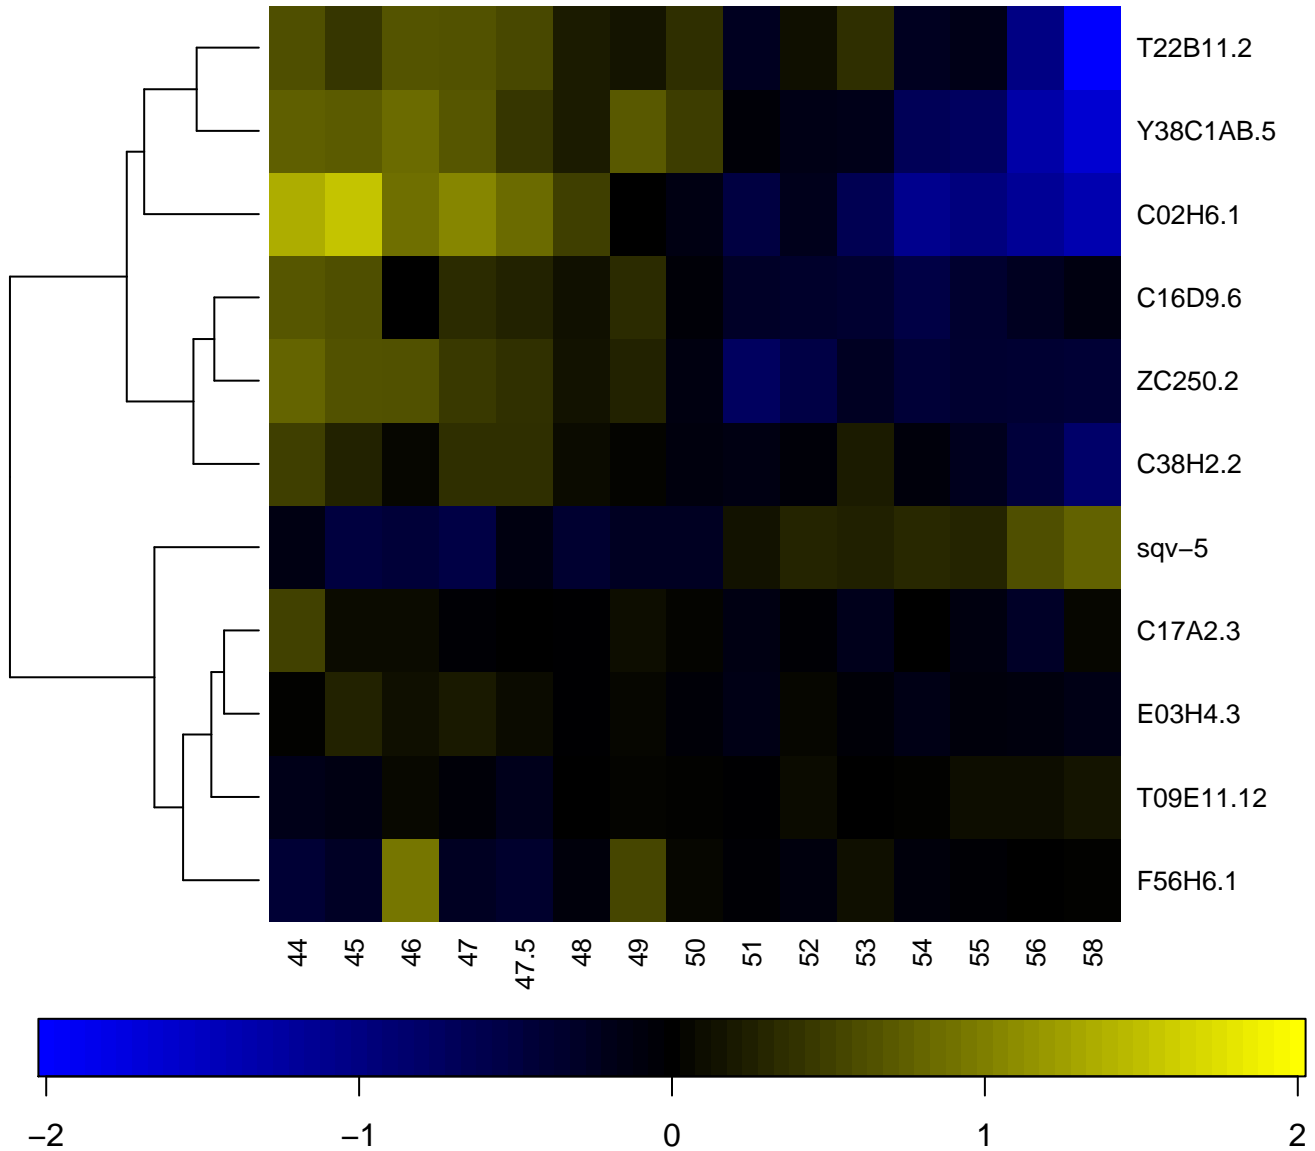

# Frizzled domain

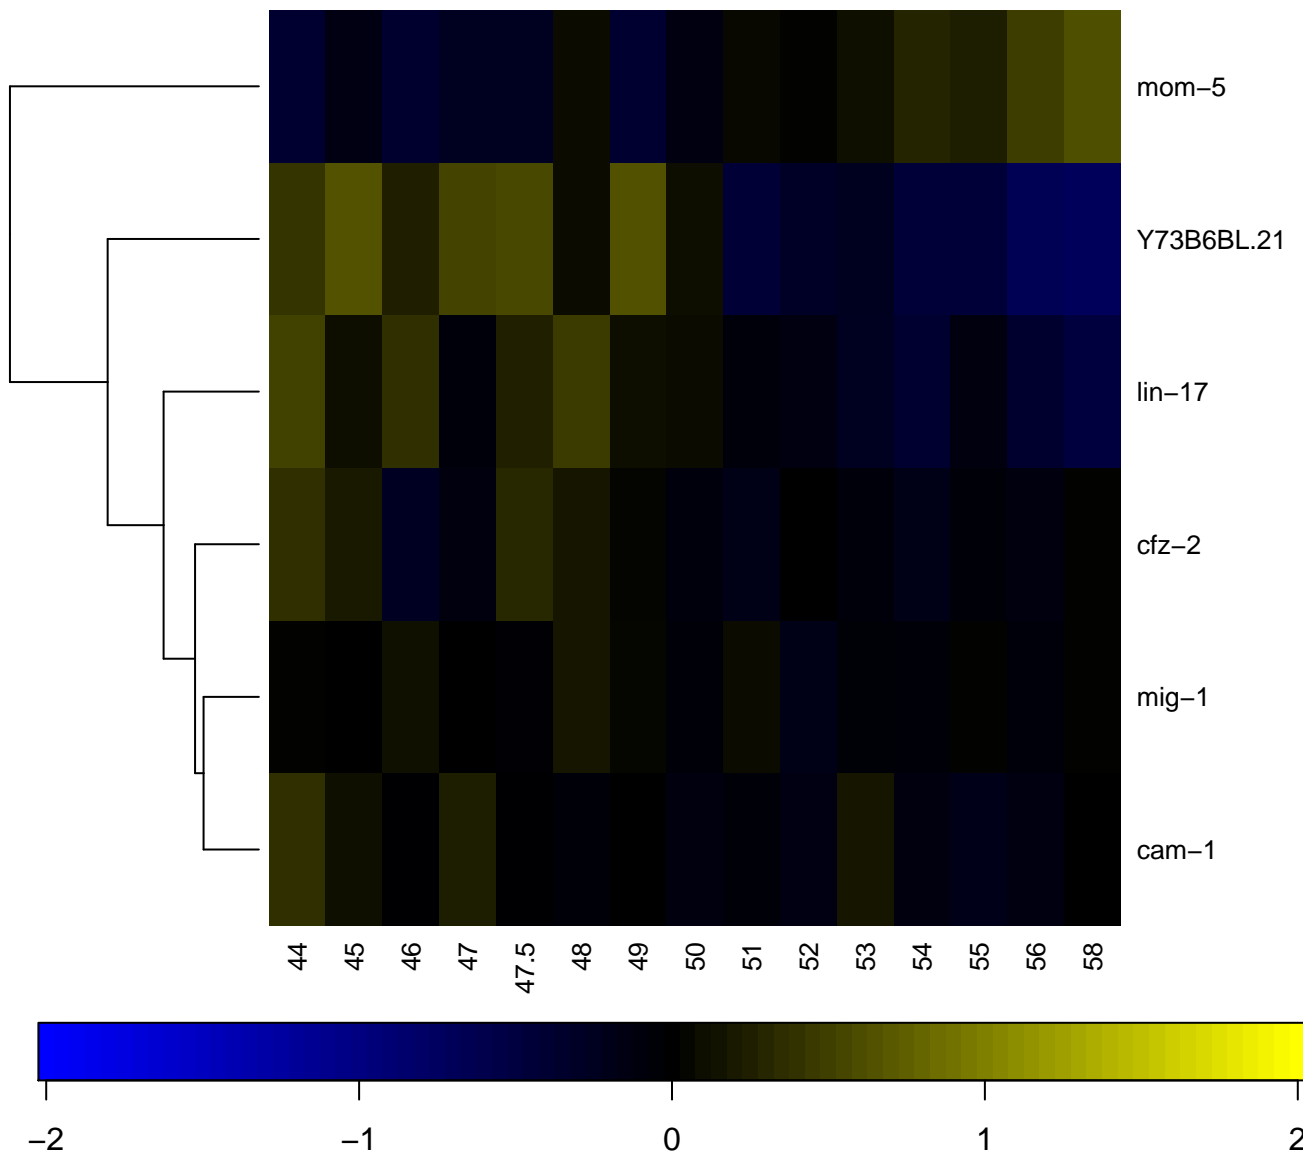



# FTH domain

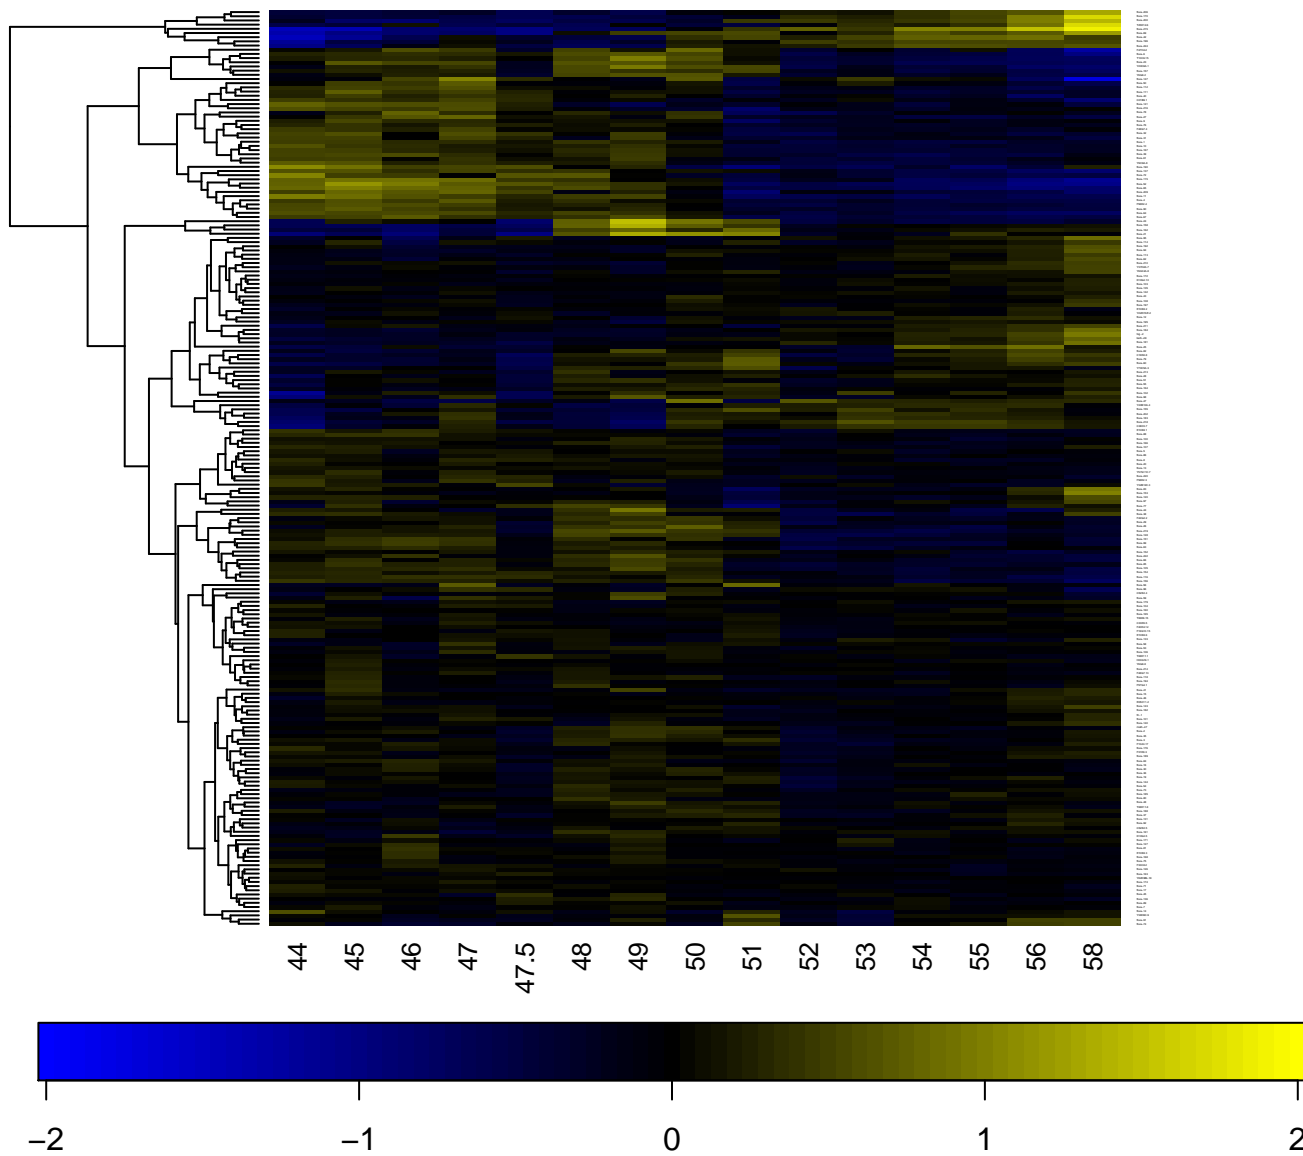











# Fz domain

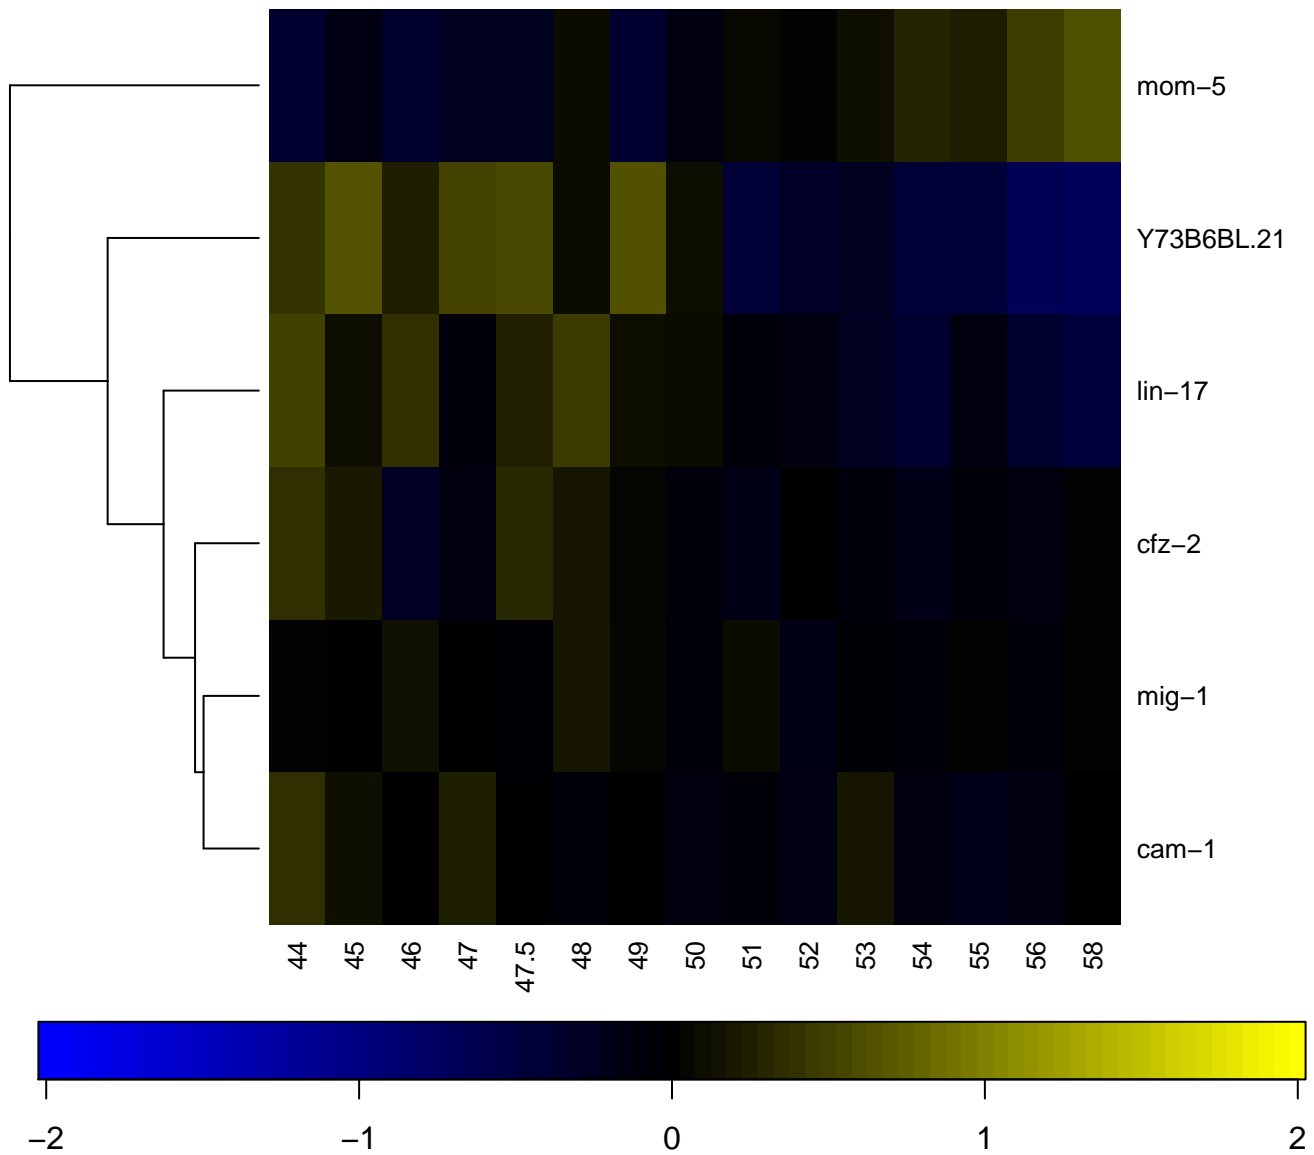







# G-protein beta WD-40 repeat, region

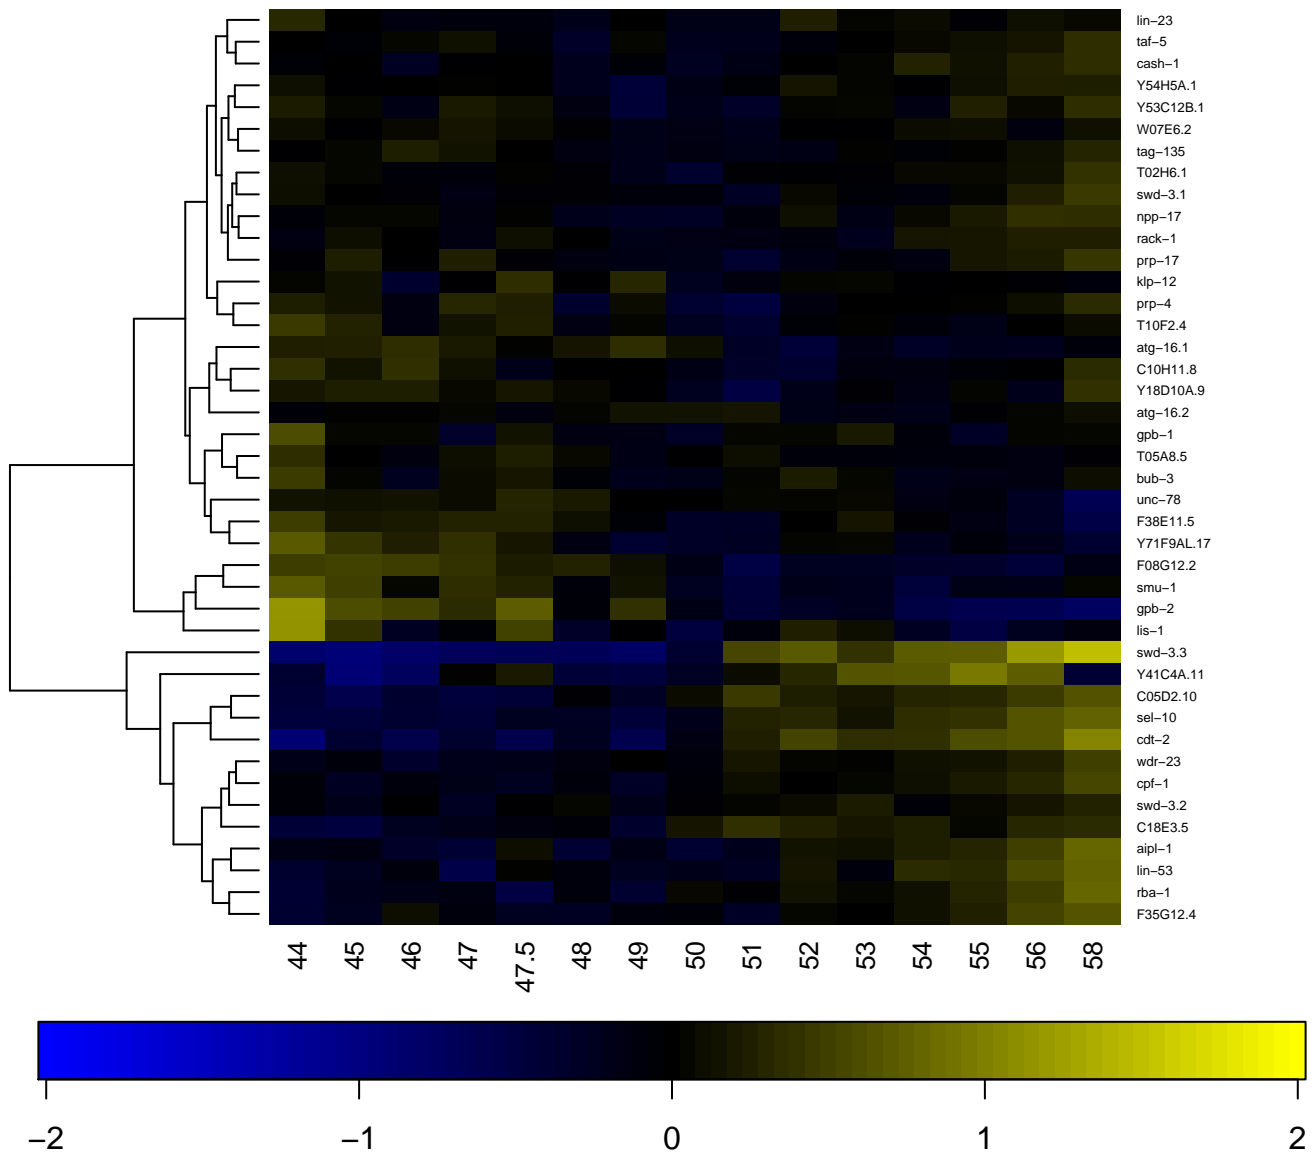





# Galactose oxidase, beta-propeller

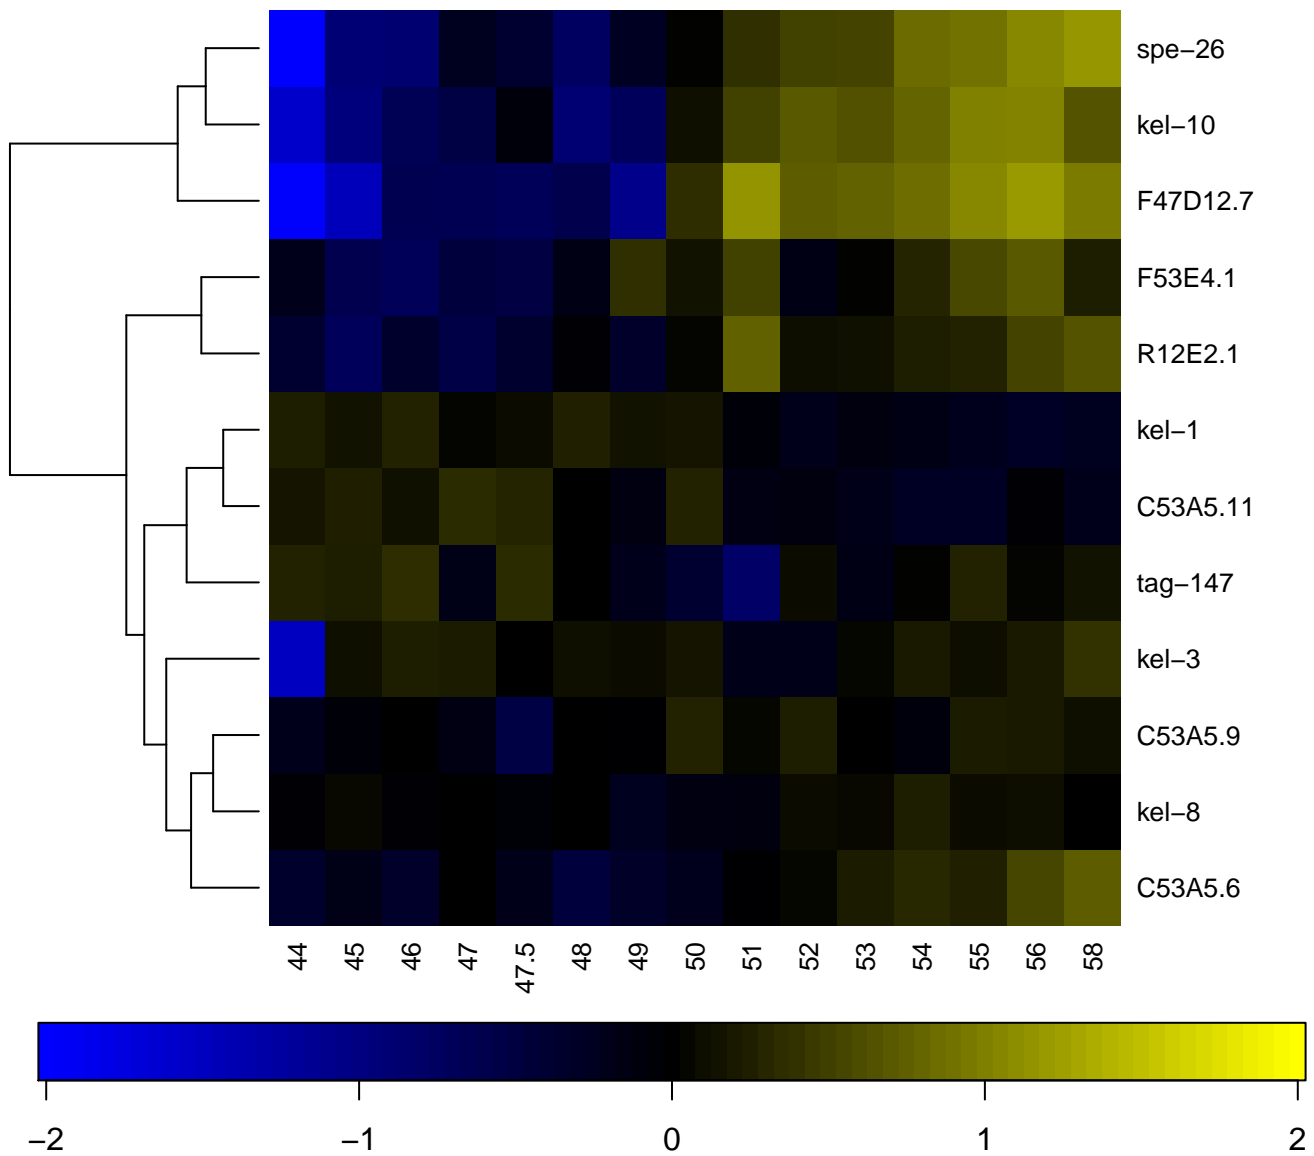





# Galectin, carbohydrate recognition domain

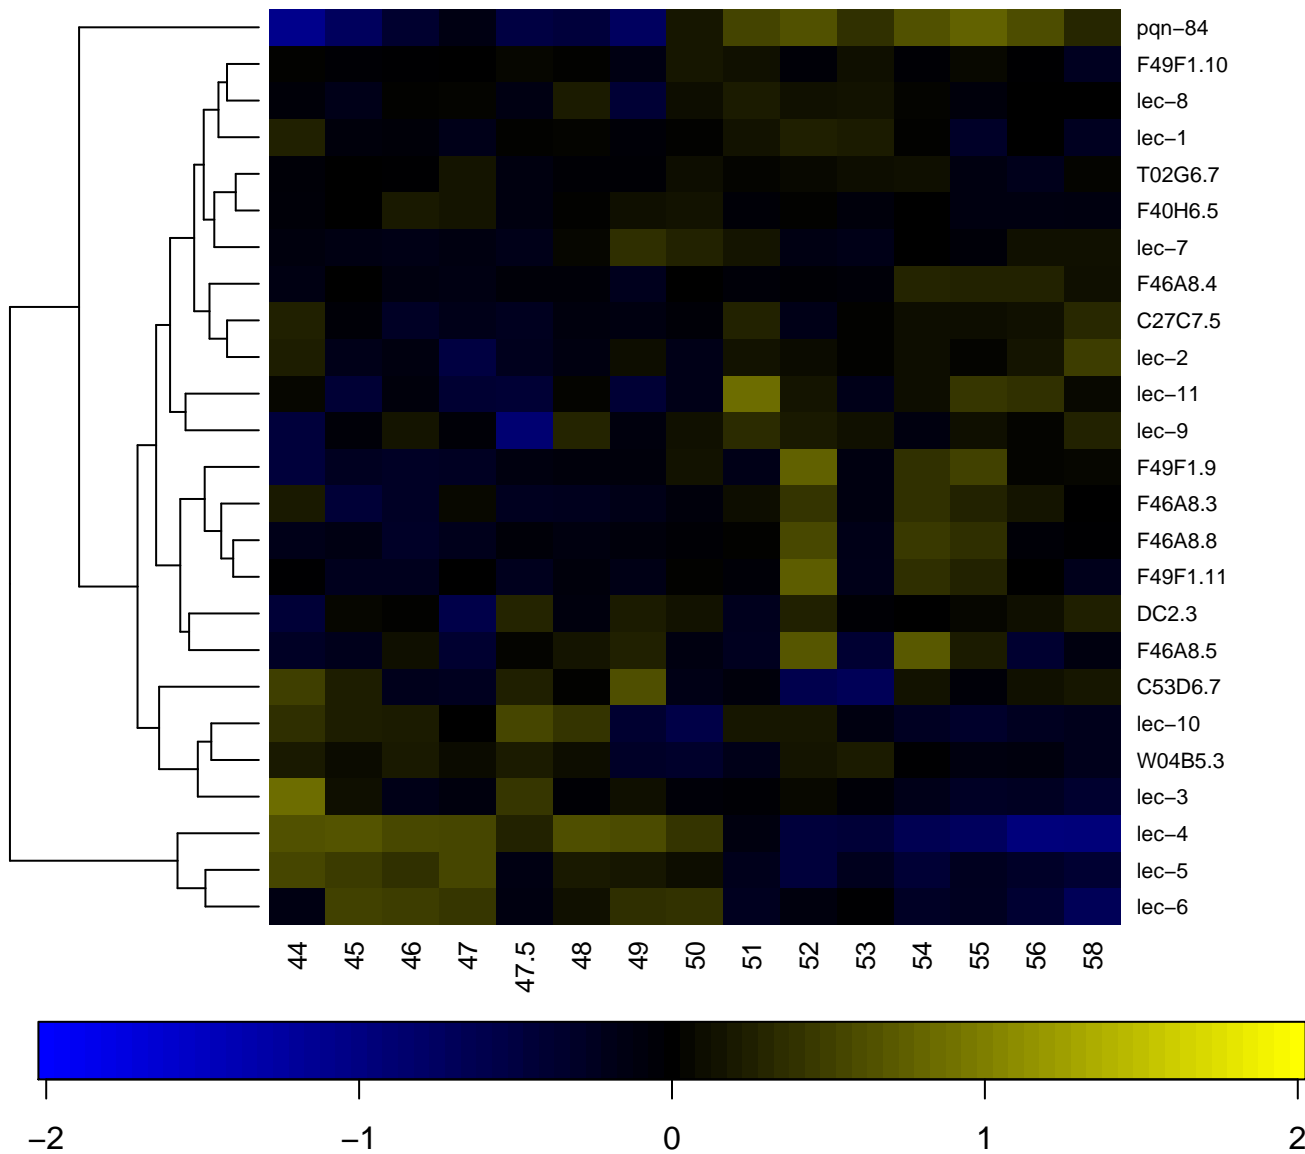

# Gamma-aminobutyric acid A receptor

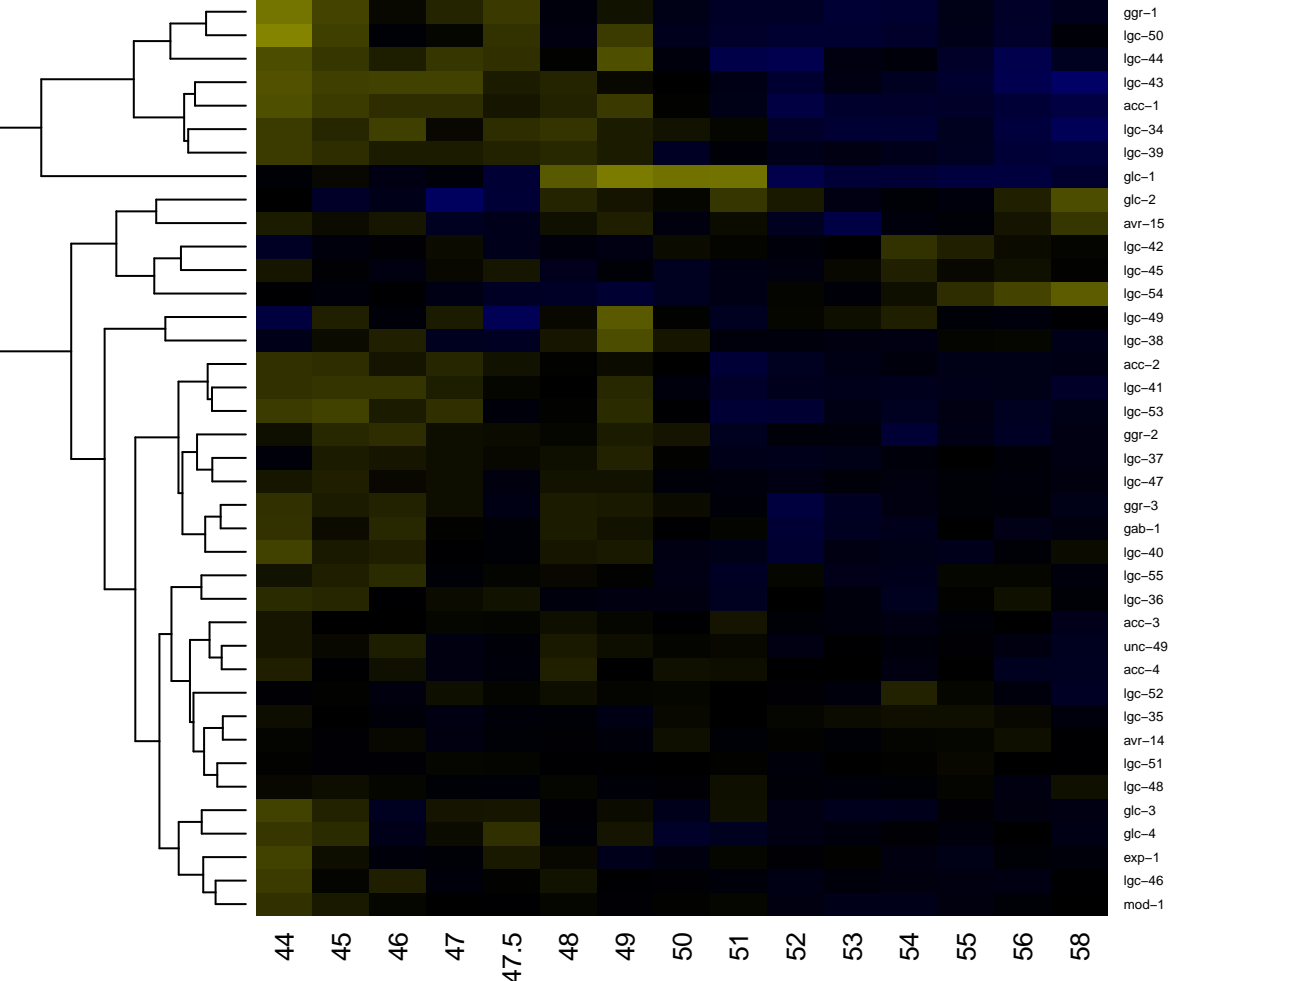







# Gamma interferon inducible lysosomal thiol reductase GIL

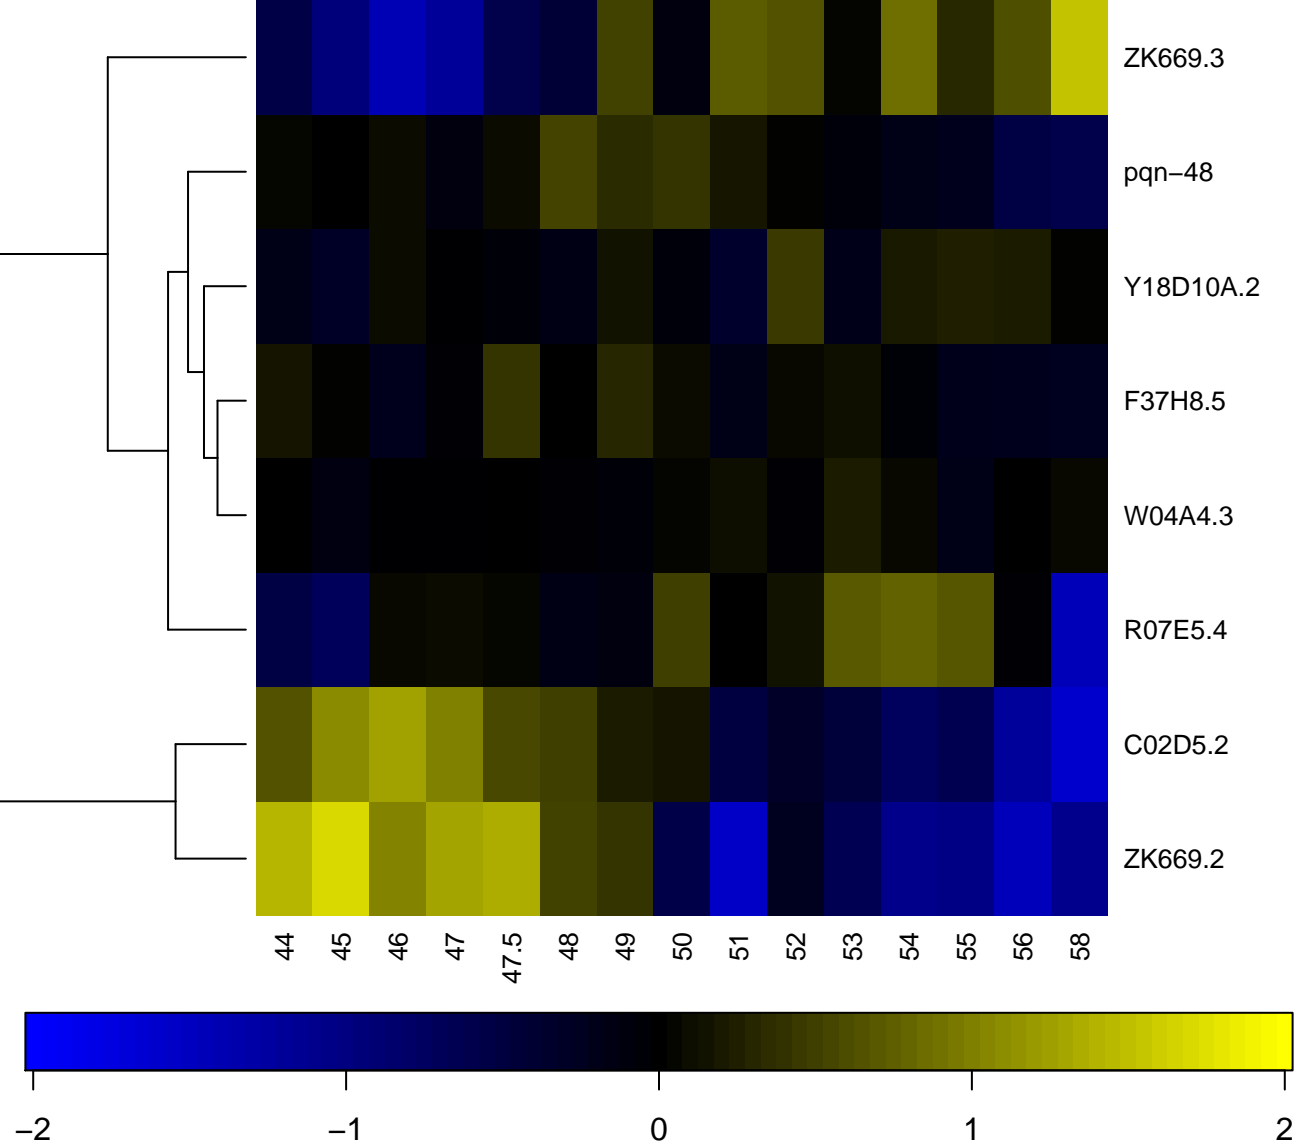





# GCN5-related N-acetyltransferase, C-terminal

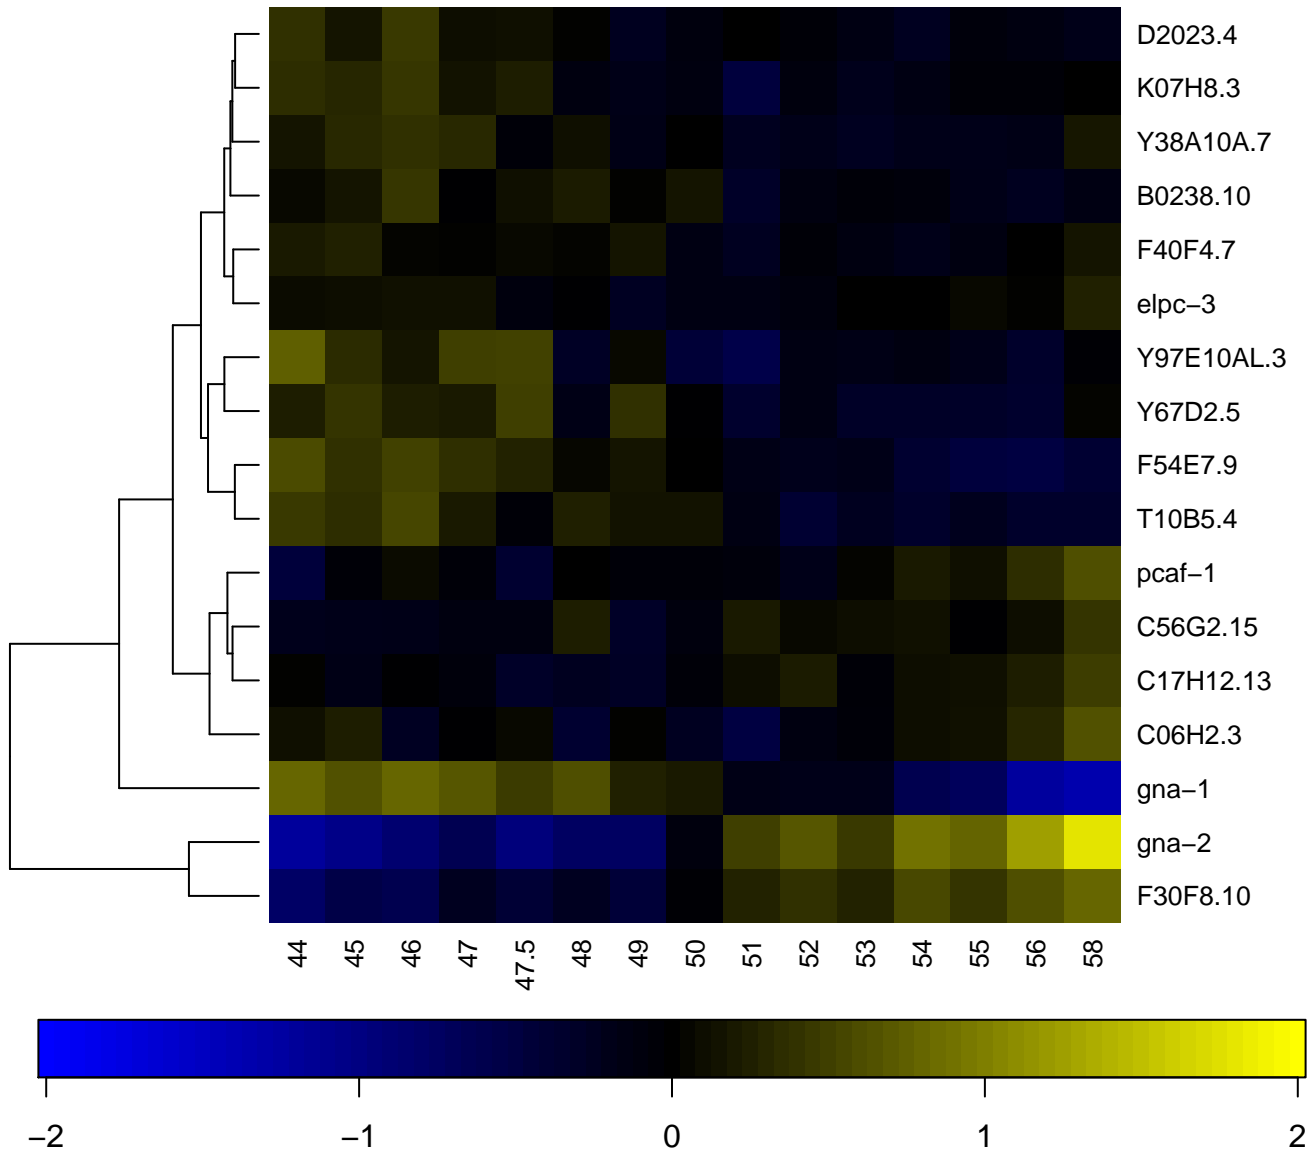







# General substrate transporter

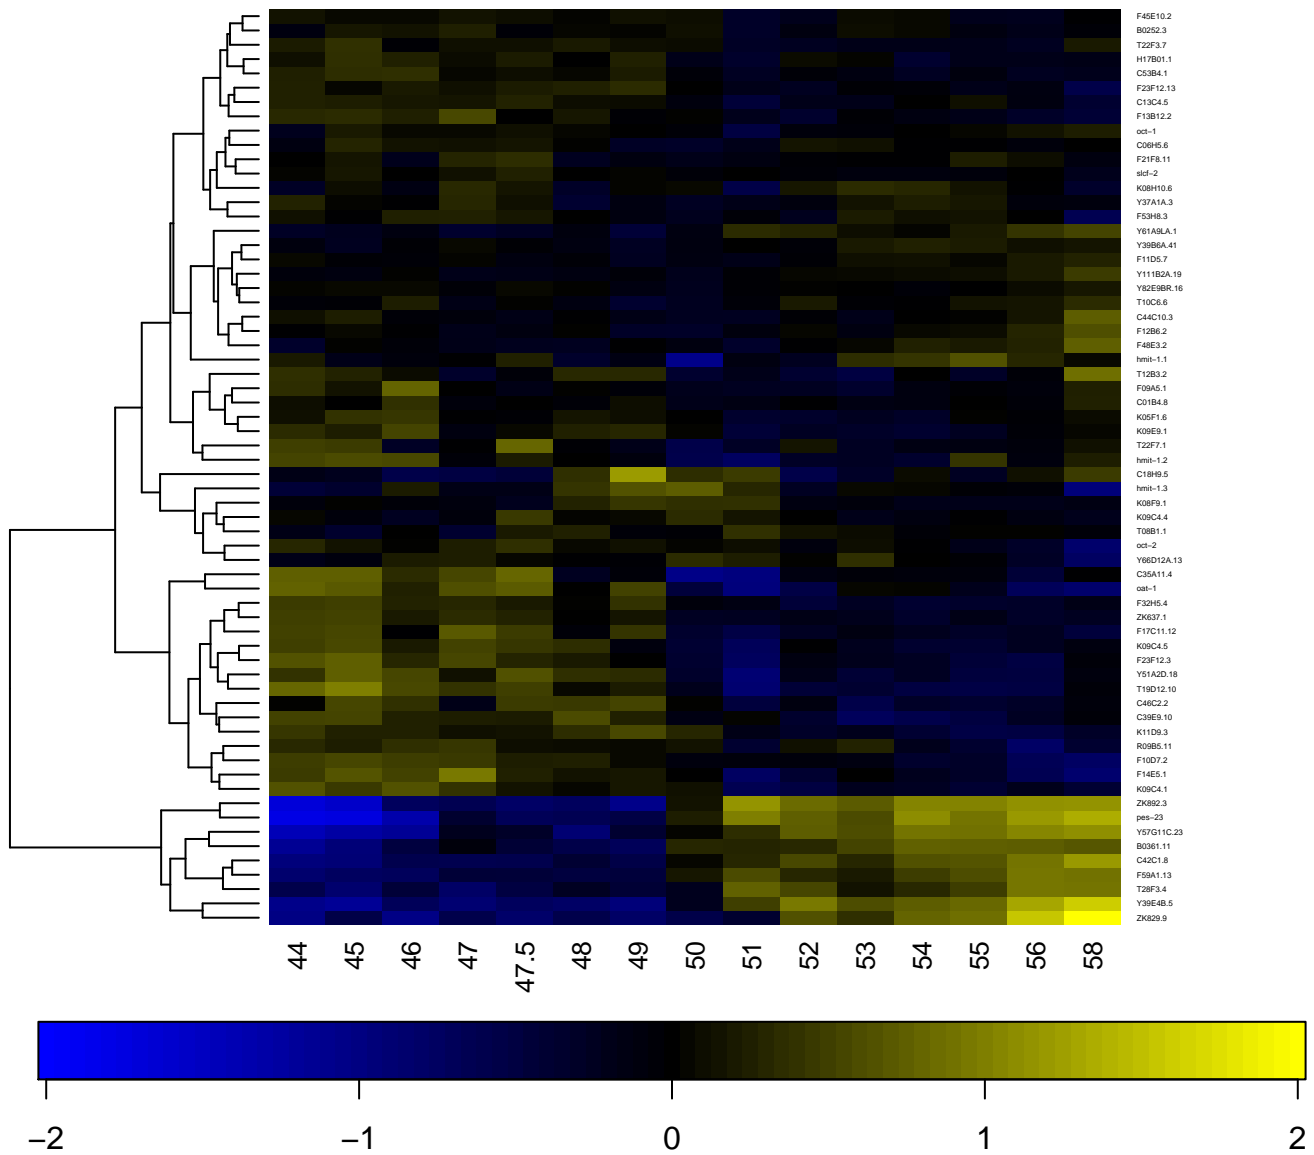



# Globin

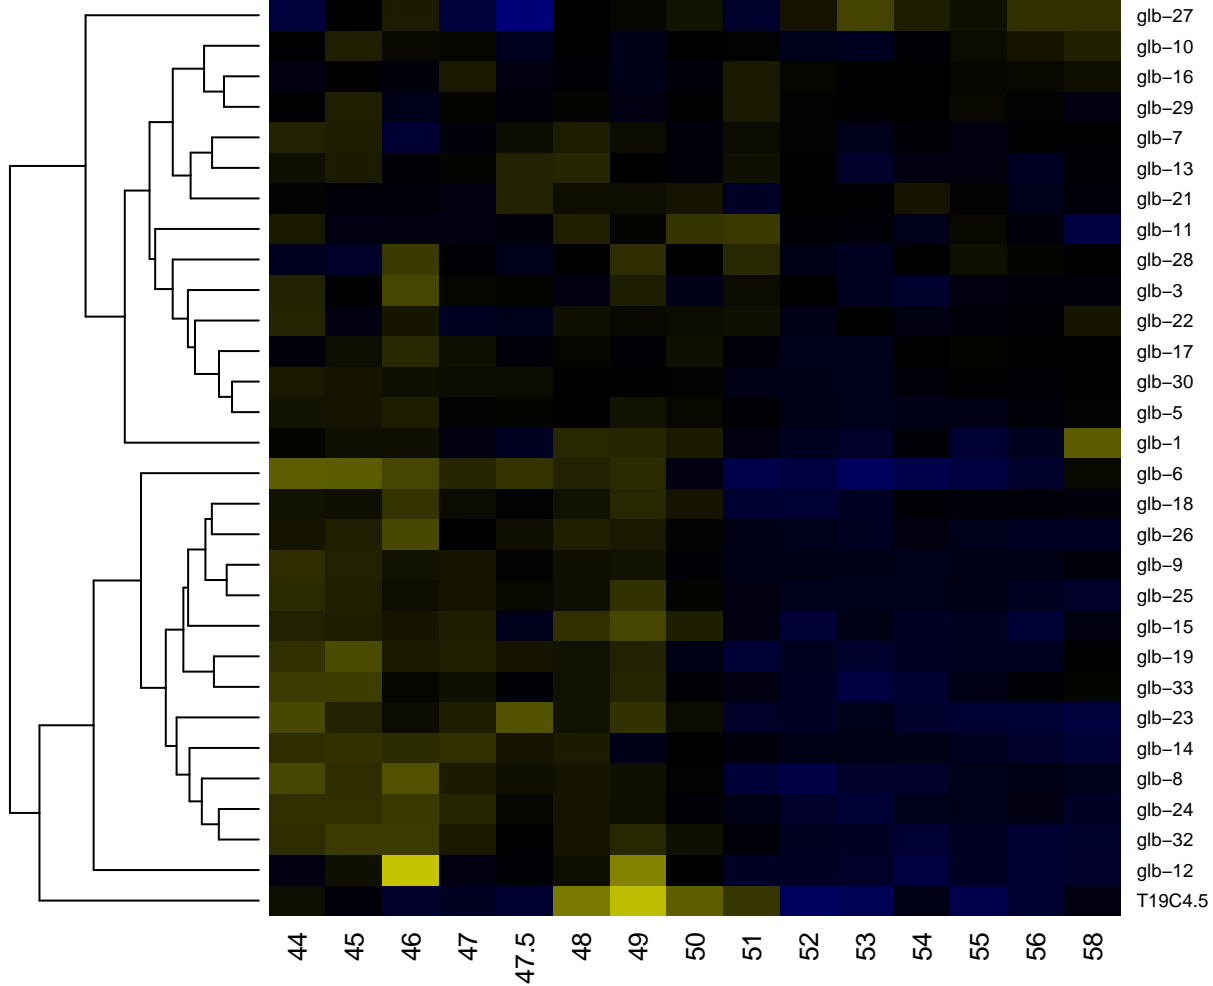

# Globin, subset

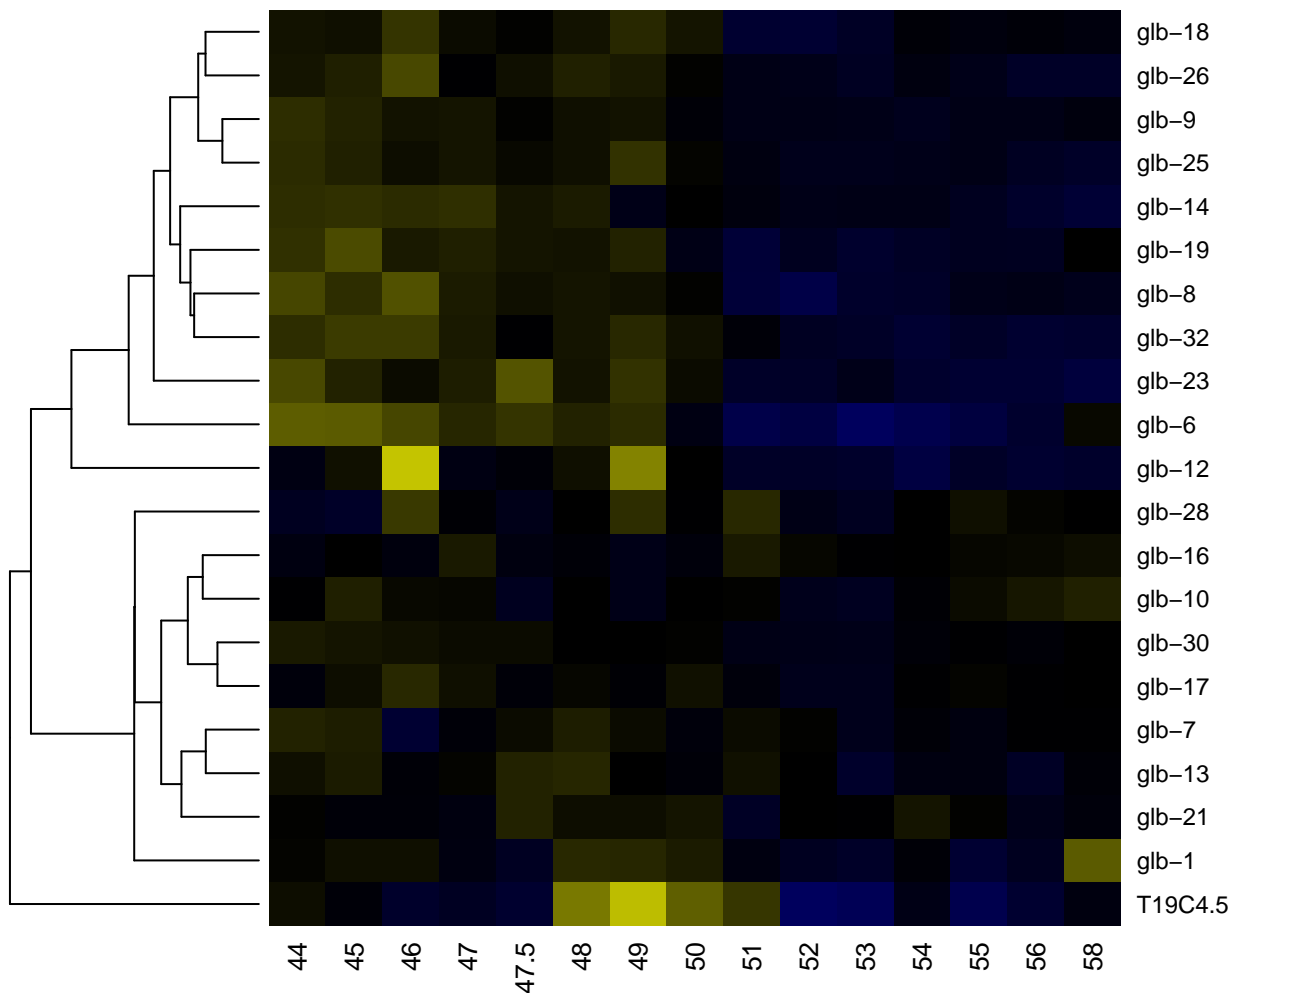



# Glucose/ribitol dehydrogenase

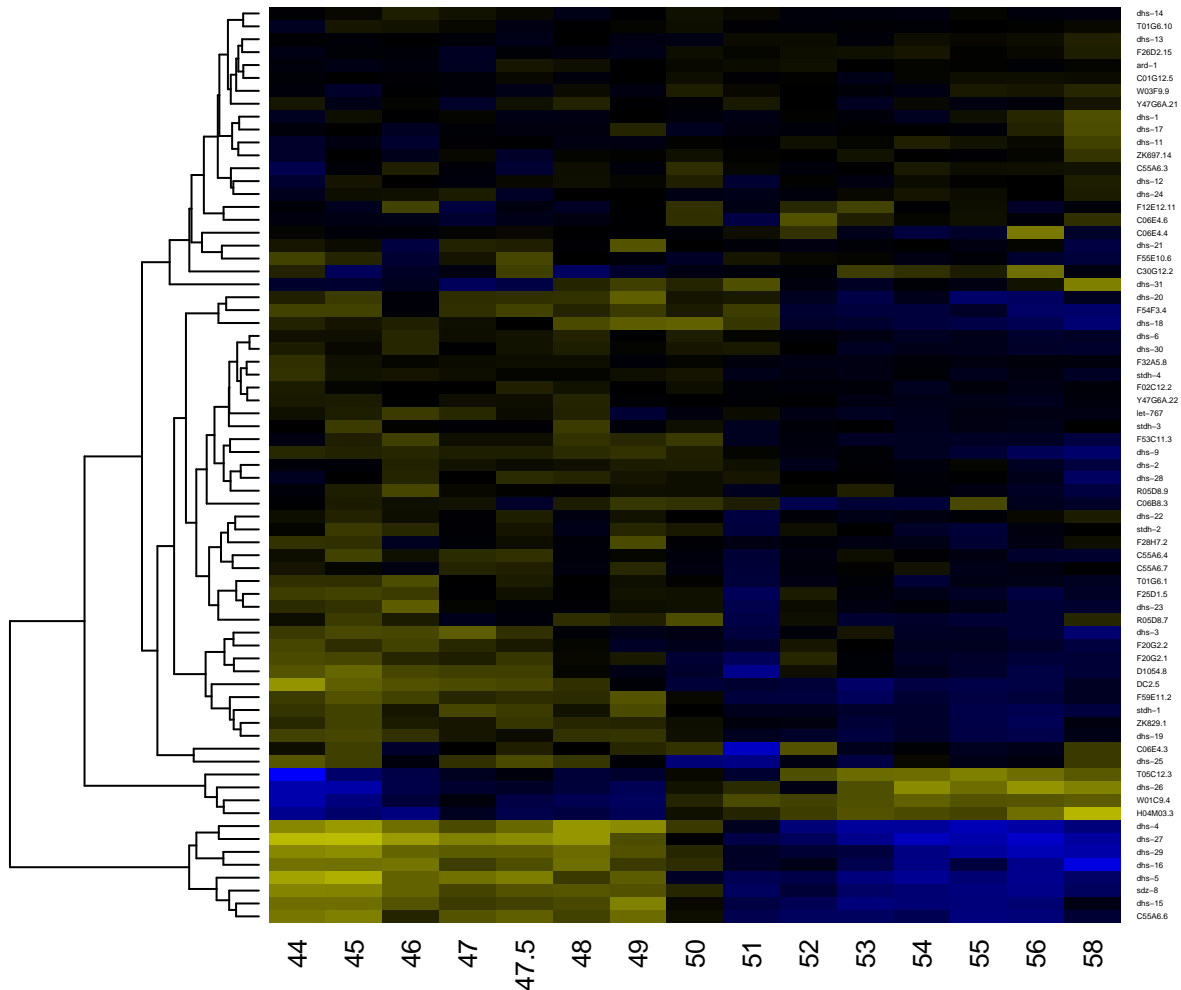

# Glutamate receptor-related

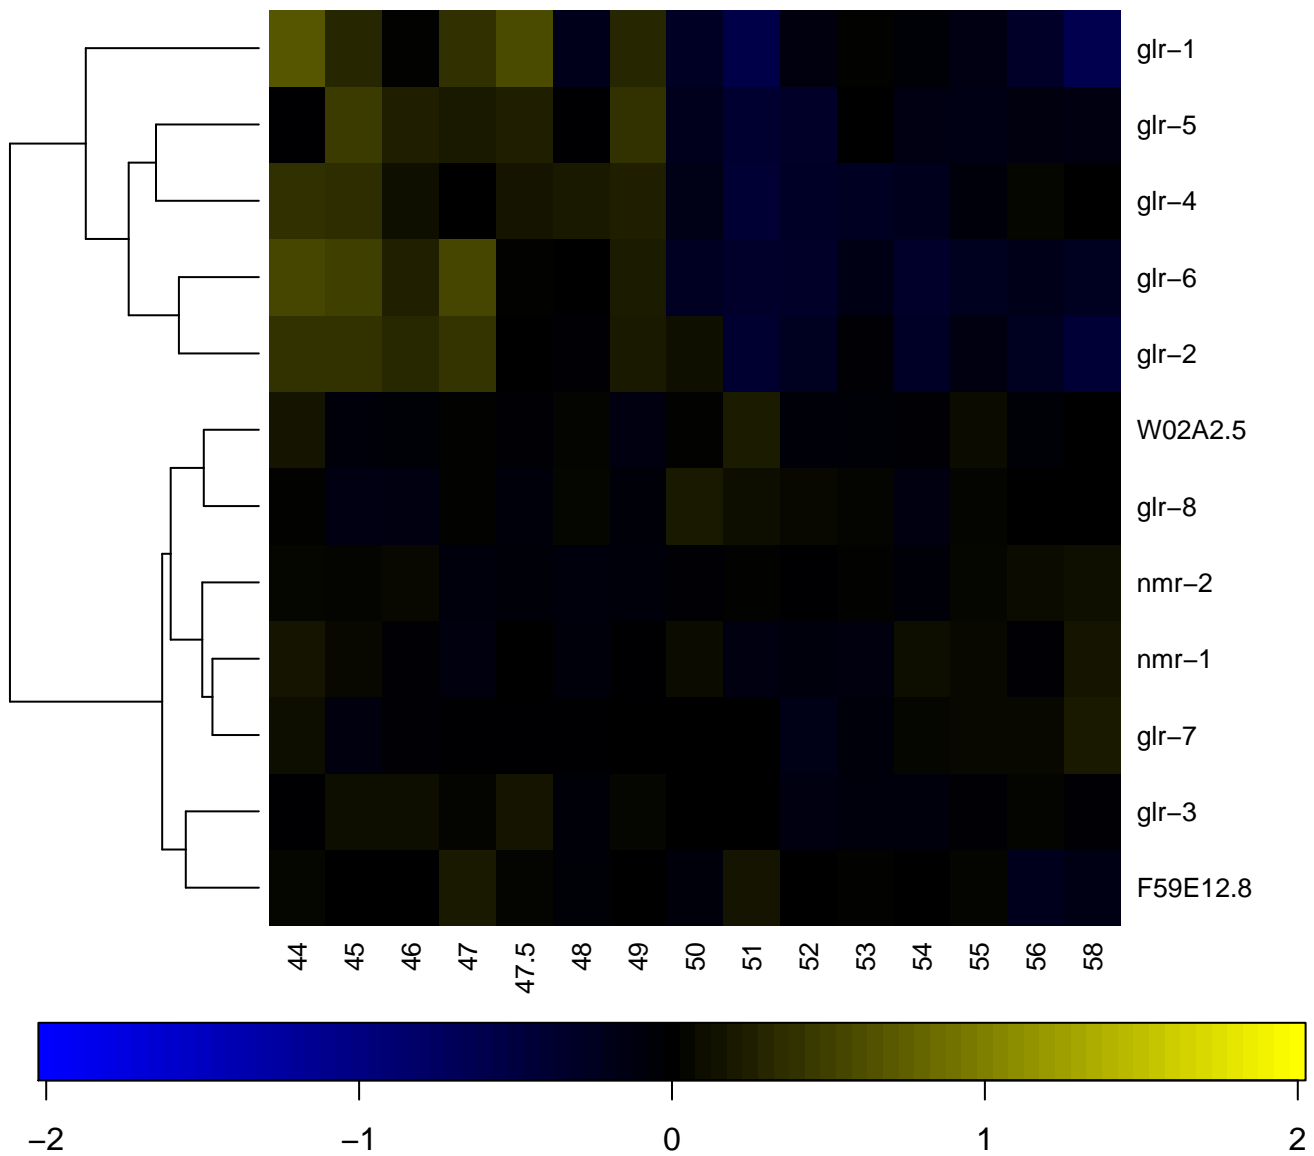

# Glutamate receptor, L-glutamate/glycine-binding

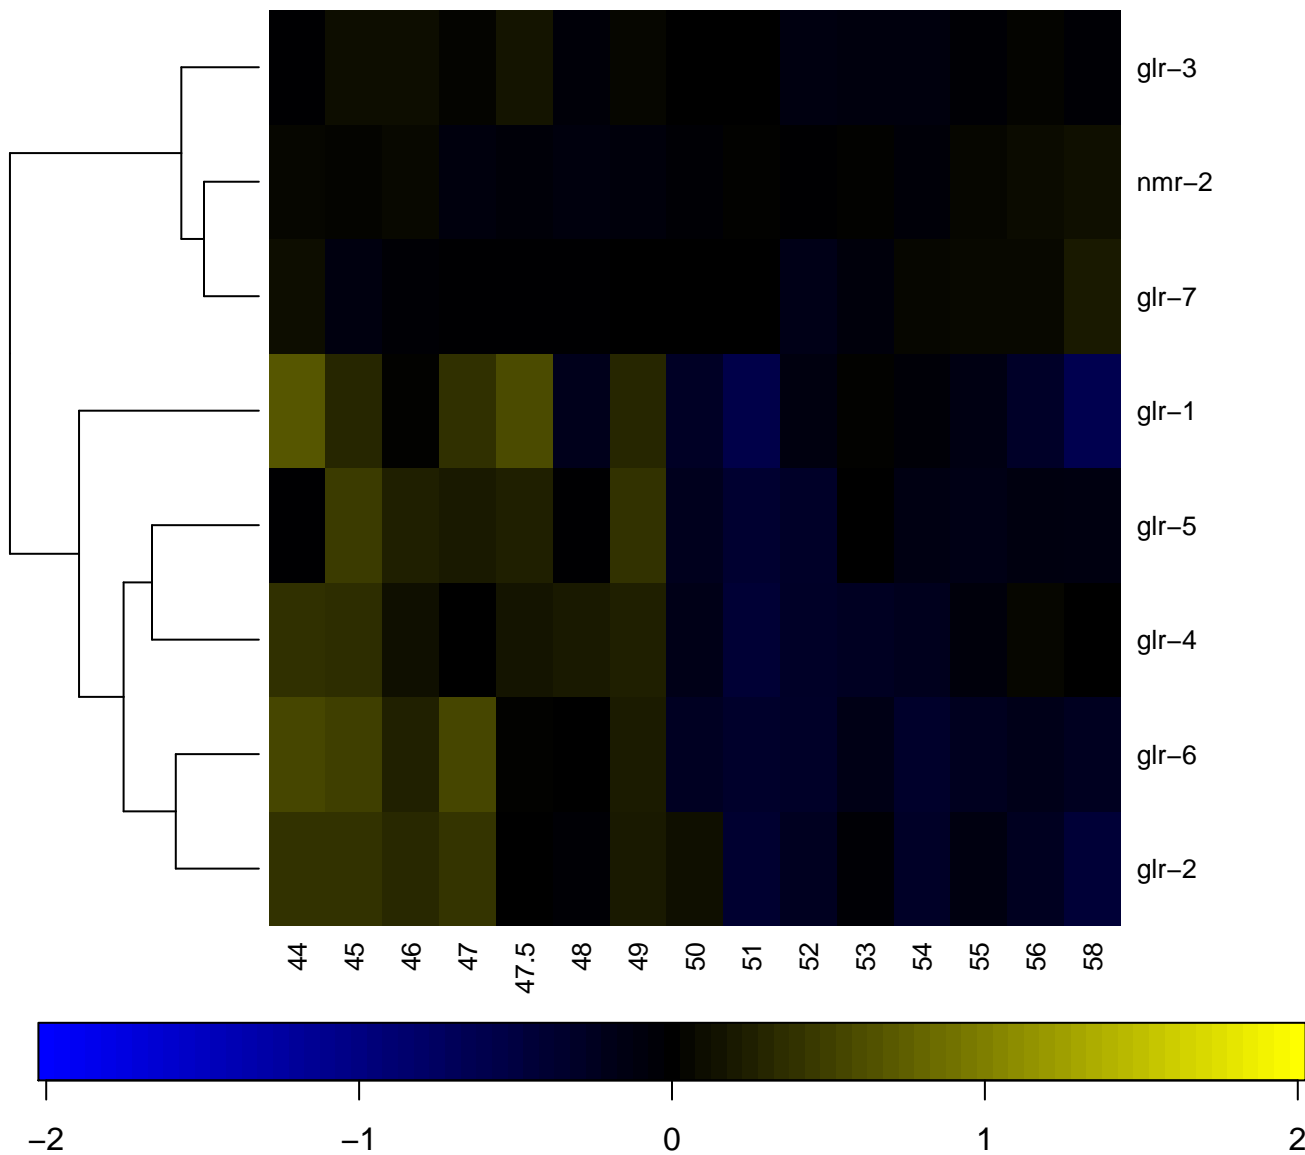







# Glutamine synthetase, beta-Grasp

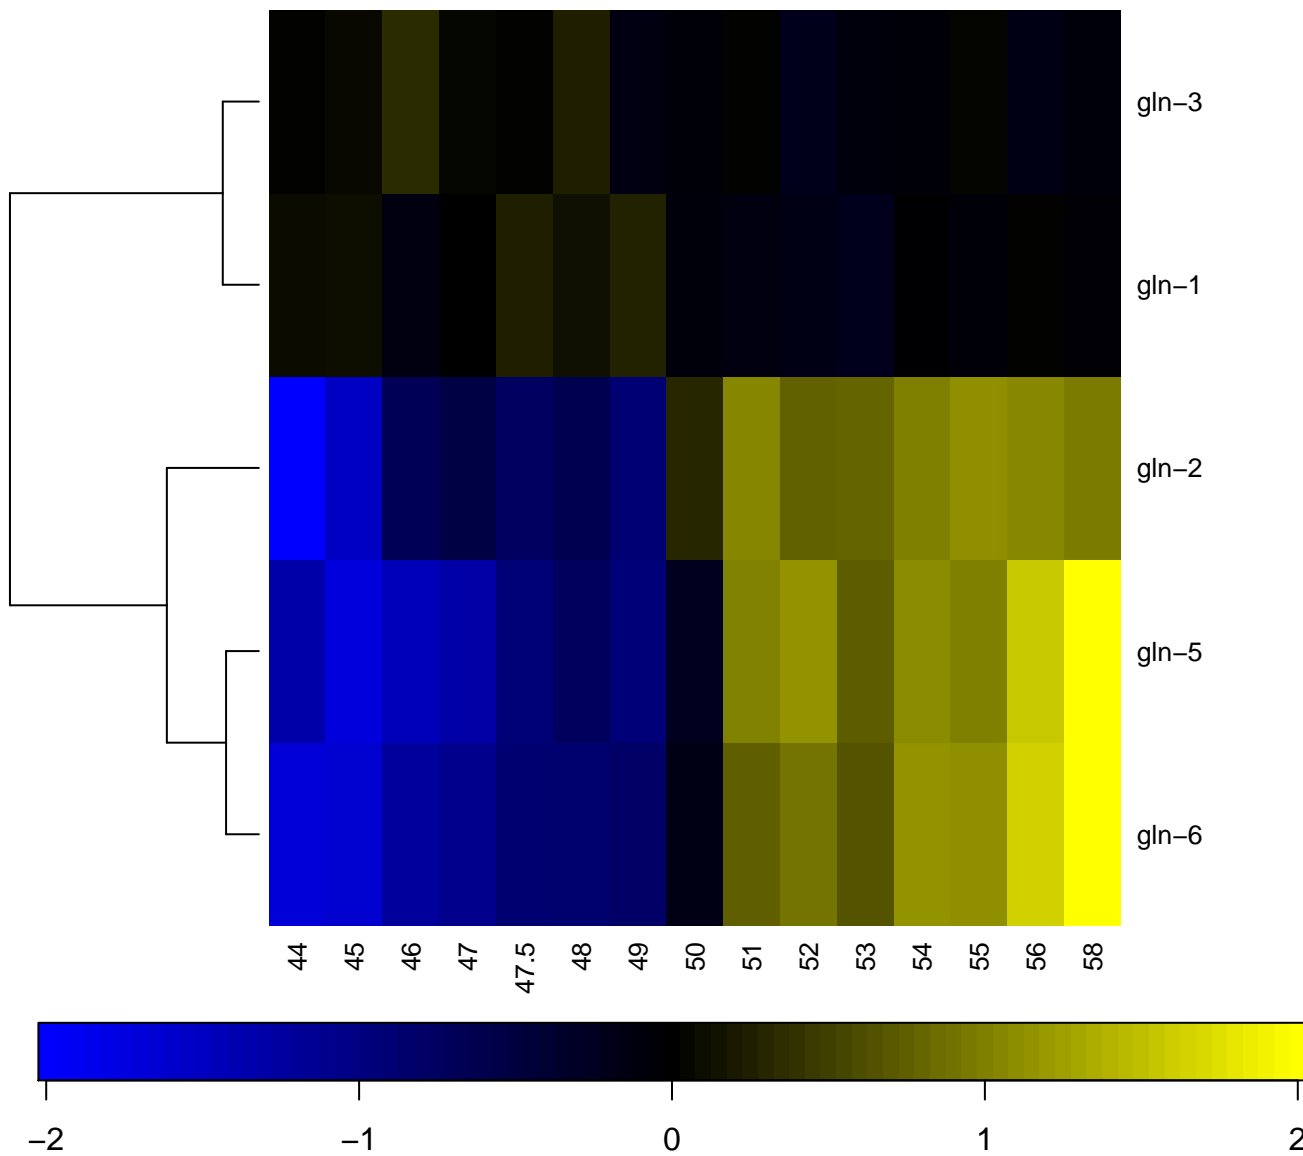

# Glutamine synthetase, beta-Grasp domain



# Glutamine synthetase, catalytic domain

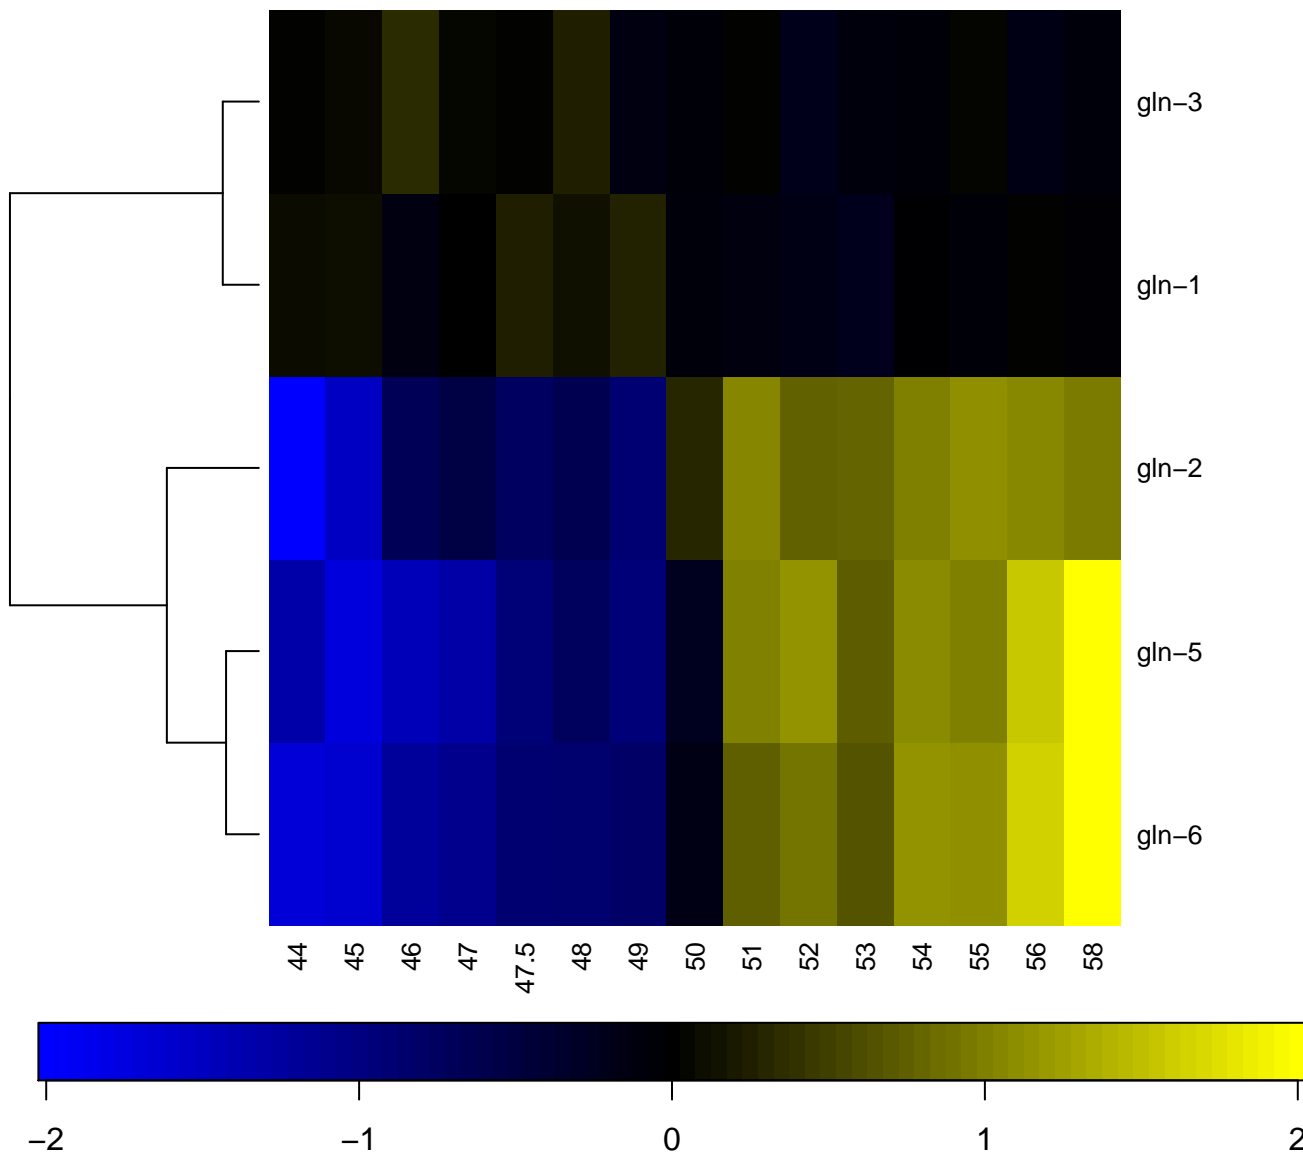





# Glutaredoxin subgroup

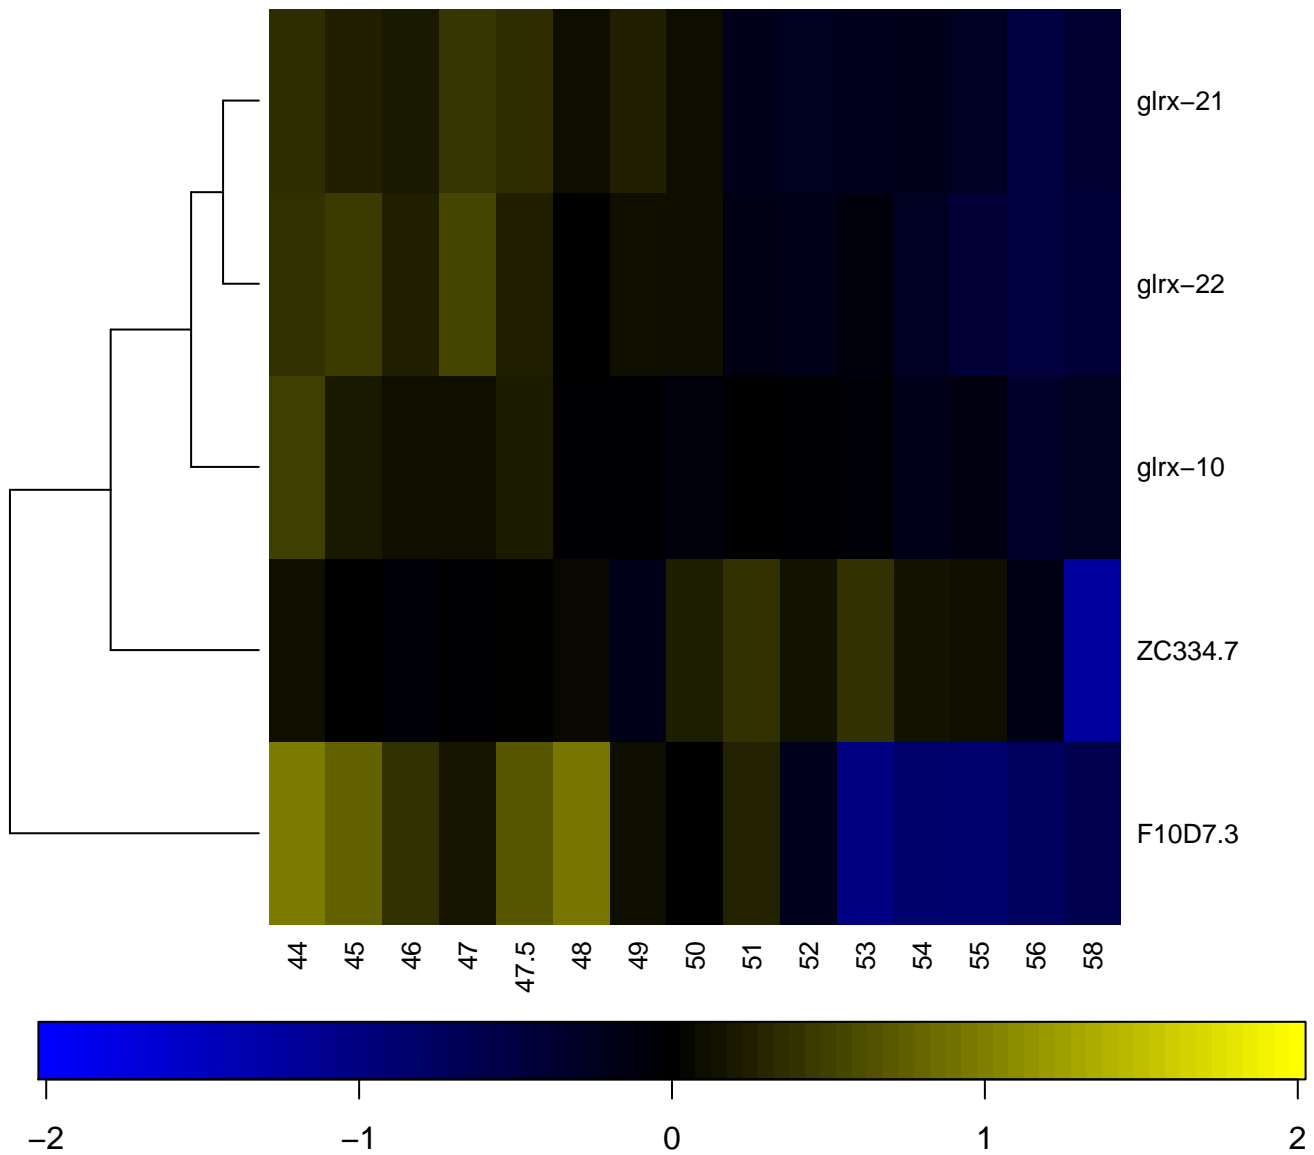



# Glutathione S-transferase, C-terminal

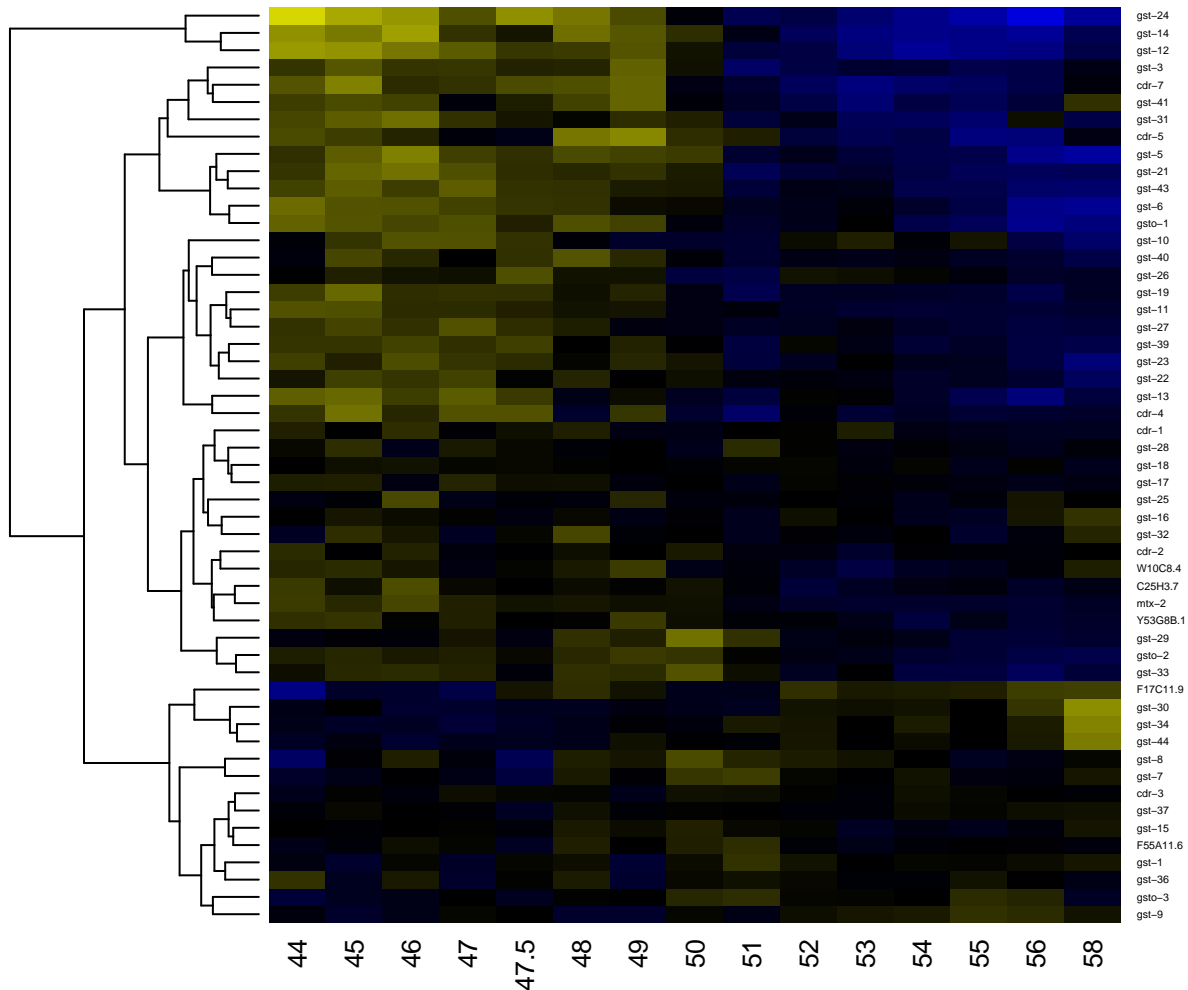



# Glutathione S-transferase, C-terminal-like

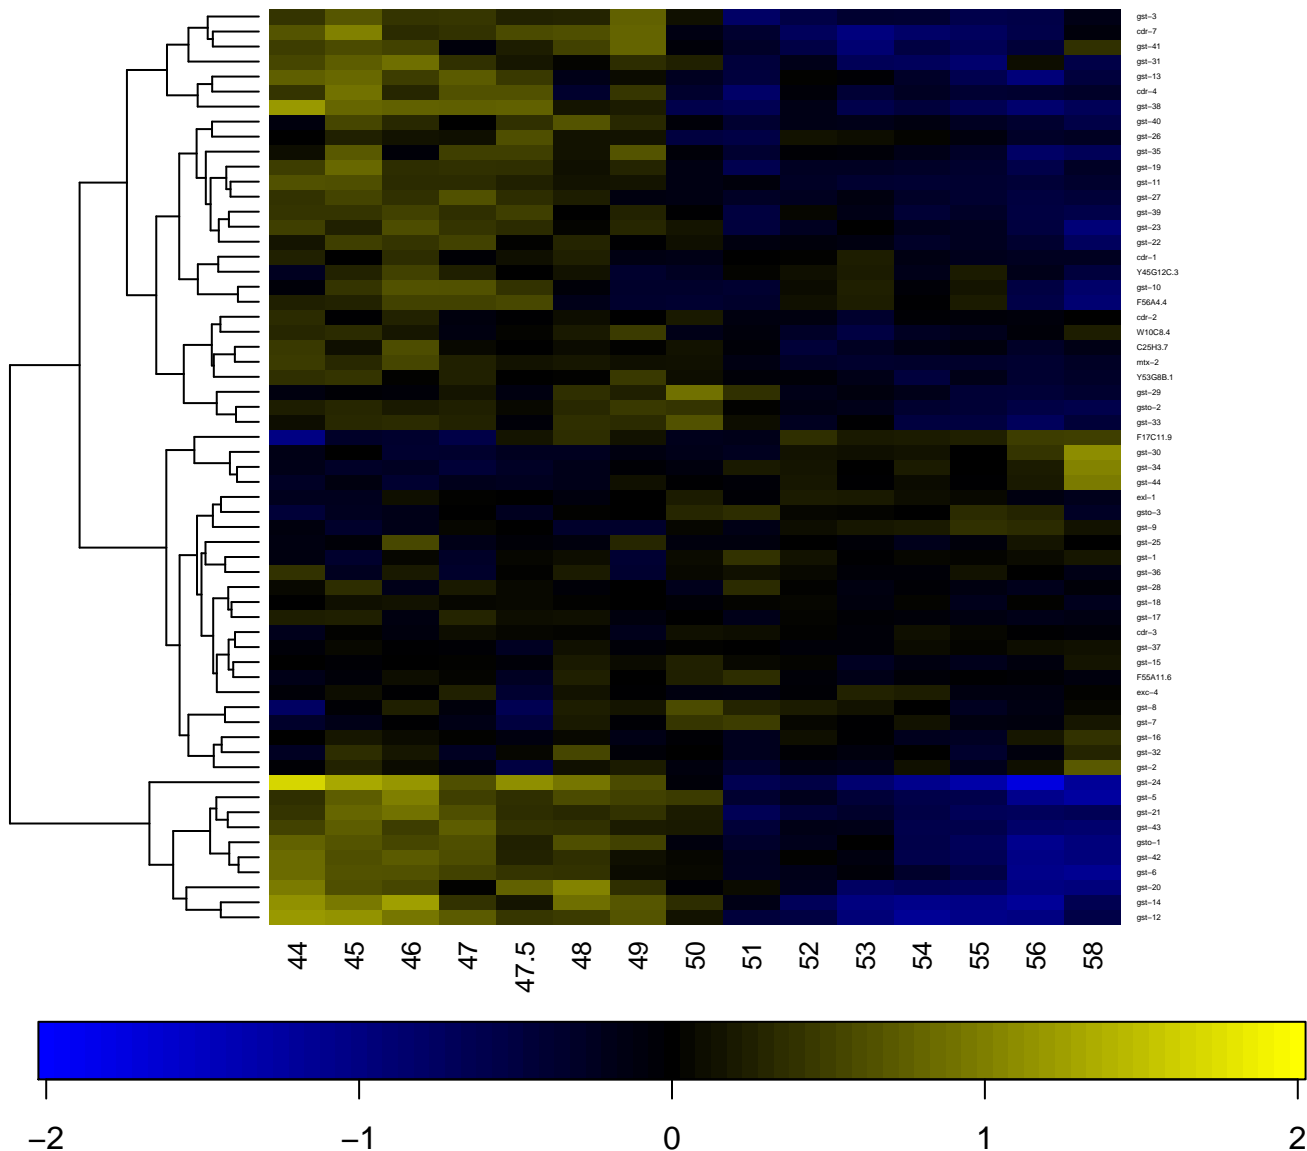

# Glutathione S-transferase, C-terminal domain



# Glutathione S-transferase, N-terminal

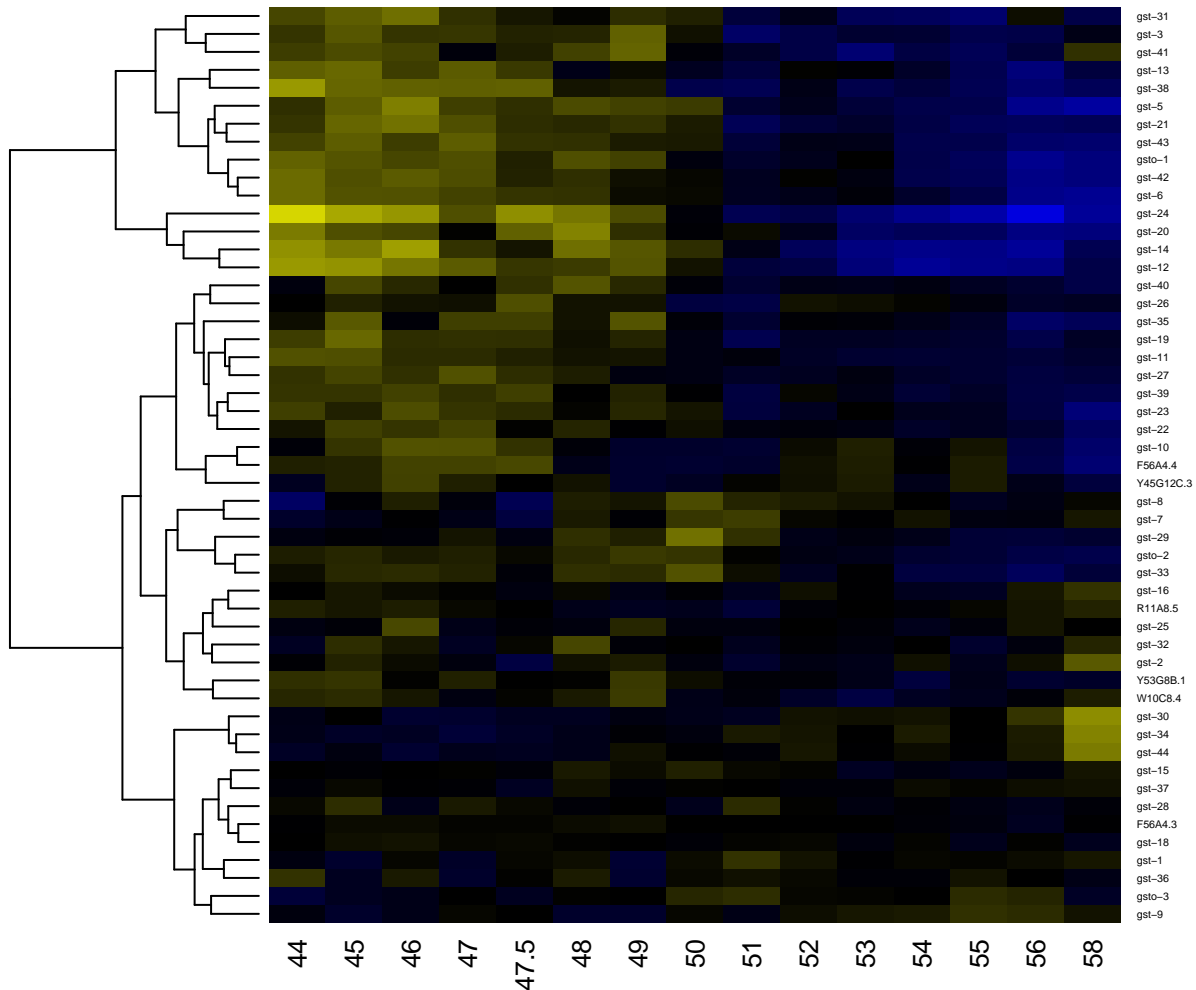

# Glutathione S-transferase, N-terminal domain



-2

-1

0

1

2











# Glycoside hydrolase, family 18, catalytic domain

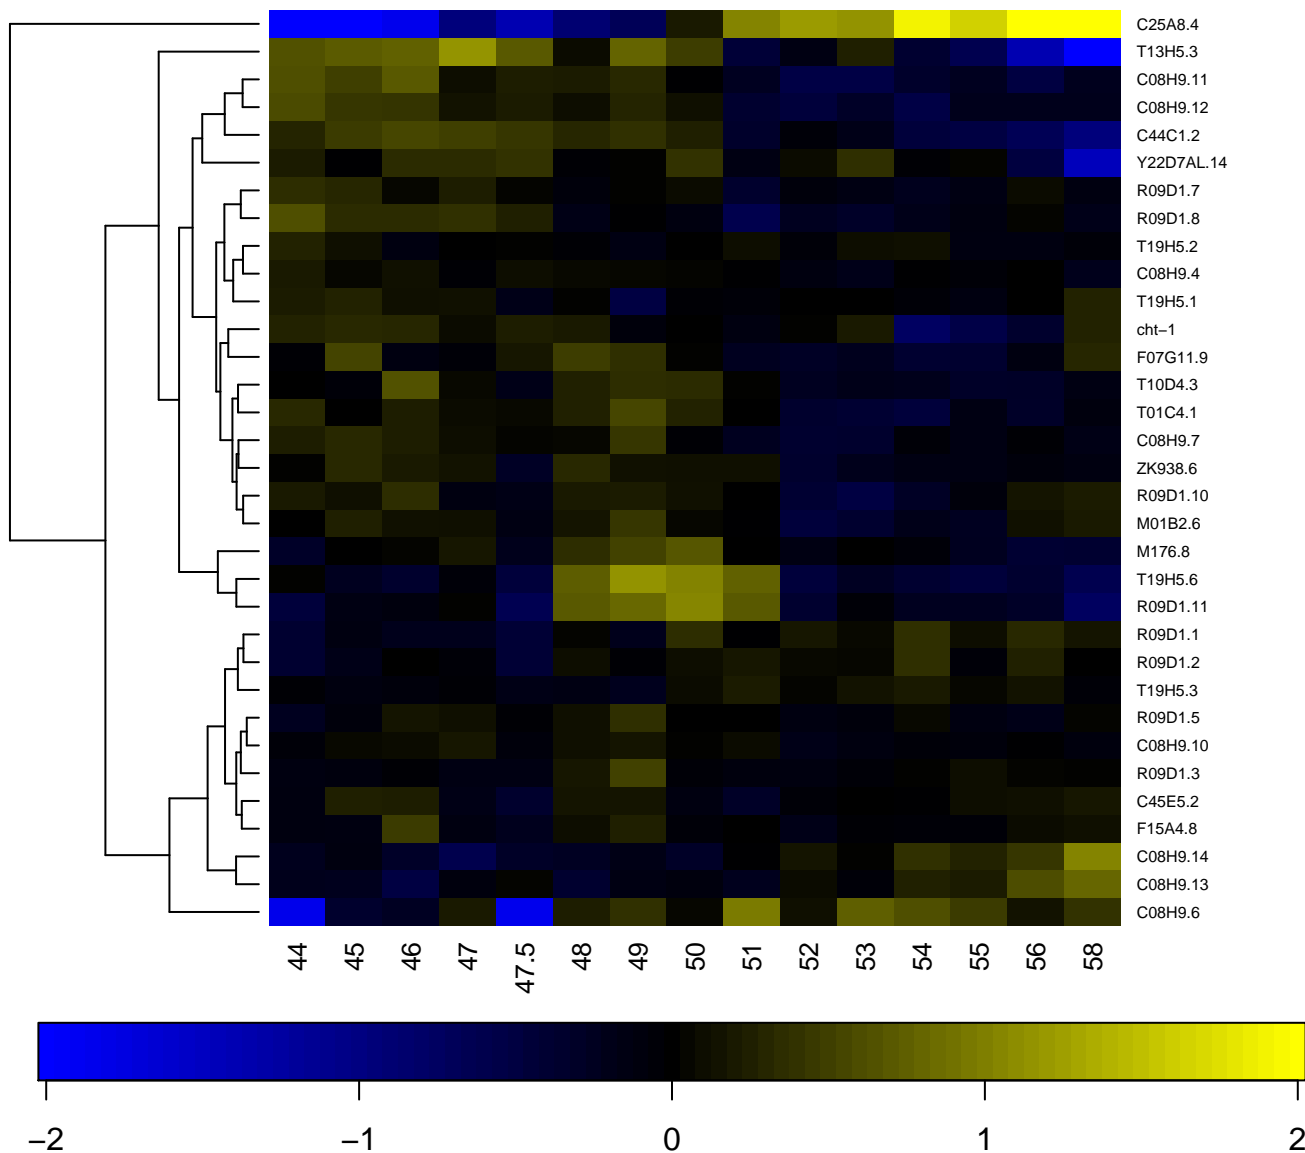

# Glycoside hydrolase, family 20, catalytic core

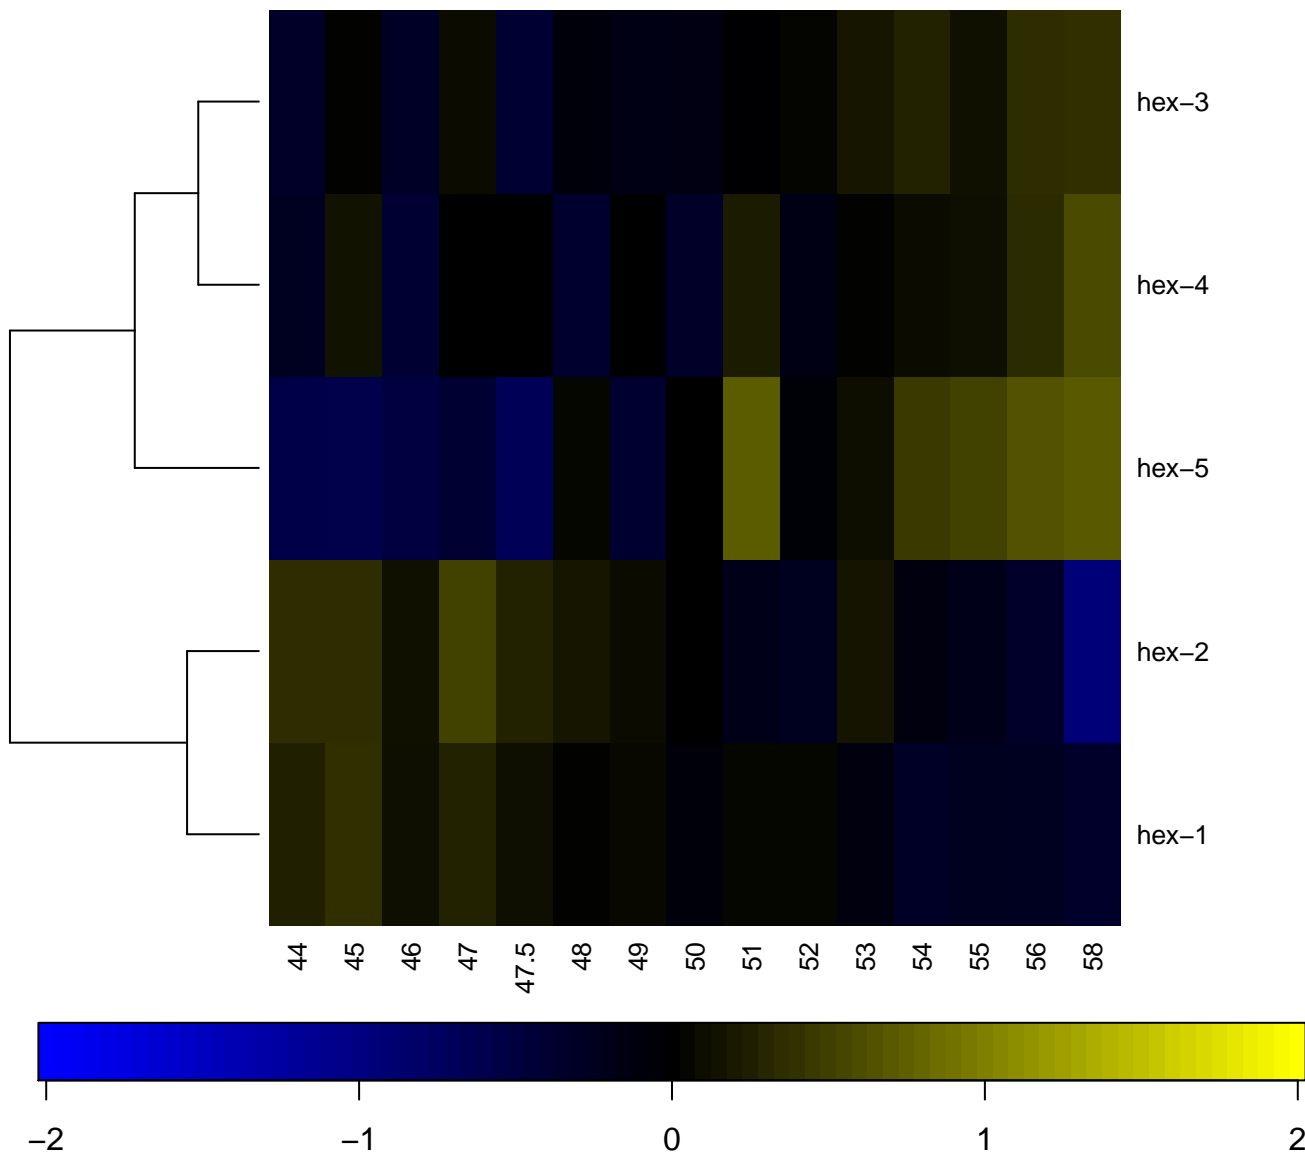



# Glycoside hydrolase, family 47

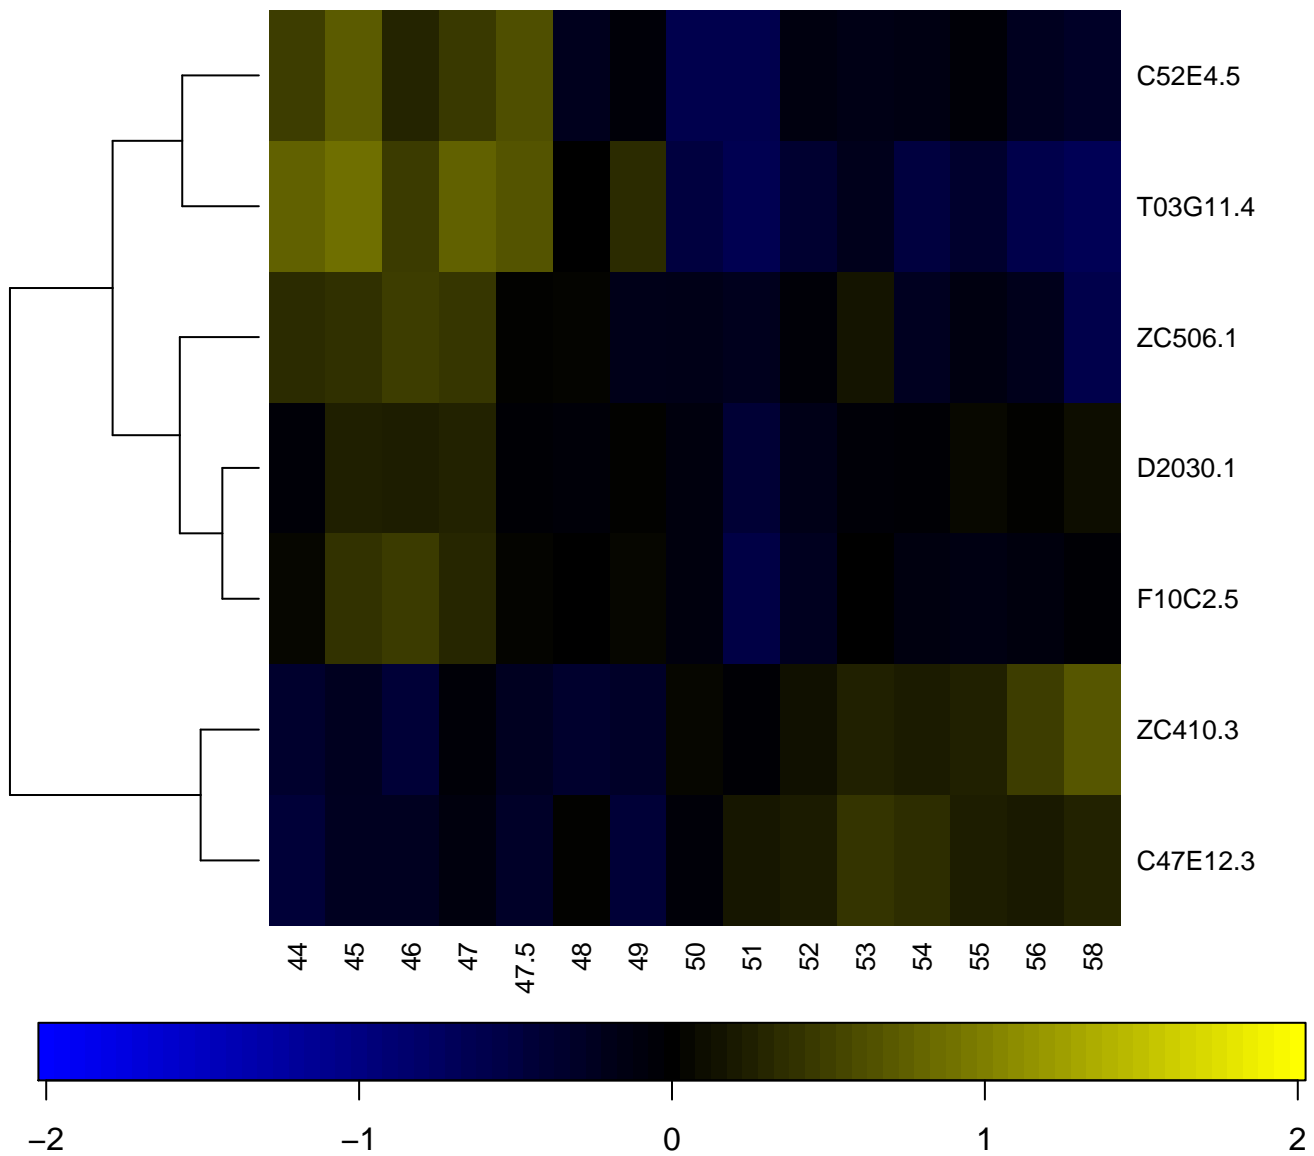

# Glycoside hydrolase, subgroup, catalytic core

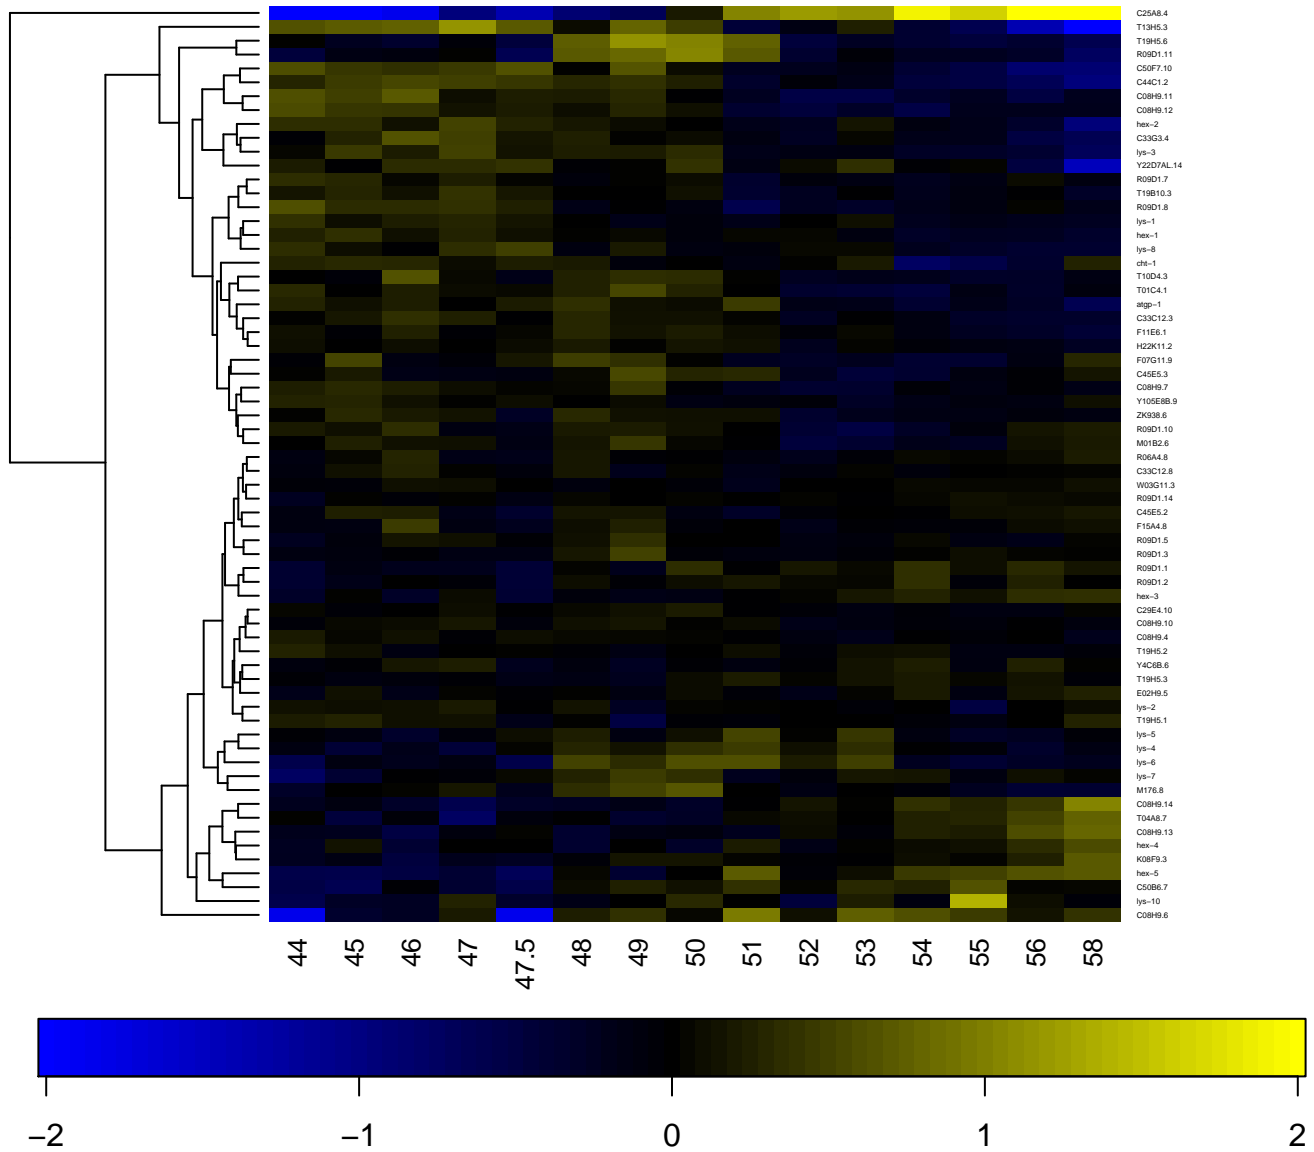



# Glycosyl hydrolase family 47







# Glycosyl transferase family 11

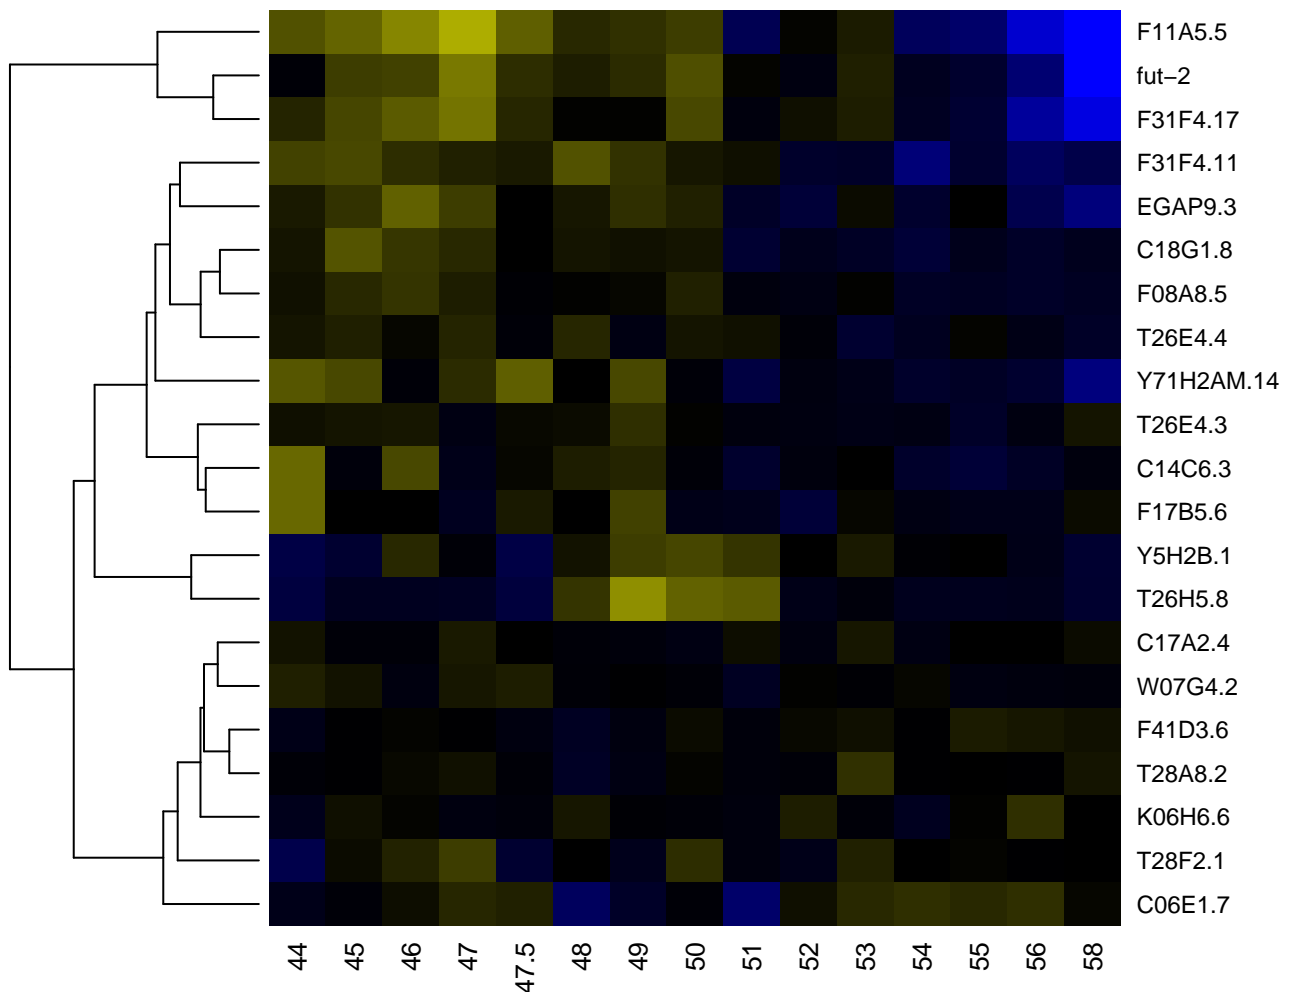



# Glycosyl transferase family 8

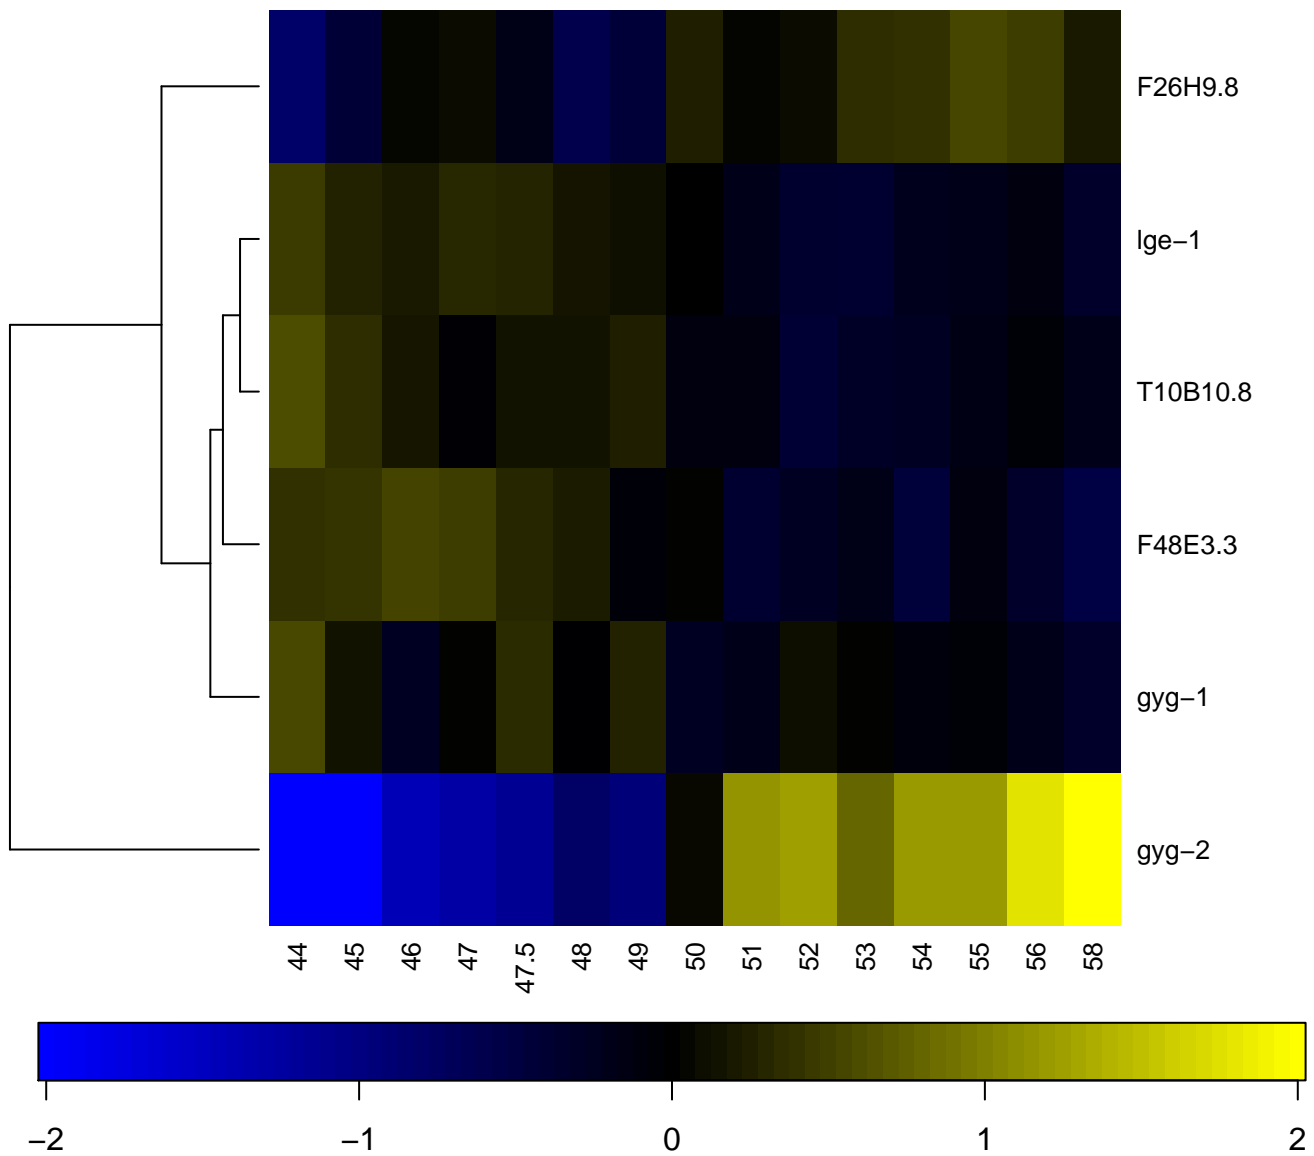



# Glycosyl transferase, family 11

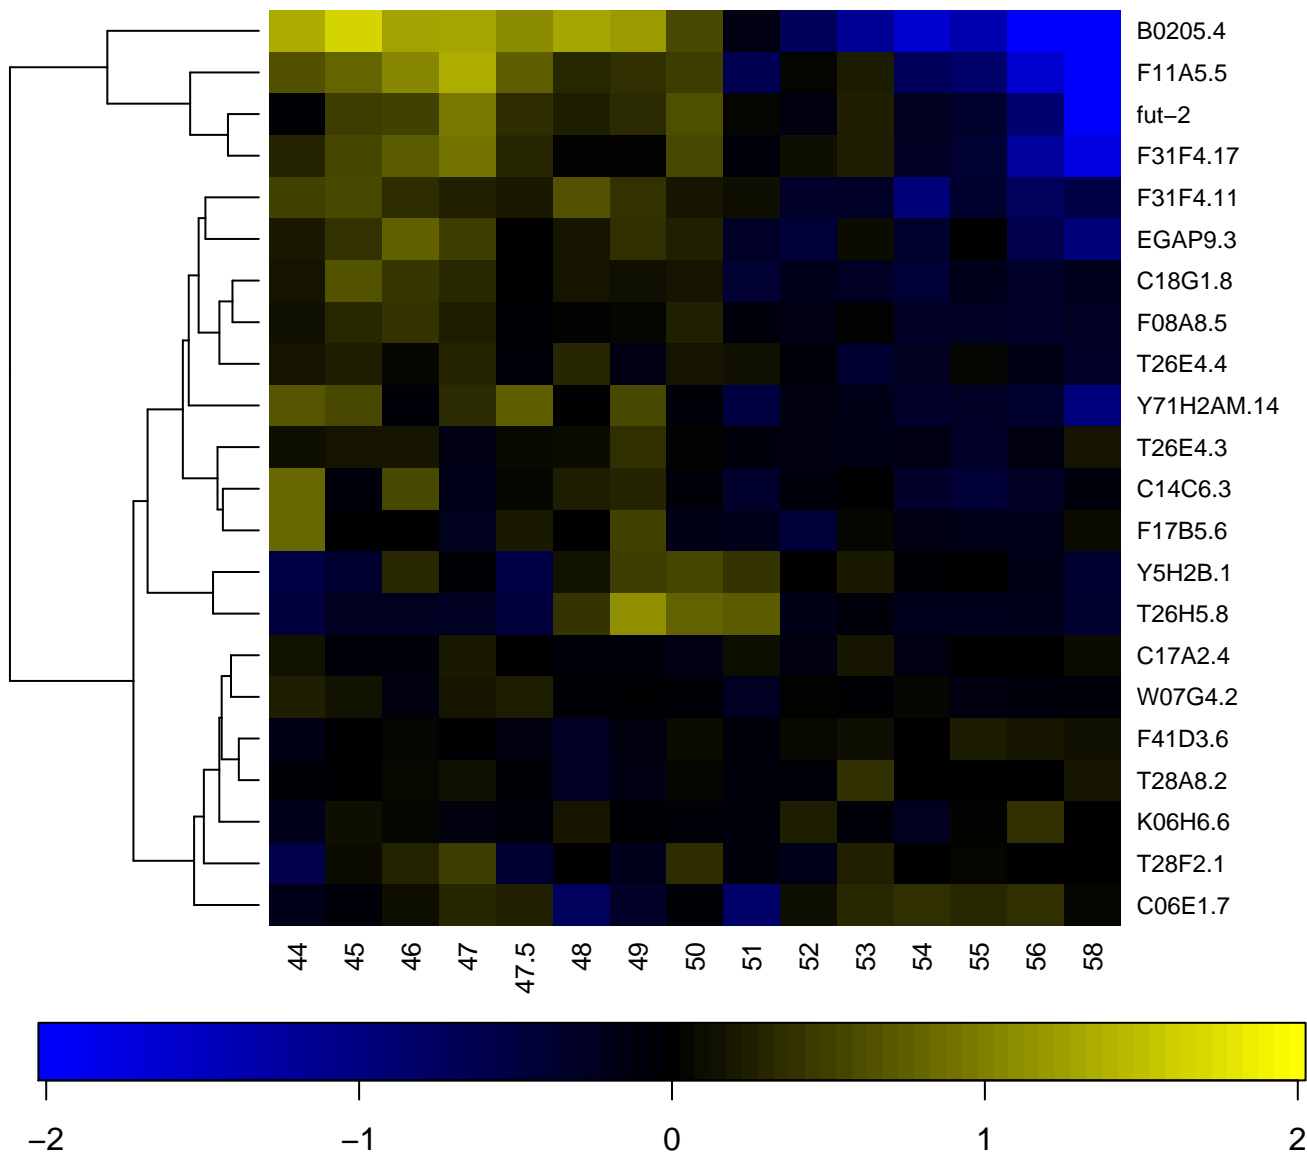



# Glycosyl transferase, family 2

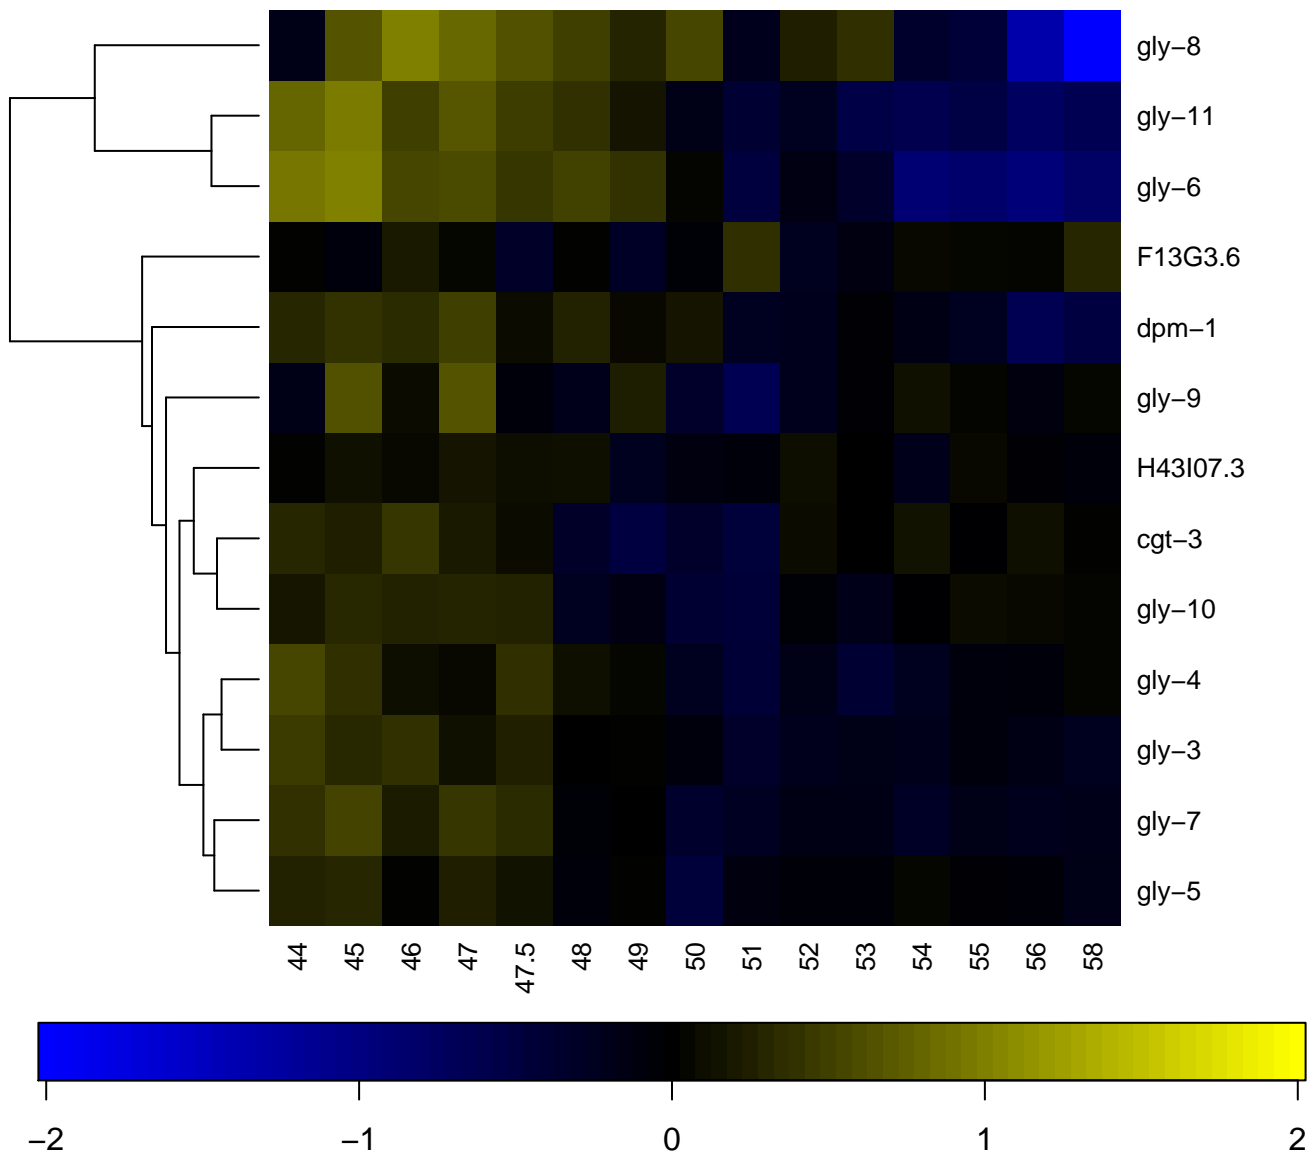

# Glycosyl transferase, family 28, C-terminal





# Glycosyl transferase, family 31

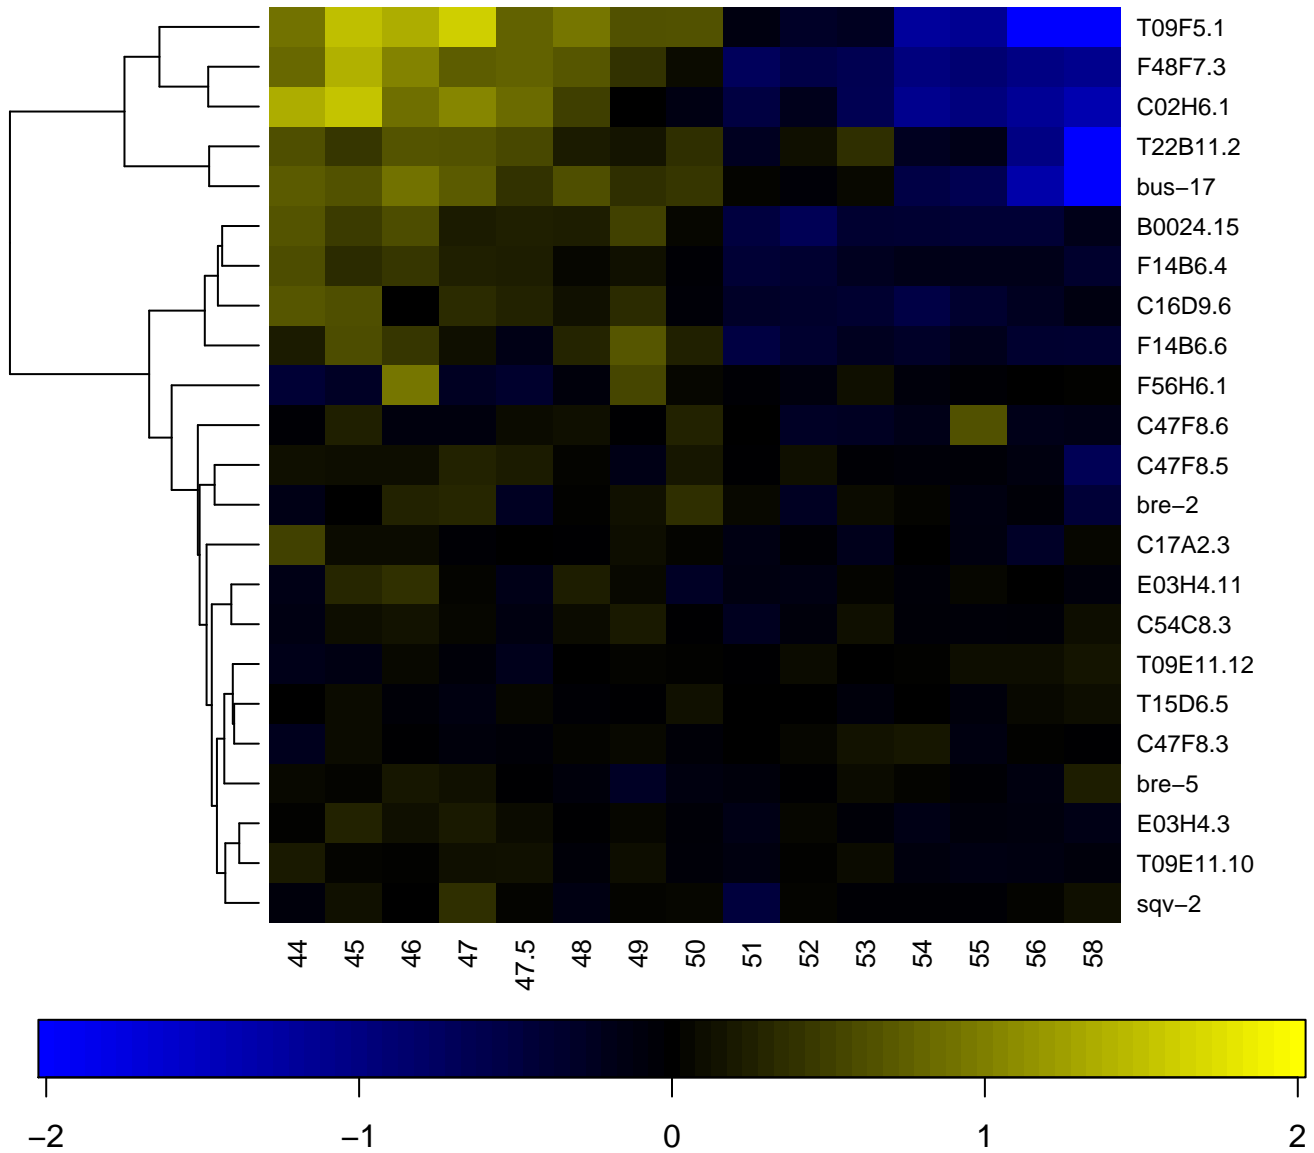

# Glycosyl transferase, family 43

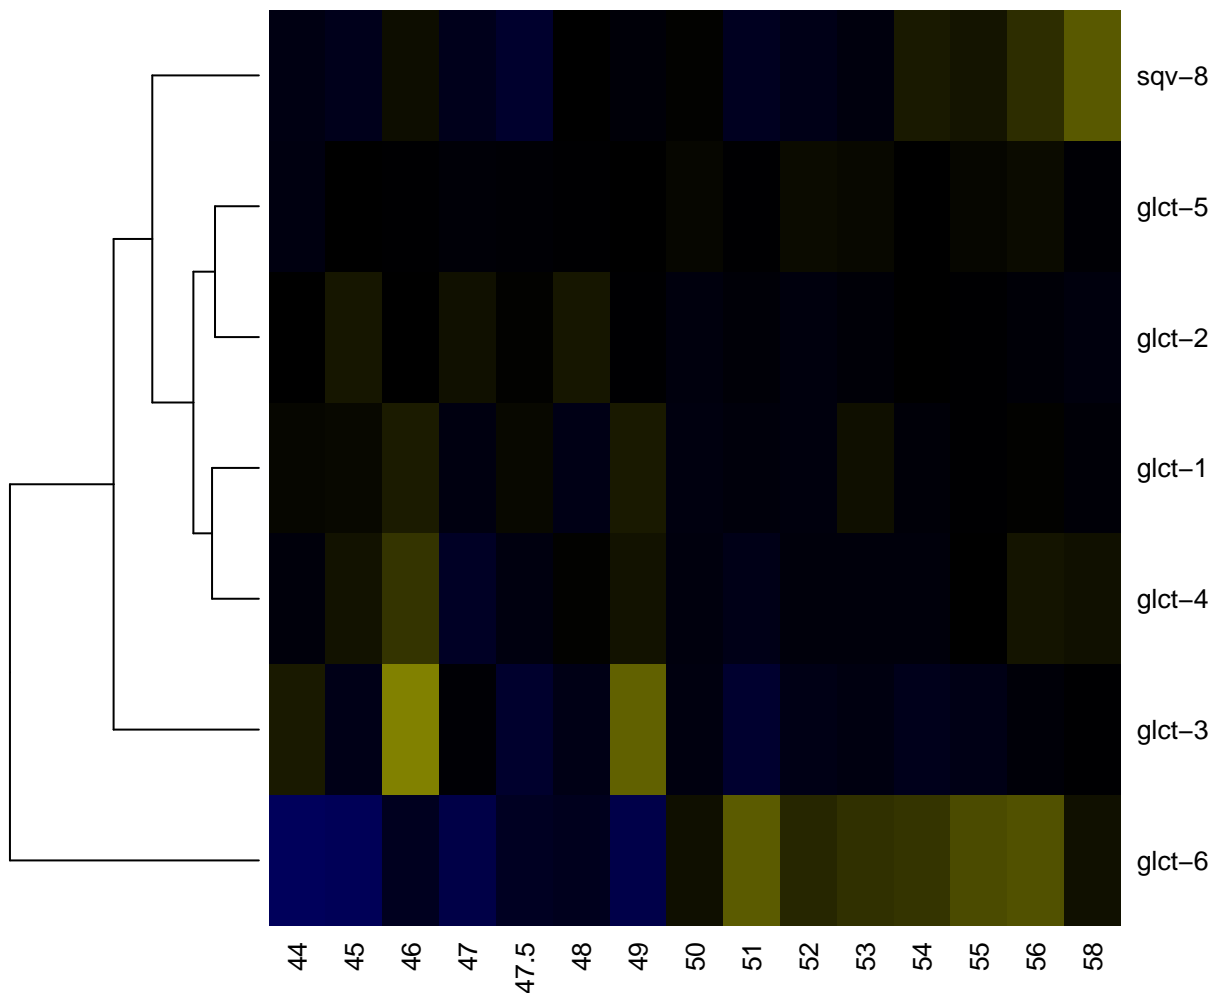

# Glycosyl transferase, family 8



# Glycosyl transferase, group 1

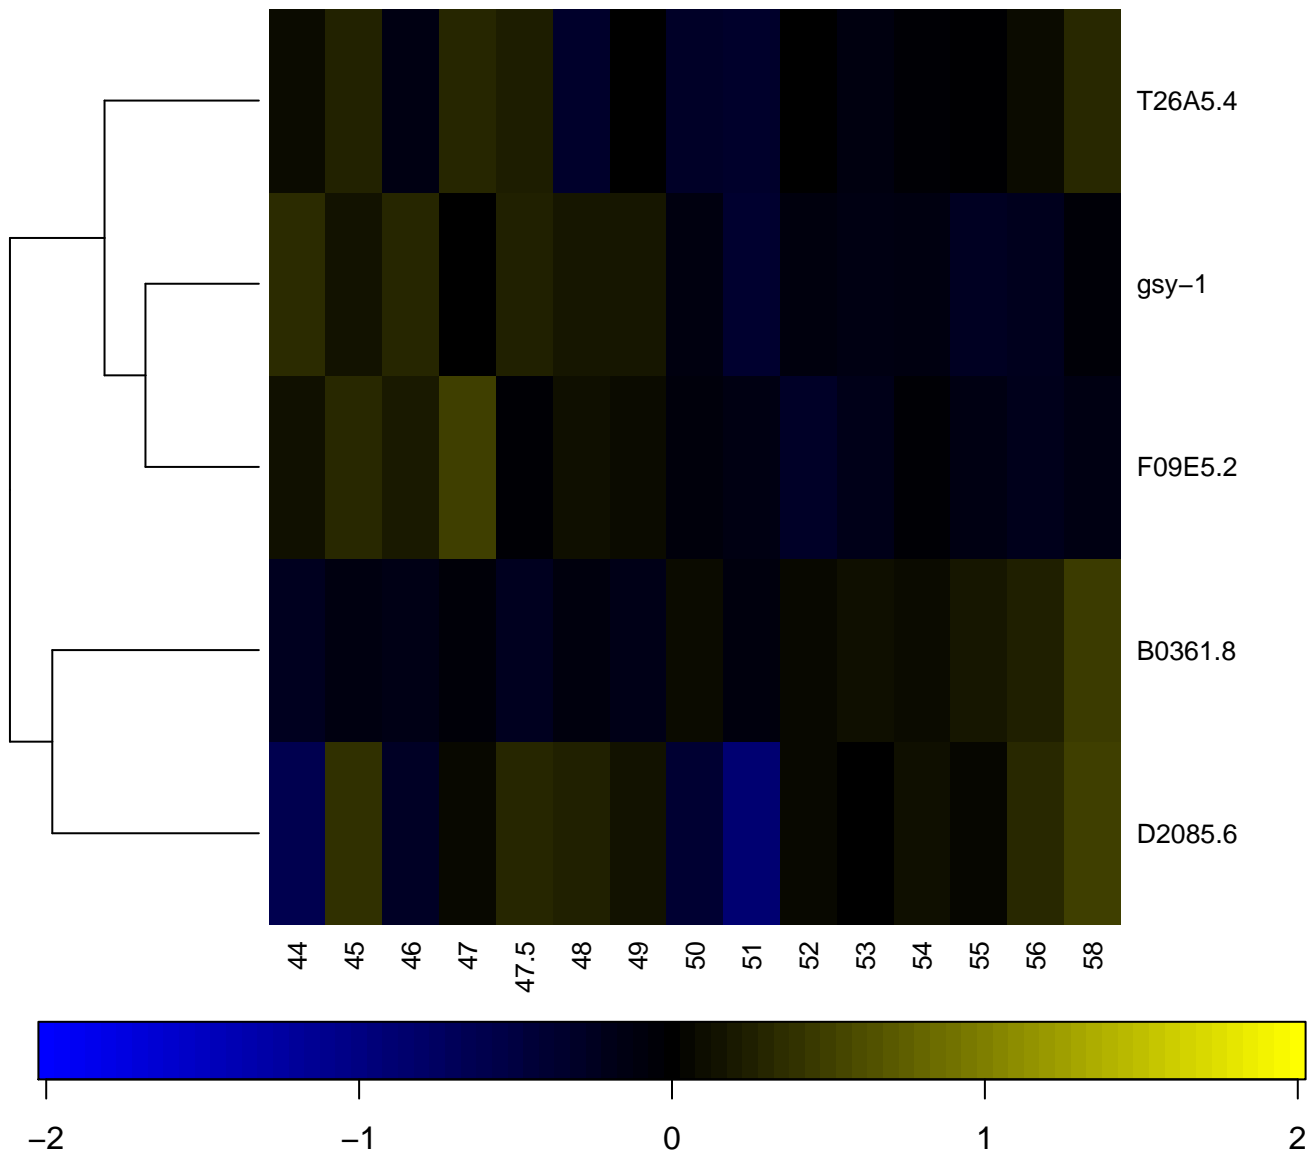

# Glycosyl transferases group 1

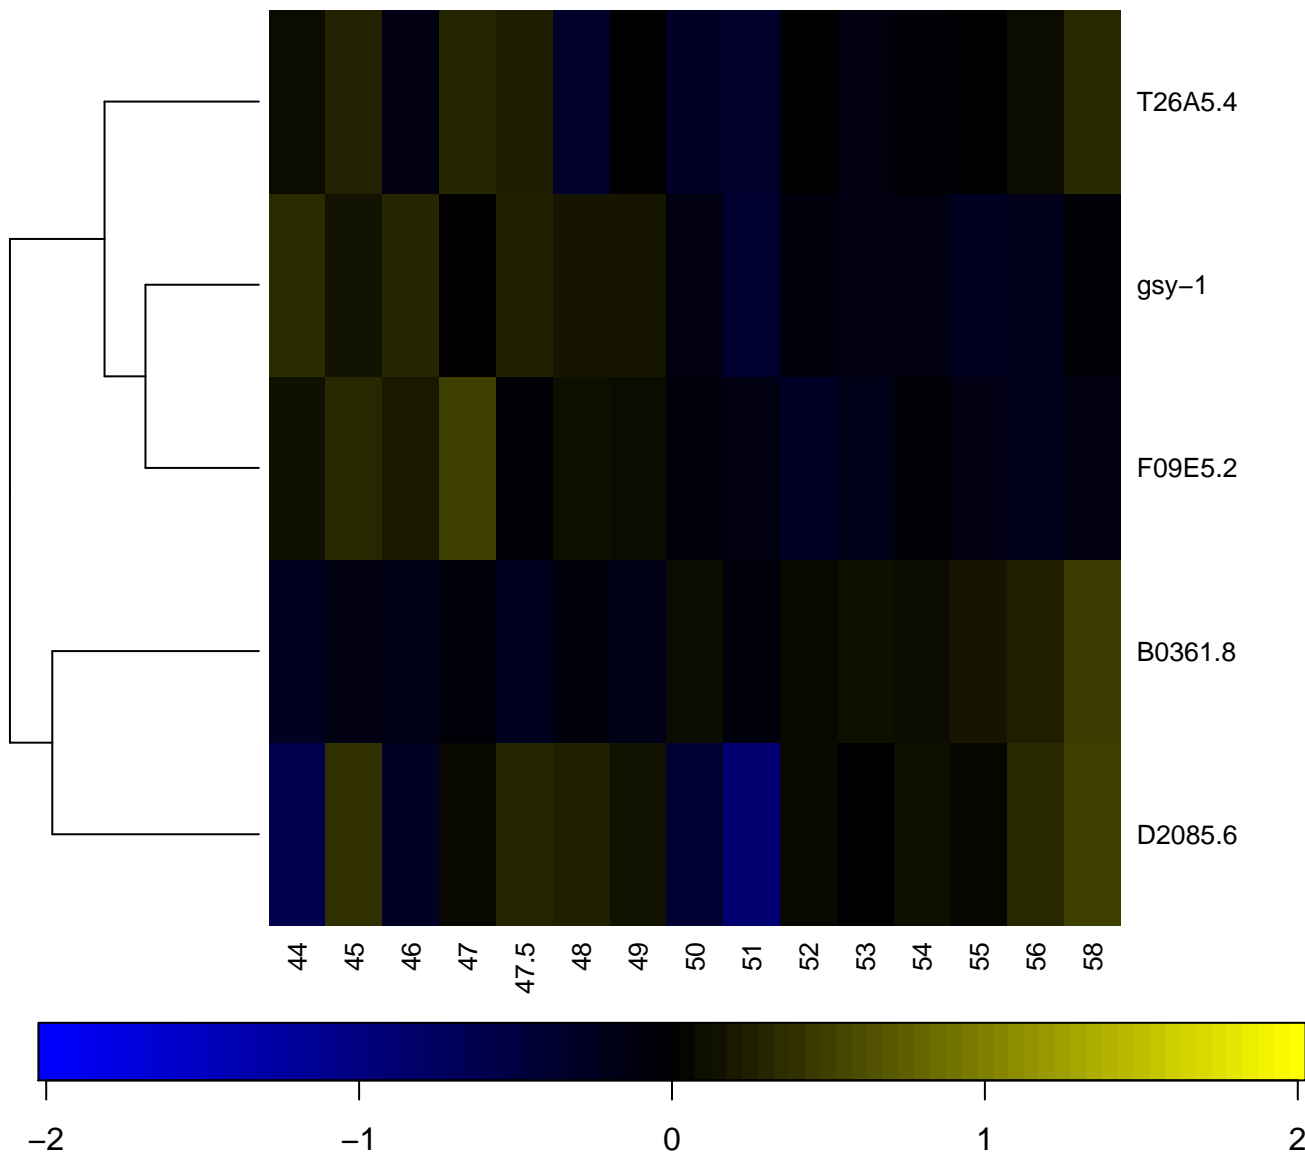

# Glycosyltransferase family 10 (fucosyltransferase)

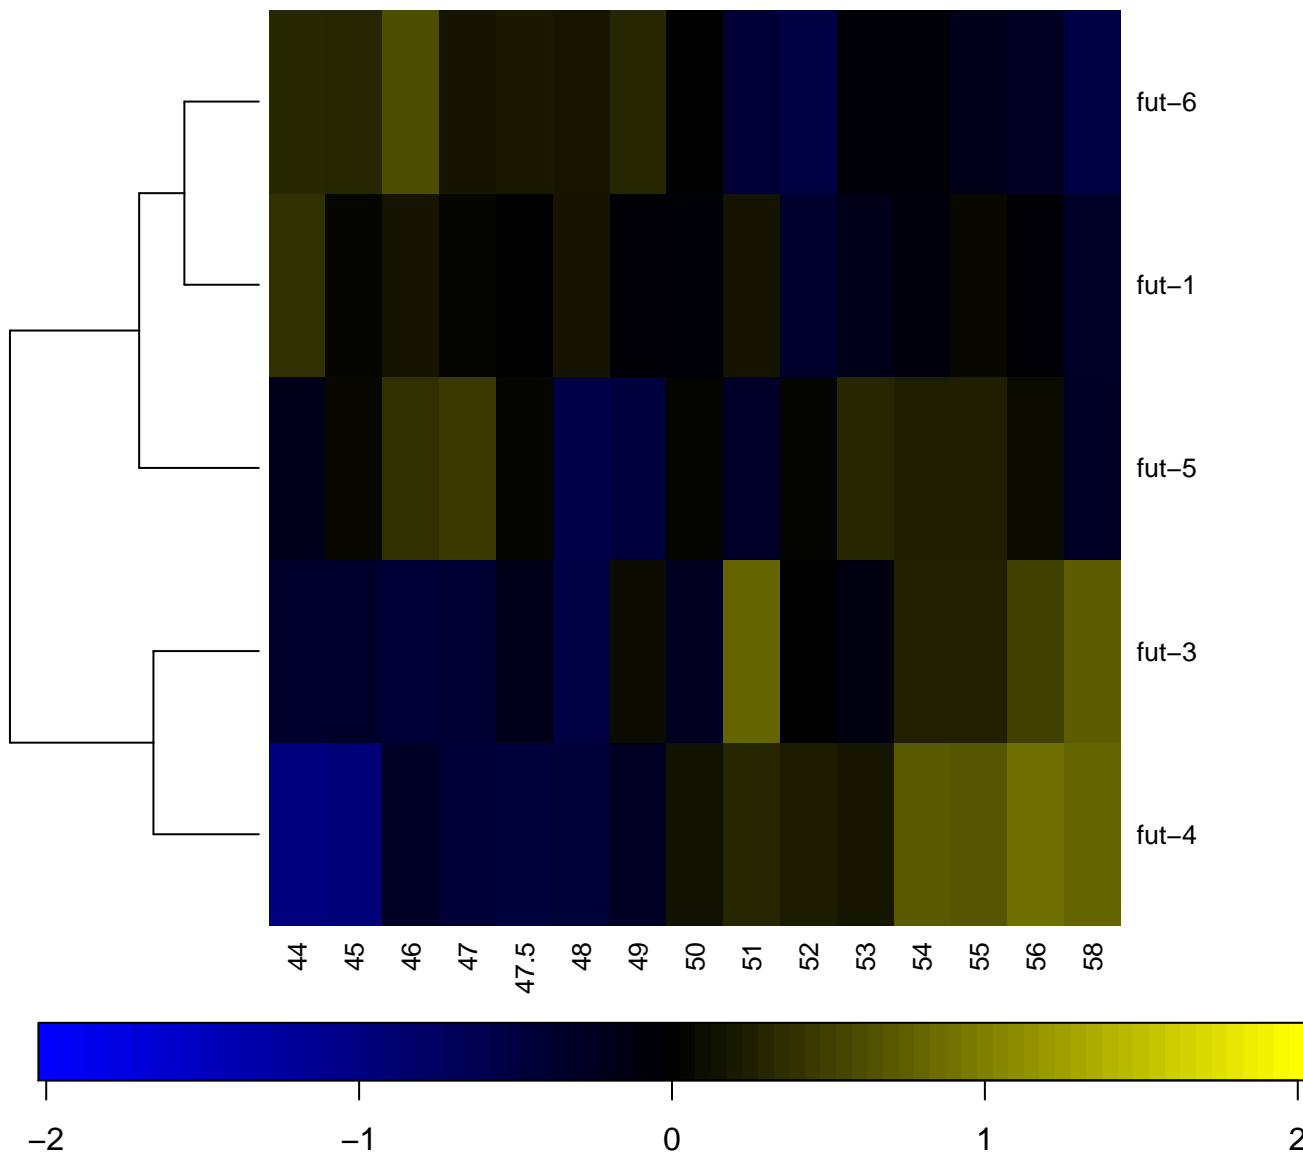

# Glycosyltransferase family 28 C-terminal domain



# Glycosyltransferase family 43

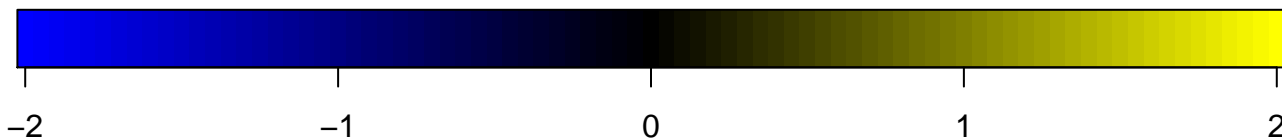



# GNS1/SUR4 family





# GPCR, family 2, extracellular hormone receptor domain

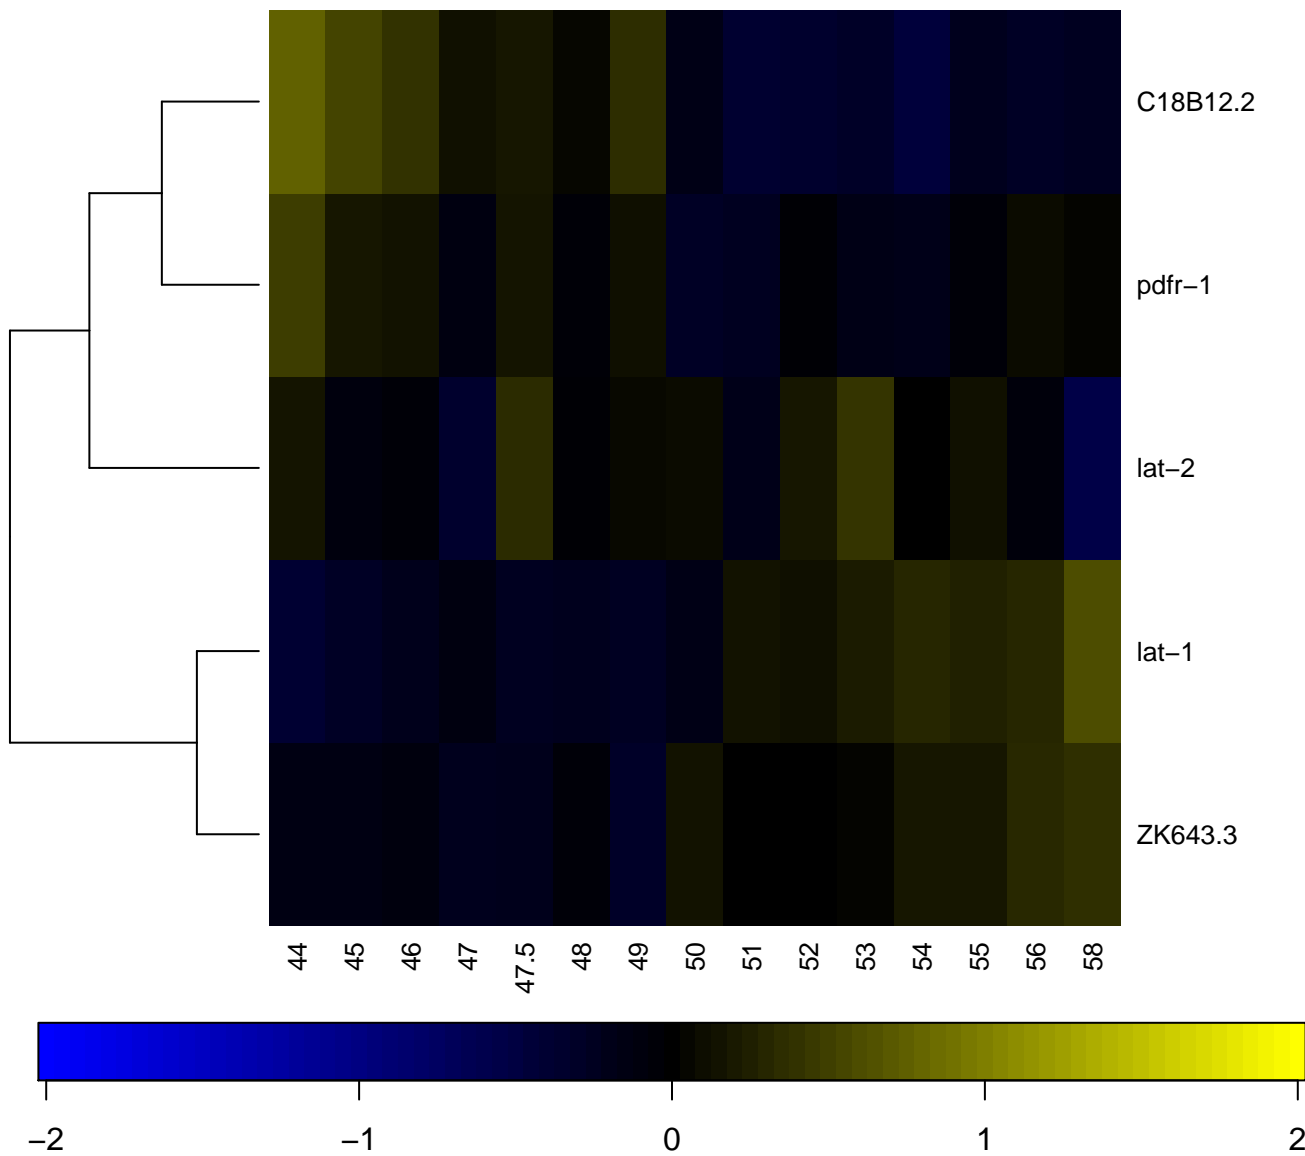















# Ground-like domain

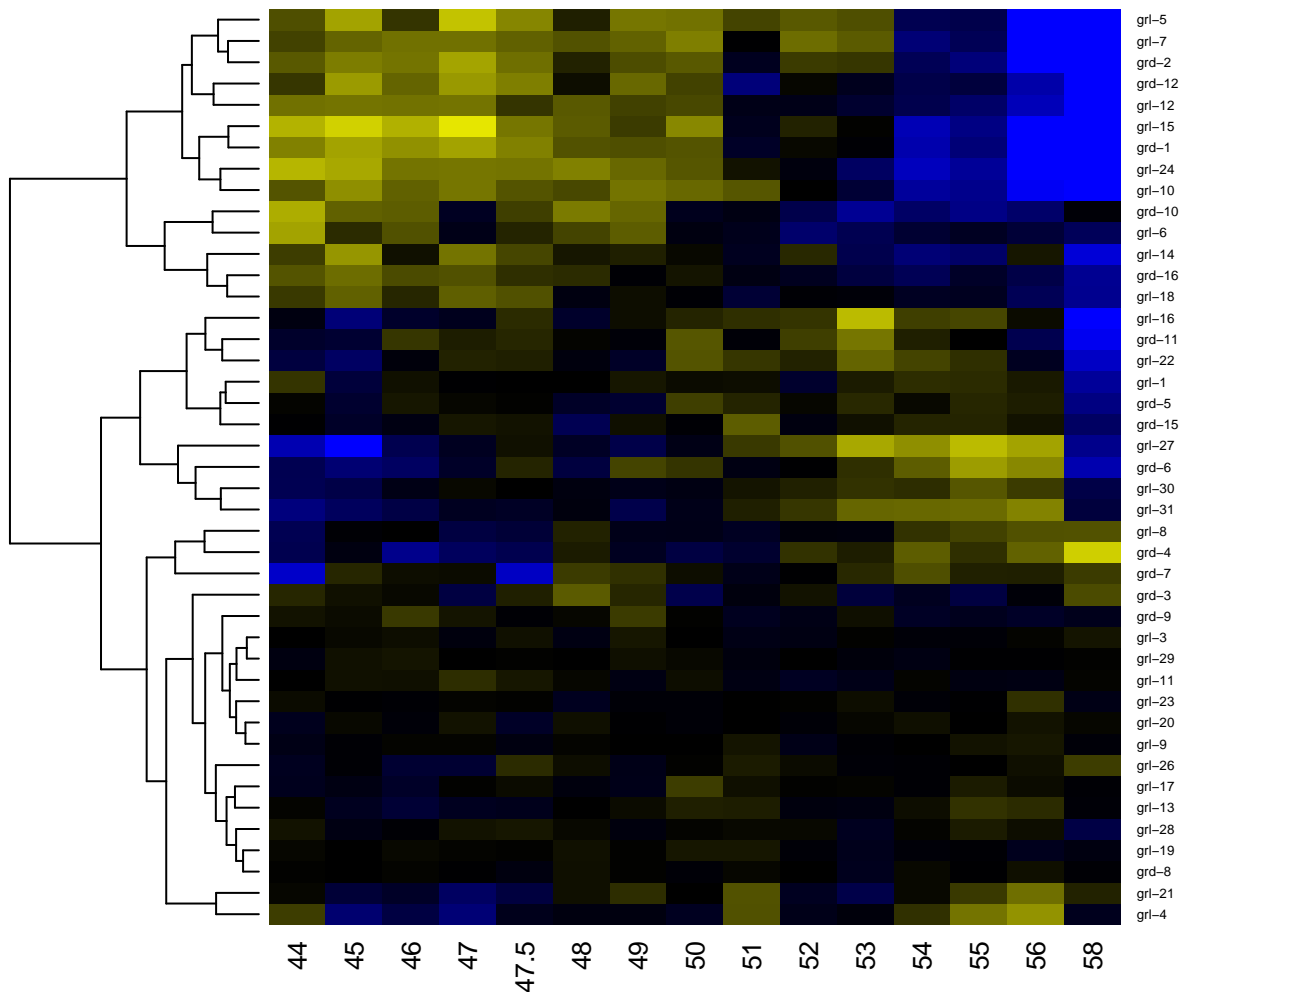

# GTP-binding protein, HSR1-related

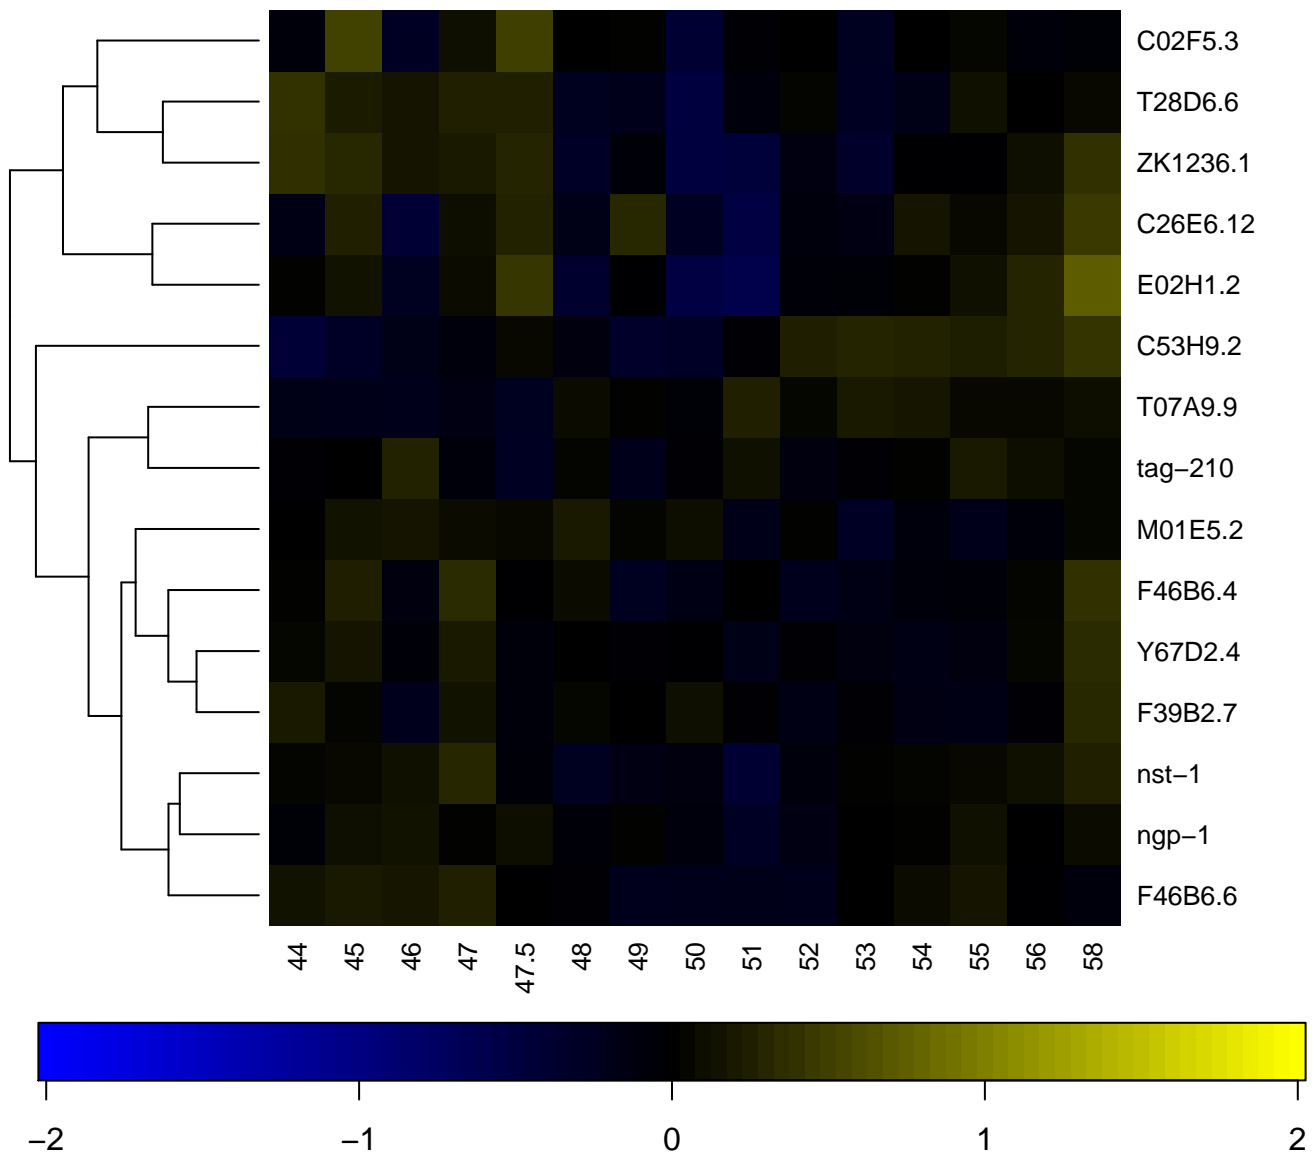

# GTP1/OBG

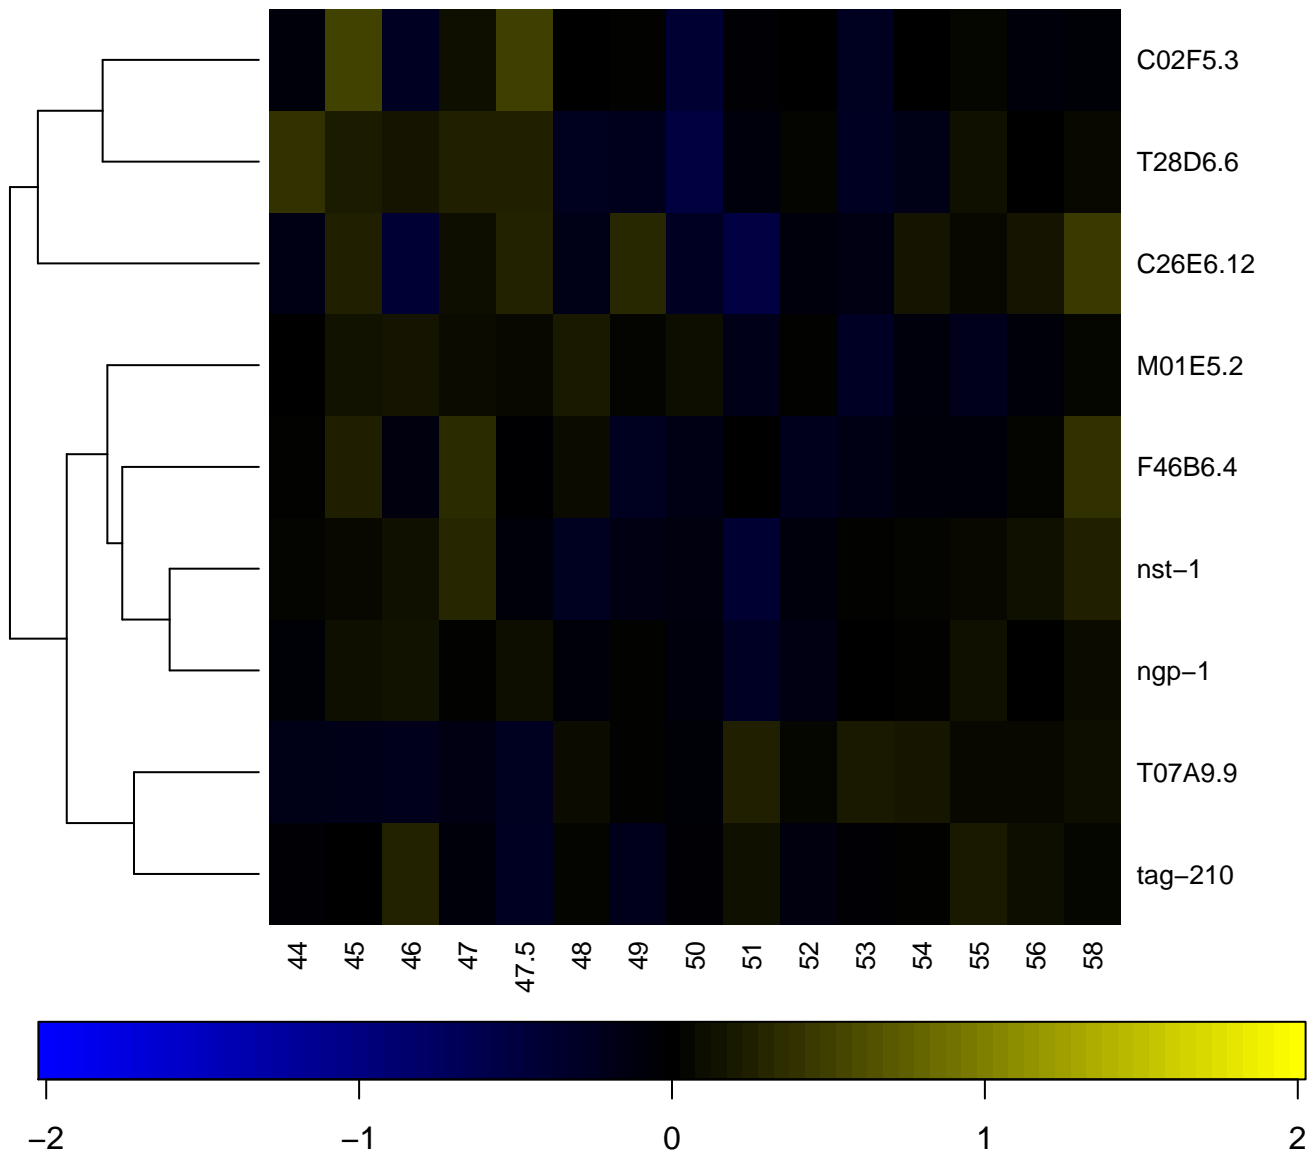



# Gtr1/RagA G protein

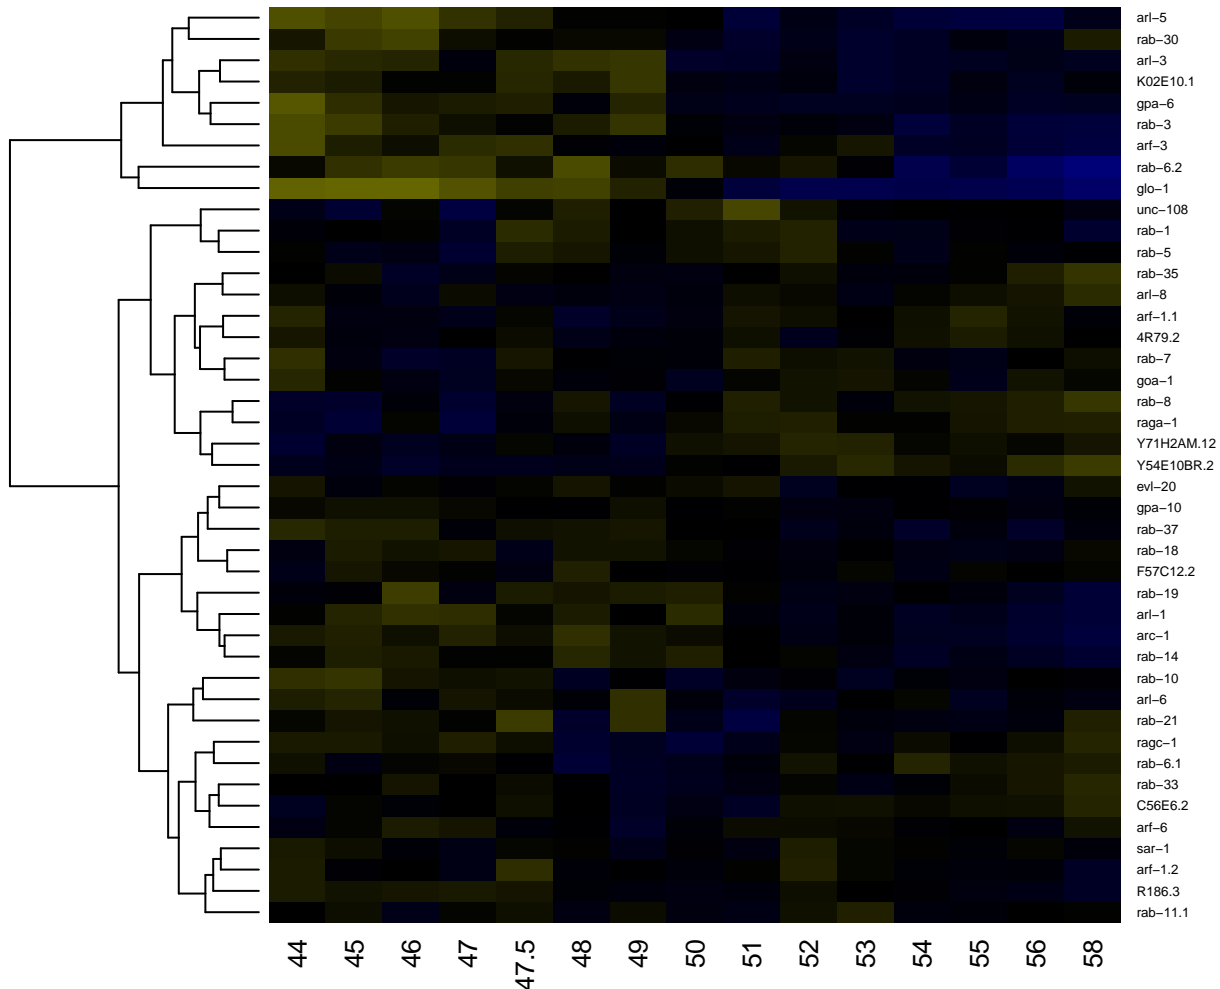

# Gtr1/RagA G protein conserved region

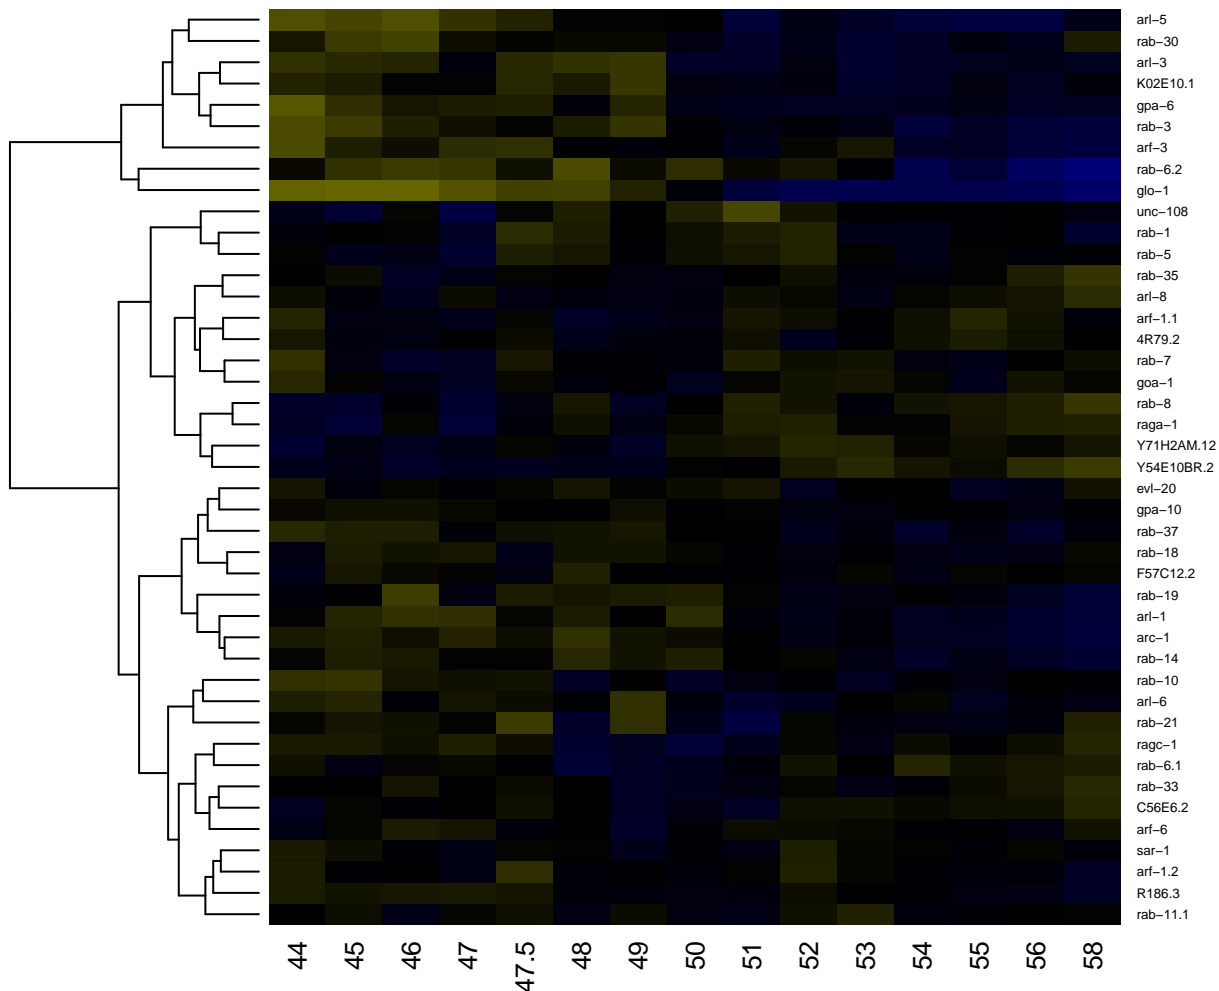

# Guanine–nucleotide dissociation stimulator CDC25

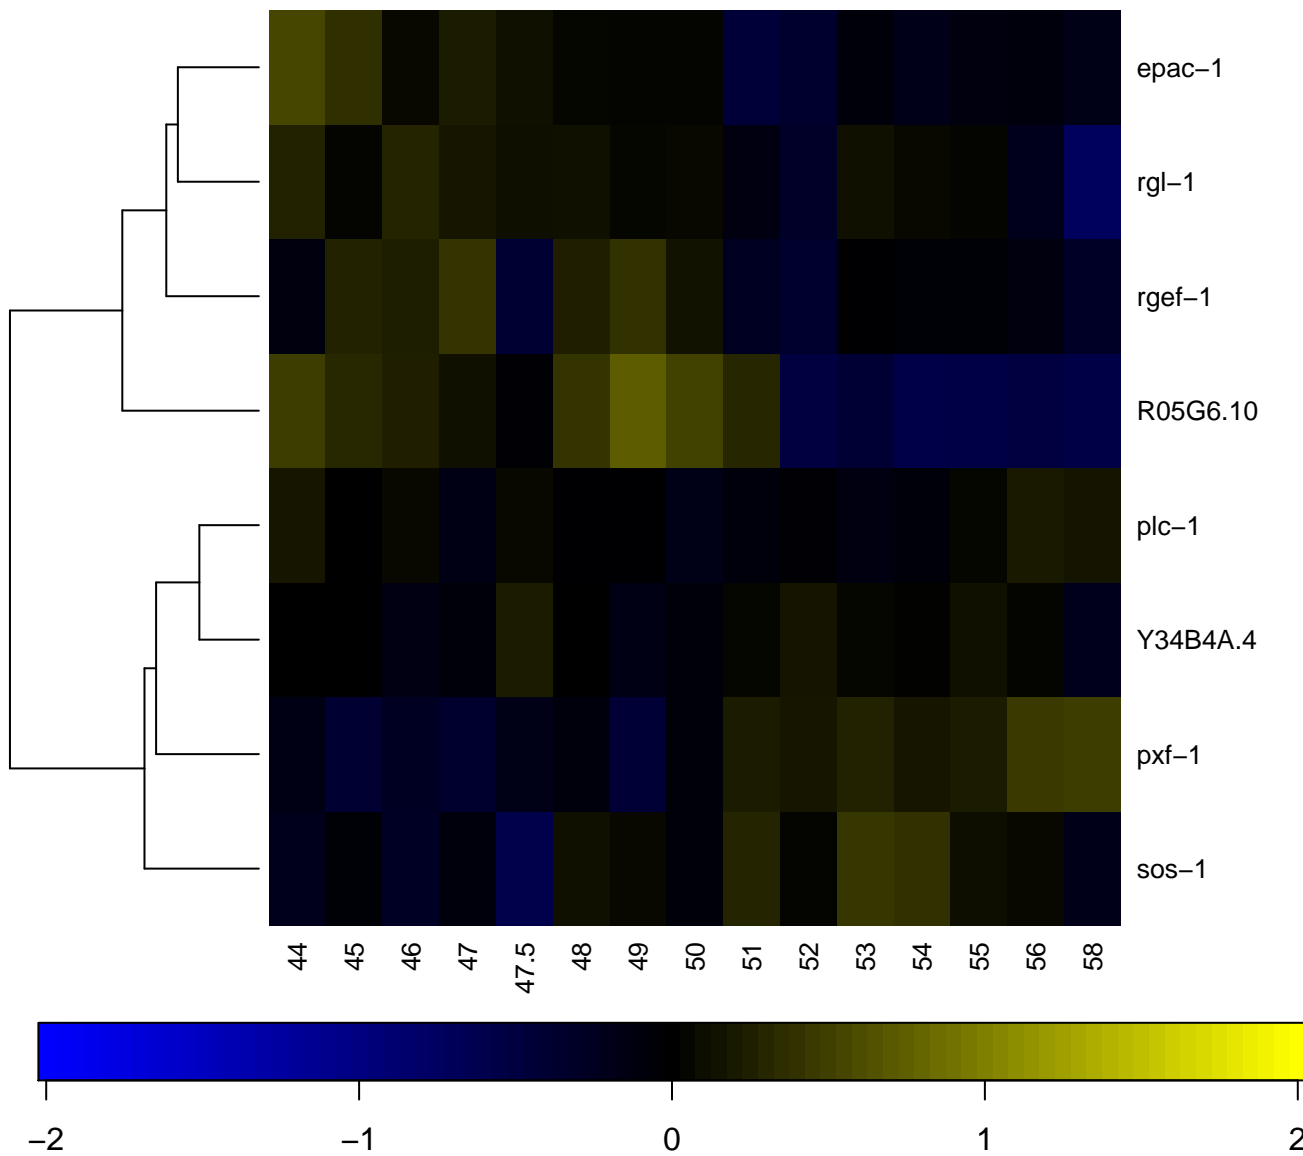



# Guanine nucleotide binding protein (G-protein), alpha subu

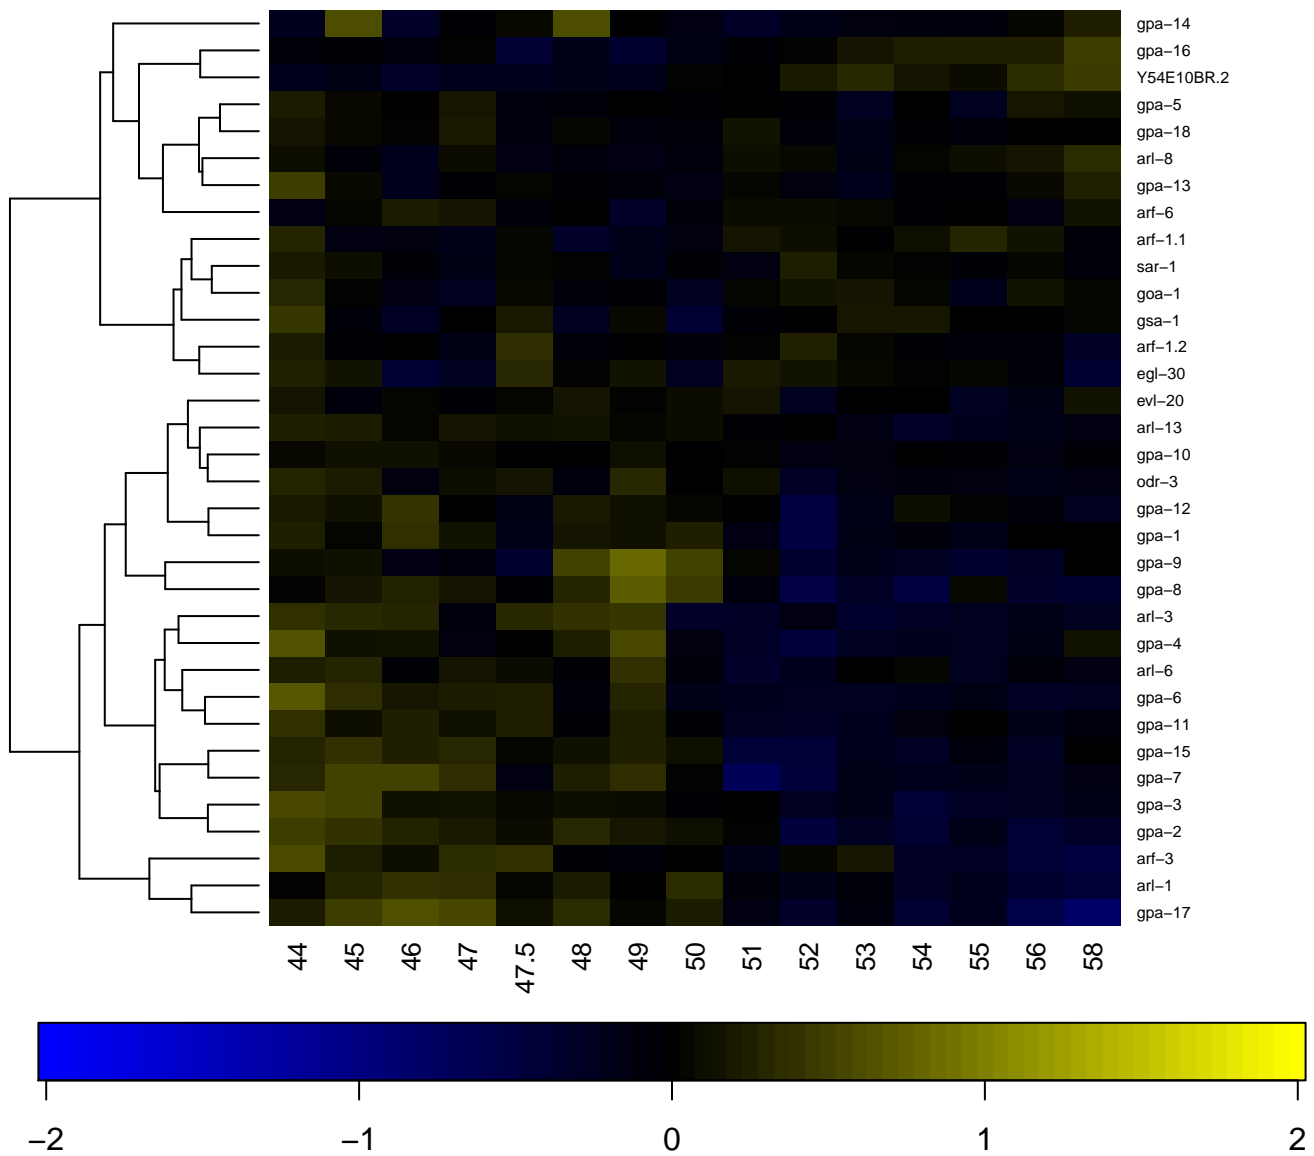

# Guanylate kinase

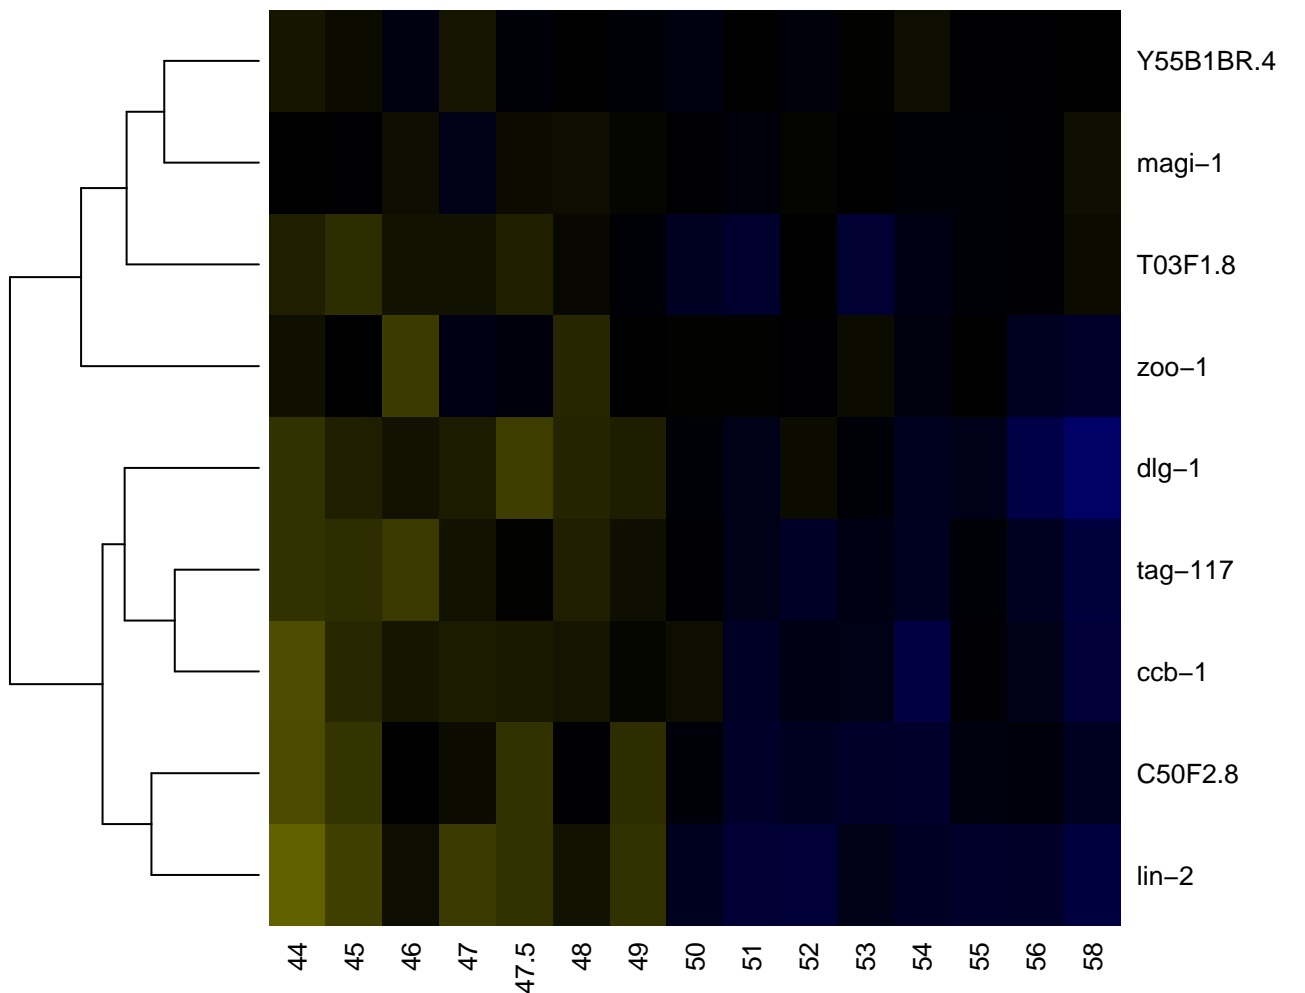



# Guanylate kinase/L-type calcium channel

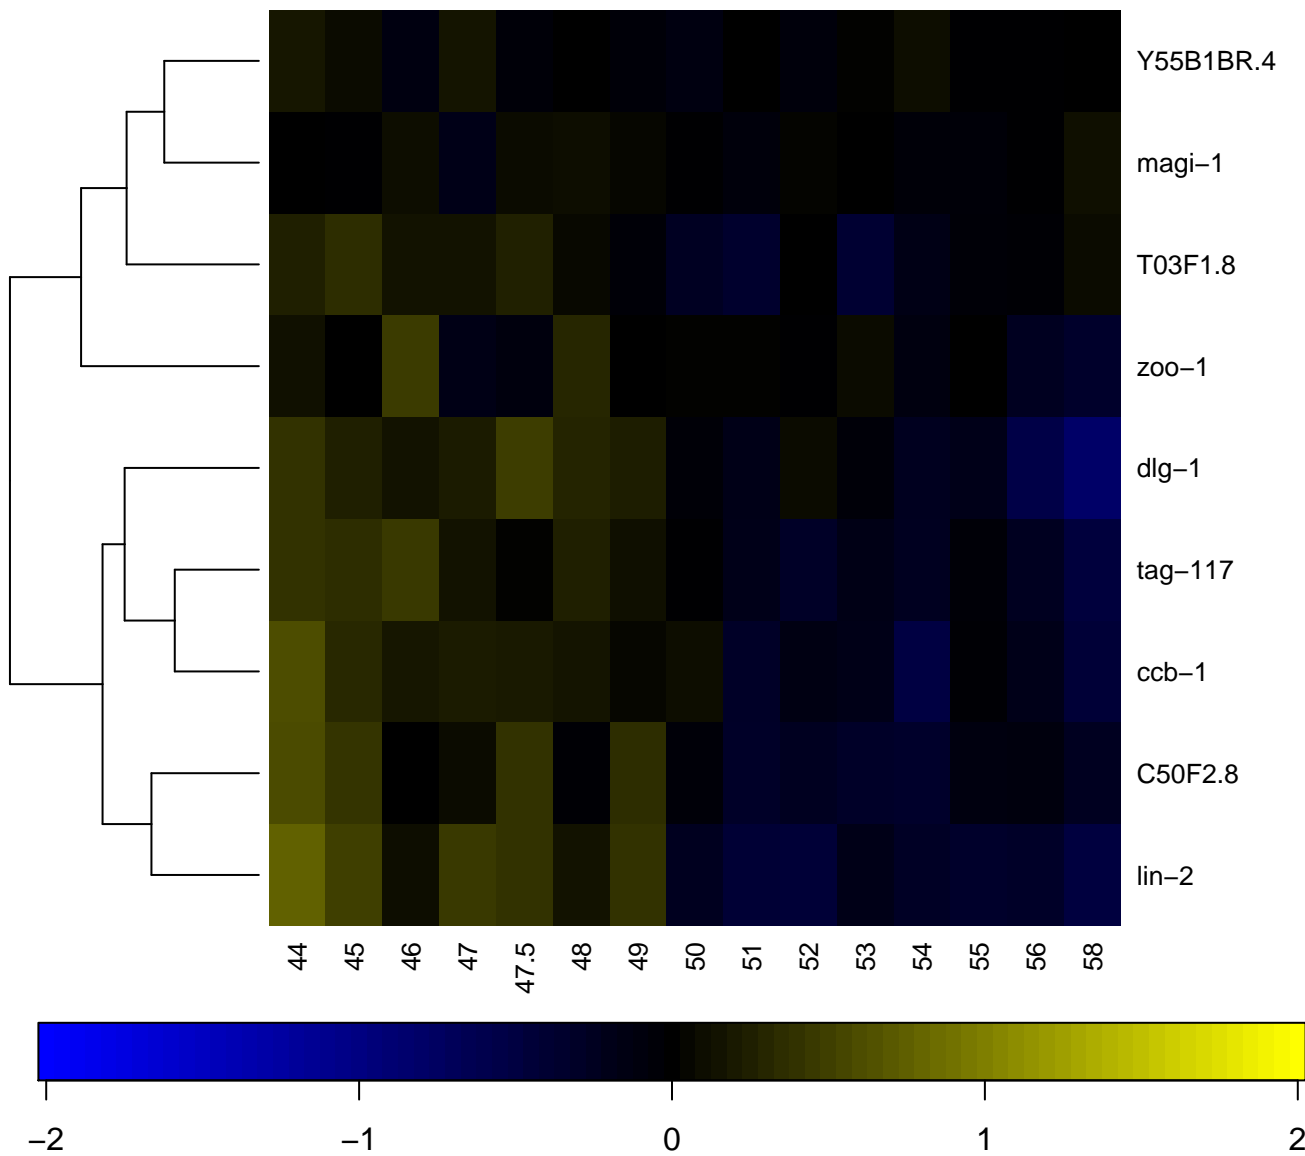





# Haem NO binding associated

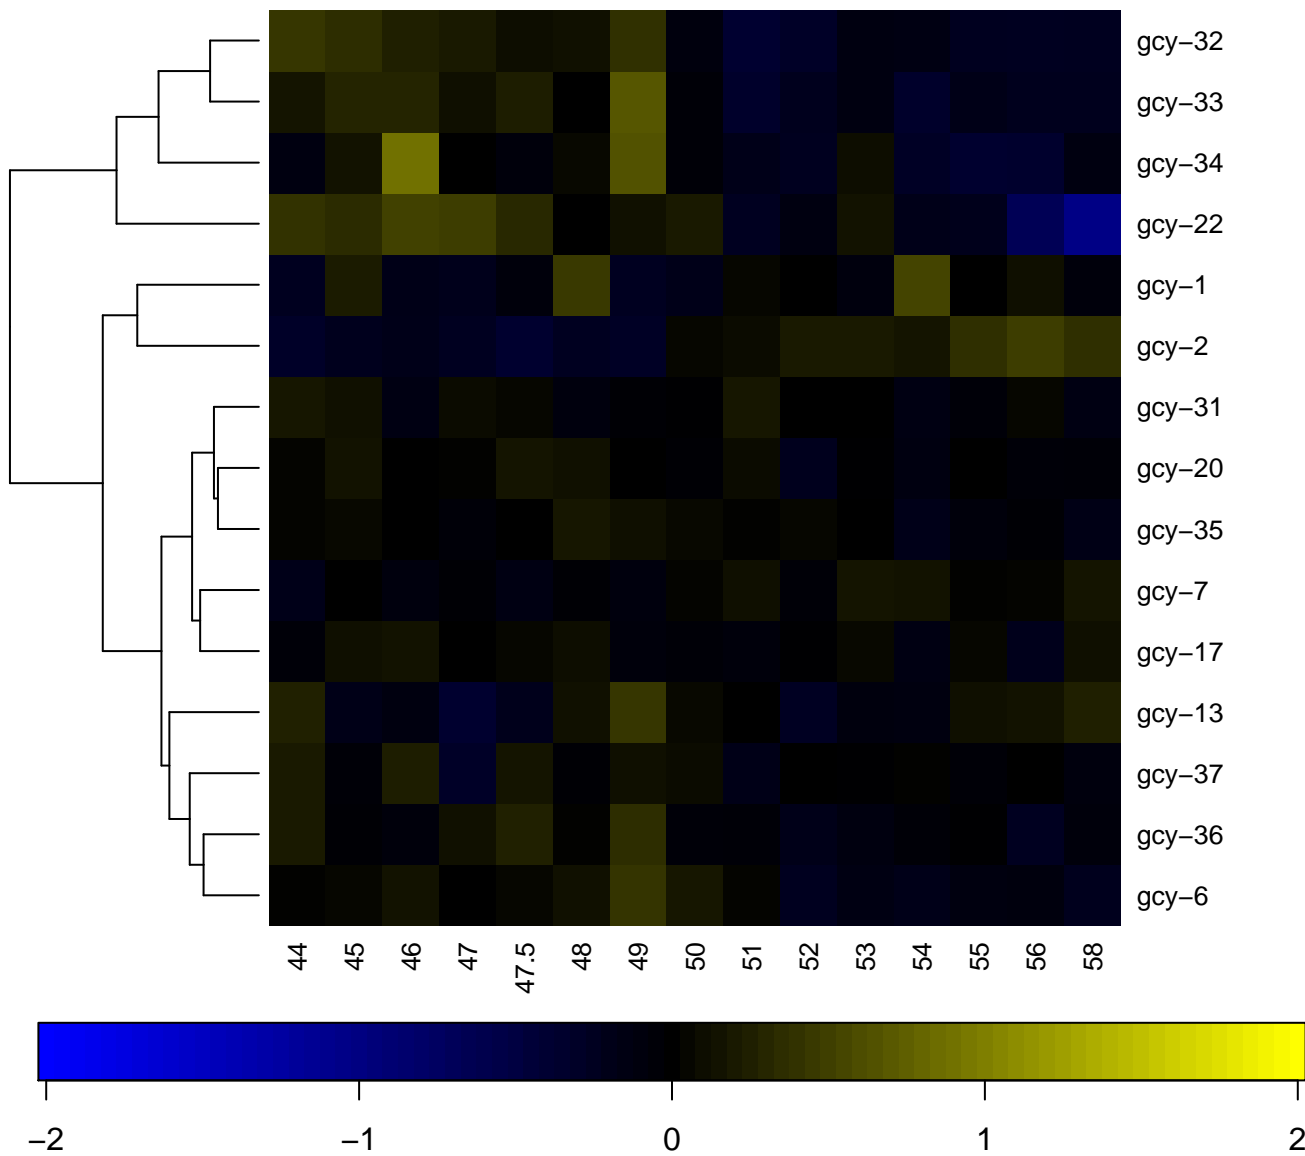

# Haem peroxidase, animal

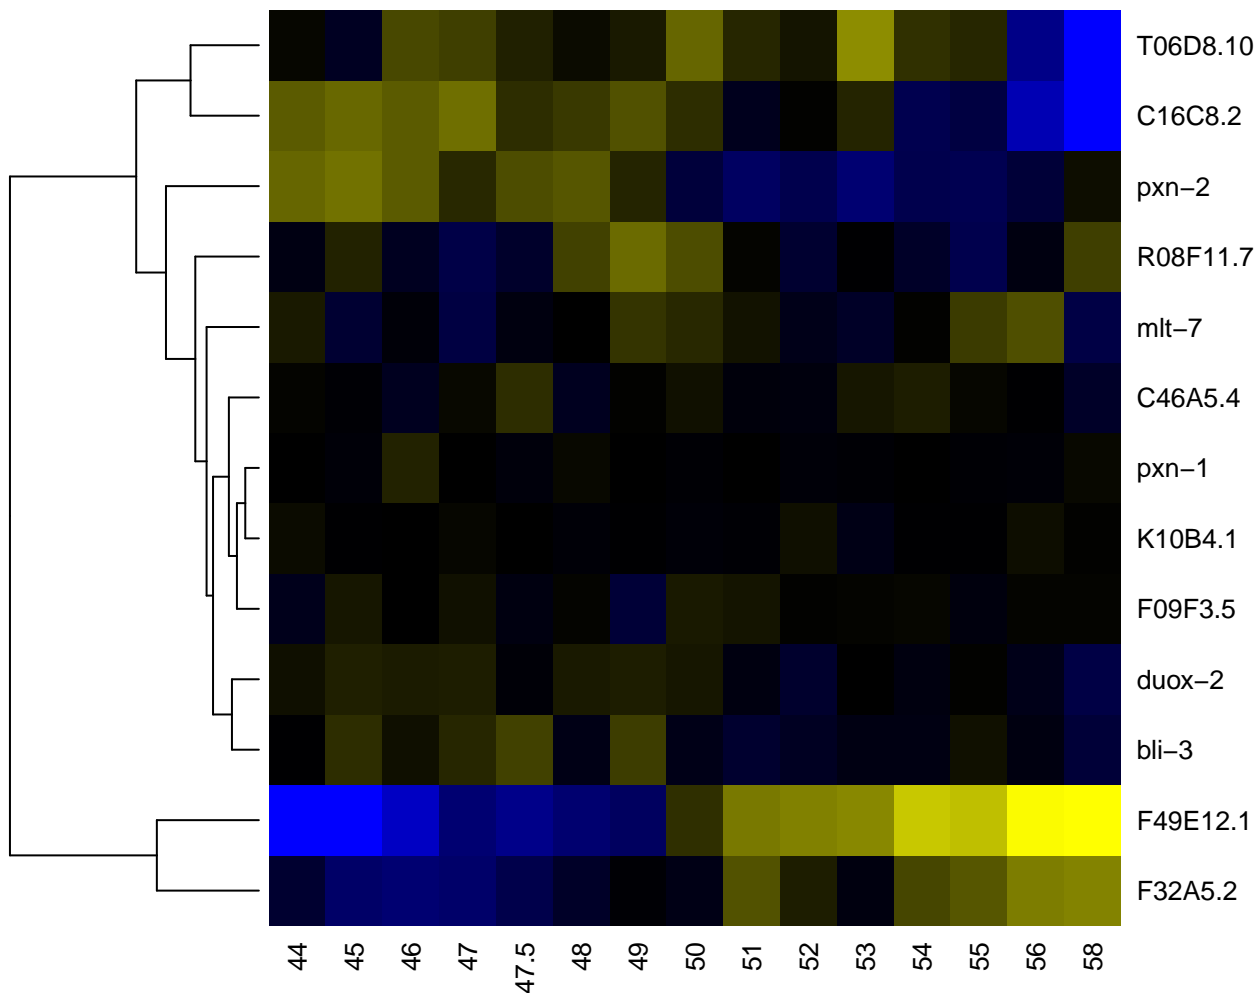



# Haem peroxidase, animal, subgroup



# Haemolysin-III related

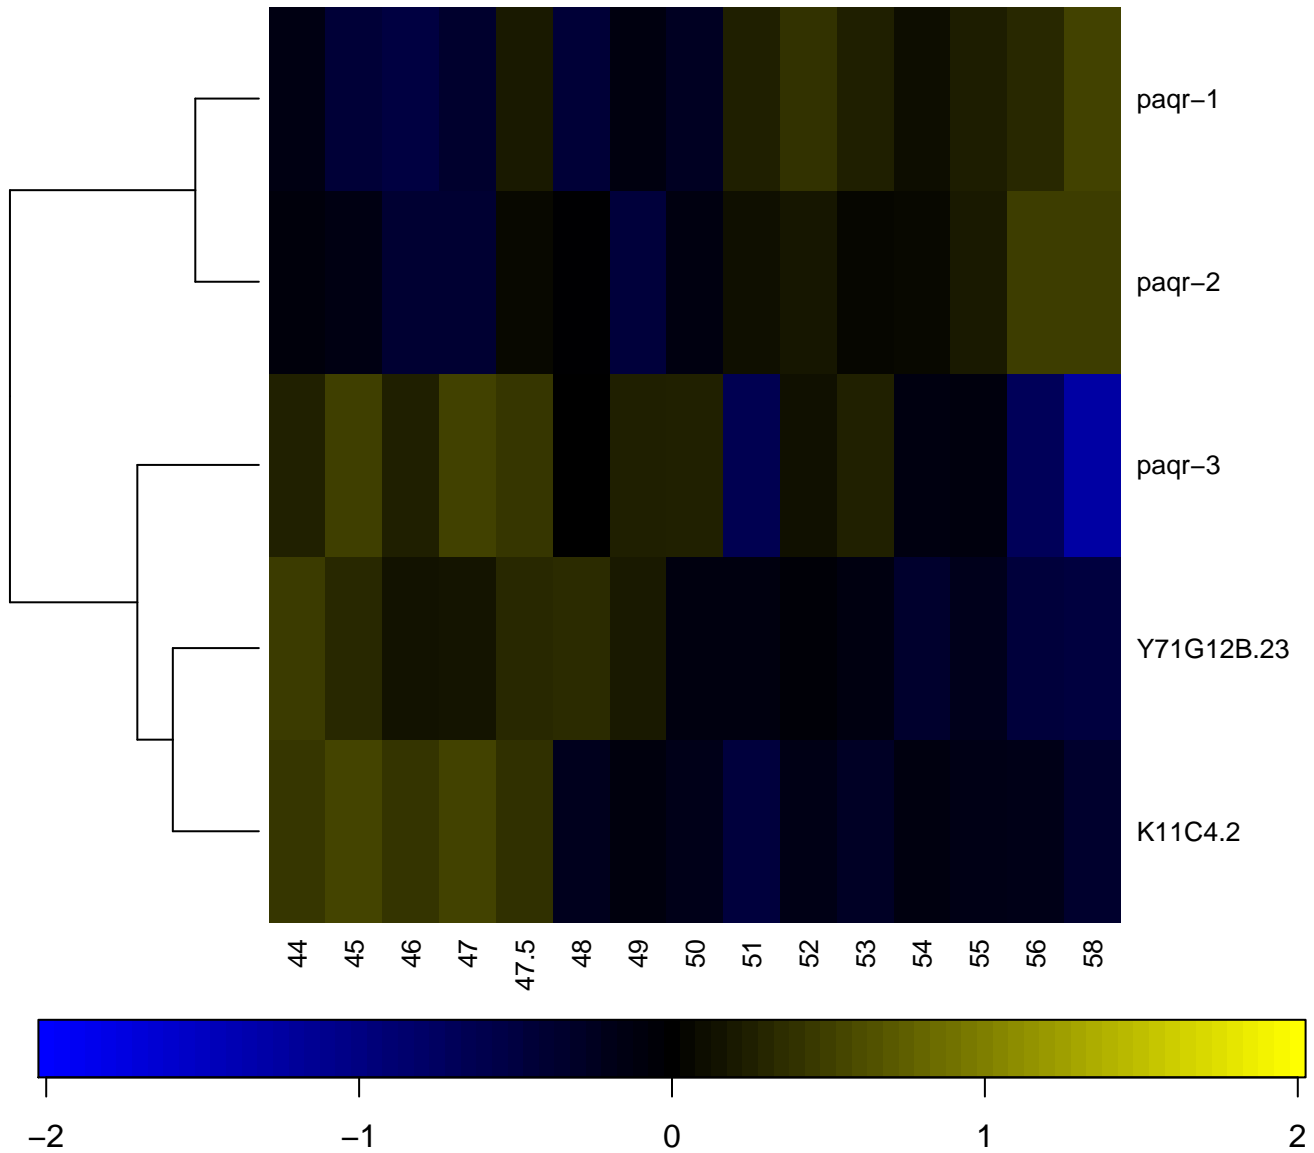





# HAT dimerisation

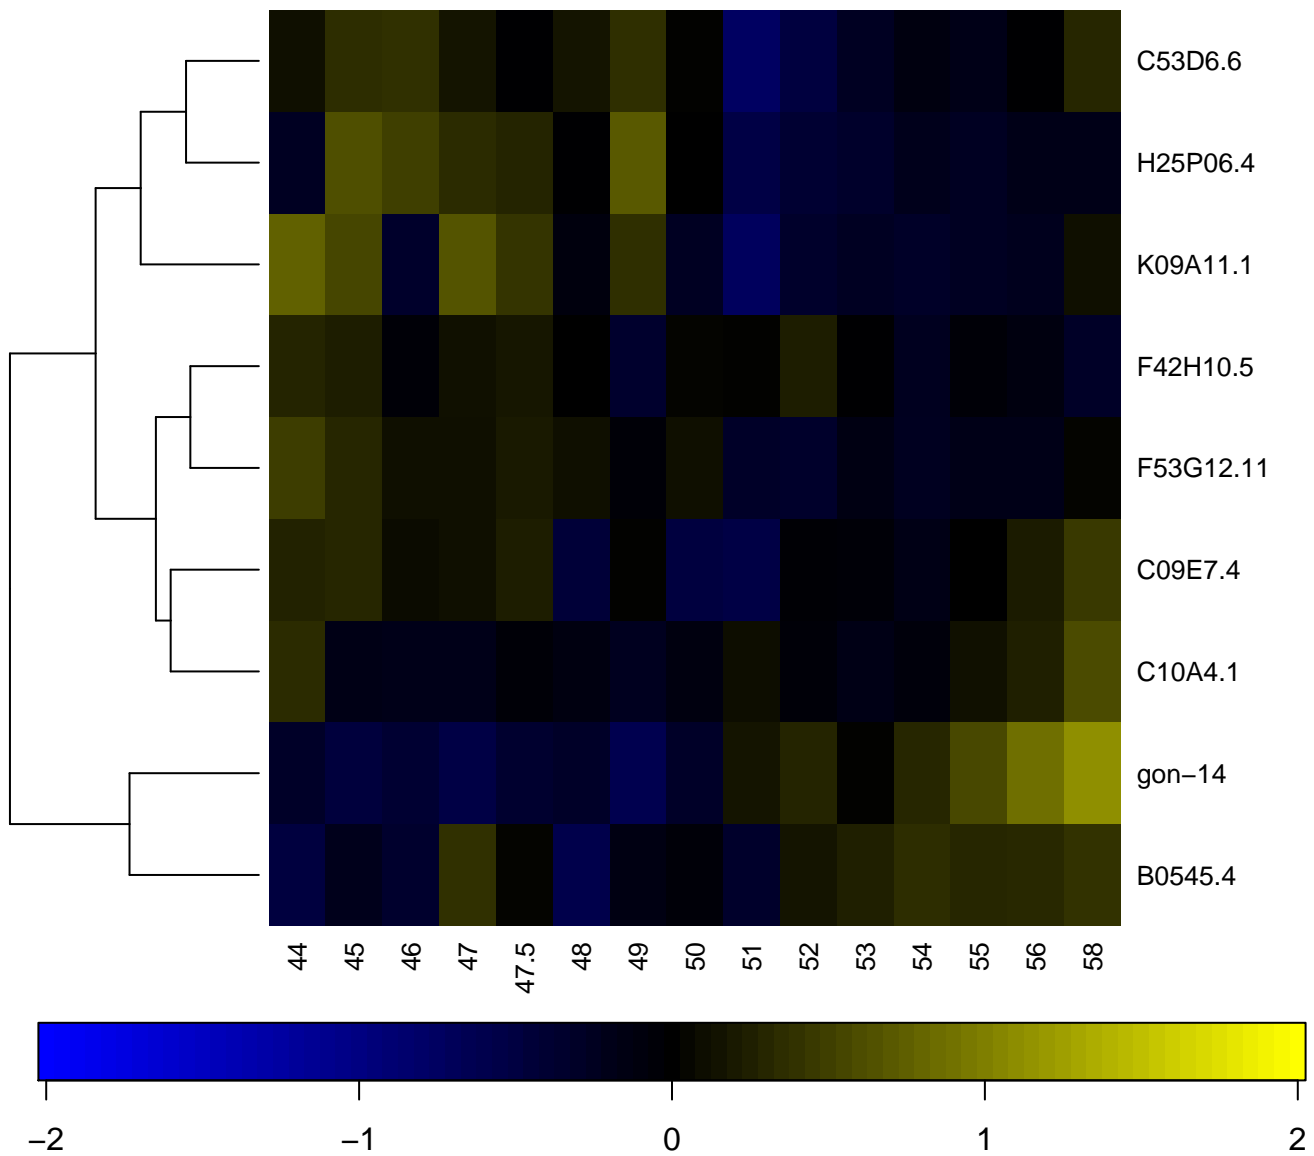

# hAT family dimerisation domain

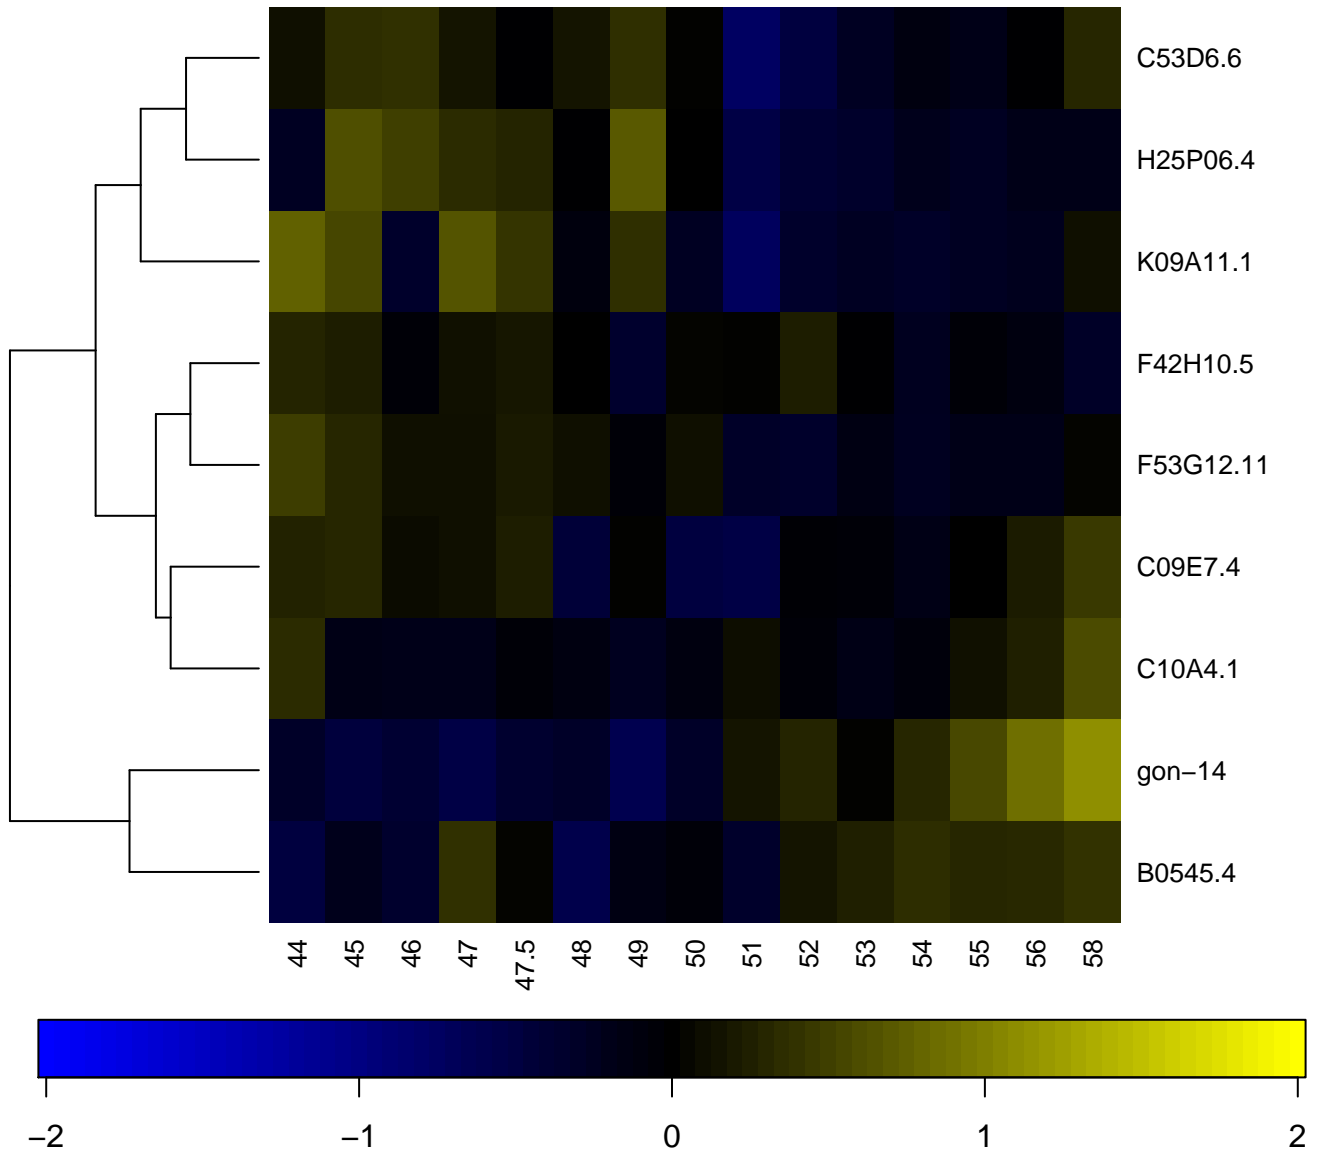



# HEAT repeat

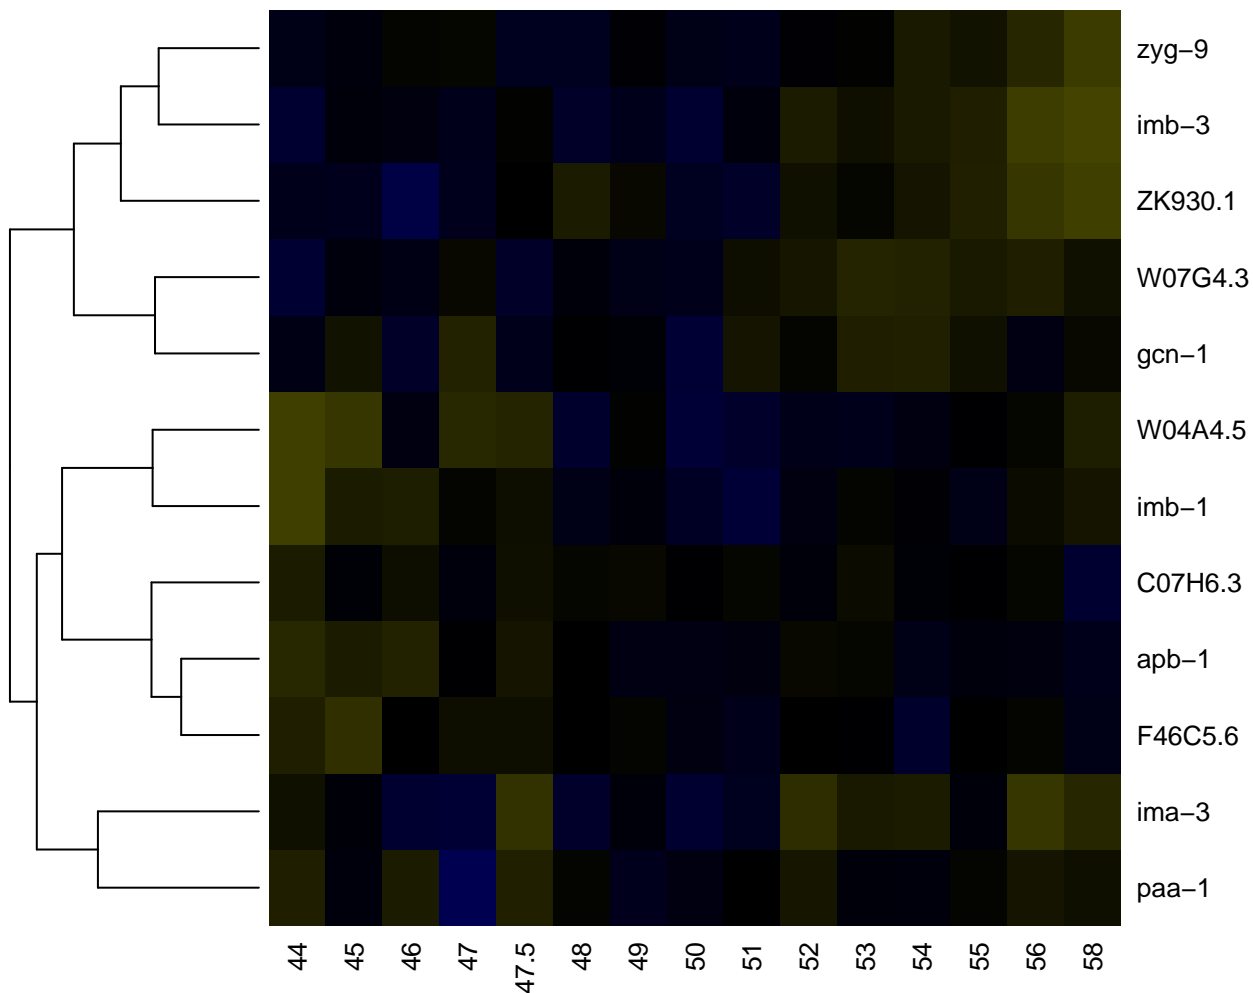











# Heat shock protein DnaJ, N-terminal

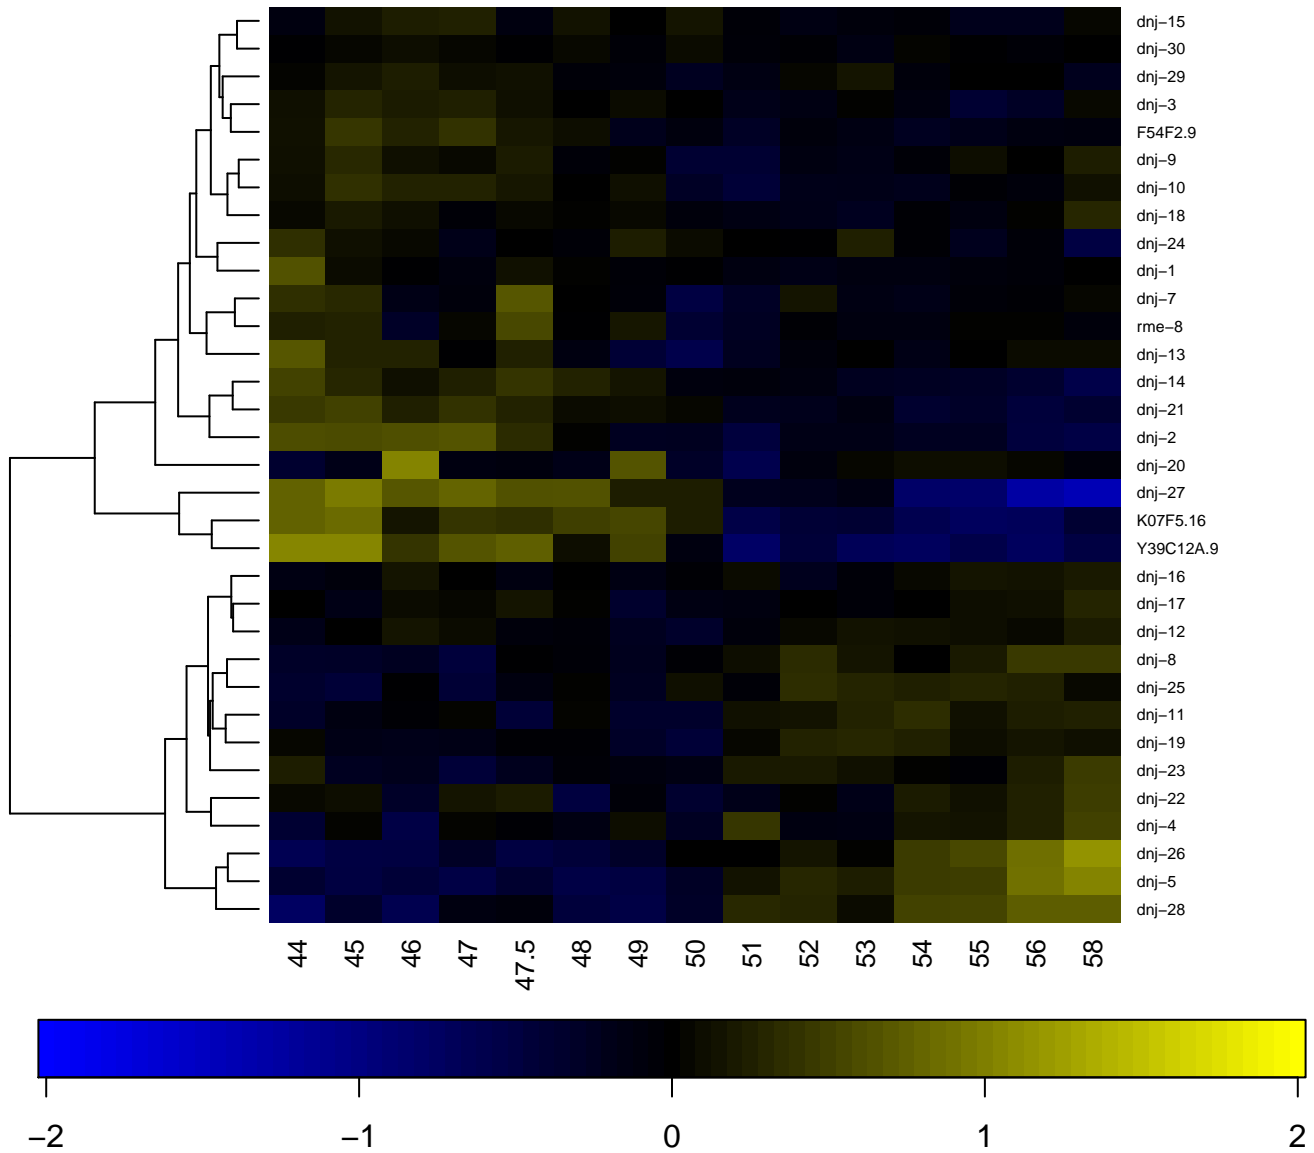

# Heat shock protein Hsp20

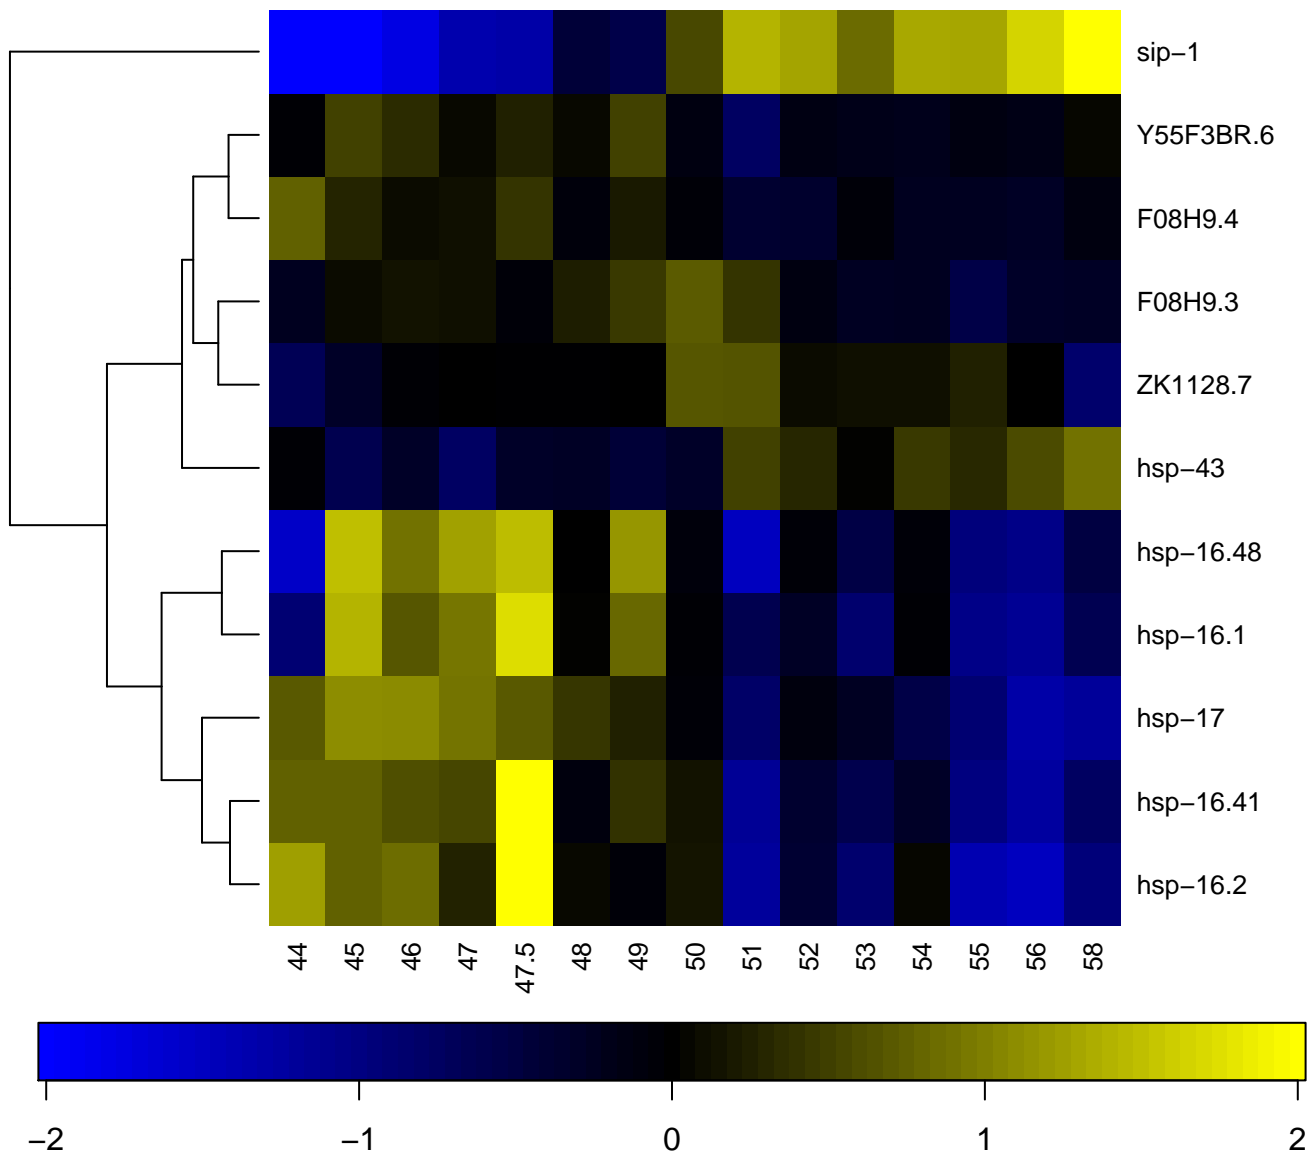

# Heat shock protein Hsp70

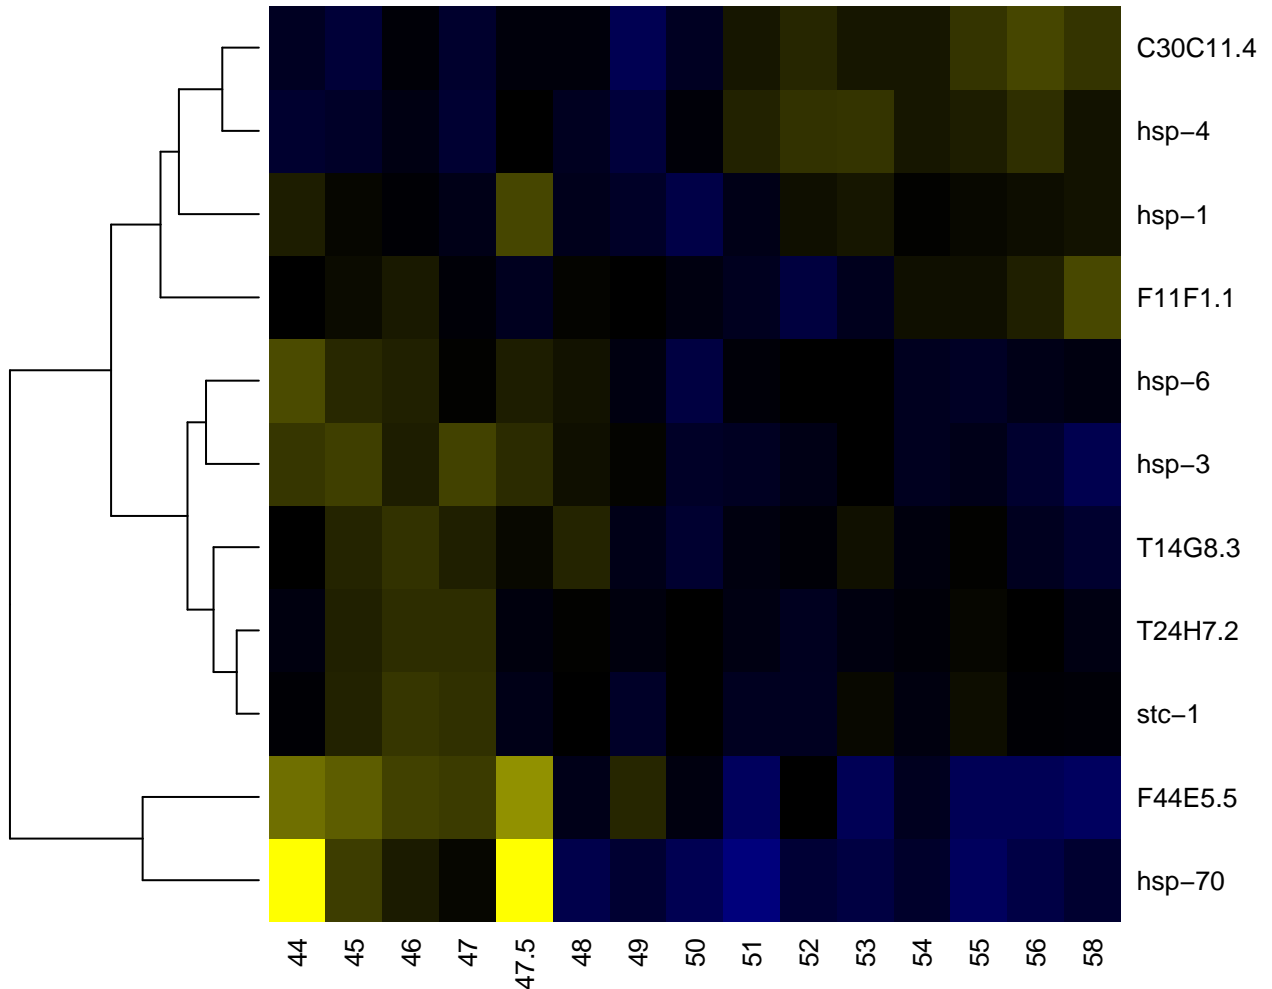





# Hedgehog/intein hint domain, C-terminal

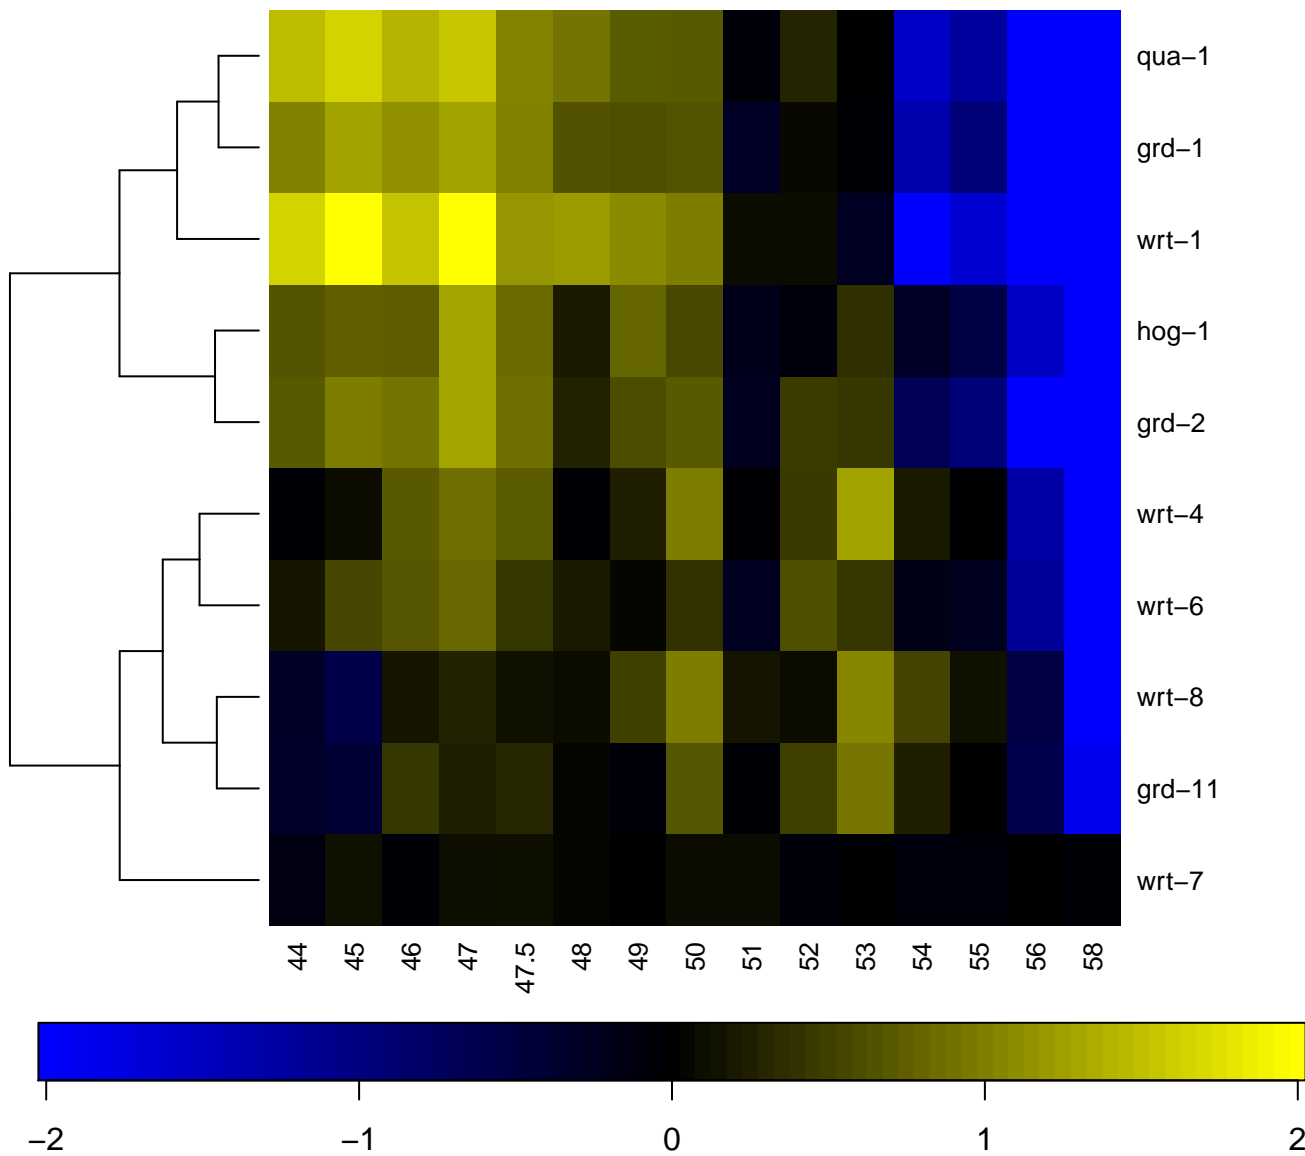





# Helicase-like, DEXD box c2 type

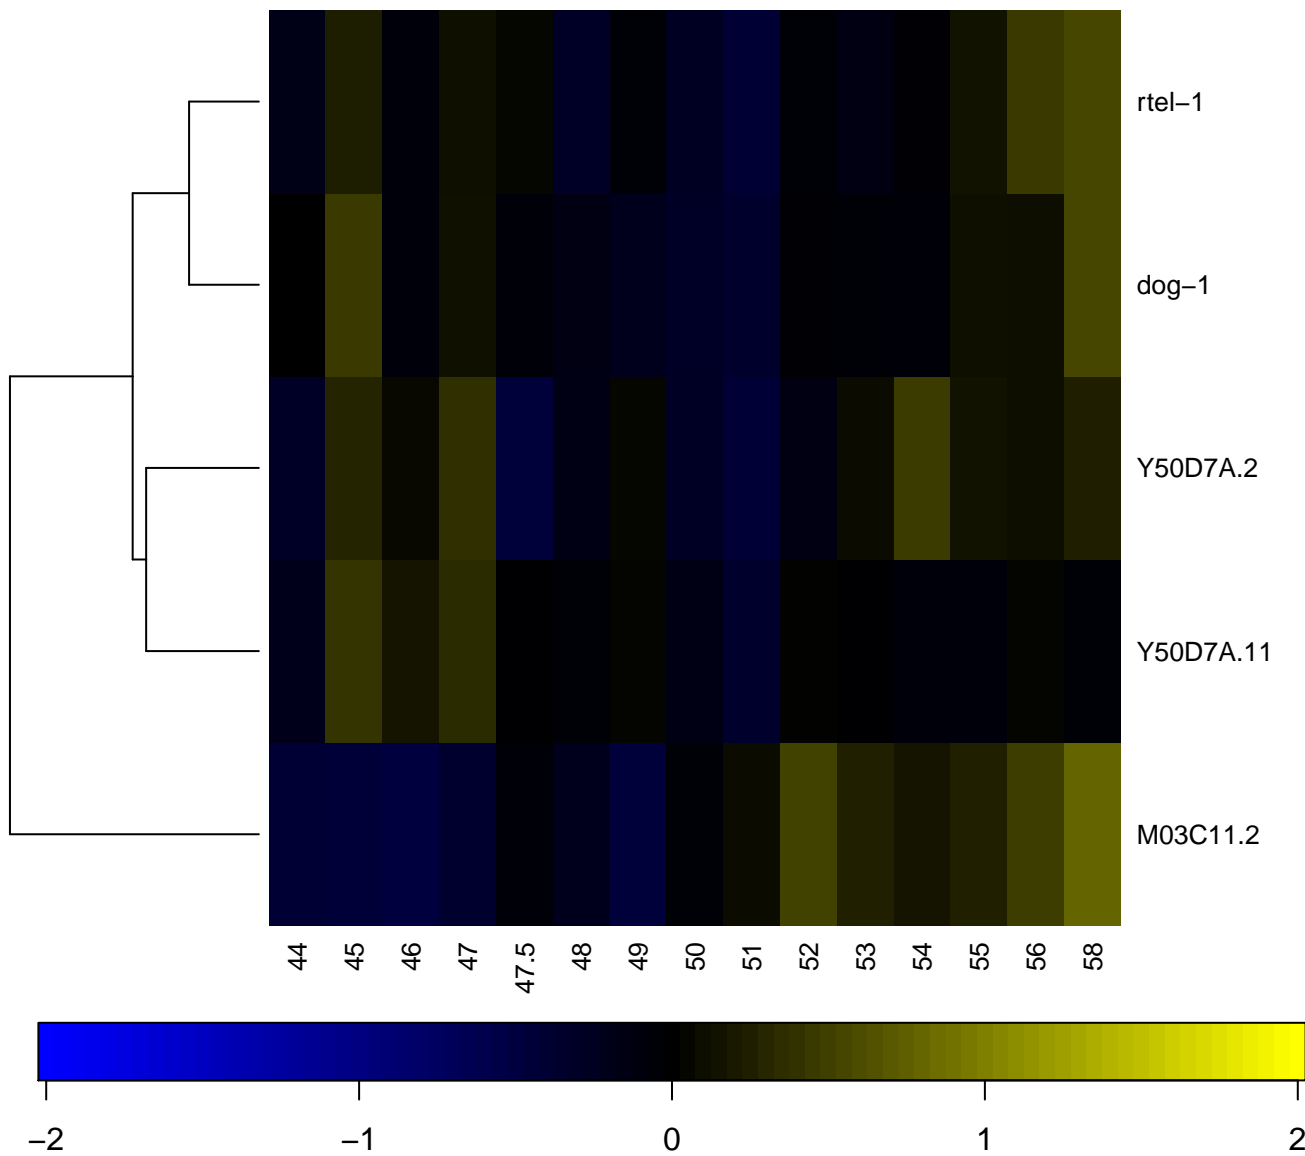



# Helicase conserved C-terminal domain

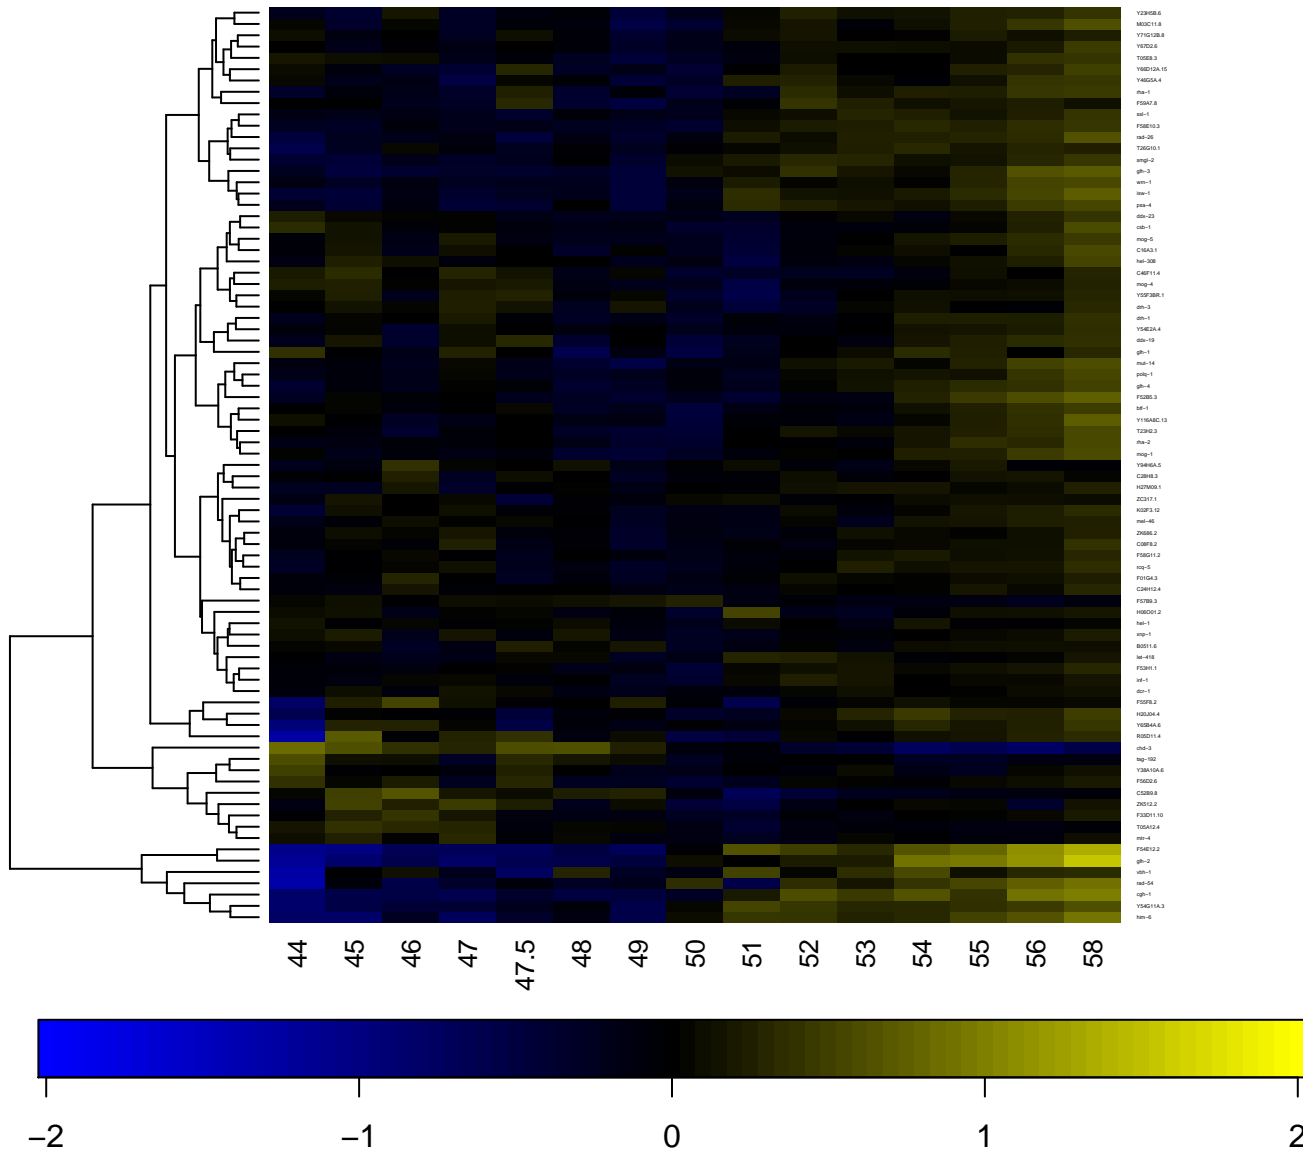

# Helix-loop-helix DNA-binding

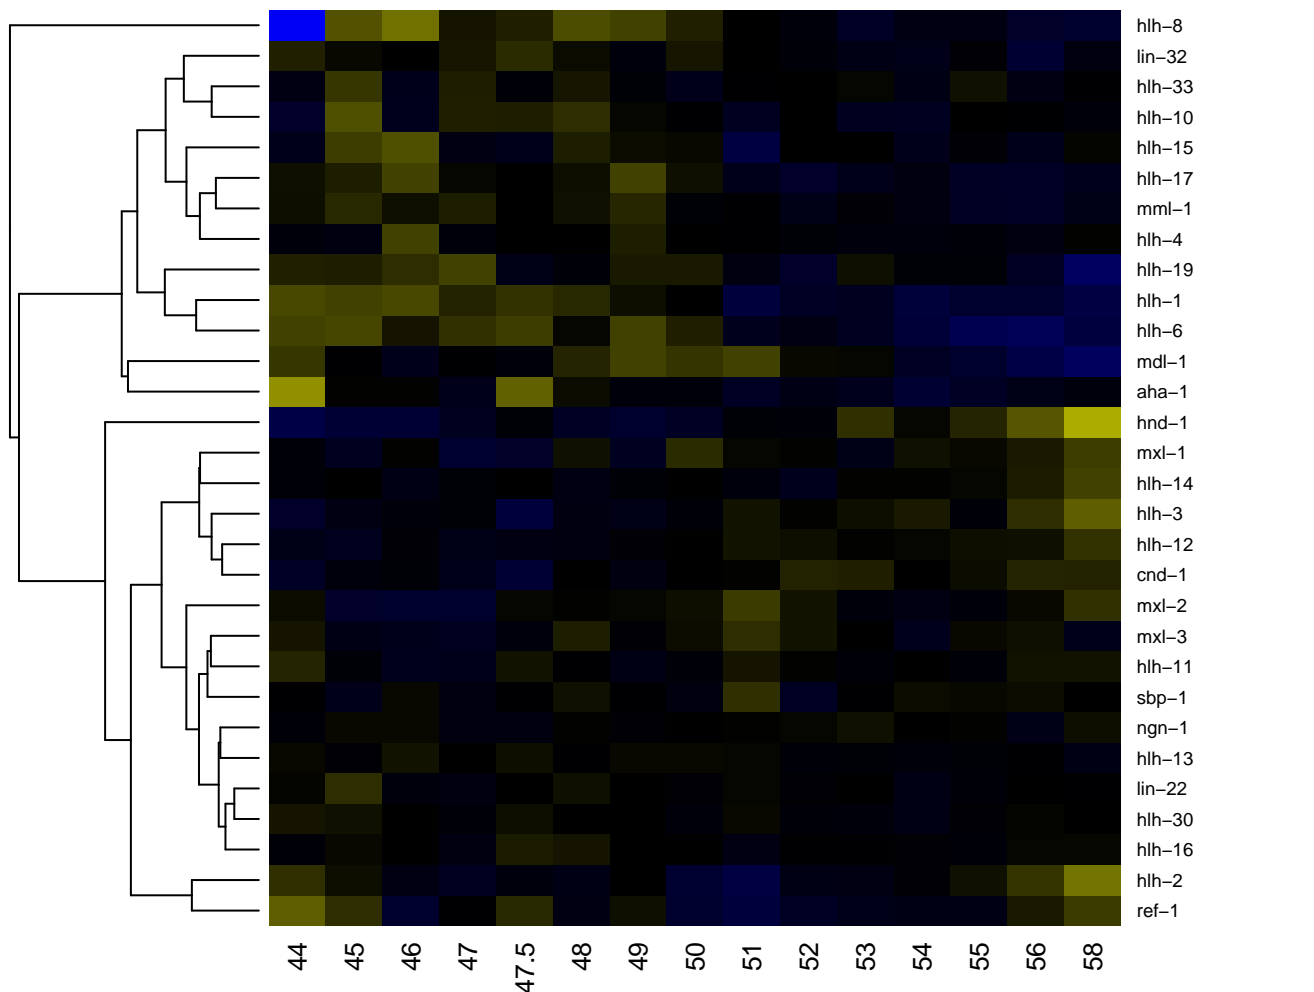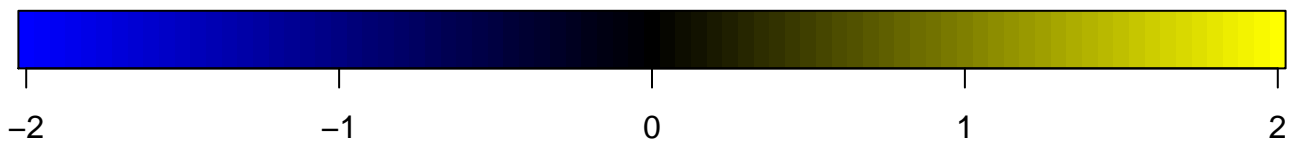

# Helix-loop-helix DNA-binding domain

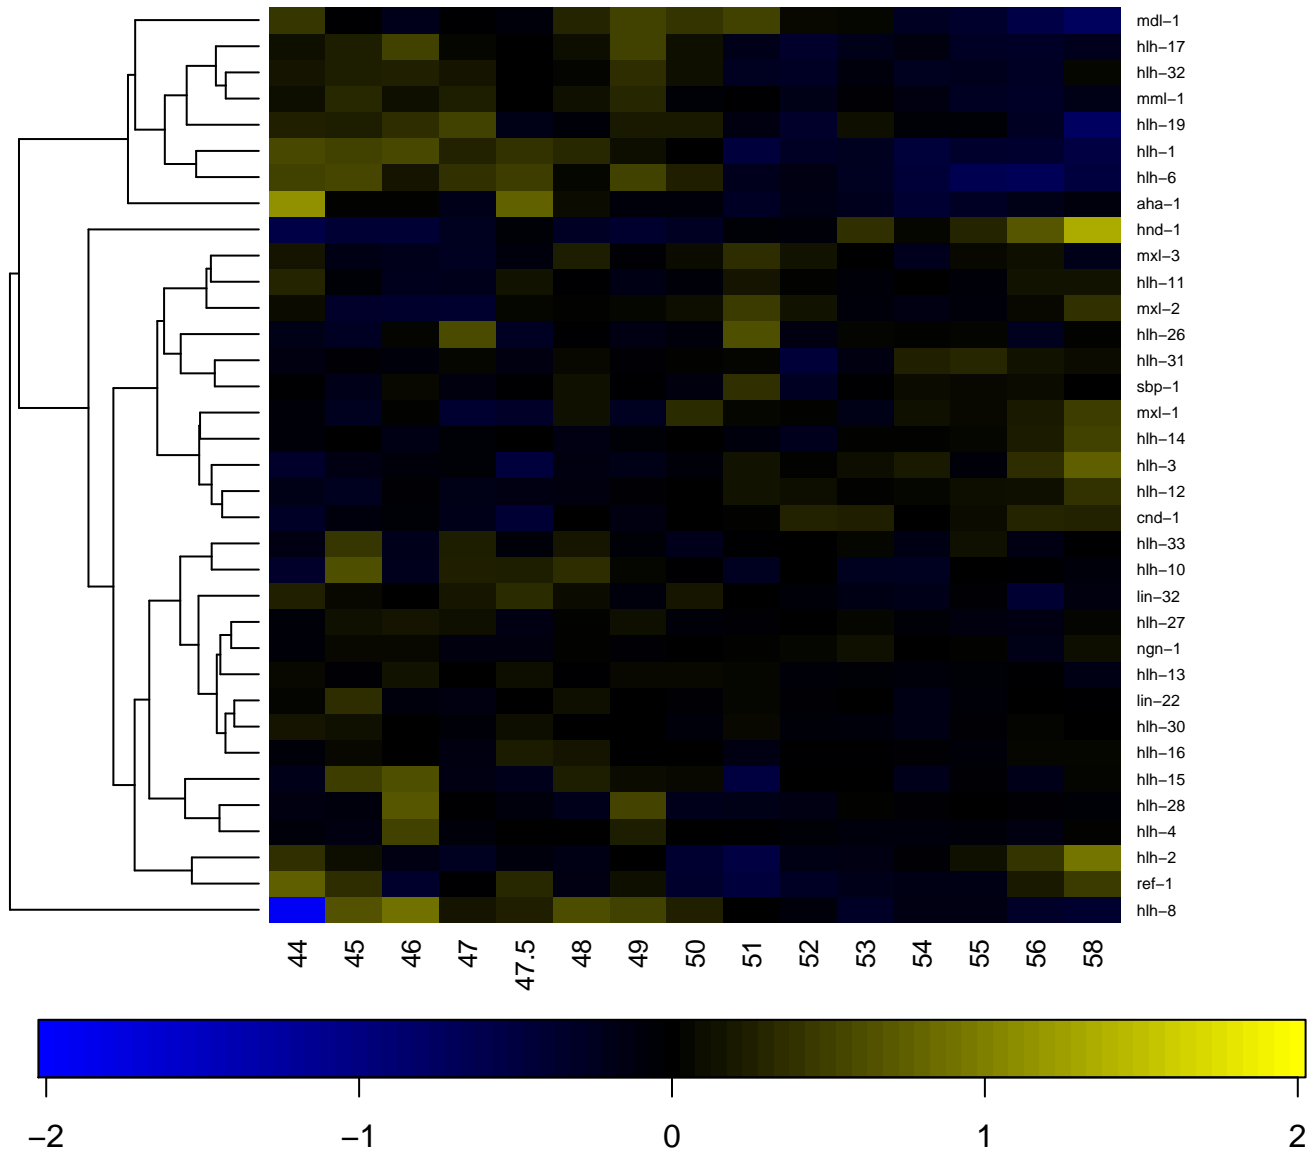





# Heme NO binding associated





# High mobility group, HMG1/HMG2

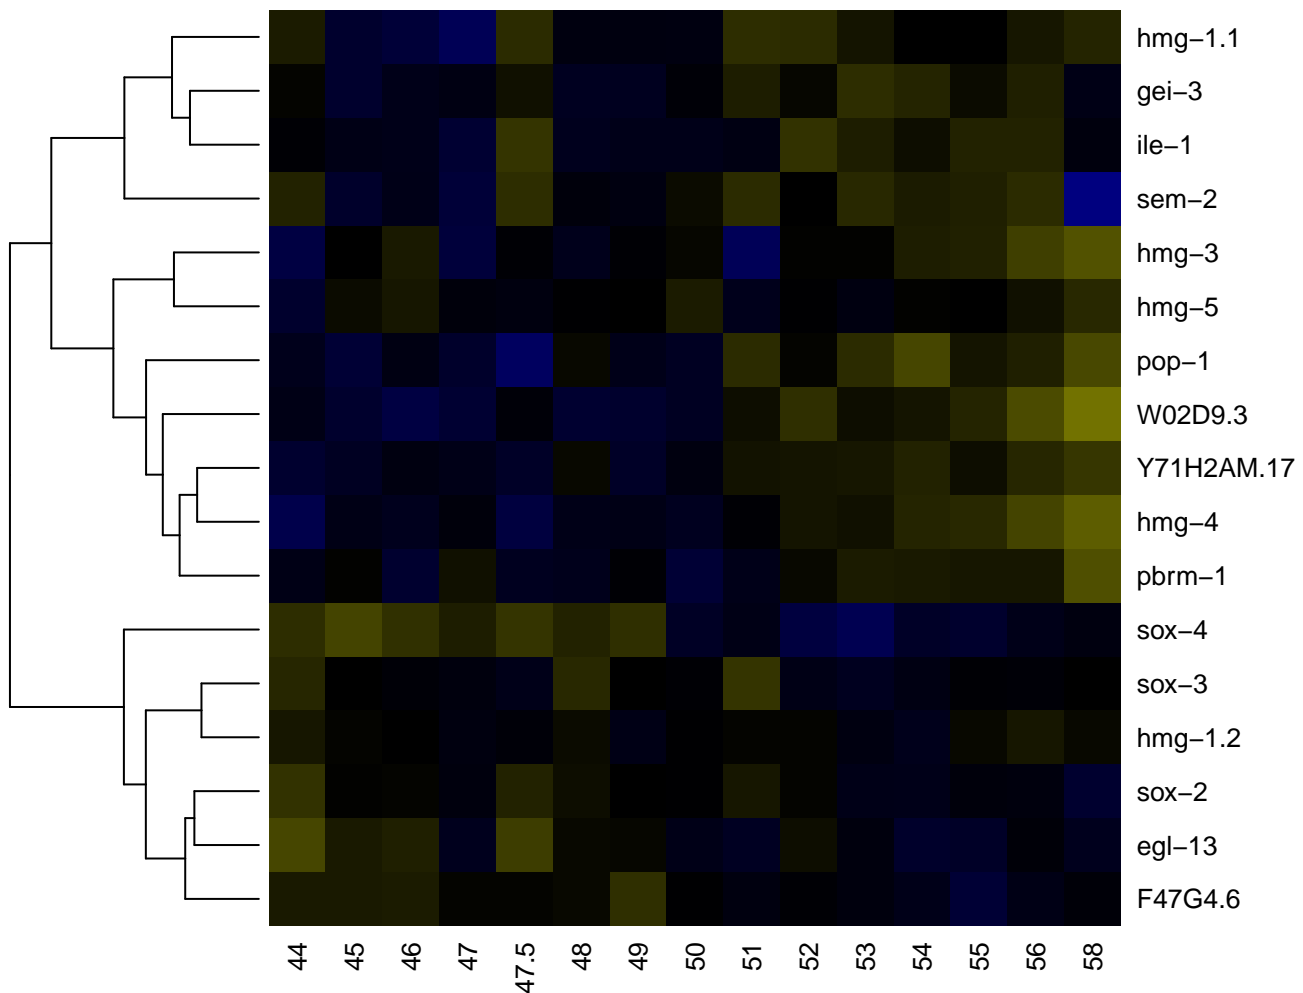

# Hint module

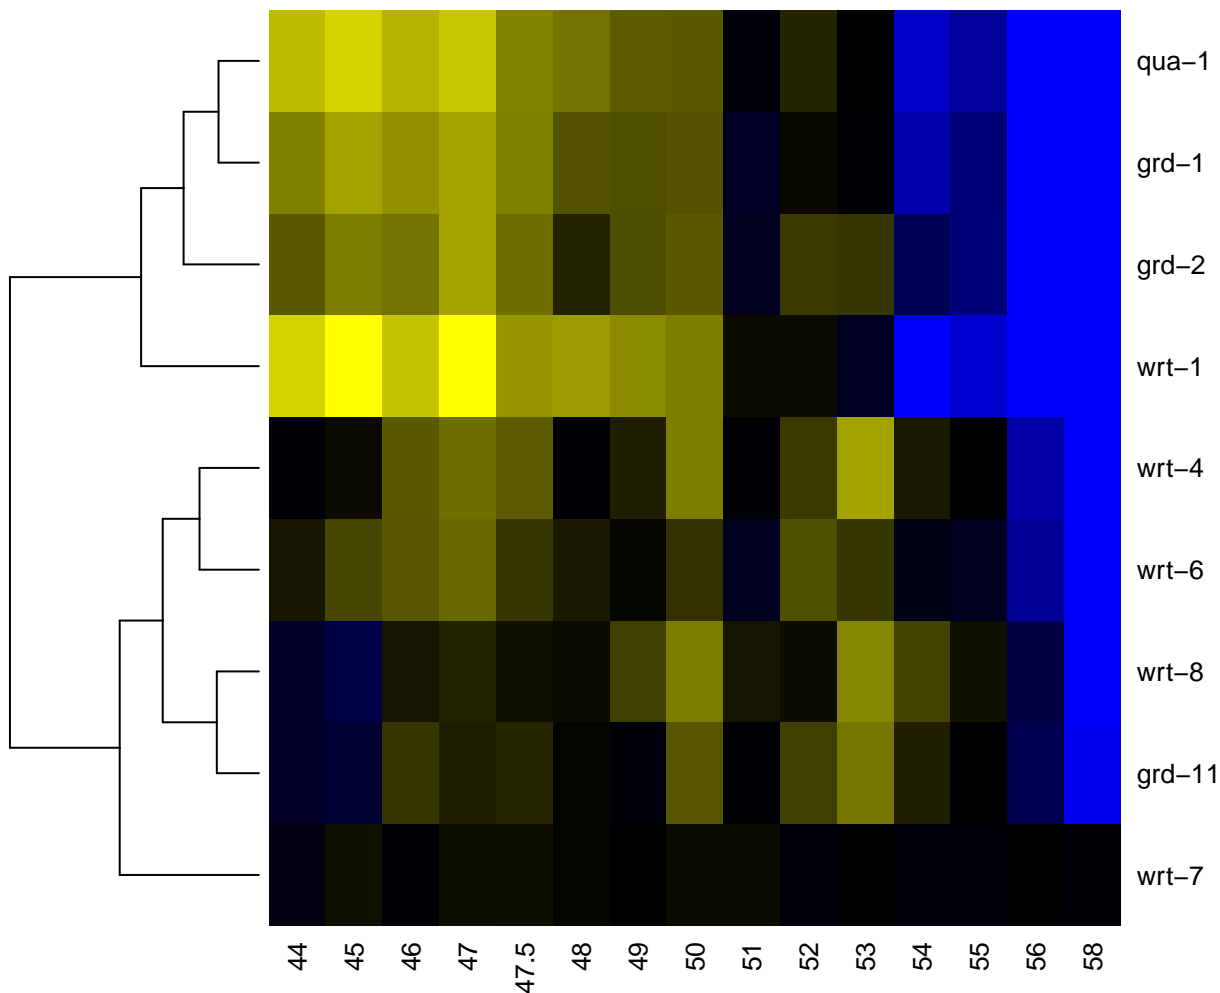



# Histidine kinase-, DNA gyrase B-, and HSP90-like ATPase

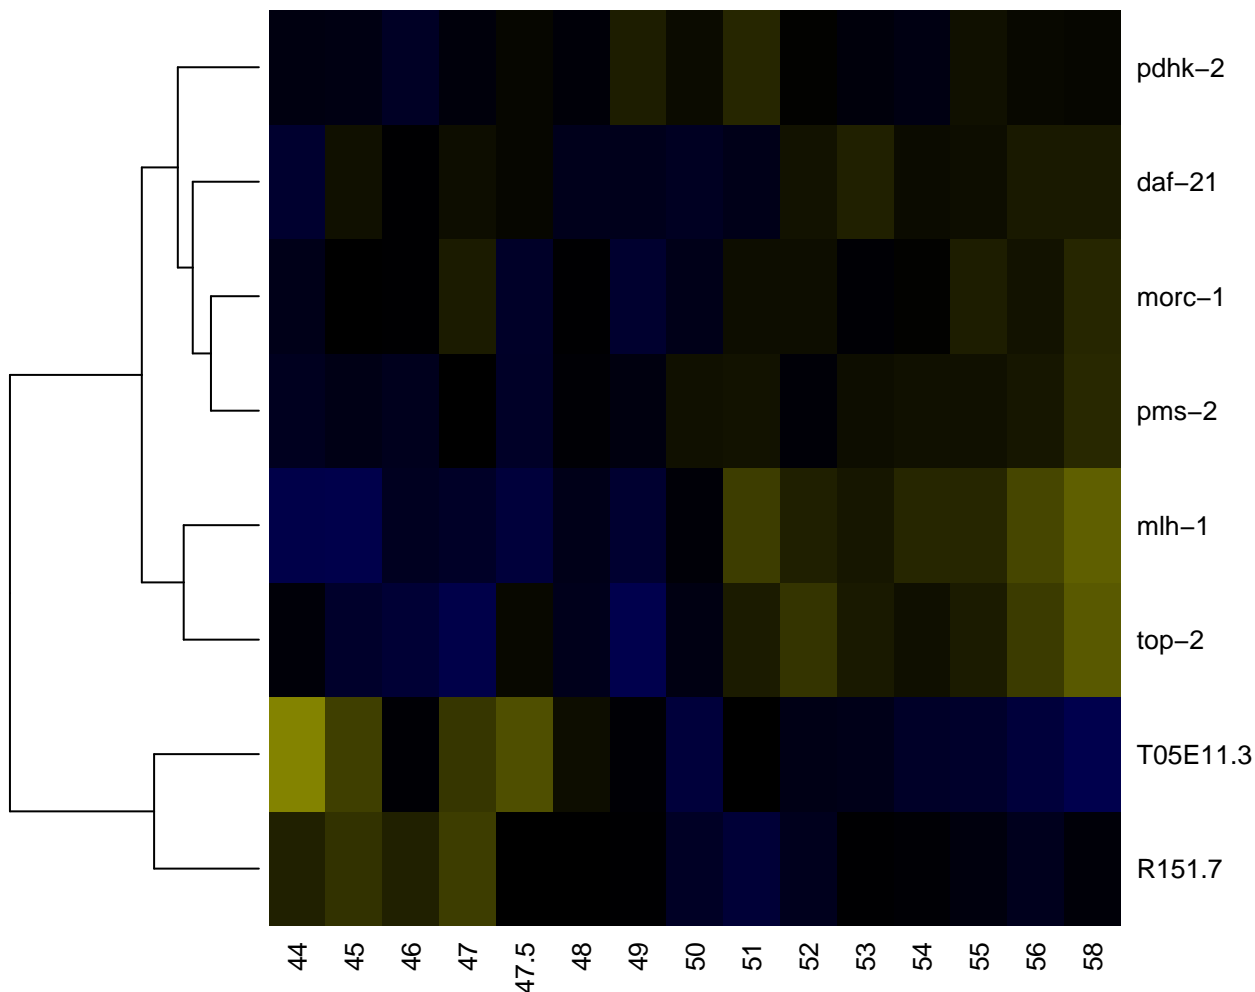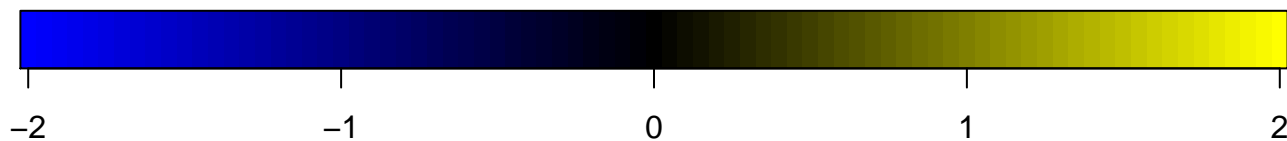







# Histone-fold

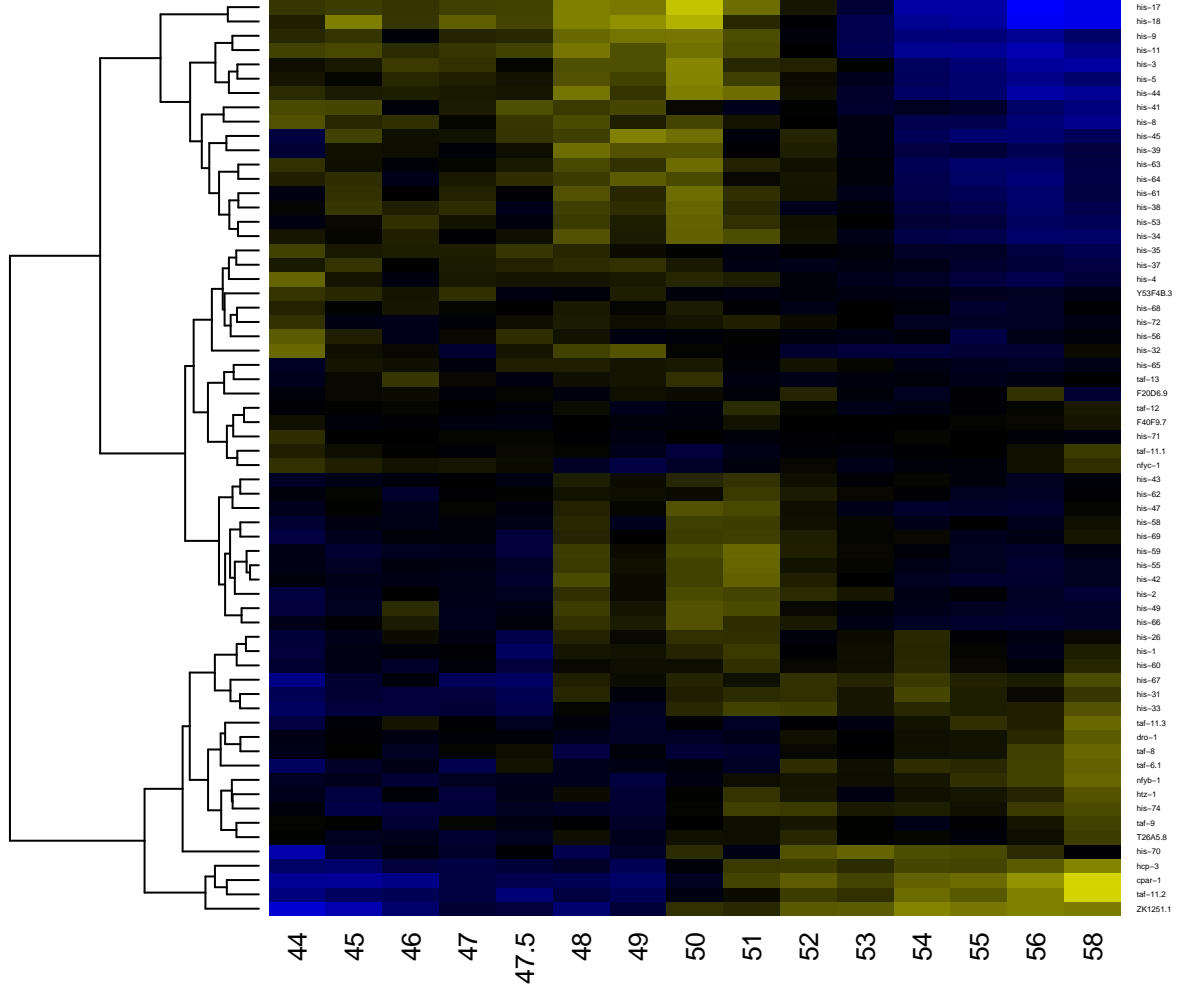

# stone-like transcription factor (CBF/NF-Y) and archaeal his

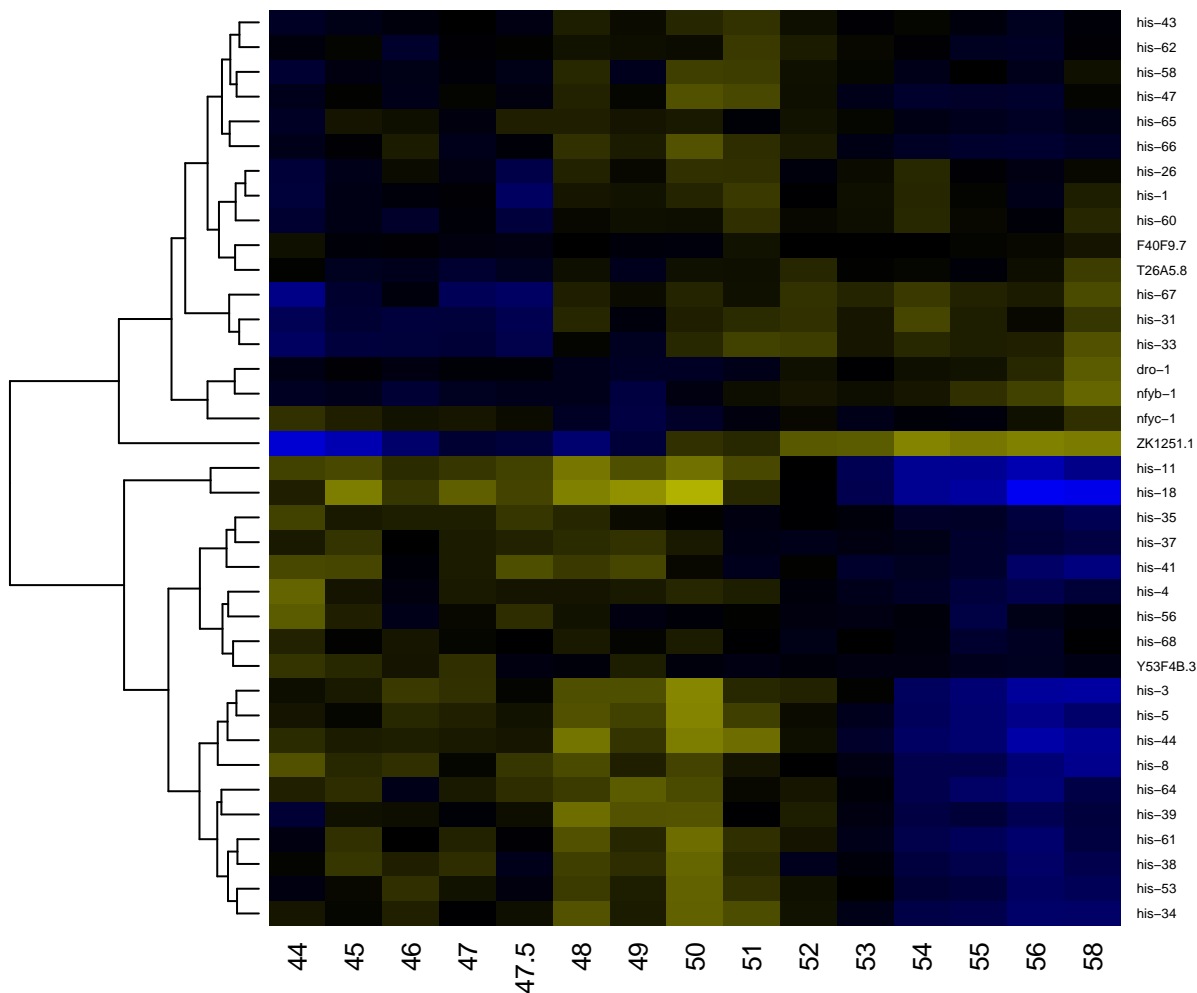

# Histone core

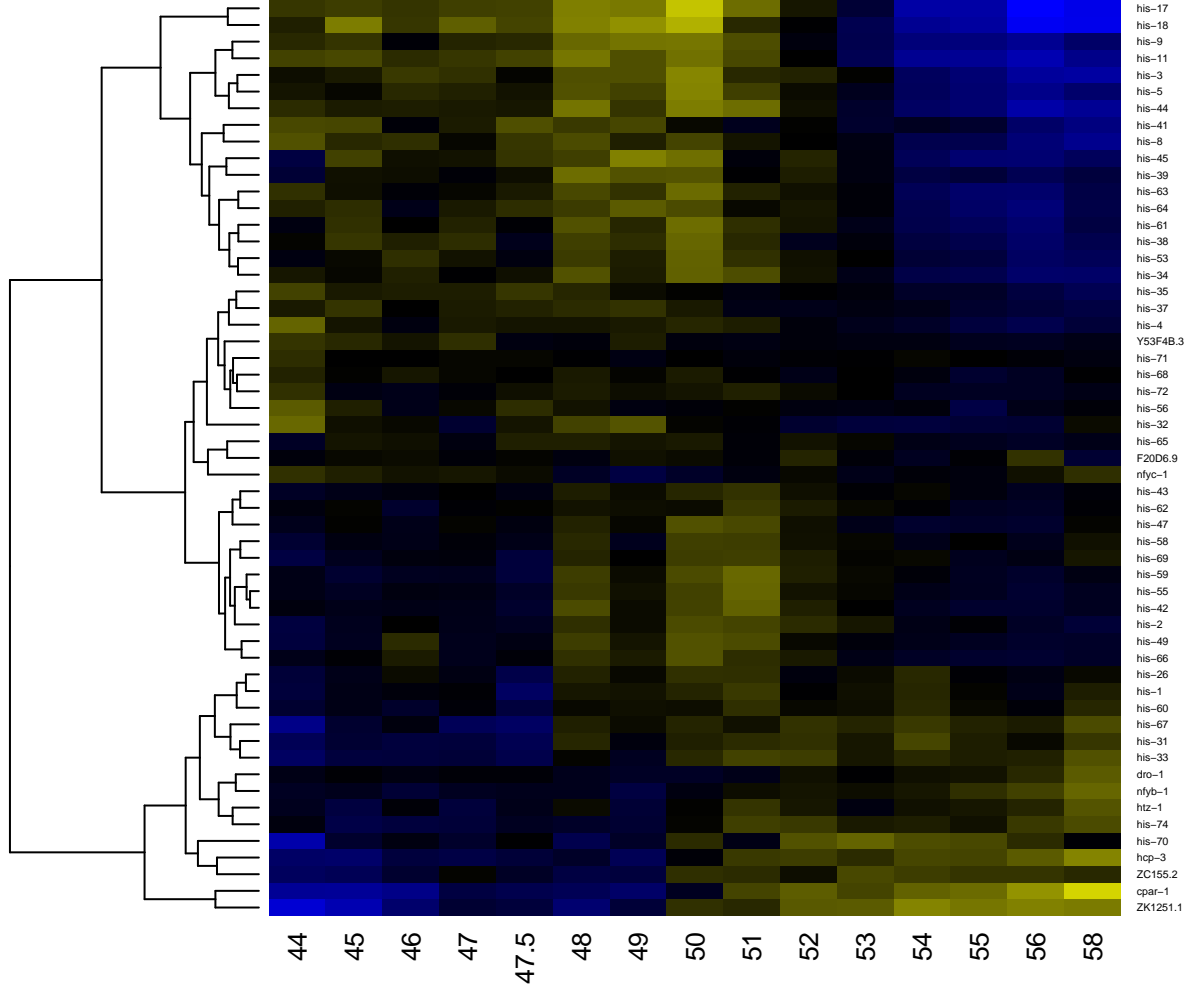



# Histone deacetylase superfamily

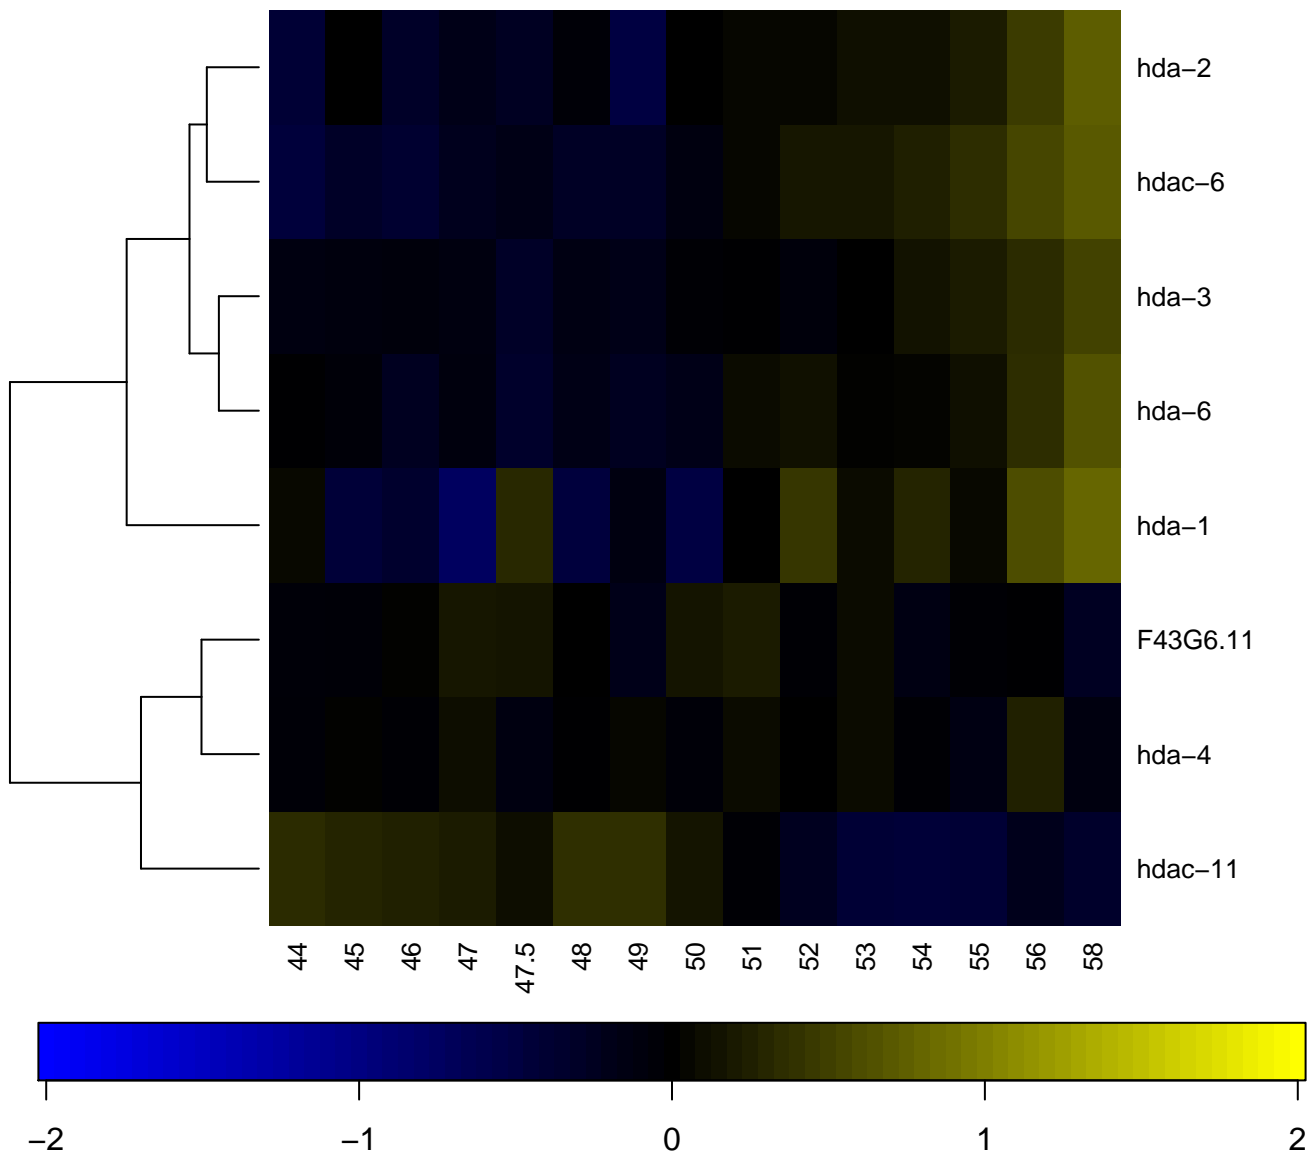

# Histone H1/H5

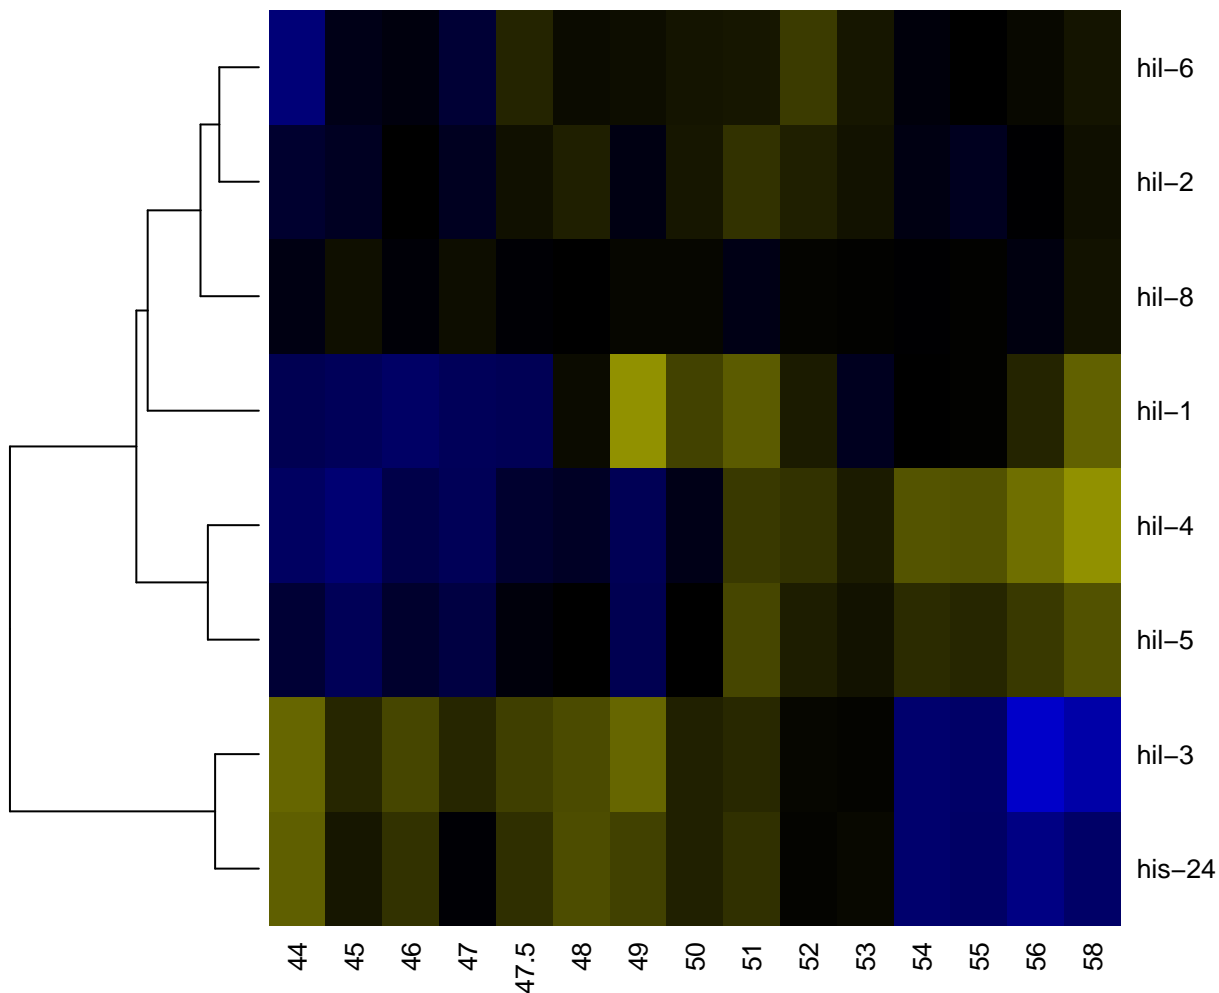





# Histone H2B

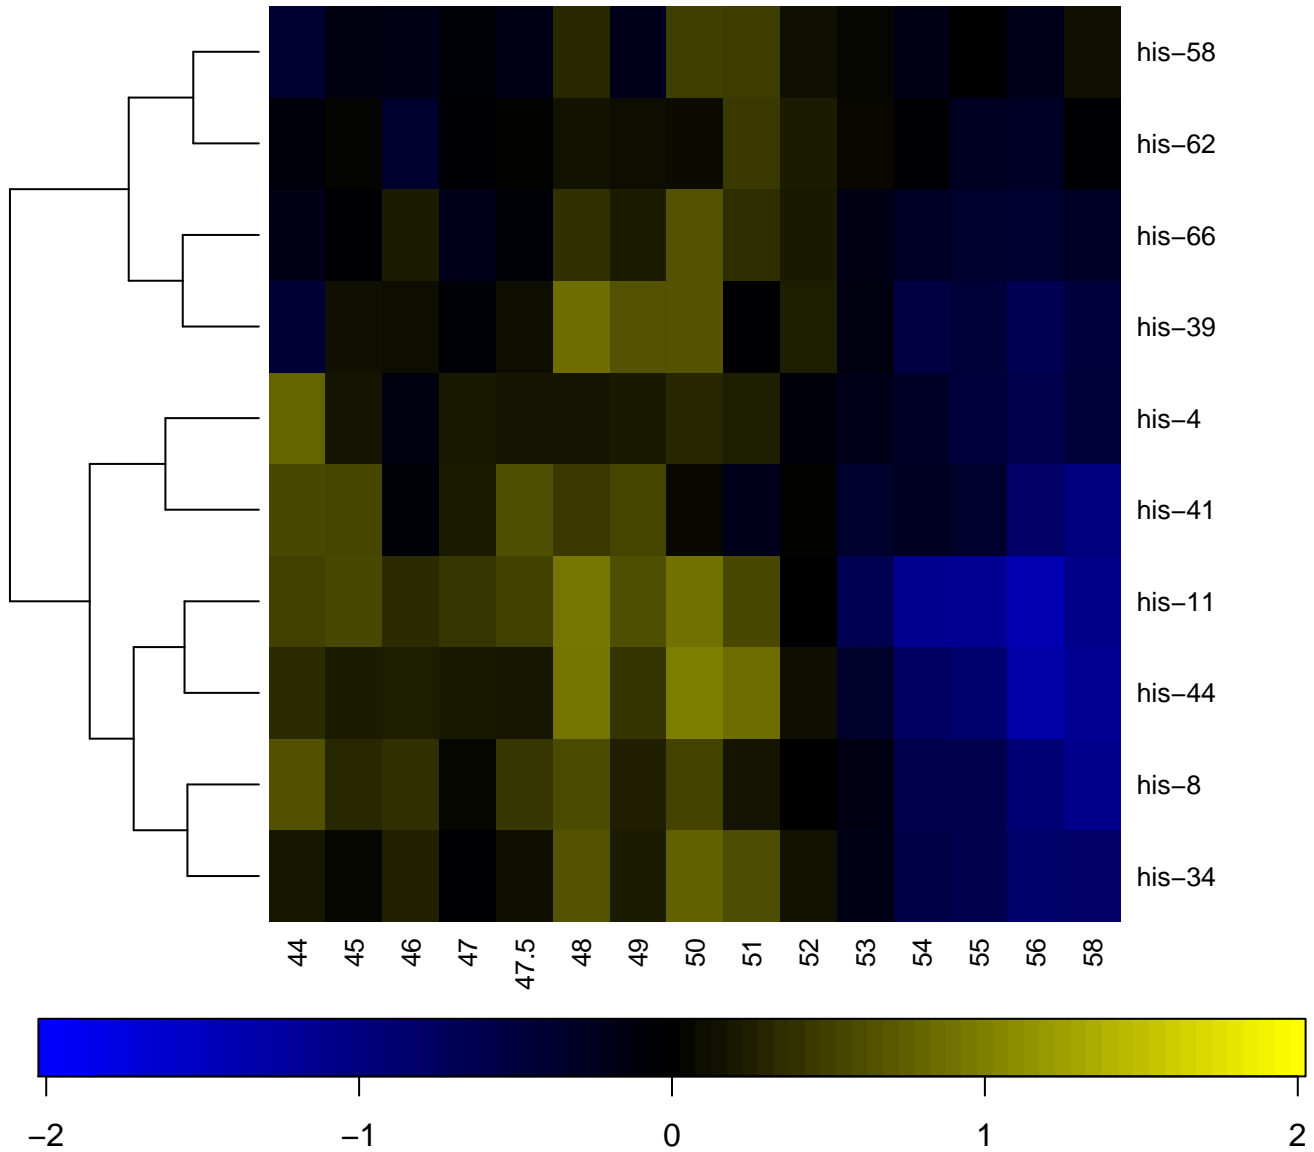

# Histone H3

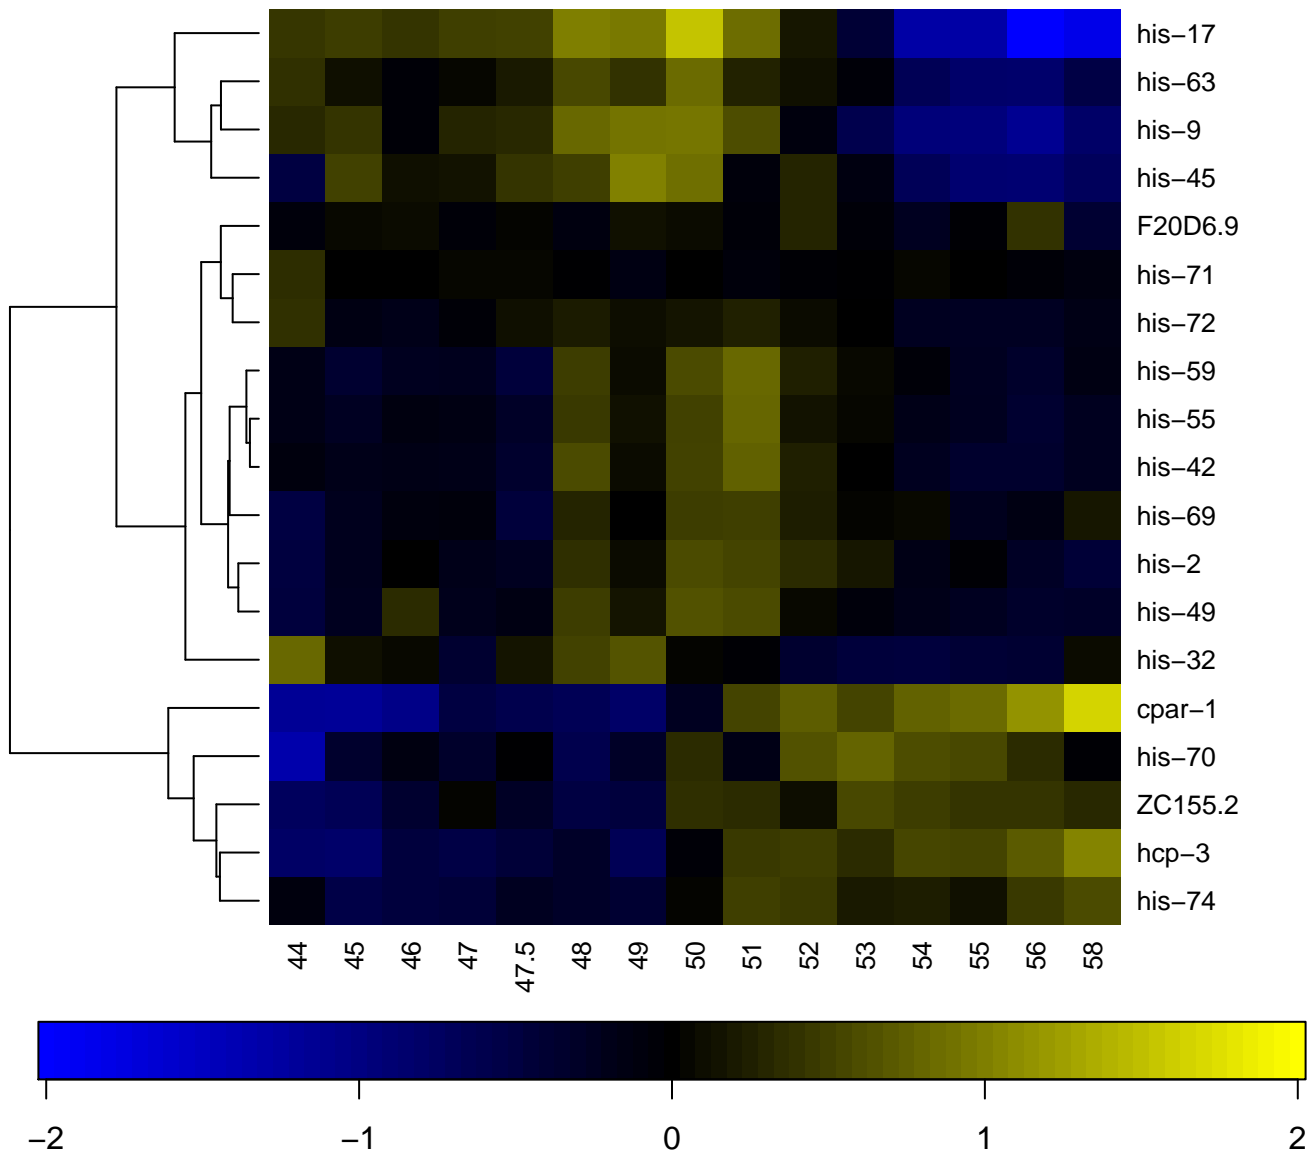

# Histone H4

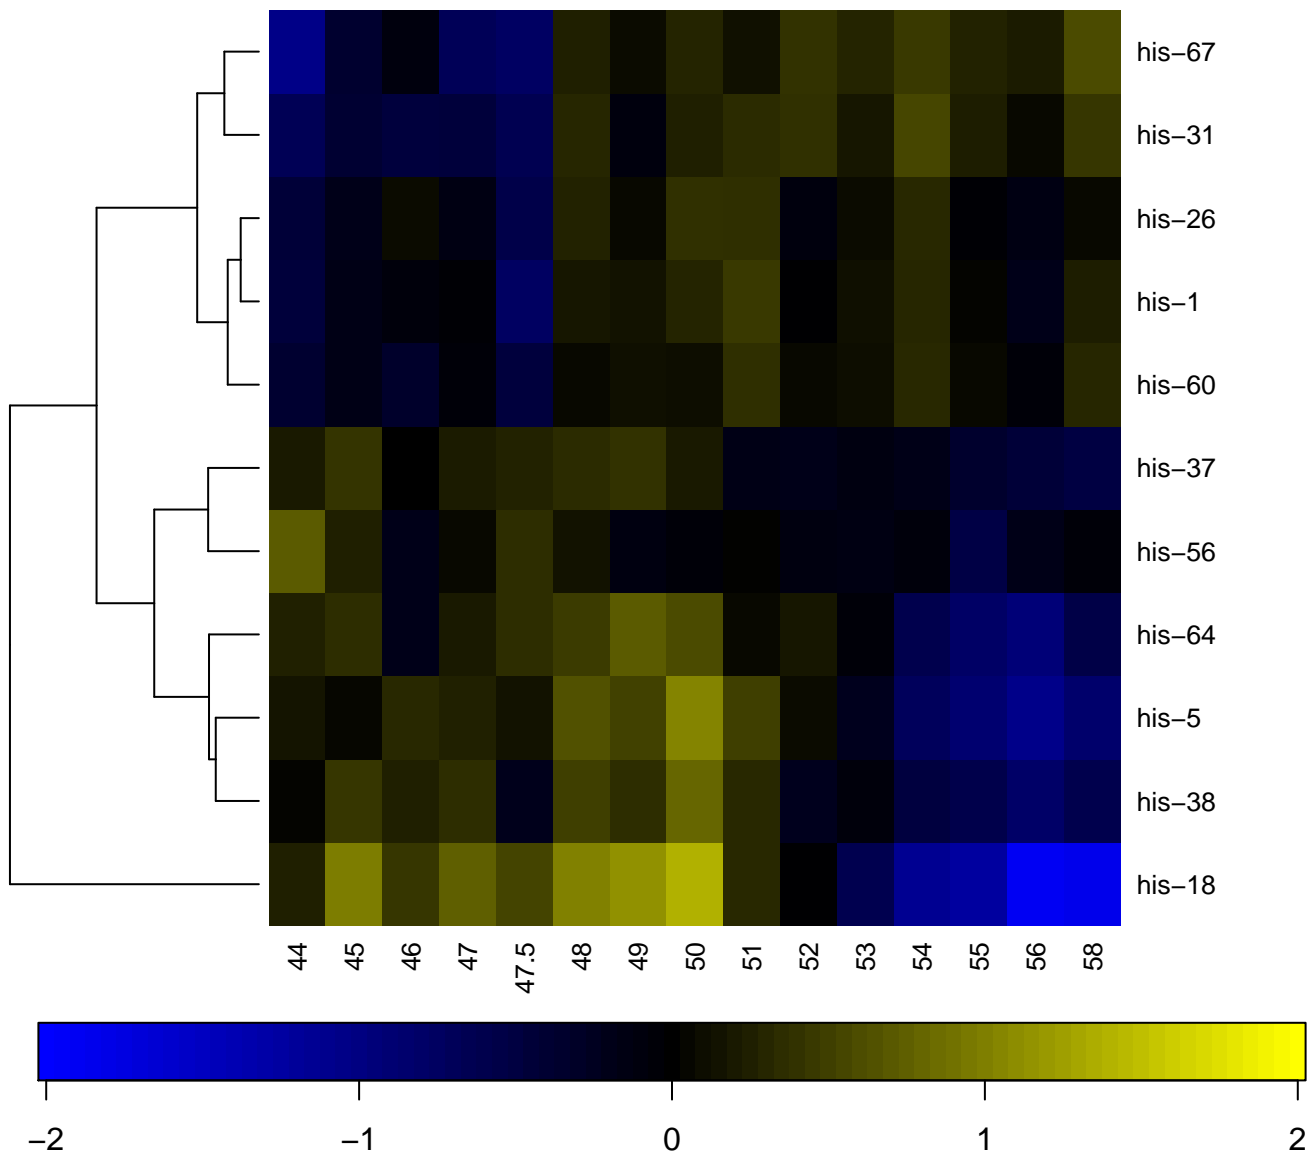

# Histone H4, conserved site

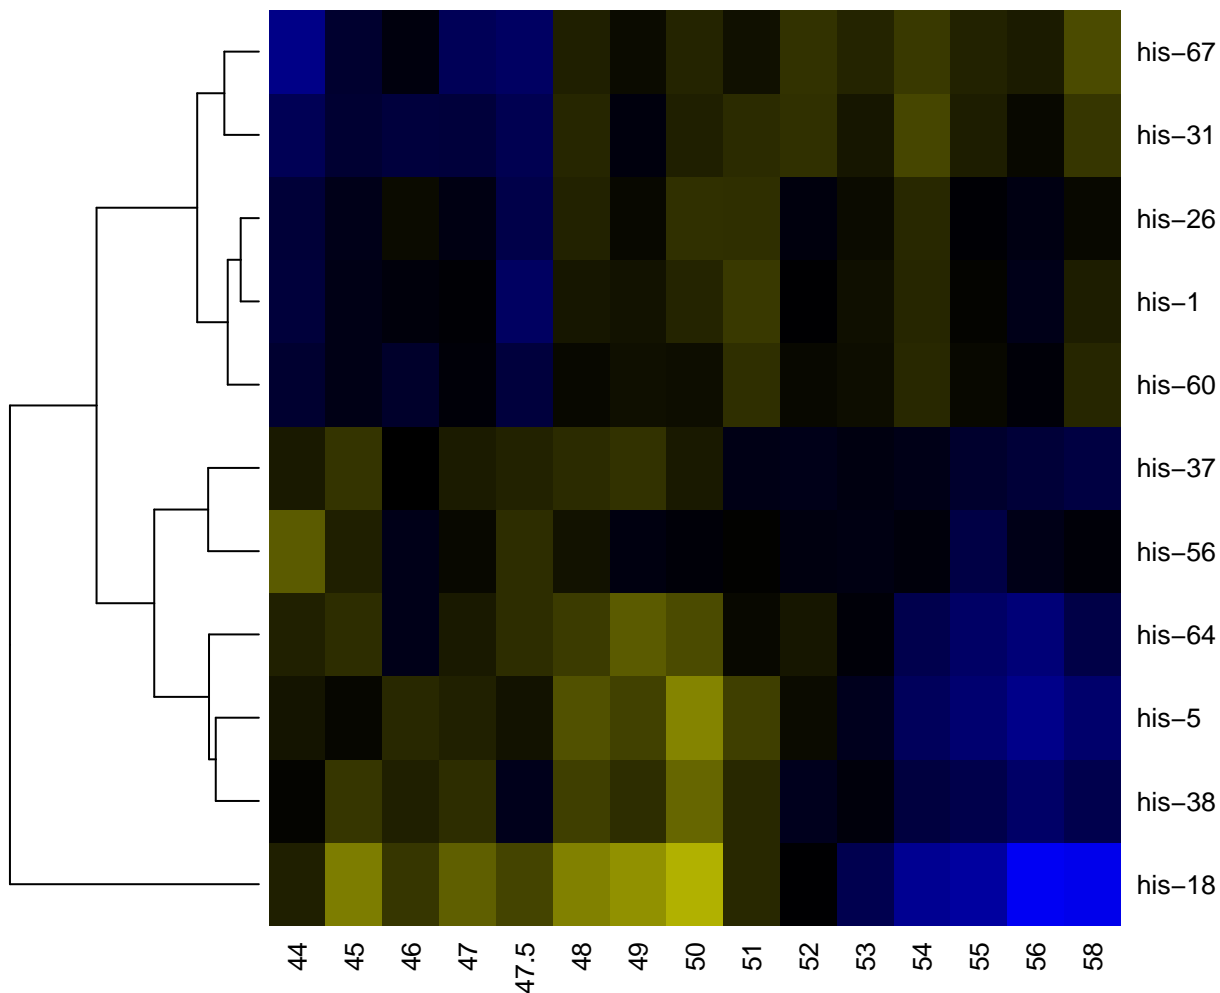







# Hly-III related

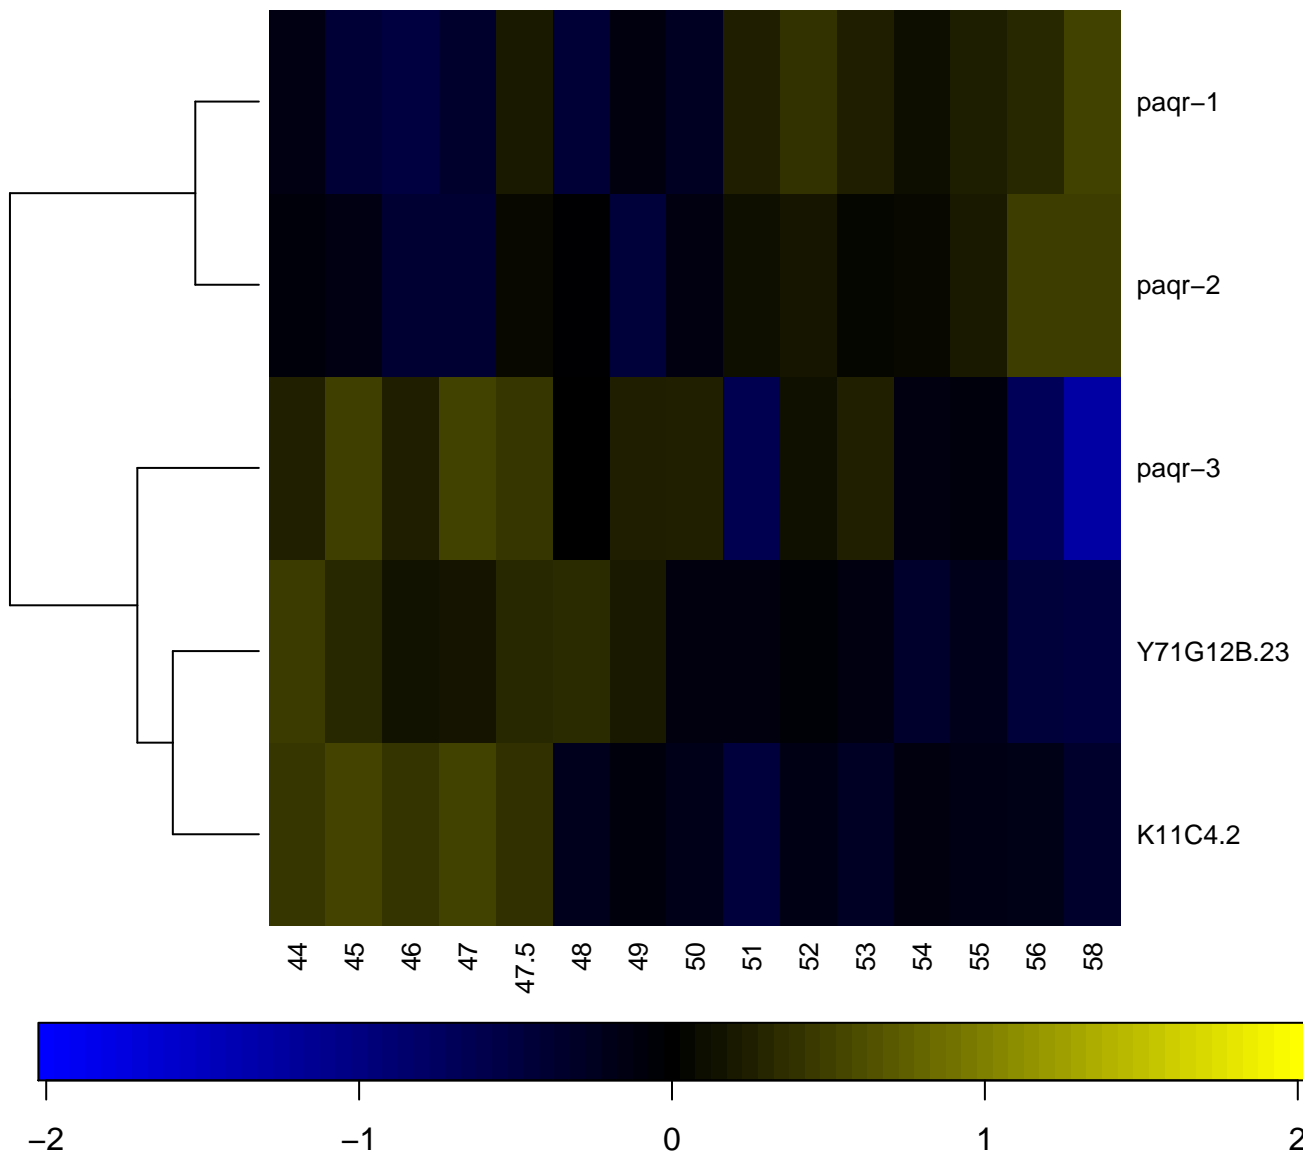



# HMG (high mobility group) box

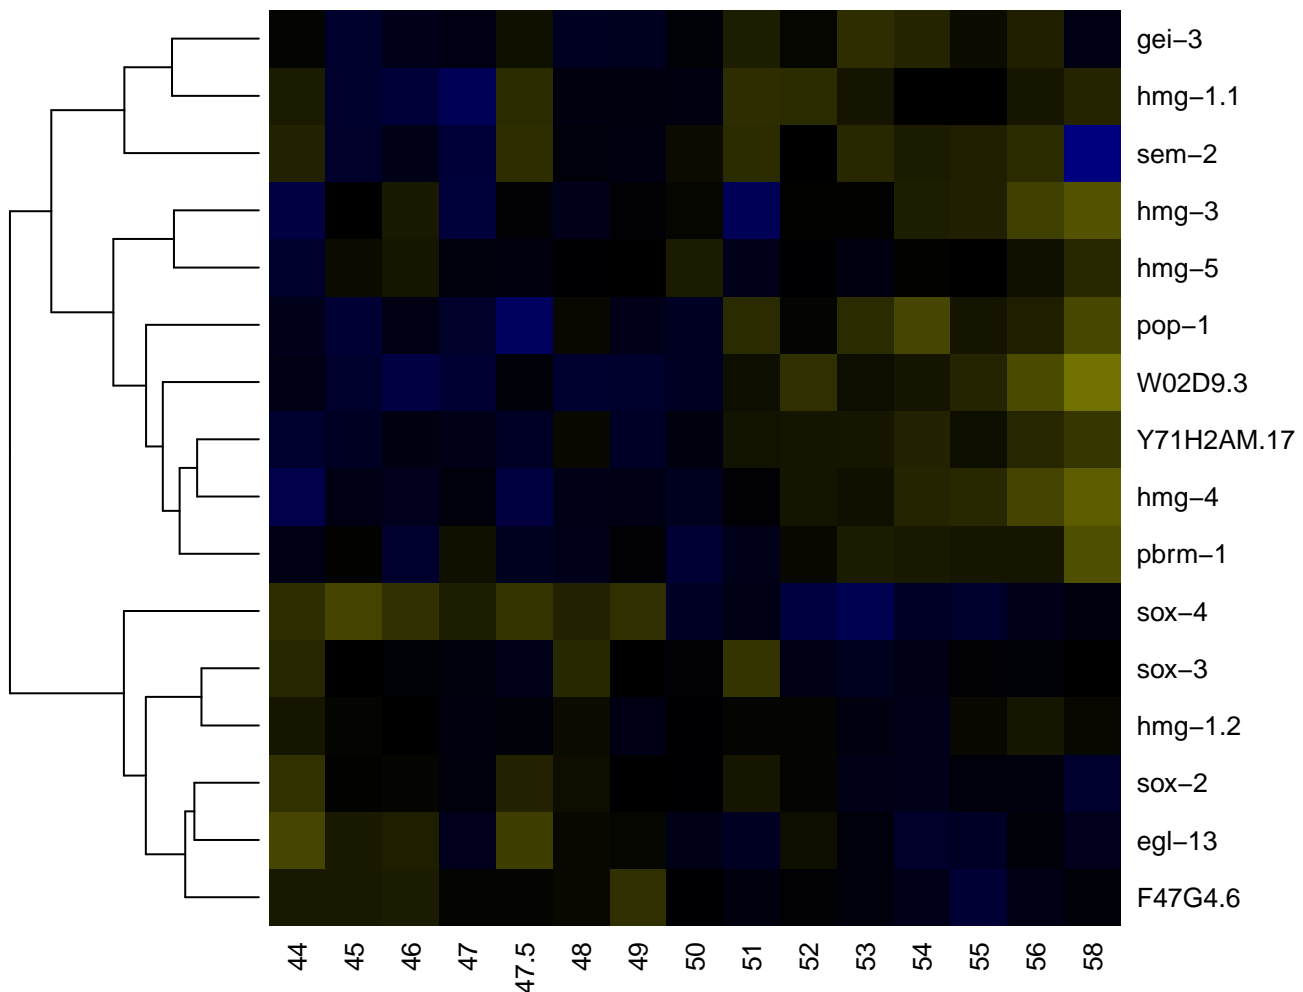

# Holliday junction DNA helicase ruvB N-terminus

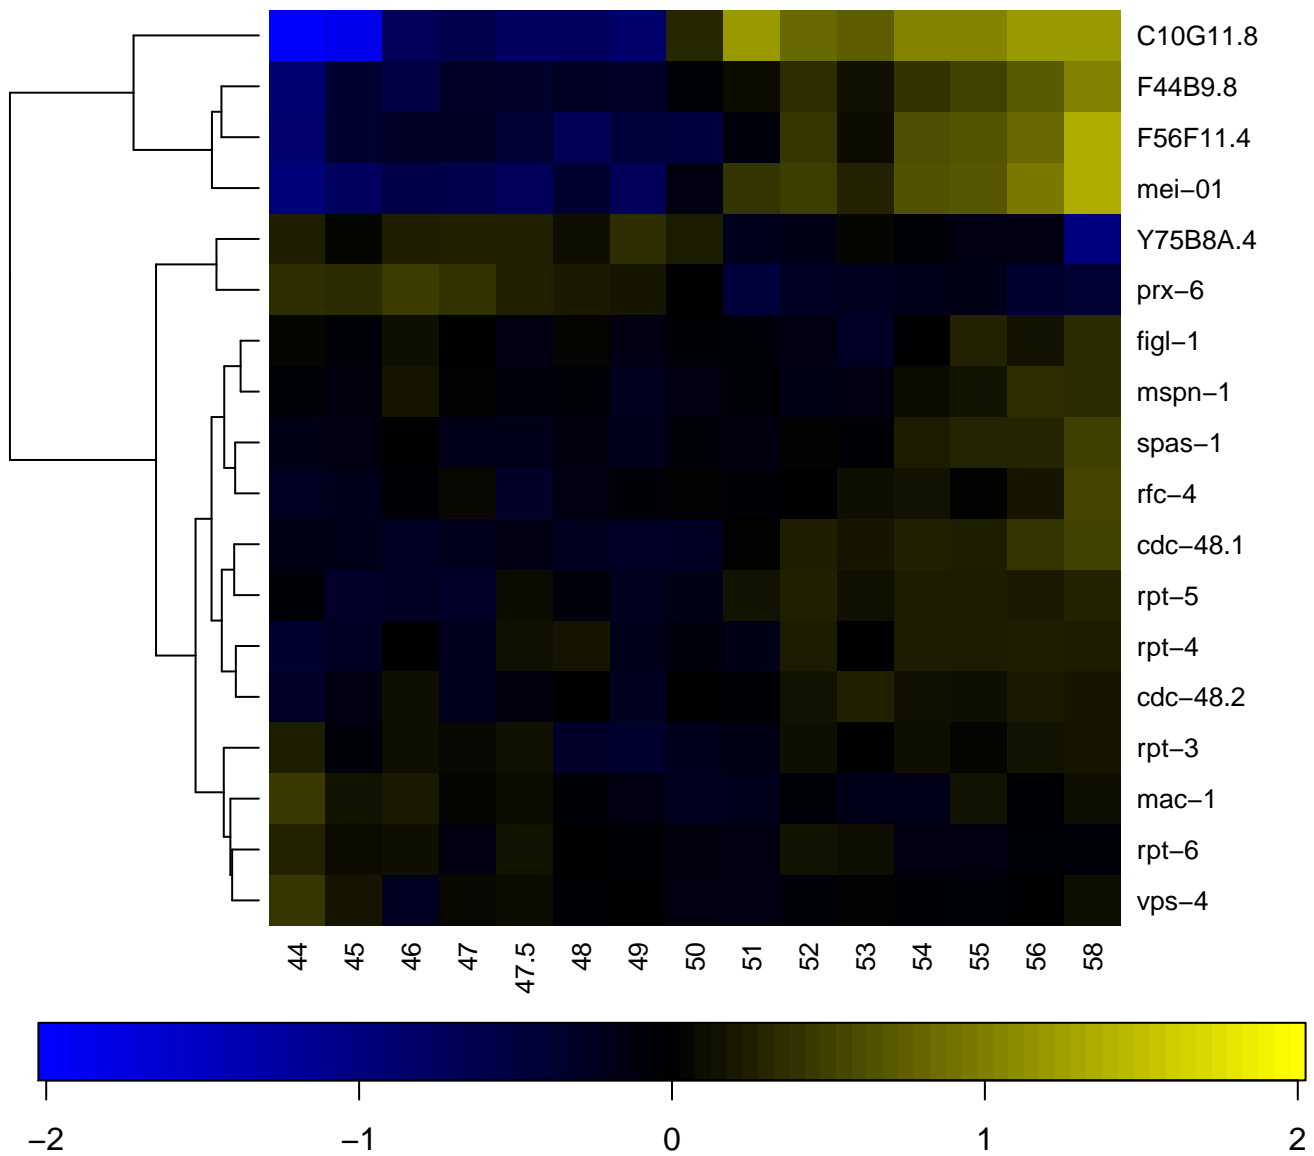

# Homeobox

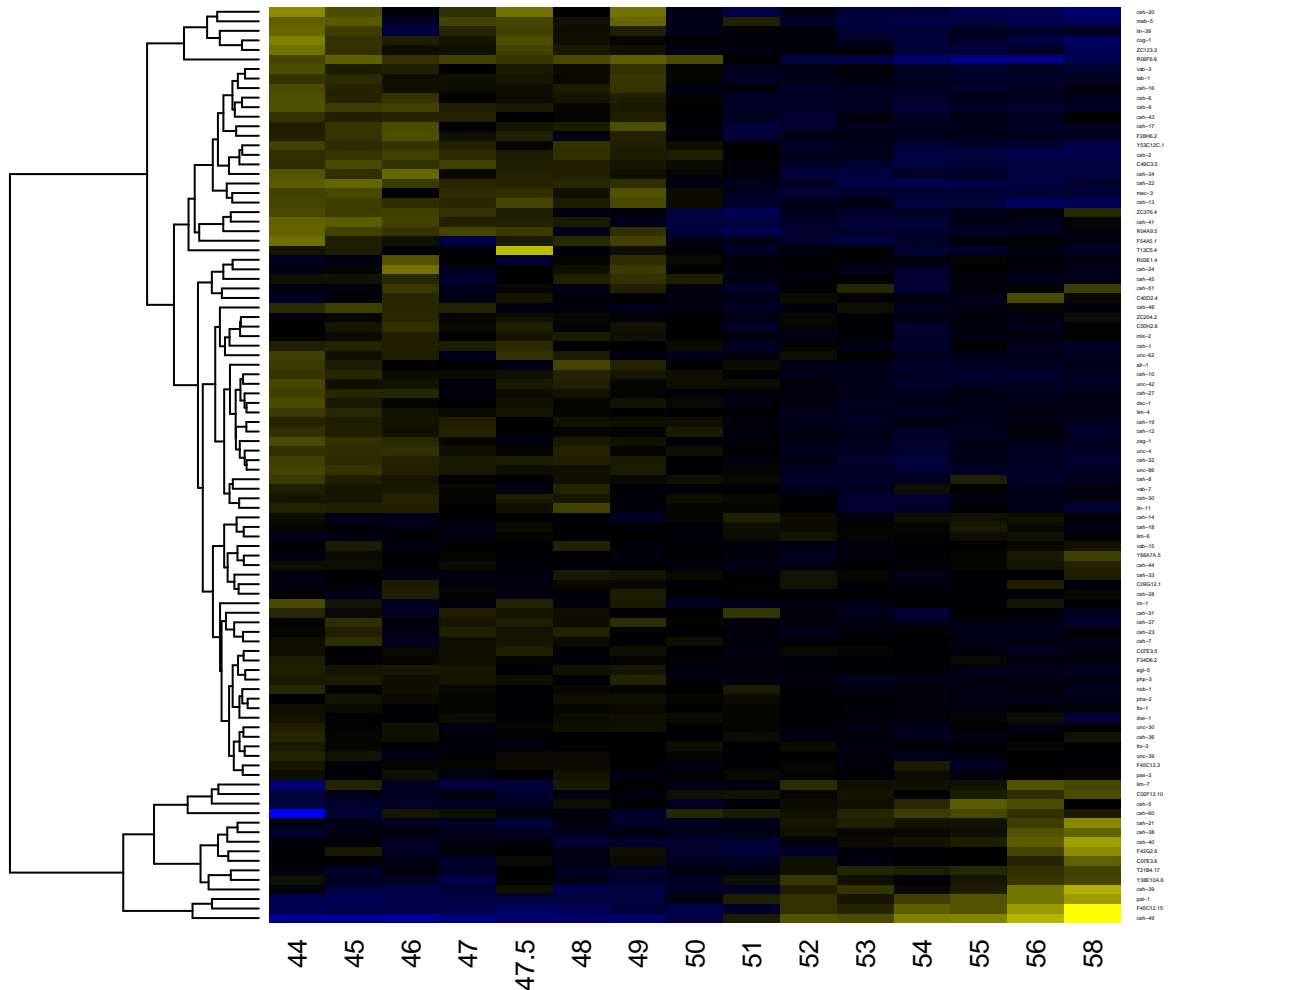

# Homeobox domain

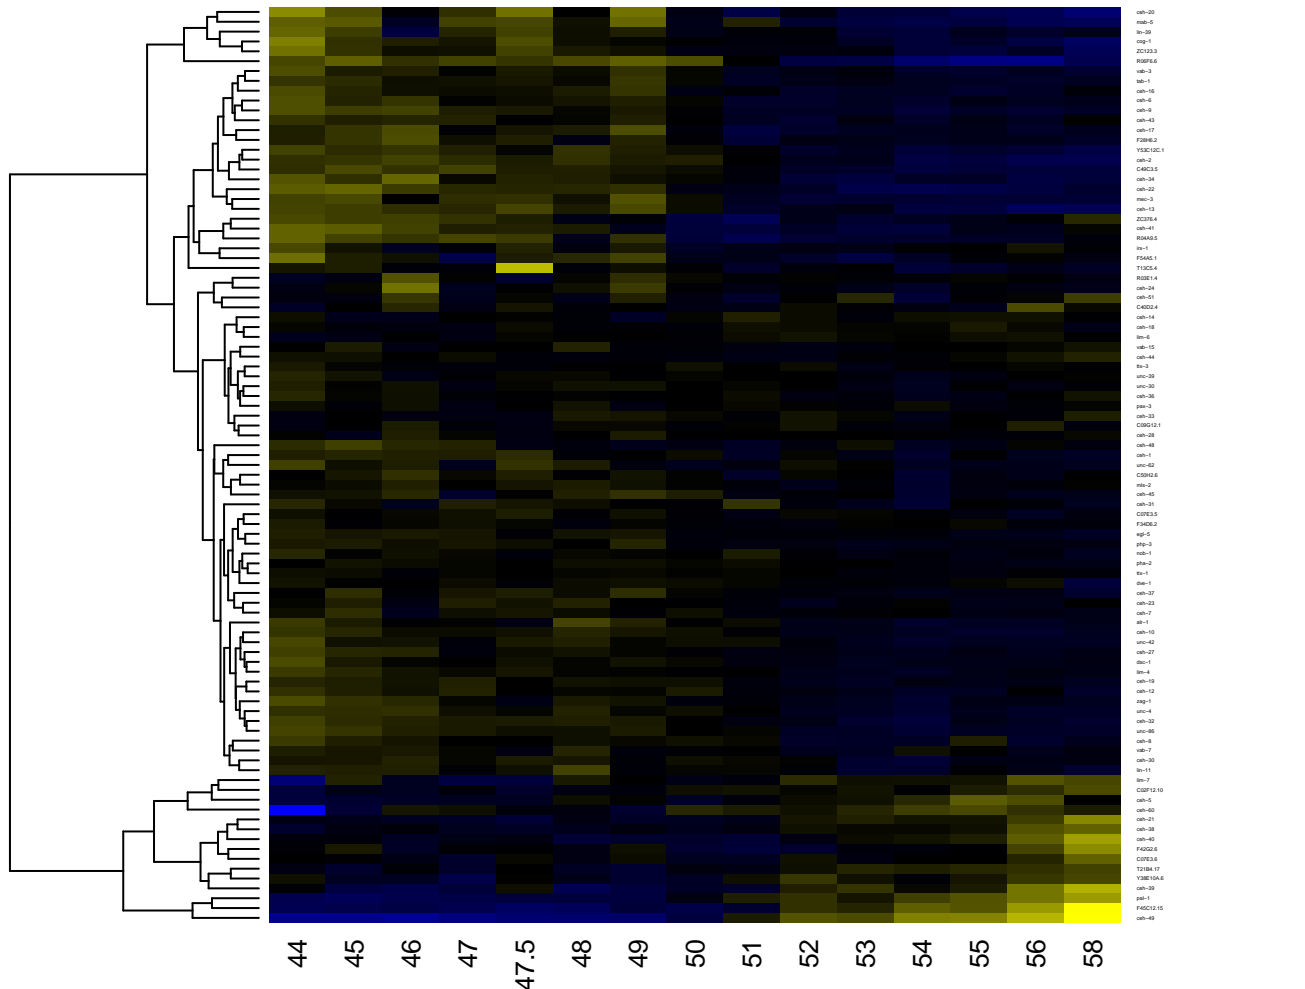

# Homeobox, conserved site

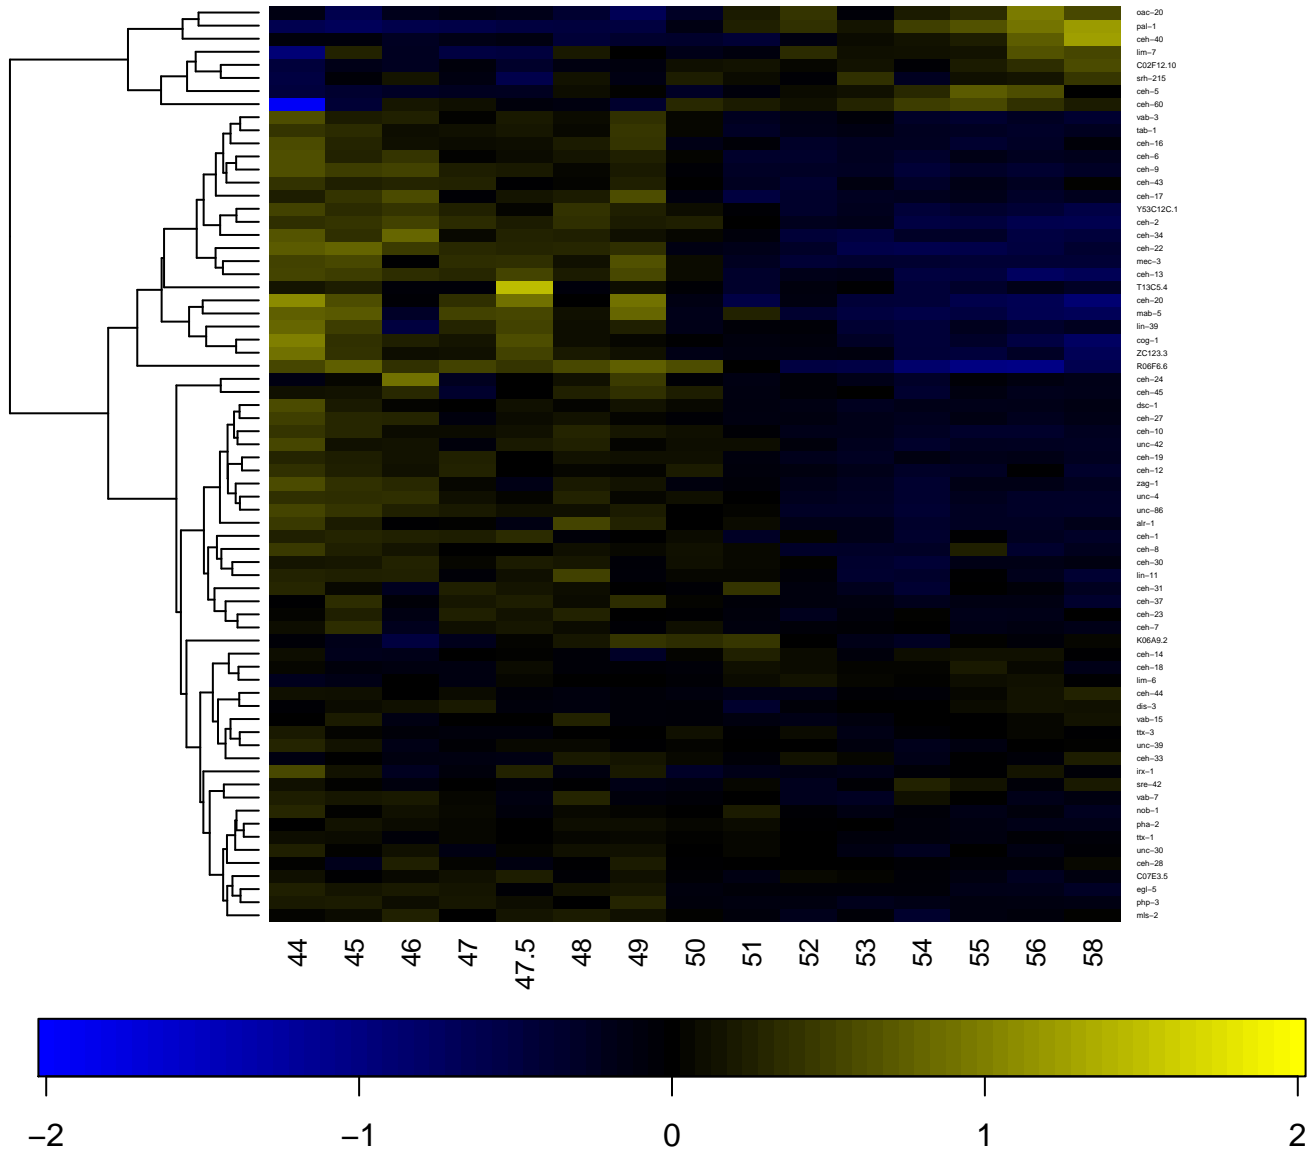

# Homeobox, region

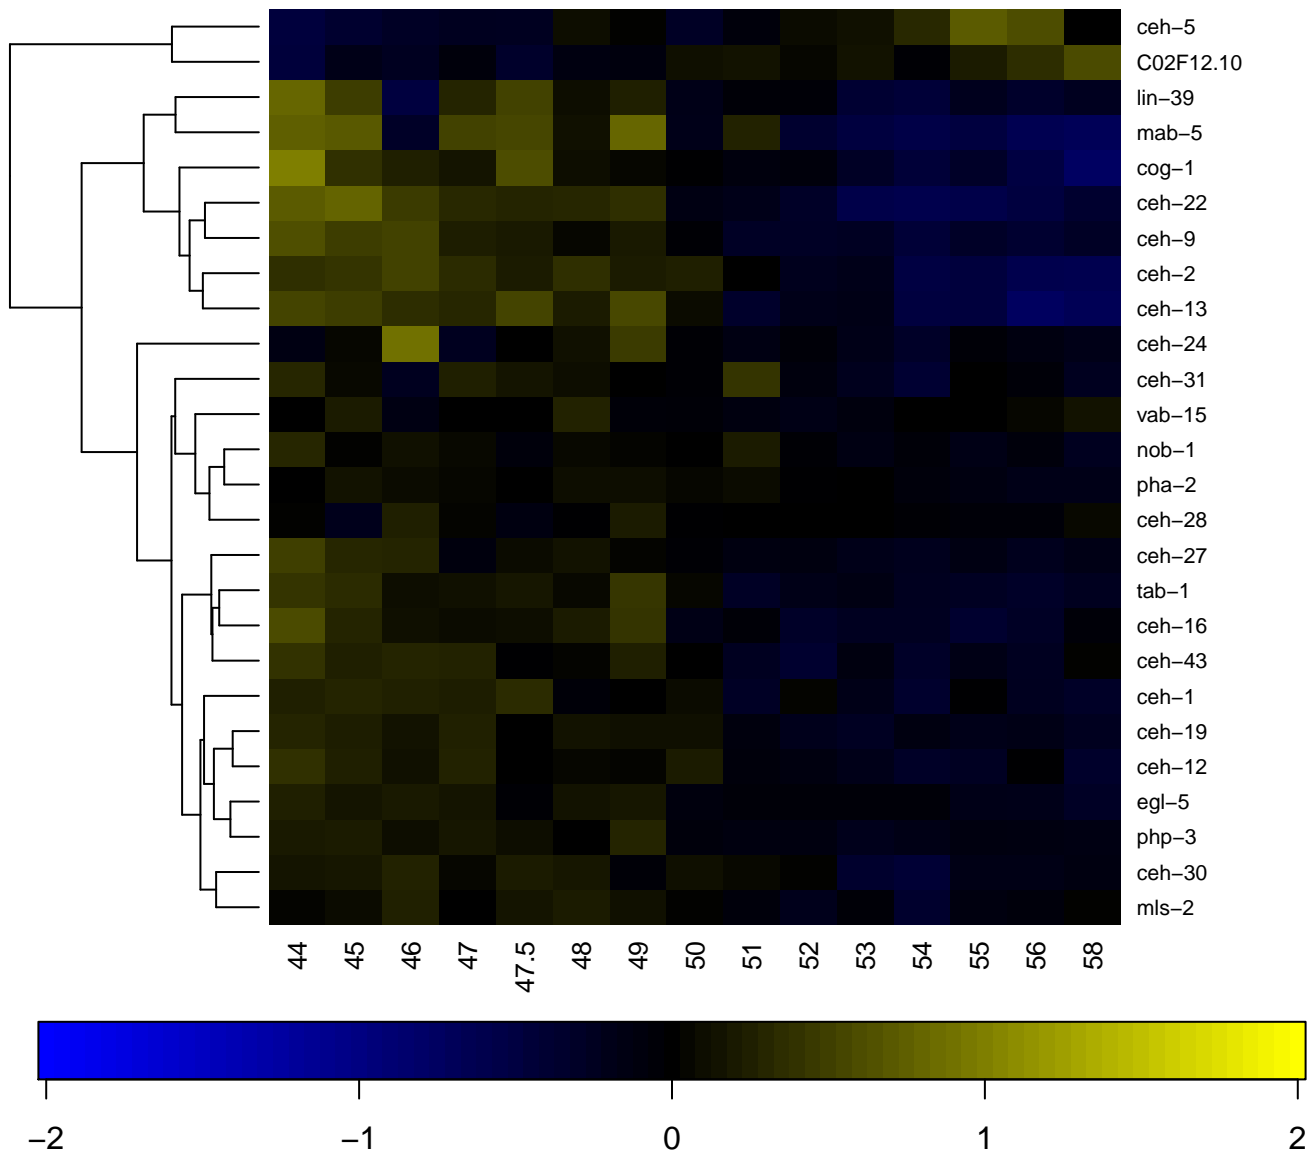

# Homeodomain-related

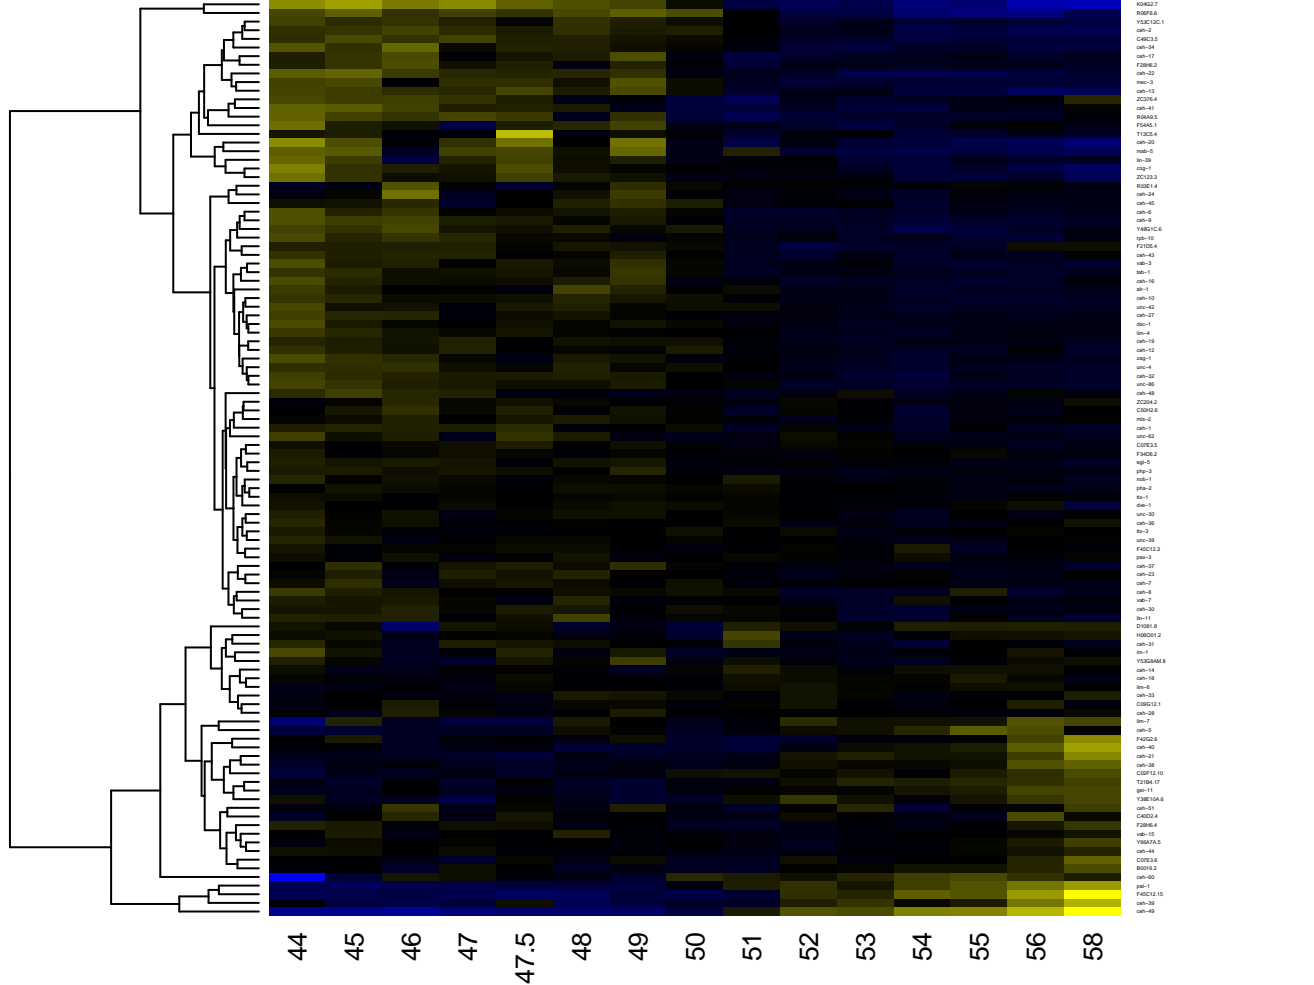

# Homeodomain protein CUT

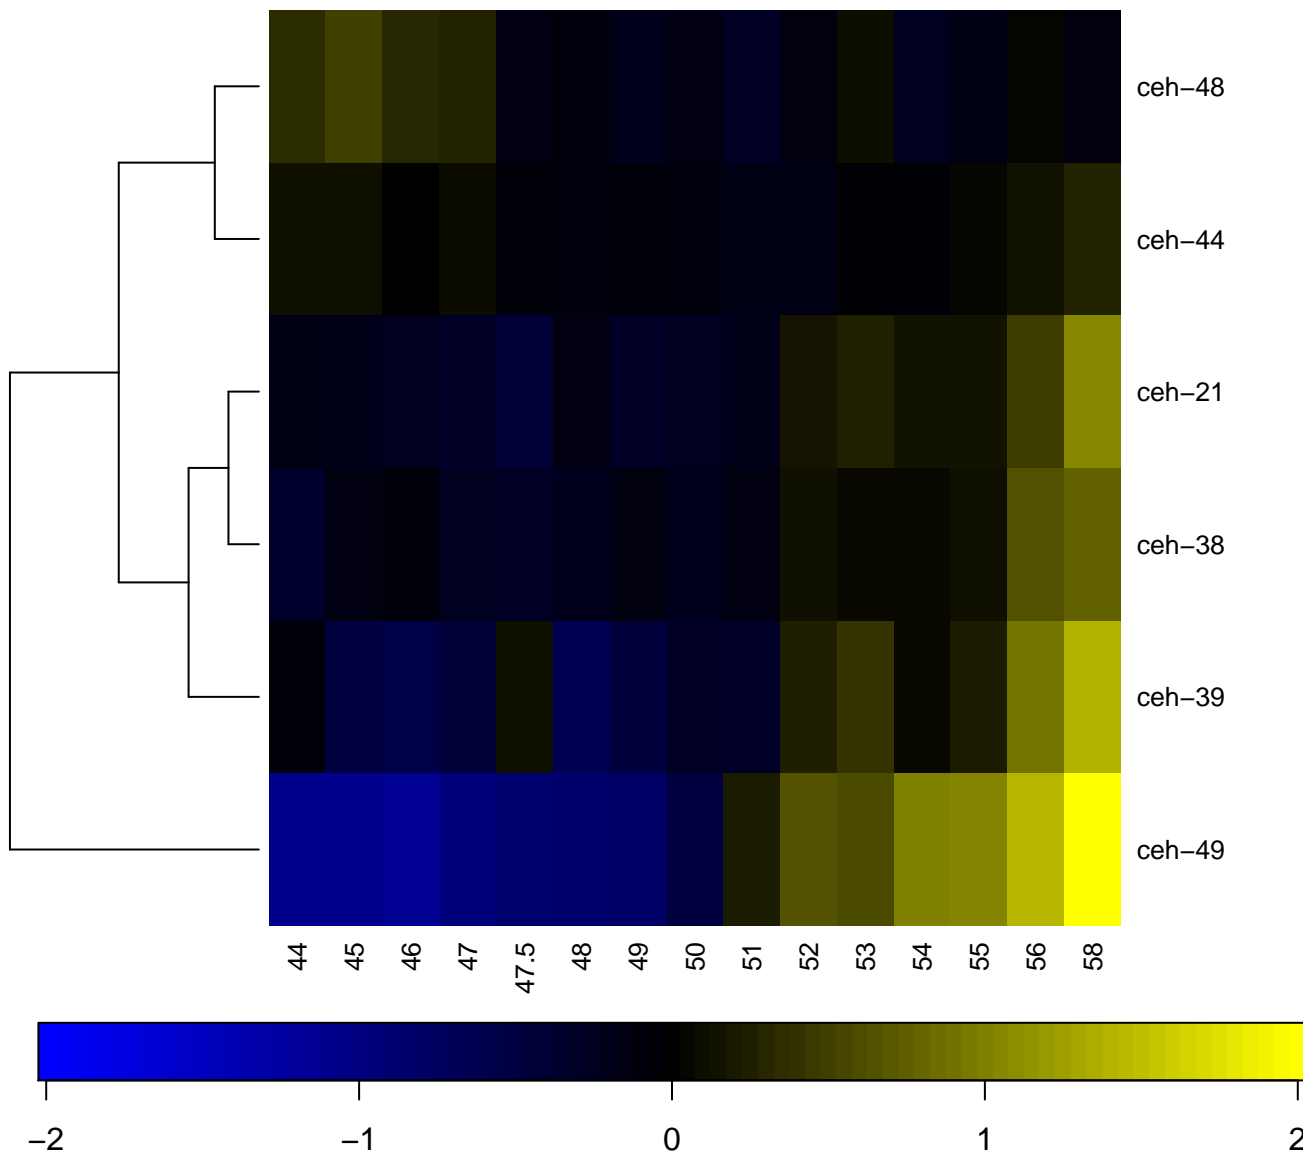



# HORMA domain

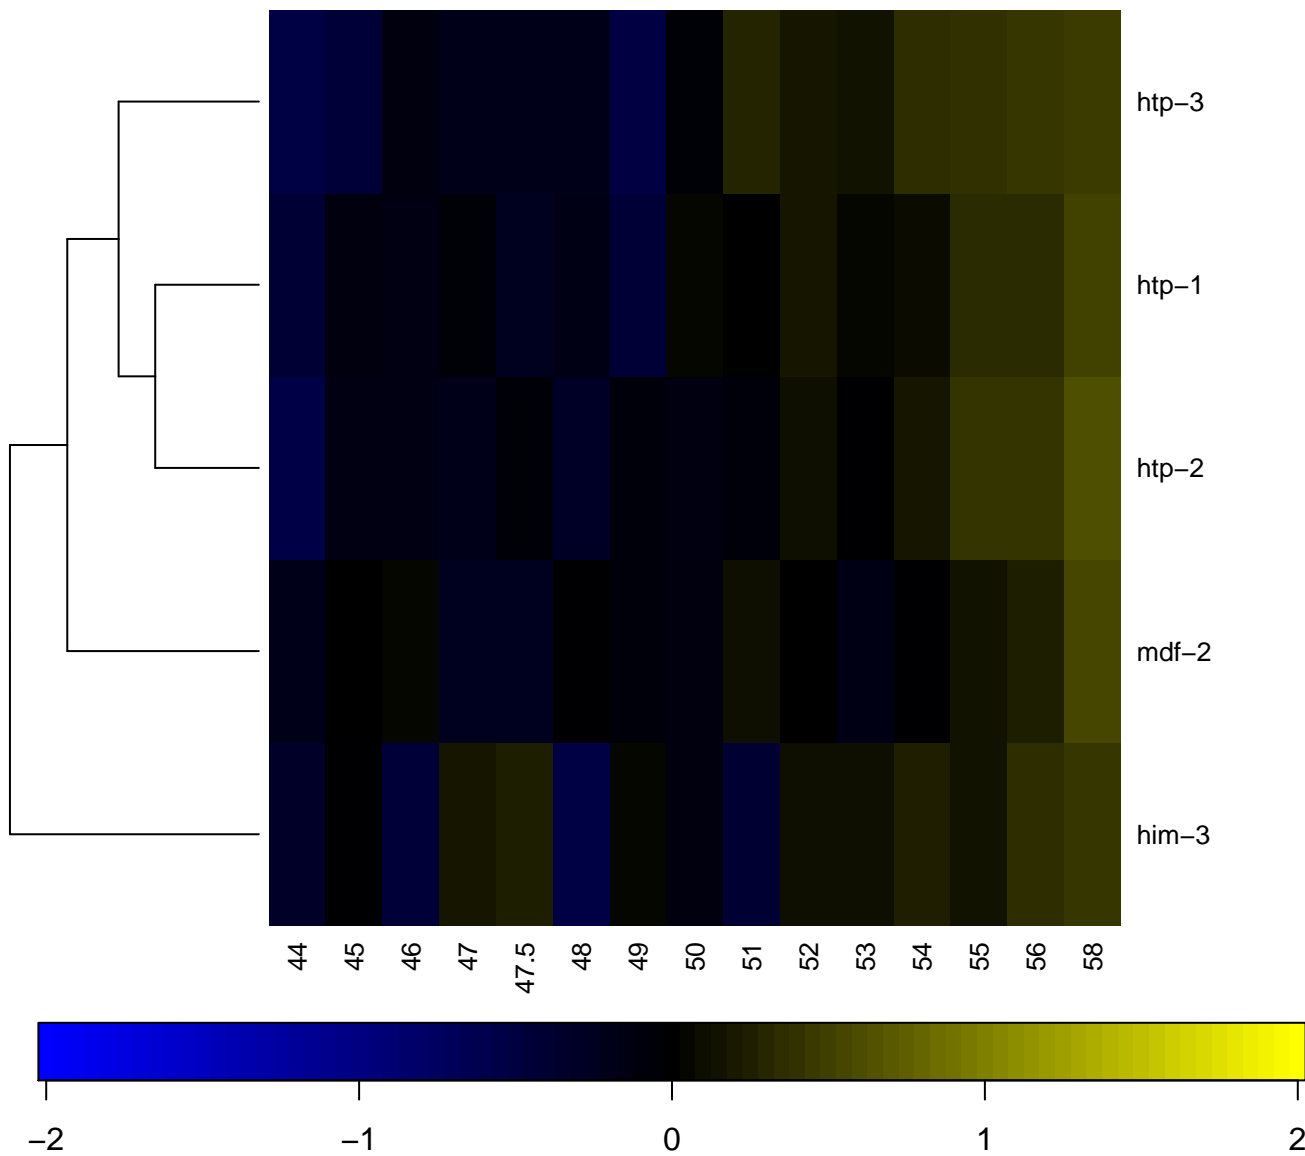



# Hsp70 protein

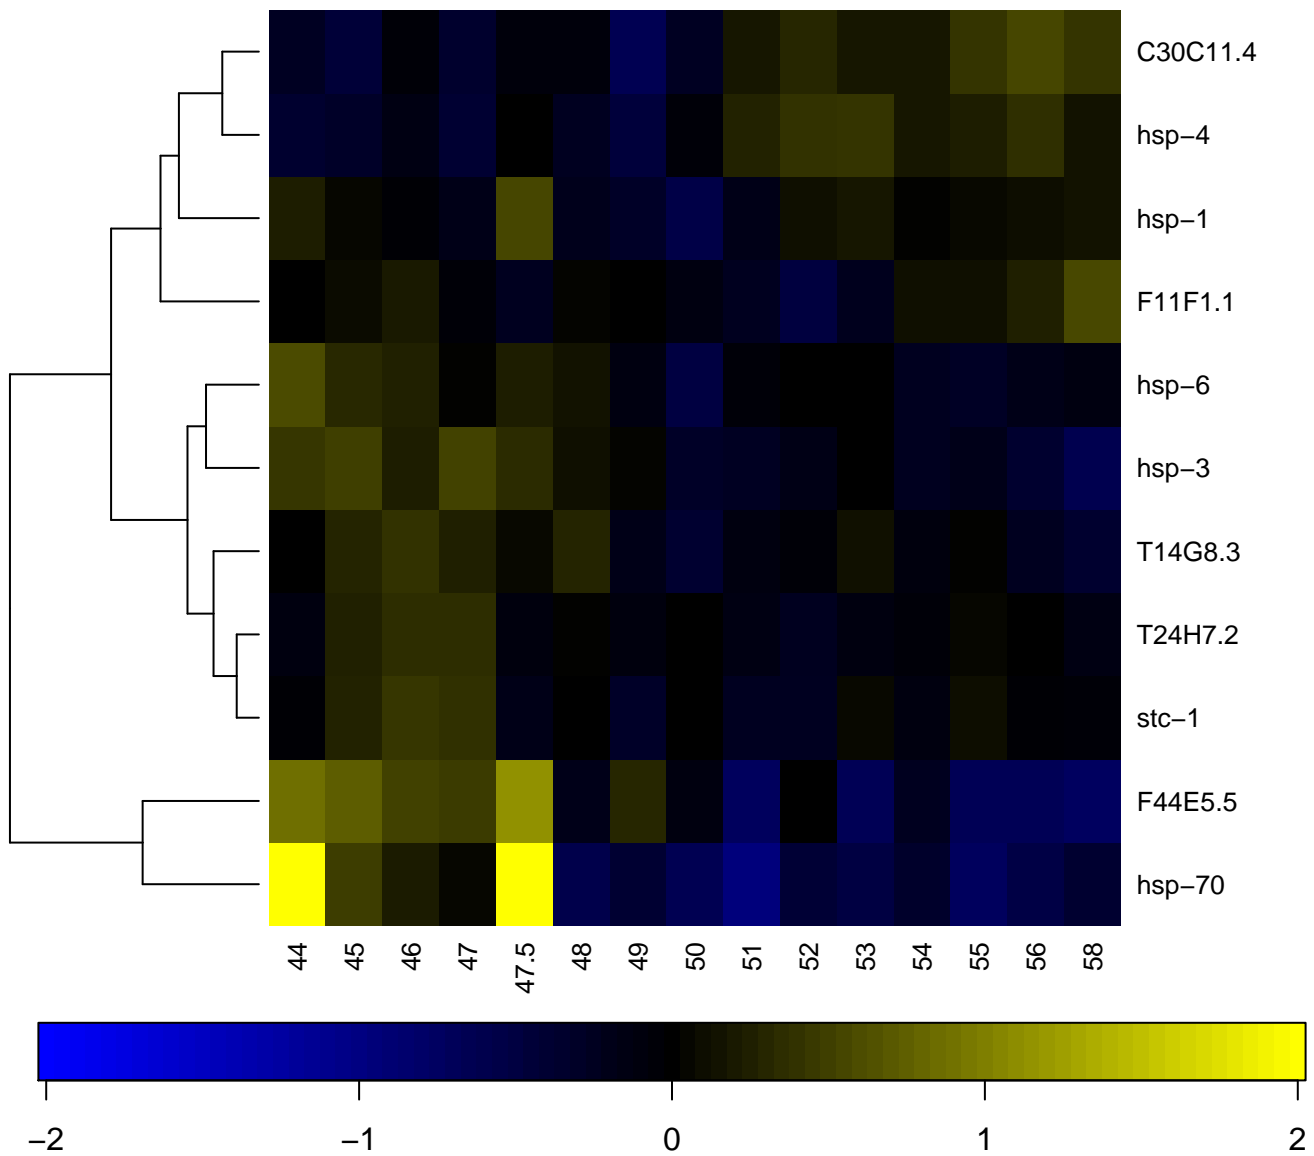



# Immunoglobulin

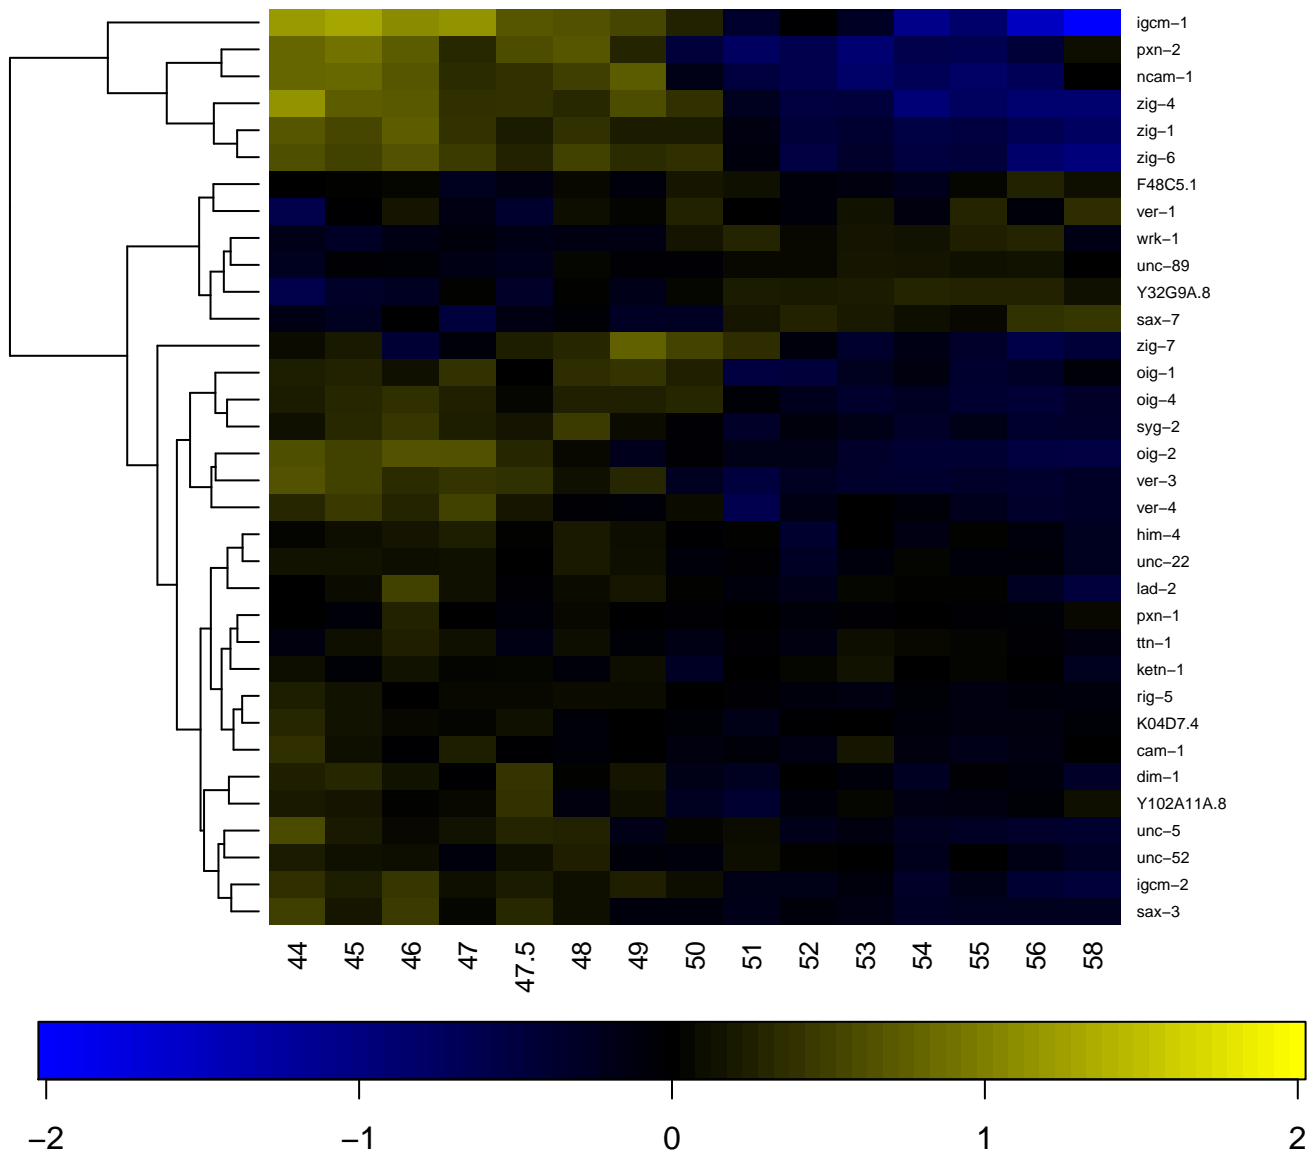

# Immunoglobulin-like fold

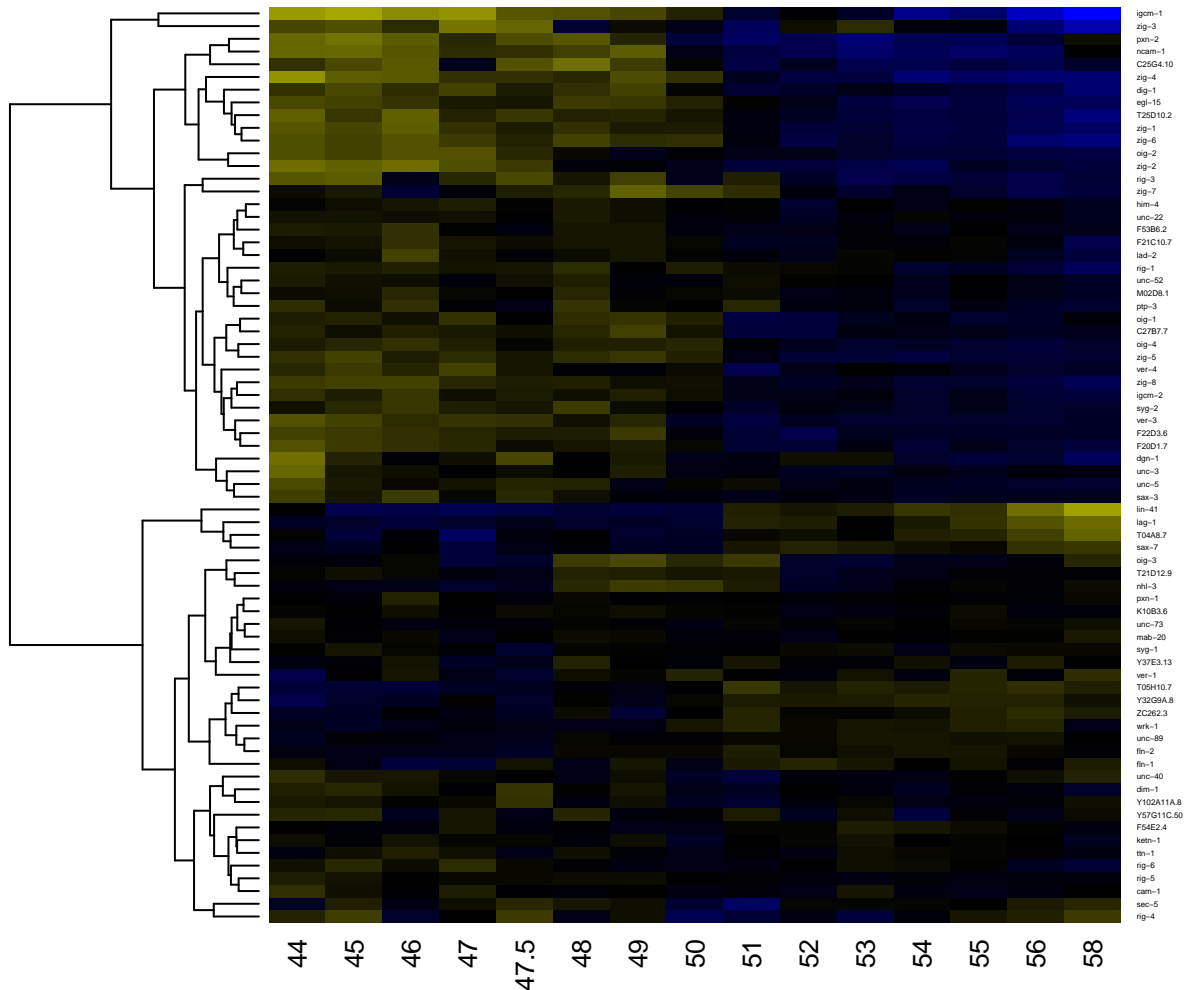

-2

-1

0

1

2



# Immunoglobulin I-set

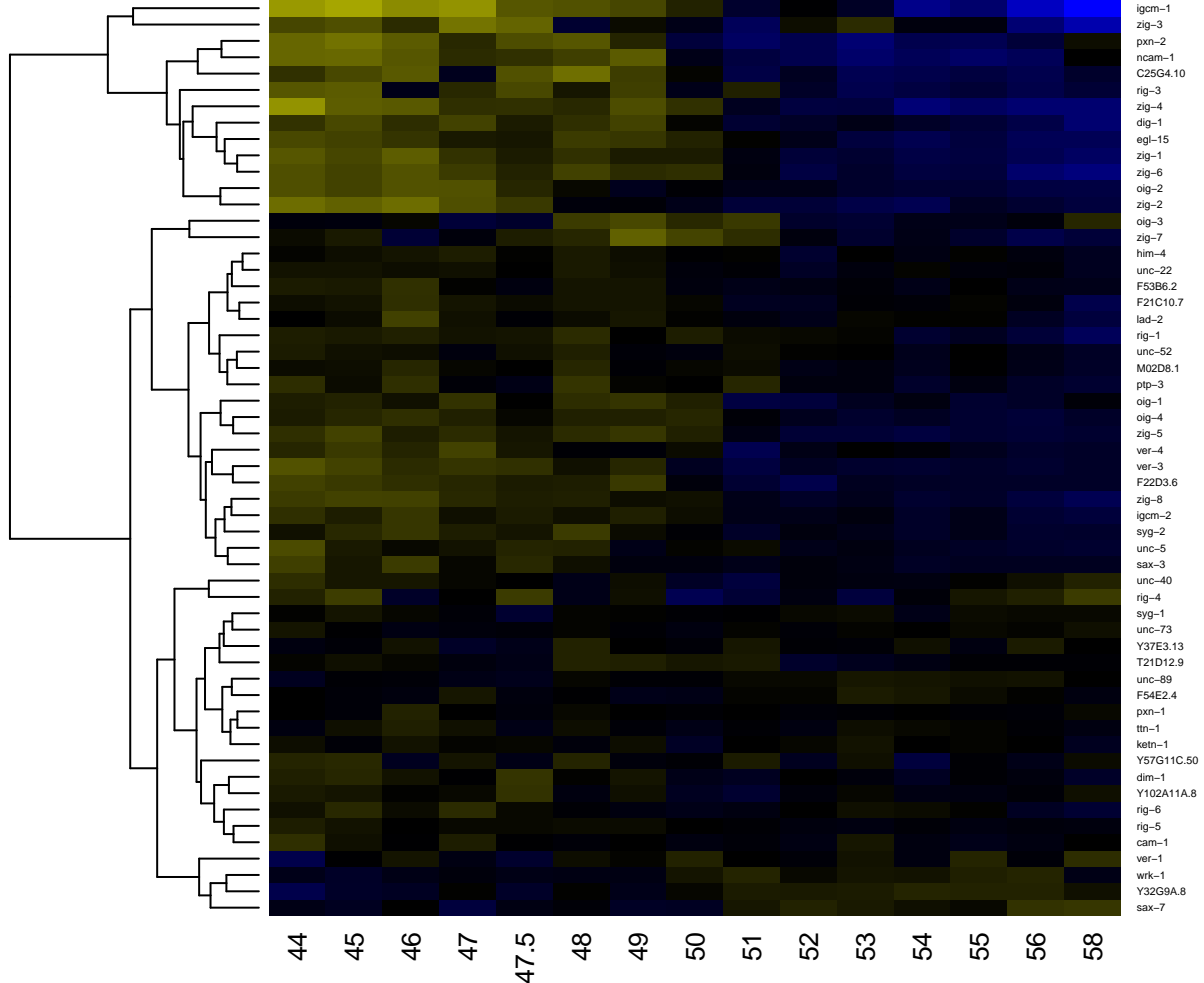



# Immunoglobulin I-set domain

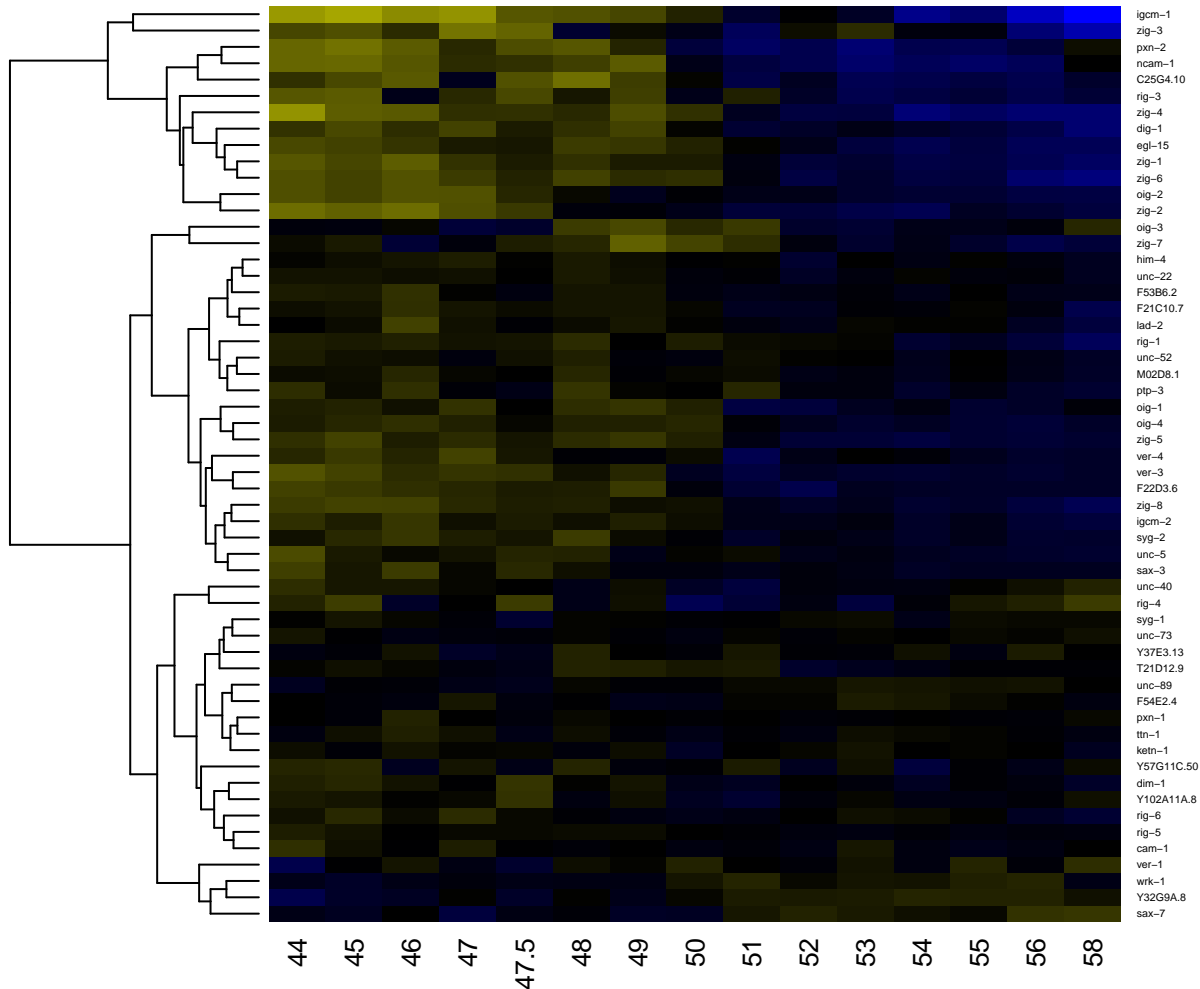

# Immunoglobulin subtype

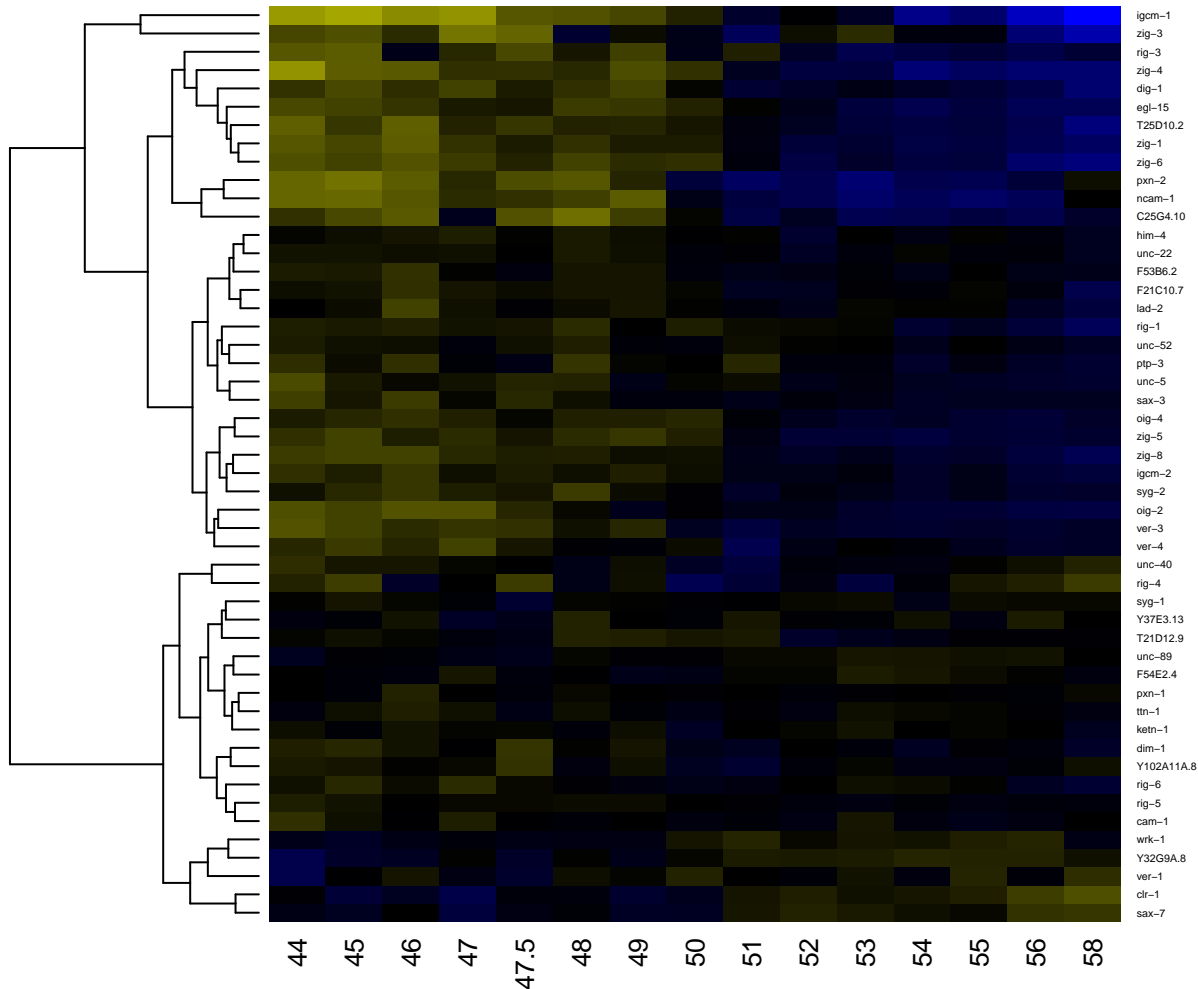

# Immunoglobulin subtype 2

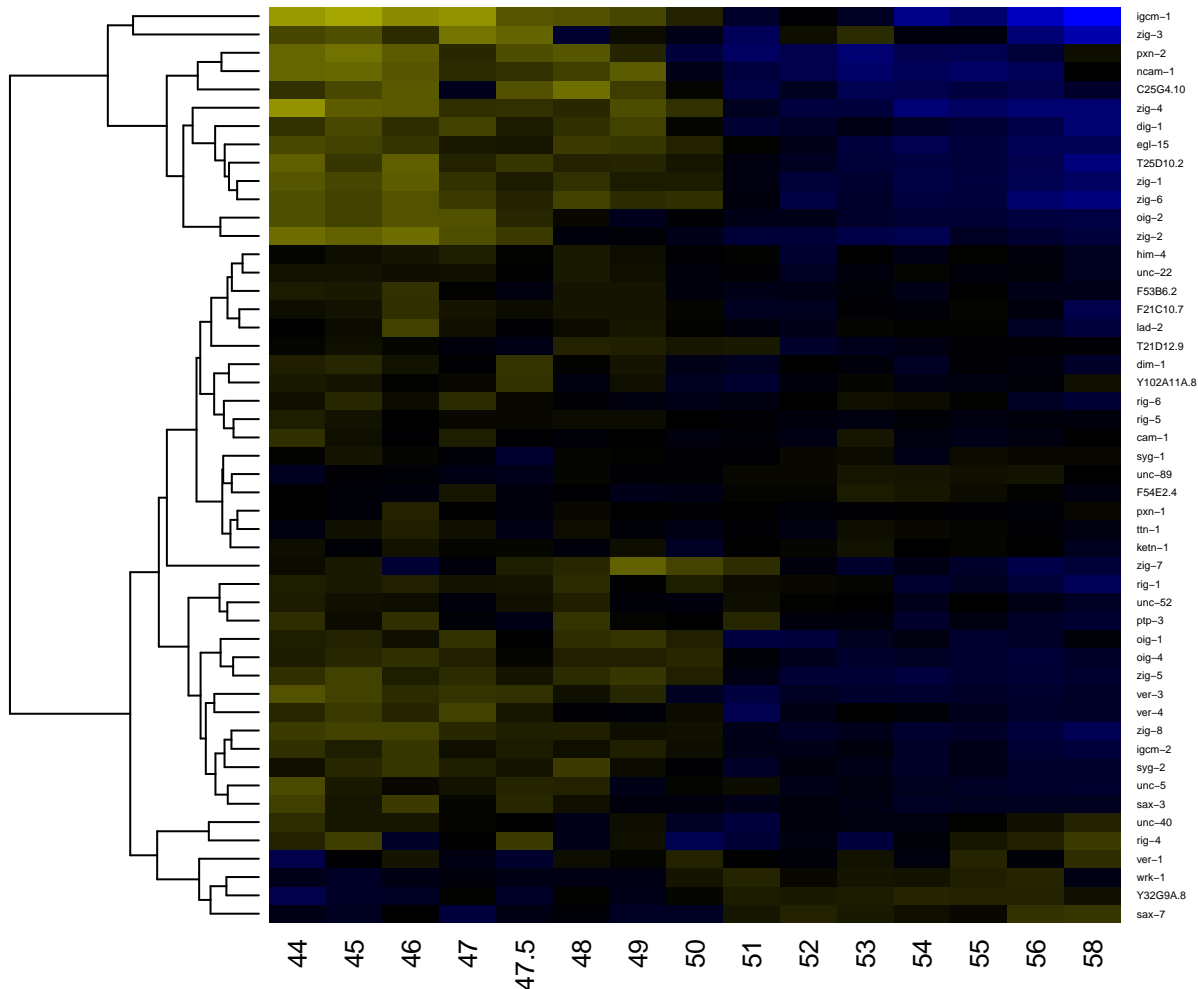

# Immunoglobulin V-set

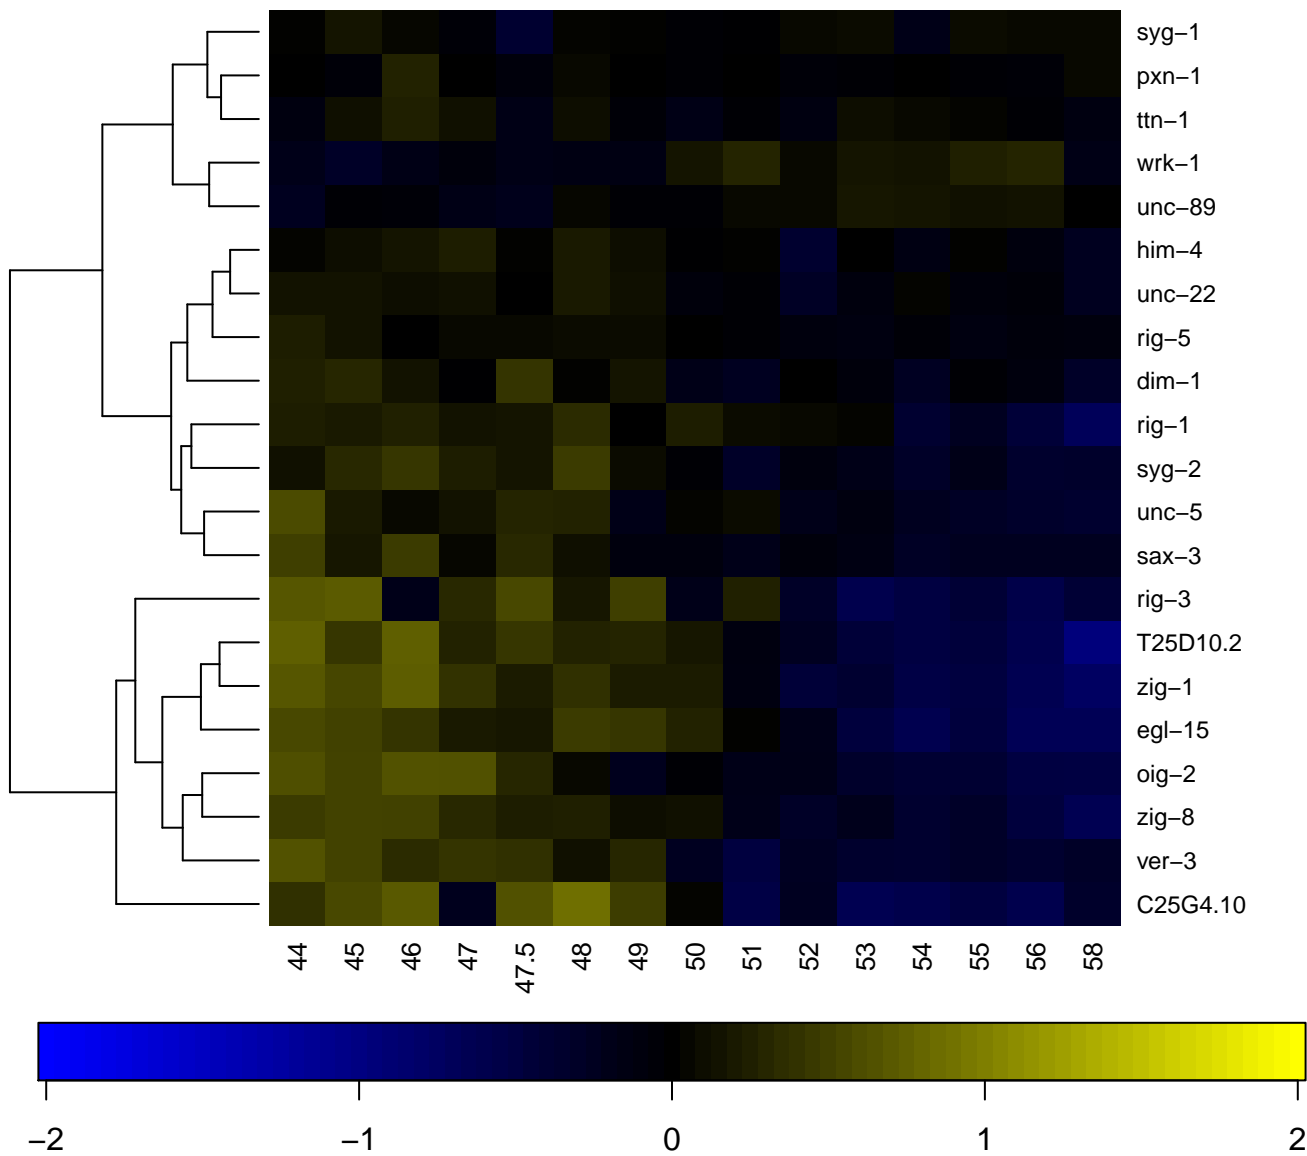



# immunoglobulin/major histocompatibility complex, conserved

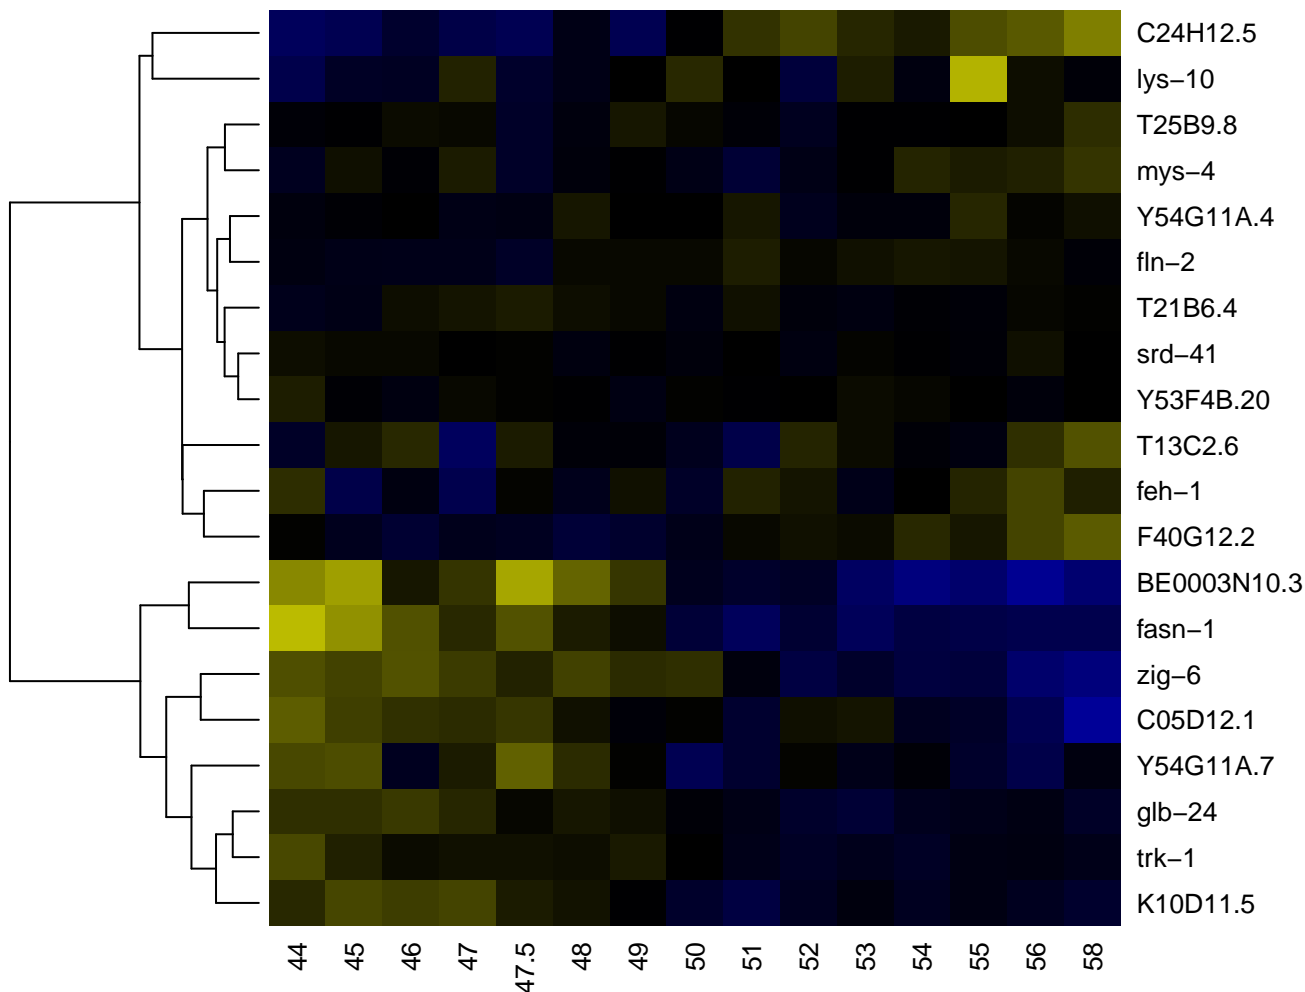

# Inhibitor of apoptosis-promoting Bax1 related

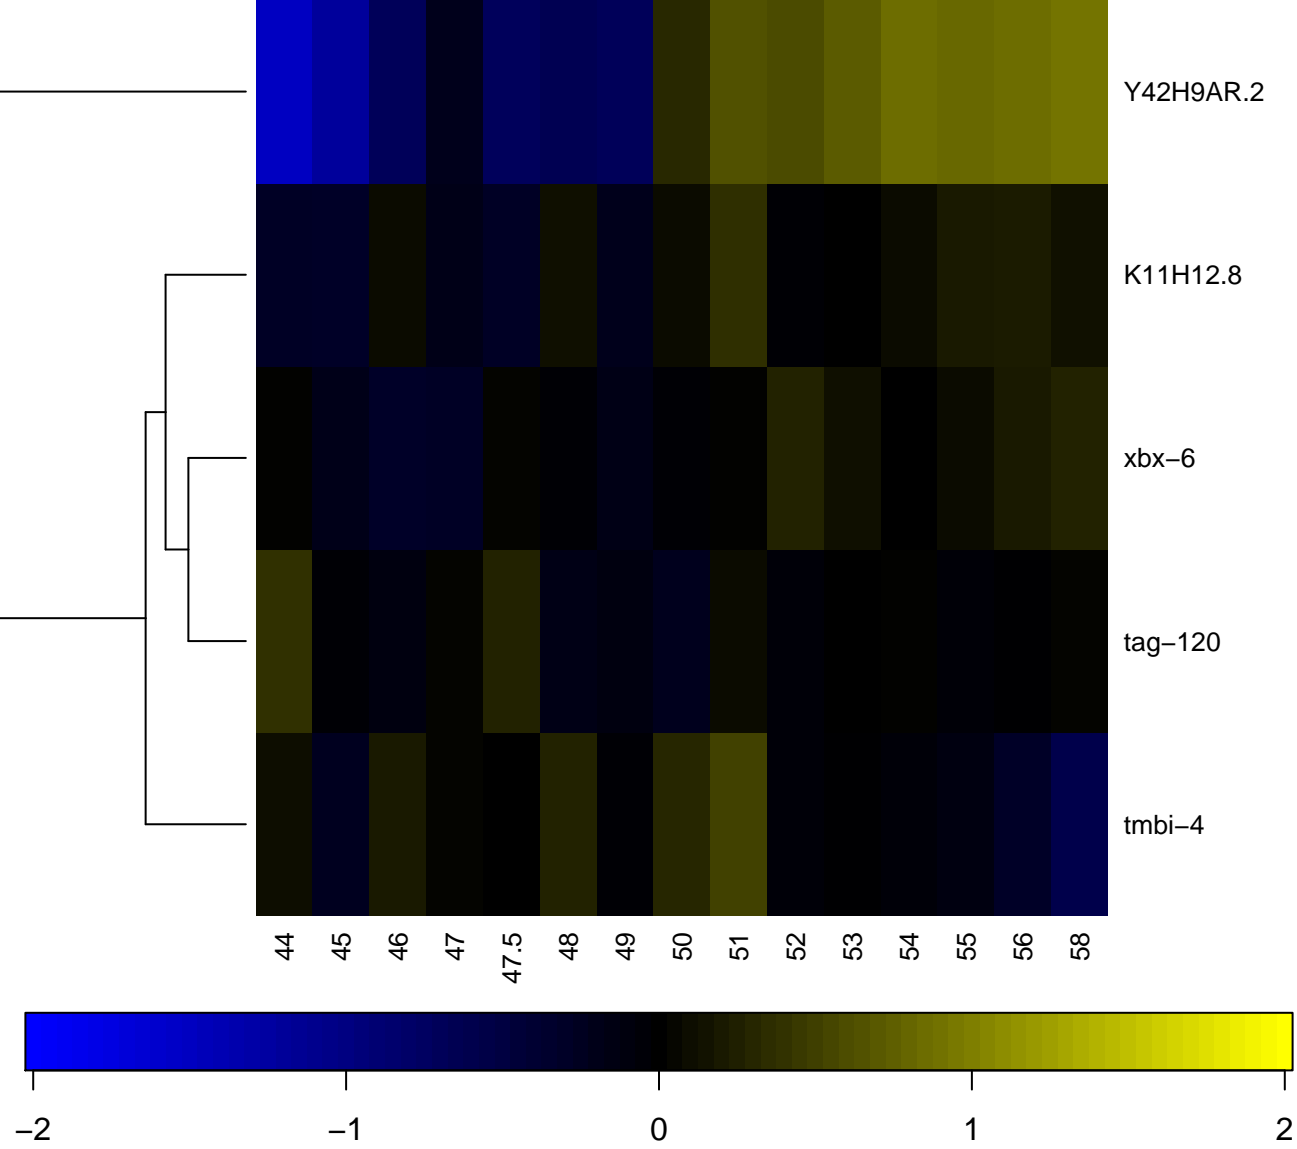

# Innexin

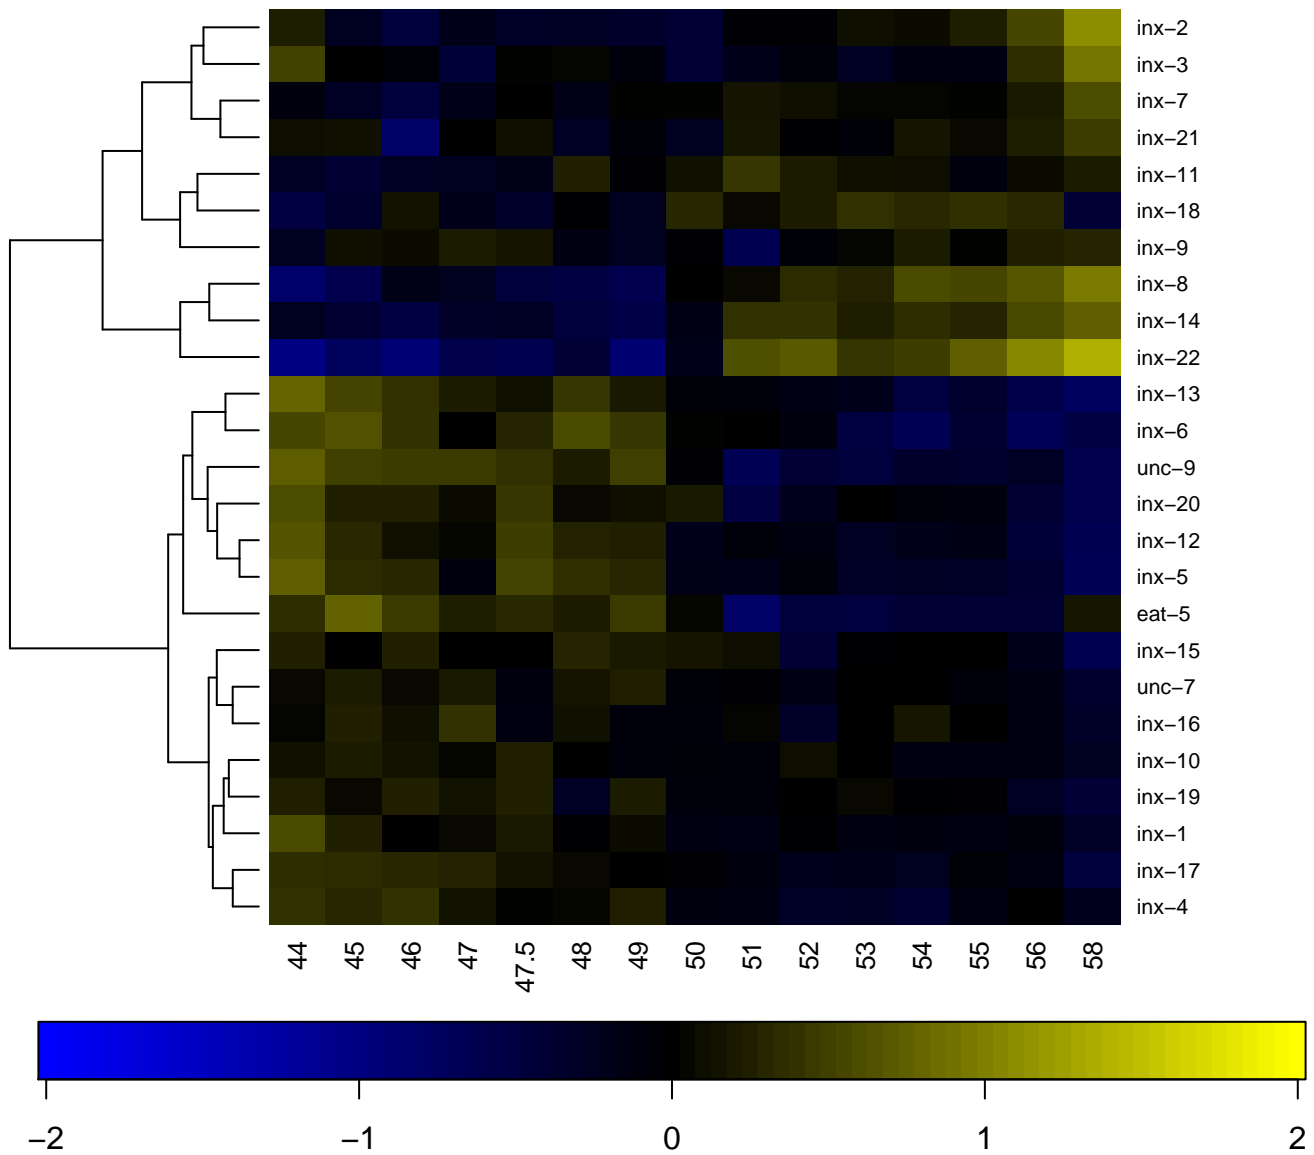



# Inorganic pyrophosphatase

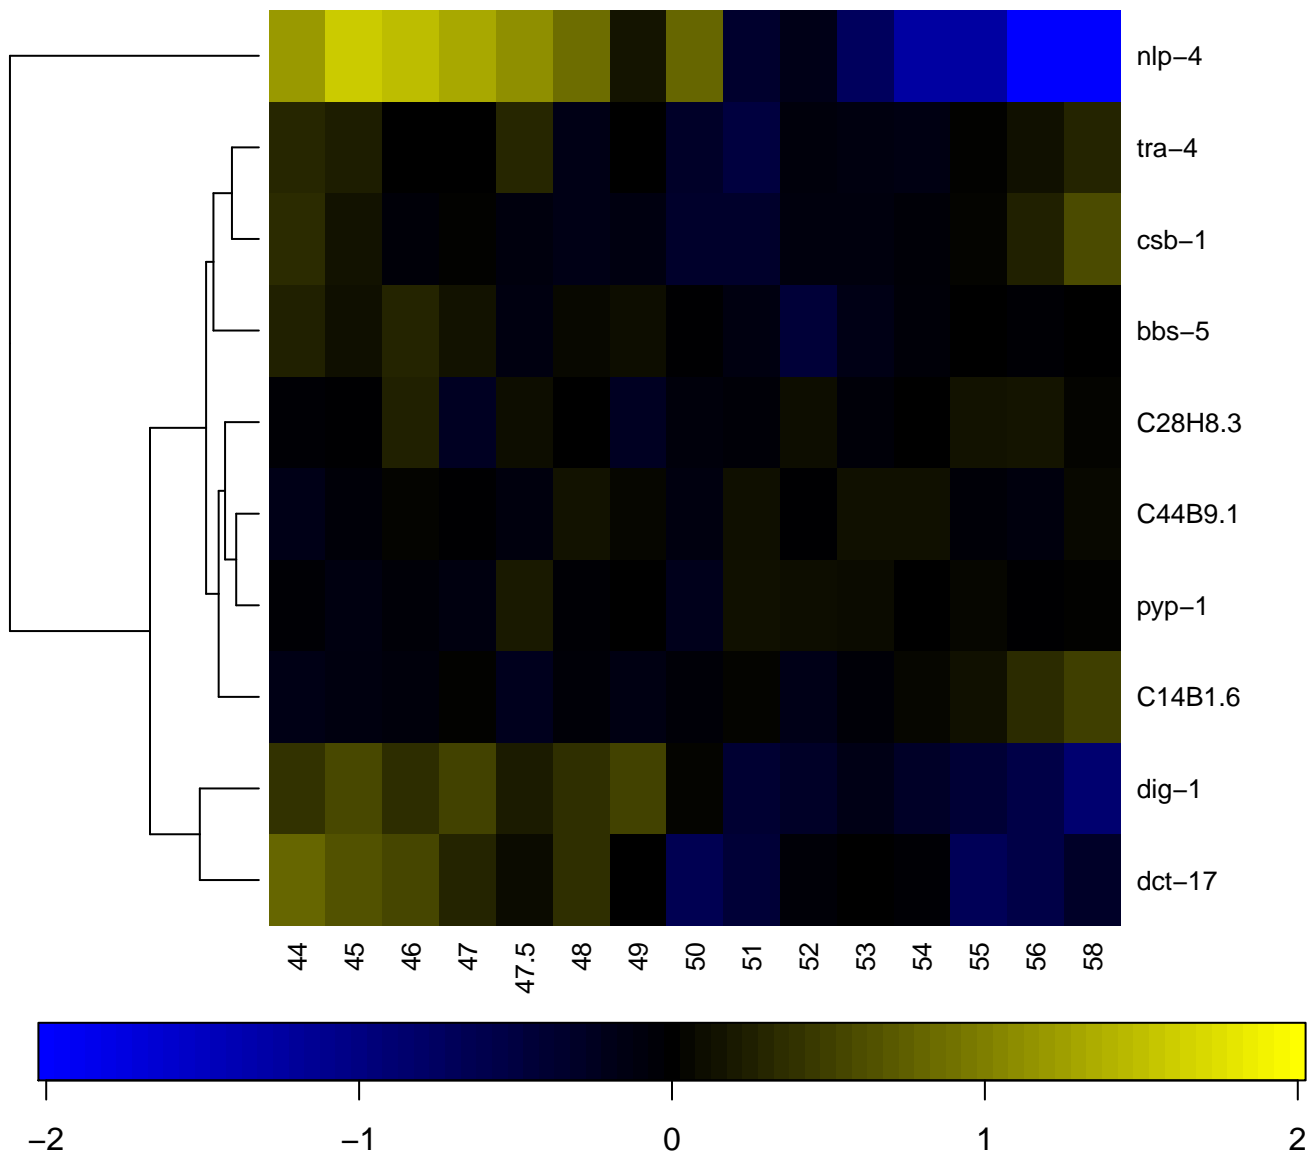



# Inositol polyphosphate related phosphatase

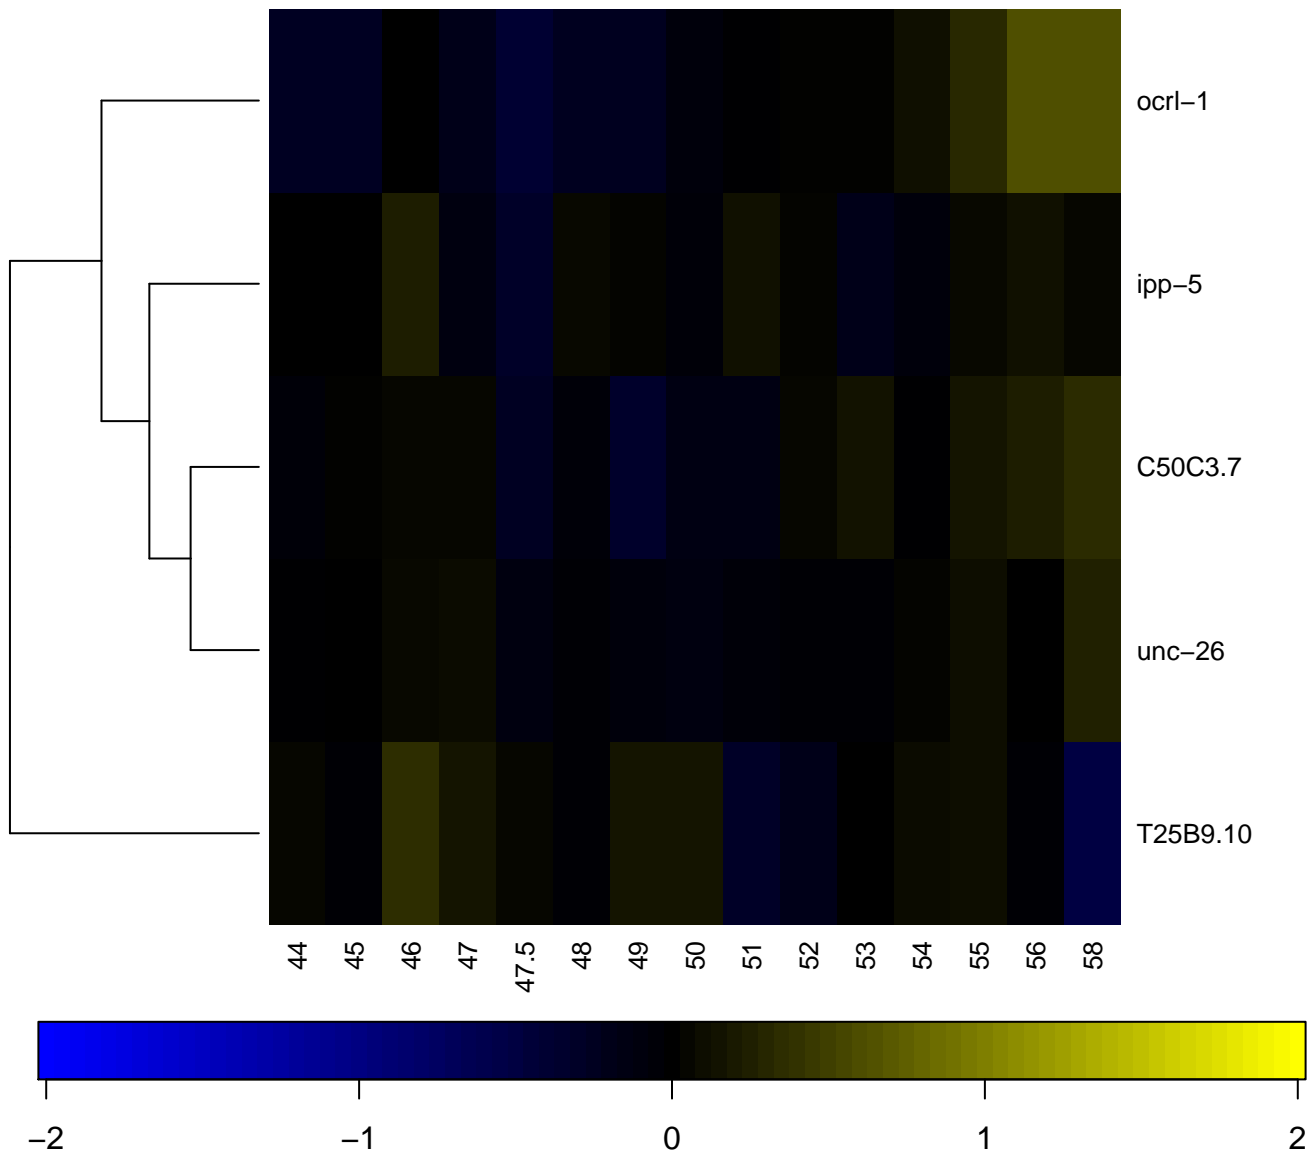







# Interactor of ZYG-11

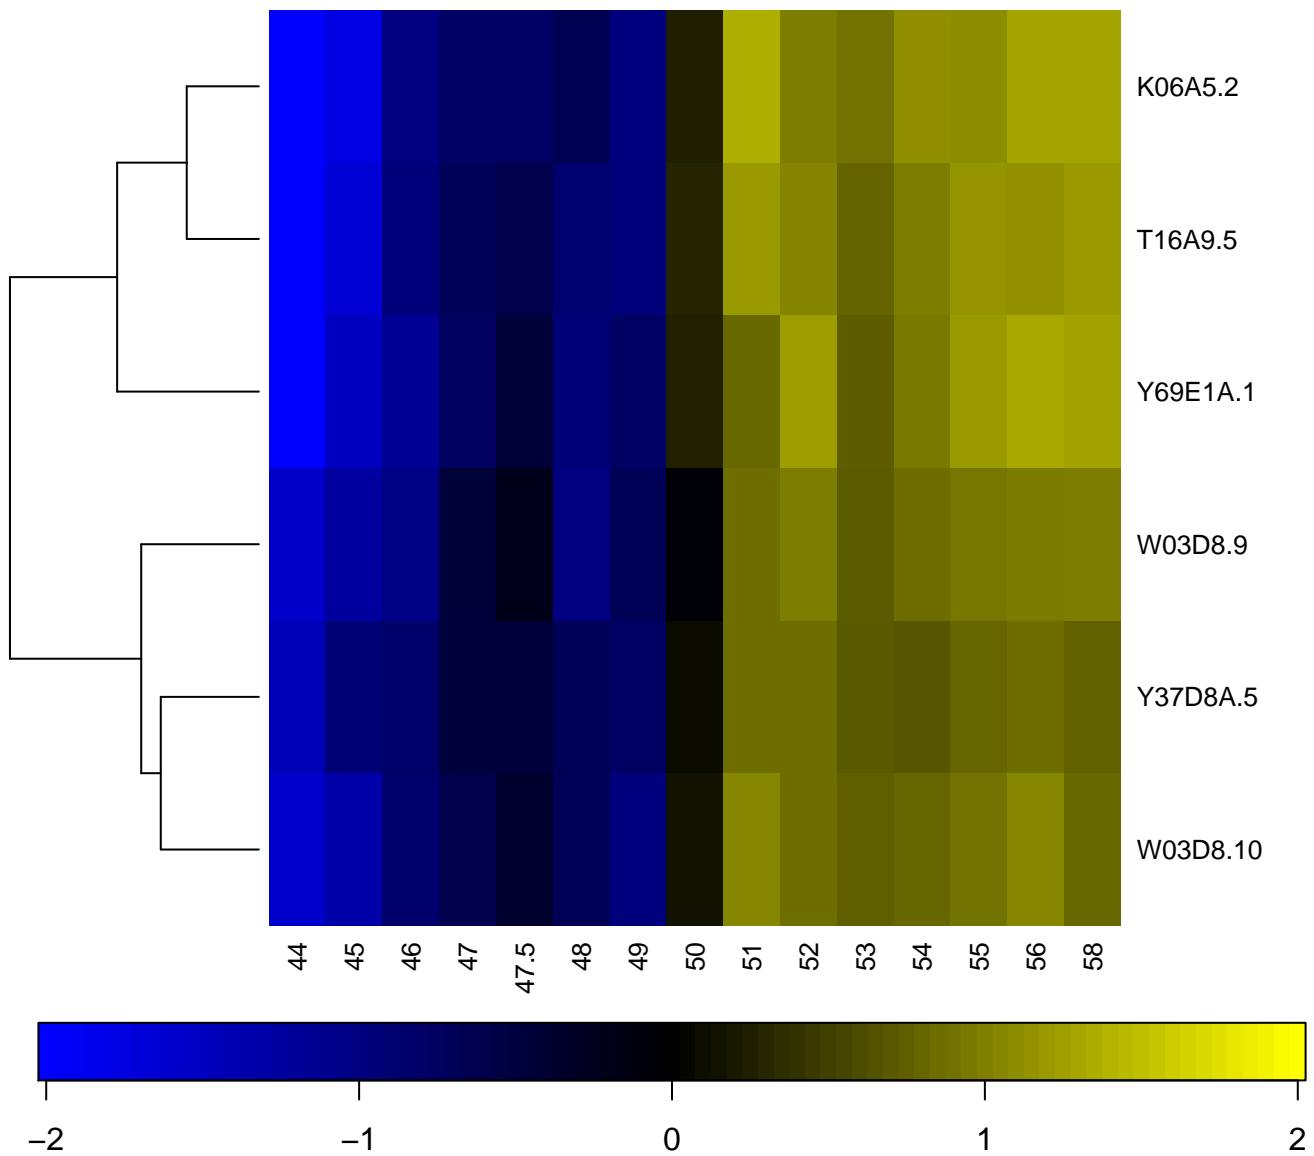

# Intermediate filament protein

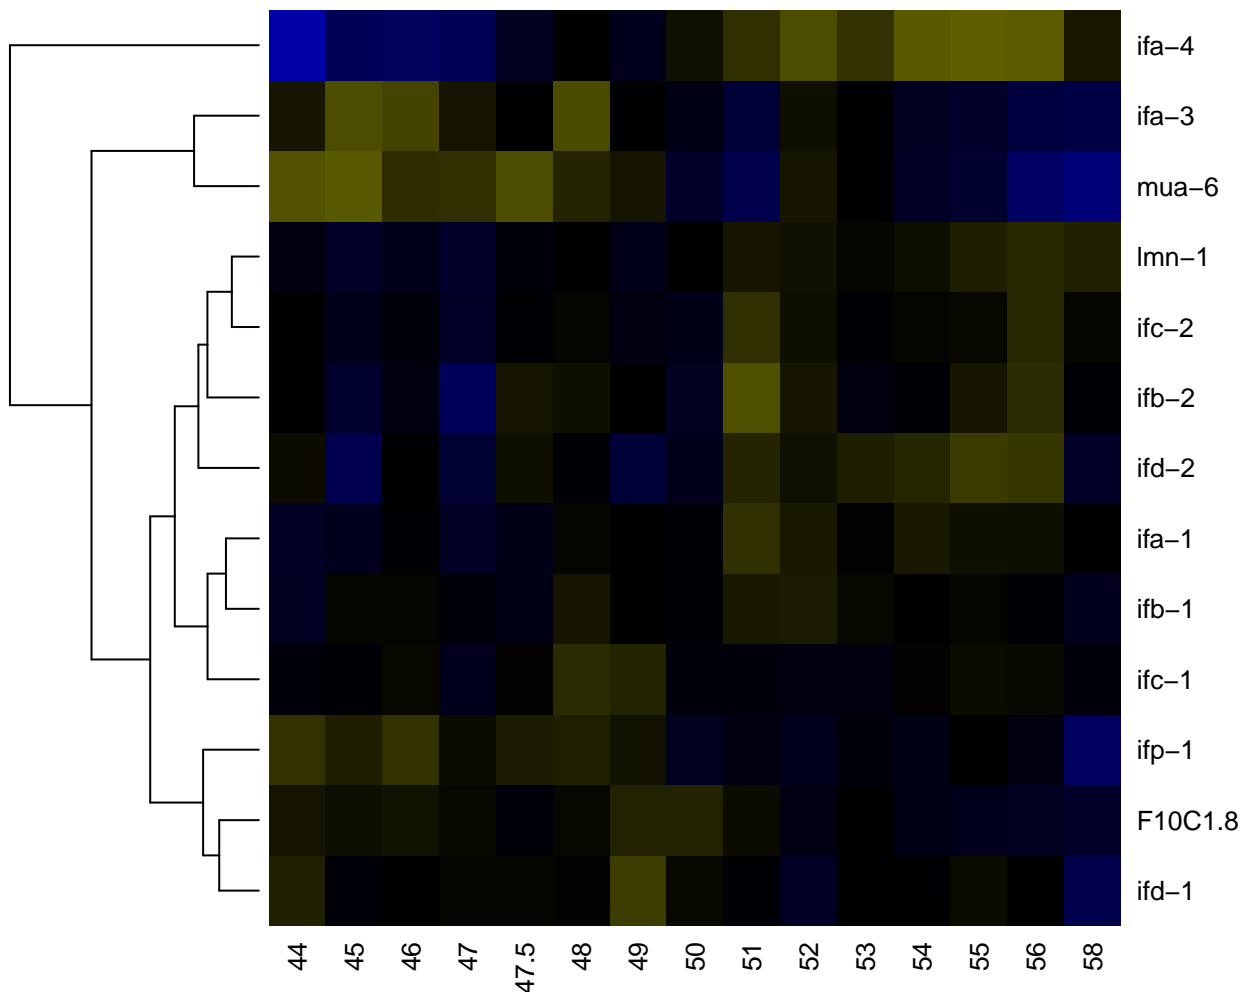









# Ion channel

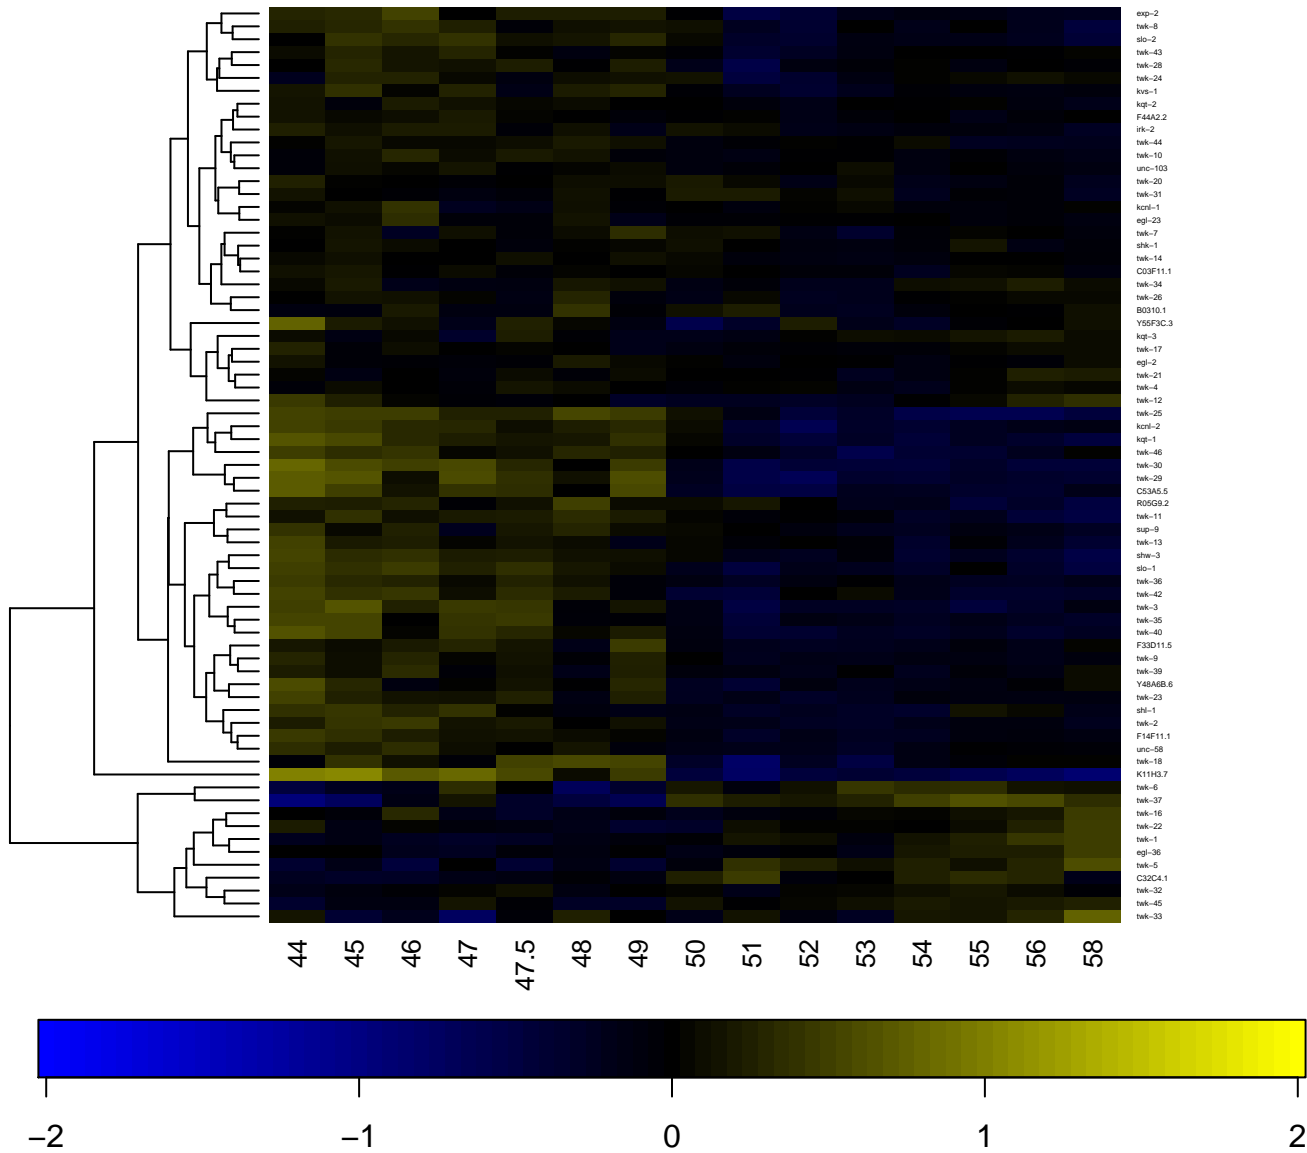



# Ion channel regulatory protein, UNC-93

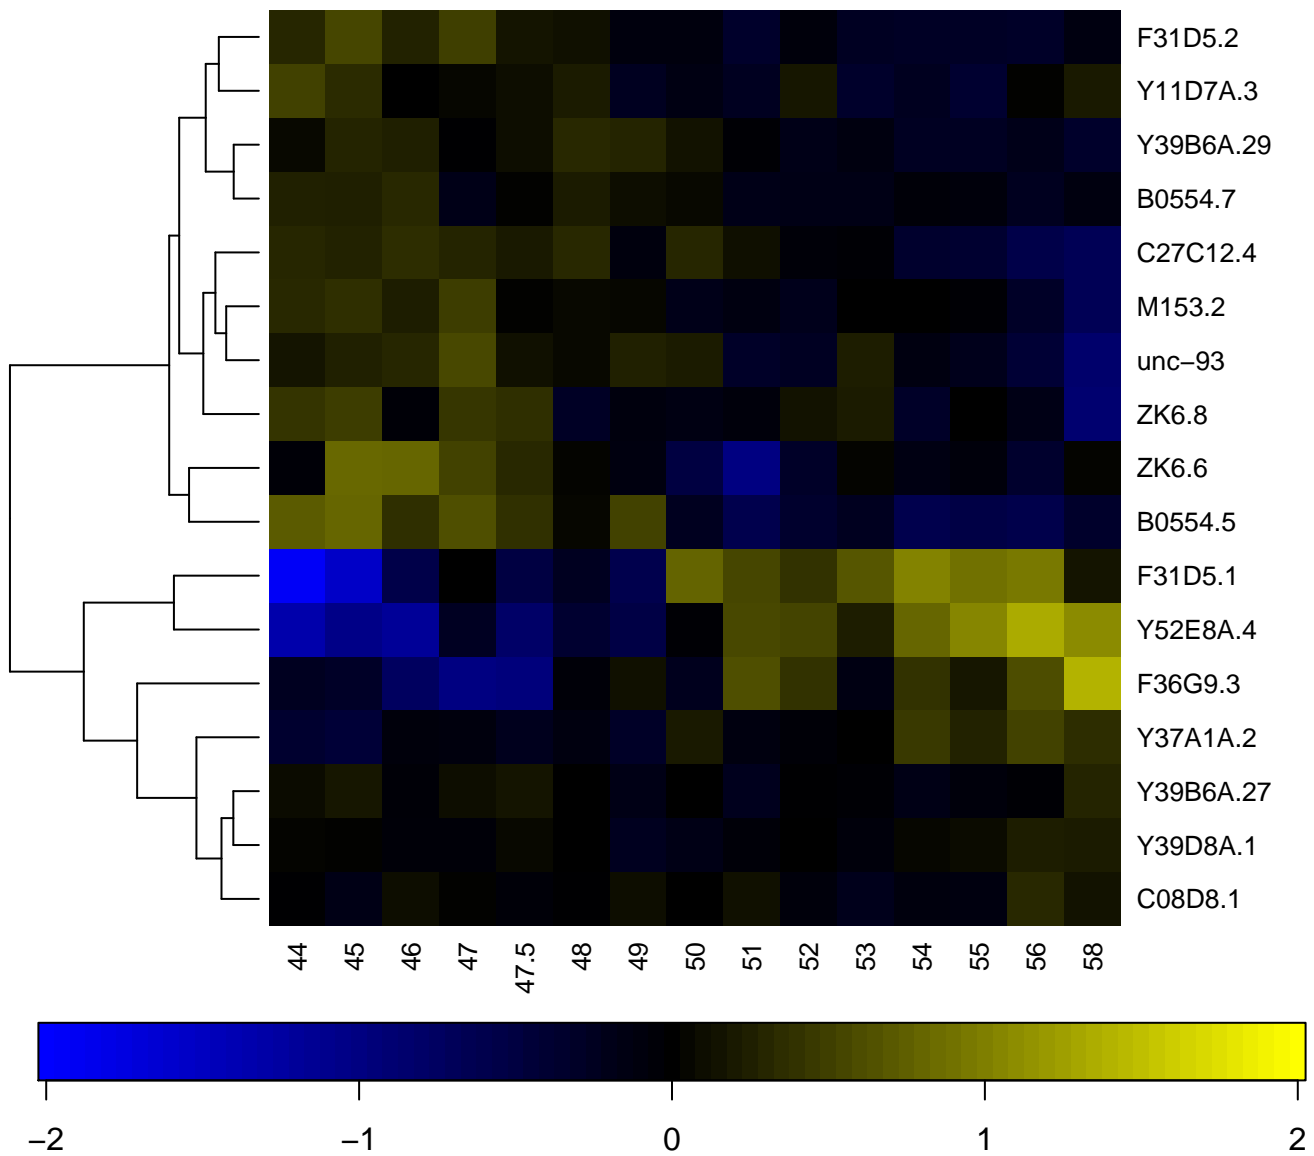

# Ion transport

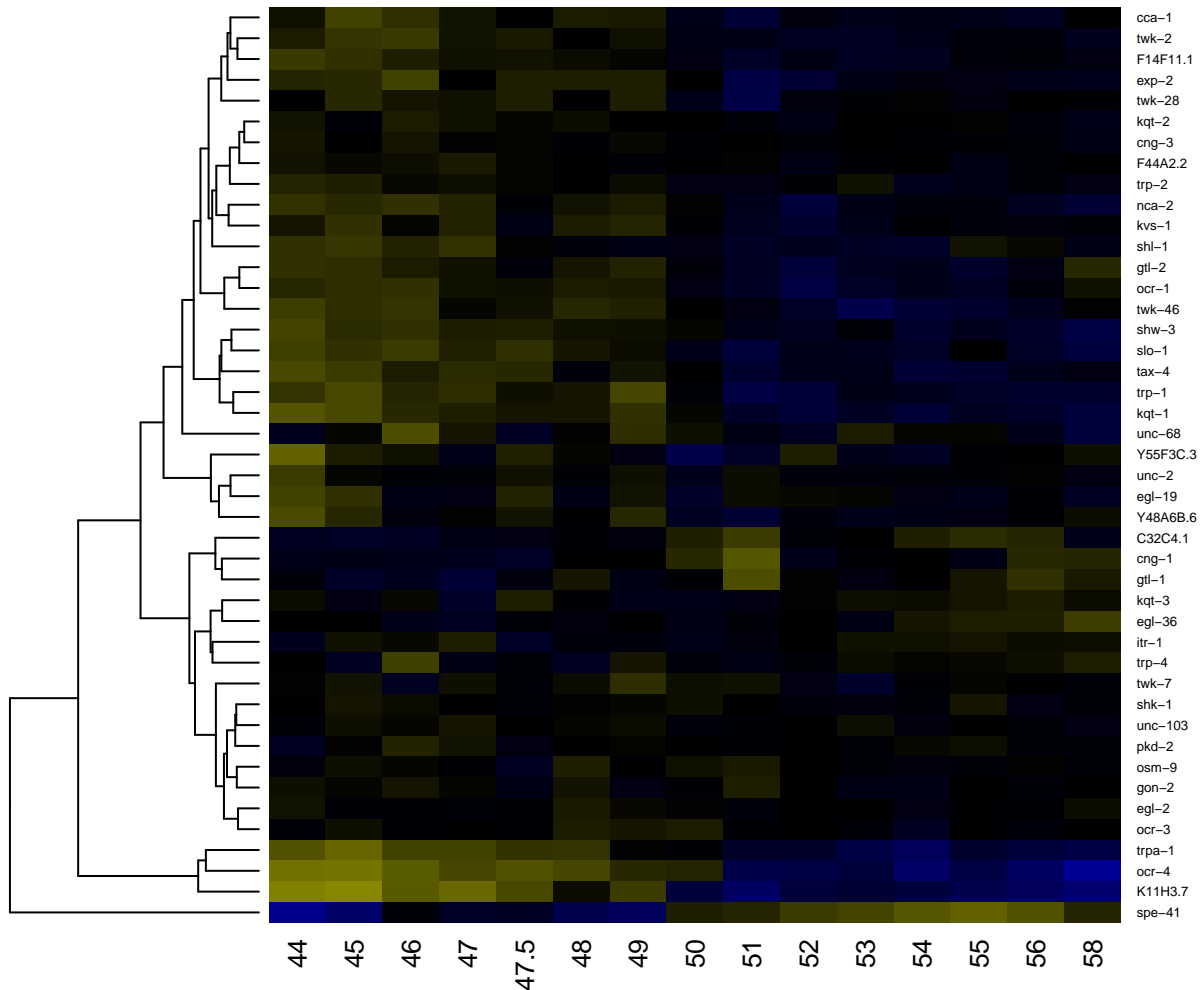

# Ion transport 2





# Ion transport protein



-2

-1

0

1

2



# IQ calmodulin-binding motif

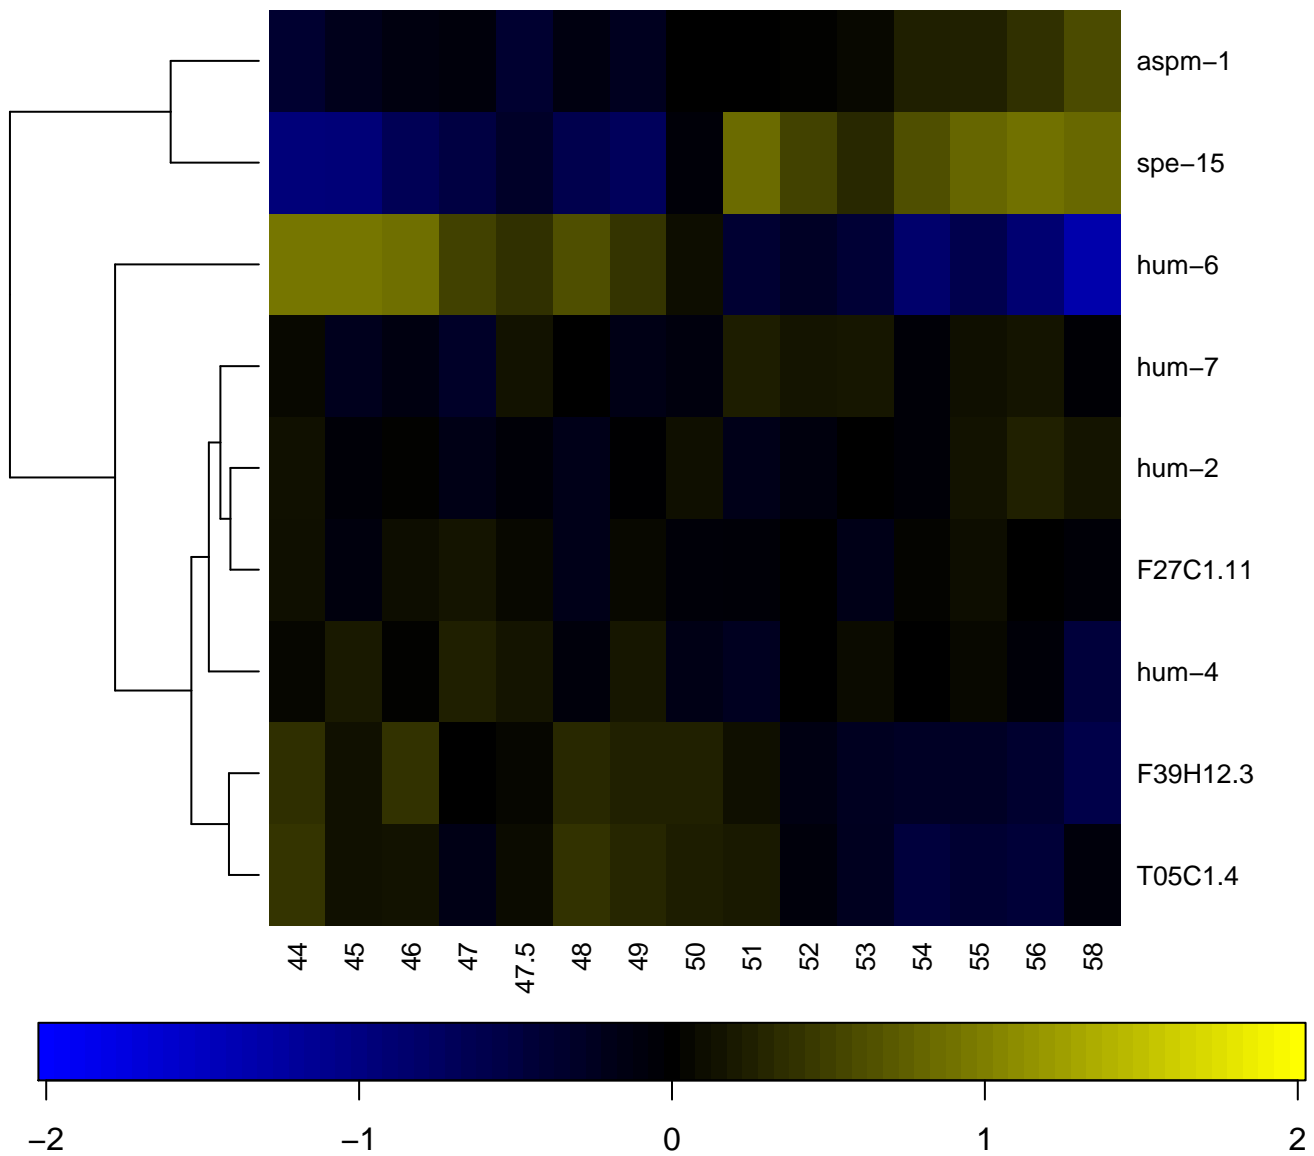

# IQ motif, EF-hand binding site

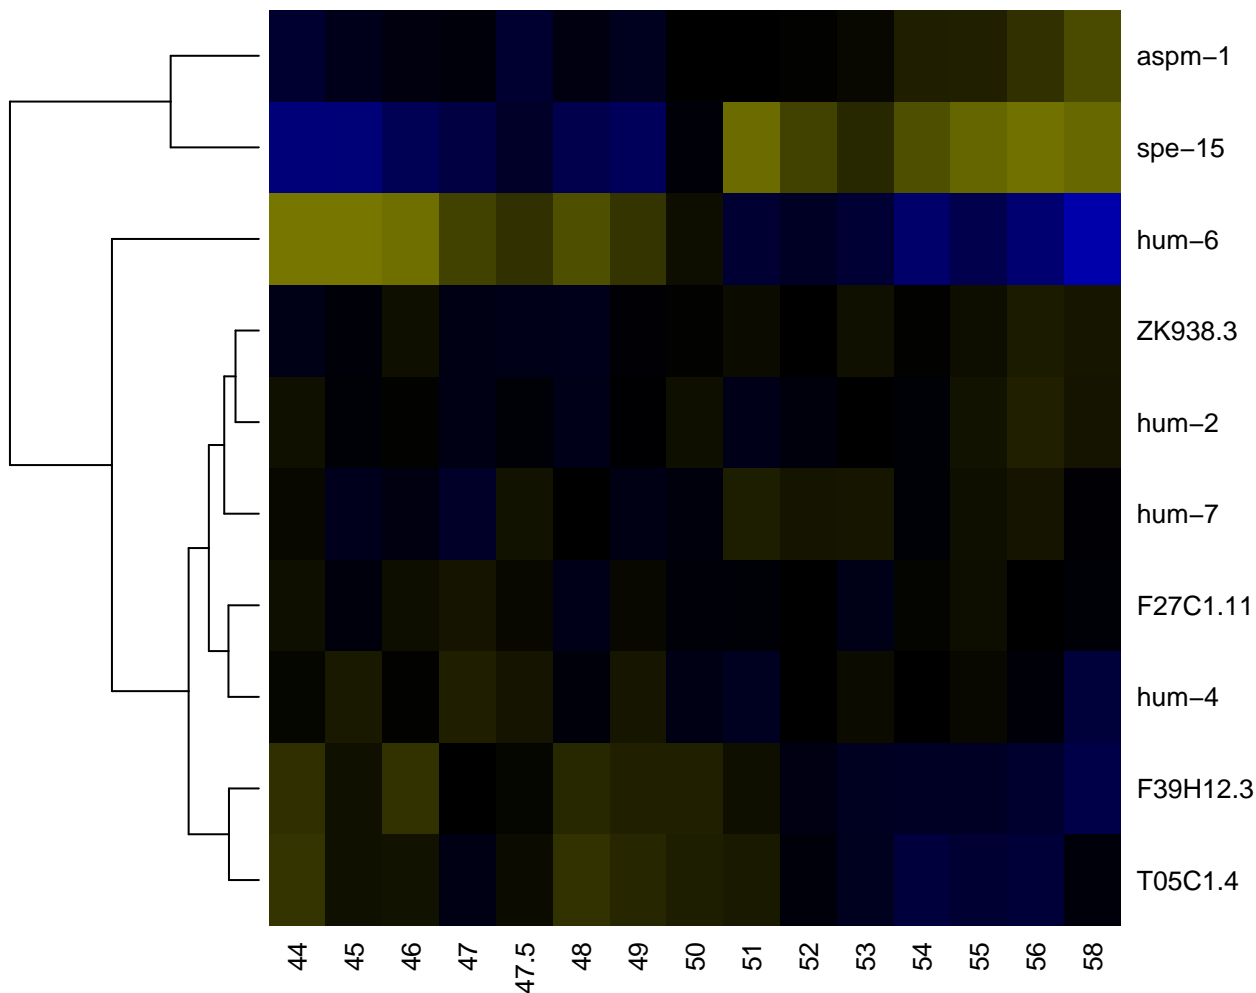











# K Homology

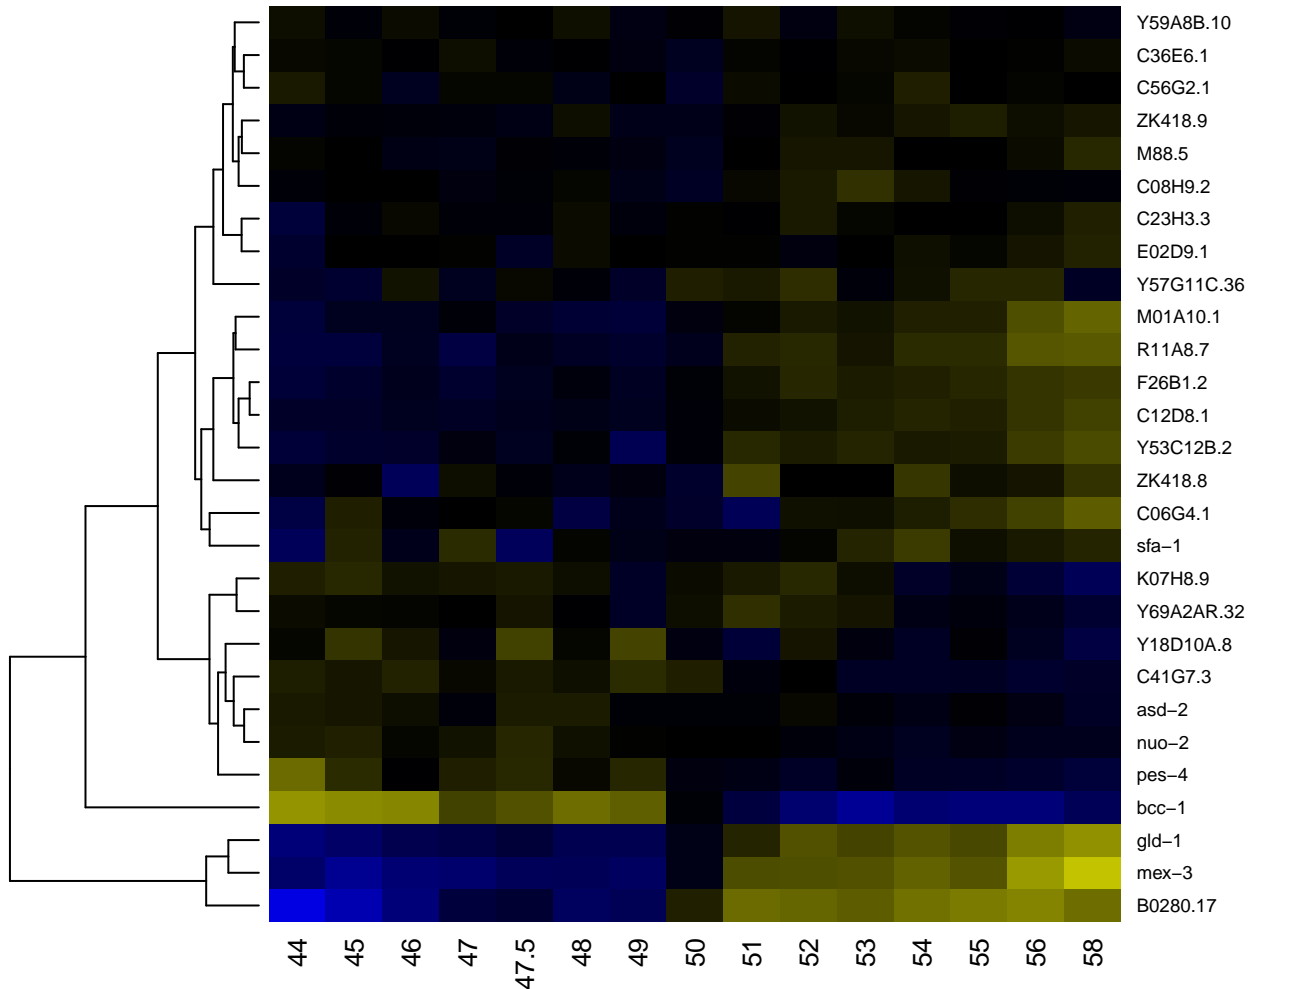

# K Homology, type 1, subgroup

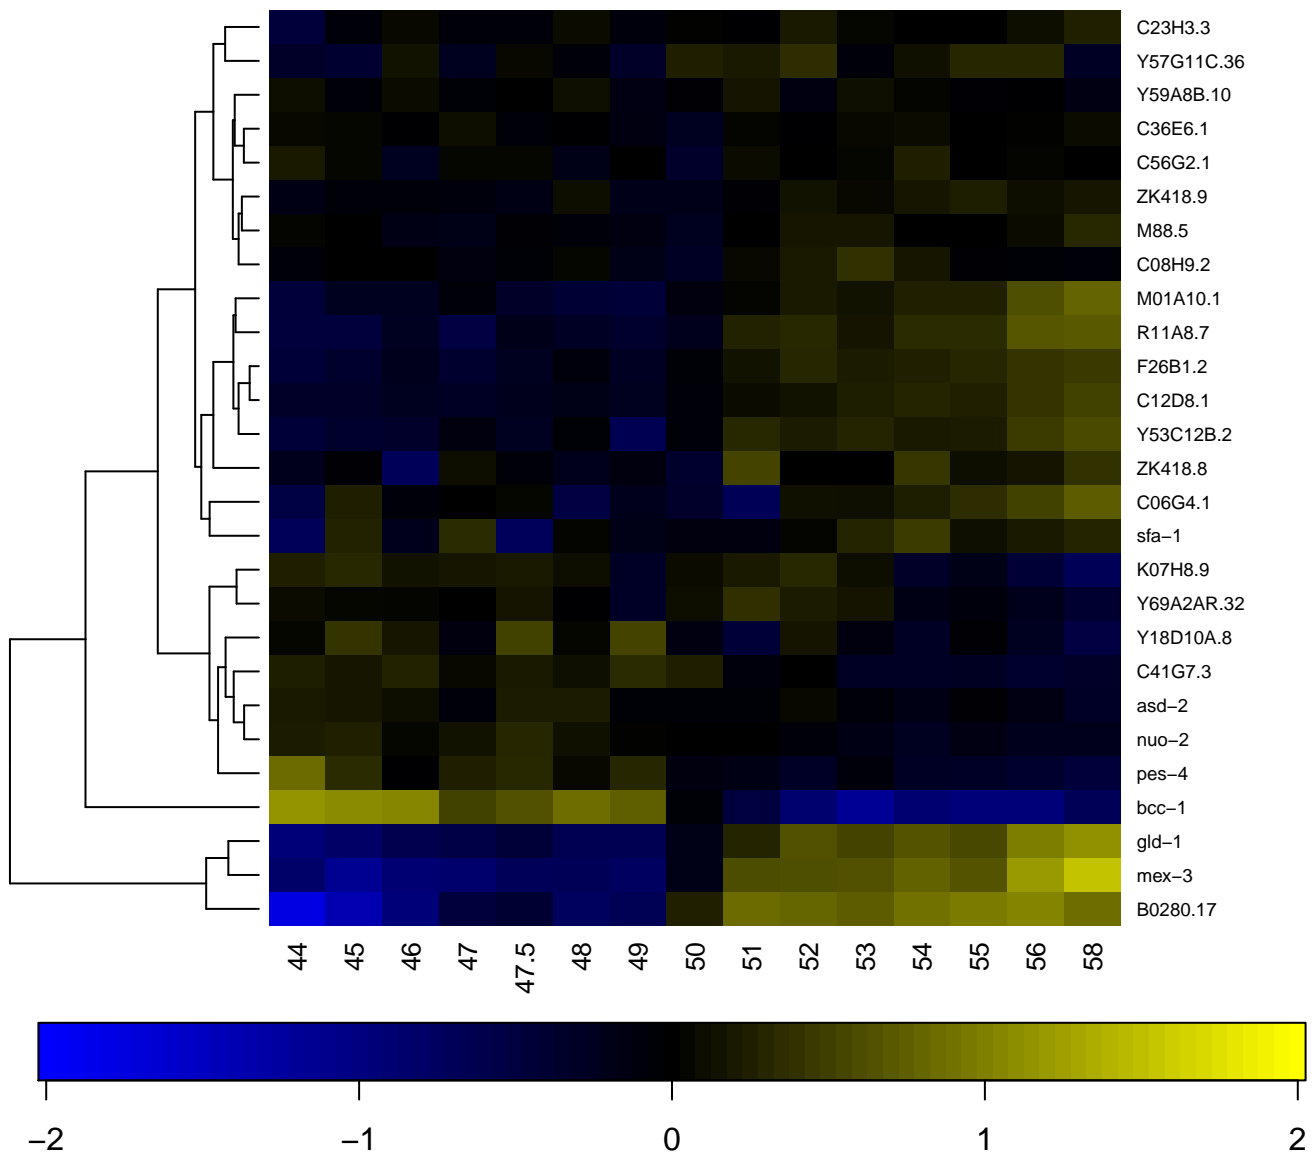

# K<sup>+</sup> channel tetramerisation domain

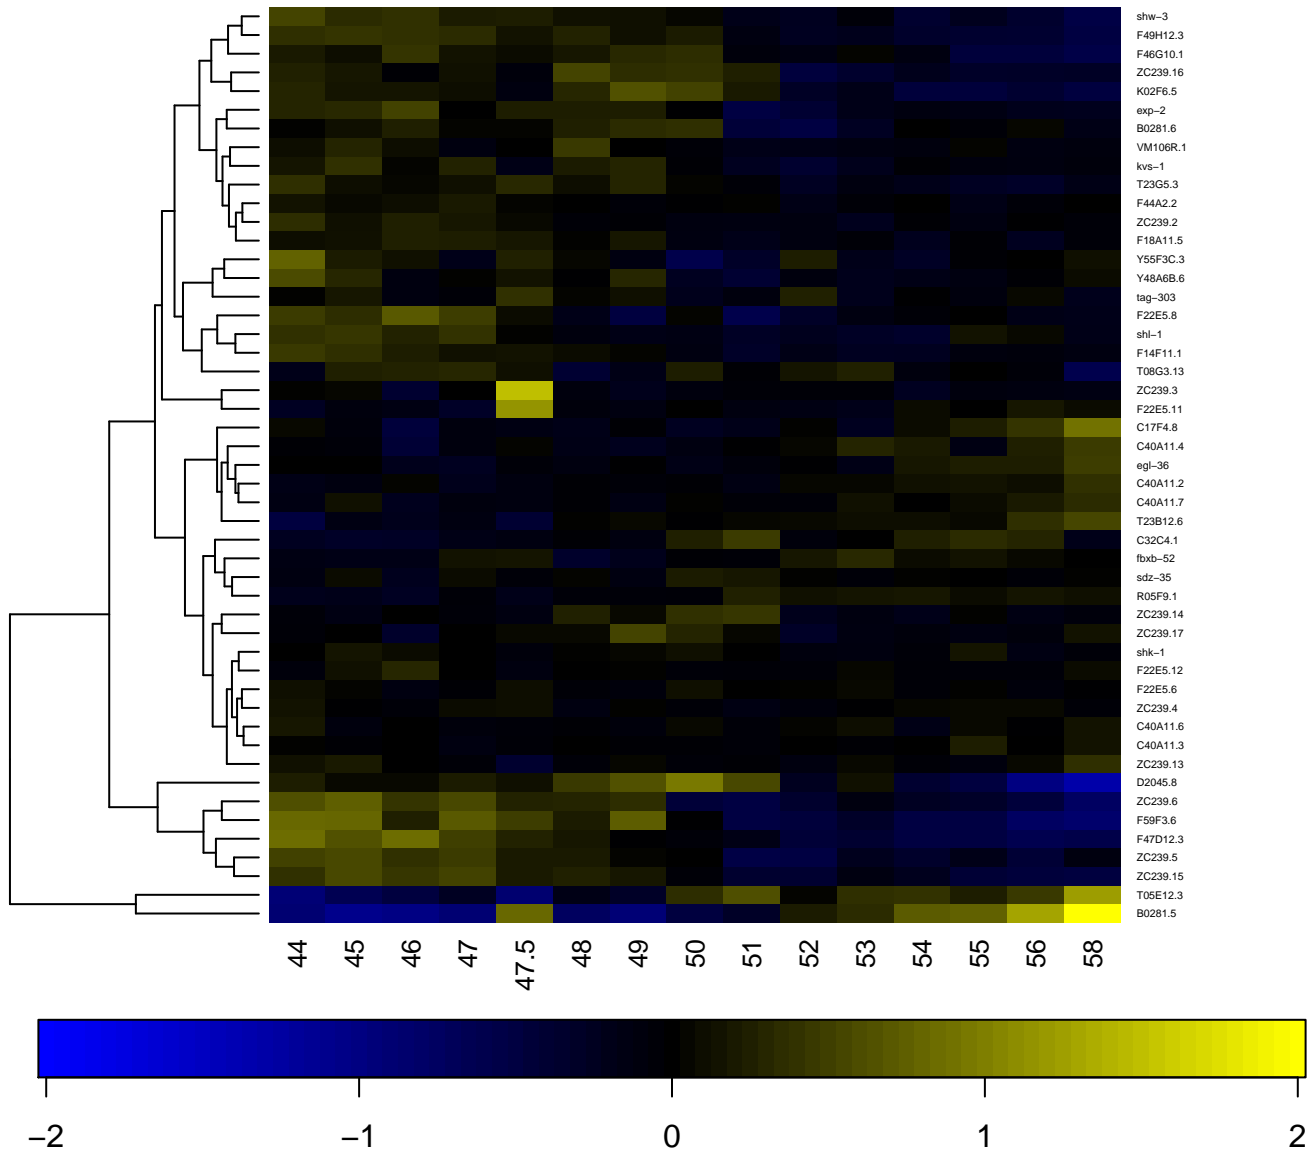

# Kelch-type beta propeller

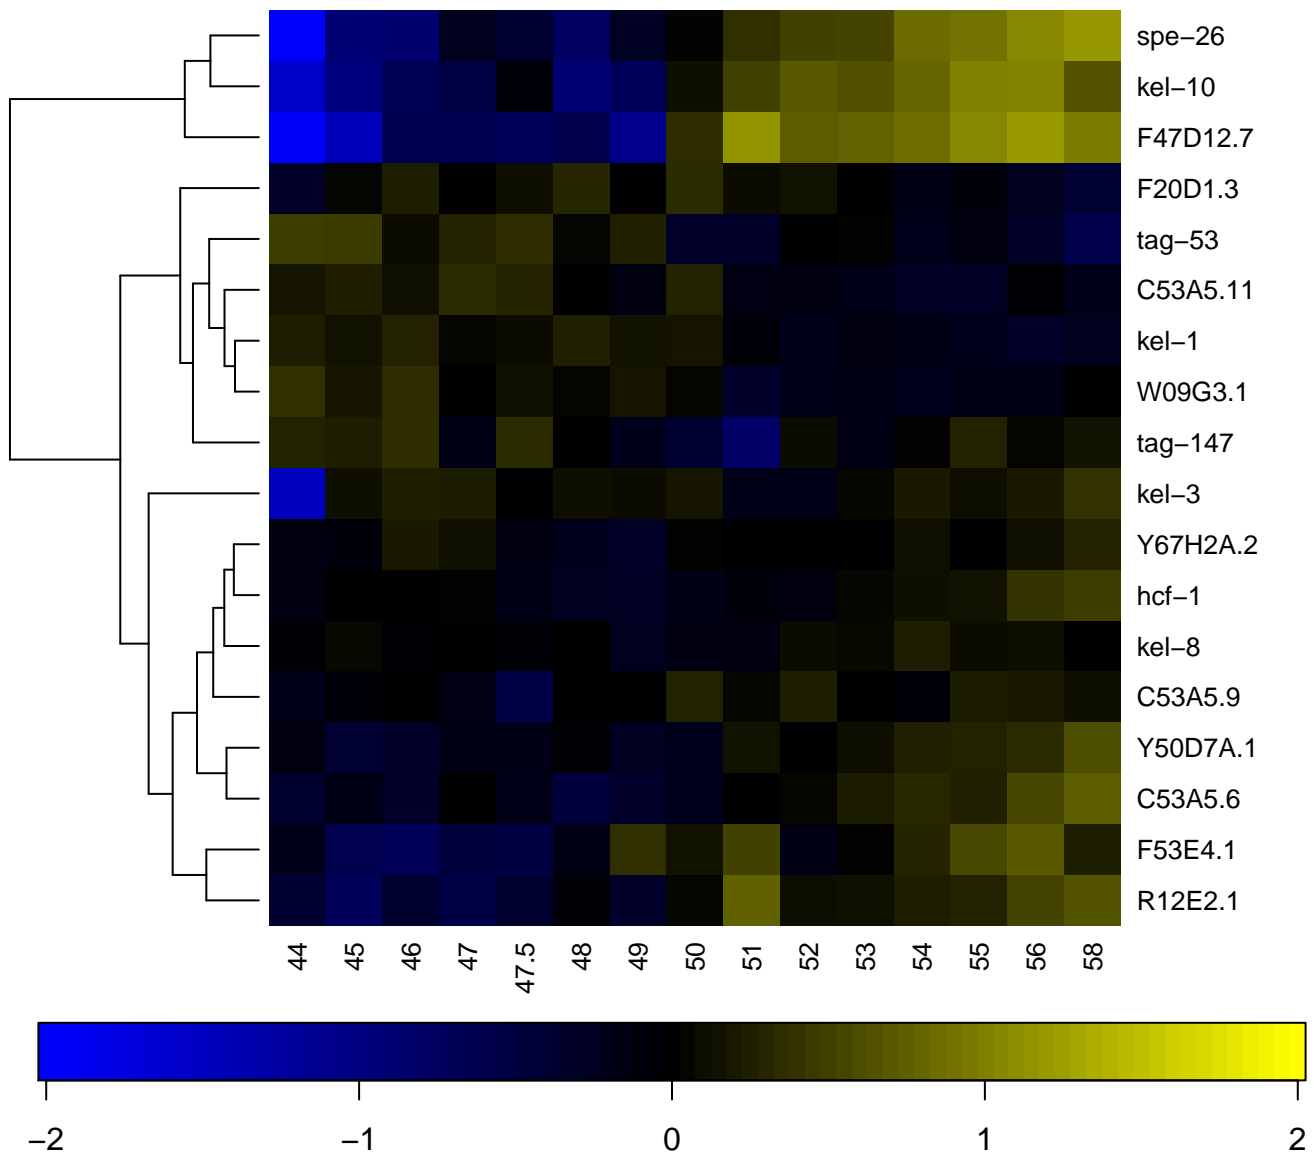

# Kelch motif

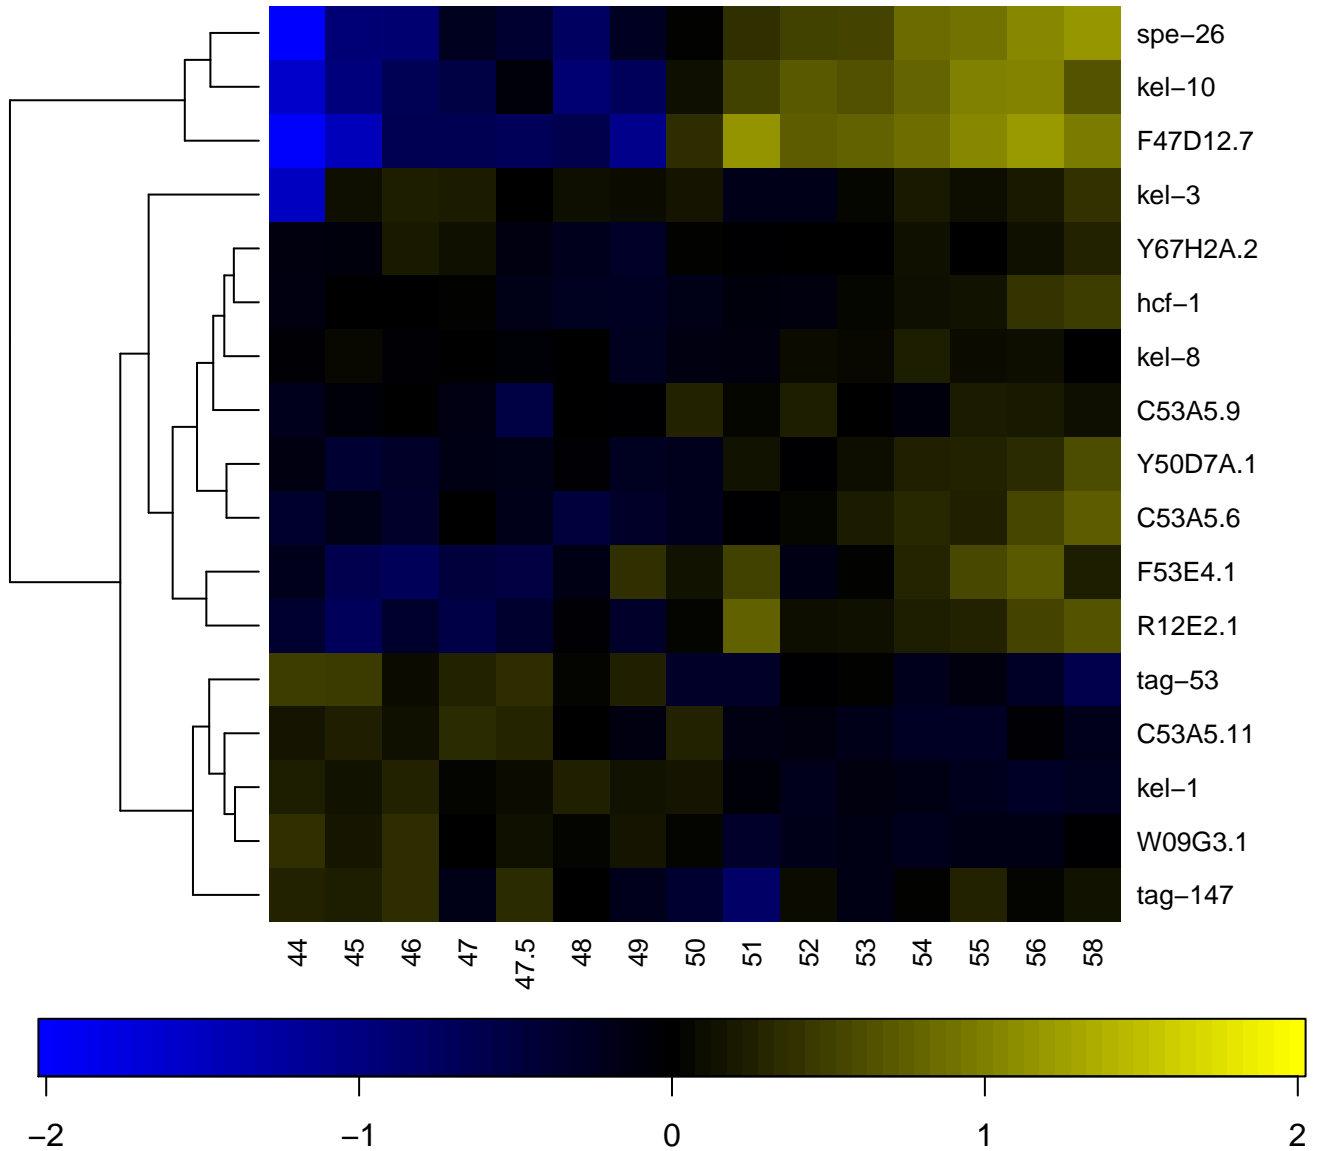

# Kelch related

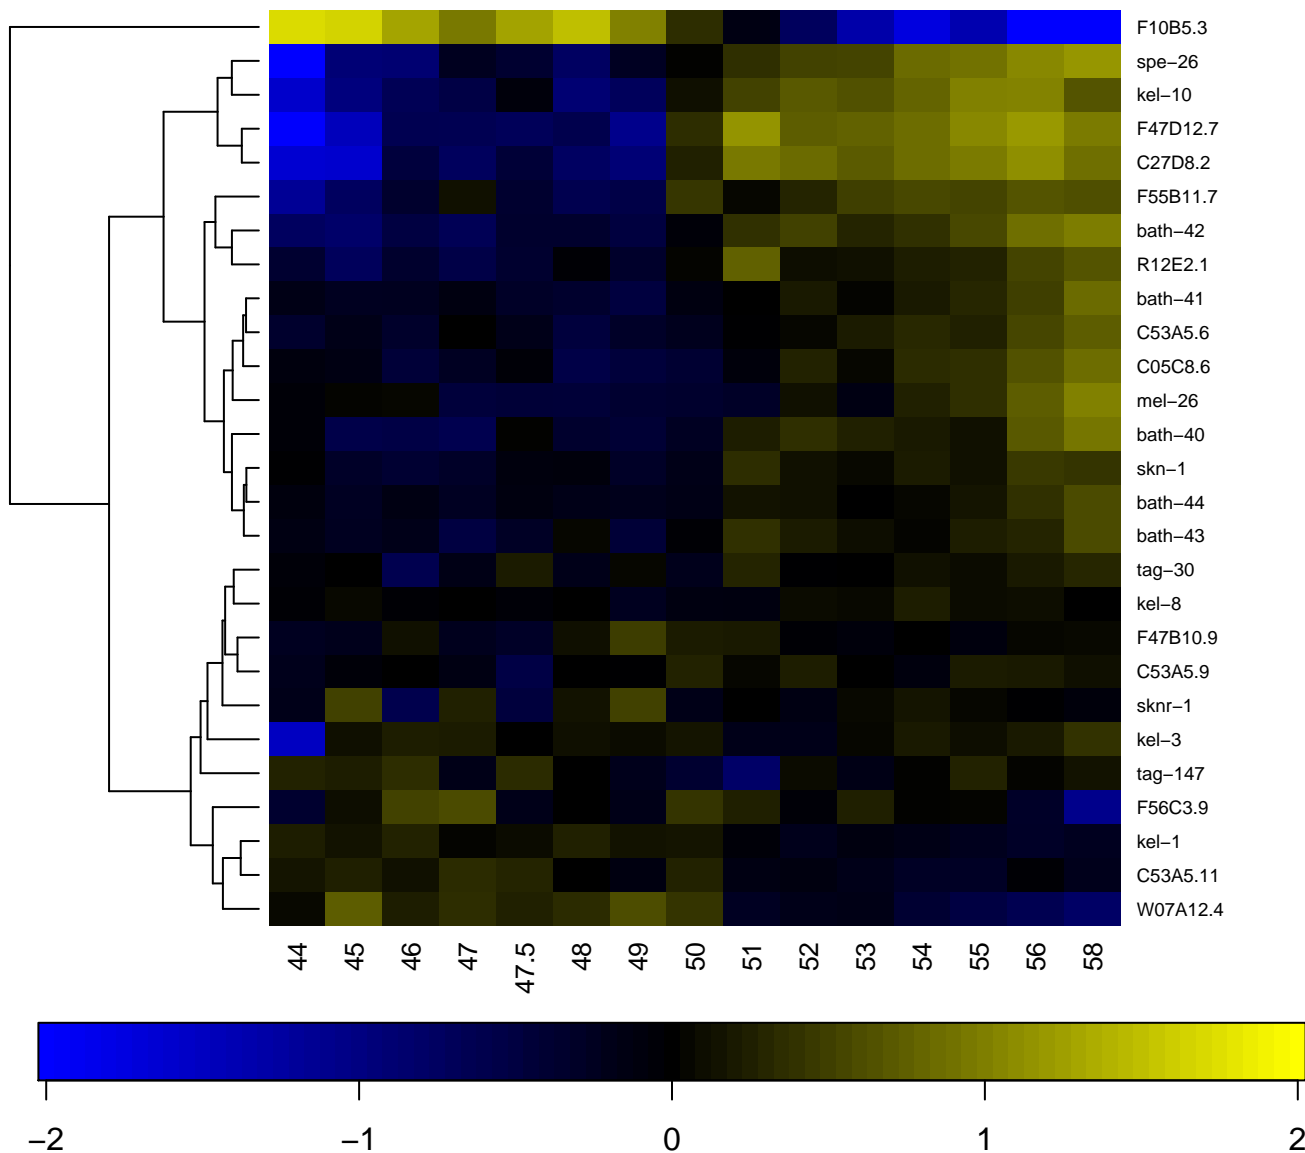

# Kelch repeat type 1

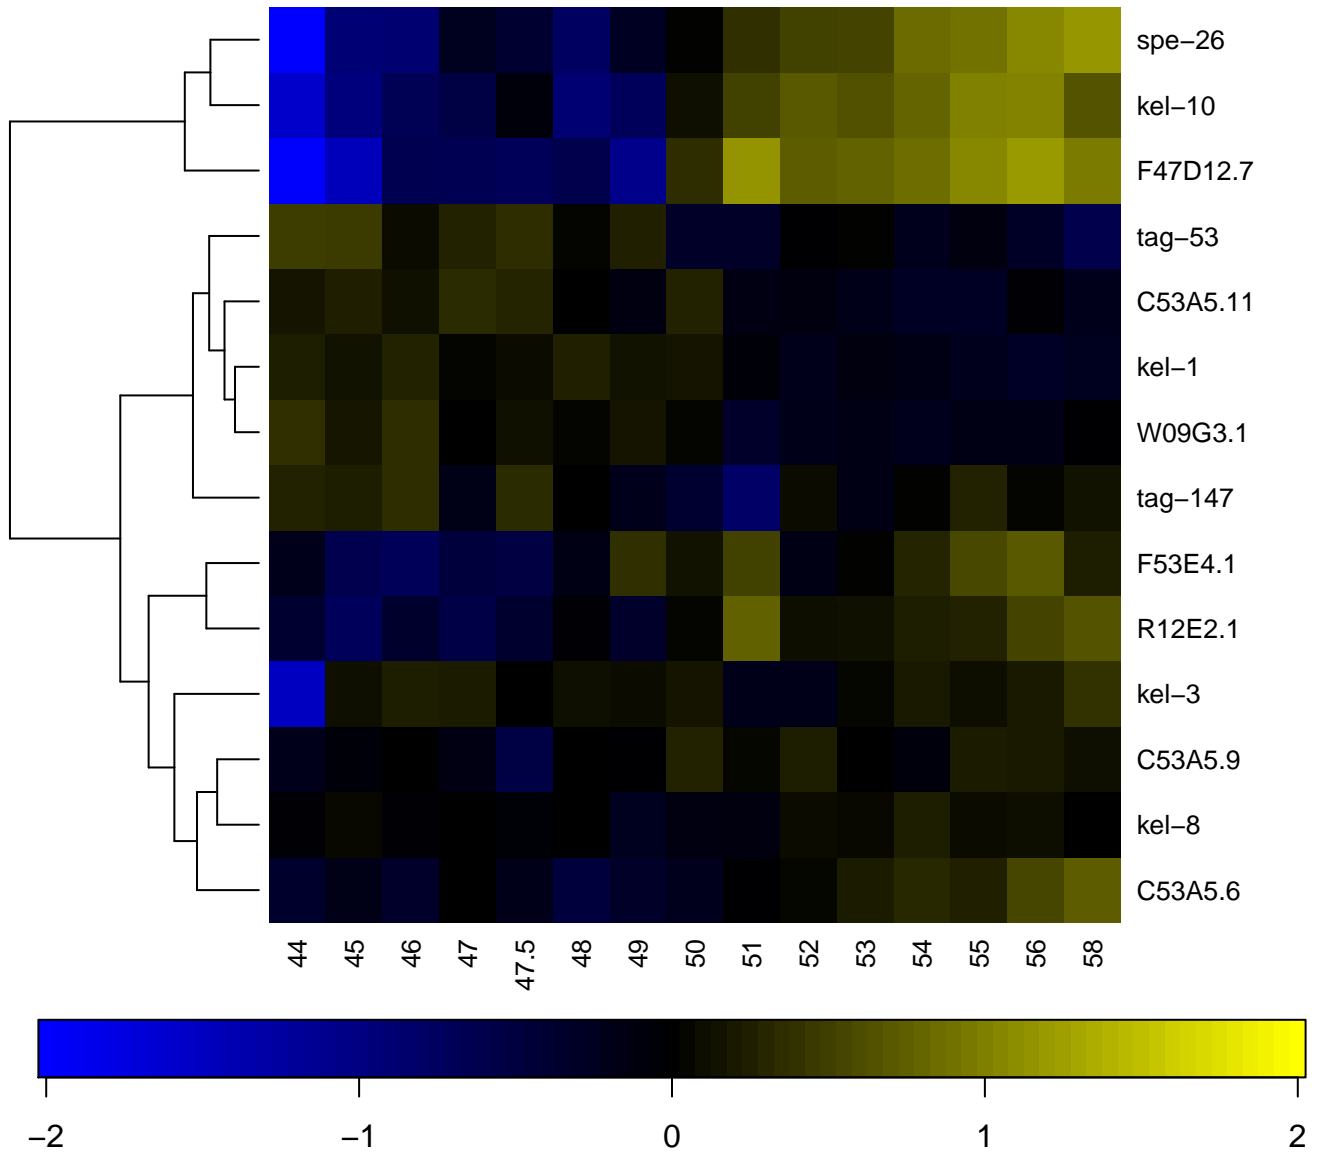

# Kelch repeat type 2

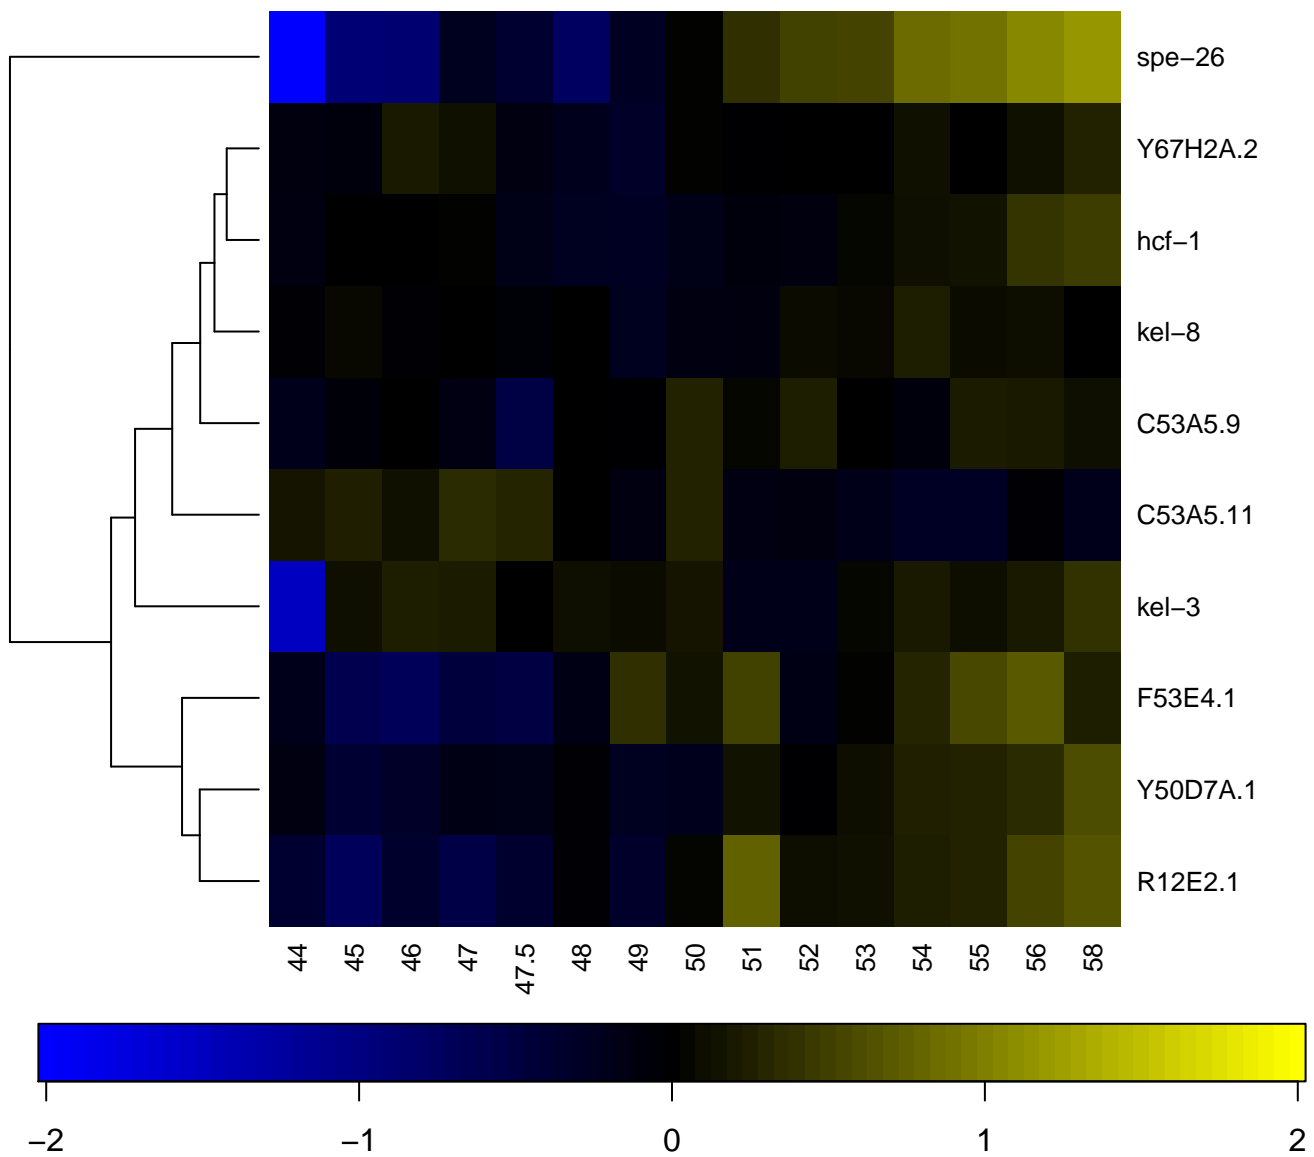



# KH domain

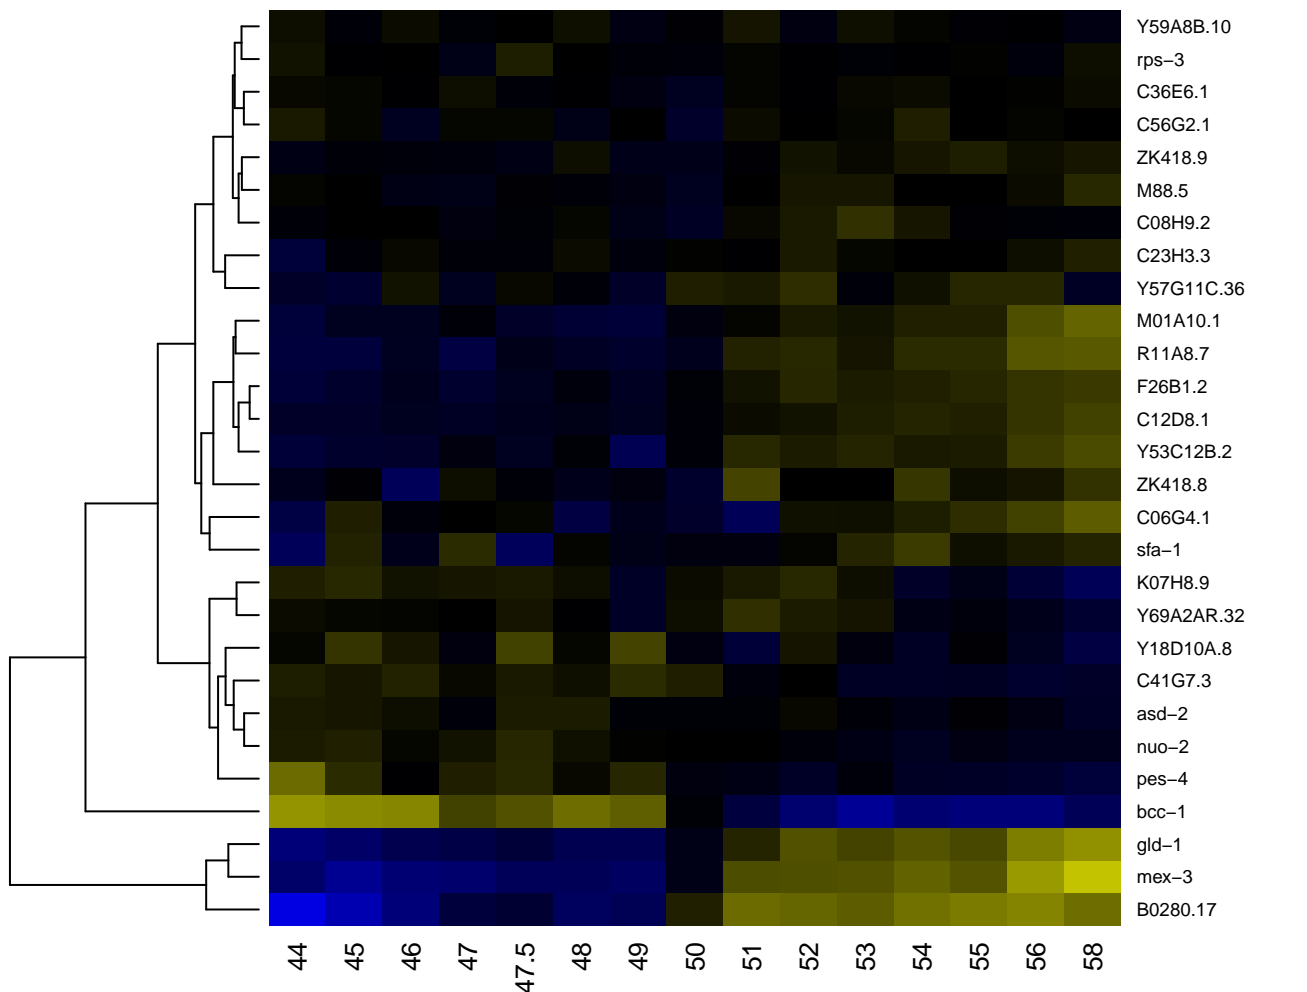







# KIX domain

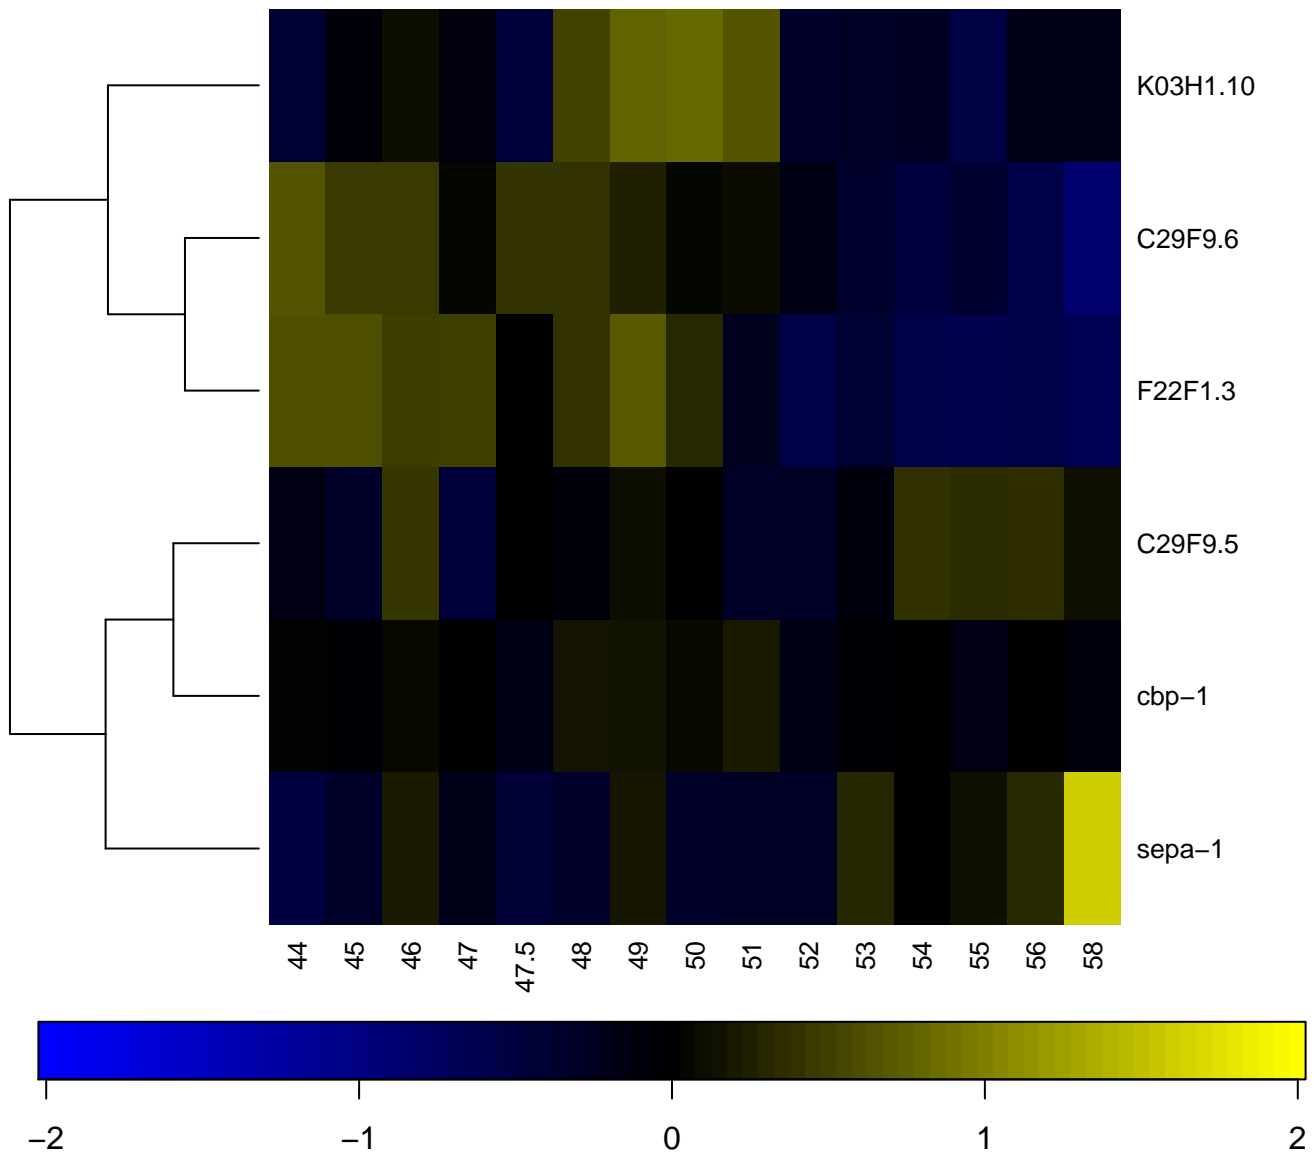





# KR domain

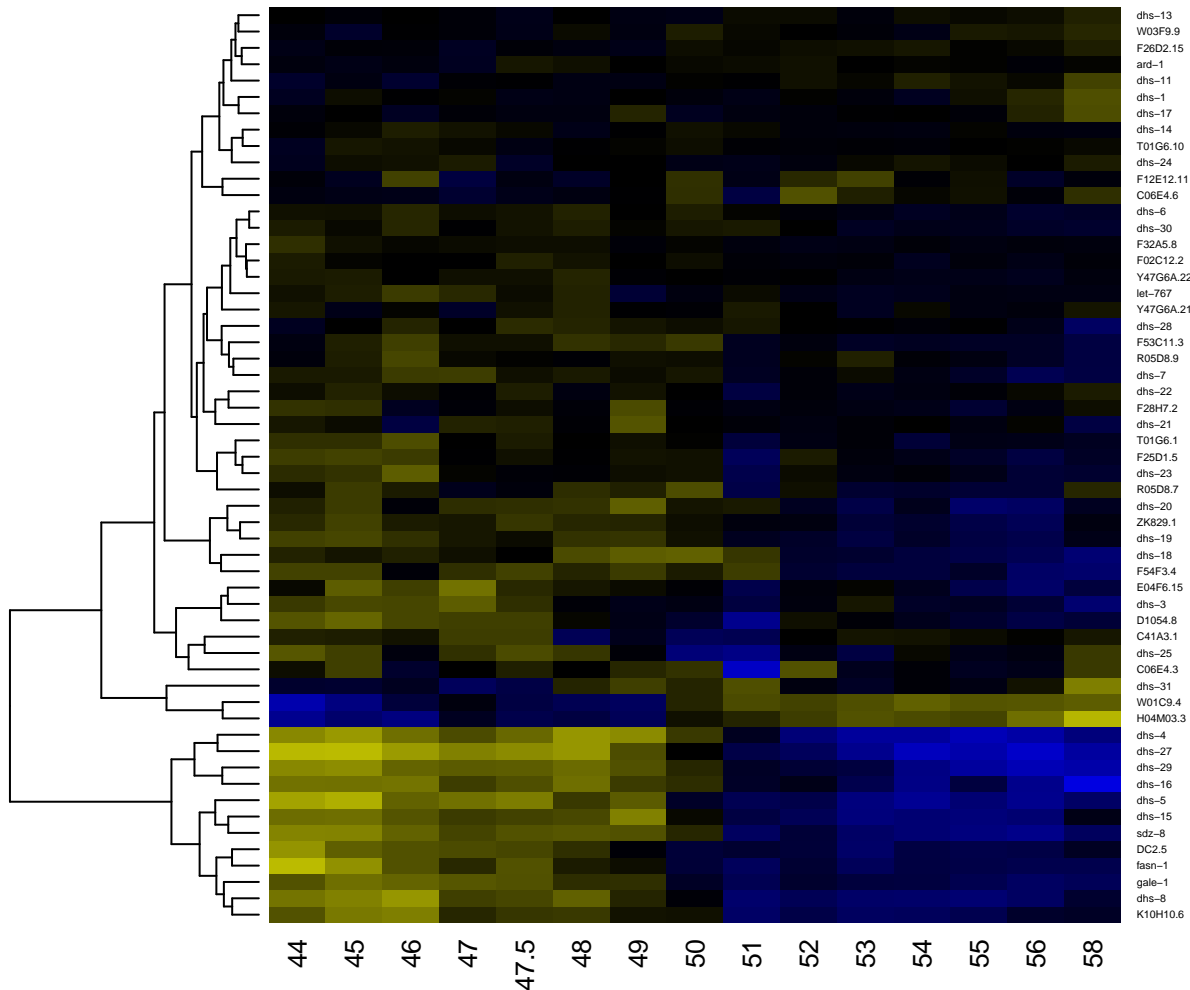



# Kunitz/Bovine pancreatic trypsin inhibitor domain

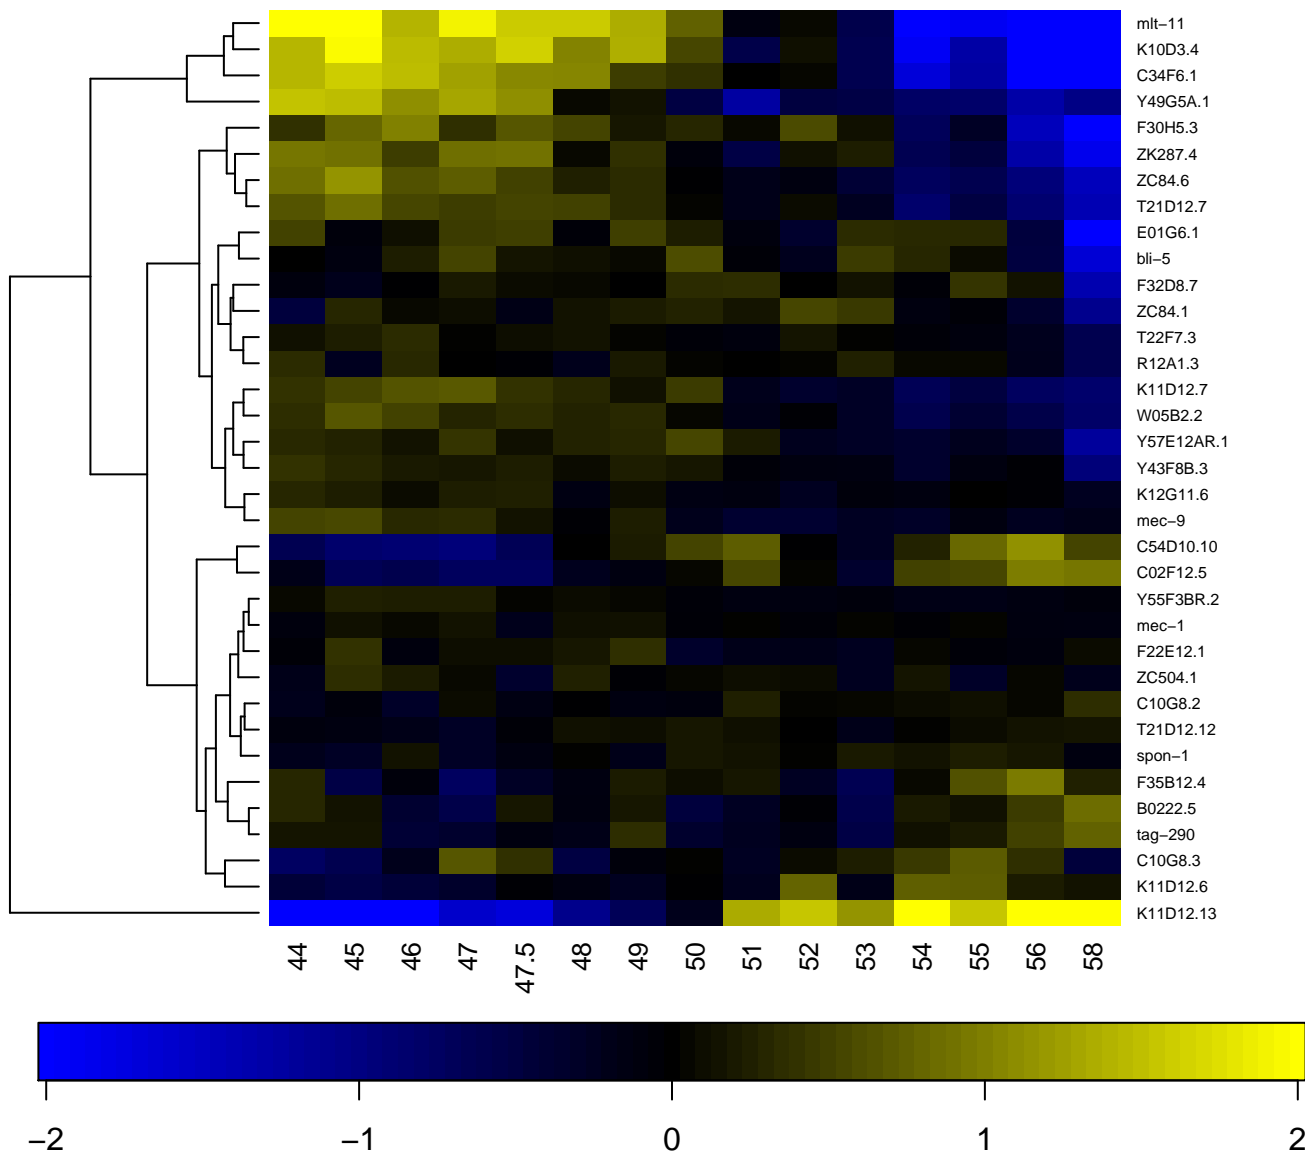









# Laminin G, subdomain 2

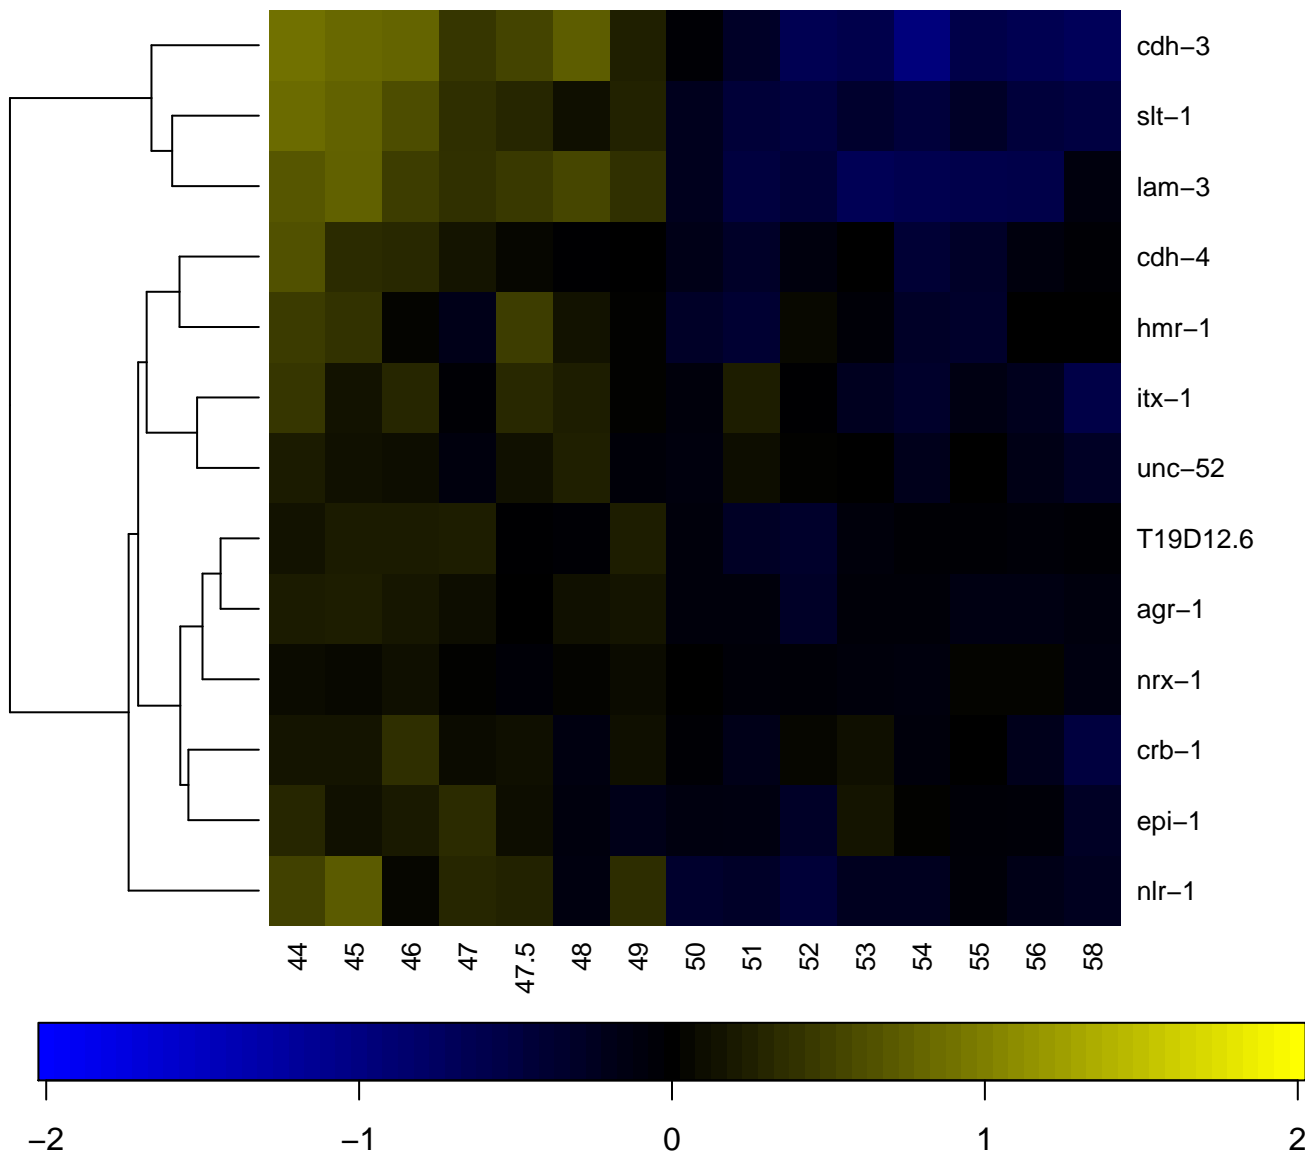

# Laminin N-terminal (Domain VI)

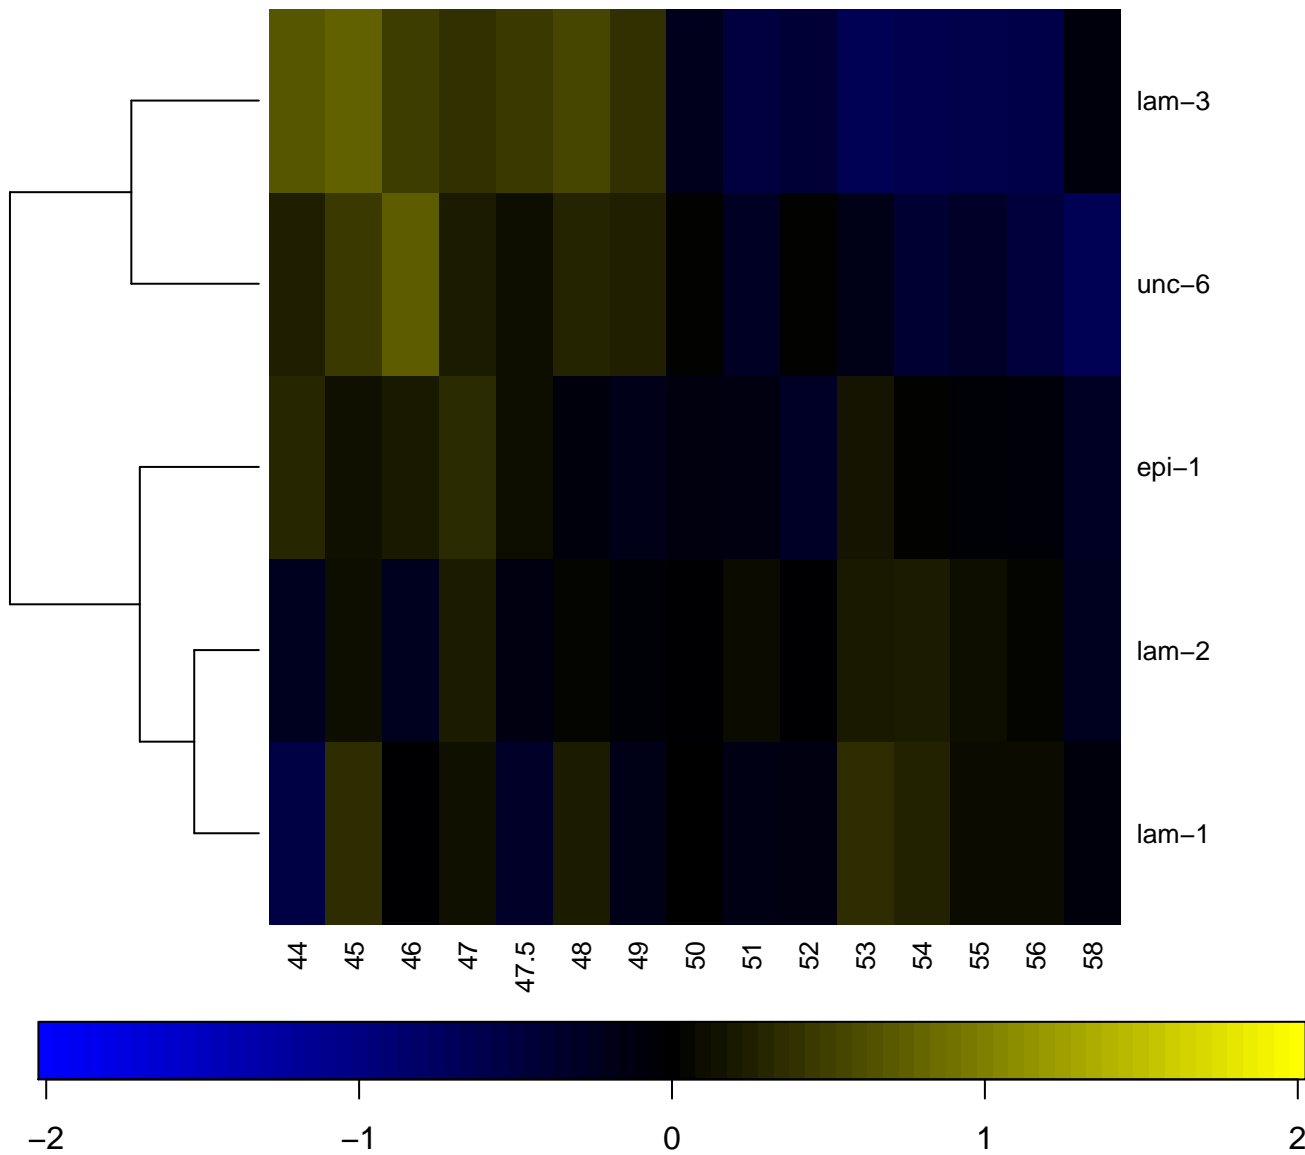





# LBP / BPI / CETP family, C-terminal domain

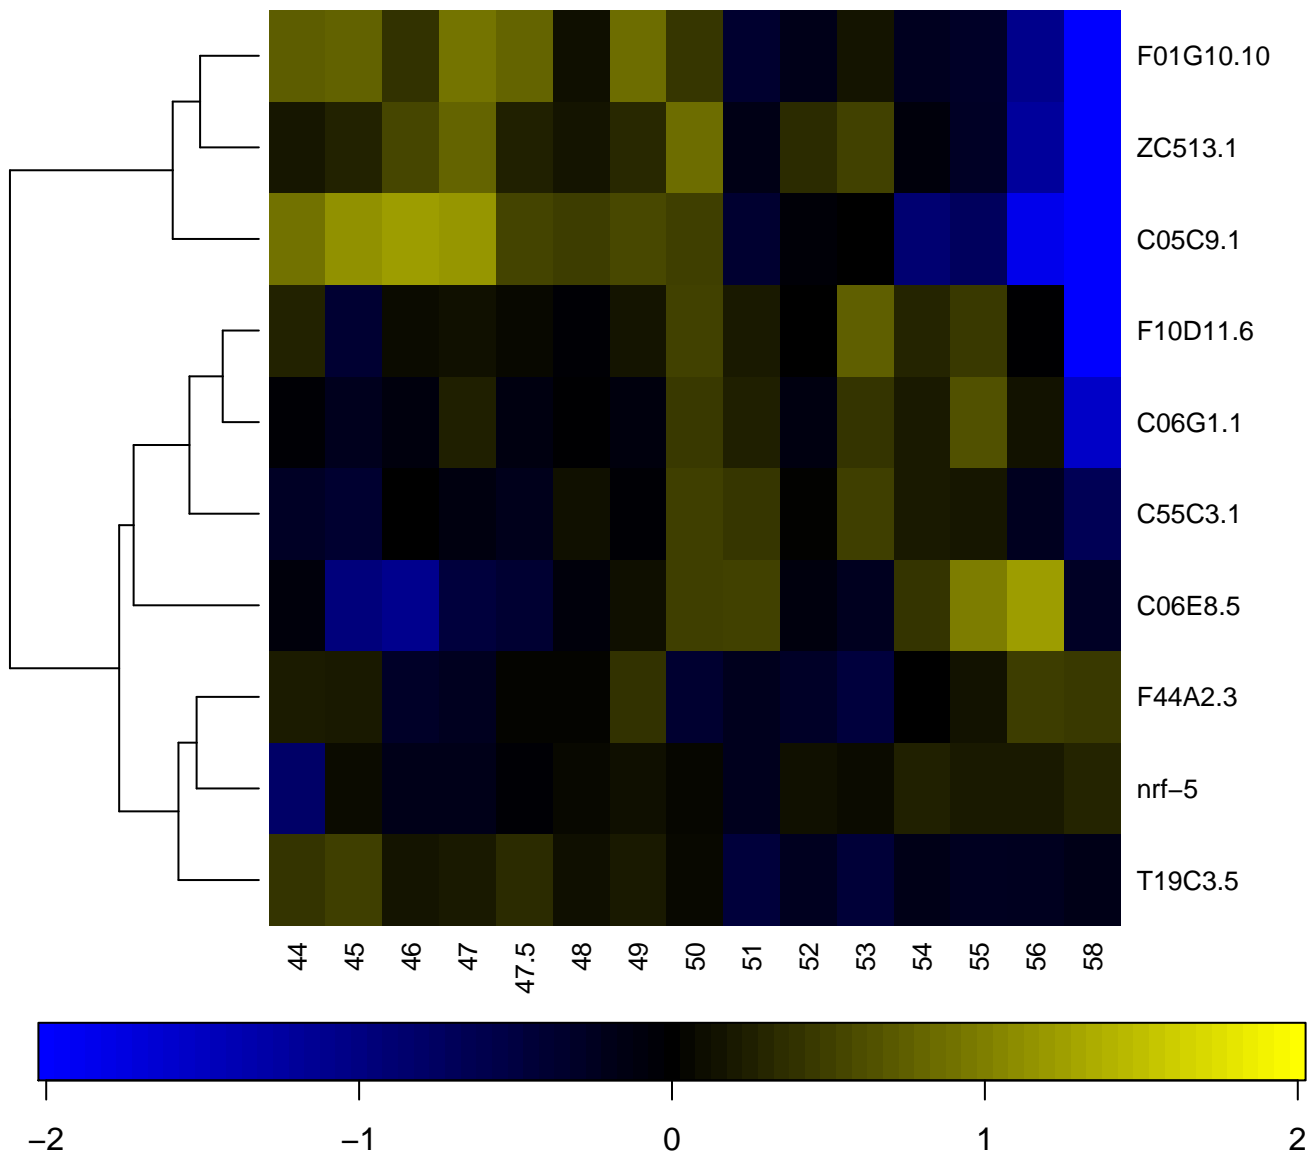

# LBP / BPI / CETP family, N-terminal domain

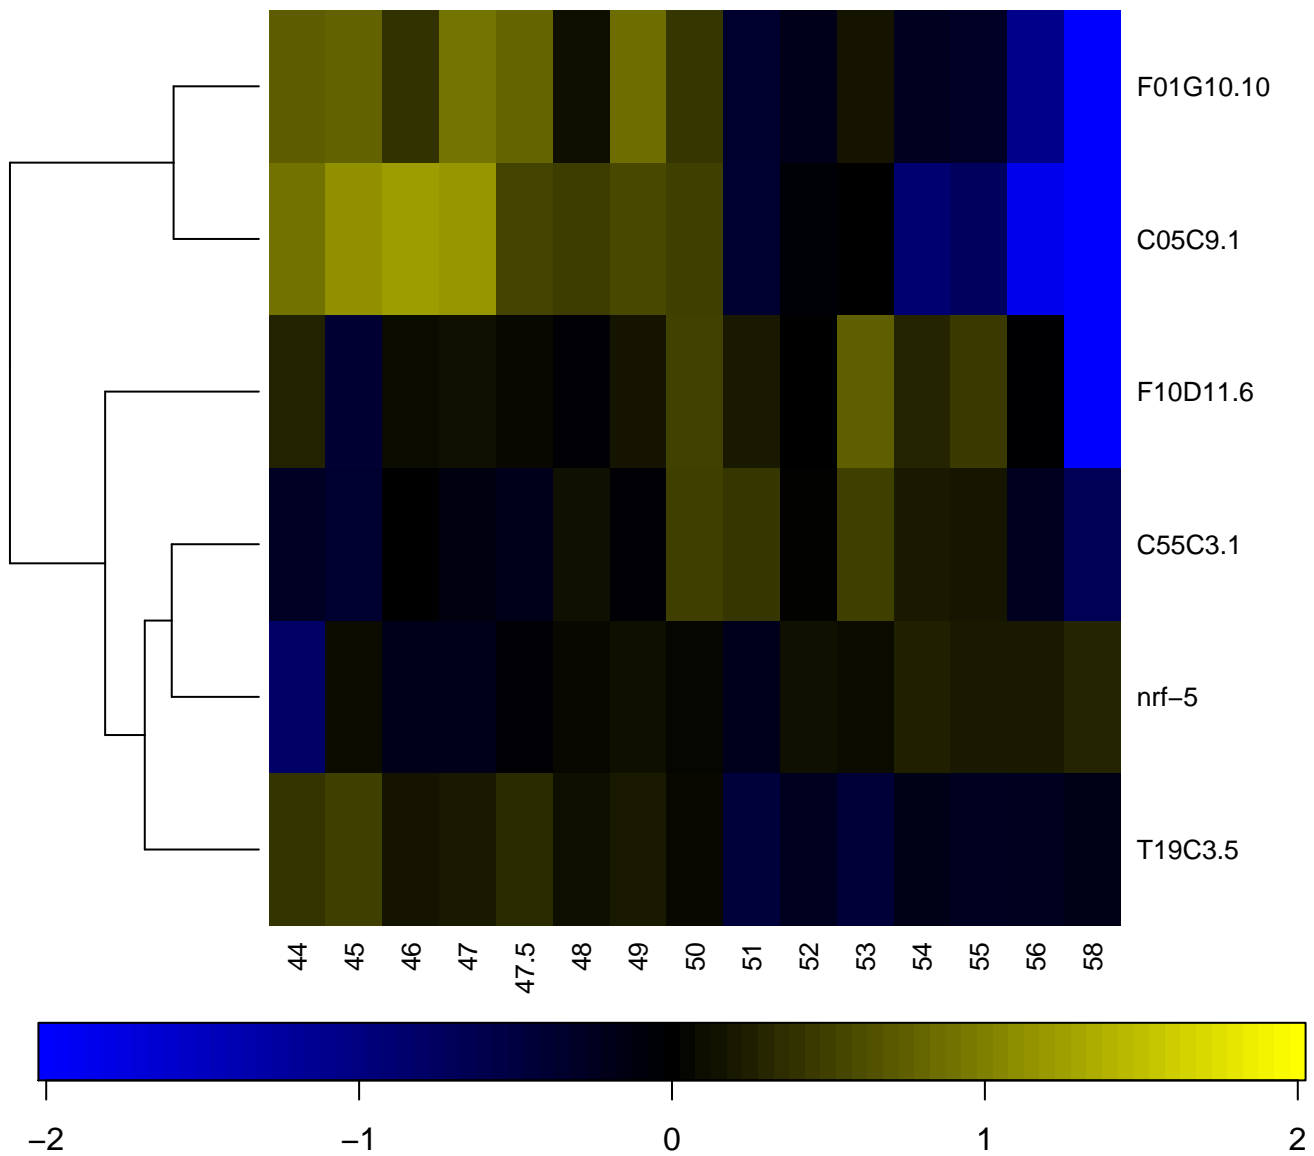

# LDLR class A repeat

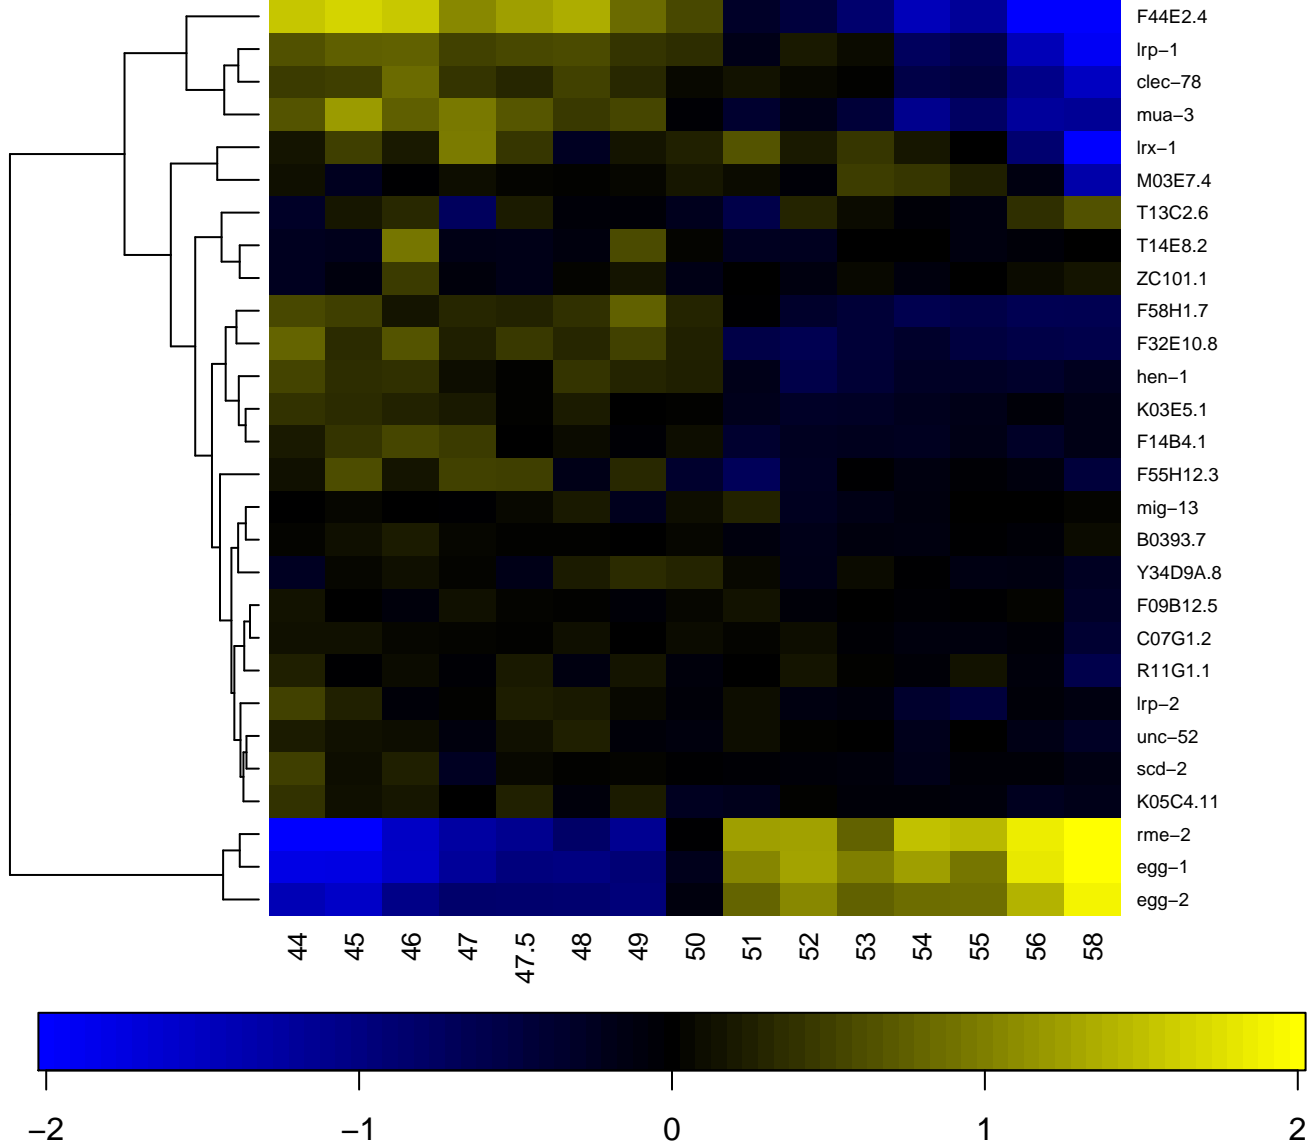

# LDLR class B repeat

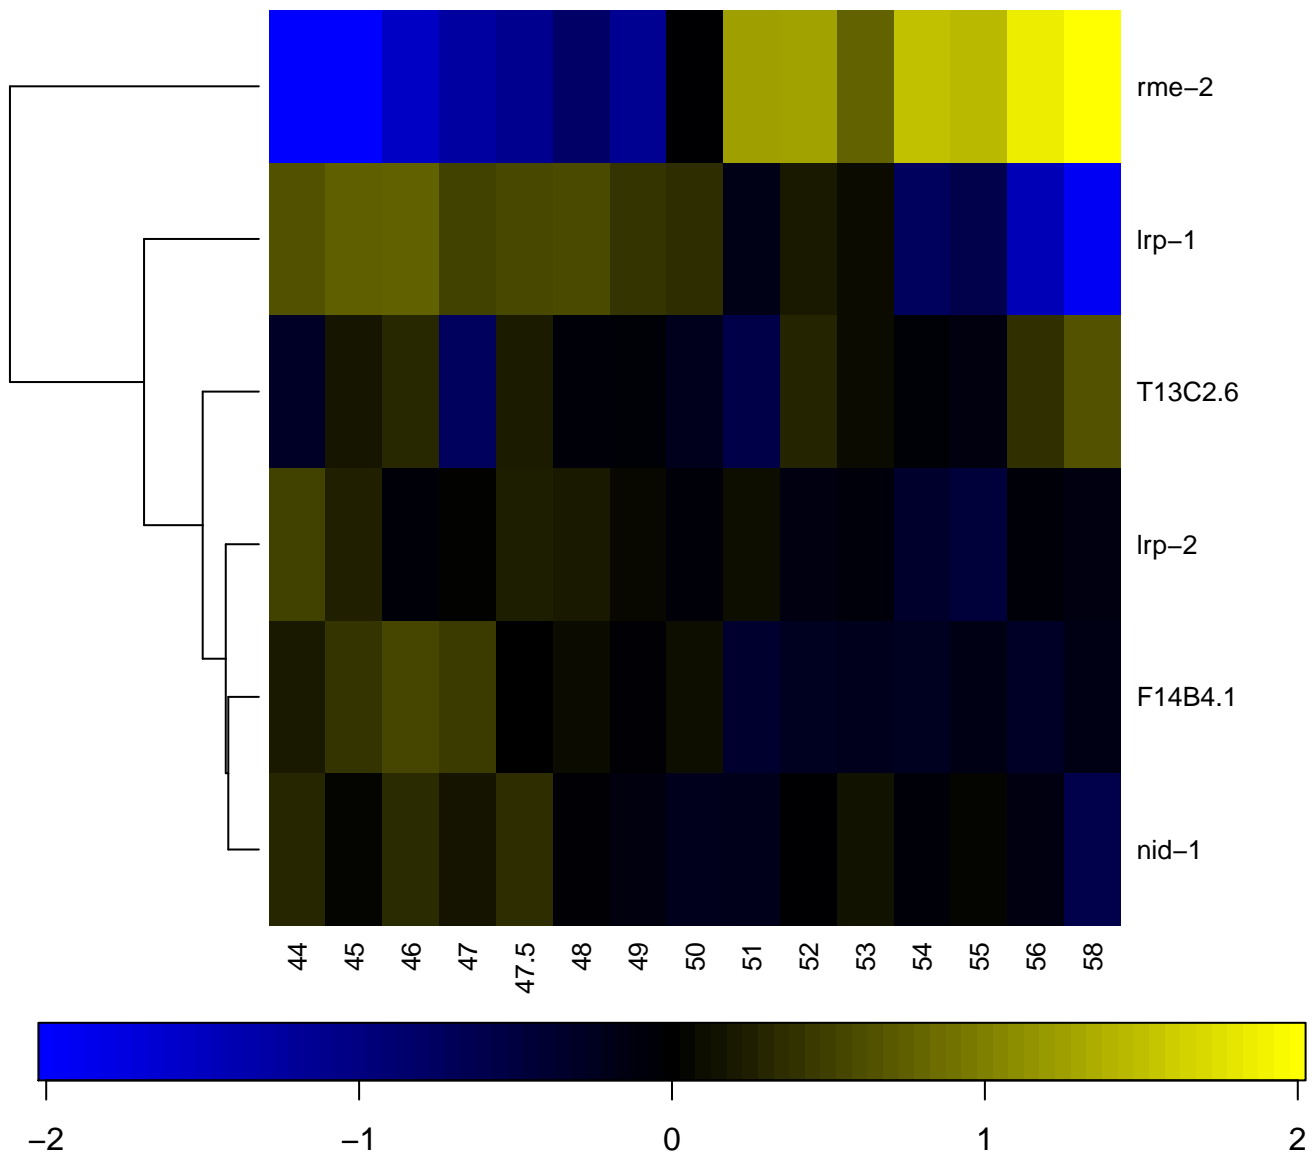

# Lectin C-type domain

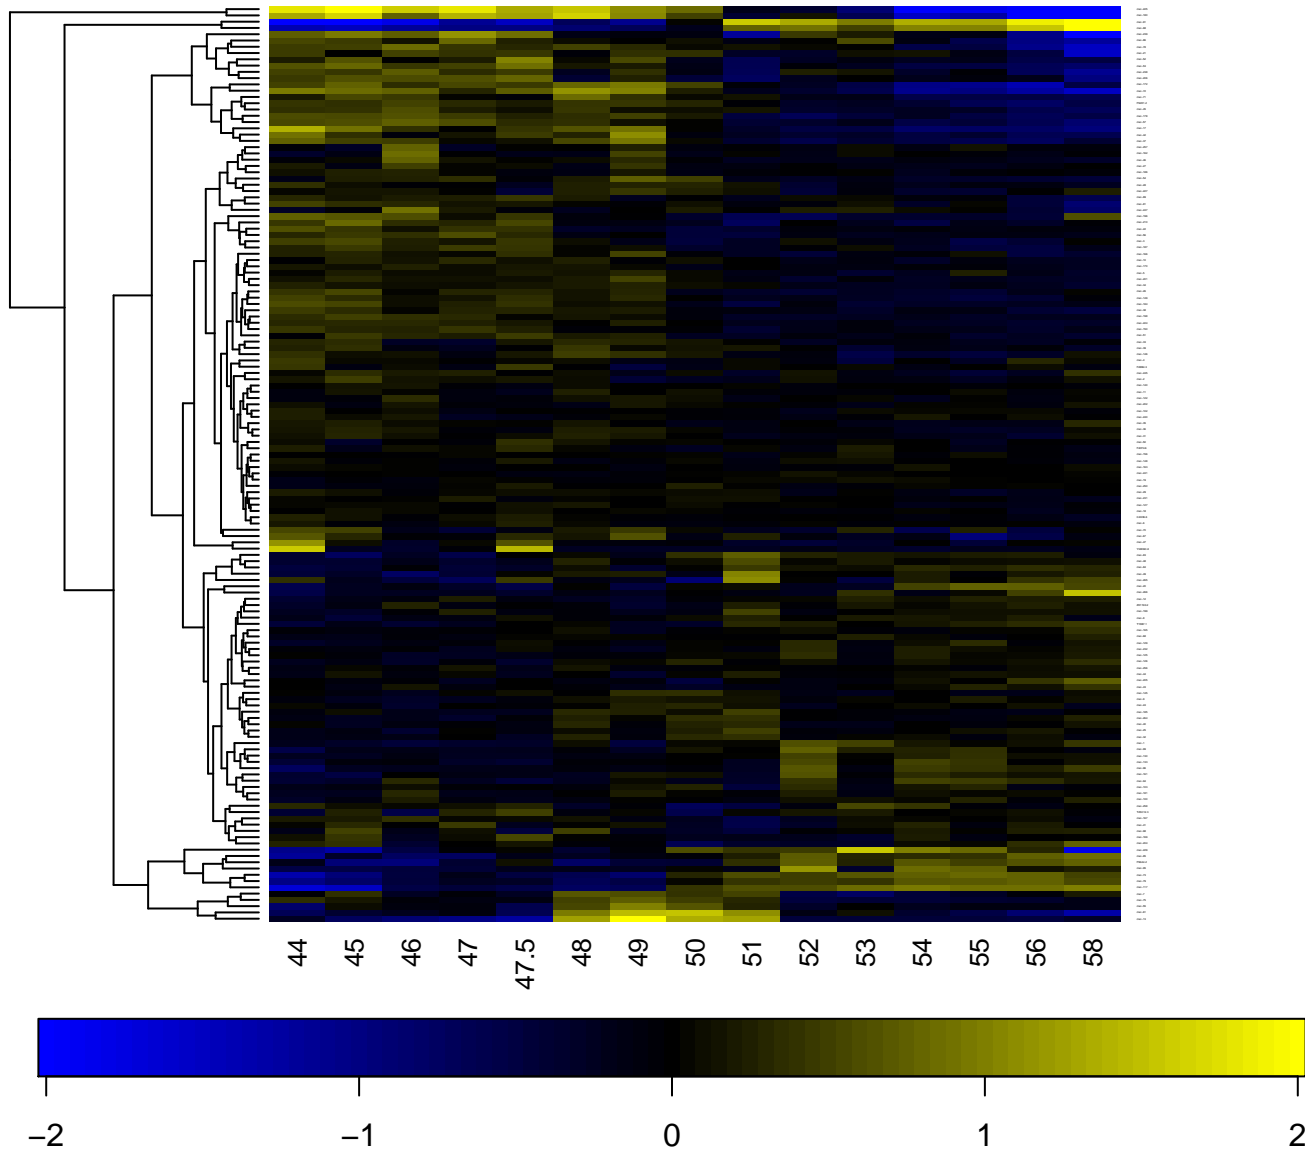

# Legume lectin, beta chain, Mn/Ca-binding site

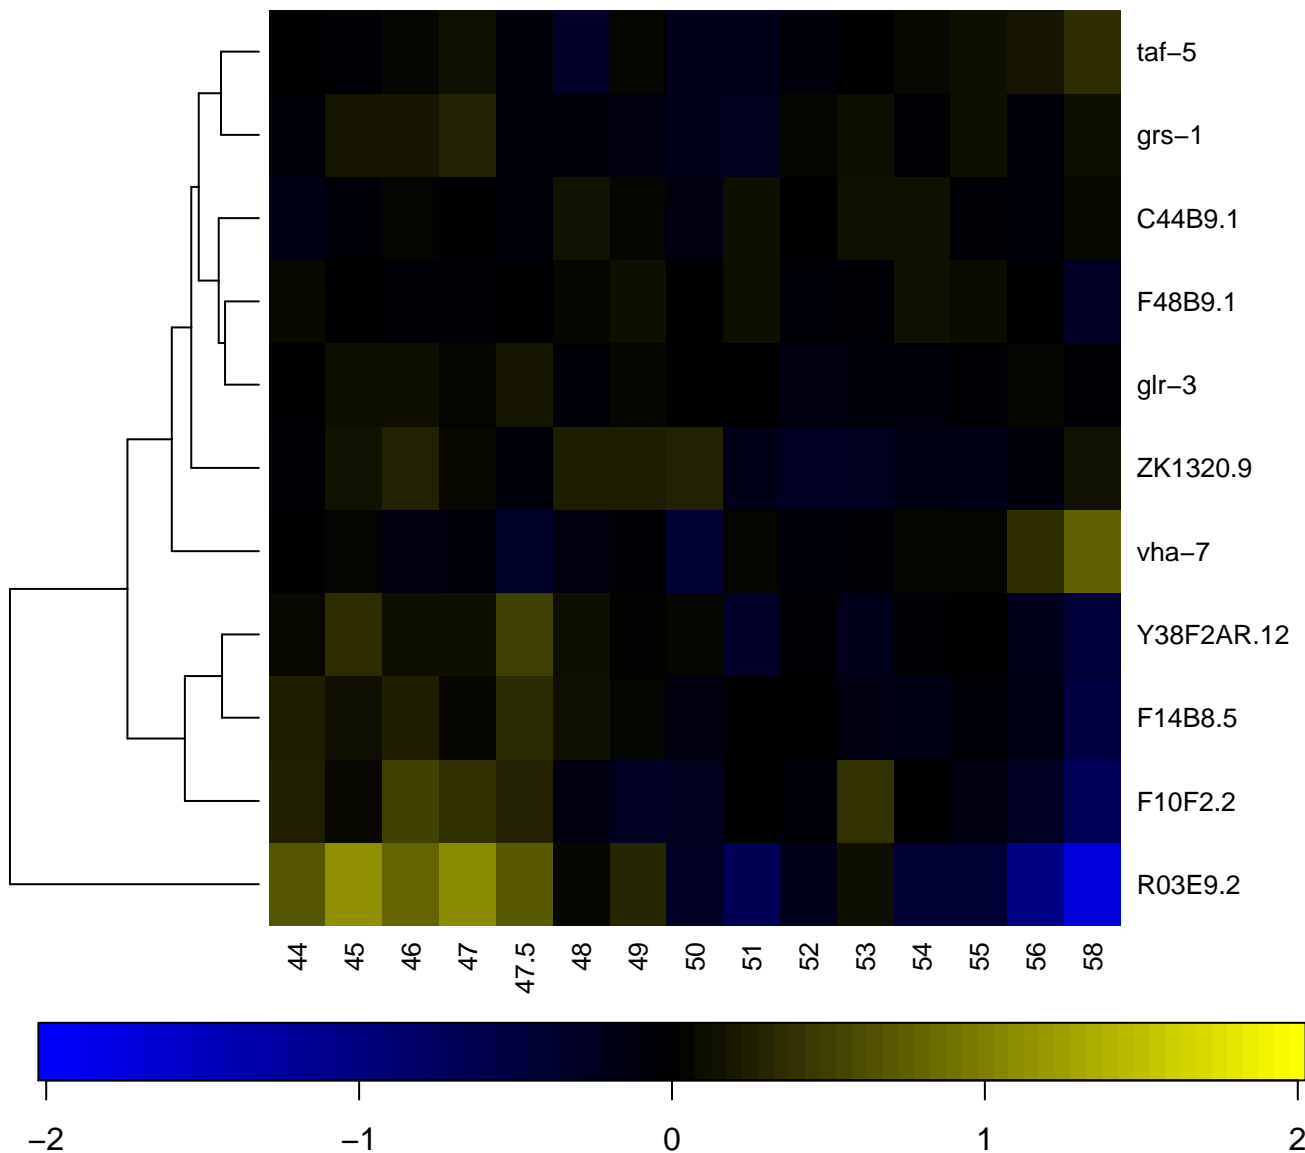

# Leucine-rich repeat

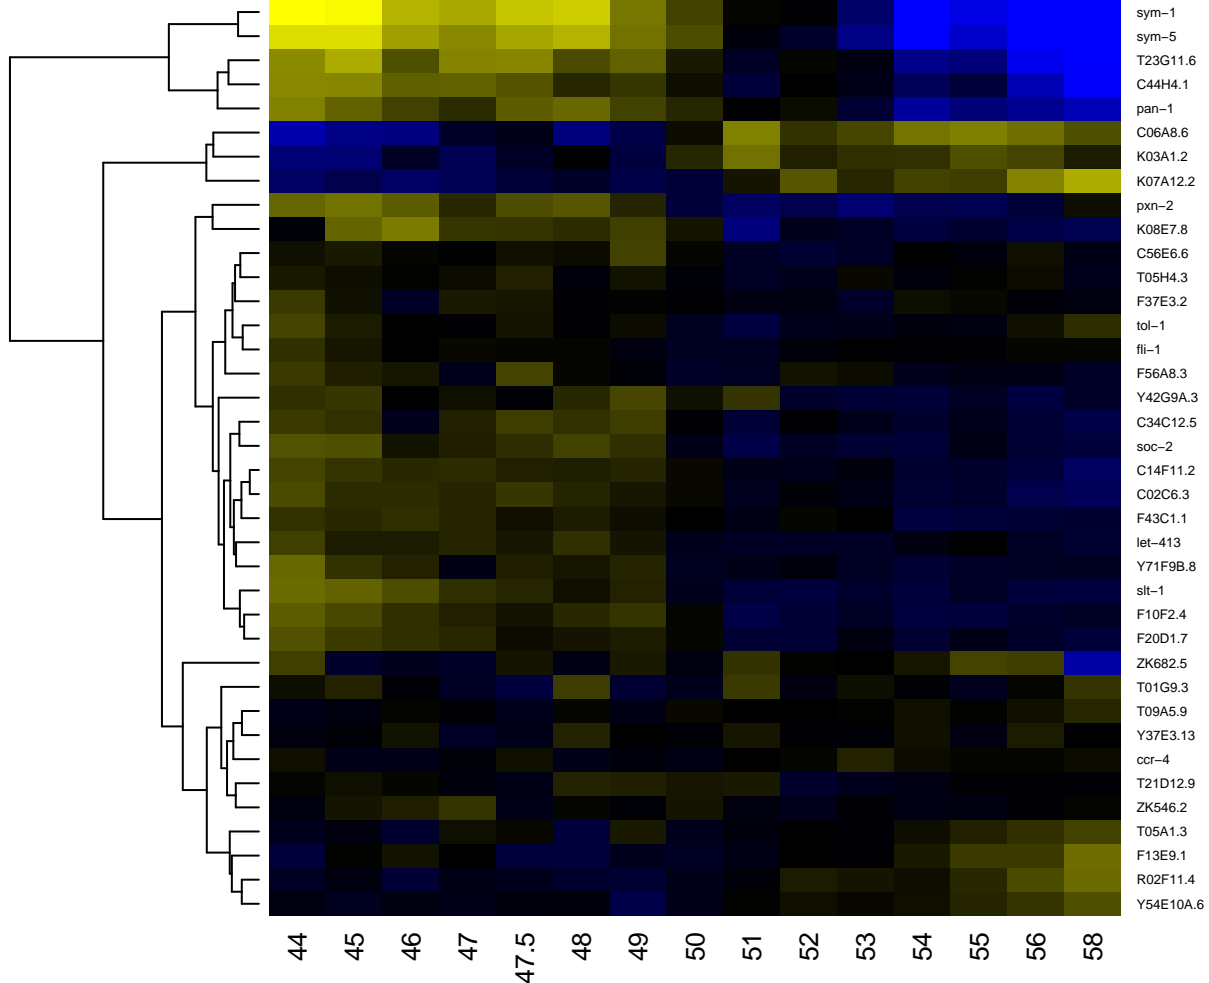

# Leucine-rich repeat, typical subtype

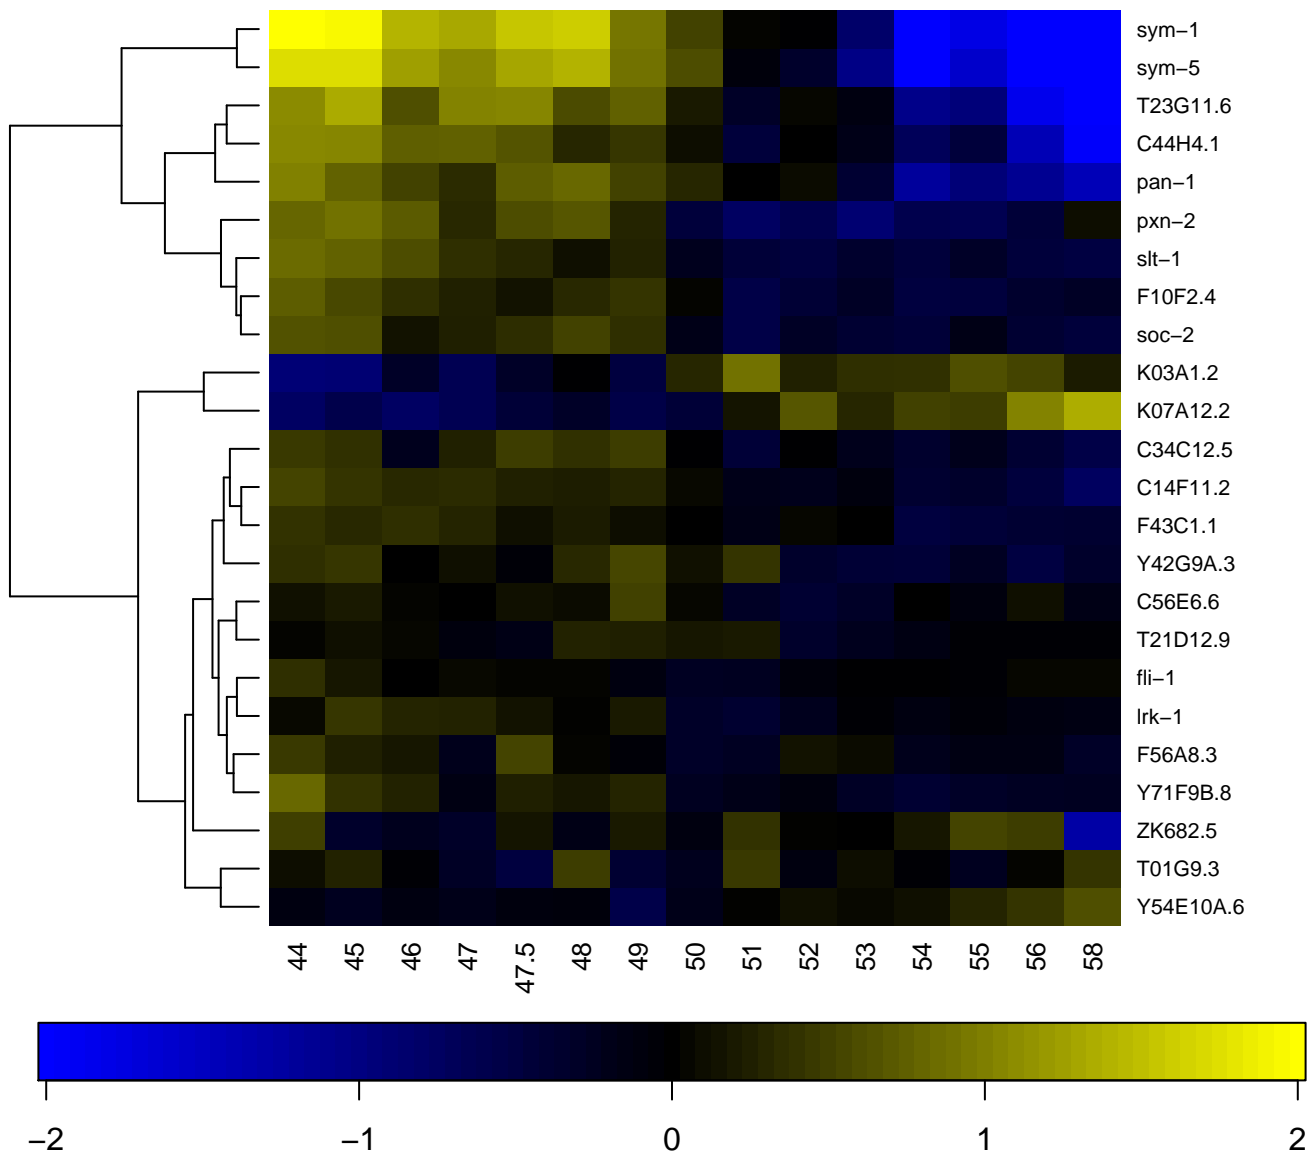



# Leucine Rich Repeat







# Ligand-binding domain of nuclear hormone receptor

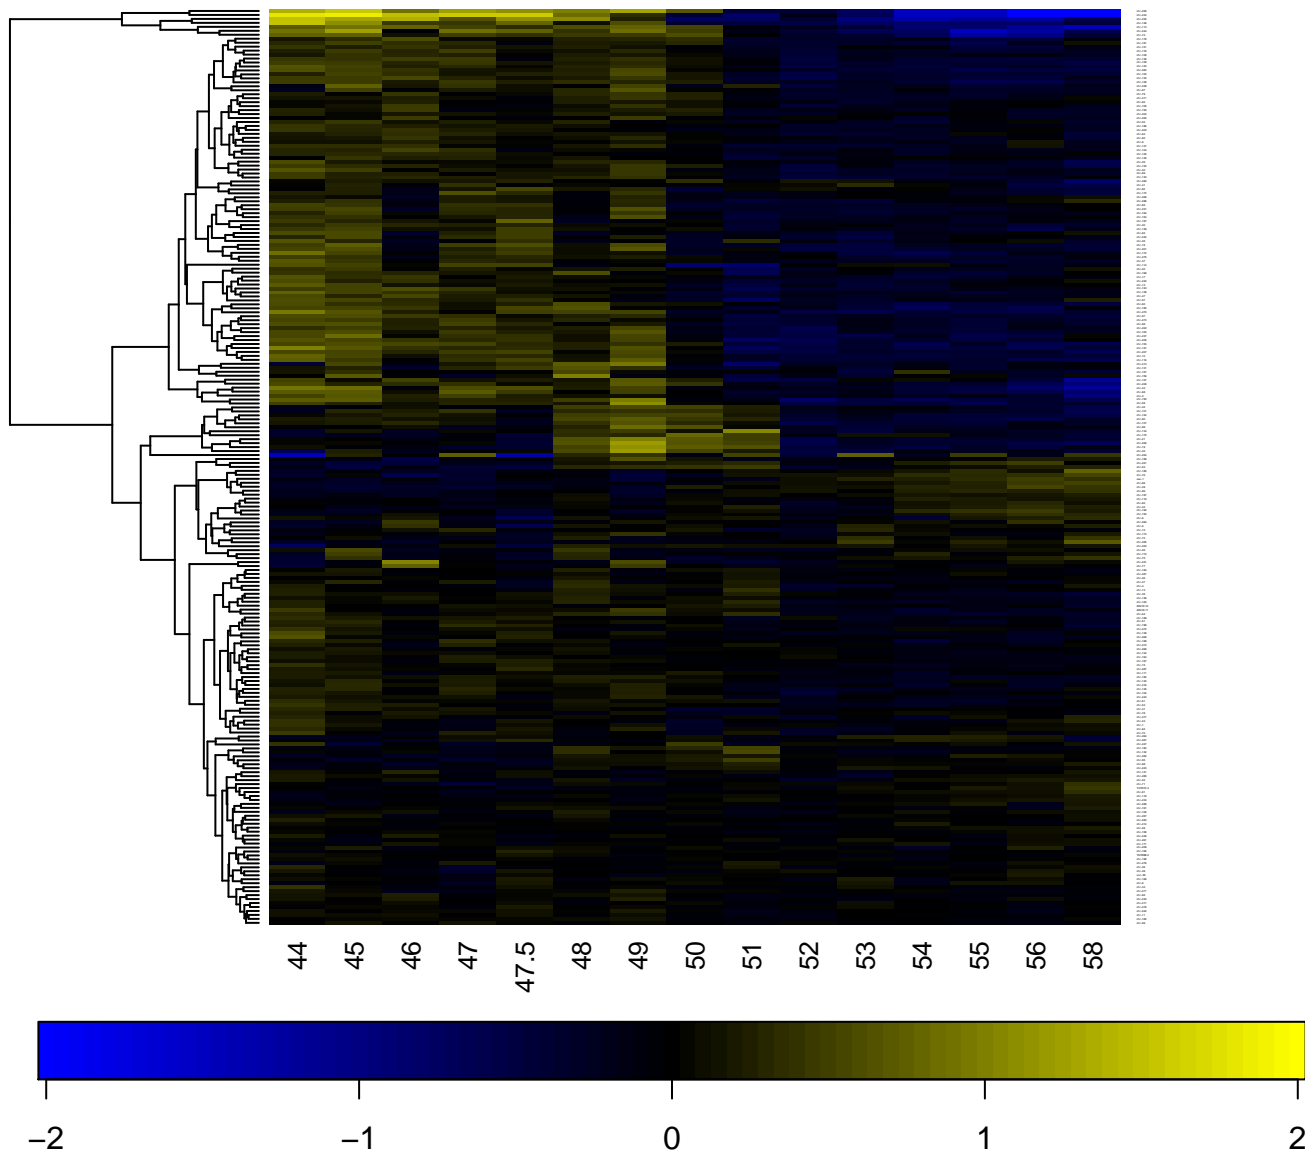

# Ligand-gated ion channel

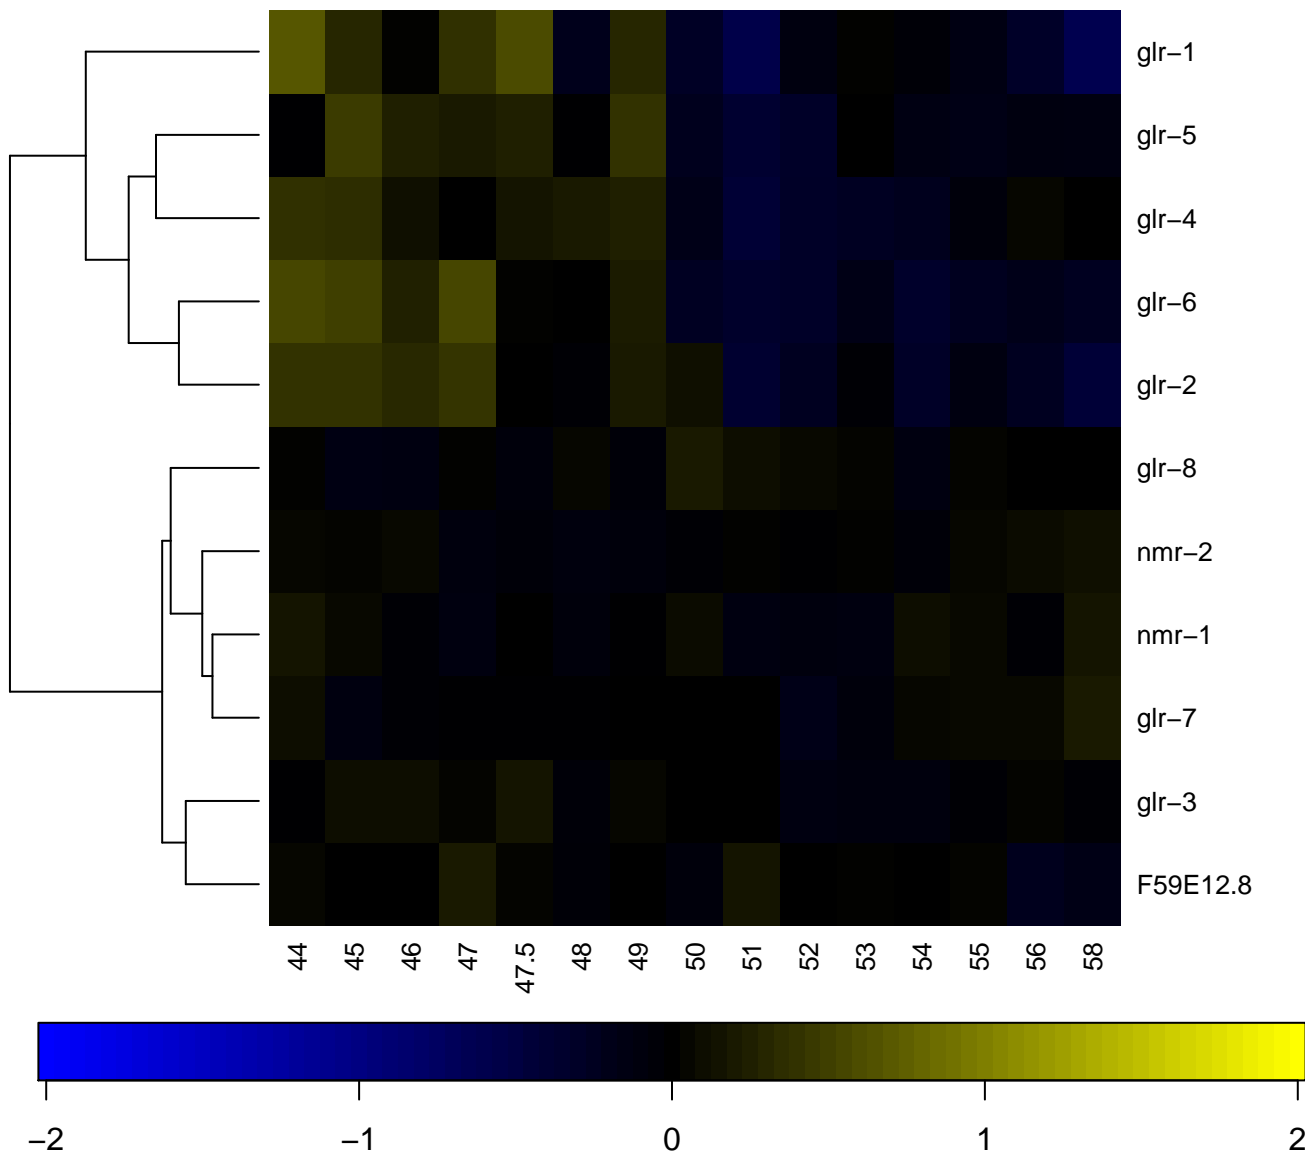



# Like-Sm ribonucleoprotein (LSM) domain

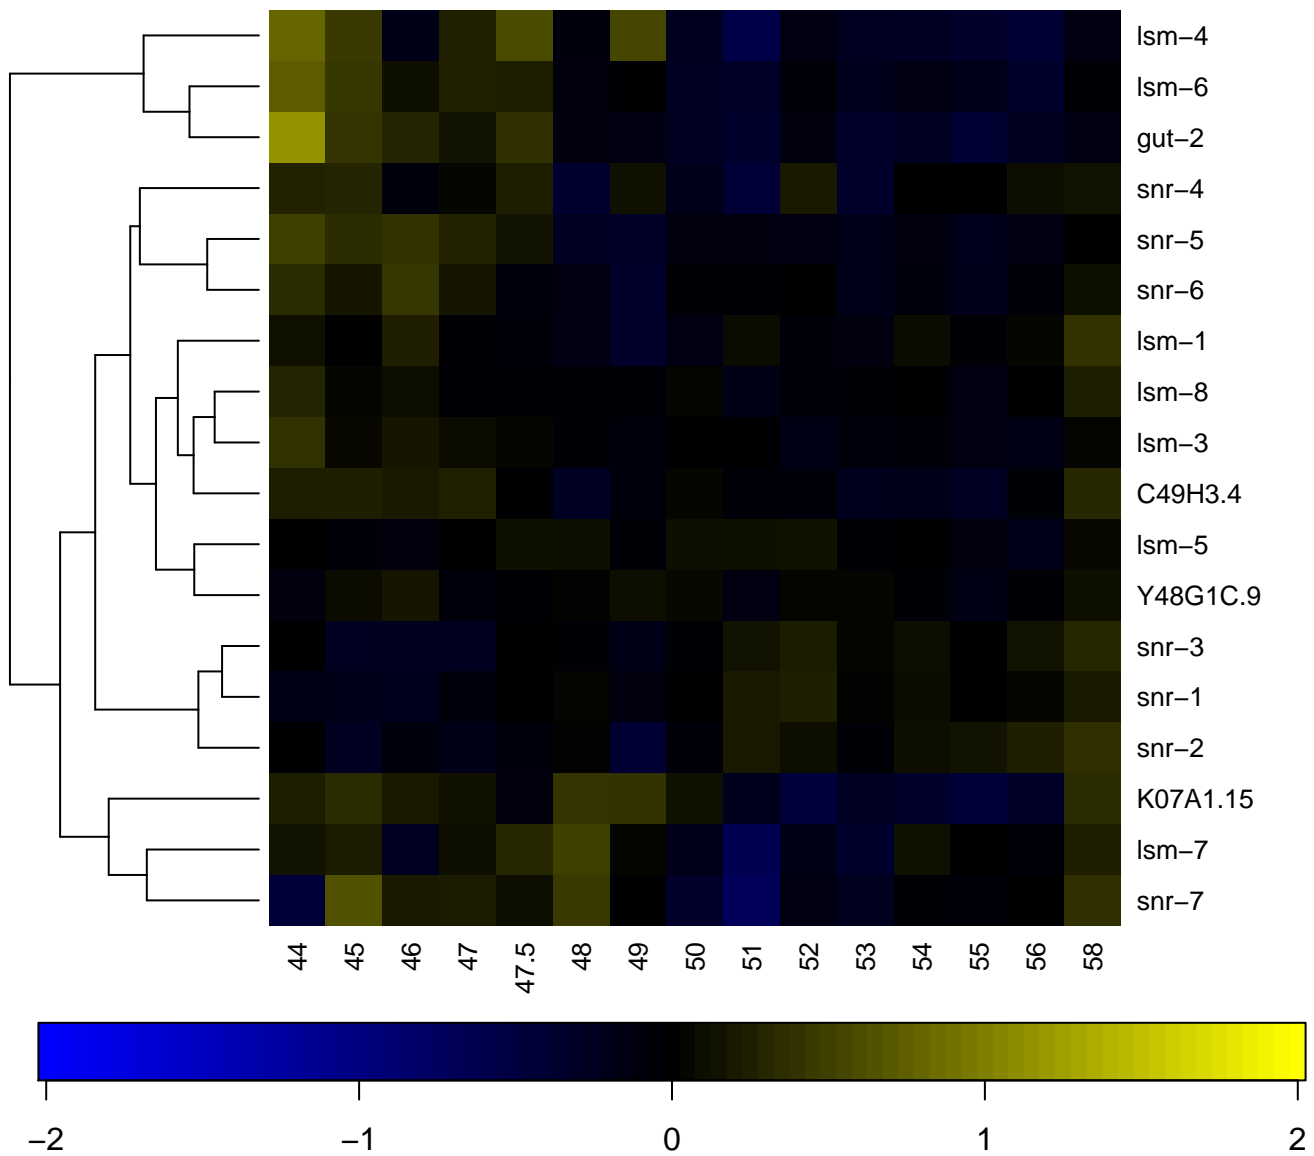

# e-Sm ribonucleoprotein (LSM) domain, eukaryotic/archaea-

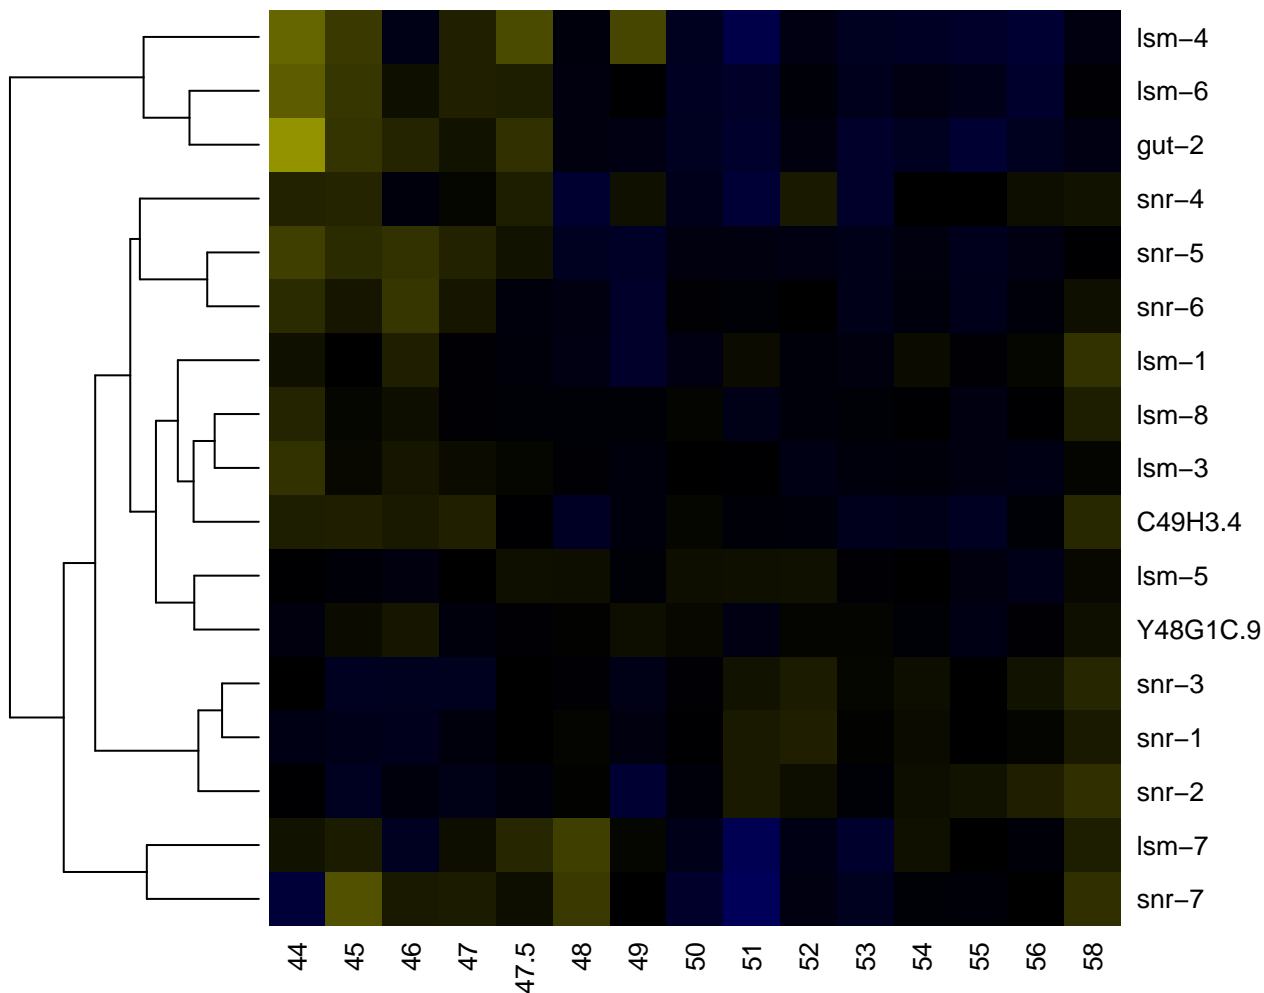



# LIM domain

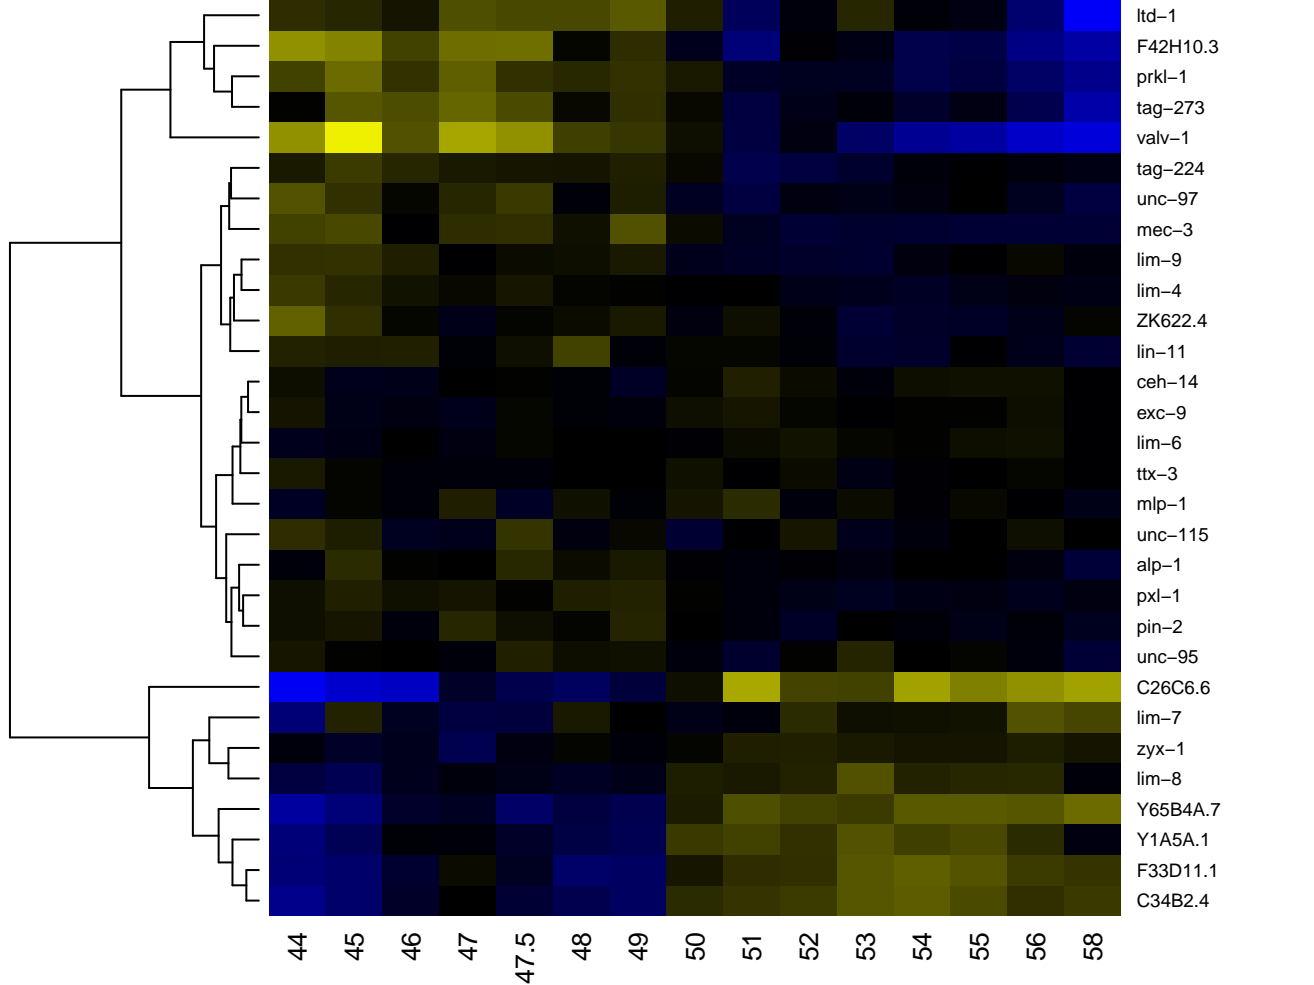

# linker histone H1 and H5 family





# Lipase (class 3)

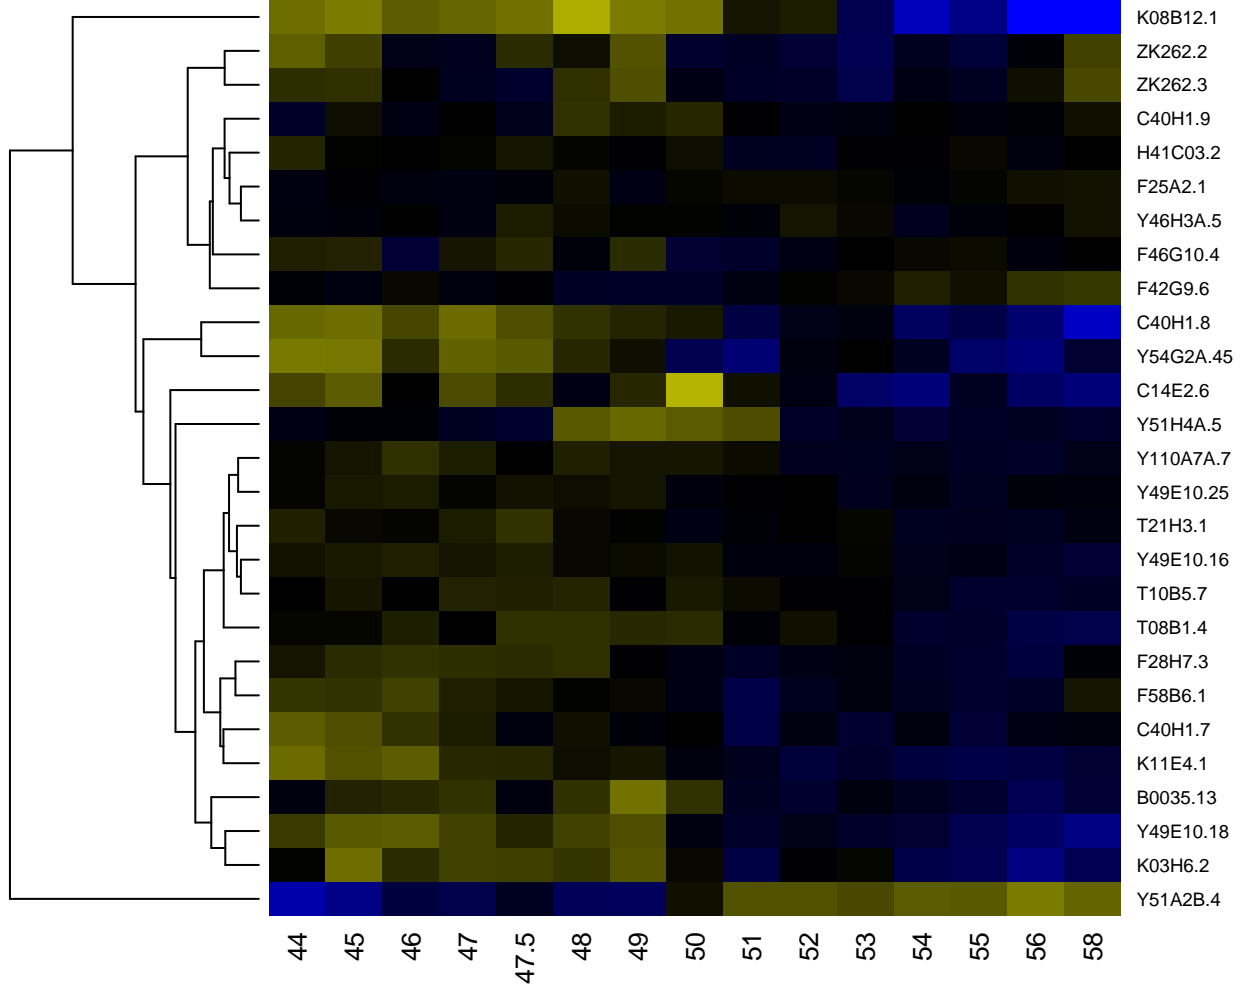



# Lipase, class 3



# Lipase, GDSL

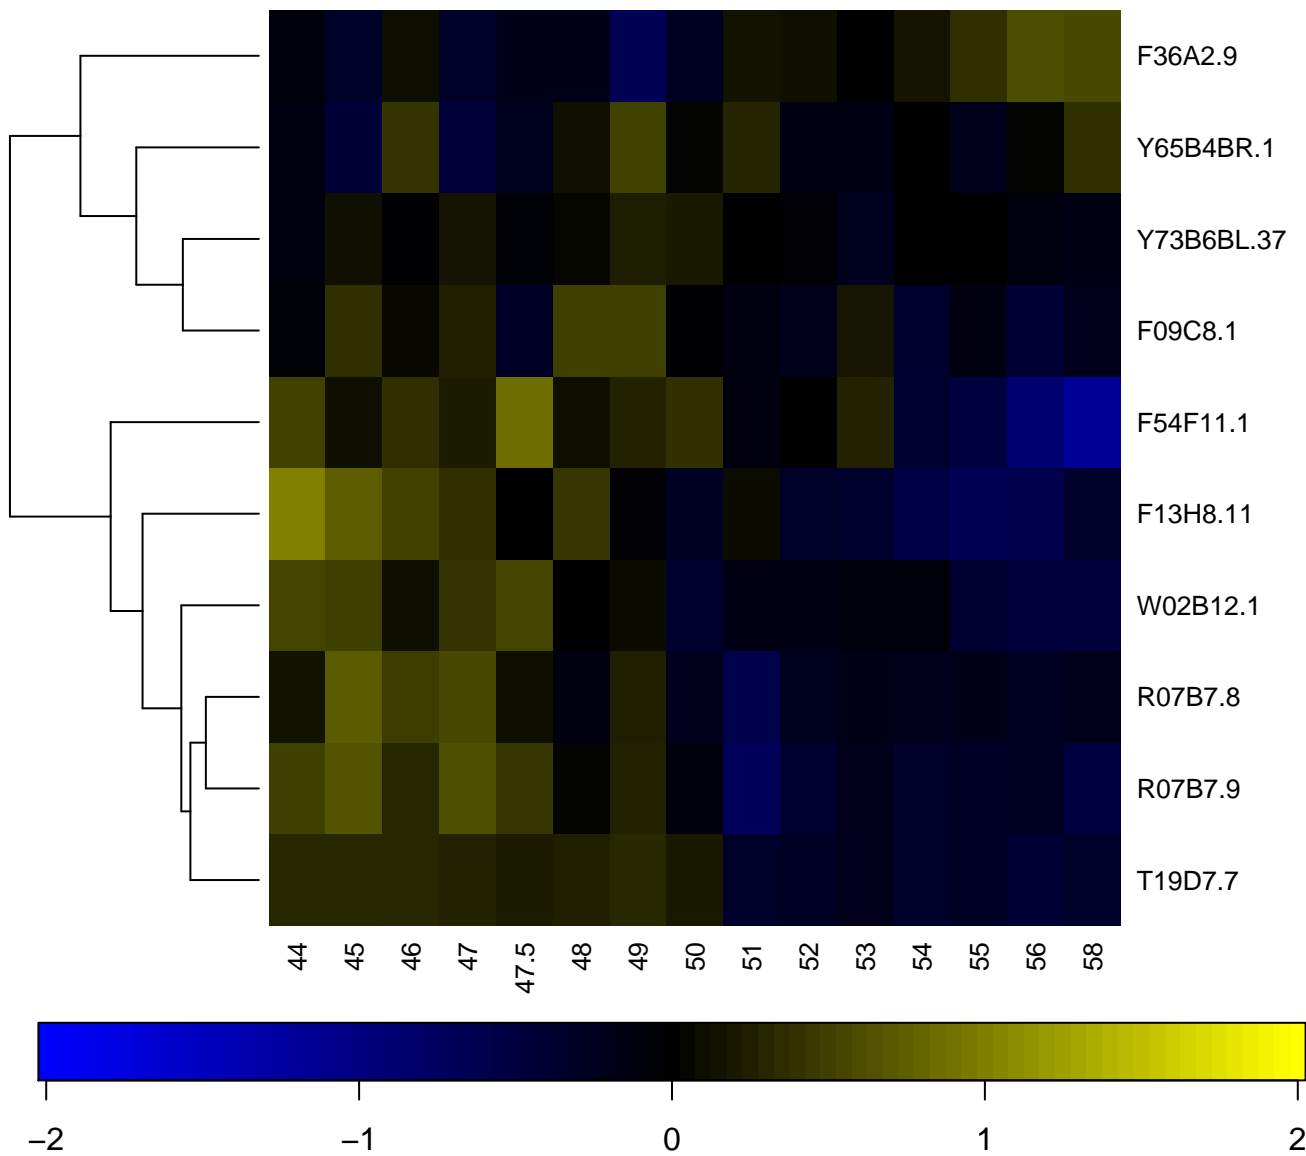

# Lipid-binding serum glycoprotein, C-terminal







# Lipid-binding START

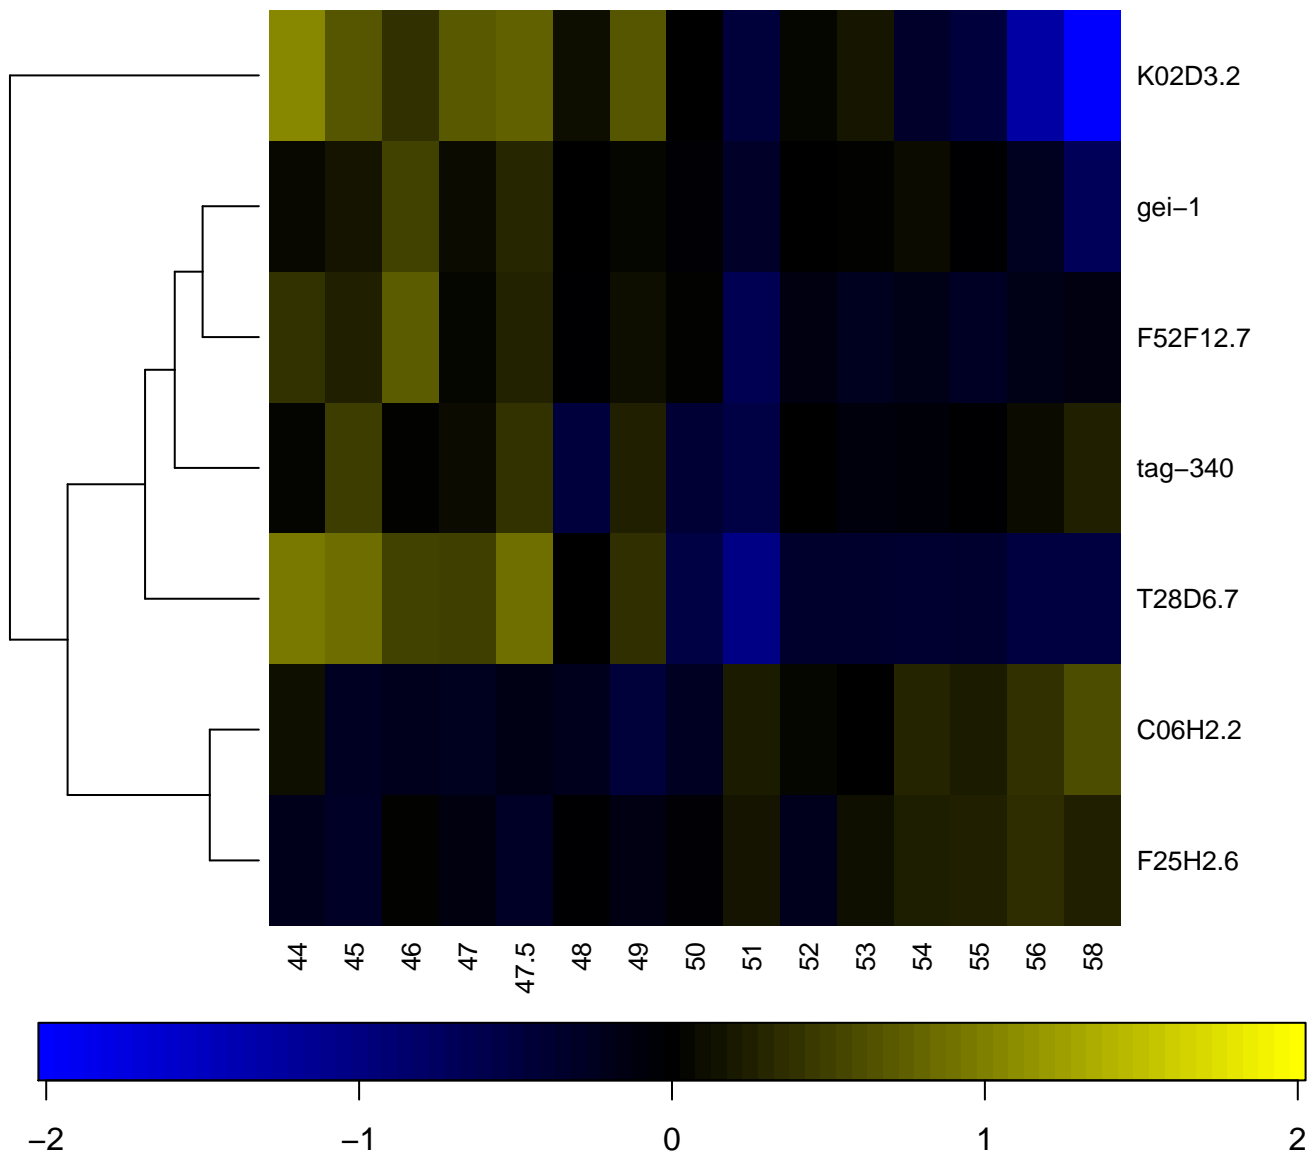

# Lipid transport protein, N-terminal

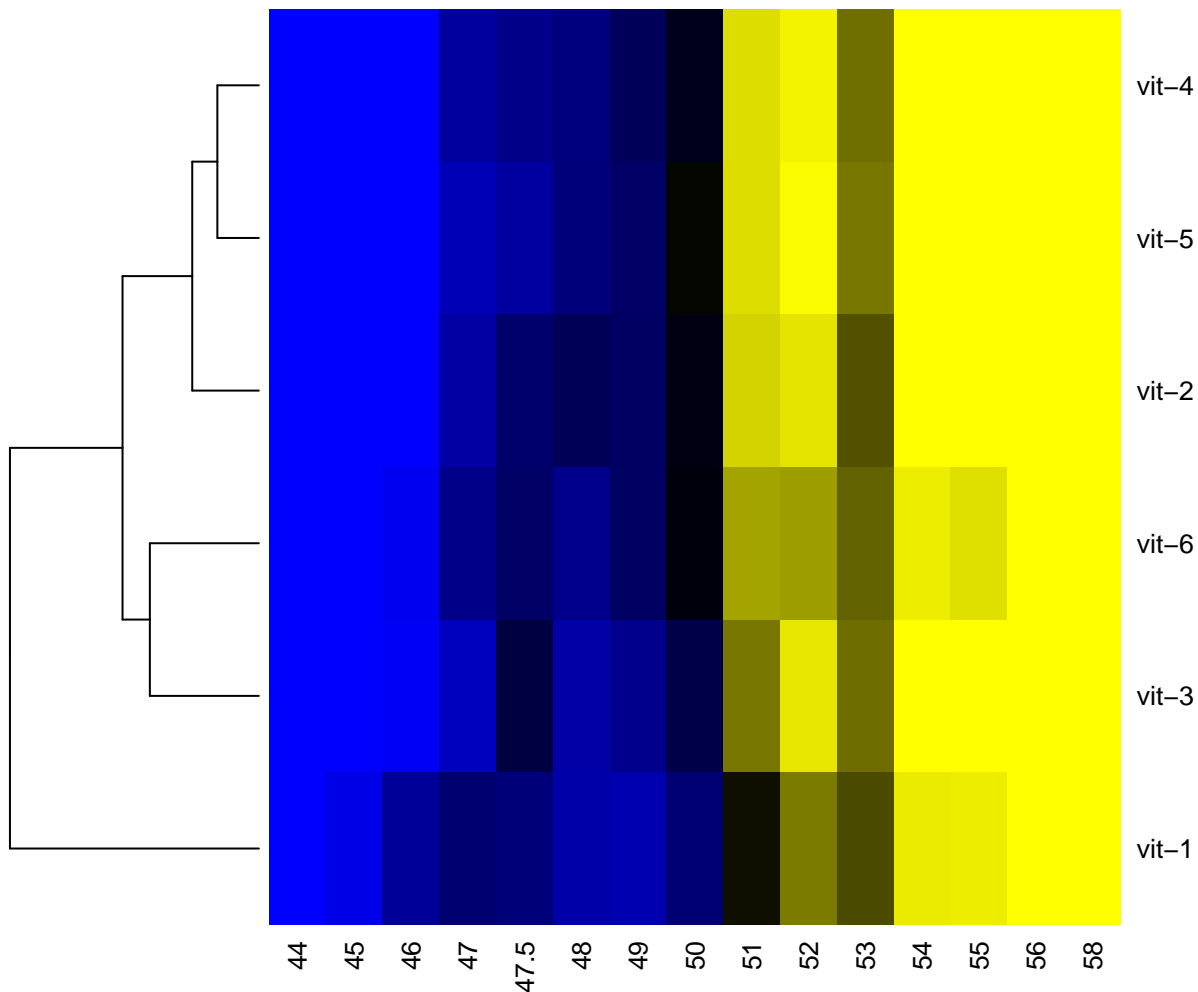

# Lipocalin conserved site

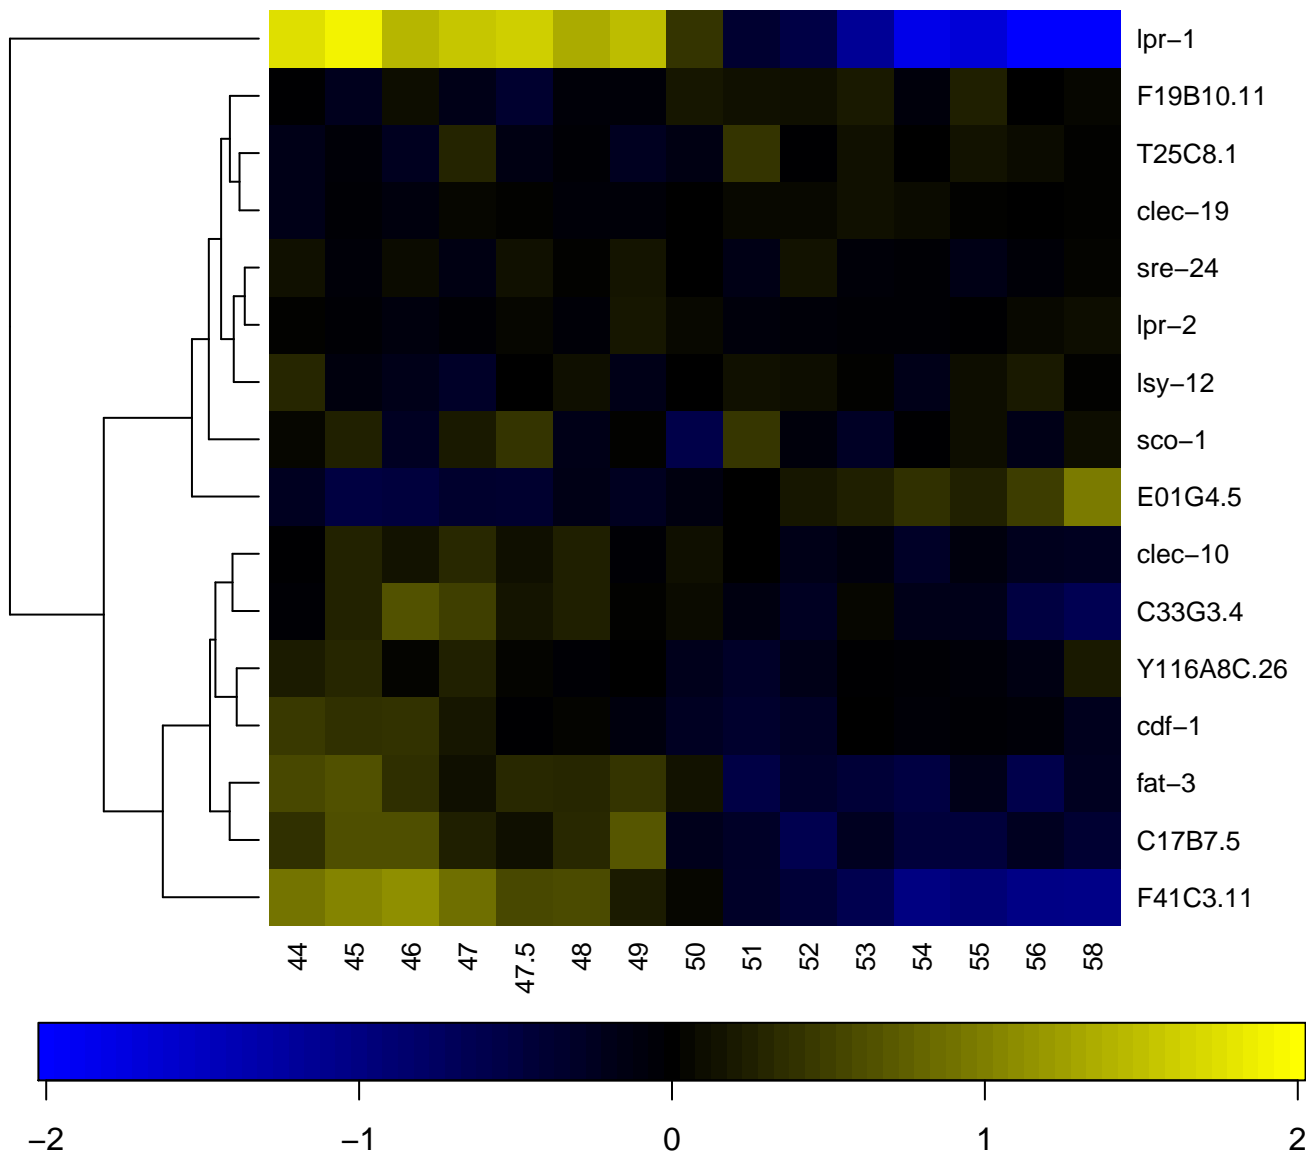





# Lipoprotein amino terminal region

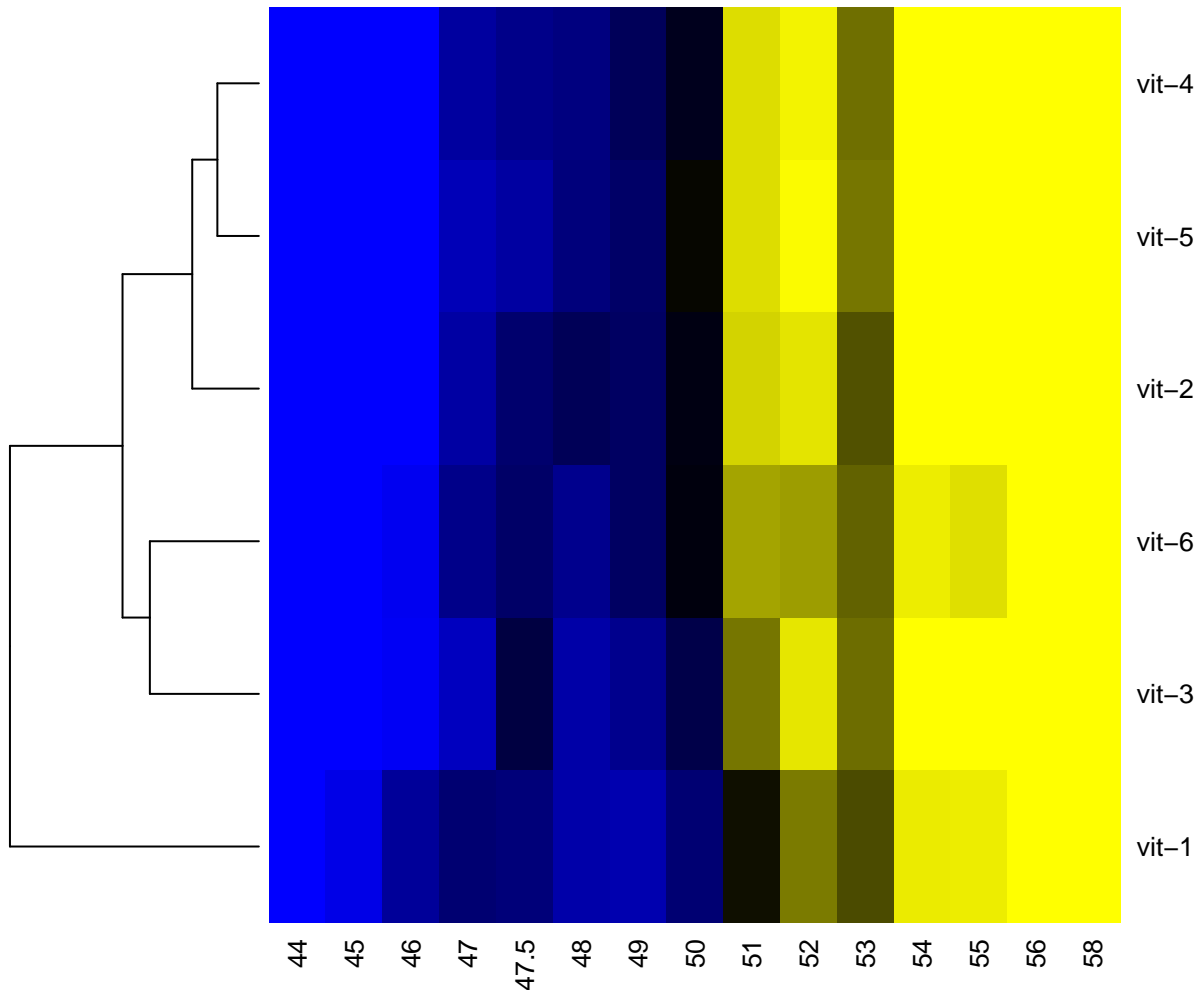









# Low-density lipoprotein receptor domain class A

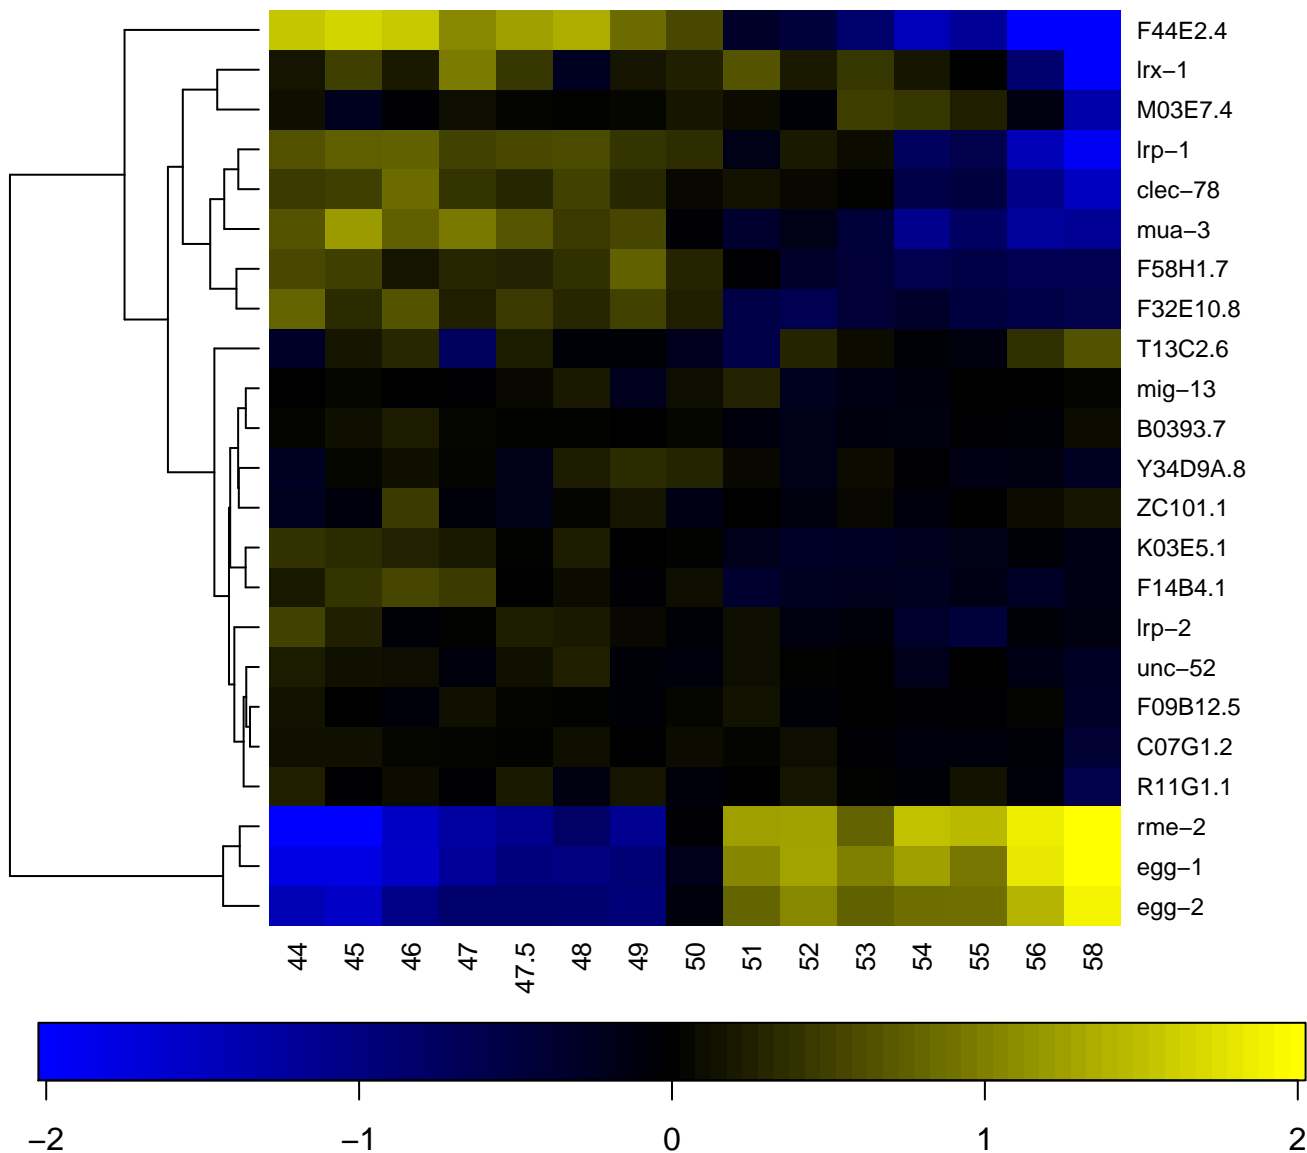

# Low-density lipoprotein receptor repeat class B

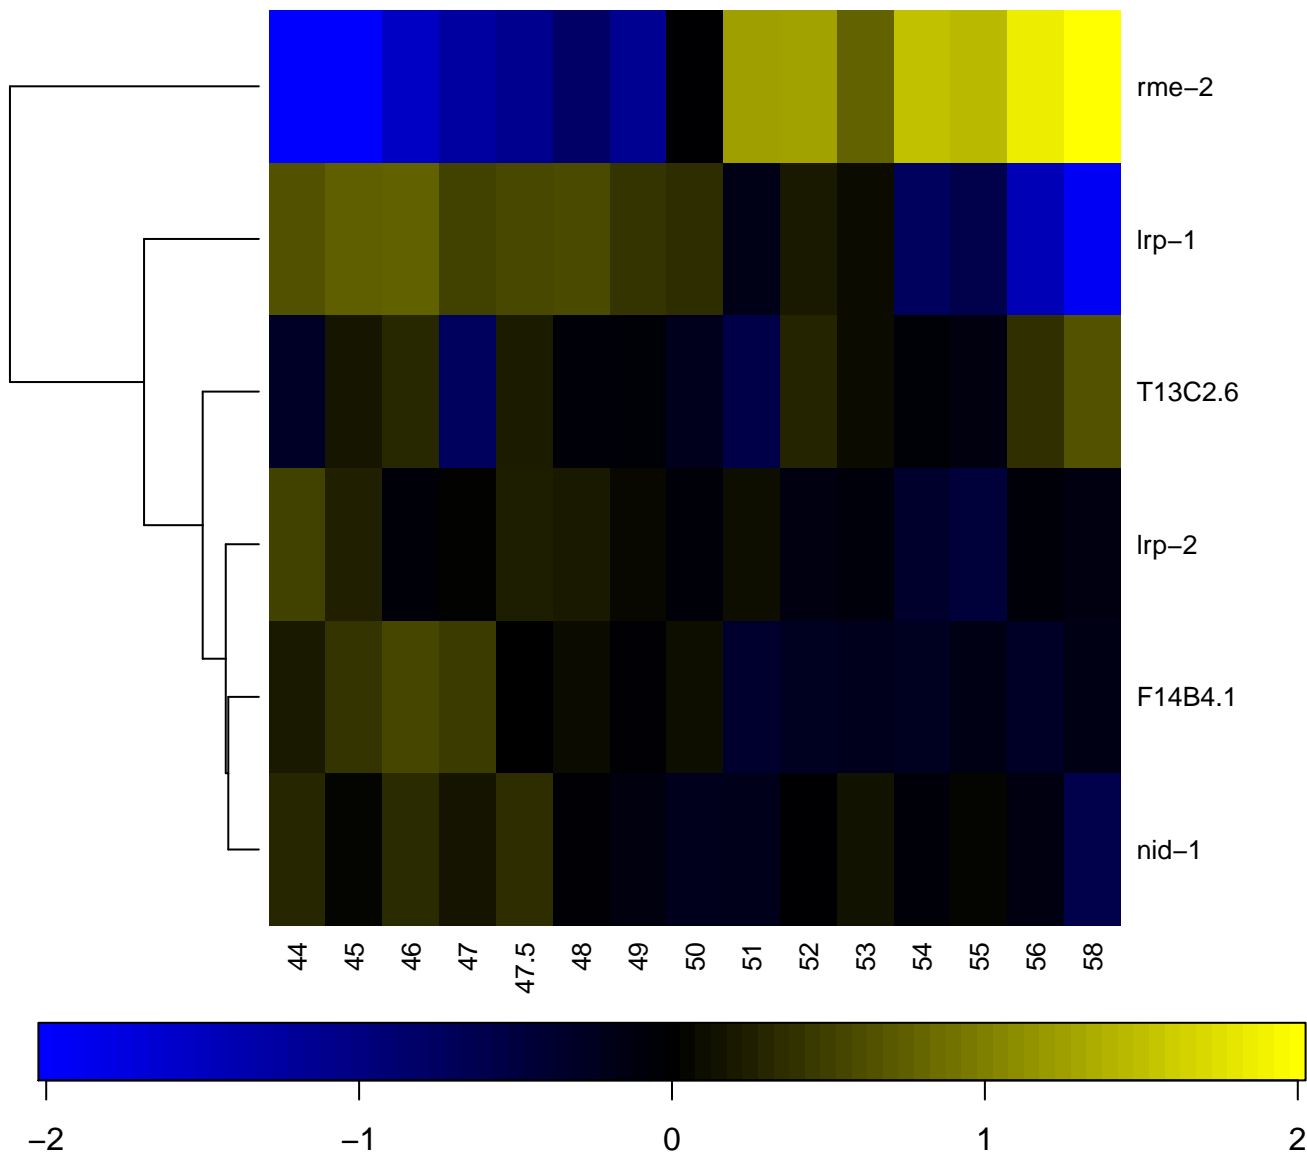

# LPS-induced tumor necrosis factor alpha factor

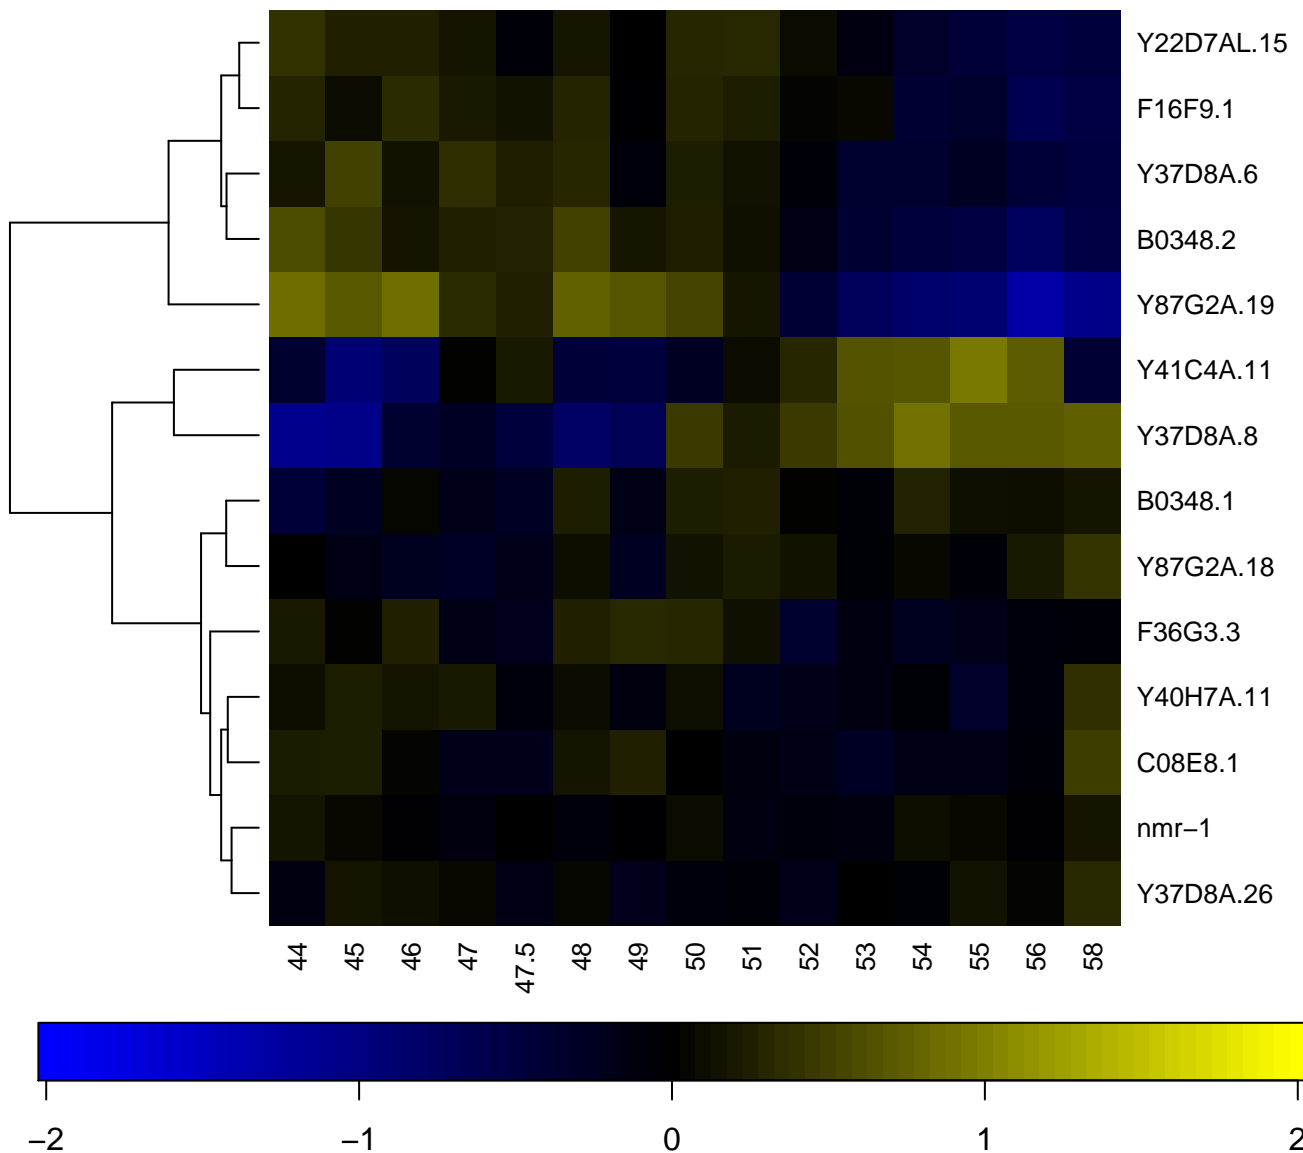

# LSM domain















# Magnesium chelatase, subunit ChII

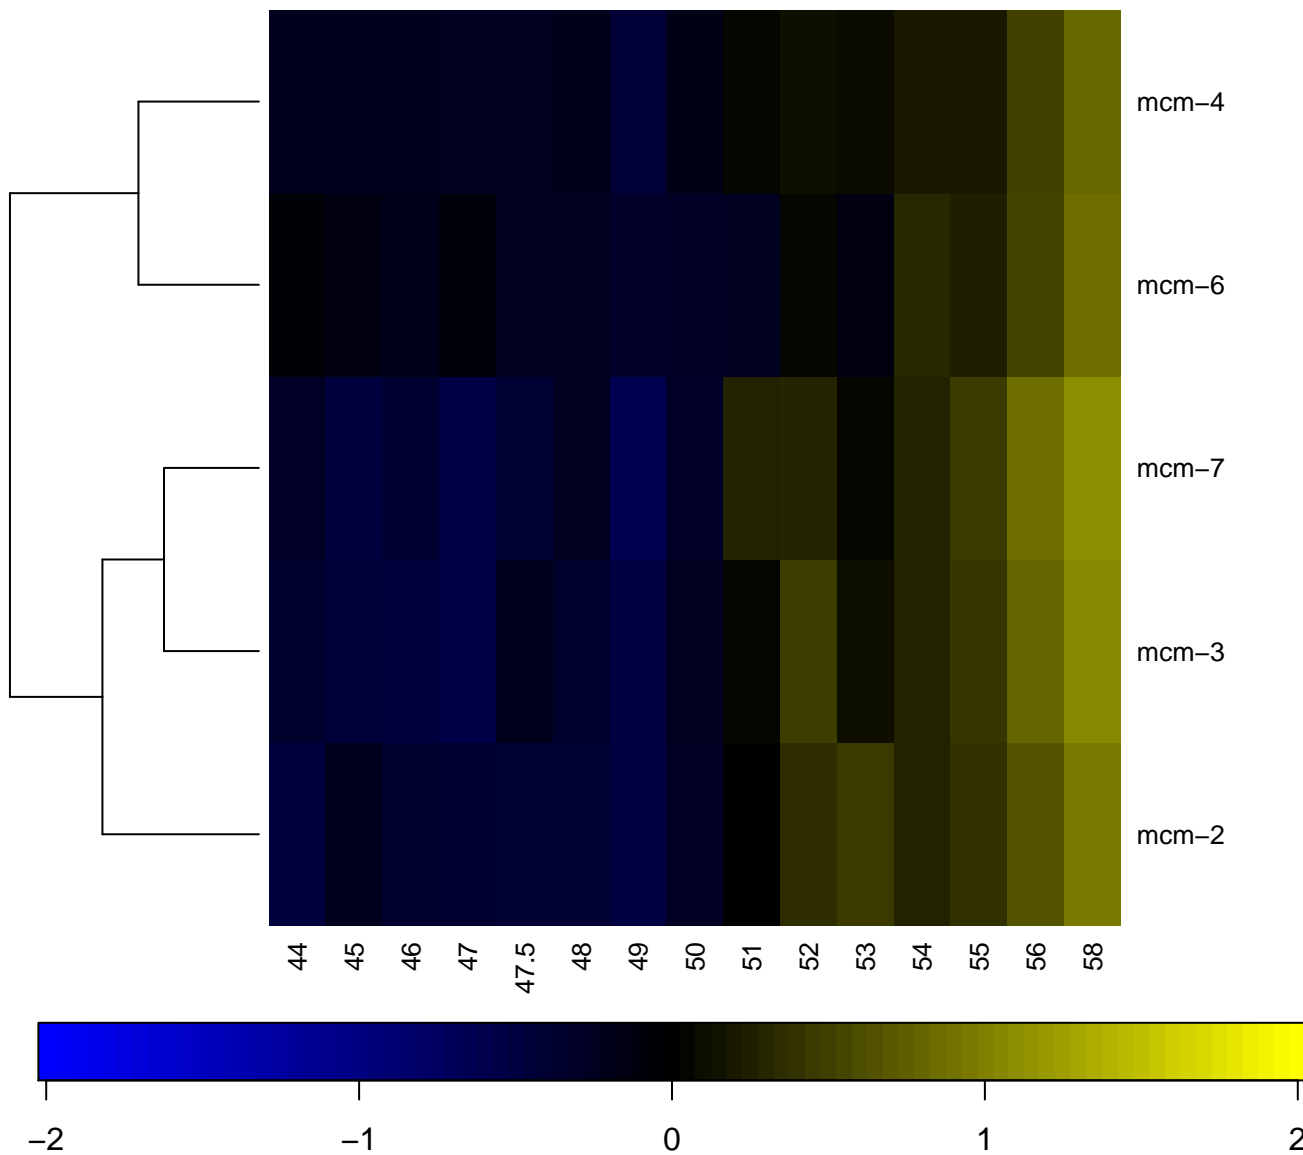

# Major Facilitator Superfamily

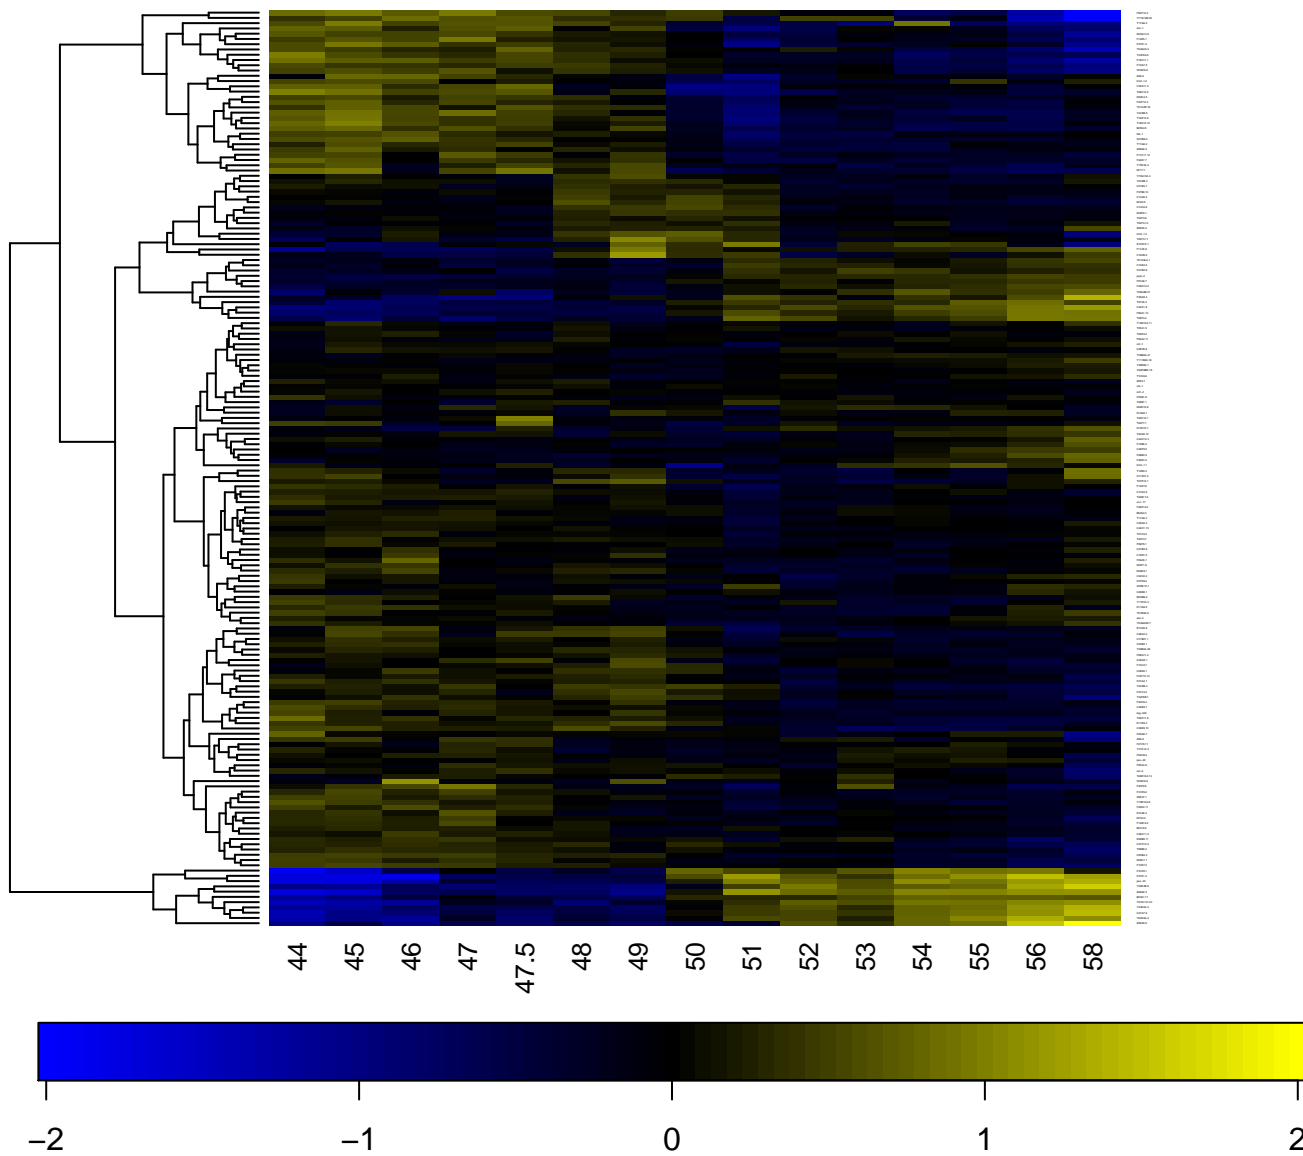

# Major facilitator superfamily MFS-1

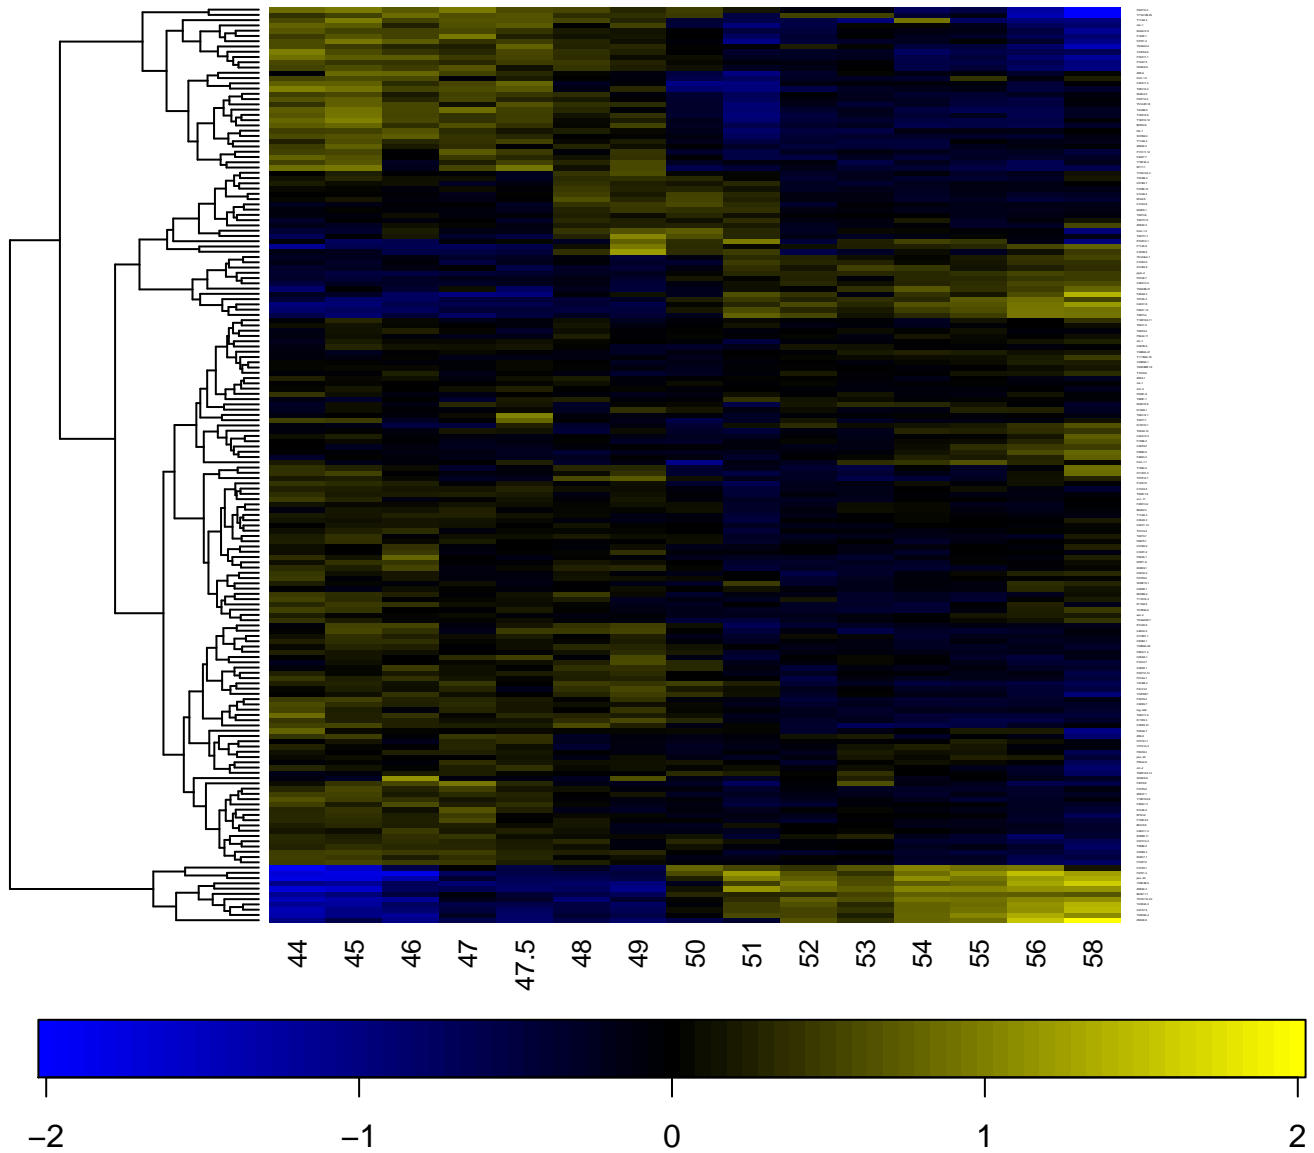







# Major sperm protein

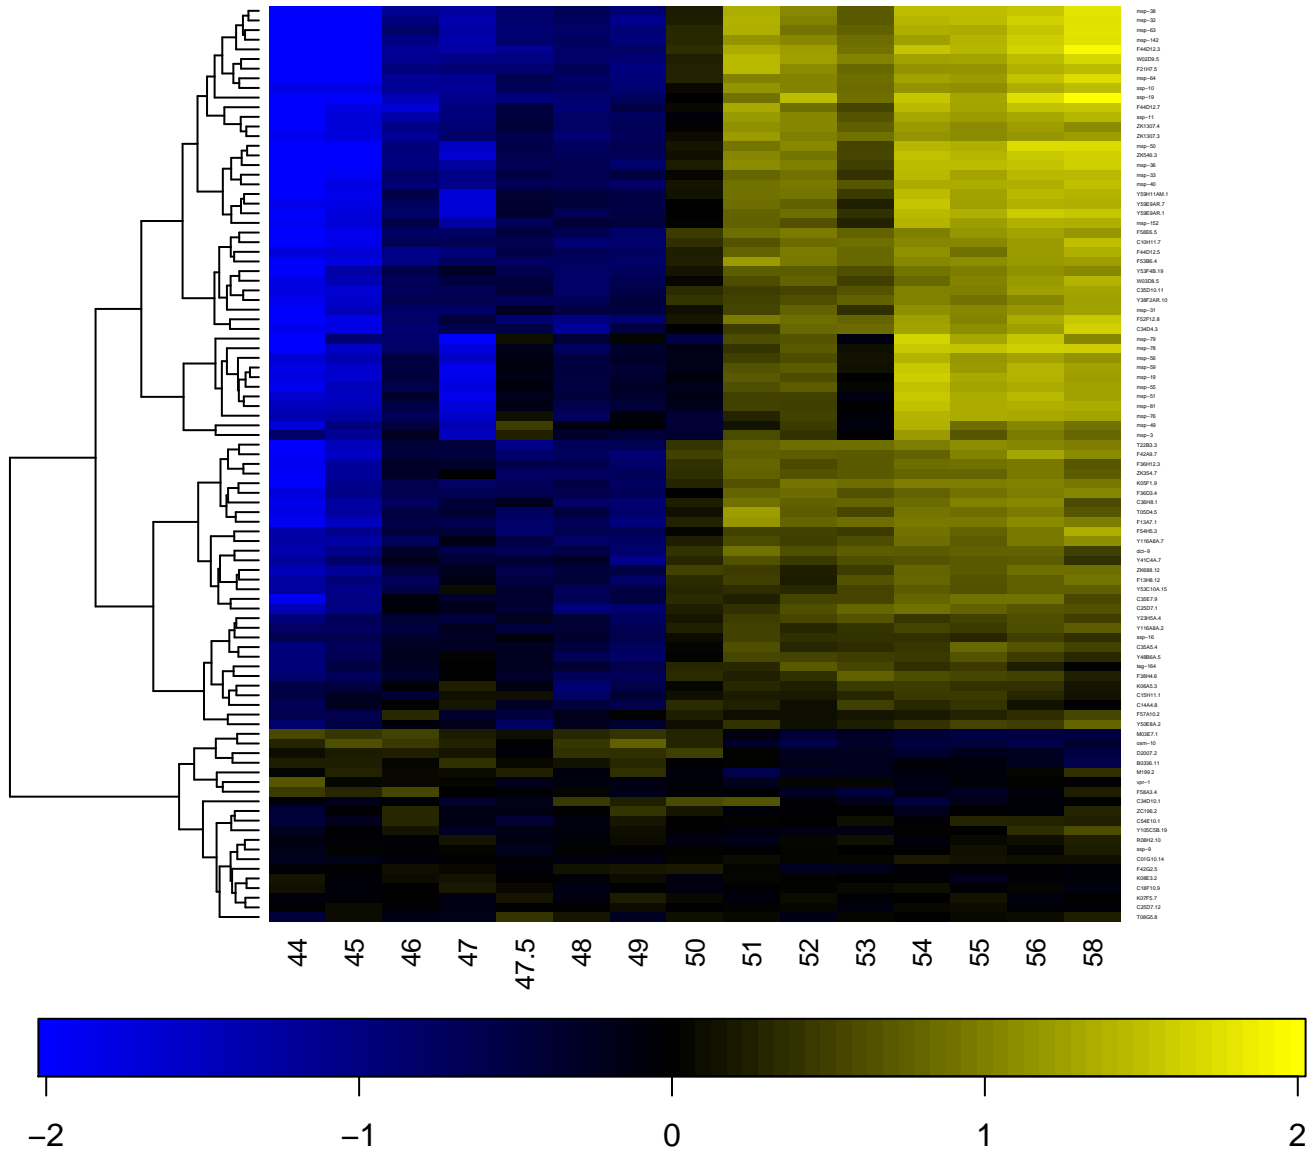

# Male sterility protein

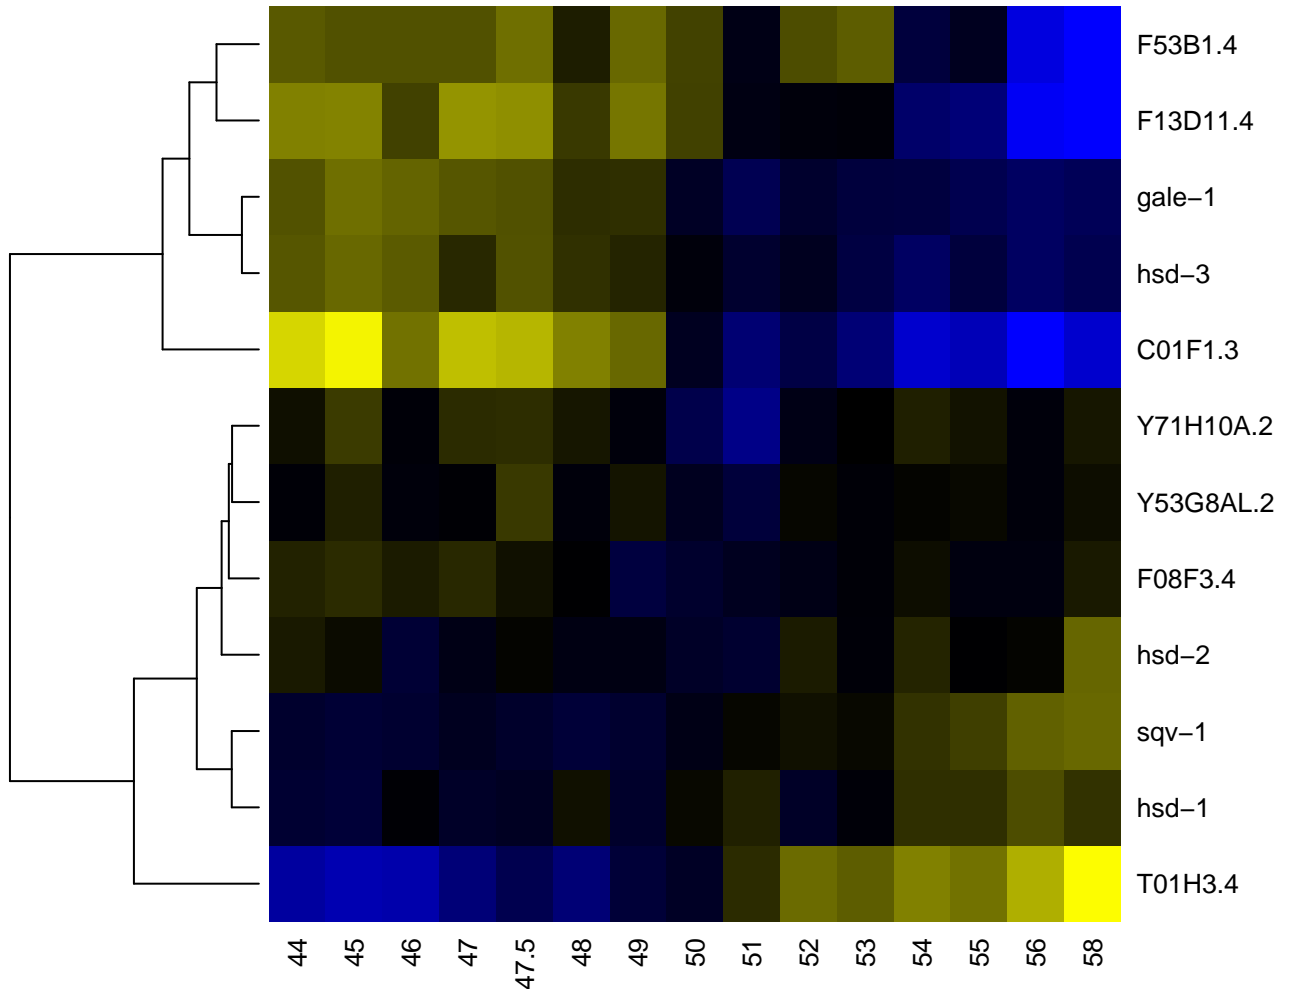

# Male sterility, NAD-binding

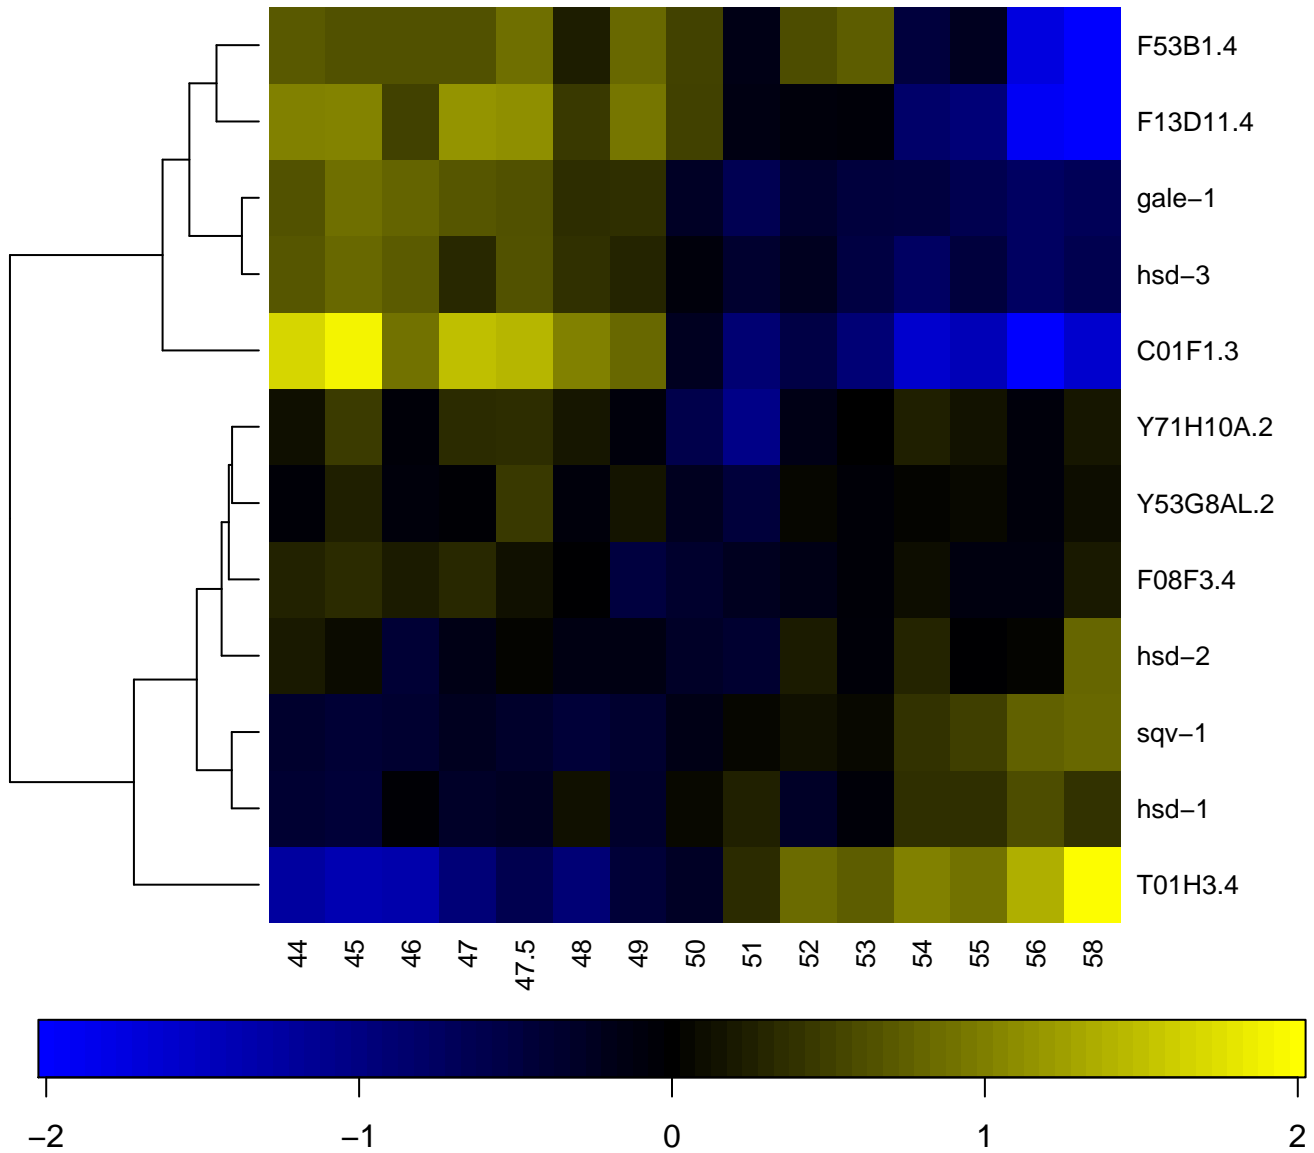

# MAM

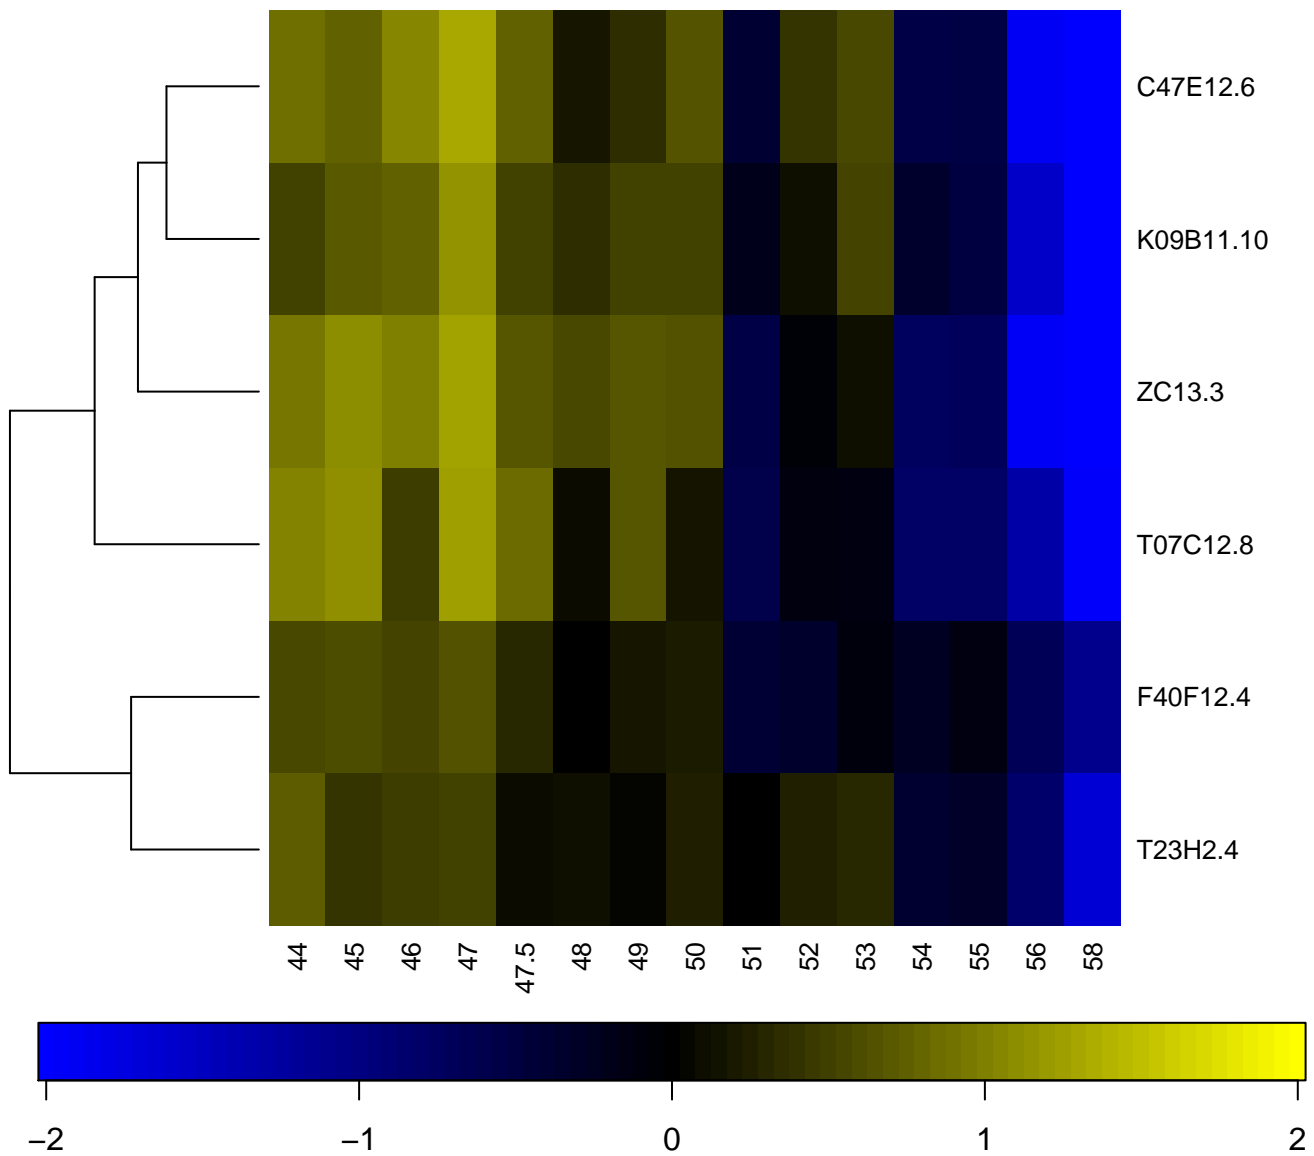











# MATH

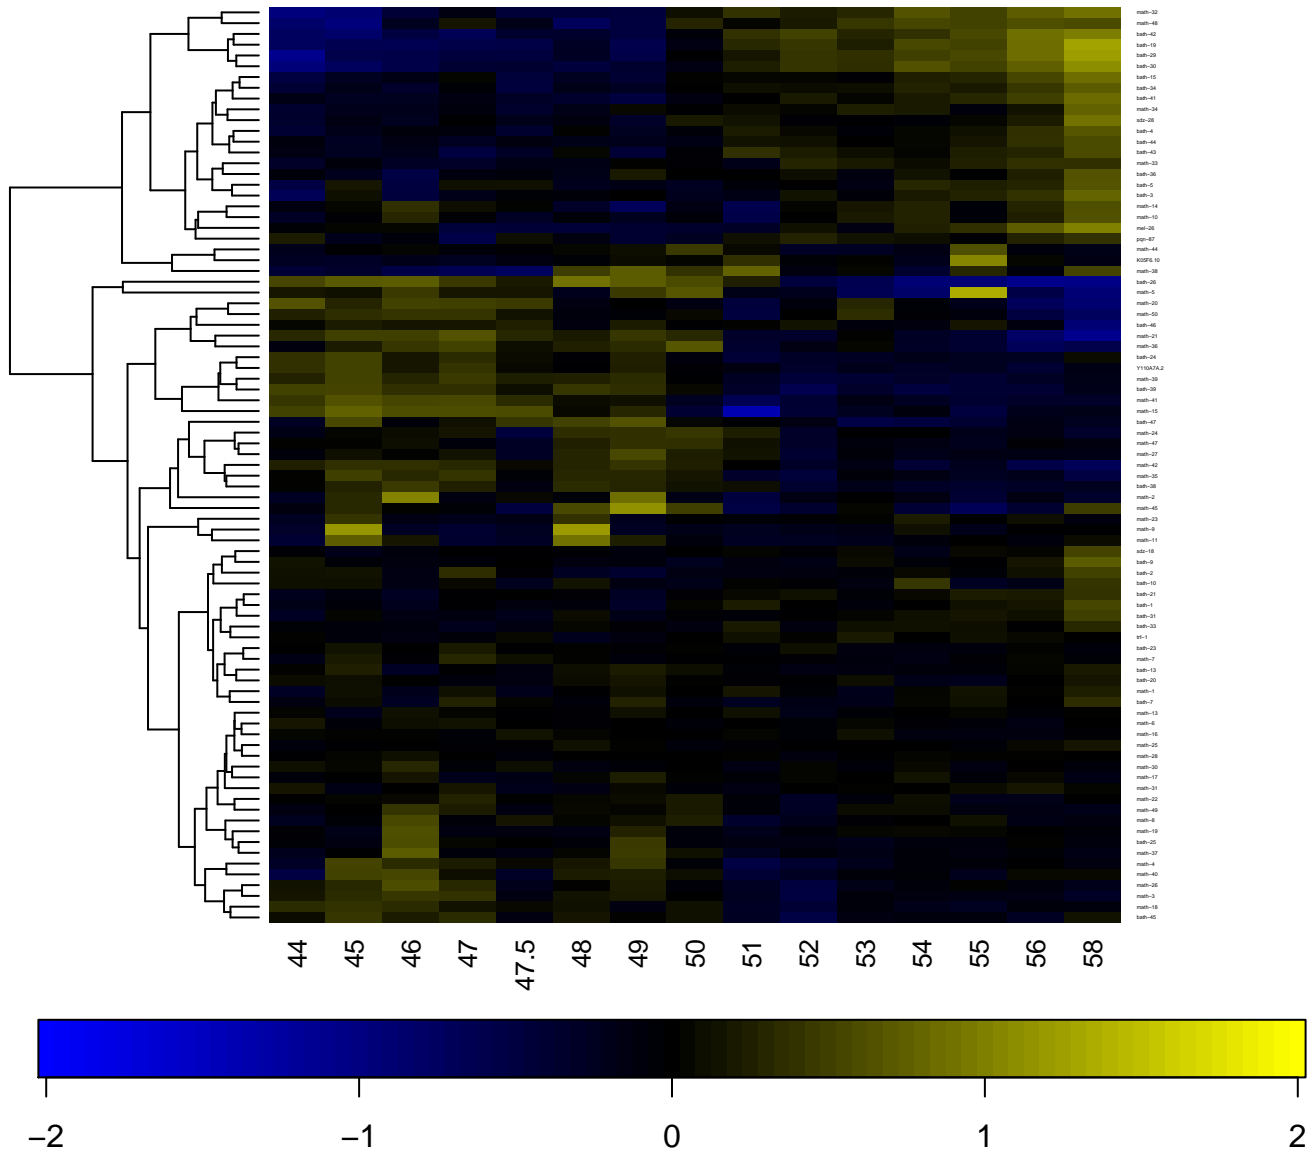

# MATH domain

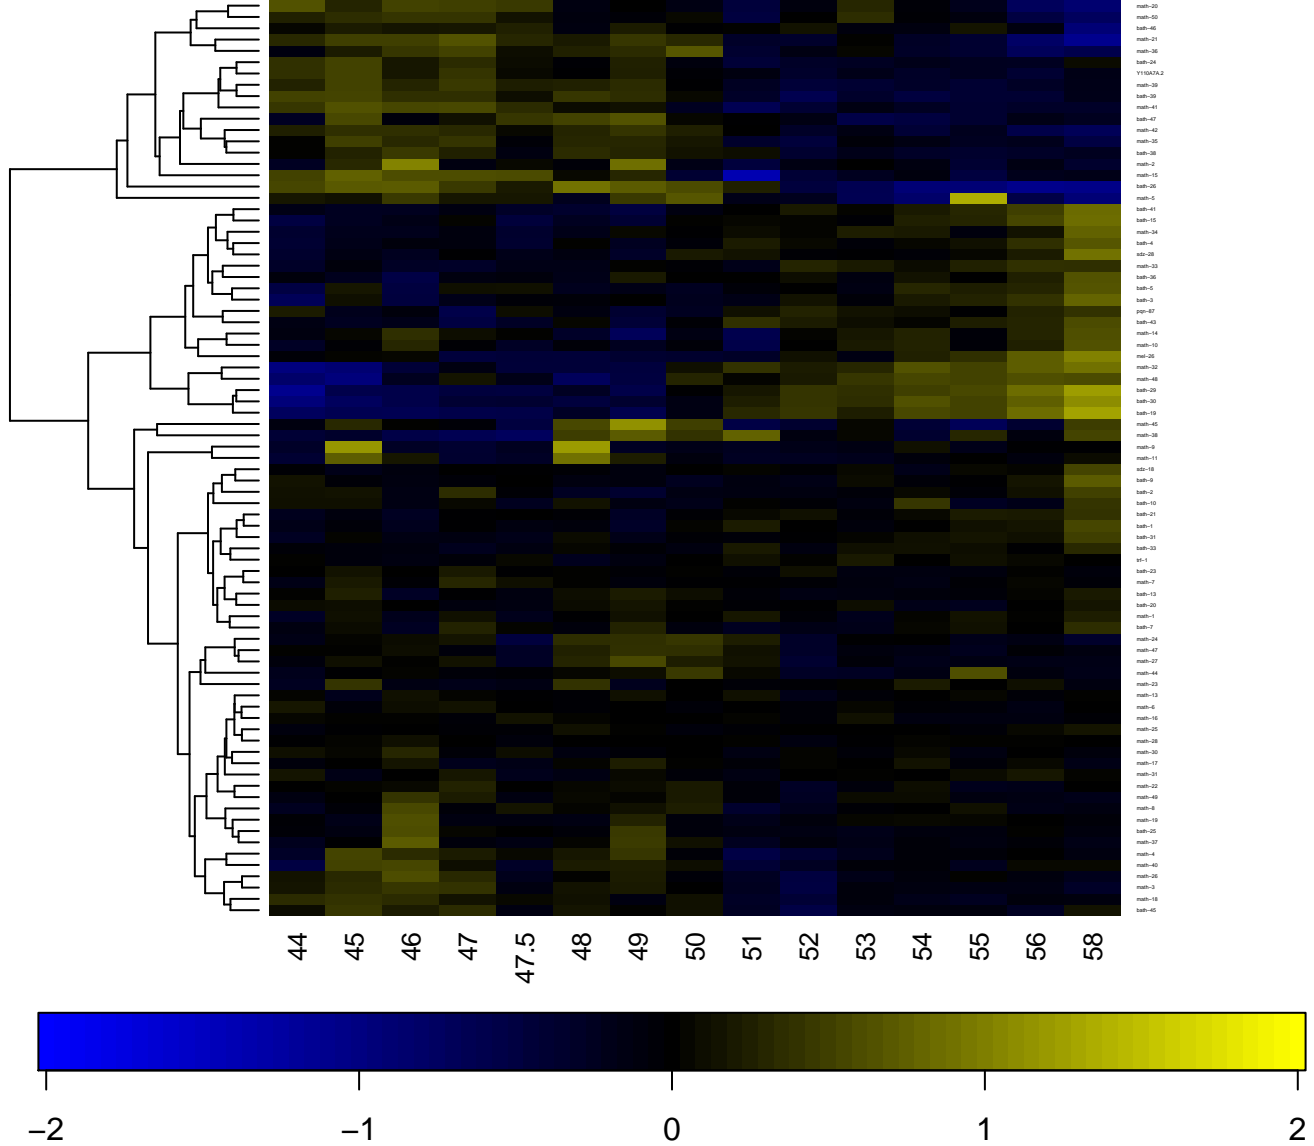



# MBOAT family

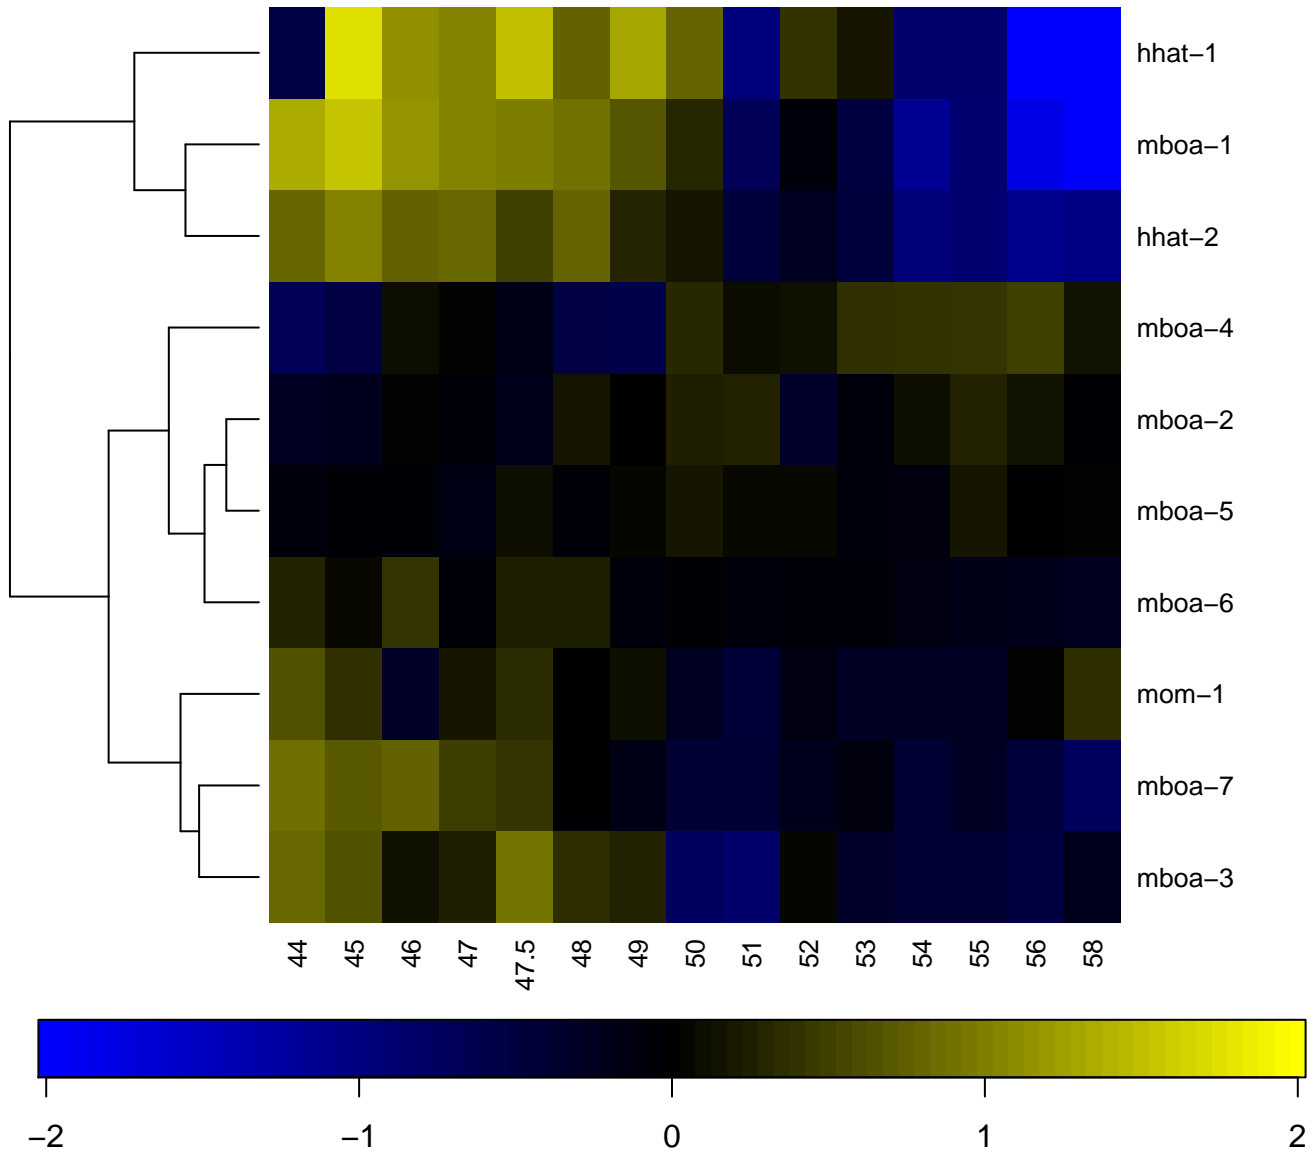



# Membrane-associated domain

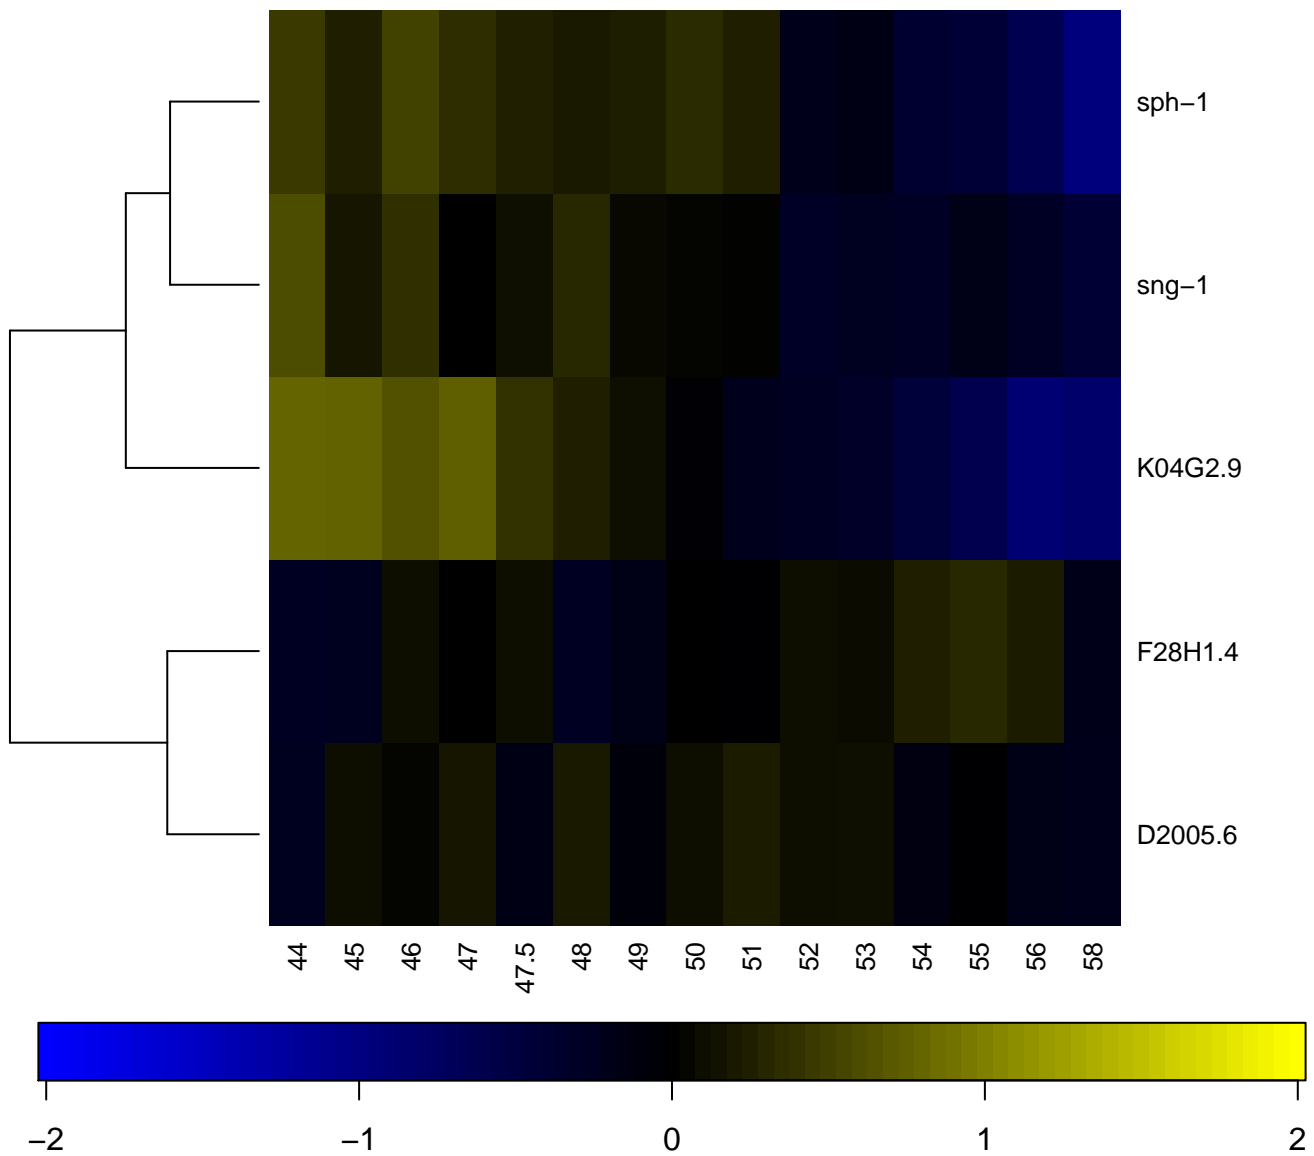



# Membrane transport protein MMPL type

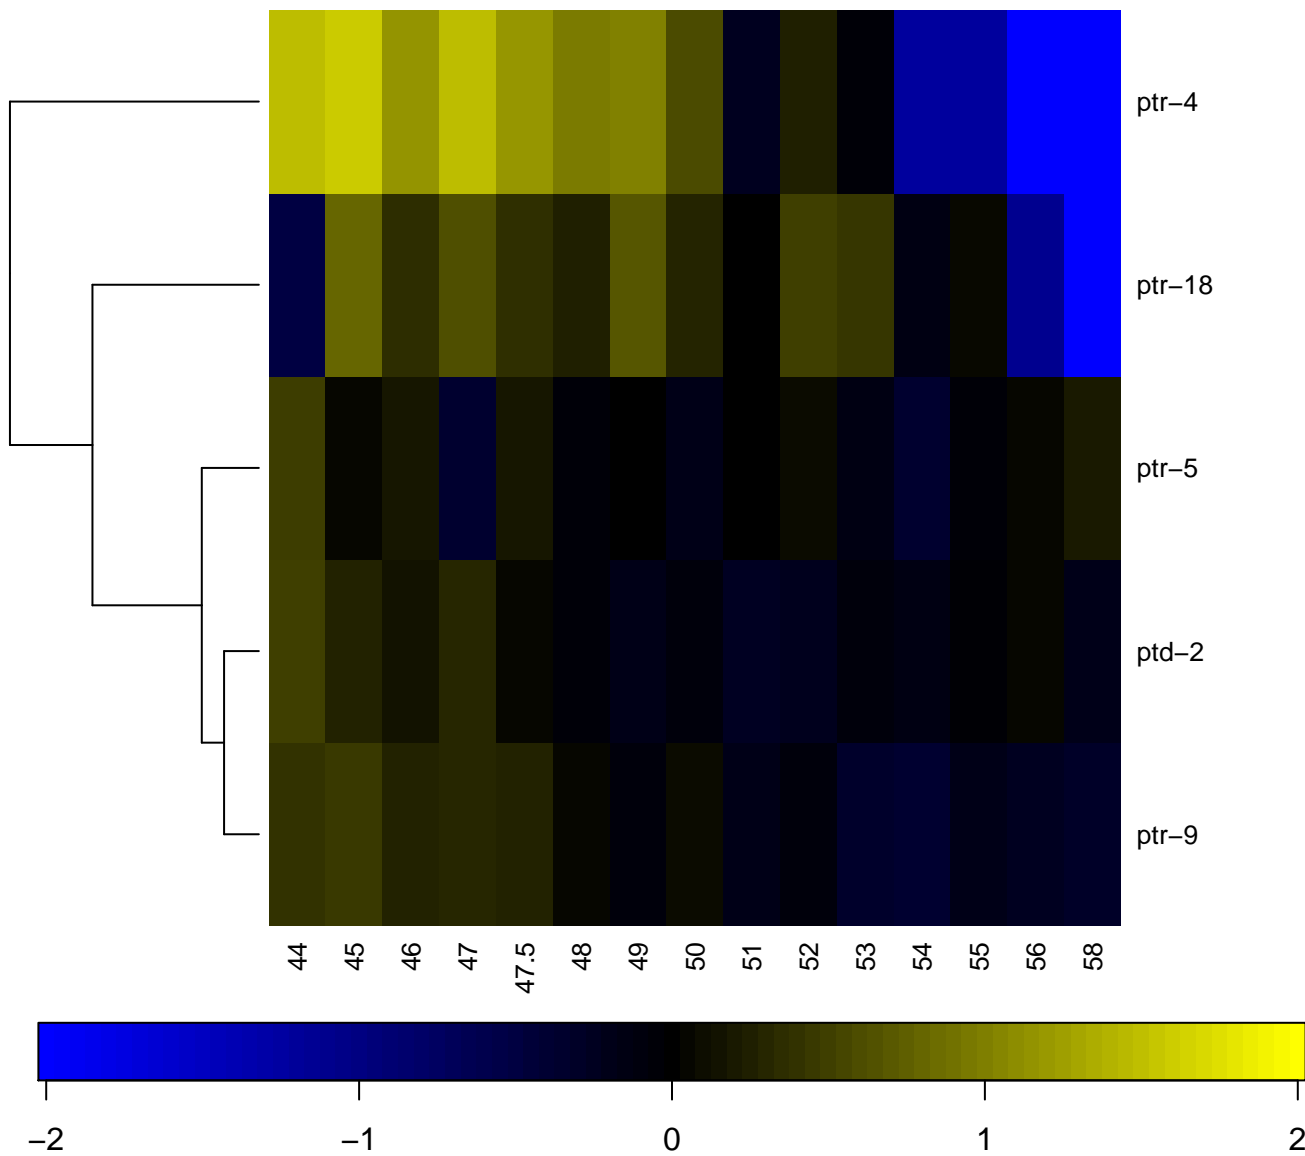





# Metallo-beta-lactamase superfamily

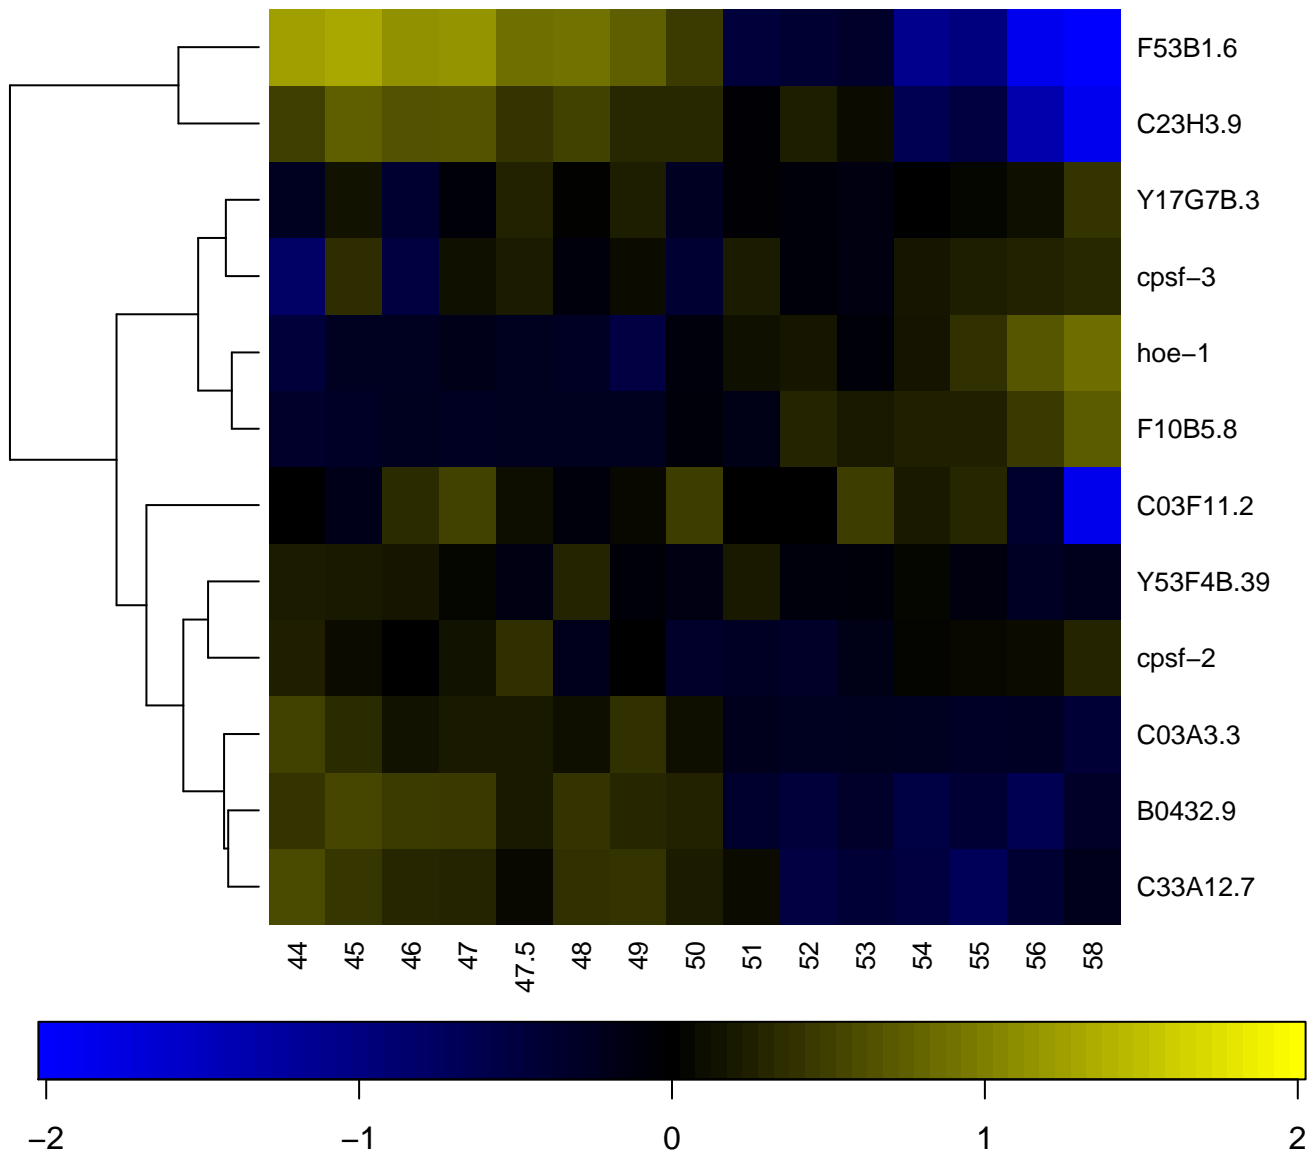

# Metallo-dependent phosphatase

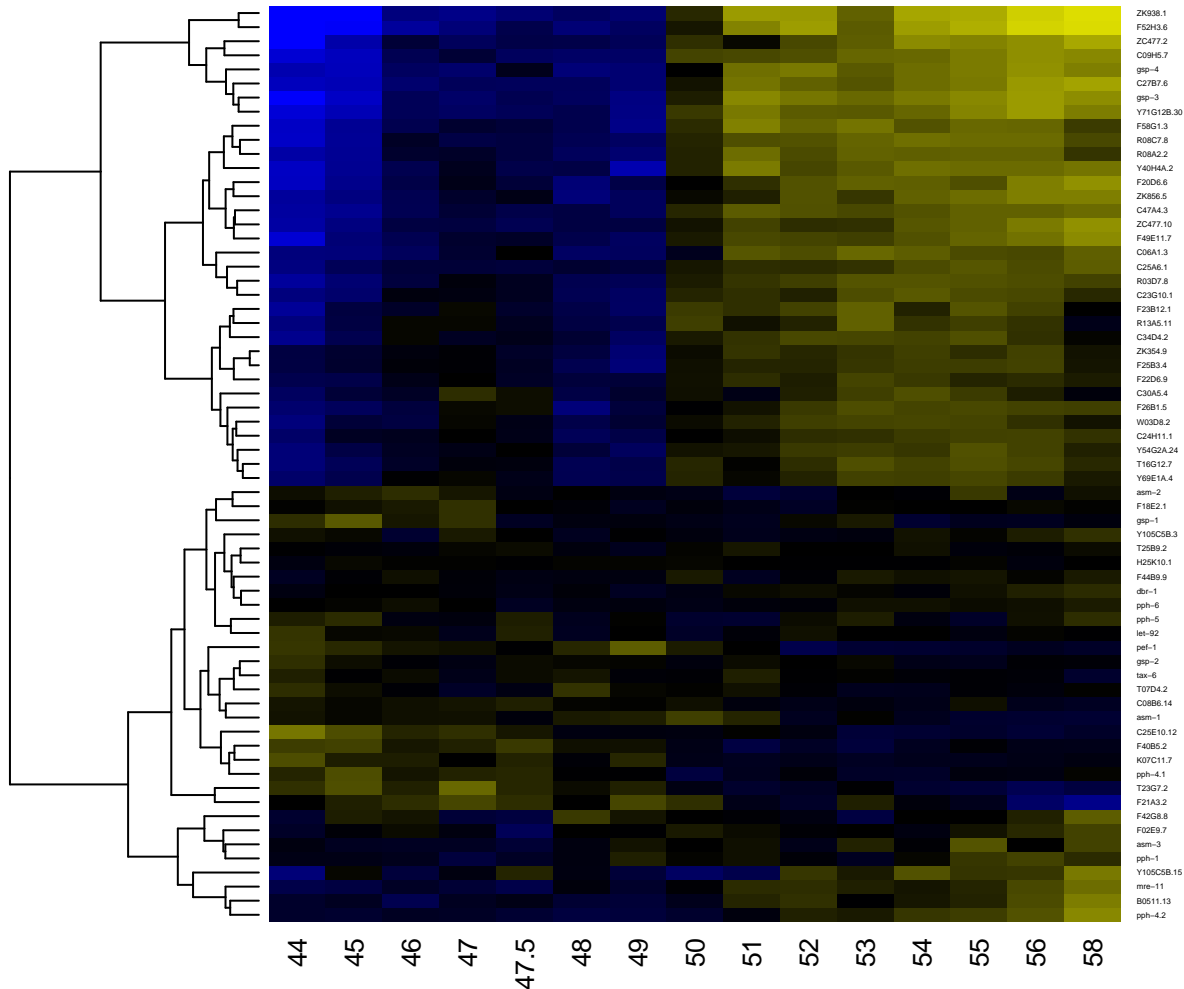

# Metallopeptidase family M24

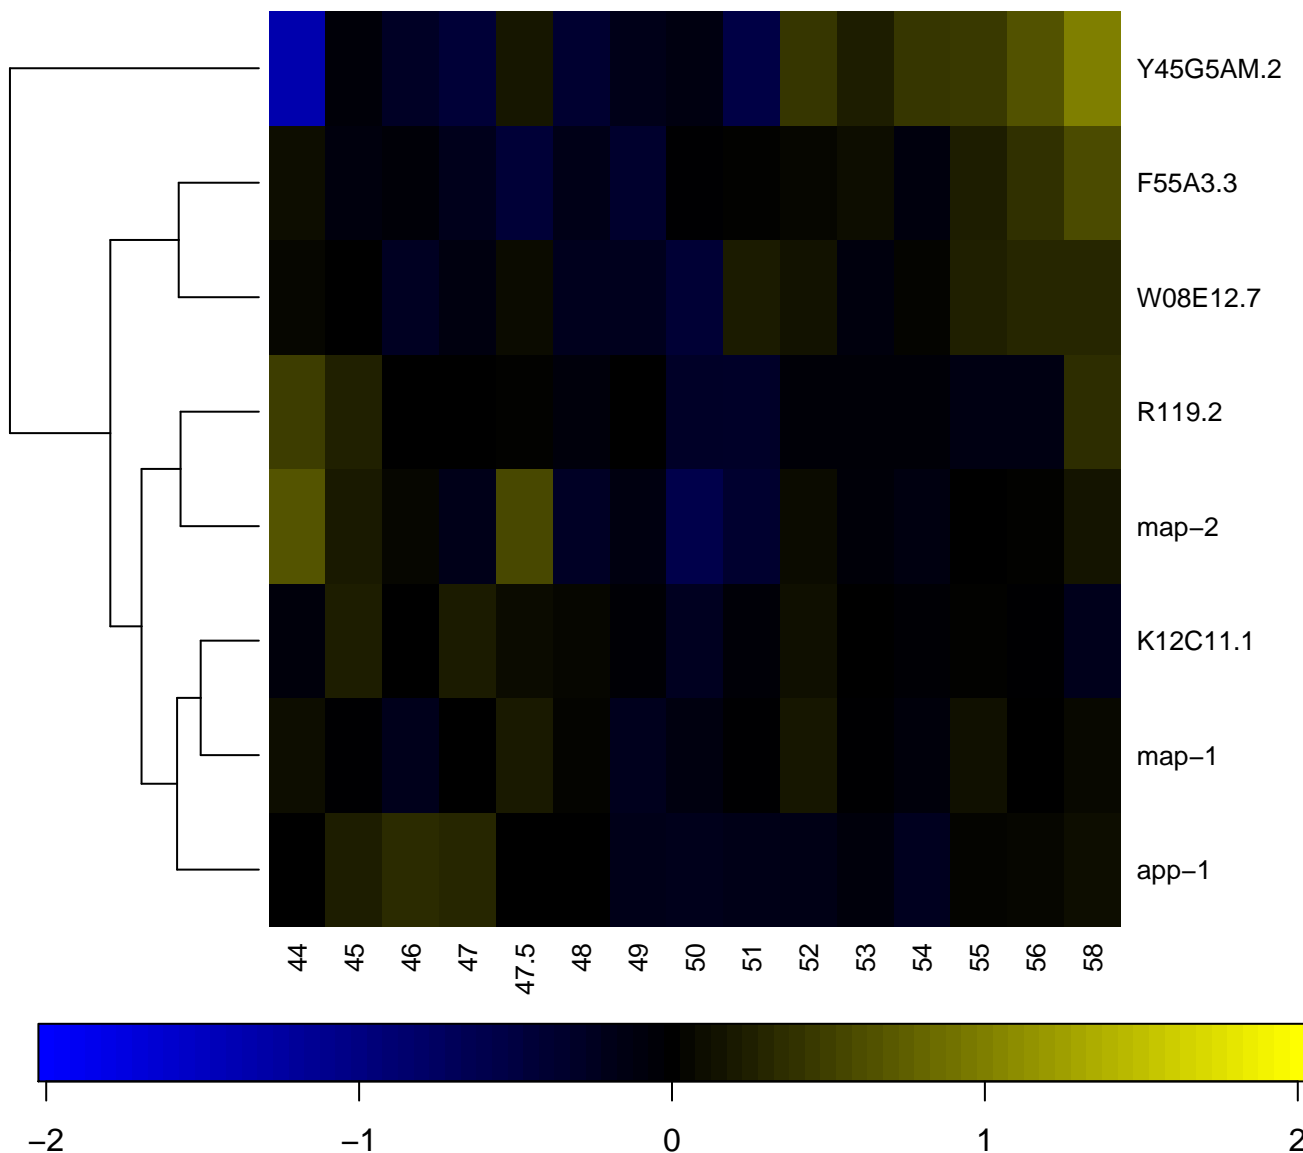







# Methyltransferase small domain

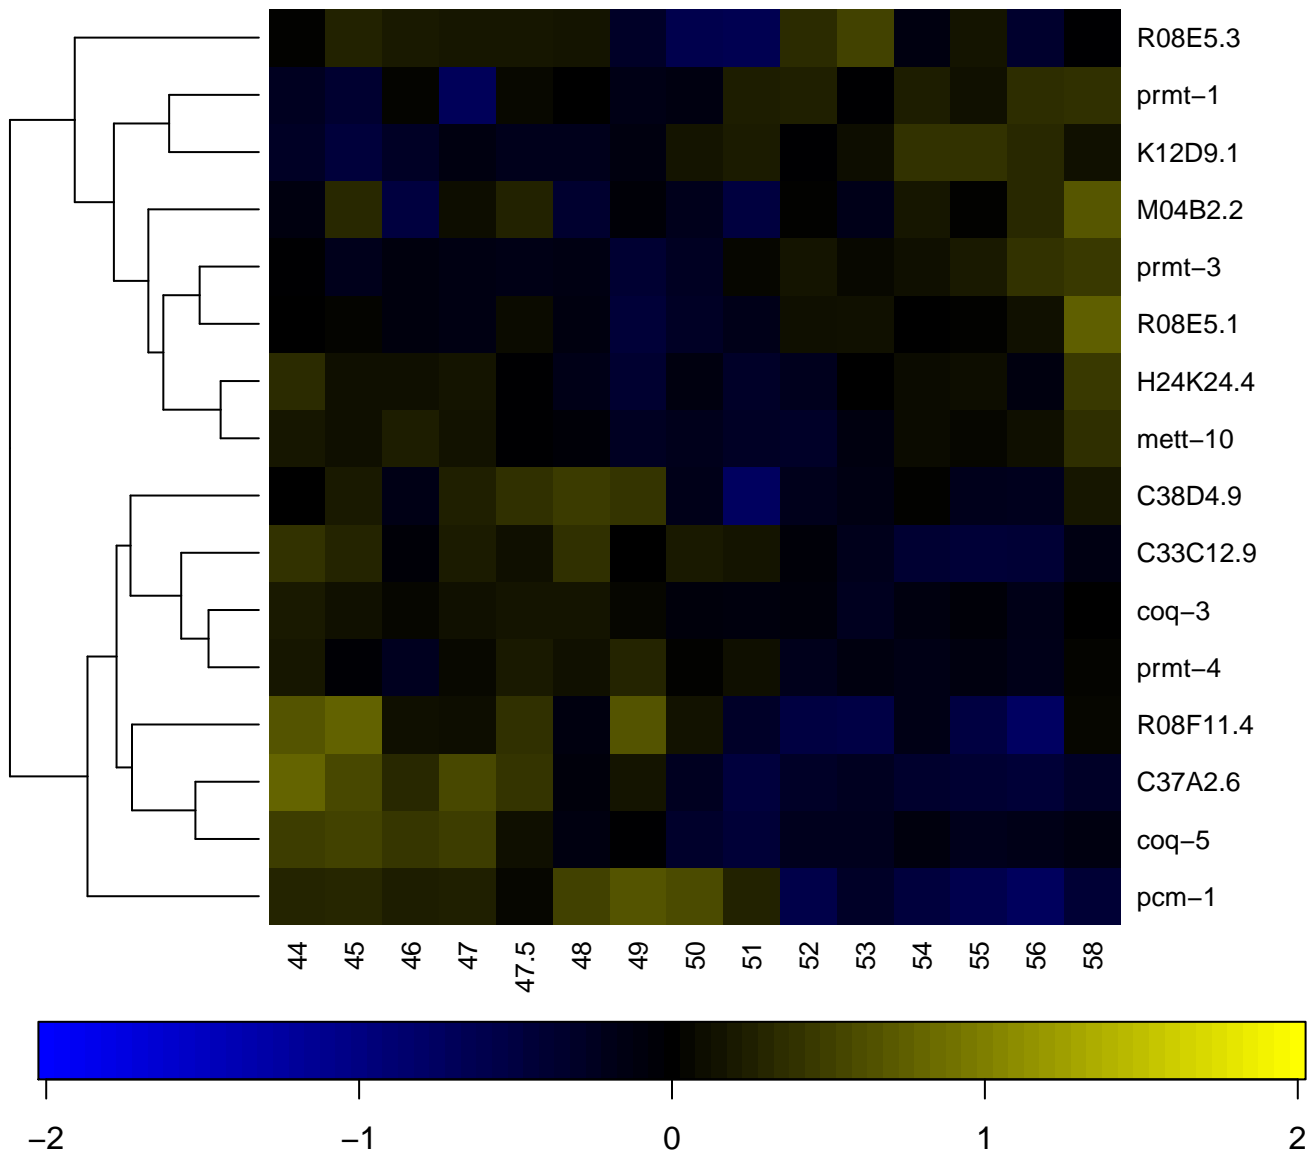



# Methyltransferase type 11

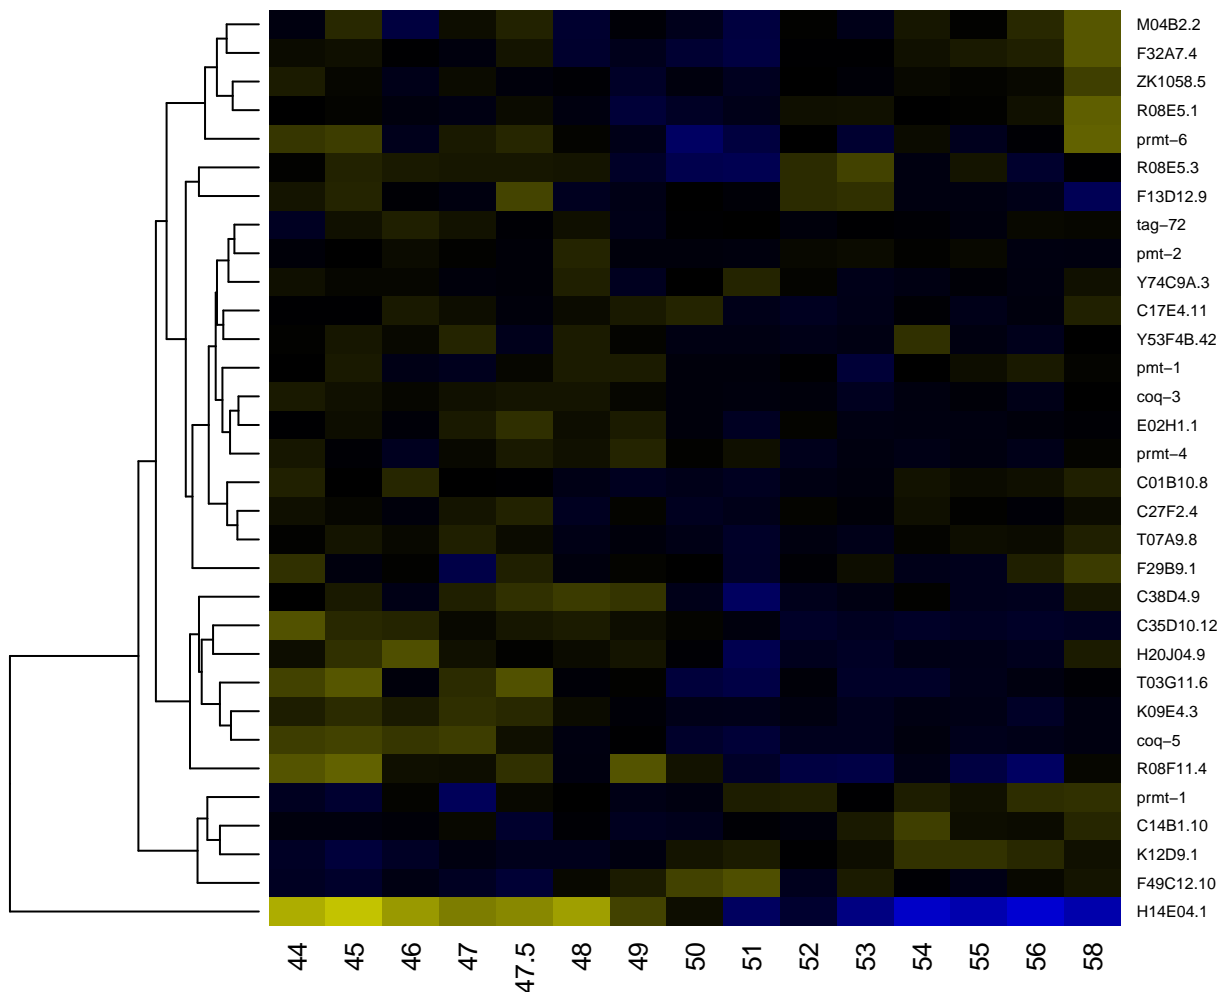

# Methyltransferase type 12

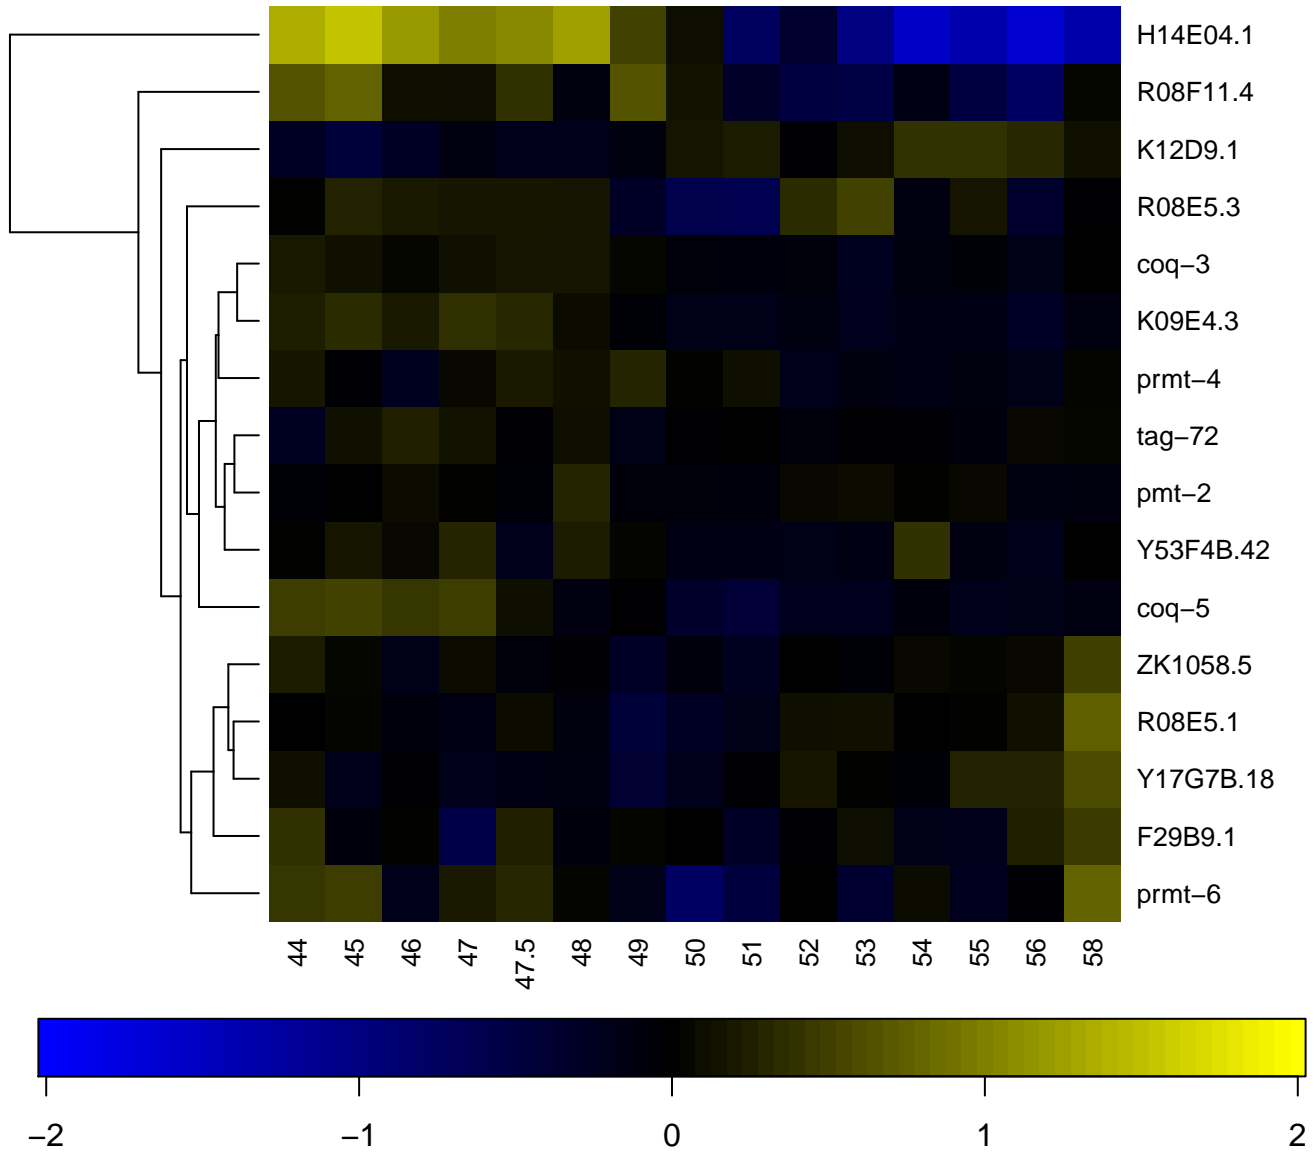

# Metridin-like ShK toxin

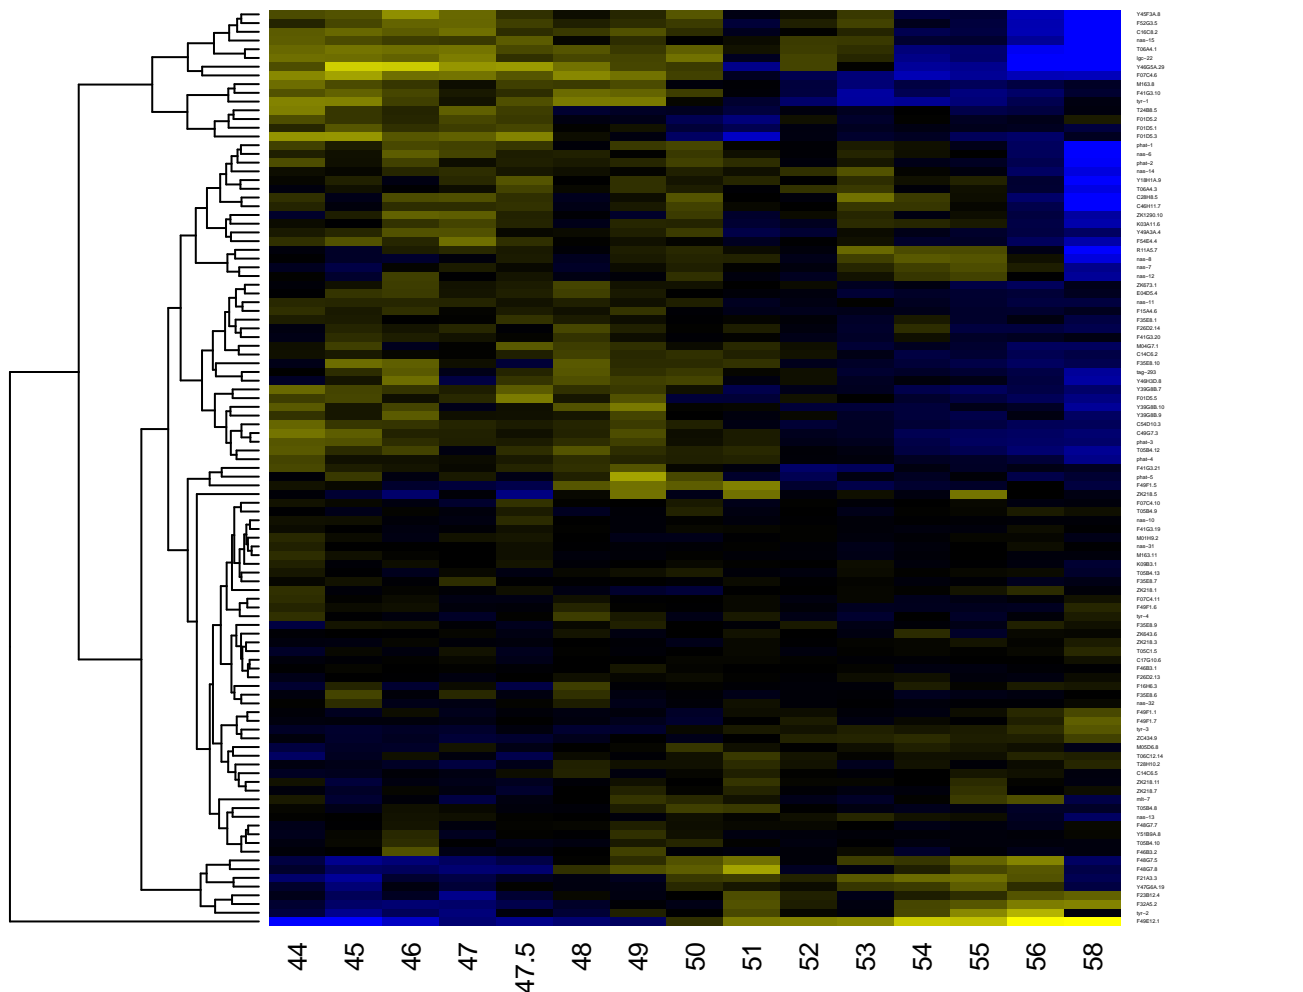

# MH1 domain

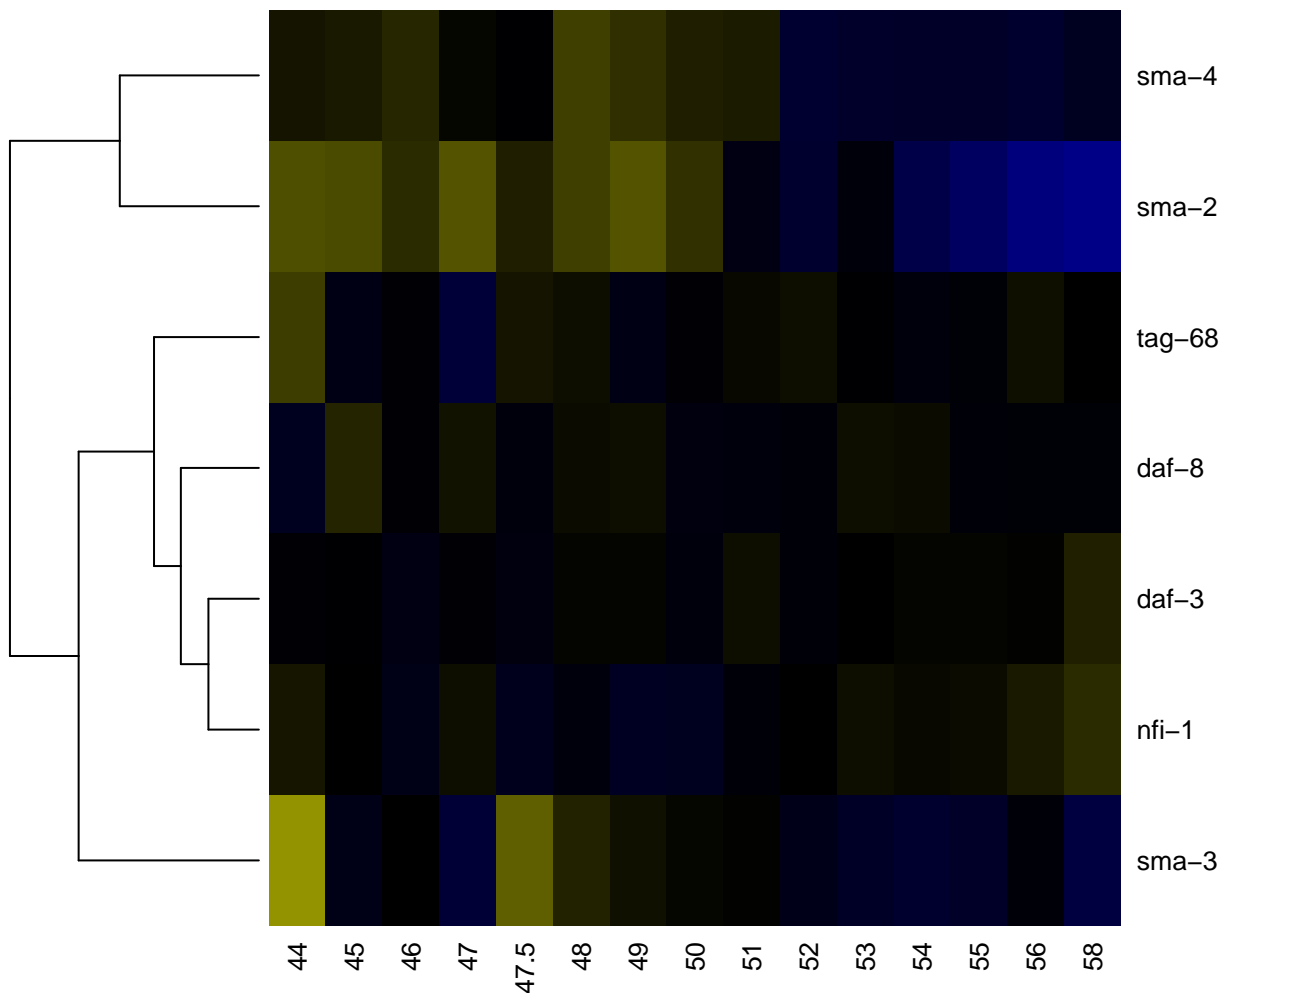

# MH2 domain

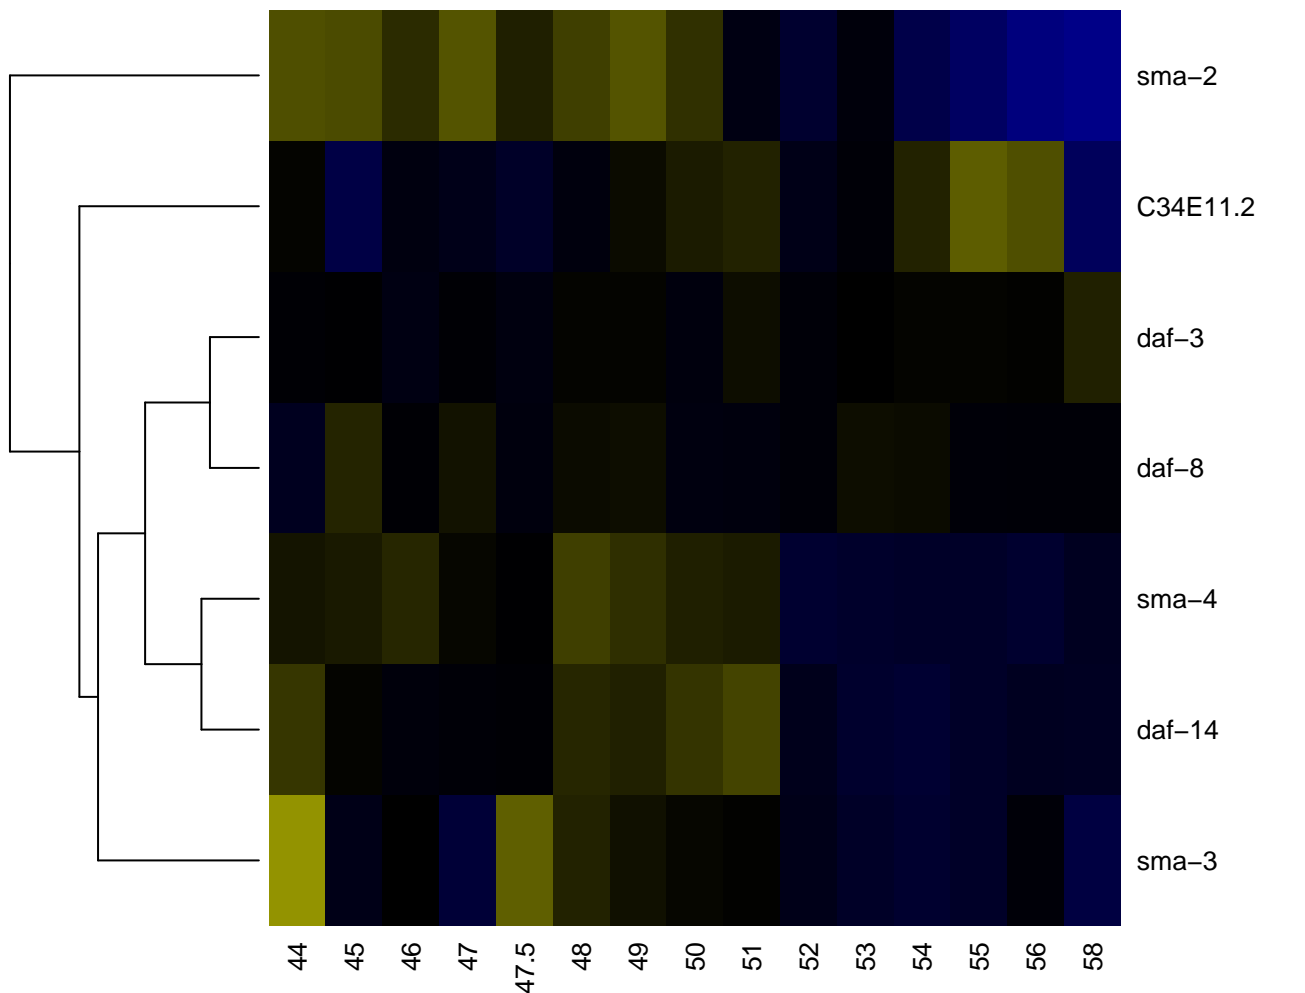

# MIF4-like, type 1/2/3

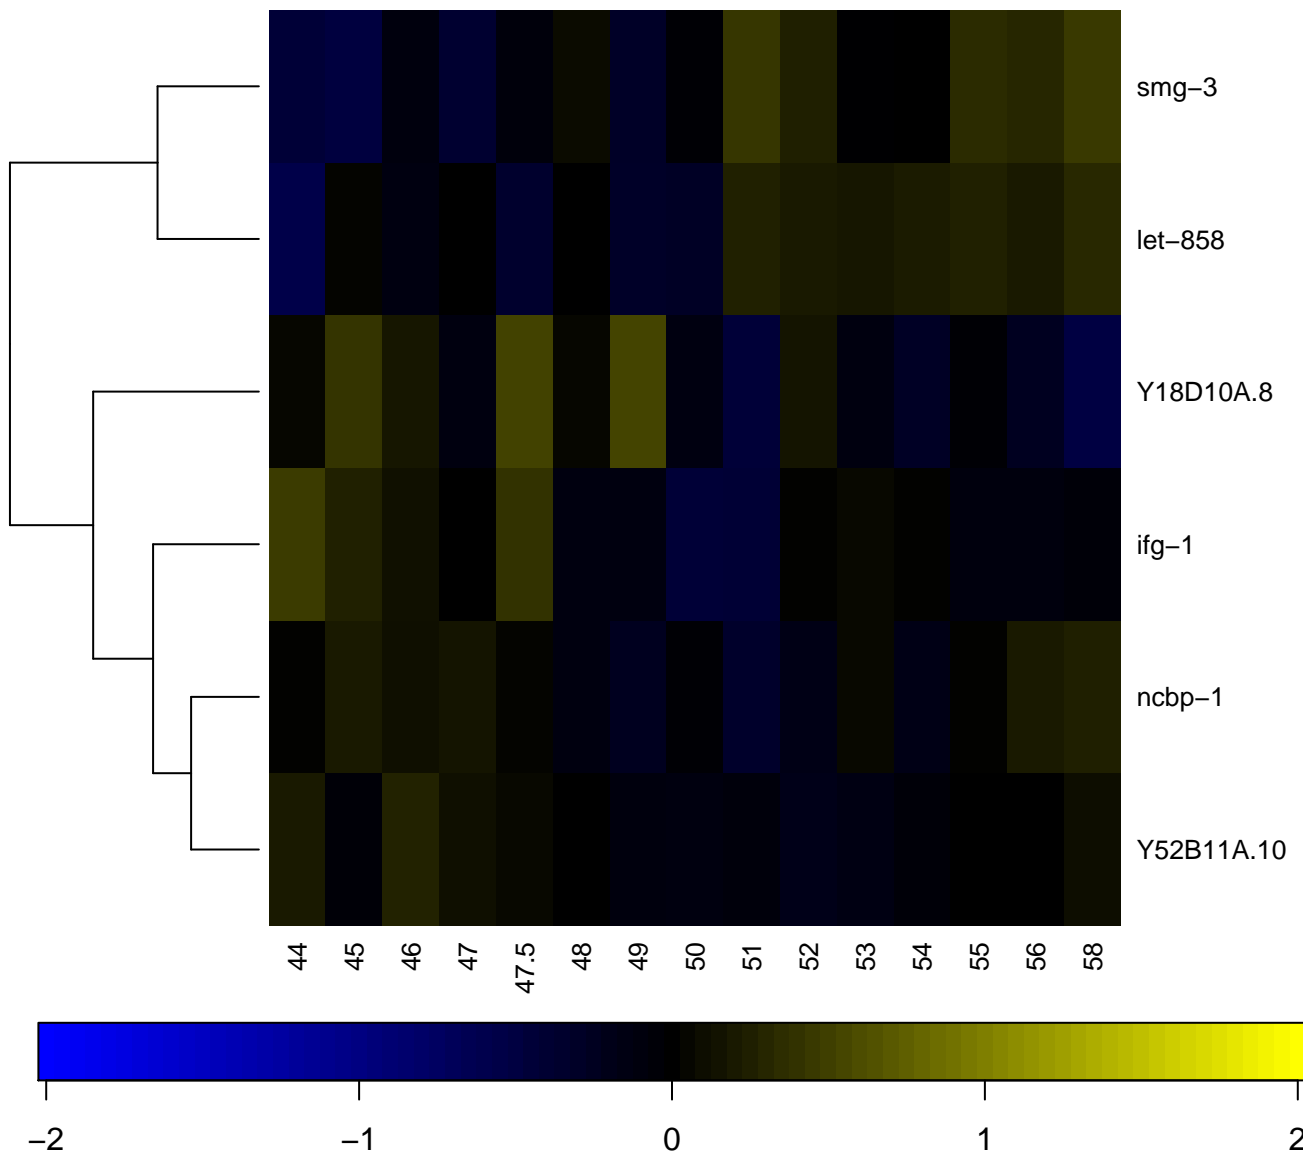

# MIF4G-like, type 3

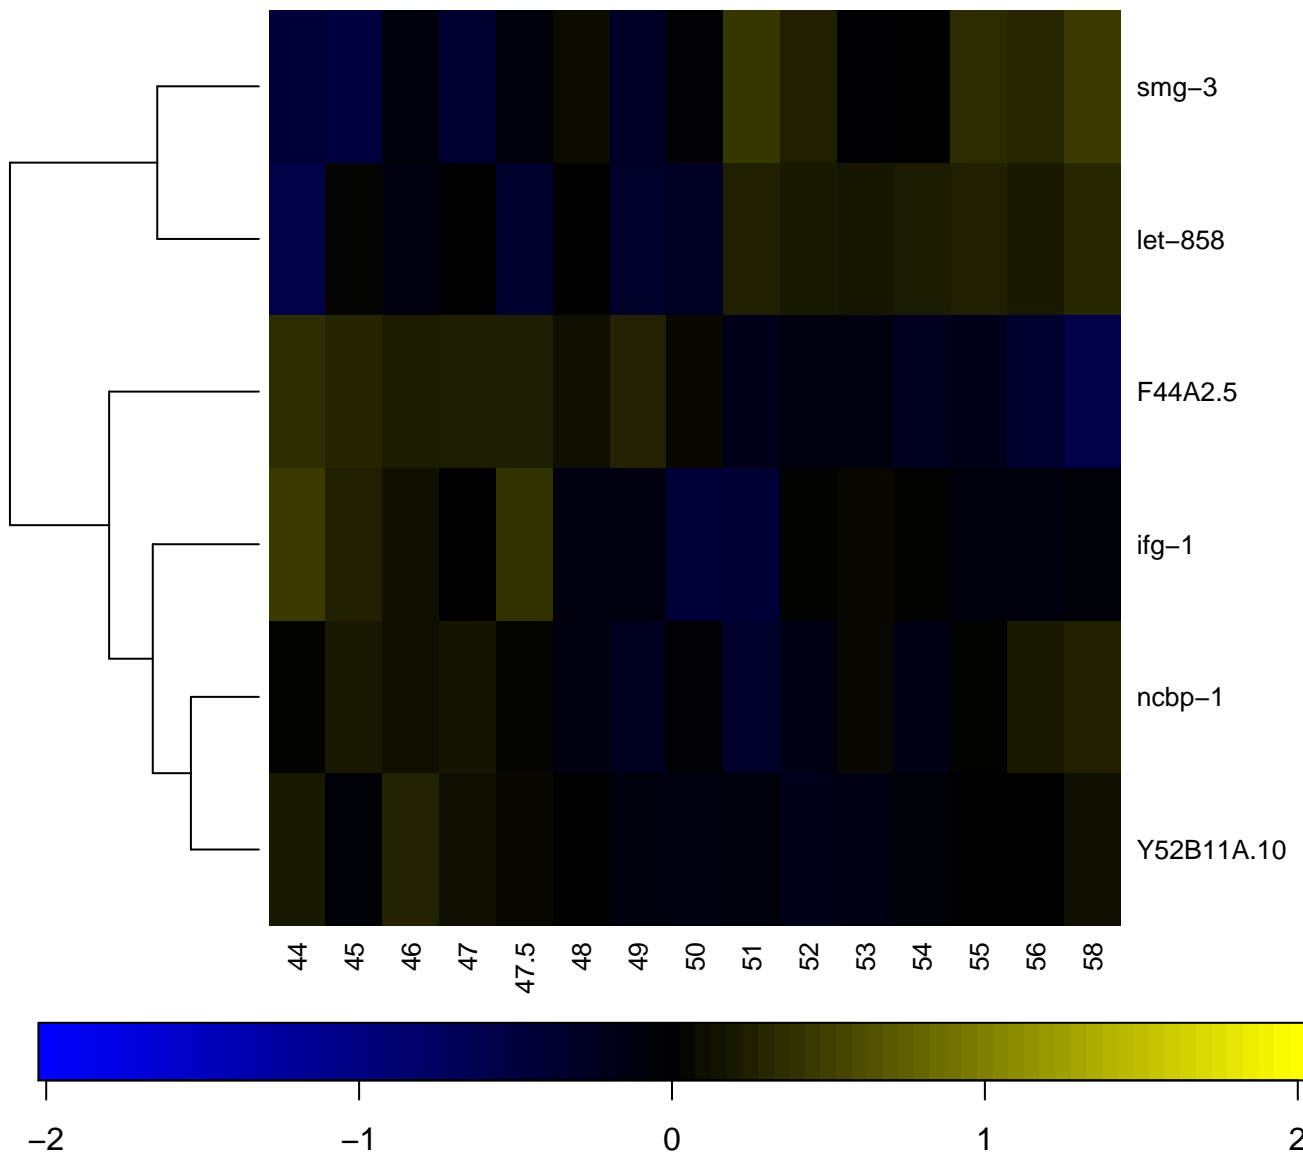





# Miro-like protein

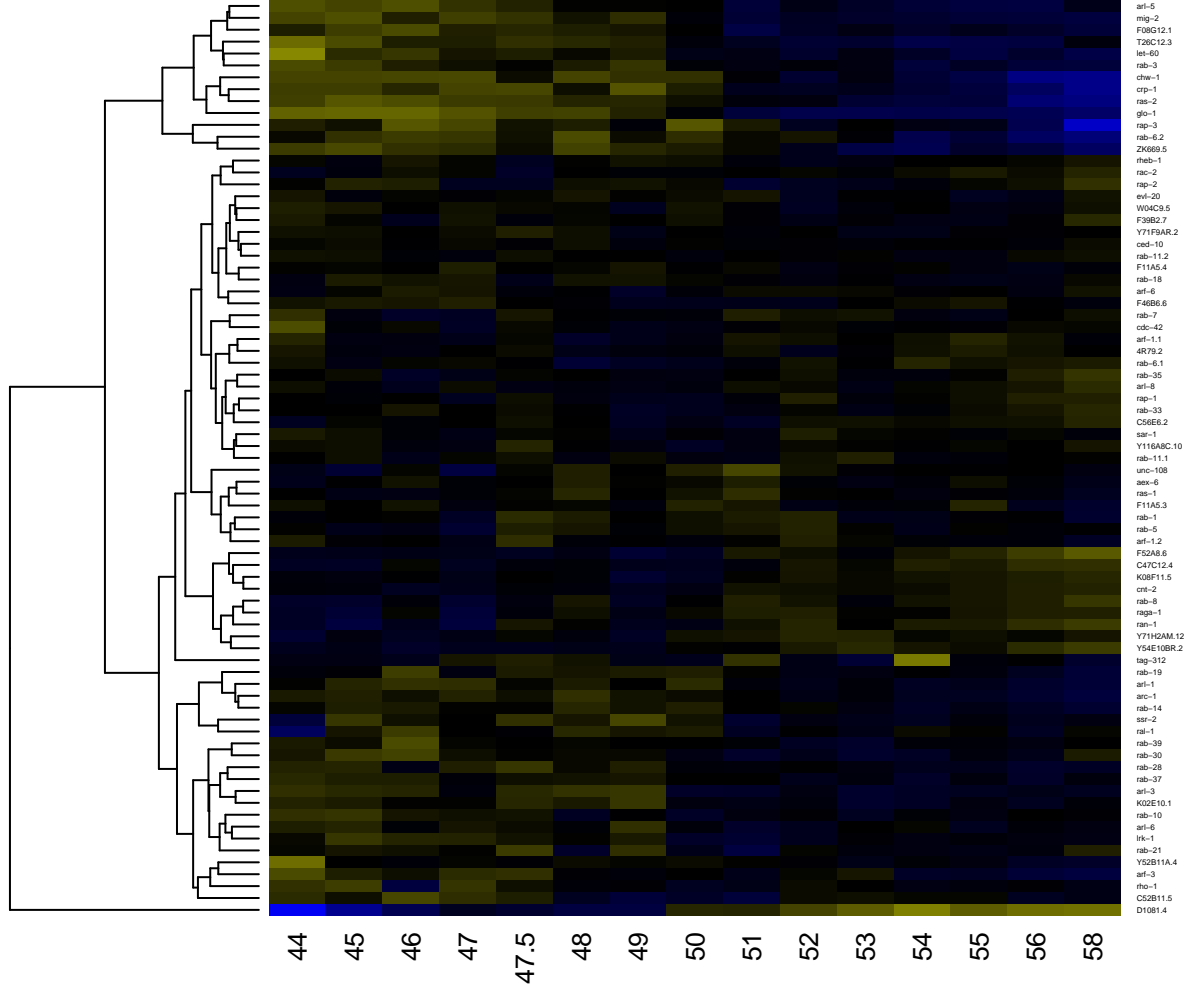

- arl-5
- mig-2
- F08G12.1
- T26C12.3
- let-60
- rab-3
- chw-1
- crp-1
- ras-2
- glo-1
- rap-3
- rab-6.2
- ZK689.5
- rheb-1
- rac-2
- rap-2
- evl-20
- W04C9.5
- F39B2.7
- Y71F9AR.2
- ced-10
- rab-11.2
- F11A5.4
- rab-18
- arf-6
- F46B6.6
- rab-7
- osb-42
- arf-1.1
- 4R79.2
- rab-6.1
- rab-35
- arl-8
- rap-1
- rab-33
- C56E2.2
- sar-1
- Y116ABC.10
- rab-11.1
- unc-108
- axx-6
- ras-1
- F11A5.3
- rab-1
- rab-5
- arf-1.2
- F52A8.6
- C47C12.4
- K08F11.5
- crn-2
- rab-8
- rggs-1
- ran-1
- Y71H2AM.12
- Y54E10BR.2
- tag-312
- rab-19
- arf-1
- arc-1
- rab-14
- sar-2
- ral-1
- rab-39
- rab-30
- rab-28
- rab-37
- arf-3
- K02E10.1
- rab-10
- arf-6
- tk-1
- rab-21
- Y52B11A.4
- arf-3
- rho-1
- C52B11.5
- D10B1.4



# Mitochondrial carrier protein

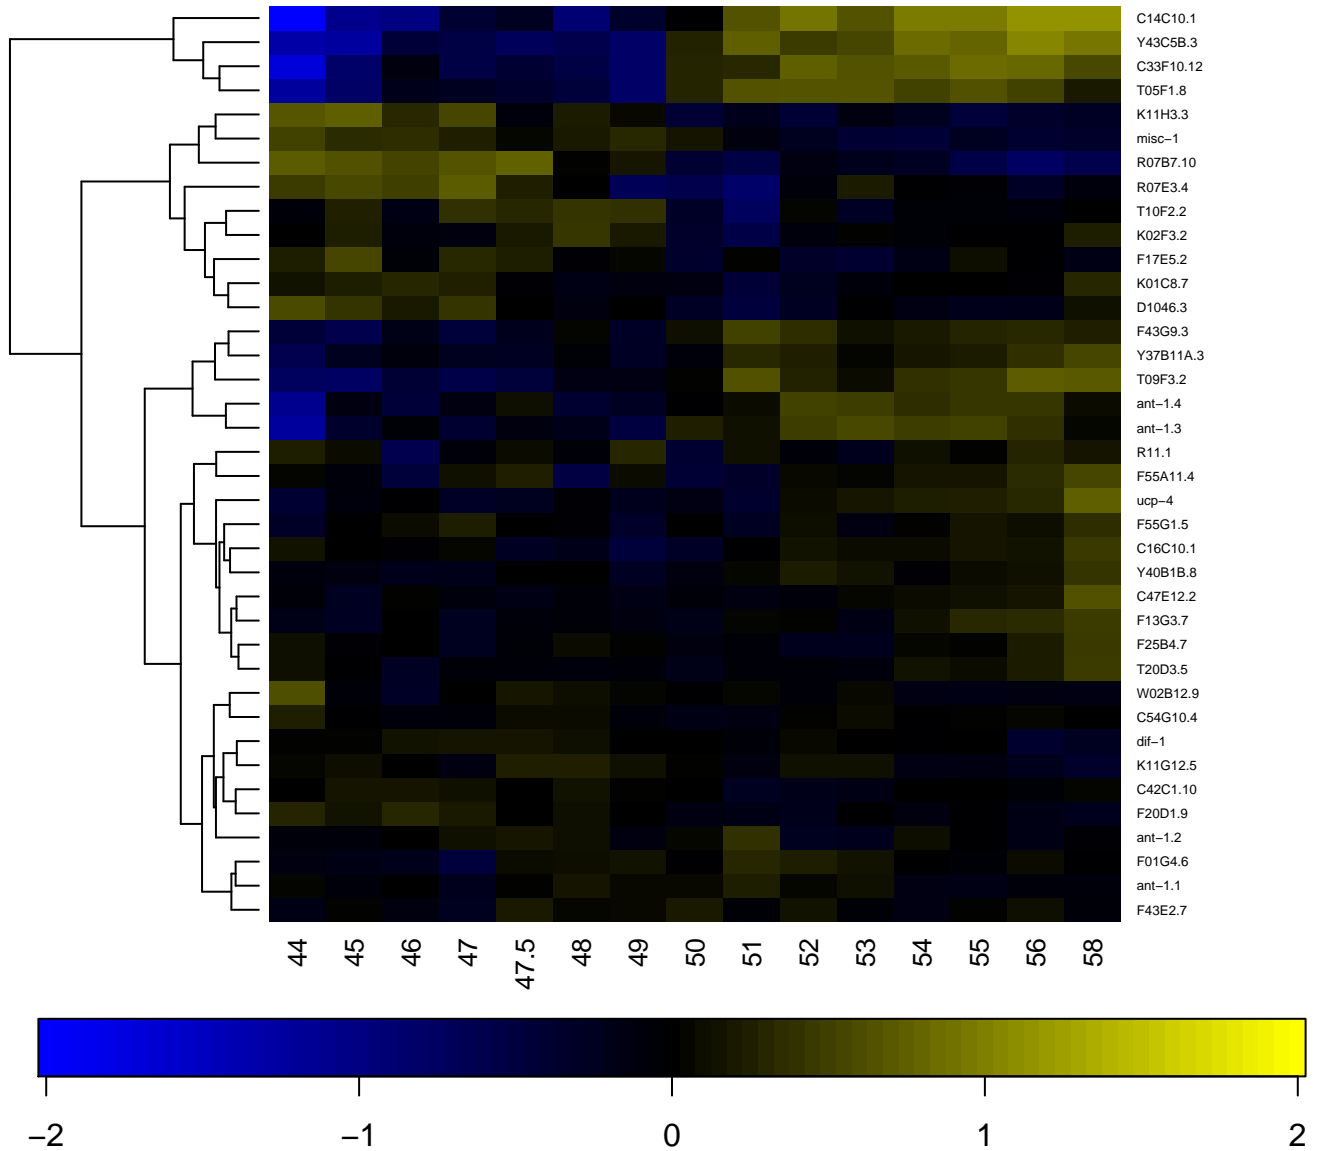

# Mitochondrial Rho-like

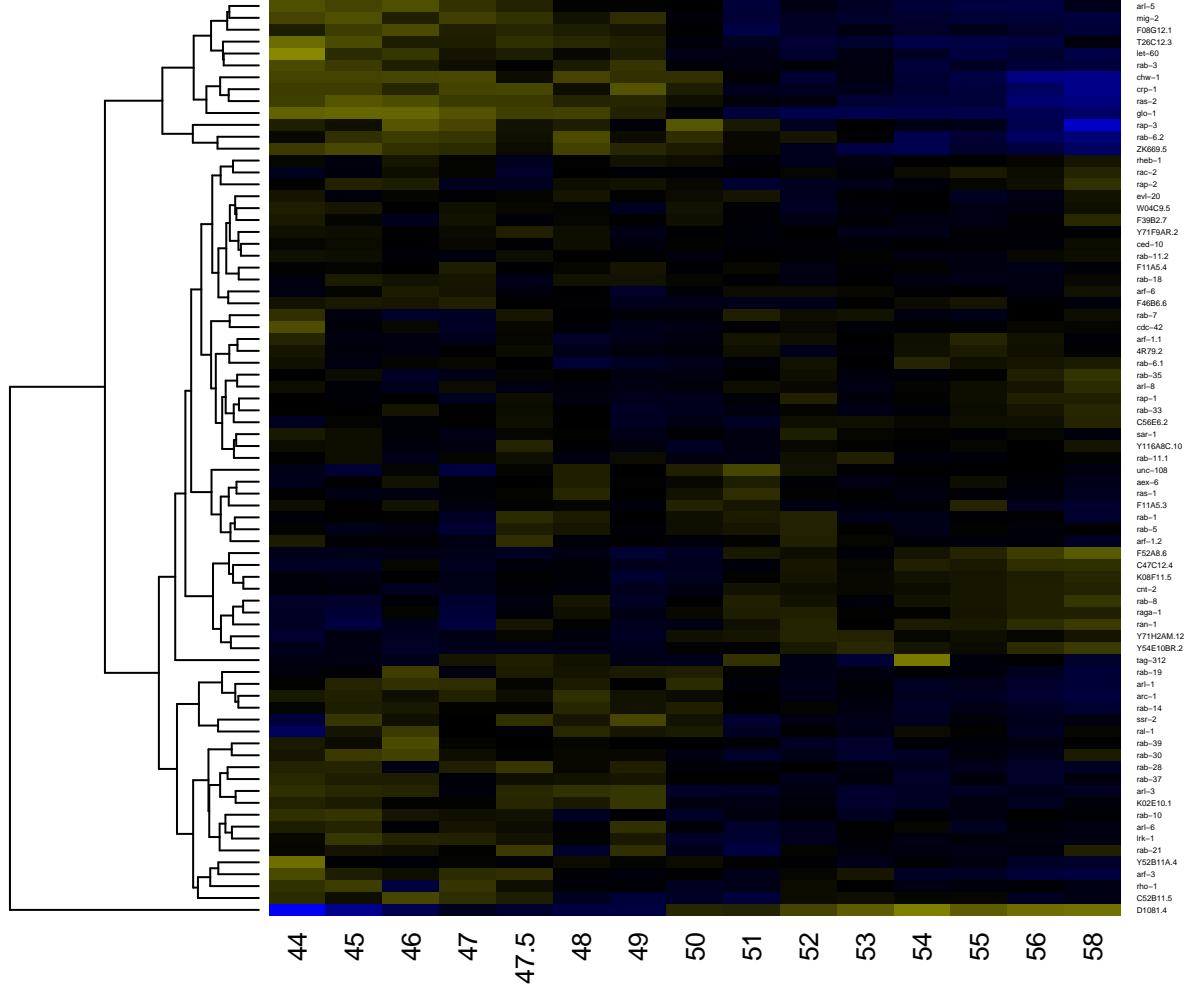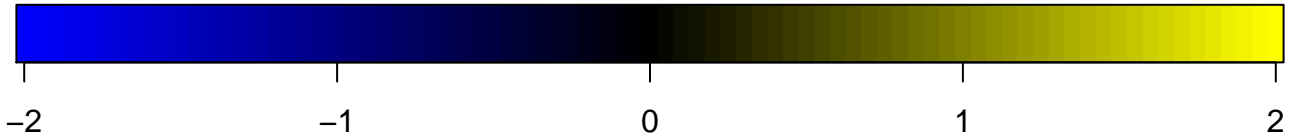

# Mitochondrial substrate carrier

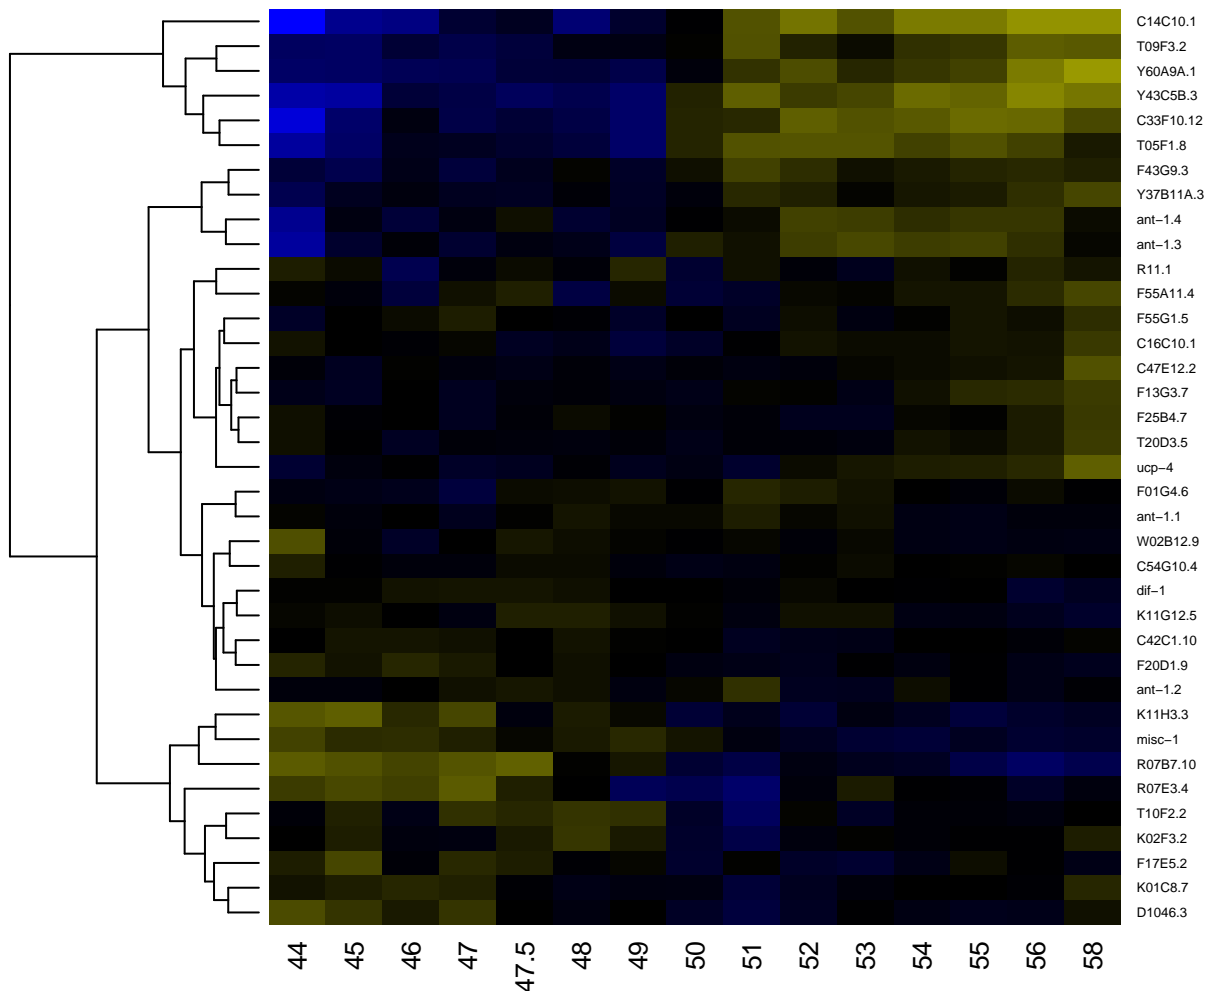

# Mitochondrial substrate/solute carrier

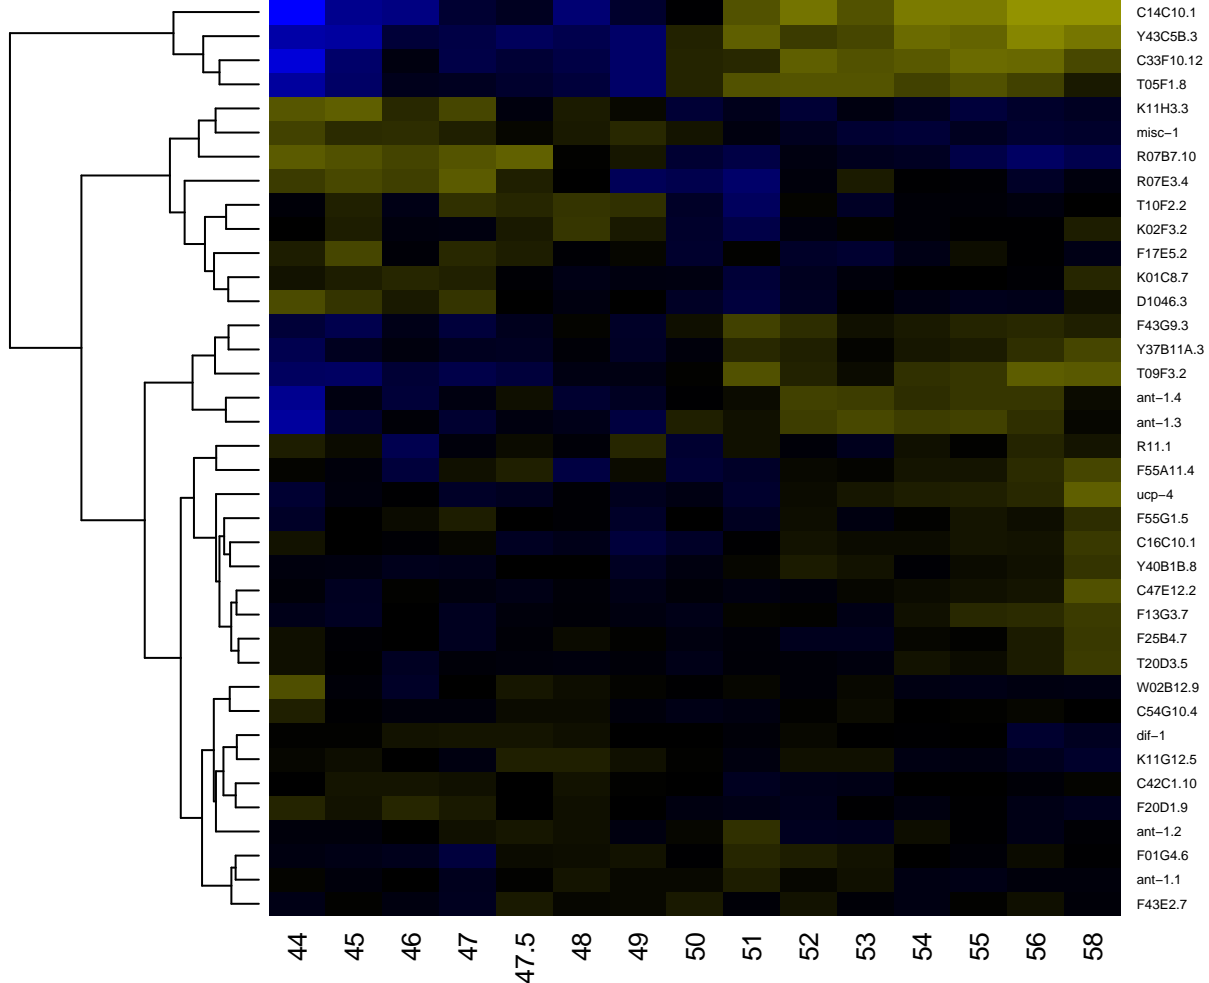

# MMPL family













# MreB/Mbl protein



# MSP (Major sperm protein) domain

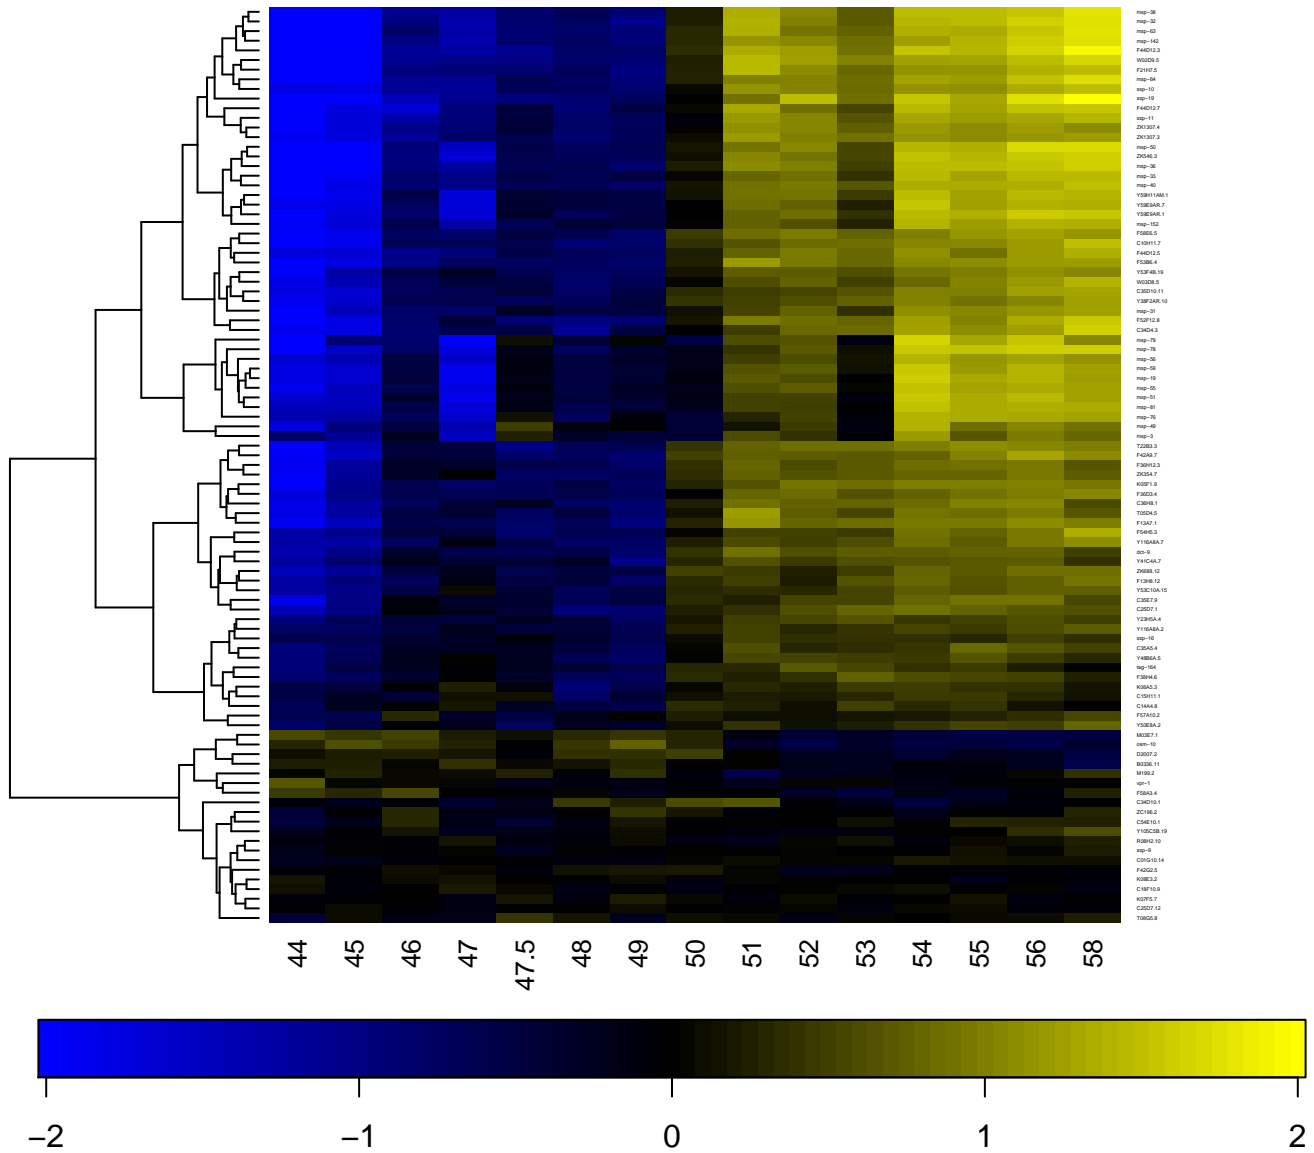





# Myb-like DNA-binding domain

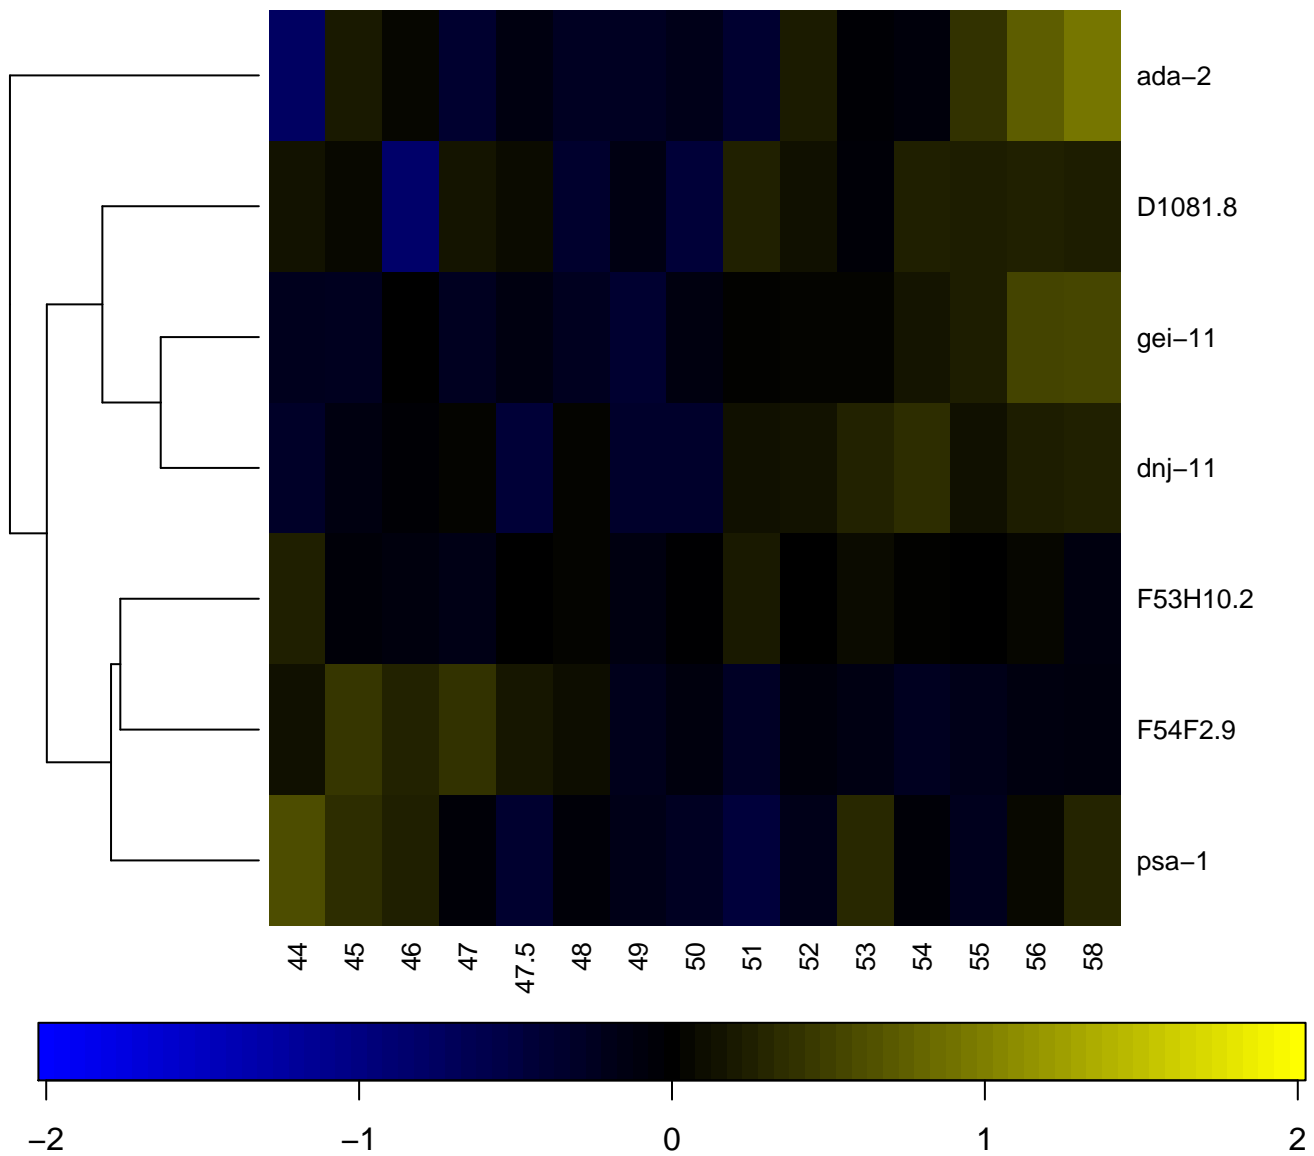

# Myb, DNA-binding





# MYND finger

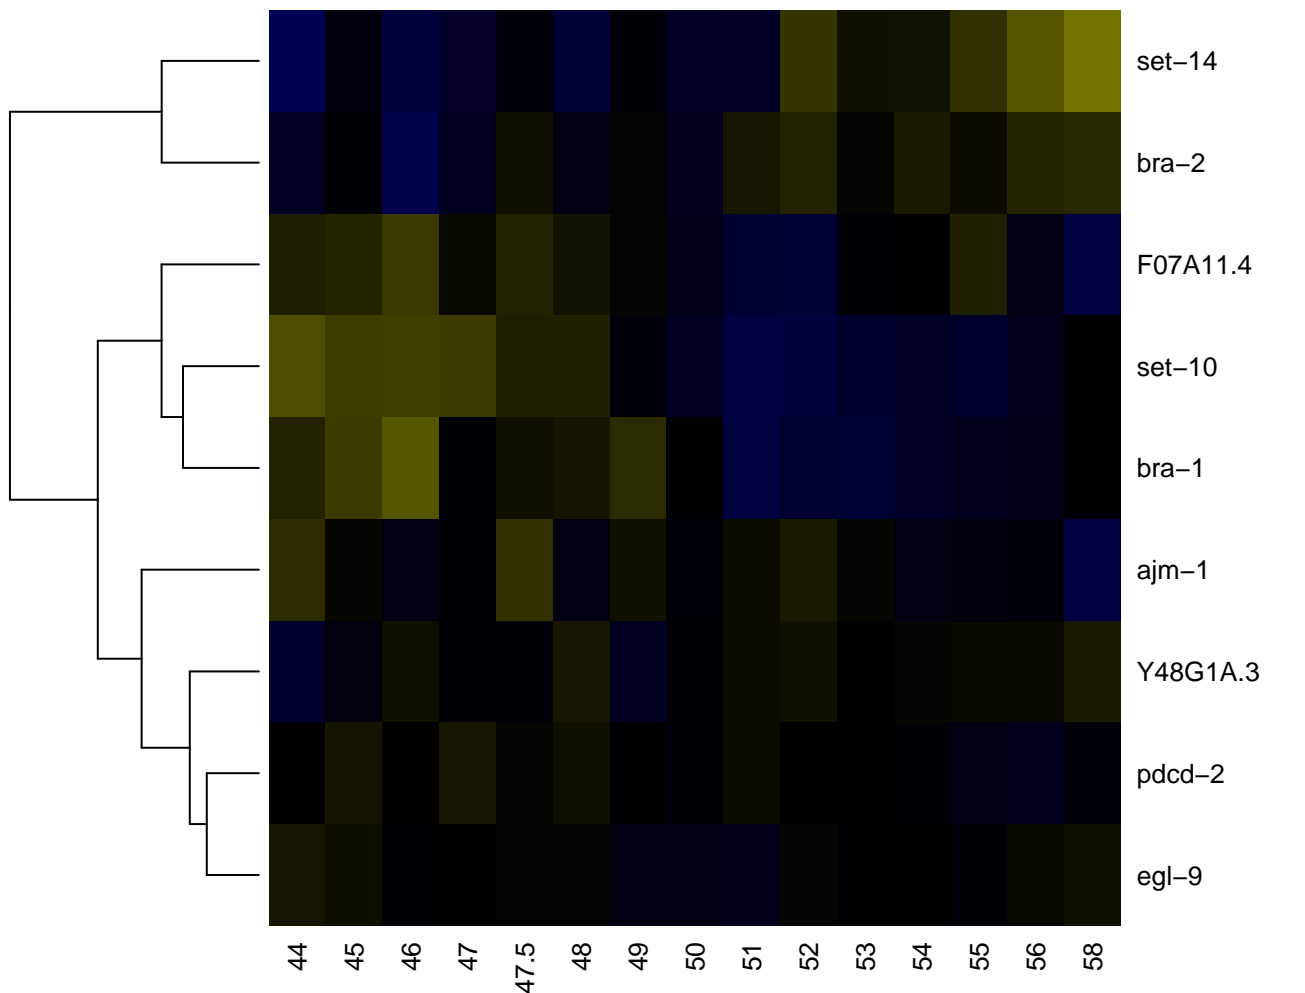





# Myosin N-terminal SH3-like domain

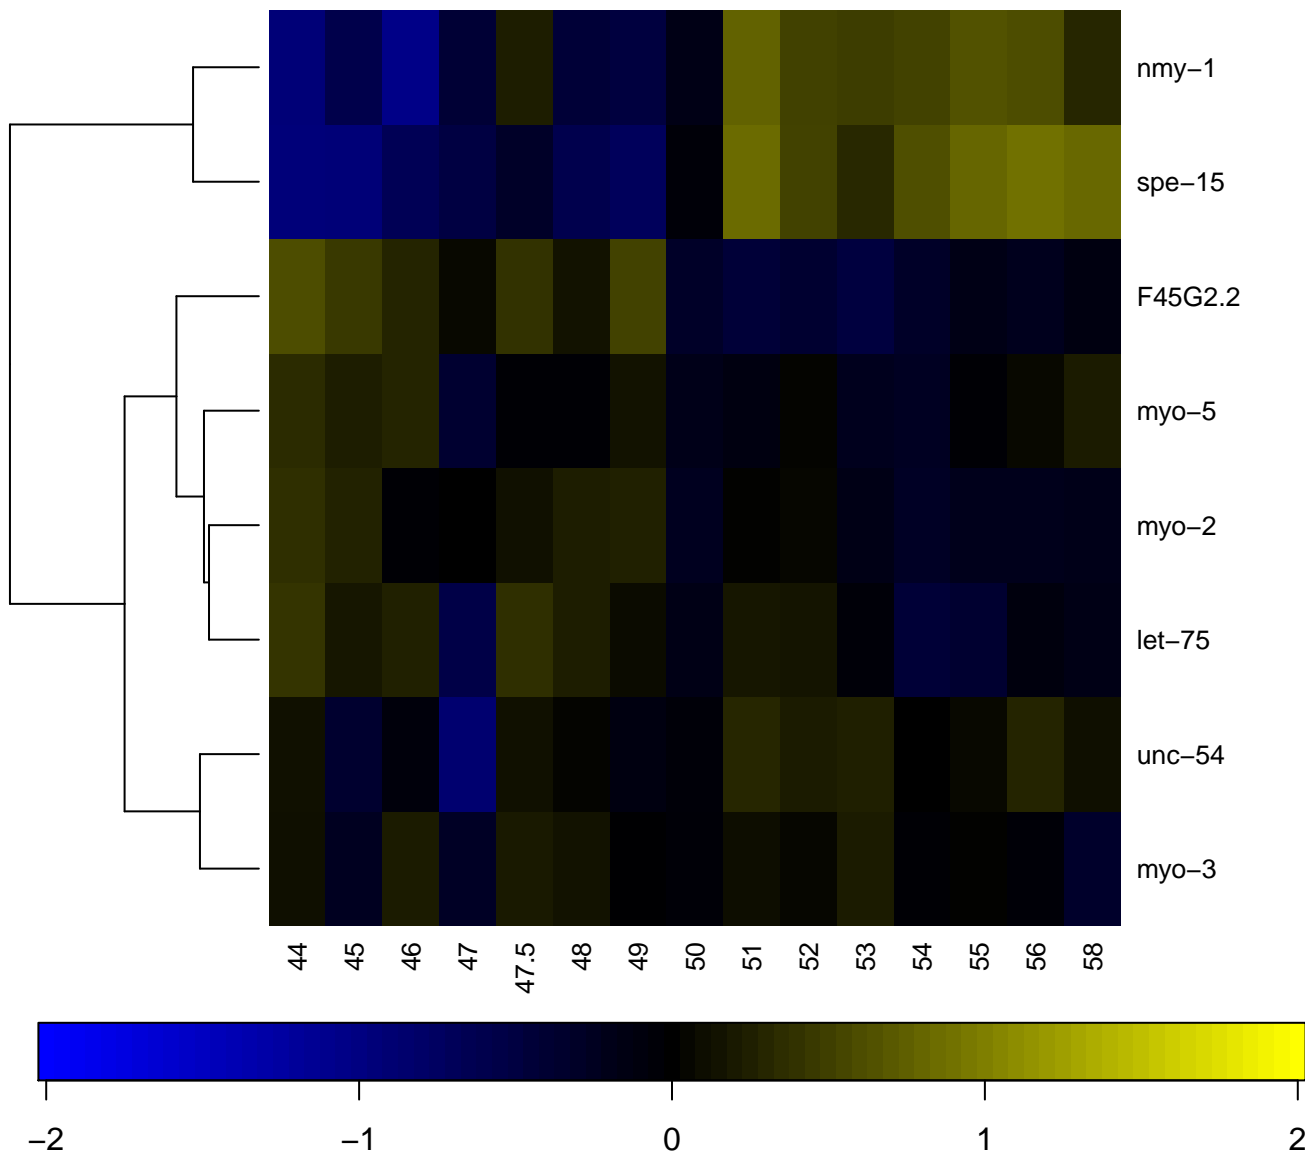

# Myosin tail

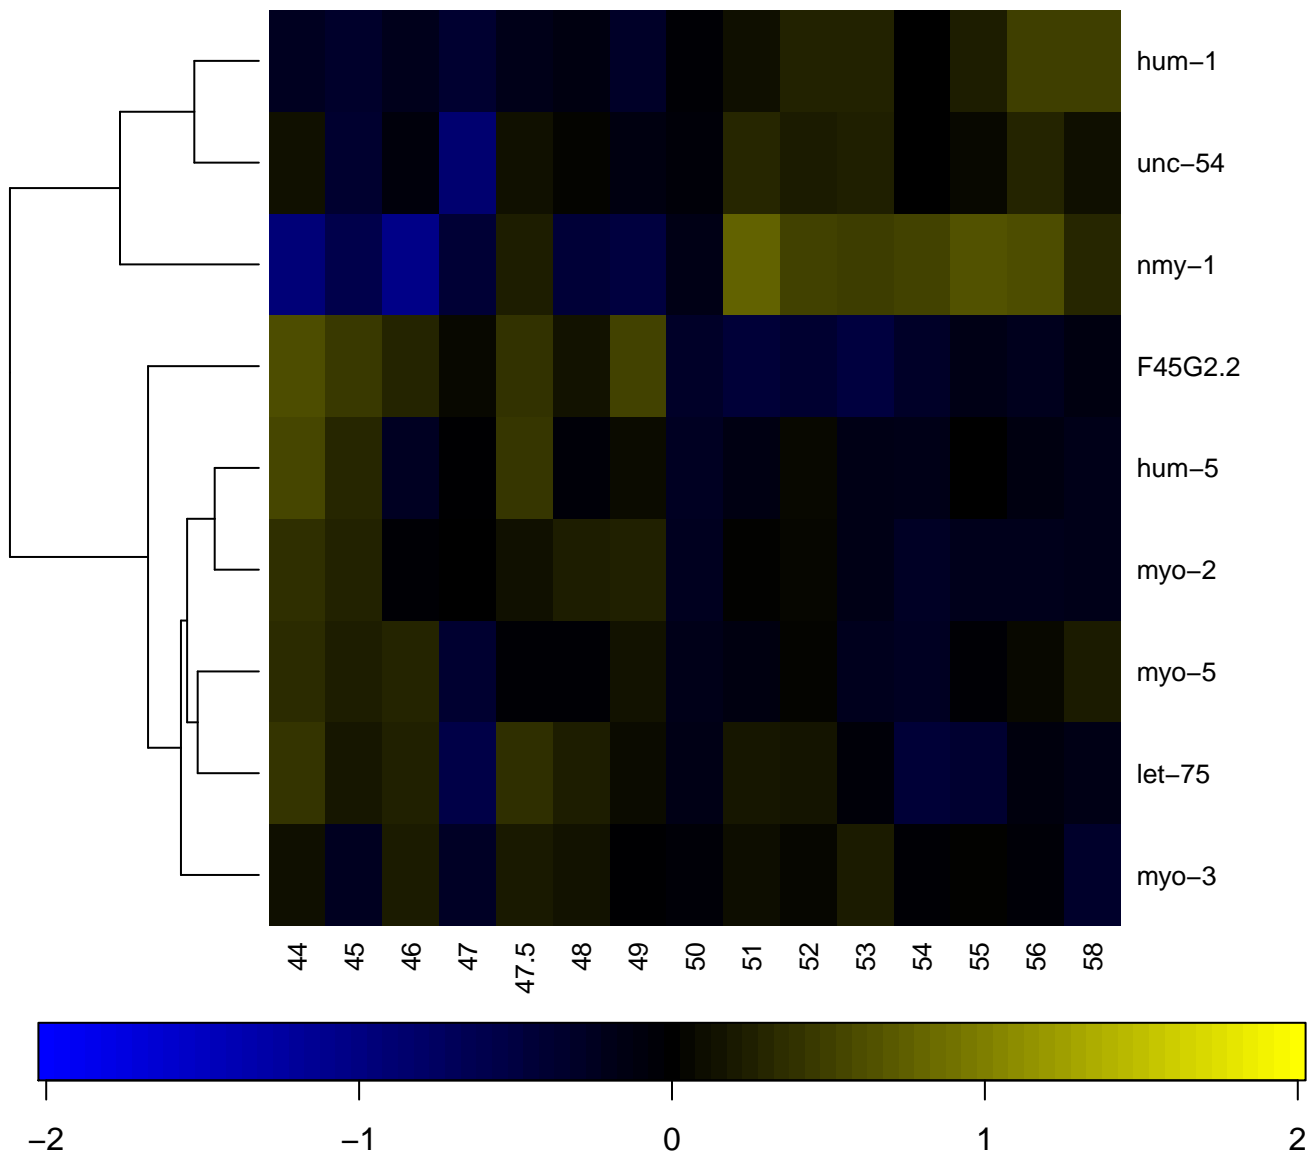





# Na<sup>+</sup> channel, amiloride-sensitive

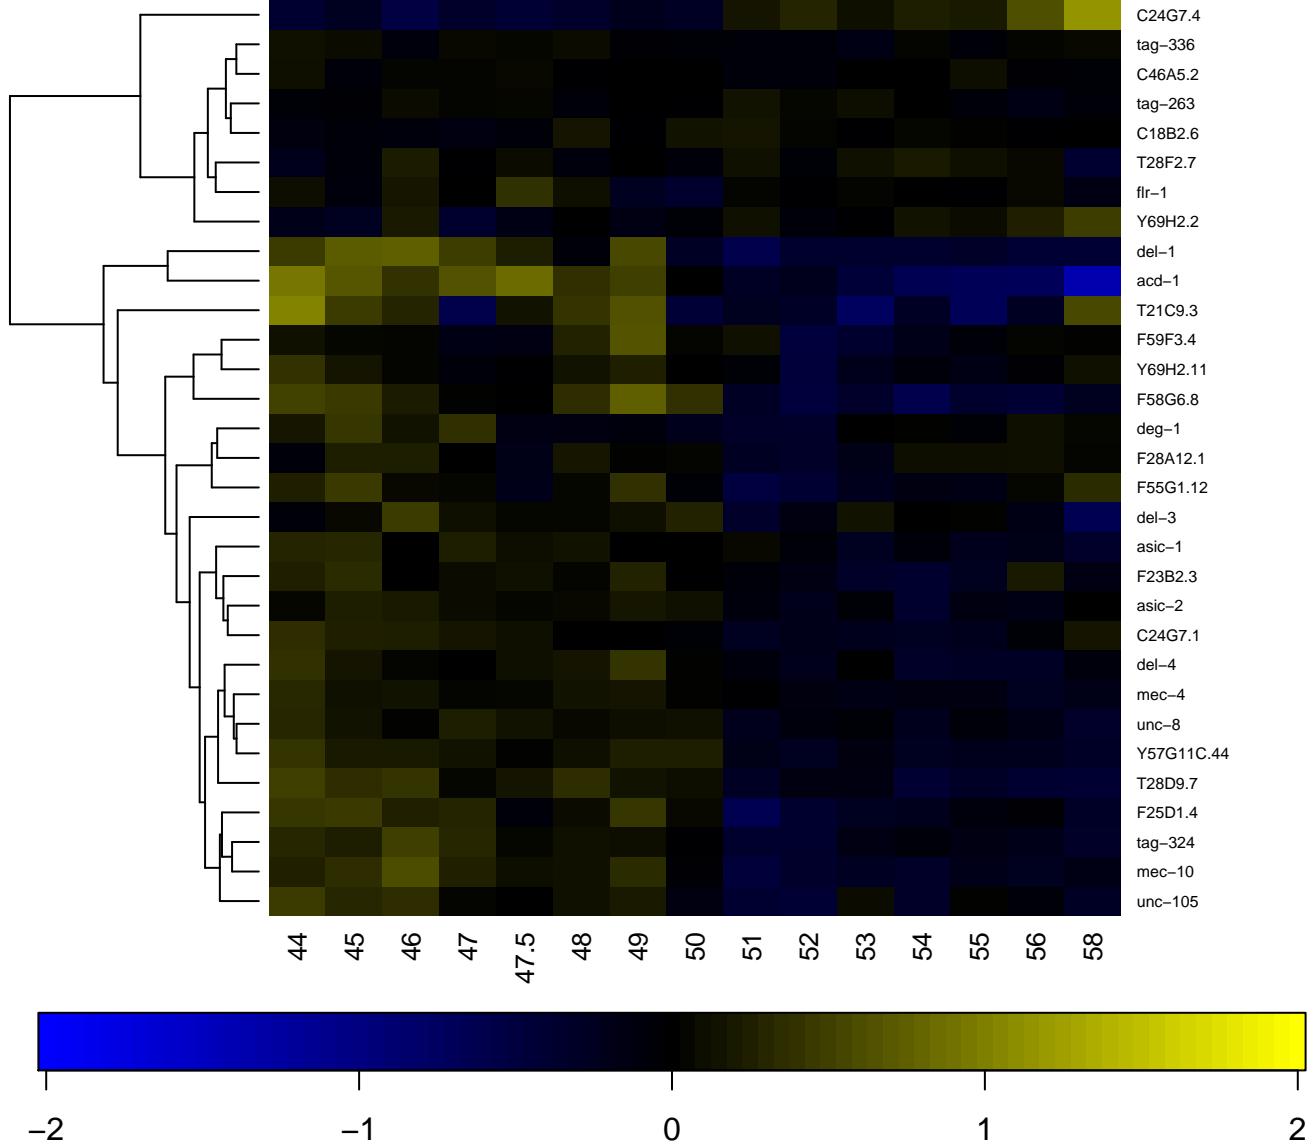



# Na<sup>+</sup> channel, amiloride-sensitive, conserved site

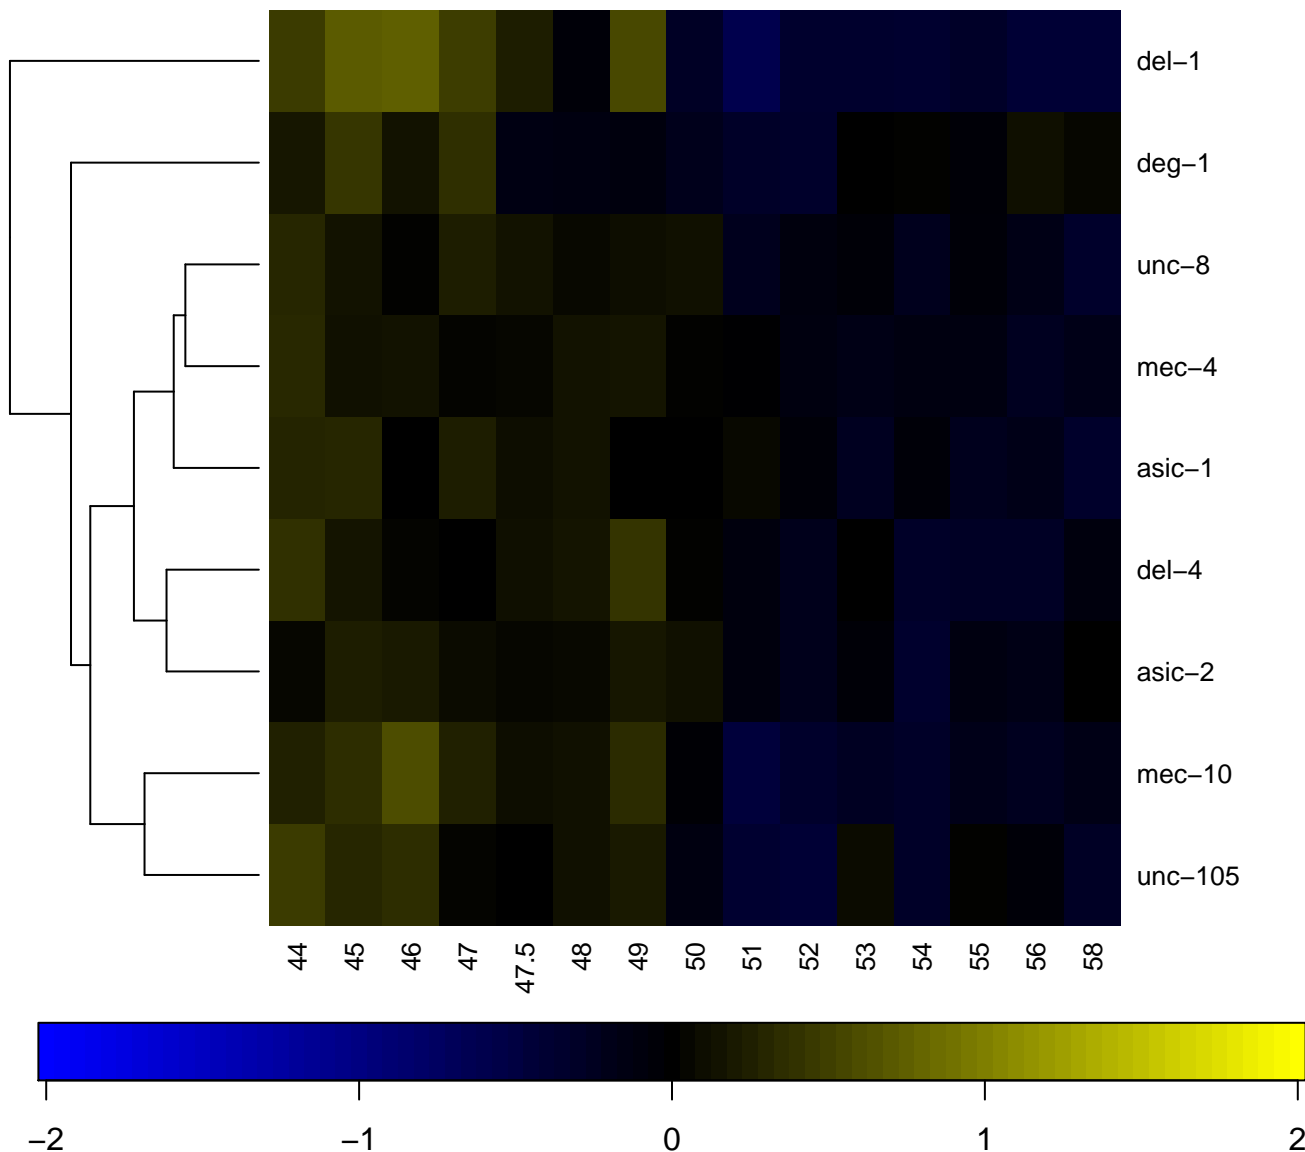

# Na<sup>+</sup>/H<sup>+</sup> exchanger

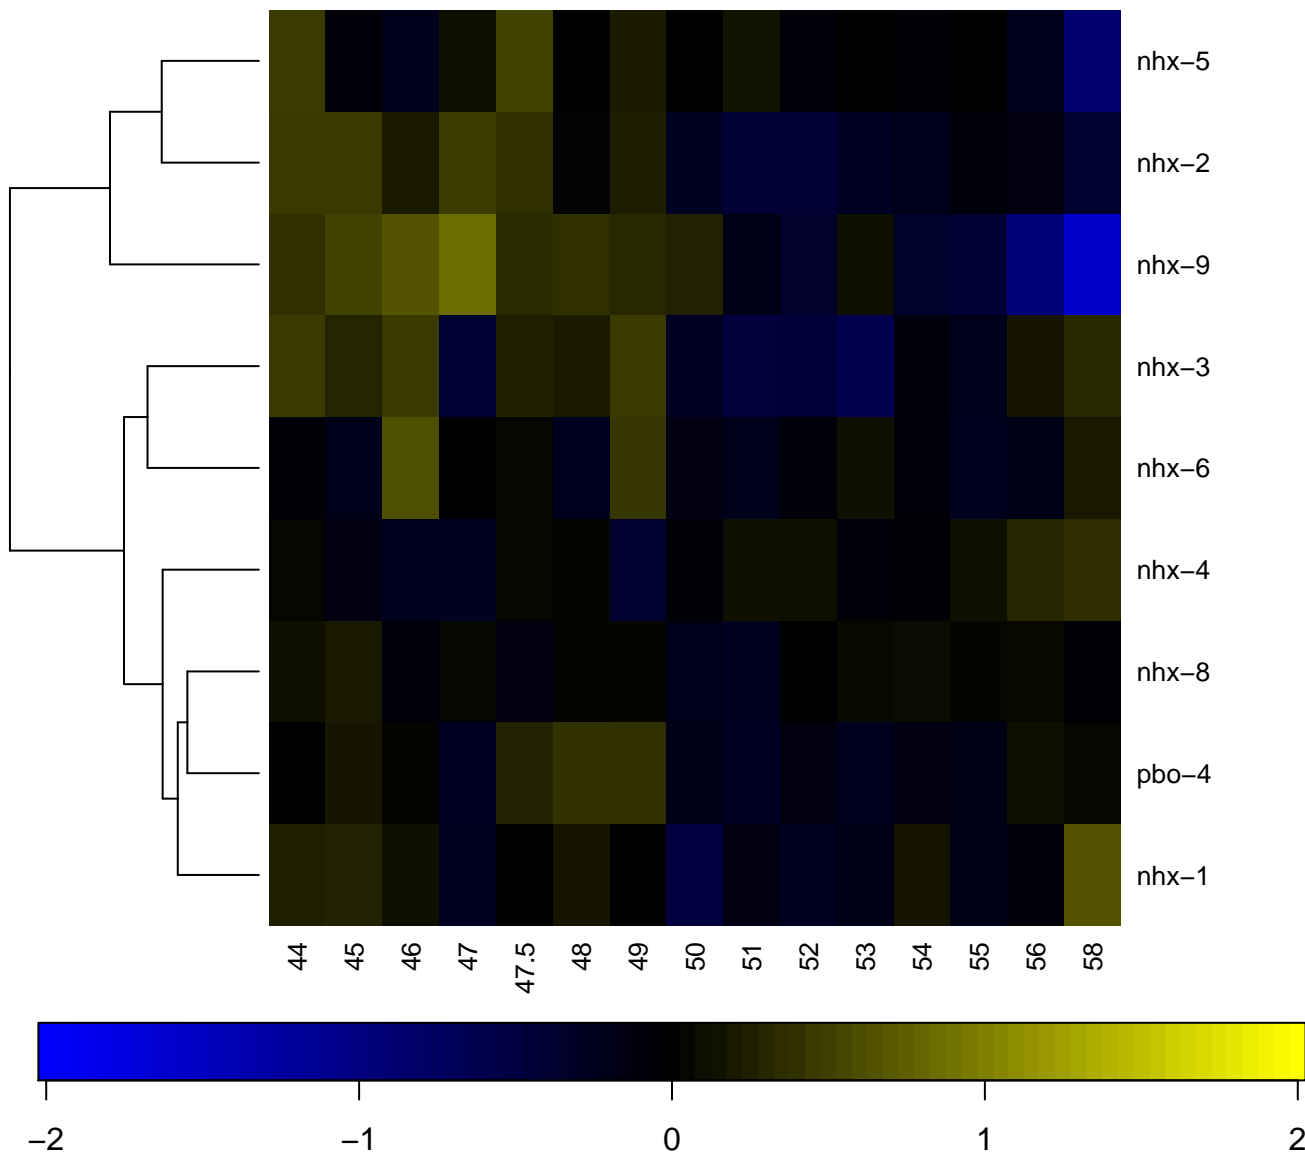

# NAD-dependent epimerase/dehydratase

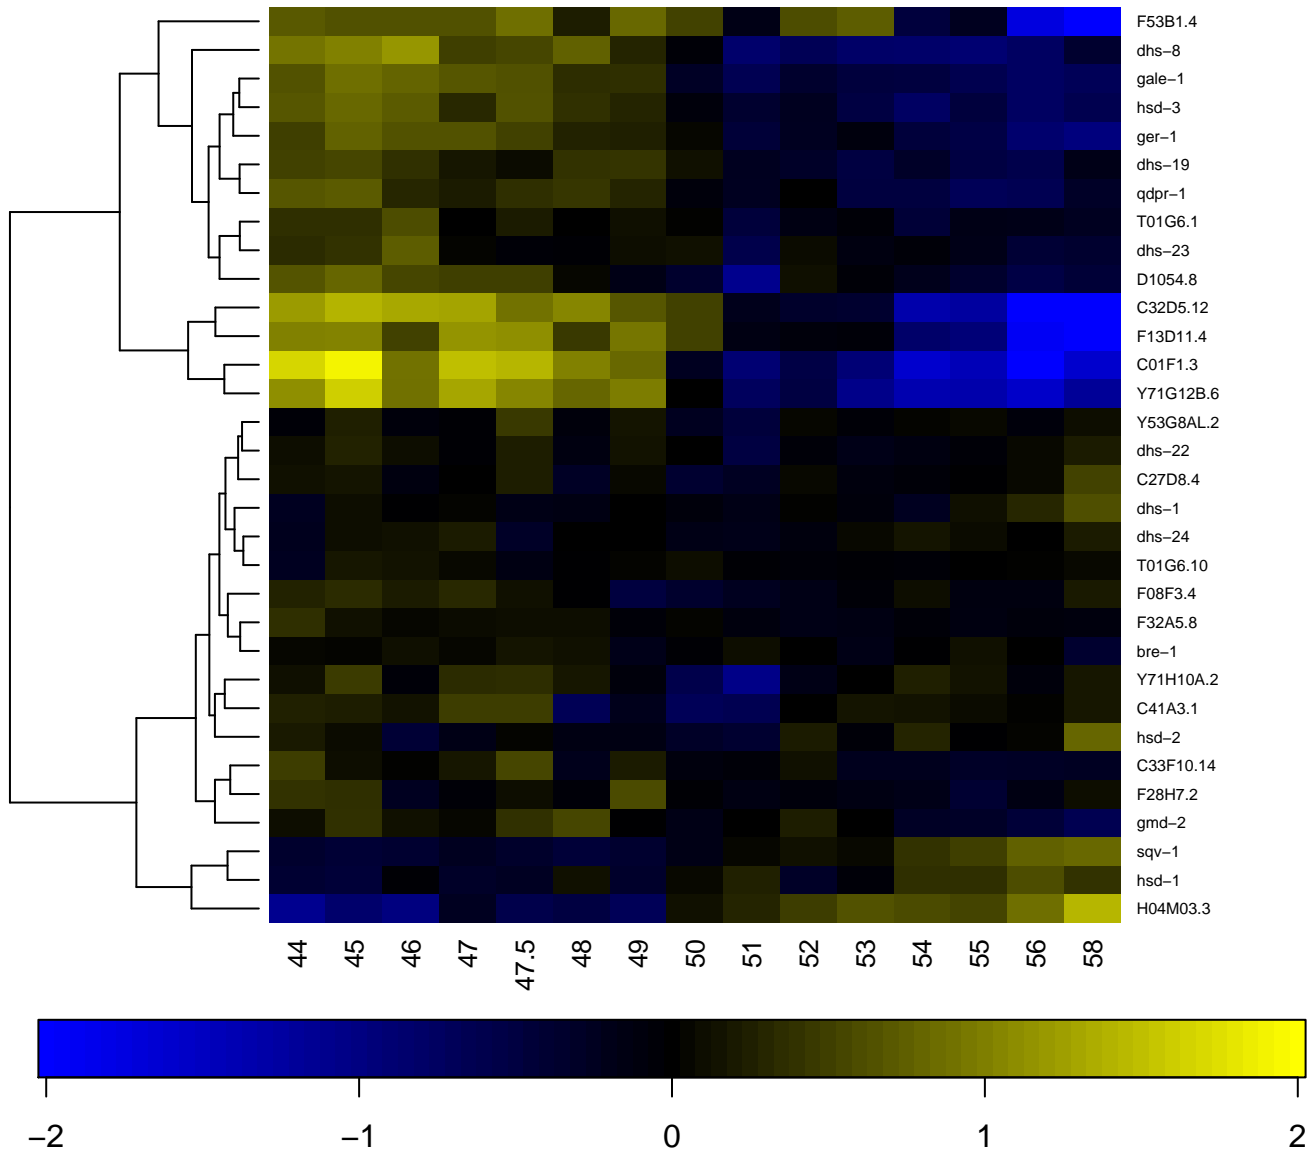

# D-dependent glycerol-3-phosphate dehydrogenase N-term



# D-dependent glycerol-3-phosphate dehydrogenase, N-term

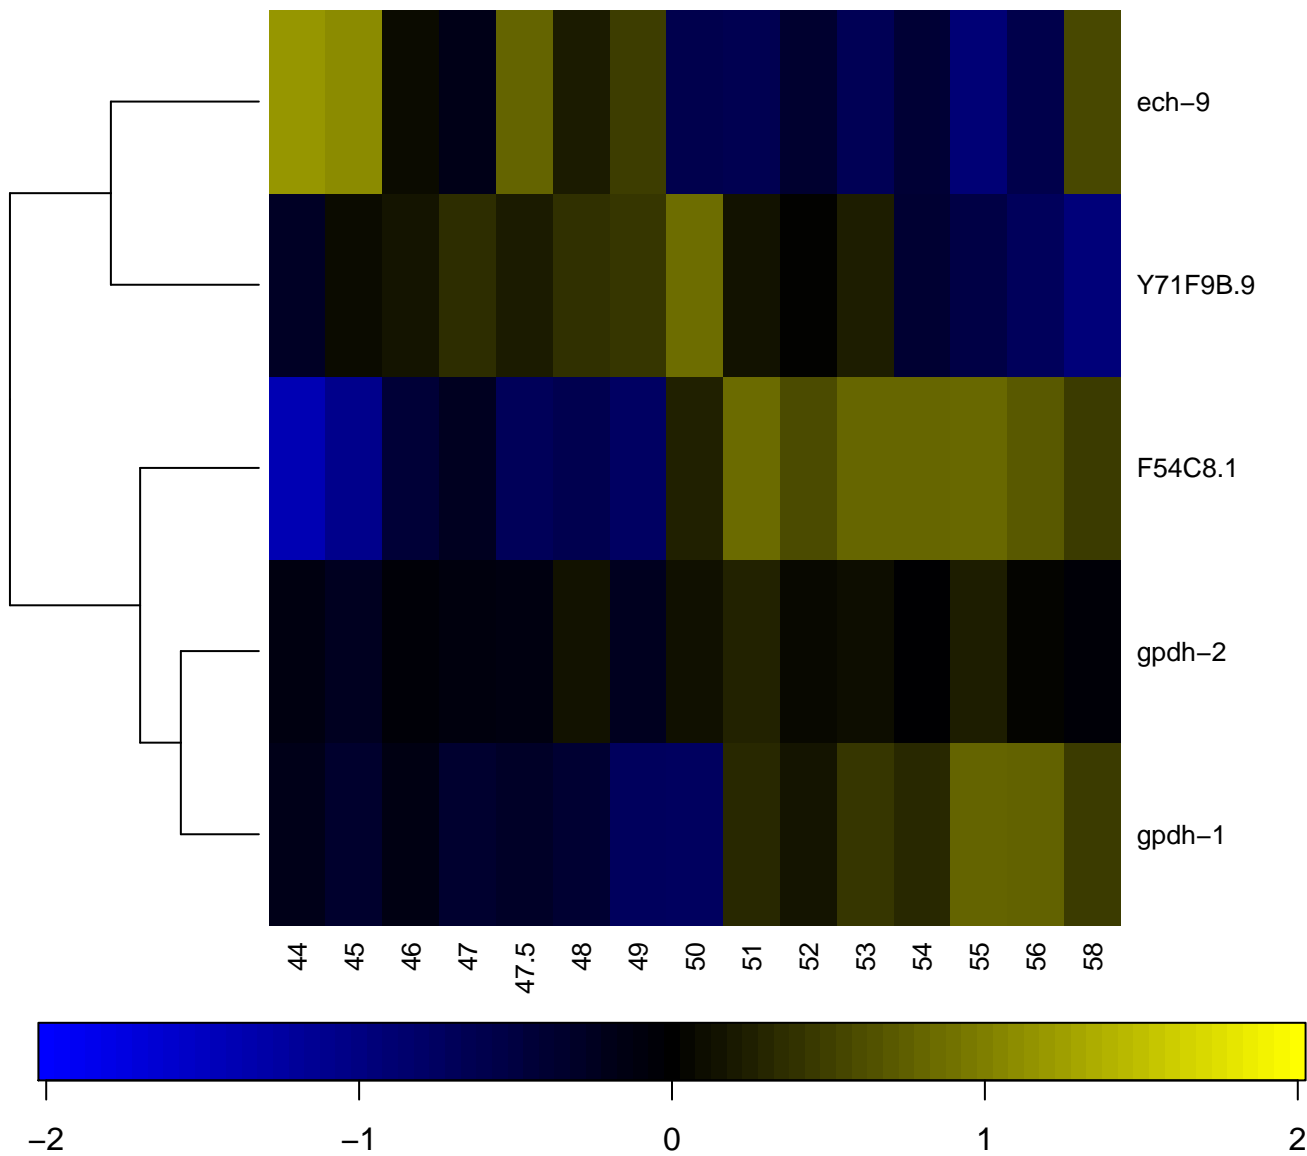

# NAD dependent epimerase/dehydratase family

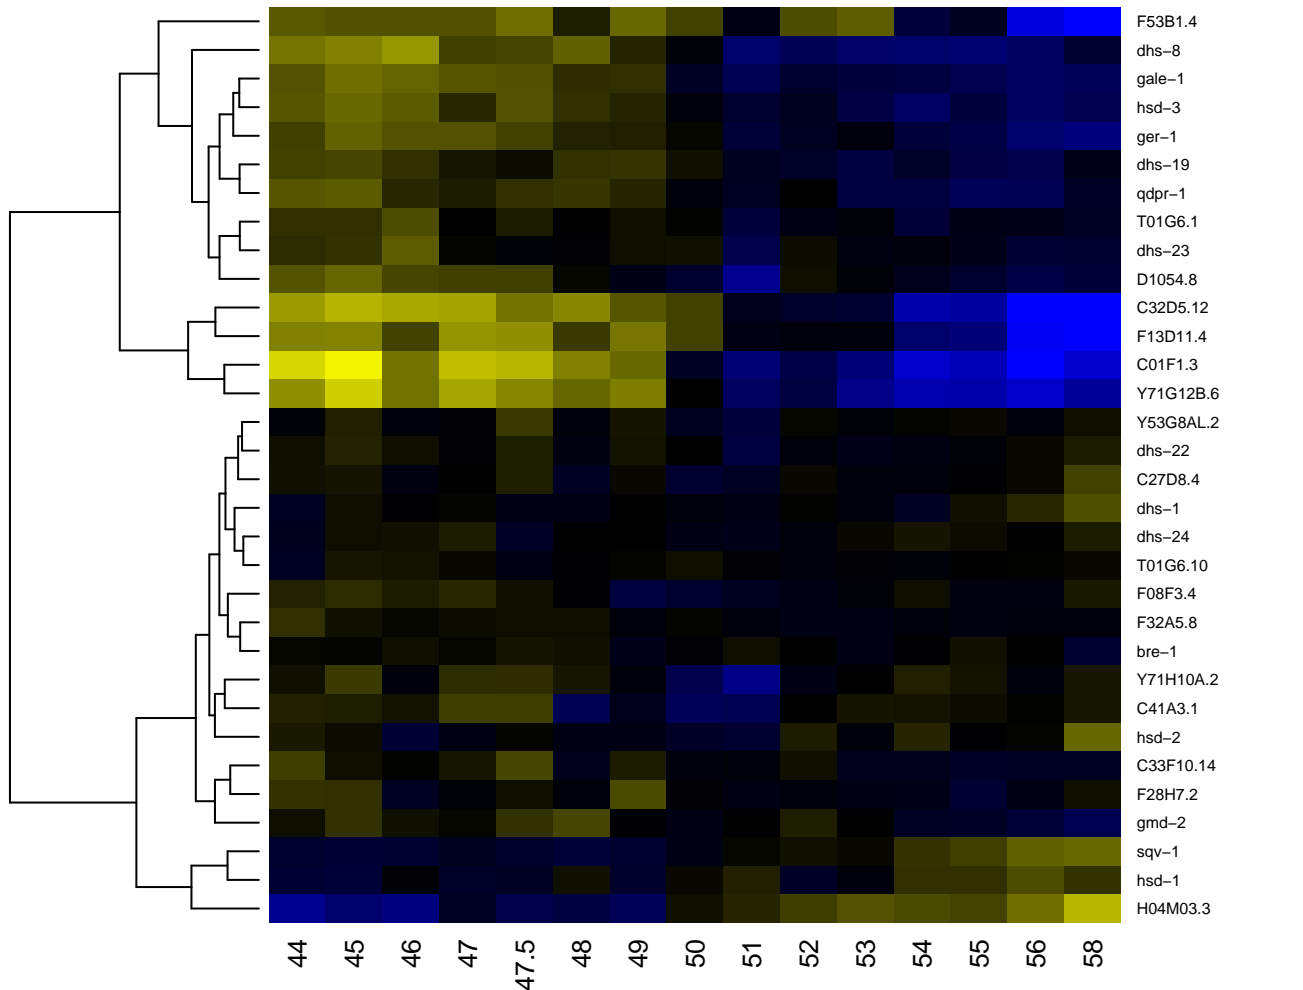

# NAD(P)-binding domain

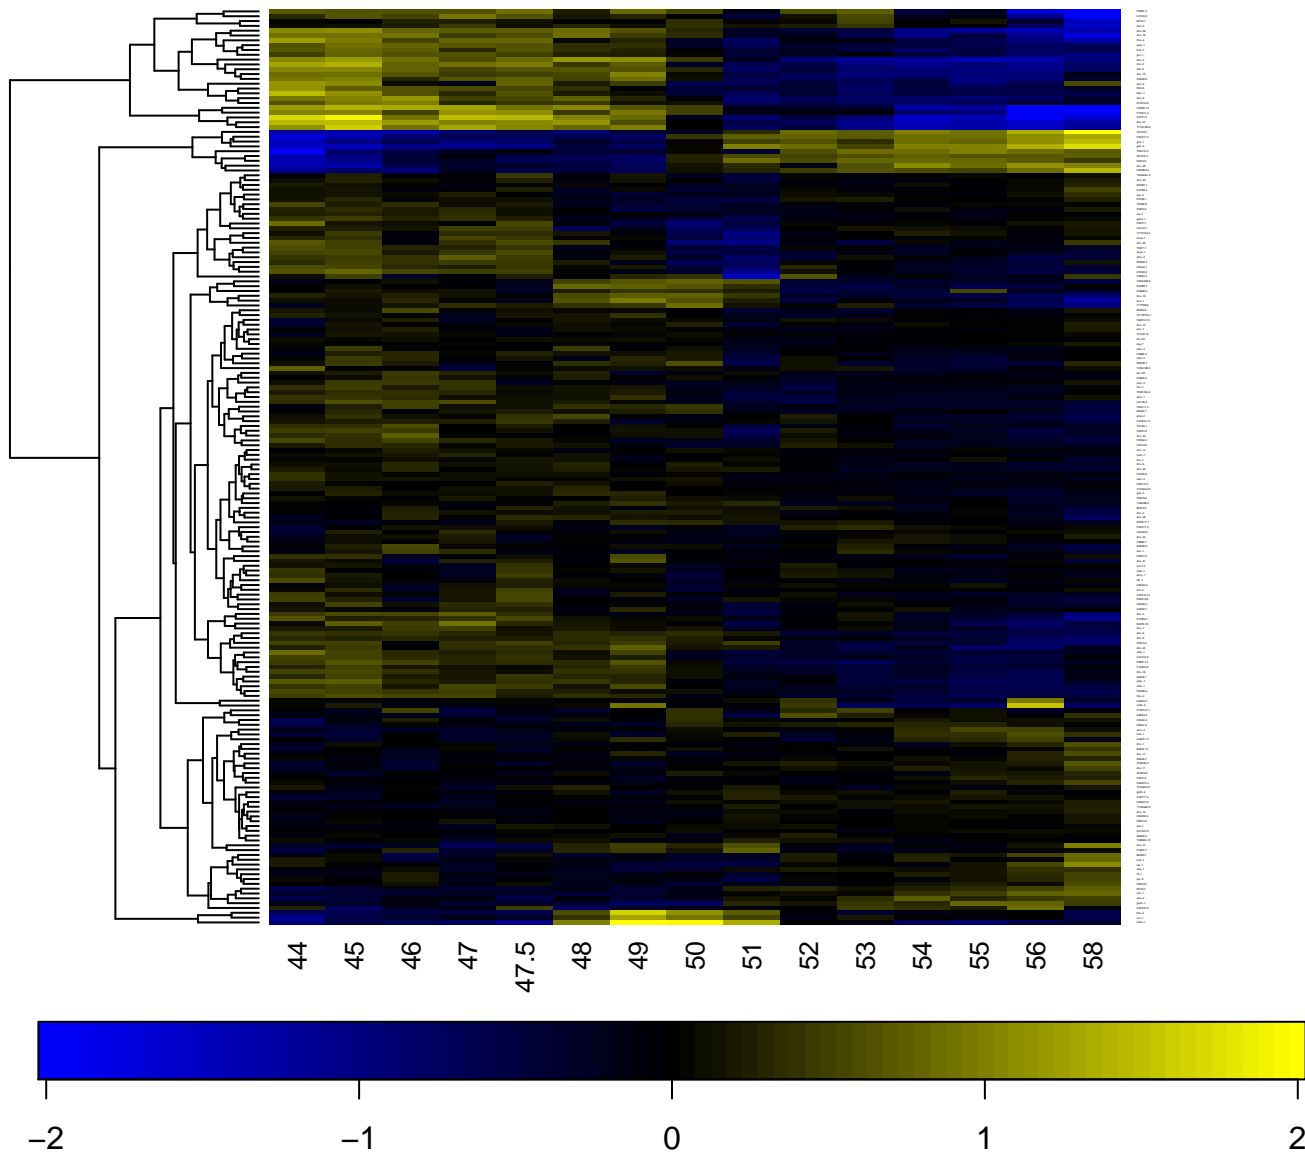







# Nematode cuticle collagen N-terminal domain

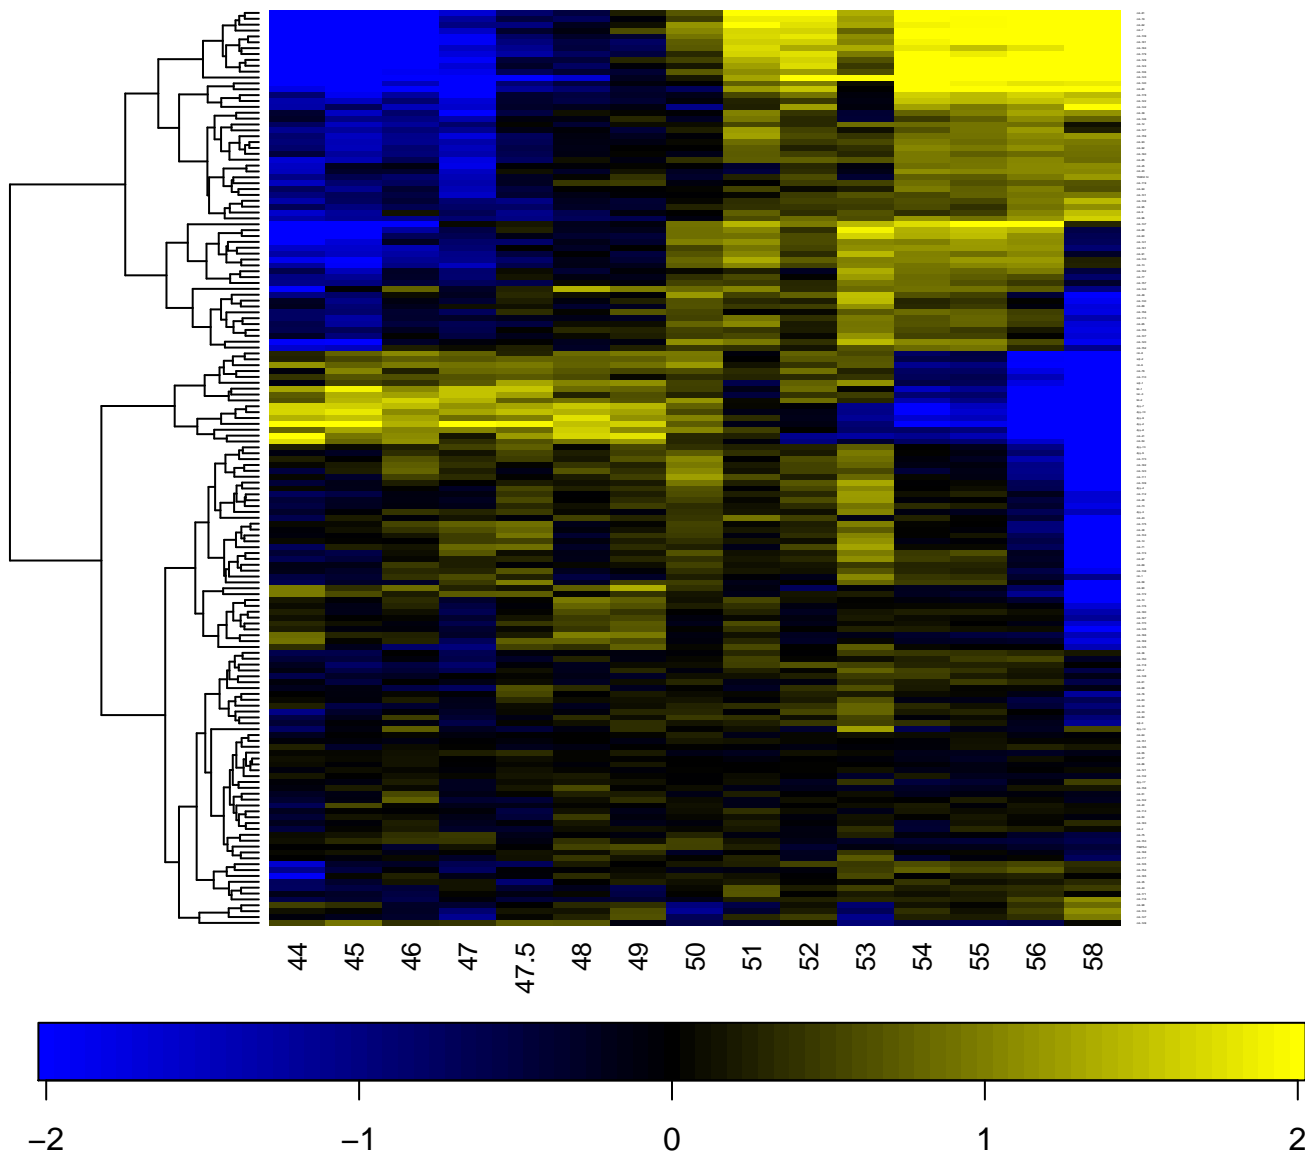

# Nematode cuticle collagen, N-terminal

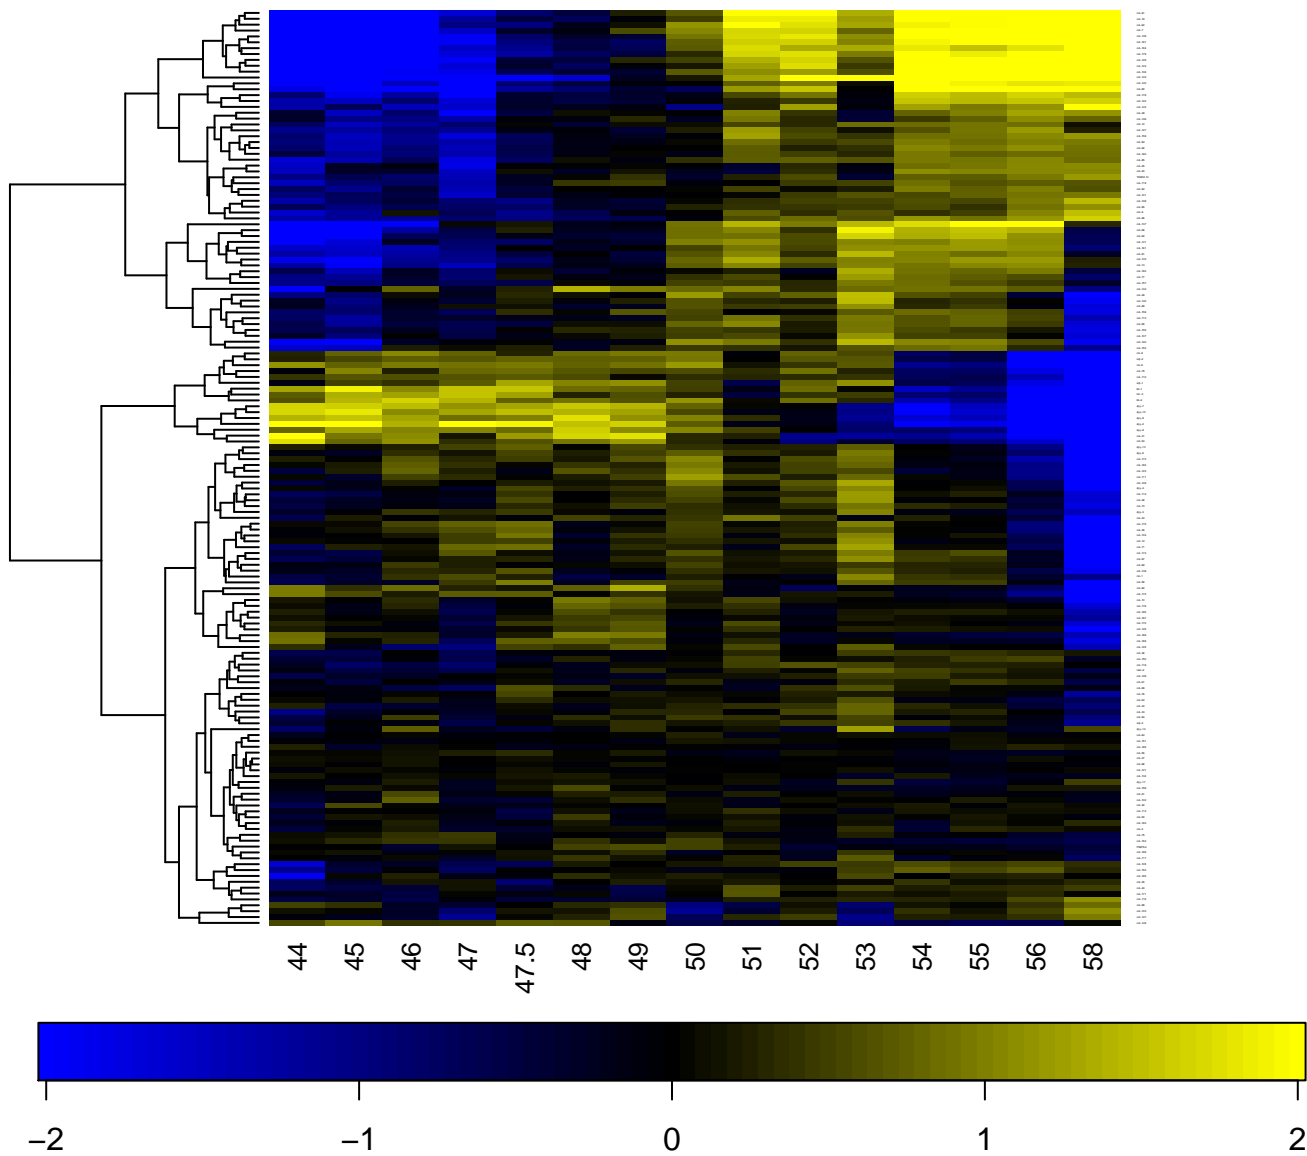













# Neurotransmitter-gated ion-channel

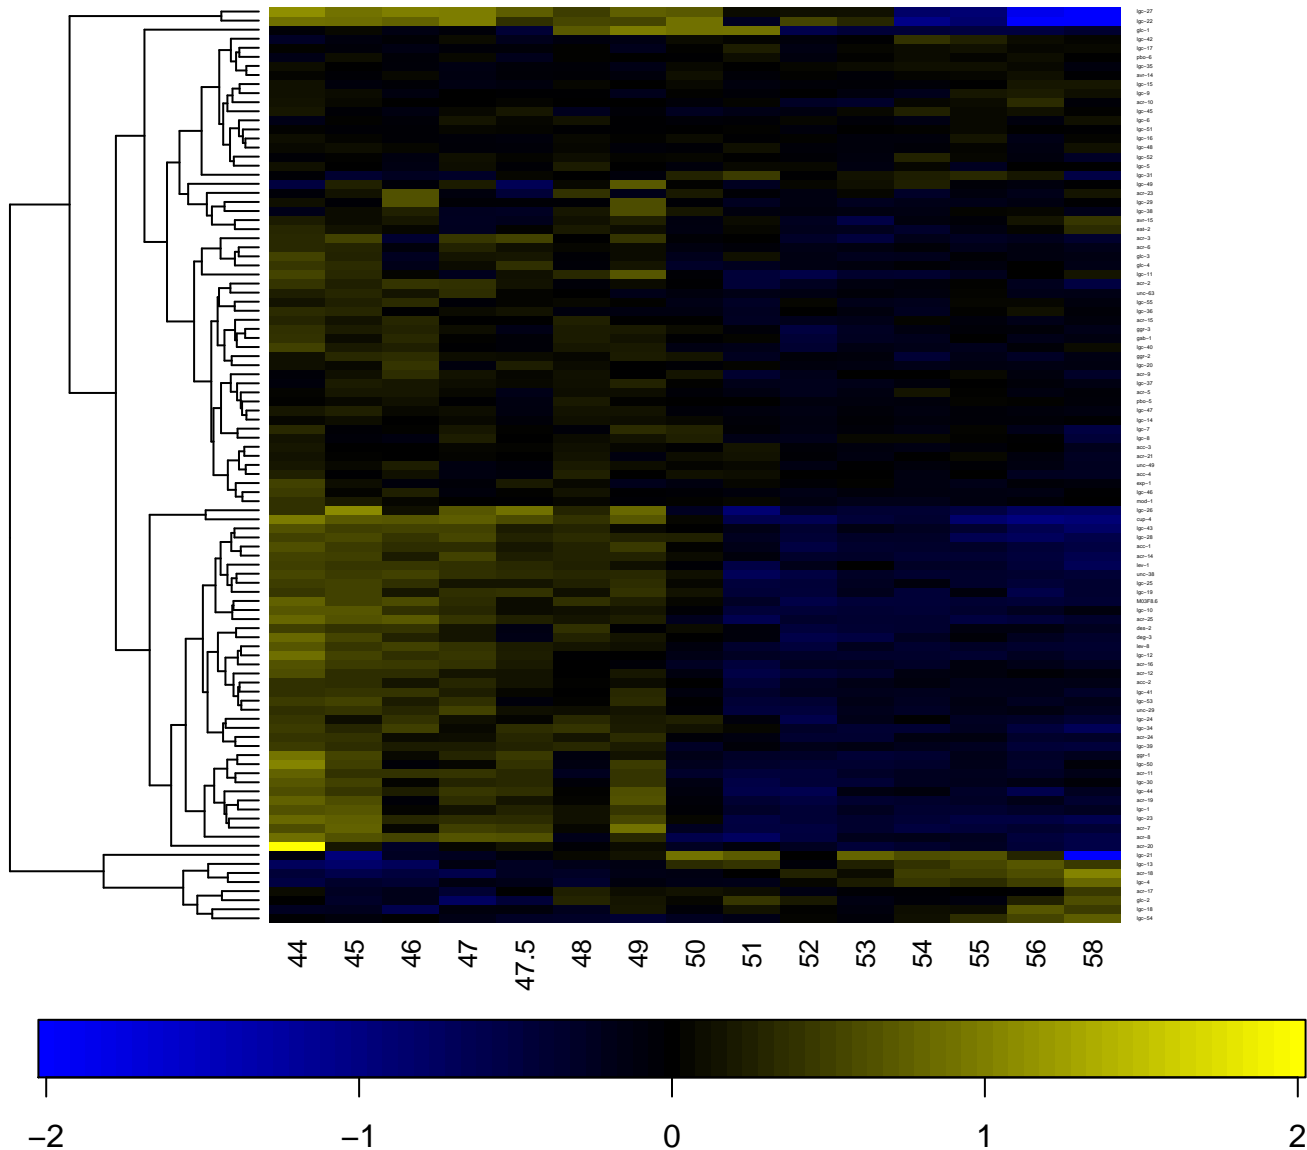

# Neurotransmitter-gated ion-channel ligand-binding

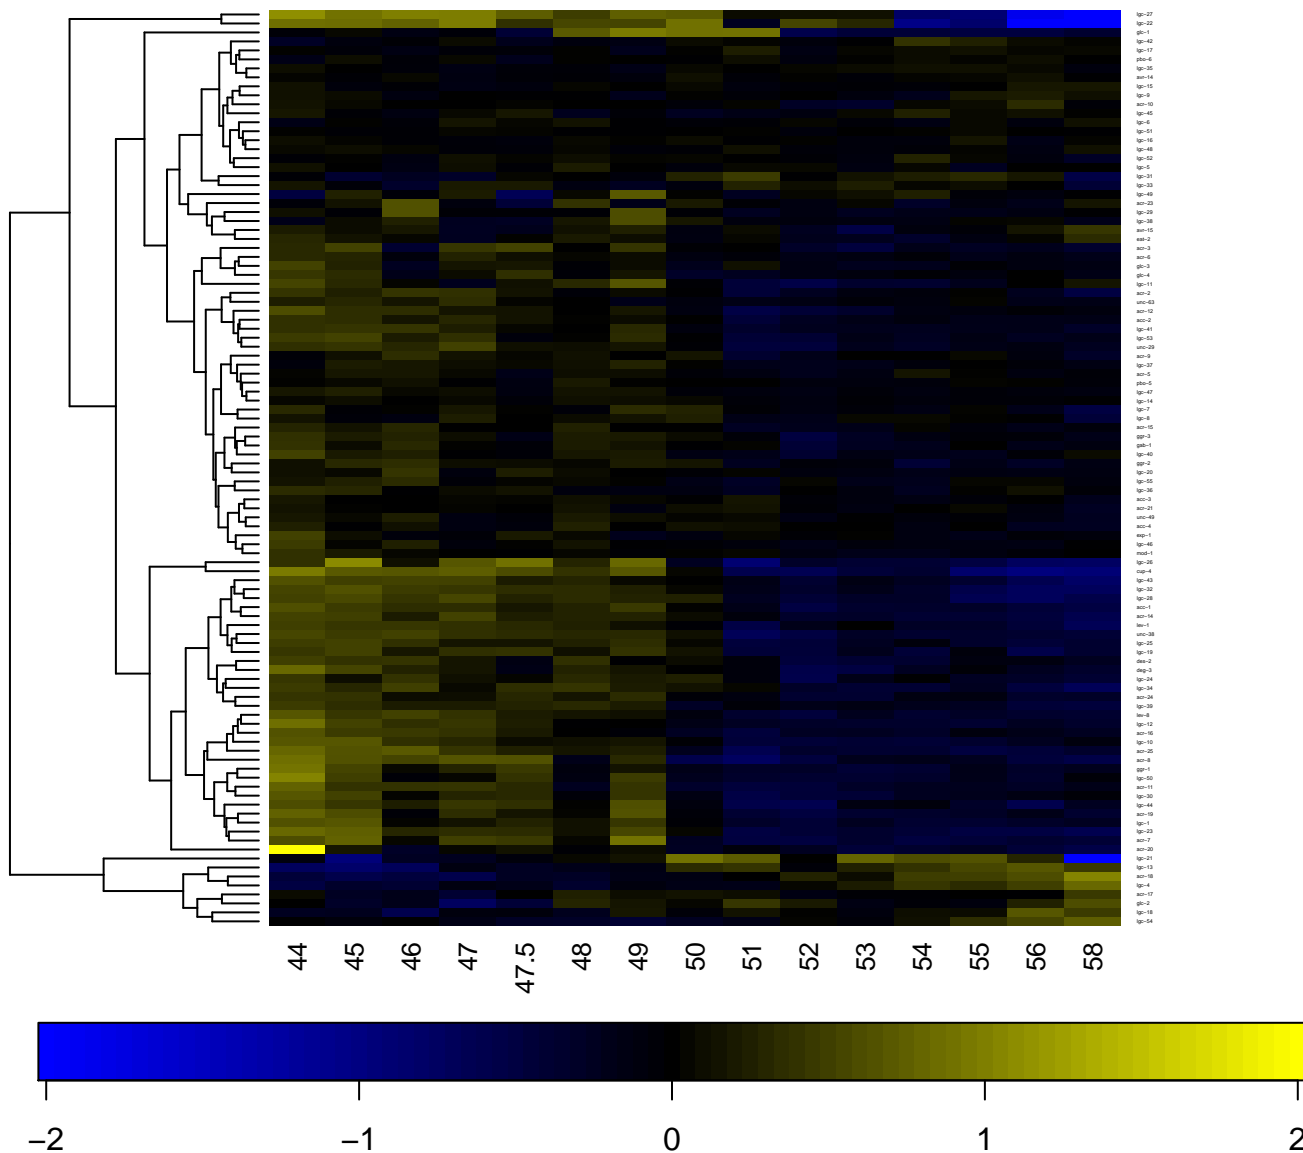

# Neurotransmitter-gated ion-channel ligand binding domain

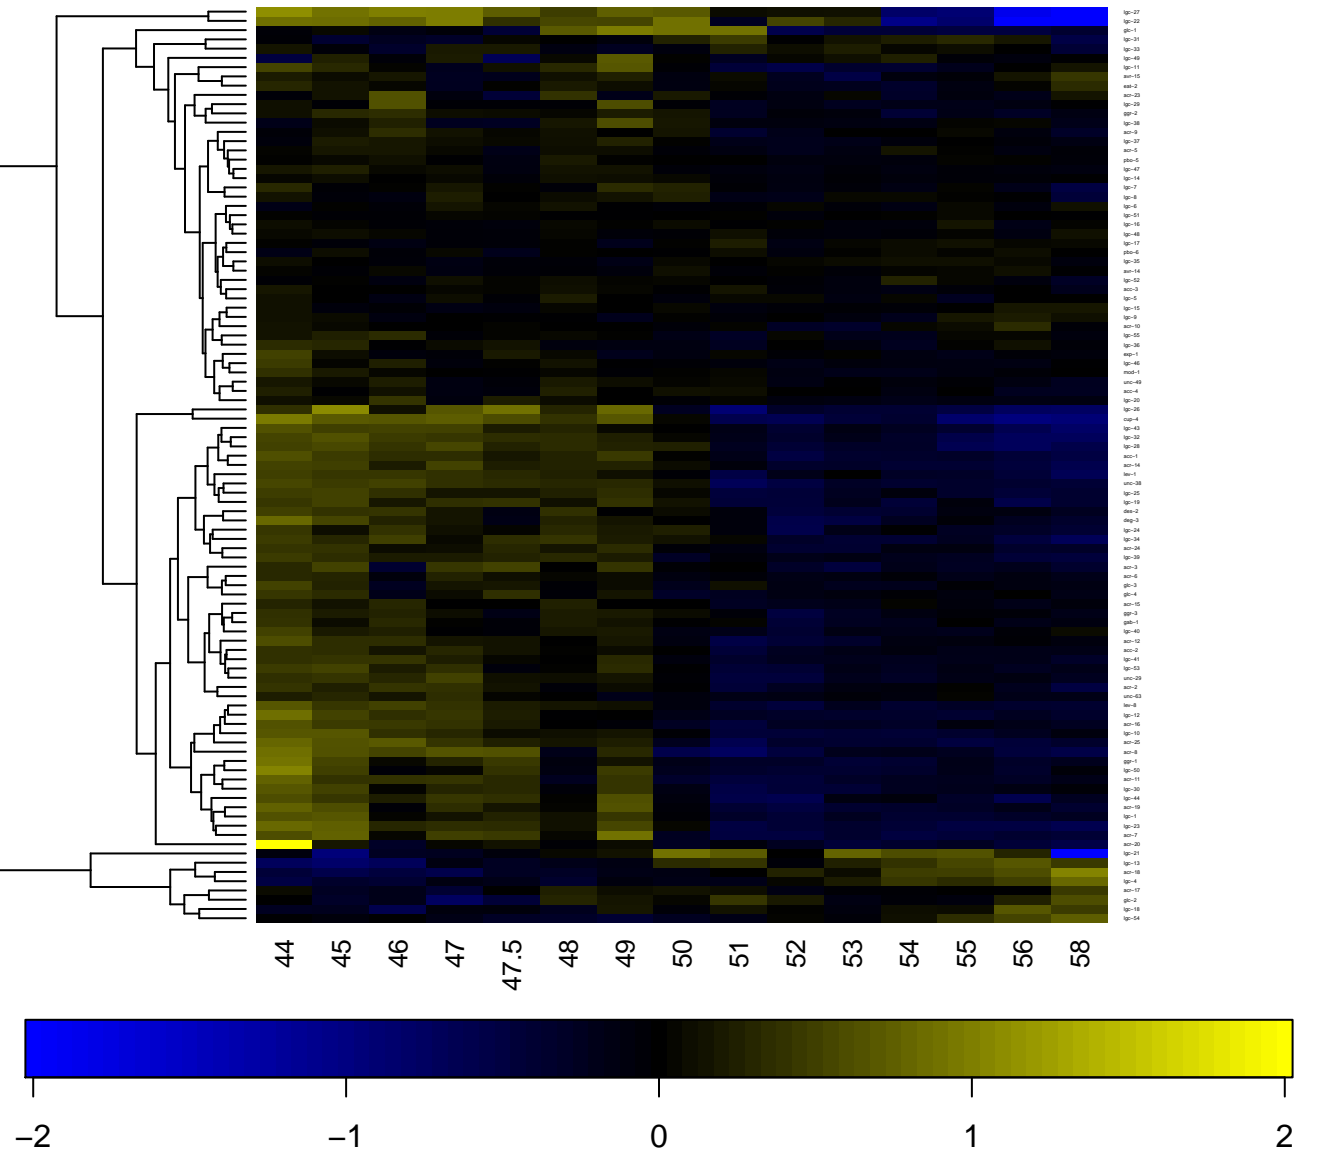

# Neurotransmitter-gated ion-channel transmembrane domain

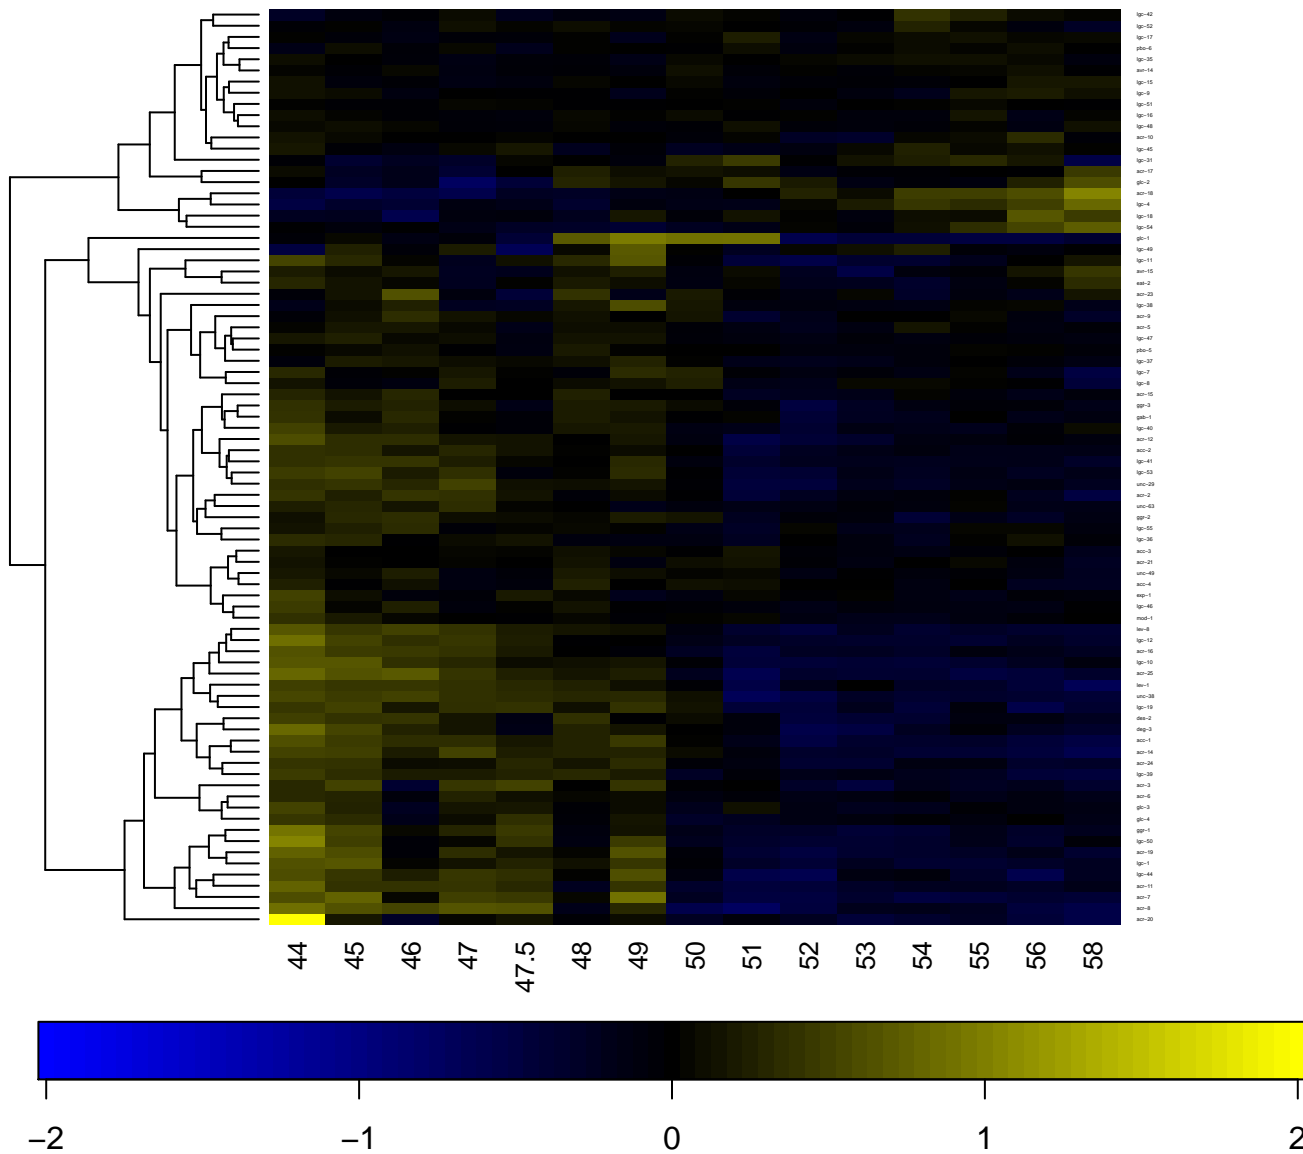

# Neurotransmitter-gated ion-channel transmembrane region

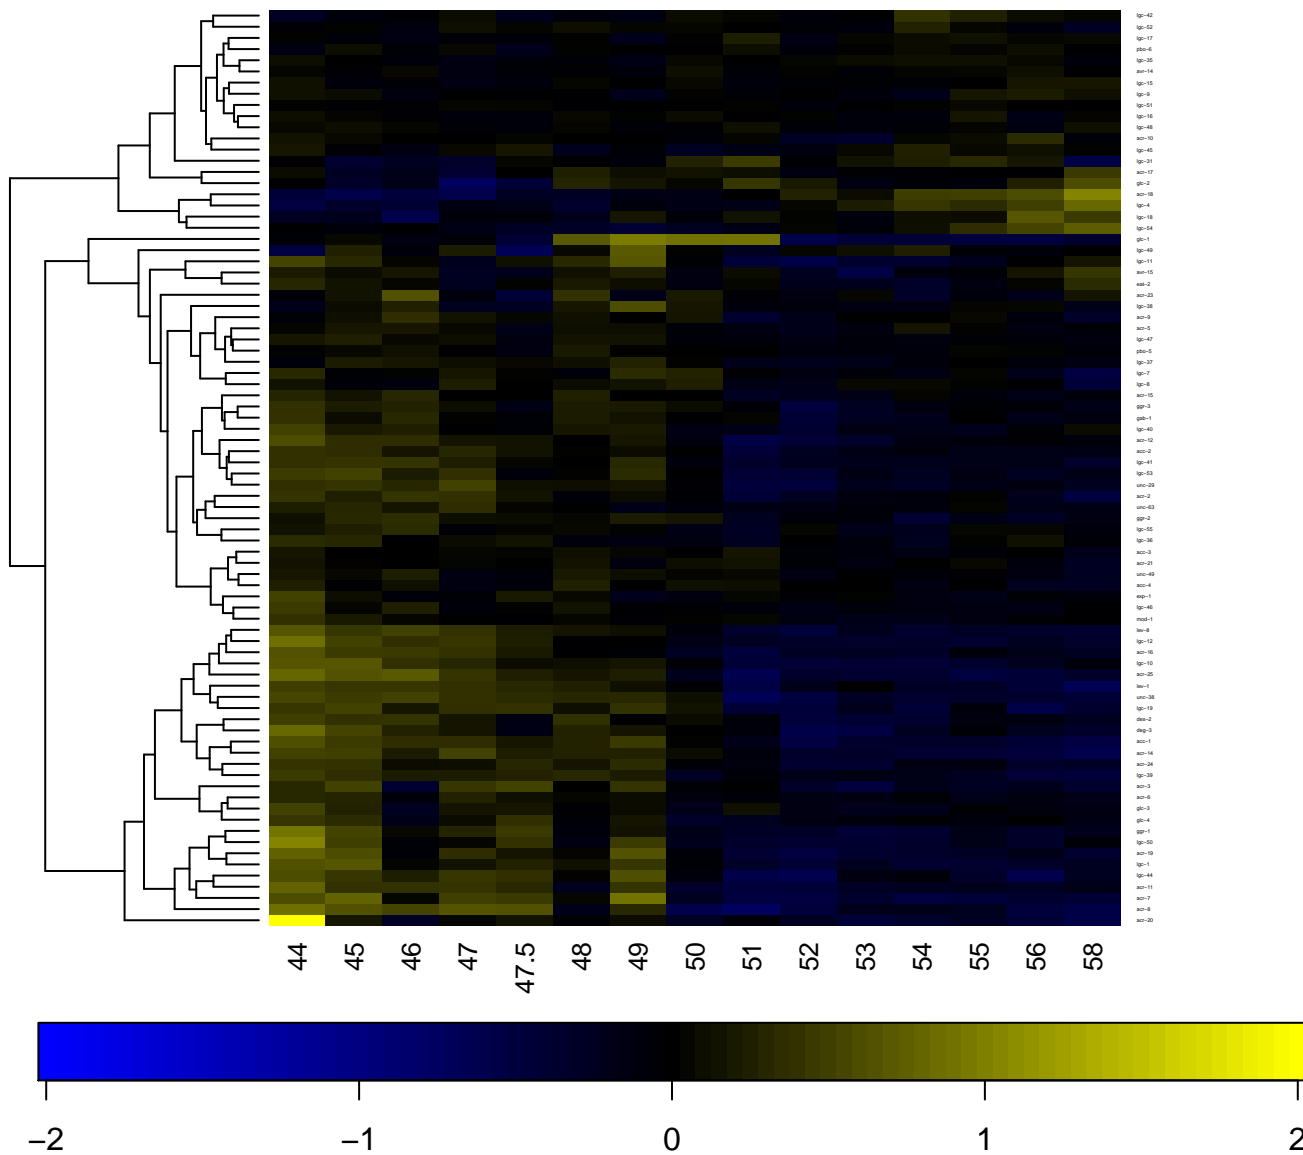

# Neurotransmitter-gated ion-channel, conserved site

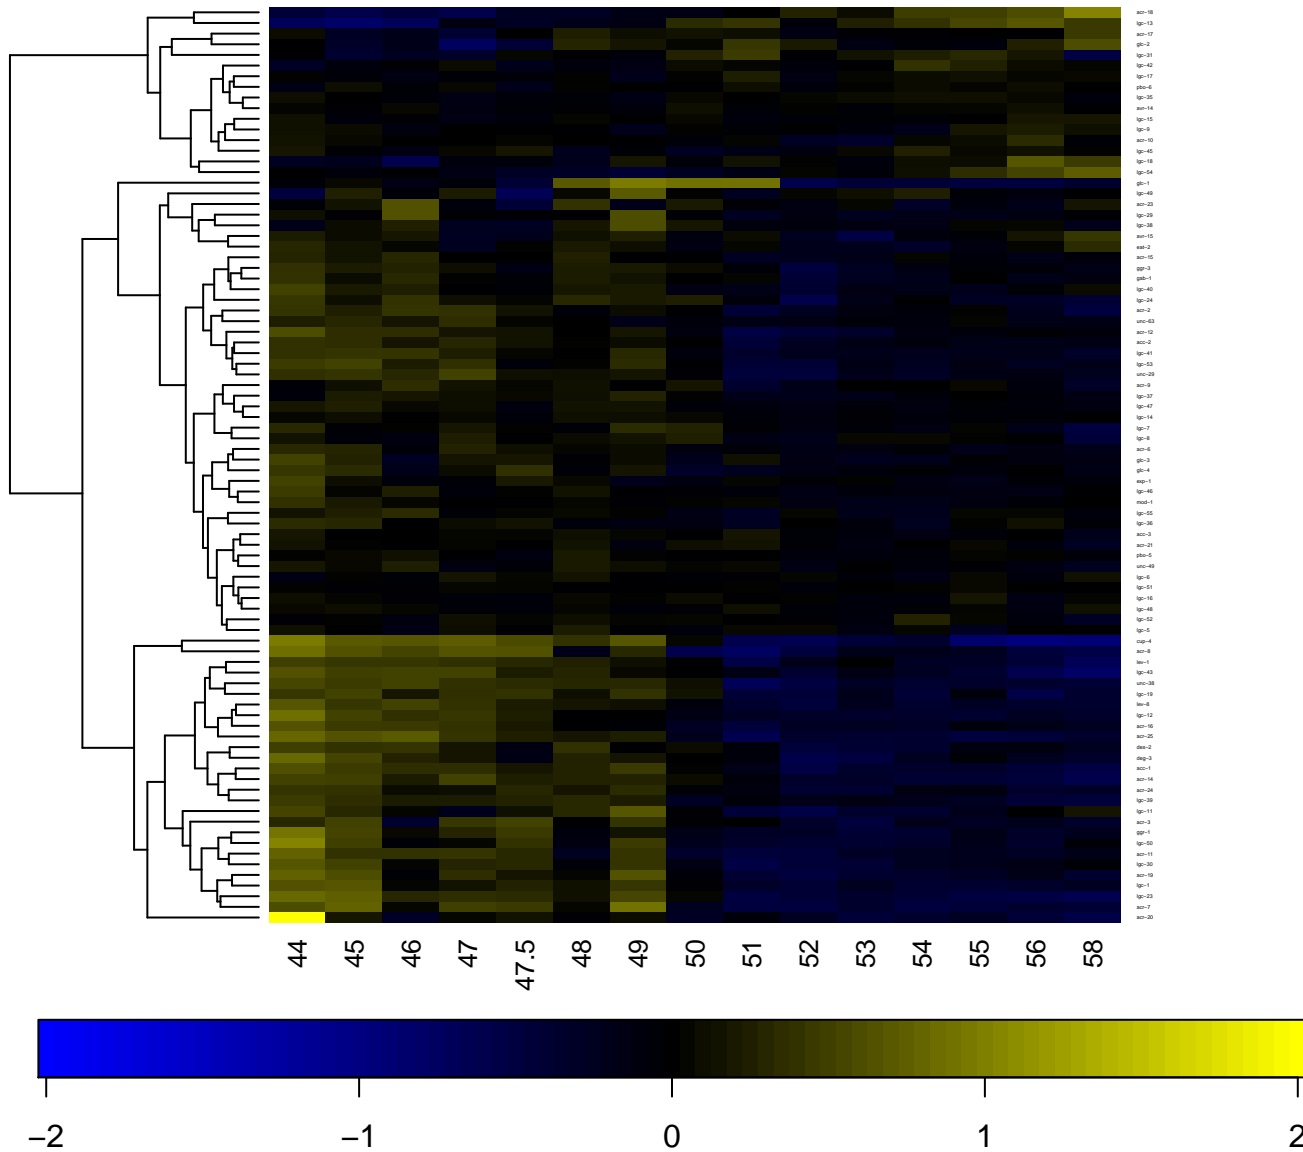

# Neutrophil cytosol factor 2 p67phox

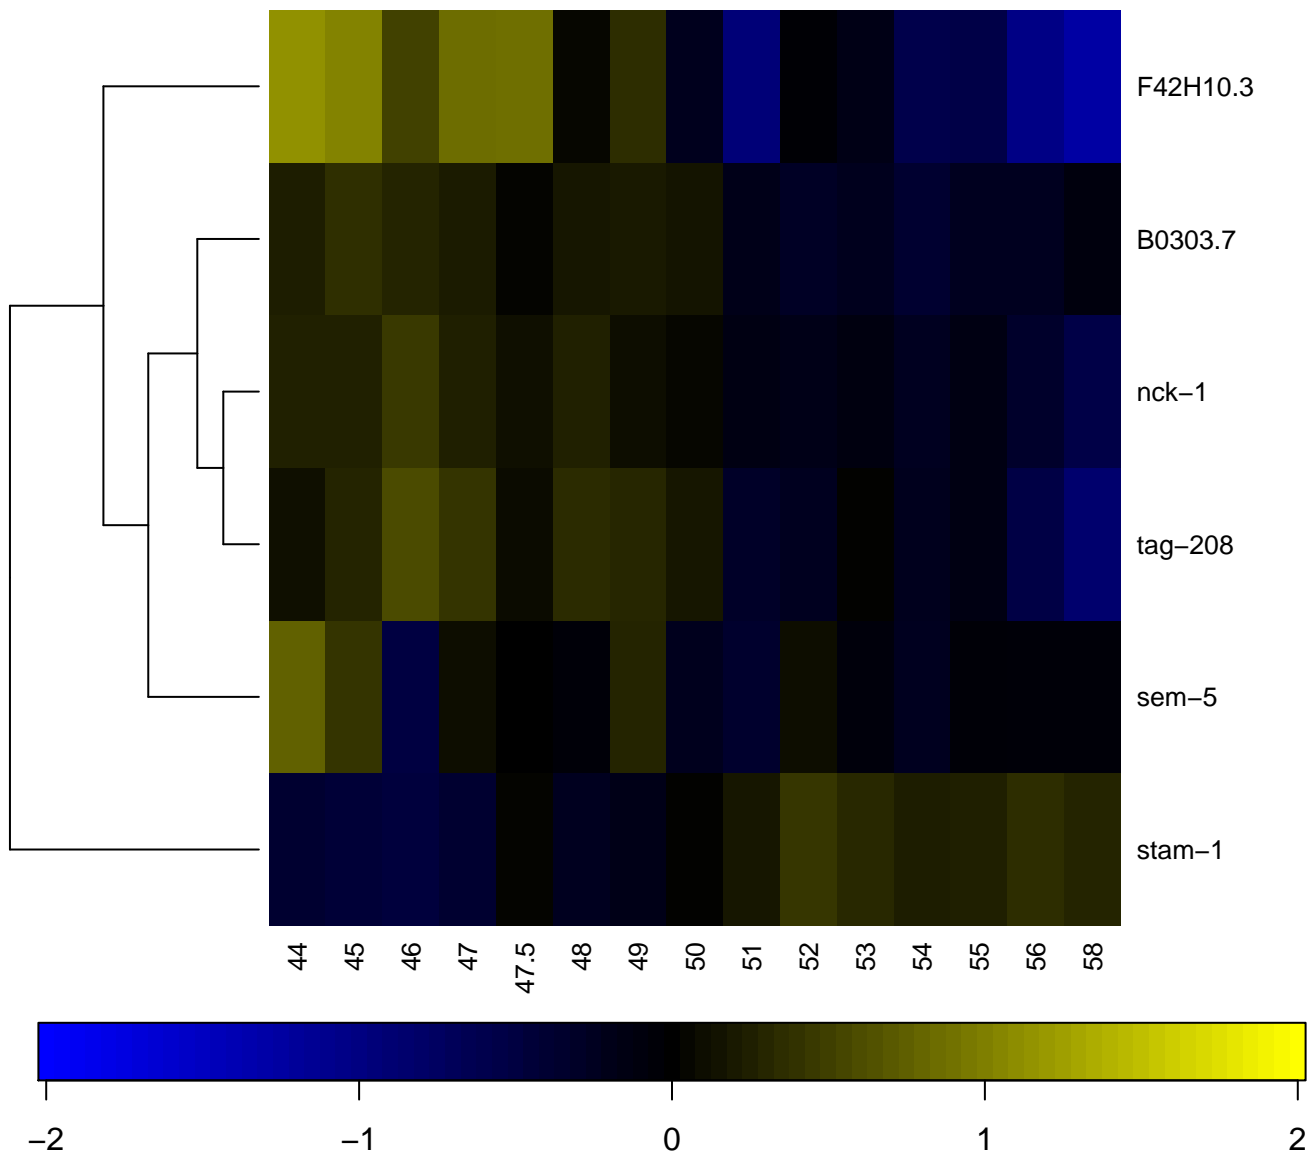







# Nidogen, extracellular domain

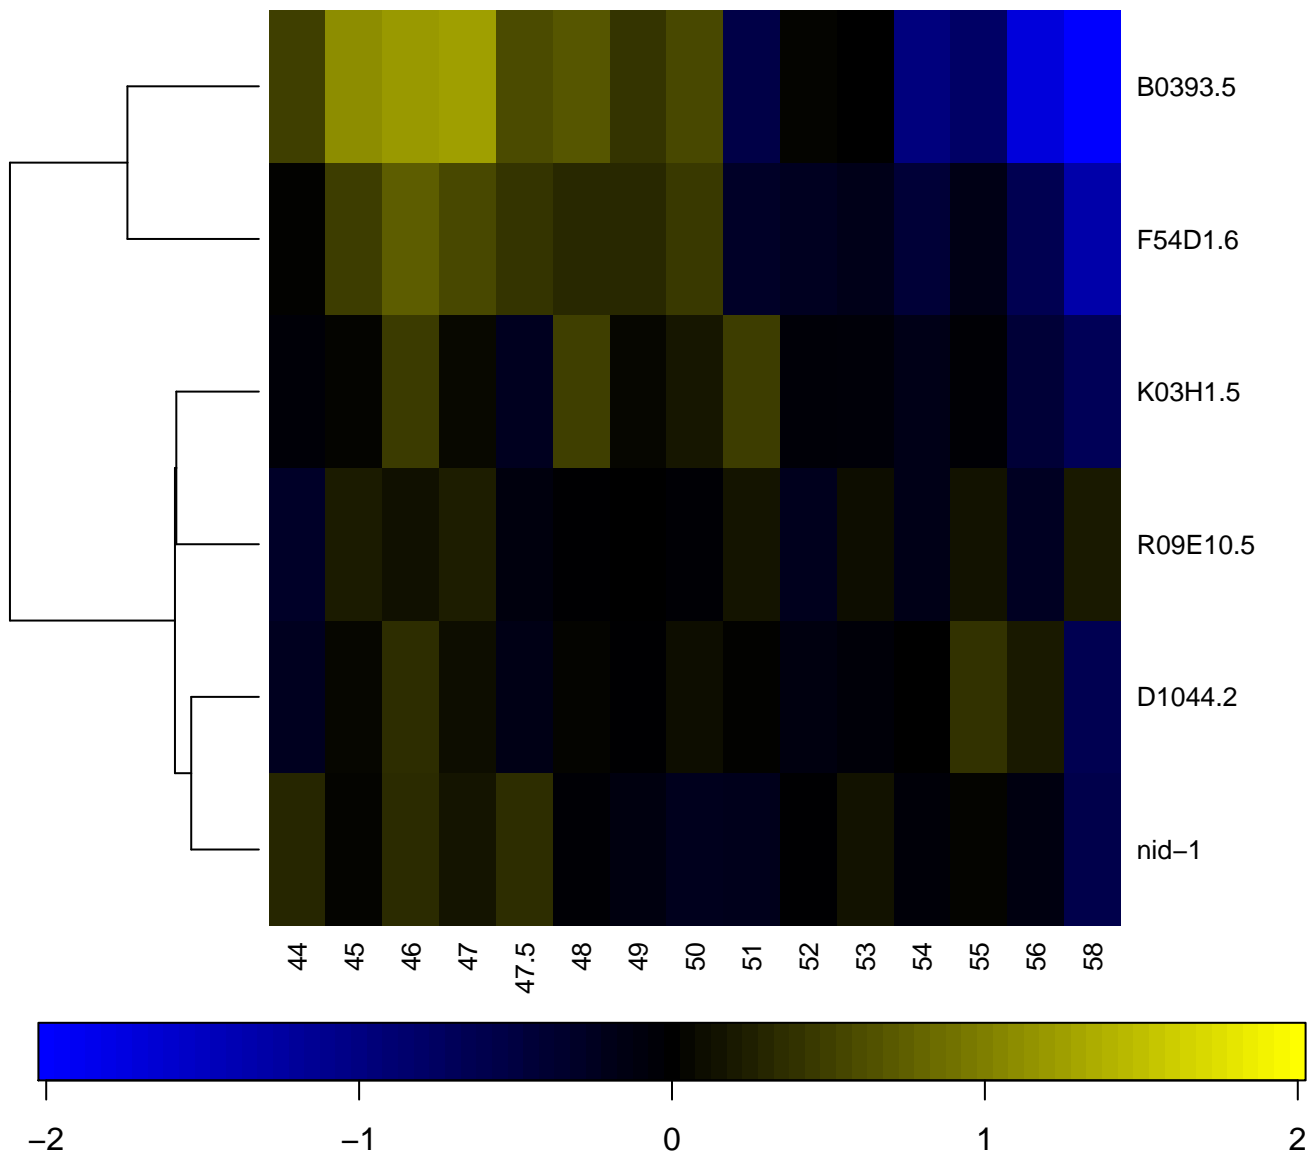

# NLI interacting factor

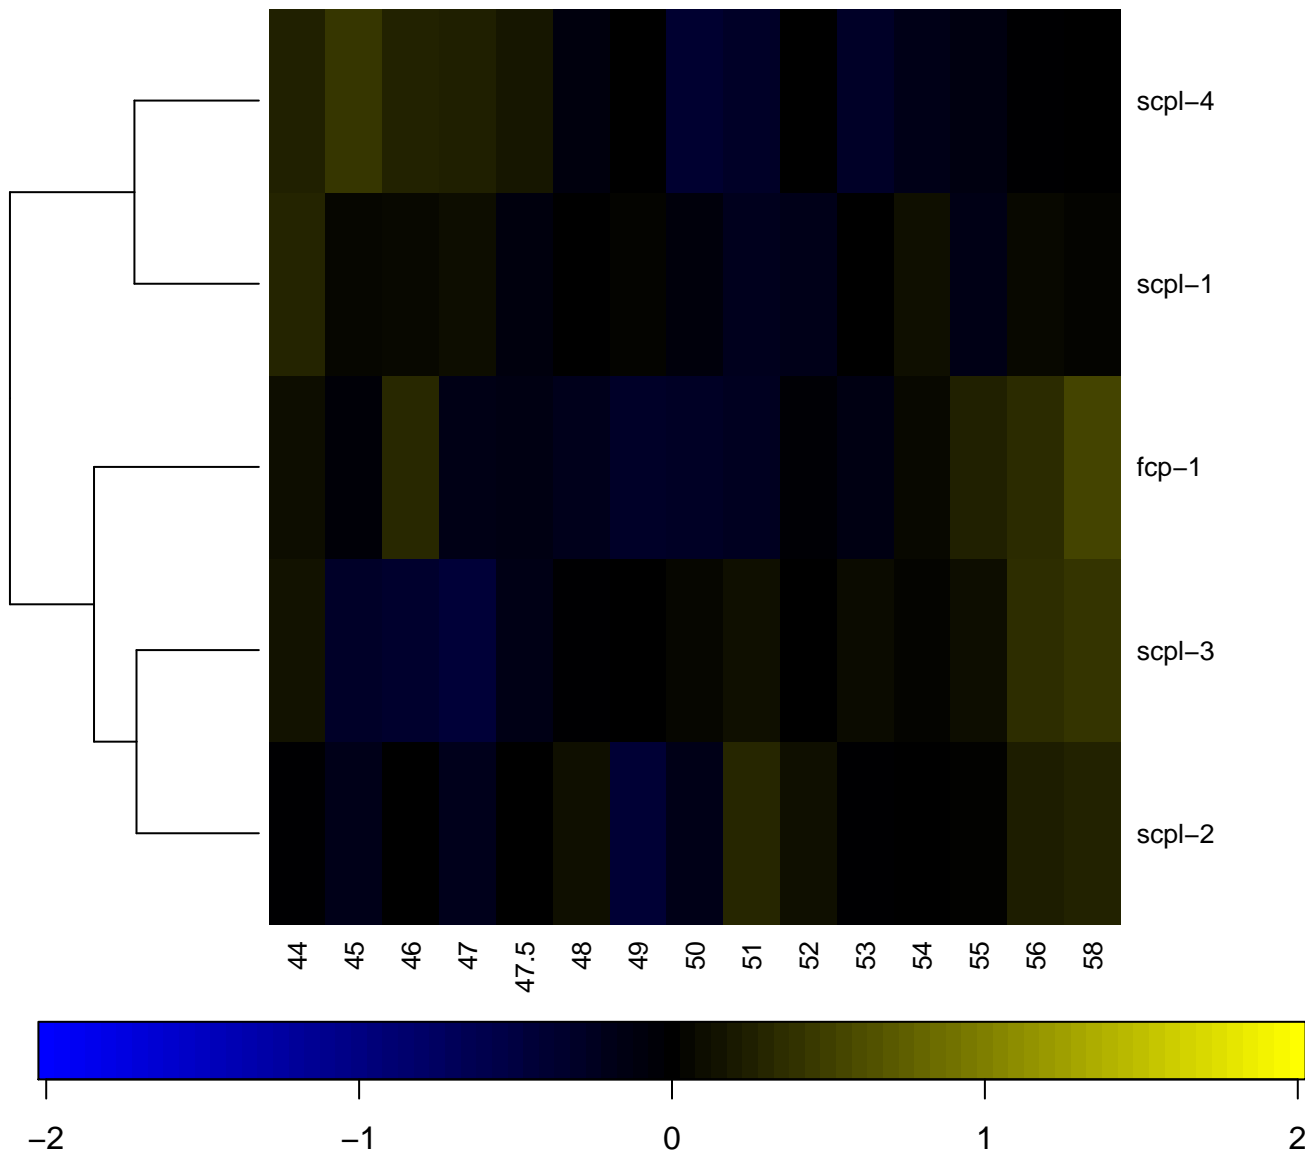



# NMDA receptor

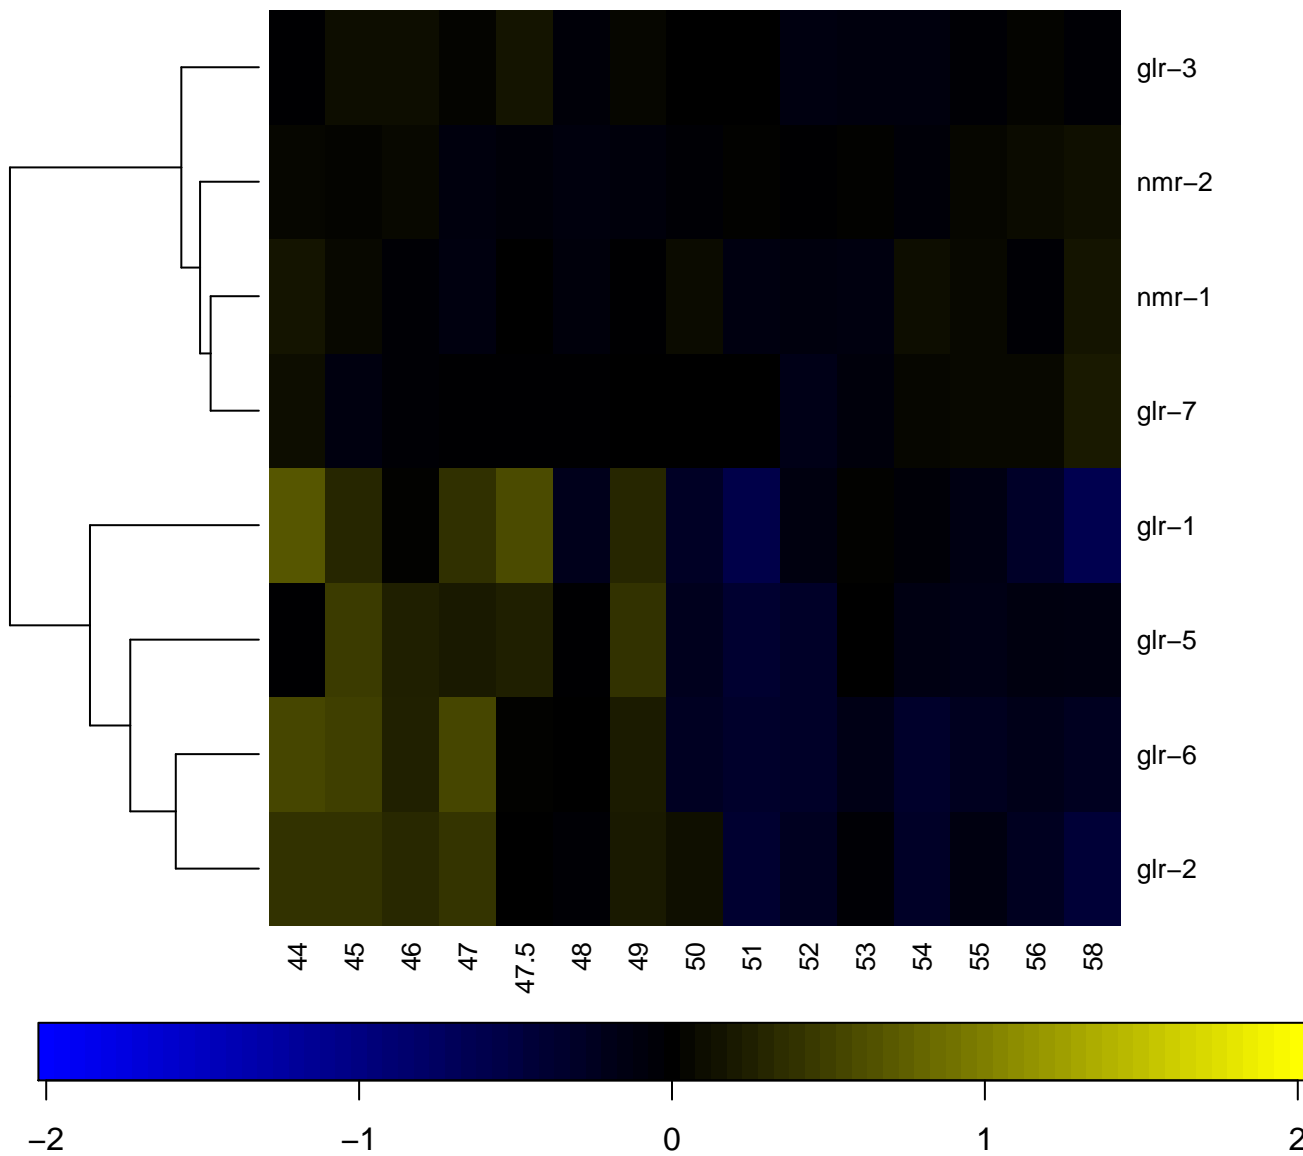



# NmrA-like family

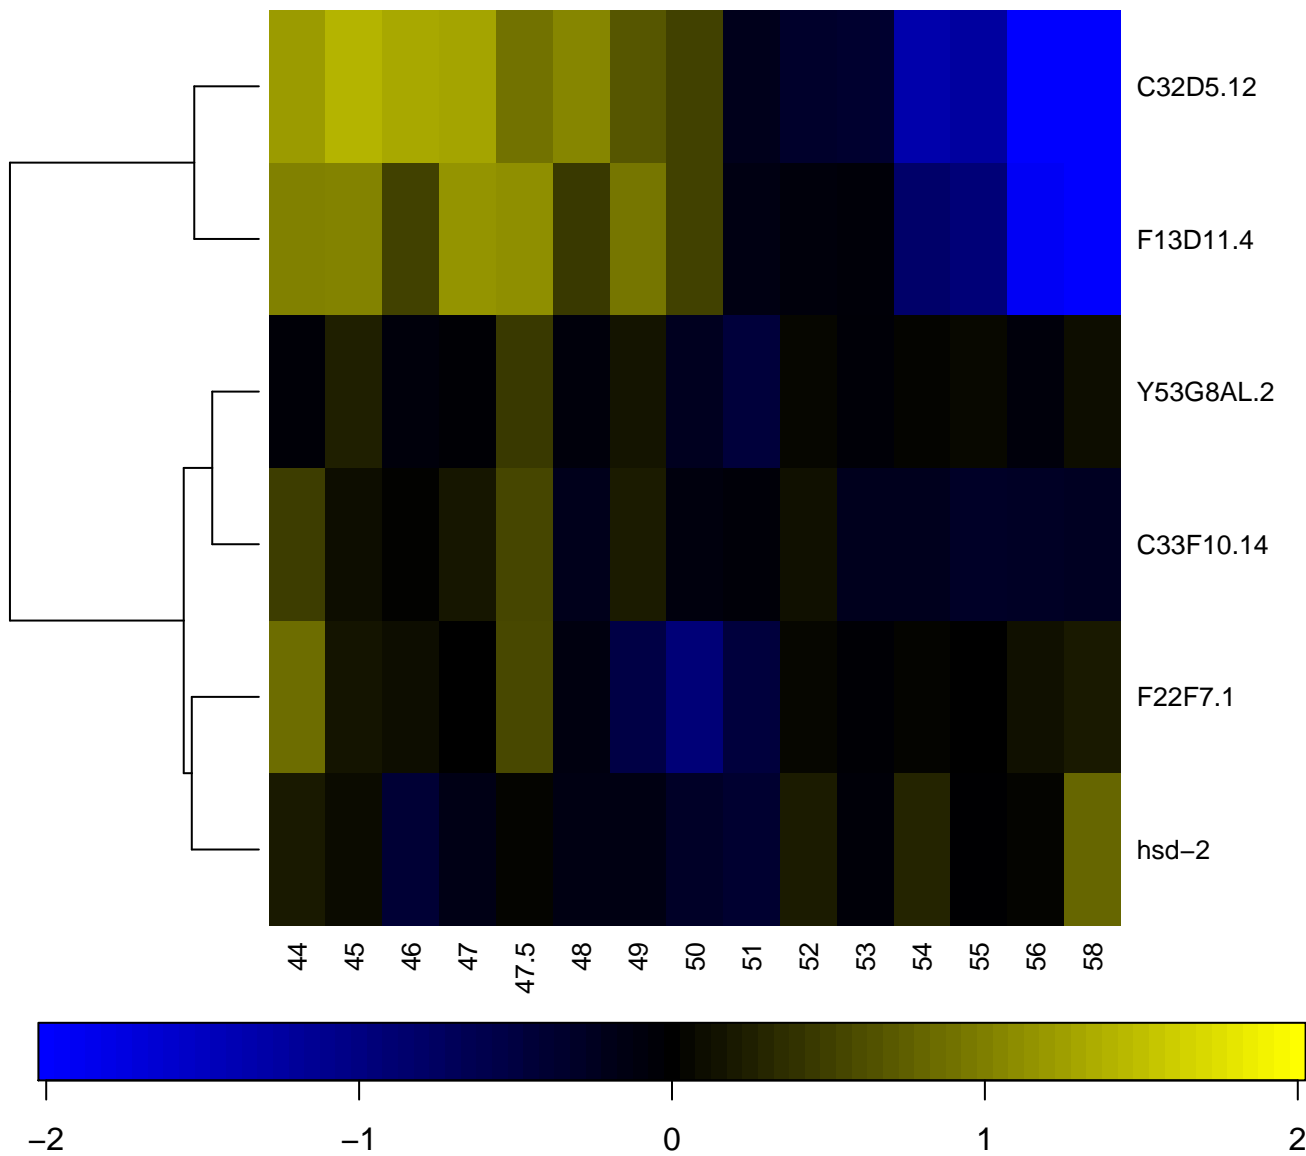





# Nuclear hormone receptor, ligand-binding

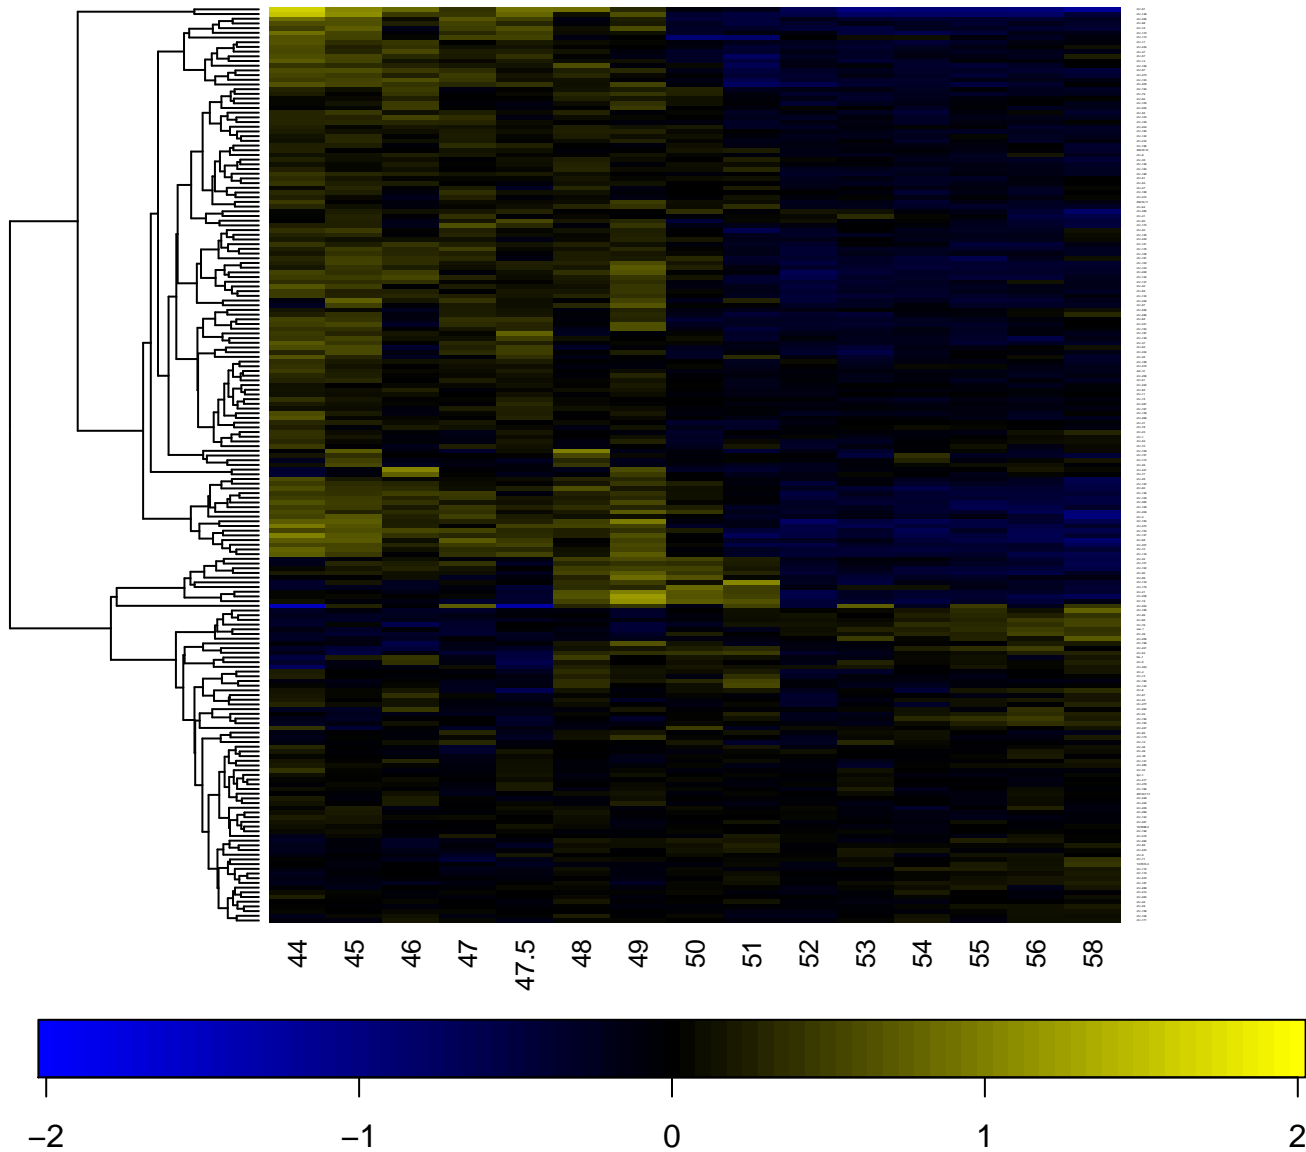

# Nuclear hormone receptor, ligand-binding, core

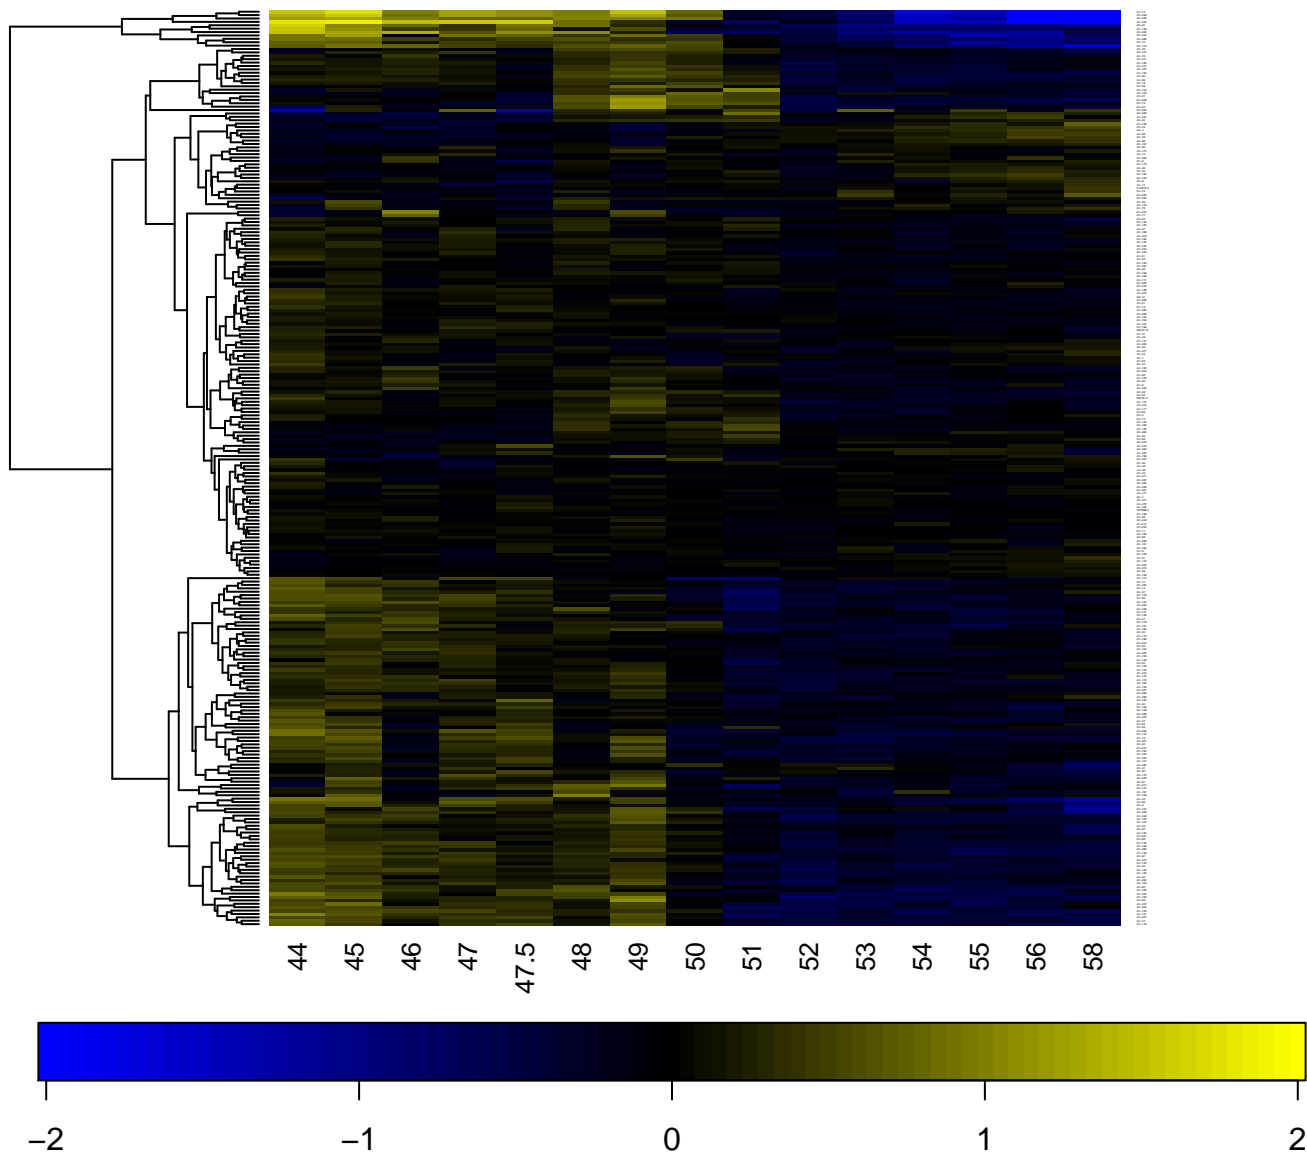

# Nucleic acid-binding, OB-fold

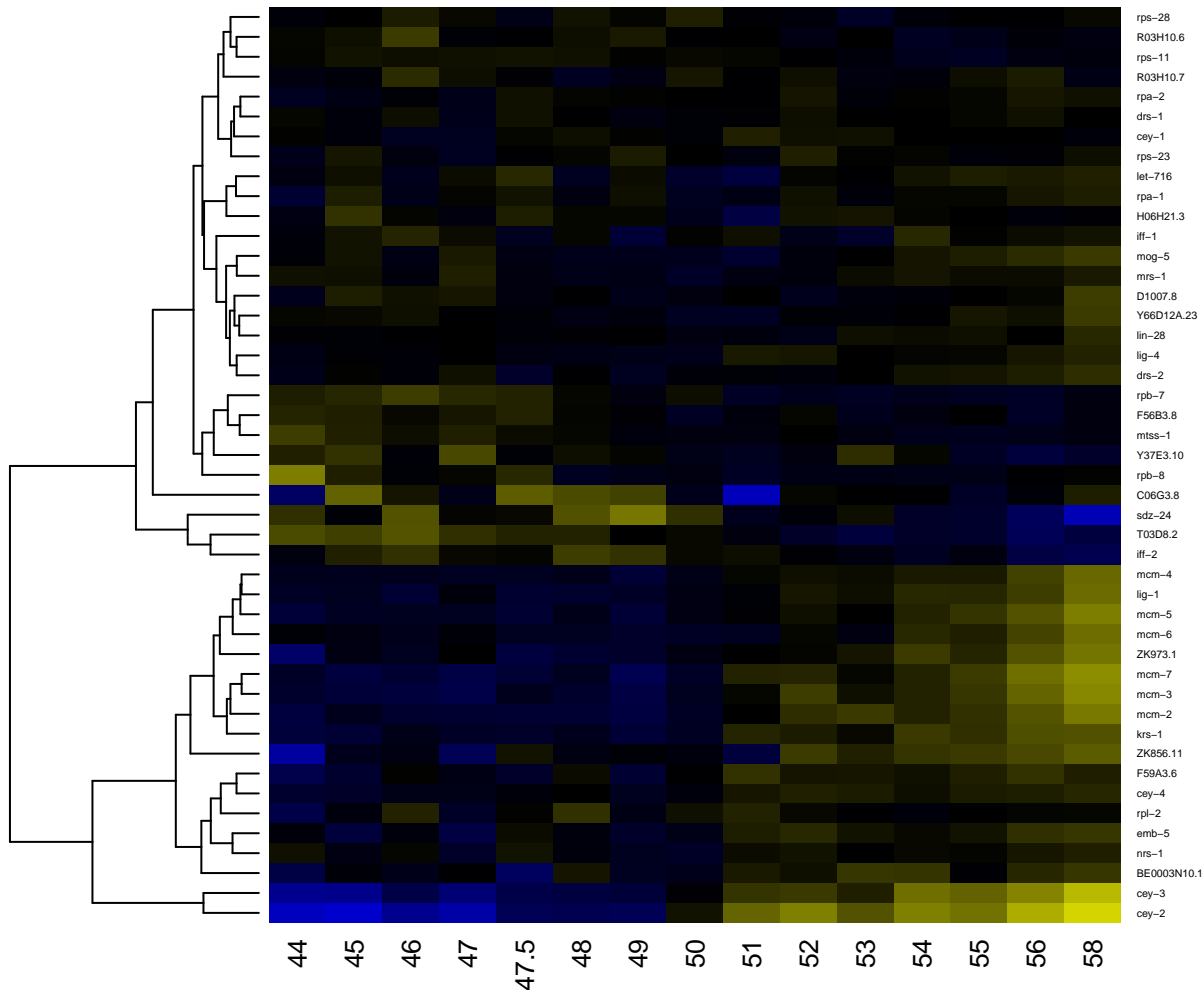





# Nucleotide-binding, alpha-beta plait

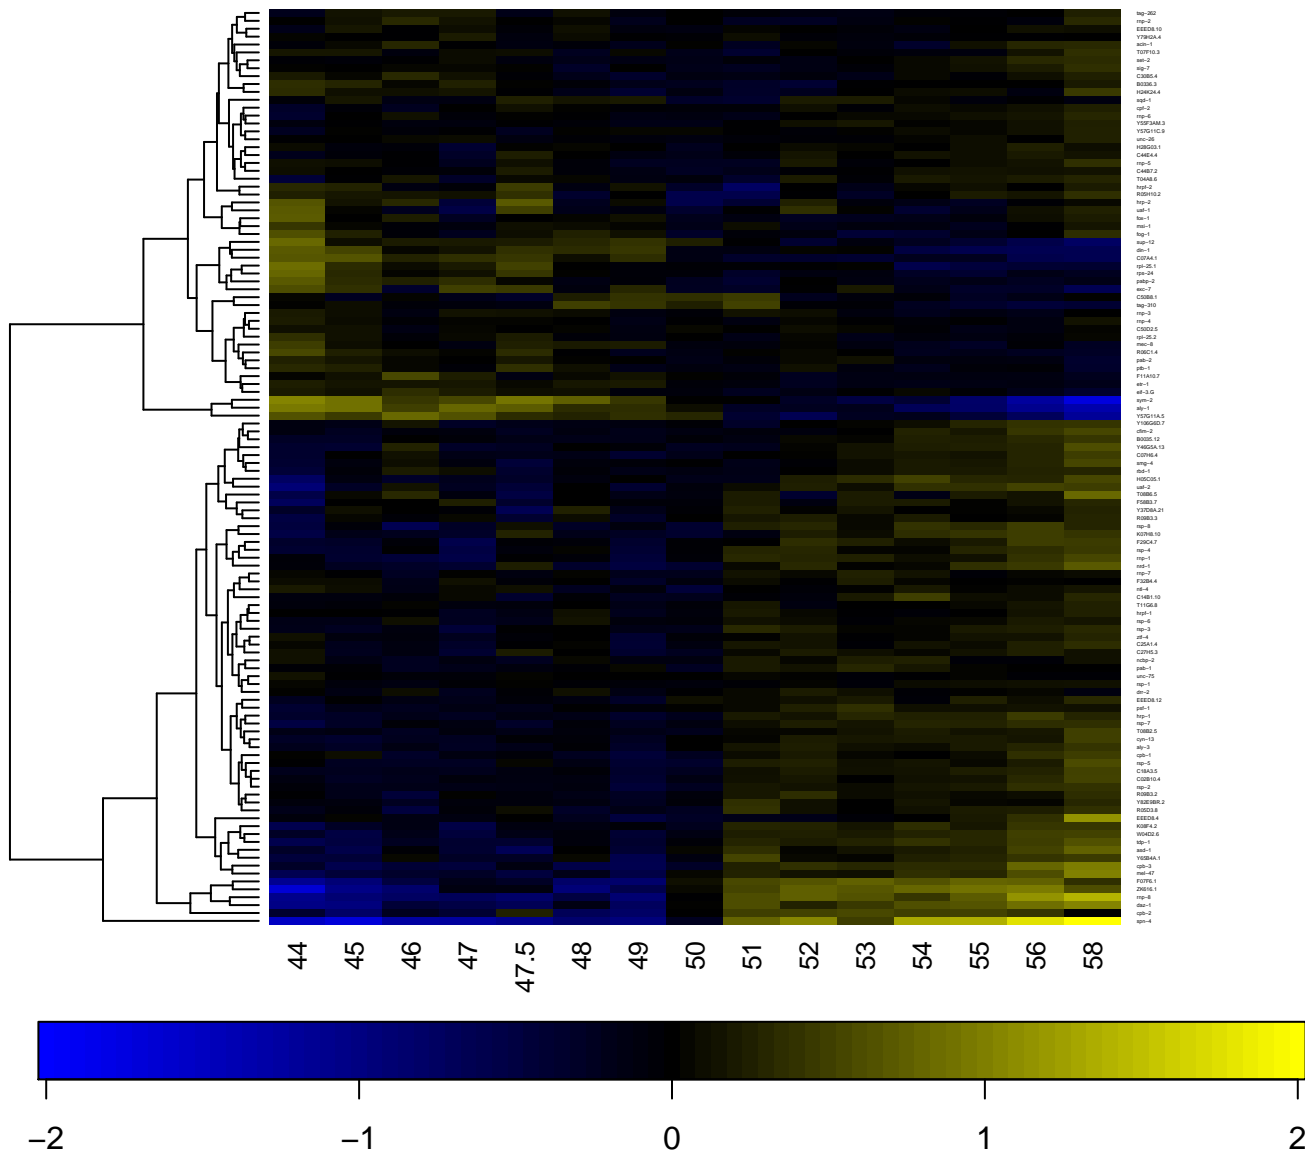

# Nucleotide-diphospho-sugar transferase

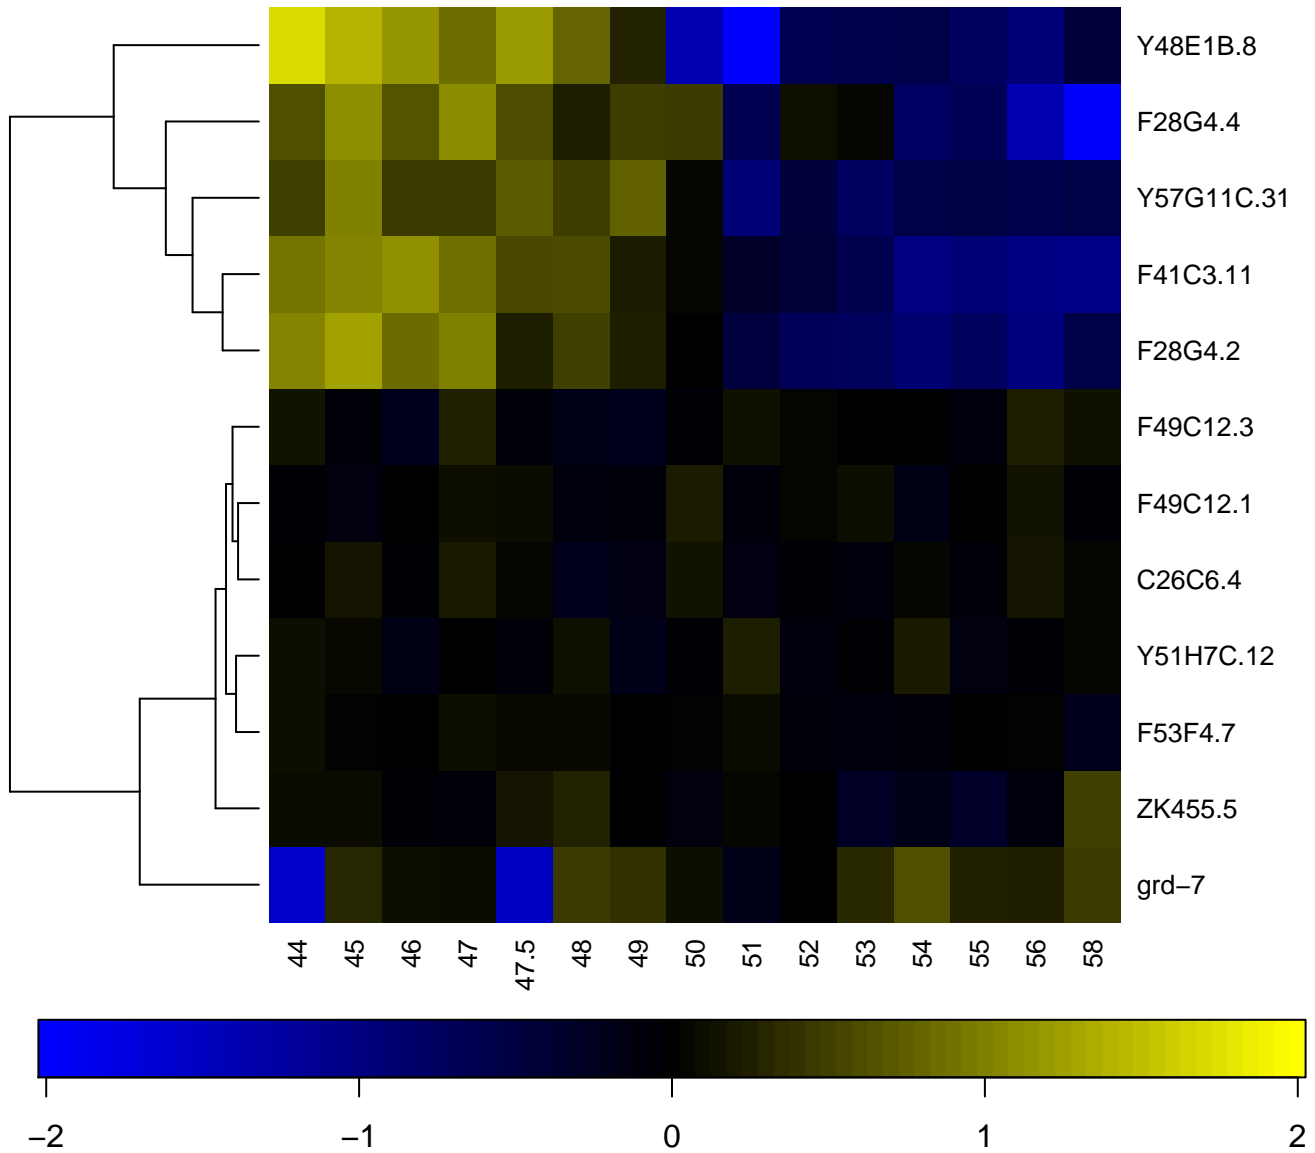

# Nucleotide-diphospho-sugar transferase, predicted

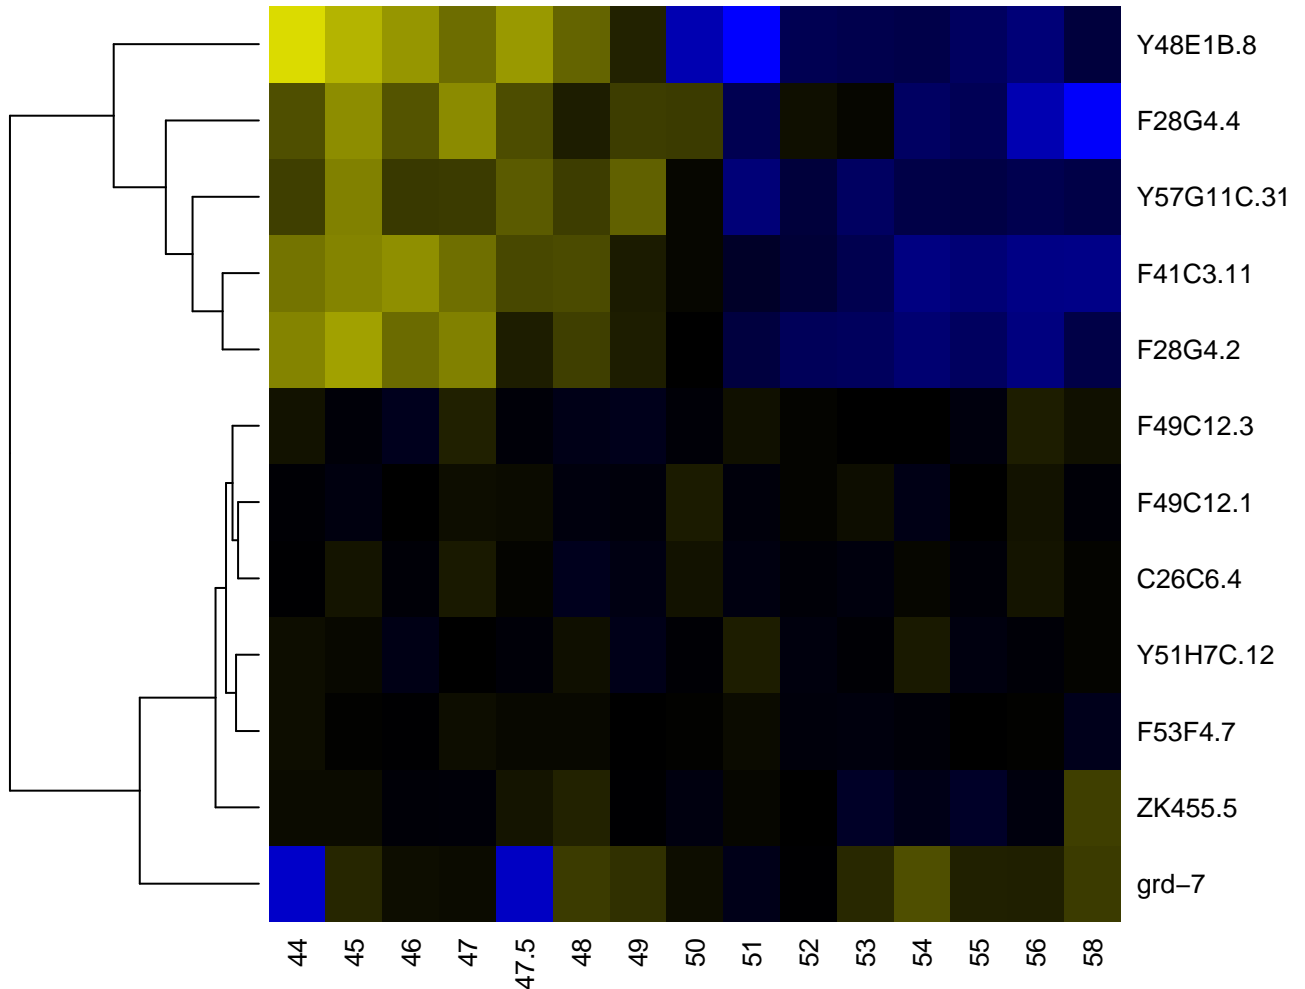

-2

-1

0

1

2











# NUDIX domain

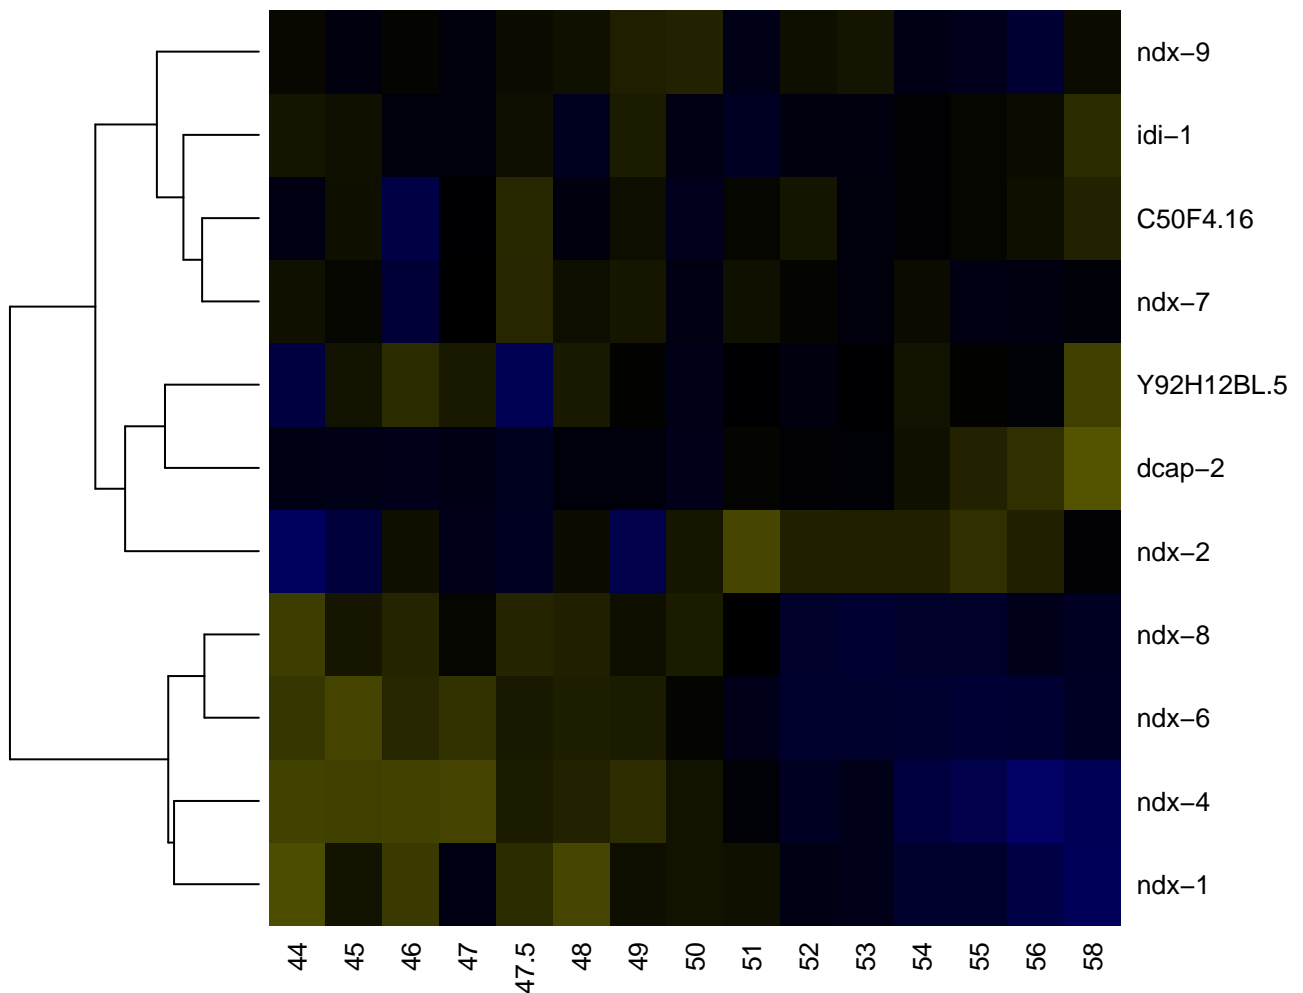

















# OTU-like cysteine protease

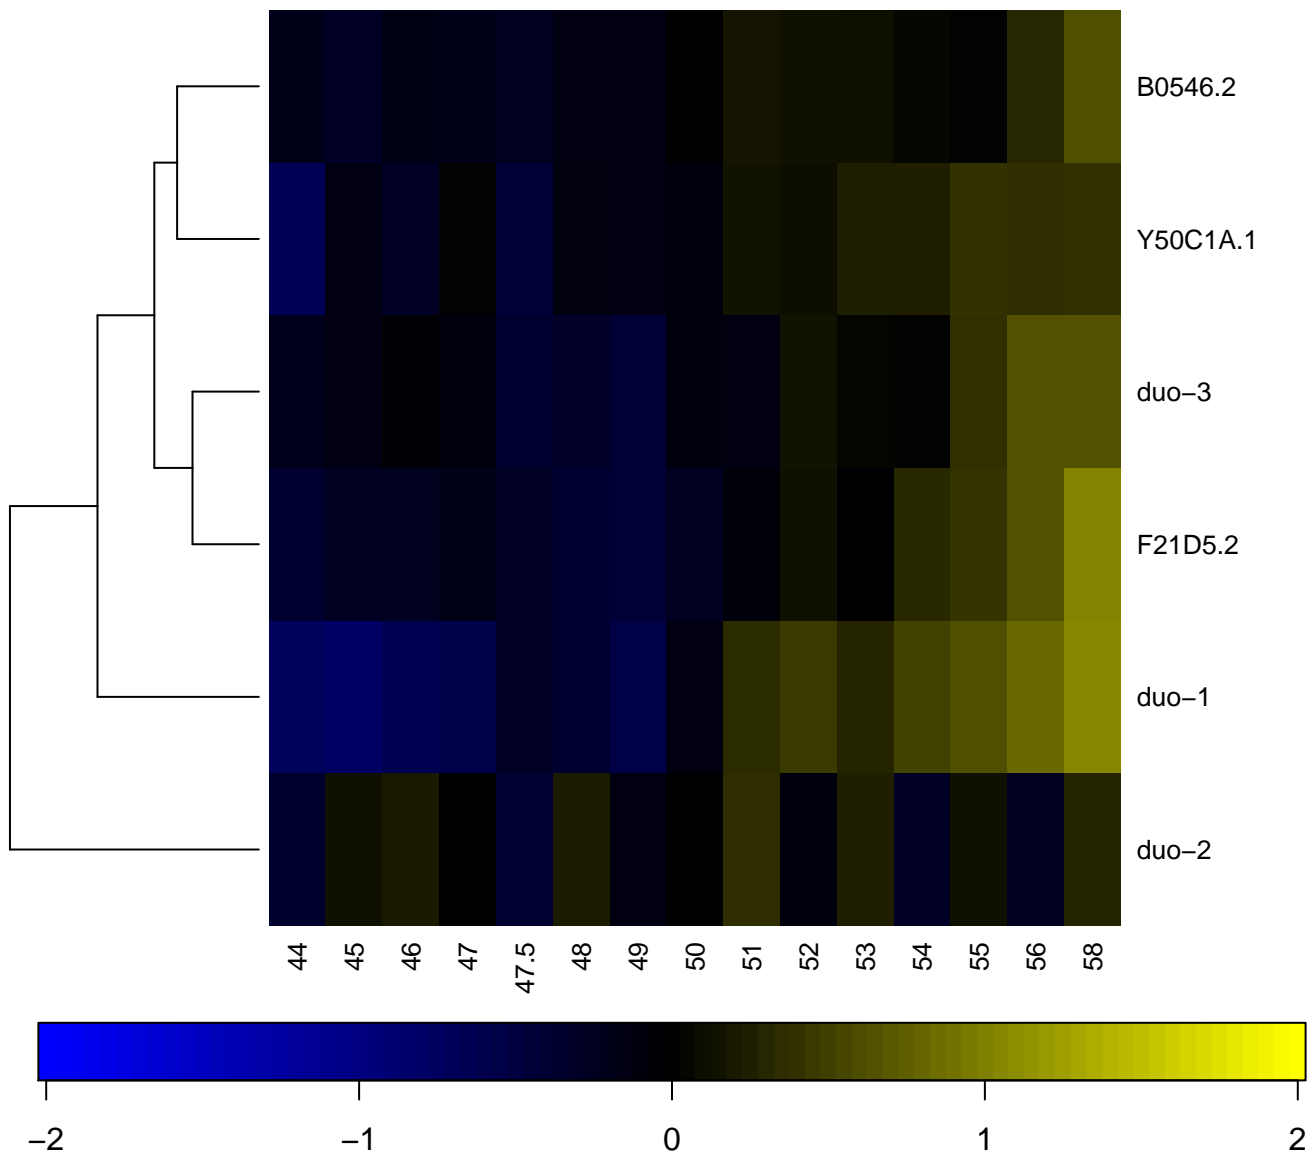

# Ovarian tumour, otubain

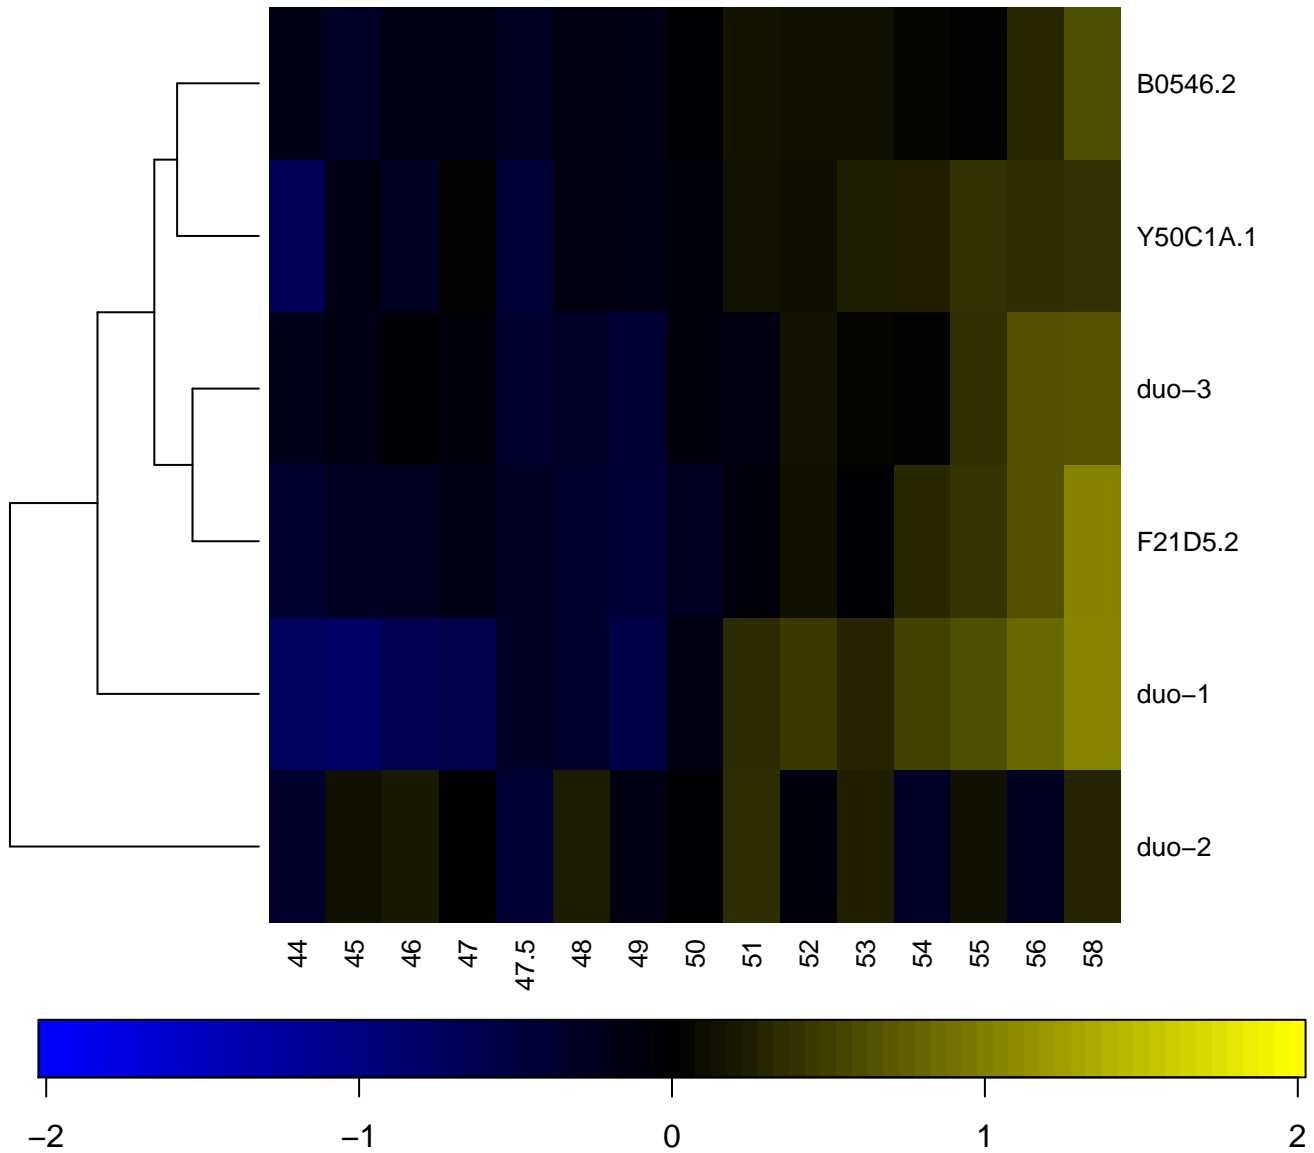

# Oxidoreductase FAD/NAD(P)-binding

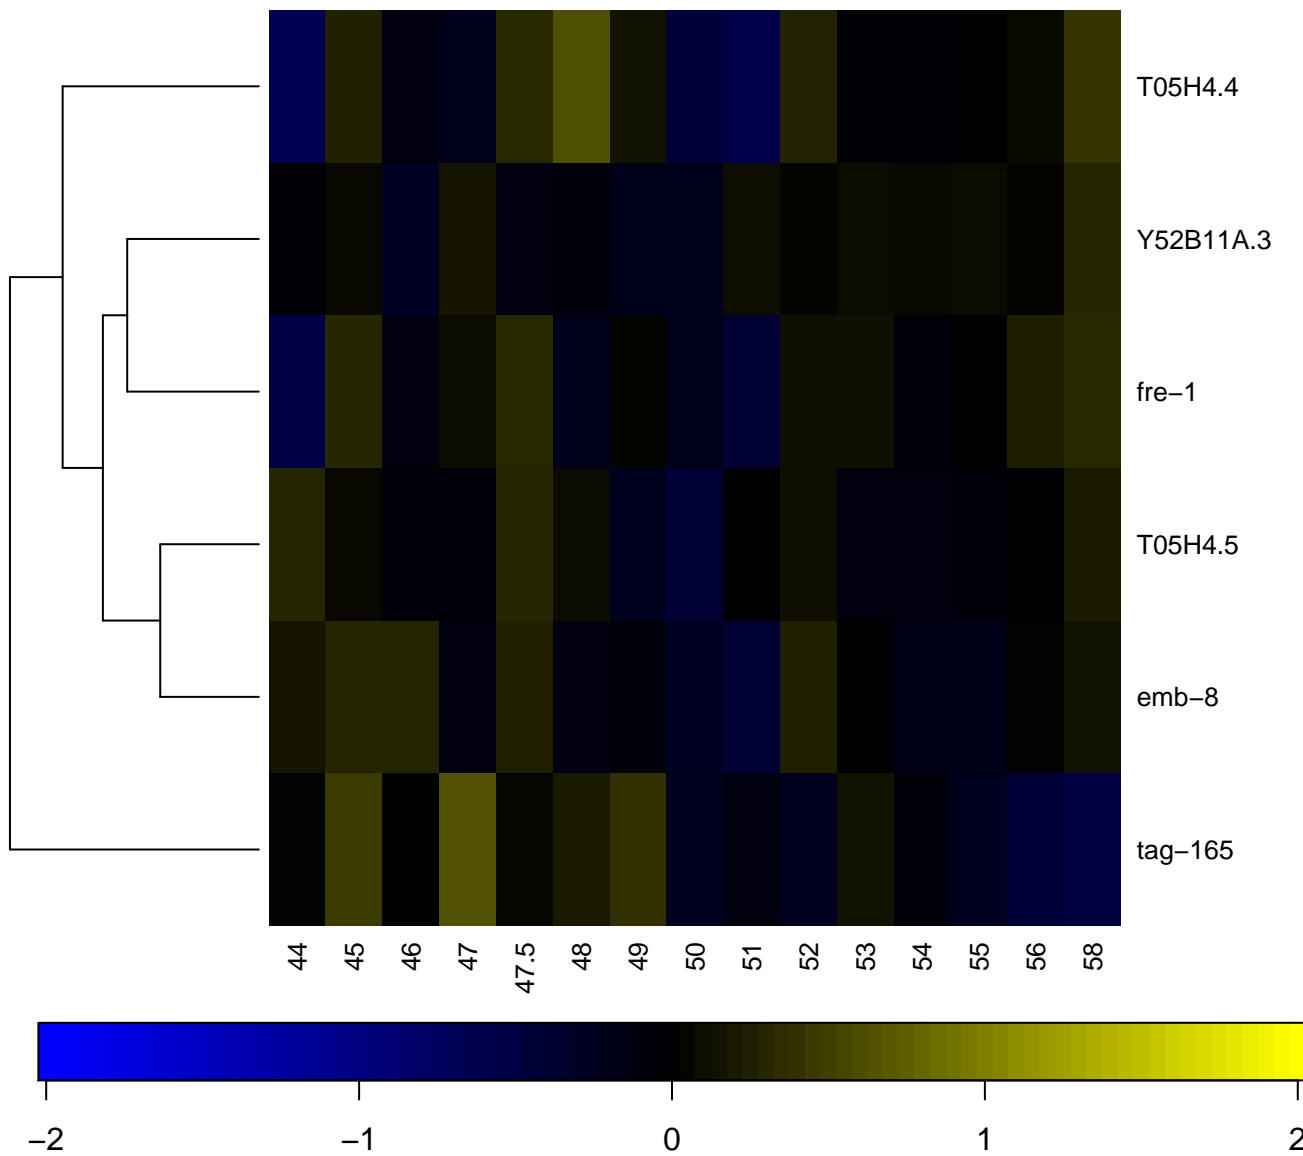













# PAN-1 domain

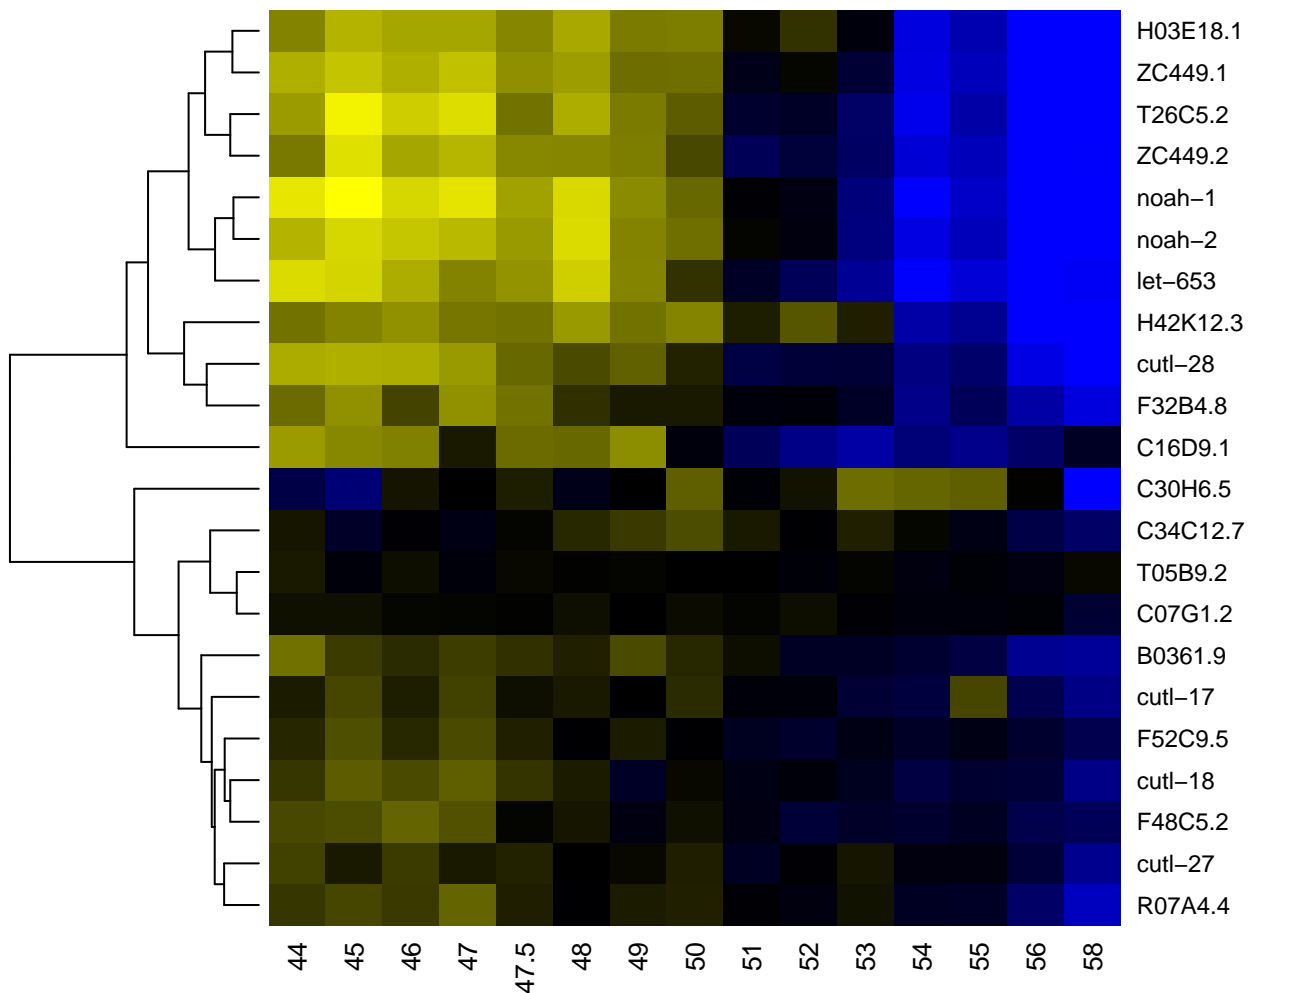

# PAN-3 domain

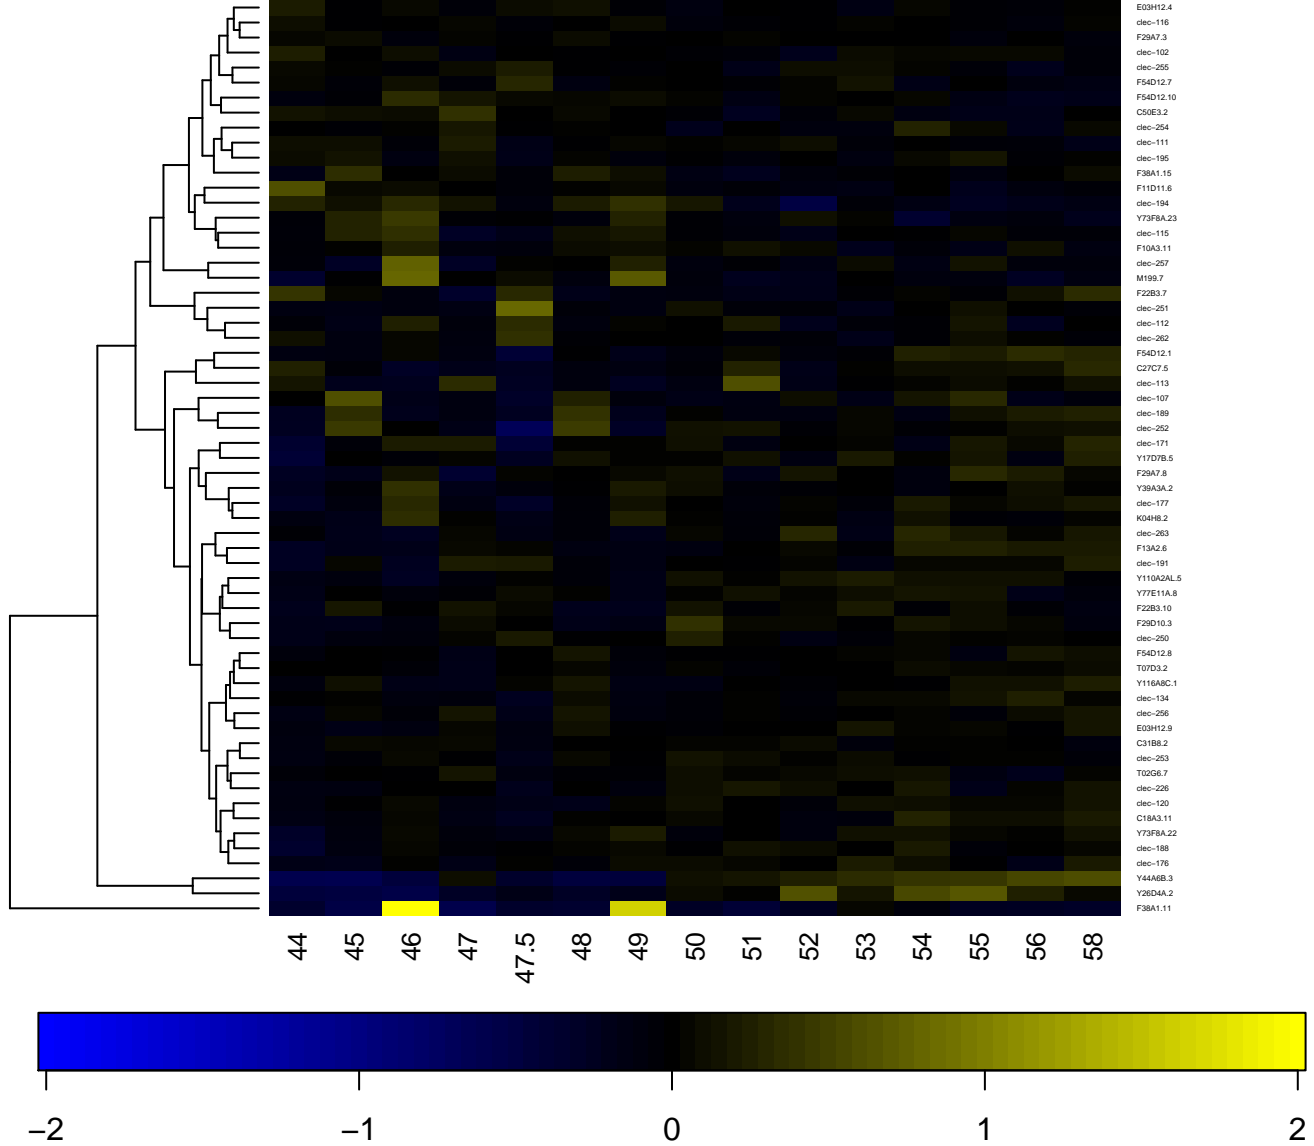

# PAN-like domain

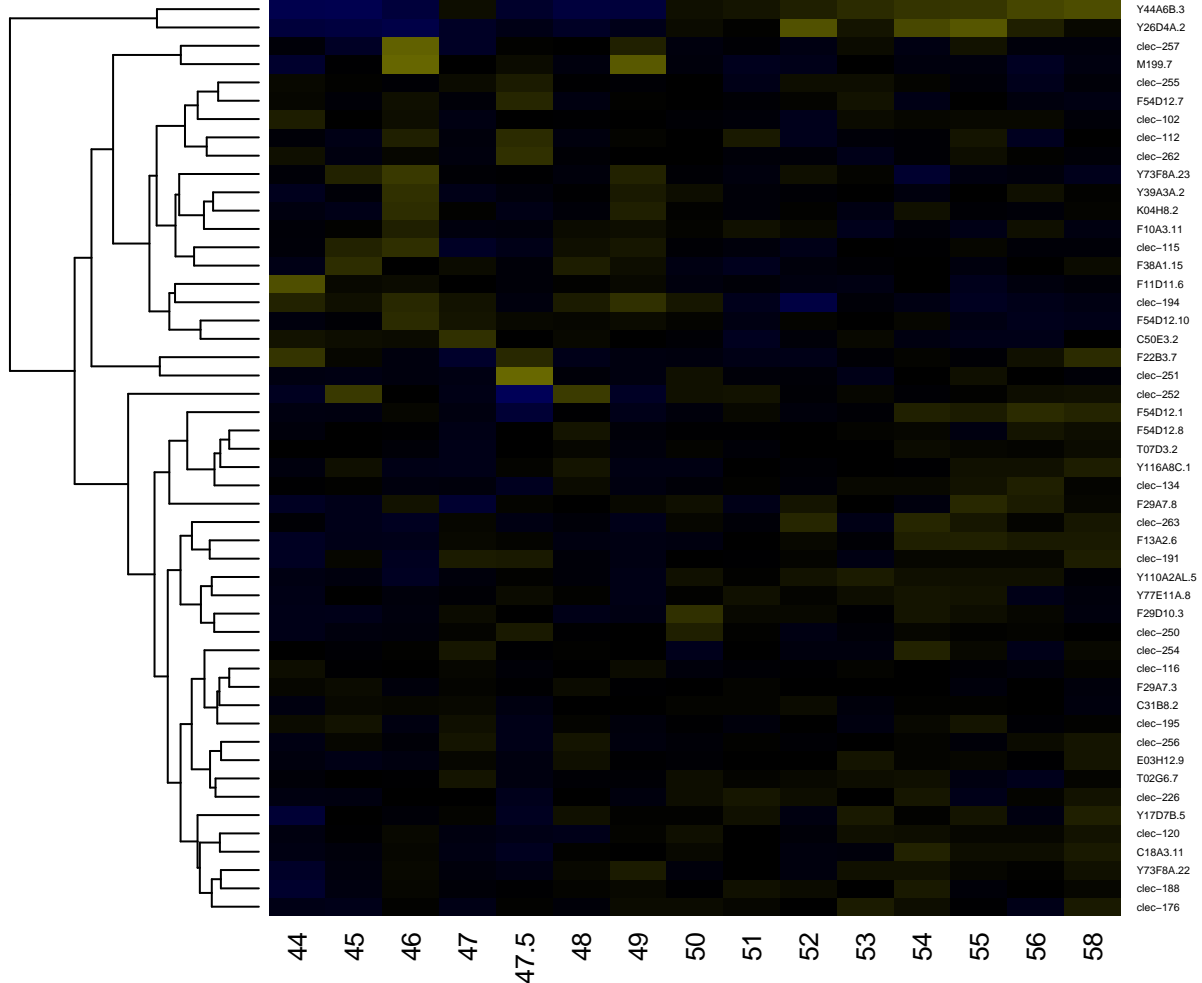

# PAN domain

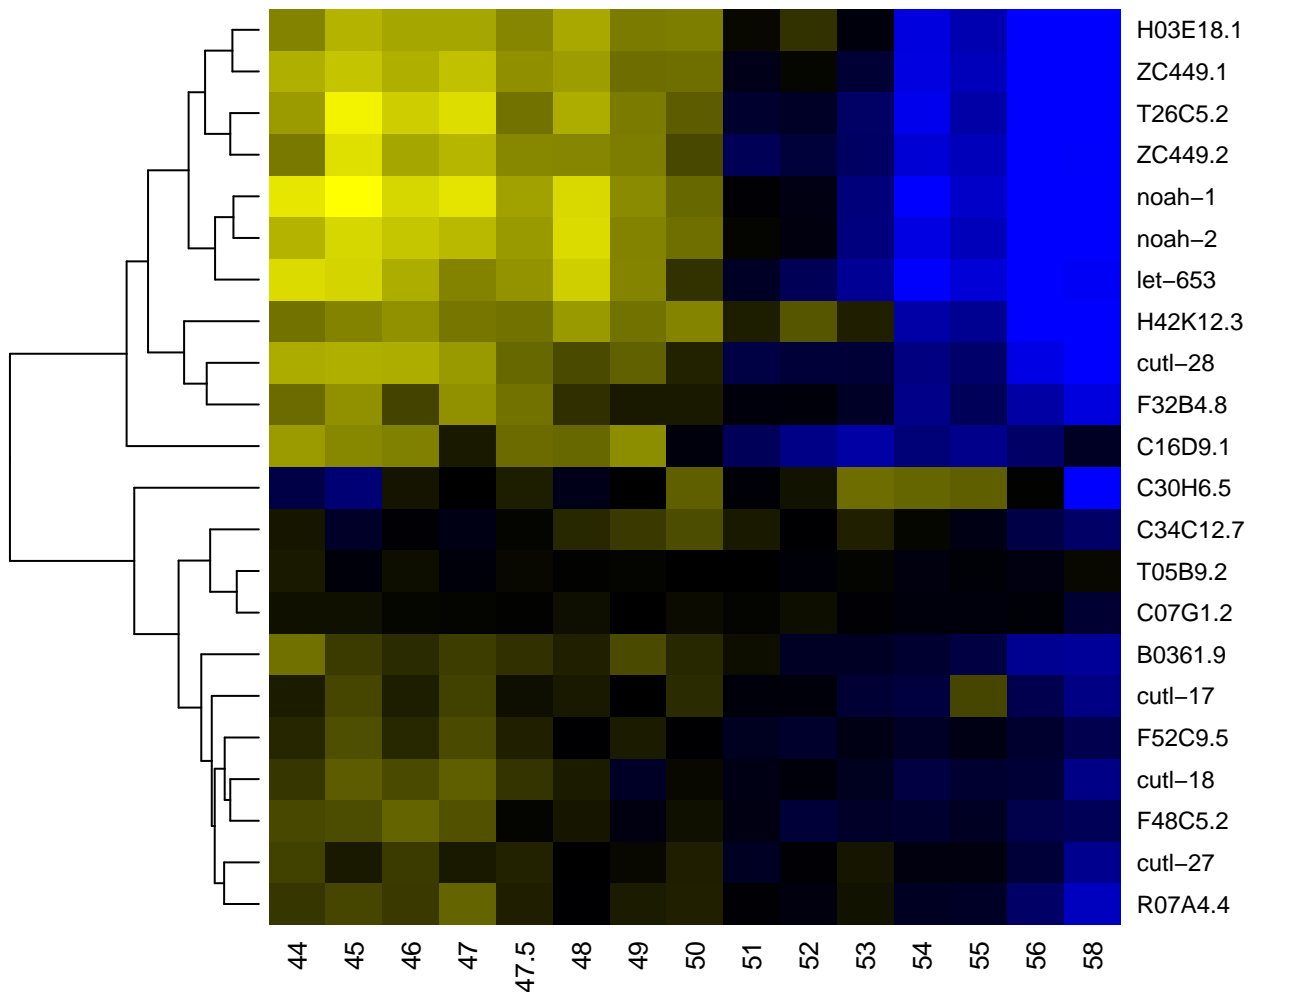



# PAP/25A-associated

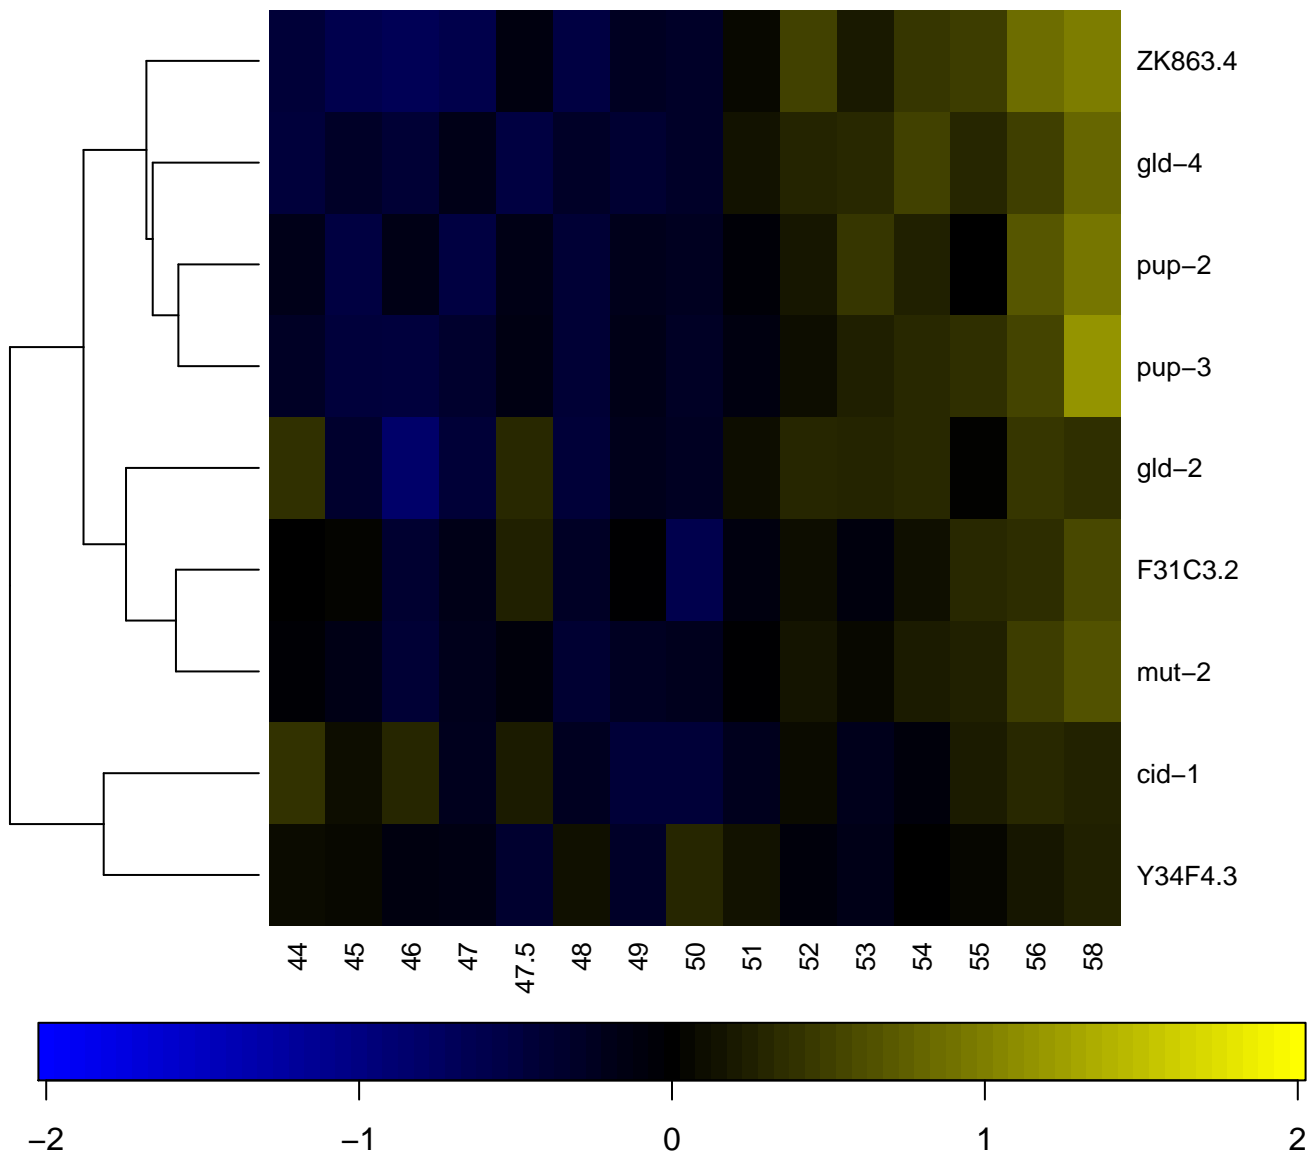



# Papain family cysteine protease

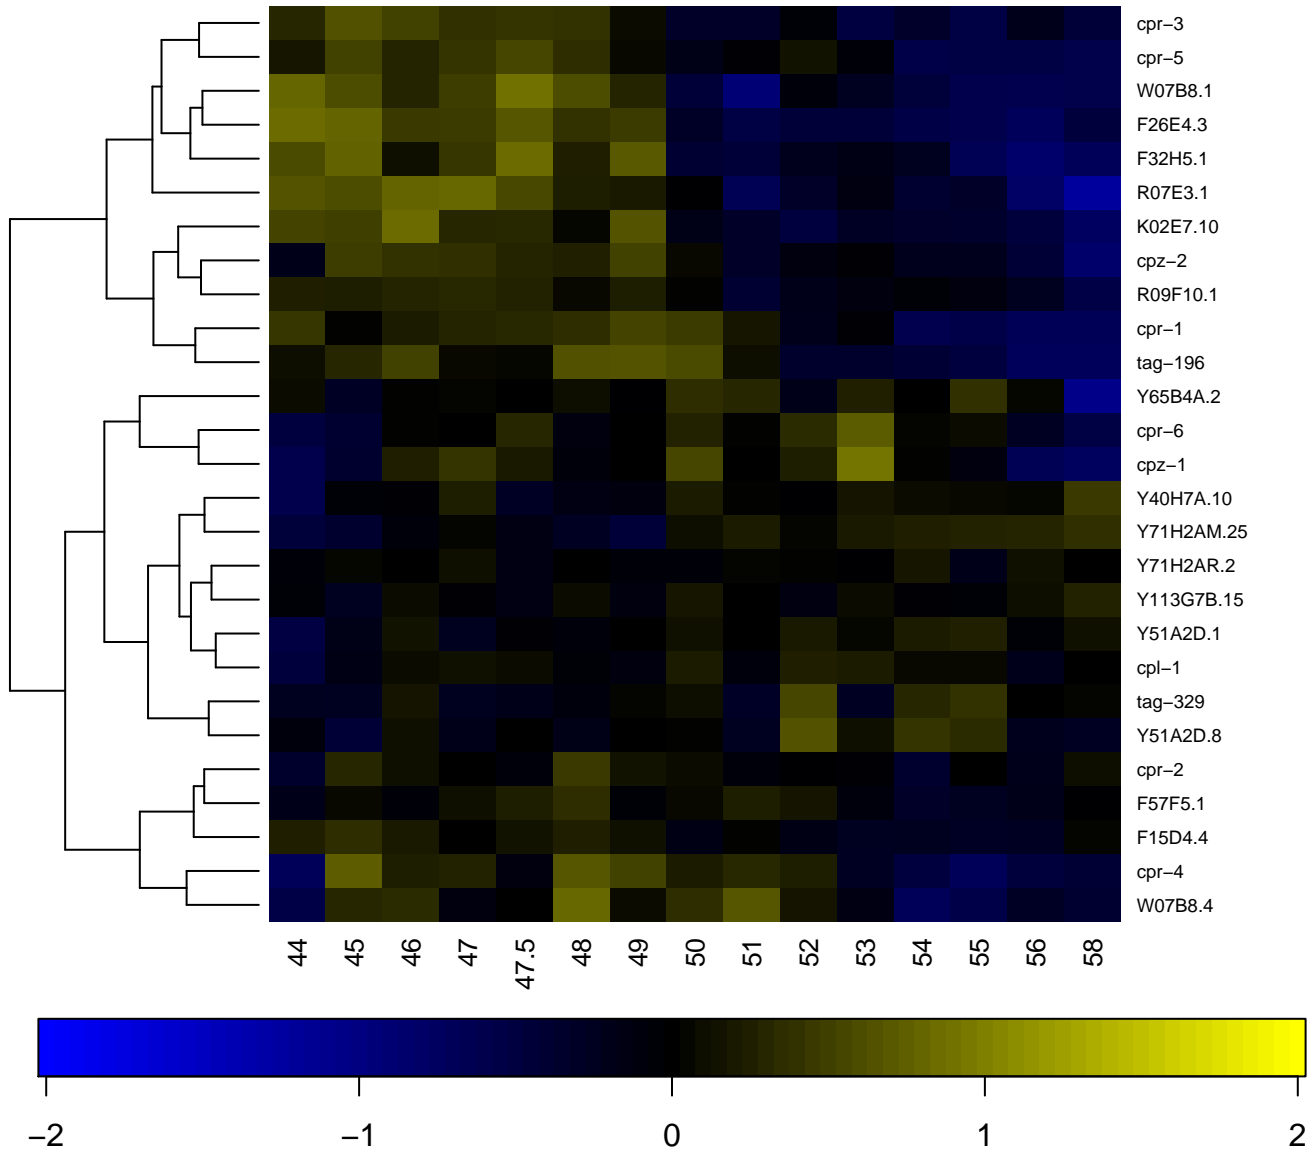

# PapD-like

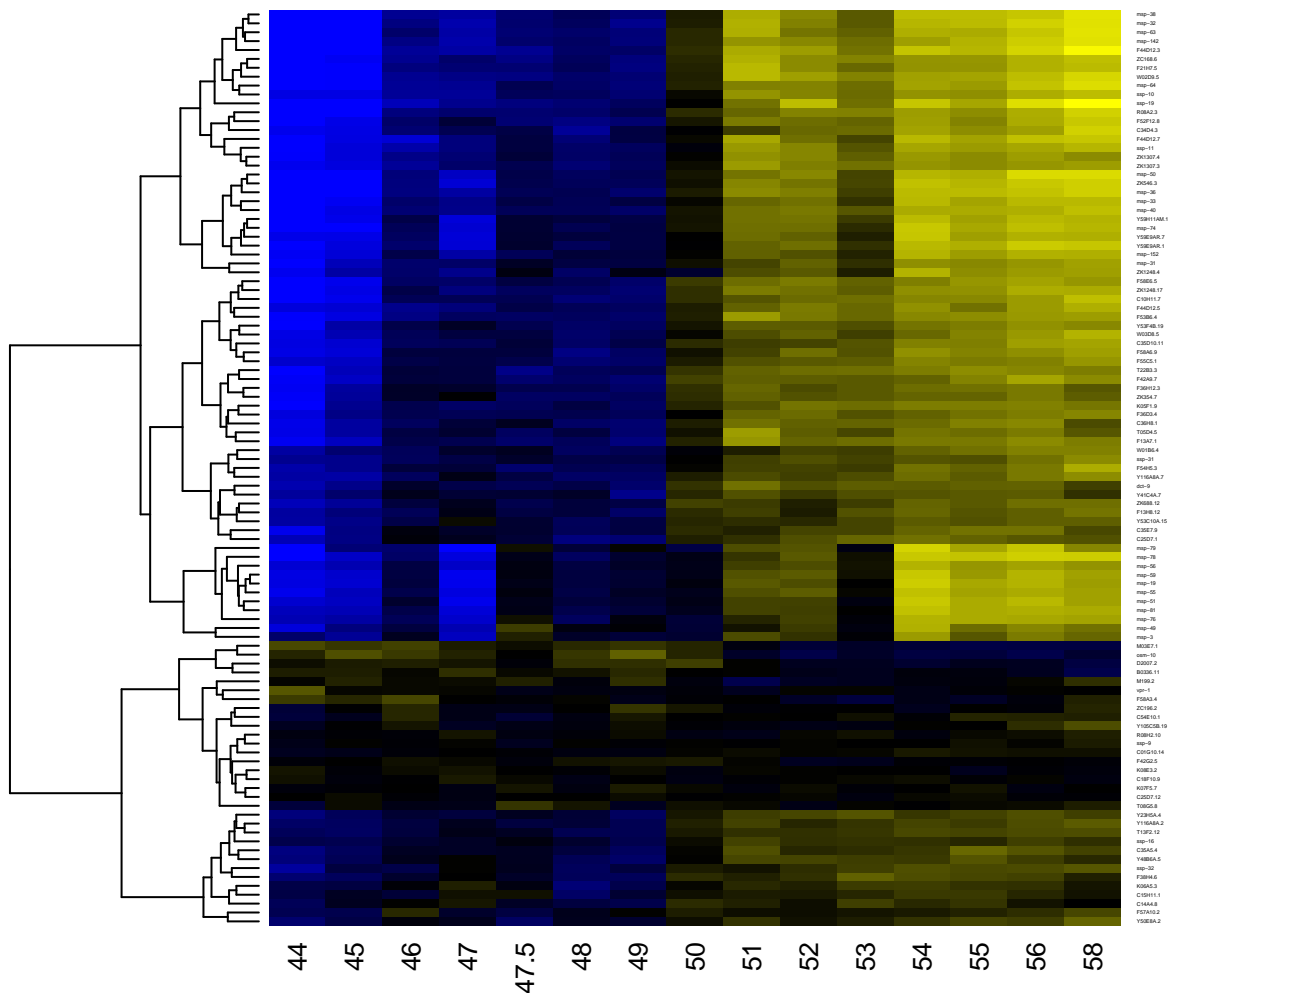



# PAS fold

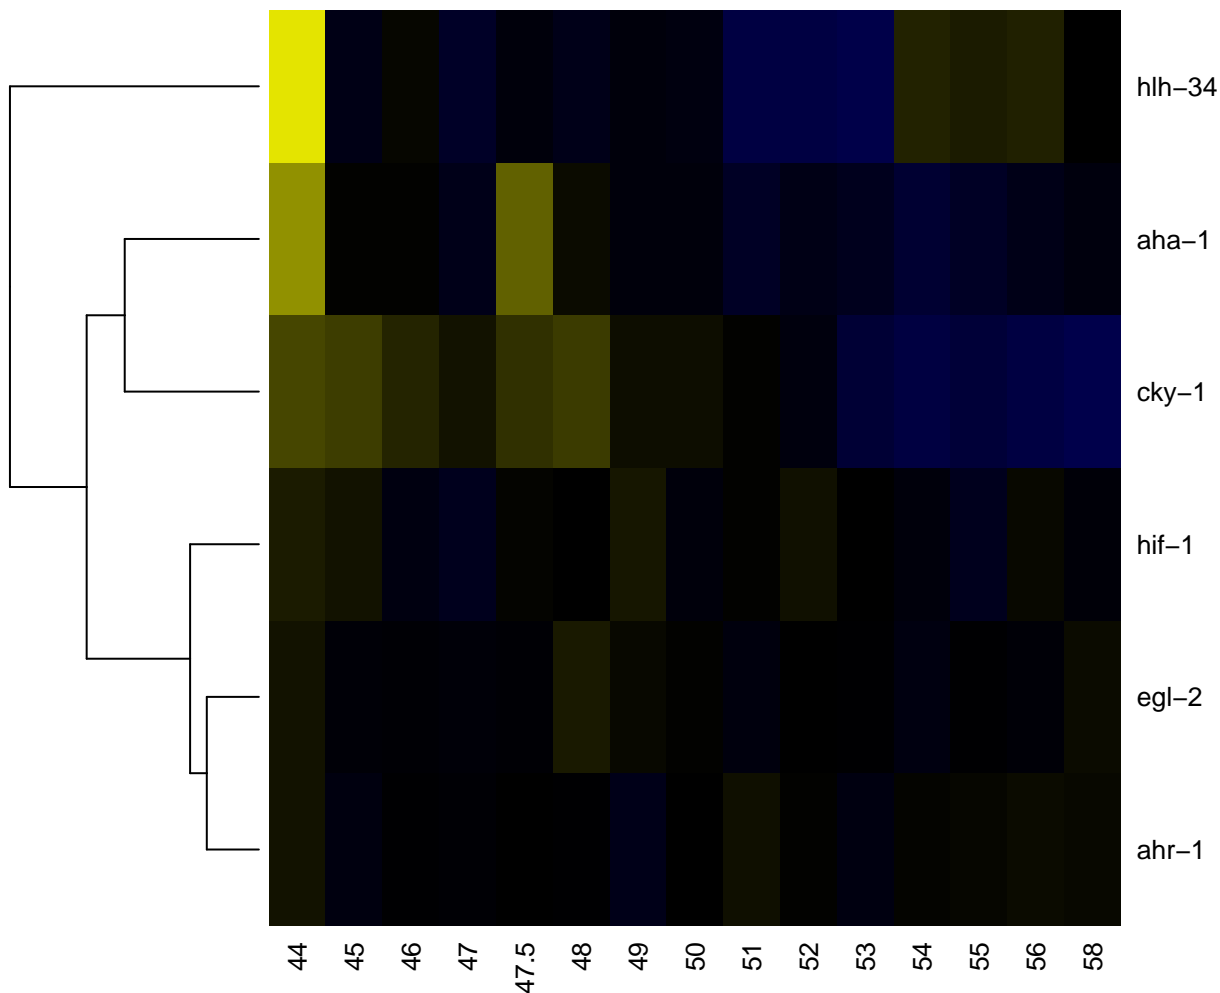



# Patatin/Phospholipase A2-related

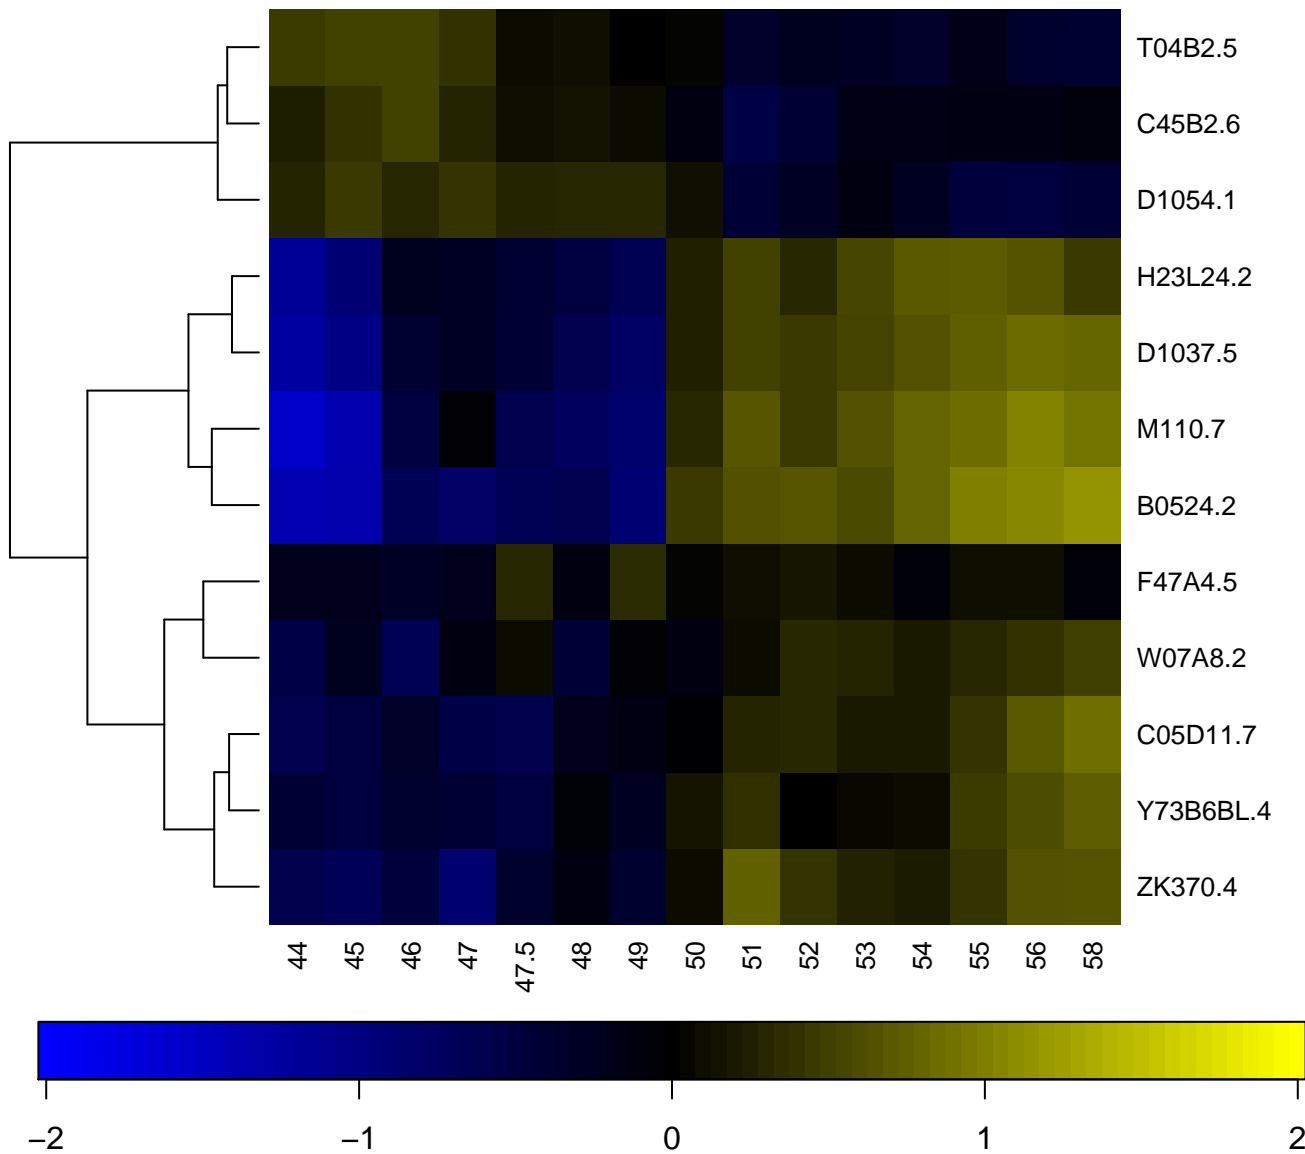



# Patched

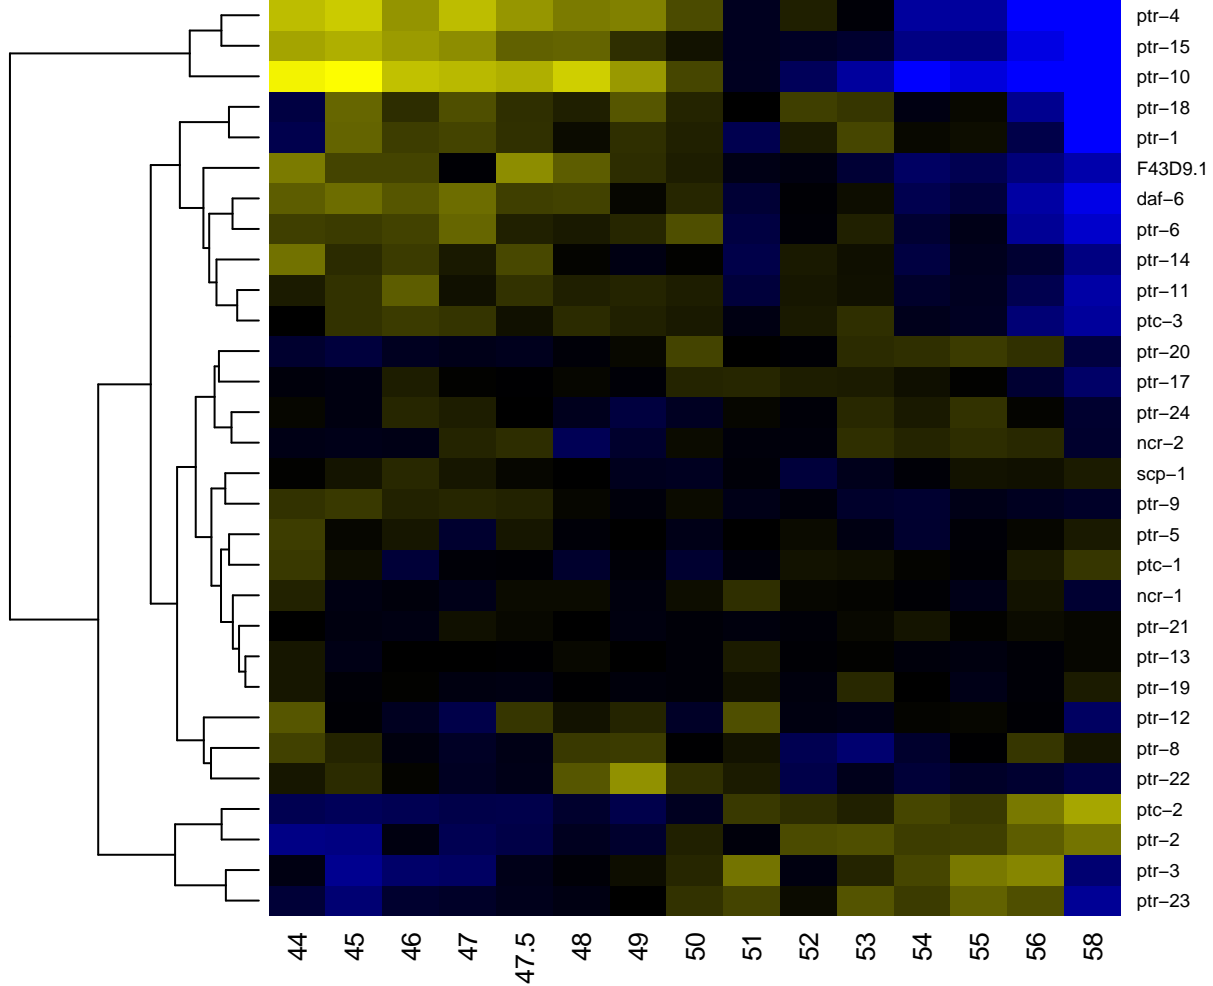

# Patched family

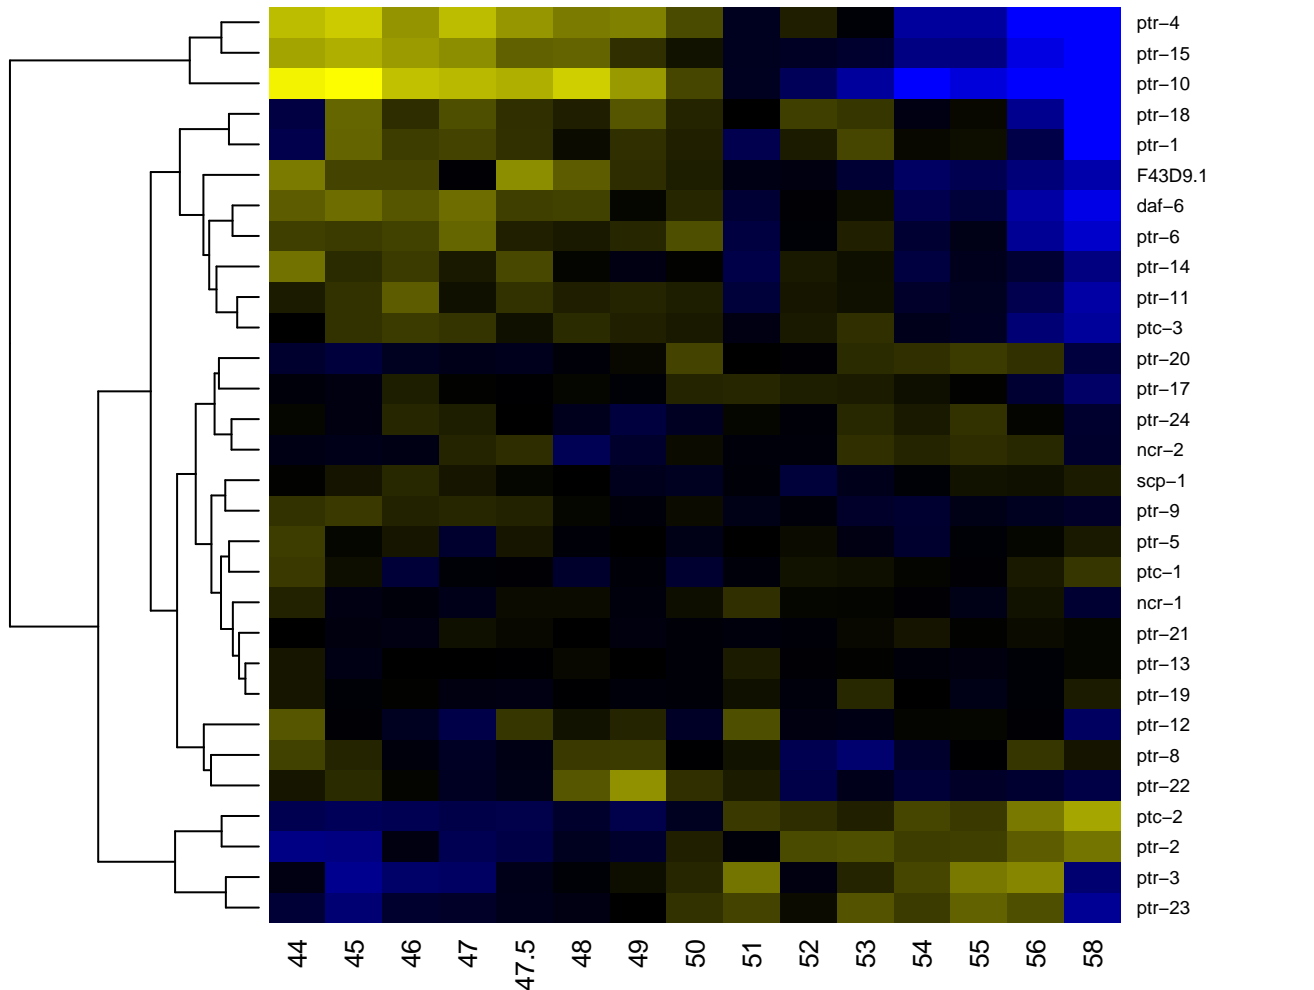

# PAZ domain

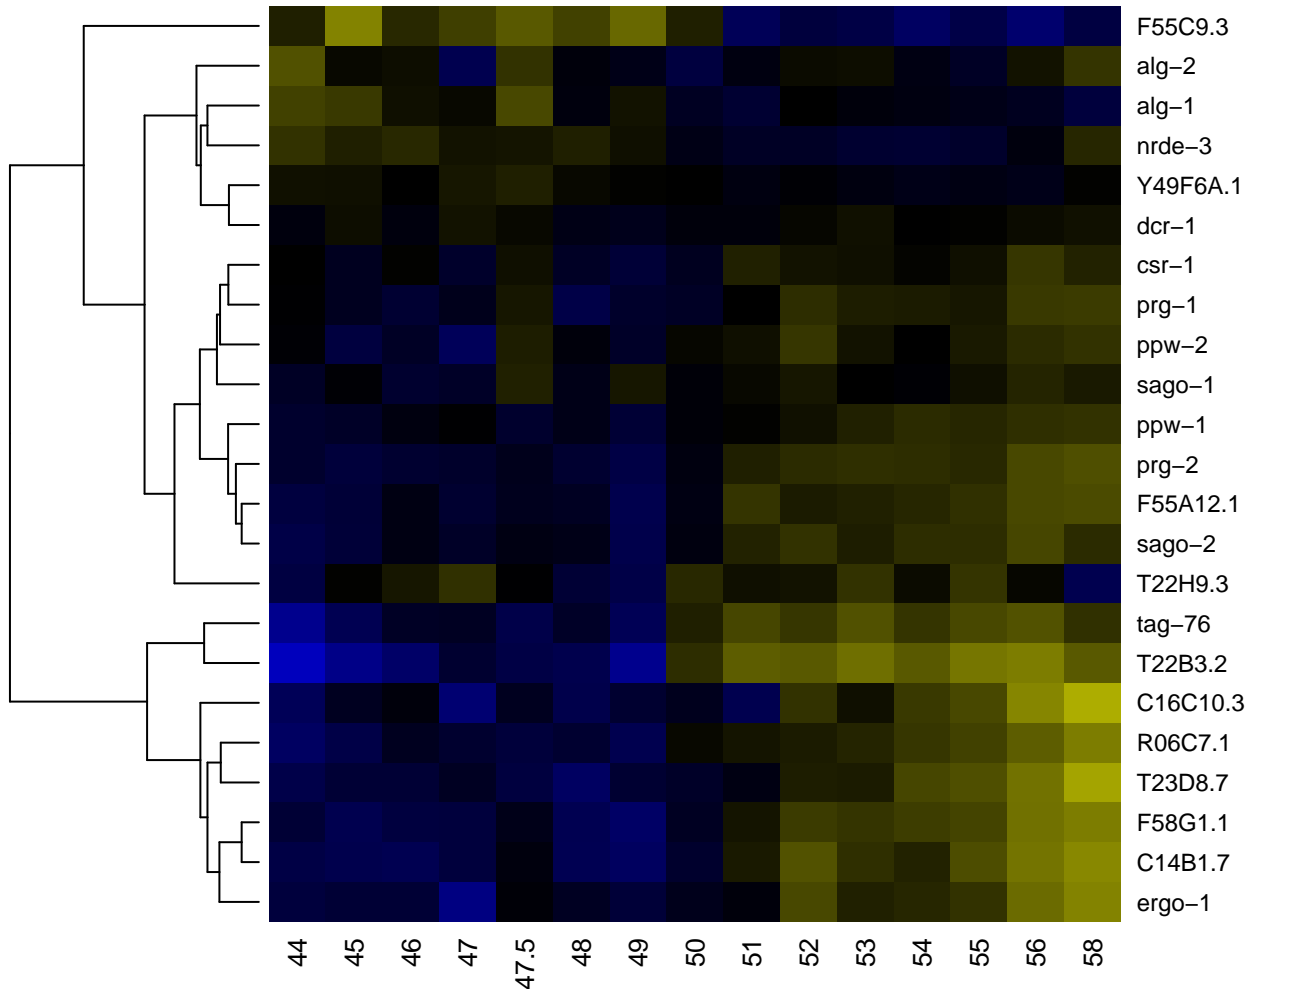





# PDZ domain (Also known as DHR or GLGF)

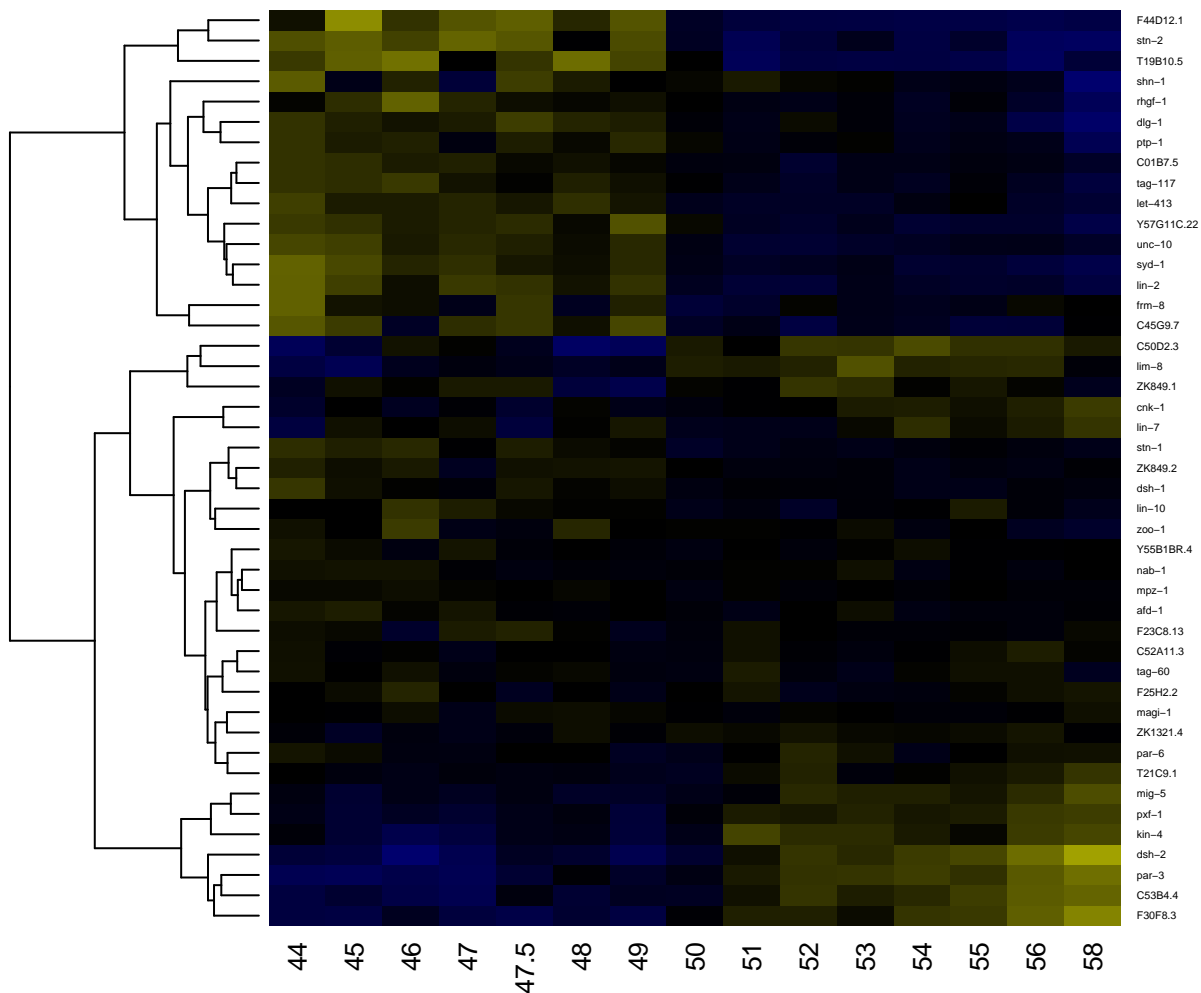

# PDZ/DHR/GLGF

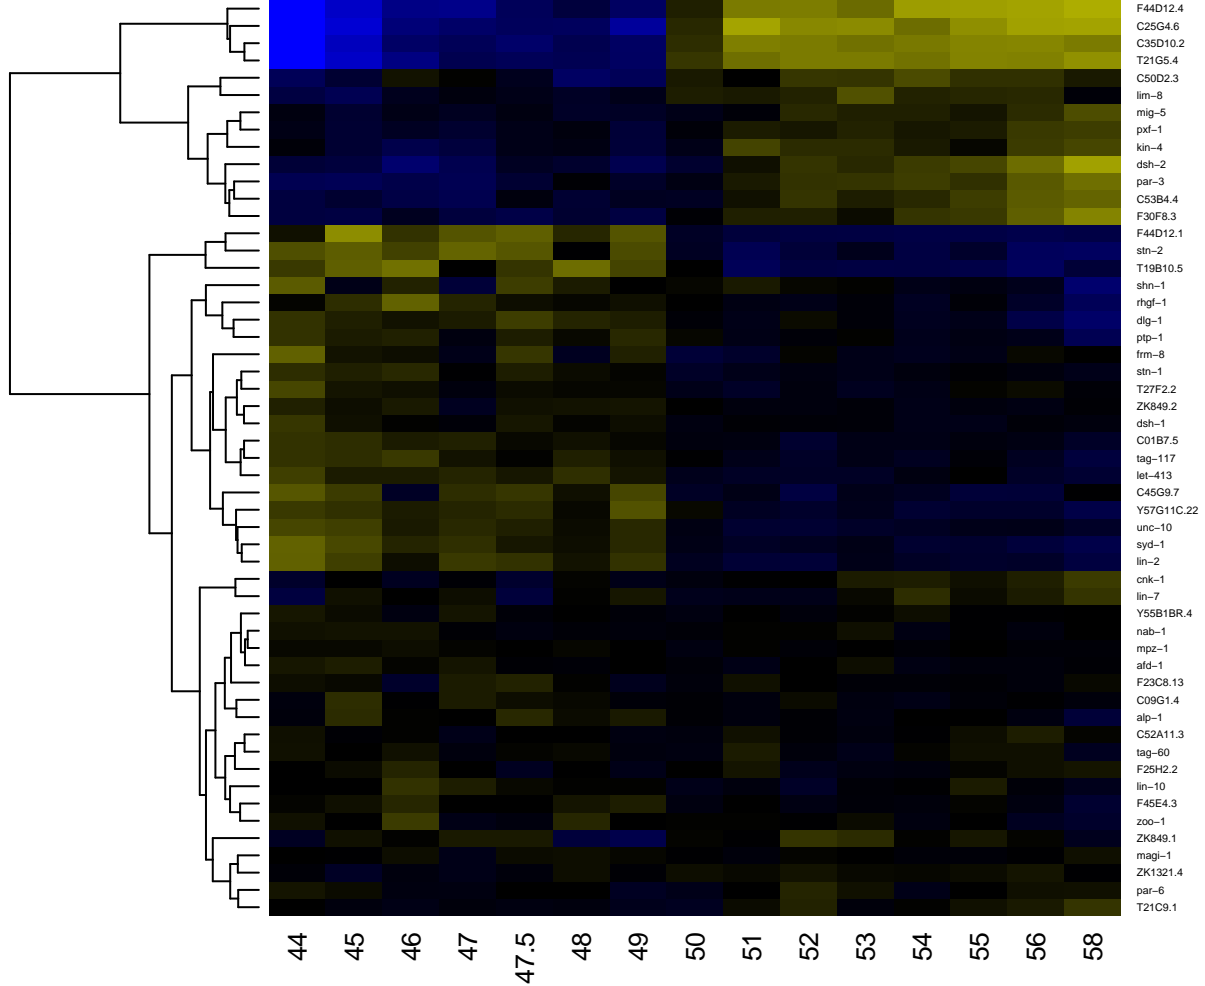





# Peptidase A22, presenilin signal peptide

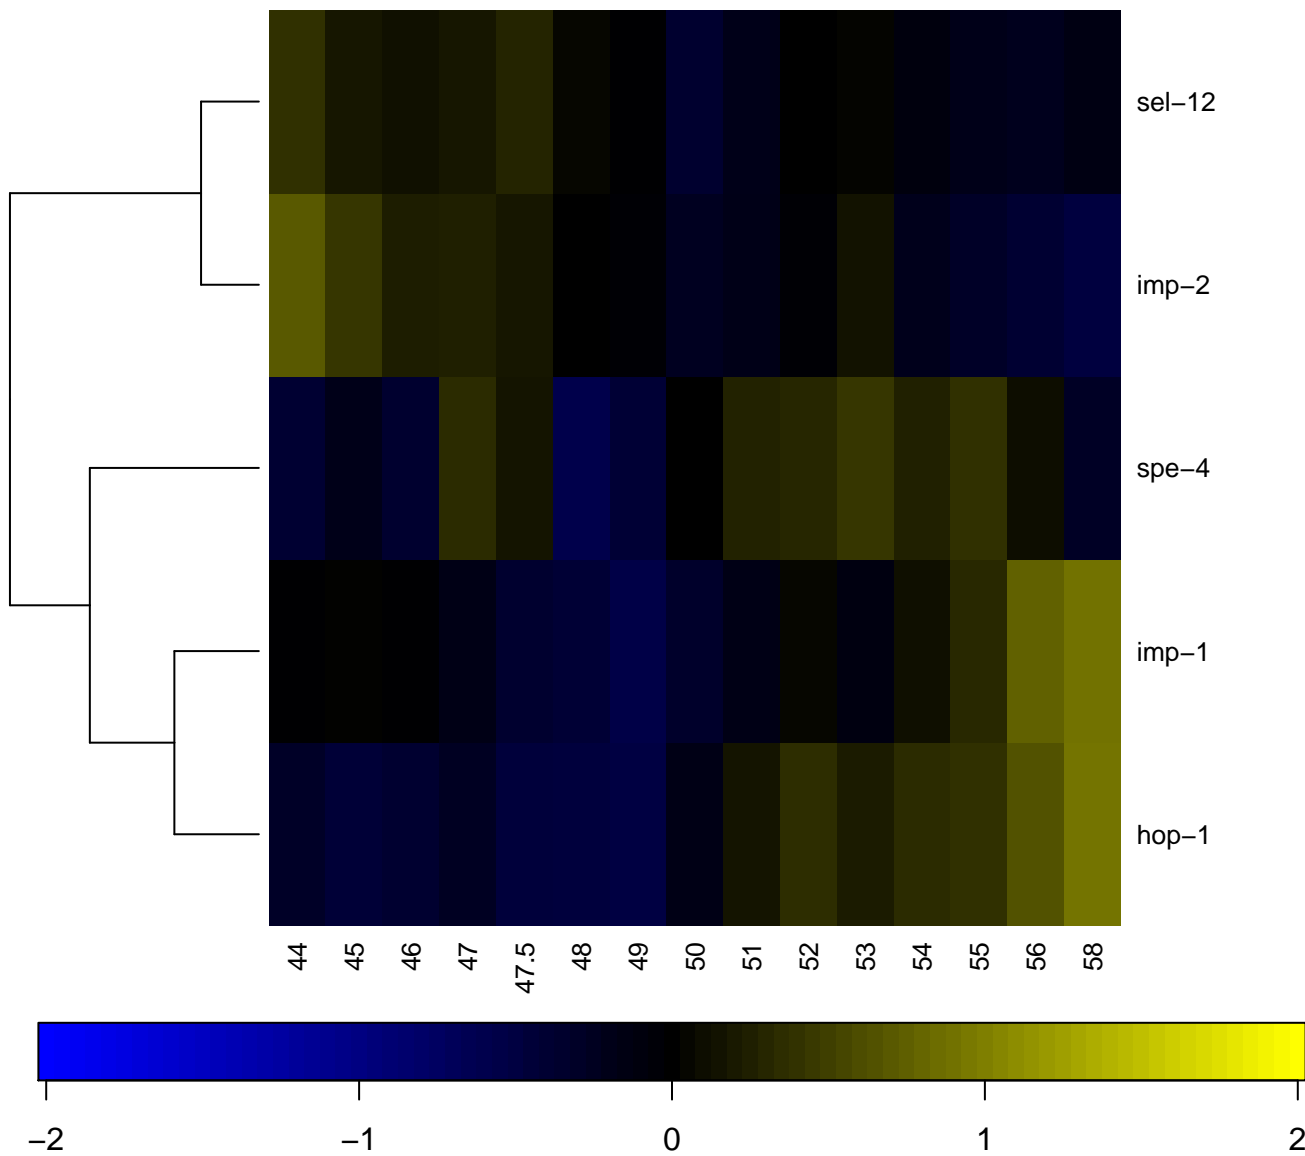



# Peptidase aspartic, catalytic

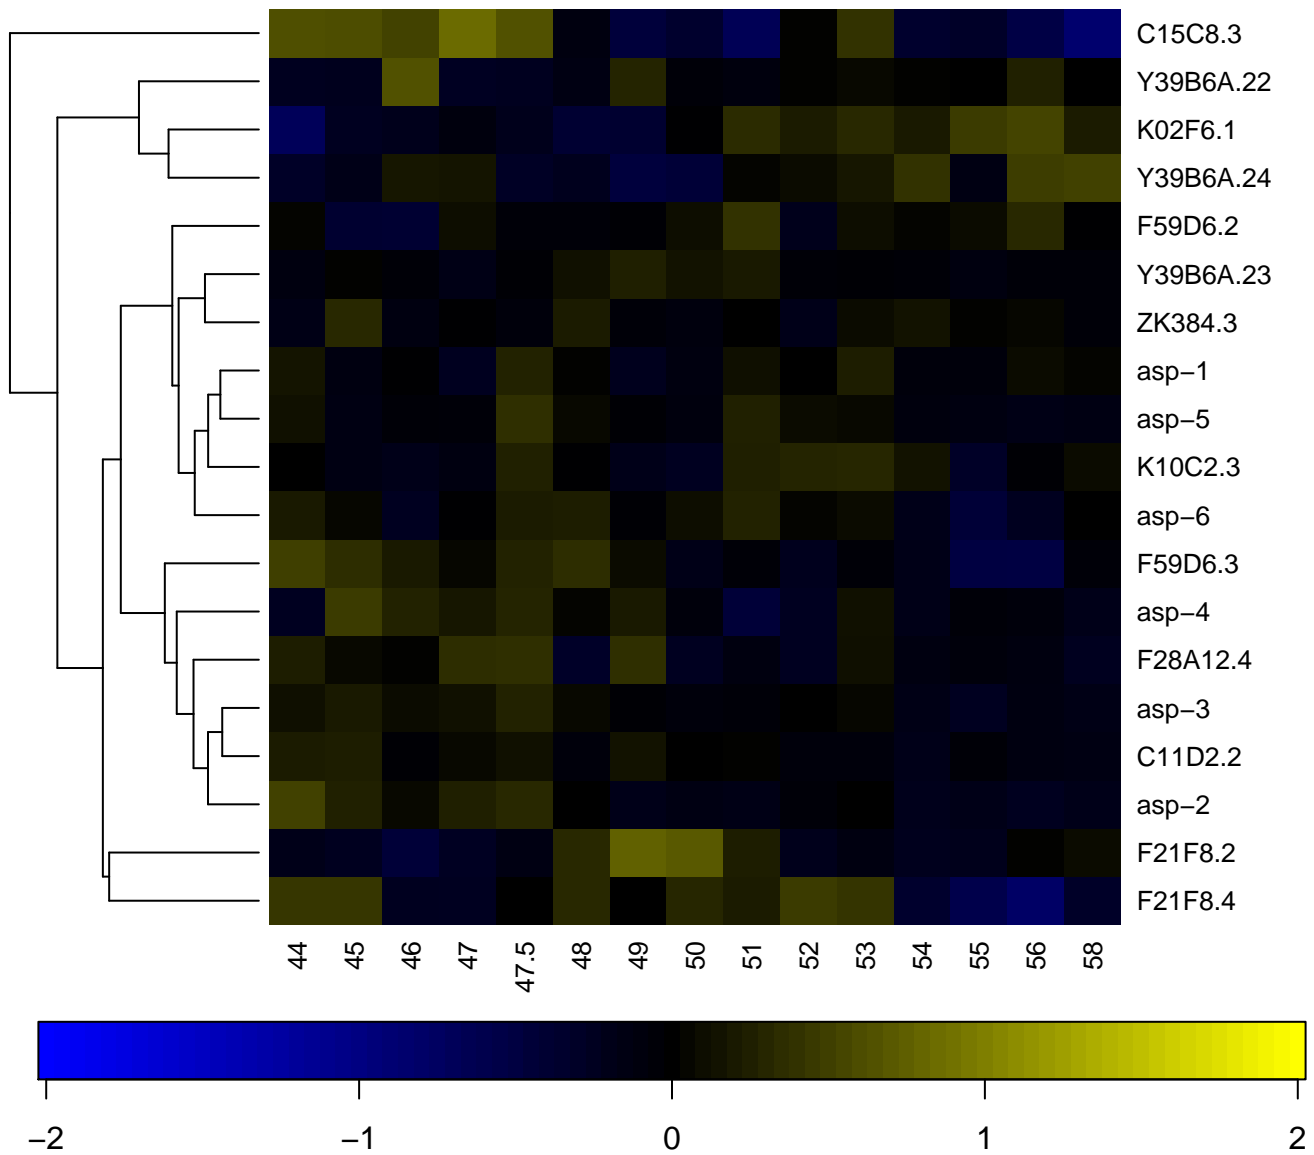

# Peptidase C14, caspase catalytic

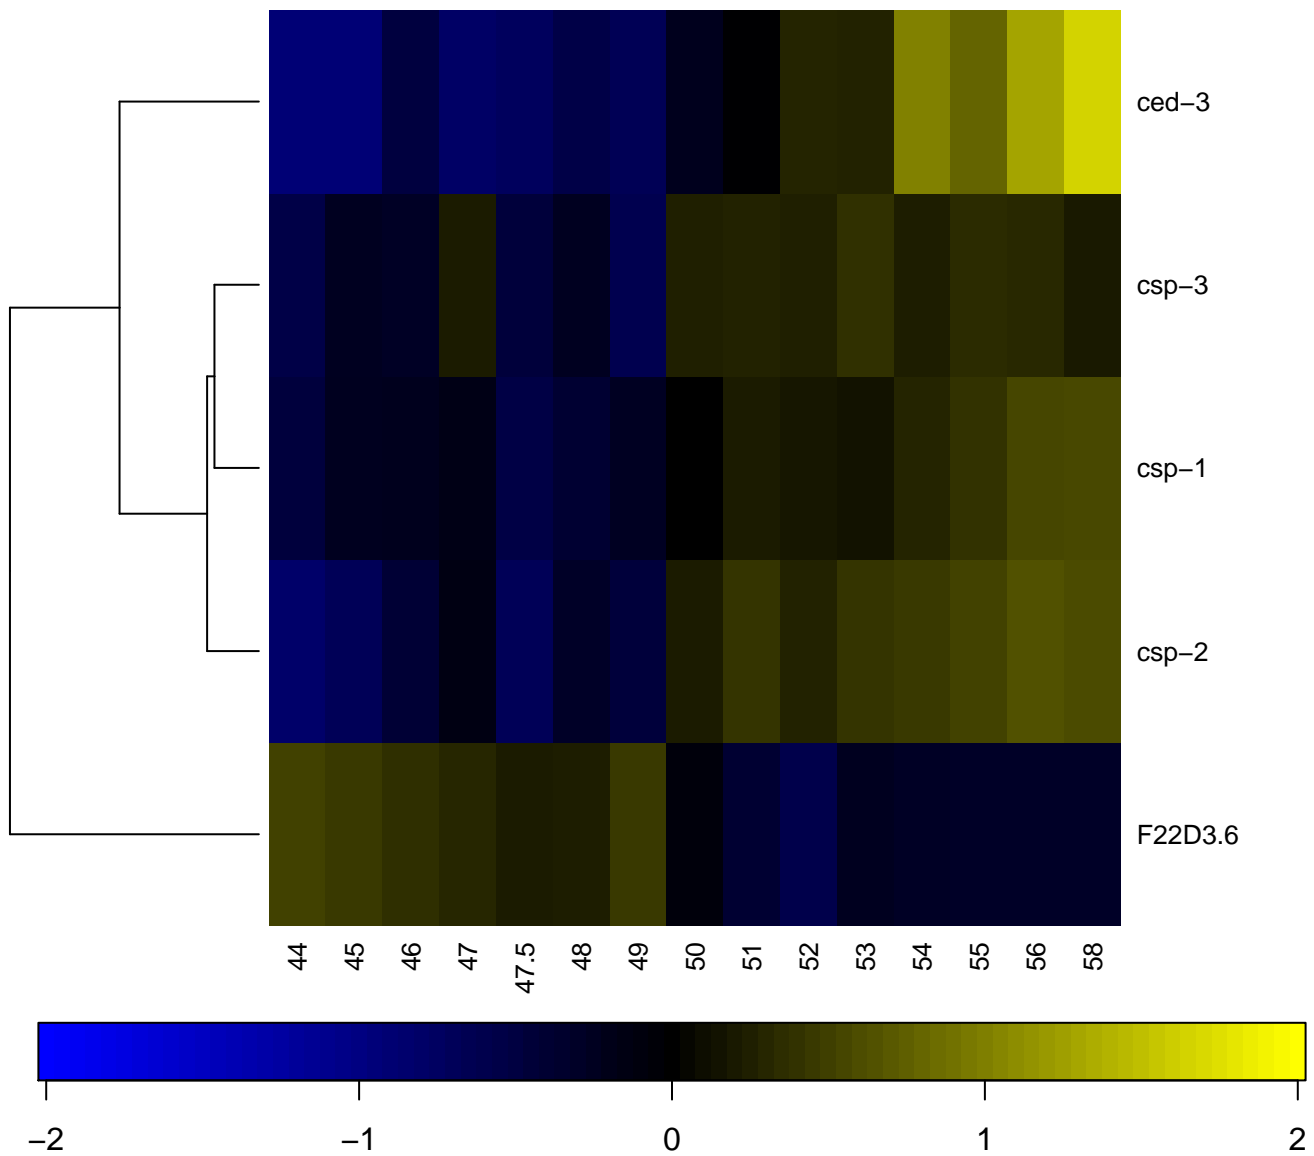







# dase C19, ubiquitin carboxyl-terminal hydrolase 2, conserv

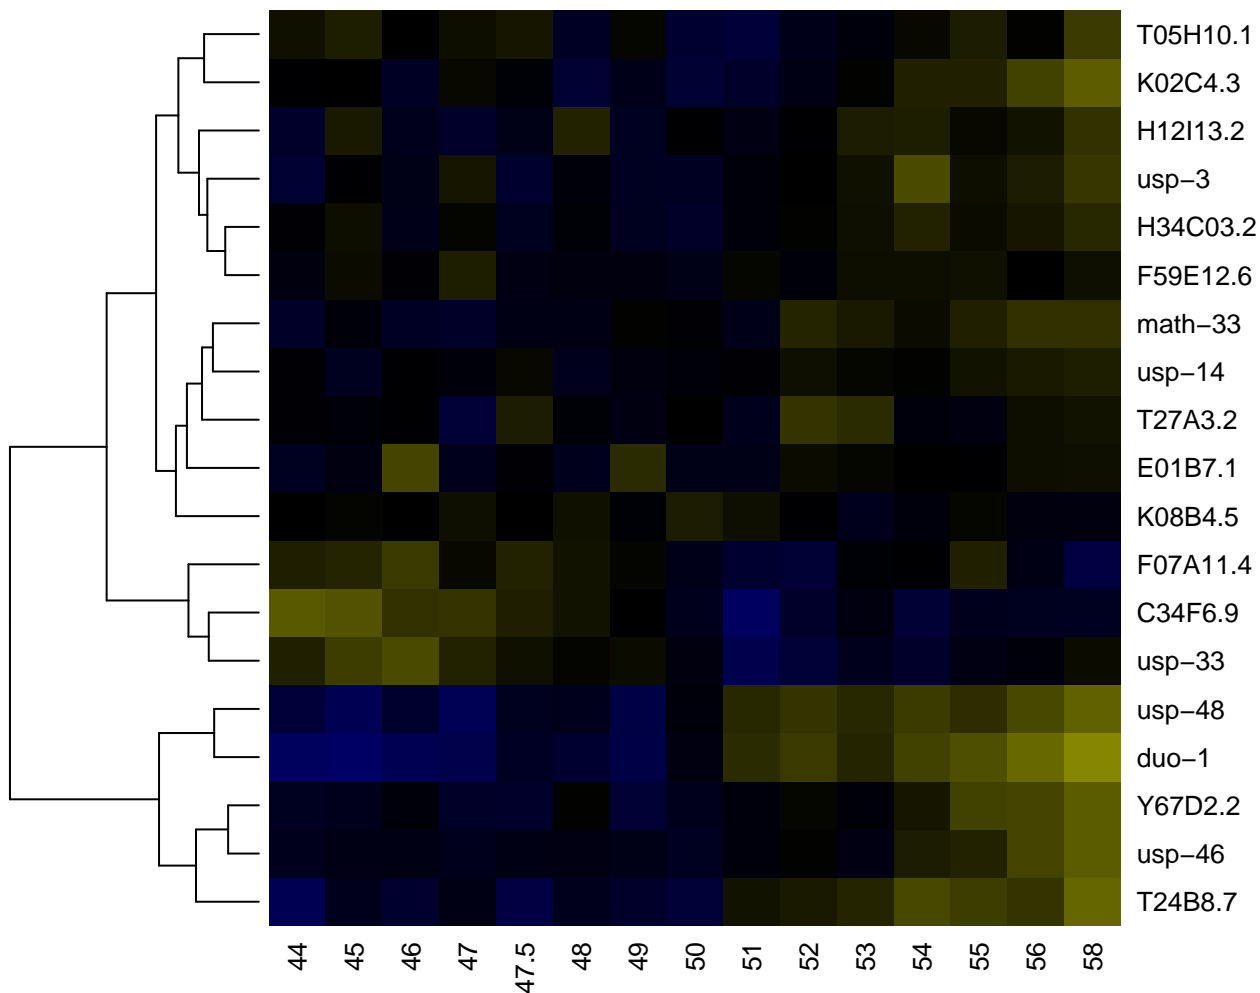



# Peptidase C1A, papain

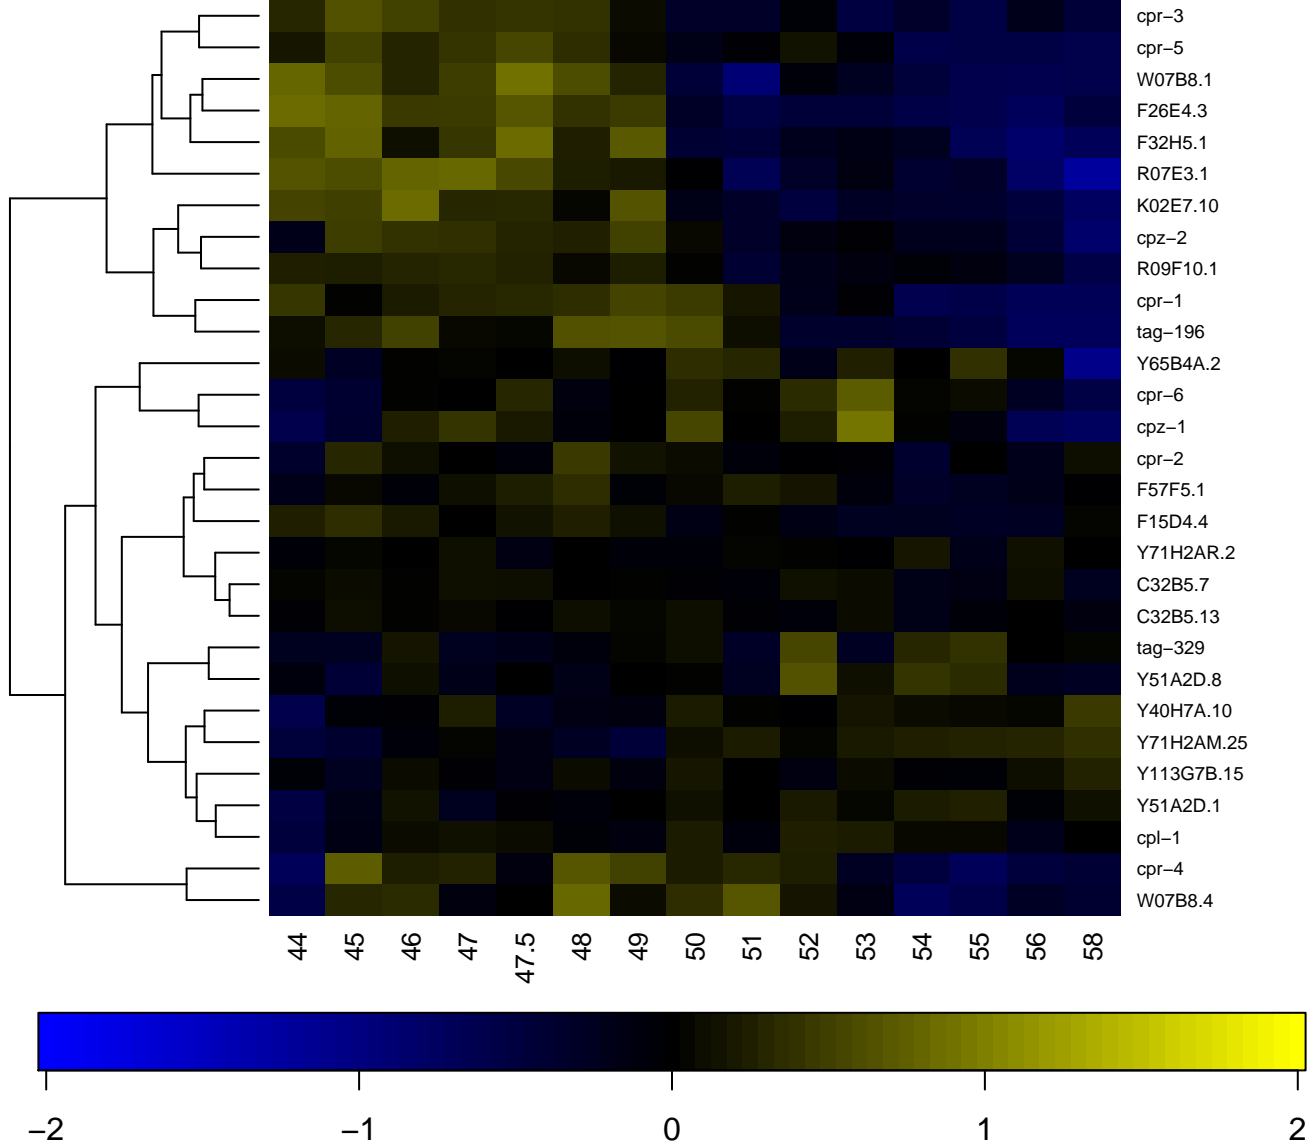

# Peptidase C1A, papain C-terminal

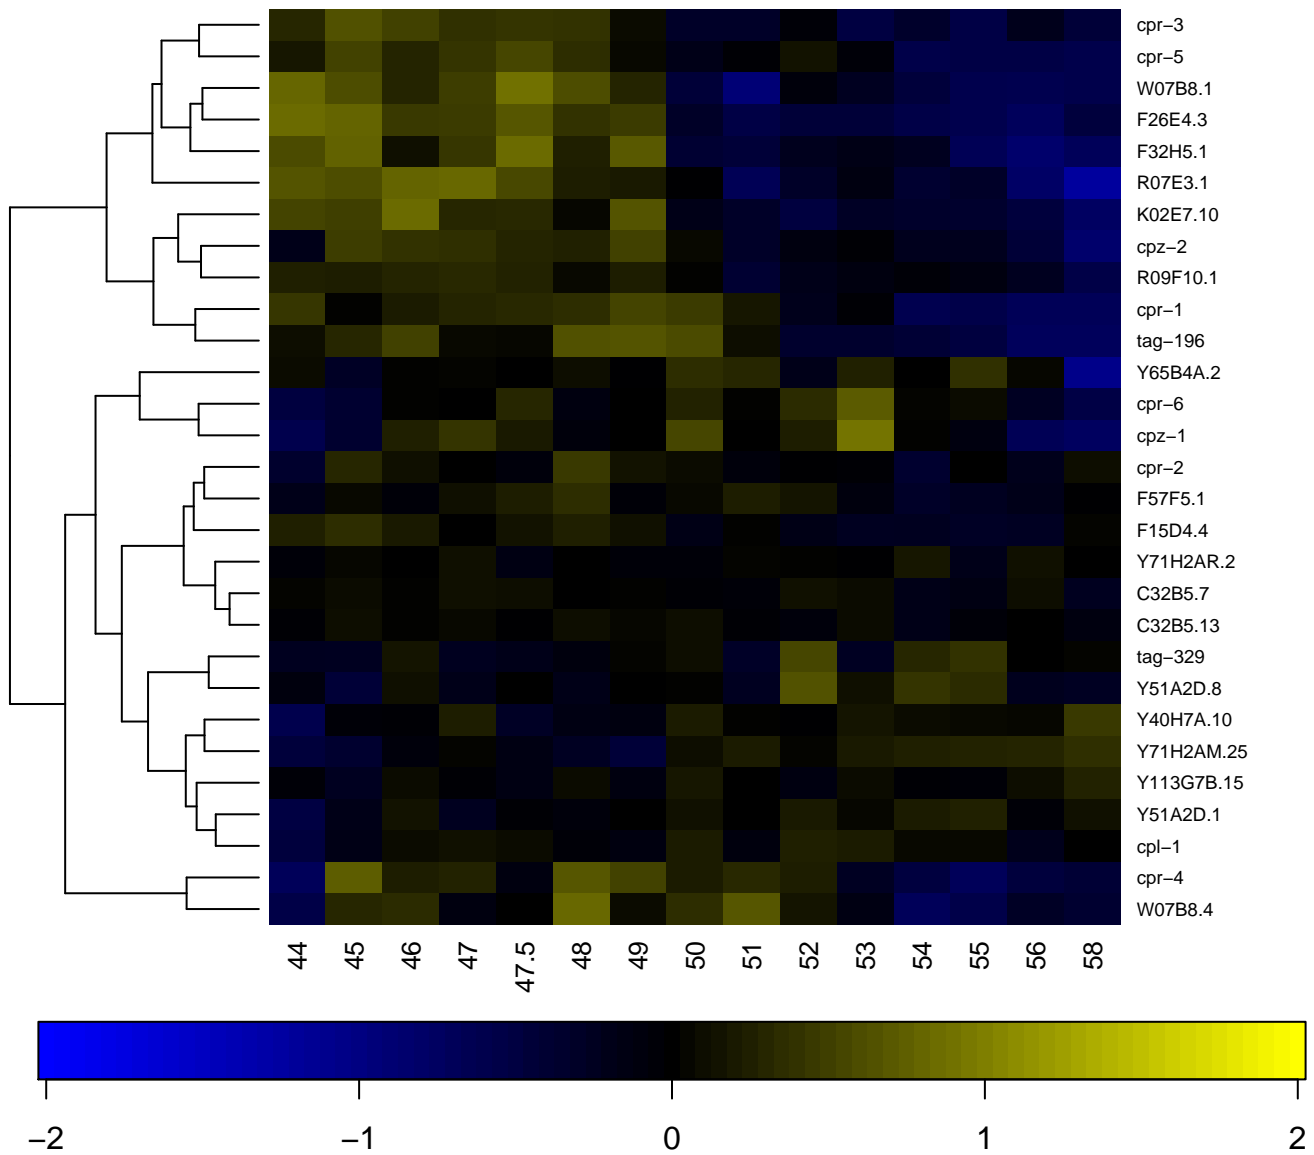

# Peptidase C2, calpain family

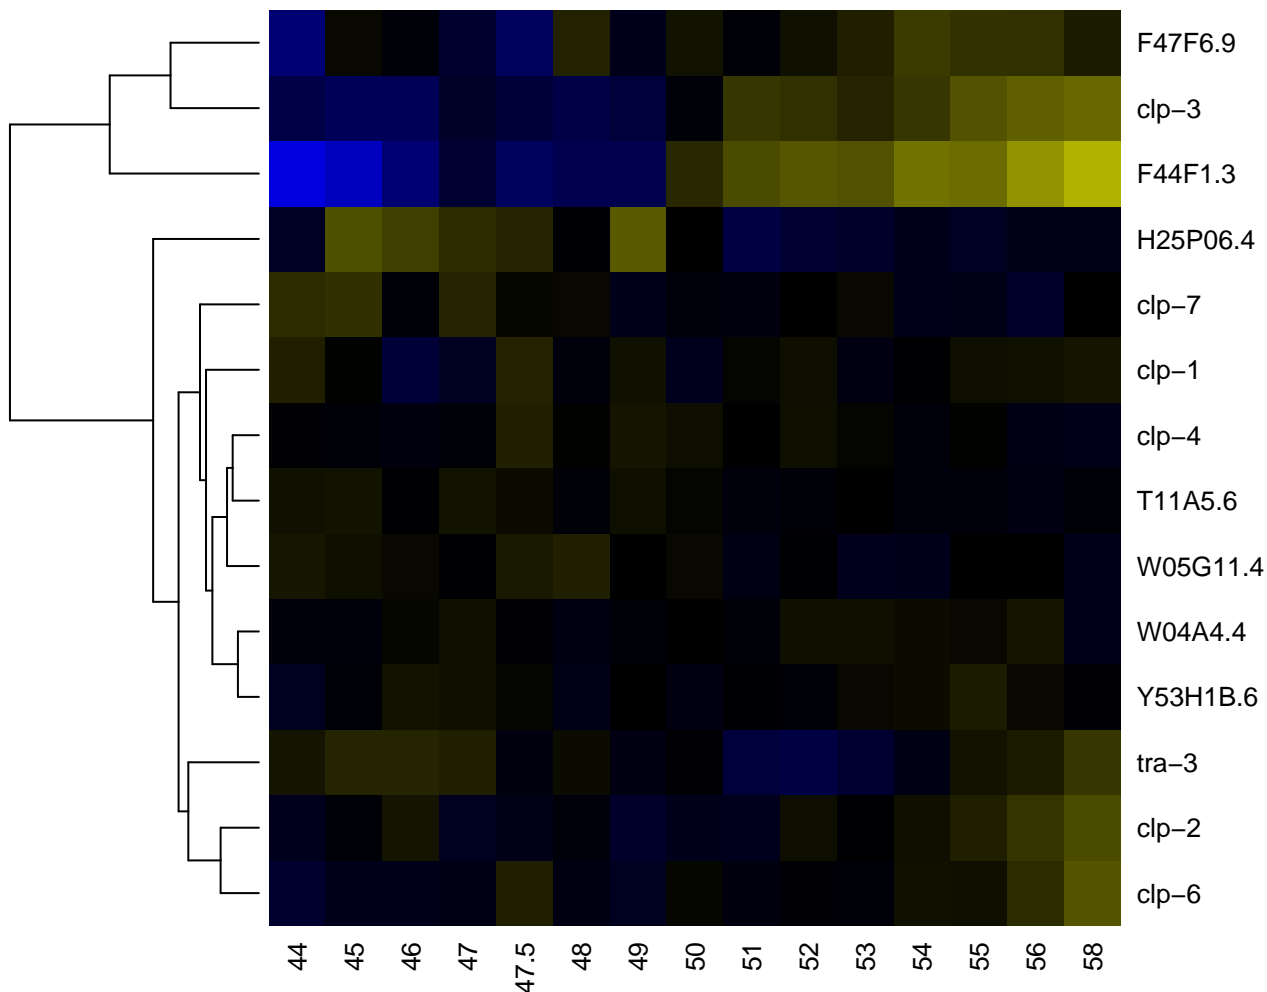





# Peptidase C2, calpain, large subunit, domain III

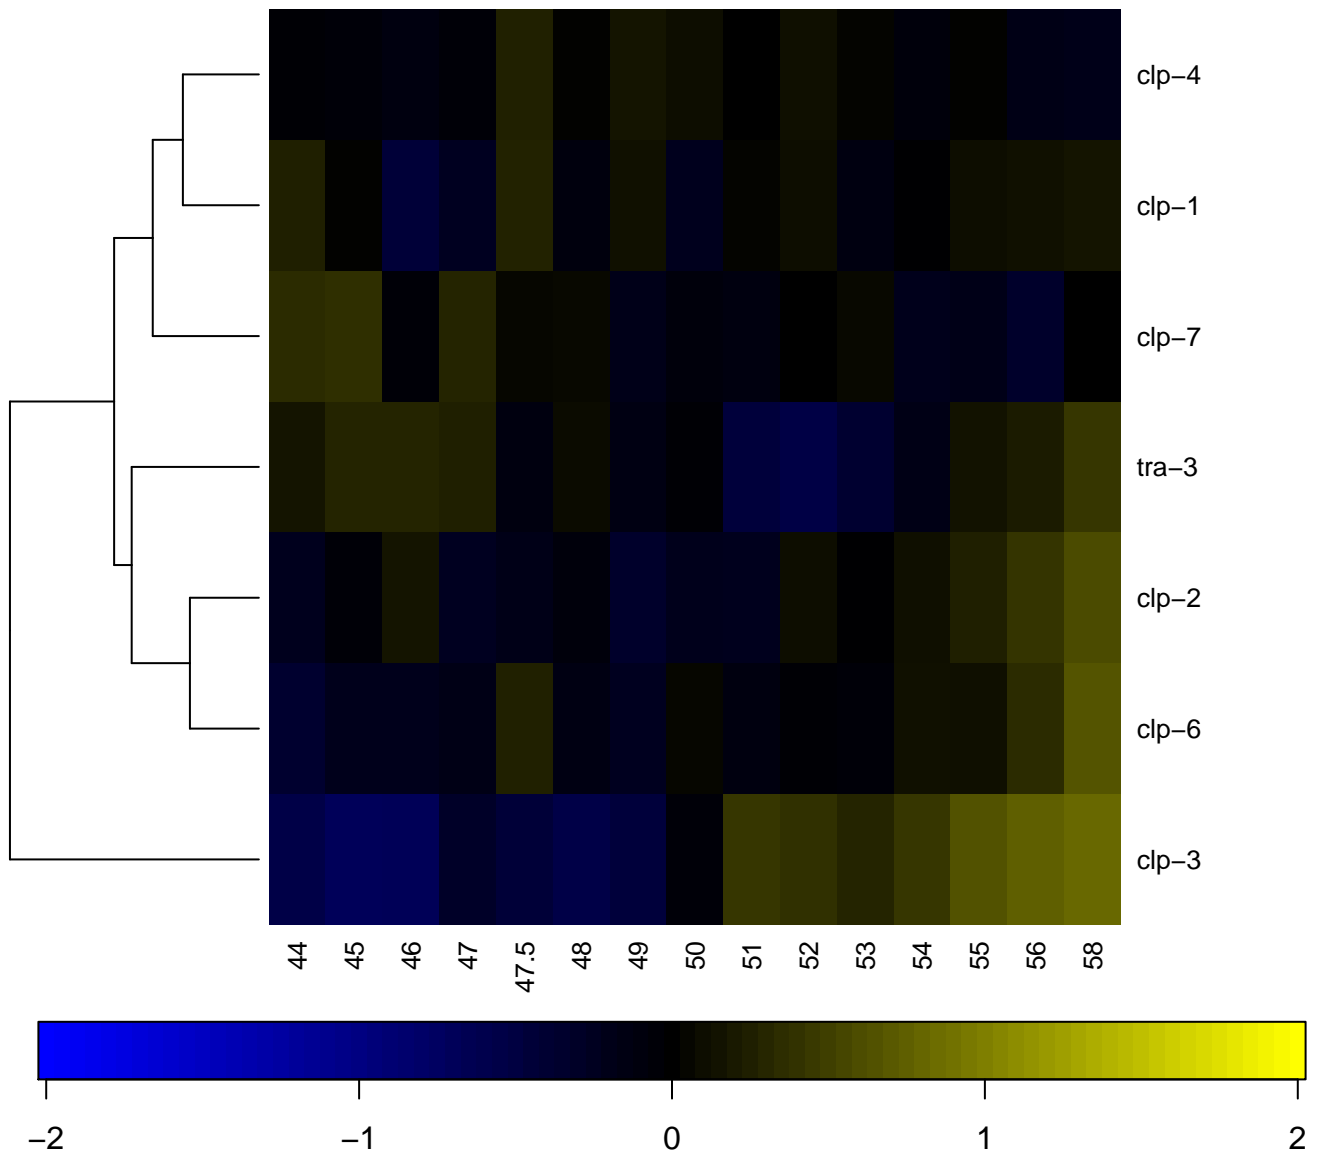

# Peptidase C46, hedgehog protein

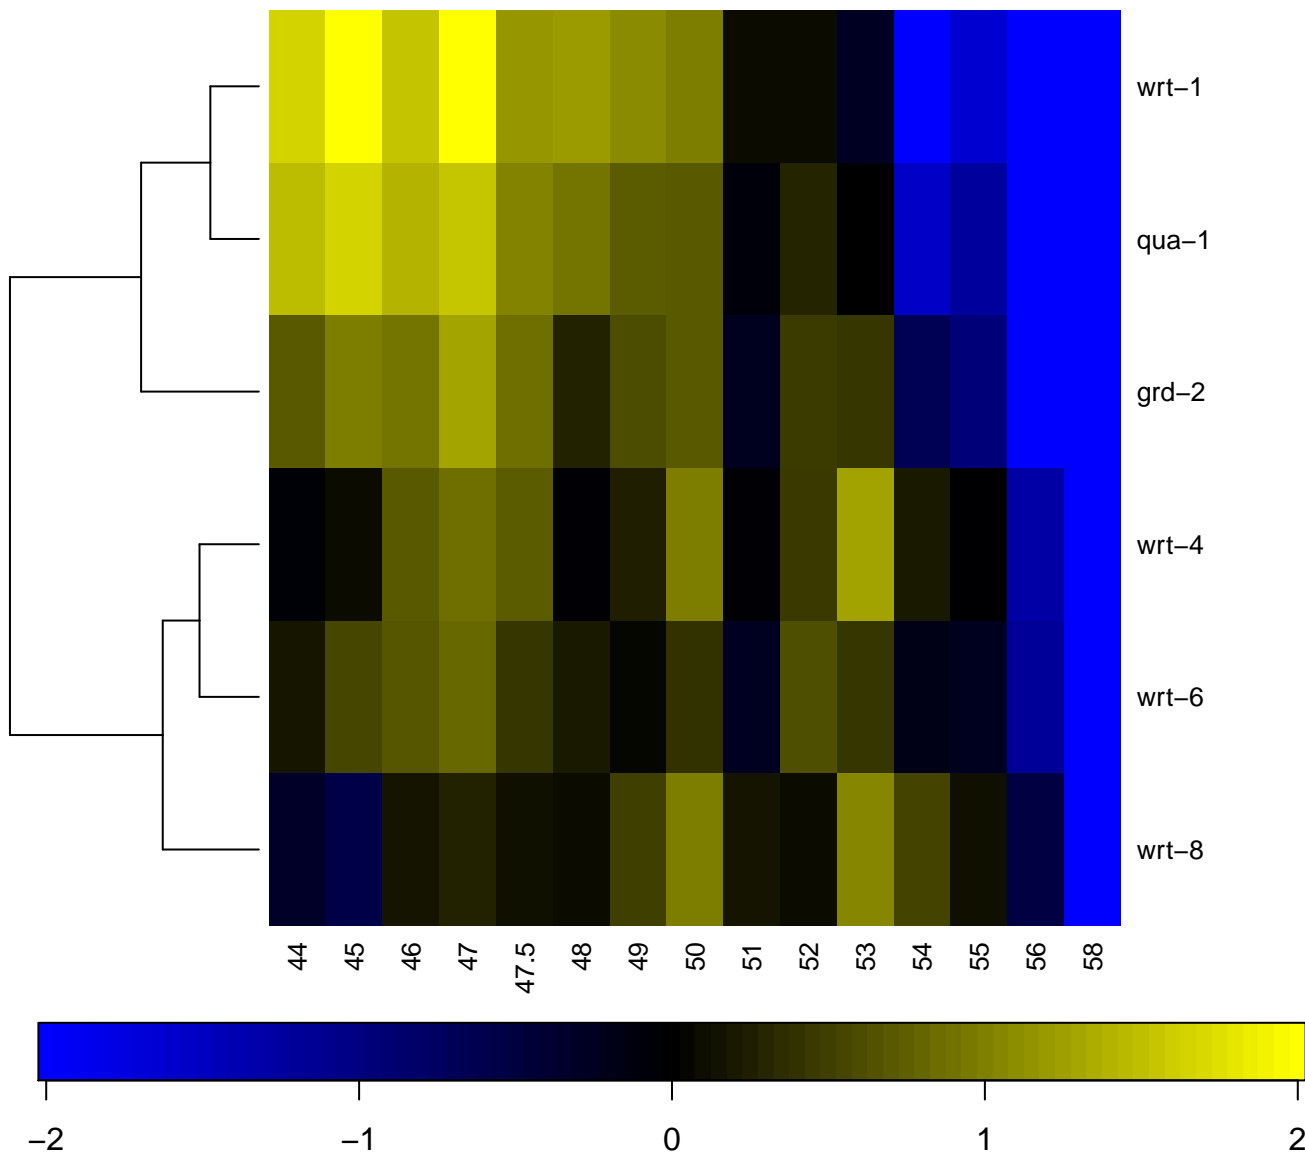

# Peptidase C46, hedgehog protein, hint region

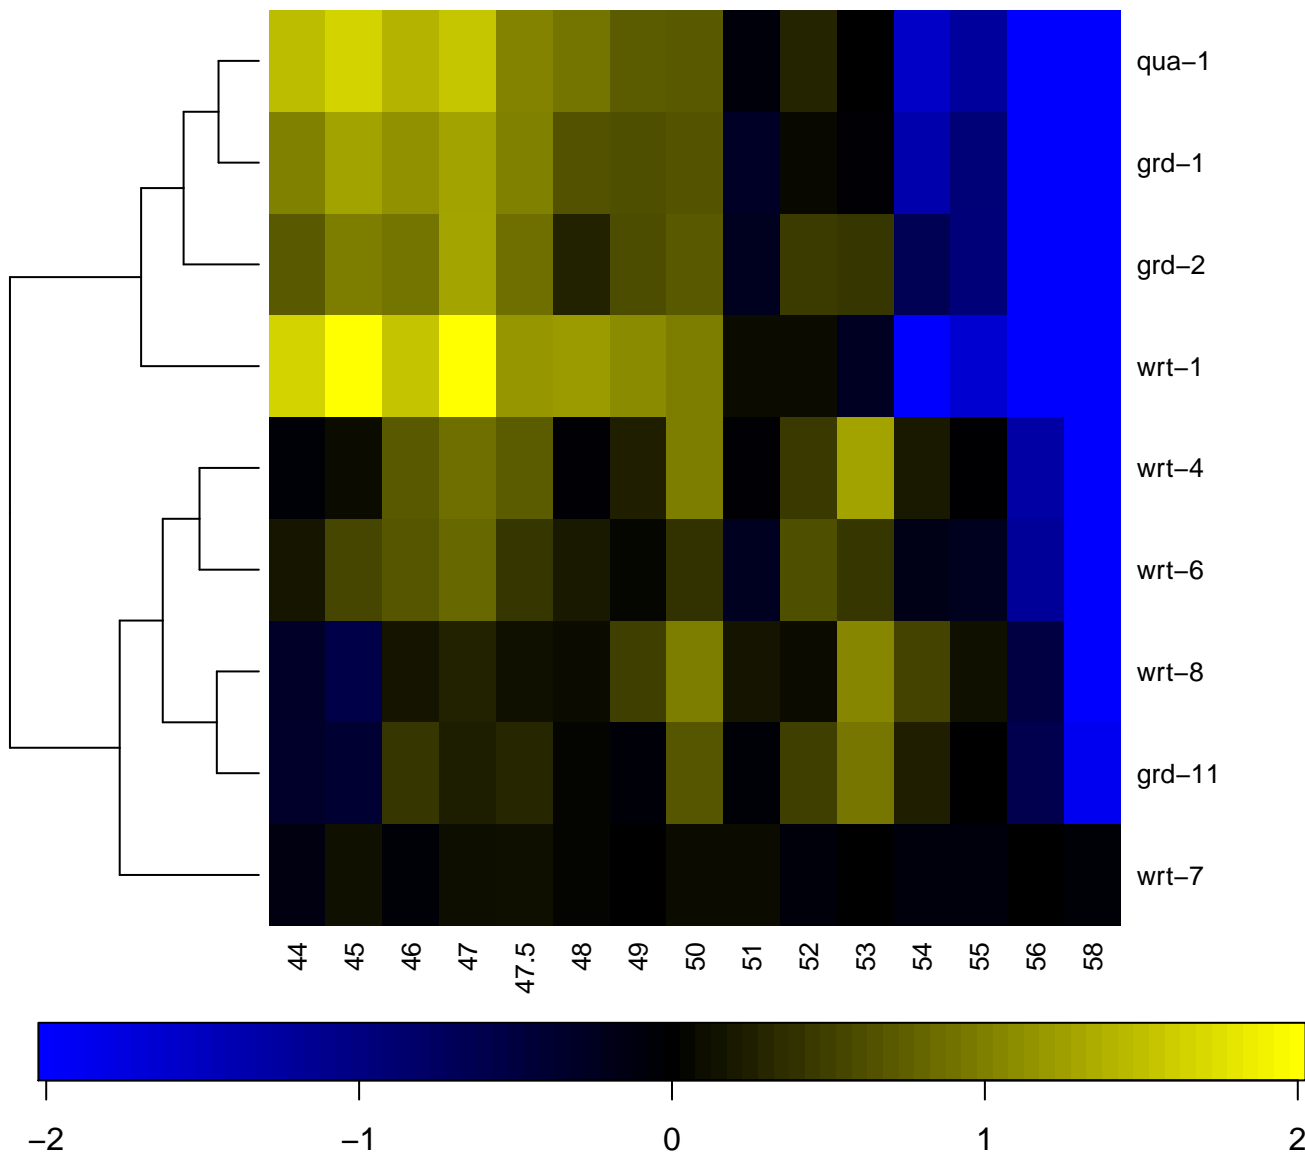







# Peptidase family M1

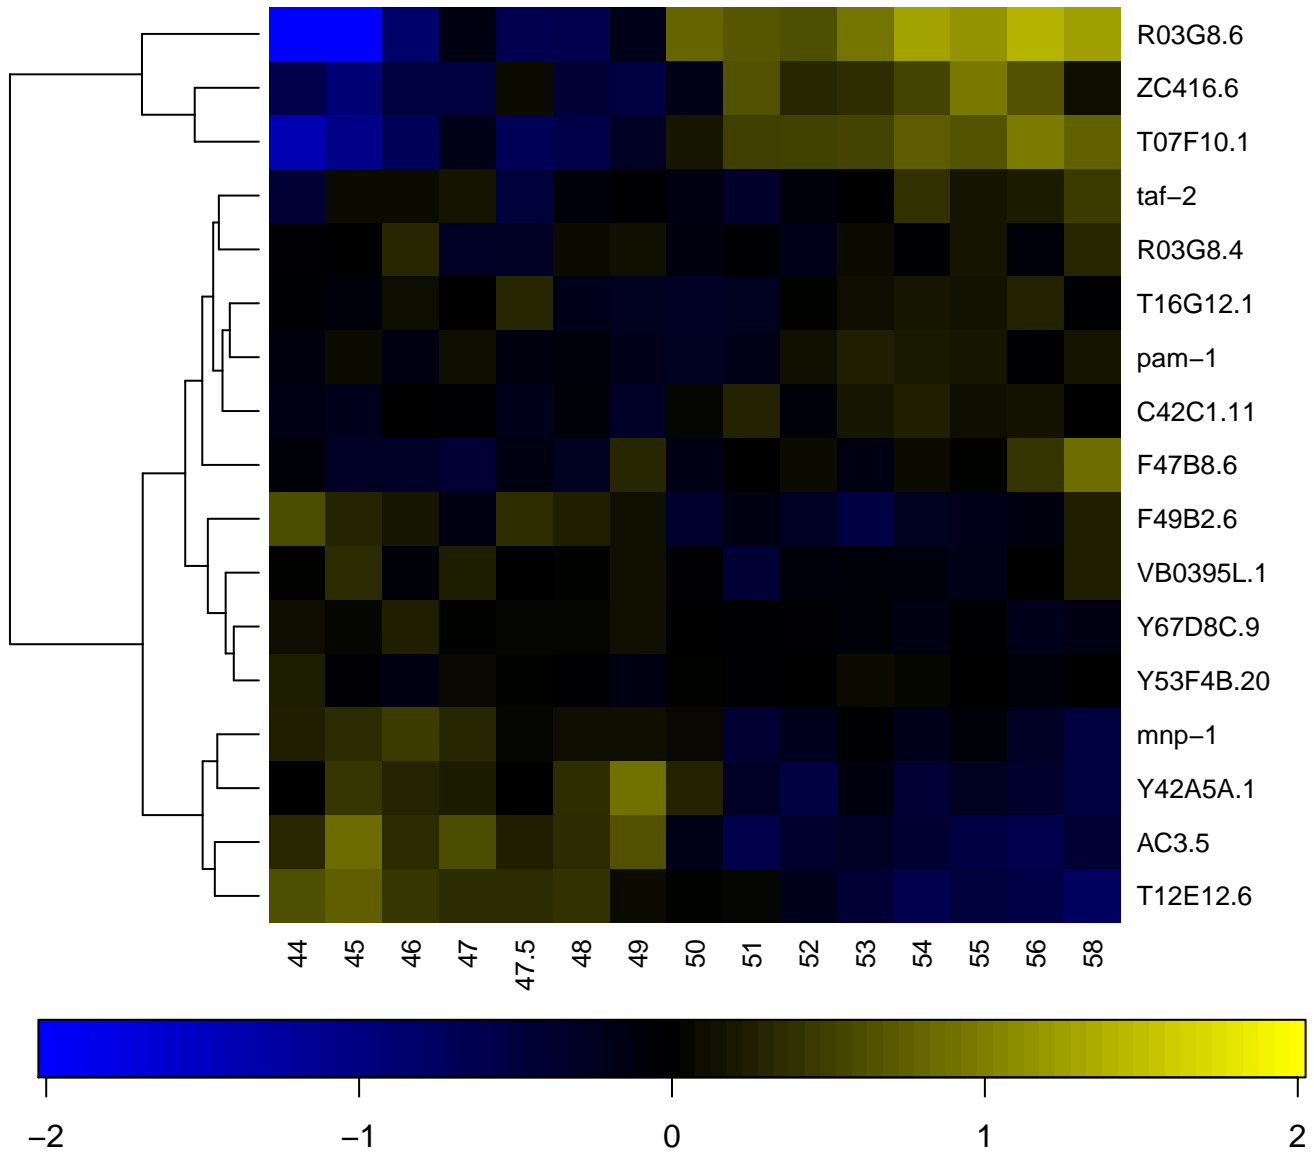

# Peptidase family M13

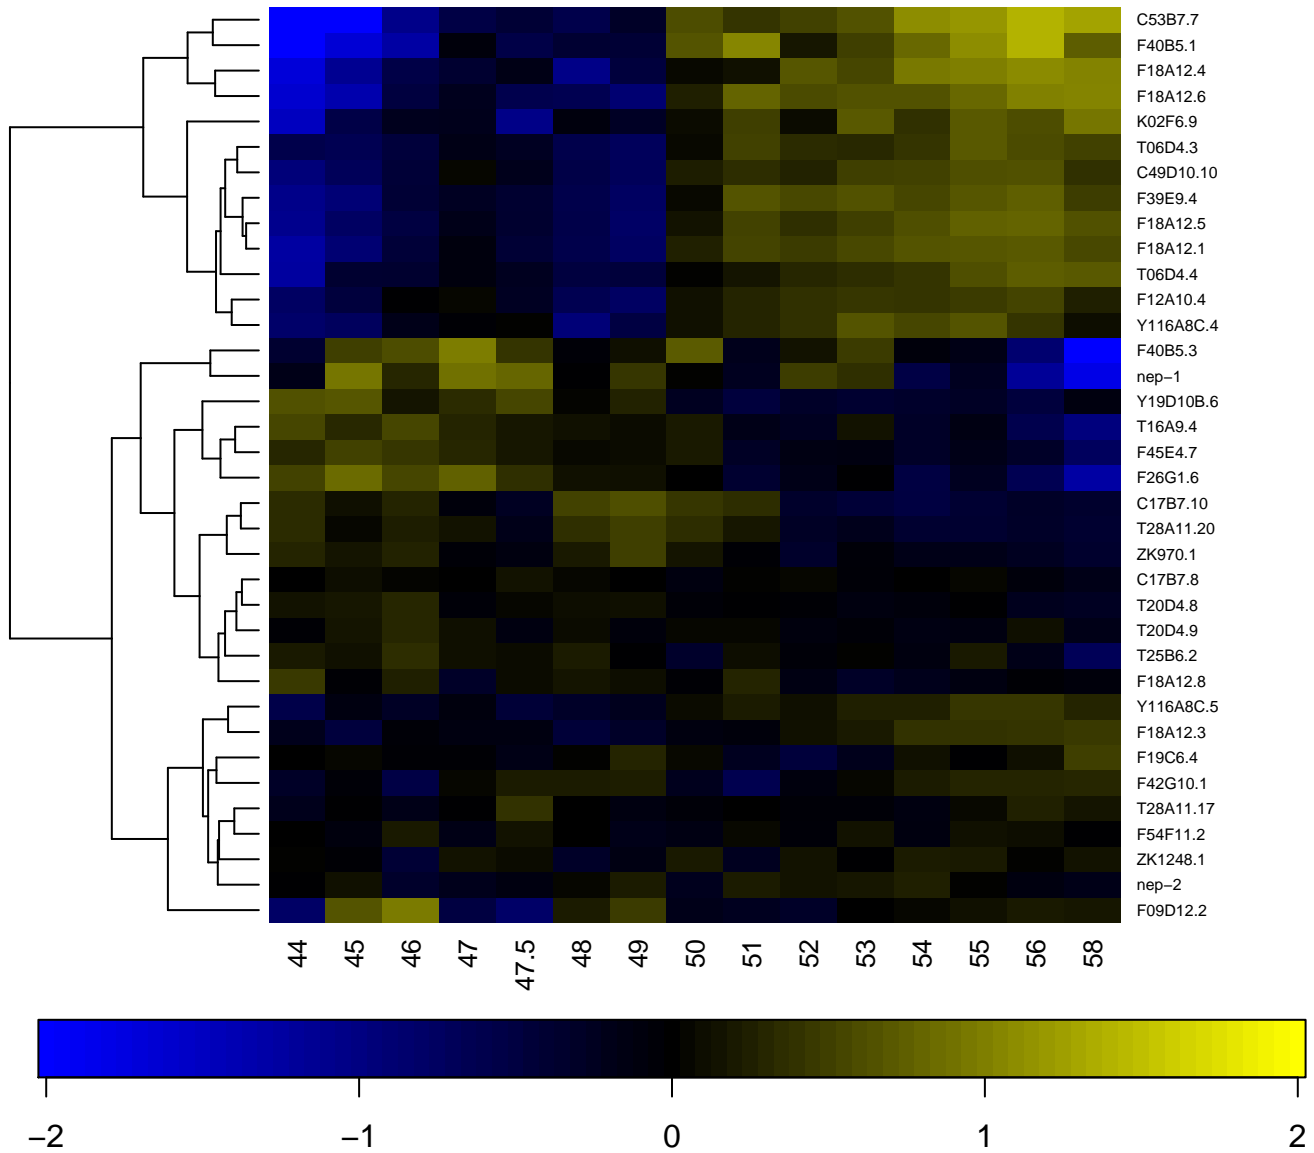

# Peptidase family M20/M25/M40

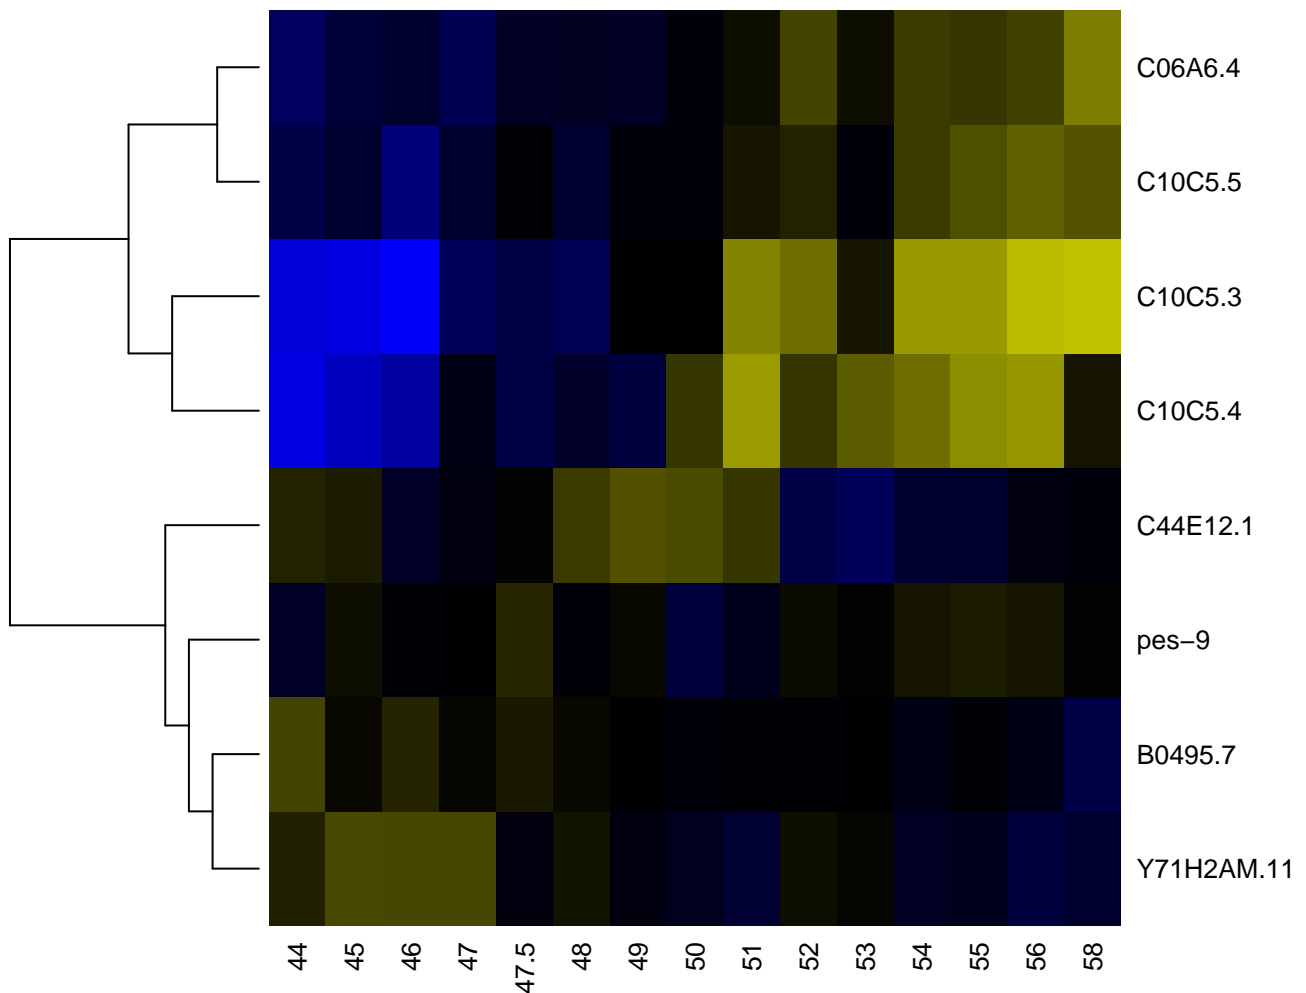





# Peptidase M1, membrane alanine aminopeptidase

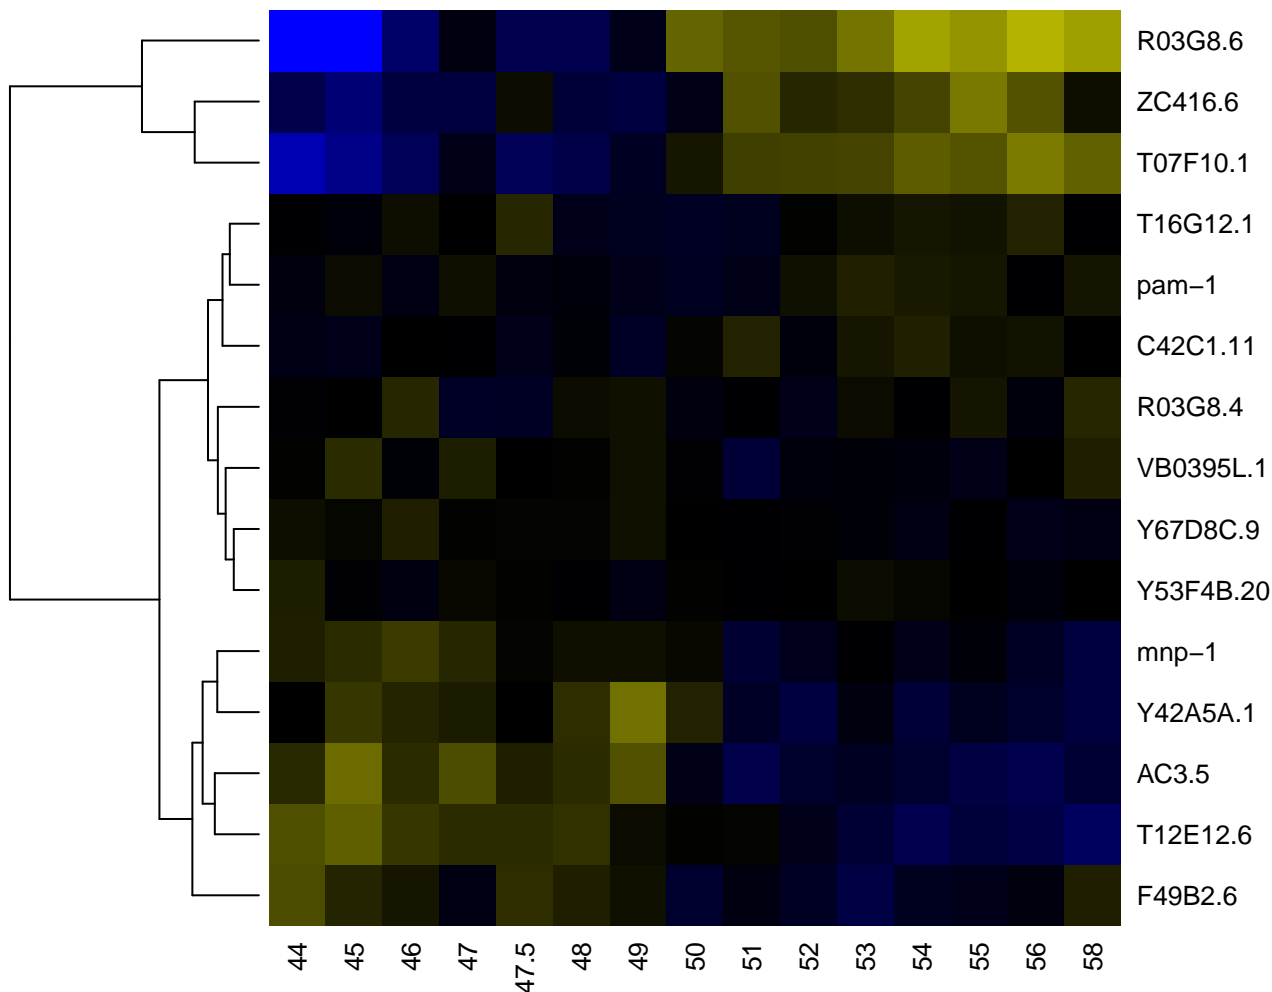



# Peptidase M1, membrane alanine aminopeptidase, N-termin

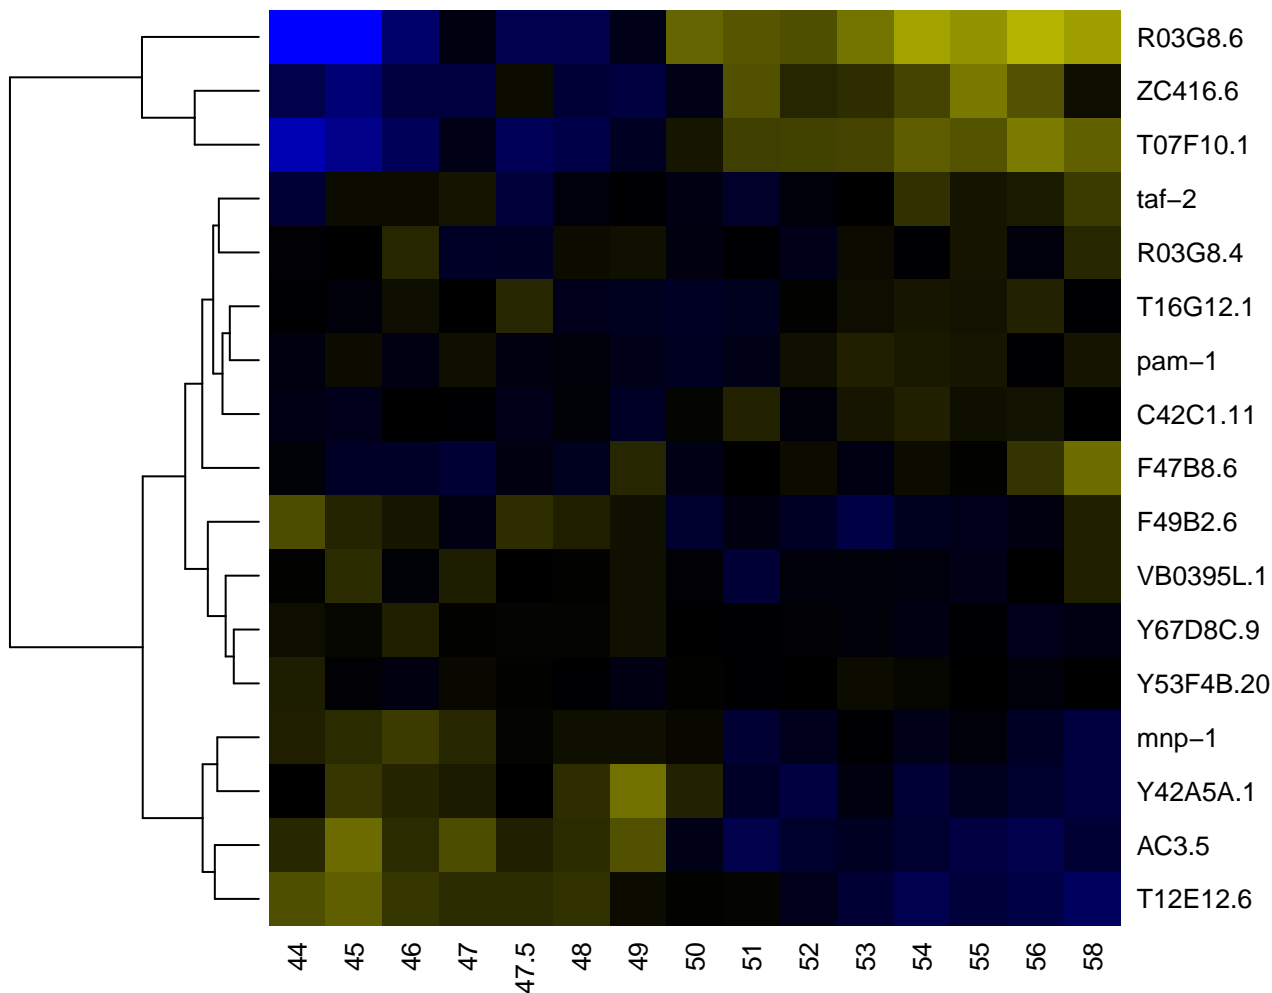

-2

-1

0

1

2





# Peptidase M12A, astacin







# Peptidase M13

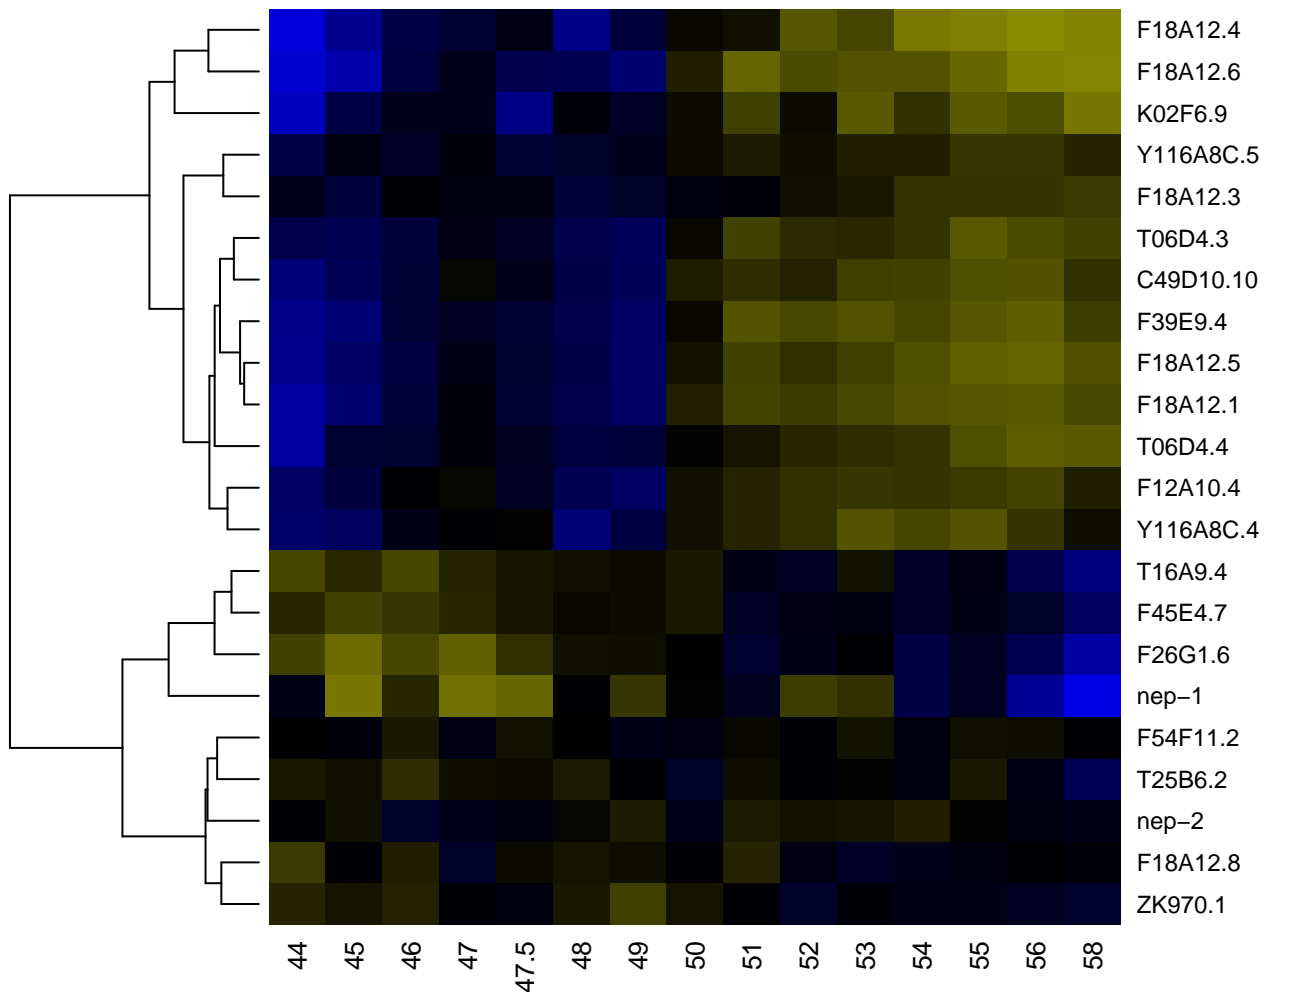

# Peptidase M13, neprilysin

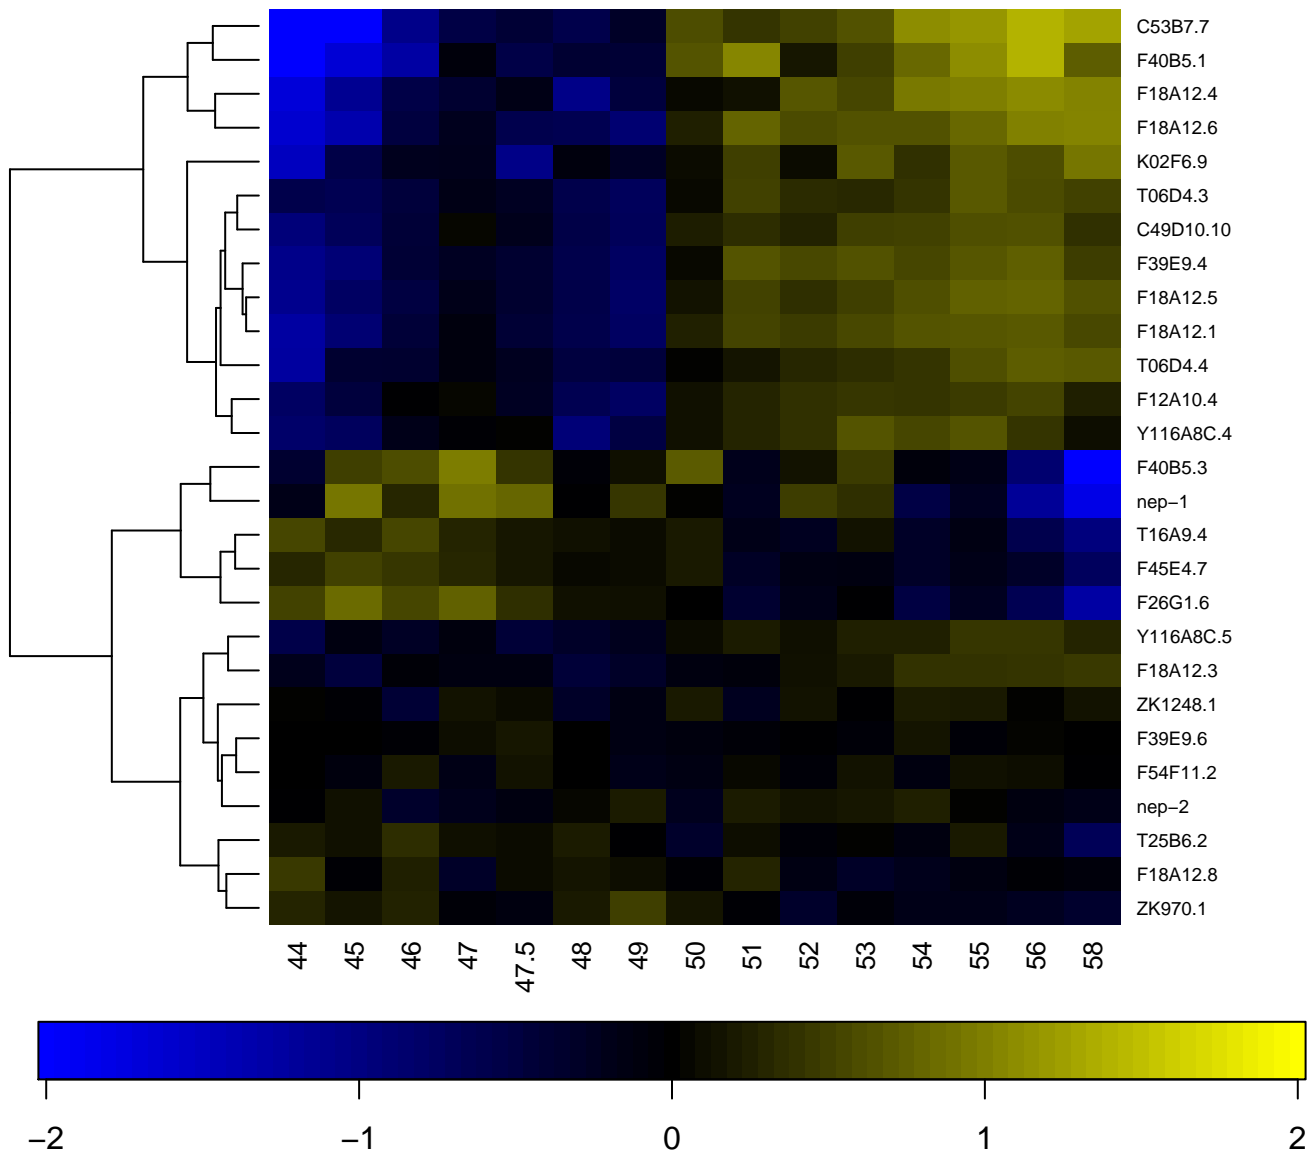



# Peptidase M13, neprilysin, C-terminal

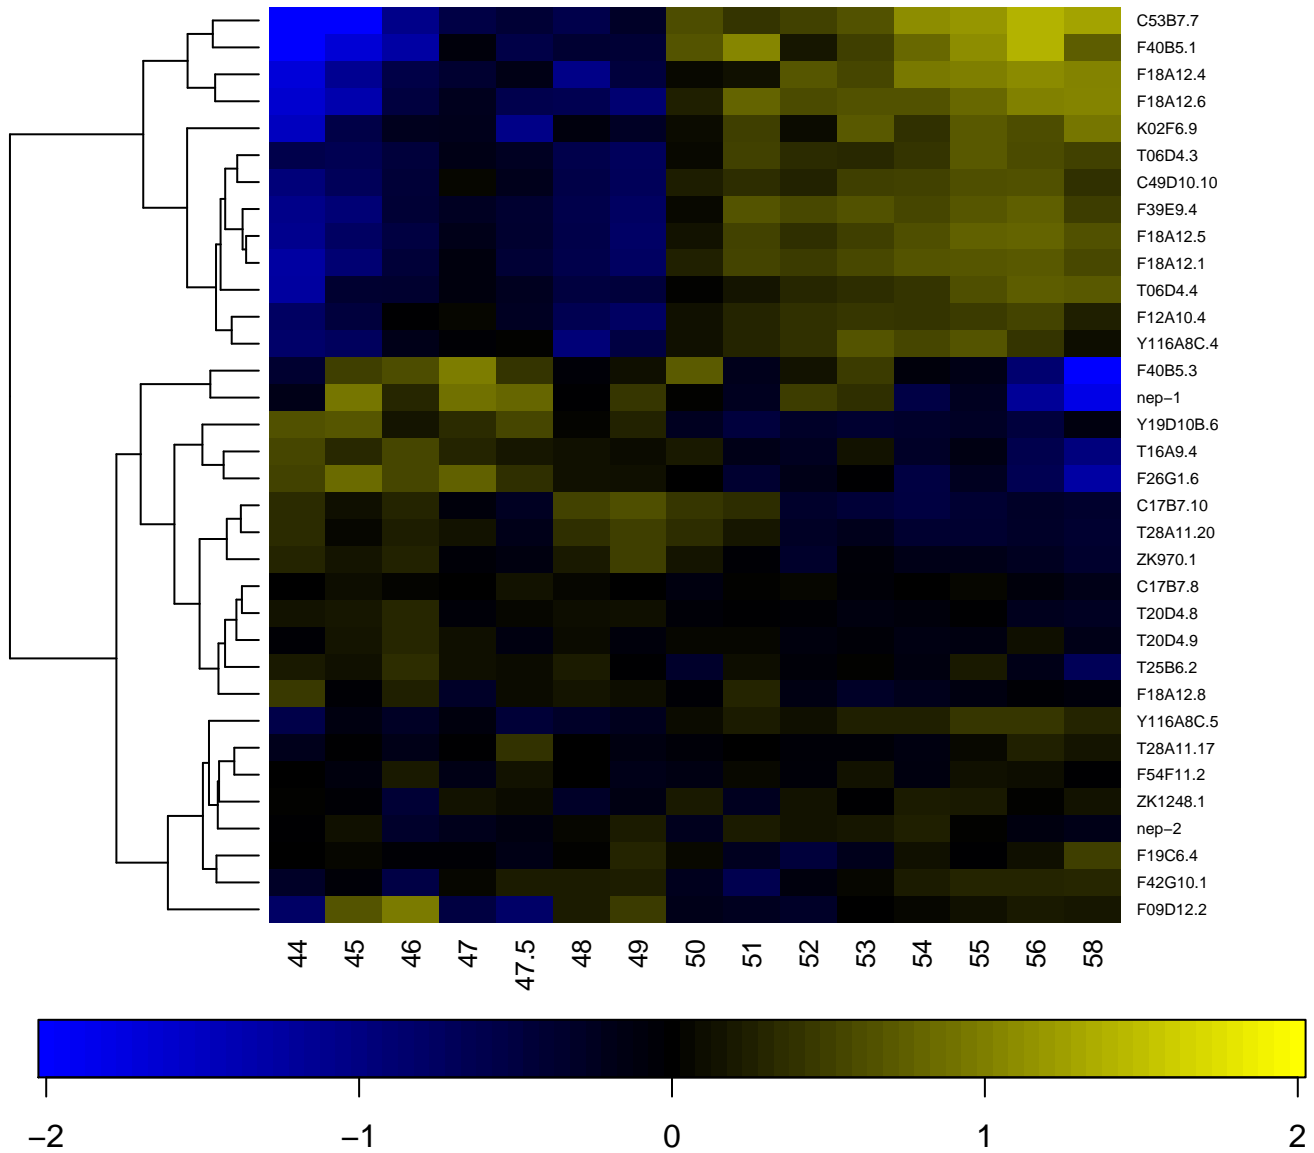

# Peptidase M14, carboxypeptidase A

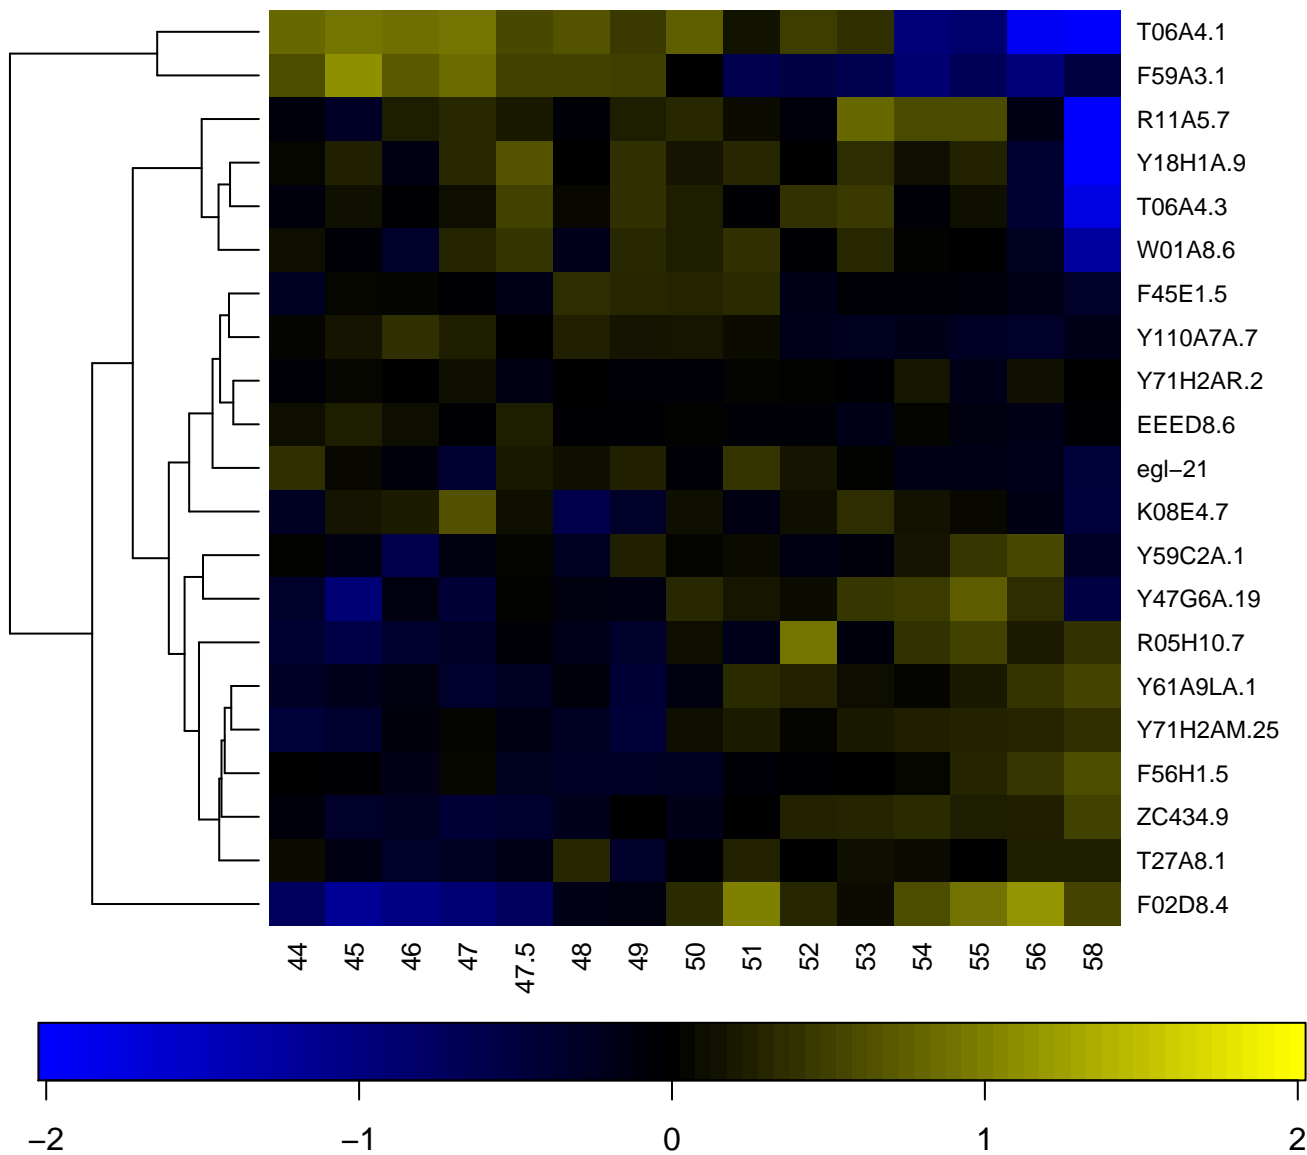

# Peptidase M16 inactive domain

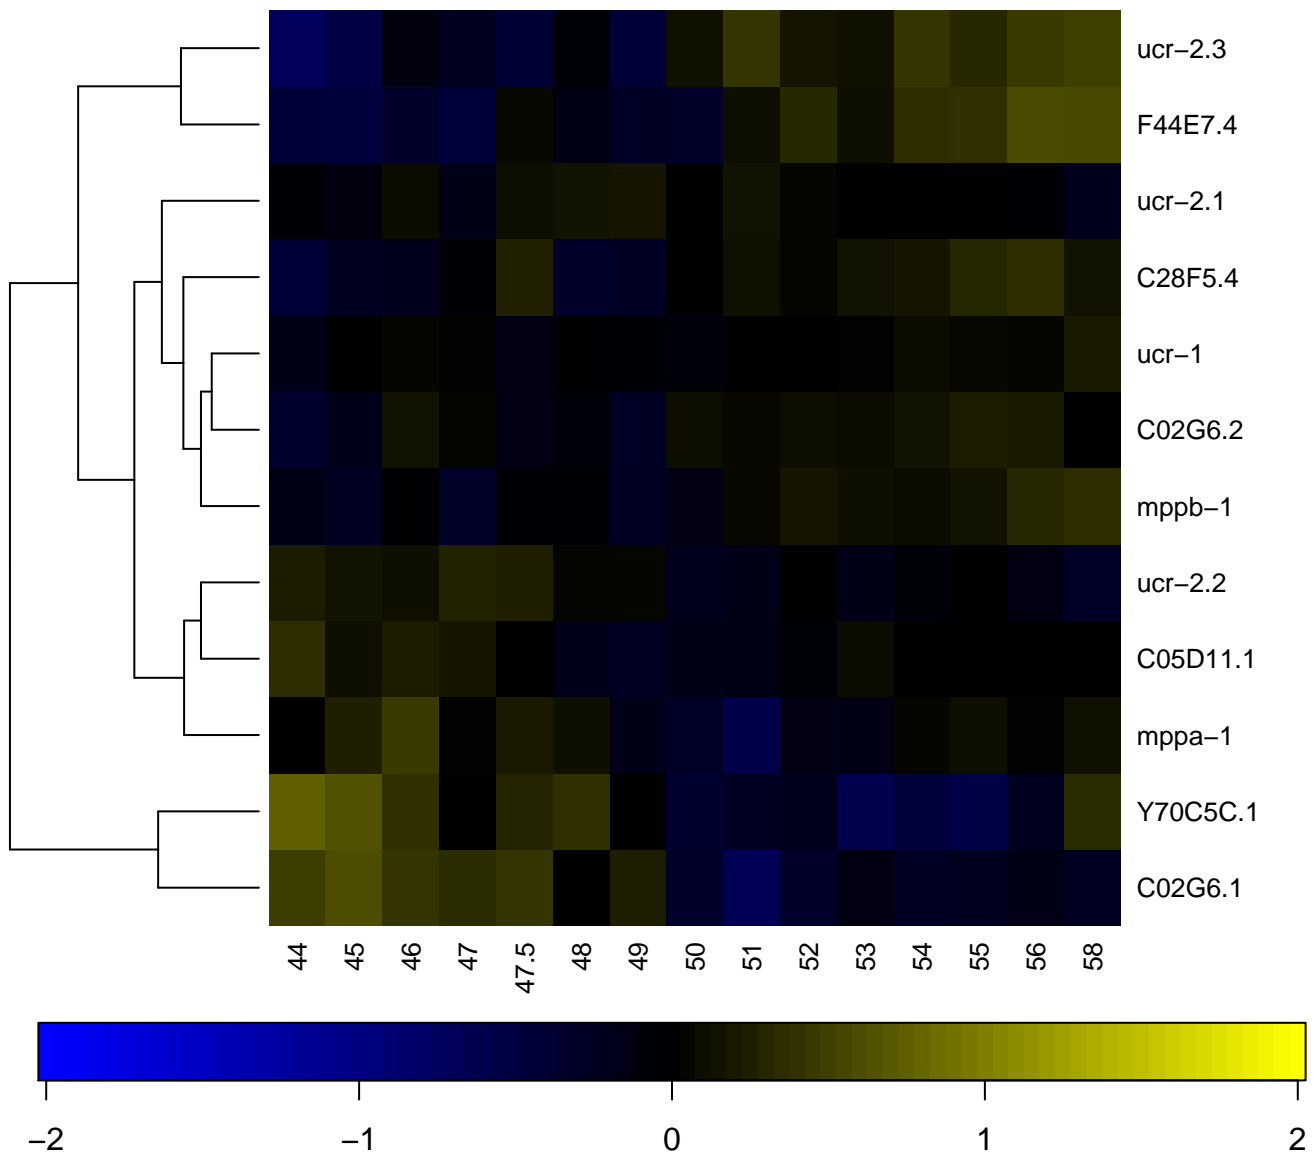









# Peptidase M20

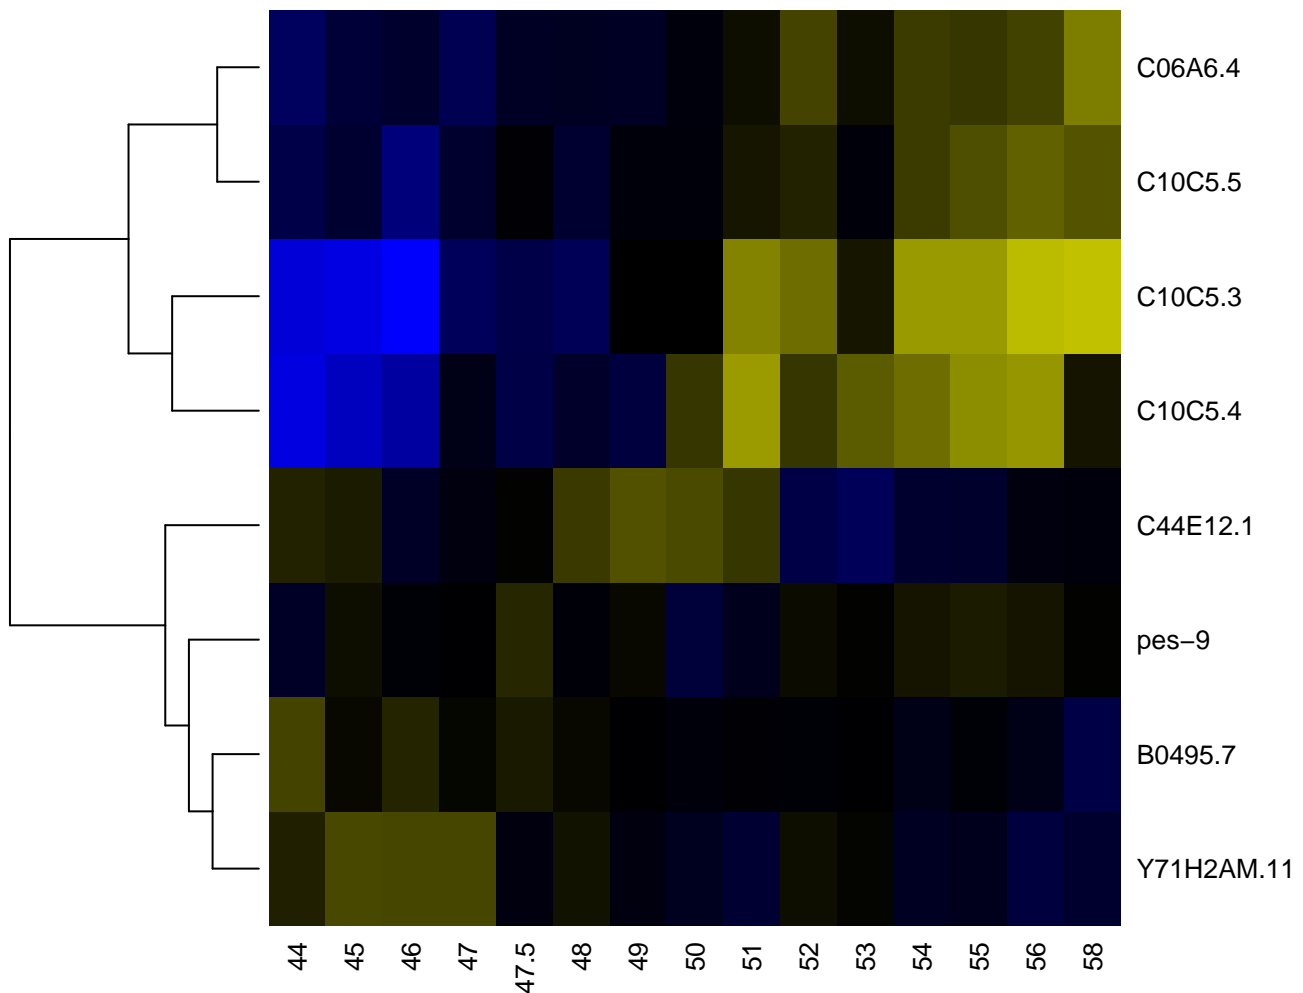





# Peptidase M24, structural domain

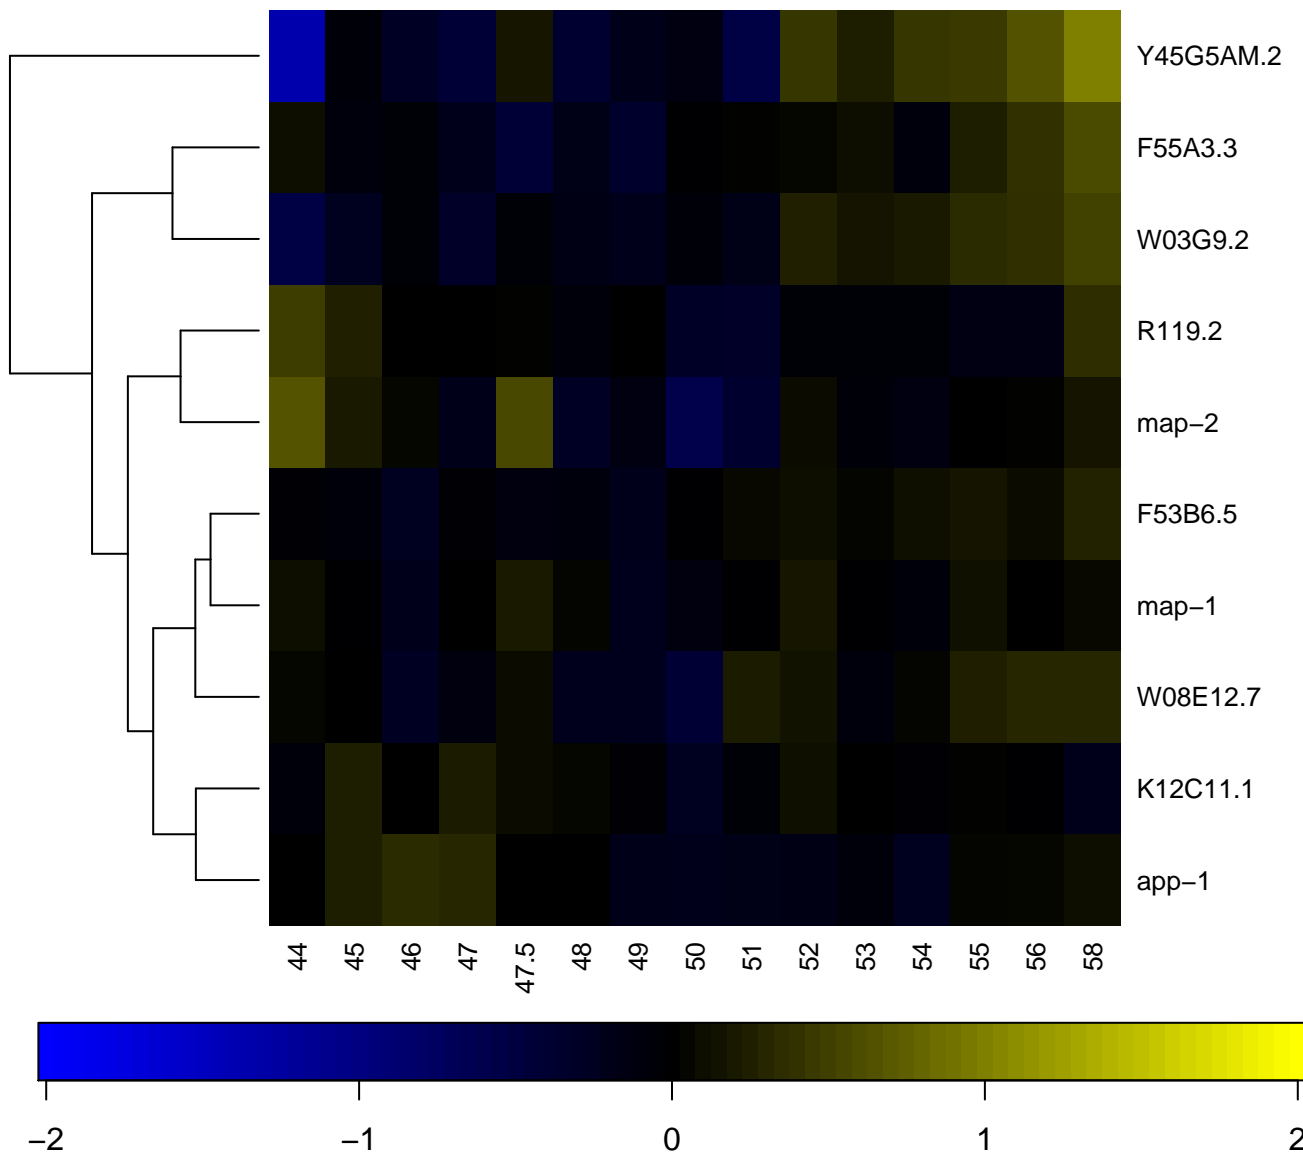



# Peptidase M41

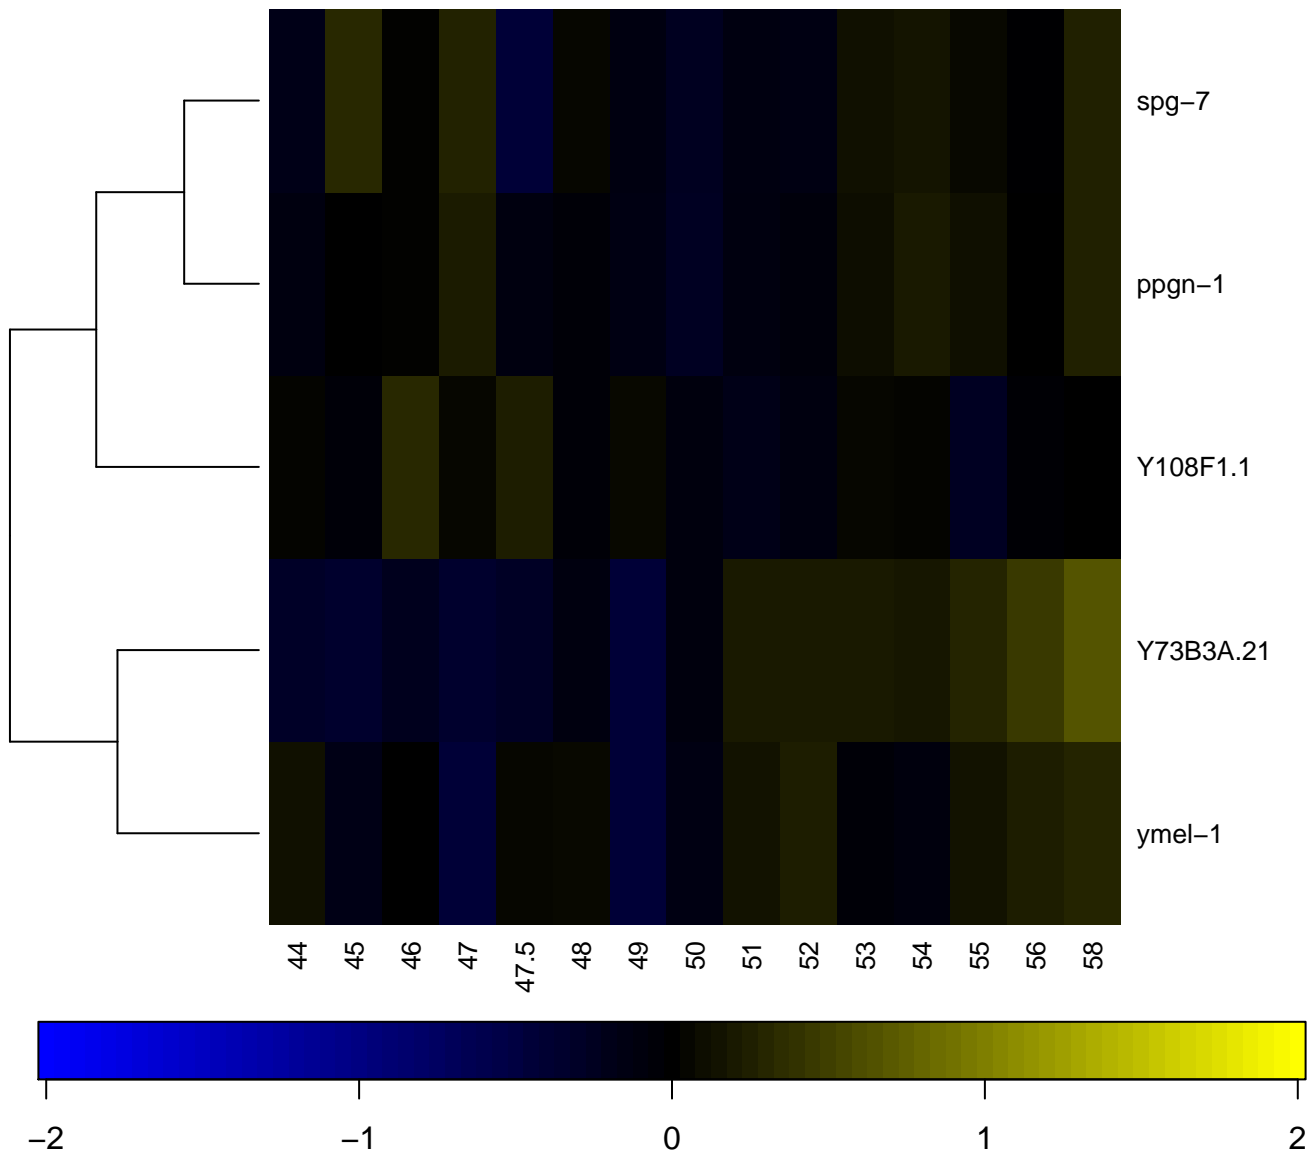







# Peptidase S10, serine carboxypeptidase, active site

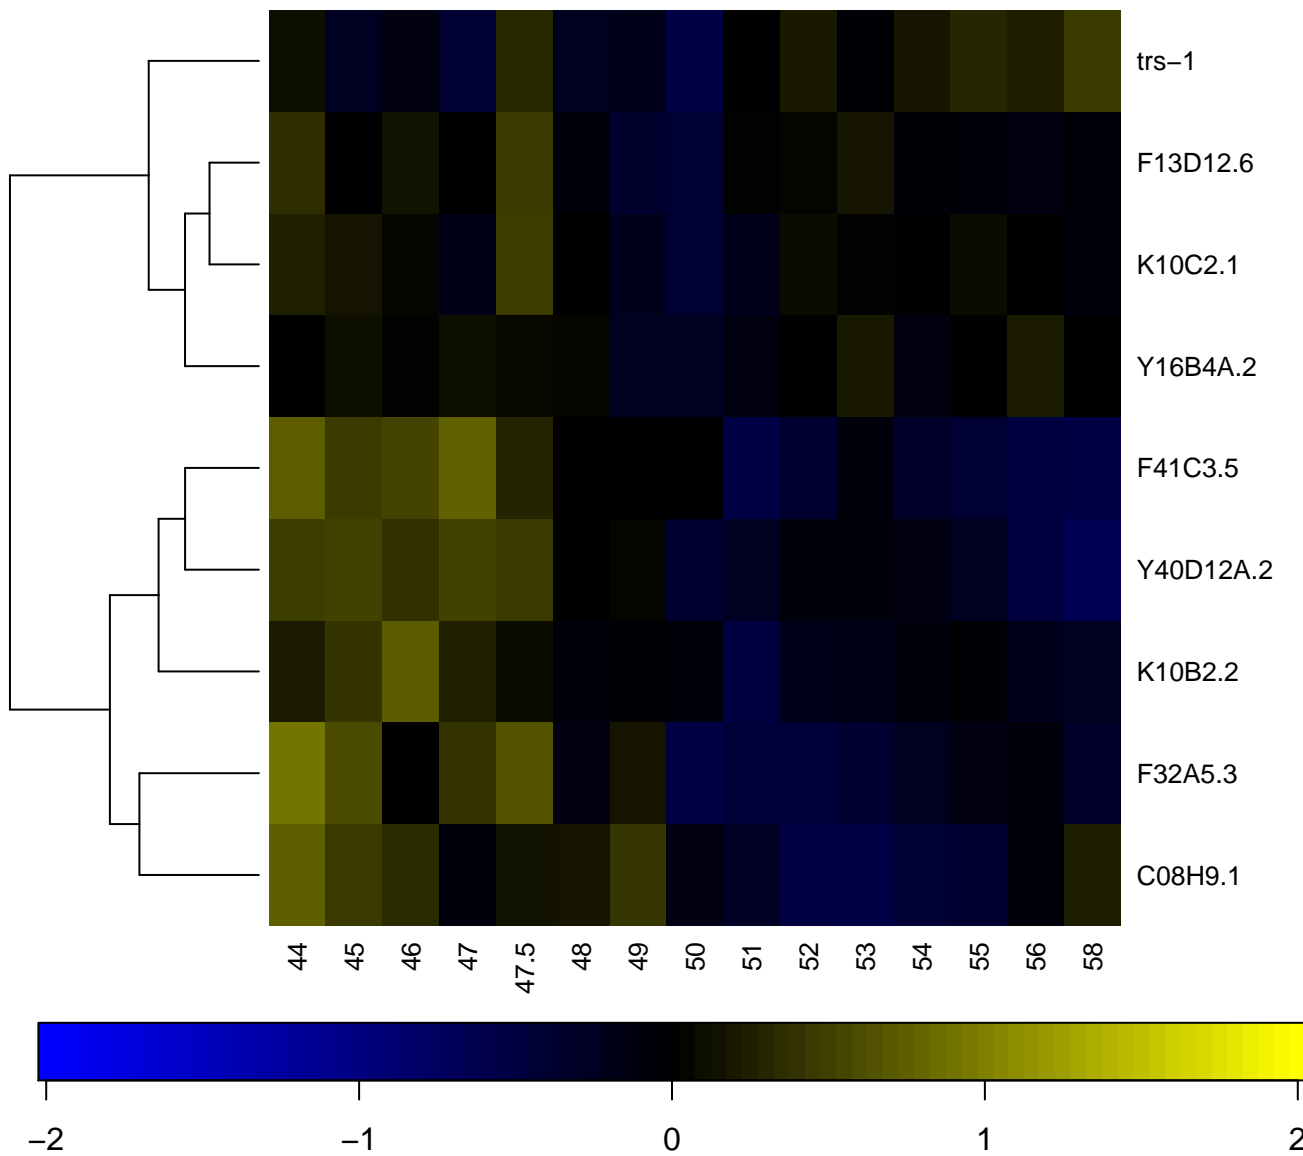





# Peptidase S1A, chymotrypsin

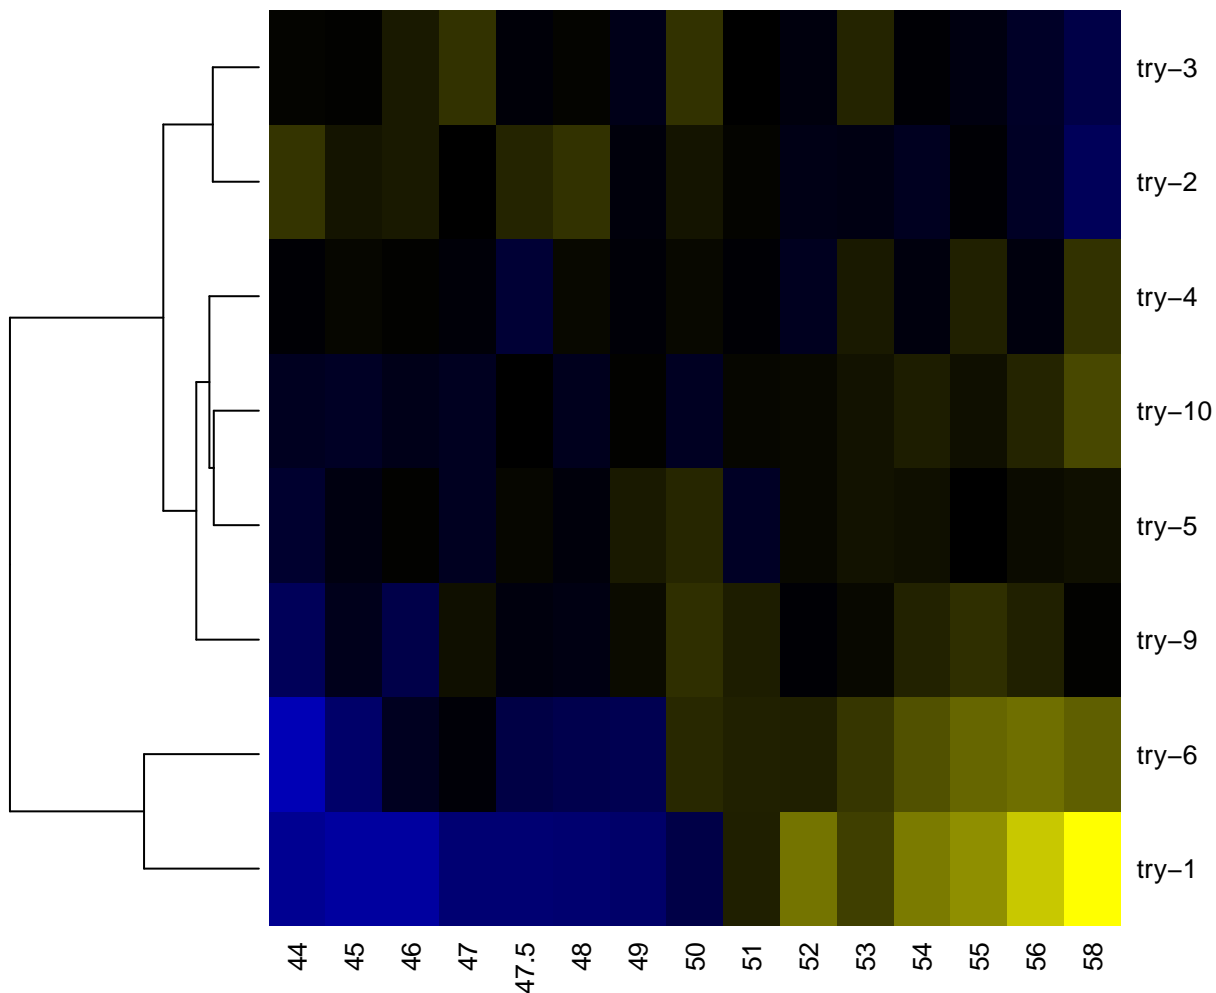

-2

-1

0

1

2















# Peptidase S9, prolyl oligopeptidase, catalytic domain

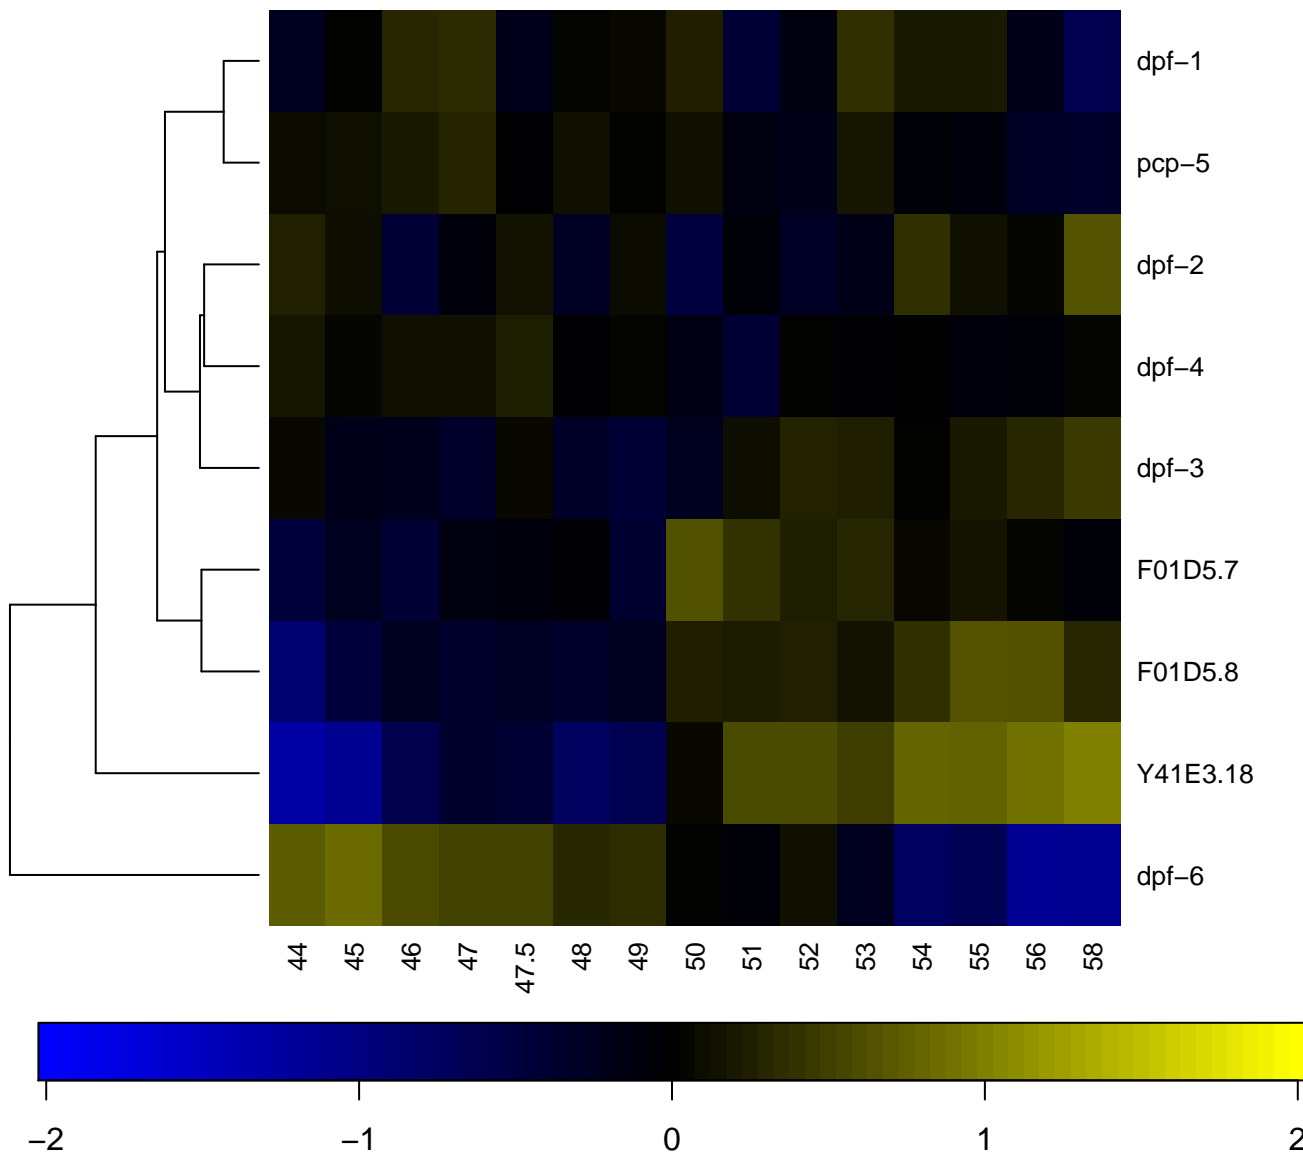

# Peptidase, cysteine peptidase active site

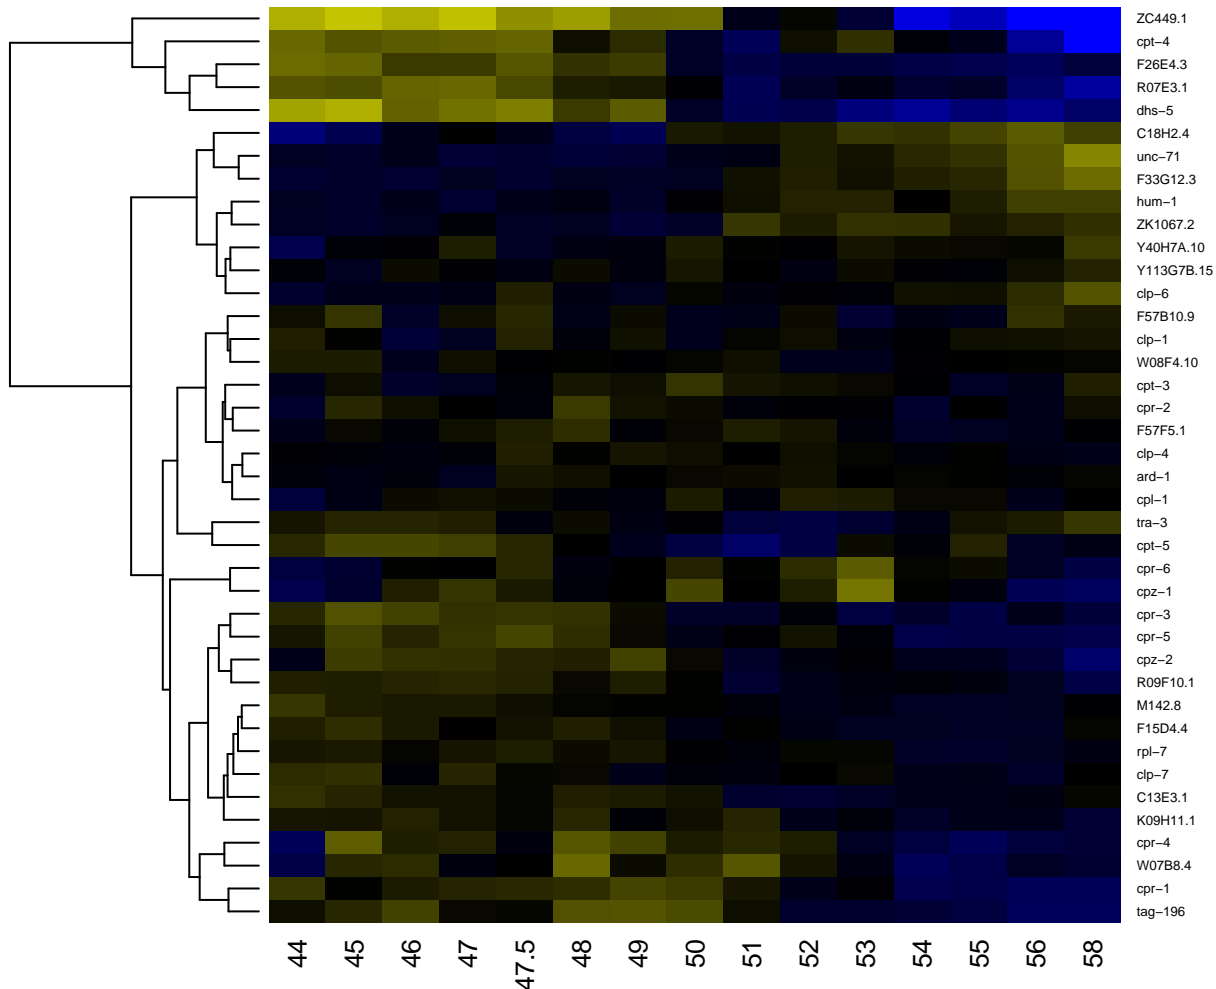

-2

-1

0

1

2

# Peptidase, metallopeptidase

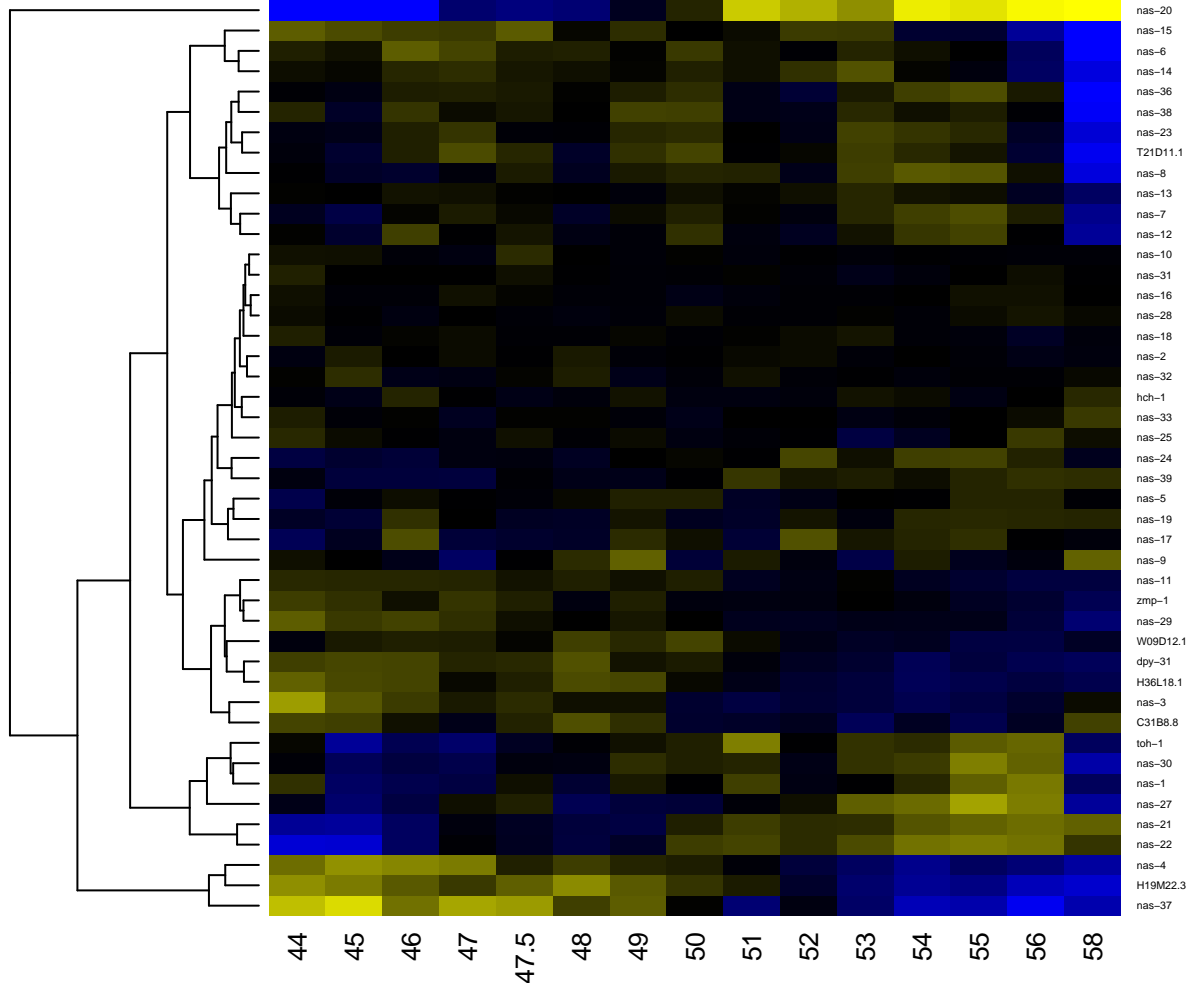

# Peptide N glycanase, PAW domain

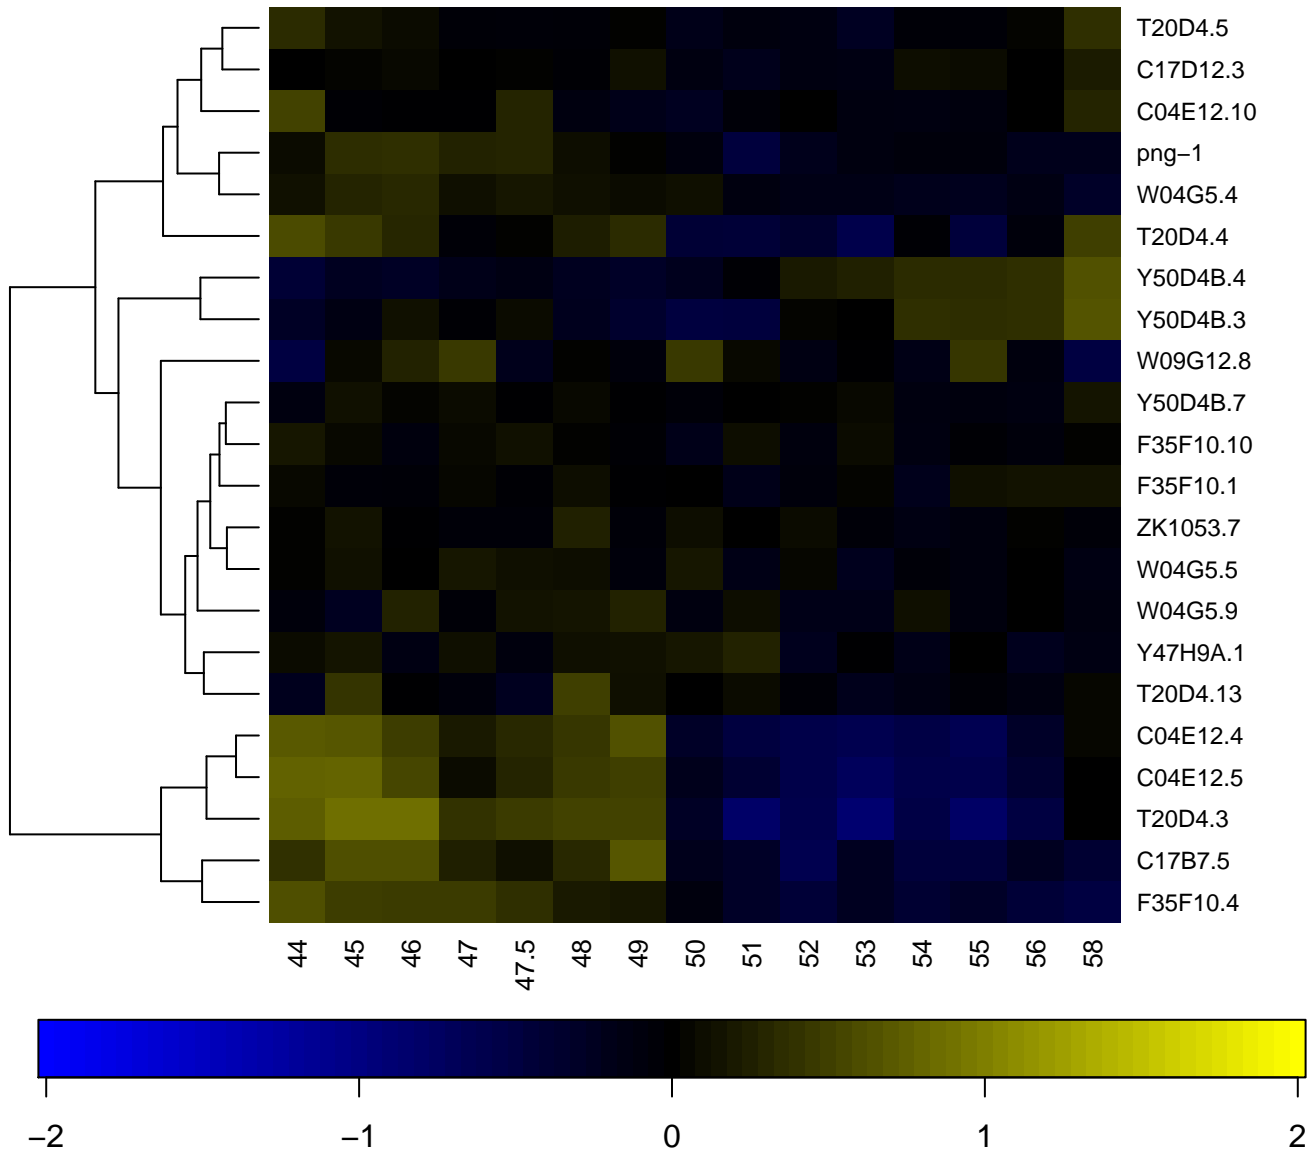







# cidyl-prolyl cis-trans isomerase, cyclophilin-type, conserved

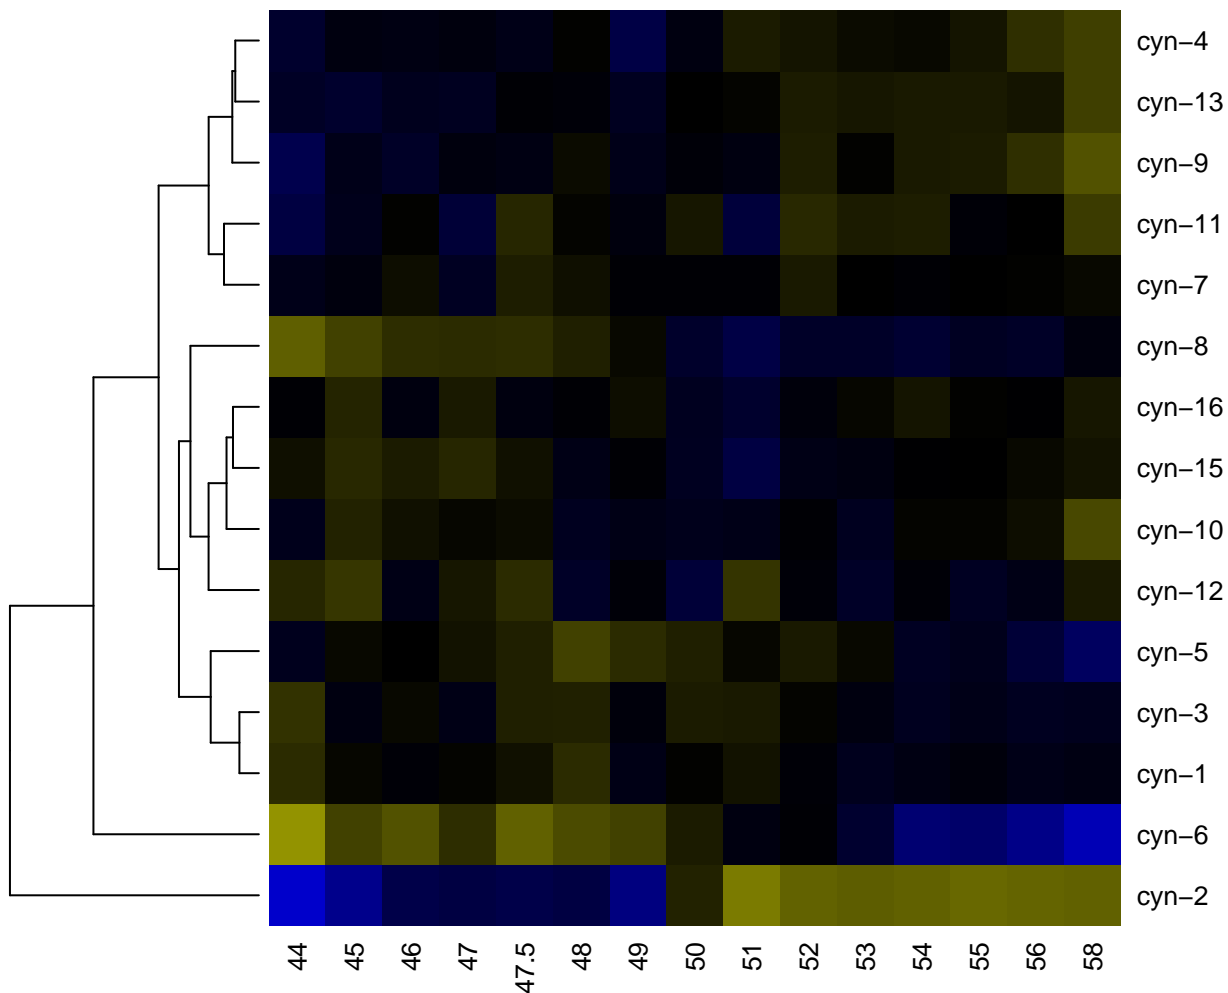









# PH domain

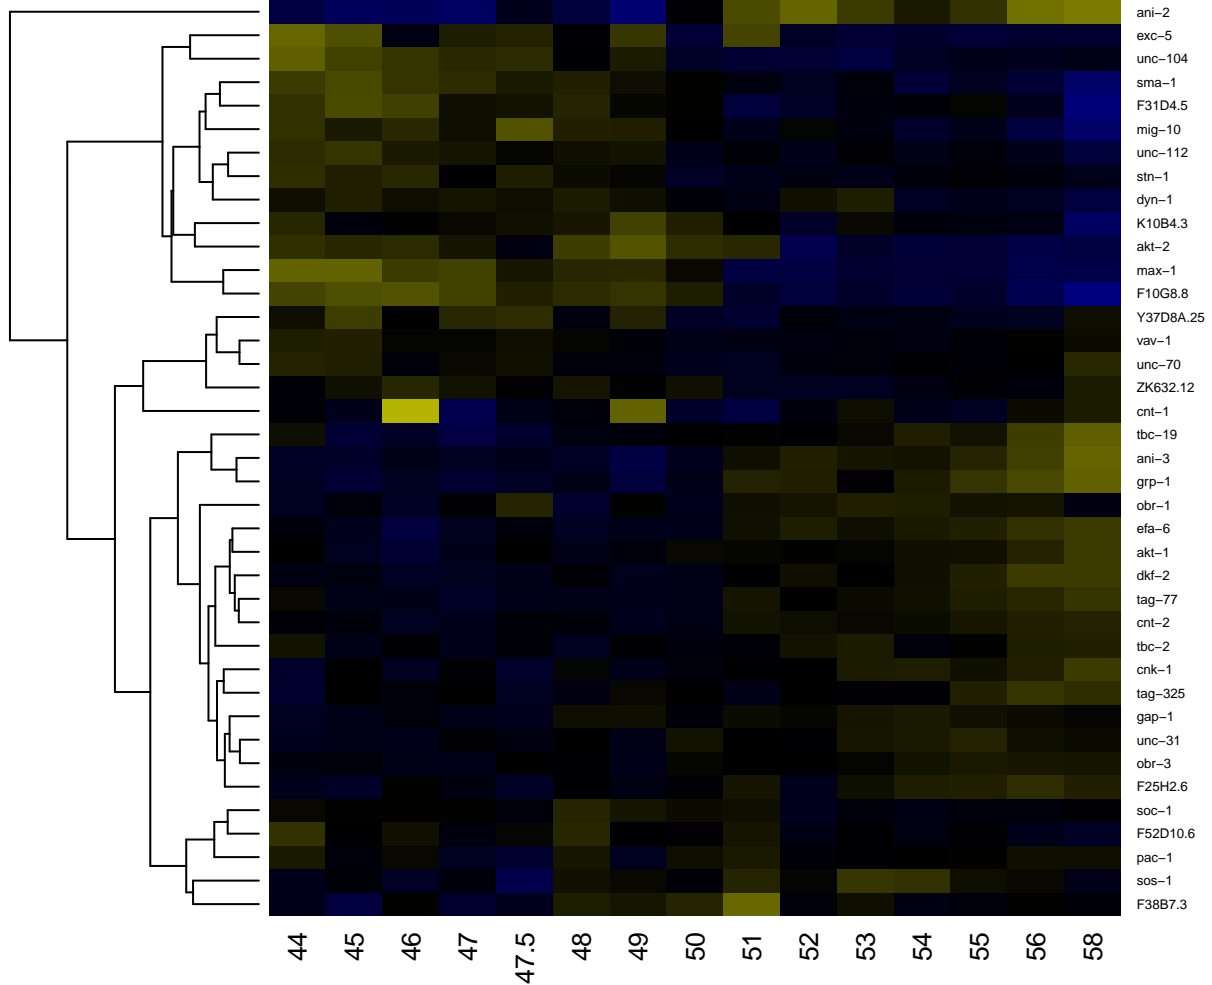

# PHD-finger

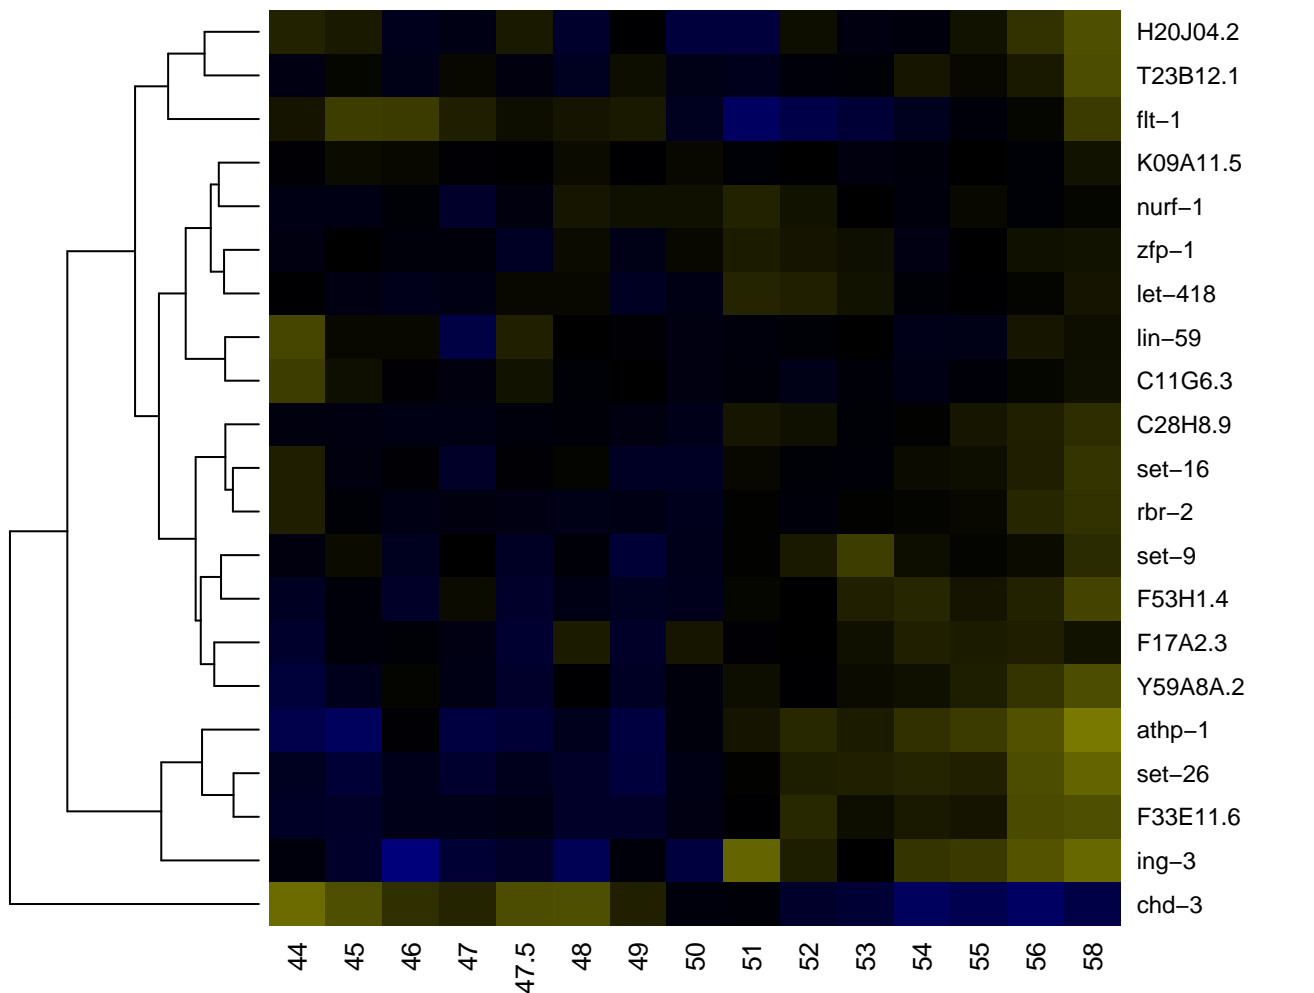

# Phorbol esters/diacylglycerol binding domain (C1 domain)

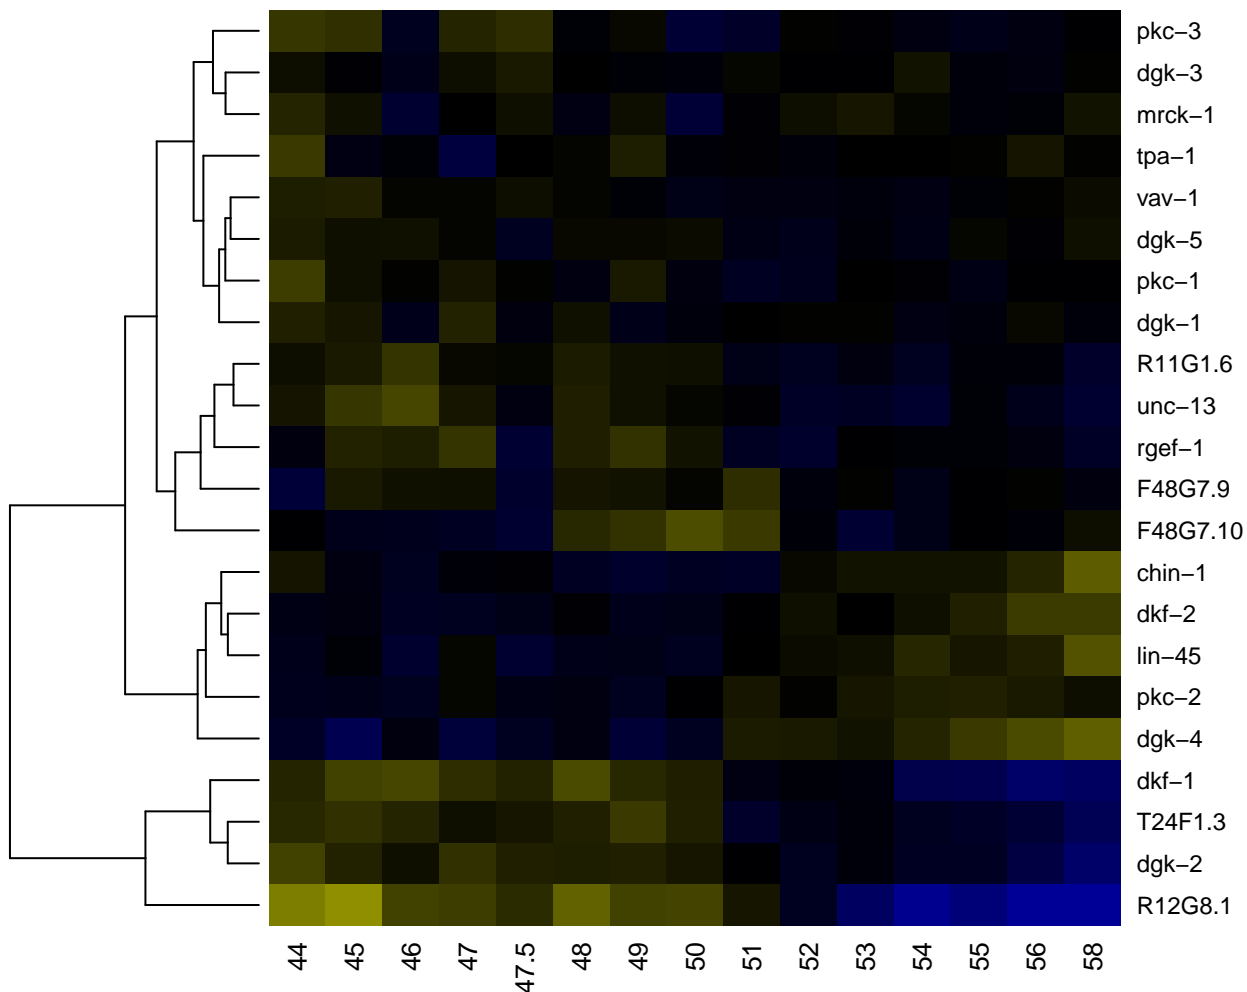

# Phosphate transporter



# Phosphate transporter family









# Phosphatidylethanolamine-binding protein PEBP

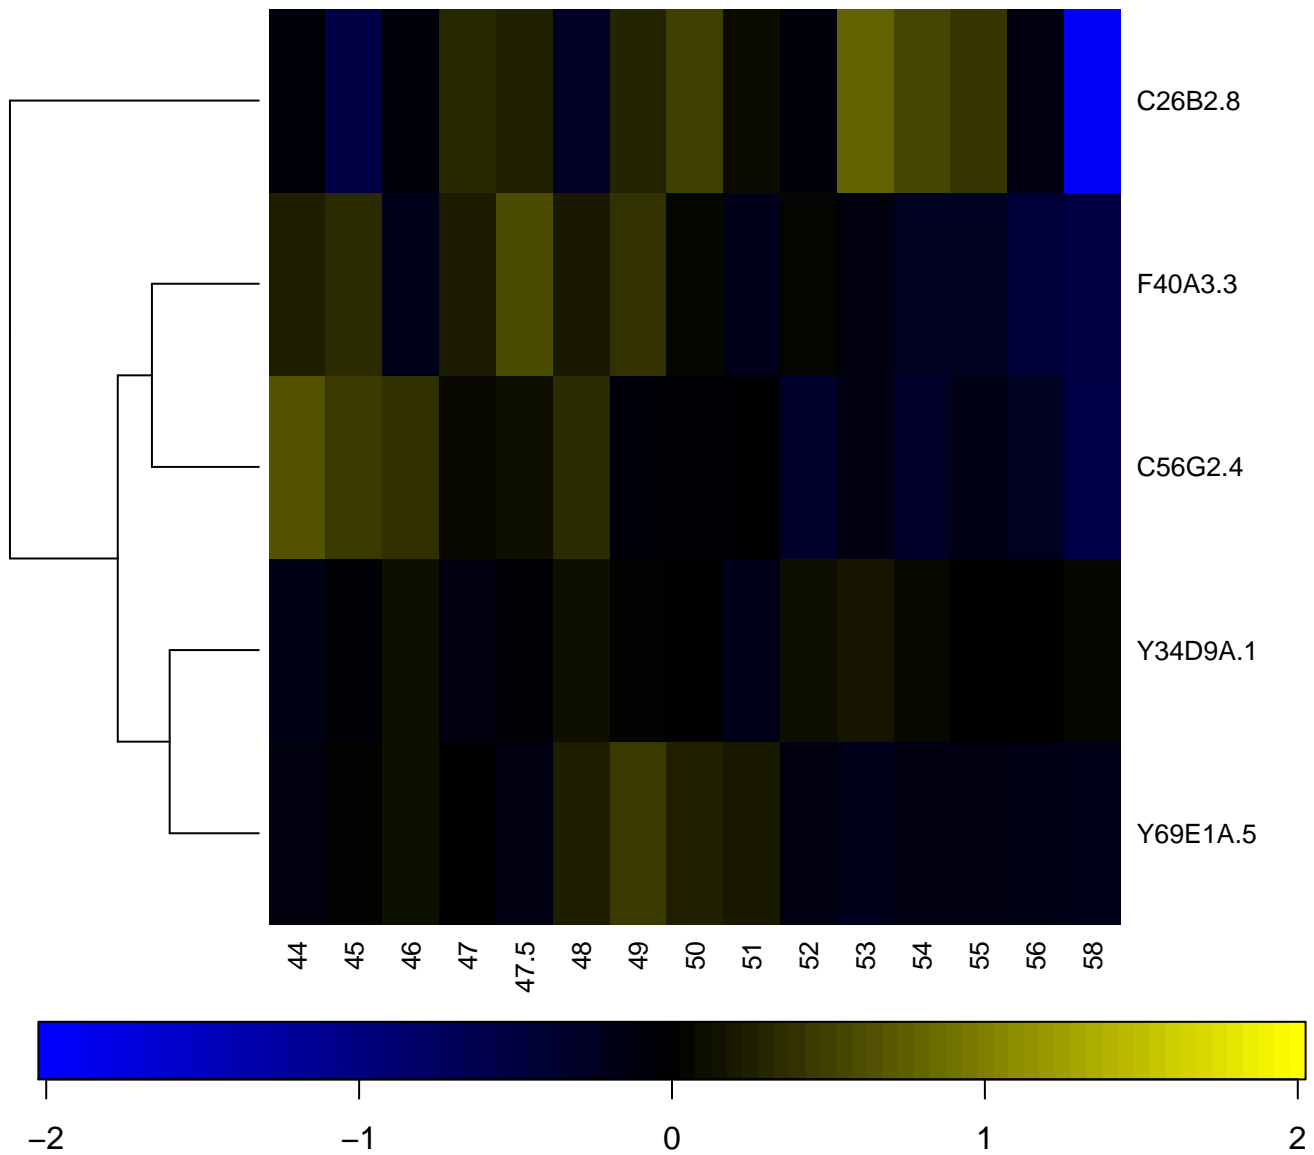

# Phosphatidylinositol-specific phospholipase C, X domain

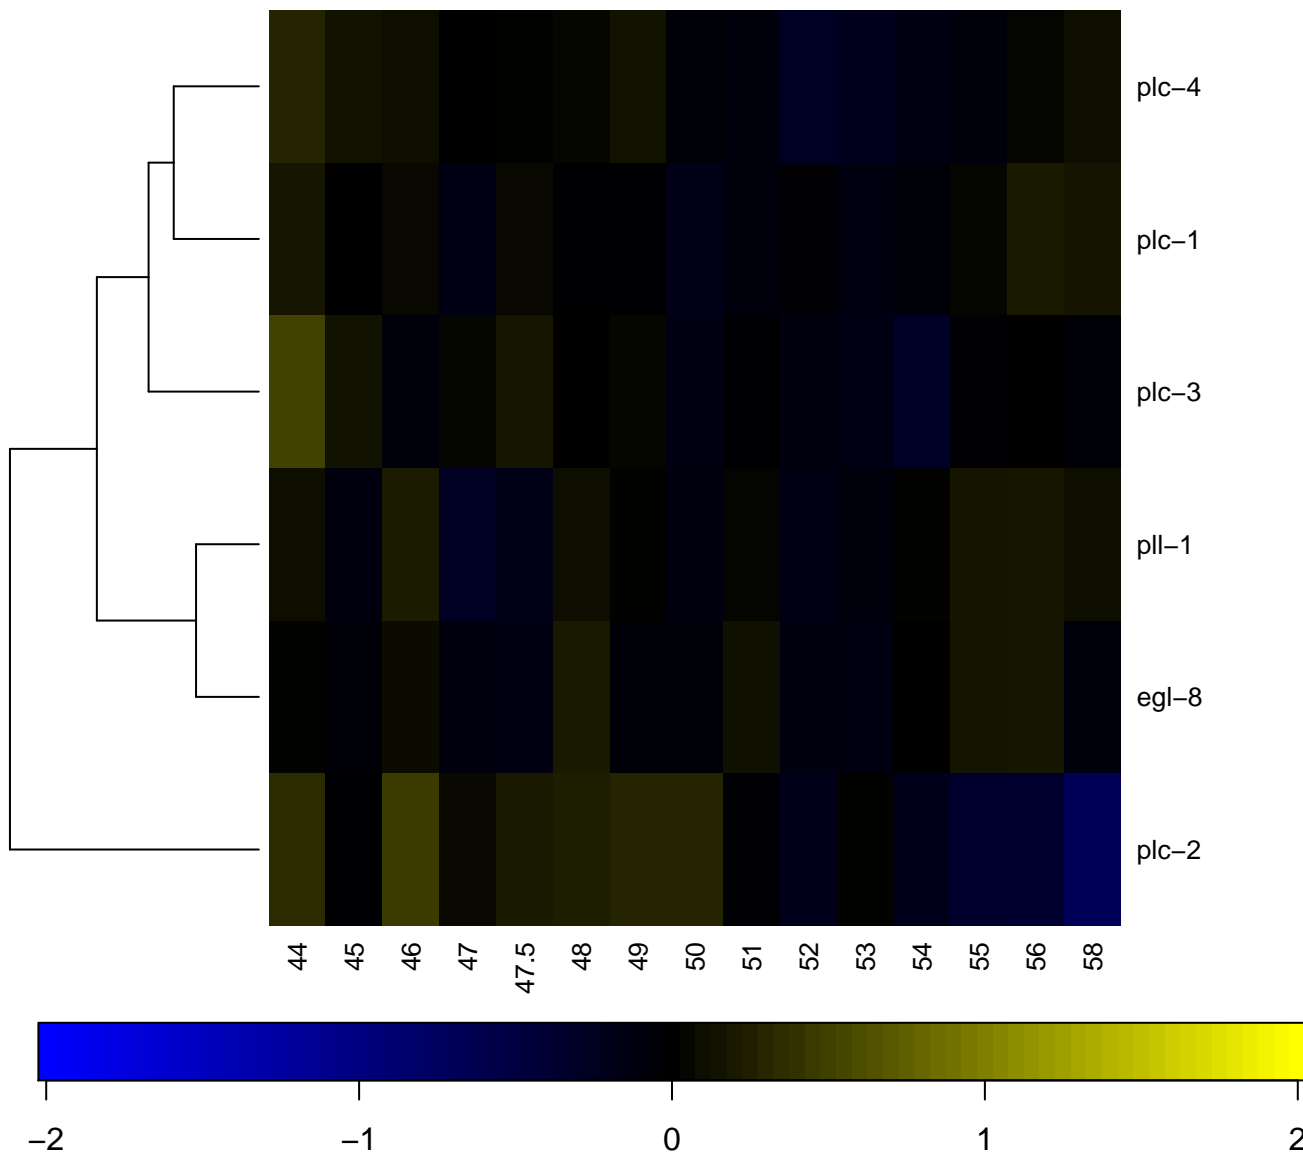







# Phosphatidylinositol 3/4-kinase, conserved site

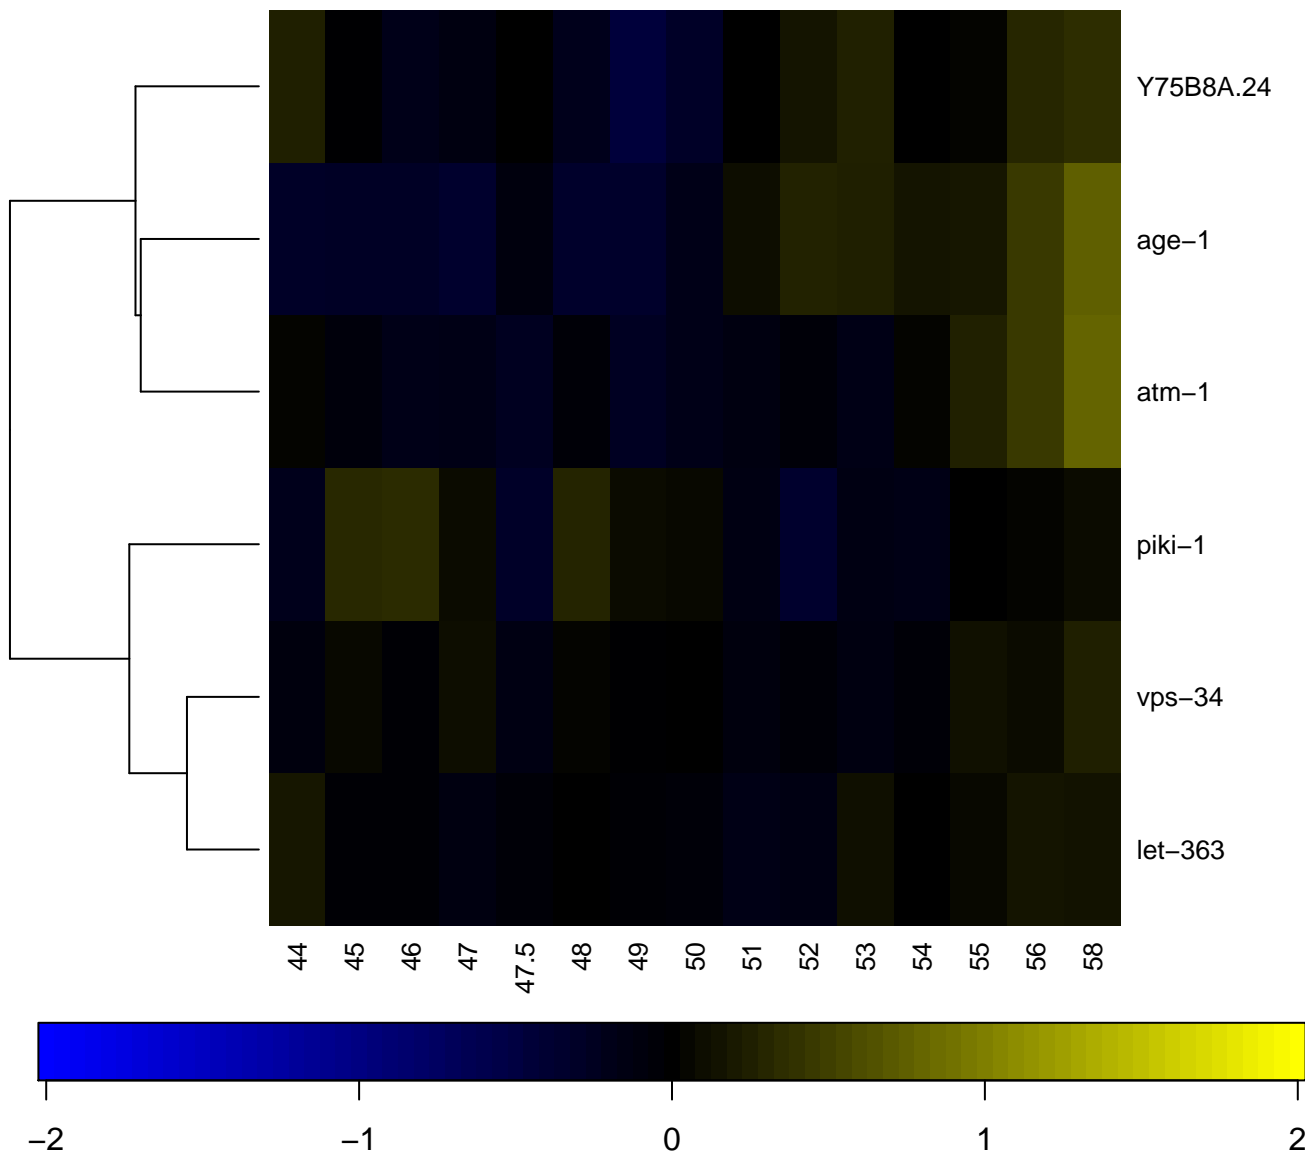



# Phosphatidylinositol Kinase

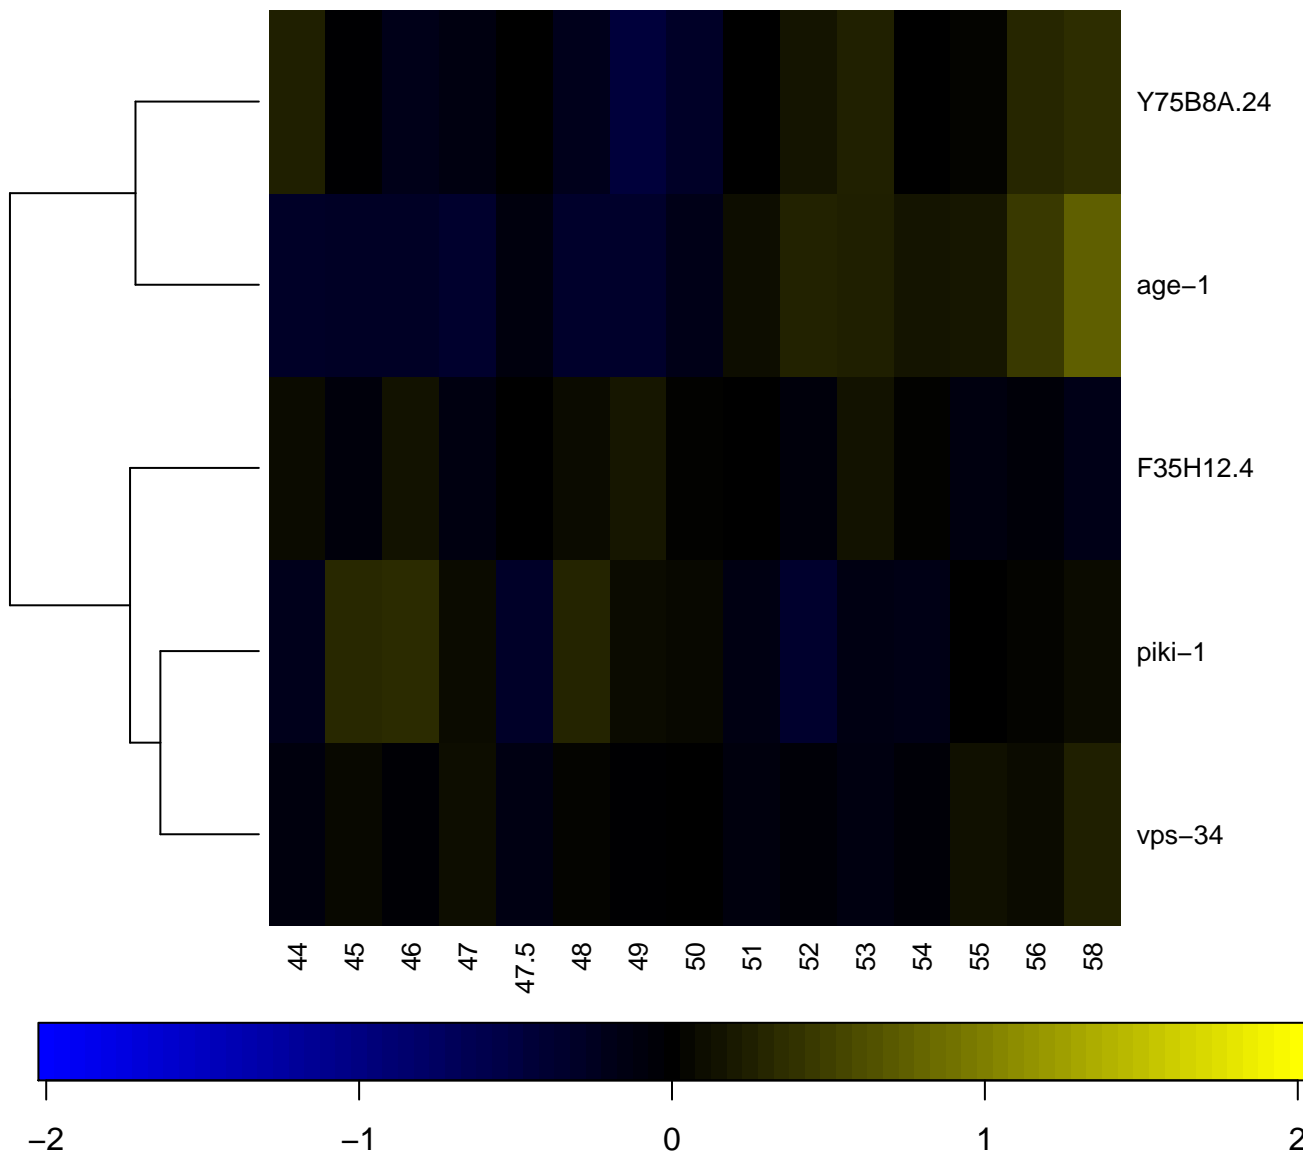







# Phospholipase A2, active site

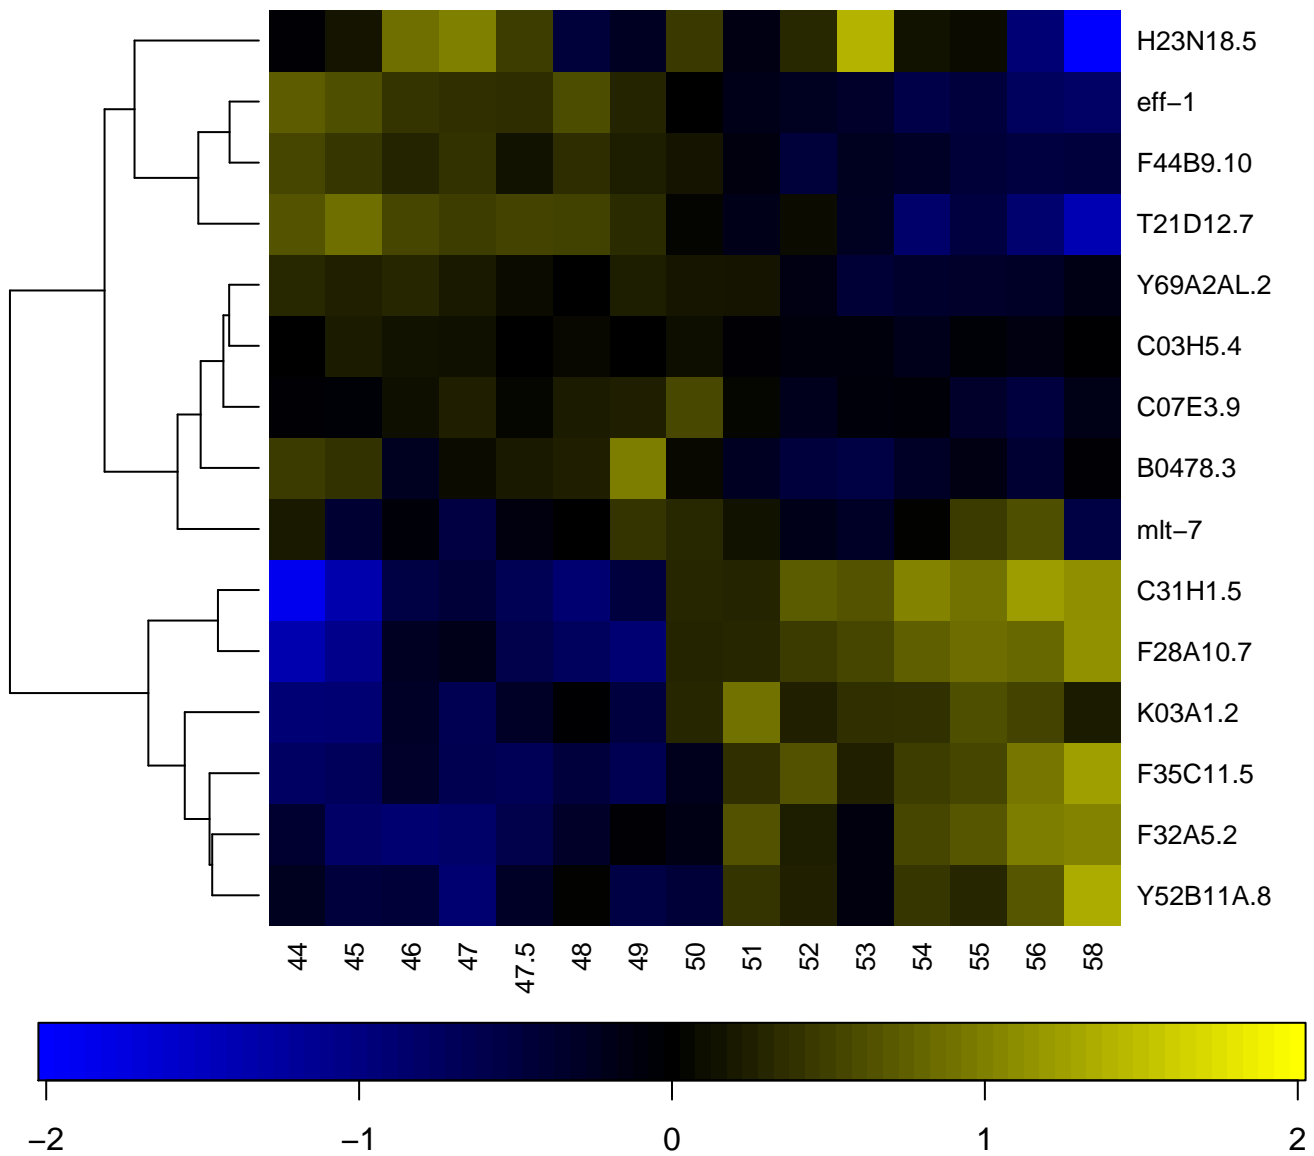











# Phospholipid/glycerol acyltransferase

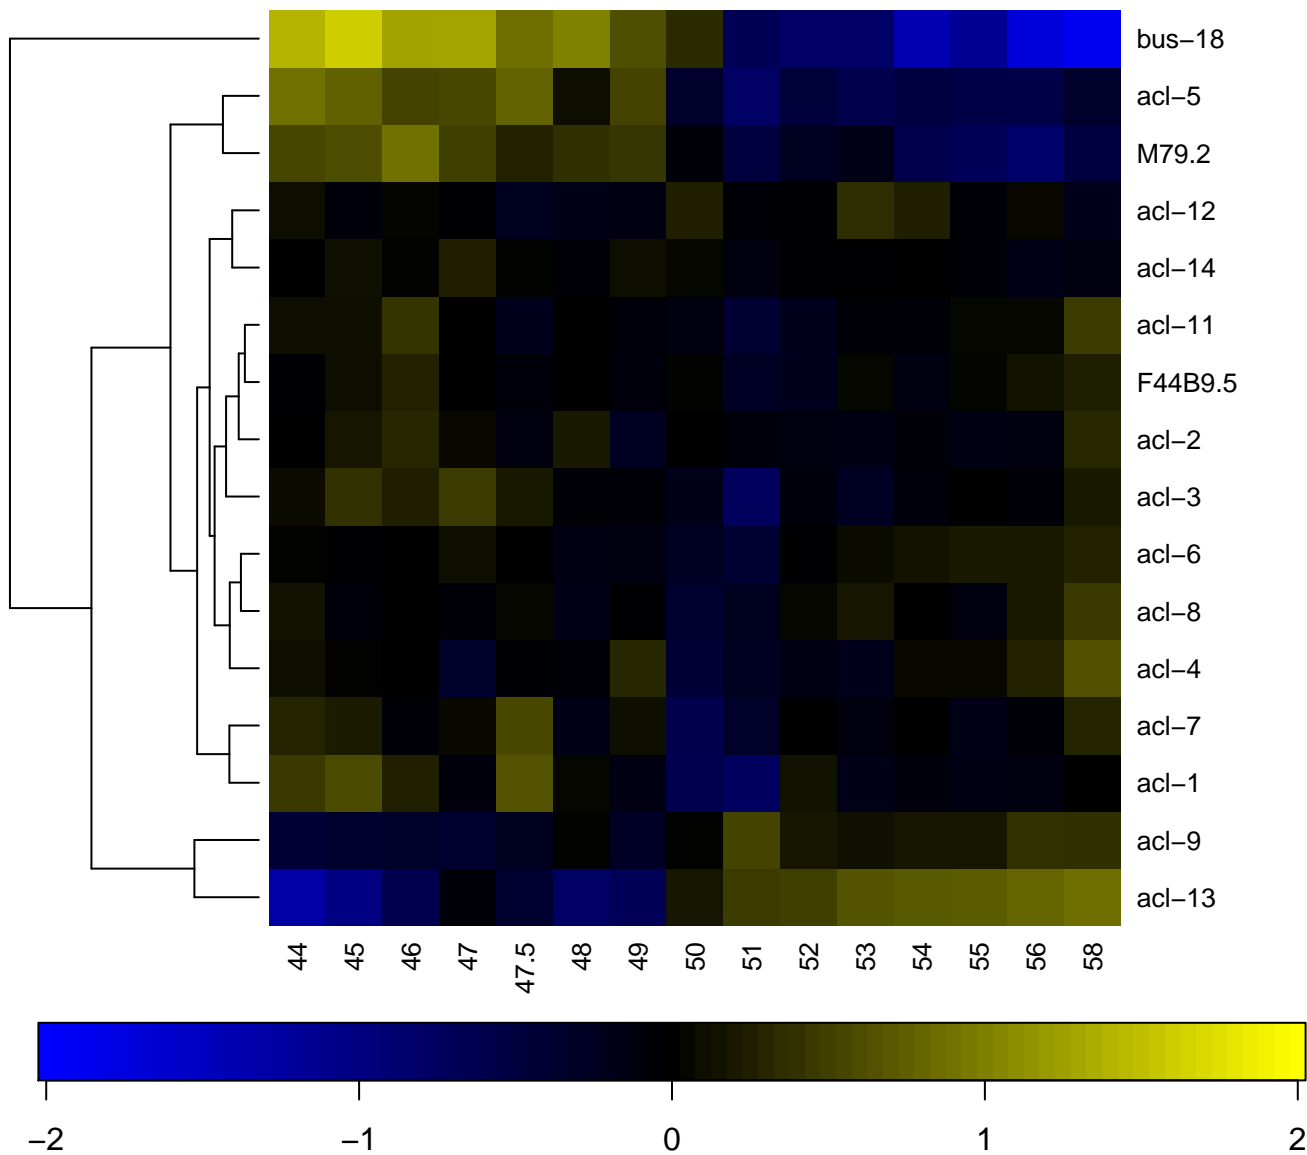



# Phosphopantetheine attachment site

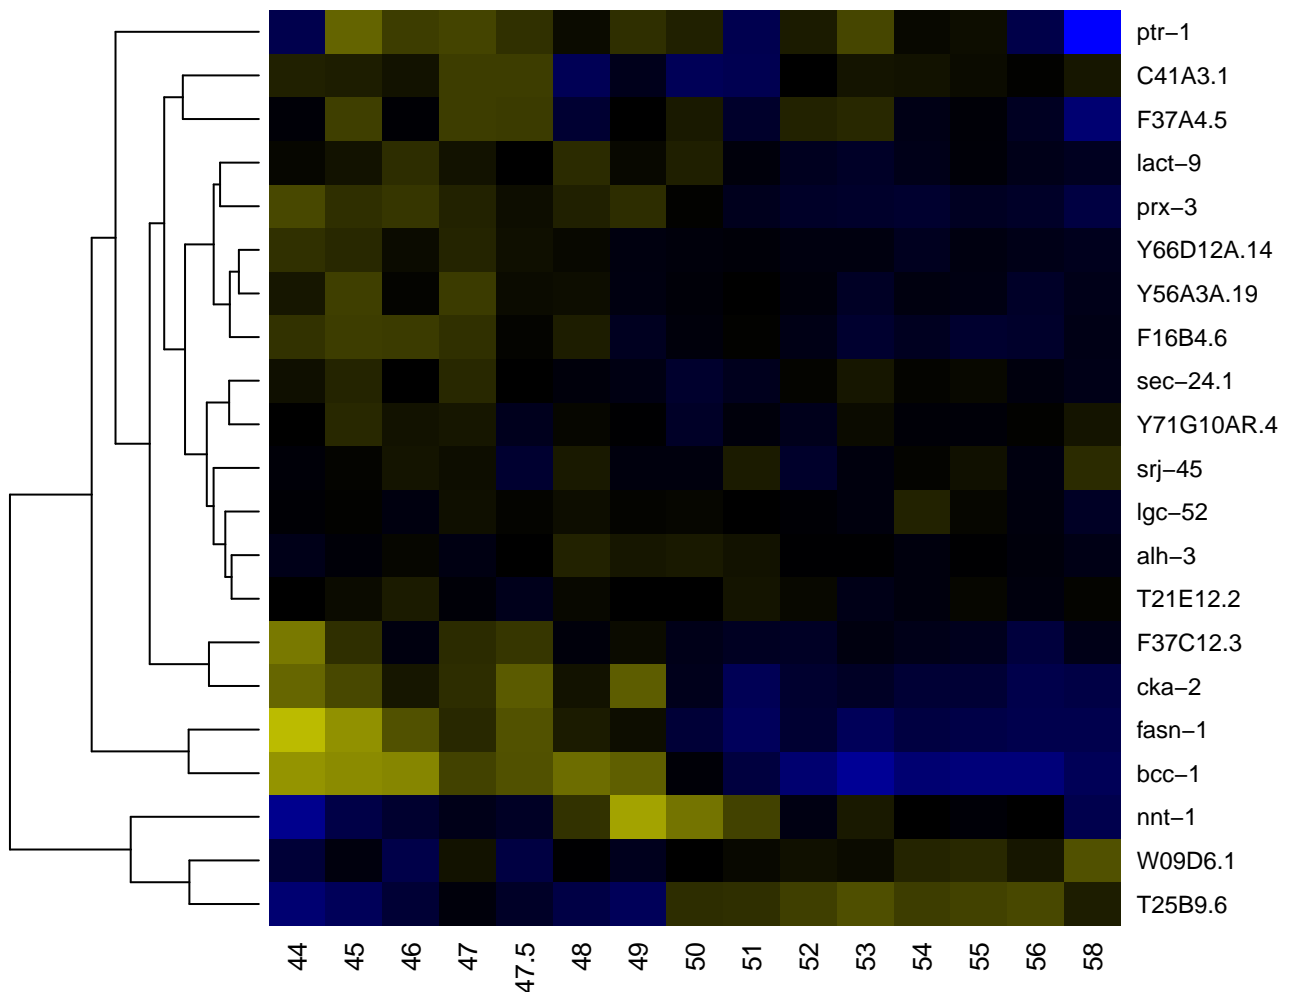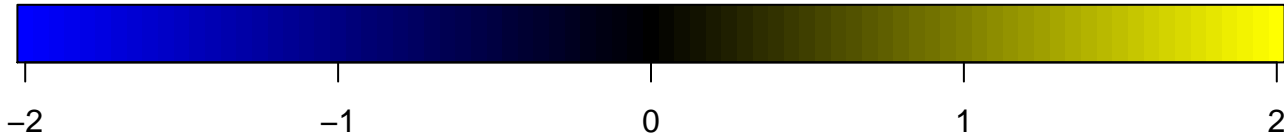

# Phosphoribosyl transferase domain

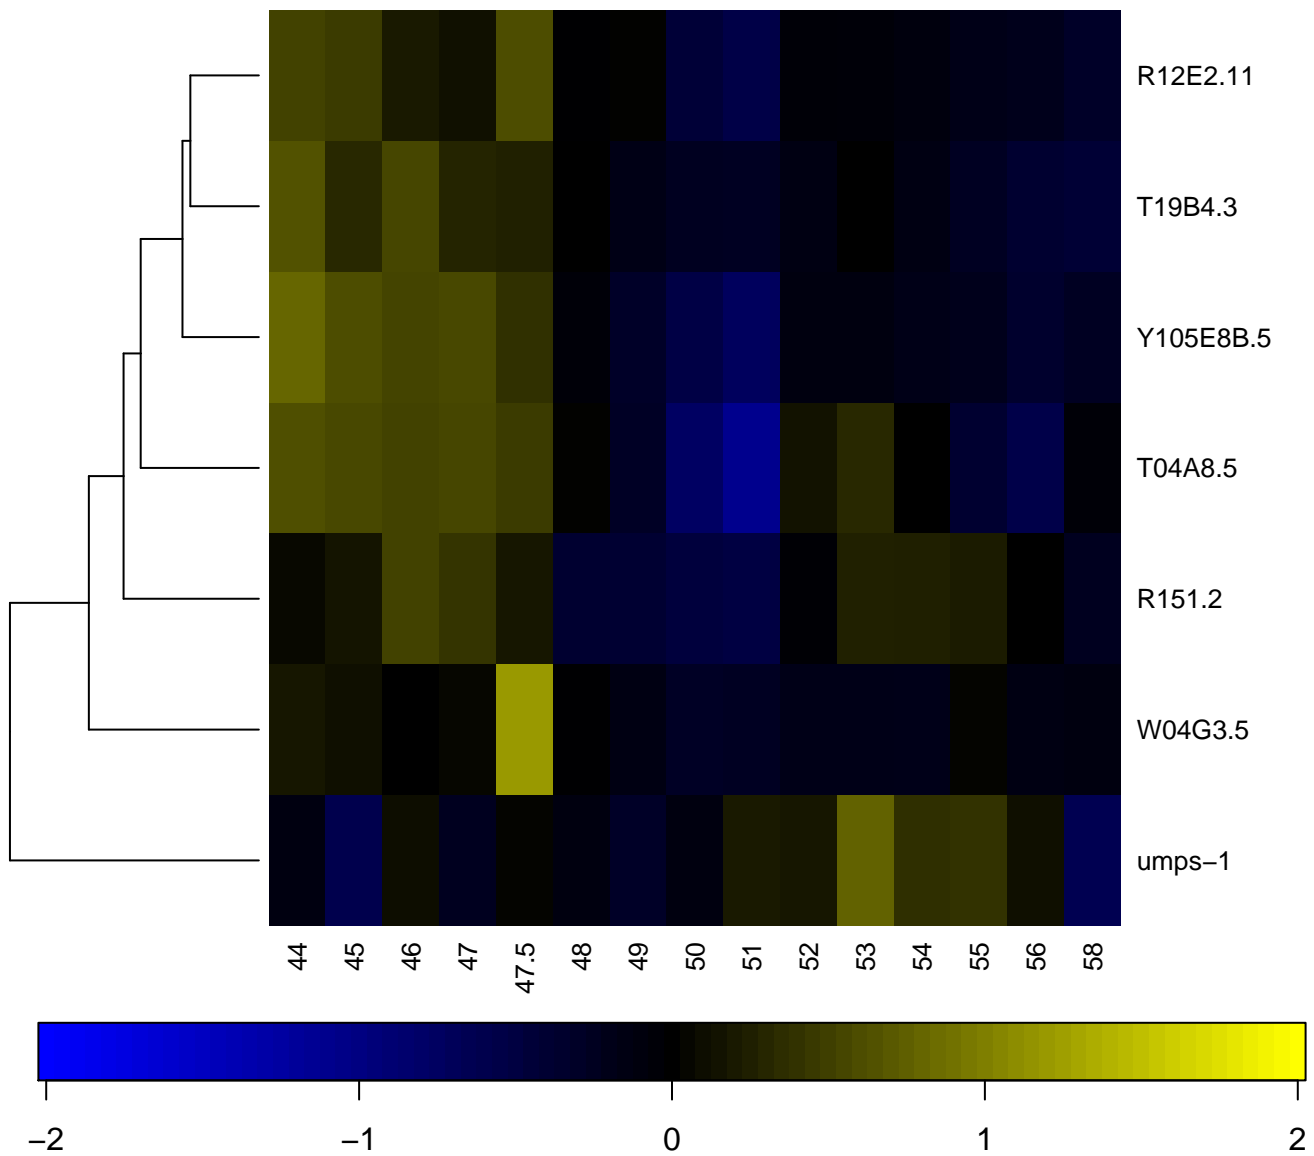



# Phosphorylation site

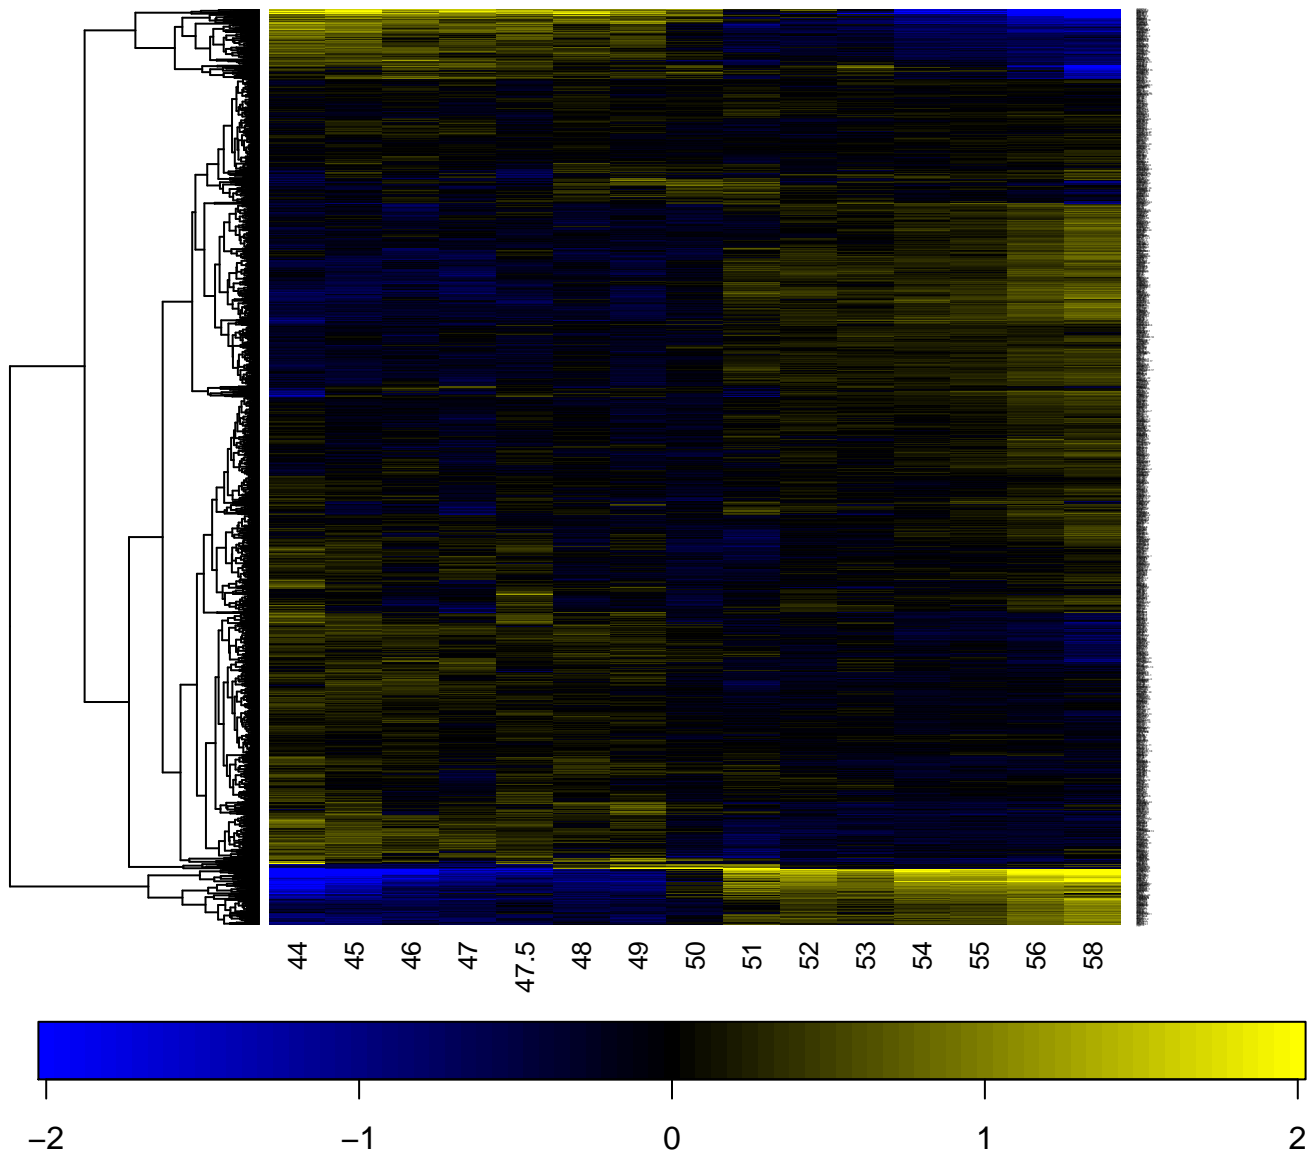

# Phosphotransferase enzyme family

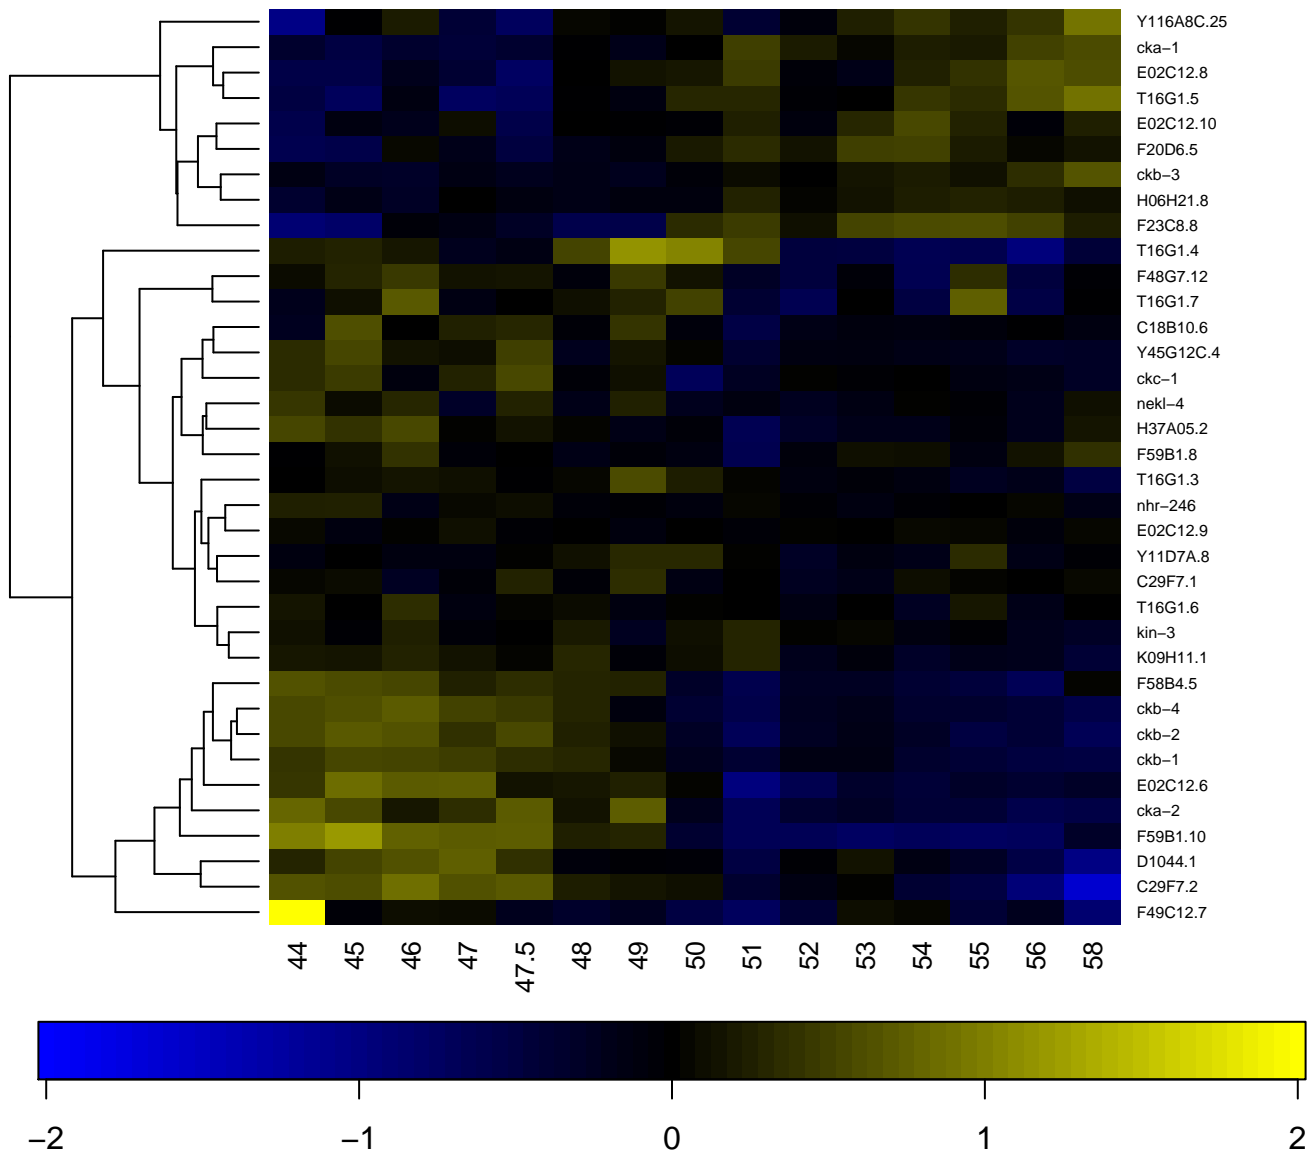







# Phox-like

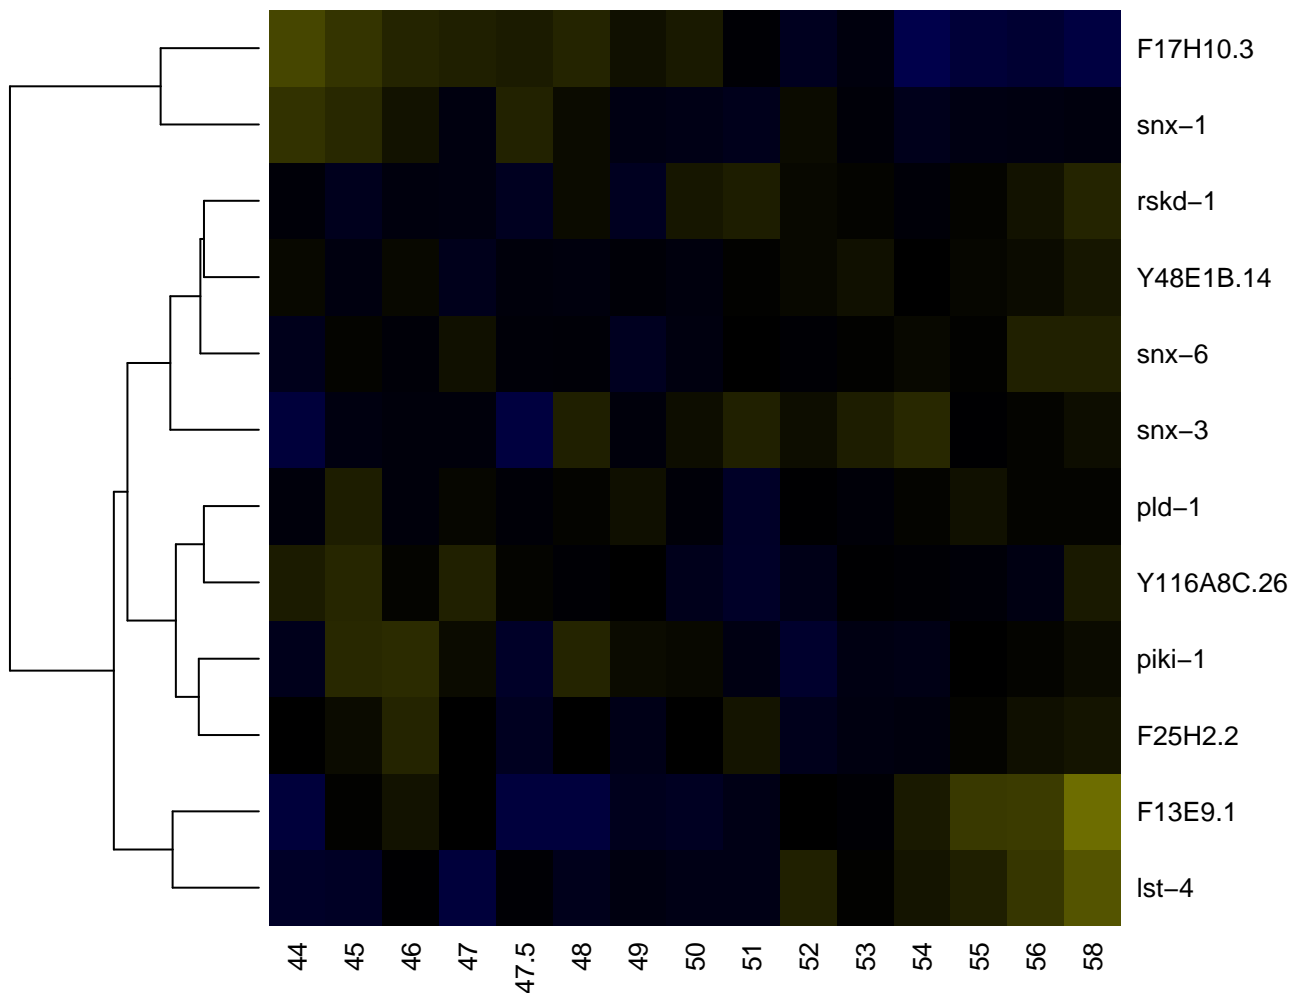







# Pleckstrin homology

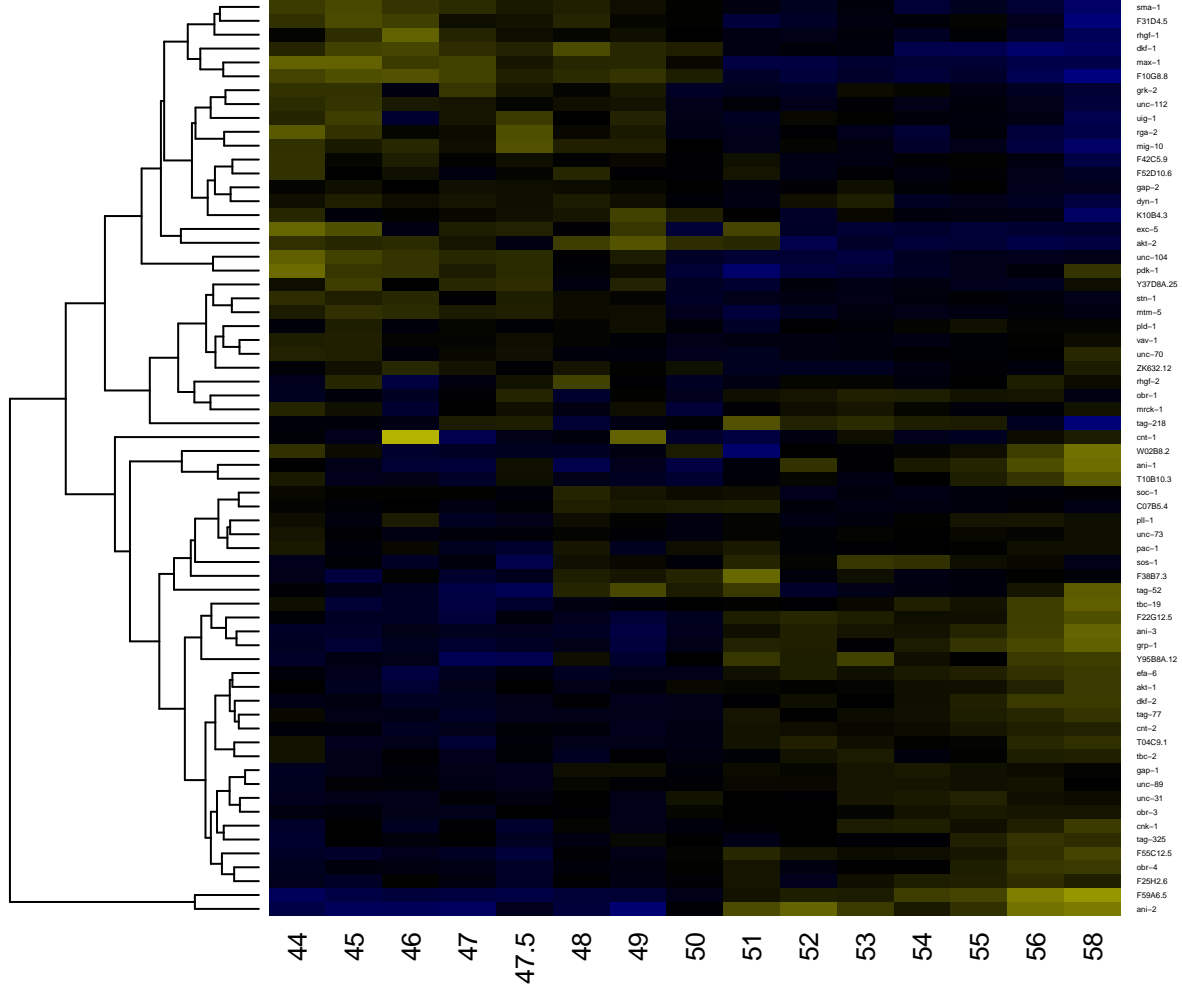

# Pleckstrin homology-type

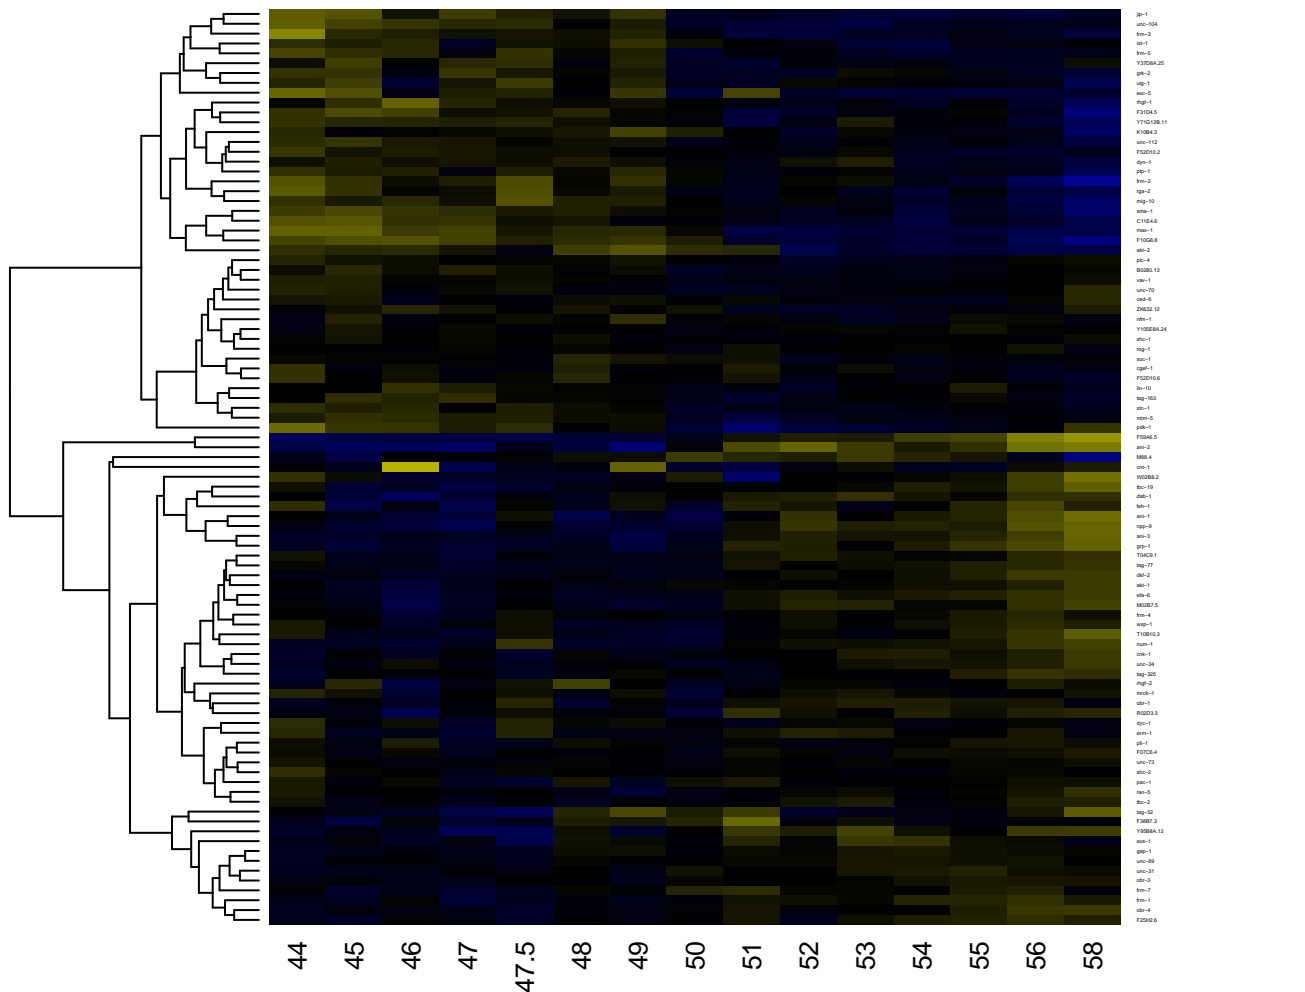







# Polycystin cation channel

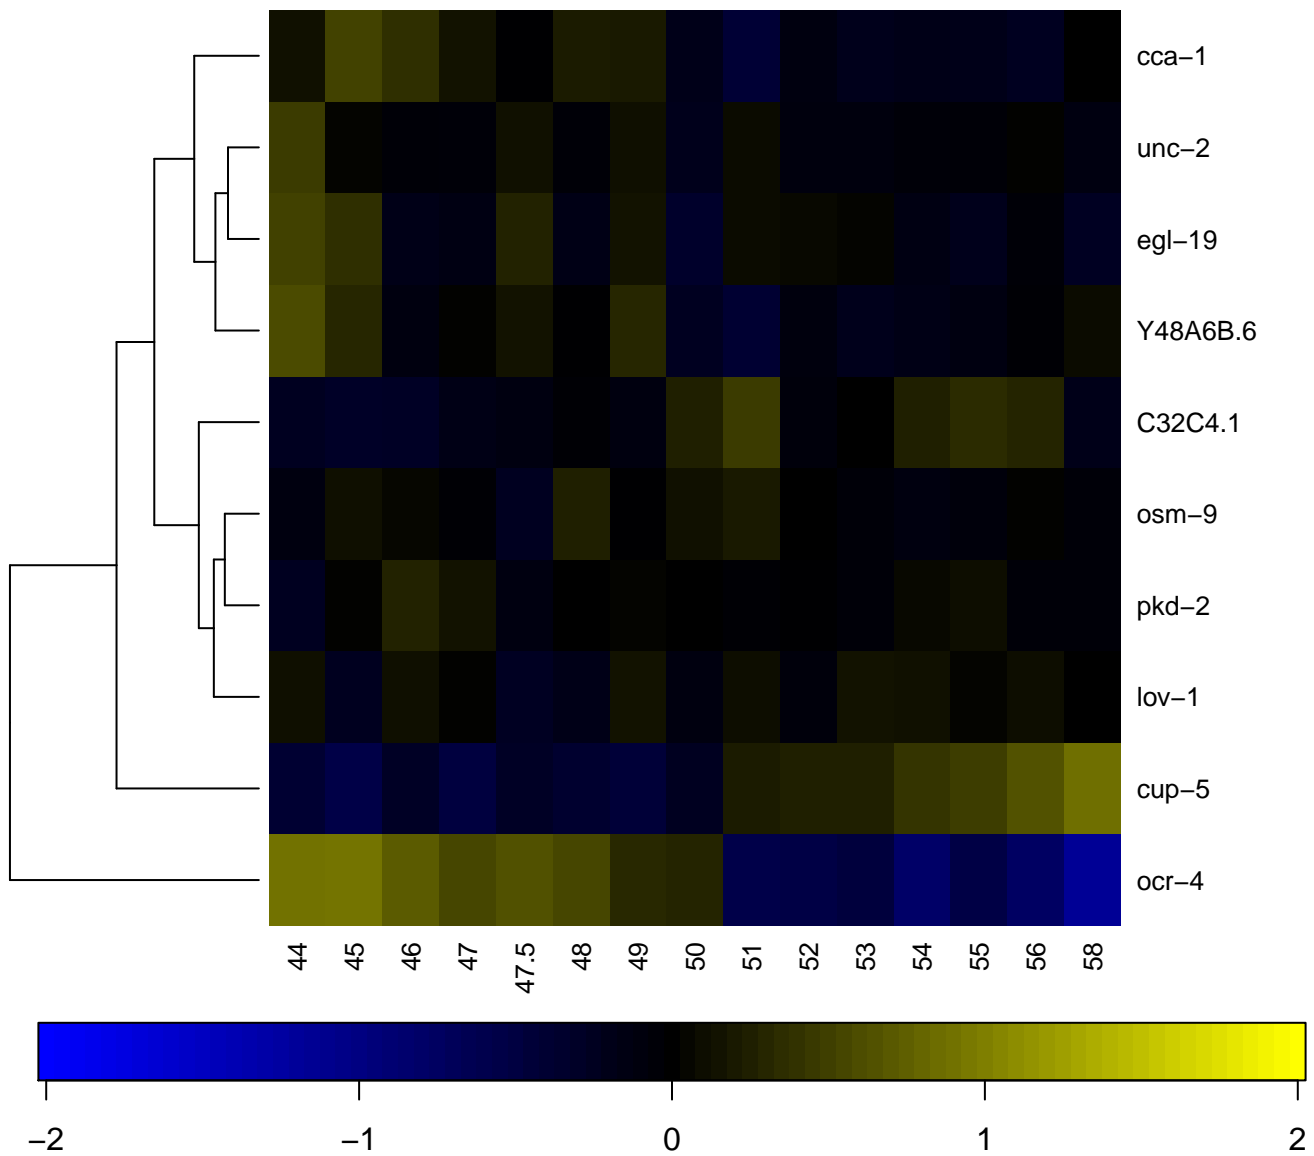



# Polyketide synthase, enoylreductase

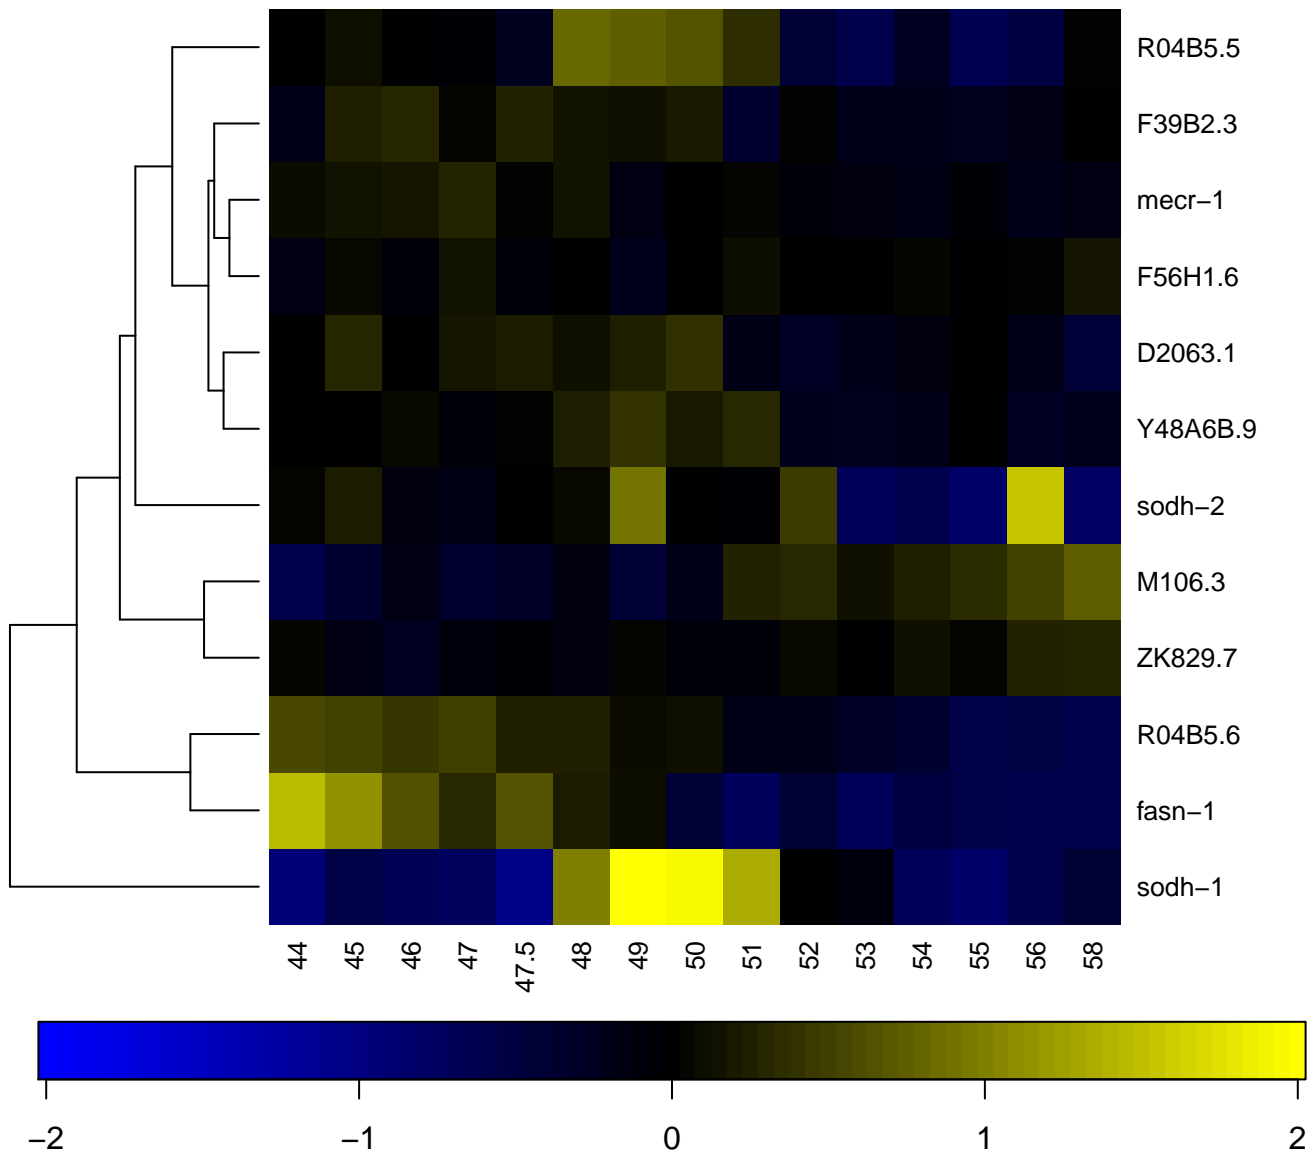

# Polyketide synthase, KR

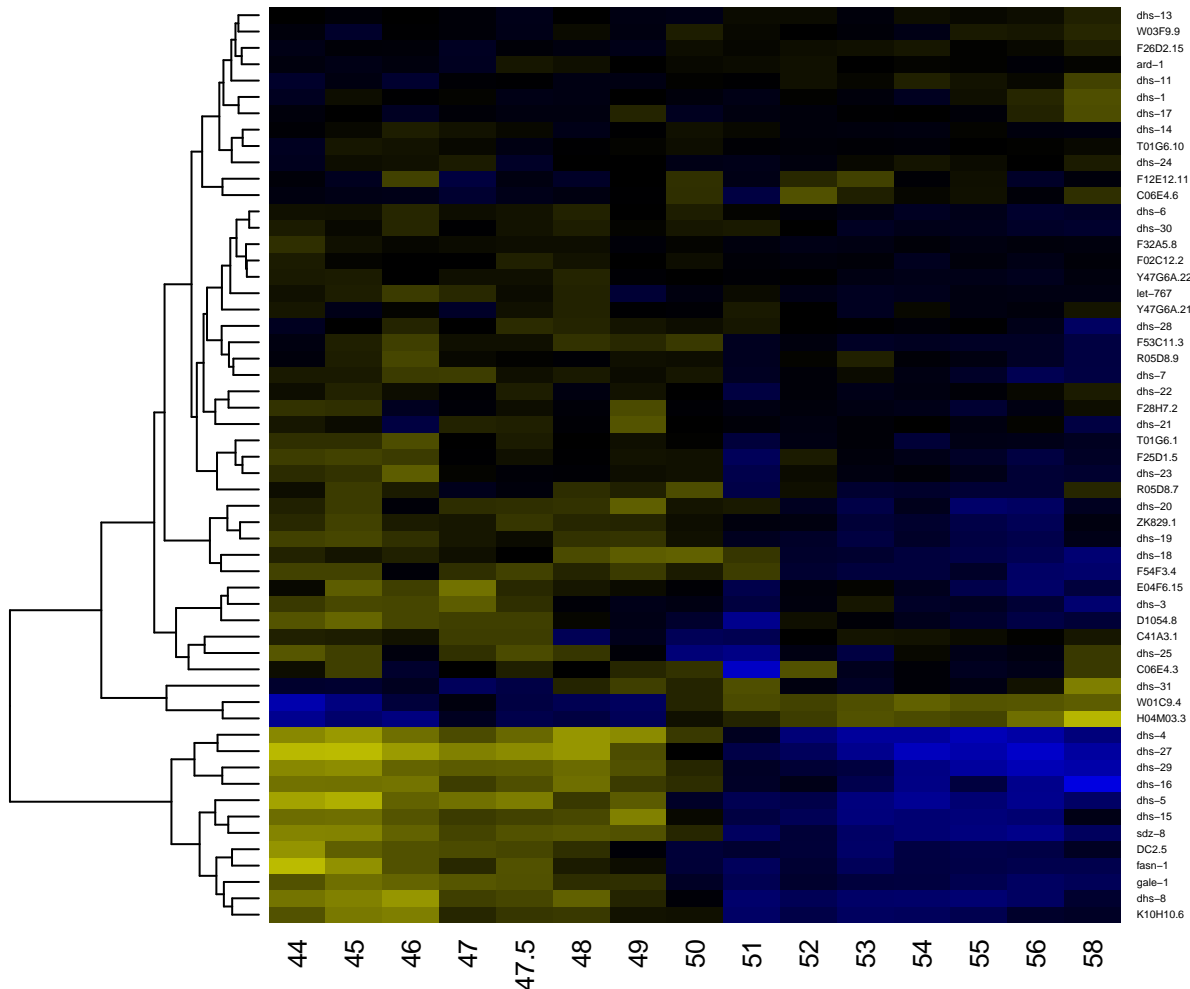











# Potassium channel, two pore-domain

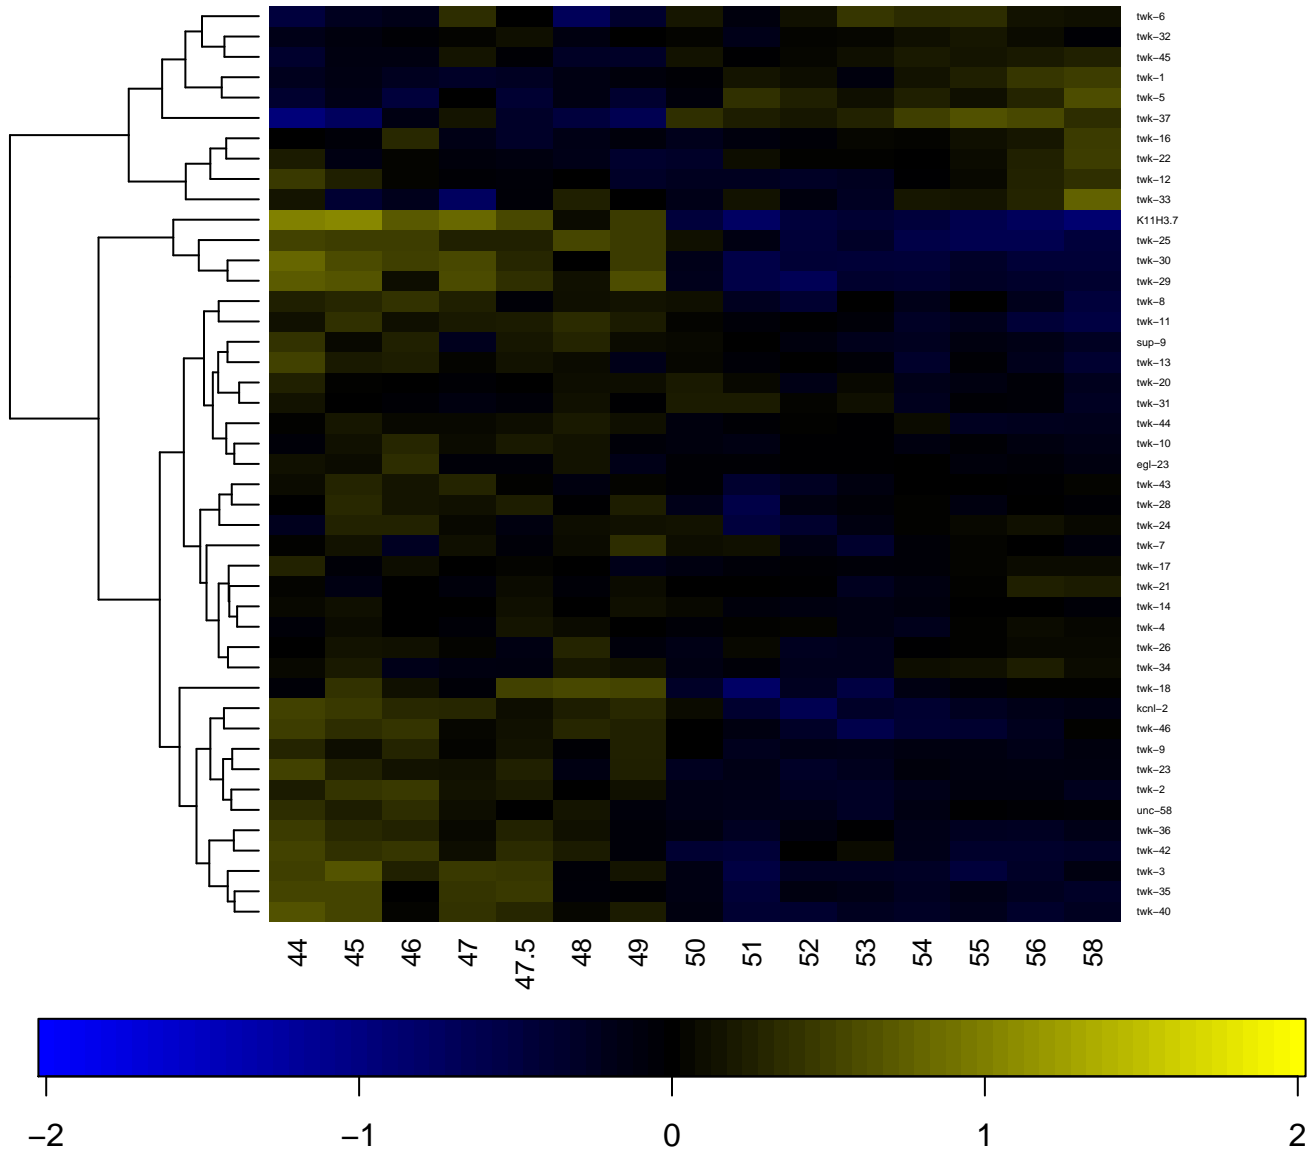



# Potassium channel, voltage dependent, Kv

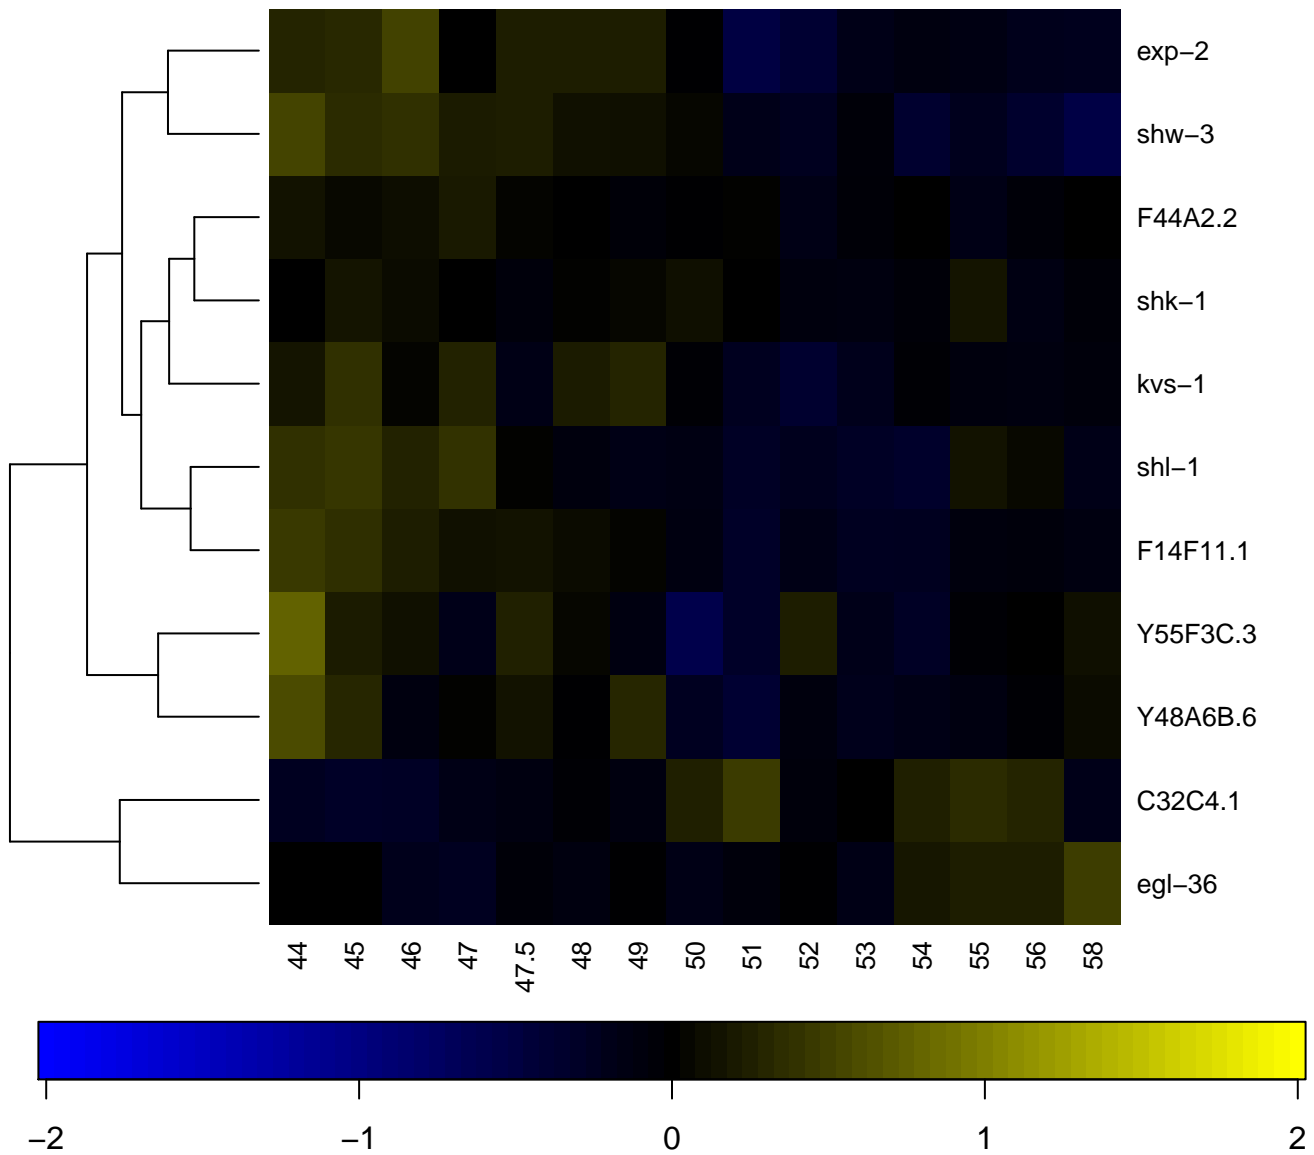

# Potassium channel, voltage dependent, Kv, tetramerisatio

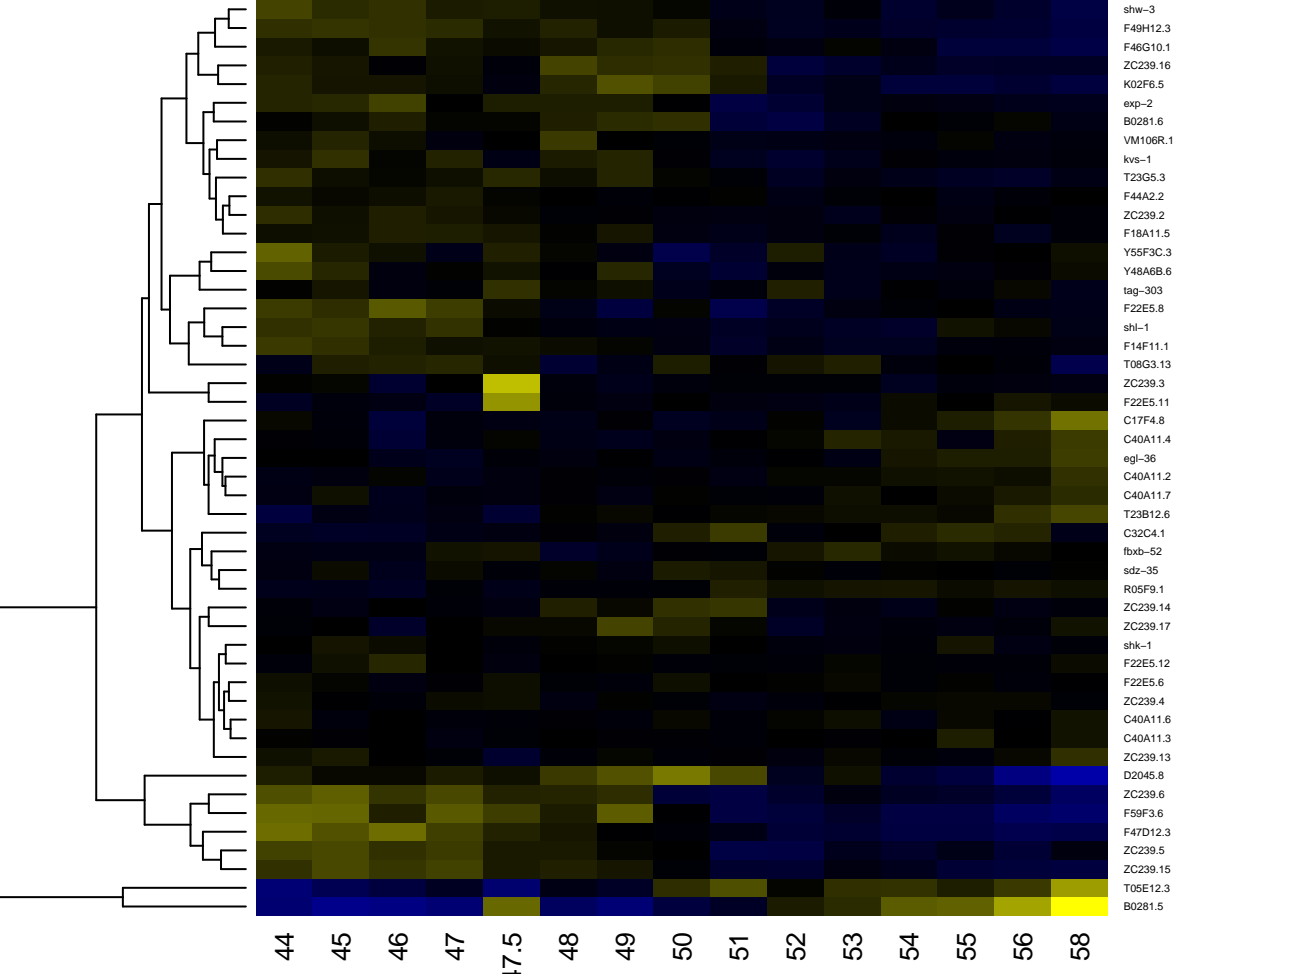















# Prolyl oligopeptidase family

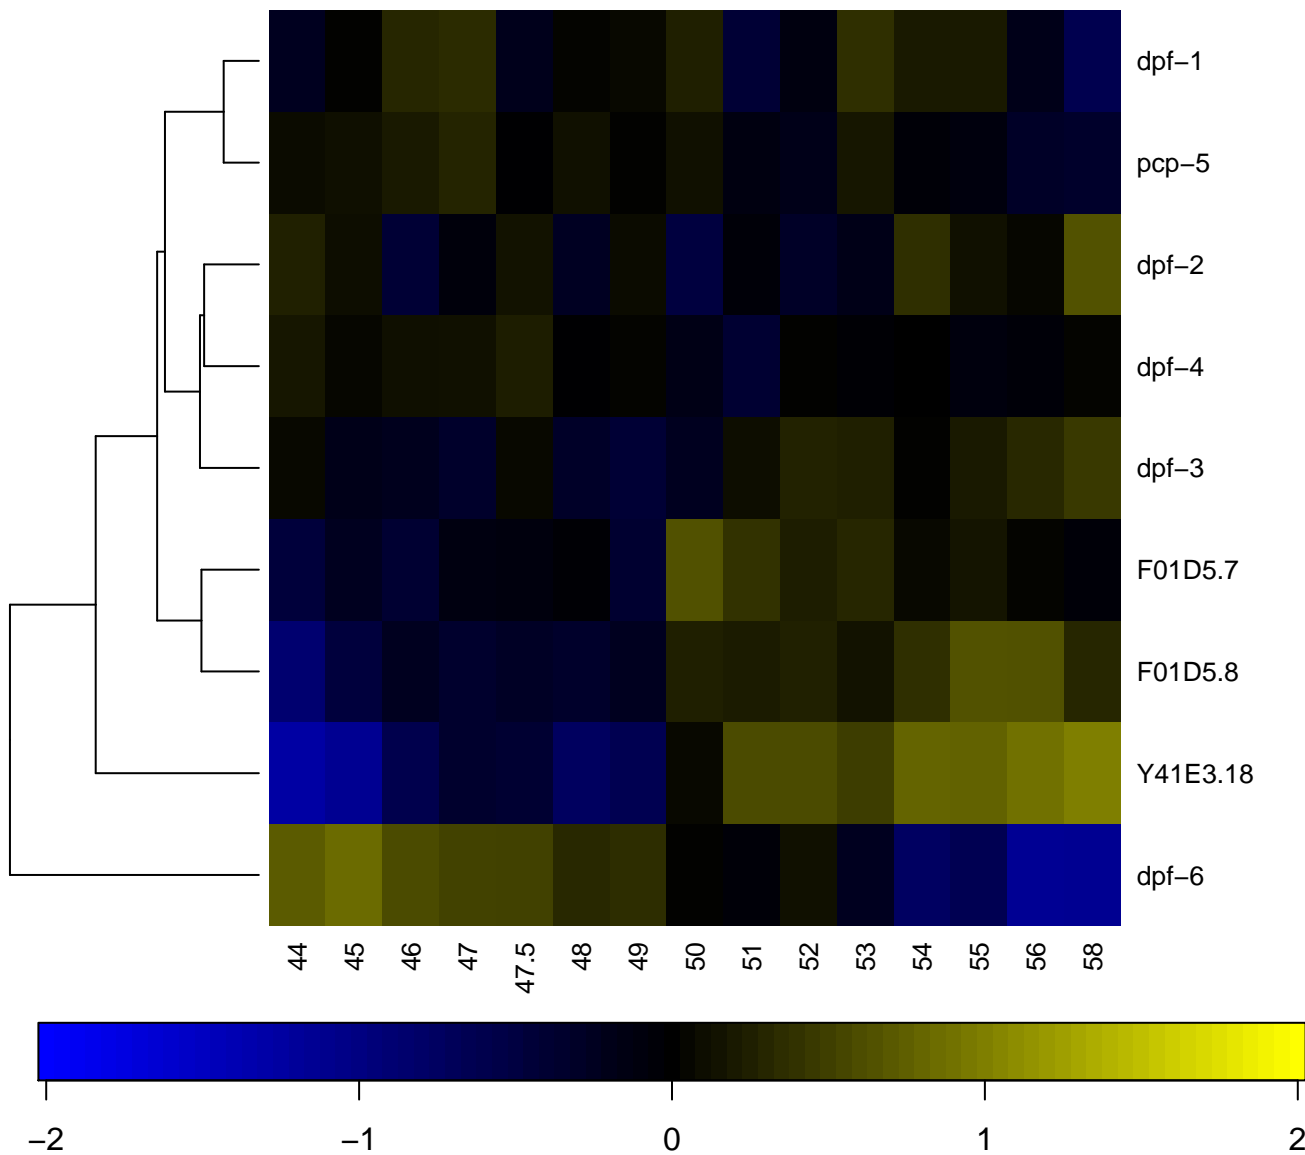



# Protease inhibitor I8, cysteine-rich trypsin inhibitor-like

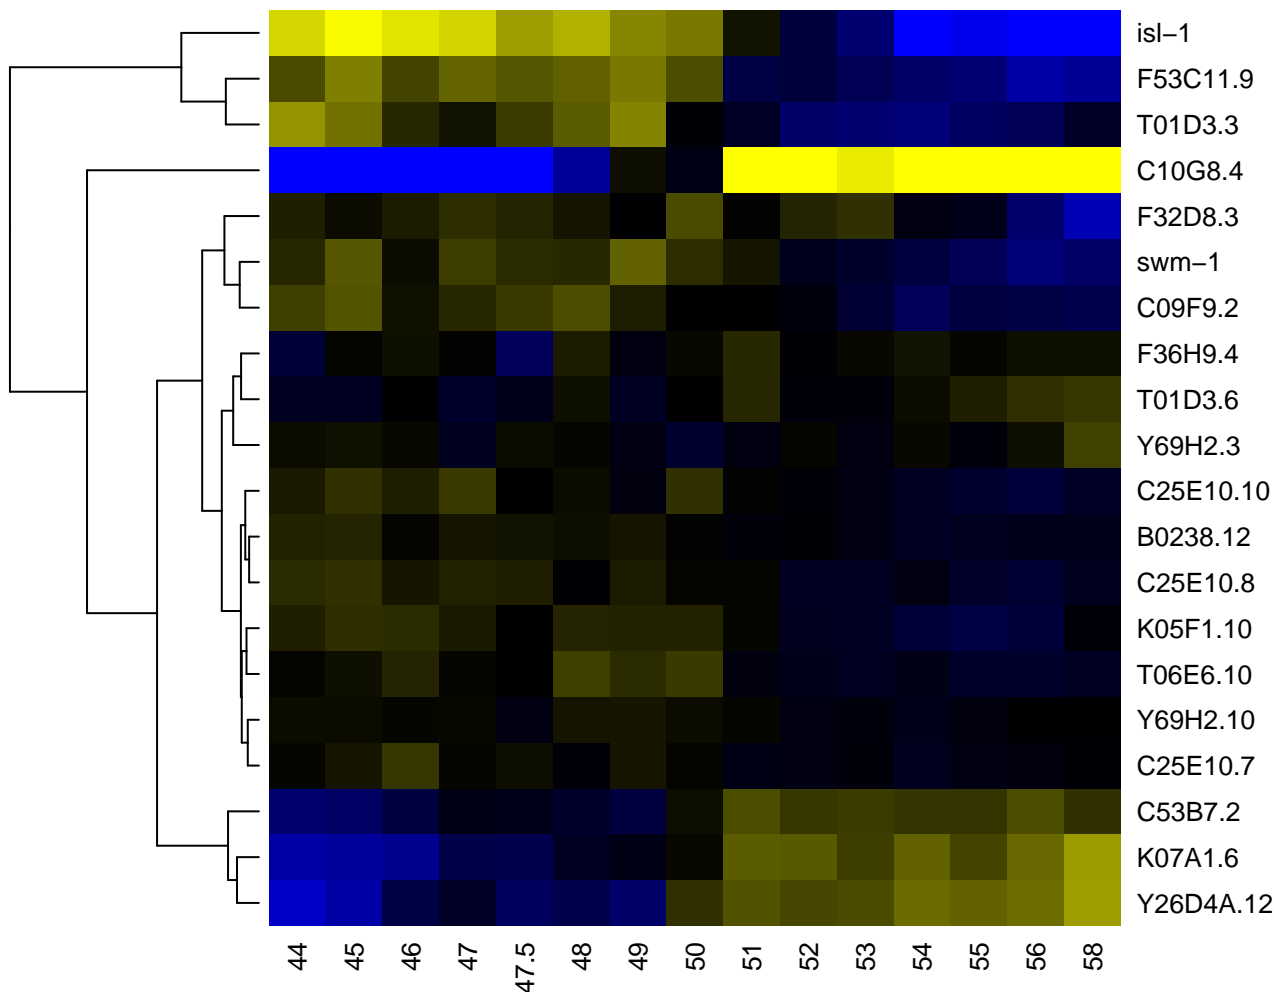

# Proteasome component (PCI) domain

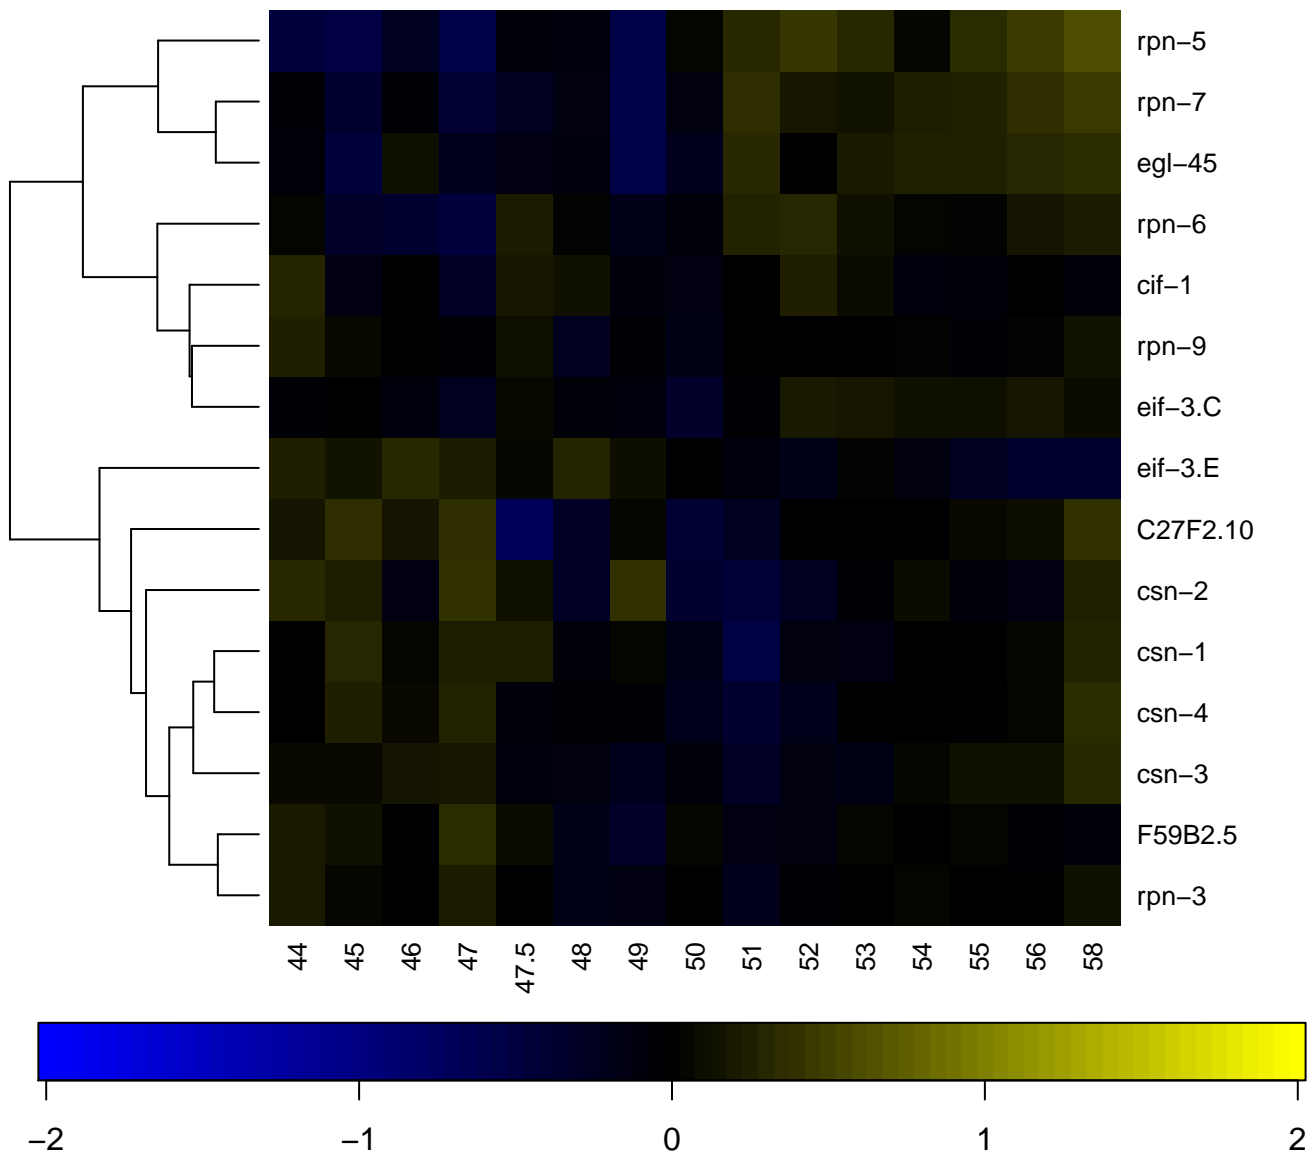



# Proteasome subunit

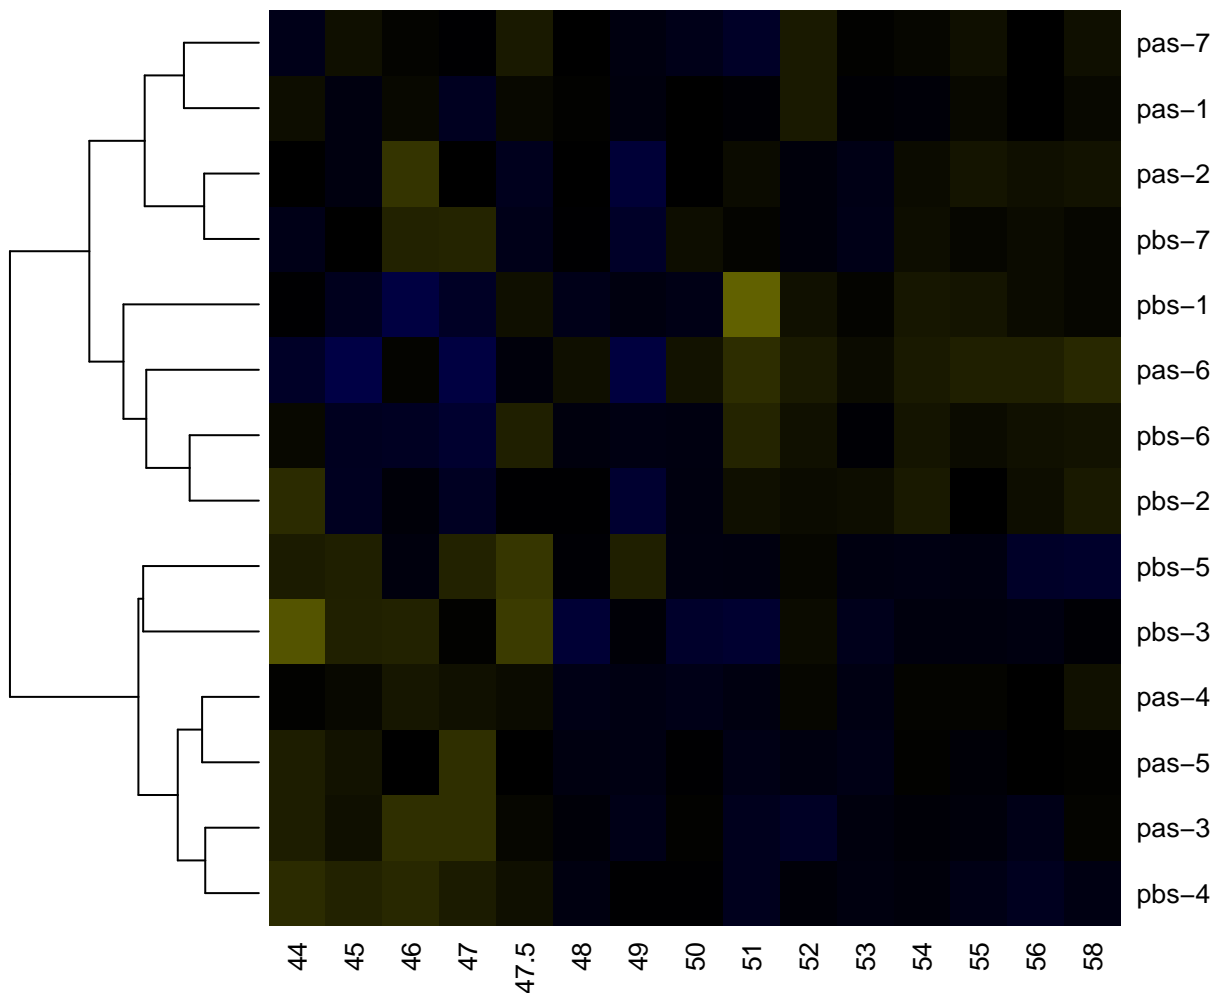

# Proteasome subunit A N-terminal signature

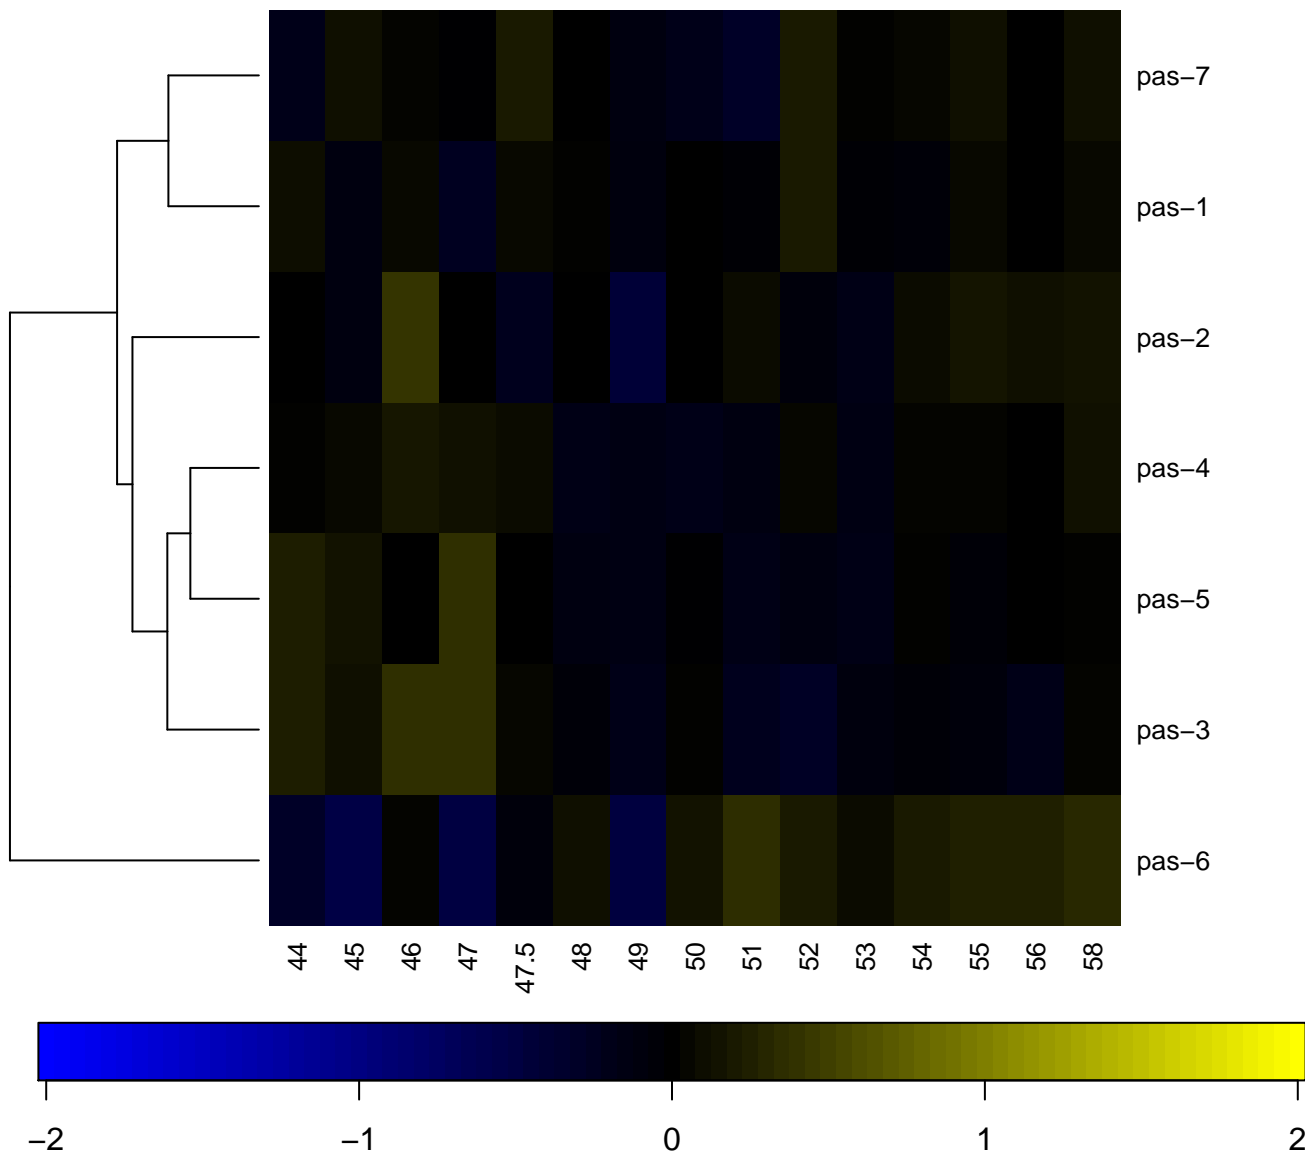





# Protein-tyrosine phosphatase

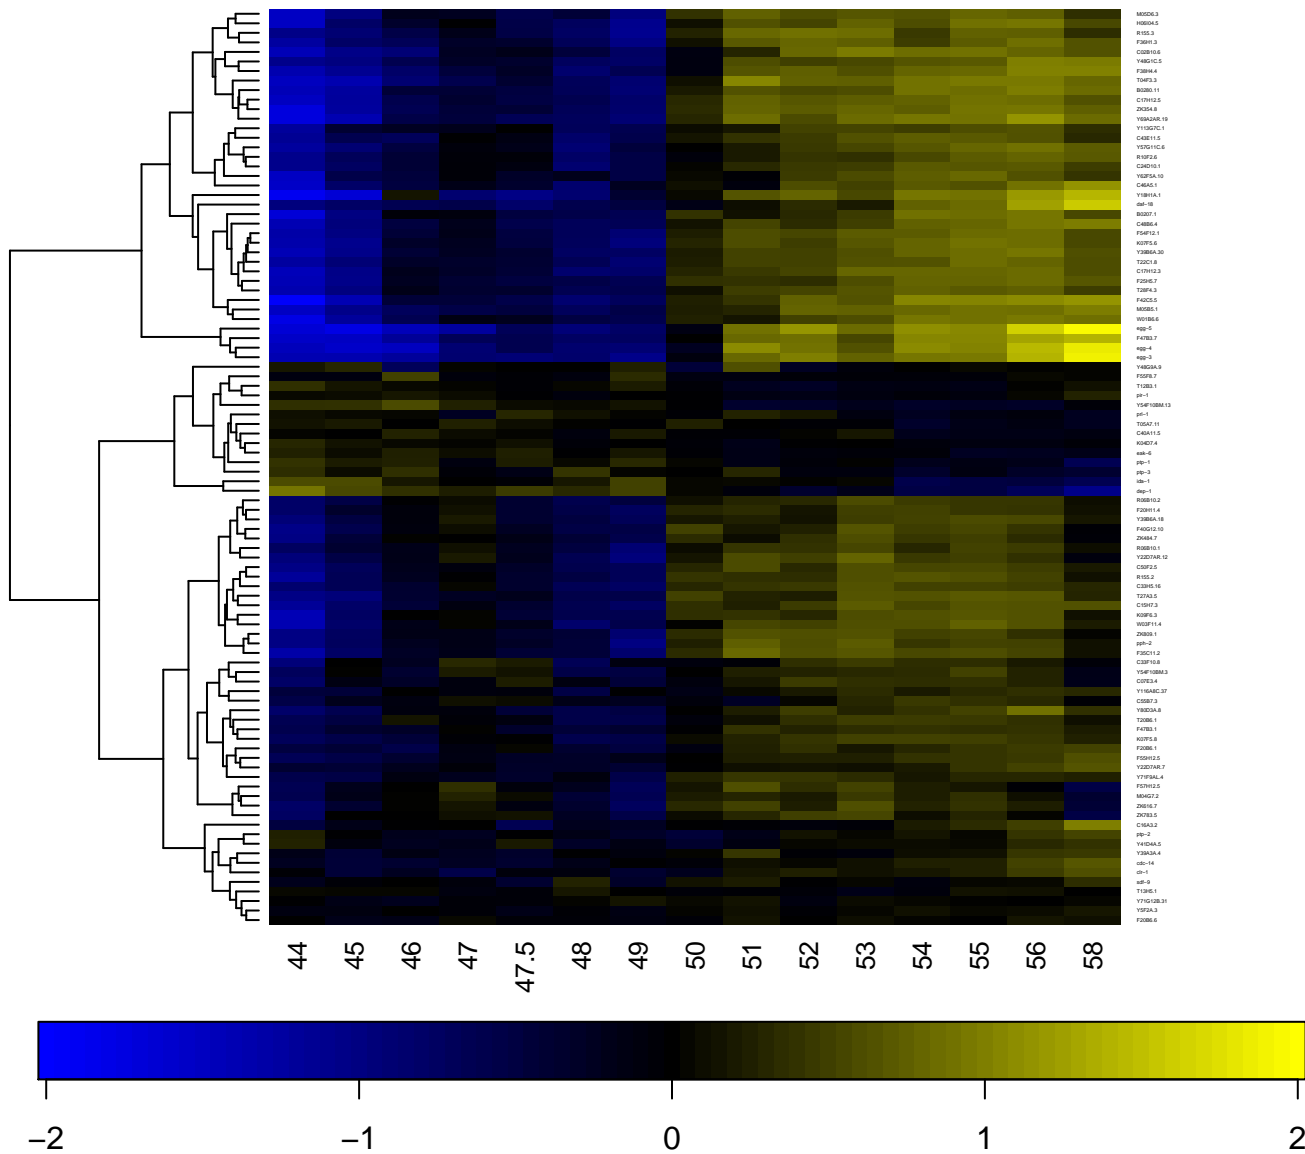

# Protein-tyrosine phosphatase, active site

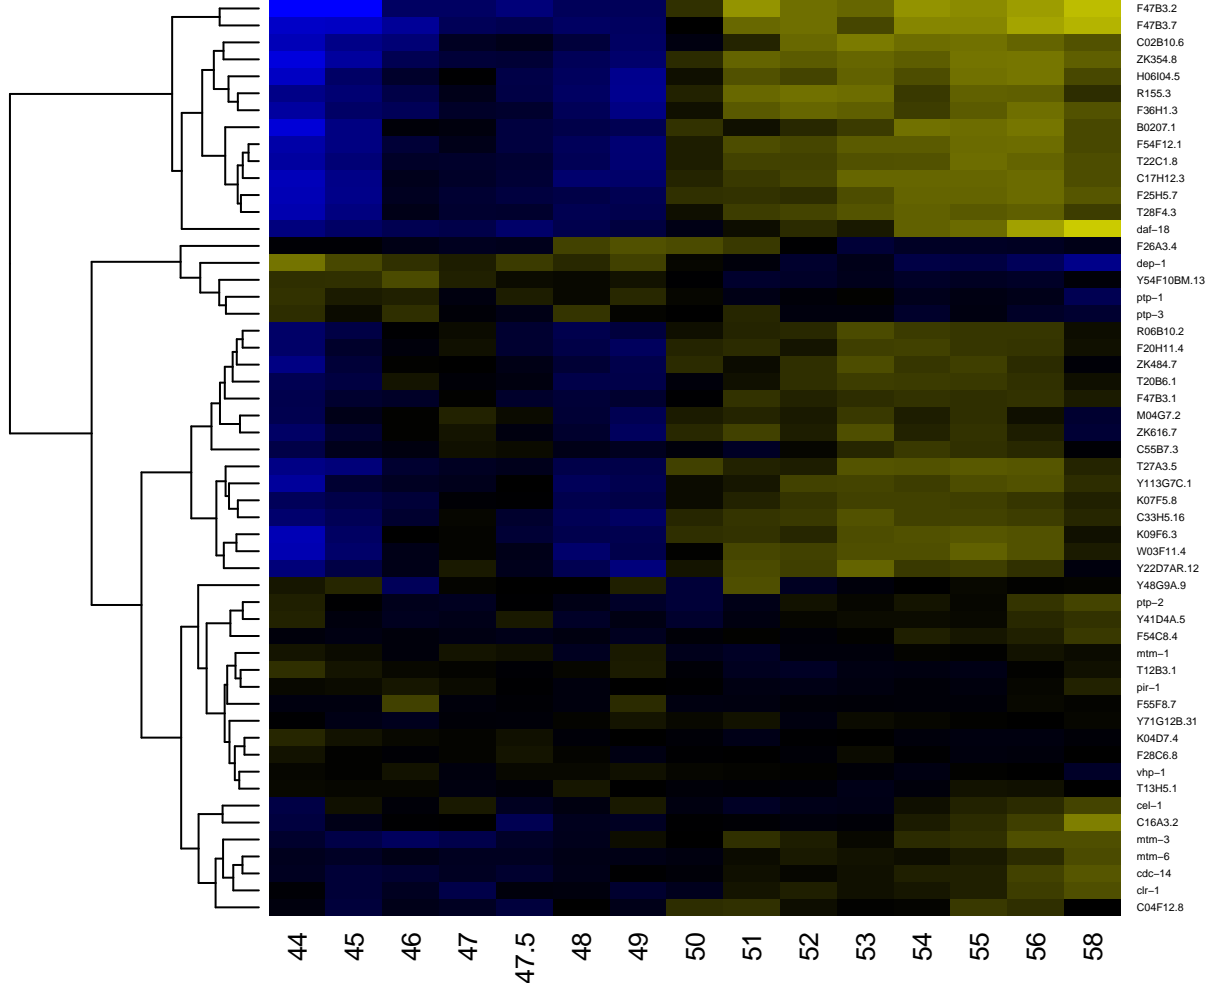

# Protein-tyrosine phosphatase, catalytic

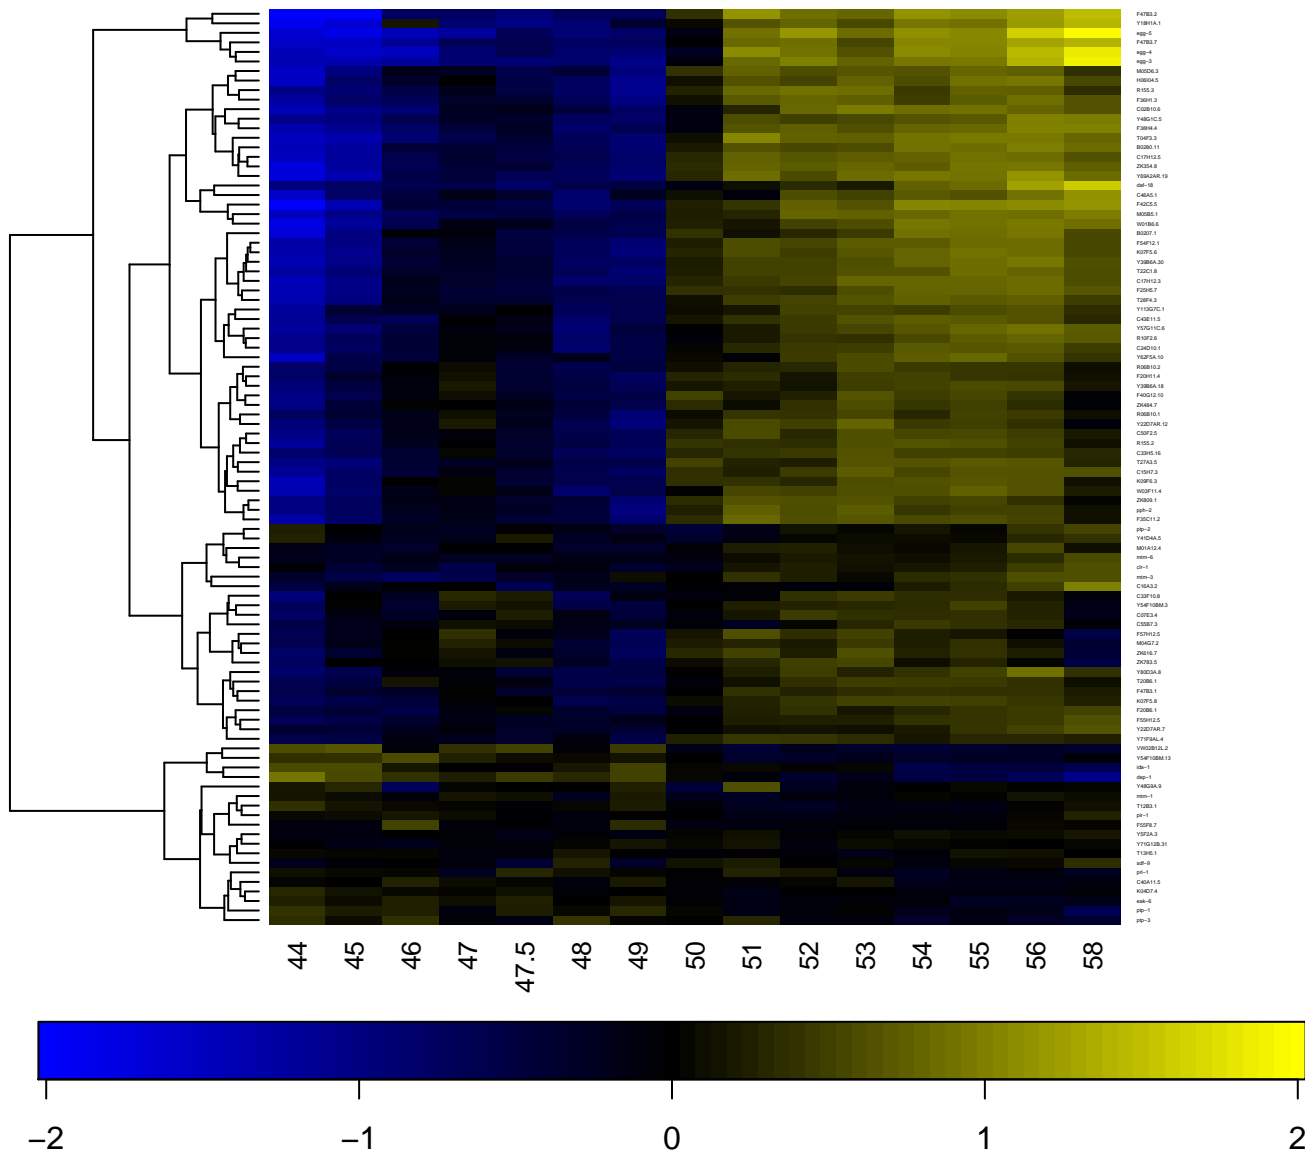

# Protein-tyrosine phosphatase, receptor/non-receptor type

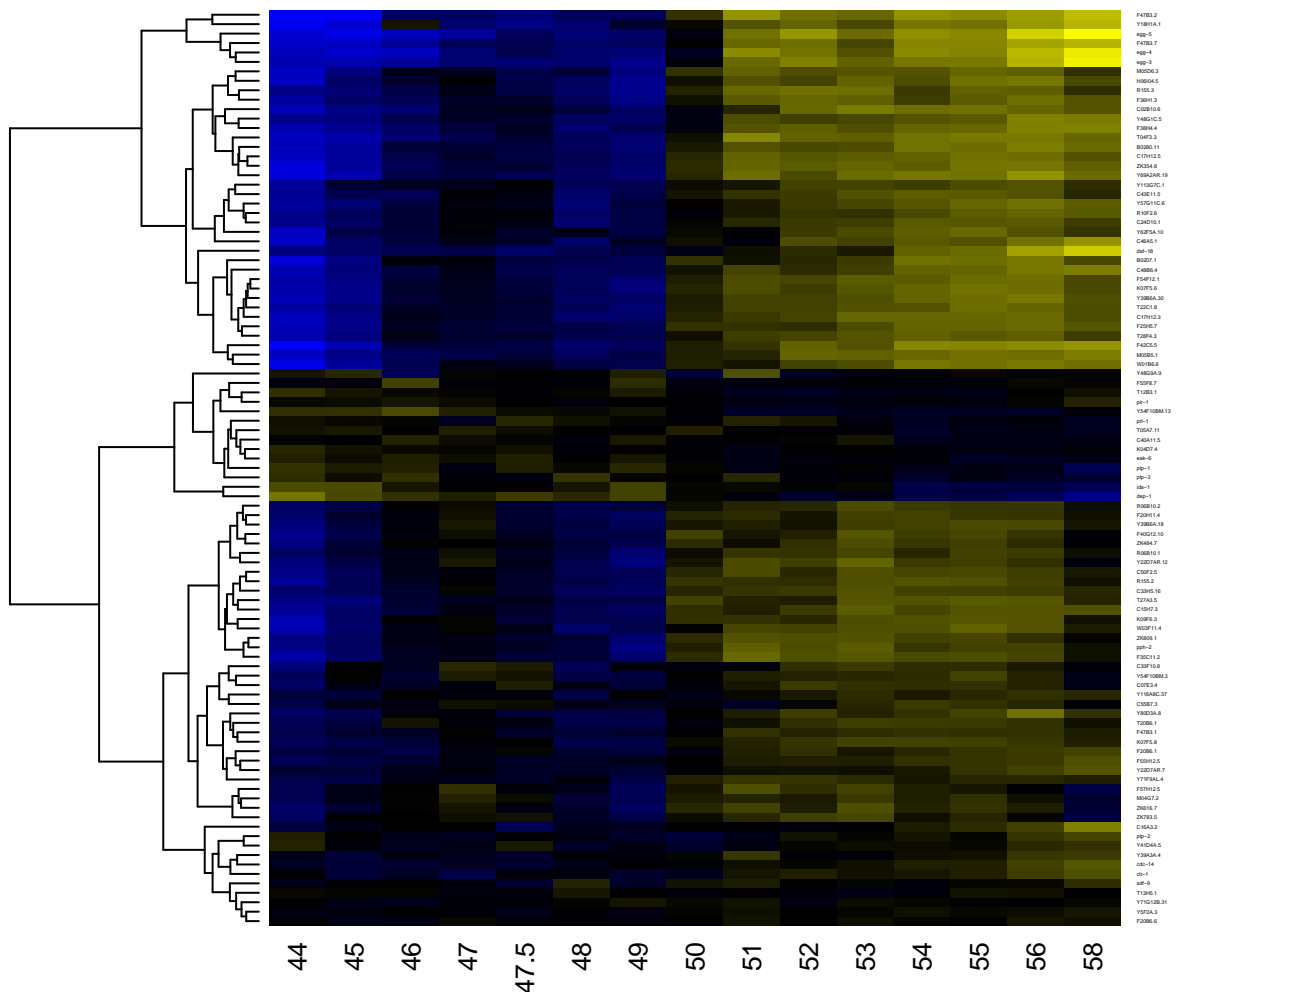



# Protein kinase C-like, phorbol ester/diacylglycerol binding

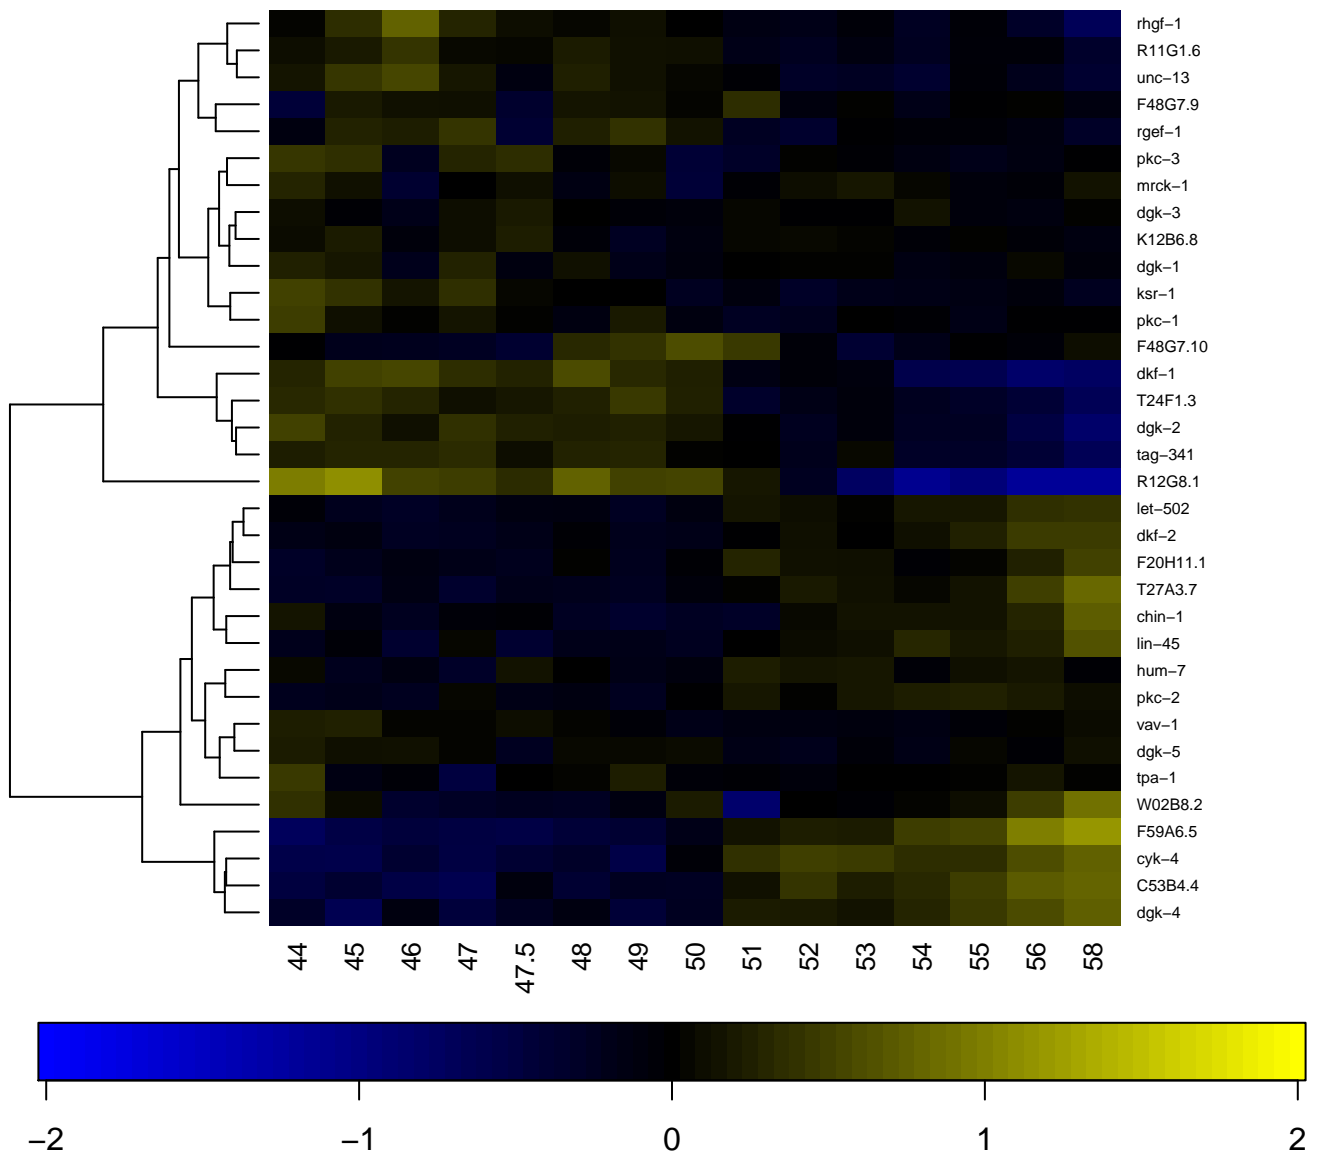





# Protein kinase domain

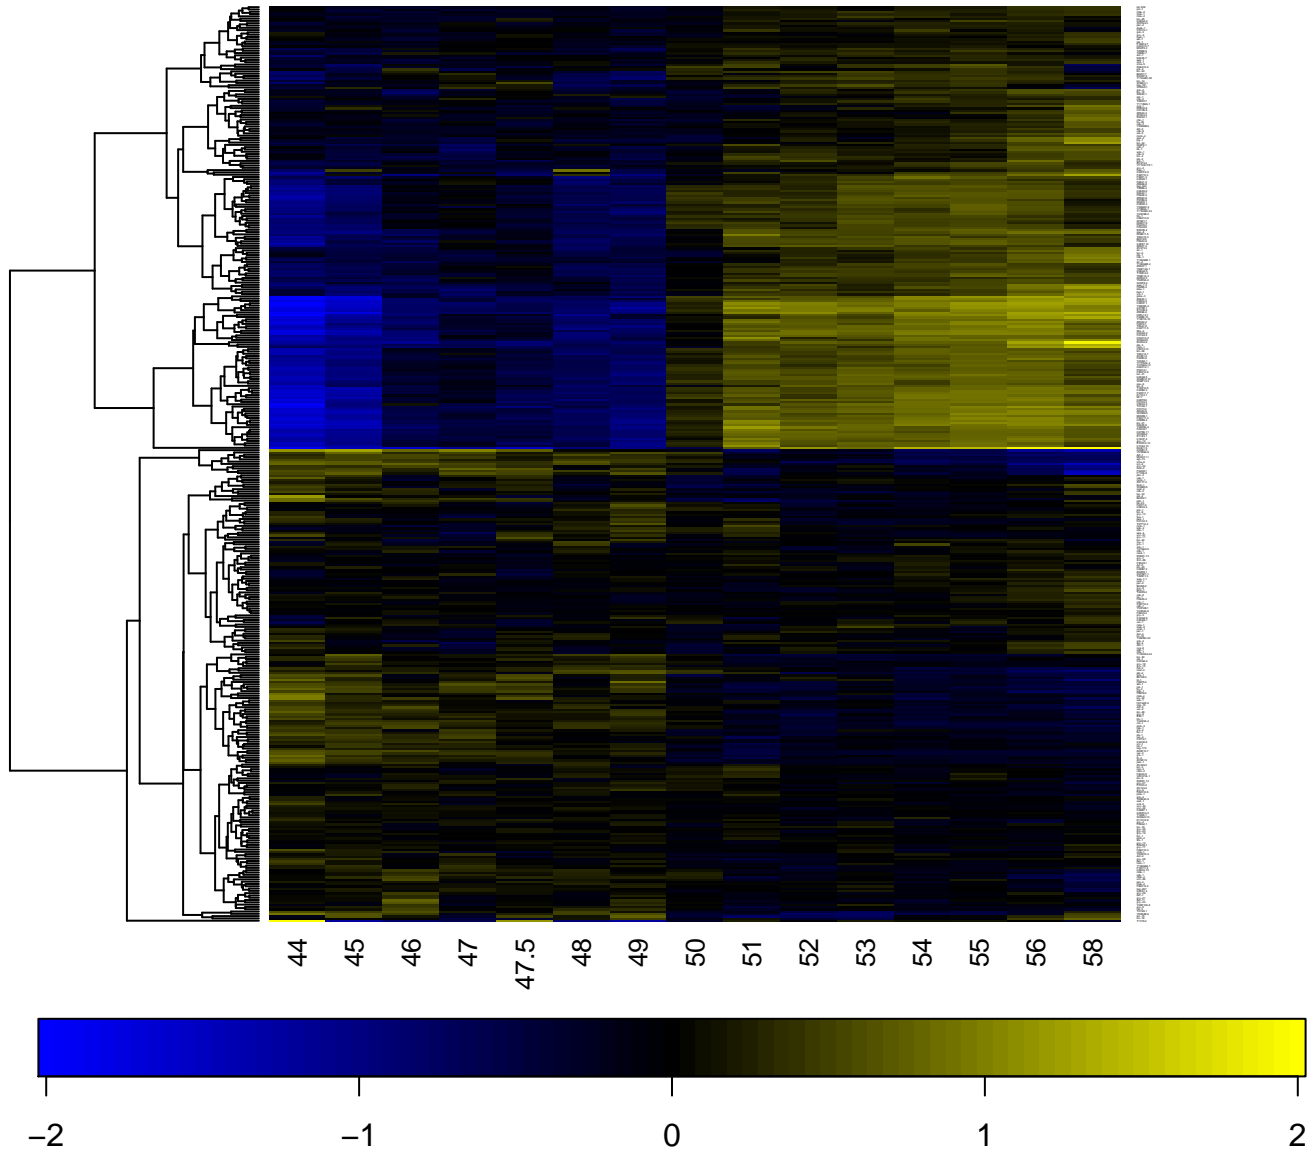

# Protein kinase, ATP binding site

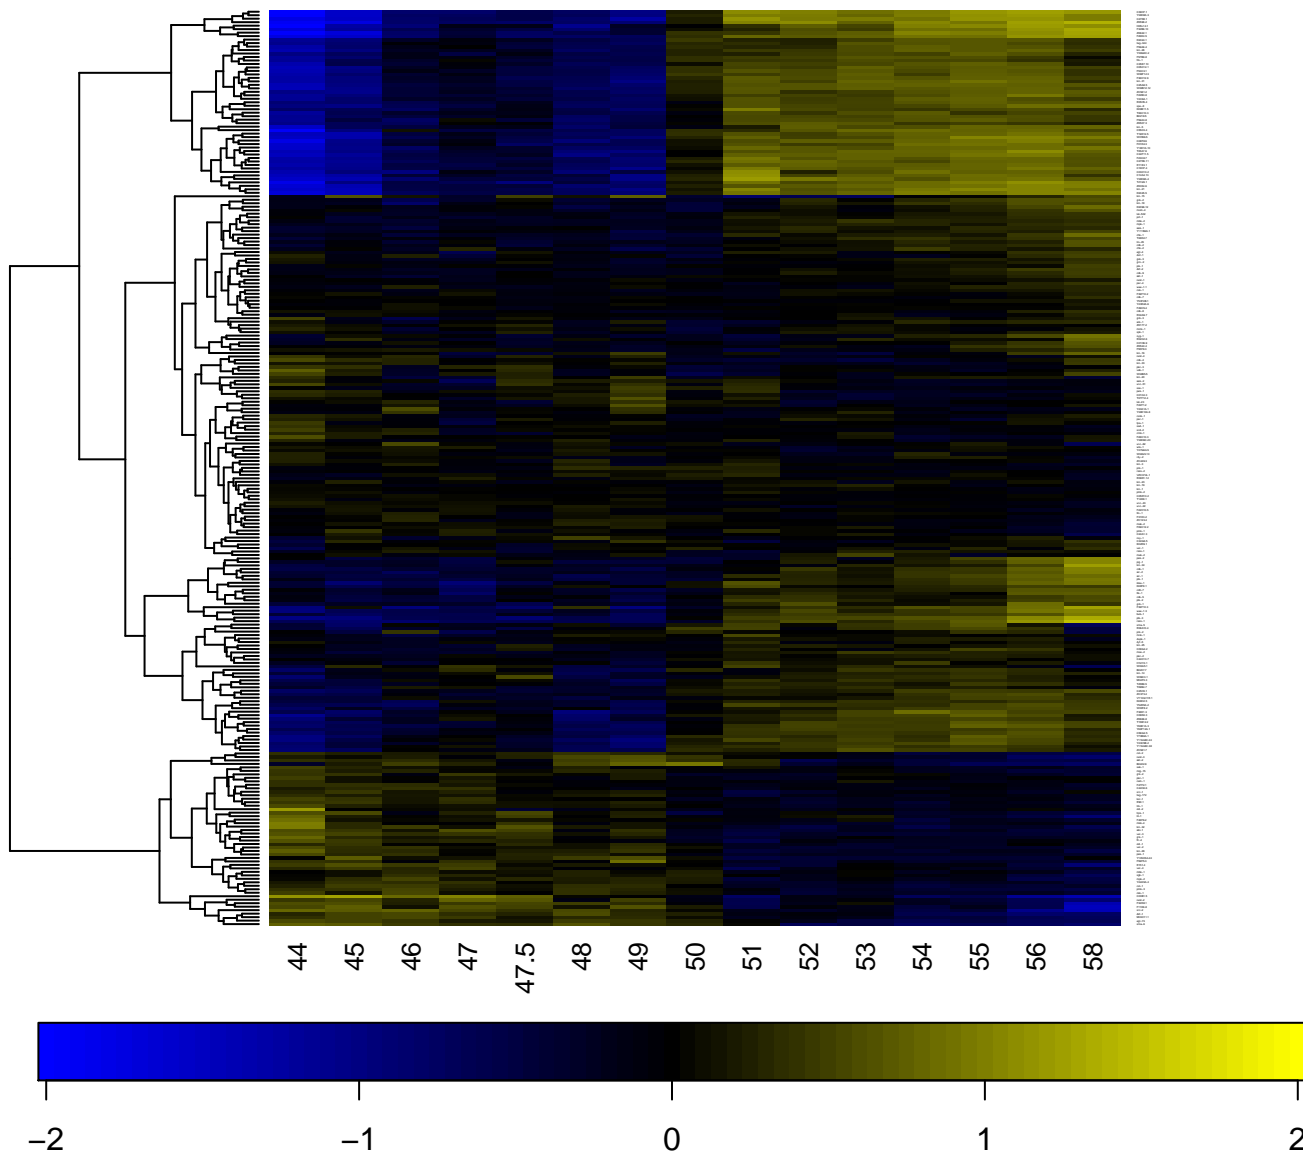

# Protein kinase, C-terminal

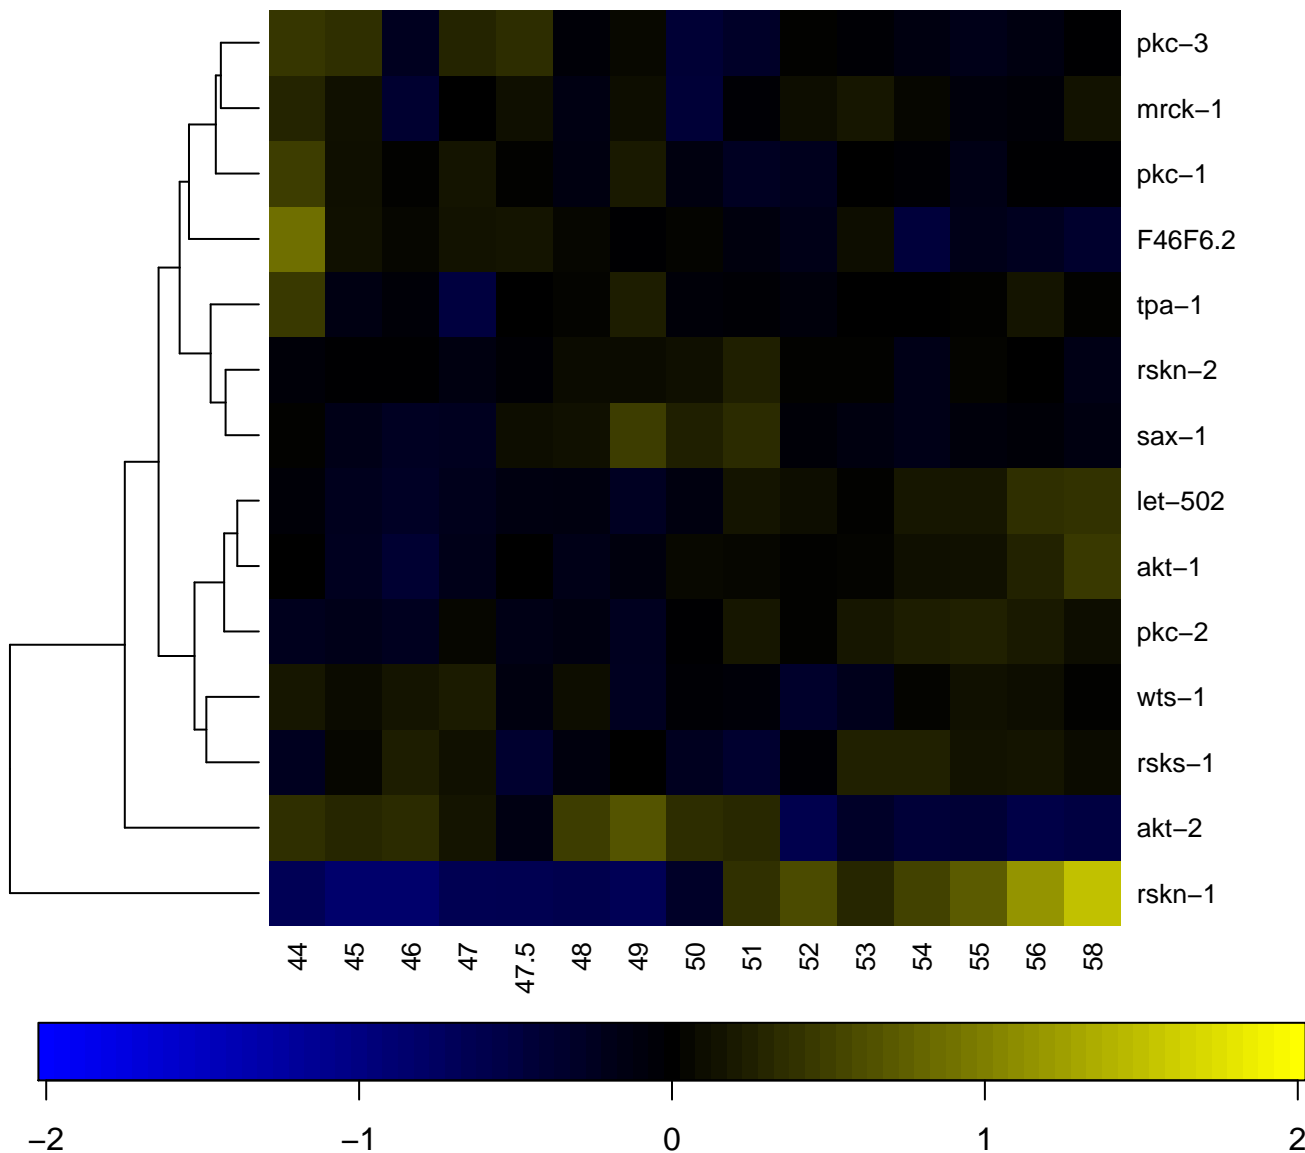

# Protein of unknown function

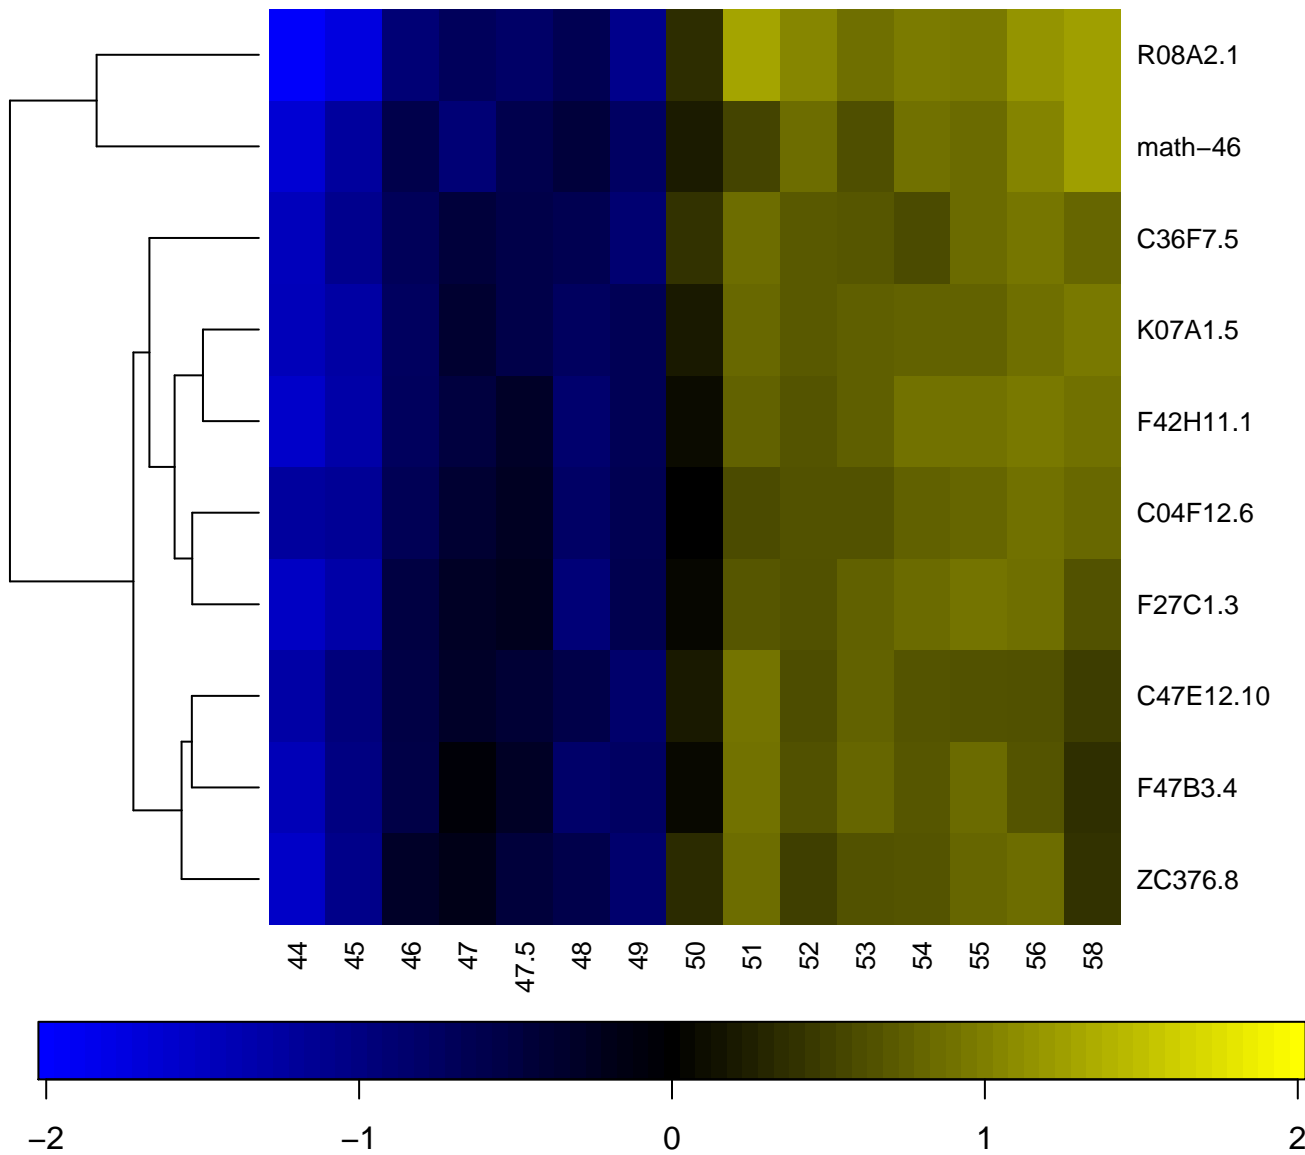





# Protein of unknown function (DUF1248)

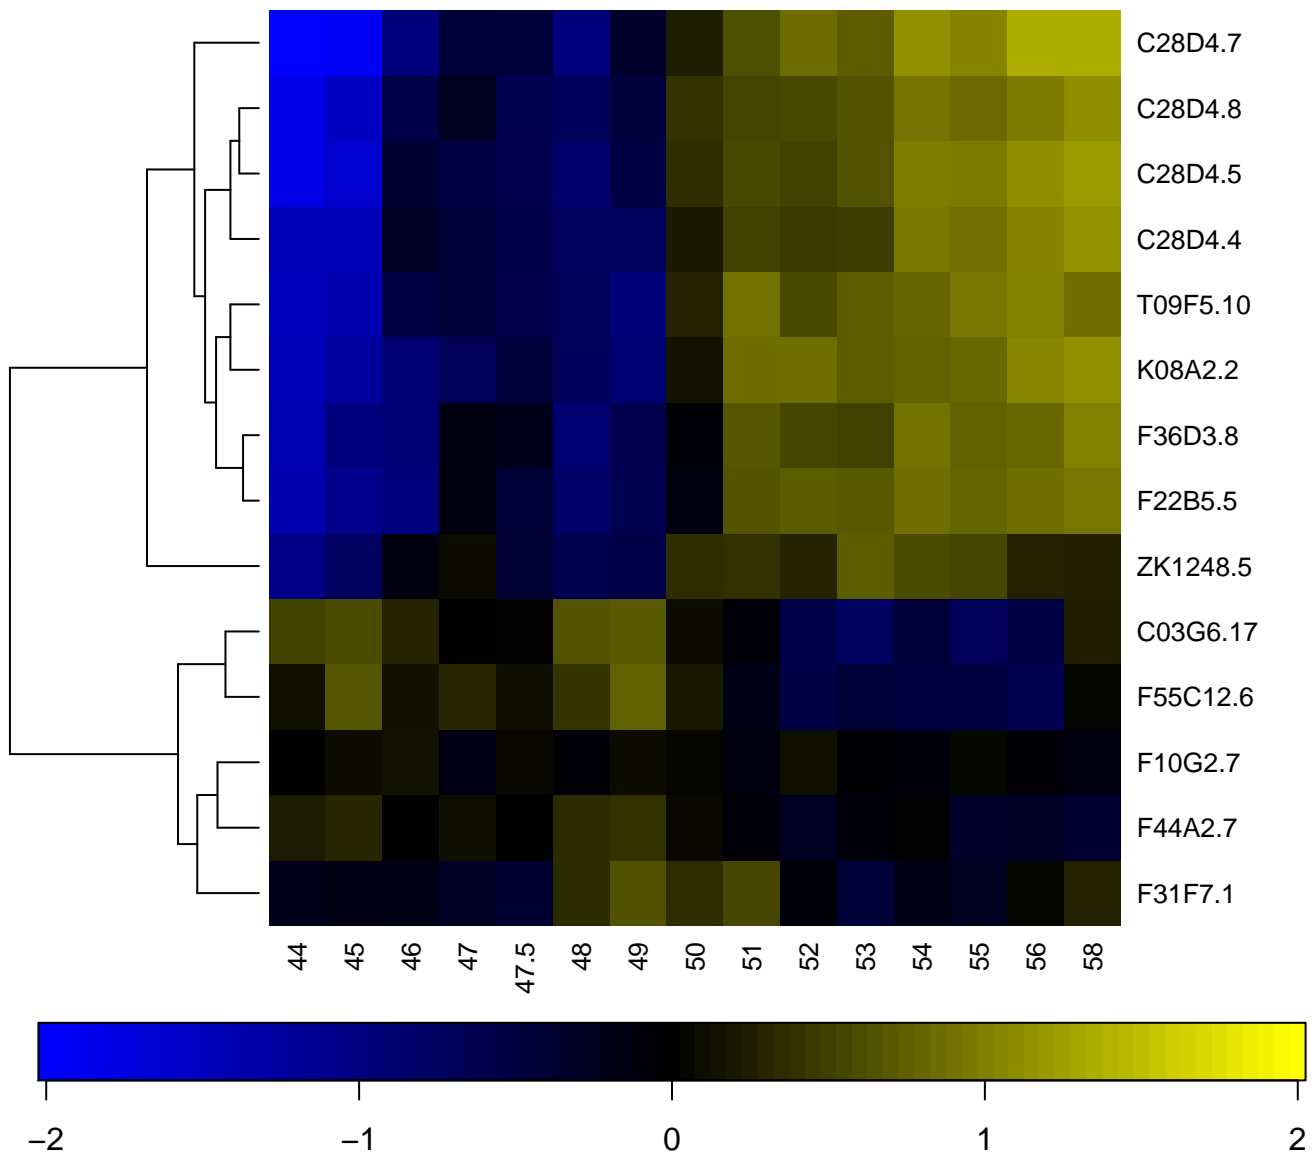



















# Protein of unknown function (DUF2424)

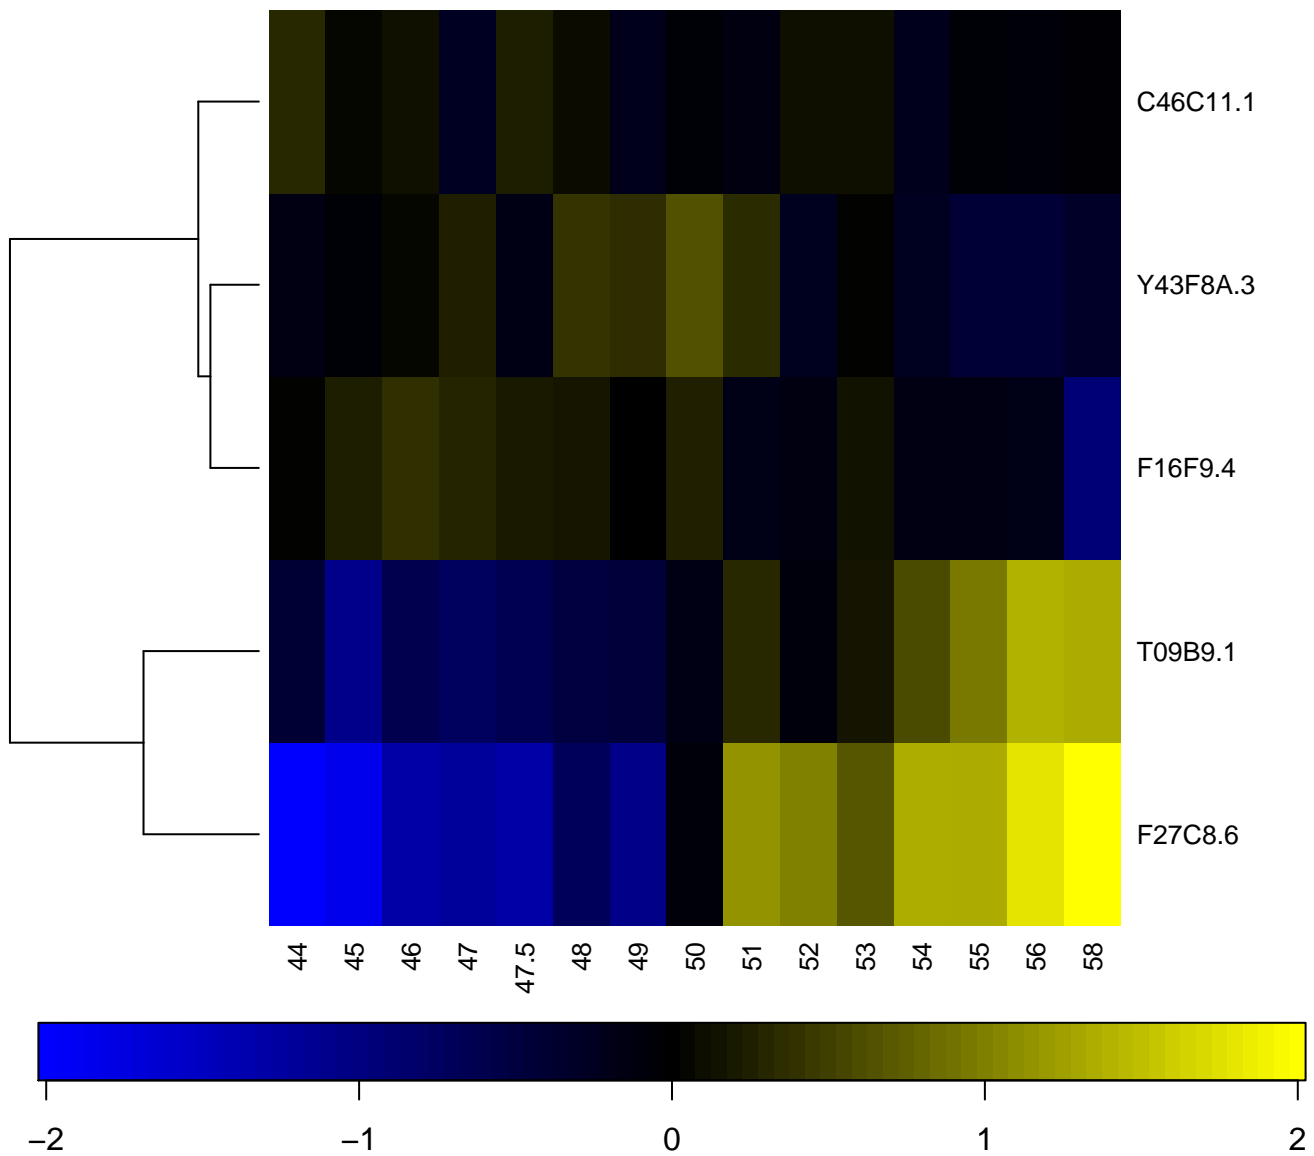

# Protein of unknown function (DUF2650)

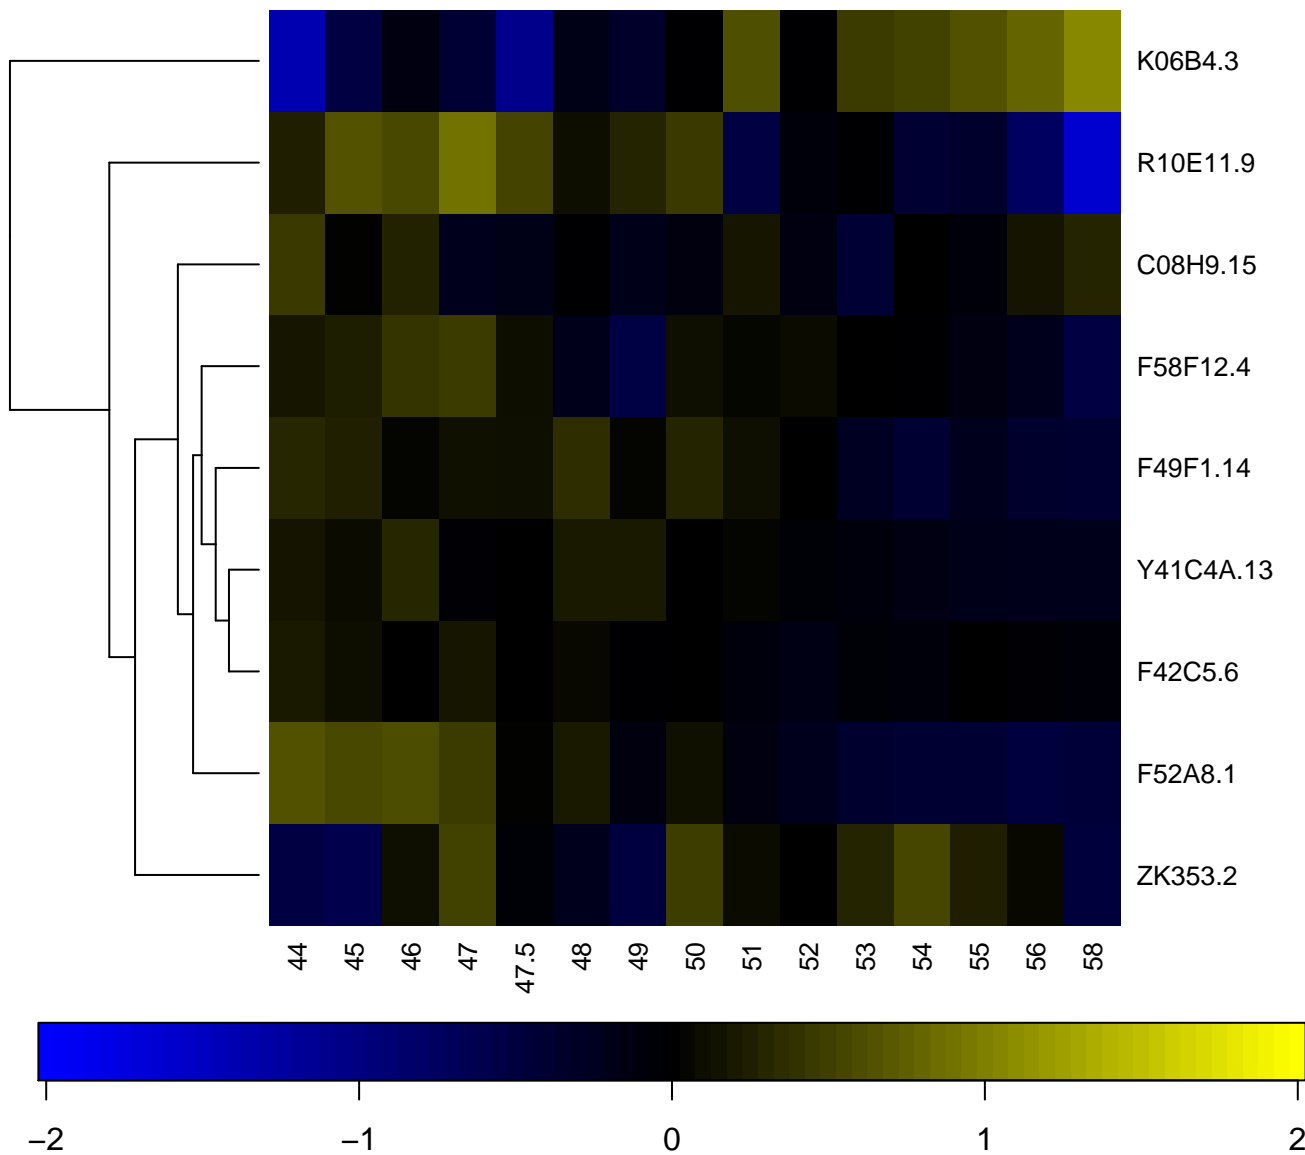









# Protein of unknown function (DUF672)

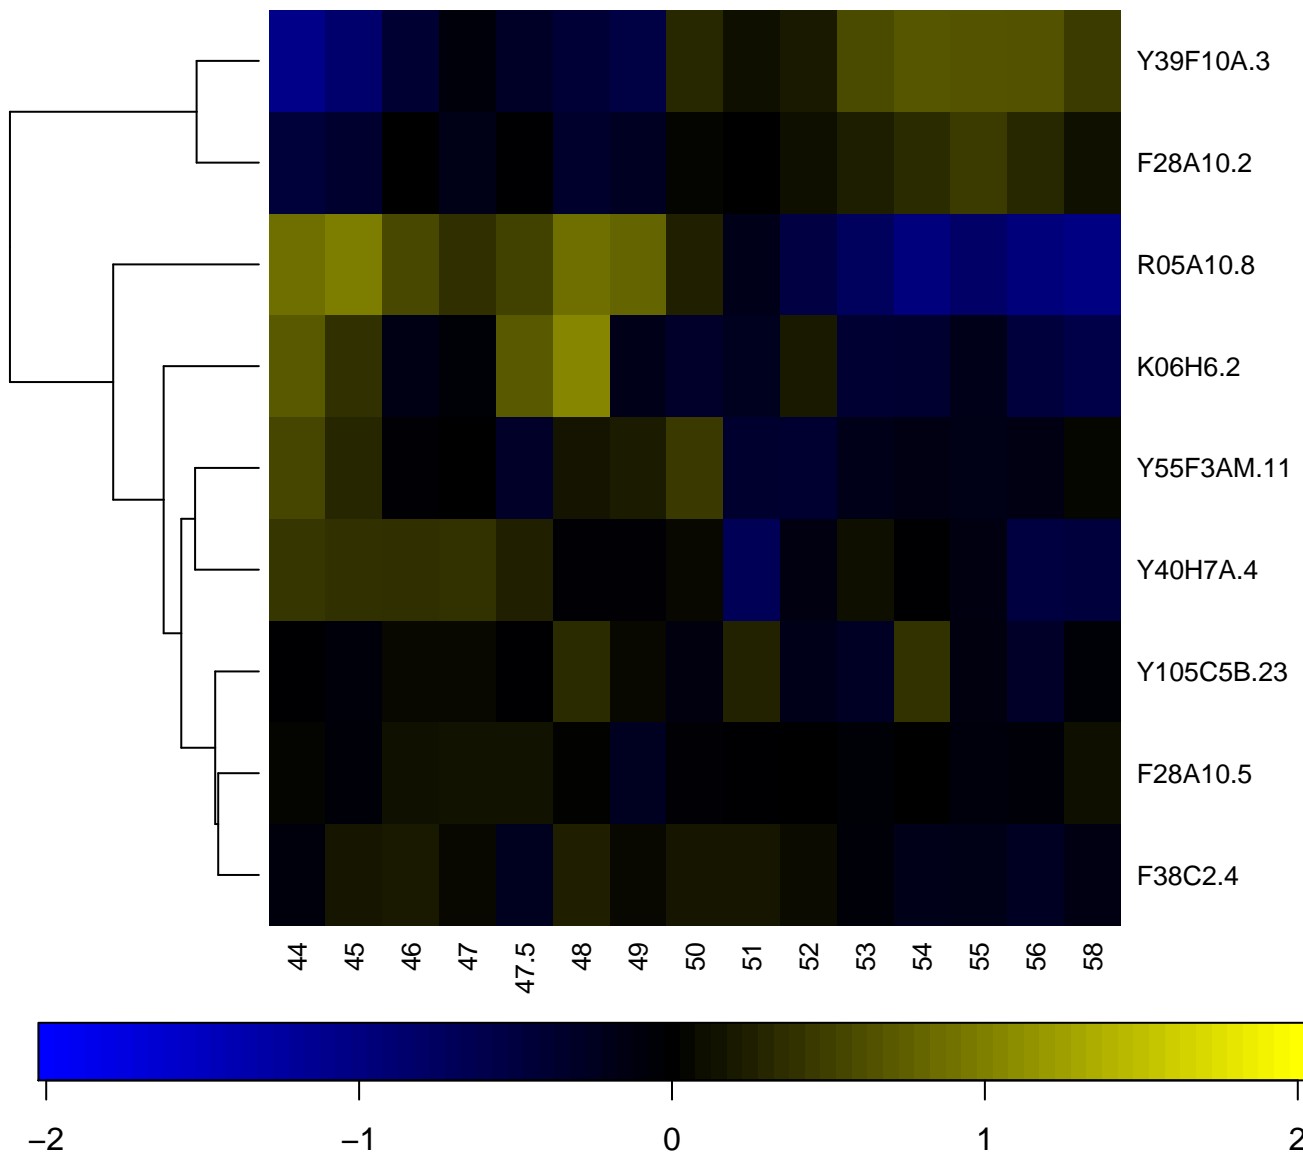



# Protein of unknown function (DUF684)

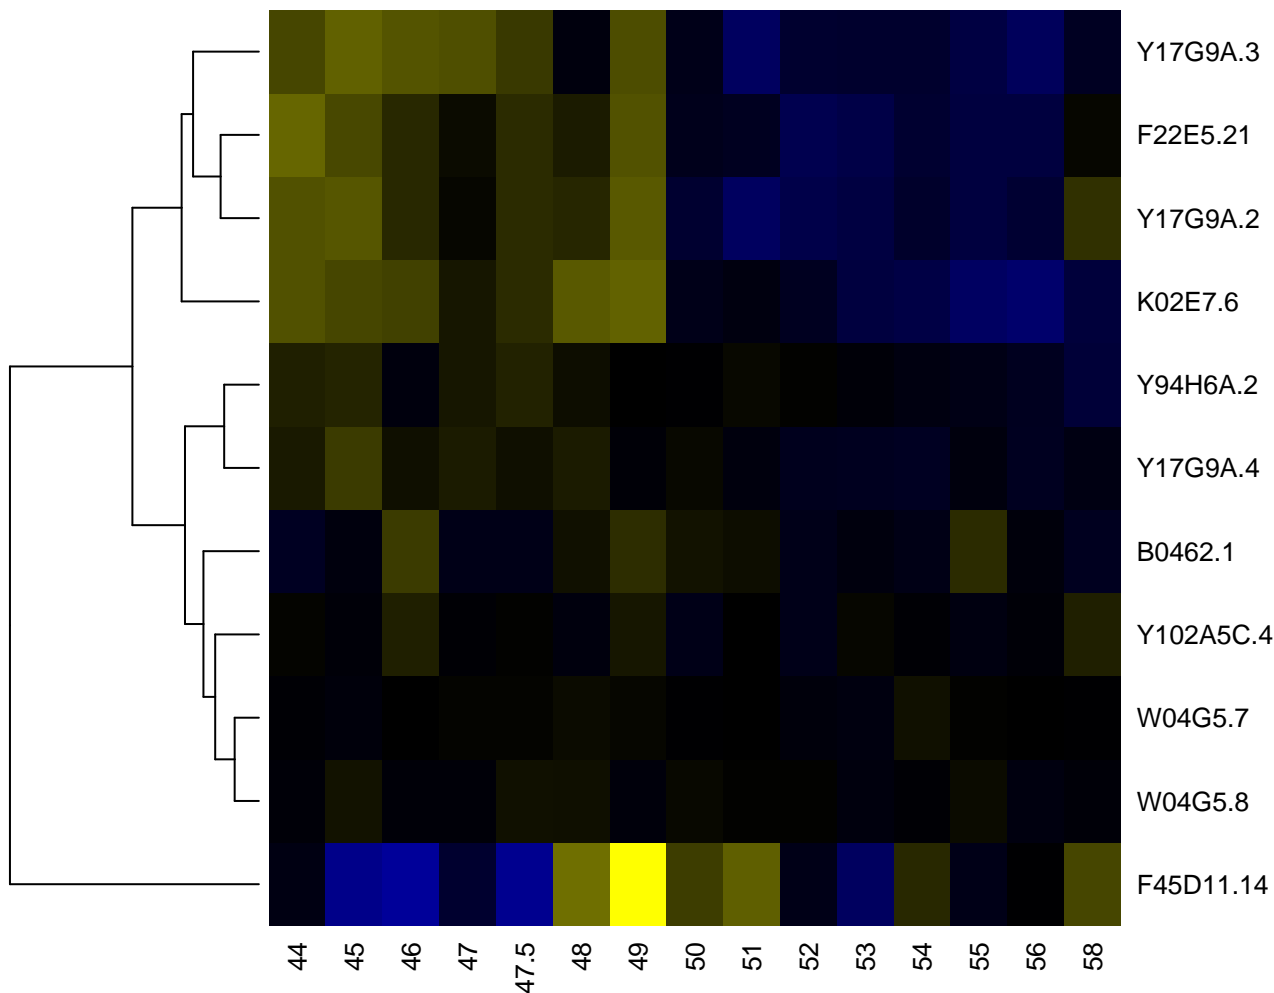





# Protein of unknown function DB

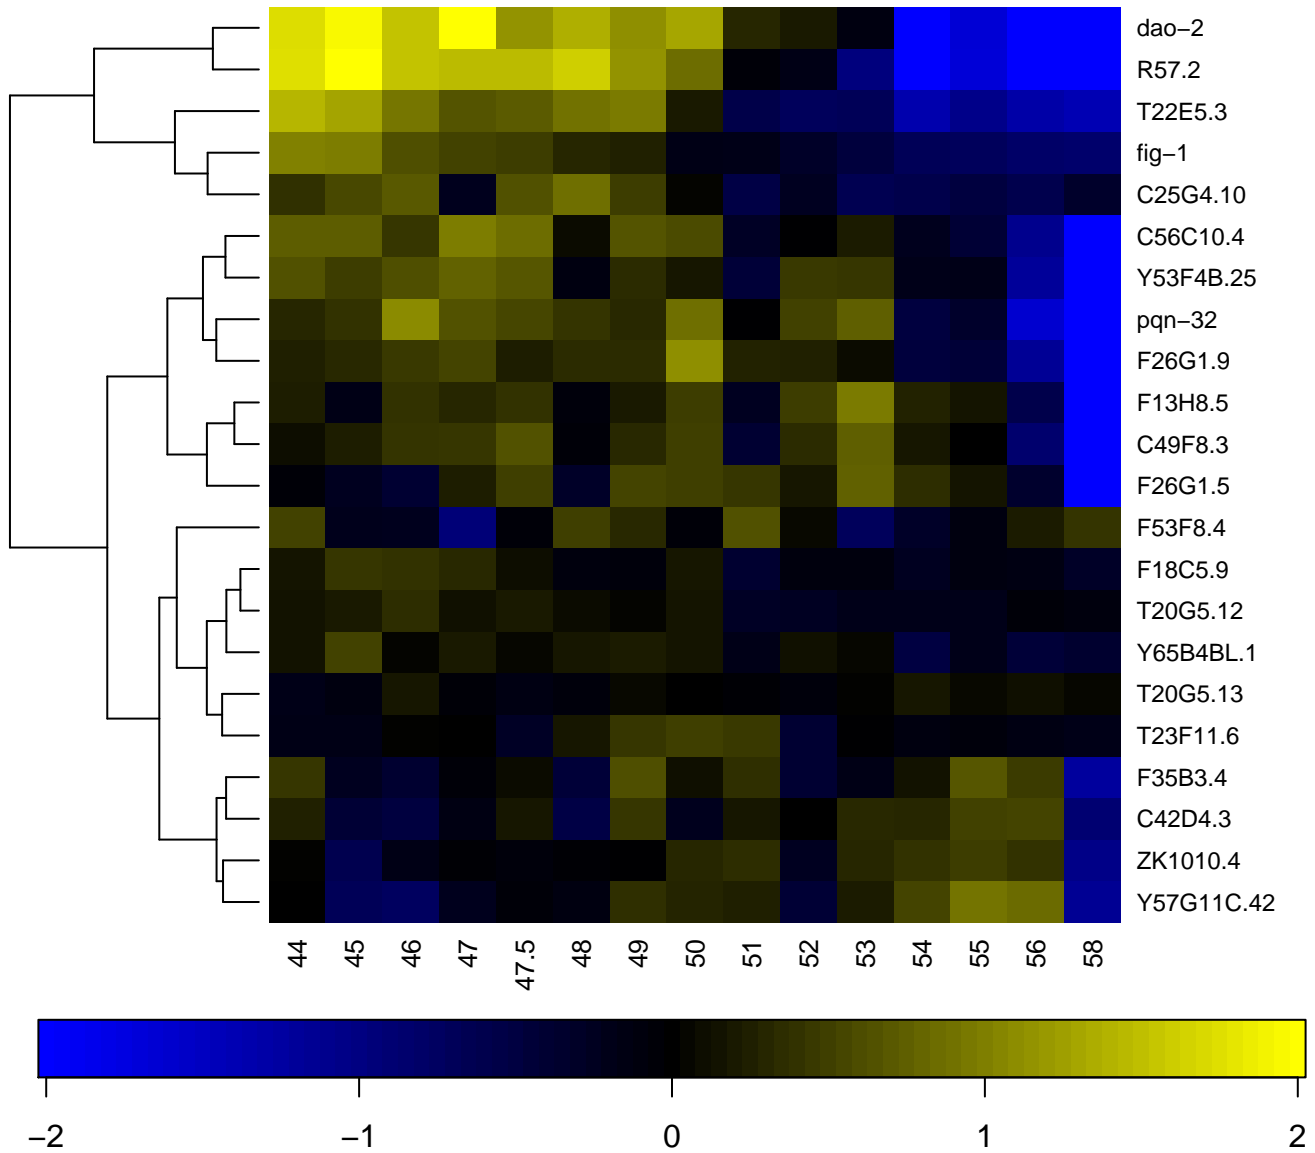





# Protein of unknown function DUF1248







# Protein of unknown function DUF1261

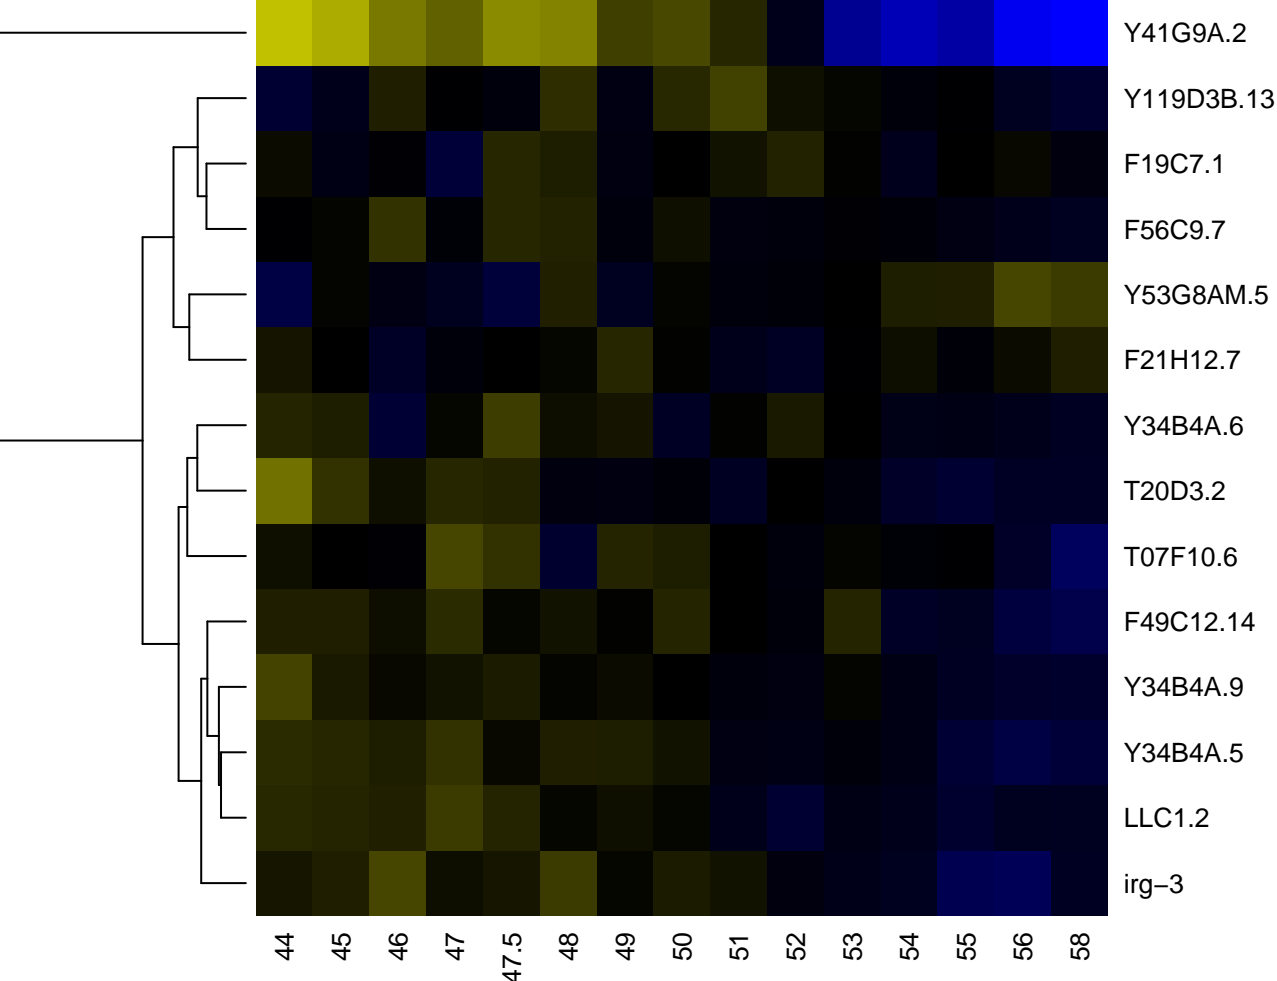



# Protein of unknown function DUF1280

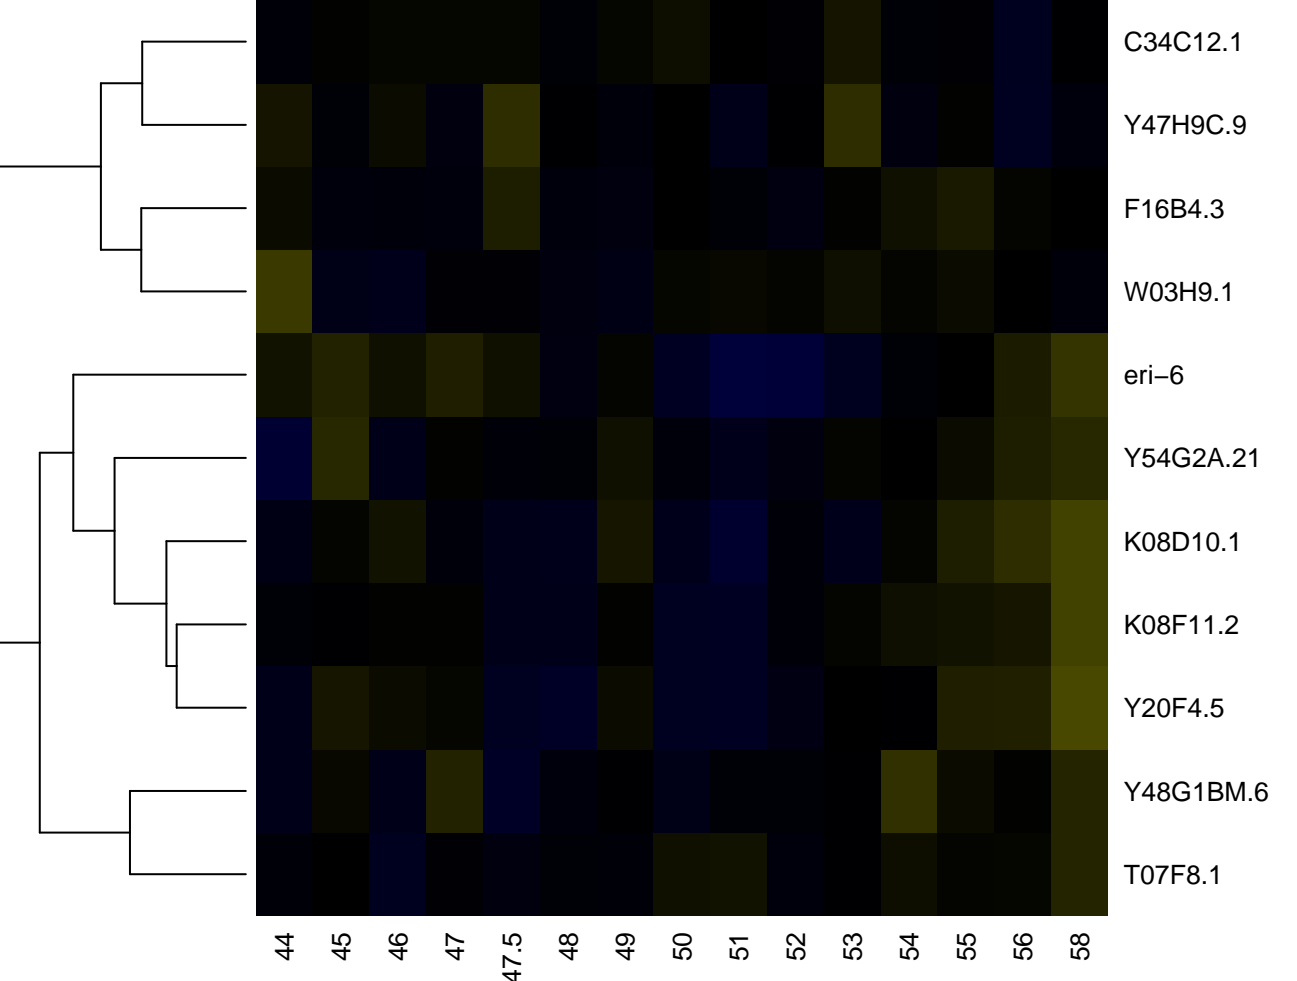

# Protein of unknown function DUF13

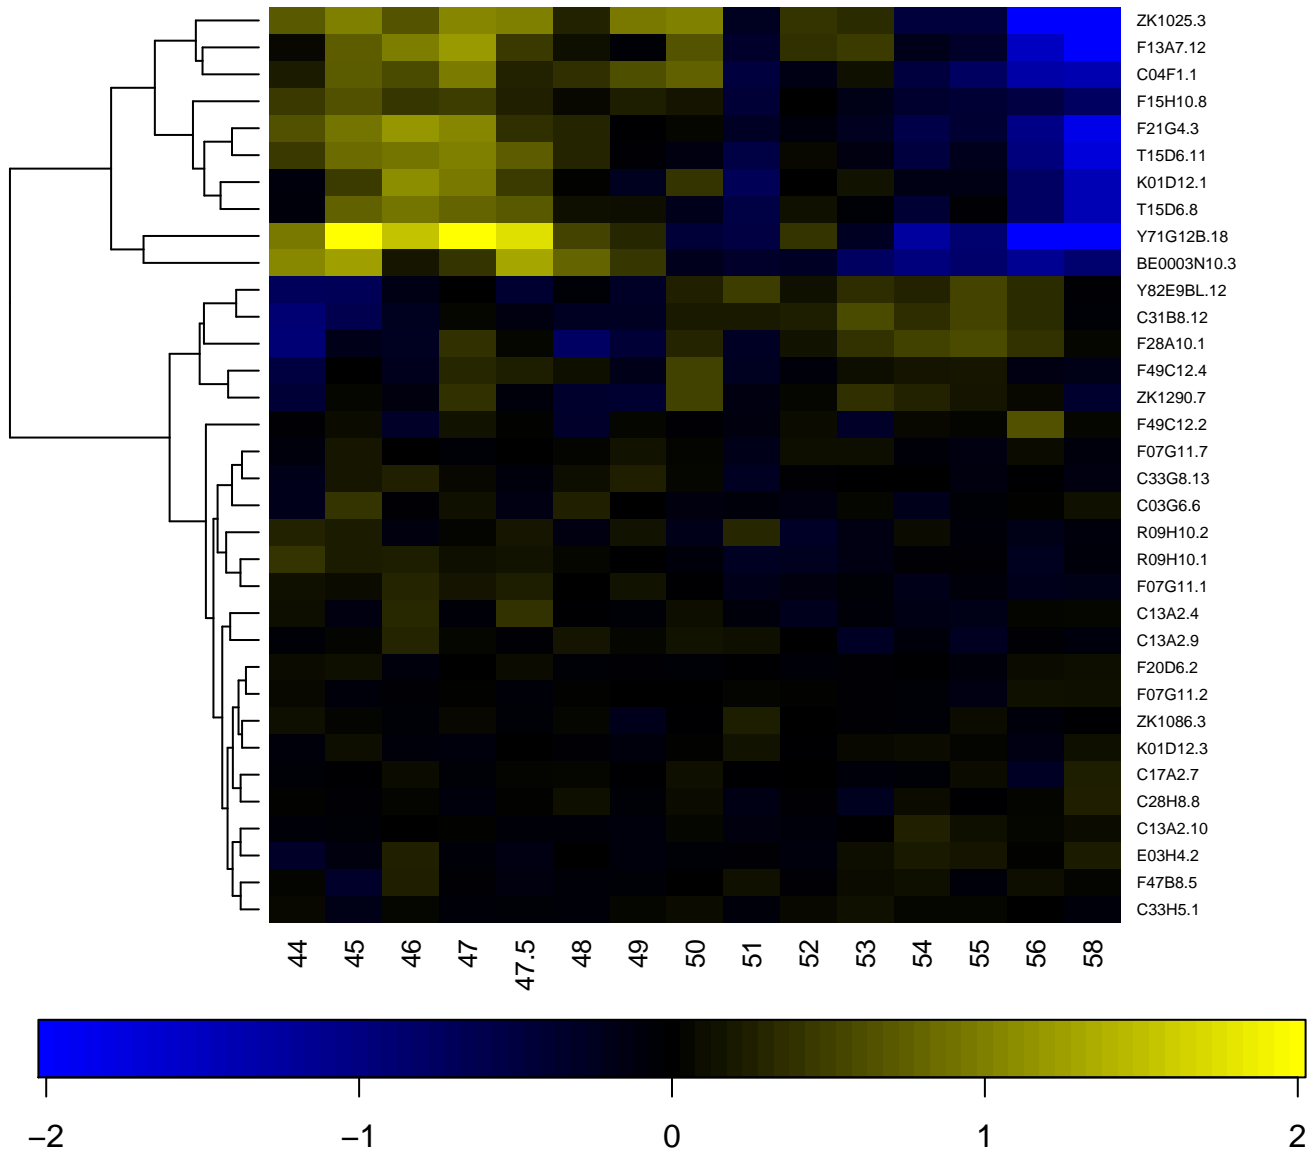



# Protein of unknown function DUF148

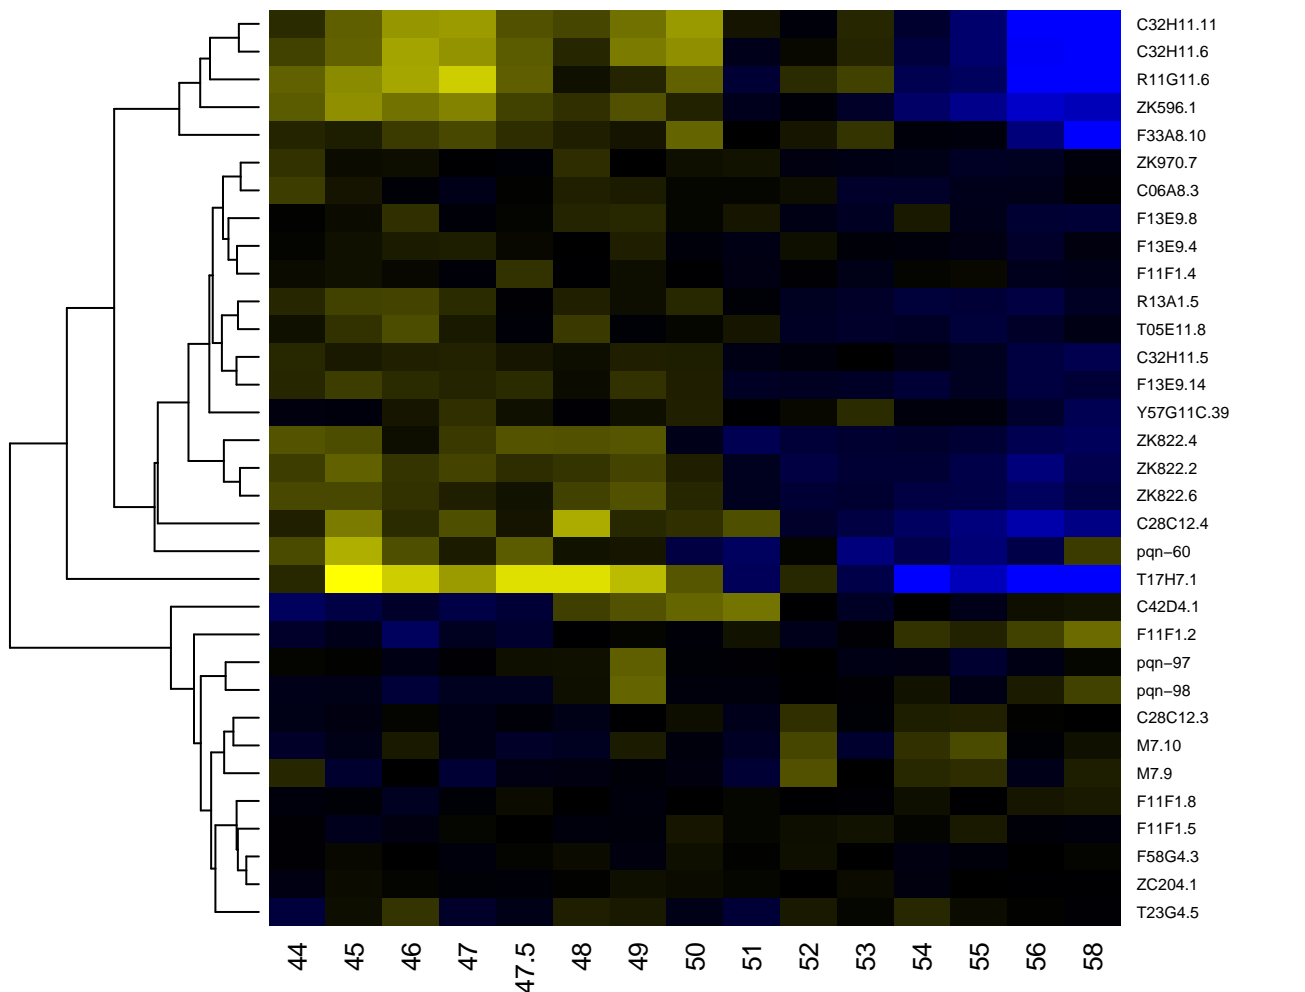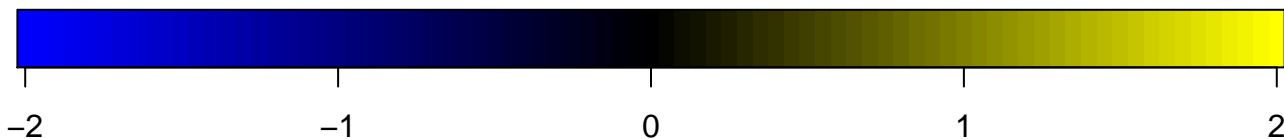



# Protein of unknown function DUF1647

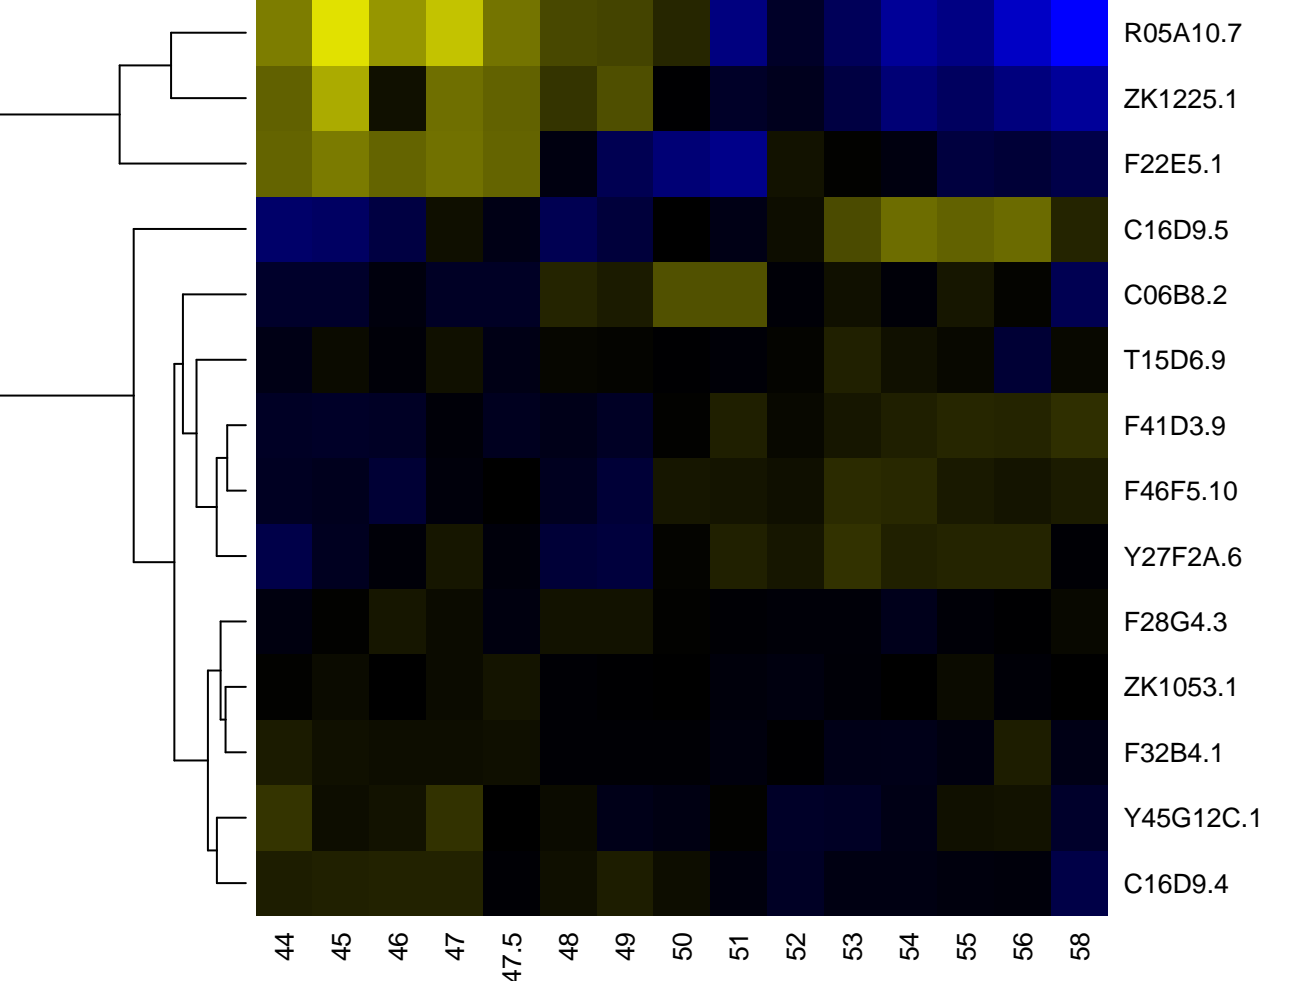





# Protein of unknown function DUF19

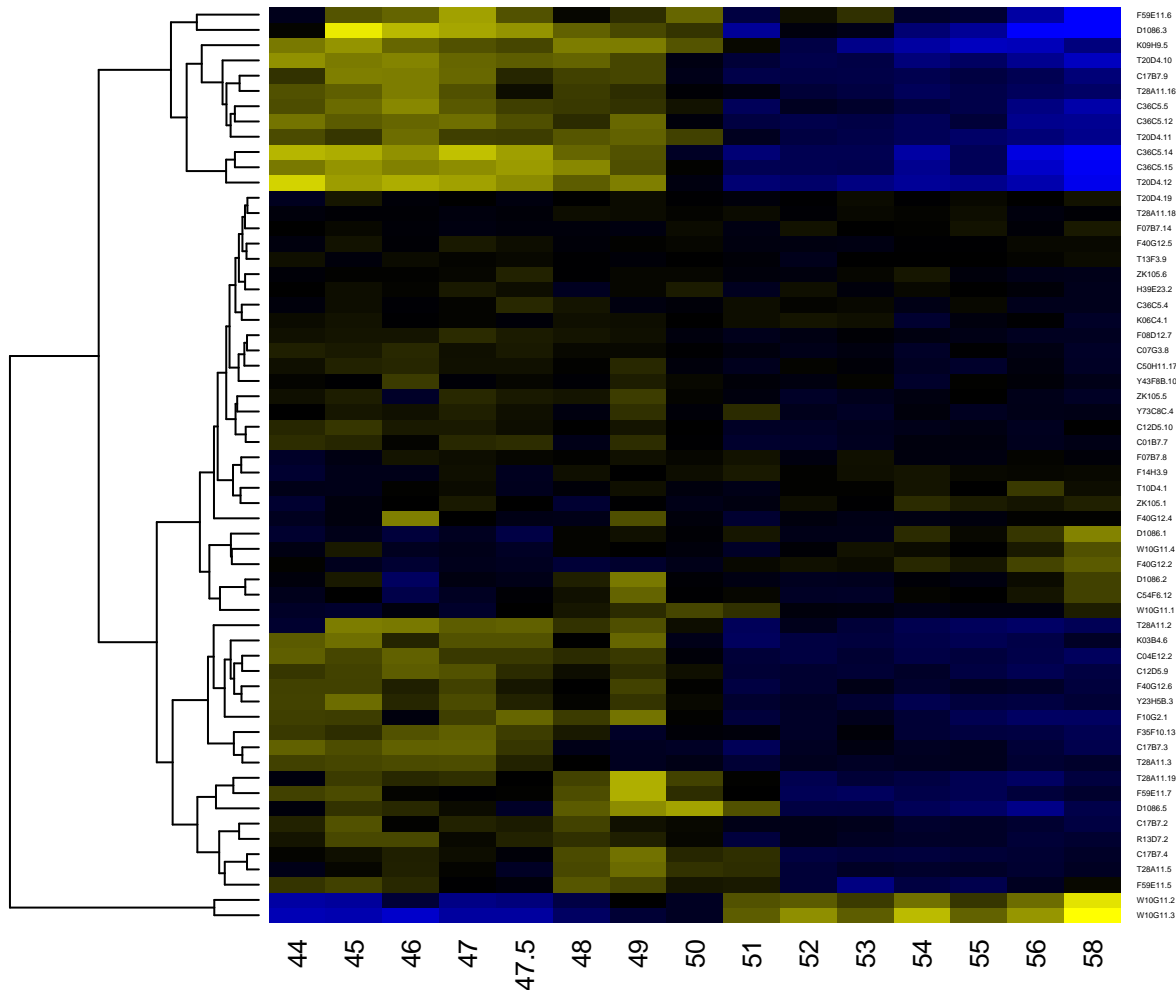



# Protein of unknown function DUF227

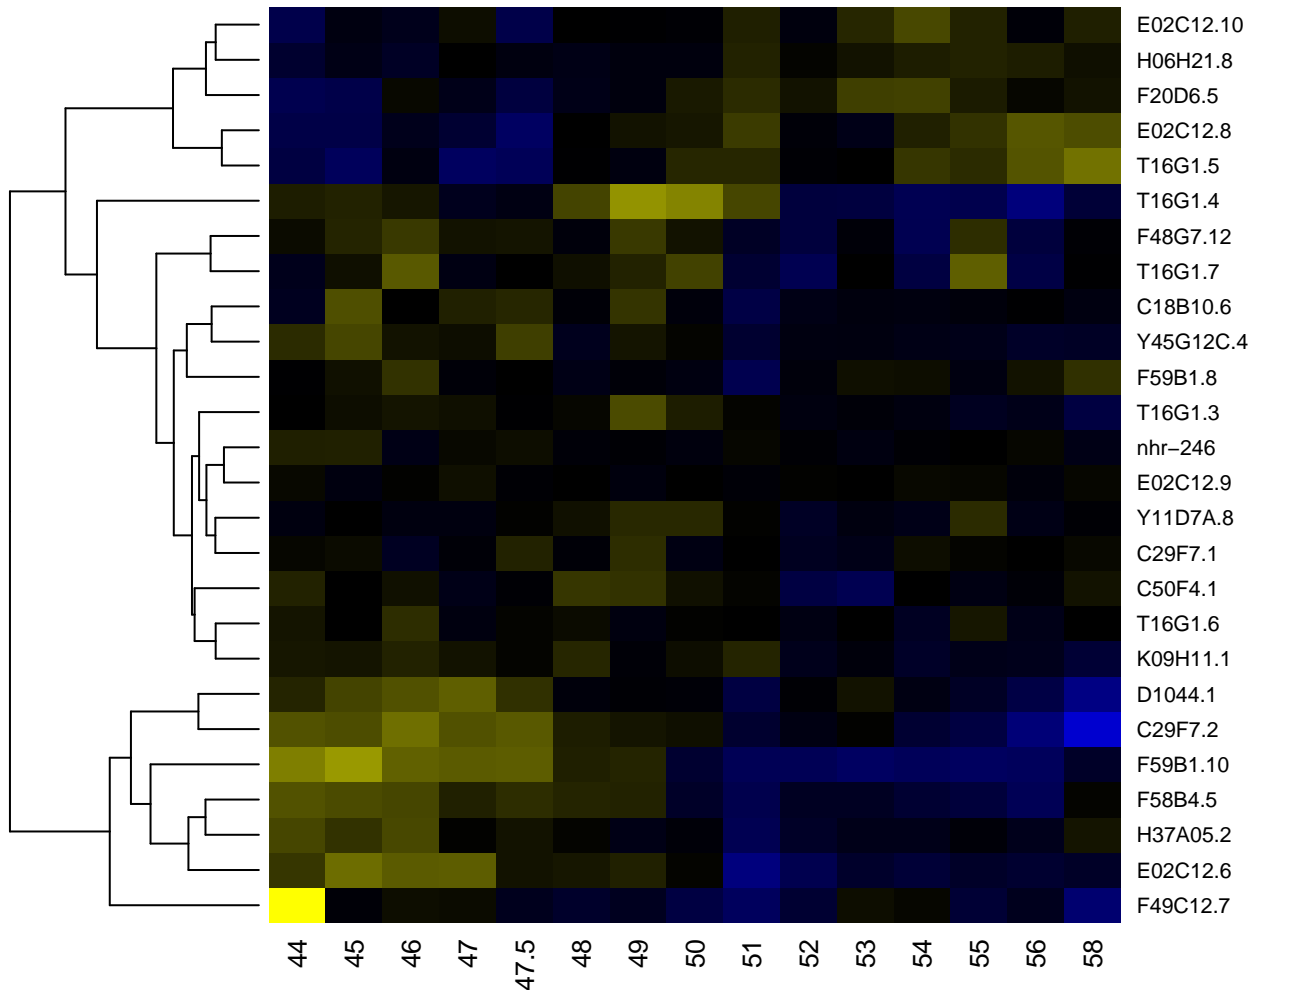

# Protein of unknown function DUF229

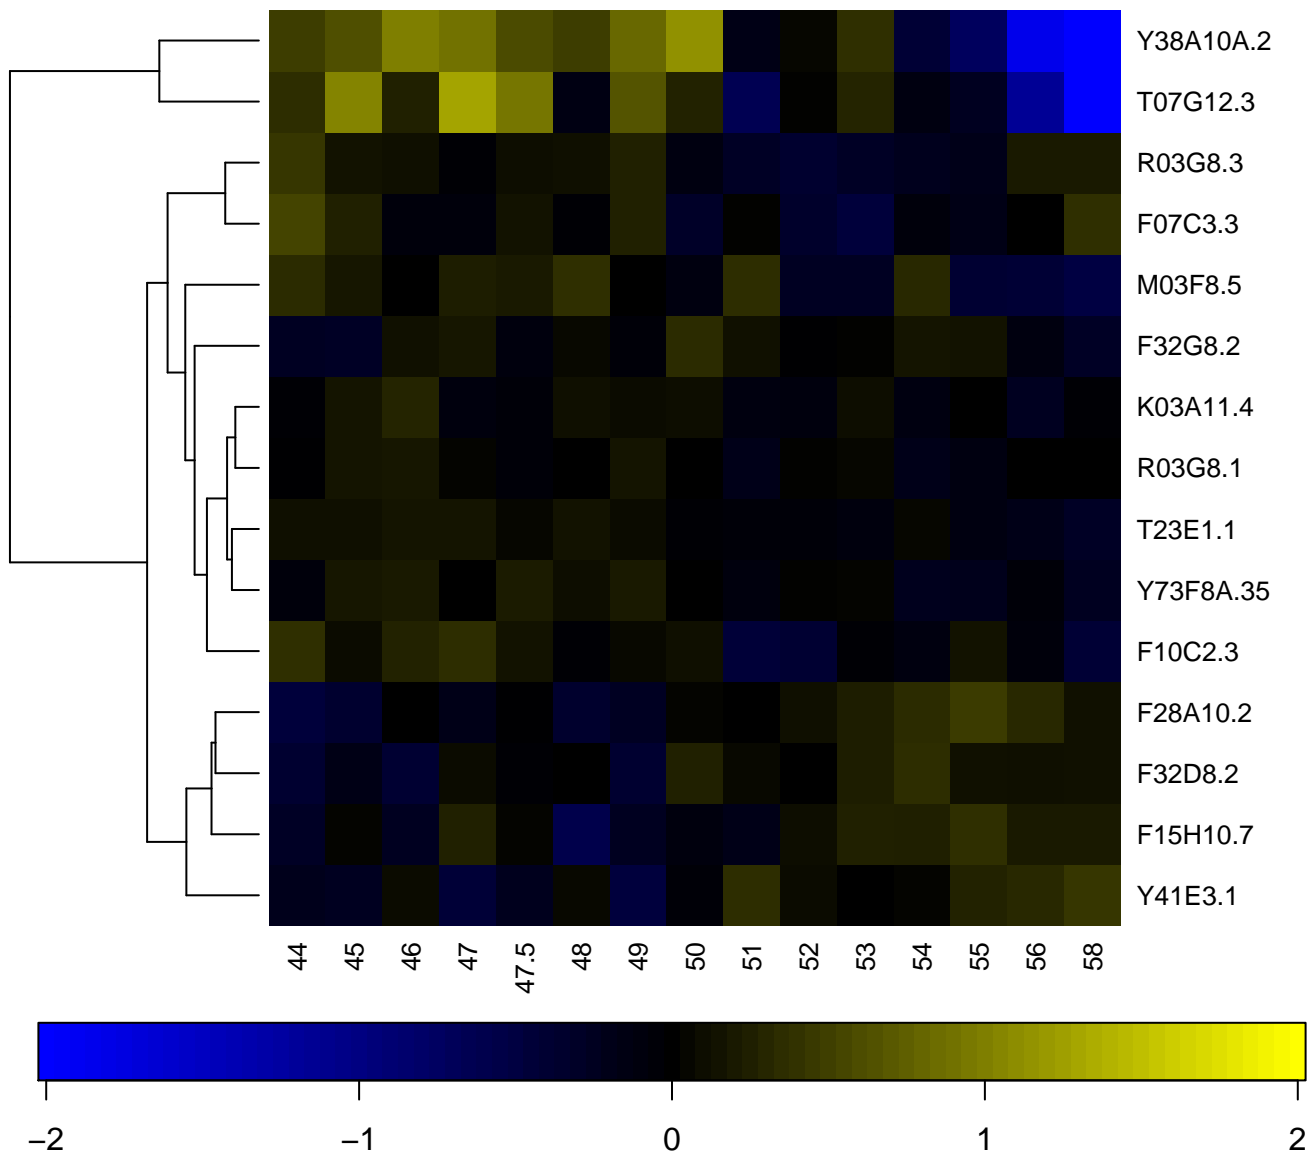

# Protein of unknown function DUF23

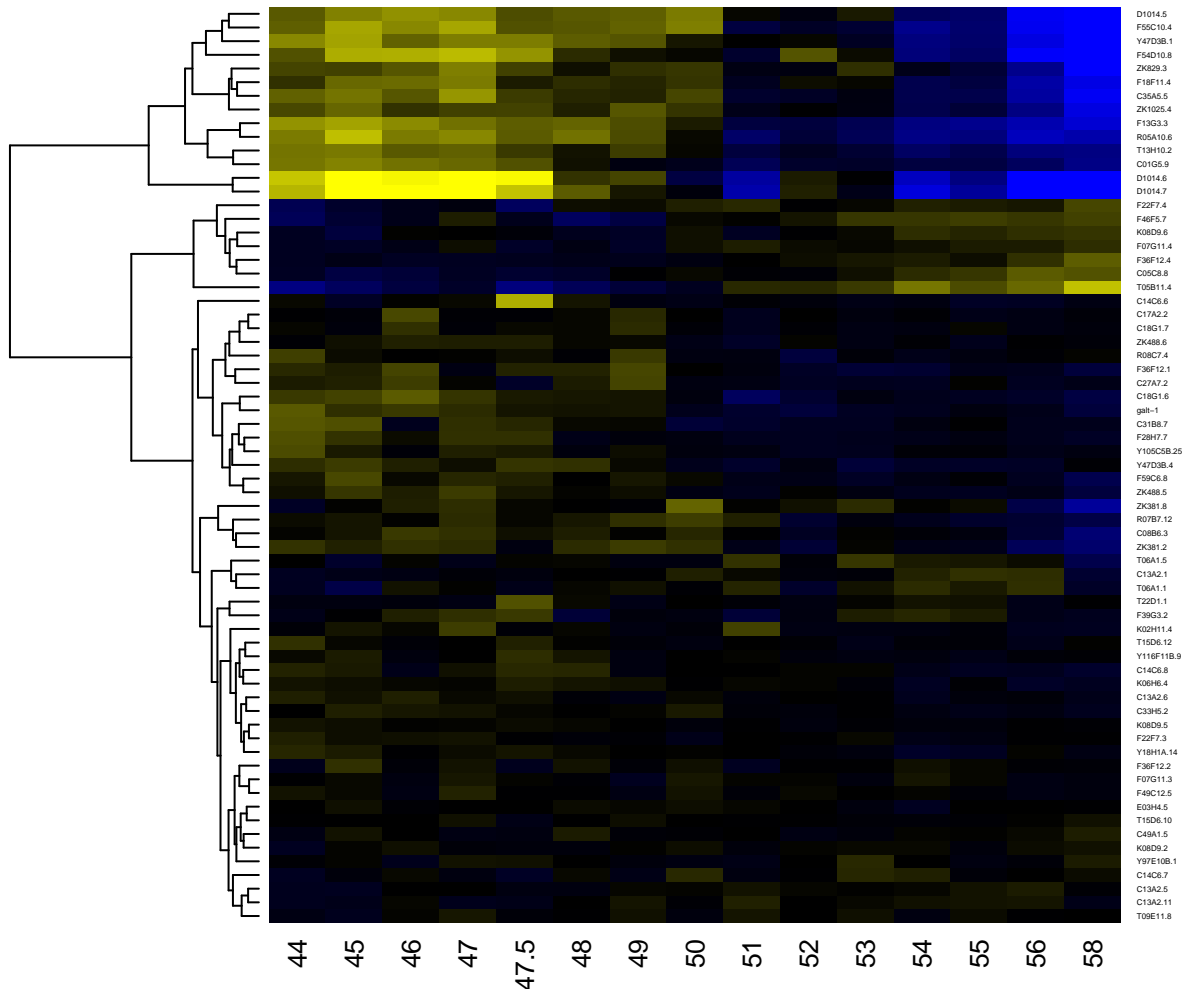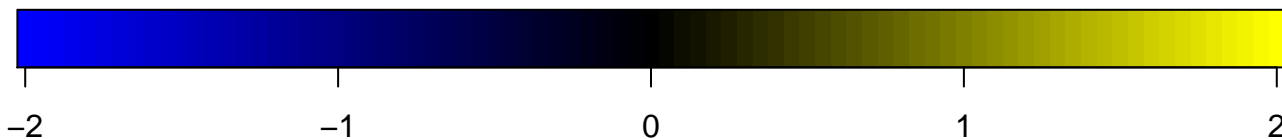

# Protein of unknown function DUF236

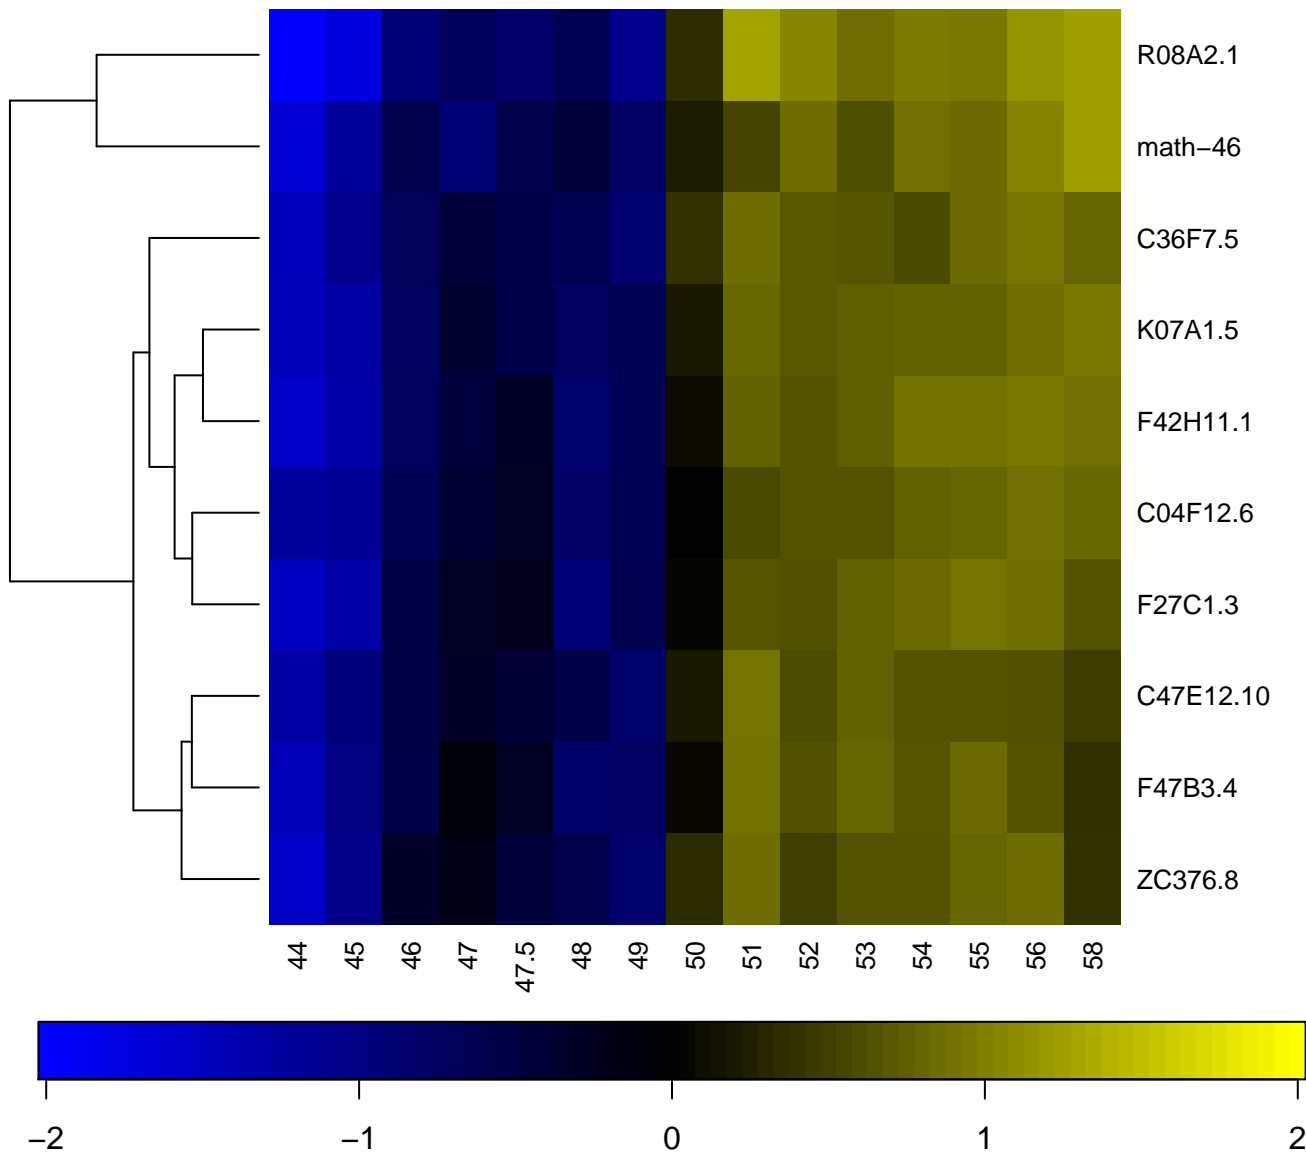









# Protein of unknown function DUF267, *Caenorhabditis* speci



# Protein of unknown function DUF272

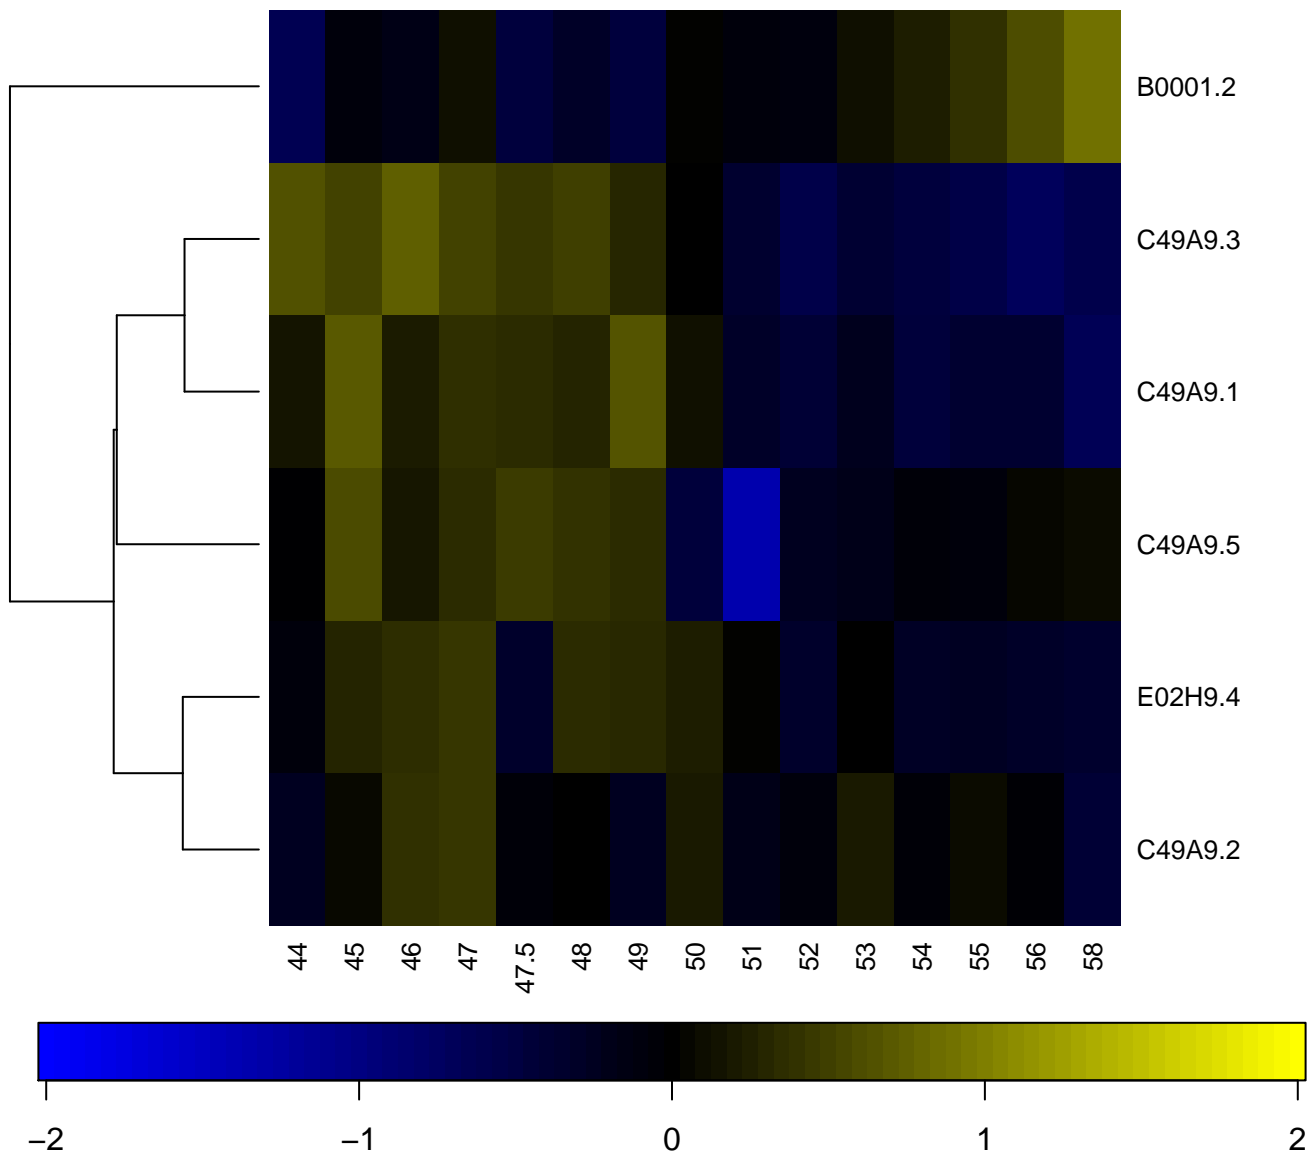

# Protein of unknown function DUF273

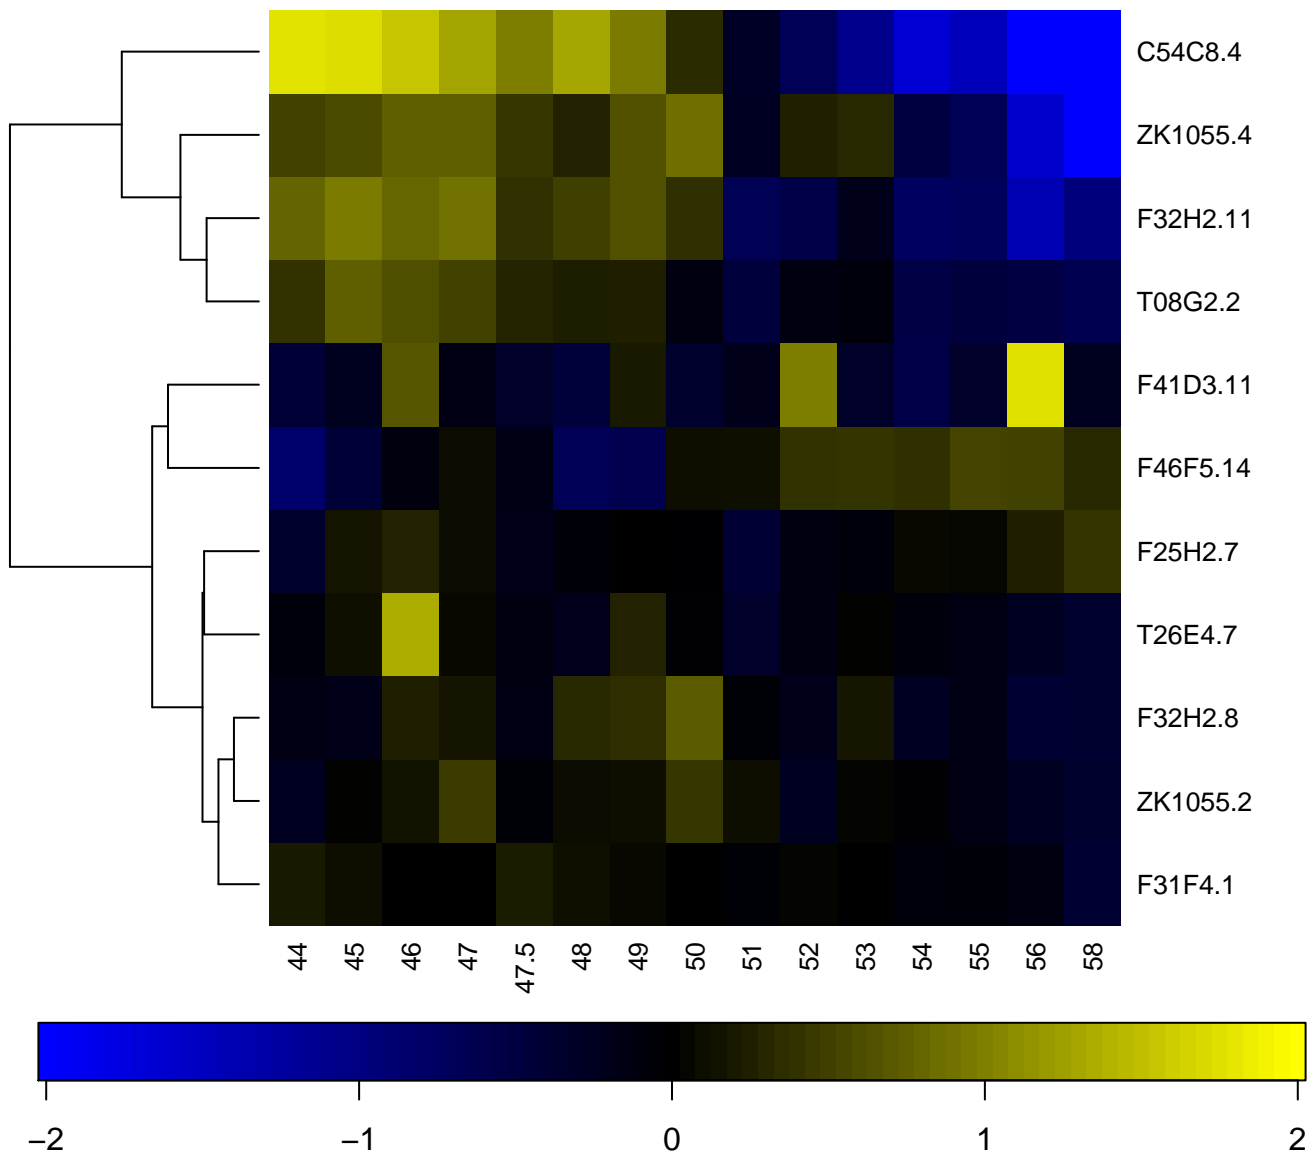









# Protein of unknown function DUF282, *Caenorhabditis* speci

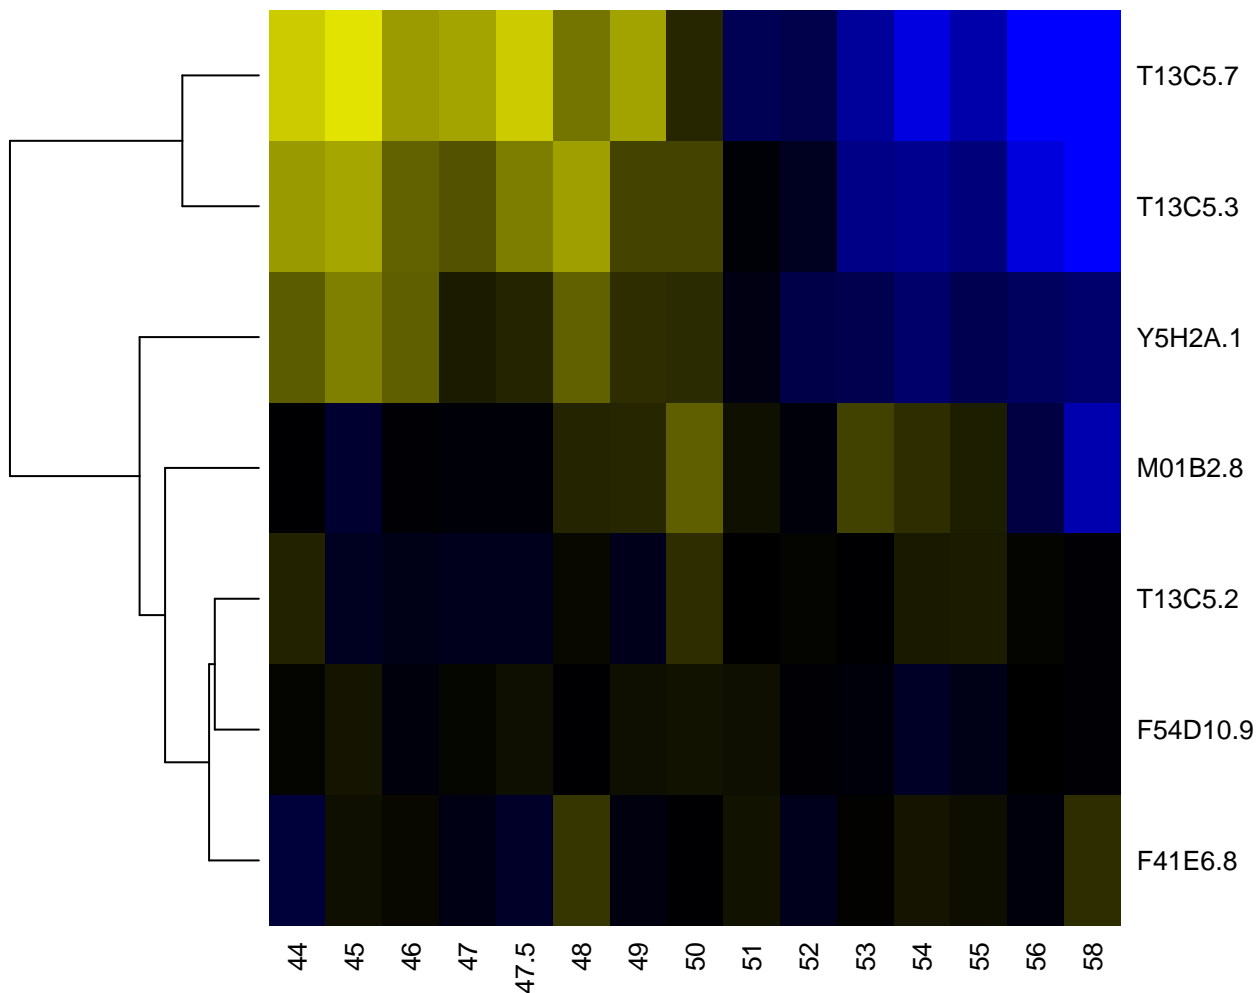



# Protein of unknown function DUF316

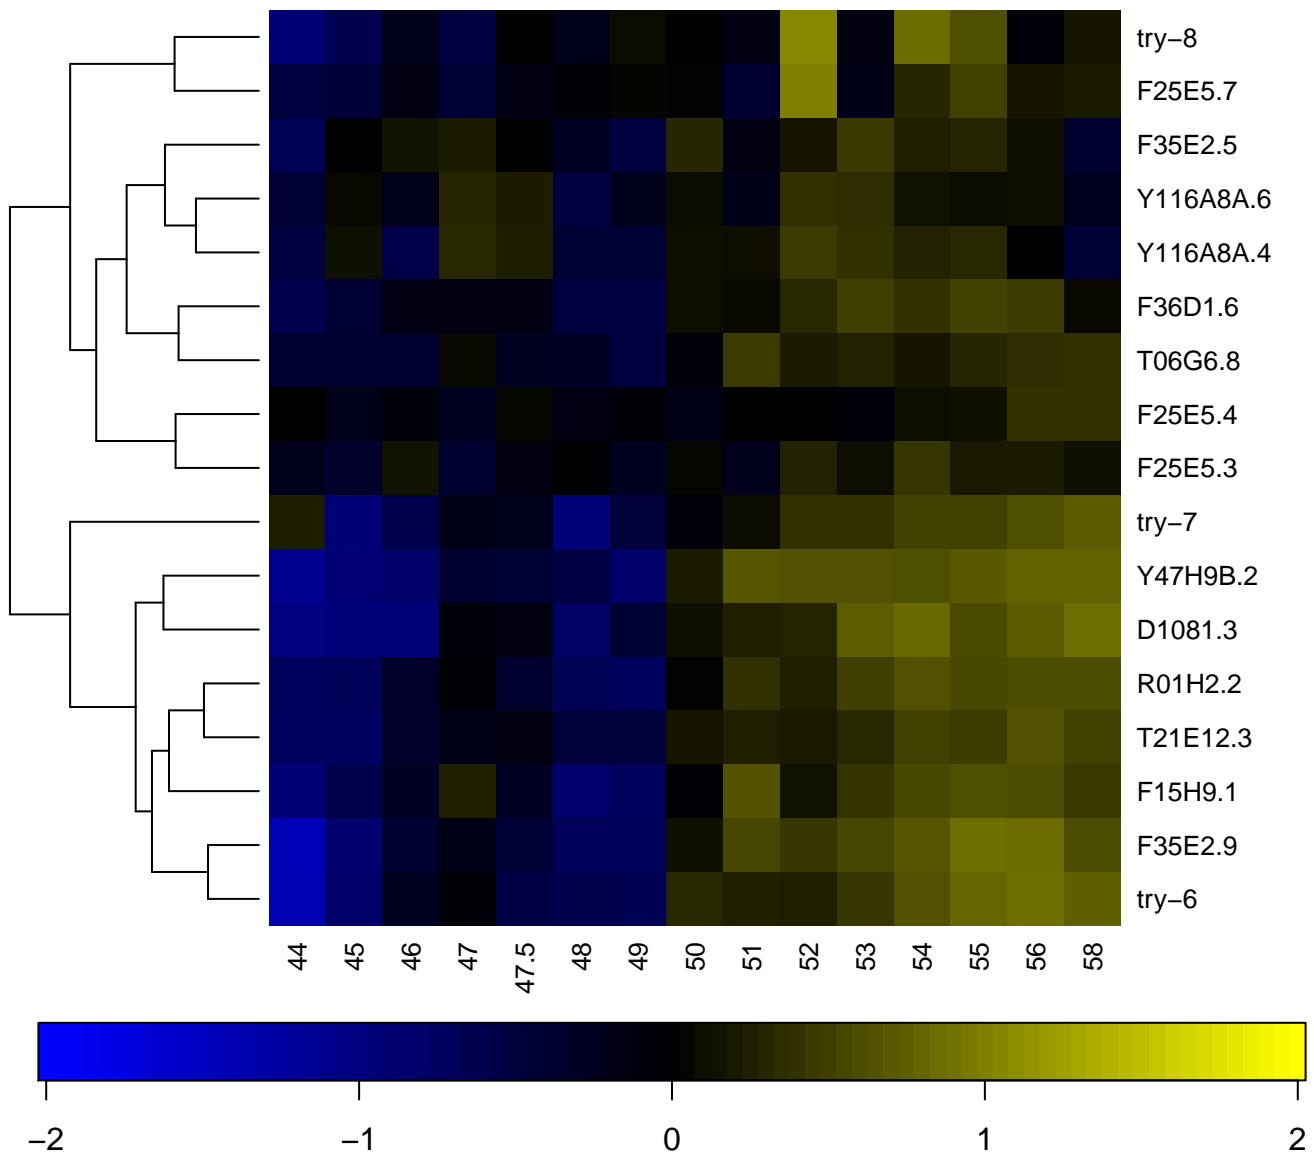

# Protein of unknown function DUF3557













# Protein of unknown function DUF672









# Protein of unknown function DUF856, *Caenorhabditis* speci

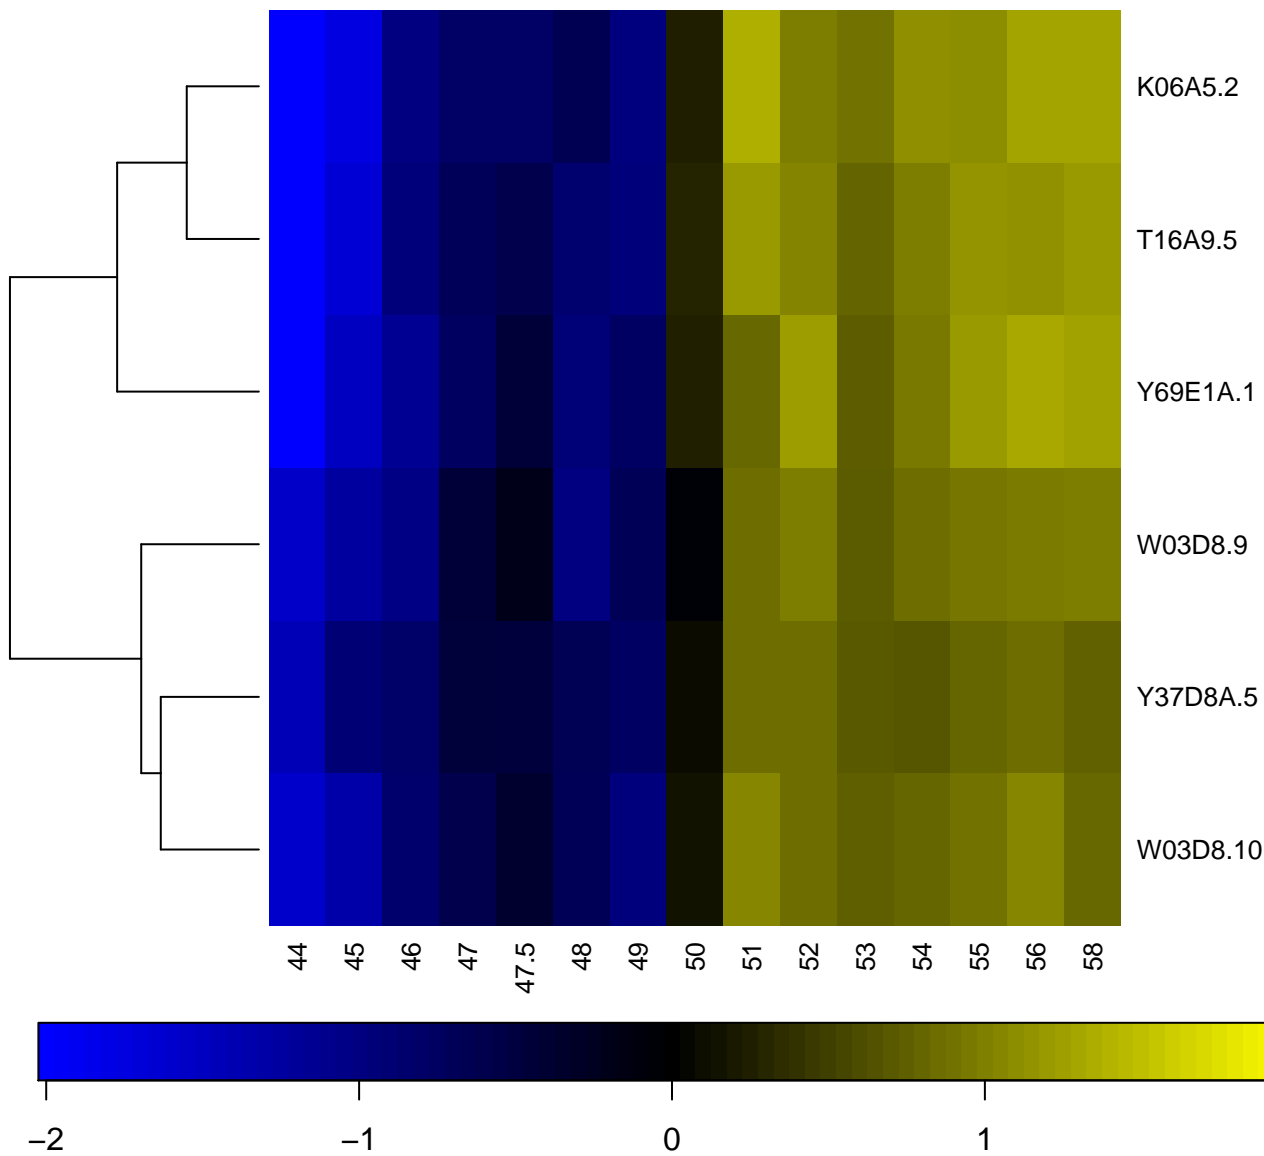

# Protein of unknown function DUF870, *Caenorhabditis* speci

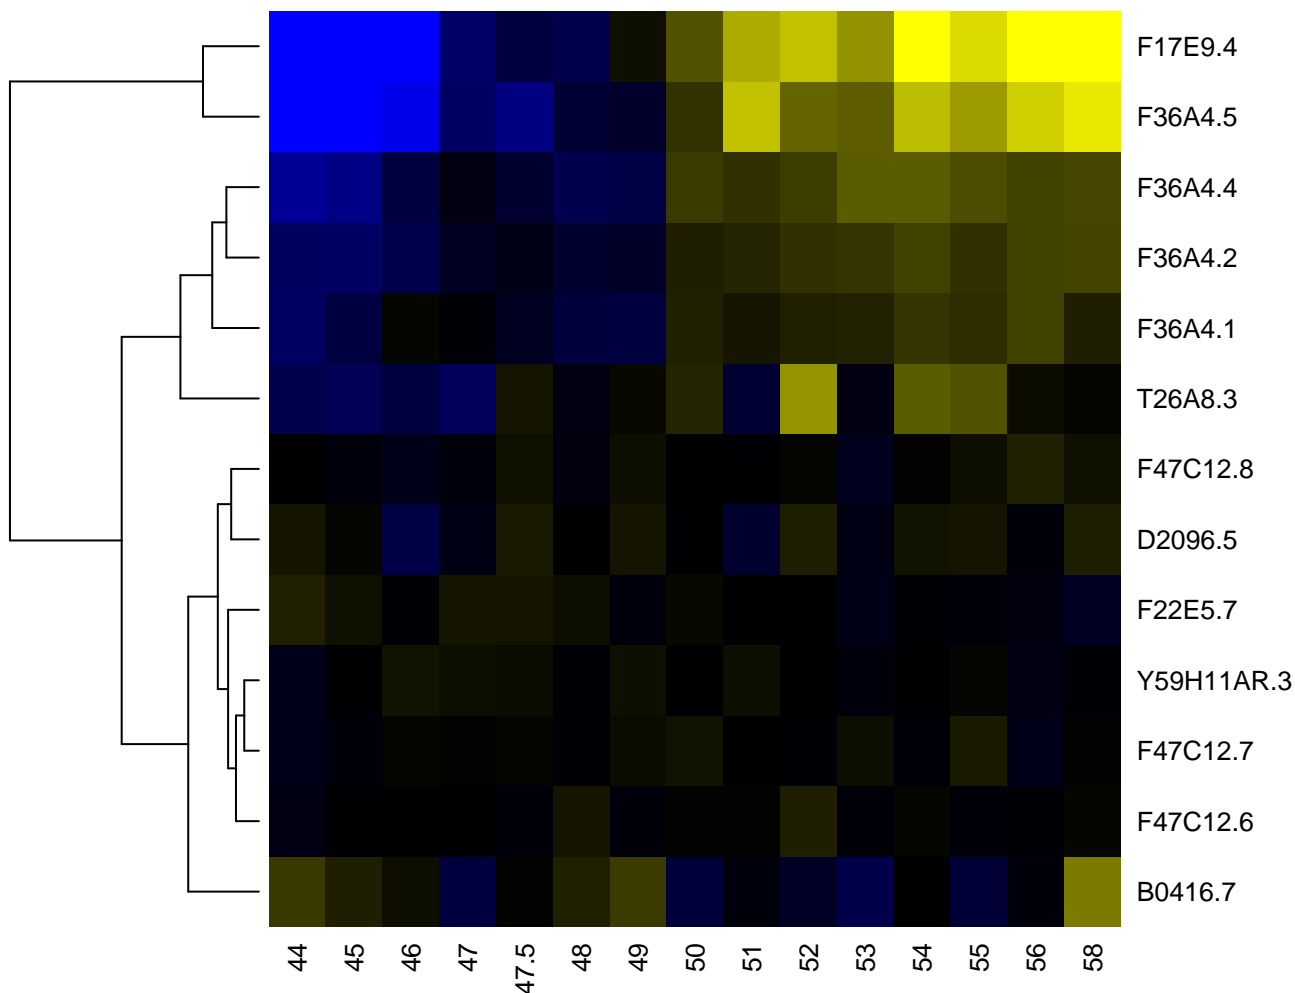

# Protein of unknown function DUF976, *Caenorhabditis* speci

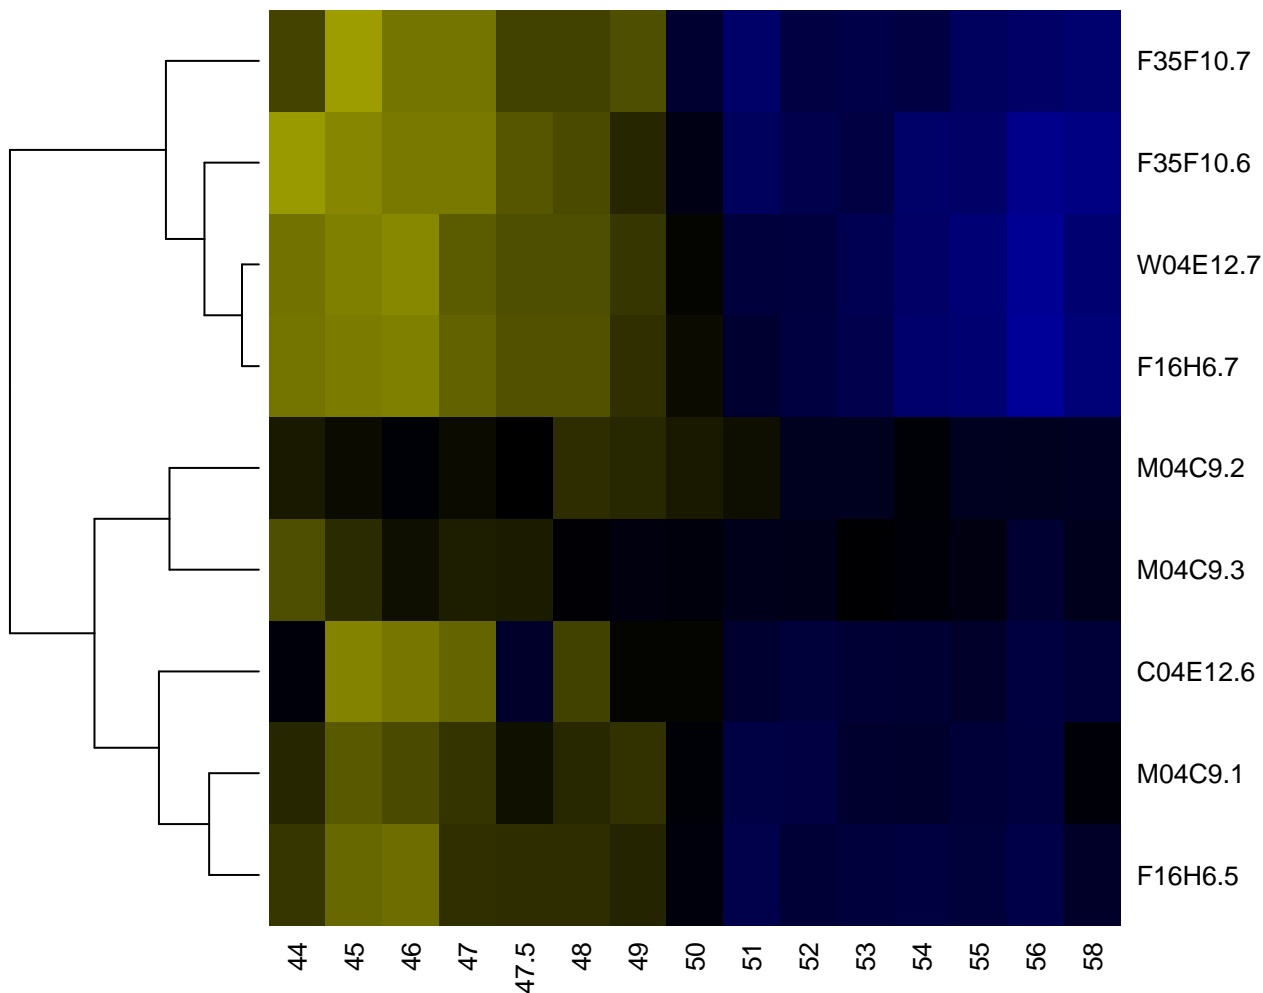





# Protein of unknown function WSN

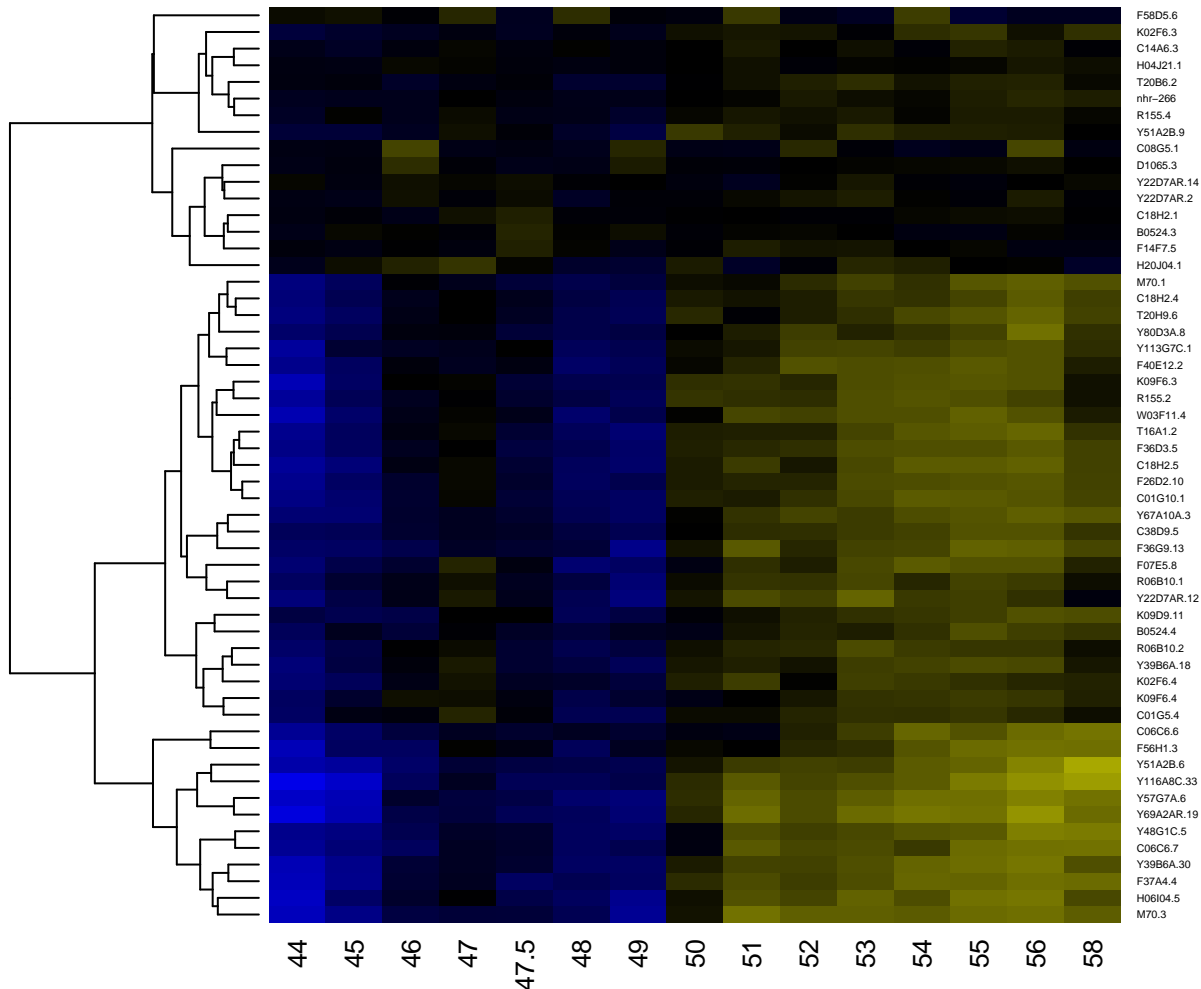

# Protein of unknown function, C6 domain

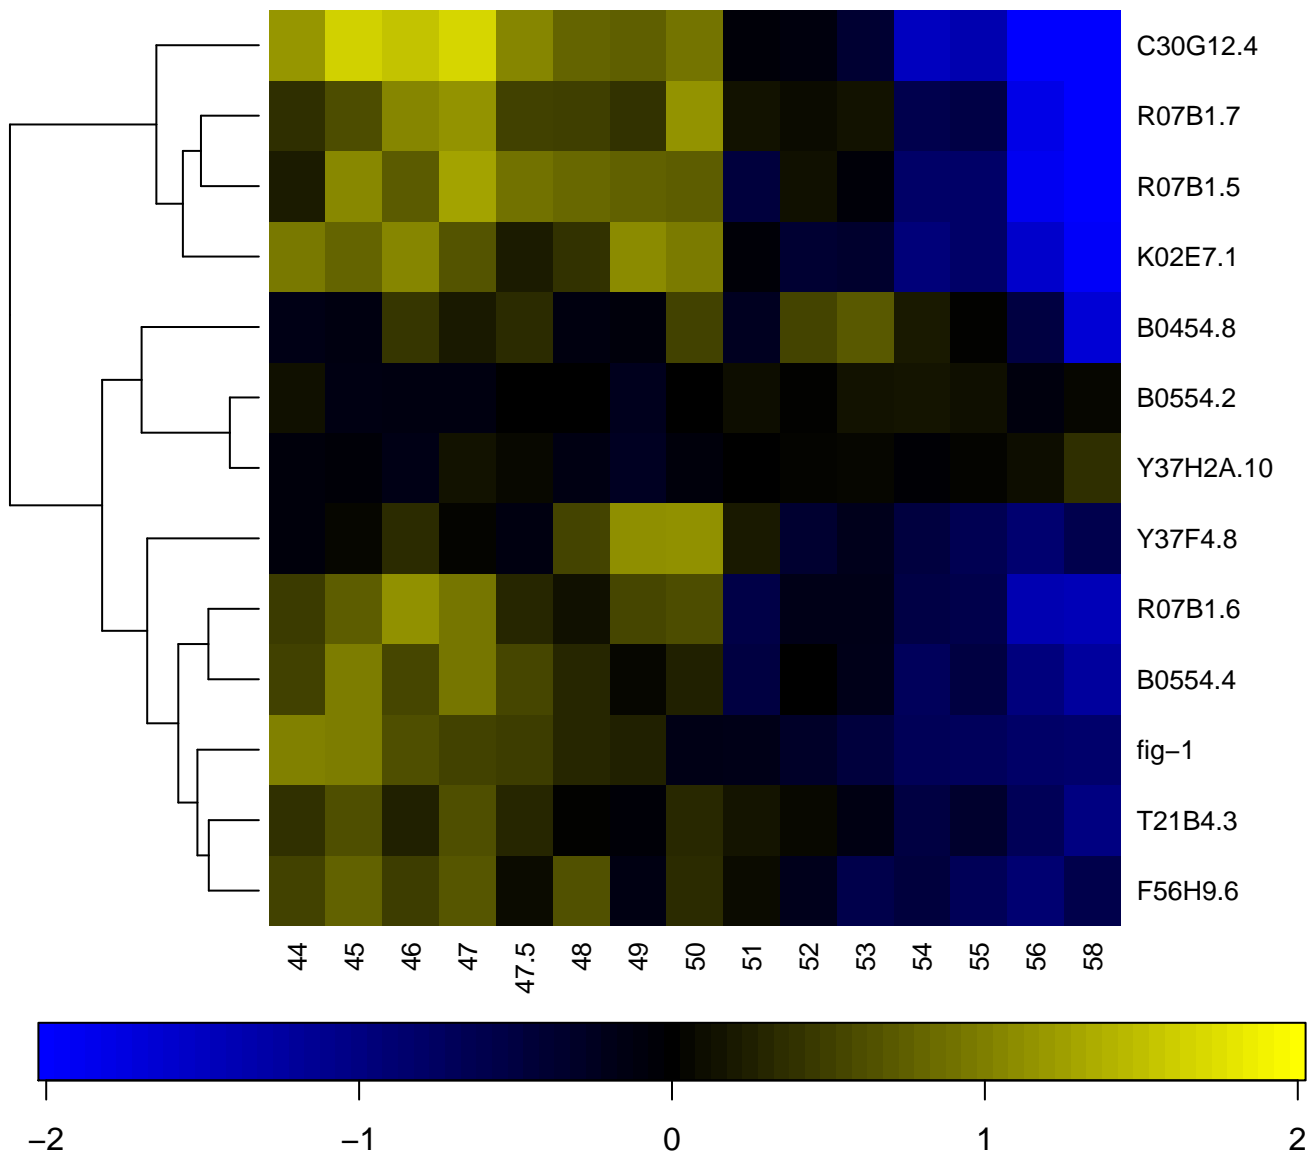

# Protein of unknown function, DUF270

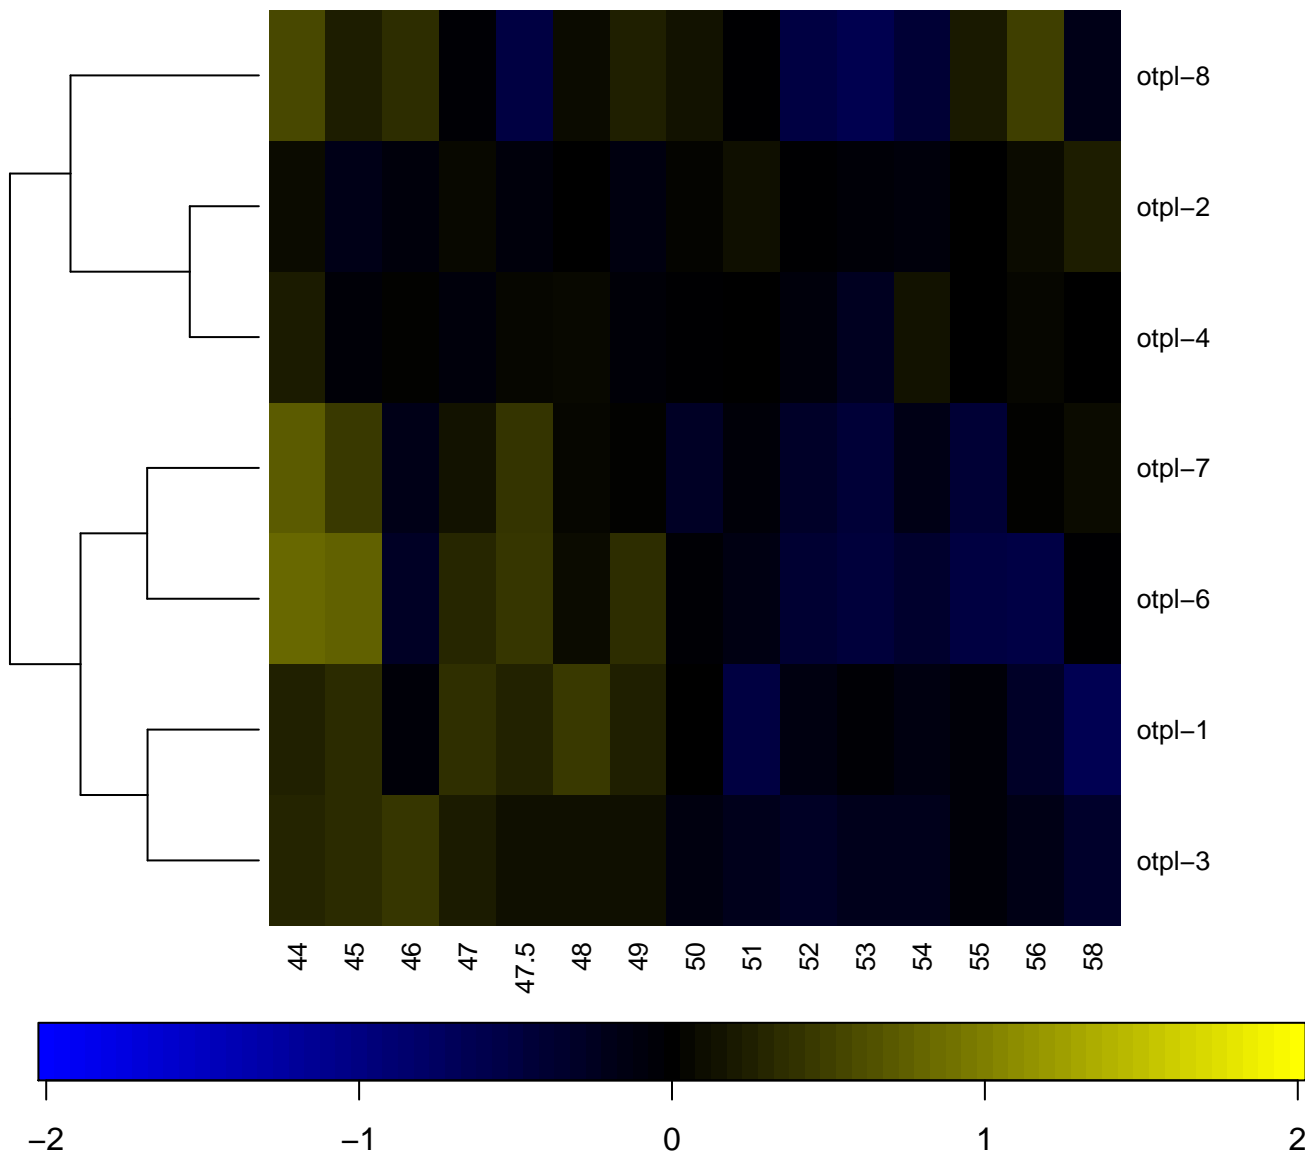







# Protein phosphatase 2C-related

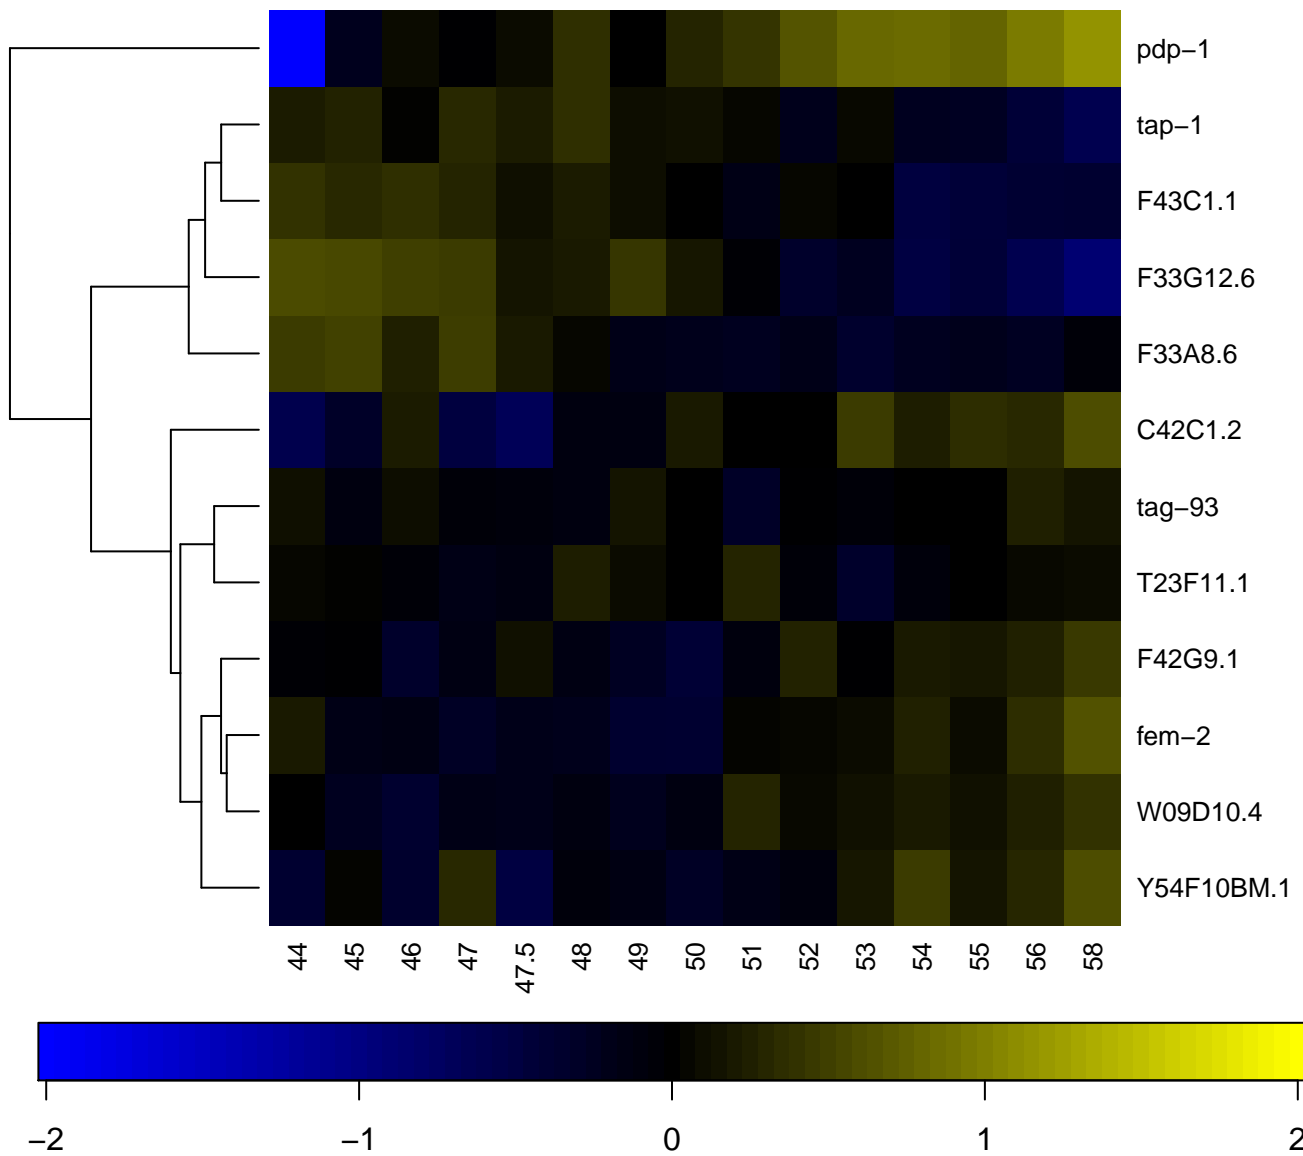





# Protein phosphatase 2C, N-terminal

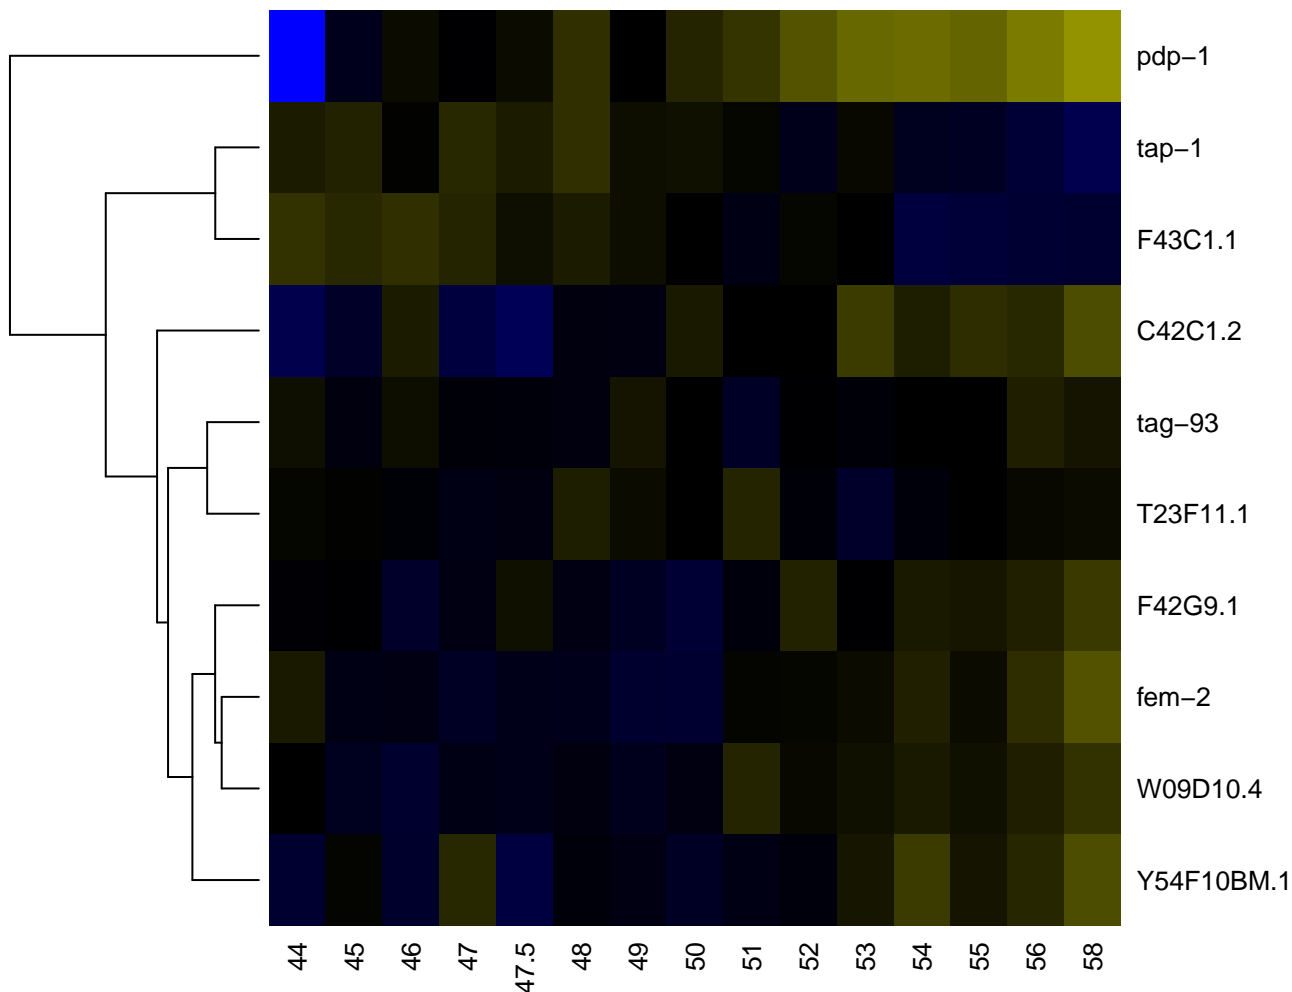

# Protein prenyltransferase

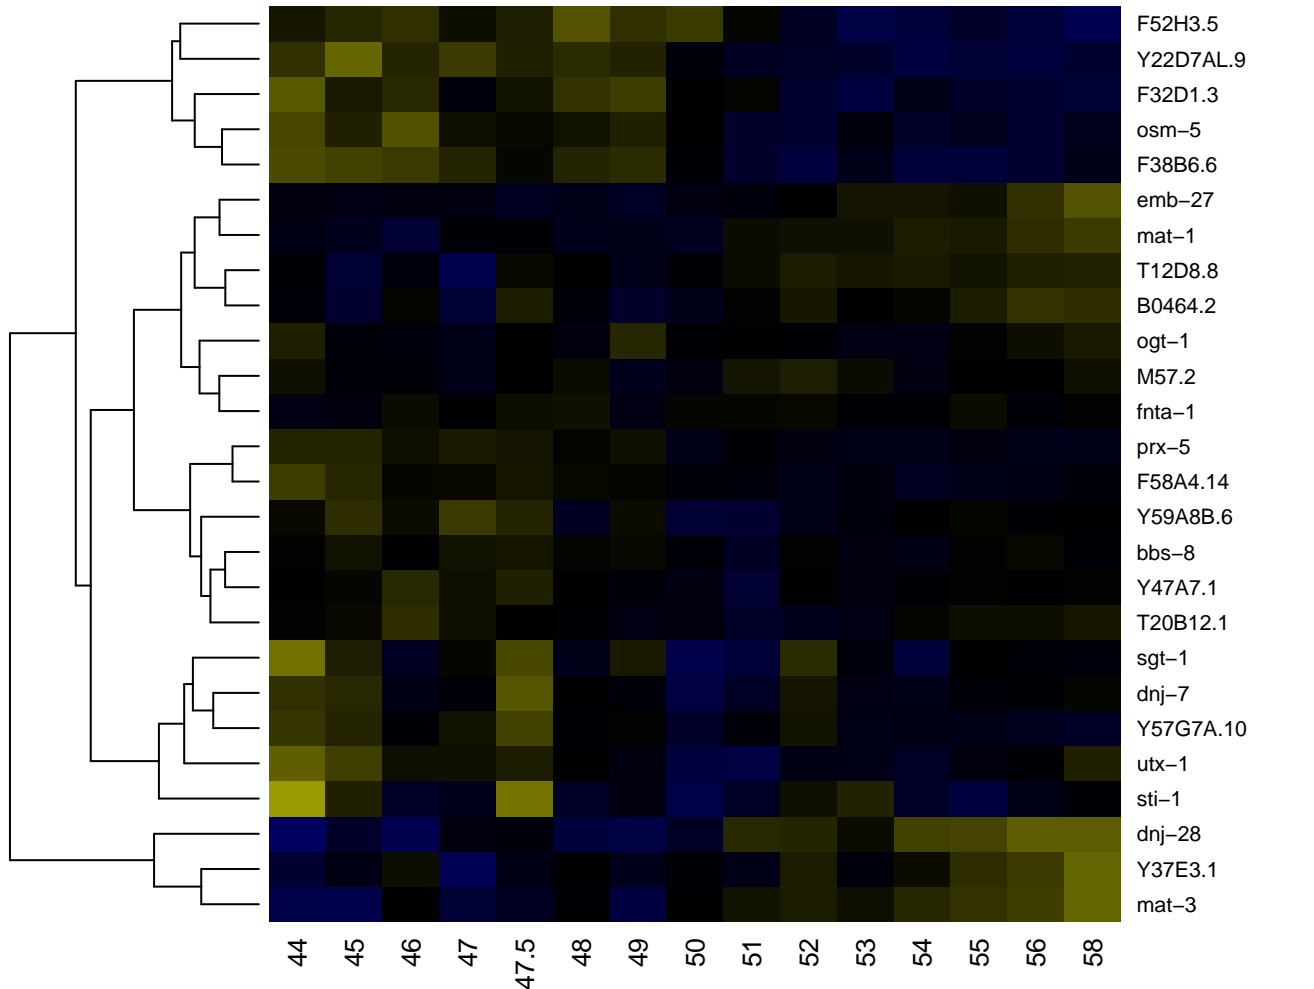

# Protein synthesis factor, GTP-binding

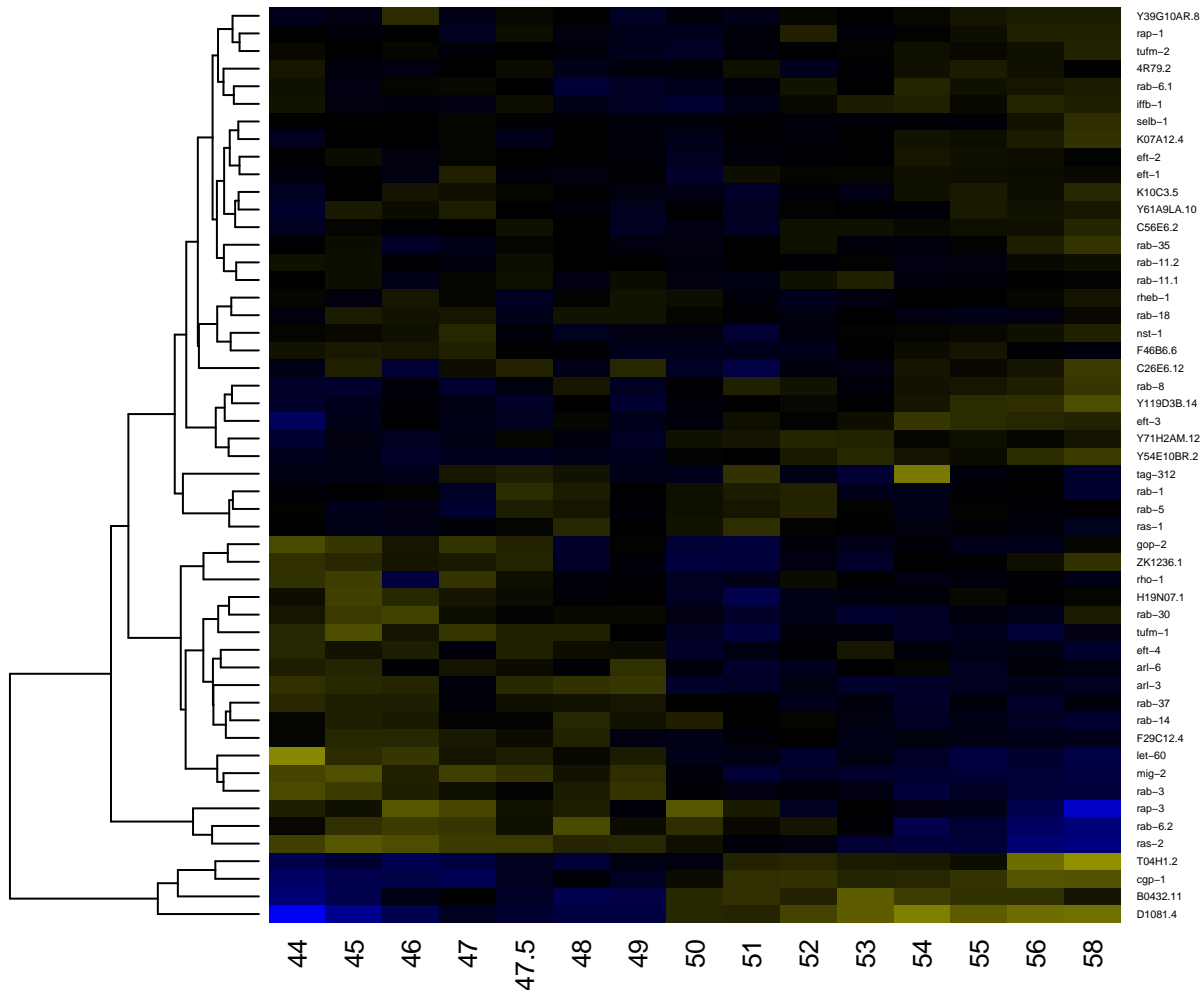

# Protein tyrosine kinase

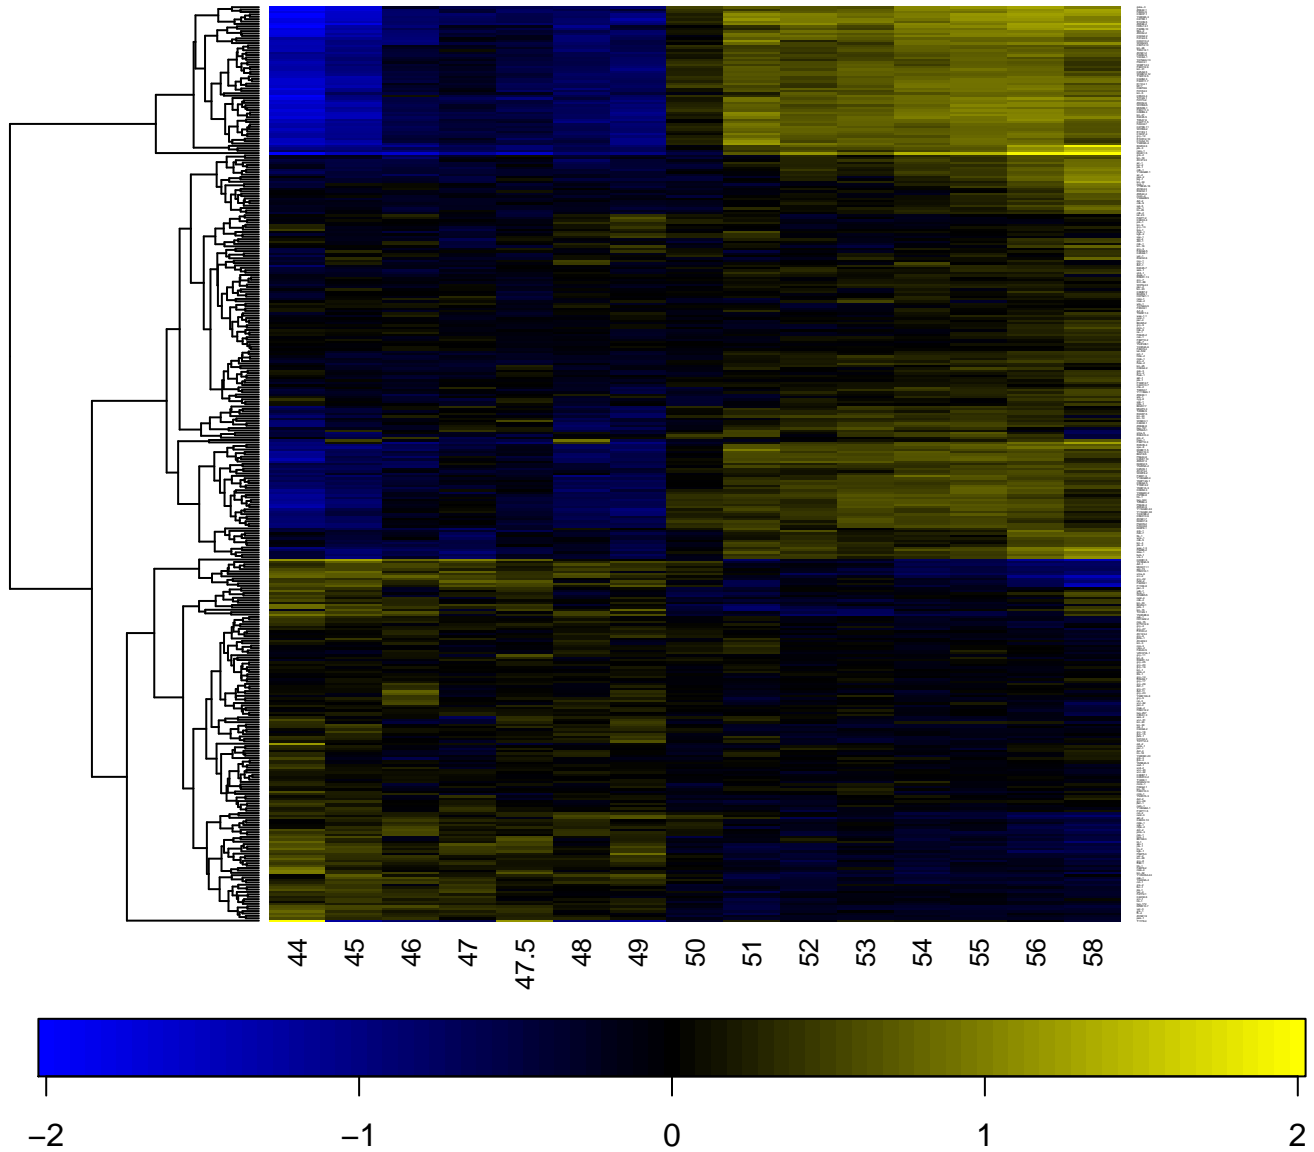



# Proteinase inhibitor I2, Kunitz metazoa

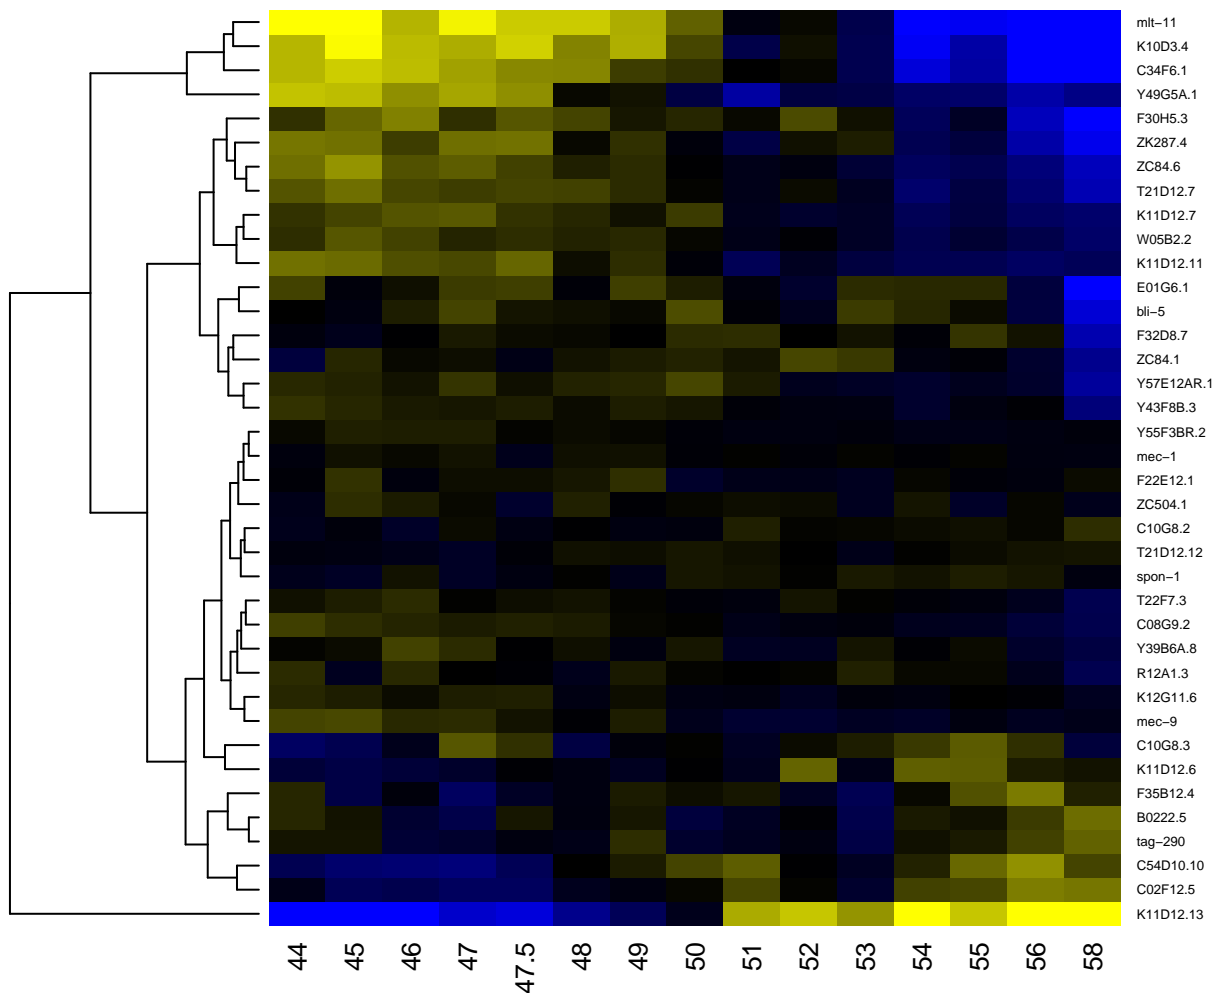

# Proteinase inhibitor I2, Kunitz, conserved site

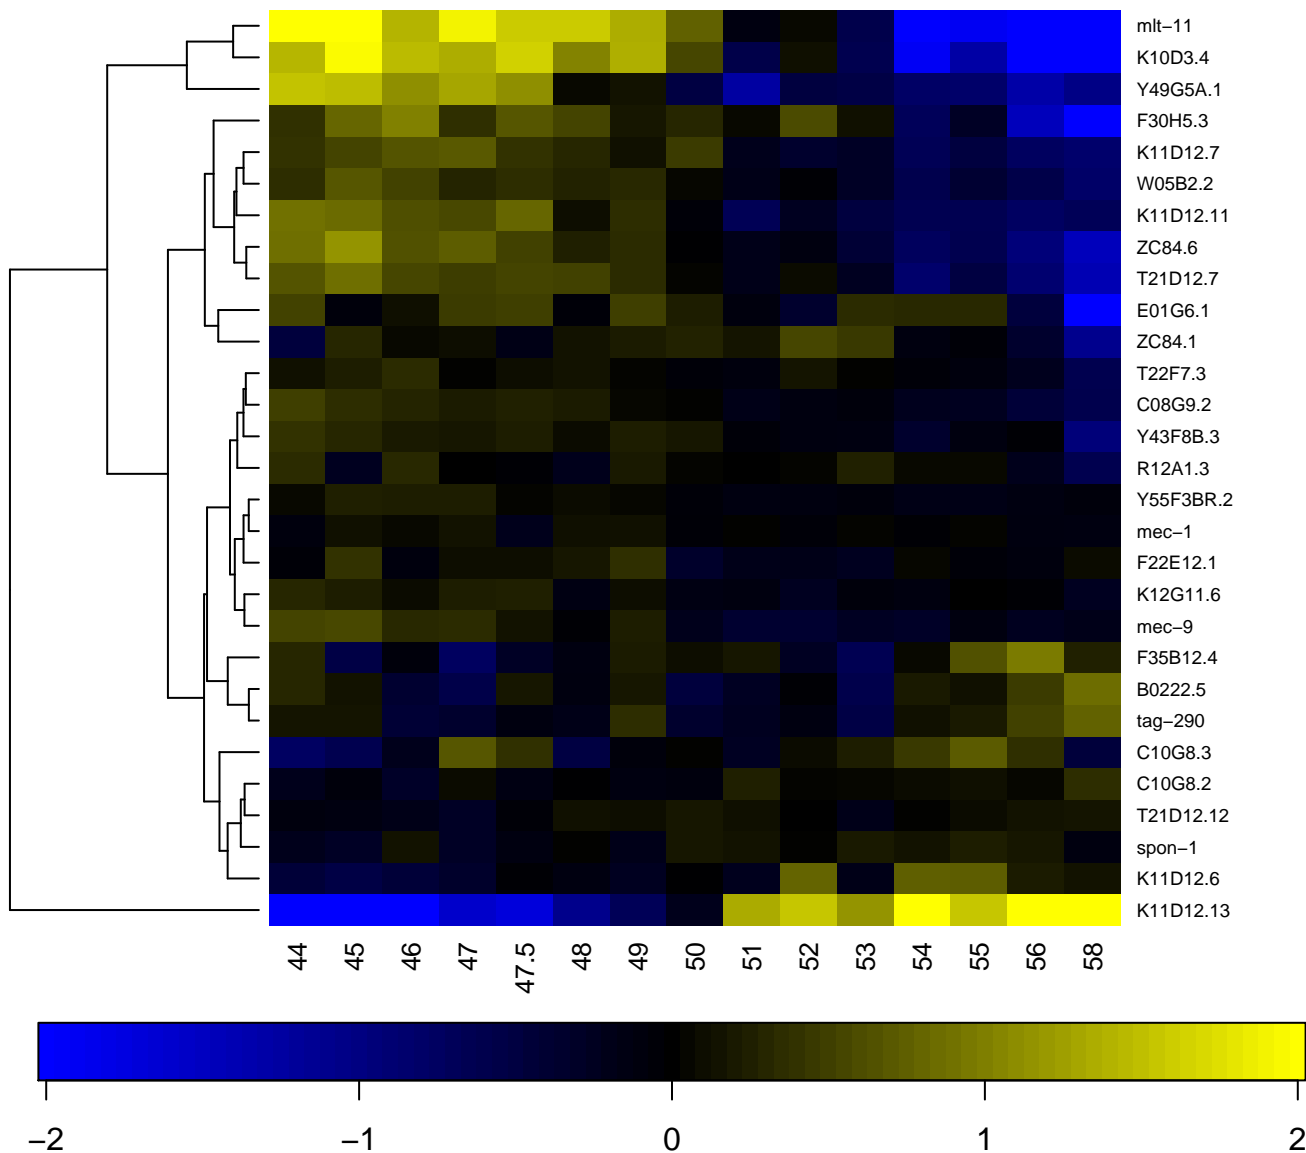







# Pumilio-family RNA binding repeat

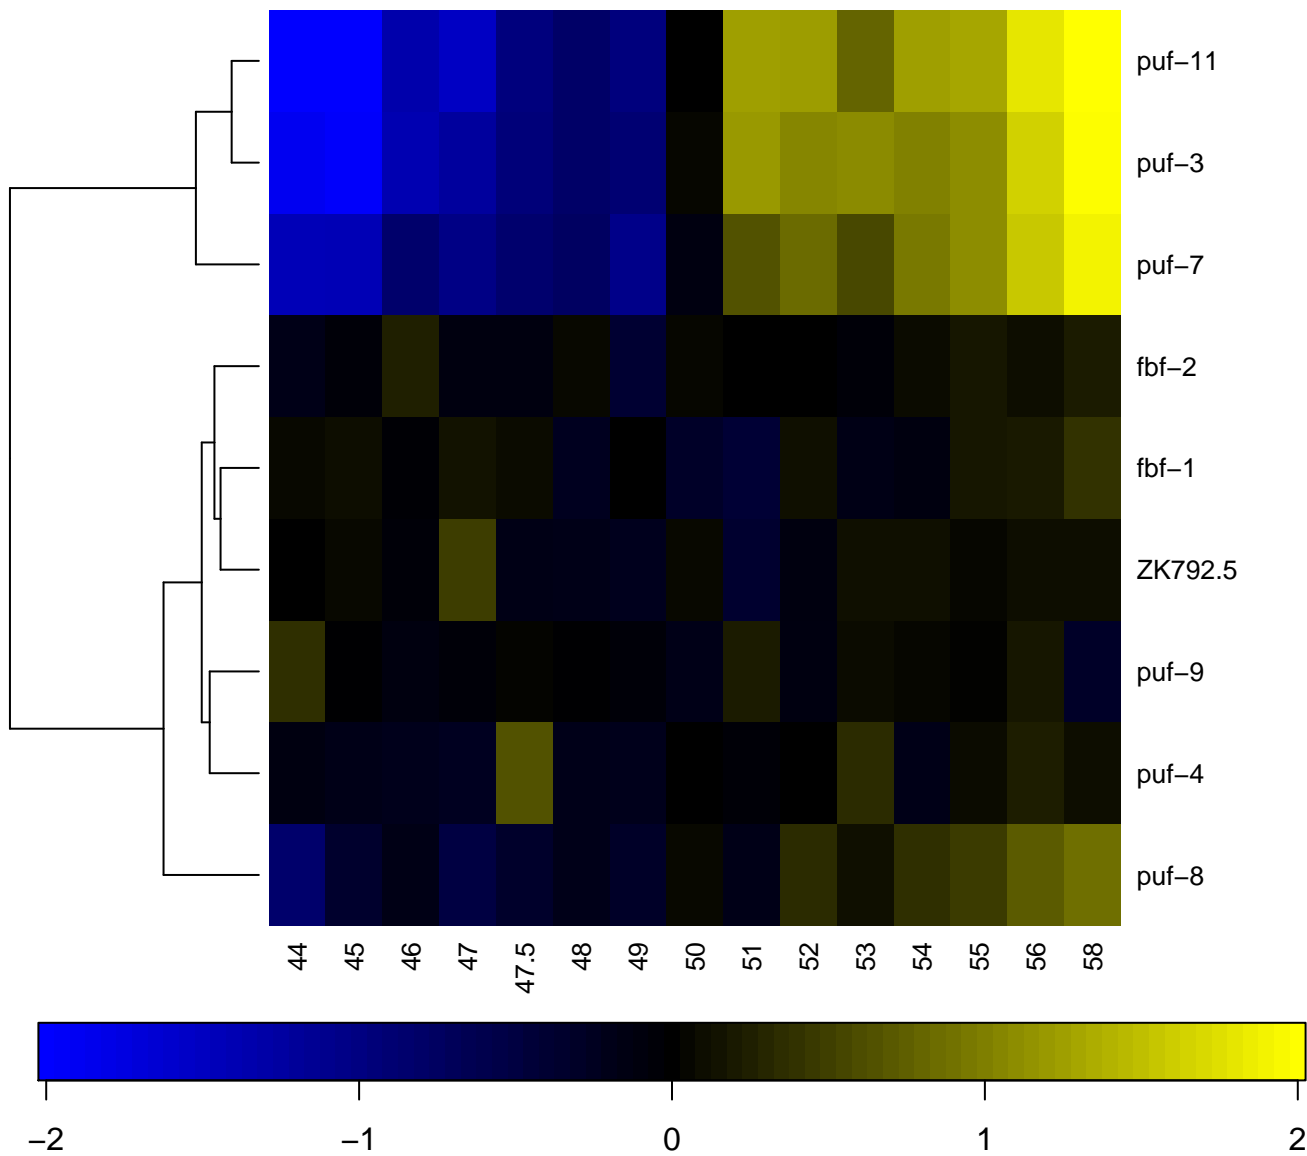

# Pumilio RNA-binding repeat

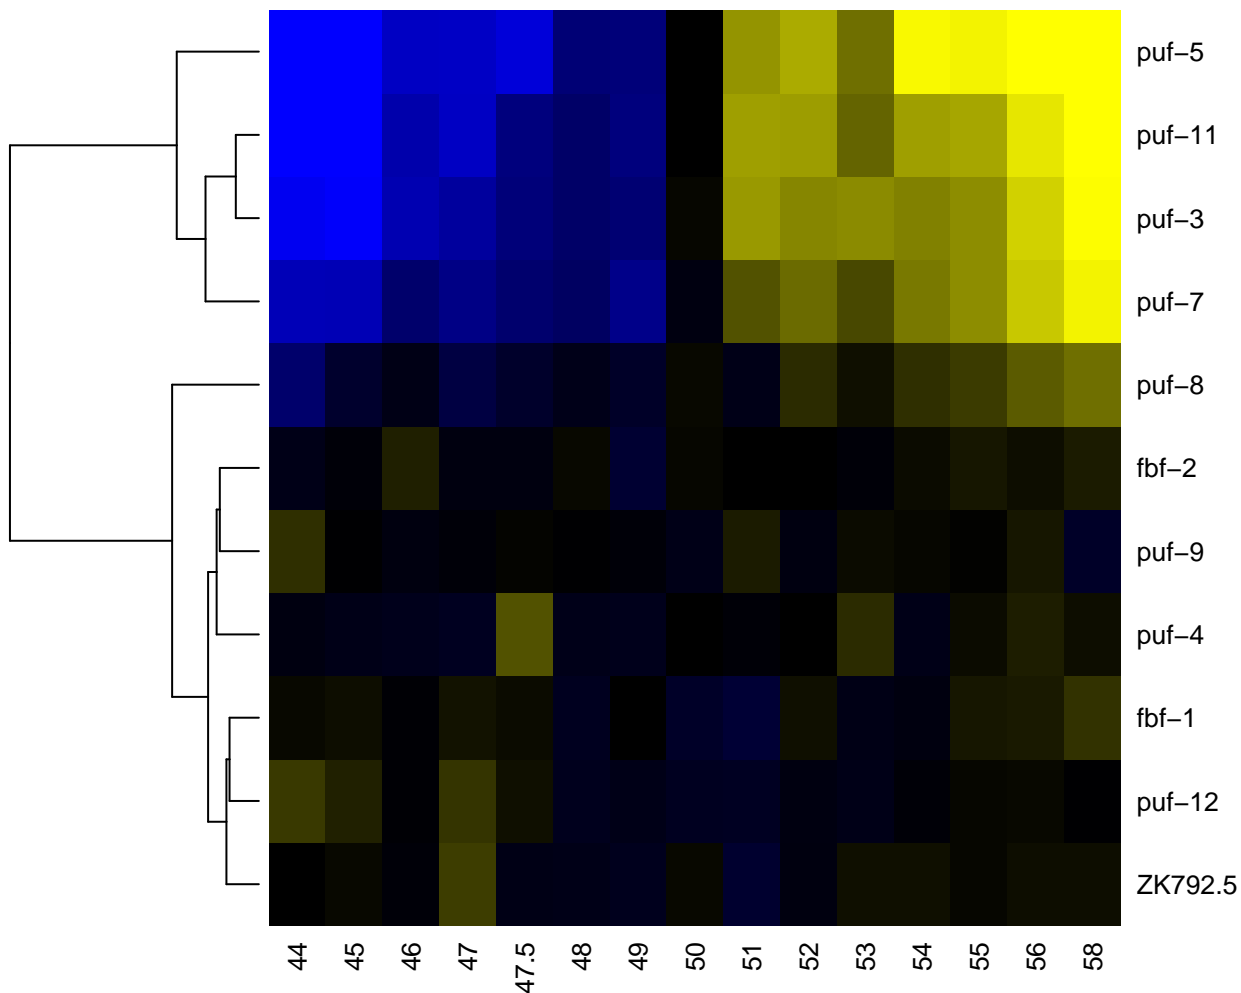

# Purple acid phosphatase, N-terminal

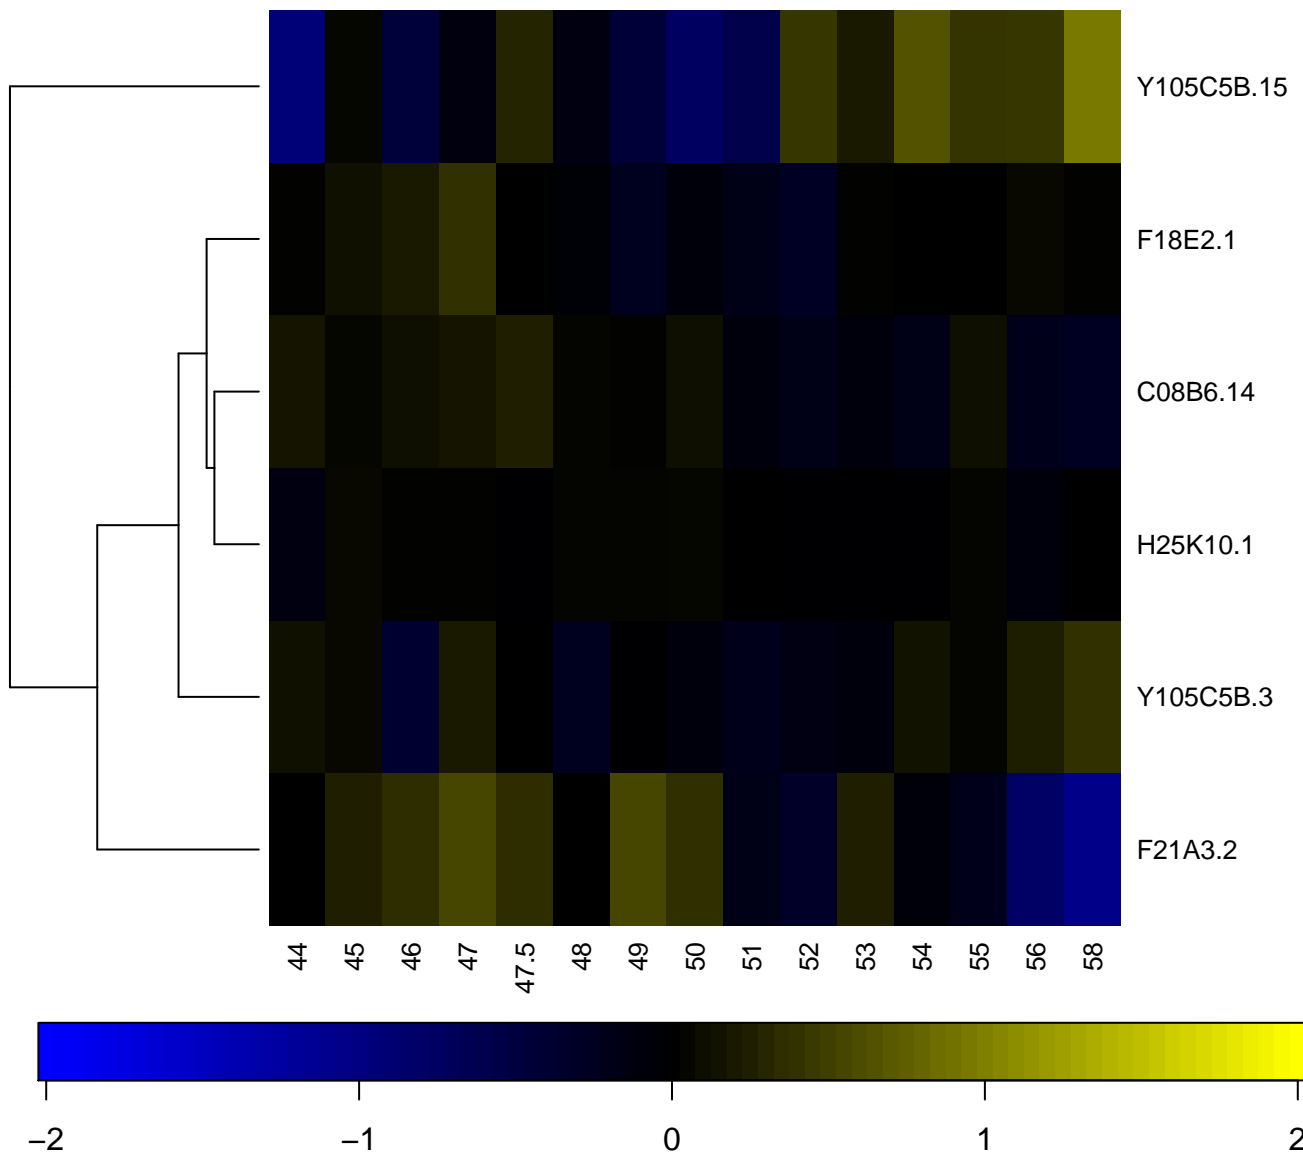



# Putative methyltransferase

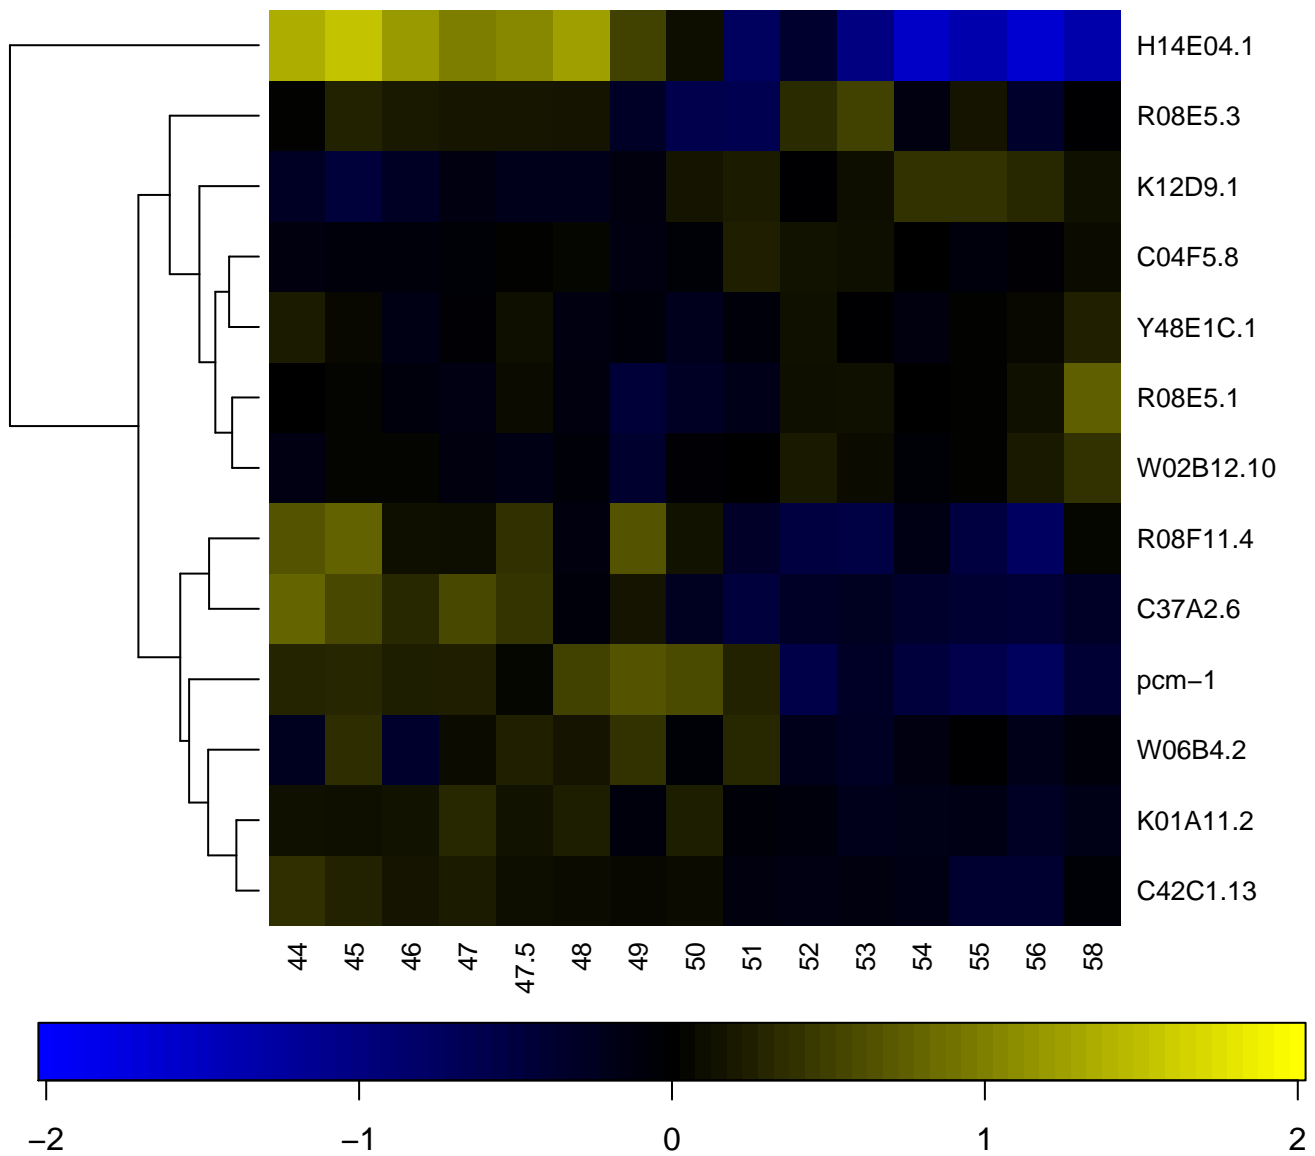

# Putative RNA methylase

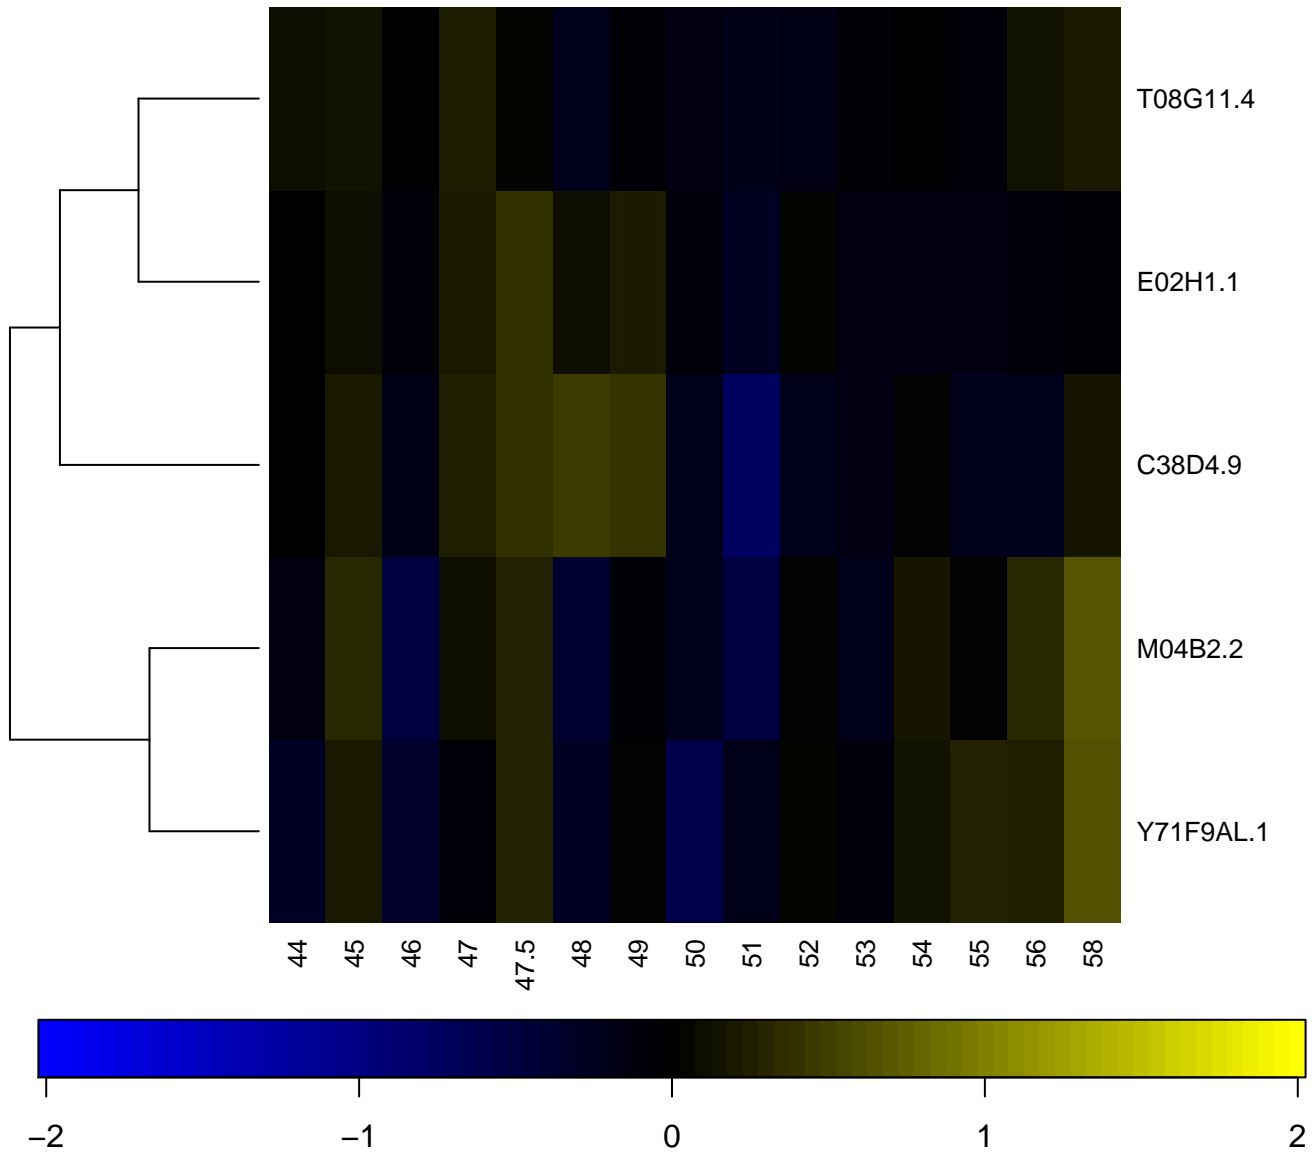

# Putative RNA methylase family UPF0020

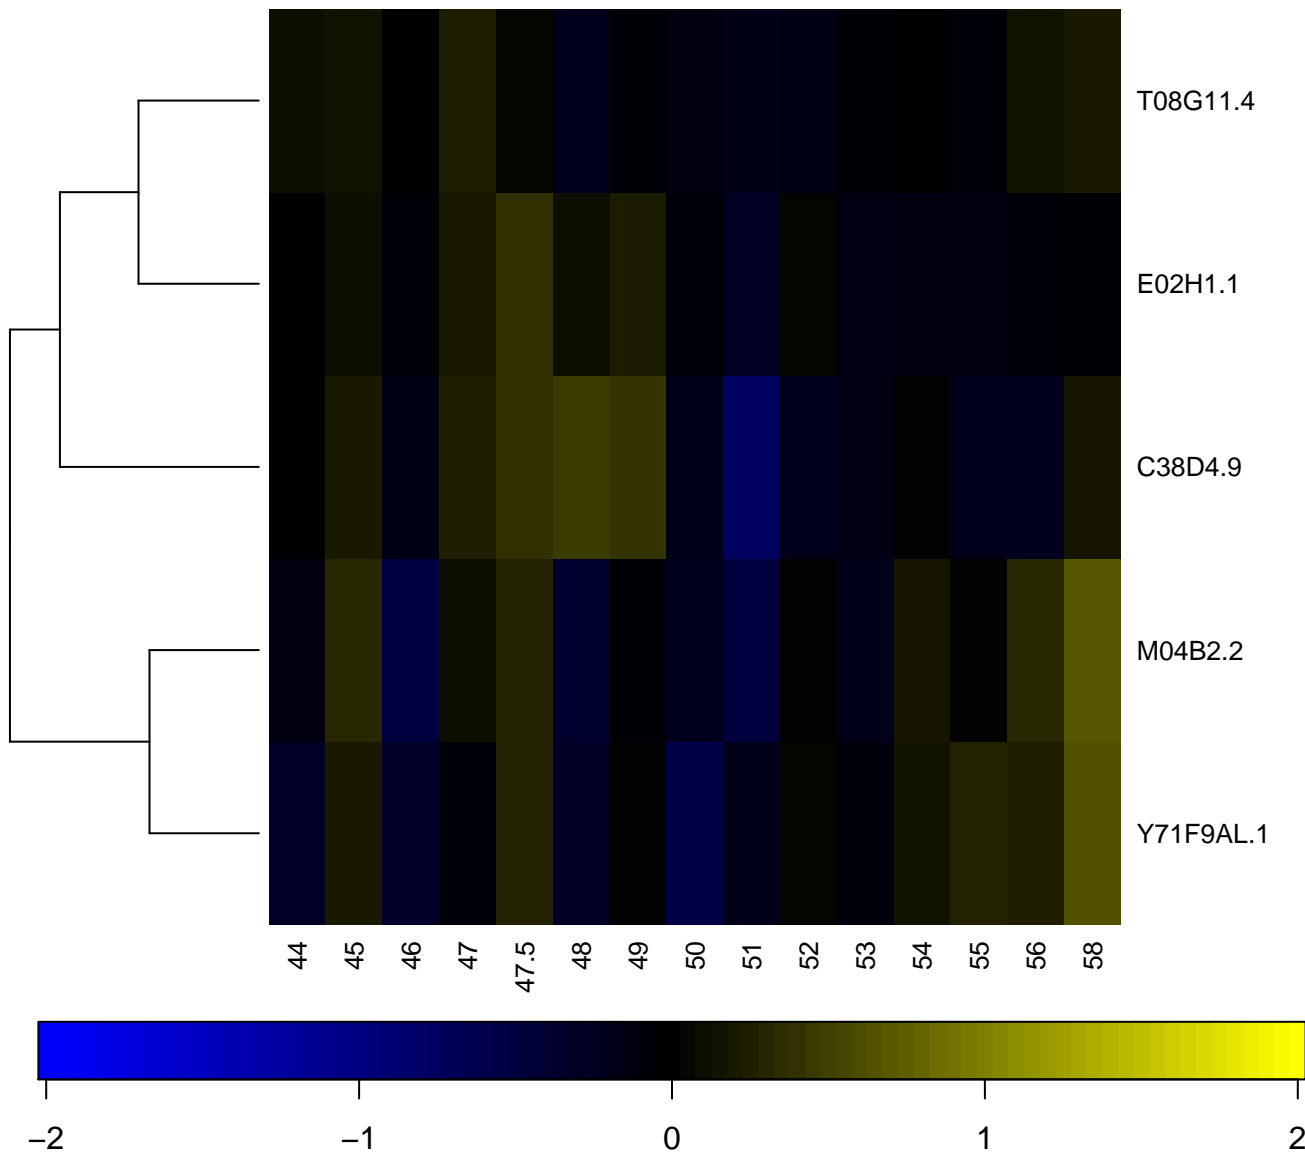



# Putative serine esterase (DUF676)

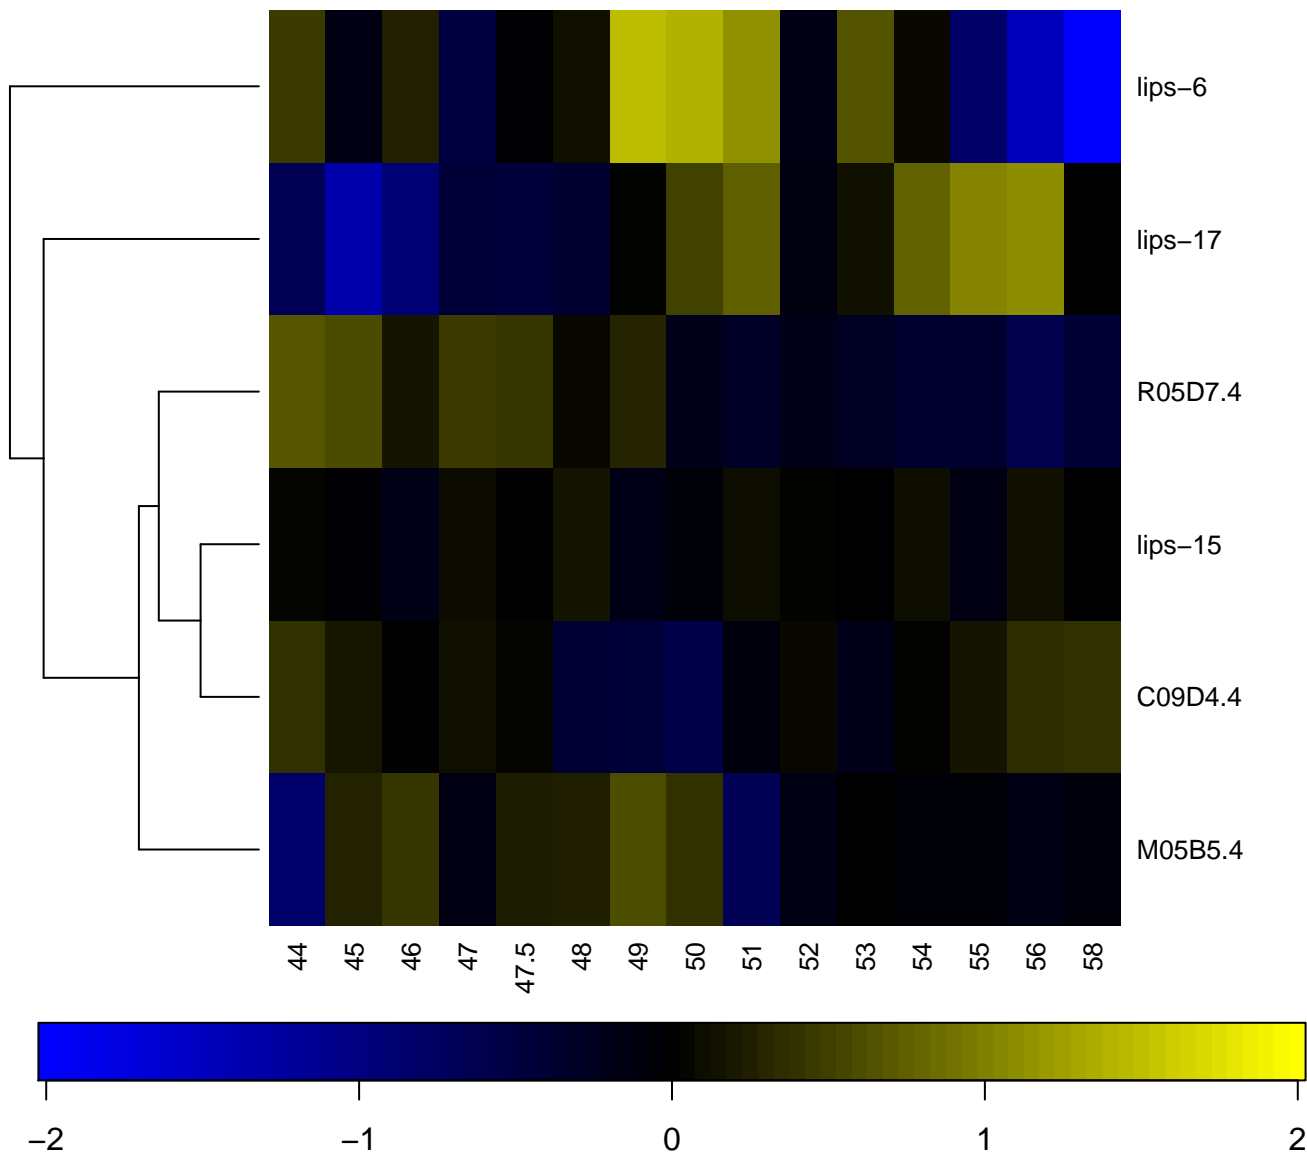



# PX domain



# Pyridine nucleotide–disulphide oxidoreductase

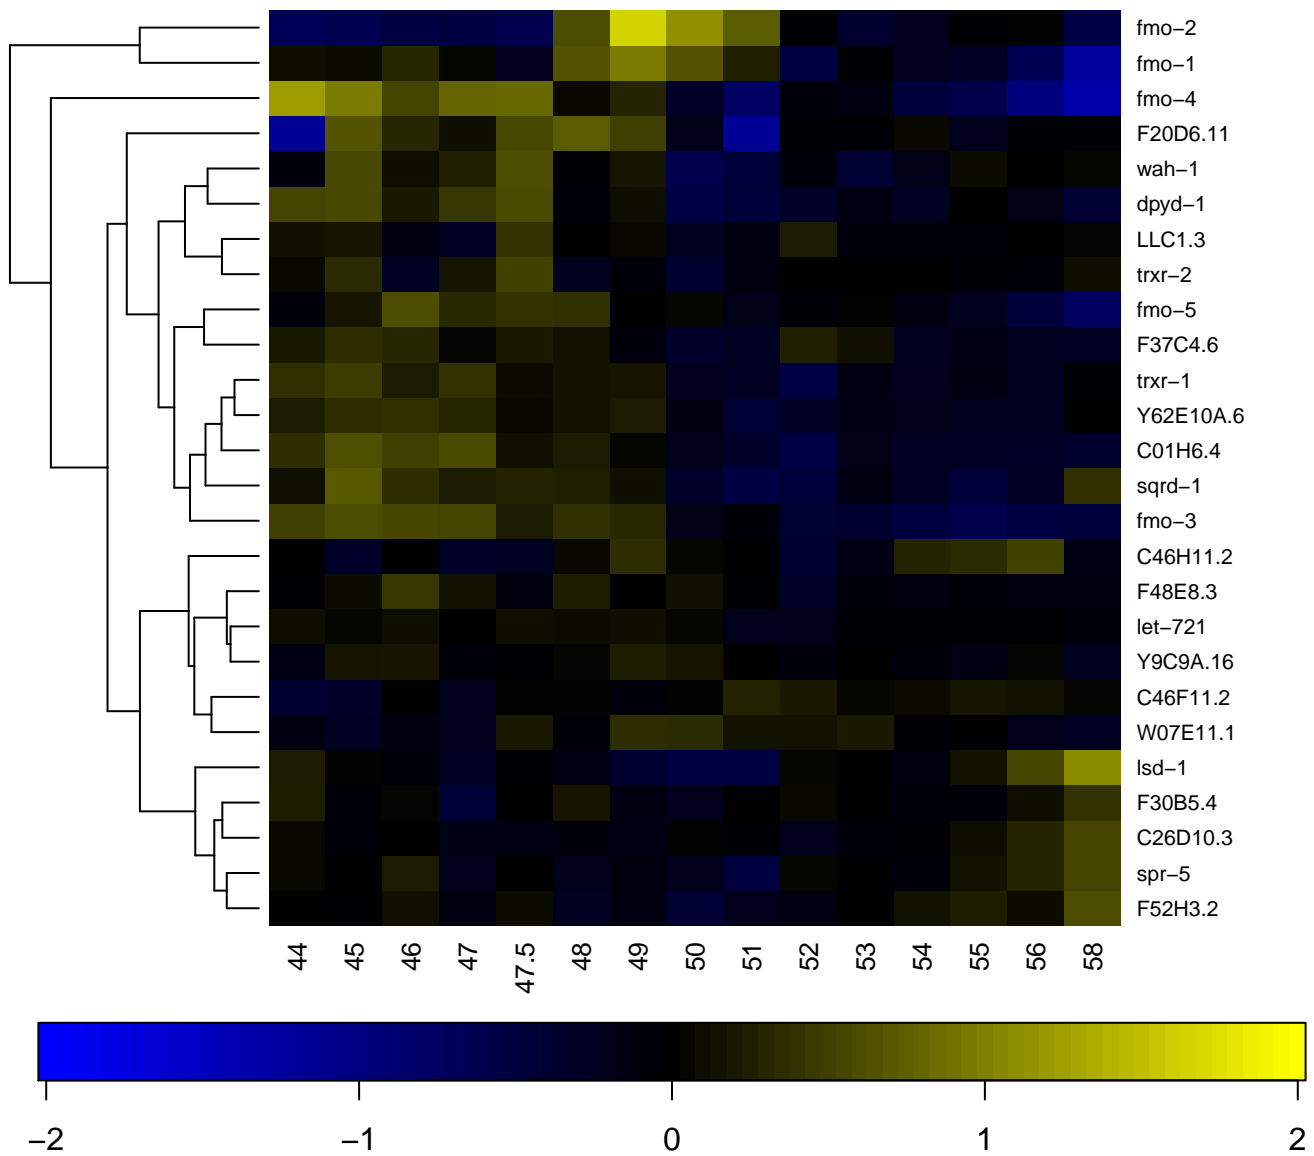



# Pyridine nucleotide–disulphide oxidoreductase, dimerisation

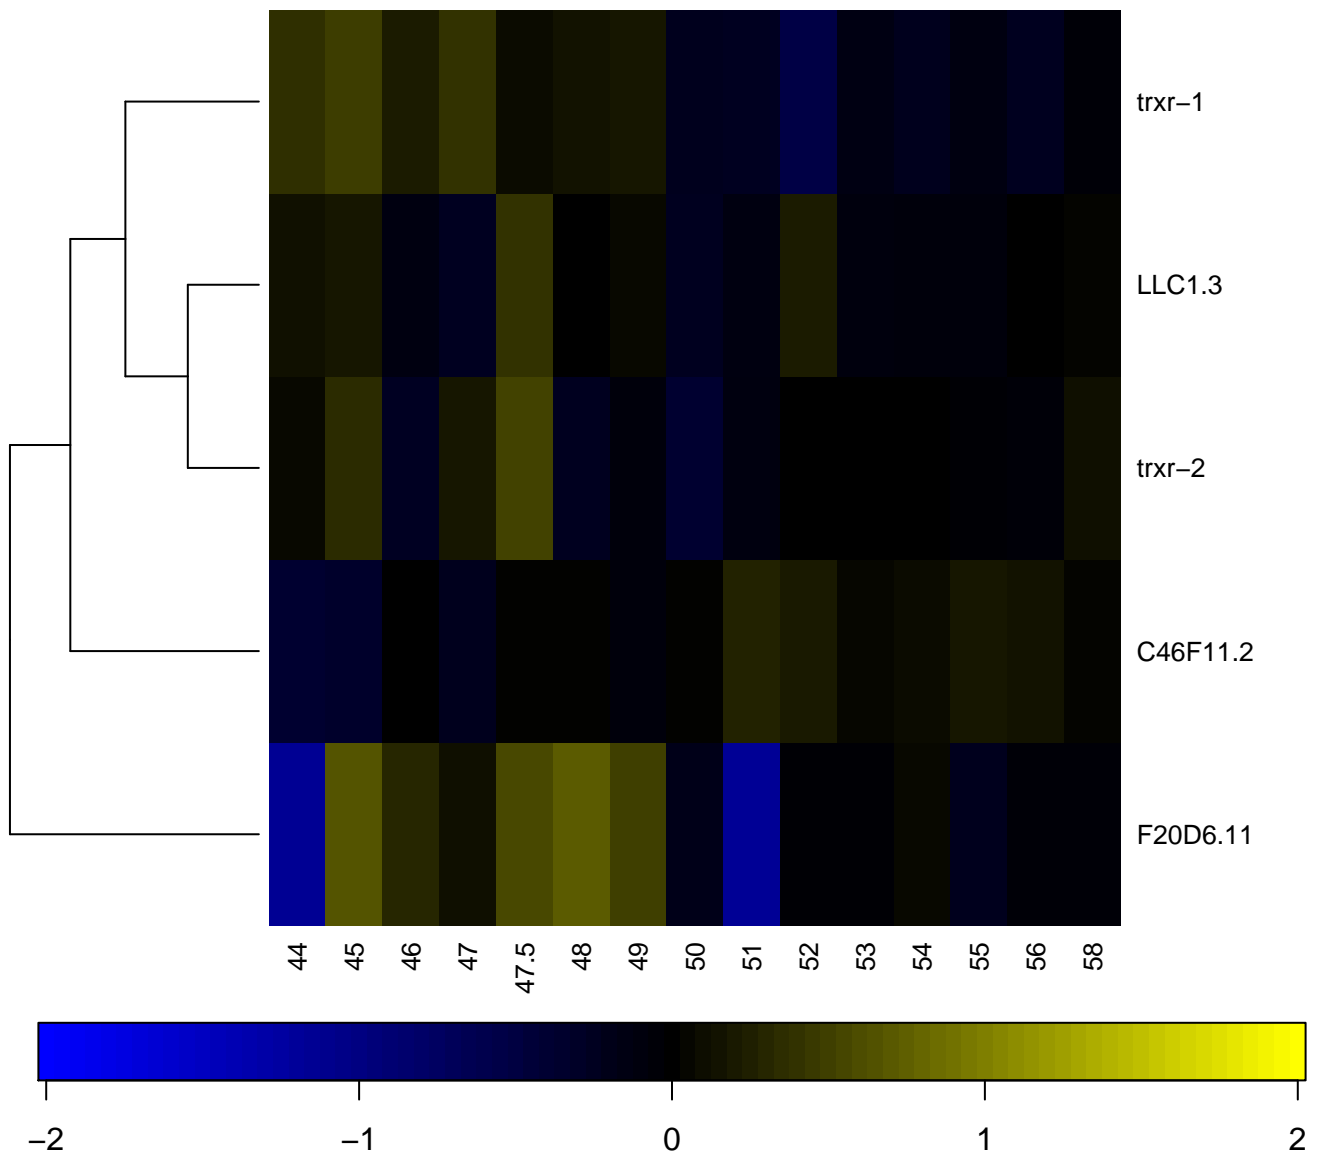



# Pyridoxal-dependent decarboxylase conserved domain

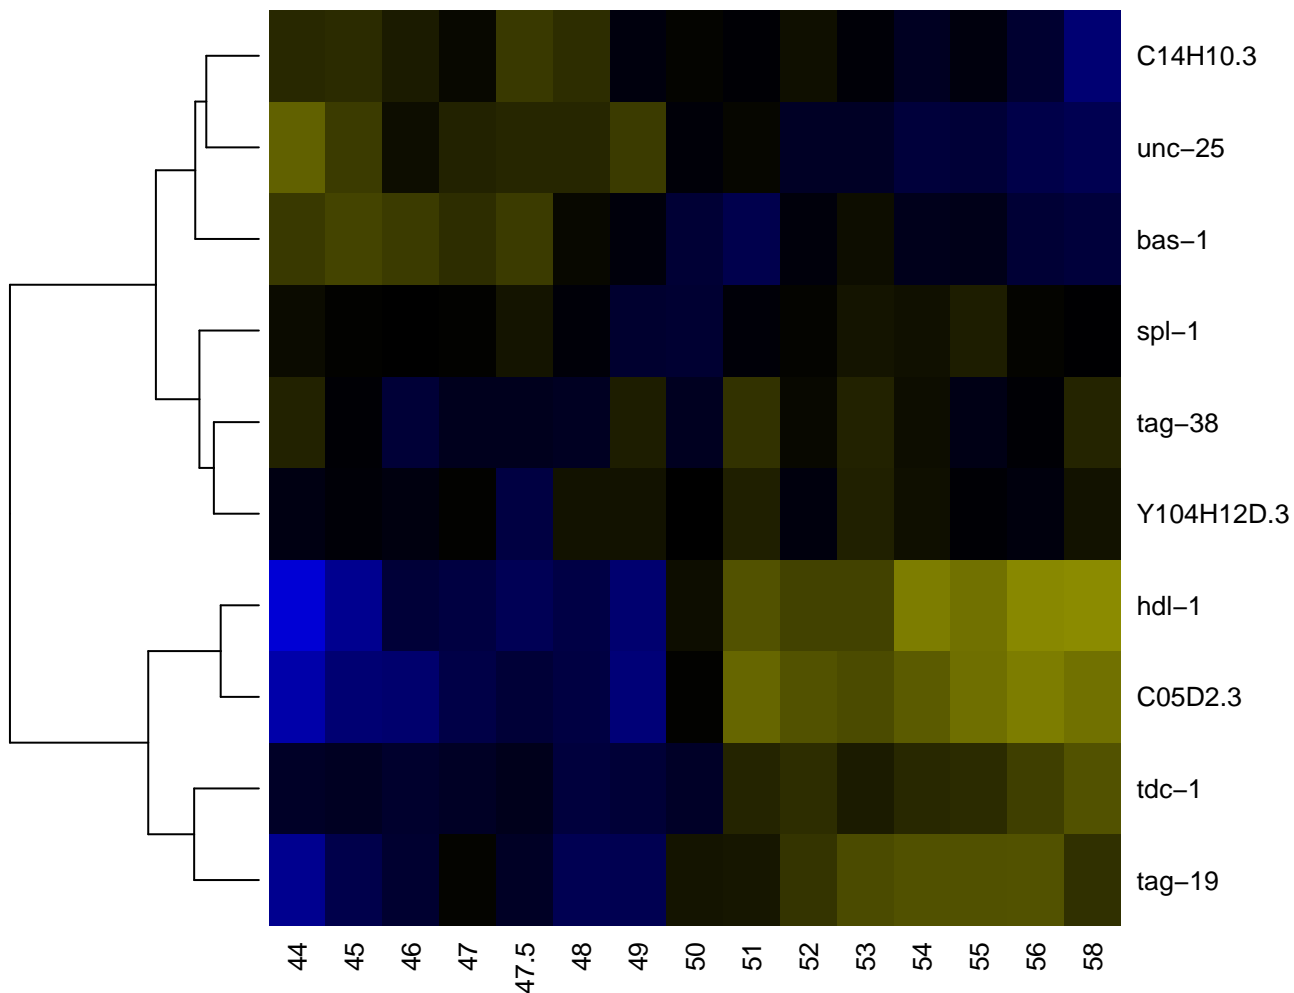



# Pyridoxal-phosphate dependent enzyme

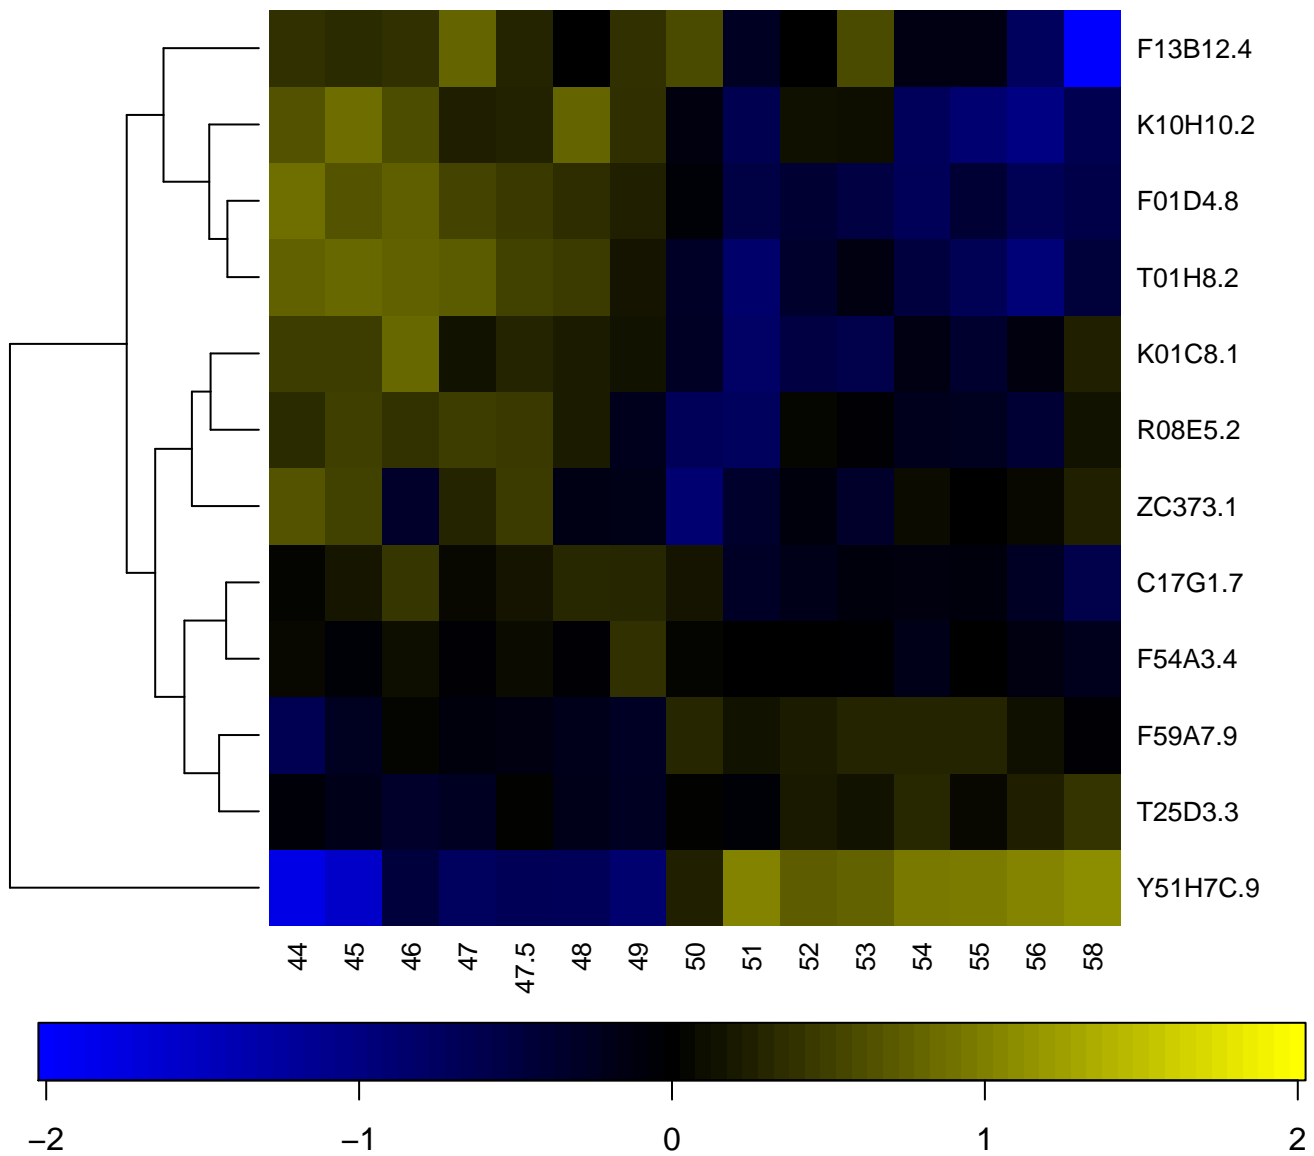

# Pyridoxal phosphate-dependent decarboxylase

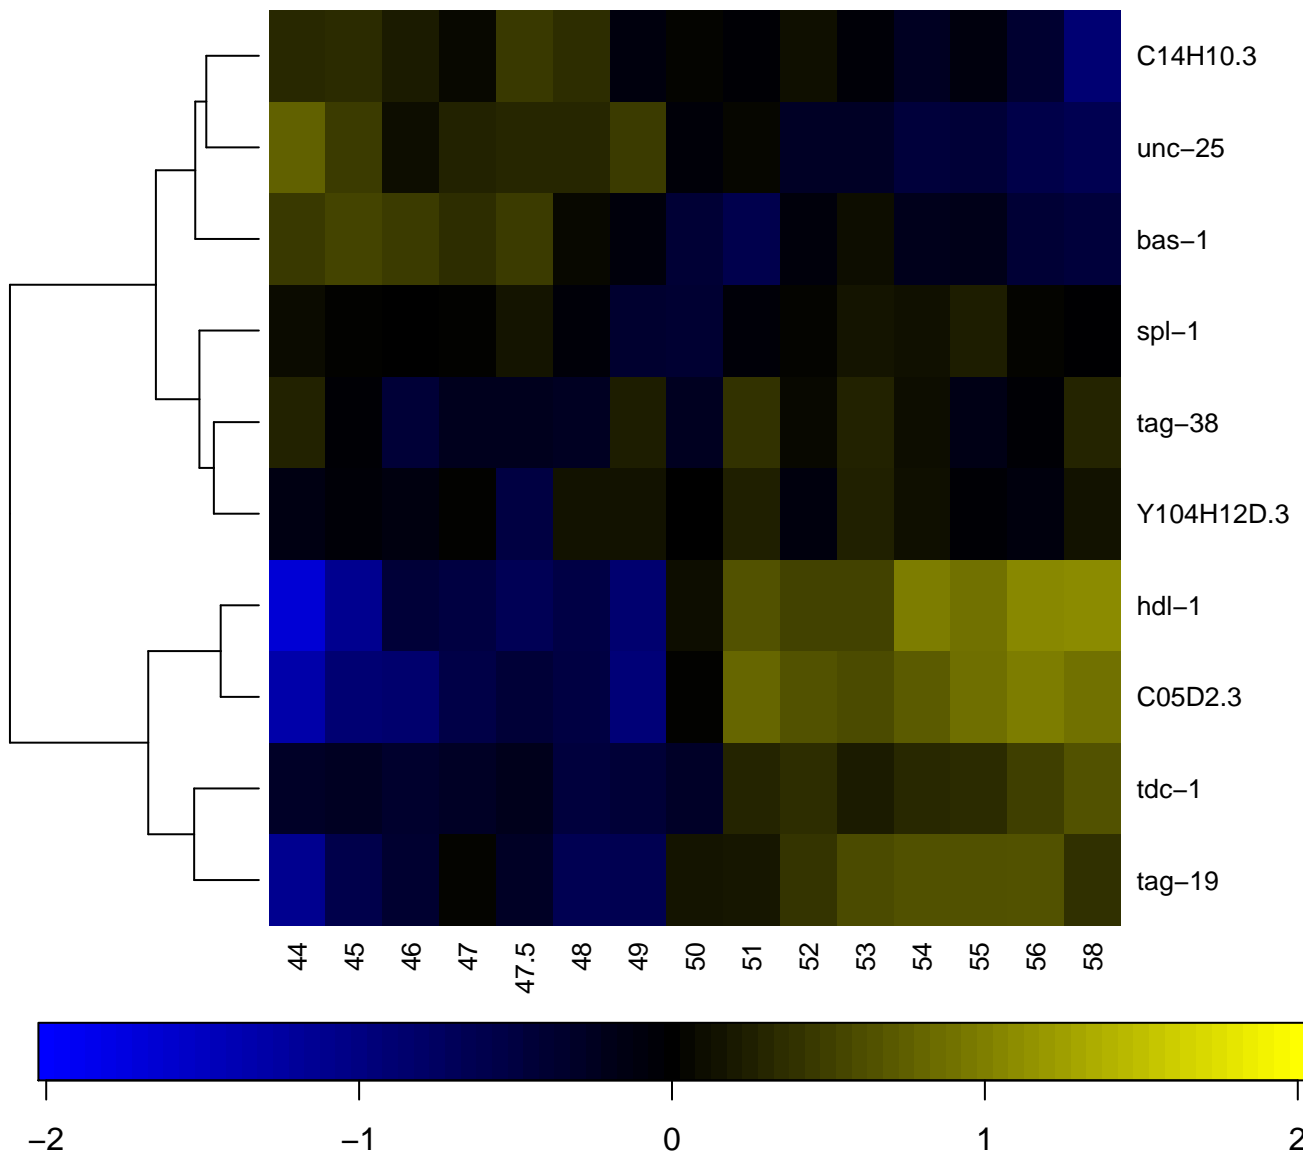

# Pyridoxal phosphate-dependent enzyme, beta subunit



# oxal phosphate-dependent transferase, major region, subd

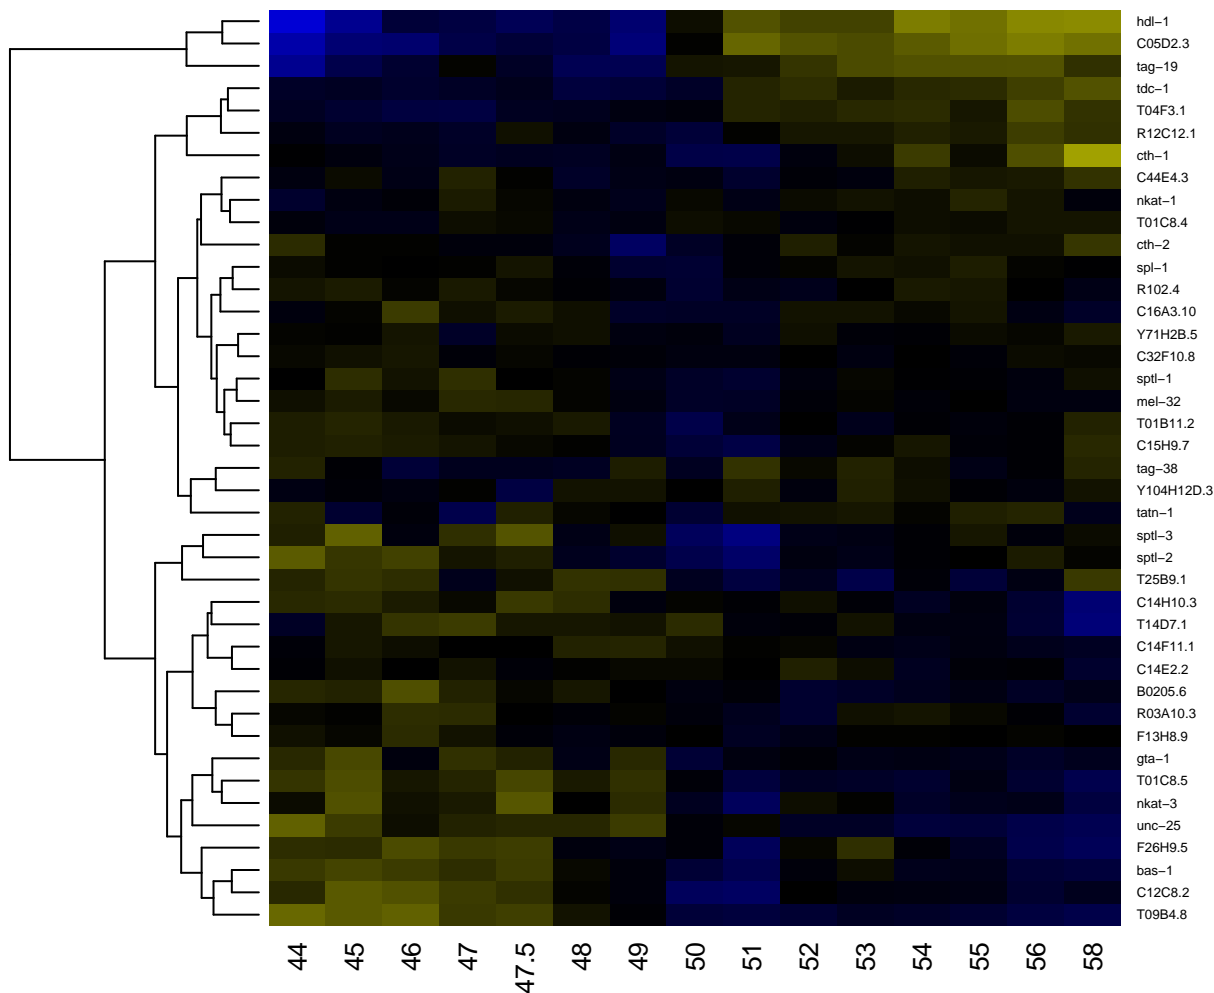

# oxal phosphate-dependent transferase, major region, subd

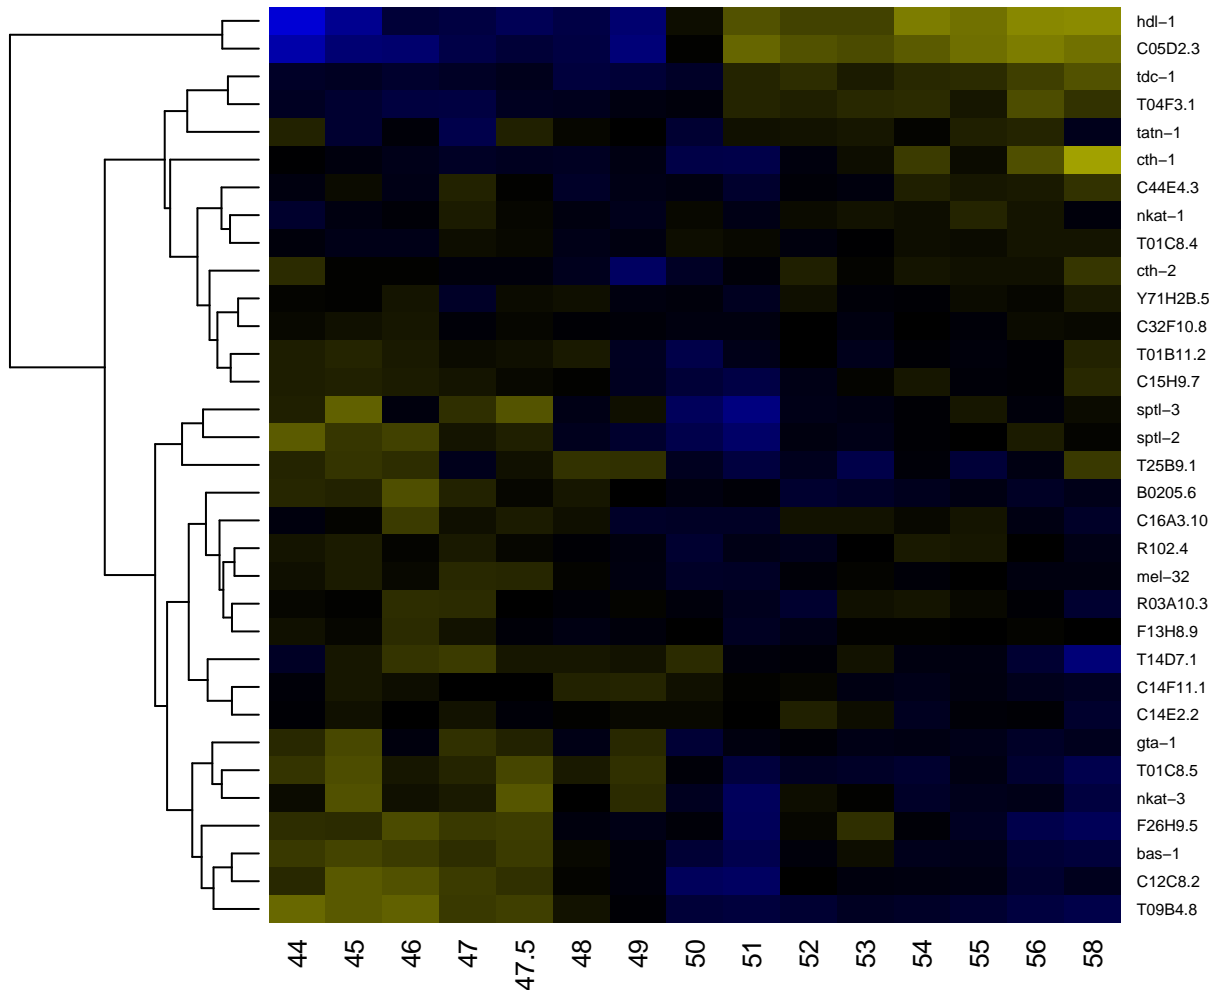



# RabGAP/TBC

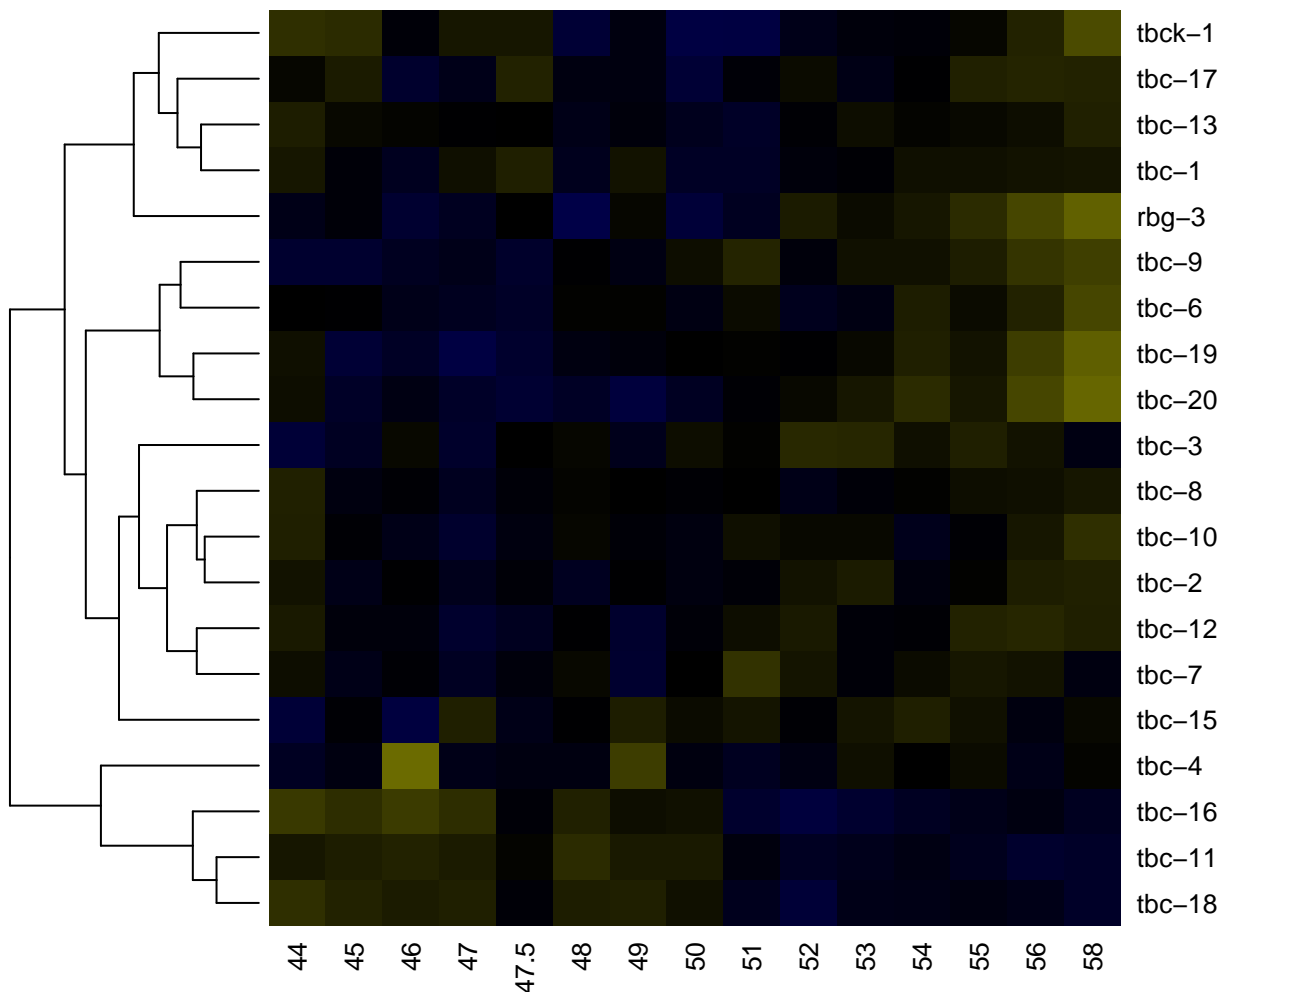









# Ran GTPase

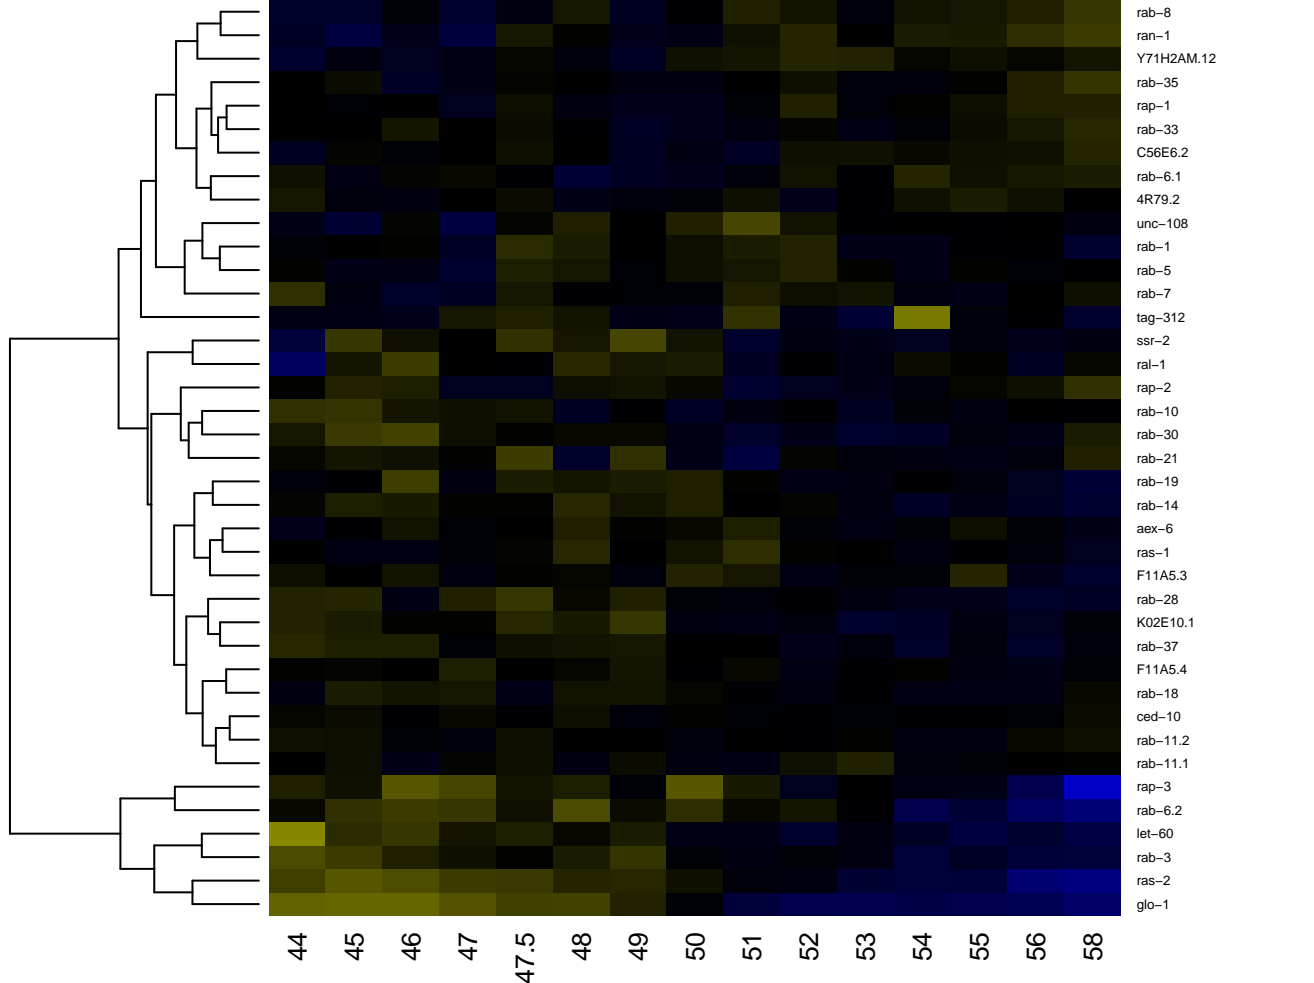

# Ras

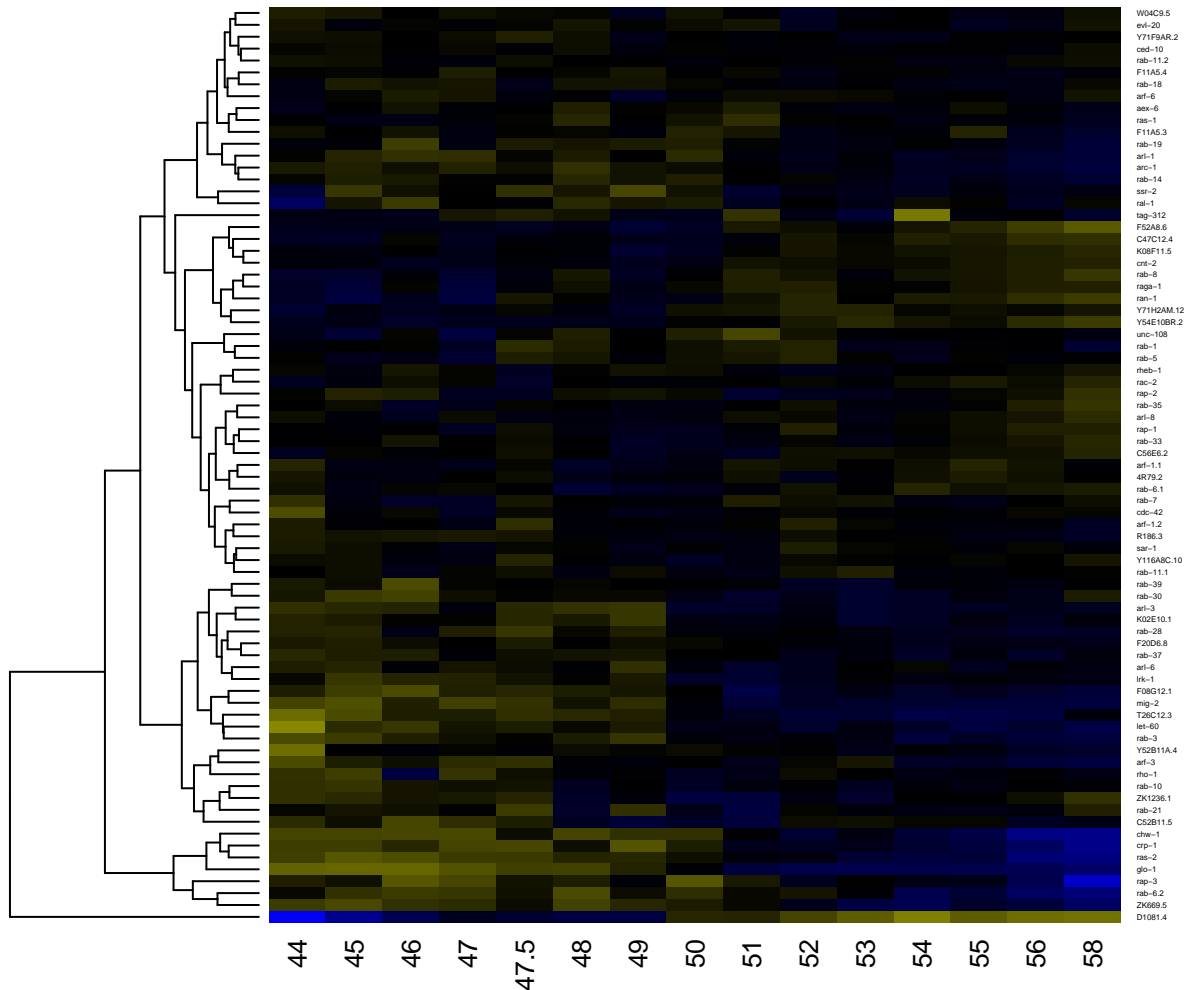

# Ras-association

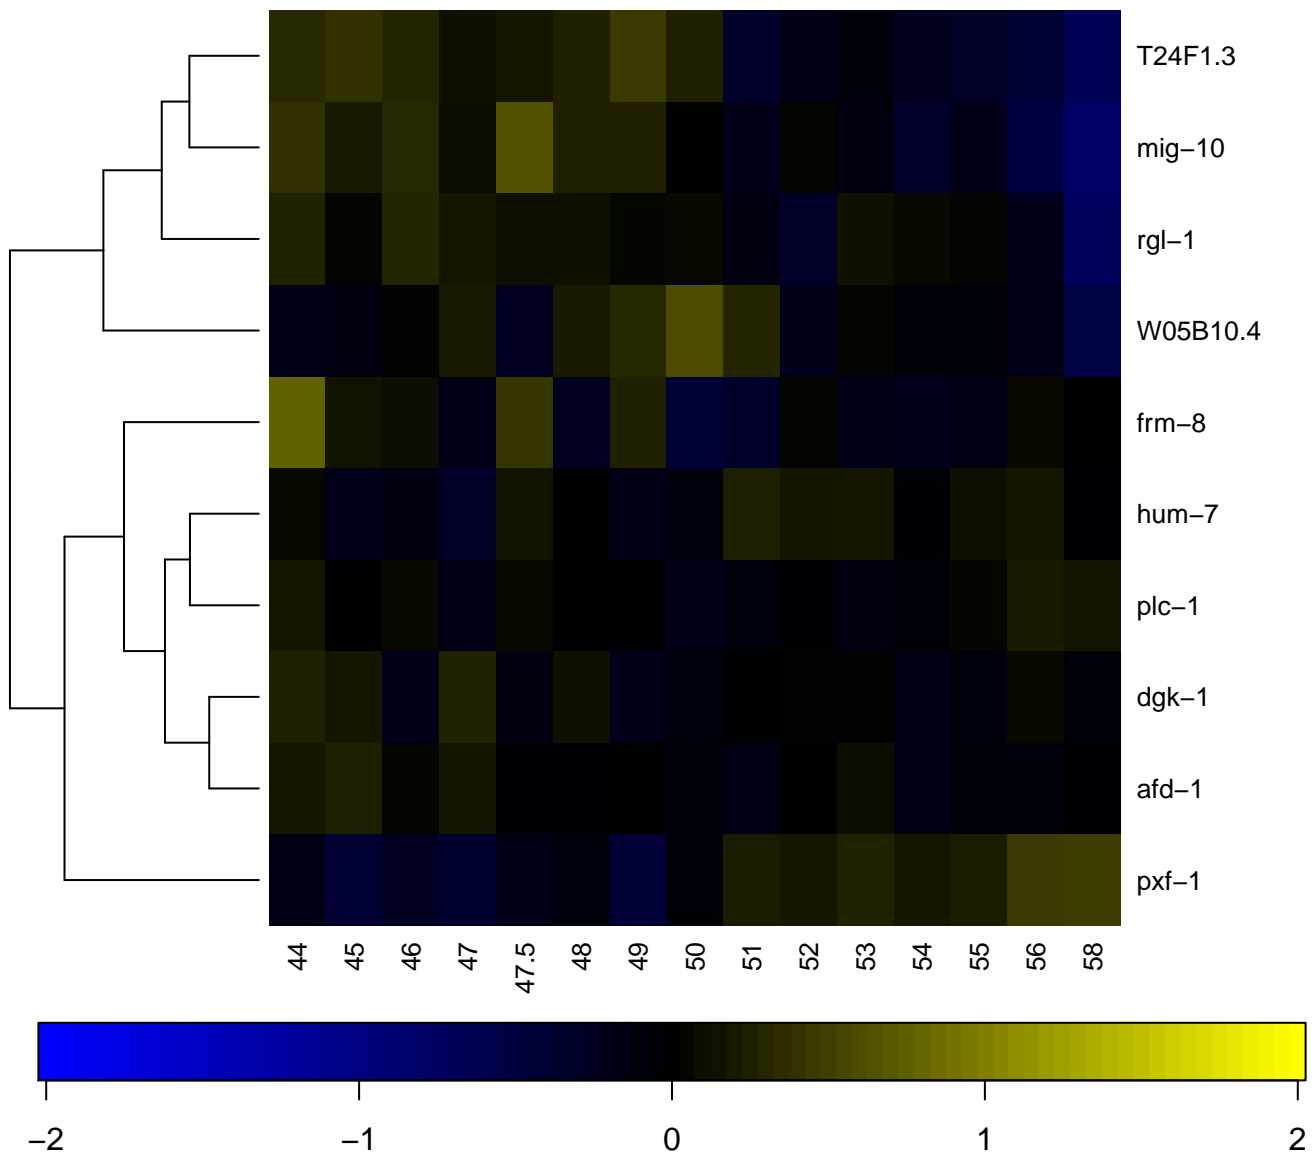

# Ras-like guanine nucleotide exchange factor, N-terminal

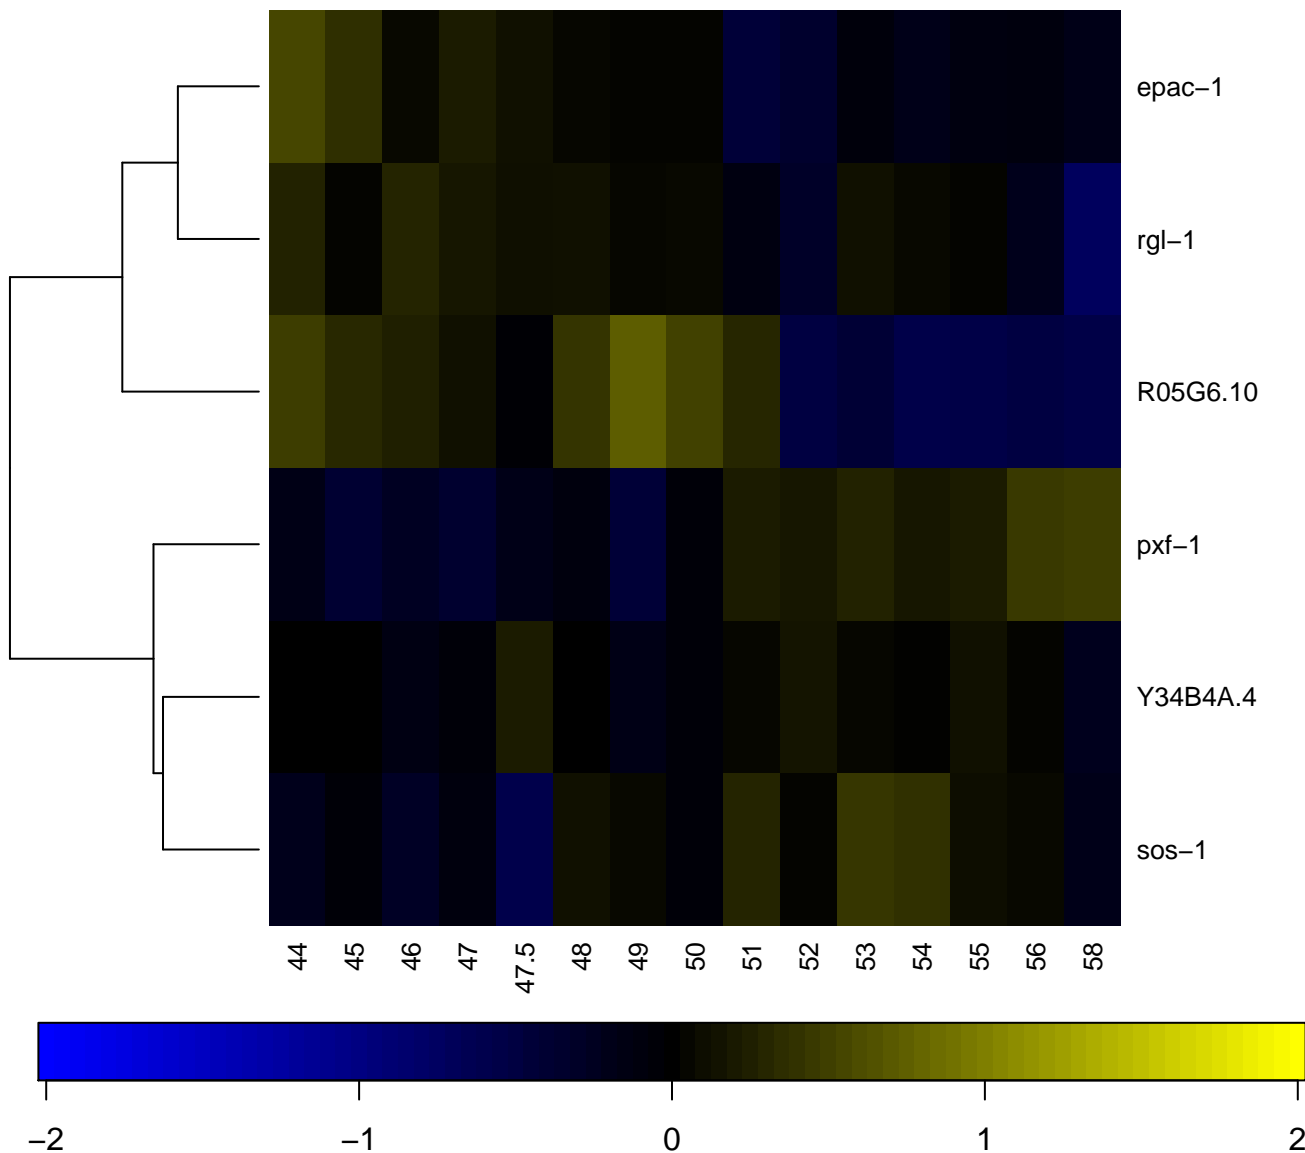







# Ras family

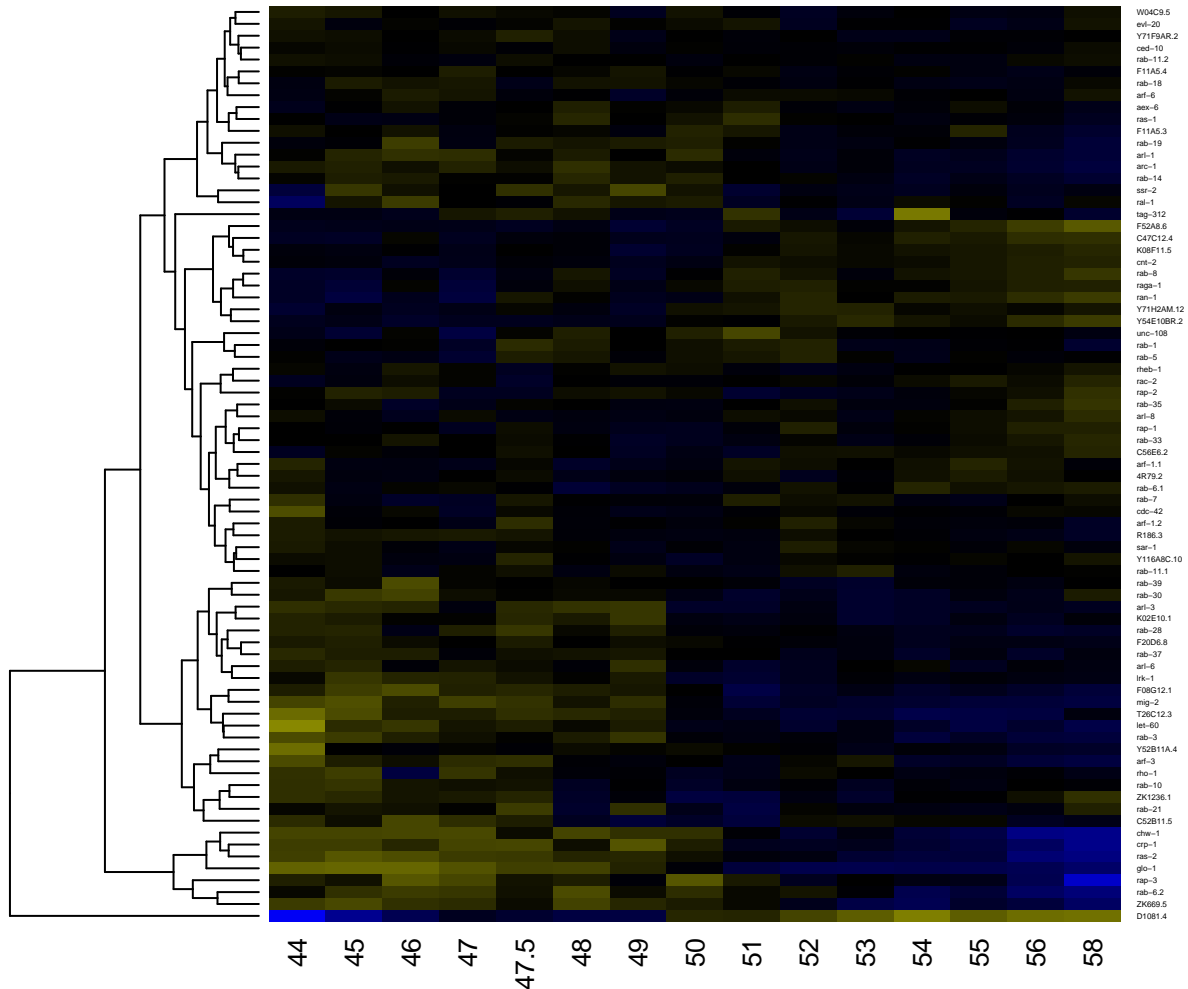

# Ras GTPase

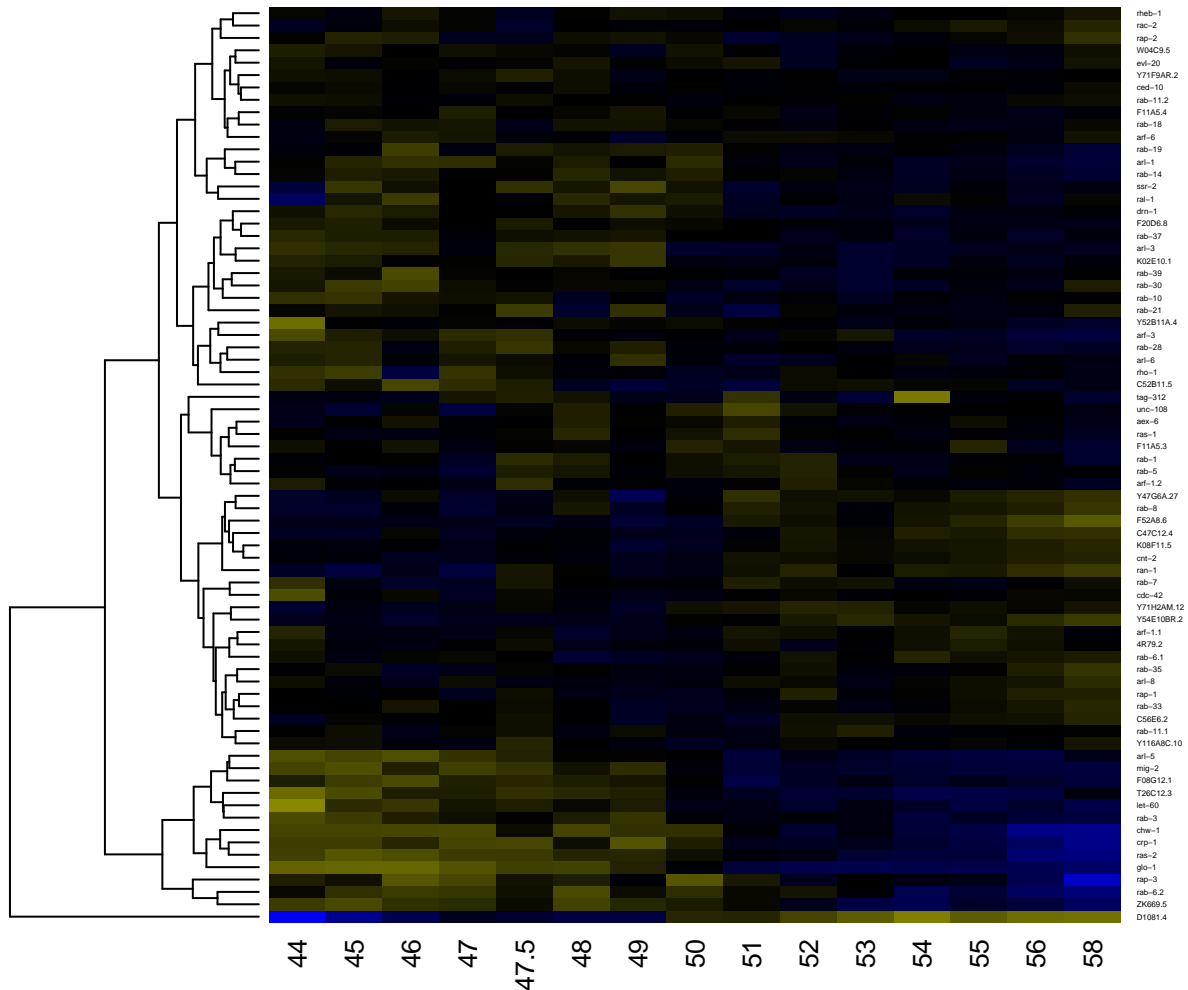

# Ras guanine nucleotide exchange factor

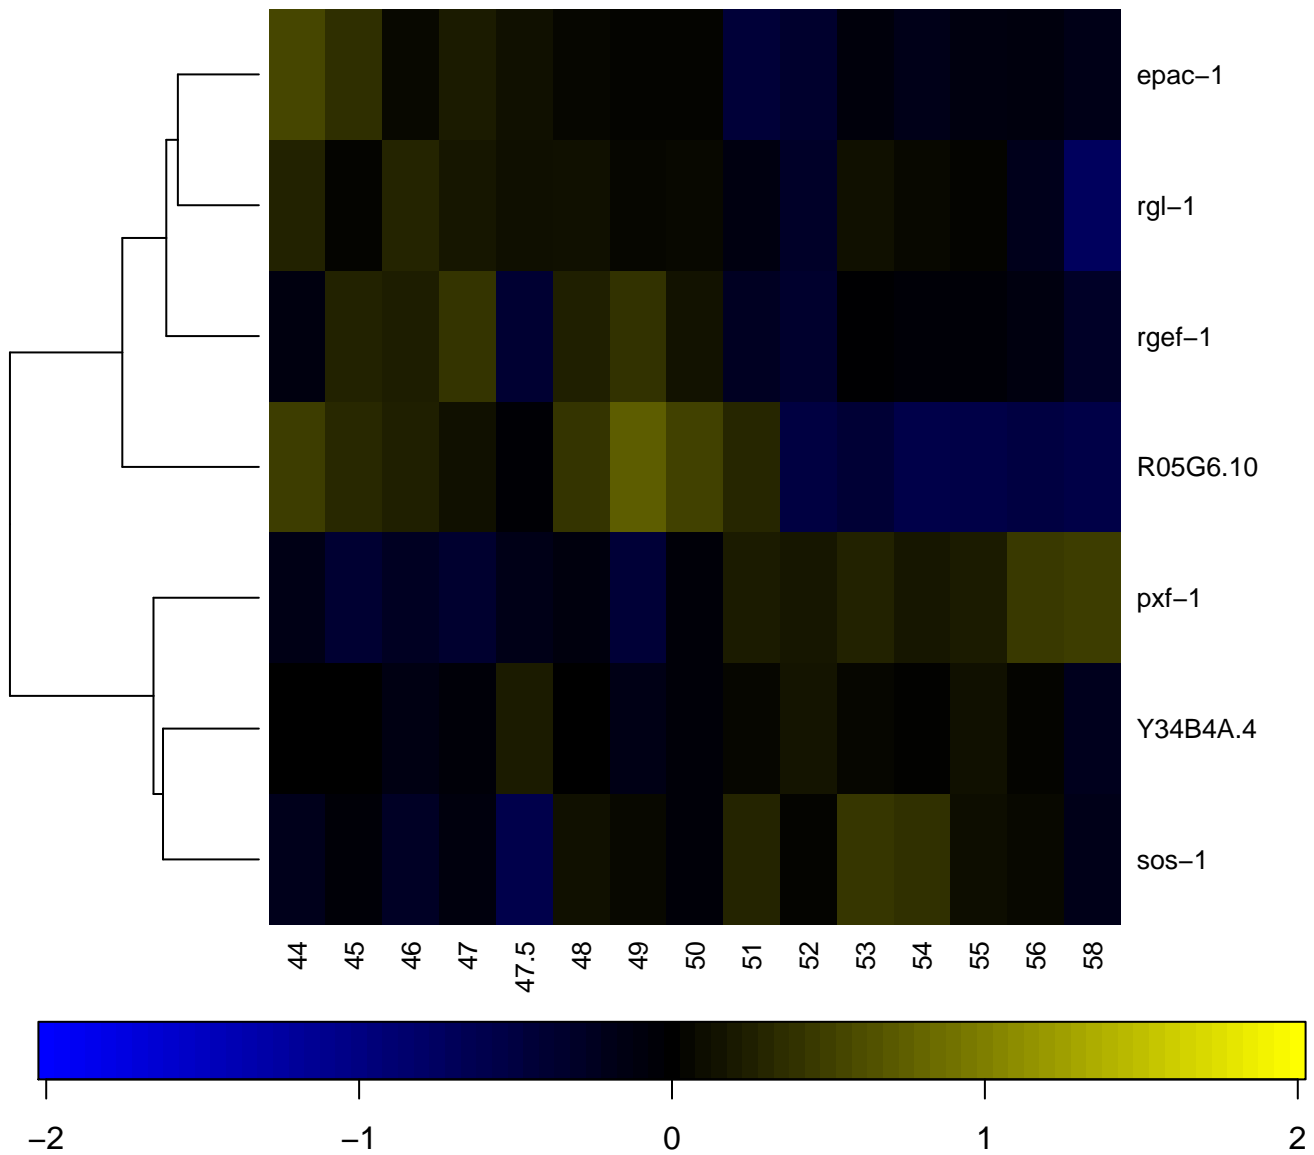

# Ras small GTPase, Rab type

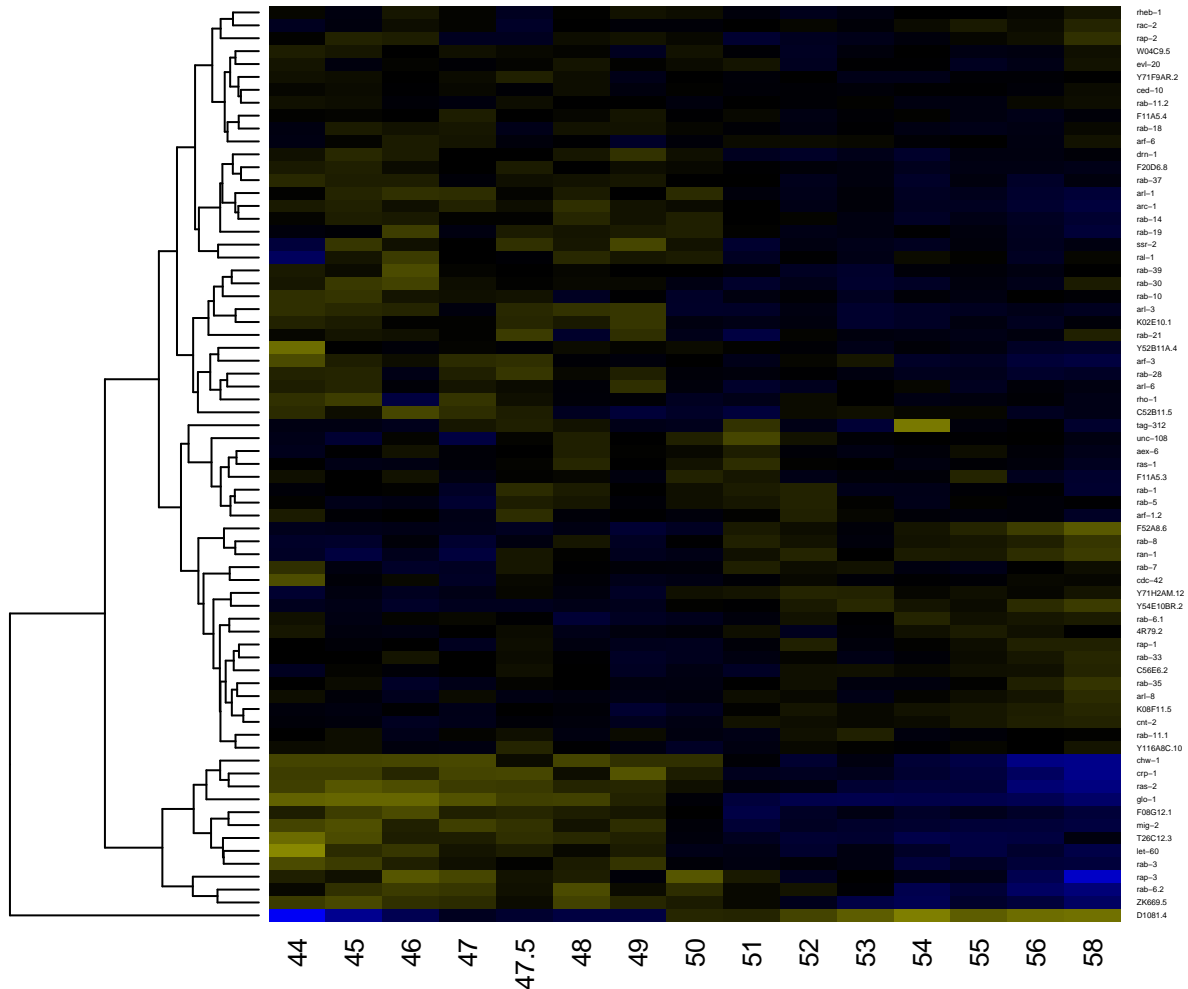

# Ras small GTPase, Ras type

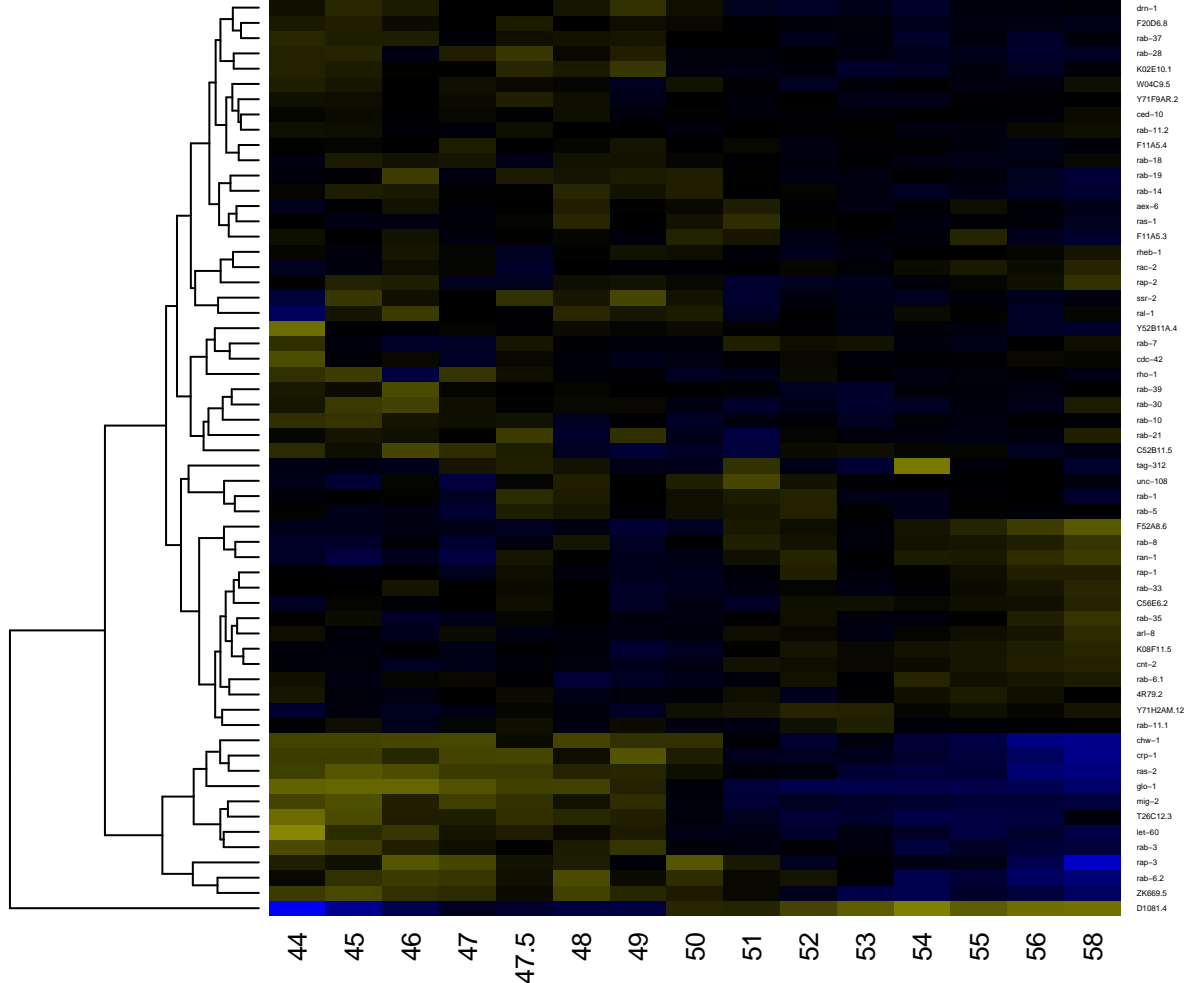

-2

-1

0

1

2

# RasGEF domain



# Receptor family ligand binding region

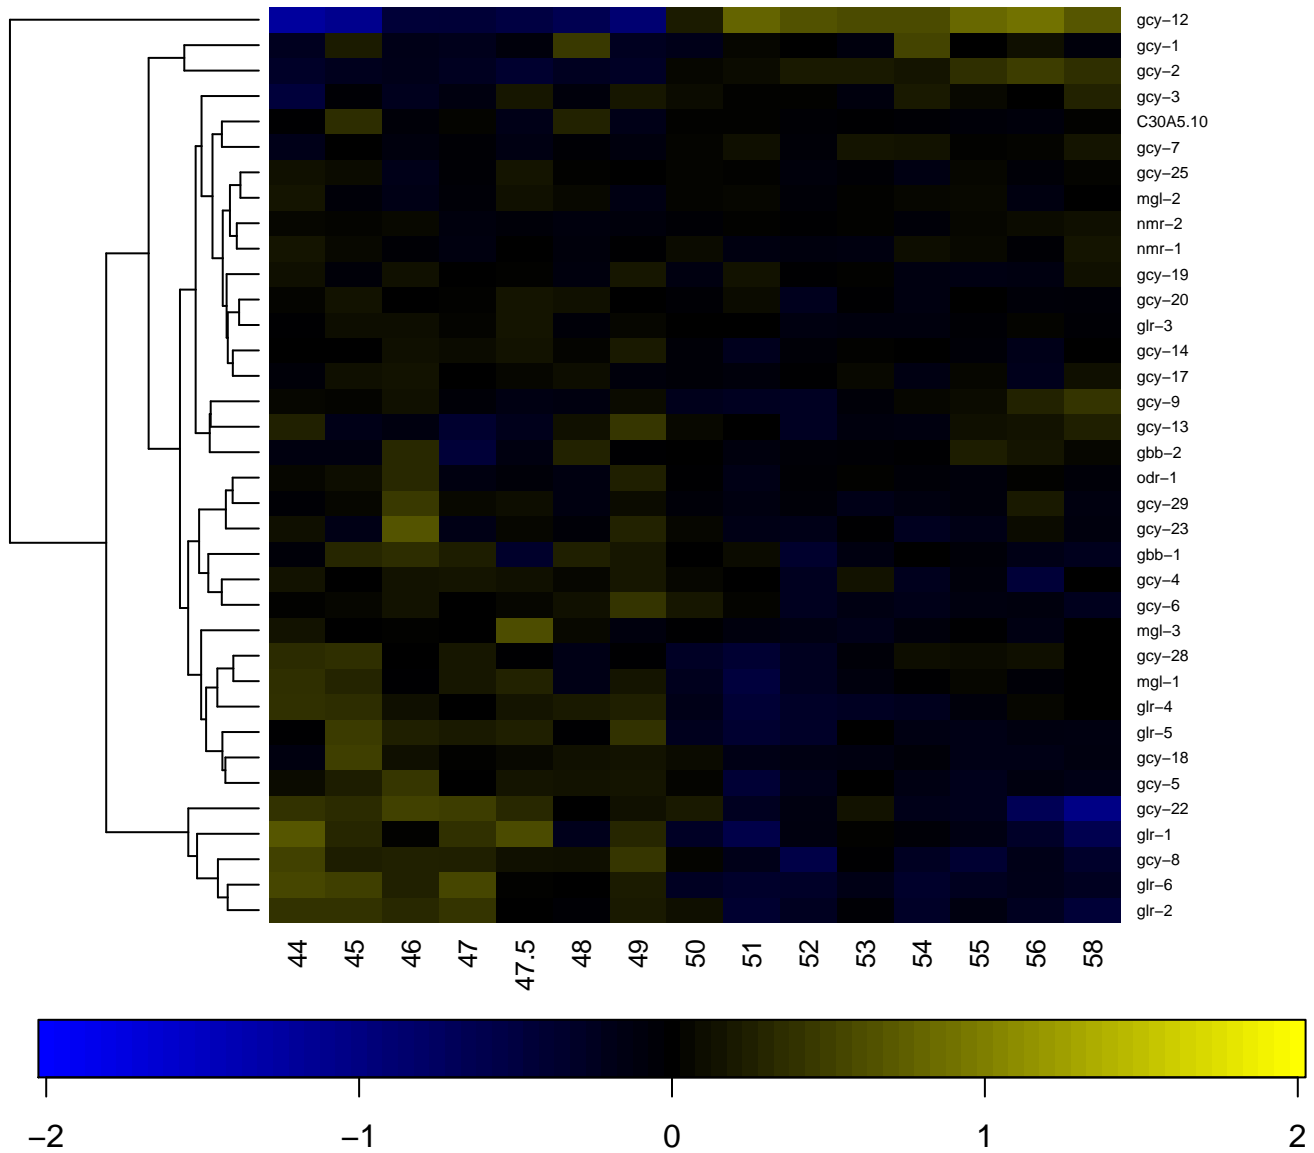

# Receptor L domain

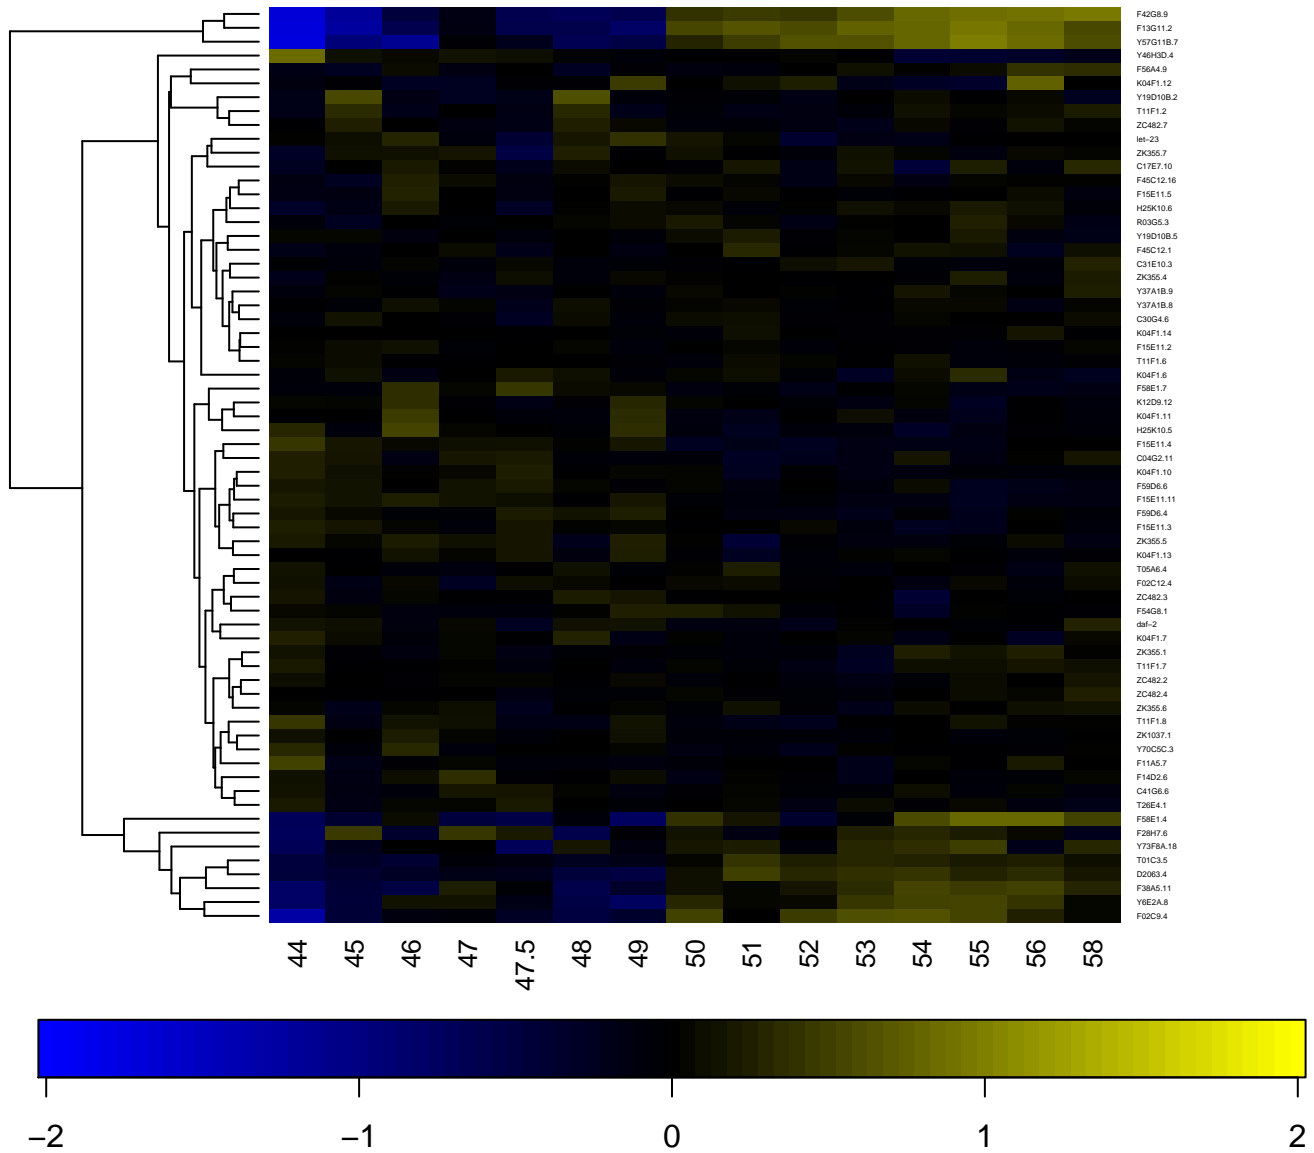







# Recoverin

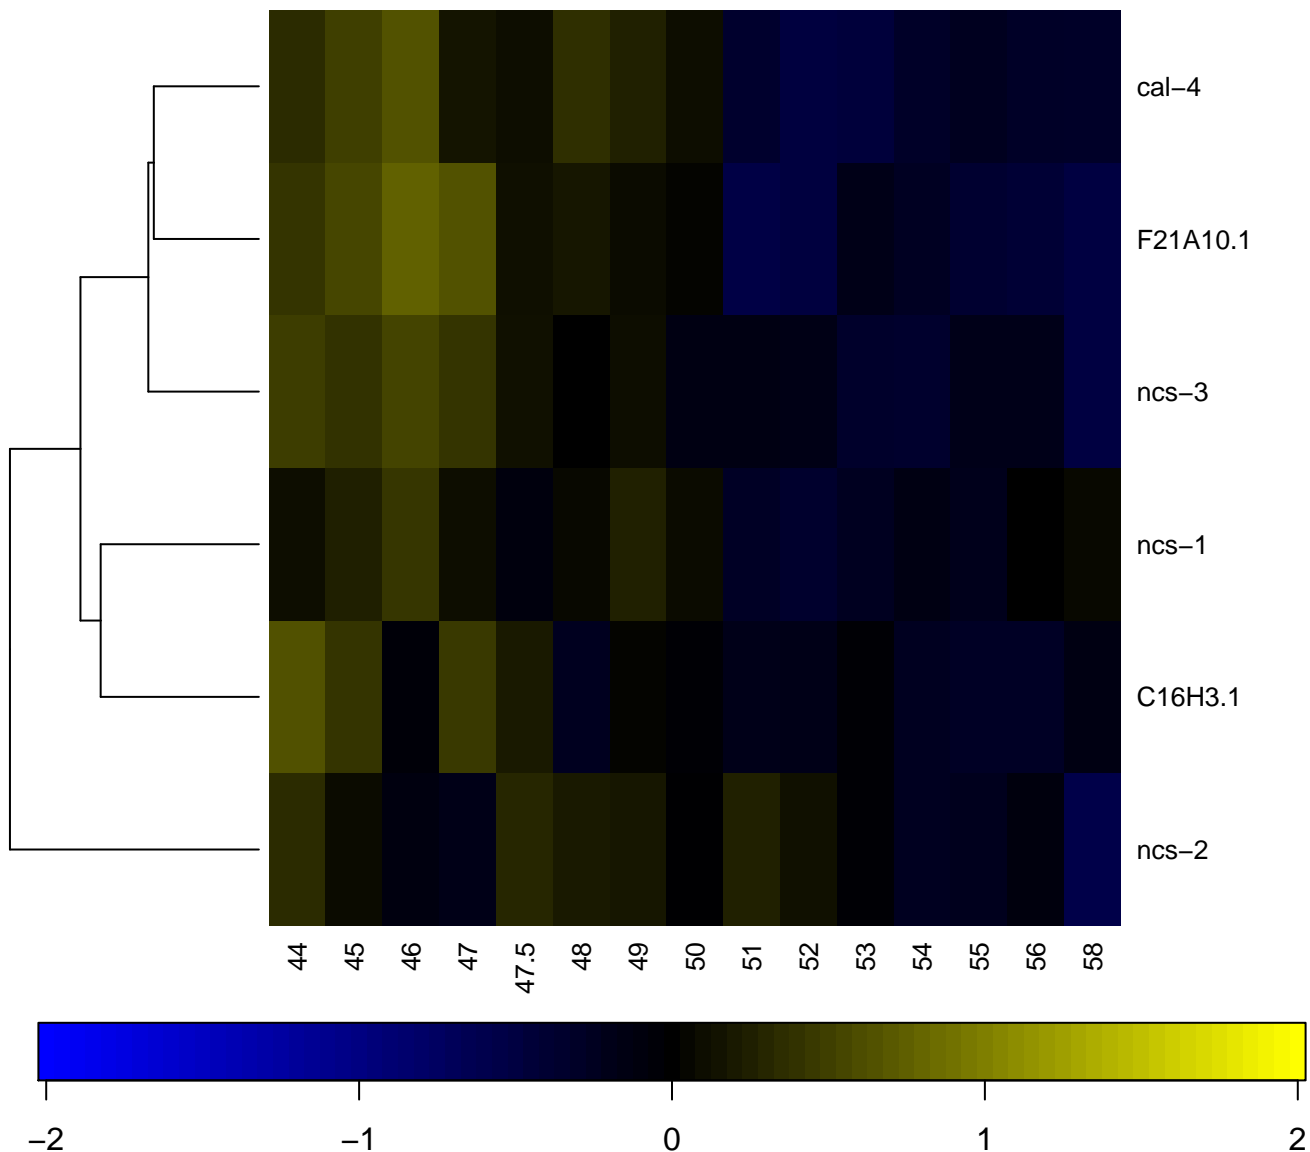

# Redoxin

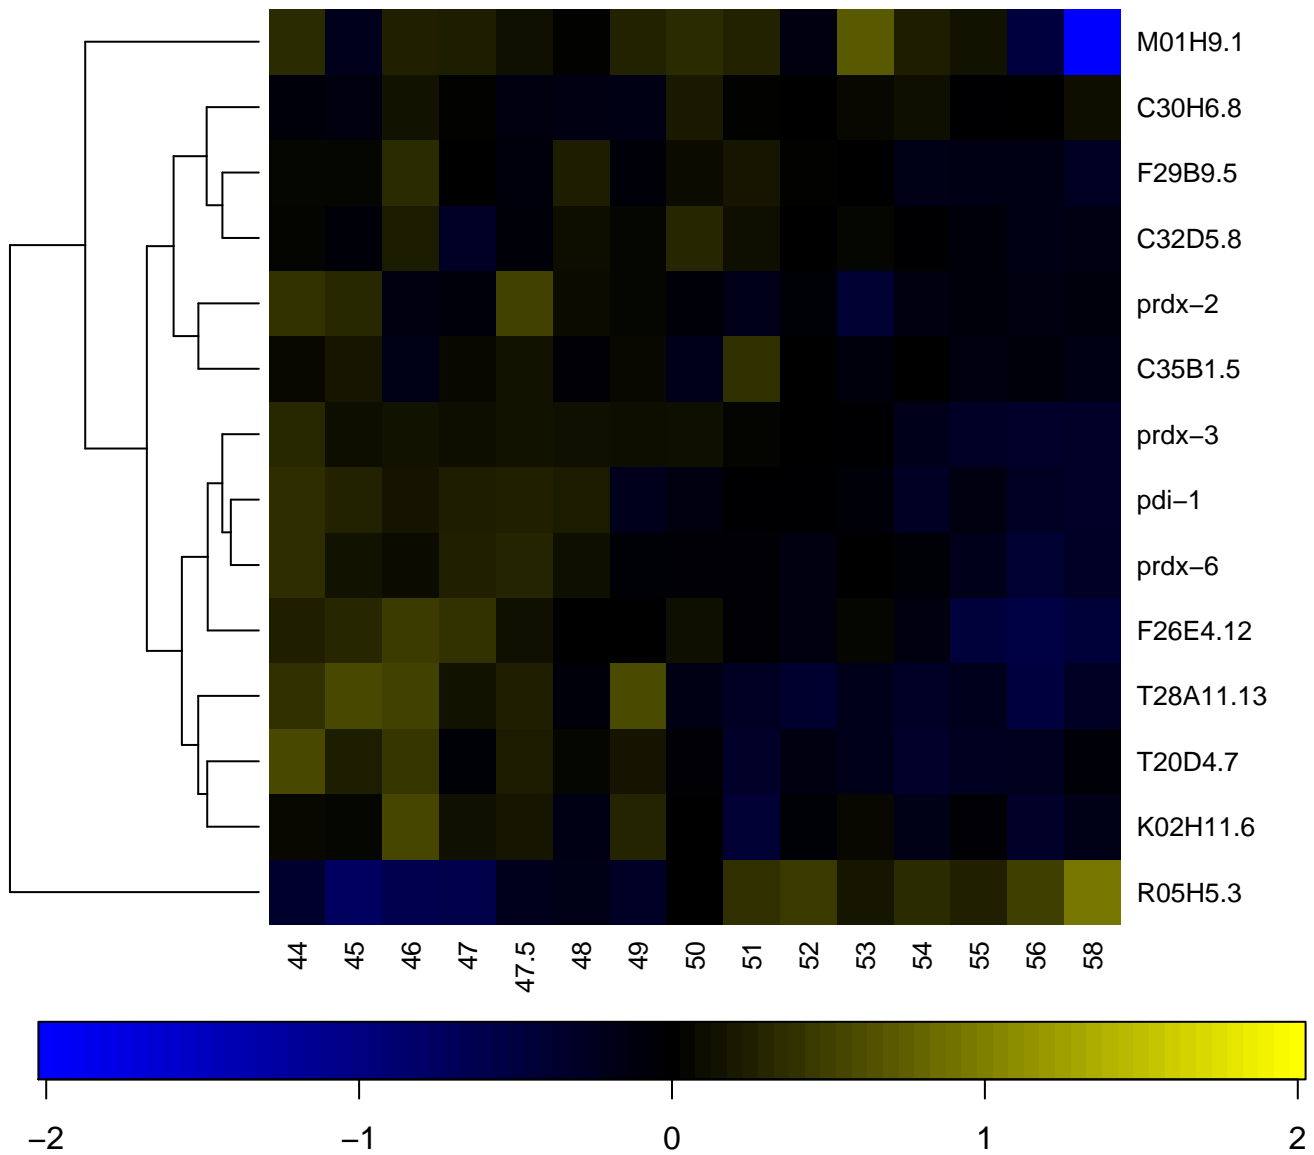

# Regulator of chromosome condensation (RCC1) repeat

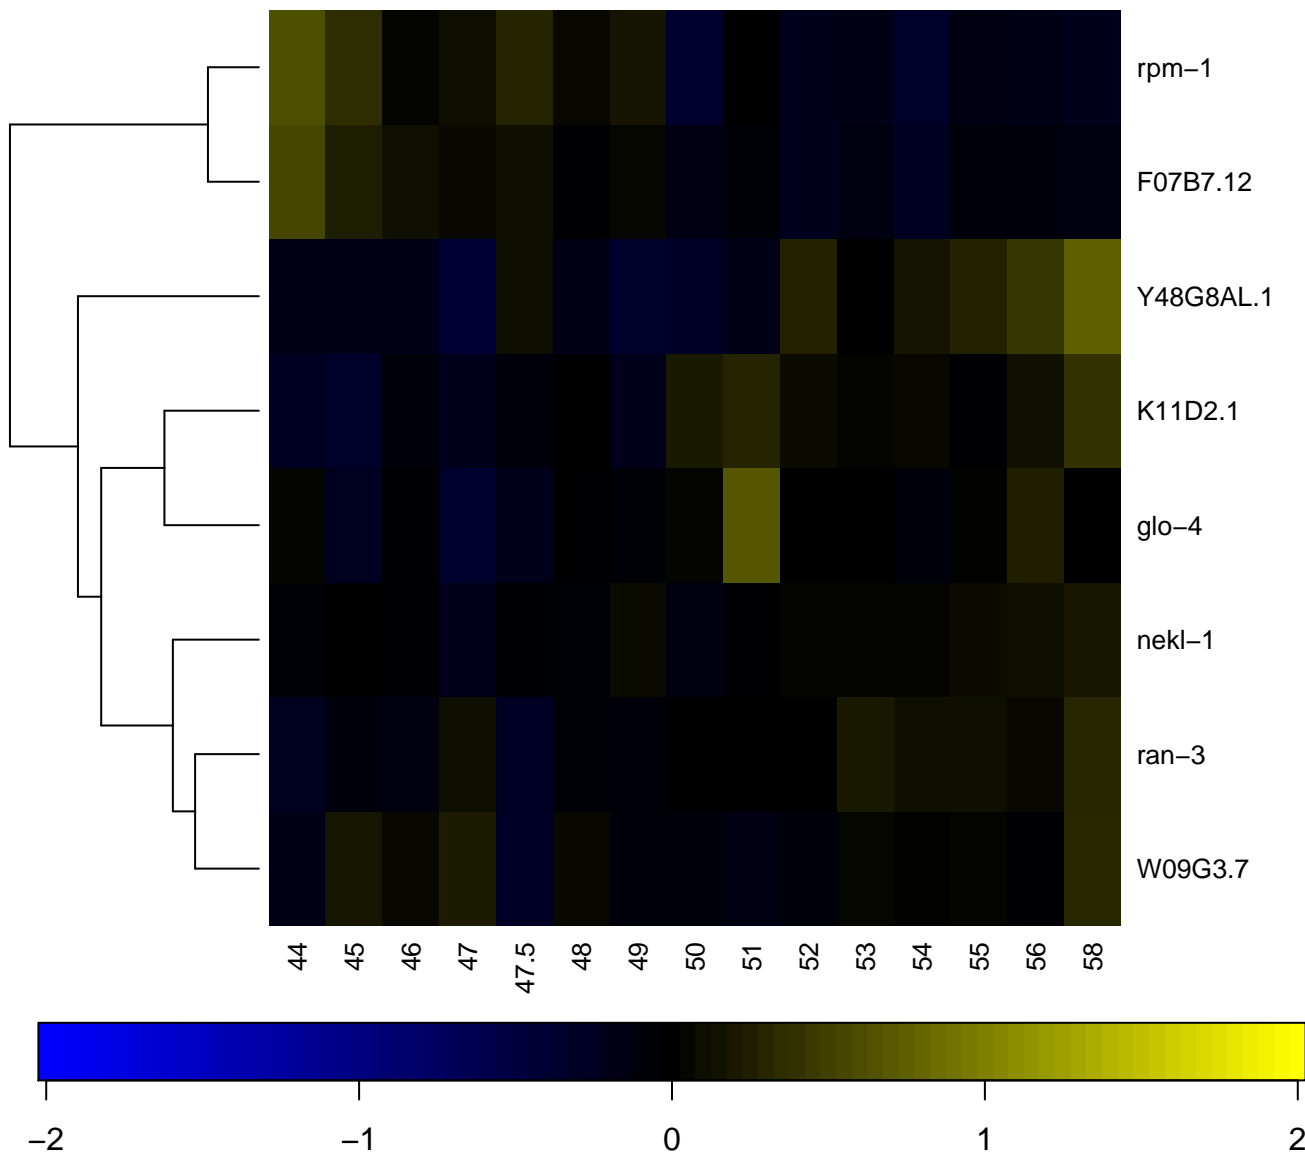



# Factor of chromosome condensation/beta-lactamase-inhibitor

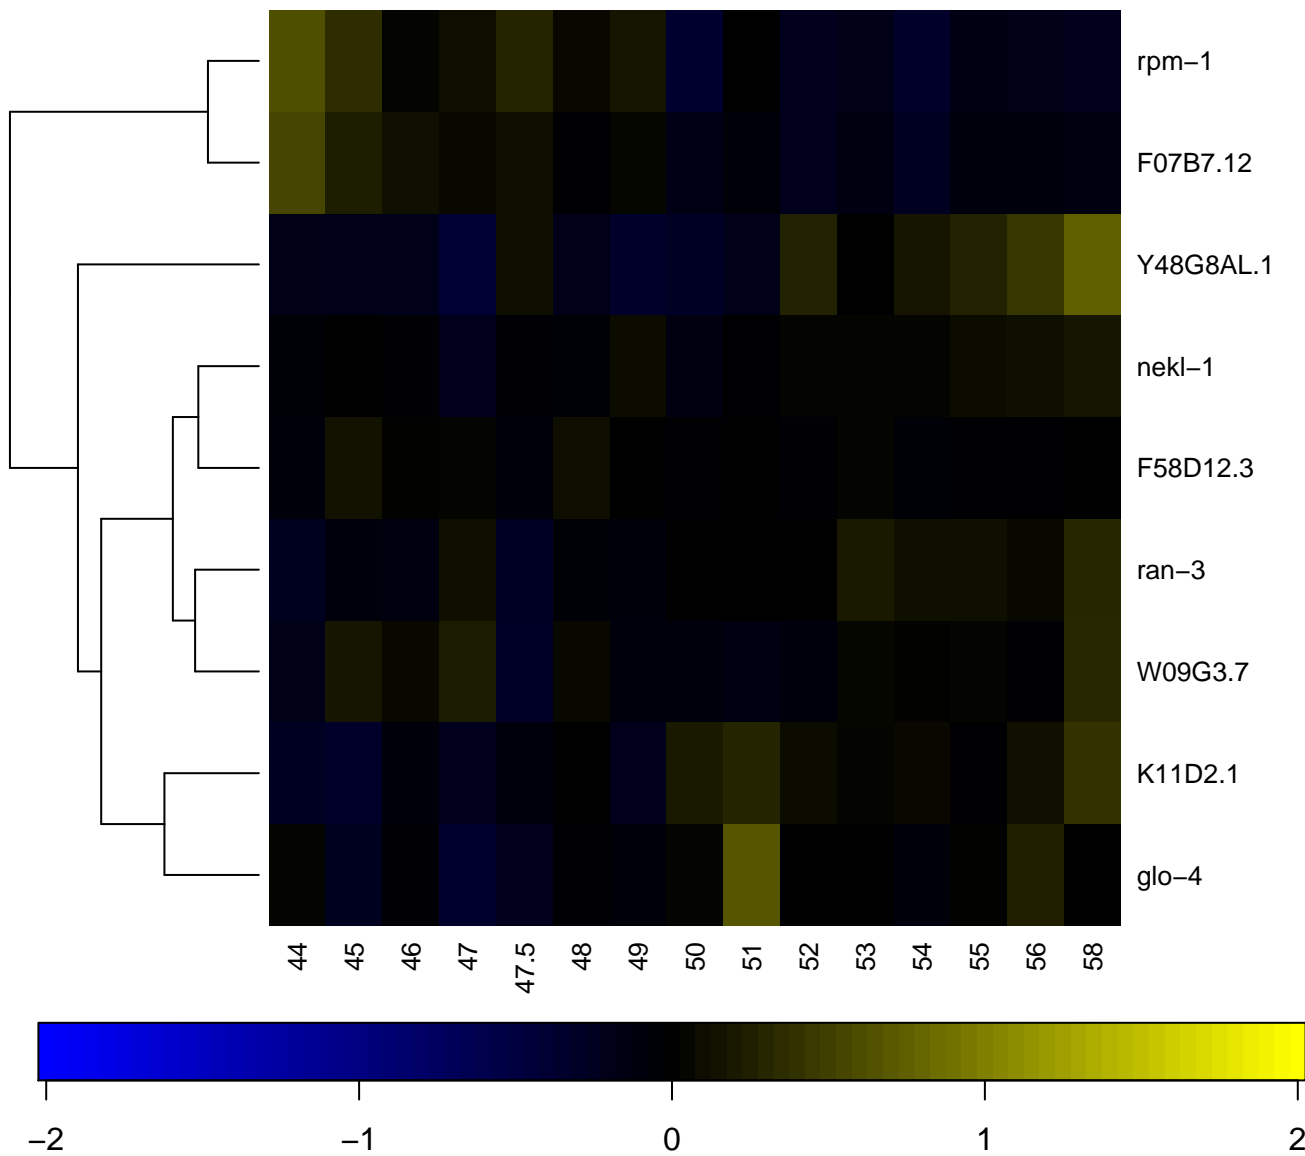

# Regulator of G protein signaling domain

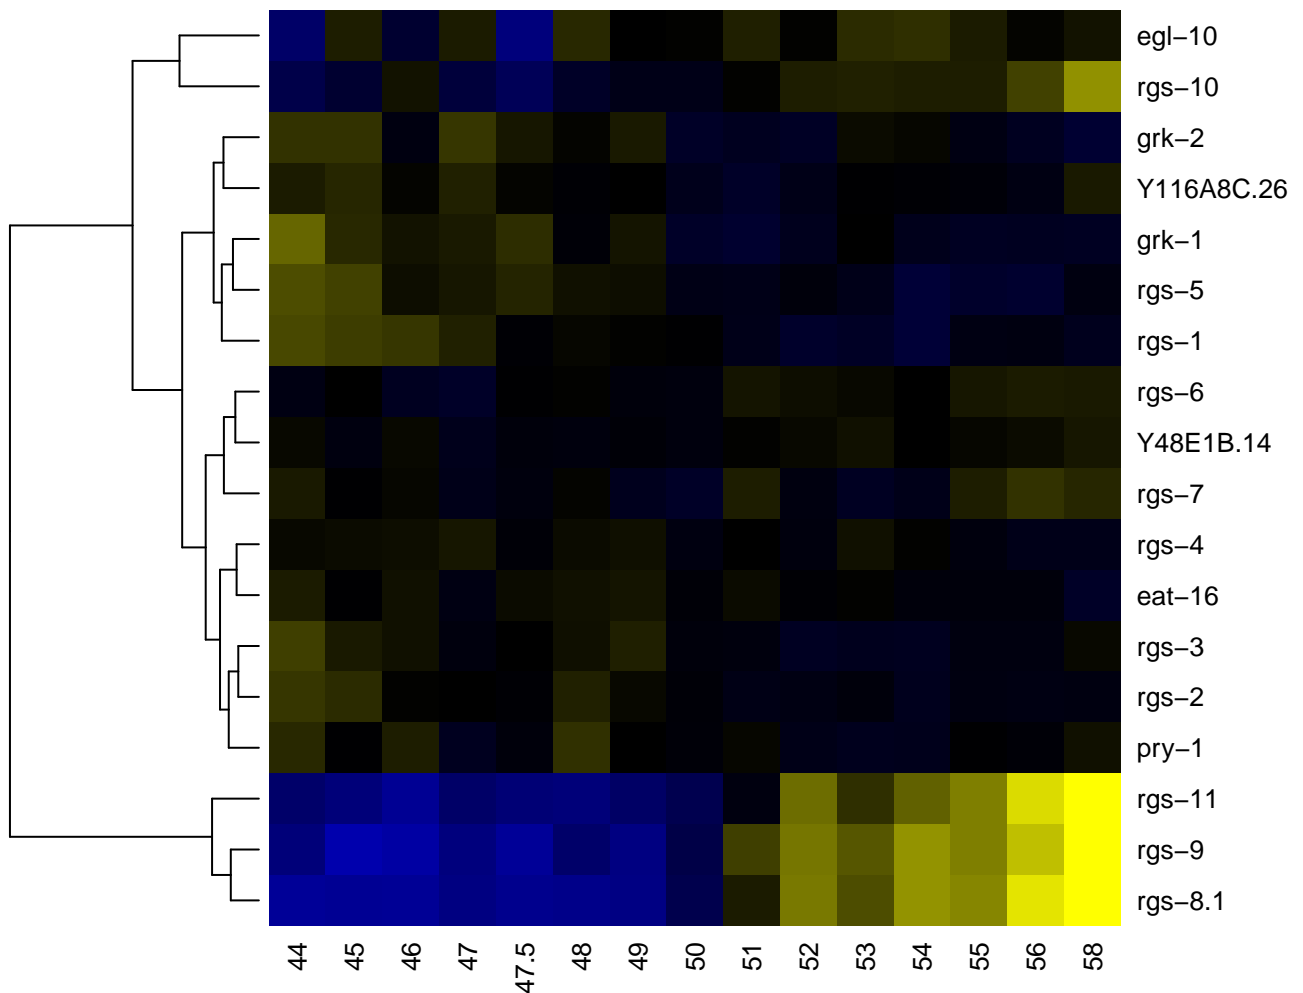



# Regulator of G protein signalling



# Regulator protein PHA-1

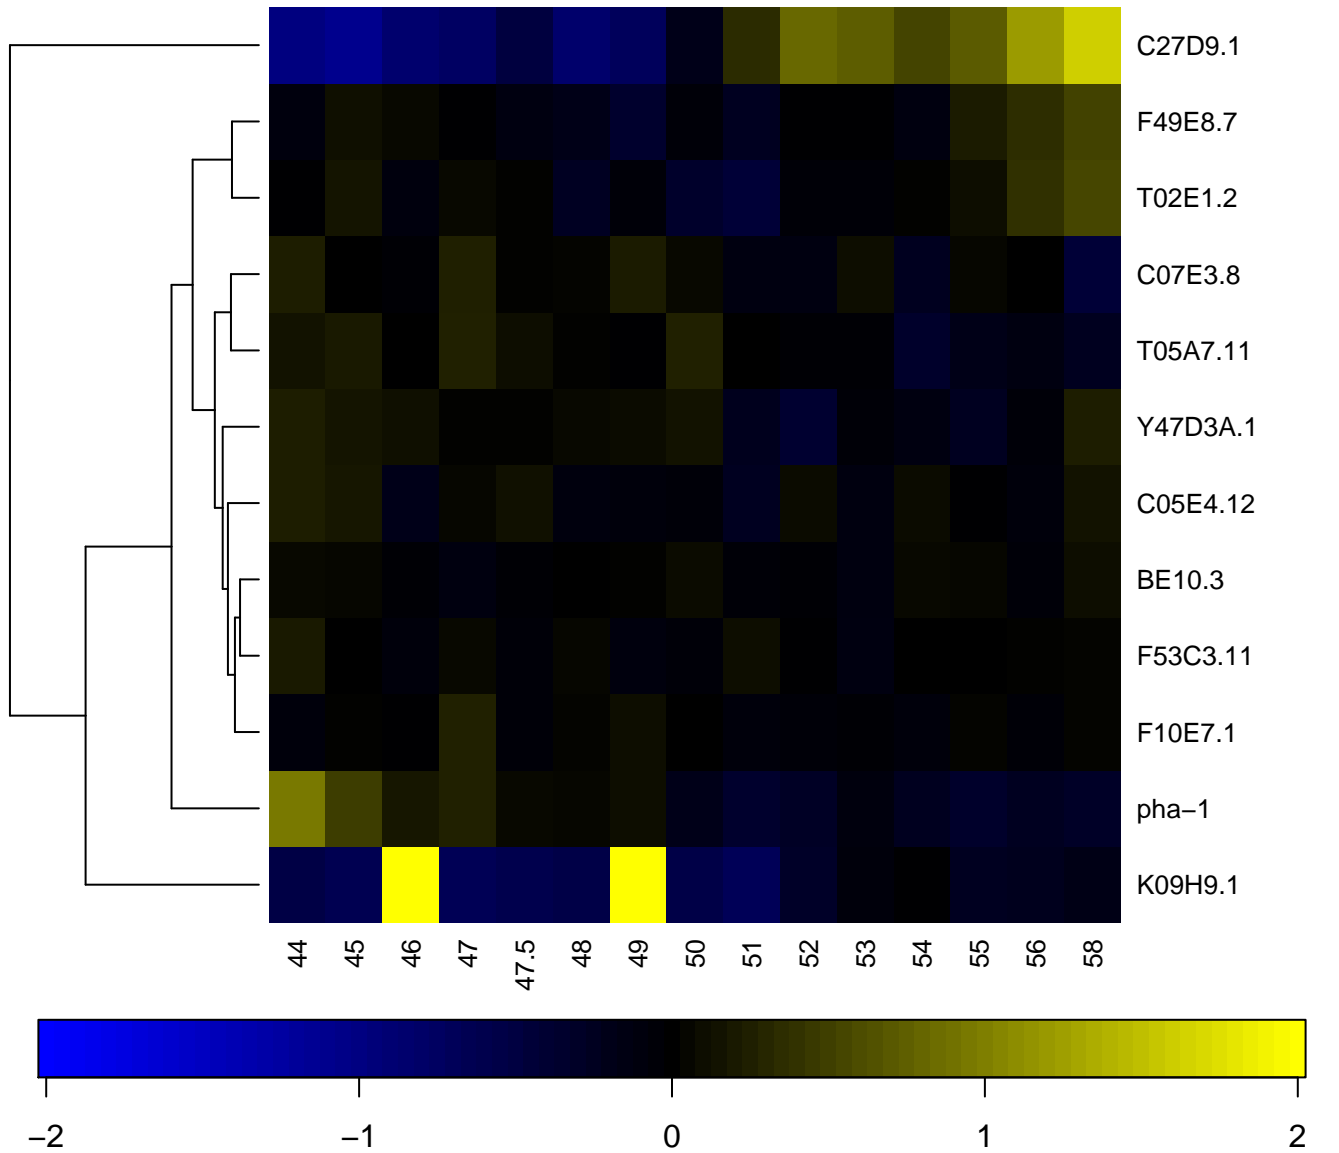

# Regulator protein, PHA-1

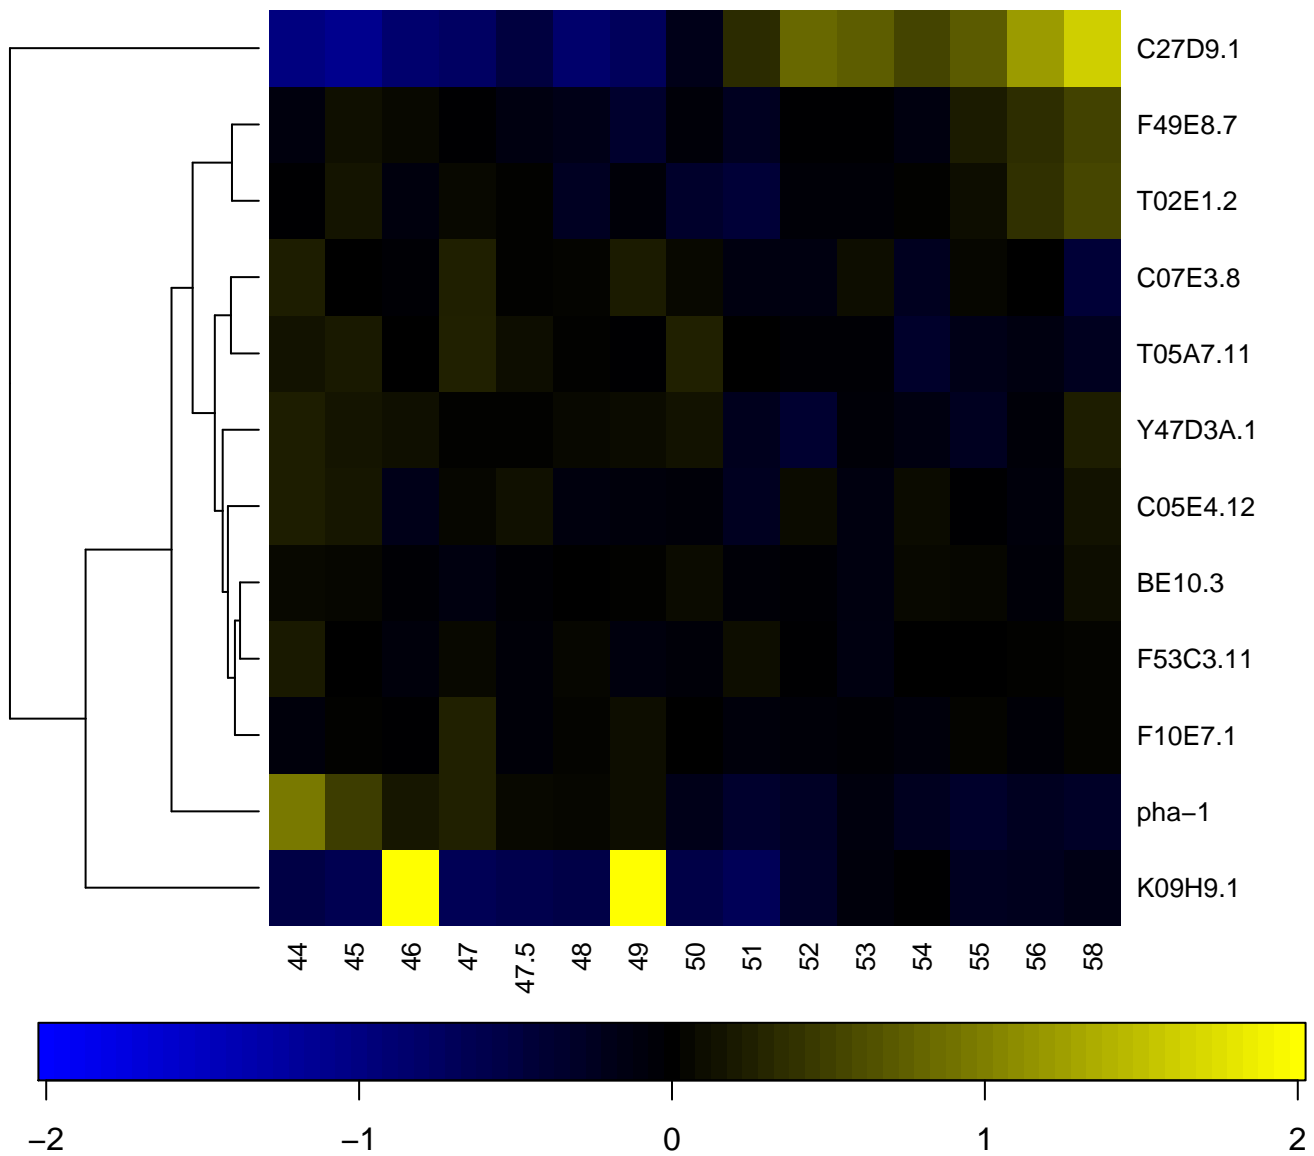







# restriction endonuclease, type I, R subunit/Type III, Res subunit

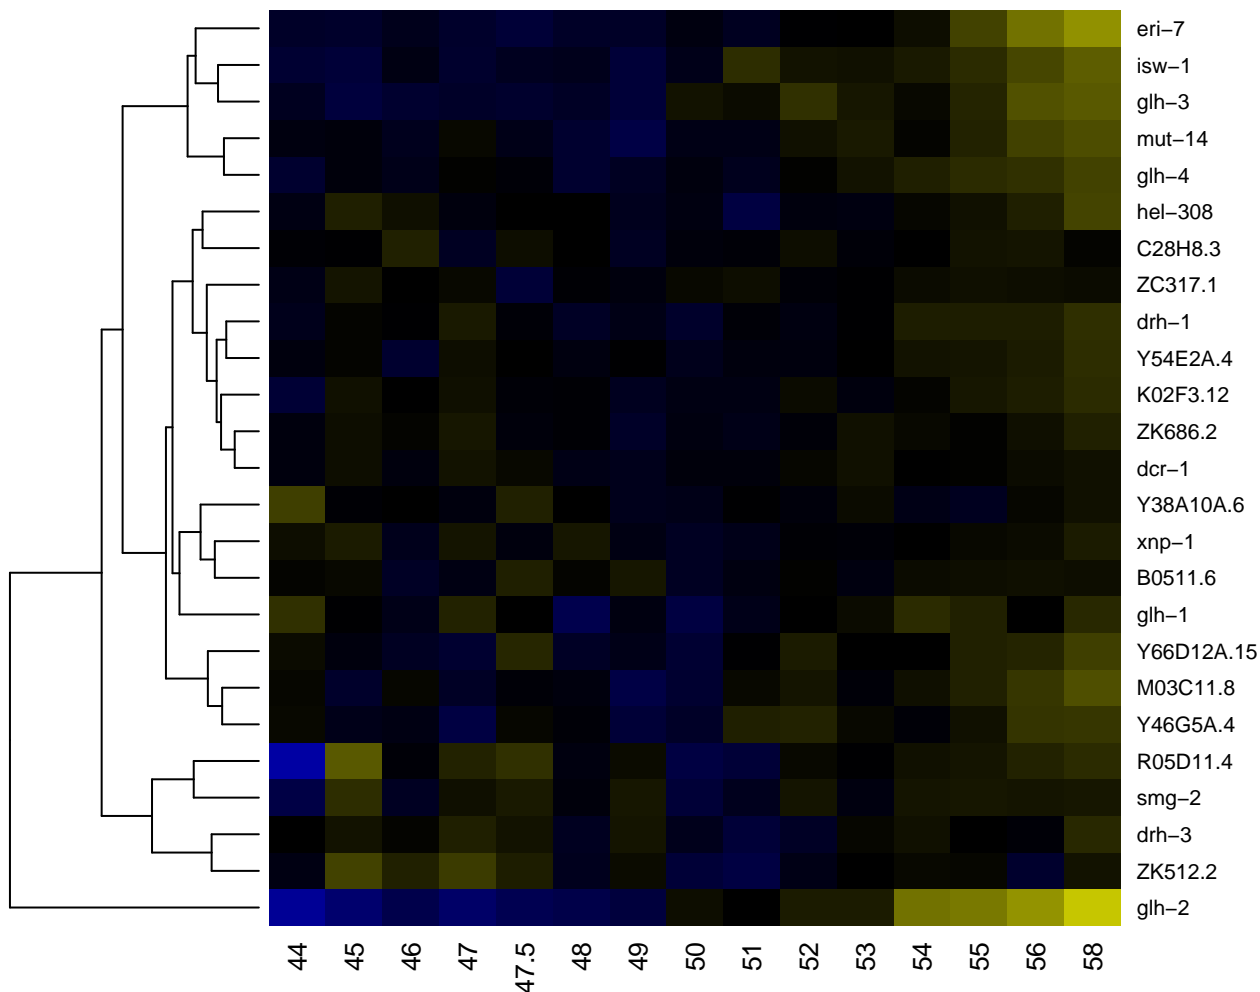

# Rhodanese-like

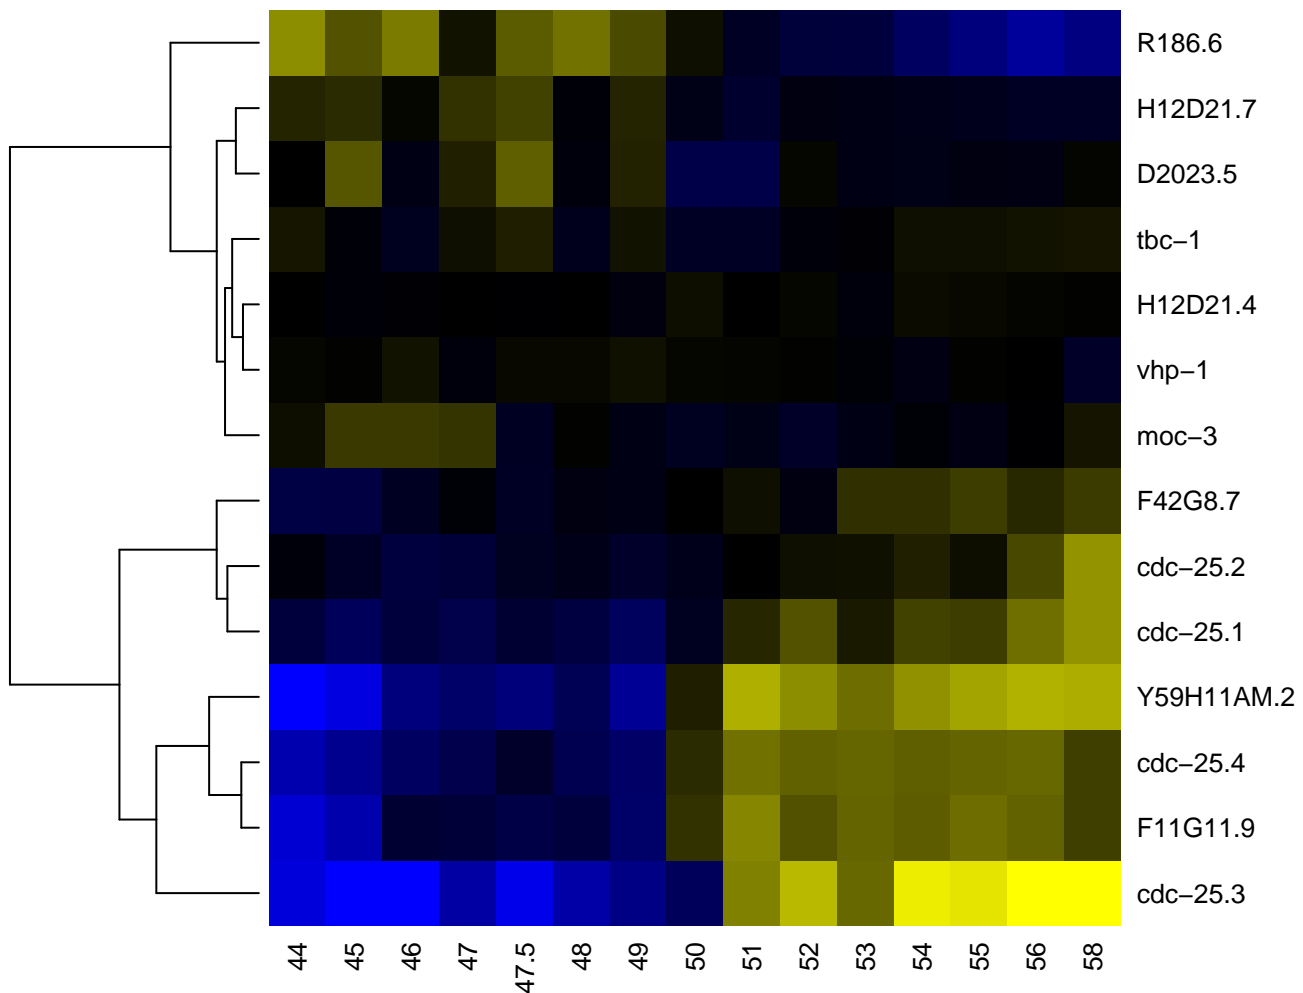



# Rhodanese-like domain

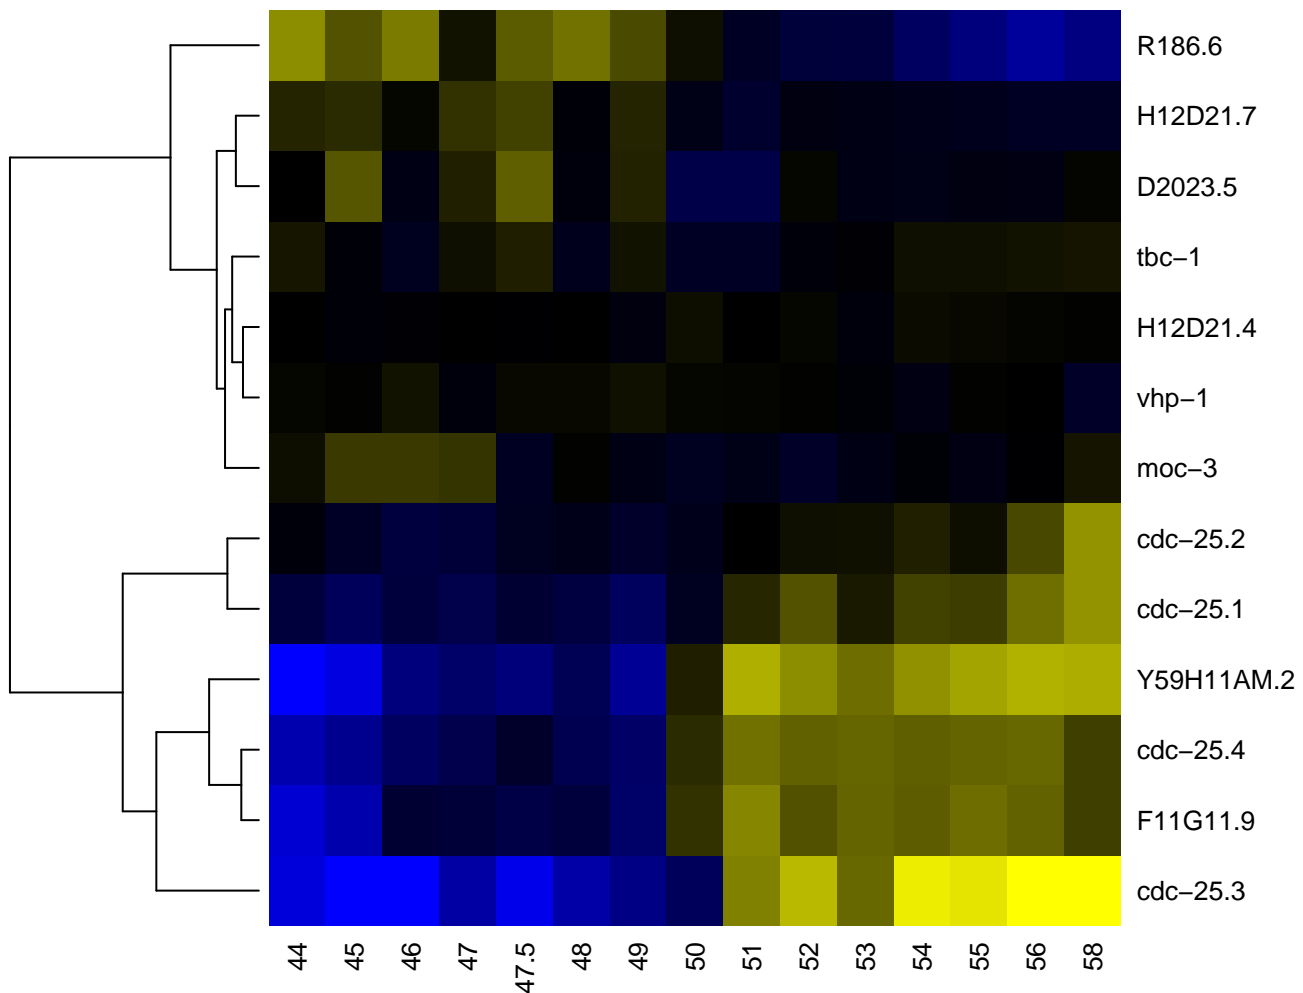







# Rhomboid family

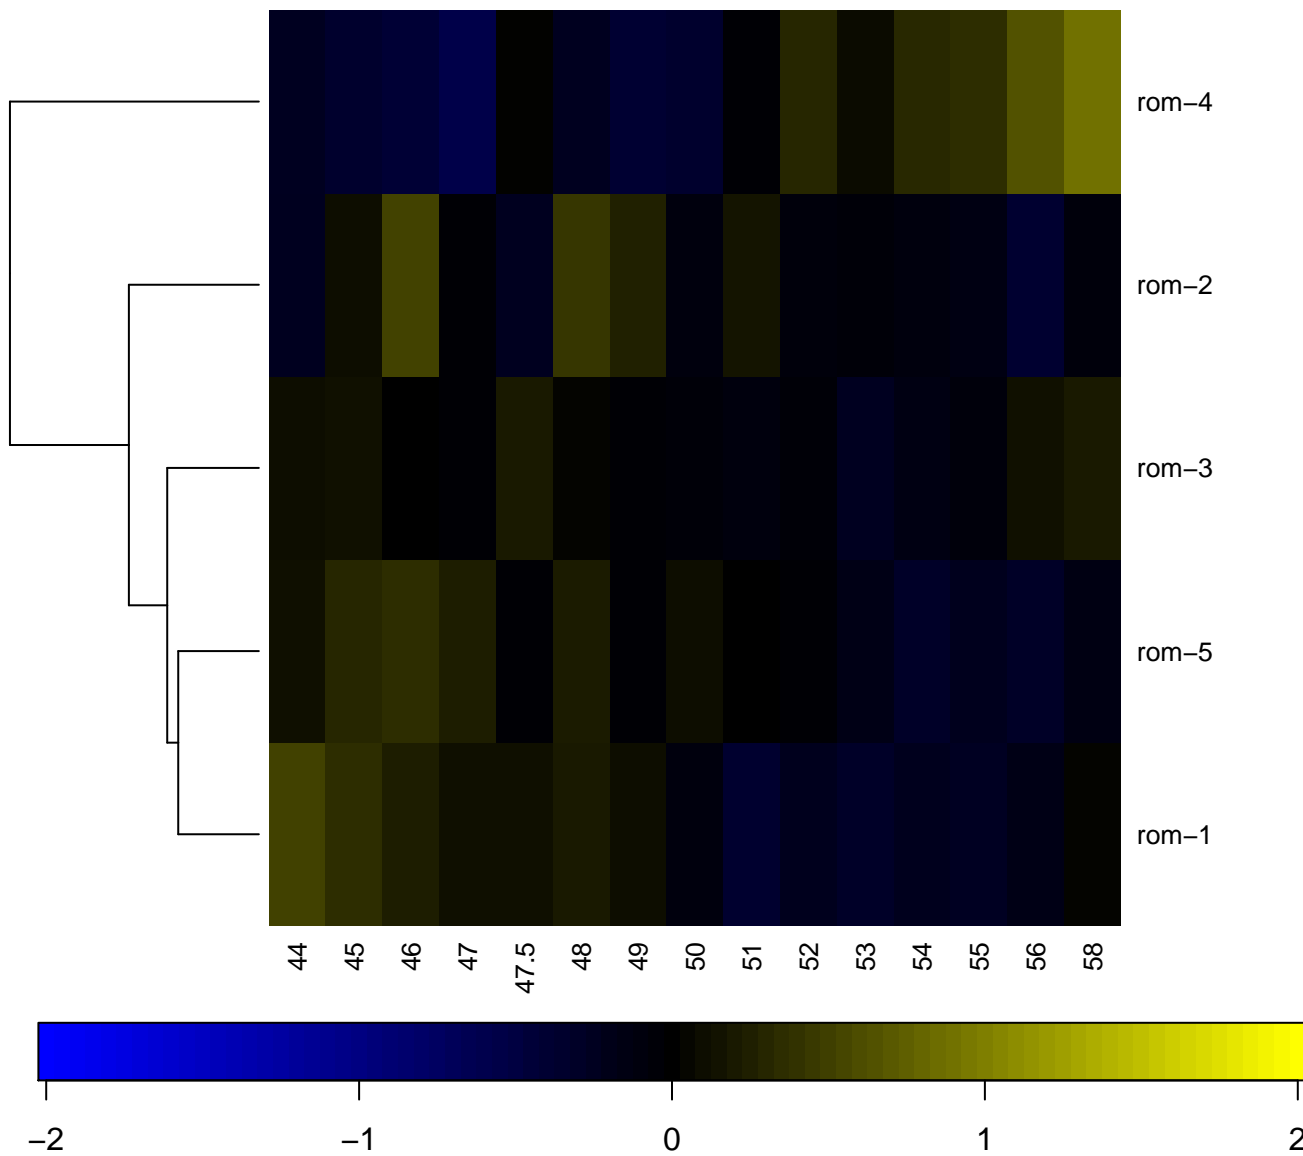

# Ribonuclease H

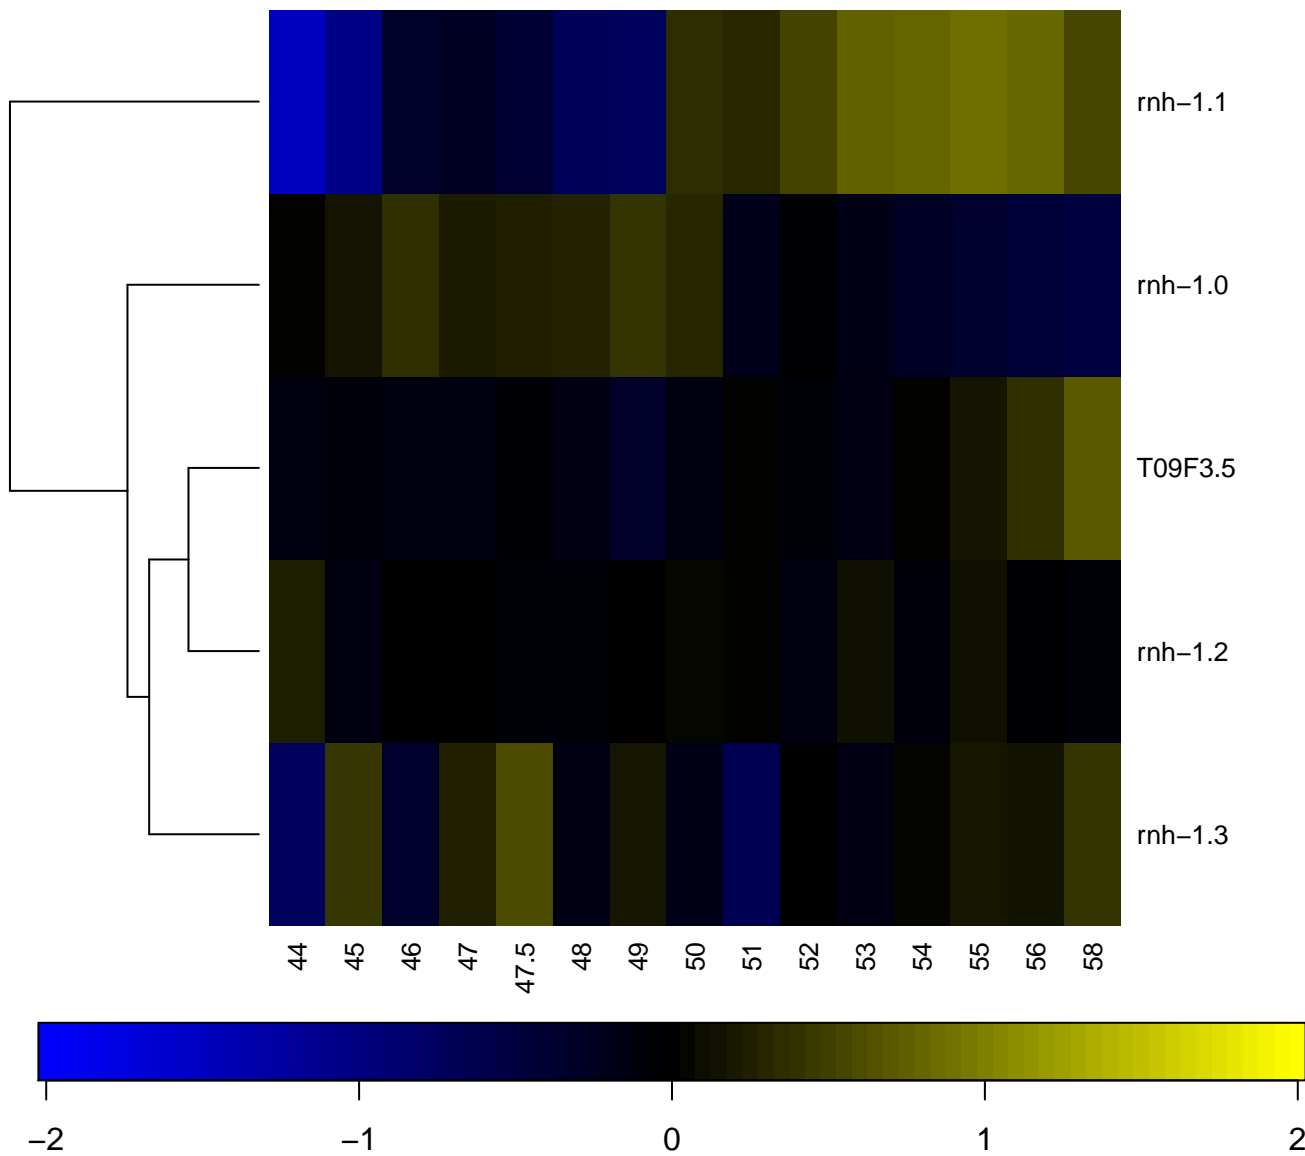



# Ribonucleotide reductase

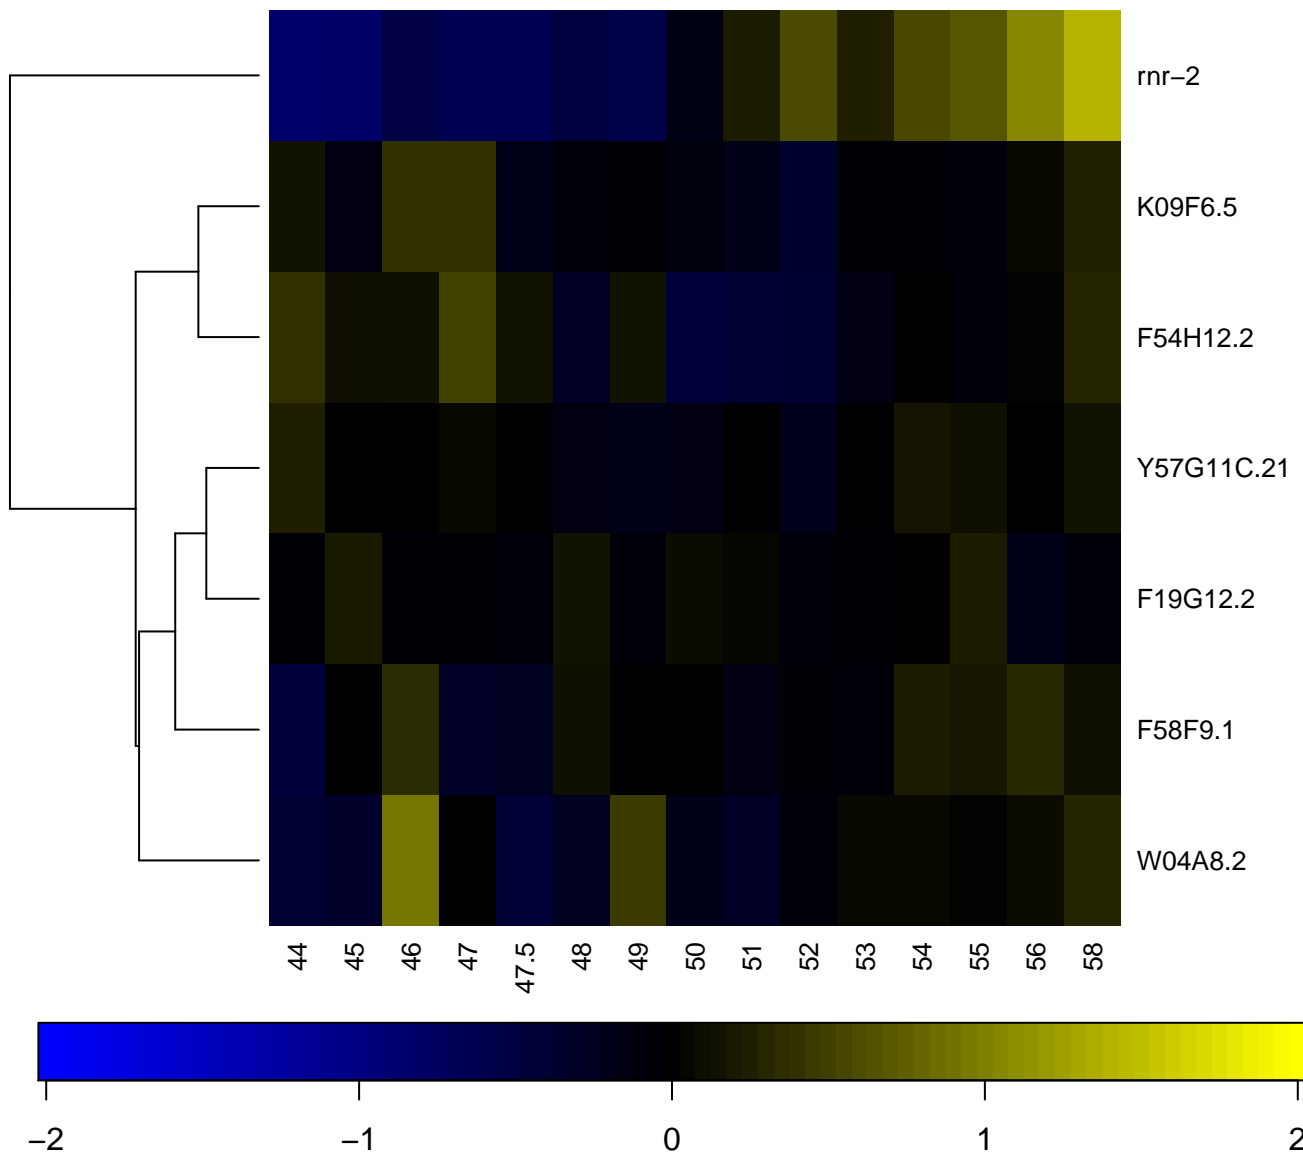







# Ribosomal protein L7Ae/L30e/S12e/Gadd45

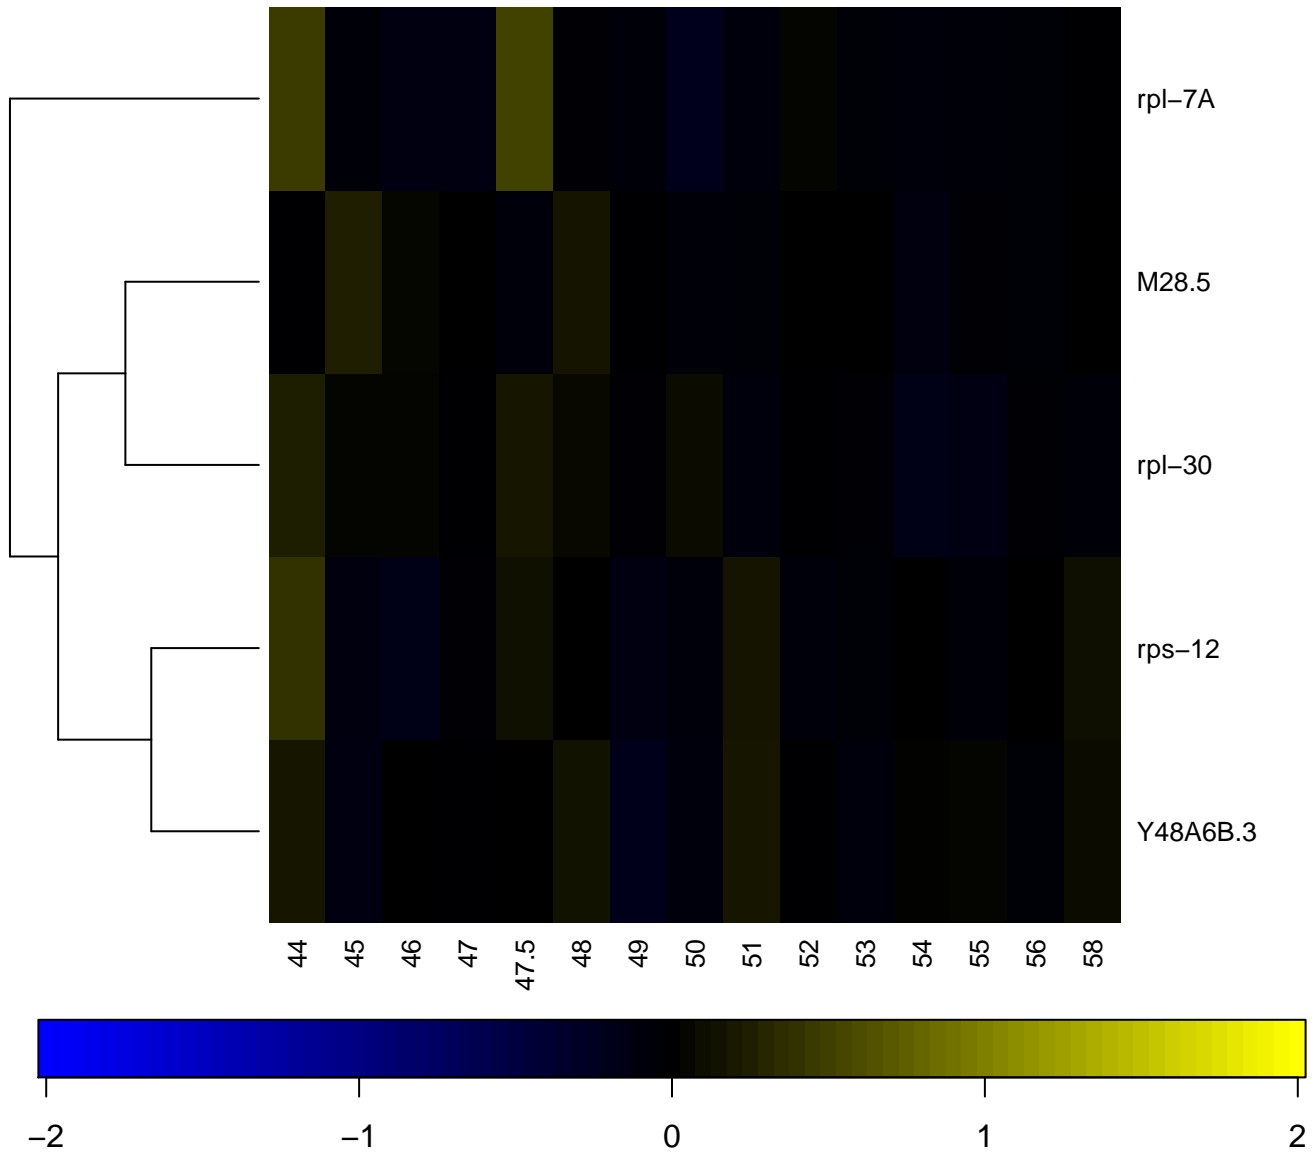

# Ribosomal protein L7Ae/L30e/S12e/Gadd45 family

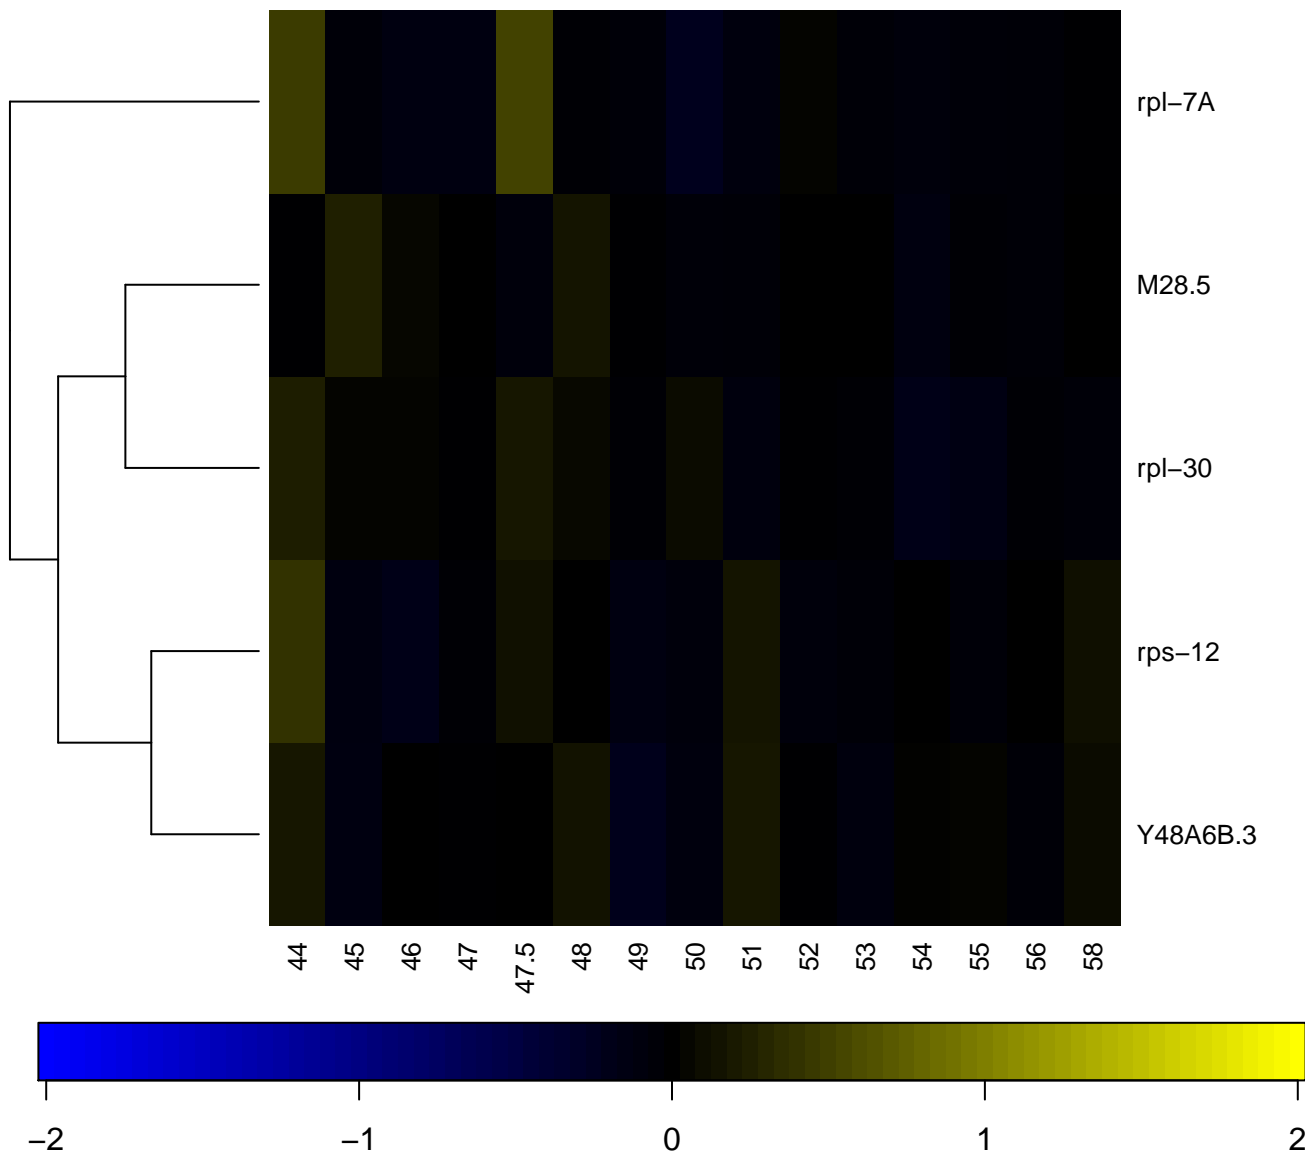











# Ricin-type beta-trefoil lectin domain

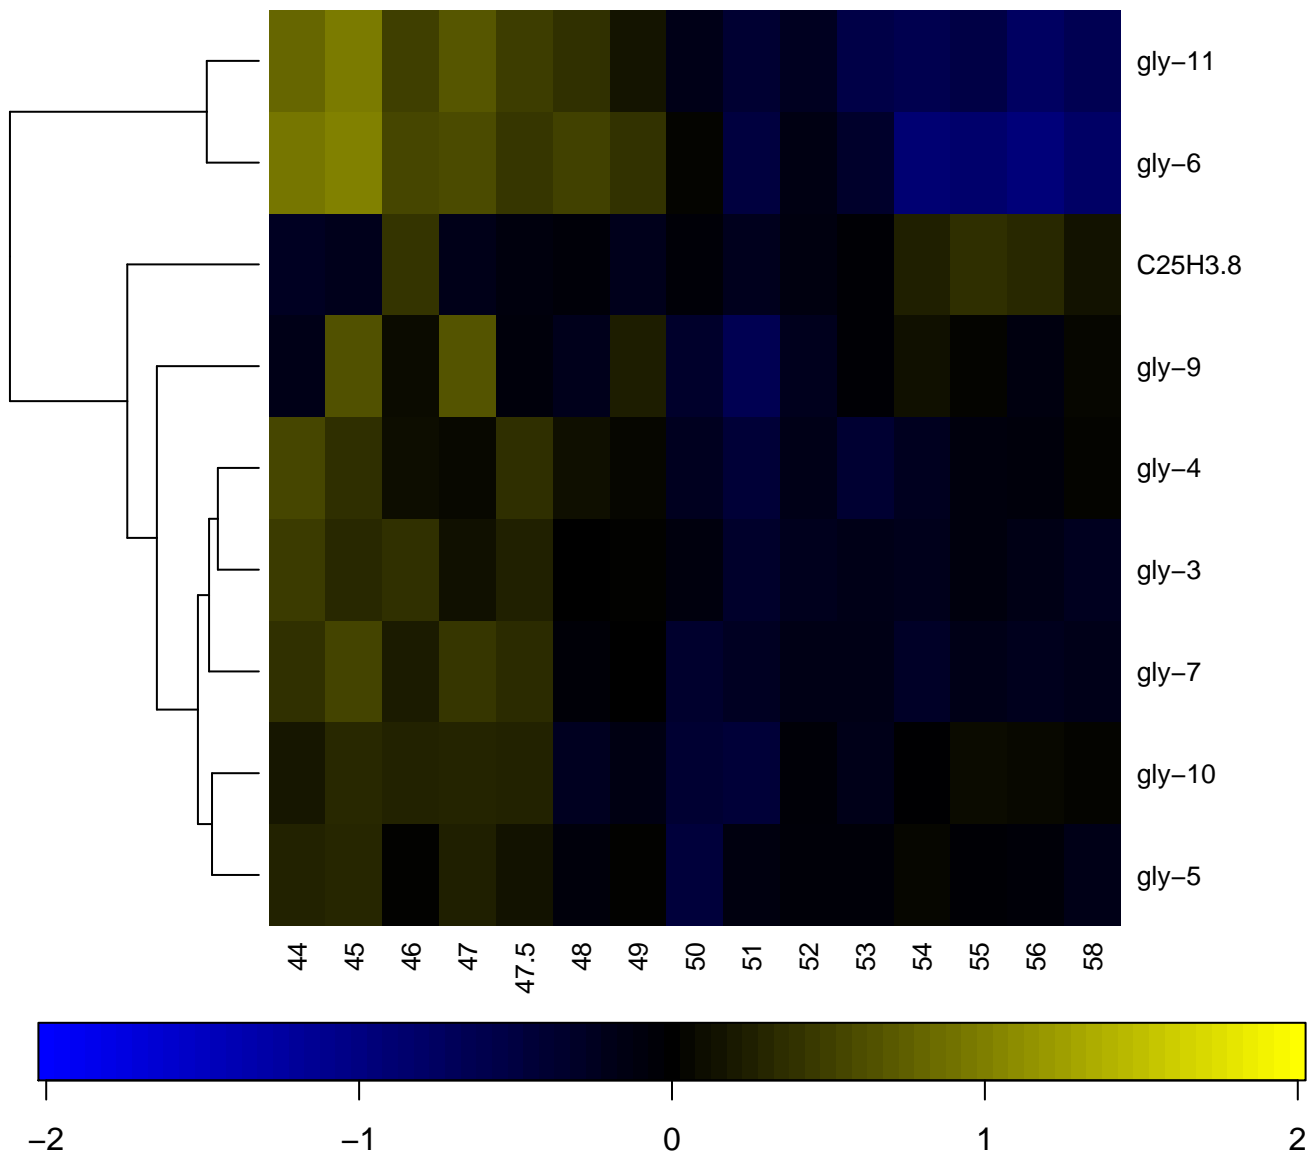

# Ricin B lectin







# RmIC-like jelly roll fold

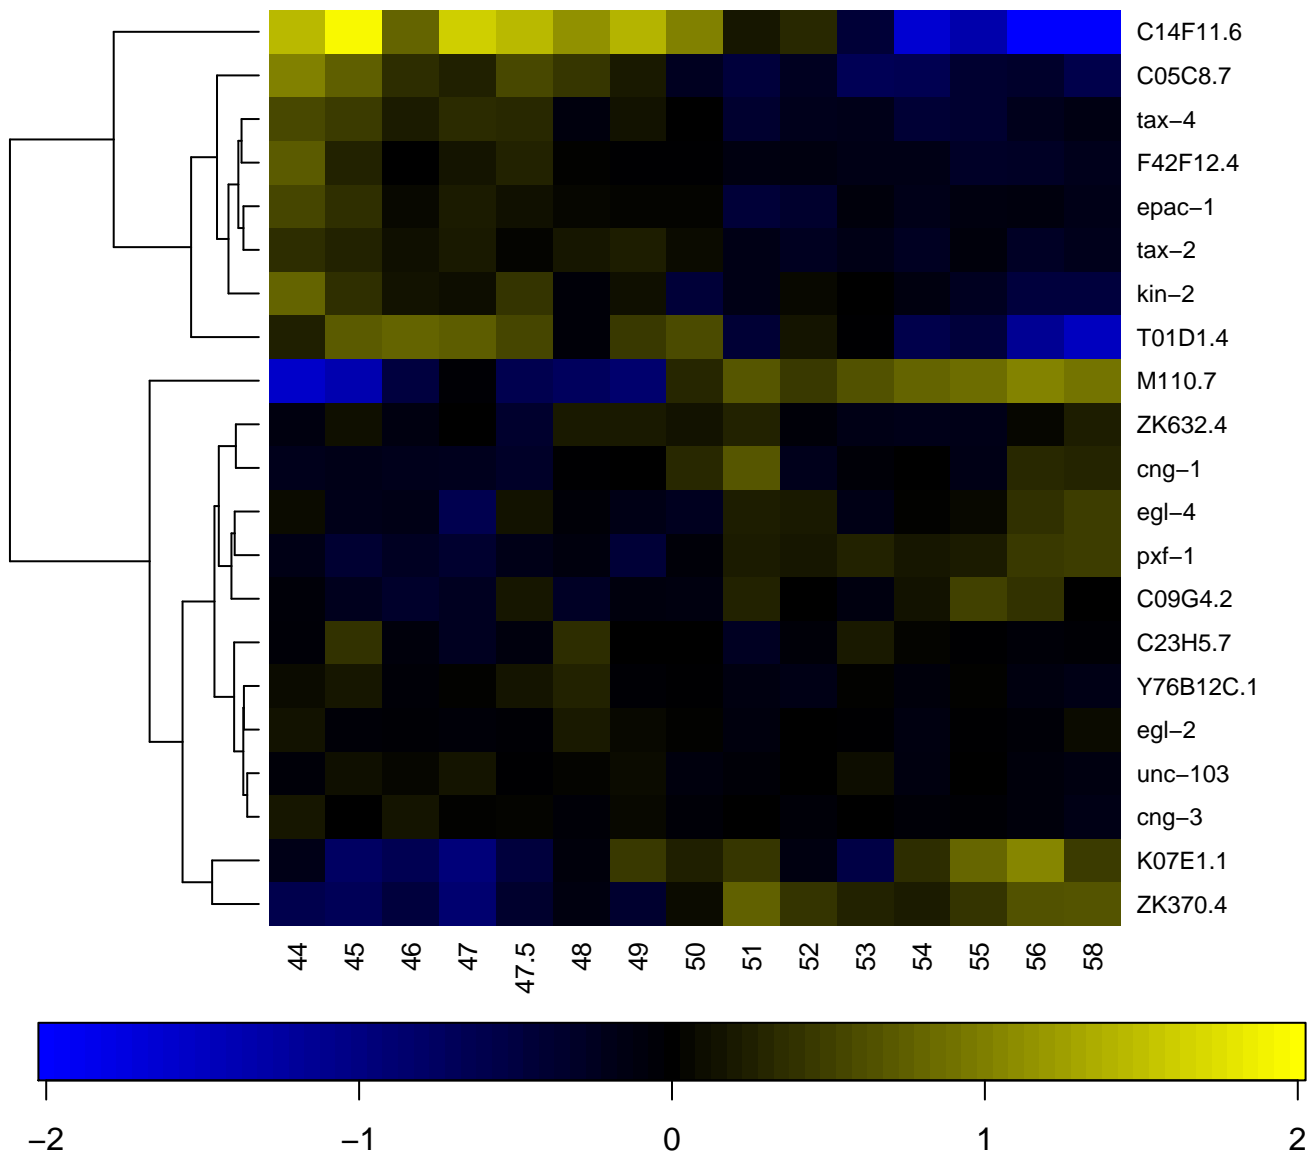





# RNA helicase, ATP-dependent, DEAD-box, conserved site

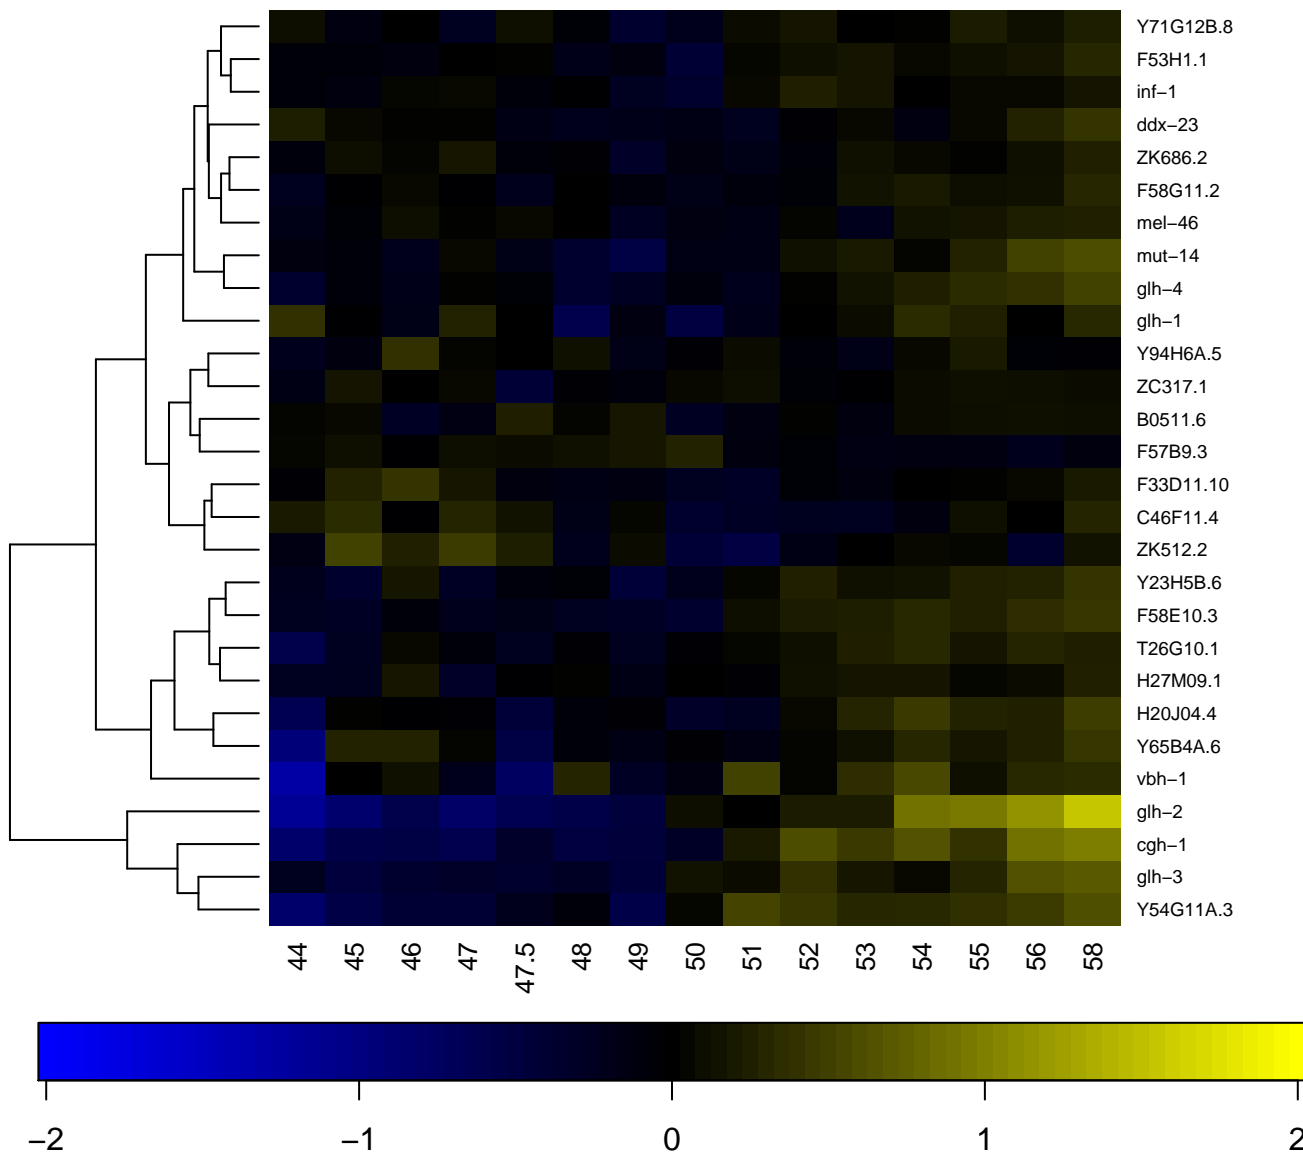





# RNA polymerase sigma factor 54, interaction

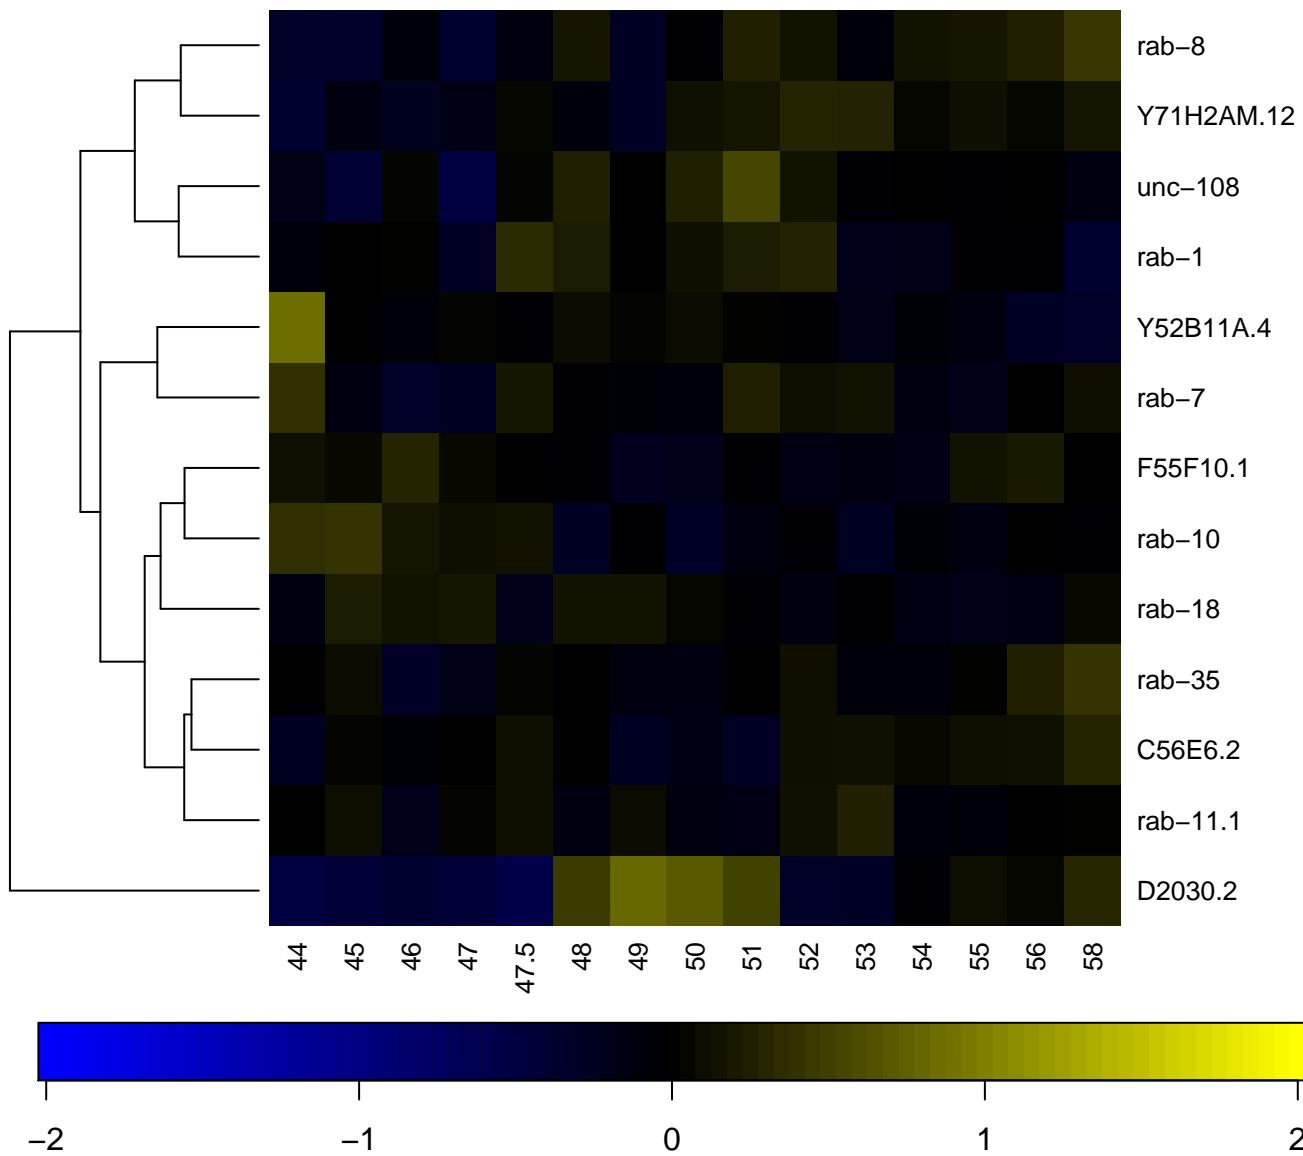

# RNA recognition motif, RNP-1

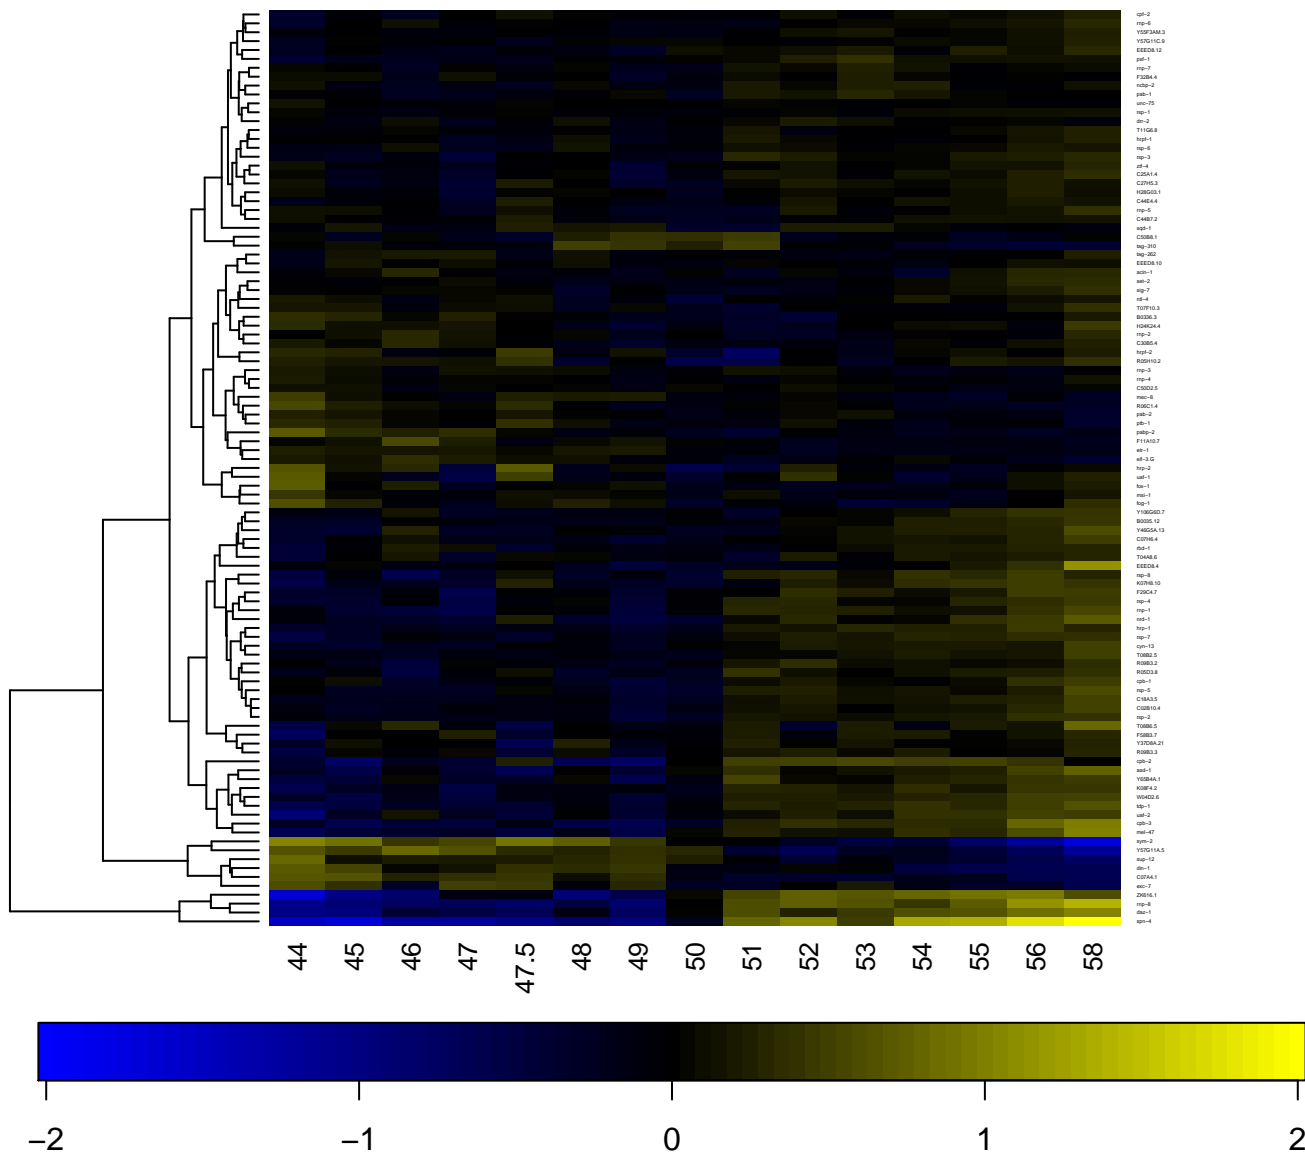

# RNA recognition motif. (a.k.a. RRM, RBD, or RNP domain)

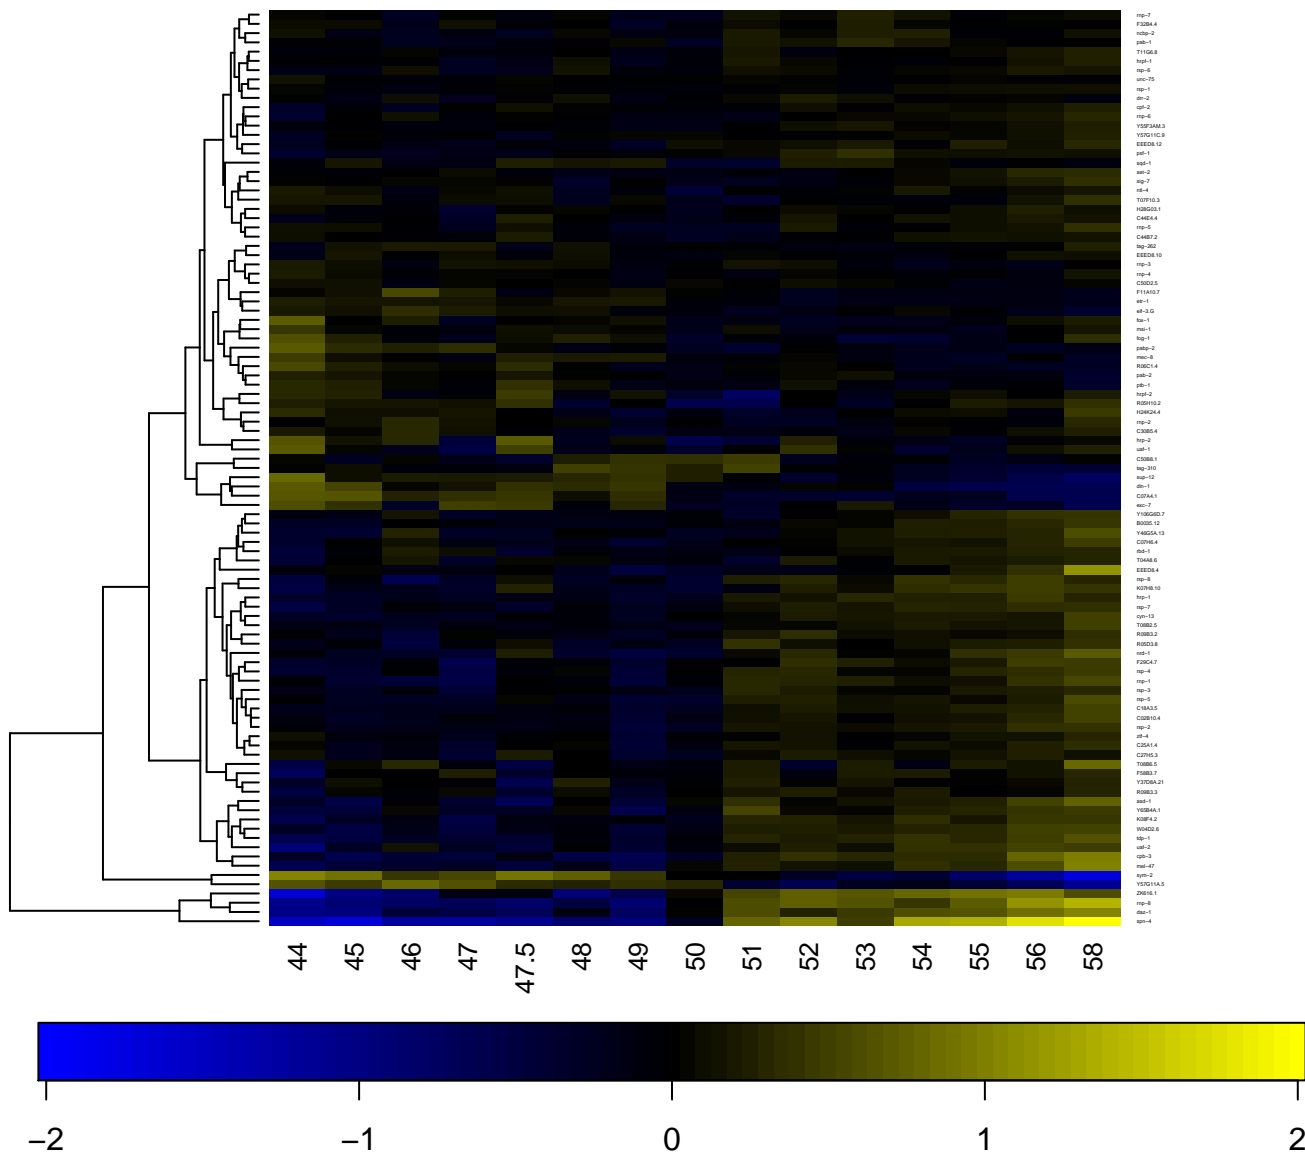

# RNA recognition, domain 1

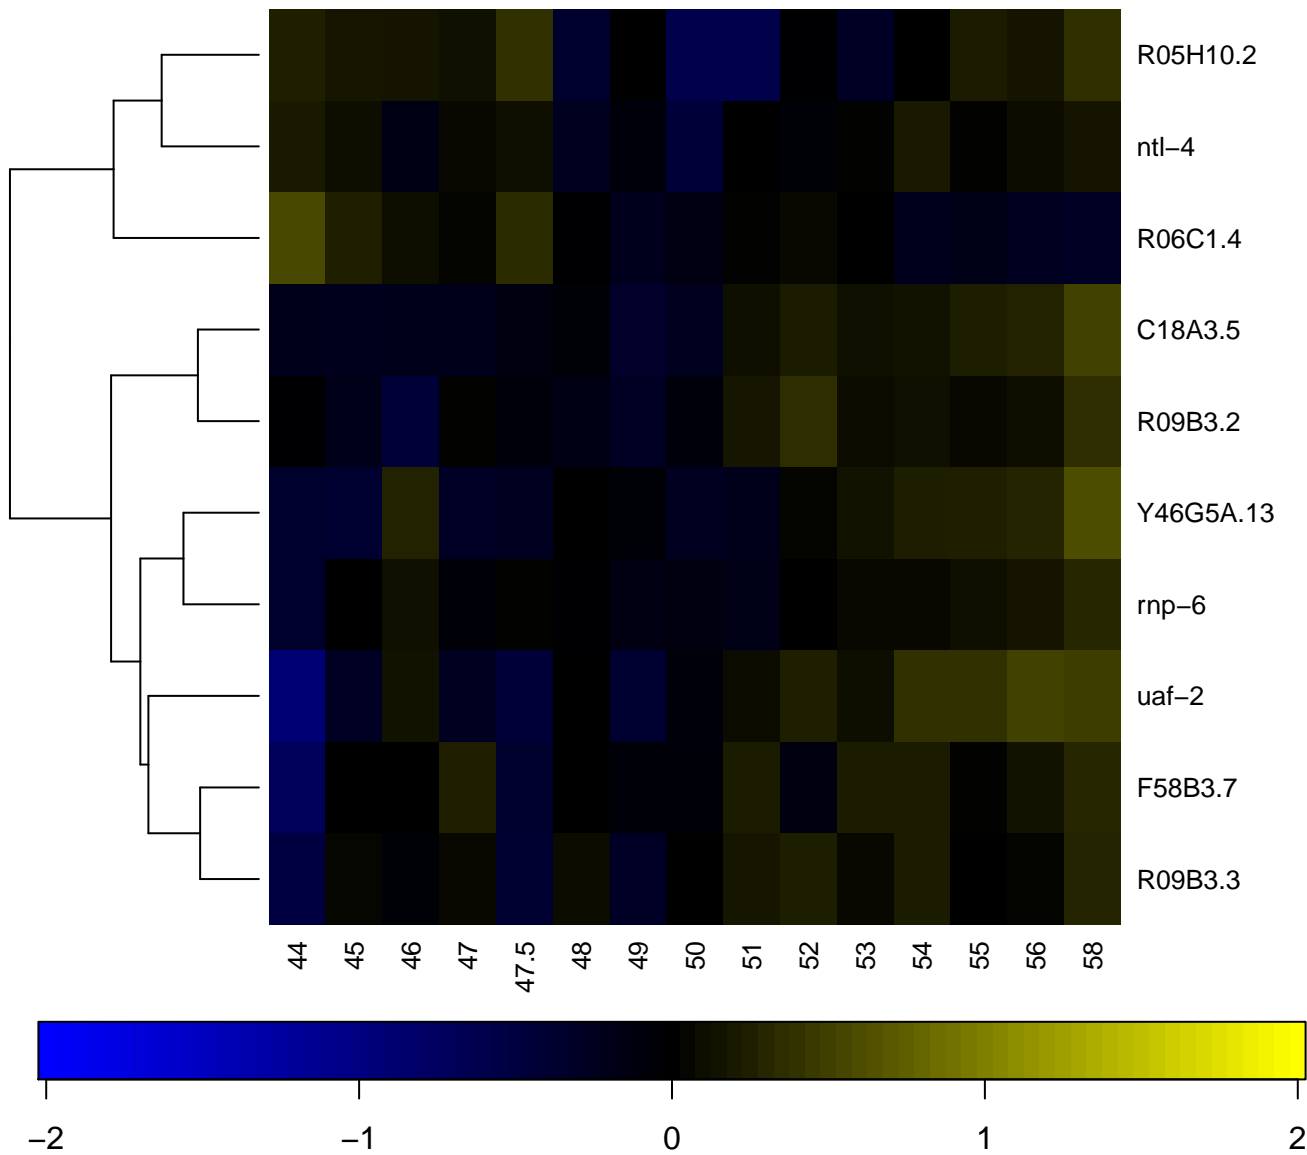

# RNase H

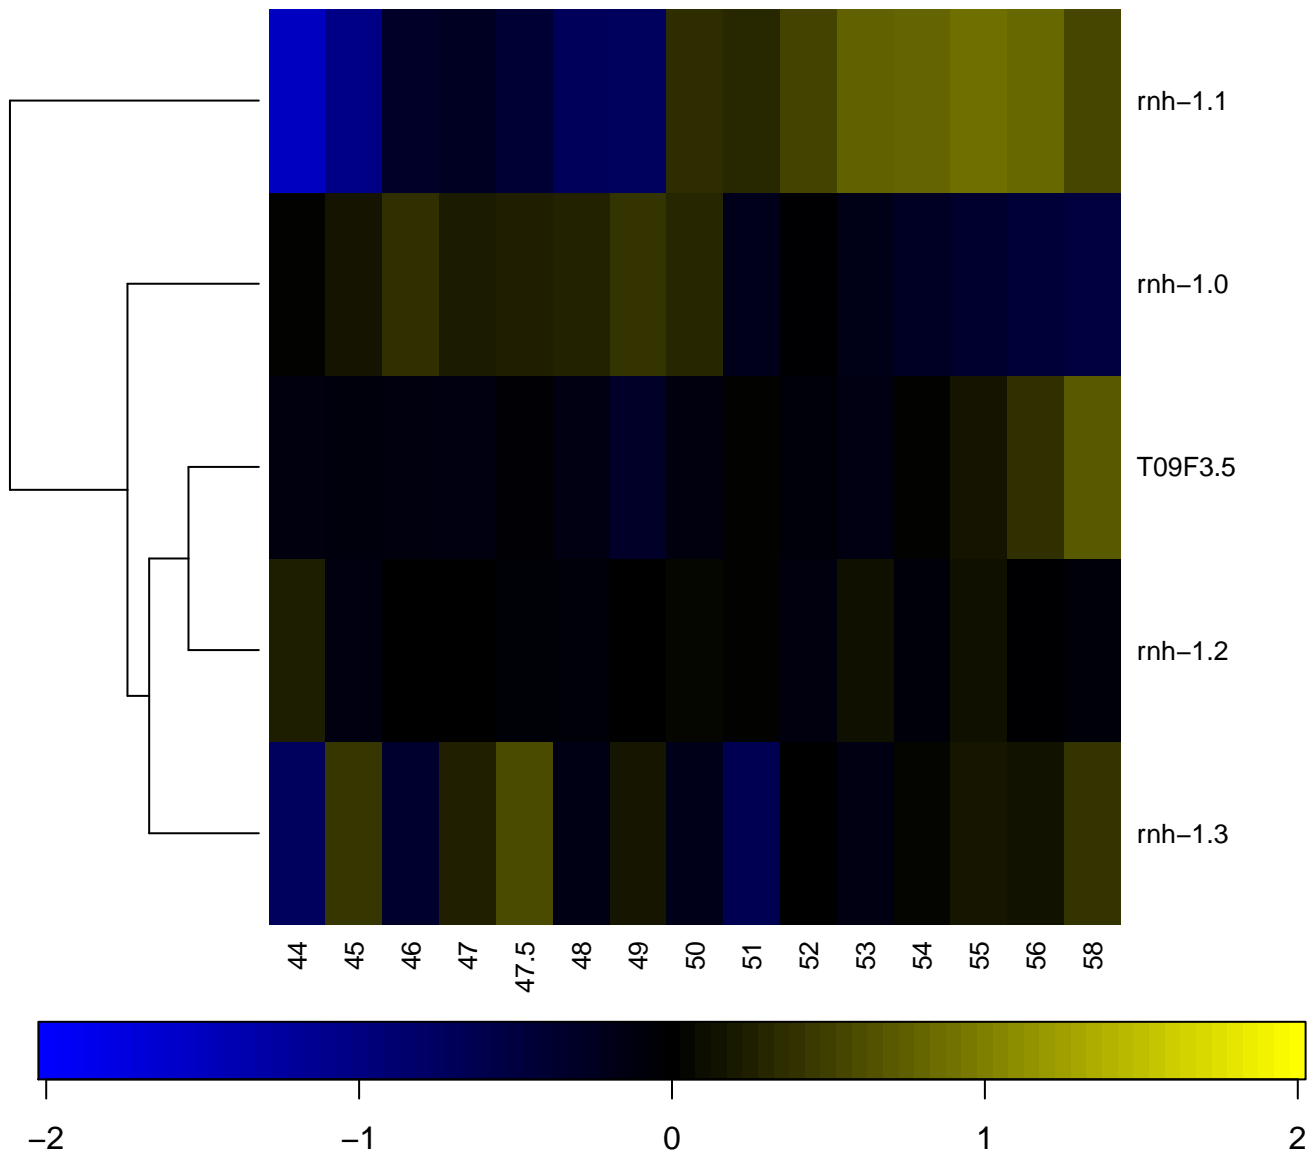

# Rossmann-like alpha/beta/alpha sandwich fold

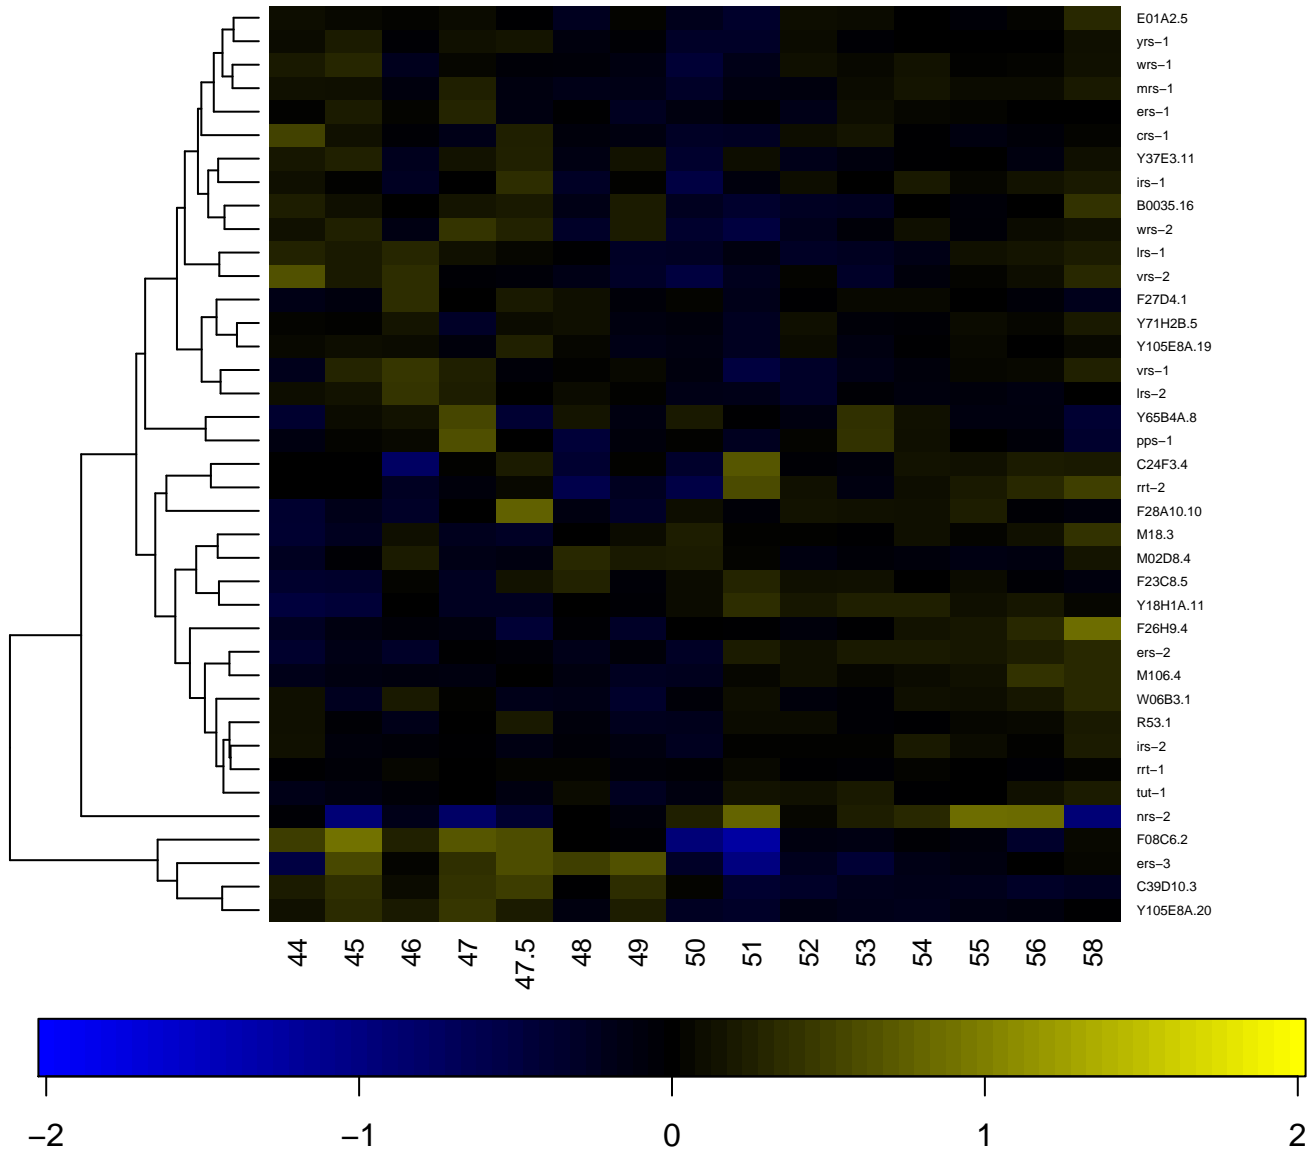







# RWD

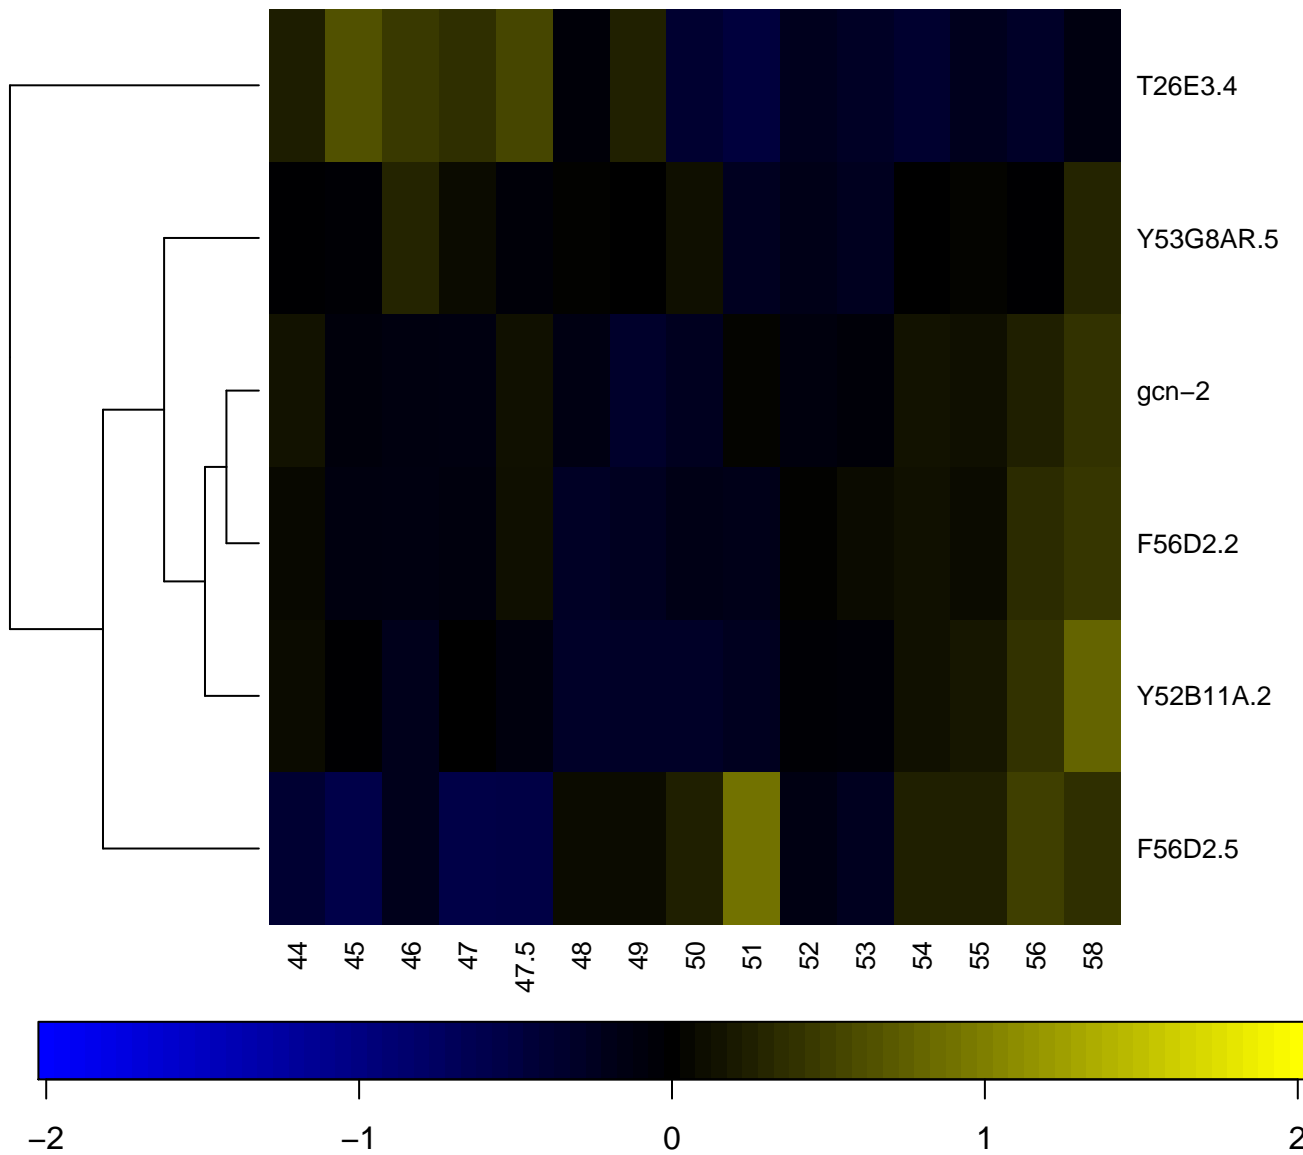

# RWD domain

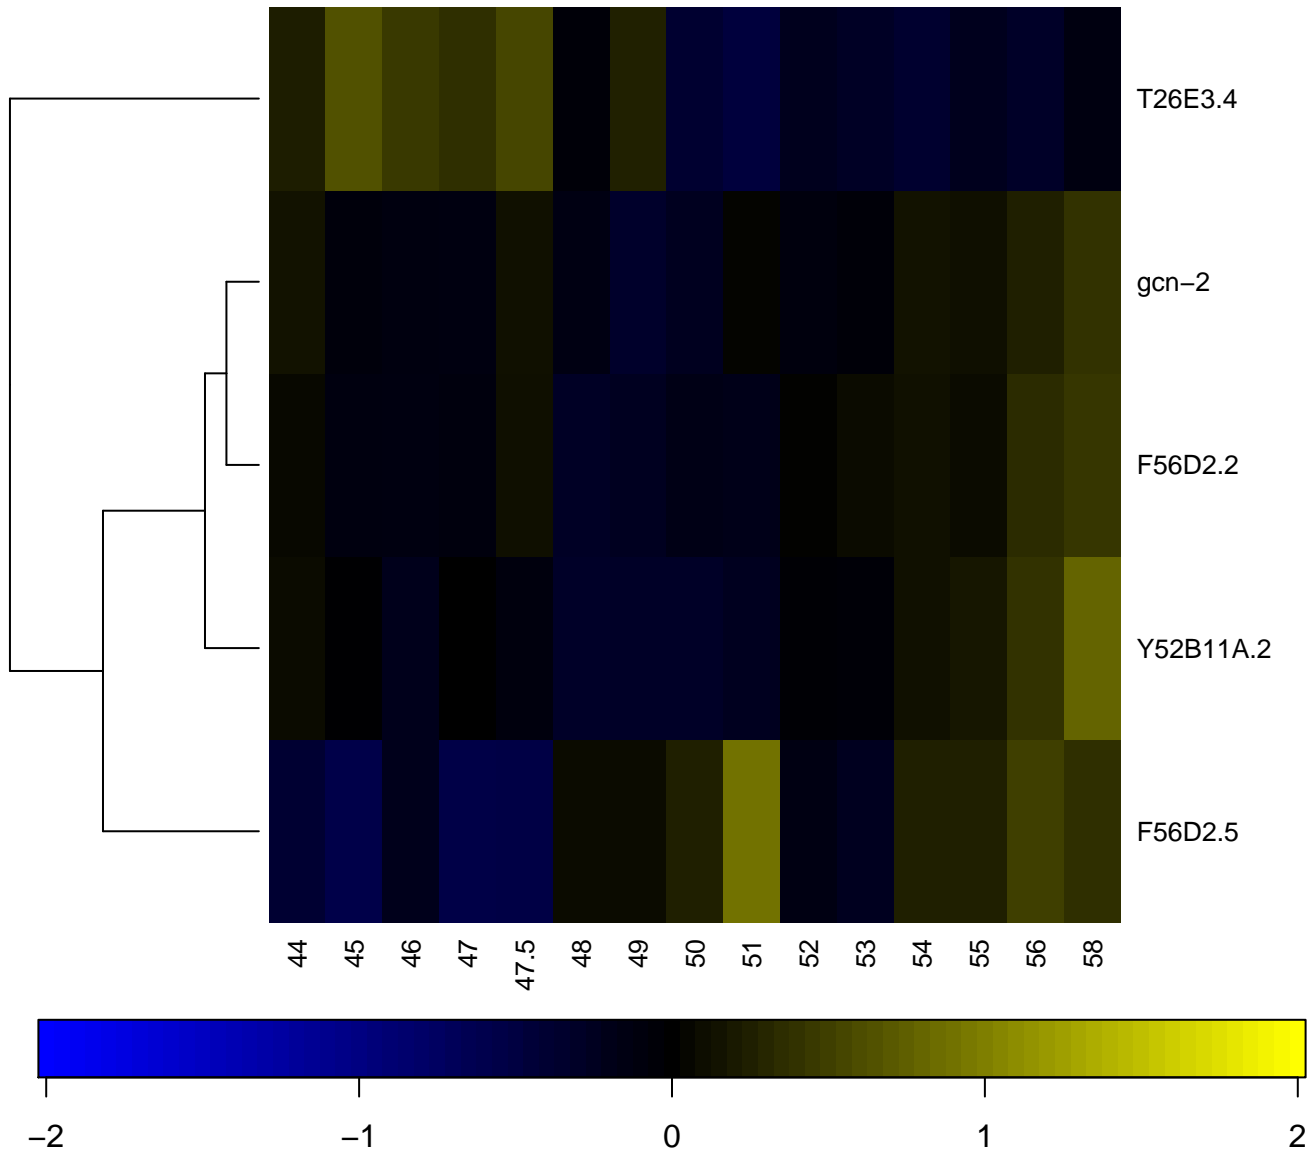

# S1 RNA binding domain

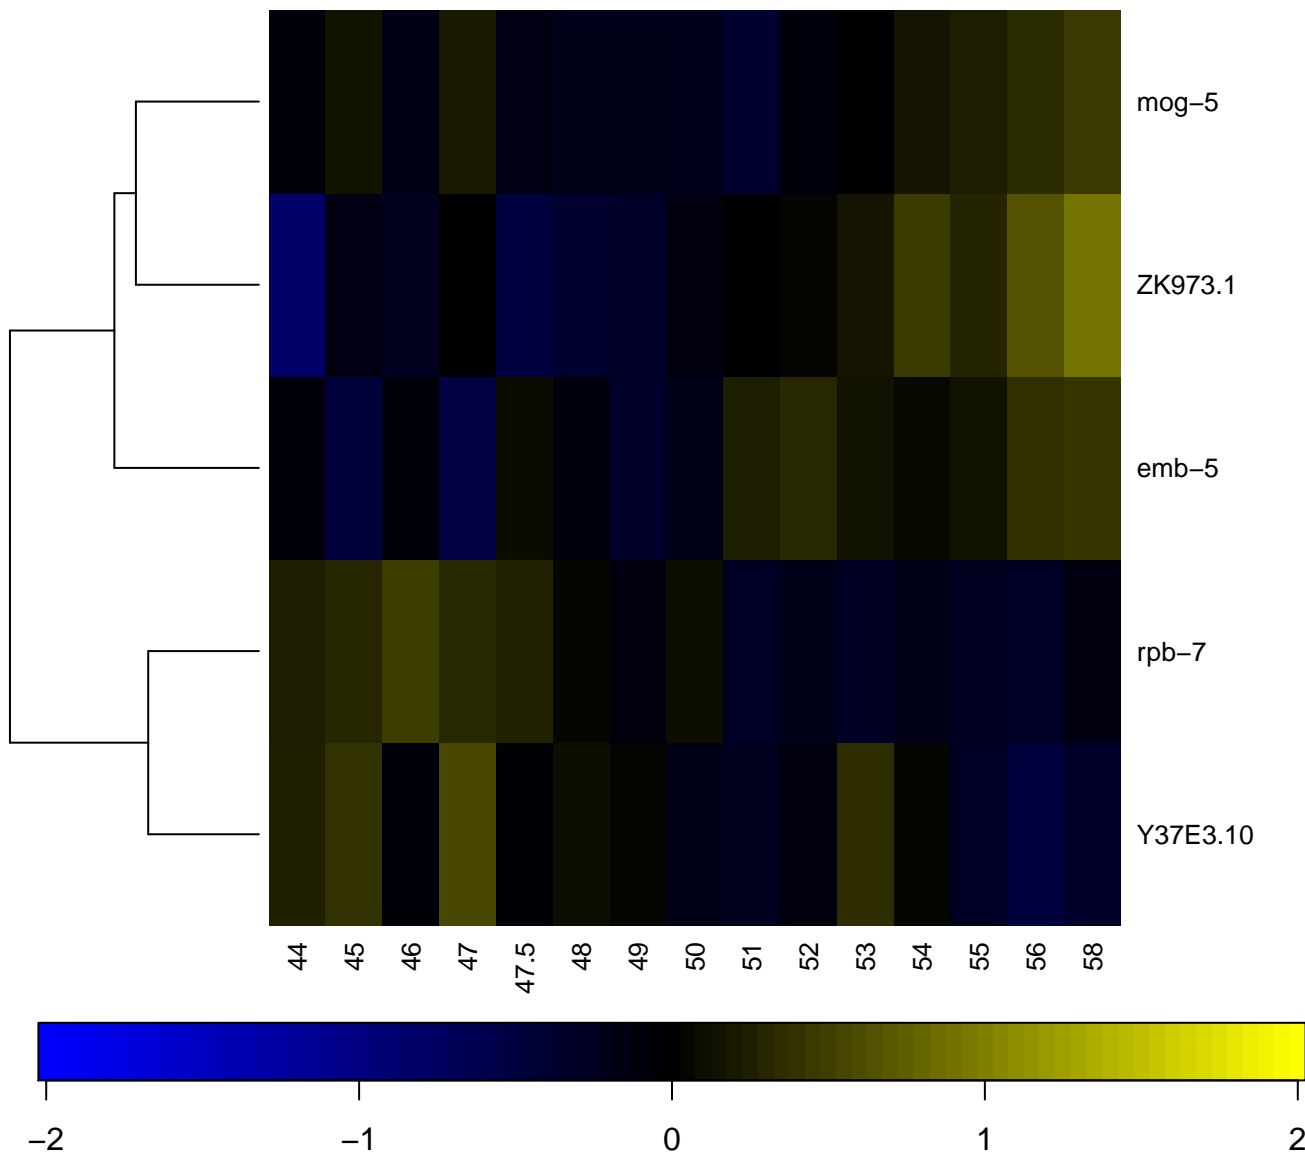

# SAC3/GANP/Nin1/mts3/eIF-3 p25

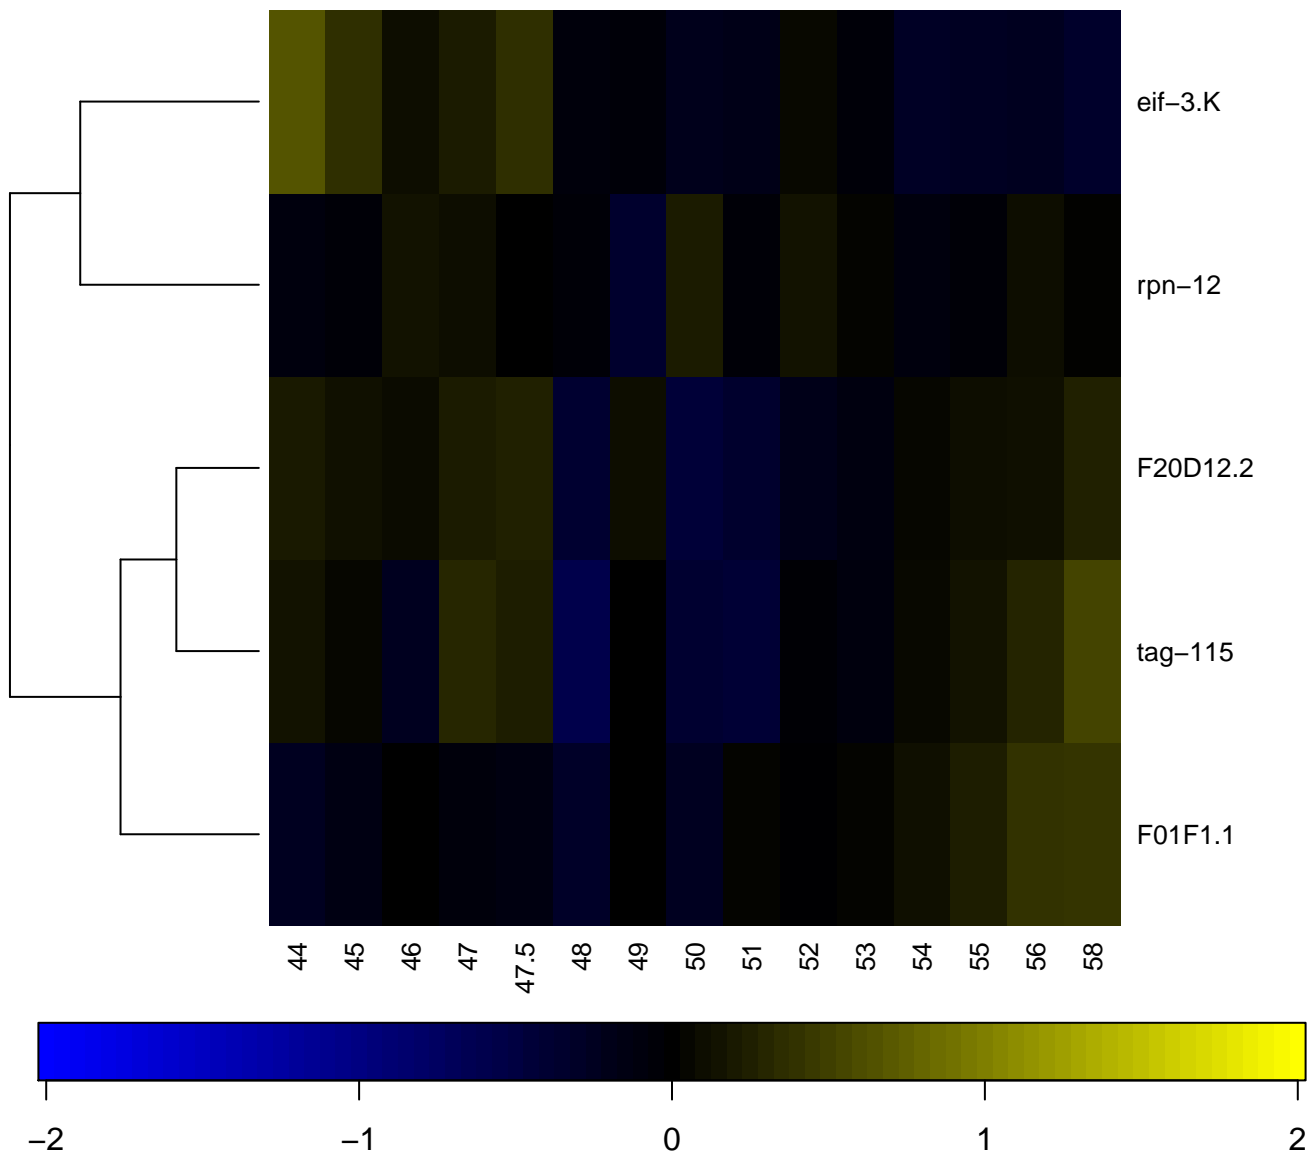

# SAC3/GANP/Nin1/mts3/eIF-3 p25 family



# SAM domain (Sterile alpha motif)

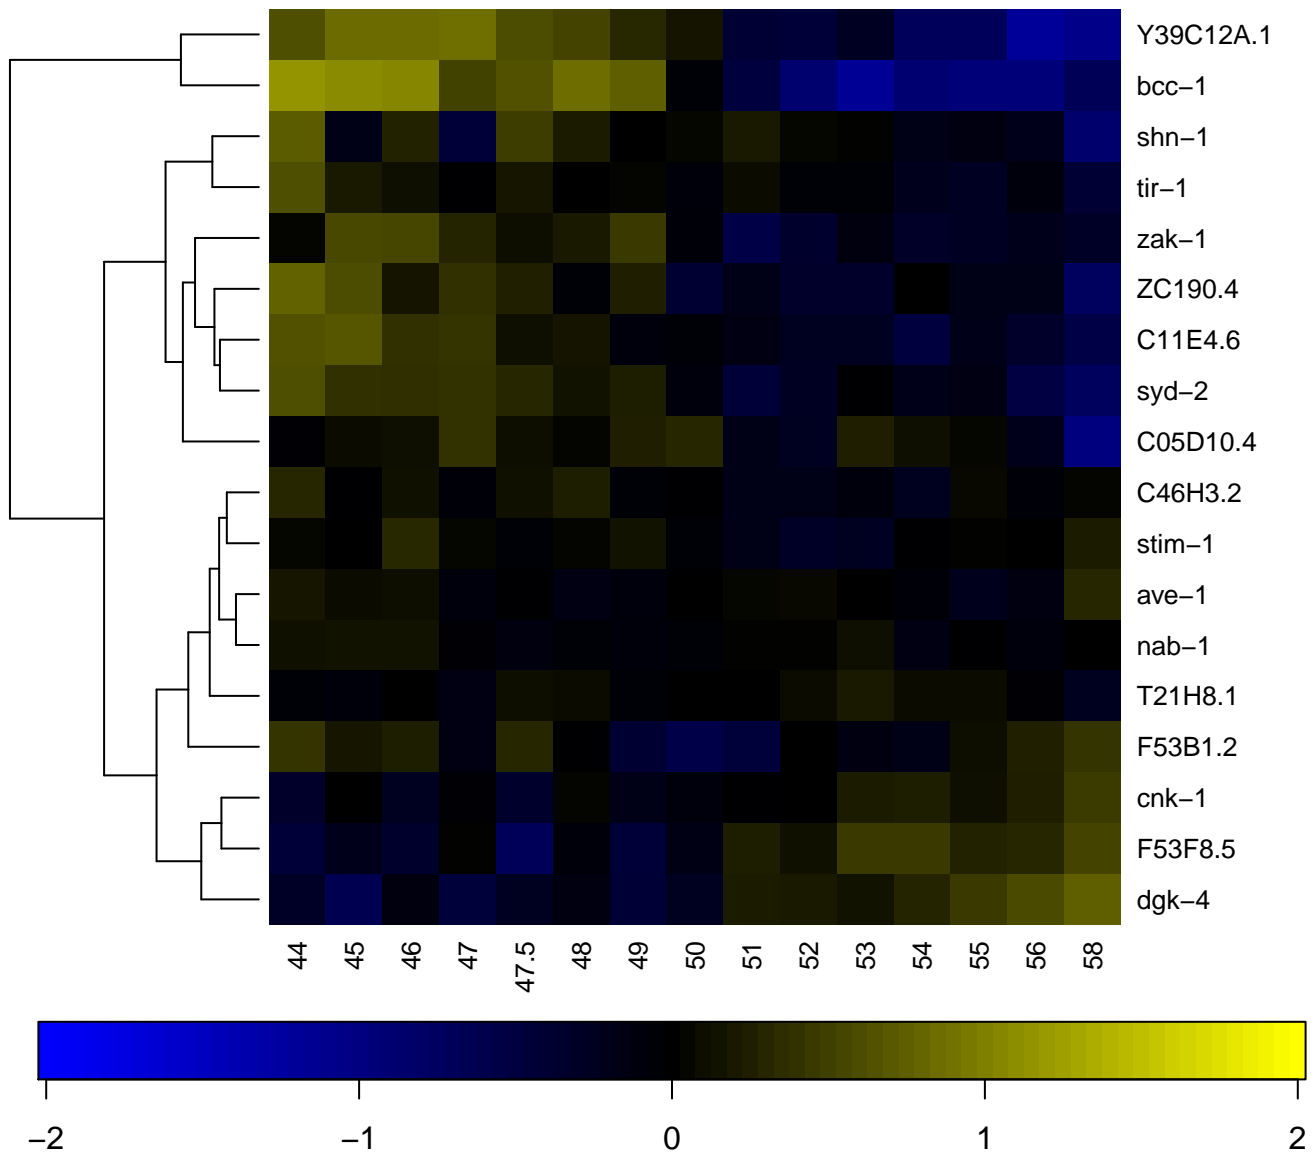













## Saposin-like type B, region 2

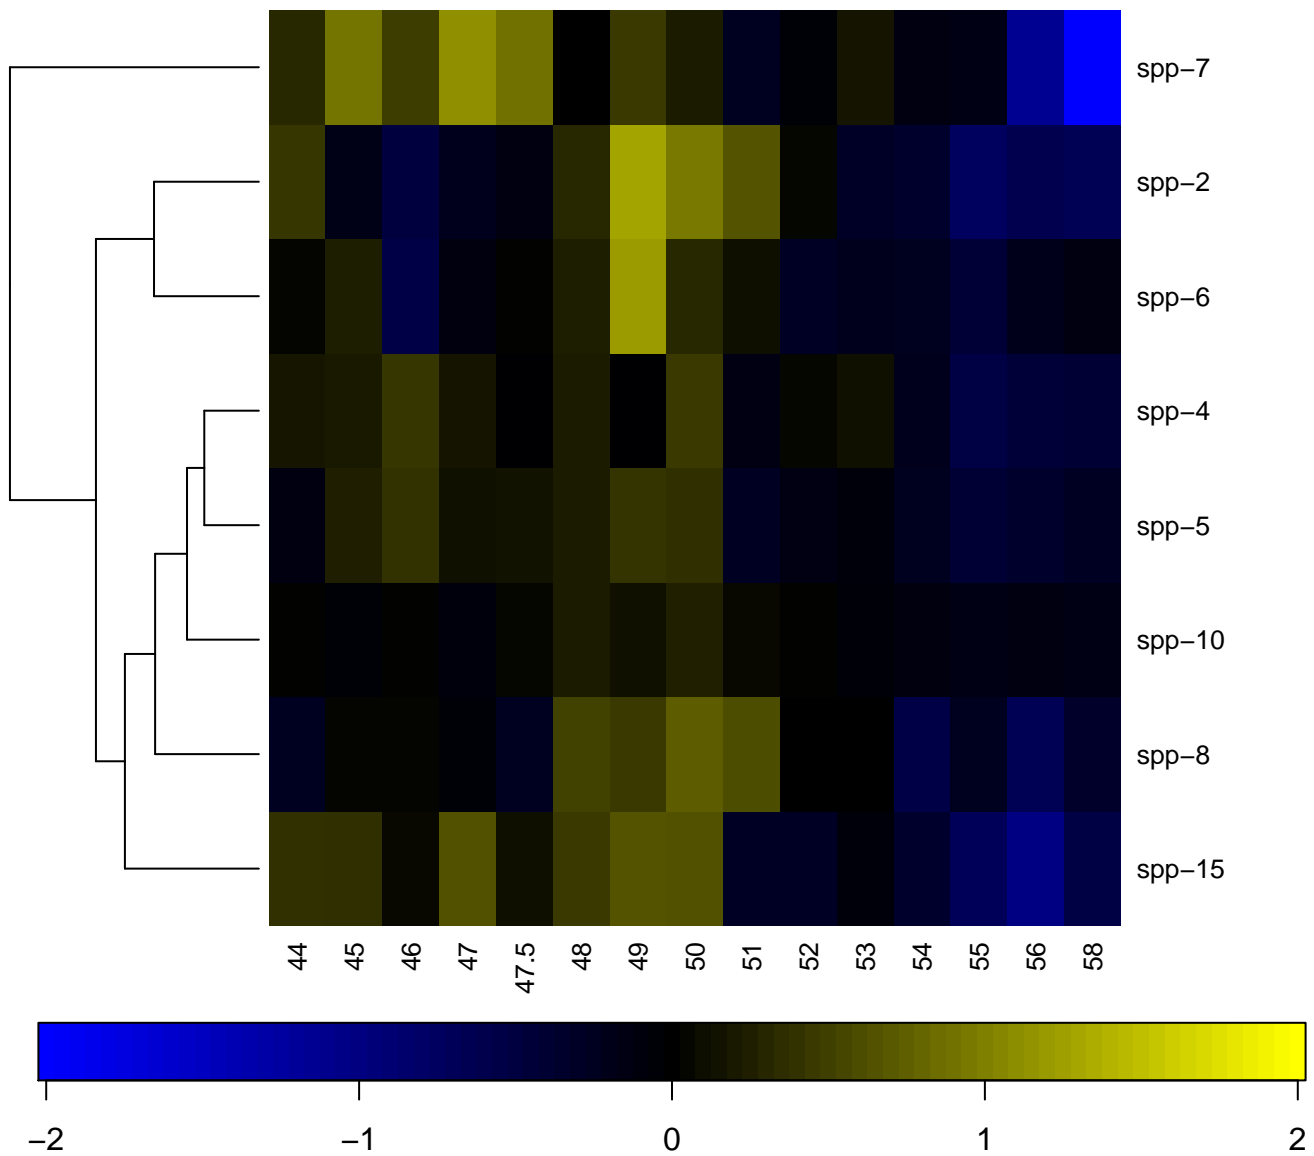

# Saposin B

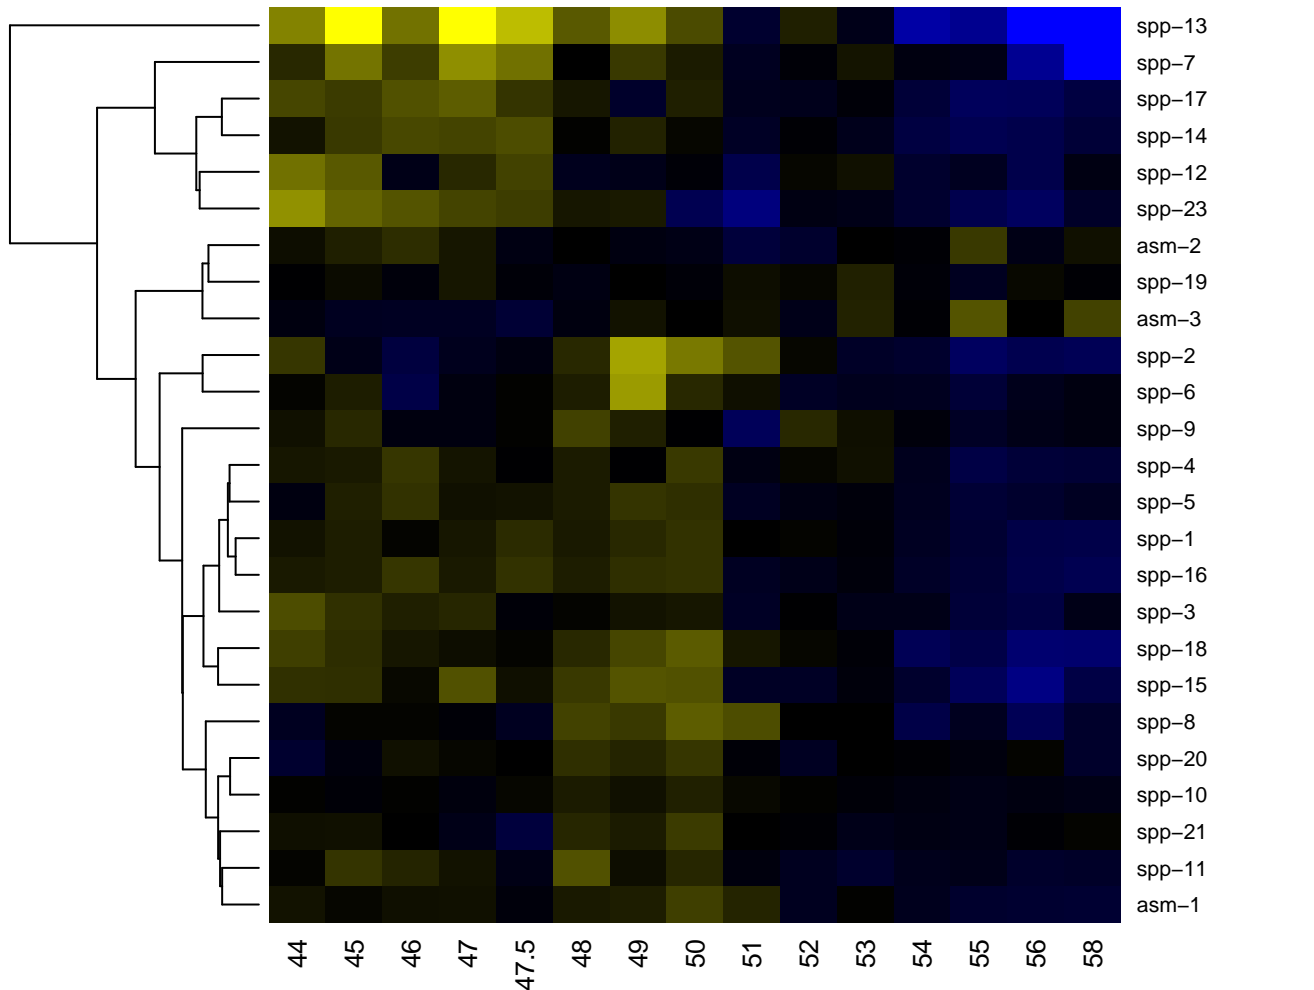

# SCO1/SenC

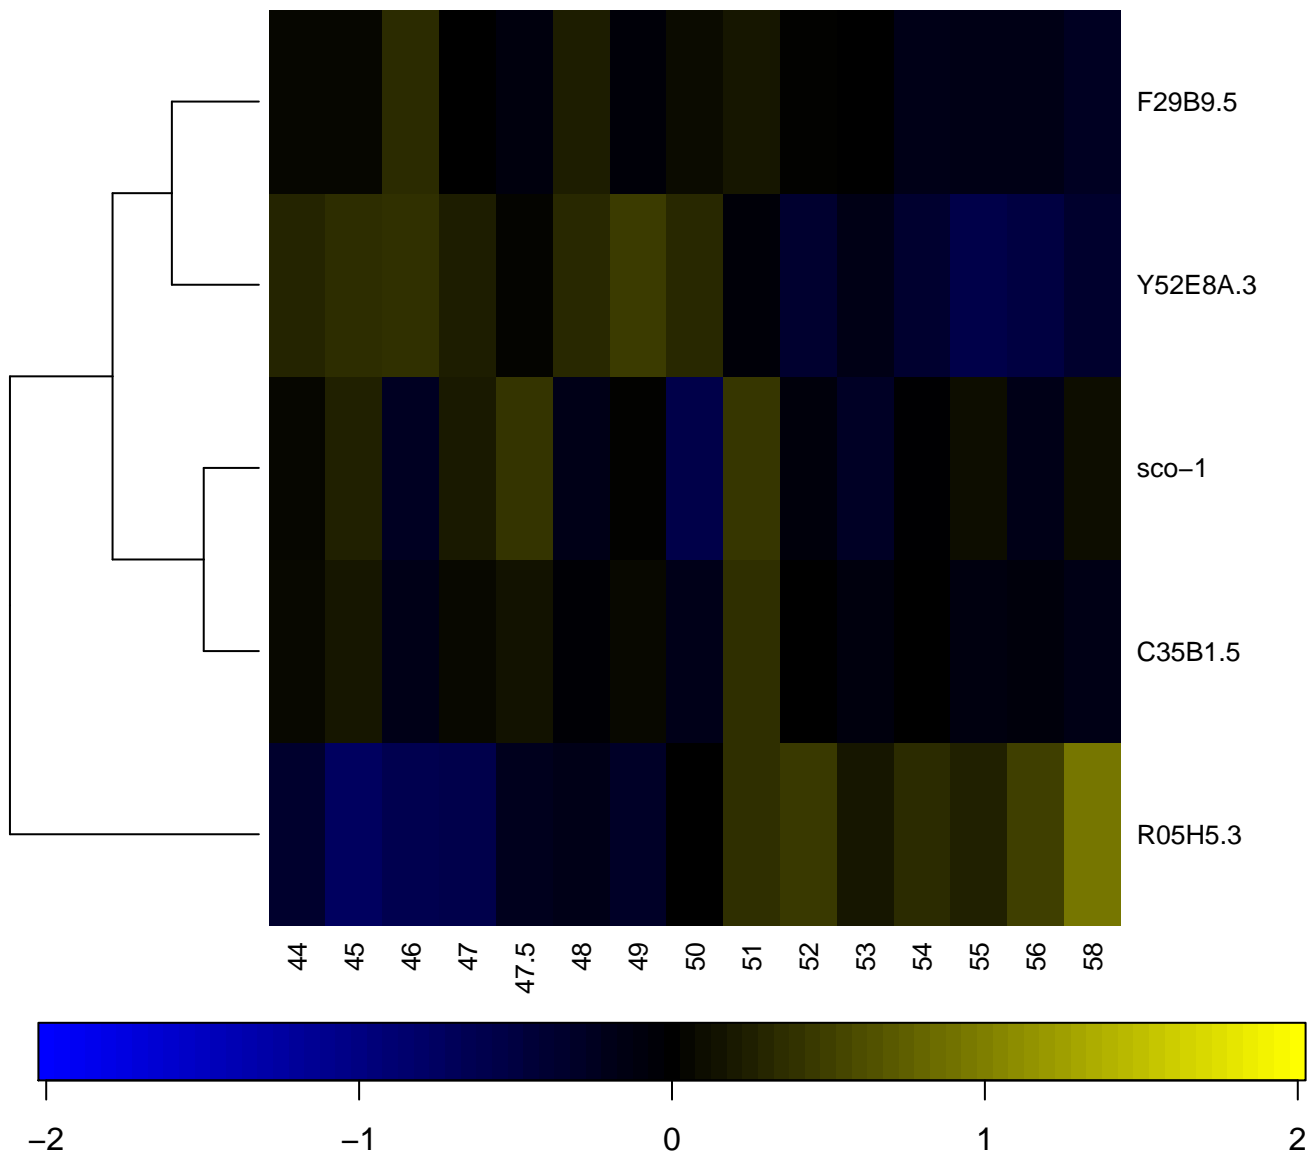

# SCP-like extracellular

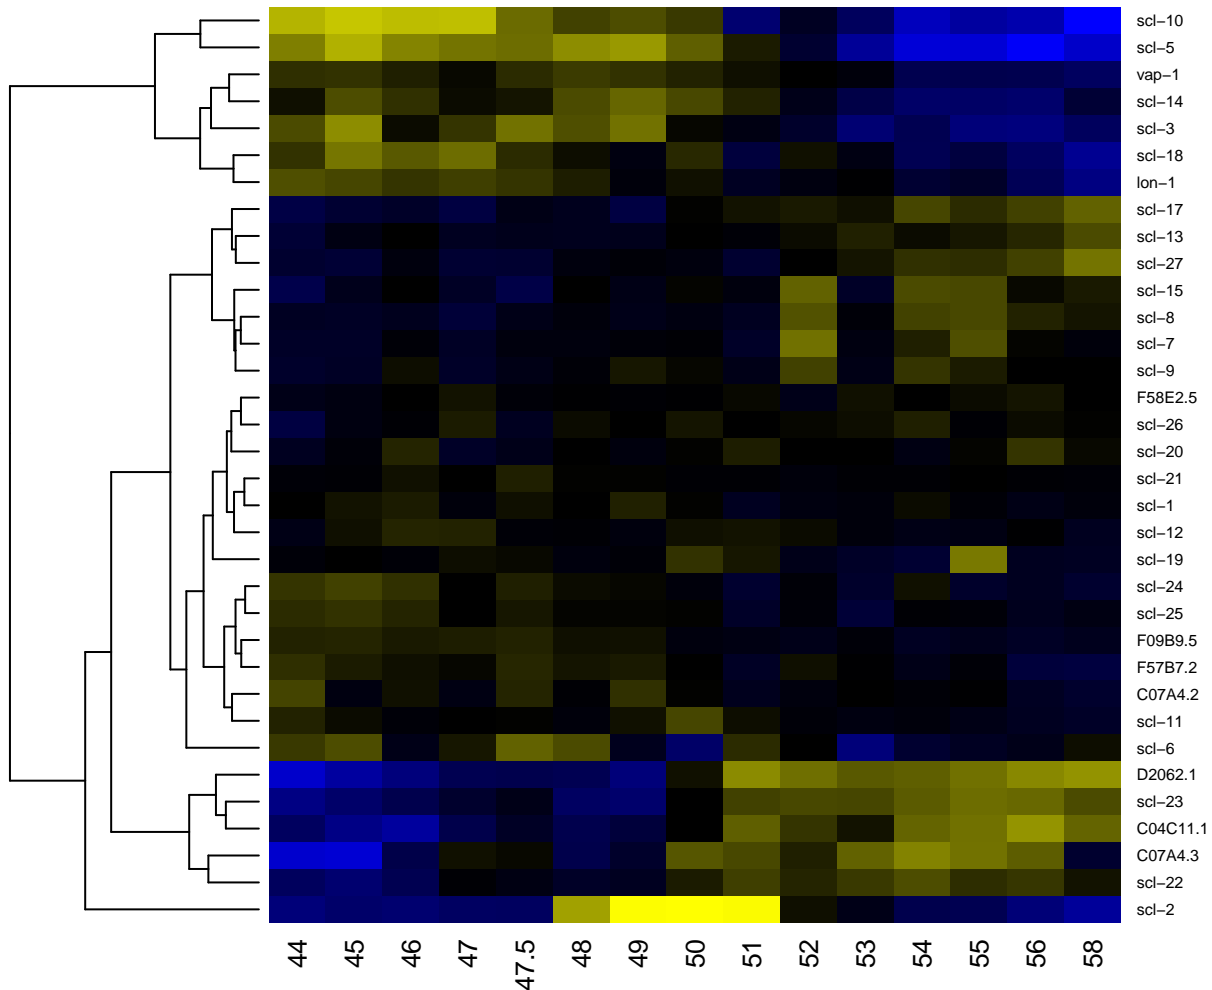





# SEA

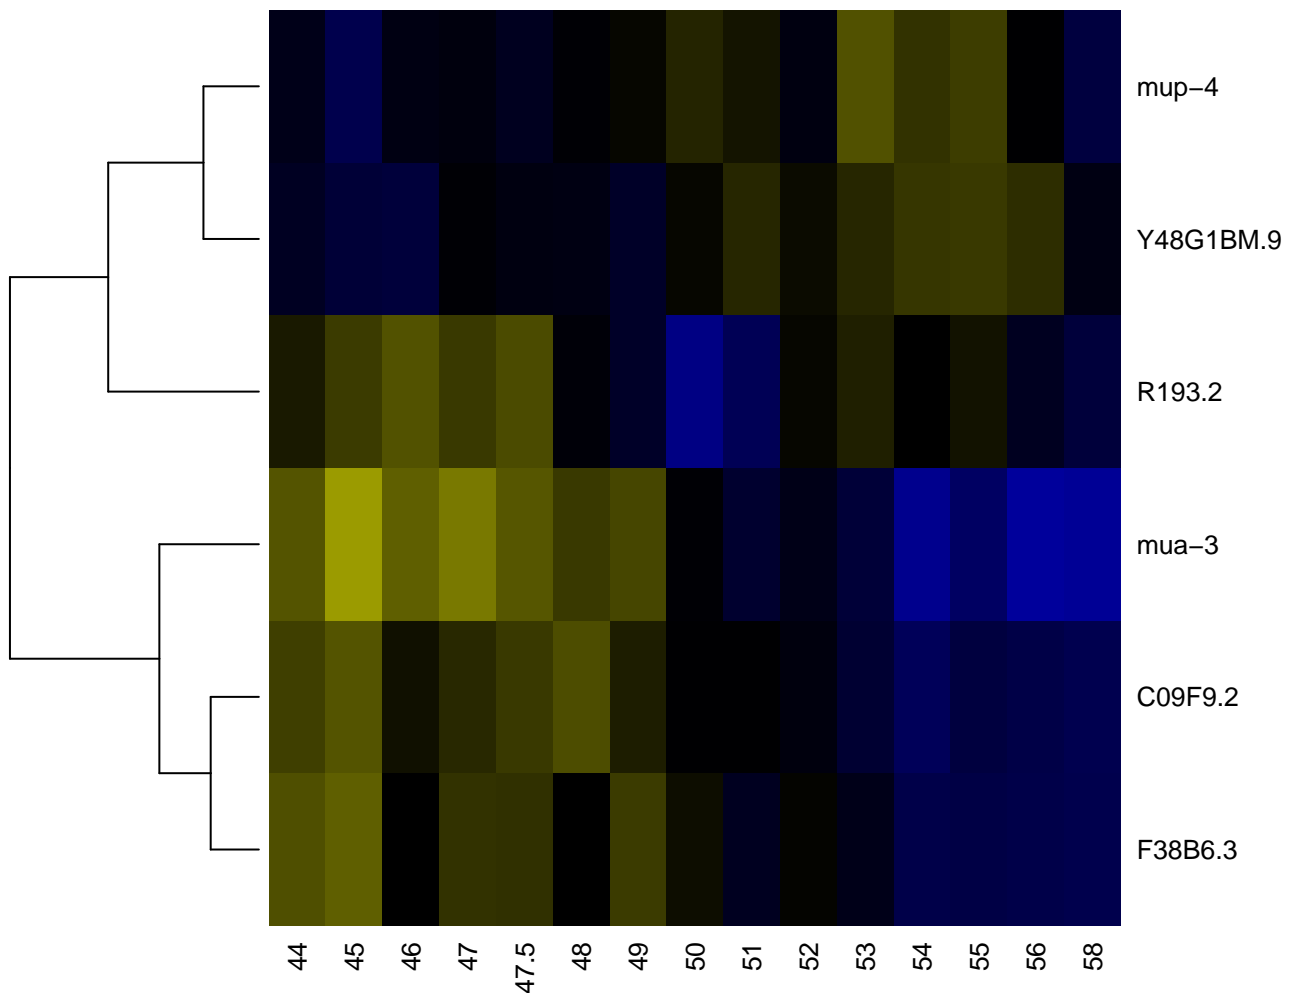







# SEC7-like

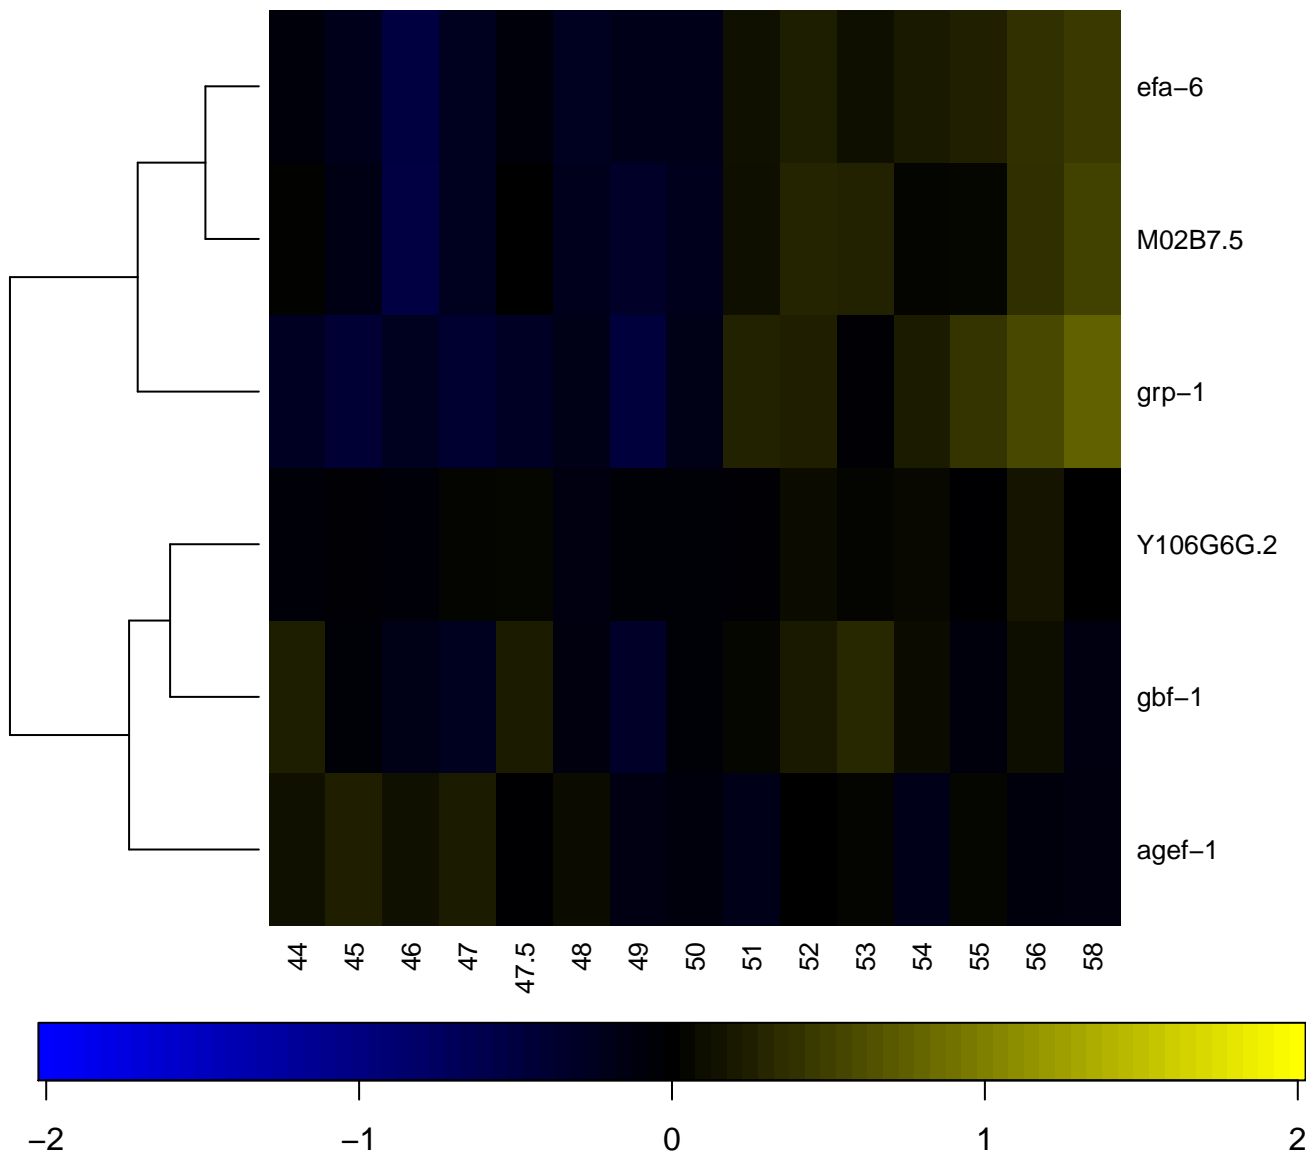



# Secreted growth factor Wnt protein

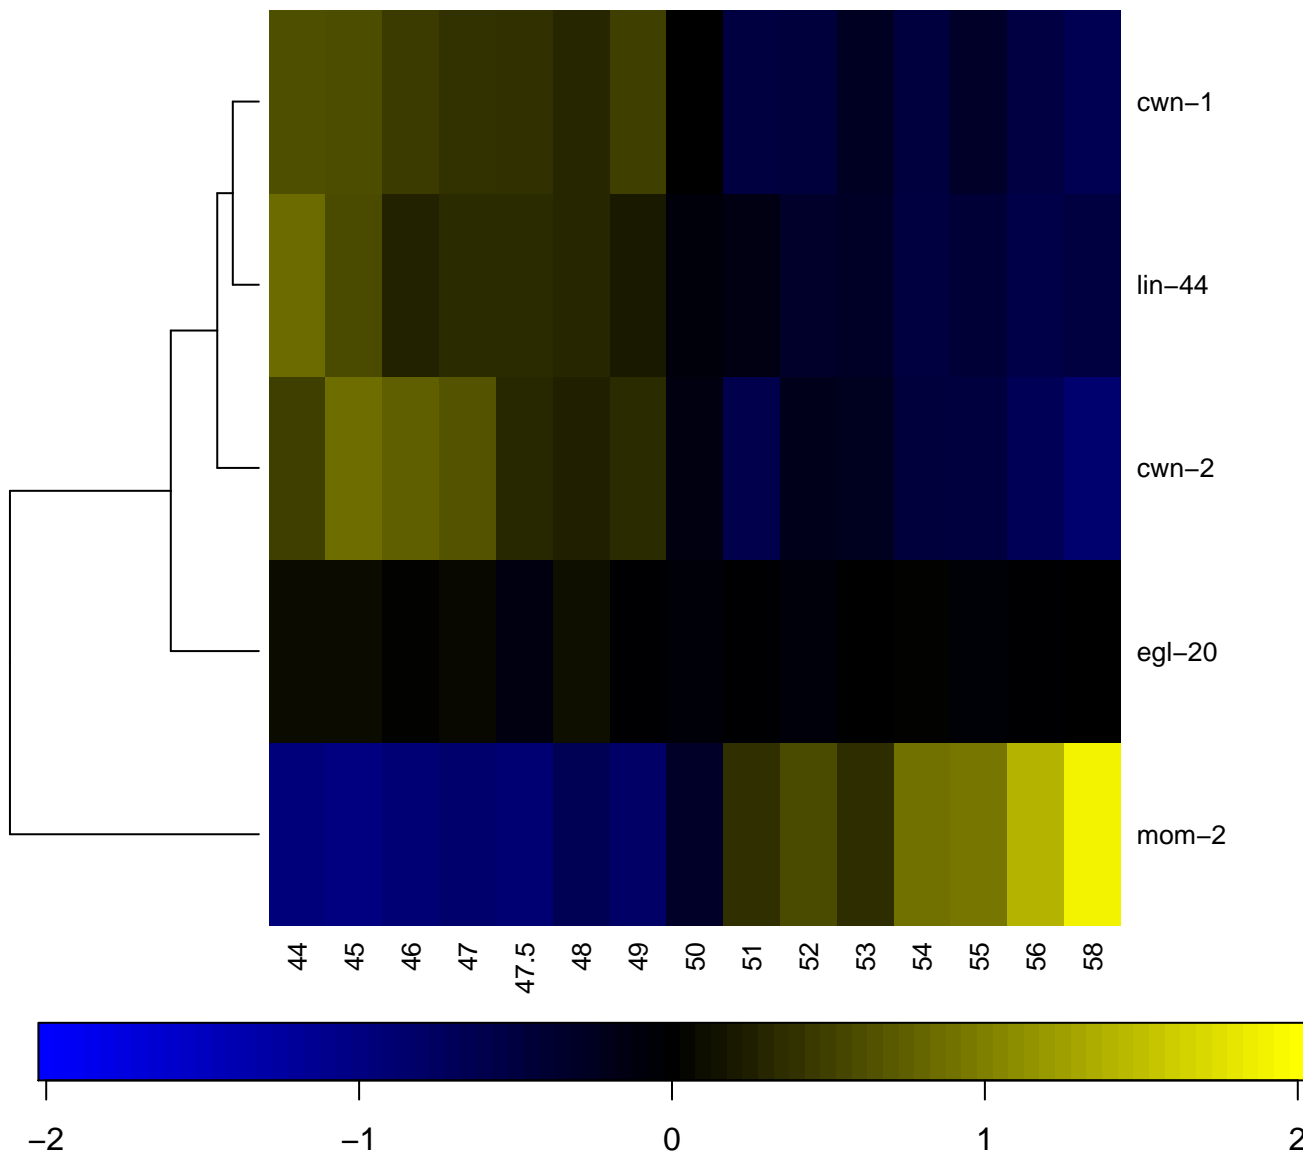



# Secreted growth factor Wnt protein, conserved site

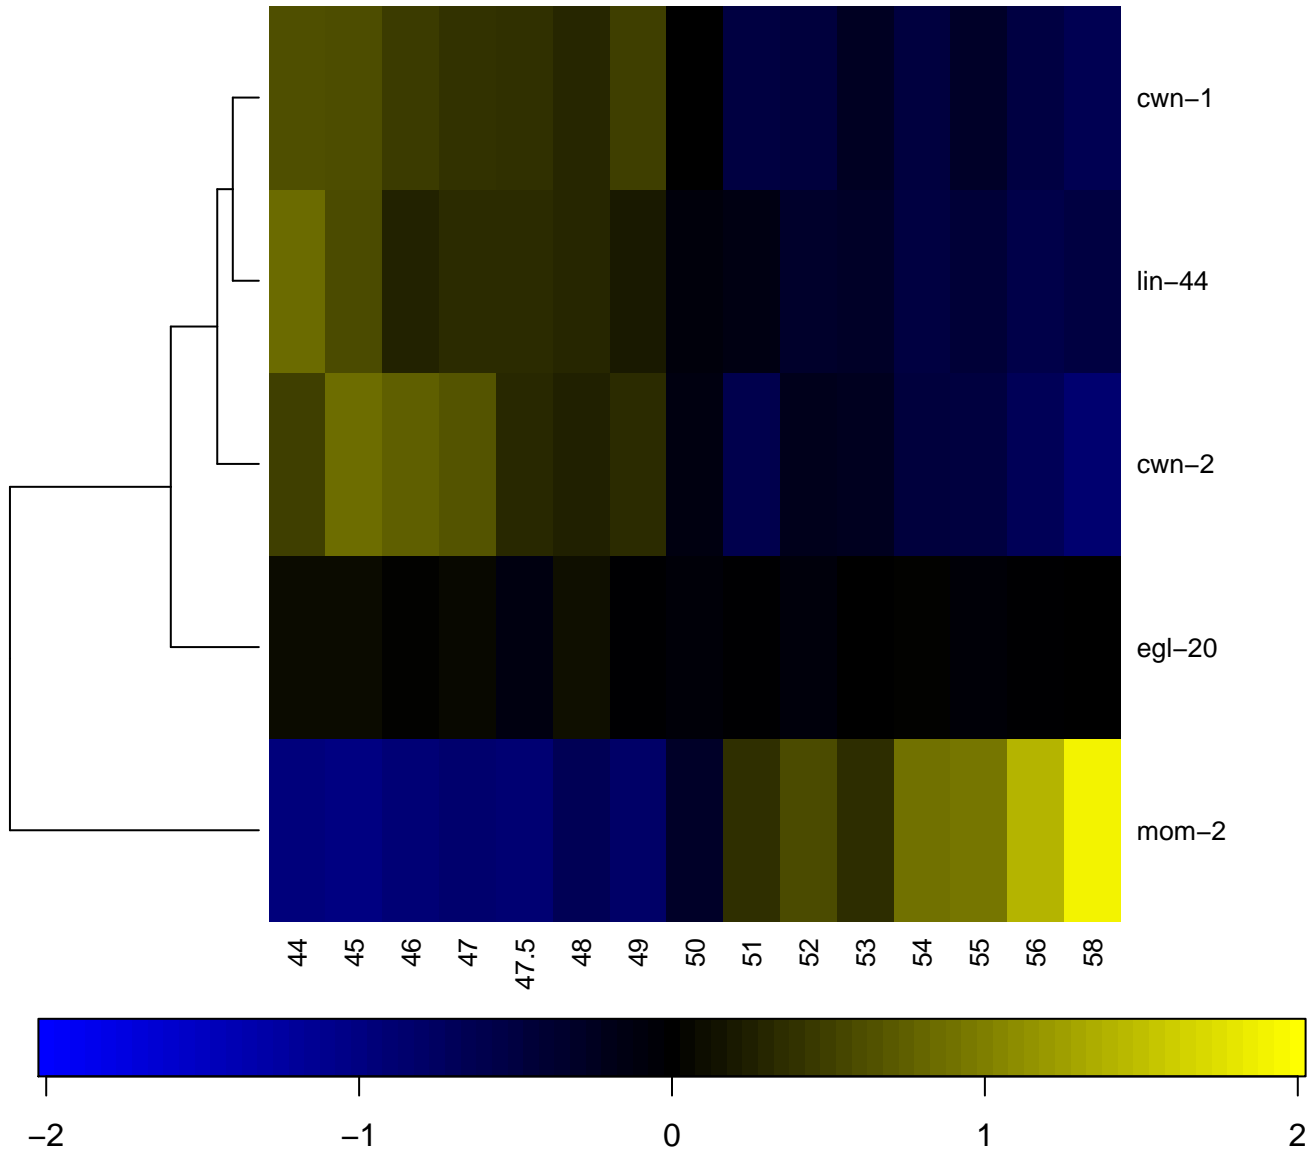

# Secreted protein acidic and rich in cysteine Ca binding region

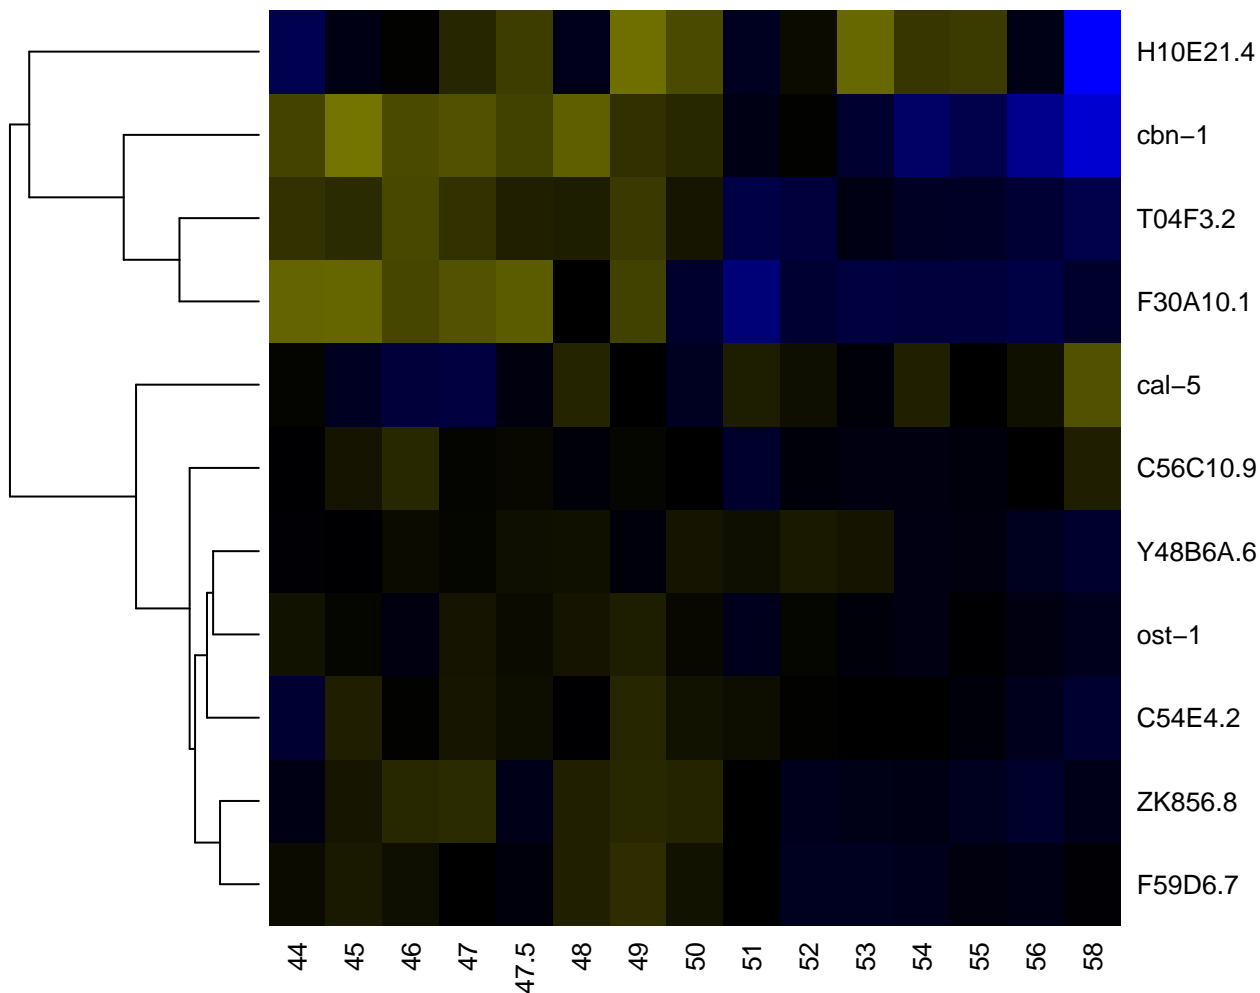



# Serine–threonine/tyrosine–protein kinase

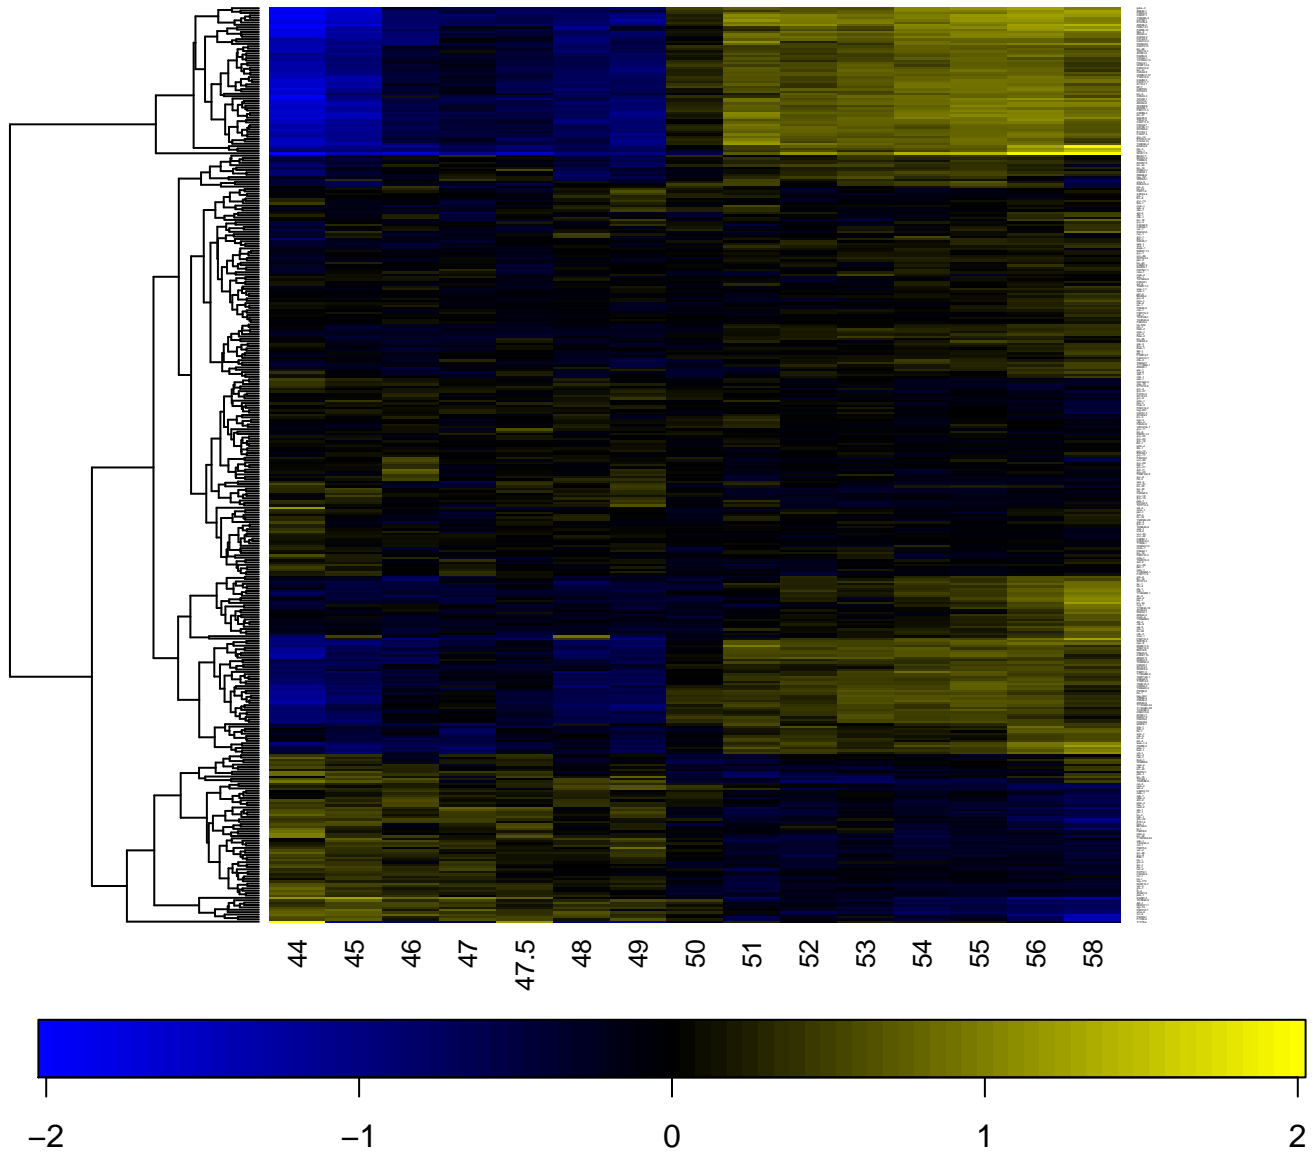

# Serine carboxypeptidase

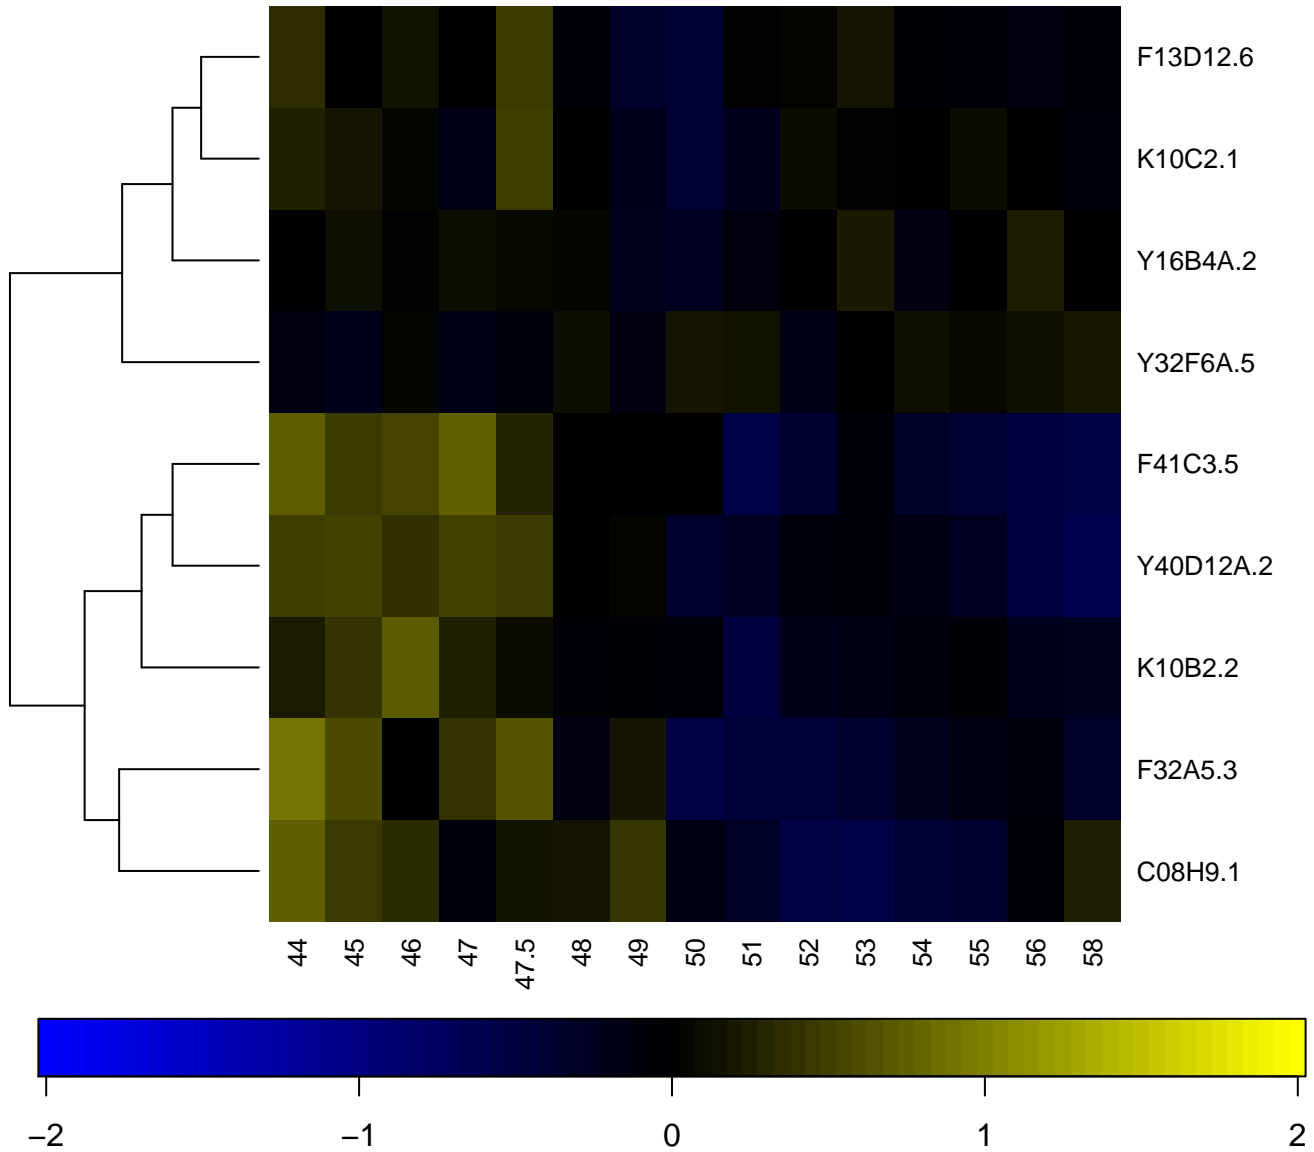



# Serine/threonine-protein kinase-like domain

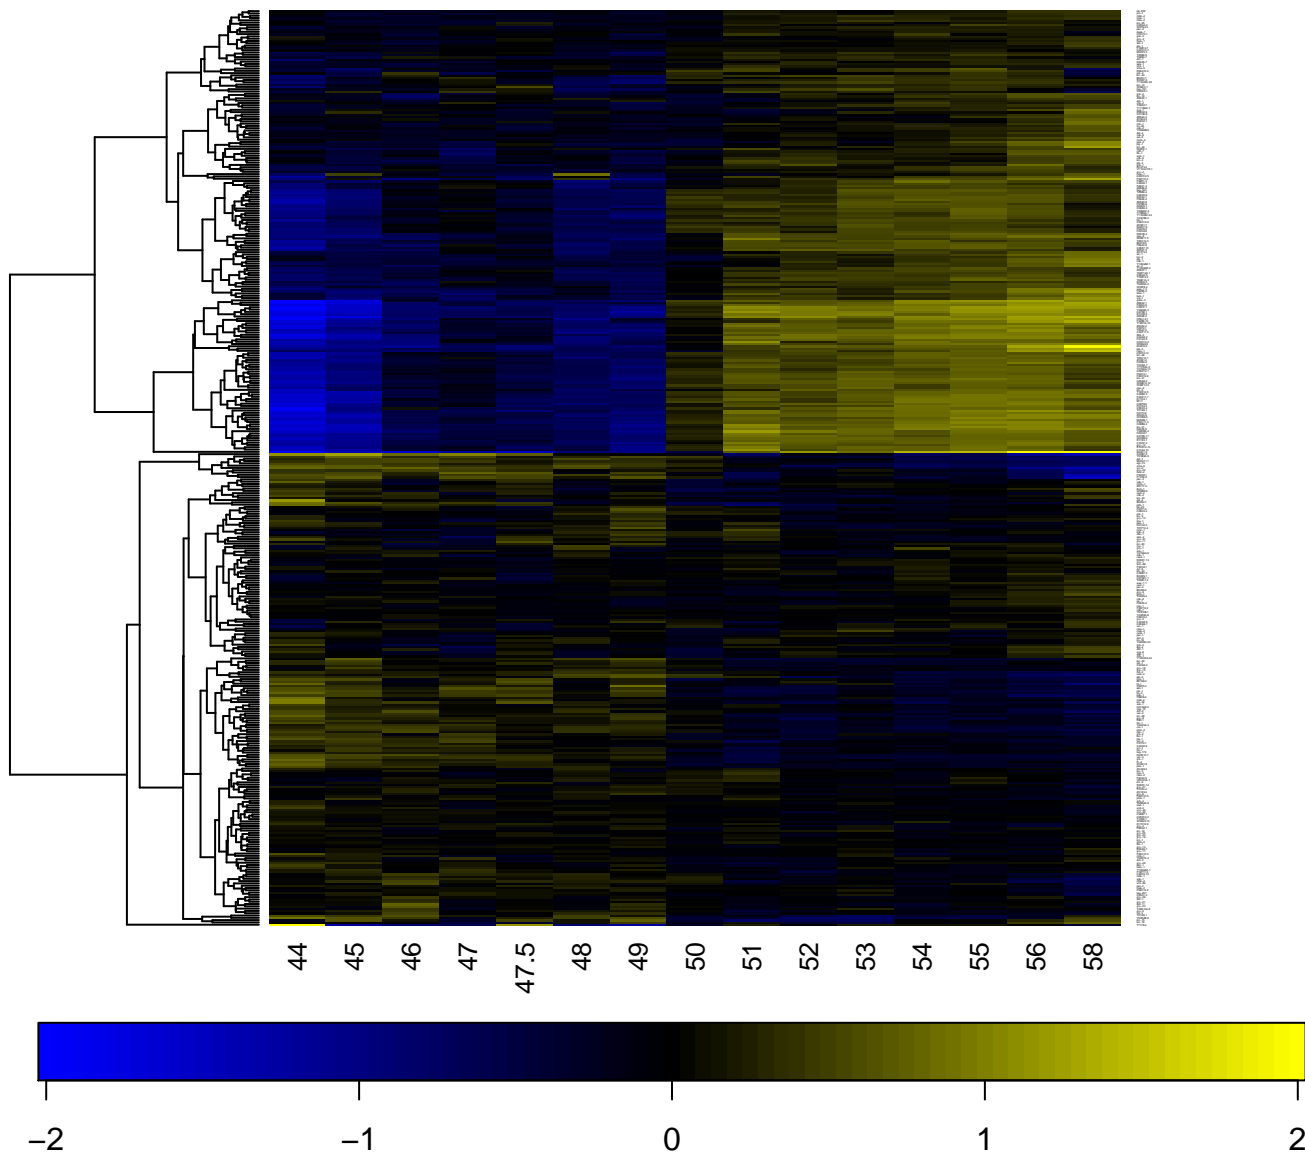

# Serine/threonine-protein kinase domain

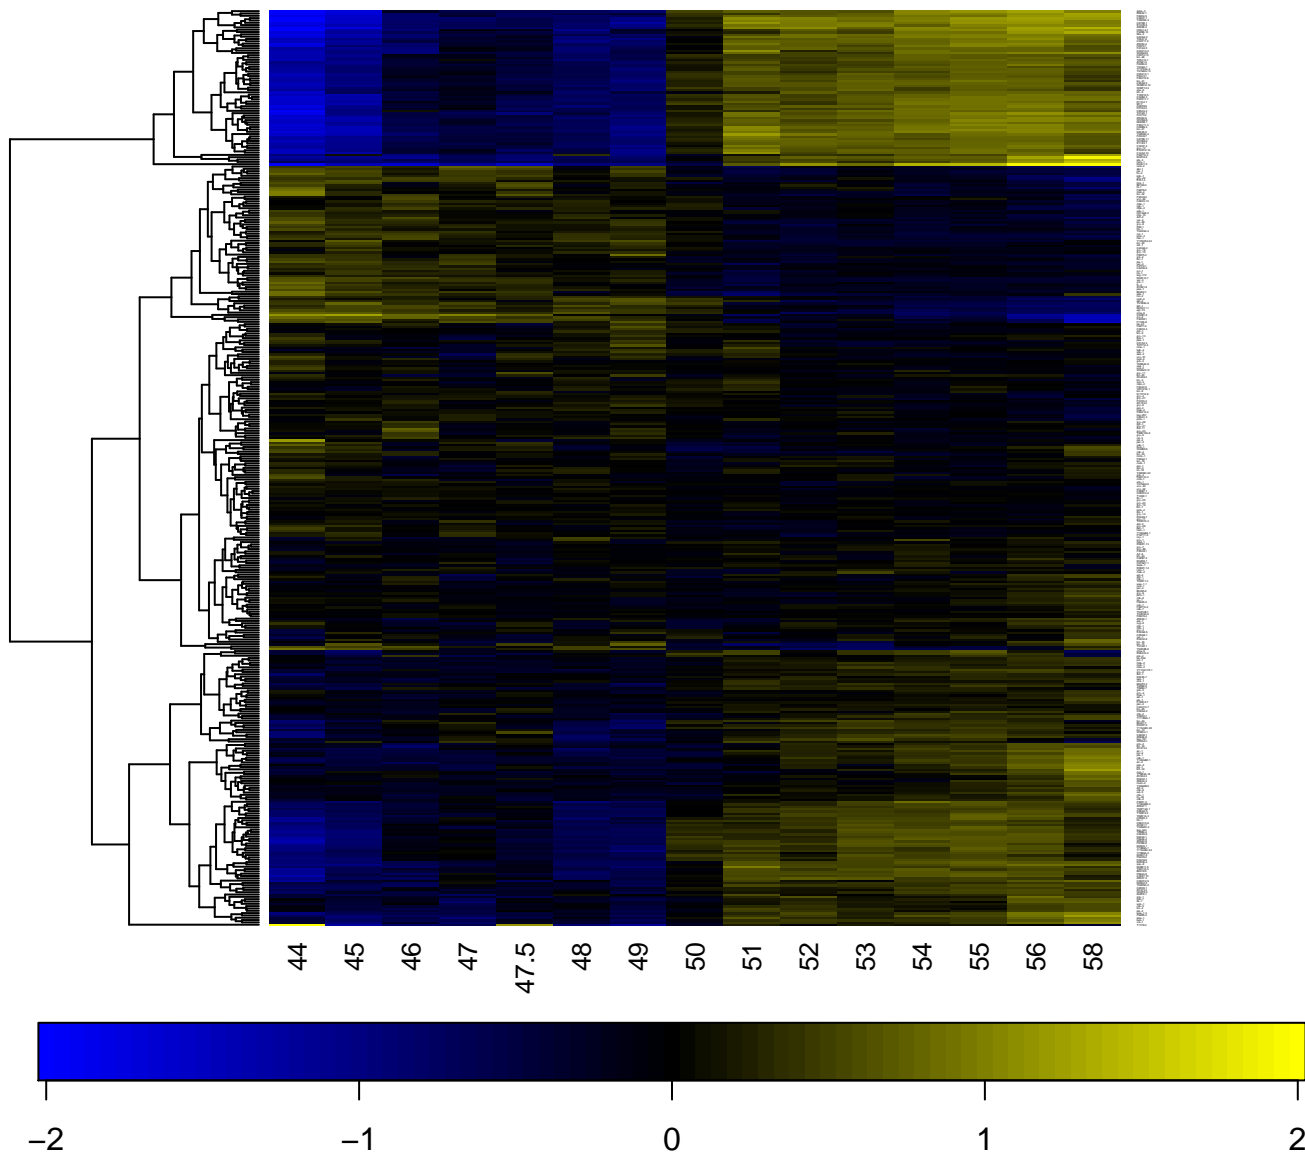



# Serine/threonine-protein kinase, active site

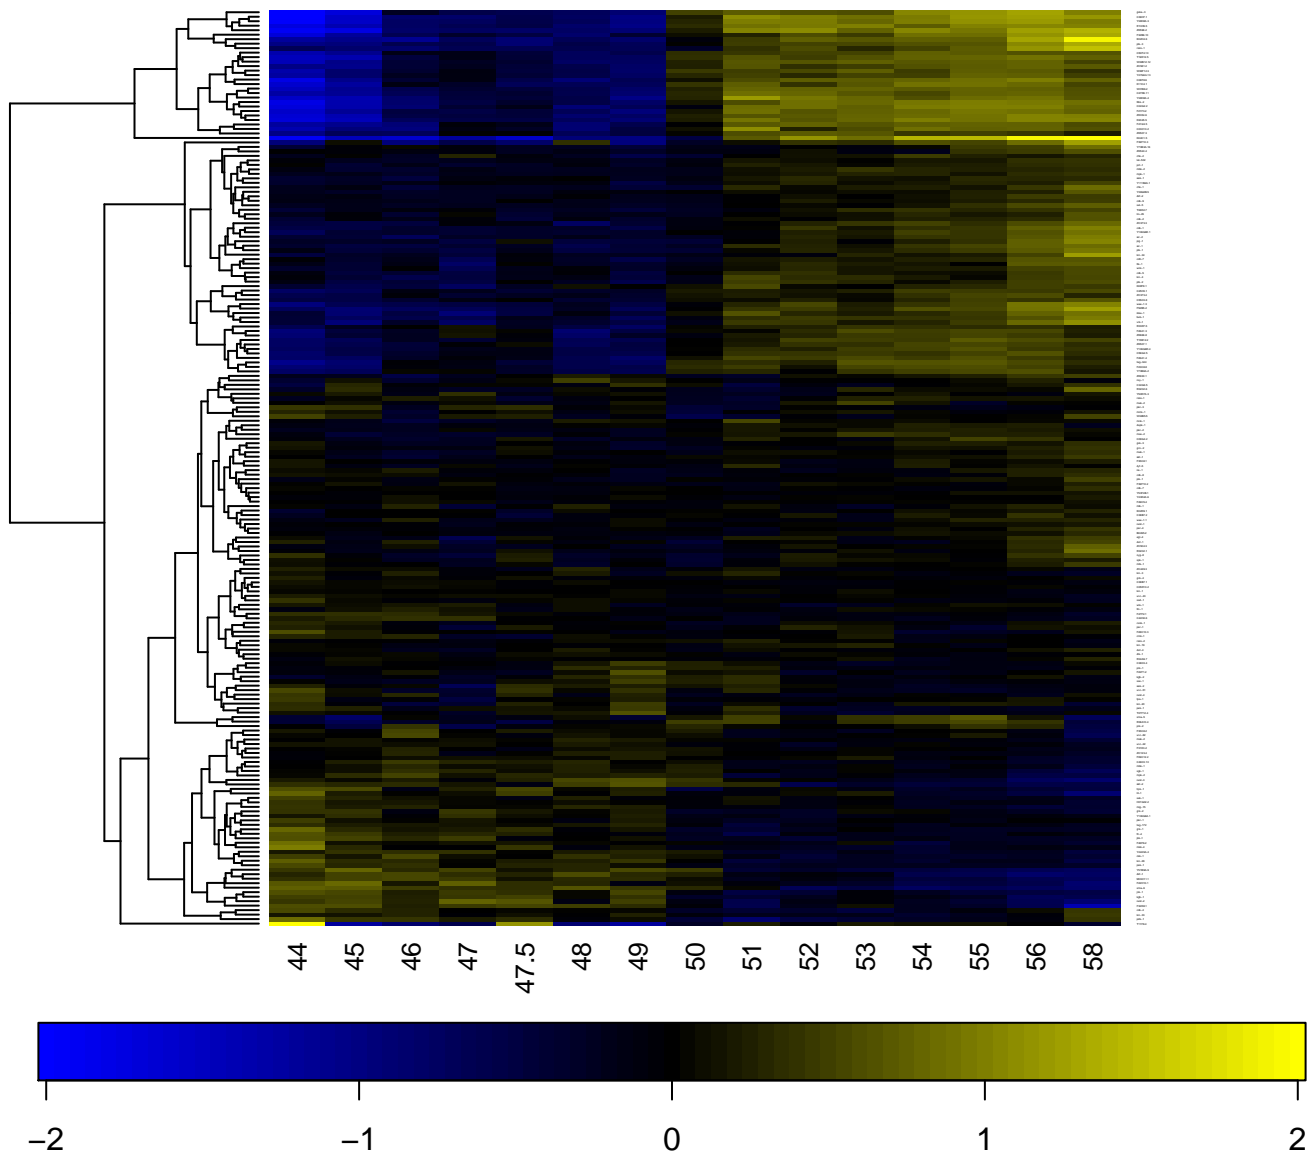

# onine-specific protein phosphatase/bis(5-nucleosyl)-tetra

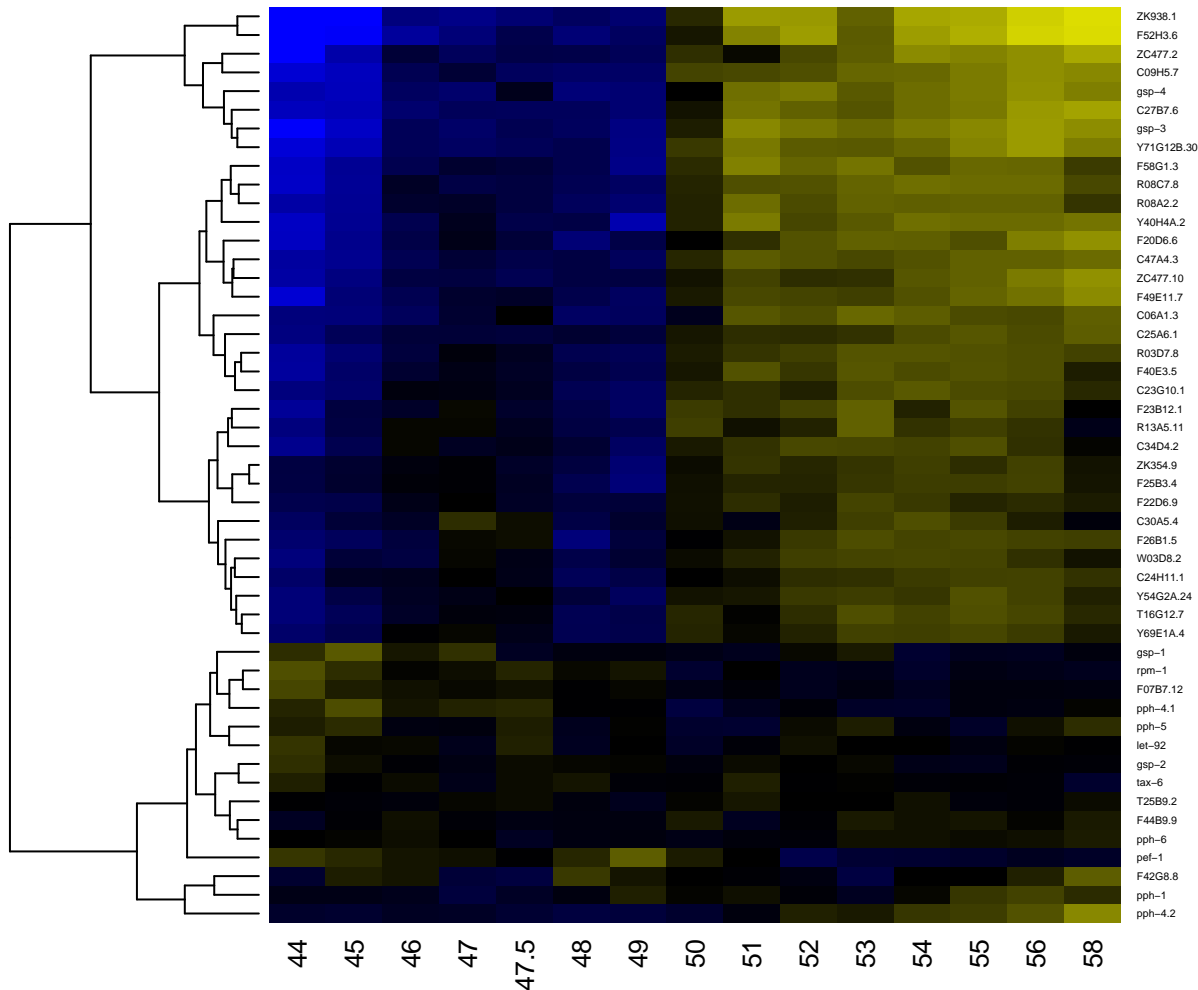

# Serpentine type 7TM GPCR chemoreceptor Sra

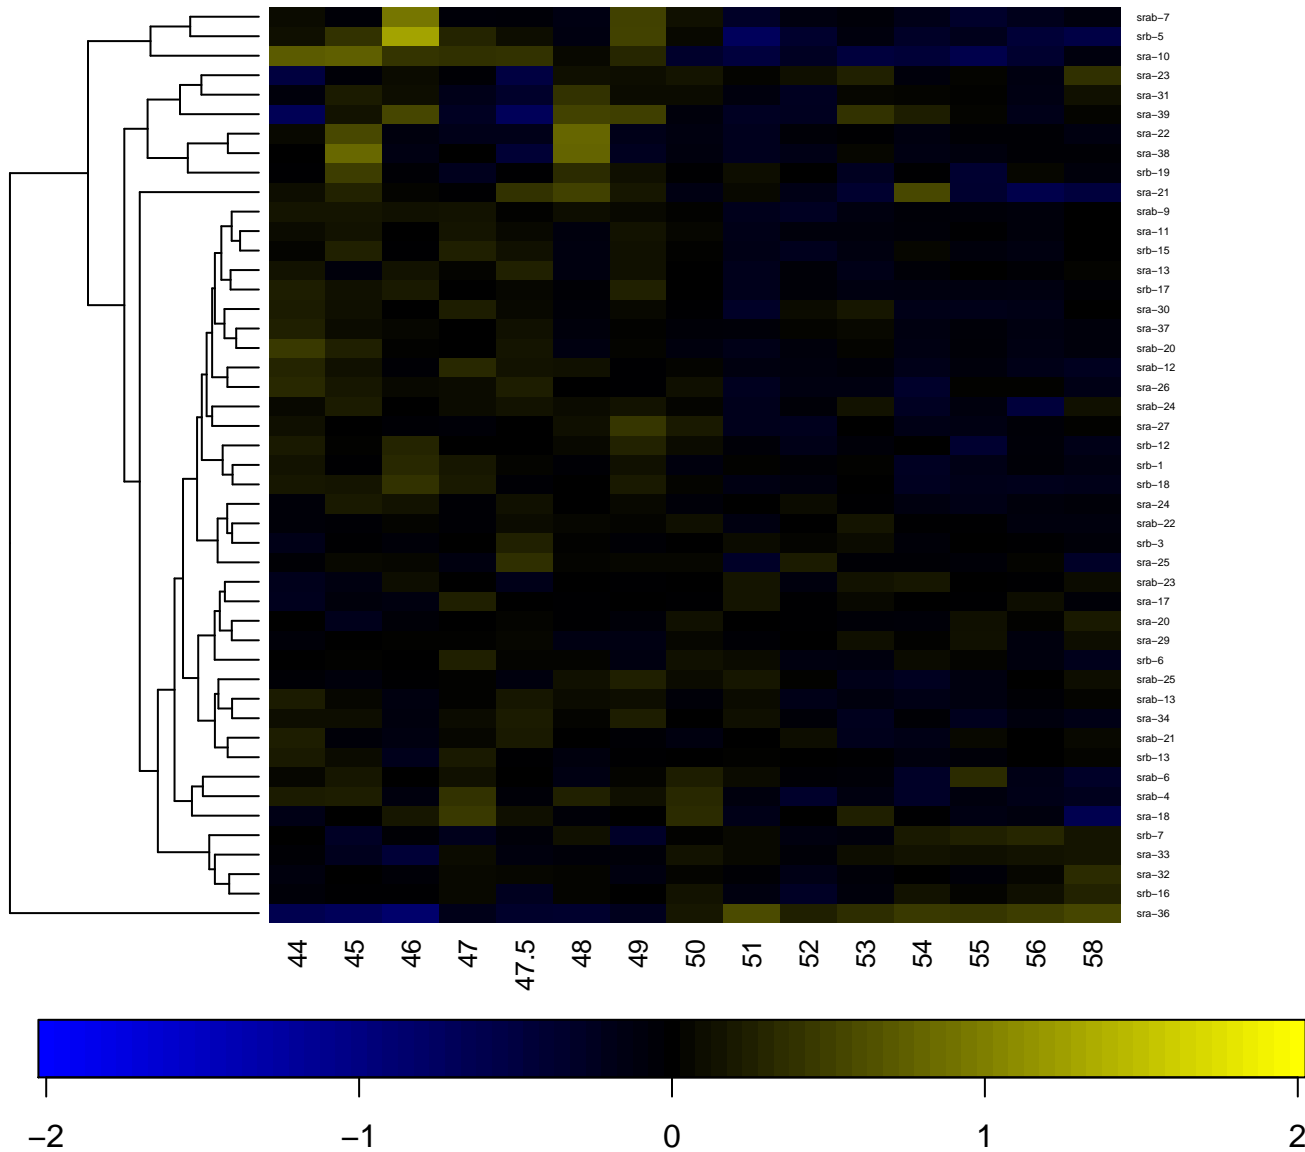

# Serpentine type 7TM GPCR chemoreceptor Srb

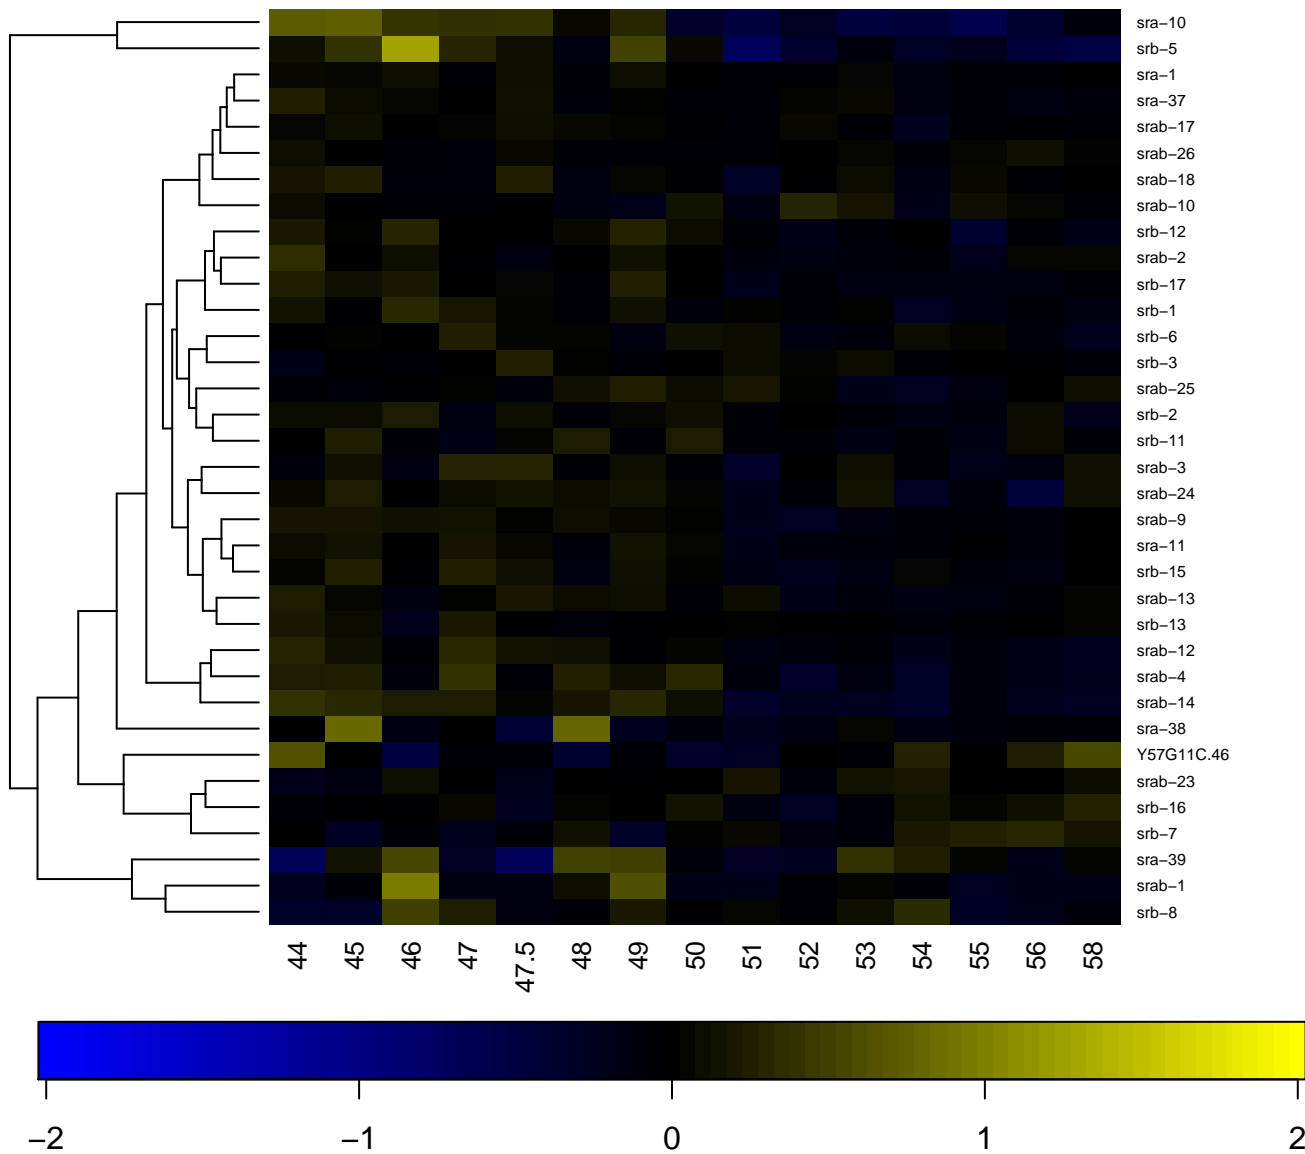

# Serpentine type 7TM GPCR chemoreceptor Srbc

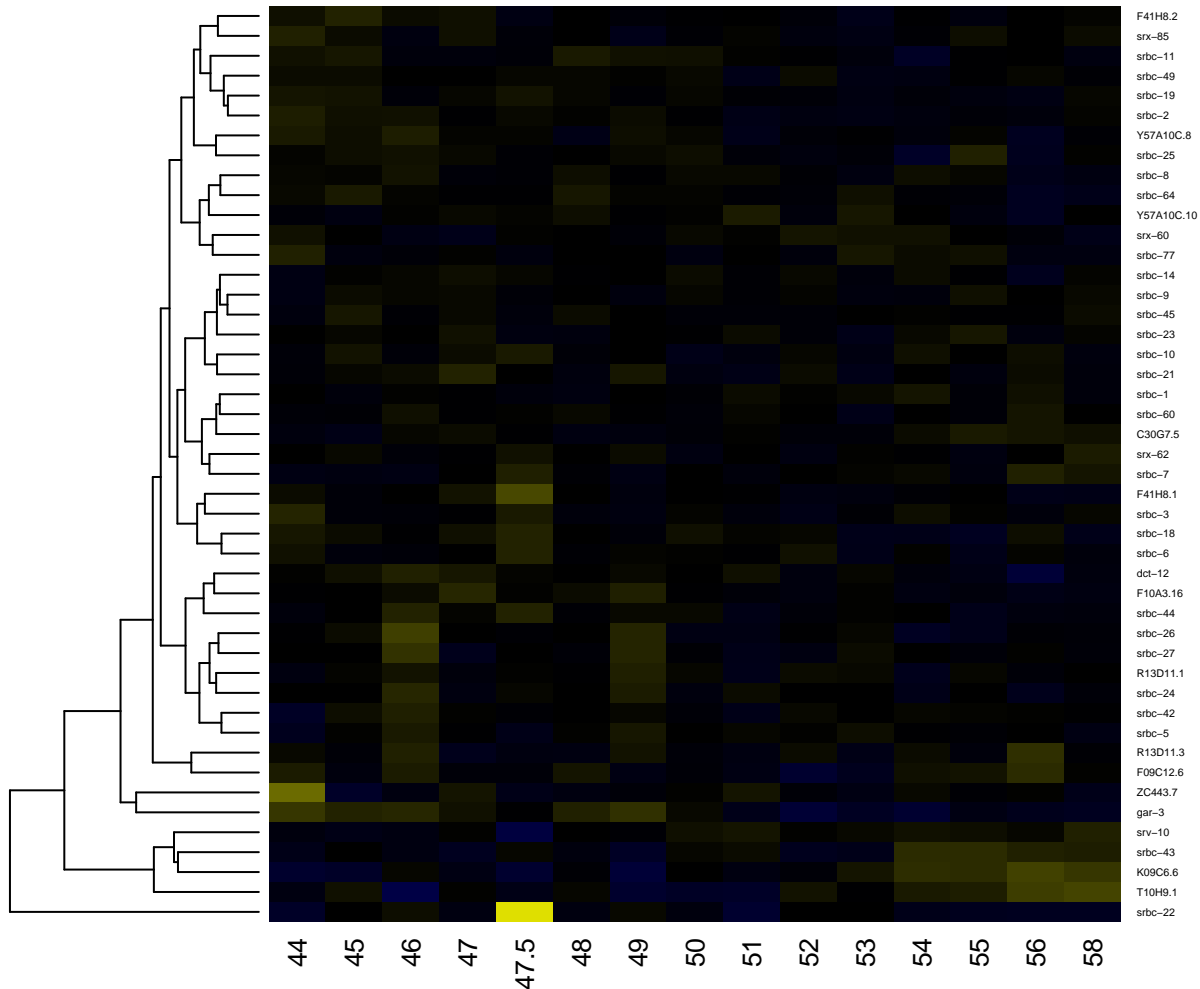

# Serpentine type 7TM GPCR chemoreceptor Srd

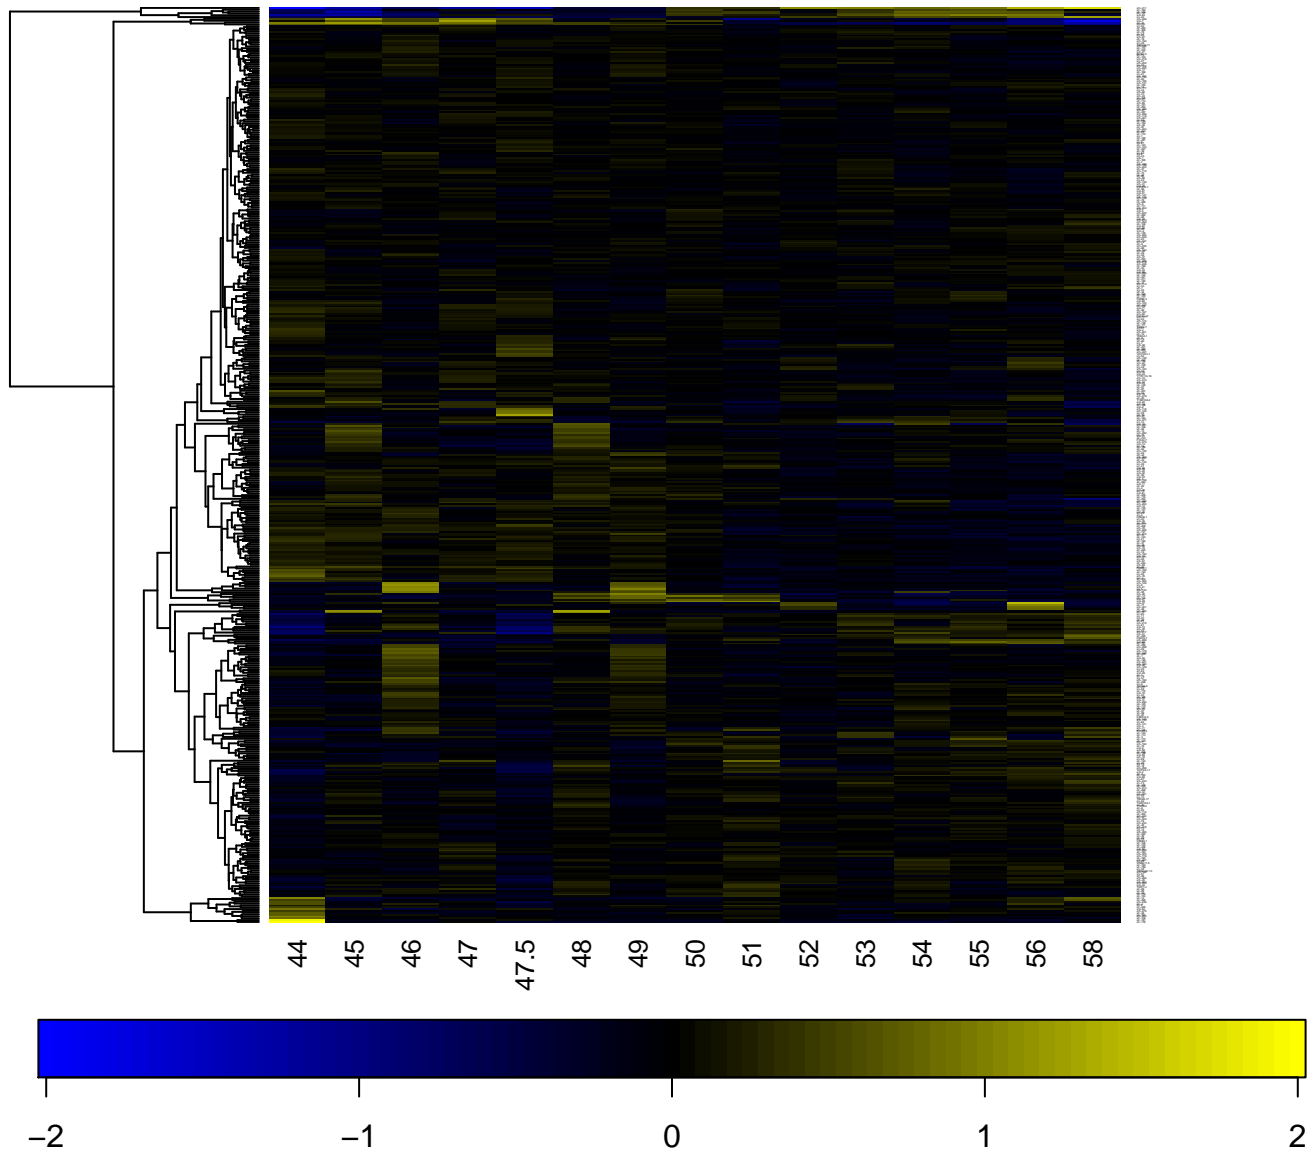

# Serpentine type 7TM GPCR chemoreceptor Srh

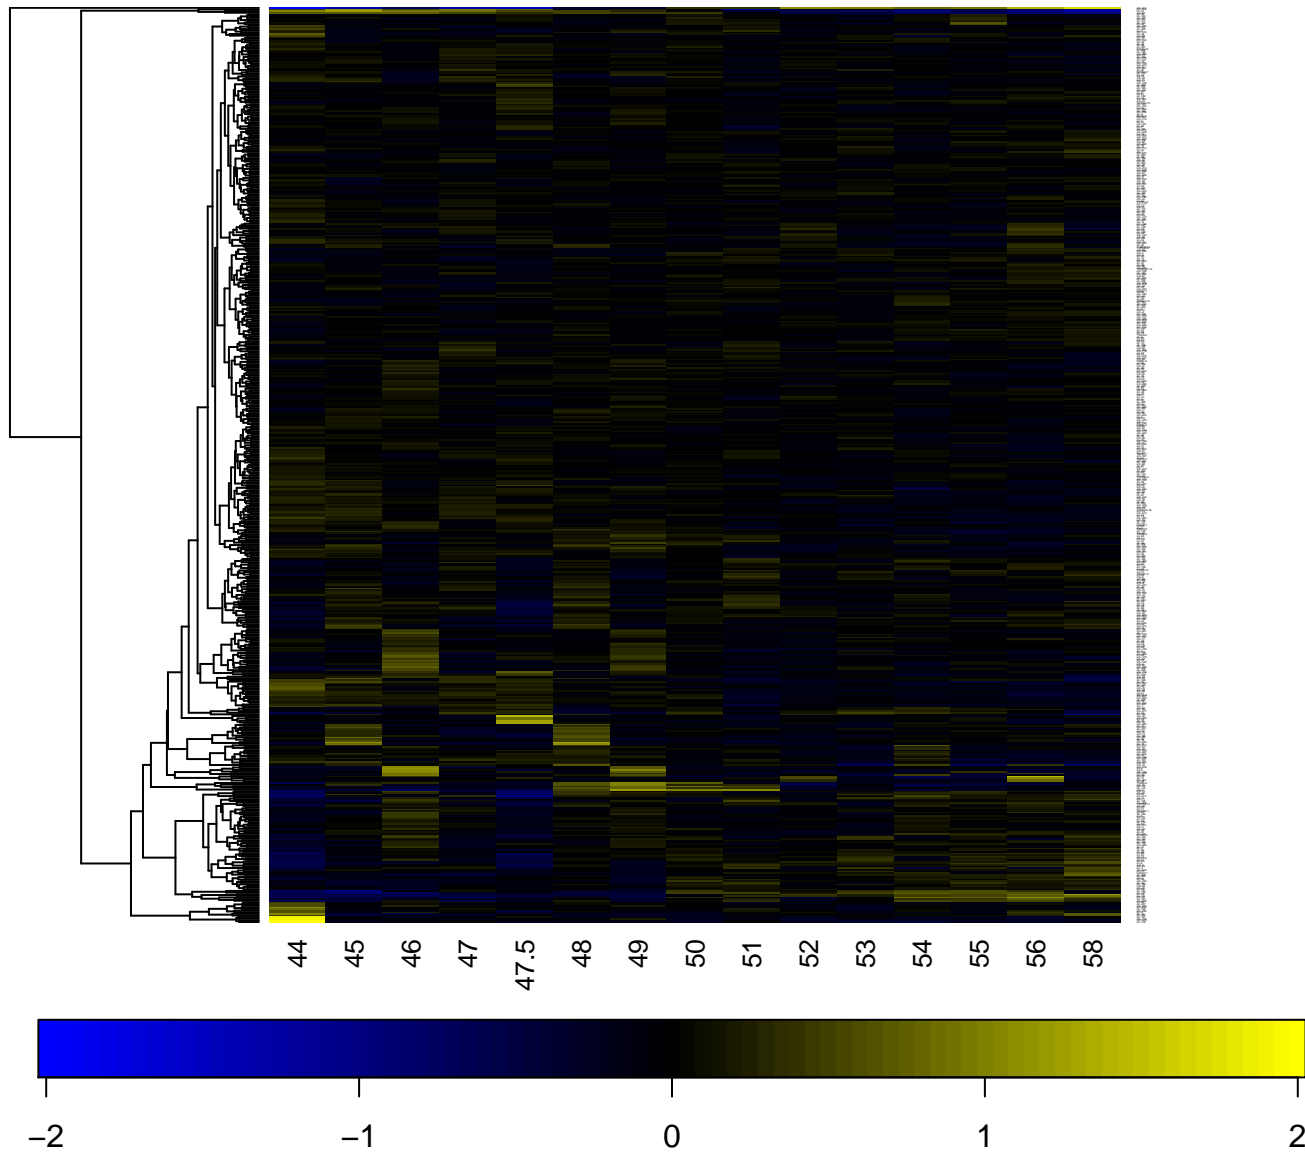

# Serpentine type 7TM GPCR chemoreceptor Sri

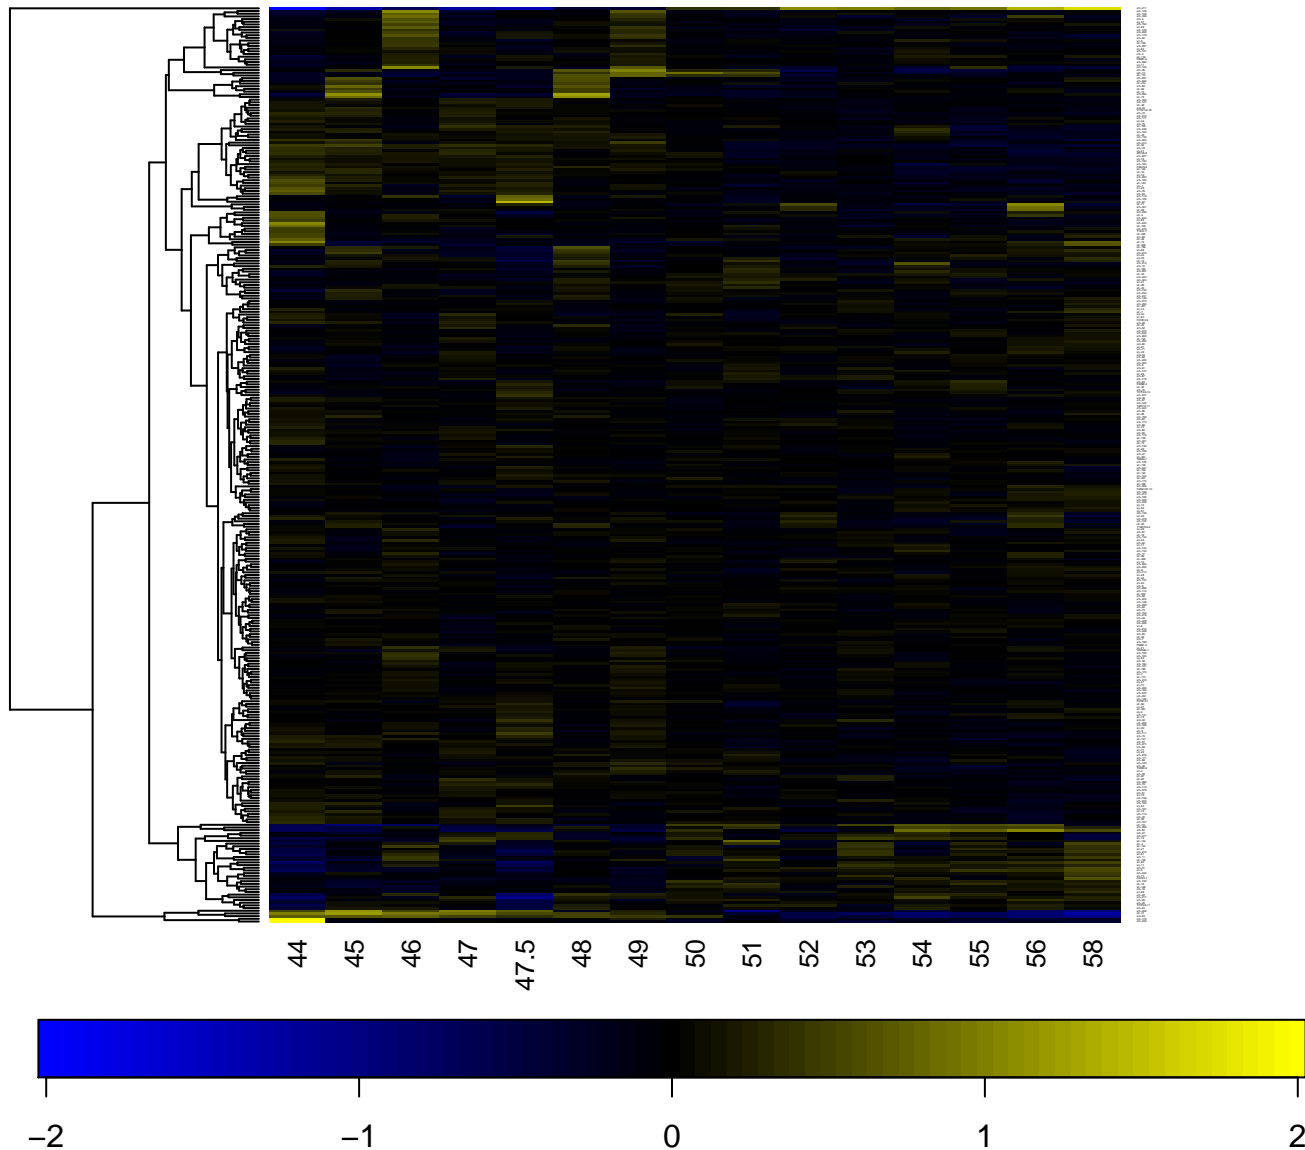



# Serpentine type 7TM GPCR chemoreceptor Srj



# Serpentine type 7TM GPCR chemoreceptor Srsx

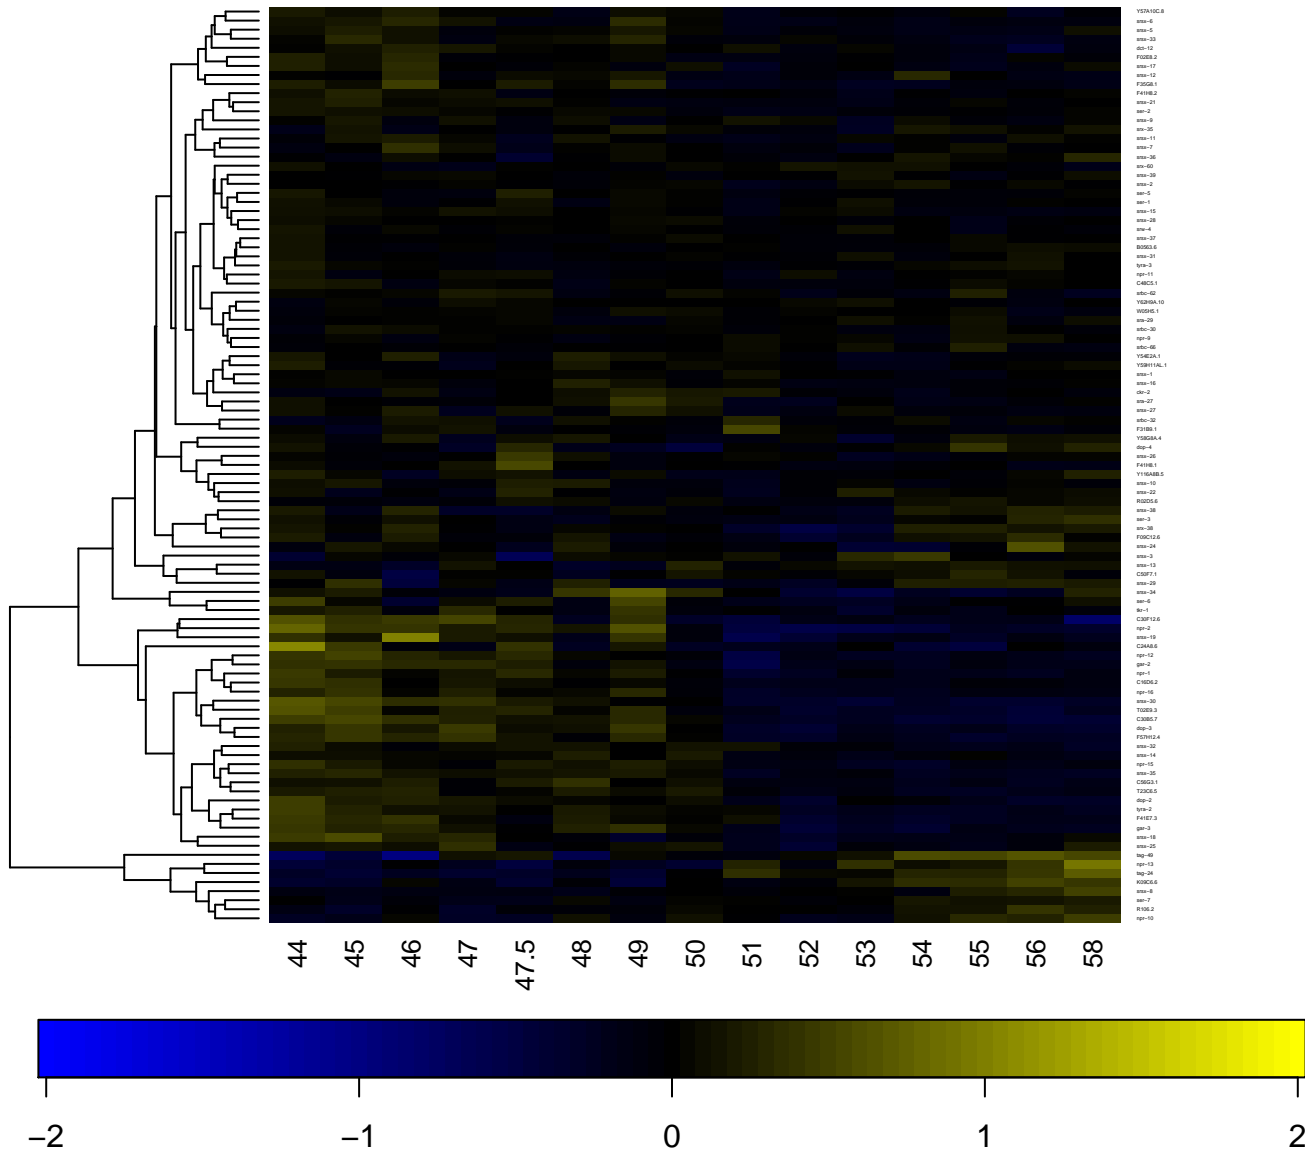

# Serpentine type 7TM GPCR chemoreceptor Srt

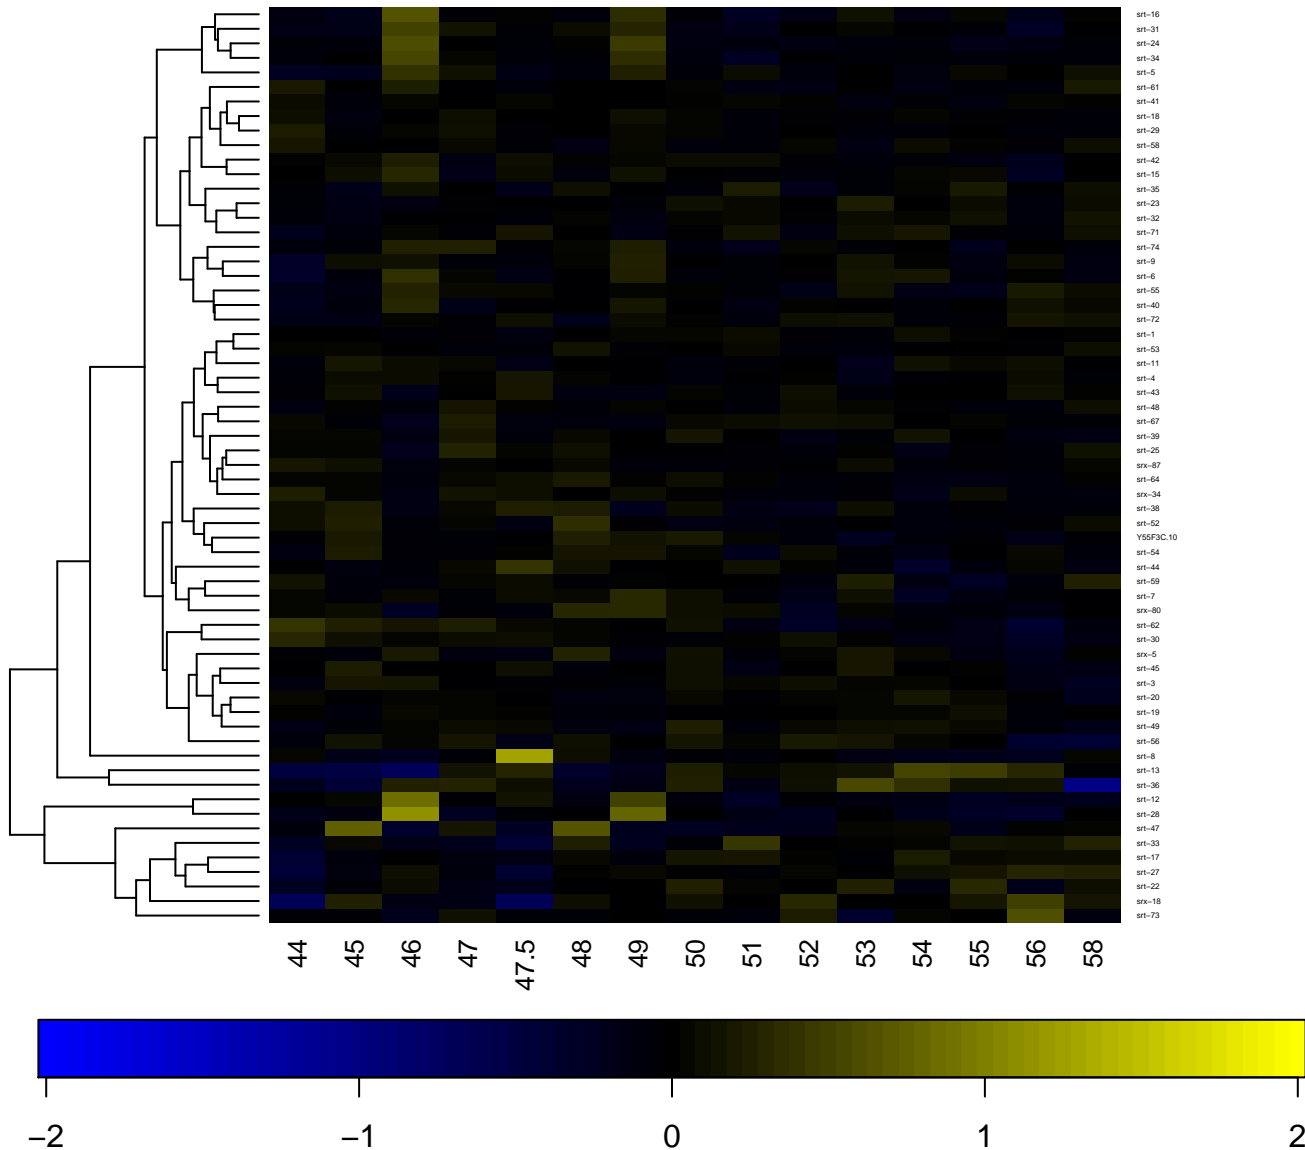

# Serpentine type 7TM GPCR chemoreceptor *Sru*

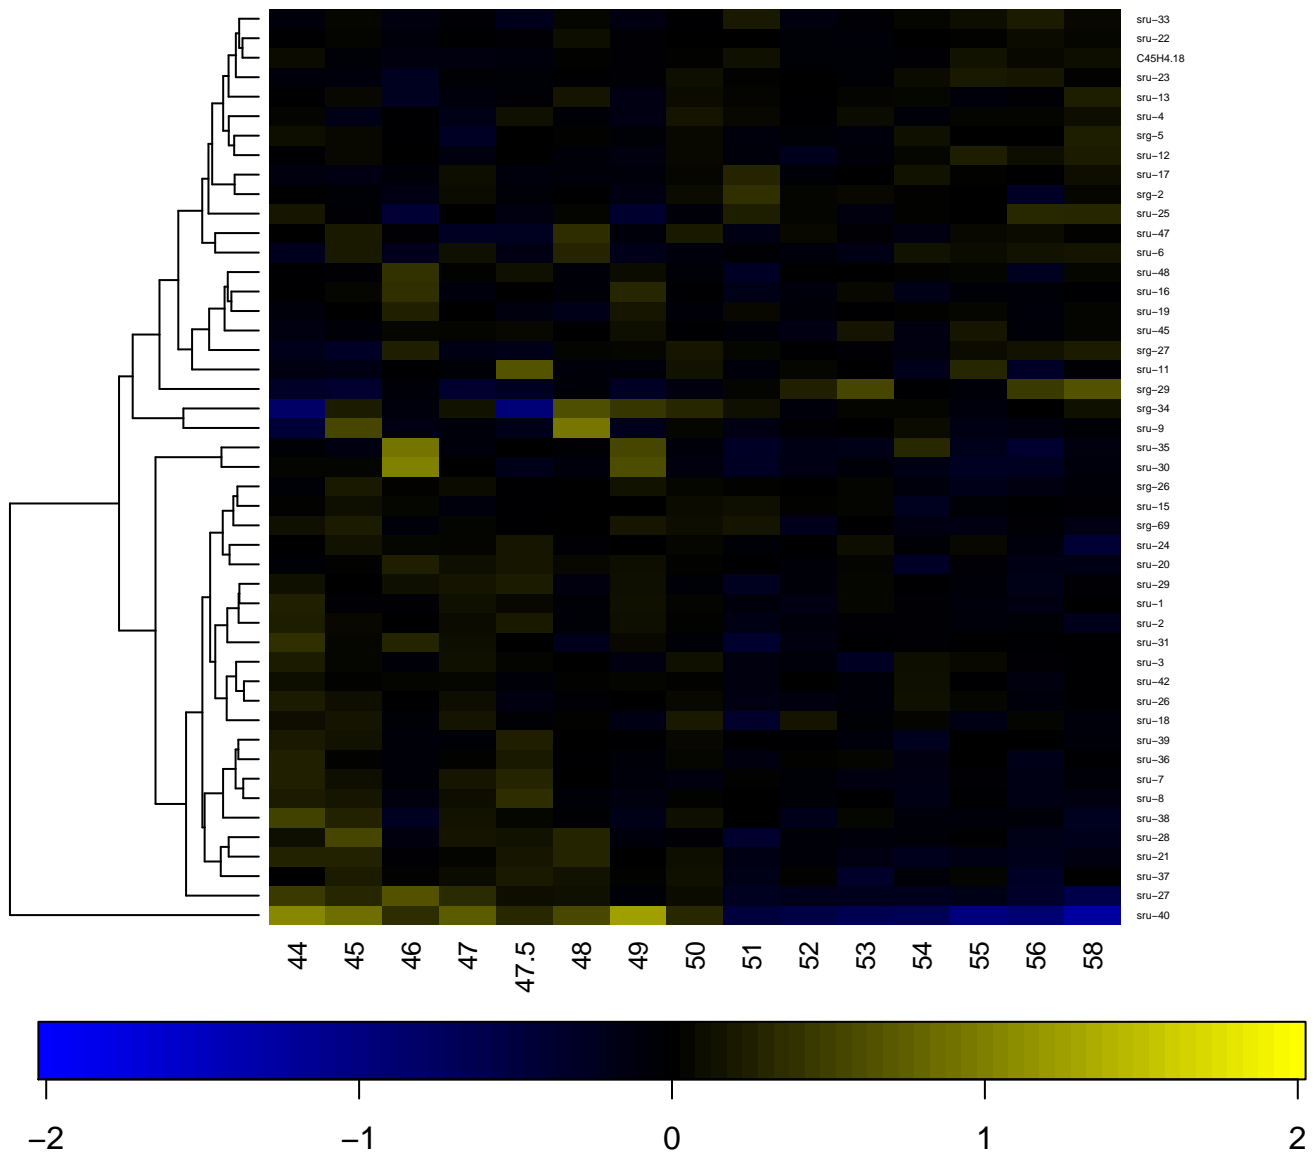

# Serpentine type 7TM GPCR chemoreceptor Srv

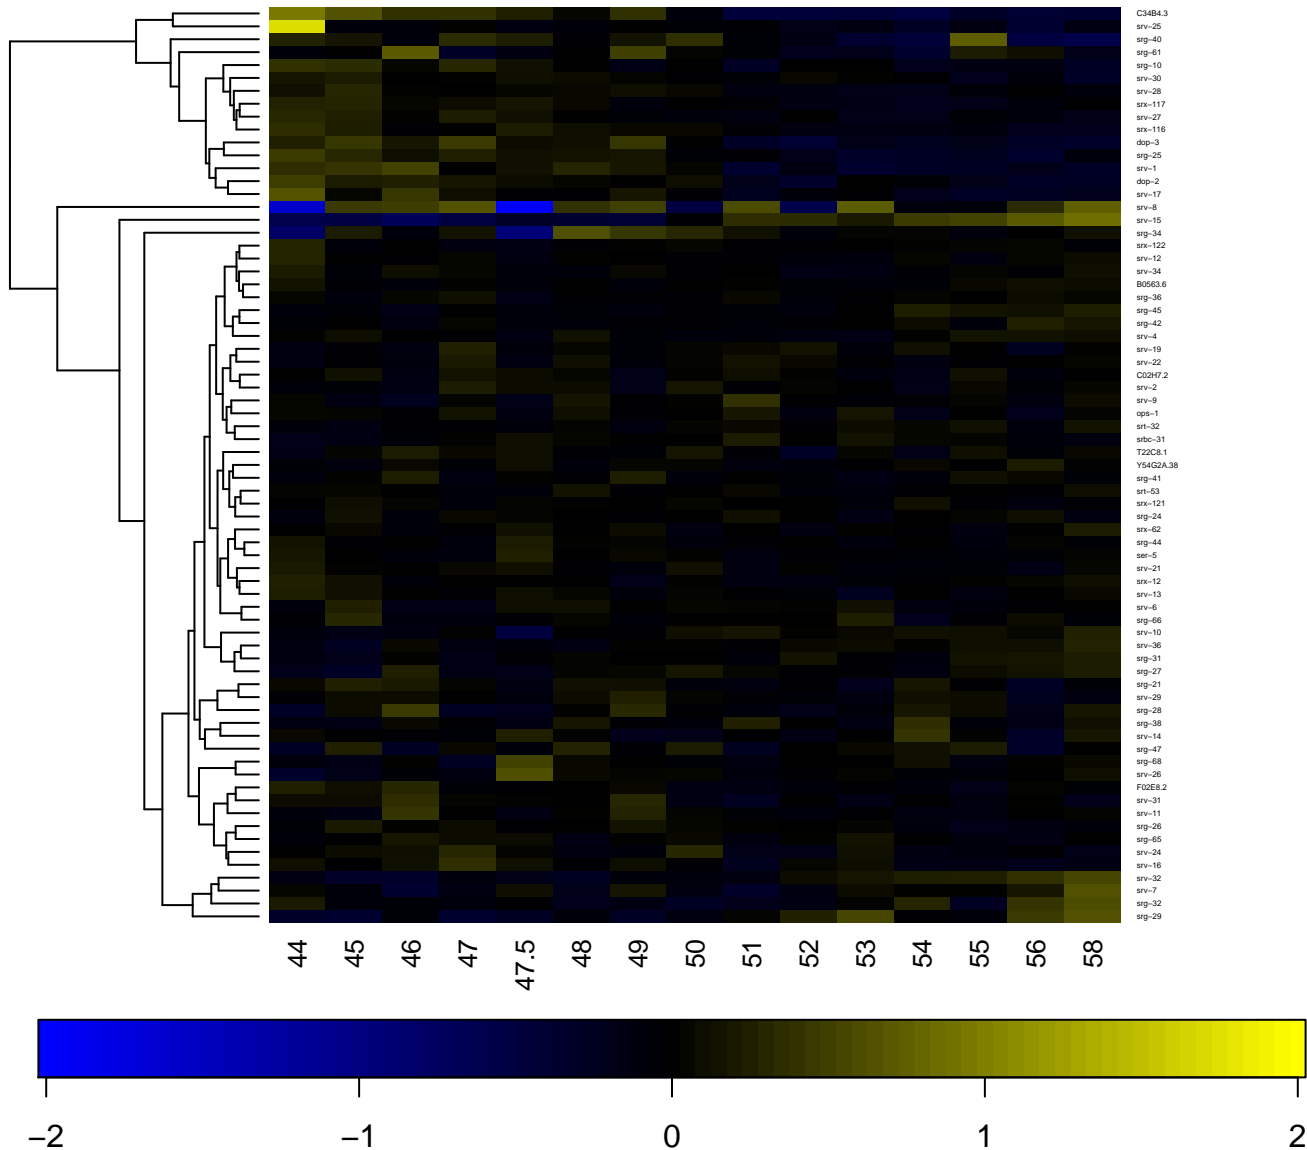

# Serpentine type 7TM GPCR chemoreceptor Srw

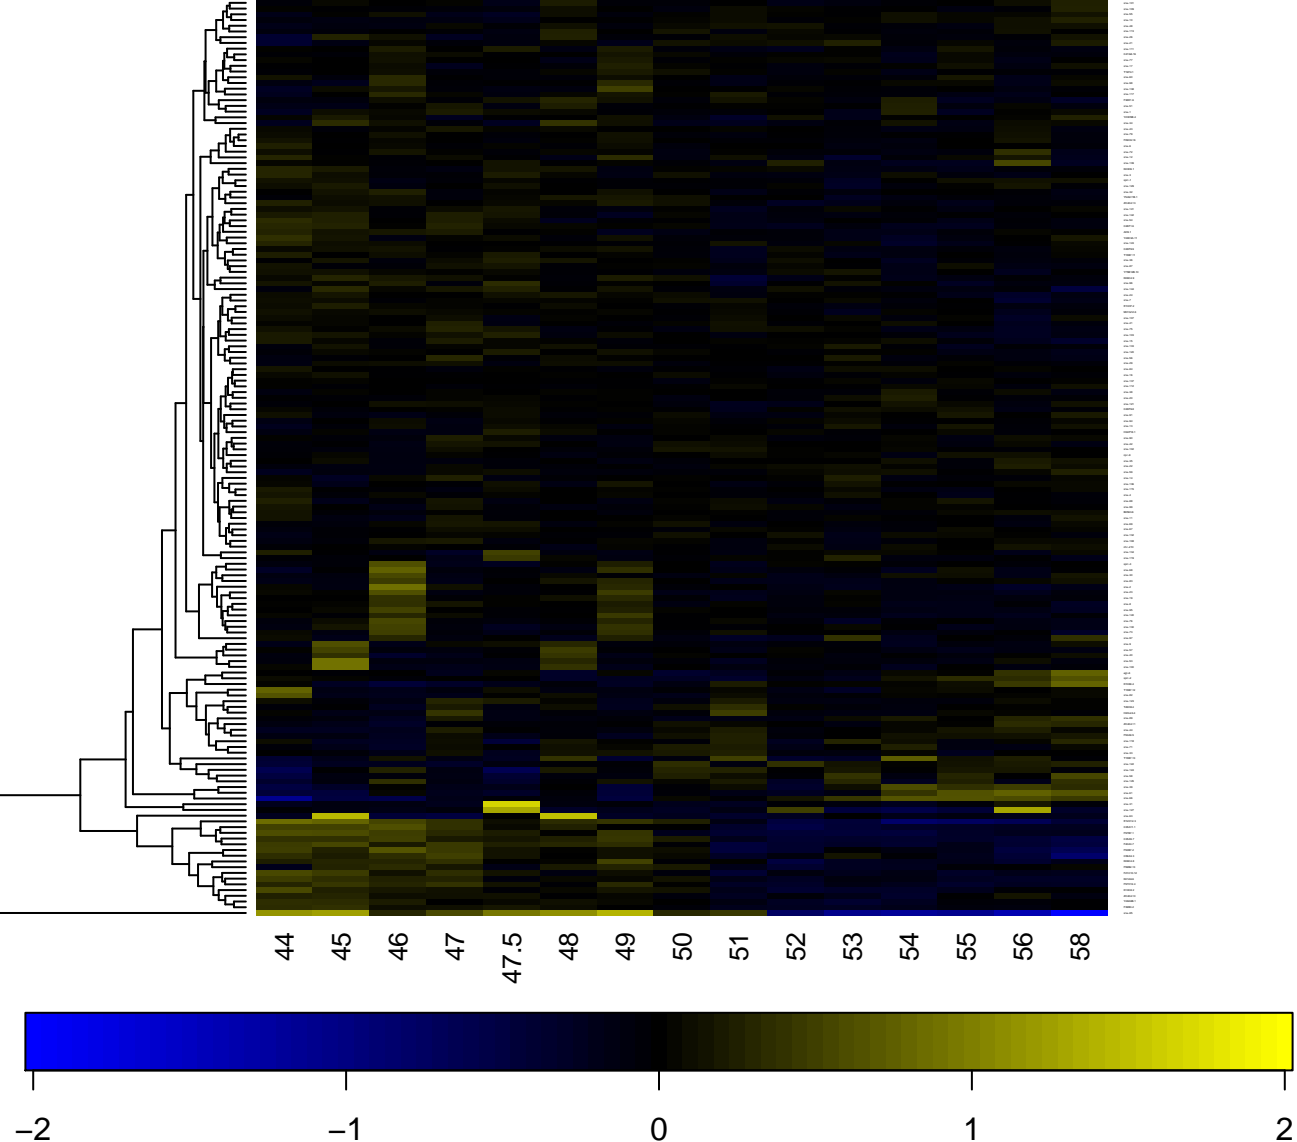

# Serpentine type 7TM GPCR chemoreceptor Srx

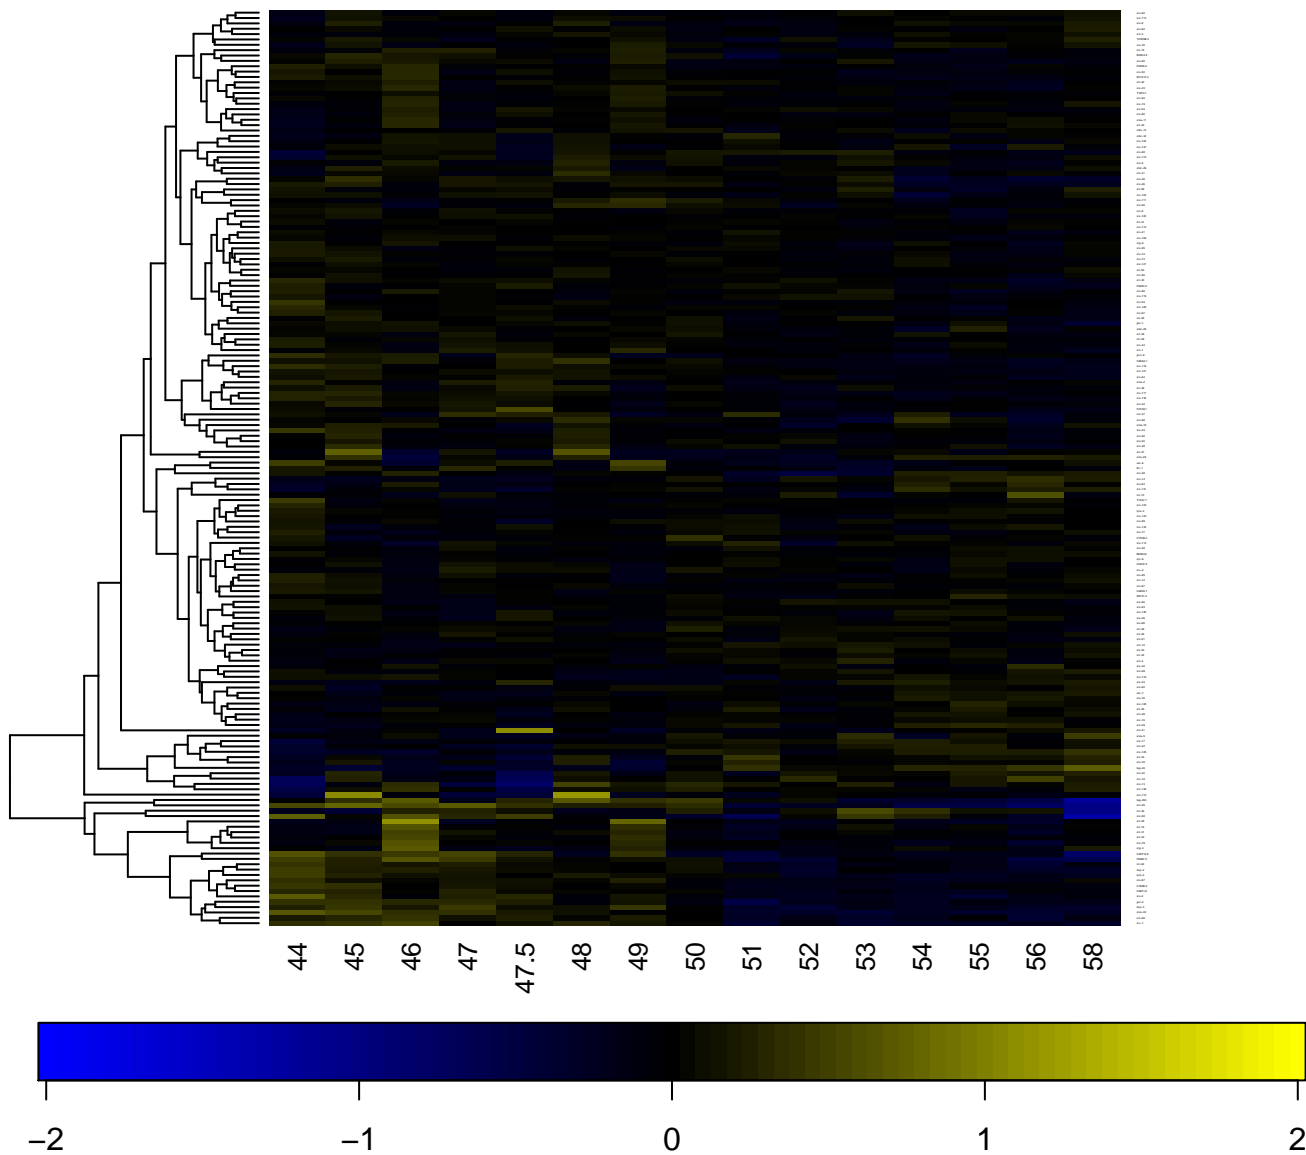

# Serpentine type 7TM GPCR chemoreceptor Srz



-2

-1

0

1

2



# Serpentine type 7TM GPCR chemoreceptor Str

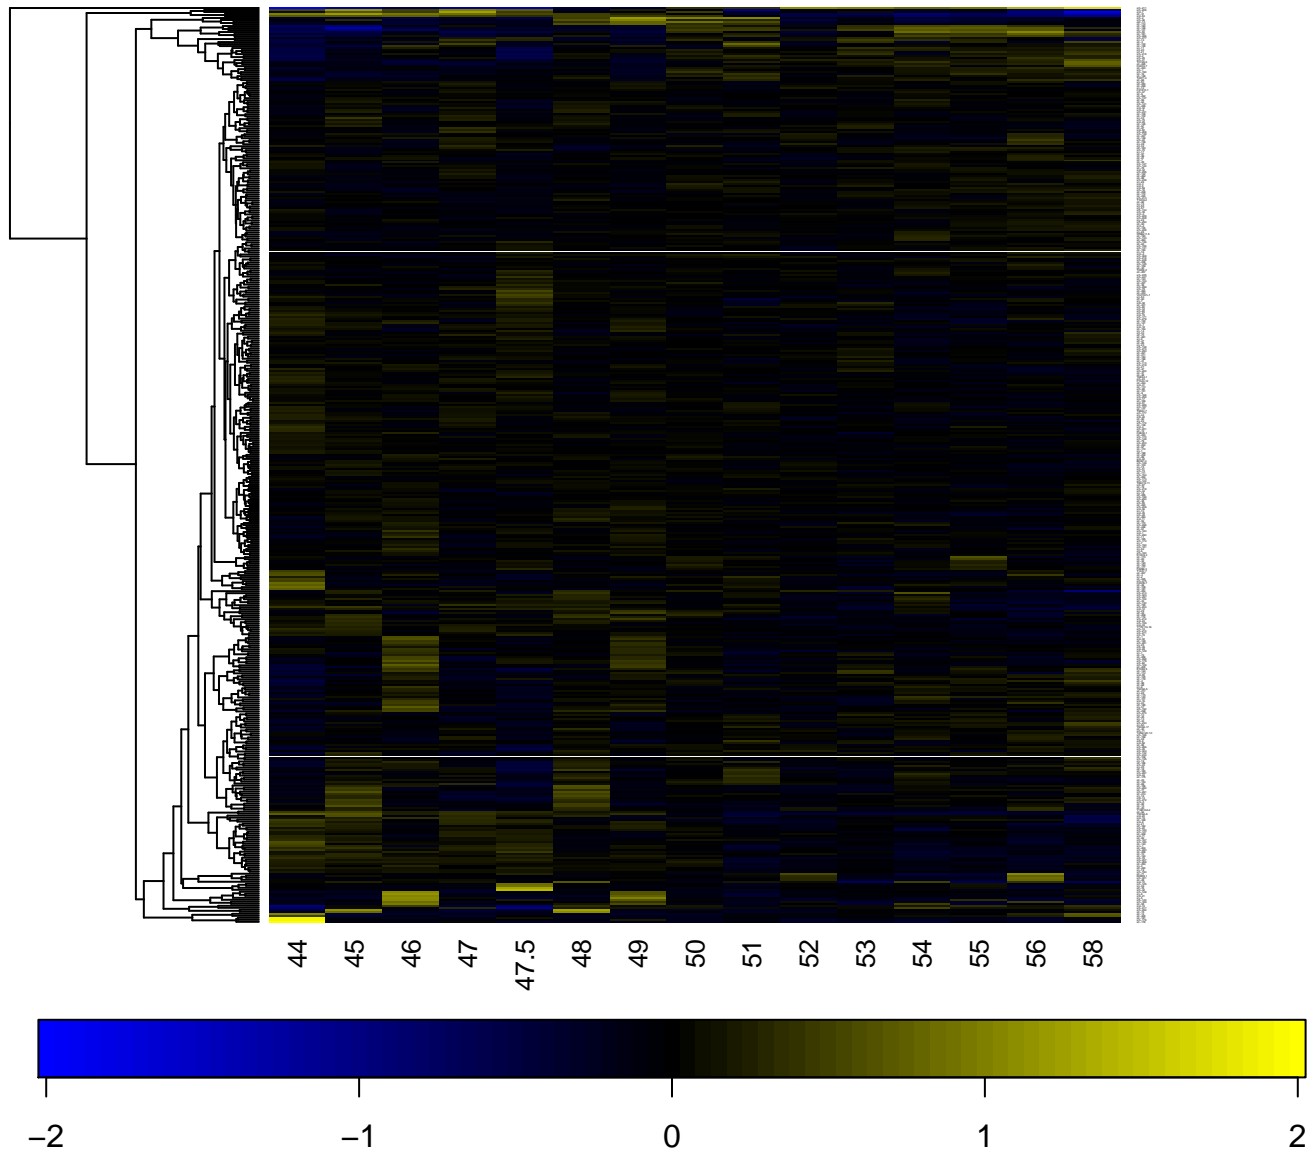





# SET domain

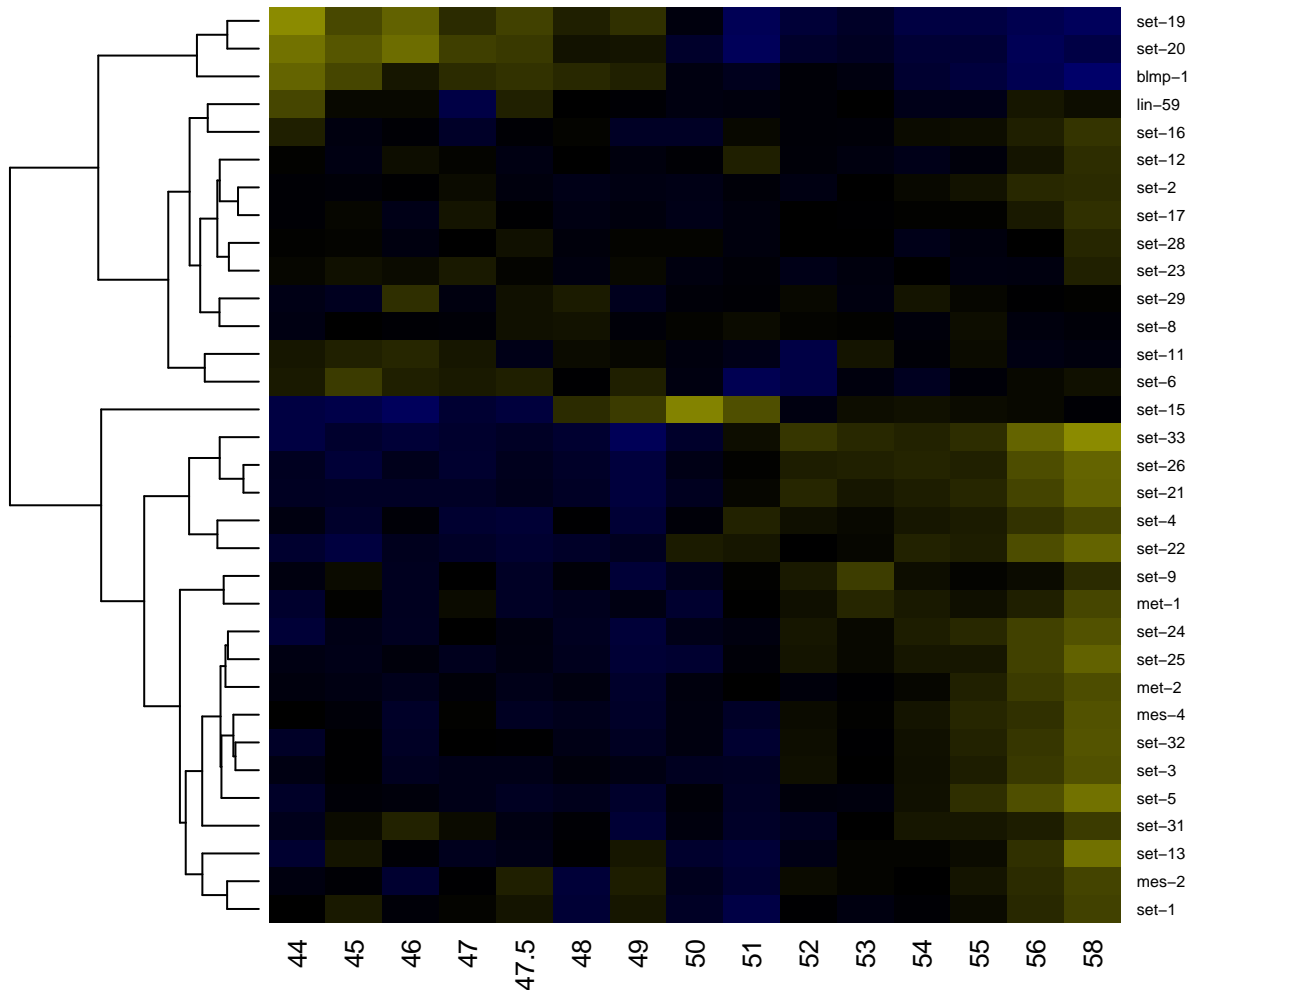

-2

-1

0

1

2

# SH2 domain

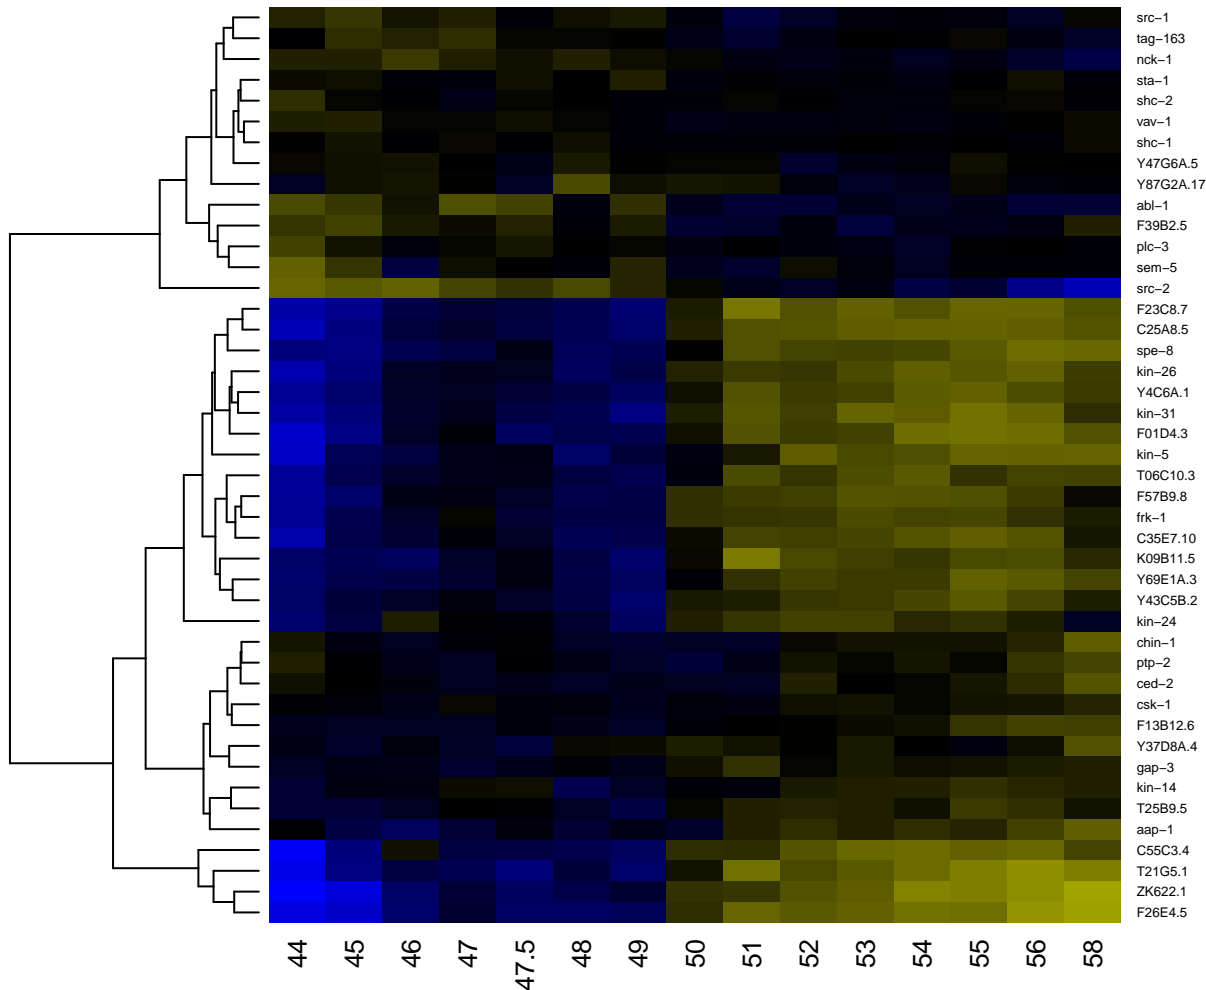

# SH2 motif

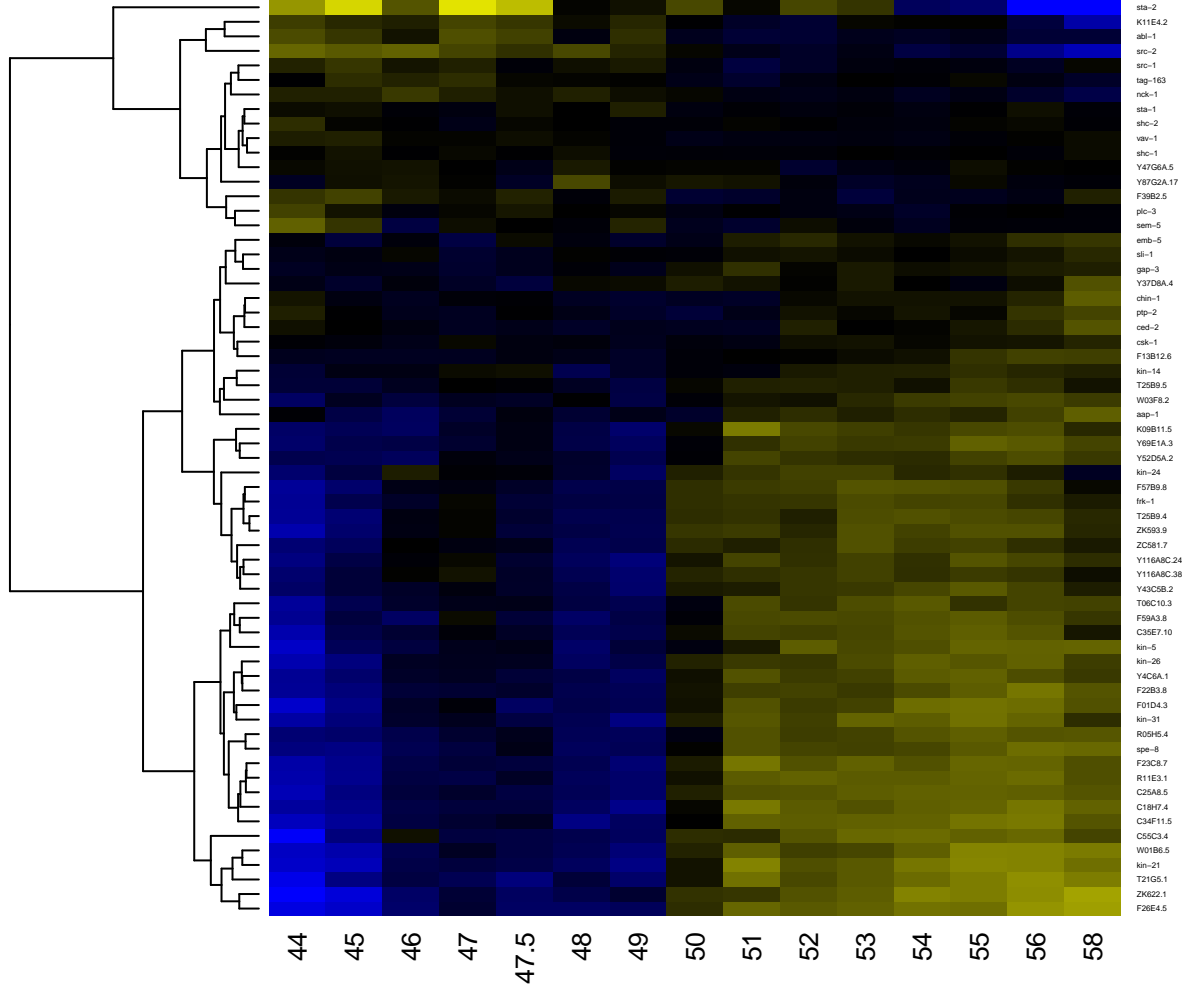

# SH3 domain

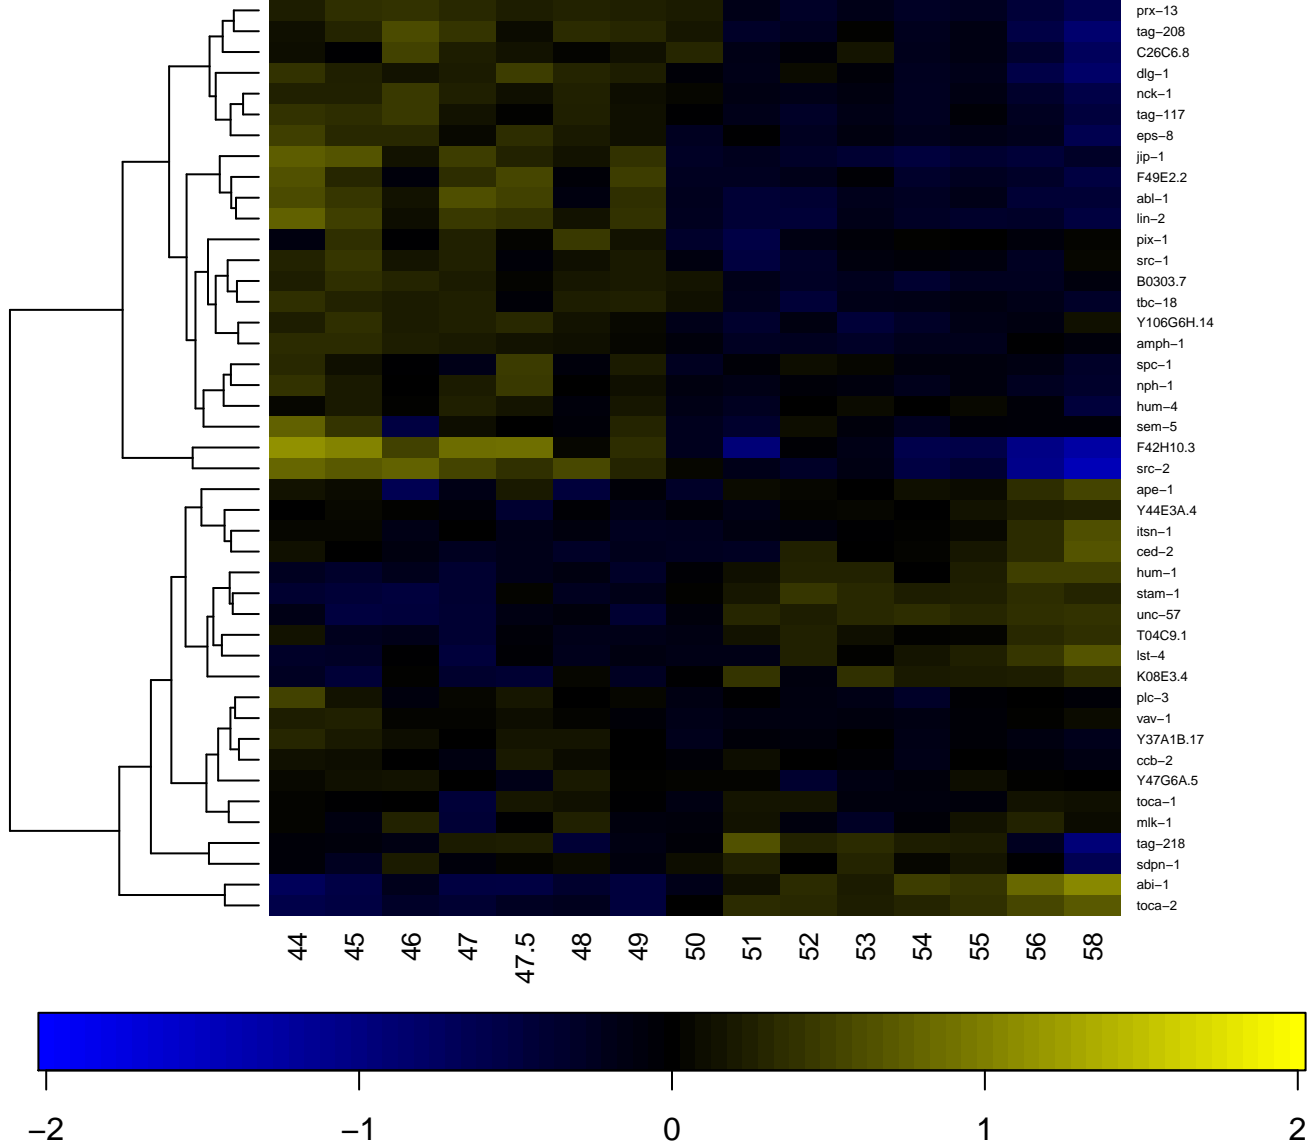

# ShK domain-like

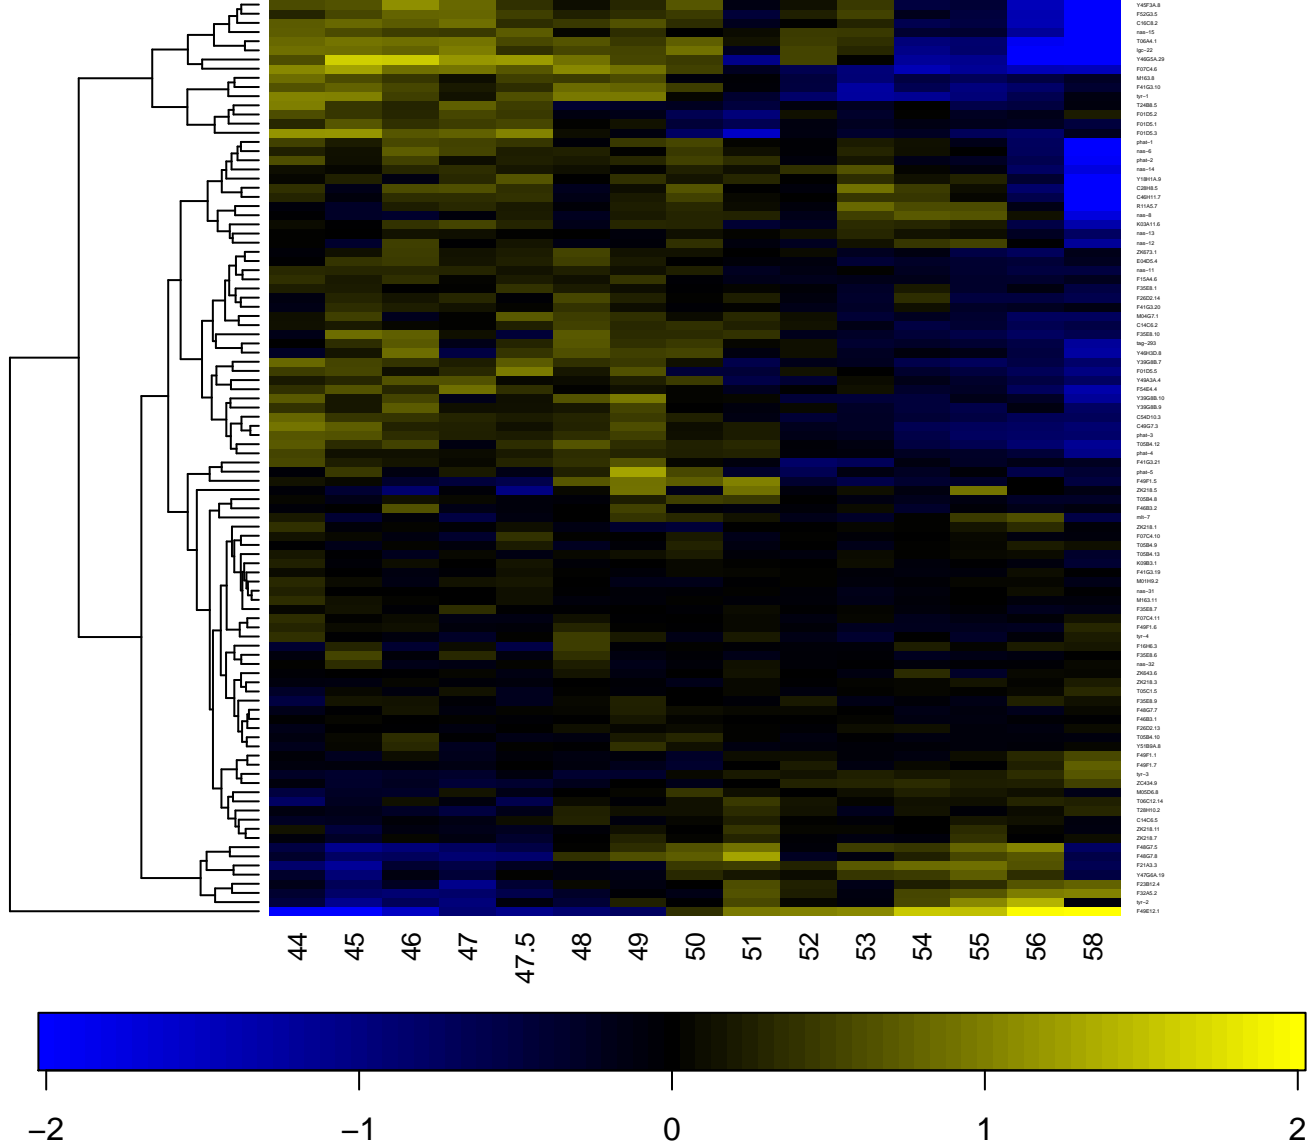



# Short-chain dehydrogenase/reductase SDR

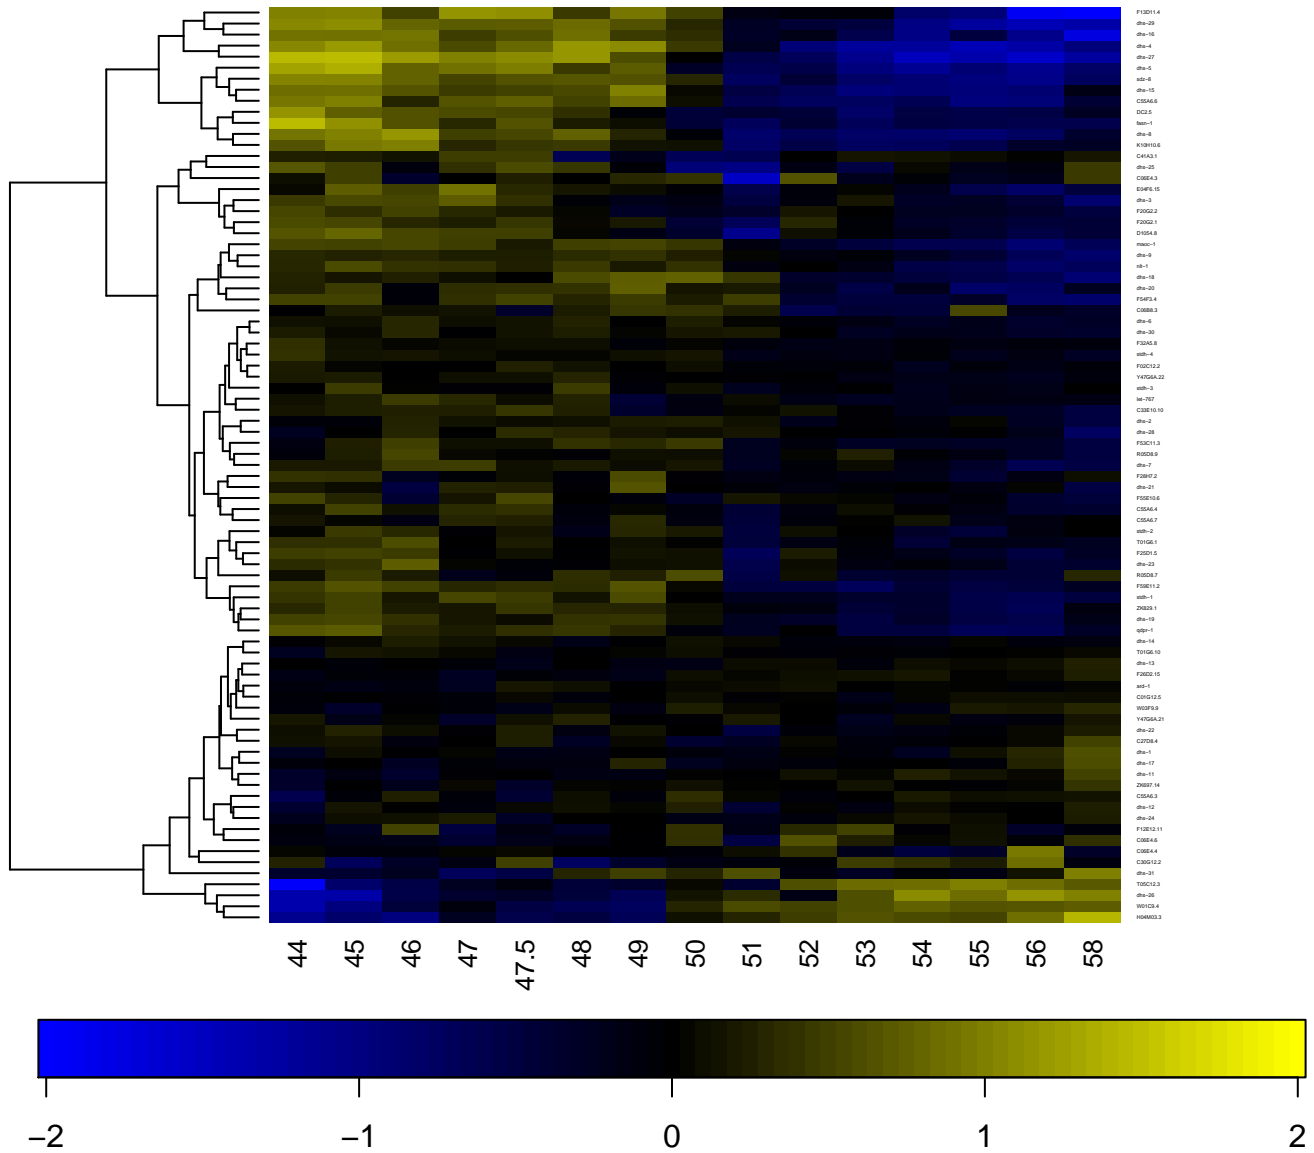

# Short-chain dehydrogenase/reductase, conserved site

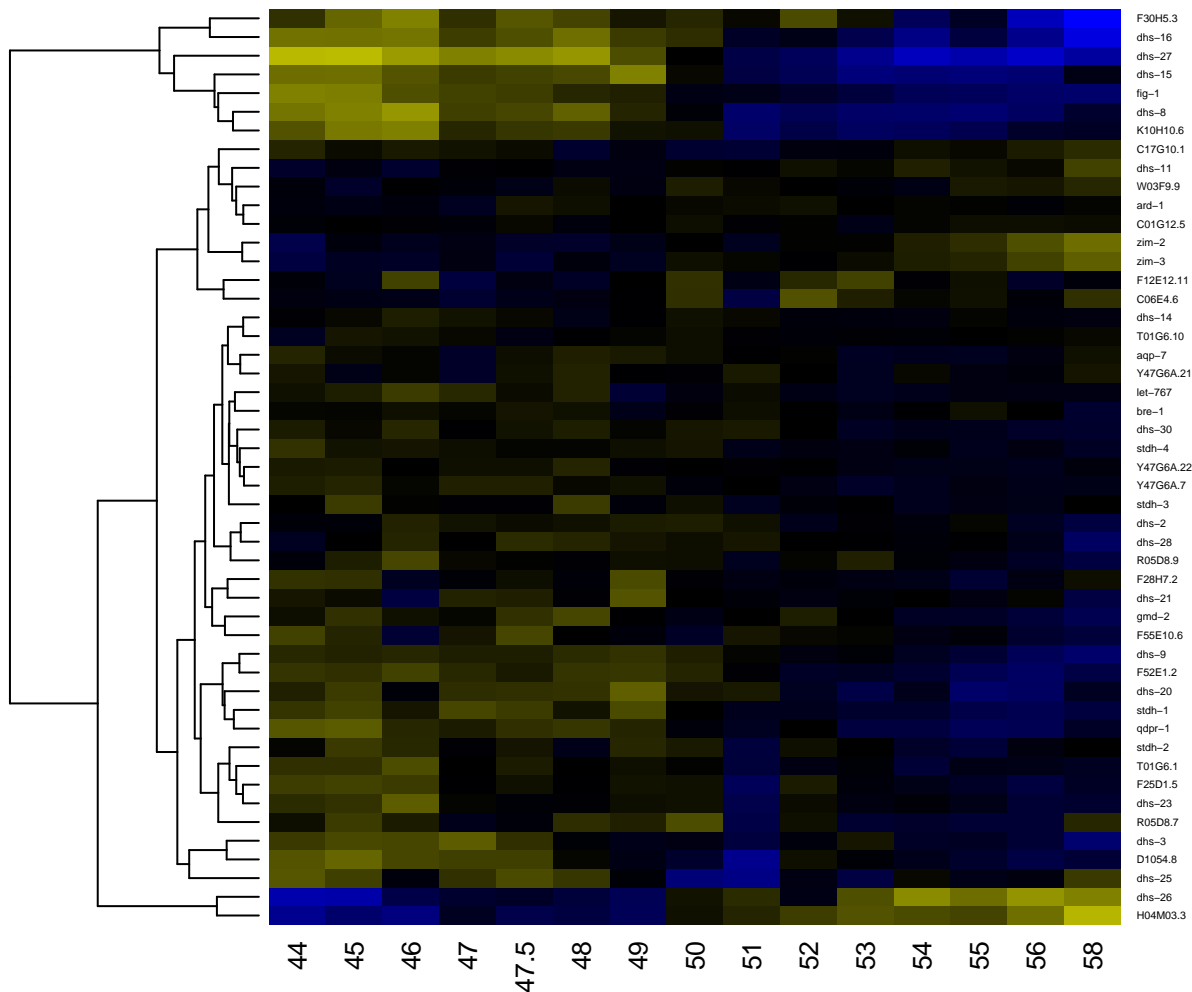

# short chain dehydrogenase

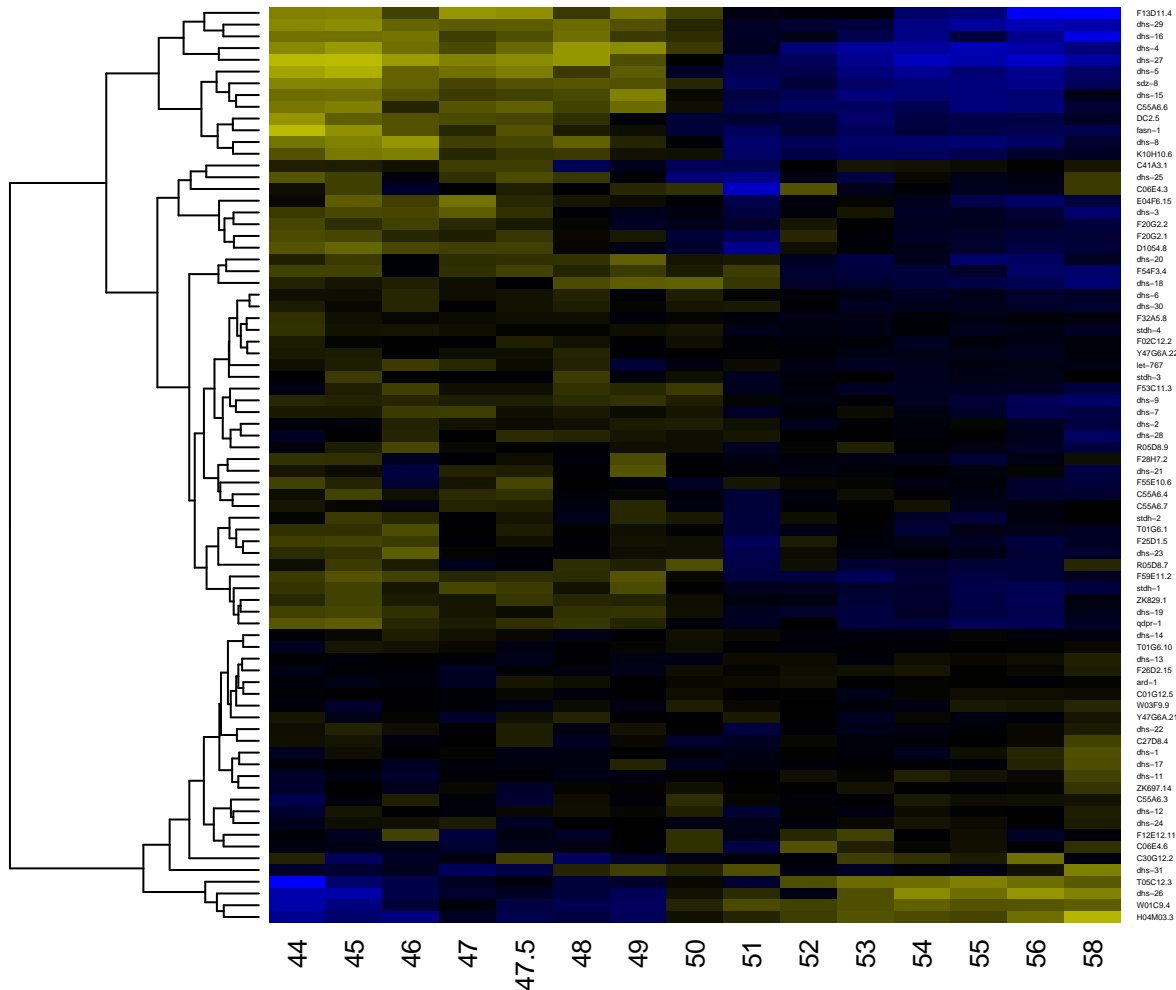

# Signal recognition particle receptor beta subunit

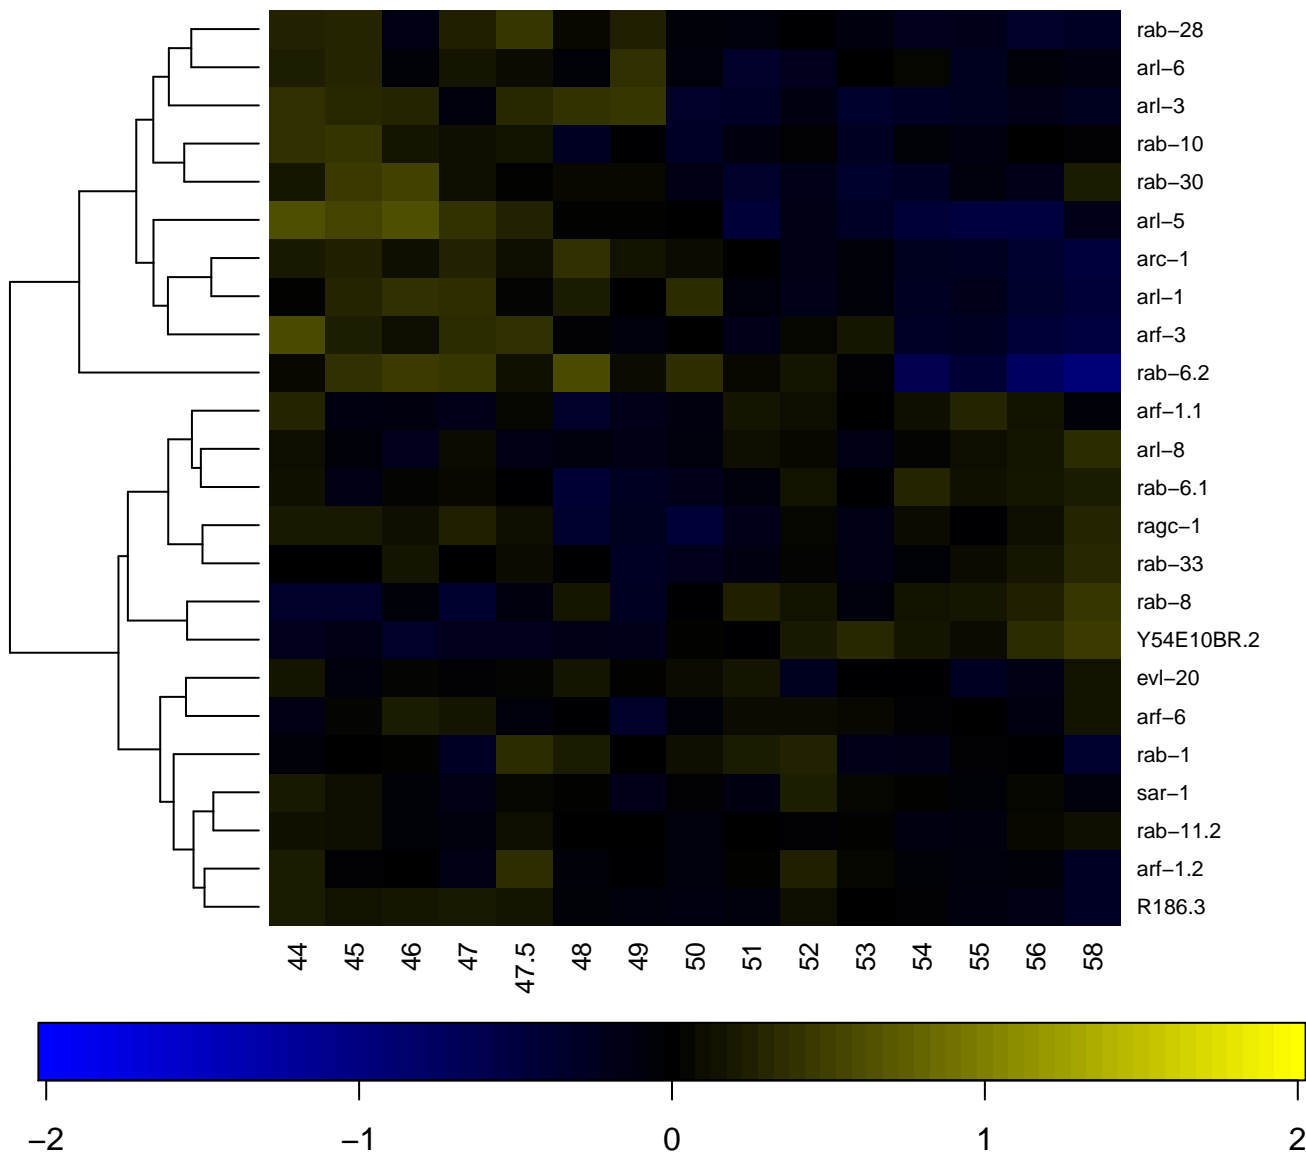

# Signal recognition particle receptor, beta subunit

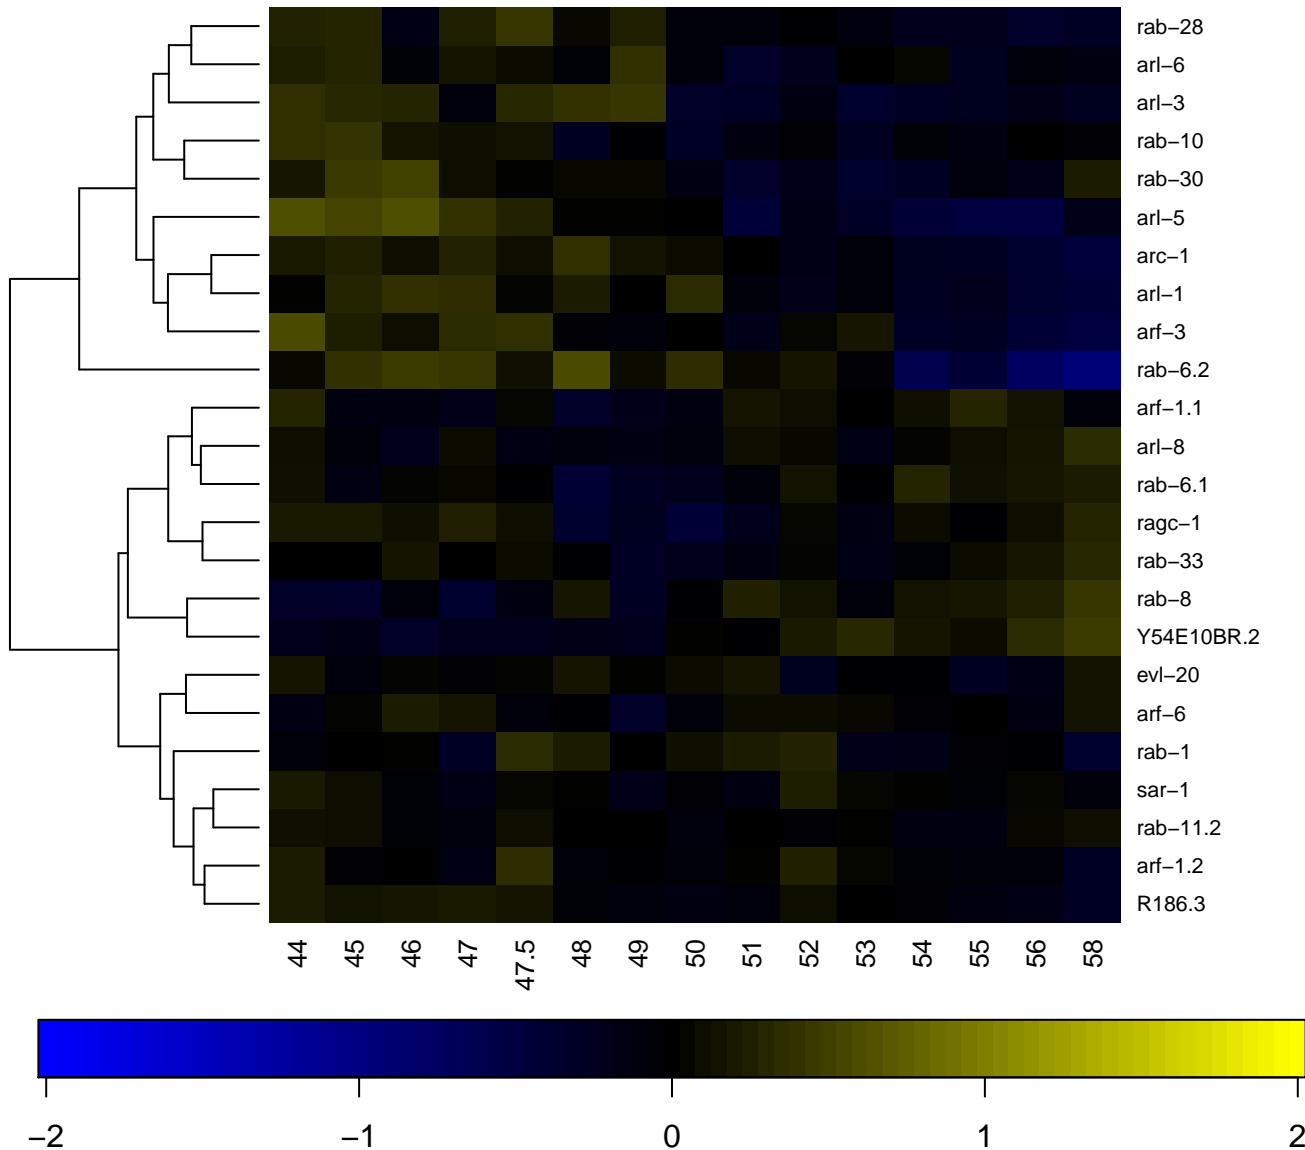

# Six-bladed beta-propeller, TolB-like

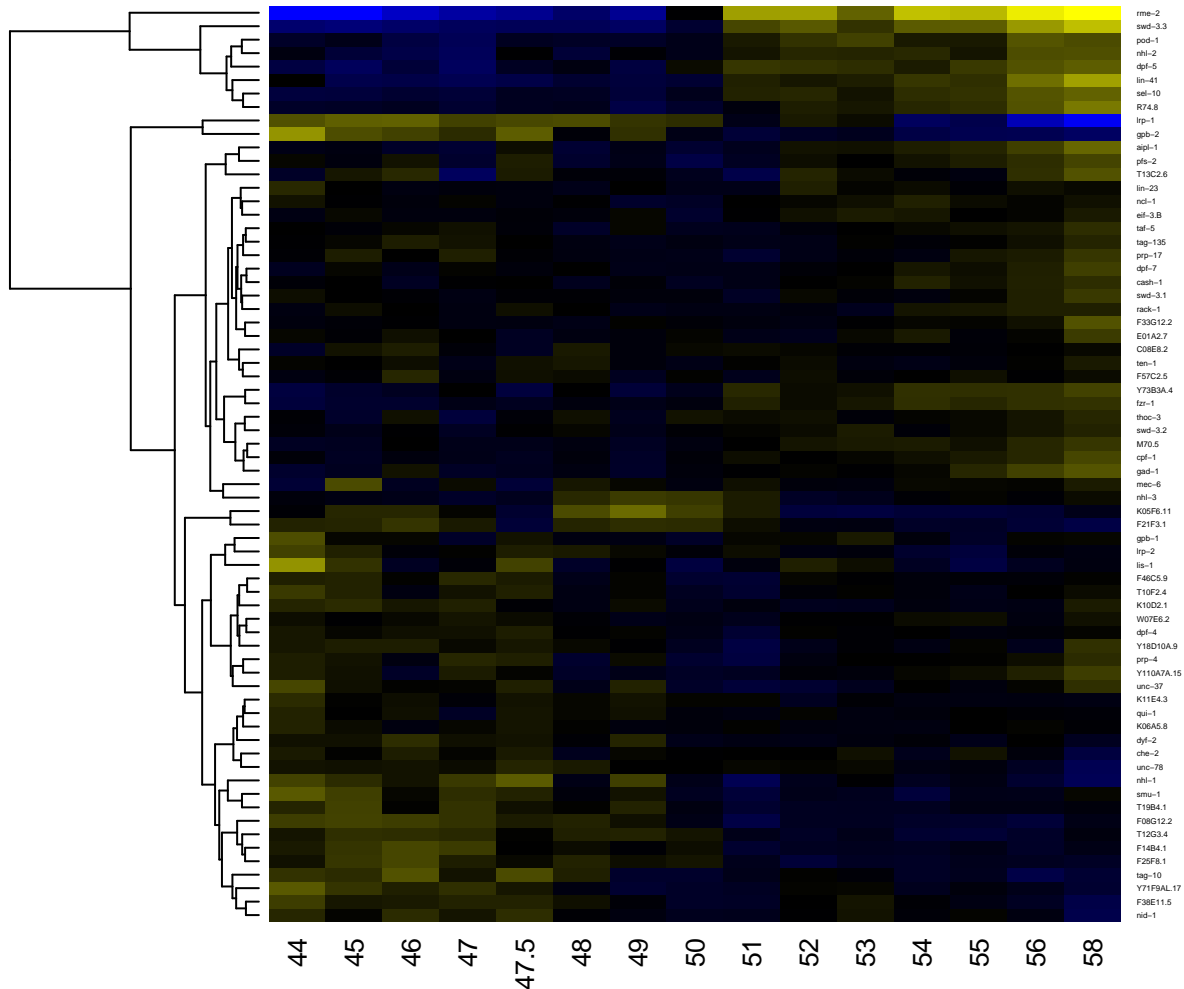

# SKP1 component

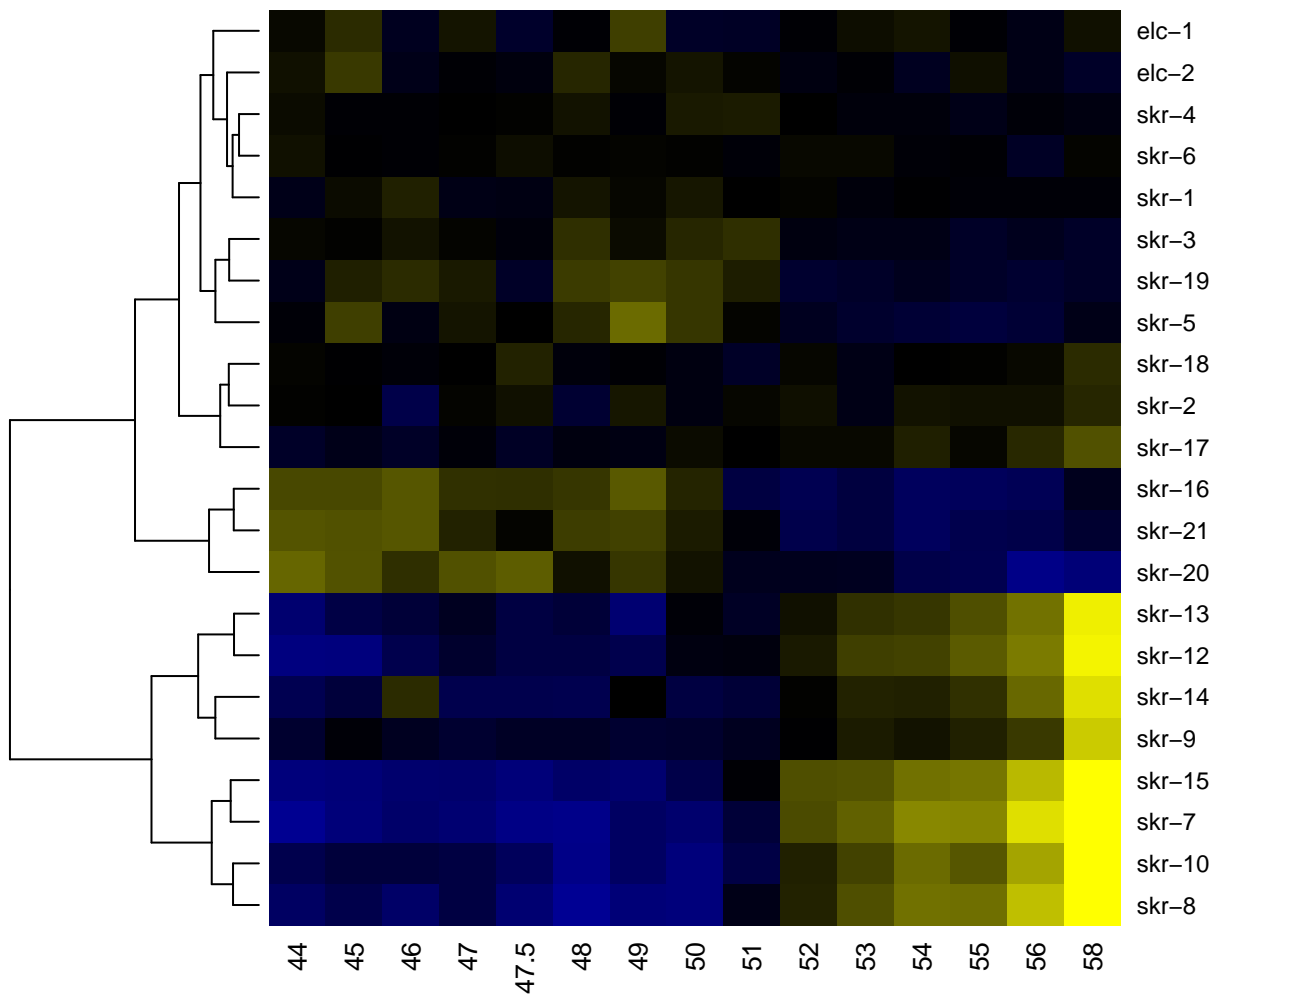











# SMAD domain-like

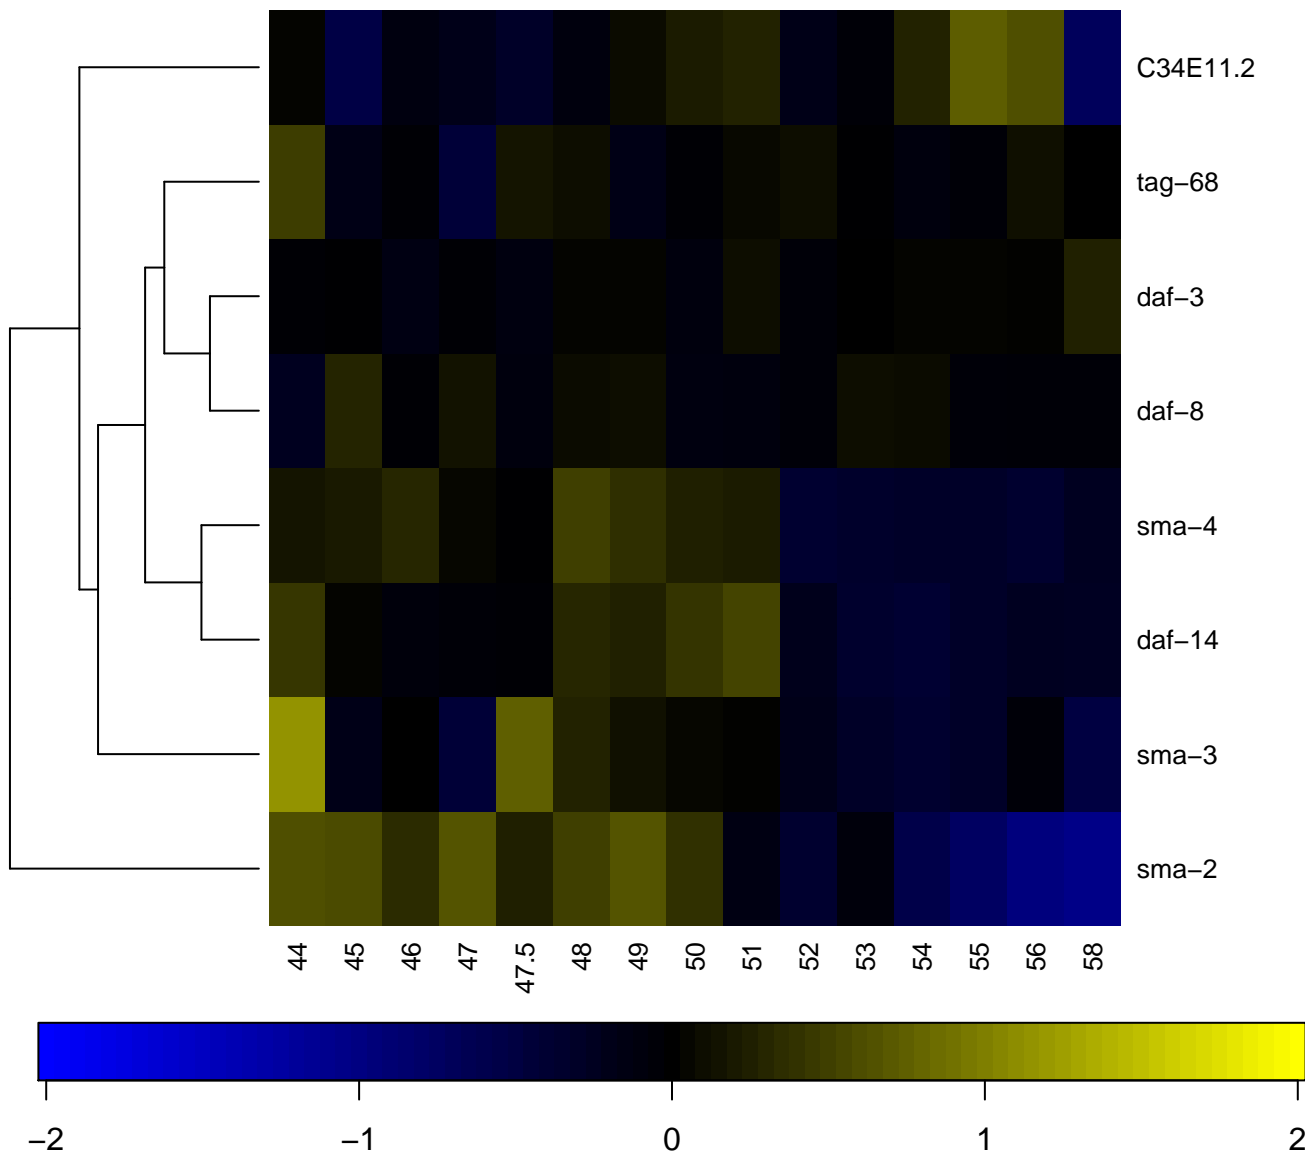

# SMAD domain, Dwarfin-type

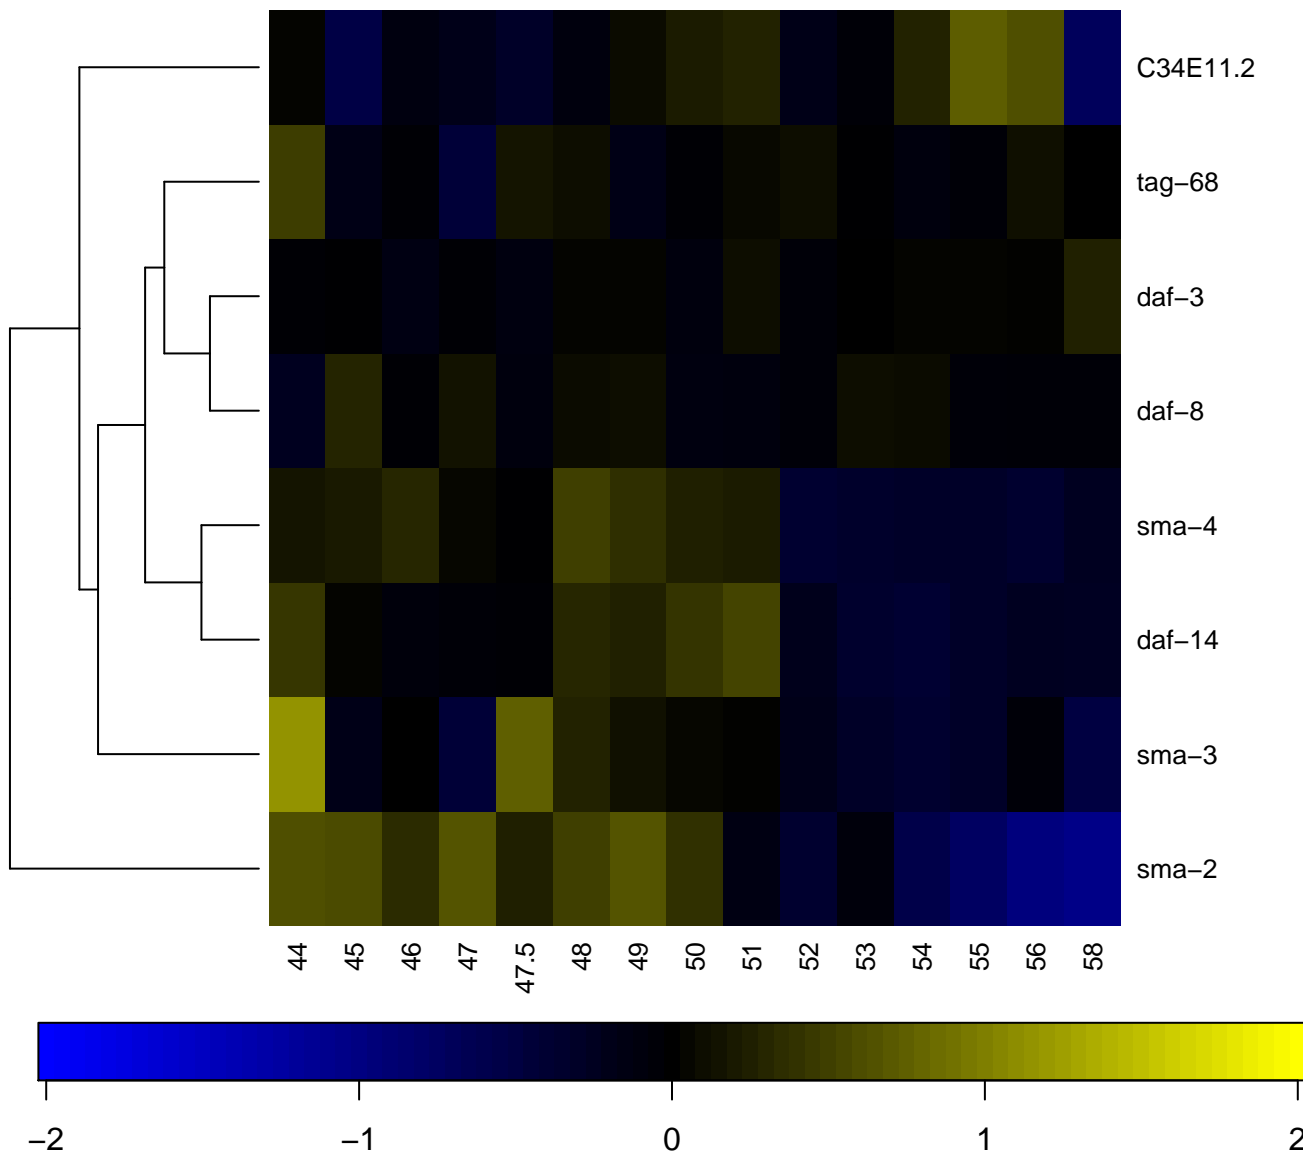

# Small GTP-binding protein

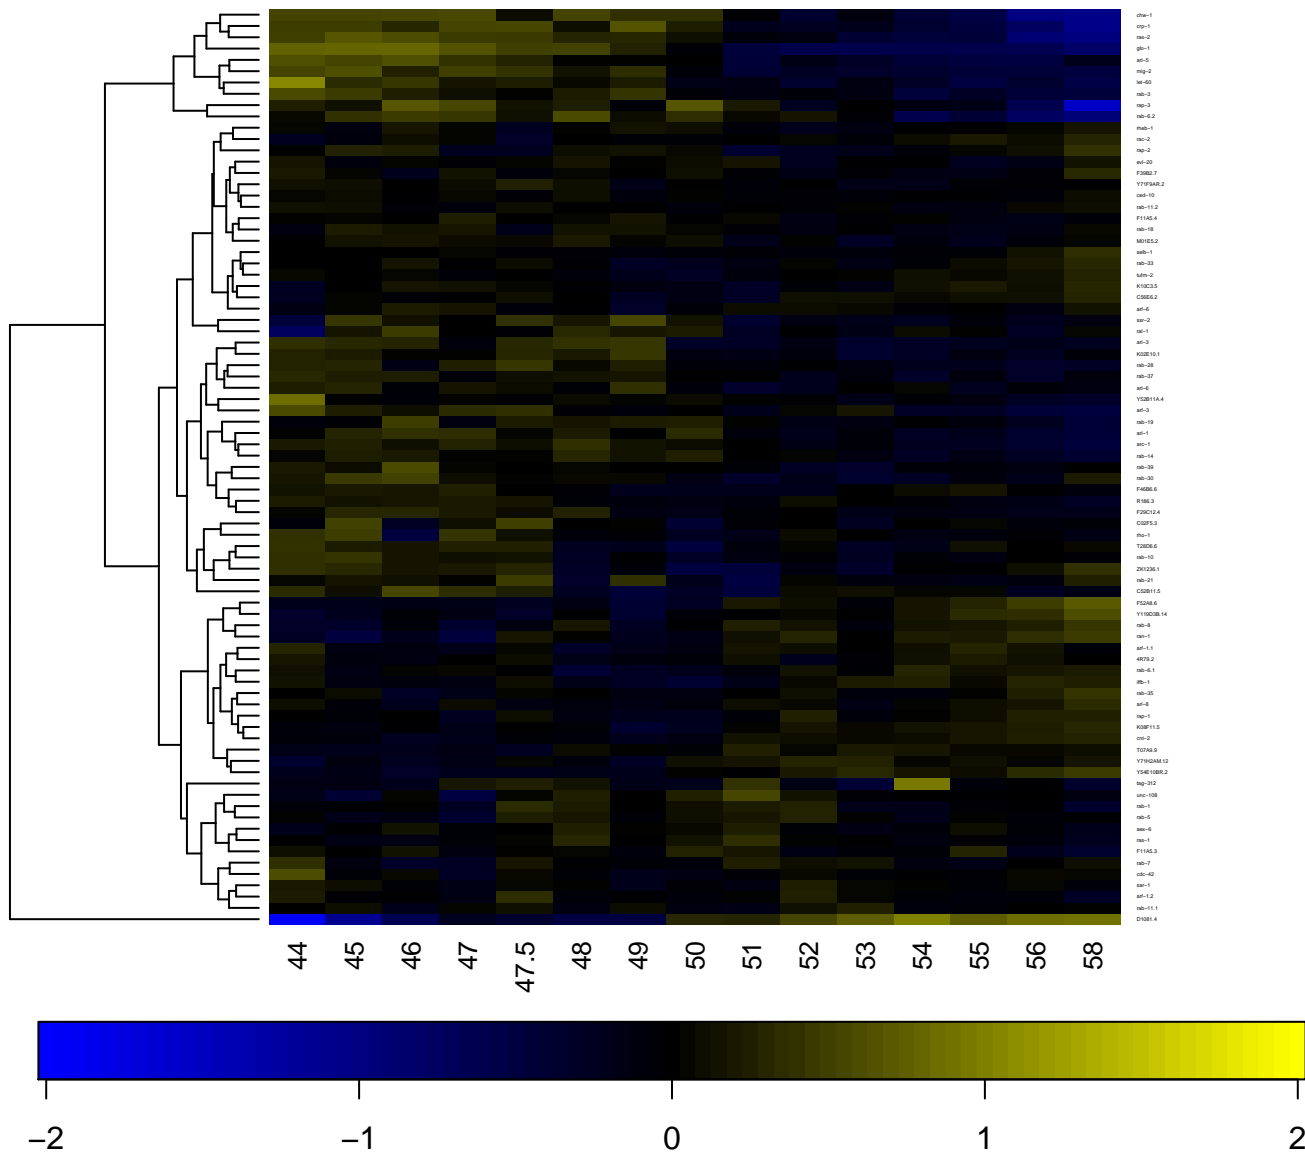

# Small GTPase SAR1-type

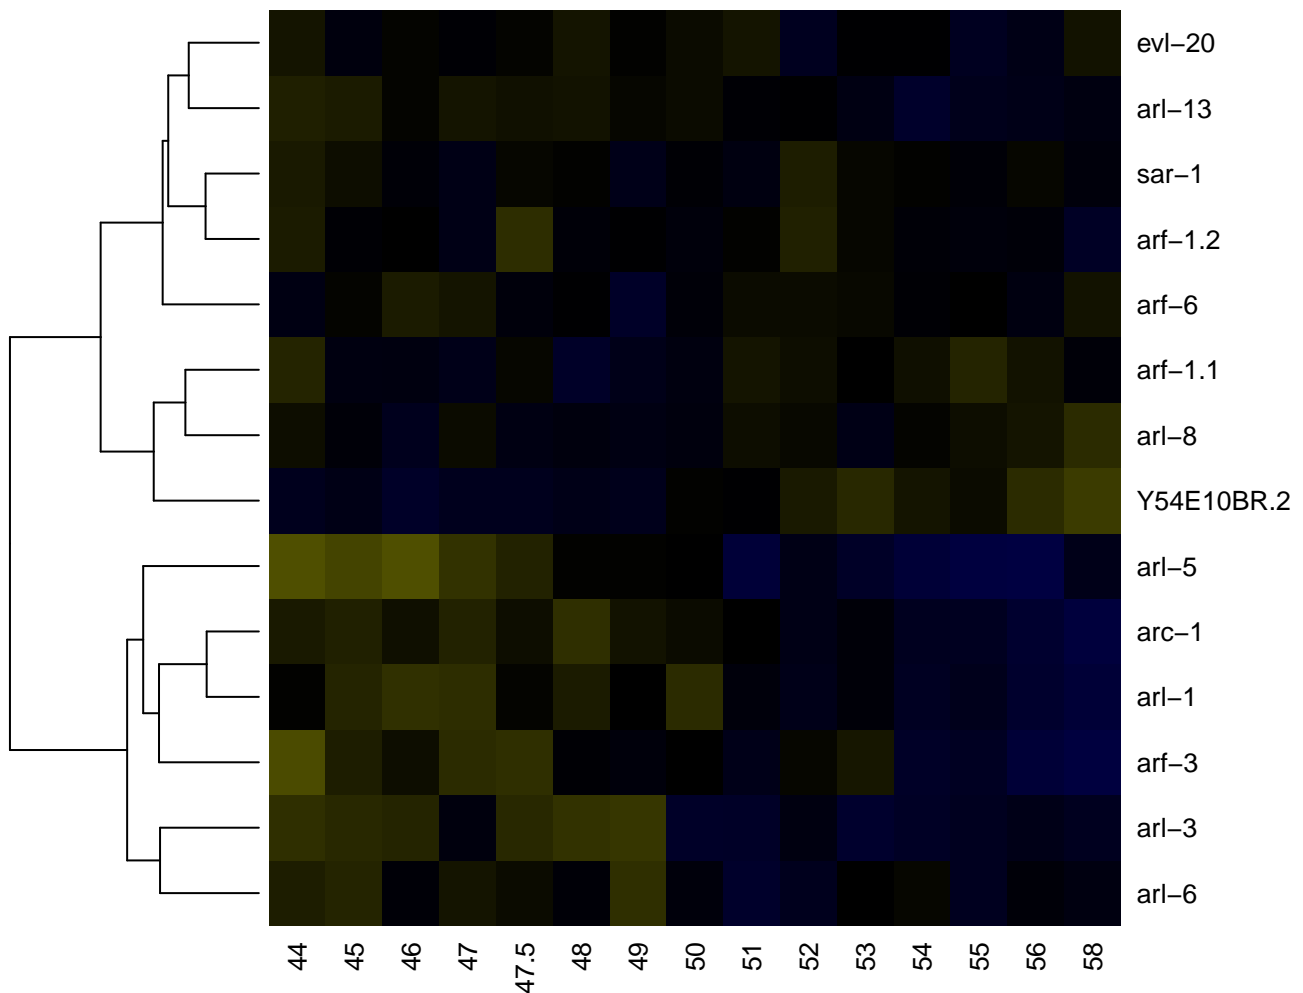

# Small GTPase, Rho type

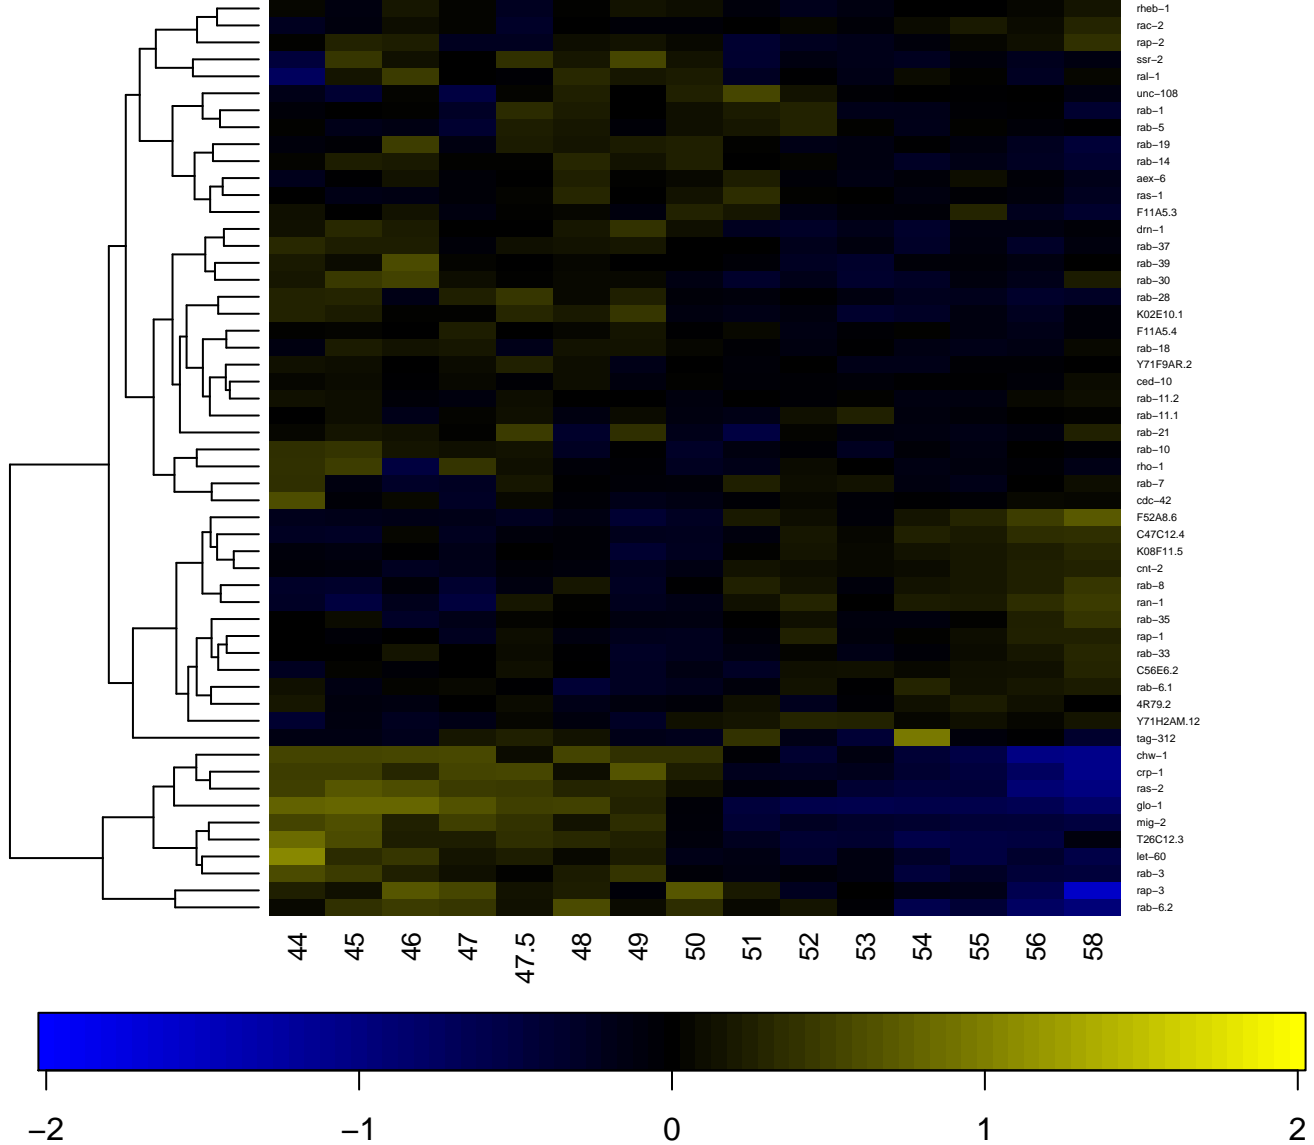







# Smr protein/MutS2 C-terminal

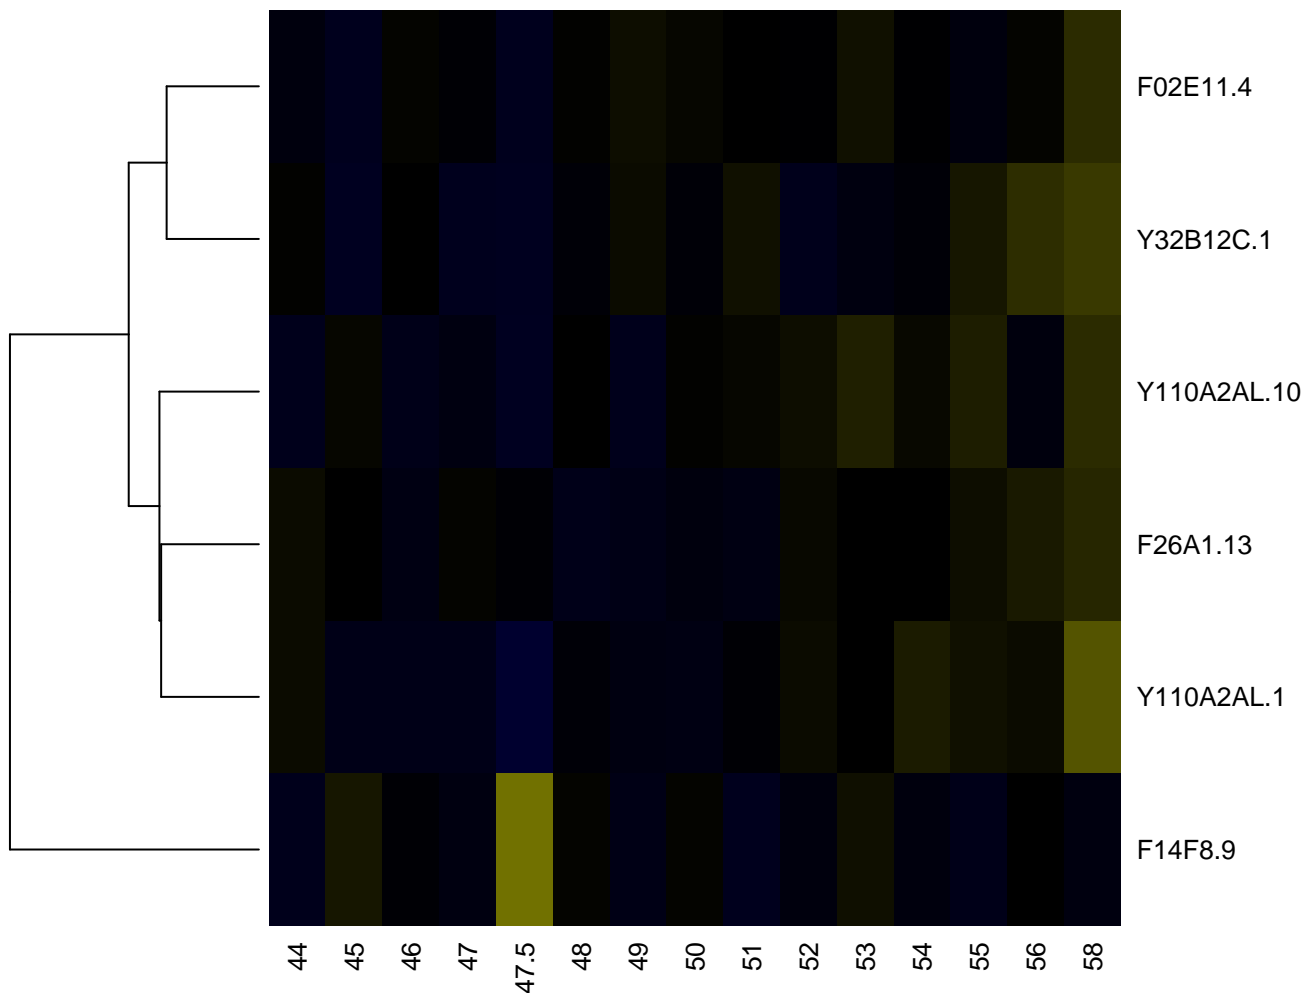



# SNF2-related

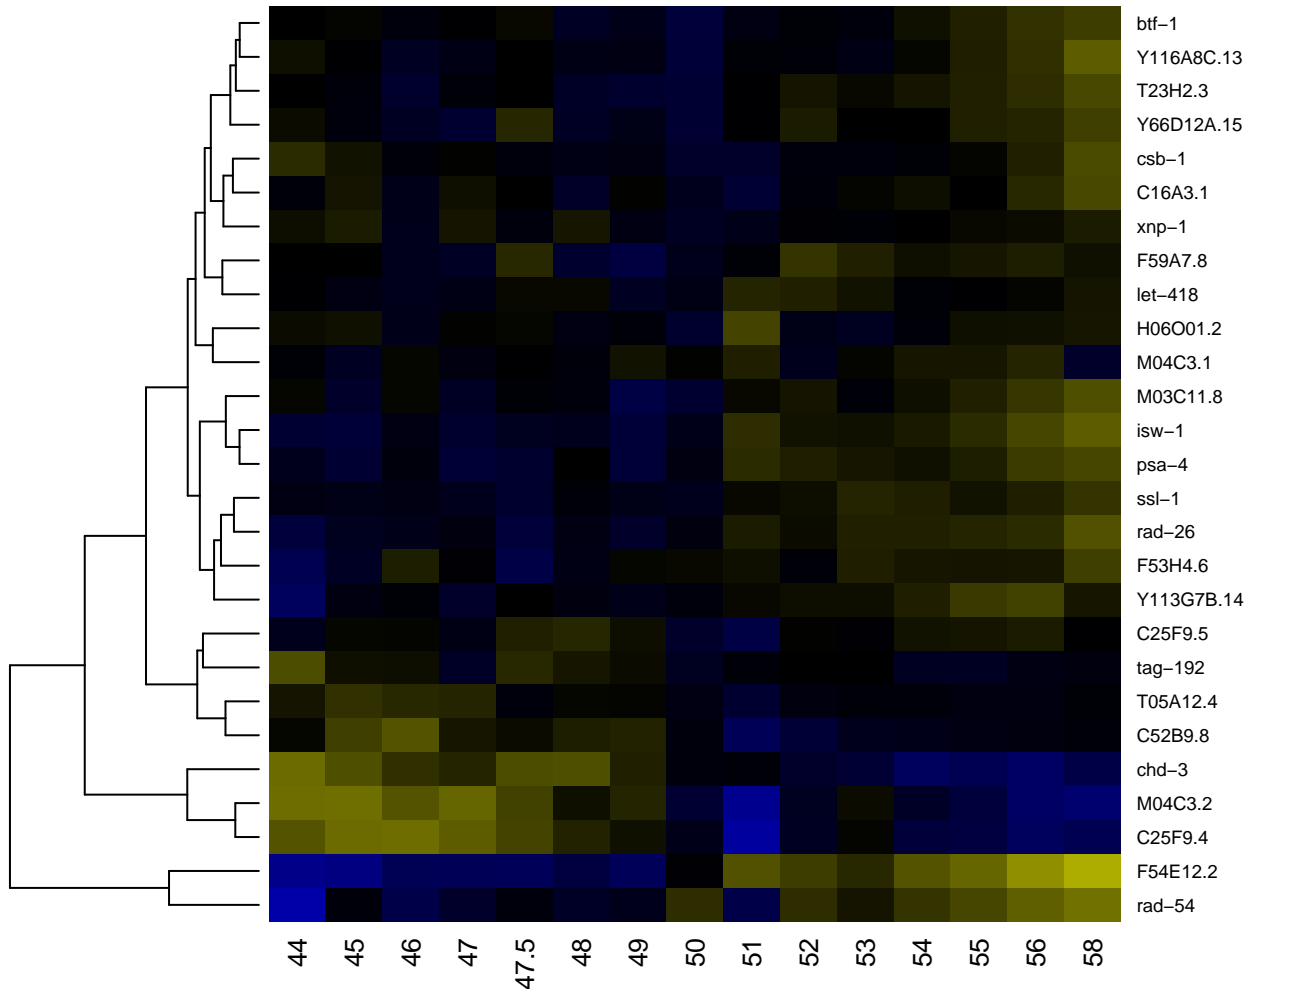





# Sodium/calcium exchanger membrane region

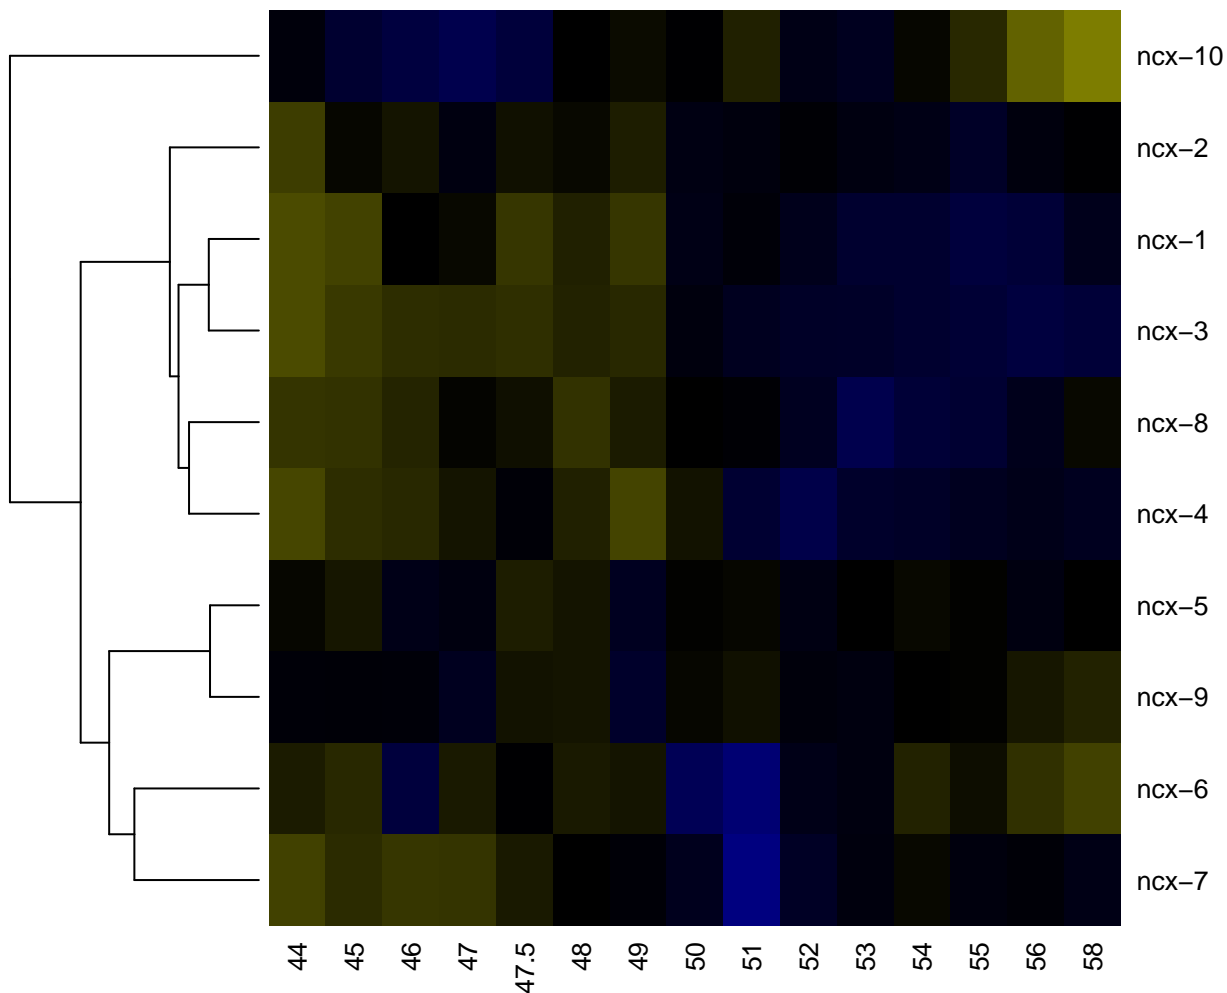



# Sodium/calcium exchanger protein

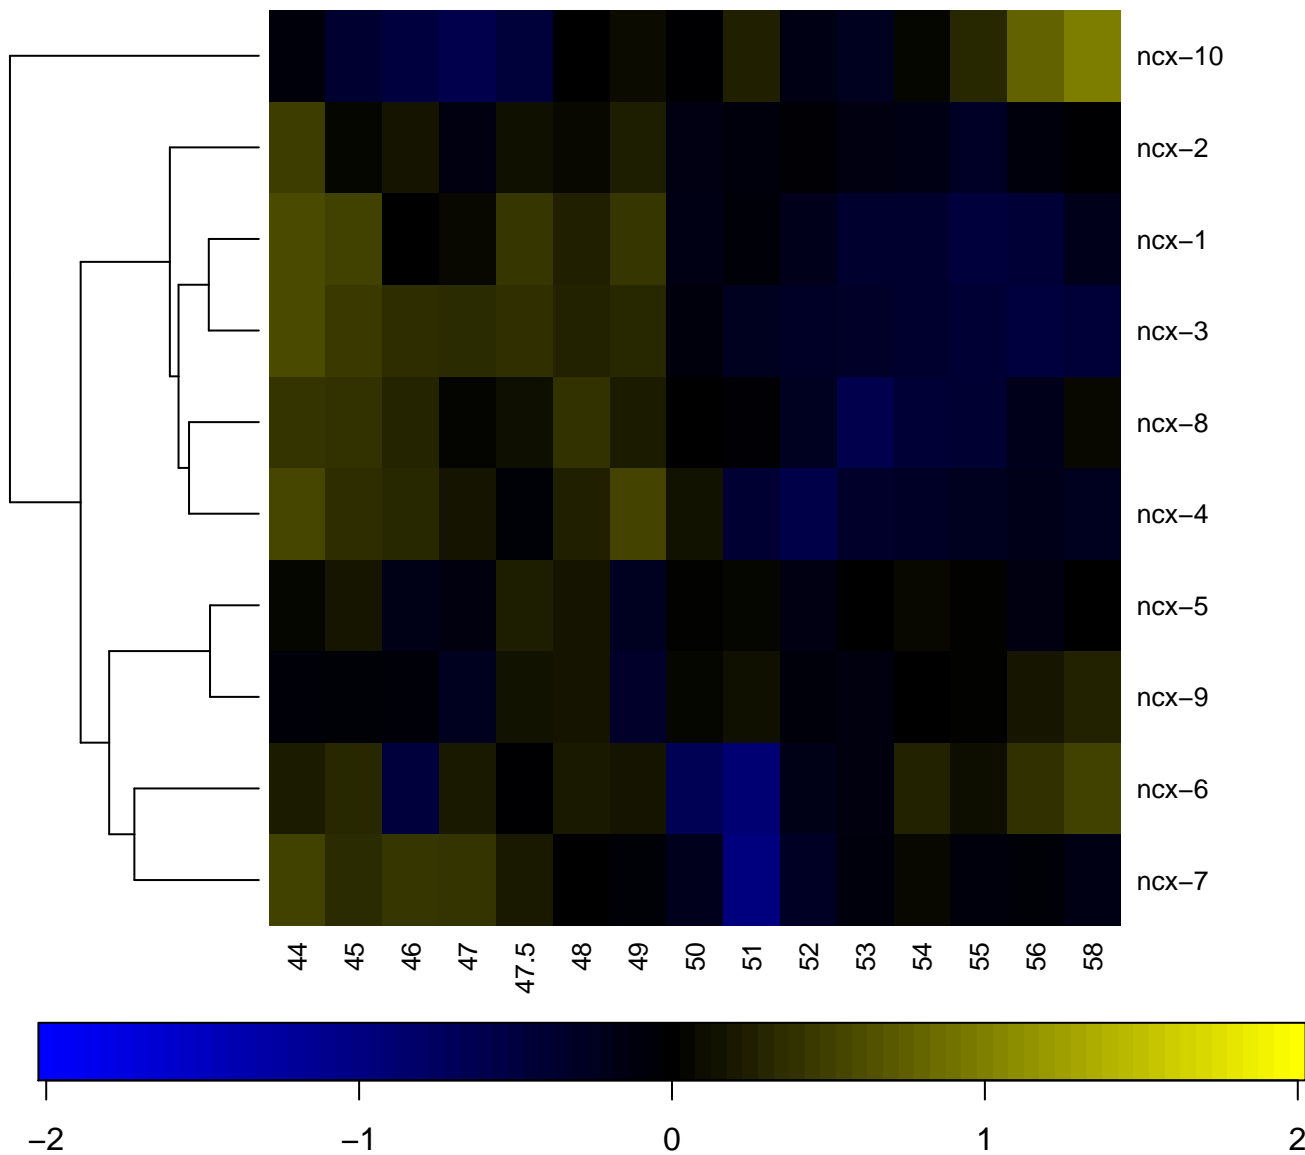





# Sodium:dicarboxylate symporter family

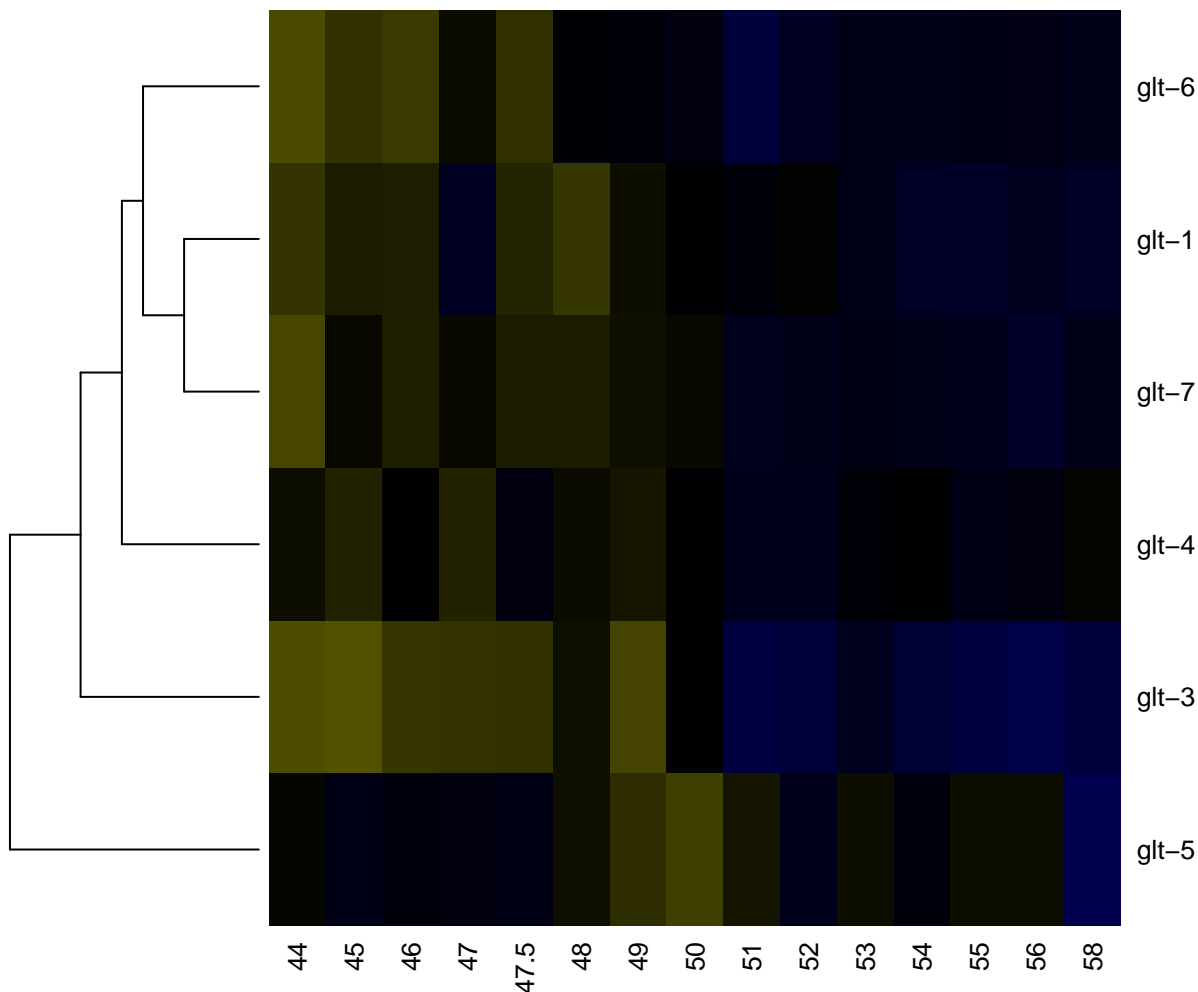

# Sodium:dicarboxylate symporter, conserved site

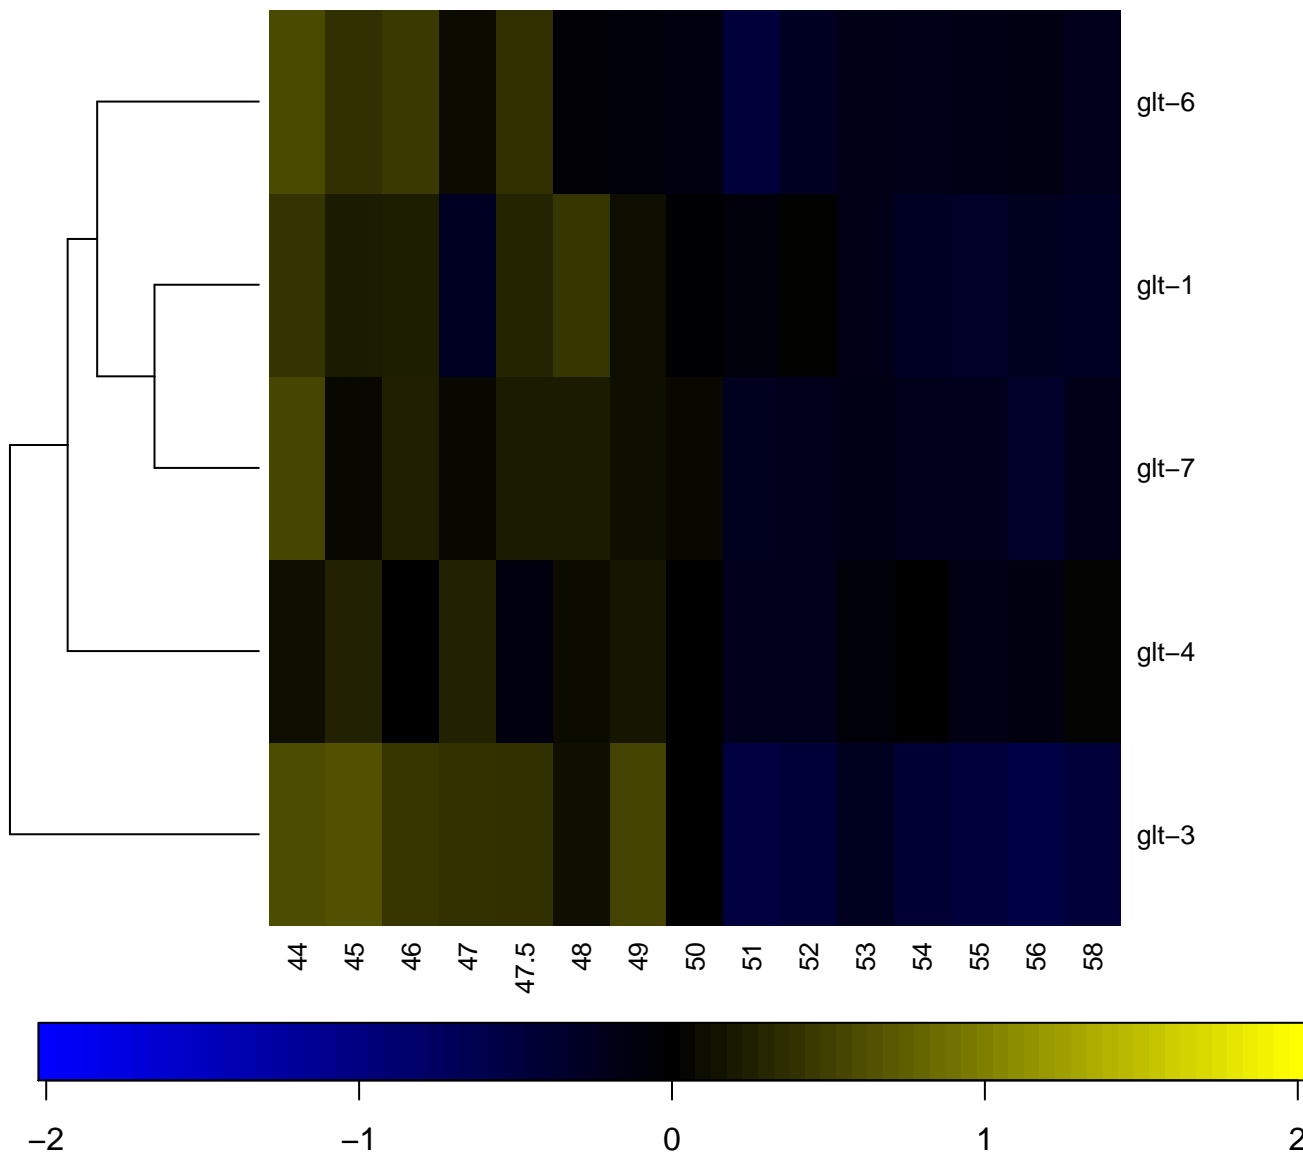

# Sodium:neurotransmitter symporter



# Sodium:neurotransmitter symporter family

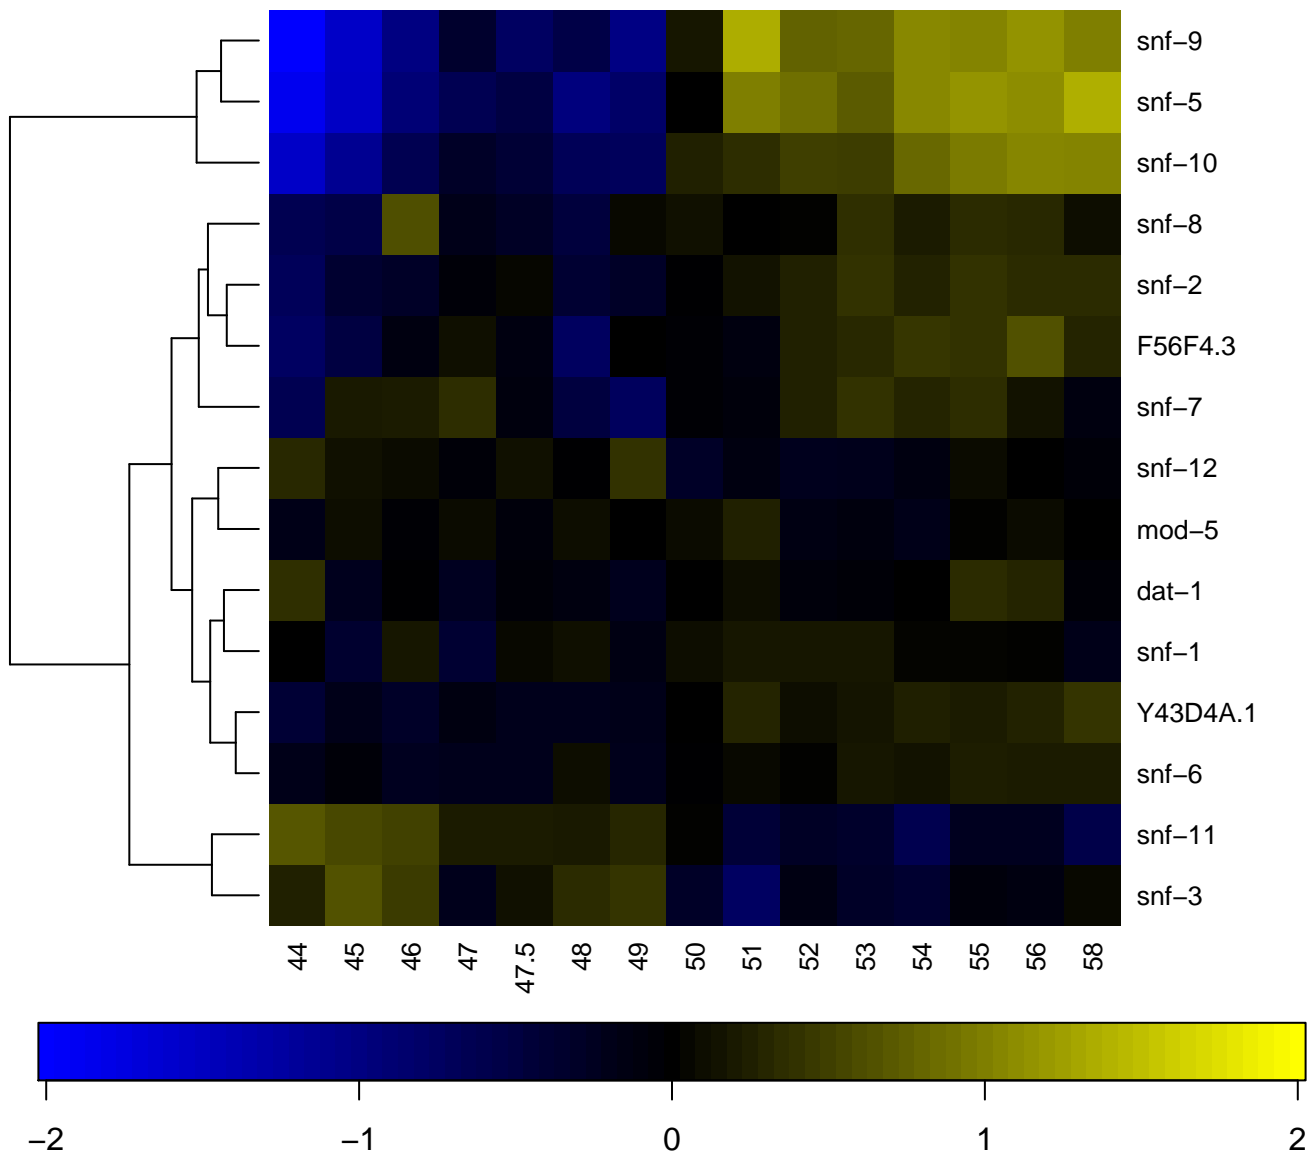







# Spectrin/alpha-actinin

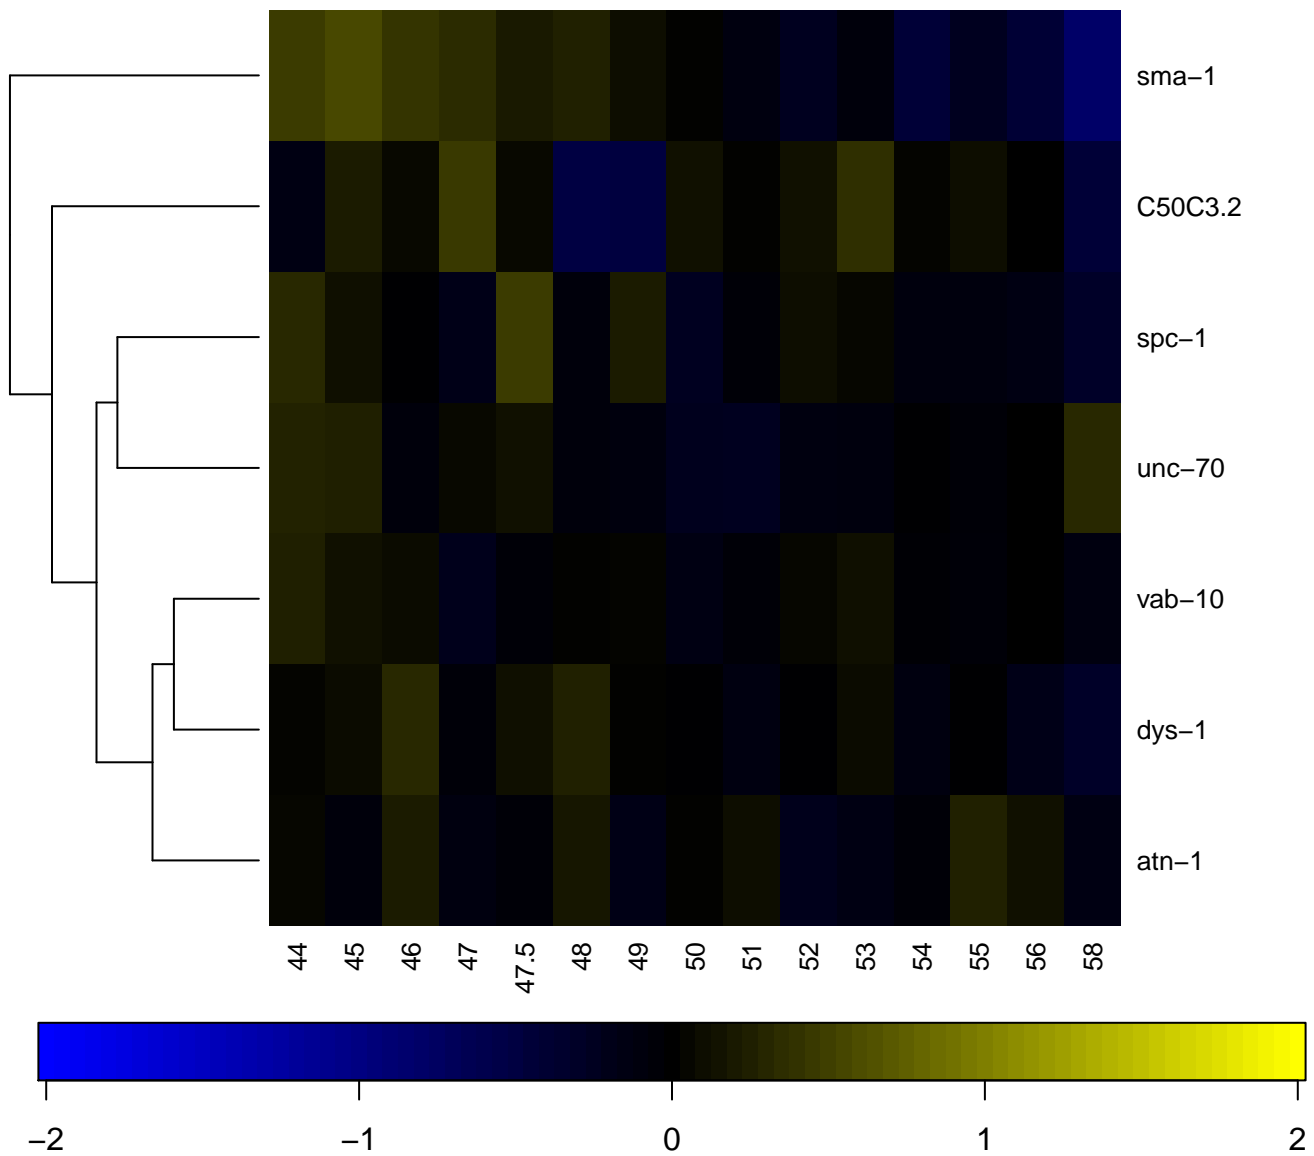

# SPFH domain / Band 7 family

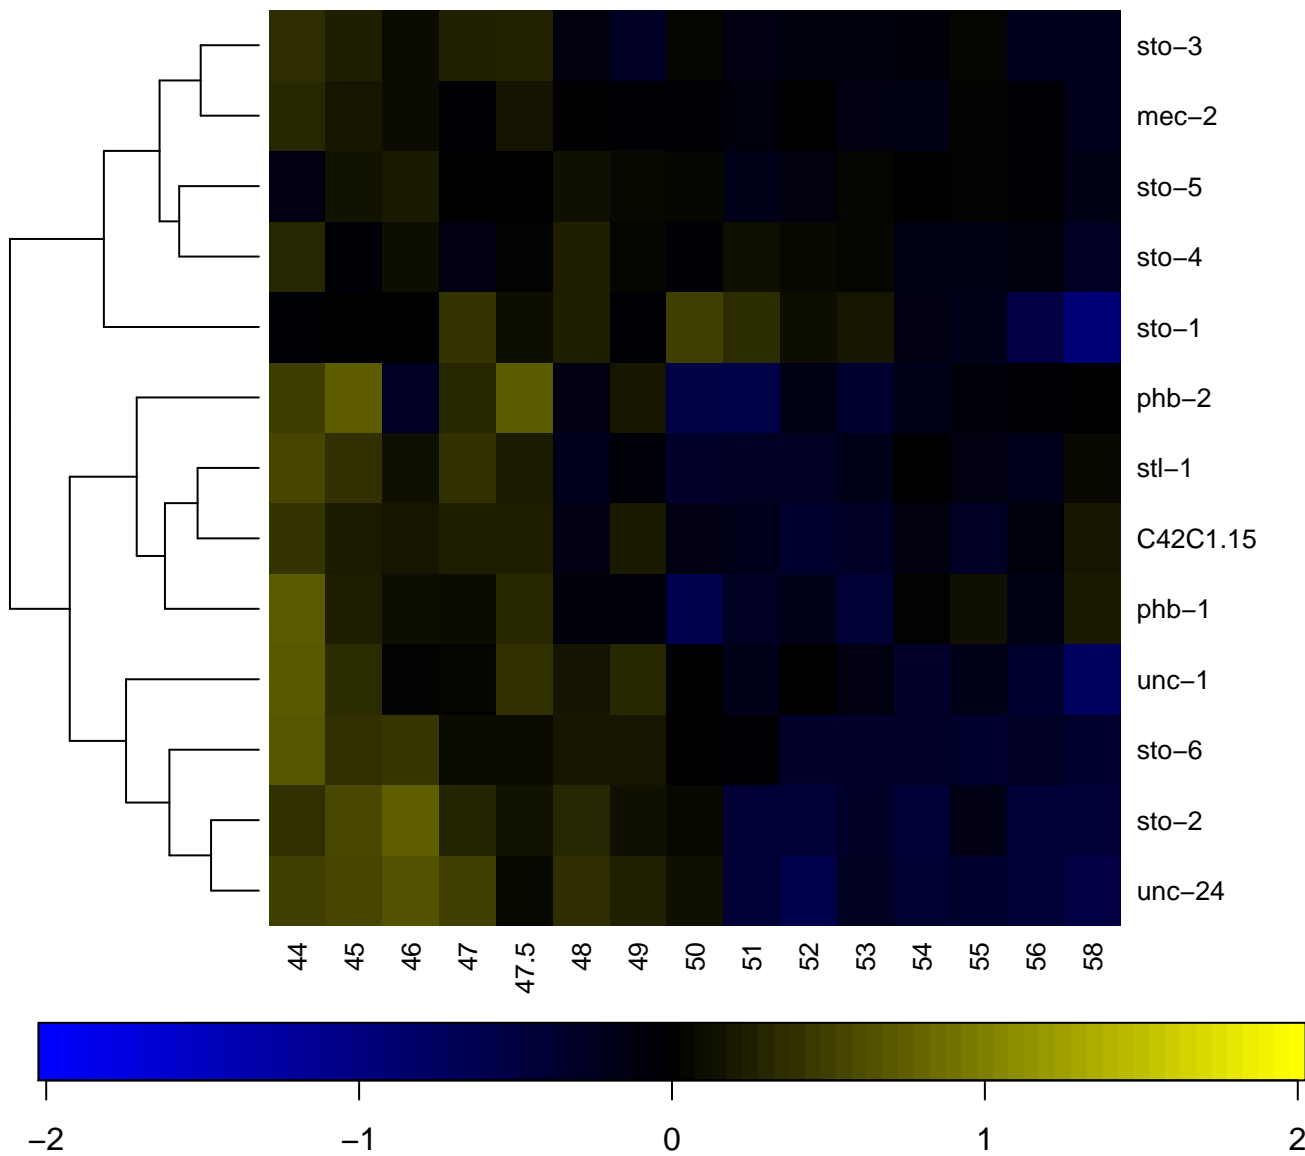

# SPK

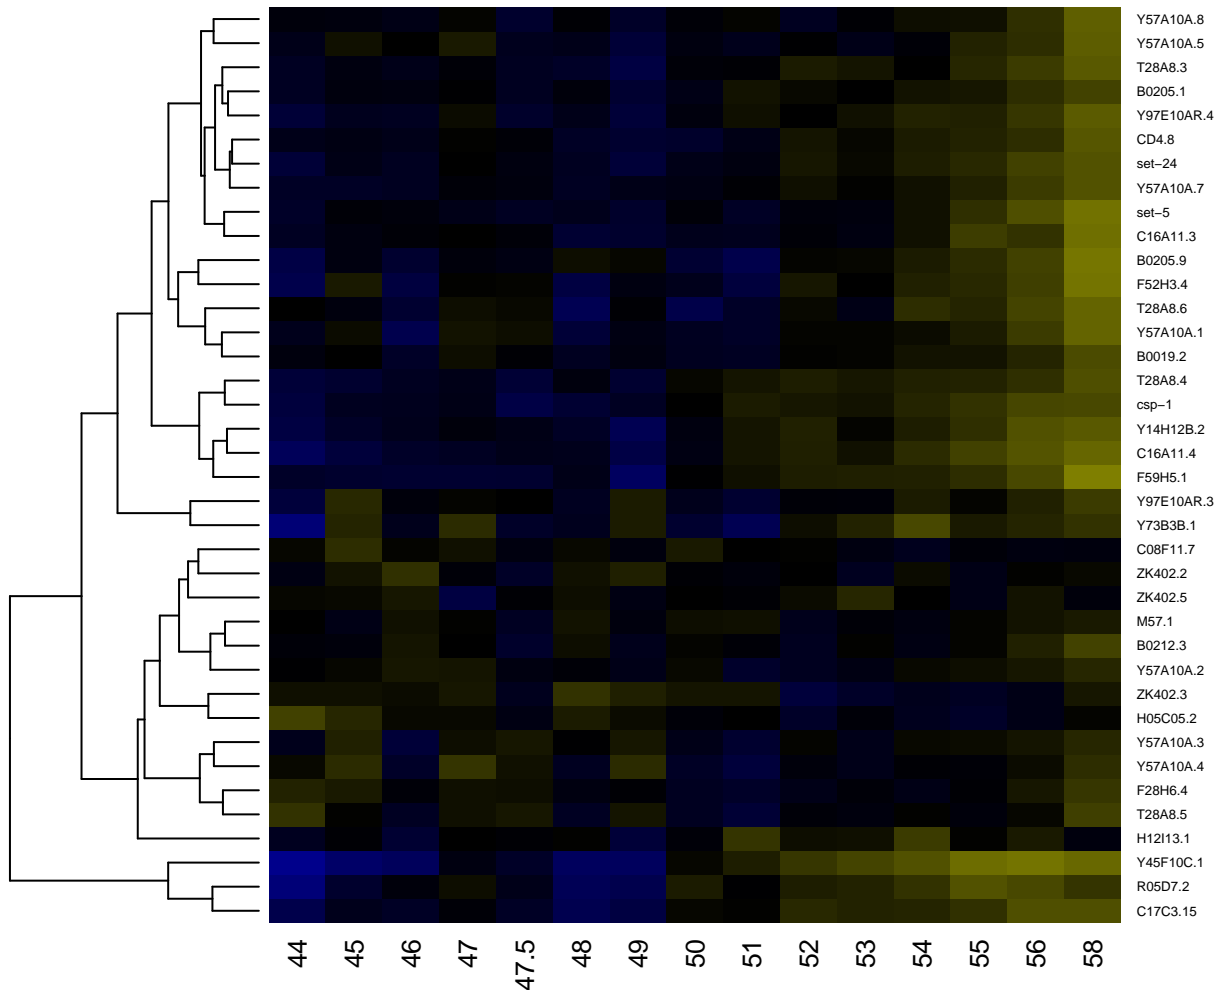

# SPIa/Ryanodine receptor SPRY

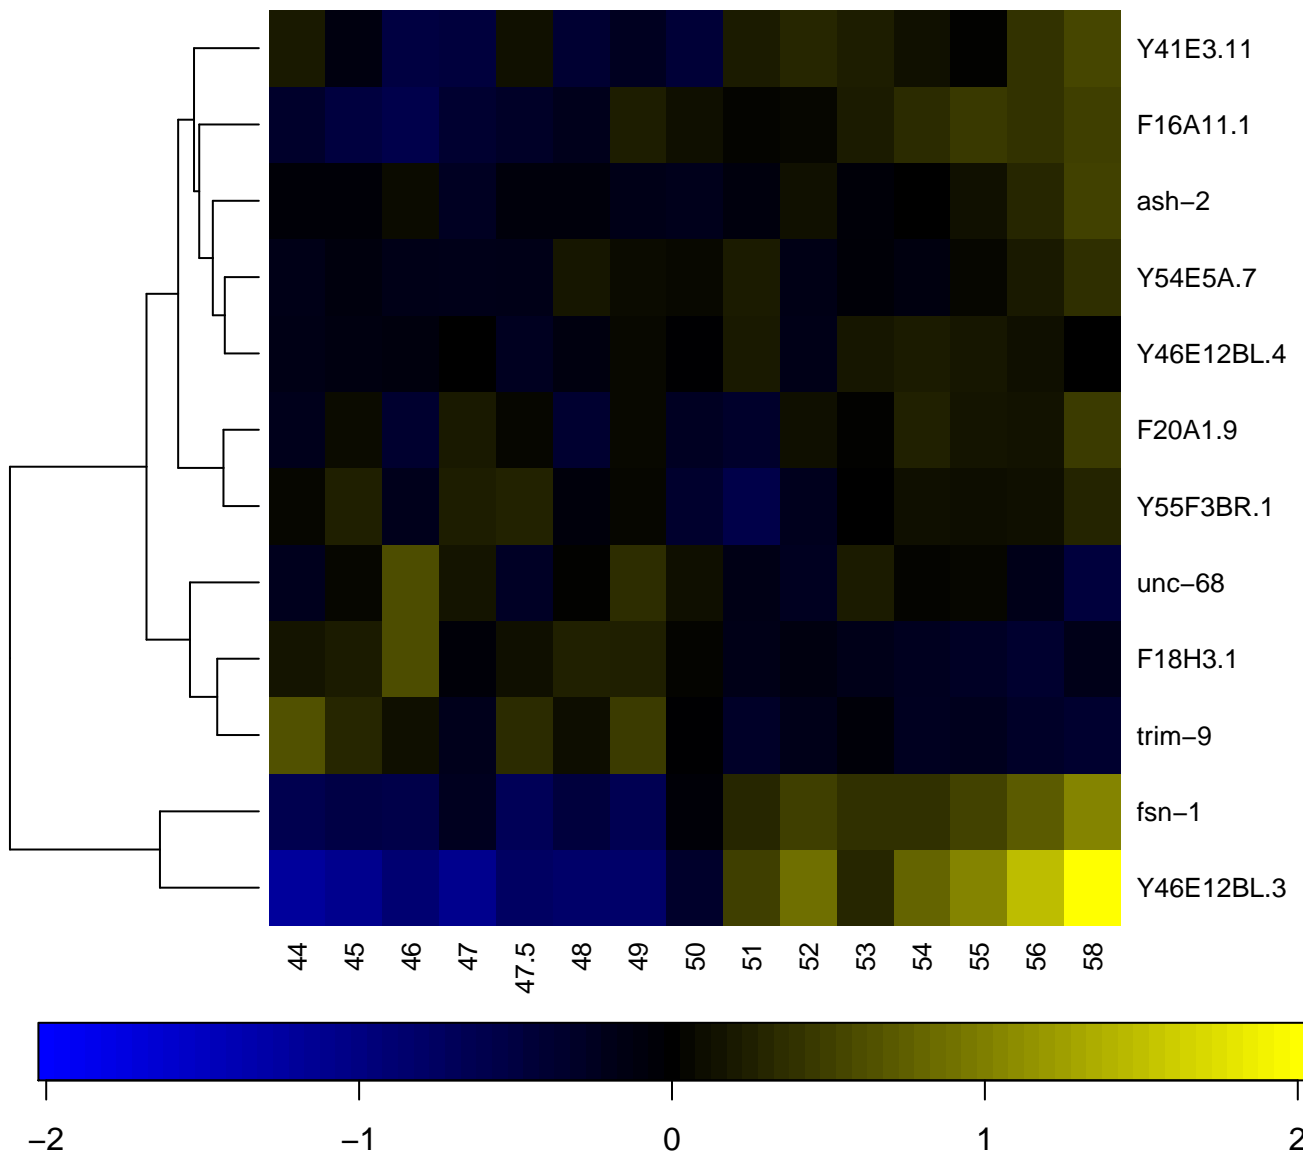

# SPIa/Ryanodine receptor subgroup

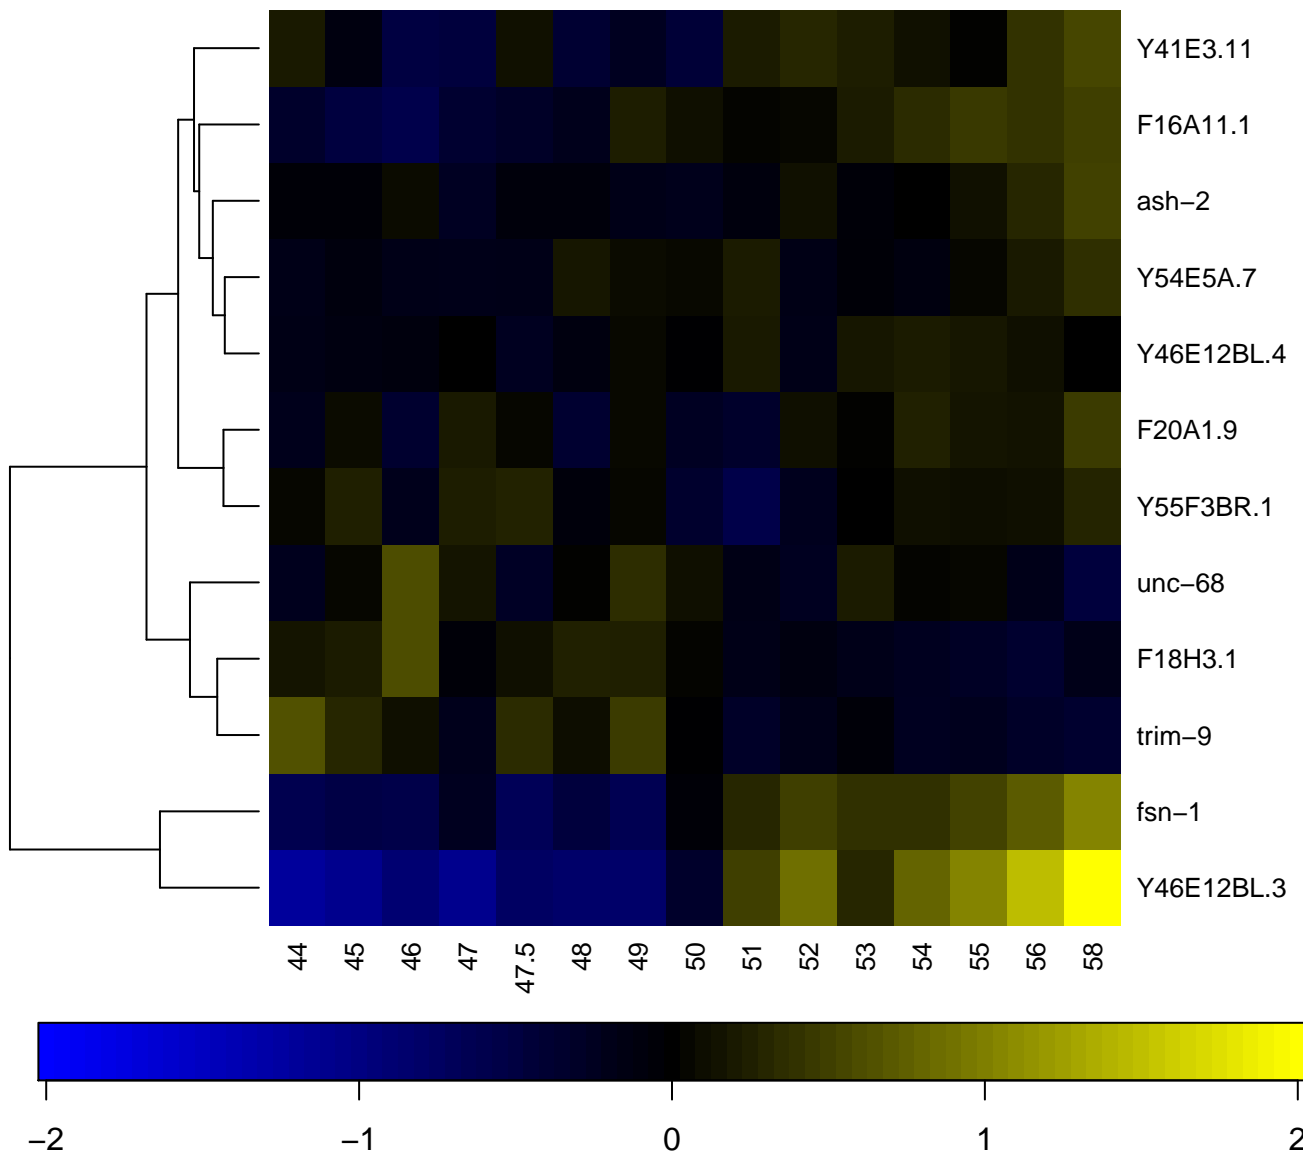

# SPRY domain

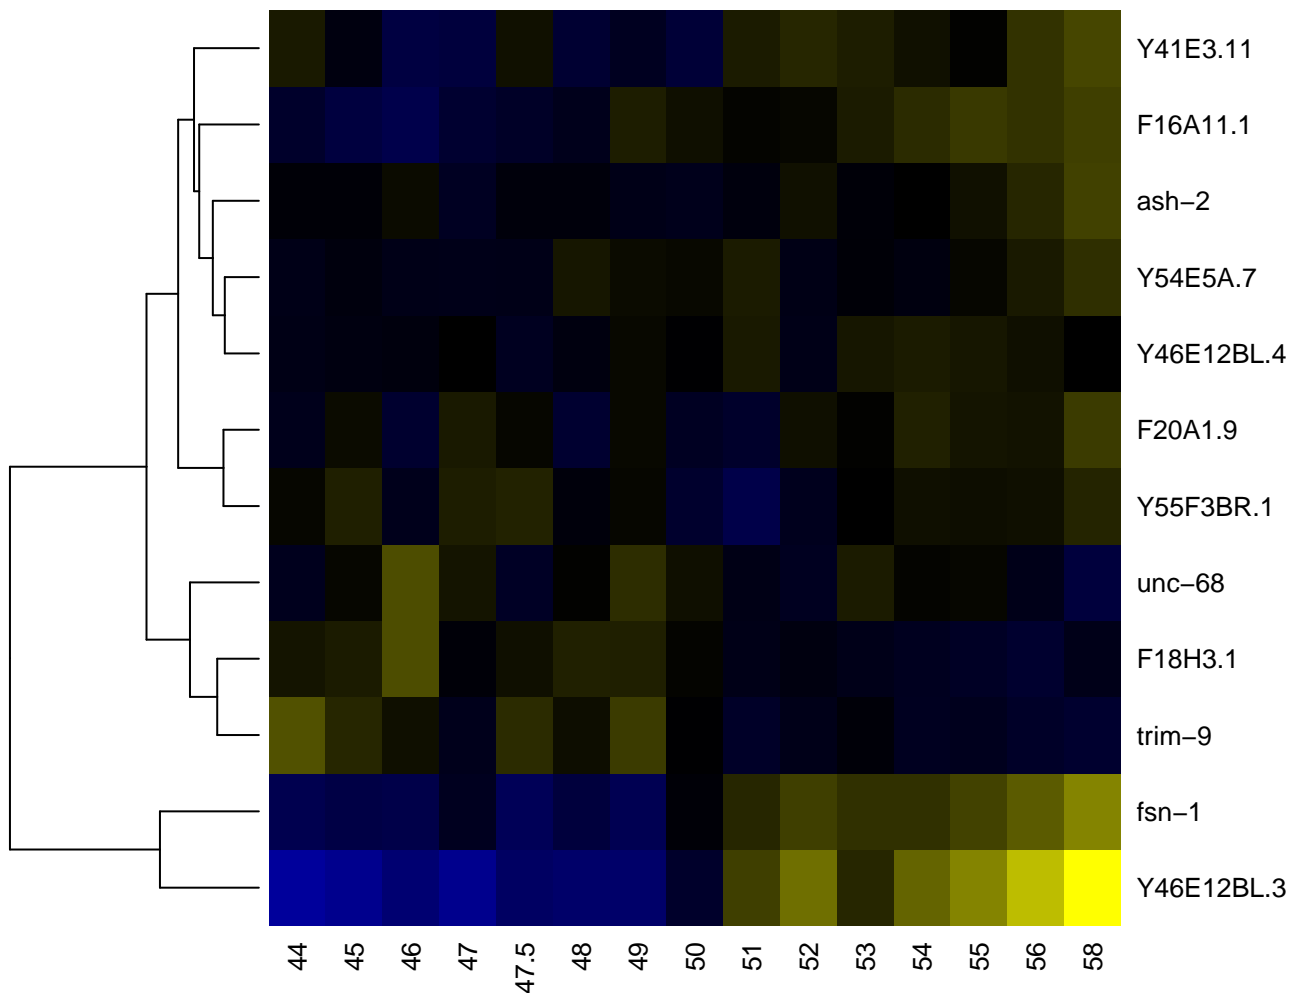

# Src homology-3 domain

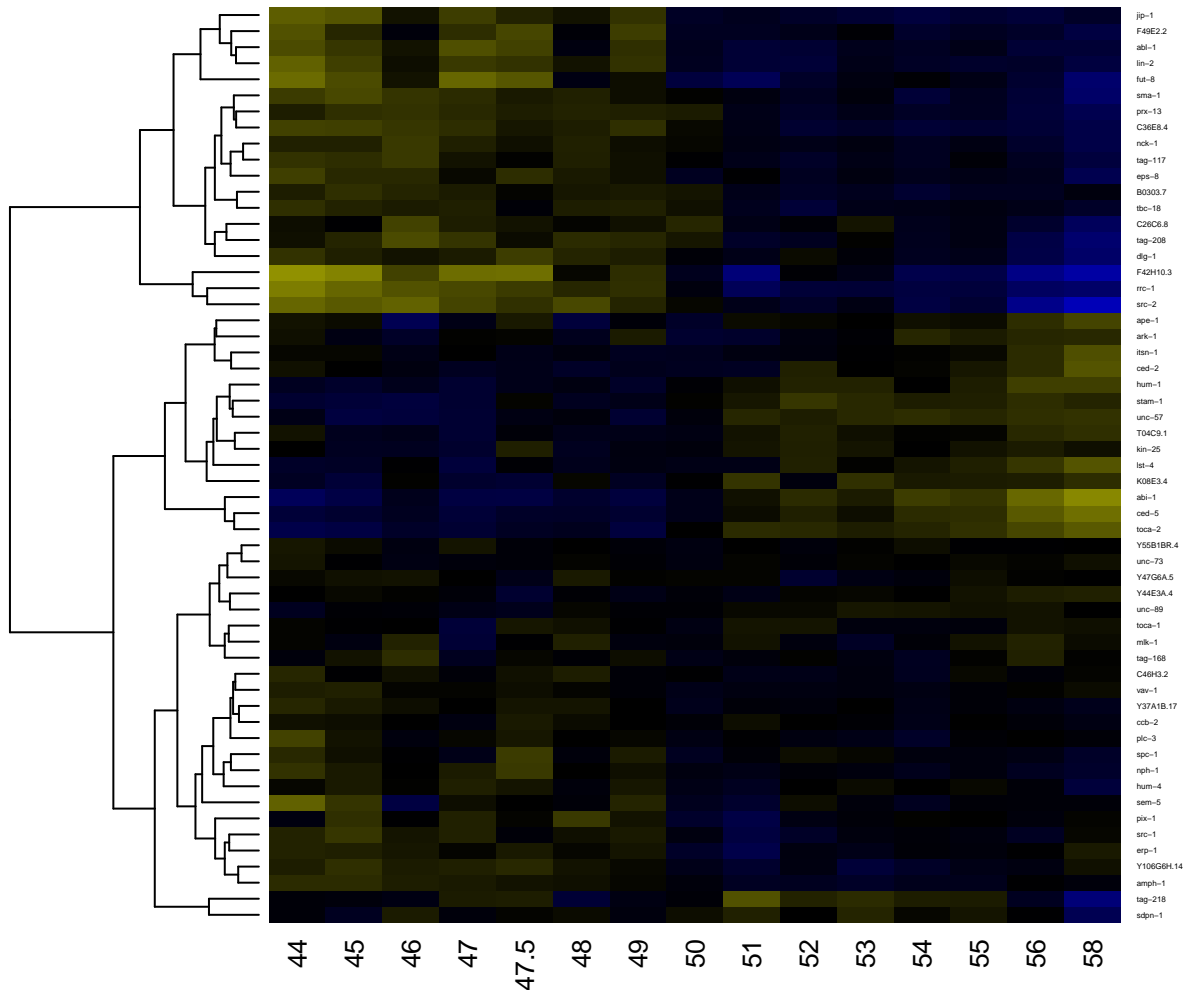





# Srg family chemoreceptor

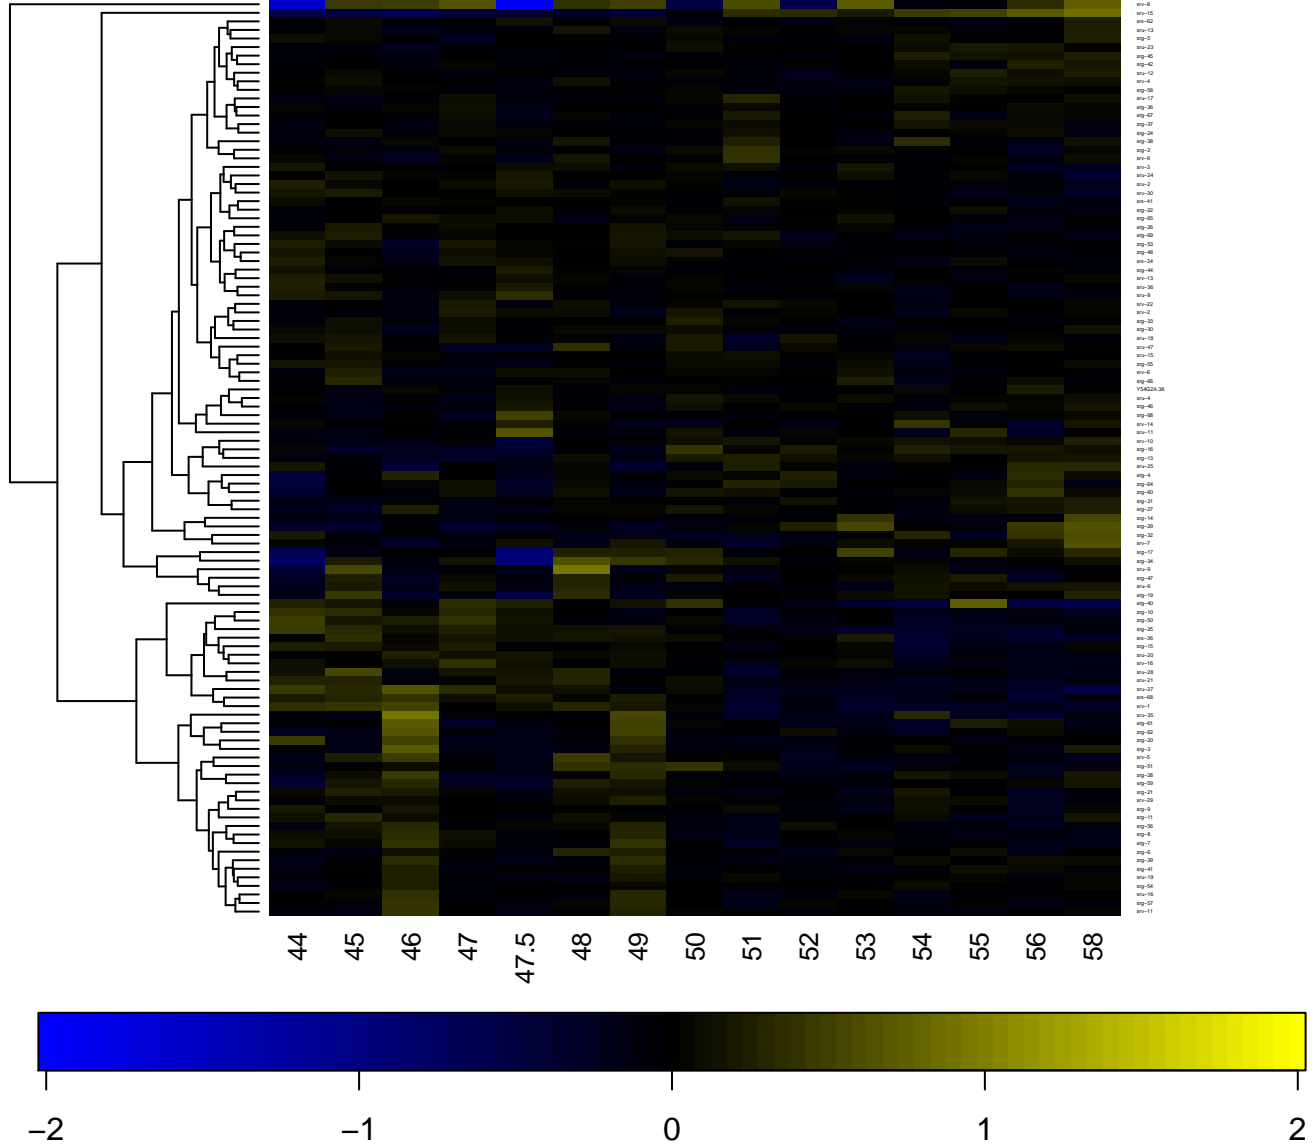

# START domain

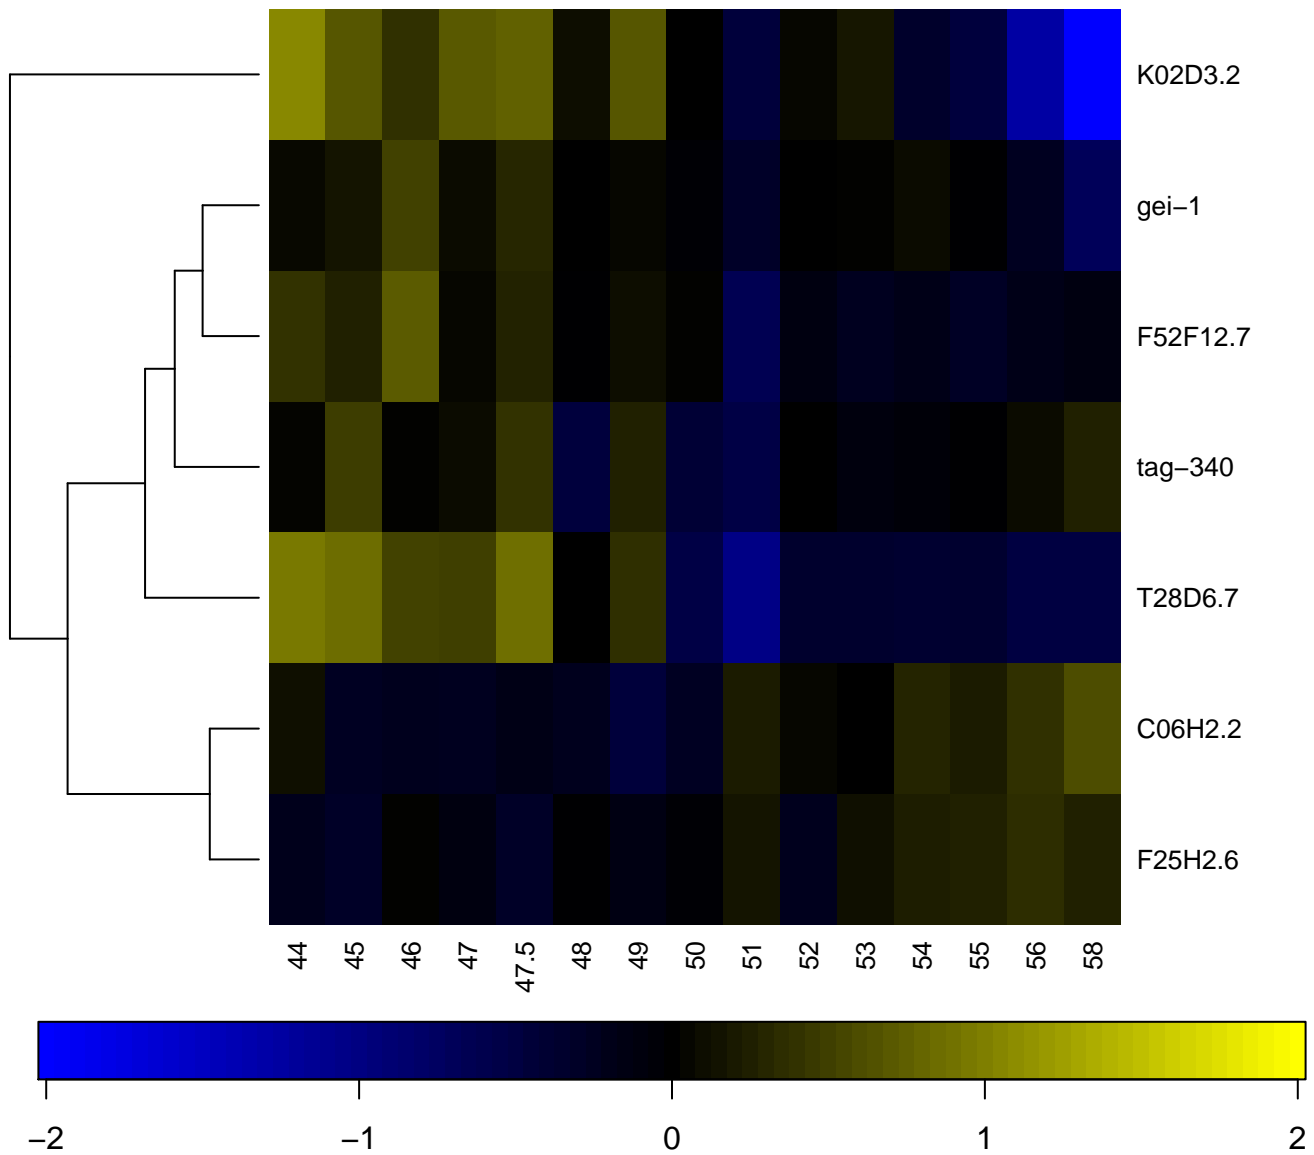



# Stem cell self-renewal protein Piwi

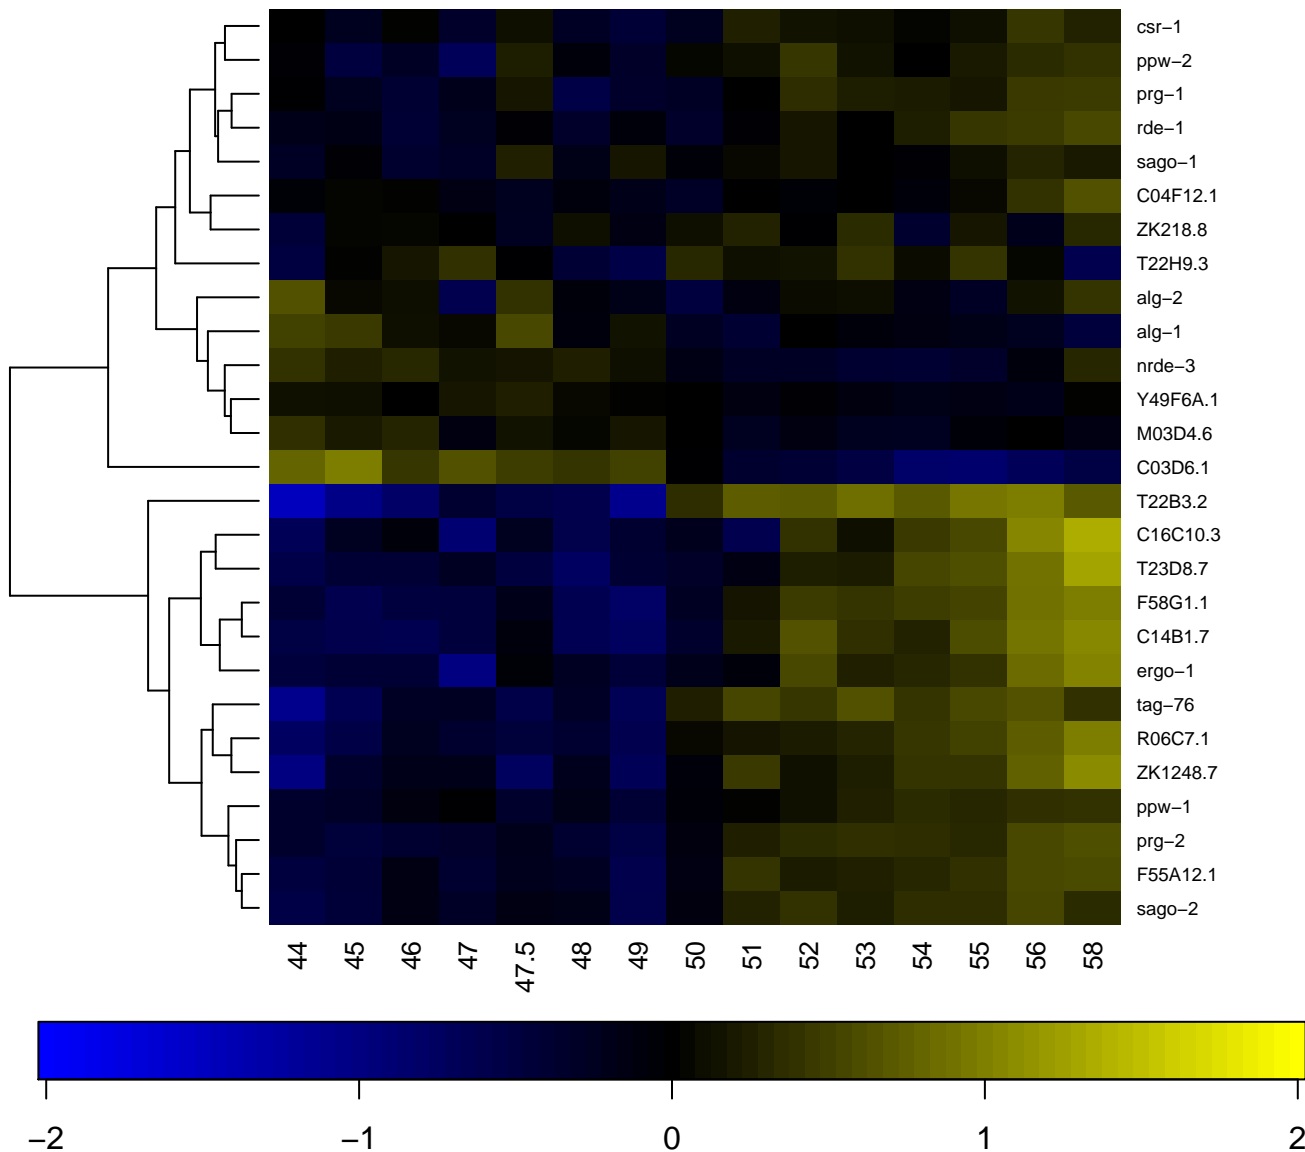













# Sterol-sensing domain of SREBP cleavage-activation

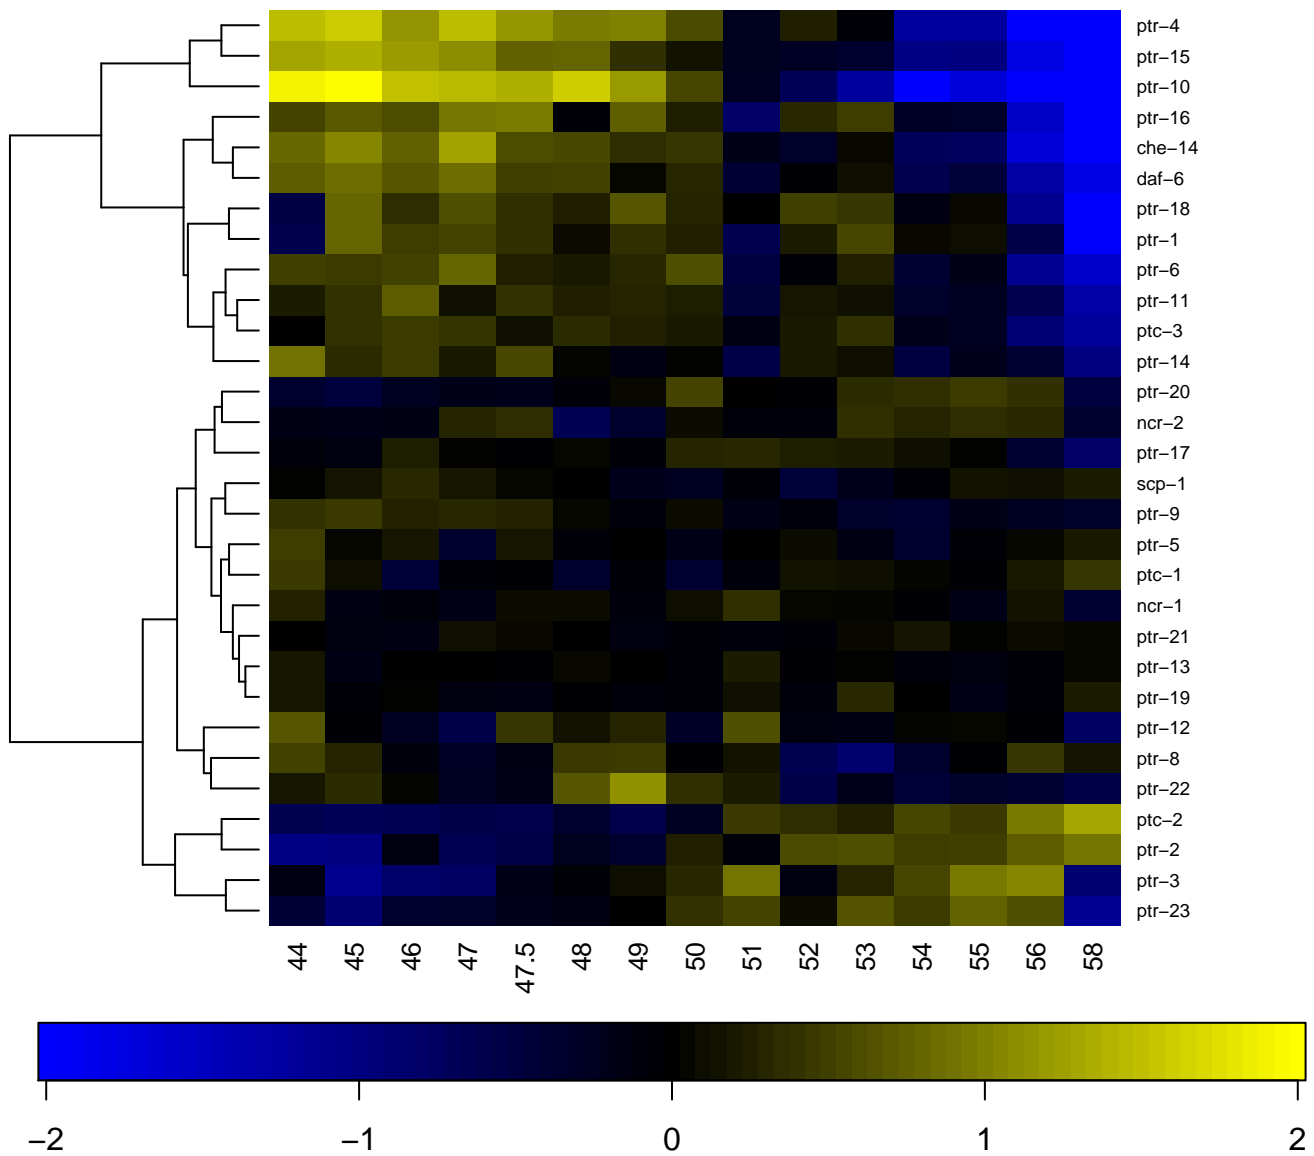





# Succinyl-CoA synthetase-like

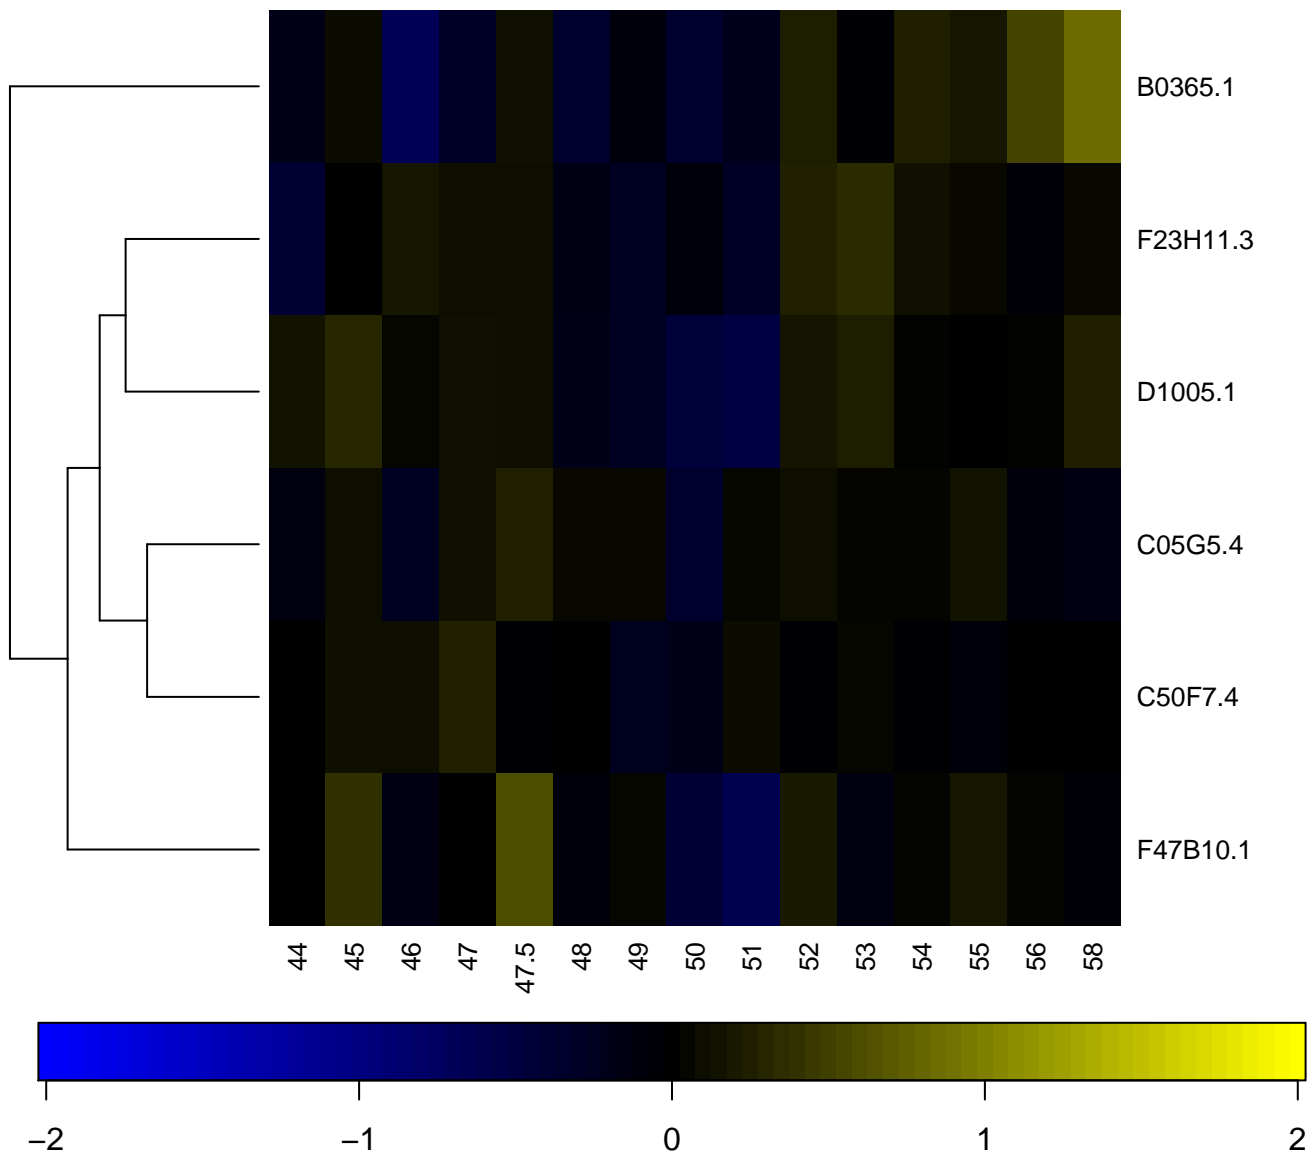

# Sugar (and other) transporter

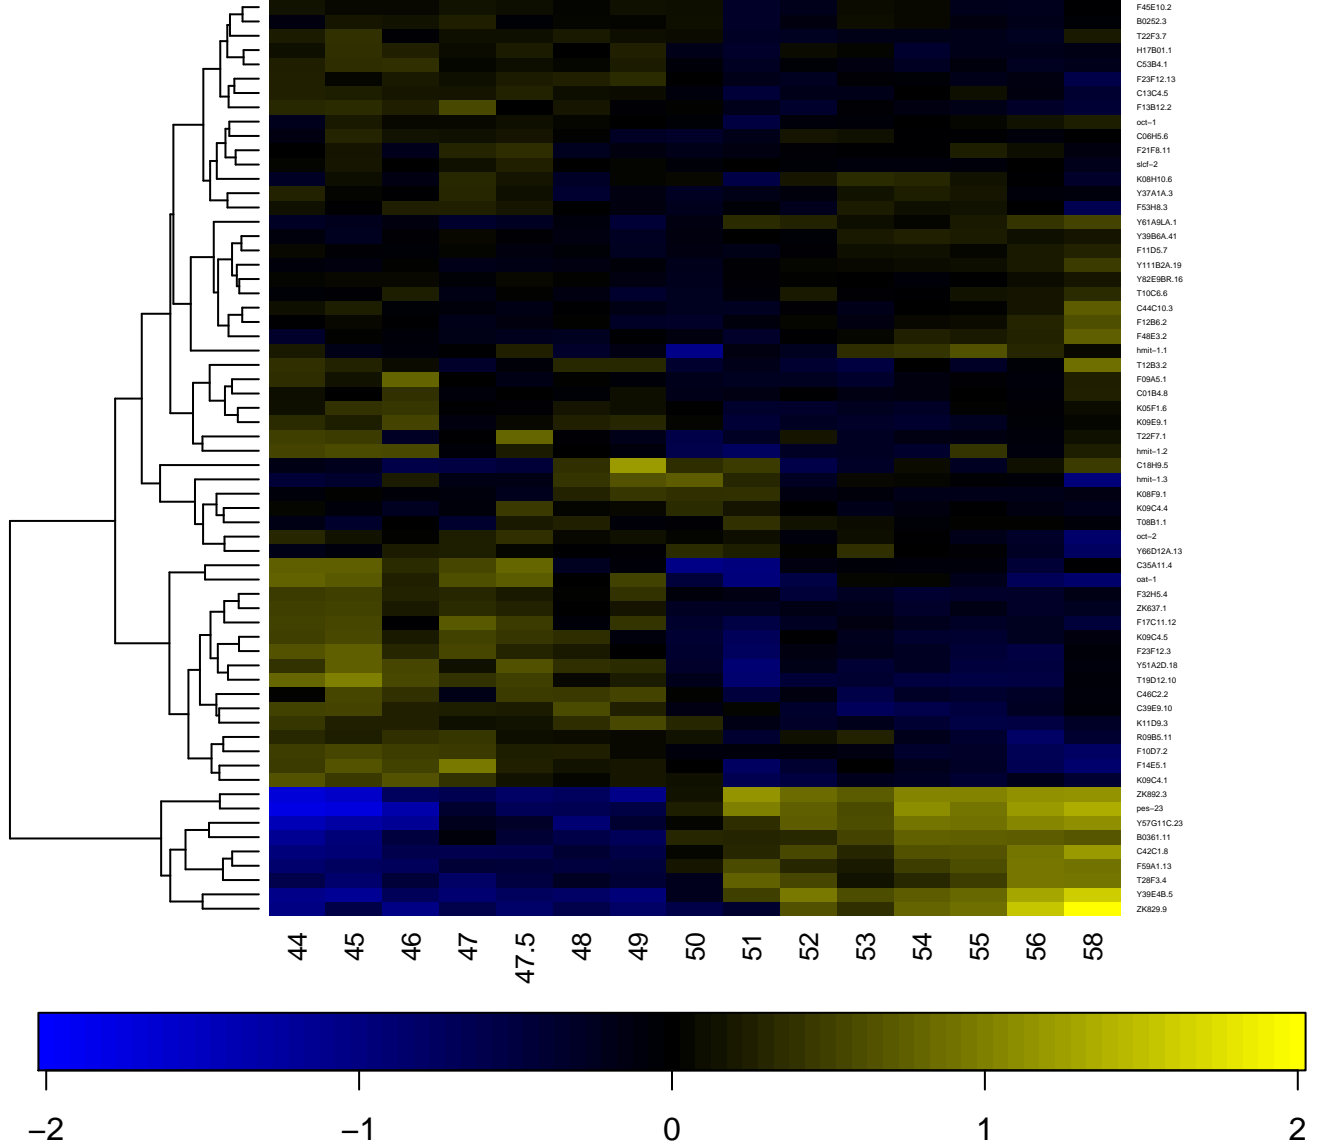







# Sulfatase

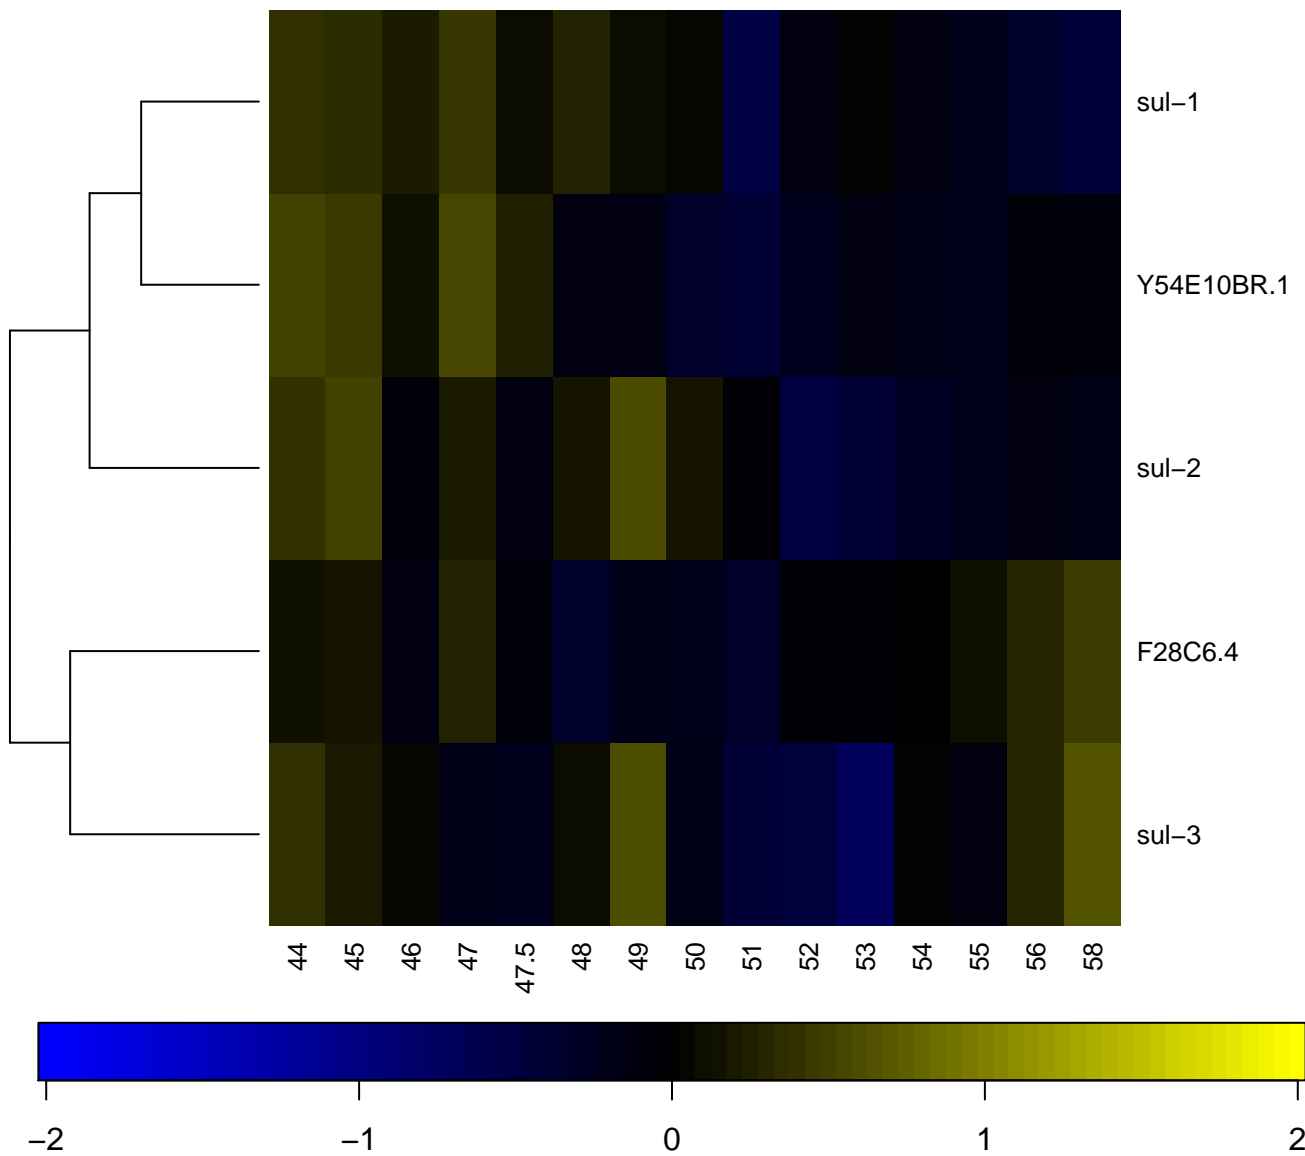



# Sulfotransferase

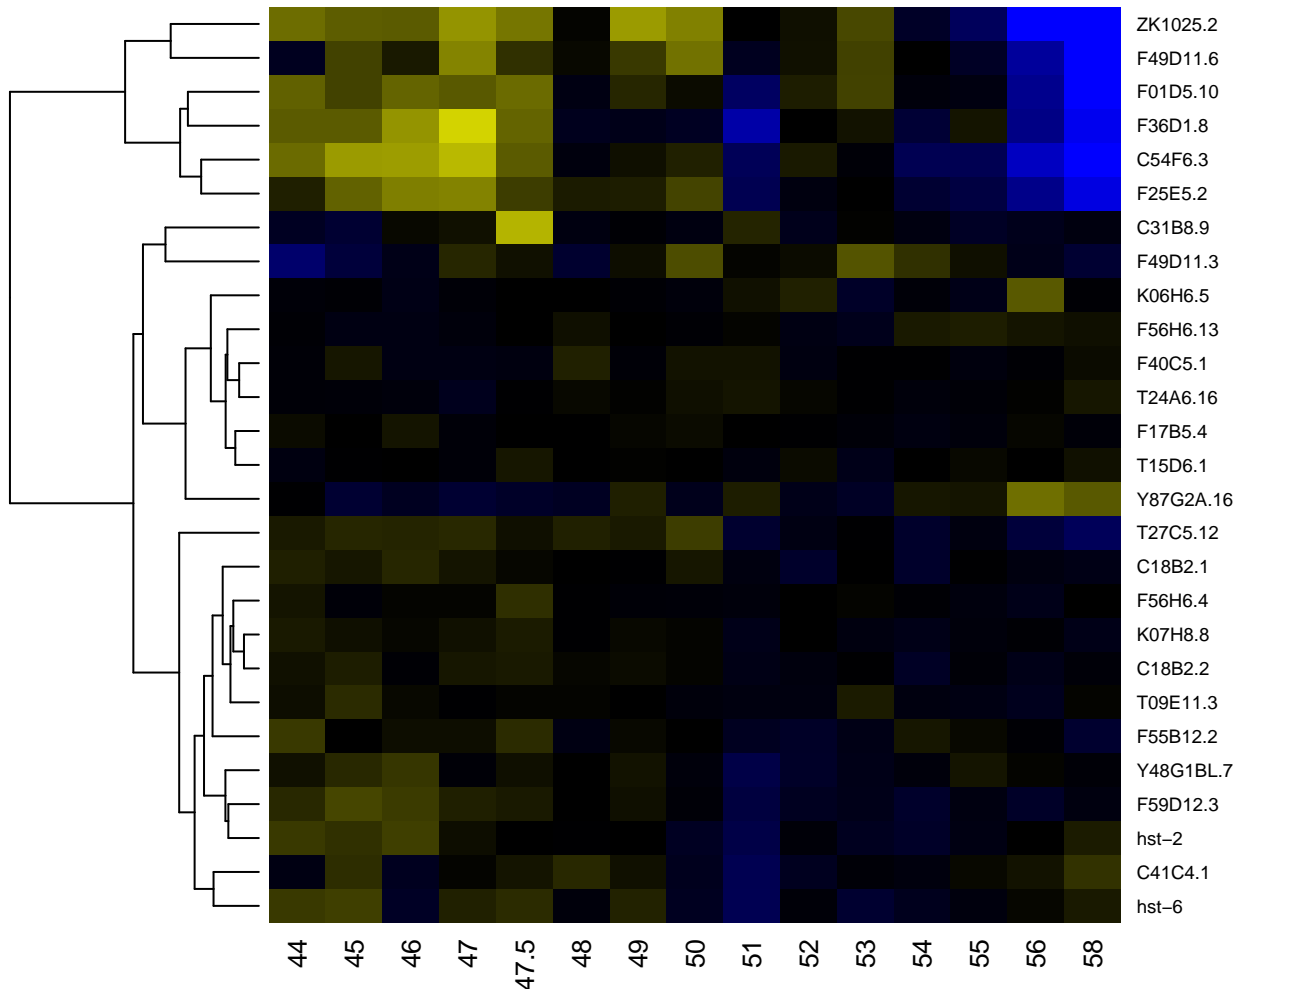

# Sulfotransferase domain

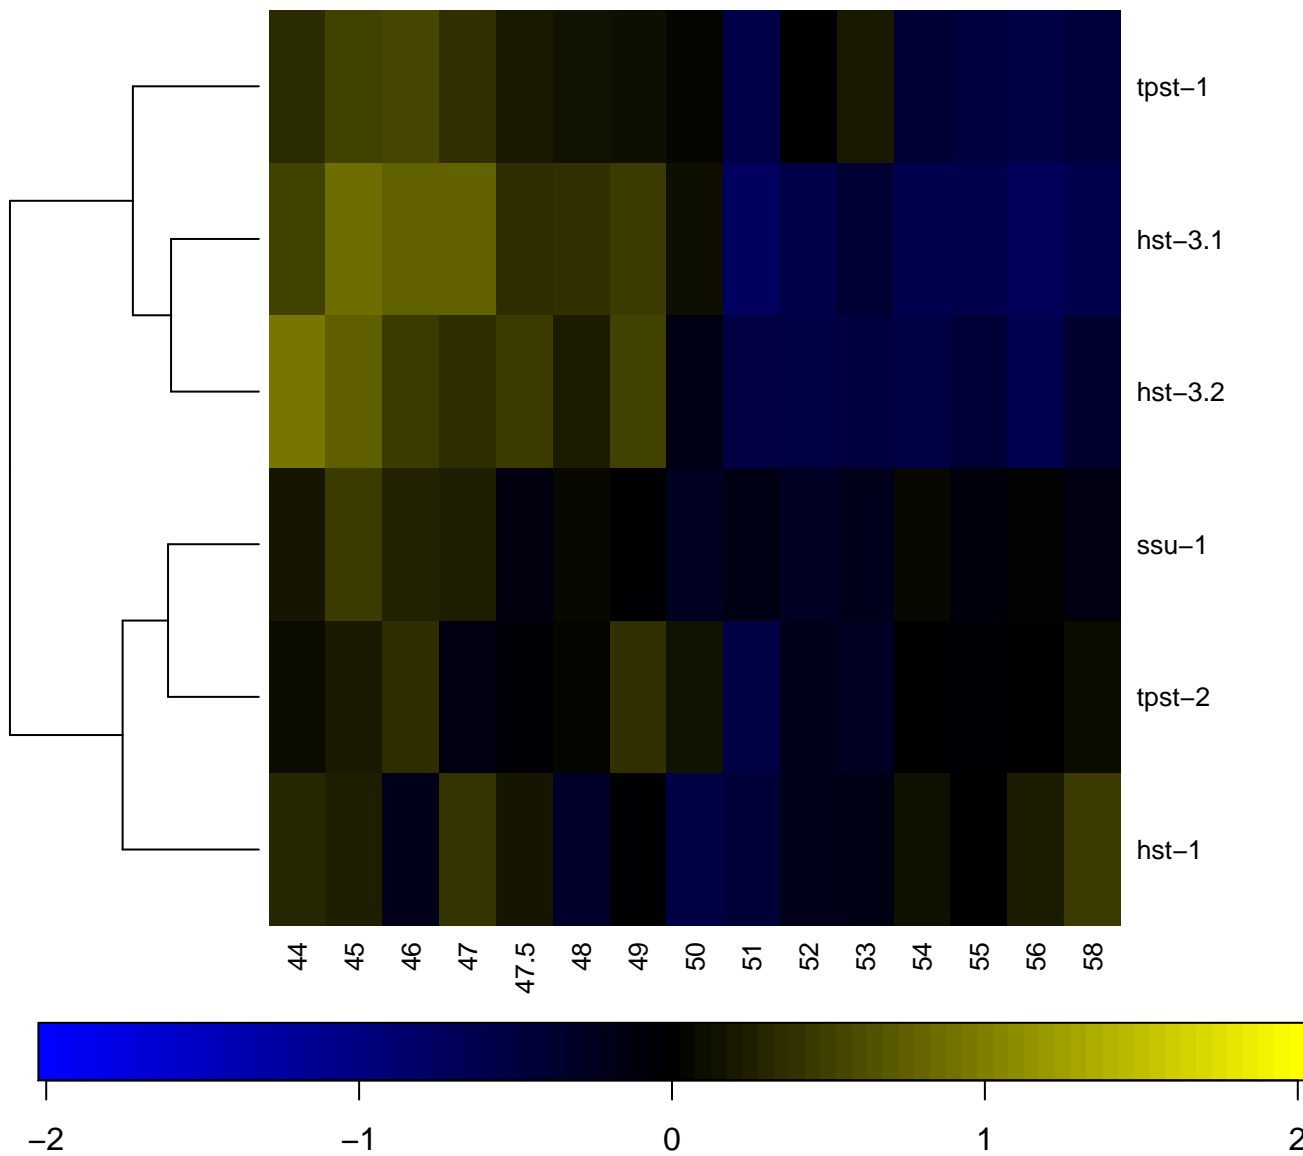

# Sulfotransferase family

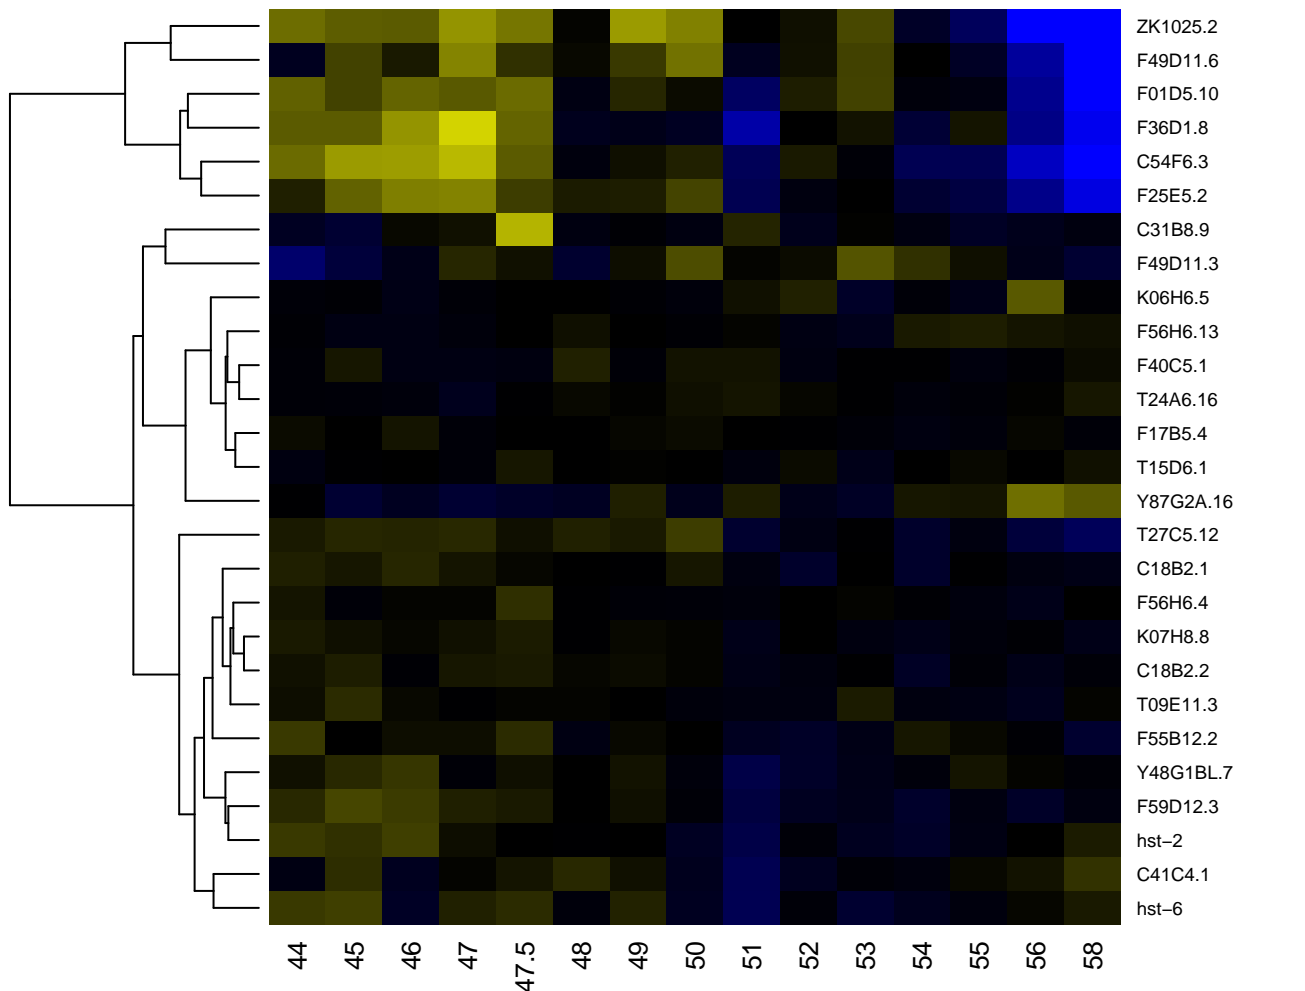







# Sushi domain (SCR repeat)

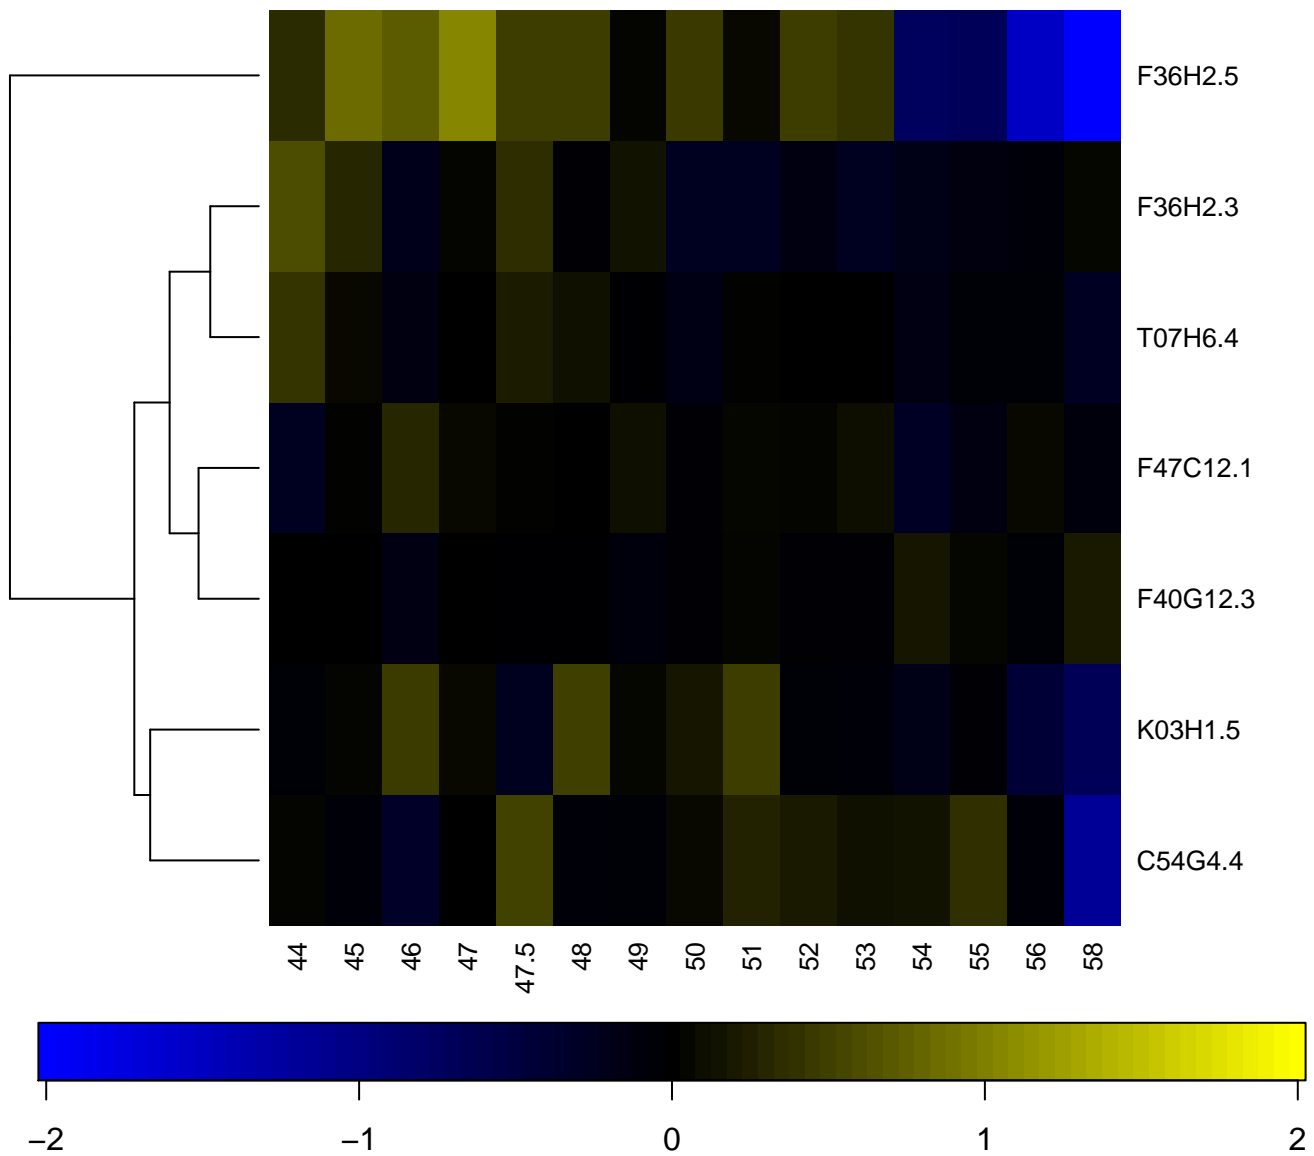



# Synaptobrevin

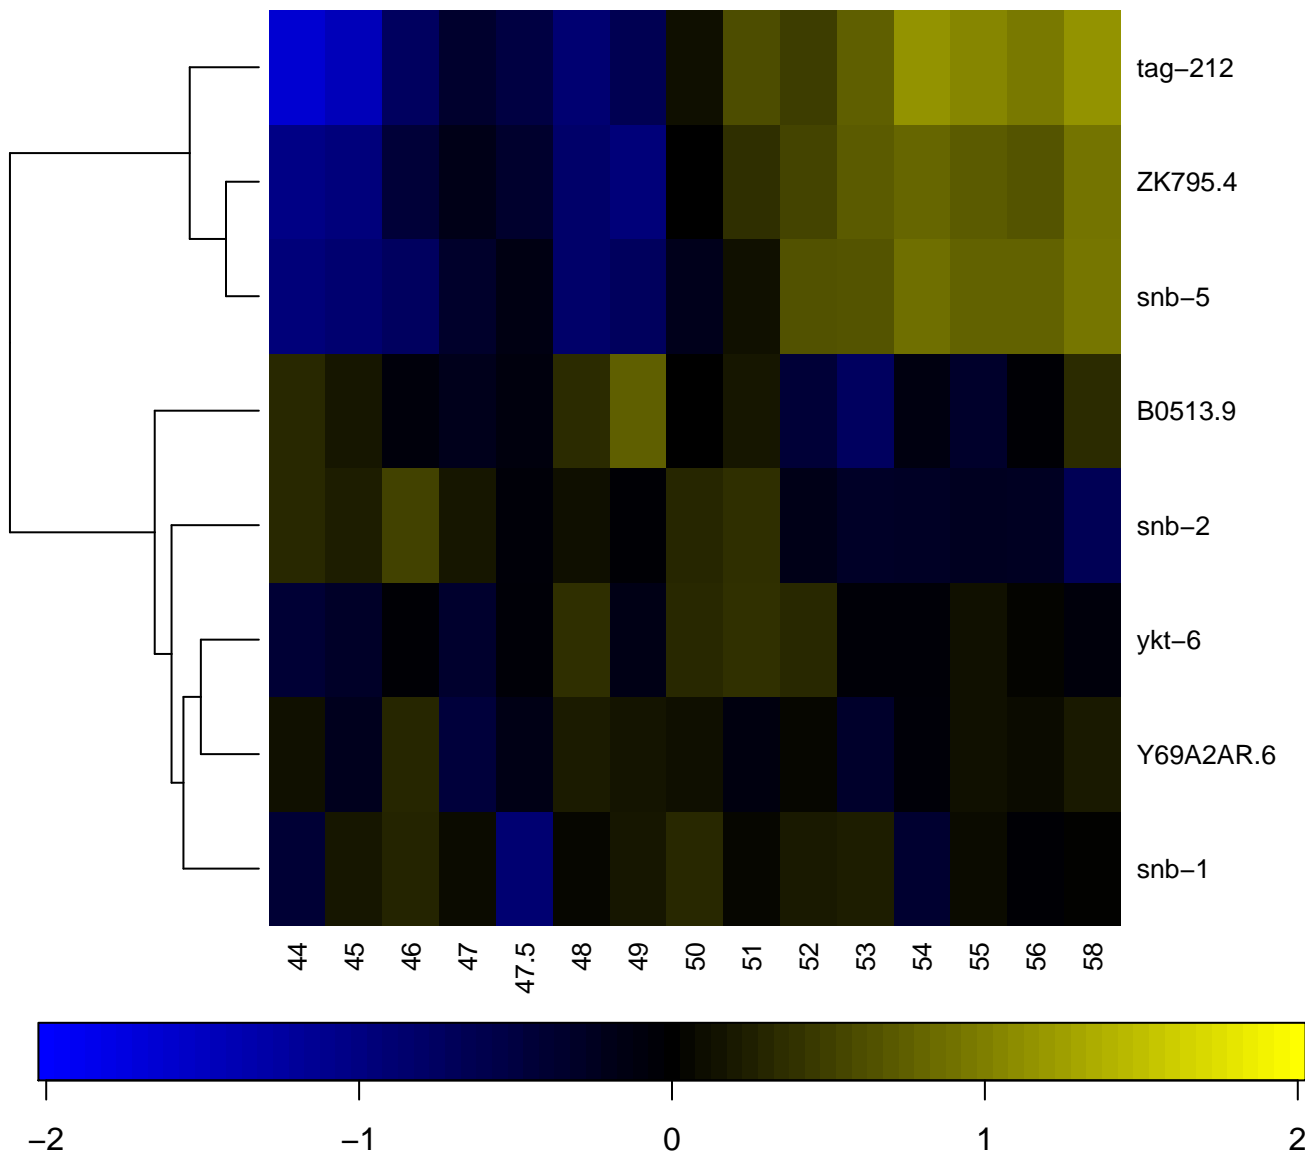







# Syntaxin/epimorphin, conserved site

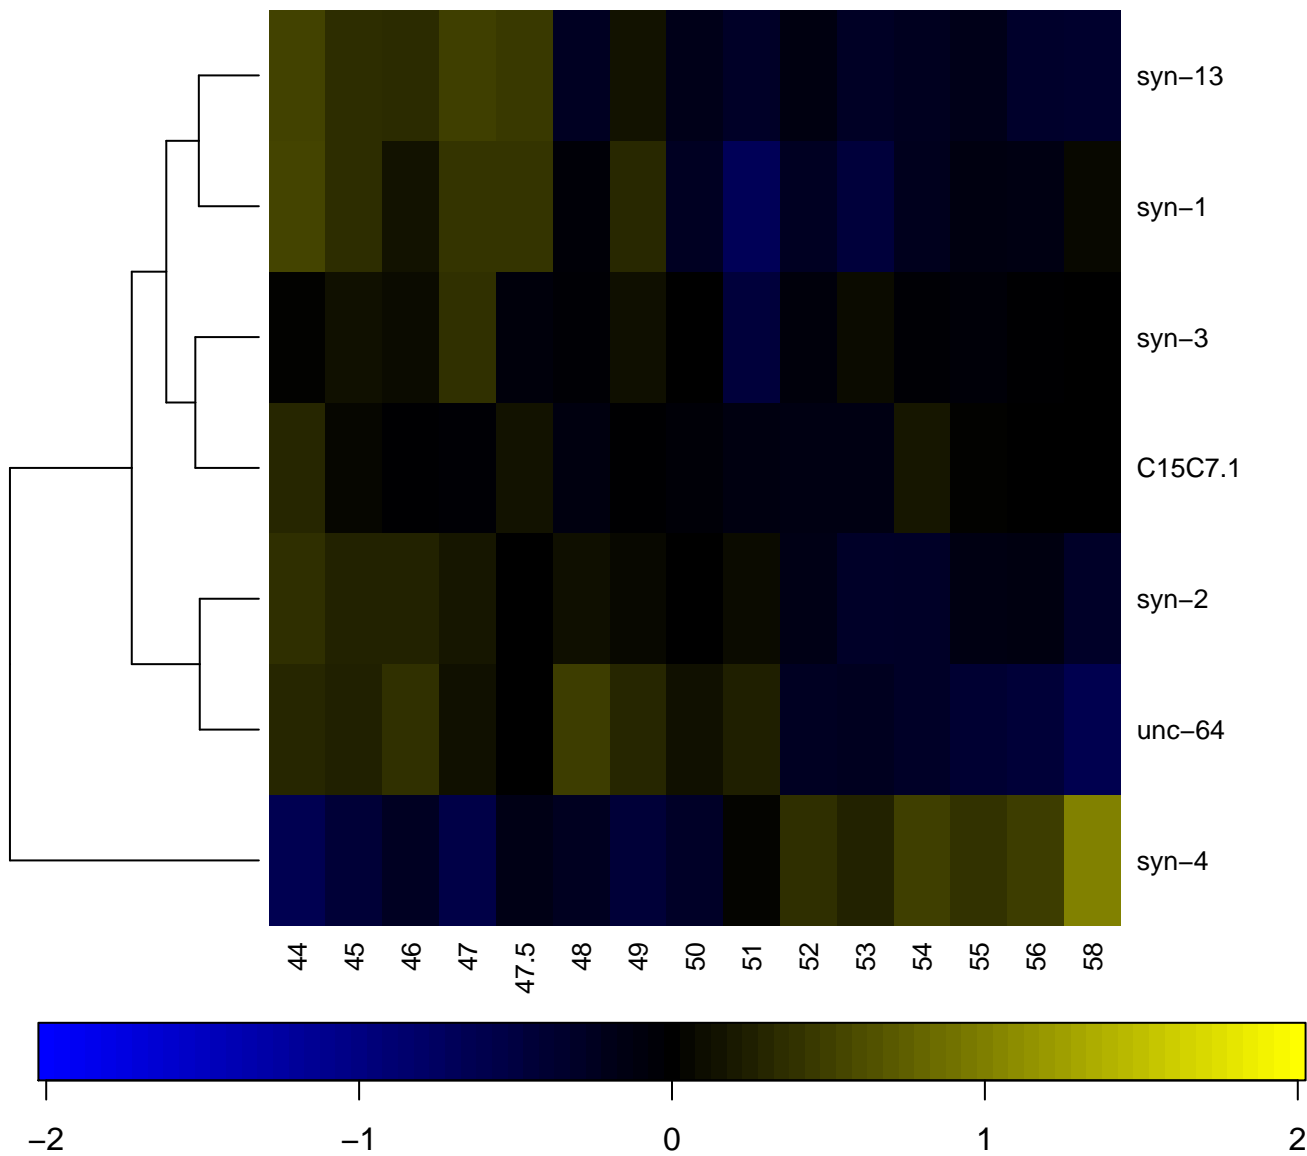

# T-box

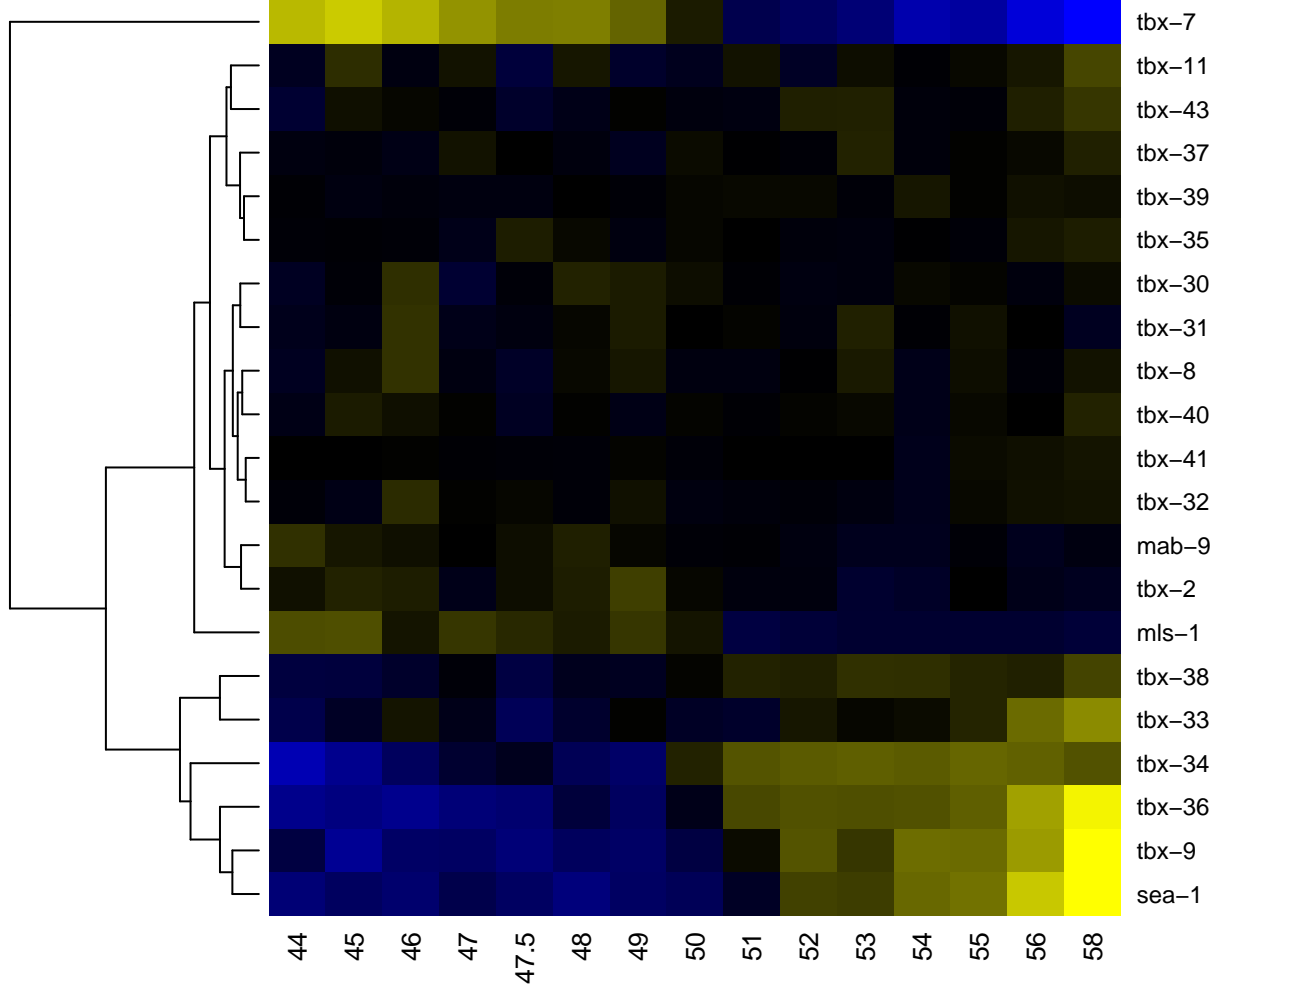



# Target SNARE coiled-coil domain

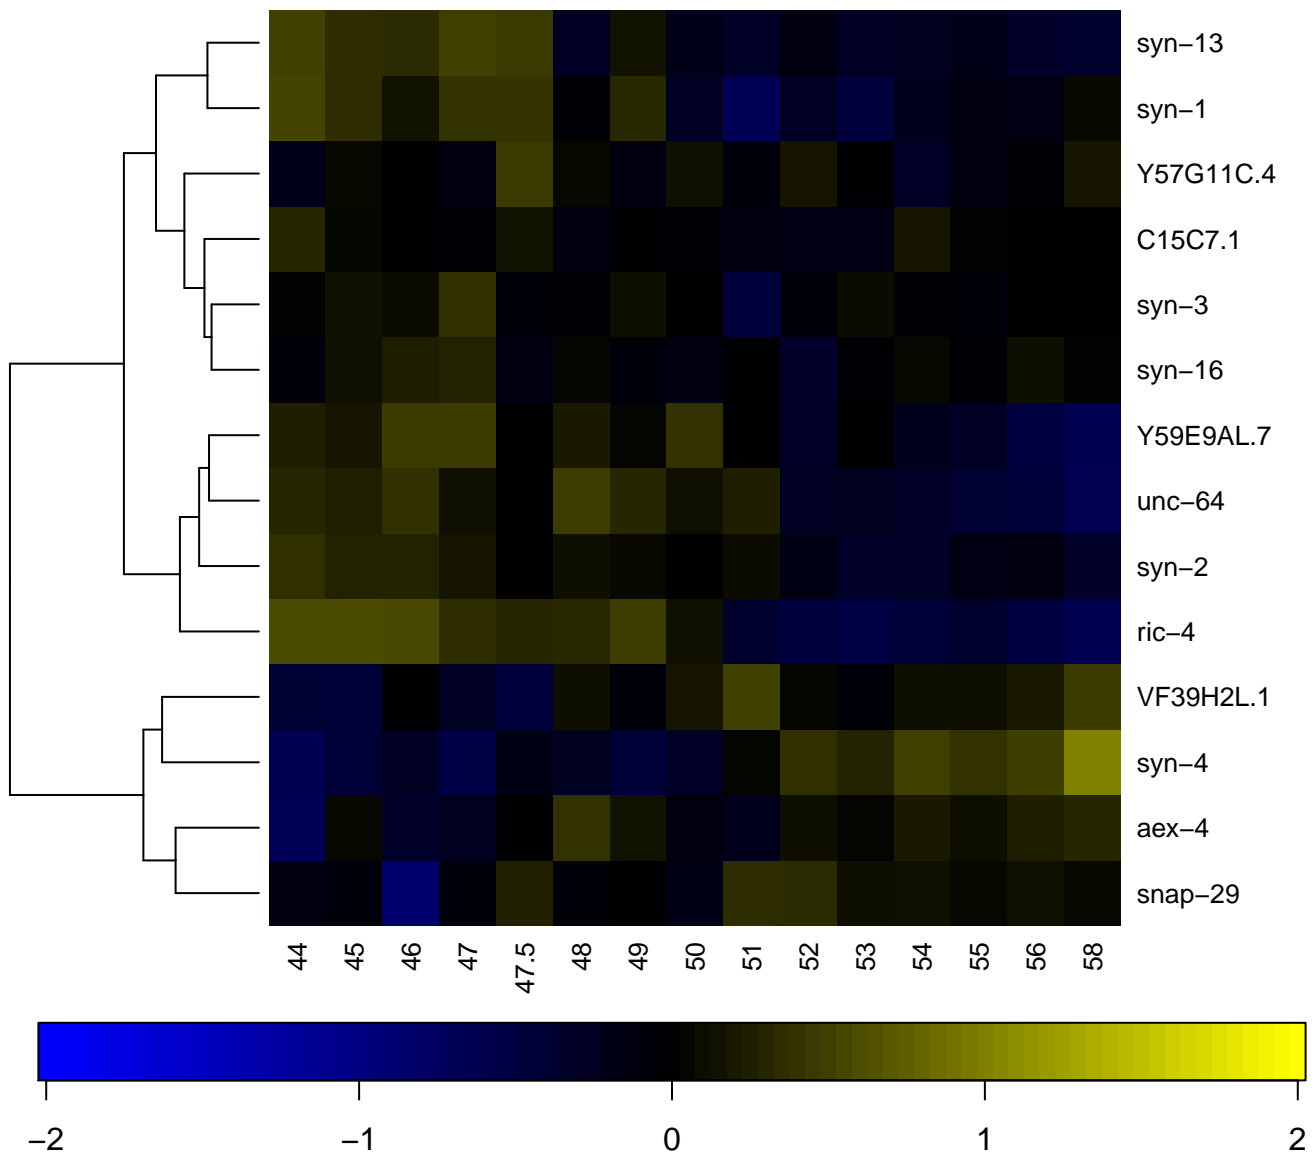



# TAZ zinc finger

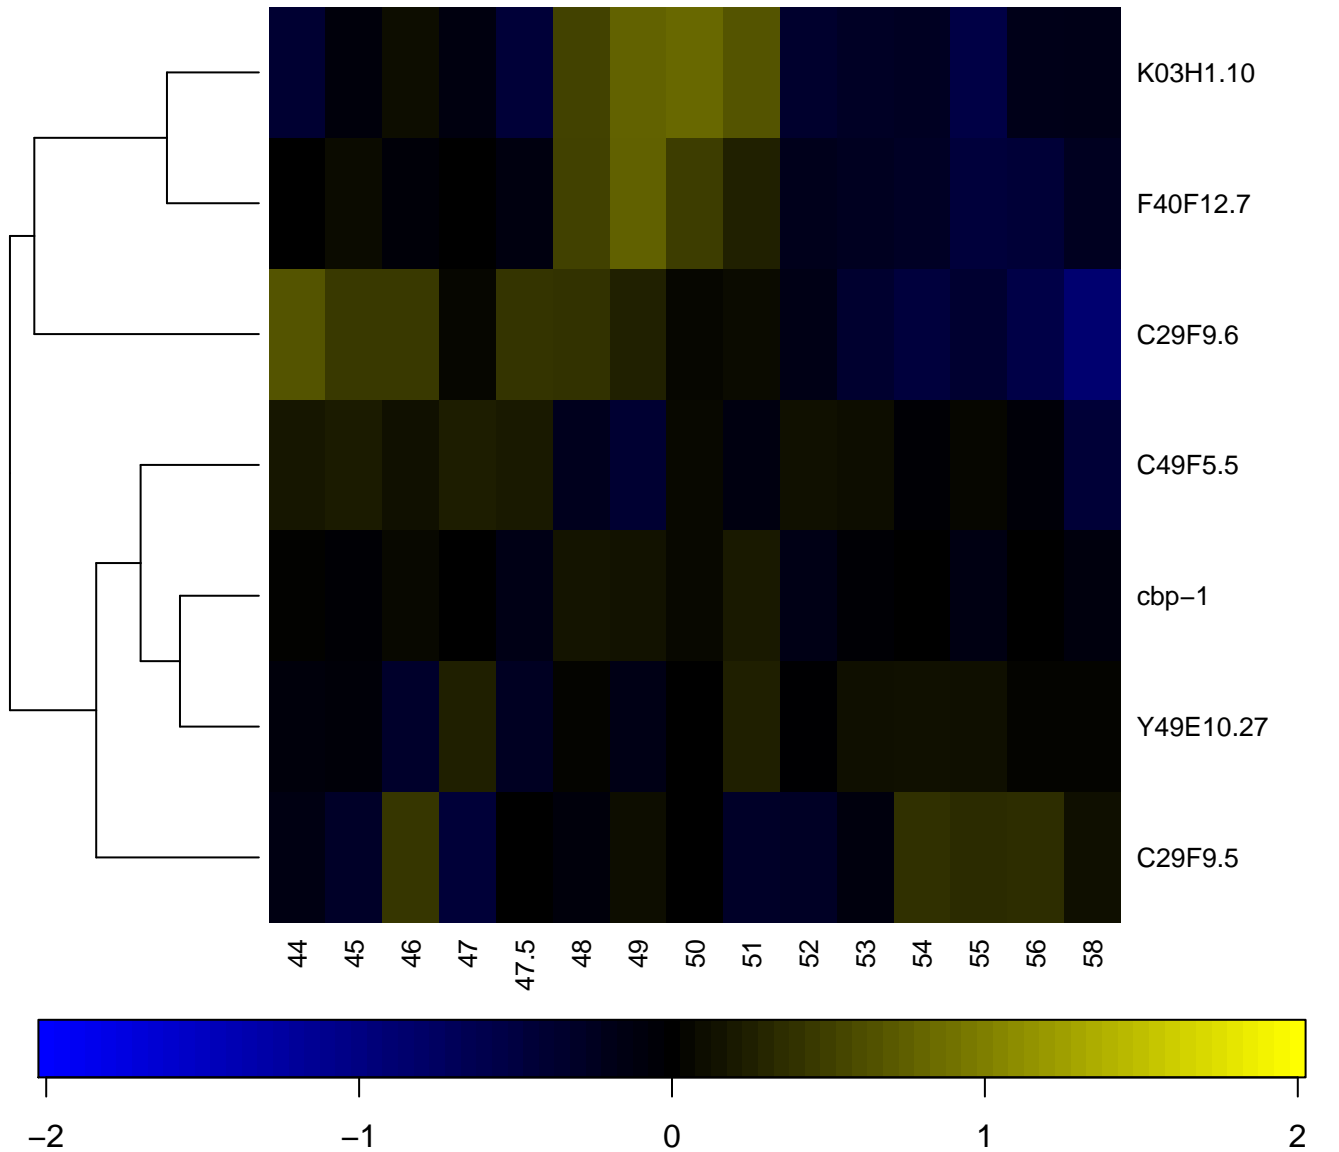

# TB2/DP1, HVA22 family

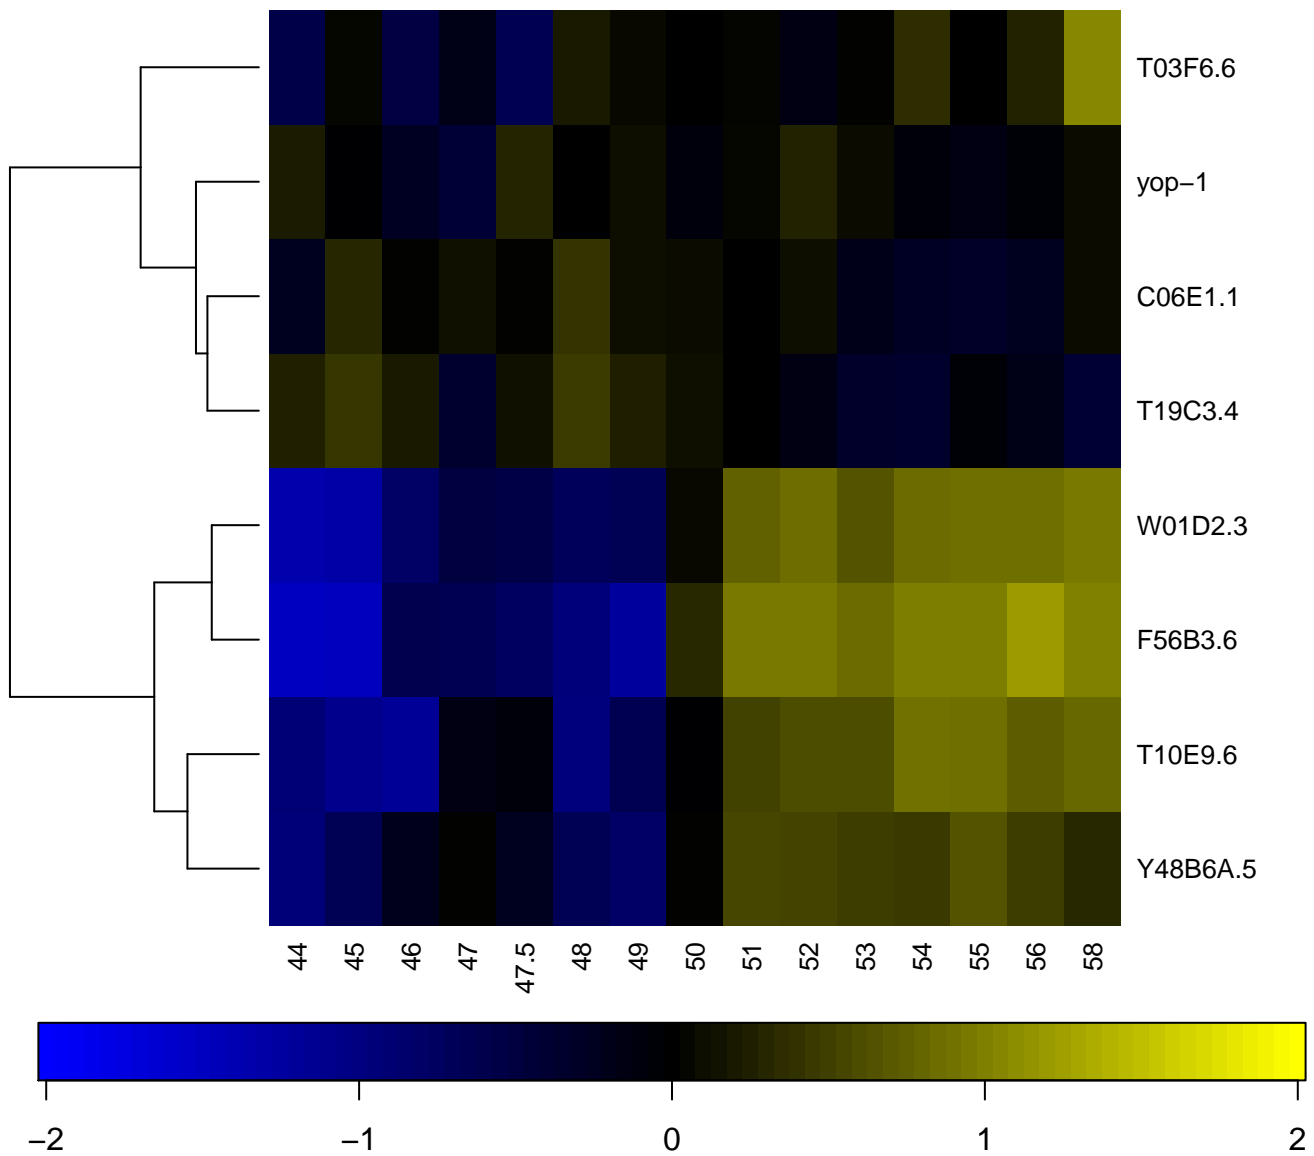

# TB2/DP1/HVA22 related protein

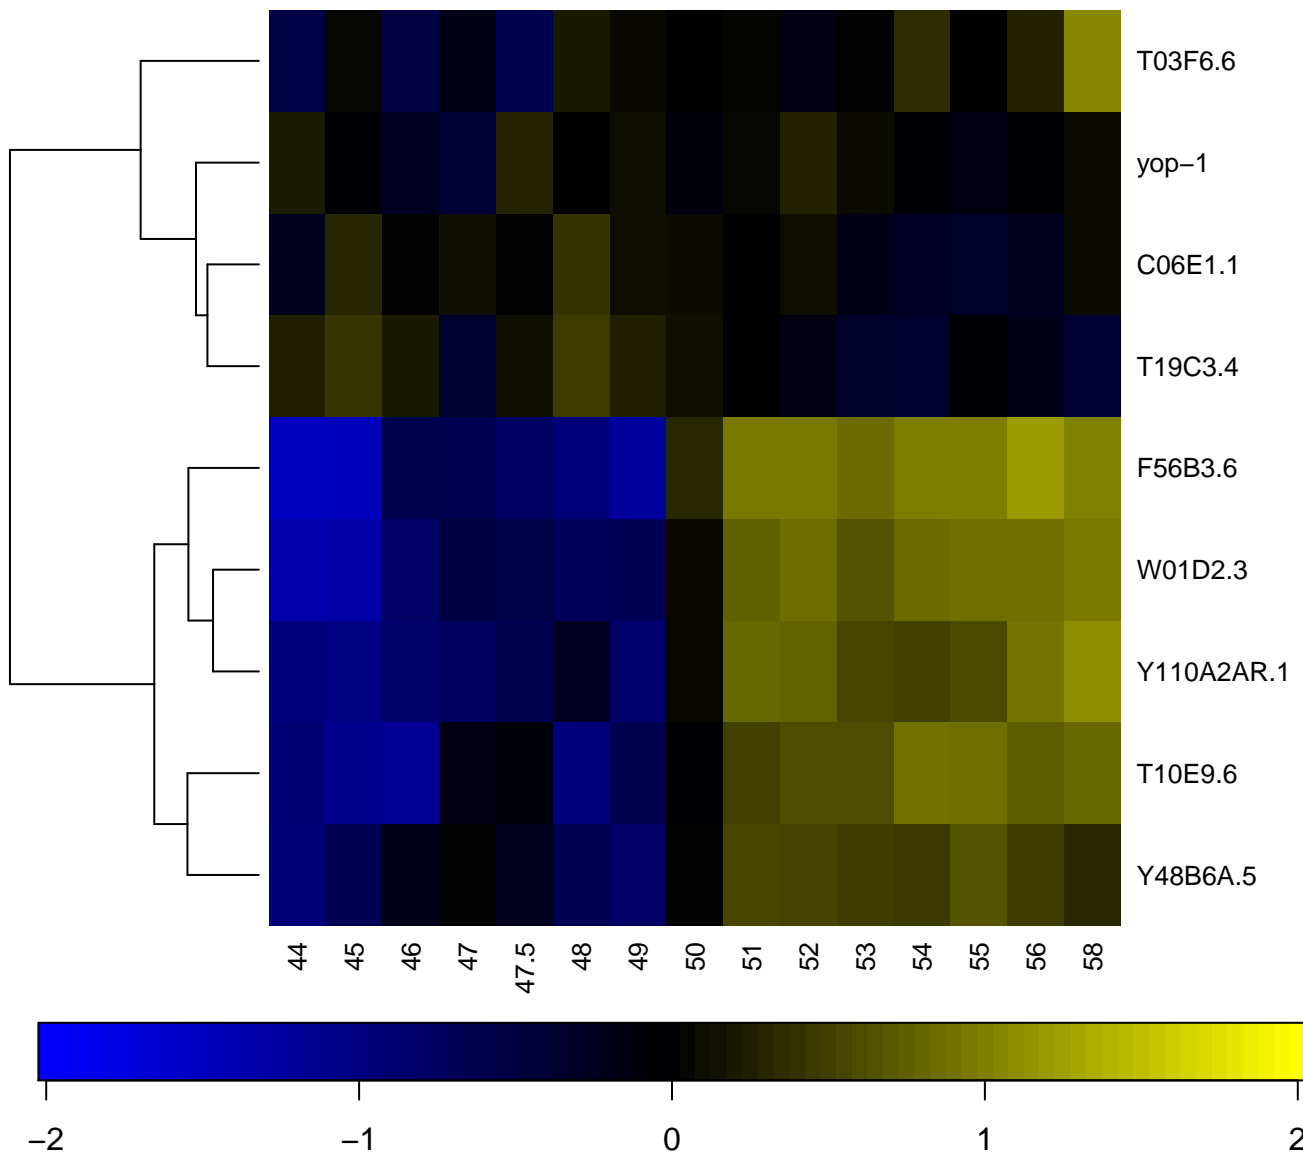





# Tetraspanin

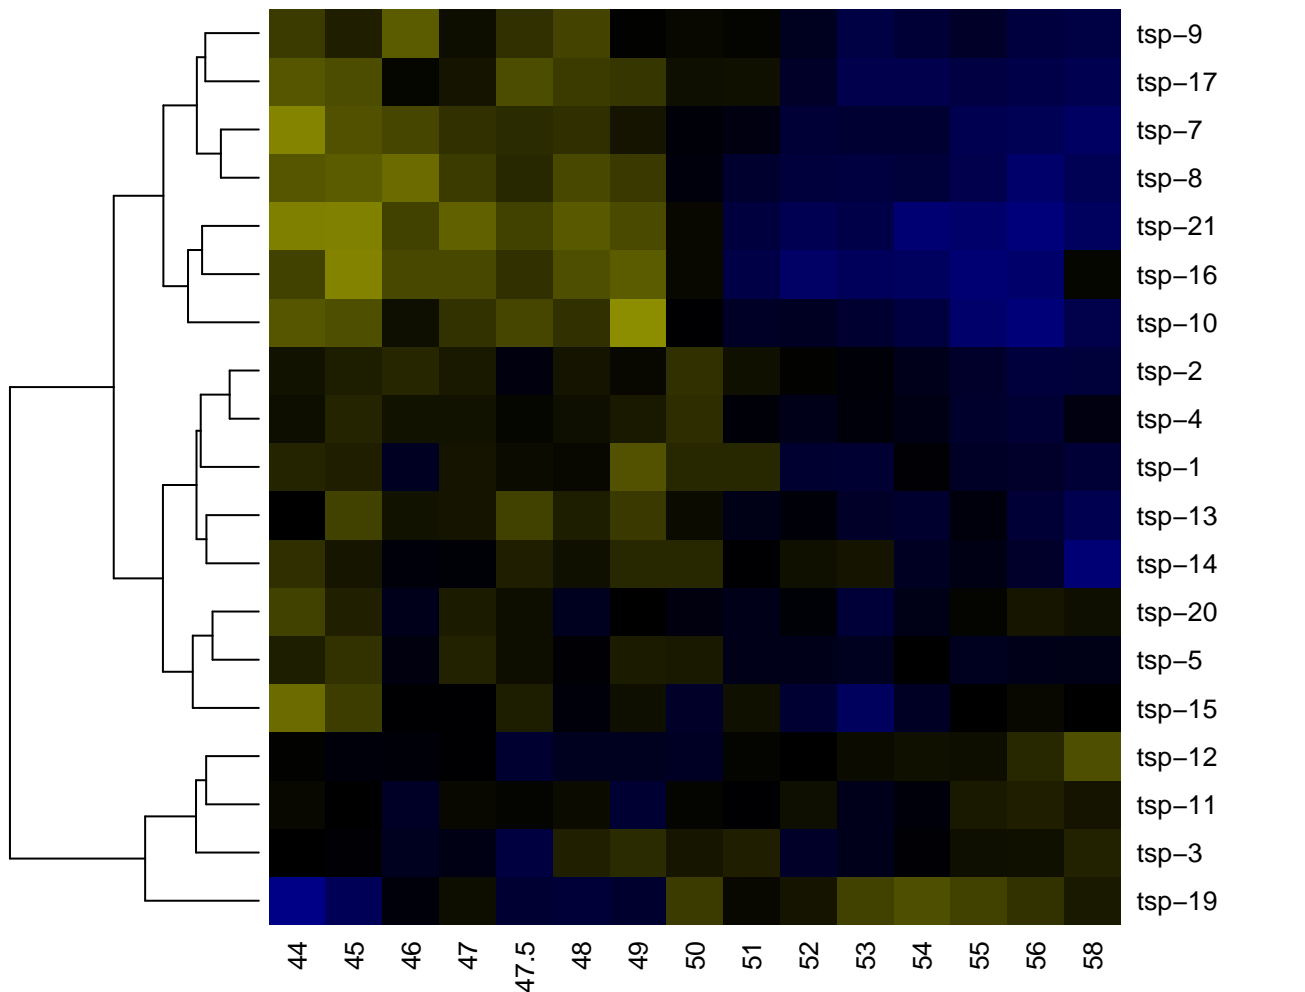



# Tetraspanin family

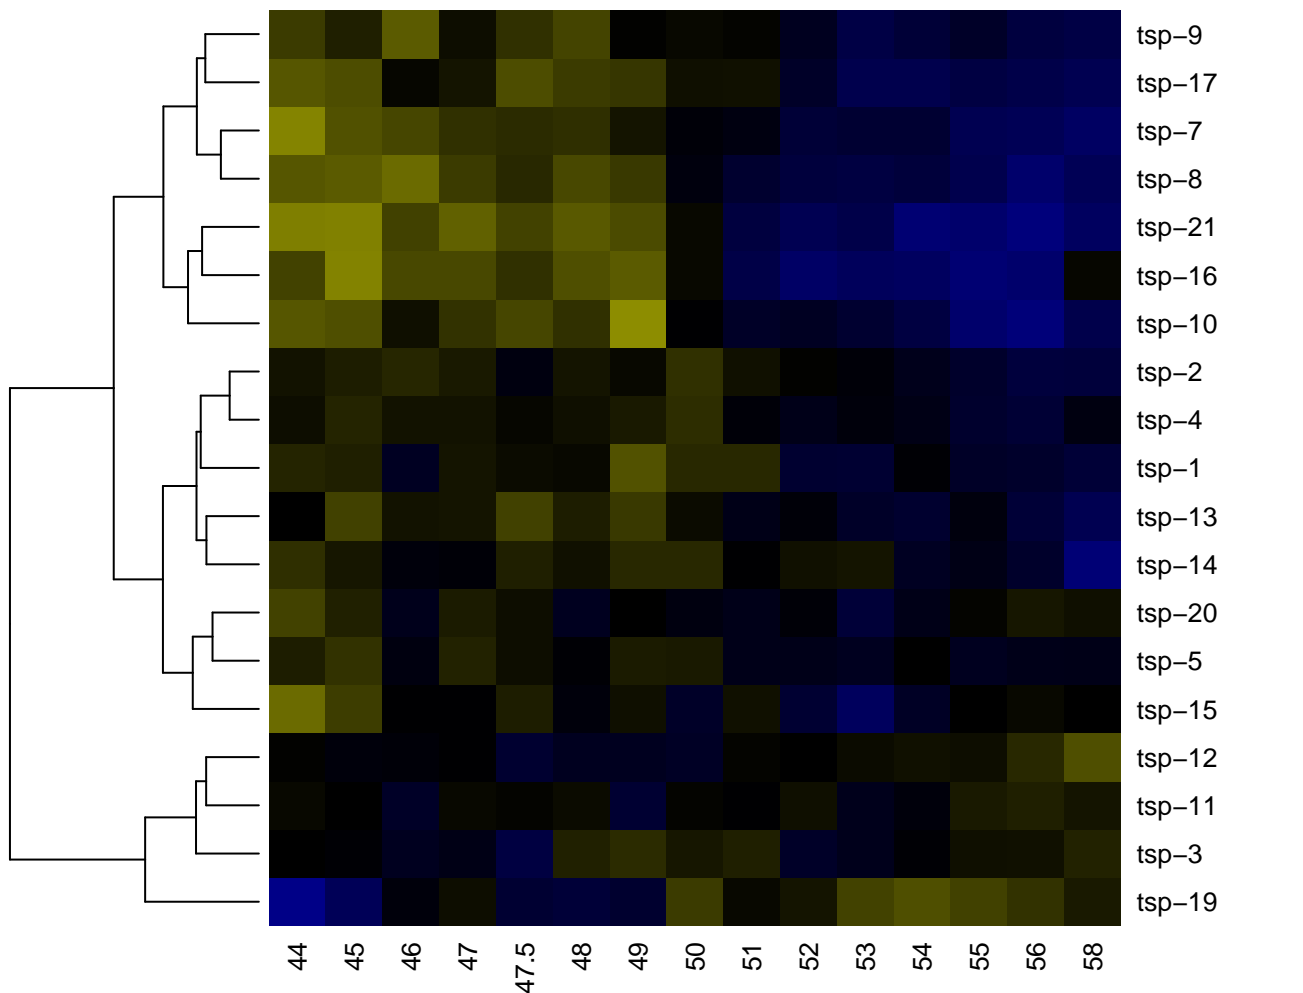



# Tetratricopeptide-like helical

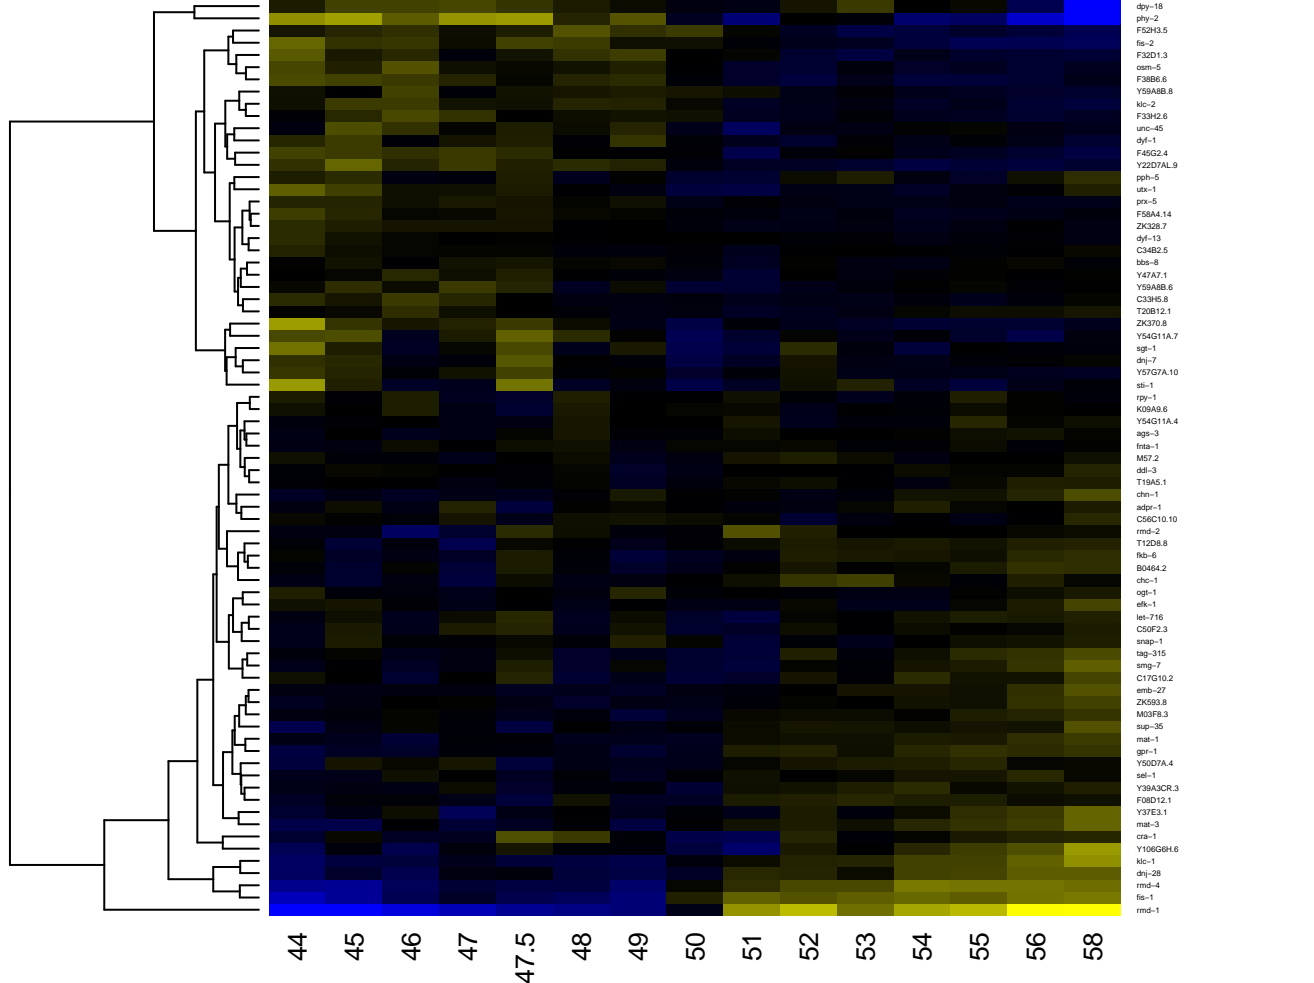









# THAP domain

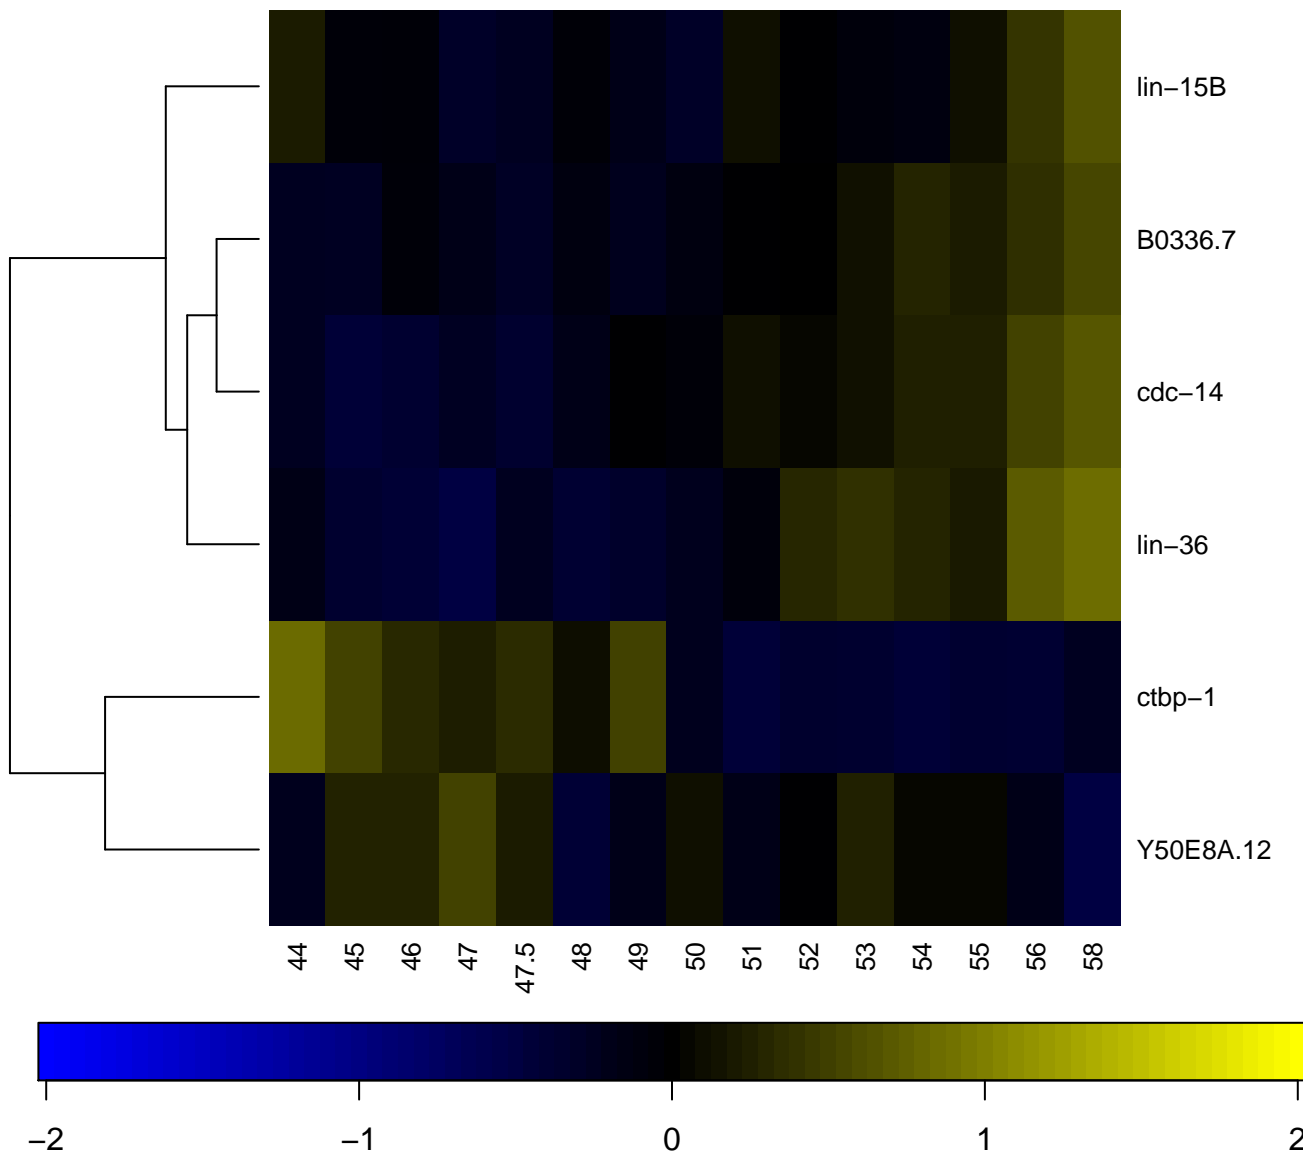



# Thaumatococcus, pathogenesis-related

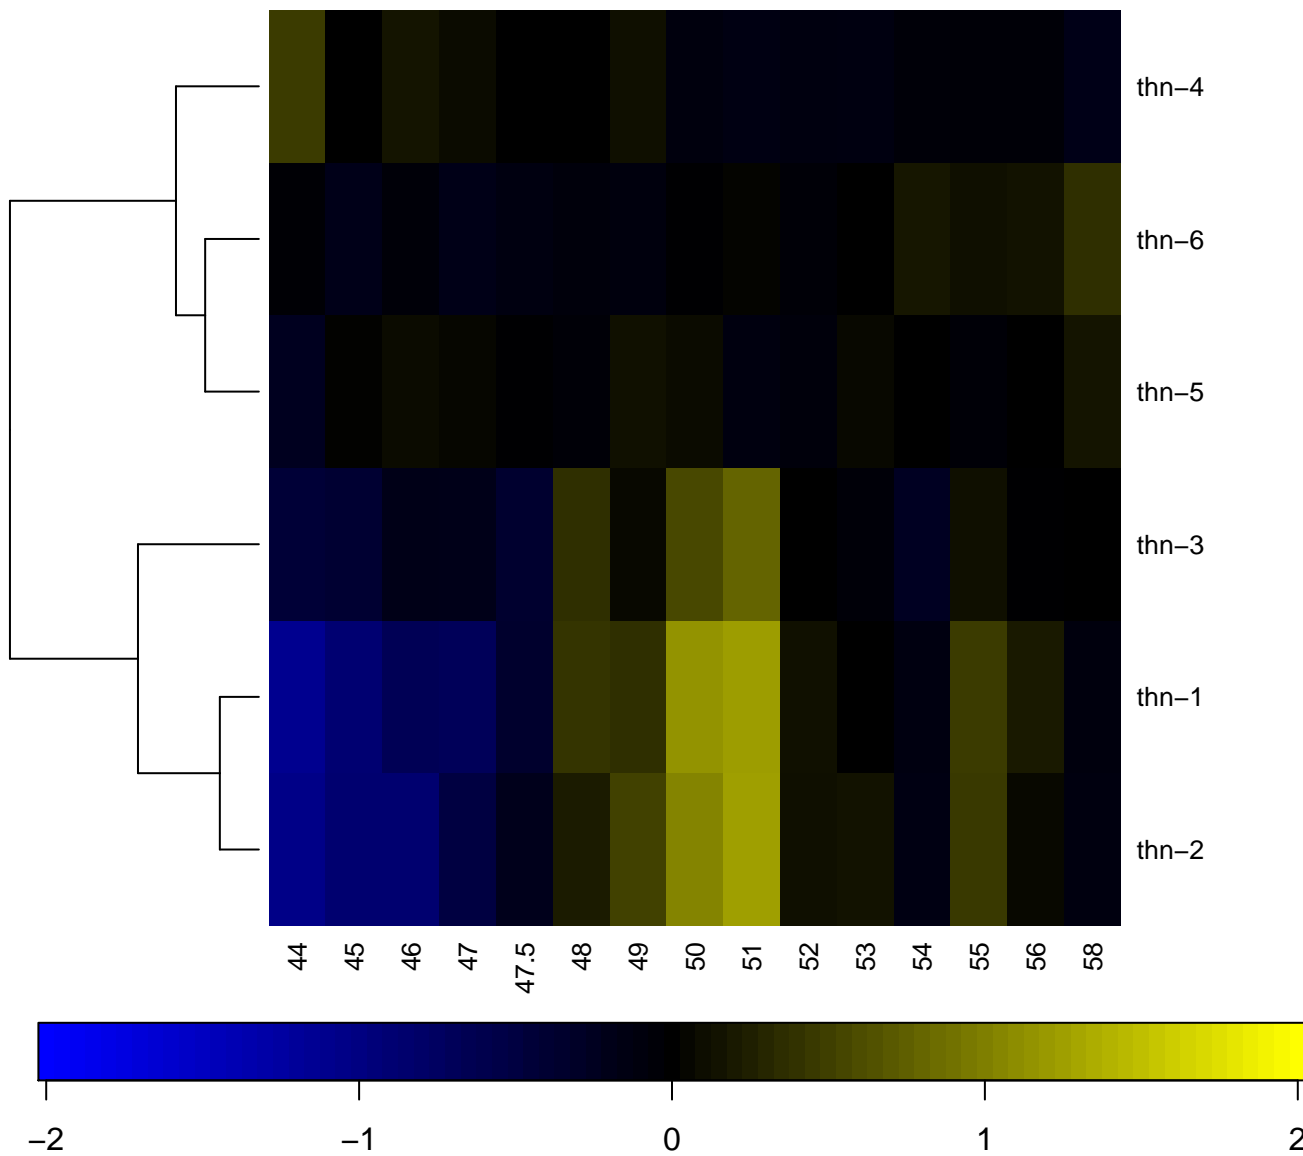

# Thi4 family

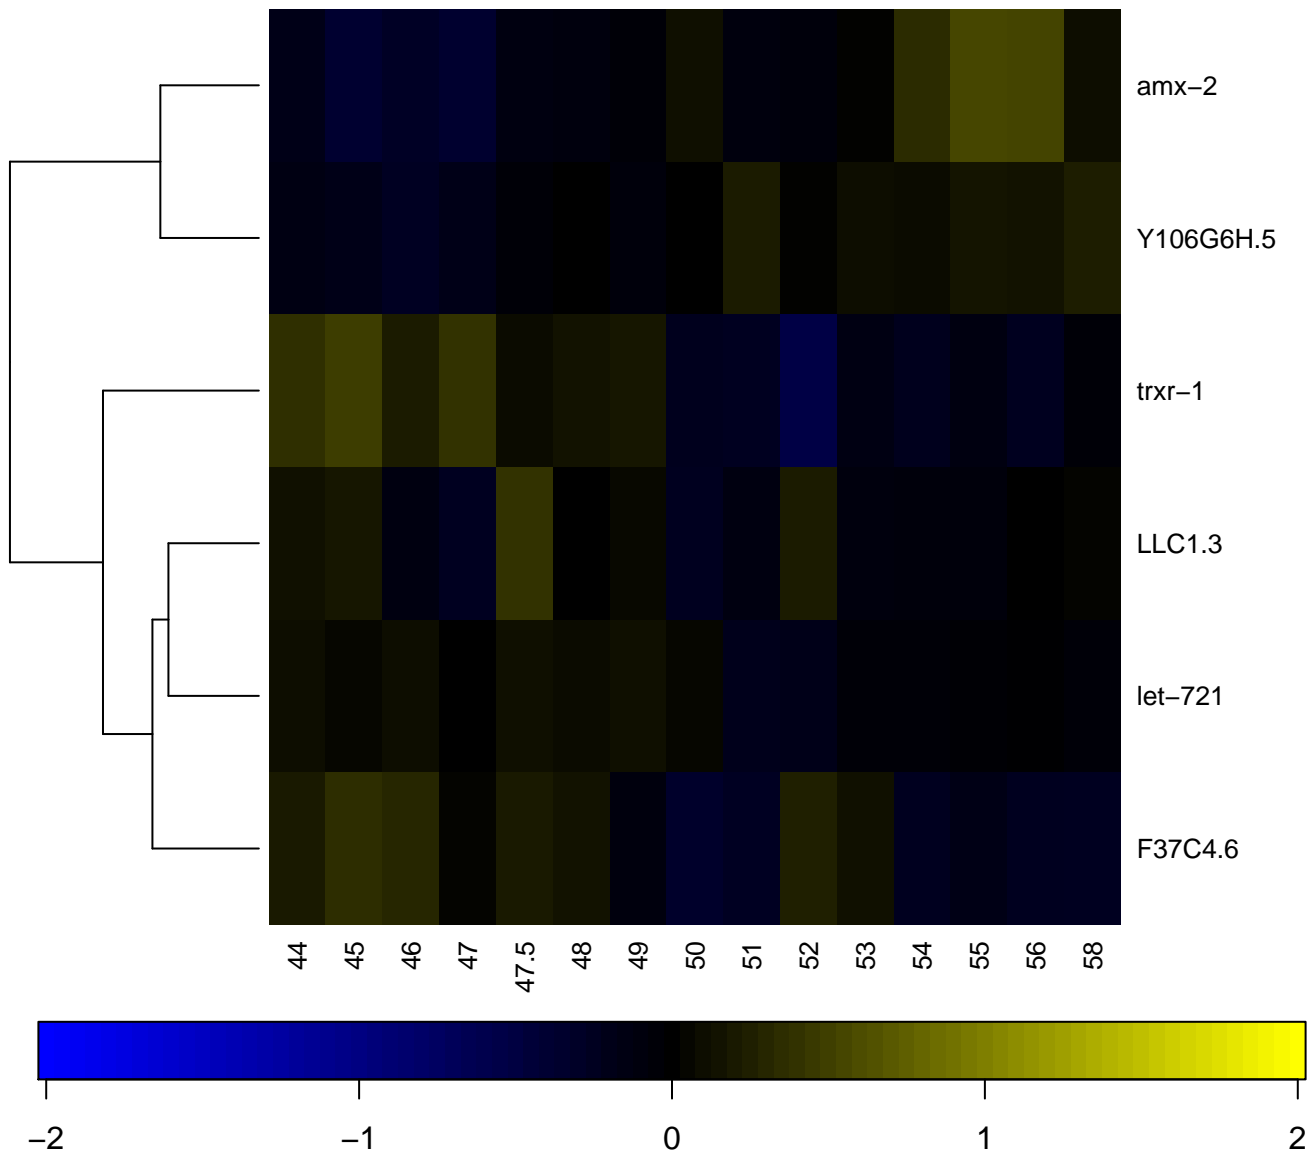



# Thioesterase superfamily

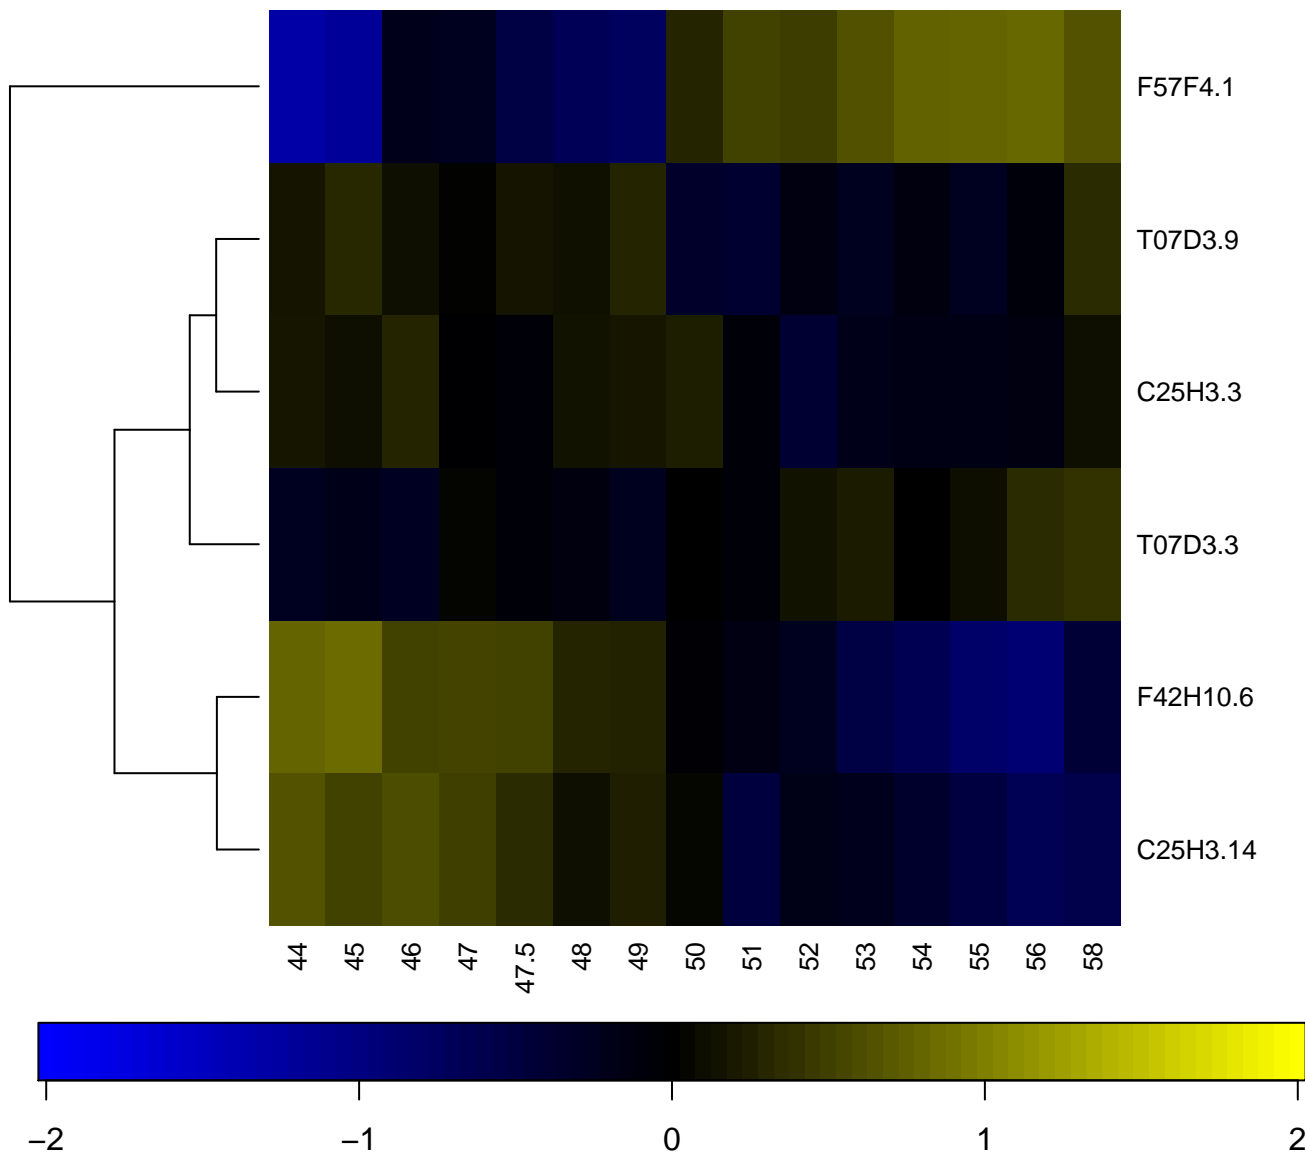







# Thiolase, C-terminal

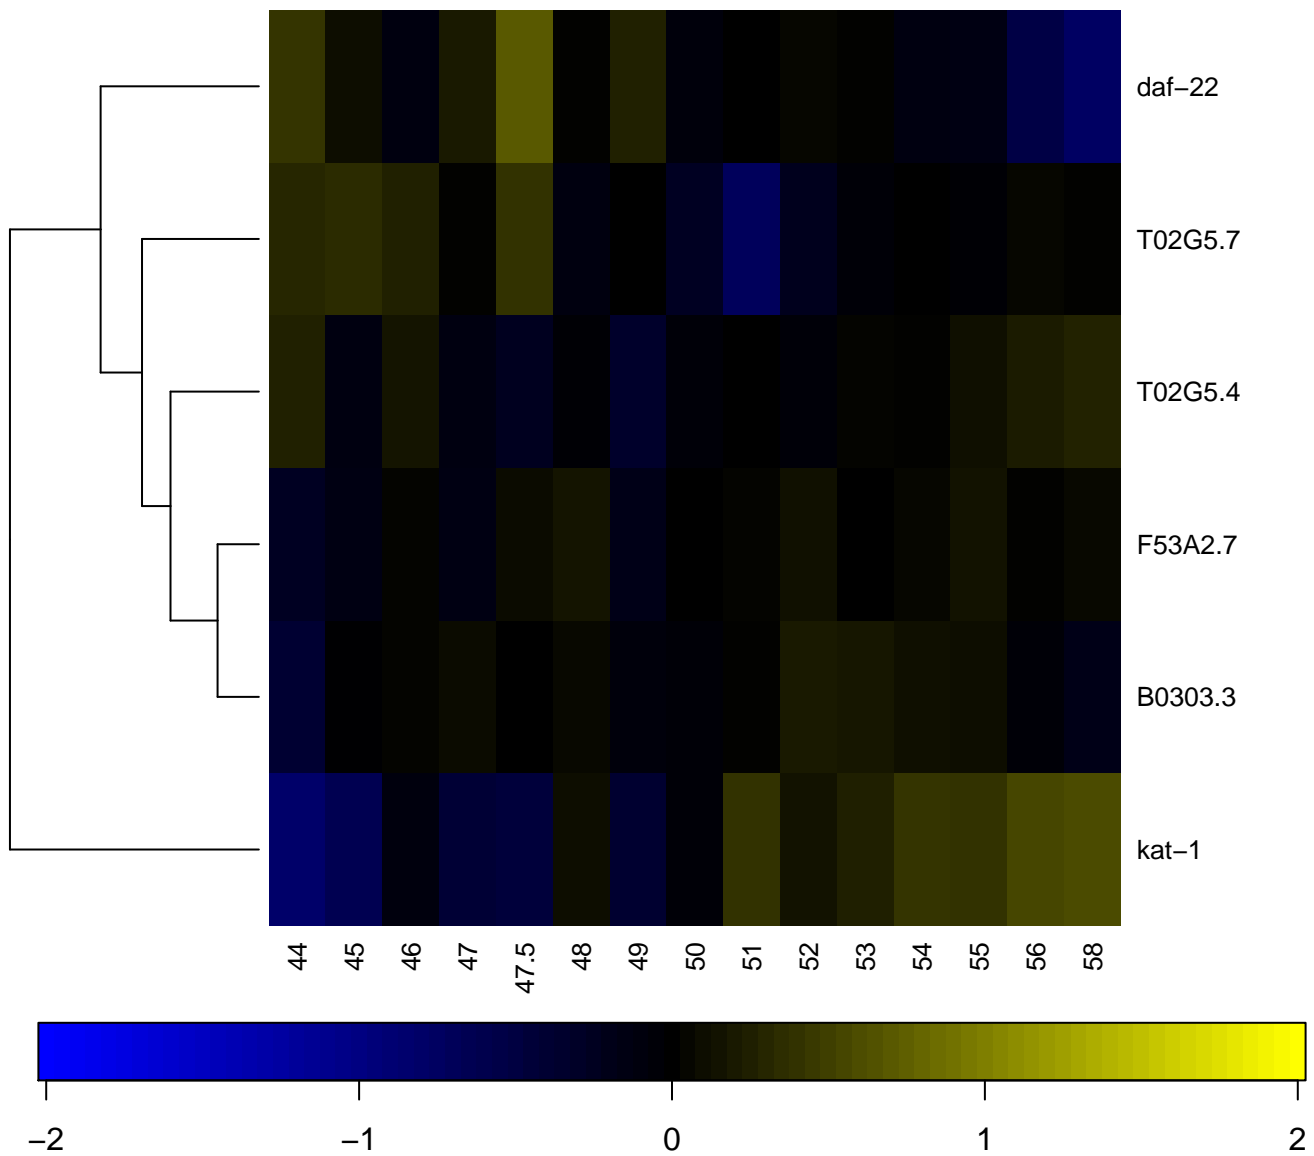



# Thiolase, C-terminal domain

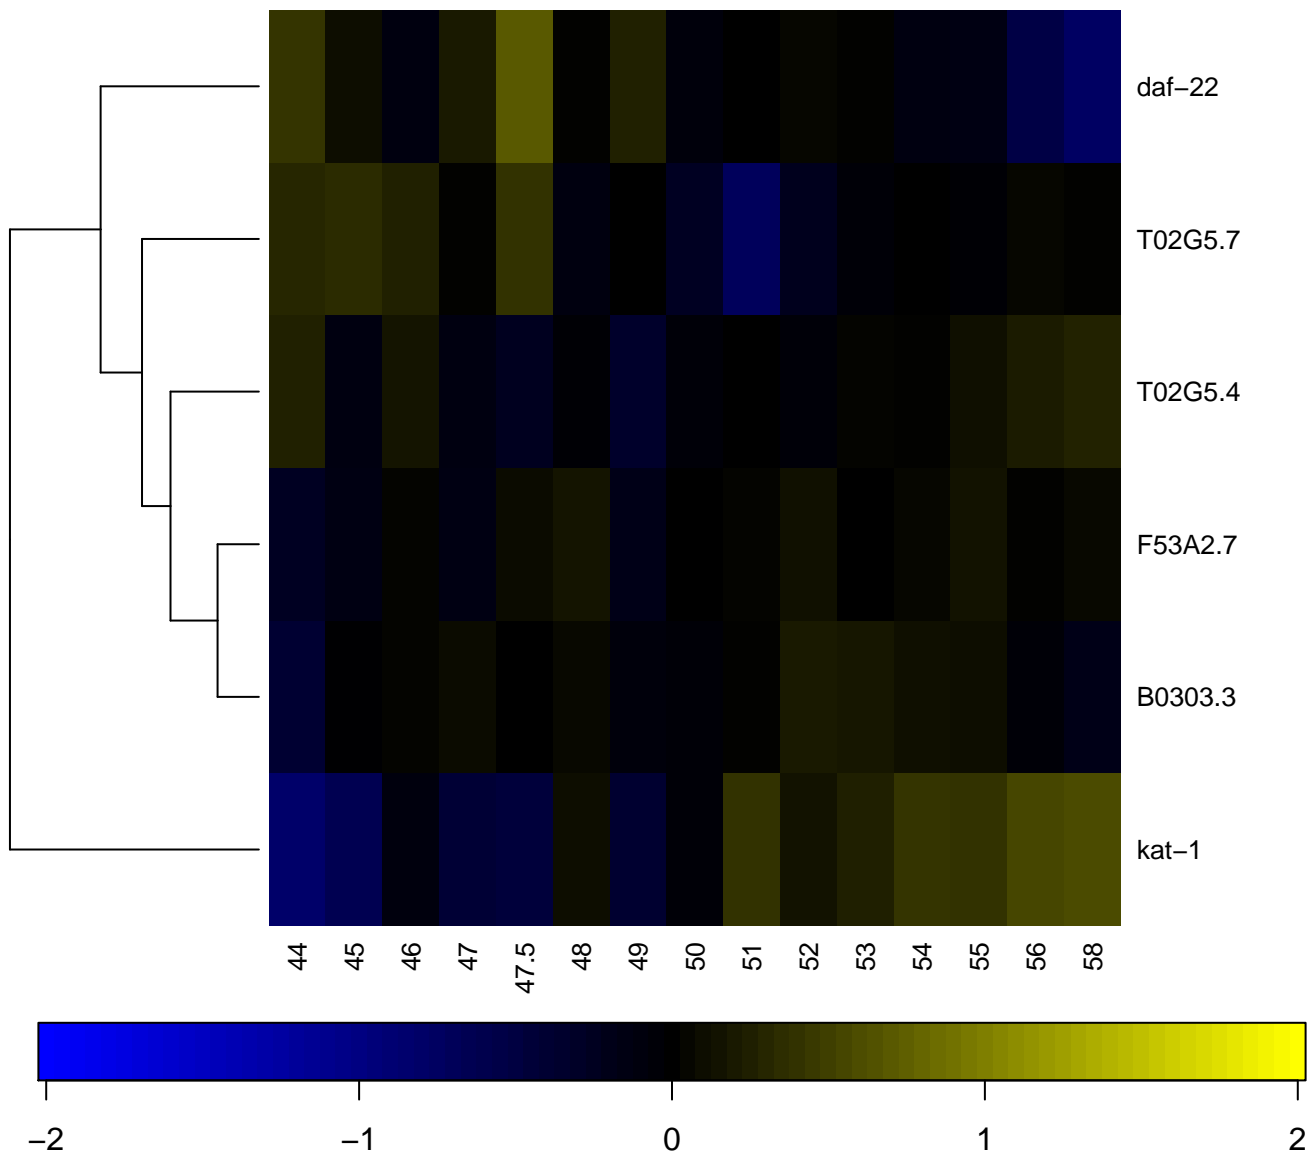

# Thiolase, conserved site



# Thiolase, N-terminal



# Thiolase, N-terminal domain



# Thioredoxin

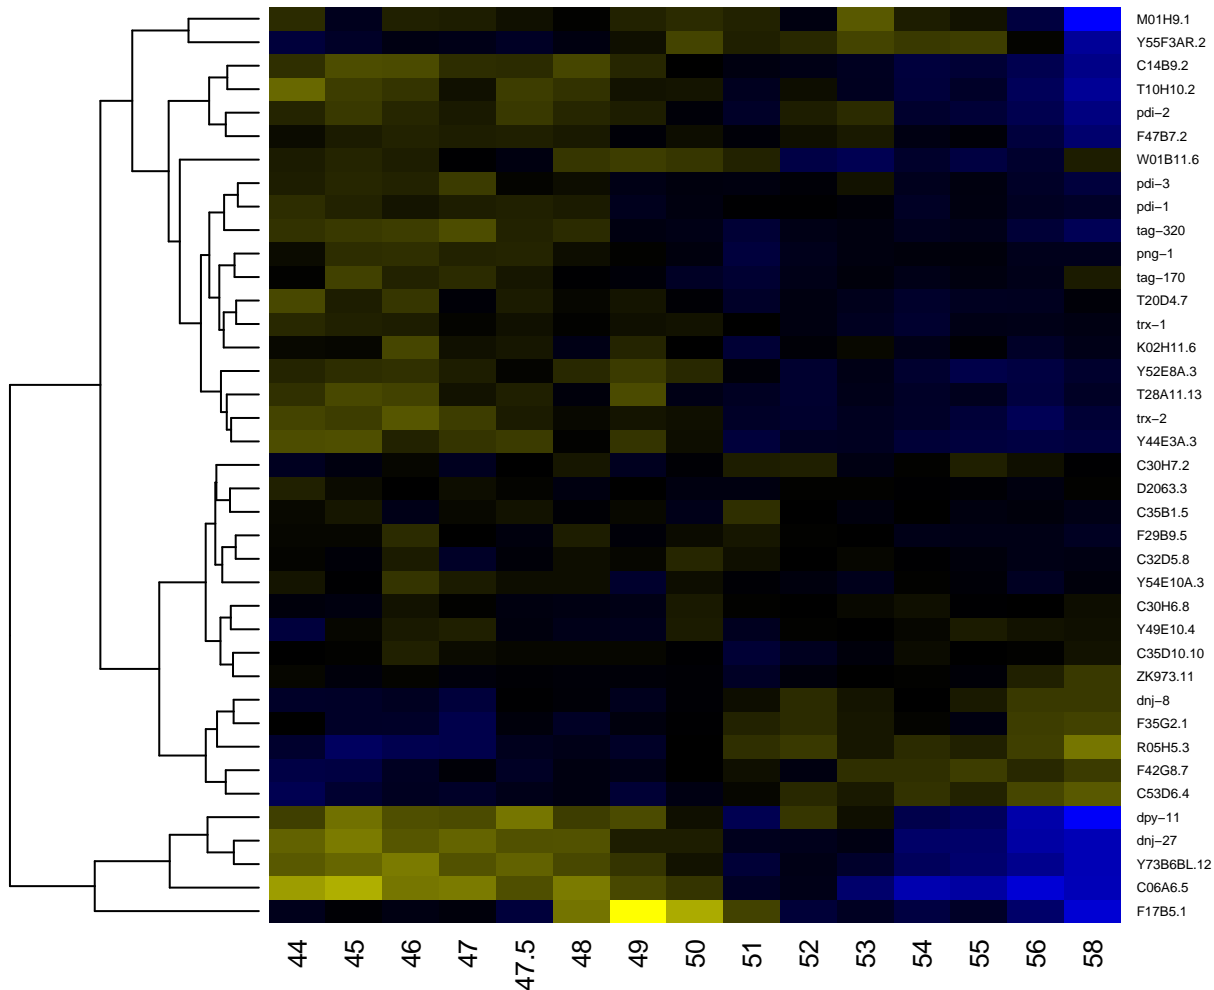

# Thioredoxin domain

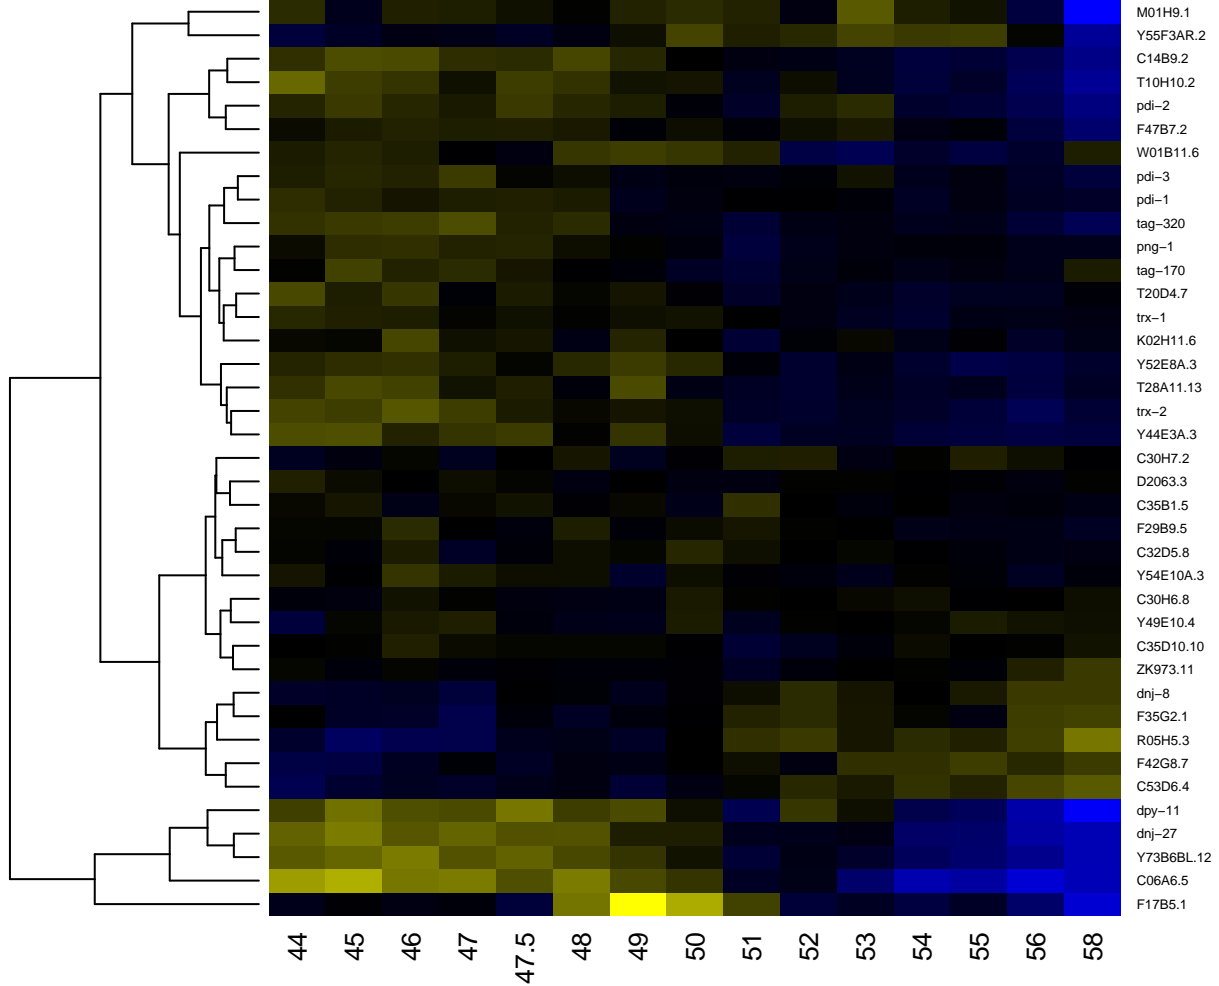

# Thioredoxin fold

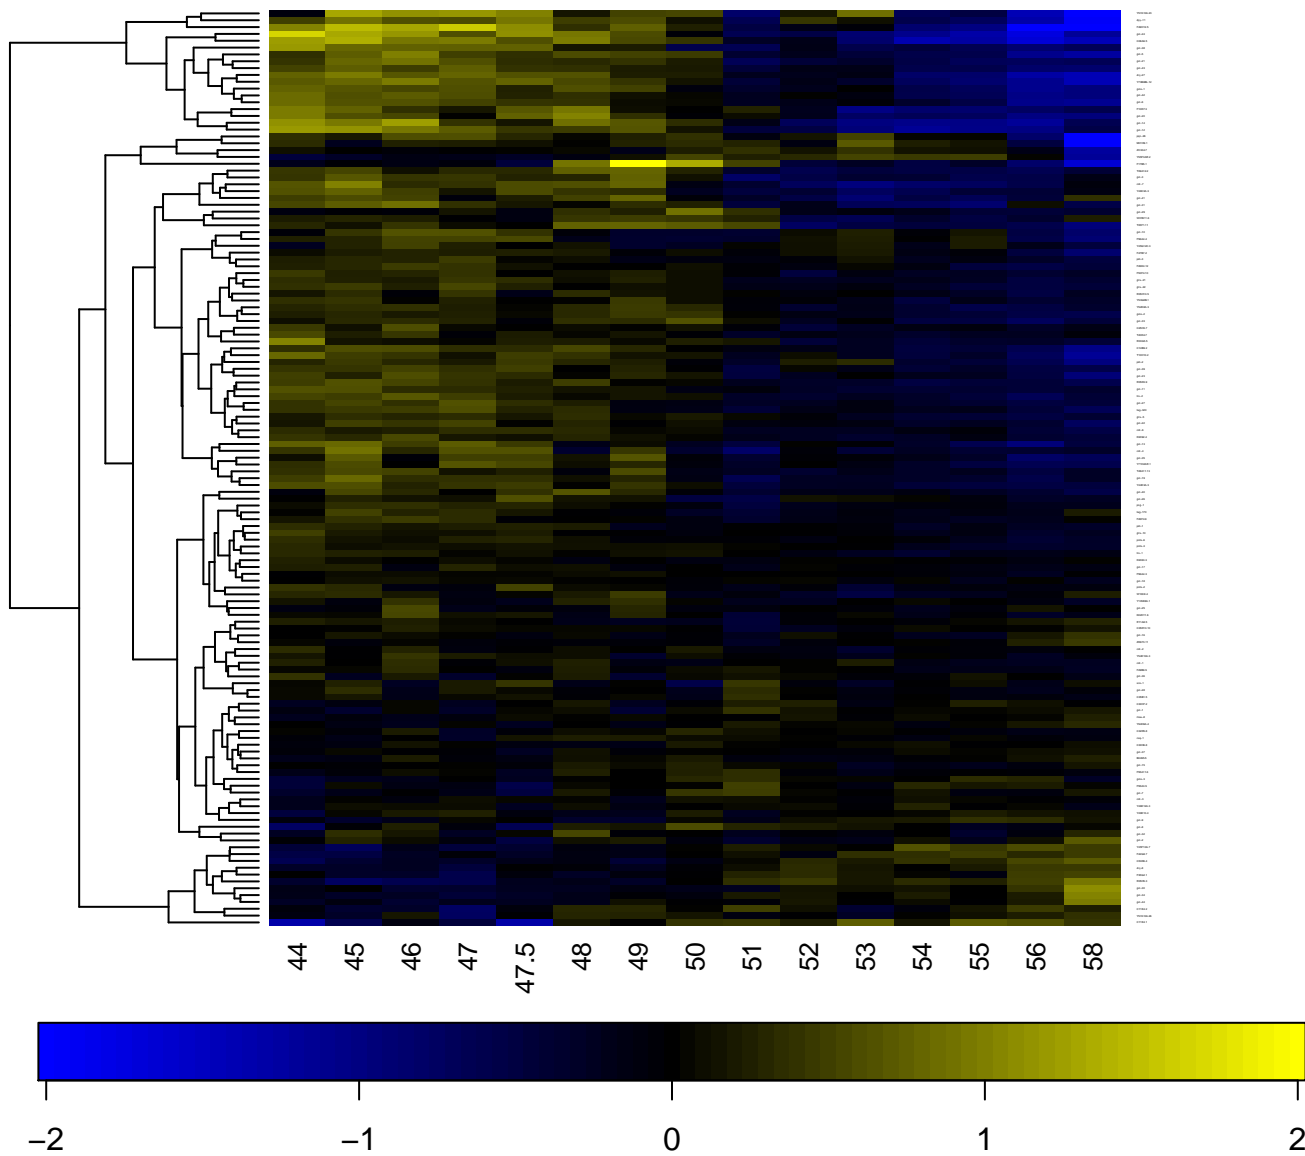





# Thrombospondin type 1 domain

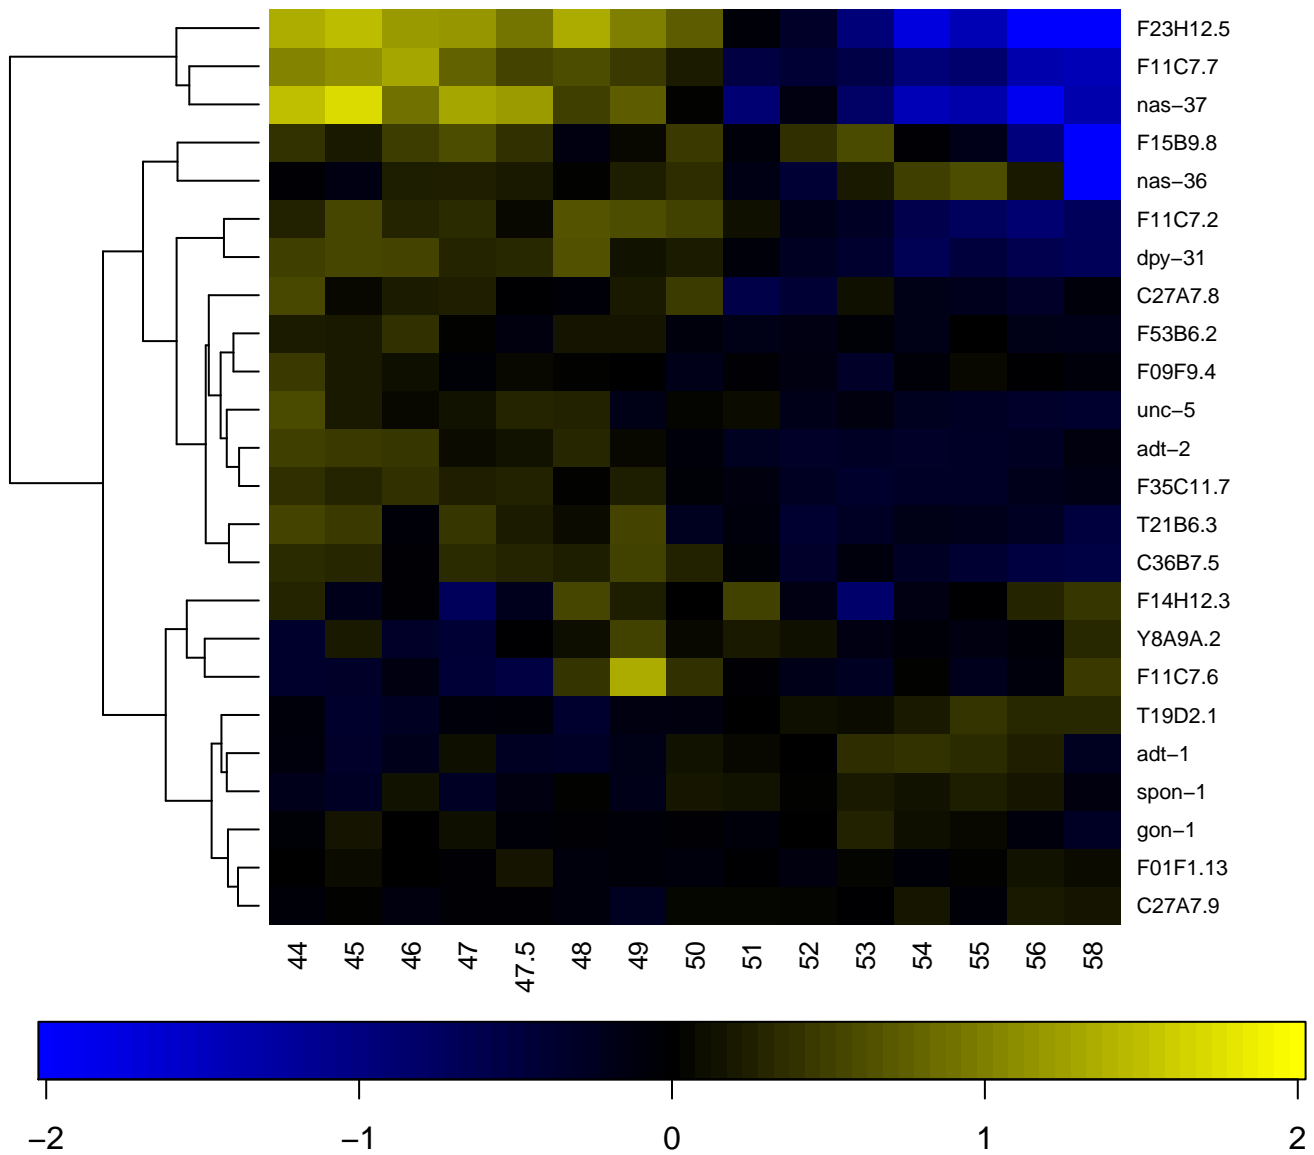

# Thrombospondin, type 1 repeat

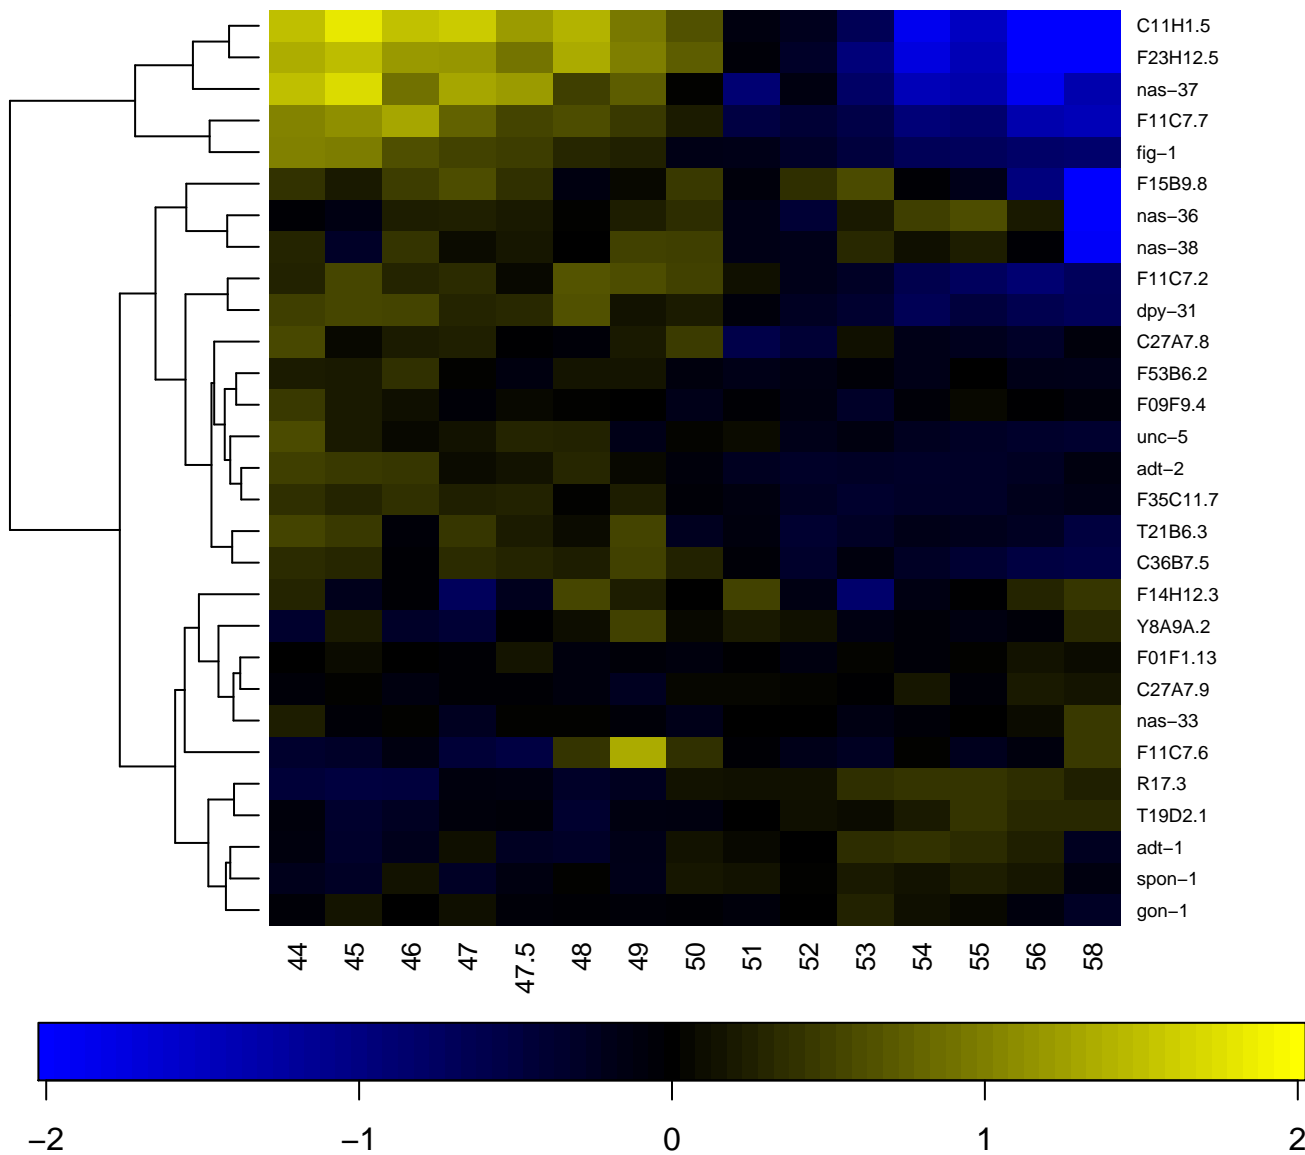

# Thyroglobulin type-1

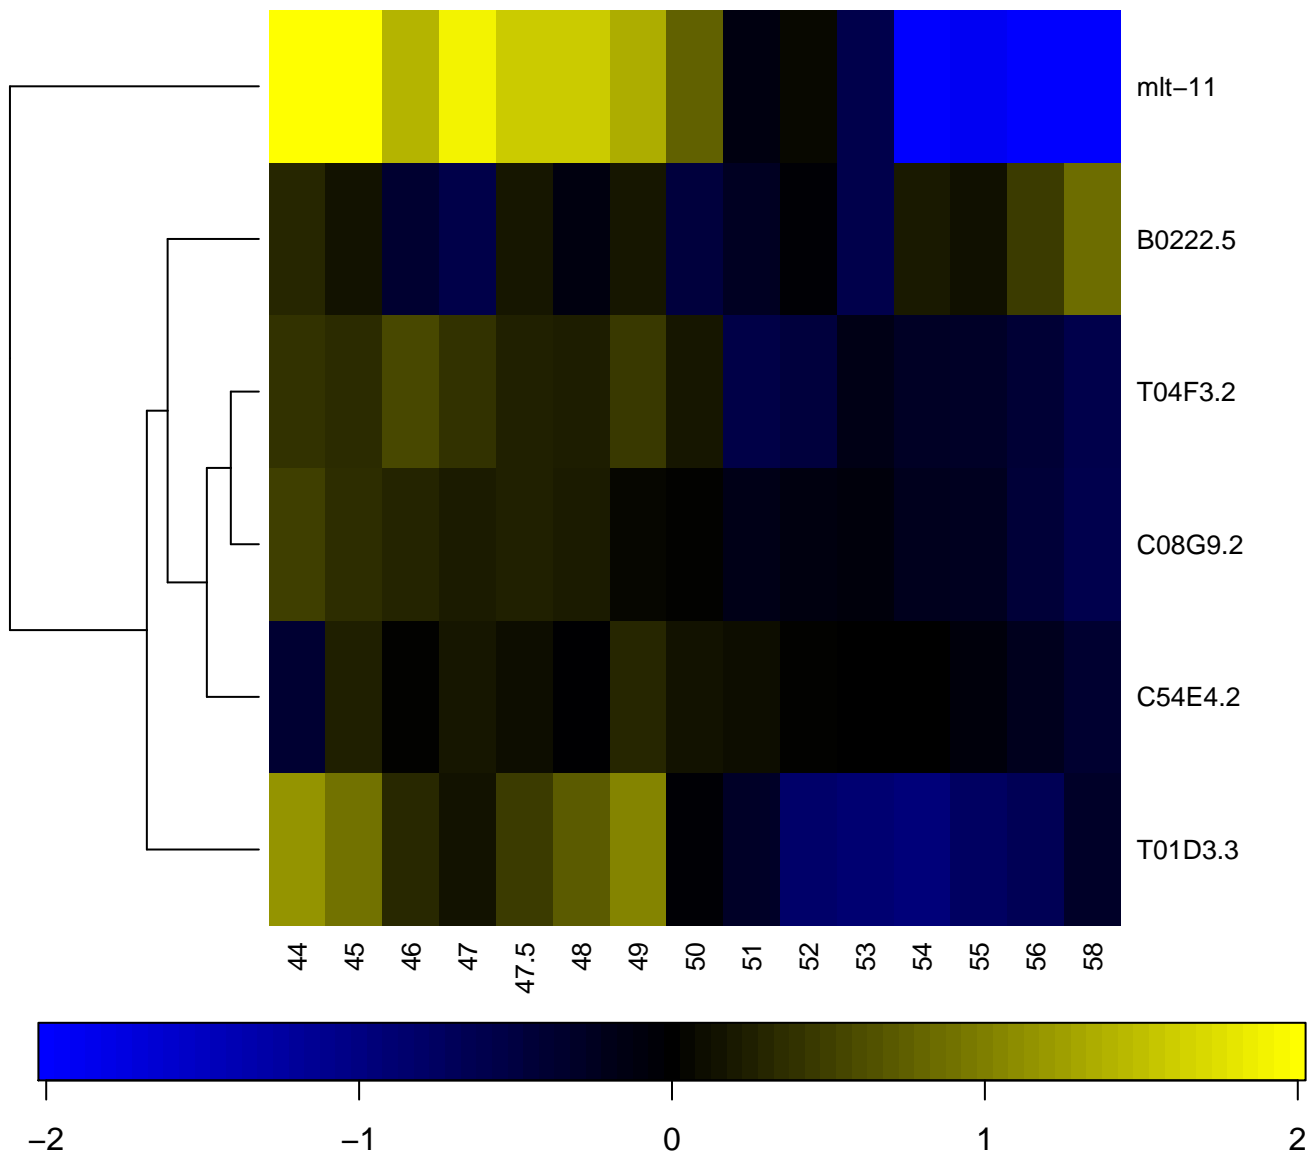





# TNFR/CD27/30/40/95 cysteine-rich region

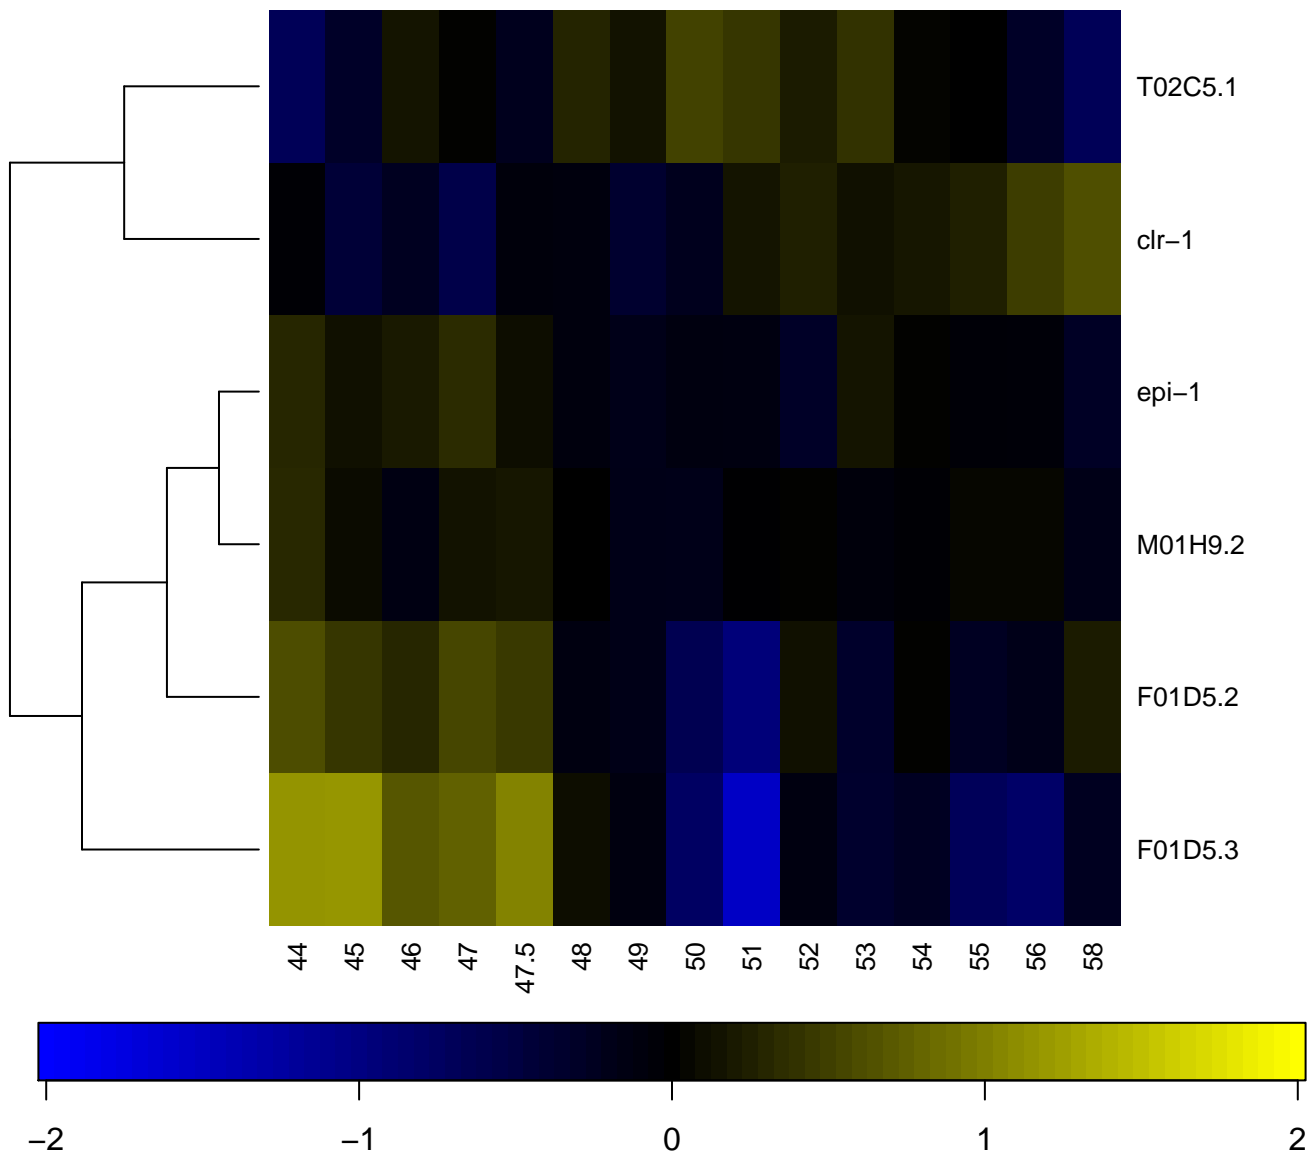

# TonB box, conserved site

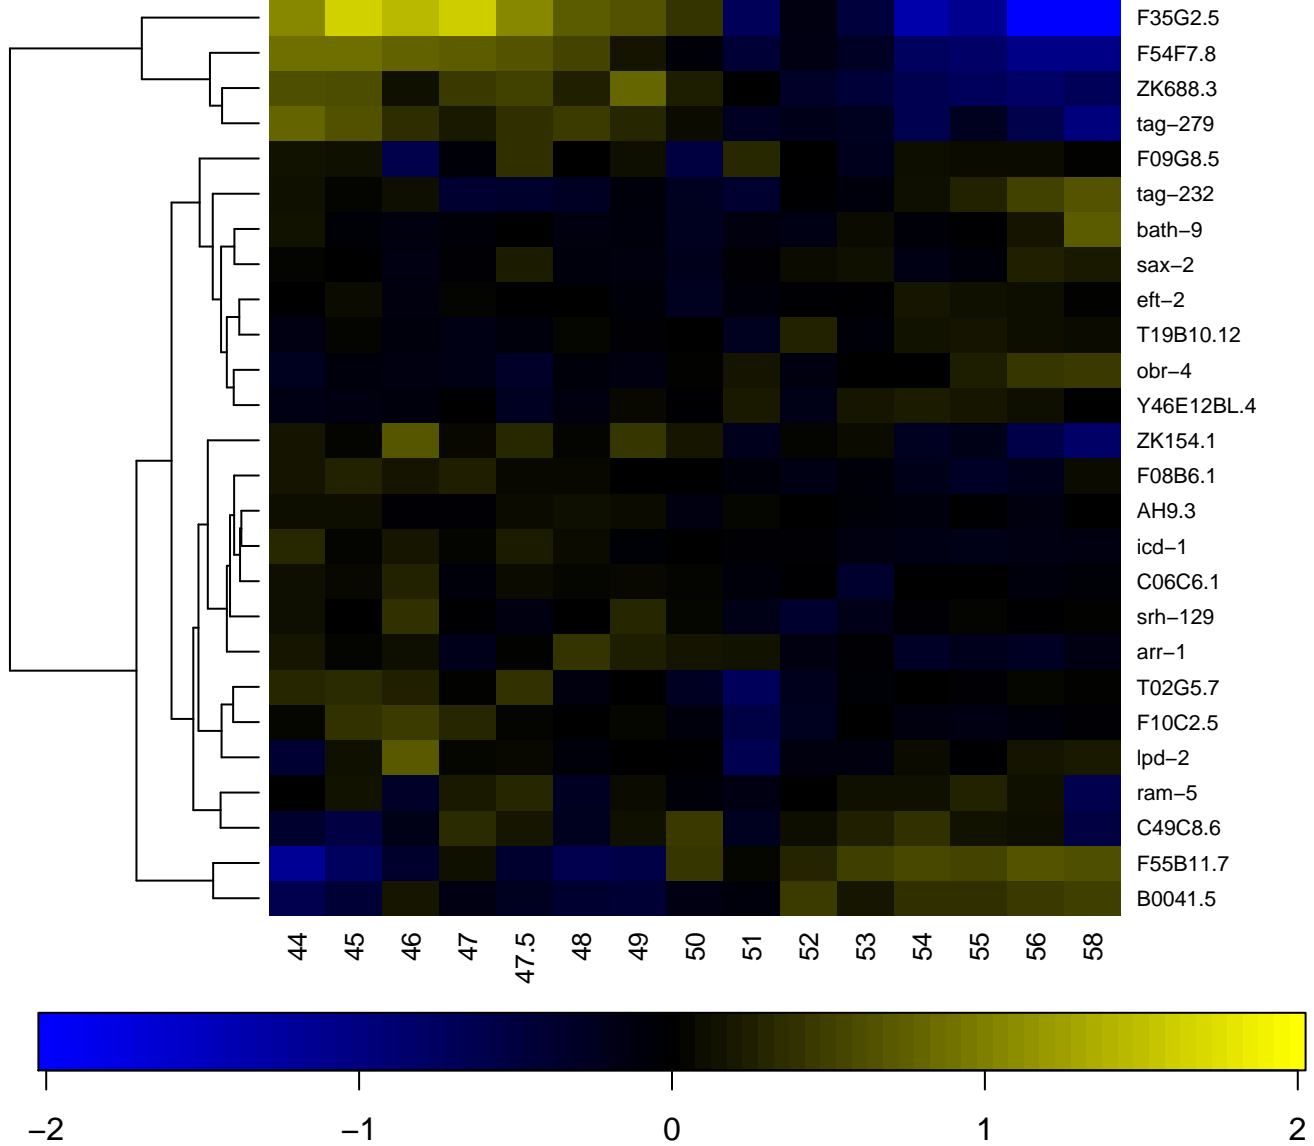

# TRA-1 regulated protein R03H10.4

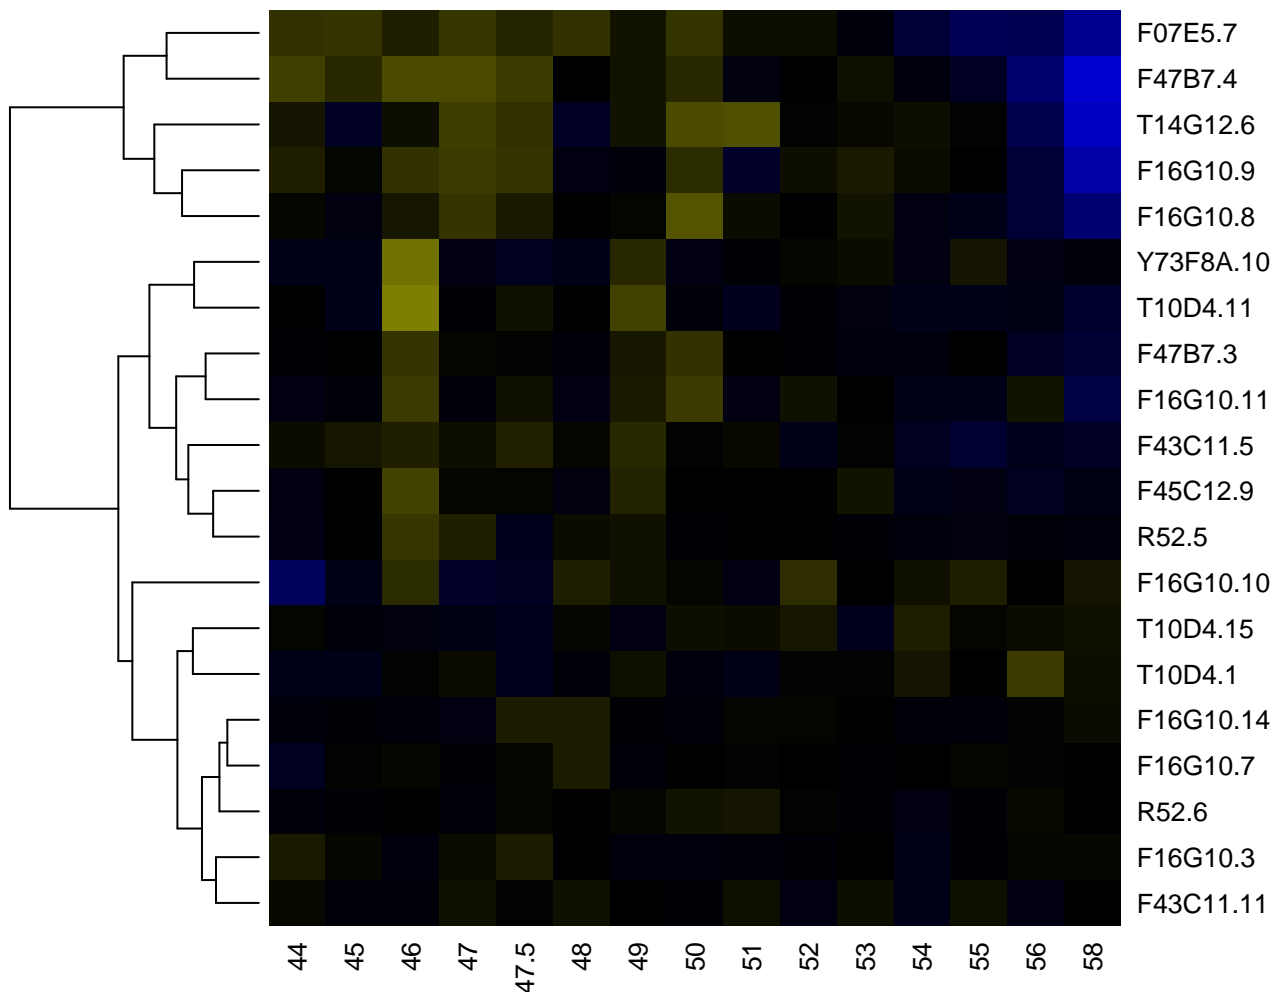





# Transcription factor CBF/NF- $\kappa$ B/archaeal histone

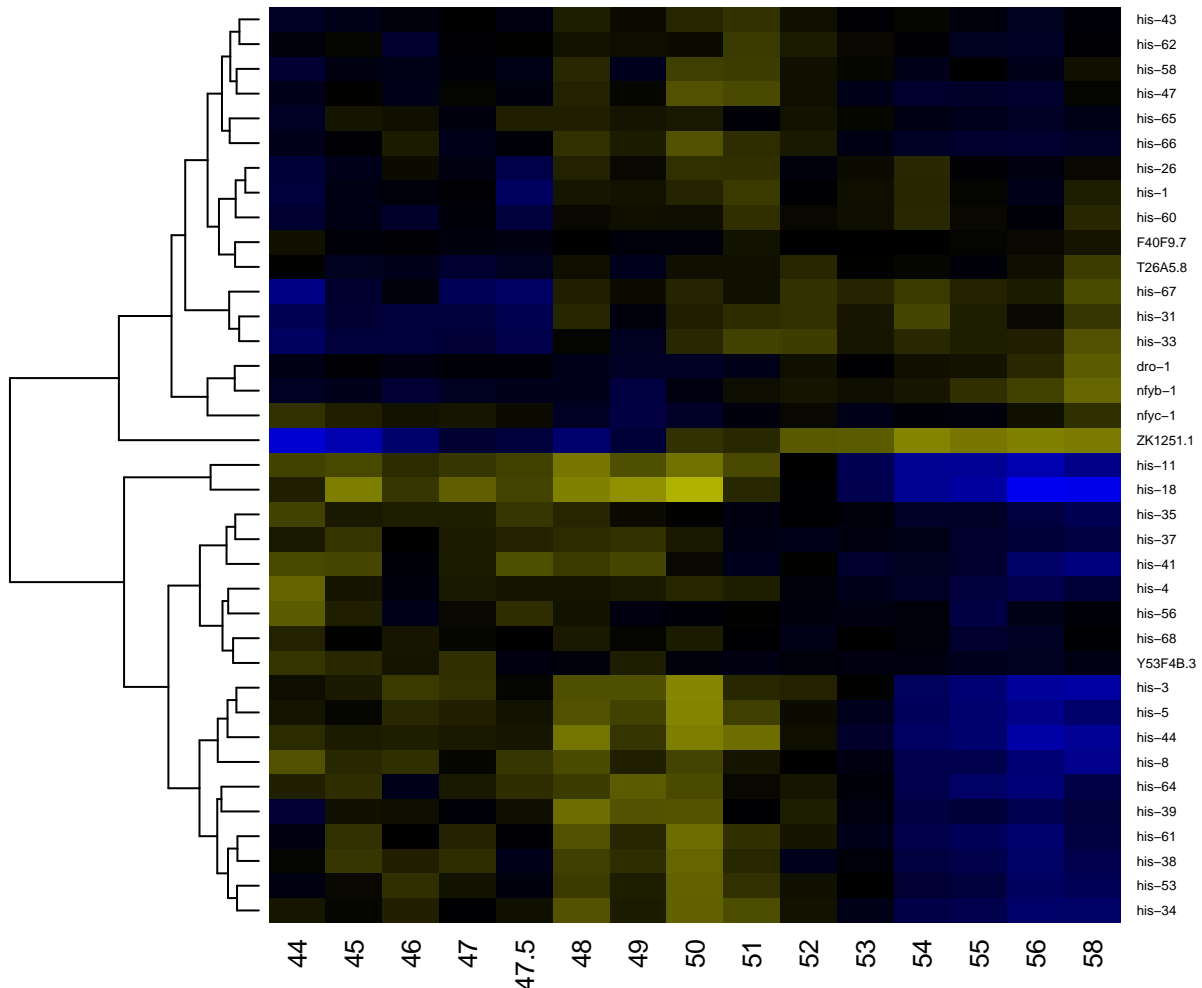

# Transcription factor jumonji

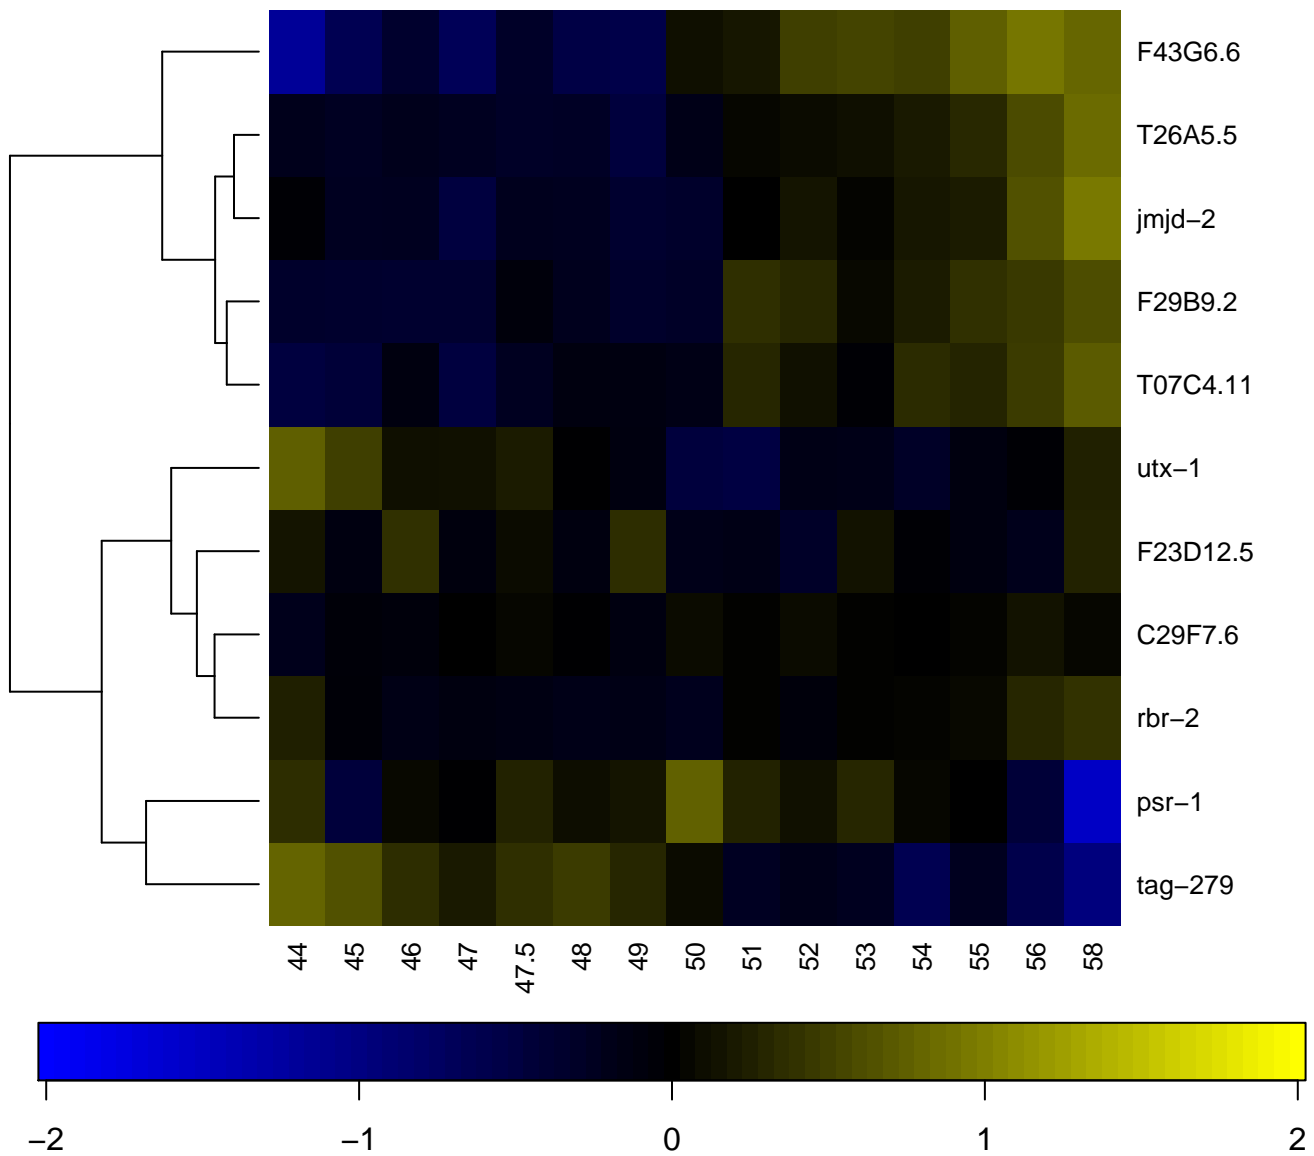

# Transcription factor jumonji/aspartyl beta-hydroxylase

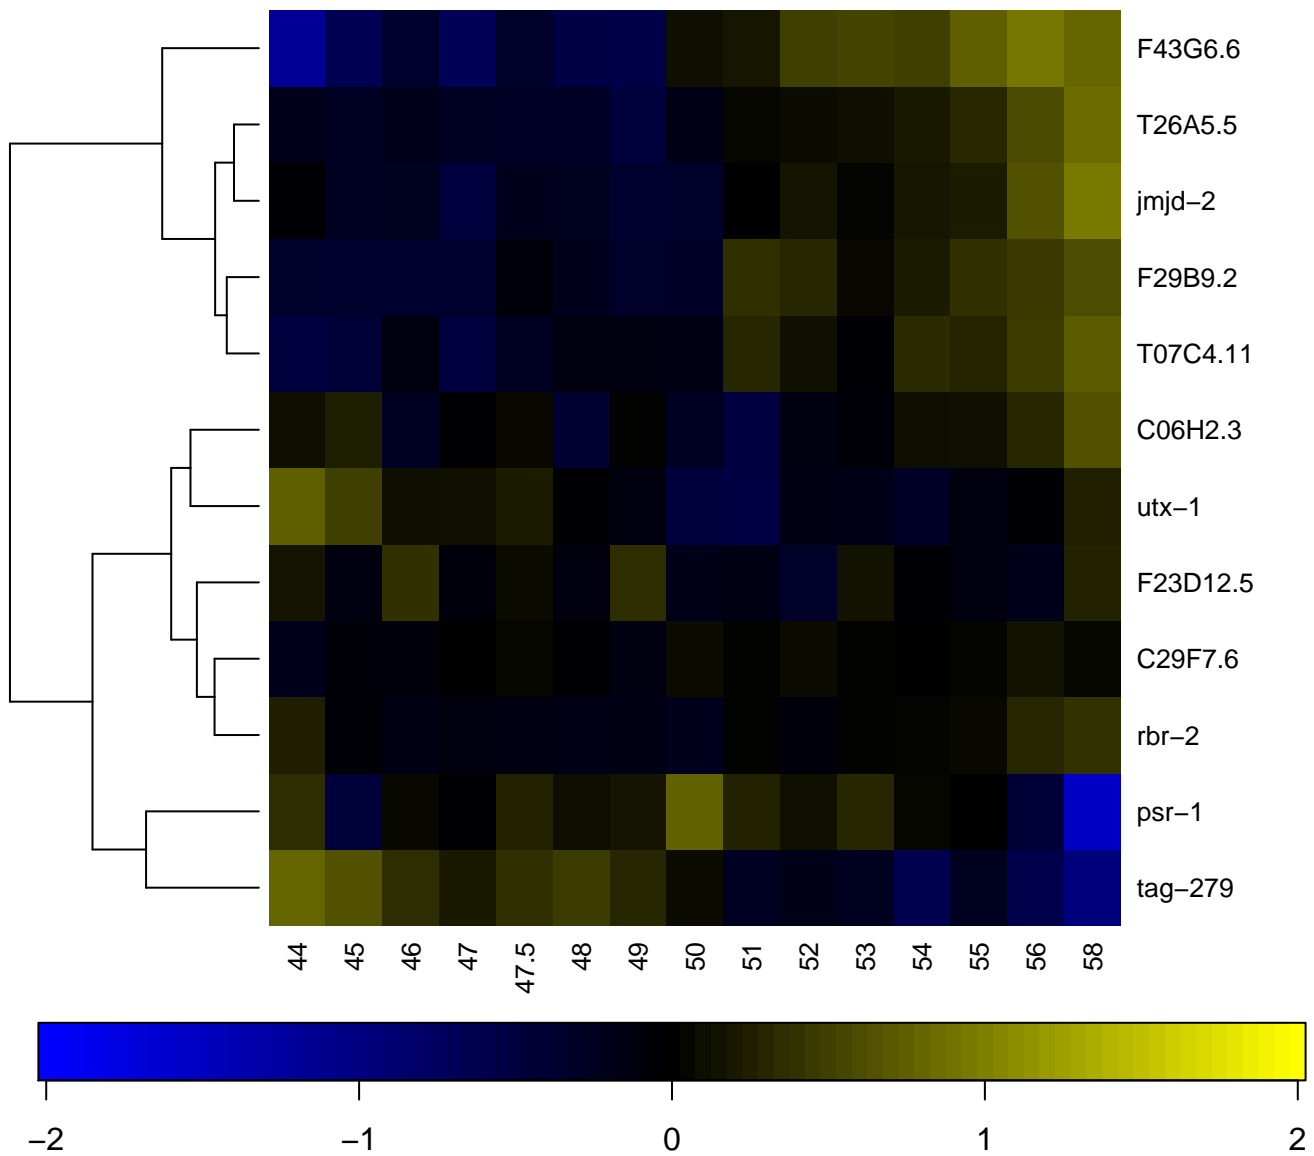

# Transcription factor, fork head

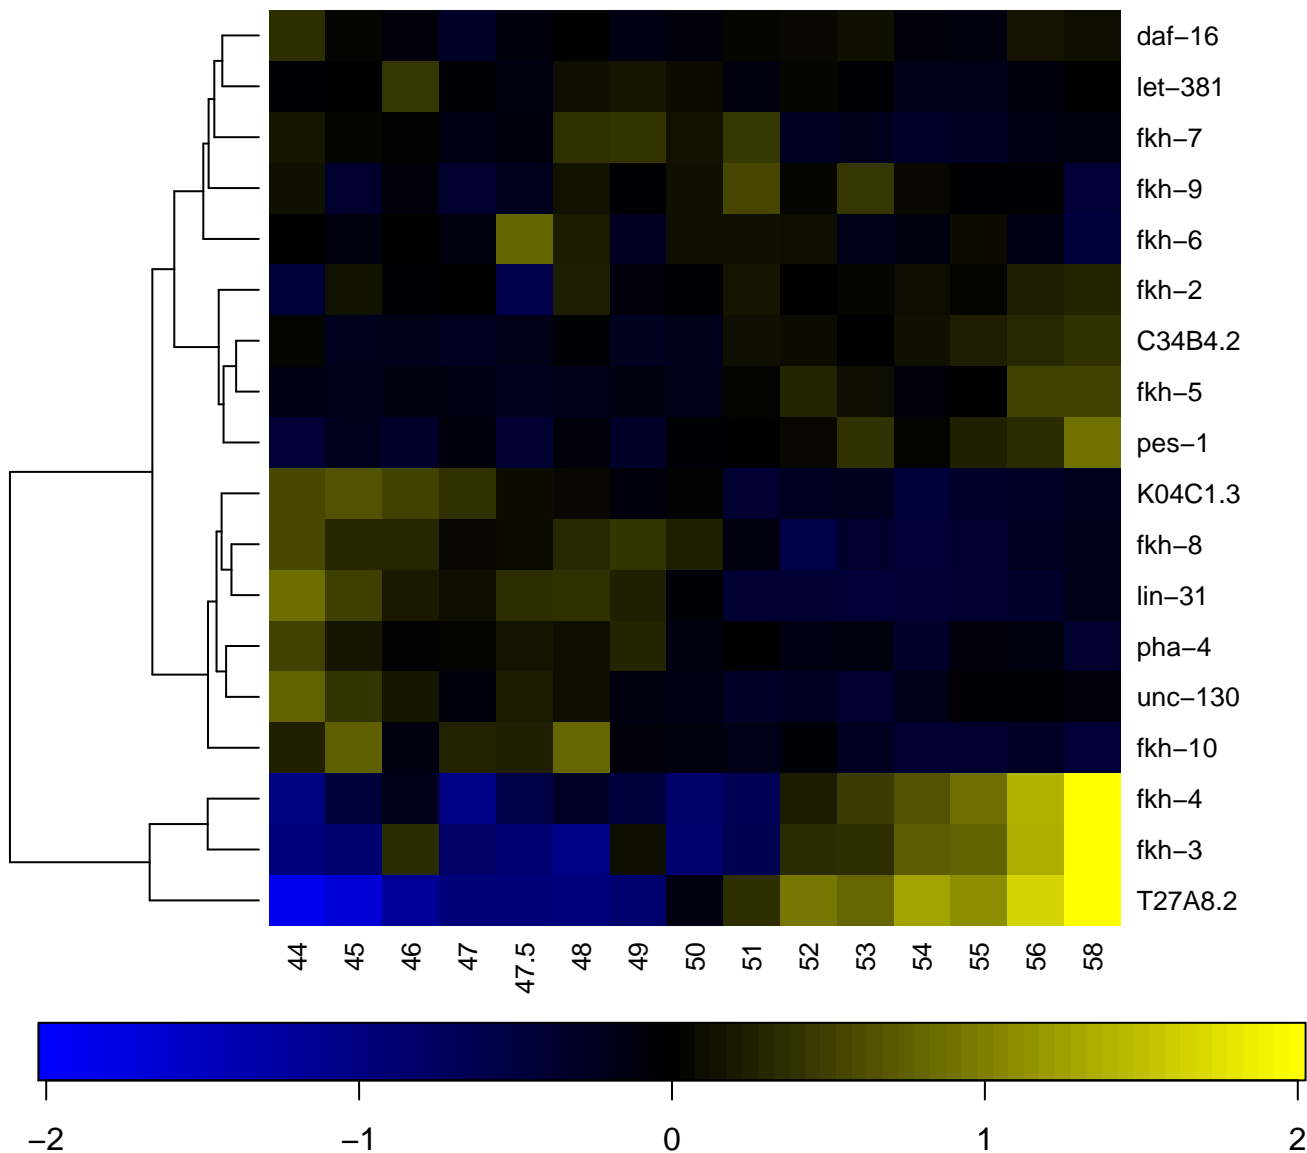

# Transcription factor, fork head, conserved site

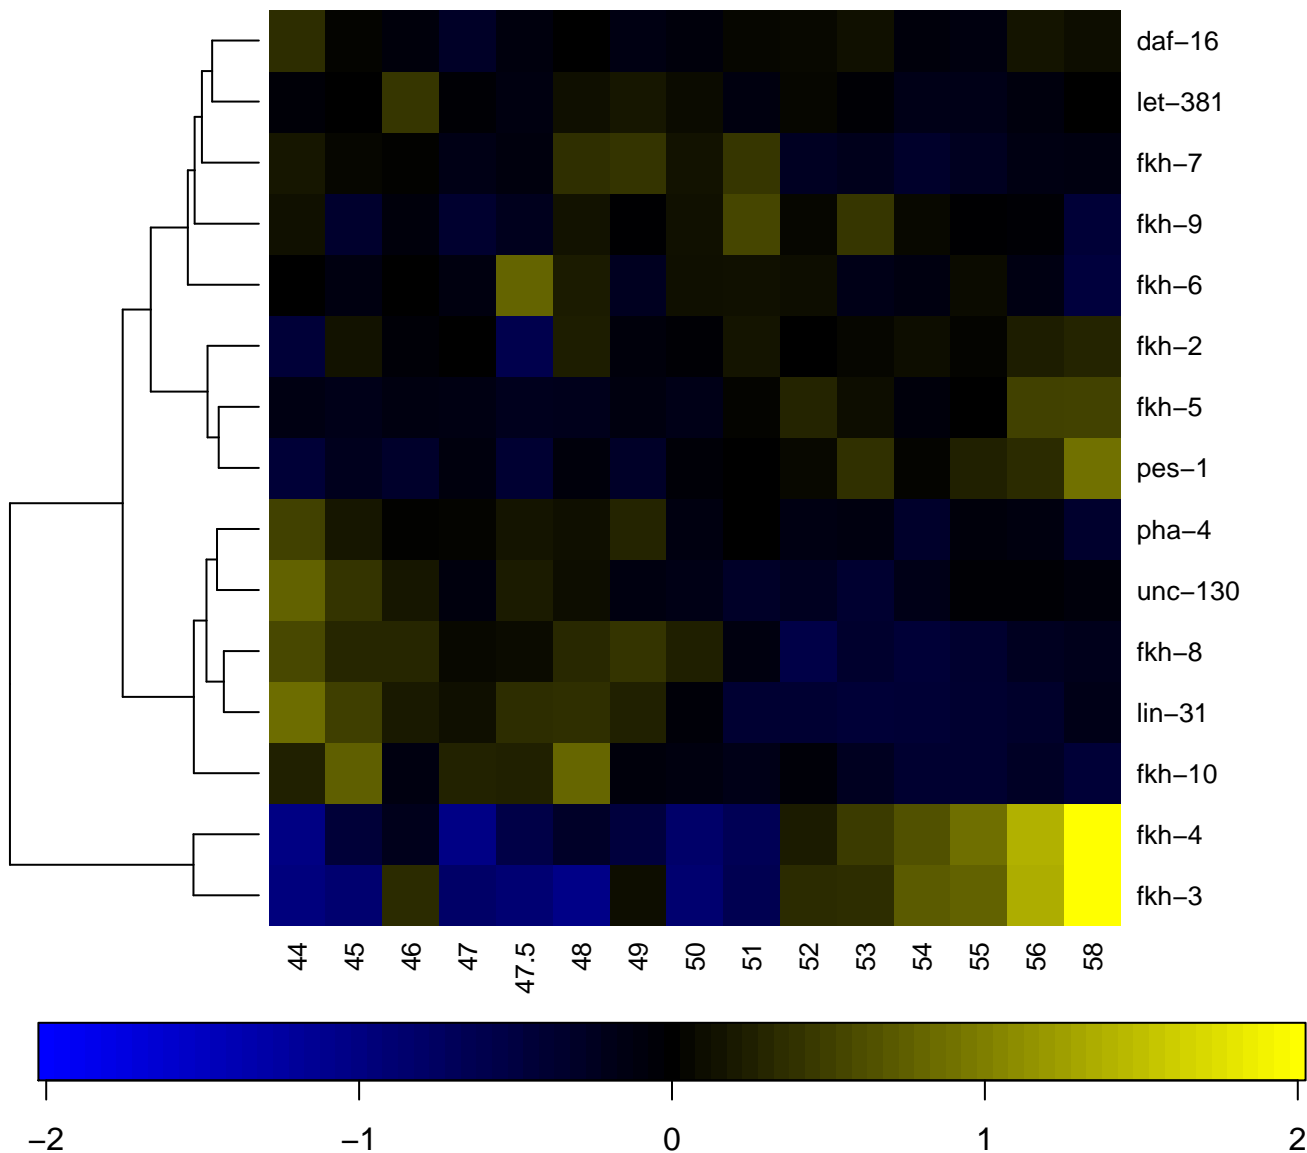



# Transcription factor, T-box, conserved site

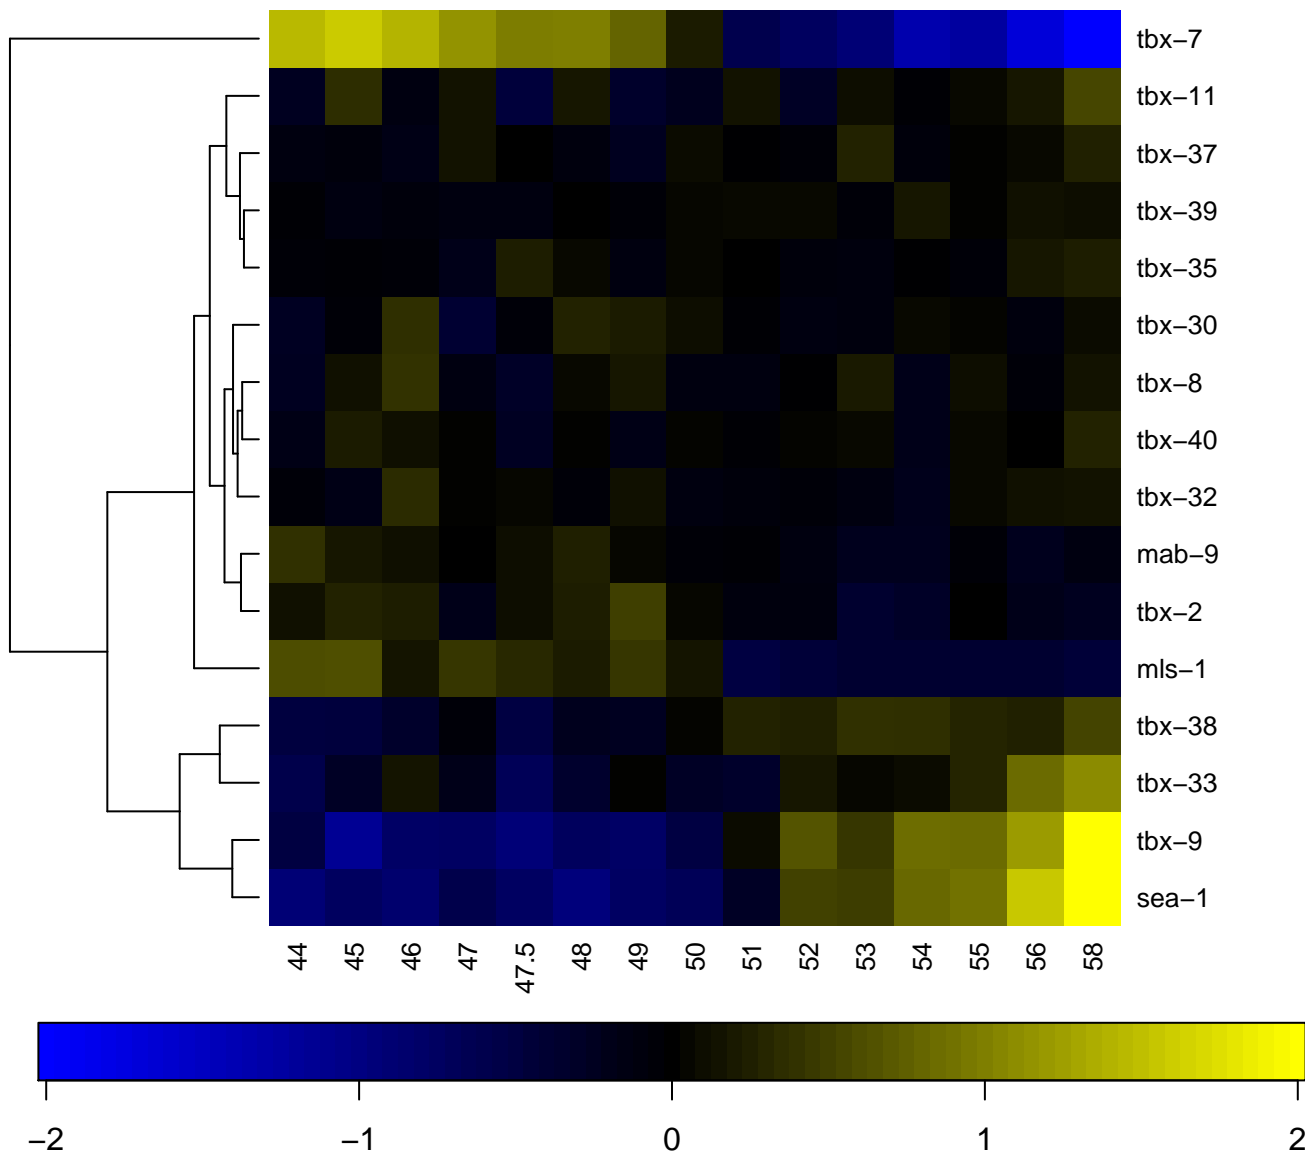



# Transcription regulator cyclin

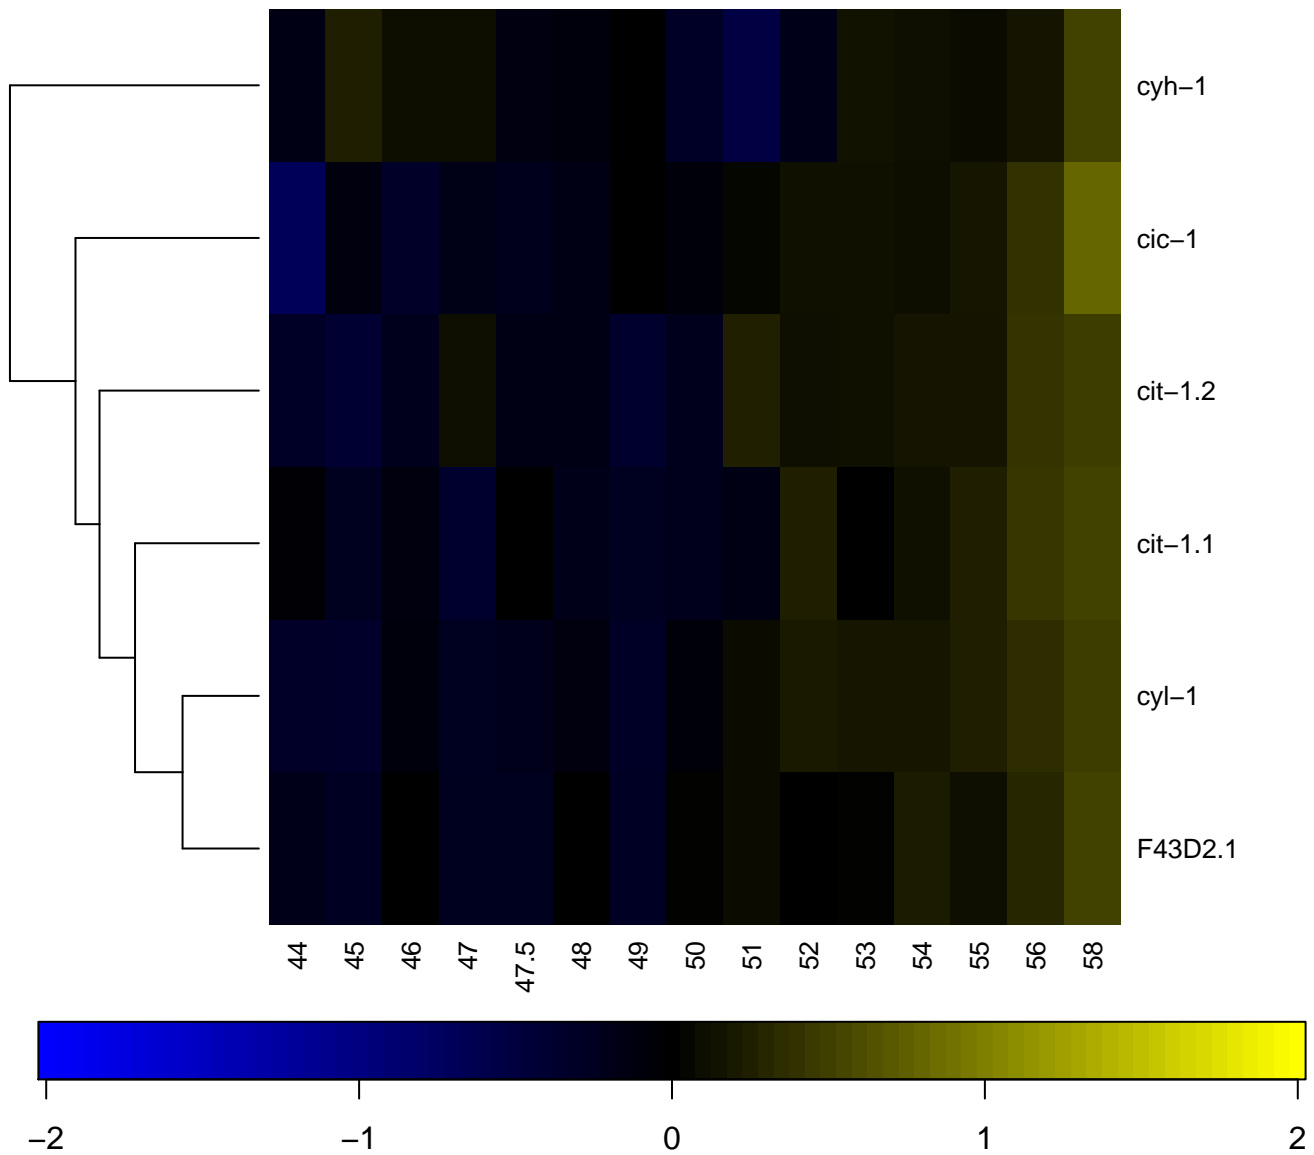











# Translation elongation factor EFTu/EF1A, C-terminal

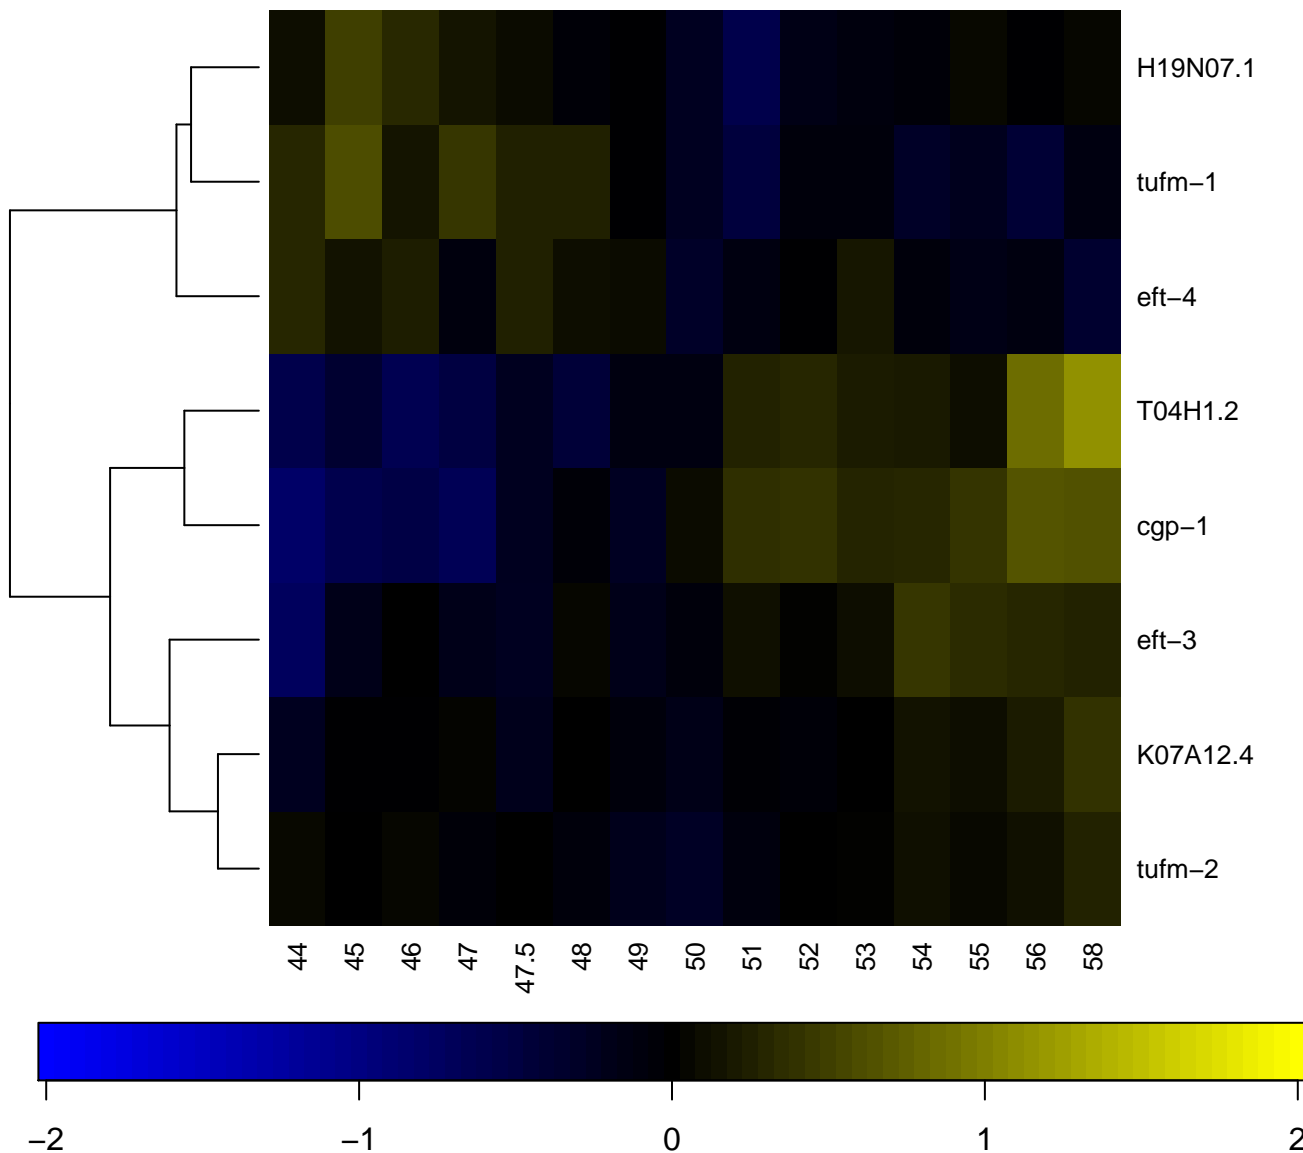

# Translation elongation factor EFTu/EF1A, domain 2





# Transmembrane amino acid transporter protein

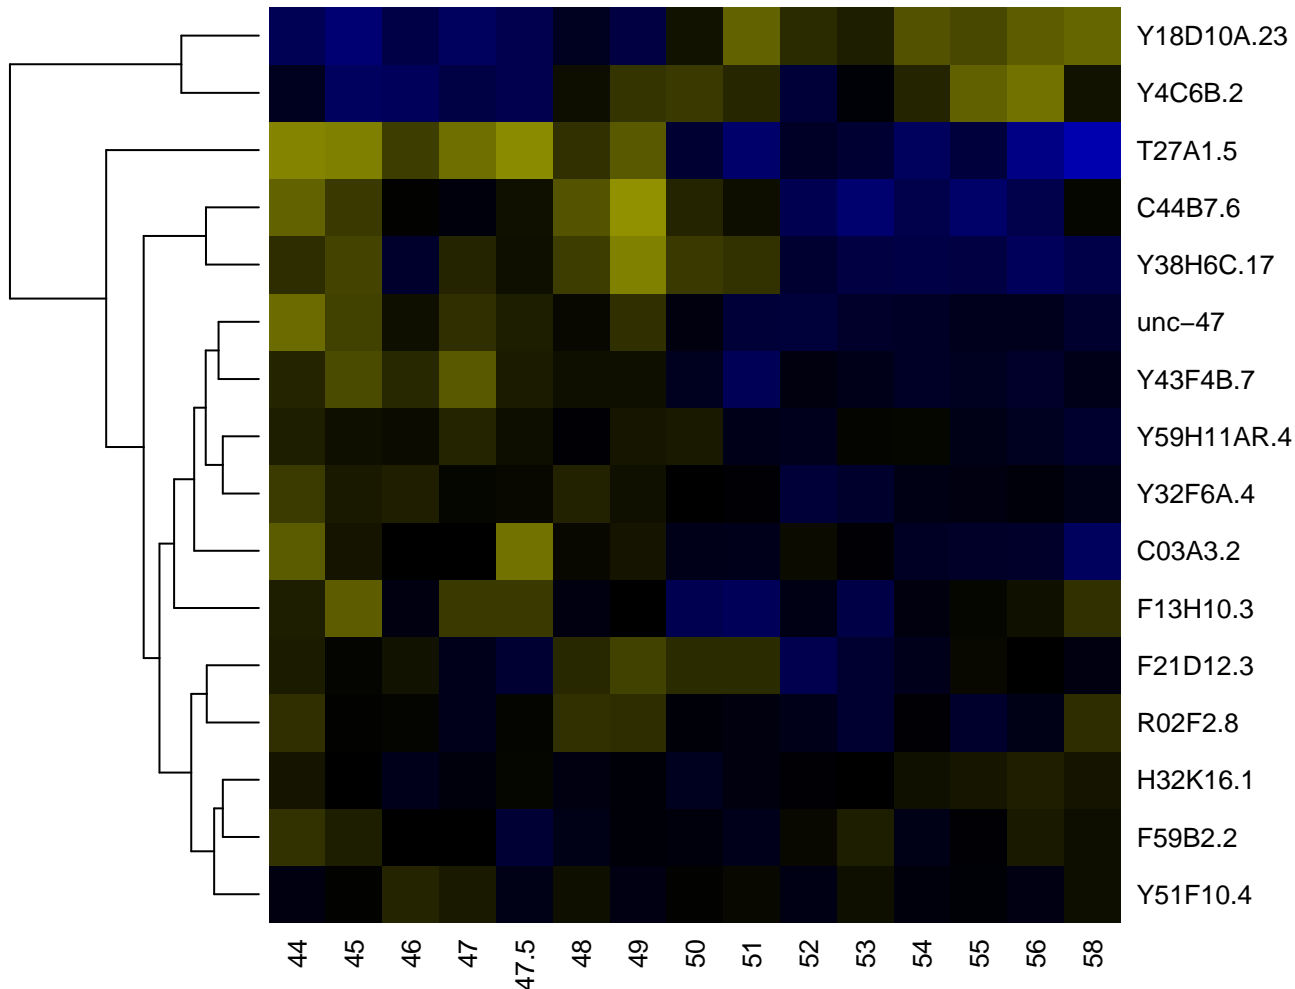

# Transmembrane glycoprotein

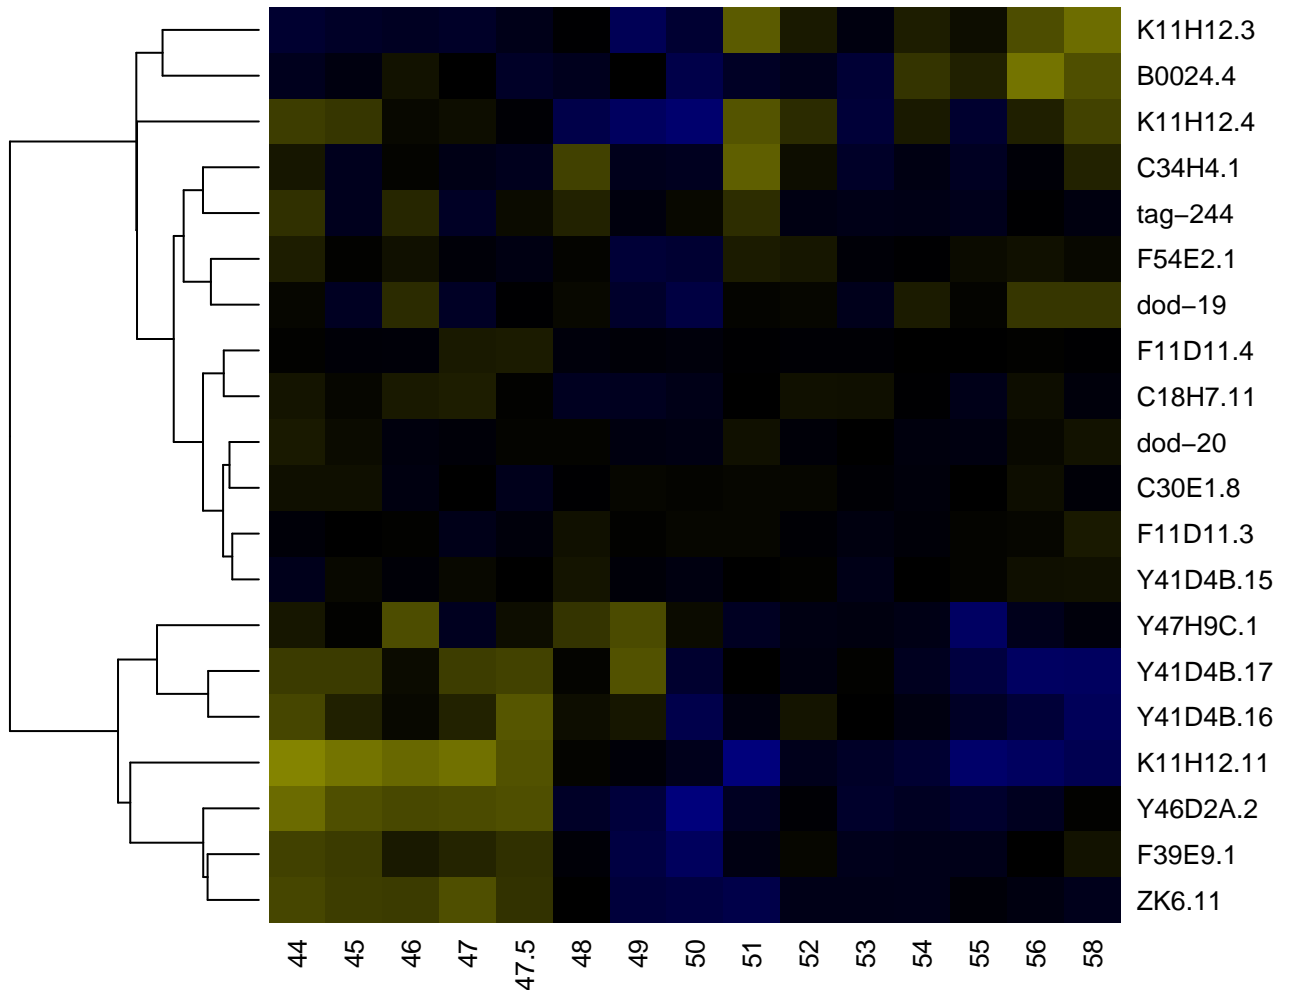

# Transthyretin-like

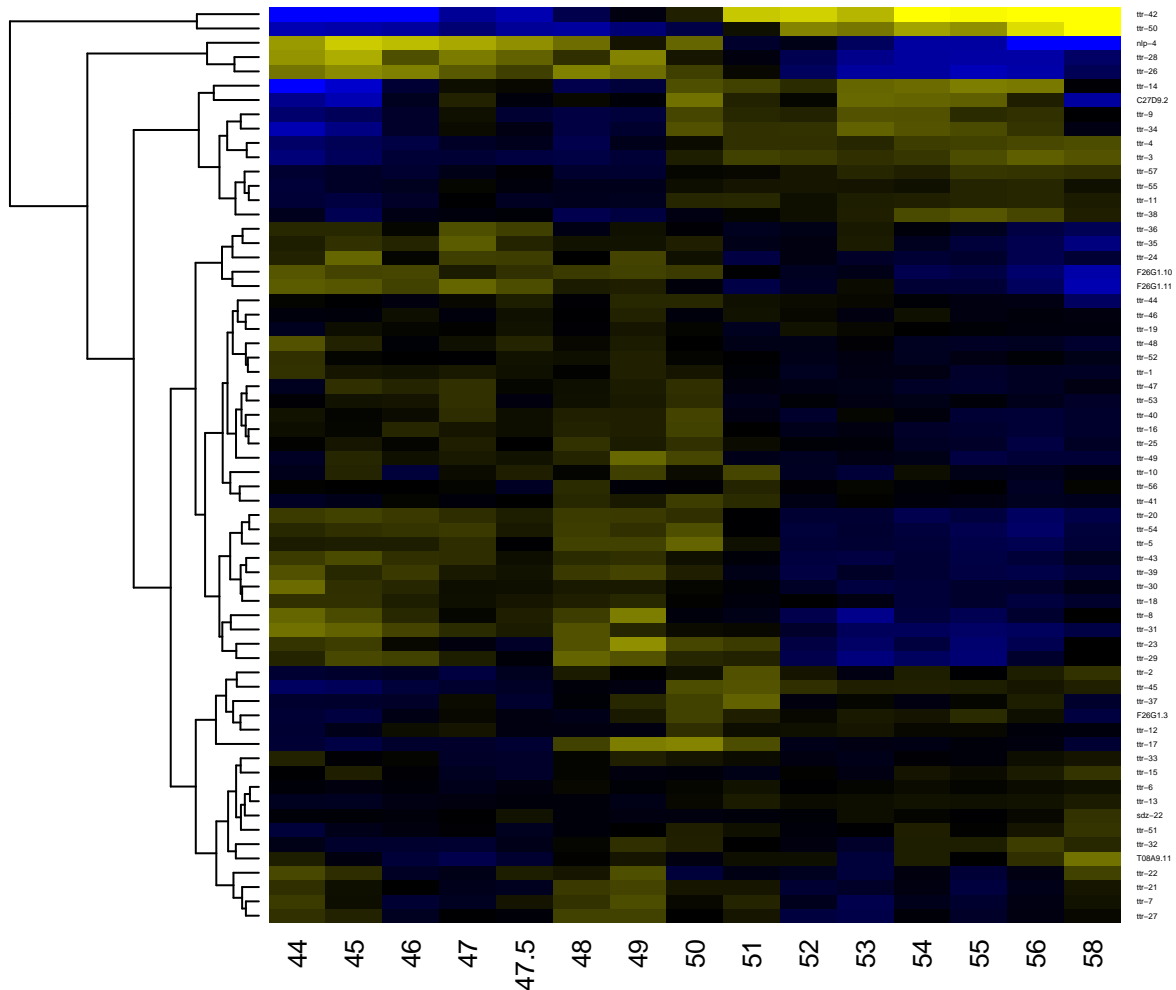

# Transthyretin-like family



# Trehalase

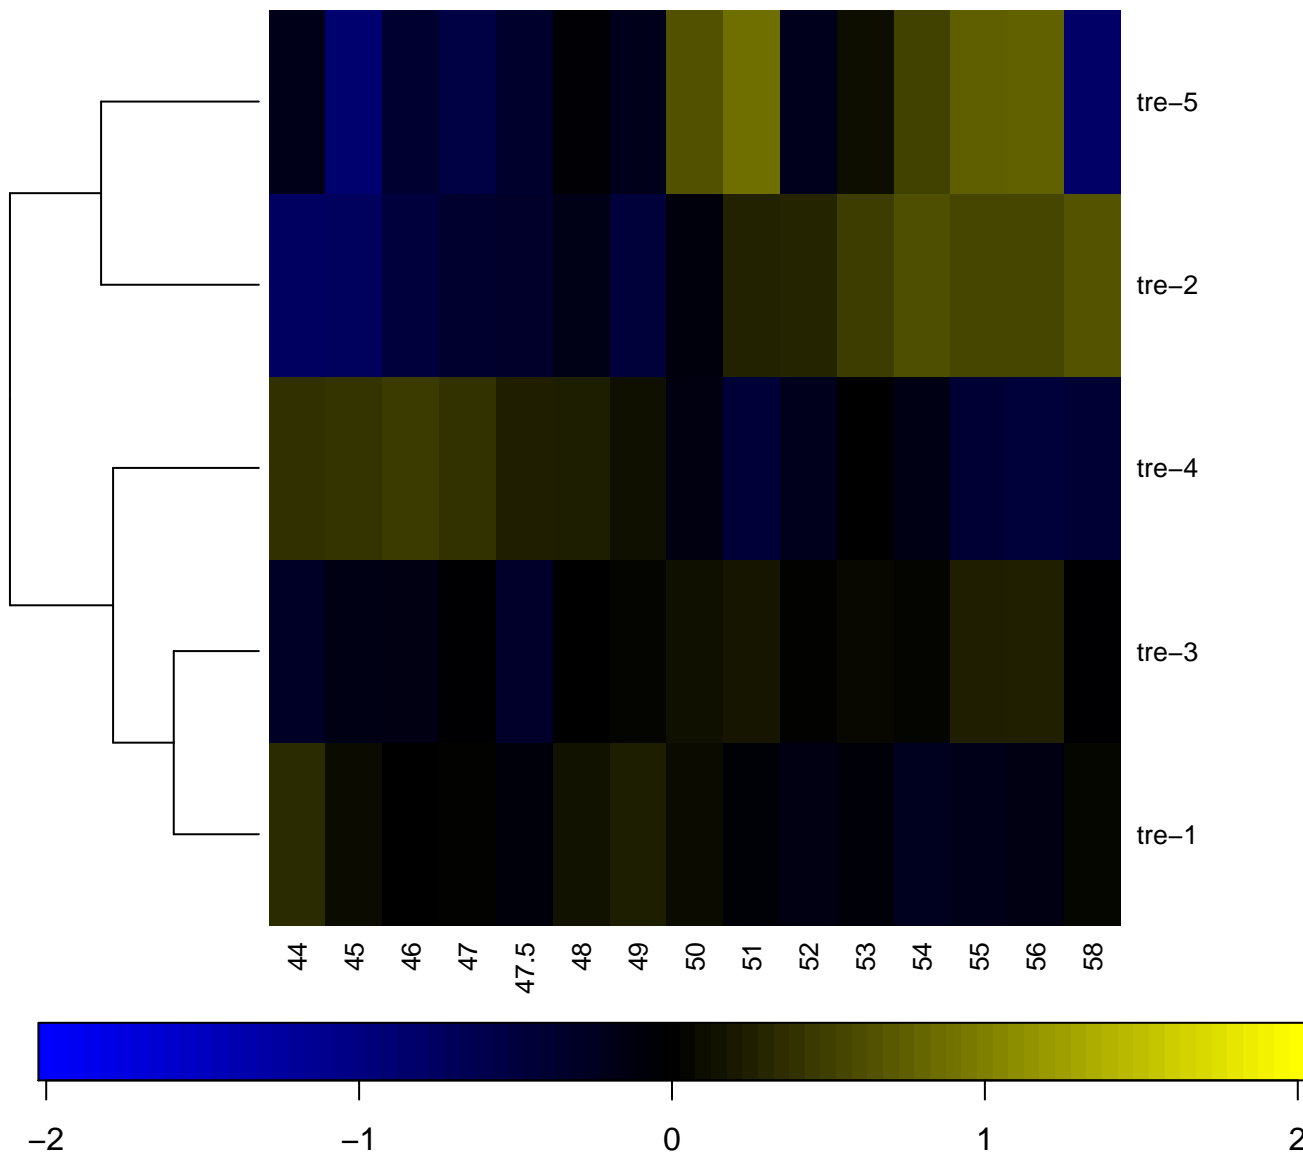

# Tricarboxylate/iron carrier

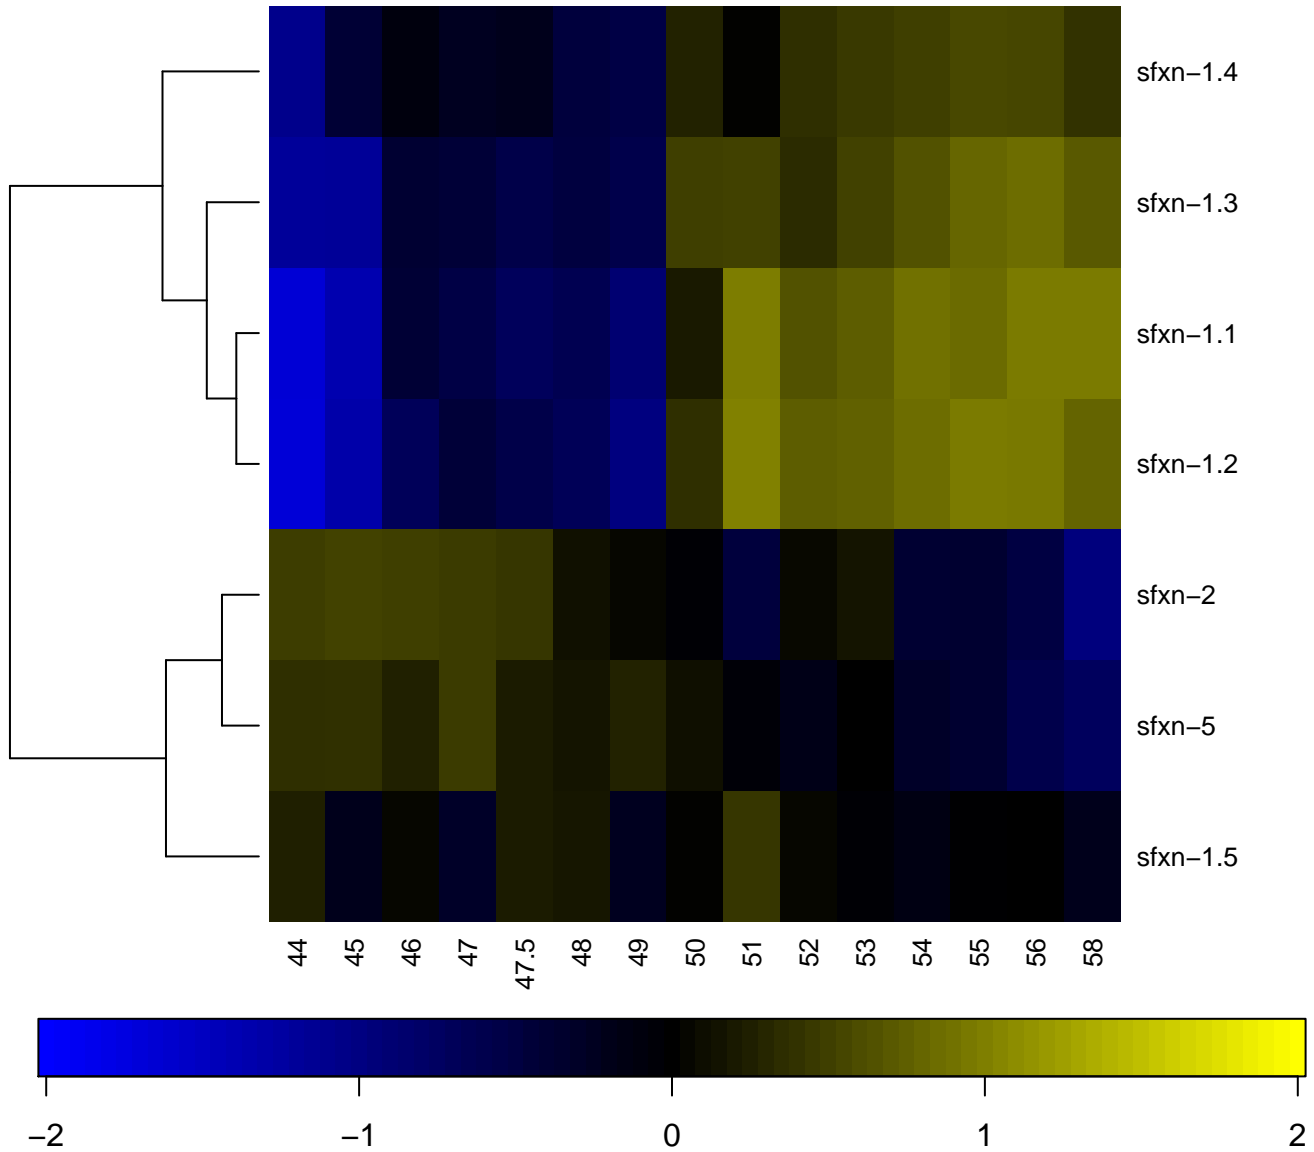



# tRNA-dihydrouridine synthase

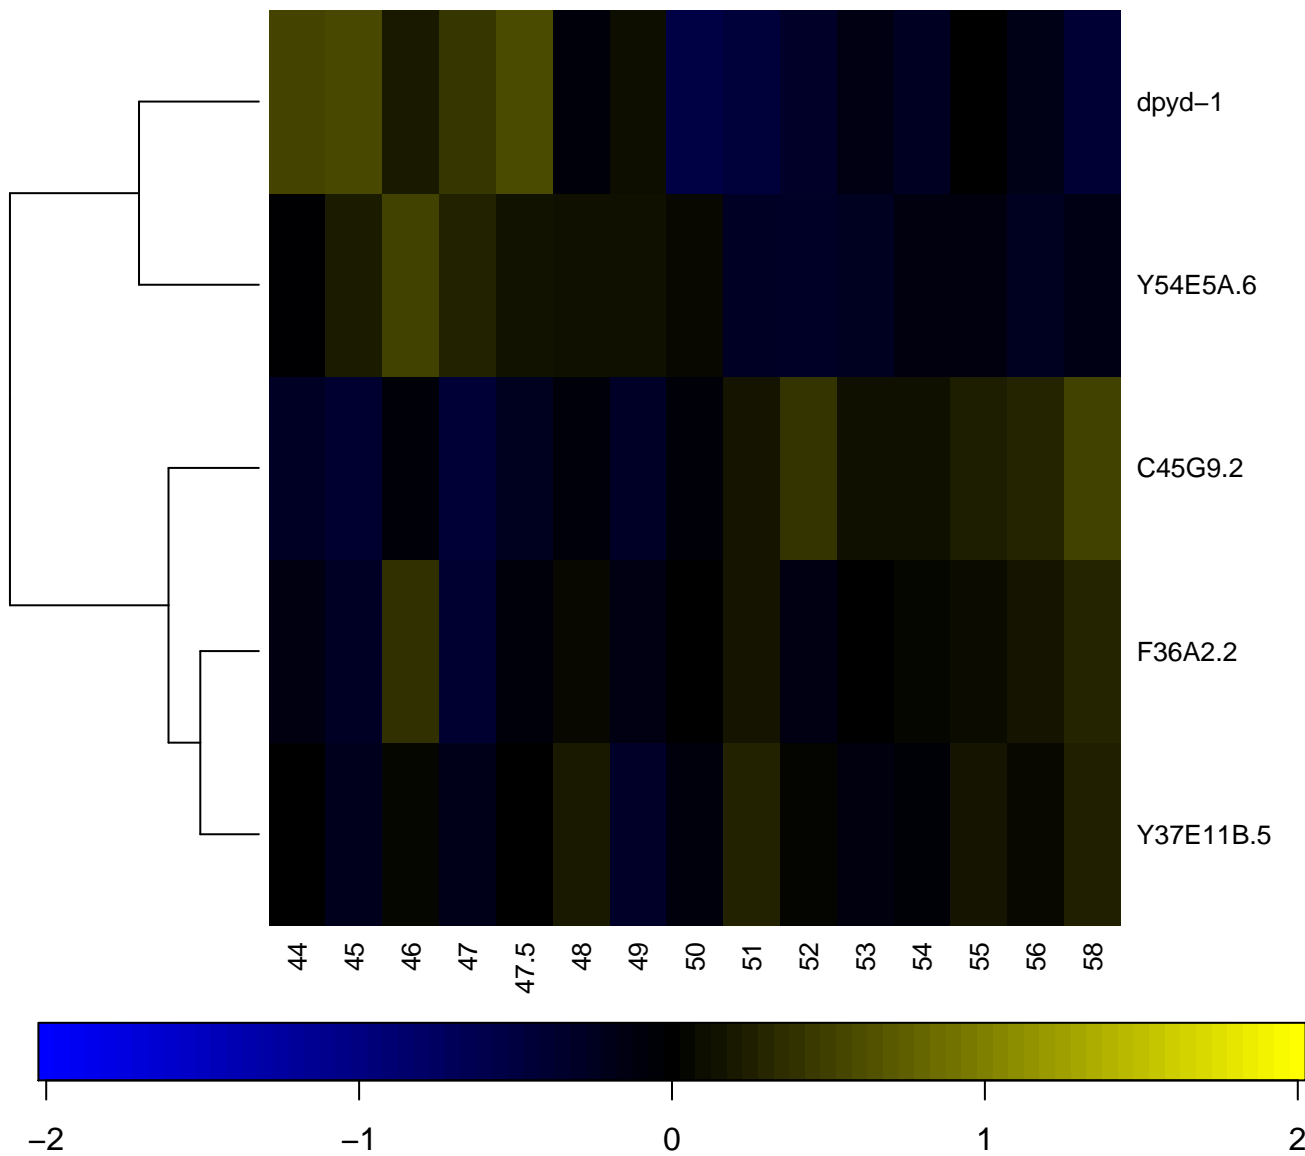











# tRNA synthetases class II (D, K and N)

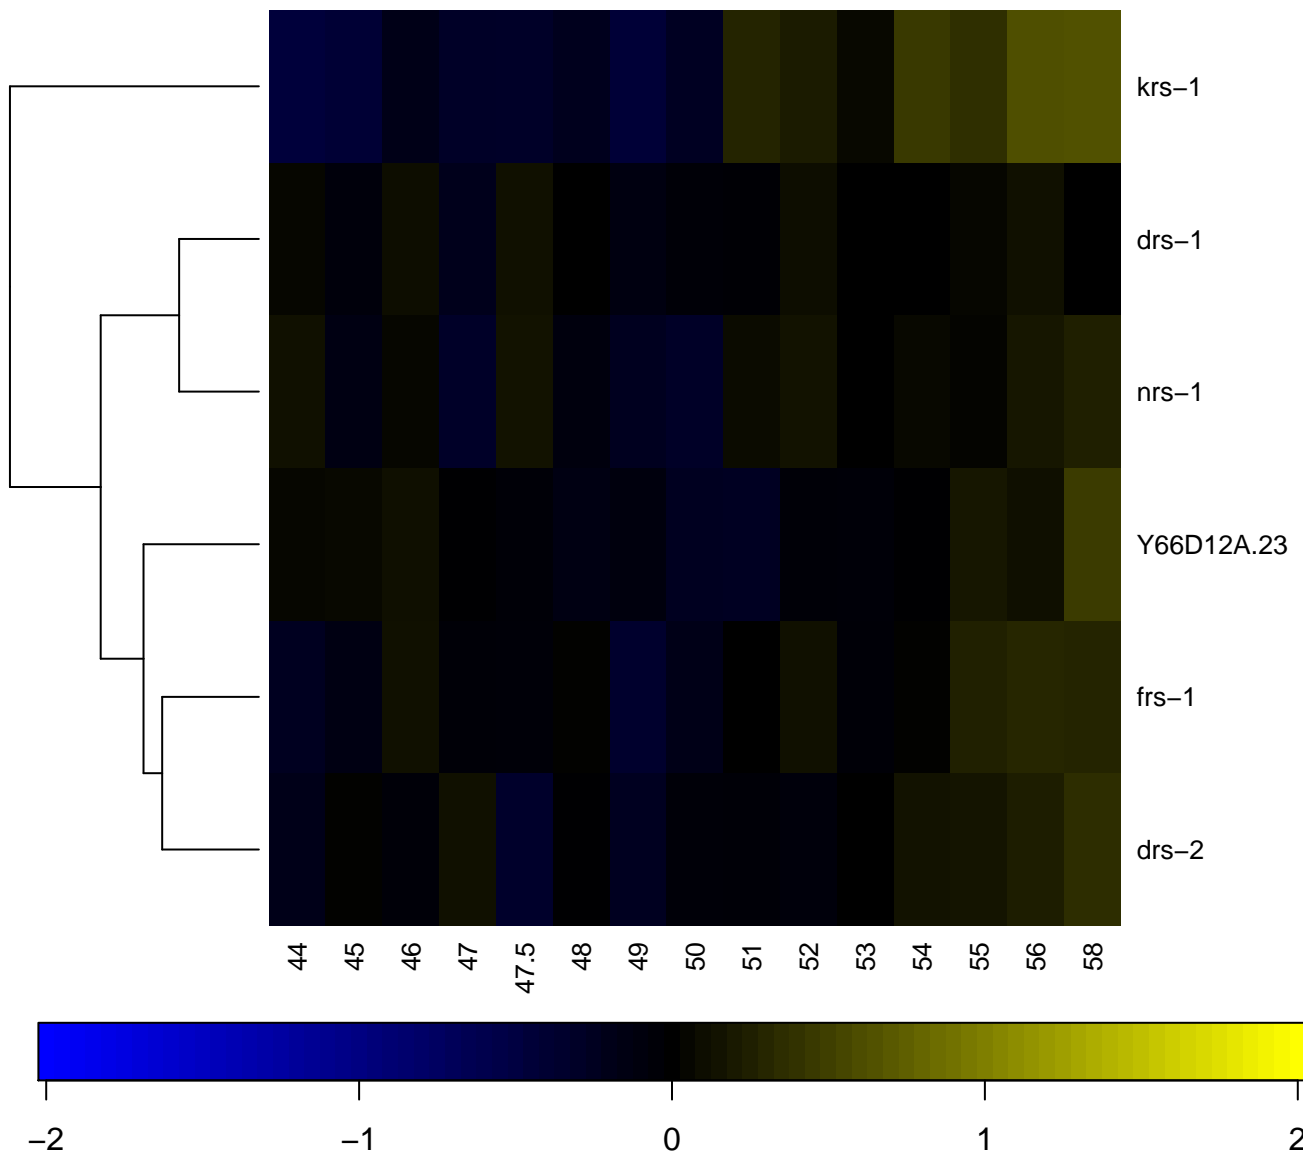



# Trypsin

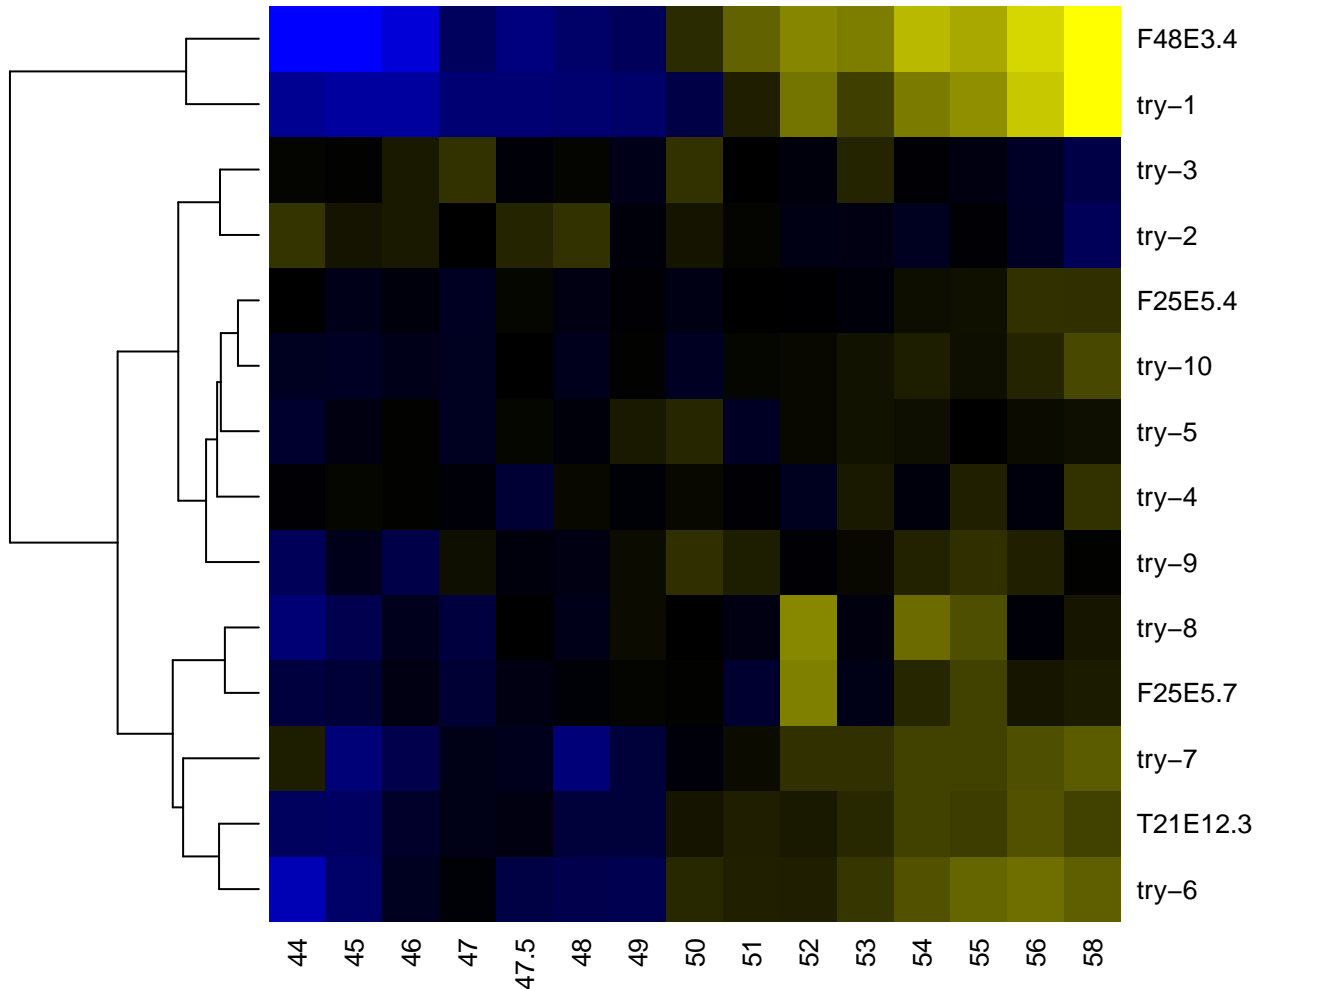

# Trypsin Inhibitor like cysteine rich domain

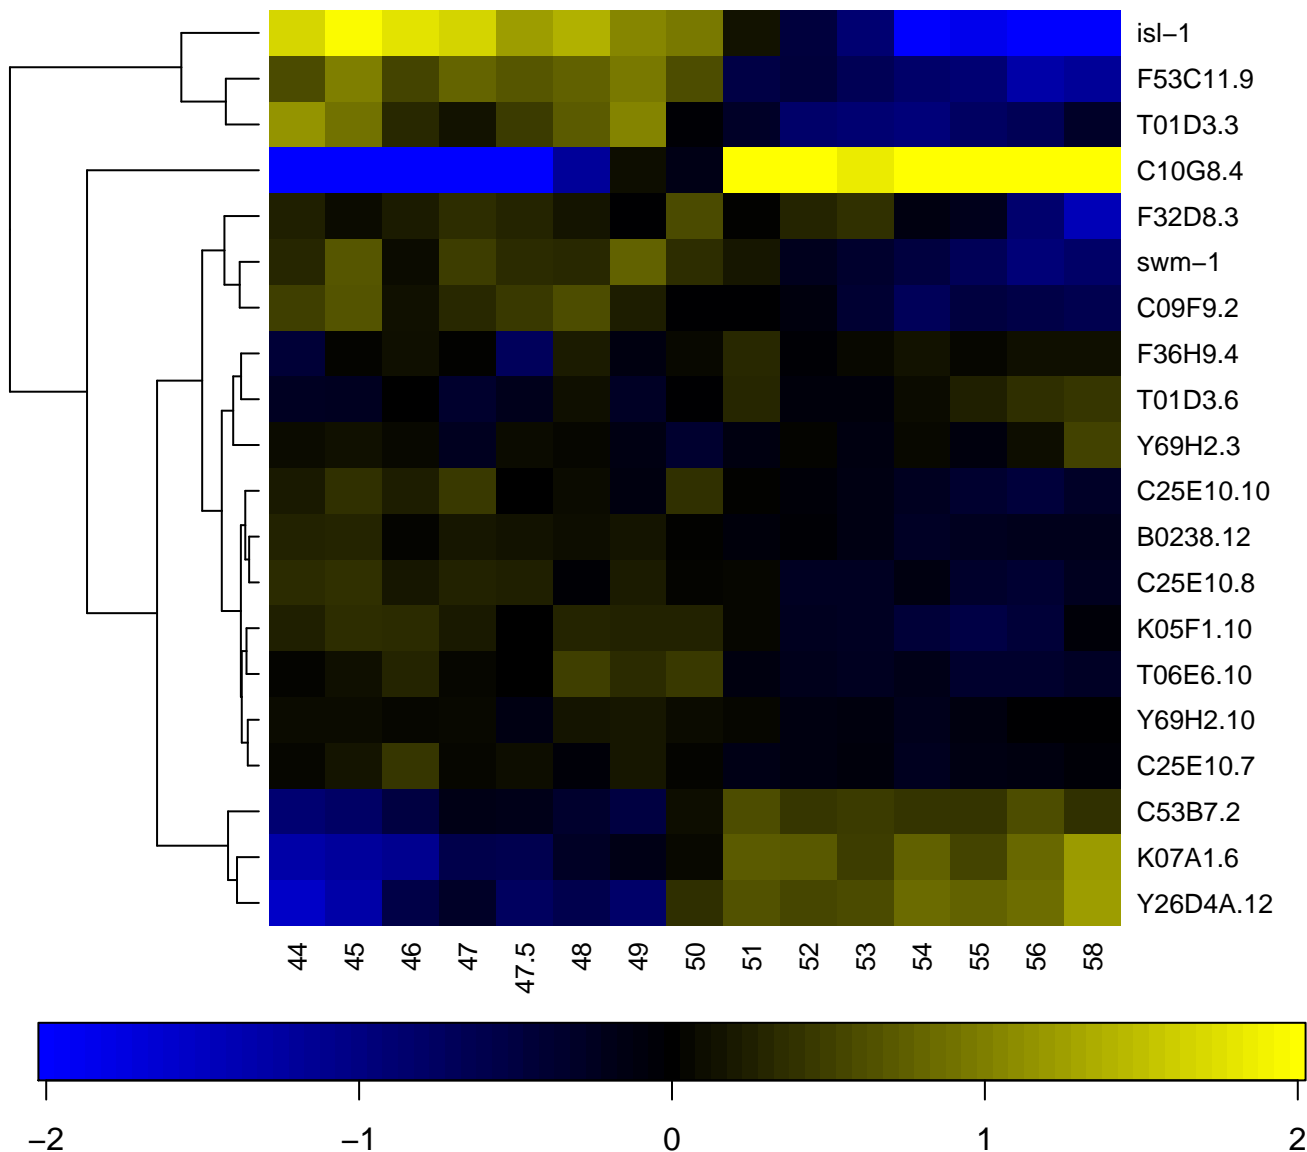



# Tubulin

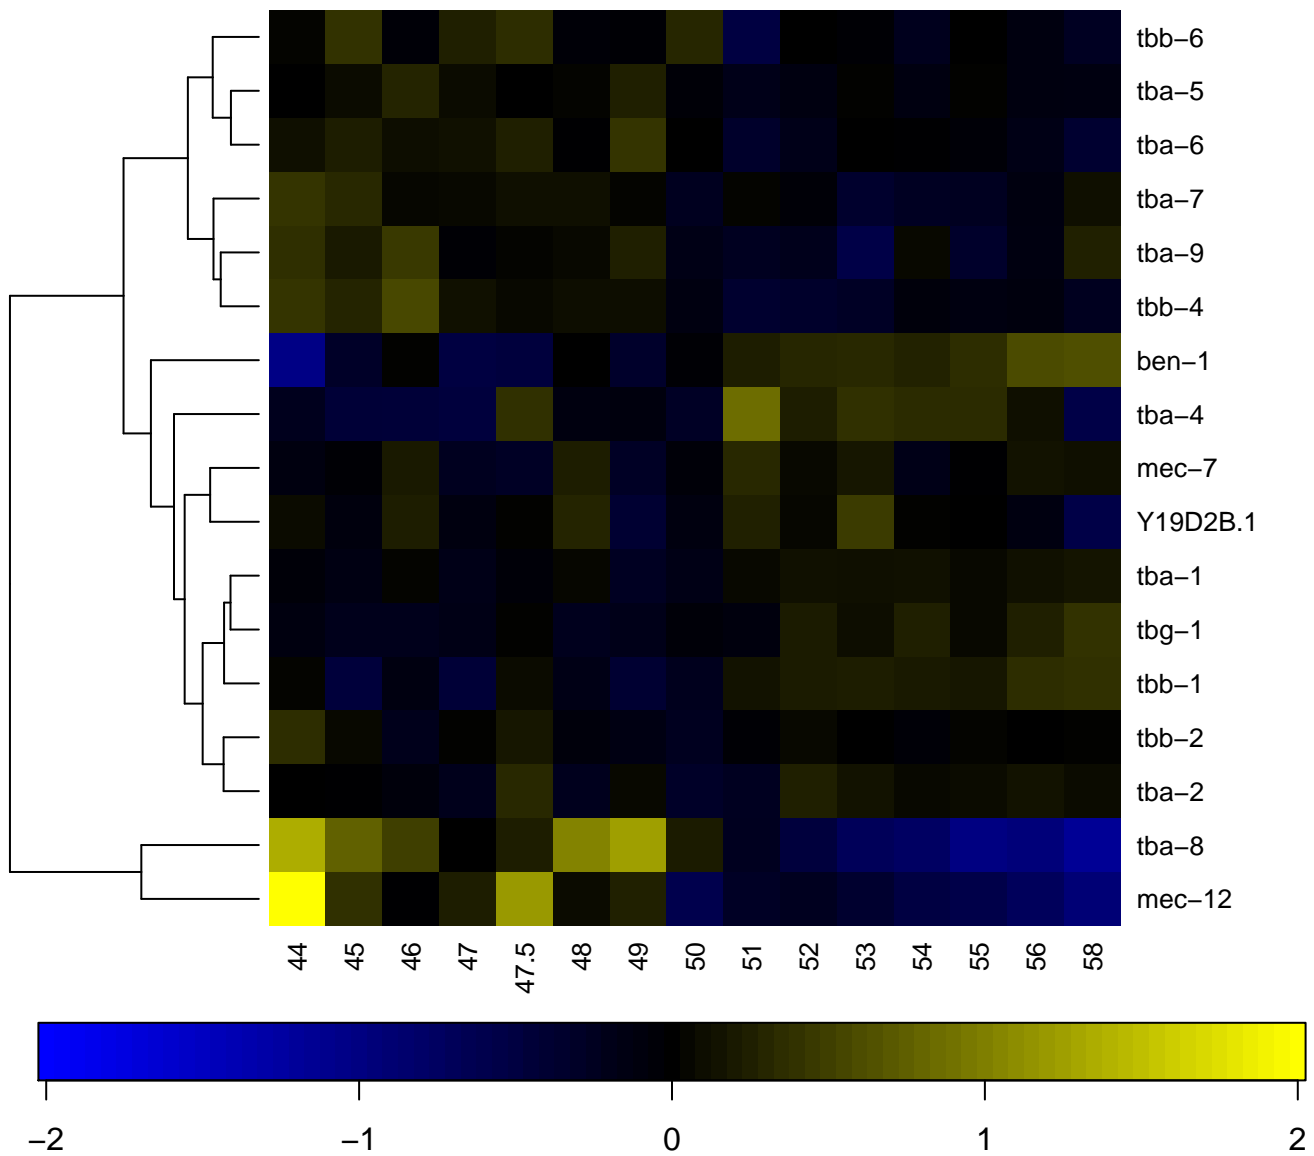



# Tubulin-tyrosine ligase family

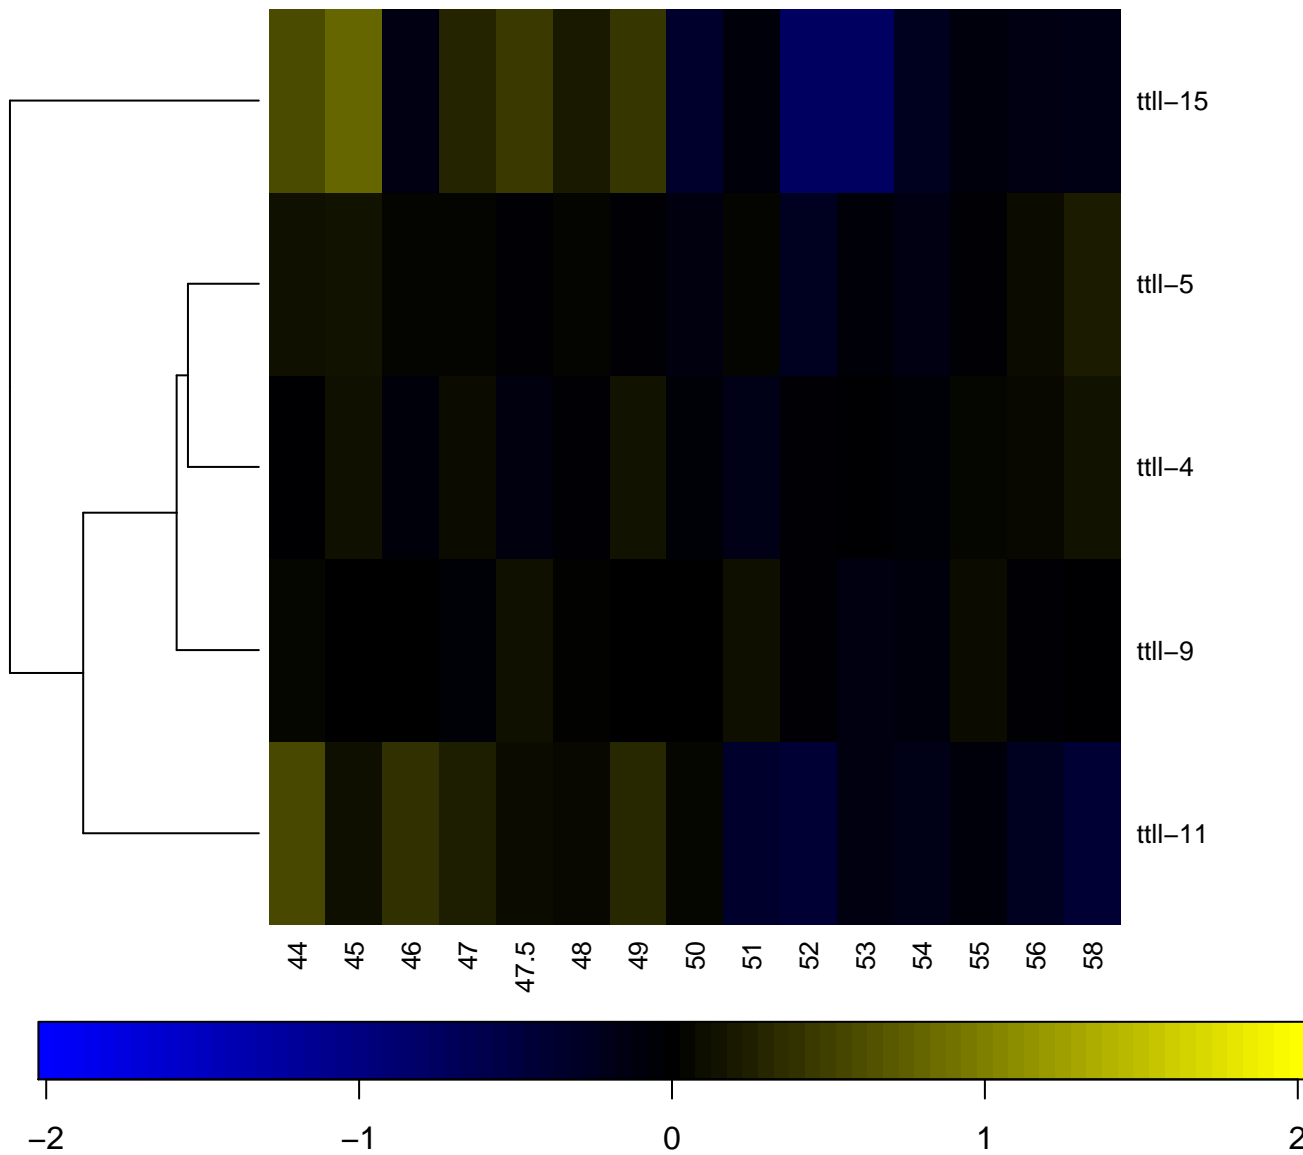

# Tubulin C-terminal domain

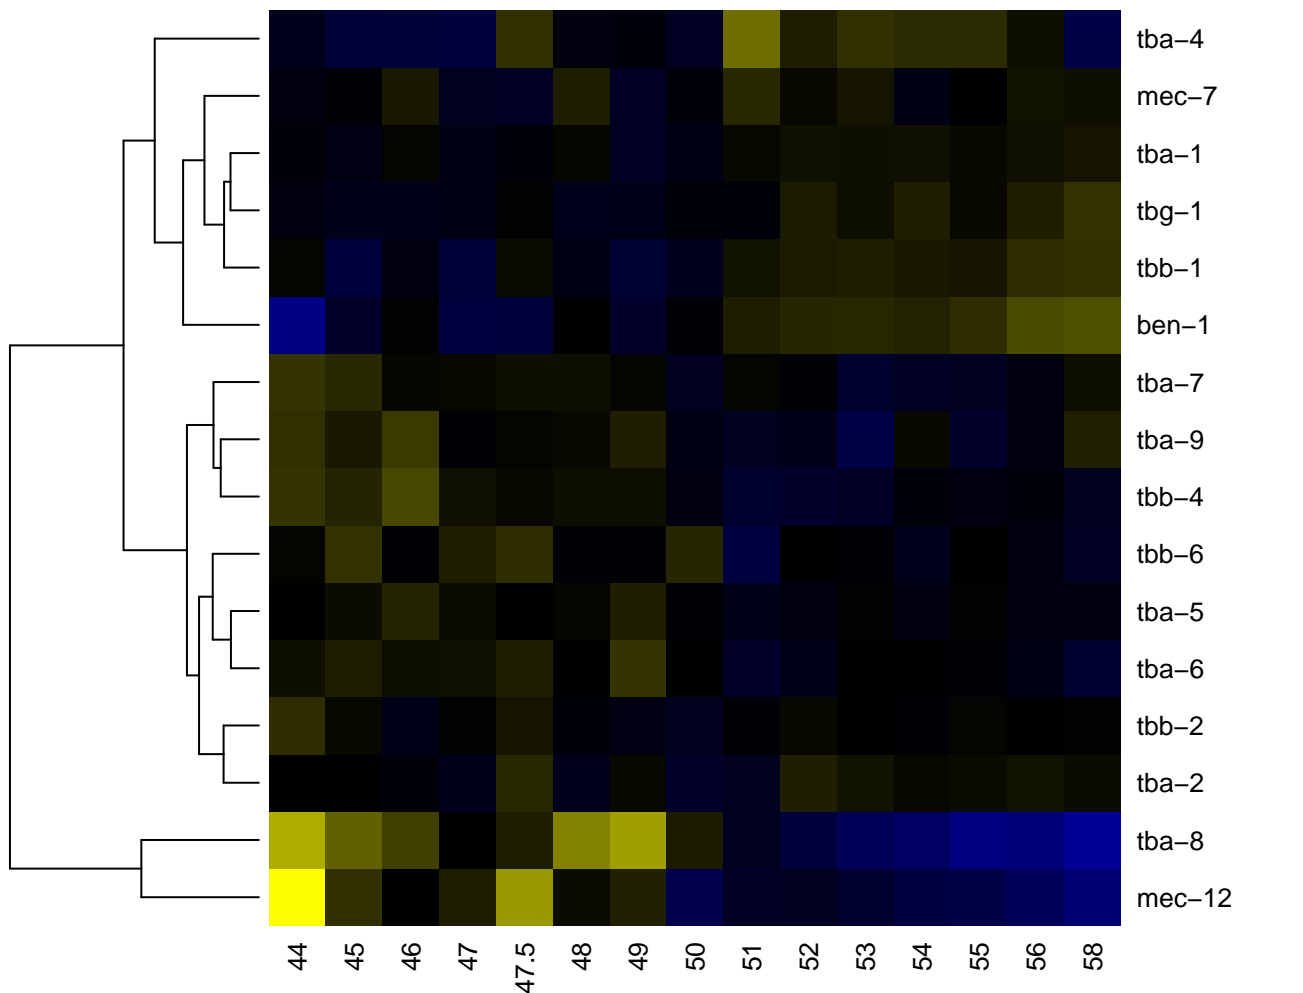



# Tubulin/FtsZ family, GTPase domain



# Tubulin/FtsZ, 2-layer sandwich domain

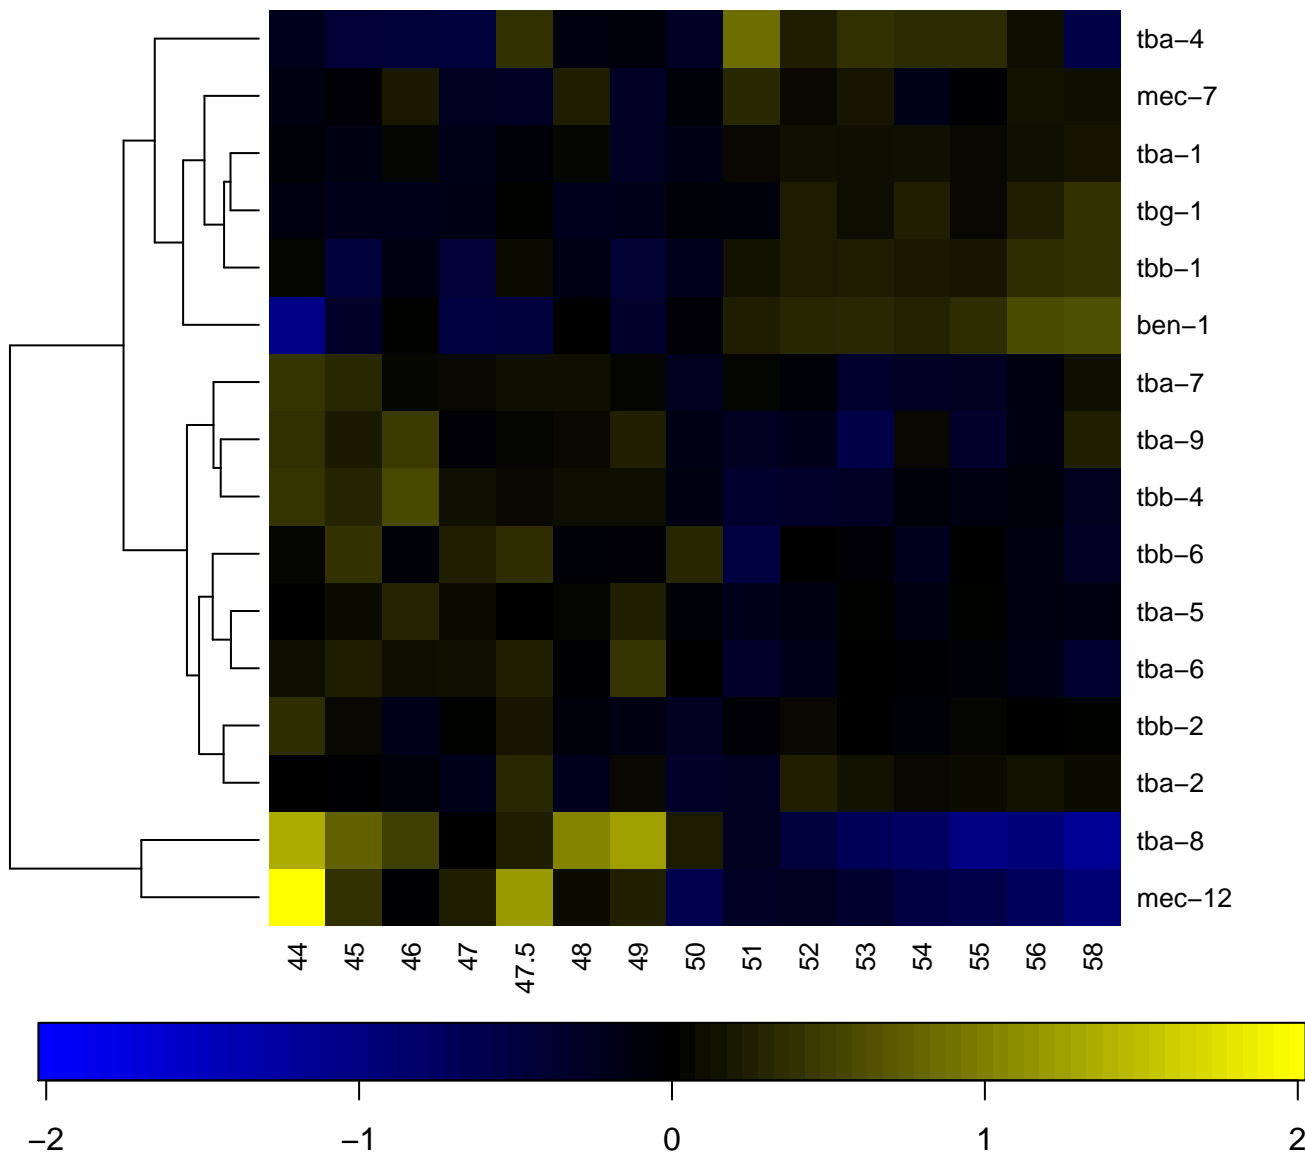

# Tubulin/FtsZ, GTPase domain











# Type III restriction enzyme, res subunit

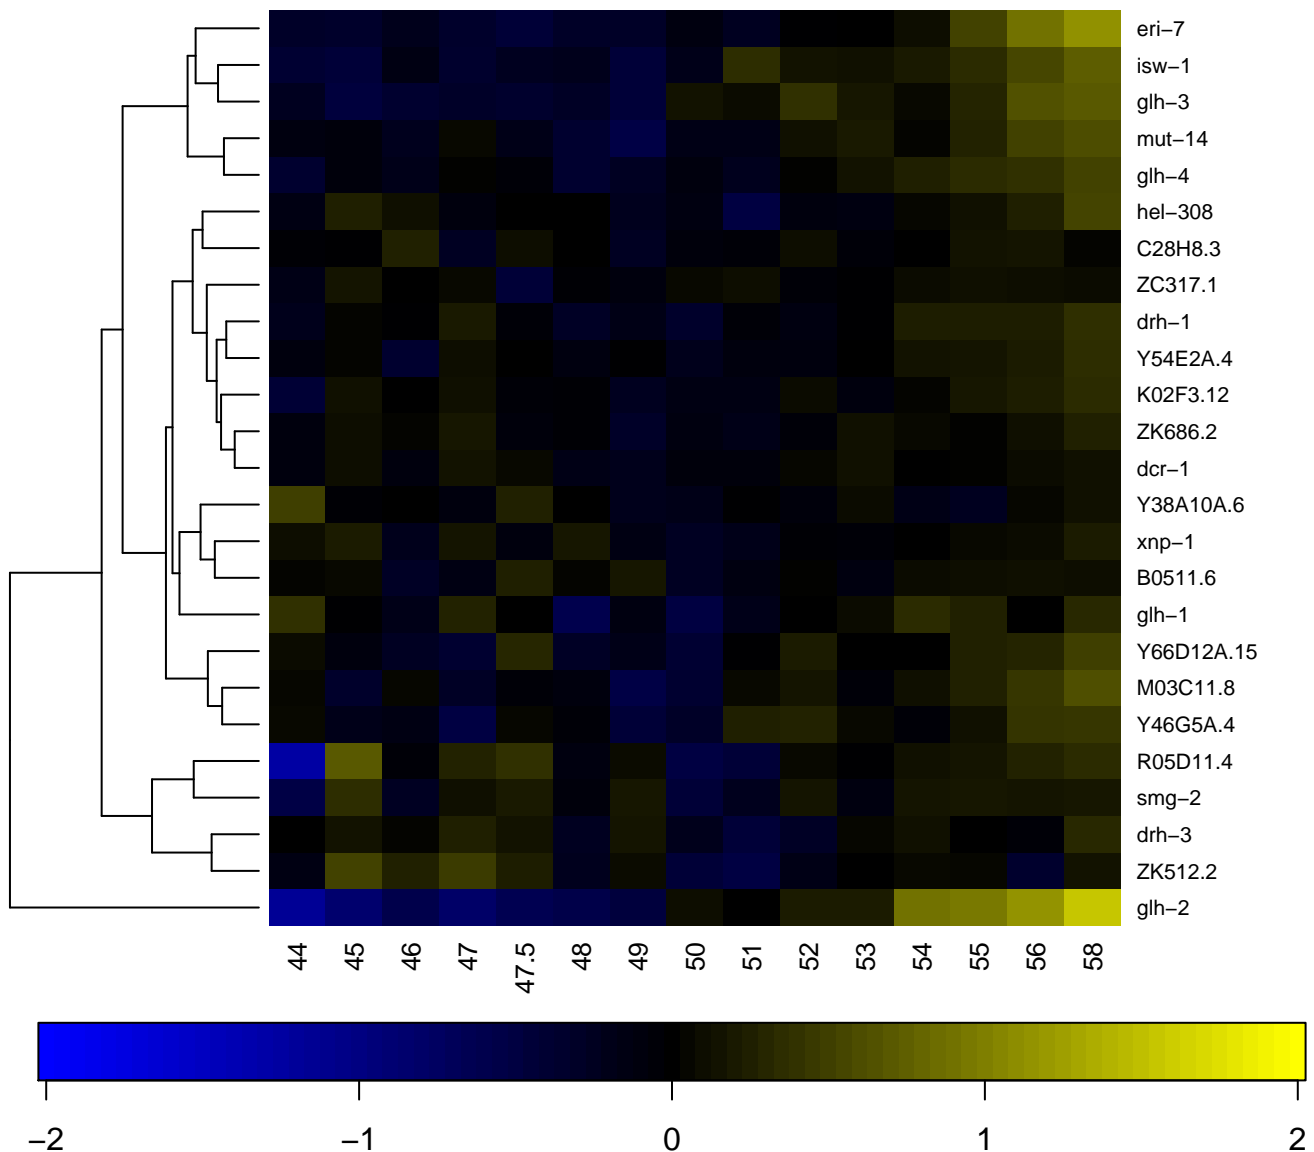

# Tyrosinase

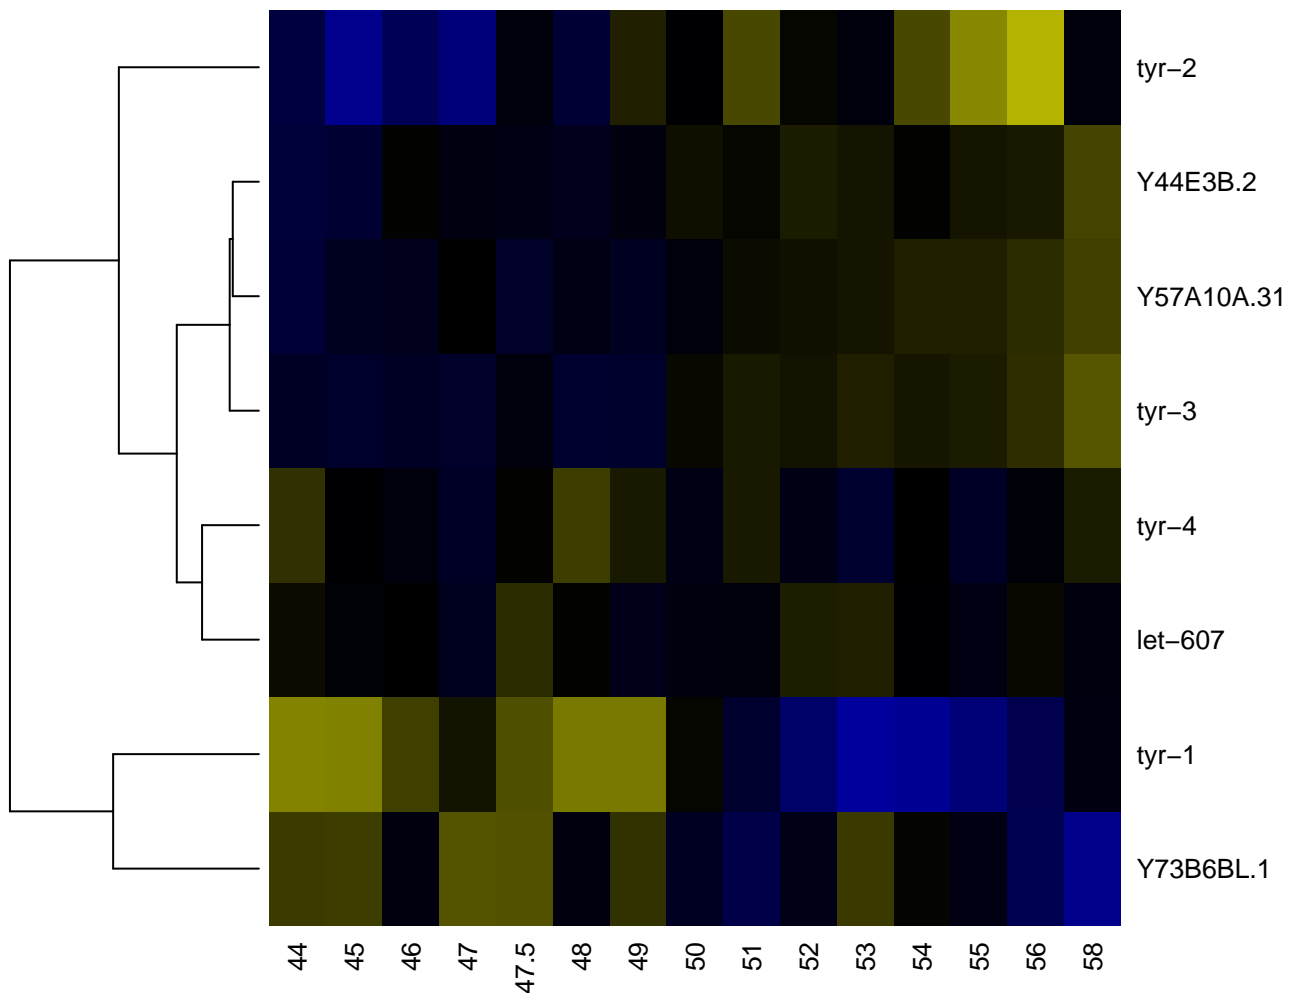

# Tyrosine-protein kinase

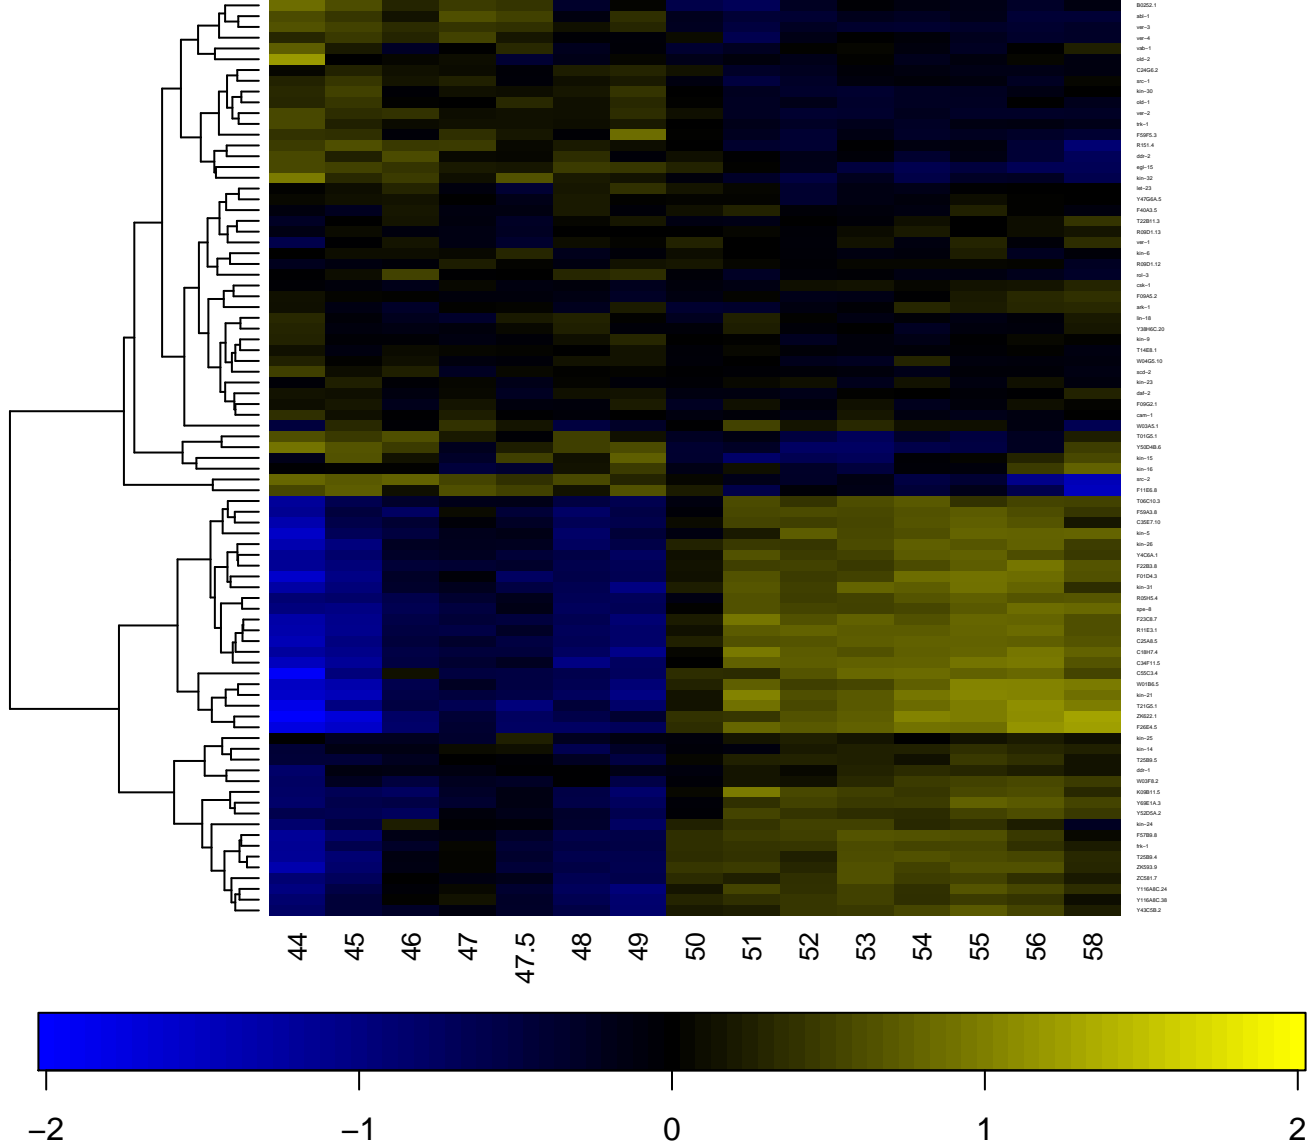

# Tyrosine-protein kinase, active site

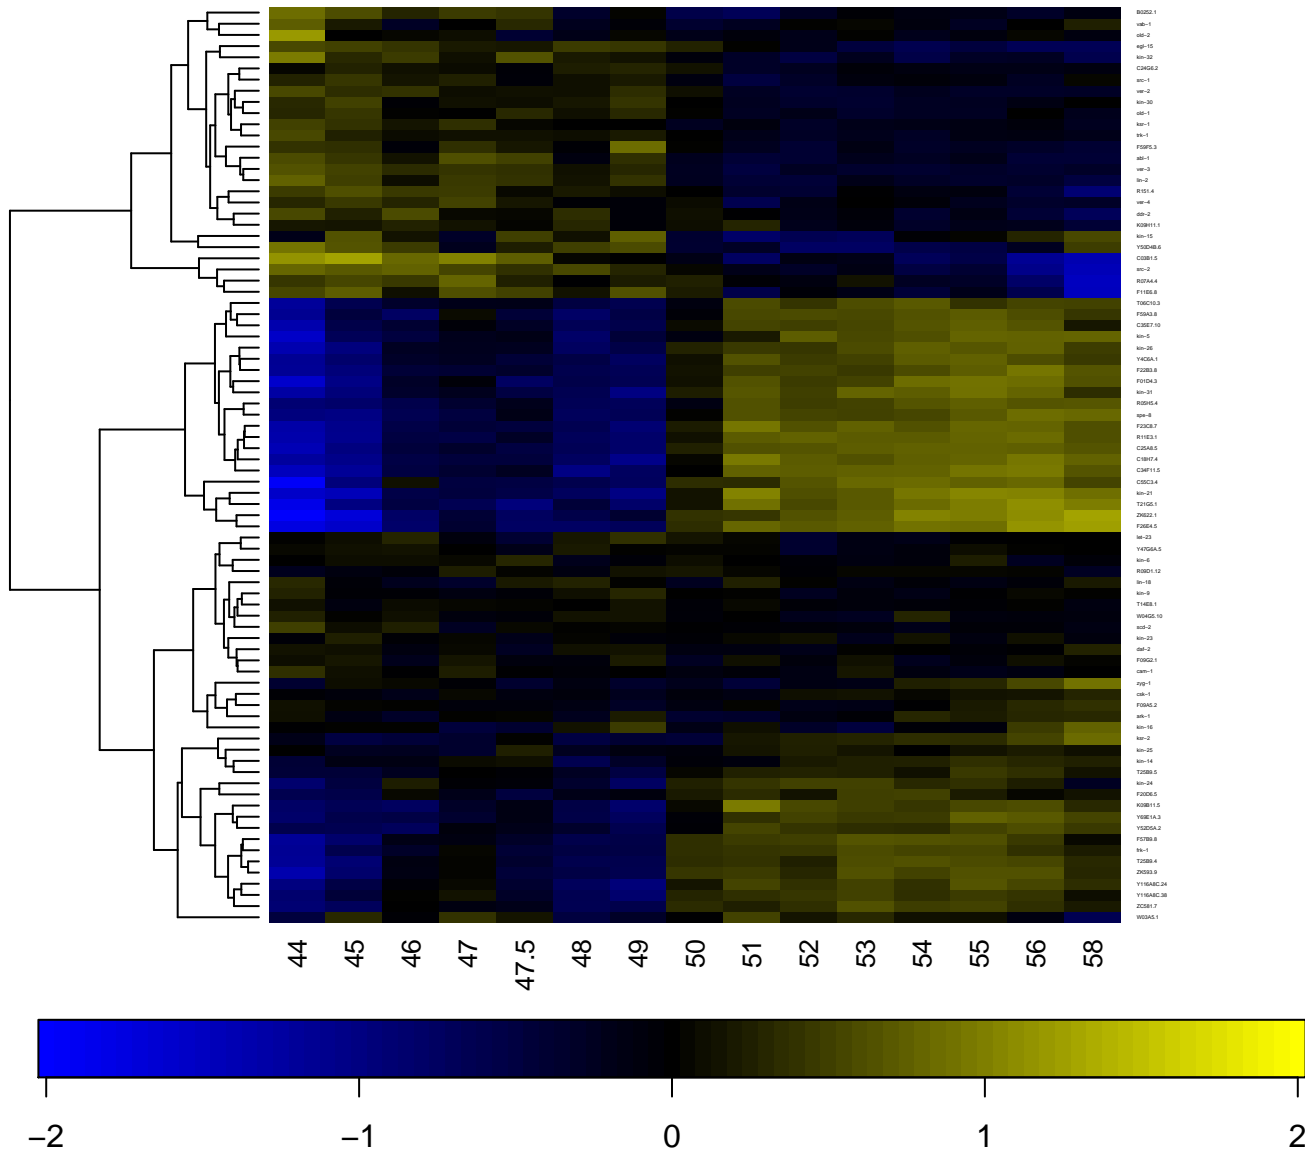

# Tyrosine-protein kinase, catalytic domain

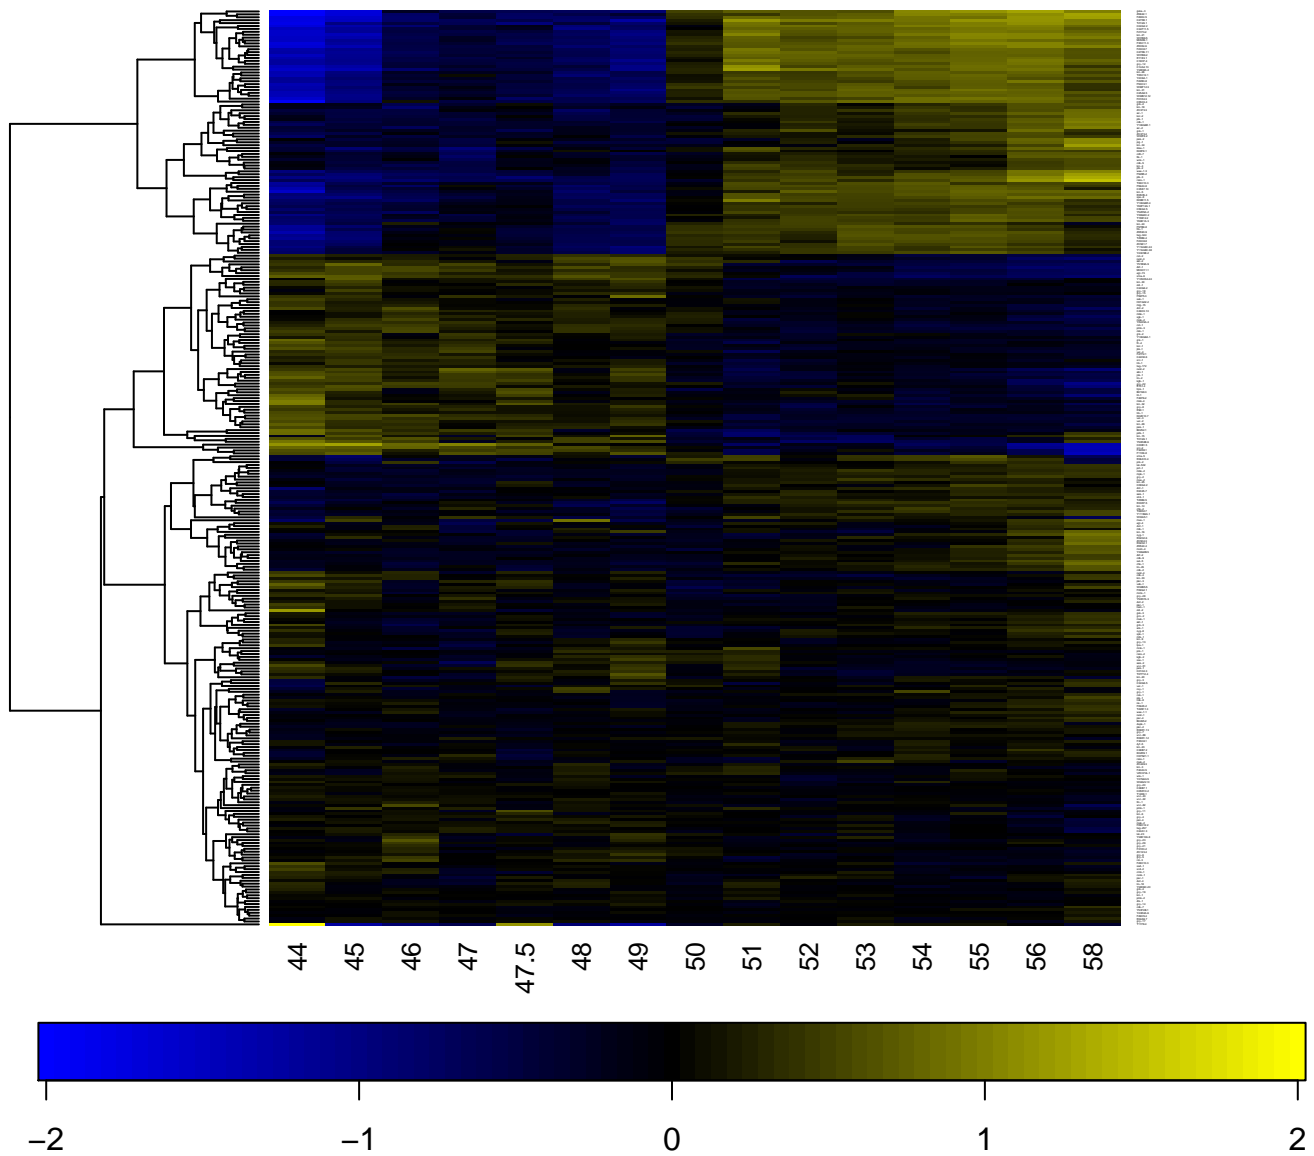









# UBA/TS-N domain

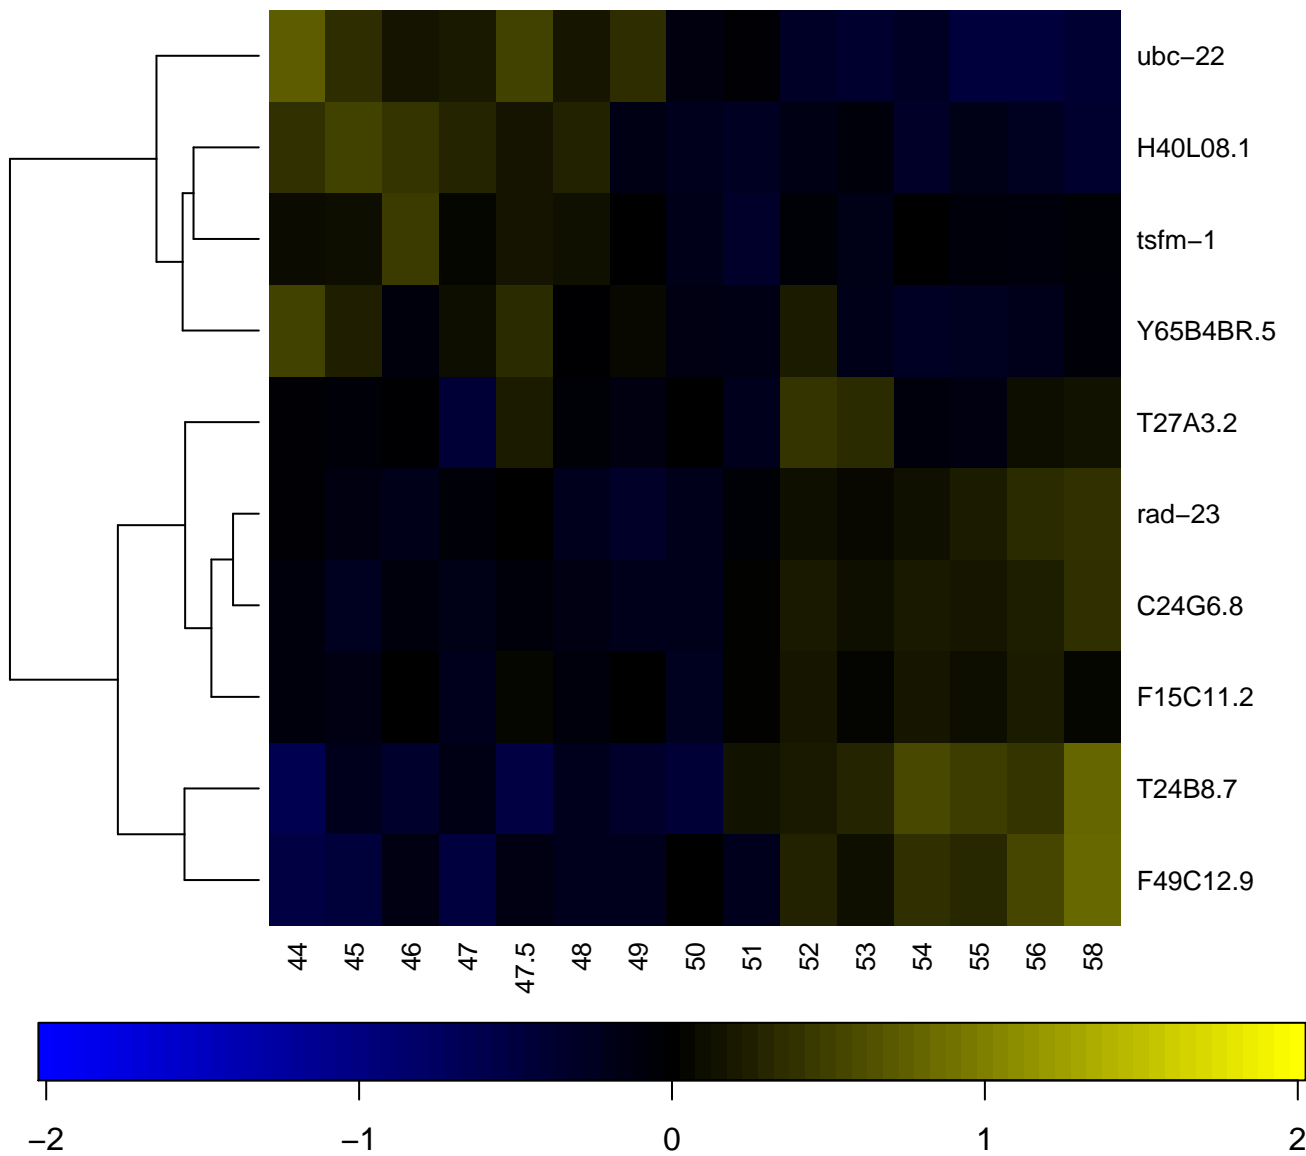

# UbiE/COQ5 methyltransferase

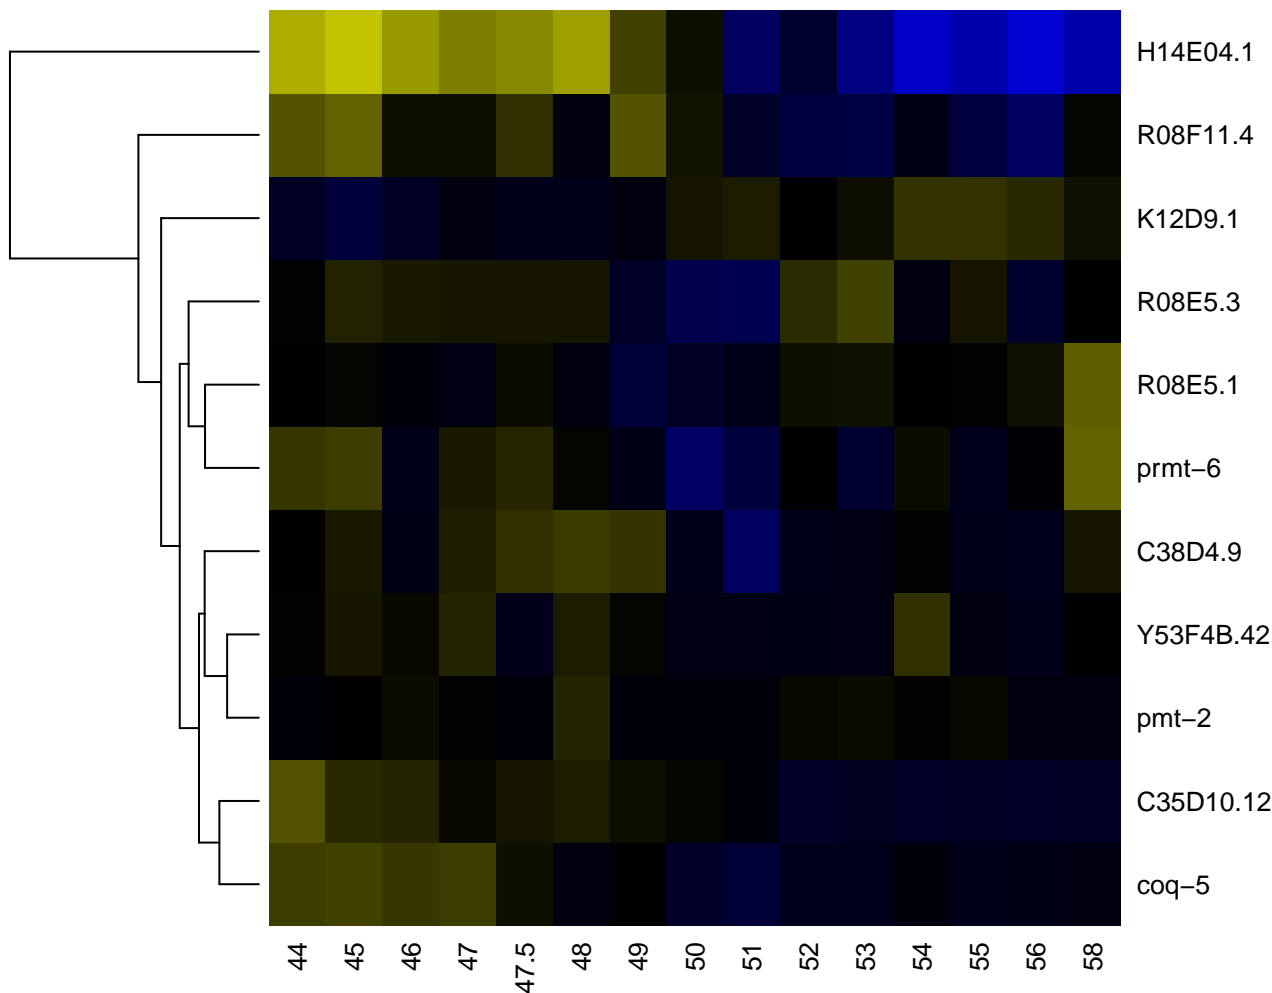

-2

-1

0

1

2



# Ubiquitin

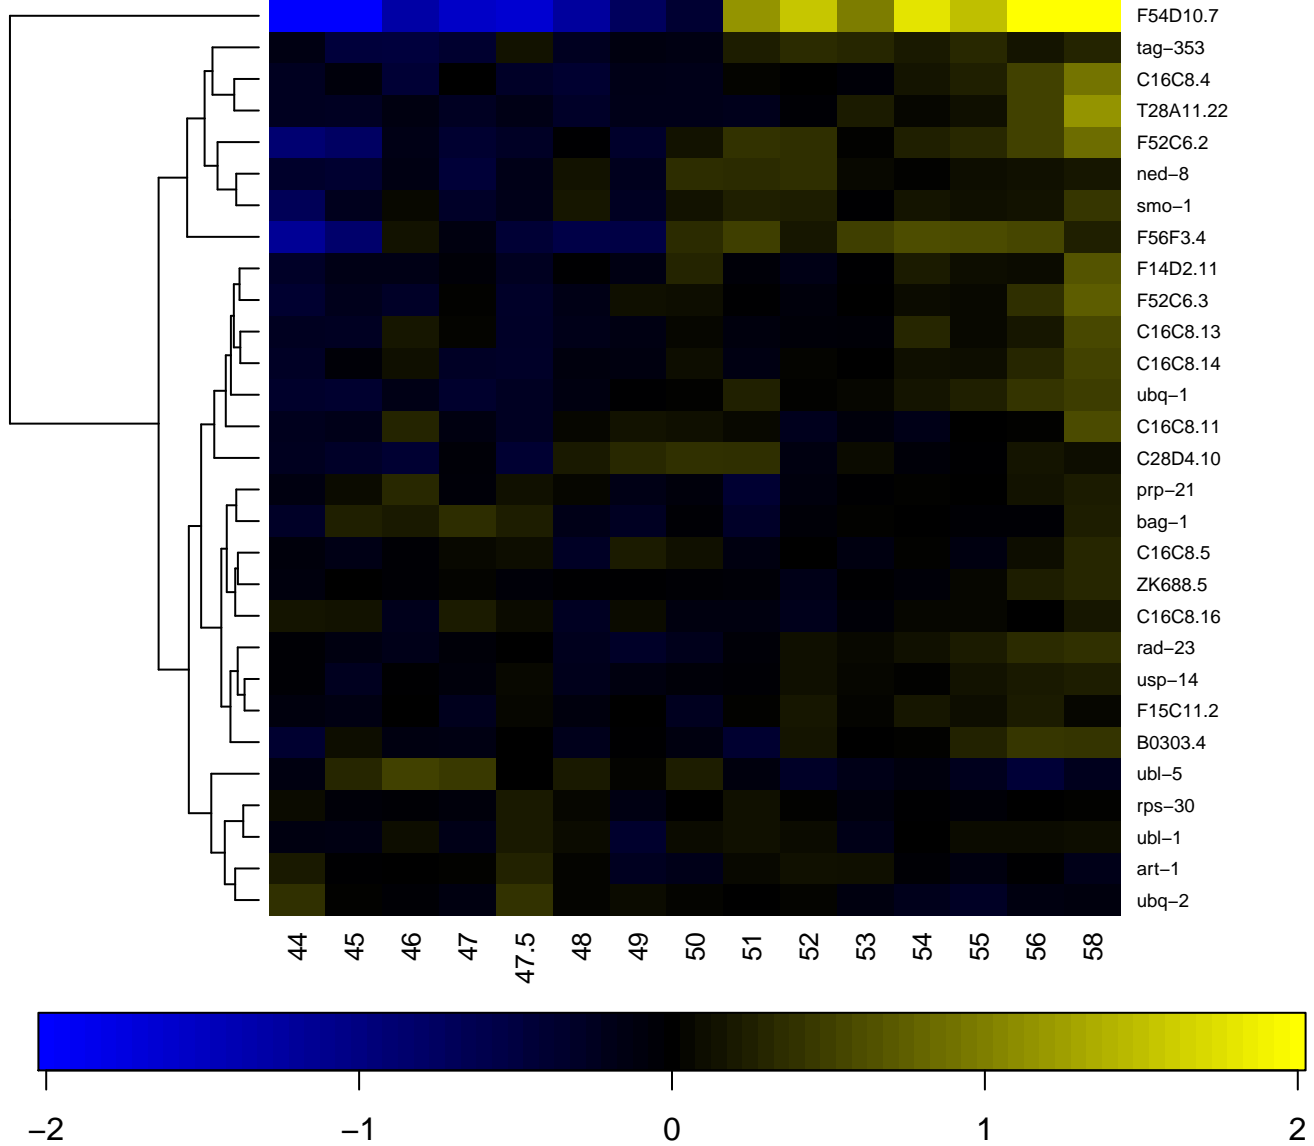

# quitin-associated/translation elongation factor EF1B, N-ter

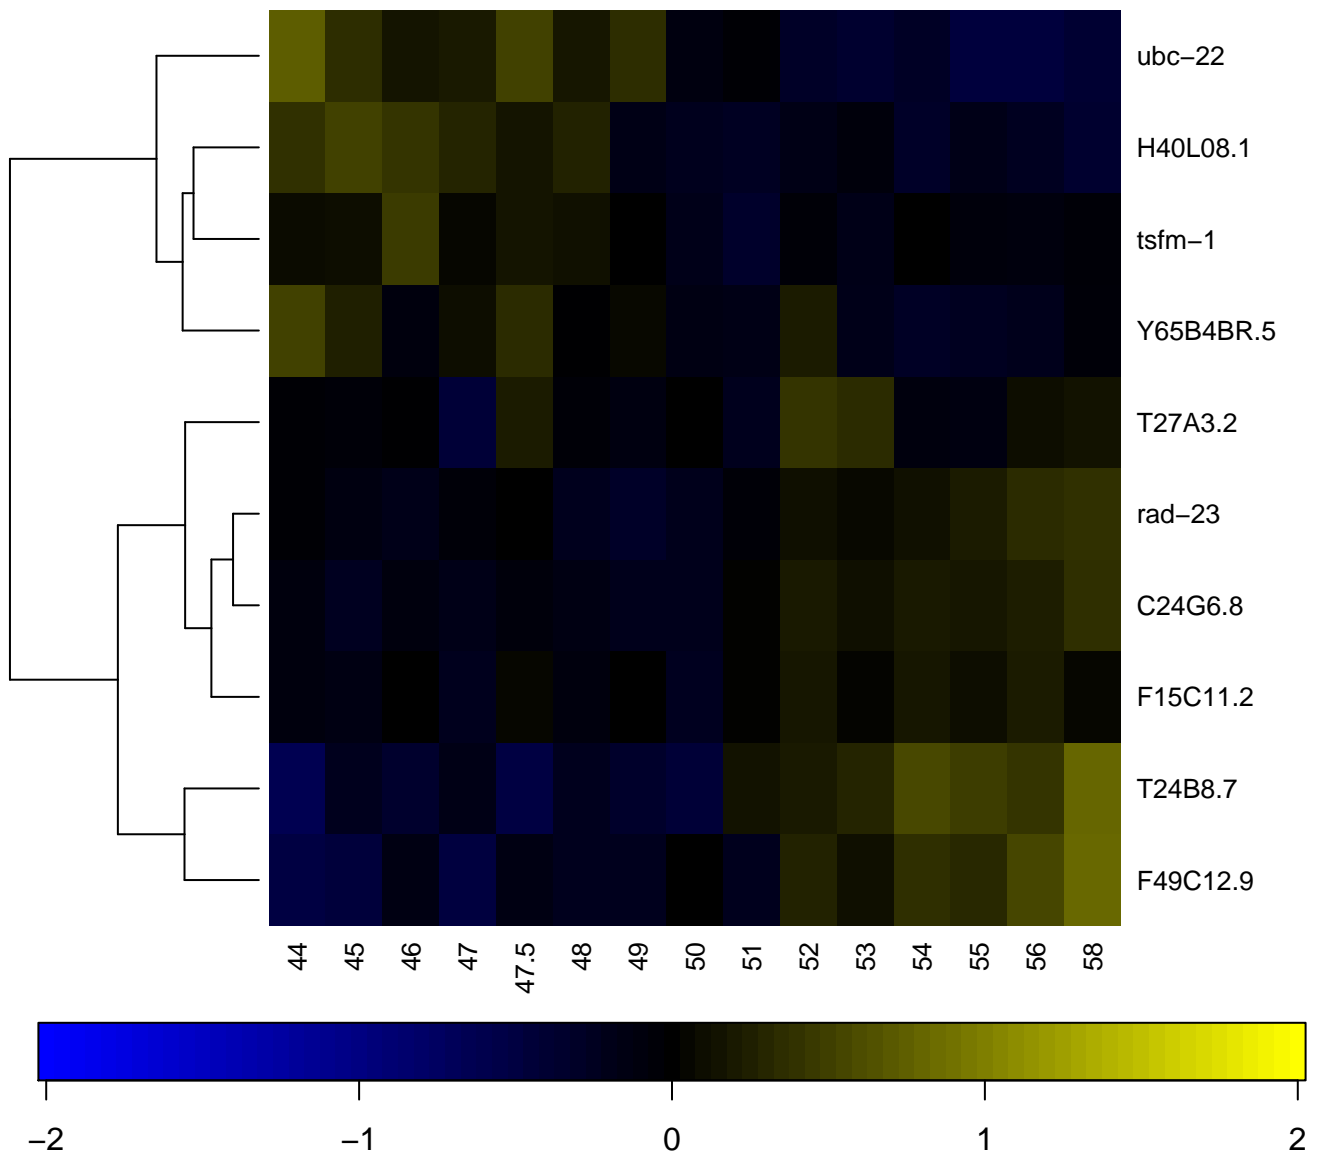



# -associated/translation elongation factor EF1B, N-terminal

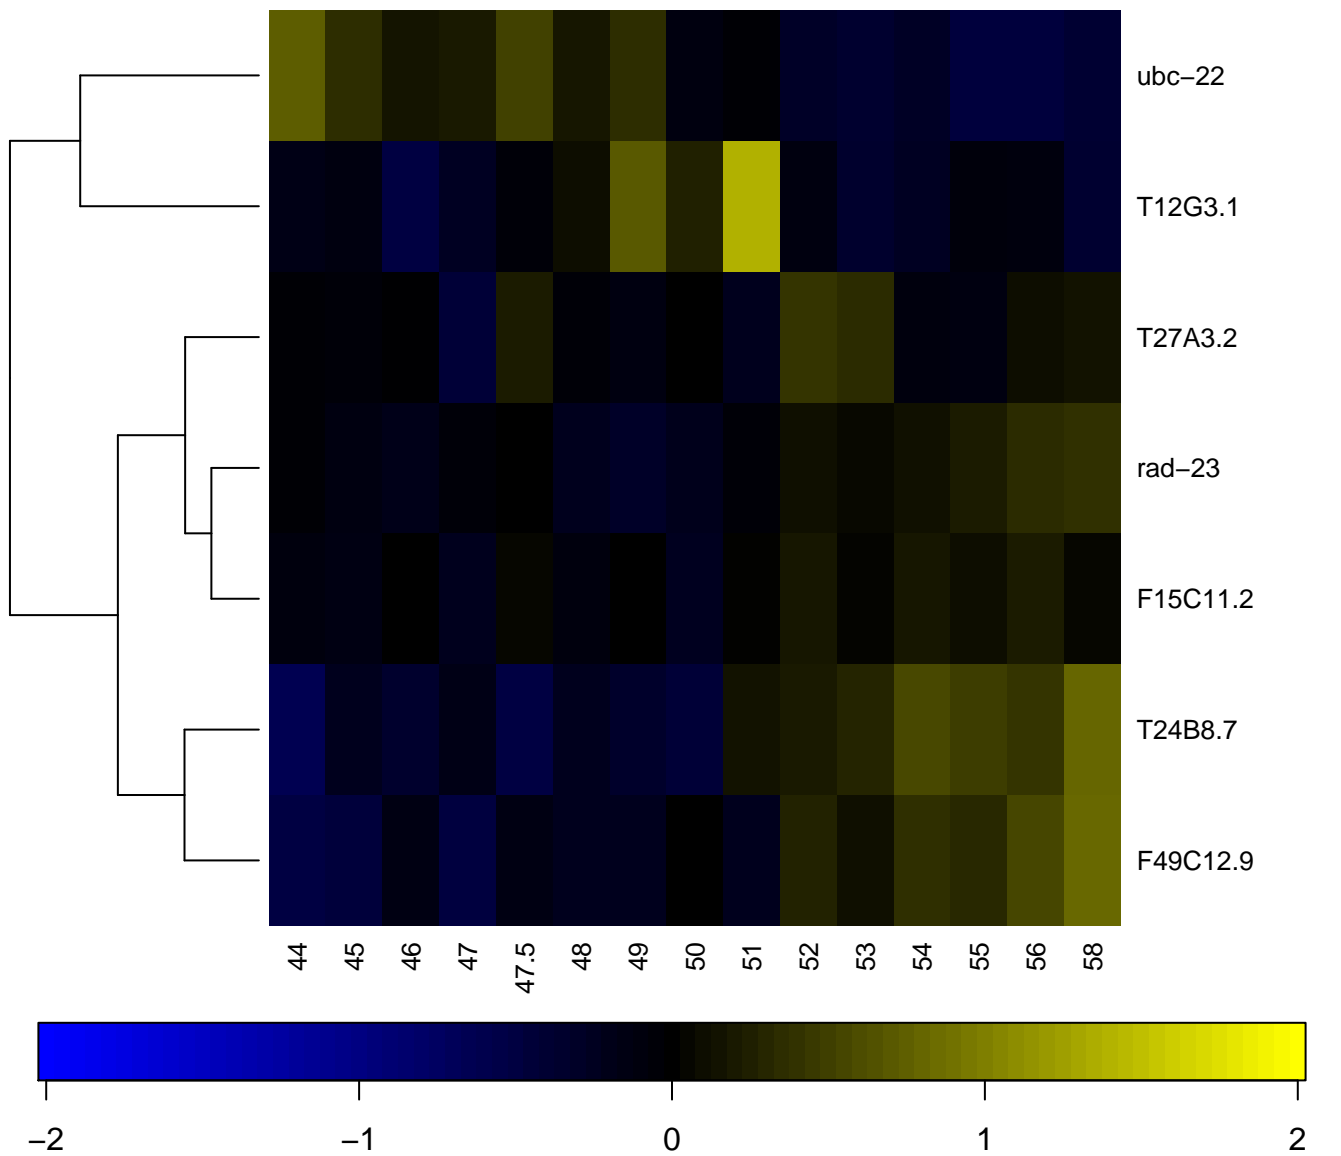





# Ubiquitin-conjugating enzyme/RWD-like

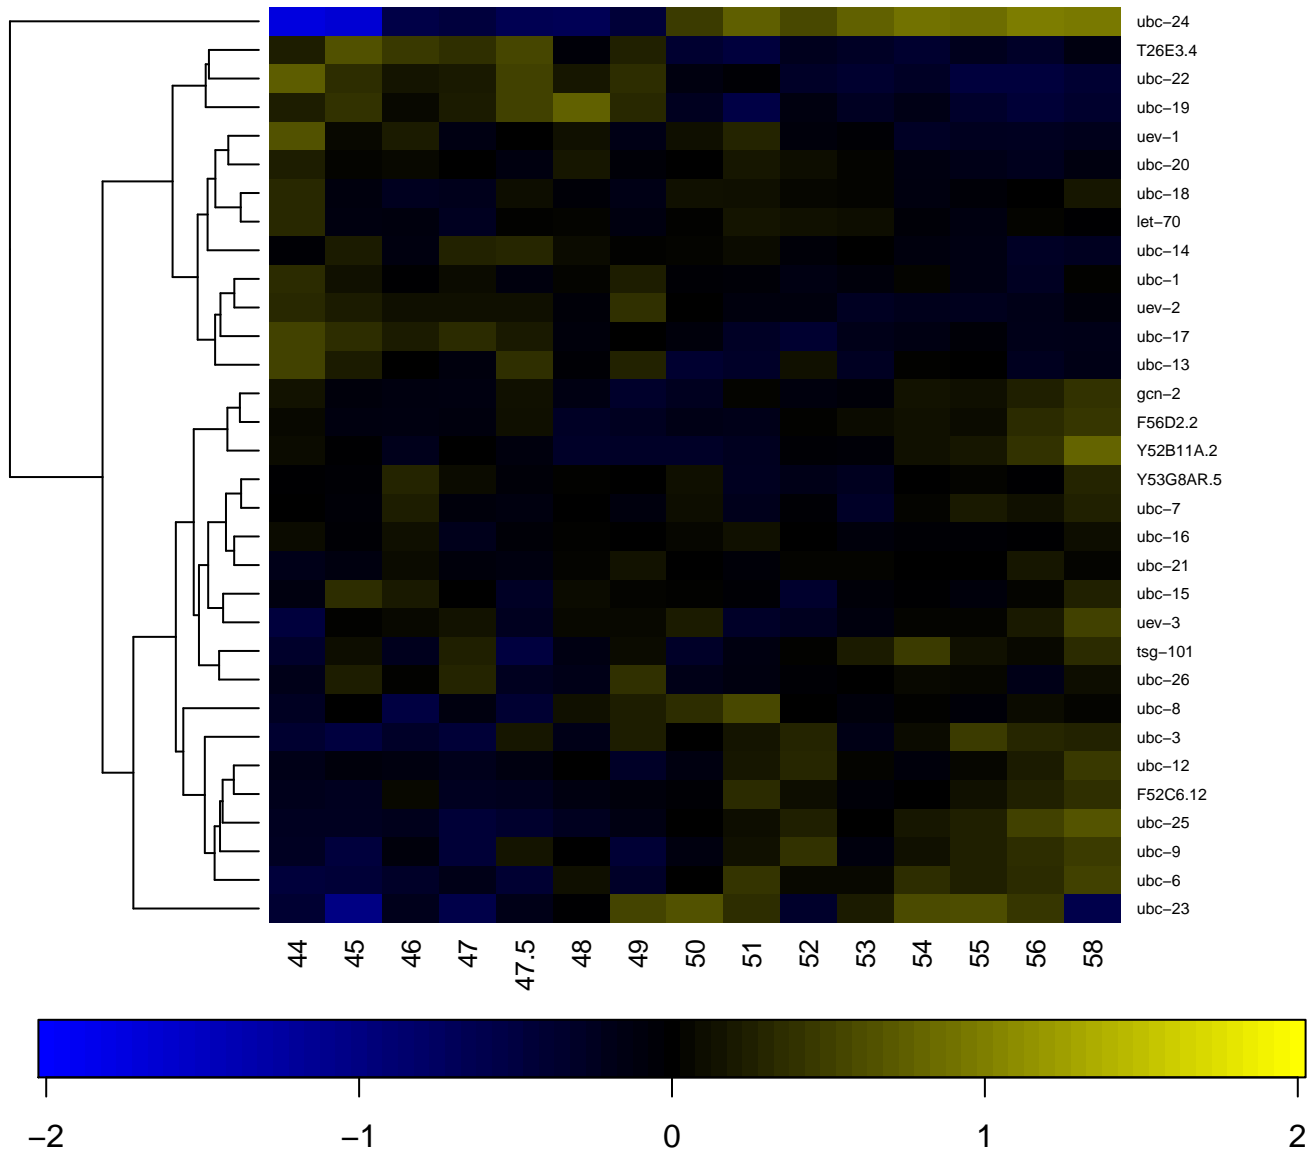

# Ubiquitin carboxyl-terminal hydrolase

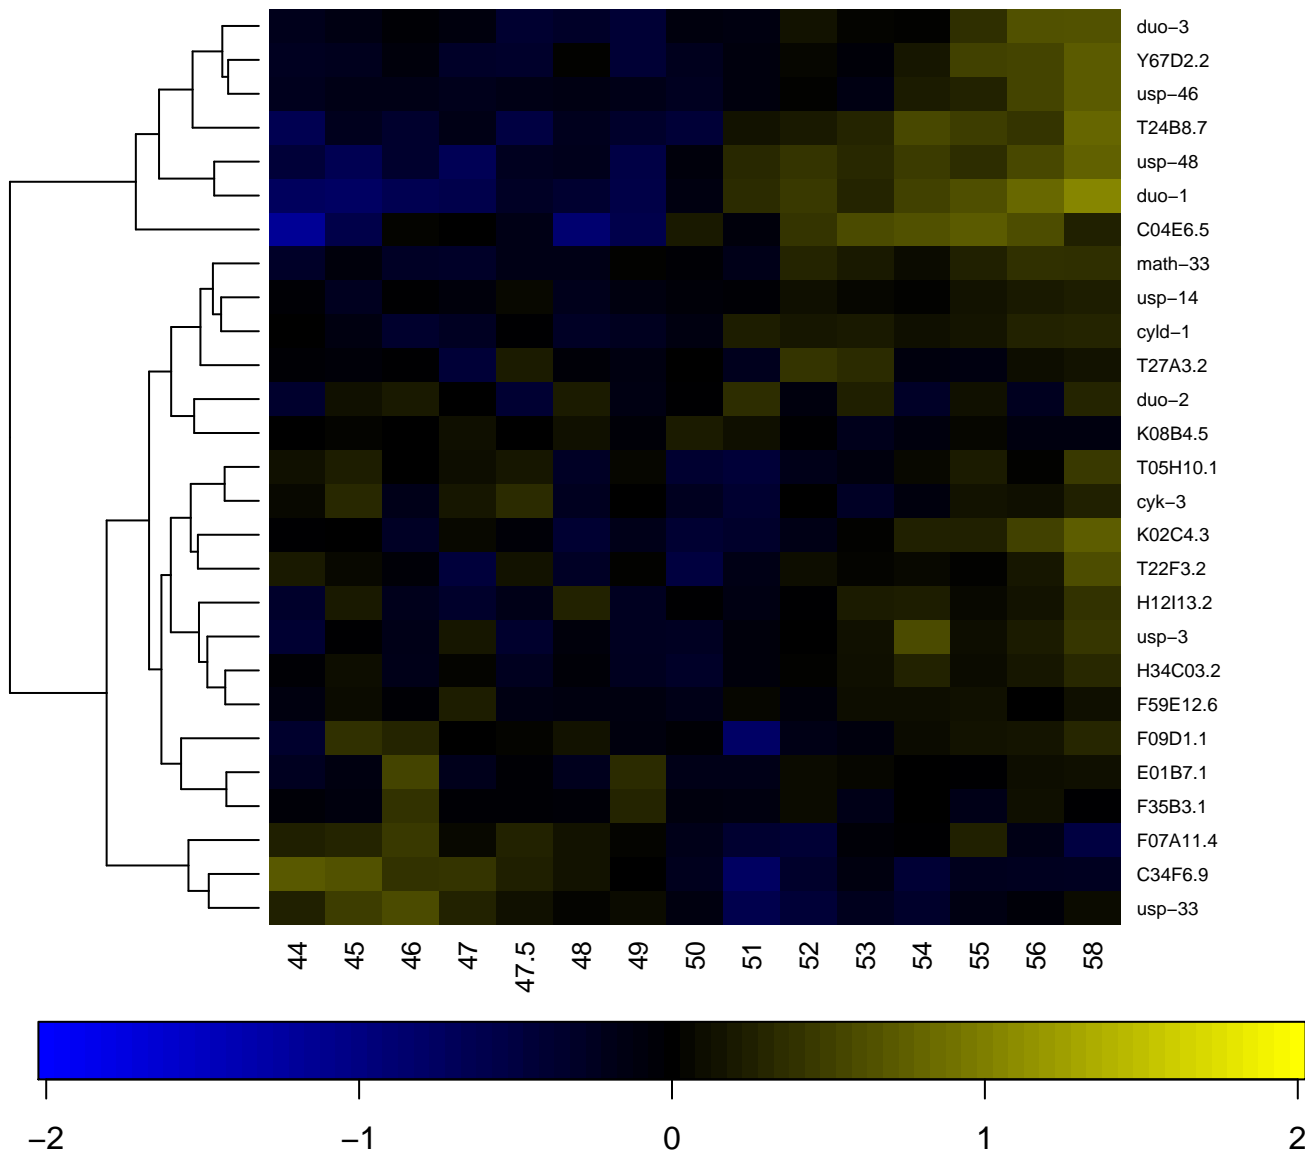





# Ubiquitin subgroup

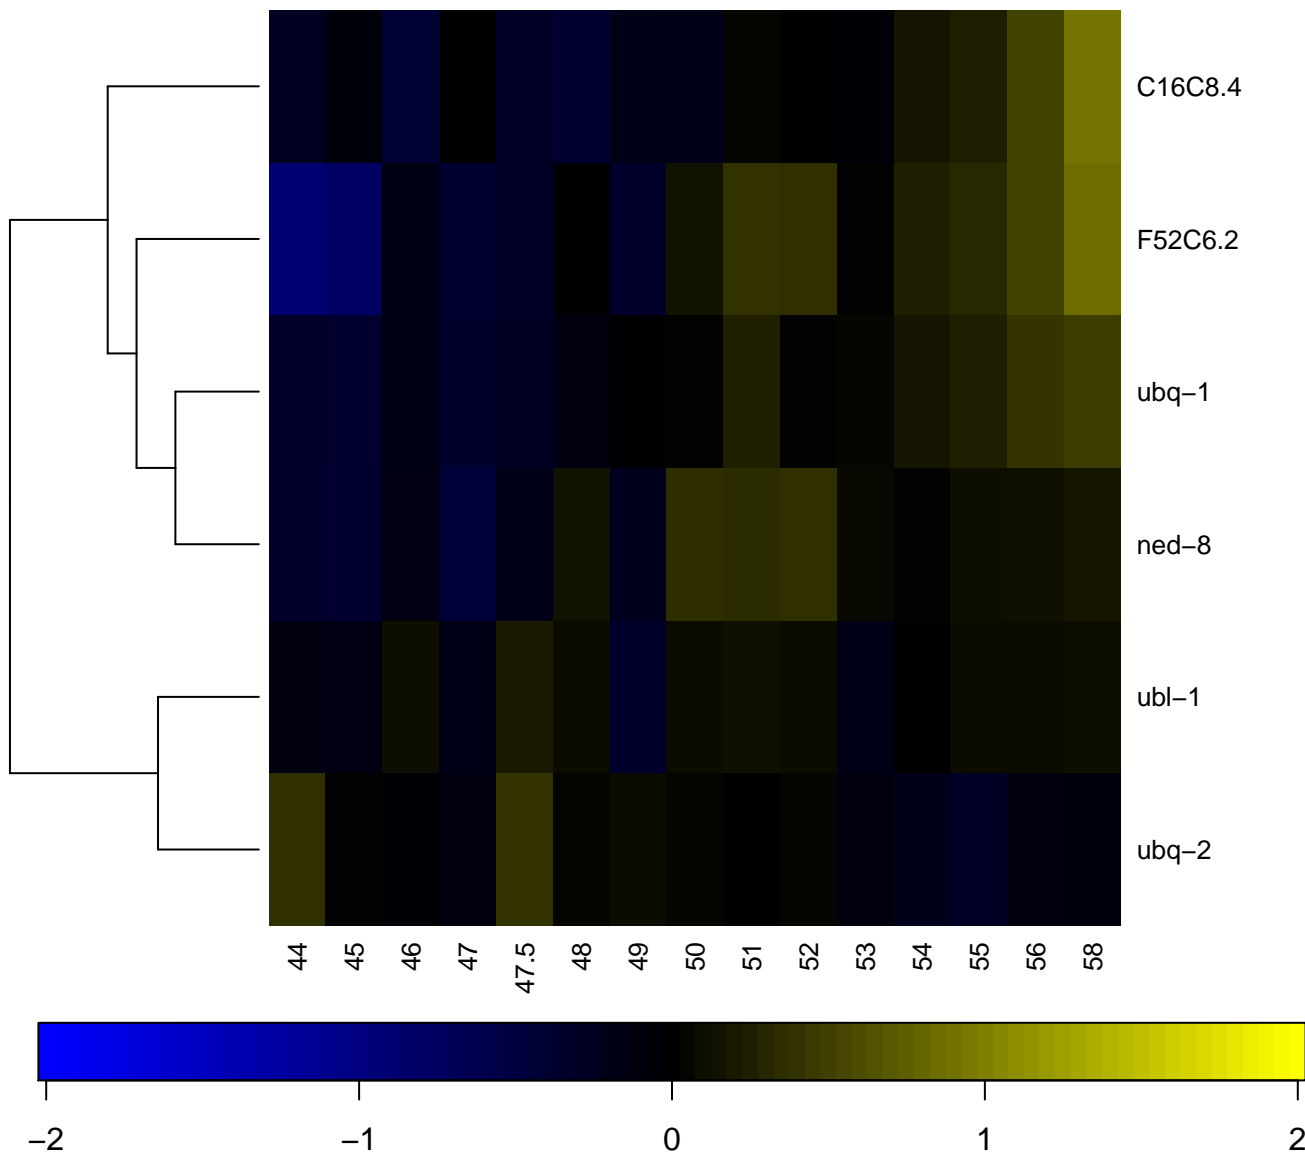









# UDP-galactose transporter



# UDP-glucuronosyl and UDP-glucosyl transferase

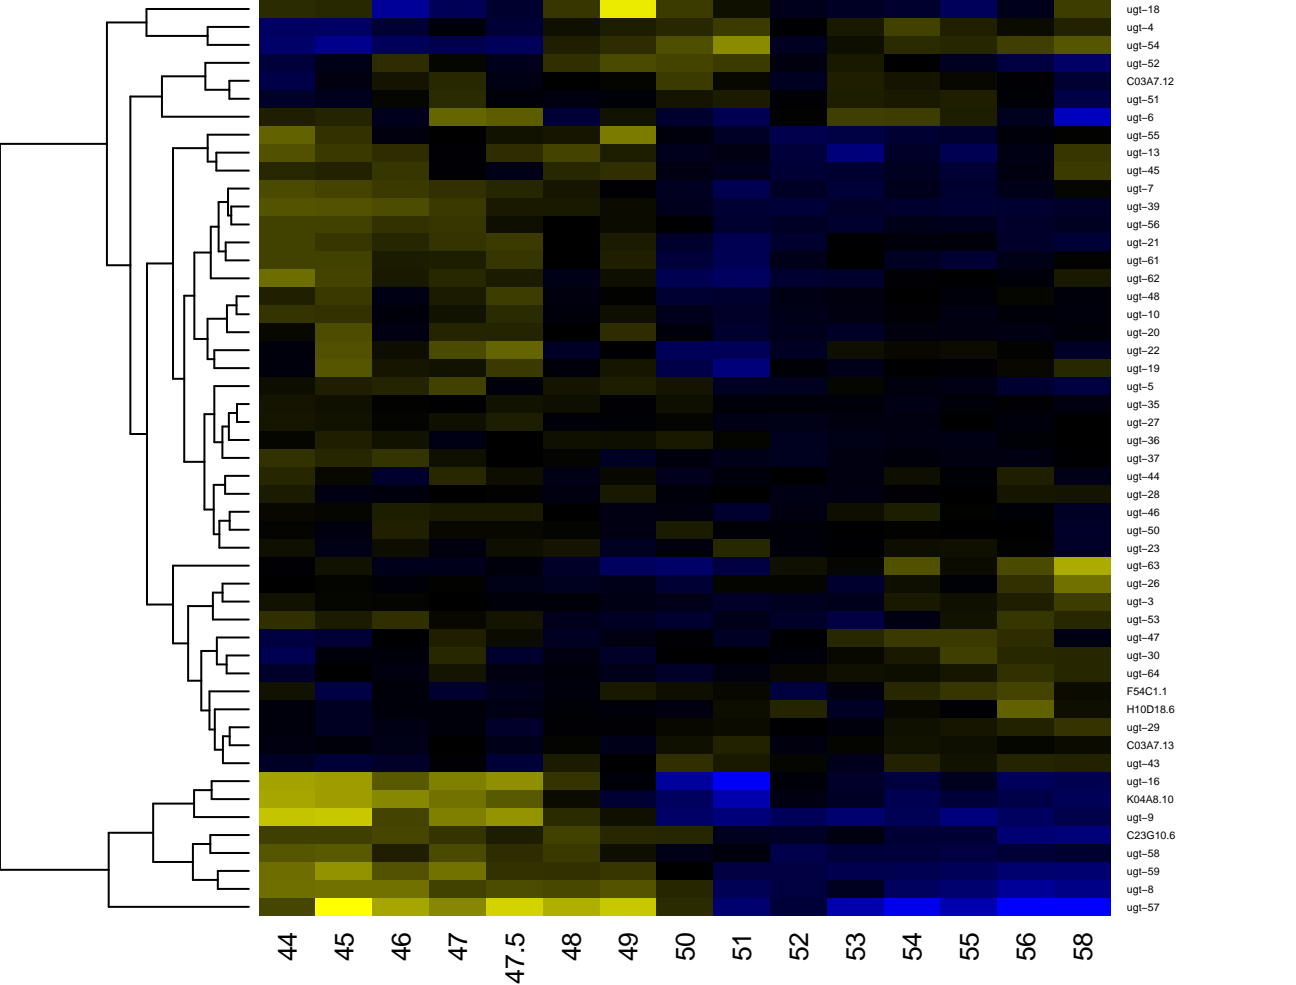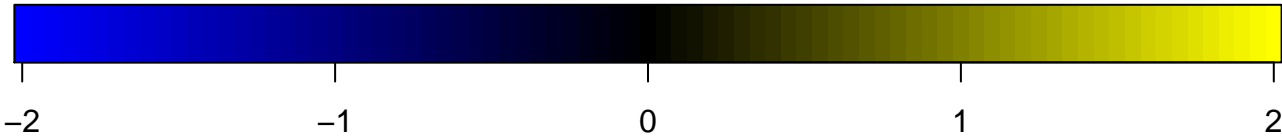

# UDP-glucuronosyl/UDP-glucosyltransferase

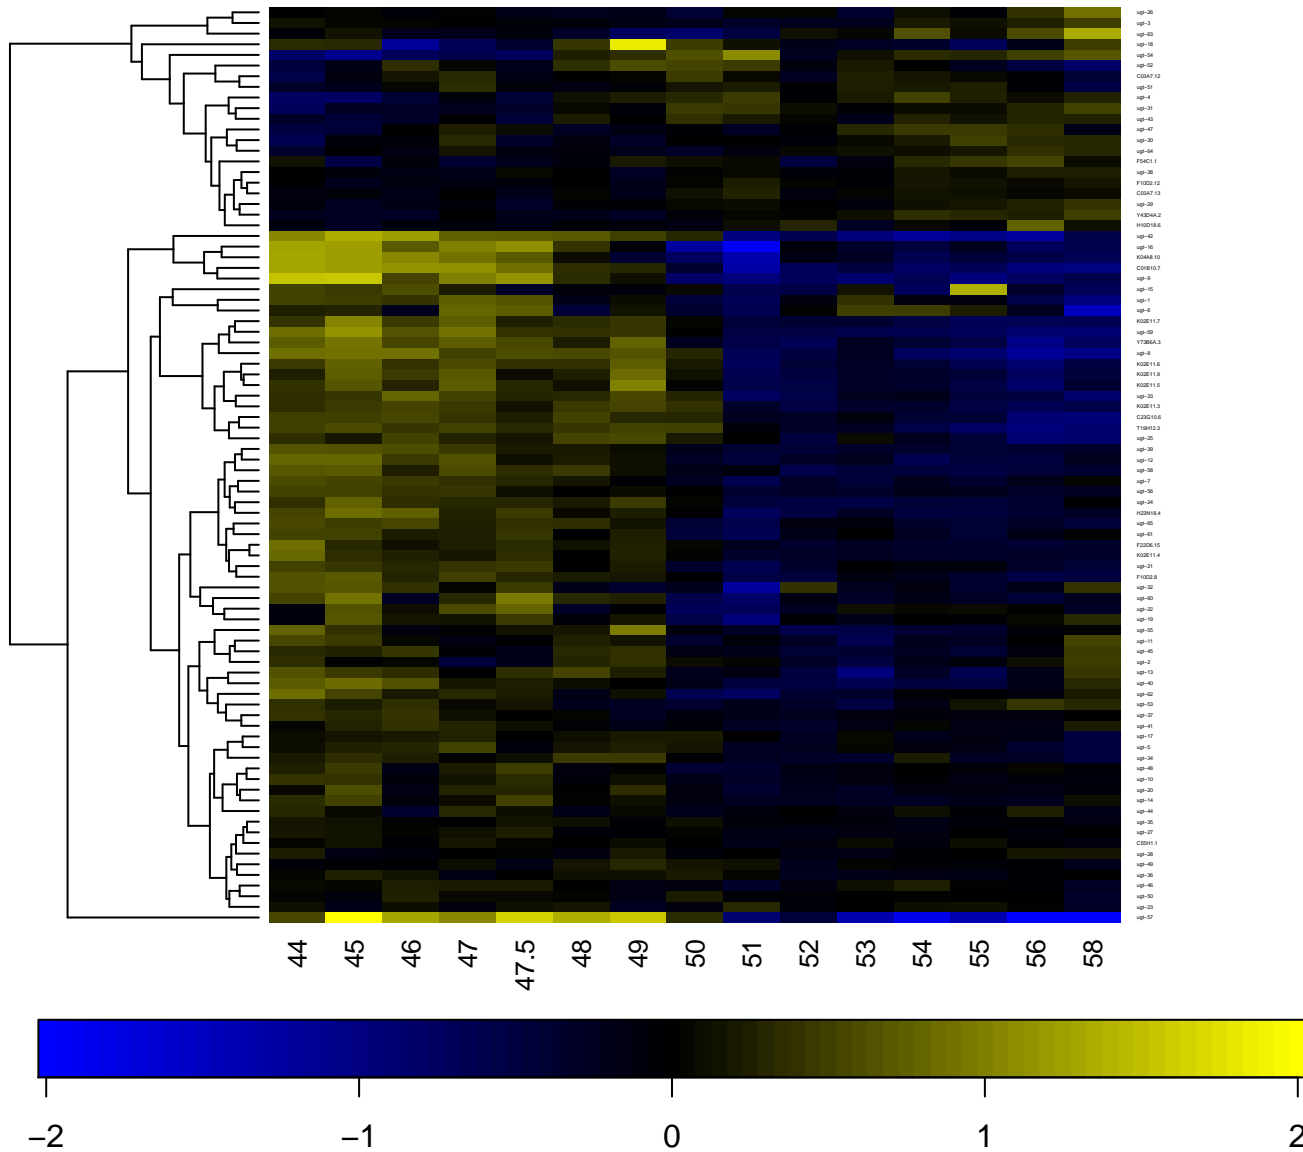

# Ulp1 protease family, C-terminal catalytic domain

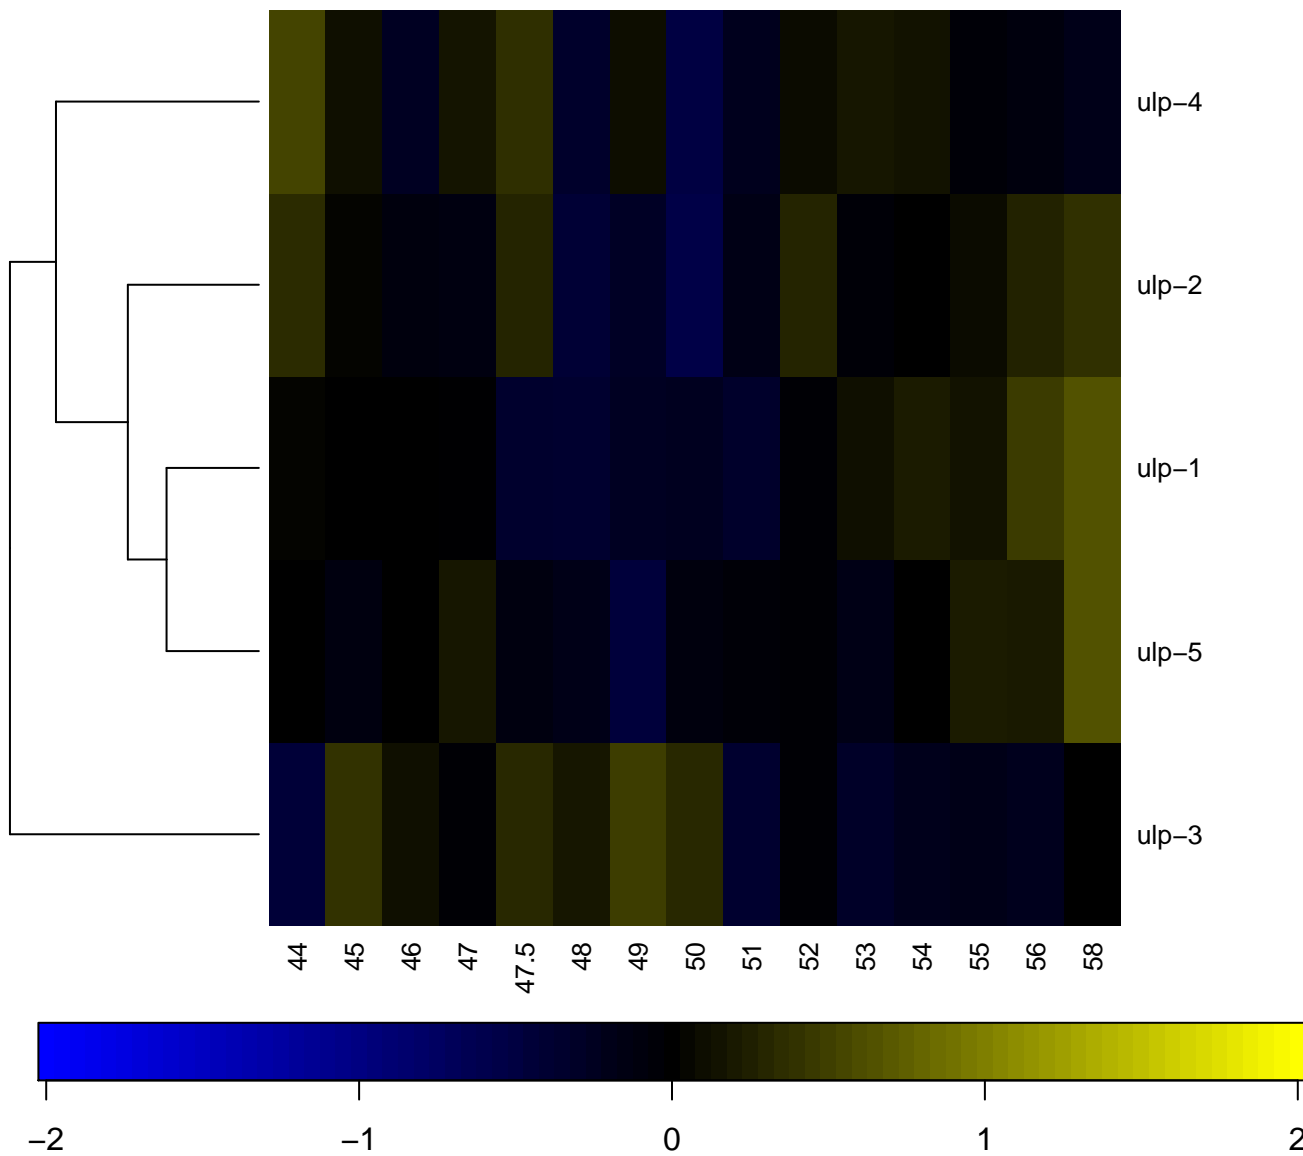

# Uncharacterised kinase D1044.1

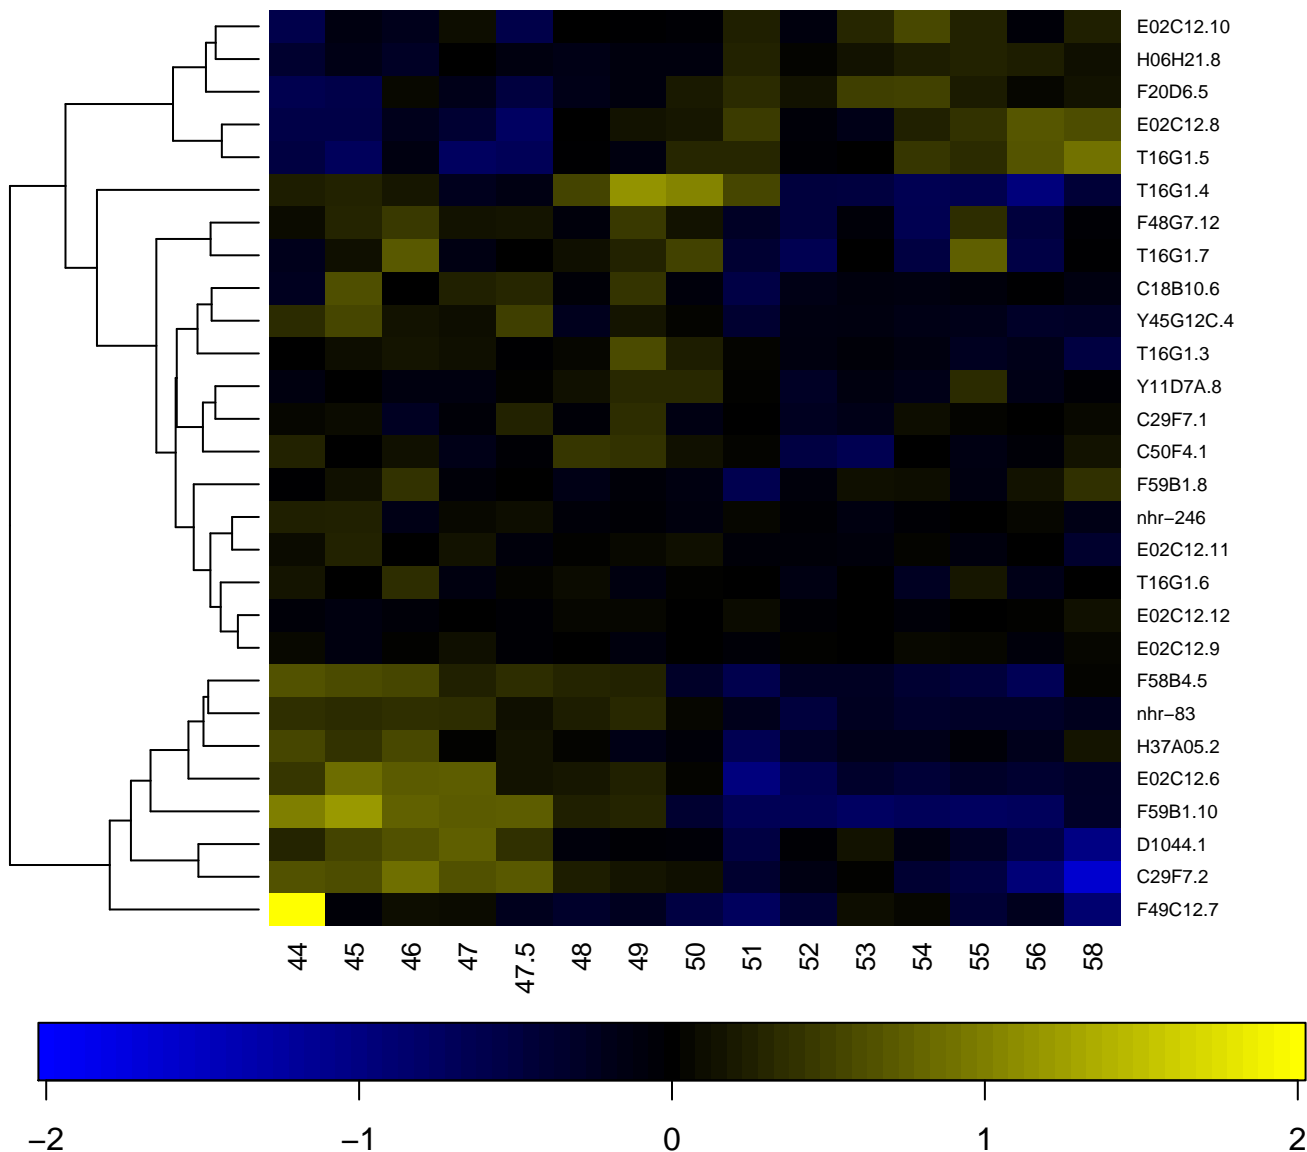



# Uncharacterised protein family T05H10.3

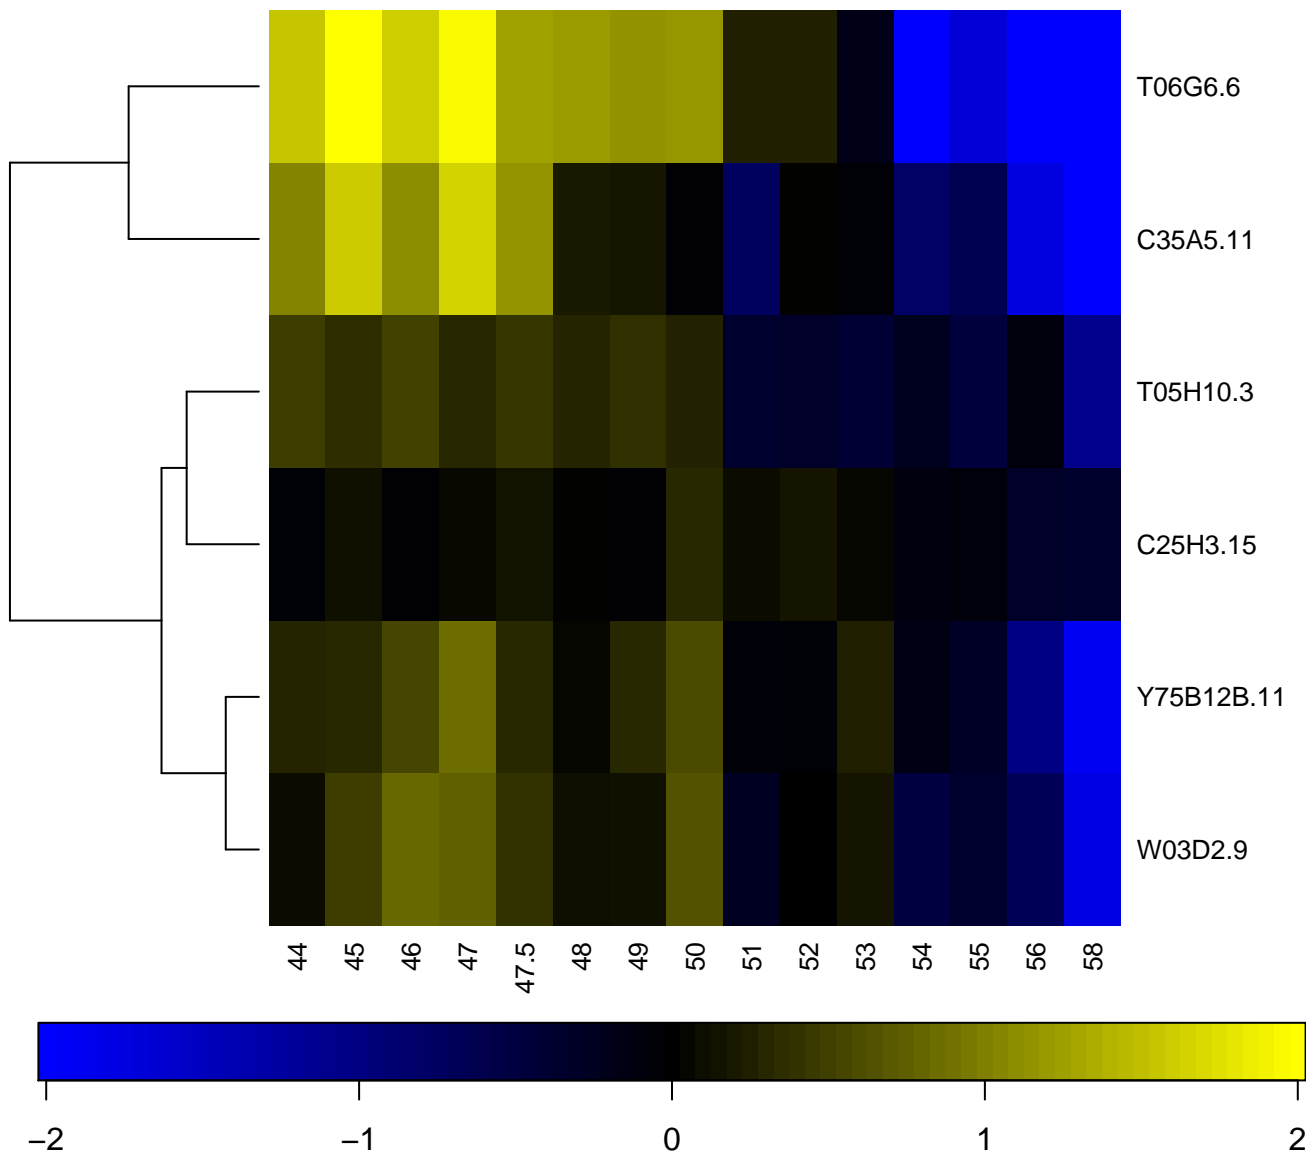

# Uncharacterised protein family UPF0005

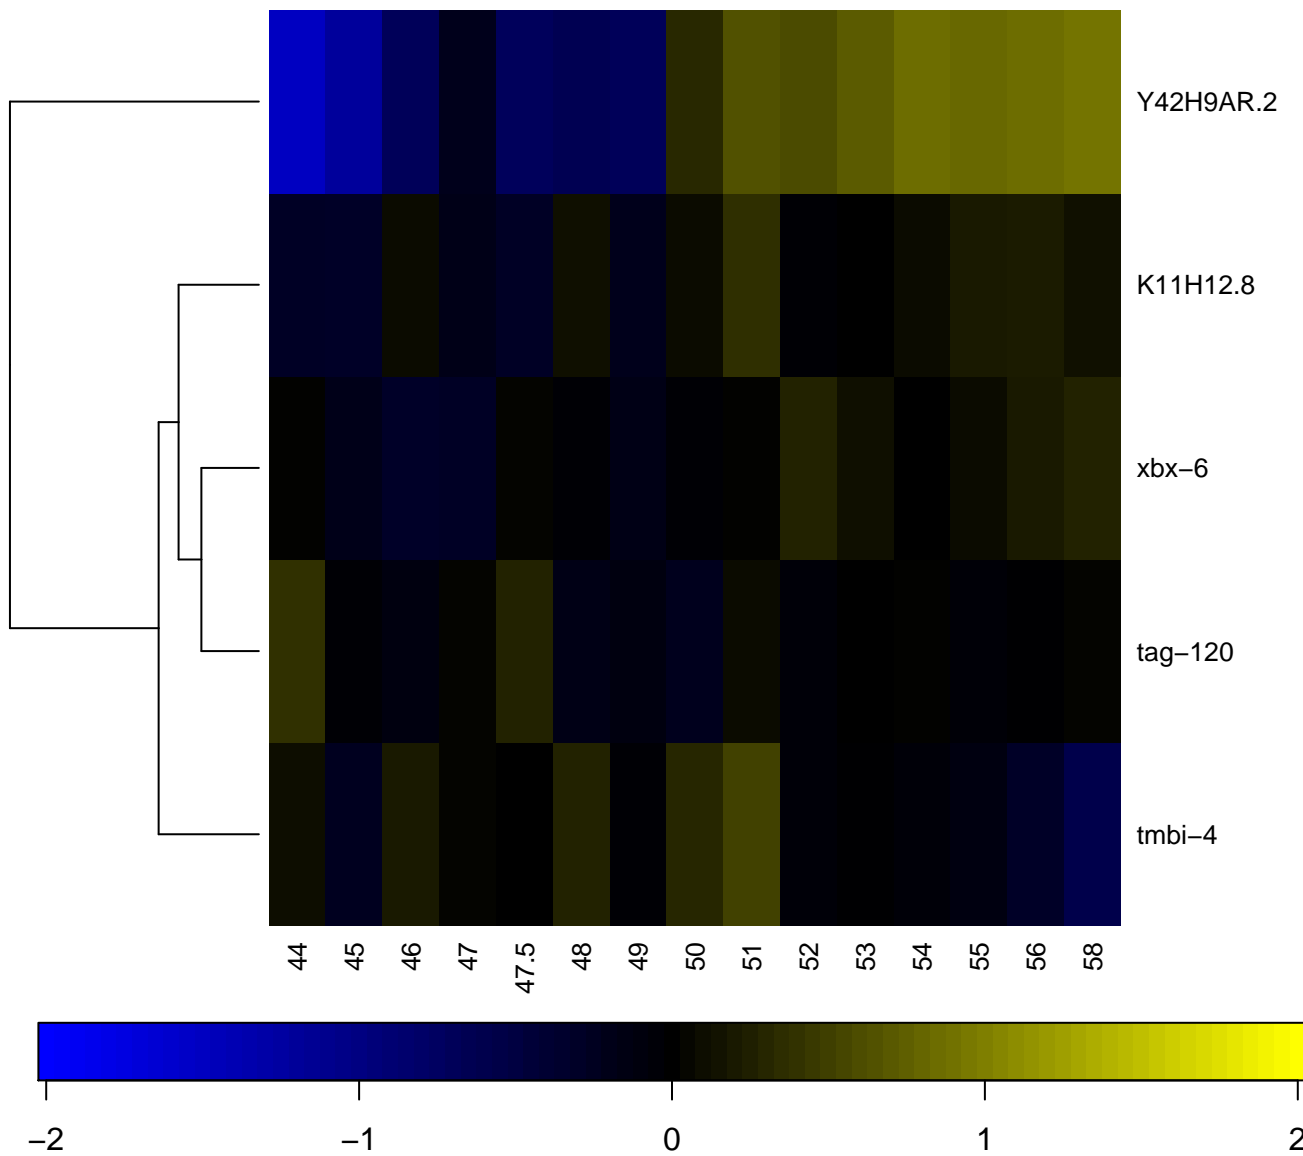

# Uncharacterised protein family UPF0057

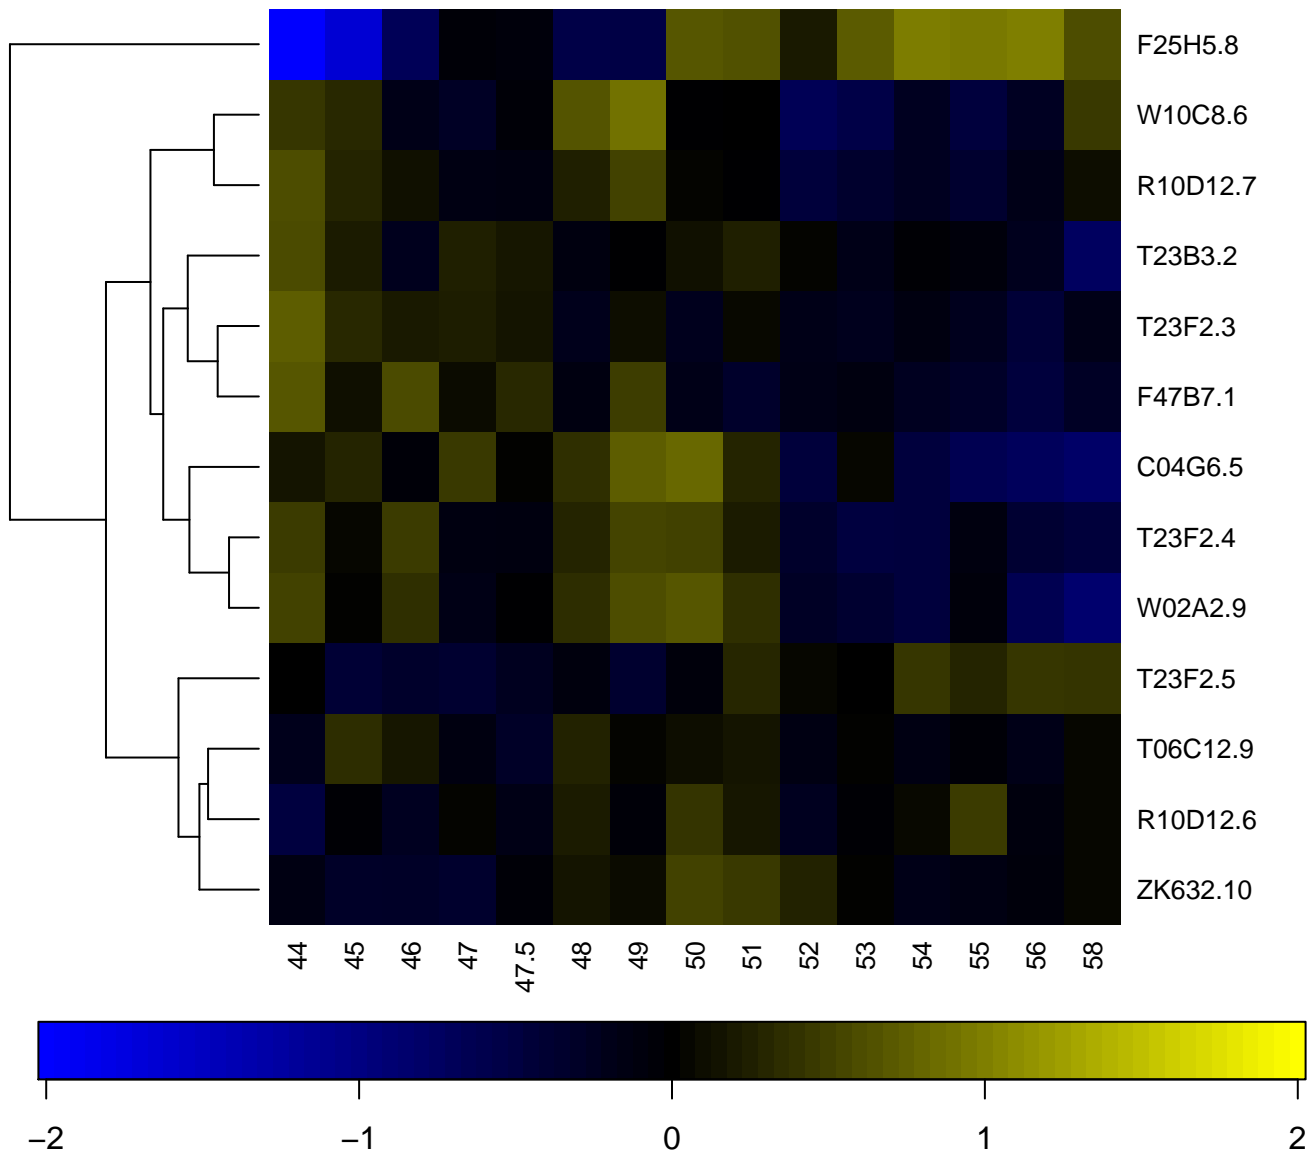



# yl/Leucyl/Isoleucyl-tRNA synthetase, class I, anticodon-binding

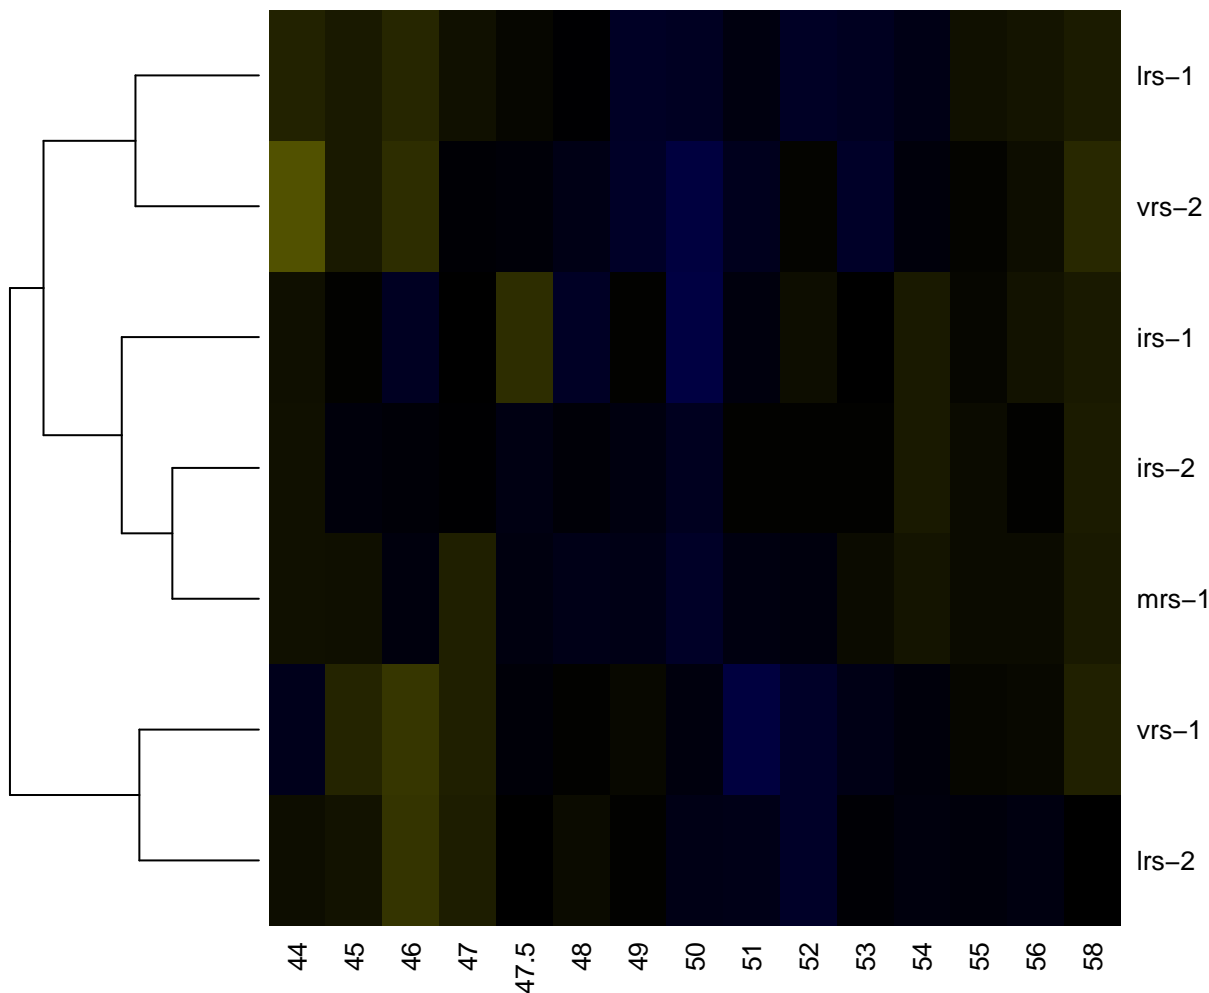

# Variant SH3

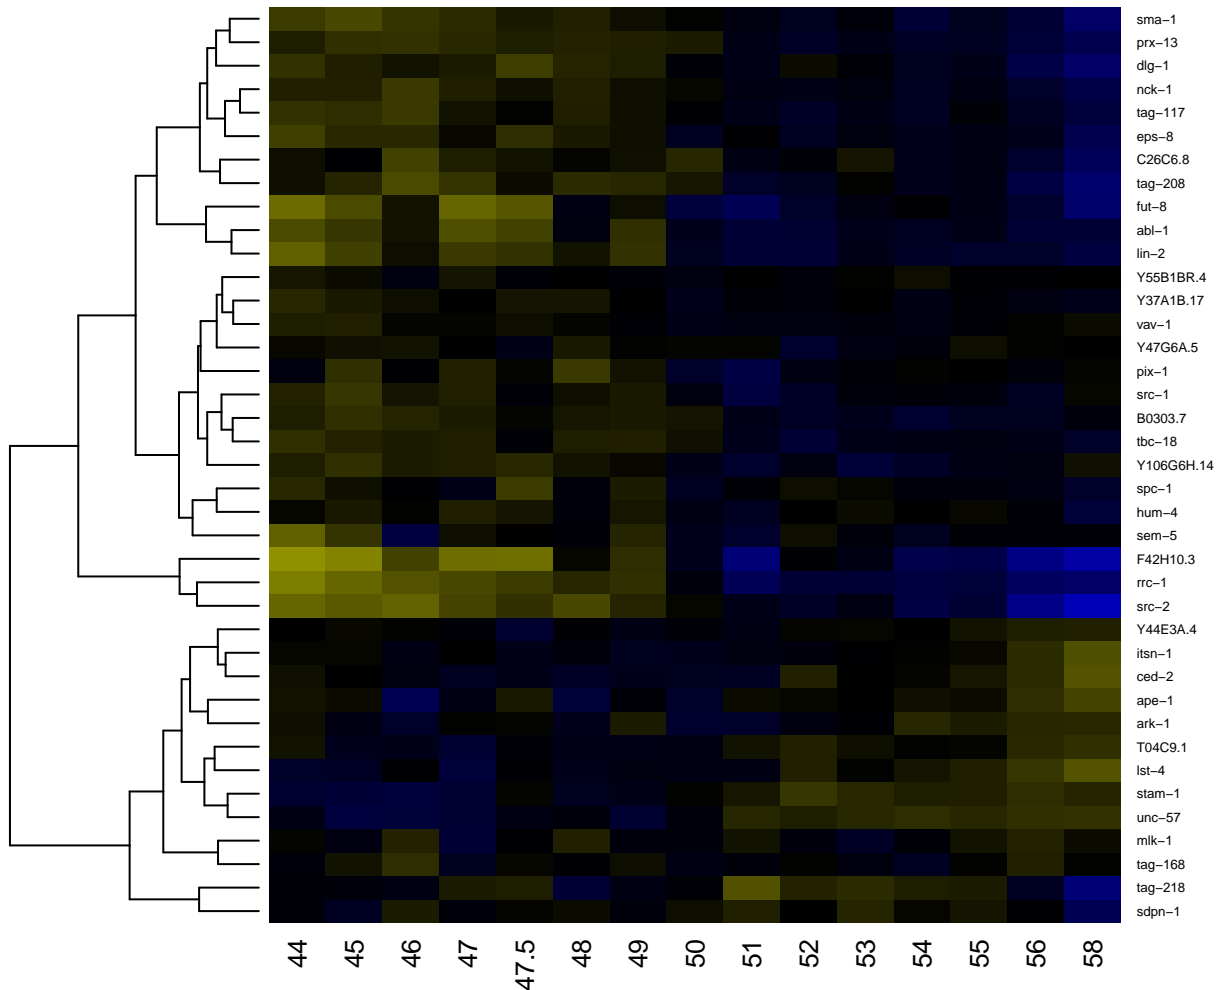



# Ves allergen

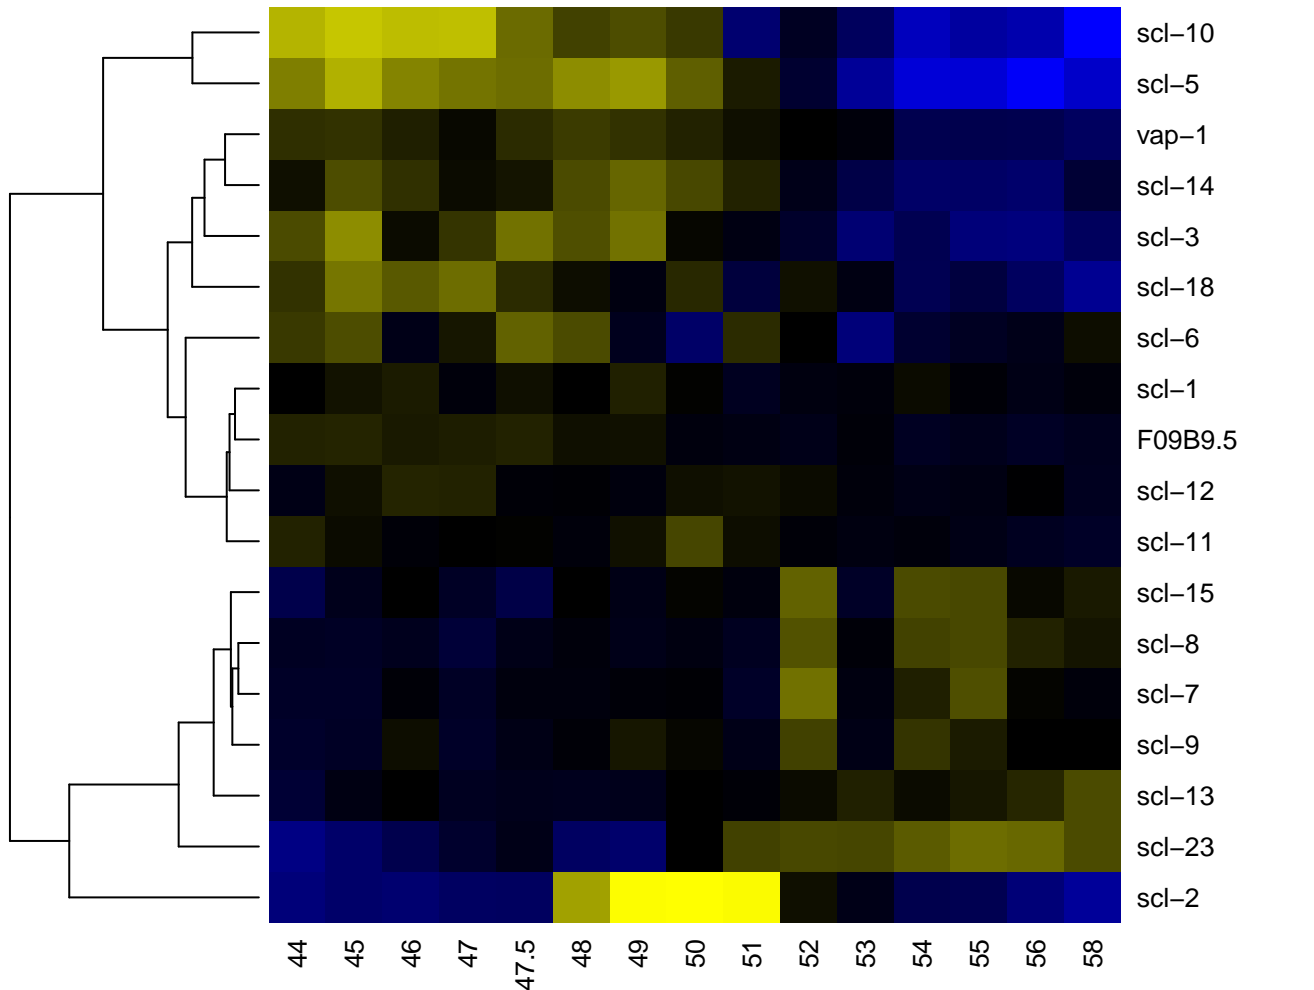



# Vitelline membrane outer layer protein I (VOMI)

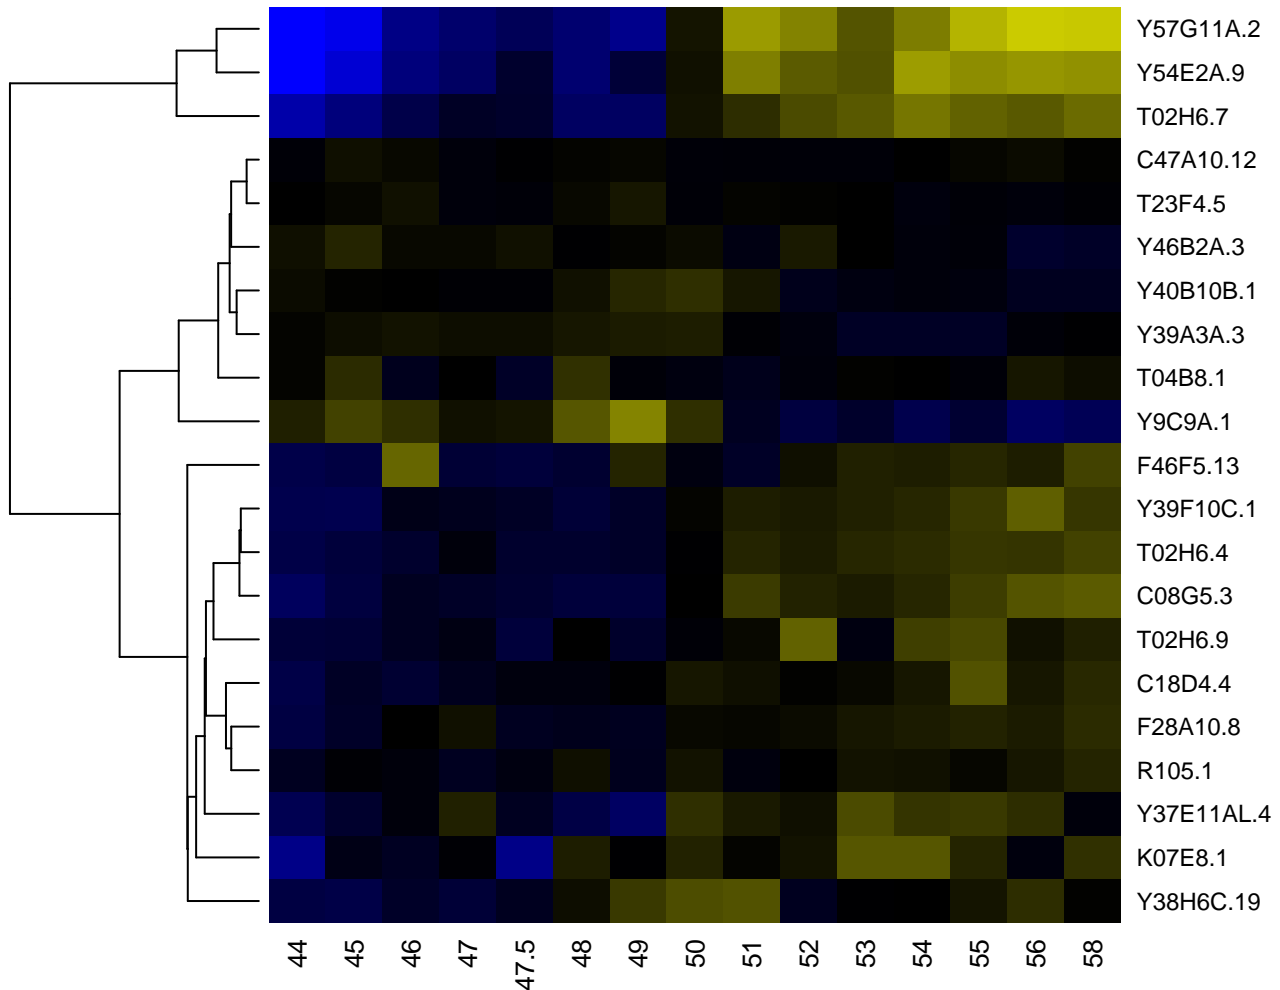

# Vitellinogen, beta-sheet N-terminal

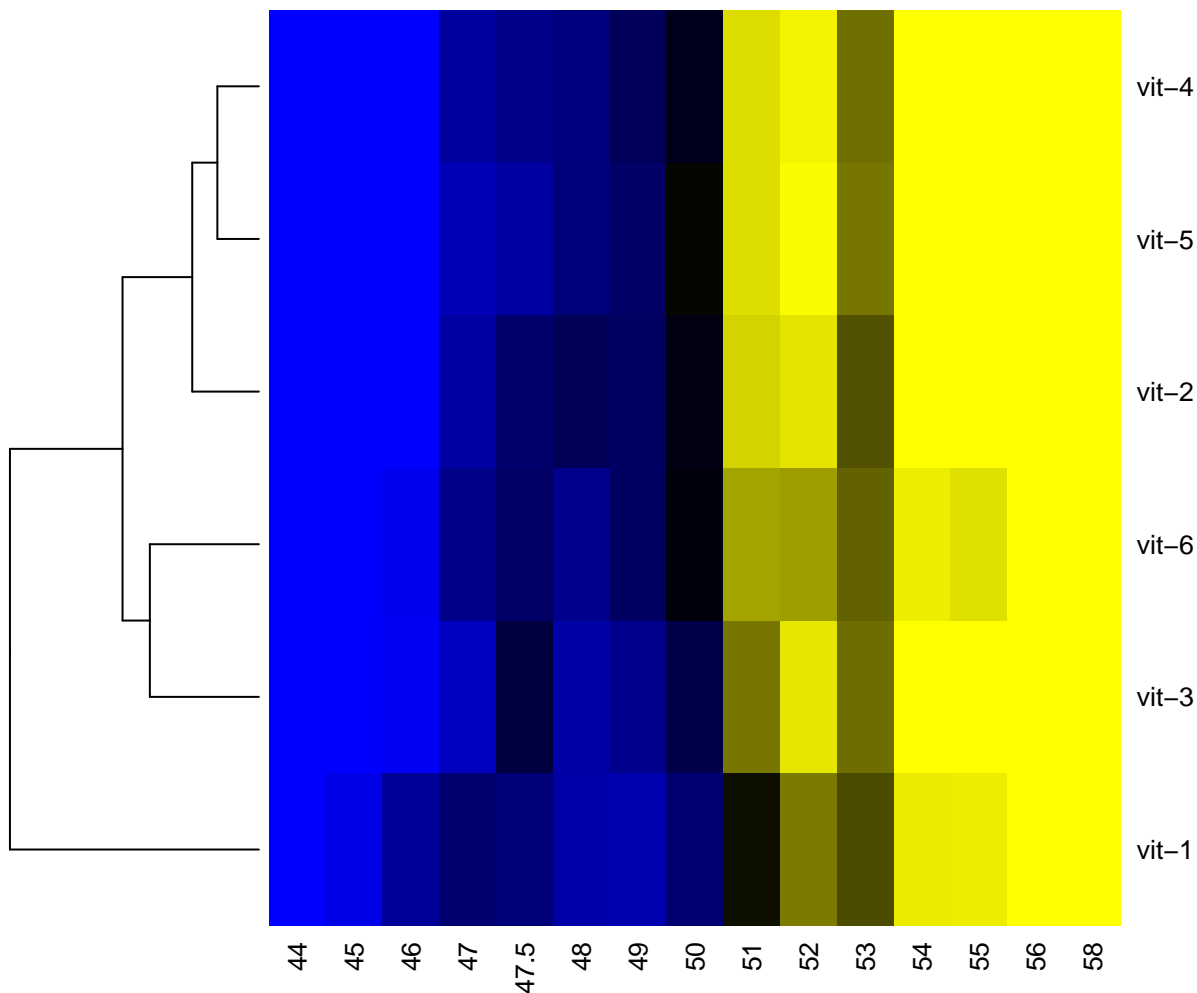

# Vitellinogen, open beta-sheet

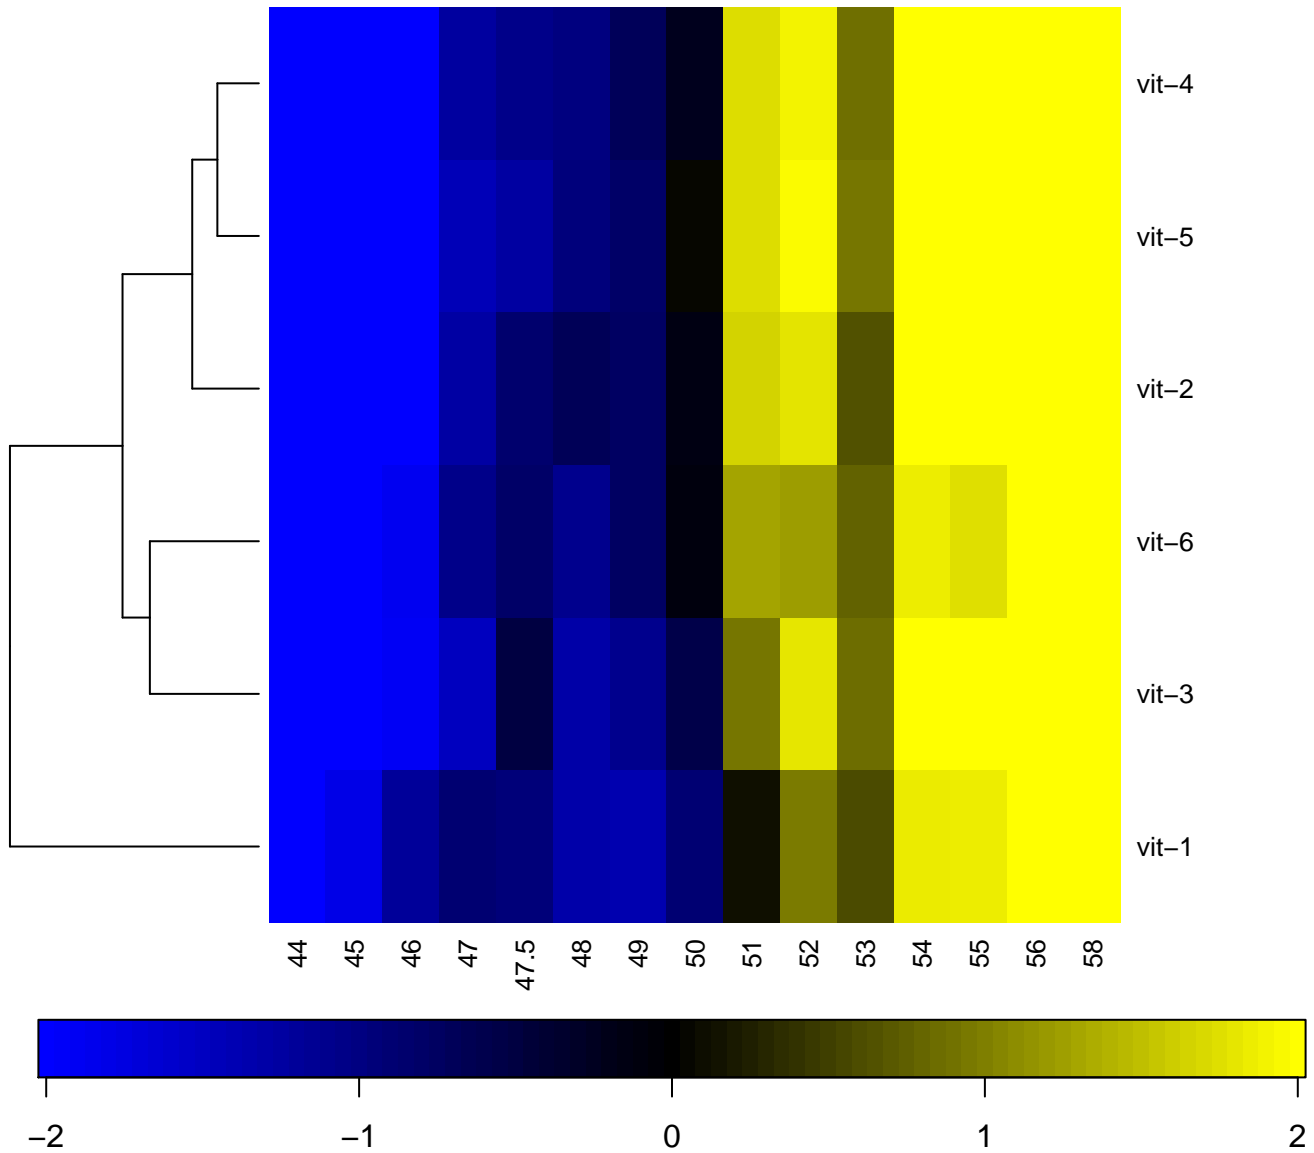



# Vitellinogen, superhelical







# von Willebrand factor type A domain

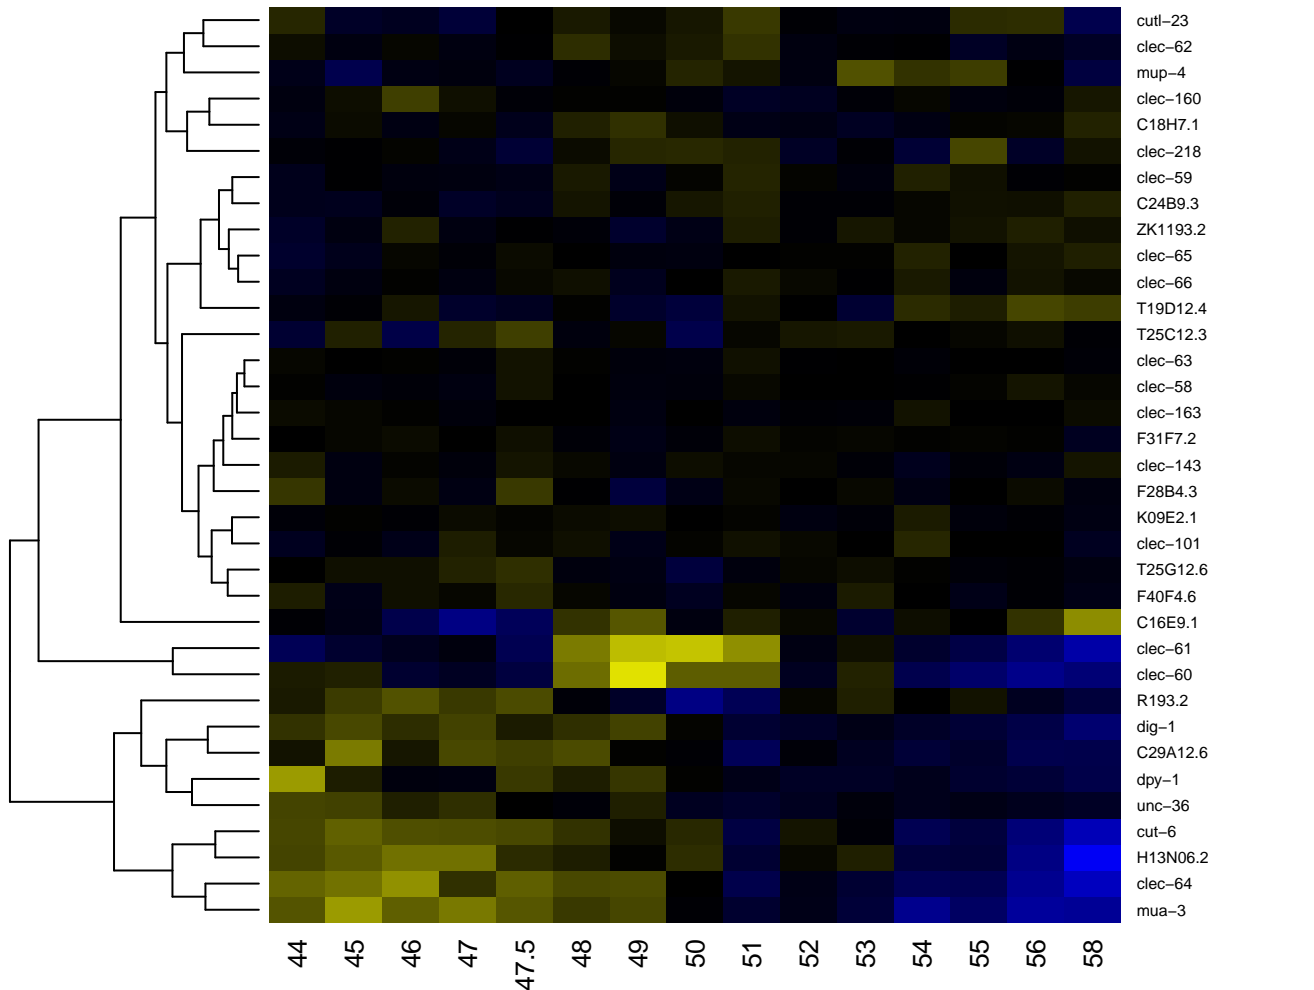



# von Willebrand factor type D domain

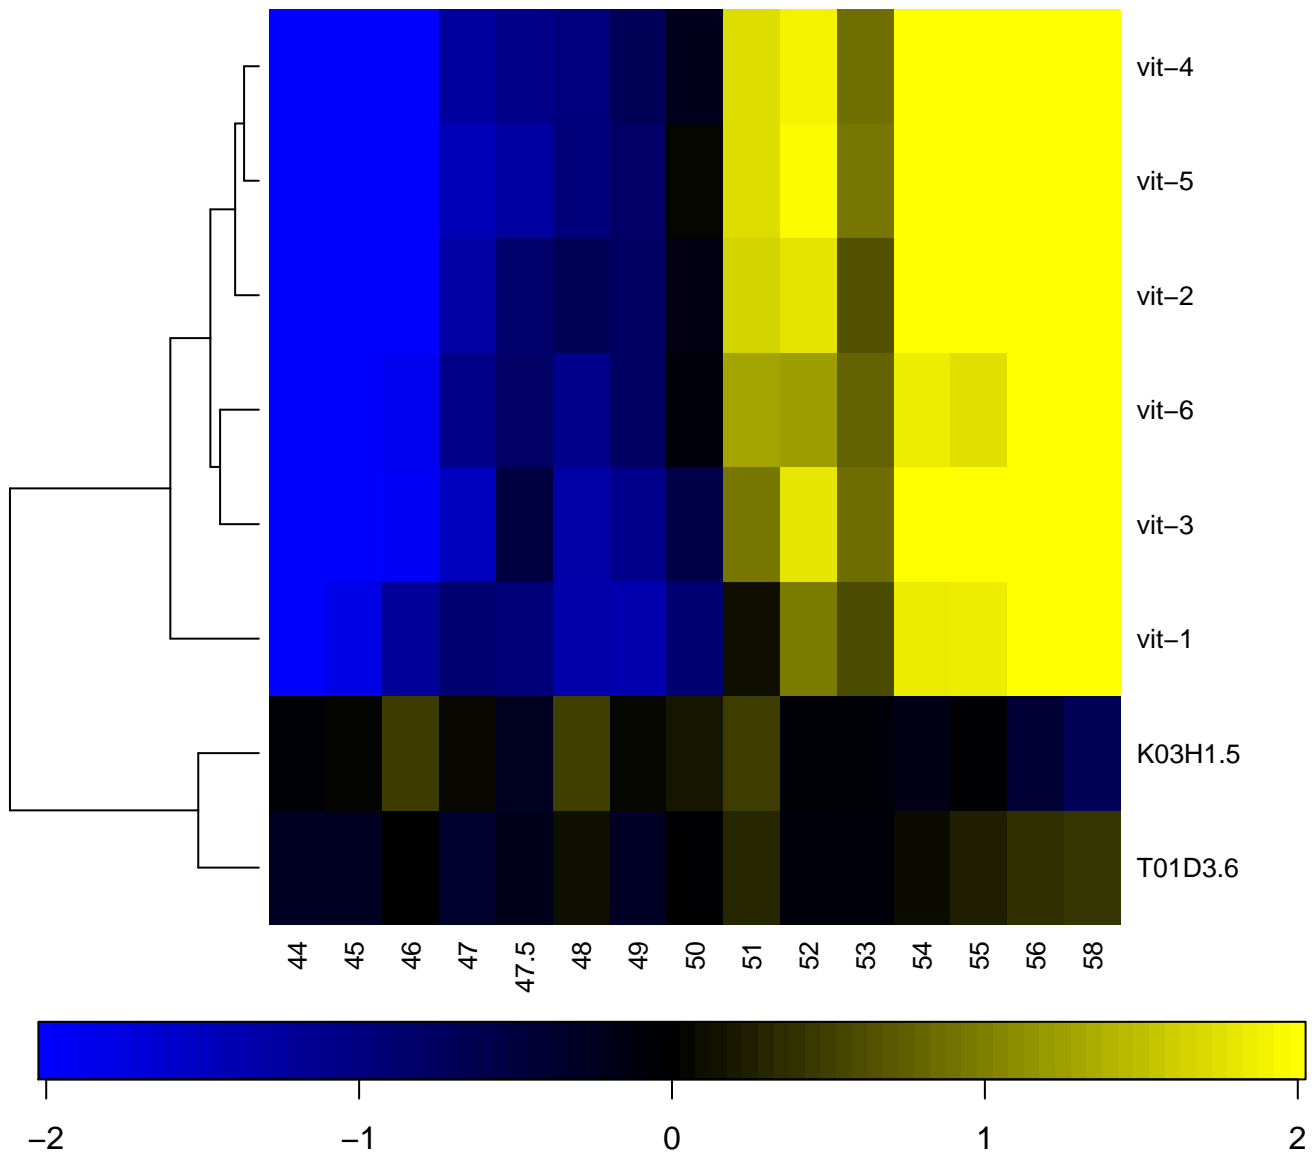

# von Willebrand factor, type A

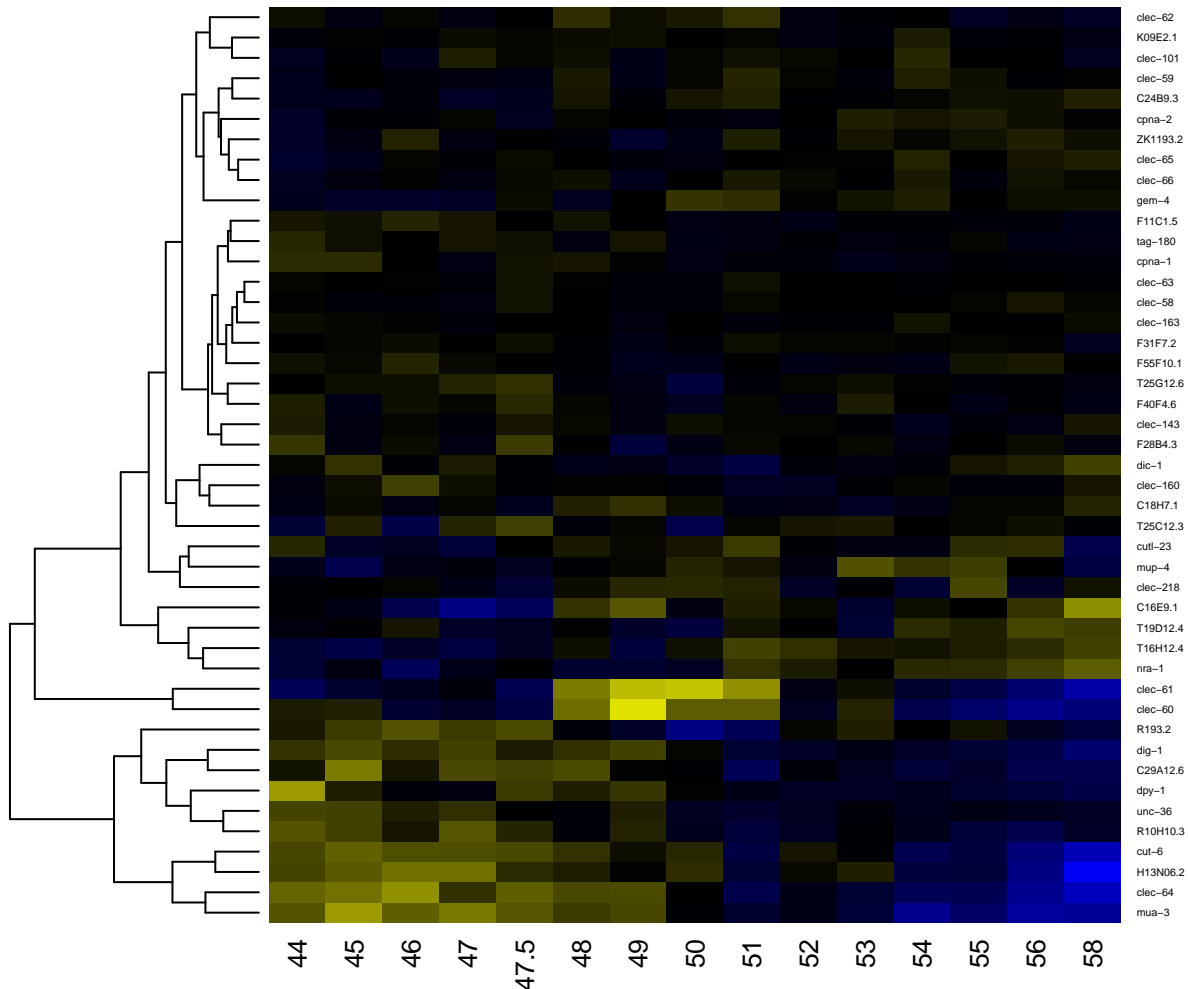





# WD domain, G-beta repeat

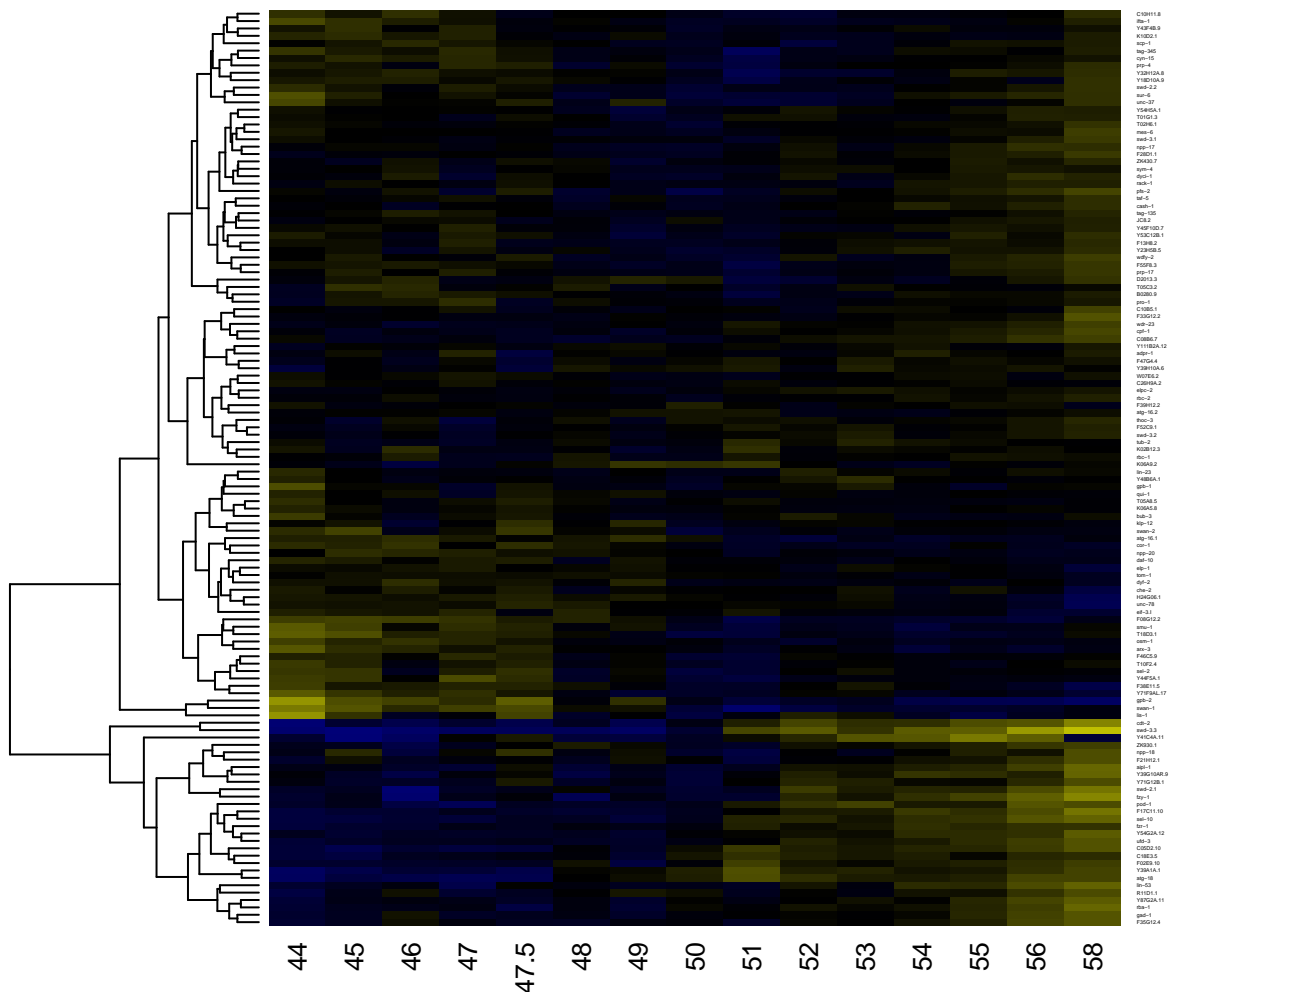



# WD40 repeat, conserved site

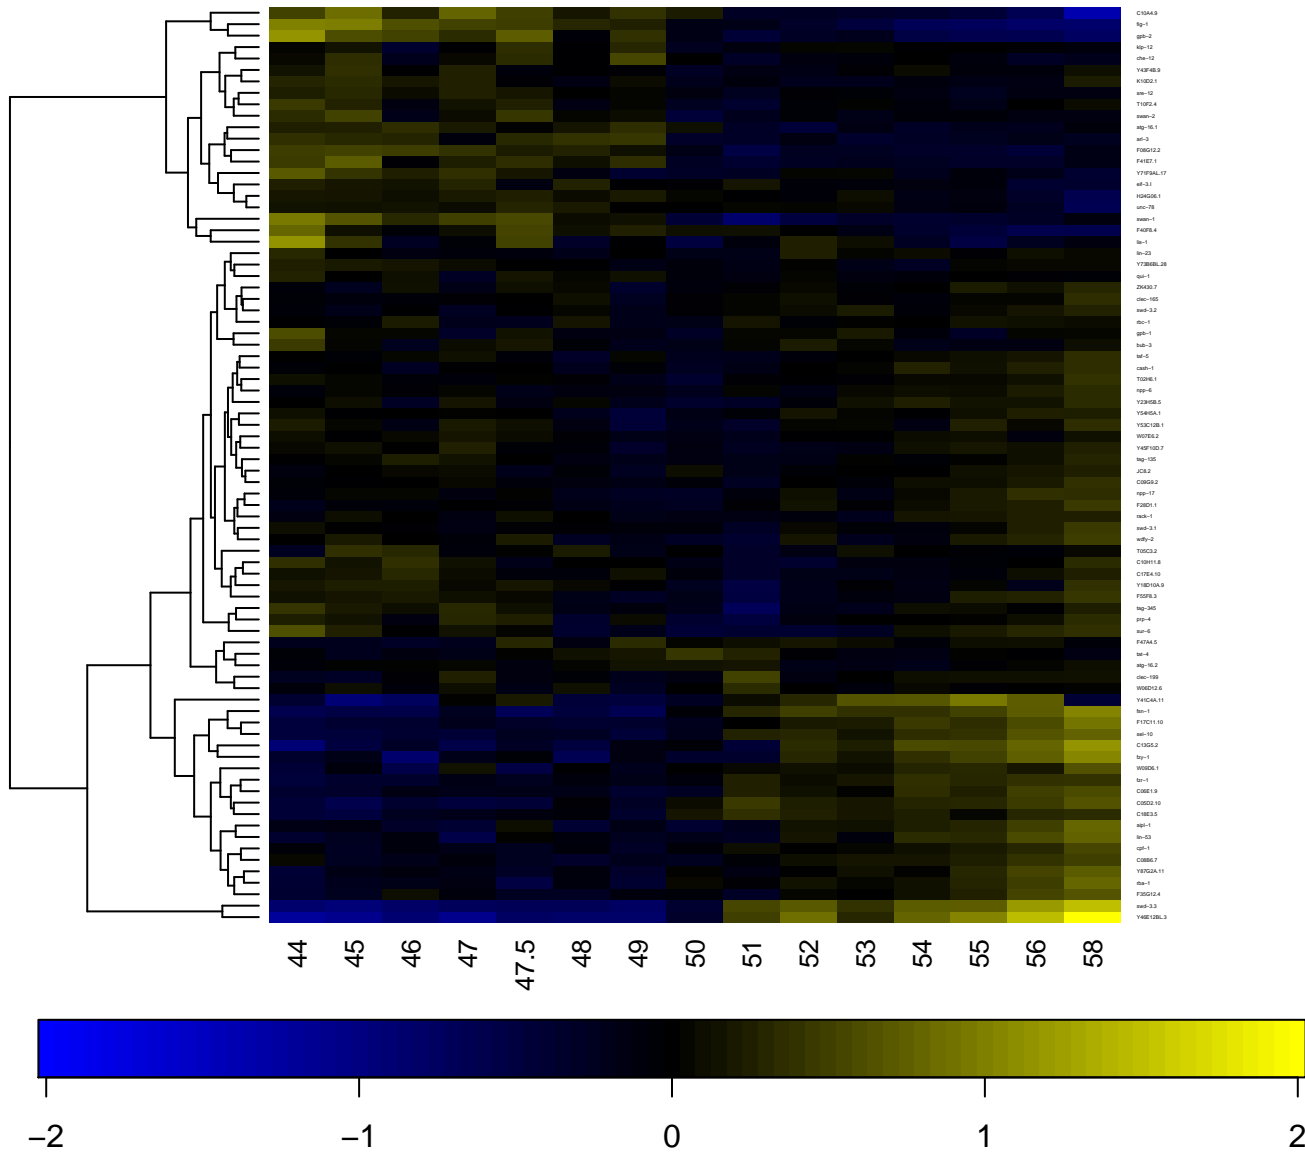

# WD40 repeat, subgroup

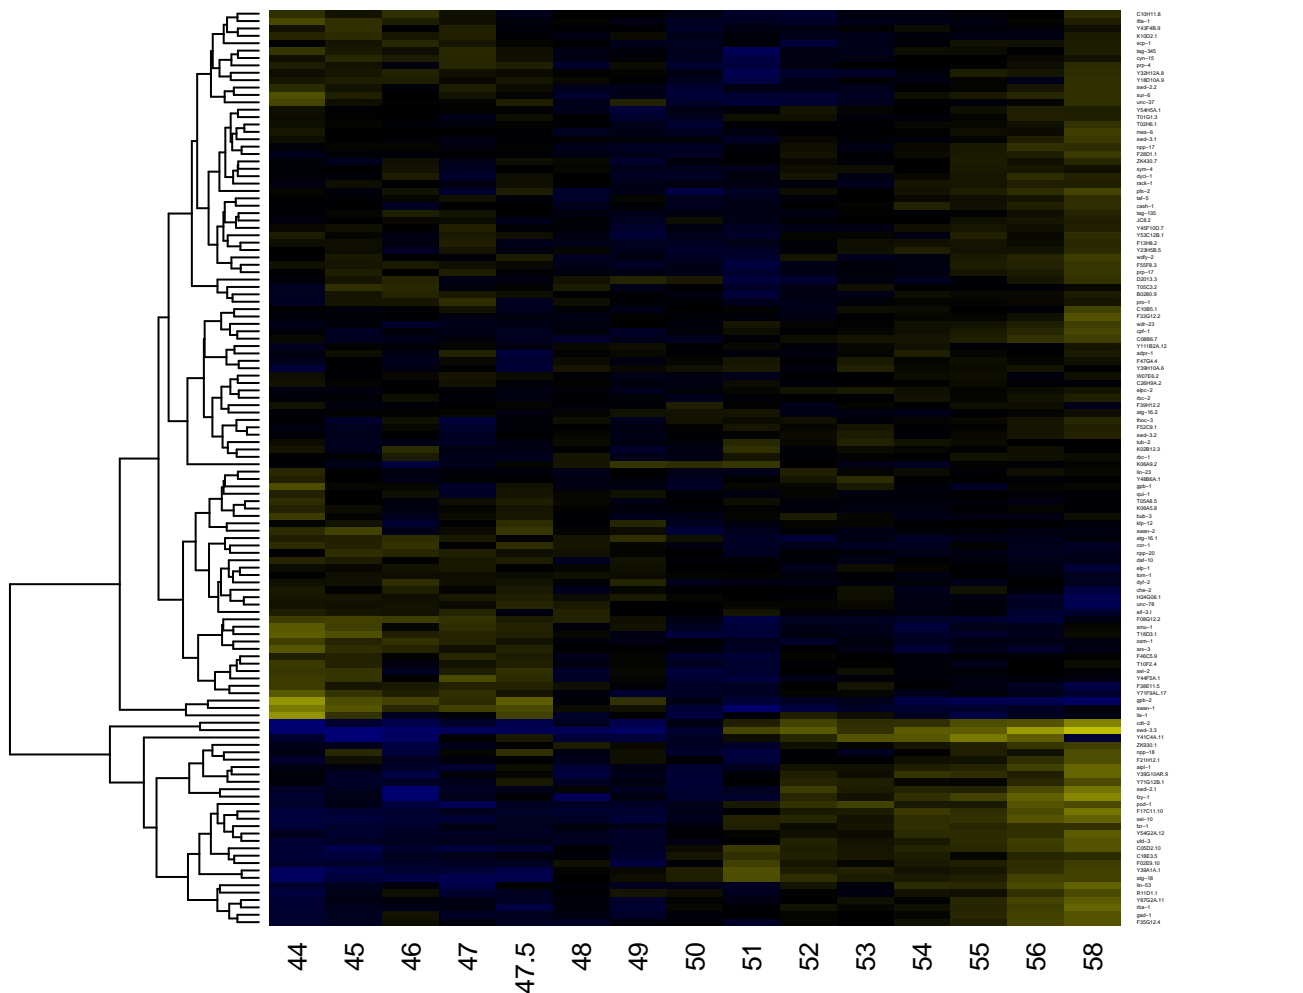



# WD40/YVTN repeat-like-containing domain

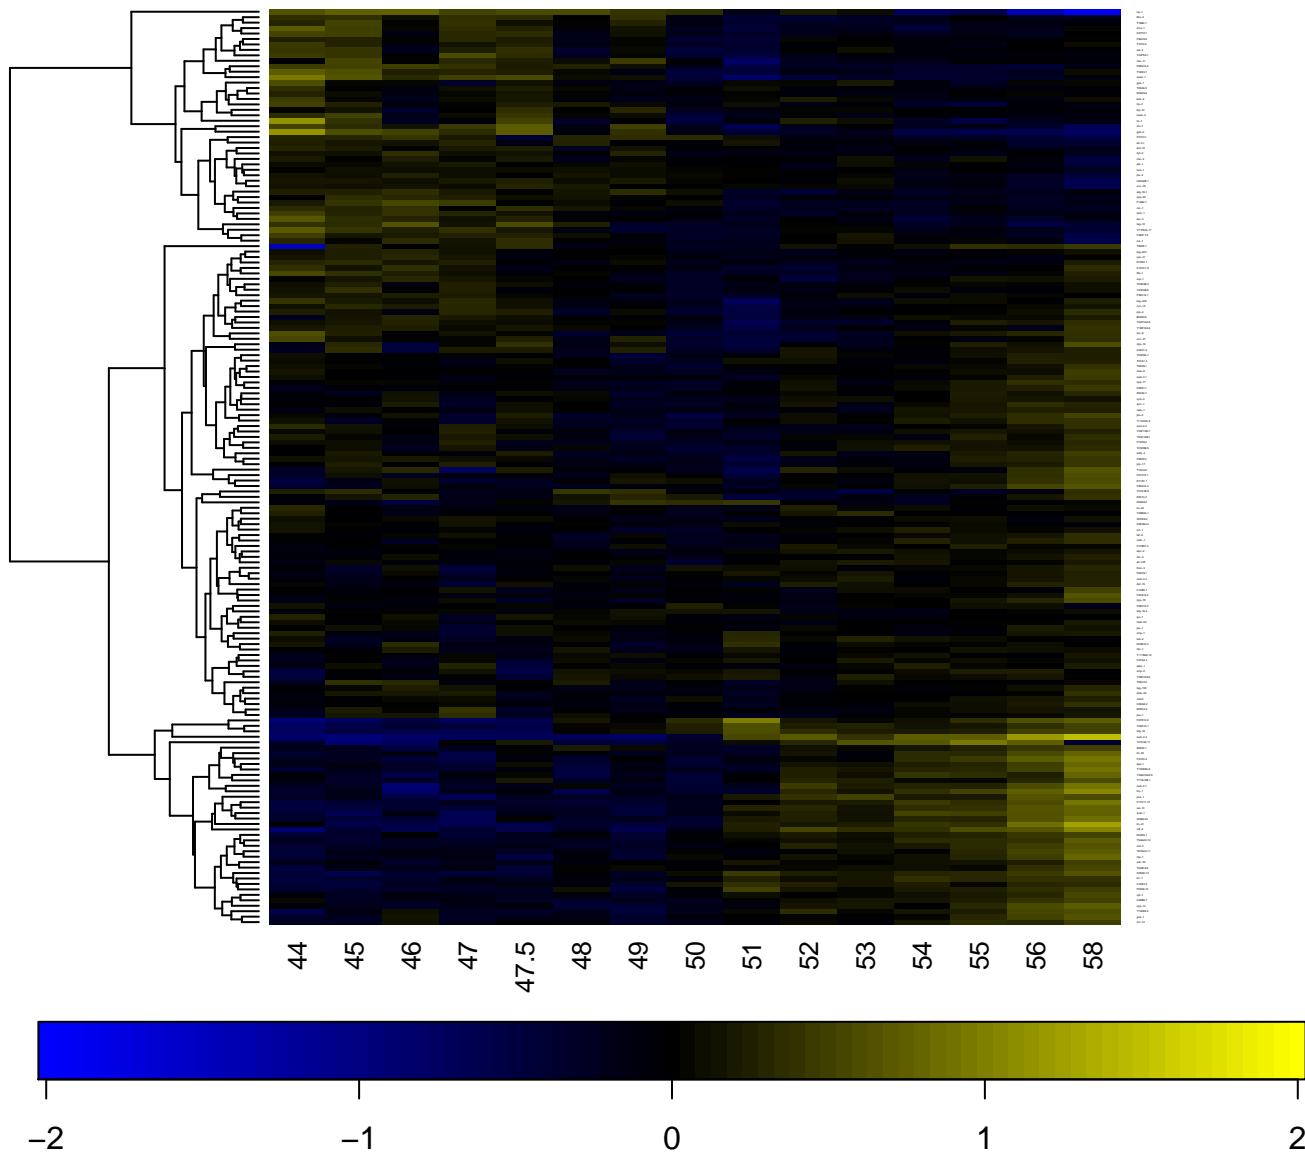





# Wnt superfamily

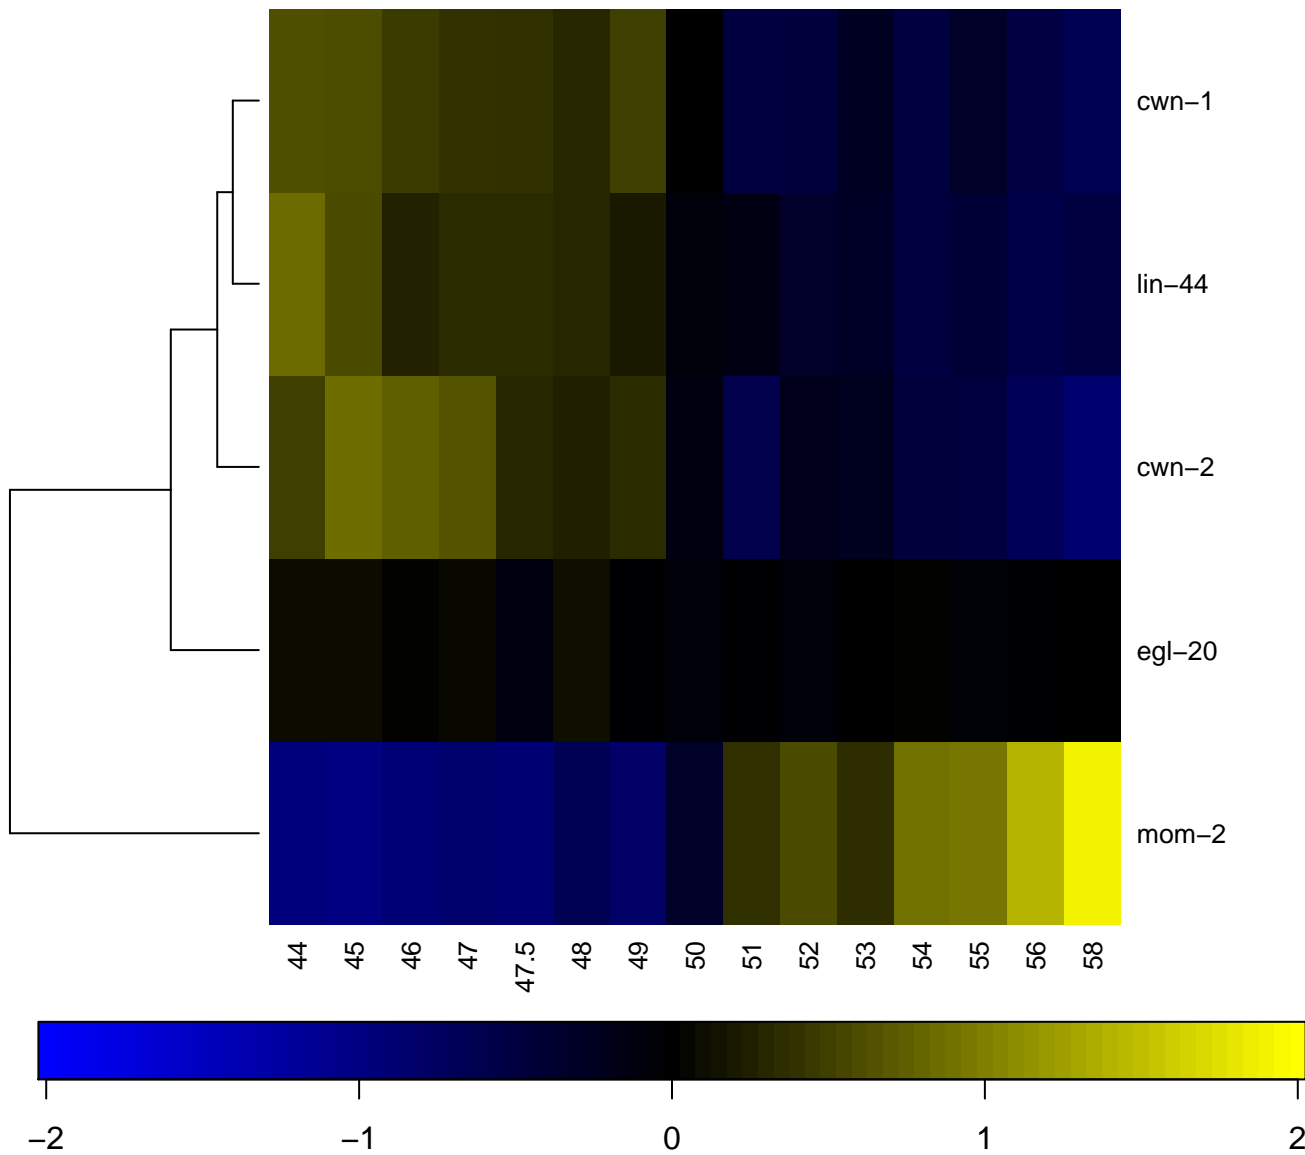

# WW domain

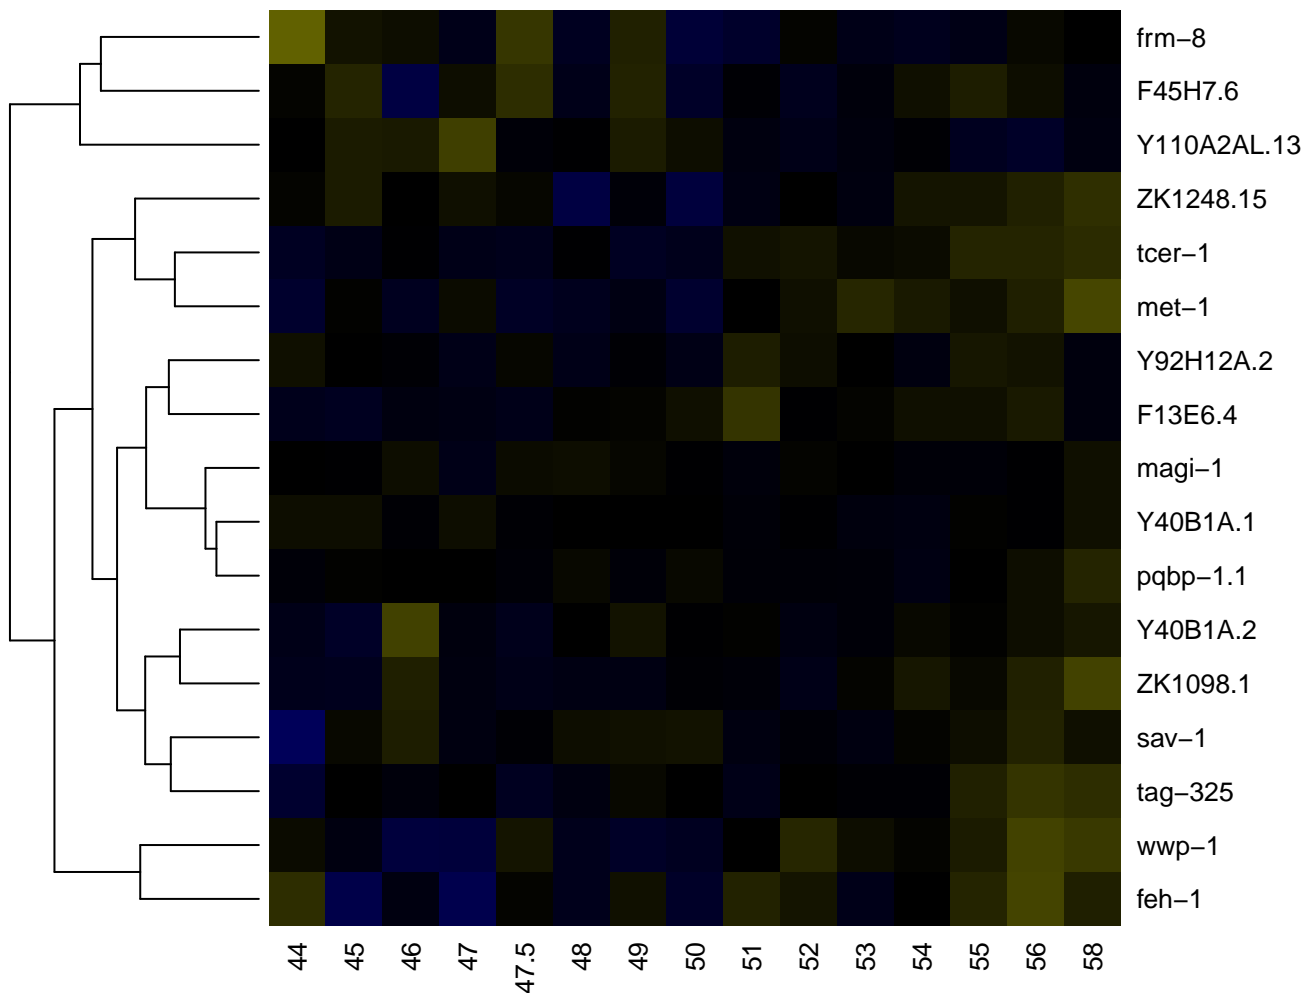

# WW/Rsp5/WWP

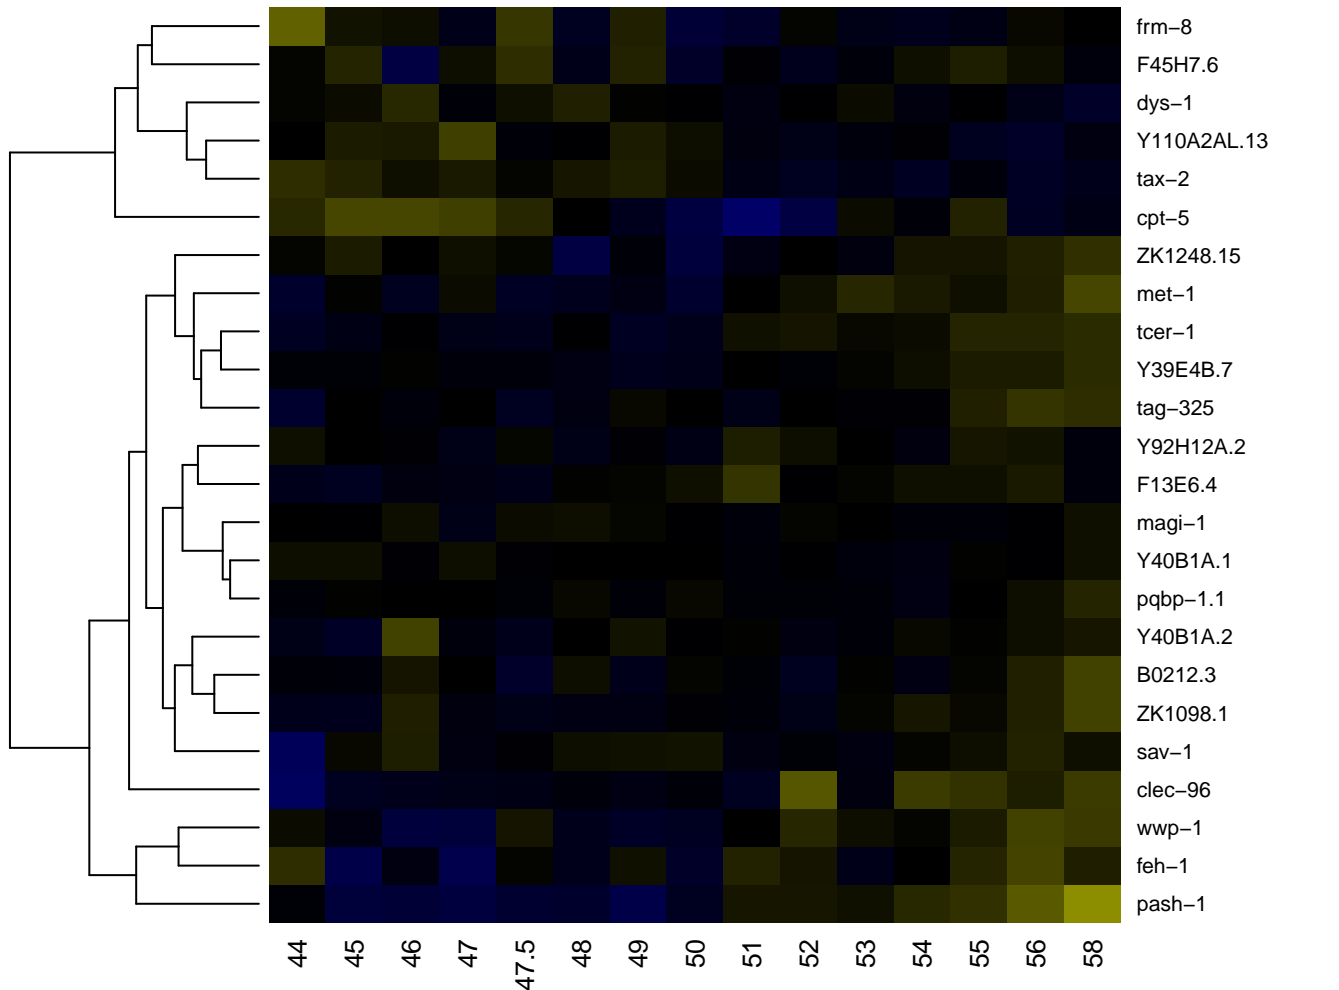

# Yip1 domain

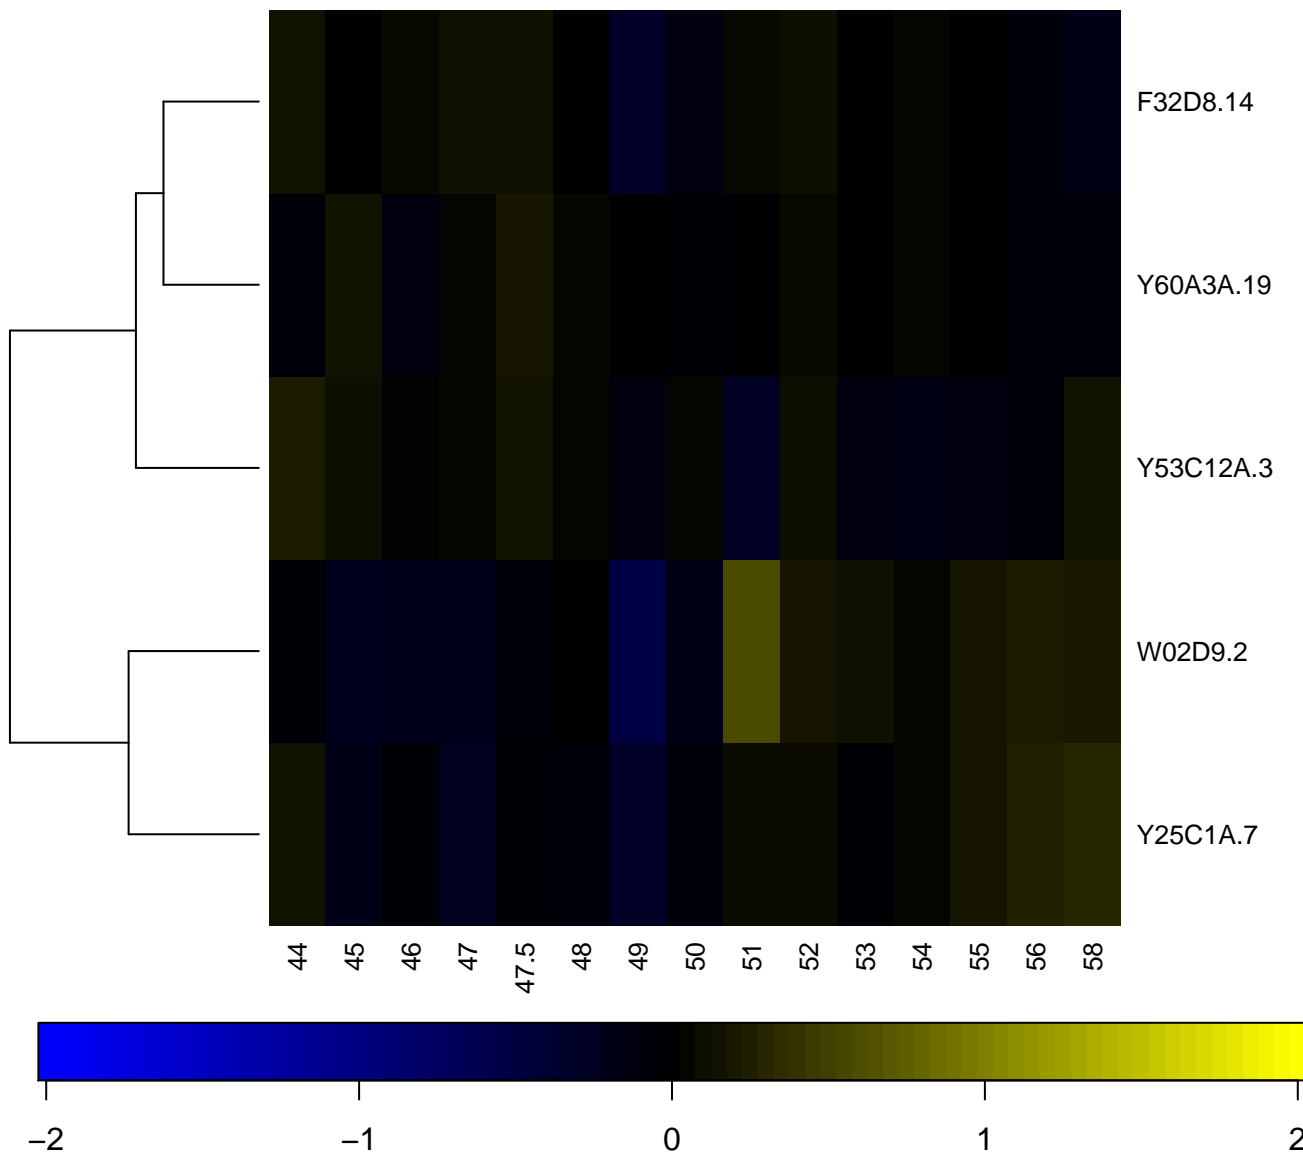











# Zinc finger C-x8-C-x5-C-x3-H type (and similar)

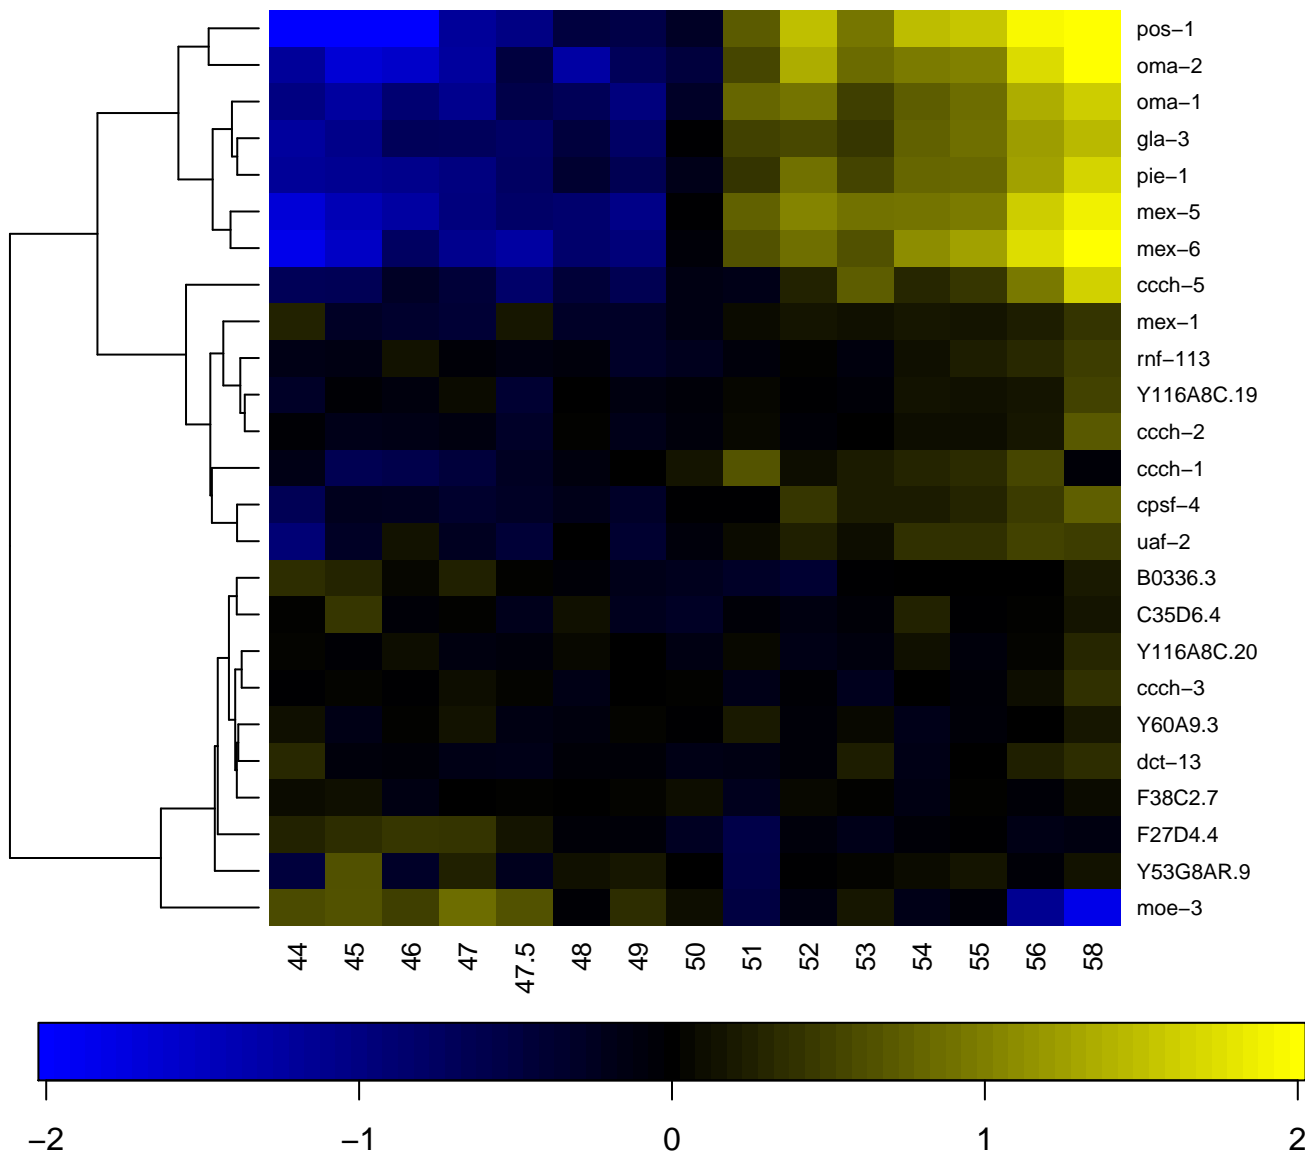

# Zinc finger, B-box

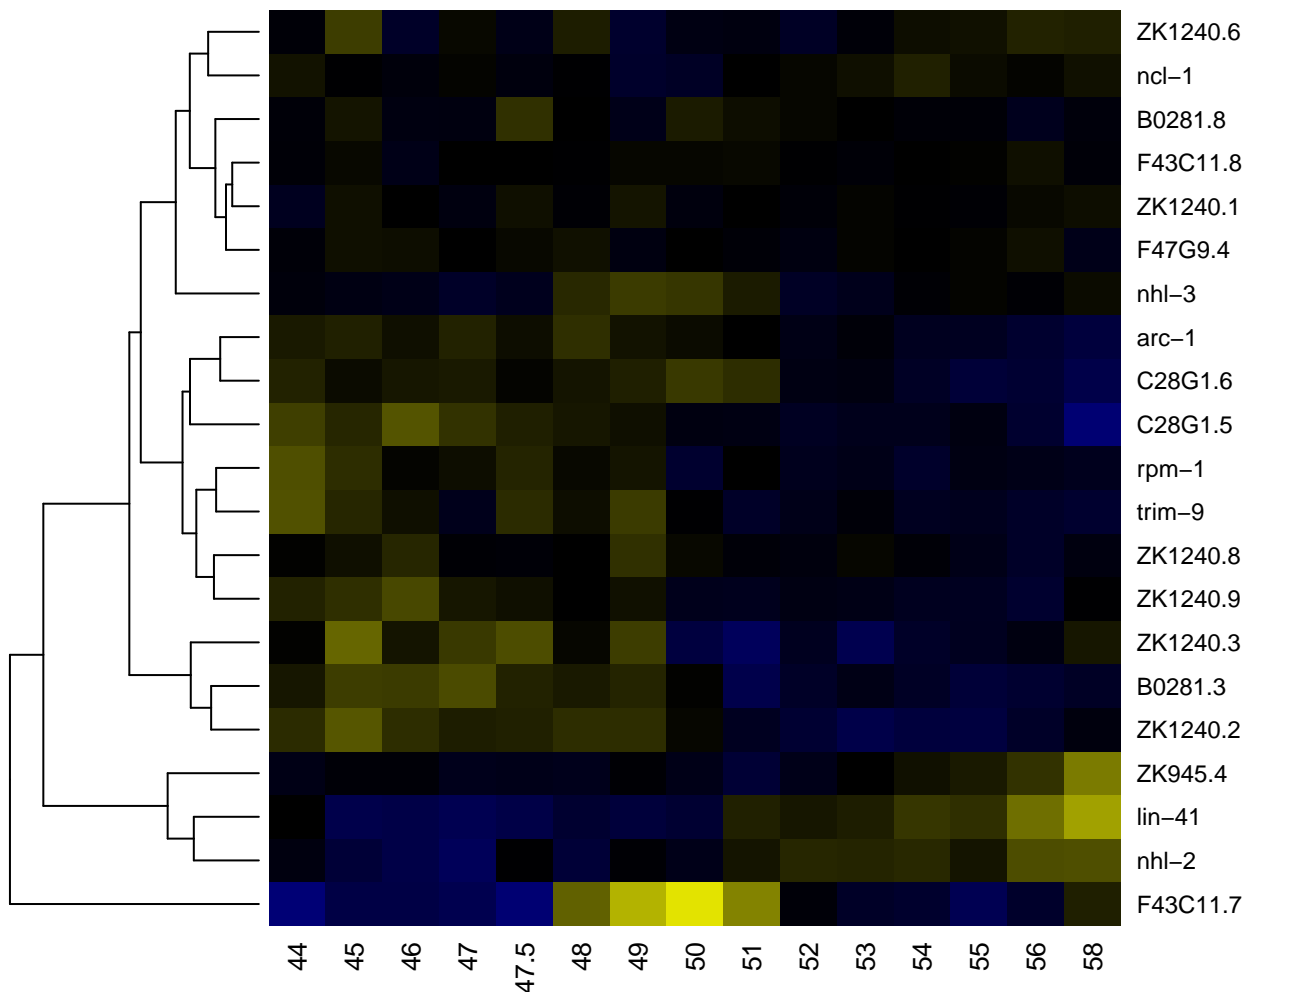

# Zinc finger, BED-type predicted





# Zinc finger, C2H2-like

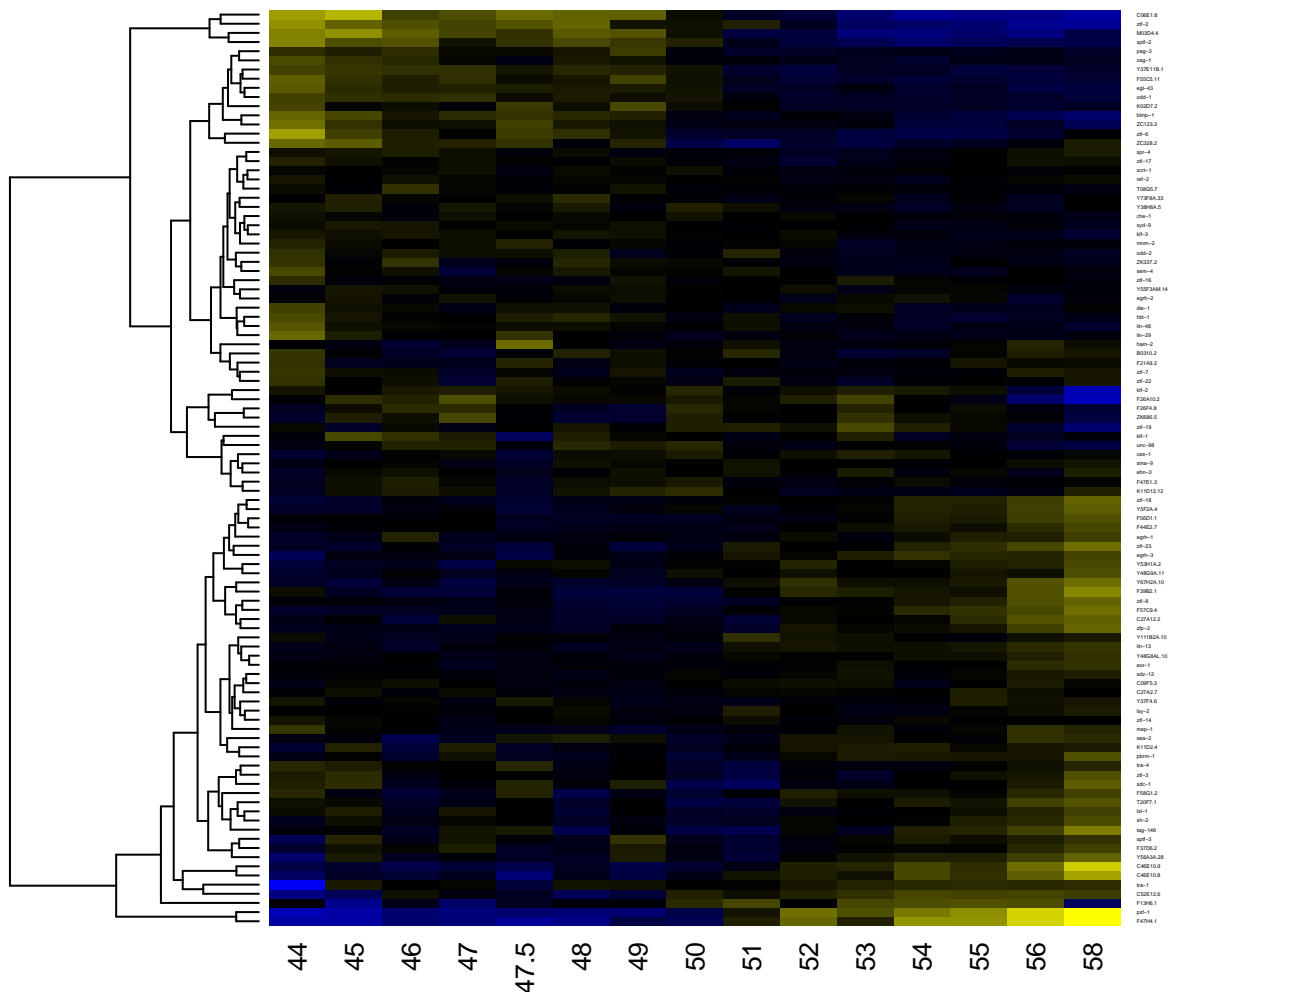



# Zinc finger, C2H2-type

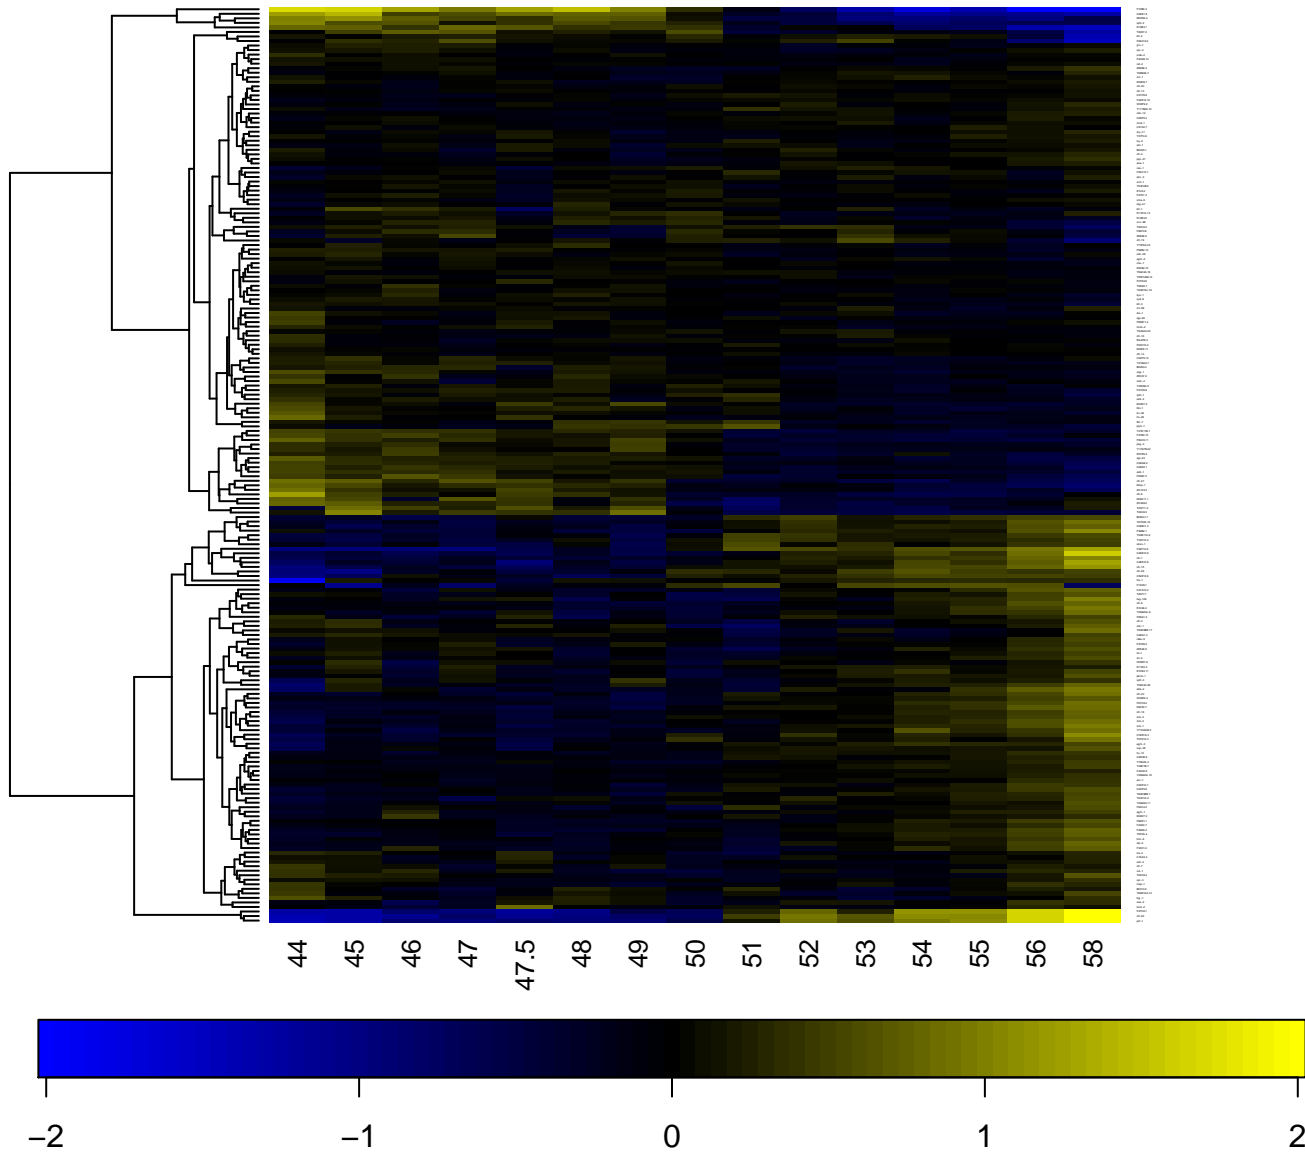



# Zinc finger, C2H2 type

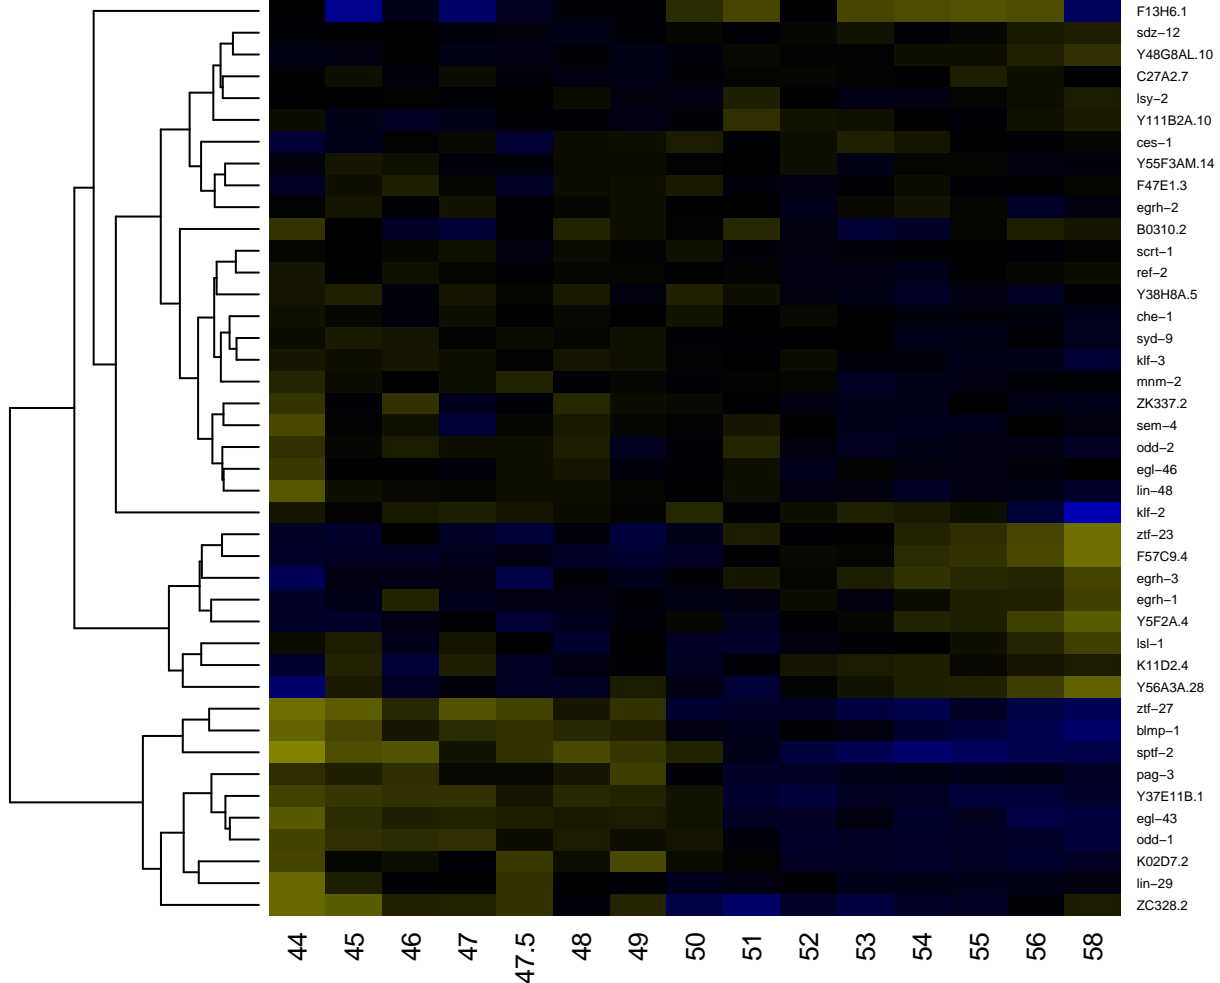

# Zinc finger, C3HC4 RING-type

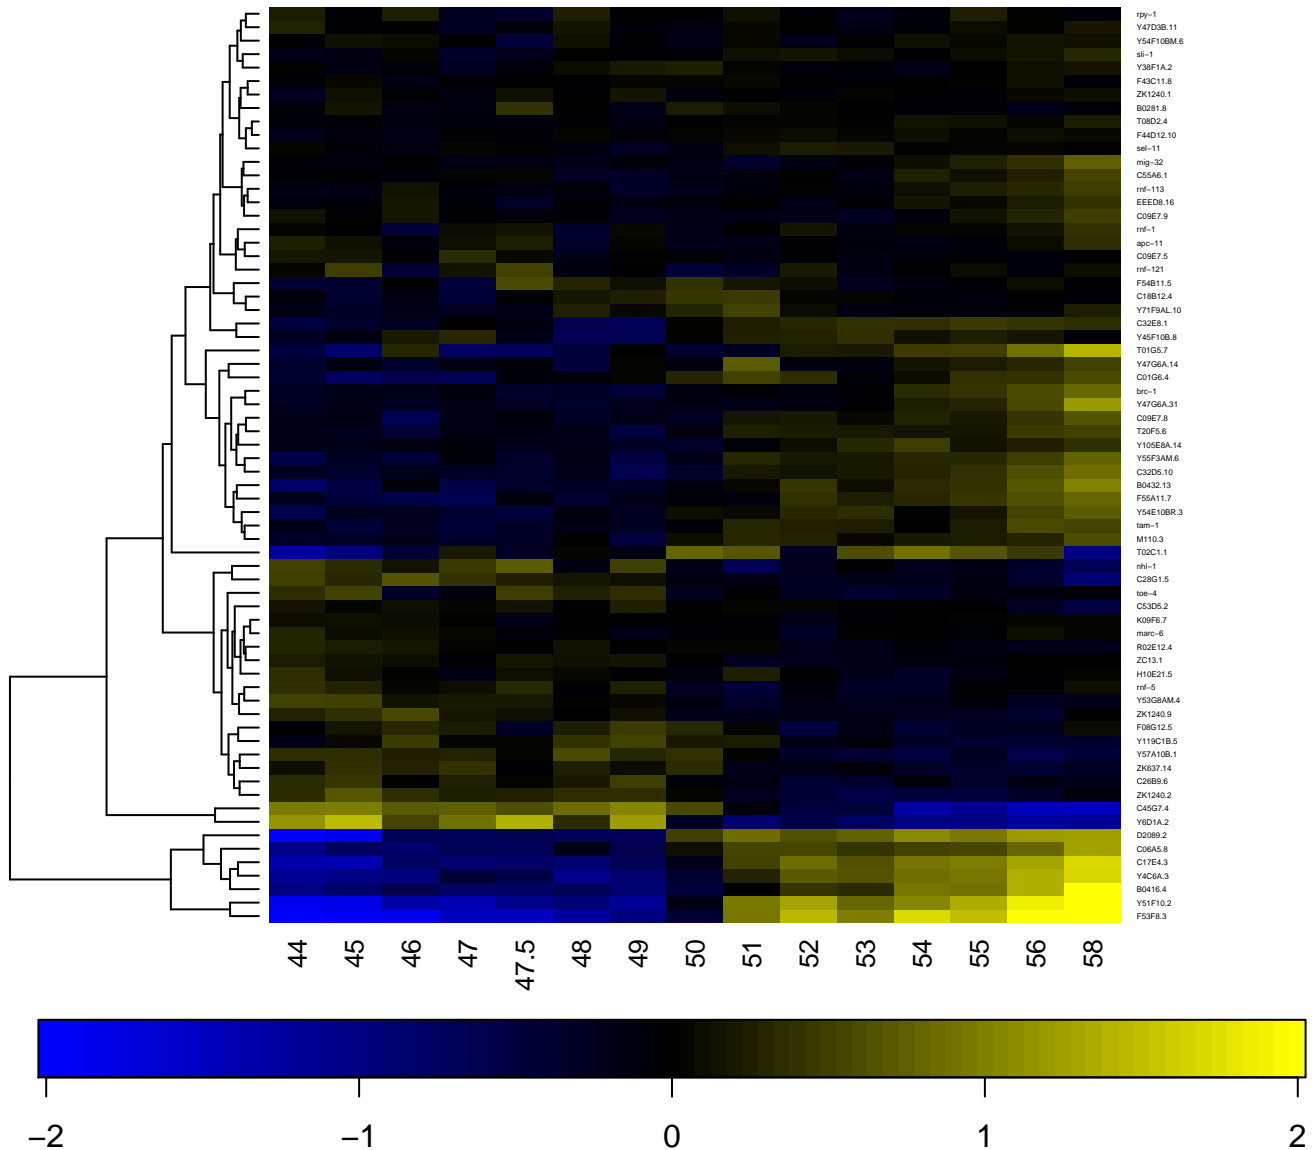

# Zinc finger, C3HC4 type (RING finger)

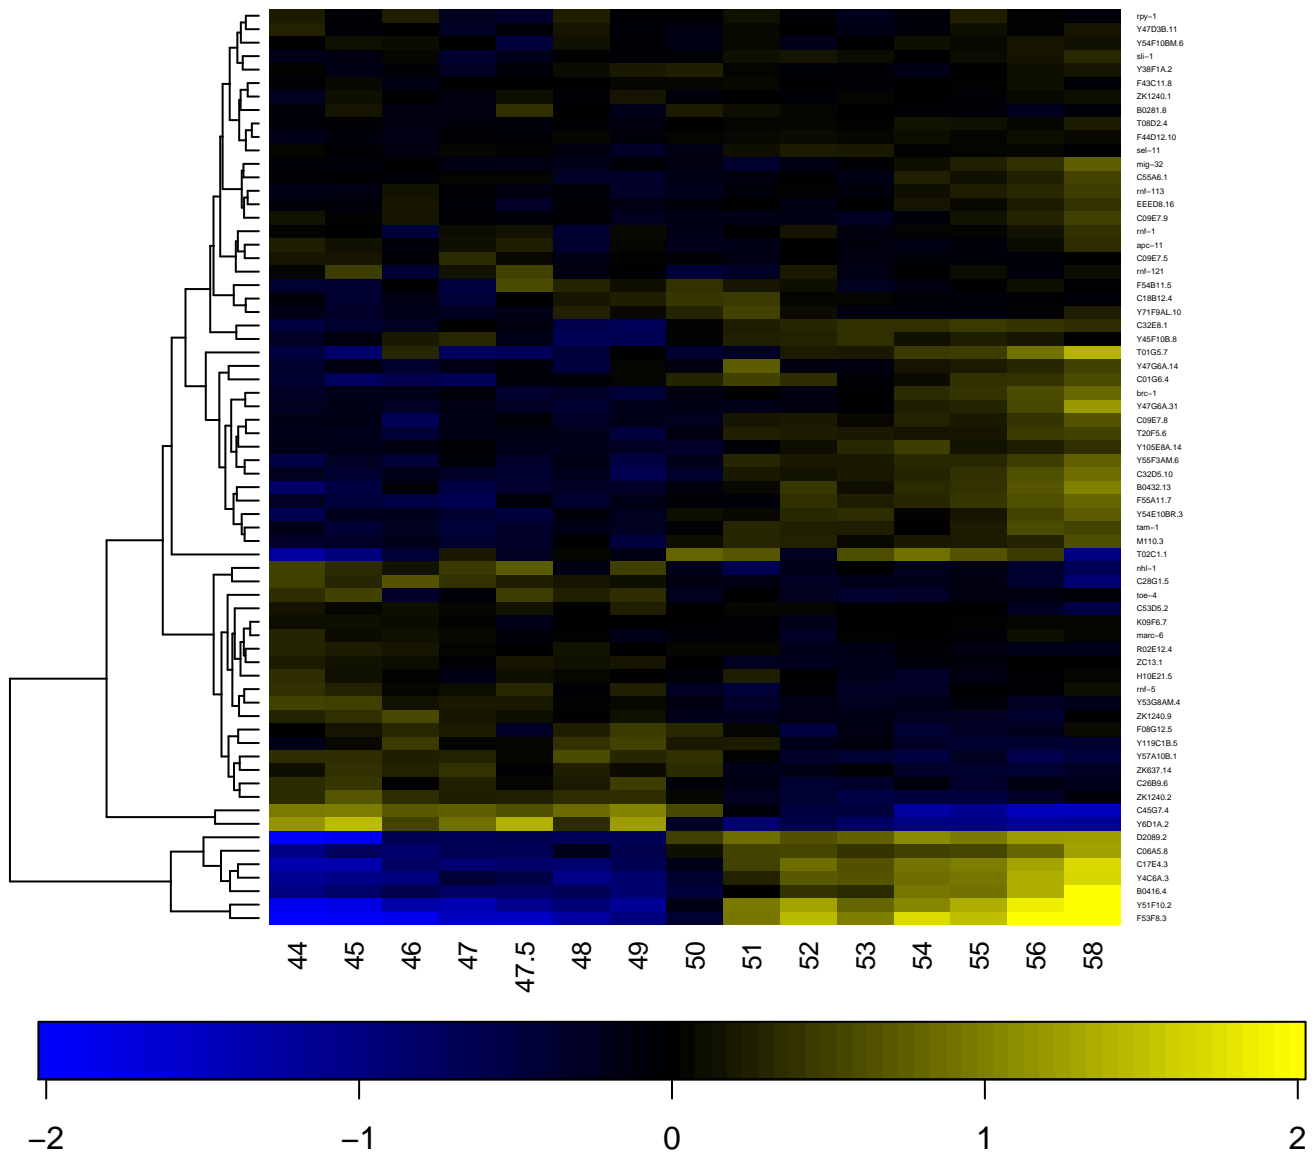

# Zinc finger, C4 type (two domains)

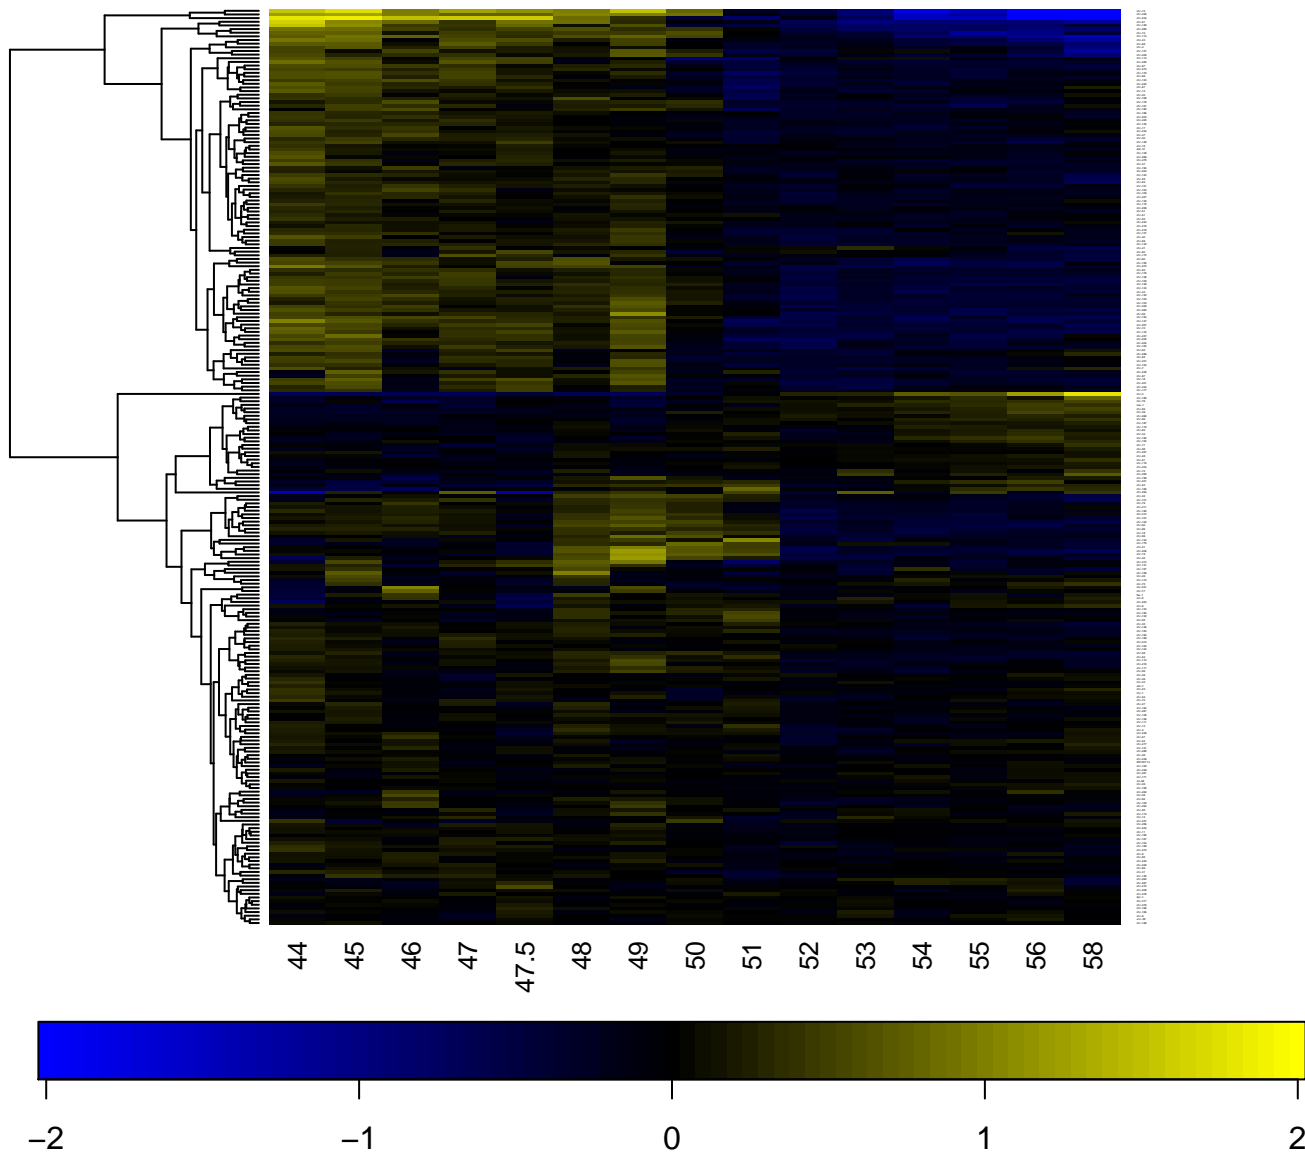



# Zinc finger, CCCH-type

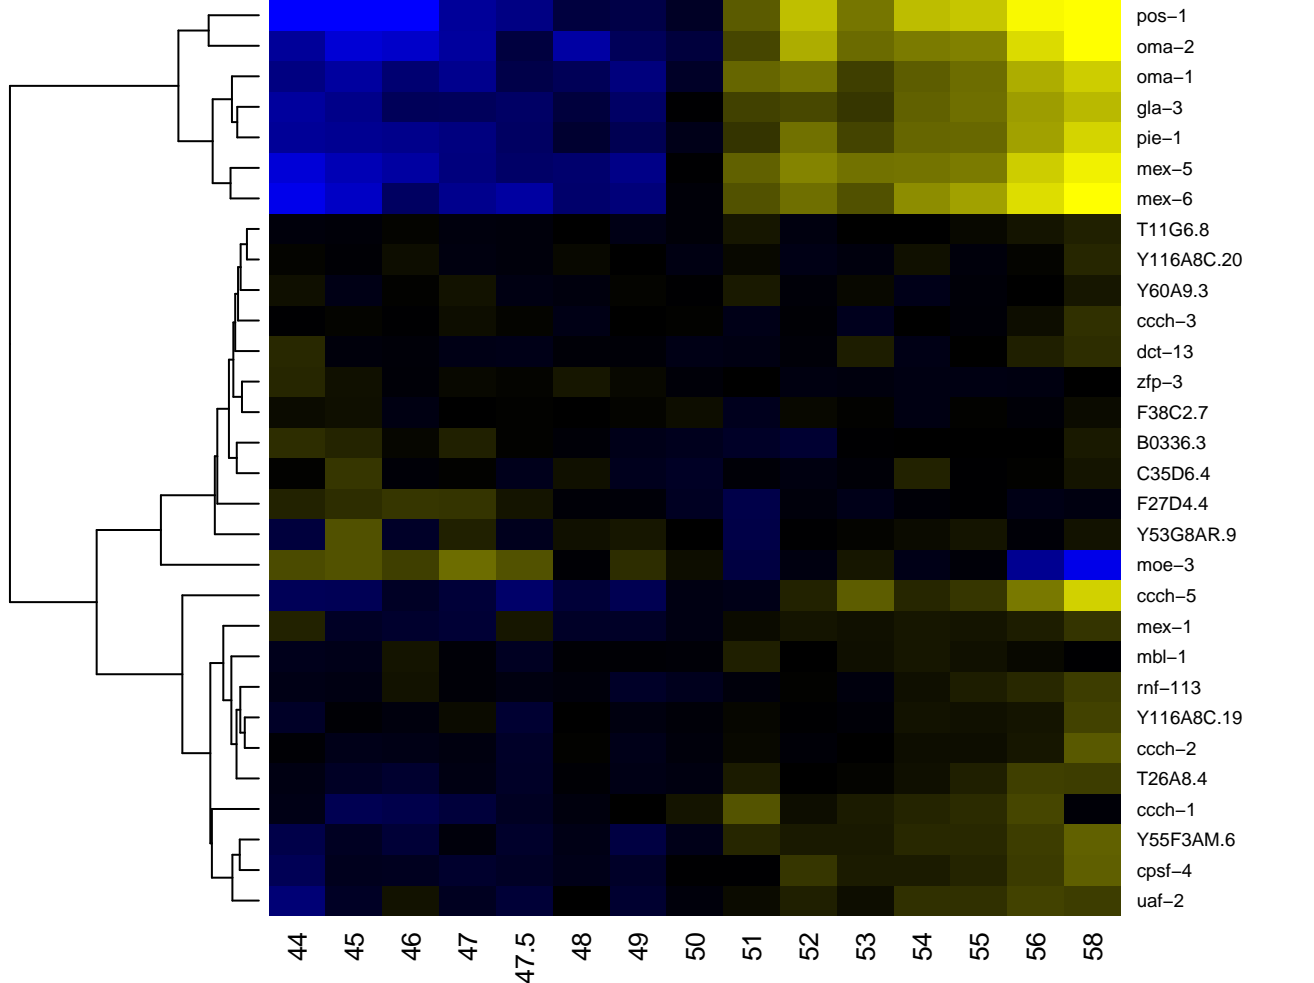





# Zinc finger, CCHC retroviral-type

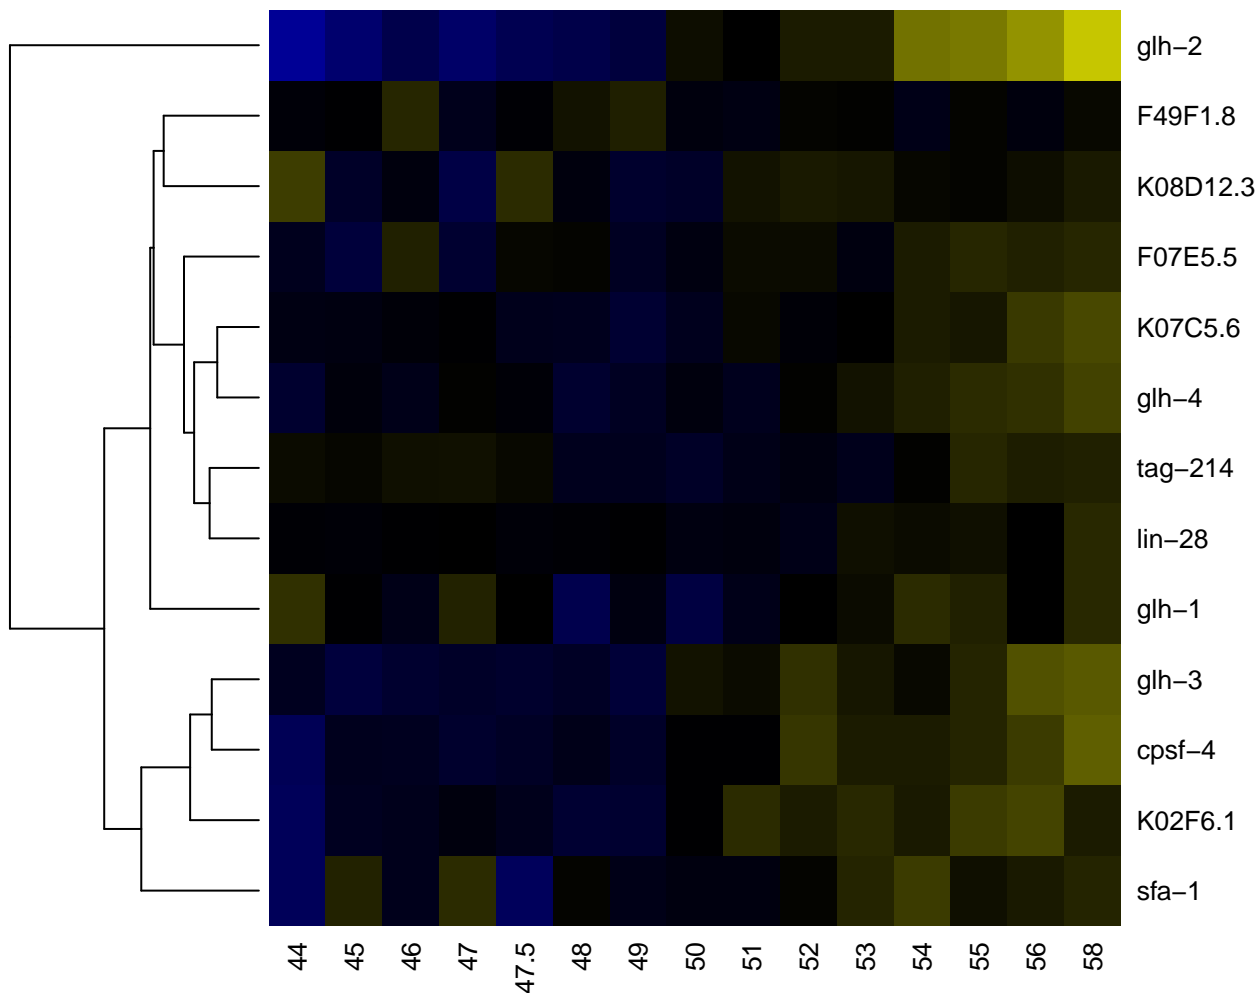

# Zinc finger, DHHC-type

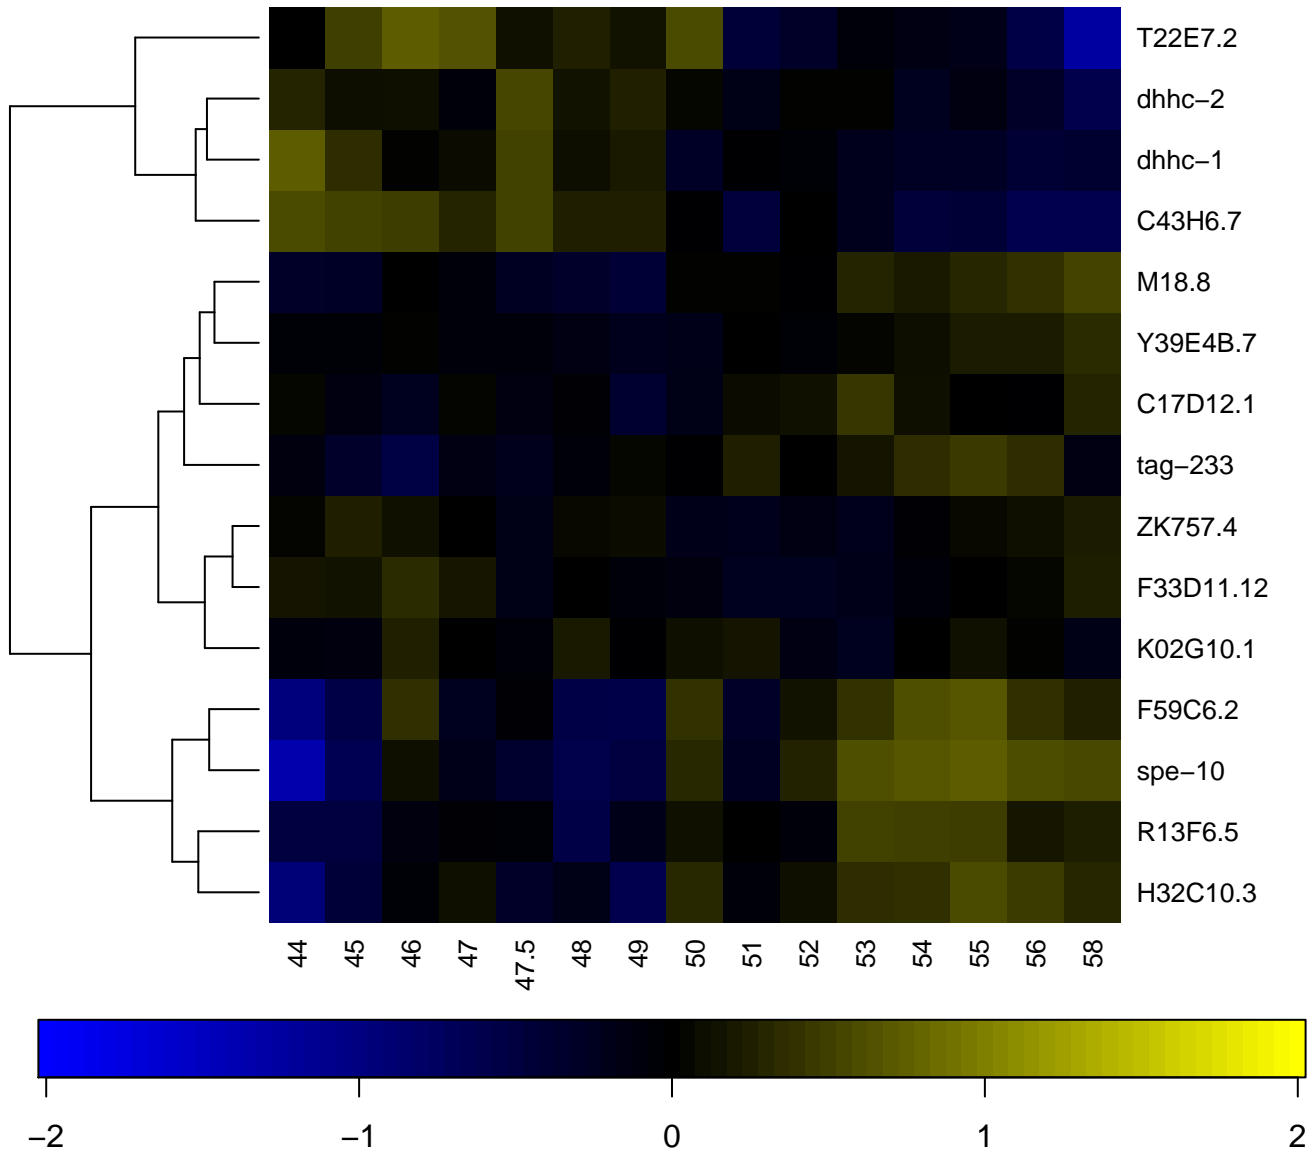





# Zinc finger, GATA-type

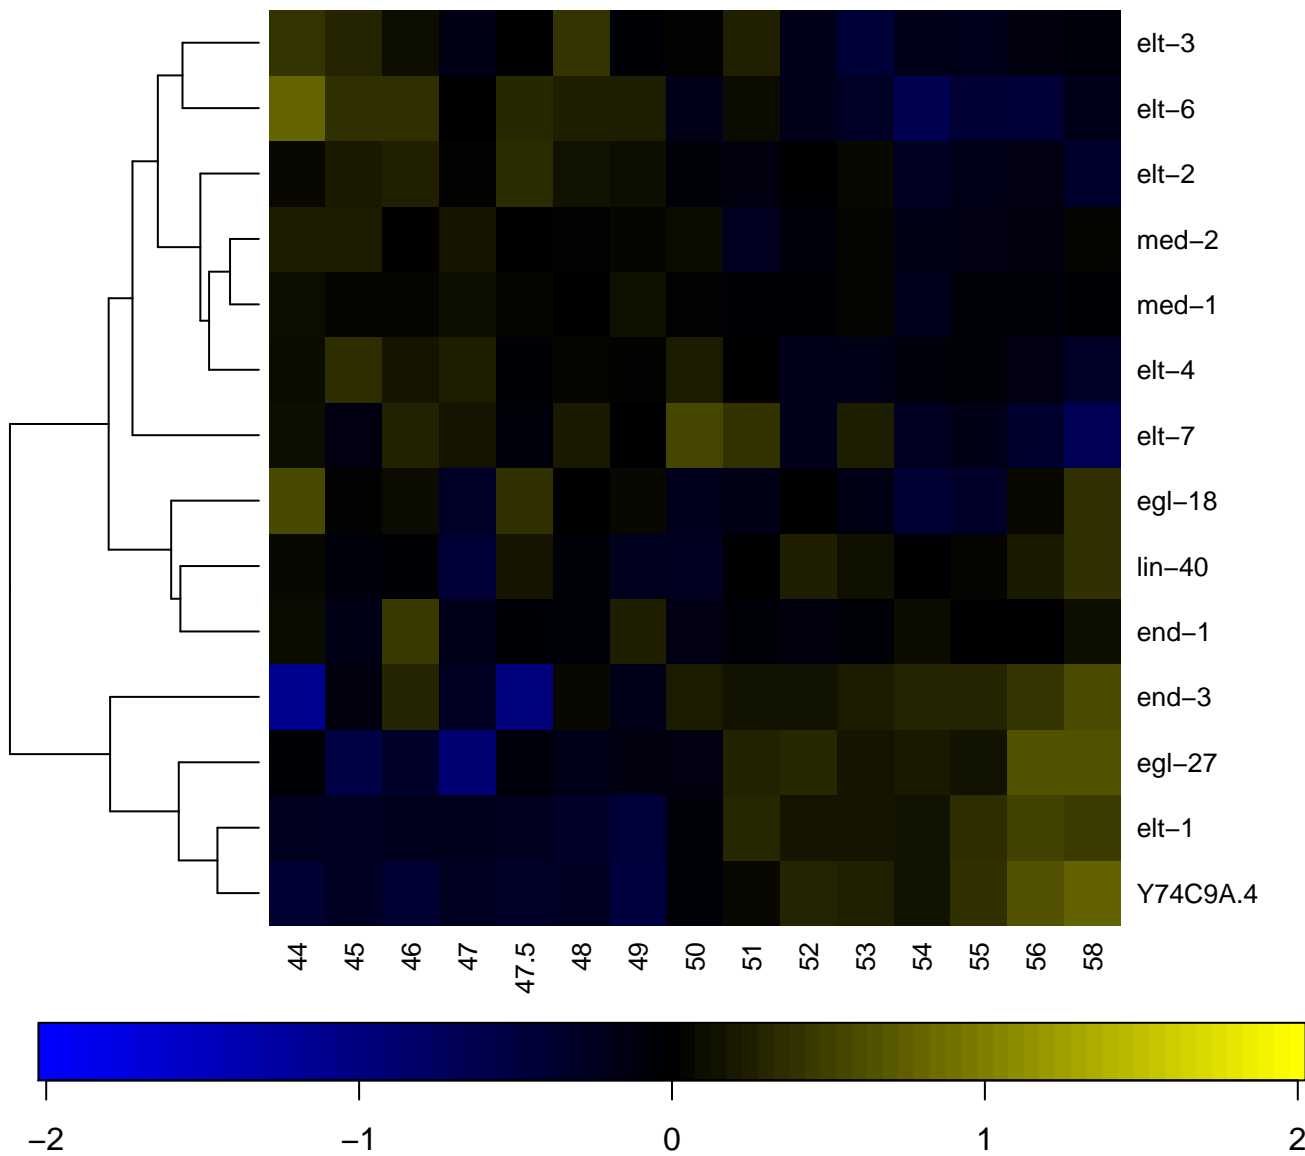

# Zinc finger, LIM-type

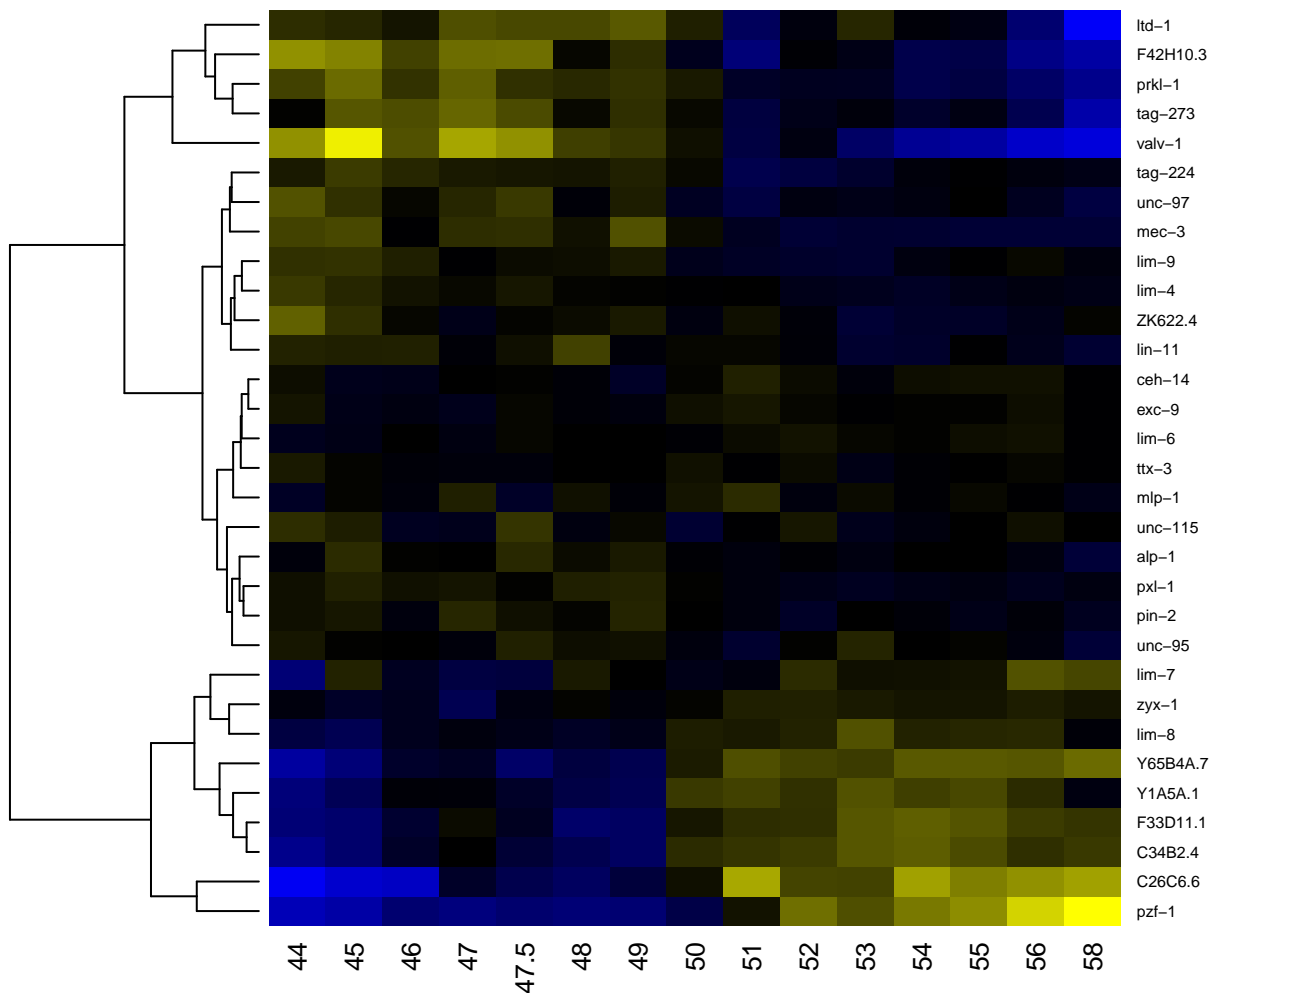

# Zinc finger, MYND-type

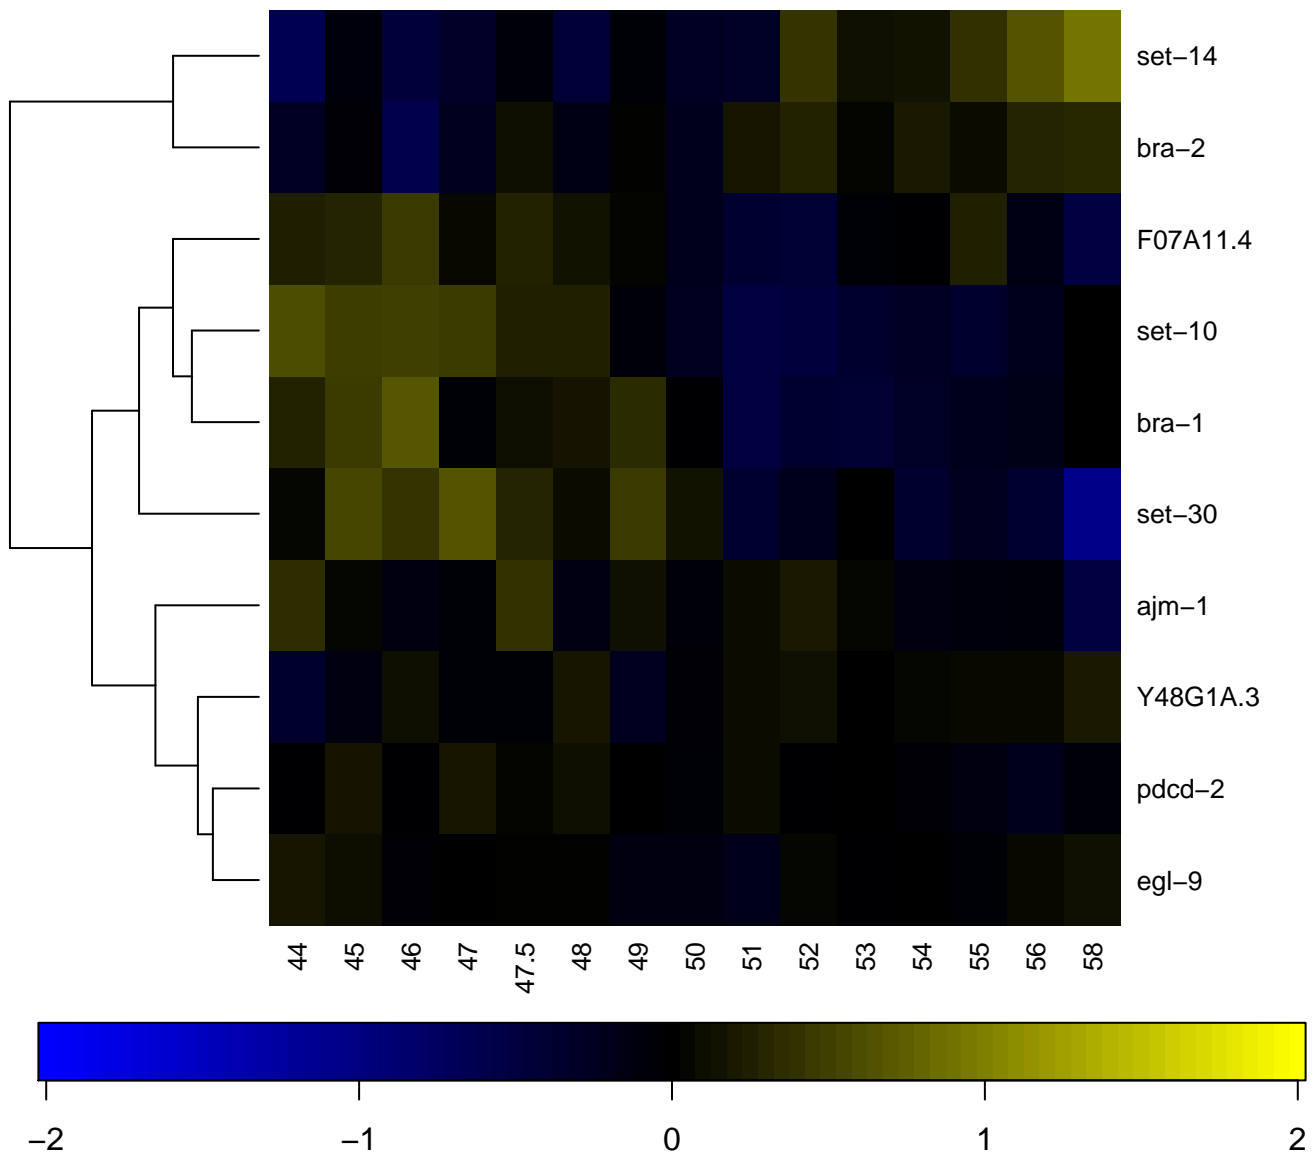







# Zinc finger, NHR/GATA-type

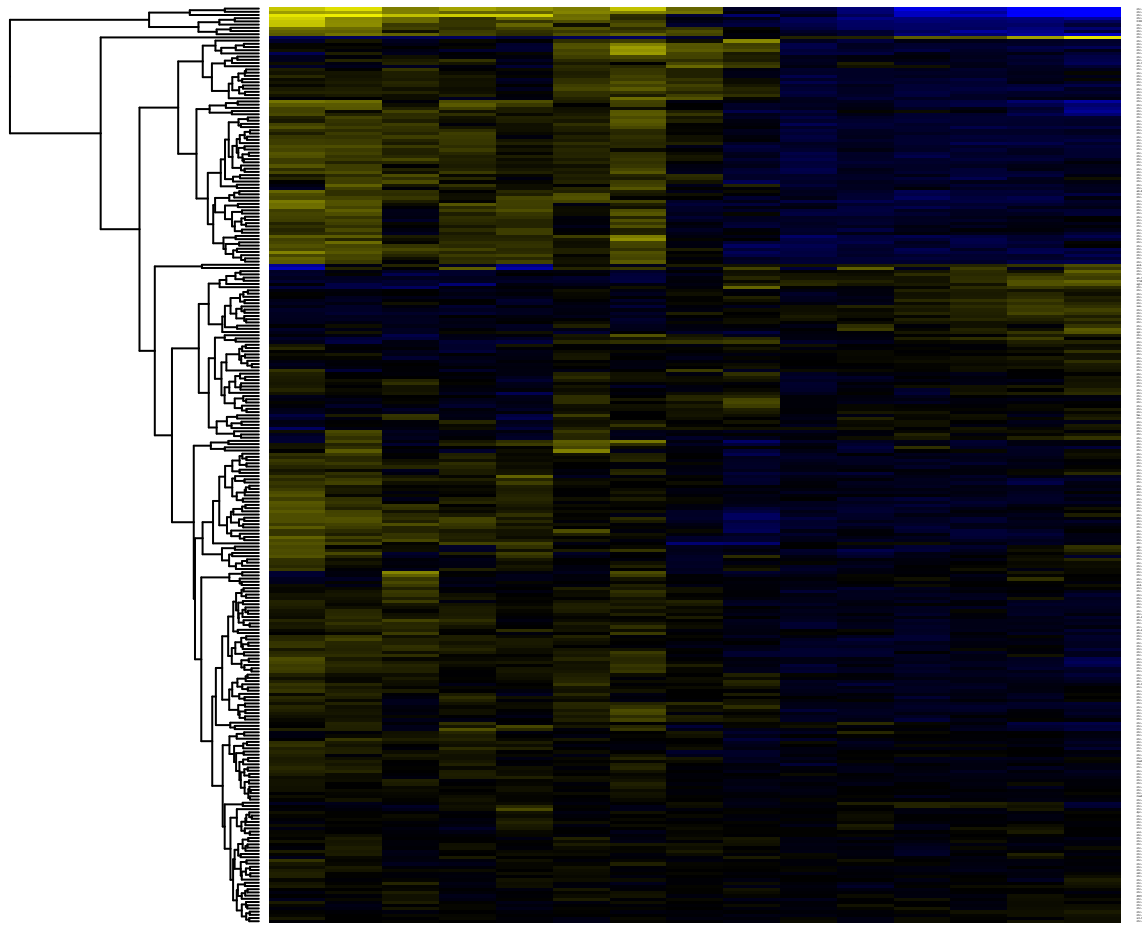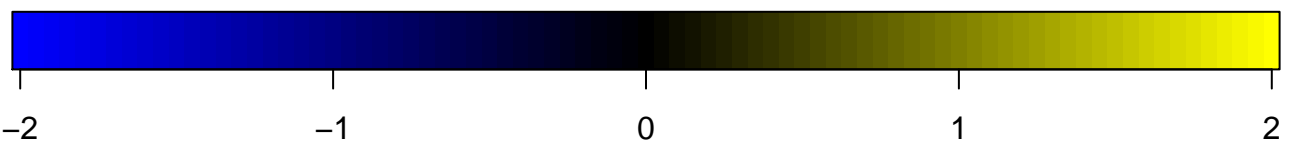

# Zinc finger, nuclear hormone receptor-type

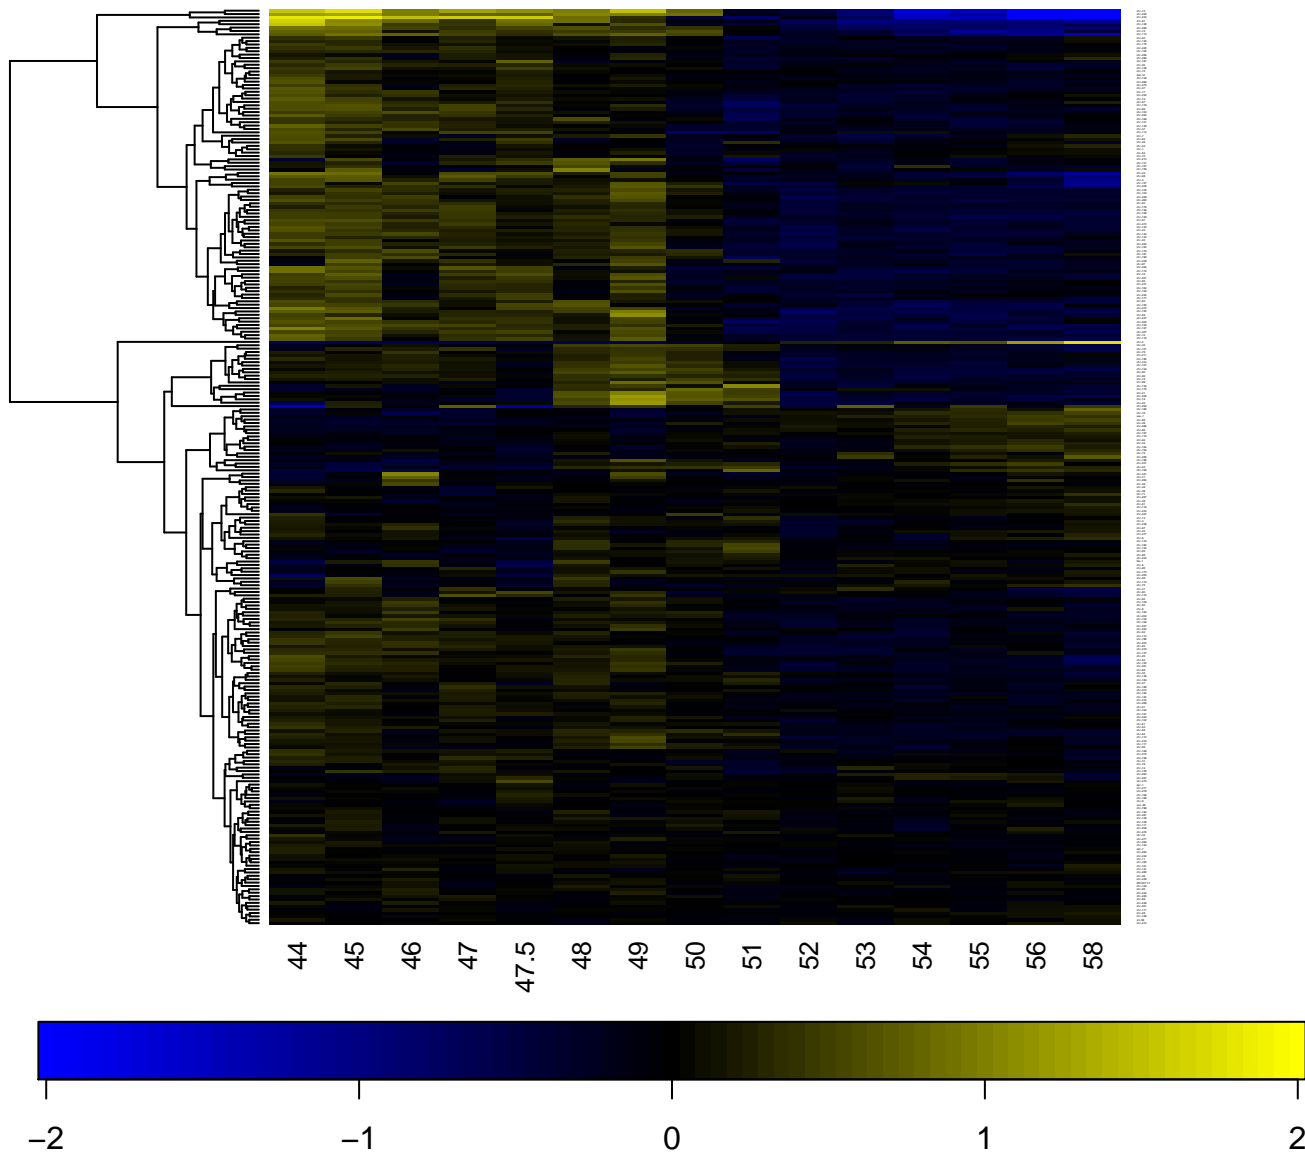

# Zinc finger, PHD-finger



# Zinc finger, PHD-type

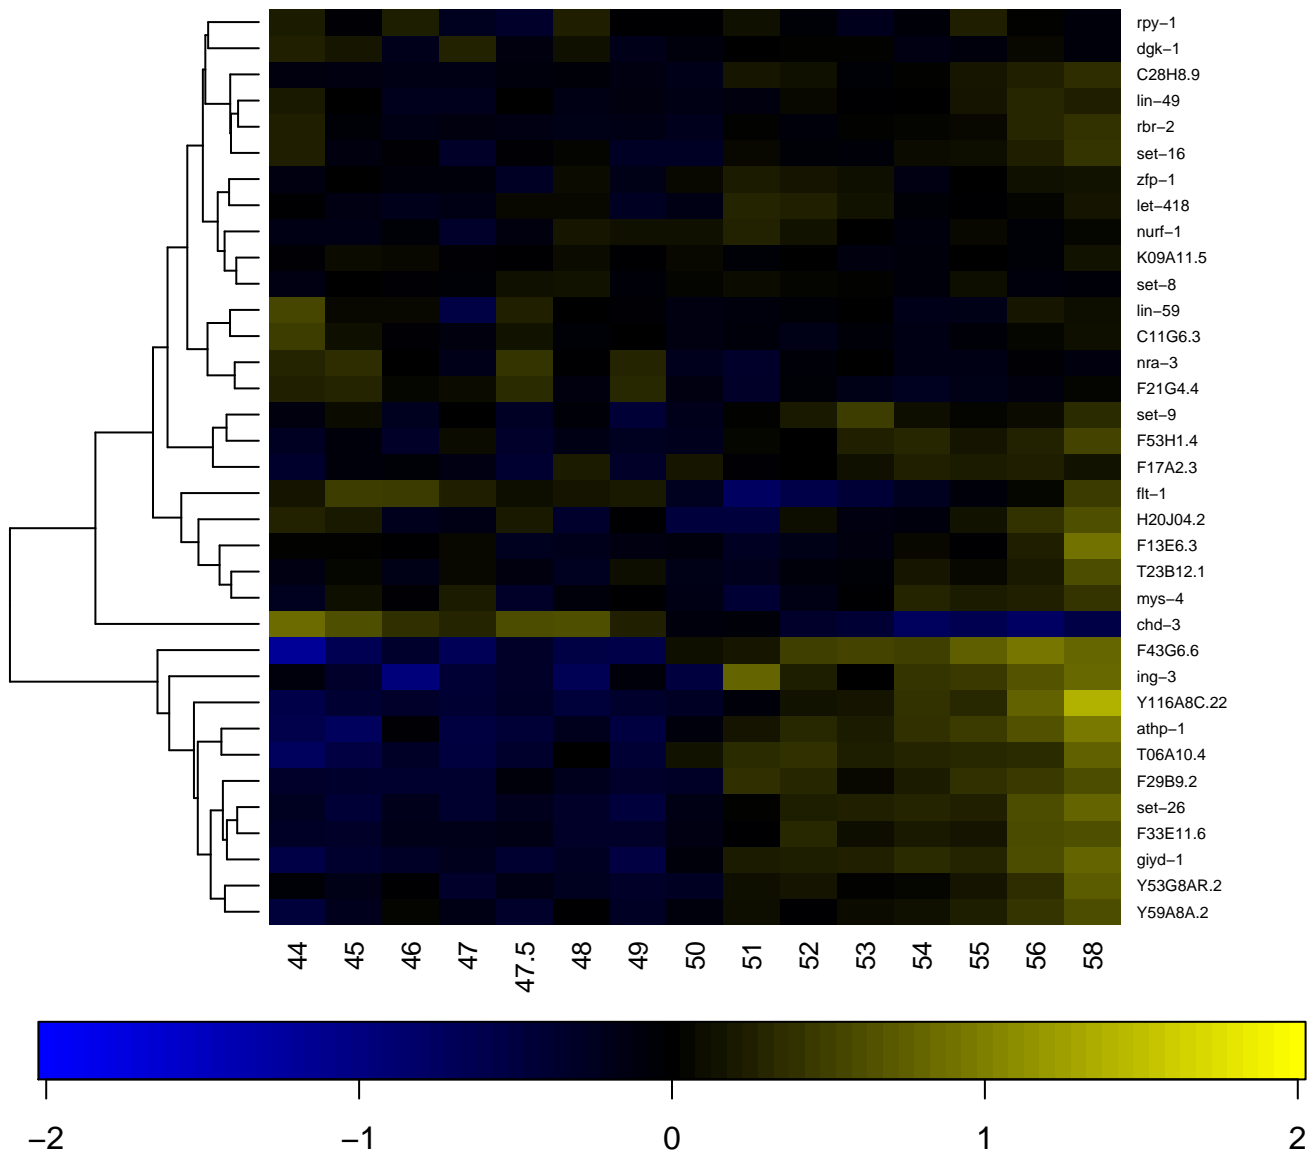

# Zinc finger, PHD-type, conserved site

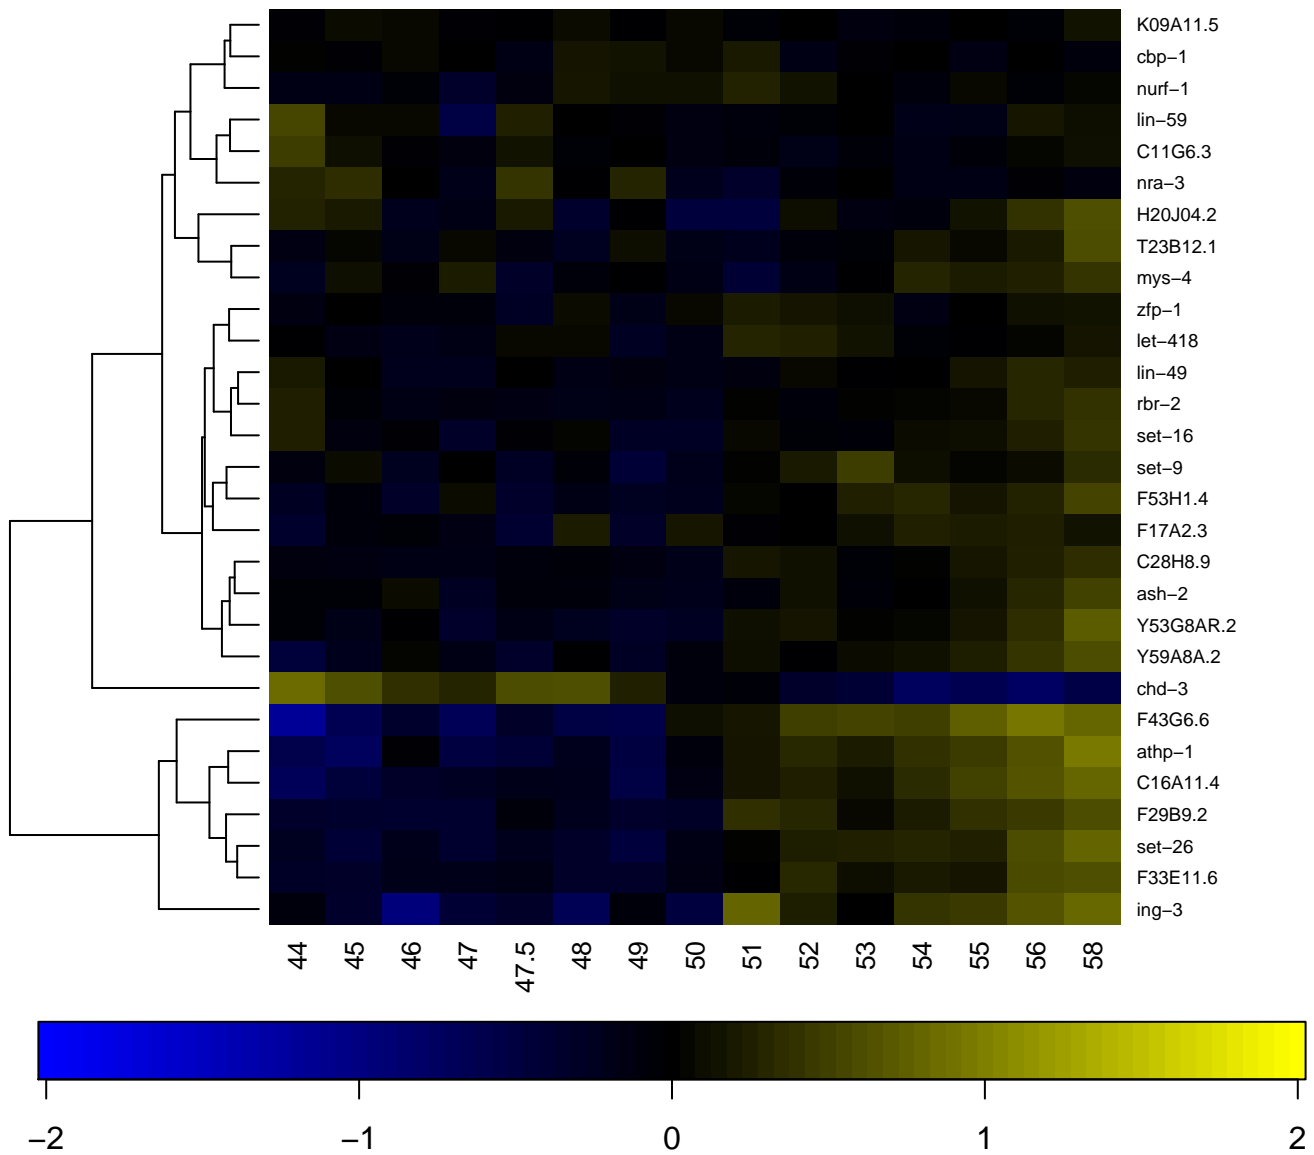

# Zinc finger, RanBP2-type

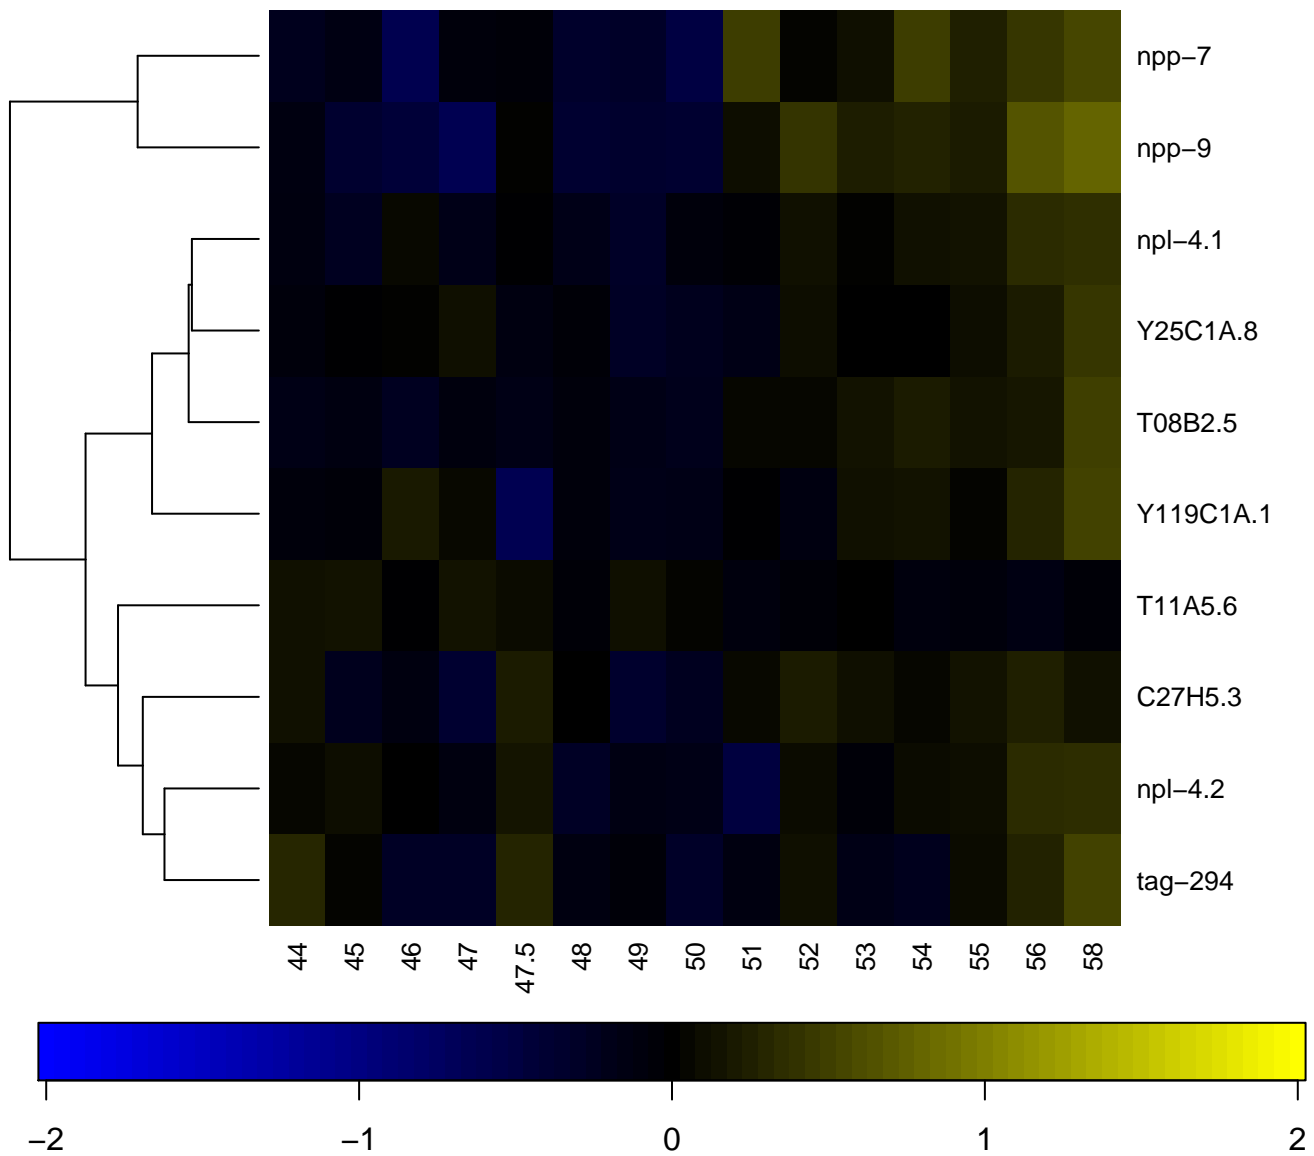



# Zinc finger, RING-CH-type

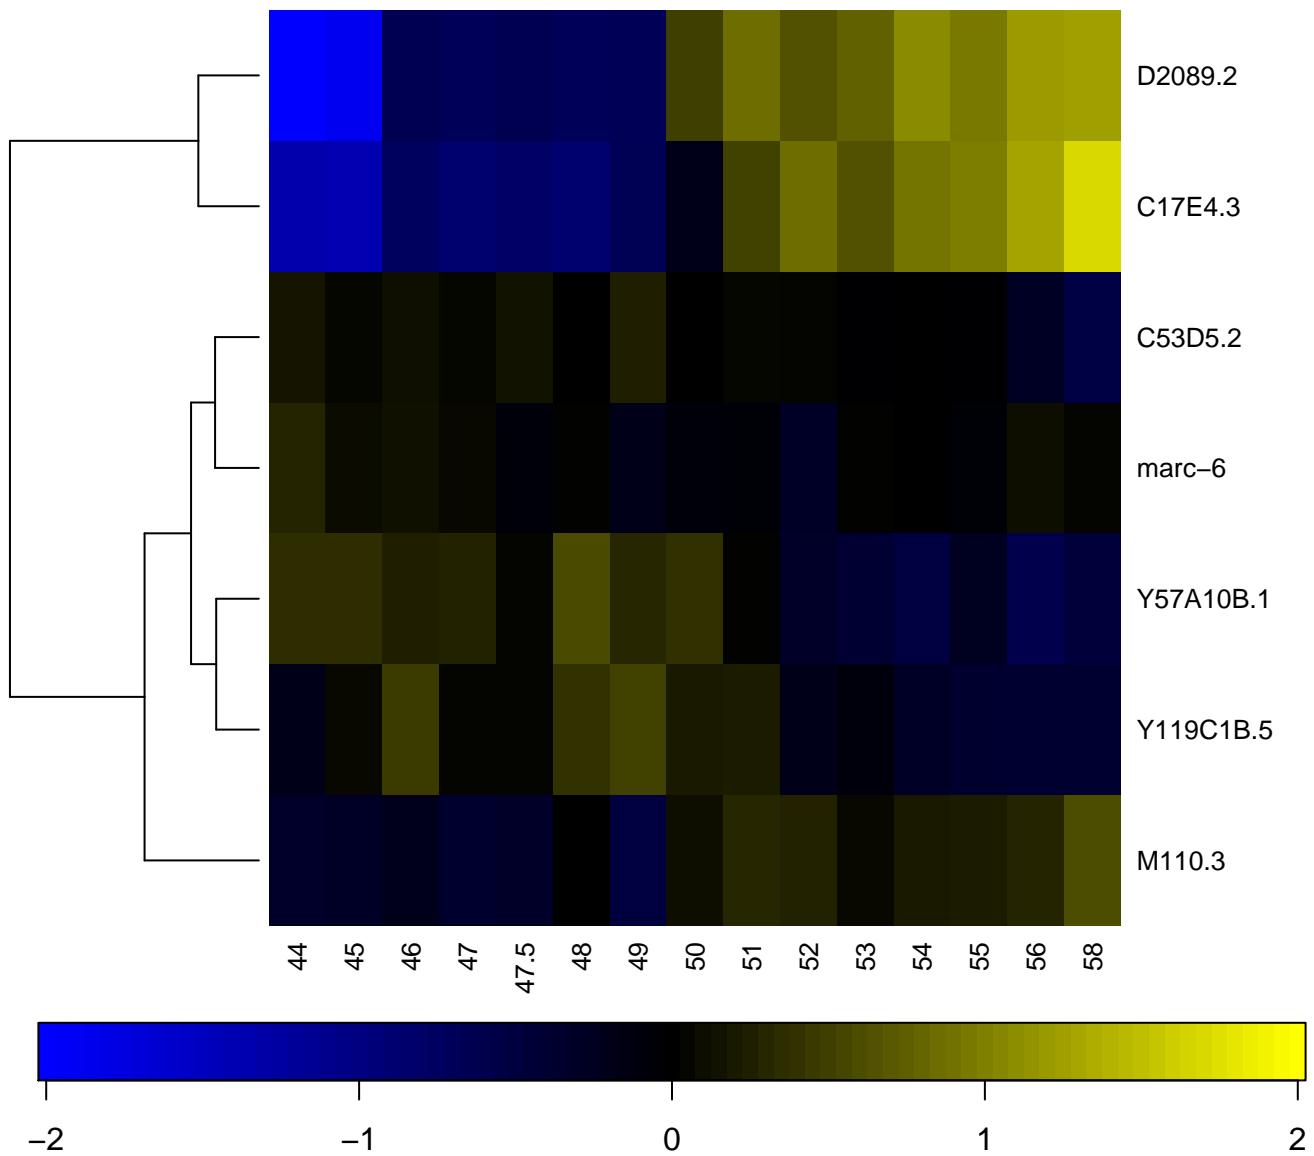

# Zinc finger, RING-type

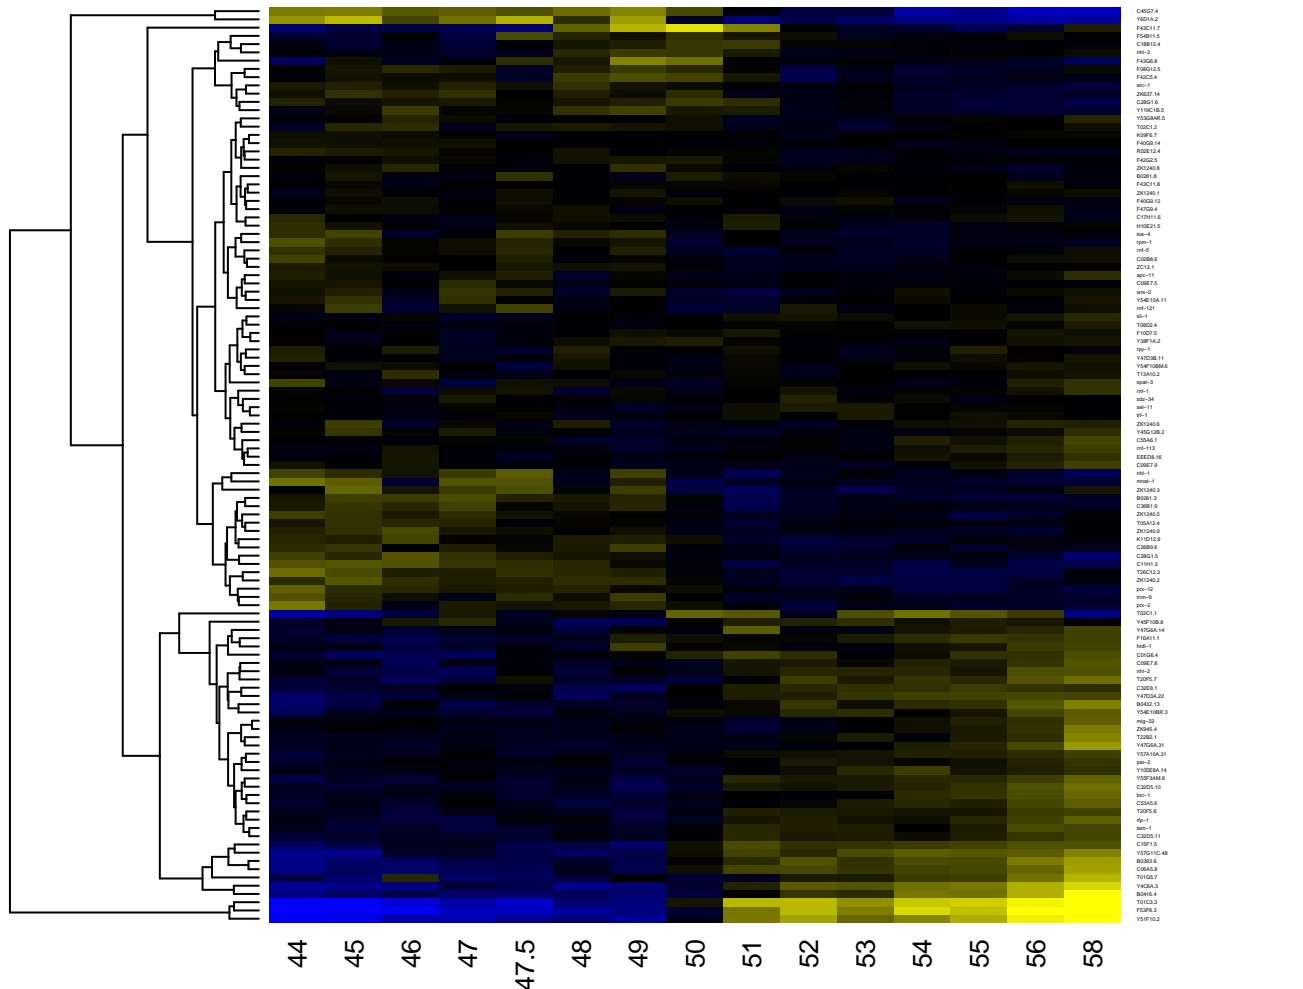

-2

-1

0

1

2

# Zinc finger, RING-type, conserved site

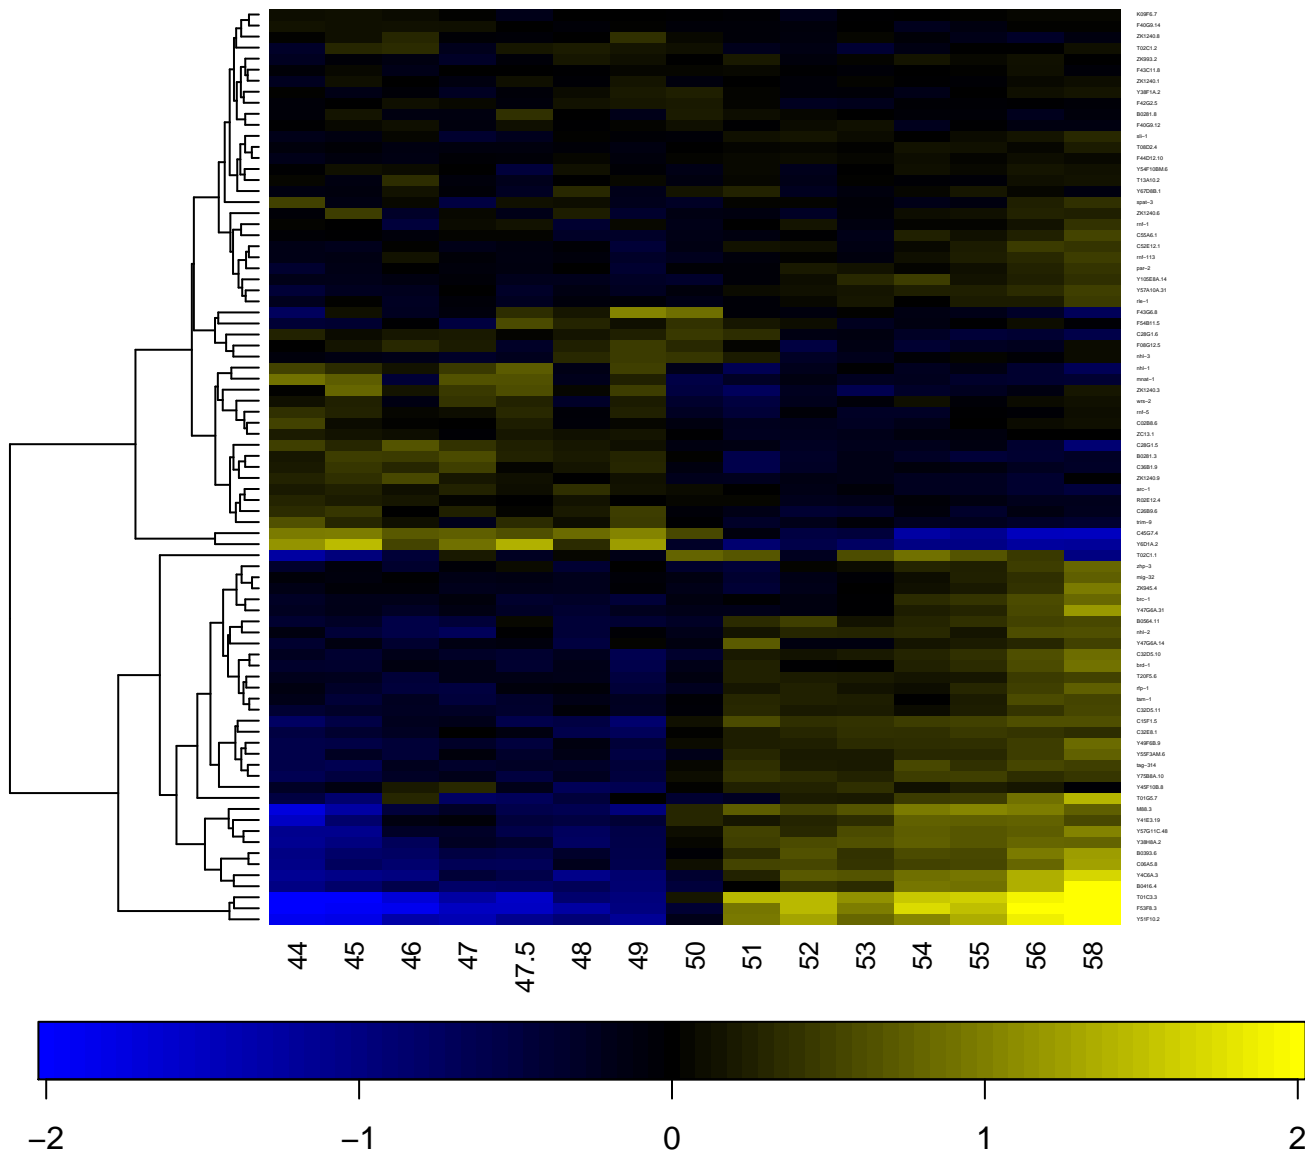

# Zinc finger, TAZ-type

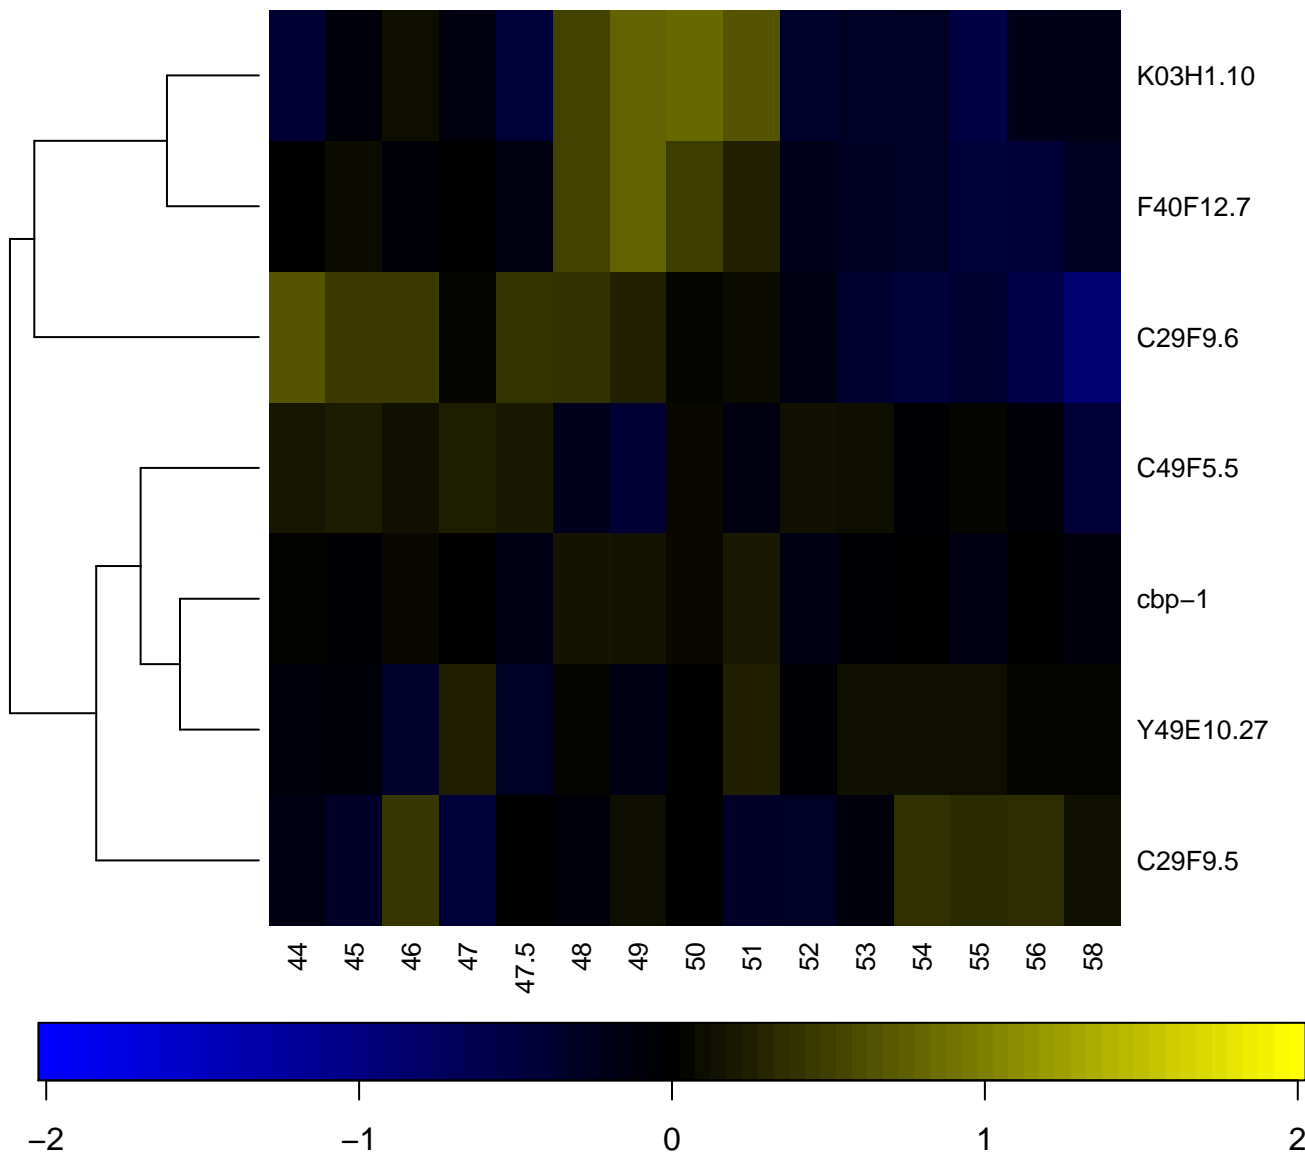



# Zinc finger, UBP-type

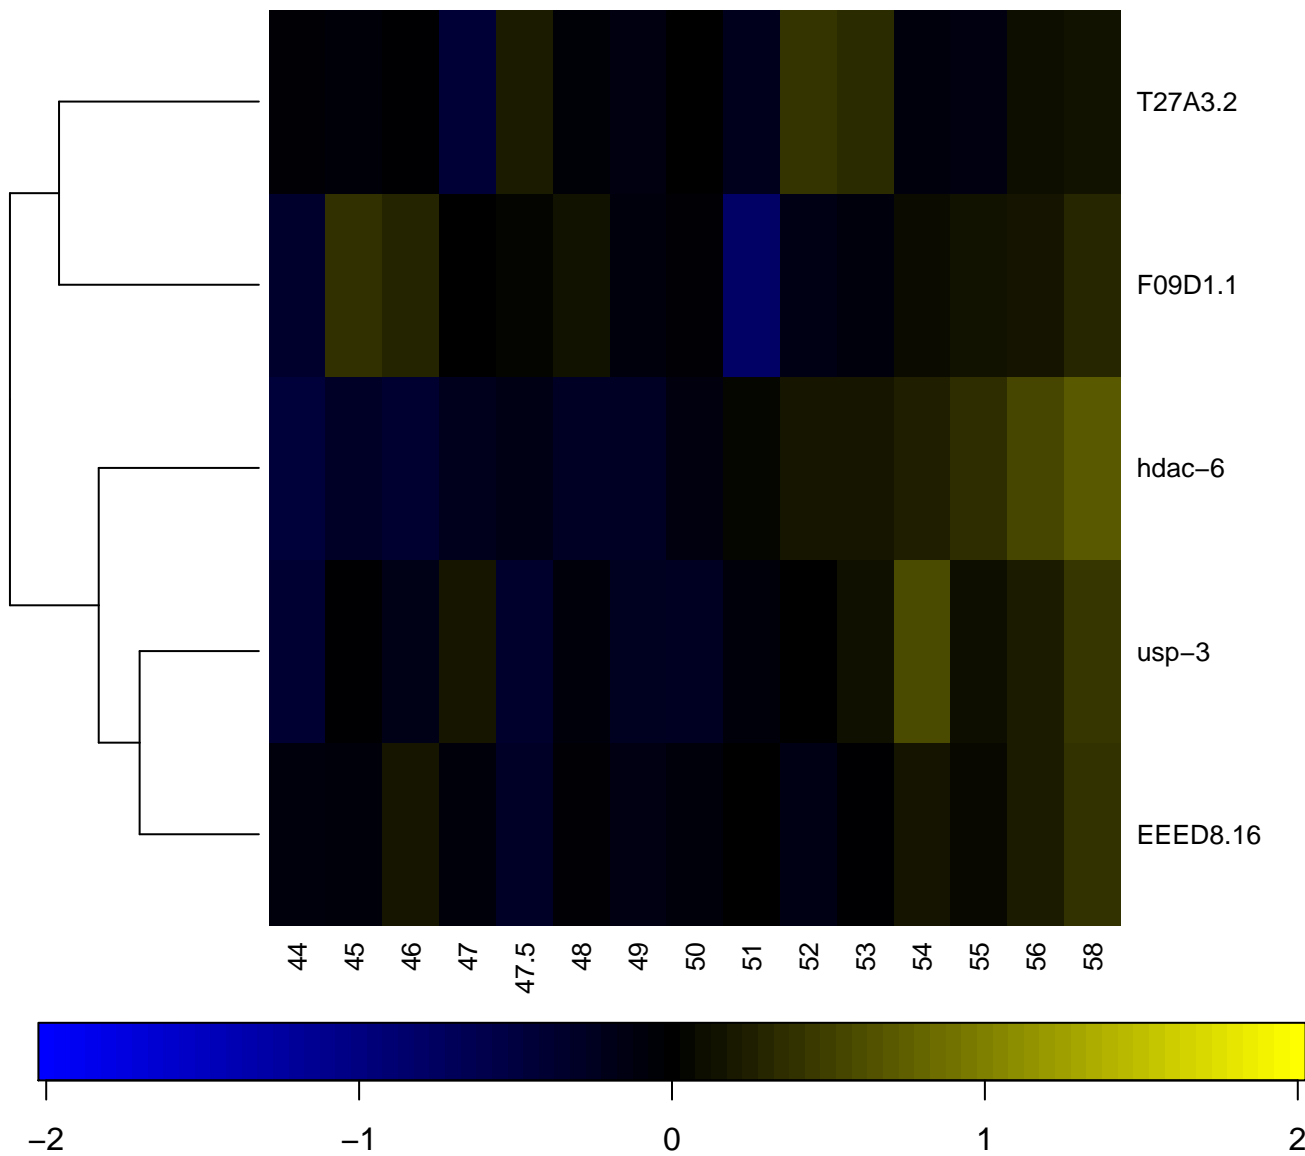

# Zinc finger, ZZ-type

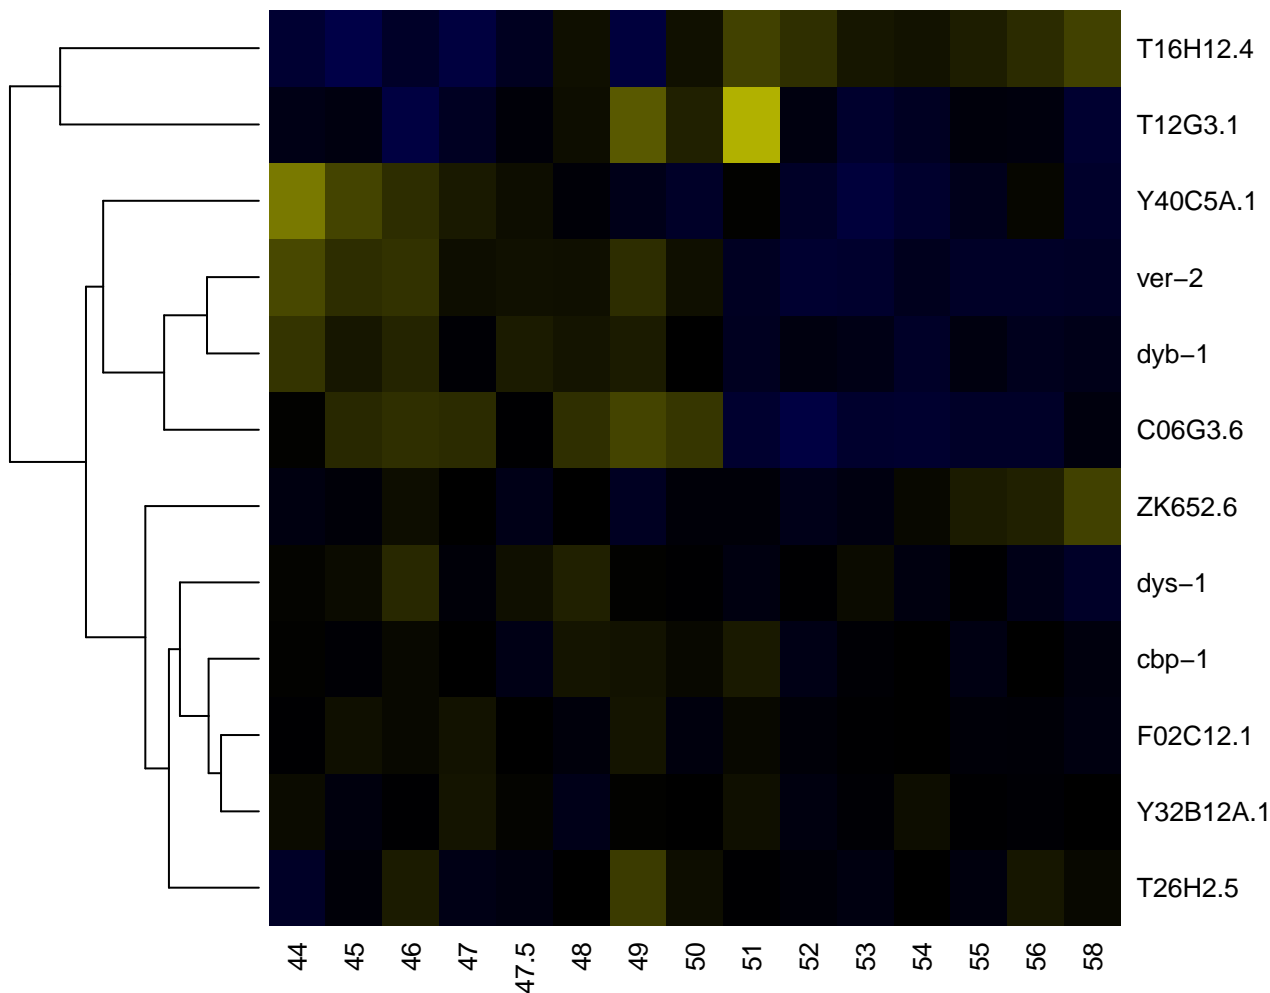

# Zinc finger, ZZ type

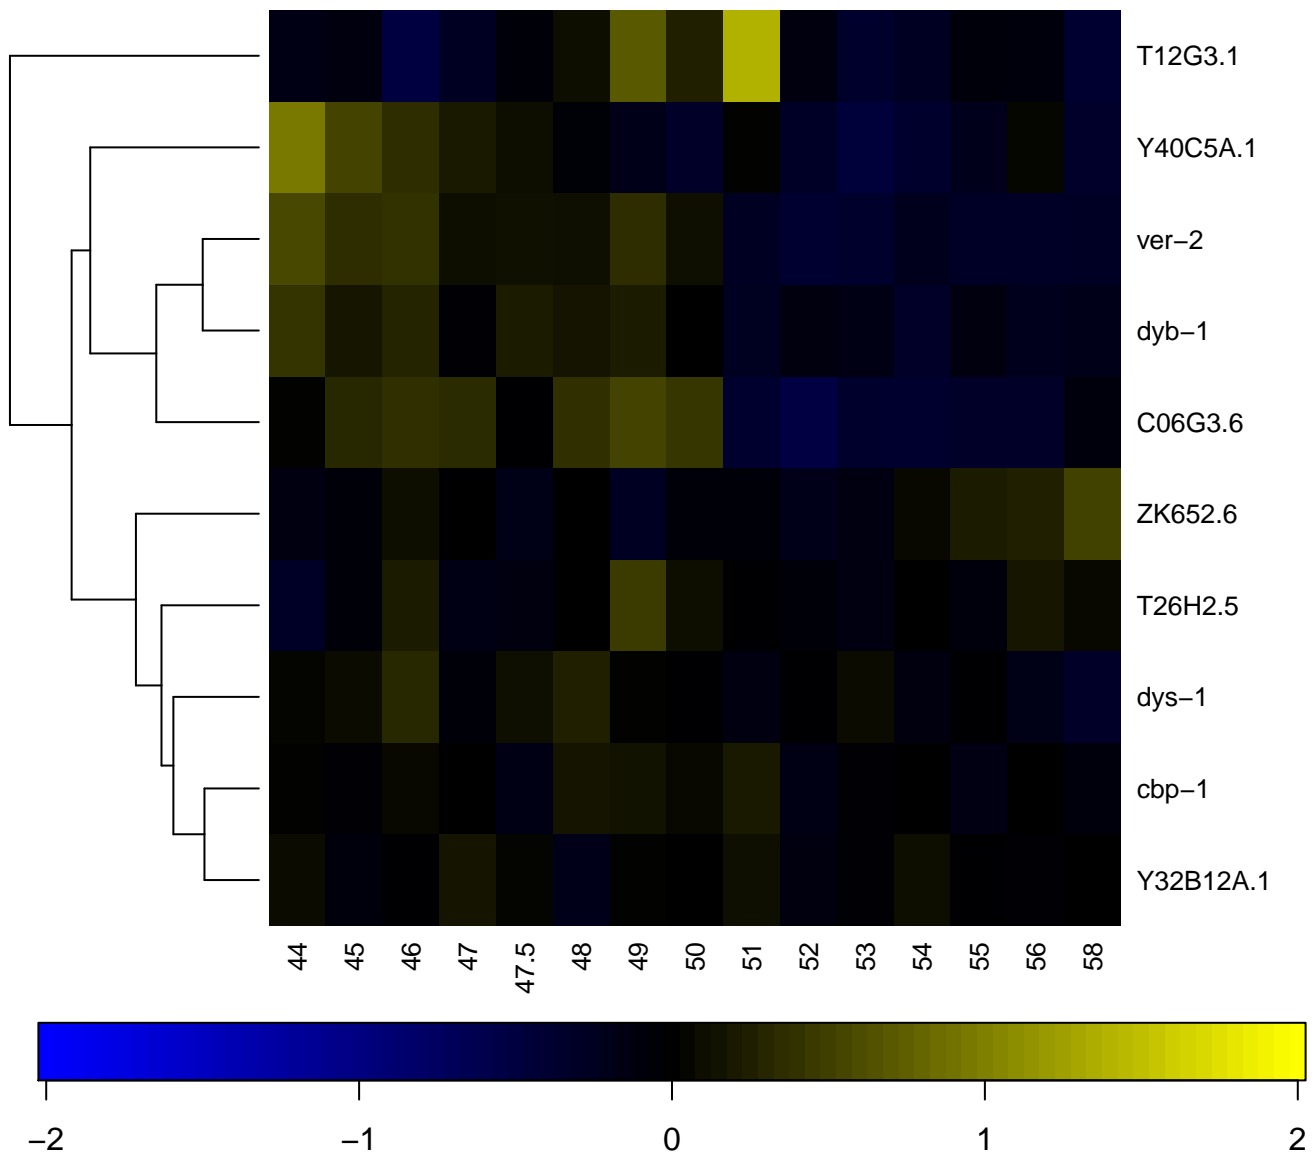





# Zinc/iron permease

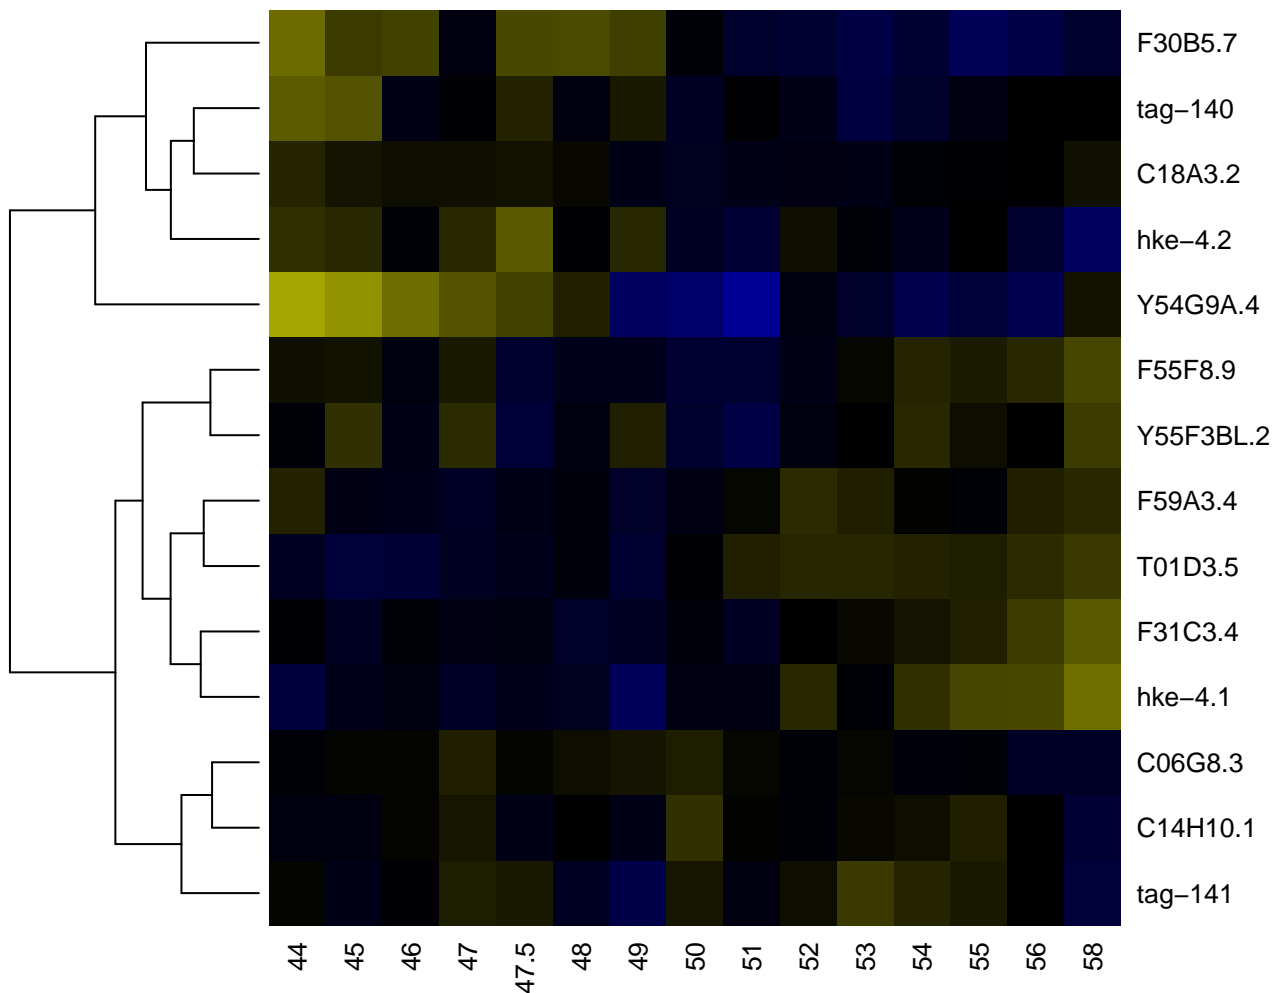







# Zona pellucida-like domain

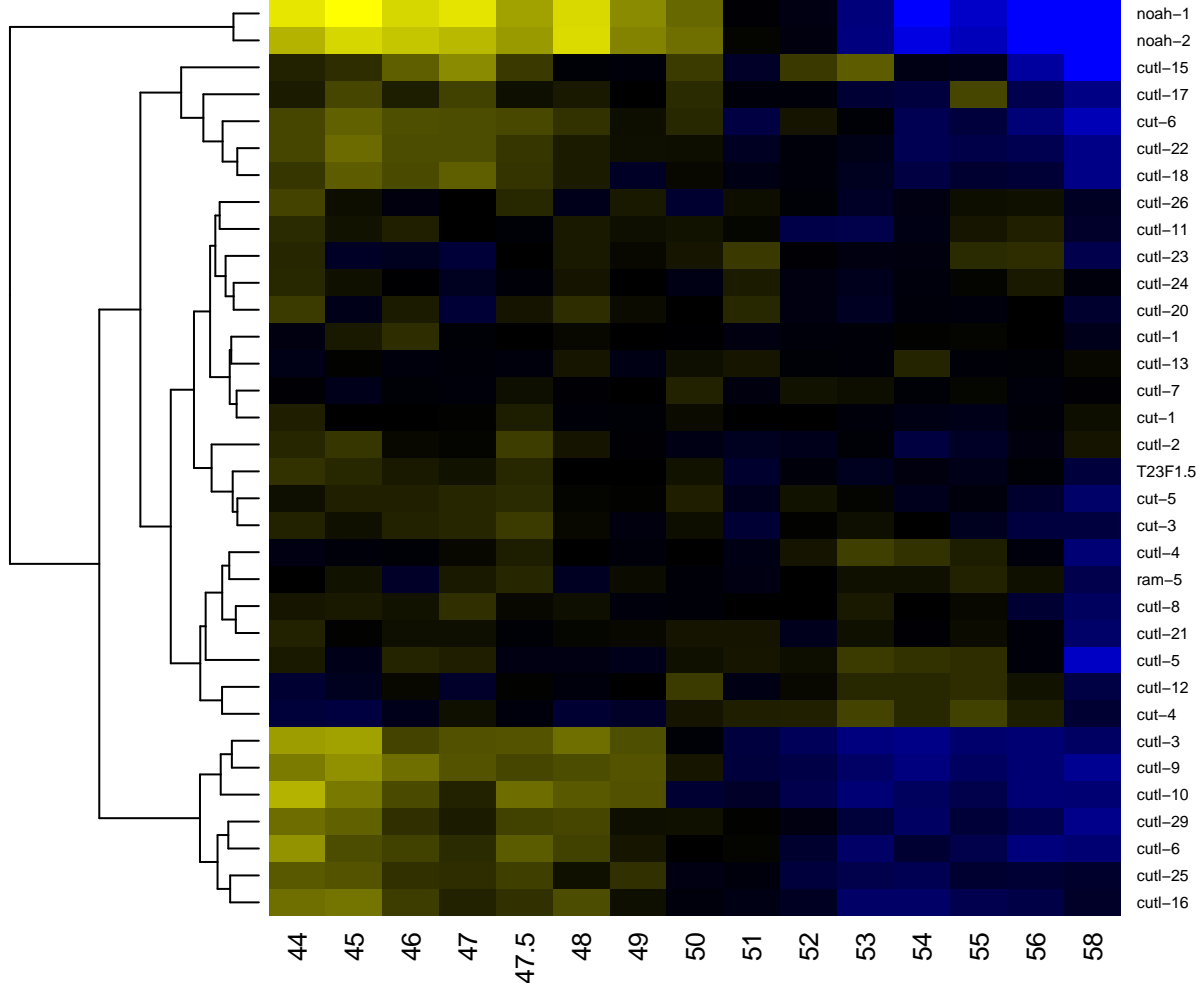

**Supplementary file I | Dynamic gene expression patterns of all Wormbook Chapters.**

The “heatmap” function of “R” was used to cluster genes of each individual Wormbook Chapter according to their expression pattern. Wormbook Chapter name is shown per page as figure title. The time in hours is shown on the x-axis. Gene names are shown on the y-axis. The scale bar shows the log<sub>2</sub> ratio with the mean for each time-point. Blue is lower than the mean and yellow is higher than the mean.

# Acetylcholine

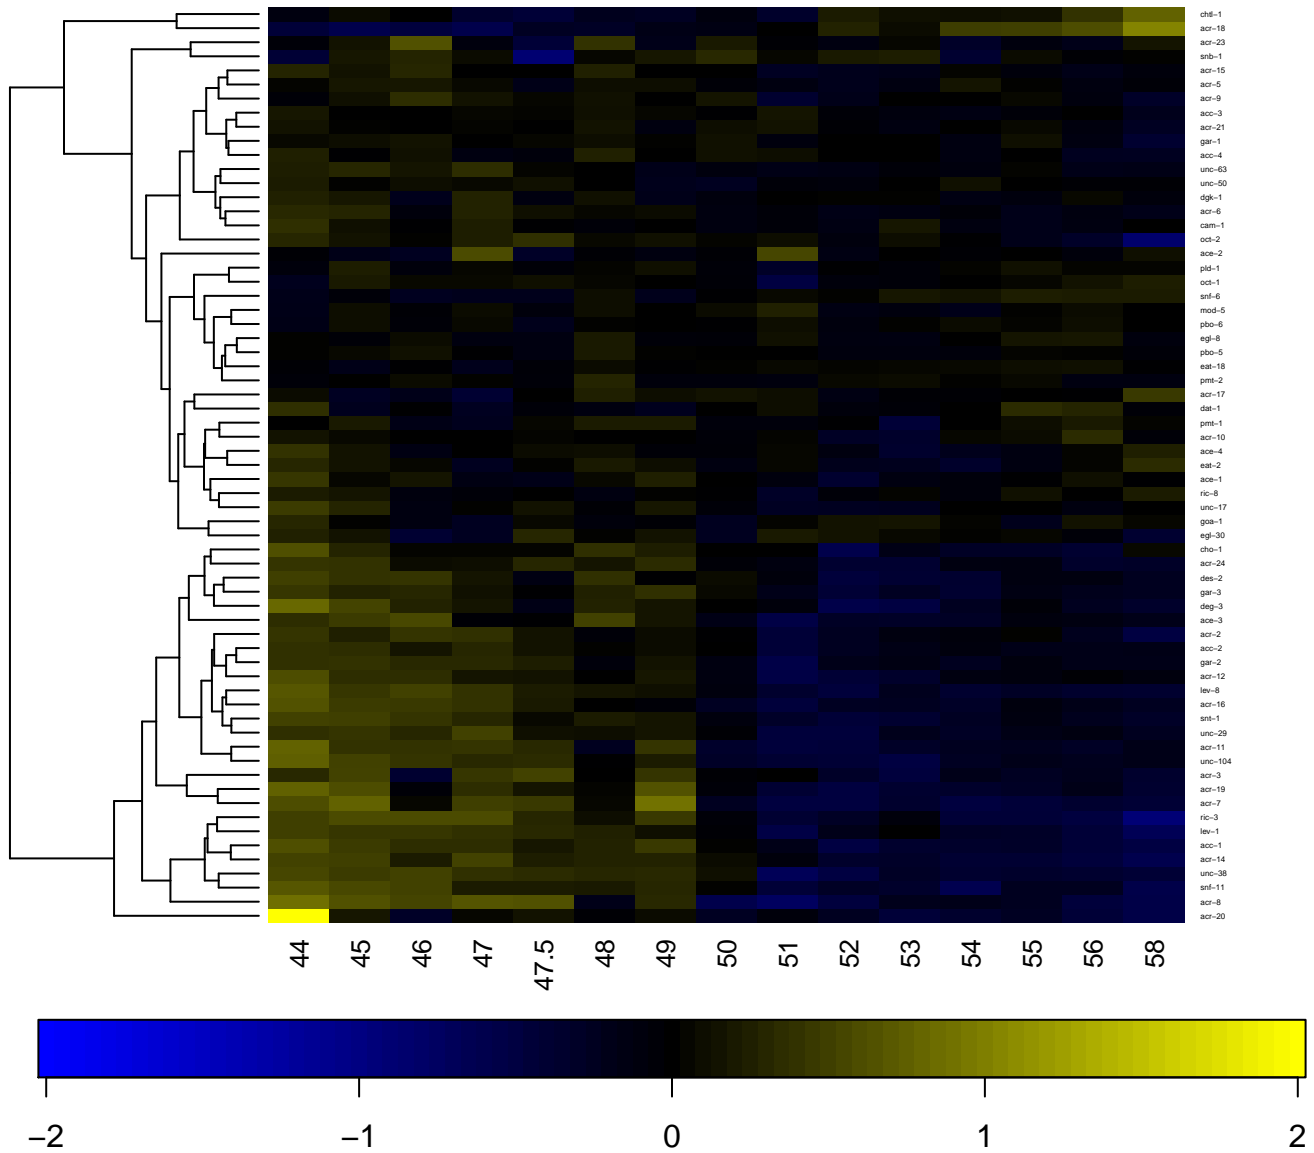



# Anthelmintic drugs

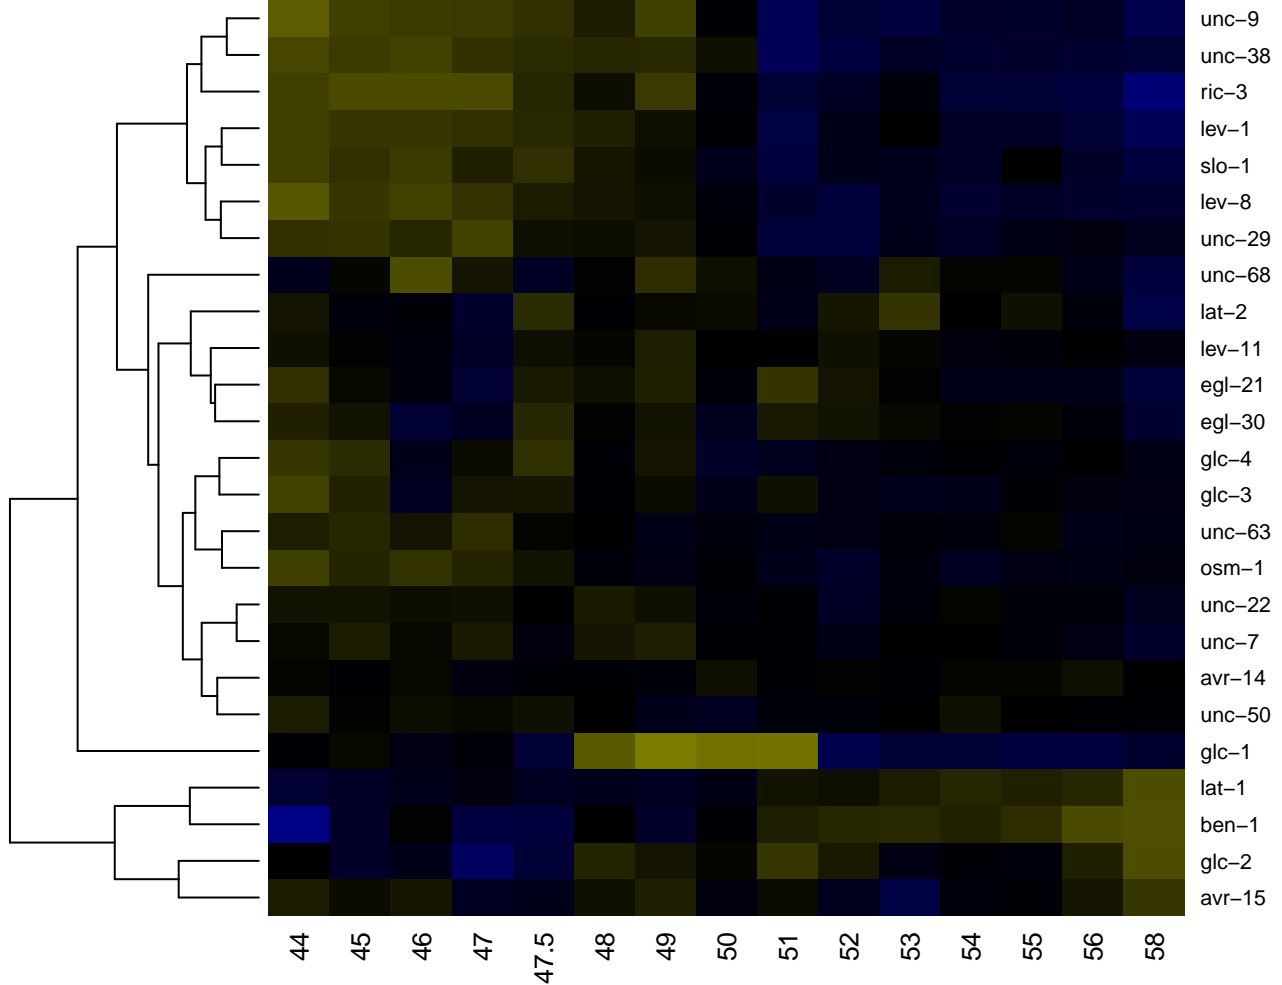

# Asymmetric cell division and axis formation in the embryo

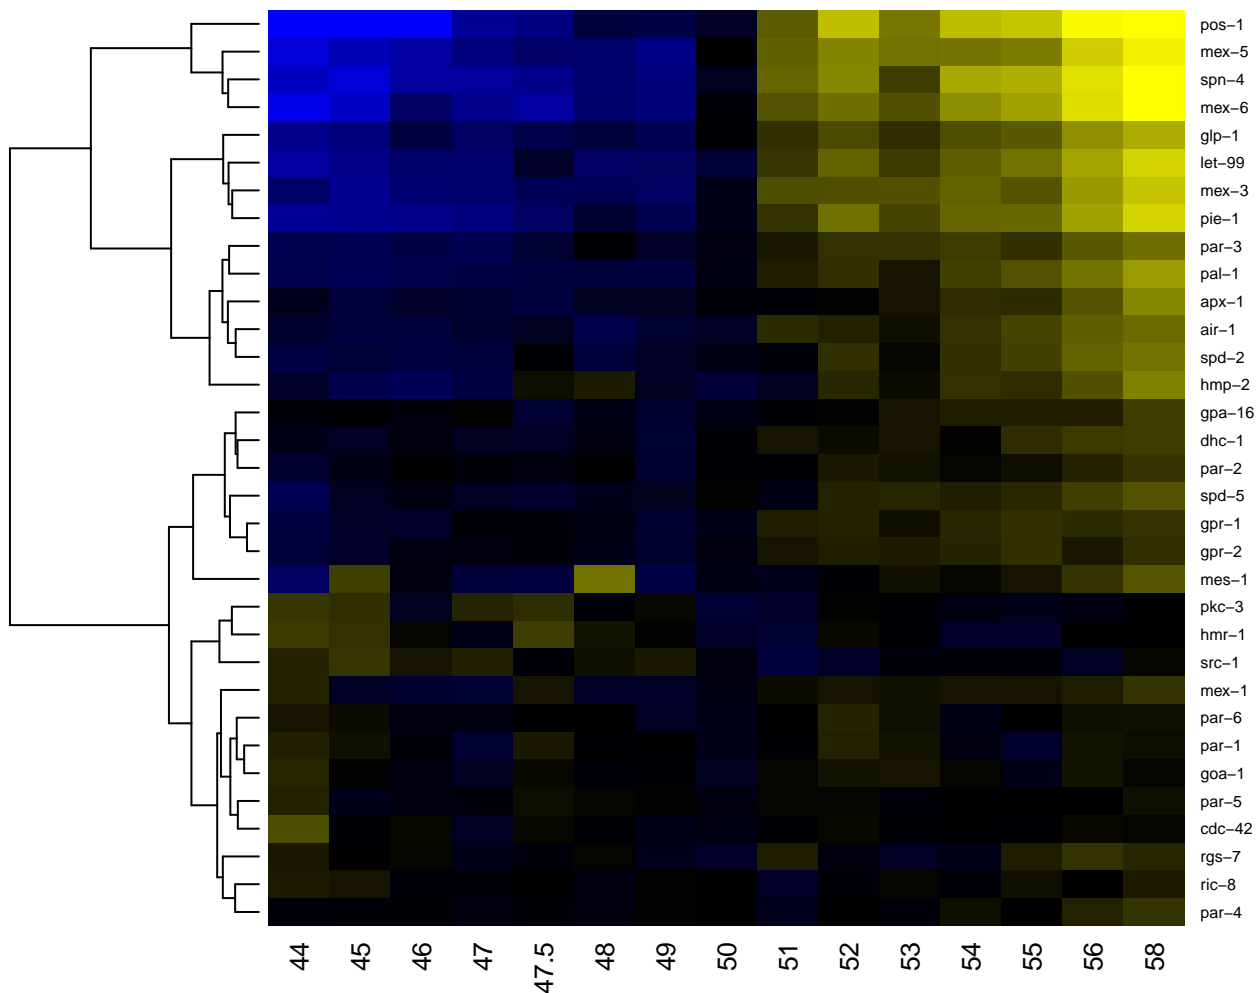

# Autophagy in *C. elegans*

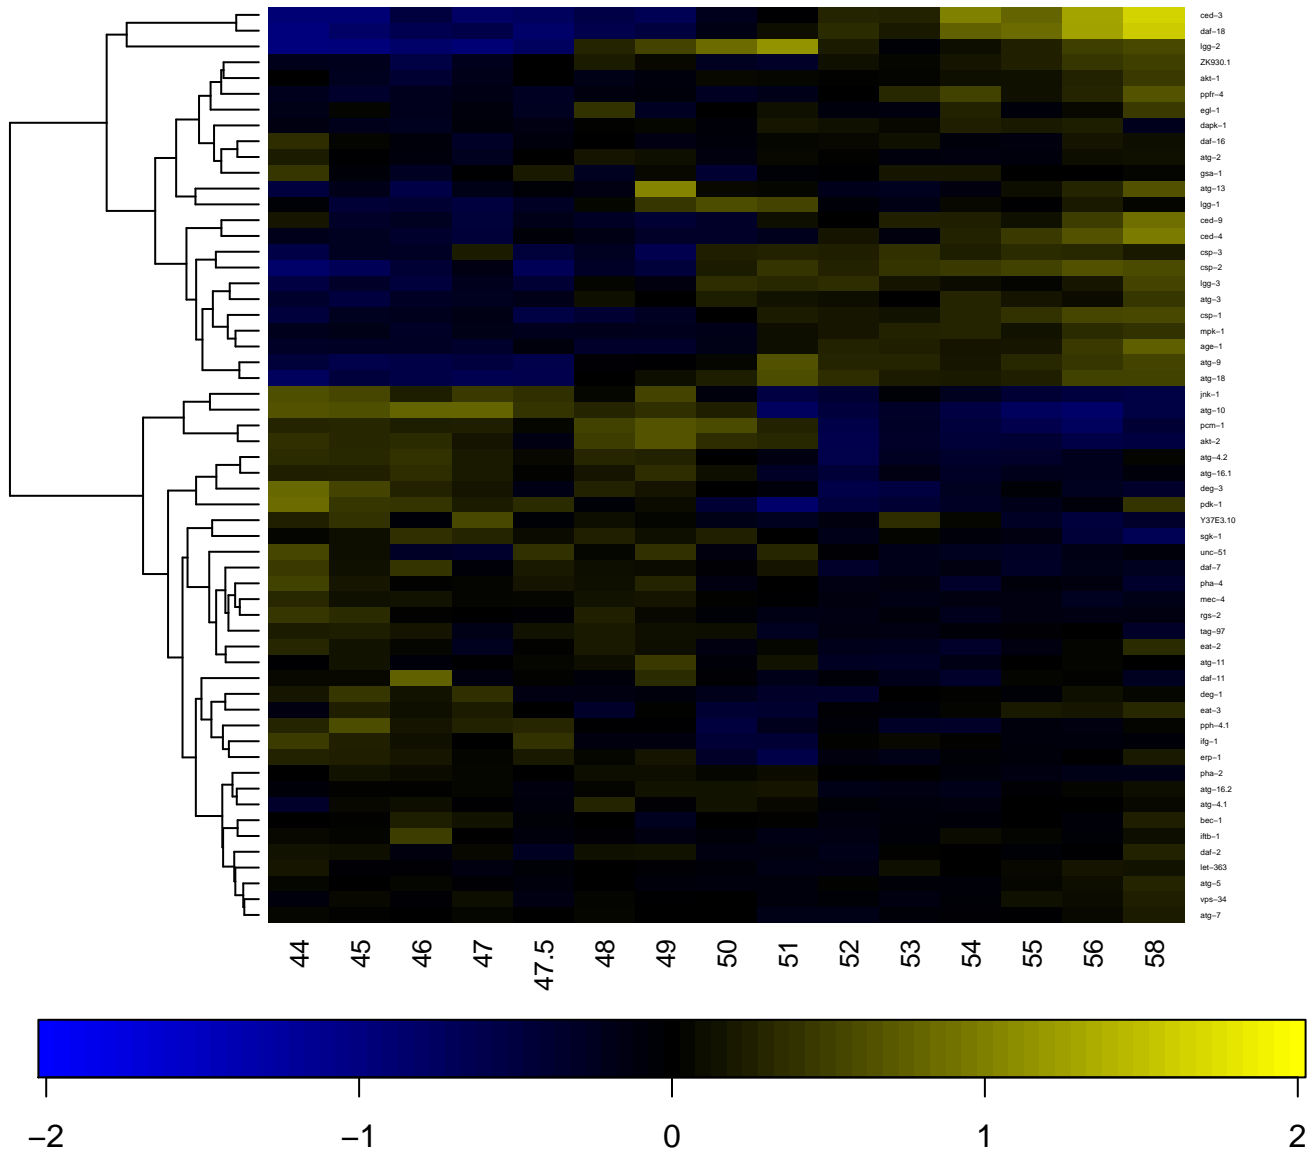



# Biogenic amine neurotransmitters

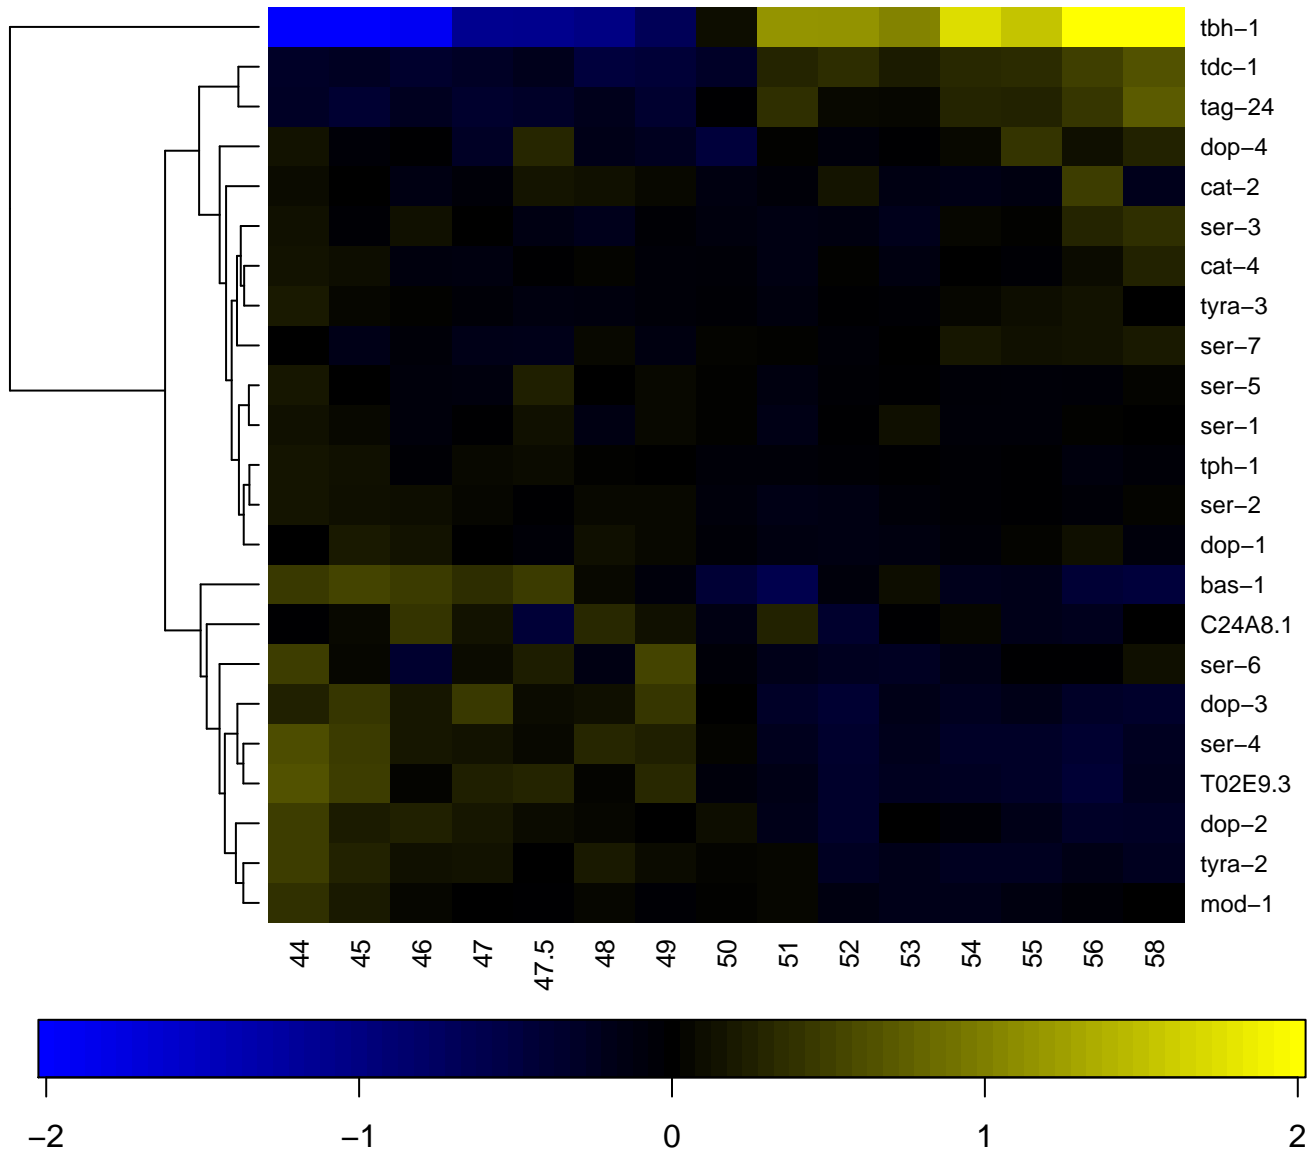

## C. elegans and volatile anesthetics

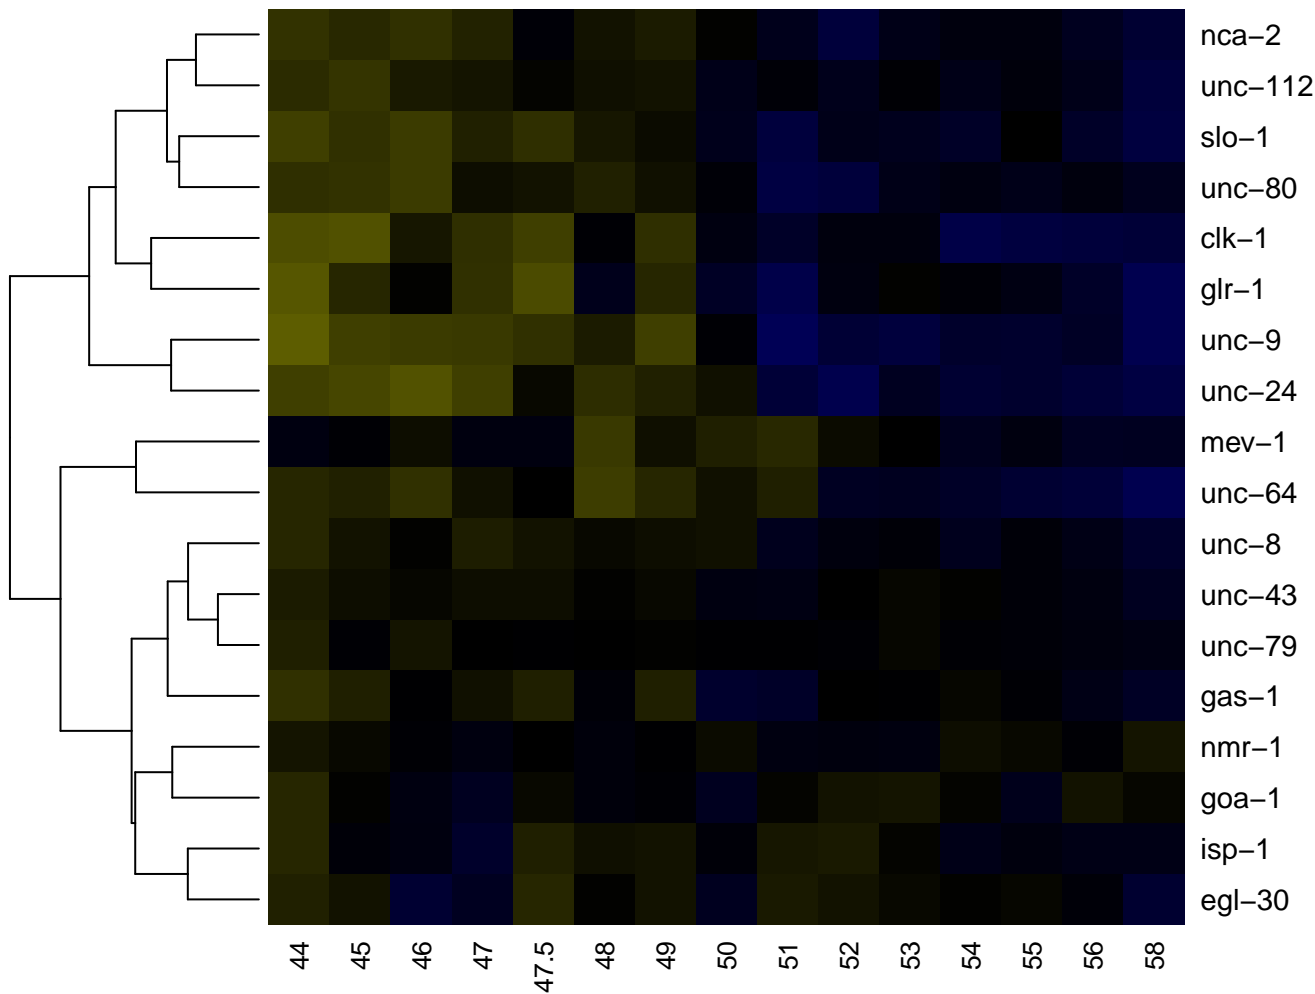

-2

-1

0

1

2



# C. elegans microRNAs

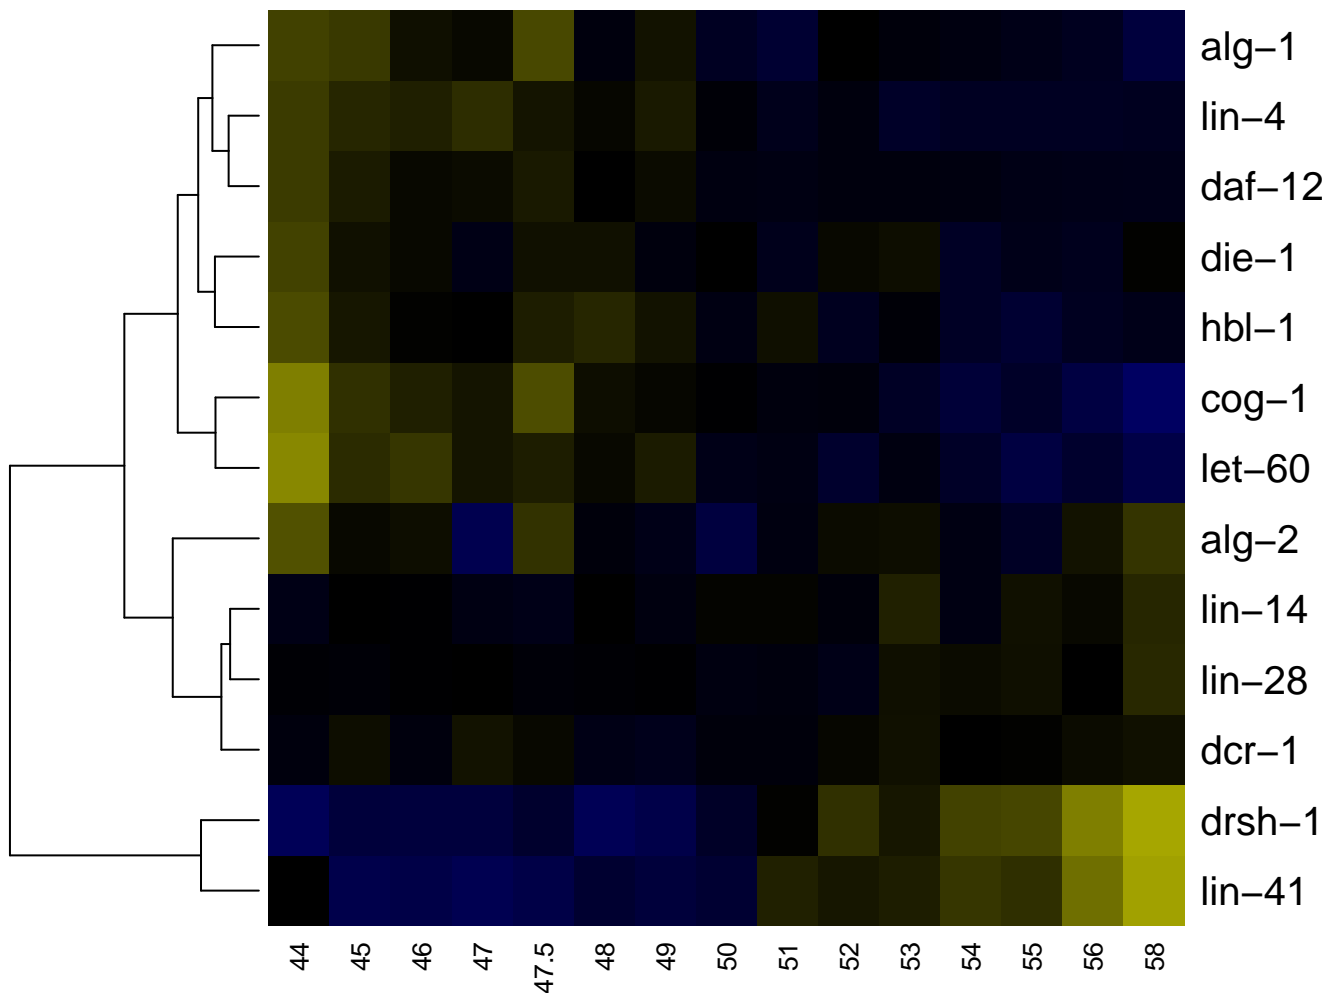



# Carbohydrates and glycosylation

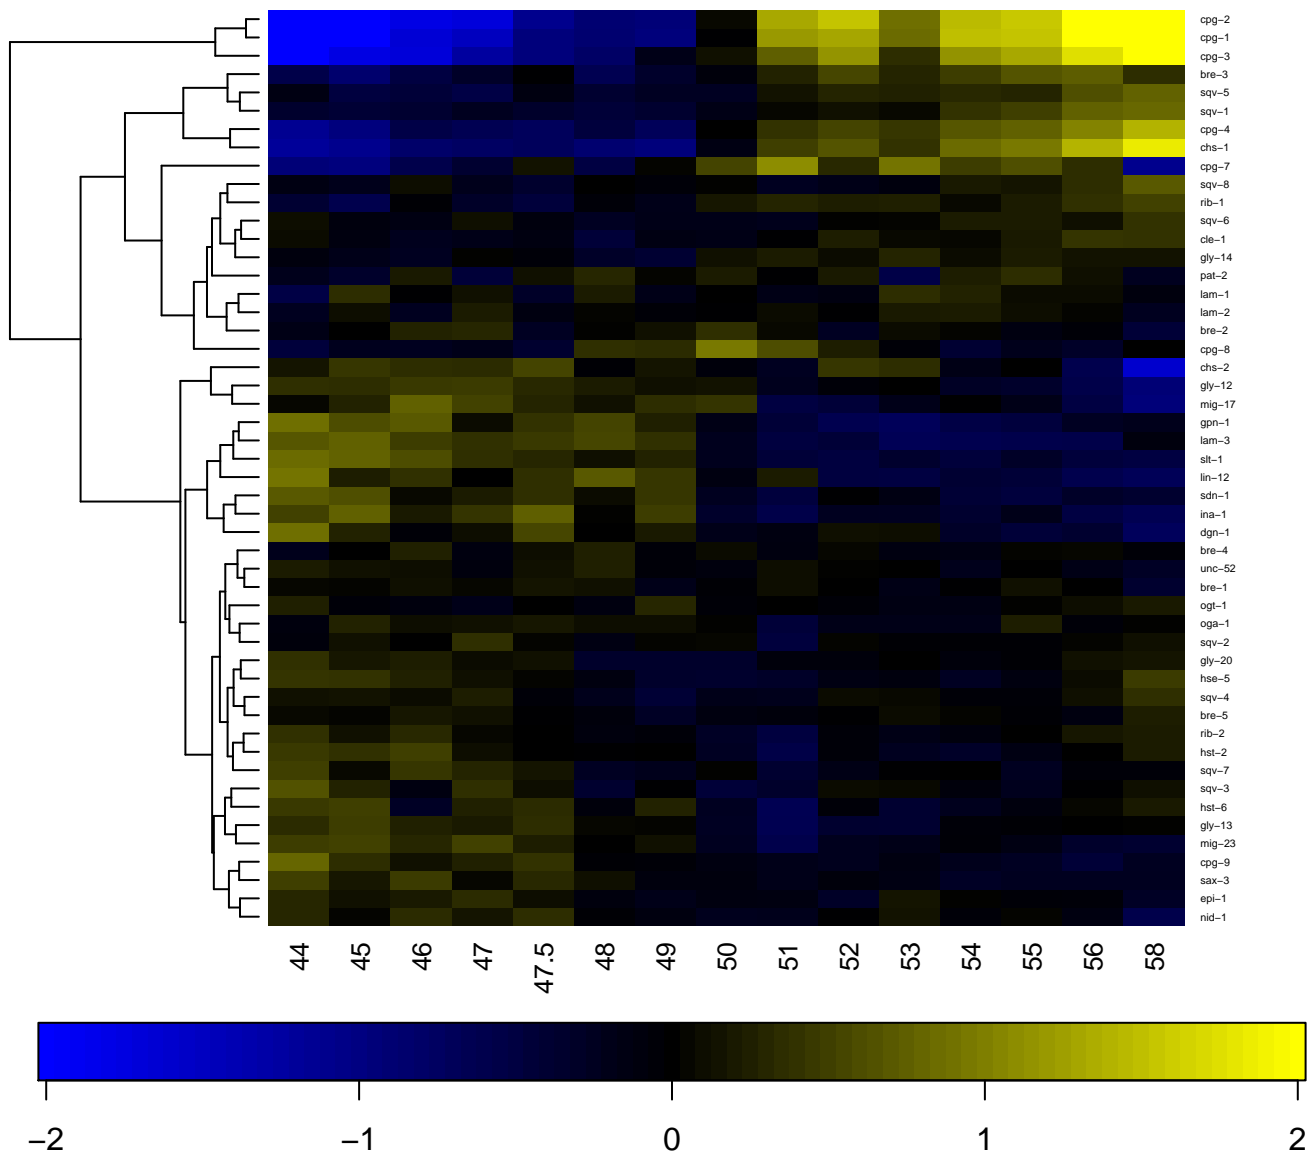

# Cell-cycle regulation

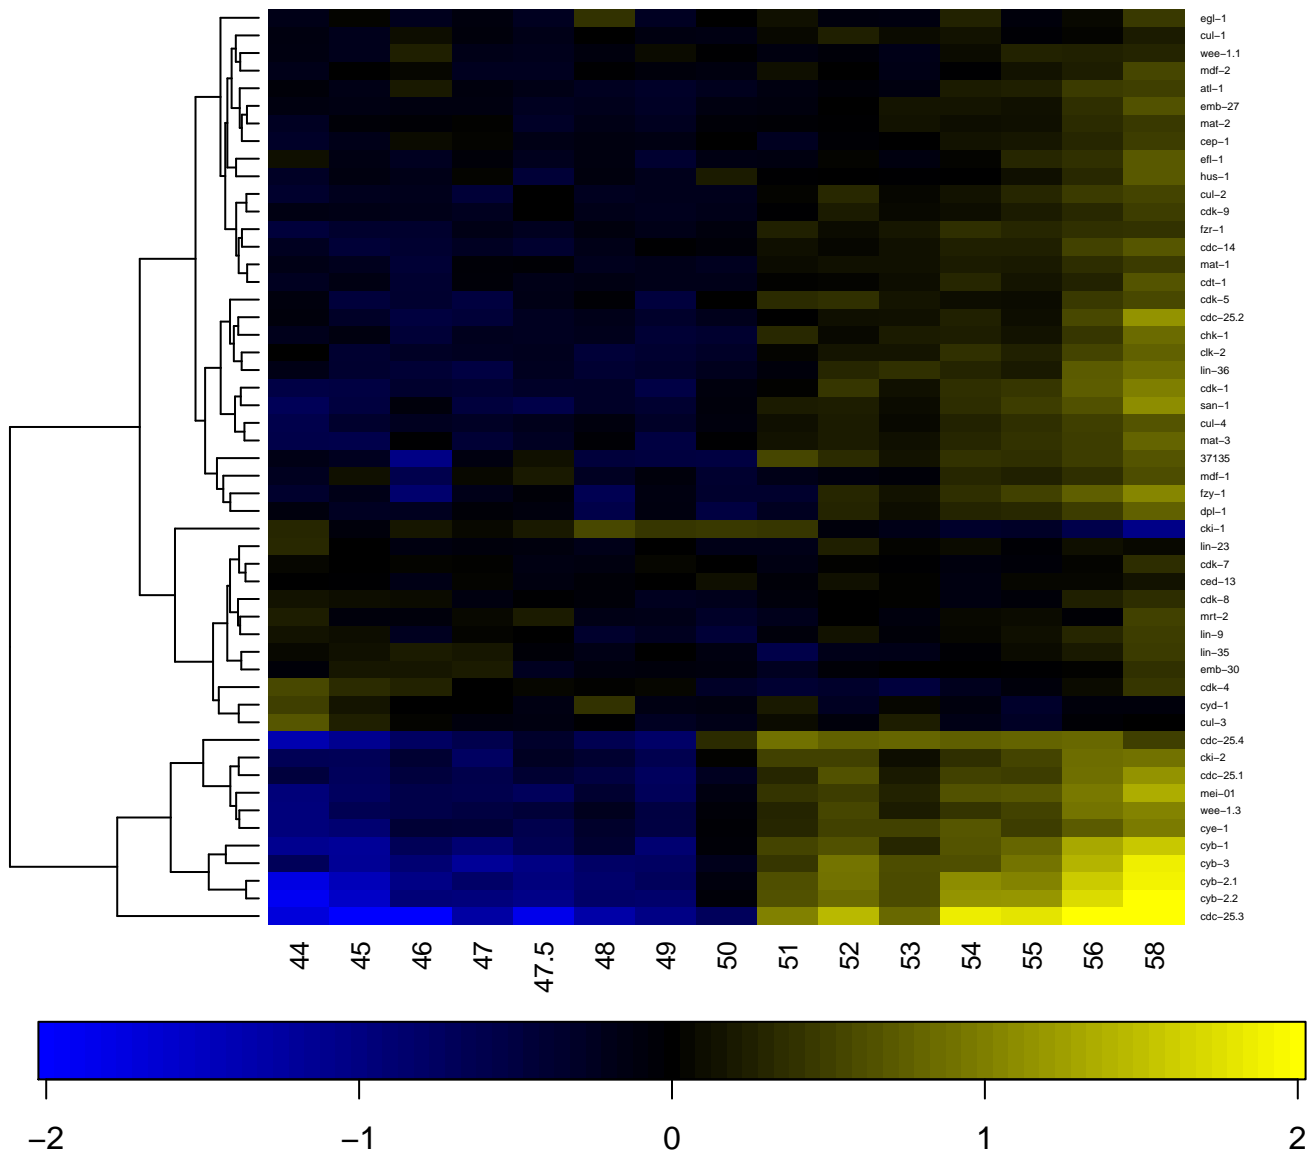

# Cell division

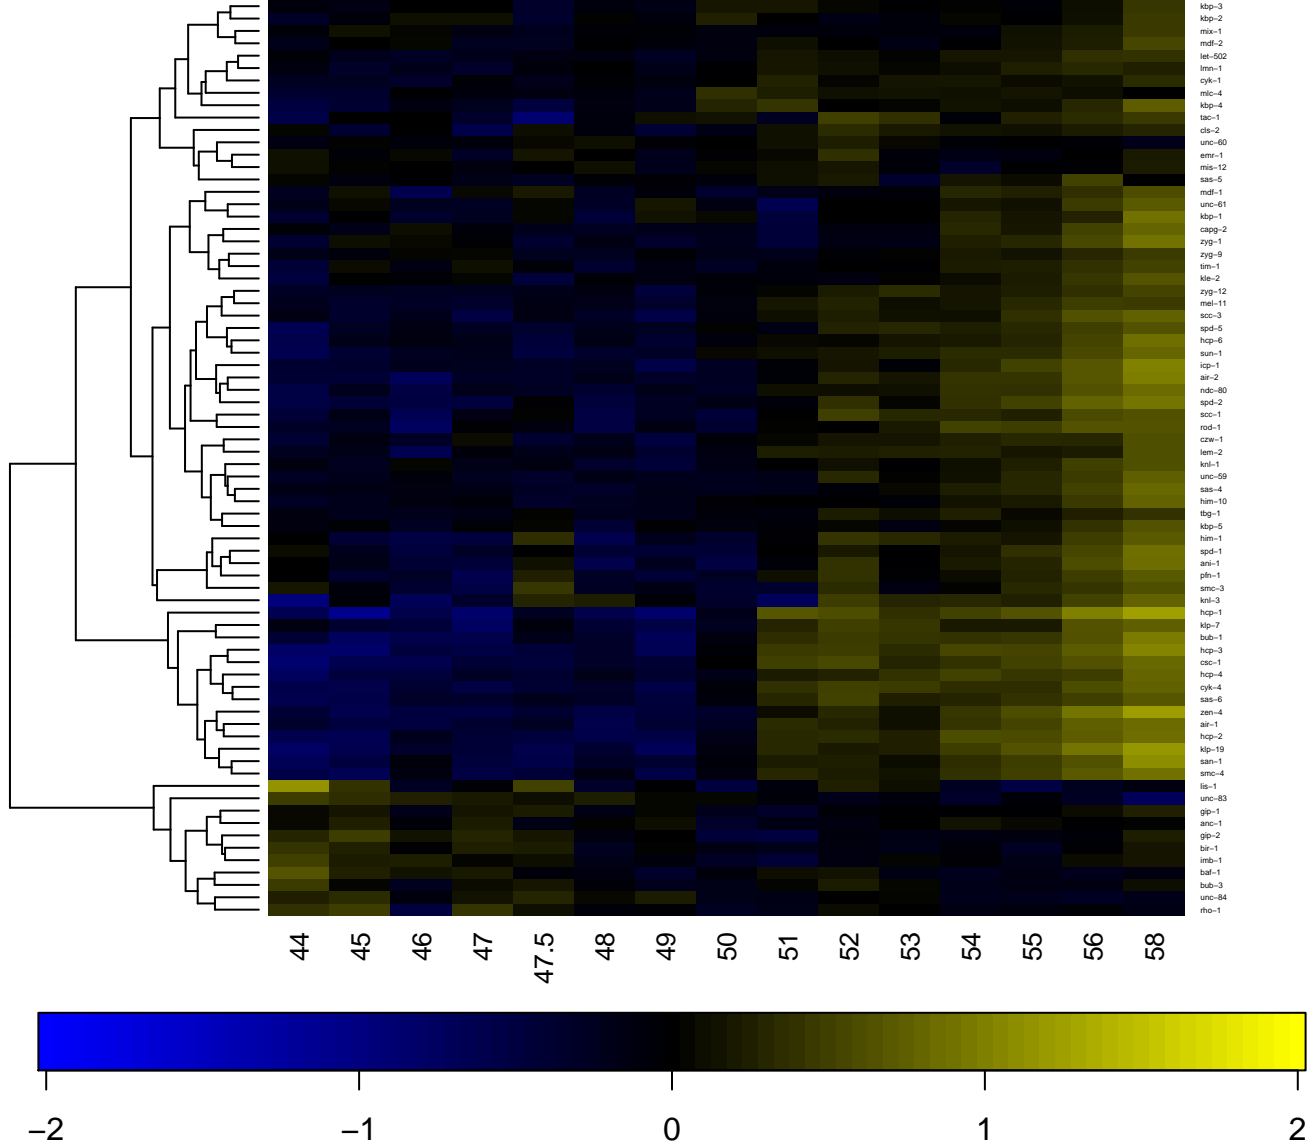



# Chemosensation

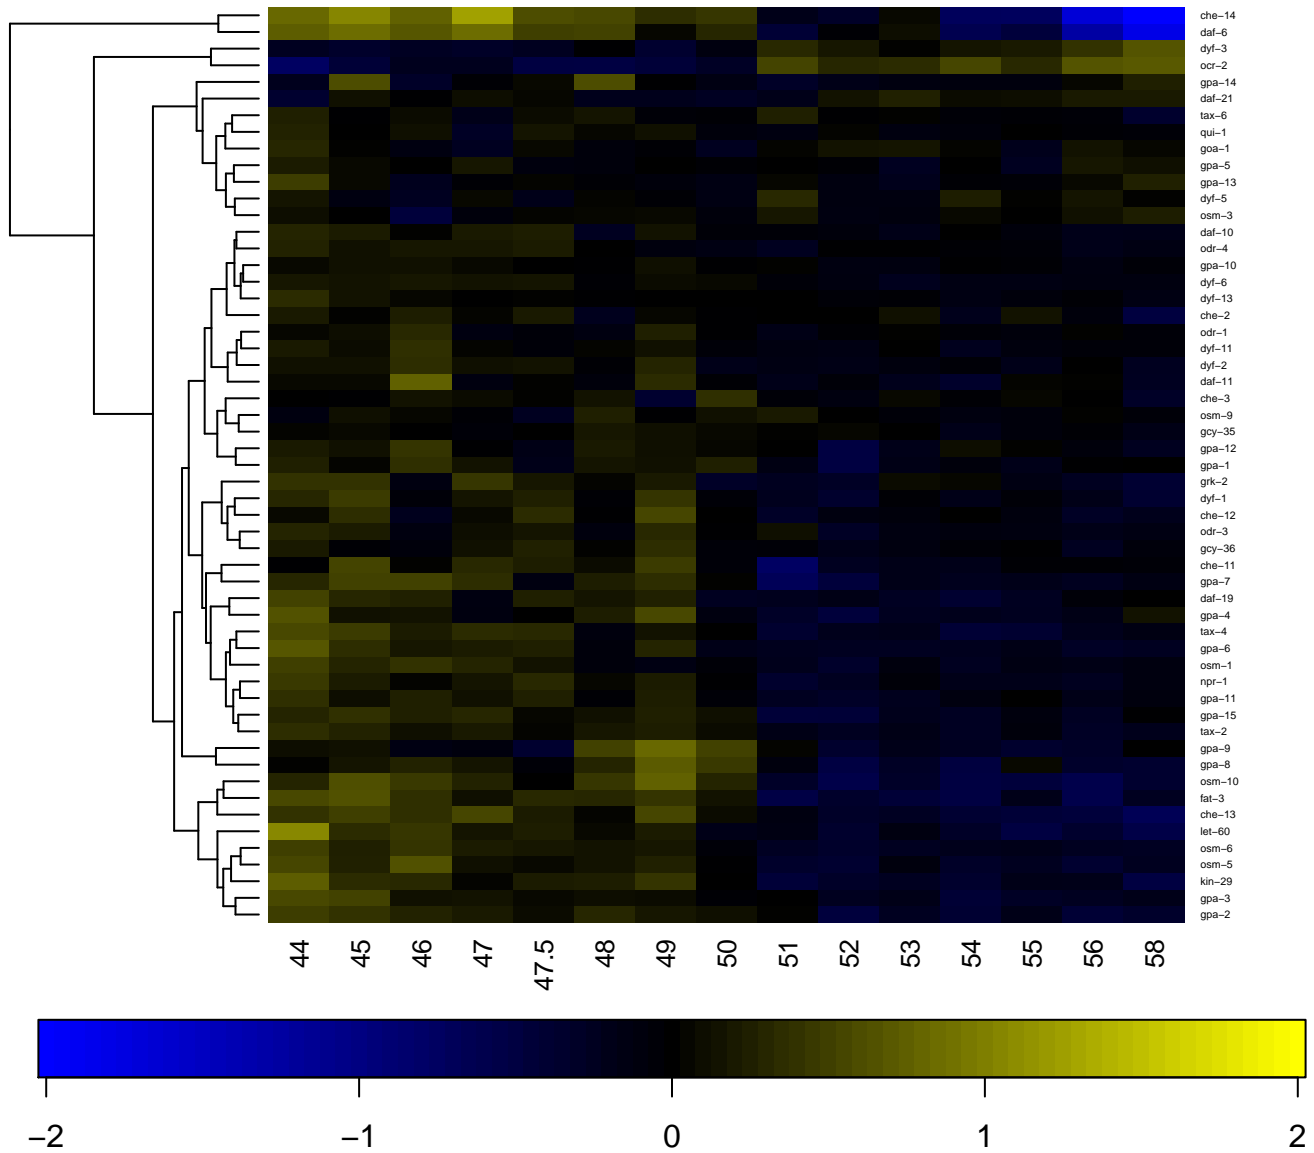

# Control of oocyte meiotic maturation and fertilization

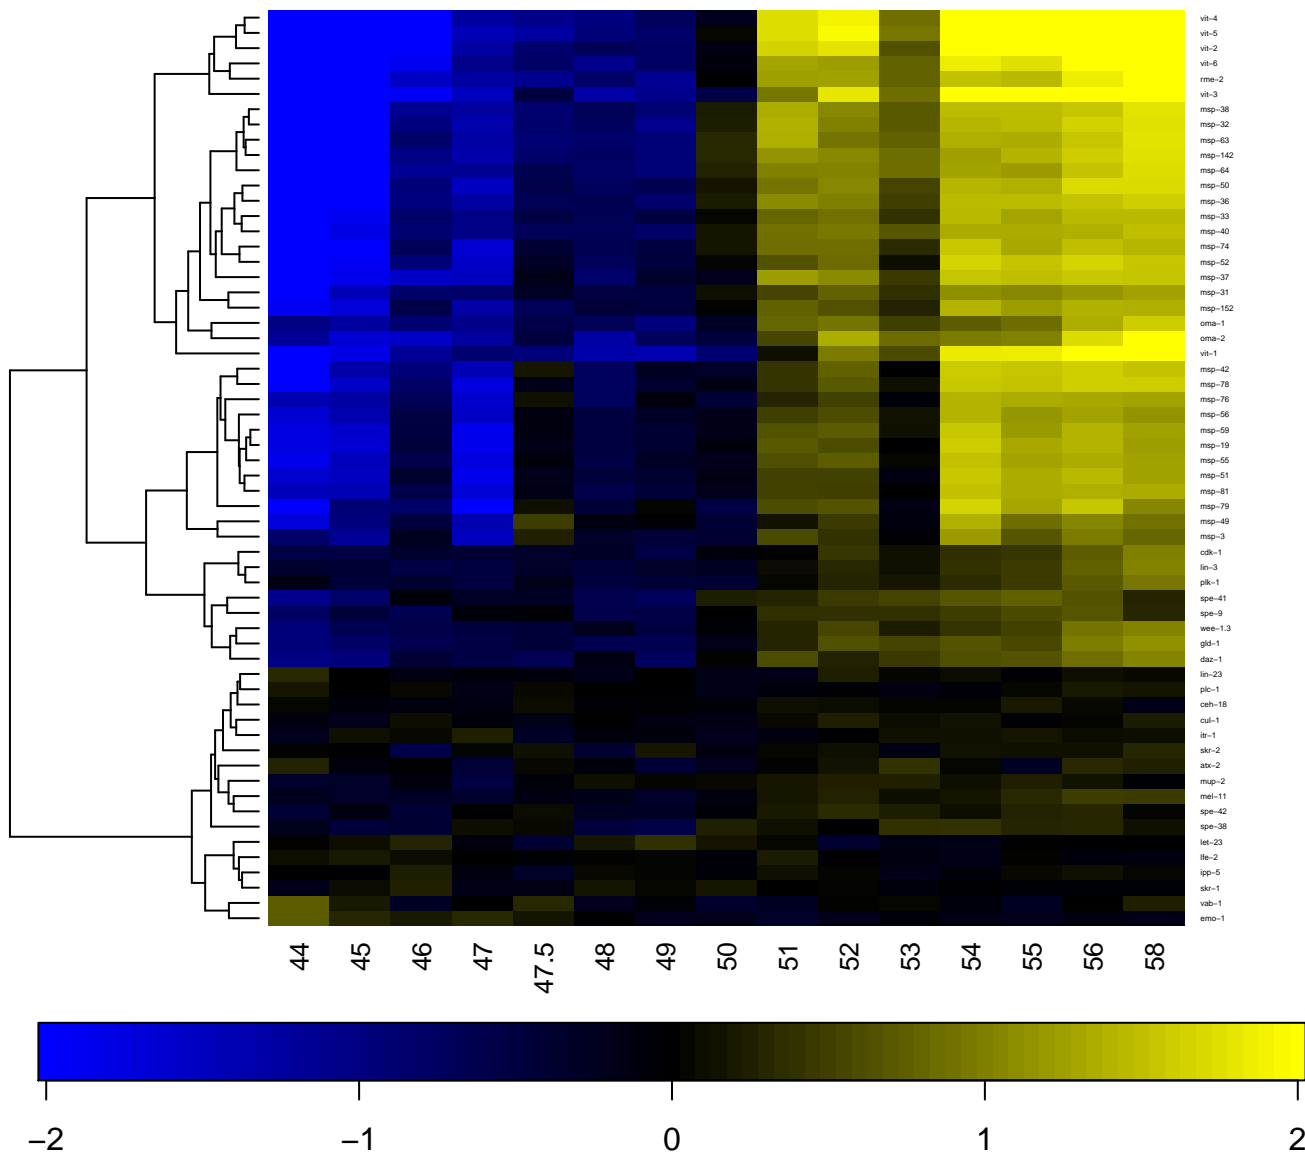

# Dauer

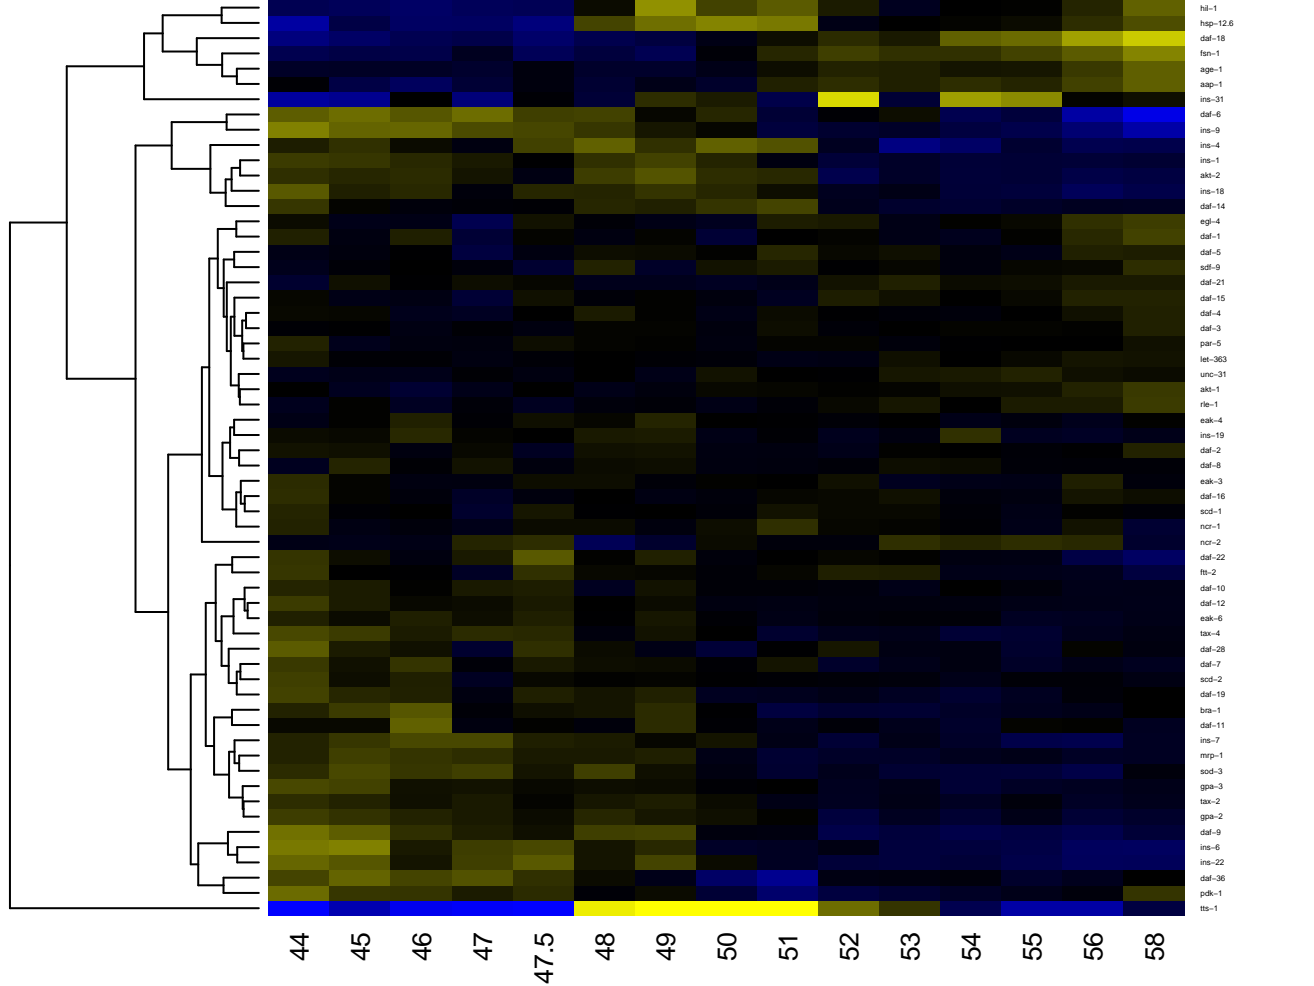

# DNA repair

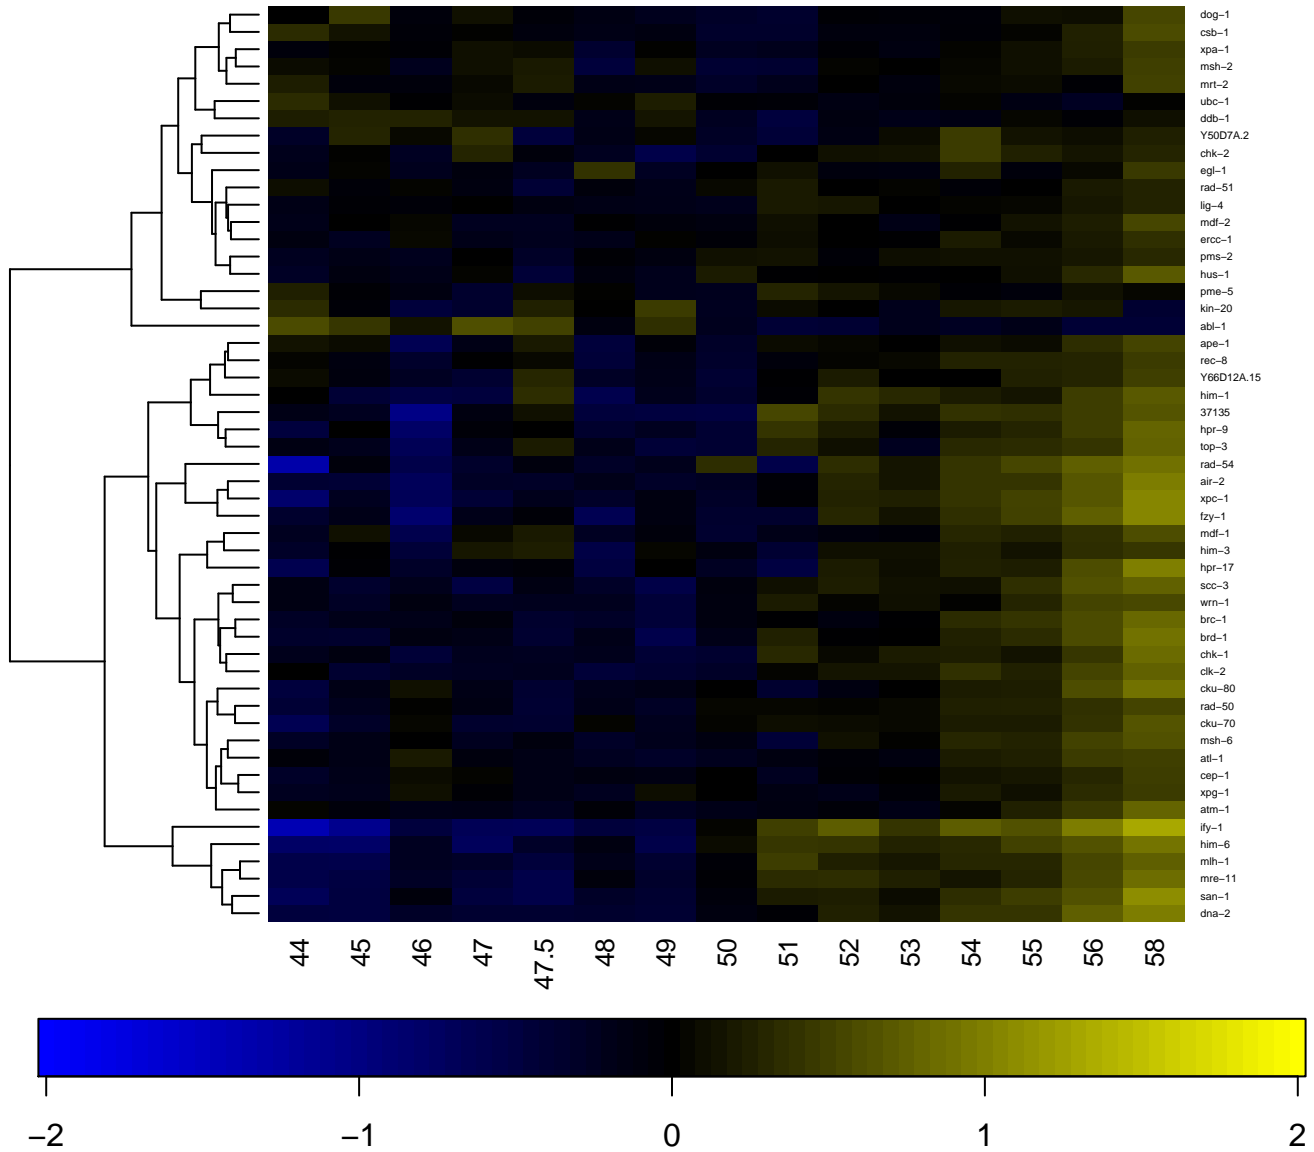



# Egg-laying

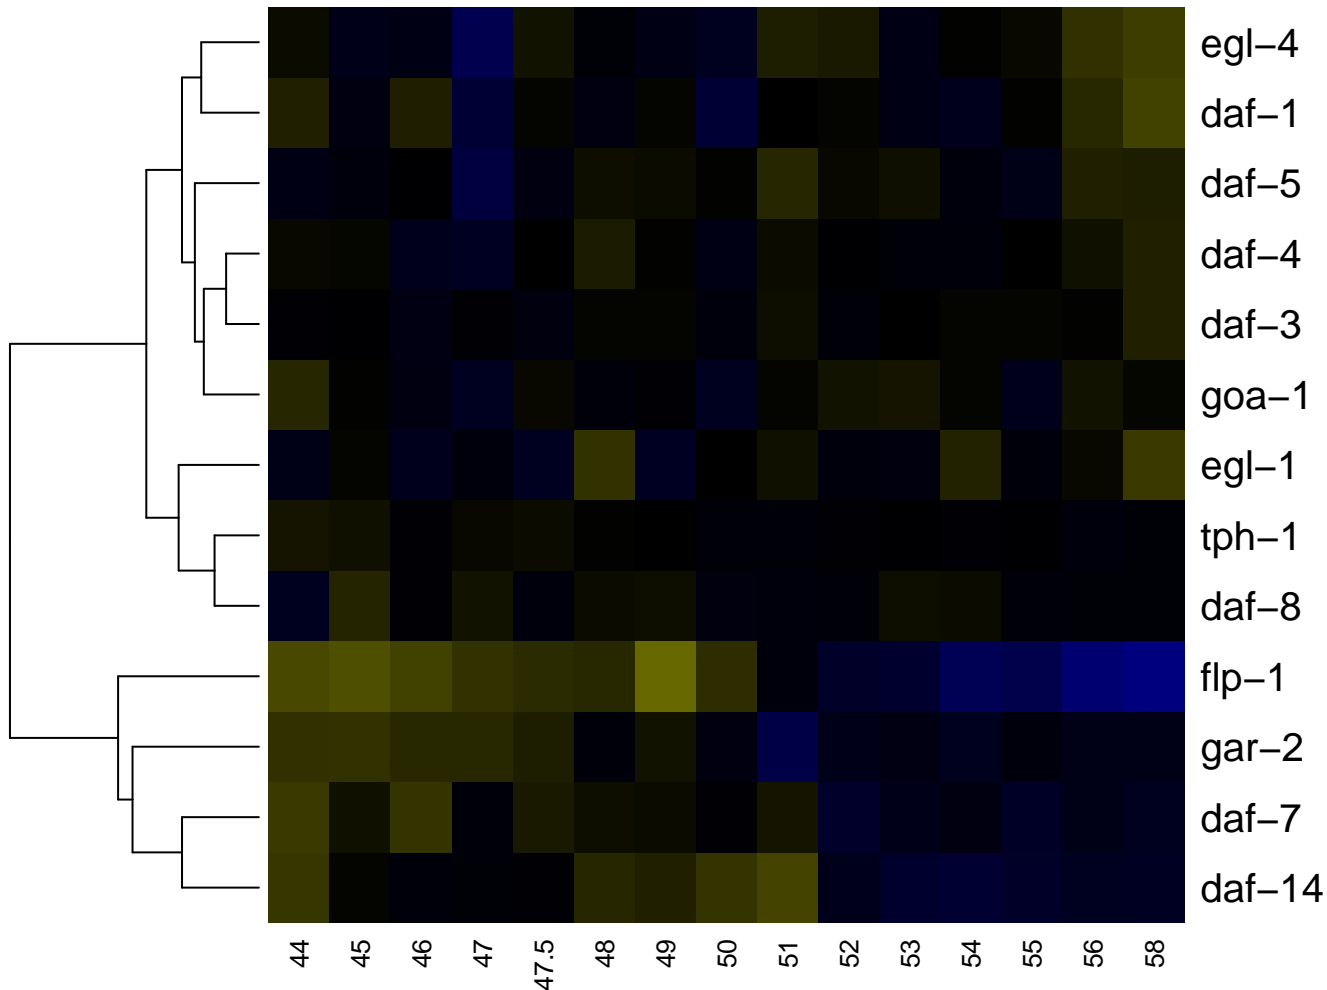

# Epidermal morphogenesis

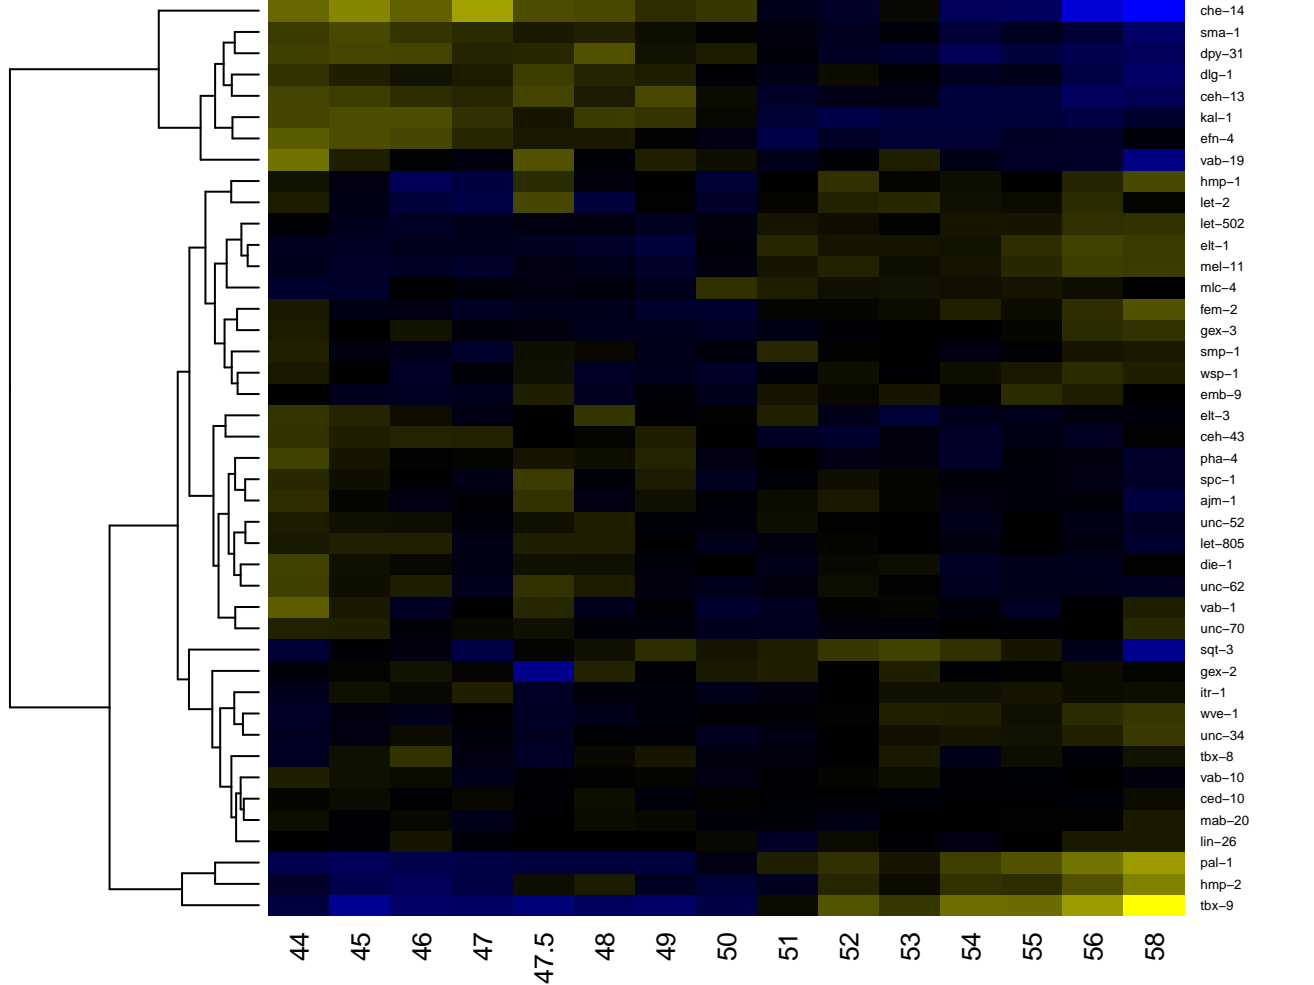

# Epithelial junctions and attachments

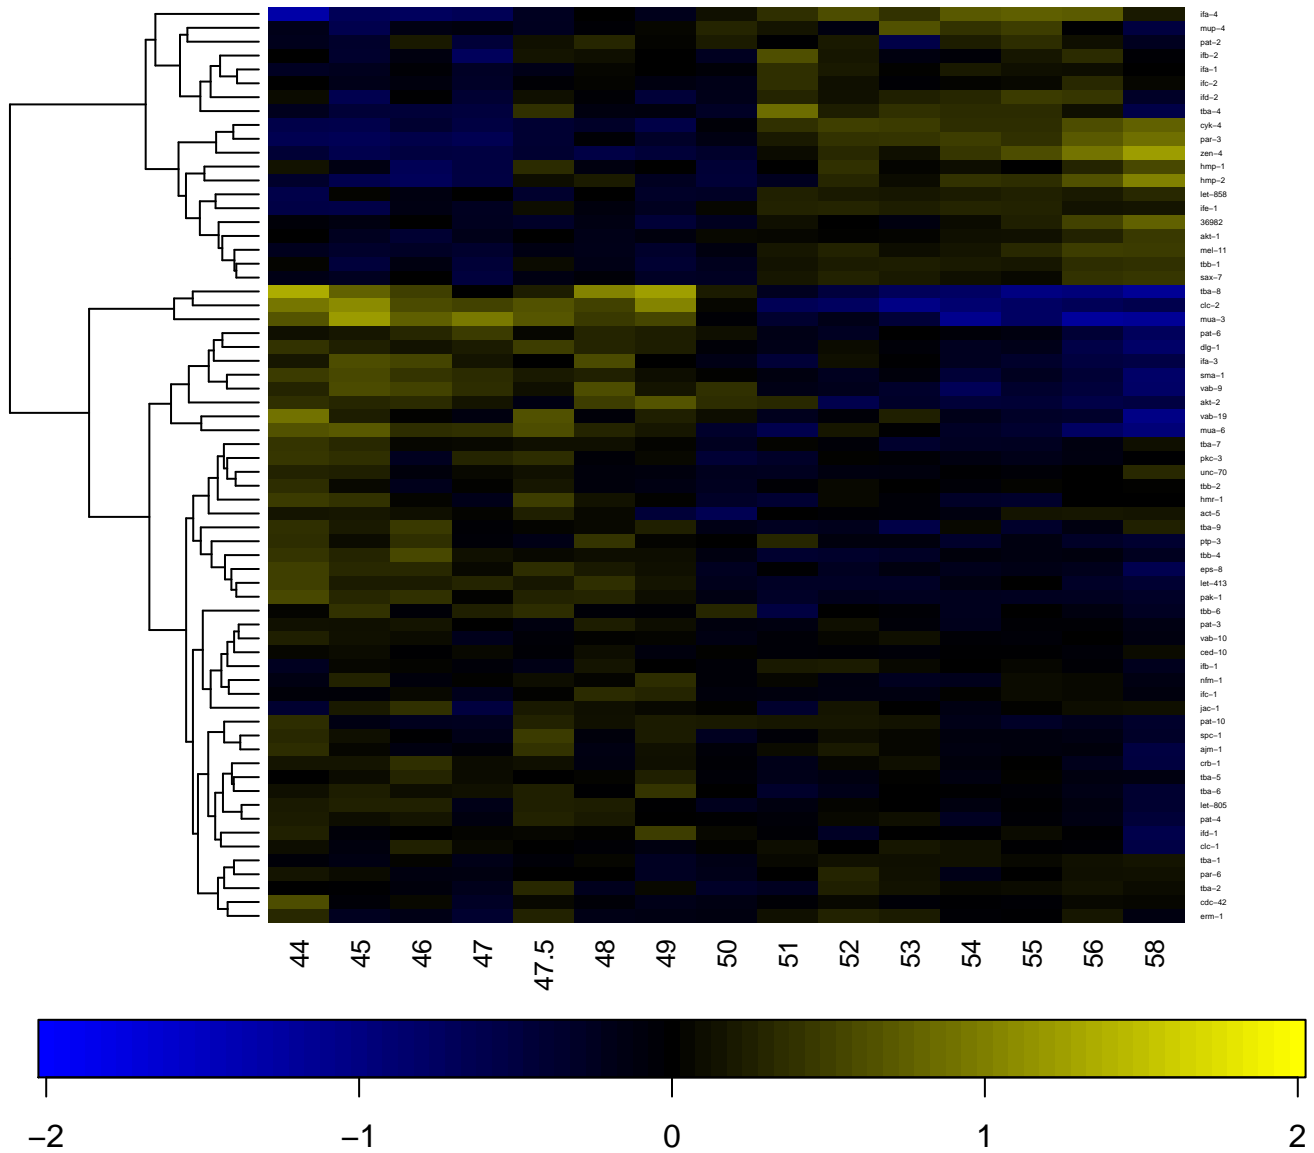

# GABA

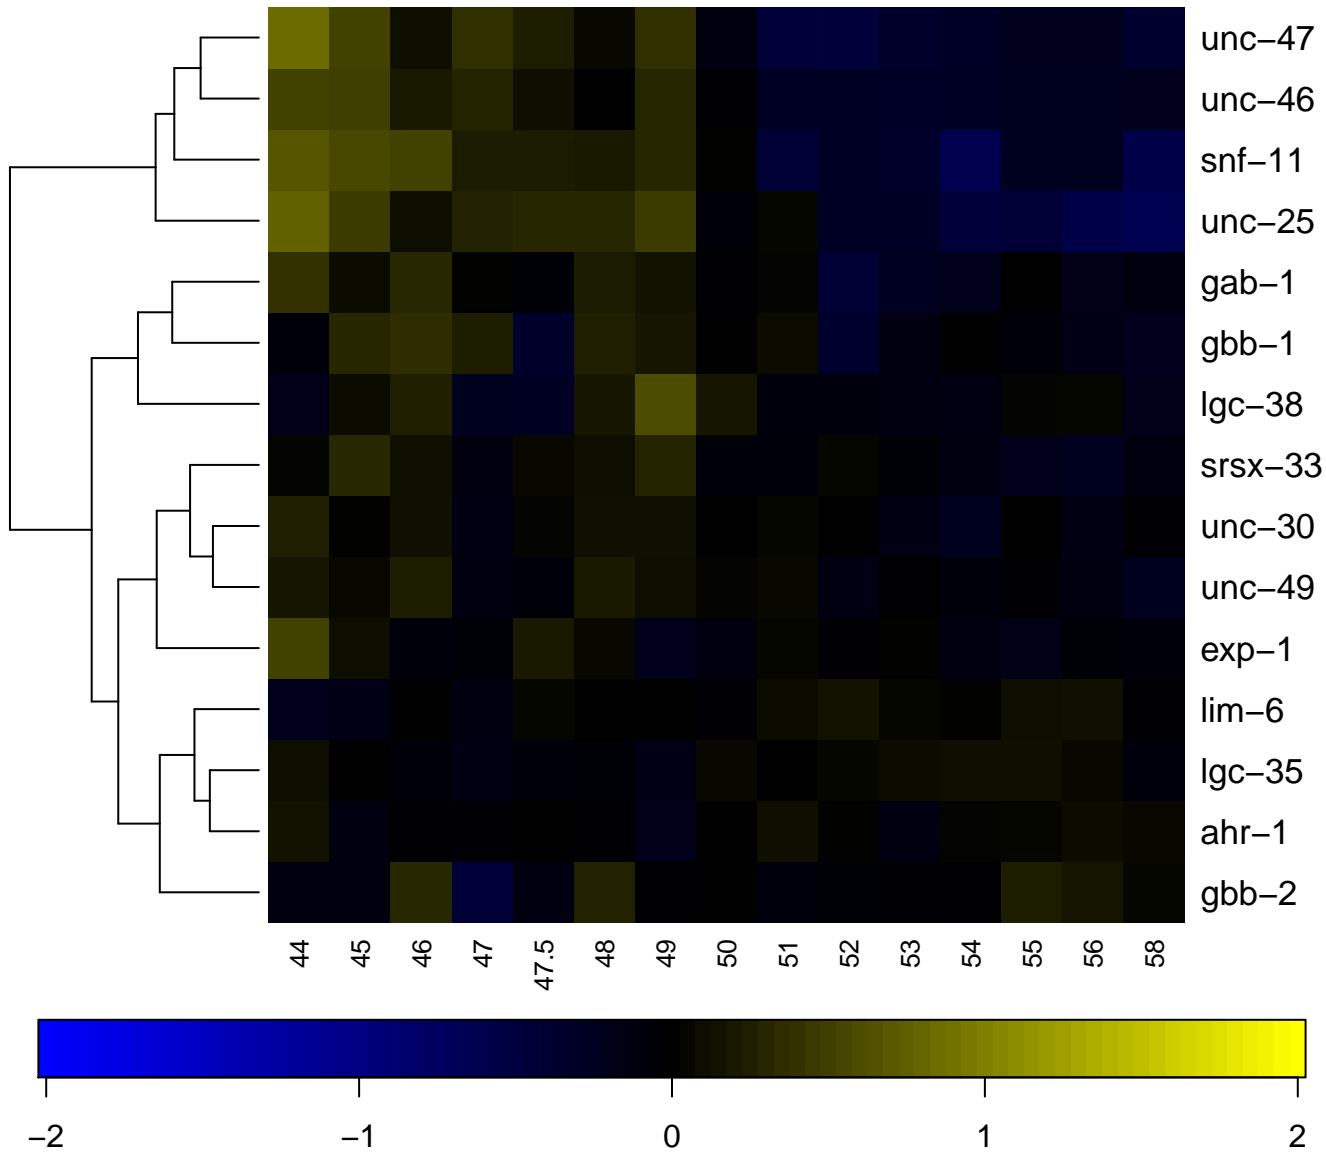

# Gastrulation

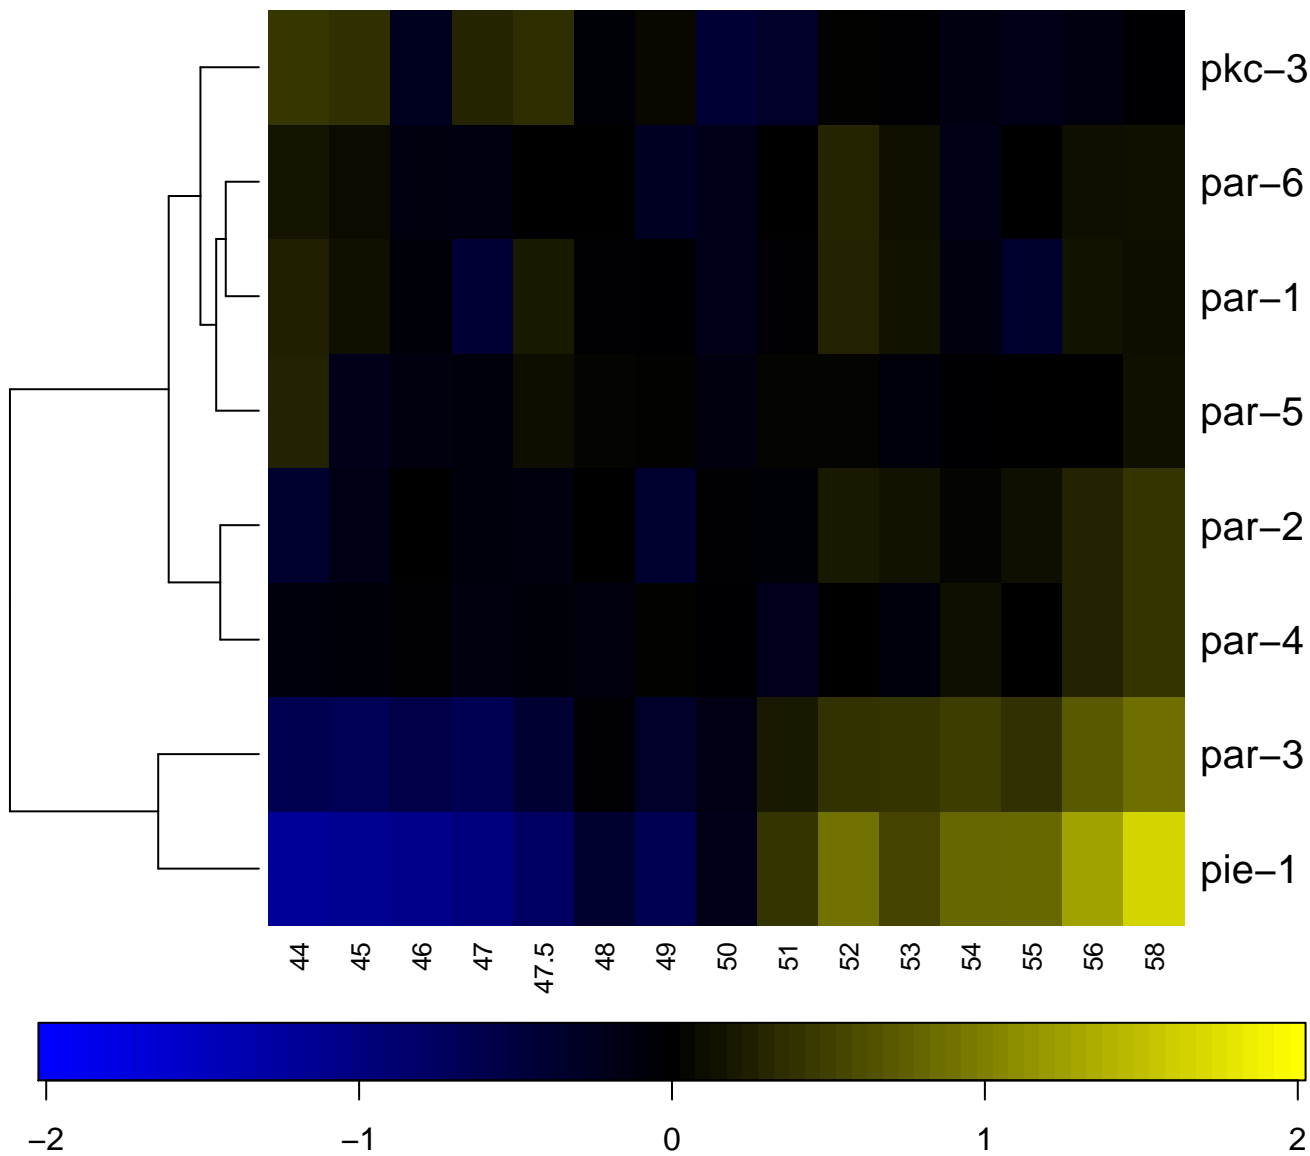

# Germline chromatin

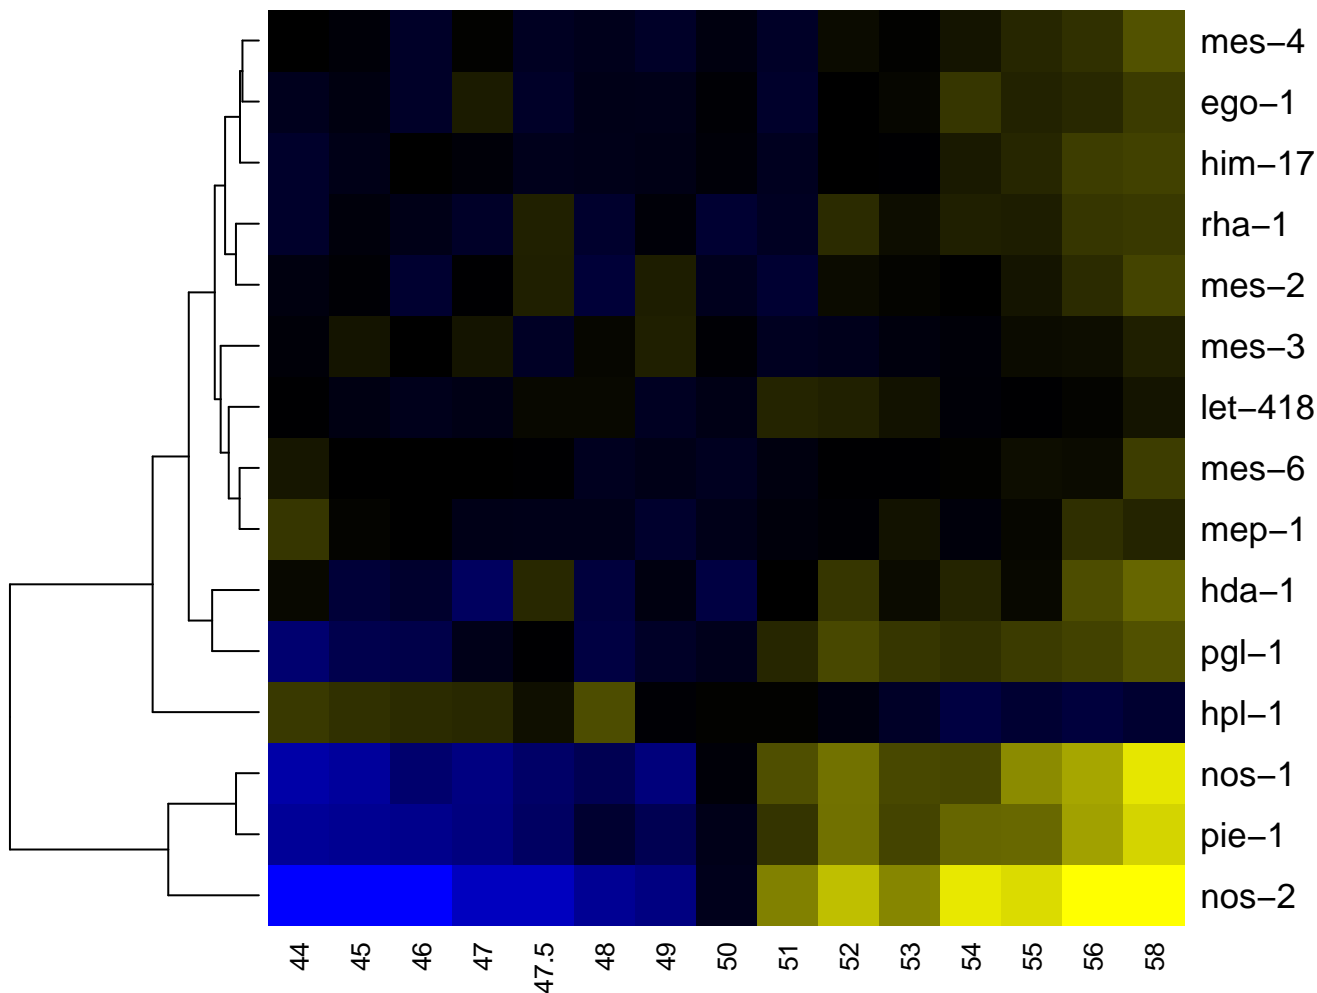

# Germline proliferation and its control

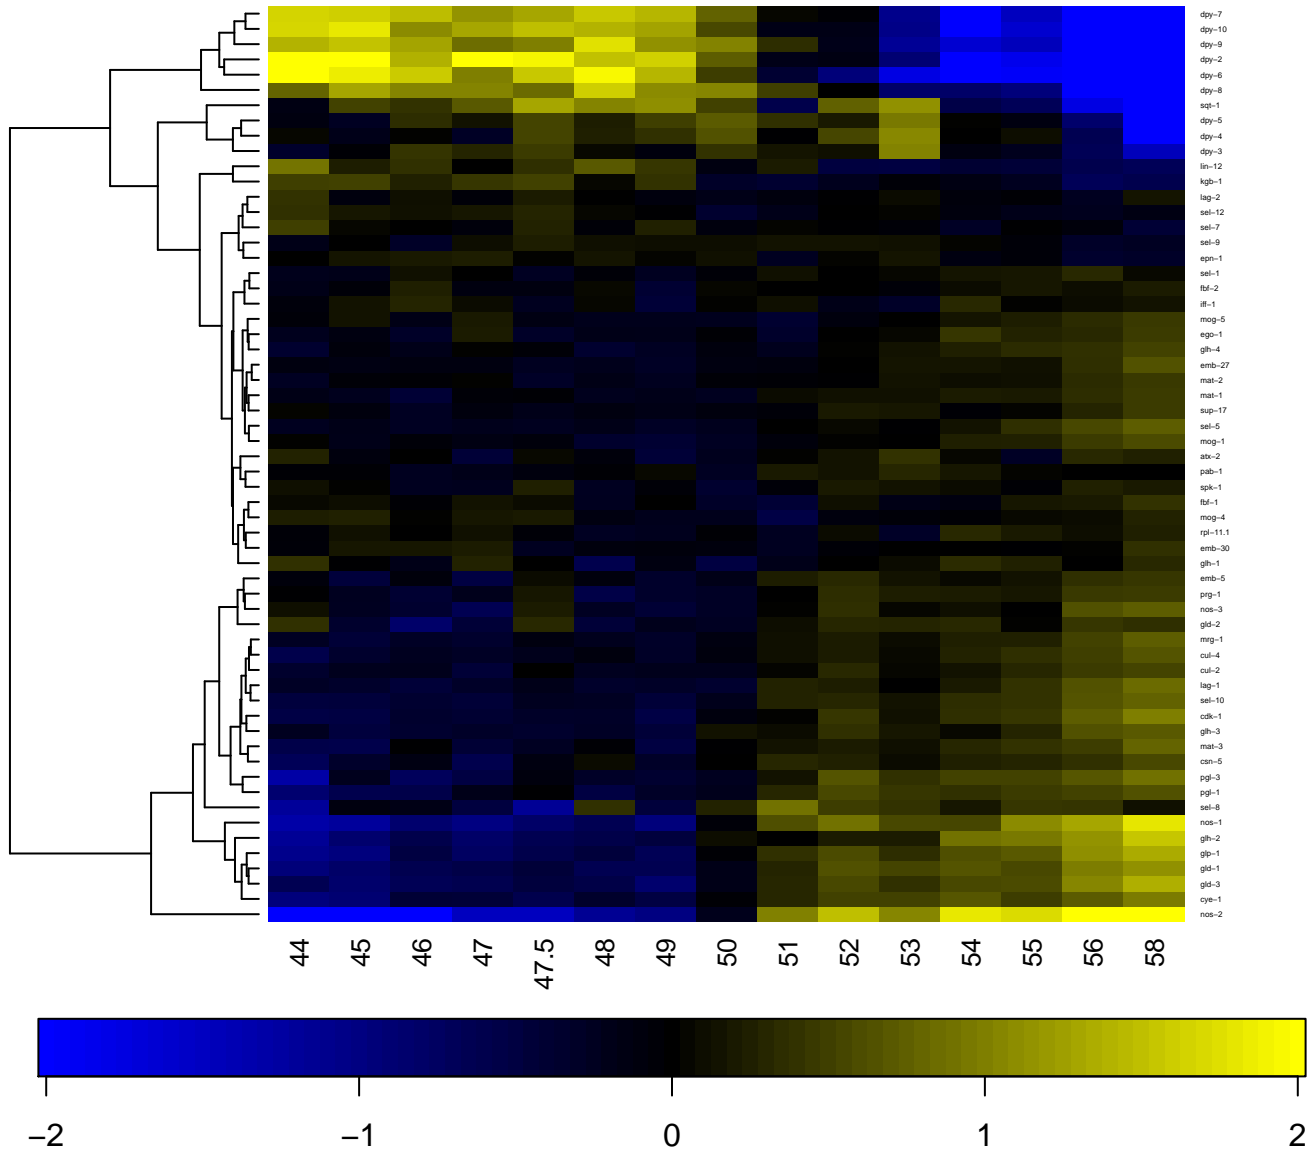

# Germline survival and apoptosis

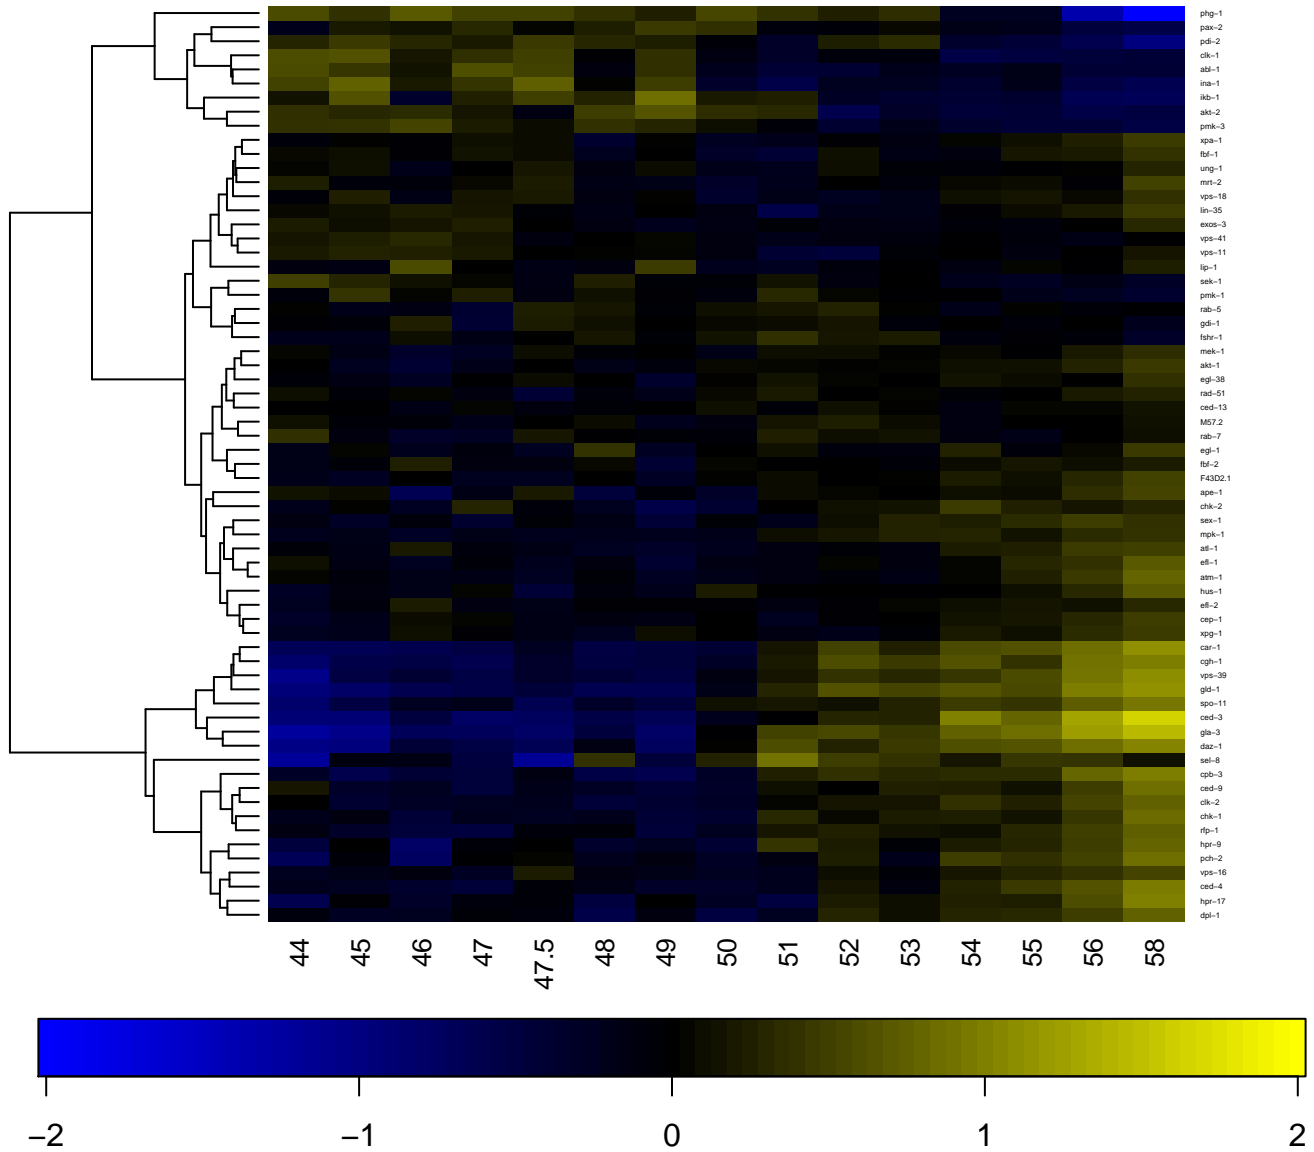



# Hermaphrodite cell-fate specification

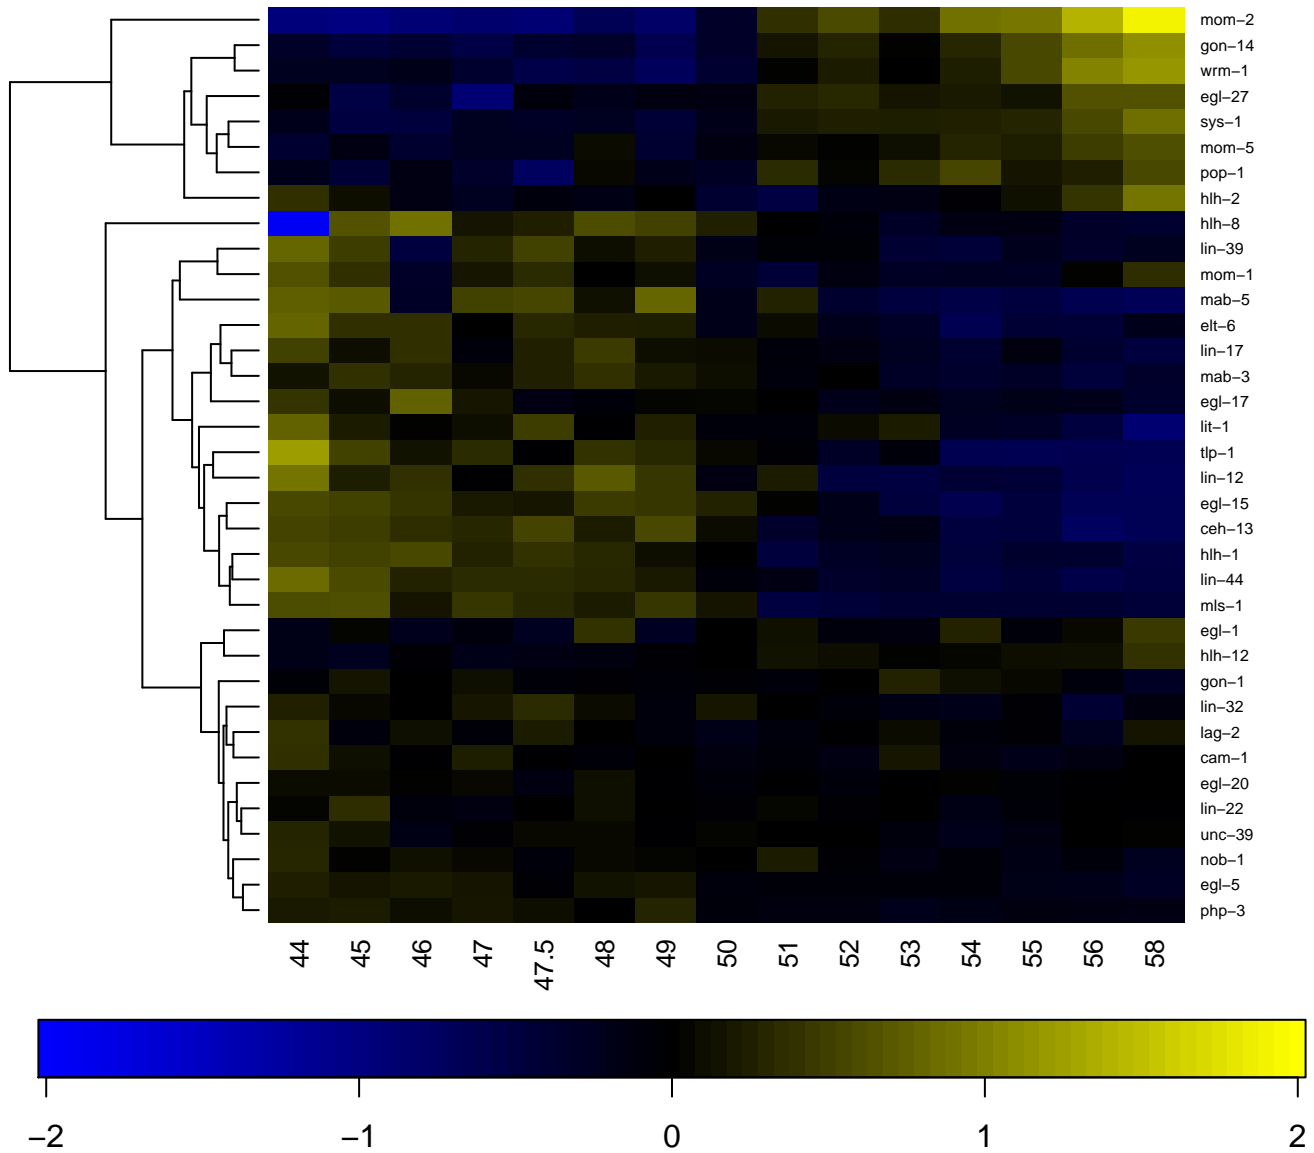



# Homologs of the Hh signalling network in *C. elegans*

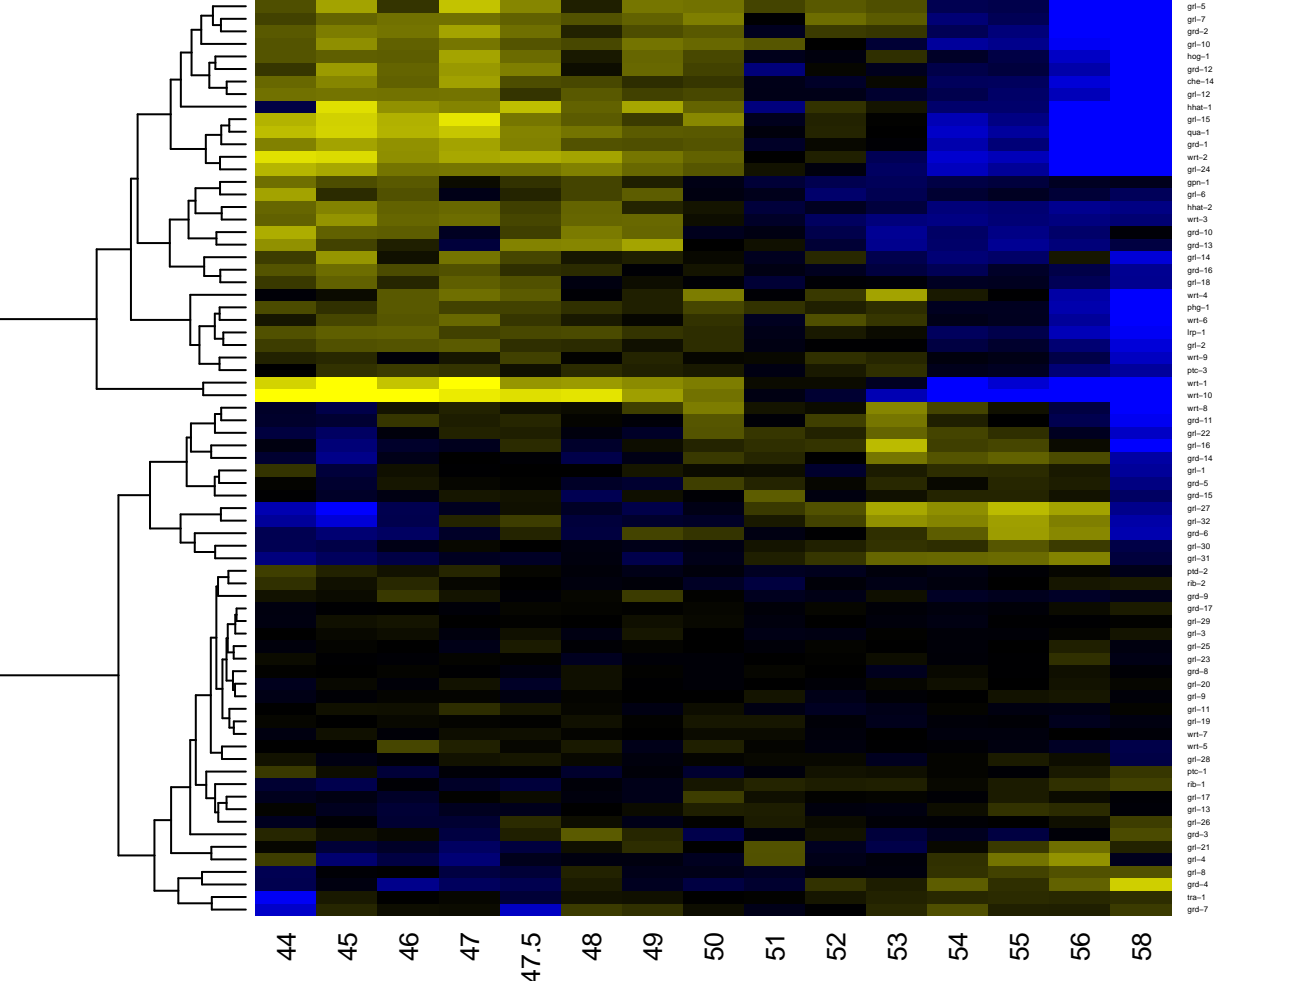

# Intermediary metabolism

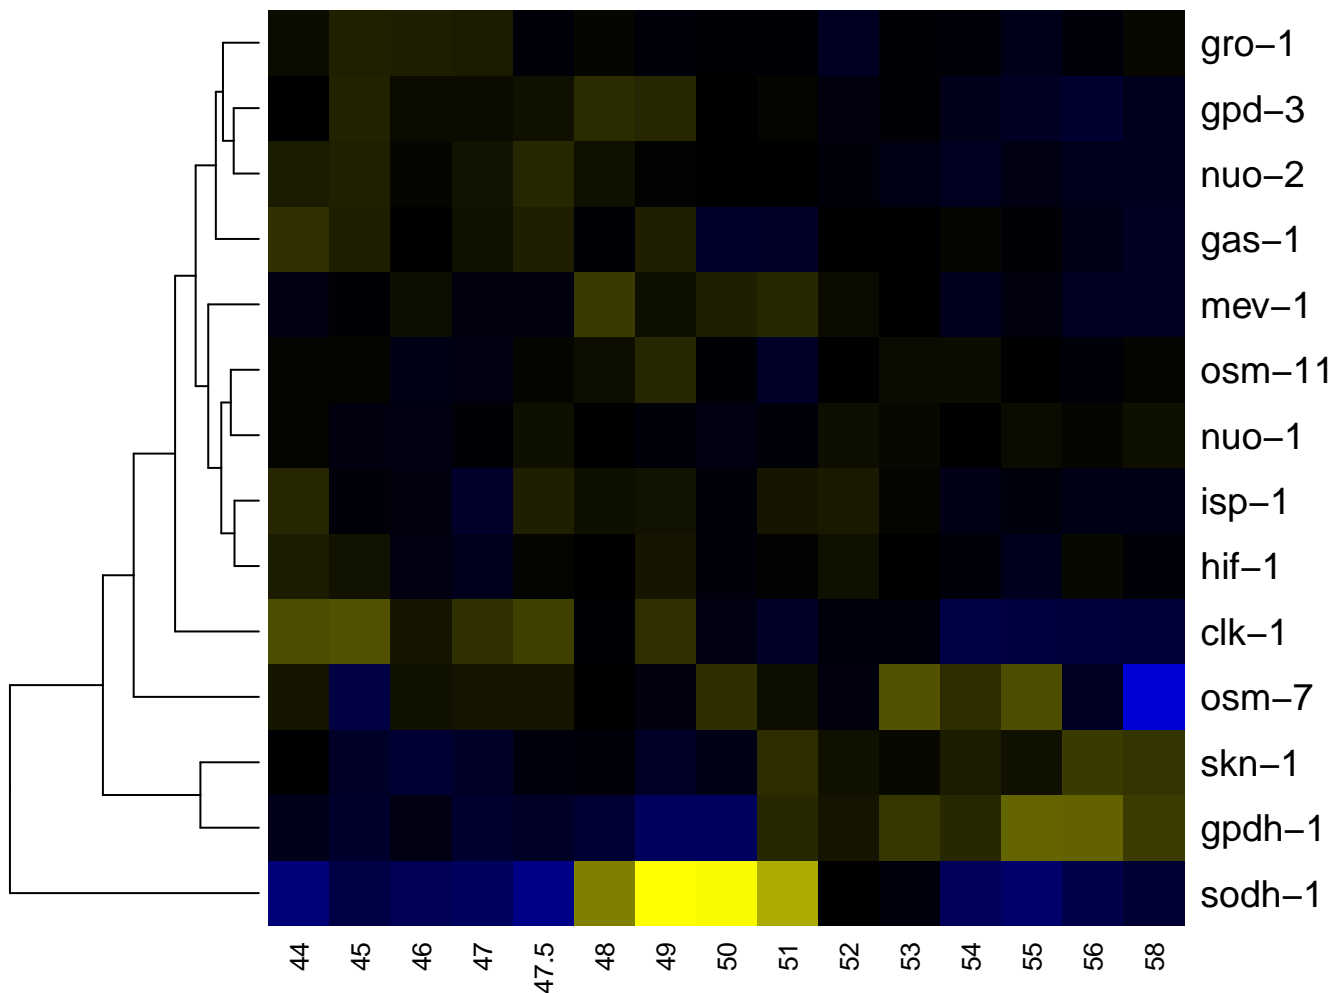

# Intracellular trafficking

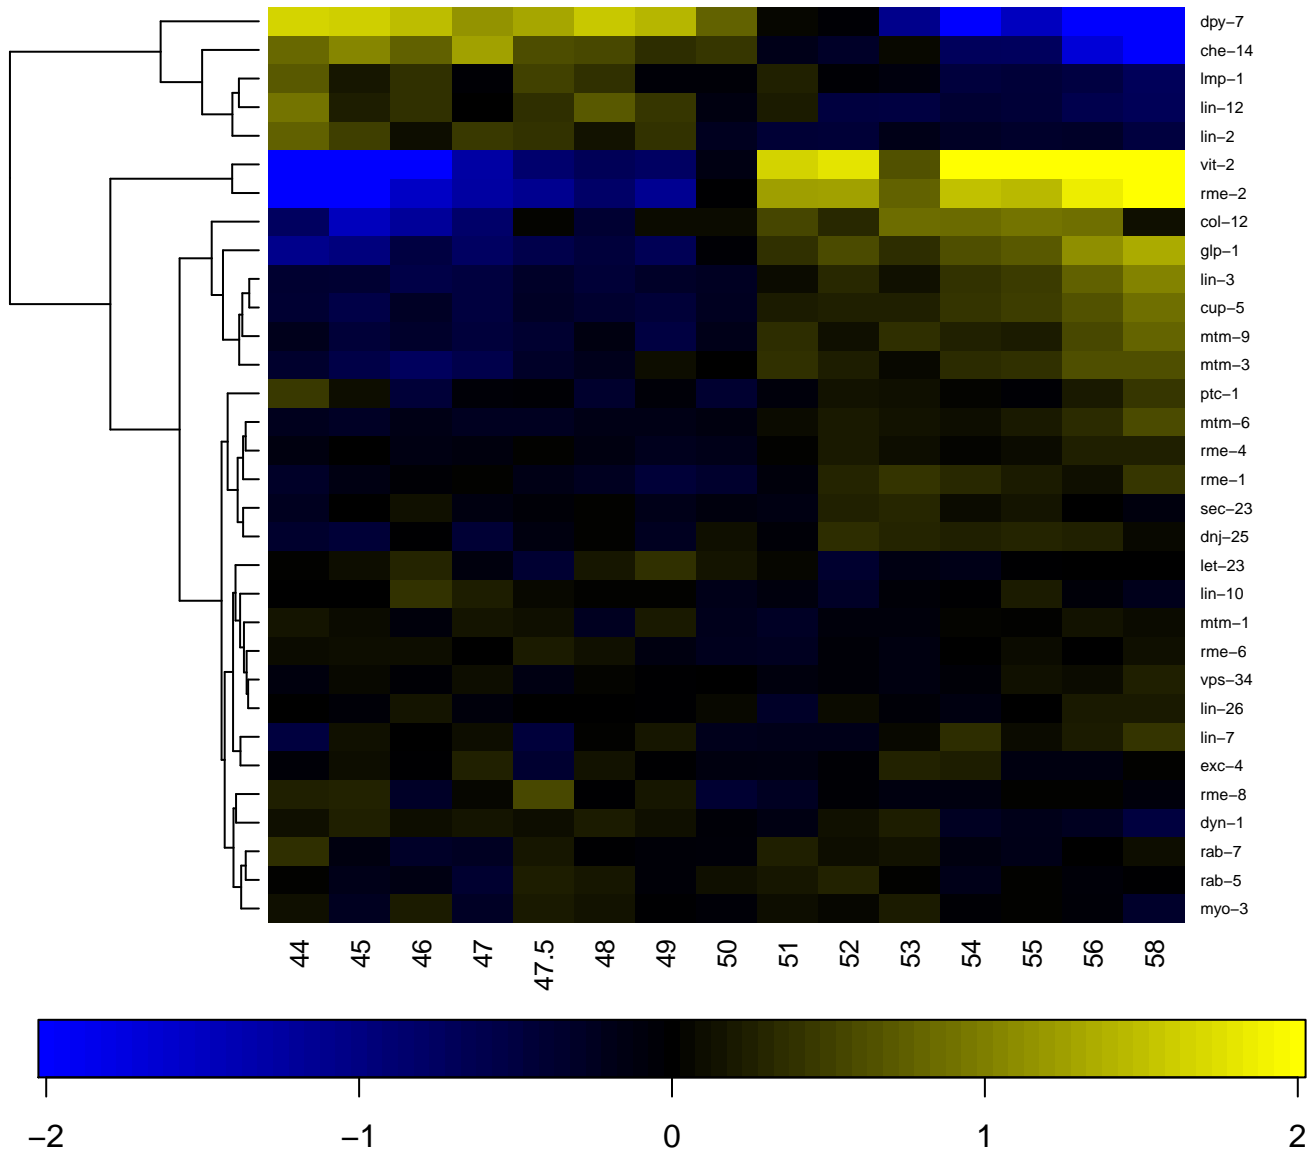



# LIN-12/Notch signaling in *C. elegans*

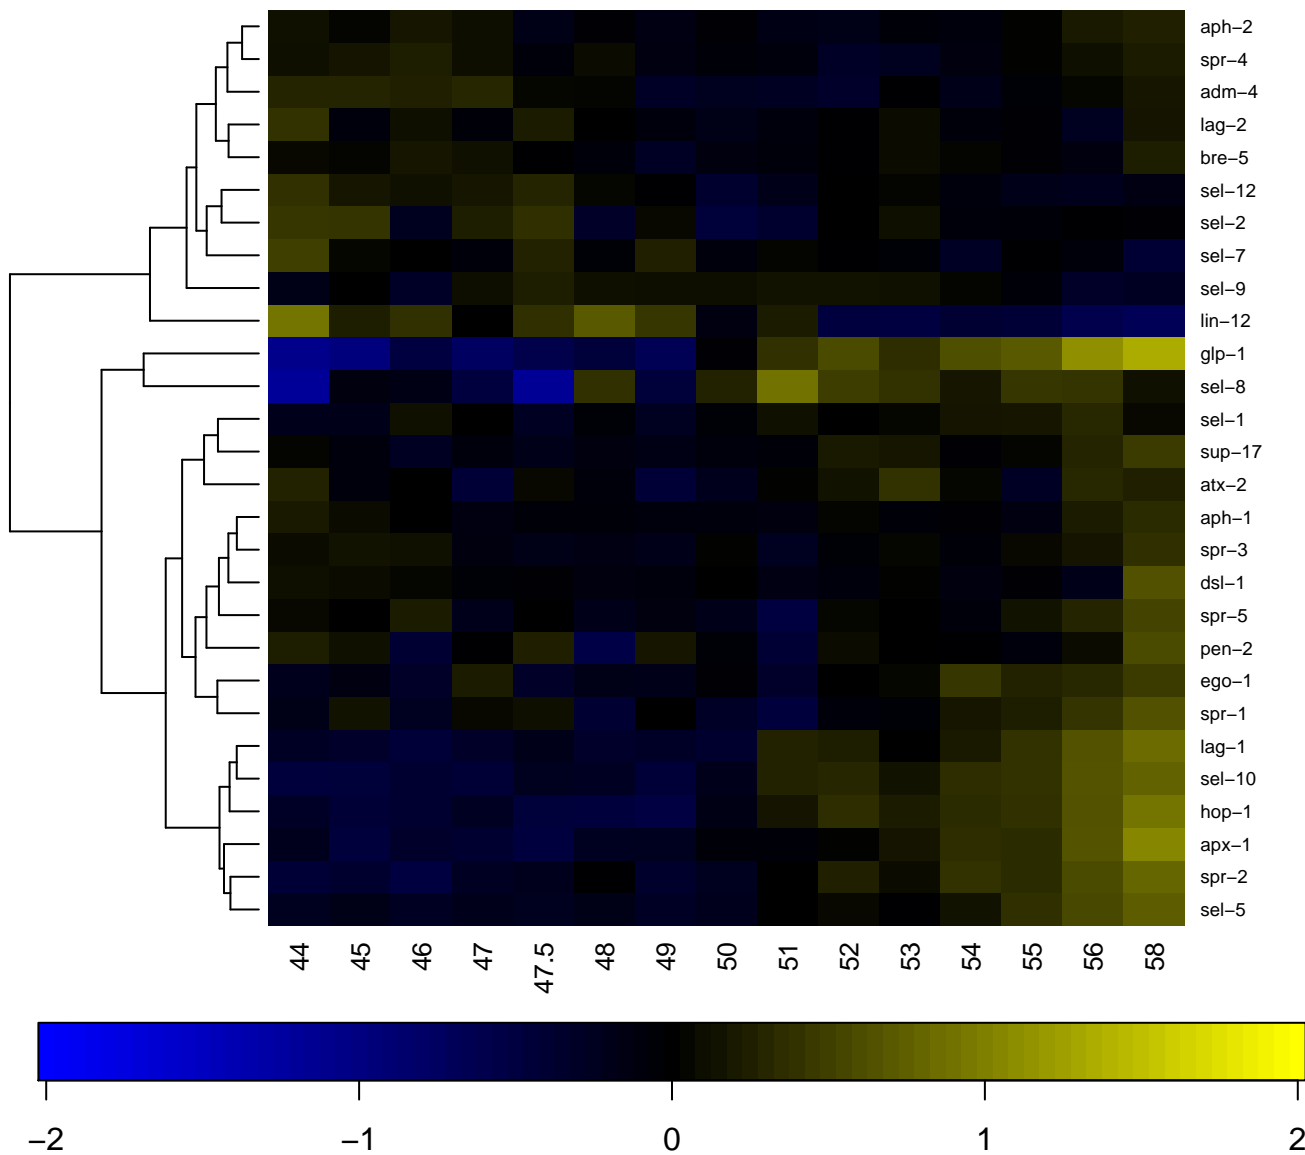

# Male development

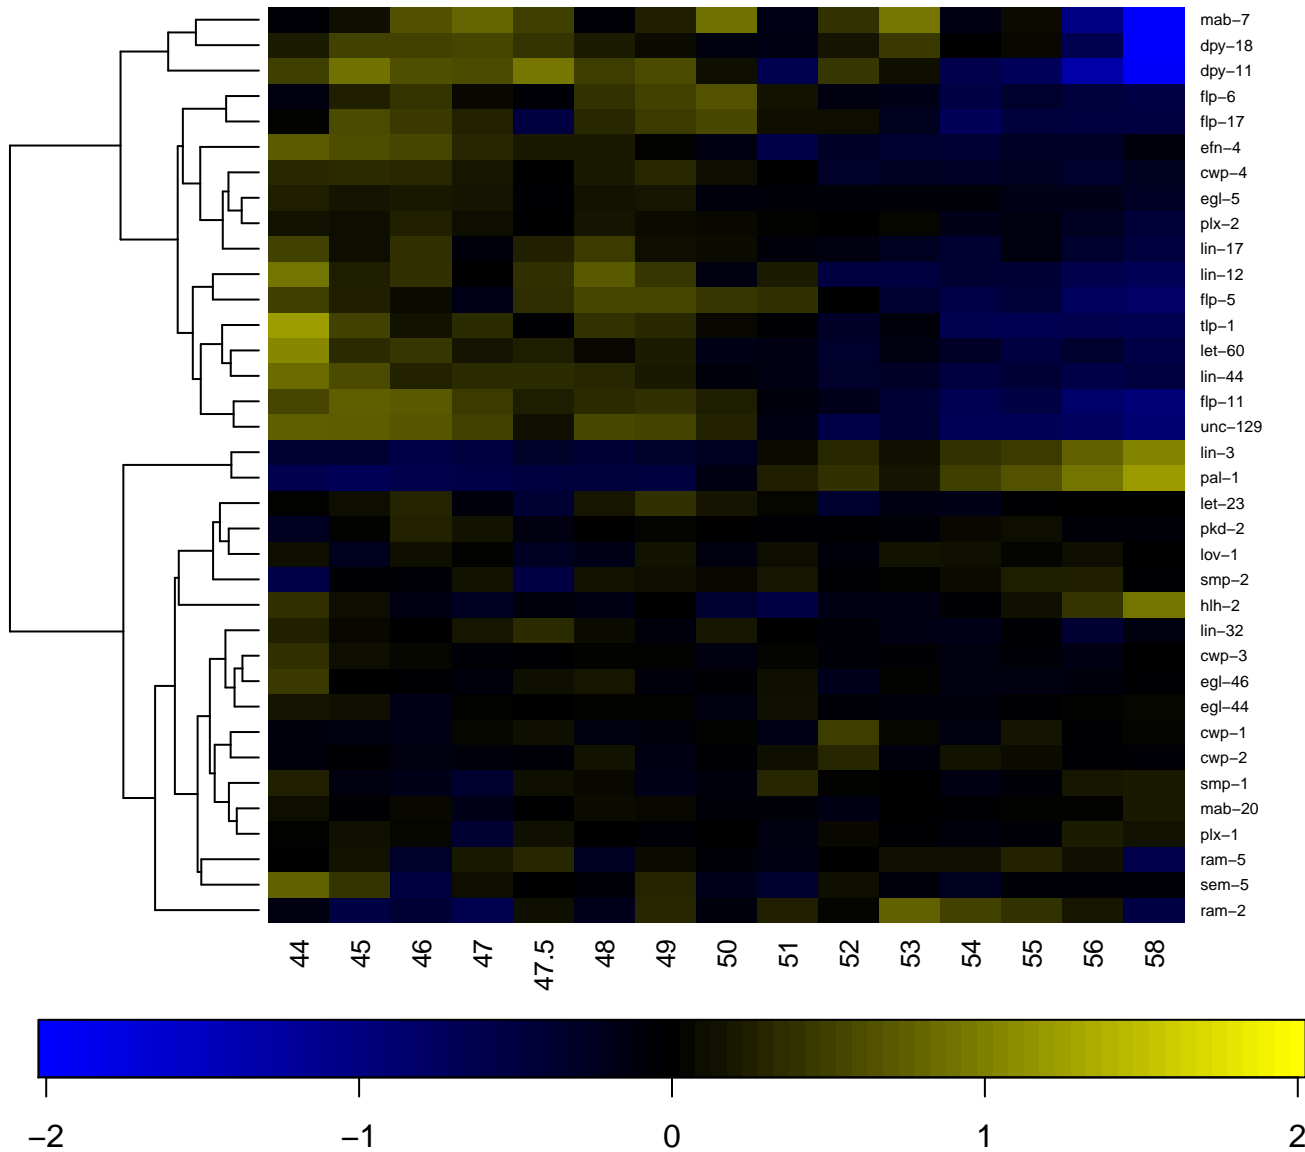



# Male mating behavior

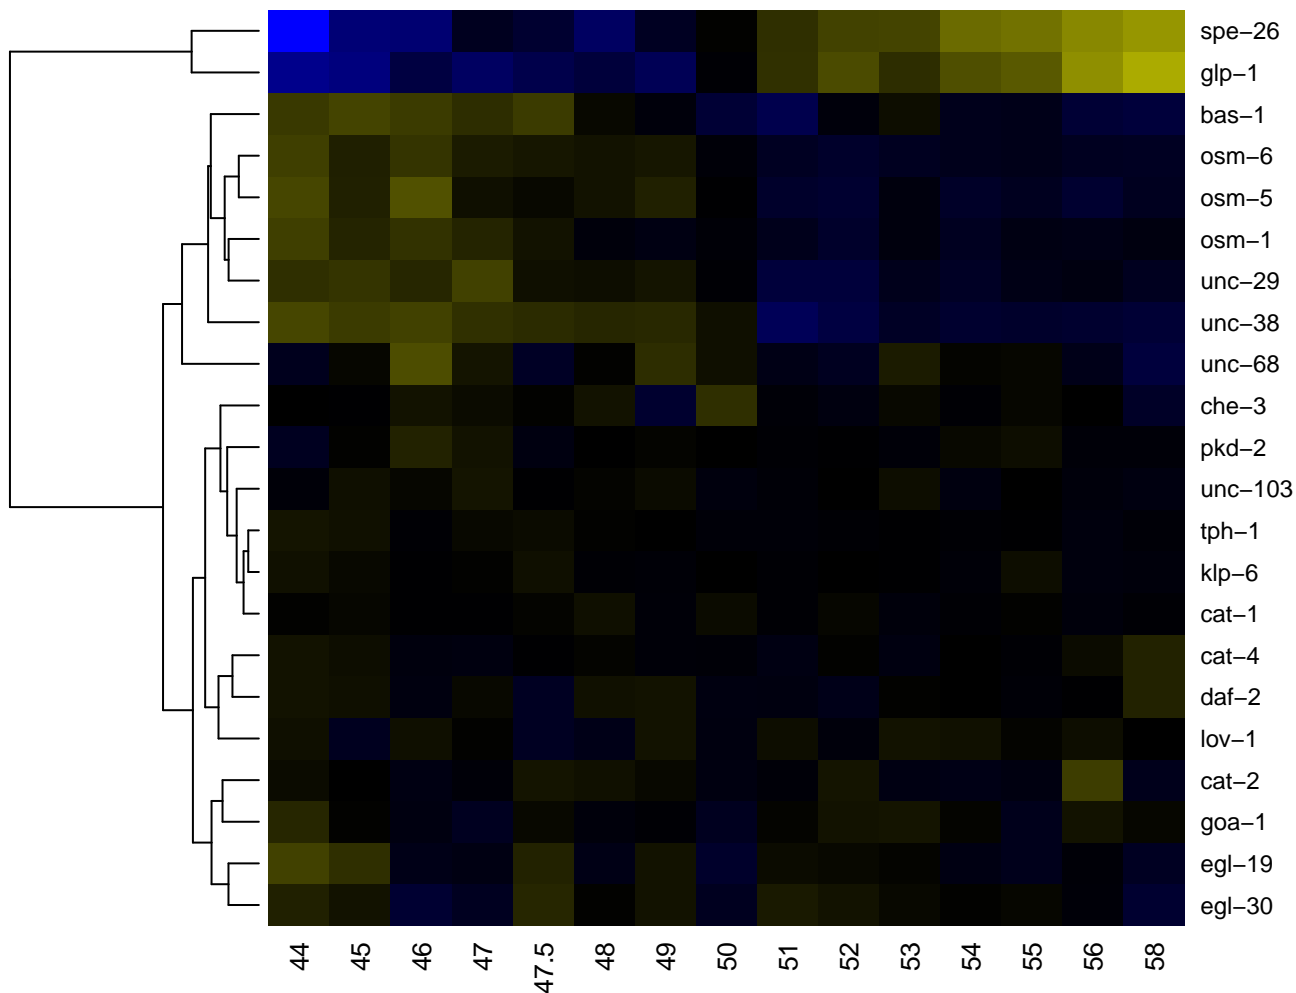

# Mechanism and regulation of translation in *C. elegans*

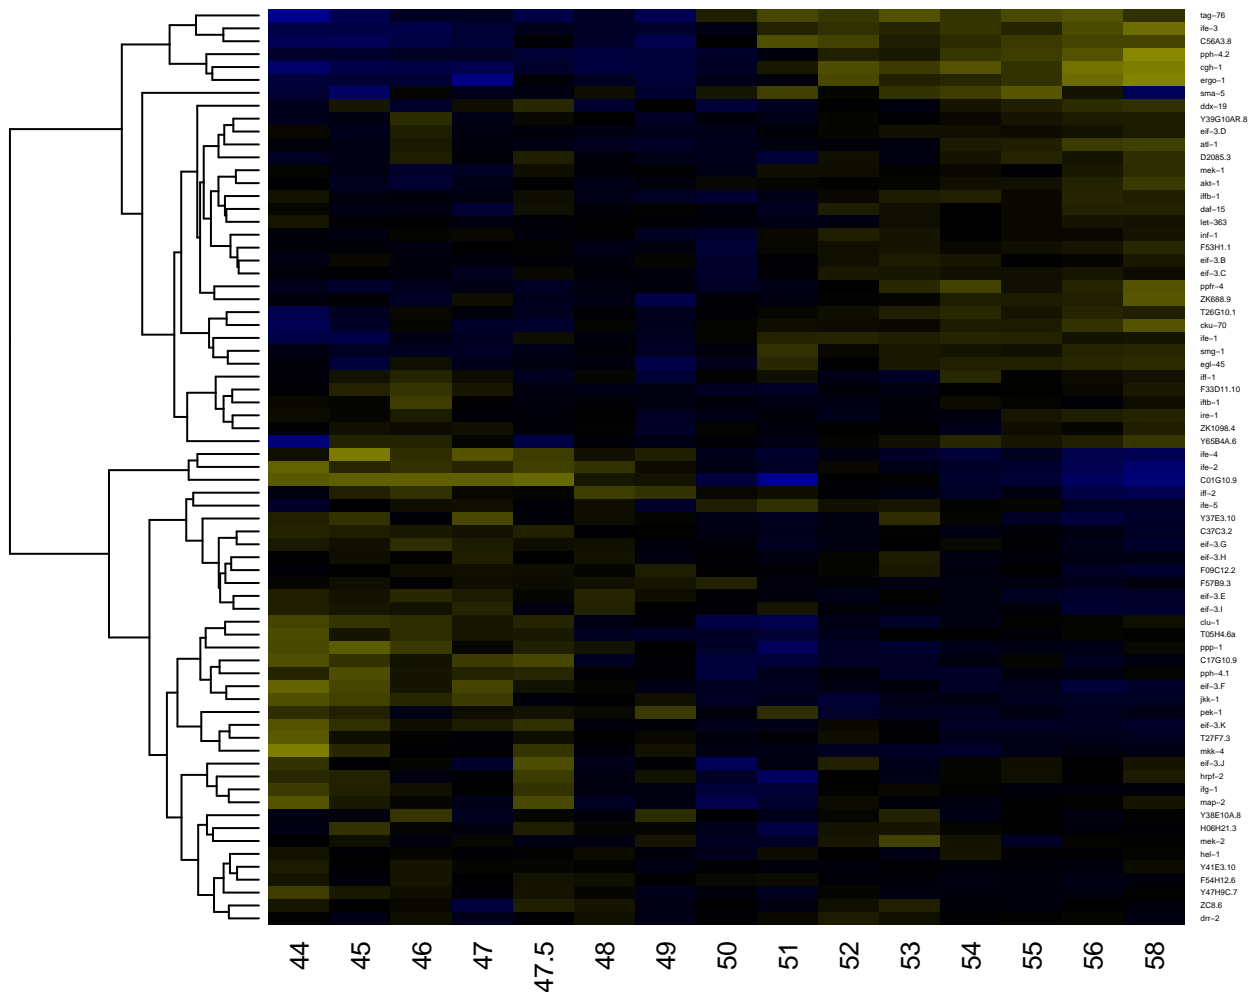

# Mechanosensation

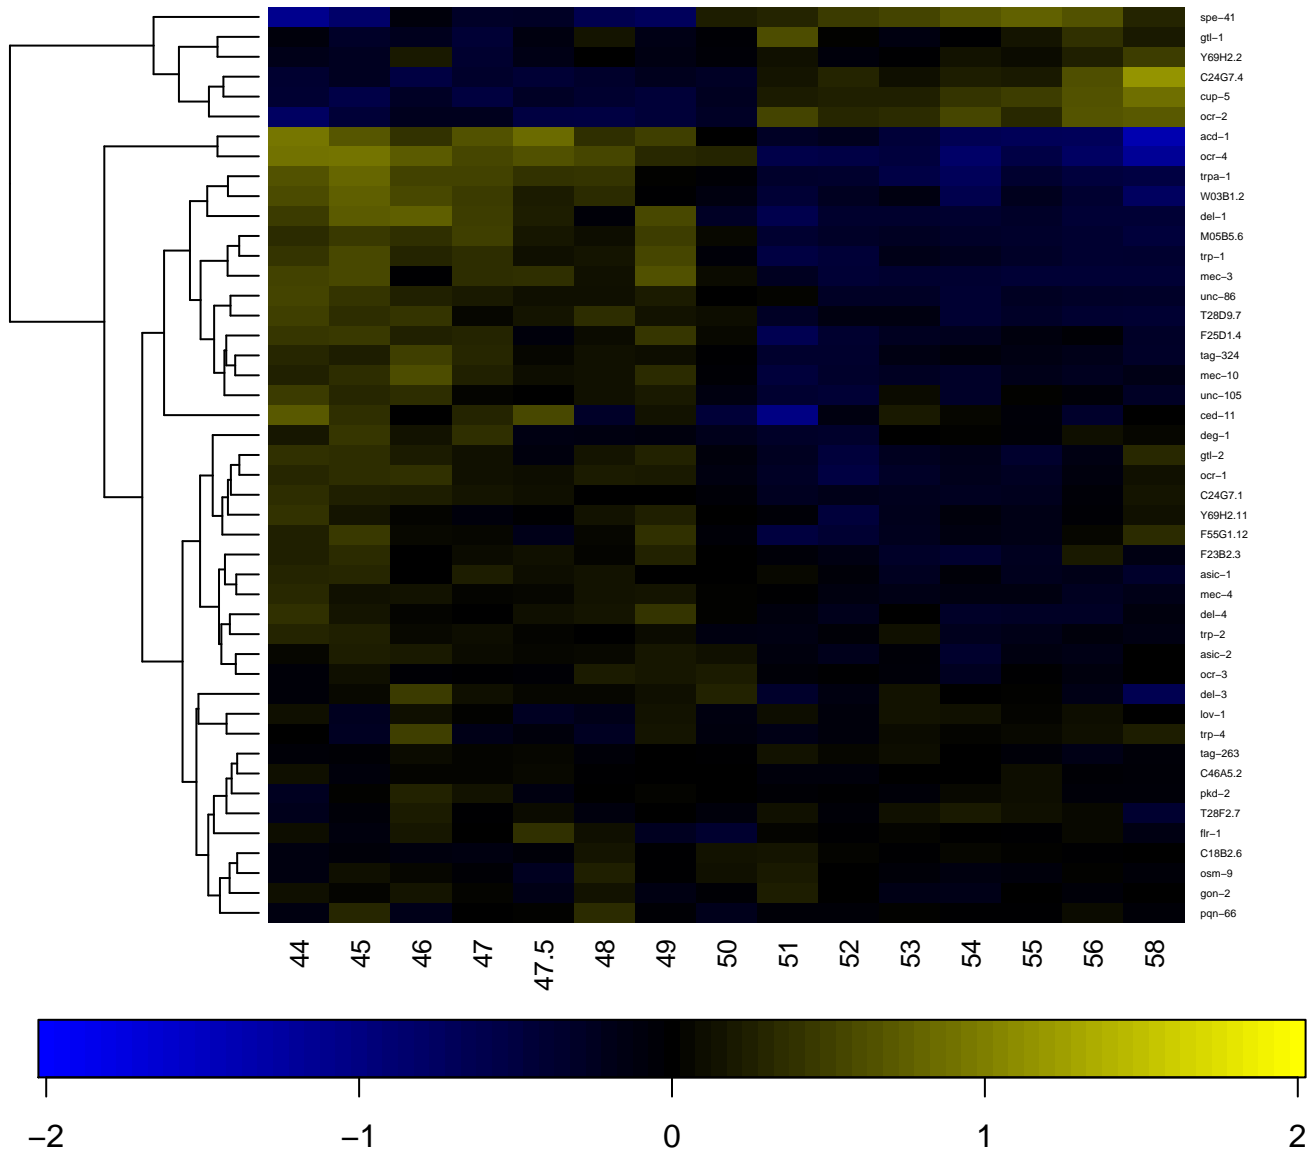

# Neurogenesis

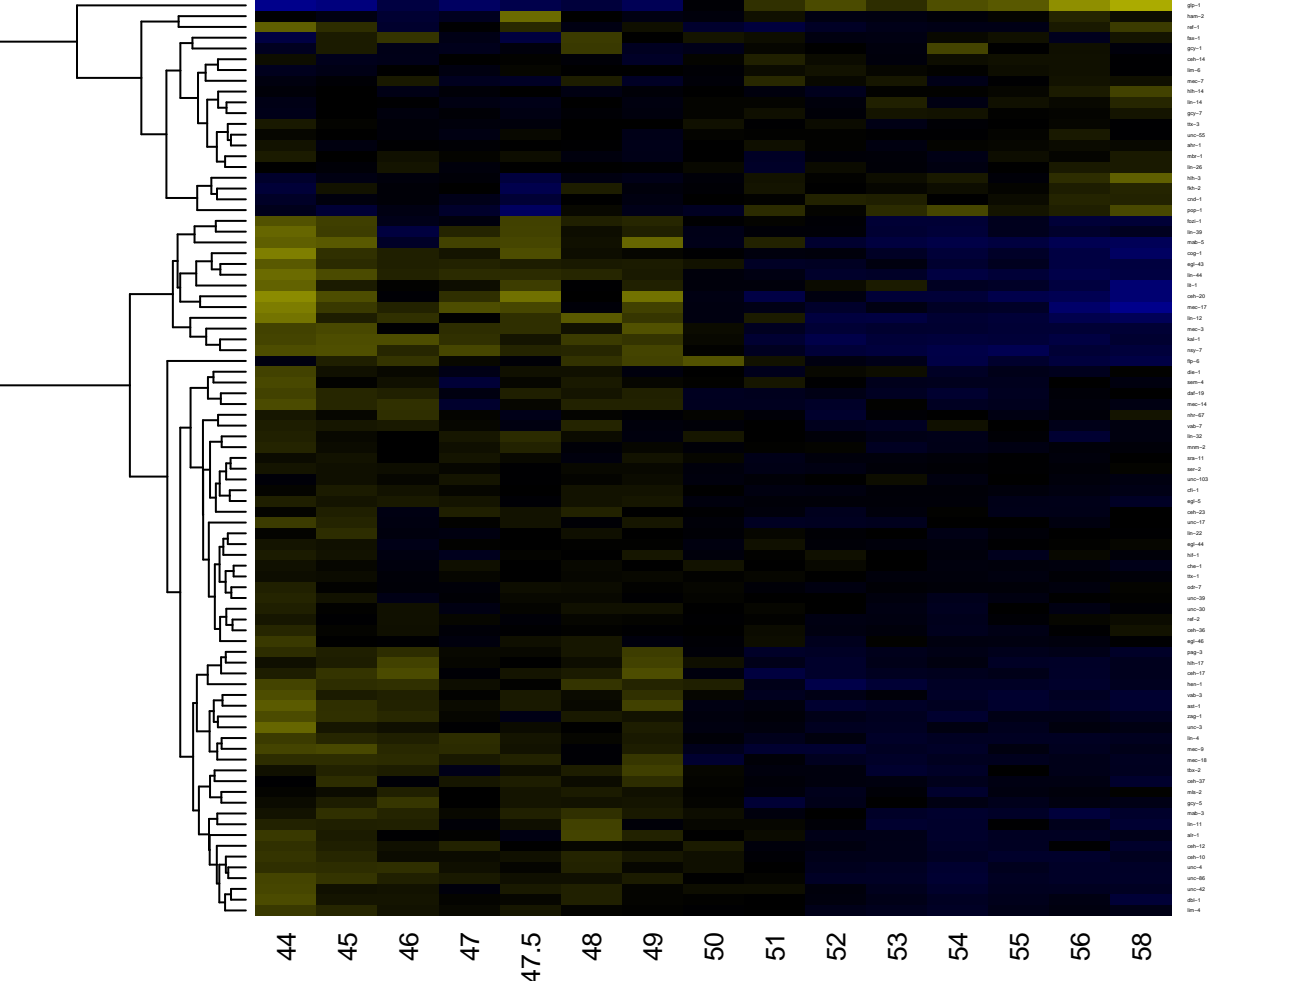

# Neuropeptides

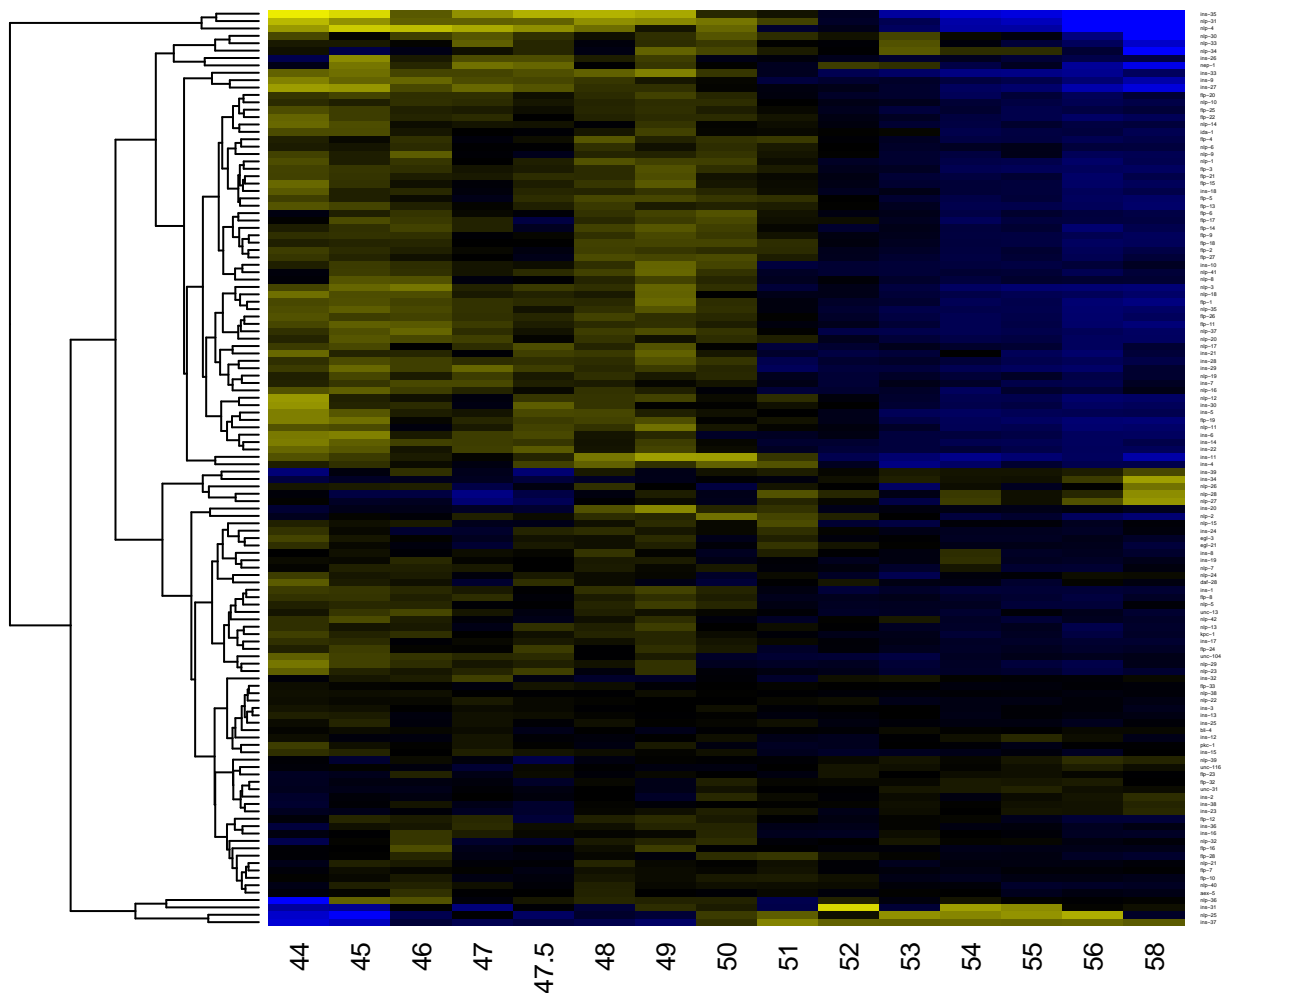

-2

-1

0

1

2

# Notch signaling in the *C. elegans* embryo

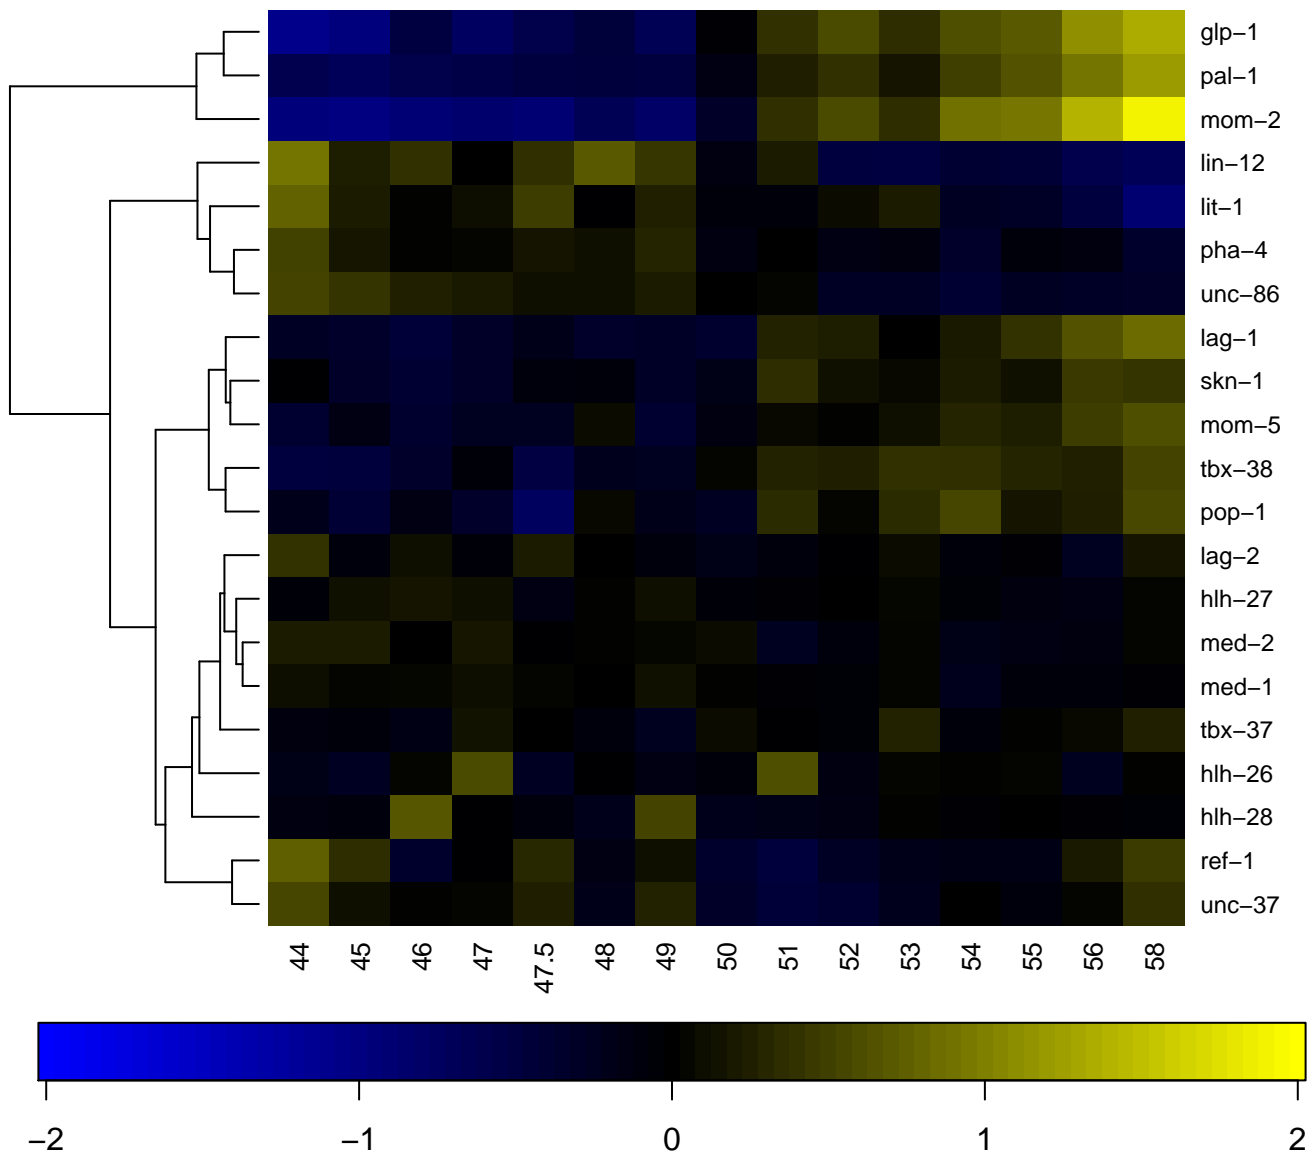

# Nuclear hormone receptors in *C. elegans*

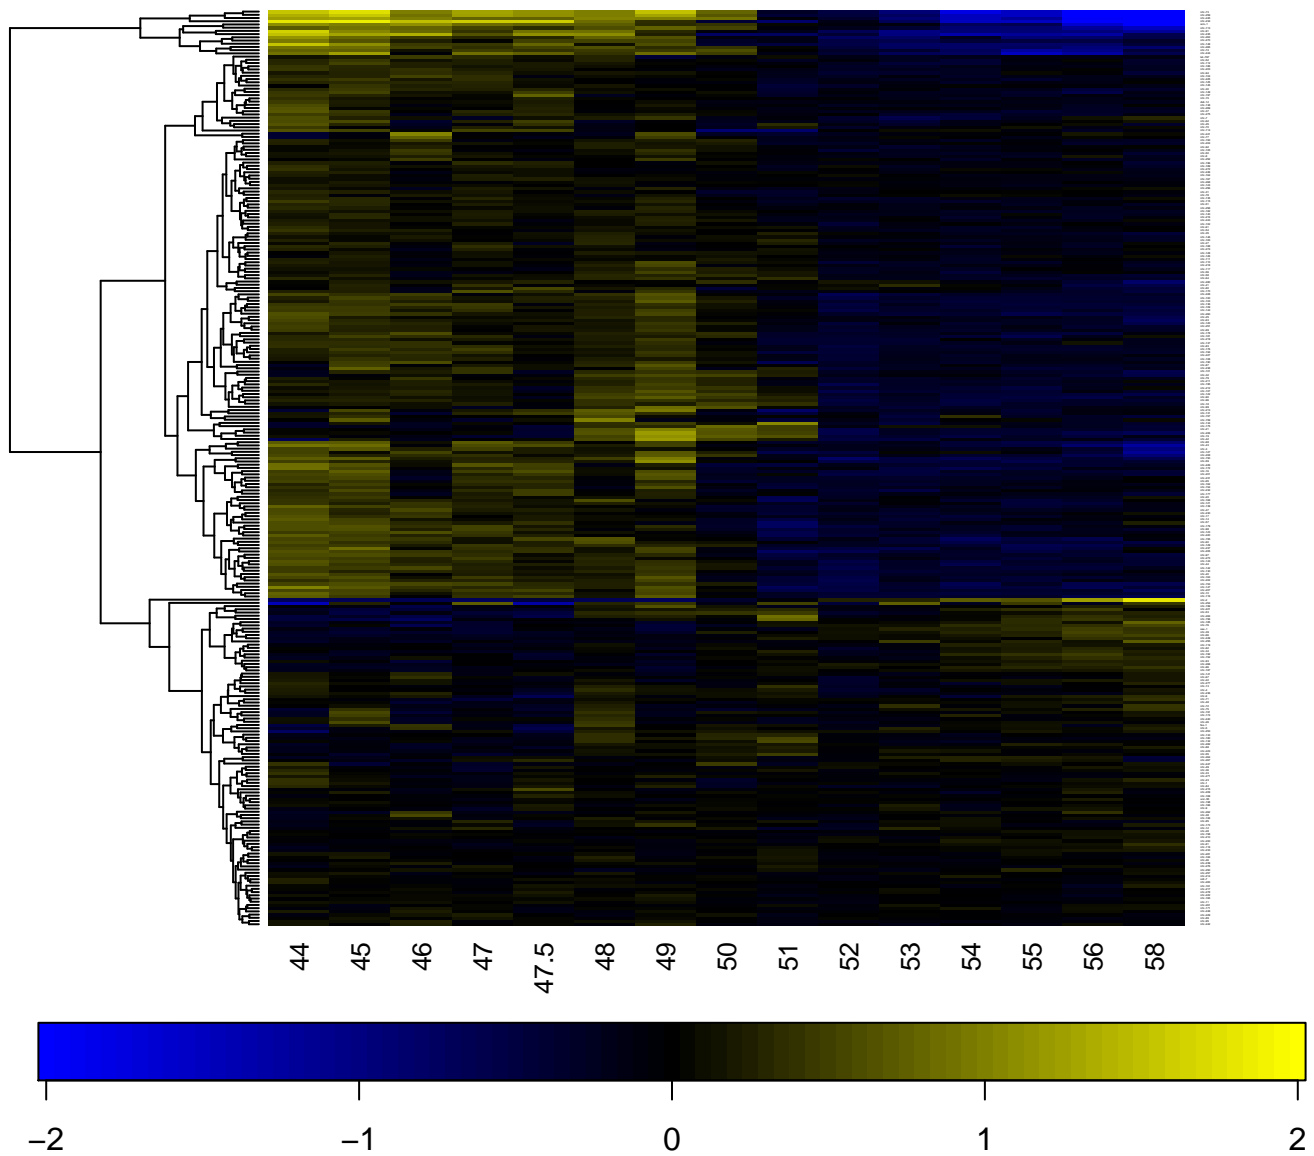

# Obesity and the regulation of fat metabolism

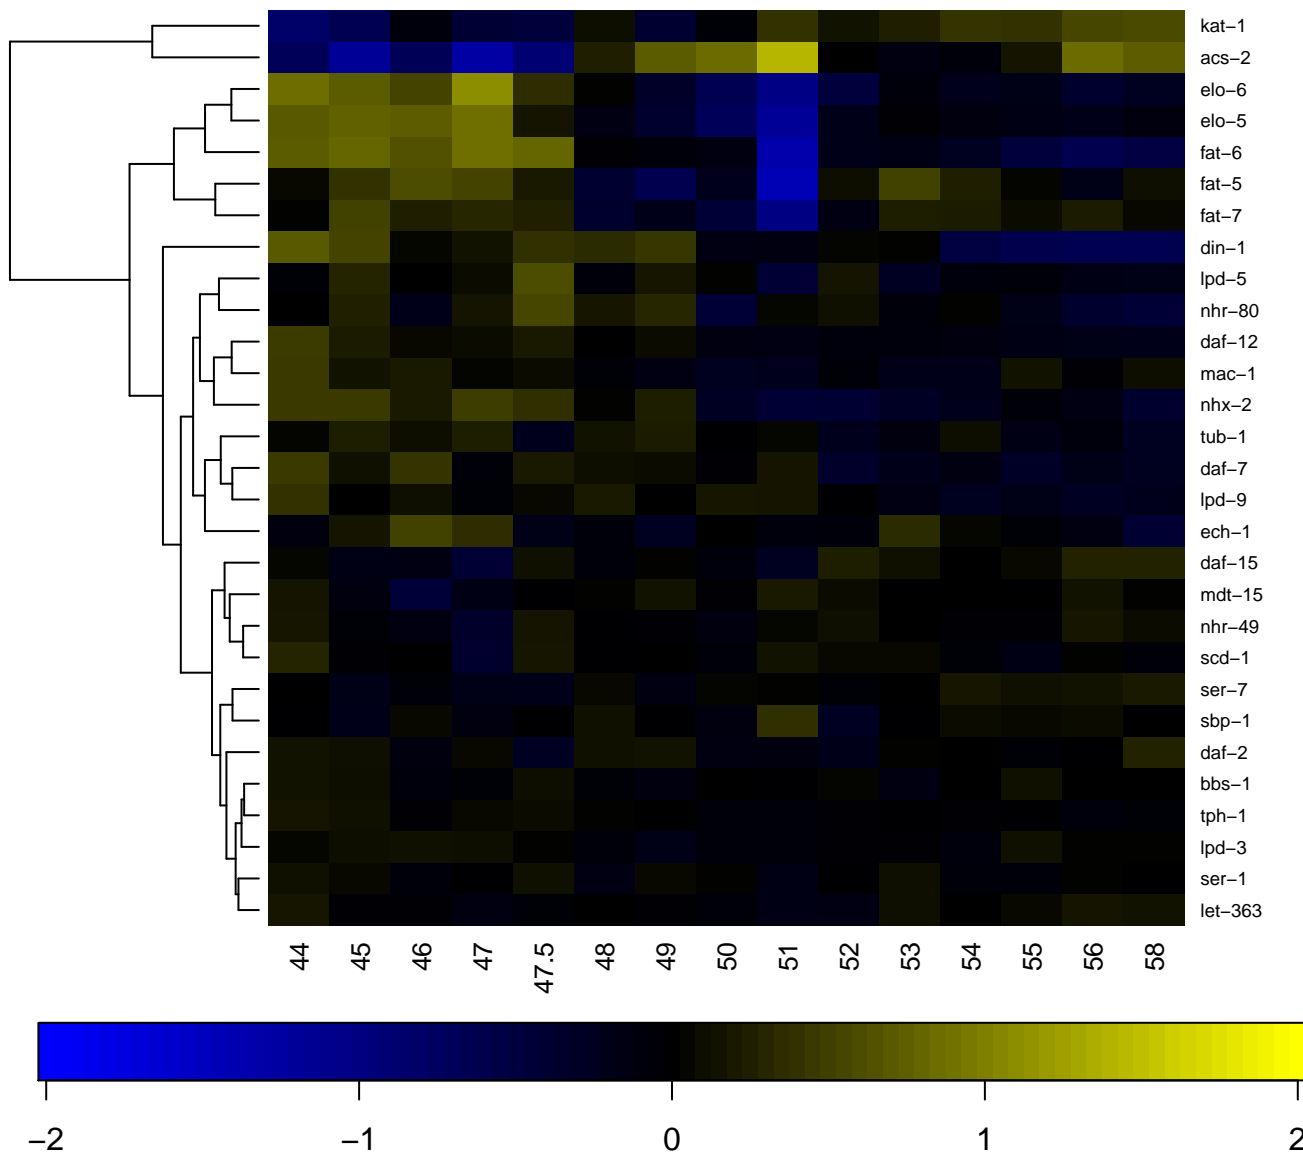



# Pre-mRNA splicing and its regulation in *Caenorhabditis elegans*

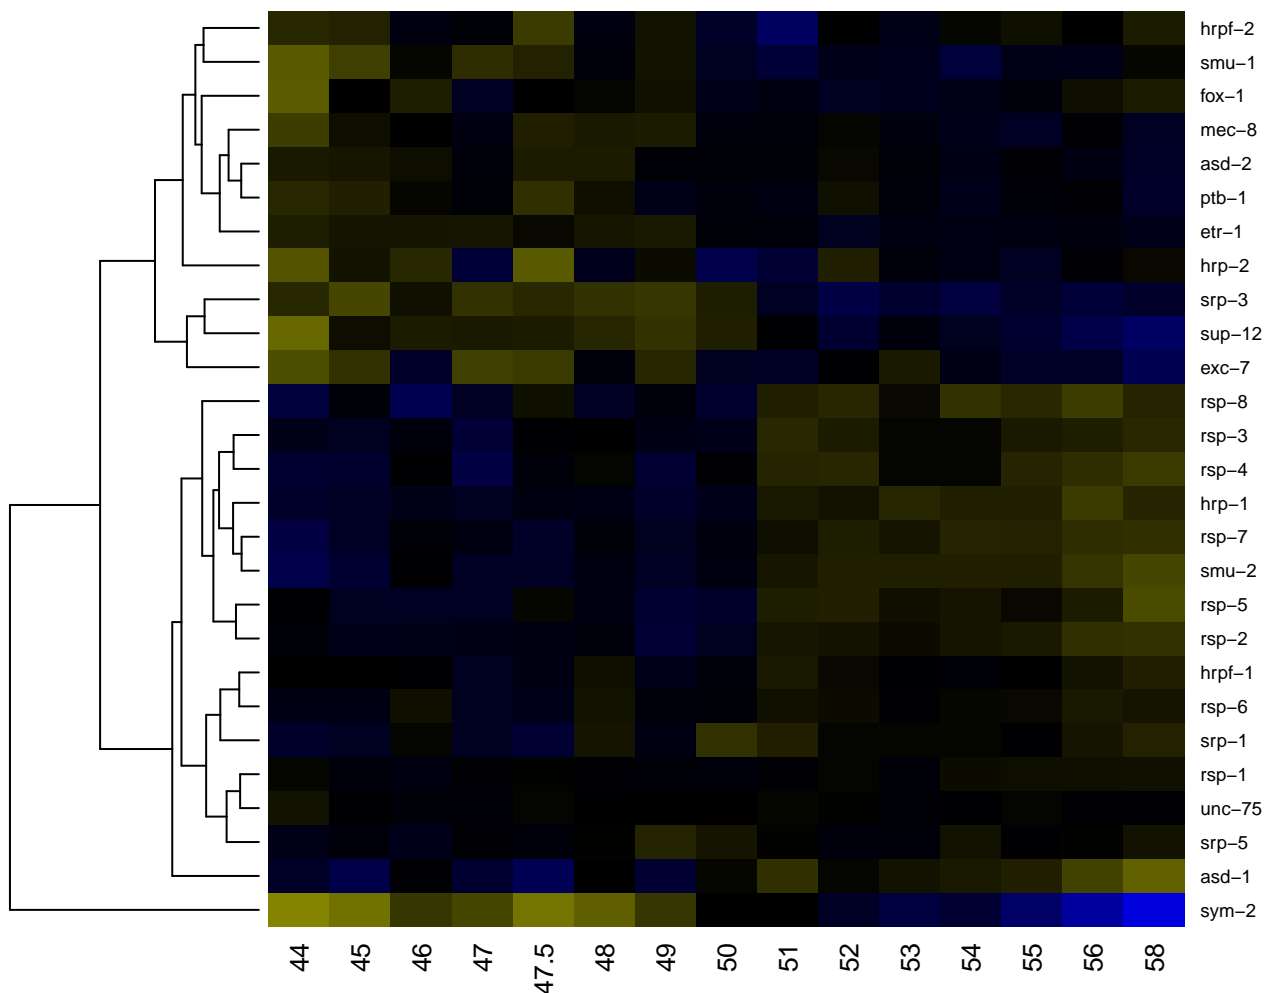

# Programmed cell death

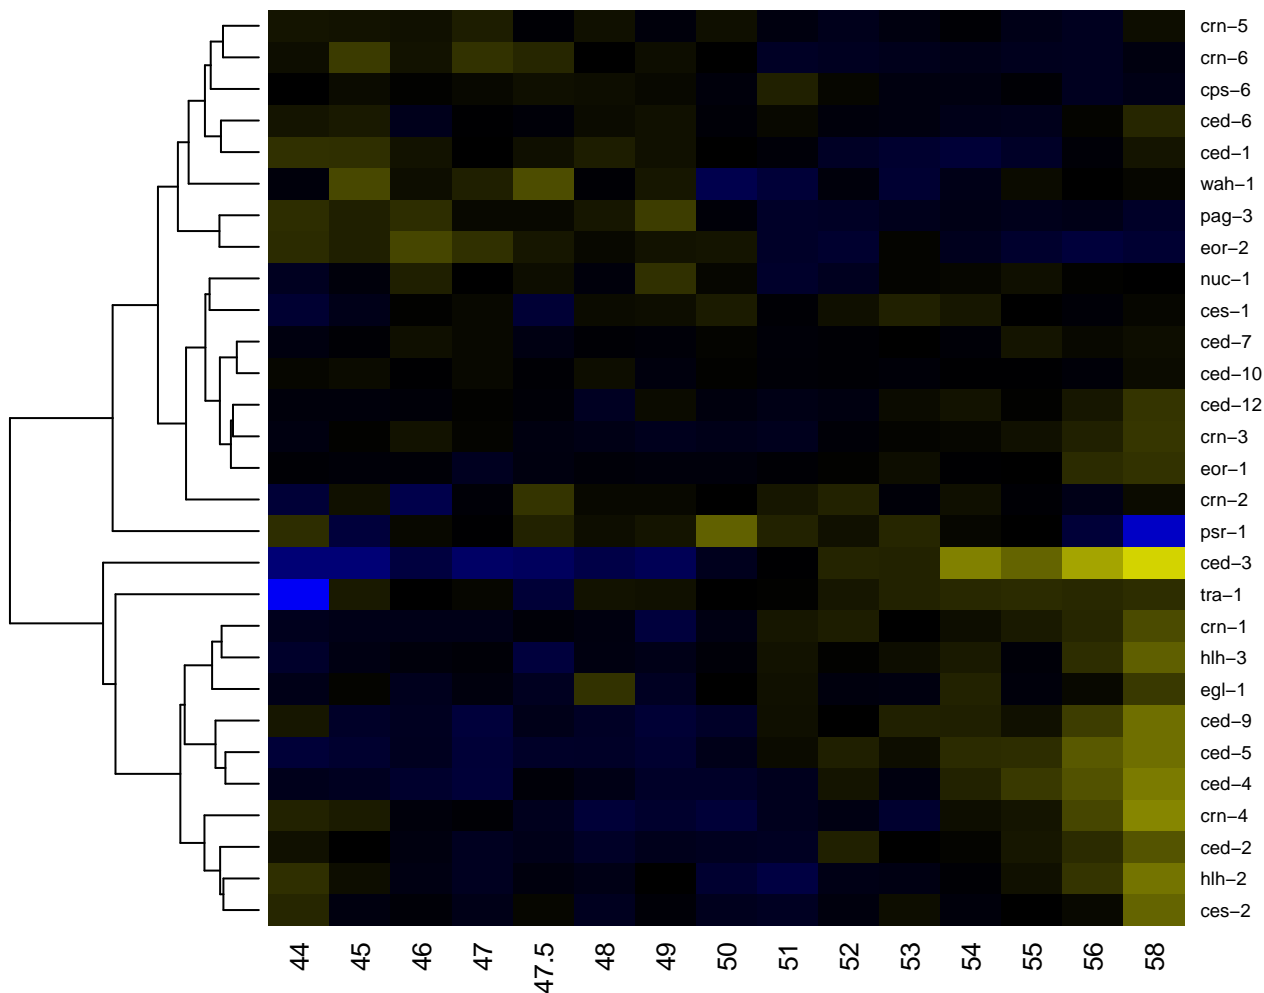

# RNA-binding proteins

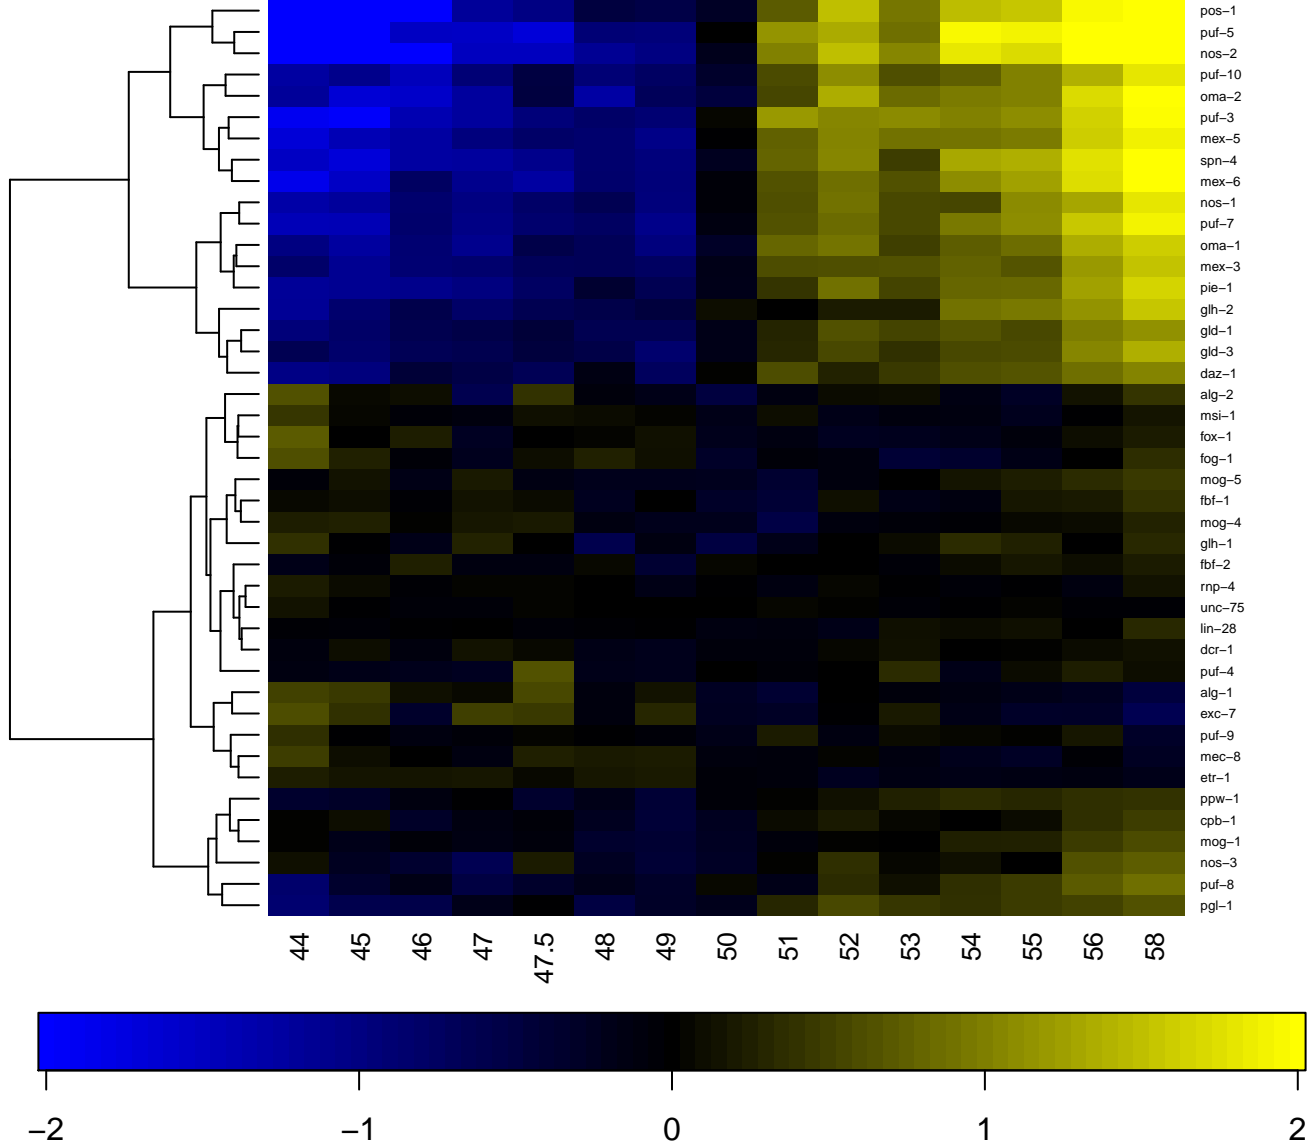

# Roles of chromatin factors in *C. elegans* development

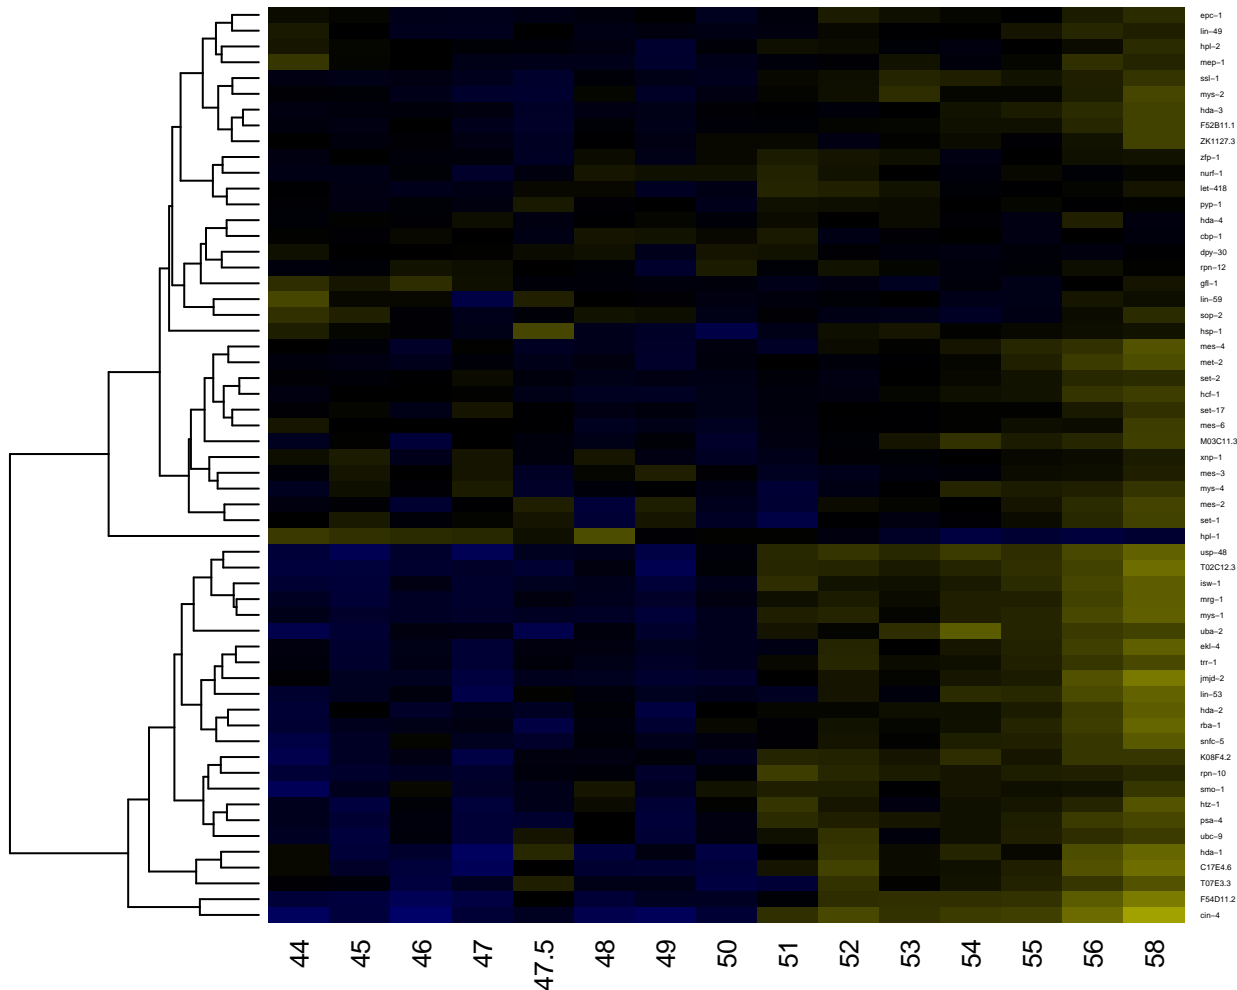





# Sex determination in the germ line

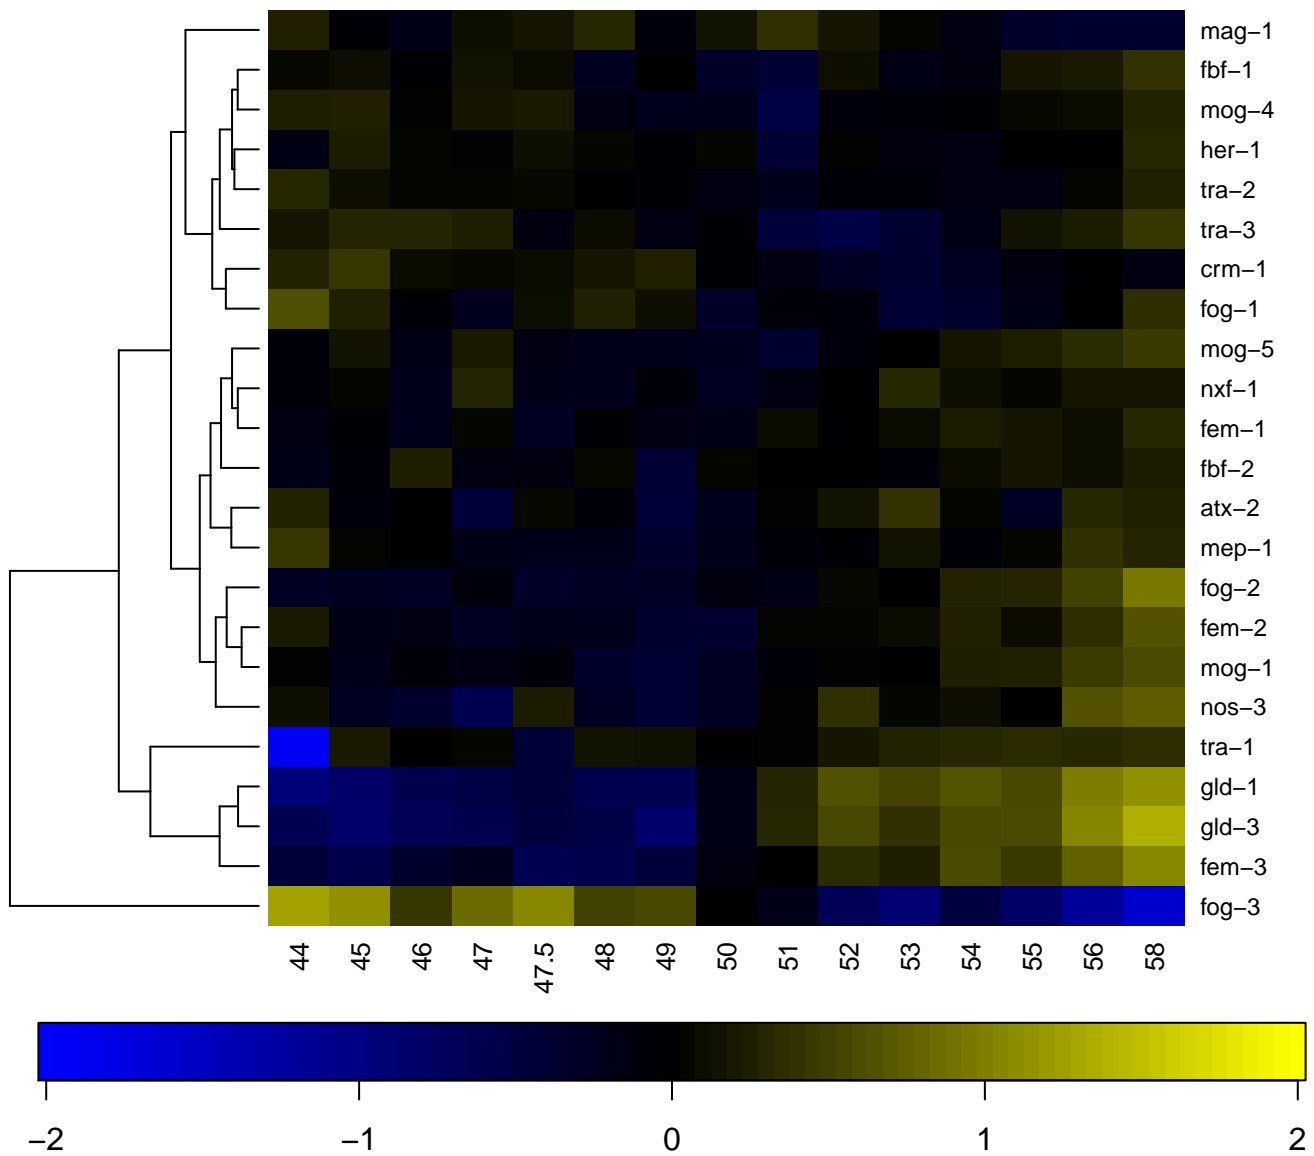

# Signaling in the immune response

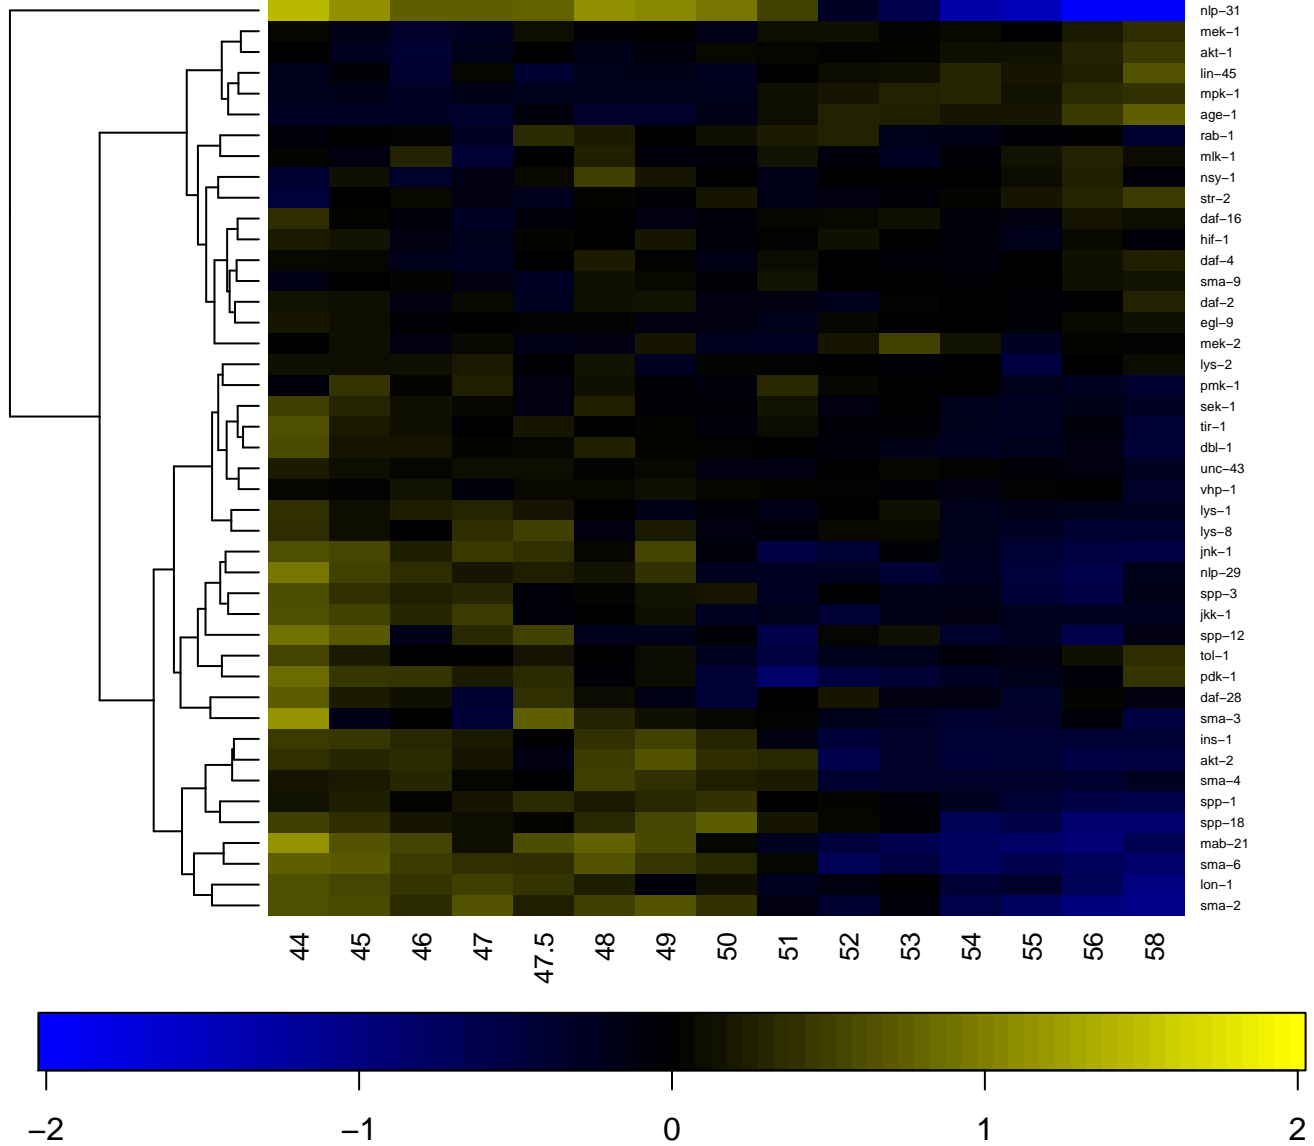



# Small GTPases

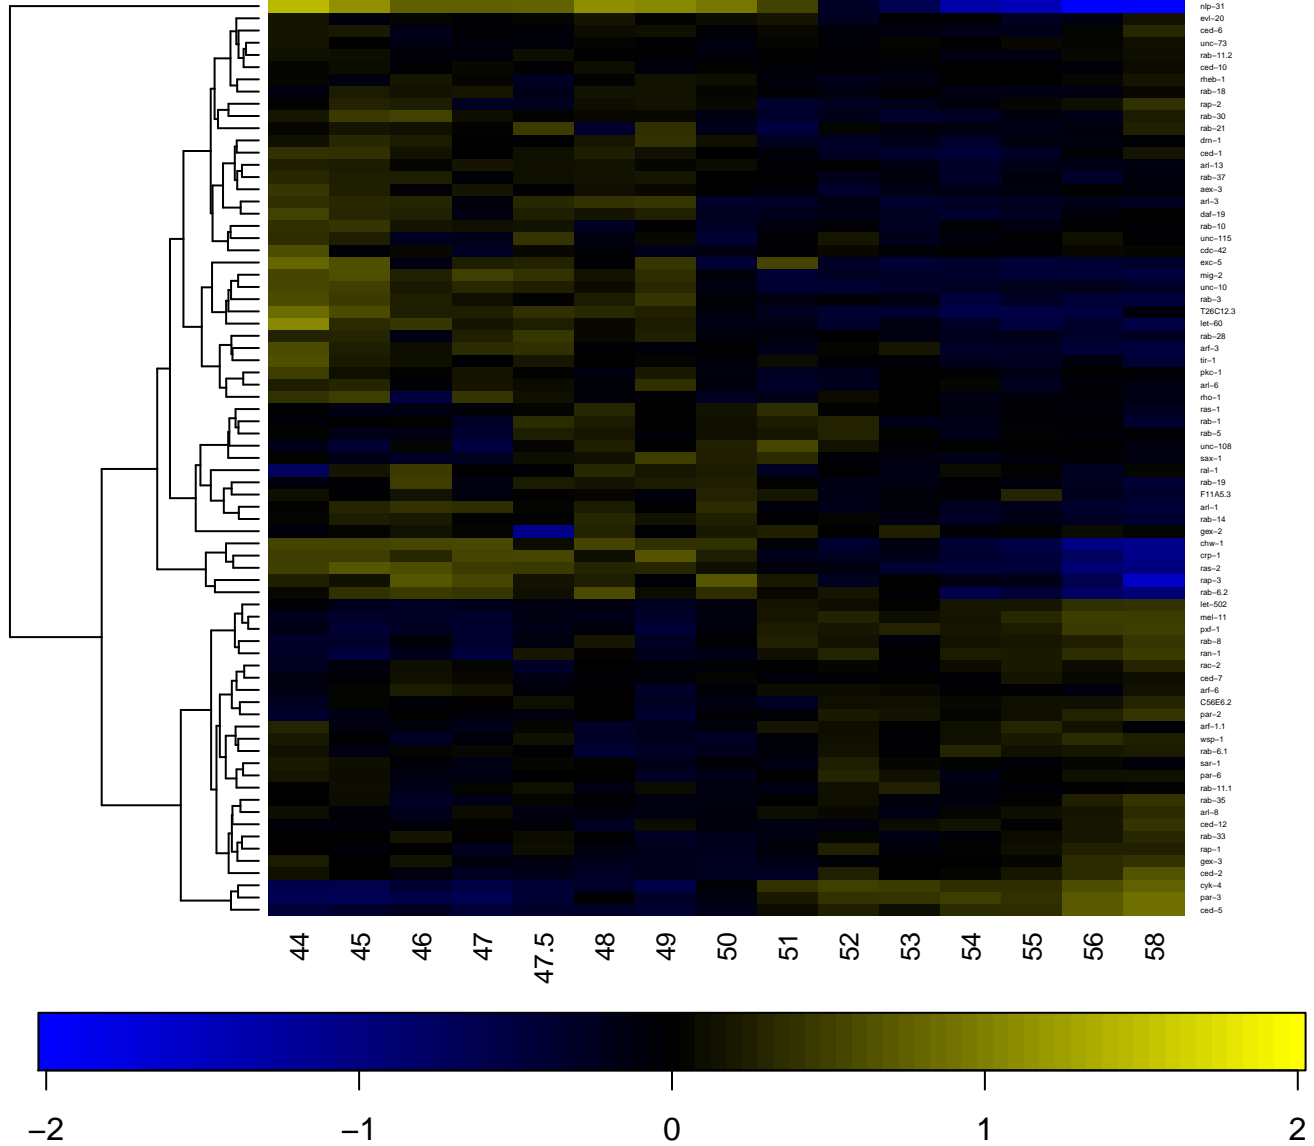

# Somatic sex determination

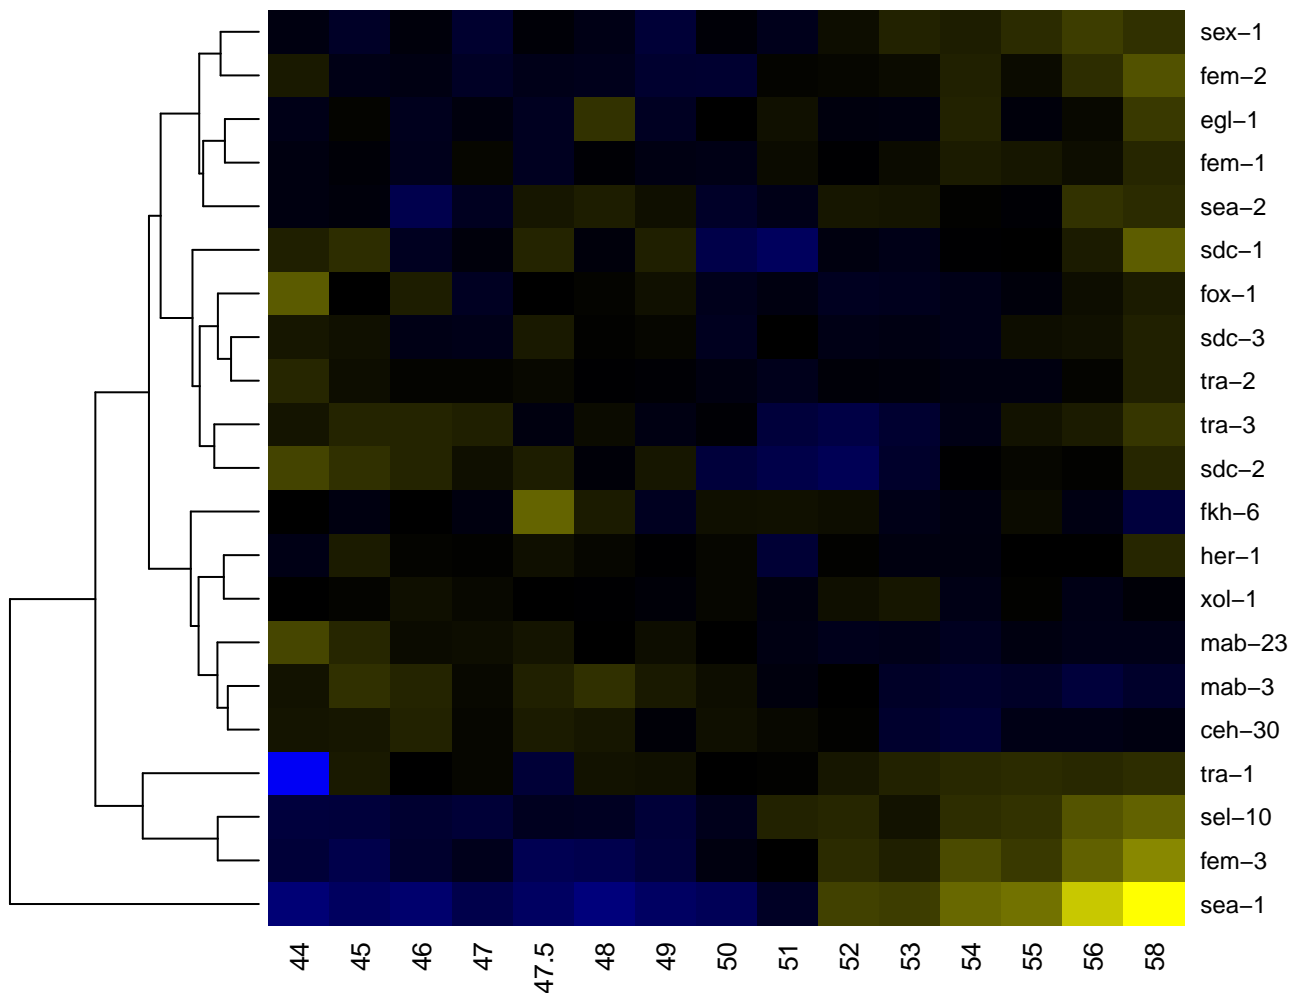

# Specification of the germ line

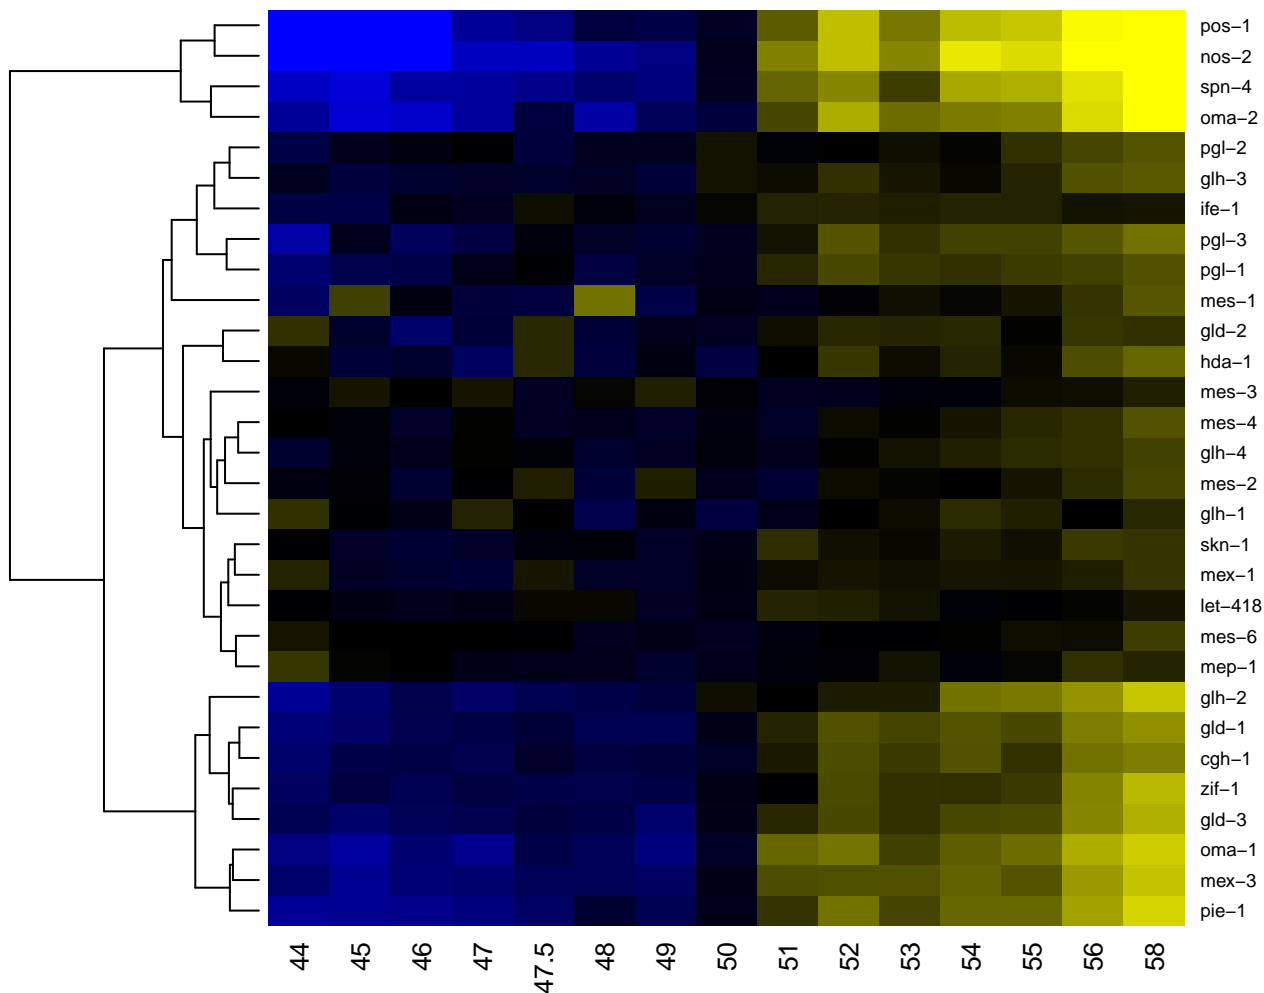

# Sperm motility and MSP

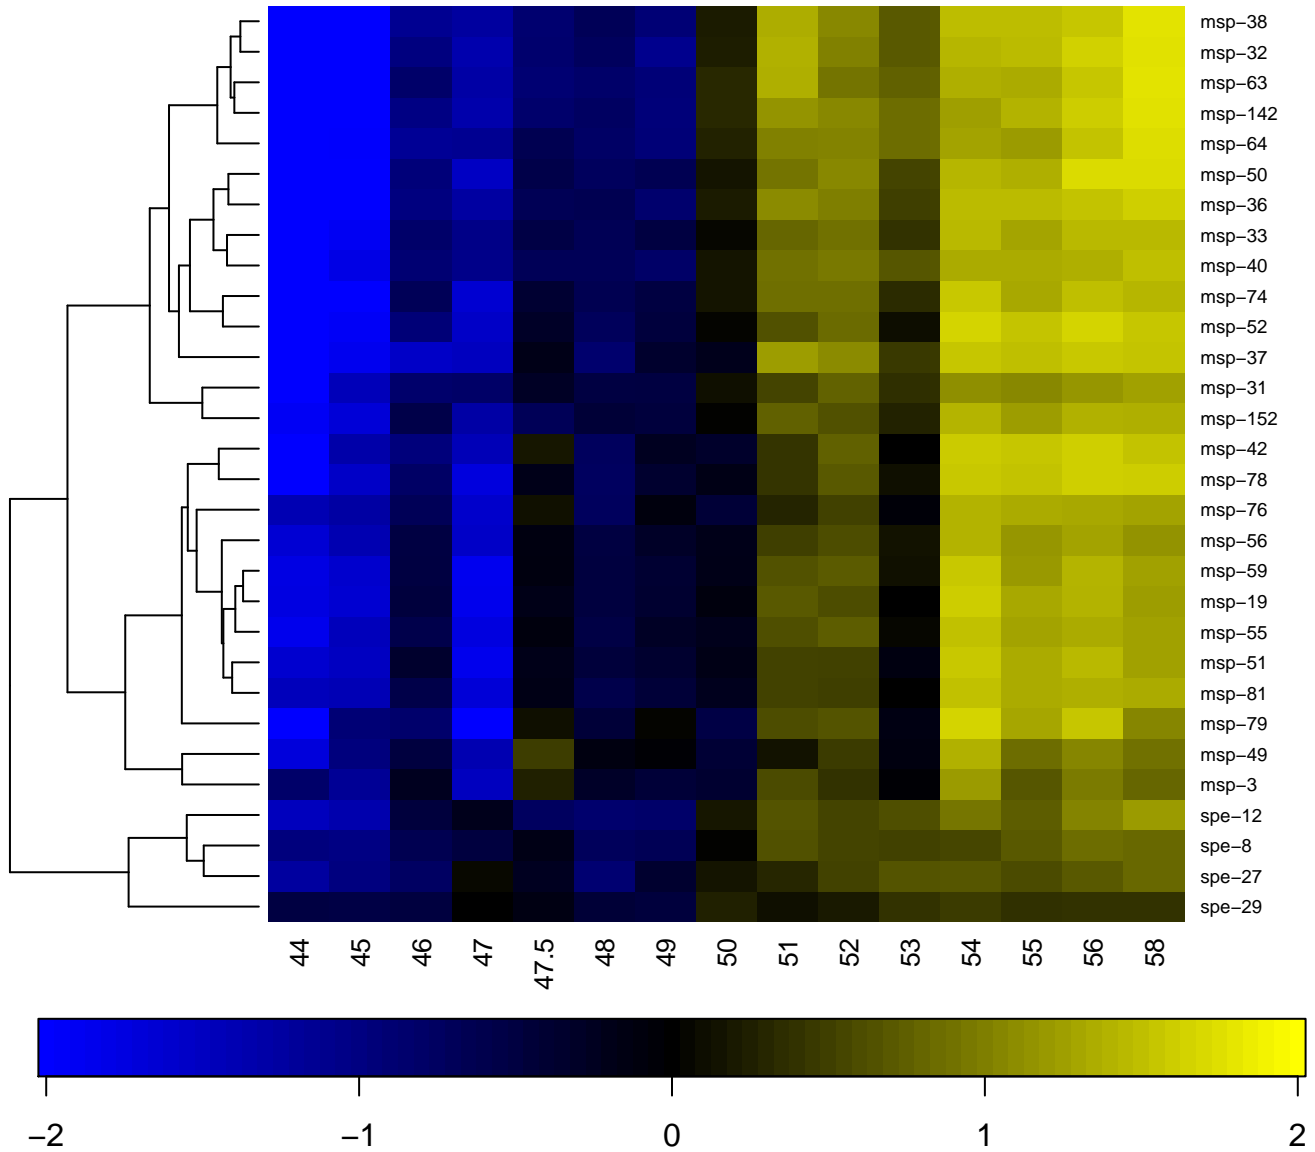

# Spermatogenesis

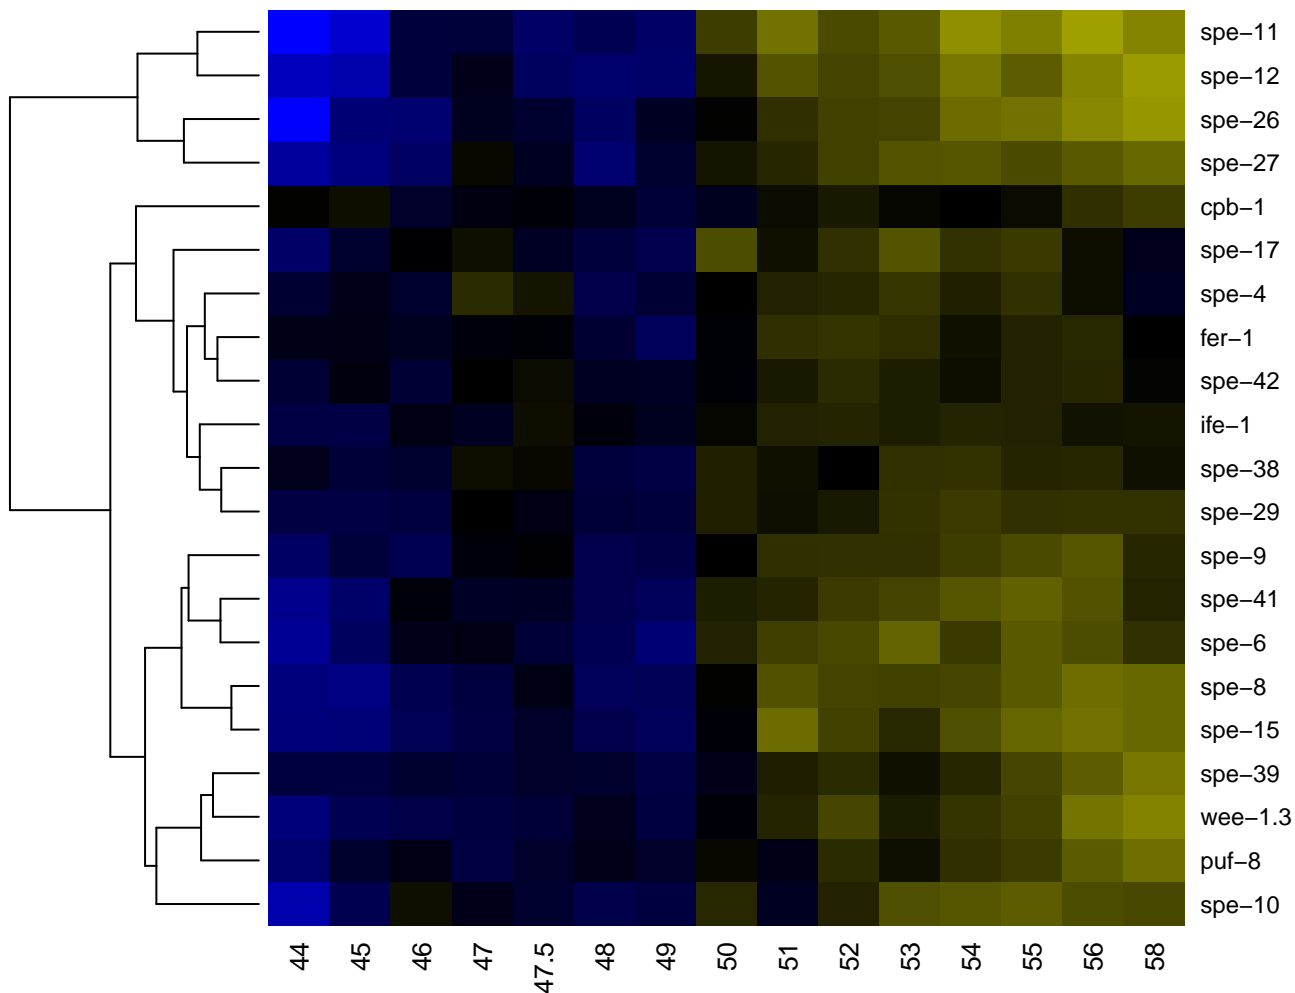

-2

-1

0

1

2



# Synaptogenesis

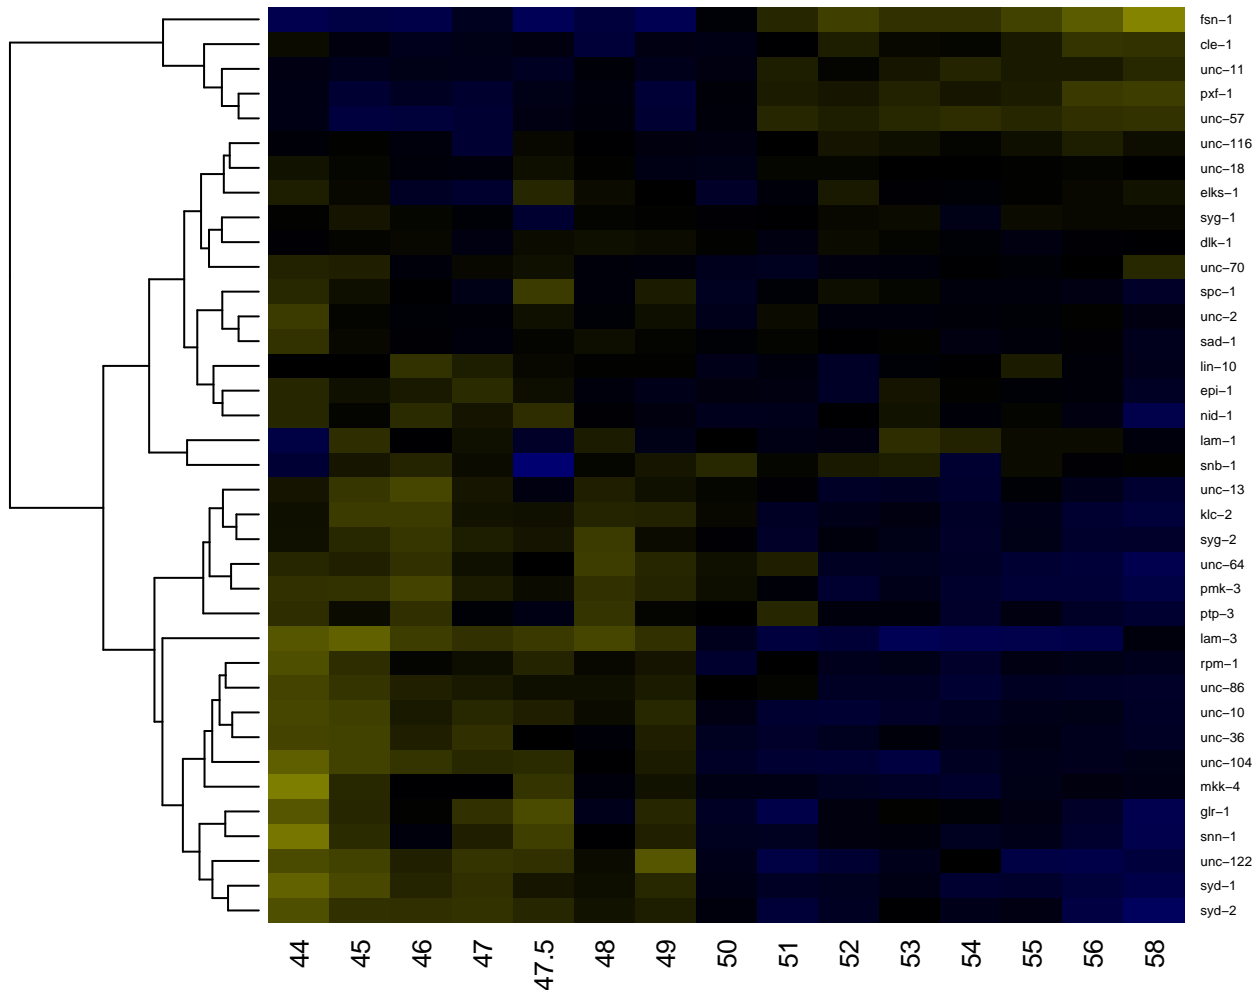

# TGF-? signaling

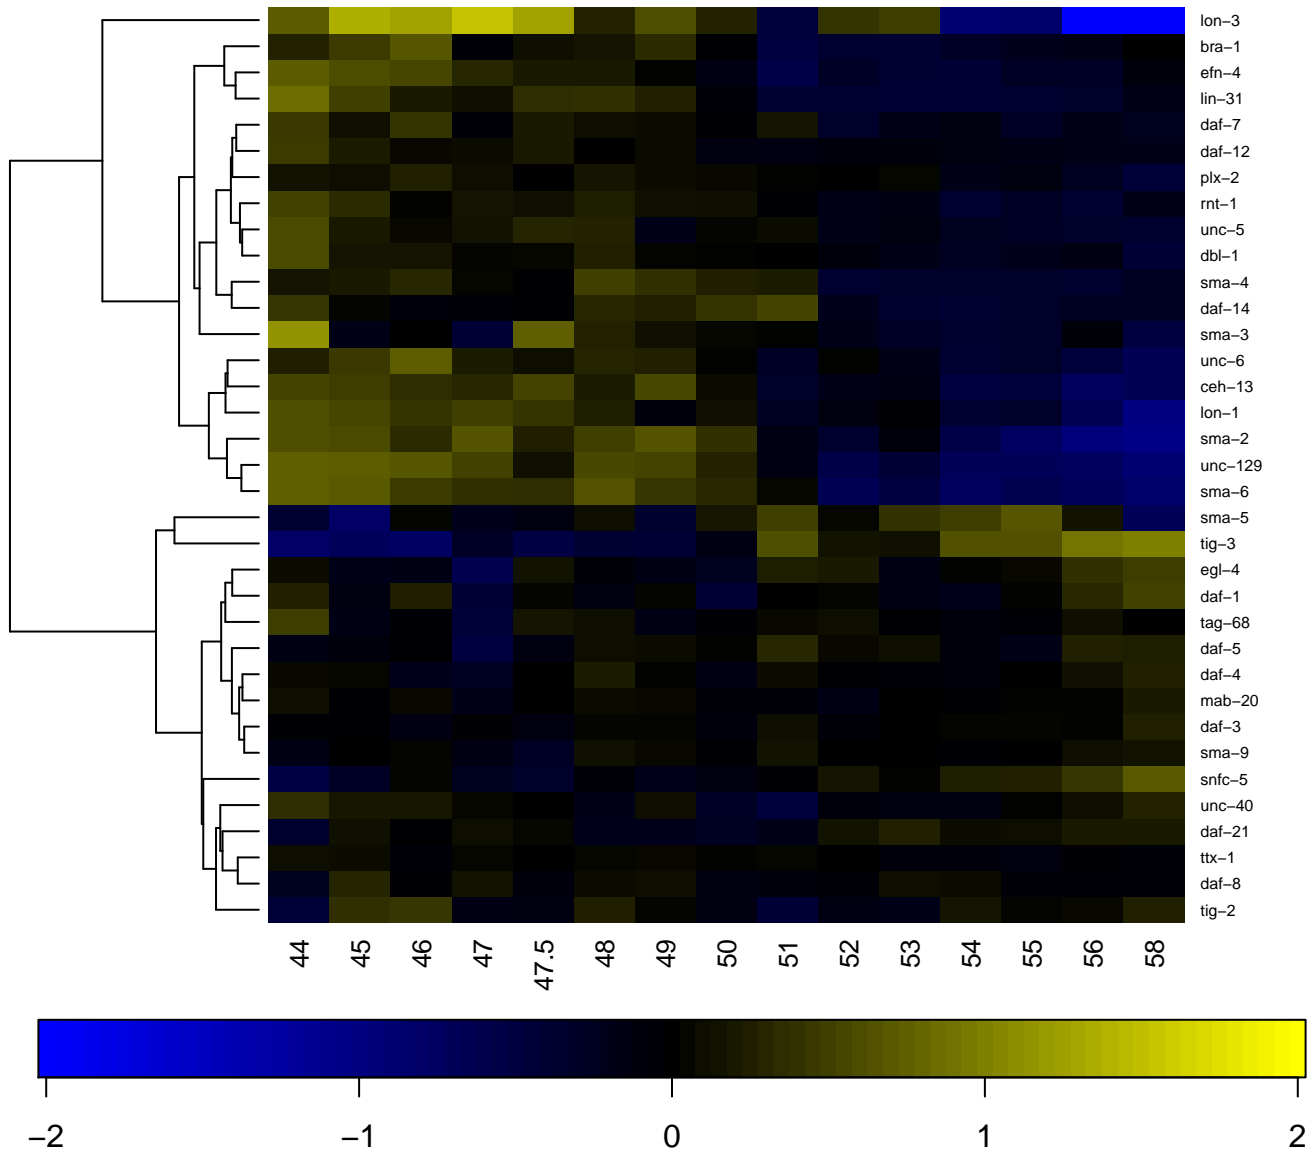



# The C. elegans intestine

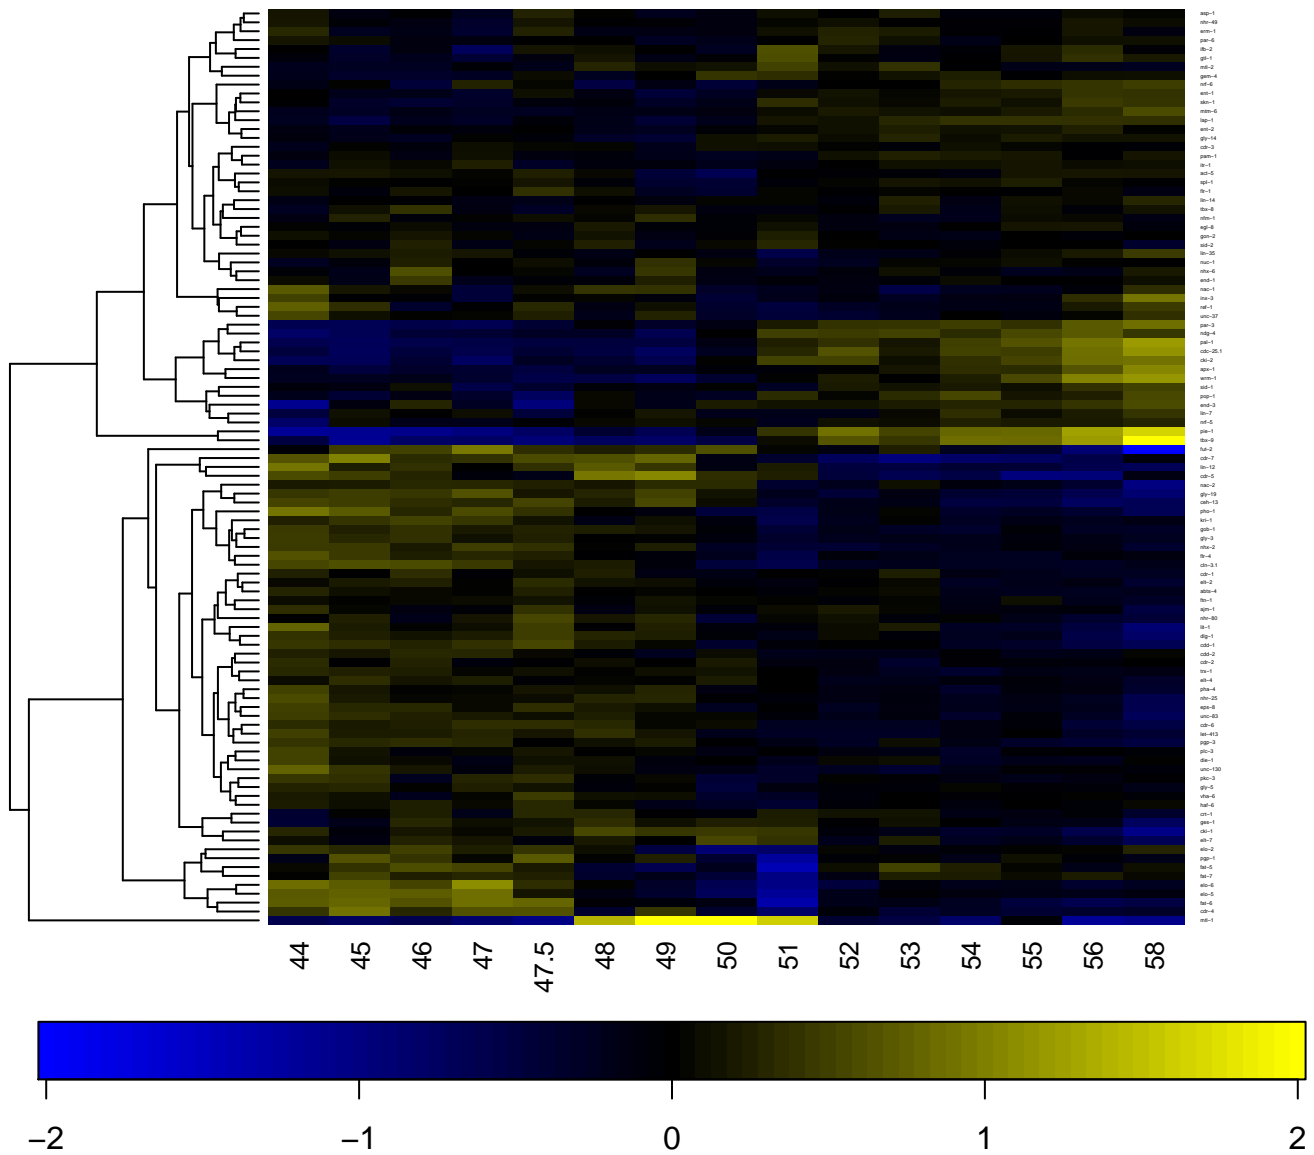

# The *C. elegans* pharynx

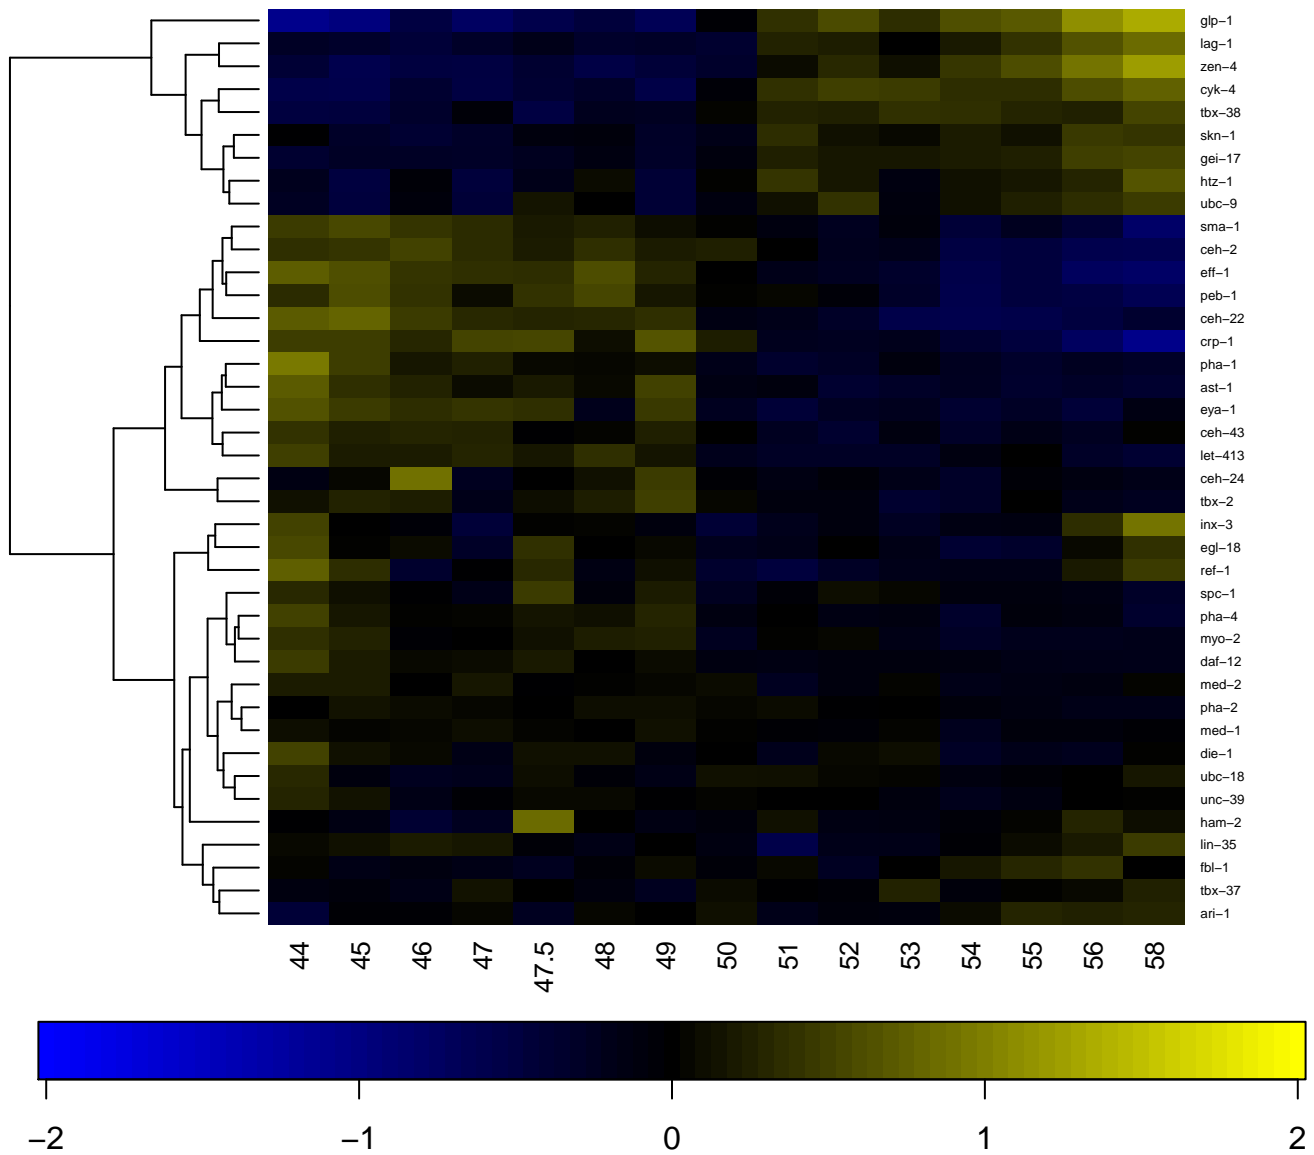



# The cuticle

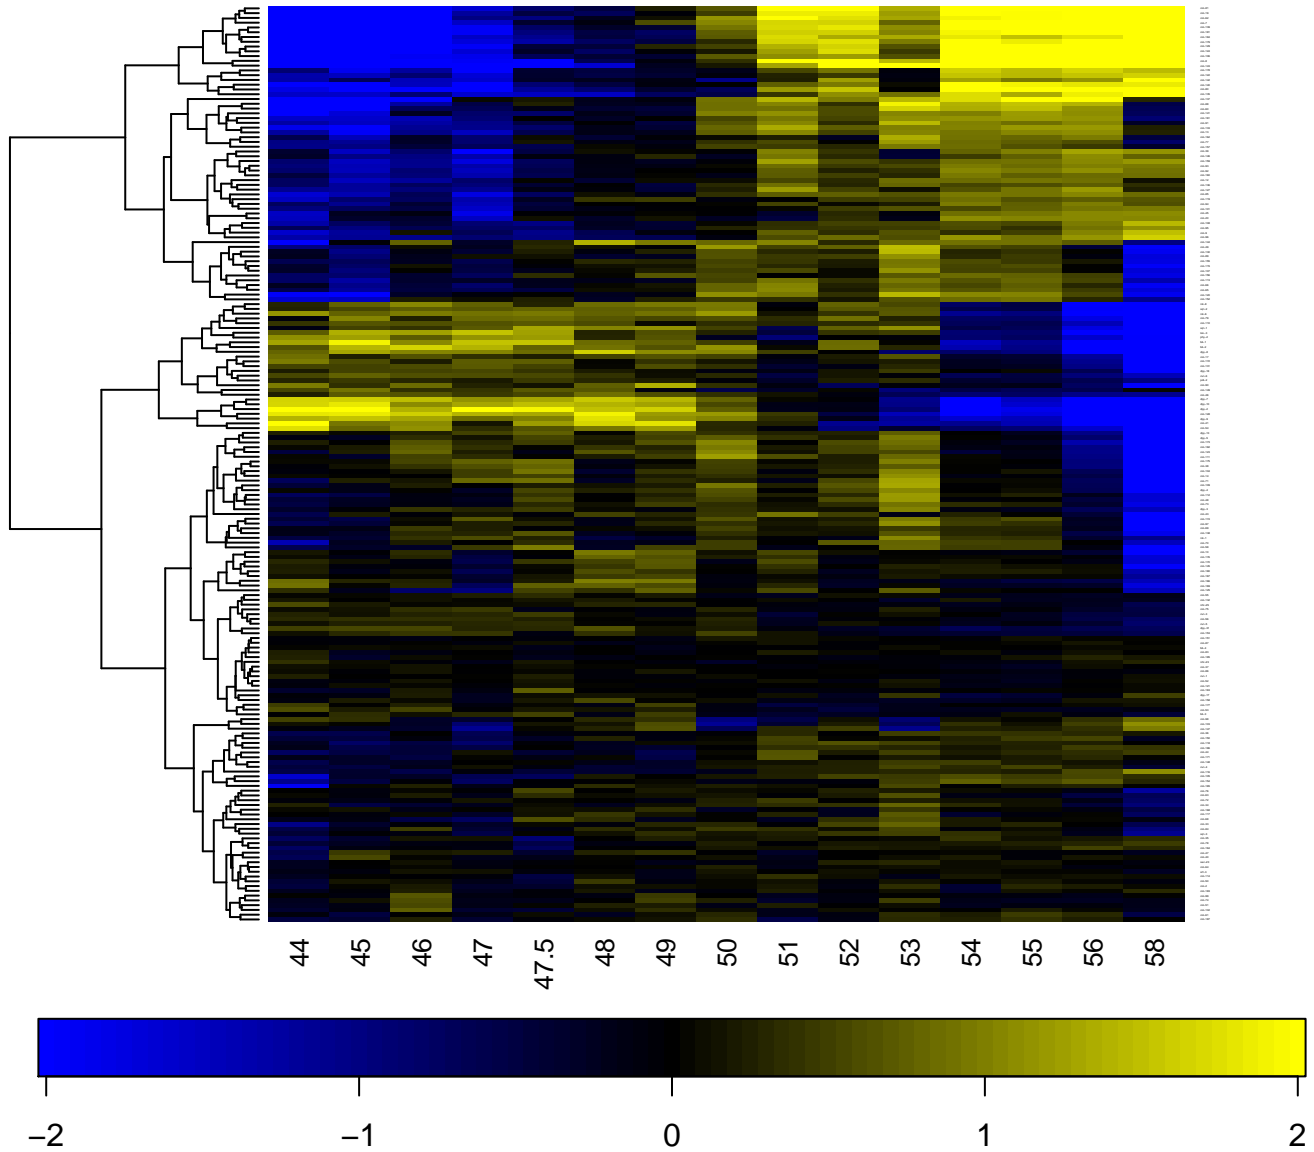





# Transcription mechanisms

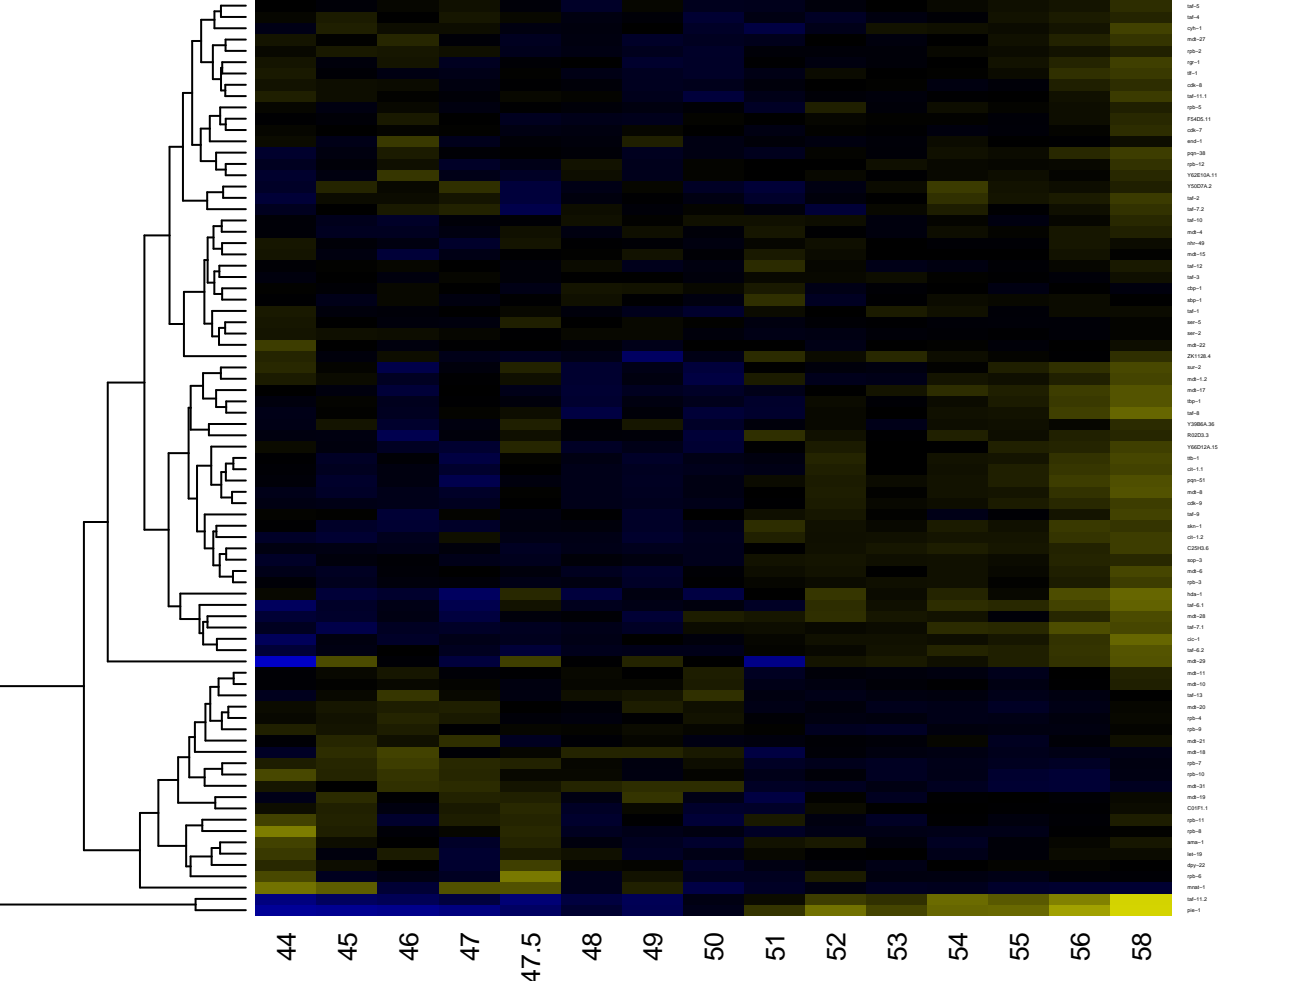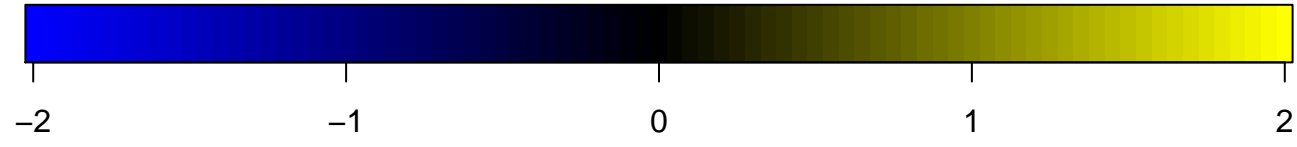

# Transcriptional regulation

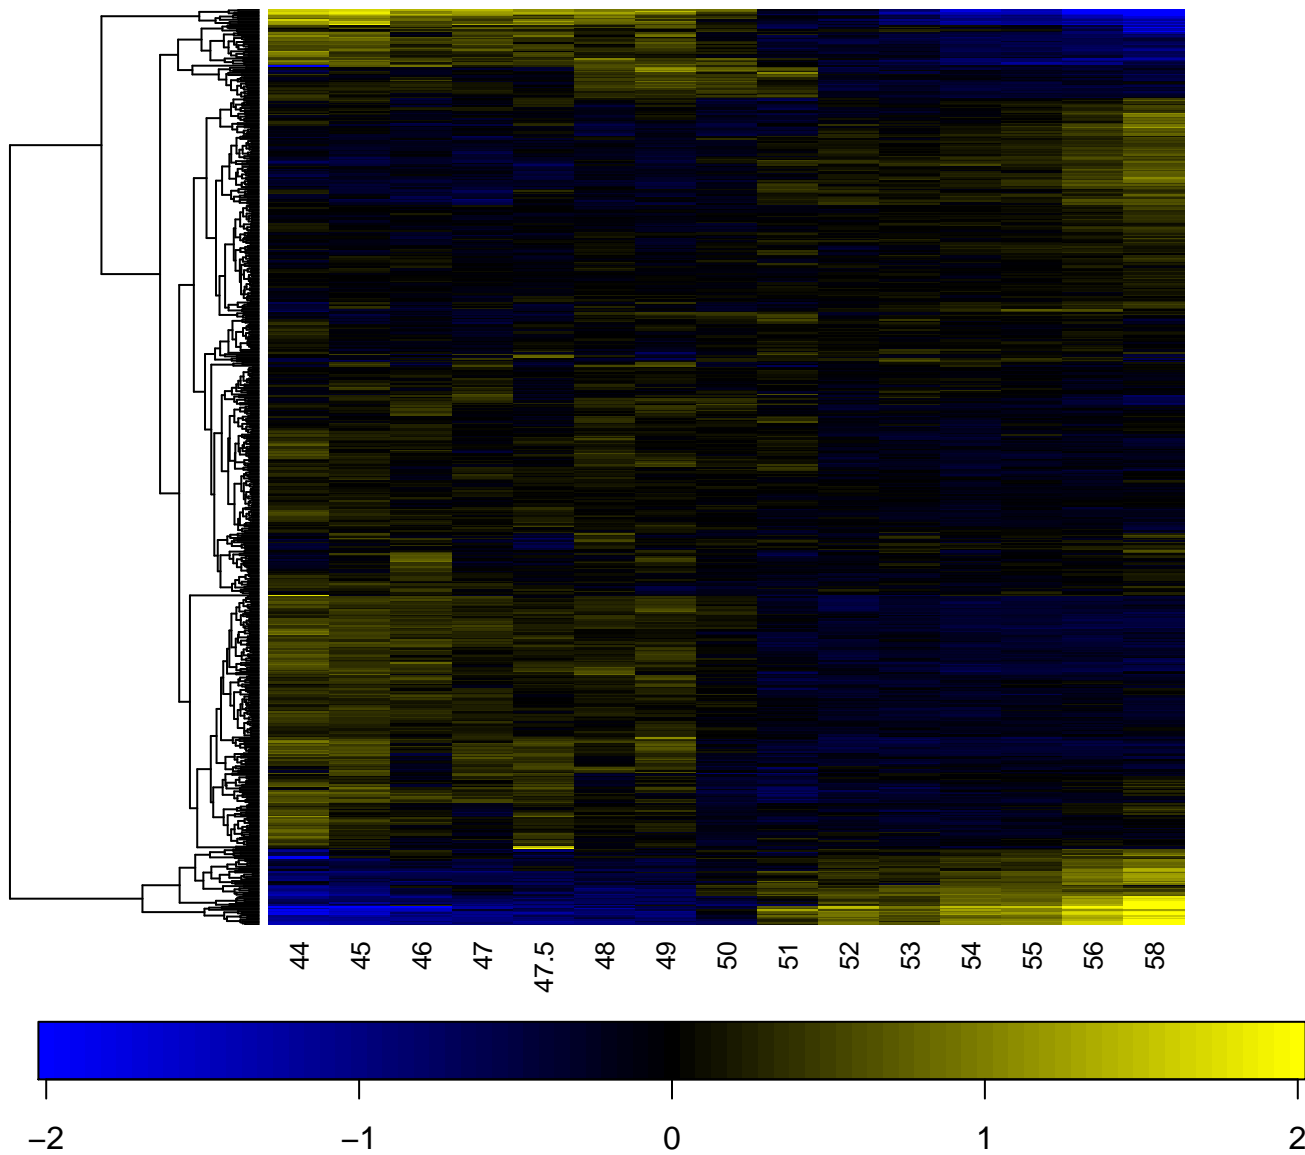



# Translational control of maternal RNAs

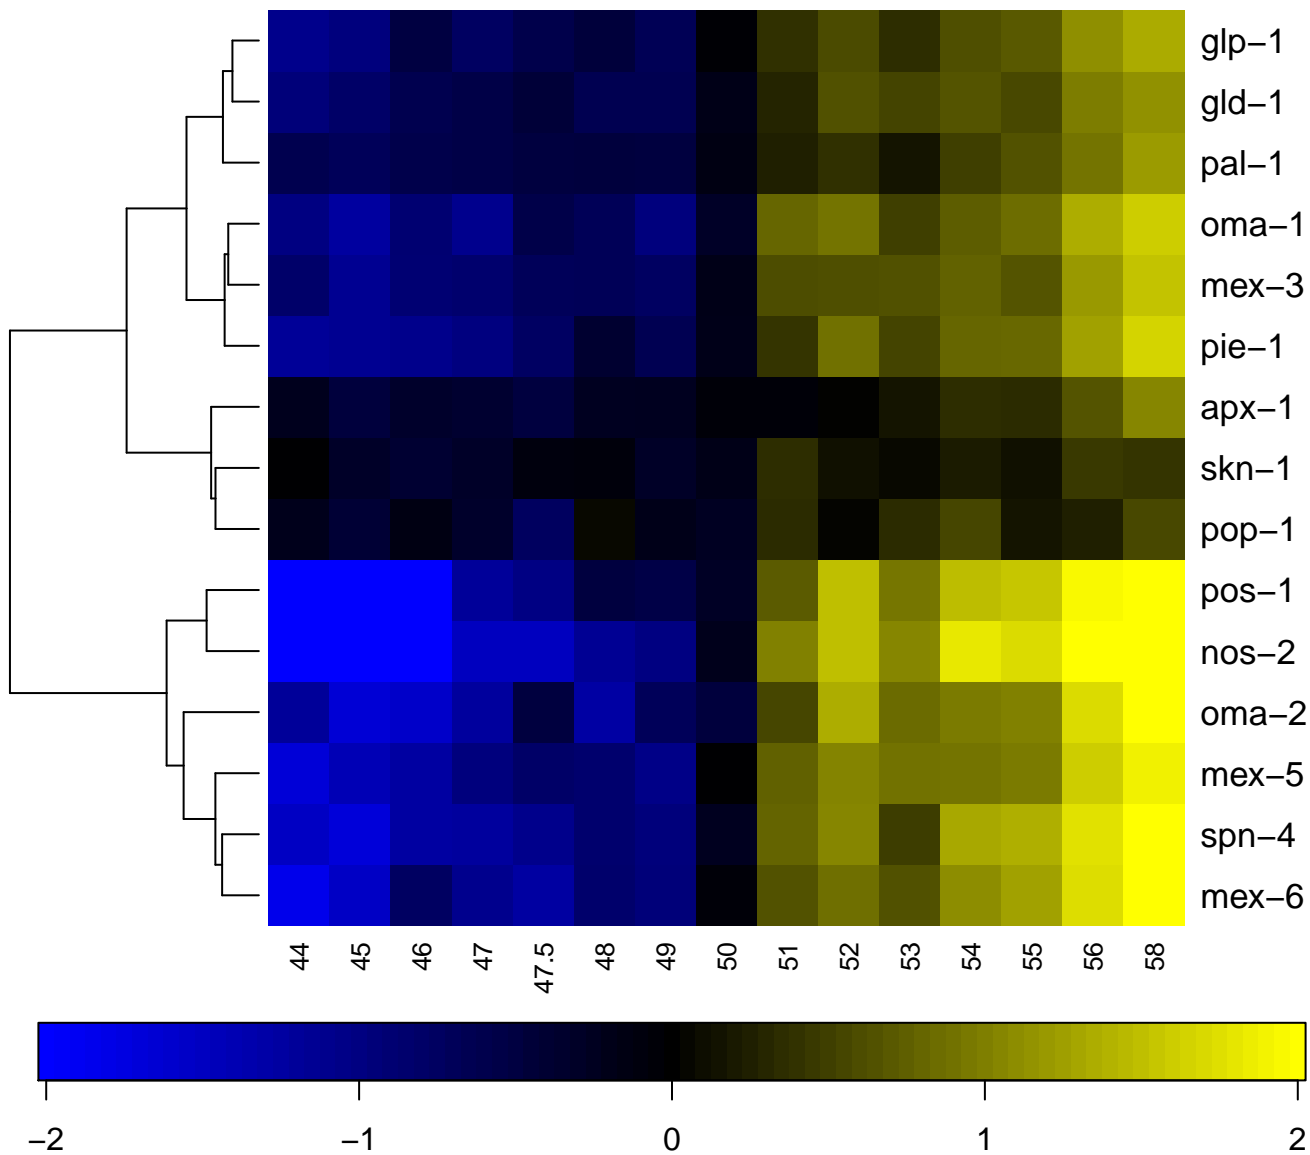

# Ubiquitin-mediated pathways in *C. elegans*

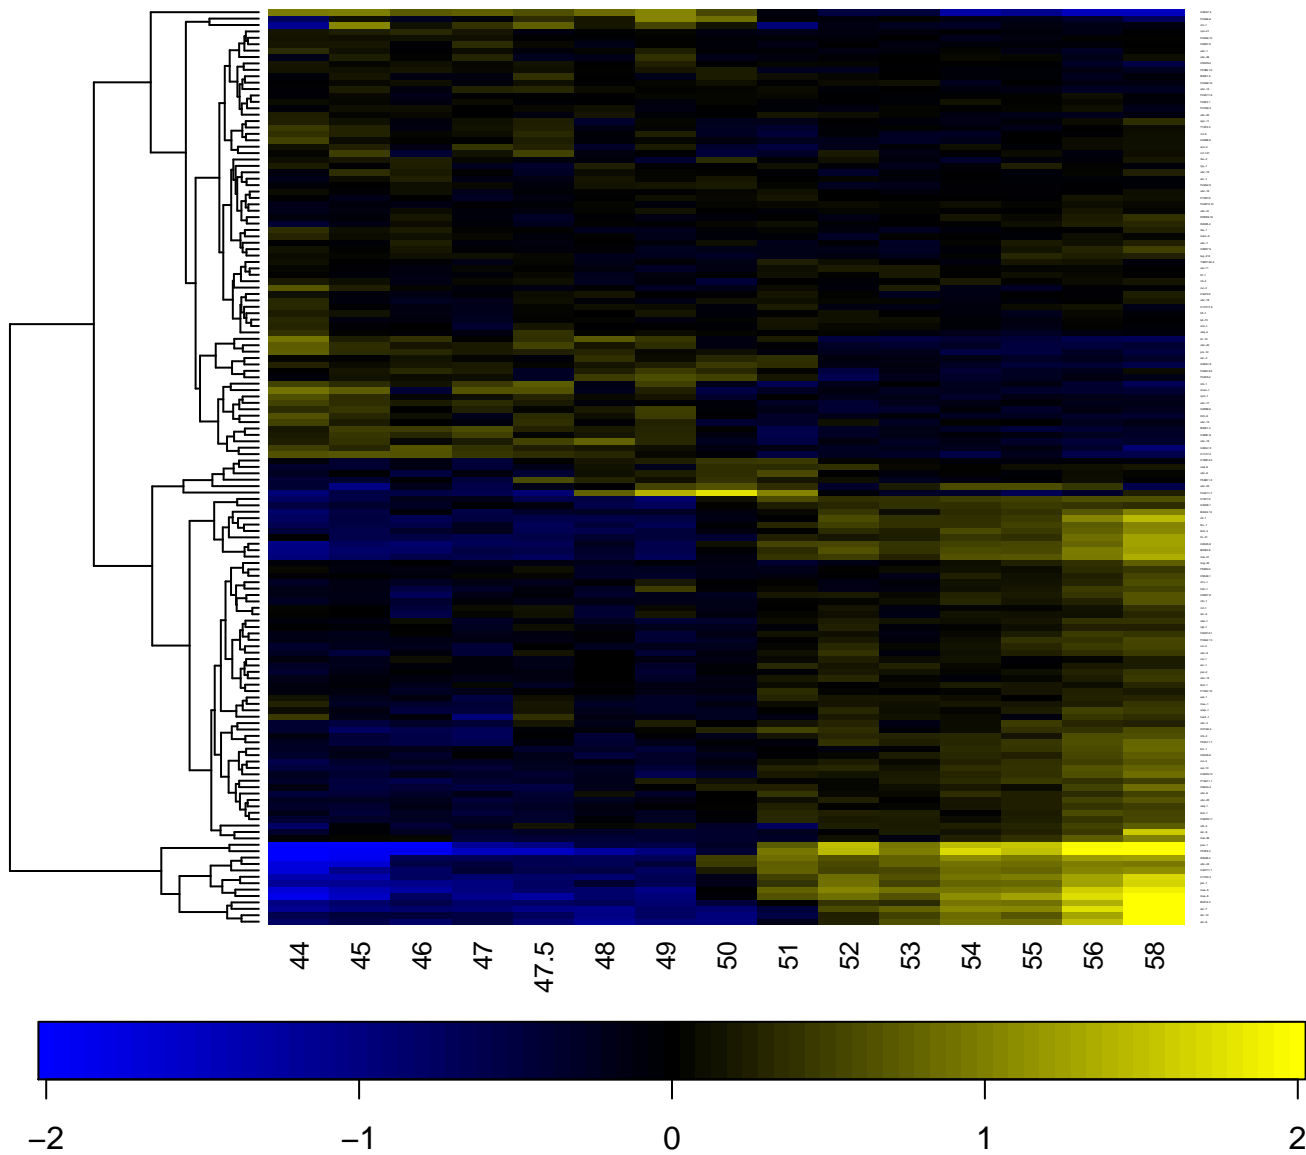



# Wnt signaling

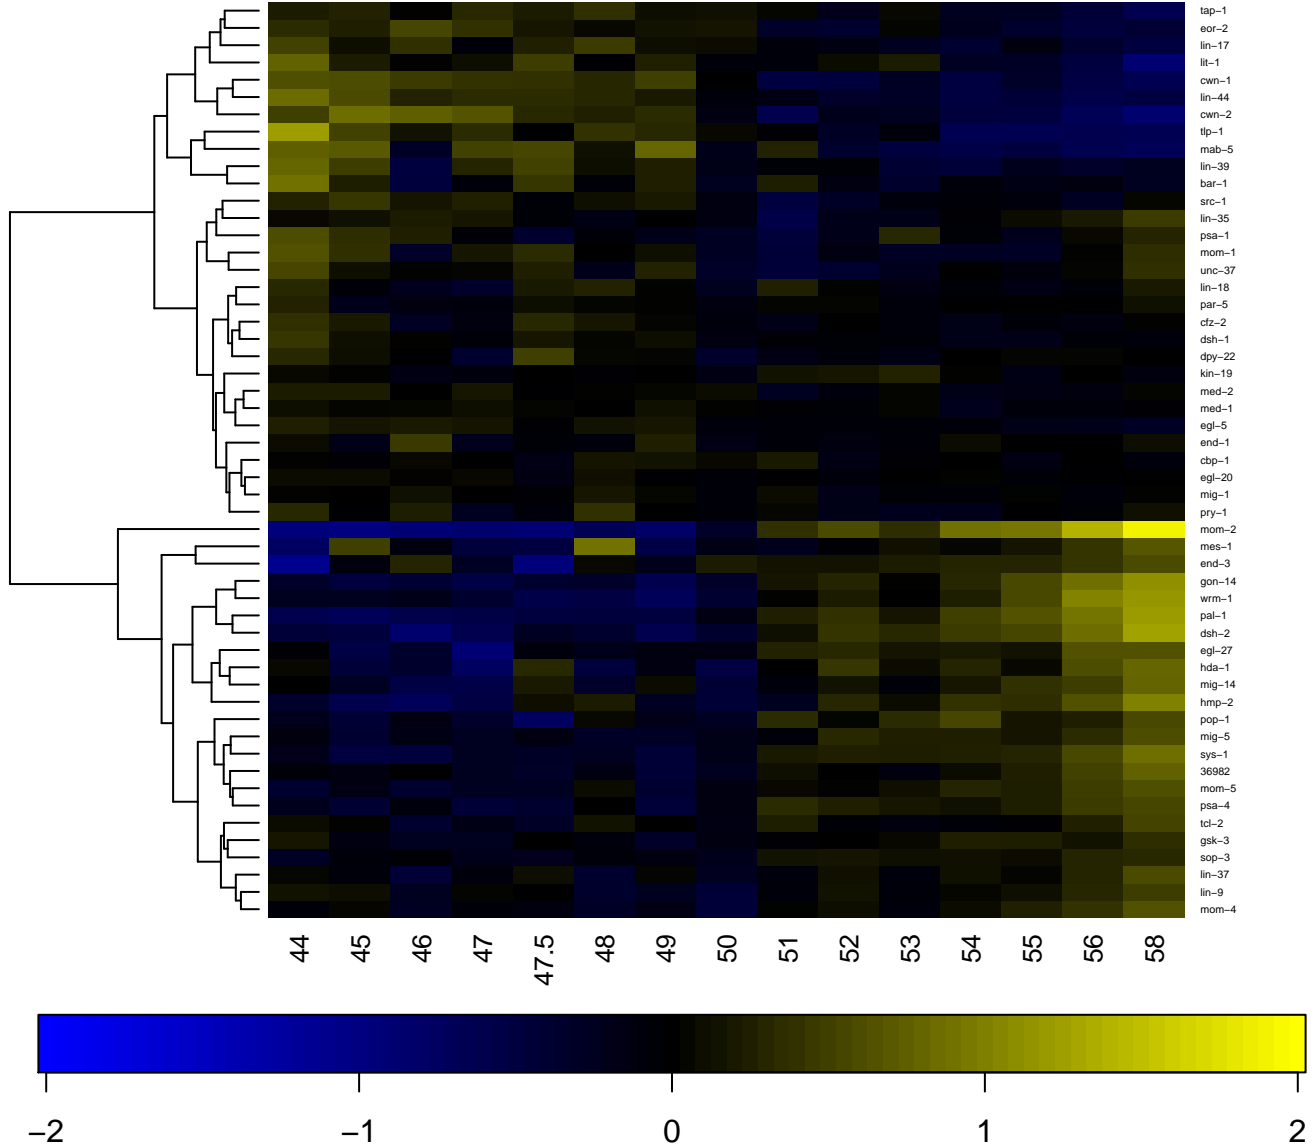



**Supplementary file J | Development as a source of variation in SPELL transcript profiles.**

All the sample comparisons of the micro-array experiments in the SPELL data base were tested for enrichment of developmental marker genes (cluster 1) in the top 10% up or down regulated genes. **The upper panel** shows the significance of the enrichment using a hyper-geometric test, green shows the results for the 10% most up regulated genes and red for the 10% most down regulated genes. **The lower panel** shows a box plot with the log<sub>2</sub> ratios of the overlapping genes developmental marker genes from cluster 1 and the 10% most up or down regulated genes. The sample names as obtained from SPELL are show on the x-axis. The publication with the original micro-array data and experimental details can be found with the Wormbase Paper ID number starting with “WBPaper” shown as page title.

# WBPaper00004349

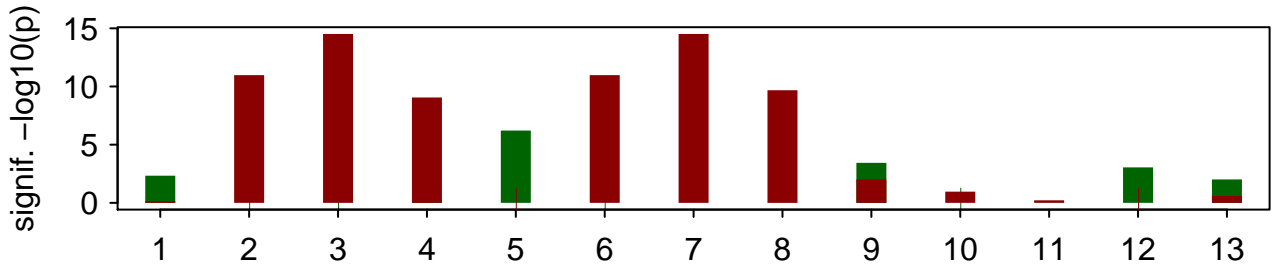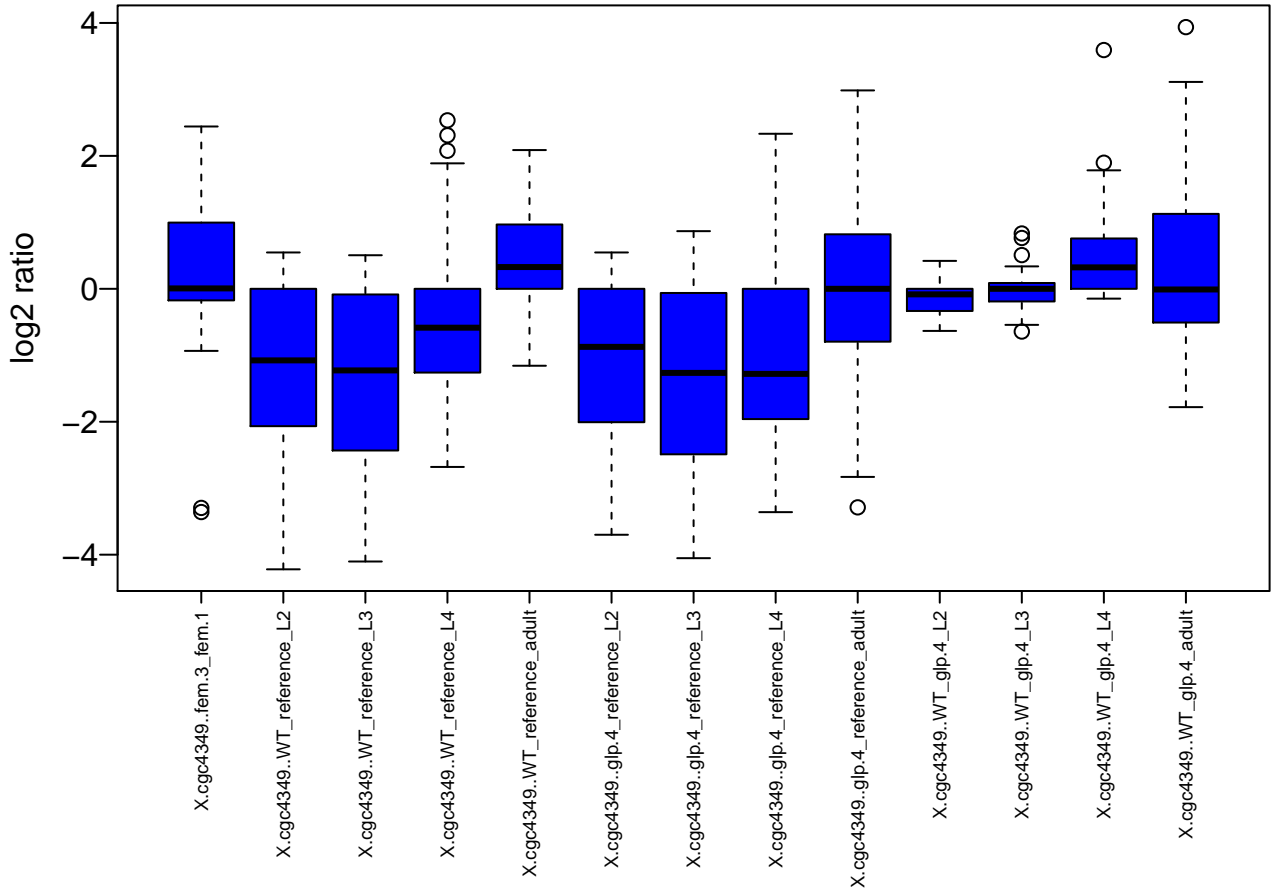

# WBPaper00004386

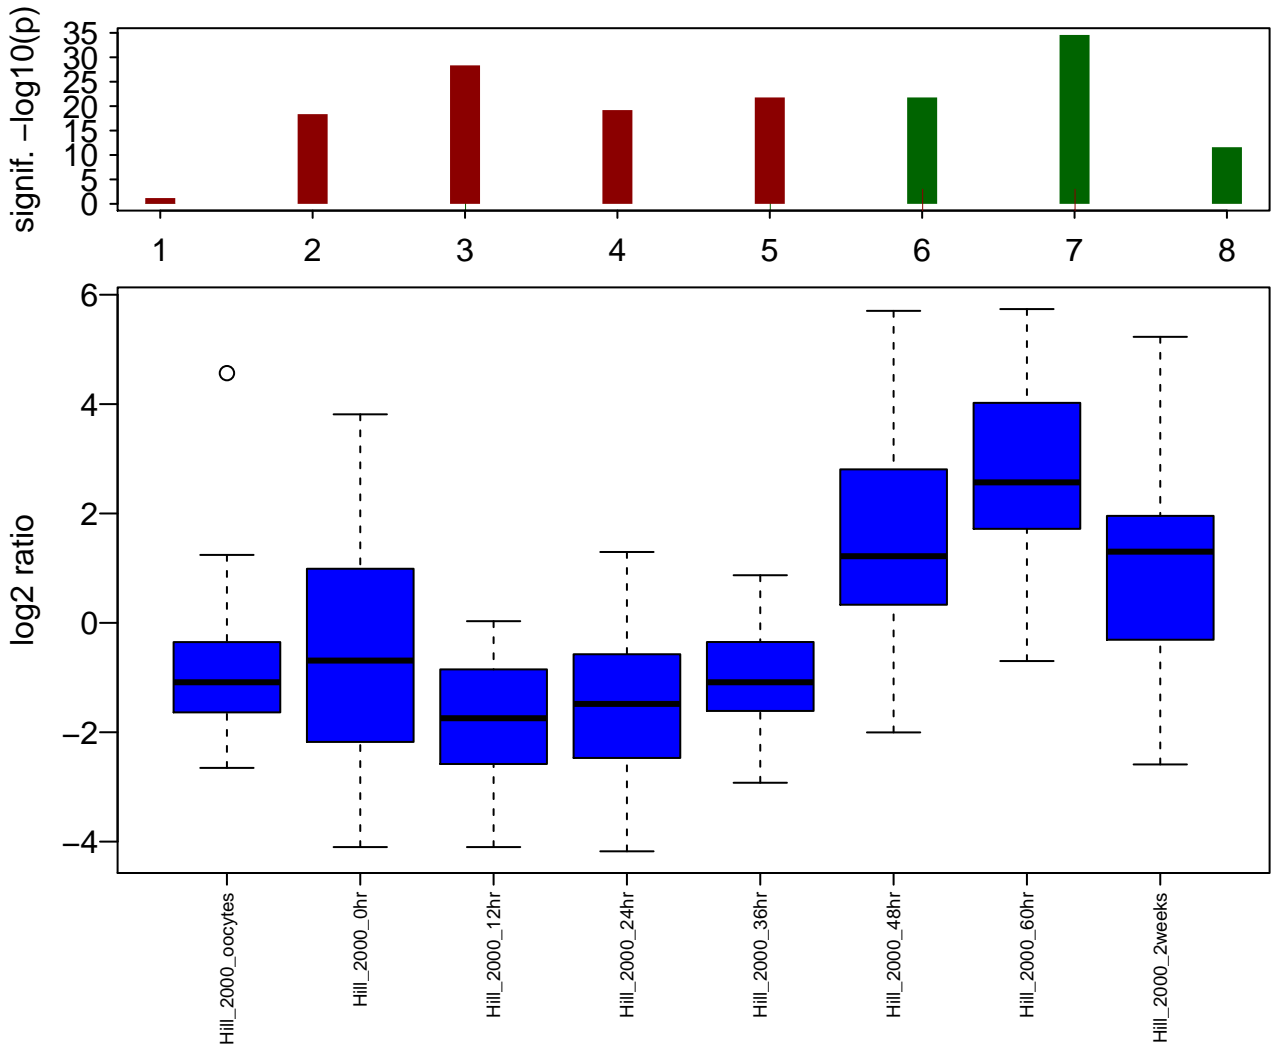



# WBPaper00004489

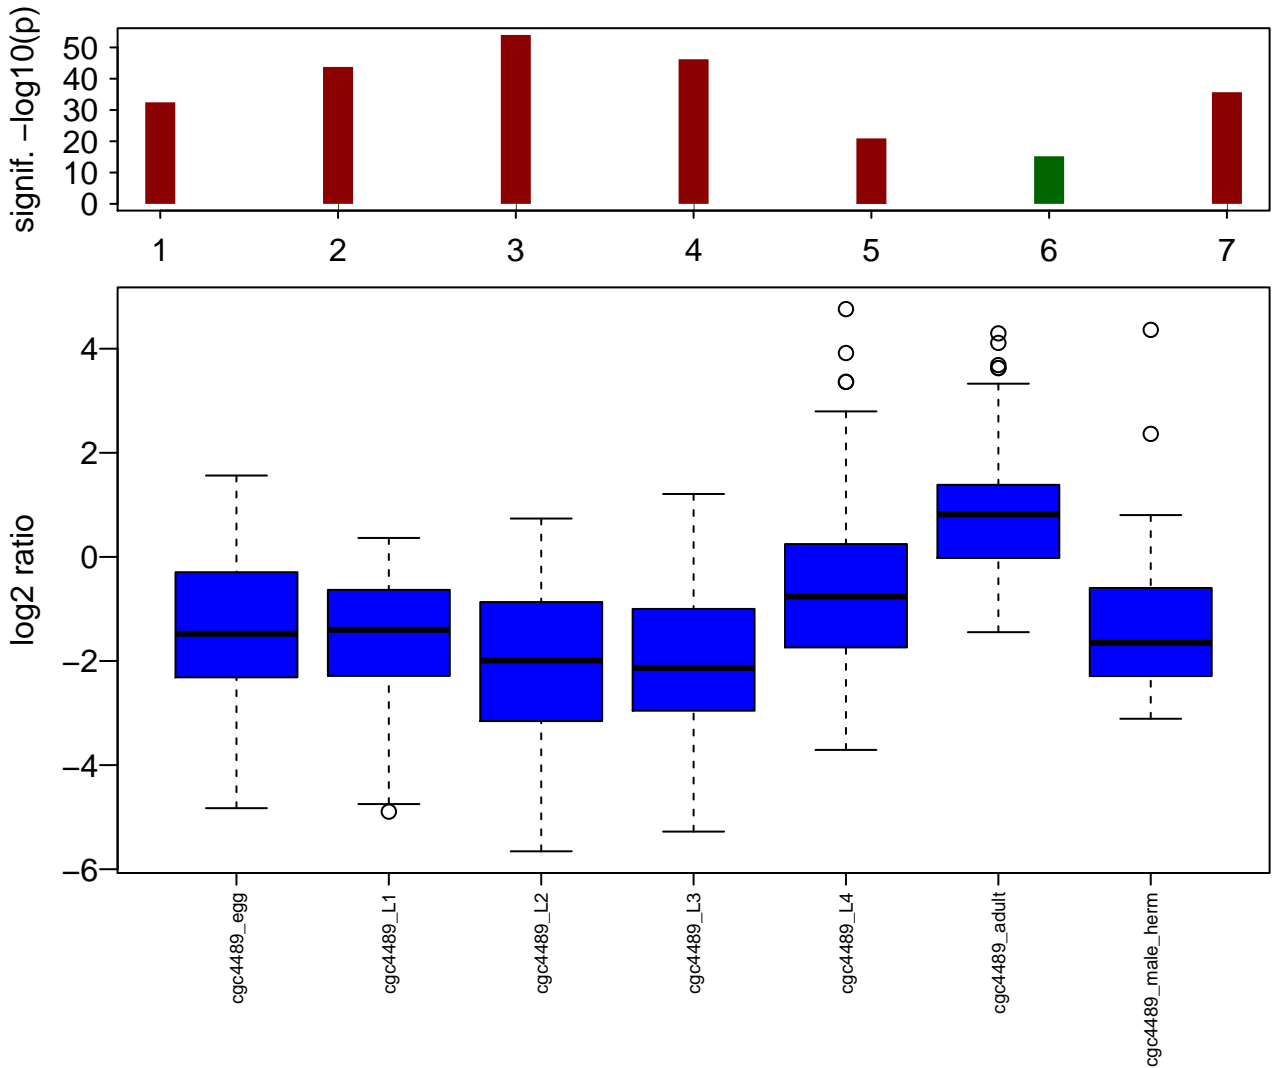

# WBPaper00004966

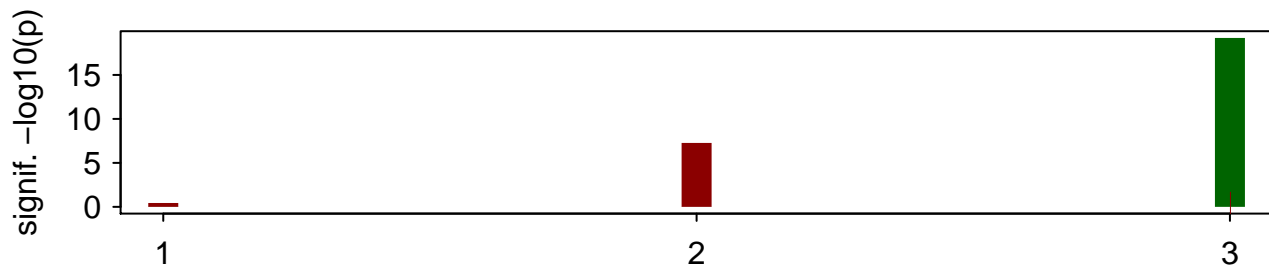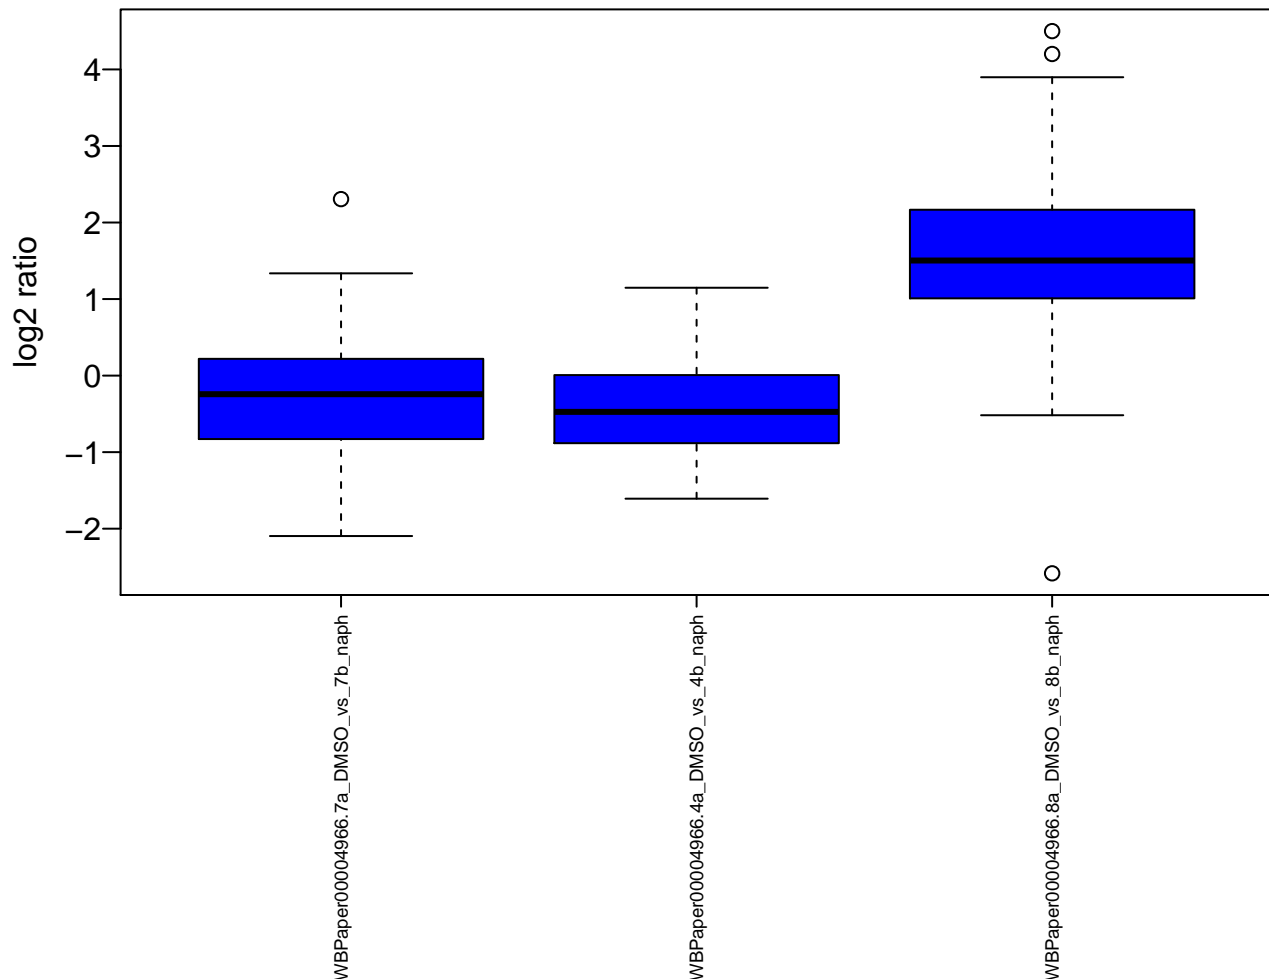

# WBPaper00005124

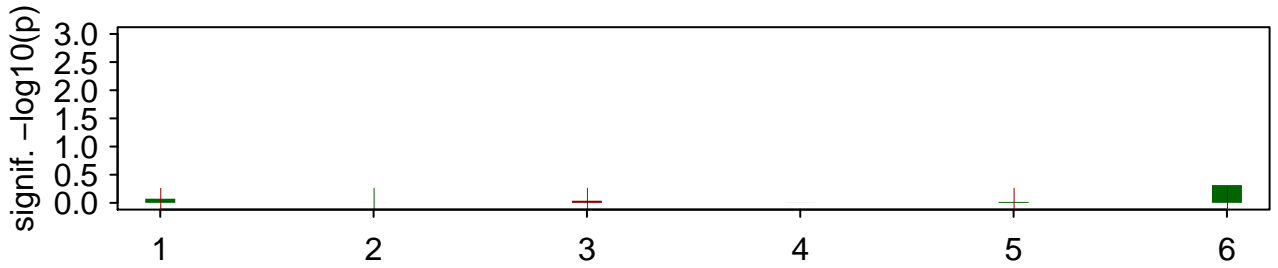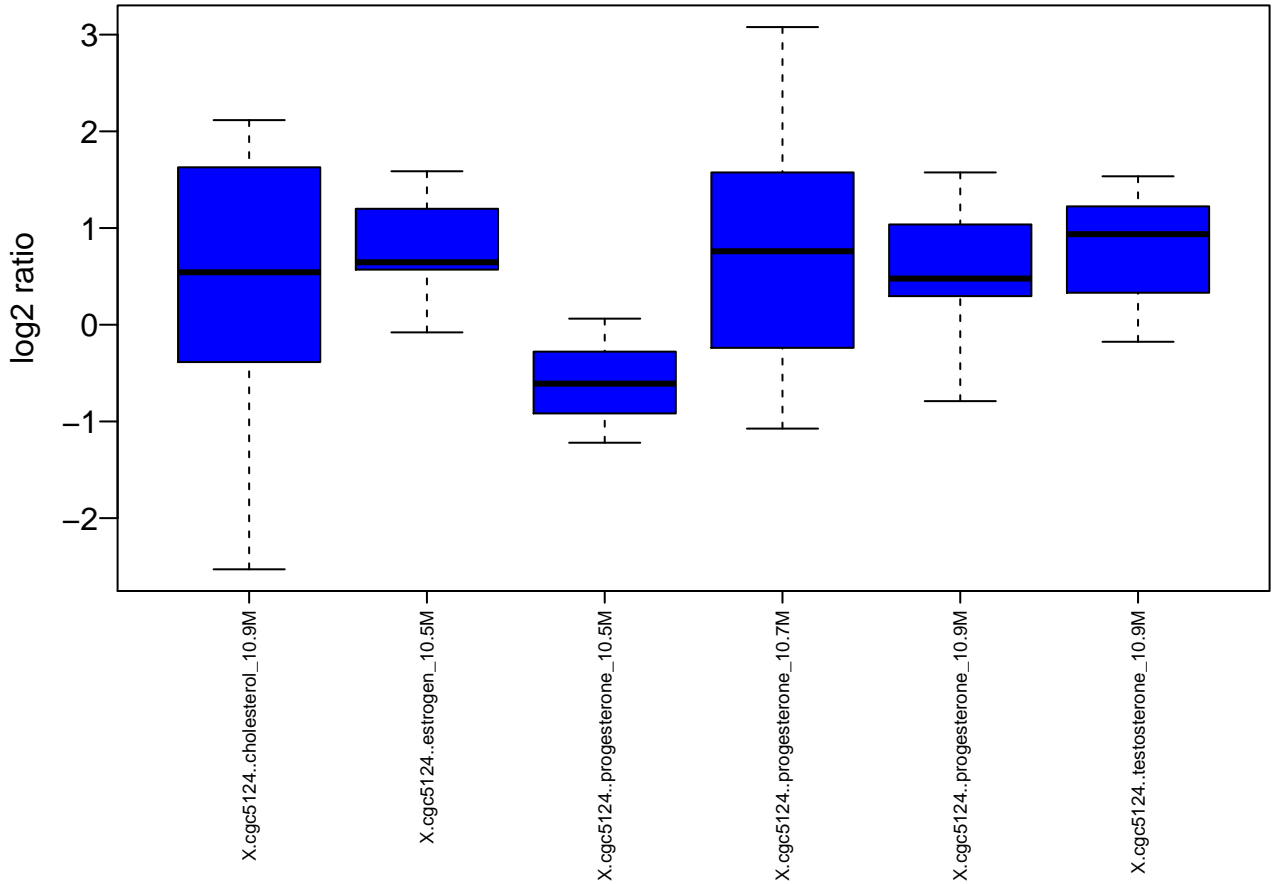

# WBPaper00005376

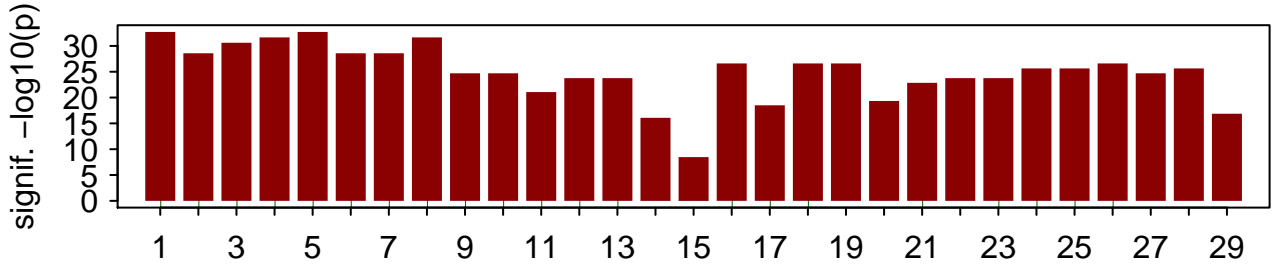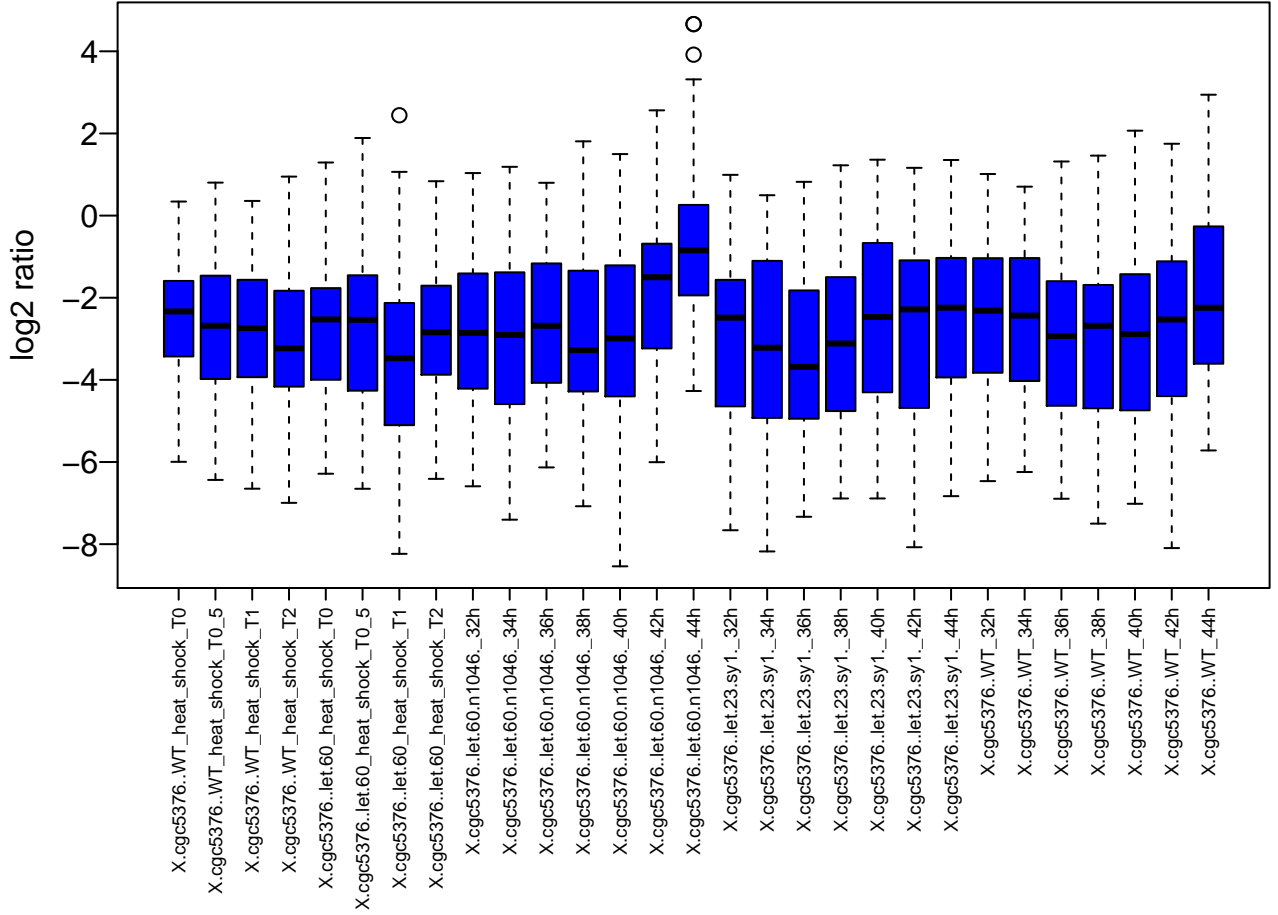

# WBPaper00005428

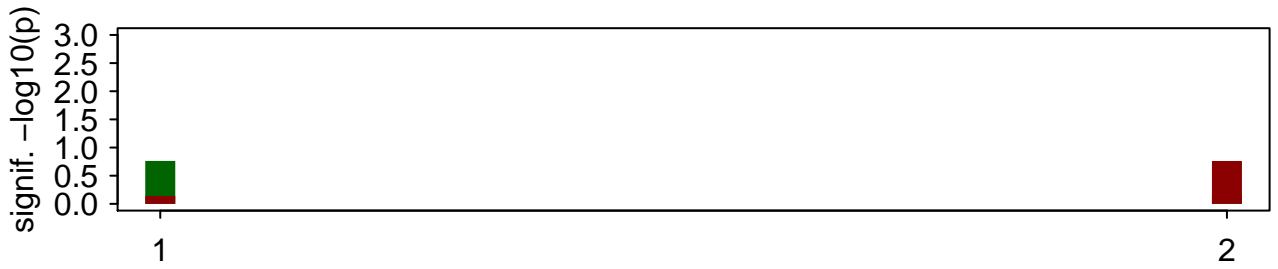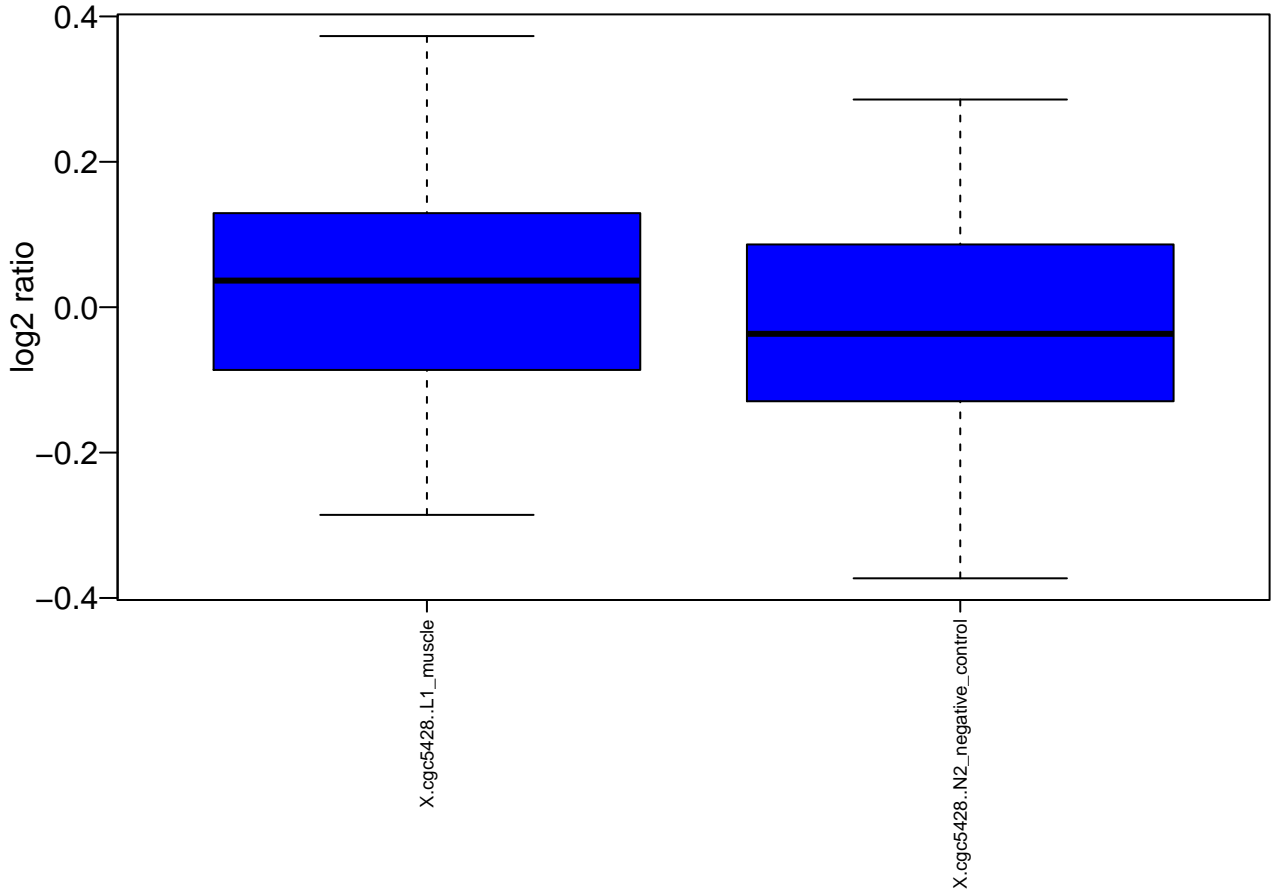

# WBPaper00005432

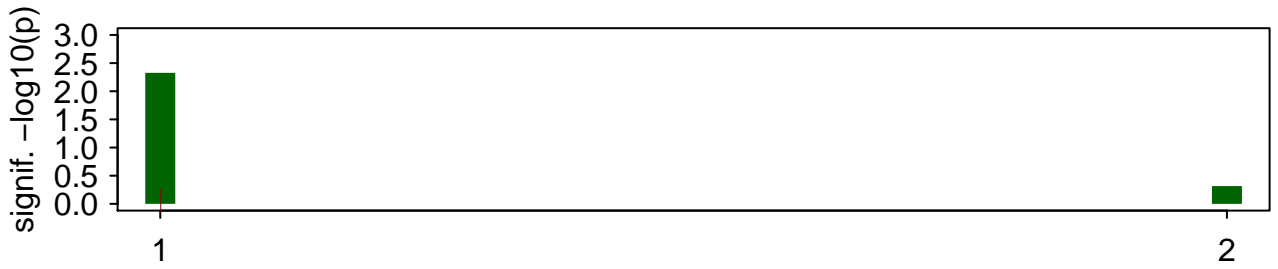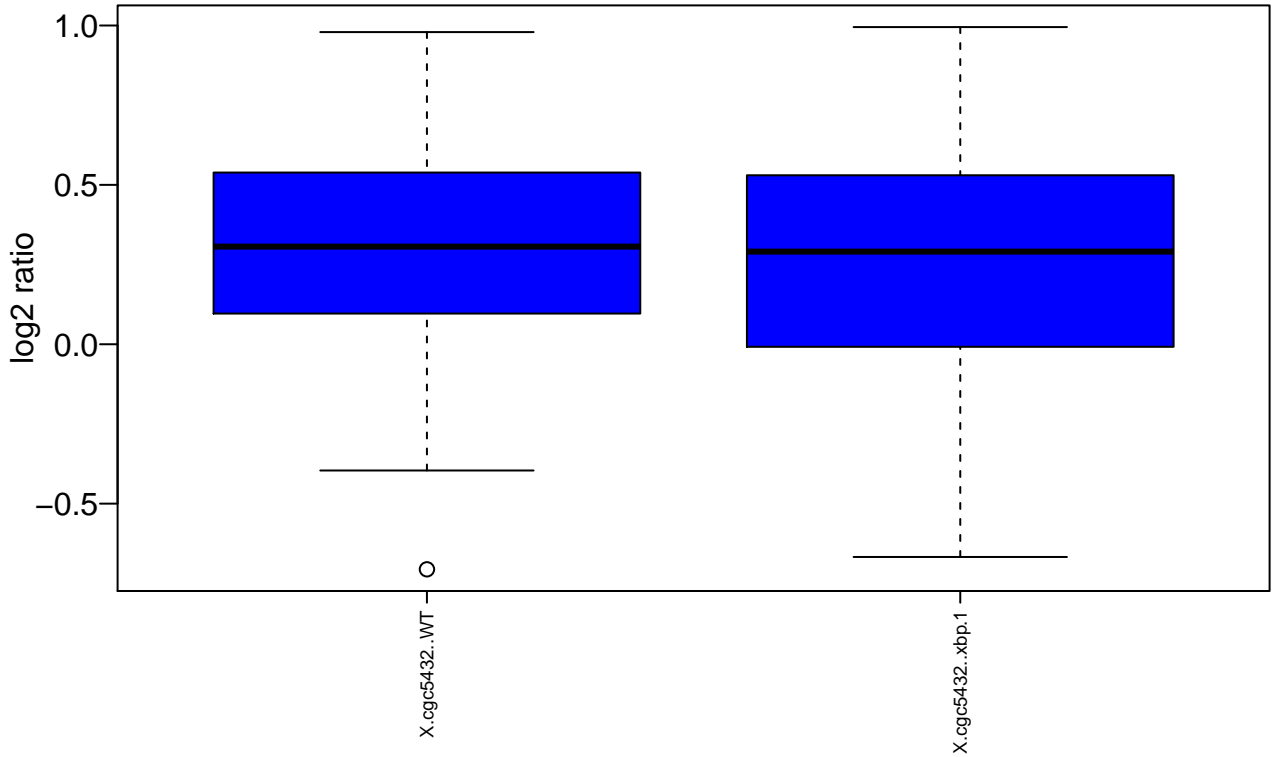

# WBPaper00005475

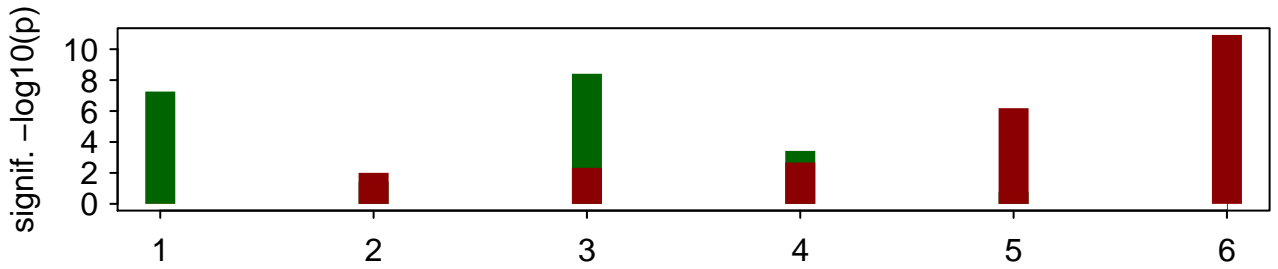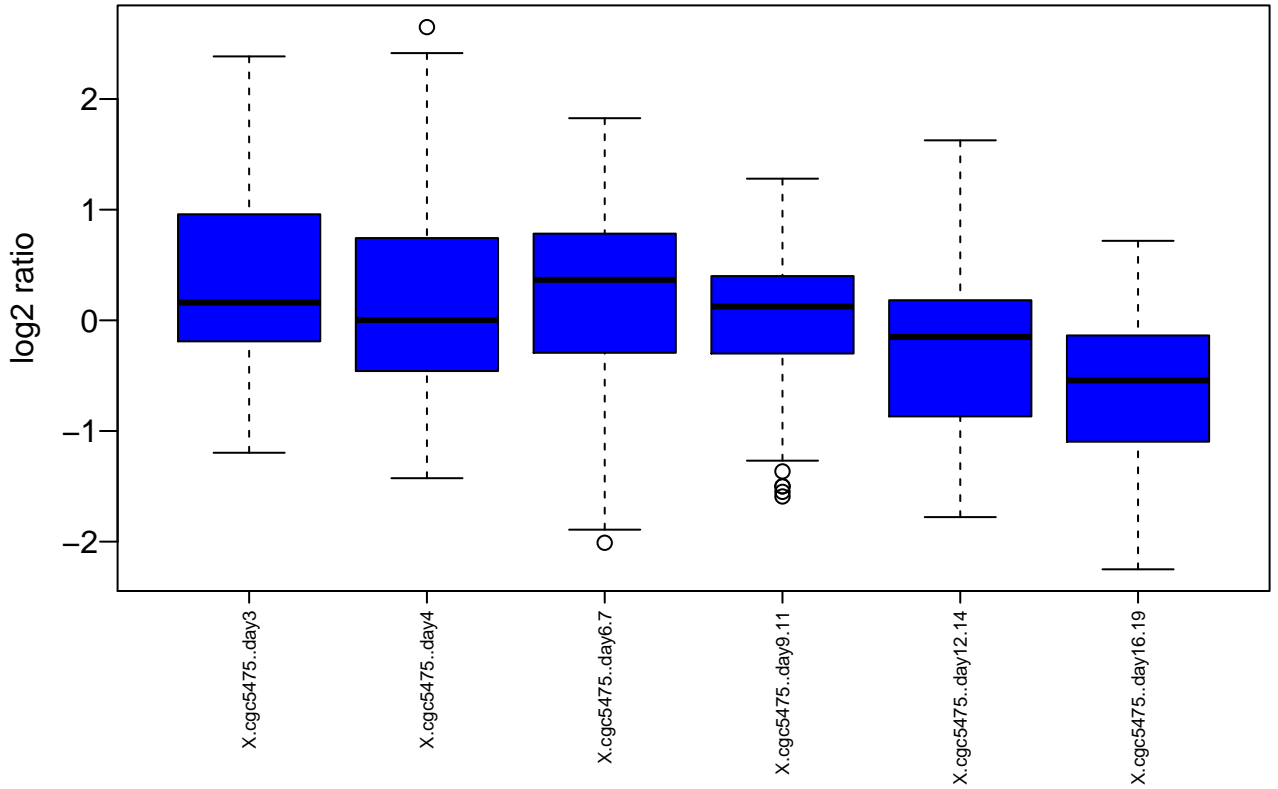

# WBPaper00005751

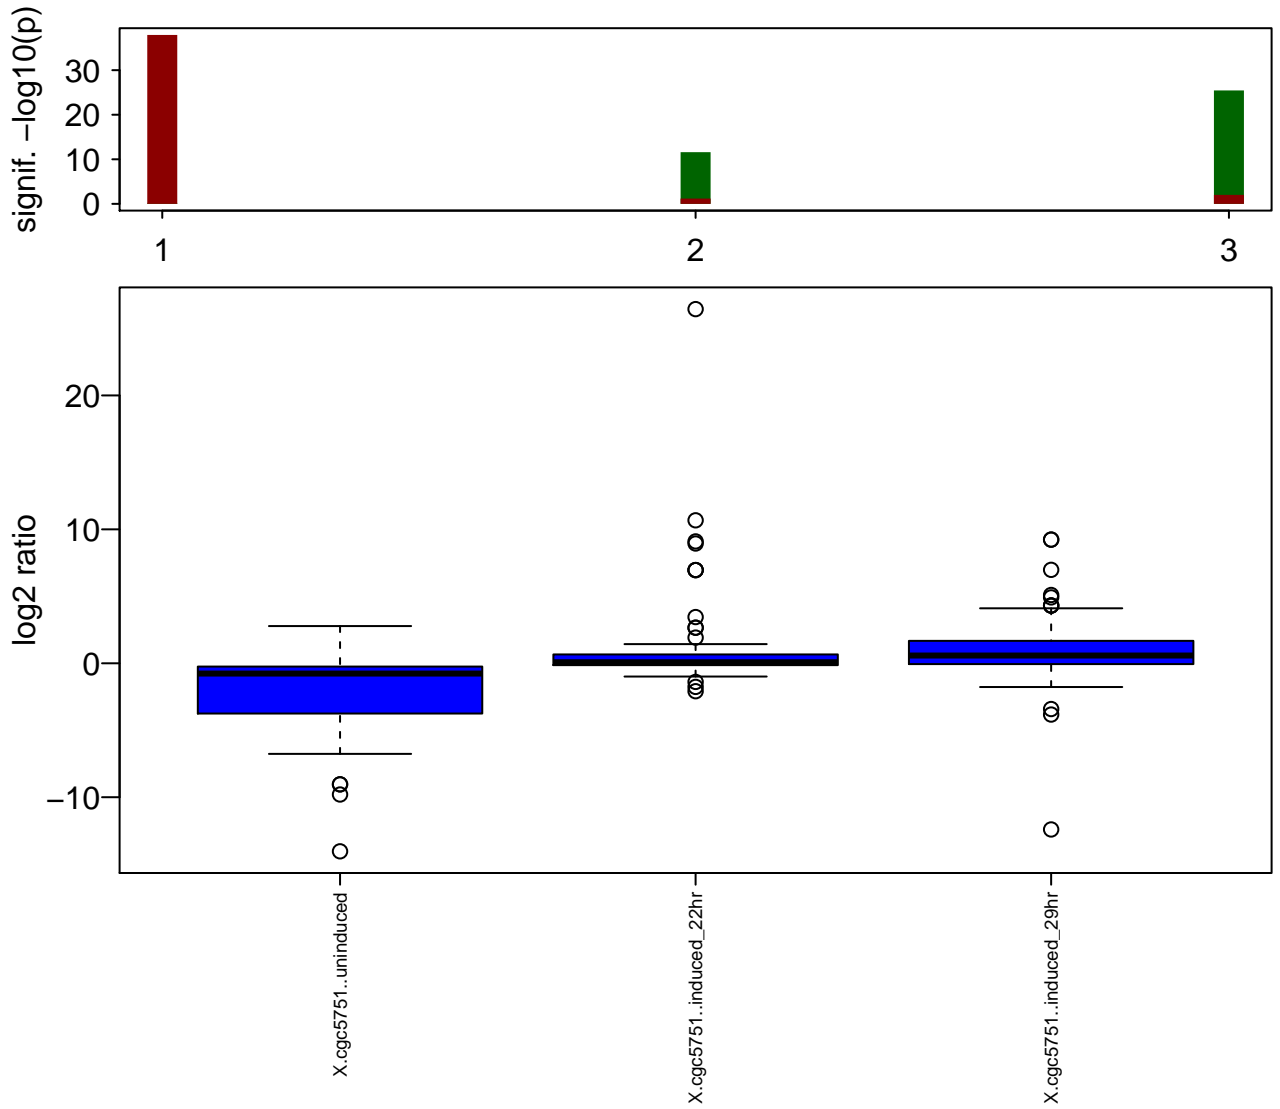



# WBPaper00005767

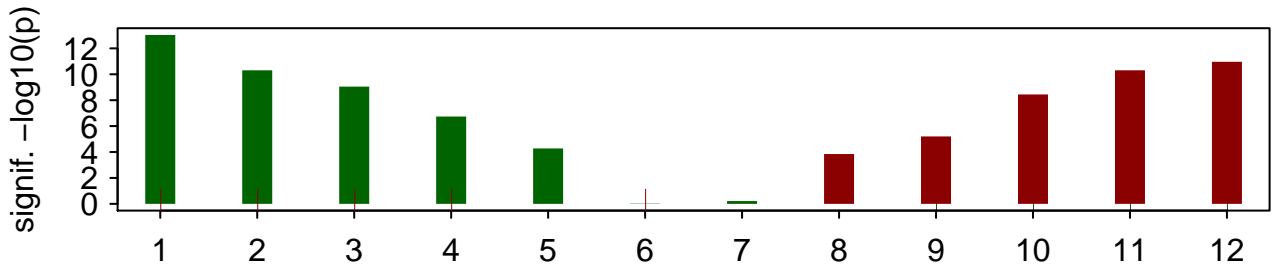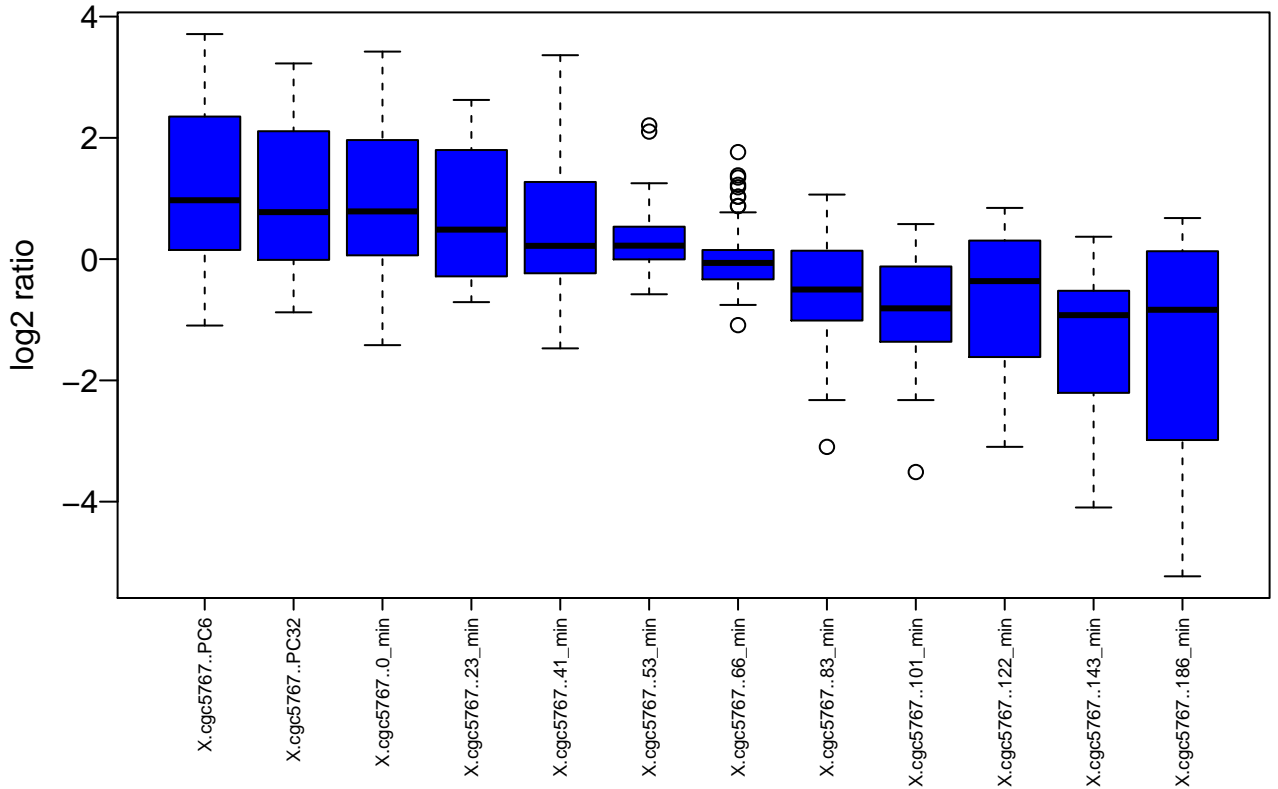

# WBPaper0005859

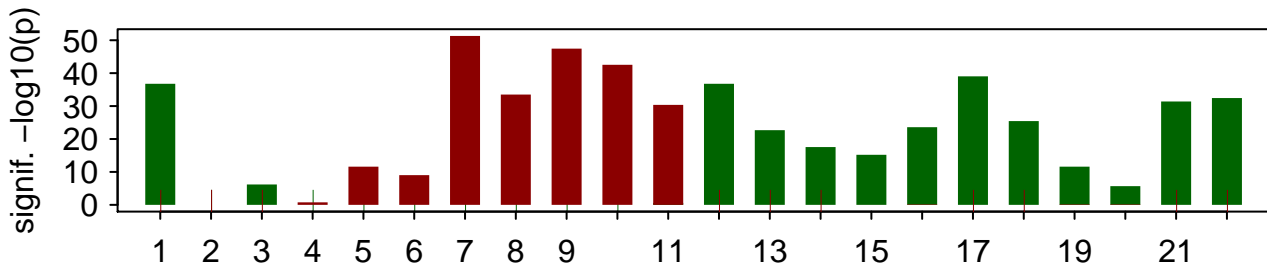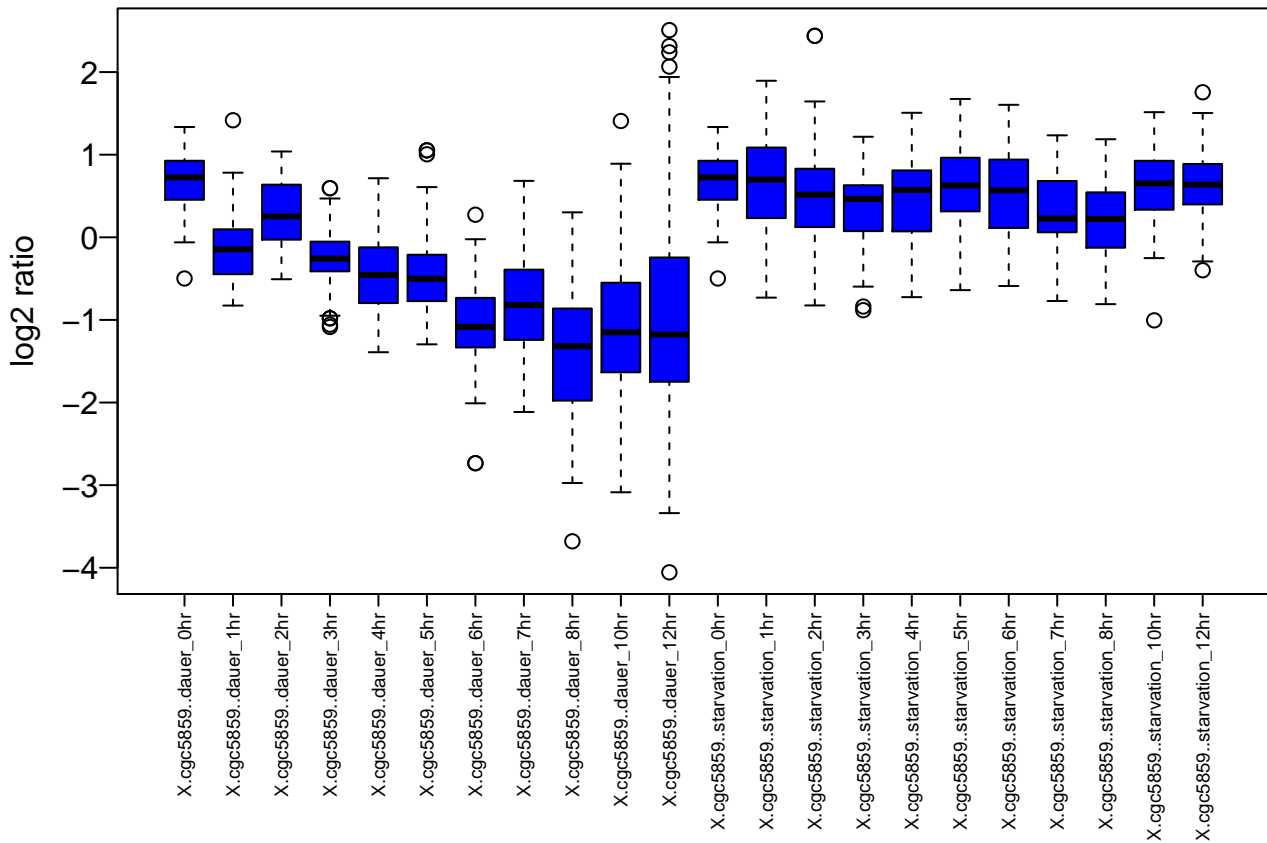

# WBPaper0005976

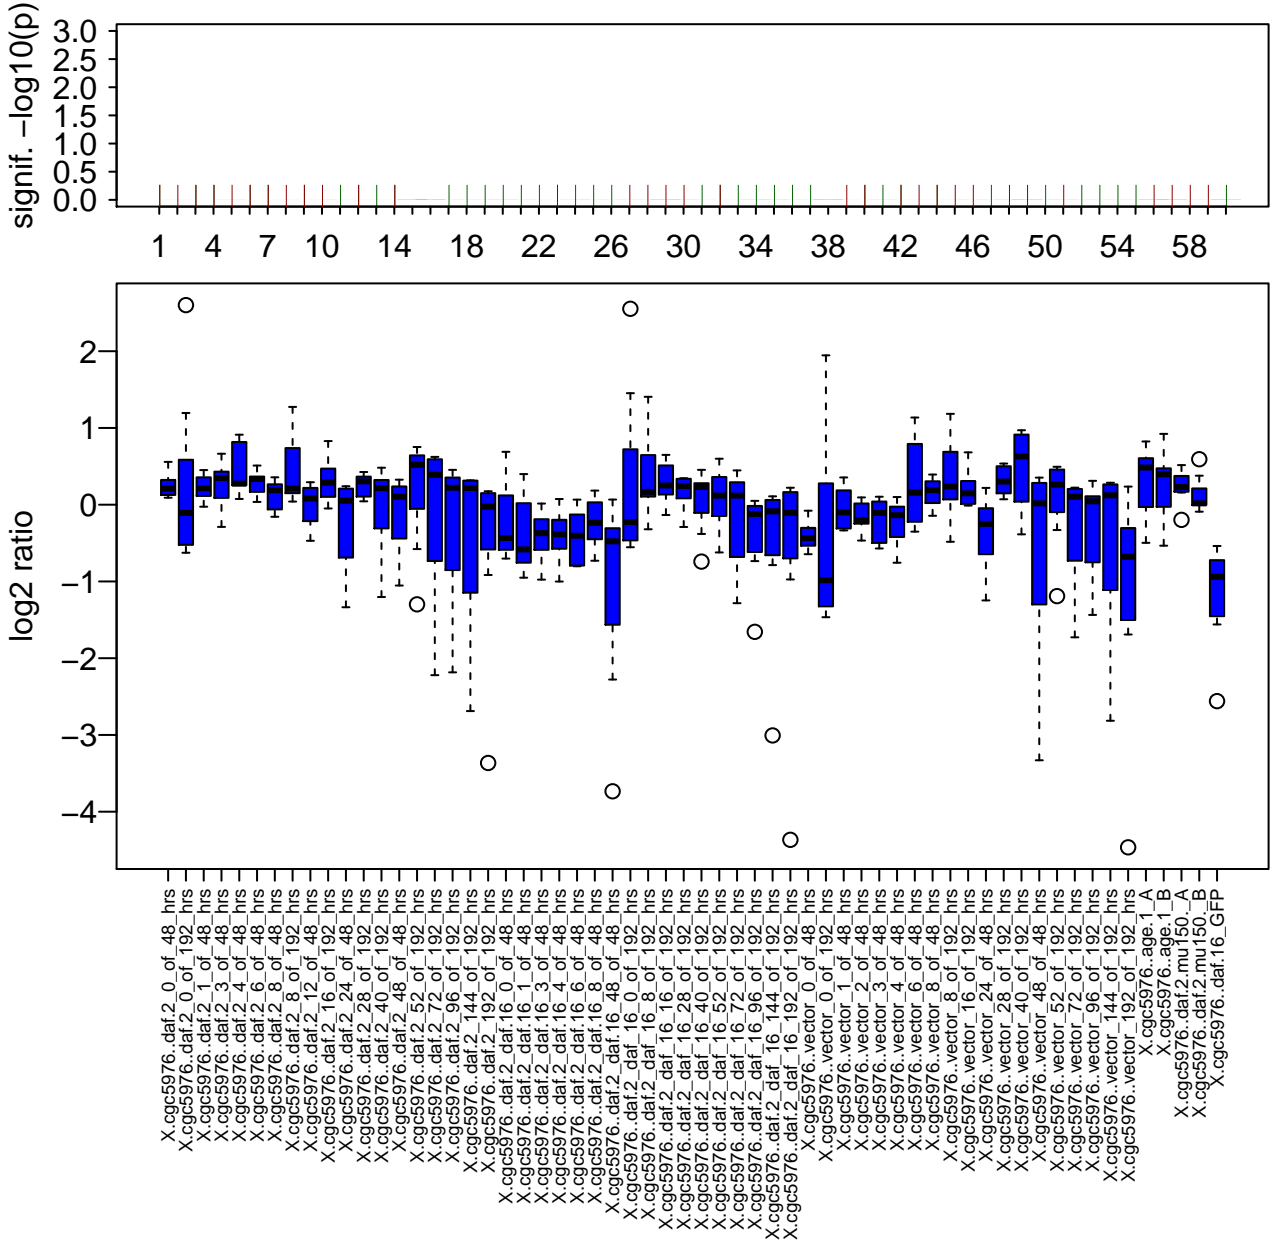

# WBPaper00006265

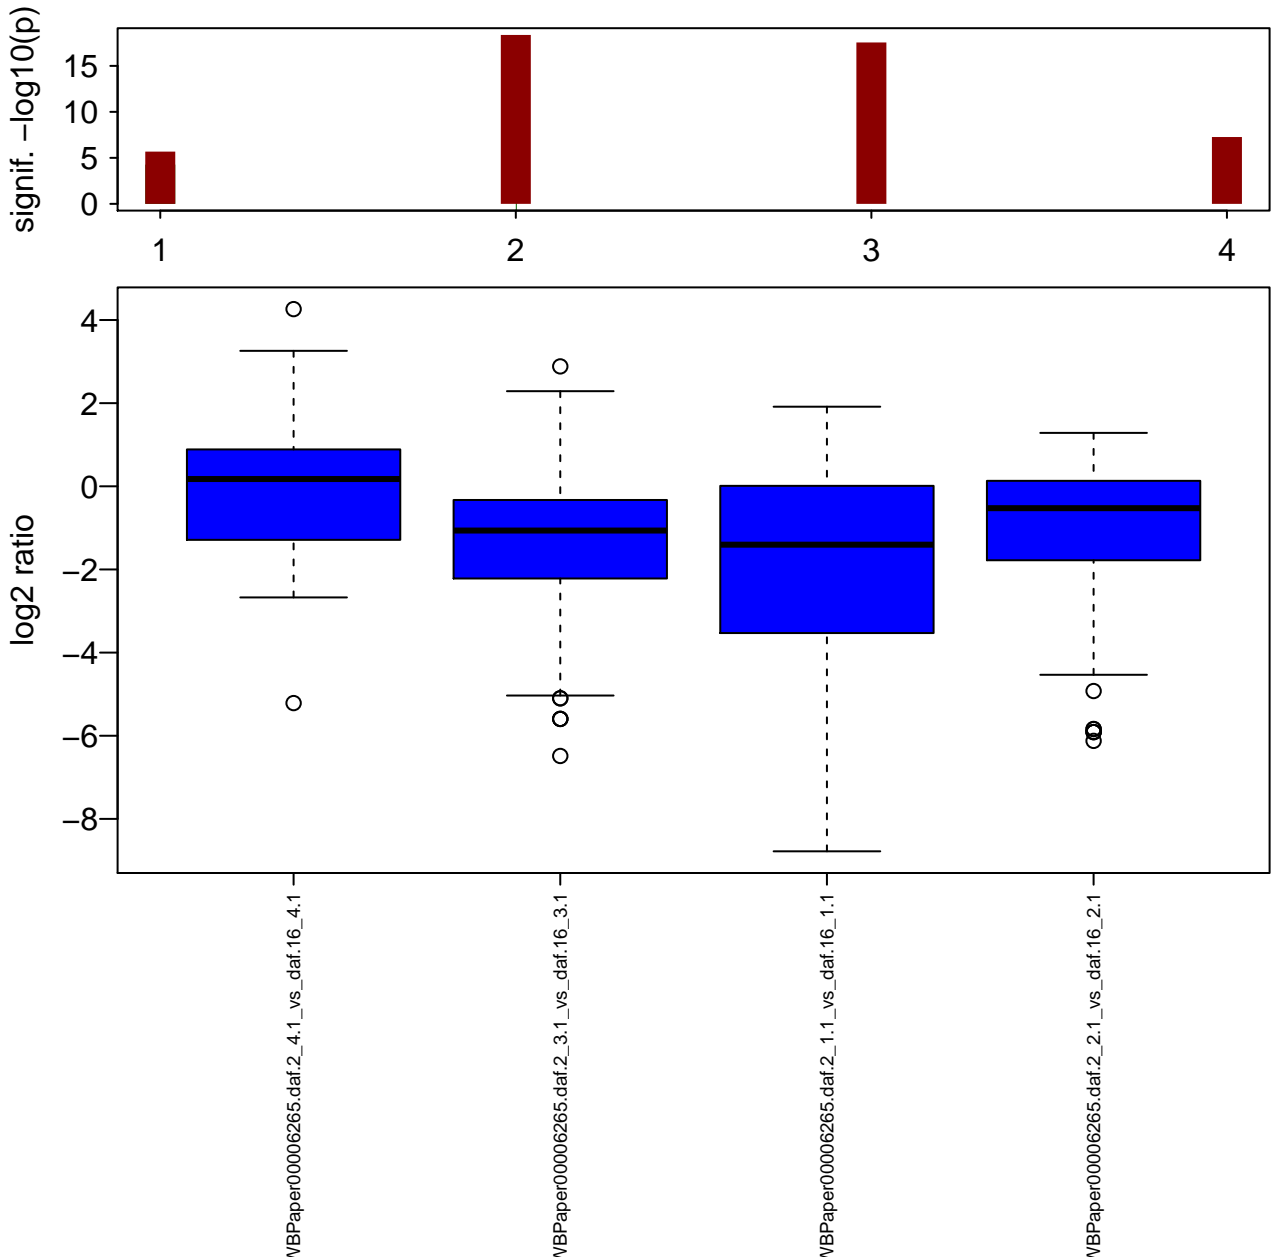

# WBPaper00006365

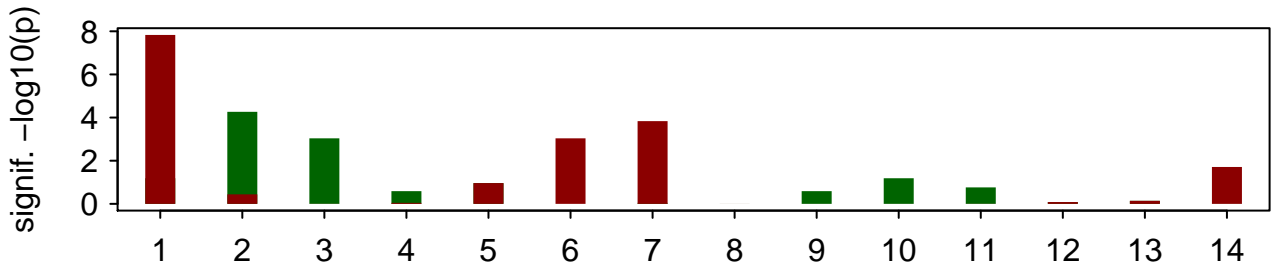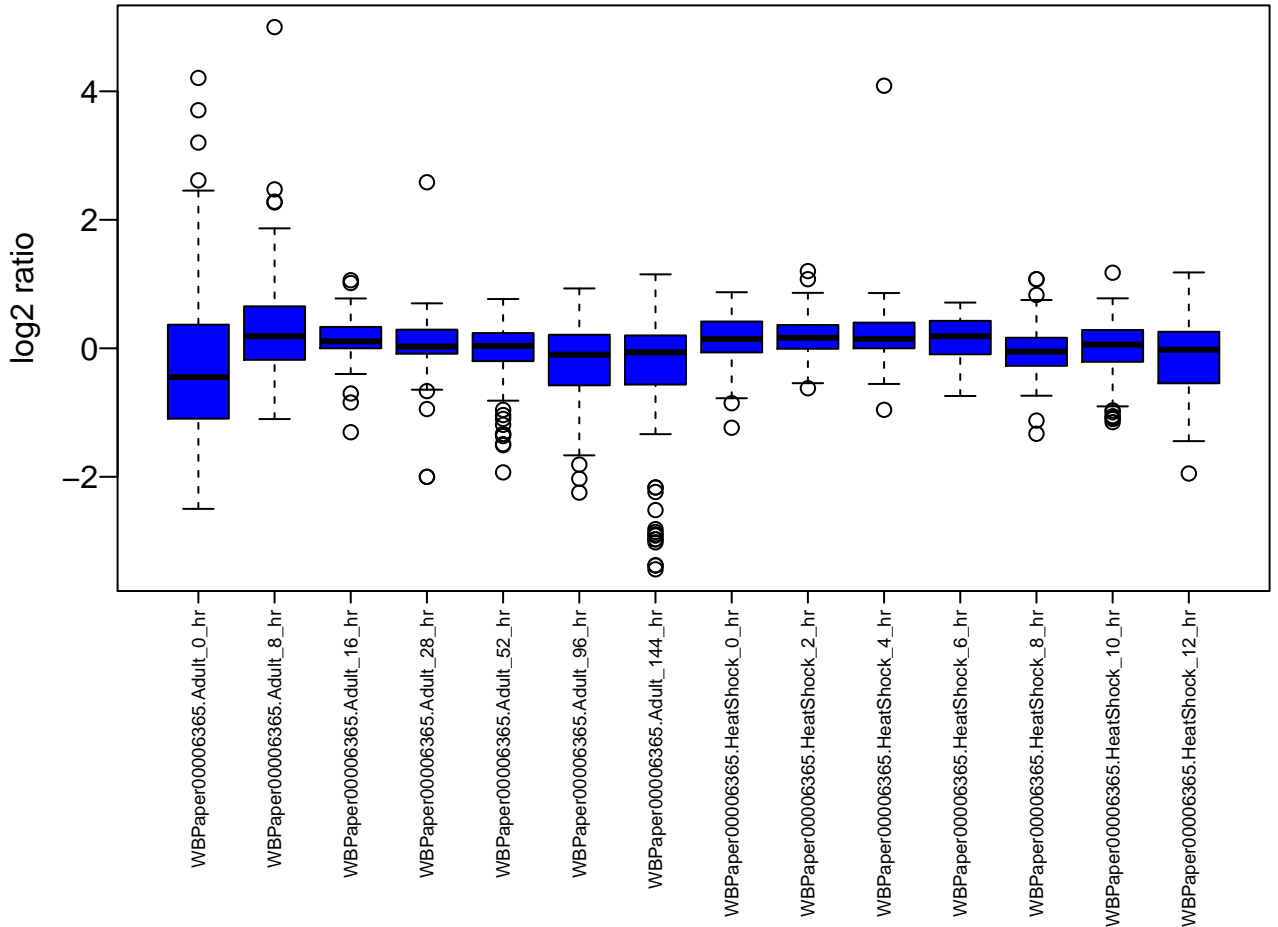

# WBPaper00006390

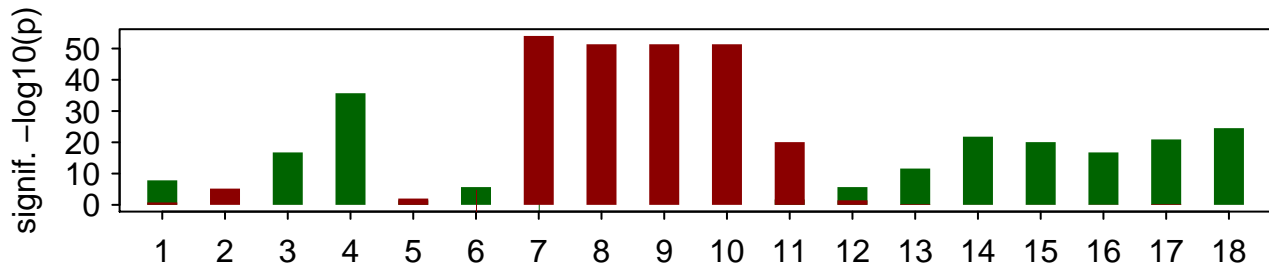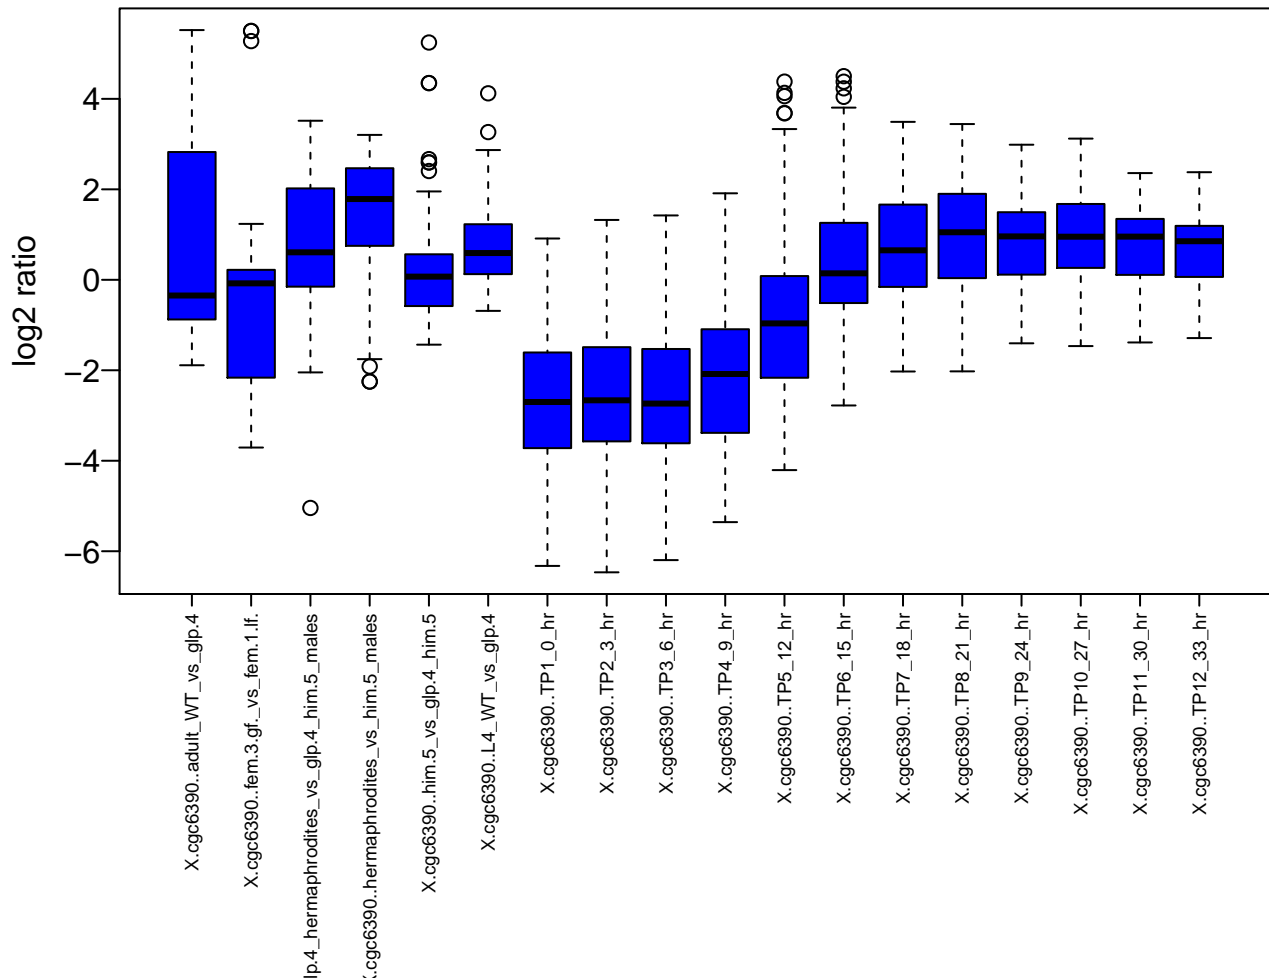

# WBPaper00006465

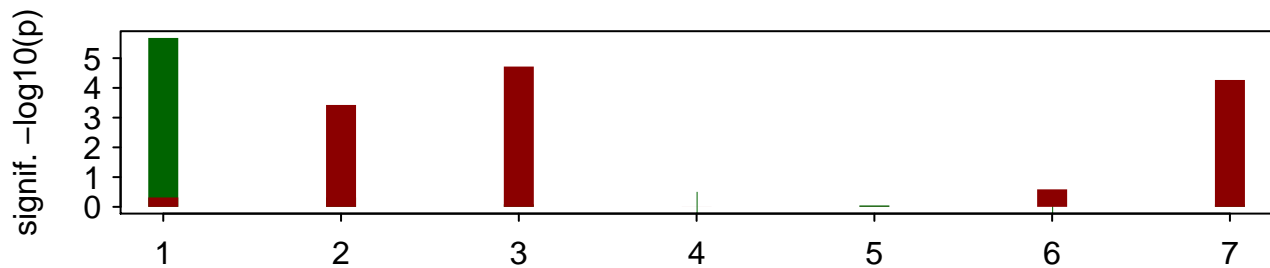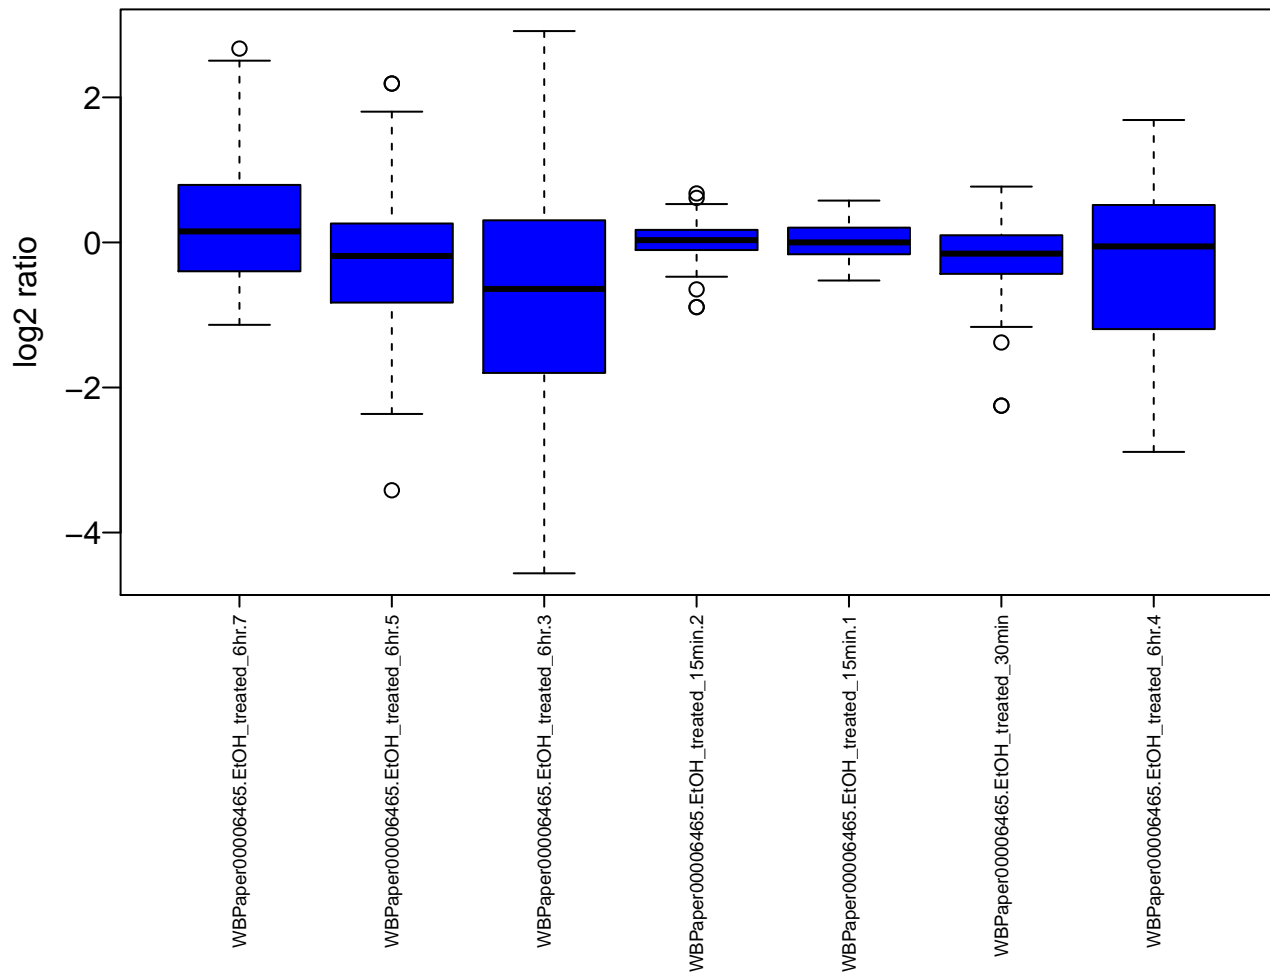

# WBPaper00013462

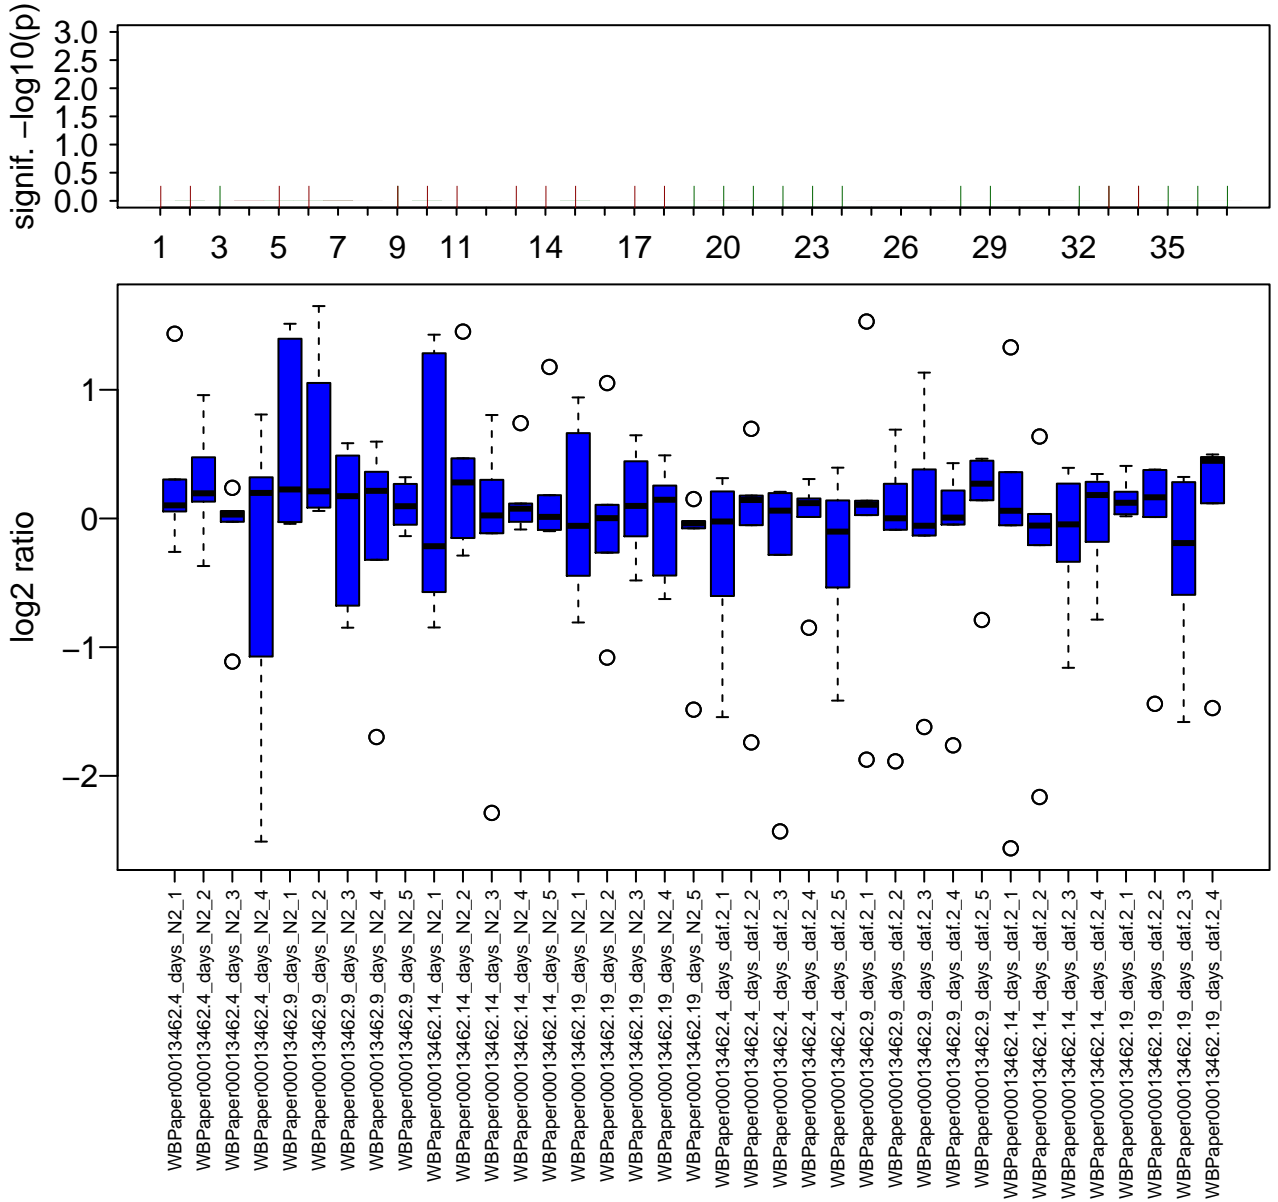



# WBPaper00024278

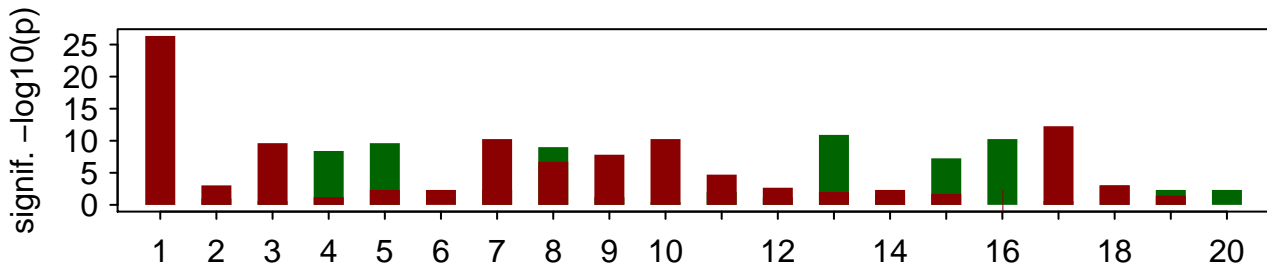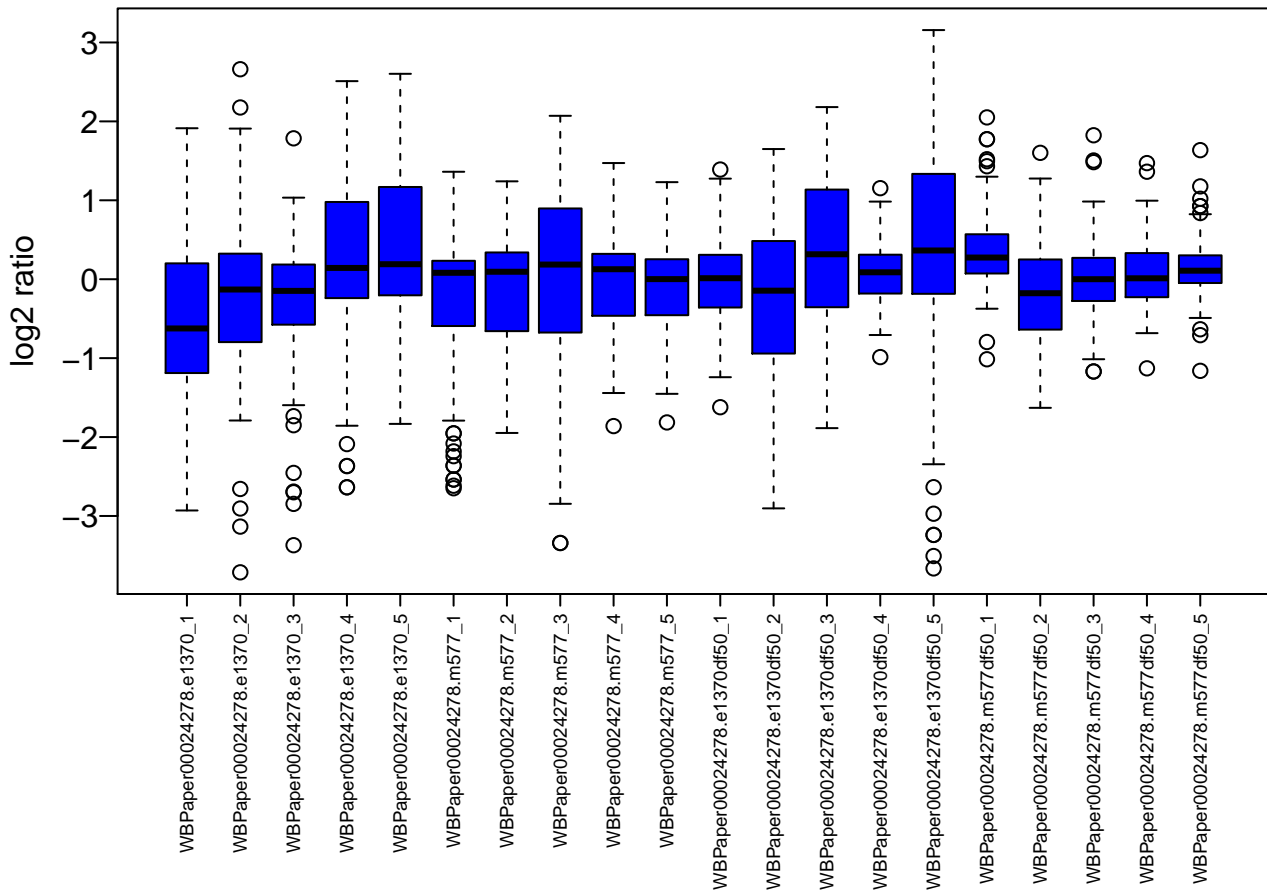

# WBPaper00024375

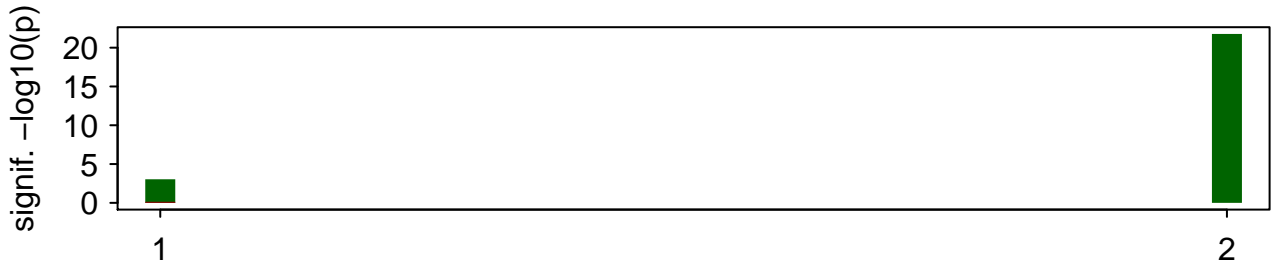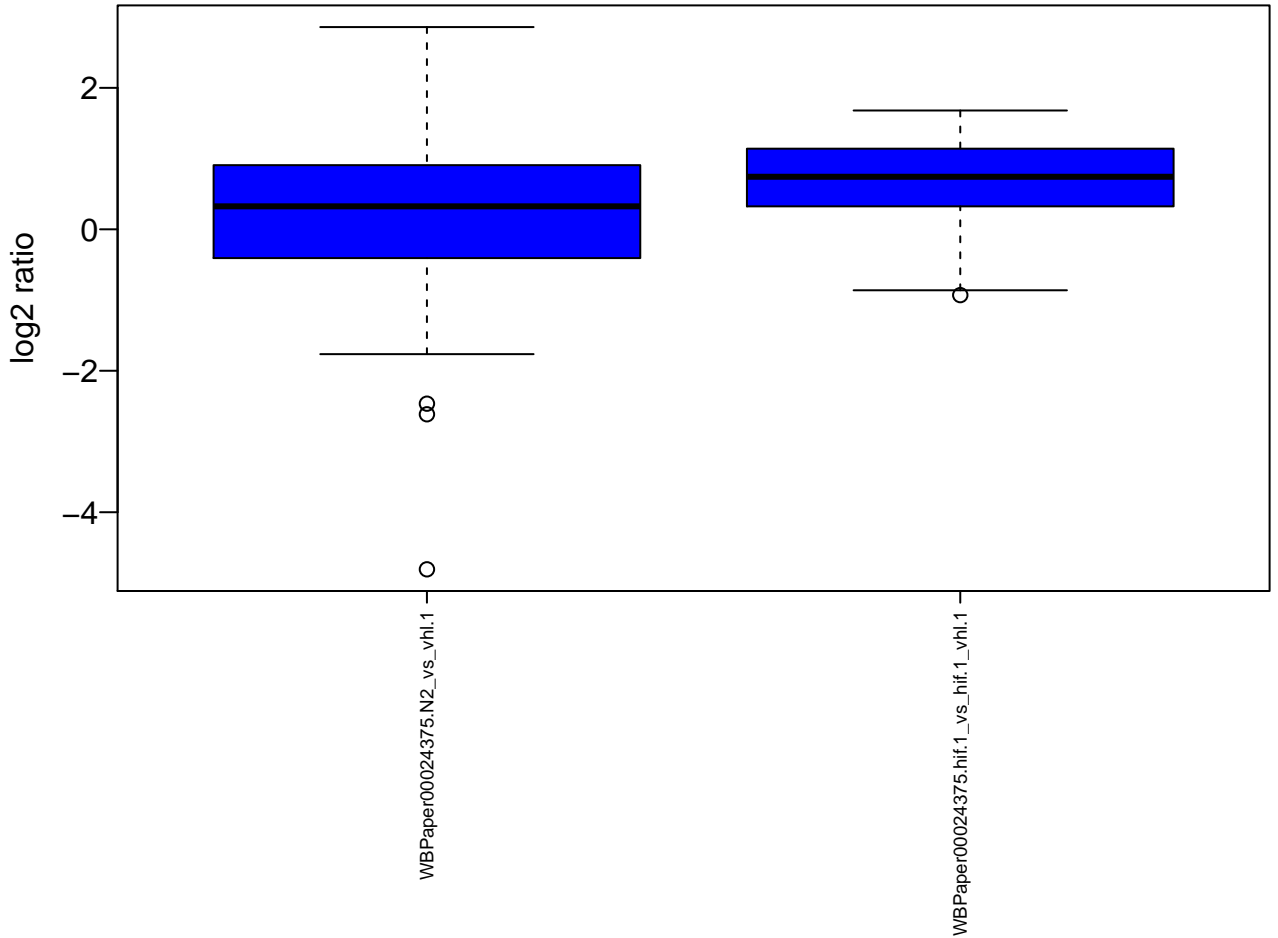

# WBPaper00024393

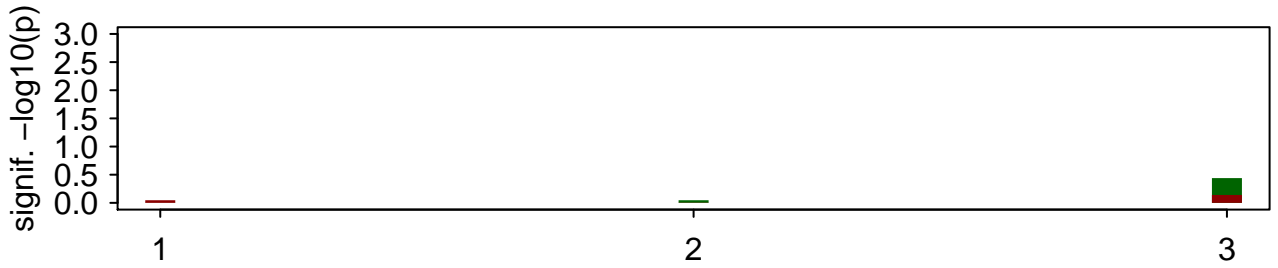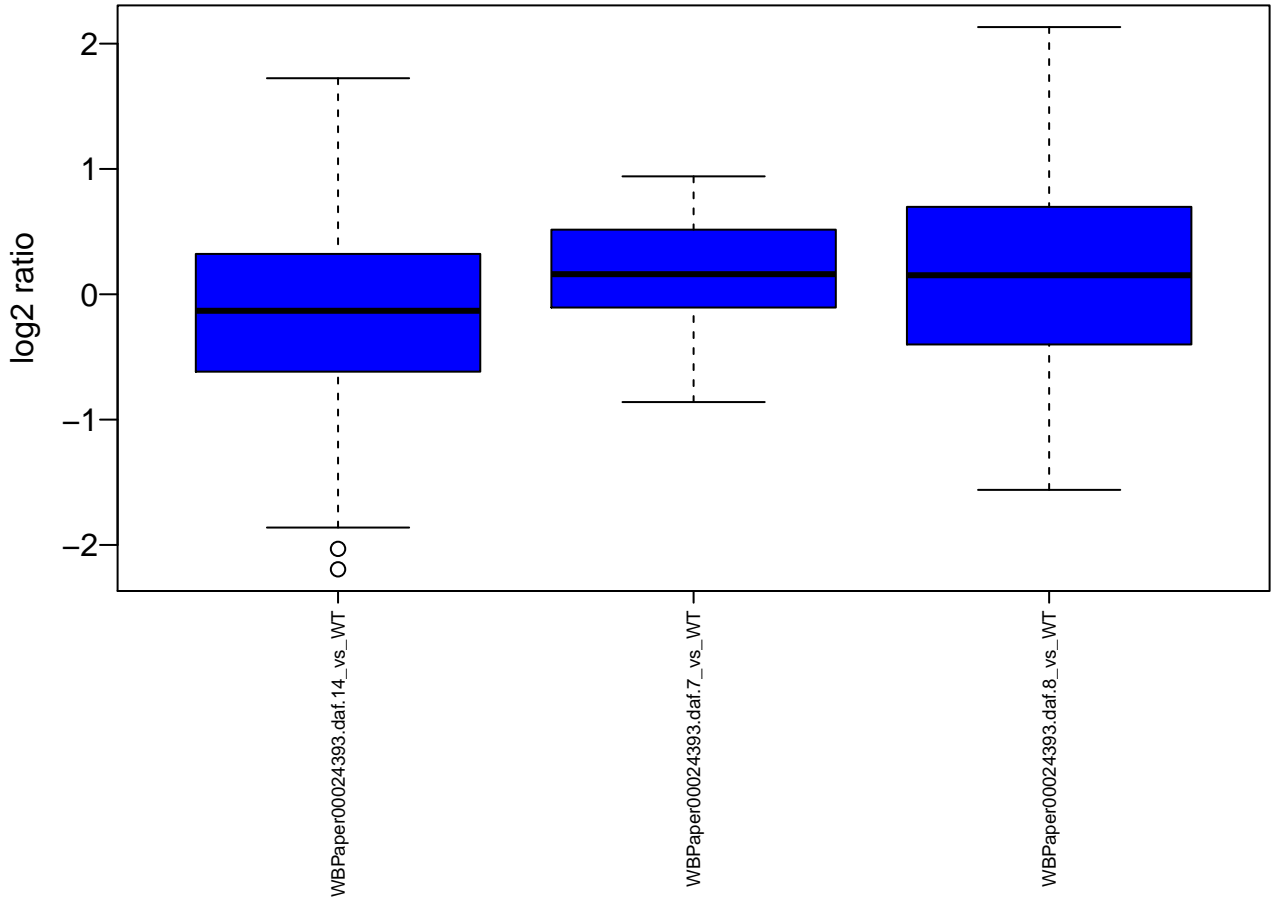

# WBPaper00024532

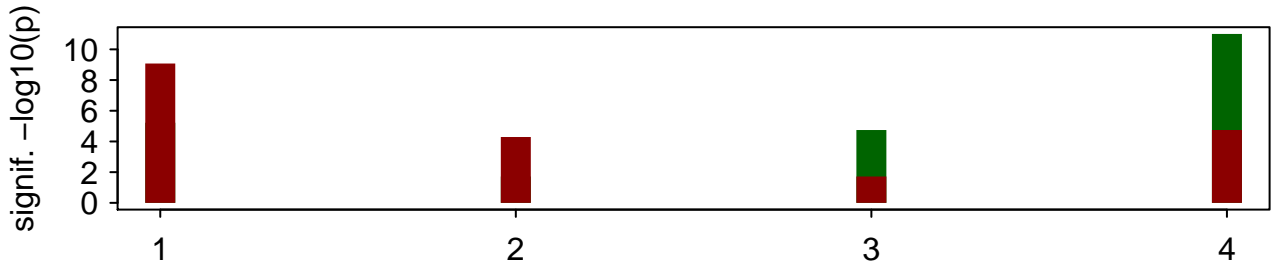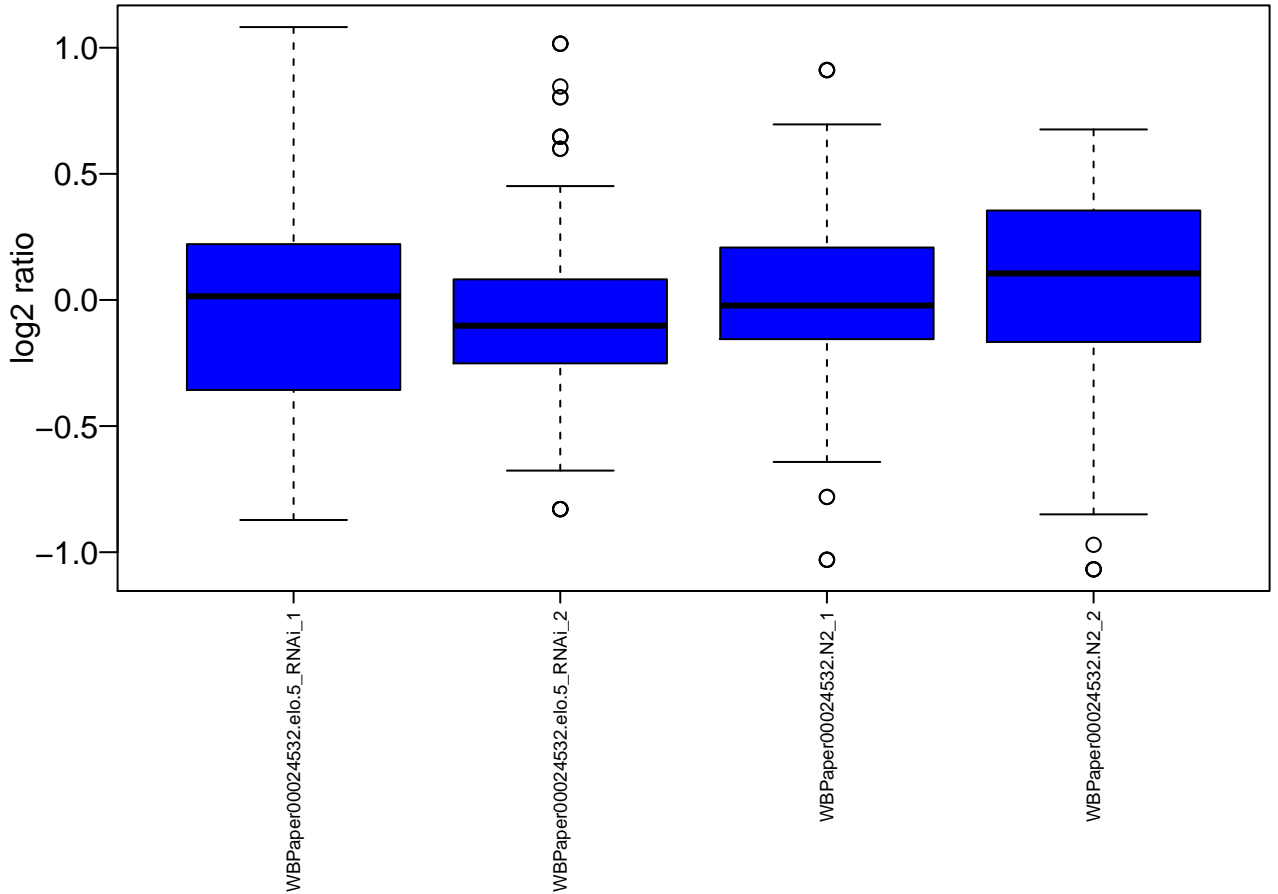

# WBPaper00024654

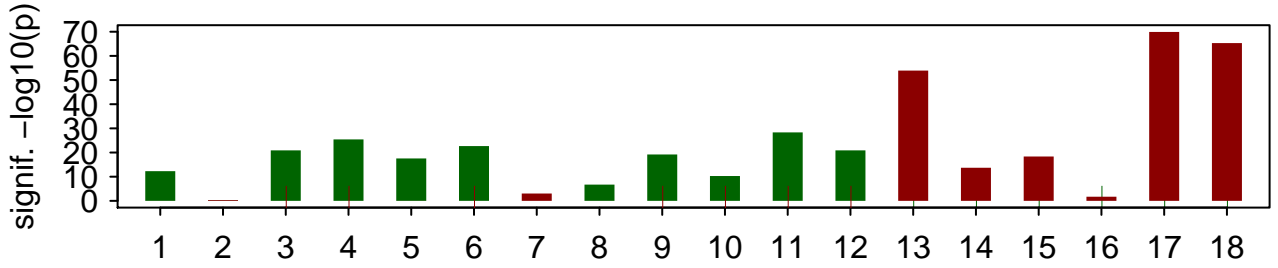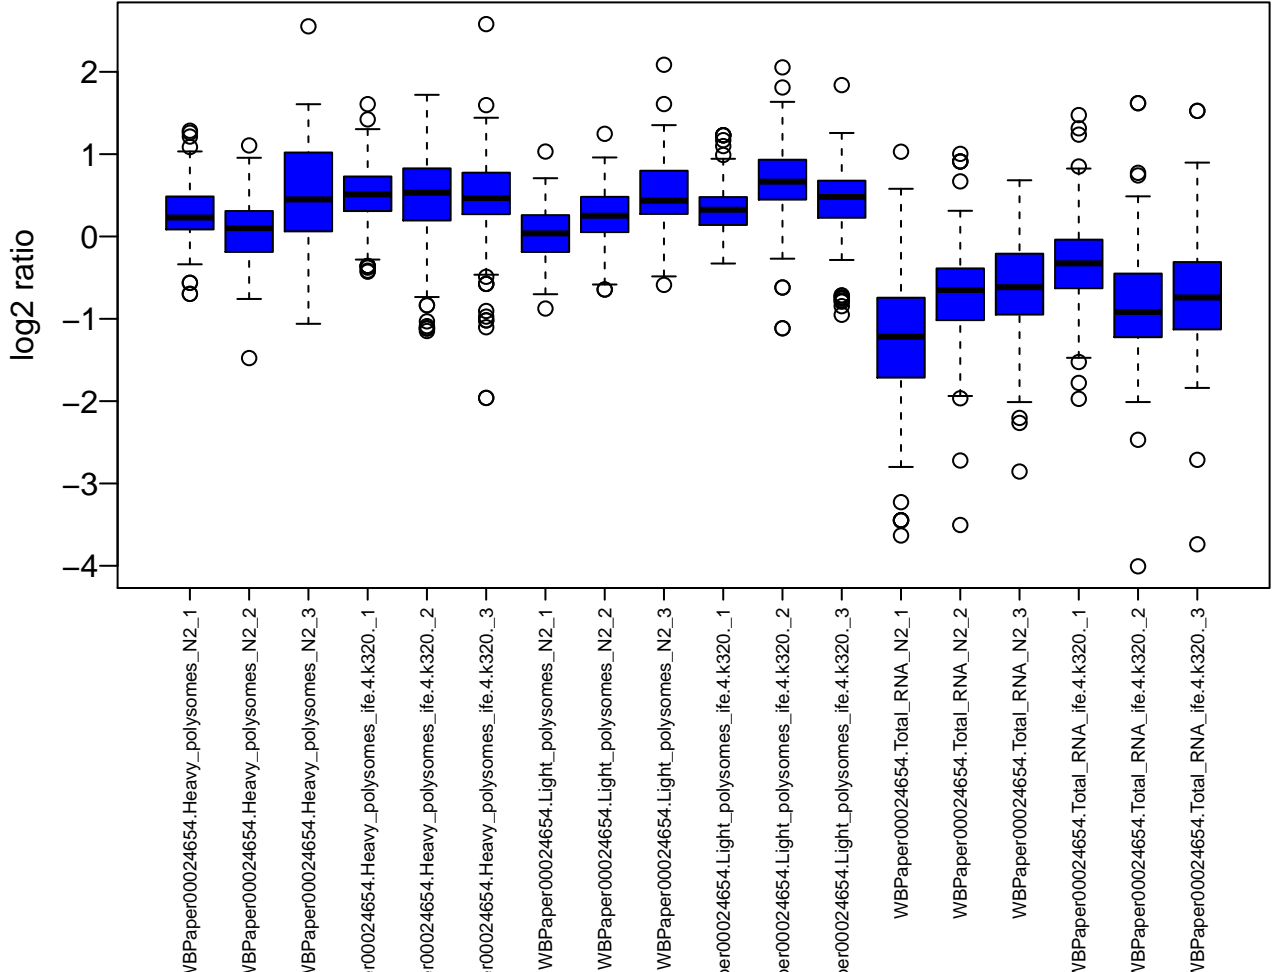

# WBPaper00024671

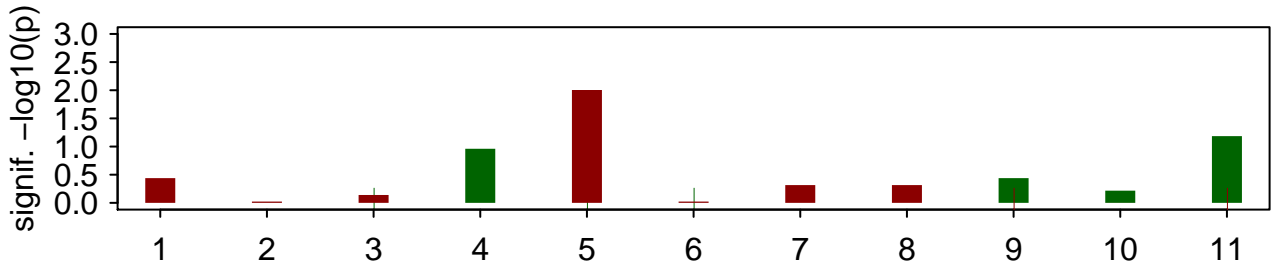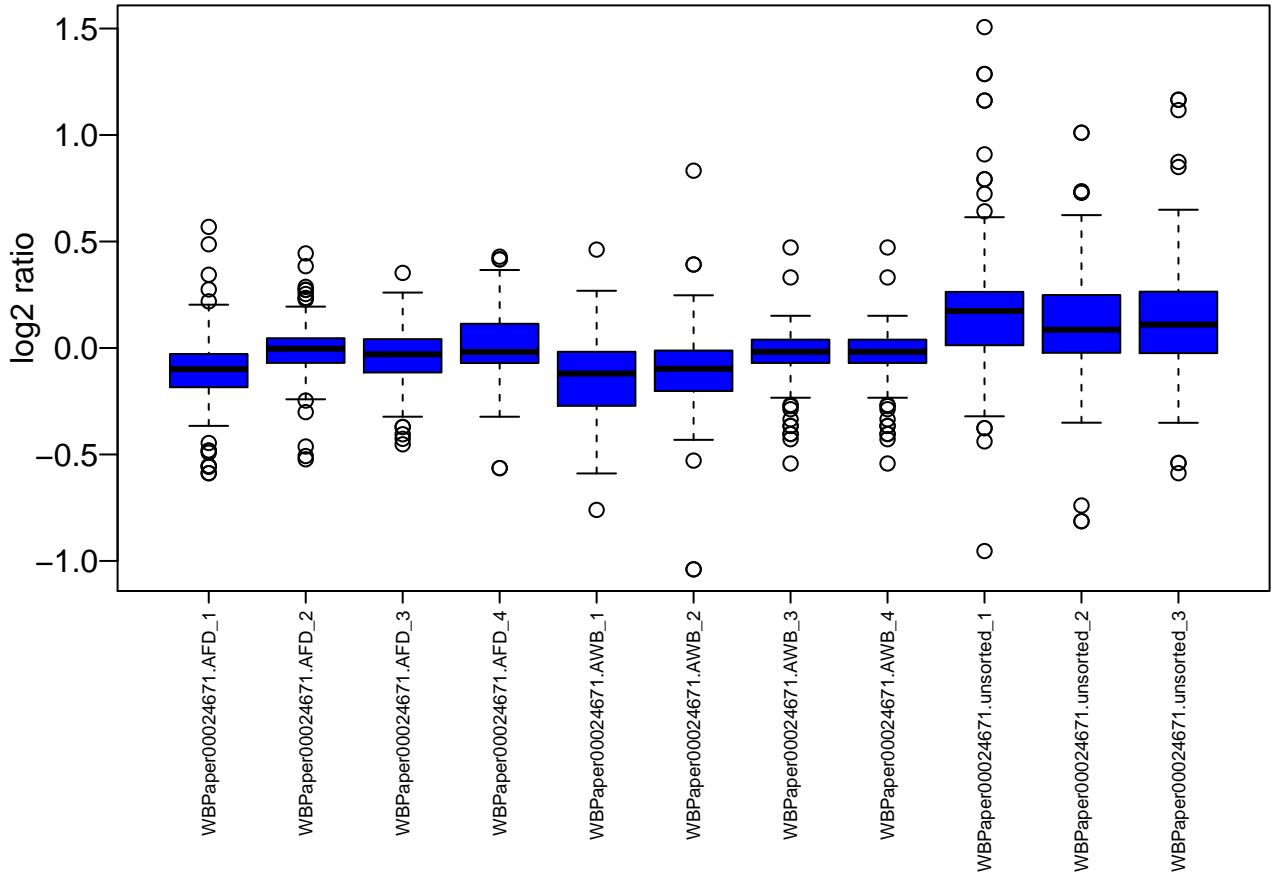

# WBPaper00025032

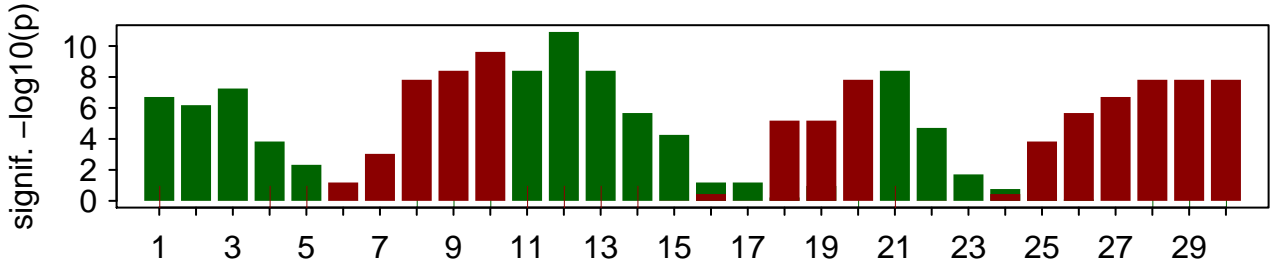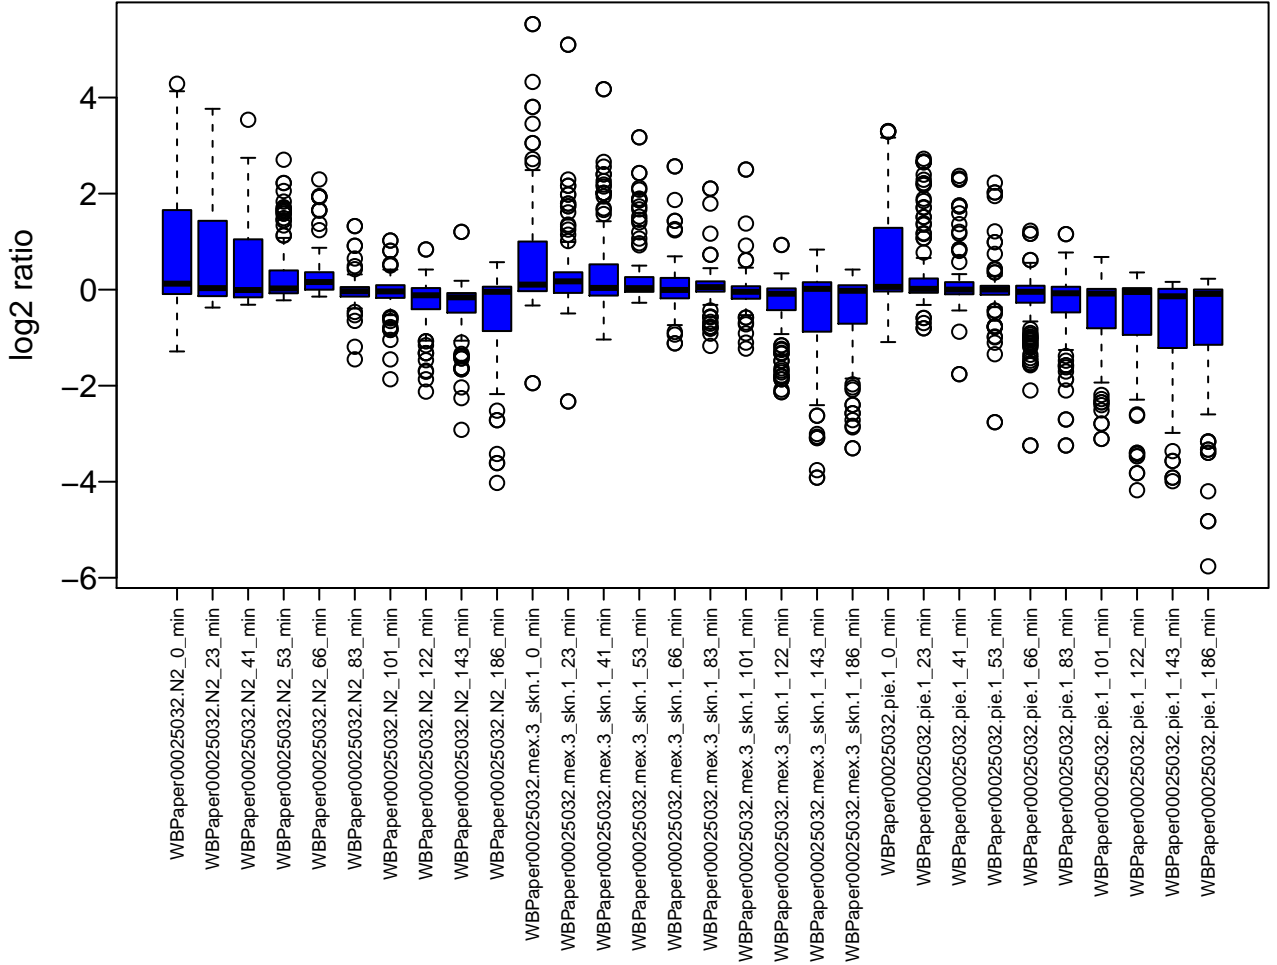

# WBPaper00025099

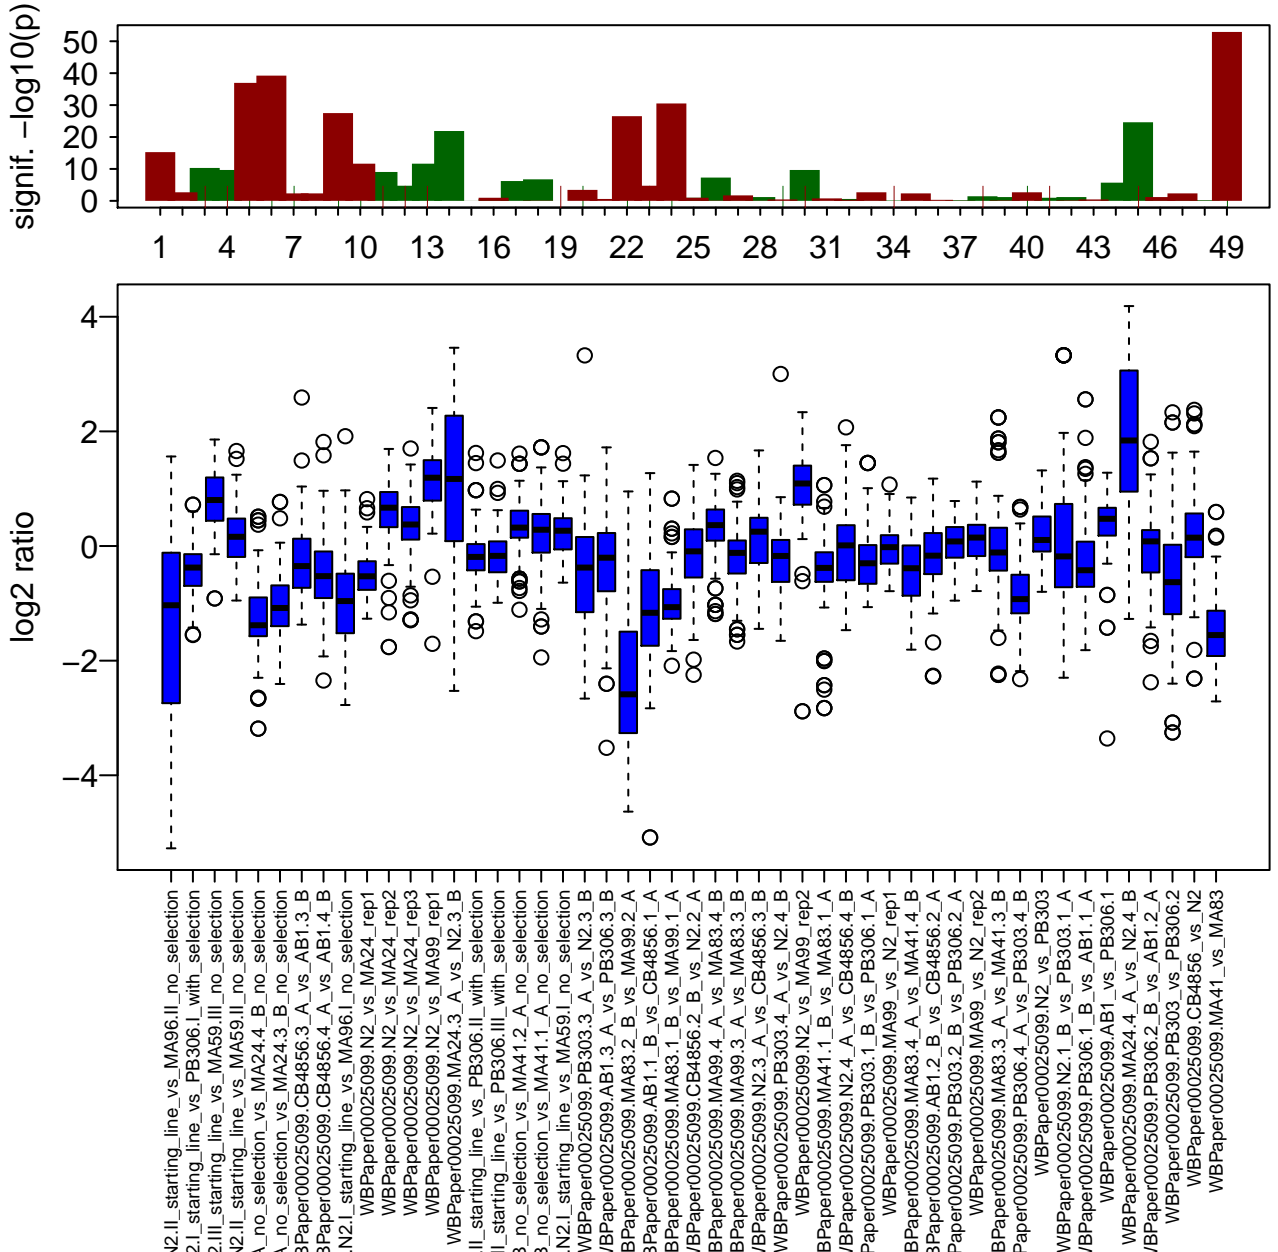



# WBPaper00025141

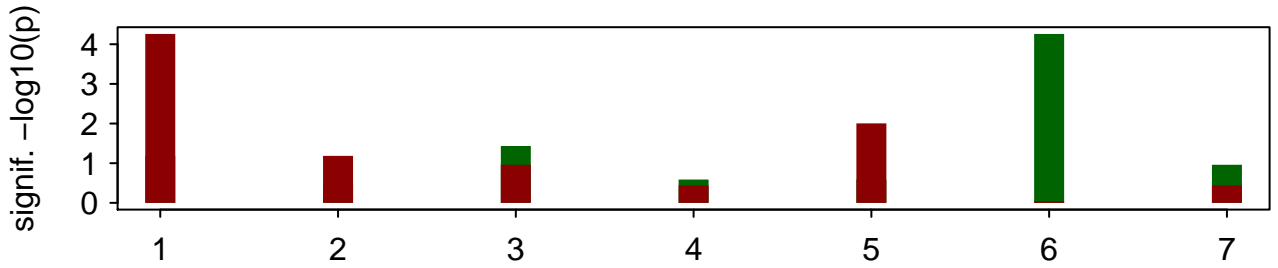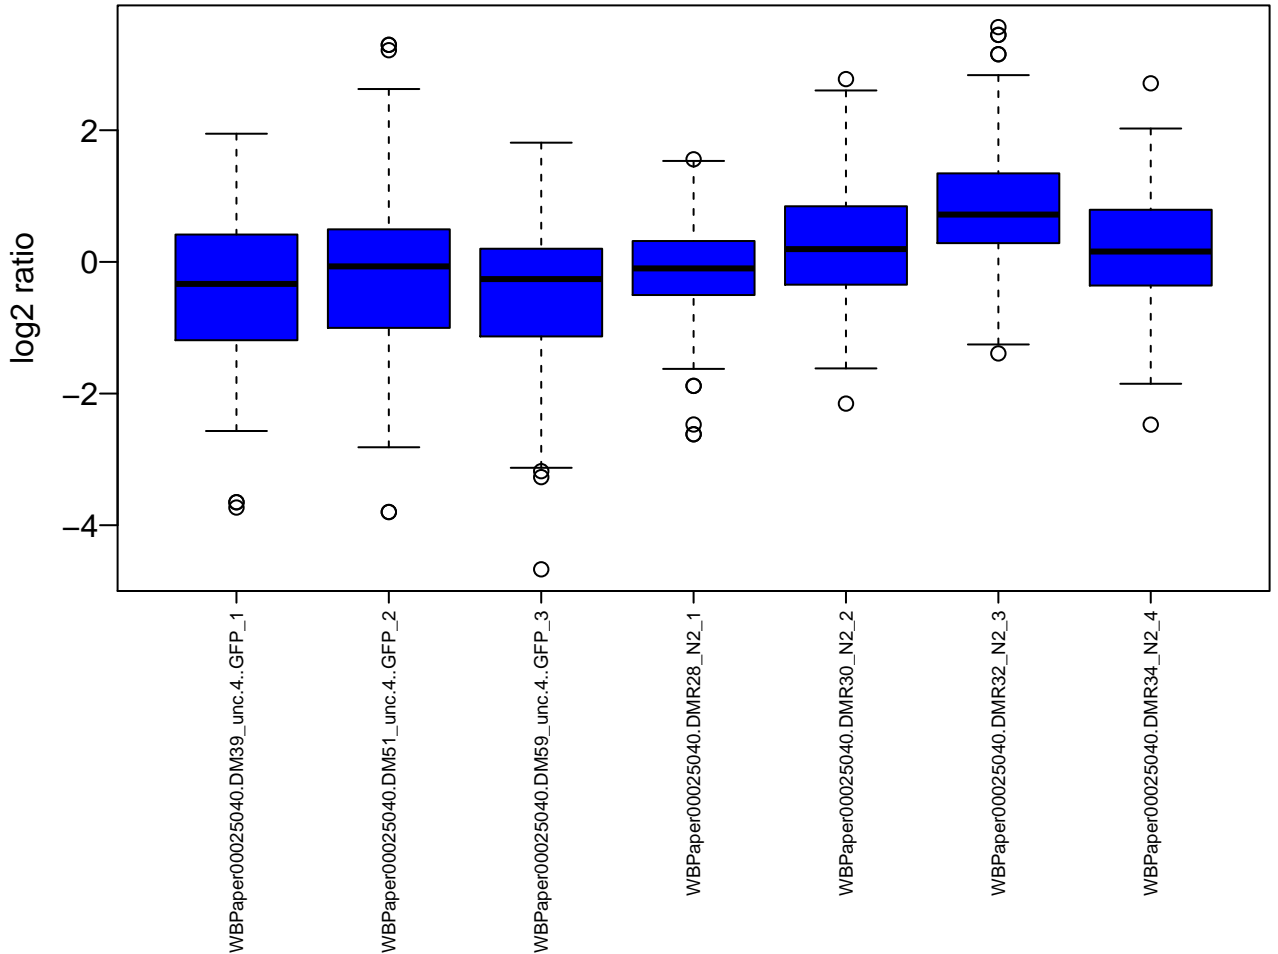

# WBPaper00026596

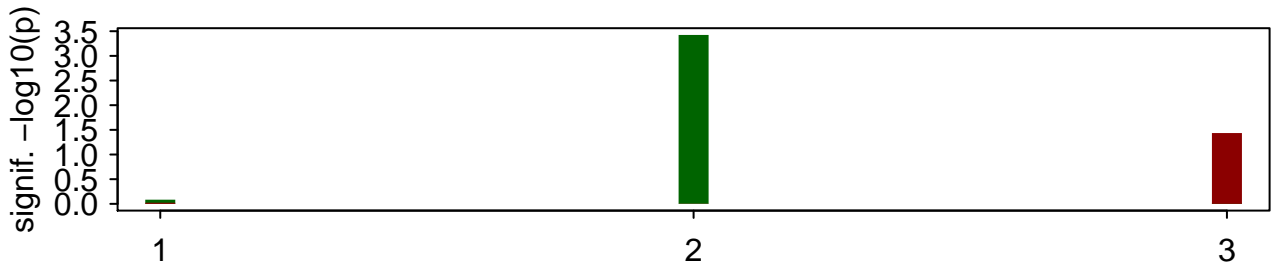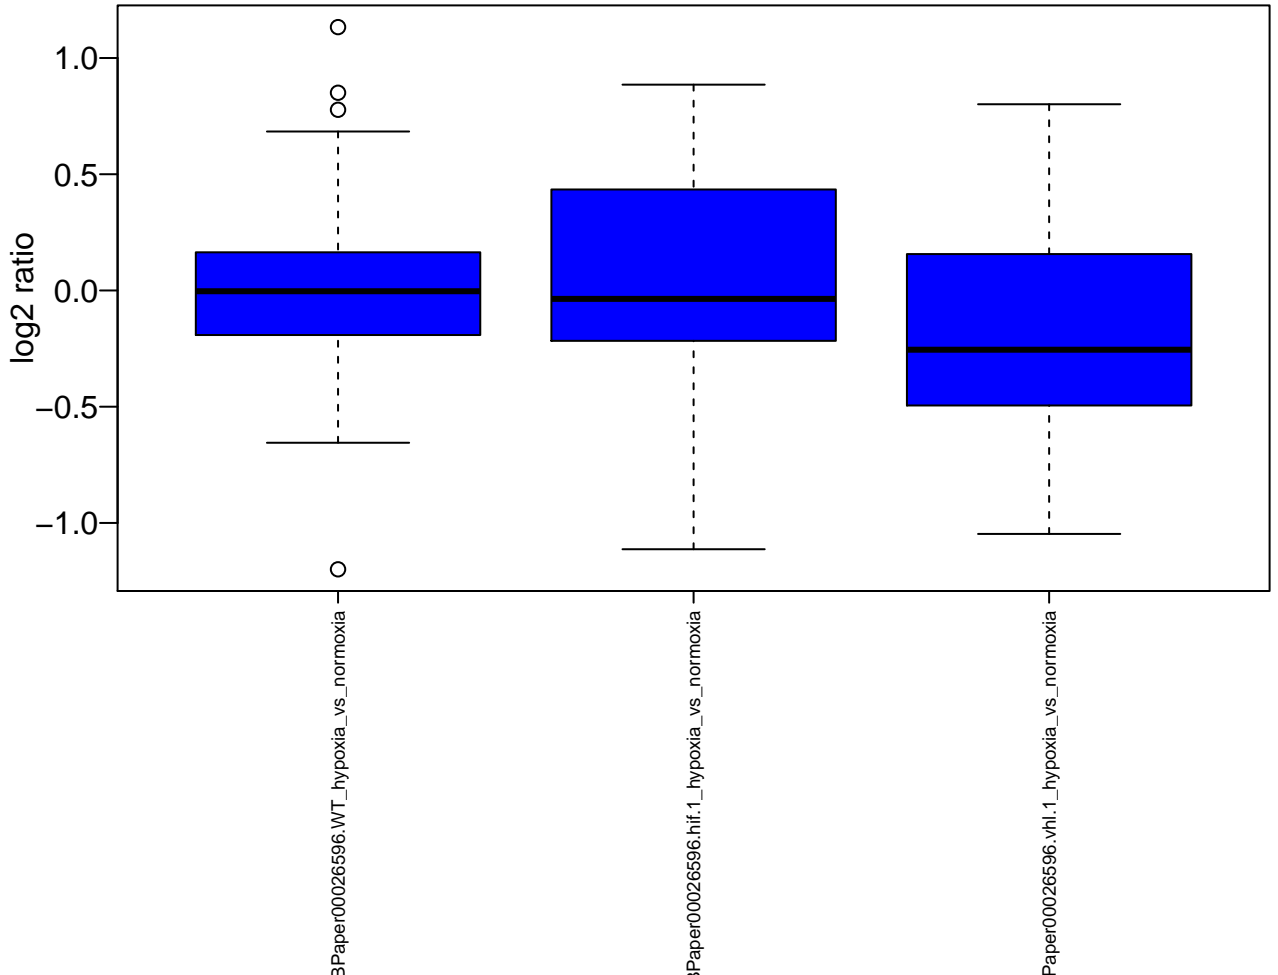

# WBPaper00026714

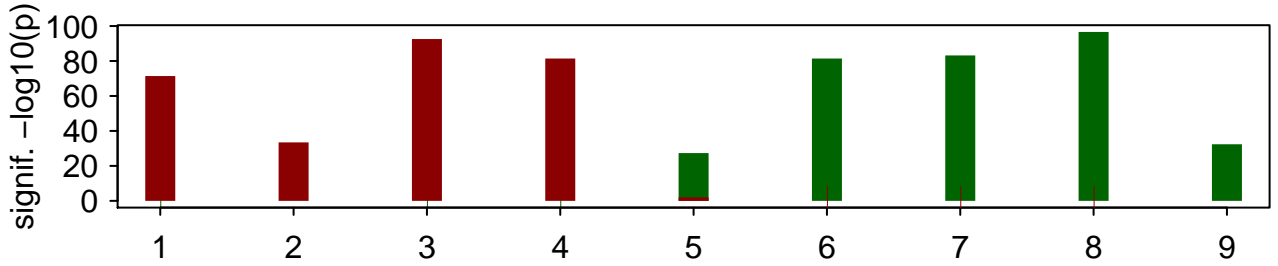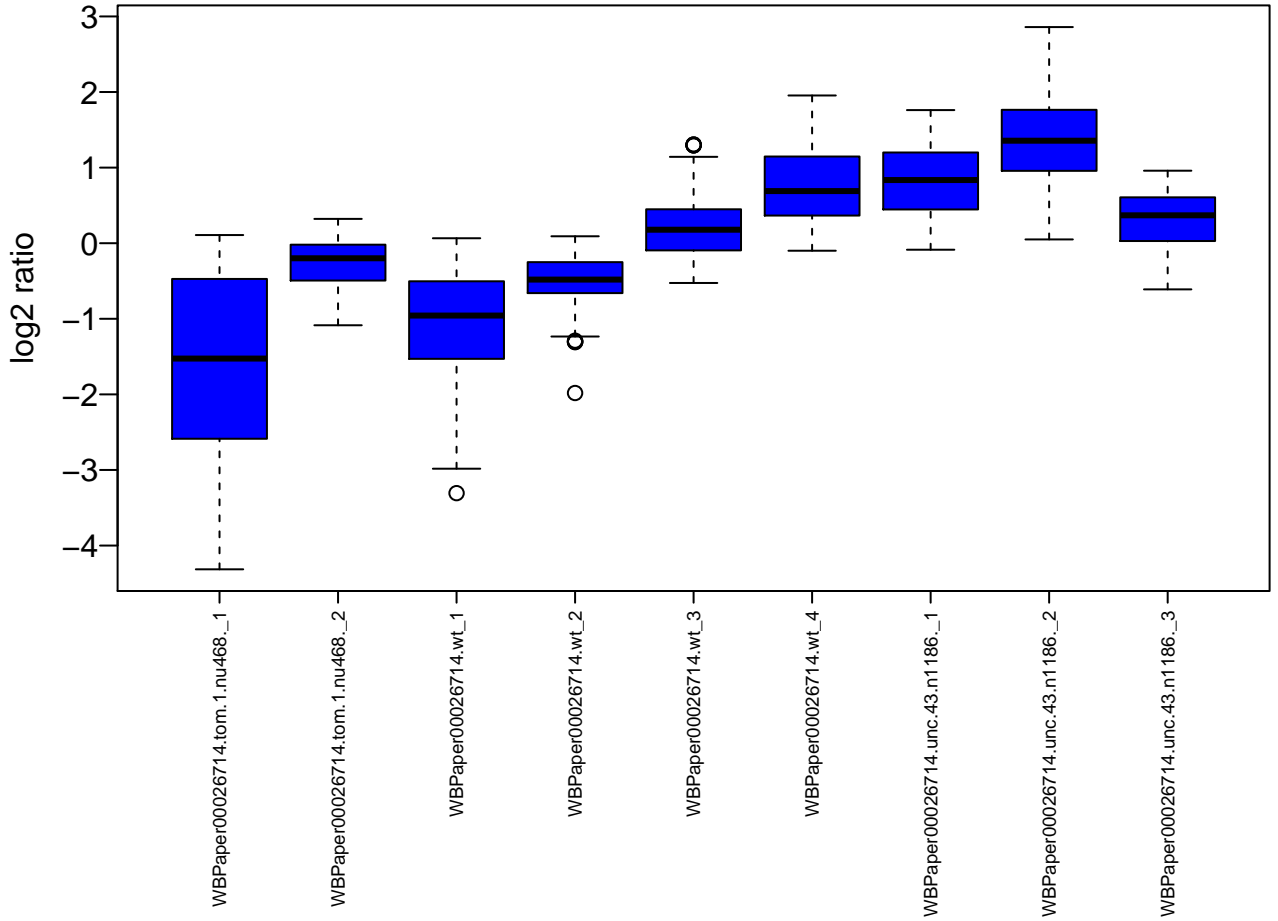

# WBPaper00026820

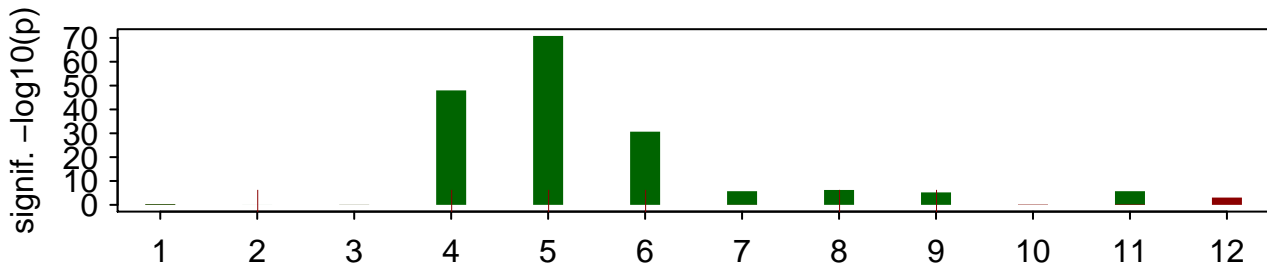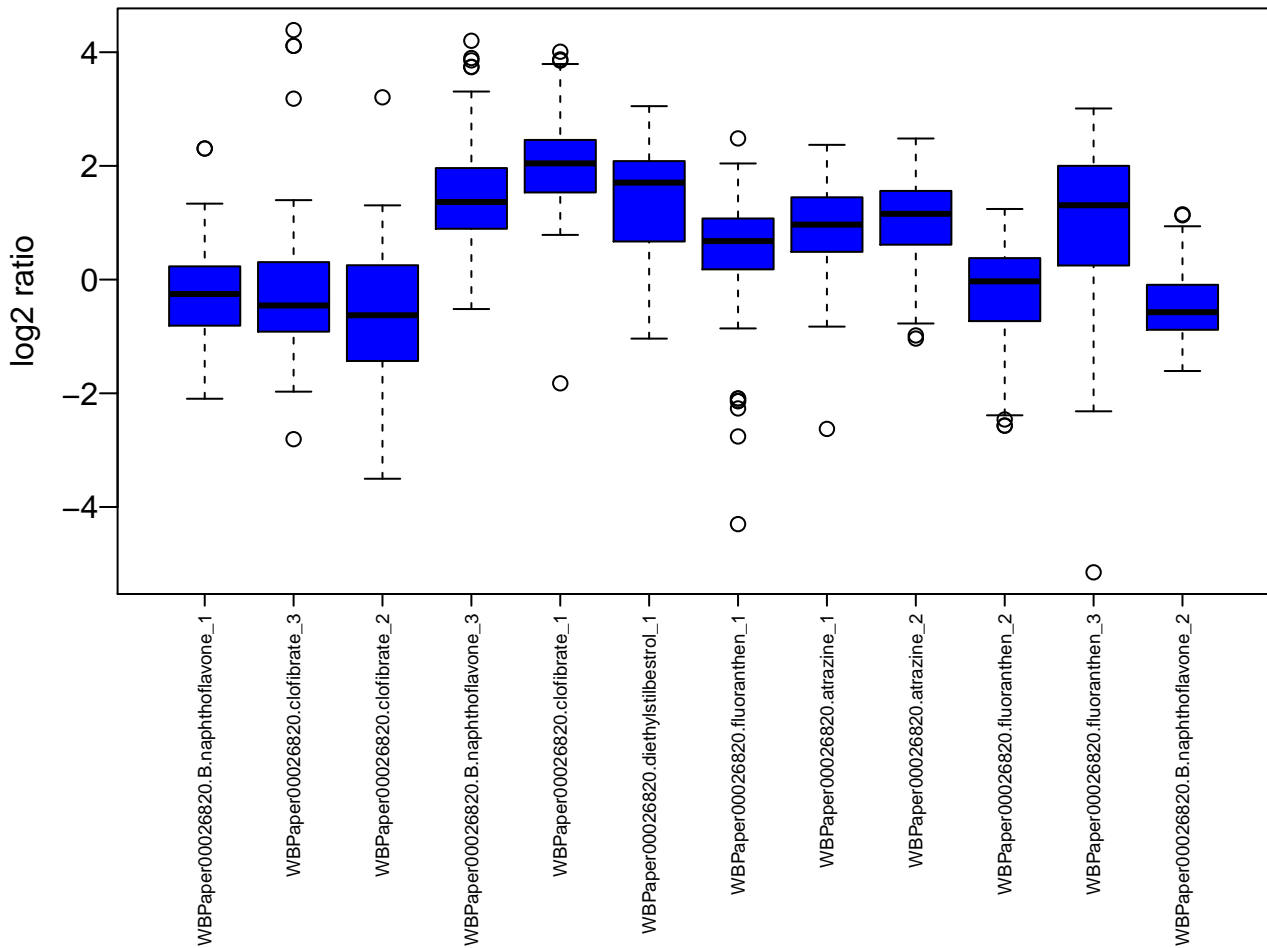

# WBPaper00026830

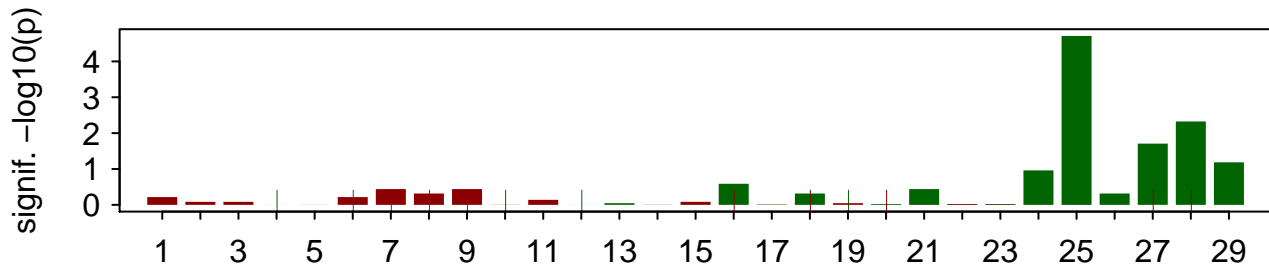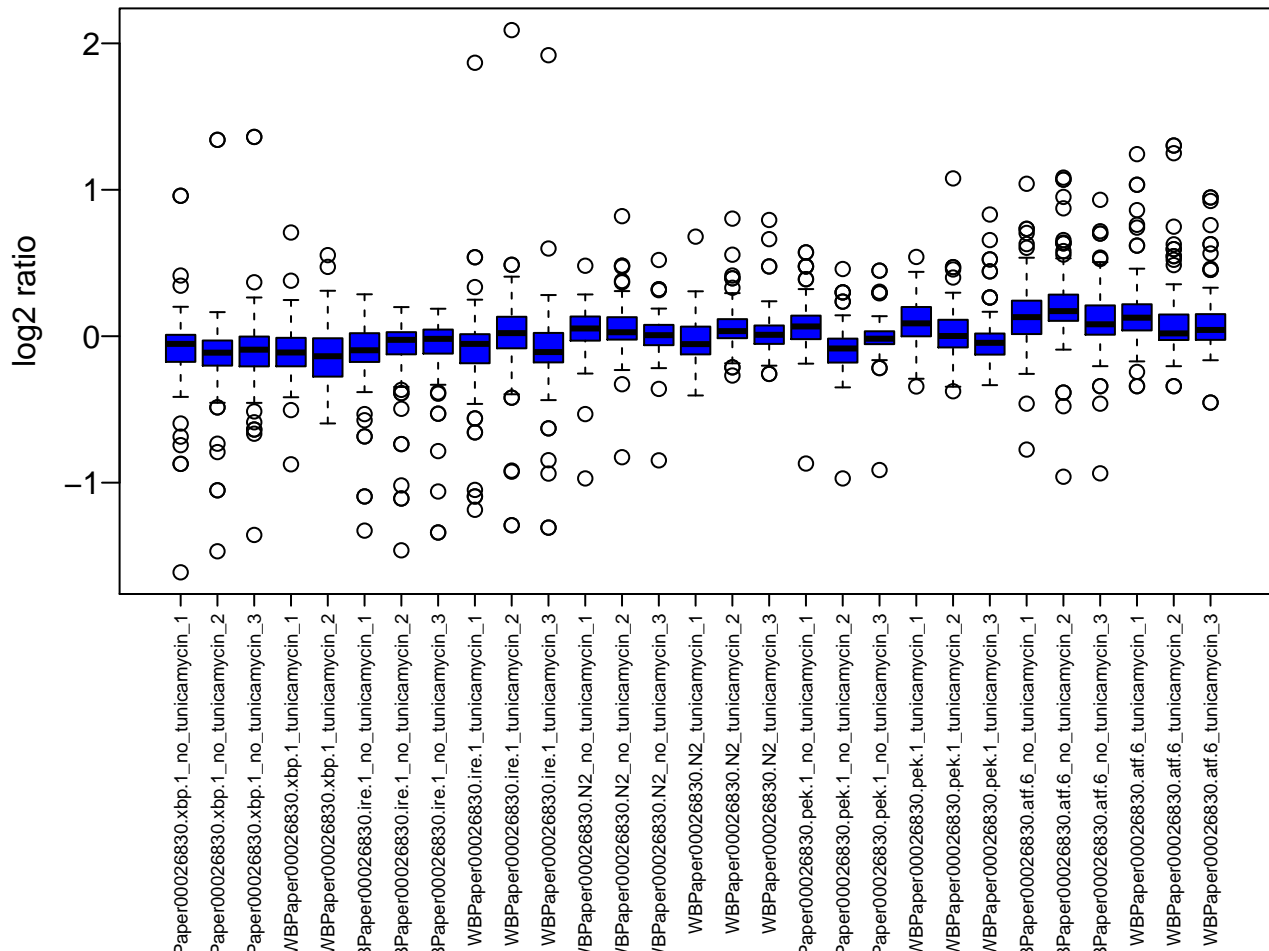

# WBPaper00026929

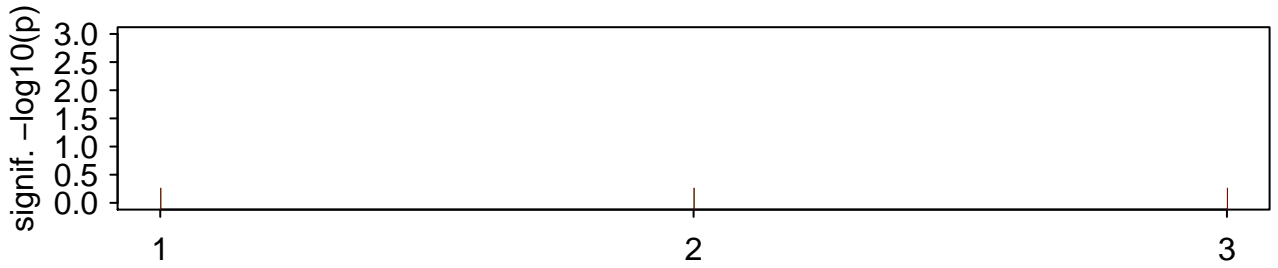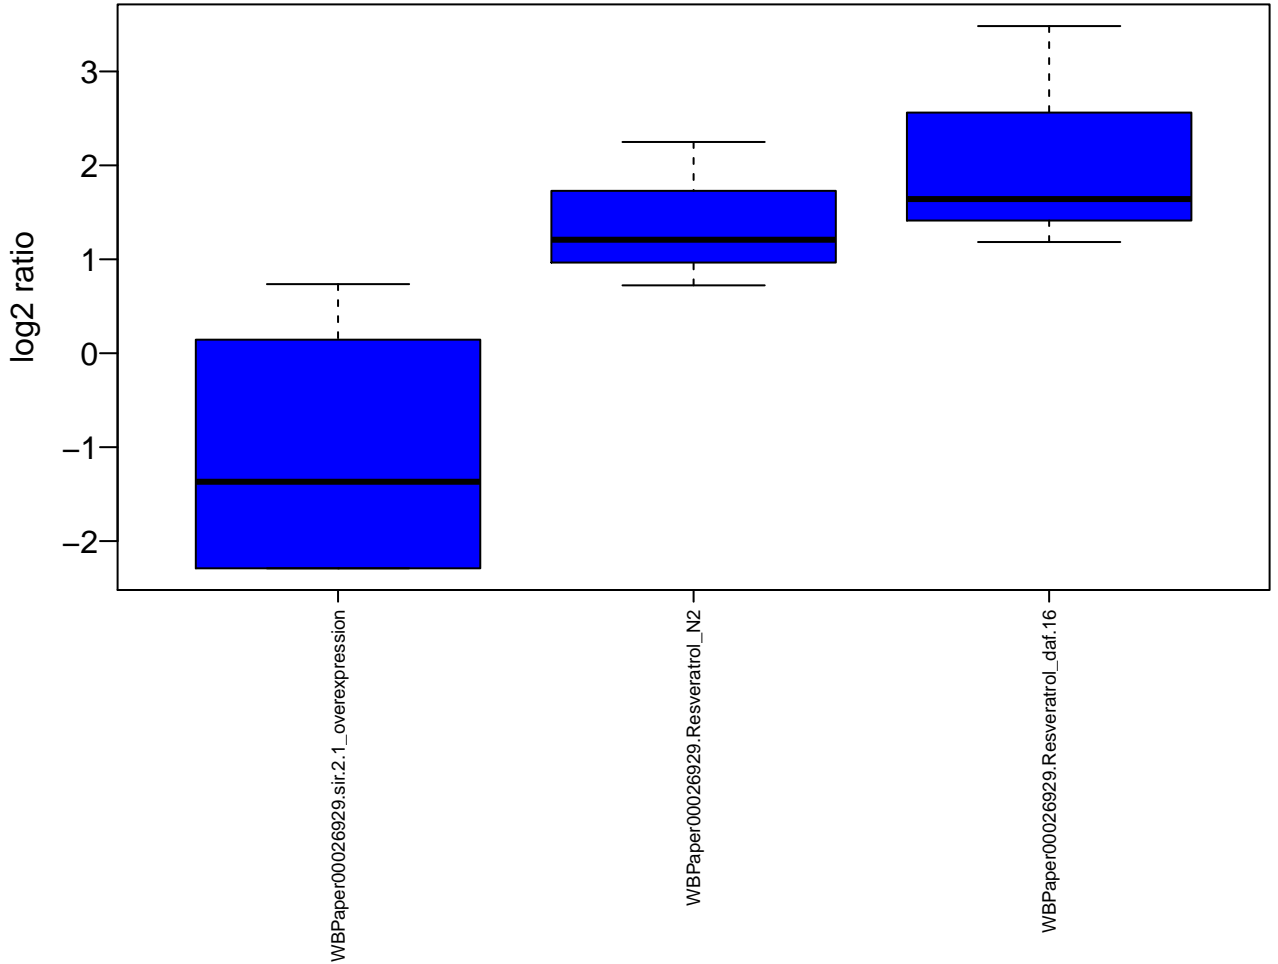

# WBPaper00026950

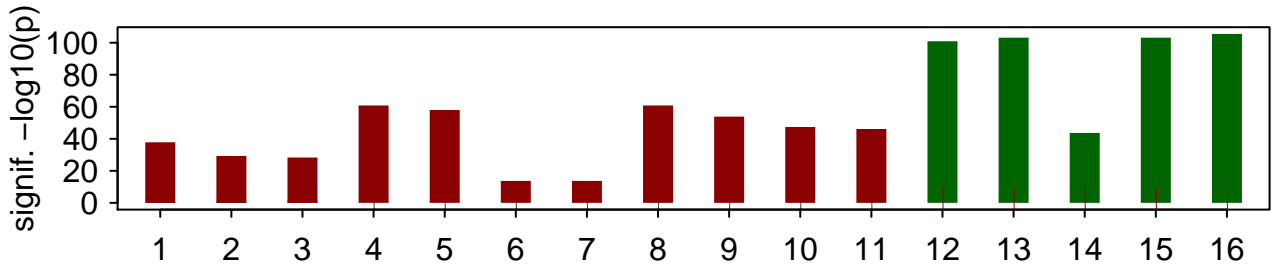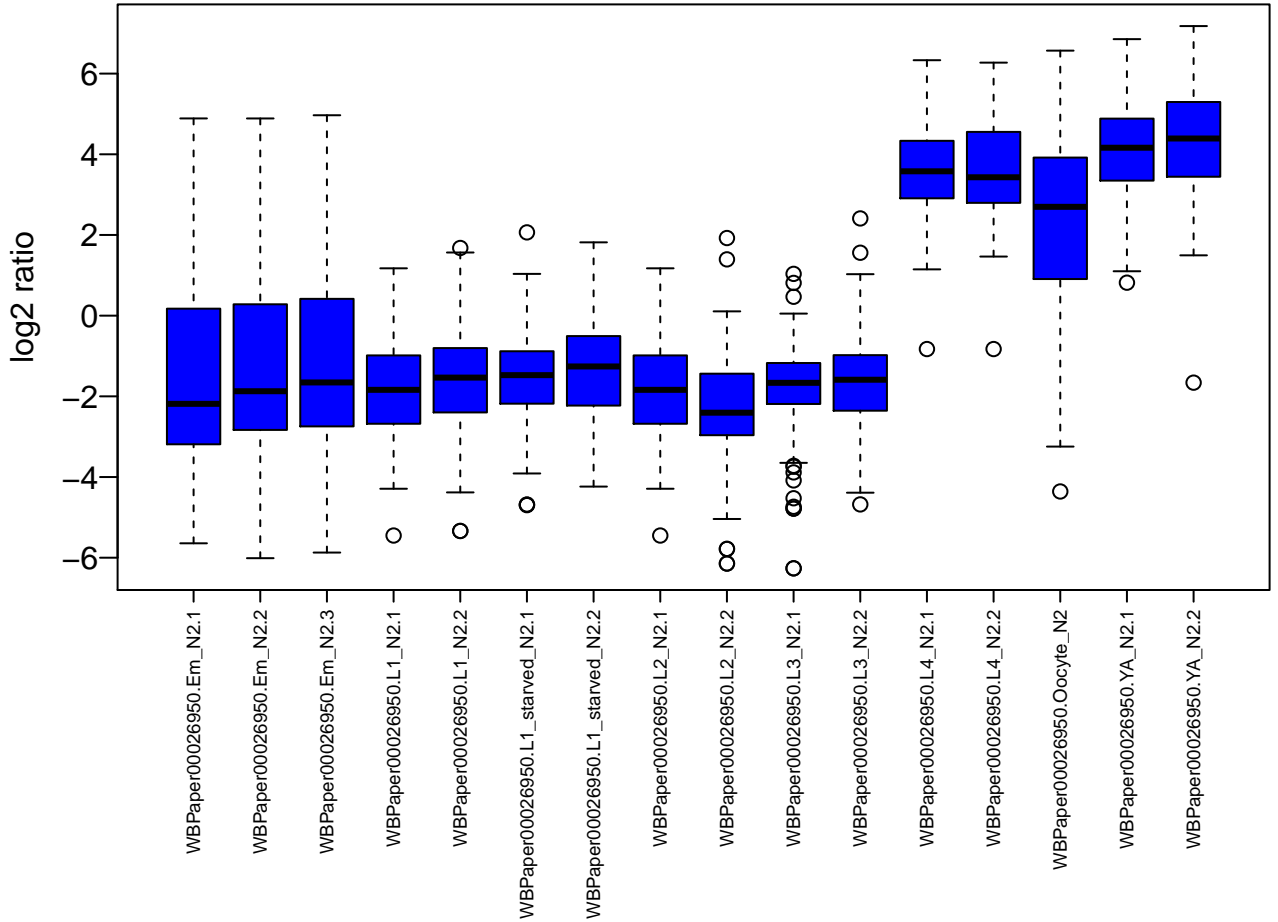

# WBPaper00026952

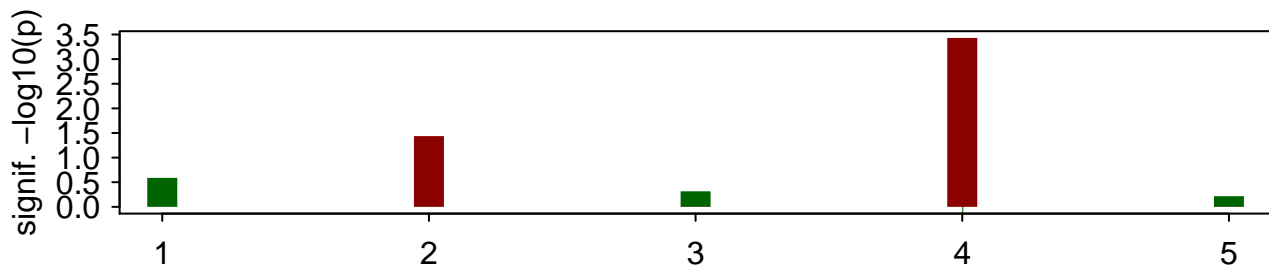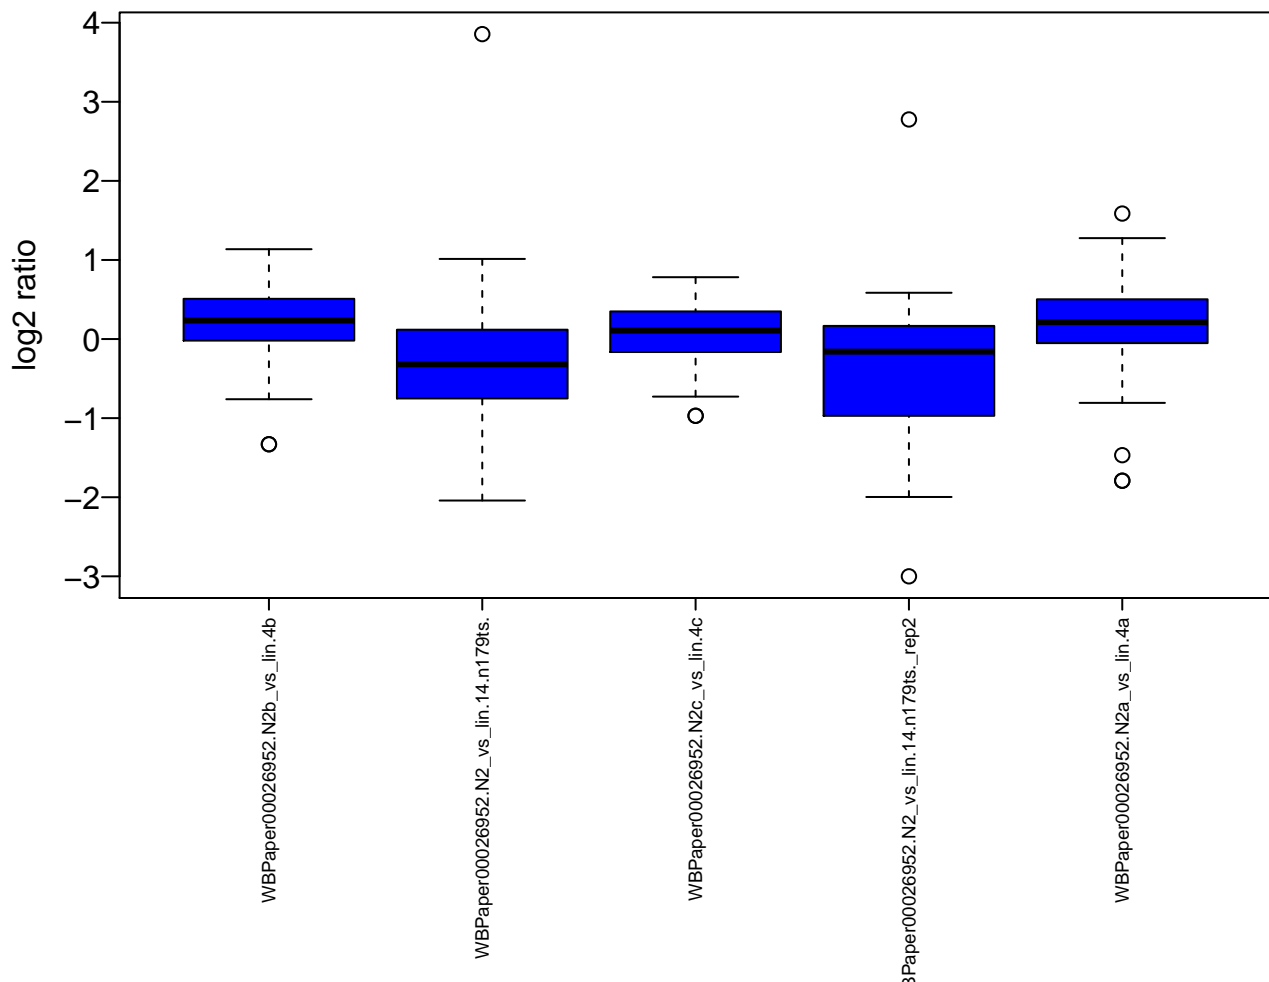



# WBPaper00026980

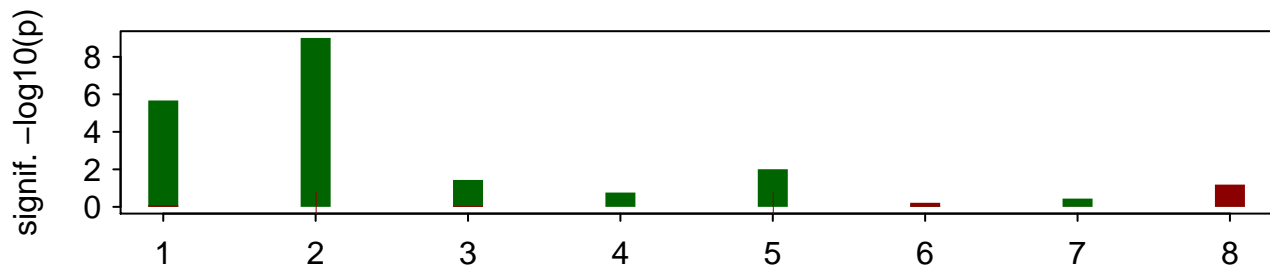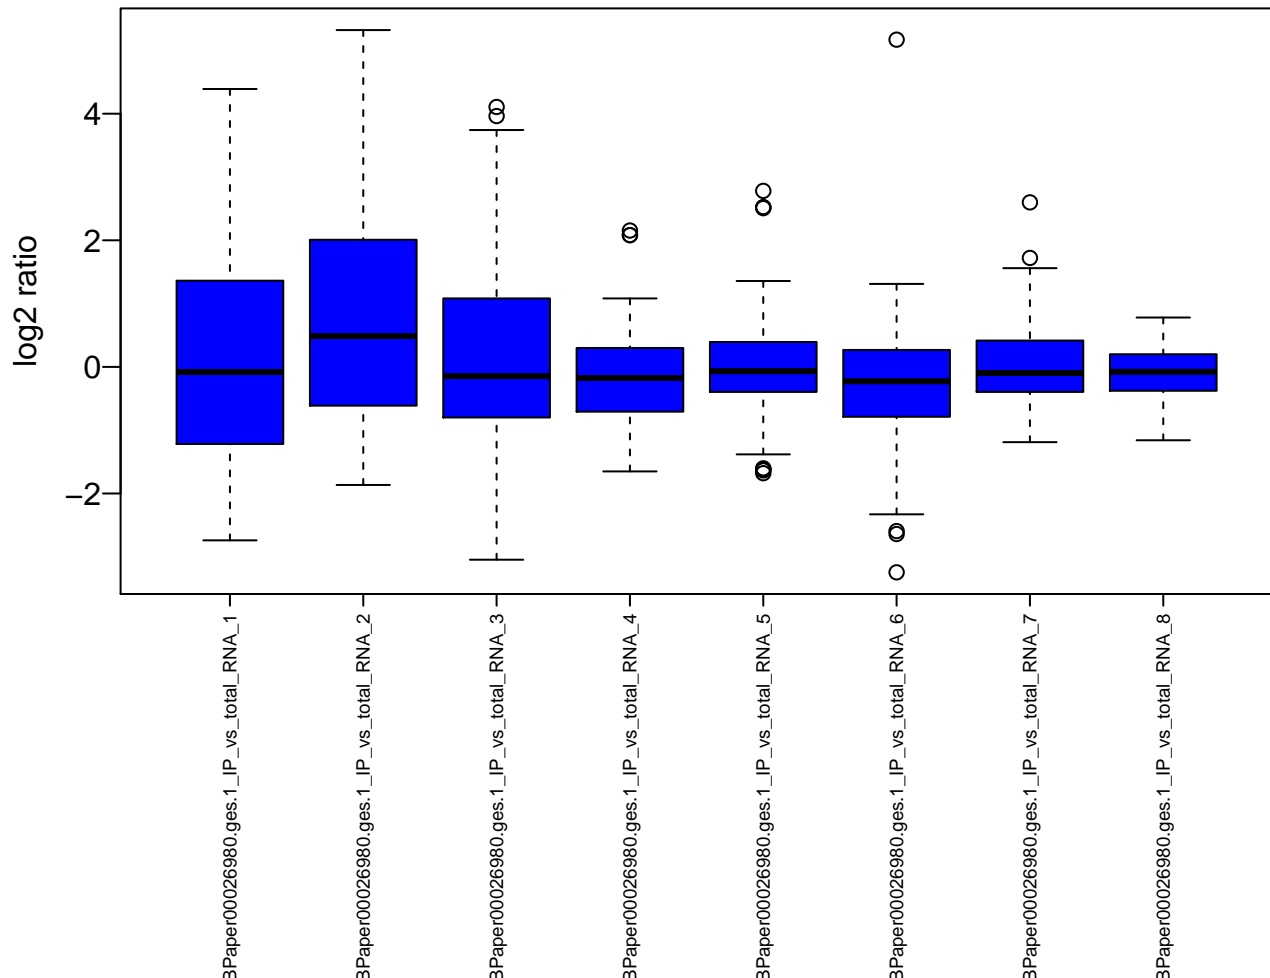

# WBPaper00027104

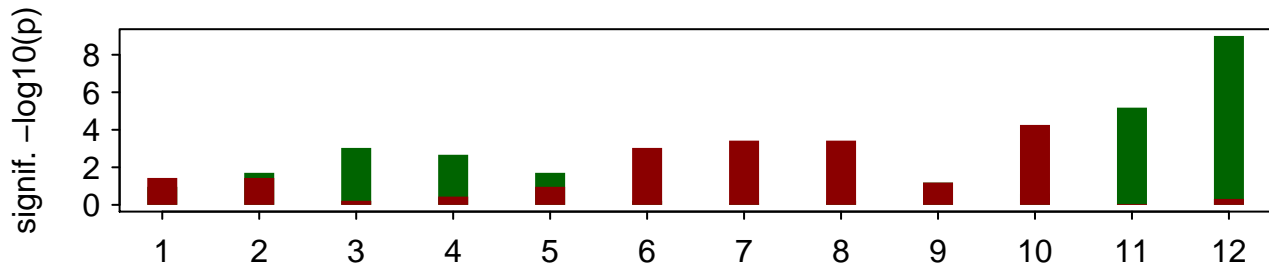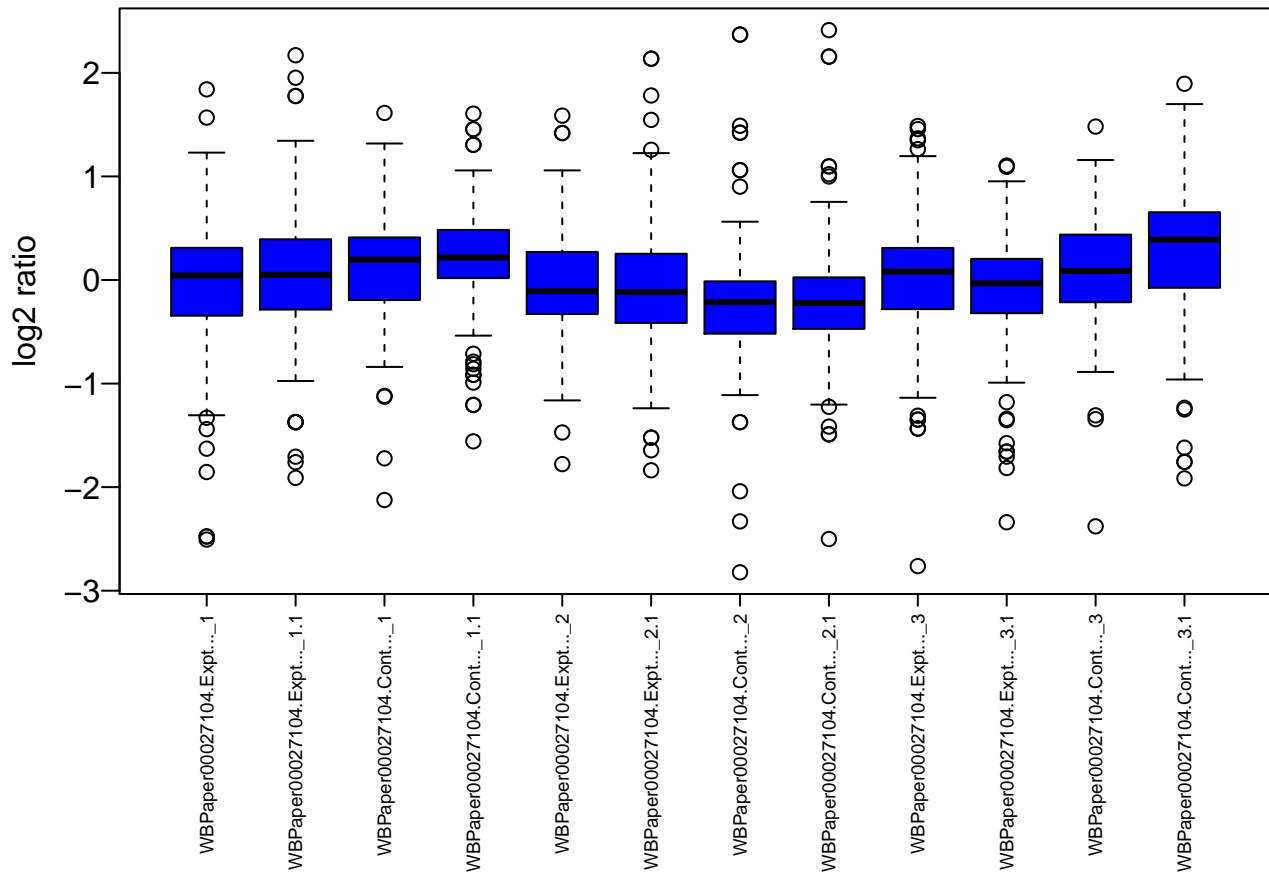

# WBPaper00027111

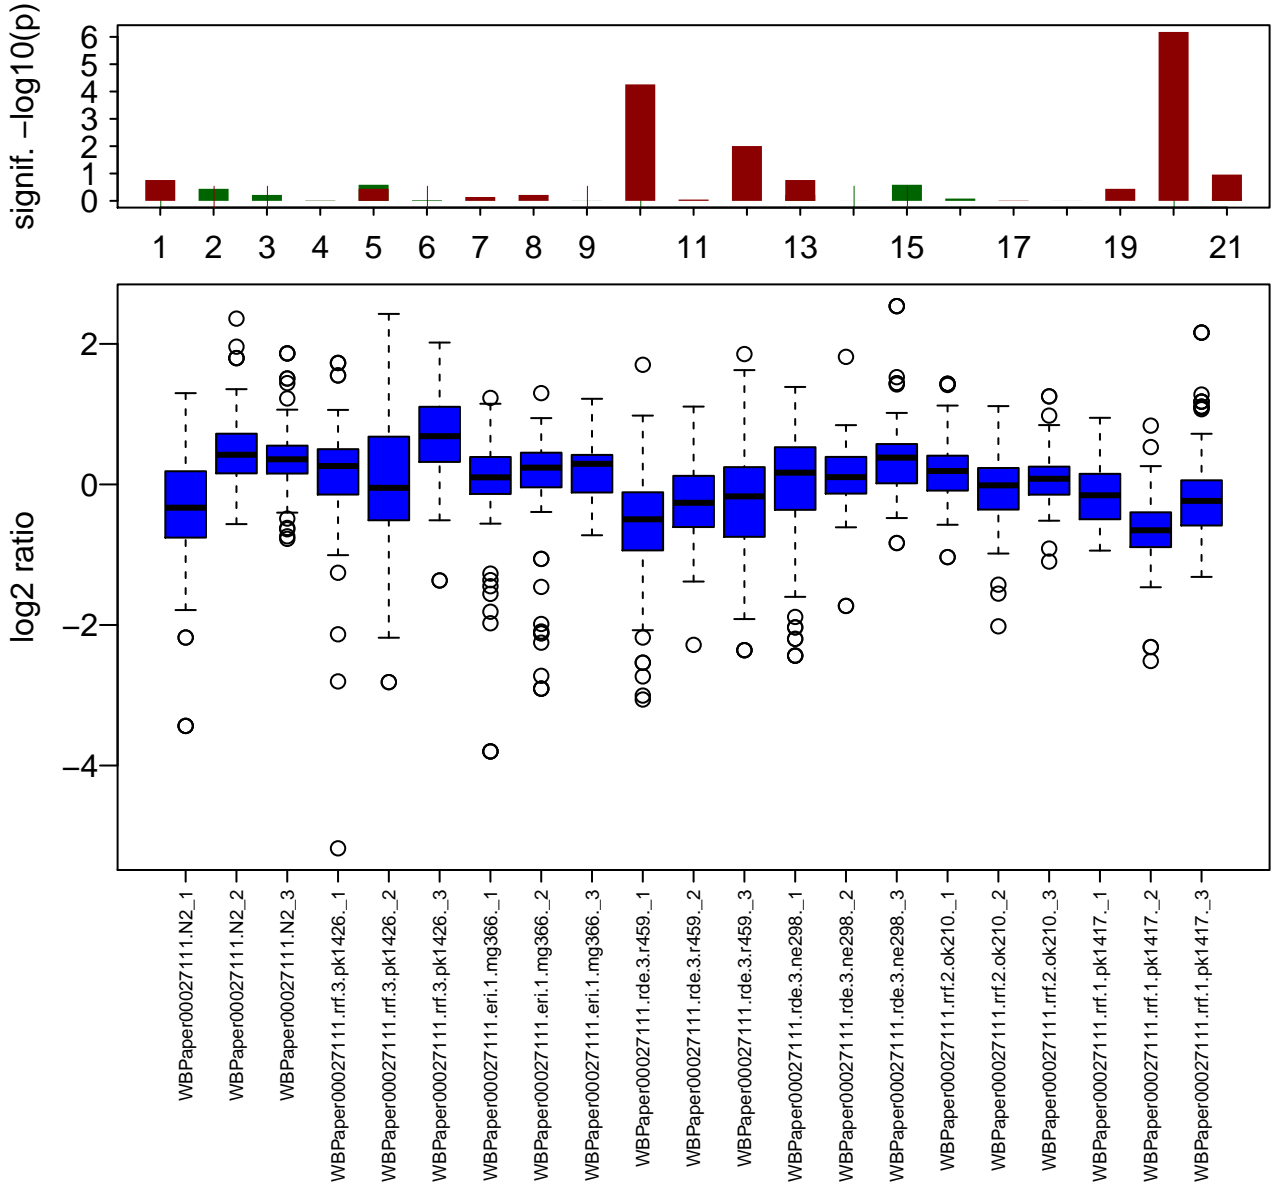

# WBPaper00027722

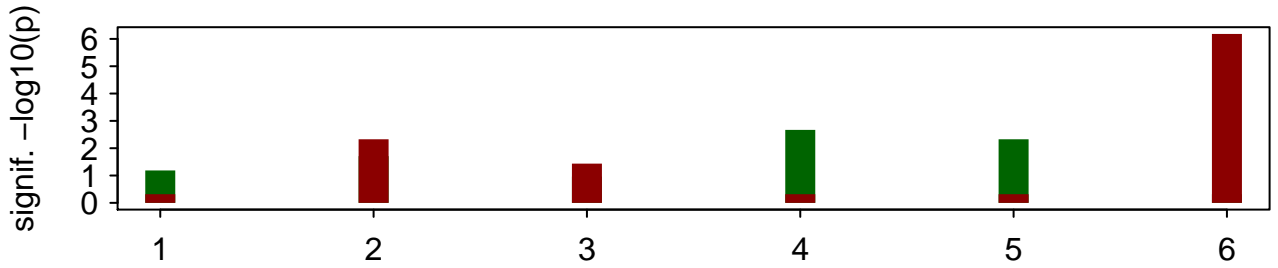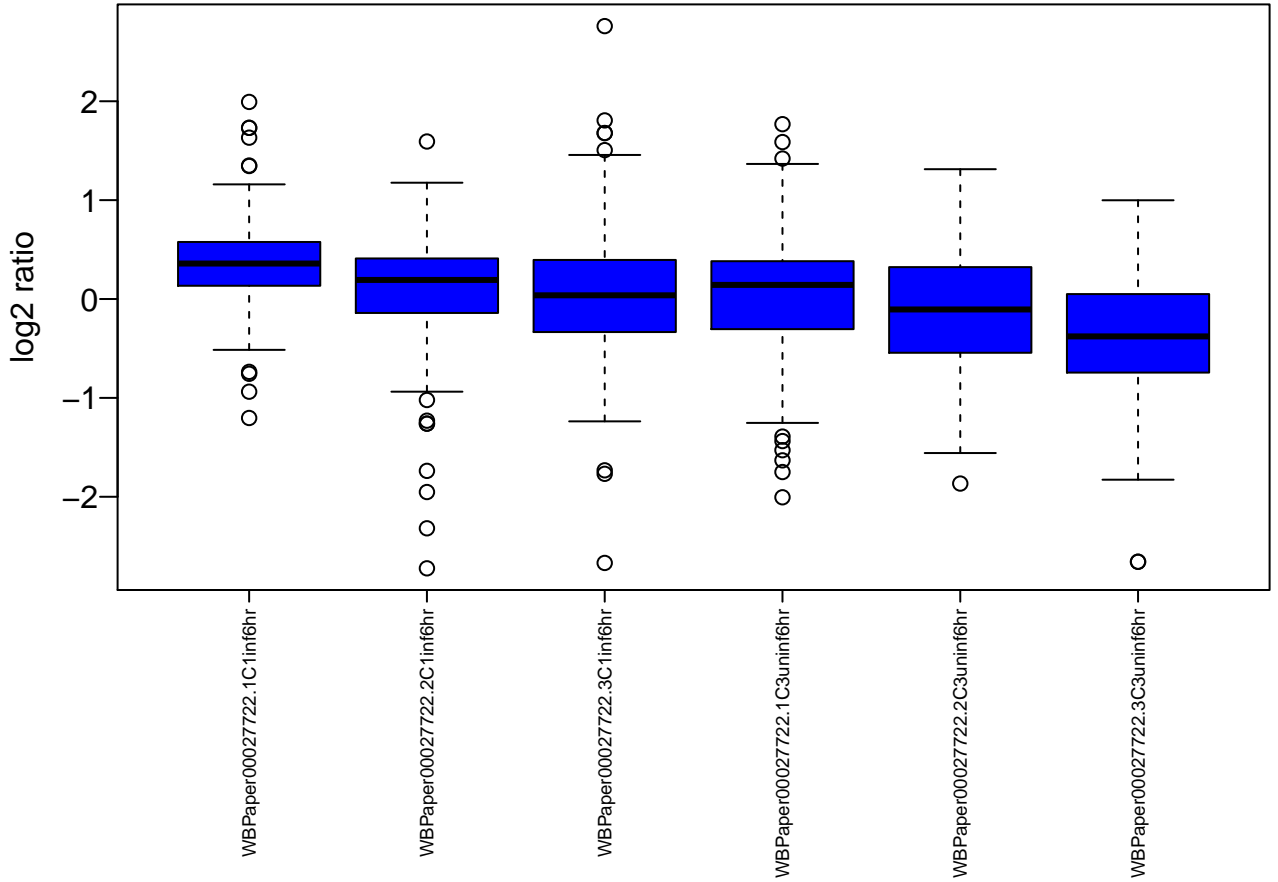

# WBPaper00027758

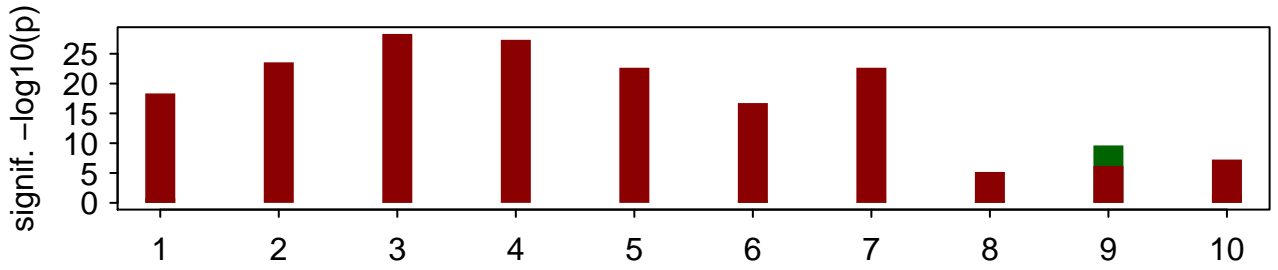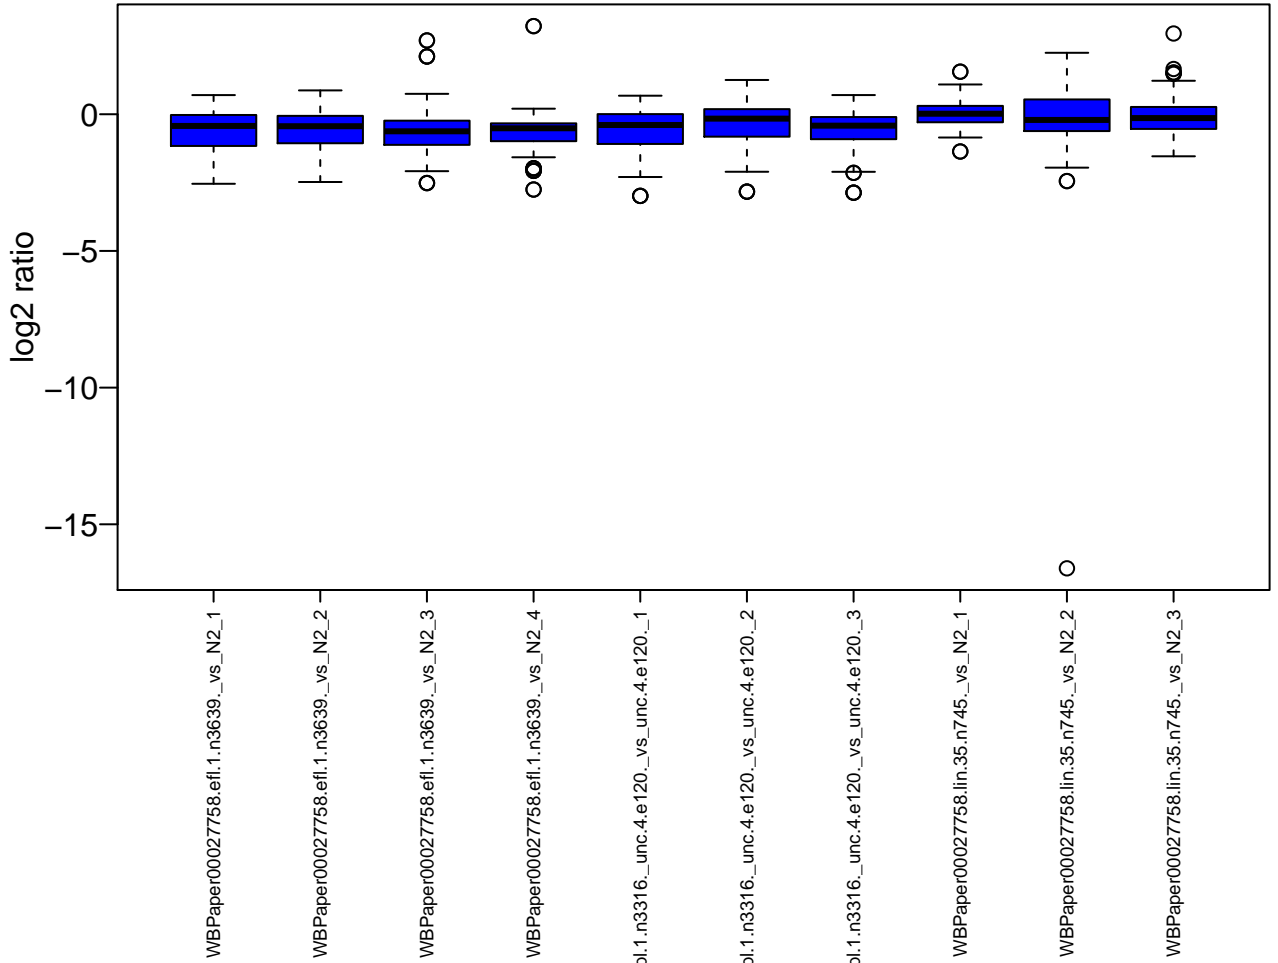

# WBPaper00028482

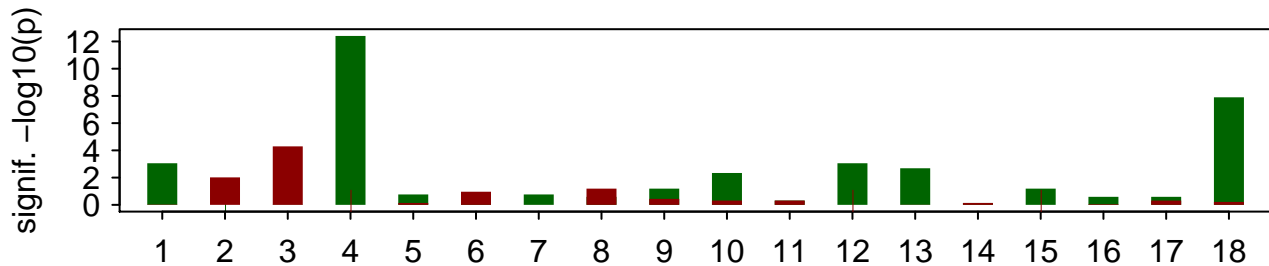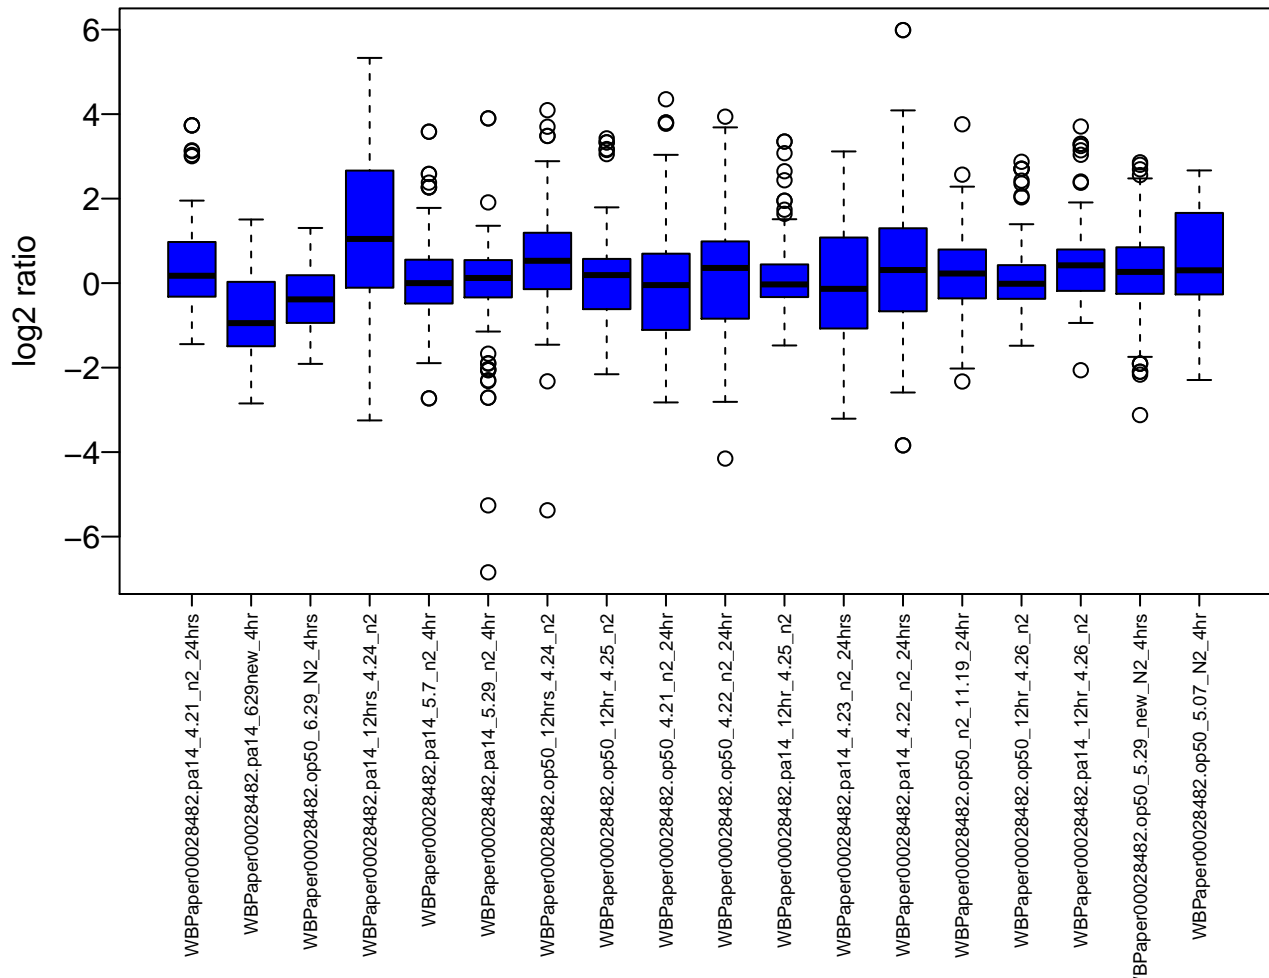

# WBPaper00028483

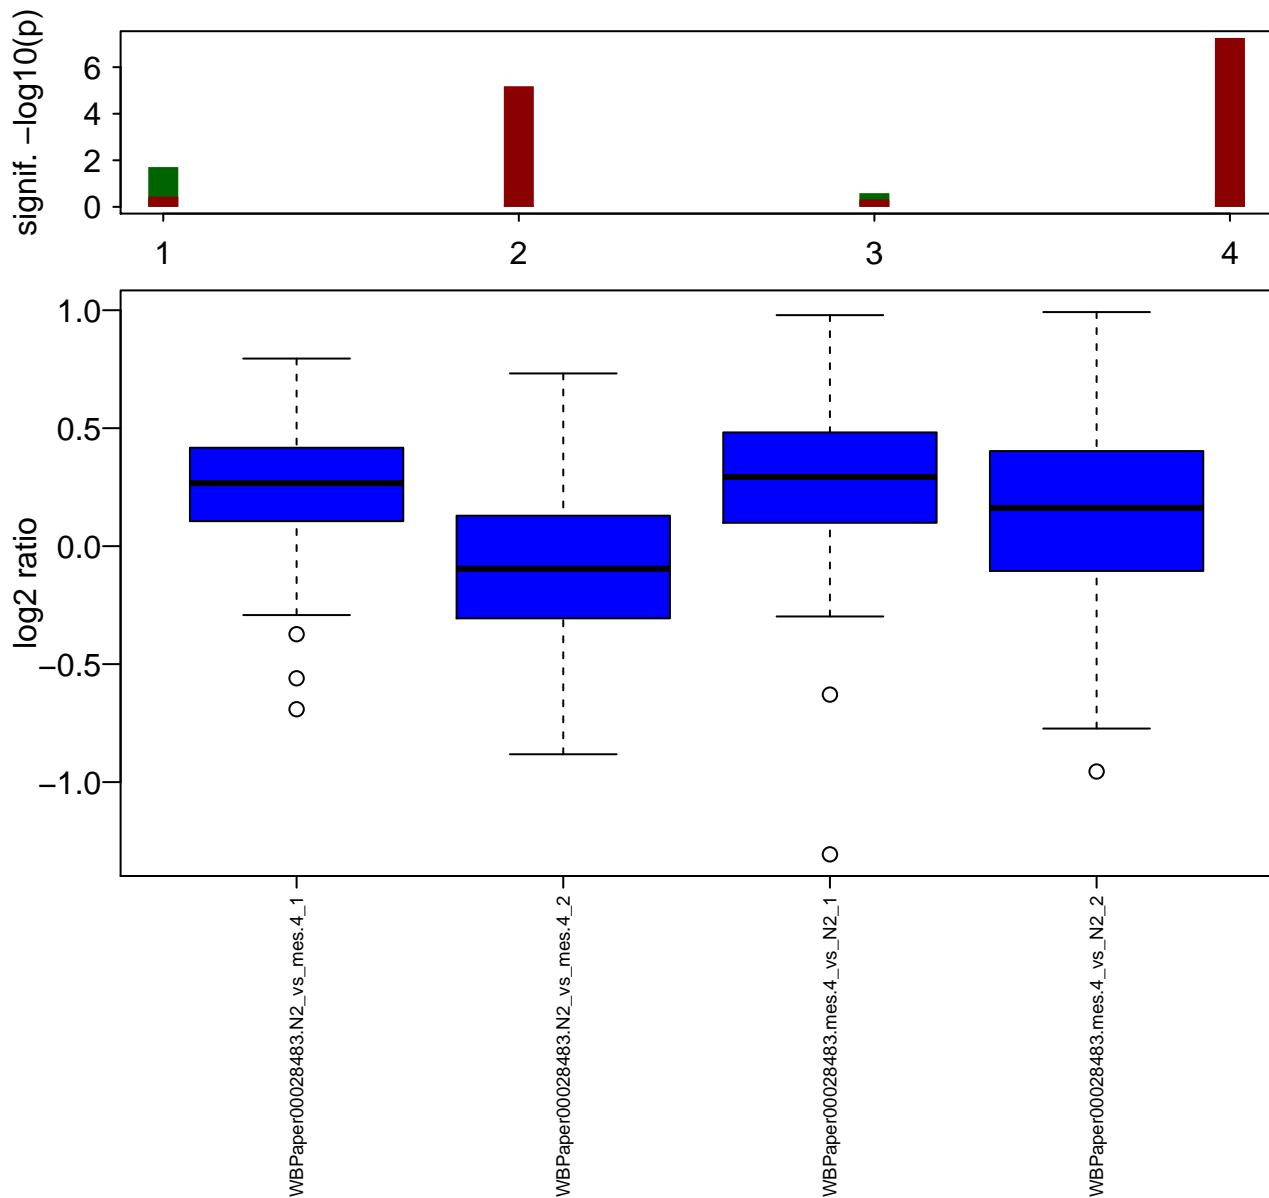

# WBPaper00028564

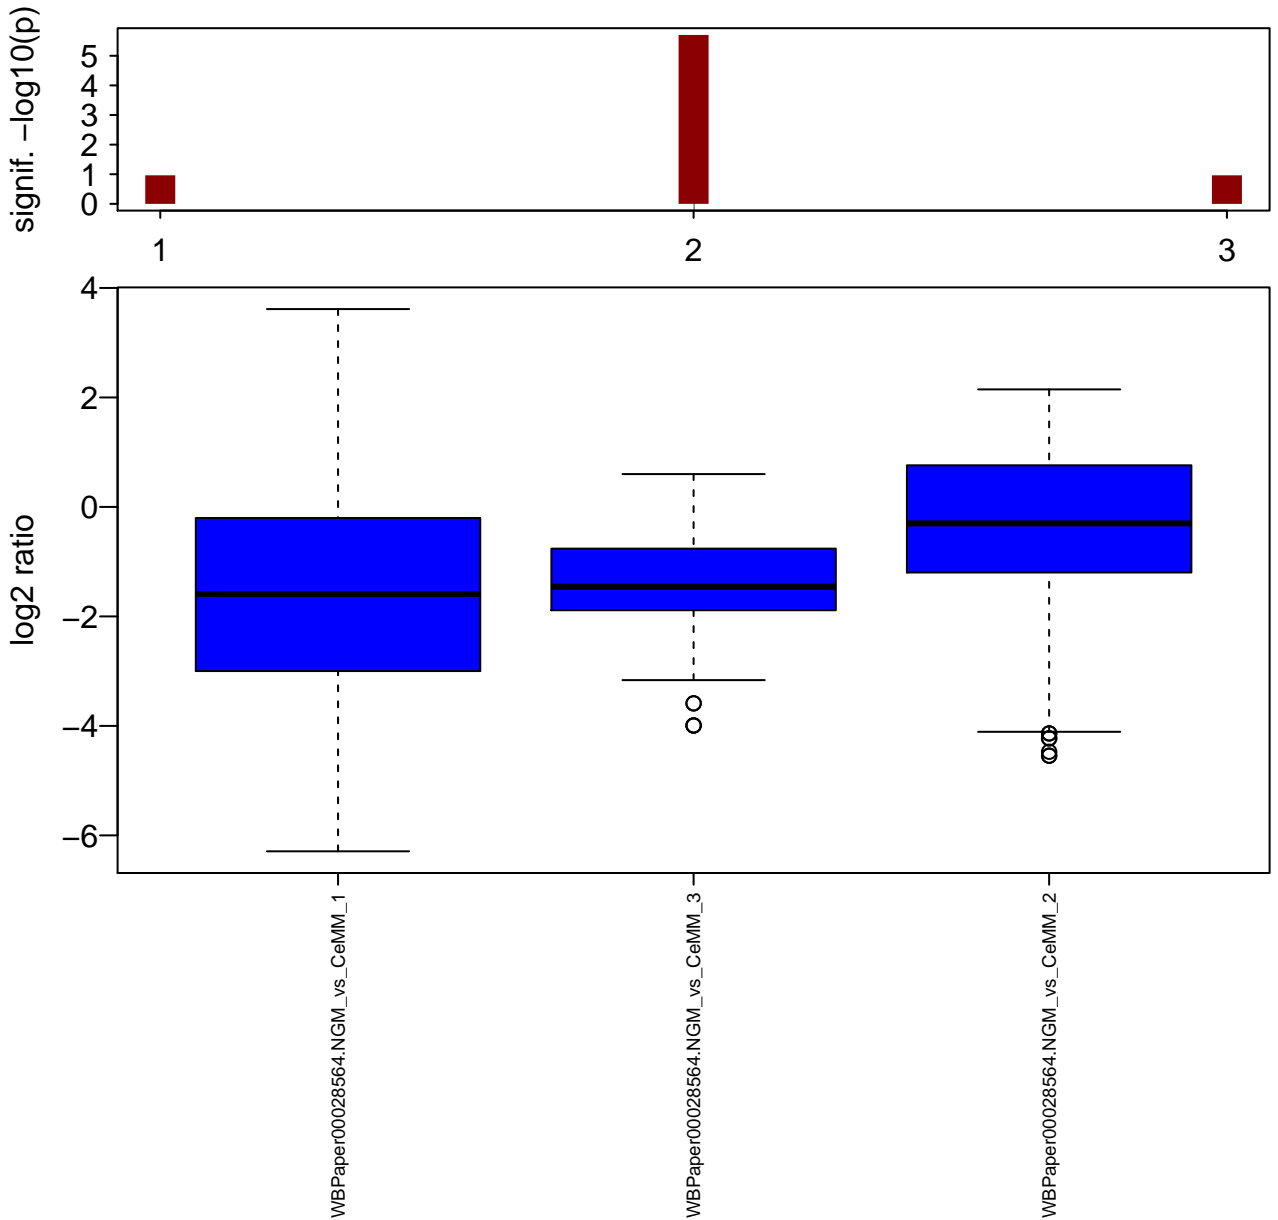



# WBPaper00028788

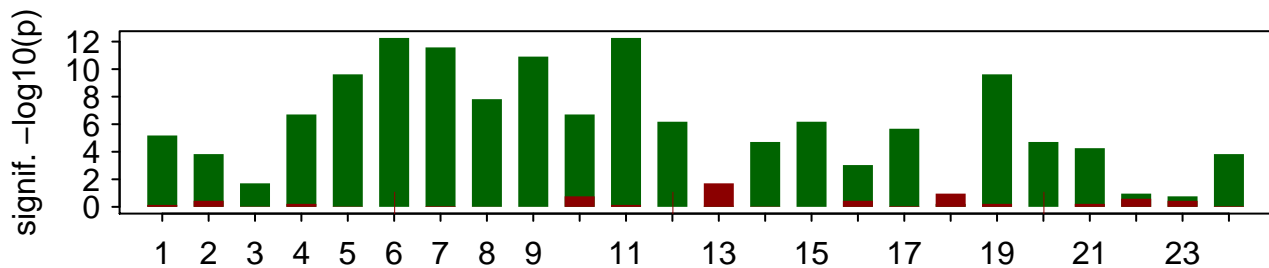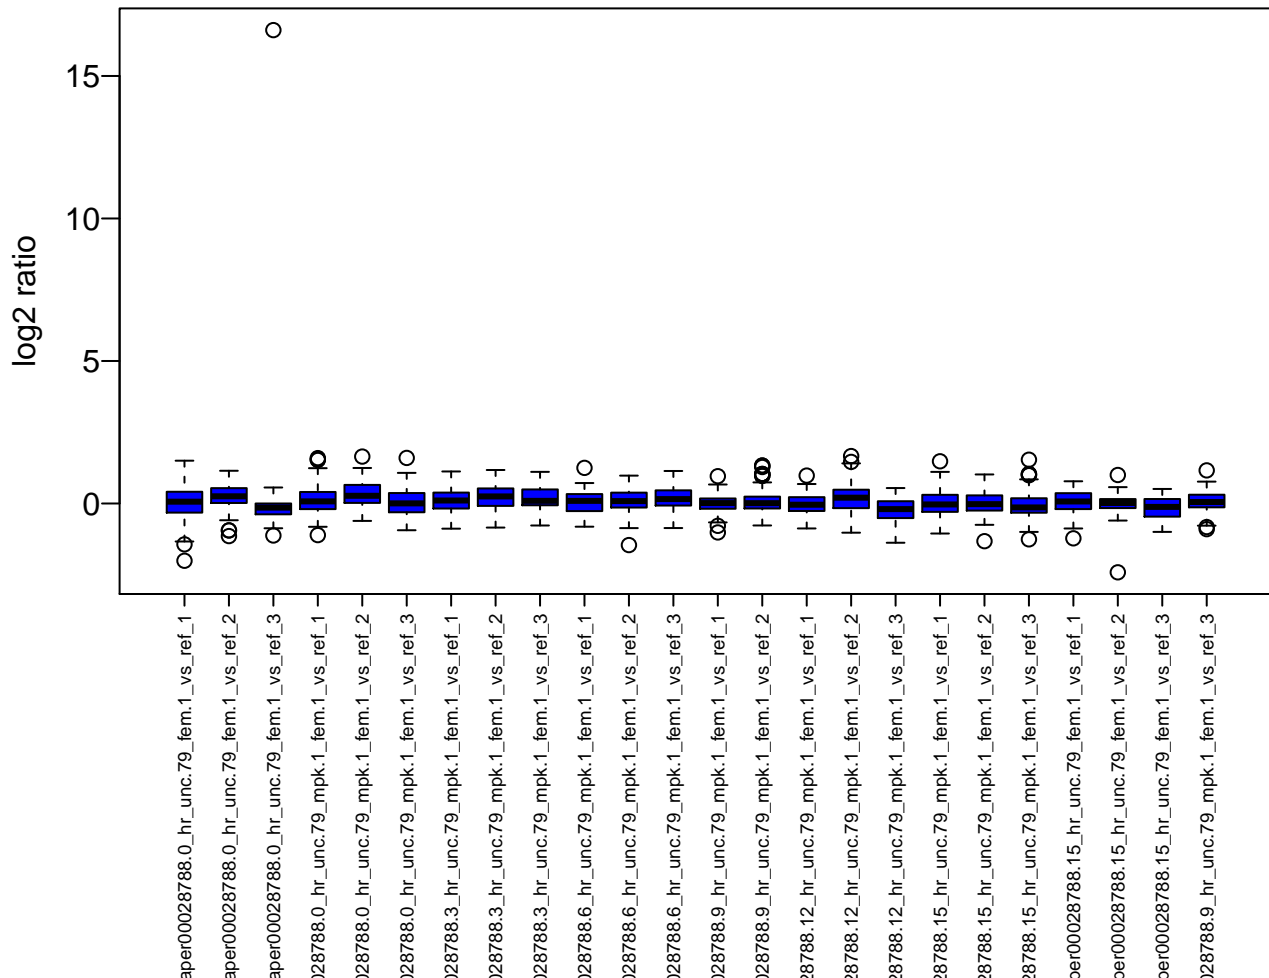

# WBPaper00028789

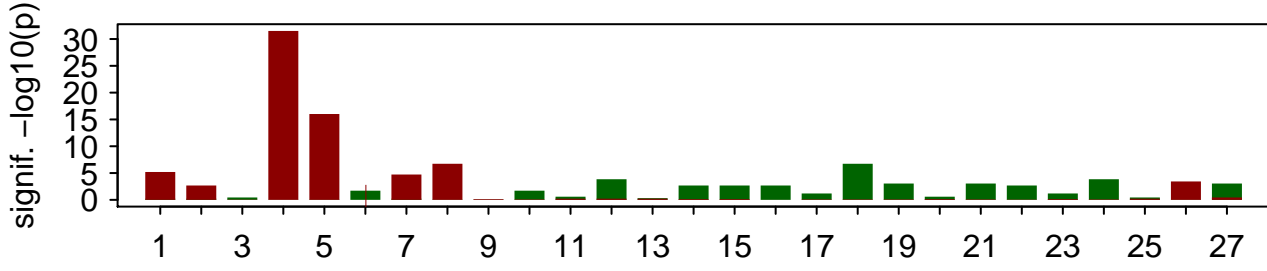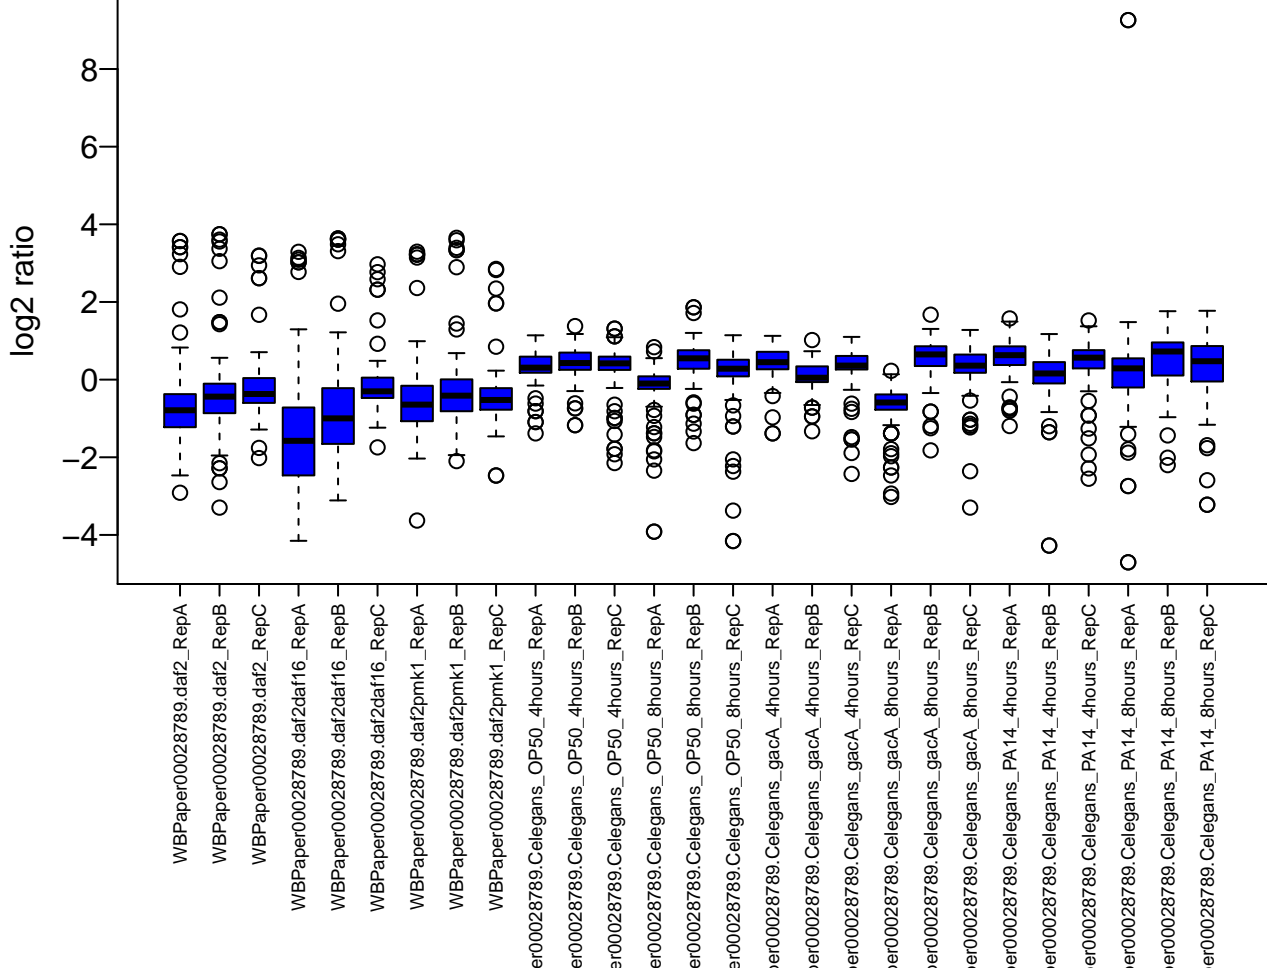

# WBPaper00028948

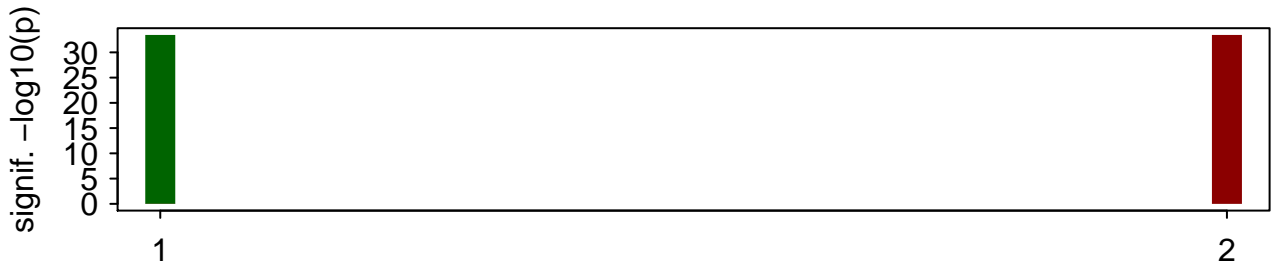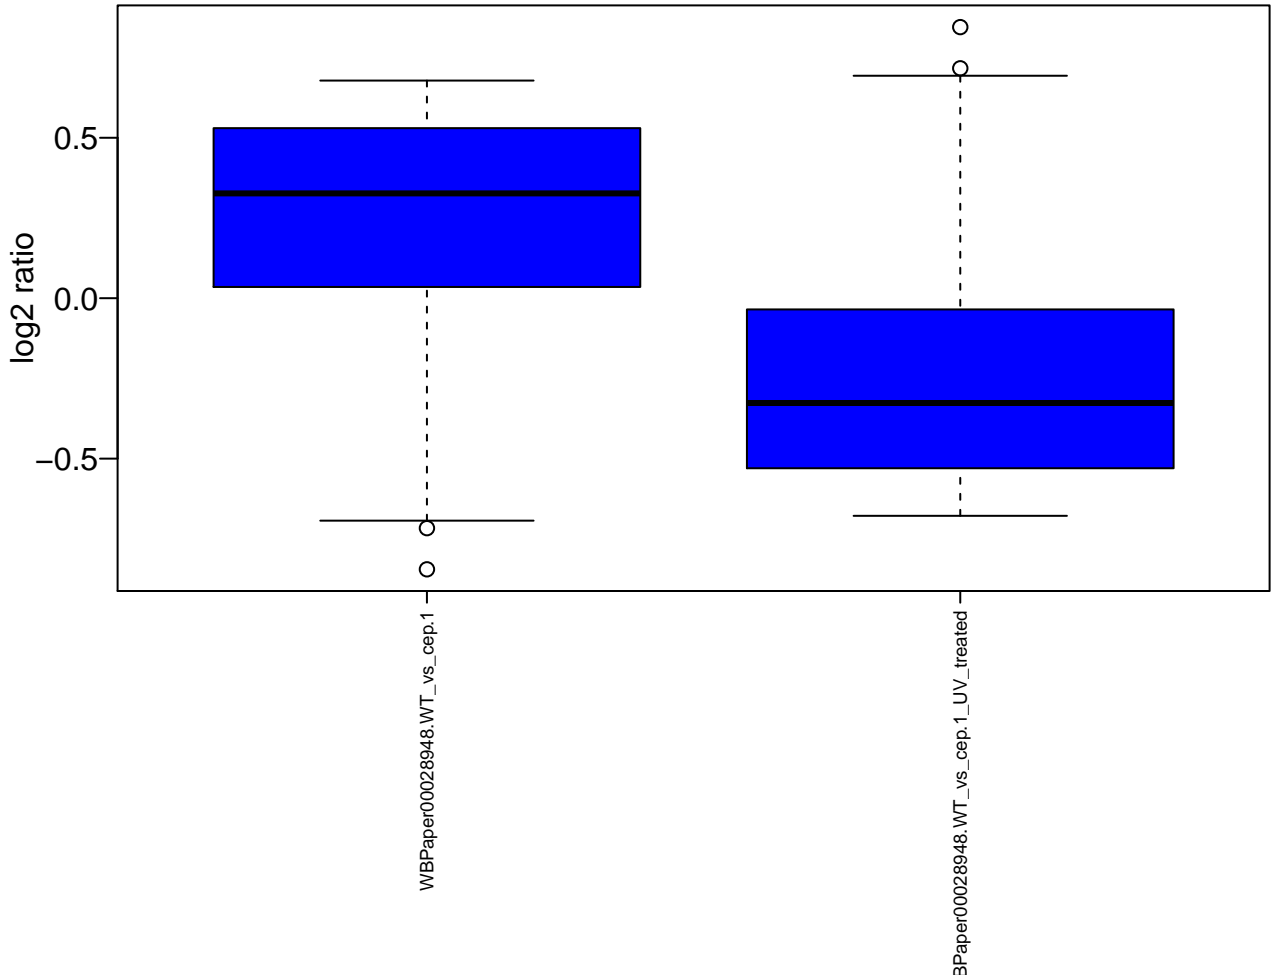

# WBPaper00028949

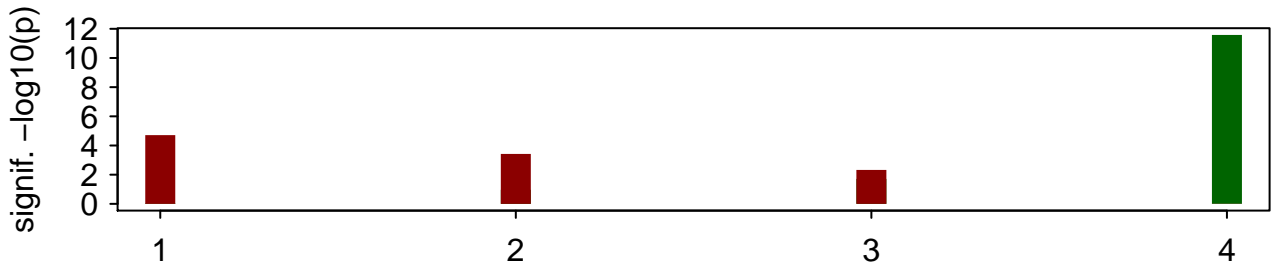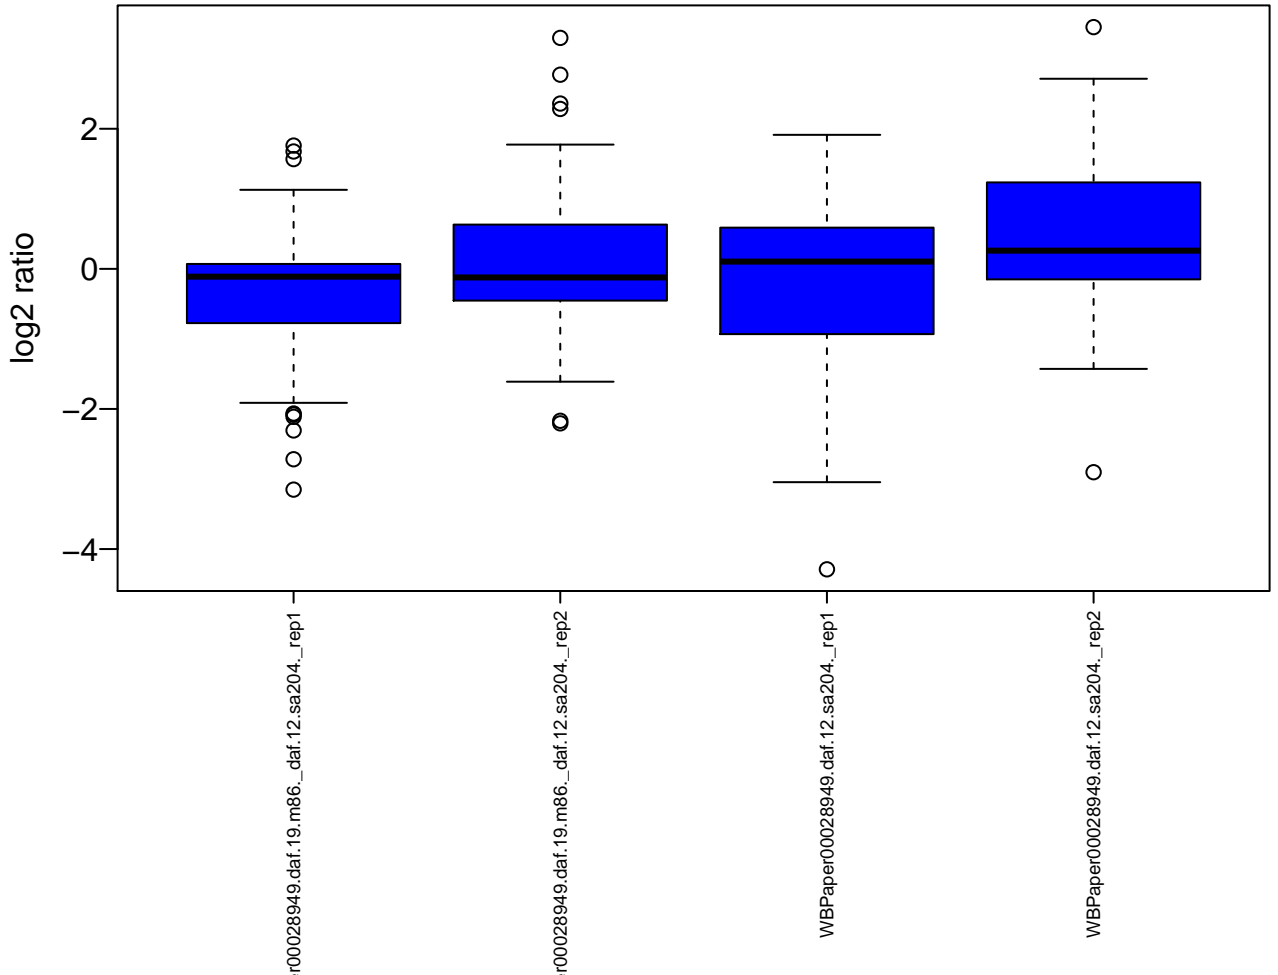

# WBPaper00028962

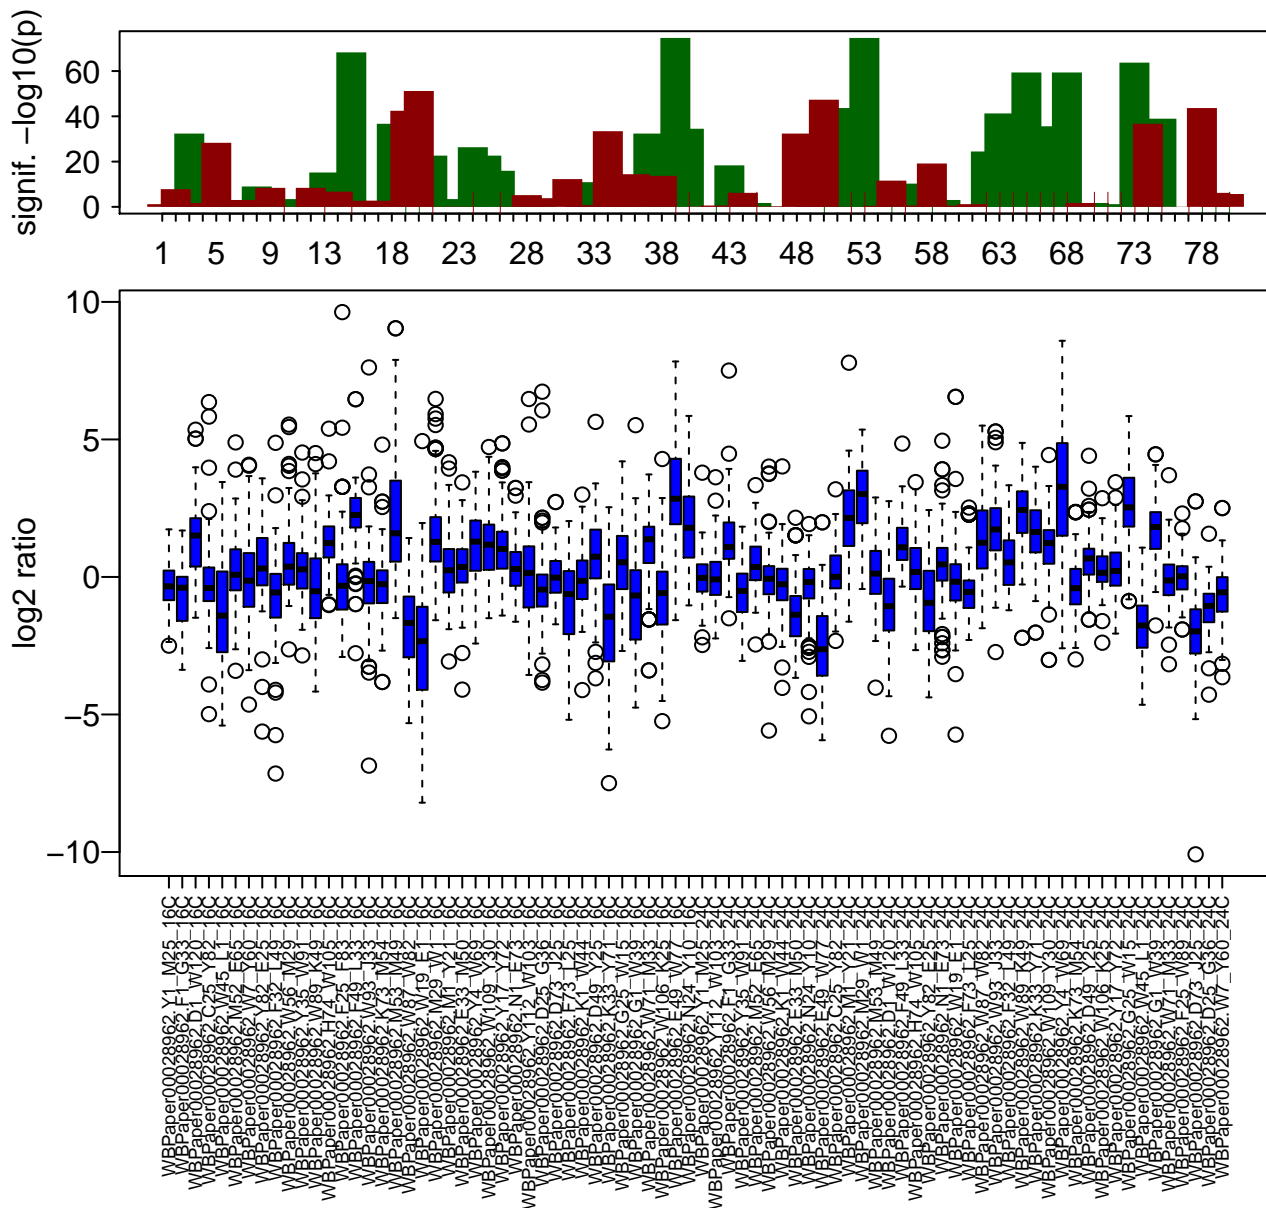

# WBPaper00029087

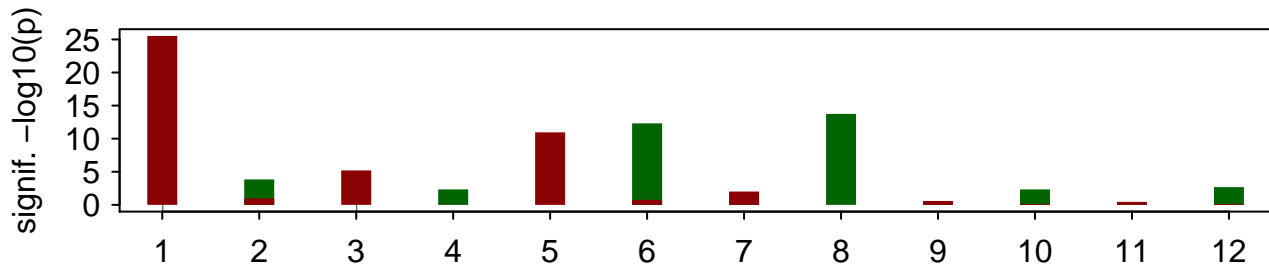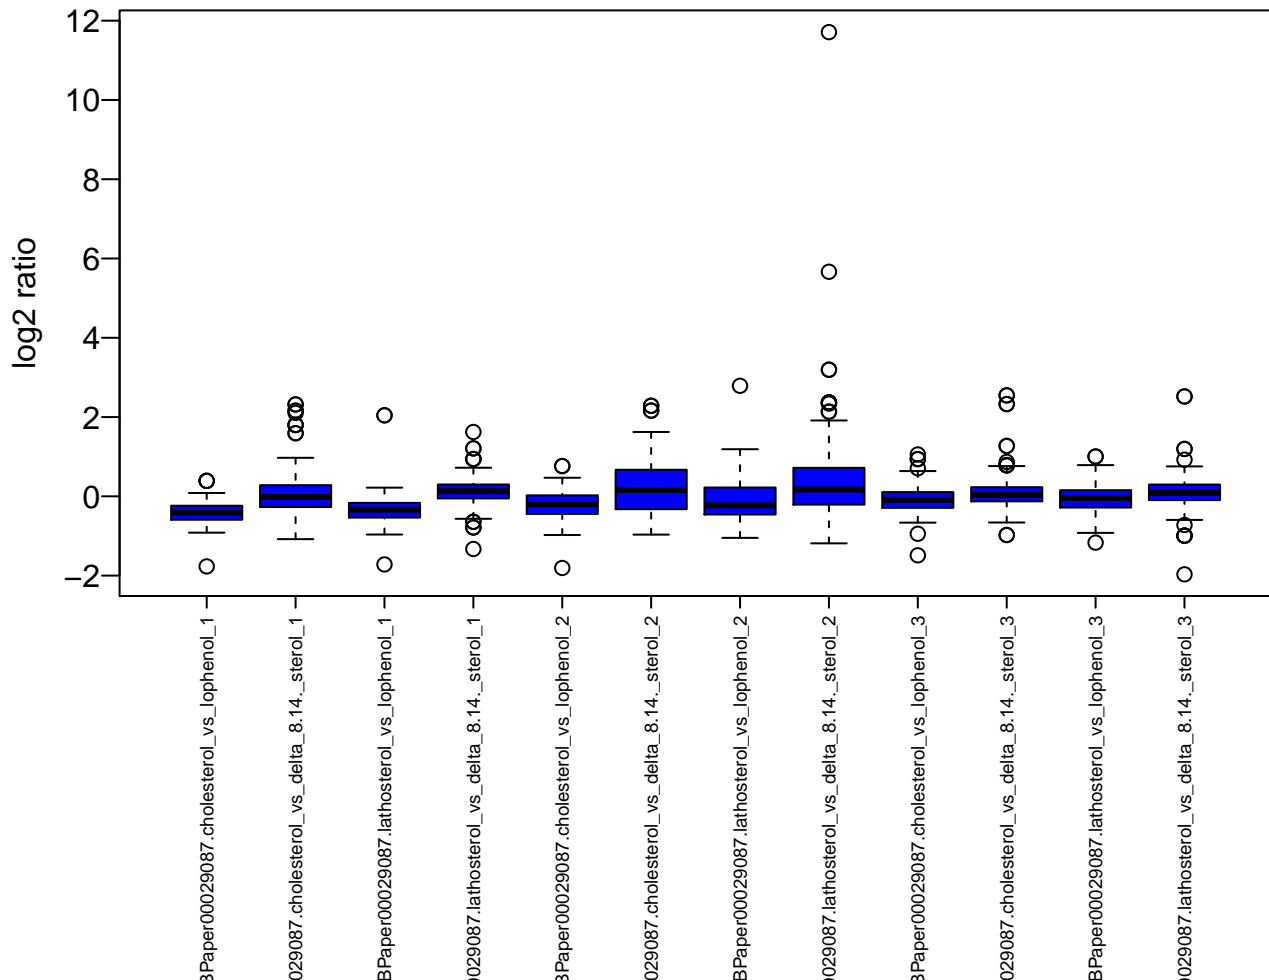

# WBPaper00029190

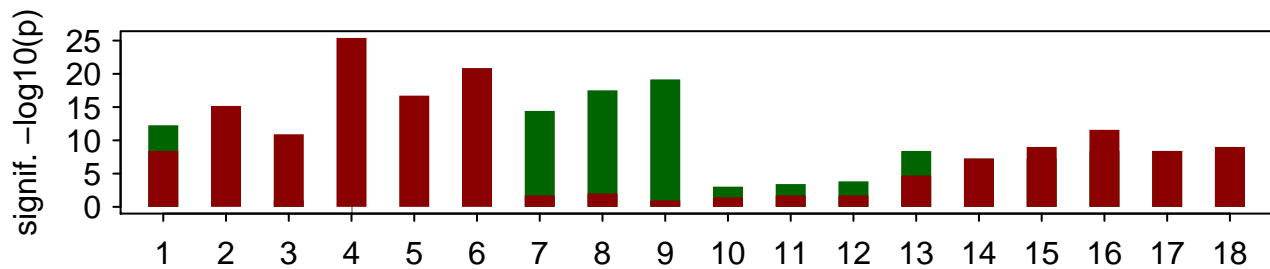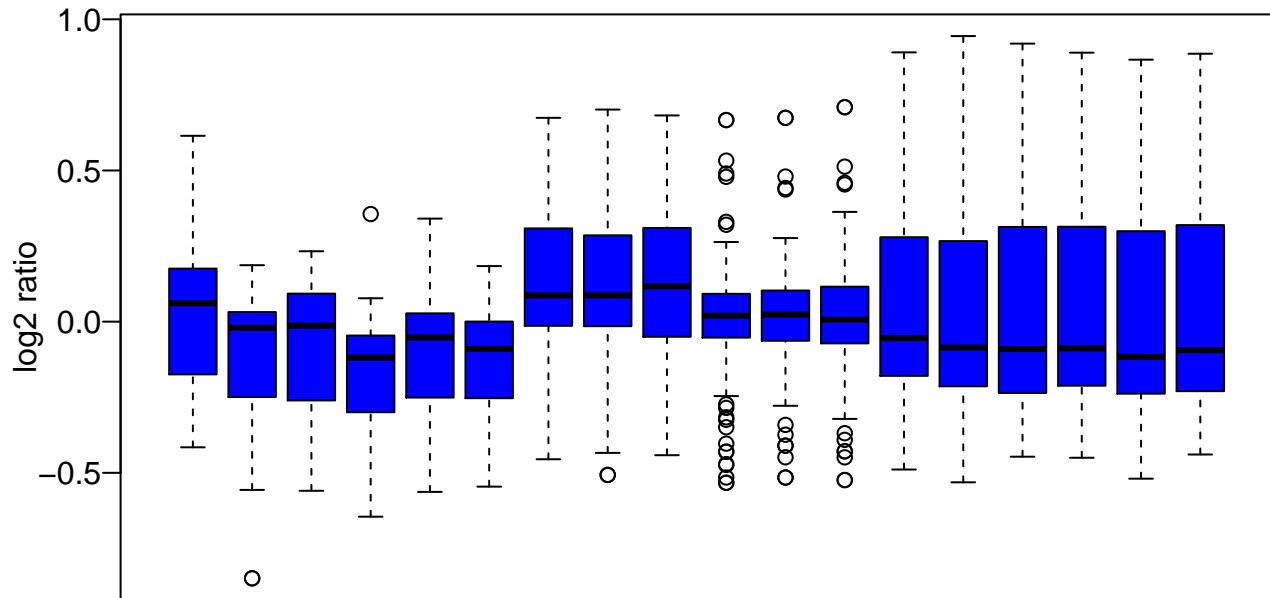

# WBPaper00029226

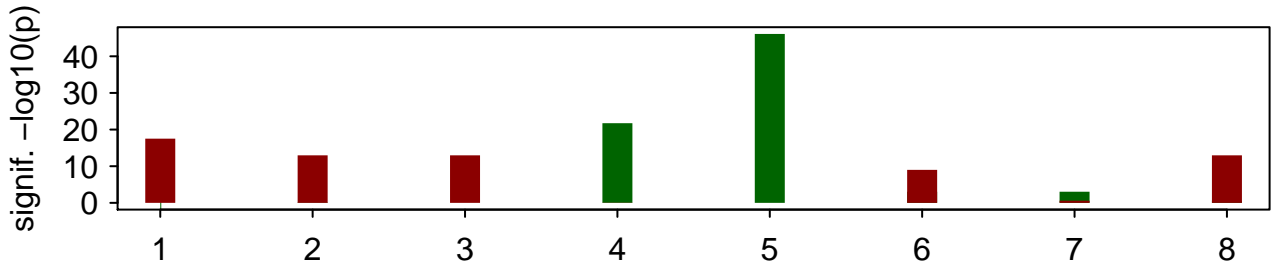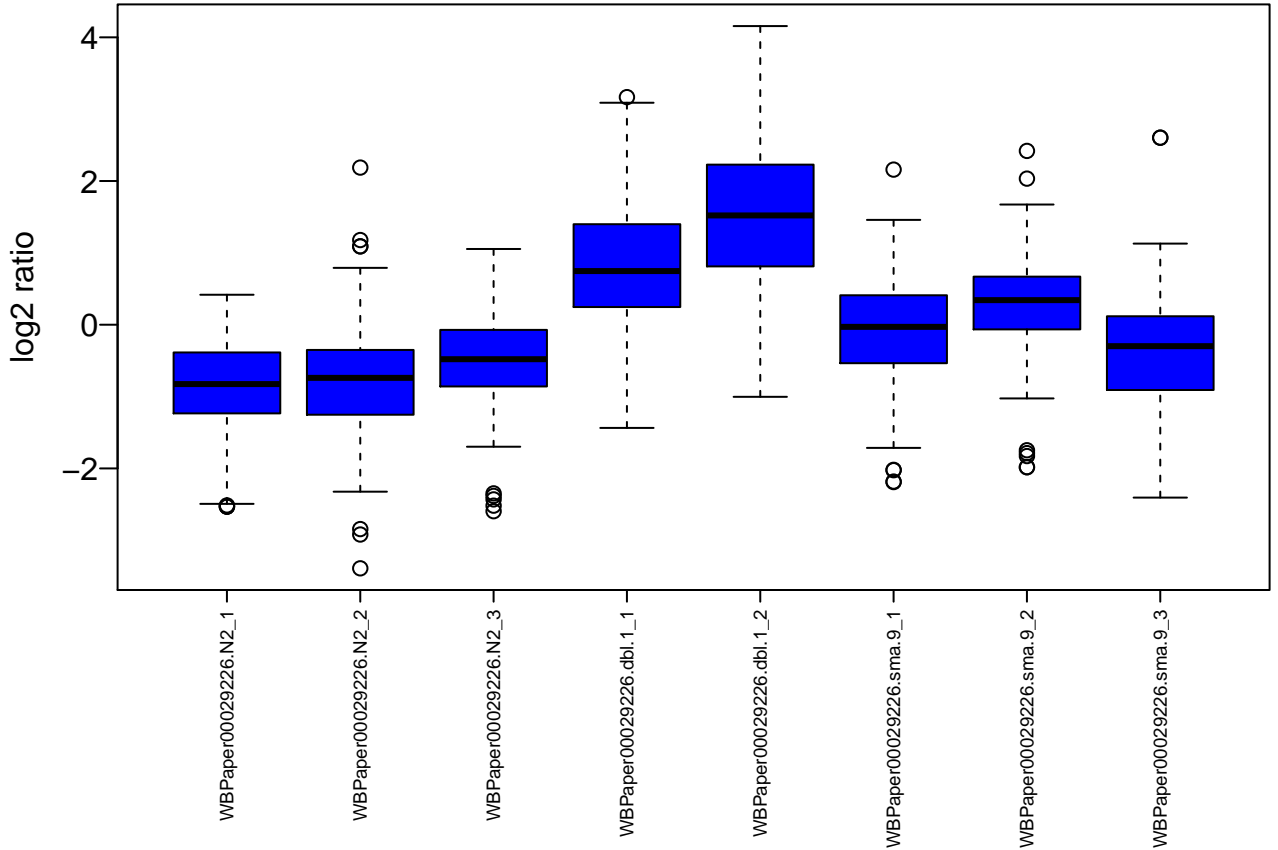



# WBPaper00029334

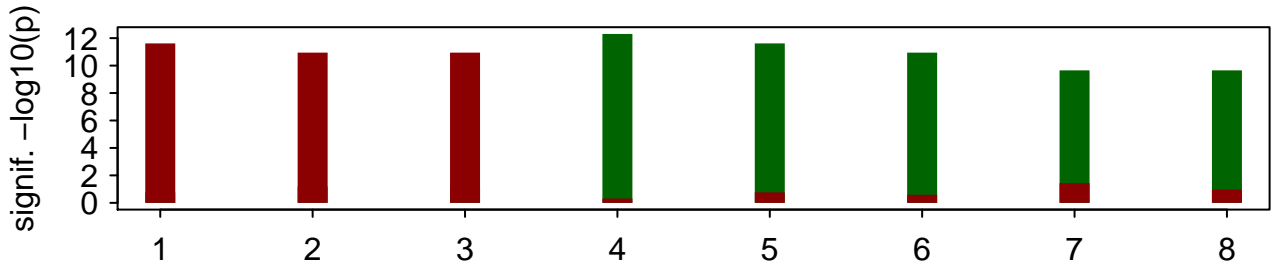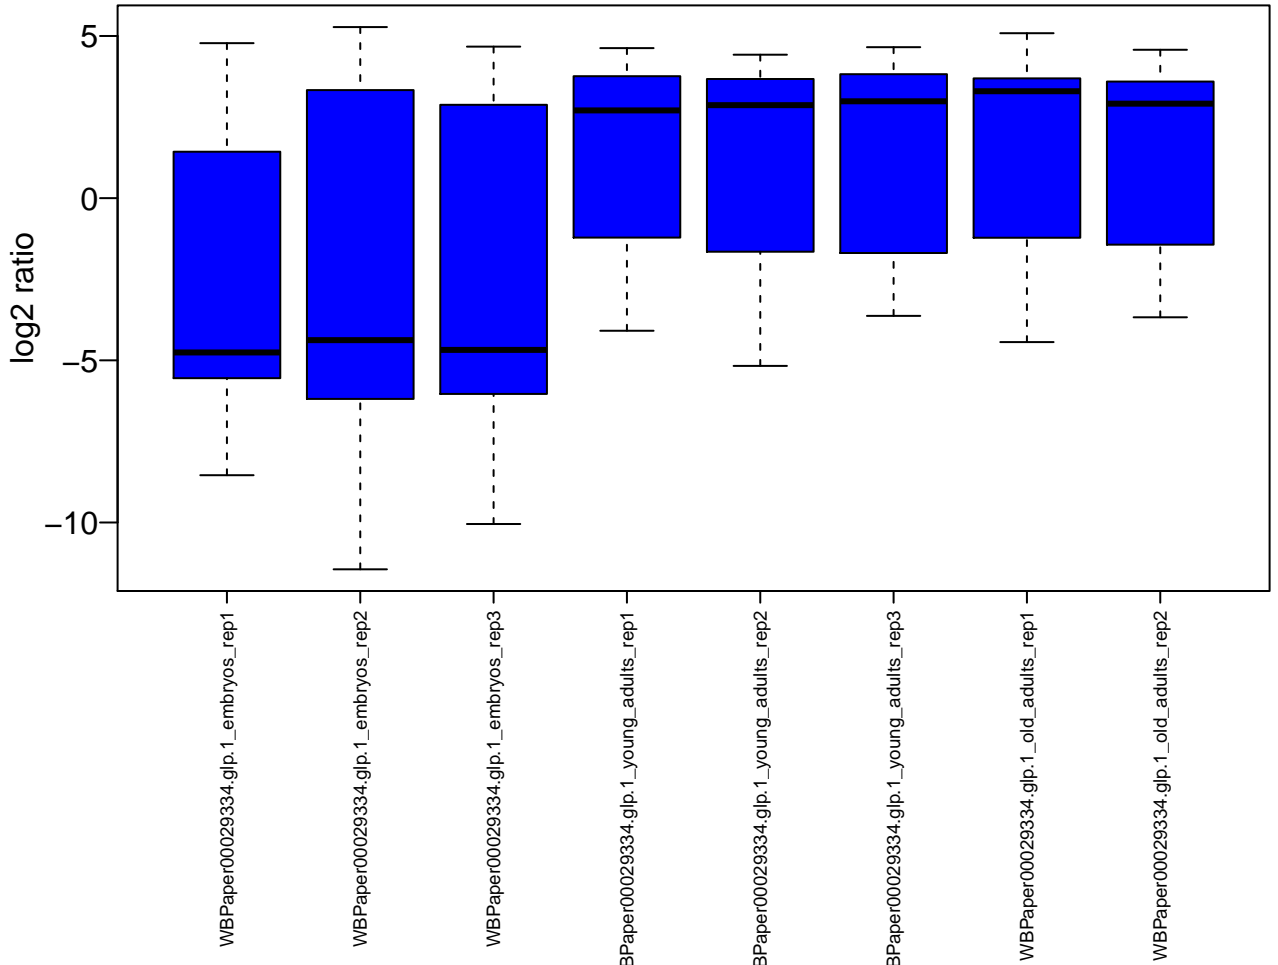

# WBPaper00029437

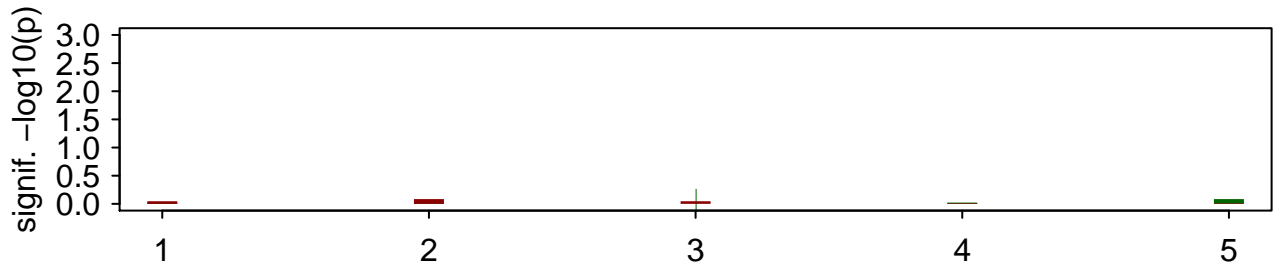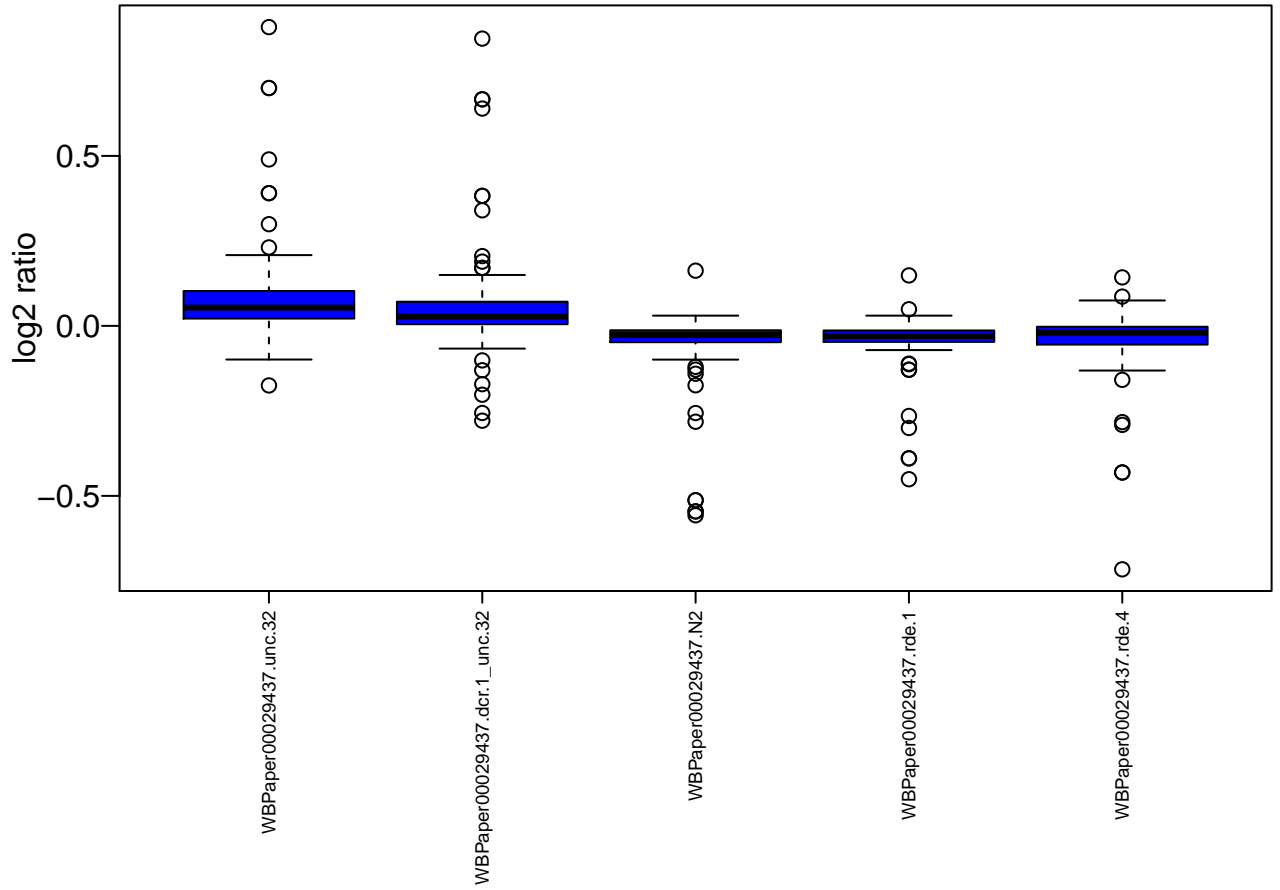

# WBPaper00030811

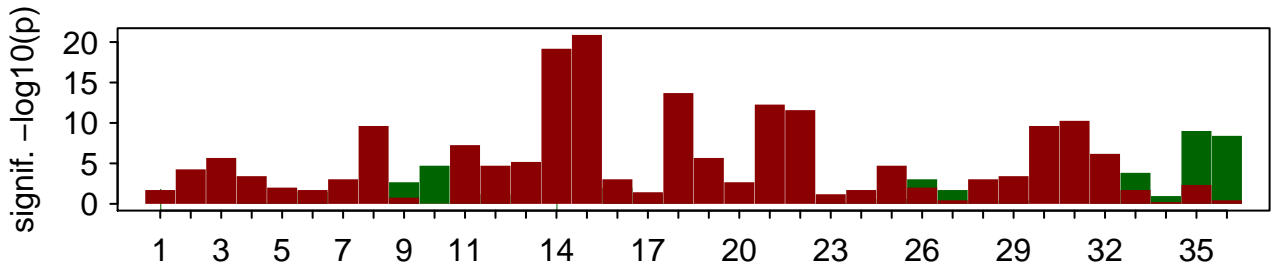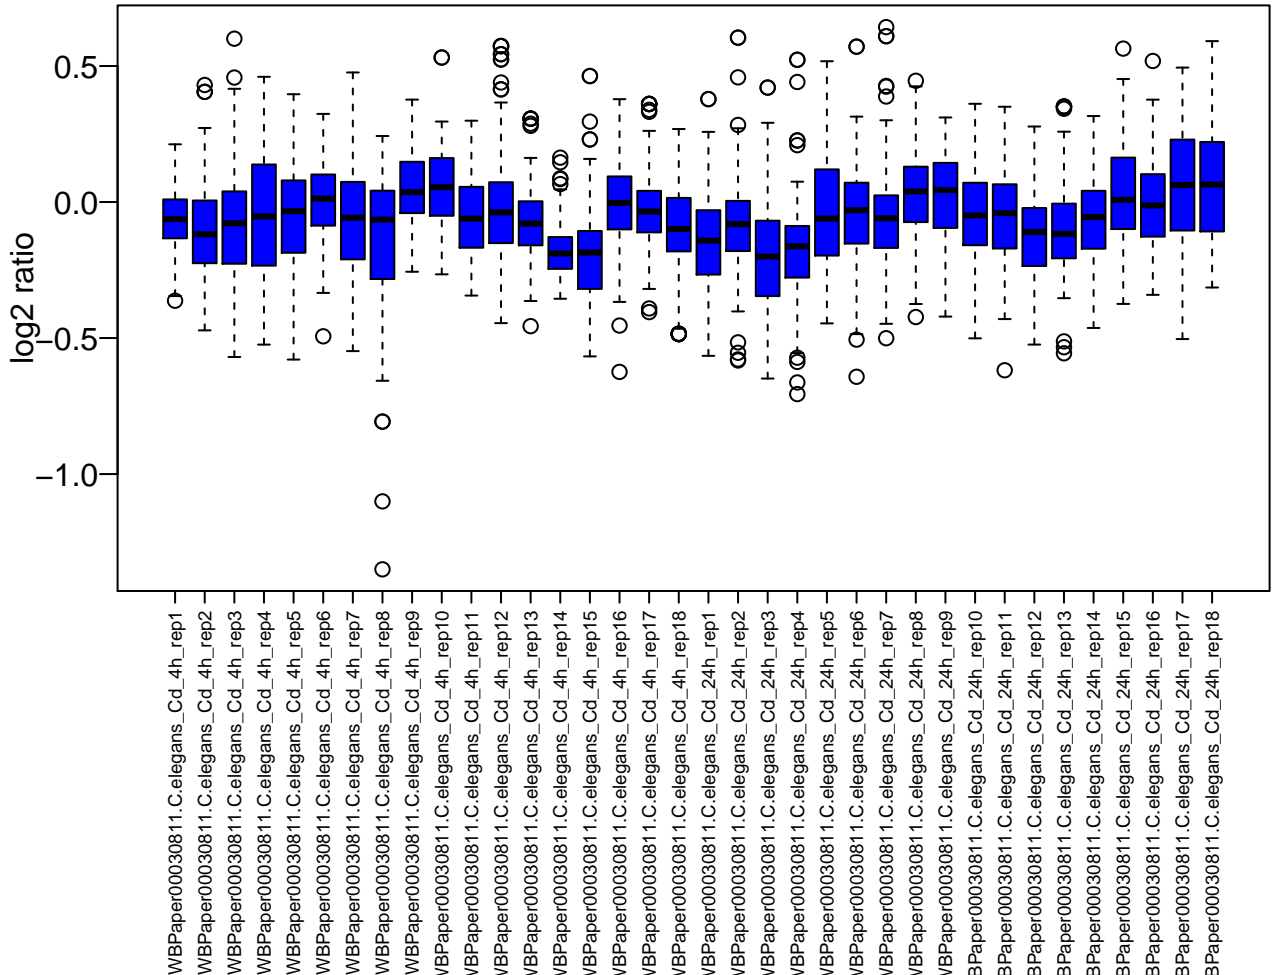

# WBPaper00030839

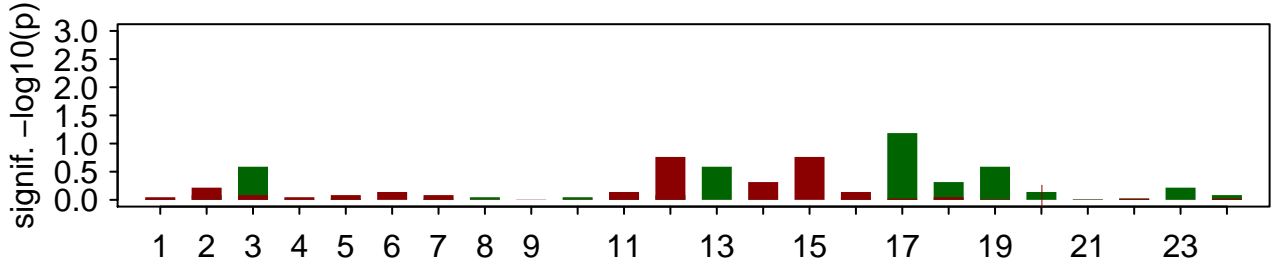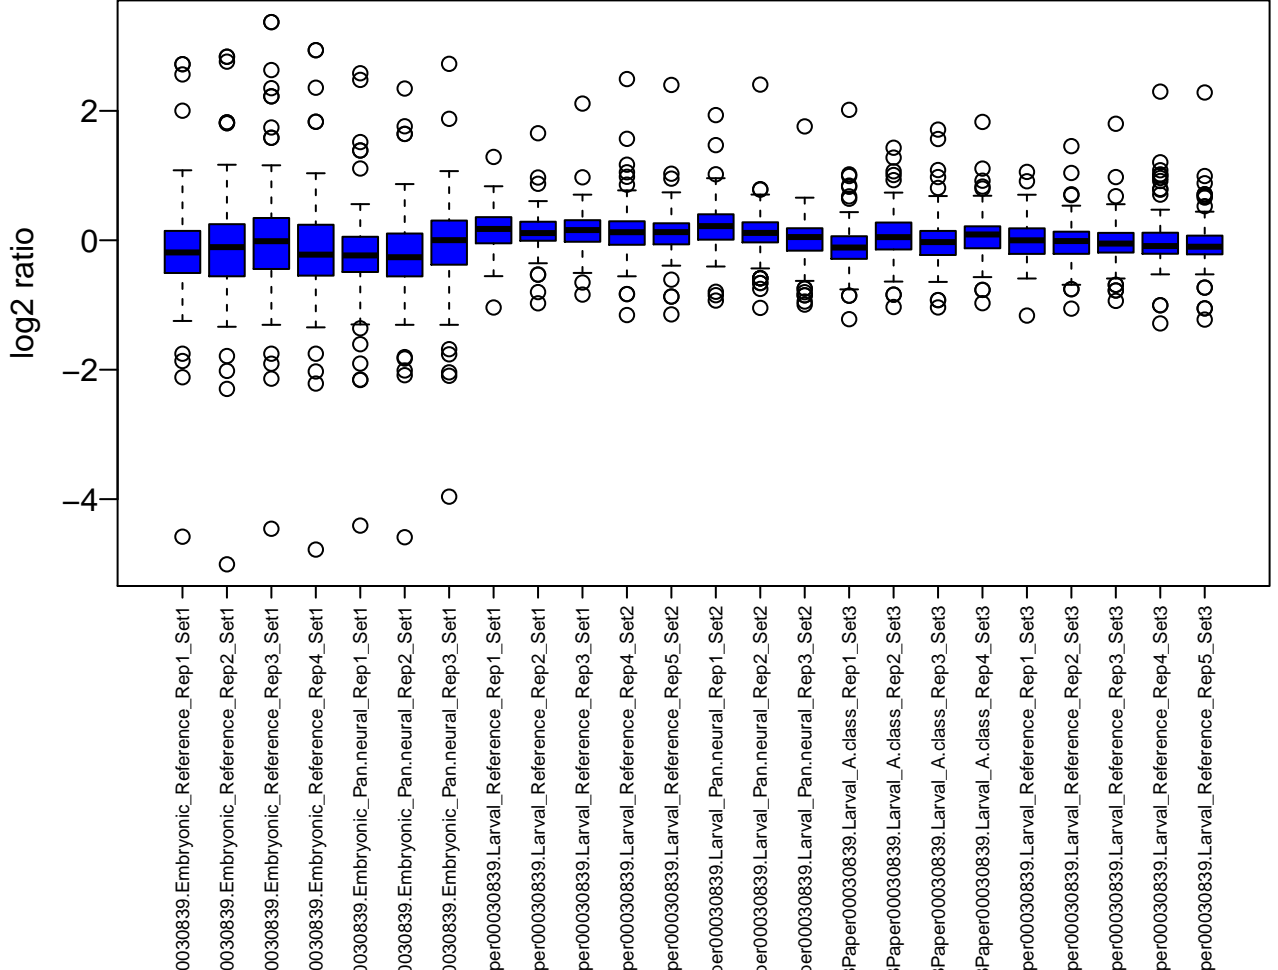

# WBPaper00030985

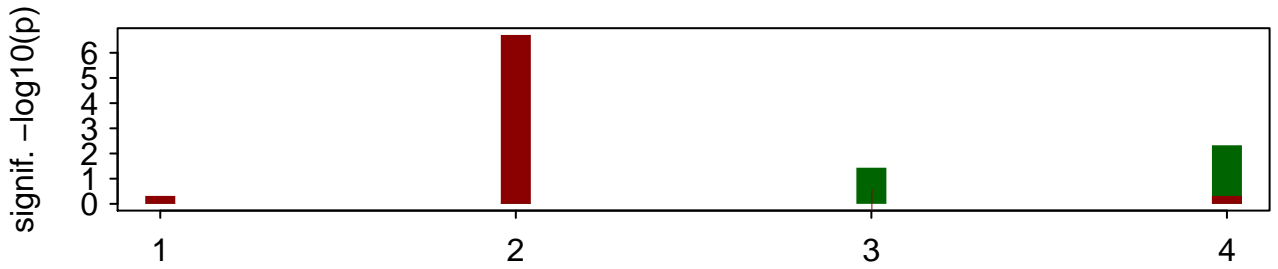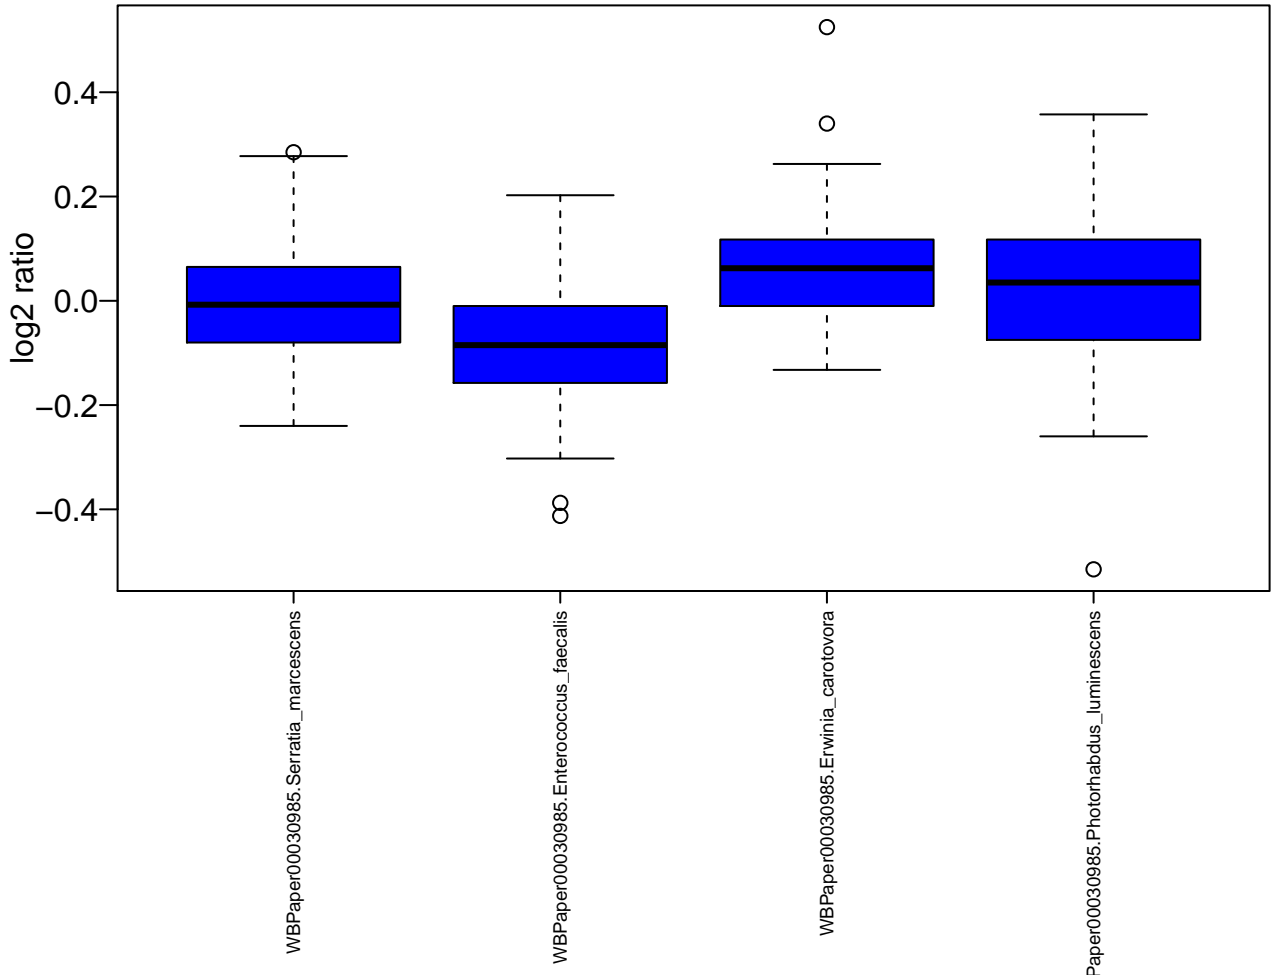

# WBPaper00031003

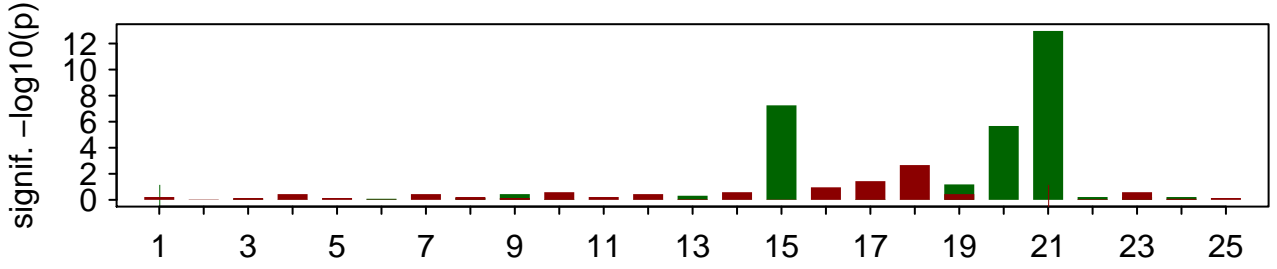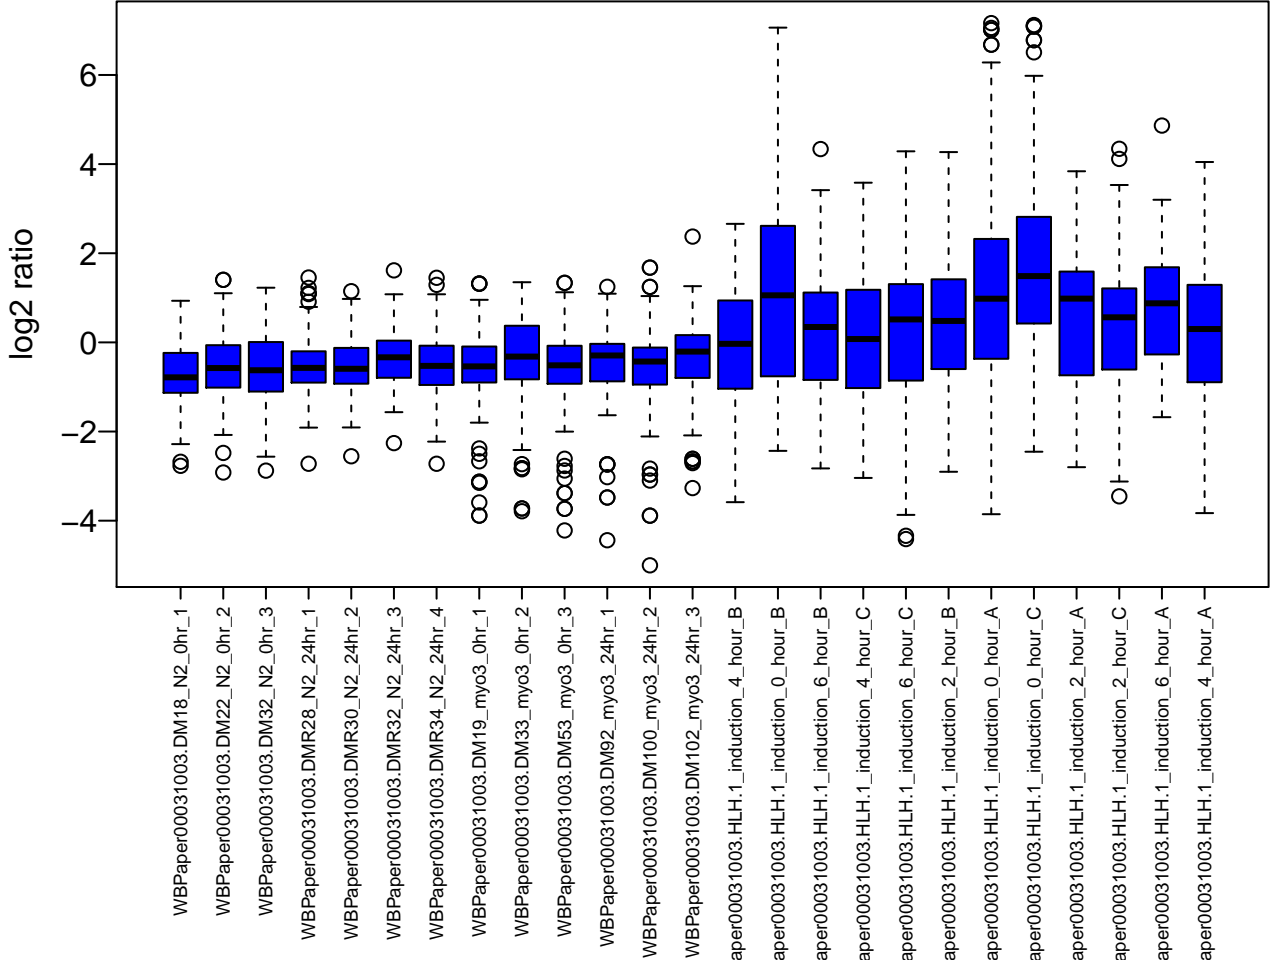

# WBPaper00031070

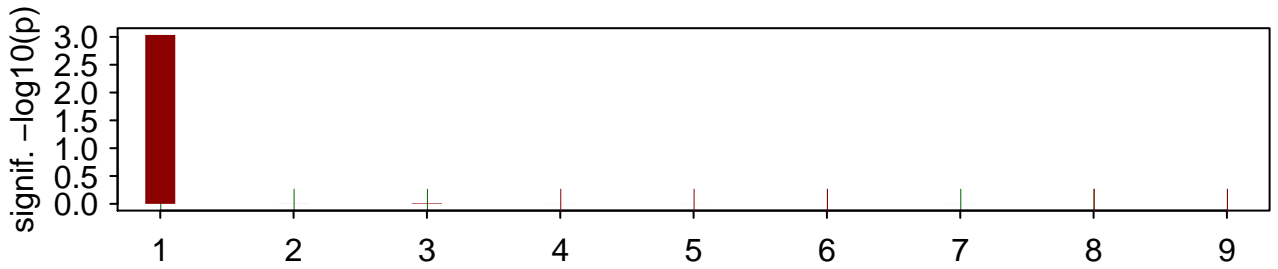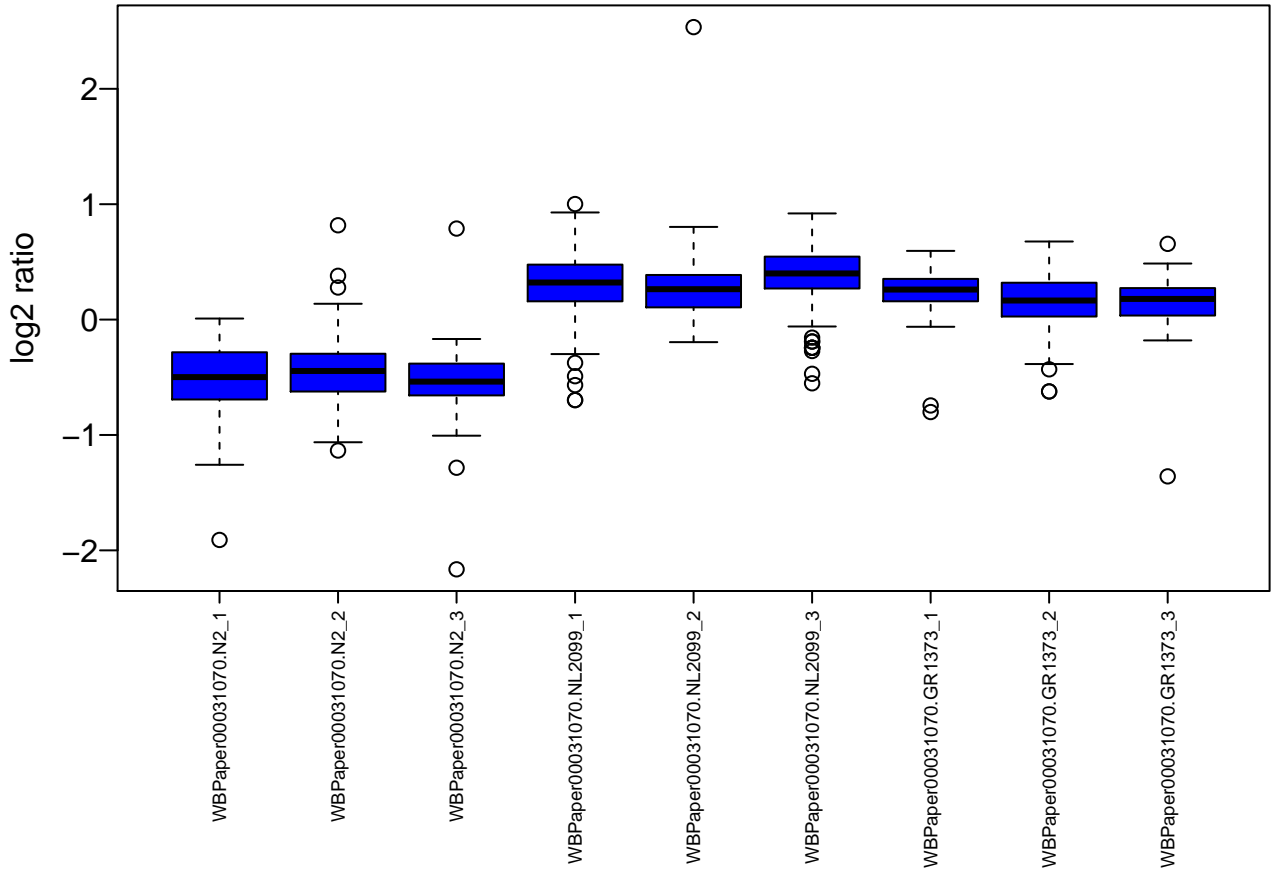

# WBPaper00031252

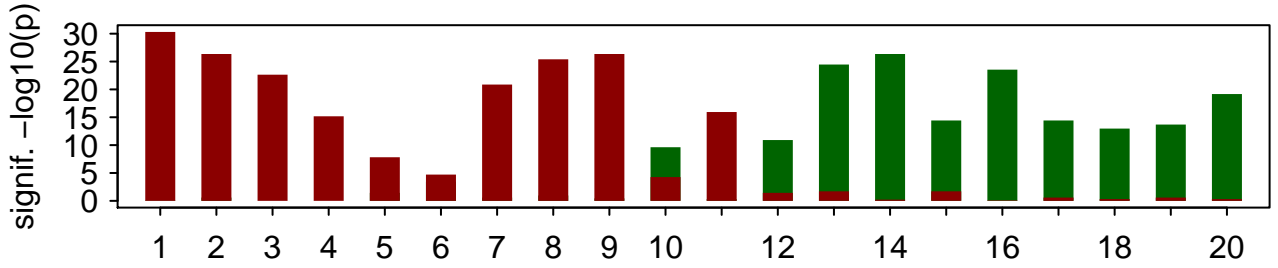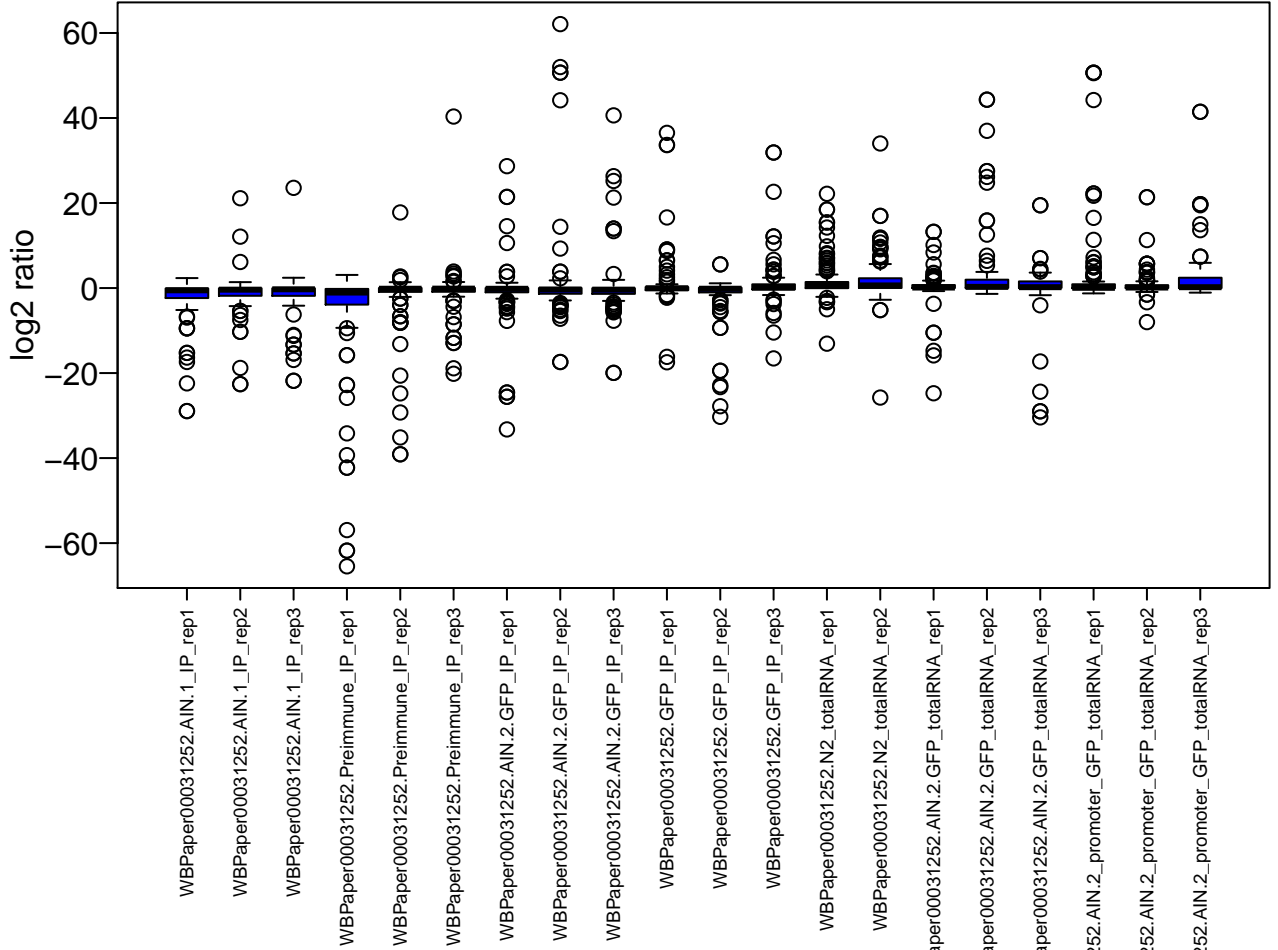



# WBPaper00031379

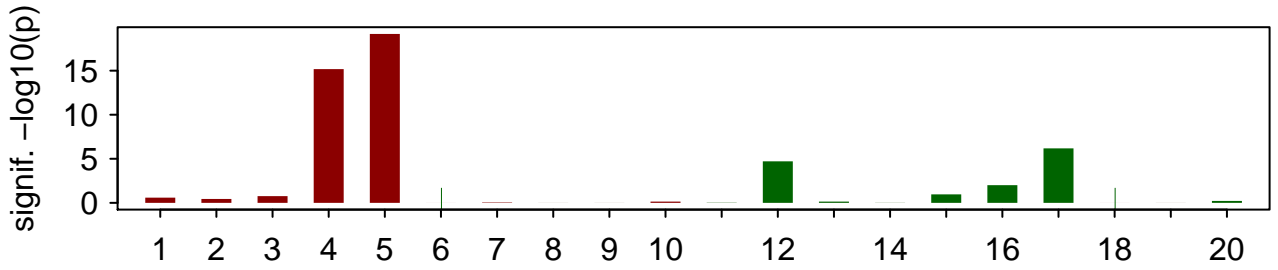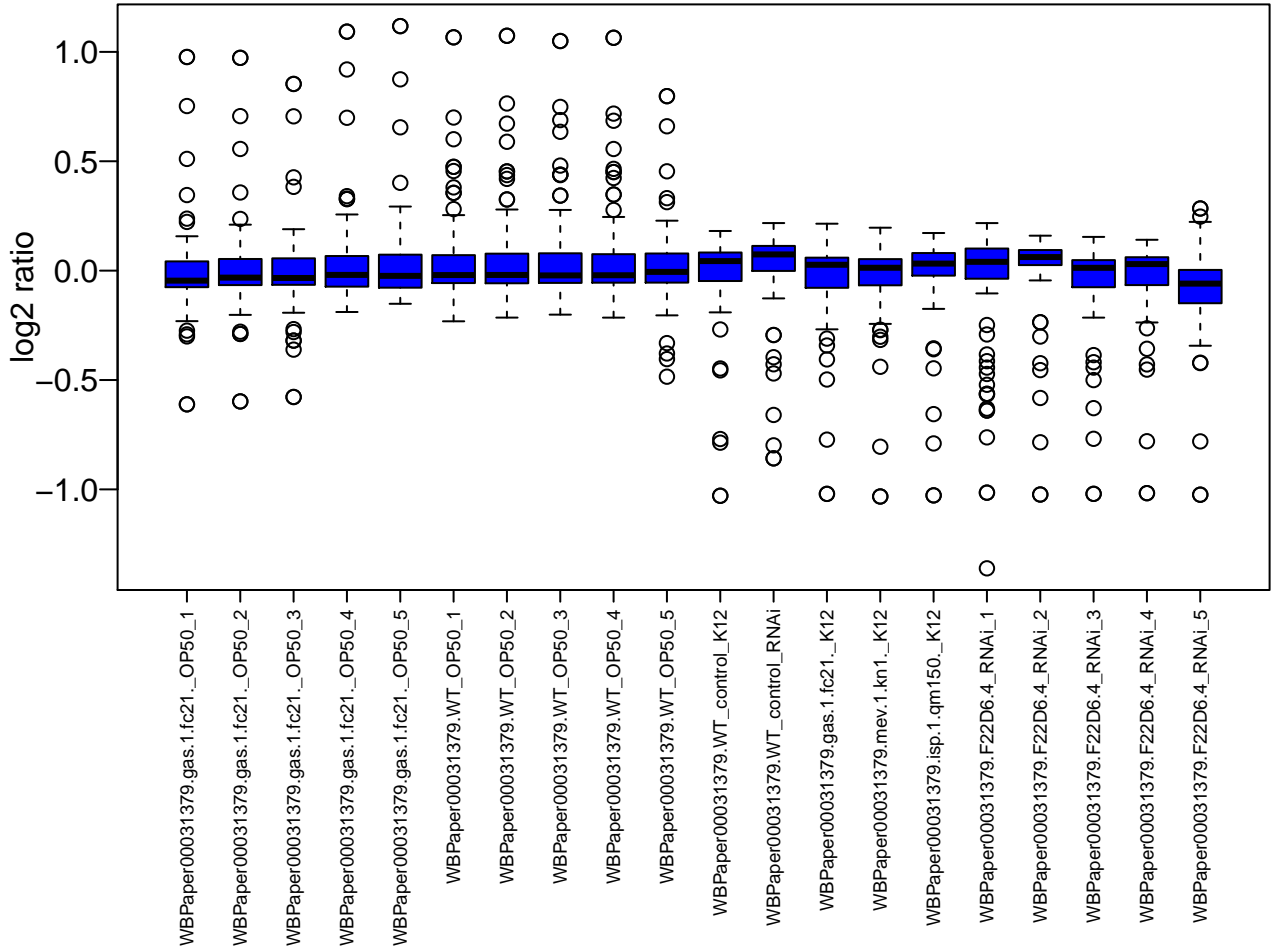

# WBPaper00031477

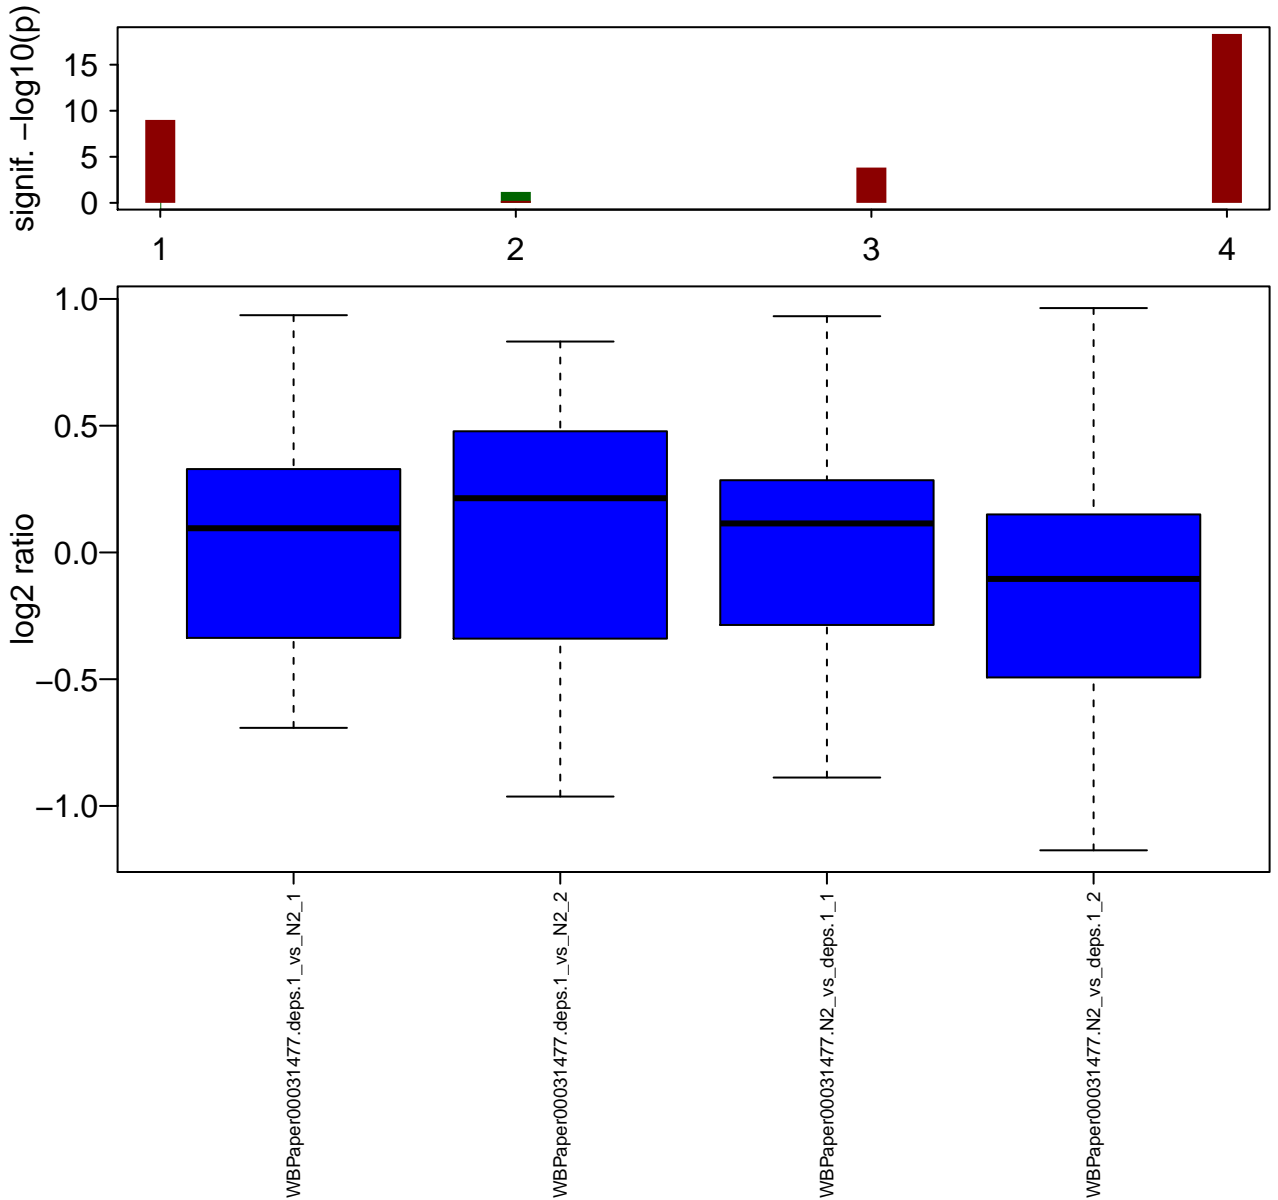

# WBPaper00031525

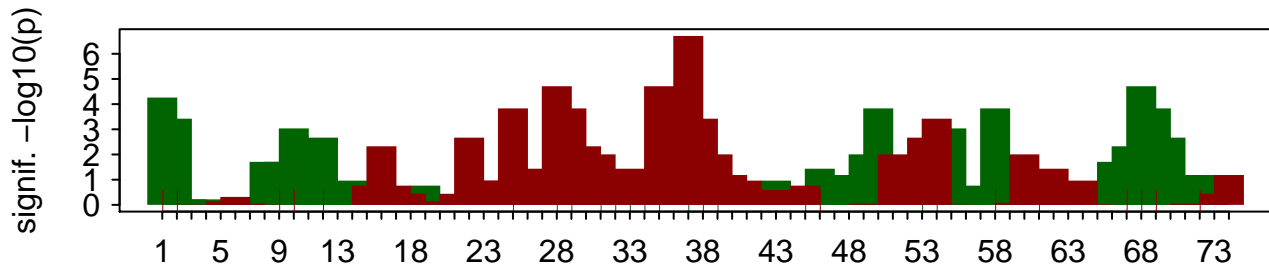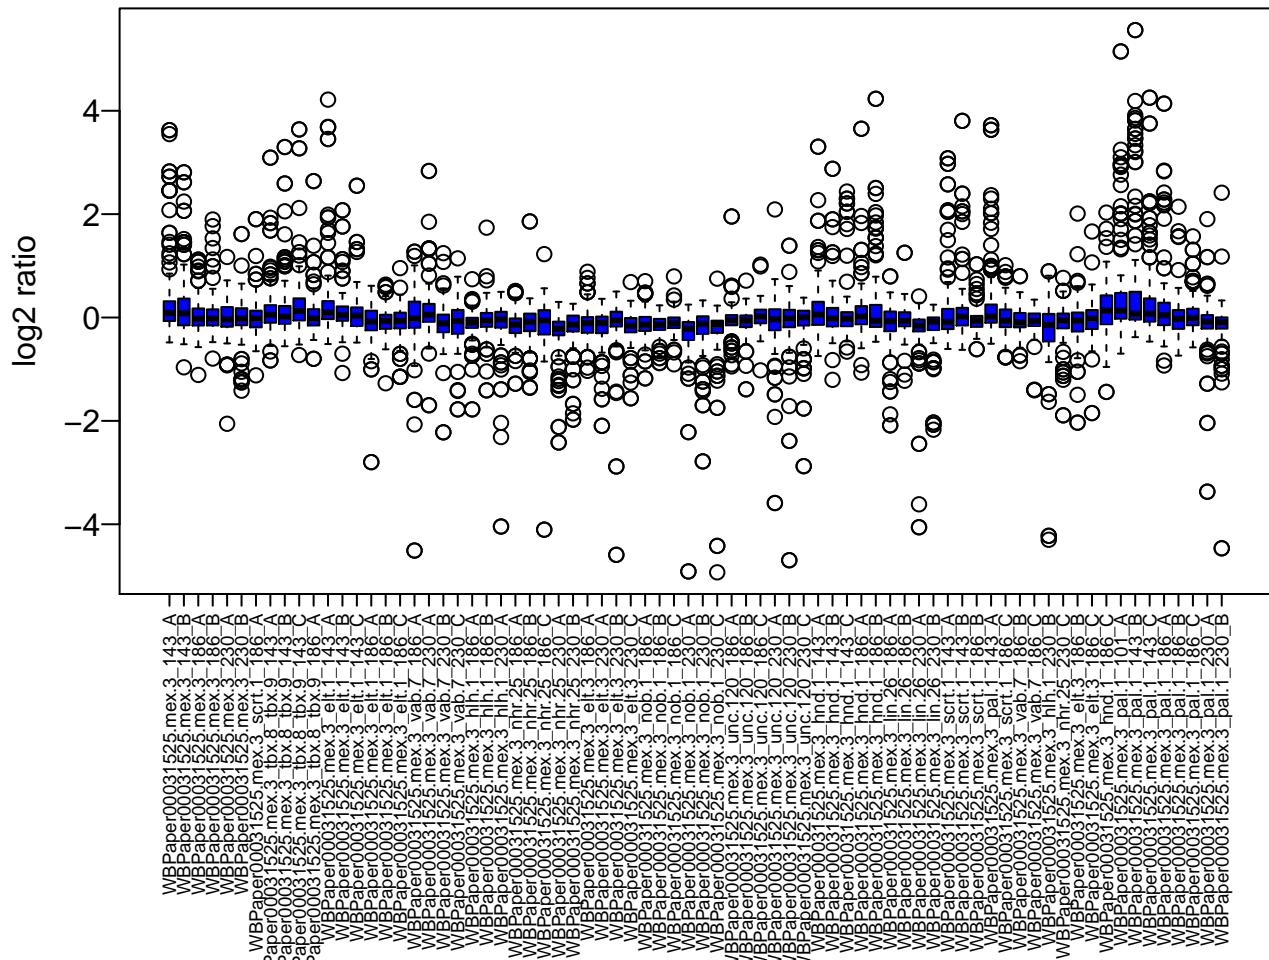

# WBPaper00031532

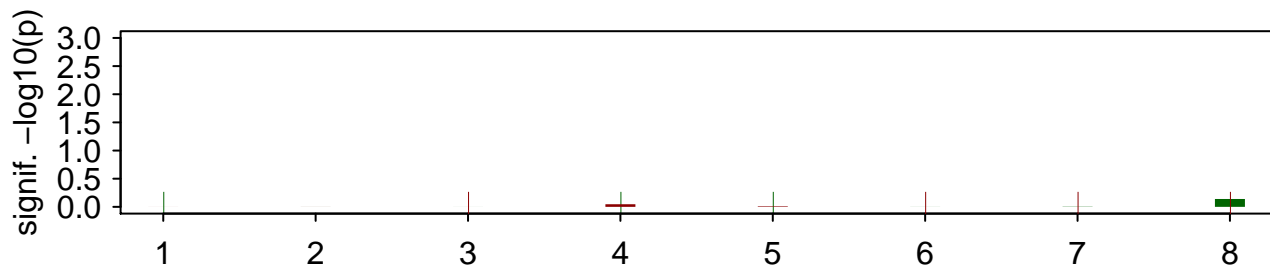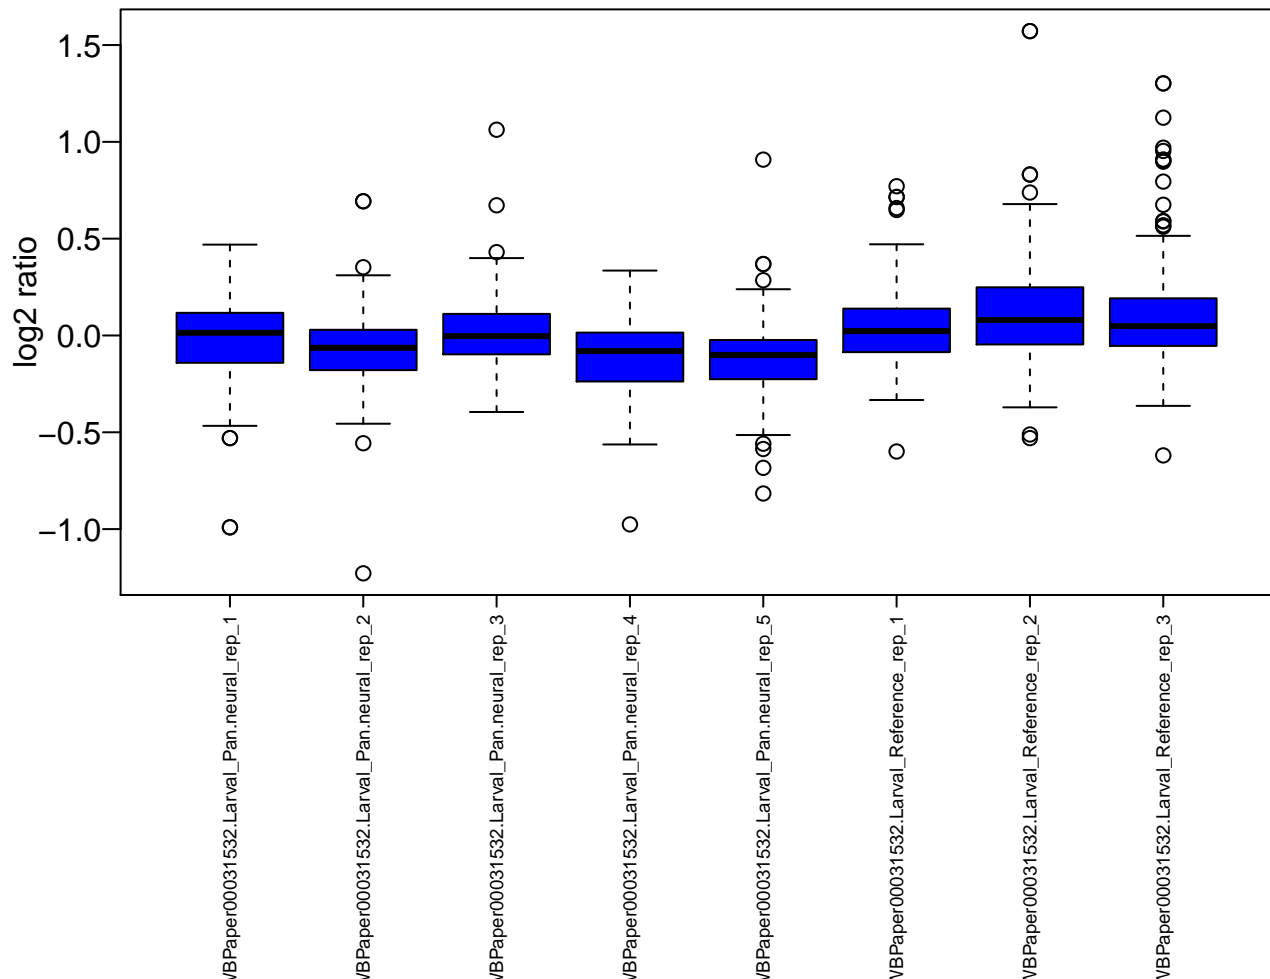

# WBPaper00031662

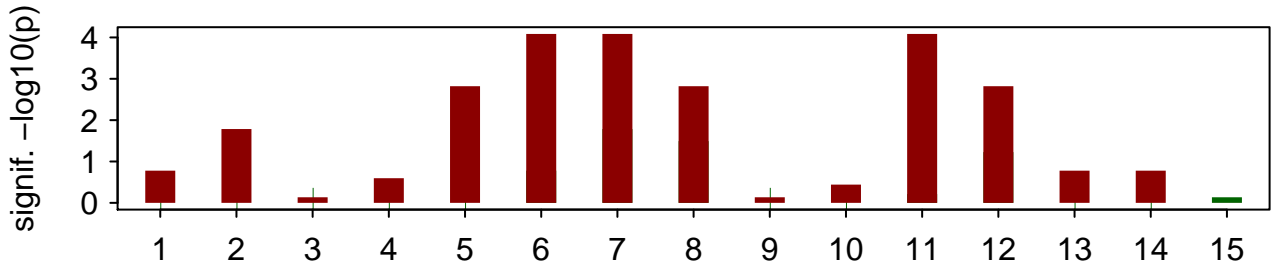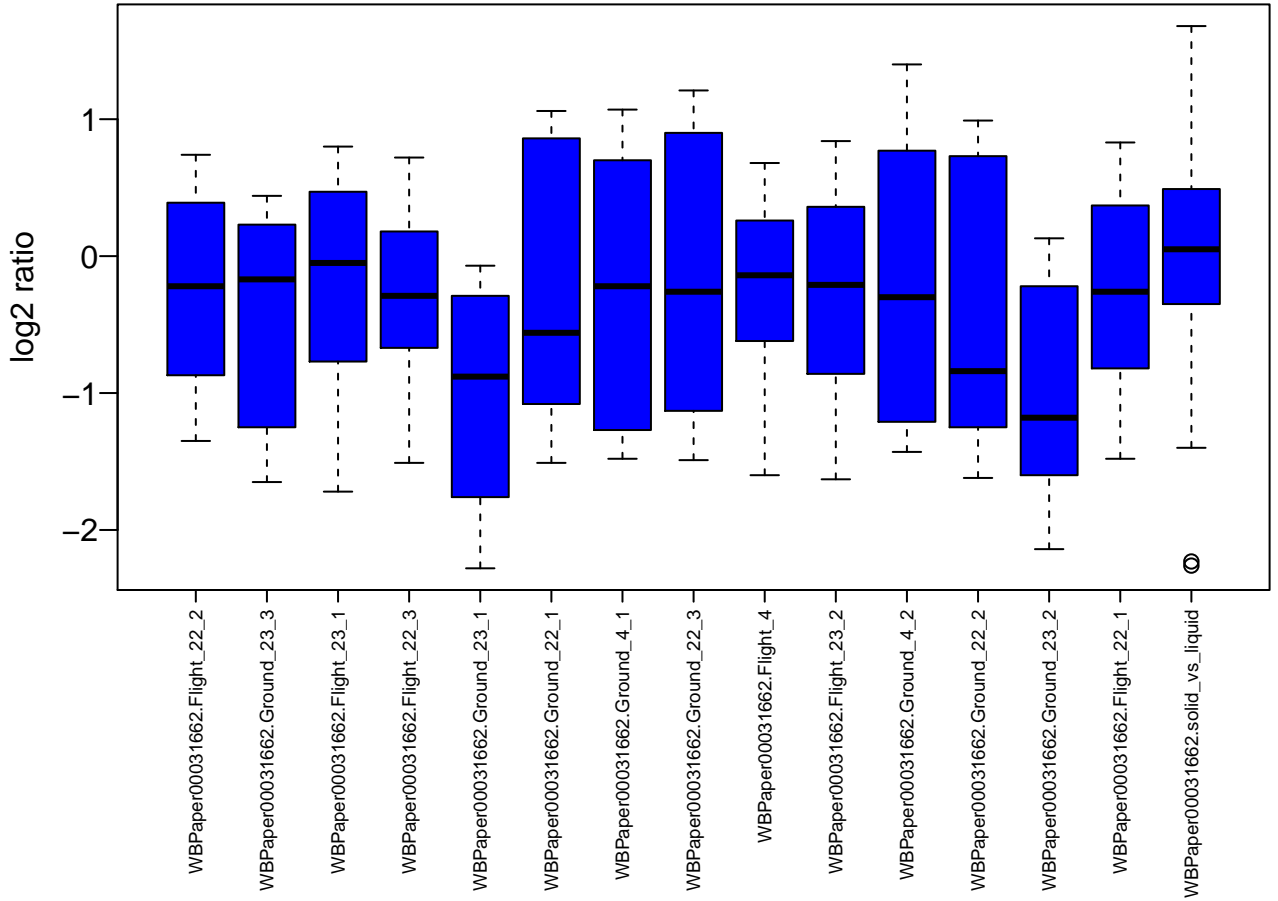

# WBPaper00031703

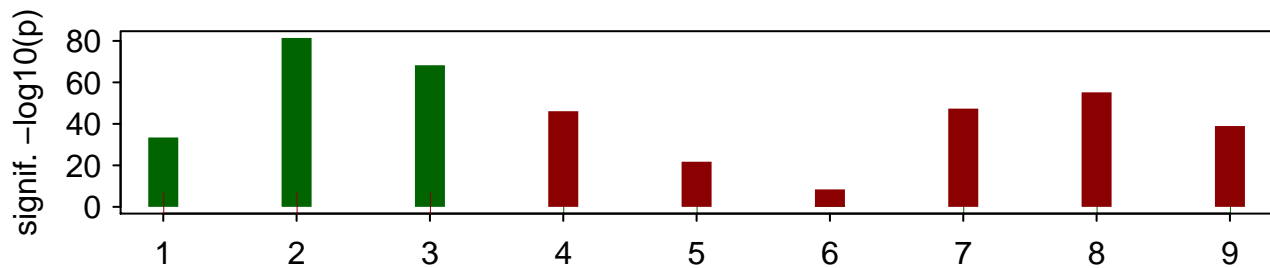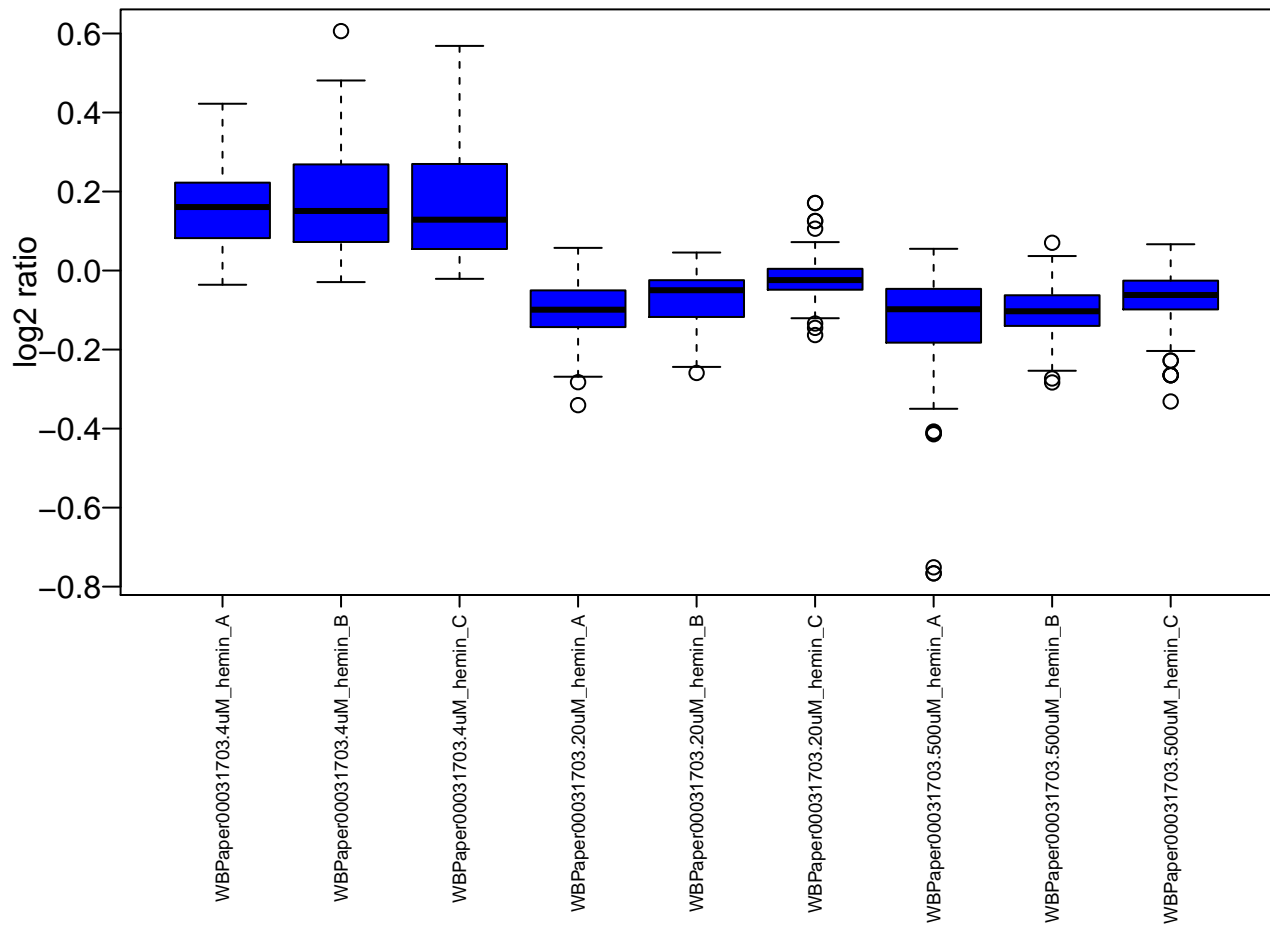

# WBPaper00031832

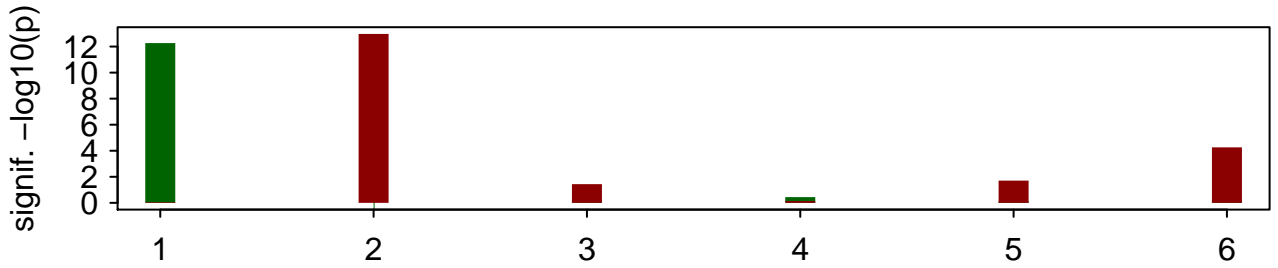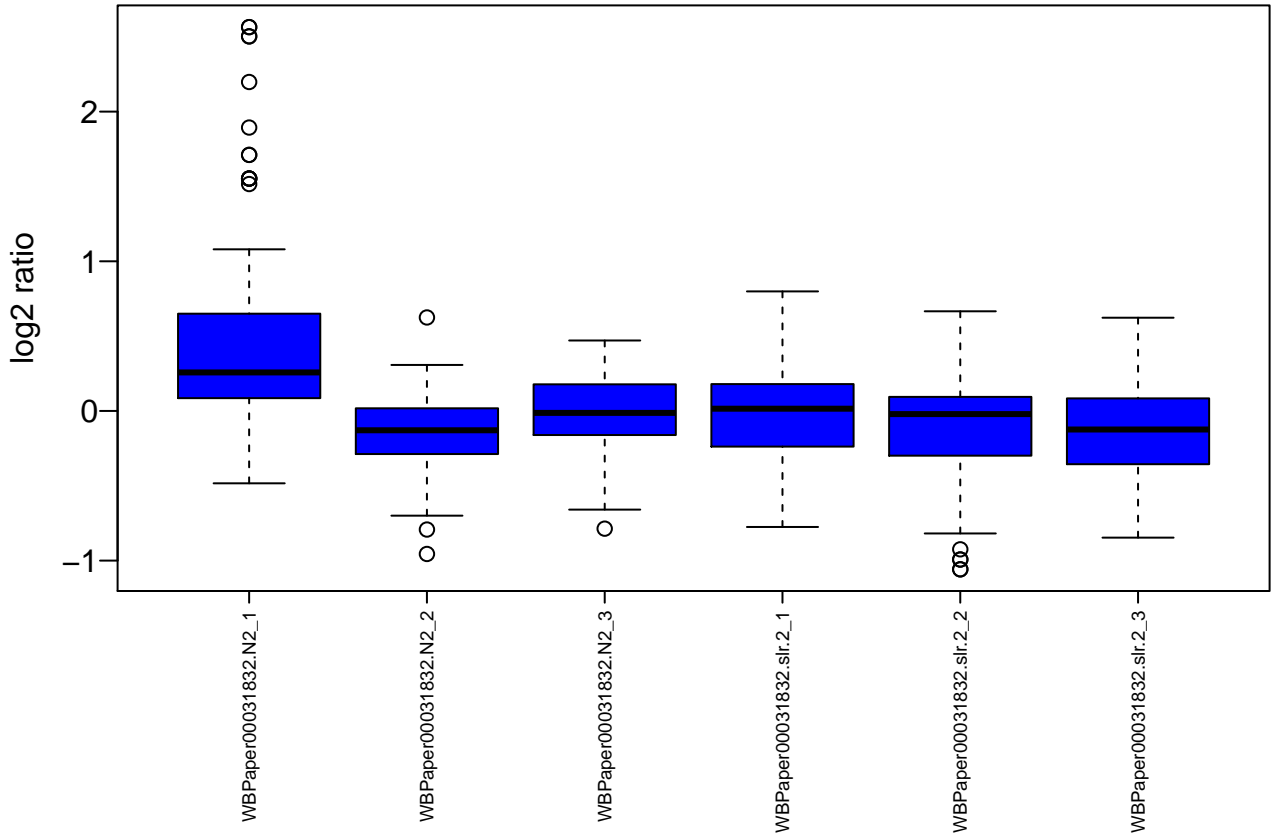

# WBPaper00031850

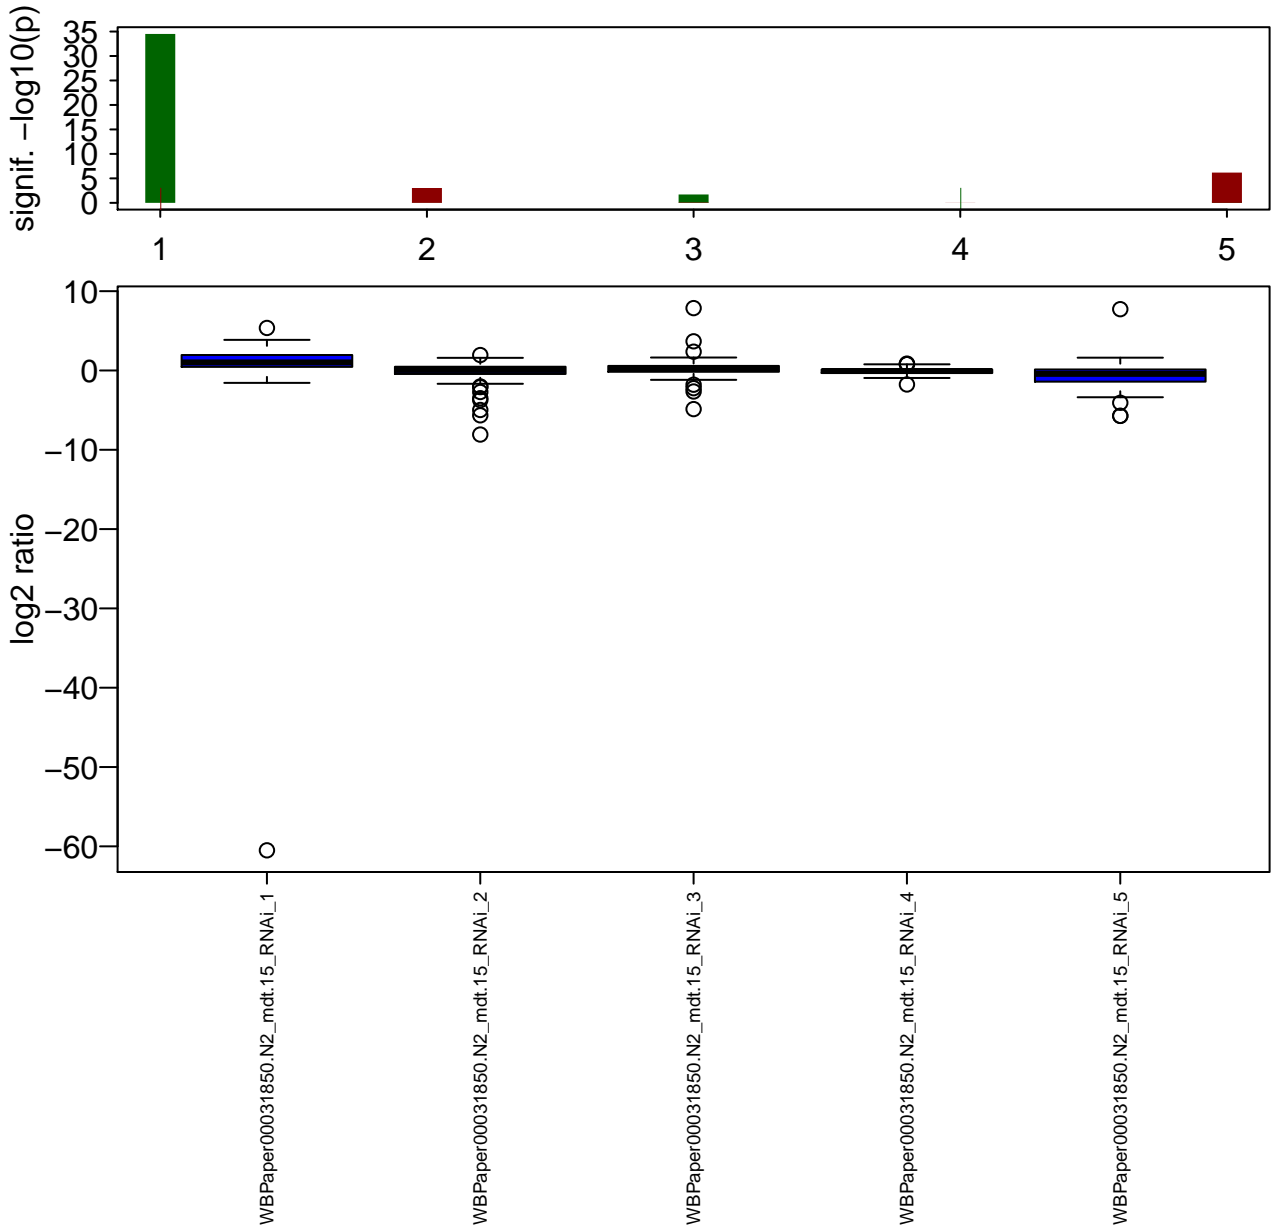



# WBPaper00032062

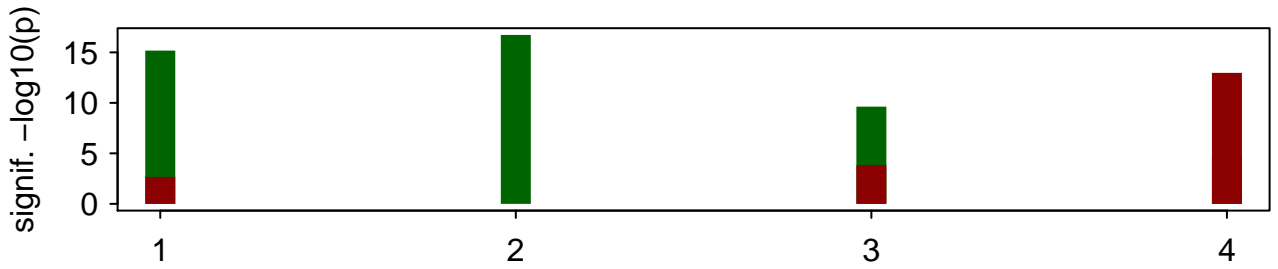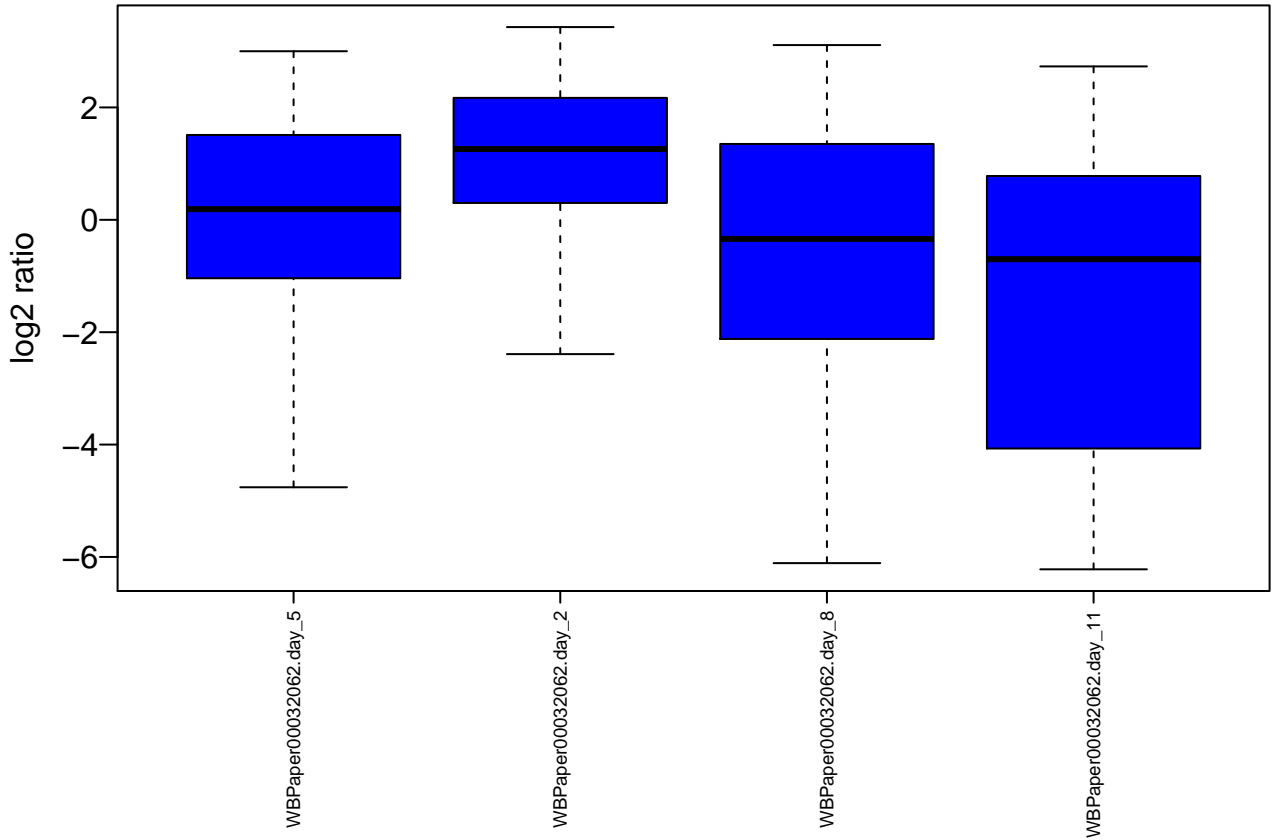

# WBPaper00032165

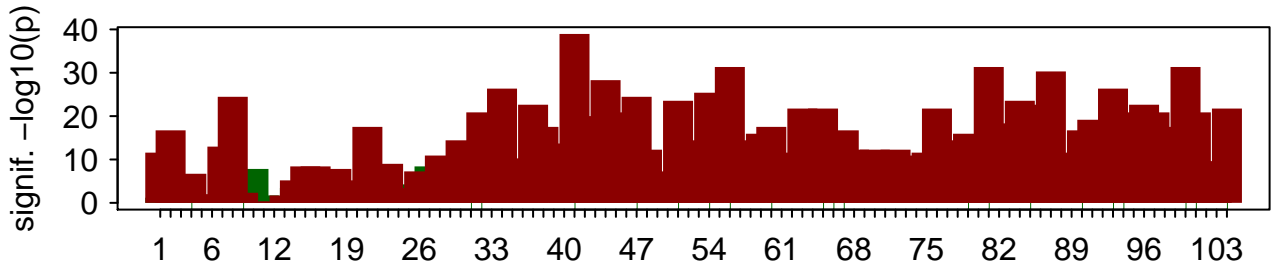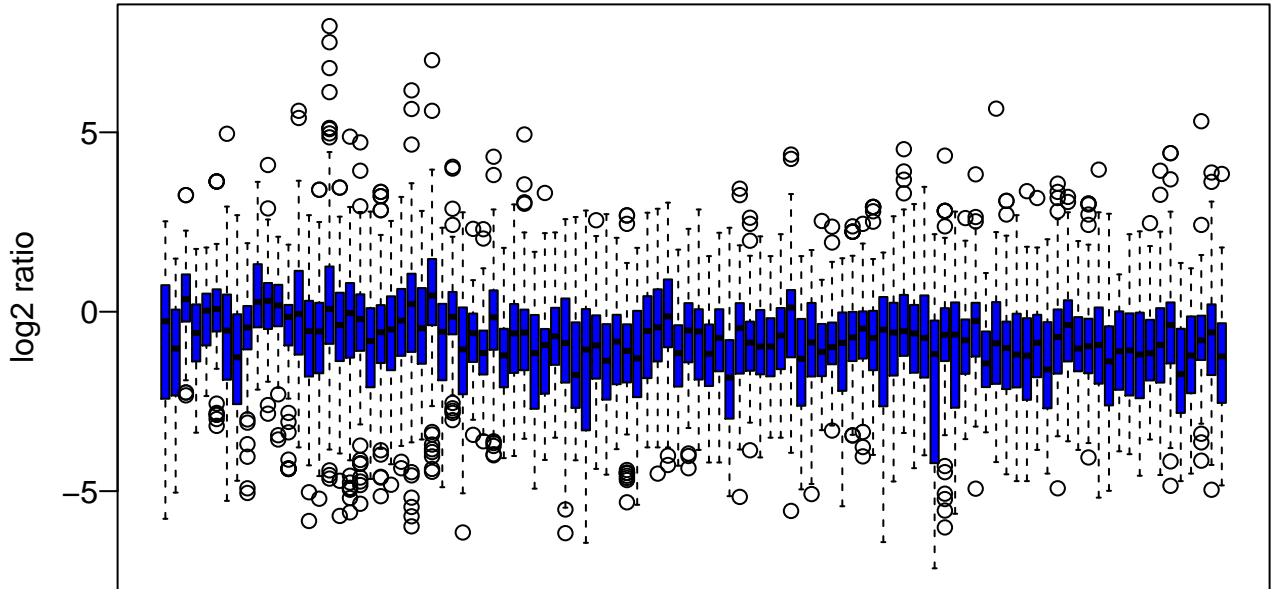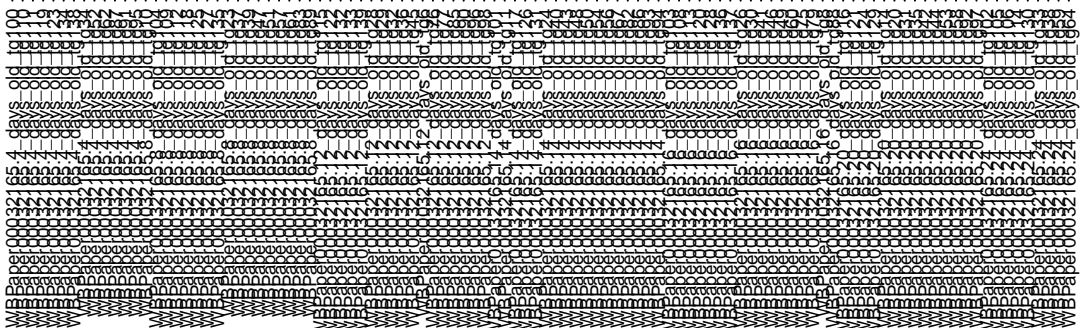

# WBPaper00032276

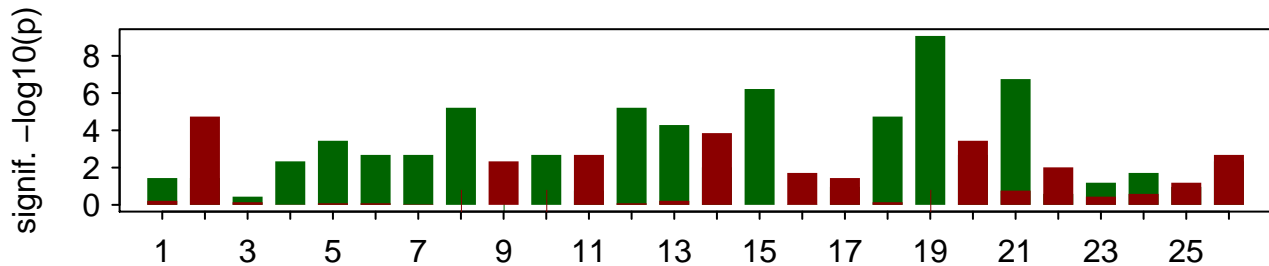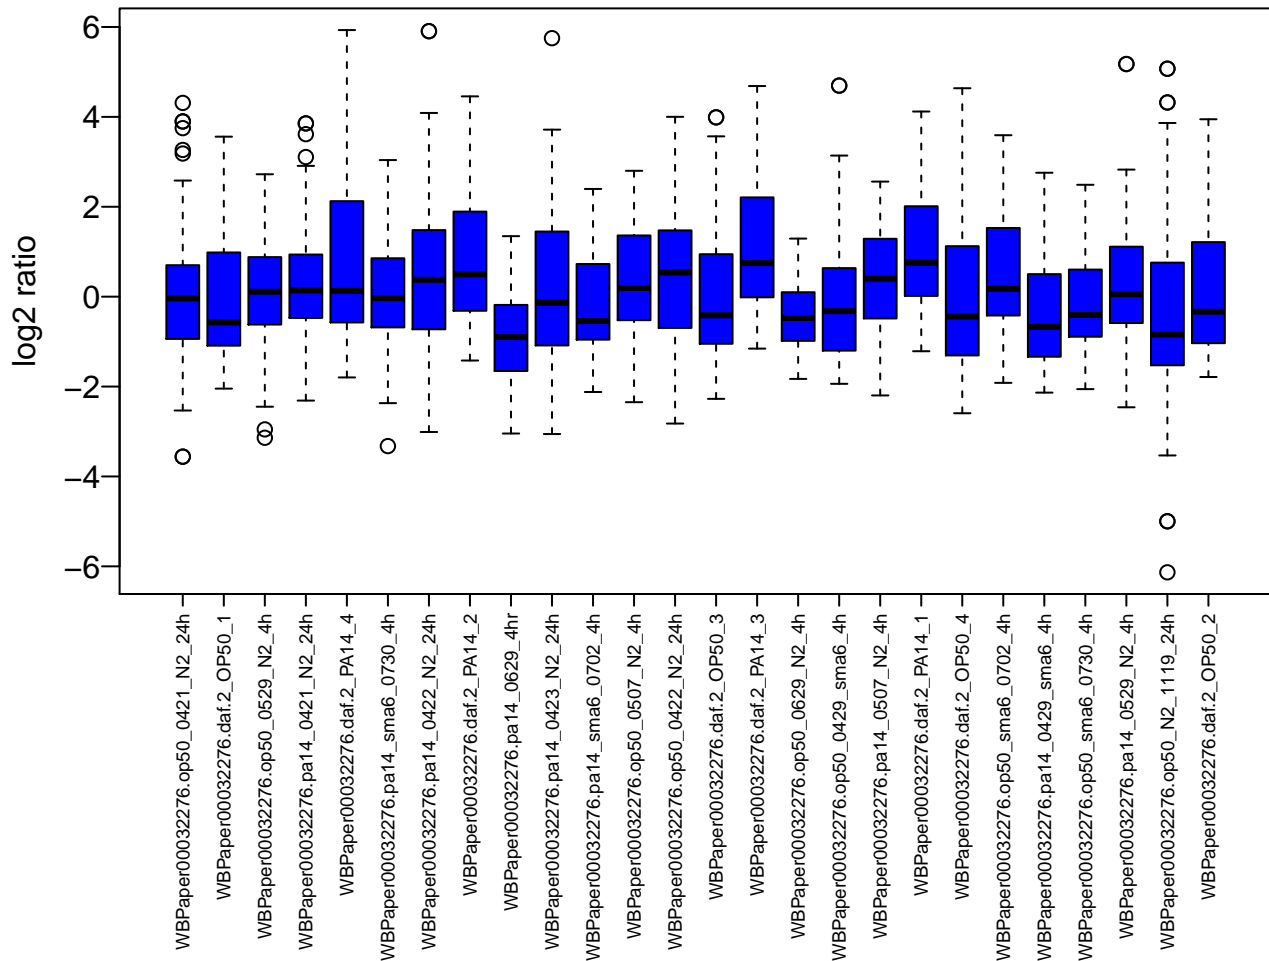

# WBPaper00032425

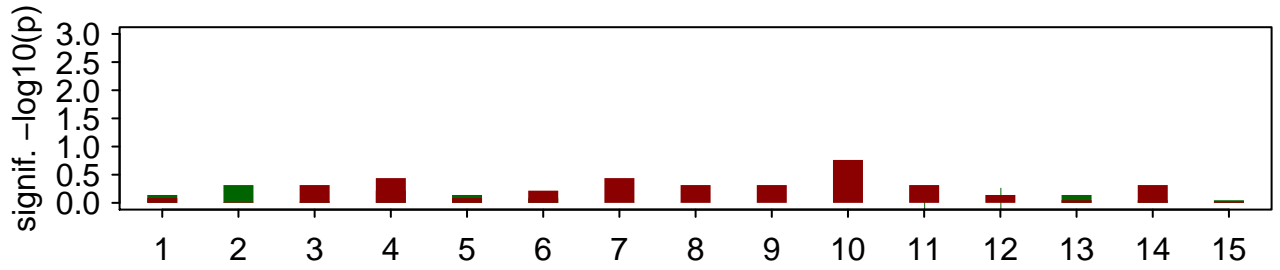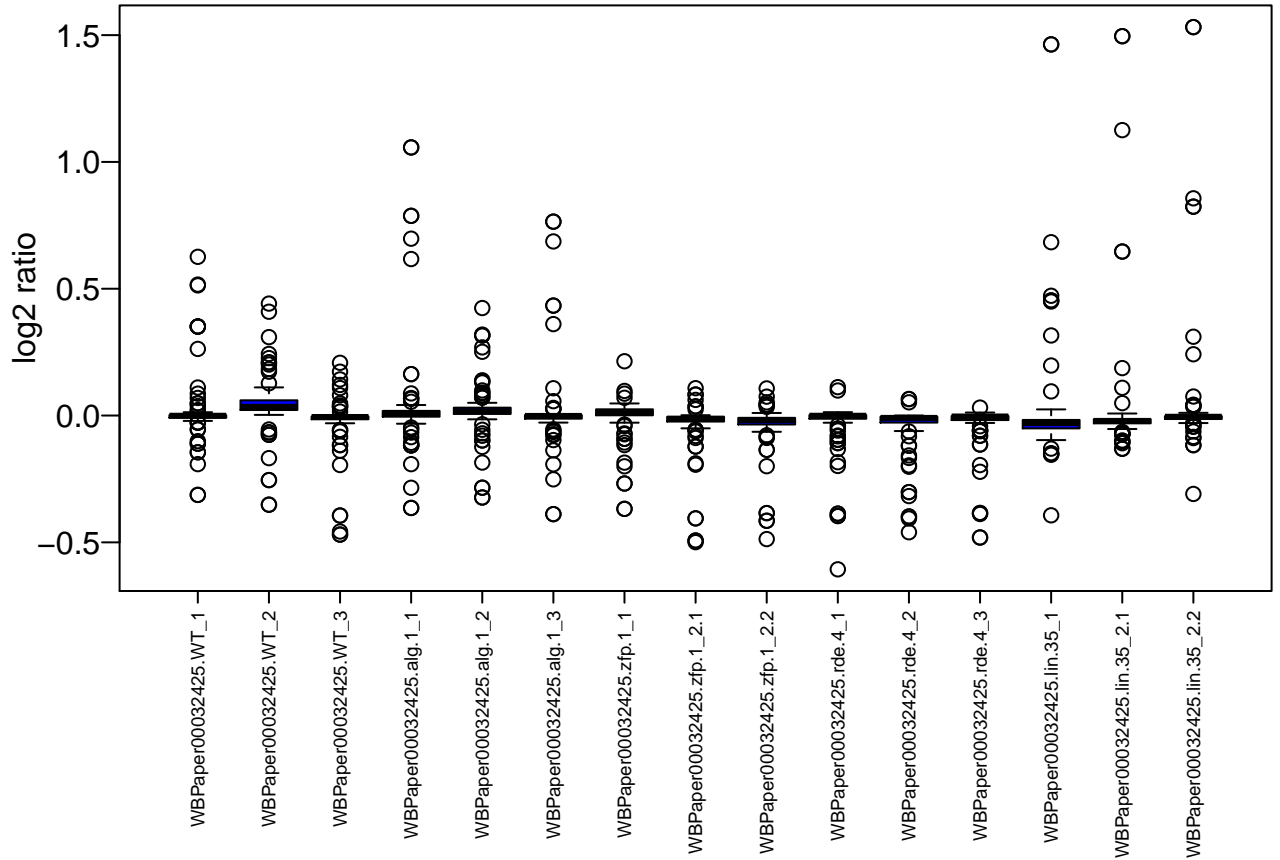

# WBPaper00032430

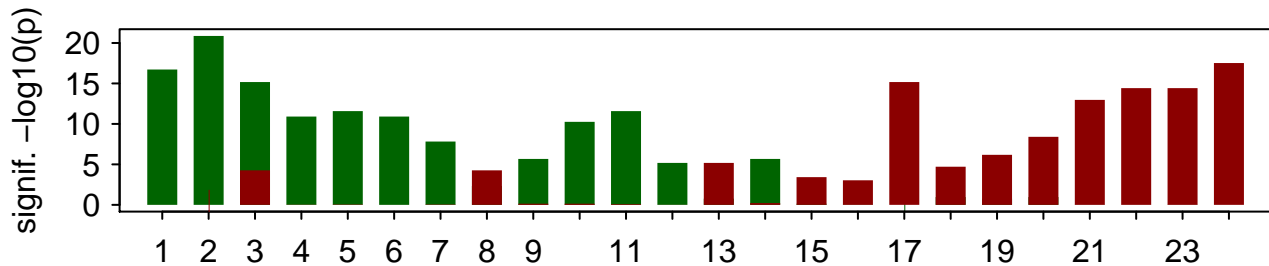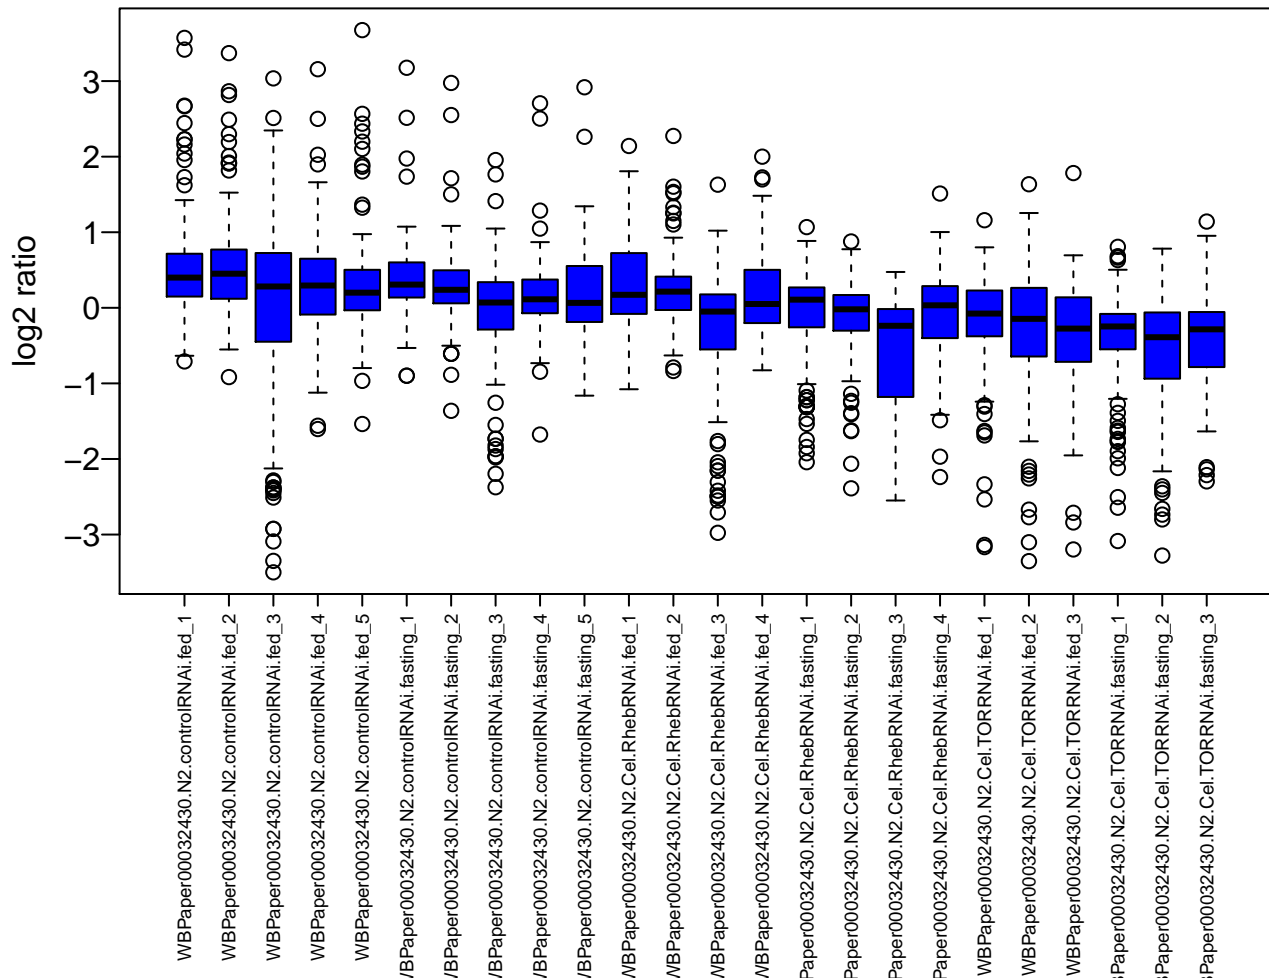

# WBPaper00032528

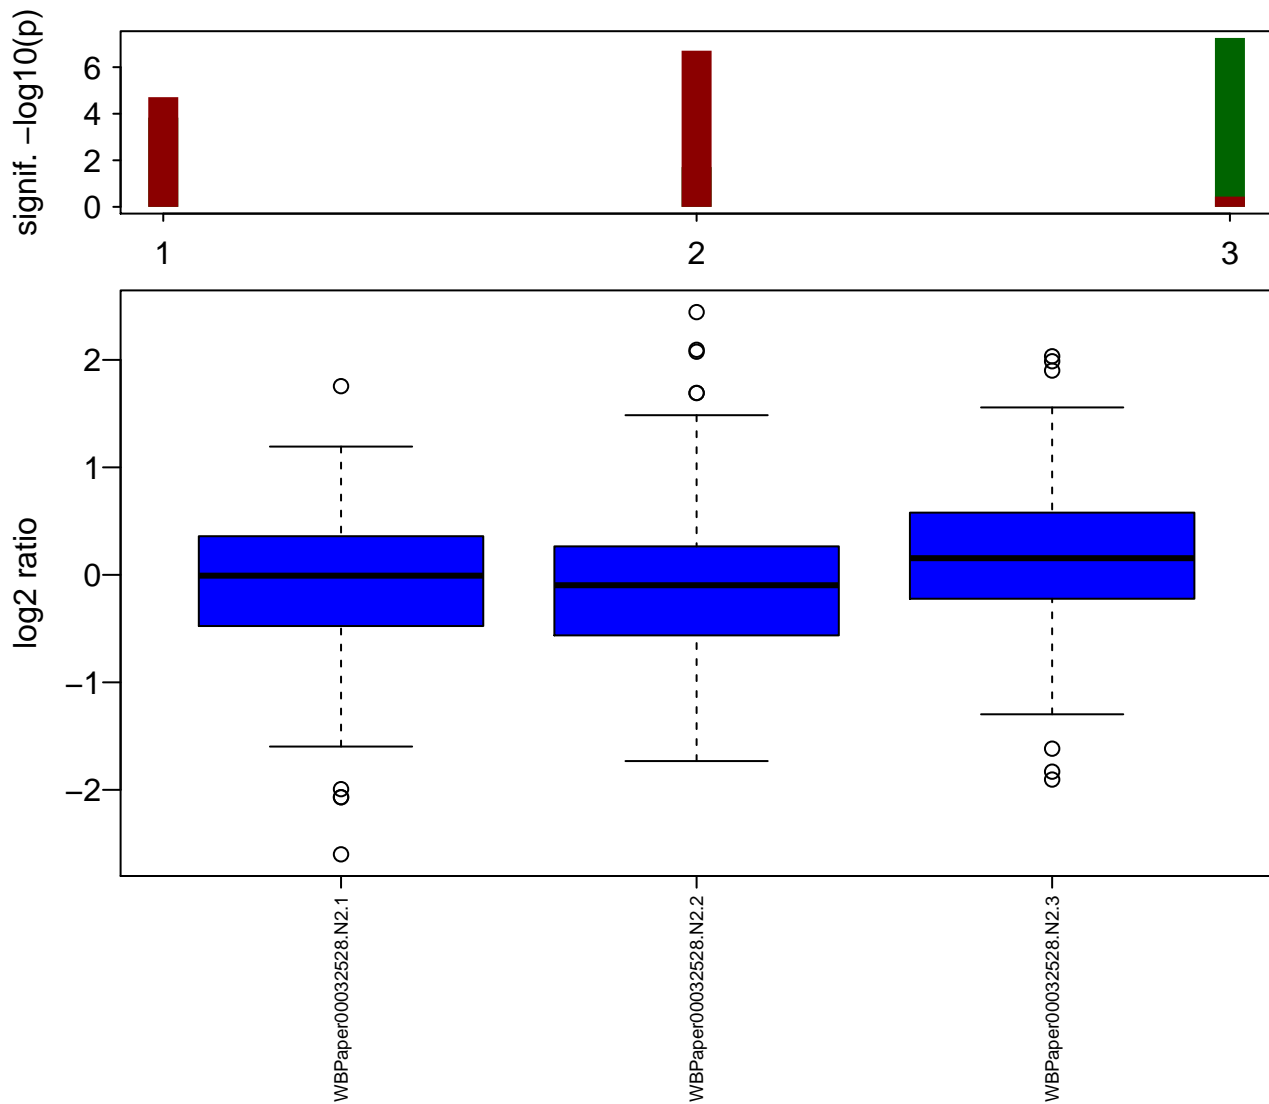

# WBPaper00032948

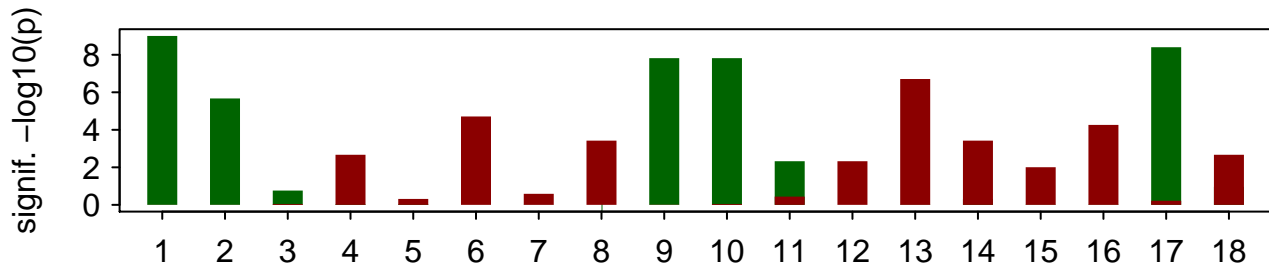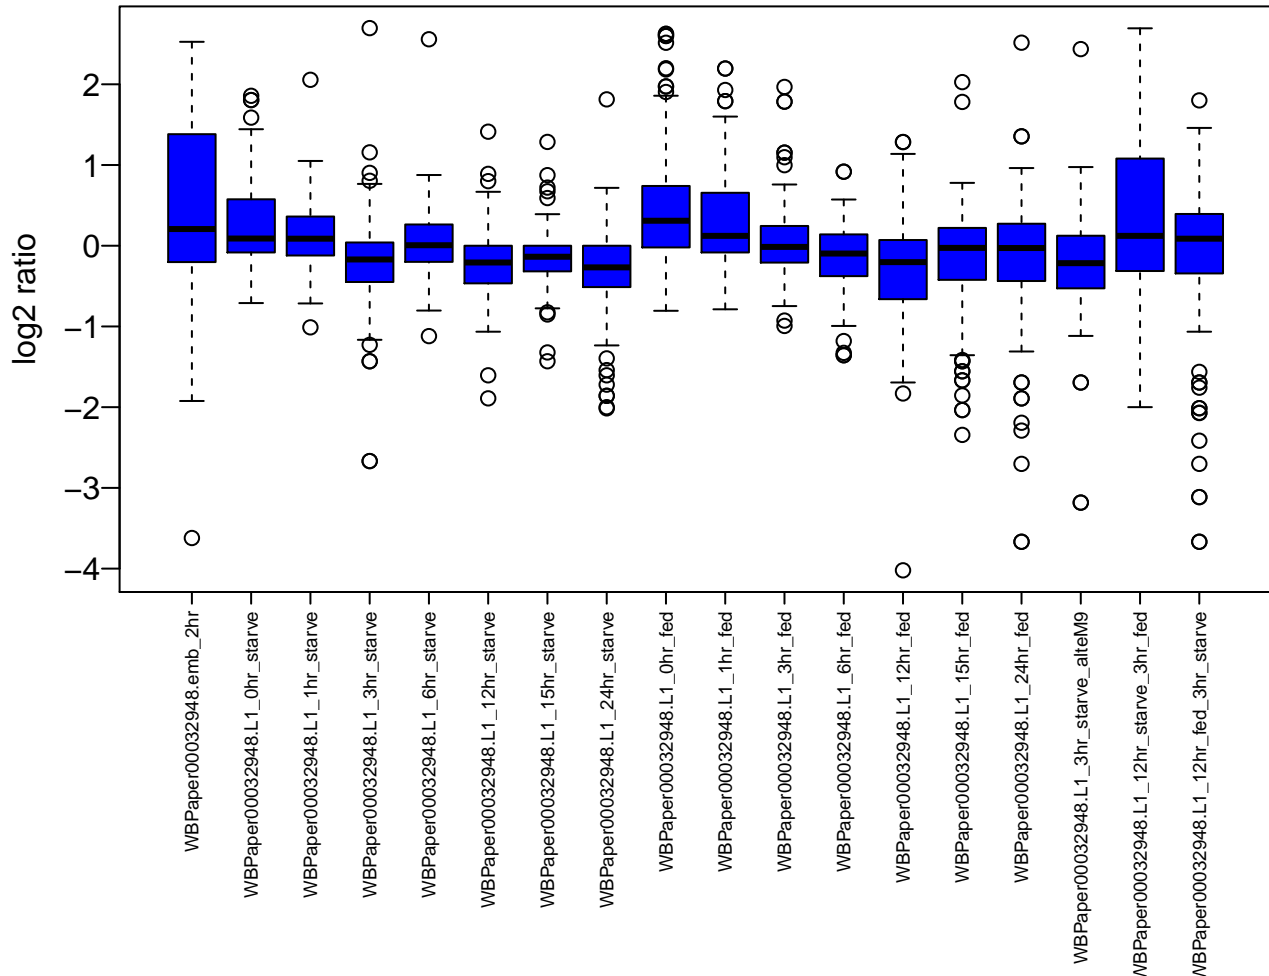

# WBPaper00032976

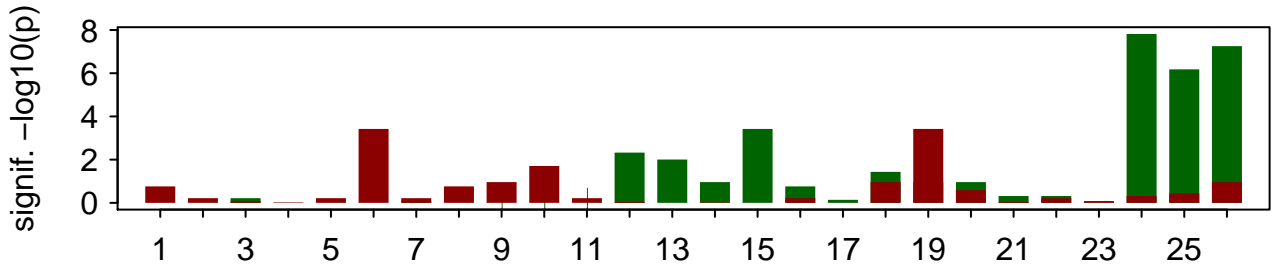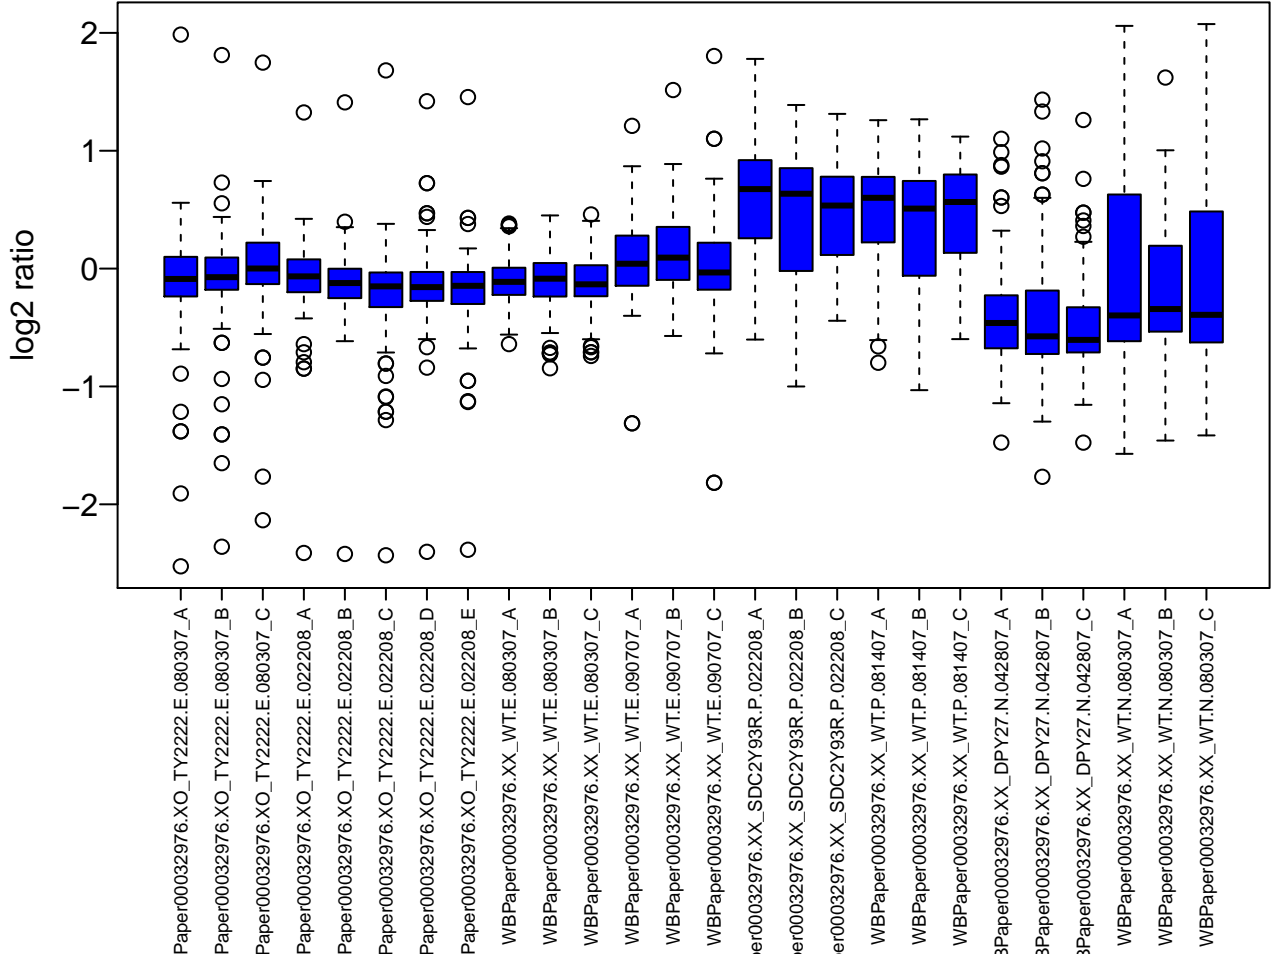



# WBPaper00033099

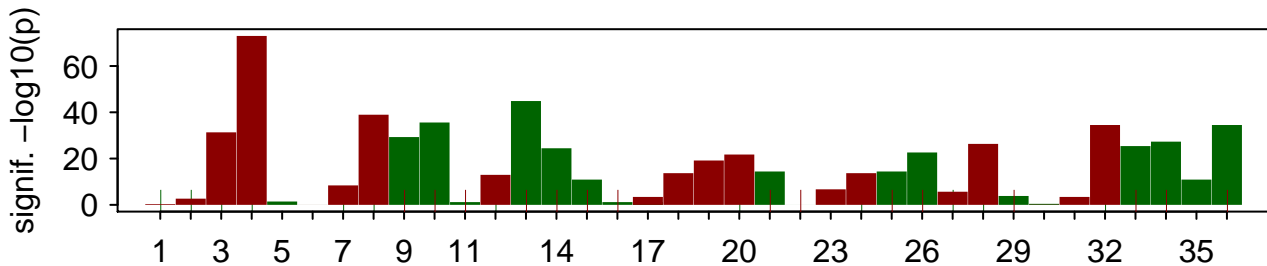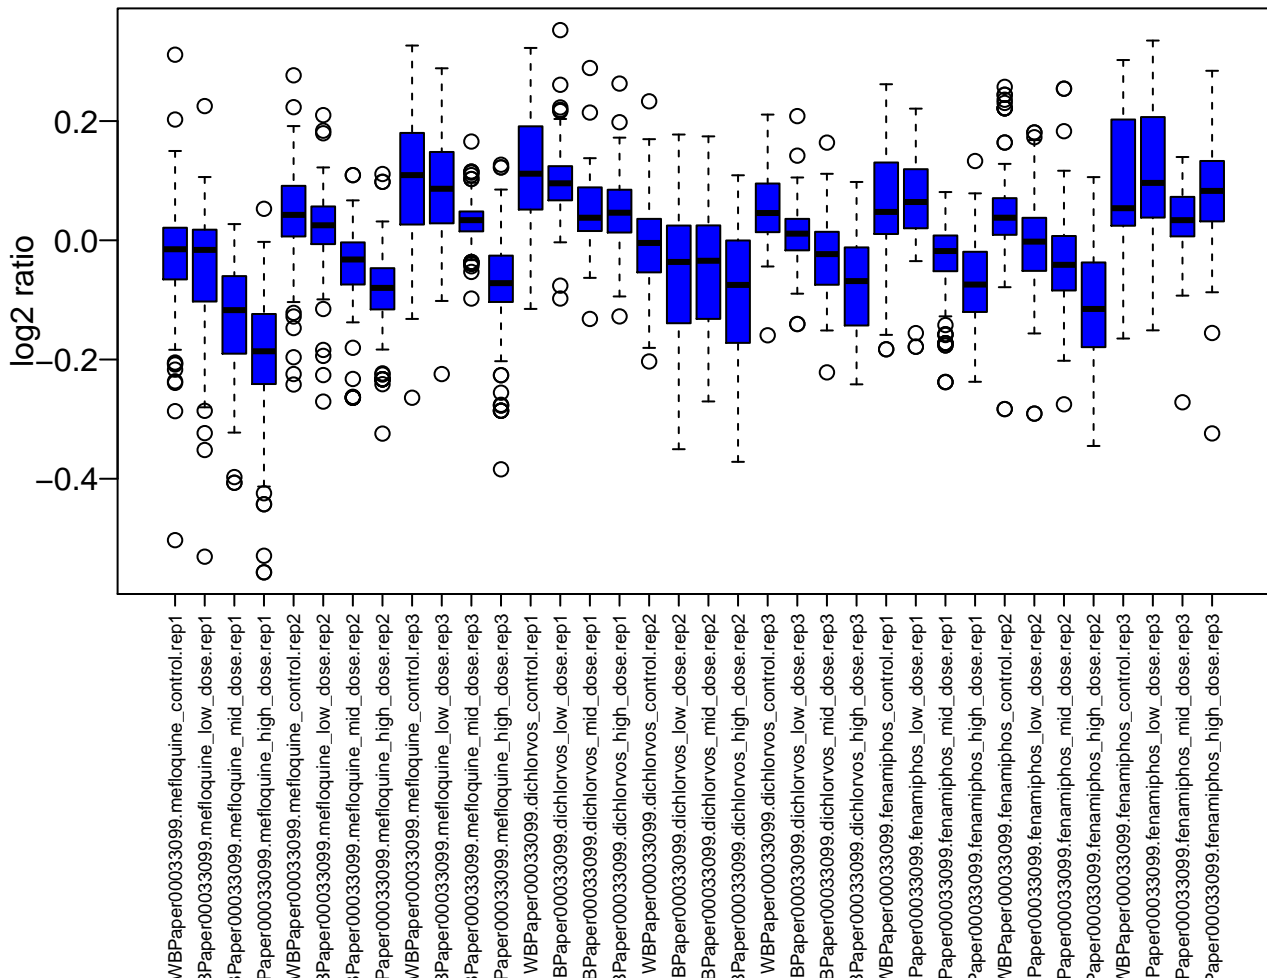

# WBPaper00033101

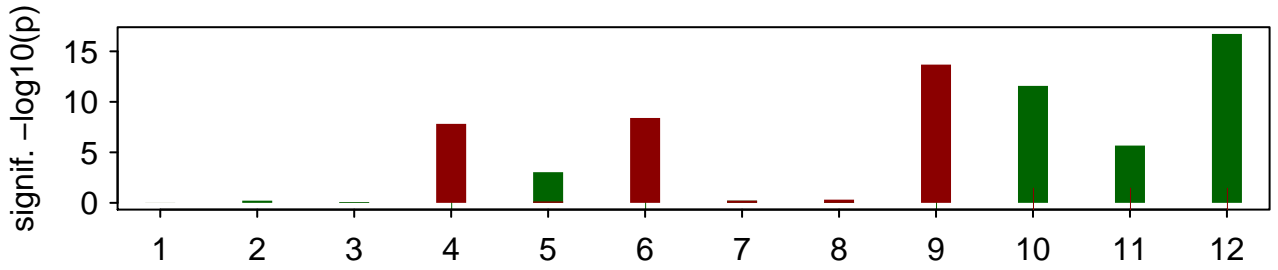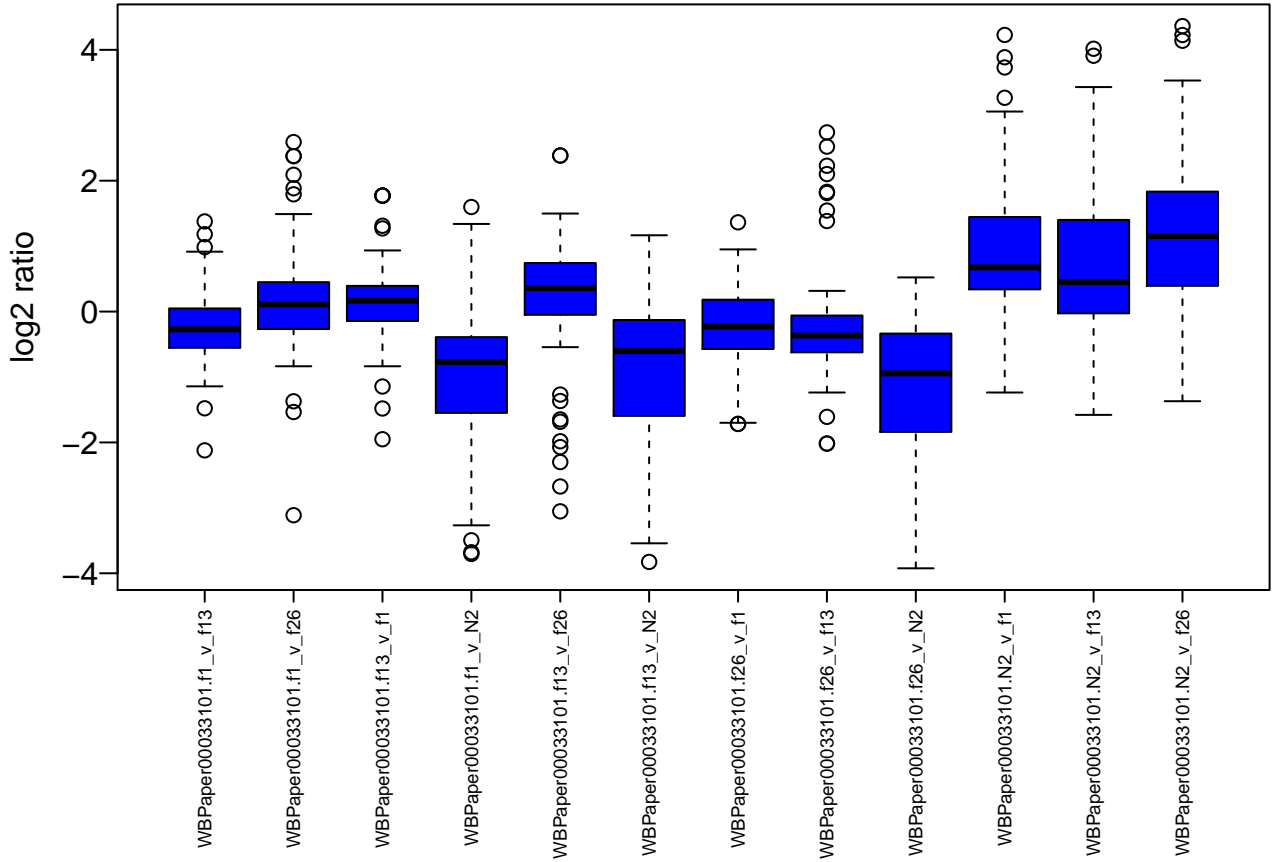

# WBPaper00033206

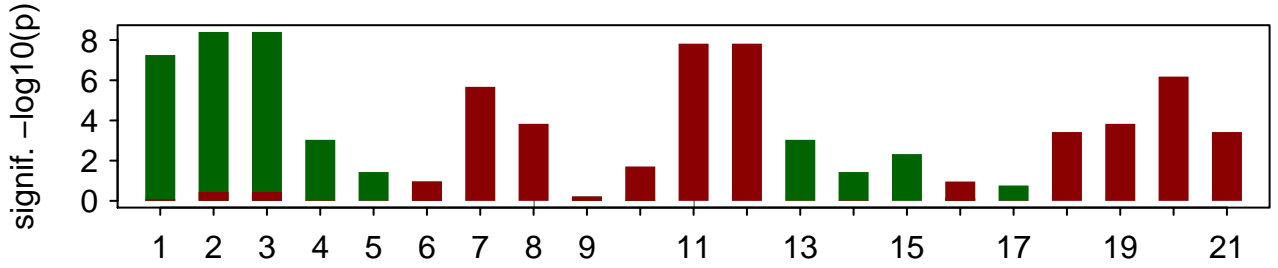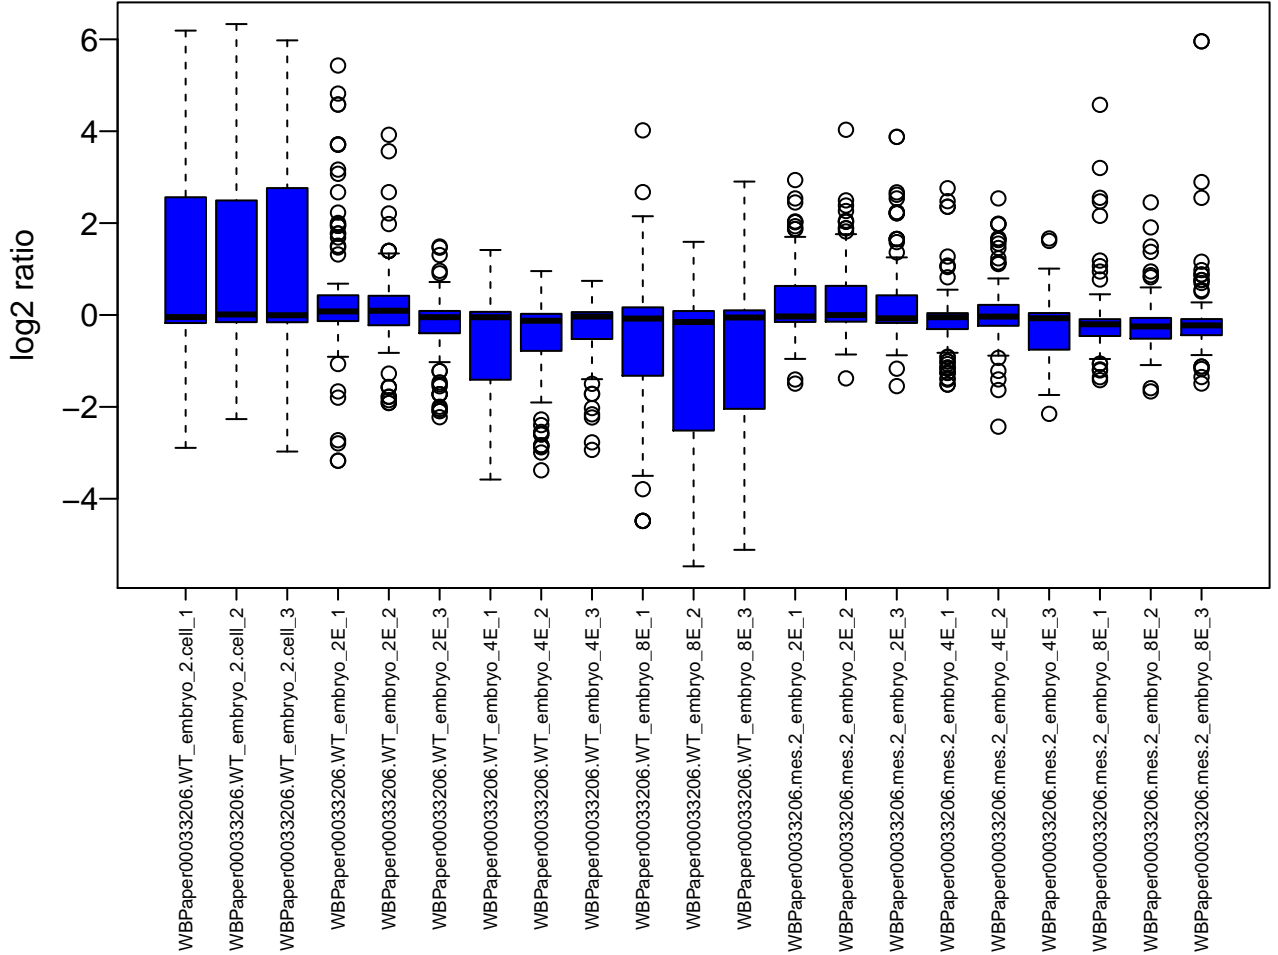

# WBPaper00033444

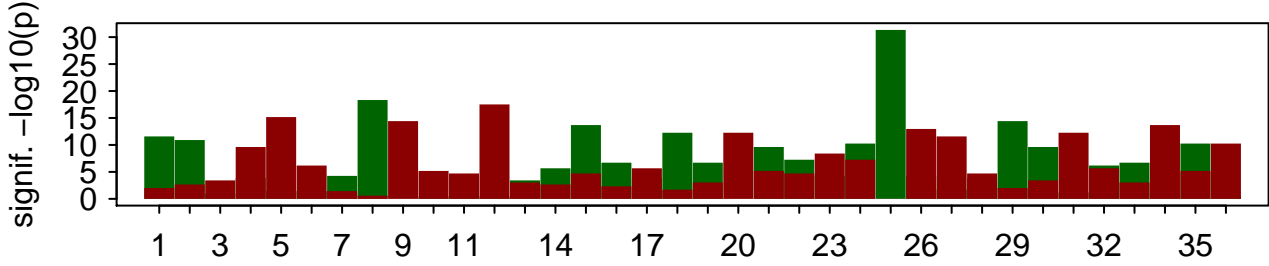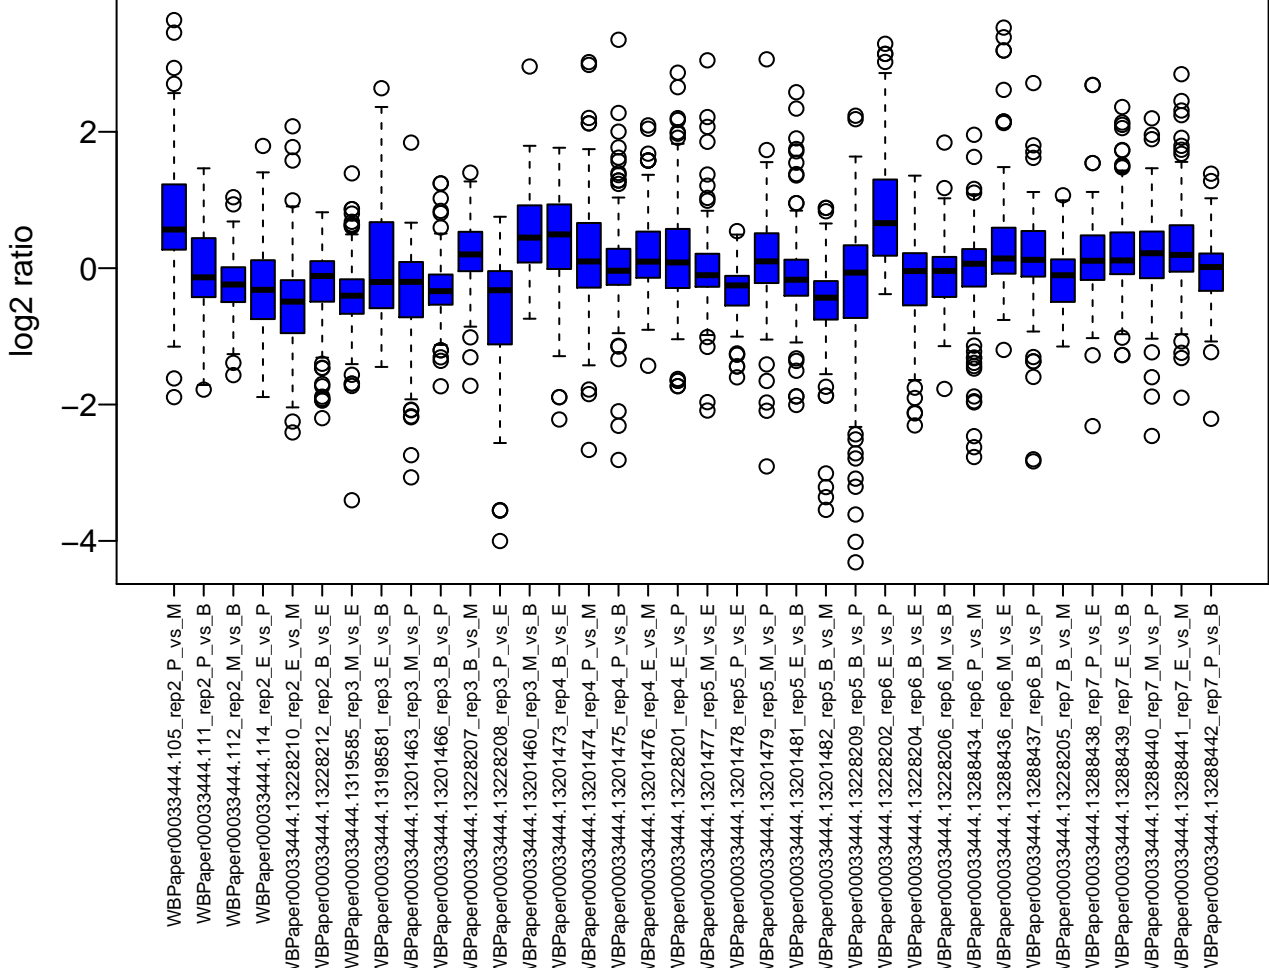

# WBPaper00034636

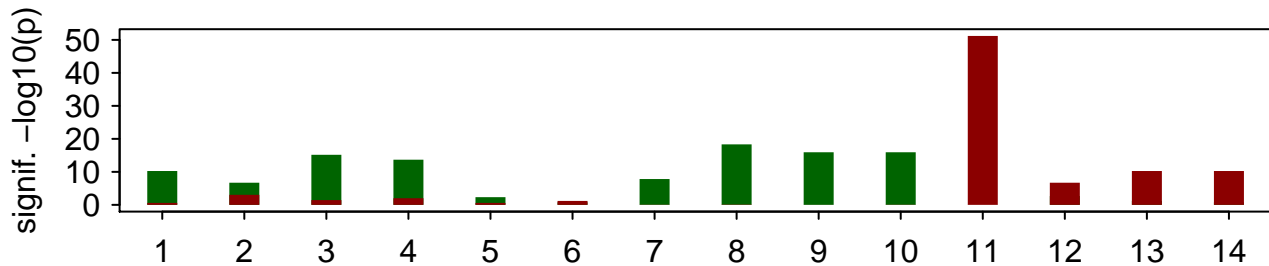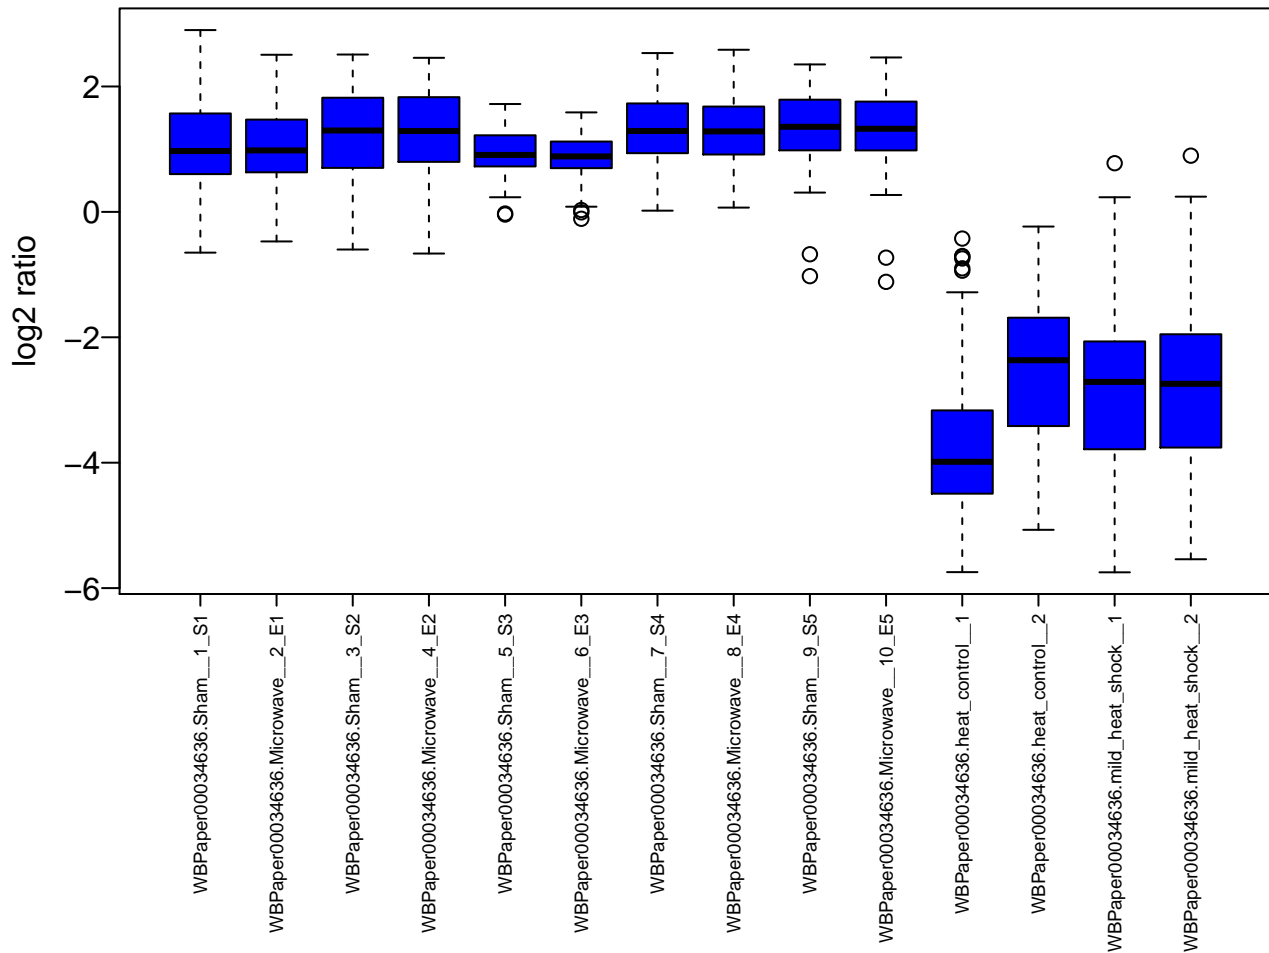

# WBPaper00034661

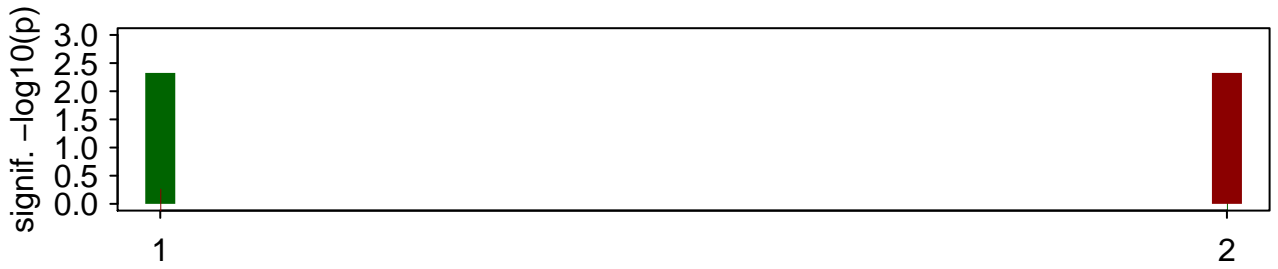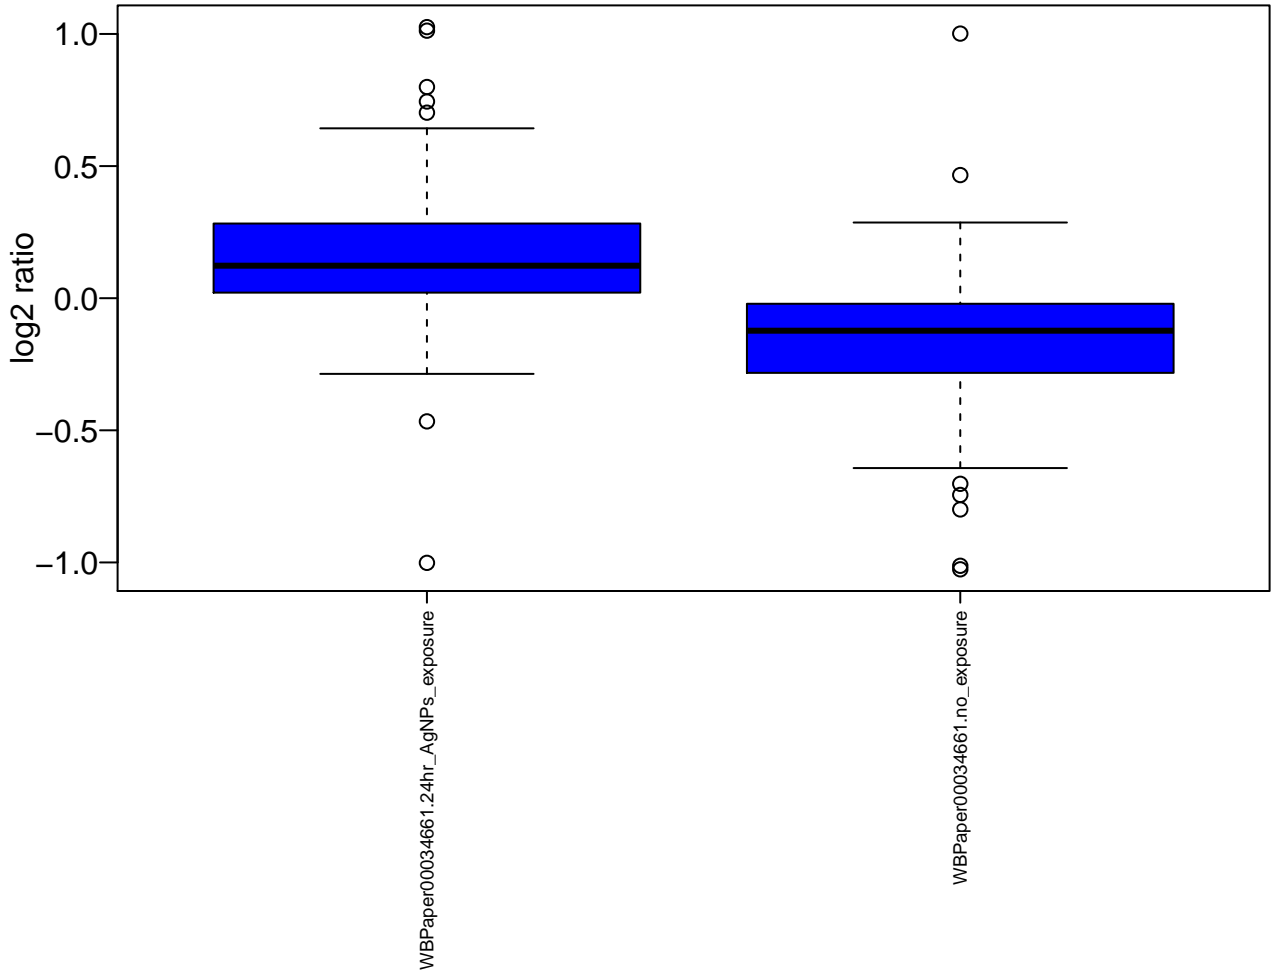

# WBPaper00034739

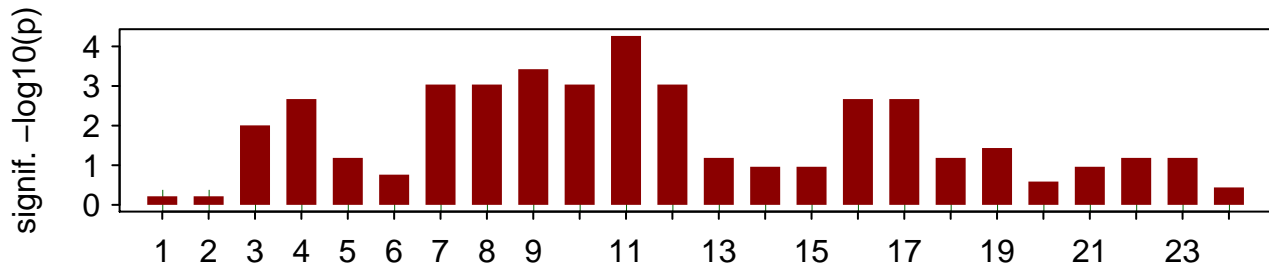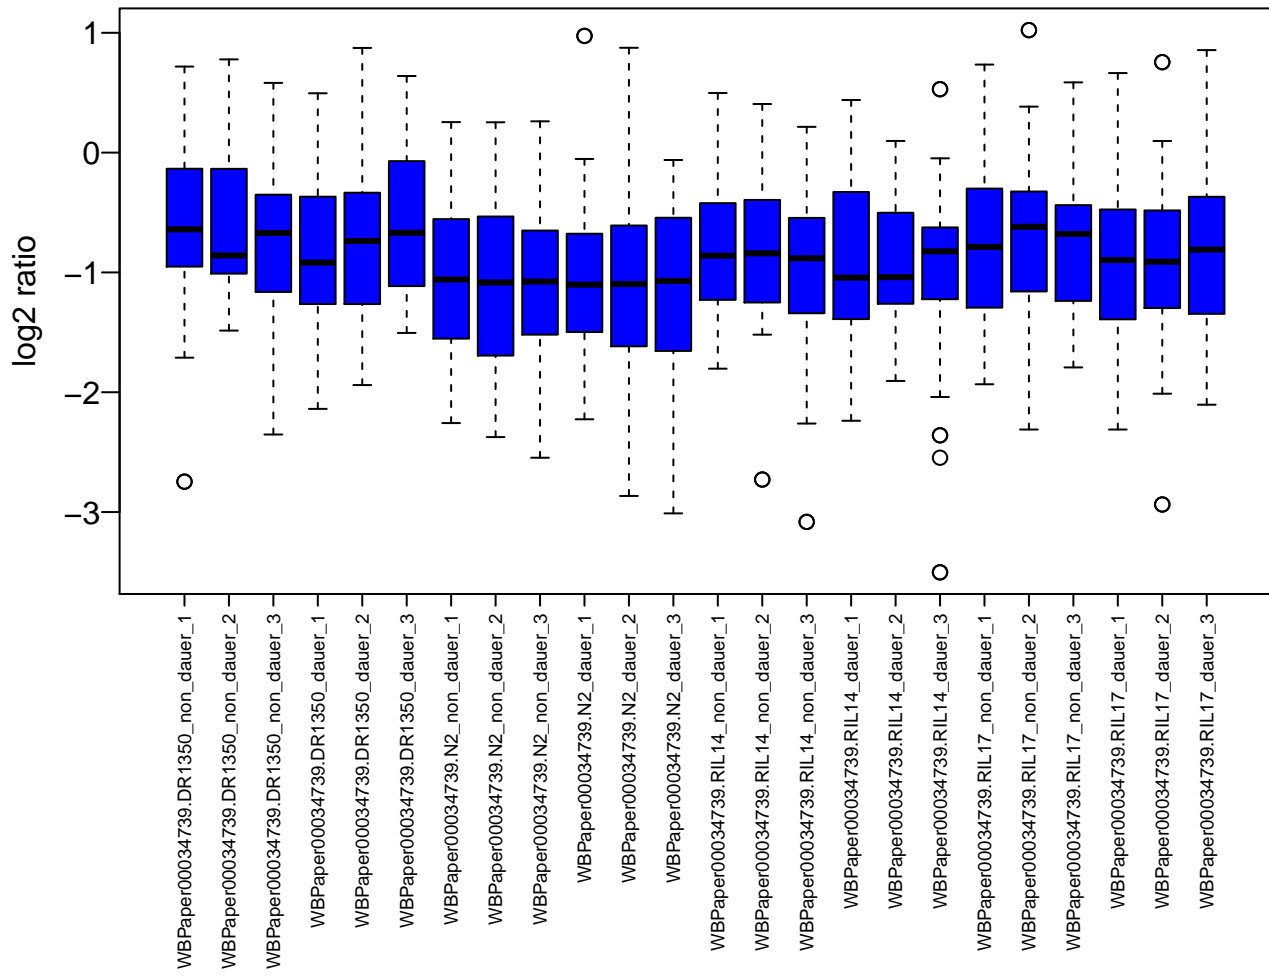

# WBPaper00034757

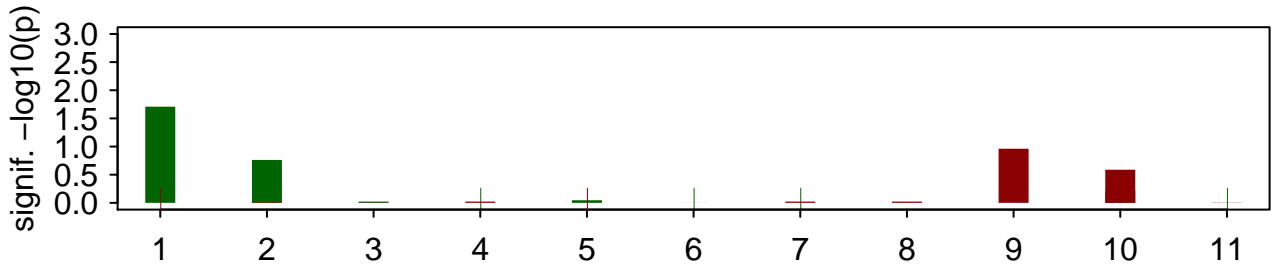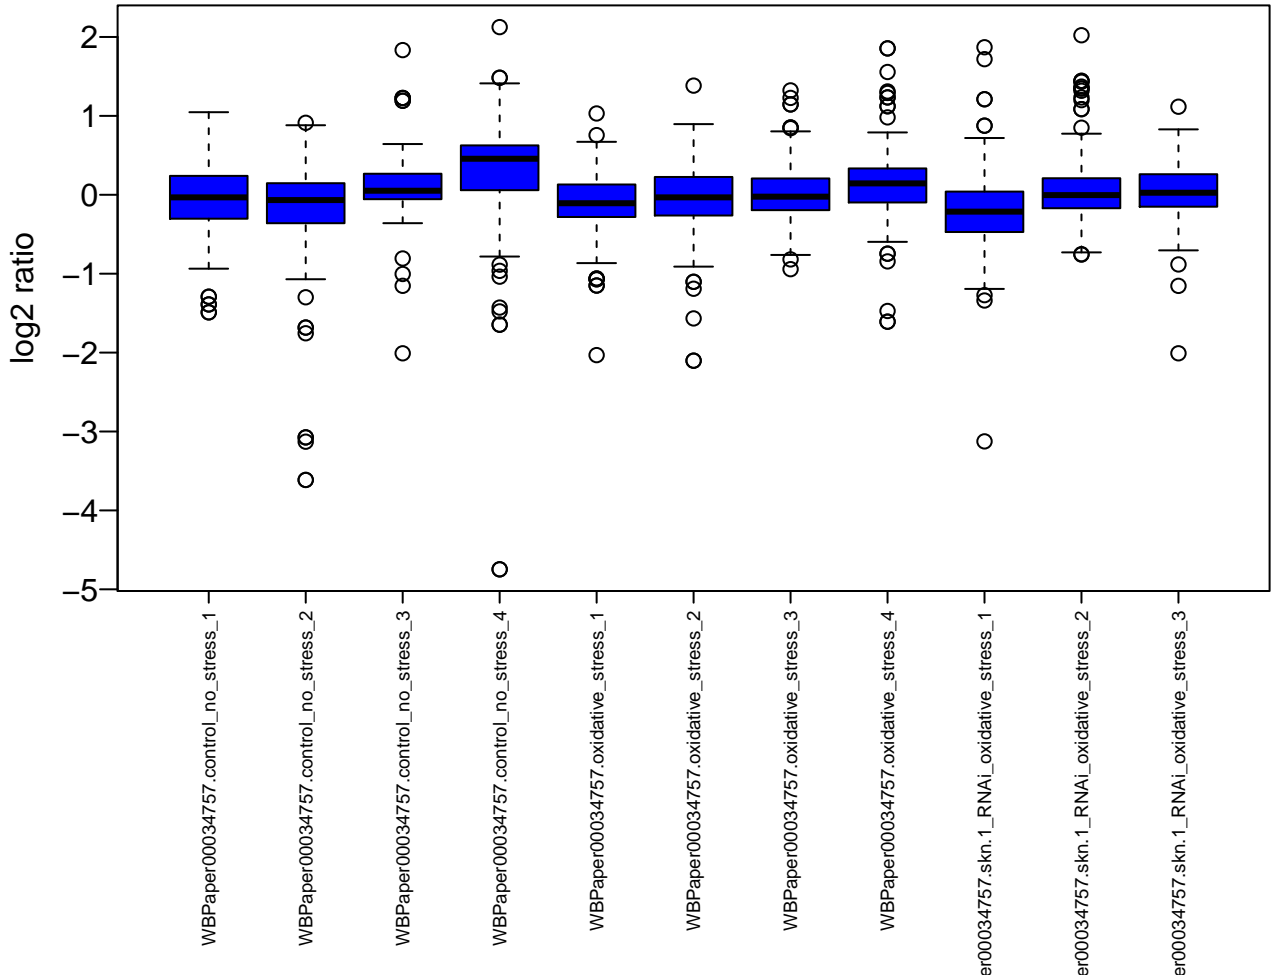



# WBPaper00034761

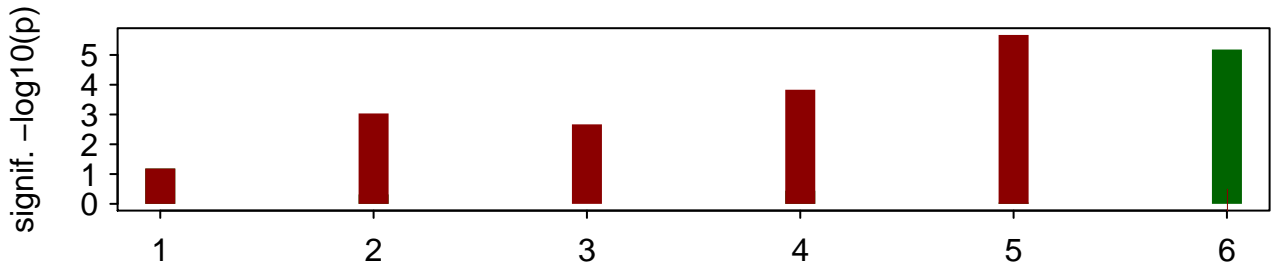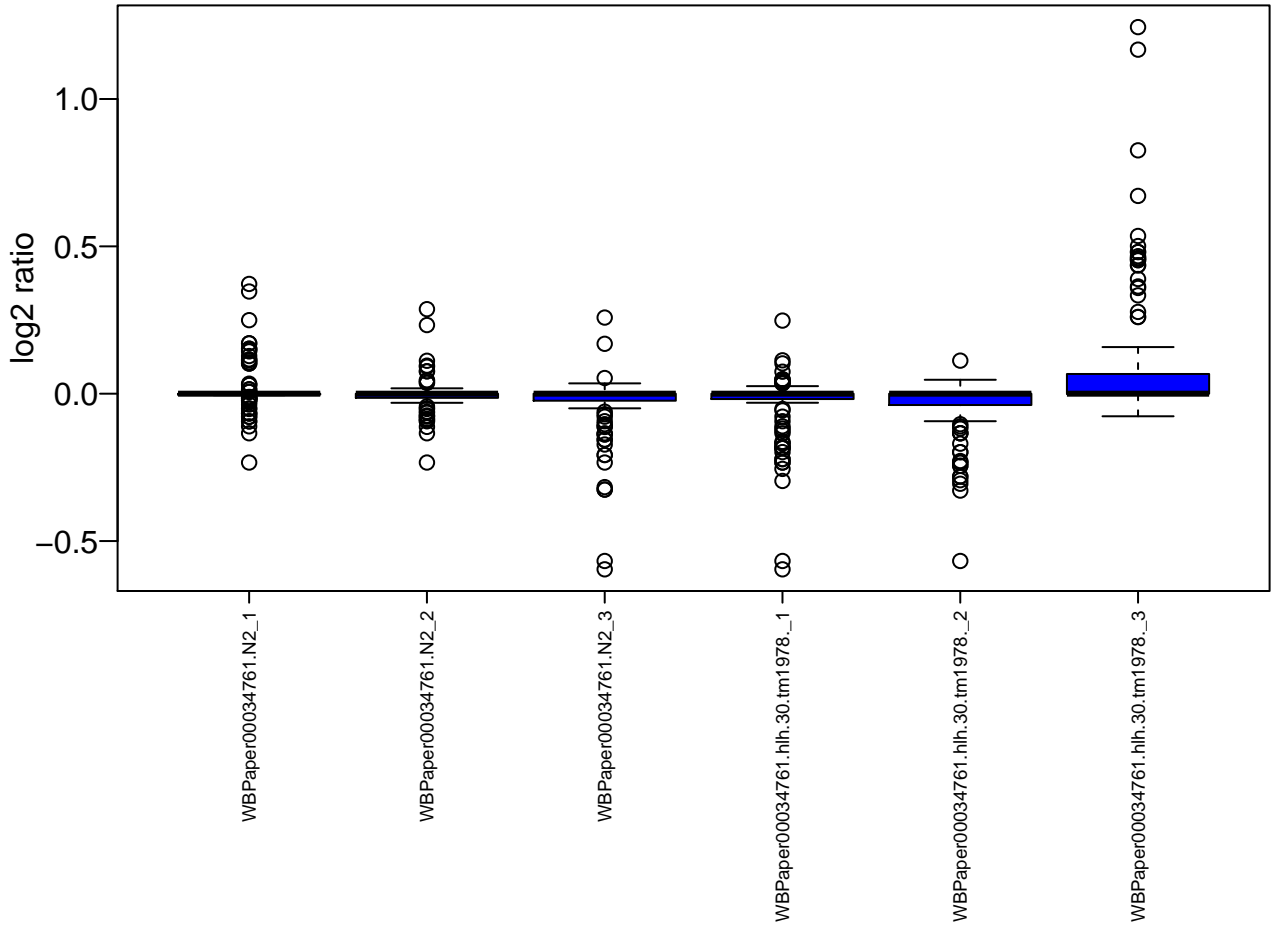

# WBPaper00035084

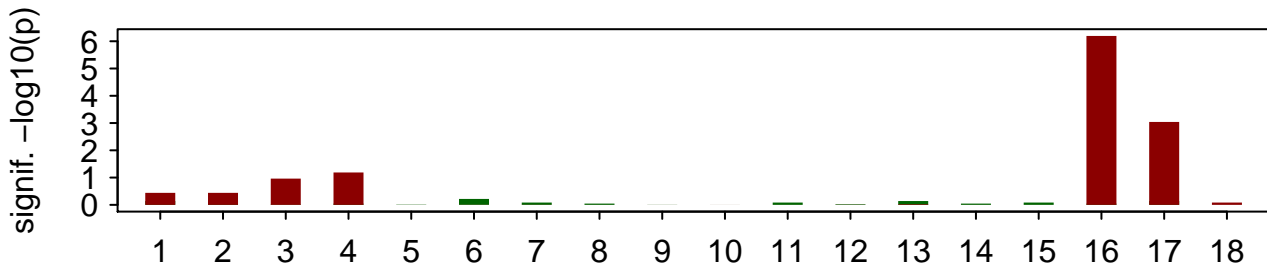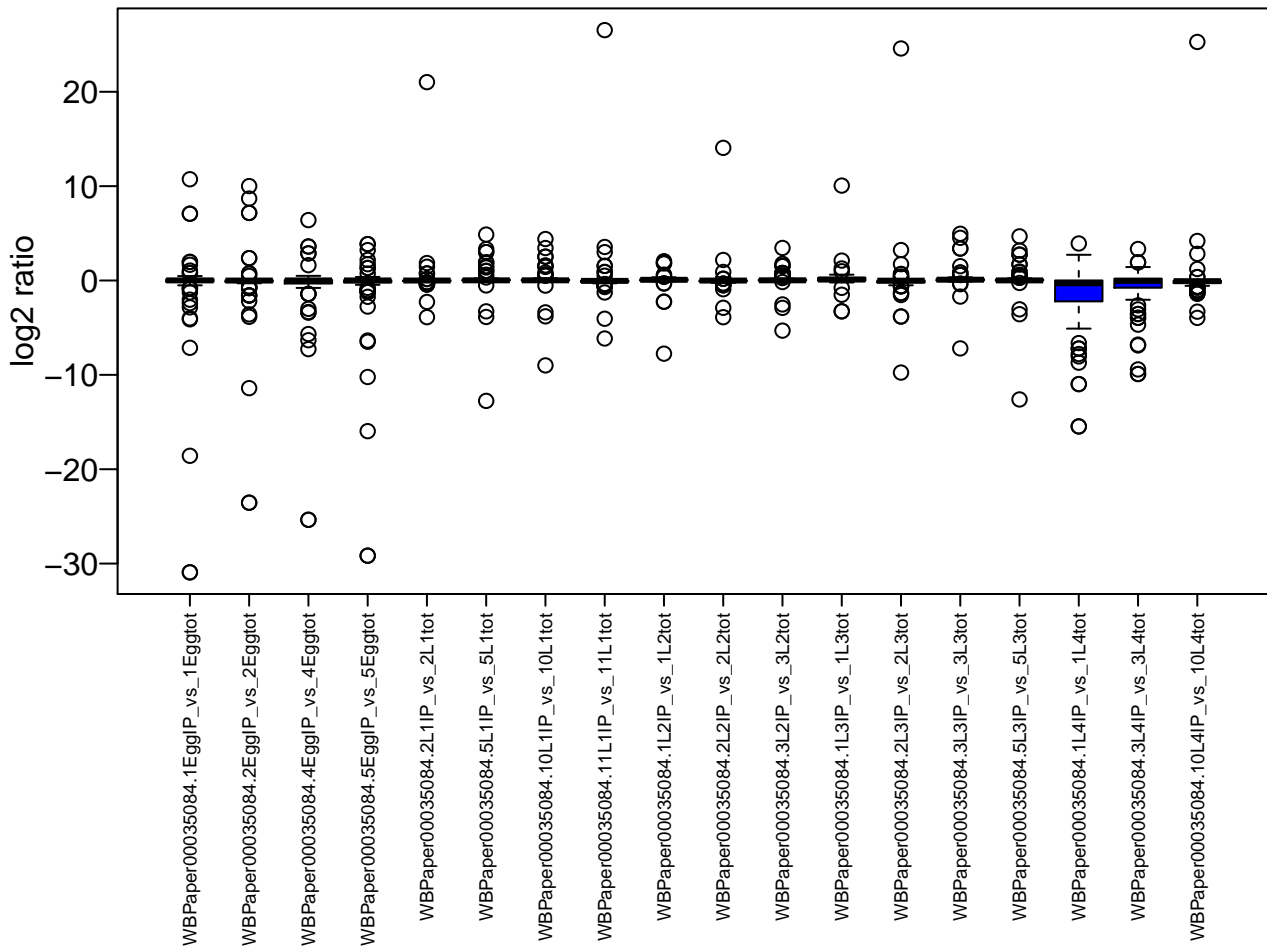

# WBPaper00035227

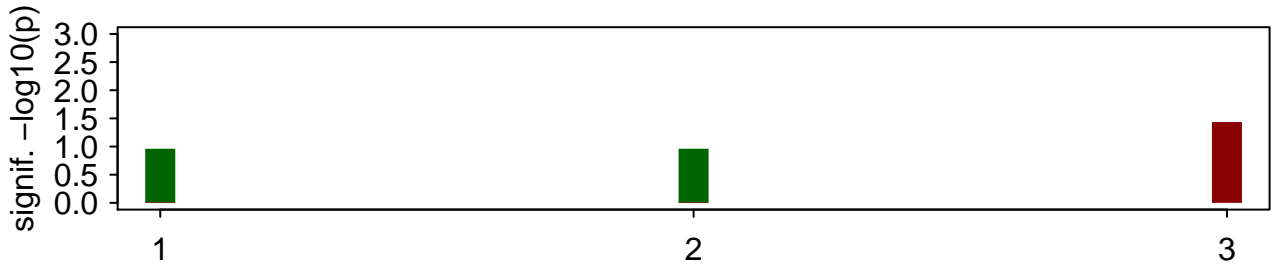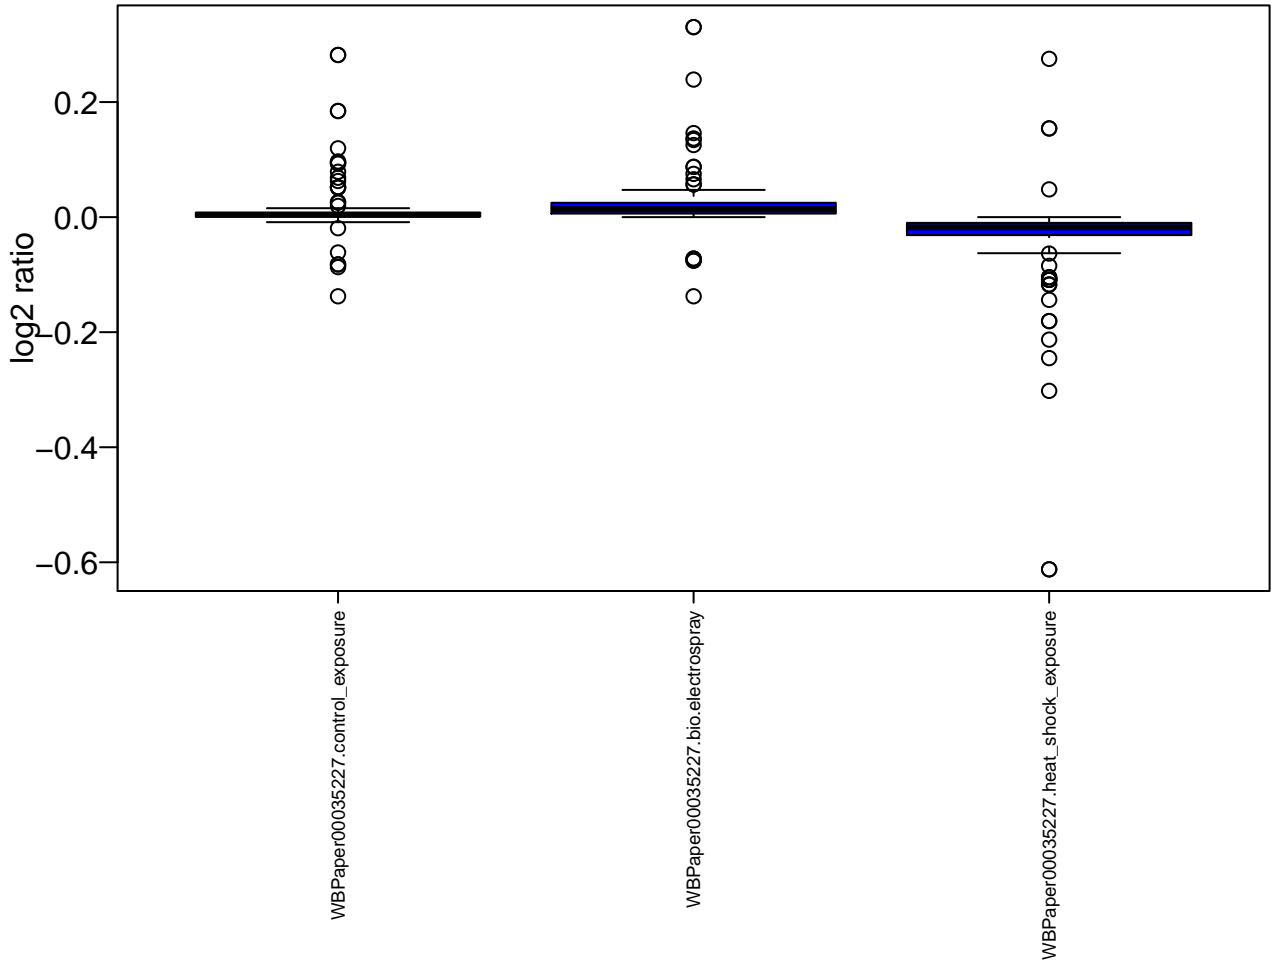

# WBPaper00035269

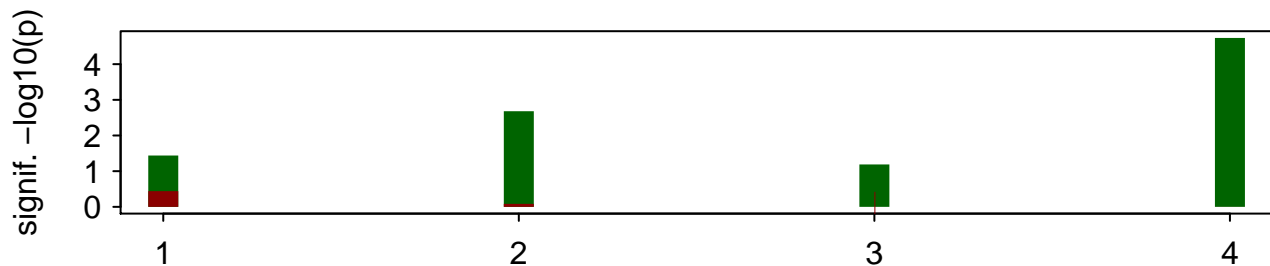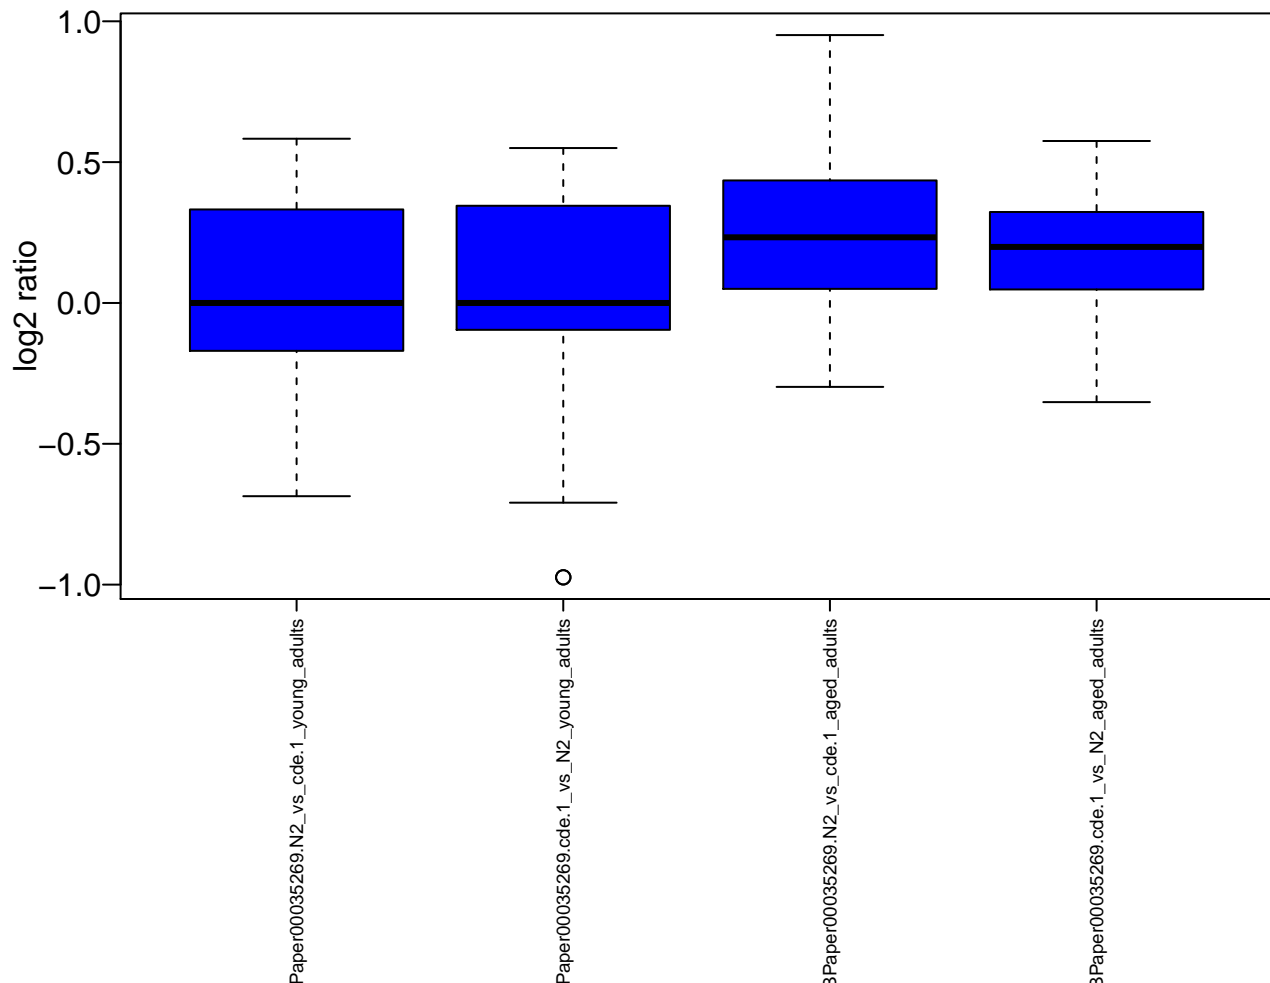

# WBPaper00035429

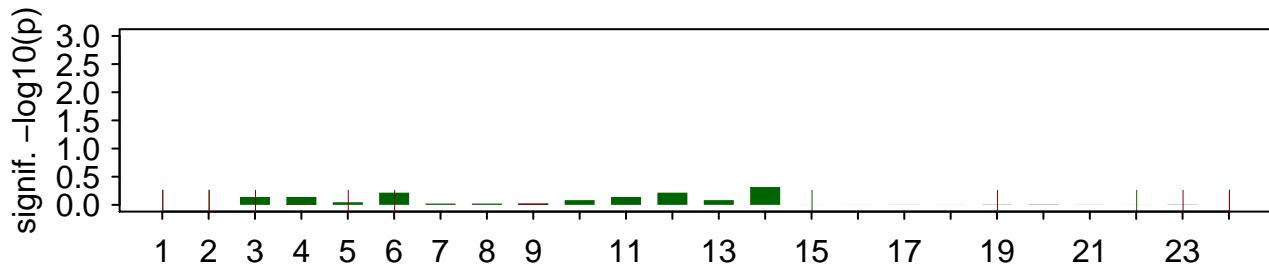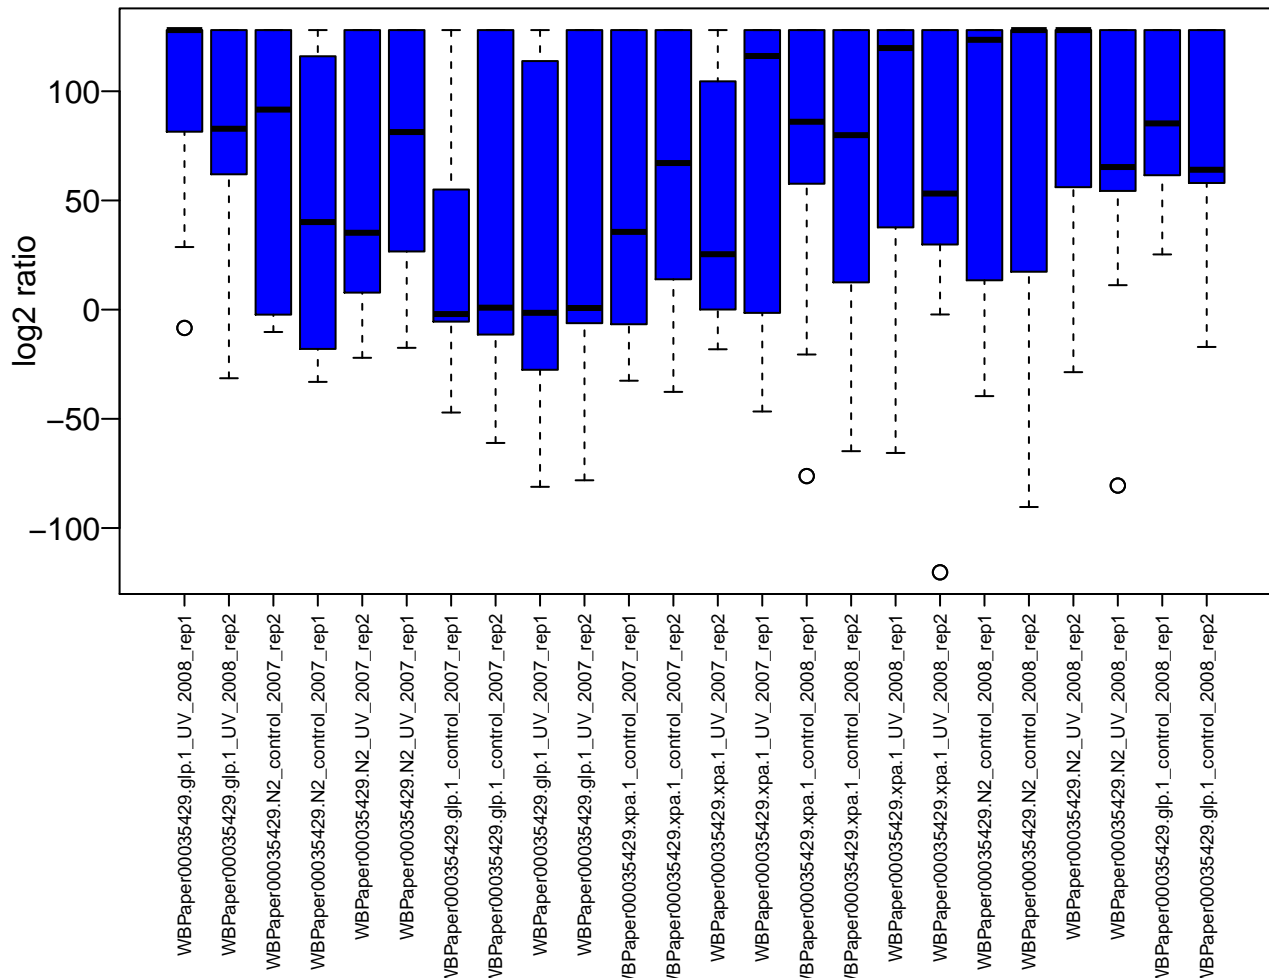

# WBPaper00035504

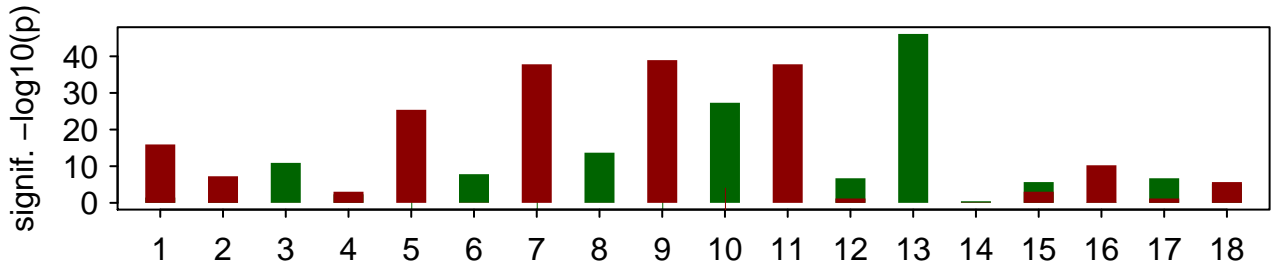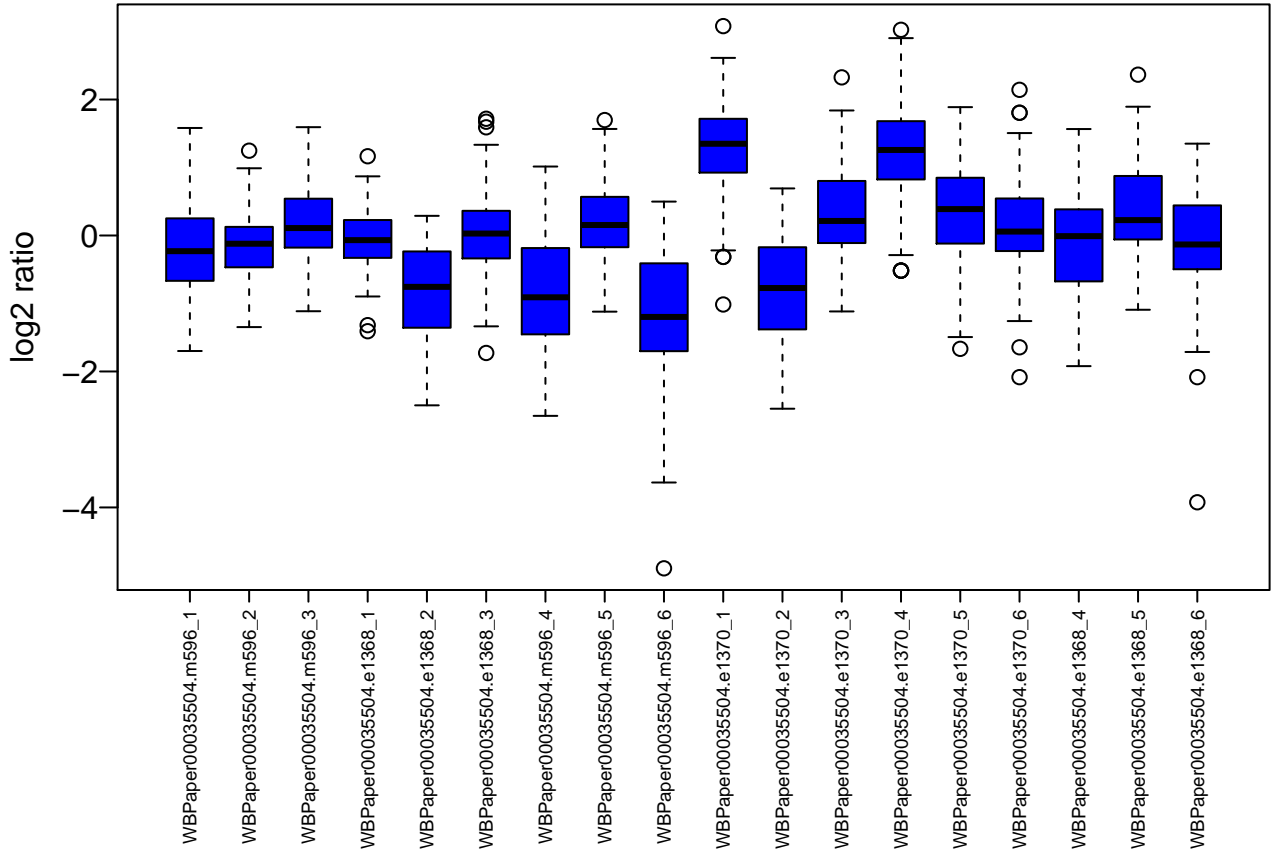

# WBPaper00035588

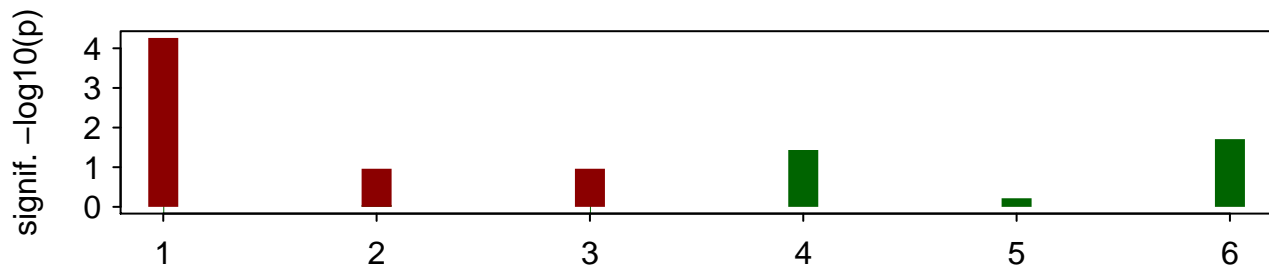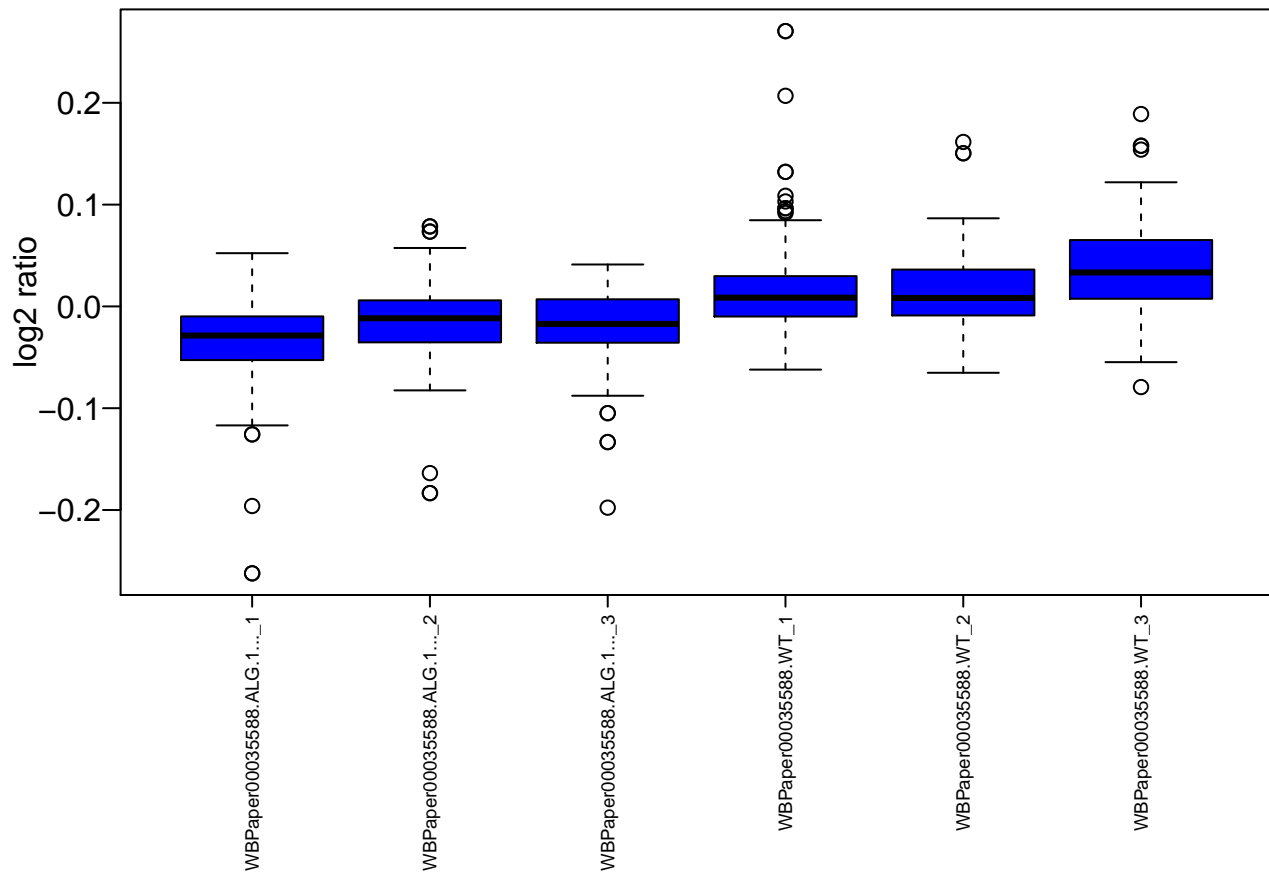

# WBPaper00035873

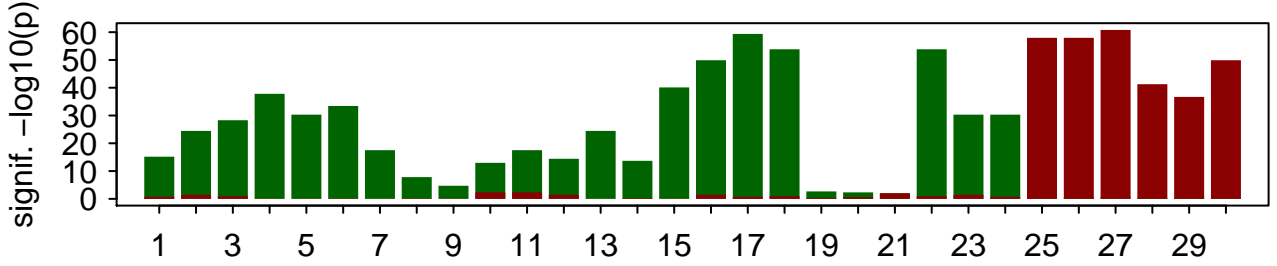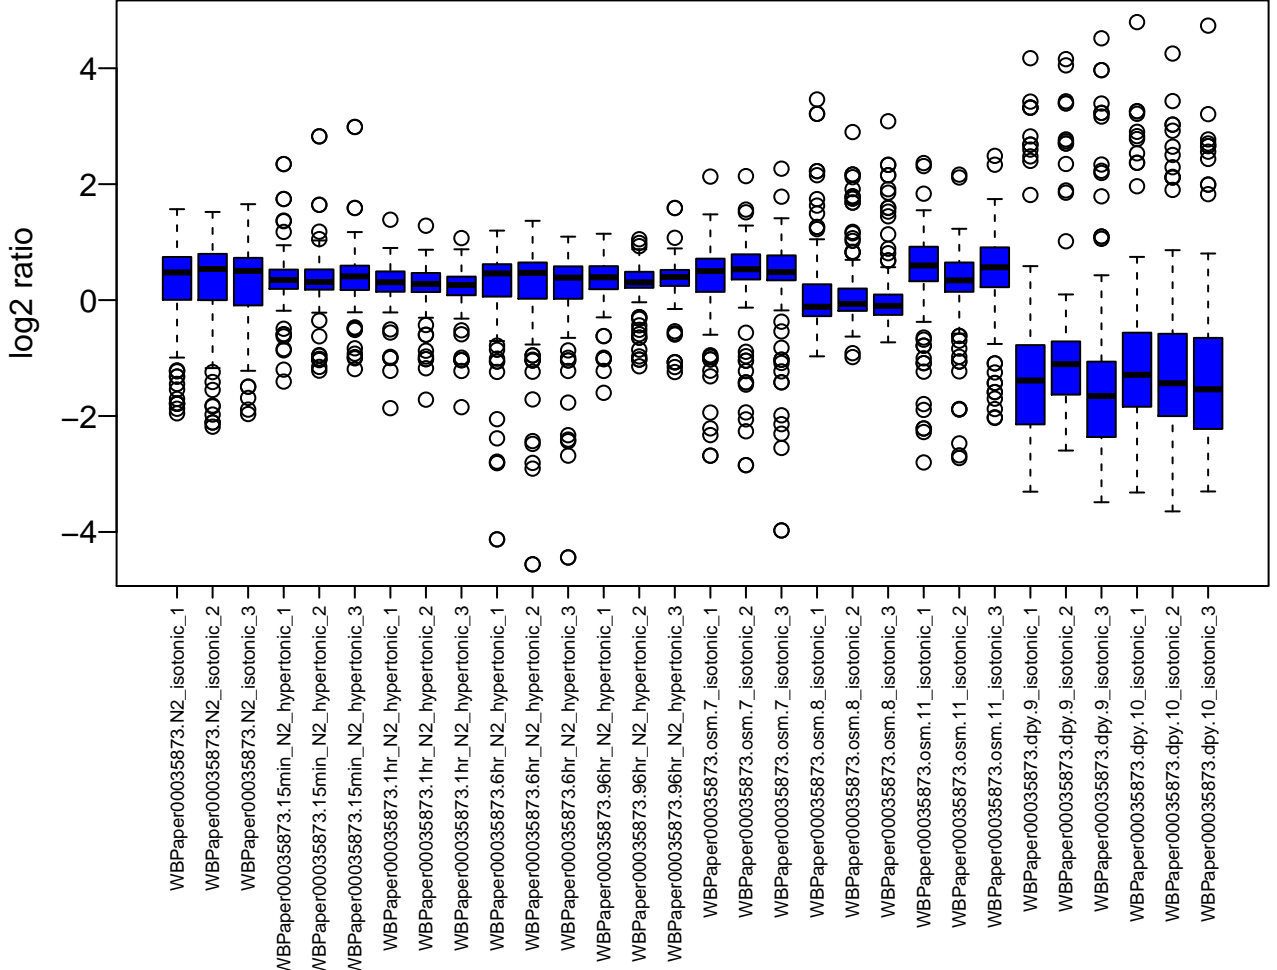



# WBPaper00035892

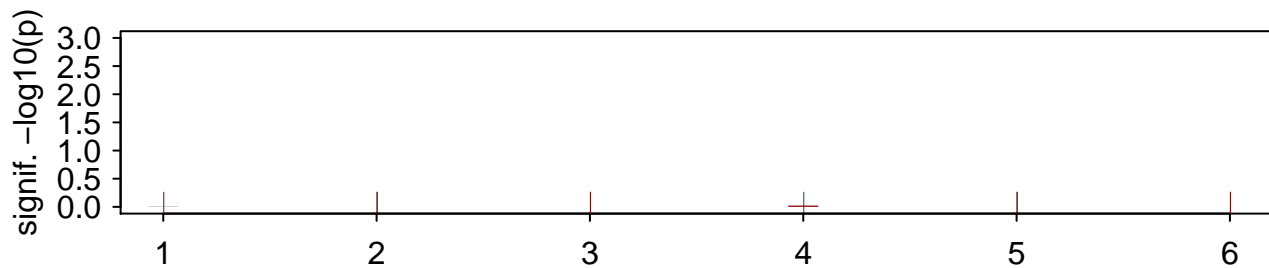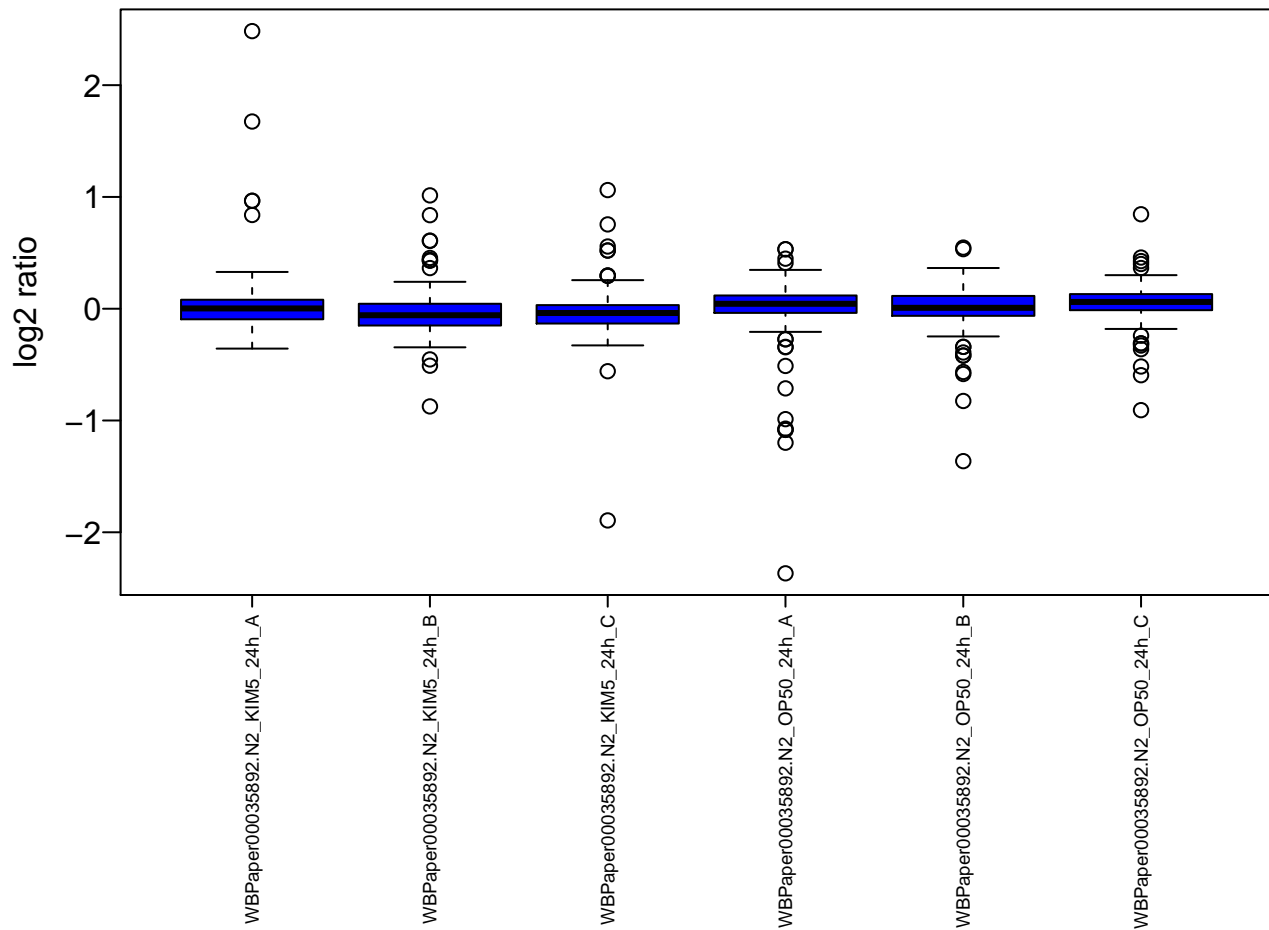

# WBPaper00035905

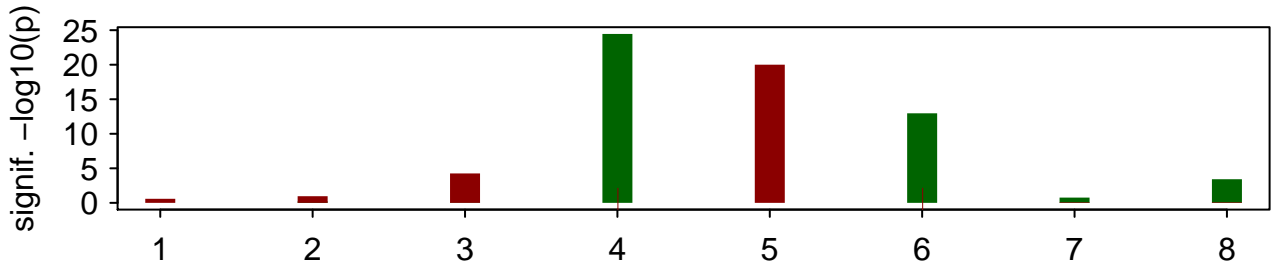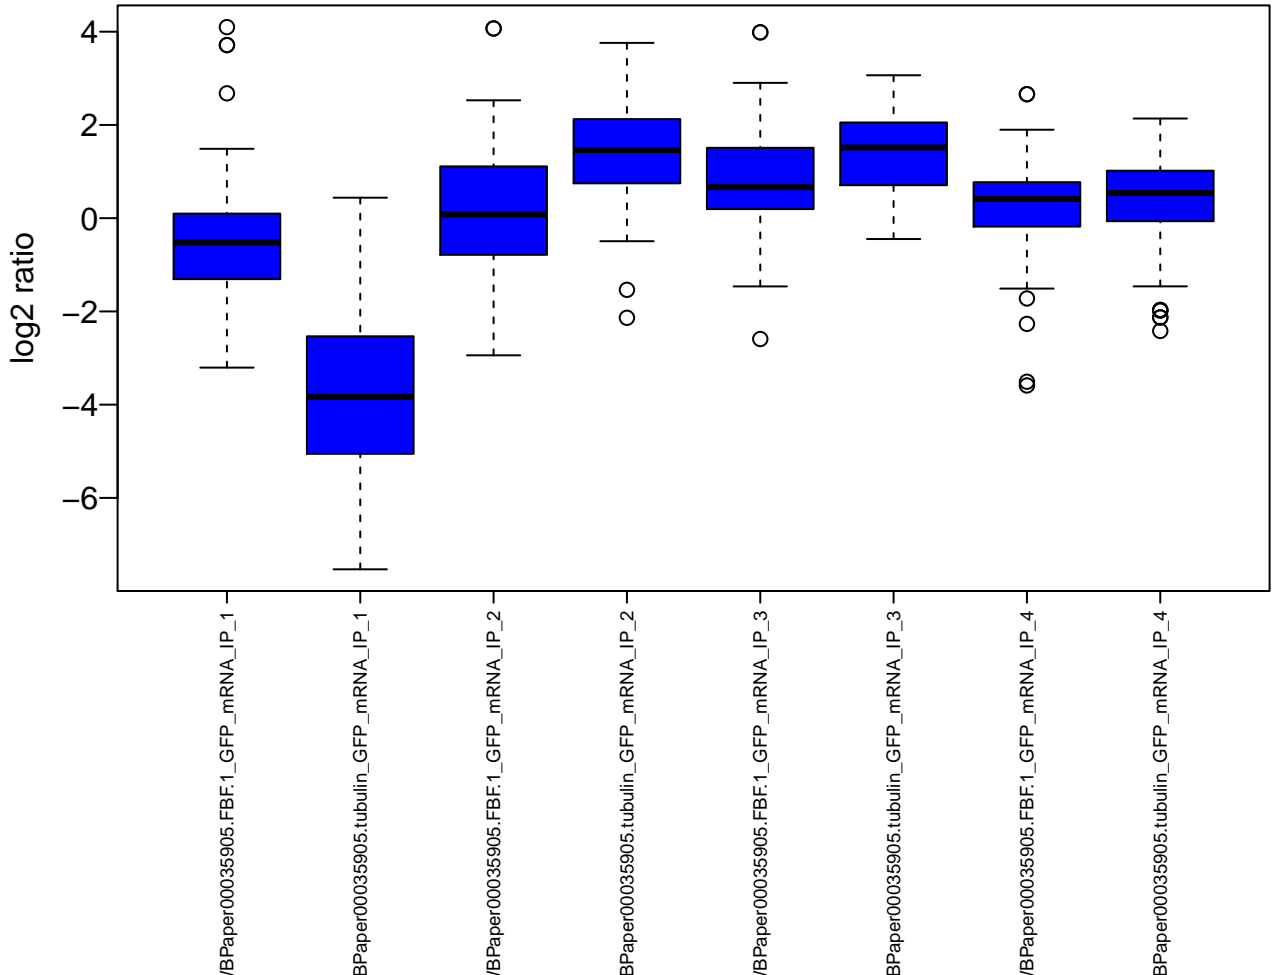

# WBPaper00035973

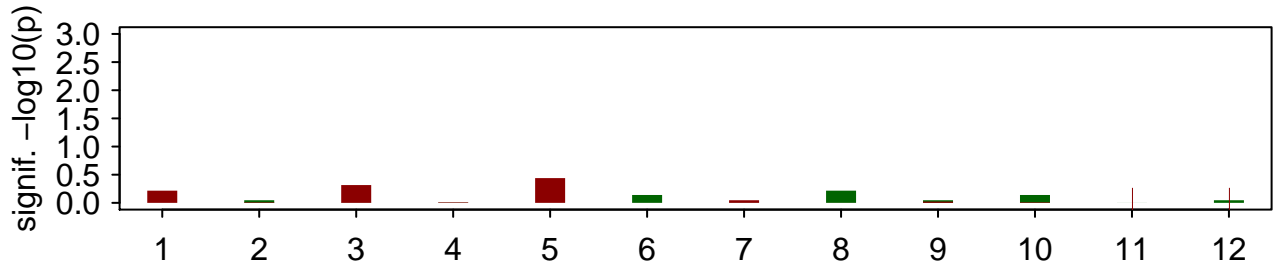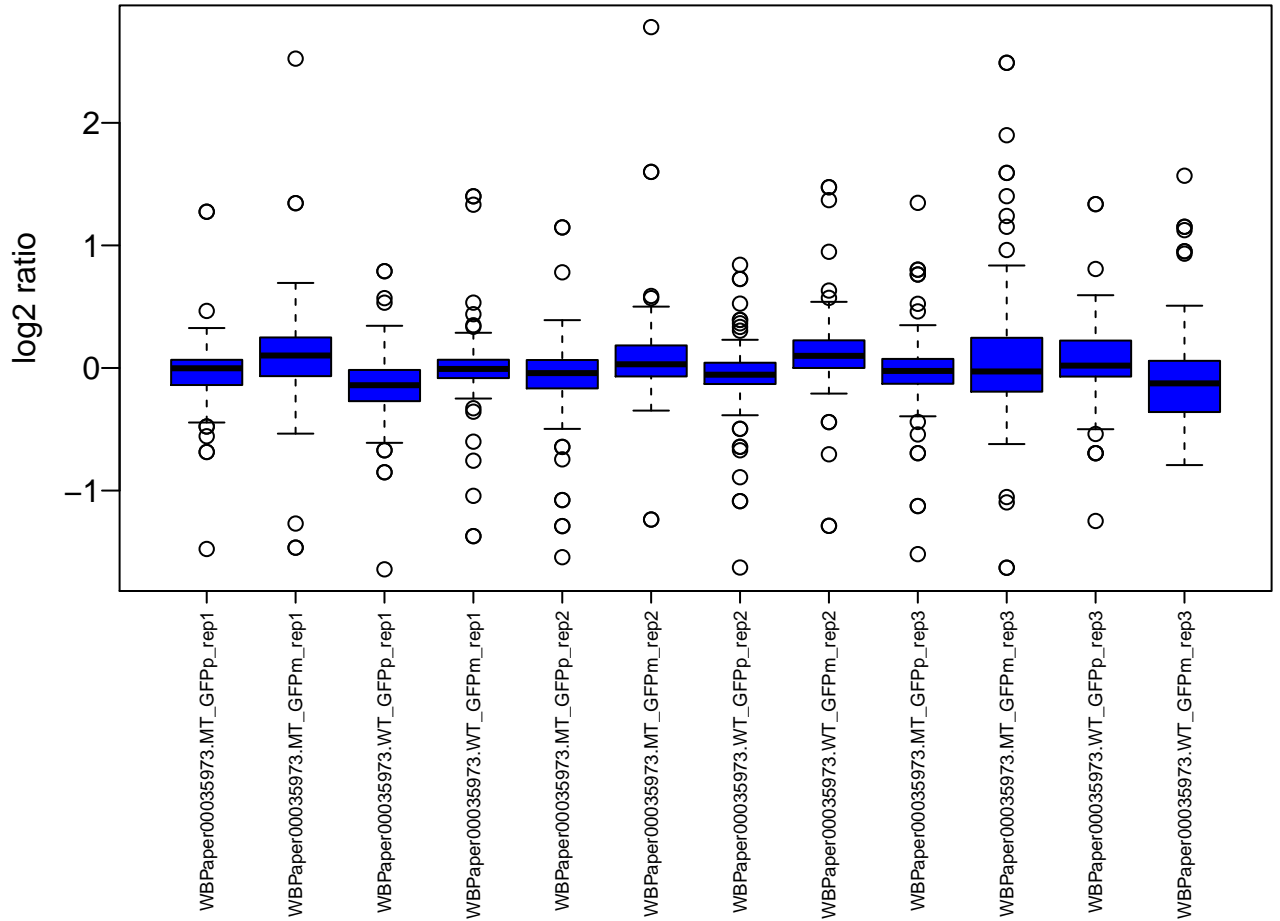

# WBPaper00036090

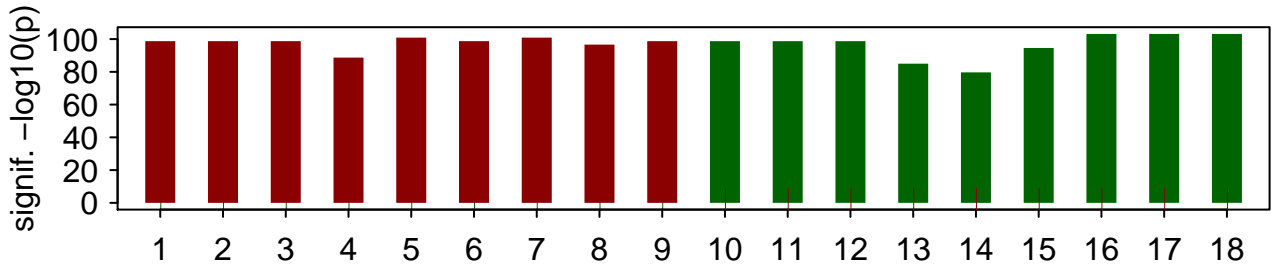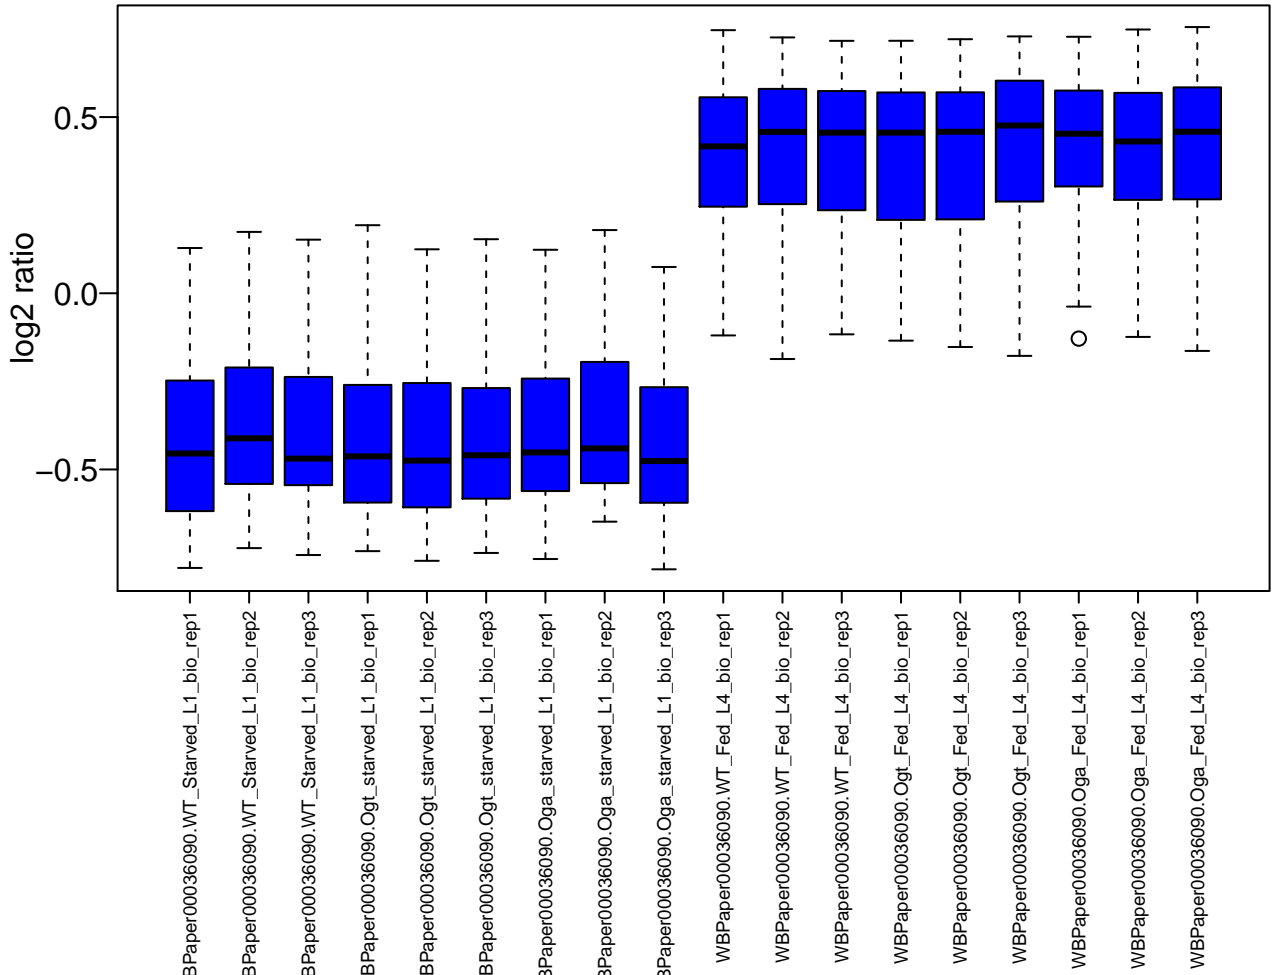

# WBPaper00036130

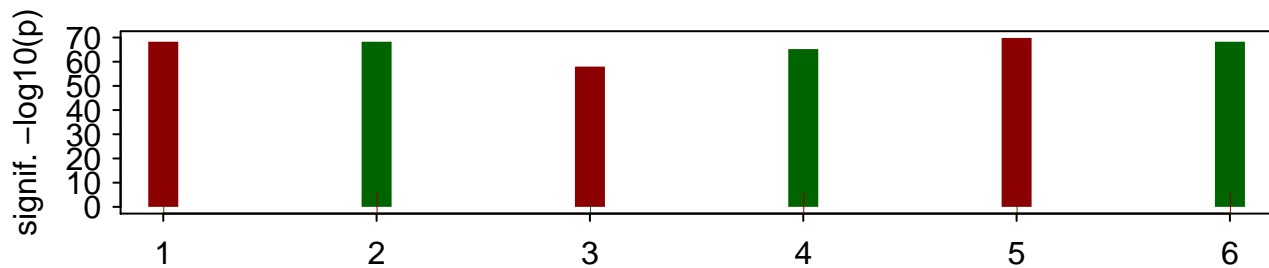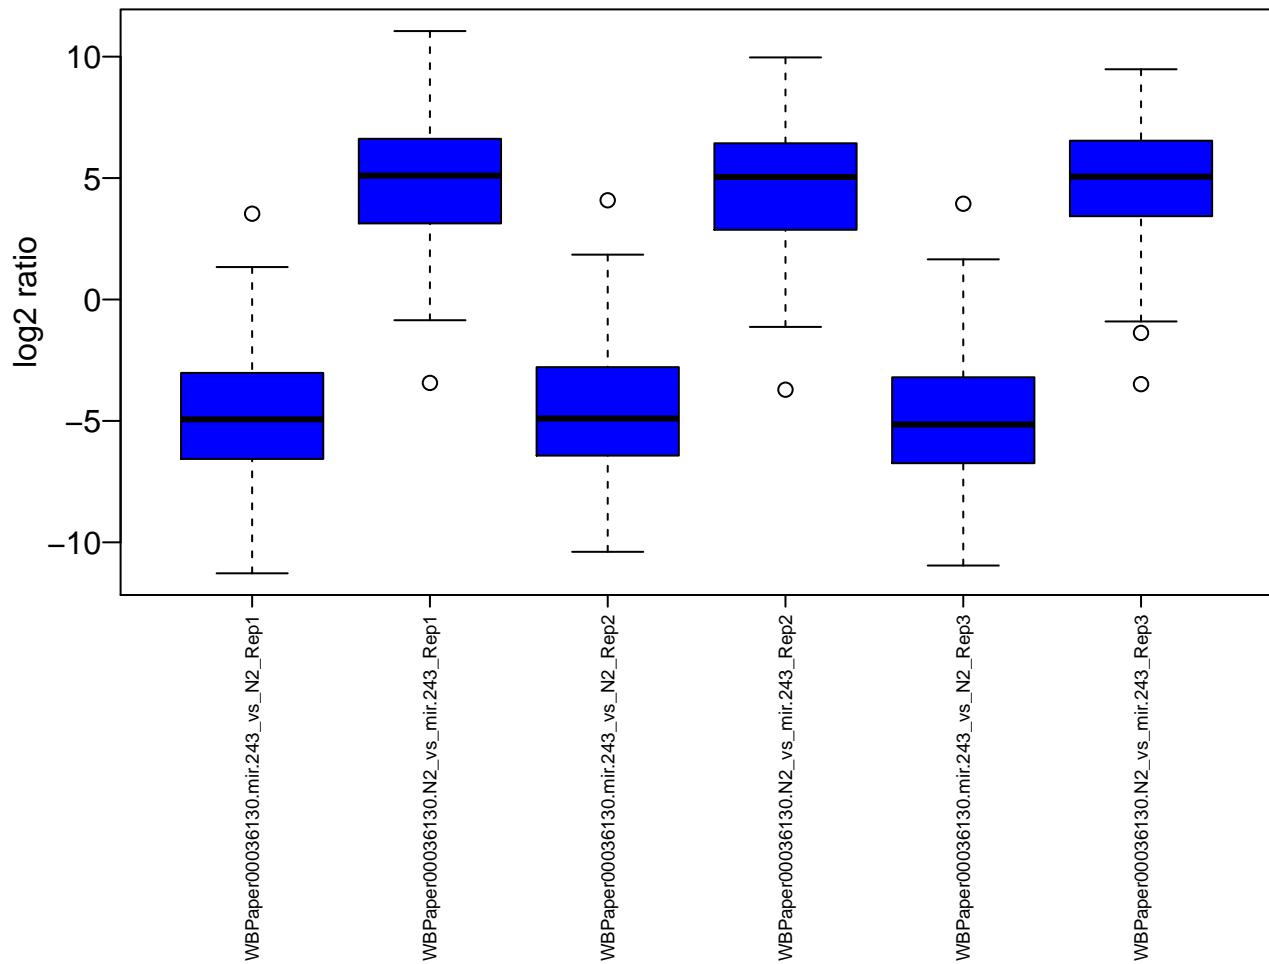

# WBPaper00036135

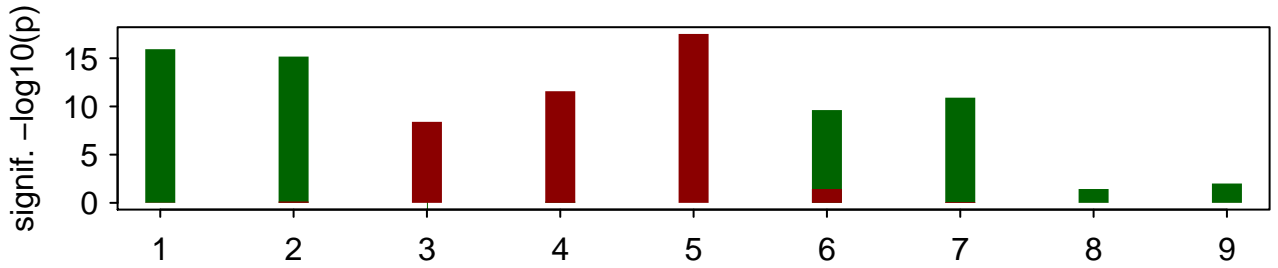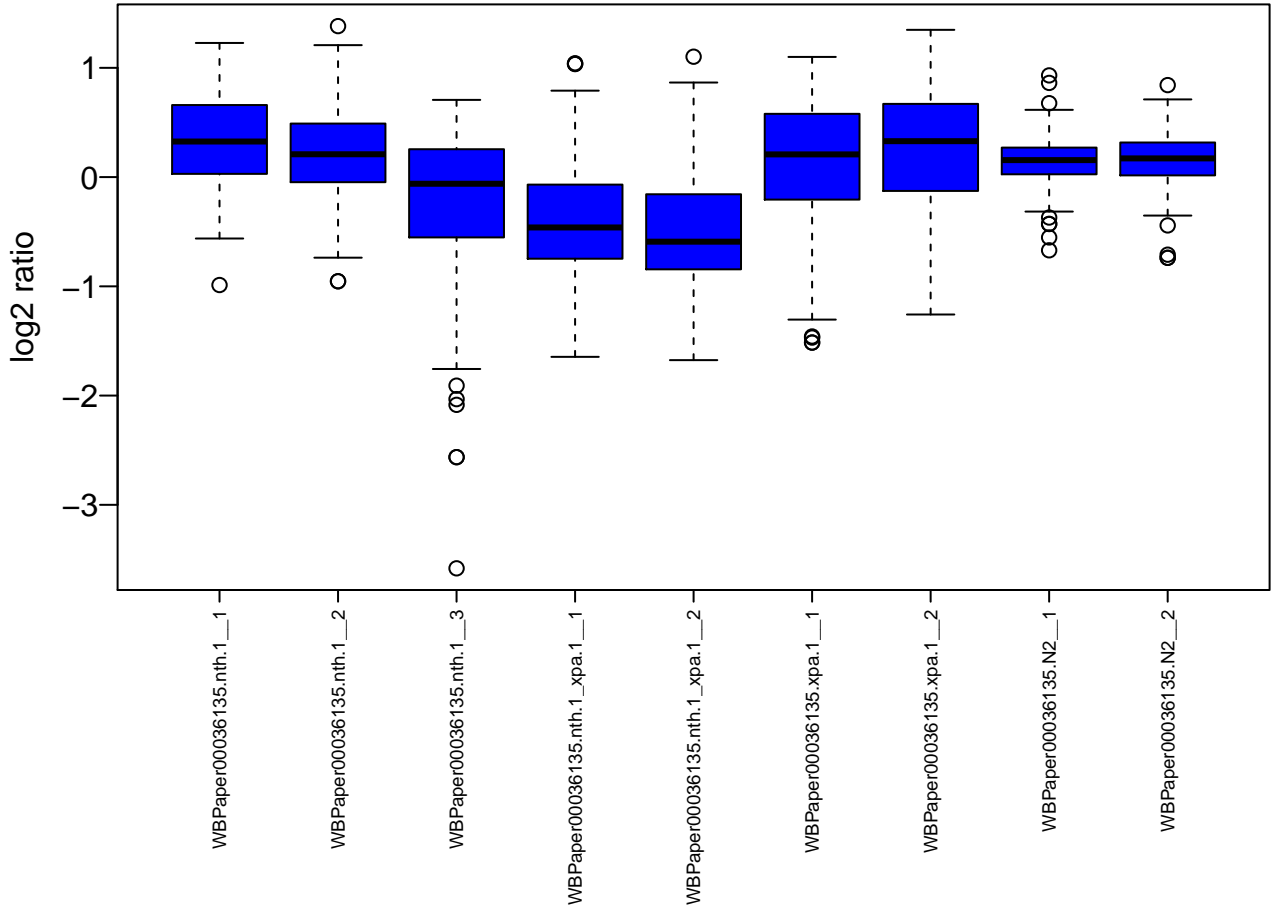

# WBPaper00036256

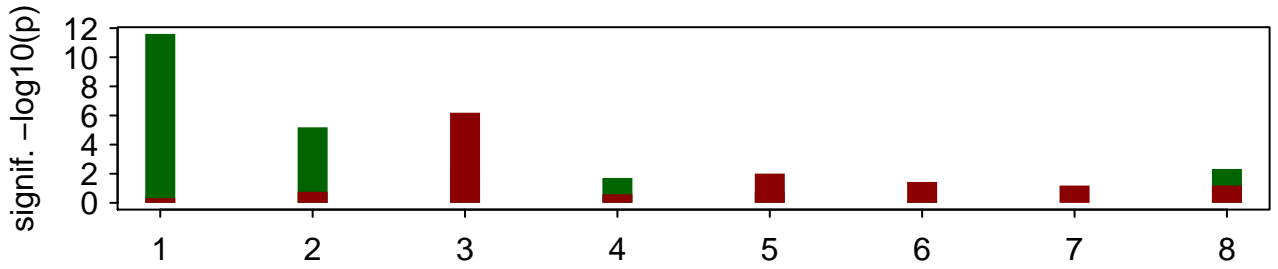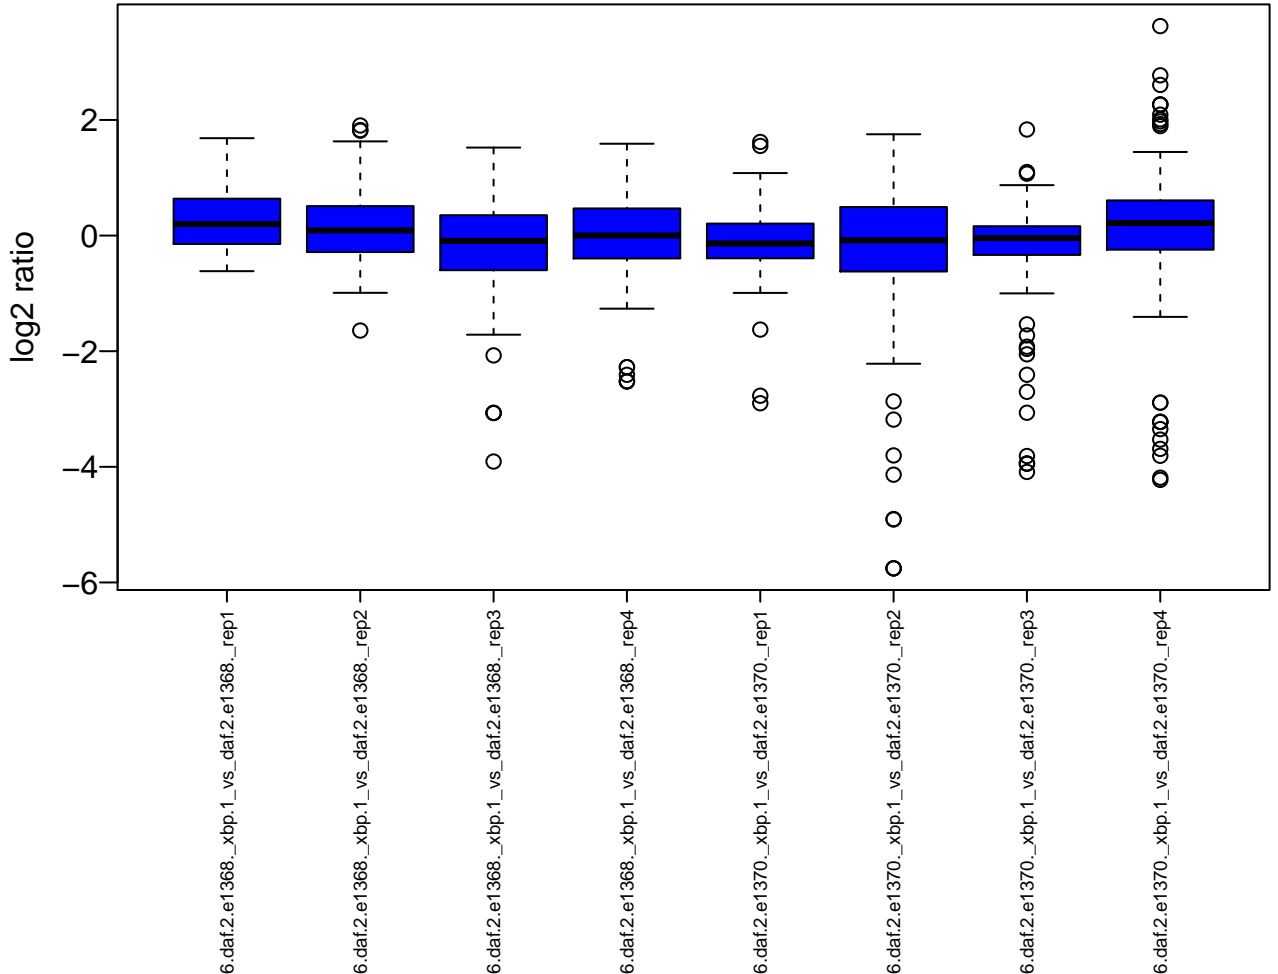

# WBPaper00036286

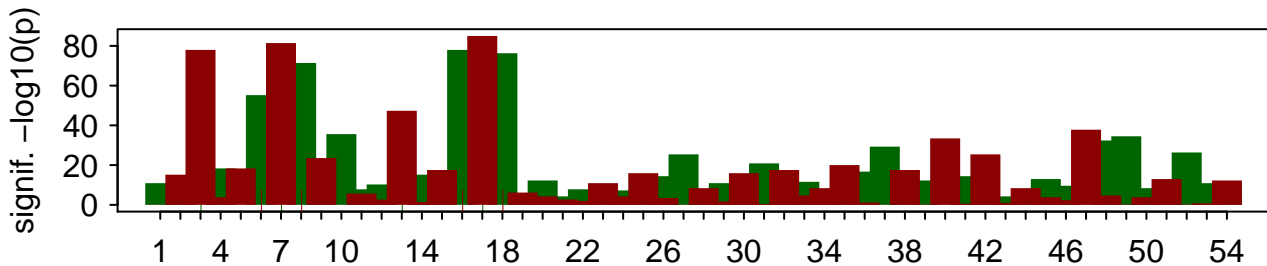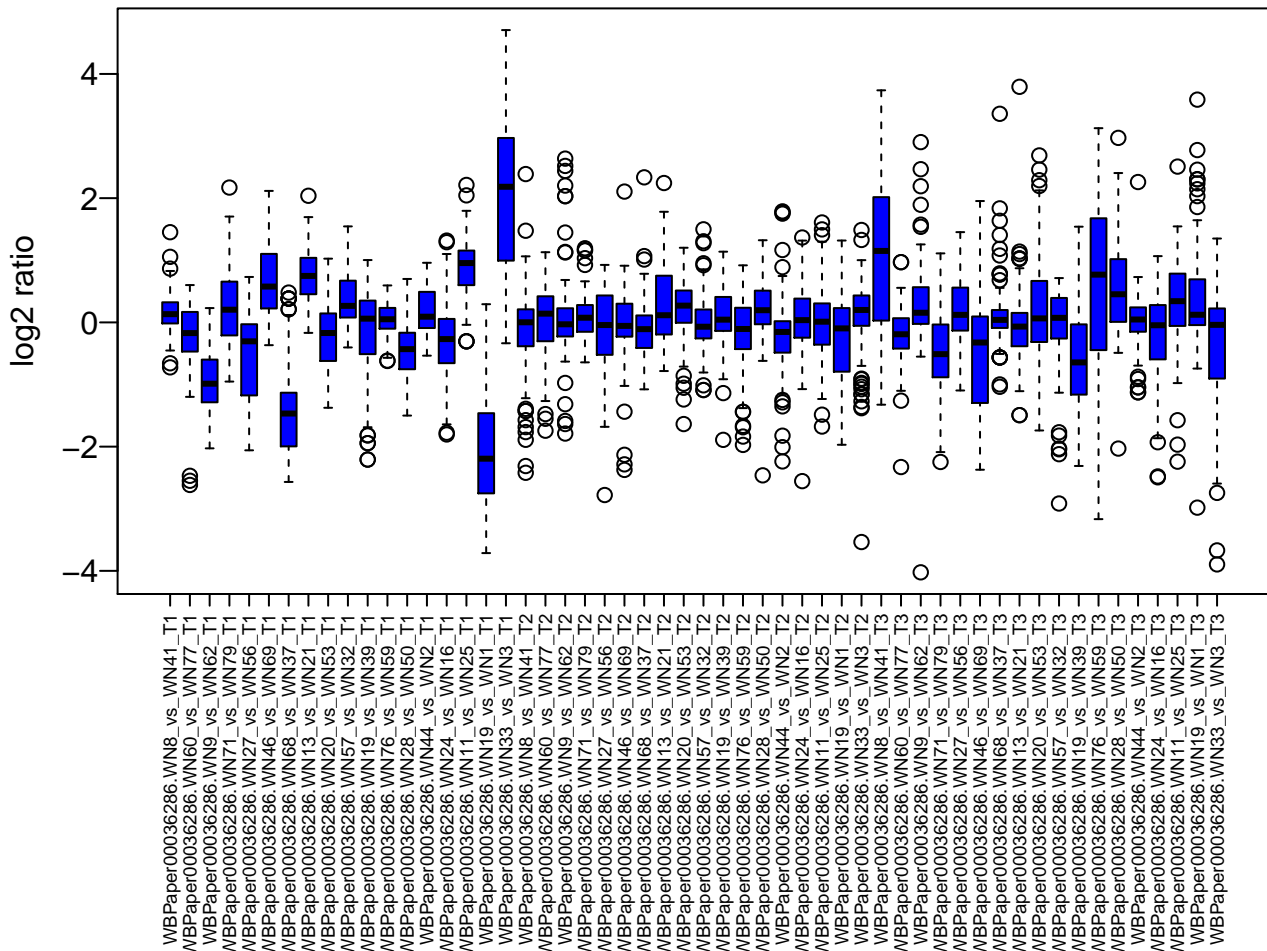



# WBPaper00036291

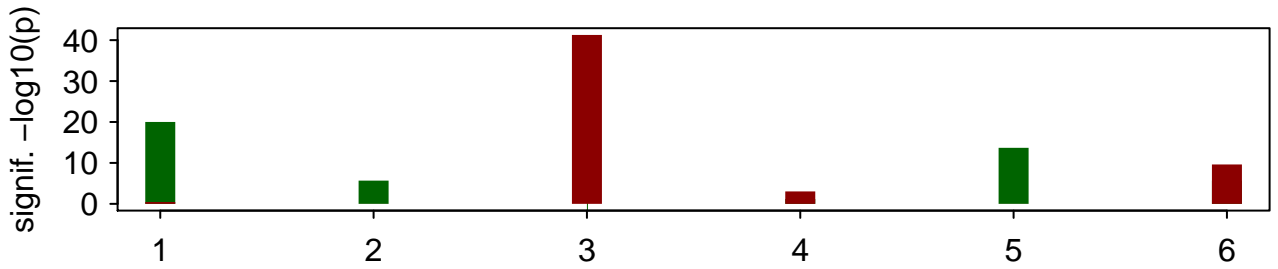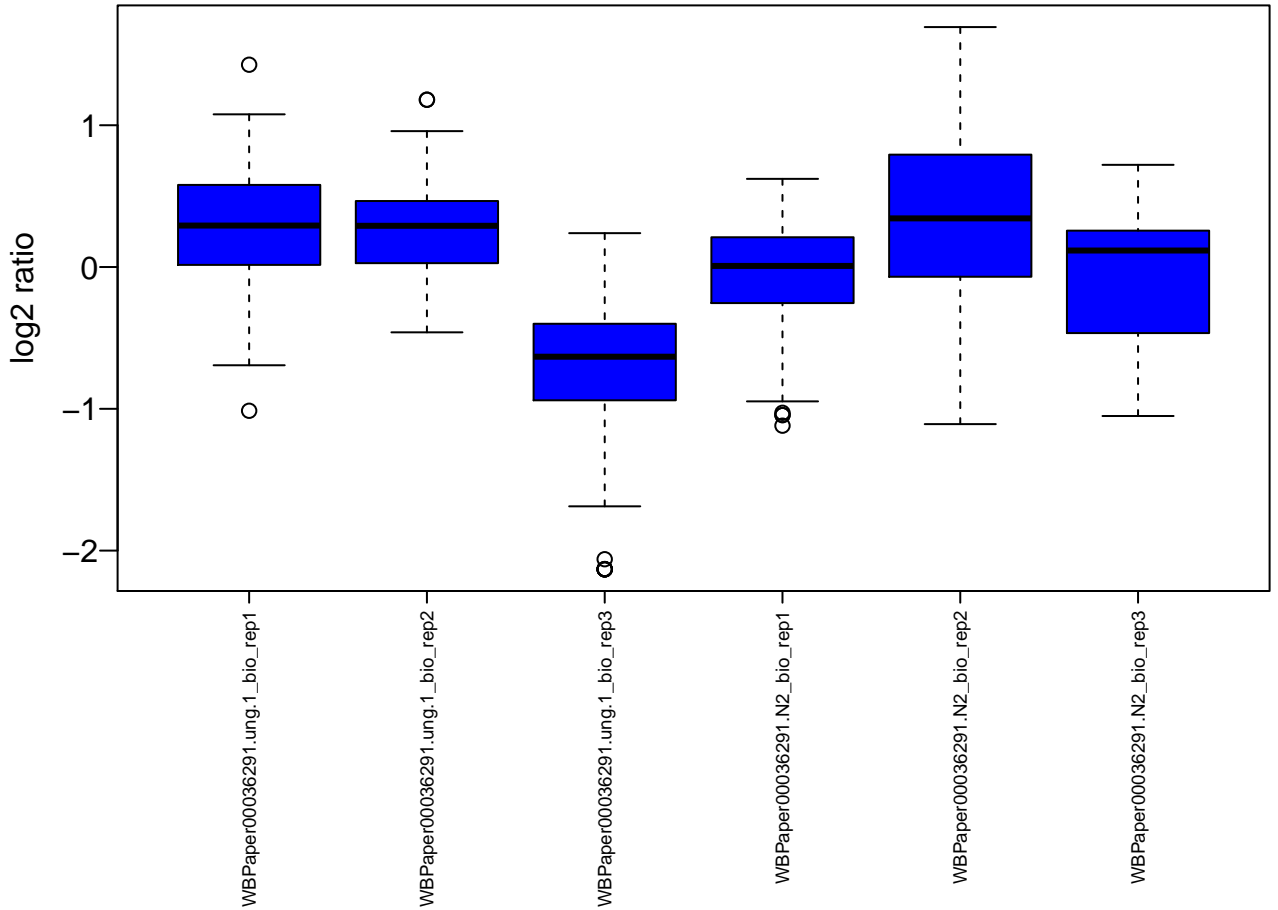

# WBPaper00036375

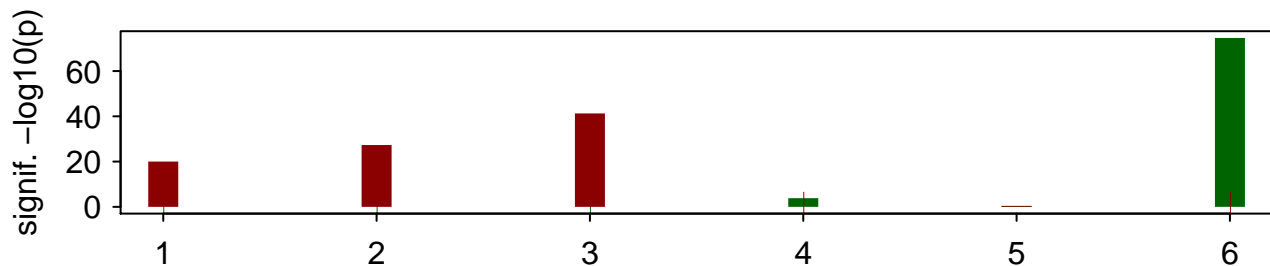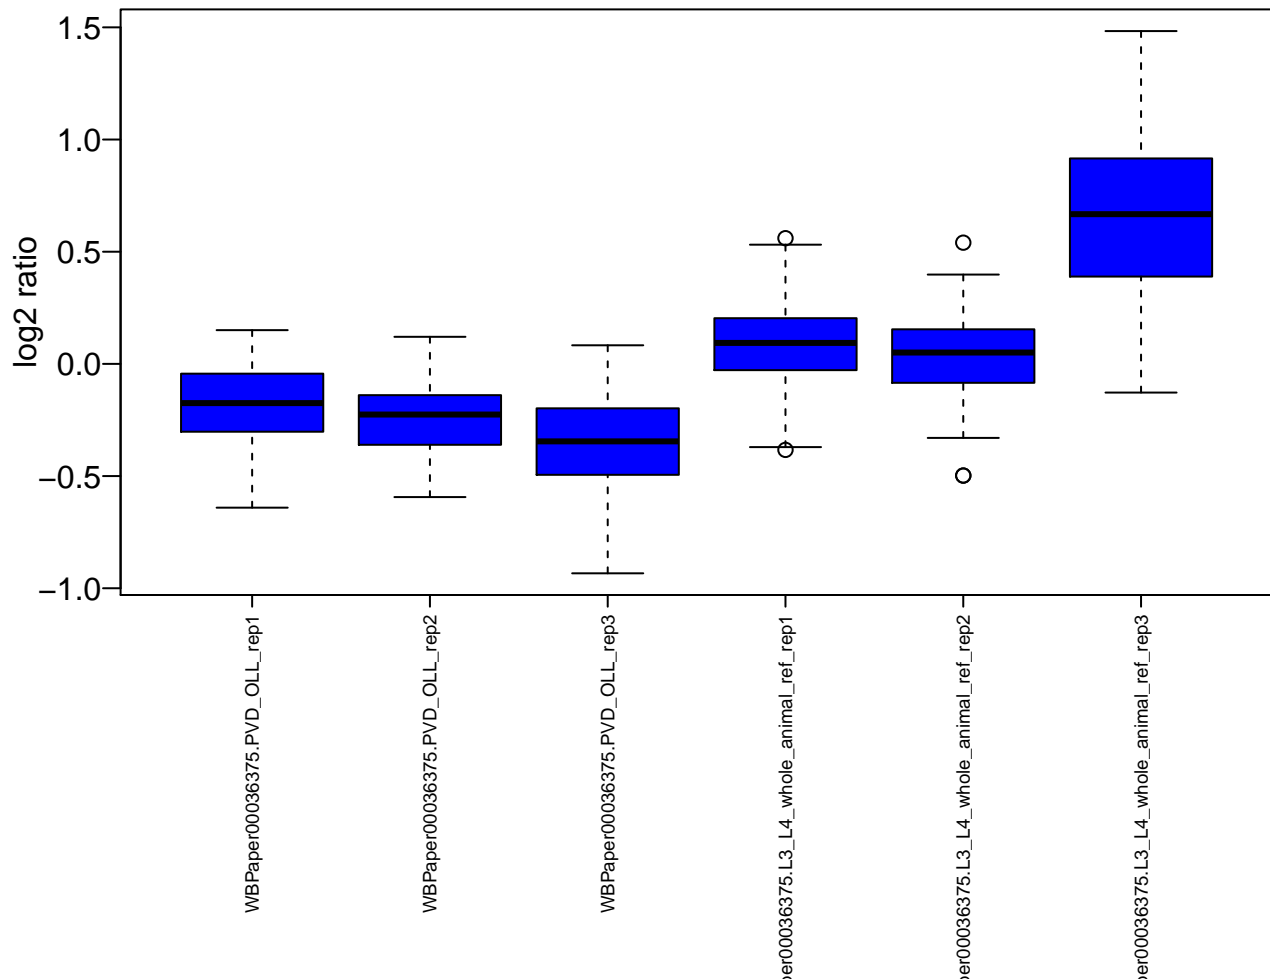

# WBPaper00036383

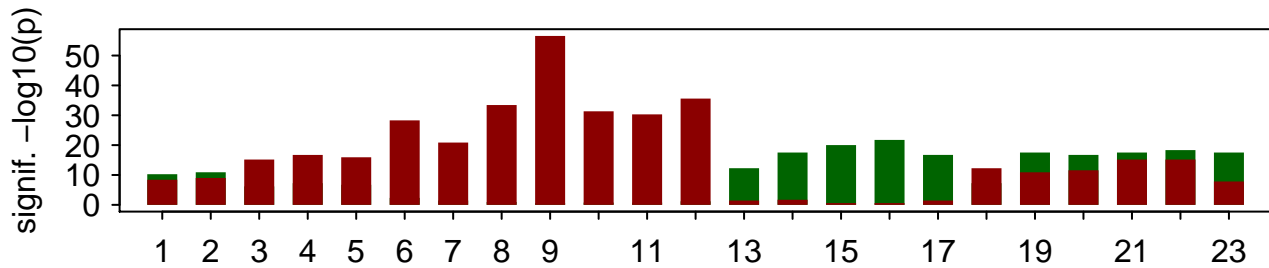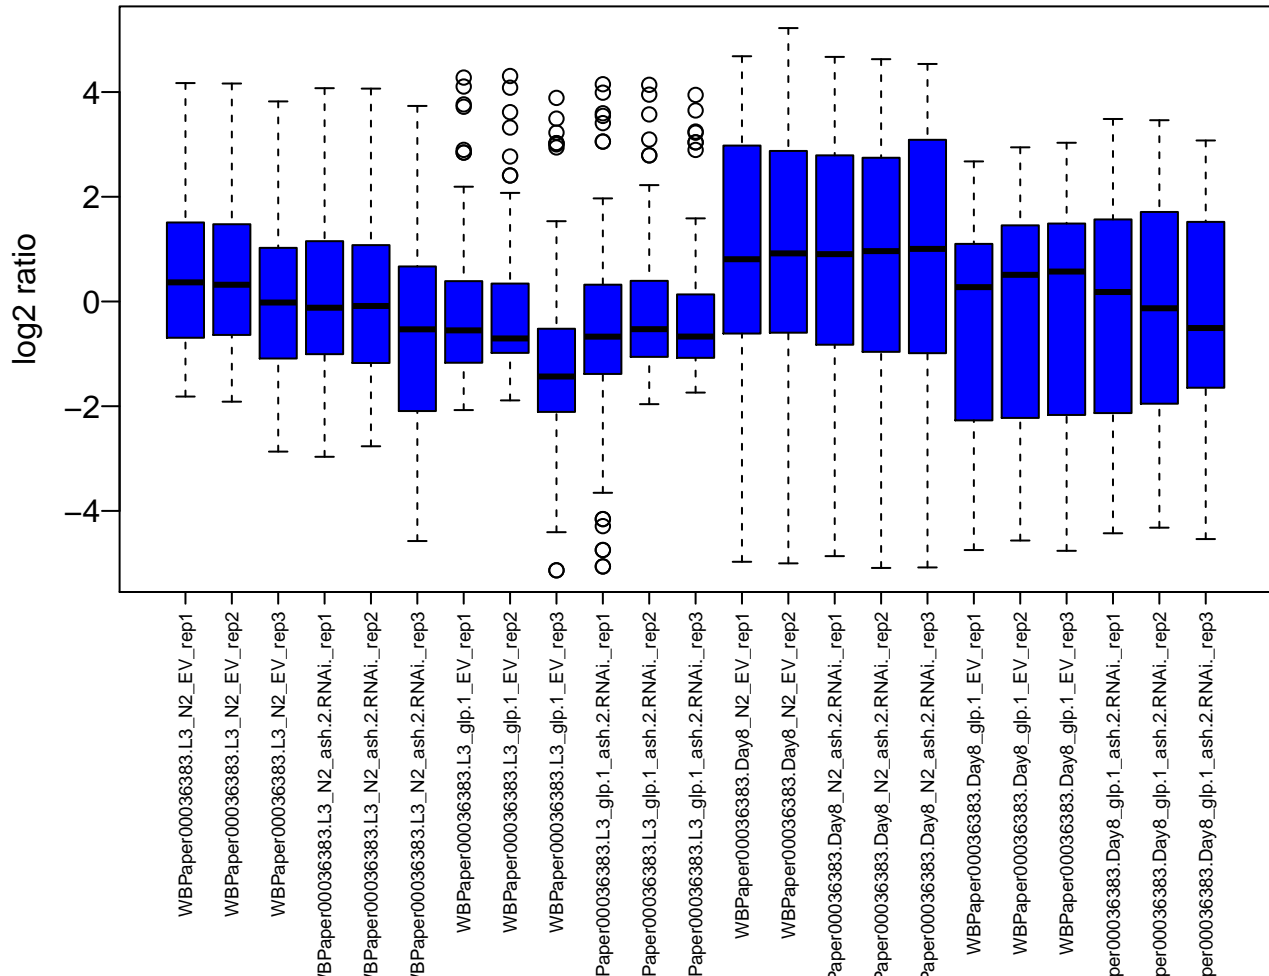

# WBPaper00036429

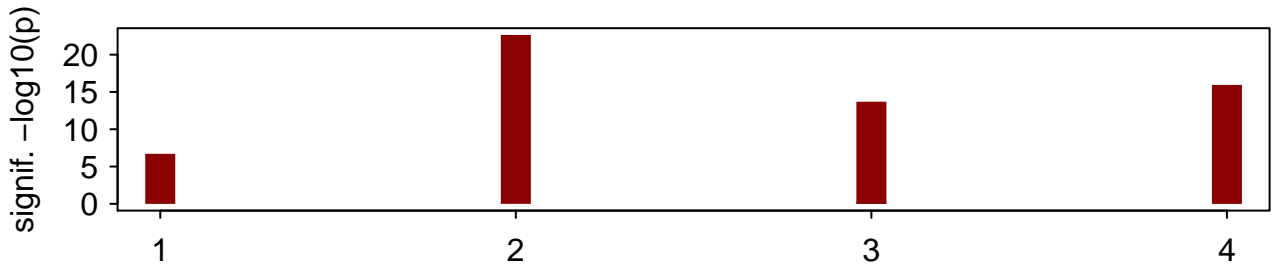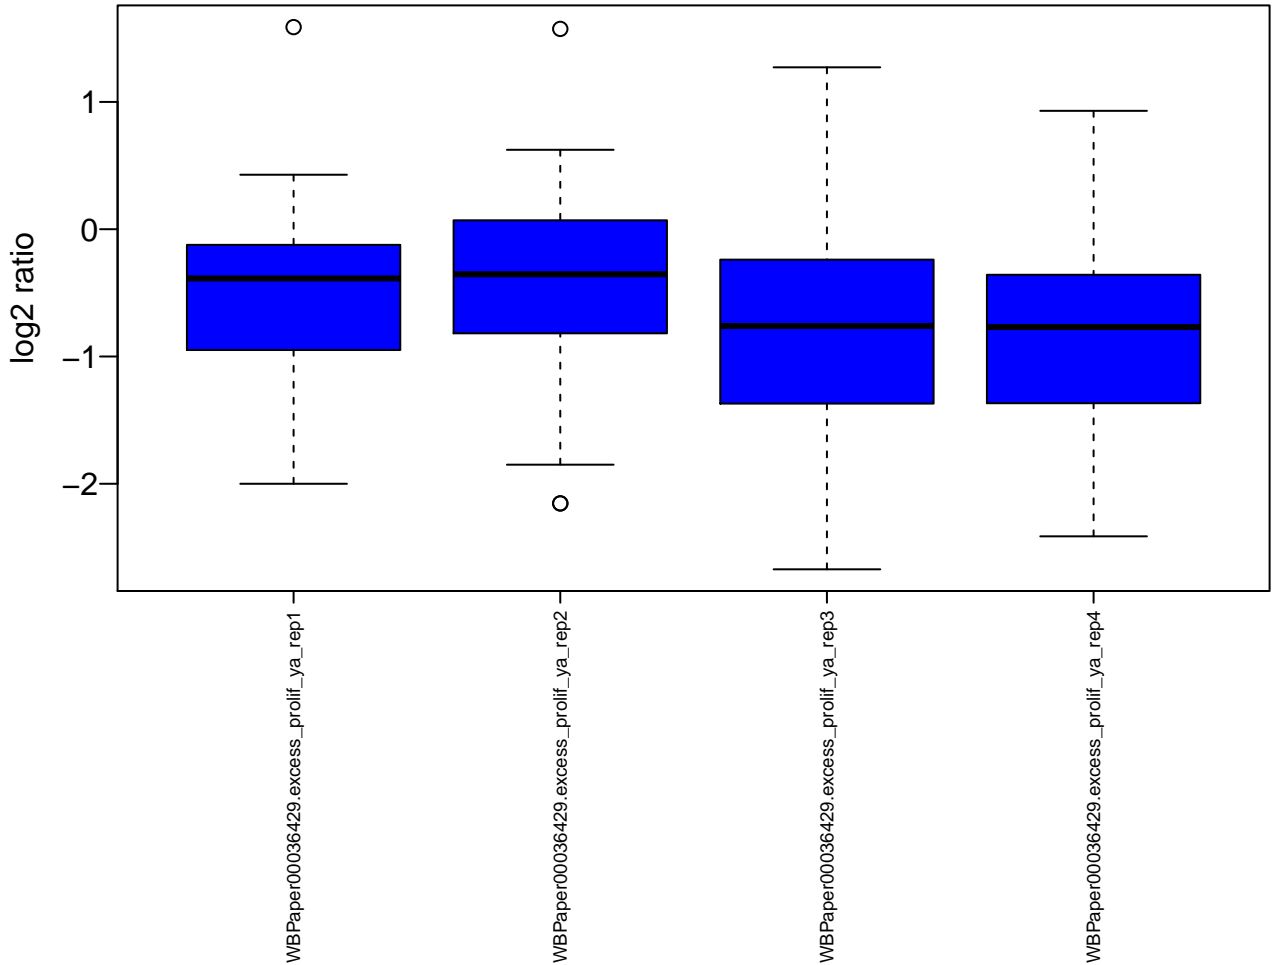

# WBPaper00036464

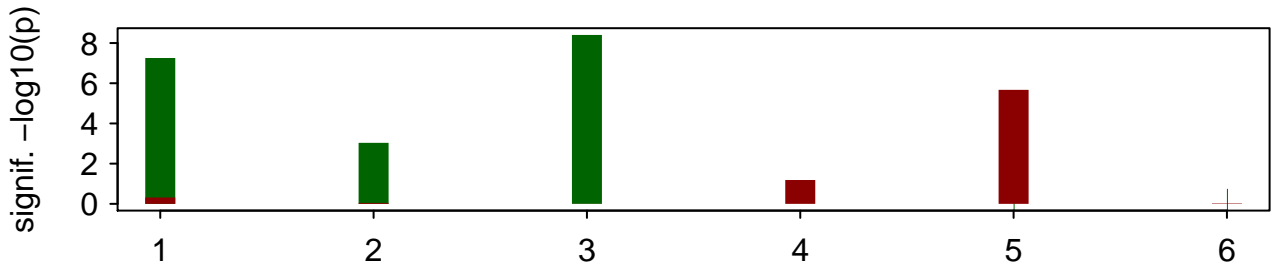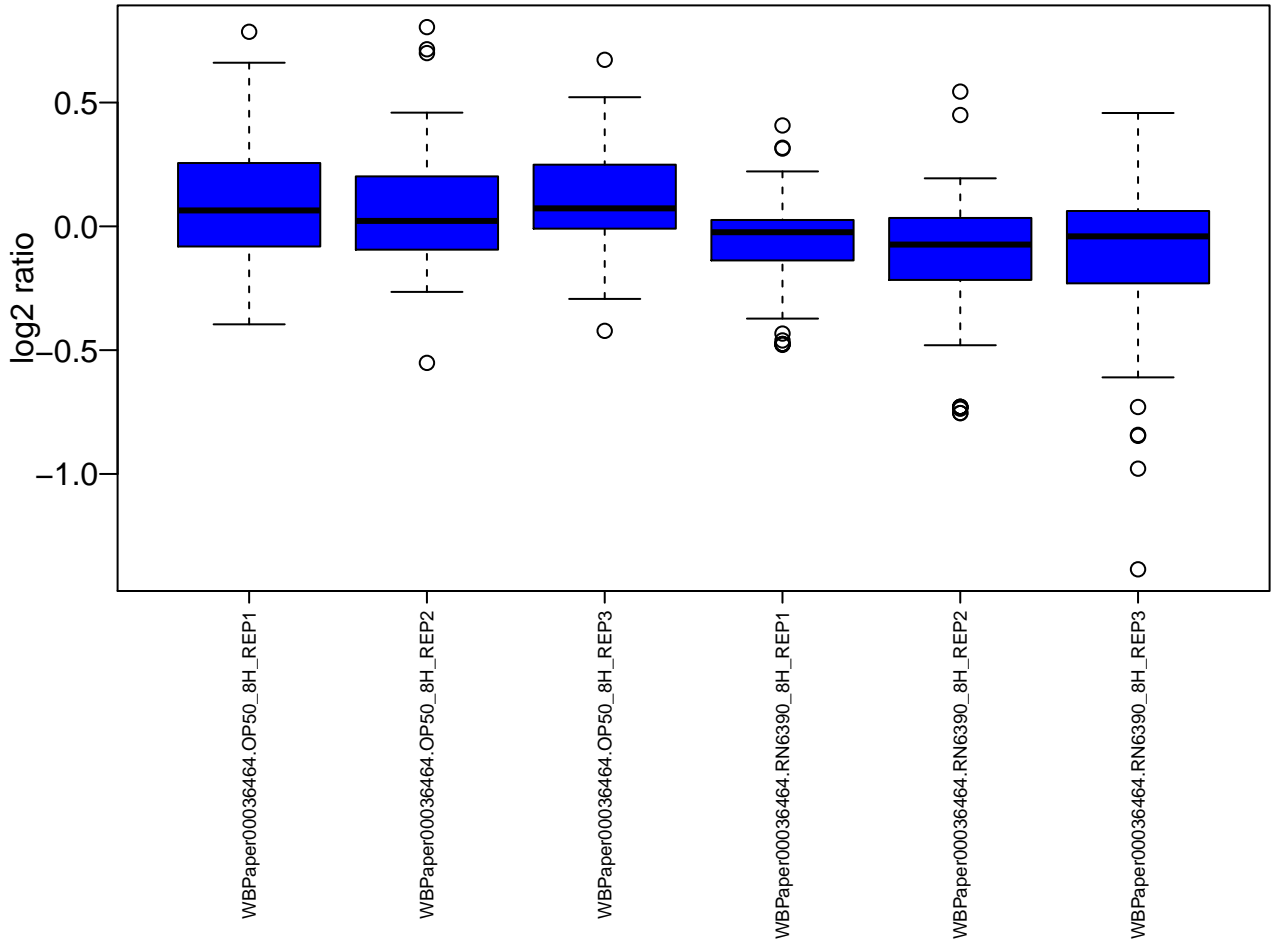

# WBPaper00037086

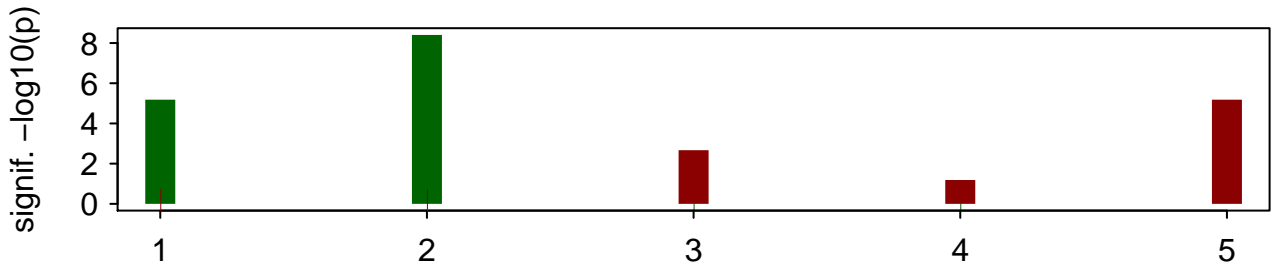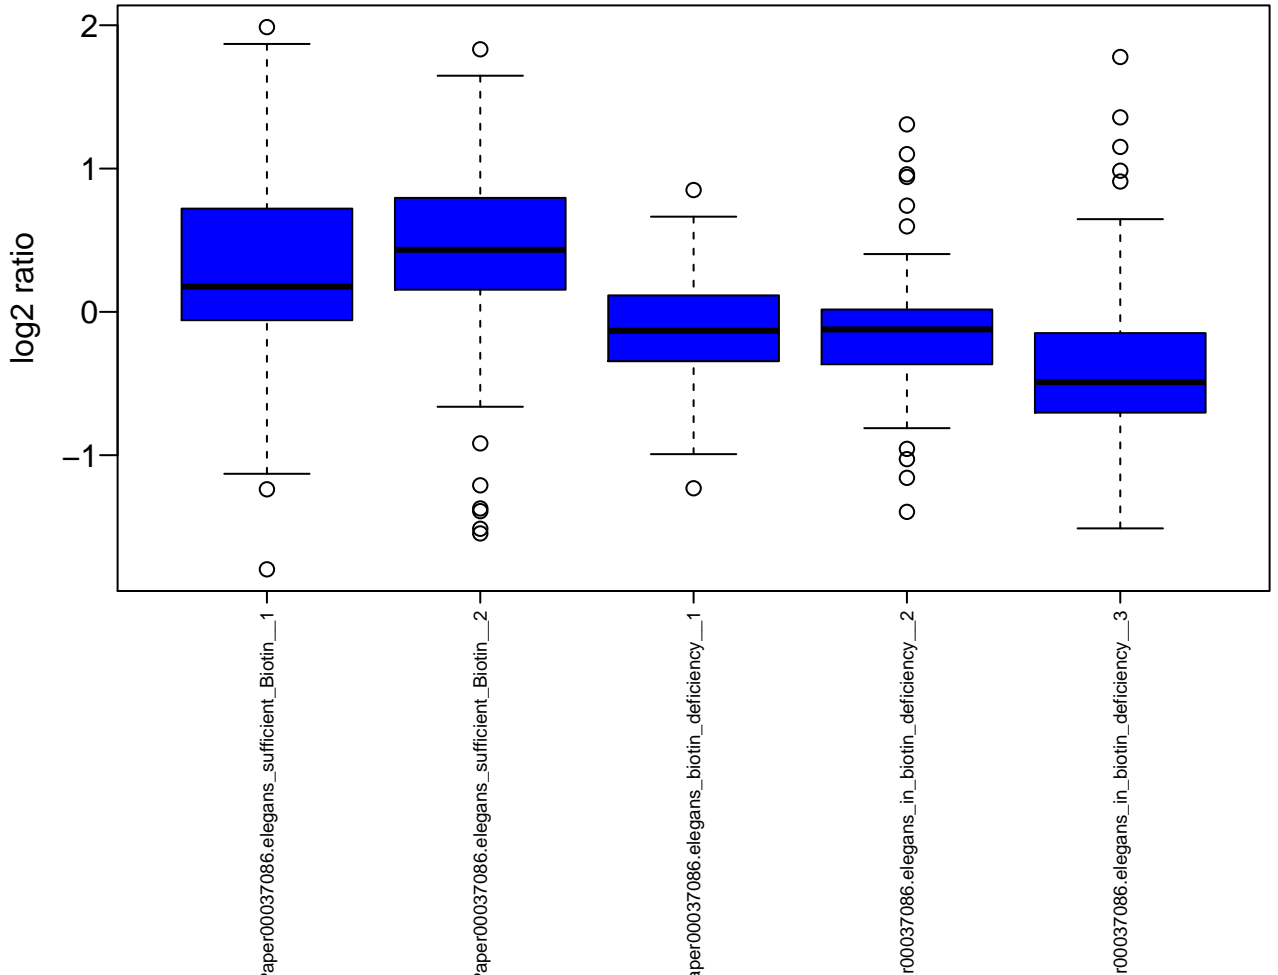

# WBPaper00037113

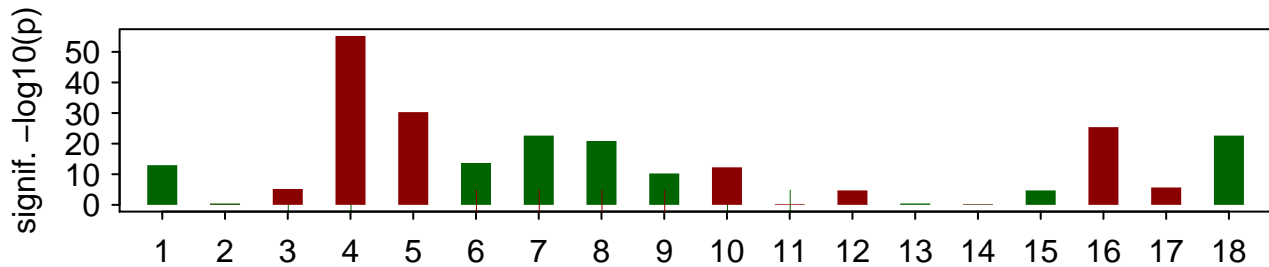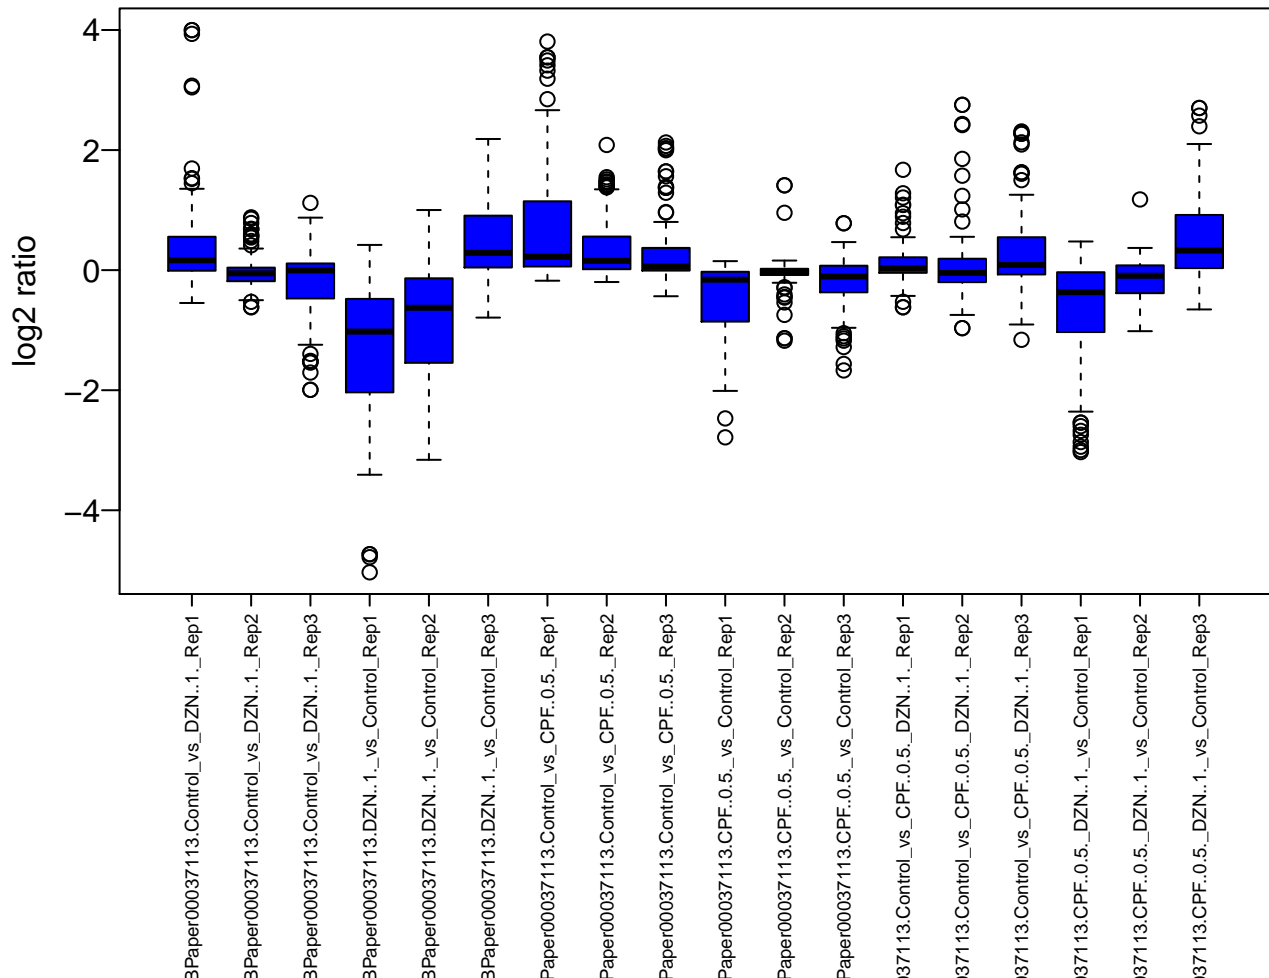

# WBPaper00037147

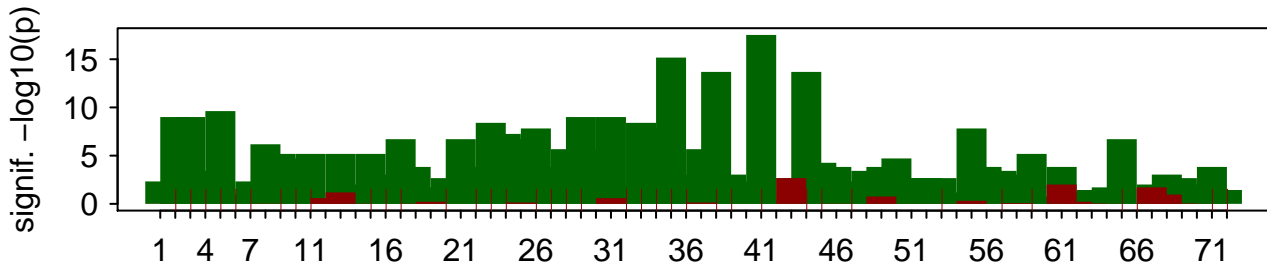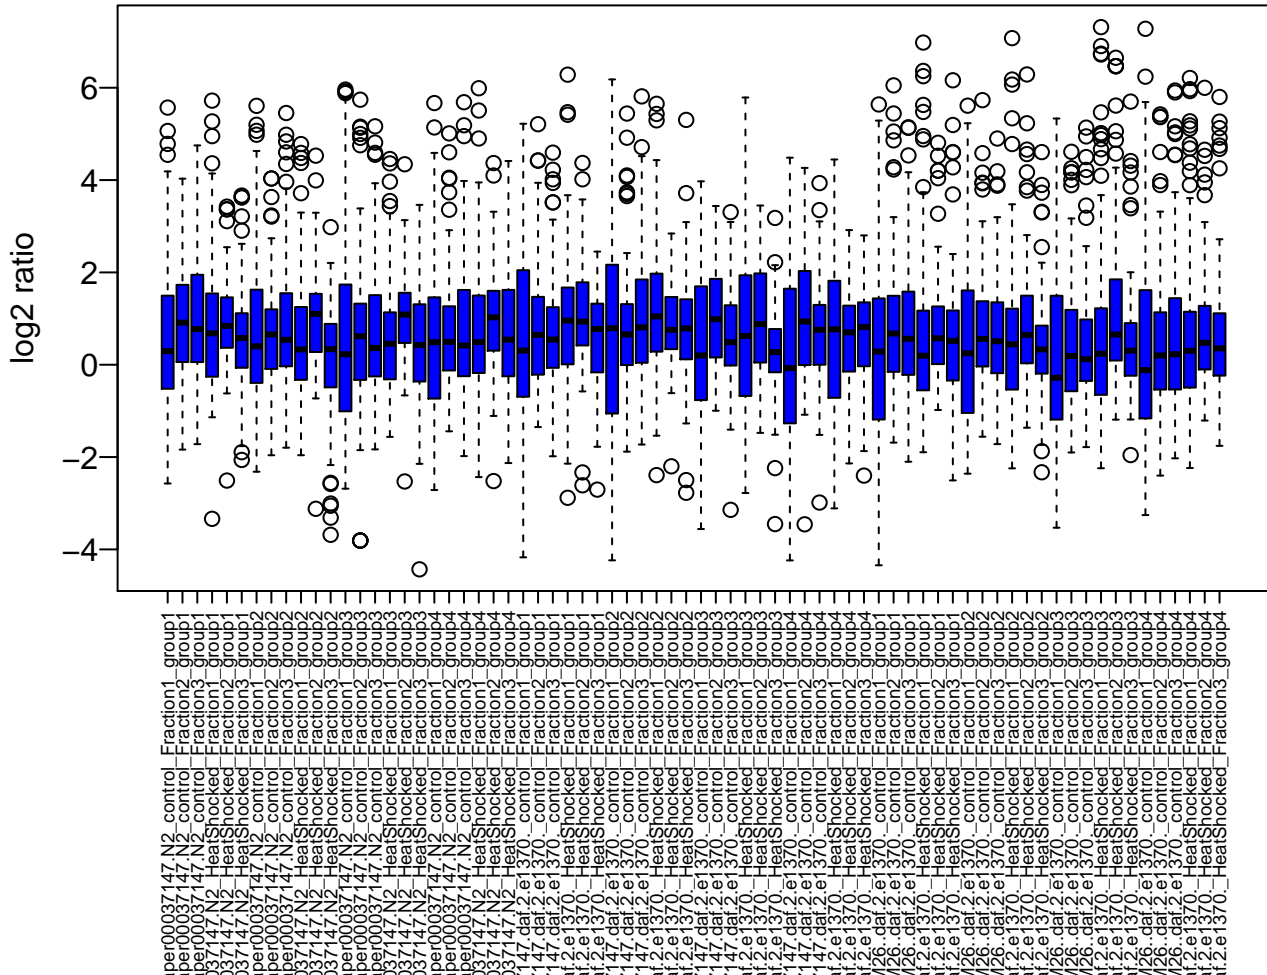



# WBPaper00037611

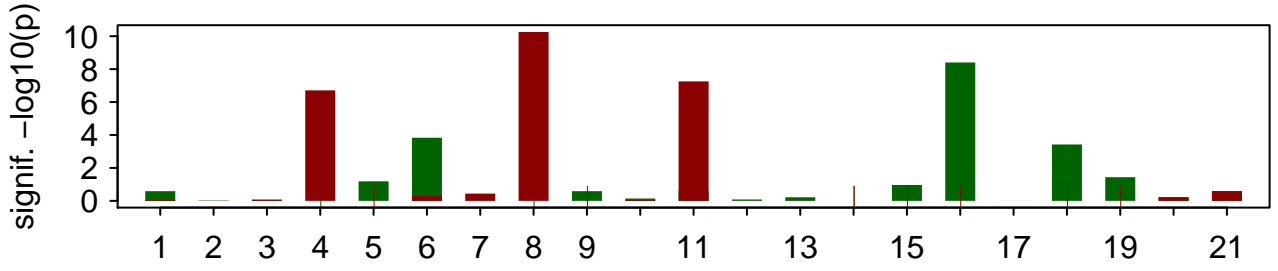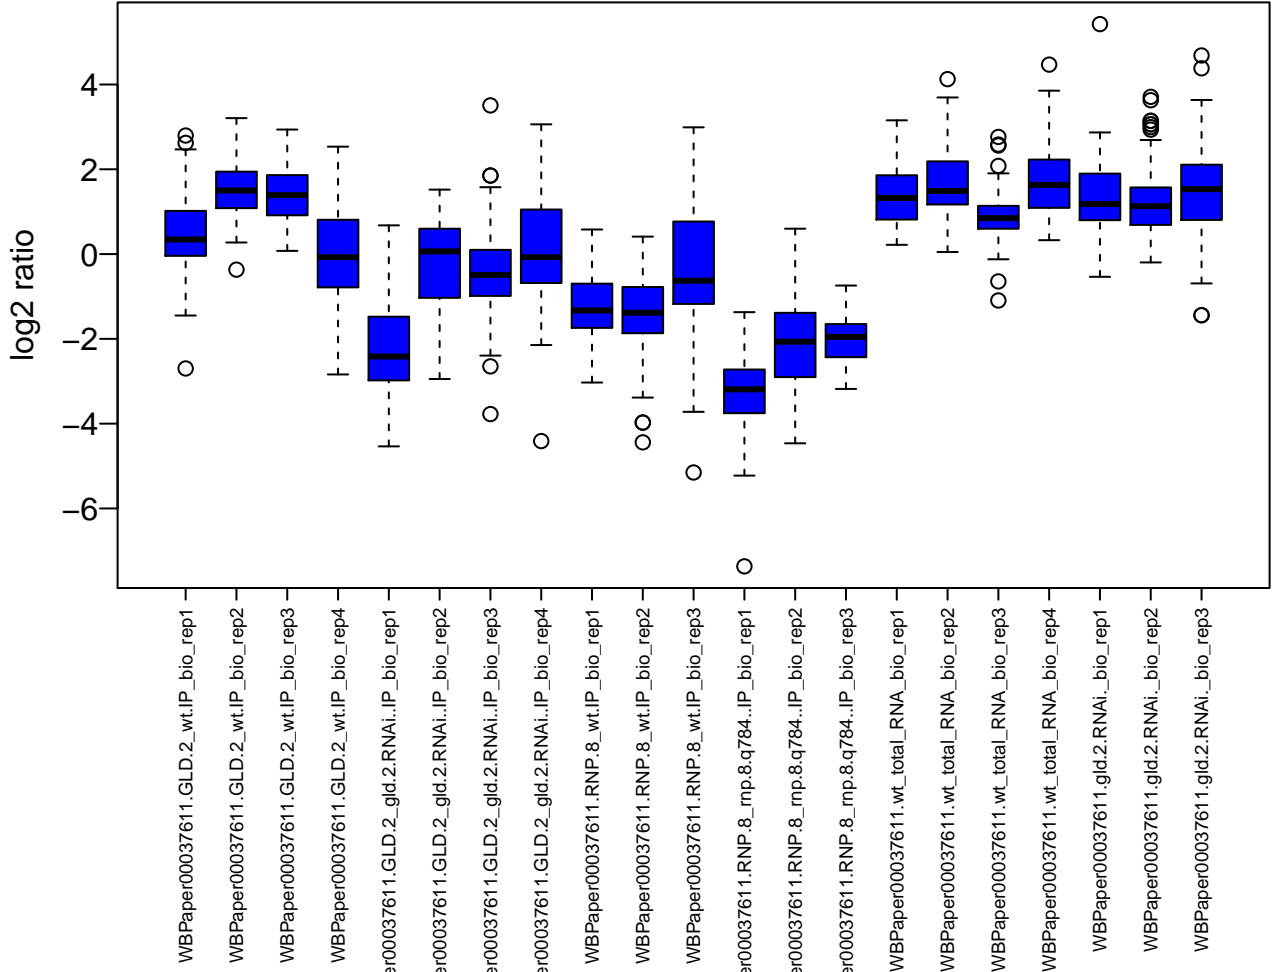

# WBPaper00037624

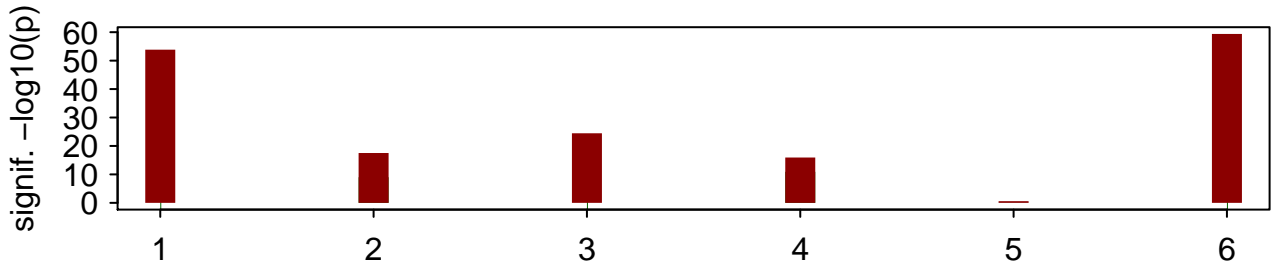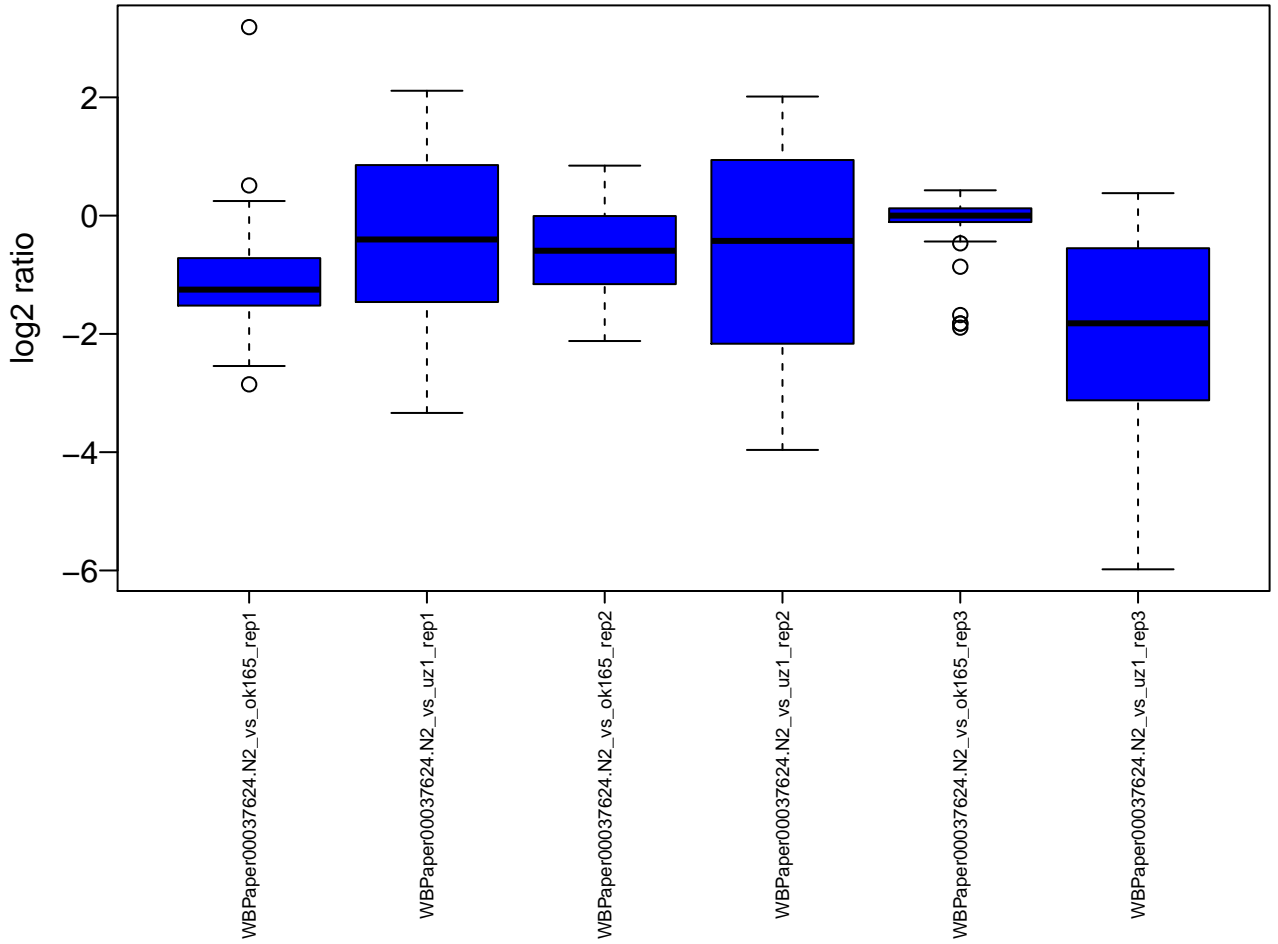

# WBPaper00037680

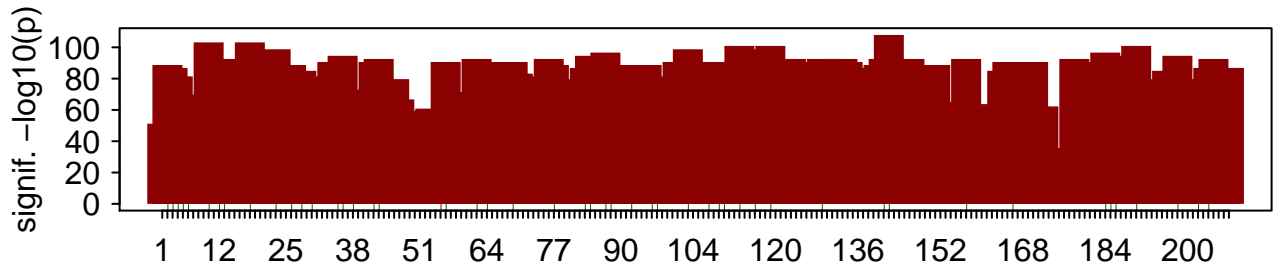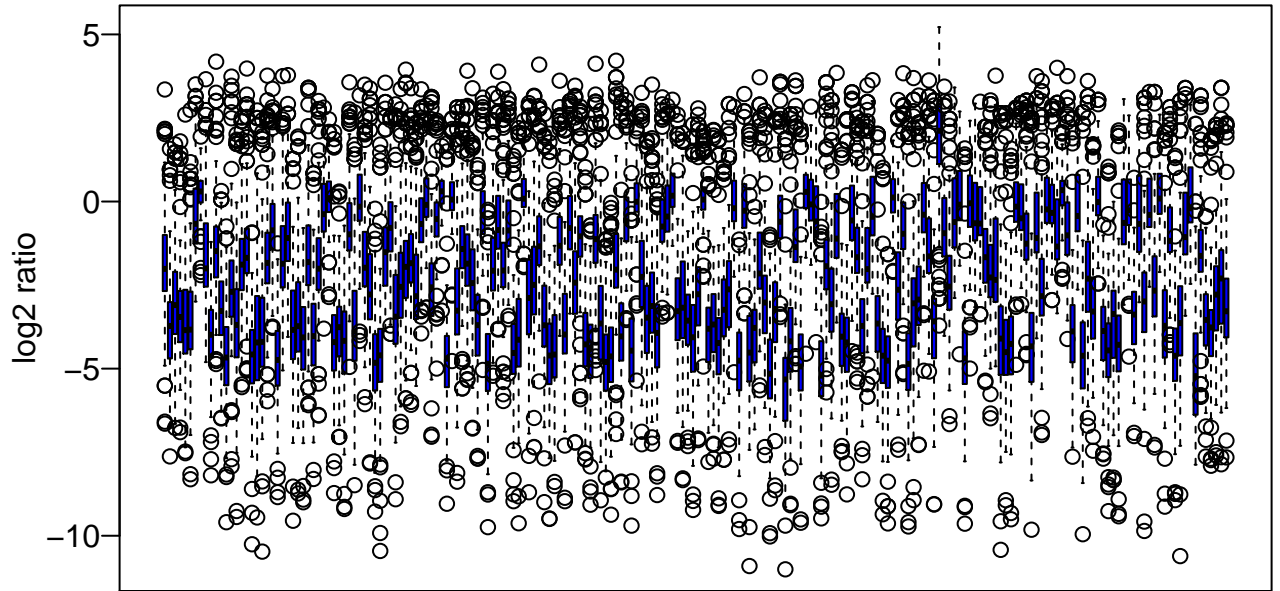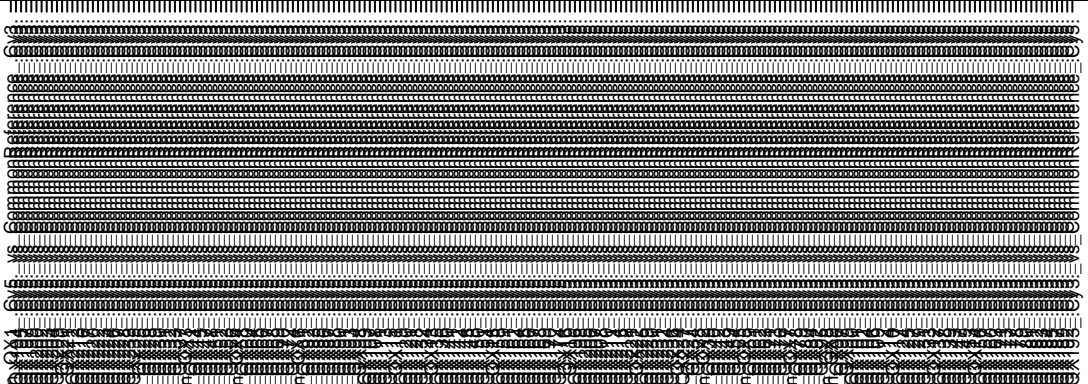

# WBPaper00037682

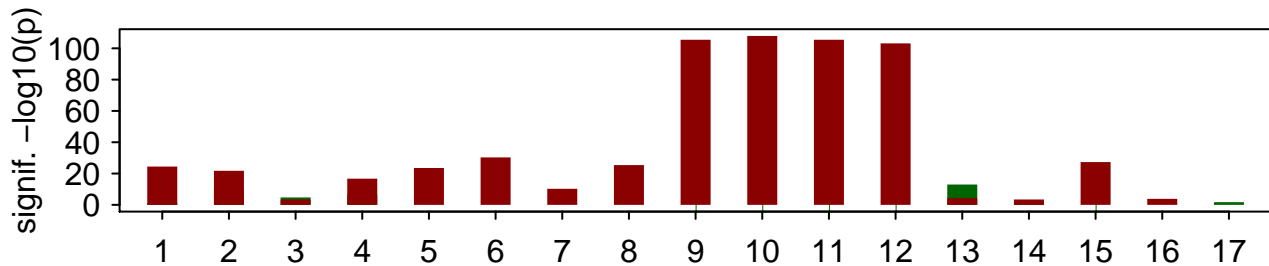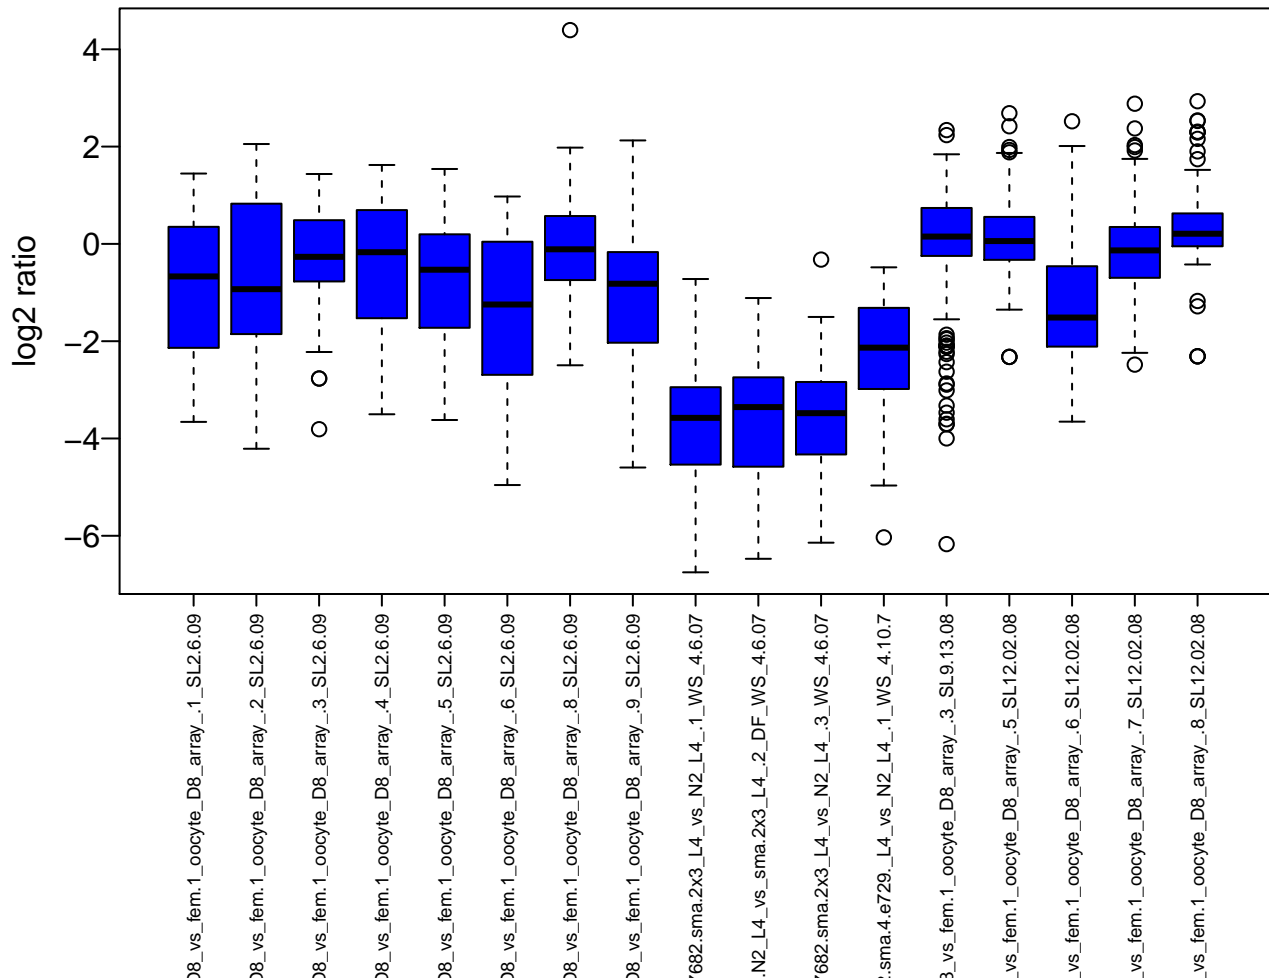

# WBPaper00037695

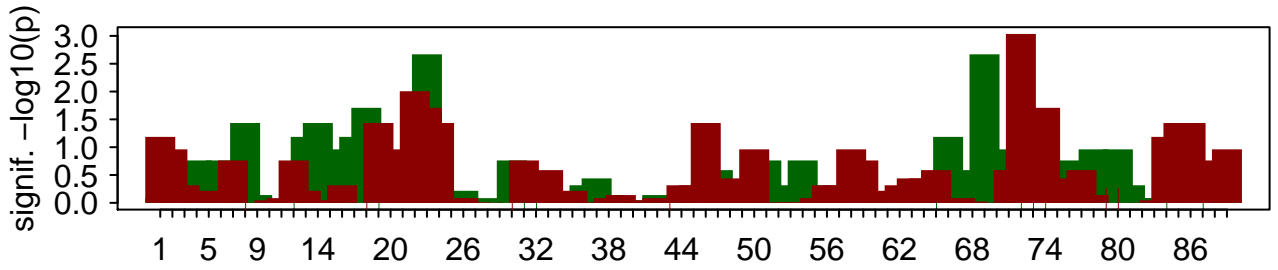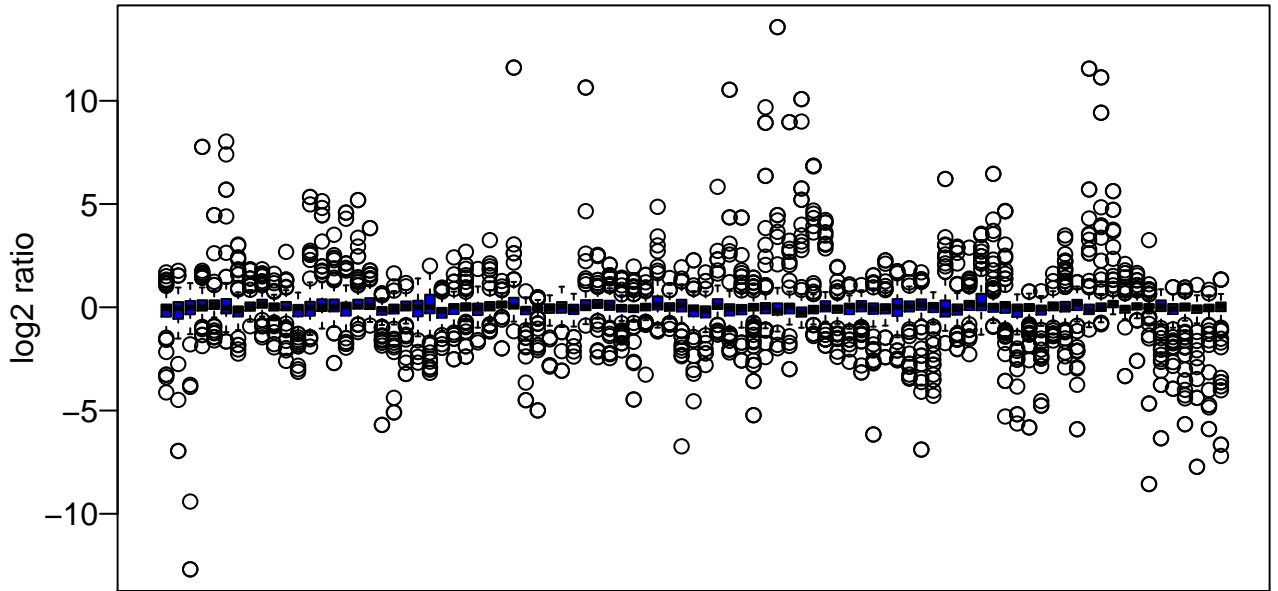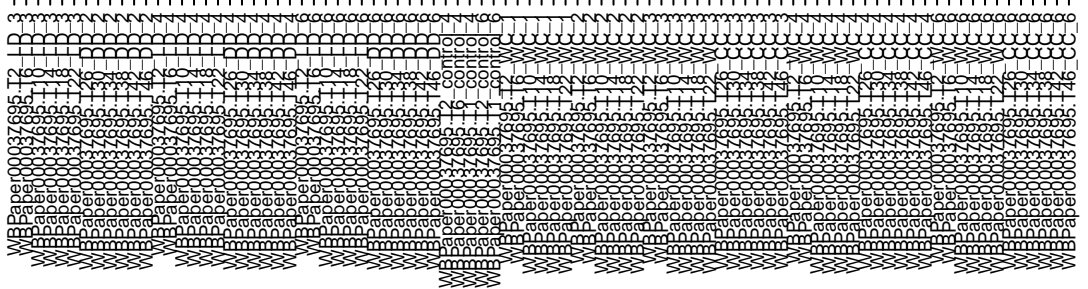

# WBPaper00037704

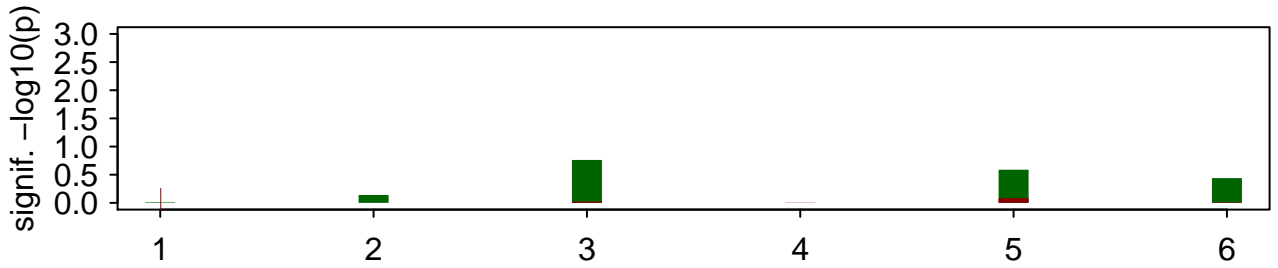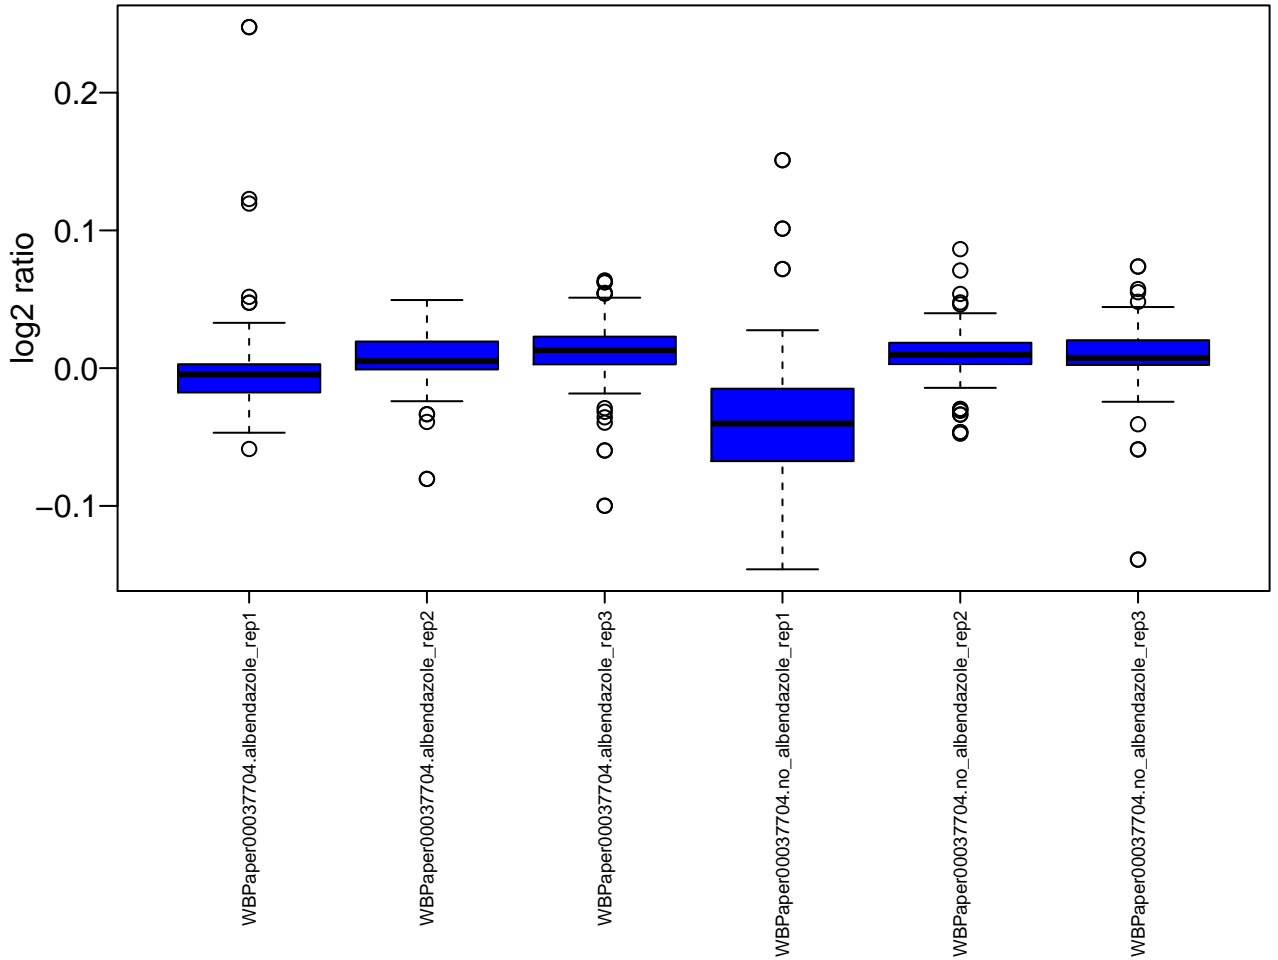

# WBPaper00037765

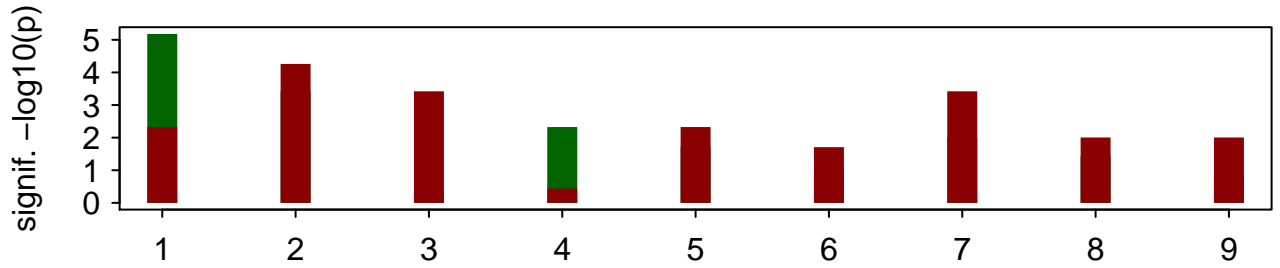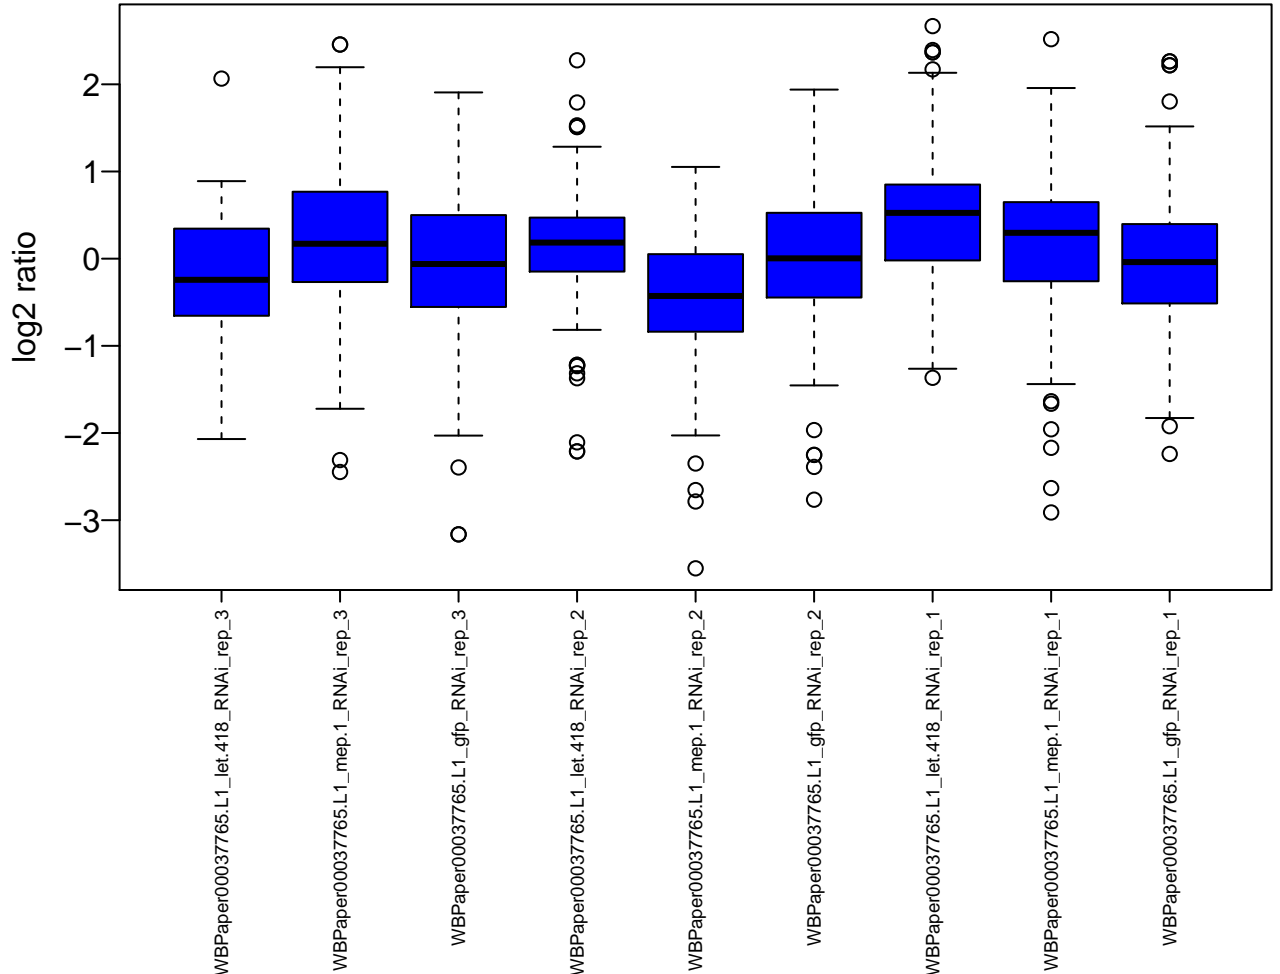

# WBPaper00037849

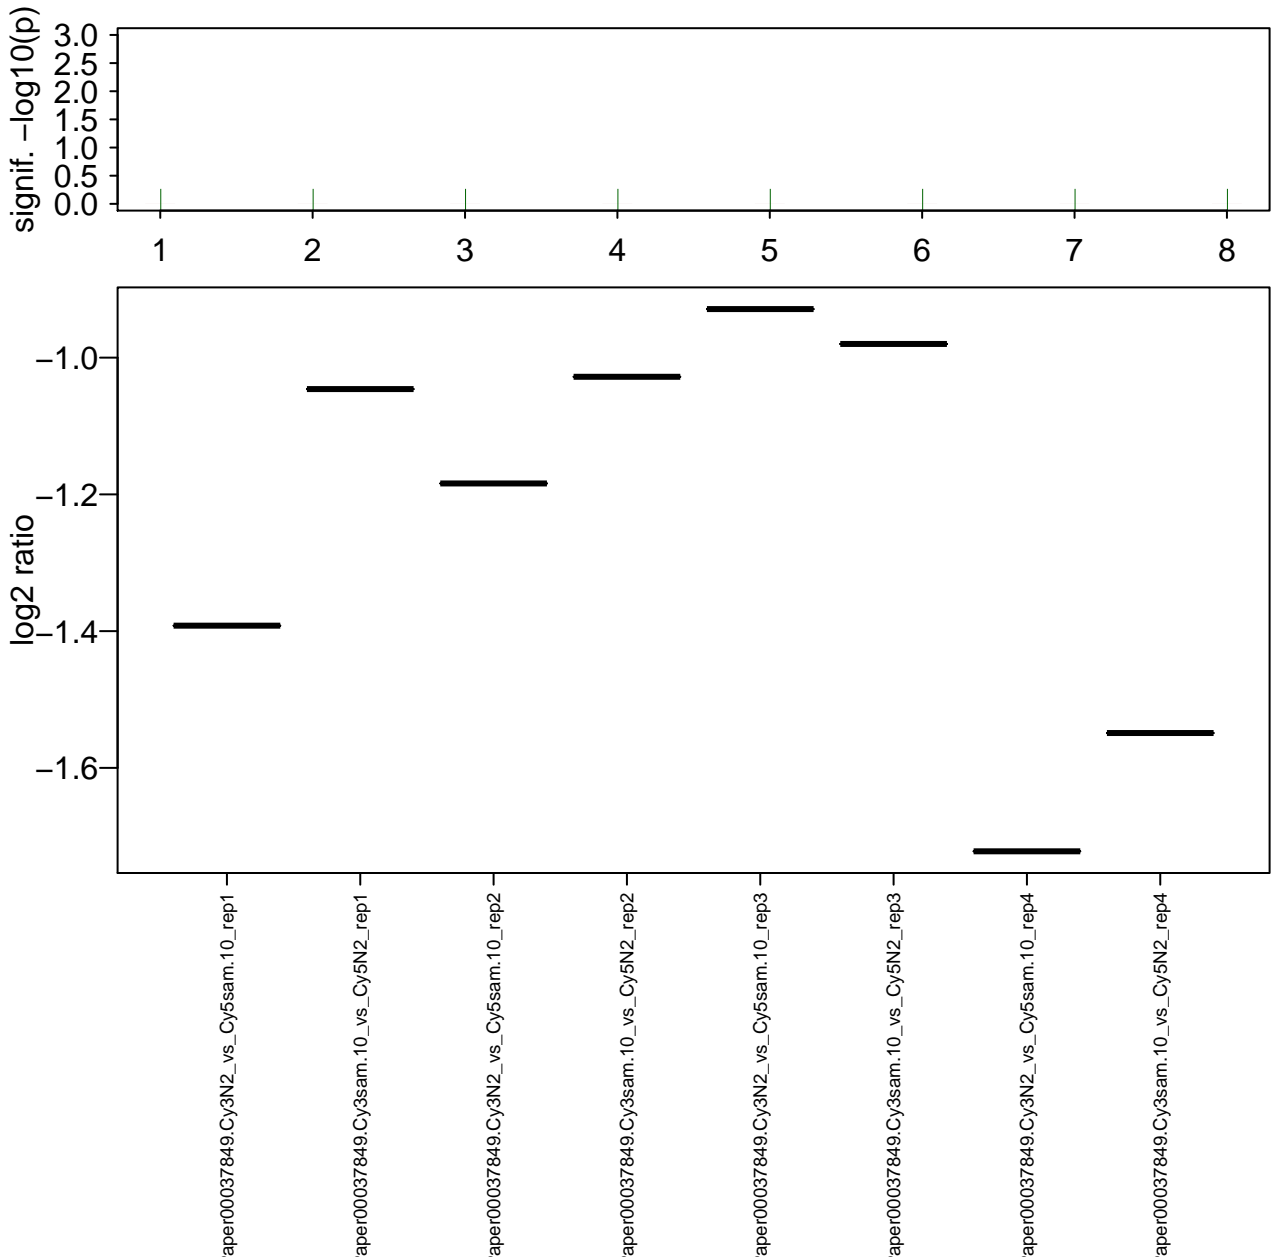



# WBPaper00037901

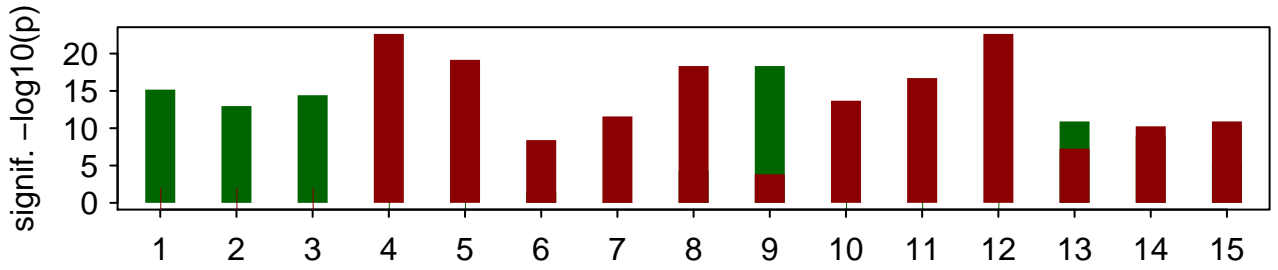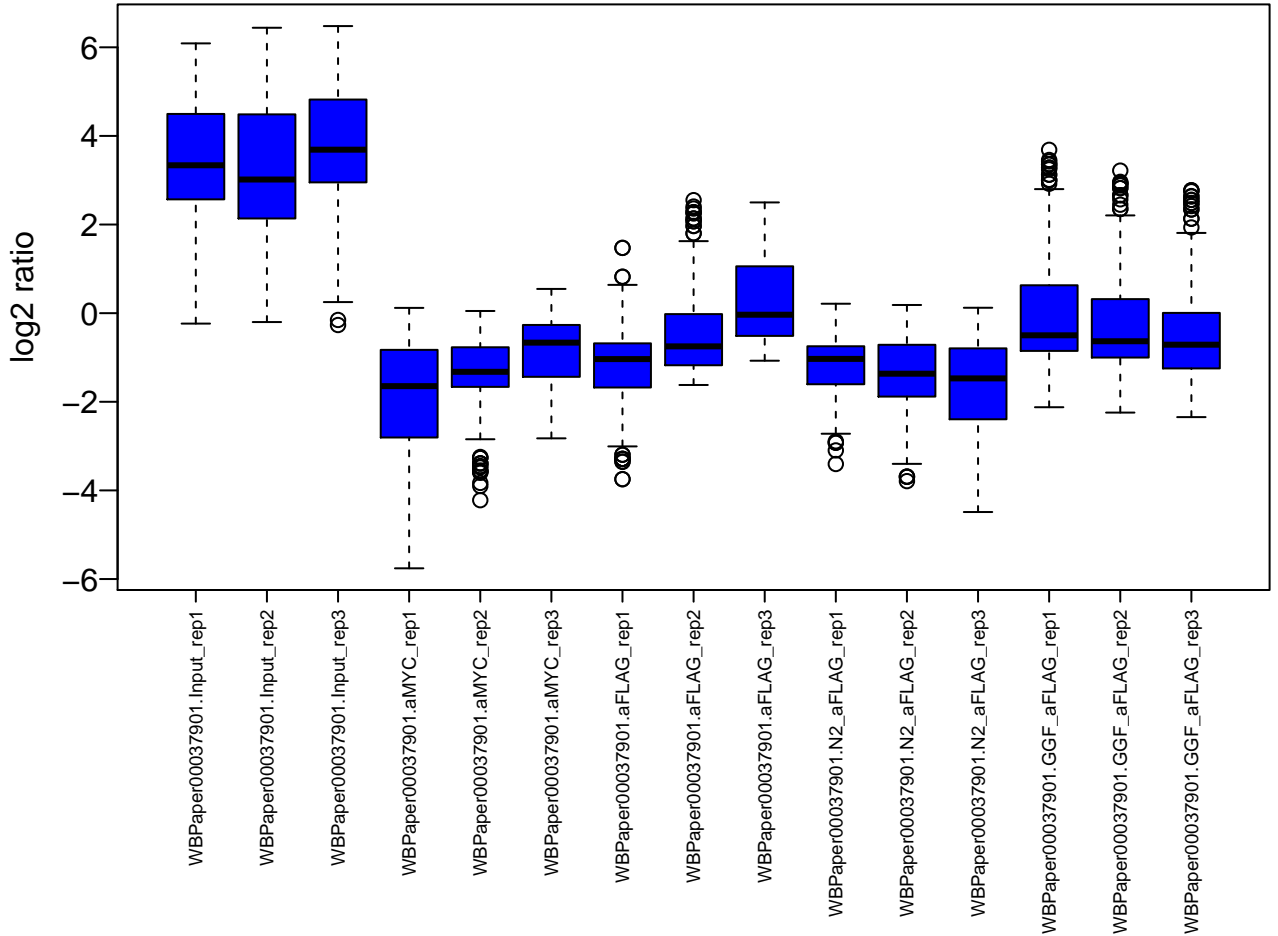

# WBPaper00038060

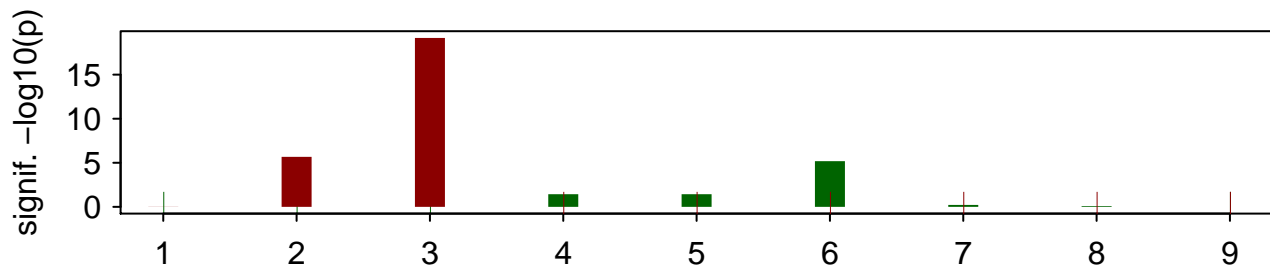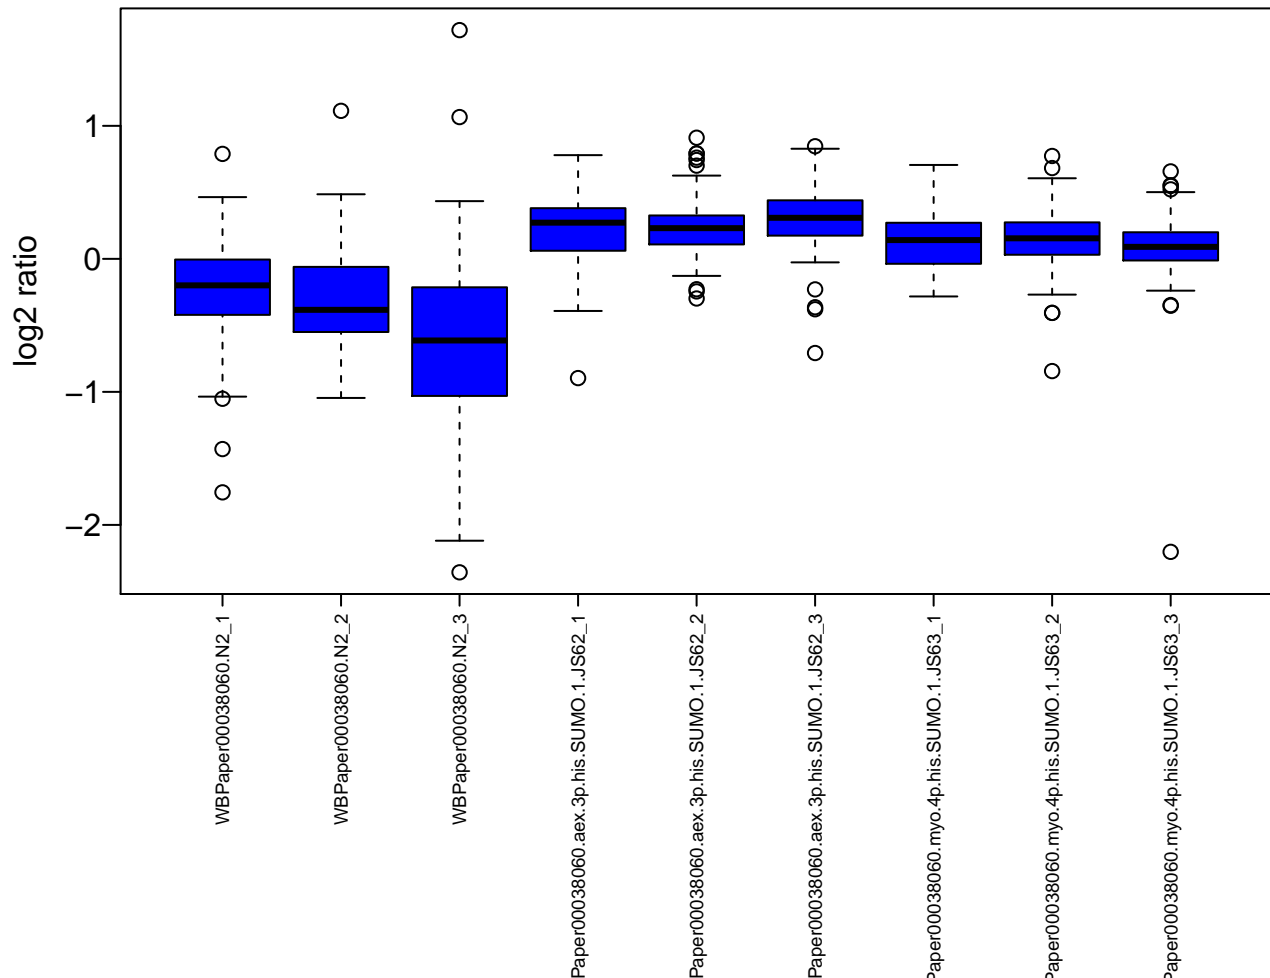

# WBPaper00038168

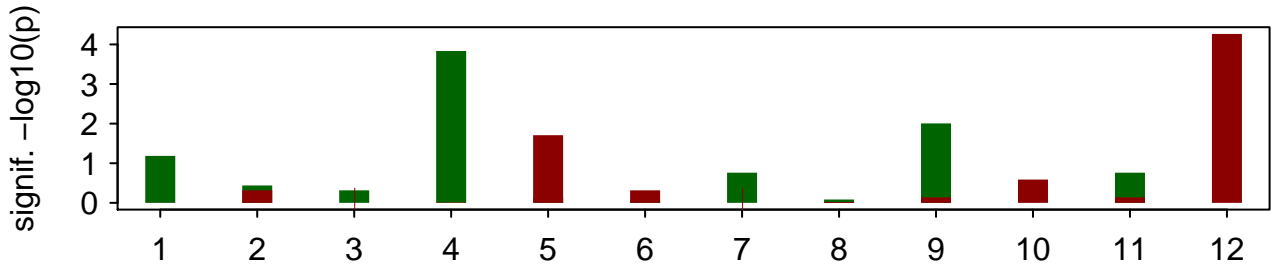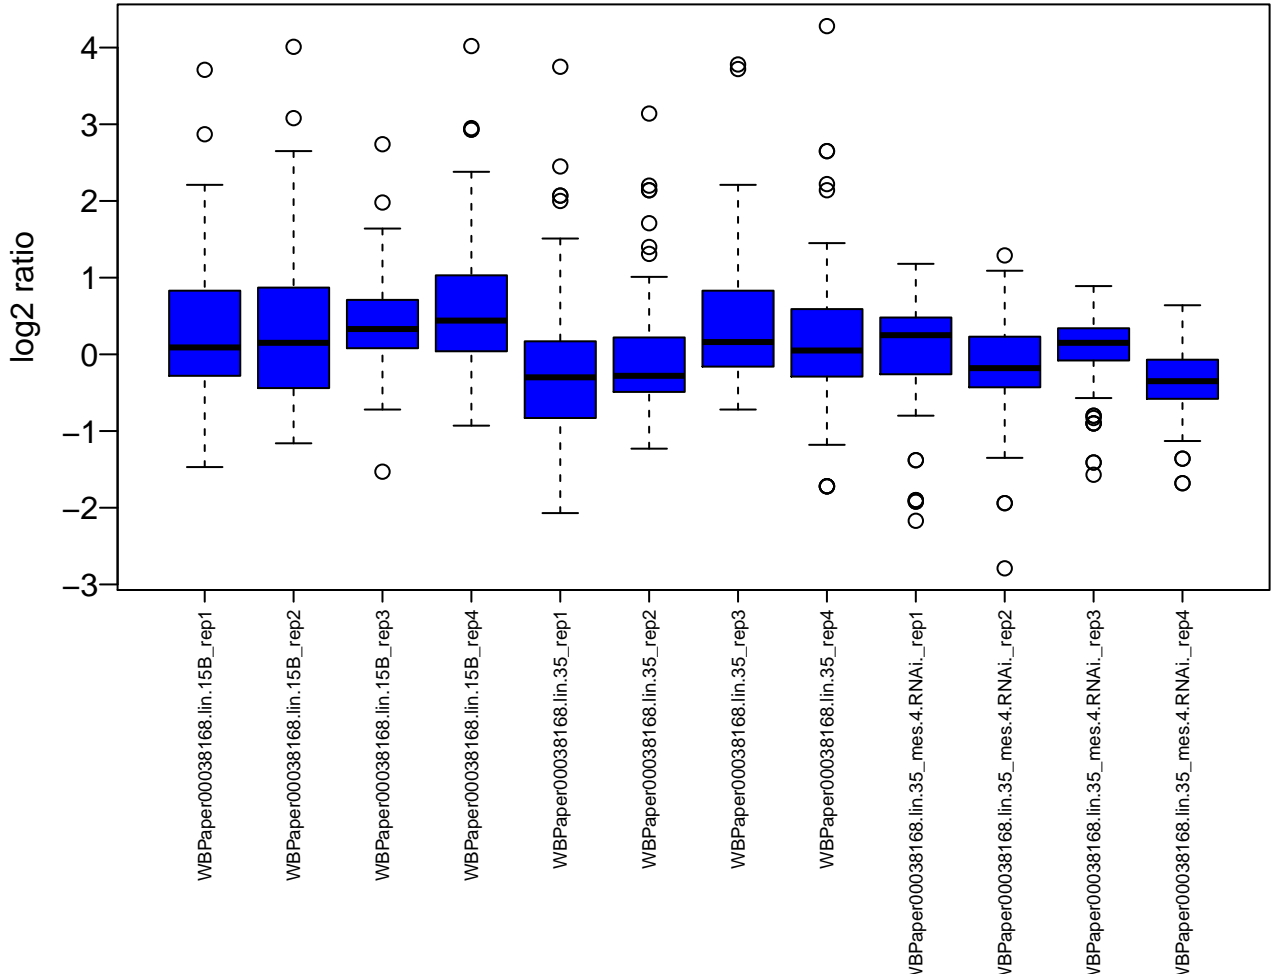

# WBPaper00038172

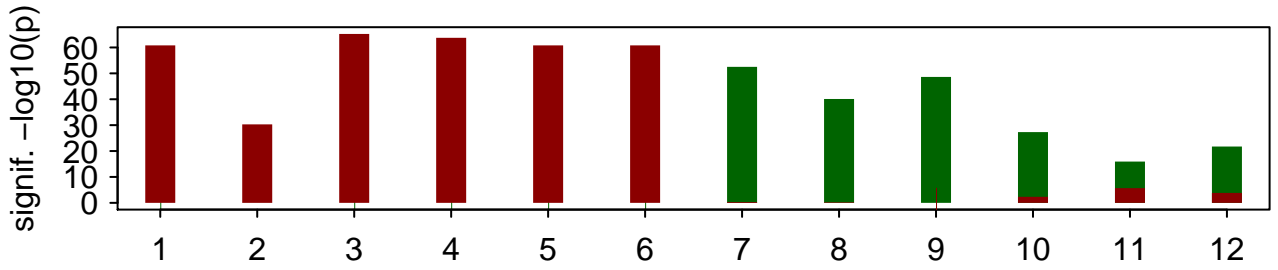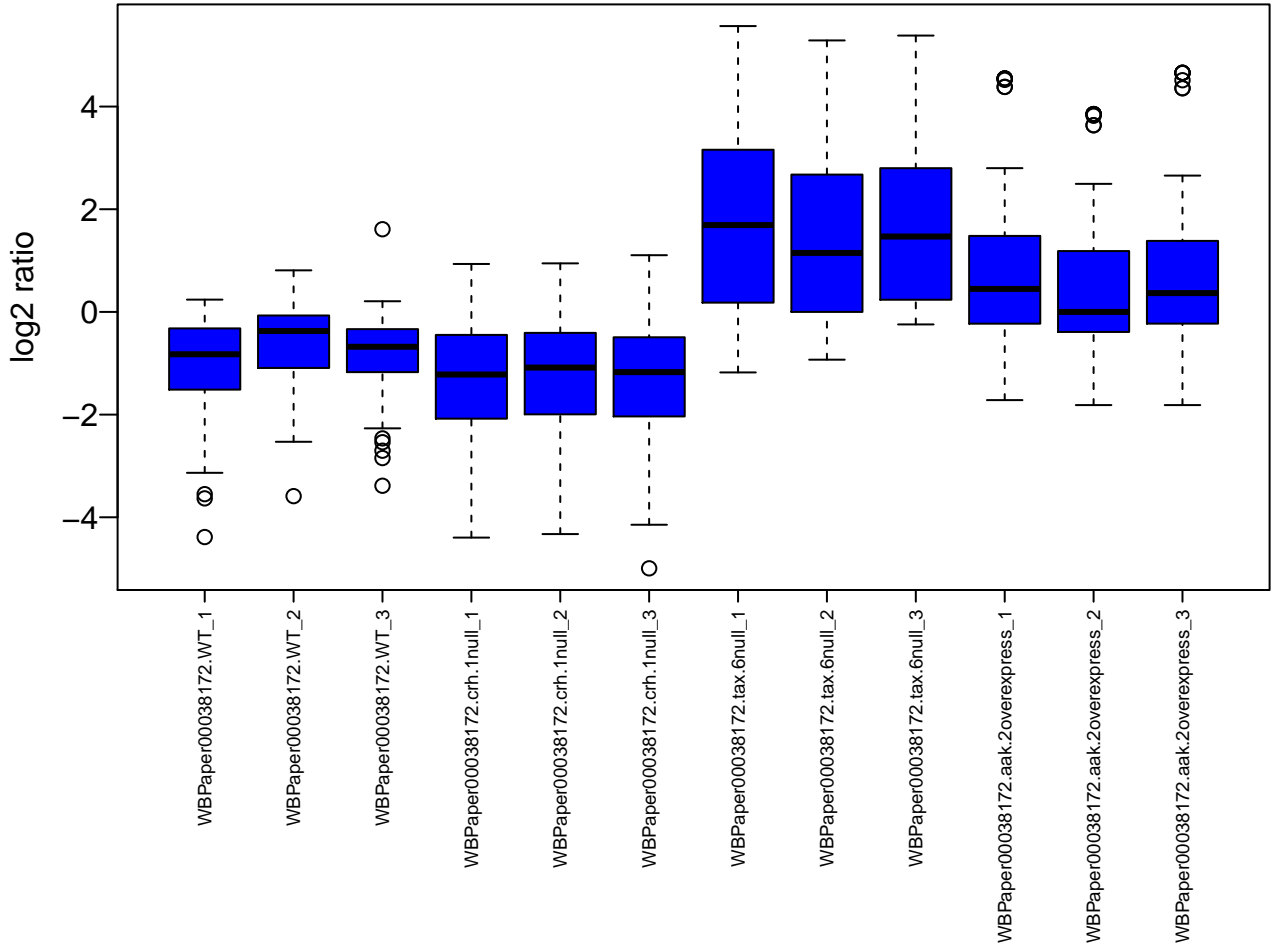

# WBPaper00038180

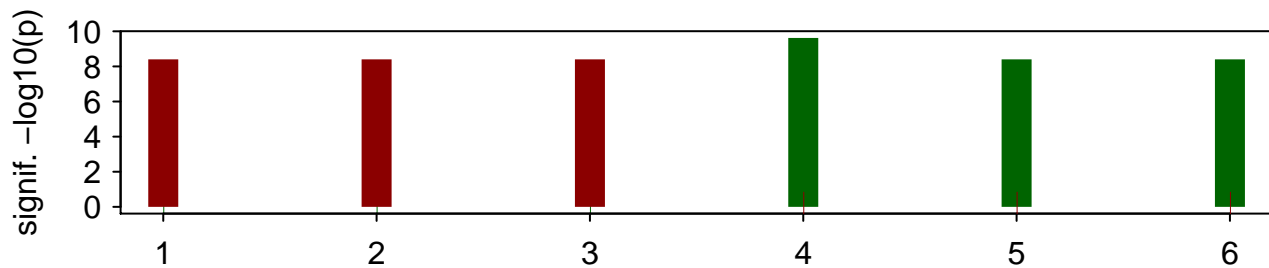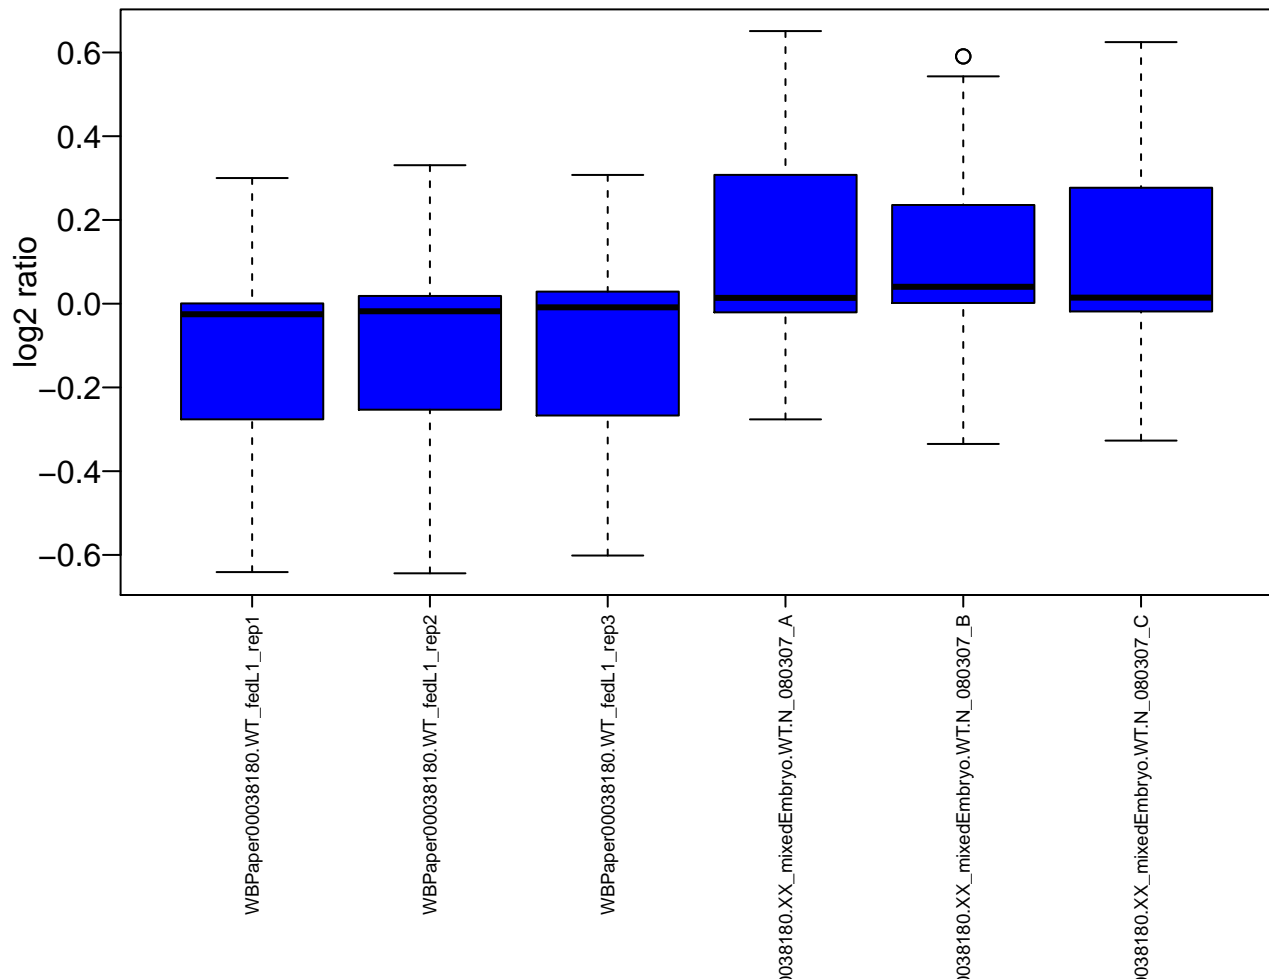

# WBPaper00038237

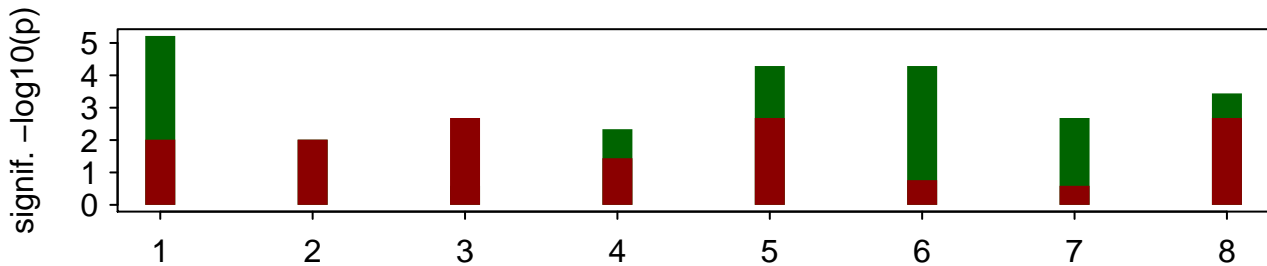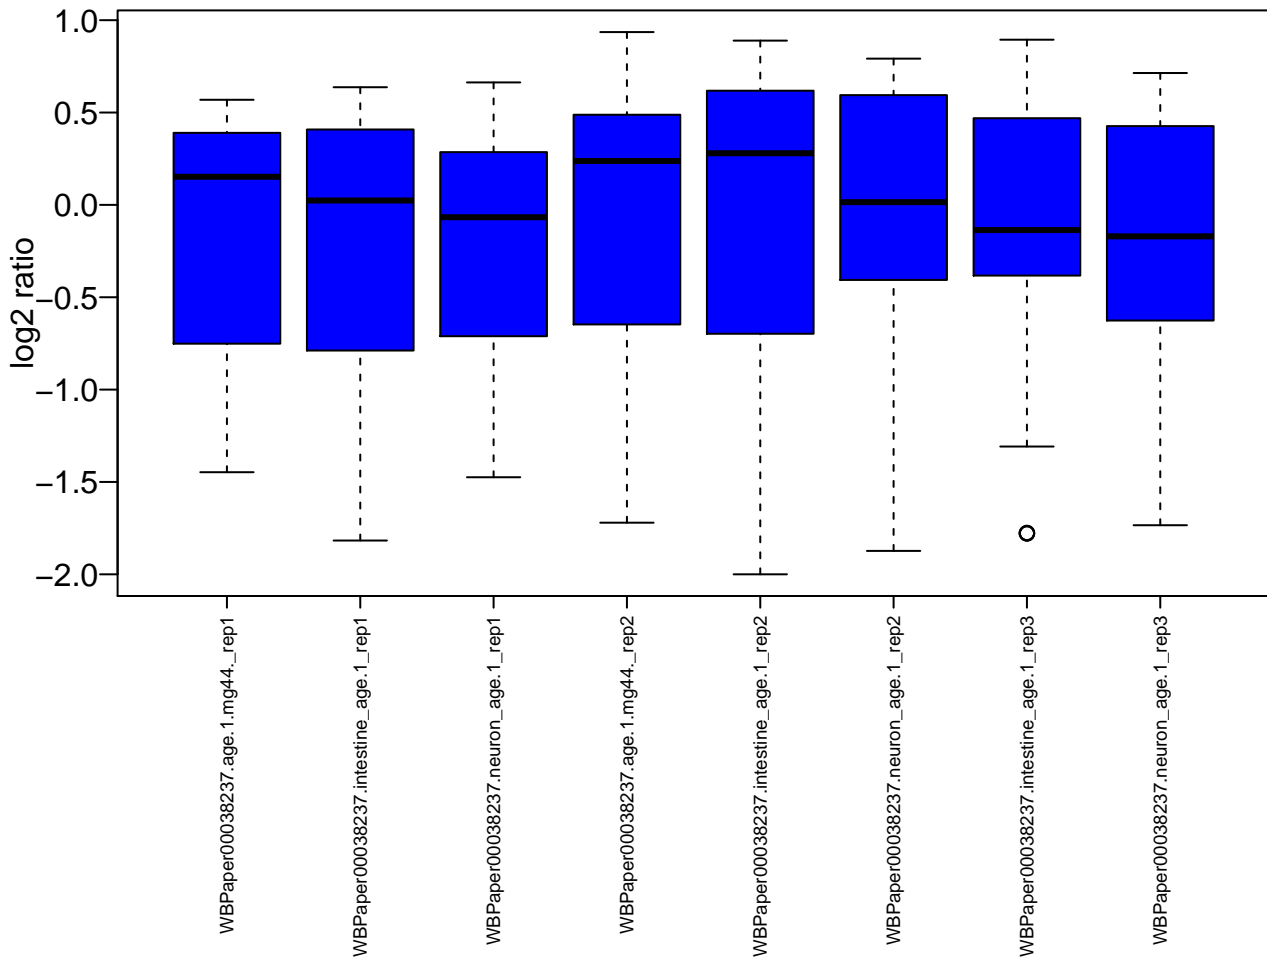

# WBPaper00038304

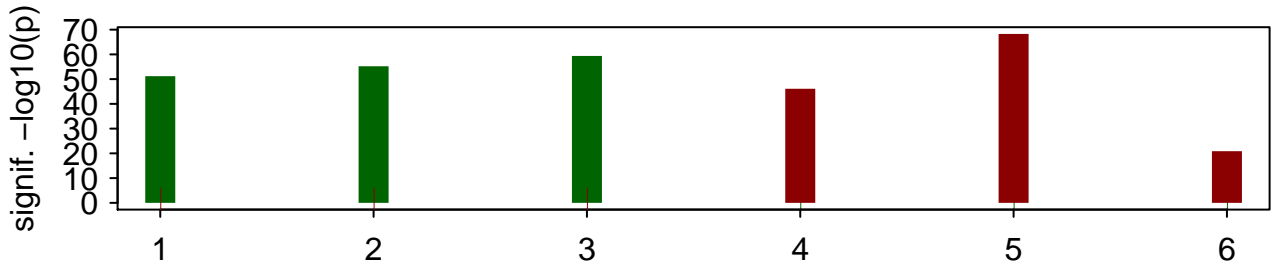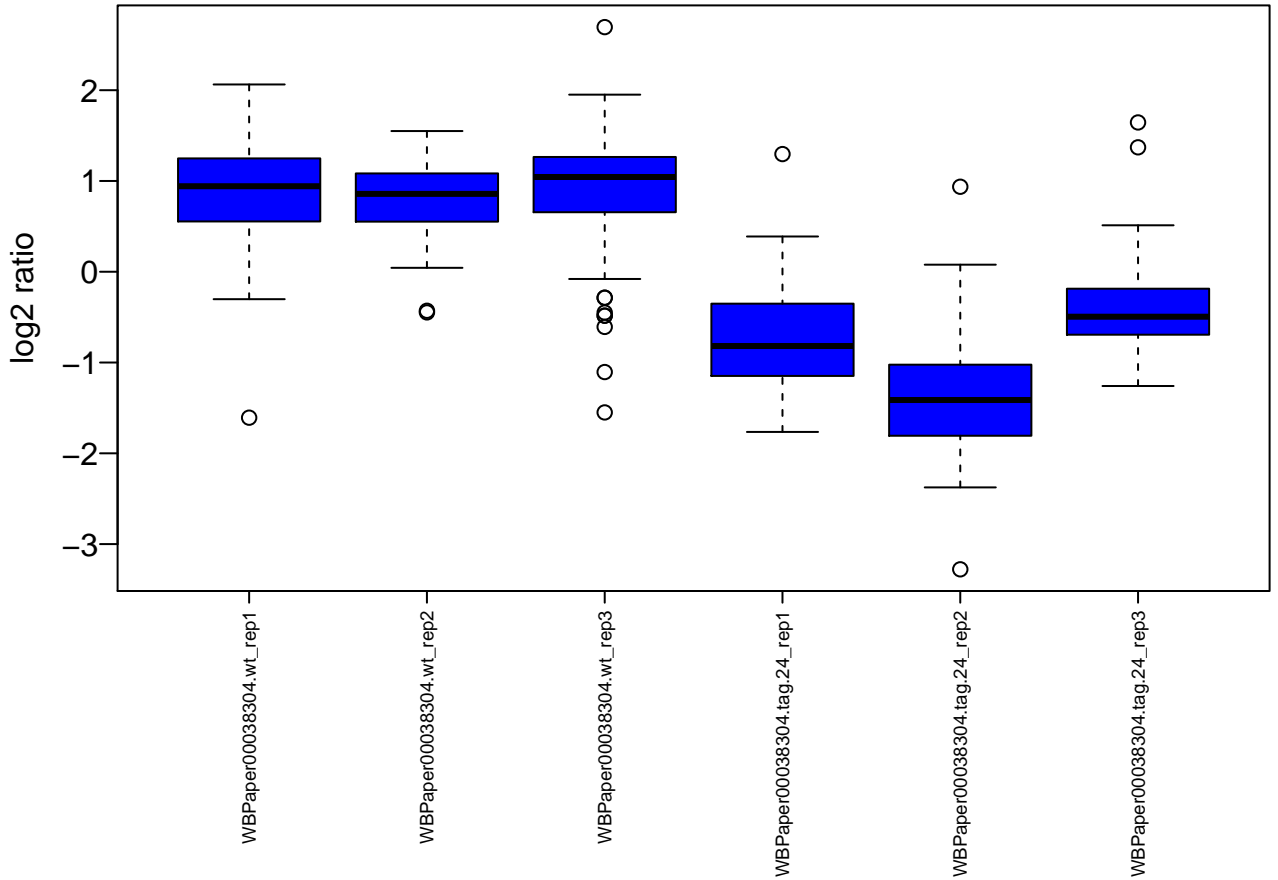

# WBPaper00038427

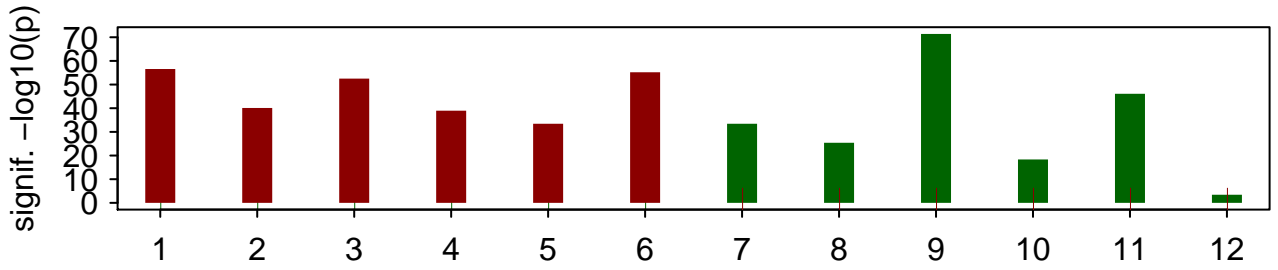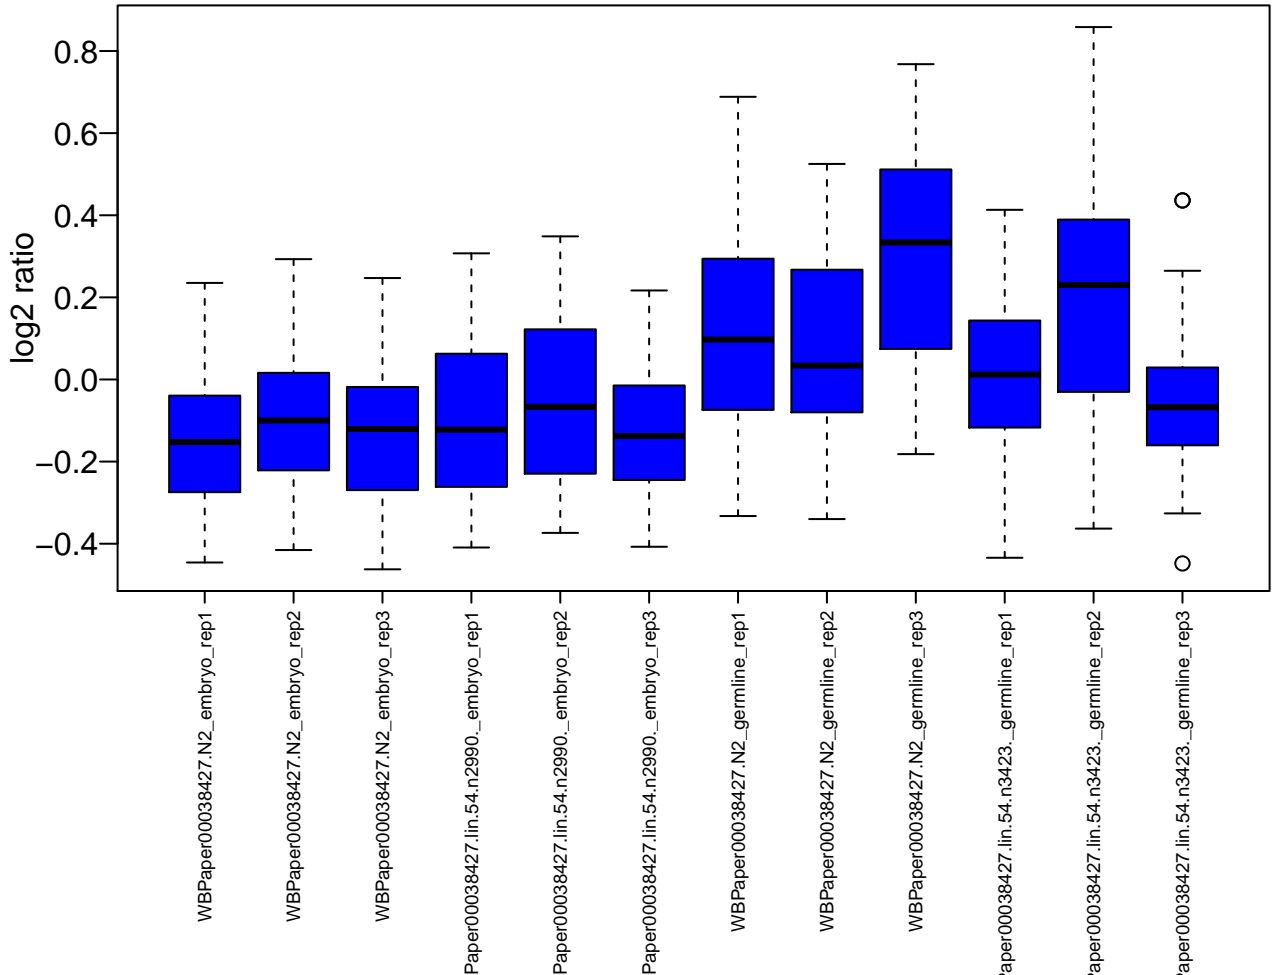



# WBPaper00038462

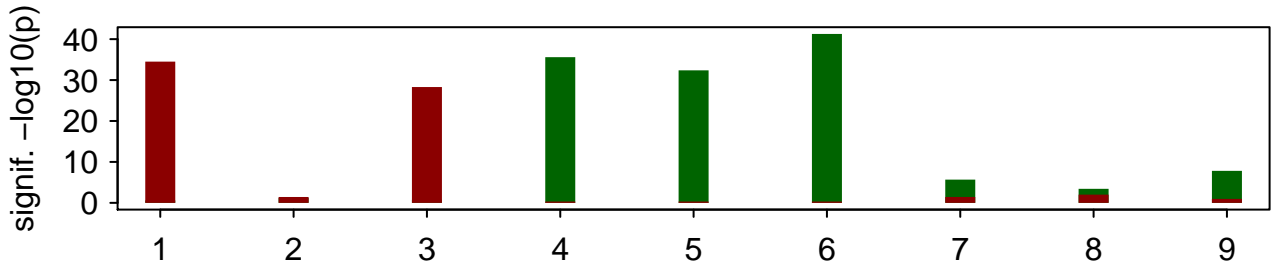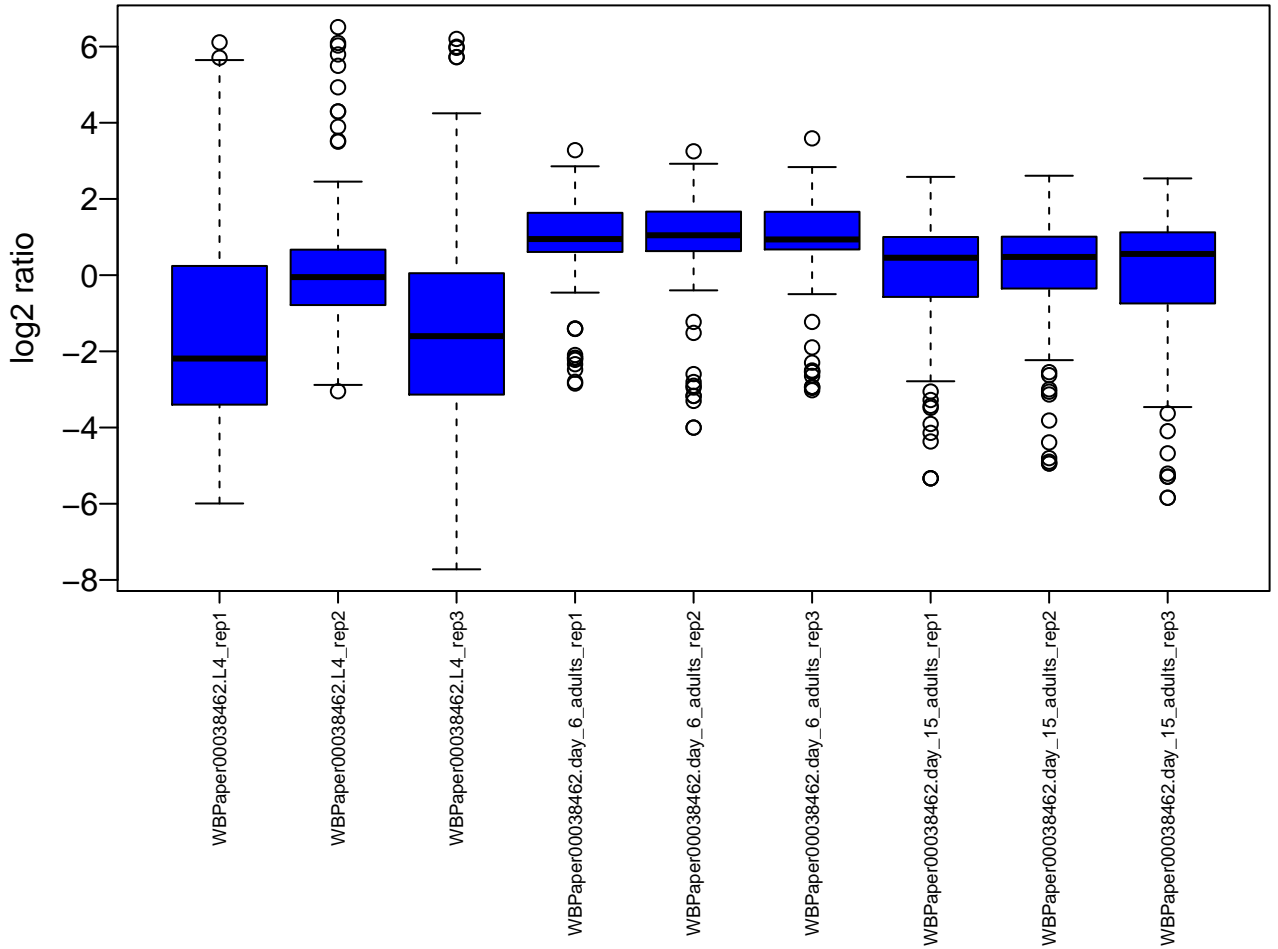

# WBPaper00038519

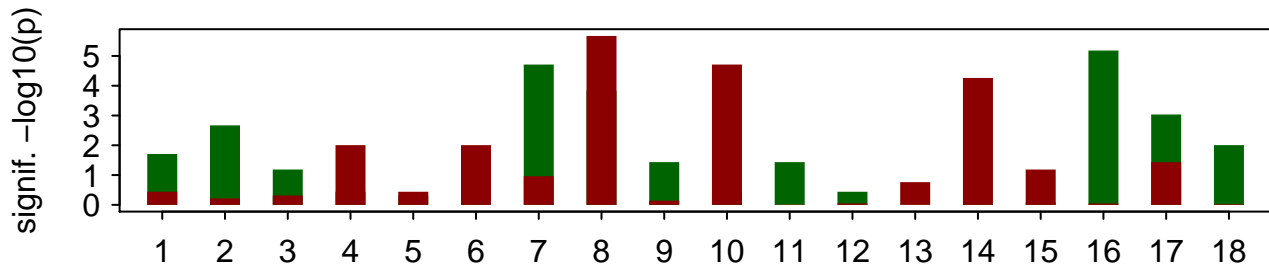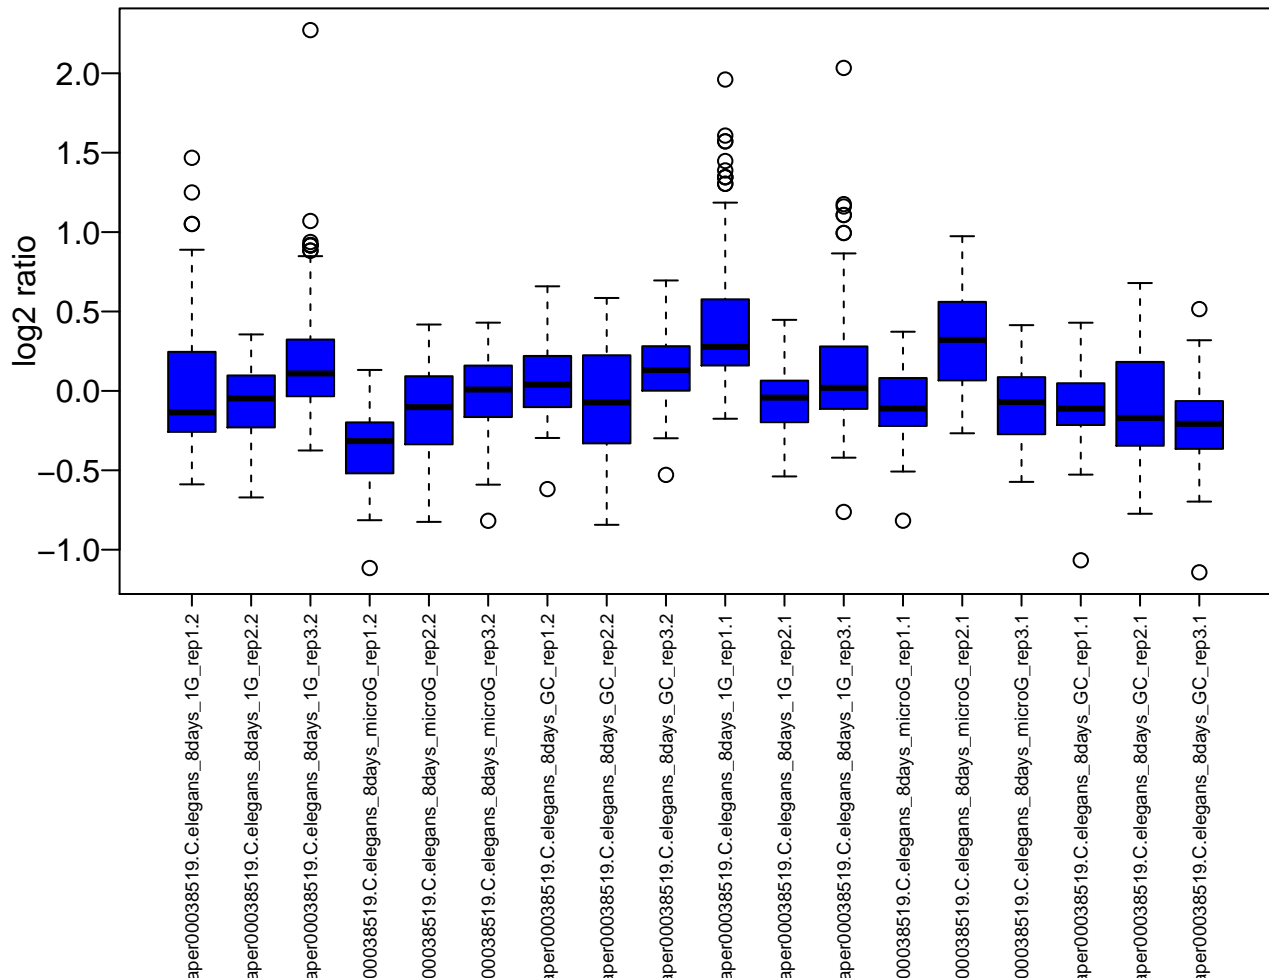

# WBPaper00039792

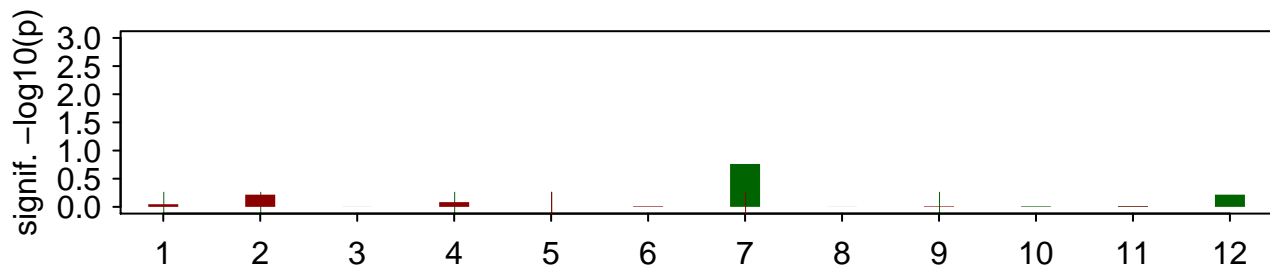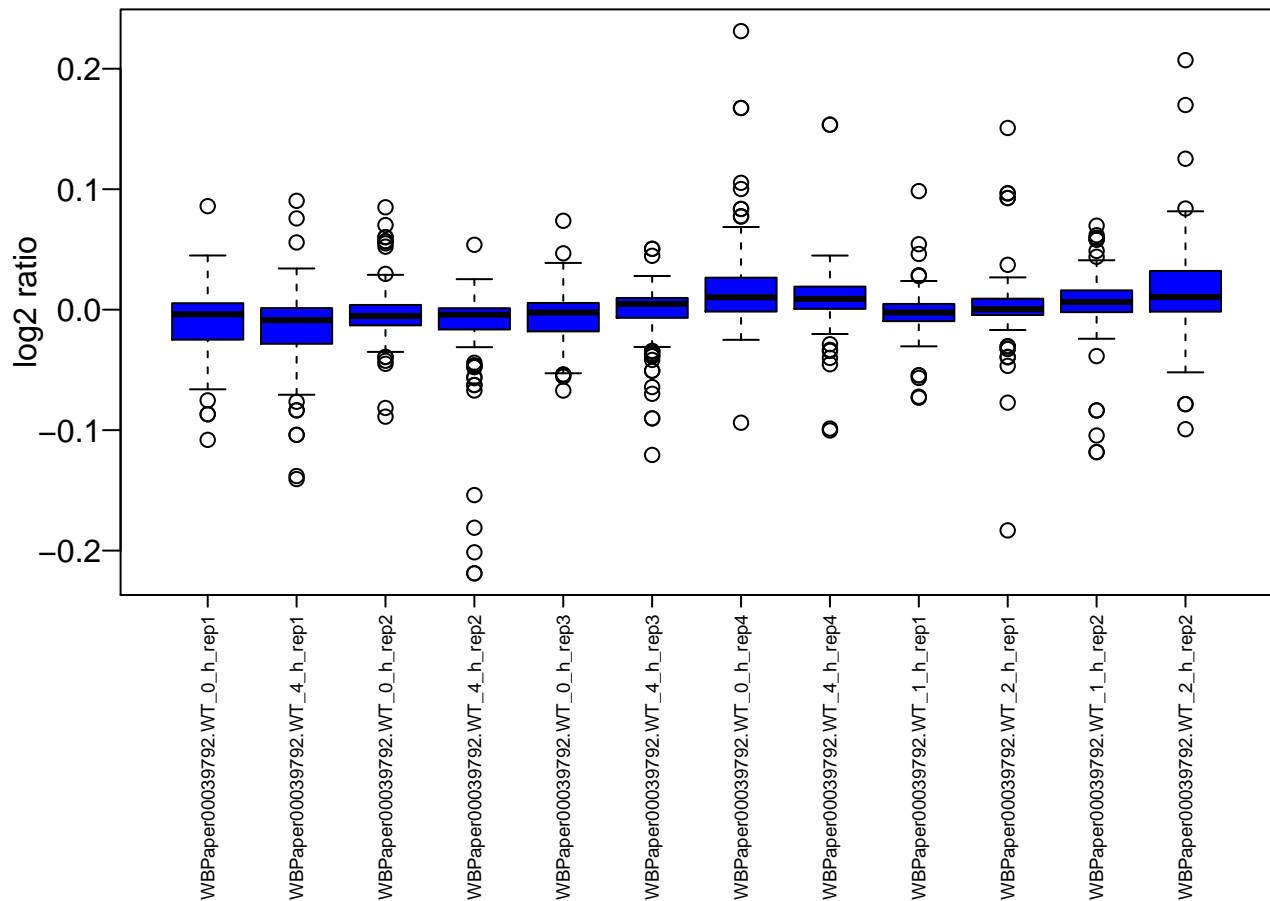

# WBPaper00039835

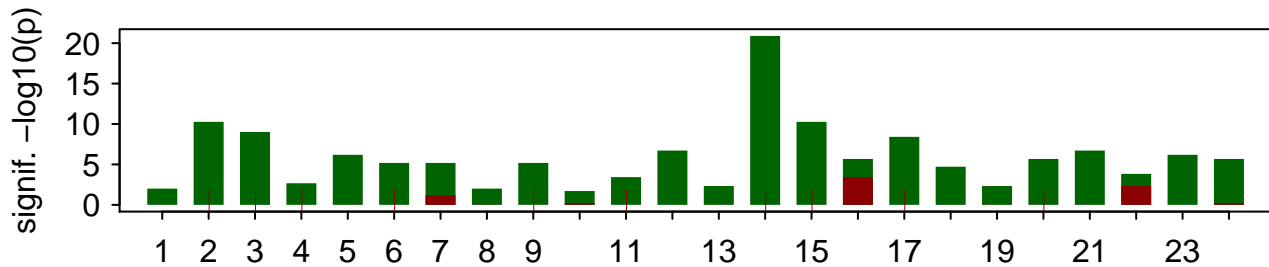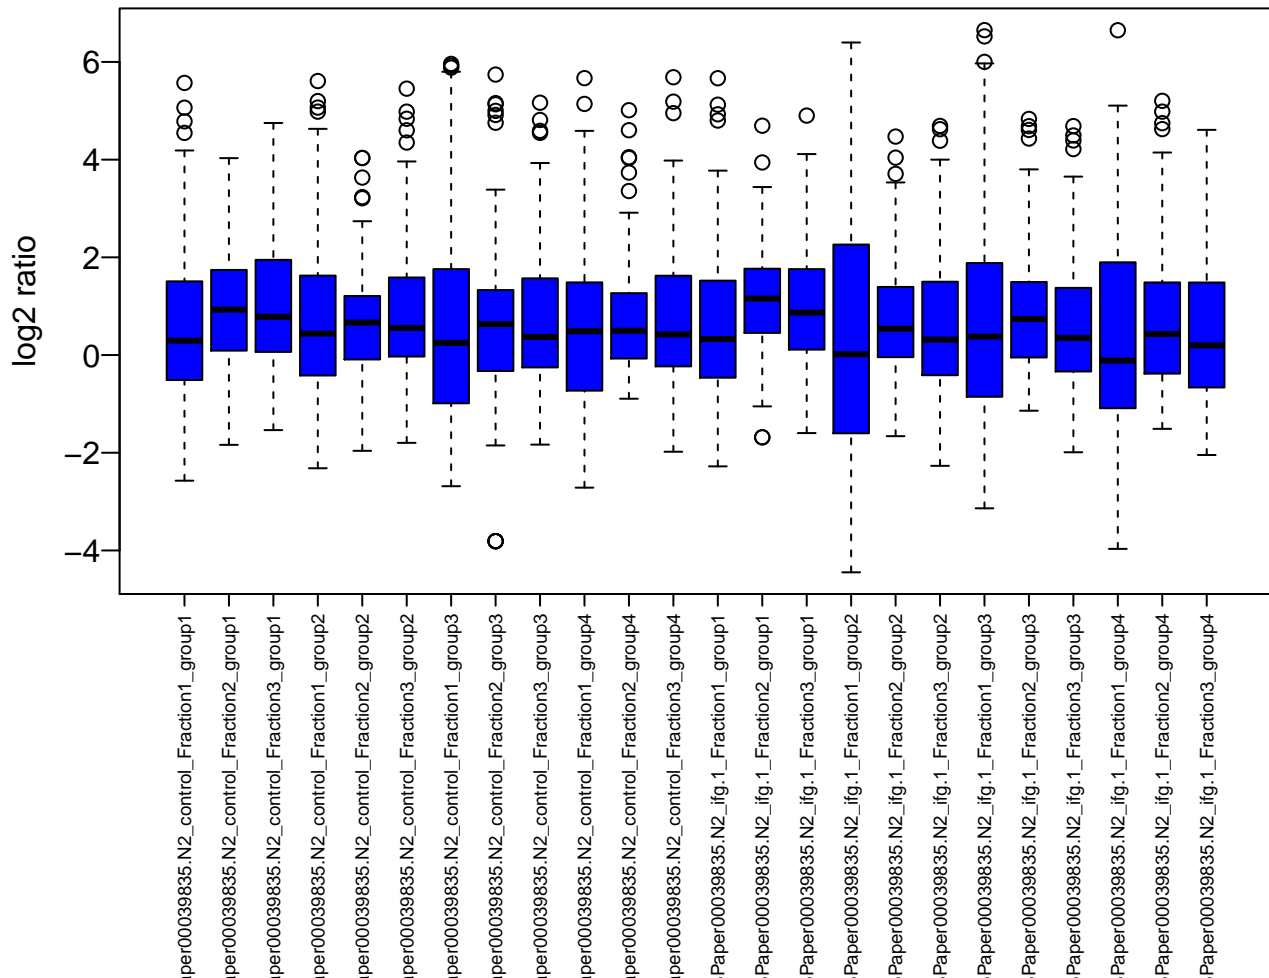

# WBPaper00039851

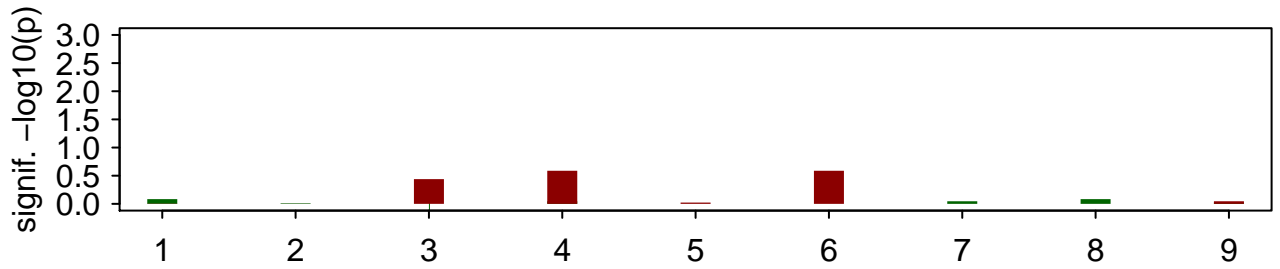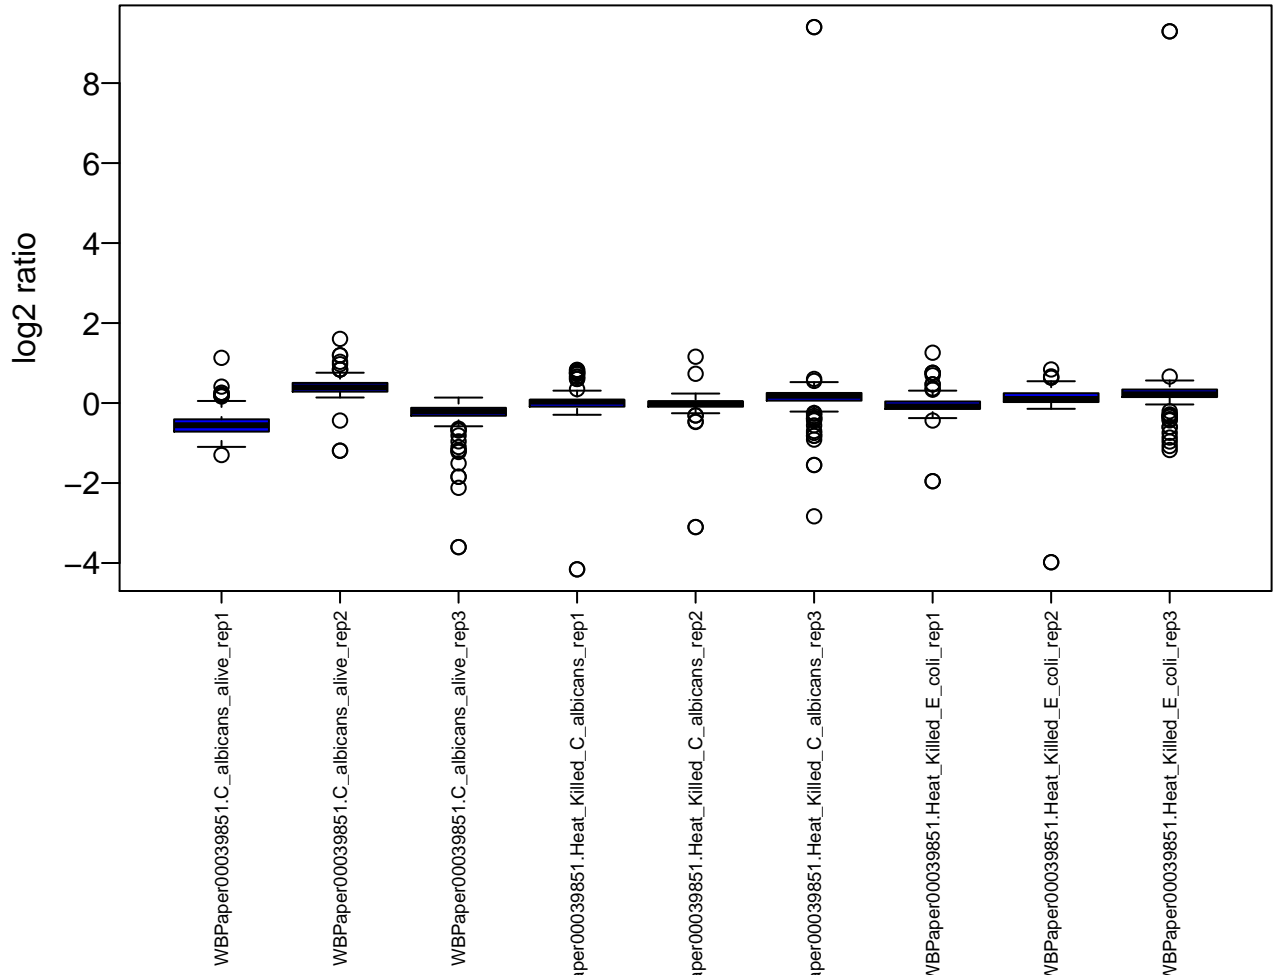

# WBPaper00039866

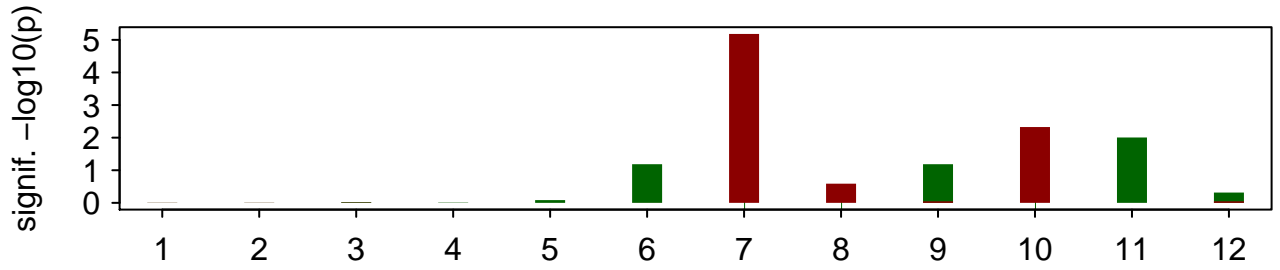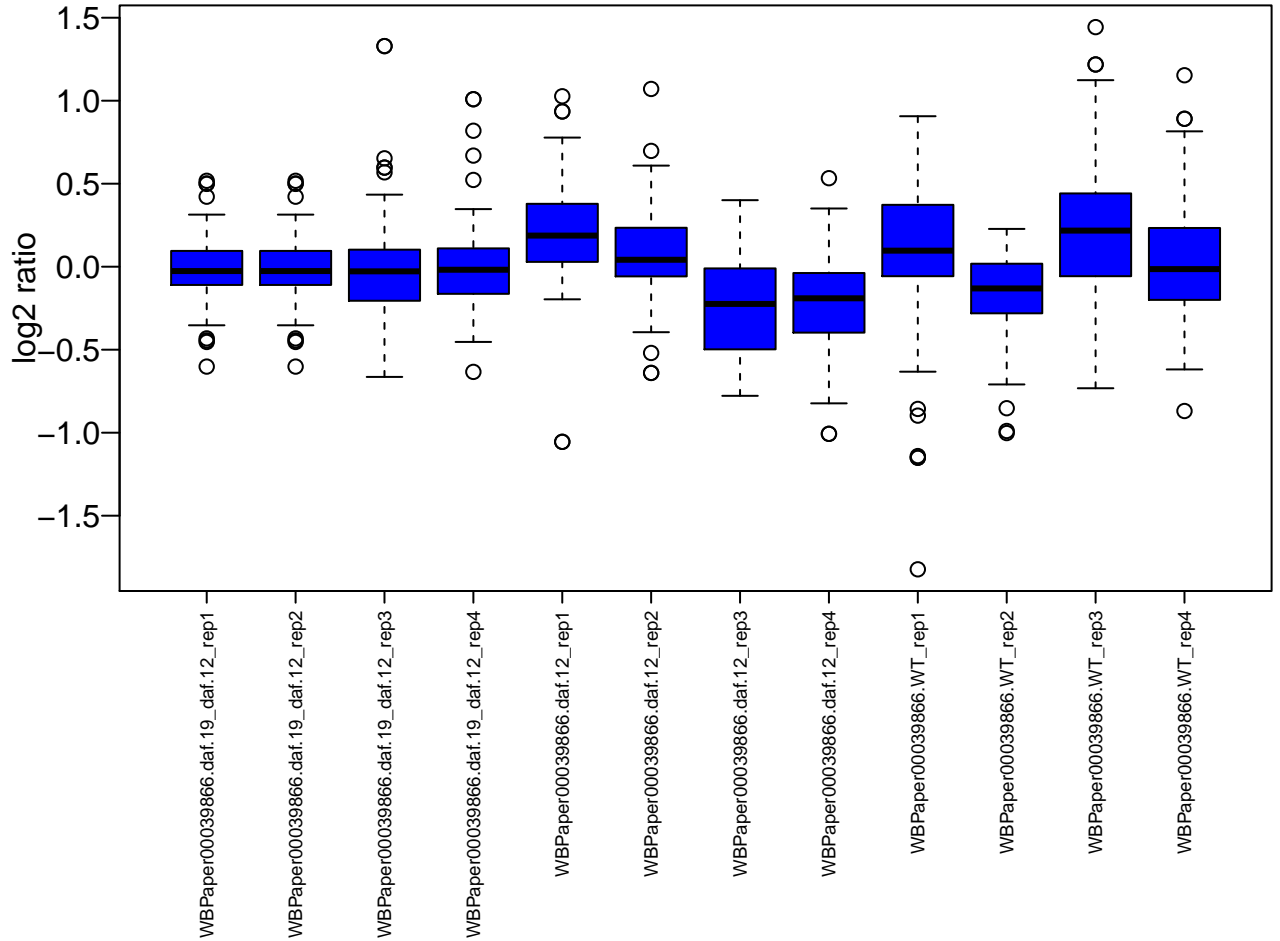

# WBPaper00039878

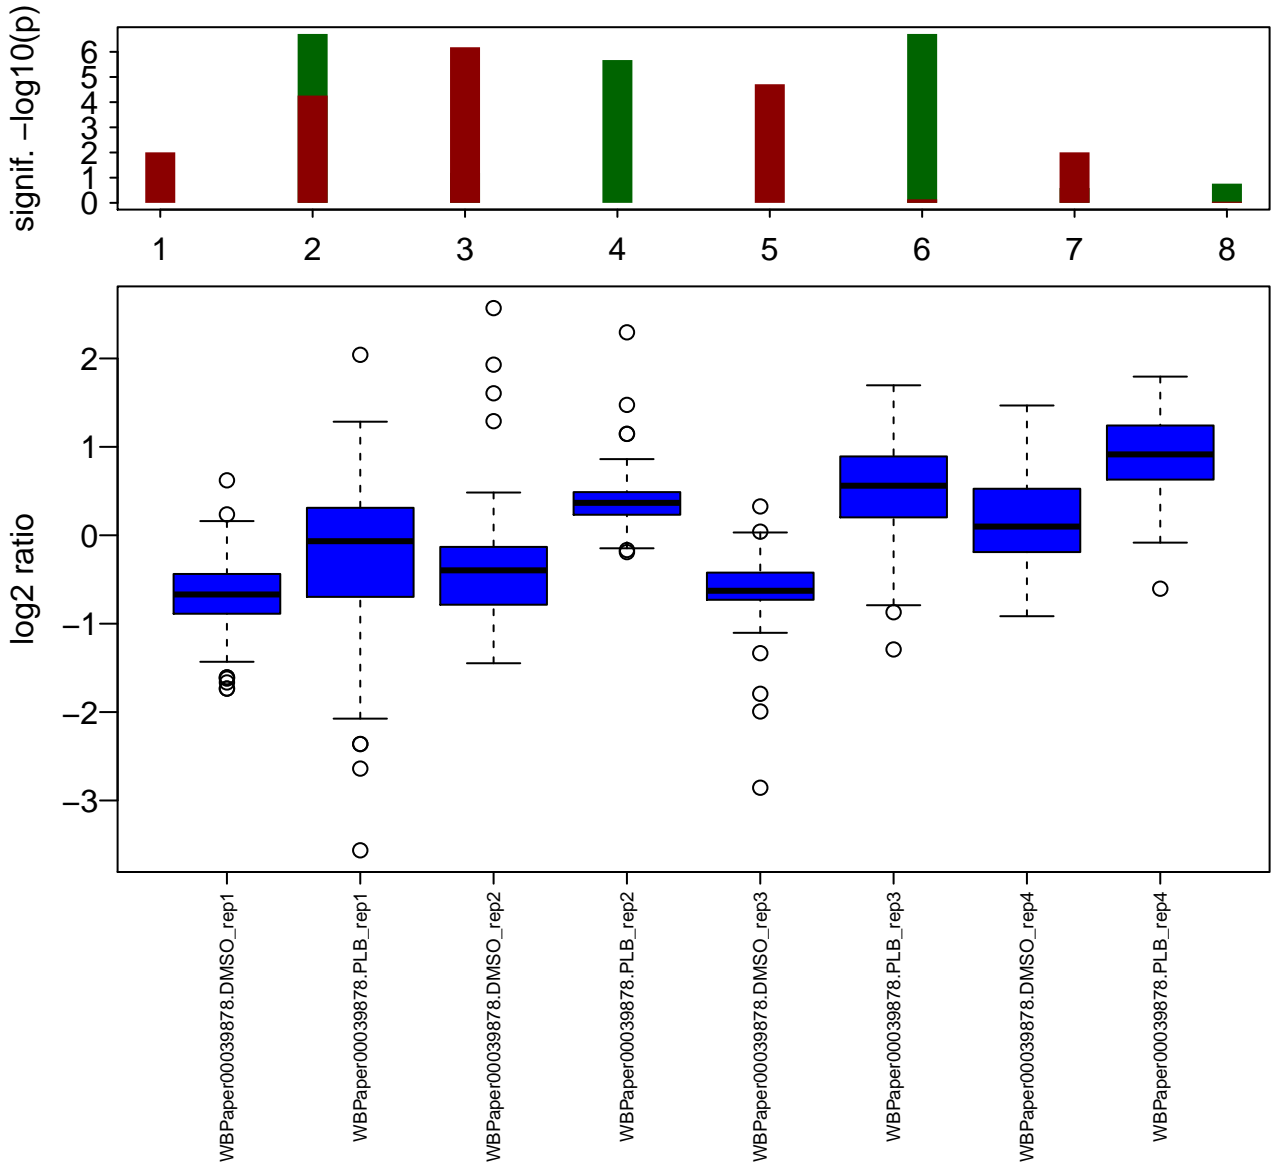

# WBPaper00040116

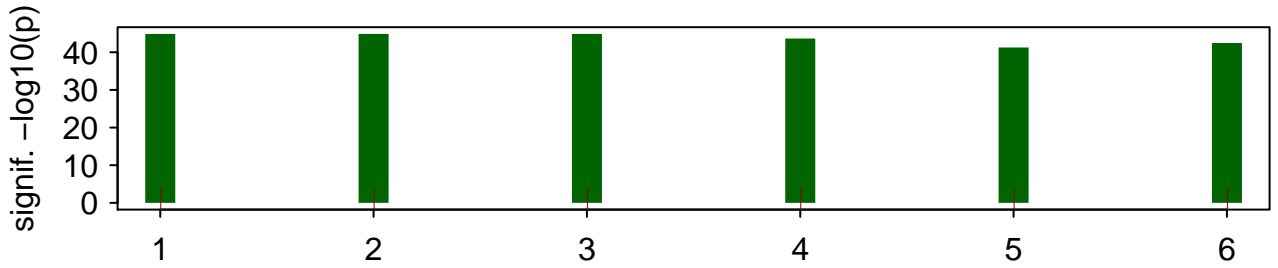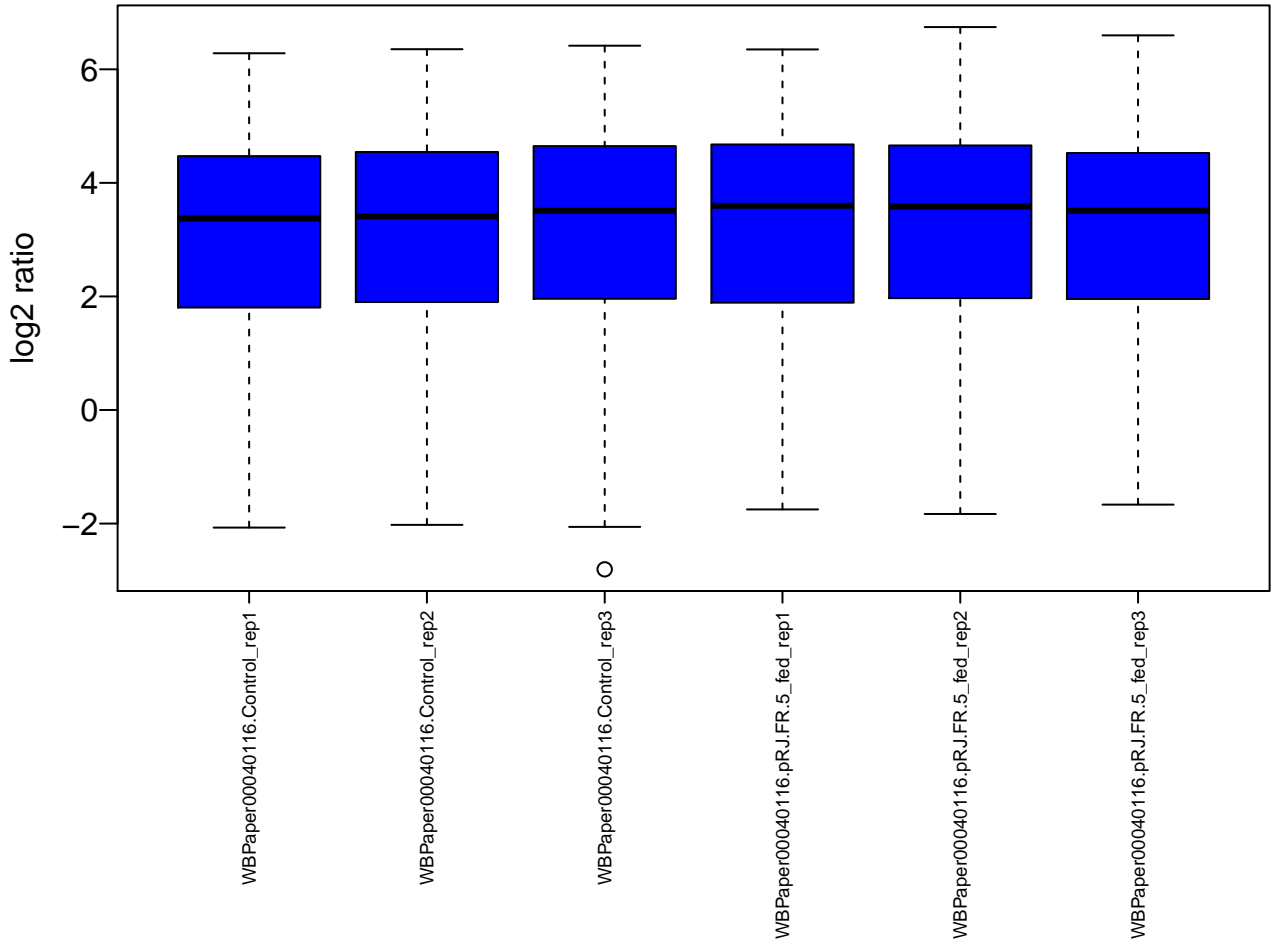



# WBPaper00040210

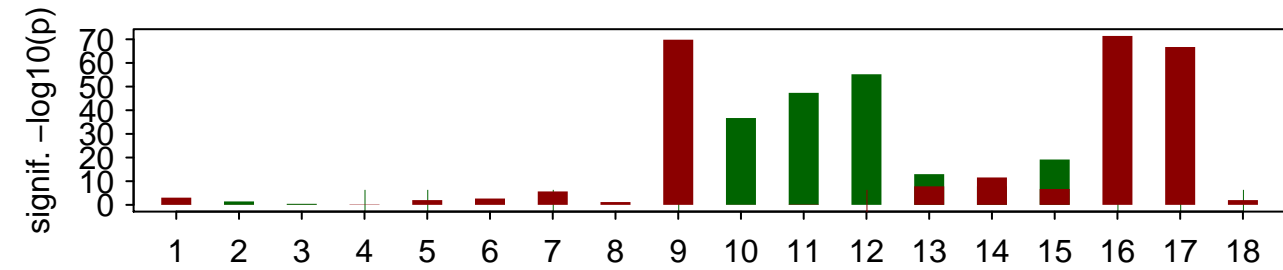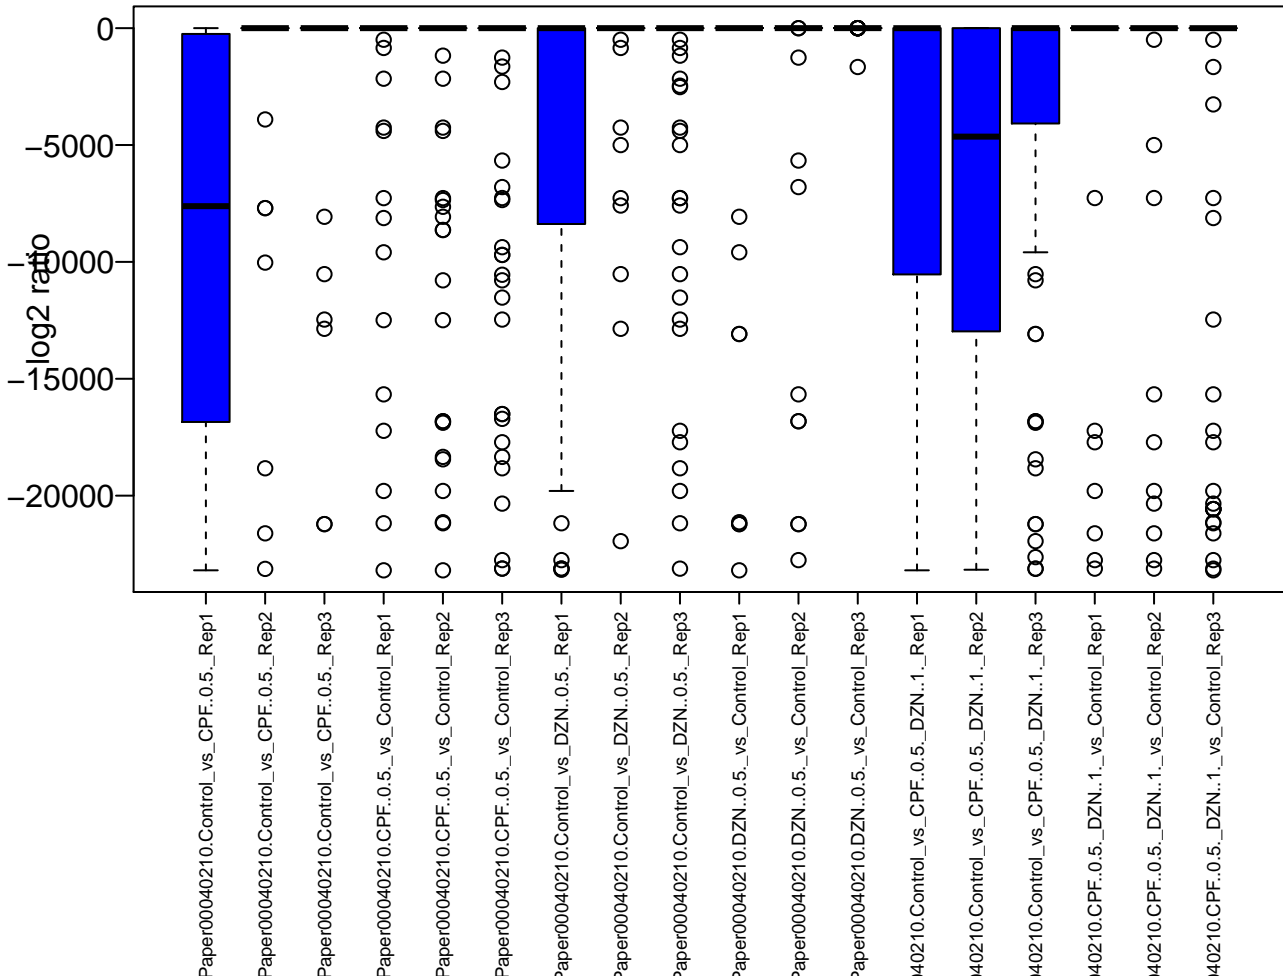

# WBPaper00040327

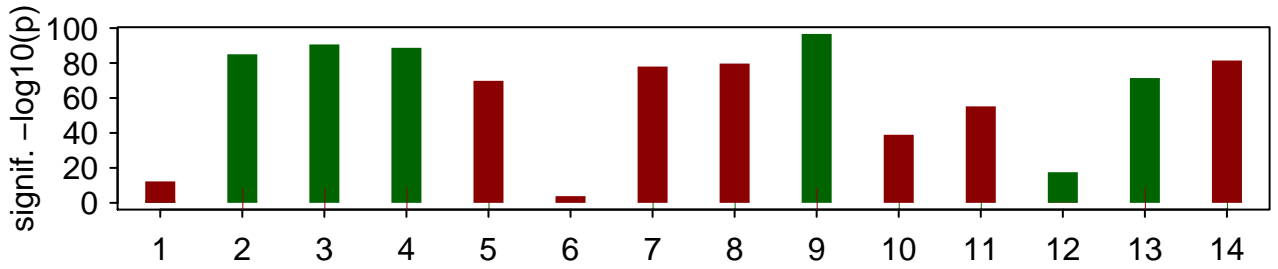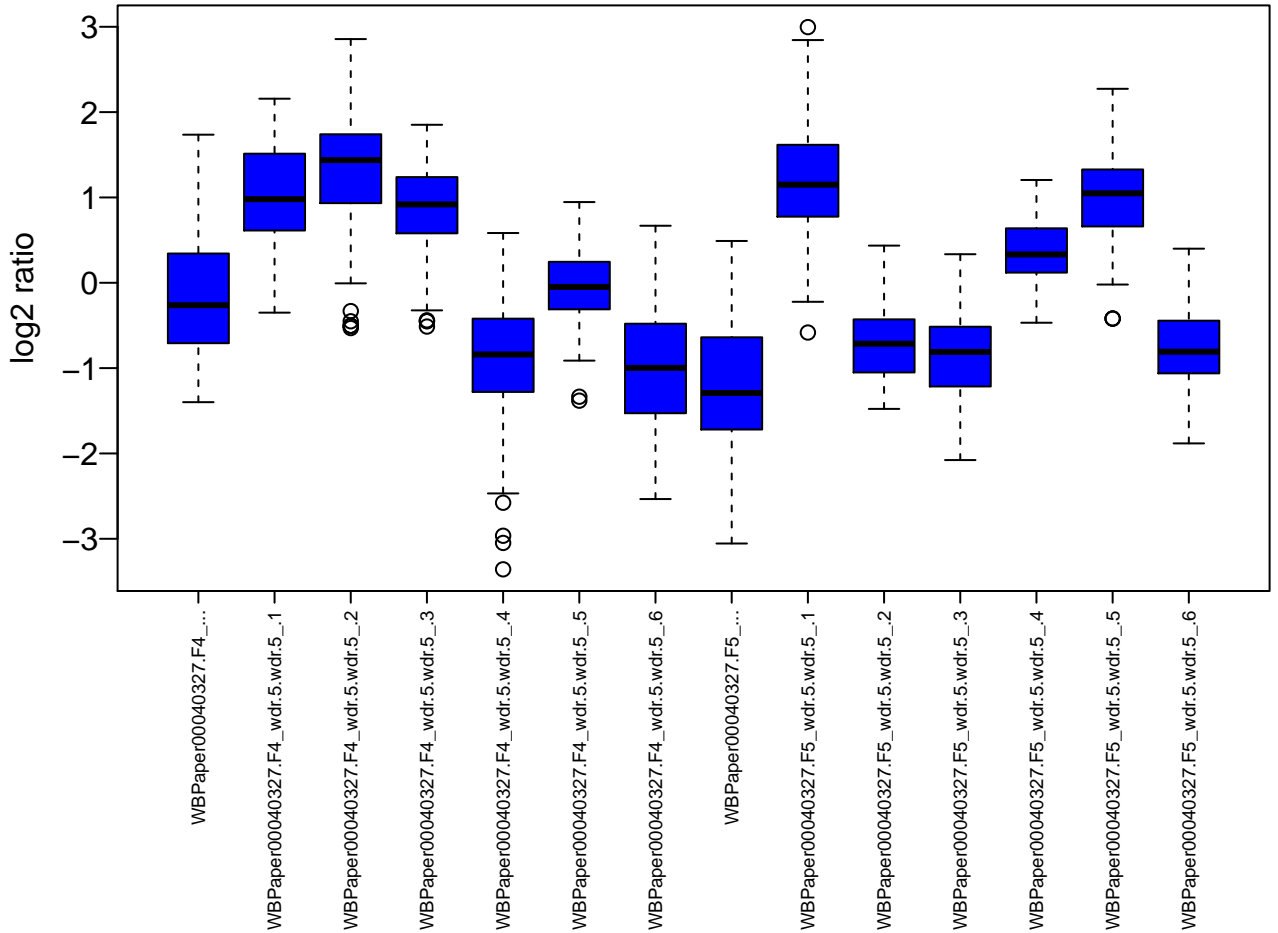

# WBPaper00040410

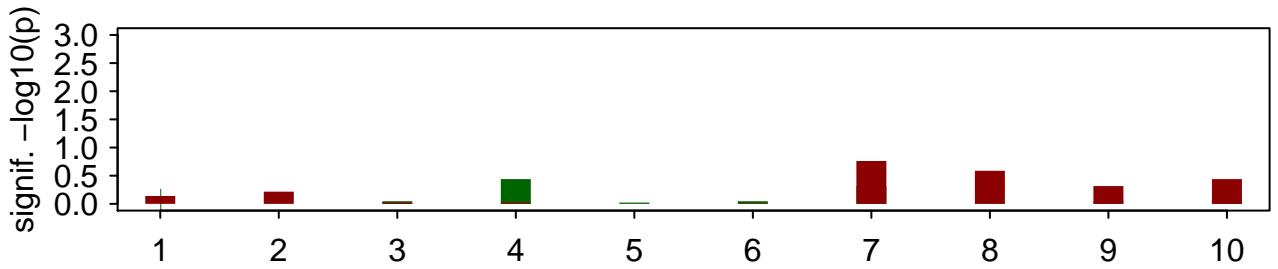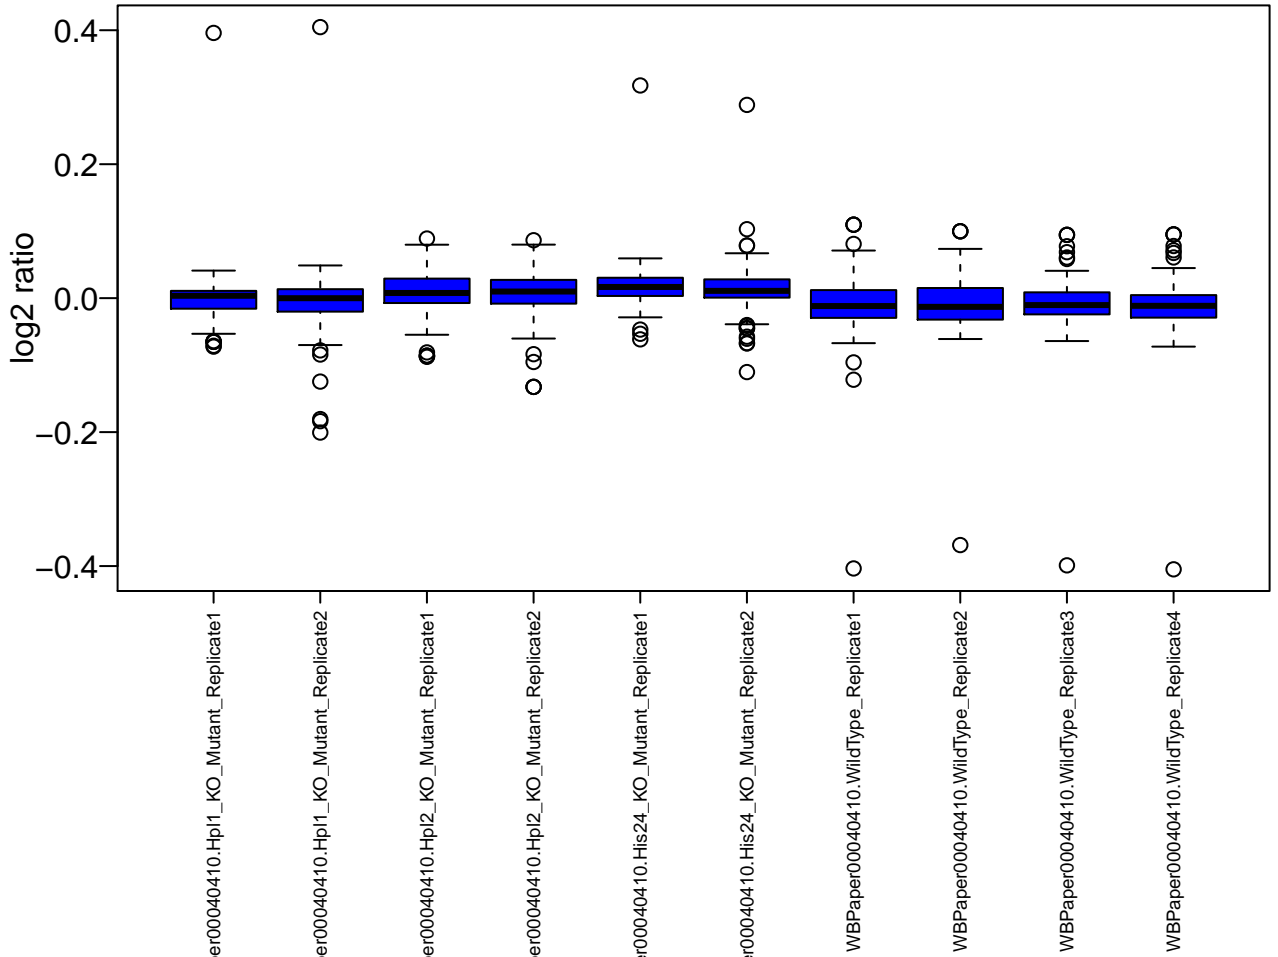

# WBPaper00040603

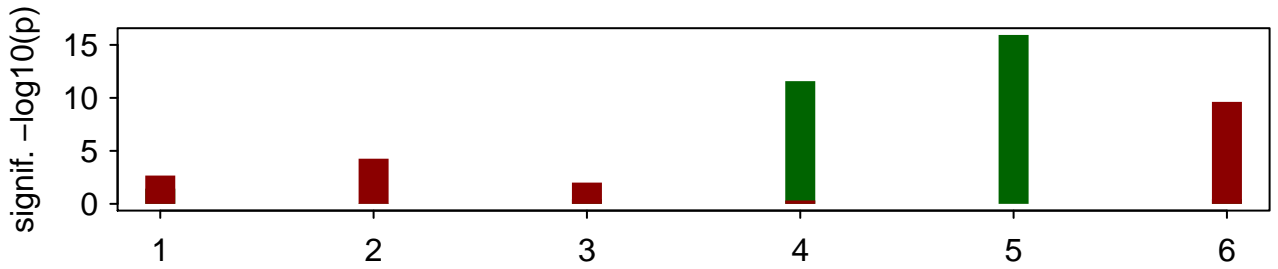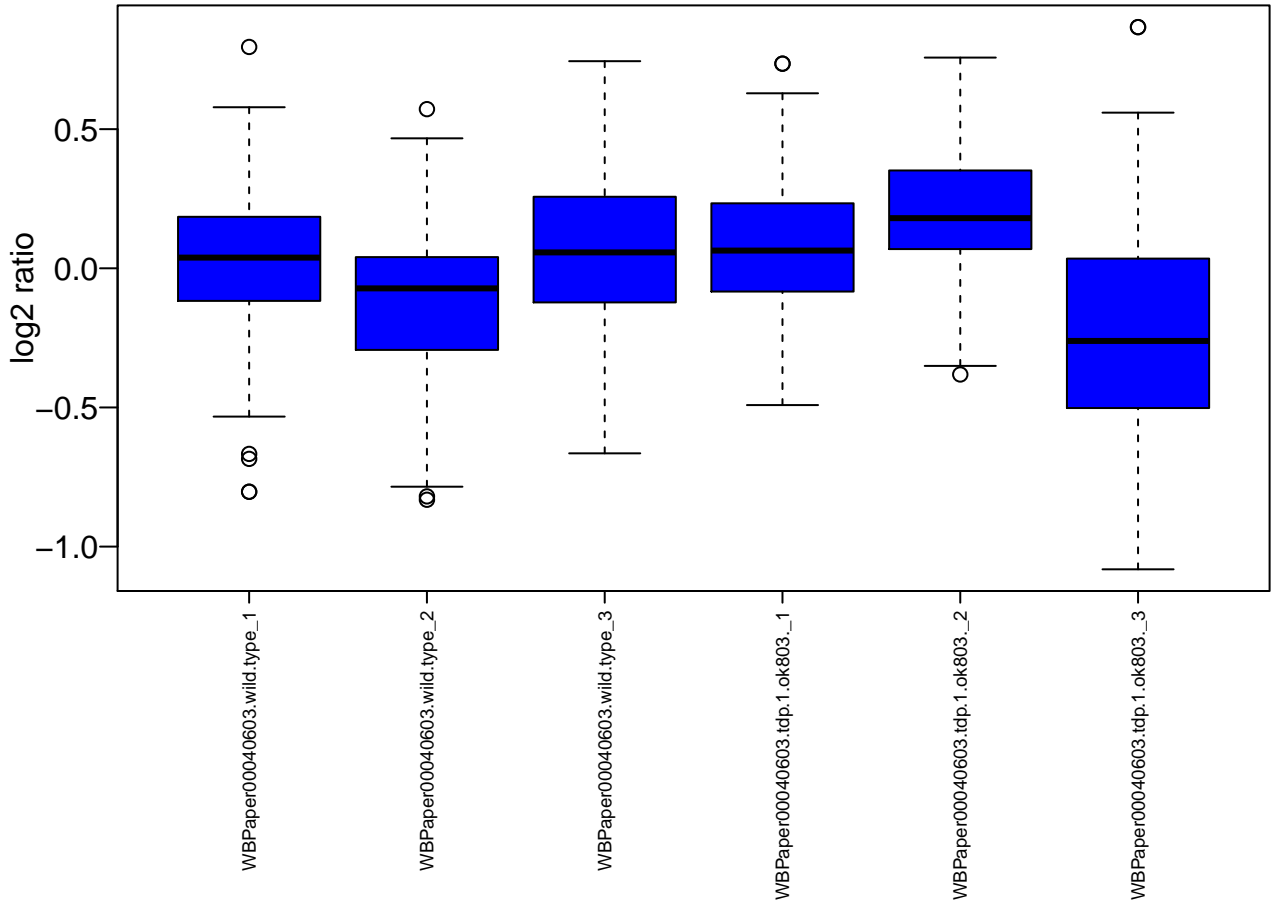

# WBPaper00040821

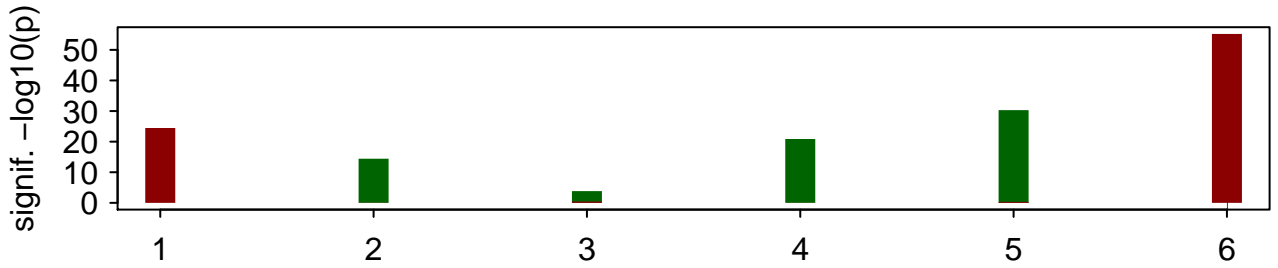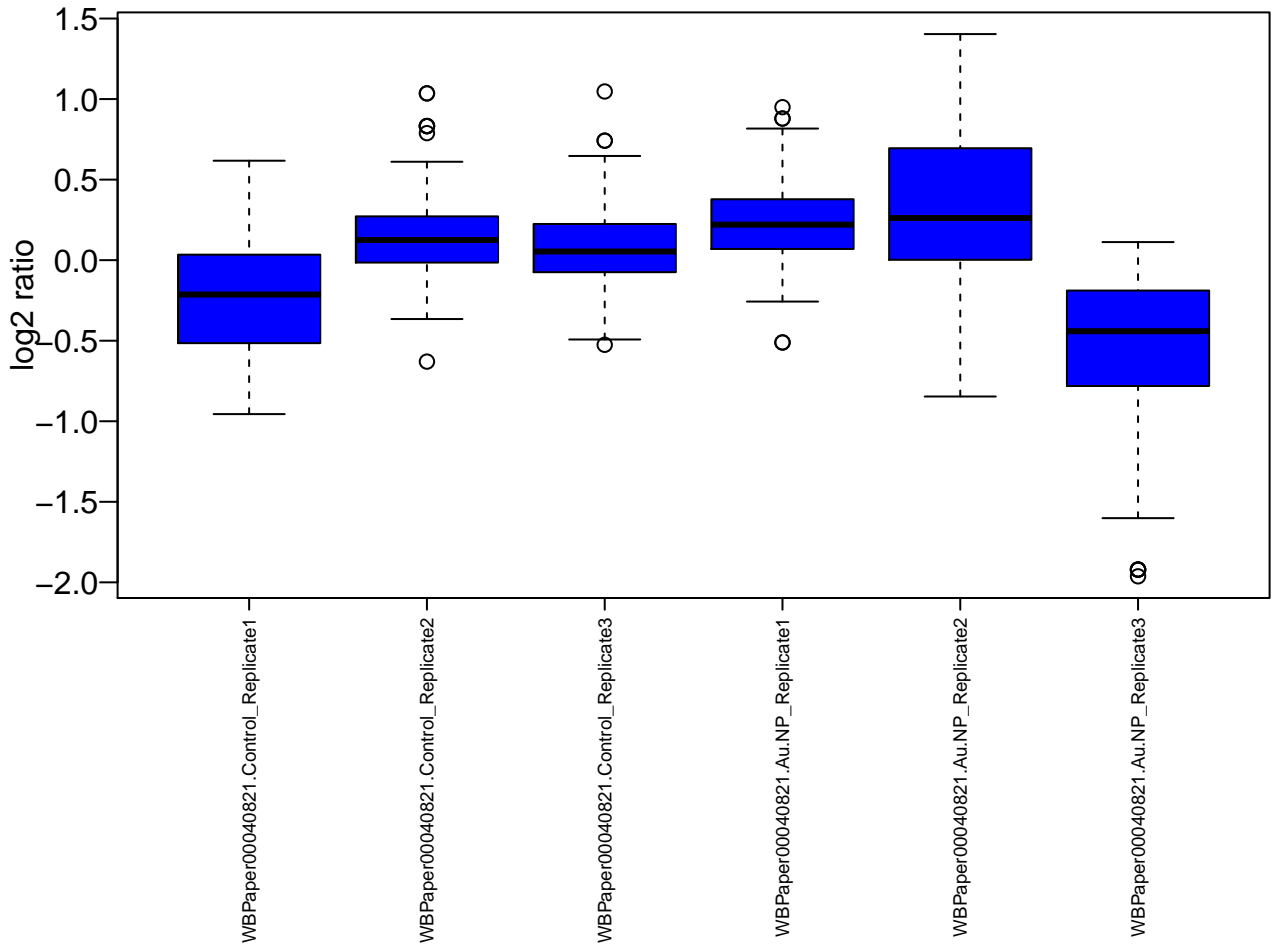

# WBPaper00040858

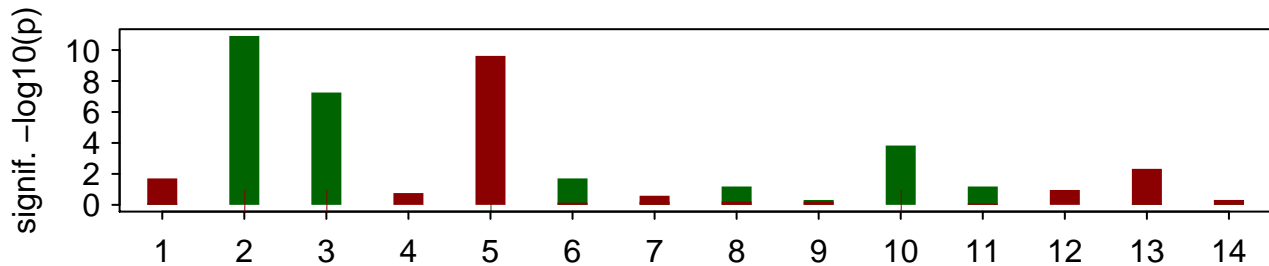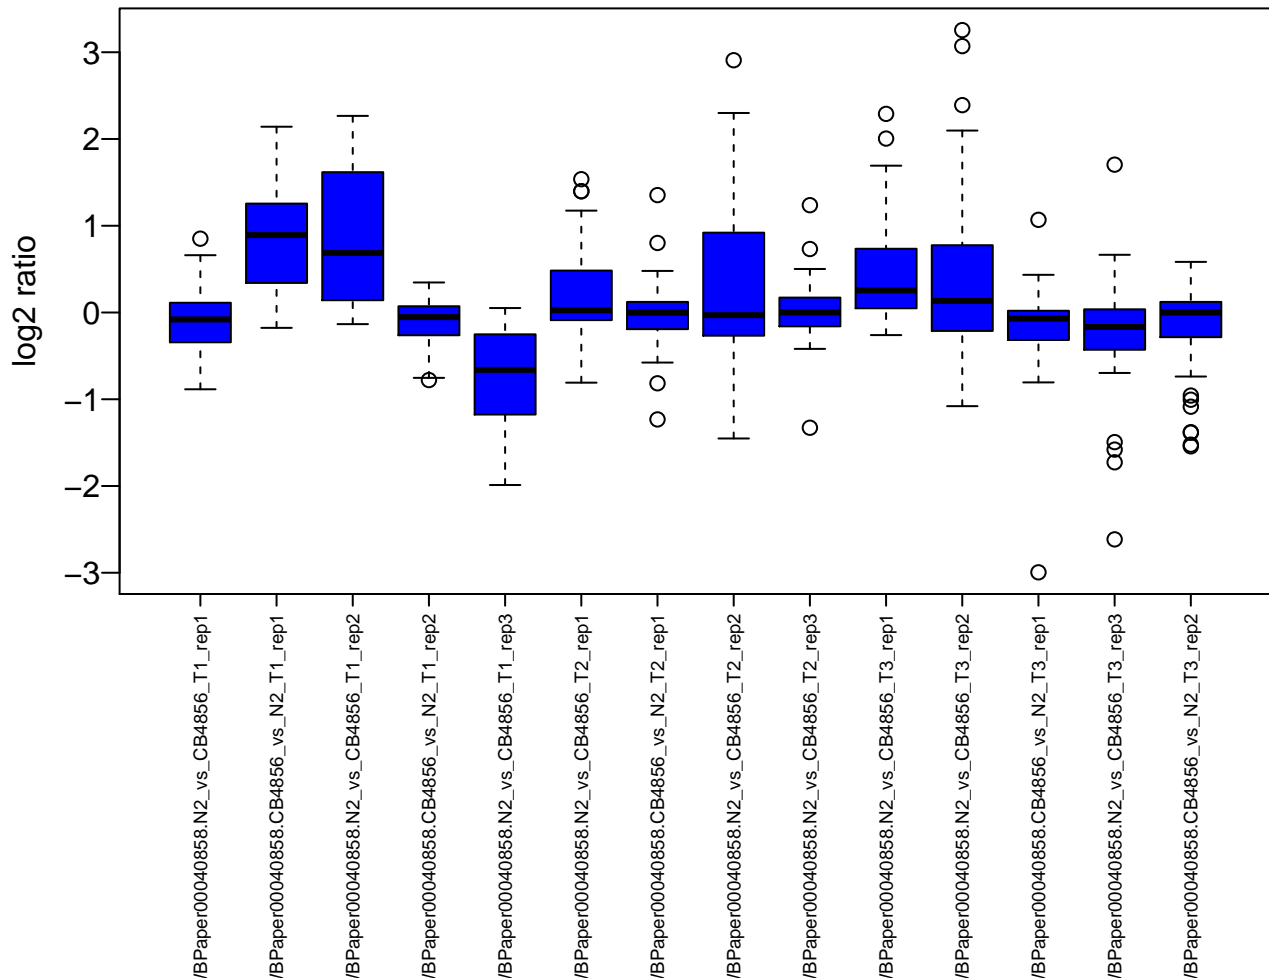

# WBPaper00040925

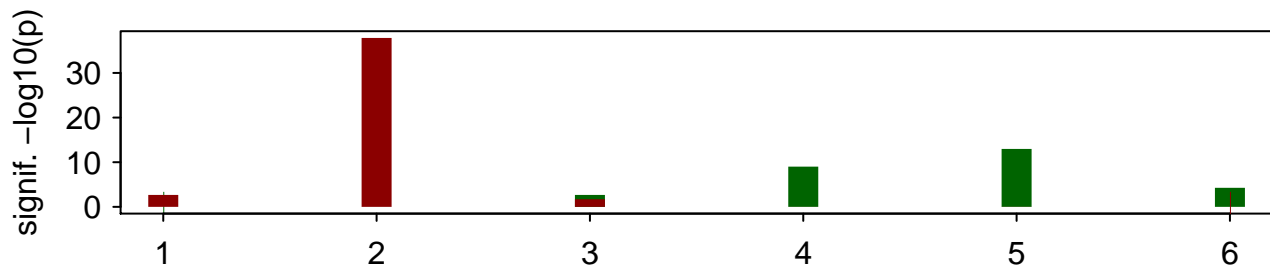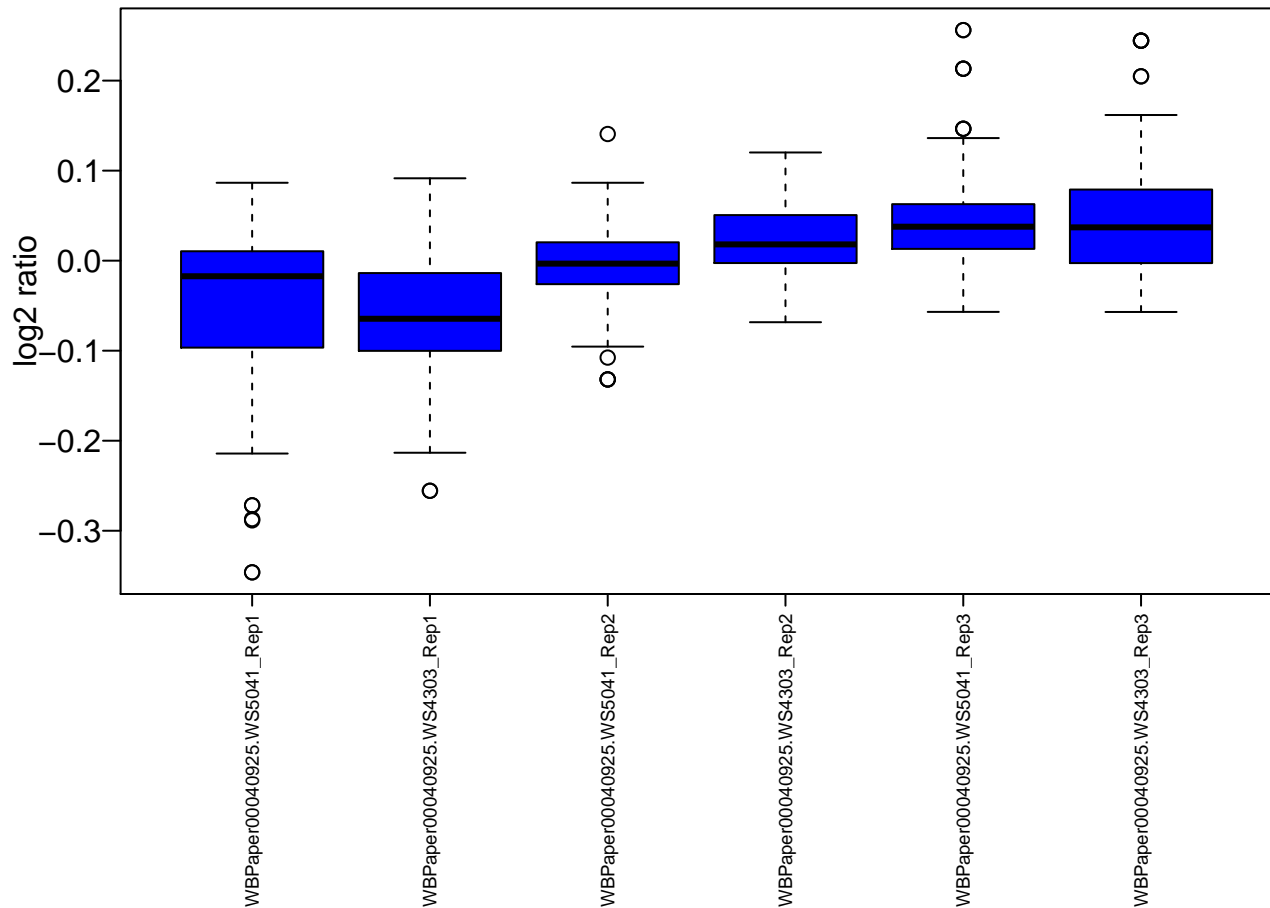

# WBPaper00040963

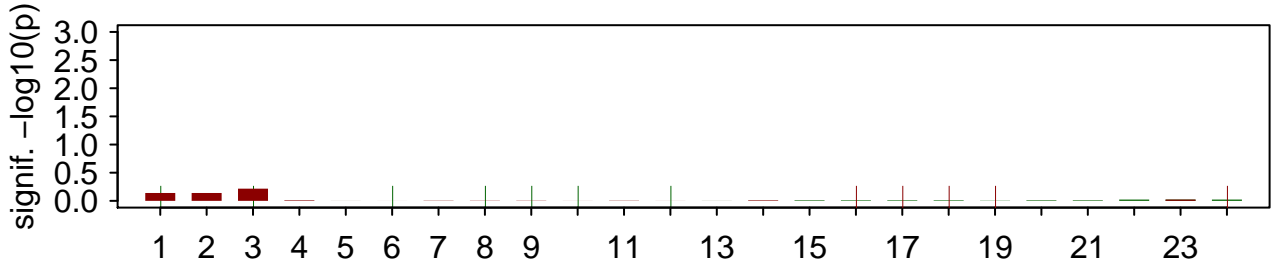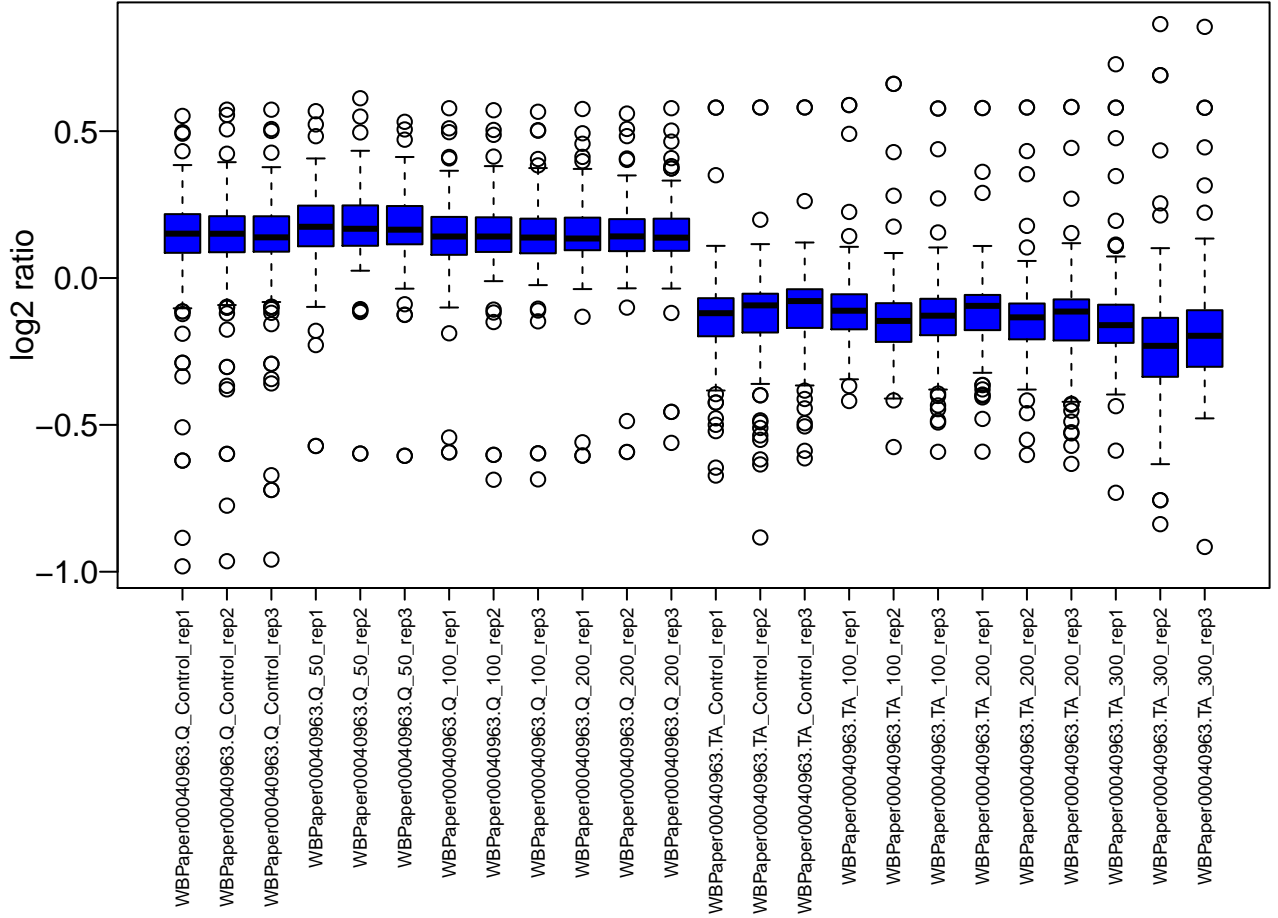



# WBPaper00040985

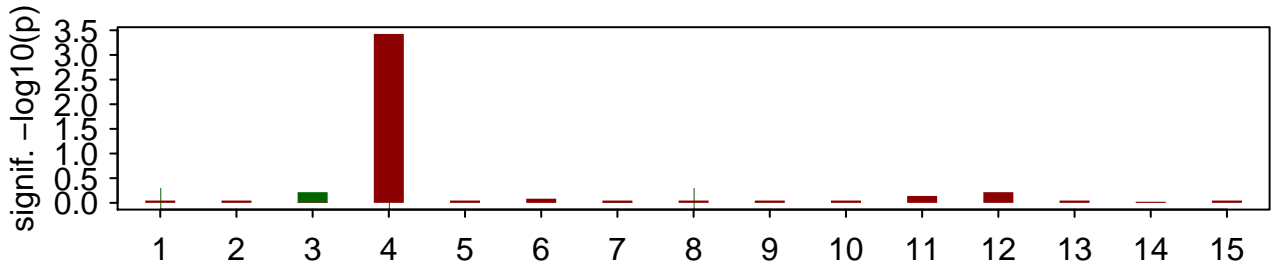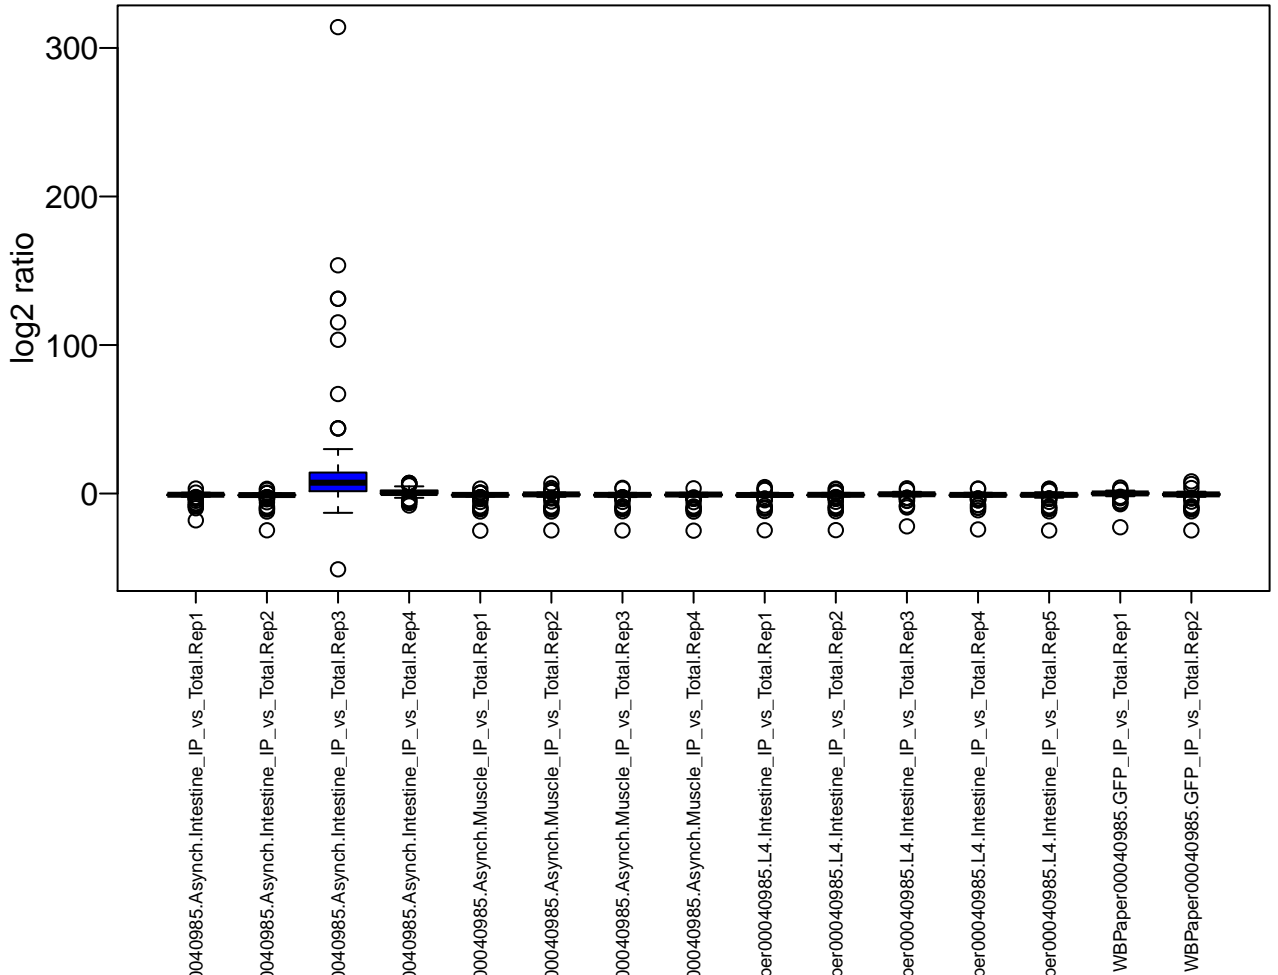

# WBPaper00040990

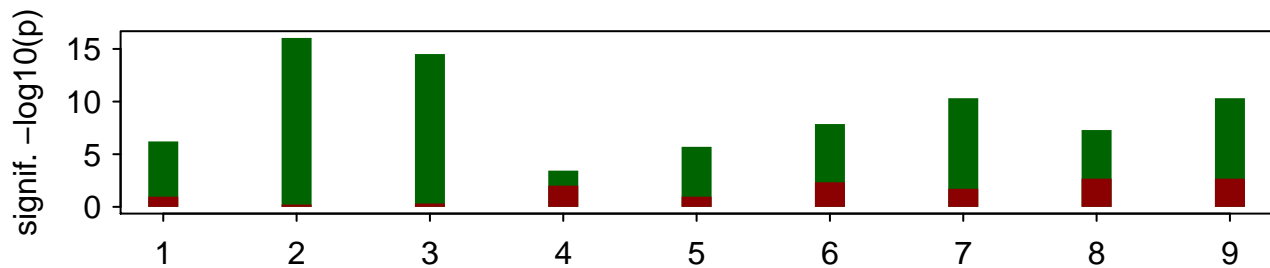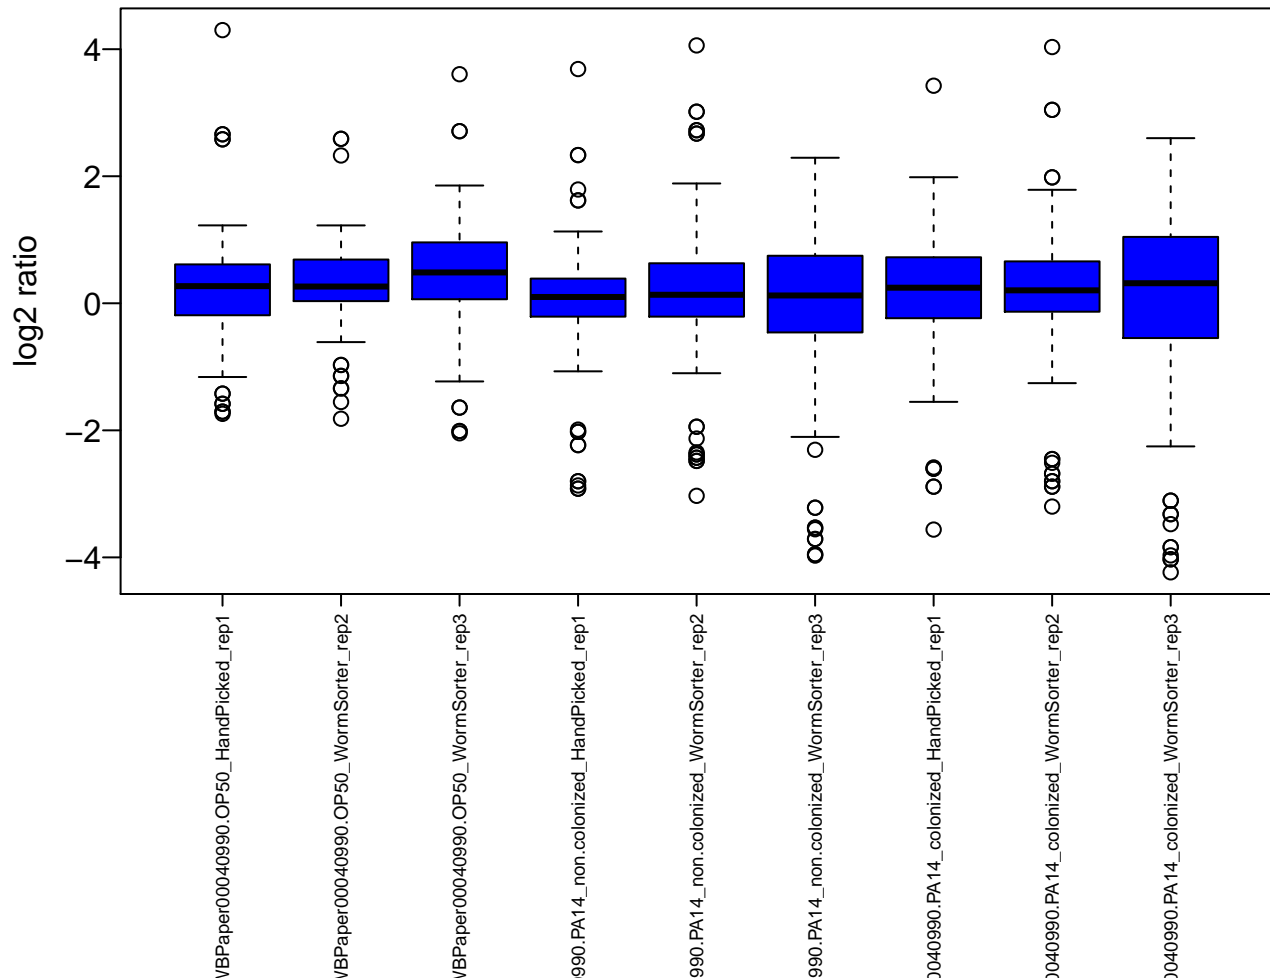

# WBPaper00040998

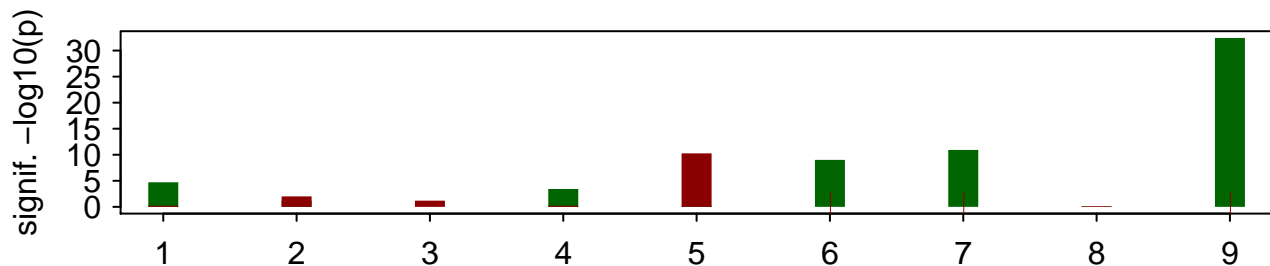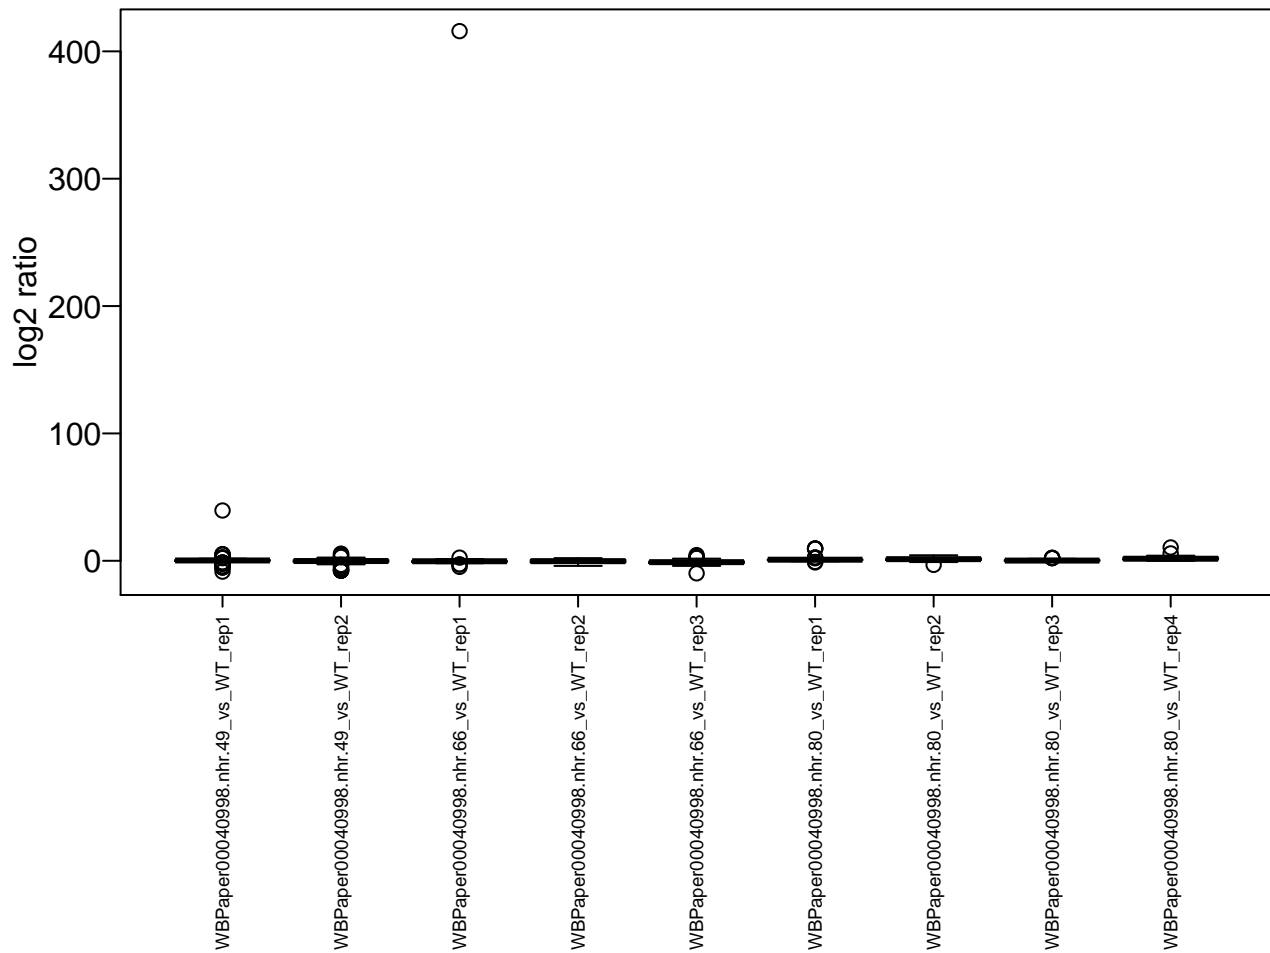

# WBPaper00041002

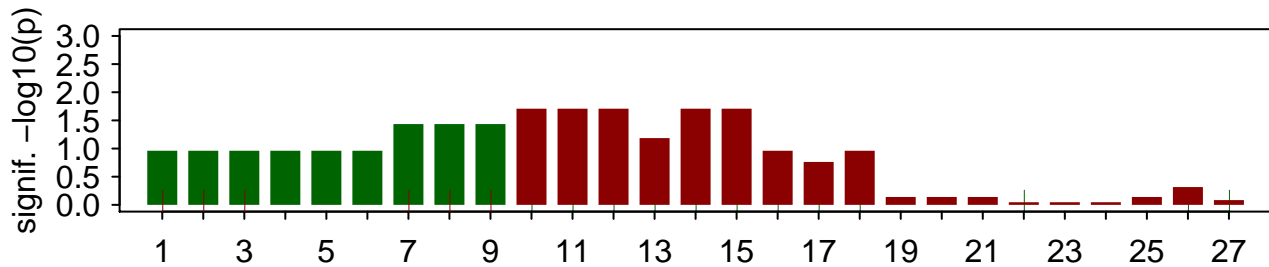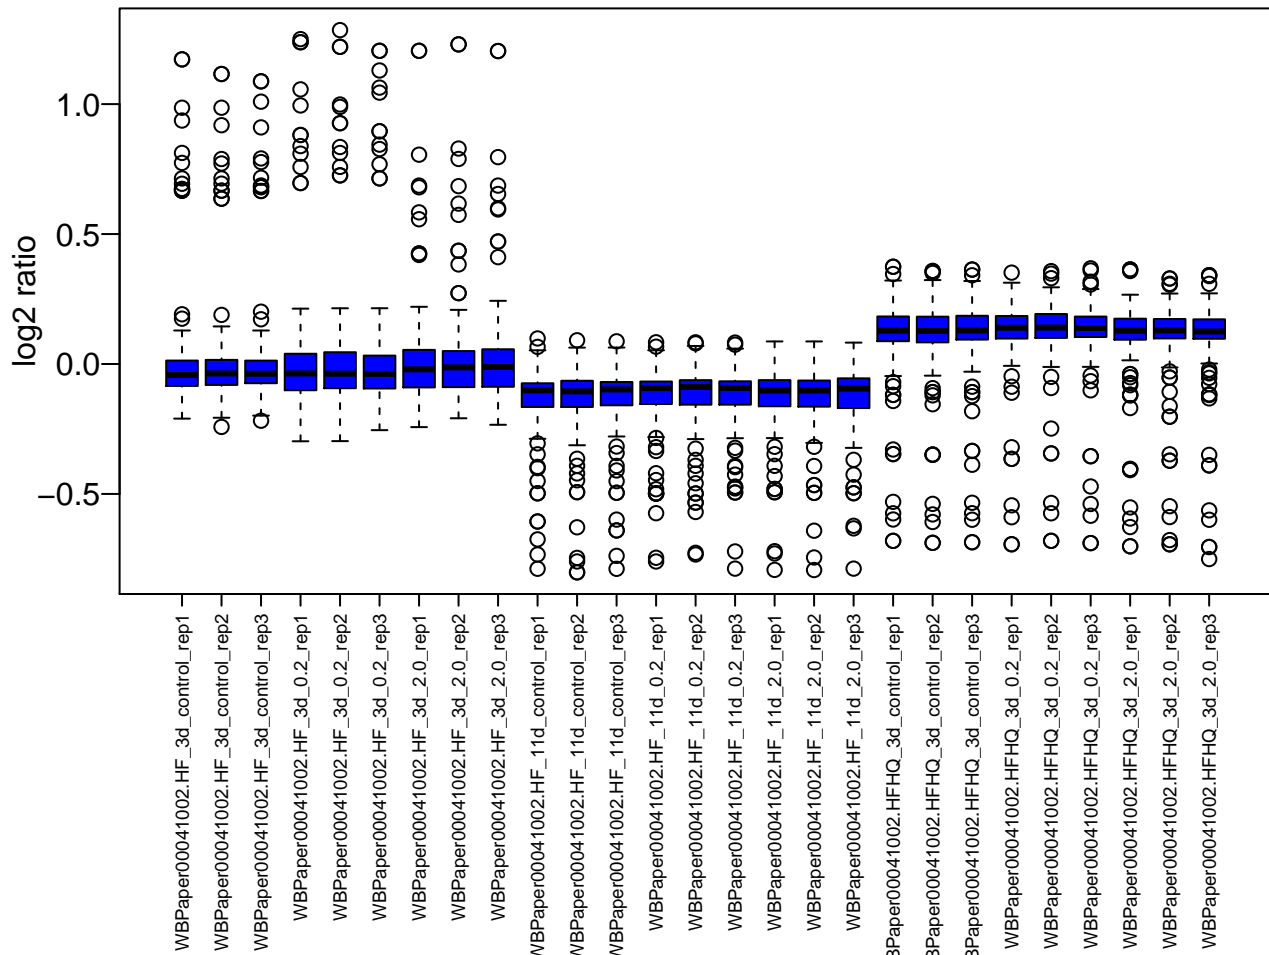

Supplement: srep03912-s1.pdf [file srep03912-s1.pdf]
